# Supplementary material for: A transcriptome-wide, organ-specific regulatory map of Dendrobium officinale, an important traditional Chinese orchid herb
Source: PubMed Central journal article supplement (PMC4702150; doi:10.1038/srep18864), 2016-01-06
Supplement: srep18864-s1.pdf [file srep18864-s1.pdf]

**A transcriptome-wide, organ-specific regulatory map of *Dendrobium officinale*, an important traditional Chinese orchid herb**

Yijun Meng<sup>1, 2, &, \*</sup>, Dongliang Yu<sup>1, &</sup>, Jie Xue<sup>1, 2</sup>, Jiangjie Lu<sup>1, 2</sup>, Shangguo Feng<sup>1, 2</sup>, Chenjia Shen<sup>1, 2</sup>, Huizhong Wang<sup>1, 2, \*</sup>

1 College of Life and Environmental Sciences, Hangzhou Normal University, Hangzhou 310036, PR China

2 Zhejiang Provincial Key Laboratory for Genetic Improvement and Quality Control of Medicinal Plants, Hangzhou Normal University, Hangzhou 310036, China

&These authors contributed equally to this work.

\*Corresponding authors:

Huizhong Wang

Zhejiang Provincial Key Laboratory for Genetic Improvement and Quality Control of Medicinal Plants, College of Life and Environmental Sciences, Hangzhou Normal University. Xuelin Street 16#, Xiasha, Hangzhou 310036, P. R. China

Tel: +86-571-28865330

E-mail: whz62@163.com

Yijun Meng

Zhejiang Provincial Key Laboratory for Genetic Improvement and Quality Control of Medicinal Plants, College of Life and Environmental Sciences, Hangzhou Normal University. Xuelin Street 16#, Xiasha, Hangzhou 310036, P. R. China

Tel: +86-571-28865198

E-mail: mengyijun@zju.edu.cn

## Supplementary data introduction

**Table S1** Statistical results of the RNA-seq experiment.

**Table S2** List of the transcripts highly accumulated in specific organs (root, flower, stem or leaf) of *Dendrobium officinale*. The transcript IDs along with their expression levels (normalized in RPKM and rescaled by log10) in four organs are included in this table. For each organ, there are two biological replicates (“Root1” and “Root2”, for example). ND: not detected.

**Table S3** List of organ-specific transcripts potentially involved in specific organ-related biological functions.

**Table S4** Organ-specific sRNAs identified in *Dendrobium officinale*. The sRNA sequences along with their accumulation levels (normalized in RPM) in sRNA-seq libraries prepared from specific organs were included in this table. Seven miRNAs were identified to be specifically accumulated in the floral organ.

**Table S5** List of 1,047 miRNA candidates identified from *Dendrobium officinale*. The miRNA candidates from *Dendrobium officinale* along with the homologous miRNAs from other species sharing identical sequences according to miRBase (release 21) are provided. The accumulation levels of the miRNA candidates in the sRNA-seq libraries prepared from four organs are also included in this table. For each organ, there are two biological replicates (“Root1” and “Root2”, for example).

**Table S6** A partial list of miRNA--target pairs identified from *Dendrobium officinale*. The miRNA IDs, target transcript IDs, target length and target annotations are included in this table. Based on the functional annotations of the target transcripts, the miRNA--target pairs were classified into four functional groups (hormone signaling-, plant development-, secondary metabolism- and Argonaute 1-related groups) for

network construction.

**Figure S1** Statistical results of the sRNA-seq experiment.

**Figure S2** Certain highly structured transcripts might serve as miRNA precursors. The transcripts were assembled by RNA-seq reads, and the transcript IDs were provided in the figure. The mature miRNA-coding regions on the long stems of the miRNA precursors were marked by red lines, and the mature miRNA IDs were provided. Note, for each mature miRNA, its average accumulation level in either organ (flower, leaf, root or stem; two biological replicates for each organ) of *Dendrobium officinale* should be 5 RPM or higher. The secondary structures of the transcripts were predicted by using RNAfold (<http://rna.tbi.univie.ac.at/cgi-bin/RNAfold.cgi>).

**Figure S3** Certain highly structured transcripts might serve as miRNA precursors. The transcripts were assembled by RNA-seq reads, and the transcript IDs were provided in the figure. The mature miRNA- and miRNA\*-coding regions on the long stems of the miRNA precursors were marked by red and blue lines respectively, and their IDs were also provided. Note, for each mature miRNA, its average accumulation level in either organ (flower, leaf, root or stem; two biological replicates for each organ; thus, there are a total of eight libraries) of *Dendrobium officinale* should be 5 RPM or higher. Besides, the accumulation level of each miRNA\* should be detectable in at least one sRNA-seq library. The secondary structures of the transcripts were predicted by using RNAfold (<http://rna.tbi.univie.ac.at/cgi-bin/RNAfold.cgi>).

**Figure S4** Certain highly structured transcripts might serve as miRNA precursors. The transcripts were assembled by RNA-seq reads, and the transcript IDs were provided in the figure. The mature miRNA- and miRNA\*-coding regions on the long stems of the miRNA precursors were marked by red and blue lines respectively, and their IDs were also provided. The 5' ends of the degradome signatures supporting the

processing of miRNAs and/or miRNA\*s from their precursors are represented by green arrows. Note, for each mature miRNA, its average accumulation level in either organ (flower, leaf, root or stem; two biological replicates for each organ; thus, there are a total of eight libraries) of *Dendrobium officinale* should be 5 RPM or higher. Besides, the accumulation level of each miRNA\* should be detectable in at least one sRNA-seq library. The secondary structures of the transcripts were predicted by using RNAfold (<http://rna.tbi.univie.ac.at/cgi-bin/RNAfold.cgi>).

**Figure S5** T-plots providing degradome-seq data-based evidences for cleavage actions between specific miRNA--target pairs identified from *Dendrobium officinale*. Four degradome-seq libraries prepared from four organs (root, flower, stem and leaf; represented by four different signs) of *Dendrobium officinale* were included for drawing t-plots. For each miRNA--target pair, two scatter diagrams are provided. The left diagram with target ID provides a global view of degradome signals distributed all along the full-length target transcript. The right diagram with ID(s) of regulatory miRNA(s) provides a detailed view of degradome signals within about 60-nt region surrounding the predicted miRNA binding site (marked by a green horizontal line) on the target transcript. The y axis of each diagram measures the intensity (in RPM) of degradome signals. Please note: only the miRNA--target pairs supported by prominent degradome signatures resided within 10<sup>th</sup> to 11<sup>th</sup> nt from the 5' ends of the regulatory miRNAs are included in this figure.

**Figure S6** Examples of miRNA--target pairs showing organ-specific regulation.

**Data S1** Sequences of the transcripts highly accumulated in specific organs in Table S2.

**Data S2** Sequences of the transcripts predicted to be miRNA precursors in Figure S2.

**Data S3** Sequences of the transcripts predicted to be miRNA precursors in Figure S3.



**Data S4** Sequences of the transcripts predicted to be miRNA precursors in Figure S4.

**Data S5** List of miRNA--target pairs identified based on degradome-seq data.

**Data S6** Transcript sequences for Data S5 and Table S5.

**Data S1** Sequences of the transcripts highly accumulated in specific organs in Table S2.

>comp100062\_c0\_seq1

GACGATTTGTCCTCTACCACGTGACGTTTCGTCATGCAAAGTATGAGATCATCCTTAAGGATTGTATATAAATACGTCGTAGGGTTGTTTGTGCTTACTTTCATATTCACTGATCACTTTGATG  
CTGTTGCACAGAACTTCTTTTAGTCCCCTCTTAAGGGTTGGCGCTCCCCAGTTTCACTTGTACCTTCAAGTGTGGTCTGAGATACCAAACTACTAGCTCGAAT

>comp100156\_c0\_seq1

TTATAGAATTAATTTTGCATCTCAATGATCATGCATTGTAGAATAGACACCATATCAGTTTTTAAACCTTAGAGAAAATTGAATTTTTGTGTTTTTCATAATGCTACAACCATTTATTTGTTC  
CTCTCCTGCAATTAAGCCTTATCTCTCCTTCTTTCCAGTTAGCACATTTACCTCACCAATTTTATCATGGACTGTGAAAACCTGTTTCTAAACAACCTTTGGTCTGTGACATATCGGCTTA  
CTATTTTATTTGTAACATTGGTGAATGCTAATTGCTGGTCTAGCTGGAGAATAGCCTTTGCATCGAGCACATTTTGAAGAATGATTGATCCAGCTTGAAAGGAGTTGAAGTGCCTTCGTT  
ATGAAAATATTCGGATCTATACTAATATTTGGAGTGTGAAGCAGGGCATTCTGTCTTAACTGTTGAGCAAGTTACTGTCCATCTCATGATCAGGTAGGCCAGTGCC

>comp100311\_c0\_seq1

AAGAATAAATTGGTAATGTATAGTTTGCTCACTTGCTTACGGAAATAAAGAAGTCGATAATATATATTCTAAACGAACGTATCTACCTCACTATCTCTTTCTTCGACAAAGTAAACACAGGTT  
GGAACCCCTCAAAGCCCTTGGTGACTGCAAAAATGACGAAGGCGAACAAGTGAAGAGAGTGGCTATAGTCGGACGTACCGGGCTTAAAATAGGGCAATCACTTGCTCGGTTGGGCTCG  
CCTTGTACAGAAATGACAAATAGTCGAAGAGAAGAACTGACGAAGAAGACAAGAGAAGGAGGAGTTTCGAGCTTCAATCGTCGCTTTCTCCGCTCGGTCGGCTCGCTTGGTTCGCAT  
AAACGAAGAAGACGAGGGAGAACGATGGTGTAAAGGCAAACCGTAAGGCATACGAGCAGTCGGGCATGTATTCACGAGATACAGTTTTGAATGGTCACCTAAACACCTTTTATTTGATT  
AAATAATATAAAATTGTAATAATTTATAATTTAAATAAATTTAATTCTAAAT

>comp100722\_c0\_seq1

AATAAATGGCAGTTTTATGTTAAATGAGAAAAAATCTAAATTAGAAGTATTTTCCCTCATATAACTAGAATTTTCCCTTTTATTATCATTAAAAAGAAGCAAAGTTCACACTTCTCACTCACA  
TTCCATGAAATCATACTCAGACAATTACGTAGTCTGAACCTTGCTTGTGCGCTCTCTTTGTCAAAAACCTCAAACCTTCACCTCTAAACTAAAATGCCACAAGTACCTCAAACAAAA  
CTACTCCAATATGCCTTTCTAACACCACCTCACCTCTTACATAAACTTCACTAGGCCACCACACACTTACAACATATCATTACATATCACTTTCCAATGAAAAAAGAATGGAAAATGCTAC  
CTTCTTACTCCACCATCTCCCGAACTCCACTCCATTGTACATCCTAACACTTTCTTAGTTCCCTAATCTCCCTCACAAACAACCTTCTCCCTCCCGCATGCCACGCCTCTCCAACTACT  
GCAACTAAGAATCATAACCCCAACAATCAAACGCTGATCAGCCACCGACAACCTCAGCTAGGATTCCCAACTGGTGCTCTTCATAAAAGTATTTATGGGGTAAGATCAATTCAGTCCCTC  
TGTTTGCTTCTTGAAGGGCACGATATCACATGCATCATTTTTGAAGGGAAAAACAATCTATGCTCACATAGCTTTTCCATCTTTTGTCTCCTAAAGCTTGTCTGTACTCTCTGCGGAAAC  
TGCTTCACCTAATATGACAACATCAATGTTCCATCCAATTGCTCTGAATGAACCAGTTGTTTCTCTGATTTGTTCCGATGCTAAATCTAAGGGA

>comp100781\_c1\_seq1

GAGGTCACTTAGTACCTTCATAAGGAAACATTGACTAGGGTAGGGCCTTCTTACAGAGGGAAGCTAGGAGTTTATATATTATCGAAGCCTATATGTGTTTGTGACTTGAATTAATTGAATA  
CCACTATGTTGATACATAATCAAGATCTCGATCTCAGGAGATCAAATCTGTTTCAATAGTAGAATCTGGACATACTTTAAGTATAATGTTATAAATATGAACACCAAAACCATGTTGATATTA  
CCGCAAAGATTGATCTTGATCACAACCTAGTGGATGCATACATGAACCATAATGATTTTTATCTGTTCAACAAGAGTTCTAGCGAAAAAATAGAAGGTGATACCATCAACAACCTTAG  
CATGCCATCCTTATGAAGAGCTCTAGCTTCTAGATTTTAGCCTAGCA

>comp100850\_c0\_seq1

TTCTGATAGAAATGCATCTTGATTTGTTTGCCAACTTTTGTAAAGGATGCAATGTTGCACATCAGCTATCGGATTCTCAACATTTACCACGACAGAACCATCTTTTGTCTCGTGCGATTTAC

CAATTCTTGTCTAAGAATACTTATAGGTGCAAAATGACCATTATGATCCCTAAATCTTTGTCGTACAAATTTCCAACCCATTTAGTAATTGTTTCTCCATCAACATACATTGGATAACGACT  
TTTGATAACTTCATGATATACGTCCCATAAATTATCGTCCTCATACCAAGACCATTCATGTAAACAACAGCGAAAAATTCATTCGCTCTTGCTTTCTCCTCCAAGAAATCATCCATGGAATA  
TGAGATAGAGTTTGCCAATCGAATCGTACCATCATAGATTAATTTCTTTCTTGGAAATAATATGTAAGAAATCCCGTGAAGGTGAGCGCTTGATTGAGGATGTCTTGGTGCGGATGACATGA  
TATG

>comp101251\_c0\_seq1

TGTTTCCATTCAAATTAATATGGAAATATATTAATAAAAAAGTTGAAGAAAATGATCAAAAAATTTATATGGAGAAAAACAATACATAAATCAAACAAAGCCGTGCATAAACAAATTTG  
AAATATCCCAGTCGATCCTGAATTGAGAAAAAAAGTTTAGATTATCATCCTAATAAGAGAGATAGTGCTCAAAGACATTACTTATGAAAGGGCCATTCAATCACGTGATCATGAATTCC  
CCCACACAACCTGGAGCTAAATTTGTAGATTTAATATTTGCATGGTTTATGATGATCACAAGCTTGGTTAGAATATAGTATAACCAAGAATGCAACTTATTATTTATTTTATCTGTATAGAC  
CTCATATTGGAGAACATGCTAGTGGTGATAGTTTTGAACAAAAAGTTTTAAAATTGAAAAAAAGATAGATTTTCGTATTTCATGTTGGTAATATTAACAGTGCACATAACATTGCTAGACAG  
AAATGTGAAGATTTAATGAATCAAGAAAGAGATATAAGATTTTCTTTCAAAGACCTTCTAATCAAACCAAAAAATTATCGTACATGATTAATGCAAGTGTAGATTGTGTATGTTTCT  
TTTGCAGCAGGGATTAGCATTCCGTGGACATAATGAATCAGAGGATTTTGAAGAATCAGAGGATTTTGAAGAATCAATGAATTTTCTTAAATTTTATGCTTTCTTGCTAGCCATATTGAAGA  
CATAAGTAAAGTTGTTTTGGATAATCACCTTGAAATAATAAATTAATAGCTCTAAAATTCAGAAACAATCACAAGCTACTACAATTGAGGTTTCAAATTTATAATGACTGAATTA  
AAAATGATGATTCGTAATTTTACATGATGAATCTCAGGATATATCAGTTAAACAACAAGTTGTTGTTGCATTATGTTATGTTGATACACAAAGATATGTTATTGAGCATTATTTGGGATTATT  
CATATAGGAGACACAACAGCTCCAACACTAAAGATGGTTATTGAAGAATTTTTCGAAGTATGAGTTGAGTGTGACACAGTTACGATAGAGCAAGCAATATACGAGAATAAGTTTAATG  
GACTAAAACATGAATCATGAAAGAAAATTGTTTAGCTTATTGTGCATTGTTTTGCACACCAATTCCAACTAGCATTAGTTACAATCGTAAAAAATTATGTCCAAGATGTTTTCTTCTTAAT  
ATTGTGACTAGCTTCTTAAATTTTATTGGTAGCTCATGCAAAAAGAGATTTACTAAAAGGAAAACATTATGAGAAAATTGTTGAGTTAACTATAAAGTGGAGGAGTTACAAAAGGTGCGA  
GGTTTAAATAAAAAAAATTGTCTTTCAAAGACCAAGAGACGCTCATTGGGATTTCCACTATAATTCACTCATTAGCTTAATCCTTTTGTGTTGGGTCTATAACAGAGGTTCTTGAGATAGTGA  
TACATGAGGGATCGAGTAGTGAGAAAAAGGTGAAGCATATTTCTACTTGAATCGGTGCAAAATTTTAAATTTGCATATAATGAAAATAAATTAGGAGTTACAAATGAGTTATCATAAGT  
ACTACAAAGAAAGGATCAAGACATTATAAATGTCATGAGTTTGGTTAAAGTTTCGAAACAACGACTCCAAAATATGAGAAATGATG

>comp101378\_c0\_seq1

GCTATTGTTAACTACCTCATAAATAGACTTCCTTCCAAATACACCTCTCTACAATCTCCCTGTCAAAATCTTCACGGGATATCCCCACTTATACTCACCTCCGCTCCTTCGGTTGCCTCTGCT  
ATCCTTGGTTACAACCTTATACCTCAAGCAAGTTCTCTCCTCGGTCGCACGATTGTATCATCATCGGTTACTCACCTACCCACAAAGTTTACAAATGTTACAACCTTGACACACACAAGACT  
CACATTTCCCATCACATTGTGTTGCACGAACACATTTTCCCTTACAATCCTTCACCGCTTACACCCTACTCAACTACTGCTTCCCCACTCACAACACCTCCCCTCTTCTCCTGATTCCCTACT  
TTGCTCGCATCATATTCAGCACCAATCCTGGCCATAATCTGCTACCAATTCAAAACAAGAAAACCATCTCACTTTGCACCAATTGCCTTCTAACTTGCCGTCCACCATAAGCACCGTGTC  
TCAATCTGTTCCACACCCCTTCTCATCCAATTCACCACATGCAGACCAGATCAAATCTGGTATATCAAACCCAAAAGCATCTTCACTCTTCTTAGCAATACGGCCTCACCCCTCACTCT  
GACAACATACAAACAAGCGGCTAAATACGAACACTGGCAGGCAGCCATTACAGCTGAATTCATGCTTTACAGTAACAAGGGACCATGTCTCTTGTTCACCCCTCCAAAACAAGCTCAT  
TGCCAATGAAAA

>comp101455\_c0\_seq1

GCTCTTCCGATCTCTGGCACTGGCAGCGGCACGCTCGCGGGCGGCAGCGGCACGCGGTACGGCAGCGCGGGTGGCAGCGGCACGCGGGCAGGGGACAGGGCAGCGGCCGGGCAGGG  
GGCAGGGCAGAGCGGGCAGCGGTCAGGCAGCAAAAAATTCATTTTTTTTTTAAATAAACGGGTTATTTGGTCTCGTTCGGTCATTTGTTGCTAGGGAATCGGATTTGAGTATGATTTTA  
CACTCACTTATTAACACGTCAGGTTTAGATTGACATTTGAGTCGTGTGATTTTGGATTGATGTGAACCTGCTCTATTGACCTATTTTAAACACCGCTATAAGTACGGGTGCAAACCAAGT

CATGTTGACTCGTGAGCTTGCTCGAGCTCAACTCGATAACAAGC

>comp101476\_c0\_seq1

ACGTTTCCTGGCAGACACACCATGGAATATTTTCGGCGCAGAATTTTCTGTTGTTTCATCATCAGCATTTC AAGCTCCCTTTTGTACGGACTACAAACTTCTTGAACCCGTTGGGTAACAGAT  
GTCTGGTCTTTTTGTTGCTACCATAACCAATGTTTGGCATCCTCATCATACCCTTGAACCTACGCCGGACTCTGTTGTCGATACCCTTTGGTTTTCTCCAGCTTGGCTTGACACGCATAAACC  
TGTCACTCTGAT

>comp101736\_c0\_seq1

ATGAGGTAATCTTTGAAATGGATTACAGCAATGAGAATATTTCCCTGTGTATGTGTAAATTTCAATTC AATTCATATCTTGCTGACAAATTCTGCAGAACCCAGGTTTCATGTAGATAGGATAG  
CTTTGTCATGTCATCAACTCCACCTGGAGGAGCTTCCATATCTTTGGGATATAATTTTGAAAGTTTTTCAATAACTGTTTTCCATTAGTCGTTTGAATCTCGGCCTCTTGCCCGGTGATTTTA  
GTAACCTCGTCCATCAGTCCAGGAAACAGCAGAATCTTCAATCCAGACATGAGAACCAACAATGATATTAATTGTTGTTCCCATGCCTTAAGAGCCTGGTAGATAAATTTATGCACCTTGCA  
AGCAGGGCAAGCGATTCAAAAAGAAAATAACCCTAGAAGACCGACGCCAACTCCAACATTACTCAGGCATT

>comp101775\_c0\_seq1

AAATTCTAGAATTTATGTAATACTTCATGAGAACGGTTGGGACCTTCCAGCCGATTTATCGGCTGACCTCTTGTGTGCGTTATCCACAATCTTTGTTAATTCGACAAATAATGATAGCATTATT  
TGGGGAAATGAGGAGGTTAAACACAGCAGCTATATTAATATCTTTATAGAAATGAGCTTATGGTTACTTGGCACCAATTTGTTTGGCACAAACATTTCTCTCTTAGATATTCTACCTTTTGC  
AGGATGGCCTTGGTTGGTGGCCTTAAGATGGCTAATGCTTTGAATATAAGGGGCATTACTATAGATTCATGCTGCTGTTTTTGTTCATTTCGGAATATAAAAAGTGCACACATCTGTTTTTTGAA  
TGCACCTACACCTTTTCTGTGCTCACCCAGCTCATTCCCTCGGATGAAGAATCATCTACTTAGACCCAATATTCTTCAAGCTTTTGAATGCACTAGTGGGACTAATAAGTGGACTATGACCTT  
TTACCATCTTATCATAATGCTGTACGATATATCACATTTGGAGGAAAAGAAATGATAGGAAGTTTGGAAACTCCTTTGCATCTTCCACTACTATATGCCTCAAAATCAAGTGTGTTTTTGTCTA  
AGATGTTGAAATGAAAACGTGGAAGCTCTCTTTTGGATATGATATAGTTTTTGGCTGGAGGTTAATTCGGGTGCTATTTTCAGCAGTTGCGATGGTTTCATCGATATGGATGAGTTTGTATTAT  
ATGAGCAAGGATGATAGAATTGCCTTCTTTCTCCCTTTGGATGGAAATACTGGGGGCTACTGCAAACAAGTTAGAGCACCAGCAATTCCTAAGCCCGTGATGGGGGAAGTATCTATCTGAA  
TGTATTTCTGGTTTTTTATGGTTGTTTTTCTGAGGTTATTTTTGTGGTGGTATAATTTTGTGGAGTTATAGCTGTTTTTCTCAACTCCTTGTAGGGTTTTGTAGCCTTTTTTGC

>comp102949\_c0\_seq1

TTTTTCTTCAGCTAAAACAGCAGATAATTTATTGTACACGTGTTACATTCAGCCACAACCTGAGAACAGAACTAGTCCAGAAAAGTCACAGGTCCAGGGCAAAAAACCAAAGGGACCATT  
TTGATATGAGCAAGGTGGGTCTCAGAGTGGTCCAGGCGATCAGAACGGCGAAAAGTTGTTATAGATCCATTGAGACAAGTTCTAGACAGAAGGCATGCAGTCCAACAAATTGTACCAAC  
GTCCCTGGCCTCTGGGATTTTCGTTTCTGCTCCTGTGGCTTCCACGGTGTACAAGTTTACTTGGACCTCTGCCTCATCTTCTTCTTTTGCCTTCAGCCTGCGCATTGCTTCTTCTCCACT  
TCGCTCTCATGGCGCGGAGGTTTCTCAGAAGATGGCGCTAAGGCCGAGAGAGCGCT

>comp102949\_c0\_seq2

CCTGCGCATTGCTTCTTCCCTCCCTTCGCTCTCGGCCTTAGCGCCATCTTCTGAGAAACCTCCGCGCCATGAGAGCGAAGTGGAGGAAGAAGCGAATGCGCAGGCTGAAGCGCAAAG  
AAGAAAGATGAGGCAGAGGTCCAAGTAAACTTGTACACCCATGGAAGCCACAGAAGCAGAAACAAGGGAAGCCAGAGGCCAGGGACGCTGGTACAAAGTGTGGACTGCATGCCTACT  
ATCTAGAACTTATCAATGGATCTGGAACATCTATGGCCATTTCTGATCACCTTGACCACCTTTGCGAGACCTACCTTGCTCATATCAAAGCCGTCCCTTTTGGTCCATTGCCCTGGACCTGTG  
ATAACTATGGACTAGTTCTTCTCAGTTGTGGCTGAATGTAACGTGTACAATAAATCACCTCTTTTGTGCTGCTTAGCGGAAGAGATGATTTATTGTACACGTTACATTCAGCCACAACCTGA  
GAAGAGAACTAGTCCATAGTTATCACAGGTCCAGGGCAATGGACAAAAGGGACGGCTTTGATATGAGCAAGGTAGGTCTCGCAAAGGTGGTCAAGGTGATCAGAATGGCCATAGATGT  
TCCAGATCCATTGATAAGTTCTAGATAGTAGGCATGCAGTCCACACTTTGTACCAGCGTCCCTGGCCTCTGGCTTCCCTTGTCTGCTTCTGTGGCTTCCATGGGTGTACAAGTTTACTTG

GACCTCTGCCTCATCTTTCTTCTTTTTCGCGCTTCAGCCTGCGCATTGCTTCTTCTCCACTTCGCTCTCATGGCGCGGAGGTTTCTCAGAAGATGGCGCTAAGGCCGAGAGAGCGCT

>comp103765\_c0\_seq1

CACCAGATTGAGTTGAACCCTGAAAAGTTAAAATTAAGCACATCACTATAAAGATATAATAATATGTGATTGAAGTATAATTGGTATGCAATTGAAACCAAGAAGATGTA AAAAGGCTTTA  
GAGGAAGTGCTGATAAAATAAAATCGCAAACCACGGAACTCGGGAAGAATATTTCCATCATTCACAATTTCTTTTATAATAGCCAGACATGAAACTGCTAATTTCTTCTCCAGTATC  
CTCTCAACAACAAGAGGTTCTAGTTATGACATTGCTTTACACCAAAAAGCCTAGCCTGCTCCCAATCAAAAATAAAACTCAGAAAGCAACTTCAATAACAATGAAAATTATGTTACTCCA  
ACTCAATCTAGCGTTCTACATAAAACATCTCCTAACAACAATCCCTCACTCAAATGTAGAAGCATATGATCGATTATCCACAGCTCCACAAATAACAGAACTTAAAAATAGCCAGGATCA  
TCAAGTGT TTTGAGACATAAGCCAAATATTTGATGGGATAAAGTCAACATTTTATATGGGAAGGAATTTATTTGTAACTAAAACTACCATATAAATTTCTACTGATGGTGGGCAATTCTA  
ATCACAGAGAAACACTACCTCTATCTT

>comp103898\_c0\_seq2

AGGATTTGCTTATTCAATAAGCGCATTGAGAGAAAATTAAGAAAAAGTTGCTACGAATTGTGCGCATGTGTGGCACTAAGCTATAAGAATATATATATCCATTTAGTAGTAATAAAGAACAT  
GTCTATTACGATGCCAATTTACTTATCTTTAAATTGTTCAAAGTTGCGATT CAGGAGATCAGAGAGCCAACTGTTACCTTCGAAAATCTATAGATGATGATATTATTAAGAGGGCTTAGTCAC  
GGTTACTCTACGTCTATTTACATGCGTCATTCTTGT TATATCCATAAATAAACGACCCCATGTCAATGAGCTGACCCCTTCGCGGTCTTCCGAGTTCCAATATGGAATCCGGAGTTGTA  
CGCGCCAAAAGCATGAGCCGAATCCTTGCTTCCATTGGGAGTGACAGCATCATGAATATTCATTGAAAATATATGTGTTCTGTT

>comp103965\_c0\_seq1

CTGACCGTCCTGCATTCTTATCTGATGAGAACAAGAAAAAATCCA ACTAATTTTCACAAAACAATAAAACAATTAAGAATAGTTGGACAGGGAATATAAAAATATTGATTGTGATGATA  
AGGTATGTAGTAAGTTATATGTTACCACAAGGCTTAATAAGGTTTTATTTATTTAGTATAATGAAAATATGATATCCAGAATGAACATACTGATAATATTCAAATAAGTTGGCCATAAATTTGA  
GACAGATTGTAATGGAGTTGAGAGACA ACTATGACATAAATACTGCTCAAGTTATTGCAAGAAATTA ACTGCCGAATGCAAAATTCCAATAAACAAATGAGATAAAAAAGACTTTTGT  
GGATACCATGAAAAACCTGCAAAGGAAGAGTATTGAGATAGTCTCTACTTAAGGGGTTGCTAGGTTCAATGTTTCTTTGATCTAATGTTGTTTATTTATGATAAGAGATGTTTAGTTTGA  
TGTCATTTCTCATATTGACATAATCTGAATAGCATTAAAAGCTAAGATTGCGGAACTCTAAATAACCAAATTTGATGCAATCTAAATTACCTCAATCTTGATAGCTTAAAAAATGATAAATG  
AAATAAATATCTTTATACCCCTTAATTTTAAAAAATAATTATATTCTTTA

>comp104594\_c0\_seq1

GTCTAGGGTTGCGCGTTCATCTTCCCTCTTCATCGTTGTTGTTTGGCTTCAGTTCGCAGGAGGGGAAGGATCACACGAGCCGATCCTTCGACTCCTTATTGTCGTTGACTTCACCCGCAT  
CTGACGCCACCGAGCCCGACGACACAACCTCCGCCCCGTCTCCACCTCCACGCTGACCCACCTCCGACGCTGCCGATCCTGTGCGCCATTCAACTTCGCCCCCTCCGACTCCTTGTGCGTG  
CCCGATCCCATCACTCCGAGGAGGTATAGGGATTGCACGGTCGCTTCTTTGGCTCTTTGTTATCATTGCGCTCCGTTGCTTCAAAAAGAGCAGAGATTTACCGTCACTTCTTAGGCTCCT  
TCGT

>comp104812\_c1\_seq1

TAAATTTATTAGCAGTTTGTAAACAATTTTAAATTTATTAGCAGTTTGATTGTTTGTAGTAGTTGATTAAGTGGTTGTTAGTAGTTTGTATGTCATTCATCGATAAATATGAAATTTGAAATC  
AAATTAGTTTATAGCATGAACAAAATTTTCTTTGGATGTCAAGATTTTCTTCATGCAGTTCGTGATTGAACTTGATTAGATAGCCTTGAAATCCTTCTGGGACAGATCTCCCTTTATATA  
AGCACGAGGTTTGTATTTCCTTACTTTTATTAATCTTTTATCTTTTCAATGTTTTATCTATTGCATTTTATCCTCTATTTTCATGACTATCCTGCATCAATTGACATGCCATAAAAAATATG  
TAAGCGGTAGCCGAGATGGGGTGATTGAAAAAATGGTTGACTACCTCCTACCAAACCTCATTCATATTGCAGGAGTGTTAAACAAATGCATCAATA

>comp105124\_c0\_seq1

AAAGAATAAGTATACTGGATCATATAAACCAAATGTTGAATAGAATTGAACTCAAATTCACACACAGCGAAACAAGATAGGAAACACCAAAAAATCTGGTCCTCCCATGCCAGCAATAA  
CGAACTTCCATAACCATTGATCCTAGTAATTACACAGCCAACAACCATATAGAAAAACCATAGAATAACTCTAAAAGAACAGCAAAAACAAAAACATATTCCTCCAGAGCCGGTAATCAACA  
CCCAAACATAACAAAACACCAAATCATCATCCAAAAGAGTCCCAACCACAAAAAGCTTAATAAAAAATTAGACCAATCCTGAAAACAAAATACAGTAGGAACAACCCAATCTGAGAGGAA  
TGAAGCAACACCAATCCAAAACATAGCTCCGTATTGAATAACAAGAAACATAAAACTCCAGGAAAACAAAAAGCCACATCCATCACAGCAAAATCAGAAAGGGTAAACAGCAAAATCA  
AGAATAACACTAAAGTAACCGGATATAAGGAAAACCCAAACGATCTAATCTAGCAAGCCCTTTAACTTCTTTAGGAAGGTTATGTTTCTTAACTCCACAAAAGTTATCTAATTTACAACCC  
CTTTTTGTAAGAAAATCGGCCACCGCATTCCCTTCTGTTAAAATATGAGAAATTTAAAGGACGTAAGAGACAGGAGATGTTTAAATATCTCTAAGACTATAGAAGTTATCTAAATTAGTAGA  
AGATTTACCTTTAATGTAATGAATAATAAGCATAGCGTCCACTTCCACCCATAGGTTATTAATCCCAAGAGAATTACAAAGATGAATCCTATATAGAAGGTTATCCAACCTCAGGTTGAATAAC  
ATTAGTAGCATTAGAGGGACCCGCATATGCTTTAATGACAAAACCCCTAGTATCCCTAATAATGCCACCACAACCTGCCTCAGTAATGTTTTTAGCACCCTGTATTGAGTTTGAAGCACC  
CCACCATAGGTTTAGTCCAGTAAATAATCCTGTTGTTAGAAAACAACAATAGTAGTAGAGAAATTCAAACCAAATTCCTCATGCAGATGATGGTAACCTTTAAAAGAGTCATGTTTTAAAAG  
CTTCGCAACATACAATTGAAAAATTTTATGCTTAATTTTGAAAATAATCGTGCTCGCATCCATATAGACATTCTCATGTTTAGAAGCATTCTACTAACCCAGATATACCAACATATCAAGACA  
GGAATGCTATTACGAATATGGCCTTTCAGTTTAGTAAACCATTCACTTAAACCTCATTGATAGAAGTAAAATGAAAAGTTGAGAACACTTTAAACAAGTTGTCAAAGTGAATCCAAACTT  
TCATAGCAATAGGACCTTAAAAGAAAACATGGAGTAAATTTTCAGTGTGATAGCAACACTGACACTTGGAACAATATAGAGACCTTCTTGATAAGCATTGAGTCCACAGGAACATAAC  
TATG

>comp105424\_c0\_seq1

CATTTCTATATTAATGAATTGTACAATATATTTATATGTATGTGCGAATGGGTATGCATCAGTCTGTTGGAGCAGCACAAAGTAATGAACAGTGCTGATTTAATTAGCTCTGCAAAAAATGACA  
GATGCAGCGAGTGGCTCCTAGTGACATGGGCTAGGCGCAGTGCTACTAGCTGGGTTTGCTAACAATACCCAATAAGTGAATGGGATAGGTGATATCGTGAGCTTGTACAAATAAAGAAA  
AATCACTGCTAAGGGAGGATCTTTGTAAATATATCAACAATTTGATCTTGGGTGTTGATATGATGAATATTGACTACATTGTGCTTGATACATTCTCTAATAAAATGATAATCCATTTCAATATG  
TTTTGTCCGAAGATGGAAGATAGGATTATGAGCAAGTTTTATTGCGGAAACATTGTACAGTATACTGAAGTTGGTTGAGATACATTTAATTGTAGATCACTAAGTAAGCGGCATATTTAAA  
TGATTTCAAGTGGTTGTGGTGGCG

>comp105470\_c0\_seq1

CGACTGTGAAGGTTTATTAAGGAATTTATTTGCCCAATAATACAAGGAAAATTTCCCATTCCTCCCTGAAACTATGATCAAAAATCAATTCTCATCATCTTCGTCACGATCTCATCATCAACA  
ATAACAACAATTTGTGTACAAAAGTAAATAAAAGGAGGCACCGCTACACAAGAGTAGGTATACACATCTTTCTTGATGCAACAGGGAAATACTATATTTGTATATTTCTTGTGCCAGCGACA  
CACGCCATTCTTATAATGATGAGGGAGAATAATCATCAAAAAAGTGTGATTGTCCTGTAAGTACATGTAGGTGTTCTTGATGTAACGAGAAAATCATATATTGTCAAATTTTCATCCAAG  
CAAATCCATACACGCTTTTCTTGTAAGATAGAAGACTTAGCCATGGTGTGATATATACCCATATATGCCTTTCTTGGCATGGTAGTTGGGCTTAGCATTCCCACAAATGCCCCCTATGCT  
ACCAAA

>comp105735\_c0\_seq1

CTTATTGAGGTGTTTGATACAAGTTTTTTAGGTATAATTTCTTCTAAAATCCAATAAGCCATAGTATTAGAAATTATGAATTTCAAATATGACACCCTAACAGCAAGGGAGAGATATCTTCTTT  
TATGCCCTTCTAATGAAGAAGTGACTTTGAAAACCTAACATCTAAAAGTAAAAAATATTAAGCCTTTTGAAAAAATAGTAATGTCAAAGTATCTCATGATAGAAGTTAAGAAAAAATATTA  
AGATTGATAGAAAAGTAGTATTATTACCATGACACCTAGATACATAATGGAGCTCTTGGAGGCATTGAATTTGAGGCCATAACCTTACCAAAAAGCAATATGAATAGTGTTCATGGCTTGA  
AGATTTCTAATAGTAGCTTTTCAAAGACCATAAGATCATCAACATATAAAAGATAAGCAATACAAGAGTTACGAATTTGAATTTTAGAGAAAGAGCCATCCATCACAACTTGTAAACA  
AAGTAGAAAGTTCATCCATAGCAATGTAAAAGAGGCAAGTTGATAATGGGAAACCTTGTTAAGGCCAAATGTAGAGTTAAAAACCCCTCCAAAGAATCATTAAGACAGATAAAAGAAA

CGAGCATTCTCAATGCAAGACTTTATCCAAATAATAAAAAATATTAGGTATACCTTTCTCATAAAGCCTAGAAAGAATGAATTTTCTGCAAACAGTGTTATAGGCTTTAAAGTTGTTGAATTTG  
GCATAAAAAAATTTTGAATTTTATCTTGCCTGAAGTCAGATAAAAAGTTCATCAGCTAGAAGAATATTAAGTAGACACCATATTTCTTAATAAAGCCTGACTGAGGCAAGTCAATGAGGT  
GAGGCATACAATCTCTAAGTCTATTAGTAAGAAGTTTATAATTGAATTTATAAAAACAAATTACAAAGAGAAATCAATCTGTGATACTTTATGTTACCCGCAAAAGAGCTTTTAAAGGATAAGA  
GATAACGTAATTGCTTTAAATTTCTTATAAAAAGTATCTCTTTTAAAGGACATGATAATAGCCTCATATATTGCTTTCCAATAACATTCCATGTGGAGGAATAAAATTCAGCAGGATAGTCTTCA  
GGTCTTAGAGCCGAGCATTAGGAGAATTAACCCACTAGTTAATTTCTCATCAGAAAAAGGAACCGTTAAGGAAGATAGTAGATTAAATGGATGGAGCTATCAATAGGAATTAAGT  
AATGGAAGCAAGAGCTGGAGTATTGAGAAAGCACTGGTAGTATCTAATAGTAGCTGAAGCAATATCATAATGAGAATAGAAAGTCCATAGGTCATCAAAAAGCTCCCTAATAAAATAATTA  
TTCTTTCTACCTTTAATTTTATCATATACGAATTTATGATCTTCTTCACTTTGAGAAAGATGACATTTACCTATTTGAATCACTCAAGAGGCCCAAGCATCATATAAATCAGATAAATCTAAA  
AGATGAGTTTTGCAGAAGAATTGAGATCCATATTAGGGGGGTCAA

>comp105857\_c0\_seq1

ATAACATAATTAATTTAAGAAAAAATTAACCTCATCTGATTGTTTGAATCCGCATTCTTCTCCTTTTGGATCATCTTAATGACATTGAGATTGTCACTTTCAATGATAGCTCCCTTGTATTT  
GAACATCCAATCTTTCATTATAATCTTCAAGTATTTAATTGCAATAACTTCCAATTTGGTATATATCCCAATGAATGCAAGATTTCCCAAAGGCCAACAAGAATCTT

>comp105922\_c0\_seq1

TGATTTGTACAGGAATTTGTGTTGGATTTGAATAGAGATTTACACAAAATTTCTGTTAATAGGATTTATACAAAGTTCGGGCATGATTTTTGCTAAATCCTATTAACAAGAGGTCGTCTGAATGA  
ATGCAAGATTGGAGTATGATTTAGGCGTTGTTGGAAACAGGATTTAGGGAAATGTTAAATCTCACTATTAGTTAATTCCTCTACTTCCCTATTTTTACTTCAGCAGATTTACATGATTTGTCC  
GAAGAAGCTTGTGAAAGGGAGATGGTTACCGTCGCAAGTAAGCGAGTTCCCATCTCACTCCCAATAGGGGTGTCAATTTCCGGGTCA

>comp106085\_c1\_seq1

TGCTGGAACATGTTAAAGGAATCATGGTGTGAGGAAAAAAGAAAACCTTTTAAAAGCTGCCATCTGAGGTGATGGCTTCTCTGTACTTACGCCATACCCCAGAATACAATAAATAA  
GCAATTAGAAAATGTTCAAGTATGAAGGGATTTCTCCTCCCCGCCAAAAGCACTGCTCTCTGAAGGAAGCTGGTTTCTCTGTAGCTACACCAGCTGTTTCAGAAAGCTCATTGGACCTGG  
TTTTGAAAACAAAACAAAGTTAAAACCTGGGAGGAATTATTGTGCAGTGTGGAGTACTCAGTCTTTCTTATAAAGAAAAAAGTTATCTGGTACCAAAGTGTGCAACCTACAGAC  
CCTCAGTACTGCCCTGTGACTTCTCTGTATGATATCACAAGGGTGCCAAGTGCCTGTTTTCTAGAGCTAGGAGTTGGTGGTTTGGCTAGTGCTGAAACCATGCATAGGATTGGTTTACTA  
AATAAAAACCTTATTACGTACGTCTCCAAAAGACAGCTGAAAAGTGGAGAGATTTTGATTTGGTGCTGTTTAAAAGAGATGGCAATTAAGAGCATAAGCACCAGGGAGATGGTTTAAATG  
GTAAGTGCCTTTTTTTTTCTTTCTTTCTTATGTCAGGCTAGAGCTCCAAGTGGAACTTGCCTTACATGCAAGAATGACTGGATAGGGAACACTCCCTGACAAAGAGCTACATAATTAGAA  
ATGGATCAAGTTATAGGGAGGGTAAGGGAAGGCTTACATTCATAATAGAGCTCAAGACATTACAAATTCATGCTGACAGGGCTGTGGCATTGCCAGACAGAGGCTATAATGGAAGTACA  
AGTACTTTACGTGCACATTACAAGGACATTTTCAGCATTGGTGGGAAAAGTCAATGCAATTAGGATTTTAGAAGGTTGGGTGATAGGGCACAAAGGTTCAATTTCAAAGCATTATGTA

>comp106264\_c0\_seq1

TTTTTATATGTGTTAATTTATTAATTAATGTGCACATACATTACATTCATGCATACATATTTATTTGATTTACTTTCTGTTGCAAAAAAGAAAGAAAAGCAAAGTAGAATGTATCTAGGATGCTT  
GTA AAAAAGAAGACTTCAAGTAGAATGTACCTAGGTGCAAATGTATGTCAAAGGGTCAAATATAAATGTAAGGTGTTAAGAGTTATAAAGGGGGTTGAAAATATTTGCTTATATATATACA  
CATAGGGATCCAAAAGATAATACCTATCTCGATGGTGTGGATTTTGGAGTCTATAGAAGATGCGGAGCTAAAAGATAATACACAAATATATTCAAATCCATGTTTCATAAGAGTAGAAA  
ACTAGGTTTGTGTTGGTGGATCCTAGCCACA

>comp107141\_c0\_seq1

GAAATTTGGAGTTCGGATGGTCCCAATTATAATTTTGGAAAGTTTCCAACCTTGATTTTGCATTGAGATTGCCAGAGGTCCCCACCTTCAAAAATTAGTCATAAAAAATTACAAAATAACAGTA

GAAGCATTAAAAATGTCGGAACCTTGCATCAAGAGGGTTGAAGCTGGAGGTGTTGGCTGCGGCTAGATGATGGATGTAGTCGACGCGGTATTGGTCCTGTTGCATCATCAGATCATACT  
GTTCCGCAAGGGACAGATTATATTGCCGCCCAAGGGTGAGCACGGGCCATATCGCTGGACCAACCTGAGCTTGTGAGGGCTCGTGCCATTATGAGGCACGGAGCAGGAGCTGCTCGGT  
ATTAGTGACTTGACGTGCATGAGATCATATTCTCCGAAAGCCCACGTAAGTACTGATACTAGAGAAATCTTCTCTATAAGAAGCAAAAAGTAGAAGAGTTTGAGAAGAGTATAACATGGGAAC  
AGAAAATAAGAAGTCGCCATGAGAATAAAGCTTCCAATTTGCCCTTTGTAGAACTTGA

>comp107441\_c0\_seq1

AGCTTTTTGATTTATATCTTTTCATAGCCAAGGATAAAATCTTGCACTACTCAGAAACCTATCTGACATGATTATGTTAGATGAATTATTTGAGCATTGCTGCAAATTGATAATTCTAAACCT  
AAAGCTCAAGAGAAATGACATATTTAAGTGGATTGGTGAGGGCATTATATACATCATTGGAGAGAACGTACAAGAAGTTCTTGAAGTTATAGGCGAATGTATAATTCACATATTTCCAATG  
AACTTGAATAAAATTTTTTTTGTATGATATGTGAAACATCGCTTCATAAAAAGGTCCTGATGTTGCATGTCTCTCAACCTTCTTGTACCTGAATGAAGACCTTGTAAGCAACTATTAGTTTCAT  
TTTGAAAAGTGACTCCCTAGATTGATTAAGATGTTATGGTTATTTAATAAGCAACATAAACTTTTCTCCCAAATCTCCTTGGAAGTGGAGGAGGGCCACTACAAATTAGGTTTGAATGACT  
ATAATAAGGTAAGTTATTTGATATTTAATAAAATTTTATACATATTAATCTTATATAAACTTCATGAGCGTATTATACTGCATTTTCA

>comp108850\_c0\_seq1

GATTCGACAGAAATAATTTCTCCTTGTTGACTCCTGAATTCGTTCTGAATGATTTGCTCATTATTTCTAGCTCTGTTAGGGACAATTATTAGGTCTAAGCGTAGTCAAAAAACGCAGTC  
AAAAAGCACTTAAAGCAAAGTTAAAGCGTAGTCAAAACGTAGTCCACATGGAAAATTTAATTGAATATTTGAACCTATTTTTAGGTCTGGTGTCCGGGCCATATAATTTCCCTCGTTAGC  
CAATAAATATCTGTAGAAACAAAATATAGAGAACACCCATAGGATTGTGGTCACAAGTTTTAAATAGAAACCGACACTAGATGCTCATCAATTTTTATTTTTAAAAATGTTTGTATTGTGTT  
TTTTTTTTTTT

>comp109949\_c0\_seq1

AAAAACTAAAAAATTTTAAATTTTATAAAATGCATAATTGTATCATGAAAATTACTTAAGAGATTTATGAAAGTTAGACATAGATTATCGTATTAATAAATTATCAGAAATAAATTCAACACAT  
TTGAAAAAATTACATAAGAGGTTTAGGACTCTCATTCCCCACCCTTCAAACCTCAAAGGCAGGCTTCACATTCATCAGTGCATTGATCCGAAGCTGCTACTCATCAATGTGTTGCGAGAGA  
GCTTTGGCAATAAAGCCAGACCTACAAAGCCACCAACAAATGCAAGAGCTGCTGCGAGCCCGAAAGCTGGCACATTTCCCTTGCCAAATAGTGAATCCCAAGGACCAGCACTGAGTGC  
AATGATCACCTGAGGAACCACAATGGAGACATTCAGAACTCCTGTGCATAACCCTTGTGAGTGTCTCCTTCGTTTCGCAACCAGCTGTGCAGCAGTTGCAAAAAGGAATGCTATACAGAAT  
AGCTAGAGGAAACCCAA

>comp110240\_c0\_seq1

CTTAAAAGAGGTACCCATCCCAGAAACCACCTGGCCCCGCACTTGATTGAGCGCTCGAGGGGAATCAAACACGTTTGTATAGAATTTCAAAGCAAAAATATAAAGGTAGGTAGATTGAGA  
TAAGAGAGAGAGCGGAGAGTGAGATGACCAATGGCGTGTGAAGGTTGGACGCTAACGAGAATTATTATTTTTAATTGTATTTTATTGTTTTGAGTGCAATATGTATACATAATGAAGTTTA  
GGTGTGAAATATGTAATCTTCTTTTTTTATATGCT

>comp110466\_c0\_seq1

AGGGGGGGGAGGAGGGGGCGGGGAGCCCCGGGGGAGGGGGACACGGAGACAACCTCAATACAACCTGCAGACGAGGCGGCCCGGGCGAGGTCCCAGGGCGGCCTCCGGAGTCC  
TCAGTGTGGCGGCGGCGTGGCGGGTGGCGGCGGCGACGGTGGCTTCTGGGCTCGGGGGCCGAGGGCAGGGCACAGTCTTAGGCGGCTCCCCTCGCCCCAAACACTGAGGCCCCGGA  
GGGCTGGCAACAAGAGTCTGTGGAGCGGCAGGCGGGCGGGCGGGCAGCGGGCATGCCCCACCAGGCGGGCGGGCGGAGCGGGCTGTCTTCTTGCCCTGCCCCCGGCATGGGA  
CGGGCCAGGGTGTGGTTCGGTACCGGAGTACGAGCTCG

>comp111039\_c0\_seq1



TATTTCAAGCCTTGTTTCATTTGGACTATAAAAGTCGTGCTAATGAATGGCAATAAAATATCAGAGTCGAGATTAAGGAGGCCACAATCATGGAGGTTCTCTACACTTCCCTCTTCCTGATC  
TCATTAATCATCCTCTTCCTCACGCTCAAGATCTCCCATGCGAAGCAGCGTGGCAGAGAACCCCCAGGGCCATGGAACCTCCCCATCCTCGGCAGTCTCCACCGCGTCGTCGGCCGGCAA  
CCTCTCACCACTCCTTCCGCAACCTCTCCGCGTCTACGGCCCCATCATGCGCCTCAAGCTCGGGGAAATCCAAGCCGTCATCATCTCCTCCGCGAAGCCGCCAGAGAAATCTTGAAG  
ACCCACGAAATCTACTTCGCTCACGCCCCGTAACGACTCCGTTAACGCCATCTTCTACAACGCCAACATCTTATTTCGGCCGCCACGGCGAATTCTGGCGCGAGATGCGGGCGGCTA  
TGCACCATGGAGTTGCTCAGCACGAAGCGCGTTTCGGTCTGTCAGGGCTGTGAGGGAGGAGGAGGTATCTCATCTCGTCTGAATTTCTAGCGGCTTCTTCCGGTGATCTTGTCAATATTAGC  
AGAAAGATGGCAGAGACTGGCAATAACATCATGGCTCGGGCGGCGATTGGGGTTCGATGCGATGACCAGAAGATGTTCTTATCGGGCGTGGGCGATGCGGTAGAATTTTTGTCTGGGATTC  
ACCATGTGGATTTGTTCCCTCCATGCCGTTTCATAGTTTGCATTTCAATCAGAACTTATTTTT

>comp111775\_c0\_seq1

GTGAGGGAAATGAACCTATGCAAATCTCTTGACTTAGGGAAGGCCACTTACCTACAAAAACTCATGAGCCTTTGTTTGGCCATGGCATTCTCAAGTCTAGTGGAGAGTCATGGGCTCAT  
CAAAGAAAATTATTGCACCAGAGTTCTACATGGATAAGGTCAAGGGAATGGTTGAATTGATGGTGGATTCTGCCATCCCCTGTTAGAAACATGGGAGAAAAGAATTGAGAAGGAAGG  
AGGAACAGCTGAGATAAATATTGATGAGGATTTGAAGAGCTTTTCTGCAGATGTAATTTCAAGAGCAAGTTTTGGAAGTAGCTATTCCAAGGAAAGCAAATGTTTTTGAAGCTTTATGAA  
TTGAAGAAAGCTGTTTCTAAACCAAATCTCCTCGTCGAAATCACTGGAATAAGATATATCCCTACGAGAAGCAACCGAGAGGTGTGGAGACTAAACAAAGAGATCCGCTCCCTCATACTC  
GAACTAGTGAAAGAAGGAAGCATTAGCGAAGGGCGAAGCTCGCCGGAGAACAACCTCCTCAGGCCATCCTCCGAAGTGCAACCGACGCTGGCGGTGGCGATGCGGAGGACTTCGTT  
GTGGATAACTGTAAGAATATATACTTCGCGGGGCATGAGACCACCGCGTGGCTGCCACCTGGTGCCTCCTCCTCGCCCTTCATCCAGAGTGGAAGATCGTGCCCGTGTCTGAGGTC  
ACGGAGCTCTGCGCTGGCCTAGCACCCGACGCTCACTCCCTCTCCAAGATGAAAACCGTGACAATGGTGATCCAAGAGGTACTTAGGCTCTATCCGCTGGACCAGTGGTCTCAAGAGA  
AGCTCTCCAAGACATGAAAGTTGGAGGCATTAGCTACCAAAAGGCATCAATATTTTTA

>comp111971\_c0\_seq1

AAGCTGCCGCAGCGTCTCCCCCTTTCGCGCCGGCAGCCGTCAGGCTCAGAGCAGCGGGATAGAGAGCGGTGAGAAGACGAAATTGGAGCCTTCATCCGCAGCCGGAATCCCTTCAAC  
CTAGCTATTTGAAGGCACGAGTCCATTTGTGTGTGAGTAGGTTCTTGGGCGATATACTCCGGAAGGAGACGATGATACTGTCGTTGGTGTTCATTTCCATGGTAGCGAAAAAGGAGGGG  
ATCTGATGTTTAGAAGAATGAGAGAAATGCTGAAACAGATGGCTGCAAGGGGTCAAAGCTCTGCTCTTATACATGGTGGATTCCAAATCCTTGCAGGCGAACTCCTGGCACTTCCGATCC  
GACAGGAACAACG

>comp111987\_c0\_seq1

GGGGTTATGTTGCCATGTAGAAATGTAGCATGGTATATTTATGAGTTGTGATAATAATAAAGATTTTTAGGTGATGGGGGCATGGATACGGGTTTCATTGGAGAGAGGCATGGTCCTGAAT  
TCGCTACAACCCATAATTAATTAATTTAATTTTTAATATTAAGTACATTAATAAGAGGTCTTAGTTTCTAACGAACGTATAACCAAATGCTCTCGATTTGAAATACAATTCAATCTACA  
AGAAGGCATTATACTCATTGAGATAAGCCTACGGAAGTGTCTTTAGTGTATTGATTGTGAGTTTTACTATCAACTAAGAGATCTTATTTAATGTACTTTAATATTAATAAATAAATTAATTA  
TAATTAATTATGGGTTGTAGGCGAATTCAGGACCATGCCTCTCTCCAATGAACCCGTATCCATGCCCCATCACCTAAAAATCTTATTATTATCACAACTCATAAAATATACCATGCTACA  
TTTCTACATGGCAACATAACCCCAAAAAGCCCTCTCTATTAAGGGAGGAATAACATGTGGAGTTTAAATGTAATTTTATGTGTGGACTCTGAGTACTATACACAATGTGTATATATTATGTAC  
AAATACATACCATATACACGTTGTGTATACTC

>comp112394\_c0\_seq1

AAAACCTCAAATTTGATTTTGCAGTGAACCTTTCATGATGATGCAAGAGTTTCATTGGCCATATCAACCACATTTCTTGTGCATATAATCTCGAAAGTCTAATTGTTCTGACAACAAAACATGTTT  
GGCAAAAAGCCAAATGAAAGATAAGAGGTCACCTCCTCTACTCAGTTGCTTTATATGCATAATTGCTTTGGTATTTCTCGCCCCTTGCAATAAGAGCTCCACCCATGCCATGGTCACAACCTT

TCCATCTCTCTTCGTCTTCAATAATAAGCATCAGATGAGCAAGCACTCGTGCTATCTCAAATAAAGATAAATATCCATGCCCTCTATCGGAGTAGTCATCATCTTTTTGCATGCCTCCTCAA  
CTTTTGCATTTGGCATCAACAAGTGATGGTCATCACCTCTTCTACGAATGAATTGAACCATATCATAAATGCAAGCCAGAACGCCAACGTGCTTGCTCCTCCCTTAGTAGACATCATATCTA  
GTGCGCATGAGCACCATATACATCATGTAGTTTGATAAGTACTTGCAAACTTCTATCTCTAAGCTCTTCCTCTTTGCTCCTCTTGGTATGTTTTCTCTGTTGTAATCTCTATTTGATGAGGATG  
CAATGGATGTAGAGACTCCGACTTCCAATGGAAACAAAGATCGGTGCAGATGTGCCATACCAGAACTTGTGATCAAATGATAACCCCTCTATAAGCTTAACAAATGATGGGACAACCCA  
AGCAGGAGTGTGTTGTTACTTGTGGAGAACAGTCAGGCCTGCAGATTCATTAATTTCTCCATGATACATGCAAGGGACTGCGTACATATGTAGCAATGATATTCATAAGTTCTTTAGTTG  
CTTGTATTGGTTGTTGTGTTGCAATGTGTAAGTTCCCTATCATCAATCCAACCTCATGTATAACTTTATCTCTTGCACTAAGCCCAGTTTCTCTTTAATCCAATCAATCATGTTTCGTCGAGG  
AGCTTTATTTGGTGCAAAATTATTAAGACAATTACTAATAAGATTCAATTGTGGCAGCTCTCCTGATCAATACCTTCTCATCAGCAACGACCTTTTAATTTAGCAATGTGCTCAGCAAGCAA  
CTTGCTCCAATTACCCAGCTTCTTAACATTGAGAAGAGTAACTATCTTTCAATCTGAGAACATGAGCATTATAGTAGCCATGGTGTGCGAGGAATATGGAAGCTACAAGTAGGACATA

>comp112619\_c0\_seq1

GGCAGATGAAGGGTAGGCAGCGAGAAACCAAACCCTAGCAAAGTGGGTTTTCAAAAAAAGTTTATGTTAGGAAAACATATTCCTATCTTGATAGCTACTATTTTCATCATTGAATAAAAA  
AGAATATTGTATGCTATATTATTAATTTTCTTATTATGAATTAAGAAAAAATAATCACTTTTATCAGAGATTAAGCATAACAAGCCACAGTCATTAATAACCTAATGAAGTCCCATCTTG  
AAAAATACAAACCAAATTAATAATATTTTTGAATGGAAAAGTAAGAGTAGAAAGACAGAAATGGCTGGAAGTCCAATTCCAGAATTAATTAAGAGCTCGGCCTTTTATGATATCCAA  
GCTCATCTCACTGGGATCAGTTGCTTGGAGCTCCACCTGAATGCCATCGAGCTCTCTCTTGAATCTATCCTTTGAGCTGGCATAACAGCATTTTACTCCTCACCCCTTGATGTATCAGGAGACC  
AGGCAATGAAGAAG

>comp112628\_c0\_seq1

CGCGTGAAGCTCAAGGACATCACGGCTCCAGAAAAGGAAGAATGGGGCAGCCTGCTGGATGCTTTCAAGGTCGCCTTGGAAGTGGAAAAGAAGGTGAACCAGAGTCTGTTGGACCTT  
CACGGTCTGGCAGACTCCAAGAAGGATGCGCAGATGTGCGACTTCATCGAGACCCACTACCTGACGGAACAGGTGGAGGCCATCAAGGAGATCGGTGACCACATACCAATCTGAAGC  
GCGTCGGCACCGCCTGGGCGAATACATCTACGATAAGGAGAACCTGAAGGAGGATTAAGACCCGGACCTCCCTCGGATGCCGTGGAACGGTTCGGACTACTTCCTTAGGAAAAGATAAAA  
AAGAAACATTTTAAAACATTTTCGAAAACAAAATCTAGGCACCGATGAAAAAATGAAAAAAGAATTATTGTTTCAGTACAATTGCCAGAGACCAACCTGGGAATTATTTCGATAAACCTT  
TGAGATTAAGATACTGTCTGTGCAAATTCTGTCAATCCAATGCTGT

>comp112712\_c0\_seq1

TTTTGTTCAATTTTAAATAGCTTAAGTAAGTTGAAATCTCACAATAAGCTAAAAATGTATTTATTTTACTATTTTAAATCATCCTTTAAATGTTAAAACACATAAAGTAAGAAACAGTGTCTTT  
ATATATTACATCAAATGGAGCGGCCATGTTTGGAGCTGCTCAATTATCAAGTATCGCTTGCTCATCATGTAAATGAACTAATATGAAAATATTGTTGTAAGAAAAATAAAATATACGATTGTA  
TAACAAATTCATATTTCCCCCTTTTTGGCATCACCATTTTTCTTACAAGCAAACCTCTACATAGAACACGATATATTATACTCCTGTTTCATTGGCTTCTTGCATAGCAAAATGACAACCGGCG  
ACTGCATCGTTTATTGAGATGAAAAACCACTCTTTTCCAACCGCTTCAATGAAATTTGCCGCAGTAACTTCTCCACCACTTTTAACTTGGGTTTGTAGTGCCACCTTGATCCCCTTCTT  
TTGAAGCATTTTATGAGCTTCCAACATCATTGCAATGCCACTGTTGTCAATGGCAGACACCCCGCTCATATCAAATATAACATACTGTAAATCCTGGCTTCTTGTCTCCTTAATTCTATTCTCT  
TCAGCTTCTACCCACCTTGCATCCTATAATTCATTTGATACTTATCAAGTGAAGAAGATTTGAAGTATTTGGTTCCATTCTTGTACGTGAGCTTAGTCAAATGTGGAATGACTTTTTTTTCTT  
TTTACCTCTCTAAGGTAACCTGGCATTAGCGAAATAGATGGGAGAGCCAAGCTGCAAGATTAGGATACCAGAAATGGTCTTGGAACTGGATATTGATCAATGTCGCGGTAGAGATCGGT  
TCCAGGCAAGTTTCCAAGCTTATATGTGACGGGTCTTGCCACGTGTAGCAATGCTCTTATGATCGACAATAAAAACGATATGGCAAGGCCTGTCTTTCATGTTAATGAAGAGAACGCCGAGA  
AGGGCAGCCATGCAAAGGCAGAAATCGAACTTATCAACTTTAAAGAGATGGCGAAGCTCATGAAGCTCGATGACGCCGATCATGGCAACGATGATAATGACCGCAAGAGCCACAAGTGG  
TGTGTAC

>comp112712\_c0\_seq2

TTTTGTTCAATTTTAAATAGCTTAAAGTAAGTTGAAATCTCACAAATAAGCTAAAAATGTATTTATTTTACTATTTTAAATCATCCTTTAAATGTTAAAACACATAAAGTAAGAAACAGTGTCTT  
ATATATTACATCAAATGGAGCGGCCATGTTTGGAGCTGCTCAATTATCAAGTATCGCTTGCCATCATGTAAATGAACTAATATGAAAATATTGTTGTAAGAAAAATAAATATACGATTGTA  
TAACAAATTCATATTTCCCCCTTTTGGCATCACCATTTTTCTTACAAGCAAACCTCTACATAGAACACGATATATTATACTCTGTTTCATTGGCTTCTTGCATAGCAAATGACAACCGGCG  
ACTGCATCGTTTATTGAGATGAAAAACCACTCTTTTCCAACCGCTTCAATGAAATTTGCCGAGTAAACTTCTCCACCACTTTTAAACTTGGGTTTGTAGTGCCACCTTGATCCCCTTCTT  
TTGAAGCATTTTATGAGCTTCCAACATCATTGCAATGCCACTGTTGTCAATGGCAGACACCCCGCTCATATCAAATATAACATACTGTAAATCCTGGCTTCTTGTCTCCTTAATTCTATTCTCT  
TCAGTCTTACCCACCTTGGCATCCTCTCTCTAAGGTAAGTGGCATTAGCGAAATAGATGGGAGAGCCAAGCTGCAAGATTAGGATACCAGAAATGGTCTTGGAAATCTGGATATTGATCAA  
TGTGCGGGTAGAGATCGGTTCCAGGCAAGTTTCCAAGCTTATATGTGACGGGTCTTGCCACGTGTAGCAATGCTCTTATGATCGACAATAAAAACGATATGGCAAGGCTGTCTTCATGTT  
AATGAAGAGAACGCCGAGAAGGGCAGCCATGCAAAGGCAGAAATCGAACTTATCAACTTTAAAGAGATGGCGAAGCTCATGAAGCTCGATGACGCCGATCATGGCAACGATGATAATG  
ACCGCAAGAGCCACAAGTGGTGTGTAC

>comp112990\_c0\_seq1

AAAGATGATGGACCACAGGAATACATACAACAGTCCGCCTAATGACATGTAAATAGAGCCATAAAACCAGTGTACCCTGGTTTCGCTGCCGTGAATAAAGCCATAAAACCAGTGTCTTG  
TGCGGAAGTGAATAAAAATGCAGAAAAATCCAAAAATCTCACCGTTCTCCGTGAATAAAGCTAGTGTATTGCGGAGTGAAGGCCACAGGCGGAAGAGCAGCTCAGAGGCATACACA  
AGGTTTCGTTGAAACTTGTCTCCCGCGAAAATGGGAAGGAAAAAAGAACGGAGTGTGTTAATAGATCATATACGCCATTCAACTTATACAAGCACACCTGCTTATATTCCGGCTACTGCT  
CCACTTCCTCCTCAGCGAATCATTACAAAAAATGGTTTTCTGCCATCGCCGCGTCTGGGCACCTGCTCCTTCTGAAACTCTAACAACCTGTTCCCTTCTTCTTAATATATACCAATGTATACA  
GGAATTGTTGACTAAGGGAATATATGAAACCTTCAACCAAACTCTTCTTCTCTCTGTTTTTCTAACATCTATTTTGCAGATCATTTCATGGTATCAGAGCTCCAGGCTCAATAGTGTGAC  
TGAGATTCTCTATGGTAGACAGCCAAAGCTCTTCGGCTCCTCAAGCCGCTTCTACAGTTACAGCCGCAACAGATATCATCATTCCCCTGTCTCTGAAGTTCATAATCTCAAATATCAAGCA  
TATCATCAACATCCAGCTGAACAGCGACAACACGCCATTTGGAAGCTCCAGGTTTTTAAATCTTTTCCGCCAACGGTTTTGATGGTTTTCTCACCGGATCTGATGTTTGTCCAGTAAAA  
CACATTTCCGATTCATCTGGAACCATTAGTTTGAATCCAACTATTAATCTATGGCAACTCACTGATCAAAAATCTTGCTGCGGCATTGTTCTCCACTATCTCACCGAATATCCTTTCTTATGTAT  
TGACGCTGCAAACCTACACACGAAATCTGGGACACTTTGGAAAAGAGGCTTCAACCAACCAATCGCTCAAGAGTCATTCAACTCAAGAACGAGTTGTATCGCATCGACATGAAAGATCTT  
ATGGTAAATCAATACCTAGCTCATGTCAAATCTTTGGTGGACAATATTGCAGCAGCGGGATCAAAGGTGGAGCAAGAAGATATAATTCTACACATTTTGAATGGCCTACCTTCATCGTATAA  
TGCCTTTAAAACAGCTATTTCGTACACGTCCCTCCAACATCCCACTGGACGAGCTCTATTCTTACTACTCAGTGAGGAAATTAATATTCAGAATGATCTTTCCAAGGATGCAACGTCTGCTG  
CTGACTCAGTTGCCCTGAATGCCTTCAAAAACACTACATCCAGGAATATATCAACTGTGCAACCCAAATCAAACCGTGGCAGATATTCAACAAACAGGGGATCCTCACAAAGGCCATTCA  
ATTCAGGCCCCAGACCGCCAGAAATTATGCTTCTCCACGGATTACTTGTCAAATCTGTAACAAACCGGGCCACCTAGATGCACAATGCTGGCATCGAGCCAACCTGCAGTATGTTCCAC  
AATGCCGTCTCCGCAACGCAGCTTTTTACCAATCAGCAACCAGGATCACCAACGGATTGGTATCTGGATACCGGCGCCTTCTCATCTCACCTCAGATCCACTTCAATTGTAGTATTCTC  
AACCATATACTGGCACCGACAGCATTTCCATTGCCAATGGCACATCACTTCCATTCAATCTACTGGGCAAGGGATCCTACCTTCCCCAACACACCCCGACAATCTGACCAACCACACTA  
TCCTTAGAGGCAGAAGTCGTGACGGTCTCTATGTCATTCCCTCCAACCTCCATTTAGCTCTTACAATCAGCAAAAATCTACCTCCACTTGGCATGCTCGGCTGGGACATCCTCACATTCA  
GCTTCTACAACATTTATCTAGGCACATCTCTAATATATGTATCTCTACTAGTTATACTTTTCAATGTGACTCATGTAATGTGGCCAAAAGCCACAAATTACCTTTAAATTCTAATGCTATAAAAA  
TGACTGTTCCATTTGCTTTAATTCATTCTGACGTGTGGGGTCCCGCACCCATTTCTGCACTAAATGGCTATAACTACTATGTGCTCTTCATAGAT

>comp113103\_c0\_seq1

ACTCCCCGAAAAATACCCTACGAGTATTACACTAAACTTTTAAATGACTATTCTTTAAACCCCAACAATTAGACGAAAGAATCCTTACAAAATGACTTTCACCTTCCCCGGTGCAGCGAAAAG

GTCGGGTCCTTTGACACCAAAGATATCTTCTTCTTCCCAAAGCTTCACTCAAGACGAACGTTGAAATCGATAATACTAAGAAGCAAGCTCGCCAAAACAACCTGTTTGAATCATCTCCAC  
ACTCCCTTGAAACCCCTCCAAAGACCTCTCTCTCAAATTCCAAACCTTCTCTCCCTTTCAAATTCTC

>comp113219\_c0\_seq1

AAGCATCAACCTATACATAAATAATAAAAAATTTTCAGGAGGCATAACACATCTCCACATTTATTTAGACAACATAAACATTCCTTCGCGAATCTCAAAGCACATATTACAAATATTAGAA  
ACATAAAGCATATATAAACTAAGTTTAGAAAAAAAATAGCAATTTAACTACGAAAAGCTGGAGAAGGGCAGCAGCATAAGGAAAAGCCACCTCATTCTAGCTCAGCAAATCAGCCGGAC  
CAGTAGCAAGTTCAAAGAATCTGGTTCCGTGGGCTCCTCAGTGGTTATTGTAGGCACAAGGAAGTCACAATAATCTGTTTCGTTCACTGCAGCAATGATATCTTCTTTTTGATAGTCCG  
ACGACACCTCTGGTCGGCGTGAGCCCATCCCTTGTGGGTTAGCTCGAGGATGAACATCTCGCAGGCACGTGCCAATAGCACAGGCGCCTCGTTGGAGACTATATCCACGTCTGTCGTCAGC  
CTTCATAATCTCTTGATGGTGCCTAAAGGGATCCTTTGCTTCTCGAAATCTGTGGTTTTCTCCATCTCGCGGTATTGATCGGCCAGTAGCATCGACCGGGCTGTGGTTGATGCACTACCT  
GCTCGGGATAGAGATTGGGGTCTGCGTCGGCGGCGAAGTTGGGCAAATGGGGAACGTCGCCGGAGGGTGGCGGCGGTCTGTTGTGGCCTTGTCCATCCATTGAGATCGATGCAAGTGGG  
AGTCGCTTTAAATGGAGGTTTCAATGGAATGTAGA

>comp113411\_c0\_seq1

ACATCCACTACCTTTTACTACTTTCAGTTATTACCTTTACTTATTAGCTTTATTTTATTTTGAAGATATAGCAATAGGGAGTATTCCAGAATACTGATATAGCCATGAGCGGCGGGAGGCAT  
CGAGCAGTTTTTTGCAAAAATCATTAGAGGAGTTAATACAAACACCTGAATATACAGGTTTATACTTCATTCCAACGATCTCATTGTTCTTGTGATTACTCTGTTTTTTTTGTCAGGTTTC  
CAGTAGGACTTCAGCTGAGTGCACGGGCTGCAACAGGTTGGCATCAGAGCCTCGCCTGGGAAAGAAATGACAGATCGCGCAAGGAACCCATCTCCGAAGGAGCGCGAAGTATTGACG  
CGCTCTAGGCAAACCAGGAAAATCTCAACCGCCGAATAGATGAGCTATTGGCCGACGTCCAGAGGCTTACCGTGGAGATTCGCCACGAGTTCAATCTCATCAGGGCGAGACAACCACCA  
CAGCTGCCACCACAAGTCGATCAACAAGGAATCAGGCCAATGCGGCGAAGGGGTTTGGTAGCGAATCGACCTTTC

>comp113485\_c0\_seq2

CCACACAGAATAATTAATCCCATCGTAGGATGTGTGCATGCTTATGTTTGTATCTTCAGTTTCGTTTGAGACAACCTTGCATGCTTAATTGTTTGTATCTTCAGCTTCGTTTGAGACAAC  
TTTTTTACGGTTCTAAAACAGCTATTTAGTACAAAAATTTCTAATTTTAAAATTTTTTGTTCAGAATGCTGCTTTAAAAAGCCATAAAAAGCTGTGCCAAAAGAAAACCCGAGTCGAGCCA  
TCATATGAACGAGCGATCATGATTTGAATGAGATTTTACAGCATAATTGGTAAGAAAAATTAGATCAATTAGTTGGGAATTTGAAAGCAAATTTGTCTAATTTCTGTTGTGCAACGAAATT  
GGATCAAGCTGAATCCGTGATCTGTGATGCTTTATTGTTCTATGTAATTCGGGAAAATGGTTTTAATTTTGTATATATTTTCATTTTTATTGCTCTT

>comp113635\_c0\_seq1

TAAAATATCATCTTGCTCTTCGCTCTTTTTTTCTTTTACAGGCTCTGTAGCAAAAAACAAACACAAAAGCAAAAAAACAAAAACAAAAAAGAAAAAAAACATAAAAAATAGGGG  
TTTGGTATACTATACGAGAAACCCCTTTTTTTTTTTGGGAATTTGAGAAACCGCATTGATCATAAGGAACGTGACGCCGGAGATGATTGCGACGATGAAGAGGAAGAGGAGGTAGAAGA  
GGAAGCGCTTTGCCGTCATCTCTAAATCCTTATAAATTCTGTTGTGGAGAAAGATAGGCTTTGTTTCTTACCCAATAATGGAAGGAACTTATATGTGCAAGGAAATAACAATAGAAAAG  
TTCAAAGTTTTTTTTTAAATTTAATTTTTGGGAAAAGTAAGGCTGACGCCTACAACTAATTTGAAAAATATTTAGTAAGCGTGCTTTTTAATGTTGTTTTTTAGACATTAAGATTACTAG  
TTTTATTGCACGT

>comp114874\_c0\_seq1

ACTTTTTGGAAATGTCTCGGGCCAAAAGATAACGTTTGTTCATGGGGAAGATGAGATGCATACTTGTCTACAACTCAAAGAAATCCCATGATTAAGGCATTGGAATTTCTTTCACAGAAAA  
TTGCAACCTCAACCACATCTACAAGCACGAAAACAGTTGCTTTTCTAGCGGTATACCTCTCCACTAAGTATGAGATCAGGTTCAATAAAGTTGCATATCTGCTTAATAATATCTTCGA  
CGCTAACAGGAGCACCTTGCTCCACTTCTTTAGAGCAATTATCATCATCTGAAGCTAATTTCTCTCAGTTGAAGGTTCTATCTTGAATATTTTTGTTGACCCGGTAGAATTTTCTCAAAC

TTGTCACCTCAGCAGCATCTTGTCTAATCGGTTTCTTTTCATTCCCAATTATGACTTCATCATCACCCAAGTACGTAACCATATGTAGCTCTTTTTTCACTCAAATTTGCATCGTTAAAATGTGA  
CTCGTTGTTATAATCAGATGGCTCCTGTTTCCCTGGCTTCTCTATTGATAGAATTGTCAGCATAGTCAACATCATCTAGGGGAACAAATTGCTCACAGTGGTCACCGCTTTCATCATCTATGAG  
AGAAGTTAACTTAAGATGACCTGGAATTAATTGTGATGGCATTCTGGATCTTCCTTTGGCAATTCTCTTTCTTTAATAAAATTTAACAACAACCTTTTTTTGCTCTTCTCCCTGCCTTAATGTAC  
TTGATAAACAATCCCATGCTCCGAATCCGAACACCTAGATGCCCCCTTGAAGCAACTGAGCACTTTAGCACCAGAAAATCAAAGAAGTCTGTTCAACTTTGATTTTCTCGTTTCTCTTTTCAT  
AATGGAATTTCAAAGAGGTGGCTGACTAATCCCTCAGTTGTGATCTCACAGATTTCTGTGCATCAGGAGACACTGAAAAGTAGTCTCGAACTAAGGGATGTTGTAGTAGAGGCCCAAGCC  
TTAGCTCATCAAACCTTGTAACCCCTTCATTCTTGCAAATACTCAATCCCAGTTCATATATCGAAGTCATTTTTTCGAGTATGCACAAAGCAGTGGATGAATGCATTCACCTTTCCTTCTACTG  
GTTGGAGATTACGAAGAGTGGGTGCATCAACTGTCCTAAACCCTAGAACCTCCCAAGAGCTCACTTTCAAAGAGCGAGCTACGGATTGGGAGATCTTCCACACTGATGCATCTCTCTCTG  
CCTCTAGGAGTCCCTTATGAGCTTTAATAACTGCTGATTC AACCTCTTCTATGGAGAAGTGGTGGGACTGATCTATGTAGTTCTCGTTTTTTGGGAATTGAGGAGAATAGAACCTAGGGTTT  
TGAAATTAGAATTTACCCCTTGCCAATAGGGAGAGTTTGAAGATGAGGCGTACGACGAGGAGTTAAGATTTTTCGGTAAAAGATCTGTACAGAACCAATTGGAGGGCCTCGGCCGCC  
TCGAGGCCGGAAGTTTGCCGGAGAGCCATACATGTTGACGAAGGCGGGAAGATAATTGTGACCGTTGG

>comp115195\_c0\_seq1

CAGATAGGGAGAAGCCGACGGCGACGAGCACGGCGACGGCGATTTTGCCAGTGTGAAATTCTTGGACGGATGTGTTTTTTTTTTTAGTTGTAGCAGCTCACAAGTTCGCATGCAGCGA  
TGAGGAGAGCAACCTCAGCCAAACATATTGGAAGCTTTACTTCCGCAAACCTCCATCCCTGCCAGCATCCAGGAGCTACTGCGCTATCAGAAAAGAAATGAAGTCGTTAAAGTTTGAA  
AGAGGCCAAAAAATTTCAAATATTTGCGCTGCTACAAATGCGTAGACAATGAGACGCCAAACCATAACGACCTCATTGCTCAGTTCTTCTTCTCCTGAAGGAGAGCCTTAACCGGGGCACA  
AAGATGACTCTCGAACTCAGCAAGTCAATCTCAATGCAACCCTTCTTTTTCAGTCGAGATGGCCAAGGCCACGCTTTCTCCTCCACCAAACCTCACTAAAATCCTCGGACTCTTCAACATC  
ACACGGGGTTCAATGGAAGCCAAAGCCATCCAGCAAACATTGGAAGACTGTGAAGAGCAGCCTATTGAGG

>comp115336\_c0\_seq4

TATTTGAGTACGAGAGTGATTTTCGTAAAAGCTTTGGCTATTTTTTTGGGAAGAACCAGGGGCATAGCCATTTTATTAAGATAAAAAGAACAAAAACCATACAAAAAATAAAGGCCAAA  
CAAAGACAAAAGACAAAGACTATTGTTTCGACAGAAGCAGCGCCATCATAGAGCTAAACAAAGACTGAAACTAAAACTTTGGAAAACCAACAAATACAAACAAAAACATCTATAACAG  
CAACAGAAGCAACAGGATGAATCAAACAGCAATCTTGAGATATCCCTCTCCAGCCCGGTGAGGCAAGGCTAATATTTTCAGTTGAATTGAAATTTTTCAATGAGGTGATGGTAATGCTTC  
CAGGTGCAAGTTTTGACCCGAATAGCATTTTTTATAGTAATGATGATGTTCTCCGAATCATTCCATTTGTTGGCAAATTTTCGATTATTCCTTTCTCTCCAAAGATGATACAGGTGCATCCTA  
TGATTAGCCAGCAGAAATCTTTTCCATTTGGACATAAGTAGCTGGTTATCCATGTAATCAAAGACCAAGCGGAACATATTGTTGAGCCGACCGAGCGAGAGGAAGAGAAGGTGAAGG  
CGTAGTGAGACGGGCGTAGTTAGCCGACCGAGCAAGAAGATGAGGATGCGAAGGCGTAGCAGACGGTTGGGTTTC

>comp115519\_c0\_seq1

TTTTTTTAGTTATAGTCAGATCTTTATTTAAAAGTCTGATCTTCCAACCTTAGCGTTTTCCACCAACTCGGGGAGCAGAAACCTTCACAGGCTTCACAATCTTTTGCTTAGGTGCTGCCTTTG  
TGGGAGCCTTTGCAGCAGCCATTGCTGCTTTTTAGATGCTTGCTTAGCTTTTTTGTCTCCTTGGCAGCCCTGATAGCTTGTTCTCTTTGAGCCTTCTAACTTCAGGTTTCTGATTCTCT  
TGCCATTATGTCAGCAAGGGATGCACCAGTTATGGCCCTCTGGAATTTGACTGCACGACGGGTTCTTTTCTTCTGAATCTCTTCCGACTGTCCCTTTTTGTGCTTCTTCTGTAGAGAACA  
GTCCAGTTGATCTGCCGAGGATTCCTCTTGGAAAGGAACGCGGACTCACATTTTGCATTAAGAAATTGAAAACCTTCCCGTCCGGTCTGGCGTAGCGCCTCCCGTGTCTGGGTAGATC  
TTGTACCCGCTGAAACTGCACAGCTCGACCTTCATGGCTGCTACTGCCGGGGAGAAAAG

>comp116270\_c0\_seq1

AAAAACACTAAATTTTGTGTGTGAAGTCAAAGAGGGAAAAAAAACCTACAGGATCTGGCTTAGATGAAATGATCCACAATGGACGTAAAATAATATAAATTCACCTTTCCCAACAATTG

GAGAATAAATGATTACAAATTTGTAAACTCAATTTTGGTCTTTTGTAAATTGTAGTGGAGTTTTCTTAGTAGTAGAGGAAAAATGATGGCAATCGGACGACGGTACTCGGGCAAGGACATTC  
AACACAATAGTTTGGATAACTACAGTTAGGCAATTGCAATTGGACACAACAGTAGGTCGATGACAATCAGAAAACGGTGAATGAACTATGATGACCAACAATGATGGTCAAACGATGA  
TTGCCGGGTGATGACAGTTGAACGACGATAGTAGTGGCTAGCGATGATCATCAACATTGATTTTAGGTAAAGCTTCAAAGTTCTTTATATATCCAAGCTCTCTCCAAACTCAAGTCCAAGAT  
CACTTCATGTAAAAAGTGTCTCAATTTATAATATTTTTAGAGTGTCTATCTTGATAAATCTAGCCACAATCTCATAACAGTCTATAGGACGGTCCATATTGAACACTTTAATCATGCAGTCAAT  
TTATTTAACATTTAAGTGTCTTAATAACATAAAAAATTAATGATTTAAACTCATTGAATTTTCATCTCATCGAGACACGCGATAATACTATAAGCACTCGGAGAACATTTGCTTCCCTCAATTAAT  
ACTACAAAATTTCAATAATCTTCAACTGTTTGATTCAAGGCTCATTGAACTTGAATCGATCATTTCAGTGTAGCTAGATTCATCTTGTGAAACATTAAGCTCAATTATAAATTTGCTGAA  
ATCAAACGTTAATTTTTAAAGATTCTTCTCAAATGAGCTAACCTCTAGAATTAAGTGATTAAGATATTGGTGTGTATGAATGCGCTTTCATTTTATACATGAAAAAATCTTCTCTATTCAAC  
TAATTGATATCTACATCTCTTTTCTTTTGTATTTAAATTTAACGAATATTTTGGCATGATTATGACAAGCATCGTAGATTTTATAATTTTAATCA

>comp117054\_c0\_seq1

TCTCGCATAAATGTGCATTCCAGCCTAGAGAGGCAACACTGACATAAATTATTACCCATCGTGTGGCAATAATCAAATTAATAAATTTAGAACAGAATAGGAAGCCGTCAAAAATTTGTTT  
CATCTGATAATATCTAATAATATCTACTTGAATAATTTAGTCATAGGAAGCAGTCTTACATTCCACTTCTAGTTATCATCTAATAGCAGCTGAGAAAATCTATAAAAATTAACCTTGTTAAAA  
CTTTTAATTATCCATAGCCGCTGCTATAAACATCATAATCCTTAACACAAAAGTGAATATGATGGATTTCTTGGACATTAATAGCATTTTATAACACTTTTCACCTCAAATAAGTACACTTA  
CAATGCTAAAACCTCAAGACCCGGACATGAGTGATTGAACAATATACAACTTTTAGGGATTAGCTCTCCCTTTTATCTGGAAGGCATTATAAAAATGCCAAATTCAGAAACGGTATGACTGA  
ACAAAAGCAAGCCCTCTCTTTCACATCAGTCCATATTTAGGGCCCAAGATTTTCTGCCTTGTCCGGAATTGGACTCCCTTGACAAATGGAAAGGACAACAGAATGCCCGTGAGATTATCT  
GGGCATGTCAGAGAAGTGAACACGAATCTATTCAAAAATTTGGGTACCAAAAAGTTGGAATATACACATTGCATGAGAACCGTGGGGACAACCATTCACTACTTCTGTACCATGTGGCA  
TGCAGGAGCATAGCAAAAACAAAATTTAATTAGACAAAATAAAGTTAAAACCATCTCTCAAACAGGGGAAGAGTTGCTTACTGTGTTTGAACCAACAAAAGATA

>comp117315\_c0\_seq2

TTAACGCTTCTCCAATCTCGATTTGCCTCCCCACTTCTCATAAAAATAAATCCGGTCTTACGTCTCTTCGTATTTTCAGCTAAGCATCTTCTCTTCTTCTTCTGCTGAATCGGAGGTCACGC  
GAGAGTCGCTATTAAGACATTCTTCACTCATTATTTATGTCAGATCAGAGGCCACGAGAGAGCTCGCCGTGATTGTTCAATTTCTTCTTGGCTATCAAGTCAGTTCGCCTTCTTCCATGAC  
ATCGTCGGTTTCACGCCCTTCTTCTTCTCAATTGCTAGCCTGGATGCATTTCTTCTTCTCATAATCACTCATCTTTTAGAAATTAATAATTATCAAGTAATCTTCTTTTTTTTTTCTG

>comp117397\_c0\_seq1

GCAAATTATCCATCAATAGGTCTCATGTTTCTTCTCCTCTGCTTCTATCACAACATAAGACATCAAGTACAACAACACTATTGCCATCGACCCTCCAAATCCTACTCCAAATAATATCCCAAT  
ACAATAATATAACTTTTATTCTTTGATGTTTGGCCACTTAAACCAGCTGATGTTATAGTCTTATTCTCGGCTGTAAATGTTATGTTGCAAGGAAACAAATCTAATCCCTTATTCTTCAAATG  
ACGTGTATGAGAAAGTGCATAATTGGCCTCCAACCTGGAA

>comp117454\_c0\_seq2

CATATATAGTATCAAATAAAAAATGCATATCTCATTTTCTAGCTCTCCTCTCTCTCTCTCTCAGCTTCTTTTTCTATCTCTCTCTAAAAGTCTCTTCTTCTTAAATTTGCCTTCTTGAAC  
GTATCTCTCGTCGCCGACGAGTTTGGCGGTTCCGAGGGCGCGAGCGCAAAAAGGCCCTACTGCATGAGAAGGCCACCGGTCTCTCAGTTAACCTTTTAAACGAGAACGGGATTTAGAT  
CTCCGCAGAAACCGGCTAGTCTCATTCTAACGGTAGCATAATAAGATACTTTTTT

>comp117552\_c1\_seq1

GACTATGATTATTCTGACCTCCGTCTCTATAACAACGATCCTTTTGTATTTCTATCATCTGGCAATGATCTTCTAATCATCGTAACCCGCGACTACTATCCTTCTAACGTCCATCGCCATACAA  
CGATCCTTTTACCTCCGTCGCTAGACAATTATCTTTCTGACCATTGTCATCGATGCGGTCTTCTAATCTCTGTCGTCATAACAACGGCCTTTTTTTACCTCCATCACCTTGCAACTATGATCC

TTCTGACCTCCATCGTCATGCAATGATCTTTCTGACCACTGTCACCCGCTG

>comp117641\_c0\_seq1

AAAAATTATTGTGTGTGAAATTCGAATGCATTTGGAGATTATCTAAAAGAGTGAAATTGAGATATTTGCATCCTGTGCGAAATAAGGAACCATGACATATATGTTTGAAACAGATTTTCATTTTG  
AGAGATTTGAAATCTGAATGGGCCAAGTCAGTGAATTTATTGGGCCTCGGTGACGTCGCATGTCAGAATTCACCTCCGAACTGCACAAAATAATTTCTGGTGATGGTGGCGCGTAGCTCC  
GTGTGGGAAACTAGATCTTGCAATATTCTCGTCTCGAAGTCGATGTAGTCGTCTCCGGCTCCTTCGTCCTCATCGTCTACGCCACCAGCGATGCCCTCGATGAGGGCAGTGGTTTCTGG  
GAGCTCGCCATAGGCTTTGAGAAGGCGGGCCTCGTCAGGCATGTATTTGAAGATGACATCAGCCTTGTCGTTTTGGAAATCGCGGAGACCGACGAGAATTATATCGCCGGCGGCAATCCA  
AATCTTCTTGTGCATCTTGCCGCGGATGTGACAGAGGCGCTTGGTTCCGTCGATGCACATGGCCTCGCAACGGCCATTTCCGAGCATGCGGAGGACCTGCGCGTAGTCCTGTCCGTCTTC  
CTTGAAGACGAGCTCGCGCTTATCGTCGTCGGCCTCGTTCTTCCCTCTCTTCCGATTCTTACCGCCCTTTCCCTTGTCTTAGGCATGGCGTGTGATTGAGGACTCTTCTCTTCGACTGAGA  
GTTTTGATCATGAGAAGTTTCTTGAATTTAATTCTGCAAGCAATAAGAAAGACACAGGAAAACAGCCGCTTCGATTGAGAAAATGAATGTGAAGCTTCGGTAATTGACTAAAATTCGA

>comp117912\_c0\_seq1

GTAACAAGCTGCCCTATACAAACATTAGTAAACATTACAGATTAATTAGTAATTACTTTGCTGGTAGTTACATTATATCAAATTTTCATCTAACCAAGCTGCCCTATATAAAAAACATAAAC  
ATGAATAACGTAAGTAAACGTACAAAACCTAACAGAACCATAACCACATTCAATCAGAATATTAACCTACCTGATTAATGGAACCTAACATACATTTTATGCATGCTGGTAACTTAAGCTGAGA  
CAAAAGTTTTATTTTGAACCGTAATTGTGAGTTGAAGCATAAAAGTTGATCATGCTAACTTAAGTTGAGAGATAAAAGTTTTATCATGCAAGTAACTGGAGTGTAACAATGCATGCAAC  
TAGATTGTGAGTTAATCAAAGGGGAAATTAATCTAAGGTCCTCTGATTGATCAATATTTATTTTTTAGTCATTGAATTTCTGTAGTTTTTCAGATAAATTAATTTTACTGTTTAAAAAAA  
TTAATATCAAATGCATCTTTATTTTCCACCTCATAGAAGTGCCCTGAGATCTACCCACAATCCACCCACTGCCTCTCTCTCTCTAATTATCGACTTAAGACAACCTGGTCATAGCTTCCTTAT  
AAATGATTATTATTTATGTGTGGTAATAATAAGATATAATTTTTTAATAAGCAGATGACGTTAGATGATAAAAATAAGATTTTAGGAAATCAACAGACTTCTATTAATAACCAGTTCTAACTTT  
TTGTTAATCATATGCTAACAGAAAATAACCCATTGAATGAAAGAAAAAAGATATGATAGGACTA

>comp117914\_c0\_seq2

GAAGACCAGGTGCAATTTGGGAGCTGTGACAGGTATGAAAAACACCAGTTAAGGCAAGCCTTAAGGTGGTTGACTGTTAGGAAACAGCAGTTTTTCTCGAAACGAGTGAGAAAATCAG  
GAAGAAAACACTTGAAATTCAATGGTAGAATTGAAAAGAAACAACCCGATAGAATGTATCTTCAATTCGAAAGGAAGATTTAACTCTTCAAATCTCTAGCCAAAGCCTAGAGTCCAAAA  
GCAATACCTATATCTCAAATTCA

>comp118193\_c1\_seq1

TGTATTCATTAGAATGCAAAAATTATTTTTCTATAACCATTATCTATCAGTATCAAGGATTACAGTGCACAATTTGAAGCAGCTAAAAGACACCCAGAATACAACCAAATCTCATATTACA  
TGCAAGCACTTAGGGGATGAAGATGACCAACCTAATTCGAGCATCTTTAGCTTTTCGAACATTGAAATTTTTTTTTATGAAAATGGAGCGATCAGTCTACTTAAAGACTAACATTGAATCAC  
CACCATTACTAGACAACTATCATCAAACCTTTTAGCACCCAAGCATTATTATCAAAGATAGTTGACATCAAAAATAATCATATTCATCTCCAATCAAAGTCCATTTTGTCAAATCCATTTTGC  
ACCCACATCTTTCTCCTTGACATTTCTTAAGAAATAAATCTGATAGAGACAAAATAAECTCAAATAAACAGTAAAACCTCAATATTGACATCGCAATGCTCACCCCAAACCAAATTTTAT  
CATTGGTTCAAGTTAAGTTGGAAAAGGCATGATCTCCTAGCAACTCTAGGATATTATTTATTAATCATTCATACTTTTATAACCTCATCTTCACCAAATACTATGAACAATAAATCATTTTAAATC  
AAAATTCAAAATTTATAATTATTTGATCTAGATCATAAATTATGATTTTTTTTTCCCTTAAGGAGAGTTT

>comp118346\_c0\_seq1

CCCTTTAAGATTTTTATTTATATCGTACTTTTCGACAAAAAAAATTTGCATACAAATTAGATCCTCACTCACAGATTGGCAAATAAATTGTAACCTTTGCATCGAGTGCTATTTGCCTCACA  
GAGGAAATGCAGCCGAGCACAGTCAACCCCGAAAAGACTGTGATGATGACCATGTTGACCCAGTAAATTGCCTTCCTCACAGATGATCCAAATGTGATGTTATACATAATAGCTGGTATCA

TAAAGTCCATTGGCAAGATTGCGAATGCTCCTATCAATGCAGTGAGATCCCCAAAGAATGGAATCATGGCAGCAATGAGGGTACTAAAGGCGACAACATAATGAGCGAGAAATGGTTCTTG  
GAATCACATTGCGTGGAGAGTATTGATGTTTTTTTTGGGTTCGGCGAGGAGCTGCTCGAGCACTTCATTGGTTGGTTGTAGGTAGACCCTGAGACAGCAAAAATTTGAACGATACAGAAGA  
AGTTGATCATCATGTAGAGCGACTTAGGAACAAGGACTGCCATCAGAAGCGAAGAAGTTTAAAAGGATGTTGCTTTGTGCTTGGTTTCCAAATGCCAATATCCTGCTATAGCAACAC  
TAAAGAAGGTGCTGATCACCACCACATAGCAGAGGCAGAGTCCCTTAAACATTTTGCCTTTTACTGGCGGAGCAA

>comp118699\_c1\_seq1

CTGCCATTTTCATCAGGGATTGCATCAAGAAACATCATATATCAGTTCATCACATATGTACAACAGATCAACTAGCAGATCTCTTCACTAAGGCACTATCAAATCCCAGATTCAAACCTTTTATC  
CAGCAAACCTTACAGCAACTACATAGCCACAAGTTTGAAGGGGGATGTTAACAGCATTACACGTGTAAAGCCATTAGTGGTTATTAAGTATACCGTTGTTAGCAATGTACTTTCTTTATT  
CTTACCATTACATATACCCCTGTAATAGATATGTTAGAATTAATGAAATACAACAATTGTTTTCTCTGGTCTCTTCCCTGTTCCGTCA

>comp118815\_c0\_seq1

AGGTTATTTCTTCCGACCAAAAAAGAATTAGATGCTAGTTACTCCTAGCATAAGCCAGTGGGACAGGTGGAACATGCCCTCGATCTTTCCACTCACCAATTTAAGTTAAATTAATGAGA  
TTGGAAAAAATATCTCATACTTCTATTATTTTTTAGTAGTTTGGAGTTATAATTGCGTAATAAGAATAGTATGTGGGAATGATTGGTCAAGAAGTGGAGTTGCTATTTGACATGCTCTGCTTG  
ACAATACATTTCAAGTATATTGCTCTAAGAAAATTAGTGATTGTTGTCTTAGAAGTTCAAGGAAATAACGTCATTCTAGCCTAATTATCTTCTACGTATAATTTAAGAAAAAACAGTAATTA  
ACAATTCAAATTTTAAACGGTAGAAAAATAAAATTCGATAGTCCAATGTCCACAATTAGATATGAAAATAAAGAAATGAGTCTAAAGCTTAAAGTGTAAATGAAGTGTGTTGTATCTATAAAA  
AAGAACAATAACAACCTCAGCACGAACTAATAAGTAATAACATCTAATAGTCCCAGTATTAATATATGATTTGTGATGAAATTCACAATGAAATGGAGATCTGTGCAGTTTGTATGCTTC  
AATGAACAACCTTTTGCATCTCGATTGTTAGGATCTCGAATGAGGAAGAATCTCTTCCCTTTTTCAGCTTCTTGAGAGAGGGGGAGAGA

>comp118843\_c0\_seq2

CCGACTGTCCATGCTCCTTCGCCTTGTGCTCTAATGCTCCCTCTCCTTTGCTCTCCAAAGATCACTGTTAGAATGGAGAGGTTTCGGCTAGGGCAAATGAGGCGAGCCGATCCAGCGACGG  
TATCGGCTAGGGCGGCGGGAGCAAGGAGAAAGGCGAGTGAGGGGGCTTGCGGCTTCTCTTGGAGTCTTCGAACAGGAAACTGCTGCTATGGAAGGAGGTTGGTTCGGCCAGGGCAGA  
GATTCTGGCGACTGAATCGCGTCGGGCTCGGCTAGGGTGAGACGACTTGGGCCTTCGGGTTCCGTCCGAACATAGGAGAGGGCGGAGGGAGTCGCCGGCCTGGCTGGGGCTTCTTTTGT  
TTCGCGAACCGAGGAAGAACCTCGAGAGGGGGAGGGCGATCCTGGGCTGGATGTCCGAATCTGAGAGGAAATGAGAGAAGCTGGCTTCGGGCCAGTTGAGGGCTTCGCCTCTCCTG  
GTGTGTGCGAAAAAAGAGCTTGAGGGAGGAGGGCGGAGGGCGTGCTAACAAAAACACAGC

>comp119247\_c0\_seq2

AGAAAATAAAACATTTGAGCTATATAAGTAAAAAAGTGCATGAAAACACTCGAAGATTTCTTGGTGTAAACACTCATGAGAAGTGTGCAAAAAAACAATGAAGATTACAAATGGATT  
TGCTCAATTAAGGTTCAATCTATGAGAAGTTGATGGCCGACTTCACTTTAATTTGCTGAACACTATGTGGCGAAATGGCGAATCACTCTTGAAGCAAGTTATTAATTTGAGTACTTGAGCG  
ACATTCGCCCATTTGATTCTTAGGCCAAATATGCTTTATCATTACATCTTTGTGAGAATTCAATCAGAGTCTTCATGATGAGCTATATTTATGCTCTTCTACTATTACTTGTCTATTTCTATGATT  
TCTCTTCTTTGATCTTTGCTACCTCTTCTGTCTATAATTTGTTTTTCTTATGATCATTCTTCGTTGTTGTTTCAGCTTCACATGATTTTTGAAGCAAAAGTTAAGAAAGCGTCGCTAAA  
GAAGCTCCTTTGCCTCTTTAACGTCCAATCTTTGTAGCTTTGGTTTTGCATGCTTTGTGTGGAGTAGTATTTTGAAGAGTCGCTAAAGAACTTCTTACCTCCTTCGACAGGGCAGAG  
CGTCTATCGAAATAAACAAGAGGAGCTCGCCCCTGCAAAGGCCGTCATCTTTTTCTCCTTTCACGCACTTCTTCGATTAATCCCAGAAATCCATCGTACTCCTGAATTTGATAAATTTGAT  
ATTTACAGCAAAAAATATAGTAATATTGGATTTATTTTCATCATTAAATCCT

>comp119829\_c0\_seq1

ATTAATAAAAAAAAAAAAAACATGAGAAGACAAGGCGCAAGCTGATAATTTGTTTTCTGATGAATCACAAAGAATTAAGCAAATAAACTGTGGAGAGAGAGGCTAATTCATTCATG



CTAACCTAAATAAACTCGATTGCCCTGGAAGACTTCAGTAACTCCTTTCTTAATATTATAAAGTAATGCATGGAGGAAAGGCCAGCAATAAACTCAGCTGTCTCCACATTAATAAA  
GCTAATCAATAAGTTTAAACAATGGTTGGAATGATATATCTTCTTTGAACAAAATAATATAGCTTTGTTCTTATTTTTTCGTAAATTTAACGGTCATATGTTTGTATGAGGTTAATGTCTAAATG  
ATAATGAAGGATTCTACAGCAATATCAAACCTGTAAAAGATCATTTCGCATAATAATTCCTGAAGTAGGAACTTTGAGTATTTGAAAATAGATA

>comp119973\_c0\_seq1

CACTAGTTCTCCTCATATGCAAGTTGCTTGTTCGGAGTTCTAAAGGATTATGGAGGTTTAGGAGCTTTAAAGGTCAACAAATTCACGATTGTTTCGCGAGATCTAACGGTCTCTTCAATTCTTG  
AAGAAAATTTGAAGAAAATTGAAGCTTGTAAGGCCACATATATGATCATAGTCACCATCGATGCAACAAGACTTACACATCAGGATTTACATTACAGCTATTAATTTTCTTCAACCTTTGC  
AATTATCTTACTACGGCATATAATATCCTCATTATTGAAAATCTTCTATTGAGATT

>comp120258\_c0\_seq1

TTTTTTTAAATATAAAGTCAGAAGCATATTATTATTCAACAAAATATTATGGCAATATAATTTTACAACAGTCGTAGTACAATCTGCAGCTTATTTAGCATGCATTCACCAATCACGAATAAG  
AAACCAAGTGGATATAATCGACTGCTGATACGTTTTTCTGGAAATAATCAACCCAGCTTCAATGAATAAGATACGTCAGTACAAGTGCTATCAGCATGAGCATATAAGCAATTCCTTGAT  
CTATCGCTTTAGCATCGTTTCTGTATGCTTCTGTTATCTGATTAGAGGTATTCTGCAAGCCCAACGAAAGACATGGATGCAAGAAAATAGAAAAGAAGAAAGTAGGCCATGAGCAGCAGAG  
CTGGAACTTTCATTGAGCTCATCTTCAAACACACGATTAATTTTCAAGATGCAGAGTG

>comp120574\_c0\_seq4

TCCCTGGGAGCATTATTAACACCGTGGTAGTTCCTCCTGAACTCACCAGGCTGATTGATTTGTAAATCTCCCAACTTTATCATCCCTTCAACAAAATCAACAAAGAAAGCTTTCTAATCAAC  
AATGTATCTTTTACCATAGCCATGTCCCTGCATCACCAGAAAATAGTGTGTTGATCTAAATTCAGAAAATCTCTGCATTCTCAATTCCTTTGAAATACTGGTTATCAAACCTTTGCTTGAGTG  
GCCTCTAGTCTTCTTTTGATGTTGCCATCTCCACTTACTAGGCAAAGGCAGTTTAGCTTGATTGAAATCTAGGATCCATGTATGGGTCAGGTCGACCTATGTCGAATTGATTGTAAAGCCTG  
AGTACAATAGAGAAGCATCCTCCATACTGATATAGTGAACAAATTGGATCTAGGACTTAGCAGTATGTTGTCTGAGGTTTCTGGCTGGCGCTTAGACTATCTTTCCTGCCAAGTTTCACT  
TCCCATTTGGGACCTCCACTCTGTAAAAAAGAGAATGAGACTTAATCTCAACTCTTATTTGAAATCTATTGATGTTACAAATTGTATTCAAGTTCTAATTTATTATTAATAGATGGAGATGA  
ACCCAACCAATCATTGTCCAAATTAATAAAAAATGATTTGTTTCAGAATAAATAATAGGTCTCAGTTGTTGGATTTACTTCTAAAATGAGTGCAAAAATAAATTTTATCTGATCATCCTTATTTG  
CACTCATCTCAAATAAATCTAATTATCTTAAATATAATCATGGTGTAATGAGCATAATCGCTTGATAGAACACCAACTTGAGCTTAAGTTTGACAAATTAATCAAGTTTGAGTTCAAGCT  
AAAACCTAATTTTATTAGTTTAG

>comp120574\_c0\_seq5

TCCCTGGGAGCATTATTAACACCGTGGTAGTTCCTCCTGAACTCACCAGGCTGATTGATTTGTAAATCTCCCAACTTTATCATCCCTTCAACAAAATCAACAAAGAAAGCTTTCTAATCAAC  
AATGTATCTTTTACCATAGCCATGTCCCTGCATCACCAGAAAATAGTGTGTTGATCTAAATTCAGAAAATCTCTGCATTCTCAATTCCTTTGAAATACTGGTTATCAAACCTTTGCTTGAGTG  
GCCTCTAGTCTTCTTTTGATGTTGCCATCTCCACTTACTAGGCAAAGGCAGTTTAGCTTGATTGAAATCTAGGATCCATGTATGGGTCAGGTCGACCTATGTCGAATTGATTGTAAAGCCAT  
TGGATCTAGGACTTAGCAGTATGTTGTCTGAGGTTTCTGGCTGGCGCTTAGACTATCTTTCCTGCCAAGTTTCACTTCCCATTTGGGACCTCCACTCTGTAAAAAAGAGAATGAGACTTAA  
TTCTCAACTCTTATTTGAAATCTATTGATGTTACAAATTGTATTCAAGTTCTAATTTATTATTAATAGATGGAGATGAACCCAACCAATCATTGTCCAAATTAATAAAAAATGATTTGTTTCAG  
AATAAATAATAGGTCTCAGTTGTTGGATTTACTTCTAAAATGAGTGCAAAAATAAATTTTATCTGATCATCCTTATTTTGCACCTCATCTCAAATAAATCTAATTATCTTAAATATAATCATGGT  
GTAATGAGCATAATCGCTTGATAGAACACCAACTTGAGCTTAAGTTTGACAAATTAATCAAGTTTGAGTTCAAGCTAAAACCTTAAATTTTATTAGTTTAG

>comp120944\_c0\_seq1

CAGATAAAGCTTCCACAAAAGAACGCGATTTAAAGGATCCATCCAAAAACCGGGGTCACACACACGATTAACCACCATAATGGAATGAAAAGGCCAAAAAAATGAGAGGGCAACTTC

CCTGAAAATTTGAAGAAAACGAGCCCCAGATGTCCCTCACGTGACGCCTGAACCACGGCCGAACGCCCCGAACCCCAAGCGCAGCCGCCCGGAACGGCGAGTGGCGGATCCGAAGCG  
ACGGCGAGCCGTCGCGAGCGGAATCCCTAGCGGATGCCCTAGC

>comp120967\_c0\_seq1

CTTAAAGCAGCTTTCGAGTATAAAAAATTTAATTTTAGTAGTAATAAGCTGTTTTAAGCAGTAGTAAGAAAACAGTCCCAAACAAAGCCTTAGTTTCATGTTCTAGTCACCAAACCAAATT  
CAAACCTCTGCTCAAGTGTAAAGACAAAGAAAAGTATGTTACATGGAGTTAACTTTAATGTTTGGTTCAAATGTTTCATTTTCAAGAAATACGAATGAAGAAGTGGAGGGAGAGTCCAGAA  
AATTTCTGAATCAATGTAGCTTTCTAAGGAGAGAGAGAGAGGTTCCAACCATGAGGCCAGGTTTCGTTTAAATAGAAAACACAGTAGAACAGAGAGAGACAGTGGGATGAGCAGGGGGGA  
GG

>comp120994\_c0\_seq1

GTGCTAAAAAATTTATAACAATAGACAAAAAATATGCAAATATCAACCTATACACAAAAAATAATAGAAATTTTCAGGAGACGTAACATCTCCTCATTATTTAAACACCTAAAACATTC  
CTTCACGAATCTCAAAGCACATATTACTAATATTAGAAACACAAAACATCTCCACATTTATTTAGACACTCAGATATATATAAACTAAGTTTAGATATAAAAAAAGGCAATAAACTACGAA  
TTCAAGCTGGAGAAGGACAGTGGCAATGTAGCATAAGGTAAGGCCACCTCAATTATTGCCGTGGTACCGCGGTTTCAAGCGGATCAAGCGGATCACCGGGGATCGCCGTAGAGGAGCTGG  
CTCCATGAGCTCCTCTGTGGTTCTTCTTTTTCTATCCACAAGGAAGTCACAATGGCCTGTTTCTTTGGCTGCAGCAACGATATCACGCTTTTCGATAGTCTGACGATTGACTTCTGGGCG  
TGAGCCCACGCTTCTCGGTGAGCTCCTGGATGAACATCTCACAGGCACGTTACATATCACAGGCGTCTCCTTGGCGGCAGCCGCGTGTGTGGCGGCAGCGGCTTTTTGTGGCCTTTT  
CGATCCATTGAGATCGATGTGAGTGGGCGTTGCTGTGAATCAAGGTTTCAATCAGATCAAGAGGGGAAGCCTTGGCTAGATTTGGATGGAGAGGAGGAGGTAGTTATATAGAAAGGAAA  
AAGAGATTTTTTTGGATAGCGAGATCAAAAACCCAAATACTCAGG

>comp121694\_c0\_seq1

TAATCCTTGTTCGTTTTATTTGATTCGTATCAGTAACTTACATTTGTTACGGGTTTATTTTACAGTGCATTTAGTTTAAATGTGACACACTGAAGATGCAGTCGGGTCAATTTATATTCATGA  
AGTTAATTAACATTAAGCACTATTAATCTAAAACAAGTCTACAGACAACCTACCAGTAACTTCATTTTGTATACTTAGACTCAAAAACGTATCTTCAATACTGGCCGCTGGTCCAGTTCCTT  
GTCTGTAGCAGCTTTTACCTCAAACGAAT

>comp121722\_c0\_seq1

TATGTTTACCTTCTAGTAGACAACAATGTCTTATTATAGATAGATGTTTCATCATTTGATATATGAAGAGCTTGGCGGAGATTTGTGAGTAACAACCTTTGCTCCCAATTTAAGGAACCAGAC  
TCATATAACGACCTCATGGTGAATAGTATGAATCGAACTTTAAATTATGATTTATCTCTAAAGGTACTTTTGAATGTTGGAGAAGGATTCAGCTTCATCAACGAGGCCATGGAATTTTTTA  
TTCTTTTTTACCTCATGGCAAGCCGAATTATATGAGCCATTGTTAAAGCTACAACCTAGCAACAGAAGATAAGCTCACATCATCAAACTTATCTTTTTCCATAATGTTGTTCTCATCTTC  
TTGGAAGCTCTAGTTATTGAAGAAAATGGTCTTTTTTTTTCTCTCCATATTTTTCTCTGATCATATCATCTCTTGGTCCACATTTTGGCACCTTTAGGCATGAAGGGGGGATTCGACTTCTCA  
AGTTTCTCCCTTTTGATTGATTATTTATTGTTGAGTTCTCATTTTTACCAGATTCCATAAGAGGTGTATTCCAATGATTGTCTTTCCAGGTAGATGGCACTCTCATCAGGAAAAGAGGAACAT  
TAATCTCCTTGGAGGATCAAAAAGCCTAACACAACGATATTTTTGCTGAGAGCACCTAAAATCTCAGCAAGCCTCCAAGAGTAATTTCAAACACCTCAACAATATCACCAATATTATG  
ACTTTTTTGTTCATAGGAGGAGGGCGTGGCCTGAGCAATTTTCTT

>comp121773\_c0\_seq1

CTGAATTTGGCTCATCACATCTCATAAAATGGCTCAAAATTGCATTTGAATAGAAAATAAAATATTTAAACTAGTTTAAAGCTAAACTAATAAATAAGCCTTAGAGTAAAACAATCATTAGGCT  
TTGCATTTAGTAATTCACCTCATCTTTTTTCGATTAGCCCTCAAACCTTCTCAATTGCATAATCCGCAATACTTTACATGAAGTTCAAATCTCAGATTCAGAAGCAGGAGGGAGGAAATATGA  
ATCCTTGGGCTTCTGCATTTCCAACATGTATACAGGTACTCAAAGCACAGTCGGCAACAAGCCCGGGCTTGGTGGTAGAGGCCTTAAAGTCAATGTTCTTCAGTTTGATATCGCATGGAAAC

GCAGAACTGCACAAGAGGTCGATTGCTACGTCGGTTGCAGAAGTACCCCTAATTTGCTCGAAGGCCGTGTTGCTAATCTTAACCCTAGAAGGAGGCTTGTGCATCATCACAAGAACCAGG  
ACAATACTCTTGATCTATGATGATAGGATTTCTGACATCCTTCATCACAATATCGTAAAAGTGCAAGTTGGTGGCGTTGATTGCCGGCGAATCCTTCCACGTCTTGATCCGGACGCCATTGG  
TTGTCCCCGAGAGCGTGCAATTAGTCACGTAAGCCCCATCGACGCCTAAGTCGTAGTTGTACTTGGCCAACTCCCAACACTGATTCCATGGCCTGGCCCGCAGAACACATTGCTTACTG  
TCACGTTTGTGCTTCTGGCCAATGGAGATGCAGTCGTCGCCACATCCAATCGTGGAGTCTATTATTTGATGTCGGACGAGTCGCCGATGTGGATGCCGTGGTGGTGGG

>comp121911\_c0\_seq1

ACTATTATTTATACTTGGTGAATAAGTAGGTATGGAATTATTTAAAATTCGATTGTTGAAGTCATCAAGAATTTTCGCTGCATCTGCTTGGAGTAGAGCTTGCAATATTCTGATTGATCAAGTAT  
GAAGAATATGGTGGTGTGTTGGGATAACGGCTAGTTAAAATGGAACCTTGATTGTCCAATTCATGAGTGATGGAGCTAGAATCCAGAGTGGTTAGGCAGGAAGAAGGTGGAGTGTTTTGA  
ATCGGATTGAATGGTACAGAGGAGGCCGGGTTGTAATCAAATGTTTGTGGTTAGGAAAGTCTTGGGGAATAATGTTCTGATTCCCGTAGTTTTTCAGAAACGTGGGGTAGCCATTGTGAG  
TTGGGCTCCATCGTGTCTTTGAAATGAGTGCAATCTAAAGCGAAACGATCGAATTCAGCCAGAGATGAATGCTTGCTTGTGTTGATTCTAAGCTTT

>comp122050\_c0\_seq1

CGATTATTCTGTGCGGACATCGGATGTCGTTCCGAATCTAACCCAGAACGTGCAAGGTCATTTTTTTGCTTGGTACCGGTTCTGGGTACTACTGGATATCGGATAACATAGCGGTTCTGATT  
GGCCTCCGGATCGTCCGGTGTCCACACAAAAAAATGTCTCCTTTTTTAGGACTGAGCTCTTCAAACCTTCTGCGAATGCTGAGAAGCAAAAGAGTAACTAAAGTTTCAGAGATGTGTTT  
GAGTGACCTTTCCAAATAGTTGTTGTCATTACGG

>comp122138\_c0\_seq1

AGTACAAAAATTAATAATTTTGTGTTAAAATGTTGCTTAGGAAGCAGTAAAACAGCTGTCCCAAACAAGCCCTAAATTTAATCCACATGCTTTAGGGTTTCAATTTTTCATTTTTTTTAAAT  
TAATTGTAATCTATGGGATCAATTTTTTGGCATGTTTCTTGATTAAATGATACTCTTTGTTATTGTAAGTTGGACATAATTTAAGCTTCAATTGATATAAAAAGTTATTGGTCCTTTTAAAAAAA  
AGATCGGAAG

>comp122268\_c1\_seq1

AAGATGTAATTTTAAAAATATACATAACAAGAAAATATAAAGATTAAGCCATCTCGCTCTCATCCCCTAAGATTTCTCATGGGTTGCCATTCAAGCAAAATTCCTTCCAACCCTCTCATT  
CCCCTCCGTTCCTCCTTTAGCTTTGACTCTCTGAAACAAGCCATCACCTTCCTCCTCGAGAAGAACAAGGAGGTCGTCTGCATCATCTTAGACTGCAAAAAGACAGTCAGGAAGAACCCT  
AAAGTCTTCCTTCTCGTAAAAGACTACTTTGATAAGGGTCTCCACAACCTCCATTTCTGCACCGCCCTCGAGAAGTGCCTCAACAATGCCCAAACTTCCTTCCAGAAAGCCGACCCAACA  
CTAAAATACGAGAAGGCCAAAGCCGAATTGAAGCGTTTCAAGGAAAGCGTTGATCTATTGCAAAAAGAATTCCTTGACGTCTTCCACTCAGTCAAC

>comp122268\_c2\_seq1

CACCATAGCCTTAATCCCATCCATTTCAATTAATCCCAGCCGAAGTTCCAGCCTTTAATGCGCTAATTATCATCTTCTCCCGCTTAATTGCTTCCCTGTAGTTATTCCACATGGAGTCAAGCCAC  
GTGCCCATGGCCGAAAATGCTGCGAAGATTGCTGTGCGAATAGGCGGCGACCAACAATAGCAGACACAATTGAGGAGATTAGAAGAACGGCAGAGGCCGAGGCAAAAATTATGGAAA  
ACAGTTTCCACCATGCTGAGCTGATTTGAGCTTCTTGTCAATCTTCTTCTTTCAAGAATCAATCTCTCCAGCATTGAGAGTT

>comp122426\_c0\_seq1

TTAAGAGAAATGCATCTTATTTGGGGAGTTTCAAGATGTATGGGAACTTCTAATGAATGAACAGAATCTCTAACAACCTTGATTGATAAATAATGCAAGAAATGGATAACAAAGGTGAAAAGC  
TACAAGGAGAACAACTAATAACCTTATGAGACAACCTAAAAAAGGGGATGTAGGACCATTTATCAAGTGGAACTGAGTGAAAAGCTACCAAAGAAGCATAAGCTCCATCCTTCATATT  
GATCAATCCTTCATGATTTCTTCTCTATGATCACTCCATTTTTTACTACTGCAATGAGATCAGCATTTTTTATTGTGGTTAGCCGATGAGCAATCACTATAGTAGTTTCGATTGATCATAACCC  
TATCCAATGCATCCTGAACAATTCCTTCAGACTCAGCATCAAGTGCACCTGTAGCCTCATCCAGGAGCAAAAATTTGGCTGCTTGATAATGGCTCGAGCAATAGCTACCCTTGTTTTTGA

CCTCCAGATAGTTGGACTCCTCGCTCTCCGACCATTGTGTTATAACCCTGCTGTAAGCTACAAATAAACTTGTGGGCGTTTGTGCCTCTGCAGCTGCTAAAATCTCAGCTTCAGTTGCTTT  
CCCTTCCTTCCCATAAGCAATGTTTCGCTCTTATTGTATCATTGAACAAGACTGGTTCCTGACTCACCAAACCCATCTGTTTCCCTCAACCATTTTAGCTTAAACTTTTCCAGTTCTATTCCATC  
AAGCAGAATATGACCCGAATCTGGATCATAAAATCTCTGCAGCAGTGCTATTGCTGTTGACTTACCACTACCGCTCGCACCTACCAATGCAACAGTCTTTCCAGATTGAACAGATAAGCAA  
AAGTCTGGAAAACCTTGAACATCTGGTCTTGAAGGGTACTTGAACATAACATGAGAGAATTCTATGTGGCCTTCCAATGTTTCTAAAGTCATCCAGAGTTATCGCTTGGATTAATTTTGG  
ATTTGCGGTCAAGAATGGCAAAAATAGAAGCTGCAGCAGATTTAGCTTTAGATGAGTTCGGTTGCTAGGGAGCTCGACTGAGAAAATTCCAATCGCTGTCAATGAAAAGGGTGAAGAAAACC  
TGAAATACTTTACGAAATGTTGTCTTCCCATCCTGAACTAGGTGAGCTCCAATATAGAAACAAATTGCATACACGCAAAAGAGTATGAAGAAGGAAACTCCATAACCAATCCCGCCAATC  
ACTCCTTGTGTTGATTCTGTTTTTATATGACCTTCACACTTATTCATATAAAGTTCCATAACTTTCTCTTCAGCTGAGAATGAAGCAACTGTCCTTATGTTTCTCAGAGCATCATTAGCCACCT  
GGTTTGCTTCTTCATACATCATCTTTGCATCAGCACTGAATCCTTTCTAGAATTCATTCTAATGCATCCTT

>comp122478\_c0\_seq1

CAAGATGACGTGCCTTGCTTTGCCGTAAAACCGGTCTTCTACCCCAACAAAAAACTGCCTATCTATATATAGCCATTAATCCCAACACCGGCATGGTGCAGTGCCTTTATTCTCCATGCAT  
CAAACCTGAACTGAGCTCCCCTCGTTGCTTCTTTATTTCCCCCATCATCTTCTTTGCTAGAAAACAAAGACATCGTACACGAAGCCATCGATGGATCGTCAGATTTTCCGGCGAGCACAAA  
AGAGAGGCCGGACTCTCTCATACTCTCCTTTGAGAATCGAAAGCCGGGCAATGGATGACCAAAGGGAGATCGAGAGAGAAAACACACCAGTACCGTATGTTTCATGGAGGAGCCTTACATG  
CCGGTAGCAGAGATGGCGATGGTGCAGAATACGTTGGAGAGAGCGCTGTCTTCGTGTAAATTAAGGGACGATGCAGCGGCGACGCCGGTGGTTTGCAAGGAGTGTGTTGCAATAATGGA  
ACAACGACGGTGGCCTGATTTCCACTGCTGCGTTCATGATGAGGAGATAGTAGGGTTTCGTACTACGGCGGGGCCTATCCAGCGGCCATCGAAGAAGTAATACATCCGAGCTTGGGCATA  
GGTTGGATCCACATGGGGTTGTTTAGGCTTCGTTTGGGACAATTT

>comp122568\_c0\_seq1

AAACTAATAATGGCCATGAAAGCCTCAGAGAAGCAAAGTTGCACAAAGCTGGCGGCCATGGCTCTCGTGAGCCTGCTGCTTCTTTCTAGCAGCCATTATTGCTATGCCGAAGCTTCAGTC  
CGTATACAATATATCTTTCTCCGAGCCAGGAAAACAAAGCCTTGAAATGGAAGAGAATGGCCATCACCTGGGAGTTTTCGGAACCGCGGCTGCCATAAGATCTTCTACTGCTAGGGCG  
GCGAACGGTAGCTGGCAGGAGAGAAACATCGCCGGCGCCACCTATTAATTTGTATAGTTGCTATTATTGTTGTTTATGTGATTGATAATTGTCGTCGTTGCTTCAATGCTTGTGATGAAATTGG  
GCACTATTTTGAATAAAACTTGTATTGATTATTTTTTATGTGTCACTAAAATAGCTTTGATCAA

>comp122650\_c0\_seq1

GGGAGACCTTCTAGGGACCCTGGAGACCCAAATTGGTTTTCTGGCCTAGATTGGAGGTTCTTCTCAATACCTGTGTCTCCGTCAATTTTGCCTACCTTTAATCTAATTCTAGCTTAGTT  
TTAGTTTTCATCTTAACTAAGATGGCGAACAATCCTGAGTCTACATGAACAGGCTTGCAGCAGATGCTGATCTCCAGGACCGTATTACTCTGATAAGAAATAGAGTTCAAACAATTACTGC  
TGCGACTCCTGTTGCGGAAGAGTTAGCAAATGGTGAAGTGCCTATGACTTGGTATCACATCTGGTGTCTCTATCCTTGAACGGCCAGGCTGCGTTCCTGAGCAACGCGTACAAGTTGA  
GTTCTTGAGGAATGAGCAACGACTGATCATCCAACTGCTATAGCTATGTCGCCACTCCAAGGGGCTATGGTTCGCTGTGAGCGAACAATATACTGGTTGAAAGGTATTGGCGAGCTACT  
ACCATGACGTATGCTGAGATCAAAGCGCTTGTAGATCCGGTAAATGATGCTGCAGCAACCCAGGCGGCCGTAAACCAACGACCATTAGCTAGGGCAGCCCAACTCTTCCAAGGATGGAA  
CCAACCTGCATGGAATACACTAAATGACCCTCTGAATTTGGTGGATATGATTATTGGTGCATTTAGTGCTTCACTGCAGTTCAACTGTGATATACGTGATGTGGGCGTACTGAATCTACCAA  
ACATGAGCACTTCTGATGTCGCATGGAGGGACGCTAAAGCTGTGCCCGTGAGCGATTACGTAATGTTCTGAGGGCATACTACTATTCAGTGTATCGCTGGGCTGAACCTGCCATGTGTACA  
AGGATACGAATTAGCTGCGTATGTGAGAGCATATGGTCTAGGGATAGGATTACTGCCATCTGCTAATTTCTAGGTCGAGATTGAATGGCTGTTTACTGCTAGACAACCGACAACCTGCTGATA  
TAACTATGACTAATAACTATCAGAAACGGTTTCTAGGAGTTTAGTATCACTATGCTGCAATGTTCTGTGATGTTTGGGCTATTTCACTTAGCGAAGGACCATACTTTCAAAACGGGTGAC  
CCTGATATGAATAGAATTGCAAATTCATATATCCAGGCACTGAGGACGTGTGTGACACAAGAAGAATTAGAGATCATGGTACAACATGTTGAGCCCTTGGTCAGAAGTGGACCACATCCTT

TTGACTAGCGCAGACATACTGGCTGGCTCAAGCGATGGGCCATCATGGCTTGGCTGACATCTCCACTGGCTATTAGAATGGAGGTATCCCCACCTCCTGTACAACGACTTATGATCGCAAG  
AGCGACGTCACGCGAGTGGACTAATCTACCCGCTGGCAGAATCATCGACAAGTTATTTGCTGAGGGTTACGTTATAATGGATCAGGAAATCGAGAACATTAGAGCTAATTTCTCCAGCATAT  
TCAGGCTTGCACAGGTTGTATGGGATTGAGCATCAACTGCATGTTGGCCCTCTAGCTATGGCACATATCGAAGCGATGATGCCAACAGTCTATGGGTACATTATGGTAGCACACACTGAAA  
CCAACGATAAGAAAGATGGTCTCGCCTACGCACTGAGTCTGAAGAACGTAAATCGTGATCAGAAAGGGATGACAAACATGTGGACTGTTGTTTGAACAAGTACTTAGATGAAATGGAA  
GGAACAGGCTTGGCAGAGTTCGTAGCGAAGATGCAAGCTACGATAGAACTACTGTGAAGTCTGCACTAGGTACGTAGATGCTGAGGGCAAGCTATGGTTAGCCAATGATATGGGCATTA  
TCTATATATCTAGAACTGTACGCCGTGGTAAATAGTGGTTGATAGCGGACCTTCCAGAGTGC GCGTGTGGGAAACTATCGCTGCCTCTATTGAAAGCTACAGTAACTAGTACACAATTGA  
GGTAGCCAAAGTGGAGCCCTAAGTATCTCCTGTCAGTCCAAAACCGTGATTATCCTTACATGTTTCGTATATTGCACTGTCTCTCCTTGTGTTTACCCTAGTTGCTCTTACTTAGGTTGTAC  
TATGTGTGTTAACCAGTCTGTGATGTTTTATCTAGTGGTAGCAATCACATCACAGCTGGAAGCCTTCGTTTTAGTCTATACCCTTCATTTGATTTACAGTAATTATTGTTATGAGAATGTT  
GGTGA AAACTCCGCACCATGTGCATTCGTTTTTGGGGTATCCTAAGGTGATGTAGCTGGAGGGGCCGGATAGGCTACTGACCAGCACACACCCATAGAGCTTTATGAACCCCTCTAACT  
ACGCCTCACCTAGCTTCGTTCCAGCATAACCCGGGCGCGTATGATGCGCATAATGCCATACGTAGTCATTGCATCCATAACCAAT

>comp122670\_c0\_seq1

TTTGAAC TTGATGTAGAACTTCGTCGAACATGTGAACTTTGCTCCATTGTCCTCAGGATCCGAACGATGATCGTTTGTGAGTTTCCTTGAAGCAAACAGTCCTTTGTCAAAGGATTAAG  
GTGCTCGAGGGTGTCCATGTGGATGGTCAAGGGAGGAGGTTTTATTTCTTCTTCCCTTAGGTGACATATCAAGCATATGAGAAGAAGTGGAGAGAGGGTGGTGGGGTAAAGTGCCAGCC  
GCCAAAGAAGAGAGAAGGGGCCAGAGTAATCCCGGATTTAGAGGTCAAATTAATGTAGGTGAAACAATTAGAAGAAATATGAATTAATTTTCTTGCCTAGGTAGCATGCAATTTAAATCA  
AGAATAAATTCAGATGGATTGAGATTTAATGGCAGCATTAAATTTGGGAGATTAATTGGAGAAATTTGAATTTGAATCTCCAAAATAAAGAGGGAAAAGAGGGGCCGCGCATTGATGGTTG  
GTGTGATTGGTAACCAAGTTAGAGAGGAAATAATGGTGGAGAGAAAAGGGTAGGGGCCGGGCTAGGCTTAGGGGAA

>comp122716\_c0\_seq1

TTAAAAGAAAAGAAAAA AAAAAA AACTCTATCCACATATTTTGATTAAGATTCTCATGACACAATCTATTTCAGAGCTCATCAATACAATAATAGTCATAAACATCAAAGA ACTACCAAGCAGC  
CTTTAACACCATACTTTTGCCATTA AAAATAAAAAAAGGTCTGCTAACAAGCATGCTTTATTCTCGACTCTTCAGTTTTGTGAAAGAACAGAAAACGCCCAAAAAA AAAAAA ACAACTTG  
GCATTC AATACTTATT

>comp122990\_c1\_seq1

GGACCTGACCTGTAAGGAATGACCCGACCTGACCCGCGAATGCTTTACTTTGCATAGGGTTGGCGAACGCAATGTGTGAGACCACACGTGAGGCTGGGACTGGCAGTGAGGTGAGGCT  
AGGGTTGTTGGGCCGGTGAATGCAGCAGTGTAGGAGACTCGCGTTCTGGGTGTAGTCTGTGCTGCGGTGTGAGTCTCGTGTGTTTCAAGTATCCTACGTGTAGGTTGGCGGAGACGGG  
TCGGCAGTCGATCGTGC GCGGTGTGGTCCAATGGTCCGTGGTGAATGGGTGAGAGTTAGCCGGGTAGGATGACAGGGTAGAGGACGGCGATTGAAATCTGGTTTTCGAGTCAACCCAAAC  
CCA ACTCGTTTTTTAAACAGGTCAAAAACCTGAACCCAACTCAACTTGTTTTACAAACGTGGTTGACCCGAACCTGGATGTTG

>comp123286\_c0\_seq1

TACATGATATGAGACTTTCATGAGTACTCTGTCTTTCTTTATATCAAAAAATGTTCTTAAATTATTATAACATAACCAATATTAGATACAGATAAAAGAGTAAGCAAATAAAGGAGTAAATATA  
ATTAAAATAAAAACATATTAGAGTGCAATTCAATAATCCAACGGGAGTATACATAAATAACTTAAAGGTTAGATTTTACTAGAAAAGAAAAGAAAAGACATATATATCCAAGATCCAAATTGAA  
TGAAGAAAATCACAATCCAATATCAAAGATCAATAAAGAAAATACAAAGTCA

>comp123968\_c0\_seq1

TTTAAAGATTTCTTCATACAATTTTCTAGATACAAAAAGAGAAAATAGGATGCGACCGTGGTTGACAGCCGCTGTTATTGTAATCGGCTATTCTTACTGAGCTTCAAGCTCTGATGCTAA

TTTAAGGTGGTAGTAAGTGGTAAAAGGAGATGCAAGAAATAGGGTAGTTTTTCAAACCTGAGCTTCAAACAGTAACACAAGTTTTTCAGAATGCAAACGTGTAGTTTTTCATTCTCTTCCCC  
TCATCTTCCTAAGAATATTTATTTCAGTATAAAGATACGTACATGATGCGTAGCAAAAAGCTTTAAAGTTTAGTGTATAACAGAAAAAGCAAATAGGAAAGTGAAAGCAAATATAAAAGAG  
TAAAACGTGCA

>comp124031\_c0\_seq1

GCTTGGCAGATAATTTCAAGATTTAAAATTTAAATGAAGGGAAAAAAAACAGTACAATGAGTAGAAATAGCGTAAATTTCTTAAATCTTACTTCCGCGGGATTTACTAAATCCAAGATTCA  
GTCAAAAAAATGGGTGGAAATTAAGATTTAAGGAGGTAGTAGAATTTGTATAGCACAACACAGTTTGGCAAGAGTTACCTAGATCCTGGCGAAATTTTGTAACTTTTGTAGCGAAGA  
TGTATGCATAACACTGGCTAAATCTCGCAATCACTACTTAACTGGAGATCTAAGCATGACTGAAATCCCACATTCGTGGCATGATTAGATCTTCTGCATTTATCTAAGATTTTCAACATCTT  
TTCATTTTACTGAAATTCCTGGCATCCAATGTACCCGTTAACTAACAATACGATGAGATCGGATTATGAACATGCTTGAATGCTATTTTCATACACAACACTACCAACTACAAAACATACAAC  
TCTAGAAAACTTAACCATCAGCCAGACGAAATAATG

>comp124166\_c0\_seq1

AGACCATGCGACTGATGACGTTGAAGCTGTGAATGGAGAGGTAGTCCTTAAGGAGGAGGGGTTACCCGGCGGGTTCGAAGAGGGCGGCAAGAAGCCCGCGCAGCTCGGCGGAGCGAA  
TGTGCTCGAAGGAGTCGATGCGGCGAGGACTGAAGAGCTCTGATGCACACATCTTACGCGTCAGACGCCAGTGGGGTCCATAGGTTGACCACGTGATGCCACAACGGTTATAGGCCGTG  
ATCTTGCCGGAGGAGGTATTAGGCCGGCCAGCGAAGGCTAGGTCGTGGGTCTTTAGAAAAGAGG

>comp124442\_c0\_seq2

ATTTAGGGCATCTCCAACCAAAAAGCTCATTTTCAATTTCAAATAACAATAACAATTCAAAATGCAGTAACTCATCTCCAACCGAATTCCATTTCAAACACACAAAATTTTATATTCTTTCTC  
AACCGAACTCCGCCCTGAATTGCTCGCCTTTCCATCATTTTCATGATTTTTTTGCGAAAATGCAACCGTAAATGACATTTGGGTGGAGCTTGAGGCAGACAAAACAACAATACTATT

>comp124473\_c0\_seq1

CTCTTCTCTTCATCTTCCCTCCTCATTGCCCGGCGAAACAGCCCCGCCGGAAGCTTTACAACGGTGAGTATGAGGAGATTGACAAGGCTGCATGGACAACAACACACCACCGCTGCA  
CATTCGGCCGCCTTTCCCGCCGGCGACCTCTGCCAGACGCTTGCTTGGCTTCGGAGGCTCCTTCAAGATCAAAGACCGCTTCGTCGCCAGCGCTCCGCCTTTTGGCCGGCGCCTGCGTGA  
CATTCGGAAGGGGTAGTTGCGATTATGCGATTTCTTGGATCATAACATCGCCGGCTTGTTTCTTGTCTCAAATGGCGGAAGGAGAGCTTTTAGCCTTTTACGTTTCGGCCTATCGGGTTCGG  
GTCGGTTCGGGTTCGGTTCGATGGGATGTTGACCCGACGGGCAACAGGCAGCAGTGCAGAATTCCTTCGGAGTTCGACTCGCCCTTGCCTTCTGCCTTCAGGAAGGCAATTTATTATGCAG  
TTATTGTGCTCTGAACACG

>comp124605\_c0\_seq1

AGGACTTGAGGGACGGACACCATTTGAGCATTAGTGGGTTCGGCGGTGGCTCGGTCCATGGGAGCAGCGACGGCATGGAAGCCGAGAAAGGGCCAGGGTCTCCTTGTGAGGACTCAG  
CTGCCAGCGACATGGACGACGACAGGGTGAGCAGCCATCGCCATAGTGCAAACCTCCGCCATGGGTTTCGGACGCTGATTTGTTGTCGACCAGGAAGAGGAAGCCGCCAGCGATATGGA  
GGCTTCGGCTGAGGGTTCCGACCACCAAGCAGACATGGAGGAGAGCATAGCCGTCCAAGCACAACCCAGCTTGCTGCGTTGGAGGCGGCCGTGTGCCAGCTGGACGGGGCGGCAT  
CTCTTGGGCGGACTGTGCAGAGTTTCAGGAAAATCCAATCTTTGATCAATTTGCTGGTGATTGTGGGAGCTCACCGCCTTTGGTTGGTGTCATGATGCGAACAATATTGATAGCTCTAGG  
TGTGAACCCCCCATGGTTCAACCTCCCCAAACGCTTGATGCAGTTTCTGCACACAAGATGCTCGGGTTAATGCCCCAAGGATCCGATTGCCTATTCTAGGCCGGAAAGGCTGCT  
GCCAAGCCCGATGACCACCATGGGGGACGGCAAGCAATCCCTTCGCTTGGAACAGGGTCCAGCTTGTGCCATTTGCAAGCTCAACAAGGAGATTTTCTTAGGCAAGGACGGCAAATC  
CATGGAACCCGAGATAGAGGCTGTCCATTGCAACATTGCAAAGCTTGATCGTGCGATTATTGCCAGAGTCATGGGGCGTCGATTGCTTTCCCTACCTCATGACCGAACTTAGAAAGCGA  
TGGTTCATTTTCGGAGAATTTGAGATTGTTACTATCGCACCCAACCTCGTTCATTTGCTTGTTCAAAGCTTGGAGGCTAGGGATGCTGTG

>comp124609\_c0\_seq1

TTCTCAAAATCAAAAACGACGAAAGAGAAAAAGATACGTTCAAATAAAAAAAAAAAGGTTACATACATATTACTTACAAAACATTTGACTAACAAAACTAAAAATAAACTGTAATTCAAAGA  
TATTCATGTTACATTCTTCTTAAAAAGATTAGGATAATCAAATTATGAAATTGATGGCATAAACCCAGATTGAAGGAGGCCAGTTAGGTTGTGAATCATAGTCAAAAAAATAGTGAAAGCAAT  
CATTCTGAAGATCAAAAAACCCAGCATCATGATAAACATCATCTTGTGACGATTATCCAAATGATCACAGAAGTATATACAGTTTGGTTAATTTTCAGGAACAGTCGTATGATGCAATGAG  
AATGTCTGGTTACAACCCACAAATAAGGAAAACCCCCCAAGTCTTTGATGGTGGTCCATTGAGAGAATGAAGAAGAAGTTGCAACAACATCCTGGACTAACTTCAAAAAGTGGATTCT  
AATTGTCTTCCCAGCGTACCTTTTCATCAACAGGCCGAGTAAAAATATTGATCTCTCTCTATTTTTAGAAAGAGTTCCCATTA AAAAGAAAATATAGTTCATGCAATATTTTGTATGGGGCG  
TTCATCCTGTATTGGCTGGCATAATCAATTTTGTCCATTATGGTTCGAAGGCTAGCACCCCTCGAGAAACGTGTTATGGCGTAGAACCTTTGTTCTTCTTCGTGATAGCACACATCTTC  
AAATTCATCATGATCATTGGTGTGTGTAAGGAAGCAGCTGTGGGCCAAGAACCCAAGCTCGATCACCAGGCCTTGCTAAAGCCAACAATTTATCATAACCATAGATTACAATTGCAGTTCCA  
TGTGGATCATTAGAGGAGATGACAATCTTTTGA AAAATATACATTGCAGAAATATTTTGTGTATGTGCAAAGGCCTCGACAAATTTCTTTATAAGATAACTCGATAGAGCCGTCTGAAGCATA  
TTCGGGCTTGATCGTATGATATTTATCATCAGGGATGGTGAAGAGCGATGGGAAGGATATTCAGCTTTTGTGAGAGGGTTGAAGATACGAGGCCGTAGATCTTCTTATCAAGTGTCCACA  
AGCCATCCATCTTTGGAGCTGATACATCGACGACCGAAGATATGTCCATTAAGGGAGGAGAAGTGGTGTATGGCAGGCAATGTCTTCTTCTTTGATGGTAAGATCCCAGAAGGCAAGAGTG  
TCGGAGGCCTCTCCTTTTTTGTAGGAAGGAGCAGCCATGGCGAGGGATGGAAATGAATGTGTTTGTGTGCATTGTTGGCAAAAGTTGAATTCCATGAGGTGCAGACGACGAGAAGCG  
GAGGAAGTCGACGACATGCAATTTTCGATGAGATATAATAGAGGAGATCTACCGGGAGATTCGACCATGCCATATTATGTTTTTGTAGCTATAATGTCATATGGACCTTATATAGATAGGAGG  
AGGAGATGCATGGCCTAATTTAGGGCCATGGCGGTTTTAAAATTTTTAAATCATTGGTGAAGGATGGTCTGTATTTTCTTAAGTTATAAATAGAAATTTTTTCTTGAATACAACCTGGAACATA  
TGCAAAAATAGGAGAAAATGGTTGTCCAATATTCATAAATAAATATTCTTTTTATATAGT

>comp124722\_c0\_seq2

CATTACCAAAAATAACAAGGAAAGAGTCTCATTACAACACAAATCTATAAAAAGCTCATTGGGGATGCTTAACATGAGAGAAAAGTACATGATGCTAAACTATTGCACTTCAAATTAACCTTG  
CCAAAGCGTAGTCATAATGCTTCAAACCTGAATCATTTAACATAATCTACCTGTAACTTAATGTCGTATTCATATCGTTGTTTAGCAACTACAAAACCTCAACAACCTCATAAGCAACAATAAAA  
TAAGAGTATTCATTATGCTTCAAGAAAATCTTCAATTAT

>comp124826\_c0\_seq2

AGCATCAGAATACCAGATTCAATGCTTCTTTAATTTCAATACCATTCTTCCATCCCAGTAATTTGATGATAACAGCTTTTCGAGATCTTCTTGATCAGAGAATTGGAGCAAAACAGCAATAGAC  
TTAAACTTTCTGTTATTCCTTTCTATCCATATAAAGTAGATAACAGCATTTAAAACGAGGAGGATGCCATTTTTTAAGCTCTTAGGCTTATCCAAATTATCTATATGTTGAAAGGCTAAAATAG  
TTGTAGCTCTGAAGTAAAAAGTTTGAATGAGGGTATGAGACTATGGAGCACTTTAAAAGAGTAATCACATTCAAACAGAATATGCGAAATGGTCTCCATACTATTGTGACAGAGAGAGC  
ATGATTTATCTAAAAGTTGAATGTTTCTTGAAGCTAGCACATCACATGTTTTTAGACCTCCTTTAAGAGCCATCCACGAGTAAACAGAAAATCTCAAAGCATGCTTCTTATGCCAGACCATA  
TGATGCCAATCAGTTTGATCATCATTAGTAAAATAGTATAAATAGAAATCCCTAAATTTGGCATTACAGTGTTTTCCACCTAATATGATACTTATTATTATGAACAATAGGAATATTCAGAAT  
AAAATCCCTTATGGAAGGGATCTCCAATTCGGGATGTTCCAAGCATCATGTTGAATCCAAGTAGCTAATTGAGAATTTAGCAATGTTAATGGGAAAATCATGAAATTTATCCAGGATAG  
TTTCCCCAAAACACC

>comp125050\_c0\_seq4

CTTACTGCAGACGAAGAGAAATCCGCAACAAATAAGCAATAATTAACAGAAAATGTGCAACATATACGCAACAAATACTCAATAAATACGCAACAAATATGCAATAAAATACTCAATCAA  
TACGTACATTTTACGCAACGAATACGCAATAAATACTCAATCAATACGCAAGTCAAATAAATATCGCGGACTTTTAACTTTCCACGTAAGCATCCGAACACAGCTCTATAACCAGATTCCGC  
ACAAAATAATTTCTCCTGAACGAGGCCAACATTGCCCTCTGGAAACTGGCTTGAGATGCAGAGGTTGTTTATAGTAATGCTAACTACCAAAAATATACTCTTCTTCCACTGCTCTCTGCATGA

TTCTTCCAAGATTTTGTGTTAATTGTGTTCTTGCCTGAAAACCTTCTGTTAGATAAACATTTTAATTAATCTTTCCTGTCATTGCATCACAATCAGGAACTAAAAGACTGATACAG

>comp125616\_c1\_seq1

TACTAAGAAAAAGTAACTCAATGACCAAGCTGGATCGTCAAACCCAAAGAAAGTAATATAAGATTAATCGCTAAGCATTCCAATTGTTGGAGAATACCTATCGAGAAATGATGCAGCATTG  
GACCAGAGAAACAATGCTGCCAGAAATAACATAAGTGAGTGCGCAGATAAAAGTGAGCAGGTGATAGCCGACCCATTCAAAGAGAAGCCAAATCAGTGCACACTGGAAGTATGCCACC  
CGATTTGTGCTTATTCTCCATAATATGATATCAGCAGATTTCCCTCCGCCGAGAATAGTGTGCACTGGCTCCTTCCGTCCAAAGAGGCGTTTCTCCTTCCCTGCAGGGATCGACGGCTCAT  
CCTTTTCTGACTCCGAAGAATAAGATGGTCGCTTGTACTCATGAATTTTATCATGGATTTCTCATATAGAAAGGCGTGACCCACATCTCCGACATCTTTGACTCTCAAATCCTTCGTTTTT  
CGATCGCCTCGGCGGTGGCTTGATCGATCTCTCGCTTTTCCCACTCGCGAAAACTGAAACTG

>comp125666\_c0\_seq1

GTCTTTATCCCACTACGTGGGGTCATACAAGCAGAAAGATAAGCAGTAAGAAATGAAAGAGTGGACAATAATTTAGGAAGCTCTTTGATAGGTCGGTTCATCCAAAACCAAGCTTTGATA  
GGTAGGTTTCATCCAGAACCGACCCAGCCGGCCTCACCTGGGCCGACAACGGTCTATAGGAGGCGGTTCAAACCGCCTCCCTTGAGTTGCCGCTAGCATAGGGGCCACACCTATTTGAAT  
TAATTTTAAAAAAATTGTATTTTAGGCAAGGGGAGGGGCGGTTATAGCTAGGGCTGAGGGTTATAAATTGGTATGAAGGGGAAGGGTTATGGTATGCTTTGATTATTGTTTACTTGTAGTC  
ACT

>comp125713\_c0\_seq1

GCACTTGTTACGCCCAAATTCATCCTCATATATATTTACGACTATTTCCCACTCGTTTTGGAAGGACAAAAAATAAGCTTCTATAAATATTTTAAAGAAAATCGTATAGATGGCGCTGCGAA  
CCAATCGCGATTTCGTGAGGGCTTGCTCTTCCCGGTTGCAAGTTCTTCCCGGTTGCAAGTTGTCATCCCTCCATTTCGGAATCCCTCTCAGGCTCACCTCTTCTCTCTGATTTCGGCTTT  
TCTTTTTATTTAATTTCTCTGTGAGTCGAGTTGATTTGGATTAGCACGGCACTATGGCCGTGAGTGGAGTTGAGAAGTCGAAGAGGGTGGTTCGTTGTGGGTGGTGGGATTGCCGAGGCA  
TCATCGCGAAGACGCTGCAGTCGCGGAGCGAAGTAACTCTTATTGATTCCAAGGAATACTTGGAGATACCATGGGCACAGTTGAGG

>comp125854\_c0\_seq2

GGAACATATATAAAGACAGCAGCTACCAACCTGGAAGTGTGGAGGAGCGCAAAAACCTCTTAGAAGTGCTCTGCCATAAGCTTCTTCTCCATTGGCTCCTTACCAAATCCGTCAAAGTT  
TTTCTTCGATCGTTTCCAGCCTCAGGAGGAGGTGAAAGCGGGGAGATGGCTCACAGACTGGATCATGAGTACGATTACCTCTTCAAGATCGTTCTGATAGGCGATTCCGGAGTTGGGAAA  
TCGAACATACTCTCCAGATTTACTCGGAACGAGTTCTGCCTGGAATCGAAATCCACGATCGGTGTAGAGTTCCGCCACGAGAACGCTTCCAGATTGATGGAAAAACAATCAAGGCTCAGATT  
TGGGACACCGCAGGTCAAGAGCGTTATCGCGCCATCACCAGCGCGTATTACAGGGGCGCAGTGGGAGCACTTCTGGTGTACGACATAACTAAGAGGCAAACTTTCAACAACCTCCATAG  
GTGGCTTCGCGAACTGAGAGACCACGCCGACTCCAACATAGTCATTATGATGGCTGGCAACAAAGCAGATCTGAACCATCTCAGAGCCATTTCCGAGGATGATGCGCACTTATTAGCTGA  
GAAGGAGGGTCTGTCTTTCTCGAGACCTCGGCTCTCGAAGCCTTCAATGTGCAAGAGCTTTTTACTCTCTGCTCACAGAGATACACAGCATAATAAGCAAGAAAGCTCTTGCTGCAC  
AAGAGGCAACTGCTACTGCTCCAATTCATGGCACAATAATCAATGTTGCTGATTCCAATGGGAGCTCAAAGCGAAGCTGCTGTTATACCTTCACTTAAATGTTGCCAGACTTCTGAAACTA  
TGAAAAGCAGAGACCTCTCTCGCACTCTGGATTTATTTTTGGACTCTGGAGGTTATTTTCTTACAGTTTTTTTTAGTATTCTCTACAGGAATTACATTTACCCATCTCTCTCTCTCTC  
A

>comp125902\_c0\_seq1

TTGTTTATACCATTTGCCATTTATGACCATCTTATTCTGACTCAGTTGGGTATTGGGGGCTCAGGGGAGGGGAAACCTTCCGCTCTCGTGCTTTCCGGTTACCGGCGTTACGACTGTTTTGTT  
AATCATAGAGGTTGGGCCATCACAGAGCTTCGTCGGCAAGAAGAGGGGAAGATTTAGGGGAAGAAATTCATTCTTCCATTAATTTAAGGATAATCTCCCACGTTTCTCTTTCTATCAATC  
AACAAAGATTTGGGTGGATGAGCGGCCGACTATCCGACTATCCGCTCCGCTTATTGCCTCGCGTAATTTCCCAACAAAAAGAAACCTCCGTTTCGAAATGGAGATGGTGTATCGGAGTTA



TTCAAAGGGGCGAGCAATGACATCGCCGGACAGATTGGGTAAATGTGGGATCAGGTGAAGGCGCCGGTGATCTTACCATTGCTGCGCGTGGCAGTTTTCTGTGCCTTGTGATGTCGGTG  
ATGCTCTTCGTGGAGAAAATTACATGACCGTCGTCATCGTTGTCTCAAGCTCTTCGGAAAGCGCCCTGAGAAGCTATACAAATGGGAGCCCTCCGTGATGATCTCGAGCTGGGCAGC  
TCGGCTTGCCCATGGTCTTTGTTCAAATCCCATGTACAATGAAAAAGAGGTTTACAAGCTCTCAATCGGAGCTGCATGCGGGCTTTCATGGCCGTCCGATCGAATCATCATTCAAGTGC  
TCGACGATTCTACAGACTCAGTCATCAAGGATCTGGTGGAGATCGAATGCCAGCGGTGGGCGAGCAAGGGCATCAACATTAGGTACGAGATACGAGACAACCGAAATGGTTACAAGGCT  
GGTGCCTCAGGGAGGGCATGAGGCACAGCTATGTGAAGAAGTGTGACTTTGTGCGCCATCTTTGACGCGGATTTCCAGCCTGAGTCCGACTTCTCCTCCGCACACTTCCATTTCTCATC  
CACAACCCCGAAGTCGGCCTTGTCCAGGCTCGC

>comp125909\_c1\_seq1

ATGAATAGTGAGAACAGATTTGAACTACCACAGCATCAACCCCAAAAAGATCAAAATTAACATAAACAAATTTCTAACTTCTGCCAACAAAAACAACATCAAGCCTTCATTACACTACA  
TGGGATCAGCTACATTAATCTTTTTTCTCCATTGTATCTTGTTAAGGGGCTATTTGGTATACGGATTTAGGCCGGATTTGAGGCGGTTTTGAGCAAAAATTCAGCCAAATGGCCTAAAATGCA  
AAGCCAGATCTCACGGCAAATGAAGGCCGCCATATACCAAAAAAATTCATCTTTTCGTGCTAAATCCTGGATTTTTGAAATCTTGATTTTGCCAAATTTACGAAATCCAACGGCTTGCGA  
GGAGTCTGCTCGTTAAATCCACTATATGGCCAAACAATCACATGAGATTTAACAAGAGTTATCATGAATGTTACAAAACAGTTTTTCAGGATTTAGGCC

>comp125914\_c0\_seq1

TAGATTGAAGAAGTTATTGAGTTCTATTATTAGATTTGGTATTTTTATGAATGAAATTTTGTTC AACCTAGACTCTTAAGAAAAAAGTGAAGATAGTTTCTCTATATGCATAAATGTCTTCAA  
GATAGTTTAGTAGGTAATGGTTGGGTTGTAACGAGGACAAGCACCTCAAGAGGAGTTCCCTTGGATATTCACCTGAAATTAACGAATTATATACTACAATTAATAAAAATCATATATAATTC  
CTCCTTATTCTTTCTATACTTCTCCATCAAATCTCTTAAGAAATGAATAGGTTCCATTGTGCGACCTACCCGATATGAATCCAAATTGATTTGAGAAACATTAGTATCATGTGTAACCTATG

>comp125931\_c0\_seq2

CCATGCTCCAGAGTATGCAATGACTGGTACACTTAATCAGAAGAGTGATGTCTACAGTTTTGGAGTCATTCTTTTAGAGCTTCTTACTGGAAGAAAGCCAGTGGACCATAAATGCCTAAA  
GGTCAACAGAGCCTGGTCACTTGGGCAACTCCAGATTAAGTGAAGACAAAGTTAAGCAGTGTGTAGATCCAAAATGAAAGAAAGCTACCCACCTAAGGCAGTAGCAAAGTTGGCAG  
CAGTTGCAGCACTTTGCATACAATATGAAGCAGATTTTCGTCCCAATATGACTATTGTTGTGAAGGCTCTCCAACCTCTTCTCATCACGAAGTCCCGACAAGAACAATGATGGCCACT  
GCTTCTTTCTGCTTGTCTTCTCATCAAAAACCTCTGCAATTTGTTTCAAGTCCACATTTTTATTGATTTTTCTCTGTGGACGAAAGTGTGGTTTATTCTTGTAGAGCTATAAAAATTTGA  
GAAATATTCTTTTCAATTAAGTAAATATATATATATTTAGCACTTTG

>comp126018\_c0\_seq1

AAAAAGTAAGTGTGGGAATGTCTAATTTTTATATAATTTGGCACTACTGATTTTTCTCATGTTTACTTACAGGTGGAATGAAGCTAAAGCGAGATAGCTTCTCGTAACAACCATTAGTACTTAT  
AAAGATGAGCTAGATGGACTTTTGGATAGTCAAGTCCTTAAATTTAAGCAATTTTCTTATATTGTTAACTAAAATTCACGATATCAAACACTTACACAAATATTTTAAATTTGTATAGATTATT  
TGGGAGCCATACTCTAGATGTTTGTGCACAACCTCCAGAAATATGCCTCATAGGAGAGCAGATCTGGATGGCACATGTGCCTTTGATTAGCTGGACGAGAGTTGAGTAGAACTTTCCCTG  
ATAAAGTGATAATACAATTTGGGTATGTCCCTCAATTTGATATACTTCCACTGGATATCCTAGCTTTCATCCGTTTACAGATGGTCAACCGAAAGTTTACATAGATTGGATAATATACTATCATAATC  
ATTGGCATGGGGAGGACAATCAGTTTTGTATTCTGCAAGAGACCACATTGCAGCCATATTTGGTAGACATGACTTAGGAGTGATCCAACCAGCTATCGACCATATGGAGGACTTGATTCAT  
GATATGTGAAGACATATGCATATCGAAGATGATCATTATACATAAGCTACACATACCTAGTACACCTACTTCAATGGCACCCCATCATTTGTGCAACCACATAGCATGGTTGCGAGCCCATTA  
TCTTACAAAAGAGCACTGTCATCTCAAGATTTGTGCCAGCTGACACCGCTAACATTCATCTTGGCCACATATATATGACTACATTCATACGGTTCATTCCATCTACATATGAGGAGGCAG  
TTGCGCATCATGCAGAGTTGCACGAGTTGAGGGATAGACCTTTAGGACGCCACATCACTACATGCAAGGTACAGATGCCATTCCATATAGGTCGAAGAAGAAACATTATGCTATATTTTC  
TCTGTATTGGATGGCCTCAACCTTCATTGTTATATCATATTTCTTTTGGAGTAAGAAGACAATGTAATACTTTTTCTTACTGTACGTATGCATCTG

>comp126060\_c0\_seq1

GACCCTGGTGGATACCAGAGGGGAATTCCAATATGGATACCCAAATTAGTAATAATTTTCAATTTTGTACGTCTTTTTATCGGTCCCTGTCACTTTTATTATGACAATATGTTAATACTAGTC  
CAGTCCAATTGATGATTACAATGCACGCGCACTCTGGCATGTAACCACCATTGGAAAACTGGATATAATTACTTACTACATATCGTCTGTAGTACACGACGGTGGTTCGCAAAACCACATCGTC  
GCATCATCAGACTCTTCTTTGAACCCCAATTCCTCCAGACAGCTCTTTCCTCCCTCAAGTATTAAGGGACCAATCCAGGCTCTAGGTGTTCTGAATCTAAATCTGTTCTGACATCGAGC  
CCAAAACCAAGCCGCATTTTATCATCATCCAATTGAGGCATCTCTAGTAGTTTCCAGATCTCACGGTAGGAGTGGTAGCGAGCCCTCACTTCTATTATTTTCAGAAGAGAGAGAAGGCACCT  
CAGTCATCATAACTGCTCCTAGTGATAGCTCGTCCTCATCGGATAAAAACCTCCTCGTTATTGAAGTGTGCTGTCTTTGAGTCGTGGAAACAGCCACAAACGAGCTAGCTTCTATCTCGATT  
GTAGTGGTAAGAGTATTCTTACCTTCCCTGCCGTAATACCTGTGAAGTTTTACTGGGCAGGGAATATGGAGGTACGTAGCCGTGAACTGGTAGTACTATCGGATCAGCCCGCAGTAGTGATT  
GGTAGGGGGAAGATAATCCAACATCTAATTCCTCCTGAATTTCTAGTTCACCAGAGTGGACTTCTTCTATGTATTTTCATGATCGTGTCTAACTCCTGAAACAGGTCTCCCATAGCTCTGTC  
AACGACTTTCTAAACTTATCTTGC AAAACTTTTGGCGATACTGTCCATCCTACCTTGTTAAGCCCATATGTGAACATCATCATCCCTTCAAGATCAGTAGGTAGCTCCTCACACAGCTTTC  
CCATGGGTGTTCTTTAACTCTACAGGCCCTAGTTTAAAGACCTTCTTCAACTTTTTTGC GGCTCTATTCTGGTCTCTAAACTCAACCAACGTGCCTTGTAAGACTCTGTTAACATCTCGC  
ACATTACTTCATCCGGTAACCCAACACATACTCGATCCCCAACGGAAAAACATCTTCAGATGTGAGAATATTTTCGCTTTCGATTGCATTTCCACCATTCTTTCAAAGTCAAATTTCTGTCT  
CATCATCCGGTGGTGCTAGCTTCTTCTATCCATACCGTGTCTATCGTTATCATTCTTCTCACATGTGGGGGGATATACTTCTCGTATGATATCCAGCCTCCAGTGCAGCATCTAAAGTCTC  
CTCGACTGATTCACTAGGCAATTCTACCATTCTTGCTAACCTCCTCTATTAGTTTATAATTCTGCAGTGTAGTAAGCTGCCAGTTGCGTTTCTCTCTTCGAACCCCTTCTTGAACATTGTC  
CGTAGATCAACTGATTCACCTGCCGCTATTGGTGCAAAGATGCCCCACATGACGTATGGTGTCTTCTGCCAGCAGATACACGCATCCAGTAGTAGAGCGACCATCCTTCAGGCAATGTGC  
GGAGTTCGAGTATCAGGTCCTTCCAGCTACCAGTTACAGGGCAGTCTCTATGCACTAACGTCCCTTGCCGACAGATACTTCCATATTTCAAGTCTTGATTGACACCTCAGTCAAATCTGTGCTA  
GTCACTAGATTAGACAACAGCATTGTCAATGTAGACATGAAGACATCAGATAGCAGGTACTCCCTAAGCCTCGCACCTCCTTACTATCATATAGAGGTTGTCTACGTAATCTAATTGATGA  
CTTGTGGTGGAATCCATCTTTAGGATCTGGAACCTAACCGTACCAGCATGTGTATGAACGGTTGATTGAGCAAGGATGTGCTGTATGTAGGATGCCAAGTTGAGAGCTCCAGATACAGTT  
AATGGCATTGTCAATTTGGCTGCTCTGAATTCGTCTAGACTGAGATGAAGCGTATTGGACCCTCTAGTAGTCATATCAGGAATAAGATTATCTTTGGATCGAGTGTGTGTTATAACCTTGTG  
AATGTATCCCTCGTTACTAAGTATCTAGGCACTTCAAATGTGGCAGCAAGGTTGACGATTCTAGTGTATCAAATTCATCTTCCAAGTTCTGCGATATTATTGCACGTTCTCGATCGTGTTC  
AGCATAATTAACCTCGTCTTGTGCTATGCTATTGCAGAAGTTCGGGCTACCATGTTGCTGTCTTGTGTTAGCTTACCAAGTAGGTTGCTGTCAGCCGTTGTTTGATTTCGTCGAGTGATTTC  
TGAGATAGACTGTCAGGCATTGAGACTTCCAGACTCGGTAAAGTGCCAGTATCTGTCTTATCCACTCCCAGCAATTCCAATATCAGTTGCTCCCAGGAGAATGGTCGCTCATAACAGGCT  
GAGATCCCACAGTCATATCCATCCGAAATCGCACAGCATGATGGTCAGATACTAATCGCGTATTTGCCCCCAATTGAACATCAGCGTTCAACTGTGAATTTGCTATCATTTTTAACGCAACT  
CGCAACCTAGGCAGTTCAAAGGTACATTAGTCCCAAGTGCATCAGAAGCTATTGTGCTGTGTTACACGGAACCCCCAACGTGTCCGGGATGTCCTGACAGTGAGTGGTAAGCCCGG  
TCCTCATTGCTGACAGTGCAGTGGCCTCAGACCATCTACATGTAAGTGTGGTATCAATCGAGCTTGGTCAACATTAAGACCCCAATTTTTGCAAATAACTGTTCCACAGCTTCAACAT  
CTCCATCCCTTGCAGTACCCGAGCACGTAACCTTGC AAAGTTTAAACTGGCTGCAGGAAAACCTGCCCTTAACTGGTATGTGGATTCTCTCGCGCAATGCCCGAGCTGACCTCTCTCC  
GAATCCTGCCGGATATGCATCCGCATCTTGAAGTATGCATATCCAAGCAAGTTAGCATAGTTTTTCCGTGTTTCTTCTAGTTTGGCTCGTATCTCTGAGAATGCTGGATATAACAATTTCA  
GAGAATGCTCCTTCTTCTTGGAGAGGCTACTGTTGAAGCGGATGATTTACAAATTTGTGATGAGAATGCTGGAGCGGACGTCGACCCGACTGATGTACCCCTATTGCTTTCTGTACTA  
GTCGTTTGAATACATCGTCAGCTGACAGAGCTATTGAGTCAACATTCCTCAGACCTCCCACGTCATTATTCATAACTAGTACTACTCTATAGATGCAGACATTGAAGAAGAACTAAATTAAG  
GACGATCAAAAAGAACCGG

>comp126086\_c0\_seq1

TTAATTAAGGCTCCCTTGTTAGAATACCTTATGGGAAGGGTCTAATTGTTCAAATCTTAGAATTACCAAAAAGTTTCTGTAATTTAGATACTGTGATTTTTACGGTGGACGATCCGATCTTGT

GCTTTATTTTGAATCAAGTGACGTTTAGTTTTCTGAGTCAAAATTACGGCCTATATGCAAAATATATTTTAGAAGTTAGAAGTCTTTTTTAATACGAACCCCTTTGCCTAAAAGAAATTA  
AAACTAAAGTTGAGAAGTATTGCTTAGCCCAAACGGCTTTAAAACGGCTTTAAAGAAGGGTGGGTAAAACCTTTTGGTCTTTGTAACCTTGATGAACTAATATTTAGTTTTGATATGG  
CATCAAAATCTCGATCGGGCACAAATCTCAAGGTATATTTGAATTGAAATTTTTCAAAATTAATTCATAATCATATGAACTCTGATTTTAGC

>comp126197\_c0\_seq1

TCACCCCTCTTCAACTTCTCTCTTTAACTTTCTACTTGGCTTTTCTTTCTCCTGTAATCAAGCTAGCTTCGTTTTCTCCTTCATGATATATAATGGCAAAGACCAAGGCTTTGCGGTTTGCTAC  
AGAGGTGGCGCCGCCTCAGCTGGTTTTAGTGGTGAAGAAGAAAAAGGTTTCGAAGTTAATGGAGACTATTGTGGAAGAAGAAAGAGATAATGCCATTTCTTCTTCTTCTTCTTTGTG  
TATATATTGCTTCAAGGCCATTTACCAGAGCTTTAATGTTGCAAGTGGCCTGACCTGTCTGCAACTGTACAGTATATAGATTTATAAAGCTTCCATTAACCAAA

>comp126304\_c0\_seq1

TATTCTCCATCTCCTCAATGCTTATAACTATTTTTCCCTTGTGTAATATTATCCTTTATATTATGAAGCTTCTTTTCATTGTTTTAAGACAAAGACTACTCTTTGTTGTTGATATATCATAAAAAT  
ATTGTCTTGATCGAGCACGAATCTCAAGGCCAAATTCGCAATGAAAACCTTTAAATTTAAATTCAGACCATTTGAACTCCGATTTAGTAACTTATAATCGAACTGAACATCTCAGAAAATA  
CAGACCCAAC

>comp126393\_c0\_seq1

CAATATCAATGATTGGATCCCCTTTTCTCCTTCTTCTCCTTCAAATGCTCCAATGAGCTCAAAATAAACGAATTAACATTAGAAAAGCAAAAACTTCAAACCTTTTGTAAATTTACAGTTTCC  
AAATTGCATATTGAGCTTCTTCACTTGCTAATCACATATAGAAGATCAGACCTTCTTTCTCCATATTTCTGTTTCTCCGTAACACATATCAAATTAAGGAAAAAAAATCTAAGAAAGAACG  
ACAAGGAGAACCAGGAGTTTACATTTACGGGGGGTTCGTCGCCGGCGACAGCCGAGCAATCTGGTTAGGACTGGTACCTTTCTTGGGCTTTGCGTAGAGCGTAAAATACGCAATGCTGG  
CGATGAGGGCGAAGCCACCGACAGCCATCACCGCAGGGCTCTGCGGCAGGCGCCGGCGCTGGTGGAGCACCTCGCCGGAGCCGGATGCCGGCCTCTTCGATTCATCAACGCCACCGTA  
TTTGTCTTCAAGCCATCGTTCCCGTTGGTCGGCATCGCTCTCTATTGGTCGACGCAGTAGTATTTCTGGCTCTCTTTCTACCGTTCTGGTTGTATATAGGAAGGGGGTAATTCAGTCCAGT  
GAGGGCAGCTGGAGCATGGACTATGTGCATGTTCAACACGCACACCGT

>comp126446\_c1\_seq1

GGTAAGTTTACAGTTAATCCTACAGCAATTTGTGAAATAGAAAATTGCGAACAACACAAAAATGAAAAAGAAACAAAGGAGATTCTTCTCCTTTCTTAAACATTTTACAGAATATCTCA  
ACGATTTGAGTTTTTAAACAAACGTTATATATCATATTACTTTGGCGTCTATATTTGCCTCTCAAACCCTACCAACTATTAGAAGATAATGCGCAATGGGTGAGAATTAGCATCCATGAATGAT  
CTTTCTGCATAAGCTTTTAAAGAGAATTTACATTTTAGTGTTAAATTCACAACACAGCCGATCTAAAAACACAGTATTTCGTCACGAAGATCTTTAGATTACGCCGAACACAAAAATGAATA  
GGTCAGGTGGATTTAAAAGTAGATAACAAACATTAGATCTTCATAGCAGAGAAGAACTAAGAAATTGAGGAAGCGCCATTCCACAAACCTGGAGGAGGAACGAGGGAAGGAAAGCTTG  
CTCGC

>comp126675\_c0\_seq1

GCAATCCAATATATTGTGCATTAGGTGACGTGACACGTTCCGGATTAACCTCCGGATGCATTTCAGACACCGTGACAAAGGATAATGAAGACATGACAACCTTCTCATTAAAGAAAGGAATTCAG  
TGCGAAGAGCAAAAAGTCAAATATCAGAATCTTTGATACAAATTTGCATCATGATGGATTTAAAAATTATTGAGTTTACTTTAAAAGTAGTGTACATACATATTTTTCATATATAACACTAA  
TCTCAAAATAAGTTCAACAATTTTAAAGGTCATTTGAAATATGAAATCCTAACTTTTTTTTTTTTTGATTAGATATTTCAATACATTTAAGTGAGCTTCAATTTTATTATATTTATATCAAAAT  
AATATTAATATAATATTTTAAATTTATATTAATTCATATAAATTTACAAAATTTGAAGCTCCACCTTAAAAAATTTCAAAAATTTGAAAGCTCCACCTTAAAAAATTTCAAAAATTTGAAAGCT  
CGGCTCGGCGTTCAAATCGATGCGCACGGCCTCTTCTCGACGGCAACGCTTCGCCACTCGAAATCTCATTAAACCGCCACCGCCGCTTTCGAAATCTCCAACATGAACGTTGGCCG  
CCACCTCCCAACCTTCTTCCCCCTACCGCGGTCCGGTCACCGGTAAGCCGCCACCGCAACCGGTGGCATCGCGAATACGATGAAGGATCTCACAGAATTCCTTCACCTCGTCTCT

CAAAACCGCCCTTCCCTCGCTCCTCGGCCGTGTTTGTCTCGTCTCGACTCTCCGTTACCGTCAGAGACGTTTCCCGACGTTTTTTCTTCTGGTTTTCTGTGTCCA

>comp126694\_c0\_seq1

TTTTTAAATTTTTTTTTTTTGGCAAACAGCCCCTAATTTCCATCAAATAAATTTGGATCAACCACAAAGTTCATACAAACCATCAACATGGTCAAATTATGACAGTAGTTGAAAACCGAAAC  
GGCCATTCATATACAAATCATCATCAGAACAAACCTTAGCGACCACAGCCGTAGGTGAAACCAATCAACAGAGATAAAAAAGAAGAGAAAACAGAGCAGAGAAACCGAAATCAAATG  
CTTTAGAAAACATCGTTCATCAATCCGCTATTGTTTCGGCAGAAGGAAGCGAACTCGTGGAAGTCGATGAAACCGTCGCCATTGGTGTGAGCTCGGCCATAATGTGTTGAACGTCGTCGG  
AAGATGTCGATCCGAGAGTTCGCAGCGCCTCCGCGAGCTCAGACTTGGAGACCTTCCGCTCTCCATTGGCGTCGAATTTCTTGAACATTCTCTCCATCTCTGGCGTCAATCCTTCCTCGTC  
TTTGCTCATGTTGATCGATTGATTGGCAGAGGGAGAAGGAGATCGAGAAGATGCGGAAATGCTATTTATTGTGCGGGTCTGTCAGTTTGAAAGGGC

>comp126713\_c0\_seq1

GATTTTTACCGGTGCCTAAAAATTTCAAAAAATTTGTGTAAGTAAAATACTACAATCAAAATACTACGACAAAGACGGTTTACAATTTAGAGTTATAATGACAACAAAAAAATTTCAAA  
GTCAAATAACAGGCTATTATAGGTATCCGTTCCAGAAAAATGATCTGATAGCCCTGCAAAGAATAGGCCCTAAAATATCCACCCTATTTATAAAAATGAAAGTTGAATCTGGTAGGCCCA  
TGAGCTGAAGAAGAAGCTCAAAGAAAACCATAATTTTGATTTCTTCATCAAAAACATGTTGATAAAGGATGCTGCATCAGATGGGGATAATGTGTTACTAGTACGGAACATAACCATATA  
CATTAAAGTGGGGGCAGCGGGTTGTATAATGTTTGAAATGGCTAATAATGTGATTAATAGCTTCATCTTATAGAGTTTGACATATAGGCACCTAGATTGACCATAATATTTTATTATAATT  
CTTAGCATGGATTTTAGCATATAAGAACCCTCAACTCATCCTCACCCCTAGACAGCCAATTATCTTTTGCTCTCTGGATCACCCAAGAAGCAAGCATATTGCTGAACTCTGAAATTTGGACAT  
TTATGGACTATAAAGAAGTATTCAAGATAGAATCTAGGAATCAACATTTATTTATCCAAACATTATGCTTGTCTTCTATGAAGCCCAACAAGATGAGCATCAATGTTGGTAGAGTTAGCCTA  
AGGATACTCCTTAACTTTACCTCTTAAATTTTAAAGTTAATACAAAATCCTGAATAGGATTTCCATTAGAAGGAGCAAAAAAGACATCTAGATCAATATTCTAATAACTTCCCAACTTGGT  
CCAATAAATTTTAAAGTGGATTTTGTGATTAGAAGCGGGTGAACACTAGATTATAAGAGGATGGGGTAGTGGTCAGAGTATGAGGGGCTTTGTATGAAGCAAAGGAGGTATGGTATGA  
CAAAAGCTAATCCTCATTCAAAAAGATTTCCACCGATTGA

>comp126829\_c0\_seq1

AGGAACTGCGCGGTCTTGAGCAAACCTTGGAAAGAGTCTCTAAGAATTGTTAGGCAGAGAAAGTATCATGTGATCGCCACACAACTGACACTTACAAGAAAAAGCTTAAAAGCACCAG  
GGAGACCTACAGAGCTCTAGTACATGAACTGGAGATGAAAGACGACAATCCGAATTATGCTTTCAGTGCAGAAAACCACAACAGAGTCTATGAAAACCTCGATTCCAATGGTGAATGATT  
GTCCTCAGATGTTTTCTTTCAGGGTTGTTAGCCAATCCAGCCAAATCTGCTTGGTATAGGATATGAATCACATGATCTTAGCCTCGCATGATATGAAGAAGTCTTATAAACTTTATGATTTG  
ATGTTGTGTTTAATAAGATTGGAGAGACTAACGATTTGTGAGTTCATGAGATGAGTGATAGATTGAGAGAACTATCCTTTTCATTTGCTTGTTCAGTTGTTTCTATTTCAAGTTTGGTATGTTT  
ATGTTTTTCAATGTGTTTTTGAACCTGATAGCTATATGAGTTTTTGTGTTTTGGTATGGATGATAAAGAATATAGTGTATATAAGAATTTTTTTTTTTGATTAGTTAAGAAGTTCATATTCAATTT  
GGTCGTTATAAGAGCTGATATTGAACAATTTTTTTAAGTCTTTCAGCTAGTTTTTCTAAATAAGCCAAATAAAAAACAGCACACACACACATGTGCACACATACGCA

>comp126833\_c0\_seq2

AGAGCTCGCGGGTCCGGTCCGGTCAAGAGGTCAGTCGCAATCCTTTCTCTTCCCTTGGCATTTTTTGTGCGTGTATCTCTGTAACCGAATGAAAAGAAGTGTTTTTATTTTGTGAGTATGT  
CGGTGAATGAGACGATGCGTCGTTTTGGGTAGGTCCGGTGGGTTTTGGTCTGTCACTGACGTGGAATCCGGTCCGGTGGTTTTGCCGTTACAGTCAACAATTTTTTTAATAATTTGTTAAATTATA  
TATTTTATTAGTTTTTTTAGACACAAATCTATAAGTACCTATTTTCGATTTTCATCTTAAATATTTAAGTATTAGTTTACAAATATATCATATAGTAATGTCTTTTTTAATTATAATATAAGTTAAAA  
TTAGTAAAAATAGAATATACAATTGCTTAGTGGCCCAATGGATAATTGTCATCTGTGGAACCCGAAGGTTTTGGGTTCAAATCTAGGGATATTCGCATTTCTTCTGGGCGGCAGGTTATTGTT  
GGGCTTTTACTGCTATCCACATTTTTGTTAATTGGATAGTGGGGCCTATGCCCCCGGGCCCCCACTATAGCTCCGCTATTGTATAAGAGTTATATTTTGAATGCGAGCGAAATTTTACT  
AAAAAATTTATTCAACATCCCAATAACGA

>comp126969\_c0\_seq1

CACTTGACCTCAGGATGGCGACTACAATAATGGAACACCTAATATTAGGTTTTAGAAAAGCACATAACAATAGGCATTTTTGTGCATTTTATTTATGTAAAACCTGAATAAAAATATAATATTAATC  
AAACAATGAAGTAAATTTTAACCAATGCCATTTAAAATATTTATTTTAAAGTTAGGTACCAAATCCTTCCACATTAATTTCTATTTATTTTAAATTAGGTCCCCAACTACTTGAAAATAGAAT  
TAATAGTTAAAGGTTGTTATTCTCTCCTATTATTAATAGAAGCTCATGTAAAACAAATACAATCAAATTCAAAATGATATTACAAATCGAAGCATACTACCTCTATATGTTTCTCAAACACAA  
TCTATCAATTGAGTGACTCATTCTATCTGTGATCCAAATCCTAAGGAATCAAGCAACTAAGAGTCCTAGATACAAGTTATAAGAGTTGCAGGGAATTATAGACAAGTGCATGGATATTTTTT  
TTCTCCTCCACTTTTTCTCTCAGCTGCAATTCCTCTTTGATGGAAGAATTTTGTGTACAAACAGTAAAATTAAGTGGTAATAATATATATATTTTTATCAATCAATACCTTCTAGGAAAATCTG  
TAAGCTCTTGGTTTATGGAGAAAATTTGAGGTAGAGAGAAAGGAGAAAGGGCCAACAACCTGCTATCCCTGGGATAGGAGCTGTCAATTAGGGGAGAAAGACAGAGTGAGGAGAGGAAG  
AAAGAAGTCGAGGAAAAGAGAAAACCTTAGATACGACATTTCAAACAGGAATTTGATTTCTATTGCAACAAAAATTACGCCAATTACAAAACAAAAAGGGATTCAAATATTAATTAATA  
GAATATCAACATATCTCCAAAATTCAAATCTTAAACCAACTTTTCTAGATTTTAGATAAGCAACTCCTAAATACAAGGAAAGATCTATTCATTAGTCTAAAATCTAGGAACAAGATAAGAG  
CGTAGA

>comp127026\_c0\_seq1

AATTCCTTTCTGTTCAAGCCTAGCCAAAACAAATTCCTTGAAACCGTATCAAAGCCTTACGAATGTCAAATTTGGCACAGAACAAATTATTCTTTCTTTATTAGTAAAAGAGAGAATTT  
CTTGTGCTAAAATGATGTTGTCCGTAGATATTCTAGAATTGATAAAGCCAGCTTGCATCTTTAATAATTAAGGCATGATCGGTTTAAATCTAGATGCAAGAATTTTGGAGATAATTTTATA  
GATCACATTACACAAGGCAATGGGTCTAAAATCTGCAAAAAGAAGAGGCATGTTTATTTTAGGAATTAAGCTAAAGCAGTGGCCTTAATGCCAGCAGGTAGAAGACCCTTGAAAAAA  
AATATTTGACAGCTTTGCAAACCAAGGTCCAATAATATGCCAGCTCCGTTTGTAAAAGTGATAATTGAATCCGTCAGGTCCAGGAGATGATGATGCAGCACCATCAAAGACAGAACCCC  
TAATTTTCATCATTAGAGACAGAGACCGTAAGTGAAGCAGCAAGAGCAGGATGTAAGTATTACCAAGGGGAAAGTATTCCATATCAAATCCTCATAGGGGGAAAGGGTTATAAAGAGTGT  
GAAAATGGTTAGTGATTCCAGAAATAAATCCGATCTGTTCAAGCTGGAAGAAGCAGCCAAATTGATAGCACCGTTATTCATAGCTCTTCTACGACGAATTTAGCATAAAGAAACTTGAG  
ATCGTCTTACCCTGAGAGAGCCAAGAAGTCTTGGCTCTCTGAATCACCAAGAGGCATGATAACTAGAGAGCTCTGAAATTTGGTGATTAATGTTCTTAAGTTGCTATTGAGGGCAAC  
ATTAAGAGGATCCAAGTCTATCATCTGTAAACAGTGGAGTTGCTTACGGTGCAGCAAGTCTAATTGAGATTGAATAGCATTGAGTTGGCCAGGATTGAAGTTTAAGACTTCTTTTAAAC  
AACCTGAGCTTAGCACAGAAATCTGCAAGAGGATTACCTTTAGCA

>comp127121\_c0\_seq1

GACGTGGTAATAGATGCGGCCGAGCAATTTGTGACCAGAGAGATGCAGAAGAGGTCATAAGCATCGGTGAAGAAACCCATTCCGGCGATGACGATCGCCGTGAAGTGGTACCATTGTG  
TCTTGGCGACATCGAGGGCGTTGAGTACCTCAAGCTGTTCCCTGGCCATTGTATCCGAGAGTAACAATGAGATCTTTCAACCCCTCTCTGTCTTCTCCCTGGACTTGCTTCCCTCTGCTTTG  
TGCCTTCTGAGCTTTTCTTTCCGCCGGAGGAGAAAAGGAAGGGCAAGGCAGAGCGGGGAAAATGTGAGGATTTTCGTGAGGATTGGAAGGAAAGGAGGATGTCGGGGCGTTAAATGG  
AAAGGTCGGTATAAGTGGGCGTCTATTGAAGGAATATTCTCCTAATTTGGAGTCGATTTGTGGCCACAACCGCACATCGCTGTTCTCACCTCCTAAATTTCTTTTGAATTCTTAAAAA  
GGCGTGGATTTGTTCAAGAACGACGATCCCCTCGCGGCTGTAGTGGAATTTCCCTATTATTCTGCAATATTCCATCTCTTGAGAGATTTTGATGGG

>comp127121\_c0\_seq2

GACGTGGTAATAGATGCGGCCGAGCAATTTGTGACCAGAGAGATGCAGAAGAGGTCATAAGCATCGGTGAAGAAACCCATTCCGGCGATGACGATCGCCGTGAAGTGGTACCATTGTG  
TCTTGGCGACATCGAGGGCGTTGAGTACCTCAAGCTGTTCCCTGGCCATTGTATCCGAGAGTAACAATGAGATCTTTCAACCCCTCTCTGTCTTCTCCCTGGACTTGCTTCCCTCTGCTTTG  
TGCCTTCTGAGCTGTTTCAAGATAGGCAAAAATTAGAAAATCGAACGCAACGGAGGAAAAATTAAGGCGGGCTTTAAACTTGTTCAATTTCTATTCAAATTAATTTTTGATCATTGATTC  
CAACACAAATCTAATGCTTTGAACTCCTTCATGATGCAGTGGGGATGCTGGGTTACCTTTTCTTTCGCCGGAGAAGAAAAGGAAGGGCAAGGCAGAGCGGGGAAAACGTGAGGATTT

CGAGAGGATTGGAAGGAAAGGAGGATGTCGGGGCGTTTAAATGGAAAGGTCGGTATAAGTGGGCGTCTATTGAAGGAATATTCTCCTAATTTTGGAGTCGATTTGTGGCCACAACCGCAC  
ATCGCTGTTCTTCACCTCCTAAATTCTCTTTGAATTCTTAAAAAAGGCGTGGATTTGTTCAAGAACGACGATCCCCTCGCGGCTGTAGTGGAAATTTCCCTATTATTCTGCAAATTATTCCA  
TCTCTTGAGAGATTTTGATGGG

>comp127189\_c1\_seq1

ATGCATGCAAATGATGAAAATCAATGTATAAGGGTCCCTACAAGTCATAAGGAAGCCCTACTACTGAGATTGGCTATCTGGTAAATATATGTGGCAGTCCTTACTAATACTAGAAGTTACA  
CAAGTAAATACGGCGGCCACCAATCAAACACATCAATCTCCTGTAAGCAAAGGGTTAATGACAATTACAATACCATAACAATCAATCACCATTCAATGATCAGATGAAGACATAATCA  
CATGCCTGCAATCAACCACCGTCATGAGCTCAACATGTTGTCATTTGCAGCGTAAATACAGAAGAGAACTGTAGTAGATACGAGCTCTTACAAGATGTTGTAAGGCCTGTGGTACGCC  
CAATATGTTGTCCACATGCAAAGACACCAAATGACAACACATCAAATGCAAGGCAGGAGATTAGTTAGTGCA

>comp127199\_c0\_seq2

TGGTCTCCCTATTTGAAGTTGTCTAACCTTCGTAATAGCTCAAACCTCATTTCCCCTGATCACGTTGTCTCCACATTCATCATTGTGTGTTAAAAATAGTTTGAACATCCACCCACCTTCGACG  
AAGACAGACACATTCATCCCATCATAGTTCTTCTAGCACTTGAAGCTAGAGCCATGCTATCTCTCCTTCTCCAAGTTTCATTGAAGATGAAAATGTTATGTTGCTCTGAGAAGTCTGAAGC  
ATCTACATTCCTCACCATCAAAAGCTTGAGTTTATTGCAATTGTTCACTTCAACCACCCTTTCTTTAAATCCAAATCAACTAGA

>comp127398\_c0\_seq1

TTTTTACTAAAAAAAAGCTTCATTAGAAAATAATAAAAAAAGTTCTCAAACAAAGCCTTAATACATTATTATGATGAGAATATGGATAGAATTAATAATTTATAGAAATACATTAAAAAA  
AACATAAATATATATAGAGCTAGCGGCGGCGTTGTTGGGCTCTCTCTGGCAATTGAAGTAGACGGCGGACGGGGAGGCCAAGCTCAAGTTGTGAAGCGAACAACCGAGTGTGAAA  
TTGGCGCGGCTGGCCAATGGACTCATTCCTTCTATTCTCTTCTCCTGCTGGAACAGAACGAAGACGTAGCGGTGGATGCCAGCGGTGGCTGAGGCGGCATATATGGAACAATTTCTTCTC  
CTTTGAAAGGATCAGTCCCACCTGGAATATTGACCACCAGCCAGTGTATCCATTCCCTCATTCTGGGCTCACTTGGGCTTGGTGCATCTGGATCTGTCATAATCAAGGTATAGAGATCAGAG  
ATATTTCCAGAGATGCACAGCGCCGGTGGGTTGACCGCCATTGATGGCTTTACATGGCAGCCATTGTTAATGTGCTTCGCACCATAATTTACTGACATAGTCACTGTAGGAACAAAGAGGT  
CGACCACCTCCCCTATCACTCTCCCCACCACCAAAGACTCCACAAAGGTTGAGGCCATGGCCGAAGAGAGAGAGAGAGAGATTCC

>comp127540\_c0\_seq2

AACCCCAACTATACCACCCAAAATTATACAACAAAAGAAAAGTATAAGCTCCAAAATGGTAGTAAGTAAGGAATTTCAAAAAGAATCCCGCCAGCTGAGACGATAAGCCTGCTCCTCTGC  
ATCGGAAATAAGAAAACCTGCACAGAGAAACACAAAACCTGCTCCCGGGCTAAACAGGCTGTACTCAGAGGAAAAATTAAGAAAGCAAGTCGTAATCCTGGTTGCCAGAGGCCATCC  
GAGAGATTACAGAGAGCTTCATCATGTACAGCCAGCCCAAGCCACCACGAAGGGACCAGCCAACATGCCAAAATCCAGCACAGAGAATGAAAATAAATCCAGATAACCAGCATAACA  
GCAAAACCGTCAGTGCCCCATTTAGGCCAGAATTTCTTGAAAGTGAAGTTAAGGGAATCATAATGCTTCCAATTGATCACTTTAGCTCTAATAGCCTGAGTTATCACCTCTTTAAGTTTCAG  
AGATATTCTTCGTCAAAGACGCAAATTTCTCCATTTCTGTTCCCTCCAAATCCAATAAATAGTCACAGAAATAGTAAGATAGCAGAAATCAACTCCAAACTACTAAAATGCCTCATGCTG  
CCCAAAAATCATAGACCTGATGCA

>comp127585\_c0\_seq1

ATTGGTCTTCACATGATGATATTCTTCGTTAATACCAAATAATAGCTAGCAATACCAAGCAAAAAGTGAAGTTTTTTAGCGGTGGGAGGACGTATCTCTAAGCAGGTGAGAGGACTGAATAG  
TTGCGAATTAATCCAACCTTCTATTTTCCCGTTAACACCAGATTTCTAAATCCTATGGTTCCGGGATTTACGTGGATTTACGGTATTTGGCCGAAGAAGCGCGTGAAAGGGGAGAAA

>comp127594\_c0\_seq3

CCACATGTCAATATTTTATTAGACACCGGACGTATCTCTACGTCCGGTGTGTCAGCTAATAATTTCCCTCATCAAGGCTTGCCTGCCACTGGATCTCGTCCCTCATAAAATATCTGTTGCT

TGTTATACATACGATGCCGCTTTTCACGAGCGTAGATGACCCAGAAAATGATCGACAACATCACAGCAGCTGAAACGAGCGTAAGGCCAATGAAGACCCAGTTTGTGTATTTTCTGAGAC  
TTGGGCAGTTTTCATGGCTTACGGACCTAAATGCCTCTCTAGCAAACGAGCAGTCCTCGAGCTGAACAAGGAAAGGAGAATAATGGTATAAAGCATAAGCCACACTTACAGCAGAATTCA  
TCTGATCGTAGAGAGTTGGAGTTACACGGCCCACAGTTTTACAGATCTCAGCCCCATTGACAATGGTGACATTGCATTTCATATTTCTCCACACCTGCGATGCATTAGTCAAGACCACCTC  
ACCAGCAGCACAAGAGCGATTGCTCAGGTCTTGGTTGAATGGATTGCAAAGTGTGGCATCAAAGGCCAGACTGGTTGAAGGAGATGGATGGGTTTGTAGGATTGGACACCCATTGA  
TGACATTATTGACCATGTCAGCCAGCTTGTAGGTTACTTGACGGCTGCTGTACAAGGATTGATTTGCGGTGGCCGCAATCACGCAGGGAAGAATGTCATCAAGAGCAGTGTGTTCTTTGG  
GGTGGCTCACCCATTTCATCCATCGCCACACAAGTGTCTCCAACGGCATTGTGCATAAGAAGGAATACACCTGACAAGATAAACATTGCCGCAACAAGAAACCATCCAATAAGAACTAAGA  
TGTAGACGAGGAATTGCAATCCCAATATAGATAAAAATAAAGCCCAGAAATGCTAACAGAAGCATCACAGCCGCGACAATGATCAGAATCAATCGCACAGTGTTCAGCACATCTCTGATATT  
TTTAGAGTTTTTATAGTGCCGCTCTATCTAGATCATTGCGAGAGGTATTAACCTTTGTTTACAATGTCATCAATTTCTATTCTGTATATCACCTGGAATAAGCAAATTAGTCACTTTGATCCTCTTA  
GCCTCTGACAAATTGCCAGAAAATCCCTAAGTTTTCCACAGTTAAATTTGCCTGGCTAACAAACATAATCCAATGTATCTGAGCTGCTGTTGTGAAACTTTTGCTGTCCATAGTAAAGAA  
GAACACATCCAATGCTGGATGCAGGTAAAAAATCTTCTCTGTTCTCTCCGAAAGCAAGAAAAAAGAAGAATTGTTGATGGAAATTACCAGAAAGGGCAACTGGCCCTCTCCAGCCGAC  
CTCCTAAAGGGAACAGGGCATATCTCTCTTCTCTGAGAAACCGGCTTATAAACTTGAAAAAATTTCAAGAAAGACGACTCTTTTCTATCAGAAACCAGCAAAAAGATCGG

>comp127720\_c0\_seq1

CTAATCGGGTCGGGTCAATGTGTGCAGAATATAACATTCCTTTGAGAAGTGTGGTCTGGTGAGGGGCTAGCAATAACTTCTCCATGACACAAATGACAACATCTCCTTCATTTCGC  
TTCCAATTCTTCGATATCTGCATCGGAGTCTTCACTTAGATCTTCTGTGTTTTTCATTCTCCCCTCCACAAGCTGAATCCTCGGCCGCGTCAGACATTCGTGAGATTTATGACCCGATTA  
AAAACACCTGAAGCATTGTAAAGTGGCAACTTTAGAATAAGGATTATCCTTTCCACAAGAAGGGTTTTAGCAAGATTGGGATCGGGCGTTGAAGAATTAACCGGTCTAGCACTGTGGG  
AATTTGTTGTTGTTTATGGGTTGCTGGTGCAGCTCTTACTCACTAGATTGATCAGTAATGTGTCGATGGCTCAAATAACTATGAAGTGTCAAGTTACTTGCATTTTCGGCCTTCAAAGTGAA  
ATTGACAGCTTGAGAAAGTGACCACACCGAGTTTAATTCTAATTTATCTTGTAAAG

>comp127818\_c0\_seq1

GTGTGGATCTCTTAAACAATGAGTATATGATCAAAAACAGGTCGGTAAGGATGTGCGCGGGCTTTGGATCGCGCAAGAGAGGGGGAGGCCGAGGGCCTTCGTTCCGTCTGGGGCGTGCAG  
AATGAGAGGGAGGAGAGCGCGTAAAGTGAAGTAGAGTAGCGGGAGAAAGTAGGAAGCTTAGGAAAGAAAGGAGGAGGAAATGAAGAAAAGGAAGAAGCAAGAAGAAGAAATGTTTAGA  
AGTTATCTGTGCGTGGGAGAGGGCCGGCACCAGGGCGGGTTTTCGCGTCGCGGAGAGAGGTGGAGGCGAGGGTTTTCGTTATGTAAACGCCAACCTGAAGATTTA

>comp127884\_c0\_seq5

TAGTCAGCAGGAGTACTTGAAACTCAAAGCTCGGGTTGAAGCCTTACAAAGATCCCAGAGGAATCTCCTGGGCGAGGACCTTGGTCCCCTCAGCAGCAAGGAACTCGAACAGCTGGAA  
CGGCAGCTGGACGCTTCACTTAAGCAGATAAGATCAACACGGACGCAGTTCATGCTCGATCAGCTTGTGACCTACAGCGAAGGGAGCAAATGCTCTGCGAGGCTAATAAACGCTGAA  
AAGGAGGGTAATTACAATTTAAGTGTCTGCTTCTGTTCAAACCTCGCTTCTTTTACTGTAAAAATCGTAAATTTATATTTGGTCATGTGAGCAGTTGGAAGAGAGTAACCAGGCATCCTCAC  
AGCACGTCTGGGATCCCAGCACTGCTCATGCTATGGGGTACGATCGGCAGTGGCTCAGCCTCATGGTGTATGCCTTCTACCACCCCTTGGAGTGCGAACCCACATTGCATATAGGGCATAA  
TTACTCTGAATTTTGAAGTTCGATGATTGCAACATTTTACGTCTTATAGTCTTACAGAGTTTTTTGAGGTACCATTCTGATTTATCGATTGCACCAATGGCTGCTCCAAATGTCAATAATTAC  
ATGCCACCTGGCTGGCTTGCATGAATAACTAGACCACTCATTGCCTCGTATAGTCTTAACAACTTTGTGTTAATTTGGCCATGTCTGTATAAGATTTCTATTCTATTTGGTGTCTCAAGG  
TCATTTATATGTAAACATATCTATAAAGCTTCTTAAACAGGAGGGCCTGAAATAGAAGACAATGTTTTATAATCATATGAGACTACAATACATCTTTCTCGGCTTCAATTTTCAATTATCCC  
ATCTGATTGATAGTTCAAGCCACATTTAATTTTGGAAATGTATGAGTGCCTGATATCCAGTTGTATTTTATACGTGGAATTGCTATGTACATGAAAAATGTGAGAGAACGCAAACCTTCATGT  
ATTGTTTTAAGTACAGTACCAAGTGTCTTTTATTTTCTCTTAAATCGAACTTGTATCTCTAGAGTTACTTGGCTGATGCAGTTCTGGACTAGCTTGTGGTTAACTTGCCTGAATAGTTCAT

>comp127927\_c0\_seq1

TGACCCTTATTTCAGAACCTAATTGACCTCCTTCAATACAGTTTTGTGTAATAAAAAAATGAAACAAAAAATTTGAAACAACCAACAAACCCAAACGGCACGGCGATTCAACCACCG  
CCATTCACGATACAAAATAAAACCCCTCTCATTTCGGTTGAGATAGGCACATACGTACAAAAAACTTAAAACCAAAGAGAAGGAAAGTCTAGAACTCACATCTCGGCTTCCACCGAAC  
TCCTGCACTCGACTGTCGCCGAAGAAAAACGTGCCTCTGCACTCGACCGCACCGGCCAATCTCGTTGTAGACCTCTACTCCGGCGTCGACCCCTCCGGCCTCTTCTTCGACGTGCA  
CACCGTACCTATTTCGCCGTCTGTCTGAGCCGACGCCGATCACACCGCCGACTACAACCAAGCTTGCTAACCTCTCCGACTCTGGCCAACCCCGTCTCTGCCTGAGCCGACGACGC  
CTCCGCCGCTCCATCGCCGAGCAGTGTGAGAGCCCCAGCGCGTGTGACCTATGACGCCTTGCCCTAGCCCGATCGGGGAGAAATTATTGTGTACGCAGTCCGAACGCAGGGATAGGTT  
CGGATGCTGCGTATTTACT

>comp128139\_c0\_seq1

ATAAAAAACCGTCCCAAATGAAGTATTAGTATTGTTTCTCGCCCTCTTCTATAGCATTCTTATTTTCATCGTTTCATGTTATAAACATGTCATTTGTGTTTGCAATTGTACAGATAACACTTT  
AATCTAGCTTTAGTCAAGTAGAATTTGATATAGGATGTCTGTGATTTAAACATATAGCCTTATTATTAACGTAATGTACTTATAAAATATCATGAAAATTA

>comp128365\_c0\_seq1

ACAAATAGTTAAATCTATTTAAAAAATAAATCACGCATTTAGTGTGTAATTAATCTATATTTCTTTGAATTTTGGCCTCATTATGAATTGAAGAAATATTGGGCCAATAACAGCTCC  
GATTTTGATCTCTCTTAGAATTATAAAAAACAACGCTTTAAAAAATAAATCATATGATATATGTATATATATGCACACACACGAAAGTCAATTATAAAAAATTCATACATTTTAAATAAAAAAGTT  
ATTGTAATATACTAATGGACTGGTCATCGCTGTCATTATTTGTCTTACATTTAATGCCAATGAAATTTGTATTGGTTGTTTTGTAGGACTTTGAATGATCAGGTTTATTTCCAAAAGAAGATA  
ATCAGGTTTGTGGGGAATGATCATATTTGTTGCGGACTAATAAATTTGTGGCGGTTGAATGGGAGAATCTTTGTCTAGTAATGCAAGTTTGCCTAAGTGAATAATTCAACTATATTTG  
TGATTTTACAAAGATTGACCCGTCCCTTCGCTTGAAGAAGCTCCTCTACCAATAGATTGGGCAACAGTCAAACCTTCGTAAGGGTATTGAGGATTTCTGGAGACCGTGGTTCGAATGACG  
AAGGTTGAAAAAATGGTGGCAGCAACCGCGAAGGTCTGGCGGCAATCTACGGCCAGACAGAGTTCTAATTGGTAGTCGGTTGCCGGGTGGAGATTTCGGCGGTGGTTGGCGGCCCGGT  
TGAAACCTAGGGATGGTGGCGGTCATGCGGAGTTCCAGCTGCGATCAATGATCATGCGAAGGTCTATGGTTGATGGTTGGGTAGAGGTCTGATTGCGATCAACAATCGAGCGGAGGTTT  
GATGGCGATCGGTGGTCAAGCAGTGGTTCGATGGTCAACAACAGAGGGCATGTCCGACGACGGTTAGTGGCCATGCAAAGGTTTGTGATGGCAATGTTCCGGGTGGAGATCCAGCAGTGG  
TAAAGTGATTGGTAGGAGATTTCGGGGGCCGTTCTGCAACAGAAGATCATCTGCGATTGTGCTTAAGTAAAACCTCAAATCCTTGAAGCCTAAGAGCTATTTCAAATCTCCAGCCATAGGC  
CCCTCTCATGAAGGGAGCGCGGGCTTATTAATAAATATTTGTGAGCAGCCTGCCCCATAATTATATGAGAAATAAGGAGCAATACGGAGCATTCCAACGGATGACCCGATTGATTCTCTTG  
AACATAAATCATTCTTTCAACATTTAAGTGTCTTAATAATGTCATAATTGGGTGATCTTAGGTTTGTGGATTTCGCTTGTCAAGCCACTTGATTTGACTACAAGCATGTCATATTCGAAAATA  
ATTTAATTATCCATGGTAATATTTTGAACCTTAATTTCCAAGTATGCTTCGATCAATTGATTTGGGCCCATCTAGGCTCGGATTGGATTGATTTTGGTGTCTTTAGATTAGTCTTATAAGGTCATT  
CAGCTTGCTAATAAGTTTGTCTAAATCGGATCTTAGATAGTCCCAAATTAATTTTGAAGTTACCACCTTCATGCTTGCATCGAGATTTGTGCCTGATCAAGGCGATTTTATGTGACATATCA  
AAATTATTAACATAAAATTGACTAATTTGTTGTGCAAGCTCATTGGTGATTATCAATGGGCTGTTTTAAATTAATTTATGTTTTTATTTTATTTTGTATA

>comp128479\_c0\_seq1

TTTTCTGAACAGCCTCTGGACACTAGGAGGCGTAATCACGGAAAGATGGCTCCTTGTCCACCGGTGCAGGAGGACGACAACGAACGAACGCAATGAAGATACATCTTGAAACAAAAT  
AGATTTTAGGTTTGTGTTAGATTAGAATAGCATCTAAGCTTCGTCCTCTTATTGTTTTGGGAAATTGATTTTCATGGTTTAGGTTTTCTGTGCTGAGAAGTGAAGGATTTGAACGCTGCC  
TCGTTTTTTGAATTTGTGTAGAAGAATTCTCATGATTAATTGAGGTAATAATAAACGGCTAAGGGGAAGGAAAATTTGGAAATGTCTGAGTCTGATTCTCCGCCTGCTTCTGAAAATTC  
CTCTTCTTCGGACAATGCGAACTCGGGCGATTCTTTACCACCTCGTTGGGATCTAGCTCATCGCCTCTTCTCAAACCTCTACCTCGTCGCCACCTTCGCCAGCGTCTAGCTCTTCACCG  
CCTTCAGCAGGGTCTAGATCAACGCCTCCTTCTCAAACTCAAGCTCT



>comp128517\_c0\_seq1

CTTTGTAAAAATATAGAAGACAATAAAAAATTACCGCATTGAGACAATTTTCATCAGAATCAATCTCGAAGTATTTTGATATATTTCAAGACAATTATAAAACATATATAATTAATATTACACTA  
ATCTCATCAAGTTAATCCTCCTGATCACTCTTTAAATAATCTCACACTTTTTTTCTTGCTGTAACGTAATTTTCATTAGTCCATCTTGAAATTTGGCTGATCCAAATACTTTTTTTTTTTTTTTTGT  
CTCTTTTTTCTCTCTTTTGGGTCTCTTTACTTGTATTTTTGGGTATAGGGATGTTTTTGGTTCATTTTGTAACTTTTTTTTTTTCATTAATACATGGCTTTTTTGCCCAAATTTCCCCCCCCAA  
AAAAATGATAGCCGACTTCATAAAACCTTTAAATATGACAGAAAAGGCATGGCAGCTCAGGTTAGAAAAGCCTTGGAACCACGT

>comp128706\_c0\_seq1

GAGAATGTATTTTATTGAAATATATTCTTTATTACACAGACGAACTAATCATCATGATTACAGTAGAAATAAGAAAAACCAACACGATACAATAATTTACACCAAACATAAATAATACACAC  
CGTCACTCCAAACAAAGTTTCAGGGATGCAAAAGCCGACAAGCTTAAATAACCAAAGTTTTTACCCTATTTATTGCATATATAACTATAAAAAGCCATGTTGTAACACACCCGAGGAAGAGC  
ATAAAGTGCCTTCCTACAATCCTGTGCCAGTGTGGTGGCCAGGCAAGTGTATTATTAGTGCCTGTAATTTGGTGCATTAGTACTGTGTAAGCCAGTTGCGCCACCAGTAGTCTCATCTAAGCC  
AGTATGGTGTCCAACCTCCAGTGTGGTGGCCACCAAGCCGGTATGCTGCCAACTCCTGTGTGGTGGCCGCCCAGGCCAGTTTGGTGGCCGAGTCCCTGTGTGATGAGCTTCTCCCTTATG  
TATAGCATTCTGCTCGTACGCTTGTCTTCTCCAACCTCAGCTTGATGAATCTTCTGGTCTTTTTCTGCTCCGCCACTTCTTCTGTAGTGGATCCCTTGTCTTCACTTTGTCGACCTTTTCT  
TCAGCTGTTGCCTTCGTCTTGTCCAAGCCAGCCTTAGCTGTTGCAGAGATGTTGAGACCTTCTCCTTAGCGGCTTCCATTATGAACGGATACTTGCAATTTCACTCTAATCACAATTGGTA  
GAAACAGAAATGTT

>comp128712\_c0\_seq1

ATCATAAAATAAGAAGAAAATTTATGTTAGAATATTTTGATATAAATTTGTATGAGGATGAGCATGGACTTTAGAACCTATGAAGTTACTTTAAGATTAGTGTGATACAAAAAGTTTTTGTG  
TATTAATCTCAAAGTAAATCTACCAATTTGTAAGCCATCCTAATAGAATTTGTATCGAGATATCCTGCAATAATTTTTATTATTAGGATATTTATAAAAAAAATTTCTCTCTCTATATATATA  
GGCTCTAAAATAAAATAGGAAGCCAAAAGGGAAAGGTTTGTTCCTATGAAAATGGTTGCCTCTTAATCGCTTCTTCAACATCATACTAATGTAACCTTTGTTTTTGGTACCTTTATGAATCC  
TATTAGAGACCAATCTTACCCTTATCTTGCTAAAGATTTTCATTGCCGCCGTCTCTCCAACCGCACAAACTTCTATCTACGGGATCCCTACCTGTTGACTAAGTAGGCTAGGTTCCATTACTT  
CCCATGAAGATGGAATCATAAATCATAATCTGTTTATTATCATTGCCCAATCATCTTCCCTGAATTTATAGTTGTAATTTCTTTTTTTTTCAATCCAAATAGCTTCTACTAAAGCAATTAAT  
CATTAGAGCCACACAAATGAAATTTAATTGAAAGTGTCTCTTATGATCAAGATAAATAGTCAACTATAGAGGATTGCACTTATAAAAAATCTCAAATTAGAATAAAAAAGTCCTCATAAGAC  
GAGTAAGACTTCGTTTG

>comp128791\_c0\_seq1

GCTGAGATGTATGGGCCCCAGTAGTATTGGGAGACCGAAGTGCACCGTGCCCTGAATGTATCGCAGCAGATGTCGTAGCTGATGGAAGTGTAGTTGCTGCGGATCATGCATGTGTTGGCAT  
AGGACGTTACCCGCATAGGCGATATCTGGTCTGGTTATAGTAAGGTATTGGAGAGAGCCGGTGATCTGTTTGTAGATGAGTGGGTTATGAAGTATGGGATCCGAGAAGGGTGTGATCGGA  
GGTTTGGTAAAATTTGGATTTGAATTTGGTTTGCAGTAGGCTTGCCCGACTTGTTTGGAGAAGGGACTTGGCATATTGTGCTTGAGAGAGGAAGTAGGAATTGGGACTTGATTGGATGTTG  
ATGCCAAGAAAGTTGTGAGCAAGCCCCGAGATACTTCATTGTGAATTTGGTACTGATTTGCATGATGAACTGGGAAATGGCTTGAGCGTTGTCTCCGGTTAAGAGAATGTCGTCAACGTAT  
ATAAGAAGATATATGTGAGTGGAGCCGTGAGTGGGTAAGCAAGGAGTGATCGGATTGACTATGAAGAAACCAAGAGAAAGAAGGTATCGGGAGAAGGTGTTGAACCATTGACGAG  
GGGCTTGTGAGACCGTAGATTGCCTTTTTGAGTAGGCAGACATGATGAGGATGACTGGGGTCTTGAAGCCCTTTGGTTGTGCCATATACACGGTTTCTTGAAGATCACCGTGGAGGA  
AGGCATTGGCCACATCCAATTGATGGATTTTCCATTGGTGTAGTAGAGCGATGGTGTAGTAGCACGCGGATAGTGGGCATTTTGGCAACC

>comp128947\_c0\_seq1

AATTTCAATCTTAGATCTCGCTAGTTCTCCAAATACCTTTAATTTCCGGCTTTTTCTTCGCATCTACAACCTGCGGCCCTCATGATTTCTTTGAAATTTGTTCCGCGTCGTTGCACTGCGATGAT

TCACTGATCTTCTCATCAAGCCTTACTATAAATTTTATTATATTTCCATGTTATCTTCCGATTGTTAGTTTTGAGTTAATGTCGGTCTTCTCGCAGAGCGAAGATTTGGAGTTCAACTTGTAAG  
TAGCATTGCAGGTTTTTCCATCTATAACCTCACTGTGGAGTTAAGTCGATTTTGCTCGAAGAGAAGAAATTGAGTATACAGGATTTCTCCGGCTCGATCAATCAATTGAGCGGAAGACGCC  
ATGAATCAGGGTTTTGCTTTGCATGGAATGTGTATCTTGTACTTTTTCTTATTCAATTCATGGGGCTTTGCCAAATTGGTTGTAAGAATTGTAGAAGGAATCTTCTTTACCCACAGAATCTTT  
GTAATATTGATACTTCATCAAAATTTGATTTGATTTCGGC

>comp128947\_c0\_seq3

AATTTCAATCTTAGATCTCGCTAGTTCTCCAAATACCTTTAATTTCCGGCTTTTTCTTCGCATCTACAACCTGCGGCCTCATGATTTCTTTGAAATTTGTTCCGCGTCGTTGCACTGCGATGAT  
TCACTGATCTTCTCATCAAGCCTTACTATAAATTTTATTATATTTCCATGTTATCTTCCGATTGTTAGTTTTGAGTTAATGTCGGTCTTCTCGCAGAGCGAAGATTTGGAGTTCAACTTGTAAG  
TAGCATTGCAGGTTTTTCCATCTATAACCTCACTGTGGAGTTAAGTCGATTTTGCTCGAAGAGAAGAAATTGAGTATACAGGATTTCTCCGGCTCGATCAATCAATTGAGCGGAAGACGCC  
ATGAATCAGGTATCTCAGTACTTTATTCAATTACTAAATTGTCCATCTAATGCCAATGATTCCACCGCTAAATCACTGAAACTACACTGCTAGGGTTTTGCTTTGCATGGAATGTGTATCTTGT  
ACTTTTTCTTATTCAATTCATGGGGCTTTGCCAAATTGGTTGTAAGAATTGTAGAAGGAATCTTCTTTACCCACAGAATCTTTGTAATATTGATACTTCATCAAAATTTGATTTGATTTCGGC

>comp129096\_c0\_seq1

CAGGGACCCTGGTTTGGAGGAGGAGGCTGATTGAATACTGAAAAATAACTATTTCATCATAGCTACATTAATGTTACCGAGTCGAATTGACCTAGGATCAAACCCATCTCTTGCTGGTACT  
GTGCATGCTGCTAGTTTAAAGTGAGTTTGAATTTGATCAAAACATTGATTAATAATGTATTTCTGTCTTTCAAAGCACTAGACCAATCTTTTATCAGGTATAGGTAAGTGGTGCAAGTGCTGGA  
GTTGGTTCCCGCCTTCTCCCTTGAATCTTCTCCCTCATAACGTTGATCATTCCCAAAGAGTTCCAGAAAGGATGCATCAATAAATAAATGGGATGTTCTGTAGTAGGTTTTGGATGGAT  
TATATTGCACTTTTTTCTAAGACGTAGTCAATTAGGTGTCCTAAGGCCACATACTTCTTTCTTATTATTAGGAAGTCCAATATCAGAGAGTTTGTAAATGTAGTTCATGATAAATTGGGCTT  
CATCAAAAGTAGTTTCAGTCATAATCAAGTATGTGATCATGGATAAAAGAGGAGTCAAGTTTATGTAATCACCAACTTTGGGAATGATATAGGTTCTTAAAAACATATT

>comp129096\_c1\_seq1

GGAATGATATAGGTTCTTAAAAAATATTGGATAATTTTGGCCTTTTGGATTAAGAGTGTACACATATGATAAATGTCCTACTTGGGCAACACTTCTAAGAGTCTAATTAATTTCTGACAAGTTA  
AAATATGTTCTAGATGTTAAAGTGTGCGCTTAACTCCTTGGGTTCTAAGGTGTAGAAAGTTGCCTAGATCTTCCTTAGTGATTTCTACATAACAAGTTTAAAGATGAAGGAGGTAATCCTAGTG  
TGATCTTAATTAACCTTCATGTTCAAGGAACATTTGAAAAGTTTCCCGATGGTAGGCATAAATCAGGGTAAGGATGAGGGAAAACCTAGGTTGAGGCAAATAGGGGCACGAAAATAAAT  
TTTTTTGTCATTTTAAATAAGGAGTCAGGAAGGAGTTACTTTTTGCTACACAATACCTATCAAAAGATTCAATCTTATTGGAAAGAAAAGTTGTTGTCCCTGCCAAATCTAGACGACGAG  
CCCTTAGAAATGCGAGGTCATTTACCGGTGCTGGCCATTCTAGATTATTTGGAATGAATGAGAATGTGAAGAAAAACTTATCCAAGACCCTTCTATTTAAAGAAAAAATGACCTATCATA  
GTACGAAATATGGATCATTCGTACTATTCTAAAATTGTACGAGACGAA

>comp129156\_c0\_seq1

TCTATTCAATTCGACTCCTCAAGCCCTAACTACACTCATCGTGCAGCCTCTCGTCAATCCCGAGTCCCGTCTCTCTTCTCCCTCGGTGATCGAACAGGTGTGAGTGCCGAGTCTGCCGG  
TCTCCGTGCTCTCTCATCCGACCCGAGACAACGTCACGCAAAGACCCTCTCTCCGTGTTCTCTCTTCGTCATTCTCTCATTGACCGAACAGGTGCCGAGTTTGTAGGTCCGGCCGTCT  
CTCACGCGATTGCAACGGTGAACCGACTACAGATTGGAAACACCAAGCCTTTTGGTTAAGGGTCTGTTGGAGTGAAGAAGAACAATTTTTAGC

>comp129275\_c0\_seq1

TTCATTTGTATAAGAAATATCTCACGCAATTTATGCAAATAATTAATCGCTTGTAAGATAATTTGTTAAGGCTTGAATCTTCAAAGCTTCTGTTATTTTATTAGAAAAATCAGCATTAATTAATT  
AGTGCTTTCATTAAGAACAGCTAGAGGAATTTAGCAGAAAGCTTCTCTGAACATTTATCCTTCACCTGCTCCATAGAATATGAGCAGAACAGCTGAGGTGGCTGAGCTAAGAGATCTCTTT  
GCAGGAACTCCGTGACGAACTGTTGAGAGATTCAAAGAGGAGTACGATGGATTTGCGGGATTAATCGAAGAAGTGCCTGAAAGGAGAAAAAGATGACGGCCTTTGCAGCGGGCGAG

CTCCTCTTGTGTTATTTTCGATAGACGCTGTCGCCTGTCGAAGGAGGTGAAGAAGTTTCTTTAGCGACTCTTTCAAATACTACTCCACACAAAAGCATGCAAAAACCAAAGCTACAAAGATTG  
GACGTTAAAAGAGGGCAAAGGAGCTTCTTTAGCGACGCTTTCTTAACTTTGCTTCAAAAATCATGTGAAGCTGAAACAACAACGAAGAAATGATCATAAGGAAAAACAAATTATAGACAG  
GAAGAGGTAGACAAAAGATCAAAGAGAAGAGAAATCATAGAAATAGACAAGTAATAGTAGGAAGAGCATAAATATAGCTCATCATGAAGACTCTGATTGAATTCTCACAAAGATGTAATGA  
TAAAGCATATTTGGCCTAAGAATCAATGGGGCAATGTCGCTCAAGTACTCAAATTAATAACTTGCTTCAAGAGTGATTGCGCCATTCGCCACATAGTGTTCAGCAAATTAAGTGAAGTCG  
GCCATCAACTTCTCATAGATTGAACCTTAATTGAGCAAATCCATTTGTAATCTTCATGTTTTTTTTTTGCAACACTTCTCATGAGTGTTTACACCAAG

>comp129414\_c0\_seq1

CAATTGTAAGTACTGATTAGCACAAATGCTACTTATTTAATCTGATTTTCGAGCATAACAAGAAATAGCGGTGACCATGAGTGACACAACCTCGTCGTCATGCTCTGTTGCACGATGAACAAACA  
AGTTAGATTCAATCATACTGCTTTATTTTACTCCAGCGGATGAATGACTGGTTGGTTTTTTGTTTCAGATGTTTGTGTTTGGACGAGCAACCTAATCTAAAATTGGTTGTAGTCTTATTAGTA  
GTTGCTGCATAATTAACCCGTTTCATCACCAACACTCTCCAGCAATCAATGAGACATCGAGCAAGTTTTTCGAATCCTGCTGGAGCAGTGCTTTAGCGTAGCACGCACTATTCTTCTAATTT  
AGTTGCTTTAACACATCTATAGATAATTGCATCTGTTGTAGAGTCTCAGCGATTCAATAAGATAAATCATATTCAGGCTCATGTAATTGATTGTTGGACAAGATCACCTCCTTTATCCTCA  
TCACCTCTCCAACATTTGATCATTCTCCTCGAGGTTGTCGGACTTGGAGCCTTTTTTCTCTCATTGAGAGATTGAGCATCACCATTATTAATAGAAAAGATGGCAGGTGTAGAGCTT

>comp129509\_c0\_seq1

TGAAATTAATAATTGAGATTTTGAATATCTCCCACCACCAACTTCCCCTAACCCAACTCCCCACTAGACCGTGATCTAGAGAGGAATTTCTGCCACATTAACACTGCTGTCCAGCCTCTTTT  
AATCCACGAAGTGCTGTCCCAAACCAACTCATGTGCTGTGCAGAAAACCTTCAGCAAACTCCCTTGCTGTCCCAAAGTCCGGGAGCTTCCTTTTGCTGACAAGAAGTCTCCCCTATCCGT  
CAGCTTCTTCAAATCCGGGATTTTCAGCAAGATTACCCAGCTAGTTTGGCTGTTTCAGTAGTTTTTTCATTGCTGTTTCAGAGGATTCCAGCAAGCTTCCTTTGCTGTCCAACAATATTGAAGGCT  
TGAAGCTTCCCTGTGCTGTCCAGGAGTCTCCACACAGCGGCCGGCTTCTTCATATTCGGGTAACTCTCTGTTGATAAAAAACCTAGTGCCTATTGTCTTTTAGTGGCTTCTTTGTTATTG  
TGTAAGATTGCTCTCCTGCTTAAGCCTATTTCAAAGAGTATGAGTGAGAGAAAATTCAAGGTGAACTATCTATTTGTTAAGCGGTGGATTCTTATTAATGGCTCATAAGTGTGAACATTTCTTT  
GATTATTCTAAATTGTCTCTAATCTAGTTGTAAGTGCACCTGTTATAATATTGAAAATTGAGA

>comp129587\_c0\_seq1

GATTTCTCTCAGCACTGTCGTCCATTCATTCCCTCGTTTATTCCAGATAACTTACTCCTGTCGCTACTACTATTGCCATTGACATCCAAGGACCTCAAGCTTGTACTCCTGATAGAAAGGTCA  
TCATAGCTTCCAACAGAAAATCTCTGCAACTGCACGTTGTTGATACTAATACTCTGCAACTCTTCTGCATCTGAGGATTTTTGCATGCTACTTATTGCACGTATTTGAGCCTCCTCCAGCTCT  
ATGACAACCTTGTCTCATGGTTGGTCTATCCTTGGGCTGCCAAGCTGTGCATTTAATGCCTAACTGTGCCATTTTCAGAACCATTTTCATGTTACATGGTCCGAGTTGGAGACTTGCATCTAG  
TATCTCTTCTAACCTCCCTCTCTCCATACTTGCCCTTGGCCCAATCACTGACGTGATATTGAGATCTTGGCCTCATATGGTCAAGTGCAGGGCAGGCAGTGACAAGCTGGAGGAGAATGACT  
CCAAAGCTGTATACATCGCTTGAAGGAGTAAGGTGGAGGCTGGAGCAGTAGGCAGGGTCCATGTAGCCCGGAGTGCCTTCACCTGAGTGCTGACATGCGATGCATCGCCATCCGGTCC  
CAATTTACTAGTCCAAAGTCTGAAACCTTAGCCTCAAATTCATCATCTATTAGGACATTTGCTTGGCTTGACGTCCCTGTGTATTATTTGGCTGGGTTTCATGAAGGTGAGCAATGCCTTT  
TGCTGATCCAATGGCTATCTTTATTCTTTGCTGCCAAGTTAAAGGCCTTTTTCTTTTTCCAACAAGGTATTCAAGTAGACATCCTTGTGAAACATACTCATAAGAACTACTCTTTGCCCATC  
TTCTGCACAGTAGCCAACCAACACACAAGGTTCTTGTGCTTGACCCTGTGAAGCAGCTCAACCTCATTTTCGAAACTCCTCAACAGTCTGATAAGAATCTAAATGAGCTTTCTTGATTGC  
AAGTGTATTTTACCACCATTAAAACTCCTTTATAAACATTTCCAAATGCACCTGAGCCAAGCAACCTTTCACCGCTGAAGGAGTTTGTAGCCTTCTCTAGTTCTGCAAGTCGATATTGTC  
TCAGCTCTACCTTTGGCCAGTCAGGATCTTTGTTTCTGCAATTTTTCTTTTGTAGTAATAATTTCTGATGTAGAAGAAGAGCAGAAGCGCAAAGATGATTCTGCAACACTCGCACCT  
ACTGCAGCGCAGATTTGTAACAGGAAATCCTGCTGTGGATTTGGGAGTTTTGTAATTGTTTGAATTTGGTGTGCTTCTTGTAAATATGAATCTGCTCATGTTTTTTATCTGTACGAGATCC  
TAATGGCAAAAAGGTAGCTCTTTTATTCAATTCCTCCTCTTATCCATGGCTGCTTCTGCTATTCCATTCATGGCTTTCTTC

>comp129590\_c0\_seq1

ATCTTATACATTTAATCACCATAGATTCTTAATAAACAGGCCAAATTAGTAGAAATTCCTTCAACAAAAACAAAAATTATGCATGGTCTAATTTTCTTCCGTTTAAACACGTCCAATTTTTTTTT  
TTTTACAATTTGCAAATTTCTATACTAAAAATGAACAAGCATTGAATAAAGTTTAGGGTATCATGAAAGCAGTAATGGTAGCTCAACAATCTTCAGTGGGGGCTCGAAAGTGCCAGGTGTGG  
GTACAATGGCATGGGTGGCCTGGTAGGTTAGCCGAGATTTACGGACTGCCAAACGCGCTCGGCCGAAAGCCAGACATGGCAGCAGATGGTTCCTCGTTATCAAAAAATAAAAAATAAAAA  
GTAAAGCTCAACAACCTAAACAGGTGATGCATGGAGGCTCTACTGTACCAAAAAACAGCTTCAACGCACAGATTATGATAGCAGTGGCCACAAGACAATACTGCAGCAGTTGGAAACTCG  
TTGAATTGGAATGATTCCGAGAAATTCACAGGGCTGAATGCTAGATCCAGGCTACAGAGTTGGCAGCTTGCTCCAAGTGGTTTTATTCGATGACCAACACAAATATCTTCTTCAGCTCTGA  
TATGGCCAACTATATCTTCTCCAAACATGATTGTAGAGACTTCTCGCGGATCAATTTAGAAGTAACAGGACTTGTAACCTTGTCTTGTGTGTAACGACGTACACGCACGGTGCAAGAAGT  
ATCATTTTCTCCTGCAGTAGCAGTAATACTTGGGCCAGACAATGAAAGTGCTTCACTTTTGCCTTTGCATTTGCTAATTCTCGCAAATGCTAAATCTTGAGTAGTGGCTTTACTCGAACCCAG  
CATGACTTGATCGAGCAACACTTCTAGTTTGGTAACGATGAGCAAAGATACTTCCGGTTCGCATTTTAAAGCCTTCTCGAGGAGGAGTTCGTCATTGCTCTGAATCAATTTCTAGGTCAGA  
GAGAGAGGGGCAGAGATAGAAAGAGAAAAGAAAGGCCTCAAAGAGCGAAAAGCCGAAGCGGAAGCC

>comp129769\_c0\_seq1

ACAAAGAAAGTTCAAAAGTATTTACAAAAAAGTTTAAACATCTCCCGTAACATCCAATGAGCACAAATAGAAAATAAAATTCACATGGTCAATCCCAAATATTTTGGATGATGA  
TGCATAGAGAGGAGCCTGAAGTAAAGTATGCATAATGGTTTCTAGCTATTTCTTCCCTGTGTGTGTACATCCTTGATCAAGTTTTGTATATGATCCAATTCCTTCTTGCACATTTGACTAC  
ATATGGACAATGTGAAAAATATTCCAAGAGAATGCTTATTTTTTGAACATTGCTTTAACTCTAATCCAAATTTGATGGAAAGCTTAAATCACCATCATGATTAGTCAAATCATAGGGAAA  
CTTCCAAATCATGCCTTGTCAATTCCTAATGAATATTGCATTTCAAGTACAATCTAATTAAAAAAAGGCATTTGCACTCTAAACCTTAAACCCTAAATGAAATTCATCA  
CAAACTTTGTTCAAAGCATGTTTCATAATACTCGAAAATATAAAAAAGTAACTTTTAAAGGTAAAGATTTGAAATTTAATATTTTGAATTTATTTGCATGTGTTTGAAGTTTTTTGTGT  
ATAAAAAAGGTATGCAAGTGTTTTGAATGAGTCACAACAGTTTGGATTGCTTTTGGTAAAAAAATGCAATTGTAATTTTAAACGCATAATTGTTGGGTGTCCGAGCACCGATGTGCC  
AAATTGTGATATTTCAATGCTATACTTGGGCTTTTGGCAAATGAACTAGCATCGCAACGCTAGGTGGTAATGTTGTATGCAGCTCTAGGCCACAATCTGCACTTCAAATATAAAATAAAC  
CTACTATTCCACTCATTCAAGCGCCGTATCCAGCTAAGCAGGGGATAGAAGGAGAGGGTTTTGGAGGGGGATAGAAGGATTTTAAAGTTACTTCCAGCAACTTTTATCCATTAGGCCAGTT  
GAGAATTAAGTTGTCAAGATTAAGGTAGGTCACATTATACTTATCTCAACTTTCAAAAATATGAACTTTTCTTTTTTGAATTAATTTATATTTCCGTTACAAAAAATGGATAATTTGTACT  
GATAAACTTTTAATGTGTAACTTTTT

>comp129799\_c0\_seq1

GTTTTTCTCTCCGTCTAGCTATAATCCACCATTCTTGATATTACAGATCGGGAAAAAACTTCCATGCATGATCTGTGCAGAATAAAAAAACATTTAGTTTCTAAATAGAAATTTTATAGG  
GCCAAAAGCCGGGACCAGCCGCCGACCAGGCCAGCGAAATGGCTATCCCAACGGTAAAGTCCGGTAAACATTTGCTTCTGGTTCATAAGTTTCTTTTCTTCTCCTCCTCCTCGC  
CGCGGGCCATGCTCATACTATAACATCACCTTGCCGGAGATGGAGGACTCCACCTGGCTCGCCGTCGCCGGCATTGTCCTCATTGCCGTCCCCTGGCTCTTCTGGATCTTGGCCTGCCTG  
TACCTTACACTGTTTCTTGGCGAAAGCCATGCGTCGTTTCTGCTCGCTTCGGCCGATCTGAAGTCAGAGGGGGCCAGCGATATCGGGCCTAGCTAGTGTGCGCCAGGAGAAACAAGC  
GGCGGCACGCCGGGACTTGATGGATAAGTCTTTATATTTGTAATACATTTTATAATATTTATGATATTTCCGATTTCTTTGCCATTATGCCTTAAAAACTAAAAGAGATAACTCCTCAATTT  
AAAAA

>comp129821\_c0\_seq1

TAACTATACCAACATAATTTAGTCATCATCAAAAAATGGGAGATTGTTGATATTATCTACCTCATGACCTATTTTATAGAGATTTTGTGATAACAAATATATGCTTGGATGCTCTAATTTGTGTGC  
TAAGTATTTAGGTGTAATGATGTGCATTATAAATAGCTTATGAGATTTACATTGCACAACCTAAGATCAATCAAATGTTGAGATTAAGATGGACCAAGATGGATAATTTGAAGCTTTTTTACA

TTATCGTAGGAATTTGTTAATGCTCCACCAATATTACTTGCATGATTTGATTTGCT

>comp130001\_c0\_seq3

ATTCCATTCGCCTCCCACCTCTAATTTATCAATCGATAAACATTAACAGCCCAGCATTTTTTAAGAATCCGGAGACCTAATCTCCTTCTGATTCATCGCCTATTCACGCGCTTTCTCTGTGCGCT  
GCAACTTTGATTTGGATGCGGAGGTTCTCATCTTCACATTGTGCCCTTGGCCACTGCTGTTCCAAGATCGAACGGTTATCTTCAGCTAATCCATTTCCGAGCGCTTTCCGGAGTTGTTCCCG  
CTGAGCCGGCTGAAGGCATGGCCTTGATTGGGGATTTCCGGCAATGCGCCTGAGGCCACGCATTTGCTCATTGCGATCTTTTTCCGCATGTGTTTCGCTCTGGCCAGGTTTTTGCTAAATCT  
CTCGTATATAAGATTCTGAAGATGAGGAAAGCCGACAGACATGATTTGTAACAGAAGCCAAATATTAATTACTCTCTACTTGCATGTCTTCATTGGGAGTAGCATTCTTTGTTAATTCCTTCT  
CTCATTGCAATGTTGTTGACCACTAGTGATTGGAATATATTCTTATAGCATAGCAGGCAGTGAAATTTGTAGGCTTCTTATTTGTTATCTCTCTTTTTATTTAAGGTTTCGTTT

>comp130262\_c1\_seq2

TCGGCTGAGTCGCTAGAACGGCGAGGCGGAAGGACTTCGGCTTCCTCCTGCTTGTGCAAACAGAGGGATTGACGAAGAGAGGAAGGACTCGGCGTCGGGTCTTGTCCAAACCAAGGG  
GAGACGGGAGCAAAGTCGTTGAAGGAGGTTCCGGCTGGCTGTTGCTCGCGAGCACCGAGGGAGAGATCGTGAGAGAGGGGGGTTCGCCTCCTAGTTCGGTCCGAACAGAGGAGAA  
AGGAGGGAGGGGTTCCGCCCTGGCTTGTGCAAACGCAGAGAGACAGAGAGGGGAAGGGAGTTCAGACGCTGCAGCGTGCCAATGGG

>comp130375\_c0\_seq1

GGAGTATGTGTGGACACATCGTCTGAATTGCATTCAGATACTGTGGCTGGTAAAGGAAGAGATCGATAATGTTATCACGTCCTTTGGGGTGATTGAAGAAAACAAACAGAGACCAGTGAA  
TGAGCCATGTTTCGCTGCTGAAGAGACTGAAGTGGAGAACTCACAGAATTATTATCTATGGTCTCTTTTAGTCGGGTAAGGTCTTCCATGGCTGCATCCCAATTTTGCATTAAGATTTTCAGAG  
GCCAGTTTTCCCCAGAGTGAAGTCAAAGCATTCTATCCGTTGCTGGAACCAATACTCTAAAGAAGTAAAGATATTCTGCTGCTCCAGAGTAATTTCCACATTCATACTGGAATTTTGCATA  
CCTATAGAGTGTATCTAAATATTCCTGCCTAAAACCATGCTTGTCTGCCAGATAATCAAACAGCATCCGACCATCCCTGGTTGATTGCATTTGCCTGGTAGTTTCTGGATCTTCGAACATCTT  
CACAATTGGTTCTGTTTCTGCCTGTAGCTGTTTCAGTTGTGCAACAACAGTGGTCCTTTTTTCTCTCAAAGCATGAGGAATATCATCAGAATAAAGGTTTTTGTATACATCCATAGCAAAT  
CCACCATGTTGGTATCACTAAGAAGATCCAATTTCCCTTGTAAATATTCTTTTTTATTATATATCTCCTTTACGGAGAGAAACTCAAGCAACGGAAAGACTAGATGCCGATCCAAAAA

>comp130473\_c0\_seq2

TTGATCGCCAAAATCACAATCCCGTCACTATGCCTATTACTACTAGAATTACACTCCATATATACAGTTTTAGATCTACTCAAGCAAAAACCTTATGCAAGAATAGCCTAAACAAAAATAAA  
TAAATAAATGAAGCGAAAGTCAACAAACAAGAGTAATTGTCATAACTGTCAGCATCATCCTCAGCCTTGTCCAACCTATTTGGGGCATGTTTCATAAATTATTCTCTCCTCATTCAATCCTACC  
AAGTATTAGATAATATGTAAACTCTAG

>comp130561\_c0\_seq1

GGGAAATTATAAAAAATATGAATTTAATAATTATTTGTGTTGCGGGCAAGAATATACGCTGCAGTAAAGTAAGAGAATAAAGAGTCTTAATAATGTATGTATATCTAACACATCAACAAATAT  
TTGAGAGAGAGAGAAACACTAGAAAGTTTTTTACGTGTAACCCAAAAAAGGAAAAACCACGGGGCCTAATCAAGATGAGAAAGTTCCACTAAATTTGACGAAGCCTGATTGCTCATT  
TACTTGGAGATGGTAGAATTACAATAGATTGAAGAATCGGACAAAAATCTAATGATGGTCAACGAACAGAAGTTCAATAGTGGTTGGAAAAAATTTCCGGCGGTGGCCAACGAACATGTG  
AAAGAACTTCAGCGGTGTTTGACAAACAGACGAAAGTCCGATCGTGGTCGACGAACGACCGAAAGTCCGACAATGGTCAACAGACGGCAAAAGTCCGACGGTGGCCTAGAGGAGCTC  
CAAATCTCTACTTTTTCAAAAATGCTTTGAGTCTTCGATTTGGGCTCGAATTGAGTCAAATTTGTGTTGTTTGGTTCGACTTTTTGAGACGTTTTGTTGACTATAAATTTGTTGAAATCG  
GAGTTTGAATGATCCCAATTTAATTTCAGAAGCTTTCAACTCATTAATTATGCCTCGAGATTTCGTGCCTGATCAAGATAACTTTTTGATGATATATCAATATGTATAAGGACCACATGGAAAT  
CAAAAGCTTCAAACACCACACATATTTCAATTGACAAGCATTCGATGATCAACAAAAAACATAAGTTGGGGTCTATGATTGGTGTATGATGGTGATTTGTATTAATGTCTAGAAAAGATTGGC  
CATAGGTGATAATCAACCATTTAAGCCTATCAAATTAATGGCTAATAATGGGCTGTGATTAACGAGAGATAAATCTCTCTGTGACAAATCTCAACATGAGTGATTAGTAAATAAATCTTTTTT

CAAATTTTGTGGGATGACACTATGTTTATTTCTATTAATATTGATACAGTTCATTAACAATTTATCAAAGTGTGTTGTAATAATTCTCATTGAATATTTCATTTTTCCTAATATTTCAAAACATAA  
>comp130612\_c0\_seq1

CGTCAGCCAGCAGAAATGGCTGAAACTAAACATCCTTTTGGTGGATTAACAAATGATTTCAAAGGAAGAGCTAGTTGTTATAAGCAAGATTGGCTTGGTGGATTTTCGTTTCAGGCTTGAGG  
ATATTGGCTCCGACTATGTTTCATCTTTTTGCTTCGGCCCTTCTGTATTGCTTTTTGGGGAGCAACTGAGCAGAGATAACAGATGGAGAATAAGCGTTTTGAGACCCCTTGCTTCAACTTC  
TATTTGTGGCATCGTACACTCAATCTTTGGGGGGCAACCCATGCTGATATTAGGAGTAGCAGAACCCACTGTGATAATGTATTCTACTTGTACCATTTGCTAAAGGGCAAGAATTACTTG  
GAAGCCGTCTGTTTTGGCCTGGGCTGGCTGGGTATGCTTCTGGACAGCGTGTATGCTGTTCTTTCTTGCTATTTTCAATGCATGCAACATCATTACTAGGTTTACAAGAGTTGCAGGCGAA  
CTTTTTGGCATGTTGATAACTGTTCTGTTCTTGAAGAAGCCATTAAGCTCCTGTAGGTGAAGATTATAATCAACACAAGTACCAGTTTGGAGGGGCTTTACACAAAACGGTTTACTGGGTGT  
TATTTTCTCACTTGGTGTGCTATTCACTTCTCTGAAGAGCAGACGAGCAAGGGCTGGAGATACGGCACAGACTGGTTTAGAAGCTTGATAGCAGACTATGGGGTACCTATGATTGTATTG  
GTATGGACAGCAGTGTCTTATGCTGTTCCAAAAGATGTTGCTTCAGGAGTCCCCGAAGGCTTTCTATTCCATTTCTCGGCAGGGTGAATCATTGCATAATTGGTCTGTTGCAAAGGATAT  
GATGCTGGTTCCCTCGTTGTACATCTTTGGTGAATAGTGCCTGCTATAATGGTTGCAGGCCTTTACTTTTTTGACCACAGCATTGCATCTCAAATGGCTCAACAAAAGGAATTTAATCTCA  
AACACCCATCTGCGTATCATTATGACATCTTTGCTCTTGGTGTCTGGTTCTGATTTGCGGGCTTCTAGGAATCCCTCCATCAAATGGGGTCTTGCCCCAGTCCCCAATGCATACAAAAGT  
CTTGCAGTTCTCAAGAGGCAGTTGATTTCGCAAGAAGATGGTTGAGAGTGCAAAGGAAAGCATAAATTGCAGGCTAGCAATTCTGAAATATATGGAAAAATGCAAGAAGTATTCATAGA  
AATGGACAAGAGCAACAGTGCTCGAACAGTGGTGAATGAATTGAAGGACTTAAACAAGCTGTCATGTCTAGTGGAGATTTAAATGGTGAATTTGATCCTGAGAAGCACATTGATGCAC  
ACCTGCCTGTTCCGGTGAATGAGCAGAGAATTACCAACCTATGCCAATCCCTAATGGTTGGAGGCTGTCTTGGAGCTATACCATTTATCAGGAAGATTCTTACATCAGTTCTGTGGGGCTA  
CTTTGCATACATGGCTATAGATAGCCTTCTGGAACCAGTTCTGGGAAAGGATTTTGTCTTTTATTCACTTCCAGGAAGACGTTACAAGTCTTGGAAAGGAATCCATGCTTCATTTGTGG  
AATCAGTTCCCTTATAGGGTTATAGGGACCTTTACAATTTTCCAATTTGGTCTATCTCCTAATATGCTTCGGAGTTACATGGATTCCCTATAGCAGGAATTTCTTTTCCACTGCCATTTTACCTGTT  
AATTAGCATCAGAGAGCATCTTCTTCCCAAATTTCTTACCAGGAGGATCTGTGGAACTGGACGCAGCTGAATATGAAGAAATGCTGGAGTTCCTATTACAGCACCATAACCTCTCATT  
CGGCTTGATGGATCCCCAGCGTGCCTGACAGCAGTCAAGAACTTGTGAGGCATTGCGCCATGGTGTGAAATTTGGATGAACTACAACCAGCAGAGGGGAGCTTAAAGCTTAGGAC  
TAAAAGCATCAATGAGGAGAGGTTCTTCCAGGTTCAACCACTTCCGATGCTGGGCAACTCAATATGTGAGTAATACAAGTGATGATGCATTCATTTAGACGCCAAATCAGGACTACAGATA  
CGGACCATACATTAGCCCTTCAATGGGCTTTGCTGAAGTTCTGAAGTACCTAAATAGAGAGCCGAAGACGAGGGCATCCATAGTGAATTCCTTTCTTTATTTTATCCCTTTCTTTTTGTATAA  
ATTTTTTTGAAAGATTGAAATATTGCATCAAAGTGAGGAGATTTAGAATGAGAAAAGGCTGCAAGGAATATAAAGTTGAGAGTGCAATAACTATCTTTTATACGGTTGAATATTTTGTAGAAA  
TTTTGCCAAATTTAAATTTGTTCTACAGATTGTTAATTTAATTTTACATAAAGGCCTAATCGTTTTTTTTTTGTAATAGACAATATATTTGAGAAGAG

>comp130642\_c0\_seq1

TAAAGTAGTATTATGAATACGGTAAAATGATGGGGGAGTTAGCAGCTACGCTATATATGTTGTTTGGCCACTTTTTTATATGAAAAATCATCTACTTTACCAATGTAATTTTATATCACATCTG  
GATGGACATCAATGTTGGTTATGCTACCACAGAGAAGTTTTATTTTGTATTGGTCATTTAGTTATTGTTCTTCTTTAACGCTAGACAAATACTGTGAAAGGCAATGAGTGTTAGTTTTGTGT  
GGAATATGATTTTGTGACCAATCGGGTGTATTGTTGACACAAATCTCAATCGAGCTTGTGGGGGTTGCAAGGGGCTCCTCCCCCTGCTTAGCTTTGAGTGCTCTATGTGATGCCCTCAGG  
TTAAACATCTAGATTGACCTGTTCTAACCTAATTGGACAAAAAATAAATATTTAAACTTTTCGAGTTTTGAACCCATTTACATATGTTTGA AAAACTGATCTCAAATCTCCAGAACTAGAAAGC  
CAAAATCTATCCTTGCAAAAAATAACTAGTATCAGATACTAGCAATGCAAATTTCTTACCCTCTTTAATTAGACCAATCATCAAAGAAGGTTGAATAATCATTGAGCTAATATACTAGAA  
TCCCGATCGGTAGAAGAAATCTCATATCCACATCAAACACTCATCGGAAGTTAACTAAACACATGAAACTCTAAAAGATATCATGCTCAGAGCATATGCTGCAACAT

>comp130659\_c0\_seq1

TAAATGTGGACGGTGCATTACACAAACCAATGGCATTACCTTCCACTCAAAGAGACCGTCTCTGGTCTTAAAAGCAGTCTTCCACTCGTCGCCGGGCCGAATTCGTATCTGGTGATAAC

CGCTACGGAGGTCTAATTTGGAGAAAATTGTCGCACCAGCCAAGTGATCTAGCATATCCTCAATCCTCGGCACCGGAAAACGATACTTAATAGTTATCTTGTGATTGACCGACTATCTATG  
CAGATTCGCCACGATCCATCTTTCTTTGGCACCAACAGAGCGGGCACGGCACAGGGGCTCAAACCTGGGCTGAATCATTGTGTTTCTGAATTAGCTCGTCAATCAACTGTTGCATAGCTTTAT  
GTTCTGTTGGGCTCATTATAATGCGGCAAATTGGGTAATGTGGCTCCTGGTACCAAATCAATTTGGTGTGTATGGTCTCAGCGGCAGCAATTCCTGTGGTAGTTTCAGTTGGAGCAATA  
TCCTCAAATTCGATCAGTAGTTGTTGTAGTTTGTGGAGGGCGAAGTGTGGGGTCTTGAGTTCTCCTCGGCTACAAAGACAGCTAAAATTCCCTTAGCTTCATGCCCAAAACGGATGA  
GGGACTTTCCTGTGACTATATGCAAAGCTGGCCGAGTTCCTGAGACAGAAGGTGGTGTGCTGTGAGAATTTGGAAGTAGCCGCAACTTCC

>comp130670\_c0\_seq1

ATAGATATATCTGTTGTTAATACTTACACAGATCGTGTATTCACAAAGTTACGGGCTTGTGGATTATAGAAACAGGTGCAAGTTCGGAAGACAAAACGGAAACGGCACAGAAAAAATTC  
GCGTATGAAAGTAGCAGGAAGACGGGCGTTCGCGTGAGCAAGTTTCGGCTTTGACTTACGTGCTGGACGTTTGTAGTTGGGGATCAATCGCAAGCAGCAAGAGCCGTCAACGGTAGGC  
GTTTGTGATTGGAAGGAGGCAAAAATCCGGCGAGAAGGAACCAGATTTGAGAAAATGCAAACCATGAGAAATGATCAACCCGTTAGTTTCGCTCGAGCACGCCATC

>comp130849\_c0\_seq2

CAAATGCTTACCAGCTGGAATGATTGATGTACCCCTTCTTCGTAGTTCCCTCCTCCAAAAGTTCAGCAAGTTCCTATGAAGCCTCATCCTCATTCTTCCTTTTGTCTTTGCATGTGTCATTA  
GAGGTTGAAGACCAGTGTACCAGTCAATAGCTCCCGGACCACCCTGGCAGGCAGGGCAGTGCCATTGTCTAGCTTGTTCATTTATTTGCTCCAAATTCAGATTATCCAAAGATTCAAAAA  
TGGCTTCAACCACTTATTCTTCTTACGTGTATCATGGCTCTTTTACTATCATCAGAGTCAAAGCCATCACTAAAATCATCCTCACTATCATCTAGCAACTCATCATCTTCAATATCGTTA  
TCAACATCTTGAGGAAGTTCATCCTGAGGATGCATATTGCAGTTTTTAAGTGGAGTATTGGTTGCAGGCCAGGCTTACCAGCTCTTGCAGACCACTGCCACCCATTTTGTAGTGGTGGAT  
GAATGGCTGCGGATGGTACCTTGTAAAGCAGTTCCTCAAGAGCCCCAACTGCTATCTAATTTGTTGAGCCTTAGAGCTTTCTCCCCAACTGATTCTTTGGAATTAATGACTTTAGGCCAACT  
GTCGTGAGATATTCTTCTGCACCAGTATCGCCAAACTTTGCATCTGTGTGCCTTGTGAAGGGCCCCAAGCTTTAGGAGCAACAGATGAAGCATTTCATTCCTTTACCGCCAGTAACACCT  
AGTTGATTAATAGAATGATTCCAAGTCAAACCCCTATCAGCATCTTGATTAGGCTCTATTTCTAAATCTTTCATCTGATGGTTCAAACGAACAACATTCCCCCTTCATAACTATATCTTCAT  
ATTGGTTTACTTTTACTGATGATGTGCCACCAGCATCAGCTGCAGCATGGTAGACTTGCTAAGAGCTTTTCTCGAATTCATTTAAGATAGCTATGAAAATTCCAACAGAGGAAATGAGAG  
AGCCAACCAGAAGACAGAATACGGAGAGCTATGCAGTTCGGGCGACGCTGCGATATGGCATCCCAAACTTCACGTGATGCGACTGCTTCTGCAGGACAGAGTGA

>comp131128\_c0\_seq2

AGGATCCAACAACAGTTCCTTGTTCCTCAACAAAATAAGAATCAAATCCGGTAATGTAAGAACTTCATCTCCCTTAATCTGGCTCTAAATGTCAAATATATGGTAATTTTCCACCTC  
TACCTCTTAACTCCCTCTCATCTAGAGAGGCATTGTGTCCATATAACATAGGAAACAACCATCAATACATAGAAAGACAAATTGAAATGCATATATACACAGTGAATTTGAAATGCATATA

>comp131222\_c0\_seq1

TCATTTTCTCTATATAAAGTGCTTATTGGTCATTCATAGAATTCACAGATTCACAACCATTGATCAAGCAATGGCAACTAGCGCTACCACCAATGCATAGCCATGGTTACAGTGCTTGTGAT  
GGTCTCAAGTGGCGCCATTATTACTGTAAGTACTGAGTCTACTATTCCTTGCAGCGAAGTAGCAAATAAGCTTCTGAGCTGCGTCTGACTACGCACAGCACGGCGGTGAGCTGCCGGCGGCGTG  
TTGACGCGGCGTGAAGGAACTGAAAGCAGAGGCTATTACTGCAGAGGACCGACAACTGTCTGTAAGTGTATAAAATCACTCGCAAGCAGATCGGAGGGCTCAACCAAAACCTTCTG  
GCGACCATTCCTGGCAAGTGCAGGAGTGCAGCTTGGCTACCCTATCAGCTTCTCGGTCGACTGCTCCAAGGTGAAGTGTATGCTGAGGTGTTTCATGAGTCAGGCCTATTAGAAAAATAATA  
TCTTTACAGCTTTGAAGATGACGACTATTAATAATTTGCTTAGCCAAATTAATATGCAATAATTAATTATCATTAGTGCTATGTAAGAGAGCTGCTTAATCTGAACCGTTAATGGAATAAAT  
CCTTTGTATAATTAAGAAAAATTACAGCGCTCGAATTTAATTAATA

>comp131256\_c0\_seq1

AATCAAGGCATTCCATGAGAAAAGATTGTTCTTAGTCAATTCATCAAATACCTTACAAGTTGATTCTAAGCAACCTTTGGCATTACACCACAGAAGGGAGTTCTCTATGCCATCTGGTGAG

AGCATGAATGATGACATCCCCACACCTGCATTGTTAATTTAAAATATTTAAAGGAAGATTTAGAGAATTGAAATCTGCTGCAATTTTCTCACAGAAGCCATTGAACAAAGGTCTAATCCA  
AGGCATCAACTTTAGCAAATGGAATTCCTTCAGAATCATTTCCTTCACATTGTTATCAGCAGAAACATTTCTGATCCCTAGGATGACATGAACACC

>comp131314\_c0\_seq2

AAAACCTCCCACAGATTCTACGCAAACCTACCCGGCTTCGTCTCTCTCTGTGTTTCCCTTCTCTATAAAACCCGTCACTGTGGCCGGTTCCTGTTGAACAAATCCCCGTTTGCTTATATGA  
GGACGGCGAAGTTGGTGAAGAGGTACGTACAGCGGAGAGAGATTTCGGTTAAAATGGCTTCTTTGACTGCGCGCAGGGAAGGGAGCTTCAGCGCTACACCAGGACCCGGAGGGCGCC  
TCGTTGCCGGATGCATTCTTATAAGTTCAACGTGAACTGTTCAAGTAGTGATTGCTTAATTCATTGGAGGTTCCTGTTATCAGTTCTCAGAAGGGACATGGAATGATGTTTCCCAAGGGT  
GGTTGGAAAGCGATGAGACAATAAAACAAGCAGCTTCTAGAGAAGCTTTAGAGGAAGCTGGCGTTCAAGGAAATGTAGAGAACCAGCTTACAAGTTGTAAATGAGGGAGTAATGTTT  
CCACTGAATGTAAACAGATGAGCTTCTCAATGGCTGAGATGAGTGTGAGGAAGCGCAGCTGGGTCTCTGTGGCAGAGGCAATGGAAGGATGTGAGCATCAATGGATGAGAGAGGCTTT  
G

>comp131320\_c0\_seq2

AAAAATTATTCTGTGCGGATGCCGGAAGCTGTCCGGAGACCAATCAGAATGTTTCGTGTTCATCTTACTGTACCGTGGCATCTGGACGTAGAGCTGTGTCTGACATCCGCACAGAATAA  
TTTCTCATTACTTGCCGCAAATAAATCATAGAATATAAAAACTATTATAGAACTGAATCCCCATCAAGCCAAGCAATTTGAAATGTTATCTGAATATGGAAAGAACCAAATCTGAATCA  
CTTGAACCTCTCCTTCTGTCCCAACTCACAAACCAAACCAATCTATTCTTACAAAGATCATAAGACACCAACTTGCCCAAAACCCATAAGTAAACCACATCTCCTTCGGATGAA

>comp131416\_c0\_seq1

AATTTTTATTTTATTATTATATAACTTGATTCTACCAACTCCAAAACACAATAAAAAACAATCTAATAACTGCTCGTAGCACAAAATCATAAGAAAAGGAGCAGCTTTGGGAGACACTCACAT  
CGTAGATAACAGTGGAATATATGCCAGTCCTTATCCCGGAGCCAAAATCATTTCAAACGATACCCACACAGCTCATAACATCCAAAATCAAACAGGGATGGTCCAATGCAGCTGTAA  
ATTCTTCAACAGCCAAAGGGGACCTGCCACCTATCCCACCCACAGTCTCTTACCTTTCTGATTTGCTCTCGGCTATAGGTACACTACAGGAACTGGAAACCGTAAGTACGCATCAAAGA  
AAGCAGAATTGCAGGAGAACAACACAGCGAAAGCAAACAAAAGTAGAAAGAACCCAACACCTATGACCGGTGAGATTAAGAAGATAGCTTCGCCACTTTCCCTTCCCATCTC  
ATCACTCTACTTTTAGTTCAAAGAATTTAAACCTTGCAGAGAAATATCTTAATATAAAATACAGTTAAAATGGATCATCAGTCGAGACAAATATCAGCAATGTGCCTGTCAGTTCAACAAA  
CCCAGTGTTCATAACCACCACTCTAACATTAACCAAGAAGTGGTGGTGGTGGTGGTCCATATGCCATCAAATAGTGTCTCATTAGGGAAATCAAAGGACAAGACAGAGGATTACAA  
GCTTAACTATCCTTGCAGCAGAACTAAAATTATGGGGTATTGGAAACCTGATAGGGAACCAAGCAGATGAGCCTAACGCTTTCTTTTGGAGAAGTGCTAATAATATAAGGTATGGATGT  
GACTTATTTAACGTTAGAGATGGAGATTTAAGGGAAAAAAATGATTATGTAGTAGCTCTAGTAGAAGATAAAGATTAGAGAGAGTCGTCTTAGA

>comp131454\_c1\_seq1

GCAAGGGGAGGTTCGGCTTCAGGCTGGCCATGCGAGAGGGAGAGAAGAGAGCGGATCGGCTTTCCTGAAACCCACGAGGCAGAGGGAAATCGGGAGGGGGCTCGGCTT  
CTCTGCTCGCGGAACTGAGGGAGCTCGAGAGGGAGGCGTCCGGTTTCCTTTCGAGCAGAGGAGGAAAGGGATCGGGCTCGAGATCTCCCTGAAGAAAATGAGAGGGAGCGTCCGGT  
GCCTTGCAGTGAGGTCCATGGCTAGGGTTCCGCGAACCAGTCCGGCCAGAGGGGTCAGGGGATTTCCGTCTTGAAAAAAAAAAAAAAAAATCGGGAGAGAGTGTTCGGTTTCTGCCAAAATCC  
AGAGAGAGCCAGCGAATCGGGTCTCCTGGCAACGGTCAATACGGATT

>comp131673\_c0\_seq1

TGGCATCGAGTCGAGCGCAGCAGGGGTAAGTTCTCCGCGATTCCGACTGCCGGAGAATGTGAAGGTGGATCAGGCGAAAAGCGTCTTGAAGAATGGGGTGTCTACTGTTGTCTGTGCC  
CAAAGAGGAGGTGAAGAAGCCTTACATGAAGTCTATTGAGATTTCTTGAGAGGATAAAATAGAAGAATATGATTTGCATCTCAAATCGCCCGTGTCTTAAAGTTGCTTGTTTGTTGTTGG  
CGAAGATTTTTGATTGCTCTGCTTTGTGAAGTTTTTGTATGTTTGTATGTTGGCTTGGTTTGTGATATTTTTTTTTTTCTAAGGTAGTTTTTTTAGTACAATTTTTTATCAAAAAATTTGTATGCT



AAAATATTATTTTAAATAATATTGAAAAACGGTGAAGTGGTGAAATTGA

>comp131861\_c0\_seq1

TAATTTTGACATCATTAAGTACTAAAATGTTGATCAAATACGCTATAATCAAGGGGATCAATATGAGTCGTTTCGATGGATTGCTCCAAATTTACCCTGGATTTTCTCCATGTTTACGGGGCA  
TGCCACTCTTAAAATCTATAAATAGATCCCAAGCCATCTTCATCCACAACCTGACCAGGCCAATTATCACTTGCATTAAGCAGCCCTTAACTTCAACCTTCTCCCCATCAATCCCATG  
ACTTGACTCAACCCTTGCAACACCCAAATGGACCAAAAACCGTAAAAAGTTCGAGTCAACCCGAGCCCATTCATTCAATTGGTCTGCCTCATGTTCAATTGCCTAACTAATGAGTTTATAAA  
CACACATCGATTATTGATTATTTCCCTGTAAGCATGACCATTACATAATGTTGAACAGGTACAAAGTAGCTATTGTAATCTTTGTGTTGAACGAA

>comp132603\_c0\_seq1

AGAGAGAATGGGGGTTGCGCCACGAAGCCGCTGGTTTTGAAGGAGGAGACGGAGGCTCTTAAACCGGTAGAGGACGTTGCTGAACCCGTCAAGGCTGAGGAAGCCGGCTCCGGGGA  
GGAGCAGGAGGCGGCAAGTCAGAGGAGGCTGAAGGCCAAAATCACTCAGCAATTACTTCCAGGAGAAGGAGGCCGAGGAGGCCCGGTGCTGCGGGGAGGAGAATGTGAAAG  
CCGCGGCCGAAGAGGCAGAATCGAAGCCGGAAGTCTCTGAATCAATGTTGAAGATGCTCCTGCTGAAGAGAAGCAGCAGTAATGAGAGCTCGAGAAGGGAATGTTTTGCTTGTCT  
TTGATGTTTGTGGATTATAAGTGATCGAATGATCATTTGATGCTTTTGTTTTGAACGGTTGATTTTCGTTTCTTTGAATTCATTTTGTAAAGAACTAAATGATGTGATTCTTTATTTGGTCTGA  
ACAGCTTATTTGTTTGGTTGAGATGATCGGCAAGTACCGGTGGACATATATATTGATAAGAAAATTTGCTTGTGAGTATGATAAAAAGCGTTCTTCTGGCTTGAATTTGACGATATTATT  
TTCAGCTTTTGGACAAAATTTTAGGACAGATTTCTCTTAAACATTTTATAGGGGAATAGAATTTTTTTTTTTAATTTATTGAAGCCGGCAAAAATTTATGTGAATCATTTTTTTTCGGCTAAC  
TGTGGCGGTTTAAATAGCTGTATGTCTTTTCCCAACGGC

>comp132723\_c0\_seq1

ACGACCTCCTCACGAGAACATGCCTCTCGCAAAGGATCTTCTTCATCCCTCTCCAGAAGAGGAGAAGAGGAAACACAAGAAGAAGCGCCTGGTGCAGAGCCCCAATTCCTATTTTCATGG  
ATGTAAAATGCCCAGGATGCTATAAAATCACCACCGTCTTTAGCCATGCACAAACAGTAGTCTTGTGTGTTGGCTGCTCTACTGTCCTCTGCCAGCCTACAGGAGGAAAAGCGAGGCTTA  
CAGAAGGATGCTCTTTCAGACGGAAGCAGCACTAAAAGTACCCTGTATCAAGATGAACGGGAAACCATCCCAATAAAC

>comp132740\_c0\_seq1

TGCCCCGTCGCTCGGCAGTTCATCTCTGAAAACCTAGAGTCTGAAAACCTACCTCTCGATCCATCGTTGTTGTTTCGCGCAAAAAGCTCTGATTCCCGTTGCAGAGATGGAAGGAAAACCTT  
CAAAGGCCAGATCACGAATCGCTAACCCTATCGCCTCTCAGGCGAAAAGTCTGATGAGGCGGTGAAGCAGCAGAAGCCCGACTTTATTCTCGAAGAGTCGGGCAAGATGACAAGAAGG  
GGAAGGGGAAAATGGCGGTGGATGAGGAAGAGGGCGGTGATGCCCAGGAGAGTGATTCTAGCGATGATGGTCACGGAAGCGATGAAATCAGTGACAGTGACTGCACTGATGATCCTCT  
TACAGAGATGGATGTTGACAACATCATAACCCGGAAGGGTACGGCCGCGCATTGCAGTGAAGGCCGGGACTTATCGATTAGAGGGCGAGAGCGATGAGGATGATCATAACGGAT

>comp132749\_c0\_seq1

AAAATATAAAATTATAAATACACTAACGCAAAGAAATGAGTTCAAACCTCCACAATGCCAGTTTCCAAGATATTCAGTAATAAAACAATCAAACCTATCCCATGATAAGATAAAAAATA  
ATCCAGTATAAAGCCATAGAGTTGAAAATACAGATCATGTAGATACATTATATGAGAAGACTATTCCAGAAATATCCTCAAATCCTAAAAAATTACATAATTACCTCATTAAGGAGAAATGAA  
GGGTAGCAAATCATAGGCATTATCATTTTCAAACGAAATTACATGTCGTAGAATCCCATGATTCCATCTCCATATCCCAAATCAAAAACATTCAAAAATAAACATTATCATCACCATTAGCCCCT  
TGCCAAACTATTTAGTATTGGATTTATGAATCCTCATTCTACATTCTCCTGTTCAAGACTCATTAAGATGTTAAATTTTTTATAGGTAAACTCATTGTACGCAAATTCTATCCATATAACCTTTG  
GTTAATCCTTTTCTCATTAATCCTTTTTTTTATACAAAATATGATCTACCAATCTCATTGATGCATCTTCTATCATTTTGTGTGACATACAAATCACATAATCTCTCATATAATCATTTCACAAATC  
TAAATTTTGGGACATATACAACTTAAAATTTTTCATCTTTGCCTCGTTCAACTAAGCTATACTACACTCGATGCTTGAATCAATAATATCCTAAATATATTTCTTCTTTTACCCCTCAATCTTA  
ATTCCATAAGTTATAGCCACATTTAAATGCTTAATCACCAATAAAATAAATCCTAAACTTAAACCTATCACACACATCACTTAATCTTCTATCAATATCAACTGATAATTATATAAATTCTA

CACTCATTAATAATCTTGTATATACTAATAACAAACCCCTTTATAAGTAAATTACAGCCTCCATGATAGGTACAGGTTAATCGCATAGGCCCATTTGAAAGTGTGATGCAATAGAAAAATGCCCC  
ATTATACAACATCTGTTGCTGCCTATTAAGCTTGCACAAGGCAAATGTTAATTACTTAACAATTCCAGGAAACAATTCTCCAGGAGGACGCATGCCTGGTTTTACCATGCTATAGAGG  
CTTCAGCTACATTTACAAACCAGGCCTTACCACCAATTCTGCAACGACATGGATTATATCATTGGAACGCTCATTGGCTAACTTCGTCTTTTTAGCCGTCAGAAAGAGGAAGCAGACATC  
TATGATTTTCTGCTAAGCTTGCATGTTGATATTGTGATAGTCCAAGTGACCAACAGATAAAACAAATCAGCTCACAATACATC

>comp132856\_c0\_seq2

GAAAACCCGCTAATTCTGTTCCCTCCGCTCACTTCATTTCCCTCAAATATCTTCTCTTCTTTGGAGAAATTACCAGTAATCAAAACAATCCAATGTCTCTCTTCTTTTCATTTGTCGCCCAAG  
TCATTTTCTTTCTTCTTTCTTTTAACTTCCCTACAATTCCACCCACAGCGTCAAACCCCTTCCCTGTATTTTATTTTGTGCCCTAACAGATTTTGTCTTTTAGAGTTTTGCGTGGGTTTTT  
GCGGCTAAAACCTCCCTTTTTATTGATTTTGGAAAGAGAACATTGAATTGAGTTGATATTTCTTGTAGATTTAGGGATTACTTATTGGAGTGATTATTTGGAAAAGCTTGTGATCAAGAGATG  
AGCTTCTTTTCTTGTTTTTTCAATCGACGGCAGGAAGAAATCAAAGAAGCATAATGCAAGGAGGGTGCCATTACGGGCTCGATTAGTTCAGGTTTCACATCAGGAGAGCGAATCCCGTTCC  
AAGCAAGGAGTAGCAAAAACAGAGGGCTGTAGCTAAAACAGTGGCAGAGAAAAGAGACACGGGAAATGGAAACATTGCAGCACAAACATTCACATCCGTGAGCTCGCTGCGGCTACC  
AAAACTTTTCGACCAGAATGTCTTATTGGTGAAGGAGGATTTGGAAGAGTTTATAAGGGCCGACTTGAAAAAACTGGCCAGGTTGTAGCTATTAAGCAGCTAGATAGGAATGGCGTGCA  
AGGAAACAGAGAGTTCCTTGTGGAGGTCCTCATGCTCAGCCTGCTCCATCATGAGCACCTTGTCAACCTCATTGGATATTGTGCTGATGGAGAGCAAAGGCTTTTGGTTTATGAGTACATG  
GCTCTGGGTCTTTAGAAGACCATTTGCTTGGAGATATCACCTAATCAAACGCCCTTAGTTGGTTCACAAGAATGAAGATAGCATTGGGCGCAGCCAAAAGGCTCGAGTATTTGCATGAGA  
AAGCTACTCCTCTGTAATATACCGTGATCTCAAATCATCAAACATCTTACTCAATGAGGACTACATCCCAAAGCTCTCAGATTTTGGCCTTGCTAAGCTCAGTTCTCTTGATGAAAAGGCC  
AATTTATCATCGAGAGTGATGGGTACCTATGGTTATTGTGCACCAGAGTATGCCAGGACTGGTCAACTACTATTAAGTCAGATGTATATAGCTTTGGAGTGGTGCTCCTAGAGCTTATCAC  
AGGCAAAAGAGTCATTGACACAAGGAGGCCGATTAAGGAGCAAAATCTAGTTGCCCTTGGCACAACCCATATTCAAGGATCAAAGAGATATCCAGAGTTAGTGGATCCTCTTCTGGGAG  
AGAACTCCCATCAAGGGCCTAAACCAGGCAATGGCAGTTGCCGCTATGTGCCTCCAAGAGGATGCTTCAGTTCGTCCAGTGATGGCAGATGTAGTTGTAGCTCTATGCTACCTCAAG  
AATCACCATGCAGTGTGGTTGACGGGAGCTCCAACCATCGTCAGCCTCTCTTAGACTCACAAGAAGATGATATACCCAACATCCATGGAATACTTGTGATAAGACTACCGTGAATCGCCA  
ACACGCTGTTGCAGAGGCTATCCGGTGGGGCTCAAATAATTCAAGAAATGGTCAGAGGTCACGACGTGGAATTGGTCTTTGTAAGCTCTTTACATGGAAGAGAAGCTTAGTATACATCT  
CTTACAATTACATCTATGTTGATGCTAATATGAGGATTGATTTAAACAATAGGTAATGAGGTCATTGGAAAATGCAAGTGGTAAAAATATTGGATGATGGACTGTGGTTTTCTTACAAA  
CCACATGTATCTATTTTATTTTACTATTTATGCAAGAAGATGATTCTGATAATCAAAGAATATATGTAATAACATTTTCTGTGGCTGAGTGACATGCAATTTTTATGAGGAATATACACAATA  
TTACTAATTATGCATATATTGA

>comp132936\_c0\_seq1

ATTATTTCTCACACATATCACCTTTTTCAAACAAAACACTTTTCATTTCTCCAACAATCAAGCTTTACTGTACCATTACAACTACAAGTTCACTGTACCATTCTCCAACAATCAAGCTTCA  
CTGTACCCTTCGTTTTTTAAAACATACTCATGCTACTATACTAAAGAAAACATCGTTGCAACATAACAAGTTCCCATAAACCCCTTACAACAGTAATAATGAGAAAAGAAAT

>comp133048\_c0\_seq2

ACACTATCTCAATCAACCAAAAAGAGATGAATCACTCAAAAAGAATACAAGCTTCTAAAGAACAATTAATAAAAAATCCTGCTTCCATTATGCCCCATGCAAAAATGCAAGCATCACATAT  
AGCTCTTGGGTGTAATTGGGAGAAAGATAATTATTATTCAGGCAGTTGTAAGAATTATCCAGCTCCCTTCCATTATACCCCATGCATATAATATCCTATAAGTTTGATGTATTGAATGTTGGAC  
TAATATCCATCCTACTAGACACTTCAACTTGATATGTAGTTAGACCAAATTTTTTCAAGGCATGACAAACCCATCTTCTGTTGCATGAGTTGGGATATGTCAATACAGGGAATCTCTCCTAG  
CATAAATATGCCATTATCATGTTACCTTCCCAGTGCCCATGTCGGCAATGTGTGTTGATGTCTGTAGGTGTTGTTTCATATGATTTTTTAAAGAGTCCTCATTGTTCTATTCATCTGTAATATTGC  
TTACTAGCTTCTCCTCTTCAAACCTCTTGTGAAATTTGGAATTTGGTGCATAATCTATGCTGTGTCATAGGTTTCTTCCAGAAACTATTTCAAGGACAACCTTAAGTTGACCGACATTTCCAG

AAGTTGTA CTGTTGTAGTAACCTTGGCTTGGGACATGCCCGTCTCTCATTATCTCGACTCCACATAGCTTTCAACA

>comp133216\_c0\_seq1

CCTCTTAACAAACATAACTAAAATAAACACCAGTAGGACACA ACTATAAGAGAGAATTTGAACAAGCATCTTTCTTGACTTAATTA AACTATATACTTTTCCAAACATAAATGAGAATGATC  
TTATAGACTGATTATCACATTATGATCTTATATCCGTTAATTGGGCCAAATTCTAAGTACAGACTCAAATTATCTCACATTTTCAAGCCTTAGCATATGATTCCCGGTTTCAGGAAAGTGTCA  
AGATCTACATACAAAACATAAATCTCTAGATTTGTGTGATCTAGGAATGCACACCTGTCAAGTTTCTTAGATGGTGTGCAATGGTGCCAATAAGAAGAGGTGTTTCGATCTAGGGGTTGAGG  
CAAACAATTTGAAGATCTCTCTTGTTTTTTCATTGAGTAGATAAAGTGAAC TTTTGATGAAAAAATCAAGGAAATAATATTTATATAAAGGATATAGGAGAATGTATTATGAGTGATTT  
GGGGCTTCAAAGGATTTGGGAAGGTGAATTTCAATGAATATCAAGAGCAATAGTGAGGGTGCAGGGATTTGGGGTCTATTTGAGTGGTTCGATTTTGTGAGGAGCTGAAGGGAAAGTTA  
AGTTTGTAGTTATGAGGGGTGTGAGTACACTCTGGTAAAGCTAAGGATGTCAGGACTAAGAATTTGAAGTTGTTTAGCATGATTATATGGAGATTTTGGCGTGTAAACATGAAAAGAAGGTTG  
GTTGGCTAAGTTTTTGTAGCATAACTAAGTGTATAAGTGTGAGAACTTAGAAAAGAAATCTTCGTAACACTAAAATG

>comp133273\_c0\_seq2

CATTGGGGATCAGTTCAGTCTGGGTATTCCAAATTTAAACTCTCCCAATGAGGTGGCTTCTCATCTCCACTAACCTTCTTTCTCAGTCGACCTCTGATGGGAAAGGTTATGTTTCTCCTA  
ATAGGTTTGATTTATTAATGTTGAGGATGATAACAAGGACTCTACCATTATCTCGGTGGTAAATTTAGAAGGGGATAATATTTGGCTGCTGATTCTGGGCAGAATTTGAATGTTAAAGTTC  
ATTCCAGTAAACATACTGAGTCTTCTACAGTCAAGAAAAC TGTAAAGGGGAAGCAGGGGAAAAGCCCCAATCTAAACATAAATCCTGATGTCTATTCCACCTATGGCTGCGTGGAATGT  
GCGGGGTTTTAATCGCCCTGACAAAGTGC TTTGTTGTAAGCGTCTCATTGAGTCATTCAAACCTTGACTTAGT TTTGTATATTGGAAAACAGGATTCATCAACAATCTCTTGCGGACCCGTTCT  
TTGAAAGCACTCATTCTCTATTTTCTAATGAGTCCAGCTGCAATAATTTCTCCATTCTGCCTCGGGGAGGATTTGGGTGAAGTGGAAATCTTTCTAAATTGTCTTTTATCCCTTCAGTCATTA  
ATTCTCAACTTATCTCTGGTTTGGTTTCTGTCTAATCATCTCTCTTTTCAGCTTTCTGTTGTGTATGCCTCTAACAGTATGACTGAACGCAAGACTCTGTGGA ACTCTCTCTCTCTGGC  
TGCTCCAGAGAGCAATTTCCCTGGGTCAATTATTGGTGATTTCAATTGTTGCAGATTTGCAACAGAAAAGCTTGGTGGATCCCCTCTCACTCTTTCTGCCATGAAAGACTTTAATGATTTCA  
TTTTCCATAATGGGCTGCTGGACCTTAACTCTGTTGGGGGAAAATCACTTGGTATAATCAACAGTTAGACAATCCTATTACATTAAGTTGGATAGAGTTCTTGTGAATGTTGTTGGGGG  
AATGTCTTCTCTGATTCTTTCTGCTCCATTCAAAGCCCTTCTGTTCCGACCCTGCCCTGTTATCTTACATCCTGGGAATGCTACGCAGGTTTTTACCGATTTCTATTCAAAAATTATTGG  
ACTAAGATTGATTCTTACTGGTCAATATTATTGGAGGTATTCTCTAGGCCTTGTTCAGGGAACCCCTCTCTCATCTCTGTCACTCTCTTAGGATGTTGAAGAGTGGTATCAAAAAGGAATAT  
TGGGCATCTTCTAATAGTGGTACAAGACACCTTGCTTATTTACACAATAAACAAAGTACATTGCTGGAACAAATGCAACTAGATCACTGTAATGCTGACACAAACATGGCCTACAAAAATT  
GCAACTCTGAGCTAGCTAAATCAACTCACTGCATGCTTCTTGGATTATTCAGAGAGCTAAGGTTAAATGGCTCAAATTTGGGGAAGATGATCTGAAATTTTTATATTCCAATATCAATATTC  
GCCACA ACTGCAACCATATTAAGGGTATTGATGTTAATGGGGTTTTACACACTTCCAGTCAGAGCATTCTAATGCTTTTATTGATCATTTTCAAAGATTATTCAATACCCCTCAACCTCCTAT  
GCATTCCAGCCTTCTACTGGAAACACCATTCCCTCCGGGATGCTGGATTGCTTATTGCCCGGTTCTCGGTTGAGGAAATTAAGCAGGTTGTCTTCTCTTCCACCTCCAATGCTTCCCCGG  
GACCTGATGGCTTCACTTTTGAATTTTATAAGGCTACTTGGCACATTCTTGGCAACAAAATTTGCTCTGCTGTTCAATCCTTTTTTCGCCACTTCTTTTATGCCTAAACATGCTAAAATACTG  
CTATTGCTTTGATTCCAAAACACCCCATGCTTCCACTGTTAGTGACTTCCGAG

>comp133298\_c0\_seq1

CATATGTTACATTCATAAGAAATGATTGGTTTCAAAC TTTATAGGTAGGTGGAAATGCTCGTAAAAACATATTTGGGCAATAATAACATGAAATTATTTATTAATCATATATTATGATGAAAAT  
CTTATCCTTAAAGTGGATTGAGACTTGAAGGTTTACTATTAGAGAGATACACTTTGGAGAACGATGGTTTCGATGGTTACACCTGGCCCCAATCCCAAAGAACACCCCACTCAAGACCC  
TCACCGGTTGTAGTGTTCCTTCATCTATAGAC TTTTACGCATCTCATCAAGAACAAAATGCACACATACACCCATTAATTTCCATACTCAGCAAGCACATGCCTTGAATCATCAACTT  
CTCTGGTTTTAGTCCAACCCTCTCTTCTAATTGGTCTAAAATGGCTCGACCACCTGGATGAACCACCCAAAAGATAGAGTTCCAATTTGAAATACCAAGAGGGGTGAAGGCCTCTCTAA

GATCTTTCCAATATTATTGGAAAGGAGGTTCCGGGACATCTTTATGGATTGTGGCTTTGATACCTCCTTCACTTAAATGGCCTGTAATAGCATGTGATGAGTTCGGCAAAATGACTTGAGATG  
CAGATGTTATGACAAAGCTTGCCCGCTACCAATAAGTCTCATTGGGGTTGACACCAACTATAAGAGCAGAGGCACCATCAGCAAATAGGGCTTGGGTAATAAGGTCTTCTTGGTGCTCCTC  
AGATGGTCCACGGAACAACATGGTGGTGGTCTCTGCAGAAAACAAGAACACGTGCACCTTTATGGCTTTCAGCAAGACACTTTGCAAGACGAAAGCATGGTTCGCCAGCGAAACAC  
CCATGCTGAAGGATCACAACACGTTCAATATTTGGGCTGAGGCCAAGGGTTTGTAAAGAGGTGGTAGTCTCCACAAGGTAGGCCAGGGTCACTCAAGGTGGAGAAGATGAGGTGAGTGAT  
ACAAGACTTAGGCTGCCCCCATTCCTGAATTGCCTTGGTGGCTGCCTCCACGGCTAACTTTTGTATCTCCTTCGCATAAATTTCAAGCCTTGTGTTTATAGAGTTTTCCATAAACTTAGAAA  
GGCAAGGGTTTTTTGTAATAAGCTCCTCATTCAAATGAAATGTGCTTTCTAATTGAAGTTTTATCAGAAATGCGTTGGAATTTCTTCTTGAGATCGATCAAGTGCTGGCTGTTGGTGACA  
CGAAAGAAATAGTCCGGGTAAGTGCTCTGTTCTAGGAAGTTTTCGGGGGTTGCCTACCAATGGCCAATATGGAGGCAGAGCCGTCTGCTAGGAAGTTTTCGGGGGTTGCCATCTTGGTGG  
ATTCAGAACCCAGCAATGTCAGAACCTTAGGCTCTACAACCTCAAATTTTTGTTGAGTAAATAGAGCTTGGCTTGGCTGCTCTACTAGGCTGATGATTAATTTATATTCTCAGGAGGAGAAA  
AGAGGGCTTGATATTGTTAGTTGTACTTTGTTTTGCTATACAAATCTGCCATAGACATTAATAATTTGTCTTCTACTCTTATATCTTCGCAATACTCTGAATGGACTCTGTACAGTTCCACCGA  
TTAT

>comp133298\_c0\_seq2

TTCTAATTGAAGTTTTATCACCTACGGATGGAGTTCAATGAATTTATTAATATTTTCATCCCATTATGATAAGATGTTGCAAATCAAAGAGAAGTATTACACTATAATGGAGATTAGATATCGA  
TGACTCAGAAATGCGTTGGAATTTCTTCTTGAGATCGATCAAGTGCTGGCTGTTGGTGACACGAAAGAAATAGTCCGGGTAAGTGCTCTGTTCTAGGAAGTTTTCGGGGGTTGCCTACCA  
ATGGCCAATATGGAGGCAGAGCCGTCTGCTAGGAAGTTTTCGGGGGTTGCCATCTTGGTGGATTGAGAACCCAGCAATGTCAGAACCTTAGGCTCTACAACCTCAAATTTTTGTTGAGTA  
AATAGAGCTTGGCTTGTCTCTACTAGGCTGATGATTAATTTATATTCTCAGGAGGAGAAAAGAGGGCTTGATATTGTTAGTTGTACTTTGTTTTGCTATACAAATCTGCCATAGACATTA  
AATTTGTCTTCTACTCTTATATCTTCGCAATACTCTGAATGGACTCTGTACAGTTCCACCGATTAT

>comp133517\_c0\_seq1

TCCCACTCTTTTTTAAAAAAATAAATATATAATAACAAACATATATATATATATAGTATACTGGCAAGAAAAACAACAAATAAAAAATAAATATATATTTTCATGGCTTATATGATTACATGAGCT  
GGCAATTTCTATCTCCATCATCACAATCACTTTAAACTGAATGATAAATATGCTATAGCTCAGCTAGCCAACAAAAAGCATGAGAGATATATATTTTTGGCATGGCATGGCATGGATTGTGAC  
AAGTAACGTTCAATGGTCTTTTGAATCATTAGAACACTGAAGAAATTTTCATATGAAGATATATATAAAATGGAACAAGCAGACAAACGACTTCTCCCATTTTTTGGTATAAAATATCGATC  
AAATGACTCACACTGCAGCCACTTGTTCATCATTTTACTCCCAACTGAAGCAAAAATACTCACCCAATTA

>comp133818\_c0\_seq2

GACTTCTACCGAACAGTCCACGTTCCACCTCCATTCTTCTTTGTTTCCTTATGCGTCTTTAGACGAAAATAAAGTCTCAAATCCATATCAGTTACAGACTTTGAGCCCAGGGGCATAACC  
TCGACCGATCTCTCCTTCCCATTTCCCATCCAGAGCTCTCAAGGCATAAATCATGGCTGAAGGAGAGGATATTCAGCCACTCGTCTGCGATAACGGGACTGGAATGGTCAAGGCTGGA  
TTT

>comp133870\_c0\_seq1

CAAAGTCAGTACTAGTTATGACATCAAACATATGAACTAACATAGTAAAAGTAGATGTTCTTGTAATTAAGGAAACTACGTAGAAATAAACATGAAGTGGATAGATTCTTCTCAAATAAA  
ACATCACAACAAGTAATTAGGAATTATAGAAAGGTTTCAATGTTTTGAAATTAAGAAAGAACTTAAGTAGTTGGCTAAGTAGTTCAGTTCTGACGCTCCATTTGCTTGAAAACATC  
AAAGGCTTCAACTGGAAATCCATTACCTCTTTCATGTTGAAACATGATAGATTTTCATGGCTTCGTTGCTGTGTCAGATGTTGAGTTCAGAGGGTTTACACCACGAGGATCACACTTAGCCCAA  
TTCTTTGCTGCTGTGCTGAAGGCTTCTCTGTGTGGGATGTCAGGCTTTGCTGCTTTAATTCGTTGTATCTCATCCCTCATGAAGCGATTATAAGCTGATGGTAAGCGATGCTTCTTTCTGGA  
GGTTTGACAACAAAAGGTGCTTTCCGGTGCTTGGCTCCATAGAAGTTGATGAAGATGCTGCTGAAAGCTGTCCCTTCTACAATCATTACATGGATCCTGAAATCCTAACTGGTGATCAGAAT

AATGAGCTTGAAGCAAGCGCCTAGGGTTTAGGAAGGAGAGATGGTTACAGTGCCCACACTTTACAGTGACAGTATCCATTAACCTCTTGCATGGAACCTCCAACCGCAAGAACAGTGCTG  
CAATATGCACAGCGAACATAGCAGAGATGCTCCCTTGAAGAAACCAGATCCATAAGAAGAGGAAGAAGGAGGAGAAGAGGGAAAGAAGGAGAAGAAGAGGAAAGAGATAGAGGGAG  
GAGGAACGAATGAGTGGAAGAAATGAACGTTTCTATTCTAGCAATACTGCCCCCGGAGGCCTACTCATGAACGTACGGCCATGGAGTAGAAATTATATAACACAAAAA

>comp133938\_c0\_seq1

TAGTTTATAATATAACCAAGATTTATATATATAATACCATATATTATTAATATTTTGATTAAGATAGCAACCATATTTAAGATAGAAAATACATTCCTTATATATATAAGAGCATAGAGCGCTTTATTT  
AAGCTAGTAAAGTAAATAGGTAATCGGTGGTGCTTTGAAAATGAGGTTTGTAGAATACGTGCAATTGTATTCAACTACGACATAATGAGACGCTTTATCTTCATTGAAGTTGCGGAGTAAG  
CAATATCCTCGAGCAGAGCGGAGCAATCCTGTCCCACCAACAATAGGCAATTCACGCACCTTTAATGACAACCTCATTGCGTCCCAAGACTGAGAGCGTGCATCCTCTGAATTCCTTGG  
GCAAATACAAAGGTCATTGCCATGAGGGAGGCAATCTTGTTTTGGTCTGACAATATACGTGCCTTGGGACCGACCTAATAAGTGAGACGATTCTTTGGCCCGATGGTTATCGGATCGT  
CGAATACAATCACGAGTCCGAAGCCGGTGAAGAGGCATTAGCTATGGGGTTTCGAGCGACTGACACAGCCGTGGGATTTGGCTCGCCAACTTGTTGTGCCAGAAGAAATGAATTTTG  
ATATGCCTCTCCTTAATTGGAAAGGTAGCGTAGTTGTTGGAGGTTTGGGTGTGGCGGTGGTGGAAAGTGTGGGAGAGGAGGGGAAGGAGTAGGATGATCAGTAGTAGTATTTTCATTGT

>comp134180\_c0\_seq1

TAAAGATAAATTTTCATTGCCACAAATTTATGATGATAAGATATCTTAACAATAAGATTTTCAACAGAAATCTAGATTTCTTTAAATCCAACCTATACATTTACATCACGATTAACCCAATGCG  
ATTTTTTATAGCAAAAAATAATATATGTTTTTATAATGTACTGAATAAATATGAGTCAAATTTGTAGAAAATAAAATAATAACCTAAAATCATAGCAAAAACCGAGAACTTCATACAGGTG  
CAAATTCATATTAATCACCCGCGCATCCAGGCTCGCTATCCGCCTGTACGCGCCTGTGAAAGTGCATGGTAGTCCCCGCCATTGACTGCTGCGACCCAAGCCTGGCGGCCTGGTCTGA  
CGACGGTGACCTCCACGGTGGCGTCGCTAATGCAAGCCGCCGCCGGCTGCGAGCTTATGCAACGCACAACATACCGACGGCTGCACGCCCCACCGTTGTTCCATATCCCGGAGCCGGCG  
GCAGCTATGGTGCCGTCGGAGGGGAATTGCGACCGGTGCTTGCCGAAGCACCTTGTGGAATGTACGGTGGGCTGTAAGAGGAGGCTGTTCCGACGTGACGCTTGGAGAGGGGGAGGA  
GGAAGGAAAAGAGGAGGAGGAGGAAGGGAGGGAGATGGCTCATGAAGAAGATAGGGGAGAGATTTGCTGATTTGGTATGTTCTACAGCTTTTATTTTTCTTTAATTATTGGAGATTTTT  
GTGGTGTAAATAGCTGCGACTCGCCGACTAATTTAATGGGTCAAATGAAGAAAATATTAATACGCCGTTAGATGCTAAATAAAAATTTATTGGCTTCTATAGTAAAATATCTAACGAC  
GAAGTTGTAACGAAGCGGACGGCTATATCCAATGAATTTTTCTTCAATTATGCATATTTTATAAATTTGTATTTTTCTTTTATAAAA

>comp134220\_c0\_seq2

TTTTTTTTTTAAAACCAGAACATTTATTGCGTGACTTTGCTGAAAATCCTTAAGATGAACTGGATGCCCAACAGCTGCCCTCTTGGGTTTAGGTGTTGTTCCCTTACGGAATCCATGCCTG  
AATCTGCGATATACAATTTTTAGGTGCCTCATTGACCAGTCCCGGTGGTGTTCGTCTTTTAGCTTTCGCACTCCAGTTATACTTCCTCTTTCGCTTGGCAGGGTAGCCACACTTGCCACA  
GGTCGACTTCTGGAGATGGTAGGCCTTAGAGCCACAGCGGCGGCACAACGTGTGCGTCTTATTCCGACGCTTTCCAACGATGACGTTCCCTTCGTCATCTCGCCTCCGCCACCGTGACC  
AA

>comp134281\_c0\_seq3

GAAGGACAATTTATCAATTAACCTTGATAAAAAAAAAATCTATTACAAGATTTTGCAATTTGCTCATAAACTTCCTCATAACGTAAATACATAGGATTTCTATATATCGAGCAAACAAATCACAA  
AAGTAAGATATCATATTTCTGGCAATCACTATCTATTACAGATTTTGAATAGTAATAATAGTTCCTCATCAAGGCAAGCAAGCATTGCATTATTCTCTATAATTGCAGAGCCATTCAGATGTC  
AAAAGAATACCATAAAAATCTAAACCTAAACATTCTCTTTGCTTACAGCAGCAAAATCAGCTTTAACATCTGCTGGTATTGCATGTTCAATAGCCACAGATTGATCTATGGGAATGTGTTT  
CTCAGCCATTTCCAAATCCAAATTTGAATTTGTAATATTCTCTACTTCAATATCTTGGTTTGTATTCTGTTCTAATCTGTCTGTTCTTACATCCATGTAGATGAAATATAAAAATTTTGTGCAA  
CTCCGAATAAAAATCCCAAGAACATTTGGTAACGCTACAAAGAAATCCCTTAGAAGAAGCCATAAAAGAACCATGCAATTGCACTAAGAGTGAGAAAGAGGGAGAGTGAAAATGGCATA  
TATTCCACGCTTTTTGTTCTTATCACCAGCCTCATGATGCTTAAAGGAGCAACAAACACTGCGACGGCAAAGGAAGCACAAATCCAACCAGTGATTTCCGGAACGCTTTCTCTCATTAGAA

AAACCAAGTGTGATGAGCAAGACCGAACCAACAGGCCAACGTTGAAGAAGAATATCATCTTGACGGTTGAAAGCCTTATTTTCTTGGAAGCATAGAAAAGGTAAATGGCTATGTAGAC  
AGATTCAAGGGCACATGTGCATGTGTTGATGGTGAGCAGGAGCACGTTATGGTTAAGAAAGGCATAGTAGAGCCACAACATTGCACTGGACAAAGCAACCACATATGGCGTTGATTGGA  
AGGAACCAGTAGACTTCTTCCGGTACACCTTATAGAATGTAGTCATTGGCGTTAAGGCCACCAAGAATGATAAAATATTTCCGAGAAGGCCAGCACCAAAAGCCAAAGGGTTCTCAATGC  
TGATGGACACCATCTTTATTTATGAGAGGTTCCCTCAGTTCTACTAAGAAATTATCTCTAAG

>comp134312\_c0\_seq3

CAAAAACAAAGAACGACAATGCTAGAAGACAAAAAAGAGATGACATTGGGTACATAAGCAGAAGAGCTAAGATTCAAATTTGATGATTCTTAGAATGAAATTGGTGGTAACCAAGAAA  
GACGACAATGTTGATAAGATTAATACTAAAGTTGTGCGAGAATAACCAACTCTGATACTATGTTAAAAATCATAAAGGACTACACTTTGCTTGATTAATCCTAATGCTAGTGTAATA

>comp134389\_c0\_seq1

AATTATTCTGTGCGGATAACCAGACATAATTTTATGTACGGATGCCACGGTACAGAACGGTACCGAGTGGTGCTGAGCAGTACCGAGCTGCGTTACAGTAAAAGGGTGACATGATGCATTTT  
TATTGGTCTACGGATGGCGTTCGGTGTCCATACATAATAATTTTTATTAGCTTGACAAGTTAAATGTGAAAGAAGGTGCTTGGCCTCGCCACAAACAGAAGAAGCCTTCTTTTLAGAATGA  
AGTACAGAATGGAGCATAACGAAGAGGATTAATAATAACAATTAGAGAGCAACACAGTAATAAAGTAGGGAAATGAAAGAAAAACCAGAGTAGCATATATTCATCTAAAGAAAACGGTA  
AAAGGAACCAGTGGAGCTCAGCTGTTAAATTAAGAAAAAGAACACGAAAAGAAAGCTGTTTATTTTCTTATGCTGCCAACTTTACAAGGAAGAATAAAGAAAGAGAATACAAGG  
ACAGGGAATAAAAGCTTCCAAACTTAGCAGAGCATAGTAGATTTTAGATATTTAGAATTATCATCAAACCGTATTTCTTTTTGGAGTTTTGAGCAAATTAGCCAAAATTCTCTACAAAGA  
GATCAAGGTGAGCTGTGTGTCATCTAACAGTATTAATAATCTCTTATGGAGTTCGTTTGGGGCGGCTTTCTTAAT

>comp134506\_c0\_seq1

TTAATAAATGCTCAATCCAATTACCCTATACAATTATCCCAATCAATCAACCGGCAATGGATGGTGCTACCCCGTCATAATAATCGGCGCTGGGCCGGCCGGCCTCGCCACCGCCGCTGC  
CTCTCCGTCCGATCCATCCCCTACCTCATCTCGAACGGGAGGACTGCATCGCTTCTTATGGCGCCACCGCACGTACAGCCGCTGAAACTCCACCTCGACAAACGCTTCTGCCAACTC  
CCTCACATGCCTCCCCCGCCGACTCACCGACGTACATGCCAGGGACAGGTTTATTAGGTACCTGGACGACTACGCGGCTAAGTTCGACGTCGTGCCGGAGTTCGGGTCCGACGTGGA  
GTCGGCGGTTTTTCAGGGAAGGGGATGGGAAGTGGGTGGTGAAGGTGAGGAGGGTGGAGAATGGAGAGGAGAGAGAGTACGTGGGAAGATATTTGGTTGCTGCCACGGGGGAGAACG  
CGGAGCCAAACGTGCCGAAGATTGAAGGATTGAAGGTTTTACTGGAGAGTTGATTCAATTCGGCGGATTATAAGAACGGGACTAAGTACGAAGGTAAGAGAGTTCTGGTTGTTGGTAGC  
GGGAATTCGGGCATGGAGATAGCTTACGATCTTTCCAGCCACGGCGCCGTCACCTCCATTTGTGTGAGAGGCGAGGTTTCAAGGTGATGAGCAAAGAGATGATTAATTTTGAATGCATCTT  
TTGAAGTACAATATGCCACTGACTATTGTTGATTGTTTTTAATTTTGCTTAGCAACATCAAGTATGGAGATTTATCCAAGTTTGGGATTAATAAAACCAAAGGATGGGCCATTTTCTCAA  
GGCCACTGTGGGAAGATCTCCTGTTATAGATGTCGGGACCAATTCACAAAATCAAGAAAGGTGAAATTCAGGTTTTACCAGCACTTTCATTTATAGAAGGCGATTGGGTGAAATTCACCAA  
CGGAGAATCGCACTACTTTGATACAATATTGTTTGGCCACCGGATATAAAAGCTTAGCAAACAATGGCTTAAGGTGATATTTGTTTATATATCTACACACTATATGTGGTTGAAAATTAGGA  
GTGTCAACATTTGACACAATACGAAAATTCGATTTGAATCCGATCCGAAAATTTGGATTAGATCCAACCAATTTCAAACGGGTCATATTTGAATTTCTCATATTTGACCTGCTTGAAAA  
CGGGTCCGATTGGAGTTGACCCGAAAACCTTTTAAACGAGCTGACCACGCTGCCAAGCATGCTCGCTCGTCACGTCCGAGCTACCCACCCG

>comp134506\_c0\_seq3

TTAATAAATGCTCAATCCAATTACCCTATACAATTATCCCAATCAATCAACCGGCAATGGATGGTGCTACCCCGTCATAATAATCGGCGCTGGGCCGGCCGGCCTCGCCACCGCCGCTGC  
CTCTCCGTCCGATCCATCCCCTACCTCATCTCGAACGGGAGGACTGCATCGCTTCTTATGGCGCCACCGCACGTACAGCCGCTGAAACTCCACCTCGACAAACGCTTCTGCCAACTC  
CCTCACATGCCTCCCCCGCCGACTCACCGACGTACATGCCAGGGACAGGTTTATTAGGTACCTGGACGACTACGCGGCTAAGTTCGACGTCGTGCCGGAGTTCGGGTCCGACGTGGA  
GTCGGCGGTTTTTCAGGGAAGGGGATGGGAAGTGGGTGGTGAAGGTGAGGAGGGTGGAGAATGGAGAGGAGAGAGAGTACGTGGGAAGATATTTGGTTGCTGCCACGGGGGAGAACG

CGGAGCCAAACGTGCCGAAGATTGAAGGGATTGAAGGTTTTACTGGAGAGTTGATTTCATTTCGGCGGATTATAAGAACGGGACTAAGTACGAAGGTAAGAGAGTTCTGGTTGTTGGTAGC  
GGGAATTCGGGCATGGAGATAGCTTACGATCTTTCCAGCCACGGCGCCGTACCTCCATTTGTGTGAGAGGCGAGGTTTCAGCAACATCAAGTATGGAGATTTATCCAAGTTTGGGATTAA  
AAAACCAAAGGATGGGCCATTTTTCTCAAGGCCACTGTGGGAAGATCTCCTGTTATAGATGTCGGGACCATTACAAAATCAAGAAAGGTGAAATTCAGGTTTTACCAGCACTTTCATT  
TATAGAAGGCGATTGGGTGAAATCACCAACGGAGAATCGCACTACTTTGATACAATATTGTTTGCCACCGGATATAAAAAGCTTAGCAAAACAAATGGCTTAAGGTGATATTTTGTATATAT  
CTACACACTATATGTGGTTGAAAATTAGGAGTGTCAACATTTGACACAATACGAAAATTCGATTTGAATCCGATCCGAAAATTTTGGATTAGATCCAACCCAATTTCAAAAACGGGTGCATATT  
TGAATTCATATTTGACCTGCTTGAAAAACGGGTCCGATTGGAGTTGACCCGAAAACCCTTTTAAAACGAGCTGACCACGCTGCCAAGCATGCTCGCTCGTCACGTCCGAGCTACCCA  
CCCG

>comp134661\_c0\_seq3

AATTTGAATTTCAAATACTTTCCTAAATTAAGAAAGCTAAATTAGGAAAGTCATGCAAATCTGGTTTTAACTTCTTAAAATCTGAAATTGATTTCCTAATTGAGATTAGTTAATTTAGGAAAT  
GTCCCCTATTCAAATTCATTTTAAATTTGAAACAGAGATCTTCAAATCTCCTTTCTTAATTTAAATATACAATTTTAGTAACCCCTTTTAAAGCACCCAATCAAATCCCCATCAAGGACCGG  
CCCCTTTTCCCTCTCTAACAATTGGATGGGTTCAAATTCAAATTAACCTTCCCTAATTAACCACCAAGCTAGCTCTTCTACAGCTGCTGTGCCCTCTCTCCCTCCCATACTAAATAAGAT  
ACTCCACTAAGTTTCCAACCTCAGCCCCACTCTAACCCCATCCACCCTAGTCGTCACCCTCAATTTCCCTCTATTTTCTGAAGCTCCTACTTGCTATCAAGGGAATTTTGGCTAGGAAAAGG  
GGCTGGCCTGTTGTTTGAACCCCCACACTGCTGTCCAGAGCCTCCATTTGGAAGAATTTTCTGCTGTCCAGGAAATTTCCCGTCCAGATTTTGTATCCAGAAAATTCAGCCAAGGTCTT  
GCTGTCCAGAAATTTCCACCCAGGACCTTTGCTGTCCAGCCCTCCTAACGCTAGGAACTGCTGTCTACAAAACCAGAGCTGCCCTCTTGCTGTCCAATGTCCCCAGAAGCTACCGTT  
TTCGTCCAAAATTTCTGGAATTTGTTGTTCCAGATATTCTACTTGTGTTCCAAGGGTTCGAGAAGGAATGTGTTGCTATCCAGACGTCCAAGGAGCCACCACTGGCTGTCTACTTCTCTC  
AAGCCCTCA

>comp134723\_c0\_seq2

GCTTTATTTGATCTCAACAAAGAAGCATCTATATTAACTTTTAATTAATTCAGGAGGAGAAGGGTGCCAATAATTGTA AAAACAGCTGAGAAAGCTGATTAACACCCCAATTTTTCGATATGA  
GATTATAGCGATATGAAGTAACAACAAAGCTAATATTTTAGTTATTTATAAGCATTATGCTGTTTTTTTTGTTTGTAAATATGGGATGCAGGTGTGGCATTAGGAGGTGGATGGCAAGCTCTTGT  
GGCTTATATAAACTTGGCTTGCTATTATGTCTTTGGCCTTCCCTTTGGGATTCTACTGGGGTATGGATTGCAGTGGGGAGTTCAGGGTATATGGGTTGGAATGCTTTTGGGAACTGCACTGC  
AGACTTTGATTCTGTGCTATGTGCTTTGGAAGACCAACTGGAATGATGAGGCTGCACAGGCATGCGAACGAGTGAGATTGTGGGGTGGAGAACAAAACTTATAGAGATGGGAAAAGTGA  
GCTTCTTTTATTGGAATTTAATTTGTTTTTTTAGGTGGATTTTGTGAATGTTTGGTGGGTGGAAAAGTAAAAATCTACCAAGAAAGAAATAGCATAAAGATTTTTTCTTTTTCTTTTTGGTTTT  
AGGAGATATGAGCCTCTGCATAAAAACATATGCAATTTTTTTTTTTTTTAAATGGCATTCAATCCATCATTCTCTAAGTCAAATCTGTGGGGTAATCCTCCTTCGGCCTTTTCTCTATAATGA  
TTTTTTTGATGGTAATGGTTACTCATCTTCCCCTAAATCTAATTTTTTTCATGATGTGTTTGTGTC

>comp134727\_c0\_seq1

GCTTTTTCGAGCATTTTCTTACCCTTACCCAAGTGACAATGAAAAGCTTTTCTTGGCTTCGCAAACAGGCTTGACAAGAAACCAAATTTTTCGAATTTGGTTCATAAATGCTCGTGTTCGGTTA  
TGGAACCCATGATAGAAGAGATGTACAGAGAAGAGTTTGCAGAGGACCAAGGAGACTCCAATAGTTCTCCTTAATAGTTGACATGGCAATGCTATCAGTAGCAAGTAGTGGCACAAAC  
TAAATGTTTACAAAATTGGGTAGCTGAGAGTTTGGGGATGTGCTGAATGTAGTTTTTGTAGAAATTGAACTTTTTGCCATGCTGAGAGATCATATCTAAATAGGTAAAAGCGGCTGATTC  
AGTTCAAGTGTTCGTGAAAATCTTCAACTAAATGAATATAAGAGAATTTGTTCCATGACTTGAGGCCTAAACAGTTTCGATGTTTTTGGGA

>comp134807\_c0\_seq1

ATACTGATGGTTCTGTGGGTATTCAAAAAGCTGGTATGGGGGGGCATTATTTGCAACCATGTGGGCTACGTTCTTAATGCTTTTGTGCTCGTTTAAACCATTGTTCTGTGATTTGTGCTG

AGTTGCTGAGTCTCTGTGGTTGTCTGTCCATTTGCCATCGAAAAGGTTTTTACAATGTGAATATTGAGGTTGACACCATCCTGGTTATTCATATTATTCAAAGGGACAATATTGGCCATCCTA  
ATTTGTTTTATATTATTAGGAAAATTAATAATGCTTCTTGCTAATTTGAATTATATTATCAACCATATTTATCGGGAAGGTAATACTTGTGCTGATTGGTTGGCTAAAATGGGTTGTATTGTGCCT  
TCTTTGCAAGAATTTGAGGAAGATAATATCCCCTGCTGTTGAGAGGGTTAACGAGACTTGATAAAATTTGGGCTTCCTTATATTAGAACTCCTTAAGTTAAAGAGATGATGCTTTTTGCTGG  
GTGTTCCCGCCCTCCTAGATGTCTTCTGGTTCCTTGGTGTACTGTACTGTTATCACTTGTTTAGGTTGGGTTTTATTCTGTCACTTATTGGGAAGTCTCGGGTGGTGTCCACCGACTGC  
TACTCTTCTGGTTAAATGTTCTTGGGGTCTTTGCTGCTGCTTCCTTGTCTGTTTTGCAGAGATGCGAGAATCCTGGGTTCTCTATTTCGTAACCAGGTTTTTTCTAAACTTTTTCTTTATTTT  
TGTTAGAGTTTTTGTGATTTTTTTTTTTTTTTTGTCTAATGGAGGCTACT

>comp134926\_c0\_seq1

TTAATGATACAAATGGCTGGAGAAAATGTAGATTTACCTTTTCCATTACCTTGGGTGATAATCGCCTTTTTTAAAGTGCCTGCACATCTTTGCATGCCTTTATTTGGTCC TTCACAGTGATTGC  
GGATCCTGGAGGGGGCGTGTTCATATCGGATCCTAAGAAGCCAGCAGGTGGTCACGTGCTGGCGCATGCAGCTACCATCCGGCTTATGCTGCGTAAAGGCAAGGGCGAGCAGCGCGTTT  
GCAAGATATTCGACGCCCTAACCTCCCAGAGGGCTGAAGCTGTGTTCCAGATAACACCAGGTGGCATTGCGGATGCCAAGGATTGAGGCC TTCACCTACAGTGGAGTAGGATAAAGAGA  
GTTATTTGAGAATTTGGTGGATATACGATGGTGTAATGATTGCACTTTTGGGCTATCGGCCTGAAAATTATTTCAACTGACACTCTTTTTAATATTACATGGATACTTTTAGGGGTATGGG  
CTGC

>comp135074\_c0\_seq2

AGTCTTTCTTAGAGCAAGATCATGATTAGCGTATGGATTATCTTTTCATTAATTCACATTTGTTTCTAAAAGATAAGTGTTGGGGTTTTAAAGCTTTAGTAGTAGCTTTGTGTTAGAAAGCCT  
TTAGTGTCTTCTTGGAGTAGGTAACCTCACTTAAGTTAGCTTTCTTTAAGGTTAACTTCTAAAATATATATAATGTCGGATAAACATAAAAATAAAAGAGAGTCTAGCCTTAAGTTTAATTTT  
AGAGGTTTGTCTCCCCTAGTTGCTTTAGGCTCTGTTTGTAGTGTGTGGTAGTTAGAGGTTCCAAACGTATCAAGTACCTCATTTGGATTGTGGGAACATT

>comp135095\_c0\_seq1

AAGGGGATTTTGCAAATTTTGGAAATCTGGAGTAAAGAAATTTTGATAAATTTTGTGCTGTTTAGATCTTTTGTGTACGAACATTAAGTCATGAAGATGTTTCTATAATCGGAGGCACATG  
CAAGTGCACAATGAAATCGAGCTTTCTGCTCTTGGAAATGGCCATTGCAACTACTGTTTCCGTTGCGGAGATTCTGAAGAACAGTGGATTGCTACTGTGAAGCAGATATTGACATCTACTG  
TGGATATCAAAGATGACTACAGGGTCCGACCATTGCAGAAAGCAAAGATTTCAATATTA CTGGGCAAGACTGAAGAGTTCGATGAGTTGATGGCTGCTGCTGCTGCAGAAGCGAGCGGT  
GGTGTCTAAGGGGATGAACAGA ACTAAATGATTATATAACTACTGTTCATTTTTTCATCTTTTTATTGTTATGCACACATTTACGGTGTTATTTTATTGTGAGATCTGAACAGTAATGATGCTCC  
GATTTGCGCACCTATAATTCAAATGCTTATTAATTTGGCTTGGAGCCGTATATAATCTATCTTTGTTGAAAAA

>comp135147\_c0\_seq2

ATTCAGGTTCTACCTGAATGTGTGGGTCACCTATATCATCAGGTGGATGGTAGGGAAAGATATCAGCAACATTGAAGGTCTTGGACGTGCGCATGGTATCTGGTAAGTCAACGACATAAGC  
ATTGTCGTTGATCTTTTTACTGATAGAAAATGGCCCCATTCCGCCTACTTAATTTGACTGCGGCCCGGTGGCAGTCTTTCCTTGCGAATACGAACATAAACTAGATCTCCTGGCTTGA  
AGATCTTTTTCTTTCGGTGTACATCCGCTGCAGCTTTATACGTCTGAGCGGAATCCTGTAGTTTGTAGGCGAACTTCAGAGAGCATCTTGACAAATTGGTCTGCGAATGCATAAGCGGCTTT  
ACTCTGGCTTTTGGGAAGA ACTGCAACGTCAAGAACAGTGTTAGGCAATTTGGTATAAACAATACTAAACA

>comp135167\_c0\_seq1

CGCATTGAAAATTTTCTTCAACTATTATTTATTACAATTAATAATTCATGTTTCATCATAACGAATCAGCCTTAAAATCAAGAAAAAAAATCAAGATACATCCGAACCACCACCGTCTTCATGAA  
TTATTGGATTCTTTTATTTCAAATCGCAACCGCCGATCTCGTTGCGCAACCACCGGATCAGCCGGCGAGCCACATTTCCCGCTCGATGAGCCCCCTTGACATAAAAAATACCAGCAGCCA  
ATTCTCCCTTCTTGTCCCACTTAGCCCCCAGCACCAACATTCCATTCTCCCGTATGACCCTCGTGATCTCCATAACAAACTGTCTCGGTA CTGAGAACTCGCACCTCCAGTCTCATCCAC



CAAGGCCCGGCCTTCGTTCTATAGCCGCCATGAGGCACTCGACGAGCTTCCCTTCTCCATCTCCGTCAGCCTCGACCAACCACCCCTTTTCTTGATGTAGTATTCCTGAACAGCAATGG  
TTTCTTCCGTGCTAACAGAGGCATGAACCACGTCATAATCCAAGTCTCCAGCGTGCACACCACATCAAAAACCAGCTTTGGACGGTCCCTACTCCTCACATTCACCTCCACCATGTAATT  
ATTTCTCACCGACACCTCCATCTCCACAGCCGTCAACACAGCTTCTGATGCCAATGGAAAATCAGTCCCTCCGGCCATCCCCTCCCAGTCATTGTCTCTCGCATTATCTGATGAAGCCGTC  
GCTCAGCACTGTGCGCACGATCAGGCGACGGCCCCGAAATCTCCAATGCCATTTCTCAATACCCCTAATAACAATGGGCTTCAACCACACGCCTCAATTGCACCTTCAACCCGGTCTGTCG  
GGGCACGCGAATTCGGGCCGTAGAAAATGAAACCAGCGCGGCCATTGTGCGCCATGCTACGGCGGAGTTAACCTCAAAGGAGAAAATCGAGGAGCGTAGCCAACACCTCGGAGAGAA  
GGCCGGGGTGGTTCGTTACCGTCATTCGAGCACGGCGTGTTCGGAGGAAAGGTGGCCTGCACCGAGCAGGTTGTTTCAGGCATGTCTCACCTCATCCGGCGGACGGCCGCTTCTCCT  
CCGCGCCTTTCGGCGAACATCAATGACTGTTCTATGTAGCGGATGTGCGCCGGTCCGTCATTCTGTTGCCGAGTTCATCCGTCACGTGGAATACATTCATGATCCATTCCCCATCGGCTGA  
GACGGTGGATTTGGAGATGATGAGGTCGAGATCGGTGATGGCCTGAACTATGTCAAGCAGTATTCCATGCCTGTTTCGCACCGTTCACCTGCATGCAAAGTAATTGGCCATGCAAGCGTTAT  
ATGTAATGTCAATATATATATATGCAGTA

>comp135203\_c0\_seq2

TTGTTGTCAACCATTACTAGTCACAACCATAGCCTGACAACCATCGCCCACCACCTGATGTCTCCATGACTAACTTGCATAATACTTAATAAAAATAAAAAACAACAATTGTTTAGAATA  
CTTACTTGTTTTTATTTCATATTAATATAAACCAAAACAAAAATAAAAAATATCAATAAAAAAAGAAATACATAACGGCACCTAAGCTTTATAAGCCAACAACTGACAGATGGATTGAAT  
AACAAAAAATAATAATAACAAGATAATGTGAAGAGCAATAATACGAGGTATAATCTTGCCGATAAATTTGGAAAAAAGTATATAAATGAAAGAAAAATTTCAAATGTGTTGGTG  
AATAAAGAGTTCATTAGCTTGATTTCCGGATGCTGATTGTCCACAAGAGATCTGTATCAGAATGAACTGTAACCTTCTCTCTCGCACAAATTTGGATGTACTACCAATCCACCAAAATGC  
ATAGCCGTTTCAGAAAGATCCCATTGGAGACCAGTGGTGGTAGTACTAGCTGATGATGTACCAACAGGAATCAGACCACAATGTGGCCTTCTACAGATGACTCGATGTAGATCTCATGAC  
GATGTGTTTTTGGAAAGATAAATTAAGCAATCATCTGACAGGAGAATGATGCGCATGTTTGAAGTAATAAAGCACATTGATGTTGCCAATTTTCATGATCAAATCTTCCACCAAGCGC  
GCCGACAACAAGAATATGTAGATTTGATTTCTCCAAGATGGGTGTGTAATCACGAATAAAAGCTACACACTTGTGTAAGTCG

>comp135365\_c0\_seq2

ATCTCAAGACAACCAGGATGGTCTCGTGAGATCACTGGTACTGGTGAGAAATGCGGCTGTCTTAAATTCTCCAAGGCAAAGAACTATAGTTCTTCATGCAATATGTAGTTTCTCTTTTCA  
GGTACGGAAAACCTGACGTTCTTCAAGAAGTTTGTCAAAGATAGAAATGAATTCCTCATGCAATAGTTTGTGTTGCTATATTTCTACCTGGTCTTCAATACCTAAACCTATAGTCATTGTCTTC  
AAGAATATTCATTGAGATTAATAATAGATTGTGCCAGAACTATGTGAACATATGTTTTTCTTAGATAGTTAAAAATCACGAATATTATTTTTCTCATTCAAGATATCACCGGATCATGCTAA  
TGATTCAAGCCAACTTAAGTGCACATTTCTTTCTTGAATGATAAGATTCTGCATTTAATTCT

>comp135675\_c0\_seq1

TAAACATATTAACCTCAAACCTCAAATTTTTTAGATCAAACCCACATCAAATTATCATCCTTTCCACATATAATATAATAGTACTTAGAATATATATAACTTGCATATATGAAATATGTCTACAGT  
GAATATTGCAGTTATCACTCATAAAGTTTTATTAAAATATTAATAATATTAATAAATATTTATAAACGAATCATGAGCAAATGCGCAACAAGATTCAGCTCCTATAAAAATCGAAGGTCTG  
GTGGTCCCCACAAACTTTAAGCAGAAGGCCTCGAAATCGCCGTACCCGATGACCCCGTCGCCGTGCGCCGTCTAACTCCGCCAGCAGCCACTGGATCTCCTCCGCCGATATCGTATTCA  
GCTTGATCATCGCTCACTGATCTTCTCCGACGAGAGCTTGCCGTGCCATTGGTGTCCAAGTGGCGGAAGACCTGGTCCACCTCCGGTGTAAAGCTTGGACCCGTTTCATCTTCTCTCCTC  
TTTCTTCTCCTCTGCCTCTTTTCTCCTC

>comp135726\_c0\_seq1

CAAATGAAACCTAAATCTCAGTAAAGGTGGAACAAAGAAGAATGACCATTGTATGGATGTTCTTTACATGTTGGGTACTTGGAAATCTATTTAATTGGGAATCTTTTTTTTCTTCGGTTTTA  
CTGCACAAGCTCTCTGAAATCTCTGTTGCTTTGCTTCTGTATAAGCTGCTCGTTGAATCCAACGCATGTAGAGTTTCGTATTCTGCTTTGGTTTACTTCATCATTGTGTATACCATCACATTA

TTACTGAGTCTTCCAGCTCTACCAAGAGGGAGCTGGAAGAGCAGTCCTTGAAAACCACCTTCACATTCCAACCTTAATTGATTTCTAAAGTAGATTGTAAAACAAAGTACAGCTCAACA

>comp135759\_c0\_seq2

CGCCAACAACAAAACATGACAAAGACCGCGGCTATTTTAGATGCAAAGTAGATTTCGTCTATTTATCCTCTCCAAAAATCGAGAGTGTACGTACACGGGATGGGAGAATCGTCTAATTTAGG  
CTTAGGTACCGTACCGCTCGGTATTAGCTCGACACCGGAAGTGGCACATTTTAATTTTCCAAGAAATTTCAATAGACTTAACGTTAGGCTTCTTCACCTCCTCTTTGGGTACGACAACACT  
AAGCACCCCATTTCTCAAGGACGCTTTCGCCTGATCCACCTTCACGTTCCCGACAGTGGGAATTGGCGGACGAACCTTACCATTGCCTCGCTCATGTAGATGCCAGCAATGGGTCTTCTCC  
TCCTGCTCCTTCCGCTCGCCGTTGATTTAGAGGACCCAGCCTTCCACAACCTCGACCTTAACATCCTCCTTTTTGACGTCAGGGAGATCGGCCTCAACGATGTGAGCCTCCAATGTCTCCT  
TCCAGTCGAAGCAGGGGTTGGCAAAAAGTTAAAACCTCGGTACAAAATTGGAGCCGGGAGCATAGATGGCGTTGTCTGGAGAAGGTGTTGAAGCTCTTTAATGGATCCCATTGGTCAAAT  
AATAAAGGCTCAAAAACCTTTCCTCCGCTAATTGTGACATCAAACTTTAATTGATTGAACAAGATTTCGATTCCGGCAAGTACTTGAGAATCGAAAAGTGCTCGCTTGATTTTGCAGGA  
AAGAATTGCAATGAACATTTATAGATGAGGAGGAAAGAGGACAGCACCTTCTCG

>comp135972\_c0\_seq3

ATTTCCCTCCCTATAAATATGAGATATAGTAACATTCATCTCCTTAACTCTATTTTTAACCTTTCTAATCAGATAAAAATAATTAGCATTACCCGTAATCCCCTCAGTAATACTTTGAACAATAA  
AAAGAGCATCTAATTCAACCCACACATCATTATACCCATGTTTAATGCACAAATCAAGACCCAGAAGTAAAGCATTGAGCTCAGCAGAAATAACATCAGAGGTTTGCAAAGGAGAAGCA  
AAAGCAGCCAAGAAGTCAACACAATAGTCCCTAATGATTCCCCCAGCACCGGCTTTACCACACTCACCGAACAAATCCGTATTAGCTTAAACAAAAGGAAGTTTAGGCTTTCTCCAATAC  
ACATAAATATCATCACTAGTTCCCGAAACCACCTCCAGCTTAATCCCAAAGAAAACAGCCAAATGTCGGCATCTATAAAAGTTTTAGCAGAAAGGATGTTGTAGTTAAAAAGCTGCAGC  
ACTTTACATTTAACATTTTCAATAATAGAAATAGCATCCATCTTACAATTCTCATGTTTGGCCAGATTTCTAGCATTCCAGATAAACCAATAATGAGAATGGGGATCAGATTAAATAAATGC  
CCTTTTTTGGGATGACACCAATTATGAAACATTAAGTTAAGAGAATCAATATACAAGGAGTTTTTATCAGCAATATTATTGAAATAGCTCC

>comp136186\_c0\_seq1

TAAAAAAAAAAAAAAAAAATTA AAAAGCCGAGTTGACTCCTTGCGCGGAAAGAGCACAAAAGACGGCGAGACGCTGGTATCTCTCGCCCCATAAATCAAAGCCAAATCGCTCCATCTCAGTA  
TTAGATATTCGCAAAACCATAAAGACAATCCATTCAACCAAAAAACTACCCAAATGTGACATAAATCAGAAGTGAAATTAACCTTACAATGTGTTAGAGTGCATGCAGCACGGAGAGCCCT  
GCCTTCTTCTCCACCTTTTGGGGTTGTGGTTTATGATTCTGCTGCTATTGATGGCTGAAGGGATTTTGGCGAGAGGGCCGAGAAGCGGAGAAAAGAAGTGACGAAGAGGCCGCGGTGTG  
AACCAATGATGTGCTGAATAAAGCAATATGTCGTTGATCAAATCCTTTCAAATTATAGGGTGACGGAAATGAGAGAGAGAAAAAAGTTTACAAAATCCTTTCAAATGTGAGAAGAAAAAG  
TGTTGGGCGAGTGCTGAGAGTGATAAAAGTAATGTAGGGGAACGAACTTTTACGCCAAGCTCAGGATGGAGAATGGTTGGAATTTAAGATGTCGTGAAGAGGAACCGTTATAGAAGTT  
GAATAGGCTAAAATAATTGGATAAGCCACCGGAGAAGAAGATTGAAGGTCAAGCCGAAGAATCAAGACCGAGCAAATCGTGAATAATAGATAAATGAGGCTTAAGTGAGCATTAATTTGT  
TTAAATGAAATTTGAACATATAAACGCGCATTAAATTGGCAATTGGTGATTCTACCGGAGAAGAAGGCGGAACGTCAAAGGCCATGCCGAAACAGAGCGATATAATAGGTAACCGACGAGG  
GCTTTATTTTGTATTATAAAGAAATTAACACGTACAAATGGACATTAATTAGTTTGTATTAGAATTAATTGTGGCAGTAAATA

>comp136257\_c0\_seq1

CAATCTTCAAACACTCTTCTGCGGCTCTACAATCAAAAACCTGACTACACTCACCTCAAGATGTTTCGGCTGTGCTTGCTACCCGTGGCTGCCACCCTCCAAACGACACAAACTTGCCCCC  
CGGGCAGCCTCCTGCATCTTCTAGGCTATCATGATGCCTACAAGGGATACAAATGTCTCGATGTCACAACCTCGCTAGCTTCTCATCTCTCGTCACGTACCTTTGACGAAGATACATTCCC  
AAACATCTCAACTCCATCAGCTCCCTCATCCACAATTCATCAATCCACACTACAACCTCCTCCCTCTACTTTGTCCTCAATTCATTGCCACAAACCCAATCACACCACCGTCTCCAACC  
AATCACTACAAAATCACCTCTGCCATCTCTCATACTCAACCAACCACCCCATCTCTCAATTCACCTCTCCCAACCACCCAACCTCCACCTCTAAAACACCACCACATGATAACCAGGGC  
TCAAACAGGACACCTCAAACCCAAATAATTACTCAACCTCTTTCACCAACTCAATGCCACAGACAAATCCATCCAGTCCGATCCACCTCATTCACCGTAGCCTACAAATCGCCTCACTG

GCGTGCAGCCATGGCATCCGAATTCCTAGCACTTCAACAACAAGGAACGTGGATCCTTGTCCCACCACCTCCCAAACACACCATTCAAGGATGTCGTTGGACCTACAAAACCAAACATC  
ACTCCAACGGTTCTATCGCCAAATACAAGGCTCGGCTTGTGCTCAA

>comp136458\_c0\_seq1

GAAAGTAACACGAGGGGTCTGTTTCAGAGGCGGGCACCACGGCGACCCCCCTTCTGCGGGTGTGTCGGAGGGGATGGGGGTGACGTCCTCAATCCGCCAATCTTCATTCCCGAGC  
GGGCGAGGGCTCTGAGGGCTGACTGGGCACCTGGCCCAGGGGTCTTGGTCCGGTTCGCCCGCCGTGGCCCCGAGCTTGATGTGGAGGGCAGTGATGCCAGCTCCTTGCAGCGCTGGGC  
CACGTCCTGGGCAGCCAGCATGGCGGCGTACGGAGAGGACTCATCCCGTTCGGCCTTACCTTCATCCCGCCGTCACGCGACAGATGGTCTCCTTGGCCGAGAGATCGGTGACATGGA  
CGAAAGTGTCAATTGAAAGACGCGAAGATGTGACACACGCCGAACACGTTTTCCCTTCAGCCACCTGCGGGCCGAGGCTGATGACCTGCTCCTCCTTCTCCTTCCCTTGC GCGGT  
GCCATTTCTGCGCGTCGCTTCAG

>comp136606\_c0\_seq1

CTAATTTCAAACCTCAAAAAGGGGCAATAAAGTTTTTCTCTTCACTAACACAAGACCTTAAAATCAAAGGGTATAATTACGCTATATAATAAAGAGAAGTGCACAAAAAGTTTTATACATTAC  
AACAAAACCTGTTTGTAGCAAATAAATAAATAAACAACAAGTGTATGCCAAAATTTTGACAACAAAGAATAACATATATGGATGATTATTATCAAGAATGCCTCGCACAGTGAGTTT  
GGTAAATCTAAGGCTTCGTTTGGGACG

>comp136658\_c1\_seq2

ATGATATTGCCACCATAGTTTGTCTTGAATGACCAAGATATAAGAGTTGTACCAAGAAATGAATAGTATCCCGACGTTAATTTTCGAGAGAGCGGATCTCCAGCCCAGTCAGCATCAGA  
AAAAGTTCTGAGTTGATGATCAGACTTGGTAATAGGTAGACCAAAATCTTGTGTTCCATGTATGTATCTAAGAAGGCGTTTGTGATATACGCGTGGTATGTGGATGGCTCGTGCATATGCT  
GCGAGAGAAAATTAACCTCAAATCAATATCAGGGCGTGTAAACGTCAAATATTGAAGTGAGCCTGTGATACACATGTAAGATTTAGATCAGATACCAAAGGATCTAAAGTAATTTGGT  
AGGCATCTTGGTACACATAGGATTGGATAAGGGATTACACCCGAAGTATTGCGCTGCTGAAGAATGGAATGGCATATGCACGTTGAGAGAAAAGTGTGATGATCTGGACTTGATGTA  
ATTTGGATTCCGAGAAAAGTTATGGGGTAGACCAAGATTTTCATGGTAAATCTTGATTCAAGCTGTTAATGAGATGATTGATGGCTGATTAGTTGTTGCATGTTAAGAGGATGTCATCGAC  
GTATACAAGTAAATATATTCTAGTTTTCGTCTTGCTTGAAAGTGATC

>comp136704\_c0\_seq2

TACTGTATGAAATTATATAATATTTTGTCTTTTATCTCTACATAGAATATATATATAAAACCAACCCAAAATCTCCCACATACCAAAGCTCTTCTCTCACATTCTTCTTTCTTTTCTCATCATCTC  
CTCCTCTTCTTTGTTCTTCTTCCACCTCTTCTTCTTCCATGATAAAAAACGCTTCTTTACATTCACAATGCCCTCCCATTGATCCCGAACGCTTACTCTGGATTTTCATTGGTGAATTTGGATC  
ATCTCTGACTGATGAAATATTTGTAATGTCTACGTGTTGACAGGAGAGCAGGGAATTCAGGGAGGTCGCCCAGAGGAGCATAGGGGGGTGGGAG

>comp136738\_c0\_seq1

TTGATCTAAAGTAACTTTACATGTATTTCTTGTTTTTTTTAAAGCATTAAAGAGATATCTTCTGGATTAATAGAATAATATGTTGGGTCAACATAAACTATGGTGGCCCATTAGTAAGAGTTC  
GAAGAATAAAGTCAATAATTATAATTTGGTTGGTATAACCAATAAATGTGAATGCATCTTGTGGTATATTATTAATAAATCCCAAATACTTGGGACGAGTGCCCTATGATGCTTCAGAAGTGCT  
GGCTAATAAATATGTTCAATGAATAGATATTTGTTAATTTAATTGAGAAAATGATGAAAATGGTCCCTTGACATTTTATGAAAGGTCAAAAATGGTTCCCAAATTTTTAAAGACCATTTT  
GGTCCGTCAACGCTTTAAAGAGGAATTAATAATTCACCCCTGAGACTATTTAGTTCTTTTAAAGTATTTGAGGGACCAAAATGATAATTAATATAATTGGATATTATTTAATCTTTCTTA  
AAGAATTAAGGGGACCATTTTAAATAATTTCTCAATTTAATCGTCTCAACAAATGTGTATATATAAATCATGTATATGTATATGCCTTCCACACATATACATGCAATTGATCTATTTCATTTAGAA  
AAAATAATAATACATGCTAAATTAATTAATTTTAAATAATTTTAAAAATAATAGGCTTATCTTGAATCAGATTTCAACTTGAAATATATTATTTGTTGAACATGACTTGAACCTTGACT  
AGAGTCAAGATTGCAACCTTCAATTTCAATTTGAGGTTGAATCACTCTAACTGG

>comp136751\_c0\_seq1

CCGACAAATCTATCAAAGGAGACAAGAAAAAGAAAGTCTTTGGCTTCCAAGTATCTTTGGTAAAAAGGGAAGAAGTGGAAGAGAGTCAGATGGAGATGTATTACCAGATTTGAATCGACAA  
TATGCGGCGAGAAGTTTTTTCTTGGATGCATCTCCTCTTATCAGAAAAAGCTTTTCAGATAGACCTTCGAATTCACGTATAGAAAAGCCTGAATCTTTGCACCTTTGAACGACCGTTGGAGG  
AACAAATCATAGAGAAGAAAGAGTACAGGATATTTGTTGGGACATGGAATGTAGGGGGTAGACCTCCACACGTTGGCCTCAATCTTGAAGATTTTCTACAAGTTGAAGAAGGCTTAGATA  
TATATGTGATAGGGTTTCAGGAAATAGTTCCCTCTGAATGCAGGCAATGTGCTTGTCTATTGAGGACAACGAACCCGCTACAAAAGTGGCTCGCGCTCATCGGTGAGCCCTTAATAGCCGA  
AATGCAGATCCTTGAGTGATAGGGAAGAGCCTTCATCAGATTCCAATCATCAAAGCACATCAACCAAGTGAAAAGAGGAGAAGACAGGAAGAACCACCTTCCAGAGGTCCTCACTGAA  
GGTCTAAGCAAACAAAATAGAGCAAATAGTGATTTGGCCAAGATCTGTAAGTCTCCCTCGACCCATCTAGCGTGCCTGGAGGGCGAGGGAGATGAGGGAGTTCATAAAGAGGATTG  
AATCAATCGCTGTTGATGAGAATTCTGCCTTACCATGCTGTGGTGGTCAAGAGAAAAGTGATTGGAAATGAATATTGTTTGATTTCACAAACAGATGGTGGGCATCTTCTGTCTGTGTG  
GGTGAGAAATGCTCTTGTACAACACATTGGCCATCTTAGGATTTCTCTACAGGGAGAGGGATCATGGGTTACCTTGGAAACAAGGGATGCATCGCAATGAGCATGACAATTCATGAGAC  
CAGCTTCTGCTTTATCTGTAGCCATTTGGCTTCAGGAGAGAAAAGGAGTACGAGTTGAGGAGGAACTCCGATGTCACCGAGATCTTGAAGAACACGCAGTTCCCTAAGATATGCAAGA  
GAACAATCGTCGAGTACCTGAAAGAATCATAGATCATGATCGAGCATTGTTGGCTTGGTGATTTGAATTATCGAGTTGCTTTGAGCTATGAGGACACAAGAACATTGCTAGATGATAATGA  
TTGGGATGCTTTACTAGAGAAGGATCAGCTAAATATGGAGAAGGAAGCAGGAAGAGTATTTTCATGGCTGGAAAGAGGGAAAGATCTACTTTGCACCAACTTACAAGTACTCTCACA  
CTGATGAATATGCTGGAGAGACAGTAAAGTCCAAGAAGAACCCTCGAACCCCGGCATGGTGGCATCGTATATTATGGTCTGGAGATGGTATTGAGCAACTACAATATAACAGAGGAGAGT  
CGCGGTTCTCCGACCACCGGCCGGTATGTGCAGTGTCAAACACTCAGGTGGAGGTTAGCAACAGTGGCTGTTACAGGAAGGGCCACTCCAGTTCAGGAGGAAGGAGTTCATTGATGA  
AACCATACCTCAAAGGCACAGCTTCTATGAGTCTGAAAGGAAGAGAAGTACATTTATCAGCTTCATTTGTATATATAATTAGTCAAATATTAGGCACCCTTTATTGCTTGTTTTTGGAA  
ACTAACAATATGGC

>comp136787\_c0\_seq1

CTAACCTCTAGACATTCATACATGTATAAGCAAGTTTAGGGATTTATGAATGAAAAGTACGATAATAAATAGAAGAGCGGGAAGTGAAAAAGAAAAGACGCTTAAACAAGATAGAAAGAGA  
AGAATGAAAATCATAATAAAAGGAATATGGGCATTTTGCTATTGGACATGATTCTTTGAAGCCAAACATGTCTCTAAAATGCCCTCCCTCCTATTCAATGCAATATGGATAGGAGAGGAA  
GTGTTTTAATGCCATTTTACTGTCCCACTCAAACTCAGCACTTGATACAATACTCAACTCAAATAAACTTAACTACCCTCTAAATAAAGCTCCAATCGACAAA

>comp136843\_c0\_seq1

AGCTATTCAAACGAAACCTAAATCTTTGAAGTTGATGACTGCATATCCATCAATGTAAATTAAGTATTTTGCATTAGGTCATACTAAATGGCATCTATTTGAAGATTTGGCCCTCTAATTA  
TTGAACTCAGCCATGAAAGCAAAGAGCATCTCACATAAAAAGTCTTTTTACTCTTTTGTACTAATCTGGTGCCAACTTACTGCCCTACACTTAATAGAATGCATCTTTTGGATTCTATGAA  
TTTGAAATGATATAAAGTTGCATGAATAATGATTAACGACAACACTTTTATGAAAAATGTCAATGTCAATTGCCGAAAAATAAATAAATTTCCAAATGATATTACCCAAAAAGGCTCAA  
CACATATTAAGACACCTTTAATCTATTCTTTTCTAATACTTCTTTCTTTTCCATTACGAGTTCTCCCTCAGTGAATGAAATTGCCTACTTACACATGATAAGTAACAGAACTAGCGG  
CACTATAATGAGTTTGCCTTTCATTATATCTATGTGTTAAAATAGAGCGAAATGAATGAAAGACTAGCAATGATTTGGATGGGTACAAAATTGGCTCAGAATATCTTACCAAATTTTGGTA  
AGGATGGATCTCAAAGCTGTTAGATTGCTTTGAGATGAACAGAATATAAATTTGATTGATTCTCCATGATATGTTGCATCCATCTCAAAGTAAATCCAACGACTCTGAGATCCATTCGGATA  
AAAAATTAATCAGGAGTCTTAATACATAAATTTCTGTCTTGAATTTGGATCCTCTCCAATTACCAGGTTGCAGTTACCAATCCAAGACTTCCAATCCAATTTGGATGGTTGGGATTA  
TTTCAAATCAAGAGCGGTTTTTCATAAAATAAGCTCGAATTAATCCAGTCATCCAAGCTTGTGCACTTACCTTGGAAATTTGGAGATAATCTGAATCCGGCATTTTTAAGATCTACAAGATTG  
GCAGTATCAATTCATGCACAACCTCAAACCAAGCAACTGAATTTCTATCTACAAGCTTCATCCAATCCAAGCAATCACAAGATACAGATCTTTCAGCTCAAATCCATAAACCTACACA  
TTAATTCCTAAATCTCTGCATTTTCTATCTGGGTAGGAAAAATAACATAACCATTCAAGTAAAGGAATGGATCCACTGAATACAGTAATCAATTAAGCATAAGAAATCAAACCTCGAT

TCCAAACCGTTCGCATTGTACATGAAGAATGAACAAAGAGAGAATCAATCCTCTTATCCCAGGTCACATTACAAAATACATATGGAAAAATTTAA

>comp136986\_c0\_seq1

TTTTATTAATAGTTAAAAATCTCAATAAAAAAATCAAAATGAGGTGAGTATAACAGCAACTGCCTTTGACAATGCAGCGCAGCAAAAACCCAATTCATGACATGTTGACAAGAGCAATAATG  
CCGAAAAGGTCAGAATCCTTCTCGCCAAAATATCAAGCAGGACAAAAACAATCCACCCGTTCTTTATAAGAAGACCAATACTTGCCATTAATTAAGATCAAGCAATGTTACTTCGCG  
CGCAACCTCTGCGATCGCAGCAAAGGACGACCCACCCGTCGCAACGATACCATTCCGCCGACGCGAGCAGCCGCGACCCGTTCTCTCAGTTCCCTCACCTTCTCAGAGTTCATCAGCC  
AACGGACTCGTTCGCTATTTTCATCGGAGTGTAACAGCCCGTCTGTAAAGCCCGCATTGCCACCCGAGCGCCGCCACCTCAACCAAGAAGTTTTTGTTCACCATATGTTCTTCTGCTG  
AGGCCACGCAATCATCGGCACTCCGGCTACGATCGACTCCAGCACTGAGGTCCAACCACAGTGTGTACGAATCCCCAACCCGCGGGTGTTCAGCACGGCCACCTGCGGCACCCACG  
ACTTCACCACCAAACCTCTCTTTTTCGTCCGTTCTAGAAAACCCCTTAGGAAGCGCCGCTCCAGTTCCTGTGAGACCCGCACAACCCACAGGAACTGTGCCCGGTACGCTCCAGGCCG  
ACAGCGATCTCCCTGATCTGCTCACCTGGGAGGGCTGATCCCCTGCGCTCAAAGCTGAGAAAACTACGCTGTTCTCGGTCCGCGCTTAGCCACGCAAGACTTTCGTGTTGAAGTTC  
GTCGCTGCTGTATATTTCTTGGCAATCTTTGGCTGTTATGGGACCGACGCAGTAGACAGGGGCCAGGGCGCTGCTAGGATCGCGGTTGCGTTCCGCAATAATCTCGAGTGCAACCCGGCTC  
CAAAATCTGAAGGTGTTTACGATAATCCCGCAGACTGGGTTAGTCGTTTATACTGAACAATCATTGCGTCCGTCTCGGTTGTTTGACCAGTGATCCGAATCATGTCCGATGCCGGGATCG  
GGCACAGTGAACGAGGCAATTGTATCGAGGTGCCCGCGGCTTCAATTGGTTGTGGAGAGCAGGGAGTTGGAGATAGACGGCGGAAAGGATGGCAGCGCTAGAGGGGAAAAAGAAGT  
AGAACCGGAGATGGACCTCGGCGGCGACTTCAAGGGCGGCGCTTAAGAAAAAGTCGAGGATGATTGCACGGGCAGATGAGGTGTAGAGGTAAATTTTGAGATGGGGGAGGACGAGGT  
GGAAGTGGTCGAGTAAGGTGGCGGAGCCGAGTTCGACGGTGGGTTTACTGGTGGCAGGTGGTTGAAGGAAAGGTAAGGGTGGGCGGTGGAGACGCGGGAGATGTACGTGTGATGT  
GTGAGTTGTGACGGAGATGATCCGGCAATGAGGATGGTGACGGAGACCCGGAGCGGTGCAAGAGCTTAGCCAGCTCCACCATGACGTCAAGGTGGCCCTTTCAGCCAGCGGGAA  
AATTATGATCTCCTTCTCCATCGCTCATAGGTAATTCGGCTATGGCACGATTACTATCTCTCTGCGGATTGGTGCCTTCTATAGCTGTGGAAACTCACGATG

>comp137012\_c0\_seq1

GCTCCAACTTCCACAAAACCCGCGGCTCAGGAAACATGTTTCAAATCCATTTATCGTATTCCAAAATCCTCATCCACGTCGATAACCAACCGTACGAACCCAACTCGCTTCTTTCGGC  
CCTTACCACCACAACAGCCGCCATCTCCTCCCCACGGAGGAGAGCAAAAACAGTGCCCTATTTCAAATCCACCCGCGCATTGCTAGAGCCTCCAAAACCCCTATGACGTCTCATCGCC  
ATGAGAAGGGTGGAGTCTGCCTCATTGCTTACTACGATGGCCTTCAAGTCGAGGAGGACAACAAGGATTGCTTAAACGTGGCCAATTCGCCCGCGTATTGGCTCAAGGAGAAGGA  
CGAGTTCCTCAAGATTATGATCACGGACAGCTGTTTCGCCTTAGAAAATCATGC

>comp137022\_c0\_seq1

ATTGTACACATATCGCCTCACCTAAATTTAATTTTACAAAAAAAATTGCATAATTATTAGTTTCAGTTATACACTTATACTATGTGAATTATGAAAATTTTATACATAAAAACCTATATTTTACAC  
AATCGAAAATTTGAATAAAATCCTGCAAAAAGTTATTTCCAAATAACCCCGGCAAGAGAATCTAACAAGTTTTGGAGTGATTAGGTAATAATTGTATCTGATTTAGTCATTTAGTATTTATT  
ACCACAATTTTTTTGACCGGACTGATTCTCATCTGGATGGGGACAAAGCCGTAGCGCTAAGACGTTTTTACCCCTCTGACGACGGGTACAGACATCGAGGAAAGGGAATTTACTAGAGG  
GCAGAGCGGTAATCCTGTACCTTTAGATAAGCTGTAAAGTGGAAATTTTTTTTAAACATTTTTTTGACCTCGAAAAAAGAGGGAAAACGGCGAGCCGACTTCATTTATGAATGGGAATGG  
CATCGACGCTTTGGAAAAAGCATTAATAAAGTCTAAAAACTTTTGCTAATATTACAATTTTCTTGCATCGGGGTAGATTTGAAAATTGAAAAGTTATTACAAGGAAATAAAACGAAATAATT  
ACAGATTTTCTCGATTAATTAATAATTTGAAAAGATAAAAAGAAAAAAAATATTATATATAATCCAAAAGAGAGACCAGAAAGCACCGGTAAGGGCGGTAAGCAAAAGATATTTCCATAA  
AAAGCAAAACAGGTCGGAAAAACCCCTGCCACAAGAAGCAAGCATCGACATGAAAAAGGAATGATCTATTGCAGAGCCAATTTATTTTGTAAAAATTAAGGAAAAATTTAAATTTATTTGCA  
AAAAAAATCAAATATGTAATTTCAAATTTAAATTTGCAAAATTAATTTTATTAAGTGATGAGCAAATTCAGAAATAATAAAAAAAGGAAATTGAAGTACTCCCTCTGCCTAAACCC  
TAACGCGAAGCAACGCAGGAGAGAACAAGGTAGAGAGAG

>comp137025\_c0\_seq1

CATTAATCATCATCGTCCTCATCGTCTTCATCAACACCTTTCTCTCCTCATAACTCAACTTCTTCAAATTGTACCTGACAAGTAAAAAGAAGAACGCAGTAAATAAAAAGTAAATAACAGAA  
CAAAC TAAGAAGCTTTTGGTAGCCAATTCCGATTCAAGCCACAAATGAAGGAAGACGTGCTTTAAGCTTGCAGCAGCCAGTACCTTATAGA ACTAAGTCATAAATGGAAGATAGTAATTT  
AAGTTGCGTTTGGAGCAGCTTTAACACAGTTTTGCTTTTCATATAAAAAATAAATTTCTATTTAGCTATTGTTTTCTGTCTATATATATATATATATAGGGGGGGCGCAATTACTCCCCAGGC  
TTTAGGTGGATCCGCCATGATATATATACAAAAAATTATAATATTTTCATACCTACACATATAAACA ACTTTAATATCGATTATGCATACTTATATCTCATTCCATAACATCCACCACCTATAAG  
CTTAAATATCAAATATTTATACTTTTTTTGGCCAAACTCACACACACATCACATATGCAATACTCGAATCCAAAGCATCTTGGTTAGTAGCCAAAGCTCTCAACCAACATACTAAAATGAGTT  
GCATATTTTATTCAAATTA ACTTATCTGATTTTTTAAGTCAATCCAAAATTAGTATATATATATATAAATTTTTTAATAAAAATGATAATTACCTCTCTTTTATAGGATCTAATTATAGCAGGAAC  
AGATACATCTGCAGCAACTATTGAATGGGCGATGGCAAATCTAATAAGAAATGCATGTGCCTTAAAAAGGGCACAAGAGGAGGTTTGGCGAGTAGTTACTGGCAAAGAAAAGTGGCGAG  
TGAACGACCTACAACATCTTCATTATCTCAAGTTAGTAATAAAGGAGACATTGAGGCTTAATCCGCCATCCCATTGCTACCACCCCGAGAGTCCATGAAAGATACCAAGATAAATGGTTAT  
GATATCCGGCAAAGACGATGGTATATGTTAACGTATGGTCTATTGGAAGGGATCCTAAGTACTGGAAAGATCCTGAGCTTTTTATGCCTGAGAGATTGAGAACAGCCTTGTTAATTTTAA  
AGGGAGCGACTTTGAGCTCATACCATTTGGTGGAGGAAGAAGGATCTGCCCTGGATTGGCACTTGGCTGGCTAATATTGAGCTGTGTTTGGCAAATCTACTCCATGAATTTGATTGGGAA  
TTTCCAATGGAATGACCAAAGAAGATATTGAAATGGGGTCTGCACCTGGGATGGTTTCTCAAAGAGAACGCCACTTATTTTGGTGGCAAACCGGCTTTGAACAAGTGACATATGGTT  
CATATGTAATAATAGAAATATAAATAAAAAGGTC ACTTGATCAAAAATGCACTTATAAAATTATATATGAAAAATAATTTTATATATACTATGAGCCATATTATCATGATTTTTAATTCATAAGAA  
AATTCAAATTGAATTTCTATATGAGAGACCAATGATTTCTCTCCCTAGAAAAACATTTTAACTCGACAAAATTTCTAATGACTAATCAGCCTTG

>comp137082\_c1\_seq1

ATTATTTTTTTAATCTTTTAATAAATAATAAAGAGGTA ACTAATATCATTATCAGTAATAAATAGCAAAAAAGATTCTATAATTTAAAATATCAATATACAAATCTATATTTTATTTTAGAATT  
TAGATATAATACTAAAAACTGCACAATCAAATCATAACTATTATATTATGAGTATAAAAAATAATTAGAACAAAAAAGAAACAAAACCTAAAGAATTCTGACTAGCCTCACACCCCTATTC  
GCTAGCCCTGACATGAATTCATTTAATCATATATAATGAGCTTAAAAAGCCAAAACAAGTCACCAAAACCTACA ACTGAATTCAAATCACGGCAAATGAGCAATATGAATGCCAACAGTCAA  
ATTATAACAATTGGATCCATATGATAATTGAATCAATA

>comp137107\_c0\_seq1

AACACCATGTTAAACTATTCATATAAGAAATGAGAGAAAAAAAATTTATTCATCTAATACAAAACAGTAAGAGAGGTGCGTATTTATAAGAGCTAAATAACCTATATTTTTGGAACAATGAG  
CTATTAAGTCAAATTAACACATAACAACATAAGCACTTAGCATTGGCCTGAAACACGTAATTTCTTTACATCTCTCTTCATTGTATAATGGCCAAATGATGGATAAAAACATGTAATAACAT  
ATTTTCTCCAATCACCTTAGCTTGATGACTCTGAAGACTCTGCTACTTCGAAACCCTCATCCATTACTTTGGTGGAGTGTGTCAACAAAACGGTCTAATTTATGGTGGAGACGAACACTCAG  
ATTCACCTTCAGAAATCTCATCGATGTCATCAGAGCCGCCGCTGCCAGTTTCCGGCTGTAGCCGGCGGTACA ACTTCTCAACAAAAGTTATGCTCCAACCAGCTGATGTACAAGTTGTGCCT  
CTCCTCTGTCCATGCCTCCCCATCTTCTTCTTGGATTCCATCAACCGTTGCTTTCTTCCAAACCCAGCAAGTCCCATTATACAAGCAATAAACGTAGATCTTTCACCATTTGTTCCATTAT  
GAAATTCTATTATGAAAGTAGATAAAATATCTCAGATATTTTTGTGCTGCAGGAAGGGAGCAGCAAAAAATCCATAGCAG

>comp137129\_c0\_seq2

GAAGAAGAAGAAGAAGAAGACGGTGGTGA AAAAGAAACGCAGAAATGAAAAATTCATTGGCTAAGAGCGTTAGCCGCCCTTTCATCCATATGTTTTGCTGGCTTTGCTTCTGTCACTCT  
TAAAGCCTTTTCTACACTACCTGAGCTTTTTAATGCATACAGATCAAATGAAAACCGGAATTTTATCGCCTCAACGGAAGAAGAAGACGATGAGAGTGATGGCCCTCAAAGGACCCGC  
CACCTGGTGGAGGTGGTCAGACTAACTGATCAATTTTGTCTCCCAATCGAGTTAACGTTCCATGCACATATATCGATCTAGCTTAGTTGATCAAGTTCCTTAGAAAGTTATGAATCTTTTC  
TGATAATTTGTCTTGTAATAATAGTTGCGCACGTCGGTTAAGTTTATCGTCGATATGCCCTCATTTTCTTATGAAATTTATTAGTTTTCTGATCTCTGAATTTCTGCGAGTTGCAACTATATATT

GCGCAAATGAACAGTAGAAAGCAATAAAAATGATACAACCAAACACAATCAACACGATGTGATTAATGTGGTCCAG

>comp137319\_c0\_seq1

ATAAGTTACCGTGGCCAAATCCTCCACCGAGGTAGAATACTGTGCCTTGTCATCTGCAACCTCTGATGTTATCTGGCTCCGCCGTCTTTTAGCTGACTTCCACATCCAGCAAACTACACCTA  
CTCCCCTATACTGTGACAACACCTCCGCCATGGCTCTTGCTCACAACCCGGTCTTCCACGCATGAACCAAACATACAGATTGAATACCATTCTATTCACCAACATATCTCCTCGGCTACTGT  
AATCATCAACCACATCAACTCAGAAGATCAACCAGCAGACATTCTACTAAACAATTACCTCTAGCTCGCTTCGCTCAGCTCAGGGACAAGTTAAGCAATCGACCATTGAAGCCTCAACT  
TGAGGGGAGCTGTTAGGACATCCAATATGCACCGATTGCACATAACAATTTATGTGCTCTCACCACGTGAGCAATTTTATGCCTTCCATTACTCTGTTCTCTGGCAGTGGCTAACGACCTAA  
GCTCCATTACCACTTTACACTTTATCAACTATATATATCACATGTAATAGGATACAAAGATATGGAGGAAATACTTTAGCTCAGTCCCTTCTCATCTTCTCCTTCTTTCTTTAGTTGCTACTAA  
CCTTTTGCAGGTACTTTTCATGGTATCAGAGCATTGGTAATCGCCATCTTCCCTTACAATGGCGGAATAGGAATCCTCTTCAGCTACTCAACTGATGTCACTCCAGGCCTCAAGACCGGATCT  
ACCCTCCTCCATGGCCACGACGGAGGTTACTATAACTCCCTCCCTTAAGTTCTTGATGACGAATCTTAAGCTCATCATACCGAATCAACTCACCAGCGGAAACTATCCAATATGGAGGCTCT  
GGATTTTCAACTGTTCAACGAATGGGTATGAAGGGCATCTAACAGGCAACATCACCAAACCTGTCCCCGATAATAGCAGAATCTAACCAATGGAGTTTCACATATGGAACCTAGTTGA  
ACAAAATCTGGTATCTGCCCTTCTCTCCACCATTTCTCCATTAGTACTGCCATACATACTCACCTCACGTTAGCCAGAGAGATCTAGAGTACACTGGAACCTTCGACTACAACCCACGAAC  
AGATCTCGAGTAATCCAGCTTAAGAATGAACTGTATCACATTAGATGAAGGATCTCTCCATGATGCAGTATTTAGCCAAGATCAAATCCCTCGTCGACAACATCGTCGTGGCTGGTTCCCT  
TCTAGATCCCGAAGAAATTATACTGCACATTCTAAACGGGATGCCTCCCTCTTACAACCTTTTAAAAACAGCCATCCACACCAGTCAACTCCCCATCAACCTTGACGTACTATATACACTAC  
TATGCATTGAGGAGATTTCATCAGTAGACAGAGATTCAATGGGACACCACACCAGCCTCCGACAATGTGGCCTTCTAAACTACTCGGGGCAGCTCCTCCCGCACTCGCTCCTACTATTGT

>comp137324\_c0\_seq2

AGAGACCTCCAGCTAGCTATTGCTCAAAAAGAGCTACAAGGAAATTCAAAAATAAACCTAAAAGCCGATGGTCCCTTTTTCTACGATTATAAAAATAAAAAGCAAAAGCAAGGGCTGCA  
AGAAGACAACACCAAAAAAAGAAGAGCAGATTGATCTCATTCAACACAATCTTCCGAAAAAATAGCAAGCAAACCTCAAAAAACTCTGAAGACTATAAGACGTGAAAATGTTGAAA  
TCATCGAACTTCCAAAATTCAGAGTAATTATGCCCTATATGCAATGTGGGTTTCGCACTCCAAGGGGTGGTAGAAGGCATCACCATGAGGCTGAGCCGACTGCCGATCGTACCCCATAGCAT  
GAGCAGTGCTGGGATCCCAGACGTGCTGTGAGGATGCCTGGTTACTCTCTTCCAACCTCCTTTTCAGCGTTTTATTAGCCTCGCAGAGCATTGCTCCCTTCGCTGTAGGTCAGCAAGCTG  
ATCGAGCATGAACTGCGTCCGTGTTGATCTTATCTGCTTAAGTGAAGCGTCCAGCTGCCGTTCCAGCTGTTTCGAGTTCCTTGCTGCTGAGGGGACCAAGGTCCTCGCCAGGAGATTCT  
CTGGGATCTTTGTAAGGCTTCAACCCGAGCTTTGAGTTTCAAGTACTCCTGCTGACTA

>comp137324\_c0\_seq3

TAGAAAATATATCAATCCATTTCTCATGACGCGCTTCAGTTGGAAGAGACTGTTTACATATTACTAAAAAATTTTCGAAATTTTGATCACATGAACTATTCAGGCAAGTTAACCAACAAGCT  
AGTCCAGAAGTGCATCAGCAAGTAACTCTAGAGATACAAGTTCGATTTTAAAGAGGAAAAATAAAGACACTTGGTACTGTACTTAAAAACAATACATGAAAGTTTGGCTTCTCTCACATTTTT  
CATGTACATAGCAATTCACGTATAAAATACAACCTGGATATCAGGCACTCATACATTTCCAAAATTAATGTGGCTTGAACATCAATCAGATGGGAATAATTGAAAAATTGAAGCCGAGAA  
AGATGTATTGTAGTCTCATATGATTATAAACATTGTCTTCTATTTTCAGGCCCTCCTGTTTAAAGAGCTTTATAGATATGTTTACATATAAATGACCTTGAGAACACCAAATAGAATAGAAATC  
TTATACAGACATGGCCAAAATTAACACAAAAGTTTGTAGGACTATACGAGGCAATGAGTGGTCTAGTTATTCATGCAAGCCAGCCAGGTGGCATGTAATTATTGACATTTGGAGCAGCCAT  
TGGTGCAATCGATAAATCAGAATGGTACCTCAAAAAACTCTGAAGACTATAAGACGTGAAAATGTTGAAATCATCGAACTTCCAAAATTCAGAGTAATTATGCCCTATATGCAATGTGGGT  
TCGCACTCCAAGGGGTGGTAGAAGGCATCACCATGAGGCTGAGCCGACTGCCGATCGTACCCCATAGCATGAGCAGTGCTGGGATCCCAGACGTGCTGTGAGGATGCCTGGTTACTCTC  
TCCAACCTCCTTTTCAGCGTTTTATTAGCCTCGCAGAGCATTGCTCCCTTCGCTGTAGGTCAGCAAGCTGATCGAGCATGAACTGCGTCCGTGTTGATCTTATCTGCTTAAAGTGAAGCGT  
CCAGCTGCCGTTCCAGCTGTTTCGAGTTCCTTGCTGCTGAGGGGACCAAGGTCCTCGCCAGGAGATTCTCTGGGATCTTTGTAAGGCTTCAACCCGAGCTTTGAGTTTCAAGTACTCCT

GCTGACTA

>comp137324\_c0\_seq5

TAGAAAATATATCAATCCATTTCTCATGACGCGCTTCAGTTGGAAGAGACTGTTTACATATTACTAAAAAATTTTCGAAATTTTGATCACATGAACTATTCAGGCAAGTTAACCAACAAGCT  
AGTCCAGAAGTGCATCAGCAAGTAACTCTAGAGATACAAGTTCGATTTTAAGAGGAAAATAAAAGACACTTGGTACTGTACTTAAAAACAATACATGAAAGTTTTCGCTTCTCTCACATTTT  
CATGTACATAGCAATTCCACGTATAAAATACAACCTGGATATCAGGCACTCATAATTTCCAAAATTAATGTGGCTTGA ACTATCAATCAGATGGGAATAATTGAAAAATTGAAGCCGAGAA  
AGATGTATTGTAGTCTCATATGATTATAAAACATTGTCTTCTATTTTCAGGCCCTCCTGTTTAAAGAAGCTTTATAGATATGTTTACATATAAATGACCTTGAGAACACCAAATAGAATAGAAATC  
TTATACAGACATGGCCAAAATTAACACAAAGTTTGTAGGACTATAACGAGGCAATGAGTGGTCTAGTTATTTCATGCAAGCCAGCCAGGTGGCATGTAATTATTGACATTTGGAGCAGCCAT  
TGGTGCAATCGATAAATCAGAATGGTACCCTATATGCAATGTGGGTTTCGCACTCCAAGGGGTGGTAGAAGGCATCACCATGAGGCTGAGCCGACTGCCGATCGTACCCCATAGCATGAGC  
AGTGCTGGGATCCCAGACGTGCTGTGAGGATGCCTGGTACTCTTCCAACCTCCTTTTCAGCGTTTTATTAGCCTCGCAGAGCATTGCTCCCTTCGCTGTAGGTCAGCAAGCTGATCG  
AGCATGAACTGCGTCCGTGTTGATCTTATCTGCTTAAGTGAAGCGTCCAGCTGCCGTTCCAGCTGTTTCGAGTTCCTTGCTGCTGAGGGGACCAAGGTCCTCGCCAGGAGATTCTCTGG  
GATCTTTGTAAGGCTTCAACCCGAGCTTTGAGTTTCAAGTACTCCTGCTGACTA

>comp137386\_c0\_seq1

AAGAAAGTCATCCCAAATGAAGTCTAAATCTTCAGTAATTCAAAGTTGATAGGTCTGTGAATCTCAAATGAAAGTCATGATTTATGTAGGCCTTGATACTTCTATGGAGTTTTTCACATAGC  
AAATTTGCATTCATGGCATGTGAATCGCCCTTATTATCTTGTTCCTTCATTTAGATTTCTCCTGCTATGTTTAGCAATGTATTAATAAAGTTCAGAAGTTCGTGTTACTGCTGCTACTGCAA  
GGCAATAAAGTATATTAAGT

>comp137441\_c0\_seq1

CCGACGACTCAATTTAGTGTGCTCCATCCCTGGGATGGTAATGGCTAATATCGGCCACGTTGAAGGTGGCGGATGTTAGGATGTCTGGTGGAAATATCTATAACATAAGCGTTGTCACTG  
ATTTTATGCTTGATTGCCACTGGACCGATCTTCCCTGGACTGAGCTTTGAGTATGTTCCAACCTGGAATCTTTTCTCCTCAAGCATACCATAACTAGTTCTCCCGGTTGGAAACTCATAGA  
GCGTCGGTGTACATCGGTTGTTTGTCTGTATGAGTCATTGGAGGCTTGCAAATTGTCACGAACAGTATCCAGCATGGTCTTGAAGTCTCCAGCTAACTTTGTTGCCGAGCAGAAATTGTGGCAT  
CTTGGAGAAGCAGTGATATCTACAAGATGGTTAGGAGGTTTAGTGTAGACGATATAAAGGGGCACATACCGGTGGATCGGTTCCGGCATTGAGTTAAATGCAAACCTCAGCTTGGCTCAA  
GTTTCGTTCCACTTCTTCGGGTTGTCTTGTACTAAGCAACGCAACATGTTGCCTAGAGTGCGATTCACTACTTCCGTTTGCCCATCTGTTTGGGGGTGGTATGCCGAGCTTAATTTAATGTC  
AGTCTGCAACTGCTTCCACAGTTCCCGACAGAAGTGGCTCACAACTTGACATCTCGGTCTAACGTAATGCTCCGGGGCAATCCGTGGAGGCGTACGATTTCTCTGAAAAACAAACGGG  
CAACTCCAAGTGCATCAGAAGTTTTTTTACAAGCTATGAAGTGGGCCATCTTGAGAATCGATCGATGACAACCTTGATTGAGTCATTTCCCTTATGCGTGCAGGTGTAGGCCGAGGACGA  
AG

>comp137464\_c0\_seq1

CTAATGTAGTTTTTTTCATTTCCGGTTTATCTCATTGATGGCTAATAACAAATCACTATAATTTCAAATTAAGACTGGTGAATATATTATAATTGTACAAGACCTTATATATGAATTTTCATT  
AAAAAAATTTATTTTCACTGTAGATTGTTGAACCTTCTCTTTATTTGTACGCGTGCAGGATGTTTACATAAGCTAAGAAATATTCTTAAGATATTAACCTTTAGGTTTGAACAAAGACCGGAG  
TTTTTCTTGTGGAATTCCTTAGAAAAGTAAACGATGGTTTCTCTGGGTATGAATAATTGCCCCGTCTCTGTGTCAATGCCGAACGTCATCCATAGACCAACCAGAATGCGCCACATC

>comp137530\_c0\_seq1

TAATTCATTATATTTGAGGAGTGCTCATTAGTTACTAATTATGTGTGTGCAAACAAGATAACAGGAATCAATCCATTCTCAATTAGACACAAACATTTAAACATCAATTACAGTTACATAGAA  
TCTCAAATGTAAACATTTACACTGTCAAAAGTCAAAAGGAAATTCGACACGTGATTTGCAGTAACAAATCACCATCTATATTATTGCAAAAATACTTAAAAAAAAAAAAAAGGATGTG



AGA ACTAAATGGGAATTGAACTAGACACACGGGGGTACACAACATTAACCGGATGAGCCATGATGCGCCGGCCCTTCATGTGCCGAAAATATACACCACCGCACCTATGGGCCACTCCA  
CCACTGCCGCCACCGCACATGCTAGAATTCCCACCGTGGGCCCTACCACCTTGCACCGGCACGGGTTACTCCTTGTCCACACTGCACGCACAACATTTTCCCTCCAACGTAAATTTGATAT  
CGTAAAGTTTCACAGAGTATCGGCCGAGTTCTAAGATTAGAGAAGAAATGATTACTATAAGTTACCAGTTAAGCTCCAACCCCTGCAATTTAAGGAAATCGAACAGGACGCGTGGCGA  
TTTCCGCTTACGCTGAAGTTTT

>comp137601\_c0\_seq3

ATGCCTTGATCCGAGTCCAAATCGTCTATTTGACAAATCAAATATTTTCAAATCTATGTACAATTATTTATTTATTTCAATTTAAATATTTTAAACCGTTCAATTATAAATCTTTTACATAA  
ATTTAAAACATCAGCGCCTGGGCAGTTTCCTTTTCATTTTCGACTTTAACGACCCCCCAAACCTCCGCTGGAAAAAATCTCTGAACATCCTGTAAATAATTTGCAAAATTGAGTATTTGTCC  
CAAAAATTTGCATTTAGATGAATACAAATTGATGTAAGAATAACAAAGCTTCCACCCCTCCGAATTTAAATTTATCTGAGAATATCCTTACGGAATTTTTTTCCACTTACCAGTACCCTAAA  
GTAAACAAGTAGTTCTCATCGGAAATGCTGCGAGTACTGCTGATCAGAAGCCATGGCCTCTTCCCAGCTTGCCAACACTCCTCATAACTCCCTCTTCTCTTTATAAATATCCTTTGCGCTG  
CTTACCCCTCTCACTCTCTCTCTCTCAACAGGATGGAGCTCAGCGTAAACGAGAAGCTGAAGCTGGCGAAGAAGGGAAACAGAAAAGCTTCTGCGGCCGGCAAAGTGCAAA  
CAAGGGAGAGGAGGCCGAGCGCGGCAGCAGGGCGGTCATTTCGCGCGGGTGCAGGCTTAGTGAAGAGCAGAGGGCGAGATTCTATATCATGCGGCGCTGCGTTGTGATGCTTAT  
TTGCTGGCGAGACTTAGCTTAATCACCGGCCGGCGTCTACCTCTTCTCTCTCTCCAGATTTGTTTCTTTAAGCCAGATCGTCTTCTCCGCTTGACAGATGGGAGCGAACAGAGCA  
AGGAGAAGATGAAGAAATTAGCCATCTTGCTTAAAAATTTCTTTTTTCTTTAGCTGGCTATGATAATAAAAAGCTGTGAGCTTTAGGTAGTAGCTTGTACTTTGTTGTTGTTGGATCT  
AGGATCTAATGTTGGGGCATGCAGTGCATGACTGAAACTCTGGAATCTGTACTTGGATTTGAGTAAGGGAAAGGAGATTAATTTAATAAAAATTTGTTTTTGCAGAAAA

>comp137654\_c0\_seq1

CGCCAGGGGCCTGCCTAGGCTGCGGATTTTCTATGATTTTACATAAGGTTAGCTGCCTGCATATACTCTGCAATATTGTTCTTTTGCTGCTCCTGATTCTTGTGTTTACCACTGGAATAA  
GAGTTTTAGGTTTTAAAAGCTGATGTAACACTATTTTCTTTAACATTCATGTCAATTTGTTGAACTATGTAGTCTAAATGAGATGAGGCTTTTACCTGTATATATTTATGGTTCCCGAAAAG  
AACACTGTTTTGAGTTTGTGTTGAAATTTAGCTATCTAATCTGCCGTTTTGATGCGATCAC

>comp137728\_c0\_seq1

TTAATGGCCCTCCGCGGCCGGCTCCTCCTTTATTCCTTATATAGCTCGGAACTGAATCCCTCCTCCTCCATTCTGTTTCCCGTAAATCGAAACCCCTAACCGAGTTCTCCGAGCGATCAG  
GGGAAAAATGATGGCGTGGAACCGGCCGCGTATAAAGGCCCGATGTCGAGGCCGGCGGAGGAGCGCGGTCTCTCTATCCGTCGATGTTGGAAAGCCCGGAACTCCGGTGGGCGTTC  
ATCAGAAAGATCTACAGCATTCTATCCATTCAGATGCTTCTTACTATTGCAGTTTCATCCGTTGTCATCTTTGTCCGACCCATCTCCCACTTTTTCGTGTCTTCCGGTGCCGGCCTCGGCCTC  
TATATTTCCCTCGTCATCTTGCCATTCTTGTGTTGATCCCTCTATATTTCTACCACCAGCGCCATCCATTAATCTGTTTCTCCTCGCCCTTTCACTGTATCCATCAGCTTCGCGGTGGGATT  
GTCATGCGCATTACCAAAGGGAAGGTTATTCTTGAGGCAGCCATTCTACCGCAGTGGTTGTCTTCAGCCTTACTCTTTACACCTTCTGGGCAGCAAAGAGAGGCCATGATTCAGCTTT  
CTCGGCCGATATTATTTCCCTCACTCATTGTCTTGATTGTTTTTGCCTTCATCCAGATCTTTTCCCAATGGGTAGAATCTCACATATGATCTATGGCGGCTTGGCTGCTCTAATCTTCAGCG  
GCTATATCATCTATGACACAGATAATTTGATTAAACGCTACTCCTATGATGAGTACATATGGGCTGCAGTCGCTCTATACCTCGACATTATCAACTTGTTTTAGCTCTTCTTACTCTTTCCGA  
GCTGCTGATGACTGAGTCATCGTAAATATTACAAGTTGTTATTTGTTTCTGCTACAAGCTTTGGATTTAGTATTAAGAATGTTTTTTTTTCTTTCAATATAGGTTACAGTGCTTTTTTTTG  
GGGTTGGTTCTTTGTAAAGTTGCTTGAACCTATCCATGAATGAAGTTTGATTTTCATGATATTTGATTTTTATTGTATTACTTTGAGGTCAAGTATCTTGACATGGCATGGTTGGAGAATGT  
TTGAAATTAGTGTGTTGCTTAATTGCTAGGTGATTCCAAGG

>comp137750\_c0\_seq1

TTGATTGAAGAAGAAAAATATTTCTTAGATCTAATGCATCGGGATTCTCCTCCGAATGAATCCGGACGCTGCACCTAATAATTCTCCTTATGATGATGTTGTATCTGTCAGAACTTATACTC

TGAACATTTATAAAGTTCCATGCTGATTATAAGTTGATTGAAGAGAAAAAATATTTTCATAGAATAATCAAGGTGGGCAGCTGACTATGTGAACCGGAGTCACAGGTATTGTCTCCCACCA  
CTCCTTCAGCCTTCTATTTCCCTTGCTTGCTCTTCTCATGCCTTGTGTTCTGAAACTTAGGCATGAAAATATATGTAACCAATCCAATCAGAACAAATTTGAAGGGCACAATCATCAACAGAA  
GTGCAACTACACTCAGCCCCTCATTGCCATGTTTGAATGCTTTGGAGTCTTTGAAACAAAGATGGATTTGATTTTTAGTATGCTGATGTTTACTGTCTTAACCATTTTCATCAAAGTTTTTGA  
GGCCATATTGGGCTGATACTATGCTTTCCACTGTGTTTTATCTGAGGGGAGGGGAAACCACAACCTCTTCAGATACCTCTCCAAGTCTTTTGTGCCTTGCCACATCATCATTCCGACGACA  
AACAGTAGGAGCGCGGGGAGGGCCGGACCAAACCATTCCTTGTATATAGTGATGAGAGTTATGATAAATGAAGCTAAAGAGACTGTTGGCCTTTCCCATGAAATGATTCTTTGGAACCAA  
GGTATTAGATTTCTAAGTGGGCTCAGTAGCTCTGTAAGAAAAATAATGCTATCAGTGATTCCCTCTTCTTTAATCCCCCAACAGTAGCATTGGCGATGCTAGCCTCCTTGGCTTCCTCTCTC  
ACCAATTCACCGTCGTCTCCAGTGATGCTAATGATTCTGCTTCTGGGCTGCTTGGTGTATCTCACCACCTTTTATATTCGTTGCATCCACCATTGGAATTGCCAGATTCAGACTCTTAAAGT  
ATGGAGGCAGCACTGCAACAGCTTATTCCTTTTGTCTTCTTCAAACACTATTATACAGTTCTTCCAACACATAATCCCCTTTGGGAACTTCATCAAGCAAAGTGAAGATTAAGAAGTTGATGG  
GAGGAGGTGGAGCCATTCTAAGCATTTCCTTGCTGCATGAAGCCTCATTACTCCCAAAATTTGTTCTGGCCTGCACCTCCCAAGCTTGCAAGAAGGCTTCTGTTTCAGGGTACTTTGCATT  
GAATTTTGACATGAATCTATGCATTAATATCACTTCTTTATGAGTGCAAACCAATGATCTCTACGGGTGGAGCTGGTCATTTCTGGGAACTCTAATGTCACTGGTTCGCGAGTAGTGAAG  
ACTCGTATGTTATGGCTTTATCAAACAAGGGAGCACCAAAAAGTCCAGTAGATGTTGCTTTCACTTGATGATCTATATCAGAAGCTCGAAAGATCAATTTTAAAGGCGTTCTCATATGAAATT  
GATTTAGAAGCCTCAAATAGAGTGCAAGATTTGTTAGAGTAAGTCGGCCTGGCCAACCTGTTGAGCCTATGTGACGAACAACCTCTGGAGTCATTCCATCTCCTTCTACATGCAAGATGA  
ATTCATCTTCTGCAAGTTCAAATCCTGTTGGTGATCTT

>comp137809\_c0\_seq2

TTATATTAAGTTTGAGCTATAAAAATGATTGCAATCATTTCCATAGAAAAATTATCAATCTTTTTTAAAATAATCTATACAAGATATTTCTATAAACCTCAAGGACTTATAATGGTGTTTAAAAT  
AGTGAATCCAAATGTTCTTTTCTCAATGGTTTAGAATTTGATGCAATTTACCTTTTGATCATTACTACTTGTCTTTGAAAGCAATCAAAGTATCATTGAGGAAAAACCTATCCCTAGTA  
CGATTAAGGCATTAATAATCCTACTTCTCCTTTGGCTATTGATCTATGCTCTTGTAAATAGGTTGAATTAGGTAGGTTCAAATCCATGTGATATTCCTTACATAGCAGGTAACCTTCTATGGTT  
AATTTTATTATGTTAGGTTTGGAAATTTGCCAATCCACCCCTCCCAAGTTTTGAATTGAGGCTTCGTTTGGGACAGCTTTTGTATTGCTTTTTAAAATATTTATTAGTACAAAAATTA AAAACT  
GCTTTAAAAA

>comp138007\_c0\_seq1

TTCTCAACCTTCAGACAAAGCCTCTCTCTCTCTCCTTCCCTTTCATGACTTCCAGATTTGAGTTCATATTACGGATTCTGCTGCCACTCTTTCTGCTACTGAAAGCAGGAGTGATAGCT  
GTTAATGGCGATGCGTTGGTGACTGGTACAGTGTCTGTGATCAGTGCAAGGATGGCTCTCGTGGCTTCTTTGATTATCCATTATCTGGCGCTAAGGTGGCTGTTTCGTGCGGCGACCAGT  
ACAAGGAGGAGAGCTCCAACCTTCATGGGATCCTATTCGGTCCGGTTCGACGGCAACCCGGACCTGAGCGGCTGTTACGCGCGGGTGGTCCGCGGGCCGGACGATTGTGGGGCGGCGGC  
TGGCCCGGCCAAGGGCTTAAGTTCATGTTCCGAATGTTTGATATGGAGGCTTATAACCGTCGACCCGTTGCTGTCCCAGCCAGCAAGCCAATGAGTTTCTGCTCCCAGTCCGGGGACCC  
GACGAAGCCCAAACCGACCCACCTGCGATCAACGTGCCGCCGCGGTTGCTTTGTCTCGGCCCTCCAGCACCGCCACGTTGCGGATCGCCGGCCATCCCCTTTTGAAGCTTCCG  
CTTGCTCTTATGACAAATGGCTAATGCCGGCATTCAAATGCCACTGGAGGGTGGTCTCACCGGAGACGCCGGTGGCCTTAGCTTTGGGGCCGGTGGCAGCCGGGAAATACGGCCCGGATT  
TGACGCTATGGAATGGGCTTTACGGCCGCGGCGACGTATAACGAACTCTTCTCCGGGAATCGACGGCGGCGCTGCTTAACTCTTACAACAGCATAAGGTTCCCTTACCCGACGCTAACTG  
TGGTCAGTAATATGAATTCAGCTCTCCTTGGCTCTCAAAGGGAAGCCTTGATGACGGCGTTAAGATTCCGGCGAGCTAACTCCGGCATCTCCGGCCGTTCAACGGTCGCTGCAATTTAC  
TCCTTGTCTTGAGGACGGATCTCTGTTTTATGGTTATTATATGCTTATTATACTGTGTTGCTTCCATCTTCGGTTTATCAATGAGAGTATATTGTGGTCATTAGAGCTTATAATCATGATTAGC

>comp138023\_c0\_seq5

CGTATCCGGCCTTTATAAGGGGCATGGACTTCTTAAAAAATACCATTTCATCCATTCAAATCACGCTGTCACGGAGATGGCGGAGAAGGCGGAGGCATTGGAGTCGAGCAGGGAGAGTT

CGCCTGCTGATGAGACGGCAATTCATATGGCACCGGCAGAGGAGGACTTCGCCGGAGATCAGACTTTCCTGACGCAGAGGCTTCAACGGTGACGGAAGGAAATCCTCAAAGTACTATG  
CAGAAGCACGAGCTGGAGCATTTCATGGACATTTTGGTTCGACAATCCCTCAGGCAAGTCCAAGCAAGAAACCTGGGGAAGCTCCATCCGCCCATCTATACATTCTCAACGGTTGAGGA  
CTTTTGGGGTCTTTACAATAACATTC AACCGCCAAGTAAACTGCCTGTTGGGGCAGACTTCCACTGTTTTAAACATGGAATCGAGCCAAAATGGGAAGATCCAGCCTGTGAAAATGGAGG  
AAAGTGGACAATCATCTGCTCATCAGGAGAAGTTGATAATTGGTGGTTGTACACATTACTTGAATGATTGGTGGAGCAGTTTGACCATTGGAATGAAATATGTGGAGCAGTCATTGCAAGT  
AATGTGTACAACCAATTCATCAACTTCTCCTGATGAGCAGATGATTGTCCACTTTCCTCCATTTTACAGGCTGGATCTTCCATTTTGGCTCGATTCCATGTTTAAAAACAGTGGAAAGTC  
TGCCCCAACAGGCAGTTTACTTGGCGGTTGAATGTTATTGTAAAGACCCCAAAAGTCCTCAACCGTTGAGAATGTATAGATGGGGCGGATGGAGCTTCCCCAGGTTTCTTGCTTGGACTT  
GCCTGAGGGATTGTGCAACCAAAATGTCCATGAATGCTCCAGCTCGTGCCTTCTGCATAGTACTTTGAGGATTTCTTCCGTACCGTTGAAGCCTCTGCGTCAGTGAAAGTCTGATCTCCG  
GCGAAGTCTCTCTGCGGGTGCCATATGAATTGCCGTCTCATCAGCAGGCGAACTCTCCCTGCTCGACTCCAATGCCTCCGCCTTCTCCGCCATCTCCGTGACAGCGTGATTTGAATGGA  
TGAATGGTATTTTTTTAAGAAGTCCATGCCCGTTATAAAGGCCCGGATACGCTCAAGGT

>comp138159\_c0\_seq1

ATCTCAAGTGTACAAATCCAGTCTGCACAATCTCCCCCTGCTTCGCAATACAAGAAAAAGATGGATTTAACGAAAACAACAACAAAAATCACTAAAAACACGATATACTTTAGTATACAATT  
ATCAAAACAAAATTGTTCTAATCAAATCCAAGCTTTAGCTCCAAAACCGGACTGTTTCCACCTTCAGCACTCTCCAATGGCGGCGCAAGTTTAAATCCAGCAAGCACTCGTCTTCCGAA  
CAAAAACAAGAAGAAGAGGAAGAAGGAGAAAATTGATCTCGAAAACCTTTCTTTTCTTACTTTTGATTGAGTCATCAAAGGAAGAAGACAATGGCTGGATAATGGCGGCACCGCCGA  
GTTTCGCCGAGGAGGTTTCTCAGGTGGGCCGTTGGCGAGTAGAACGAGTGAGGAGGCGACTTGGTGTTCCTCGTCCGTGAACTGGGCCCAGGAGAATGCGGCGGCGGAATAATTCC  
TCGCCACTGGCGCTCTGGATGGCATCGCATGTGACCGAACAGAGCTTCCATGAGGGGAAGAGCTTCCCGCATTAGTGCAAGGCGGAATGGCTTCGGGCATGCCGAGAACTCGGGCT  
TTTTTGGGGCCCGTCGCTTTGTGGCTCCGGCGGGTGGTTTTGGTGGTGGAAAGCGTTGGGGATGATTGGAAGGAGGAAGAGGAGGCTGTGAAACGGGAGGATCCGCTGGAGGAGGAG  
AAGAAGGATTTGAGGAGTTCATCATGGTGAAGTTCGAGATTTCAATATCGAATTTCTCGTGCCTGAAGATCGAGCGAGCGGCAAATAGCGAACAAGAGAGCGGGAGGGGCTCTGTGTGG  
GTGAATTCGAACGAGGCGAGAGGG

>comp138208\_c0\_seq1

GCATTGAAAATAGTTTTTTTATTGAATGTTTTATTCAAAGAAACAGAGATTAATTAGCACATAAAAATACCACCAAACAACAAAATCAAACAGGATAACAACAACAATAGTATATGA  
ATTTTTACCCTTTACAACCTATTTTTACTAAGCTACGAACAGTTATTGATCGAATAACTTAACTCATAGCTAGTCCGCCATGCGAAGAAAAGCTCGGCAGTCTTCAGATCCTCACGAAGAAA  
ATACTGAGCTCGGGGCCGCTGTTAGTCTCCGGATTAAGCATGTAGAAAAGTCTCCGAATCCTTGCTGCCAACAACGCGGTCAAATGAGCCCGCATATACGCAAGCTCGCCGTCATTTGCG  
TCGGCGAGGTGCGGCGGAAGAACCCCGGCGCCATCGACACCGCGTGGAGAAGCTGCAGAACGTGGAGATCCGATTGGTTCGGTTCGCGCCGCTGCGCATAGCCGATCCTCCGCCCGT  
TTATGAATGCGGACCAAATCTTCTTCTAATAGCCGGACGCGGTCCCCCGTTTTTTCTCGCATTCGAGCGCCACGCGCAGCAGCCCGTCCCCATATCCTGCATGAACCGGGCGGTCTG  
GACCGGAGCTCGAGGACCAGAATGGGGATGCTACGGGAGTTCTTGGATGGCGATGGAGATGCGGGCCTTGCGGTAGCCGAAGAGAGTGCCGGTGGTGCGGGTGGCGCCGTGGATG  
TGCCCGTTCGTGGTGGGCGCTGGGGGCGGATCGGGGGATGGGGGAGTGGAAAGCCGAGGCGGGGCTGATGATGGGGAAAAGTGCAGGAGCGAAAGACGCGGAAGACTTTGGA  
TGGATTGGGGCCGCGCTTGCCTGCGAAGGGGGTTGGAGGATGGTGGTGGGGGAGGCAACGGTAGGGCTTGTGGAGCTTCCGGCAGGTTTTGGAGGAAGGGGAGGCGGCGGCGGCGG  
CGGCGGCTTTGTCATGTGGAAGATGGGCAGCGGAGGACGTTAGGGGTTGTTGAATTGAACGTATGTGTATACGAAGCTTAGCTTTGGGCGGGTTAATGCGTTGTACGCACGTCGTCGGAA  
GAGGAAGGTAGGAAGGGATCAAAGACGCAGTAGGAGAGAGAGAGAGAG

>comp138323\_c0\_seq1

CGTGTGACTCTCACTGCTCAATTCATTTCTATTGCCTCTTAAAACCCCTAACAAACCCCAAGATCTCGAAGAAGTTGAAAGGGAGGAGTAAATTGCTGATTTGCCAATCAGAAAC

GGAGATTGAGTGACGATCTTTTTTTAAGGGCAATGAGTCGGTGTGTGGGCTTTCTGCAGCGACGACGAGCTTCAATGGCACTTAGCGCTCAAGACACACA ACTATGGAGACTTCTCAT  
TCGCTATTTCTCAGGCCAACTCTCAGTTTCGAGGATCAGGGTCAGGTTTTCAATACTCCTTACGCGACCTTCATTGGCGTTTACGACGGTCATGGCGGCCCGATGCCTCACGATTCCTCAA  
CTCCCGGATGTTCTCTAATCTCCACAGGTTTGTACGGAGGATGGAGGGGTGCAATCGAAGTGATAAAGAAGGCCTTCCGTGCCTCTGAGGAGGAGTTCTTGCAAATGGTGGGGCGTTC  
TTGGCAGTCTGTCCGCATTTGTTTCGGTTGGTTCGTGTTGCCTCGTTGGGGTGATAGTGGAGGATATGCTTTATTTGGGGAATTTAGGAGATTCCAGGGCGGTGCTCGGCCGTAACAGA  
ATACCTGGGGAAAATGAGGTGGTGGCGGAGAGATTAACCTTCTGATCACAATGTGATGGACGAGGAAGTCAGGAATGAGGTGATCAACCAACACCCAGATGACTCCCGTATACTAGTTCAT  
ATAAGAGGAGCGTGGCGGATTAAGGGGATCATCCAGGTATCACGAACCATTGGGGACTACTACCTGAAAAACCTGAATTCAGCAGAAGCCCACTGTACCAACAGCTCTTCCCTCCGC  
CACCCCATCAACCGGCCTGTATCACATCCGAGCCATCTGTTGGGAGGCGCAGGCTGAGACCTCATGACTTGTTCTGTGATATTTCGTTTCAGATGGCCTTTGGGAACA ACTAAGTGATGAA  
>comp138461\_c0\_seq2

AGGGTTAGGGTTAGGGTTAGGGTTGGGCATAGGAAGAAAAGCAACAAGATTAGGGTTGAGTTGTAAGATGGATTCCAGCTGTTGGCGAAGGAAGGGAAGAGAGGGTTGTGGAGGAG  
AGGATGGGAGAGGGTATTATTAATGGTTGCTGGATCGGAATTTGCGATCAGCCTCGCACTTTCTTCTGCAAGGGCATCACAGAAGGCTCTGTGAGTGATGAAGCTGTCCTCCCTGCATGCA  
AAAATTGAATTTTTTTAGCATTCTATTATAACAATTCGATGATCAGAAACGACAATTTTTTTAAAGAGCCTAACTCGCTTATATGGTTTTGGGTCTGCATGTAAGAAATTTAAGAACTTTGCTG  
AATTGTGGAGTTAATGTGTTACGAAATTTGGATCTATAAAATGAGCAAATTTGCTGAACATGTCTTGATTTTGTAGGTGTAAACATTTCTCTTCCAACACAATCTATATAGAGCTTCAAGAGC  
CTTTCTAACTAGTTAATACTTCTCTTTTTGTTTTGACTTCGCTTCTGAAGAATATGTATAAGAAGAATAAAAAAAAAACTTGGCTGCATGGCTGCGATGGAGTTTTTTCTAAGATCAAACCAAG  
GTTTTTCATCAGTAAT

>comp138484\_c0\_seq4

ACGATGCTCGAATGACCTCCGATTGACGAACGGACTACGTCAATGCGACCGGGACATTGTCAATACTCTAAATGCACTACCAATTTGTCTAATATCTATGTTCAACAAAATTGACACGTAA  
AACAAGACAATTACACATTAATCGAGAGGTTTGCACACAAAACGGAGCGACTTTGGGTGATGCATTGCAGTCATCTCAAATTAATGAGGATACCAACAATAGTATATCATTATTAATTTTC  
AAATCTCTTTGGCTGAAATGGAAAGTCAAATGAAGGATCAAATCAAAGTTAATGCAAACCTGATGTTATCTCGAATGCTTCTACCTCAAATCCCAATTCAAATCCCATAAATCCAGCTGAAT  
ACTCTGCTTTGCGTCCCTTCTTGGCCTAGATTTTGTGTTCTCTTTCGCTTAAAATGAGAAGACTAGGCAGCTCGCGTTGGTGCTGGGTCACTGCCTGCTCTCTGAATCTTCTCCCGGACG  
GACGAGTCTGCCGGAATTACTTCTCCAGCTCTTCGATCTGTACCTTAAACAAGATCGTCGAAGCCTGTTCTTCTTCTCTTCTGTTGGTCCGAACCAGCAACCCCTCCGCCA ACTTCCC  
AGCTCTATAGTGAAGTCCCTCCAAA CTGTATTATAACAGCA

>comp138500\_c0\_seq2

AACAACAGCGTGAGCTCCTTATTCTCATCGATTTCTACATTCATGCGAGGGAGAATGGTTTGTCTCAGTGACGGAAGCTTCGAAGAATCTCAATCCCCCAAGGTAATTTGGTTTCAAATG  
CTCACTTGTGTGCGCTATACTGCGCGGCAATAGCATATATTGTTTCTGTGTTGGTATCTCTATTGTCTGGCTTTTCAGAGTGGAAAATGCAATATCAGATTCTGAATT

>comp138501\_c0\_seq1

GAGAGTTGCCAACCAATAGGATATTGAGGAAGCAACATATGCCCGCAGTGTGGGTGTGTTGGGAGACAAGATAAAATGTGCTTTTGGTATGATTGATATGAAGCCCAGACAAAGAGGCTA  
AACCGTCAATATGTTATTAAGGGCAATAGTAGTATTCTGAGCATTGGTTTTGCCAAACACAAGGAGATAATTAGCATAAGGCAAATGTGTGAATTGTGTACTATCCATATAAGCCCTCAAAA  
TTCTGACCTATAACAAATGAATCTAAAAGATTTGAAGGTCATCCATAATAATGCAAATAGGTATGGAGAGAGGGGACATCCTTGTCTCAATCTAGATGAGGAACTAAAAACCTTTTAGAC  
CACCATTAATACAAACTGAATAATAATCTCATTGGTGCAAGCTTAAATCCGAGAAATAAAAAGCAGAAGGGAACTTTTTTGTTCAGTCGTTTTAGTAGAAAGCCTCTTGA AACCGTGTT  
CAAACCTTAATAAATATCAAGTTTAGAATTTTTTTTTTCATAACAGAATGATTAACCTTCCCCAACAACTCAGAAGCAAGAATAATATTATTGTTGAAATCCTCTTTTGAATAAAGCCAAA  
TTGATTGGGATGAATGATATGAGACATAATAGGTTTGGCCTATTAGCTAAAATTTTTGCAATCACTTTATAAAATATATTGCAAATAGAAATAGGCATGAAGTTAGAAATATTATTAGCATGA

TTGGTTTTGAGAATCAAAAATTATAGCTGTGGCTTTGTCTCTCATTGATAAATAGCAATGTTGAAAAAGAATTTAACAGCCTTGTAACCTTGAGGTCCAATAATATTCCAGTCACTTTTATAG  
AATTCAAATGTGTATCAATCAAGACCAAGGACTGAAGAGGTAGGATTAGAGAGAATGATATATTGGATTTTCATCATCTGCACTGGGGAAGTAAGAGAAGCAATGAGGTGGGGGGGGGATT  
TATTGAGCCTAGTGAATGA

>comp138534\_c0\_seq2

CAAATACAAATACAAAAGTGTCAATAATCAAAAAGATAGTCCACCCTTTAAATATTAATAAGAAAAGATTTGGTATATCTATAATTAATTTTGAATACCGTGCGCACATTTGCTGCTTTTCTA  
AACATATAAAGAAAAAGCATGAAGATTAATGACCCAGCAGTAGAGCTCCTCTCGAGCTTTTATGTTGCTTTACCTCAGTACTGTGTCAATAGCTCTTCACAATCTTTAGTATTGAACTGTAG  
GTCCCAAAAATTGCACTGATGATCCCAATAGCTACAATAACGATGGATACAGCAACCTGGAACCTTTGTGGCTTTGTTCTTTGATAACTTCAAGAAGCATAGGGTTGGCGCTATGATCGCCAT  
TAAAAACAGCCTGGGTGAACTGCAACCATGAGAAGCAAGTTTTCCATGAATTTGTACATGACAAGAAATGCTTTGTCTCCAGTTAAACTGATCATTTTCTTGAAGTTCTTGTCCAAACC  
ATCTTTCTCTATAATACTTCCCGAAAGGAGAGGTTGCTTCAAGTTTAGATCATGTCCACTTTGTGAGCCAAGGTCAAGGCTTGAATATCT

>comp138541\_c0\_seq1

CCACAATTCGCGCCAAAAGTGACTAATAAACTTCACGTCGCGATCAGACGTGATGCTTCGATGGAGGCCATGGAGTCGTACTATCTCCCTGAAGAACAGTCGAGCAACACCGAGGGGGT  
CGCAAGTCTTCCTGCAAGCTATAAAATGTGACATTTTAGAAAACCTATCTACTACAACCATGATGGAATCGGCACCTTTTTTTGTACGAGGTAGCCCCAGTATGAAGTCCATACTCAAATCC  
TCCCAAATAGACATGGGCACGGGTAGAGGTGTATATAAGCCGGCATTTTGTGCGAGCACCTTTATACACCTGGCACACCTGACATCTCTCAACAAAACCGAGAGATATCTCGCCGCAAATGA  
GGCCAATAAAAACGTTGTTGCATTTGCTCCACTGTCTTTCCCTTCCCAGGTGAGCCGCCAGTCTCCTCCATGCACTTCTTGTATTAATTGCAACCCGACCGAAGAGAAGGGAATACATA  
AAGAATTACCTTTGAACAGGTAACCGTGGCGTATGAGATAGTCTCCCAAGACCTGTTGATGGAGCAAATTTCCCAAGCCTTAGCAAAGTCTGGATCTTGAGGATACAGGTCTTTAAGAG  
ACTCTAAGCCTGTGAGTTTCGGTCTGCAGCTTGGTGATCAAGGCTGACCGCCGGCTAAGTGCATCAGCCACCCTATTTGACTGCCCGATTTGTGCTTTAGAACAAAGCTAAATTTTTGTAA  
GAATATTATCCACCGCATGCATTCGTTAATATTCTTTGGGTATTTAGATATTGTAGCGATTGGTGATCACTACACAAGATAAAGTCTTGGTGAAGTAAGTAATGCTCCCATTGCTTCAA  
AGCTCGAACAACCTGCGTACAGTTCCTGTTTCGTAAGTGGACCATTTTTGTCT

>comp138627\_c0\_seq1

AGGGTGTGCTGAATCAGGCCAGACGGAAGTAAGGAGGAGGTCGTTTCAACATGCCTATGAGATCCGGATCAGGTACACGAAGAAGTCGGCCTGAGGTAGGGTTGGTTCGGCTTCATTG  
CTTAAGGATCAAGCGTAGGGTCTCACATGGAATCGAGCCATGCATATGCAGGCCAGGCGCTAGGAAAGCGAGCTTCTCGTGCGAATTGGAGAATGTAAGTCGGGCTGGAGAGTTGCAGG  
TGACAGGCTGGATCAGAGGTCACGAGCGGAAGCAGTTGGGGTTCGTGCGTCTGGGATCGGAAGAGGGGGATCAAATGATGCTTTTGCATGCGGTCTCTGTGTATGACAAAGAGGGAG  
TTCGATATCCCTTGTTTGTGTGTGCGCCAAAATTCGAATGCATGTGTTTTGGTCAATGTCGTGTGAGGGATGGTTGTGAGATCGTGGGATCATGCGTGAGTGTCATGGATCGTGTGTGGGG  
GCTGGTTCGGCTAATCAACAATCAACATACTTTACACCTTCGCAGATAGCTCTATGATATACACAATGGTATGTACAATATCAGTCAATTTCCAATGAAGTGCGAGATGTCAACAGTACATTC  
AAAATAAGAGTGAGATATTGAAAAGCTATAAACTAGATTCTACAATACCTAAAAGATACGATCAACAATTCATGAAGGTTTGAAGAAGAGCCTTAAAATAAGAGGATATGTTGCCGG  
TGATTTAGGAGGCCTATATACTTGAATAAATAGTATTAGATACATCTACACTTTGGGTGACACTAGCATCAAGCTACATGTTAACTTAAAGAACAAGTTGCATTATTAATAAGGCCAA

>comp138670\_c0\_seq1

TAATGCAAAAGCTTCTACTTCAGTTAAGGCTTTCACTGTTCTTGTGGAAGAAGGAGATTGGCTCCAGCTTTTGGATCTAAAGCCCAGGTCAACAGCTCCTCGCCACAGAAATCTCCTTC  
CTTGAGAATACTTCTGTTGAAGAAACCACTTCTGCCACCGTCAGTGGTGATGCTCTCGAGTCGGCCGCGAATGATGAAGAGCATTTTCATCAACTGGATCTCCTTCTCTGACAACATAGATG  
CTCTCAGTGACAGGCTTGGTTTCAGCCGTTACATATGGCATCTAGTAATCGTCTATCCATGTTTTCAAACAAAGGAACCCCTTCTACCAAAGCTAAACAGAGATGGCGTTTGATATCCC  
TCCTAAGATCCTTGGGAAGGCTCTGGACCAAGTTCTCTTCATCAACACCTCTCGTTTCCAGCCACTTATATTGATCATAGCGCCTAACACGTTCCCTGAGTTCCTGTGGCAGTAATCTATGA

TGCATCCACTGCTCTGAGTCGCGCCTTTTCACTCTCATCTCTTCCAGTCTTATGGTCAGTGACTGAAGATAAGTCTGCATGTTCCCAATTAGAAGGGCAAAGAGAATGAGTCCAAGTATAG  
AAAGAGCAATGGAGAAAACAACCTCCCCAGGATAAATACTCGTTGTGAGACCTTGGCCAAGGGTACTCAGGTTTTGTAAACCAAACCATAAACAATAACAAAATTTGGAGACGAACTTA  
TTTGATGTAATGATTCAGAAAGTTACAGCCTGAGTGTAAGATGCCAAAATTAATTGCGGATTATCAACATCCACAGAGCATTGTTTCTTAAGAACTGCACTGCTGACATTGGACCATTGATC  
AAAACCATCAAGATGATGATCACTGCAATACAAGAAATCCCTGAGGCATCCATTATACTTTGAACAAGCAAGATGCCAACAATCATCCTGACGTTCAACAGATAACAGATAACAAAATGC  
ACCCACTATATGACTAGCAAGTAGAAAACCAATAGGTAGTATGCAGCGCCAGCCCAAGCAGTTTCAGCAAACACACCAGTAGTTTCGTTTAAAGCTCTGATGTCAAAGGAAAAATTCTGAT  
AAATCTGGGAATATACTGAAGGAATATAAGGAAGAGCAATATATTTTTTTGTGGCCAGCACATCATAACCTTCTGATCGTTGGAGAAACCTCCAAACAACAATCTGT

>comp138722\_c0\_seq1

AATTTTCTTCAAAAATATGTTGGGATTAATAATACCAATCATCAGCAAAATCAGATACGAAATTTGTTAATCTTCATTGAAATCCCAATGAGAACTAATACTGCAGATCAAATCTGTGTGTT  
TGATCTCCTGCTTCGAATTGATCAACACAAGAAGCAGGGCTCAAAACTTCCATATCATAATTCATTGAAGAGCAACAGGAATCCATGTCCTCGTCACAATAGAAATCAAAATCGAAATCCC  
TCCCCTGCATTCTCCTGCTTCGCCGGAGAACAAAGTTTCGACACCCAGTTTCGGCAGAAATGCCGCTTTCTGTCTGATAGTTGCTCGGACTTCGGTCCAGTTTGATCCCAAGTCCA  
GTTTGCTGGTGGCGACACCAGCTGCTGAATCCCTCCATCGAATGCTCCATTGGGCTTGGGAGTCTTCTTCTTCTTCTTCTCCTCATCGATTTCCGCATCCCATGAATCAAAATCCAGCGTTG  
TTTTAGGAGAGATCCACTTCCACTGTTCCAAATTAACGGGGCAGAACAGAGCATTCTCGCCCTTCTCTGCTTCTGCCACAAATGGATGGCTTAATAGCTGCTCCGCTGTCCATCTCTC  
CTTCGGATCTCGCTGGAAGCACTTCGTAACGAAGTCTTCGCTTGGCTCCGAAACCCACTCCGGCAGTCCGCGGACGTCGGAGGTAATCCAATTCGATGAATTGCCGCAACGGGATCATC  
GGCGTCCGGCCACGGCGACTTCCCTGTGCGCATCTCCACCACAGTACACCCAGCGACCACACATCTCCGGCAATCCCCTGCTCCTCCCCTCGCACCACCTCCGGTGCCATGAACGCCGG  
TGTCATCCGCAACCCCTTTCCAATACGGCGAGCGCAGCCAAAGTCCCCGAGCTTAATCTTGCCATCAGAGCCCACGAGAACGTTCCCTTCCCTTGACGTCGCAGTGACAAATGCCGTT  
GGAATGGAGGTAGCGGAGTGCAGAAAGGATCTGAAGAGTGAAAGATCGGATTTGTGCTCTTCGAGATGTCCGGCGTGGTCCGACAAGGCACCGCCGCGGCCAGCTCGAGAAAAGAG  
GTGATAAAATTCGCCAGAAACGCTGGAGCCGAGGCATGATATGATGTGAGGGGAGGAAAGCGAGGAAAGGATGCTCCGCTCCTTTTGAAGGAGAGCAGATCGAGAGACGTGGGAGGA  
CTTGACAGCGAATAGATCACCGGAGTGTGCTGAGCCGCCAGGGAGACGATGGCAGTGGCGCCGCGGCCAATGACGGGGCCAAGTGTCCATTGCGCCCTGCATGGCCATTGATCCAAATT  
CTTCTTAGAGCTCCGCACAAAAGGAATCGTAACCTCTCGACATCGCTTCCCTGGCTCTATATAAAGGCCGCAGGCAGAGAAGGTAGAAATGCAGAGAGACGTTGA

>comp138756\_c0\_seq1

GTCCCTTGGAAAATATGTTTTCCCATCTTATCCAACCTTGTTAATAAAAATTATCACCAGCTCTCTTTGTCTATCAATTTGGTTGGCTTCCACTTCGATAGAGGATCAAGCAAATTTTTTCCA  
TTCCCTTAGATATATCCTTCCATTATACACATGGGATGAATCCAGCGTACAACCACGCCCAAGTGCAAGTCTTTGTATTTCCATTCTATATACCATTTTATGCCAACATCTGCTCCACCATCAG  
CAGCTGGTCTTATAATAAATCTATATGCTTCGTAAGGAATGTAATGAAATGATTTATCATTTCAAAATTCG

>comp138834\_c0\_seq2

TCAATCCGTTTCATGCTAAAGAGGCCAAACACTCTAAAAGCCATAGACAATAAACTTTATCTTACAAGAGGAGAAGAAGAAGAAGAAATTTACCAACACCAGAAATAAAAATGTAGCAA  
CTGCATCTTTTCAAAAAGTTAGCAGTATTTTCTACTAGTACCAATTCAACATTATATTTTTTTTTTCTAAAGTAGGACTTACTTGTGGTTCATGGAGATAGAAAACACTATTTATTAACATACG  
TGGAGAACATTTTCTTCTGCAAGTGGCTTCGGAGATGCAGCCAAATATATATCCAAAACCTTTCTTCTTGGTCAACTTGCCACTCAAGAAGACTTCTCAGCTCATCATCTTCAGCA  
AAATCATATTGACTTTGGAATGCACCTACGTCTTCTCCCTGTAGAAAGTCTCTTTATCCACCACCATACTGAAATCATAAACCTGACTCTTGACTACACCCTCCAACGCCGACCCATCACA  
TCCGTTAATTAATCATCATCAATTCTGCTGTTCTTCCATCTTCAACTTCCGTTCTTCGAGAGCCGCCATTGCCGATTCCCATCGGGATAGCTCGGAAAAAGCGTAGGATAGCTCAAACCTGGA  
TCTGCTCCAGTTGCTGCTGGAGTCCAGAGATTGTTCTAACGCAGCCGTAGACAGGATCTATGAAATACATTTTGGACTCATAGACAAGTGAAATTAATGATCTTGCCTCTCTGGGATG  
TAGATCAGTCAAGATCTTGCCACGTTGCTGGCACCGAAGACGCGGTGAACTAGGGCAAACATCTGCTGTTGTTCCGGGAGGAAATAGGGTGCGAAGATGCAATCAGGATGACATTTT

GGCGTAGATATTTGCATGCAGCGCATGCGGTATTTTGTACAGACCCCCATTCCGCTGCCATTGATGAGGATGATGATGATAAGACAGAAGATGGGGTAGATAGGATTGGCGATTGTTGATCG  
TCCATCGATGCGAGGGTCAATTGTCTCATCTCAGATAGATTCATCAATCATCTATCGATCAACAGAAGAAGAGCACGGAGGGATTGTAAGTAAATCATCAAAGTGAAGGAGAAAAAAGA  
AATTGCAAGAAGGATTGGCATAAACAGATCATCAACGAAGAGATCGA

>comp138837\_c0\_seq1

AATAGGTAGCTGTAAAAGTTAAAAGCGAATAAATAAAAGATTTTAAAAGTATTATTATATAATATAAGACAGTACCGCAAGGGAAAGCTGAAATATAATGAAAAGTTAAAAAAGGATAAGAG  
TTAATCGTACCTTTTGTATTATGGTTTAAACAAGATCTGATGATAAACAGAACAGCACCCGAAATCTGGAGAGCTAACCAAACCCTCTCAAAGGAGAACTACACAACCACTGTTGCAAGAG  
TGGTAAAAGAGGTTTGGTTAGAGATGATATGTTAACGCGCCAGATGATAGCTGGTTTTCTTAGAAAAAAGTTTAAAGCTTTTCTCCCTTATTCACAGTTTTTACCTTAAAGGAAAATATTAG  
GAAAGAAAAAAGGGAAGAAAGAGAAAAAGAAGATAAGTTCTTTTCTCAAAAAGGAAACAACCAGGAAAGAAGGAAAGACCAAAAACAAGTGAAAAGGGAAAGGATCAAAGTAGGCC  
TAAAAGCGGCCATCTAAAAGAAAGCGTTAAAGCTCAAATCCTCTTAACCCGAAAATTTTGTACTAGATCCAACCTCTTTTAAACTAAAGGAAAATAATAATGTTAAAACGAGTAAGAA  
AAAGACTTTGTTACCCACTAAAGGAAAATAAACAACCAAGAACGCCTAAAACCACAAGAGTAAGCATCAAGGAATCCTTCCCAACACAGGAAGTGGCCAAACAAGGAAAAAGG  
GGAAGAAAGGAACTAGGCAAATAAAAAGGGGGACTGTTTACCAAAAACATAGCCCCACGAACTTCATATGTGGGGTGCAGCCTGCCAGTGGAATTTATTCTAAACGGCCGCGGTATTT  
TGACCGTGCAAAGGTAGCATAATCACTTGTCTCTTAATTGGGGACCTGTATGAATGGCTTTTCACTCTTCACTGTCTCTCTTCCCTCCCTCCTAATCTTCTAATCACGTGAAGAAGCGTGA  
ACAAATAAGAAAGACGAGAAGACCCTGTGAGCTTAAAGCTAACCCCTGAAATGTCGTCTACCTTTTTTCTTAGAAAAGAGGTAAATTTAGATAAAGTTTTGGTTGGGGCAACCGTGGAGA  
AAAAGAATCCTCCAGTTAGTTAGGAAGAAAACCTTTACCTAAAAAATTTAGCGACCCAGTTACTCTGGTAAACGGAAAAAGTTACCGCAGGGATAACAGCGTTATCTTCTAAGAGCC  
CATATTGACGAGAAGGATTGCGACCTCGATGTTGGATTGGGGTAACCAAGGGTGTAGCAGCTCTTTAAGGTTGGACTGTTTCGTCCATTAACCTCCCTACATGATCTGAGTTCAGACCCGAC  
GTAAGTCAGGTCAGCTTCTATCTTCTAATAACCCTTCTAGTACGAAAGGACCGAAGGGAGGCCTTCAATGACCAACGTTAAAAGGTAAAAAACAAGAAAAAAGTTAATAAAAAAAA  
AA

>comp138882\_c0\_seq4

CACTTTTGACACAGAAGGAAAAAATACTTAAAGATAATACTCAAGAAATACTTAAAATCCATTCAGGAGTAAAAACAGGTTGTCATTTGAAATCTTTATTTCAGCTTTTCCACTGCATTGC  
TTCTATGGAAATCAGTCTAGAAGTGATGAAGTAAATATCATTGCCCTGGAGTCAAATTTGCCTTAGGATCATACTTCTTCTTTCAGCTTACAAGTCTCTCCATTTTGATCCAAAATAGCTC  
TTCCACTCTCTGTAGTTTTGTAGCATGGCGTGTACTCTTTGTCCCATTTGCCATTCTCATTACAGAAGCTCCTGATCTCCTTAATGCGACCTAAAACTCGCTCCACATCATTGGCATCAGCG  
GTGATCAGAAGTCCGATTTTGTAAATGATTTCTTCTTCCCTCCGAAACATAAGAGACCATCTCTCATCCCACTTGTTTCTATTTCATGGGATAAACAAGATAGACACCCAAGGGCTTCTCCTC  
TTGAAAATGCCCTTAAAGAGCTTCTCATTGAAAATGTTTATCTTTGATTGGGTACGATCAGGTTTAGCCATGGATGATGAAGGTTCCACAGGTTACGACGACGGAGCTTCTGCTCCTCC  
CTGCGAACCCGGTCTATGAATGTGGTGAAGGGAGGTCTCTGGTAAACTTGACCCGTAAGCCATTGATCAGCCACTGATAATTGTTTCAATCTCCTGGTGCAGAGTGGATGCAGAGCTTT  
CACTATAATGAAATGCTGCTTCAATGAGGTAGATCCCGCATTTGTGGTACGCTAAGGCGCCAGCGATCTCTCGATCCTGTACAGACAGAAATGGAGAAATAAAGTTTTCTACATGACTGCT  
GTTTGAGAAGAAGAAGCCTTCGATGTAGTCAATCCTTTGTTGCTCTTTTCATTCCATCCAAGGAAATCAGTCACCTGGCCGCGTGGAGTGACAGAGAAAGAGCTTCCAGAAGACTTAT  
AAGAAAATCGATGATCTTACAATATCAAGCTCGGAGTTGGGGCAAAGAACGCCGCCGCGCTGGCTCTGACGATGCCGCCGAAGTCGGTGGAAACCTCCTCAGCAGCTTCGTCGTCG  
AATCTGATCCGCGCTGCAATGTCCAGTTCTGAAACATTTCCATCACAGTCTTCTTCTGCTCTCGGAGGAACAAACTTCCATAATGAGTTATTTATAGGACTGTAAATTATATATGAGATATTG  
TAAATTAAGTATTTCTTGTAGATTGAAGGCAGCGAAGCAGAGATGTTATGTACTGTATTGAGAGA

>comp138887\_c0\_seq1

CATCGAAGAAGGTTCTTCAAGGAGCCCGGTGAATTAGGCCGAGCGTTCCTTCTATTGAATTCCTAAACCTAGATTTCTTTCCGATGGCCGGAAGAGGGAAAGTGATCGGTGCGGCGGCA

TCGAAGAAGGTTACTTCAAGGAGCAGCAAGGCAGGGCTTCAGTTTCCTGTTGGTAGGATTGCTCGATTCTCAAGACTGGCAAGTATCCGAGCGCGTTGGTGCTGGTGCGCCGGTTTACATGGCCGCTGTGTTGGAATATCTTGCTGCTGAGGTTCTAGAGCTTGCCGGGAACGCTGCCCGGGACAACAAGAAAACGAGGATAGTTCCAAGGCACATTCAGCTTGCTGTGAGAAACGACGAGGAACTTTCAAAGCTCCTTGGTTCTGTAACCATGCTAATGGCGGTGTGATGCCCAACATTCACAGCCTTCTCCTTCCAAAGAAGTCCGGATCTTCAAAGGCCGGTGTGATGCCGACAACACTAGATTGTGCAATTTCTCATTCTTTGTTCTTTCCGTTTAGAAATCTCGGGATTTGTATATGAGTAACCTTCTGATATAGTCCATCAACTTGGAACTATTATTGCTAACGTTGTTTGTCTCTGTCCAAGTGTTACAGAAATTGTAGGTGCTTGTCTGACTATTTTCATGGTGTGTTGGTTCTGTGATTACAGTGATCTTTTAAATTAATTTAGTTTGTAAATATATTTTTGGAGATTATAATCATGTT

>comp138965\_c0\_seq1

AATGTAAAAAAGTAGTTTAATAAATCAGCAAATTAATTTAAAATGTATAAAAGCAATCTTTTTTGTGTTATAGAAATTGAAATAAAATGCAATGAAACATCTGAGGTTTTTAATGAAAAAAGAGAGCTTTGTAAACCAAATGGAGGATAAATATGTAATAATTTGGGTATAGGGAAGACAATTAGCCCCCTCAAATCTAGACATGATGAACTCATGCATGCAATGTTTCTCATGTGCACGTGAAATTAGCTAGGGTTCATATGCATGCATTGTATTTGTGCATGCTTTATTAATTACTTAATCTATTTCTTTAATCAATTAAGTATAGAGAGAGAGAGGTTGAGAGAGAAAGAGAGAGGCAGAGA

>comp139069\_c0\_seq1

TTTTTATATGATATATATTGATCCTAAACATGGATCGACACCTAGTTAGACTCGATAGTACCTTTGGGCACGCGCACTCTGGCCCTCAGGTACACTTAGCTATTTAAAGTACCTAACTTGCATATCAGCTCTGGATTATTGGAGGCAAAACGCAGTGTCTCACGAGAGAAACATCTTTTGGGGTAATAATCCAGAGCTTCTATTAGATCTTTCTTCACCATTCGCCGTAACCGCTGCAATTCATACTTATCCAGGAACTCTGCGAGAGTAGCACTTGATGCTAGCTTCTGAATGAATTCGTCTATAAACATCACCGGCGACGAAGCATATATCAGCCGAATTTCTTCAGCGCTAGTCGACGGTGTGCTTGAAAGACCTCACCCATAGCTGTCAAGAATCTTCTCCCAGTTTATCCTGTTCTAAATACTGCCTACTCAGGGTATTGCTAGCCAGACTCCTCAGTTTACGCCTCATTGCAGATACAA GACGTTGAGTCTTGATTCTCGGACCAGTGACATGAAATTGCTCAGGCTCACGCATAAAGTCTAGAGGACTCAGTGTTCAACTTCTTGCTCCATTACAGCATTCAAACAGTGACTCAACA GTGGATACTCATAACCAAGTCTAATCATCATGCCTATAACCCTCCTTGGTTACATTGGCTACCTCATTACACCCCATCTGTGATATACTTCTAATCCCAGCACCGCCAAAGCTTAGGGGAGTAA TACAGAATAGCCTATAGTCTATAGGGTATAGGCCATGATTGTCTGCAGACGAACCCCATTCGGTAGTGTGCACACAACAGTTCAAATATGTAACATAGTGGCAGATATCTATTGGTGCA CCAACACCATGGGCTCCACGCATCTTTCCAAAGTATAACTGCTCATAGTCCGAAGCAGACATAACCTCCTTCAATTCCATGTCACCGATCGTACAGAAGCTTTTTCAGTCCACCAGATATGA AACTACCATCGACGACTAGTTCGTTACGATTACAAAATATCTCTACTGATGAATGTTTATCCCAGCTTAACTCTCTTCCCTAATACACGTAAGTCCAAAGATAACGTCATCTATCACATCAC GCGCAGCTTTCCAGCATTCGCCGTCTCTCGTTTATCAGACTCTATTGTAACTTTCTTAAATCCGTCATCGATGAATGATAGAAAGTGCGATTTTCTTTTAGTAGCCCTTTTCCCGGCAGA TACGGGTCGAGAGTCCCTGCGCAACTATTTCCAGCCATGTGTTACTGGATCCTCGCATGCCTTCCCTATCTGTGCCATTACTGTTGTAGTGTACCAAGTGACCATGTAATCGATAATAGAGA TCACAGTGATACATGATTGGACCATAGGCCTTCATCCCAGGAATGTCAAACAATTCAGCGAAGAAGTCAGCTGGCAGTTGCTGTGACATGGGATCCATCCTCGGACTATACTTTGCTTTAT CATCACTCATGTAGAAACAATAGCGTTCCAGATCATCCTTCTCACTTGCACTTTGTAAGTCCATGAACTTCTGCCGCTAGACTTCCCAACATGCTTTGAGGGACGTGGTTCAGAAAGTC TCGAGTTAGGCCGTGCAAGTAGCTCAGAATACATCCCATGGTGGACTGGCAGCATAGAATGGCCGAGGCGCATCTTTATGTCTCTCACATCTGGAGCCTGTGACTATATCAGTGGTAAAT TCAAAGTCAGTAGAAACCTCTCCAACATACTGATCAGGAAGCTTACGCCCAATCTCATCCAACCTTAGCAAGTACACCAGGTAGATCTGGTAGCTCTGGTTCCTGGATCGCGTATAGCAGTT TGCGTTTGTGCCTACGAGGAGCTTTCCGCATCGCTTCATAATCCCGGTACGCGCTAGGCATTGGGGGGGCACATGCAGAATCTGCTTGTGTTGAAATATTGCTCGTTAGTTATATTGCTACTA TAATCGACCCAGTCAGGTCTACATCATGTGCATCCCAGTATTCACCCCAATGCCATCAATCTTATACTTGGCGTGCCATGTTTCTCCTCGACACCTTCTCGTATTCCGCCAGGCCAAA TCCCTAATCTTTTATGGAGGACTCTAATGCCAAGTACCACATATACGACTTTGTGTCCATGAAACGCTCAGATTACAGCAGACCCAGTAACCACTCAGTTTCAAACCTGGACATATGCAA TTTATACTGTTACCAACTACCAAAAAGGGTCCACCTCAGGGTAGATACTAGCCTTATACATTCCCAGTAAATCCACAGCCCAGTCCACTGGTAAGTTCTTCAGATATTGCAACGCTAGTT



CCTGGCAGGGCATCTGCAGTAGTCCCTTACTCTTGAGCTTTTGTCTCATAATACTAGAGTGATCATAGAAAGTGTCTCCGCTTTTCCAGGCCAAGTACCTCCACTGCAGCACATCAAAGTA  
AACTCCCAACTTATTCTACAGCTAAACTCGTTTCCACATGTCTCCATTGCATCCAGGTATAGTGCCACATCATTGTTGTGCCTTTTGTAGTCGTCCATCCTTCCAGTCGCGTCGTAGGTC  
AAAGGTCCGACGCTTGTGATAGAGCTTTATGGCTGAGCACGCATTCAGTAGATATGATATATCCTGTAAATCACGCGAACTCAAGACATAAAGCTCATGCTCACTCTTCACCTTCTCTTCC  
TAAATTGAGATGTGCGGATTGGAGACGACAGGTACGCGGTTTCGATGAGACTGCTGGGCGATTTCGTGTGTATGTTTCTTGTAGACCTTGATGTAGTAGAGGTCGCTGCAGTGGTAGATCTT  
GACGTCATAGCTCGATGACTTCTCAGTTCTAATCCACGATTGGTTGAGATGCGGGGATCTGGGGCTTGTGGATAACACTGGGGTCGAACGAGTTATAGTGATCGACGGCCTTCTTGGTG  
TCCCGATATCTACCCTGGAAACTGGTGCAGTTGCGATACTTGATGCACCACTGTCTAACCATTCTTGCATTTCTTGTGGTGGTGGAAAGCTTCTGGATAGTTGGTCAAAGAAGTCTGCTGCTC  
CTCTATAGTATCGTCTATCAGCGGTGGCATTGAATCGTCCAACGTTGTGTTCTGTTCTGGCAGAGACTCCGTAGGCGGCTGGGGCAAGTAAGTTTCGATATCTGCGCGACATGGCGATAAGC  
ATGCTTAATGGACCAGACTCGCTAAAATGCAGACCCCACTTCTCTAGATATAGCACTGCAGAGTCTGAGAACAGCAGCGTTTCCACTATAGGTGGTAGCATCTGTGCTAAGCCGGAGT  
AGGAAAGGCGGAGTCTCGTGCATACAGGAGCACGATGCAGATTAGGAAACAATTATTAGCAAGTTGTACAGGATCATCTGAACTGCGTAGGCGCATCCCGAGATTTTCAGTTTTCCCG  
AGTCCCTCAAAGGGCGGCATATCAGTAGCAAGTTGATAATTGTCAAACACCCCAAGTAAGTATAAGTAGGCAGTATTCCATAAACATAGCAGTTACTGACGAATGGTTGAGAGACATTCTTCT  
GTTTCAGTAGAGCTCATAAACAGCTAGGCGAATCAGTGAAAATCTAAGTACAGCTAACTAAACCGGATGCACAGGAAGTGAAGCAGAAGTCTAATCTAGGTGGAAAATAATTTGAG

>comp139089\_c0\_seq2

GAACCTTAAATCCATAATCATTATAATAAGAACATAATGAAAGAGAAAAATTGAGTGAGGATATCTGAACTATAATCAGATAATGACAAATTTTTAAAATTTGAATTTATTTTTATTCTATA  
TTAATTTTAAAATAAACTCAAATTTTAAAAATTTATTATGATATCCTCACCTAATTTTTATTCTGTTTACGTTAGGACGAAACAAAATAATAATAATAACATGTTAGAAAACCTCTGAGAAA  
AGATTGCCGTTTCAGCTGCCAGAGTCTTTAGTAAAATAGACGAATAAAAGTGGTTGCTGCAGAATGCTGCTCCAGATGCAATCGGTATCTTCGGGATCCTCGTCGGACACCTGCGGGAGGT  
TGGACGGCGAAGCCATCGGCAGGGAGAGGCGGTCGCCGGGAAATCCGATGGCGGCGGAGCAGCCATCGACGAGGGAAGAGAAGAAGACGTCTGTGAAGCTGCAGCCCTCCAATTCCG  
GCGCCAGGGATCCCTCTTCTTCCATGGAAACTCGAAAATCCCAAGCGGCATTTACACAAATCGTCGCAGCTGCCGGAGACATCGTCTTCTGGTTTCGCCACCGCCGGCGCCTTGG  
CCTTTTTGGTAATTGGCTCCGGCGCCAGCAATACATTAGTCTTTACCGCTGAGTTTTTACATTAGCTCTGCTTCTTTCTTCTTTAATTCTATCTTCATTTTGTGATCGAAAAGTTCAAAGCC  
GAGATGCATGAAAGCCAATGGGAGATTCAAAAATAGAAATTCATATAAAAACGAAGCGAAGATCAGAAGTCATAACGGGATGGAAATTTTCAGTAGGCAAGAAAAATGGAAACCTCAGC  
GTCTTGGATTCAACAAAAATGGGCCAAACGAATTCTTCTTCAAATTTCTTCTCAAATGAATCAAACCTCCATGATTAACCCGAGCTATGATCAATTCAGAGAAATTAGAGCTAAACGGA  
TCAAGCAACGAAACTCAAACCAGATCGAAAATTTAATATAAATAAATCGTGATCTGAAGCTCAGGCGAAGTAACATGATCCTAAACTTTTCGTGCTTCTGCTTACACGTTCTTCTTCCC  
CTCCAAGGGCAATCA

>comp139089\_c0\_seq3

GAACCTTAAATCCATAATCATTATAATAAGAACATAATGAAAGAGAAAAATTGAGTGAGGATATCTGAACTATAATCAGATAATGACAAATTTTTAAAATTTGAATTTATTTTTATTCTATA  
TTAATTTTAAAATAAACTCAAATTTTAAAAATTTATTATGATATCCTCACCTAATTTTTATTCTGTTTACGTTAGGACGAAACAAAATAATAATAATAACATGTTAGAAAACCTCTGAGAAA  
AGATTGCCGTTTCAGCTGCCAGAGTCTTTAGTAAAATAGACGAATAAAAGTGGTTGCTGCAGAATGCTGCTCCAGATGCAATCGGTATCTTCGGGATCCTCGTCGGACACCTGCGGGAGGT  
TGGACGGCGAAGCCATCGGCAGGGAGAGGCGGTCGCCGGGAAATCCGATGGCGGCGGAGCAGCCATCGACGAGGGAAGAGAAGAAGACGTCTGTGAAGCTGCAGCCCTCCAATTCCG  
GCGCCAGGGATCCCTCTTCTTCCATGGAAACTCGAAAATCCCAAGCGGCATTTACACAAATCGTCGCAGCTGCCGGAGACATCGTCTTCTGGTTTCGCCACCGCCGGCGCCTTGG  
CCTTTTTGGTAATTGGCTCCGGCGCCAGCAATACATTAGTCTTTACCGCTGAGTTTTTACATTAGCTCTGCTTCTTTCTTCTTTAATTCTATCTTCATCTGGGCGGAAAGAAAAGAACTA  
GAAAATGATTGAATTTATCGGAGAATTTAGAAGGGAAGAGGATGTTCAAATCTTTACTTTGTGATCGAAAAGTTCAAAGCCGAGATGCATGAAAGCCAATGGGAGATTCAAAAATAGAA  
ATTCCATATAAAAACGAAGCGAAGATCAGAAGTCATAACGGGATGGAAATTTTCAGTAGGCAAGAAAAATGGAAACCTCAGCGTCTTGGATTCAACAAAAATGGGCCAAACGAATTCTTC

TTCAAATTTCTTCTCAAATGAATCAAACCTCCCATGATTAACCGAGCTATGATCAATTCAGAGAAATTAGAGCTAAACGGATCAAGCAACGAAACTCAAACCAGATCGAAAATTTAATA  
TAAATAAATCGTGATCTGAAGCTCAGGCGAAGTAACATGATCCTAAACTTTTCGTGCTTCTGCTTACACGTTCTTCTCTTCCCCTCCAAGGGCAATCA

>comp139089\_c0\_seq4

GAACCTTAAATCCATAATCATTGATAATAAGAACATAATGAAAGAGAAAAATTGAGTGAGGATATCTGAACTATAATCAGATAATGACAAATTTTTAAAATTTGAATTTATTTTTATTCTATA  
TTAATTTTTAAAATAAACTCAAATTTTTAAAAATTTATTATGATATCCTCACCTAATTTTTATTCTGTTTACGTTAGGACGAAAACAAAATAATAATAATAATACATGTTAGAAAACCTCTGAGAAA  
AGATTGCCGTTTACGCTGCCAGAGTCTTTAGTAAAATAGACGAATAAAAGTGGTTGCTGCAGAATGCTGCTCCAGATGCAATCGGTATCTTCGGGATCCTCGTCCGACACCTGCGGGAGGT  
TGGACGGCGAAGCCATCGGCAGGGAGAGGCGGTGCGCCGGGAAATCCGATGGCGGCGGAGCAGCCATCGACGAGGGAAGAGAAGAAGACGCTCTGTGAAGCTGCAGCCCTCAATTCGG  
GCGCCAGGGATCCCTCTTCTTCTTCCATGGAACTCGAAAATCCCAAGCGGCATTTTACAAAATCGTTCGACGCTGCCGGAGACATCGTCTTCTGGTTTCGCCACCGCCGGCGCCTTGG  
CCTTTTTGGTAATTGGCTCCGGCGCCAGCAATACATTAGTCTTTACCGCTGAGTTTTTACATTAGCTCTGCTTCTTTTCTTCTTAAATCTATCTTCATCTCAGCGTCTTGGATTCAACAAAA  
ATGGGCCAAACGAATCTTCTTCAAATTTCTTCTCAAATGAATCAAACCTCCCATGATTAACCGAGCTATGATCAATTCAGAGAAATTAGAGCTAAACGGATCAAGCAACGAAACTCA  
AACCAGATCGAAAATTTAATAATAATAAATCGTGATCTGAAGCTCAGGCGAAGTAACATGATCCTAAACTTTTCGTGCTTCTGCTTACACGTTCTTCTTCCCCTCCAAGGGCAATCA

>comp139123\_c0\_seq1

TTTTTATTAATAAATATTAATGCATAATTCATTTATAATATTAACCTTTTAAGAGTTTACATTACAGCATTATTAATAAATTTAAATTTATATCTCACTTCTTATATCAAATAATTTCTTATTTT  
TATCATTTTATTACATATCATGAACCAGTAGAATTAAGCTATGCCCTTACTTCCAACCAGTCATCAACAATTCACCTTGCTTCTCCTGAACCAGCTTCCAAGTTGCTTCCACATGTTGTTTCT  
CCGTCAGCGTCCCACCAACCGCAAACCGCAACACGAATTCCCCACCAACGACCGCATGTGTCATAAATACTTTCCCCTTCCATTCACCGAATCAAGCAACTTCATGTTTCATCTCCCTACA  
CTTCTTCCCCTCATTTTTATCAACCCTCAATTTAAAGCAAACAAGCGTCAATCGTTCGTGGCACAACCAAATCGAACCTCTCATCTTCAGCGACAAGTTTCTCGAAATGCTTTGCCATGTC  
ACATCACTCCTCACGTGCTCCATCAAATTAGCCTGGCCGAAACGCCTAATGACCACCCACAATTCATGGCGCGAAACCTCCGGCTCAGTGCATCTGCCAATCTTTGTAGTCGATCACAT  
TGCCGACTTCAGTTGCGGTGTTCCGCAATATCTCTGGCTTGGTTGACAGCGAGTCTATCAATTTGCTCGTGACCTTACCCAAAGGCAGCAGCAGTCCATATTCGCAAGCAGCCACTTGTG  
TGGATTCACTAAACGAATCCGCCGTCTCCAATCCATCAAAGTACCACCTGAACTCCGGGCAAATAGCAGCGCTCCCAGCGCACGCTGCGTCCACGTGGAACCAACCCCCGAATTCCT  
CGCCACTTCCCAGATCTCCCTTAATGGGTCCACCGCCCCACCGCGTTGTCCCCACCGTTCCACACAAATACAACGGCACCATCCCAGCCACTACATCAGCATCCATCGCCGCCCTCACG  
CTCTCCGCCGTCAACGCATACCCTGTCTCCGCCGACGTGATATCACCCGAAAAGTTTCTGGTCCGAAATTCACCAGCTTCGCTGCCTTTTGAATGTAAAATGCGTTTGTATCAGATGCAT  
ATACCGTCAGCTTTGTGATCCCTTCGCCATTGCTCTGGCTCAGAGCATTATCTTTGCCGCGCAAGCGTGCAGACCACGGCTTCGCACGTGCTGCCGTGGATGACGCCGCCGCCGAGTC  
CGCCAGAAAGAAAAGTTGGTGGGAGTTTGAGCATAATTGGCCATCCAGTCCATAACGATGGTTTCAAGCTCGGTGGCGGAGGGGAAGCGATCCAGCTGAATCCGACGACGTTGAGGCC  
GGAACAGAGCATCTCTCCGGCGAAGCCGGCAGAGCTAGCGTTGGCTTGGTAATAGGCATAAAAAATTGGGGCTTTGCCAGTGGGTGAGGCCGGGAAAGATGTCTGTTTTGATGTCGTGGA  
GAATGGTGGTATGGGTGAGGGGAAGAGGGGAGGGGTGTCGGGAATGAGGTTGCGGAGATAGCCGGCTTACTTGGCTGCGAACGGGGAAGCGTTCTATGTCGCGGTAGTAGTCGGA  
GATGAAGTCGACGACCGCTTTGGATTCTTTGGAGAAGAGGTCTAGGTCTAGTGGCTGGAATGGTTTCGATGGGGAGGTTTCCCATTGCGTCTTGAATTTGGAGGAAGTAGAAACAAGAAA  
GGGGCTTGCTTGTGCTTTTGTGCTG

>comp139258\_c0\_seq1

CAACTGTGATGAGTTCTTAGATCATGATCGTCTACTTTTCGACAAAATTTCTAATAAACCGACGTGTTTGGAGATGAATCGATTGGATTACTTGGATTAAATCGACTAGATTTAGCTTGAATCGG  
GTTTTTGGATATTTAGGTGTACATCATATGCGGATAATCTCATCAACAATAAAAAATAATTTAAATTTTGGTTCGAATTGGAATATCATTACACATTAATAAATCTTTTATAAATCACCAT  
AAGCCACAGTAATTACTAATTAGTCAAAAACAACCAAACAATTACAAATCTTACAACATAAAAAATAGGGCGAAAAATGCTCTTTTTTTTATTTTTTTTCAAACCTGCACCTTTAAAAACAA

CTTATTACATAAACTACTGCGGAGGAGCAGGAGCCCCCTTACAATCAAAGGAGAATTGATAGGTGACCGGCTTACCGACAACCTGGCAGTGAGCAGGGCCCCACCCCTCCACACCCG  
CAGTTGCAGCTTCGACAGATGTCATTGCACCCACATAACACGGTTCGGCGATGGCAAACCGGAACCGGTATGGGTGGCCCAACCGGCCAGAATGGCAAGTAAACCGGTTTCAGGGTTCCT  
CGGCGGCGTGGGCGGCGGGGGCGGCGGCGTGGGCTCTATTATGTTGATATTCTTAATGGCTTACAAGCCTTGCAACAGAGCTTATTCTTCAGCTTGACGGGATCGAACGGGCCAGAAAT  
CGTCACTGTATTCTTCTTCATCGTATTCTATTTCTGAATGCGCTCTCGTTCTAGATTTAACTTAATTAGCCATTTAACAAAATAATTATTAATTAGAGCAATTAATGAATATTAATTAAGATT  
TTCAATTTTAAATTTACCTTGGAGTTTGCAAATGGCCTTTTTTATCTTCTTGCTGCAAAGACGGCACTCCAGATCAACCGTCAAGATTAGTGTGGGGTCTCCCCTGCCATTCTTTGAGATAAT  
GAGCGAGAGAGAGAGAGAGAGAGCGAGGGAGGAAGAGACCAACTCGCTCCTTTTCGATTGGATCAGAAGCAGACATTTTAATACTCGCTGTGACTCCC

>comp139258\_c0\_seq2

CAACTGTGATGAGTTCTTAGATCATGATCGTCTACTTTTCGACAAAATTTCTAATAAACCGACGTGTTTGAGATGAATCGATTGGATTACTTGGATTAATCGACTAGATTTAGCTTGAATCGG  
GTTTTTGGATATTTAGGTGTACATCATATGCGGATAATCTCATCAAACAATAAAAAATAATTTAAATATTTTTGGTTCGAATTGGAATATCATTACACATTAATAAATCTTTTATAAATCACCAT  
AAGCCACAGTAATTAATAATTAGTCAAAAAACAACCAAACAATTACAAATCTTACAACATAAAAAATAGGGCGAAAAATGCTCTTTTTTTTATTTTTTTCAAACCTGACCTTTAAAAACAA  
CTTATTACATAAACTACTGCGGAGGAGCAGGAGCCCCCTTACAATCAAAGGAGAATTGATAGGTGACCGGCTTACCGACAACCTGGCAGTGAGCAGGGCCCCACCCCTCCACACCCG  
CAGTTGCAGCTTCGACAGATGTCATTGCACCCACATAACACGGTTCGGCGATGGCAAACCGGAACCGGTATGGGTGGCCCAACCGGCCAGAATGGCAAGTAAACCGGTTTCAGGGTTCCT  
CGGCGGCGTGGGCGGCGGGGGCGGCGGCGTGGGCTCTATTATGTTGATATTCTTAATGGCTTACAAGCCTTGCAACAGAGCTTATTCTTCAGCTTGACGGGATCGAACGGGCCAGAAAT  
CGTCACTGTATTCTTCTTCATCGTATTCTATTTCTGAATGCGCTCTCGTTCTTGAGTTTGCAAATGGCCTTTTTTATCTTCTTGCTGCAAAGACGGCACTCCAGATCAACCGTCAAGAT  
TAGTGTGGGGTCTCCCCTGCCATTCTTTGAGATAATGAGCGAGAGAGAGAGAGAGAGAGCGAGGGAGGAAGAGACCAACTCGCTCCTTTTCGATTGGATCAGAAGCAGACATTTTAAT  
ACTCGCTGTGACTCCC

>comp139262\_c1\_seq1

GTGTTGTACCTTACAGTCACTACTCATCCATTTCCCTCATTTGCACTGAGAAGAGAGACGATCATCTAGCCAGTCCAAACATCTTGAAACAGGAAAGTCACACACAACGCAGCATTATGA  
AGCAAACCACAGTAAACCAGATACTTATGTCGGTTATGGCCATGCTTTTTGGTTCGTCAACATAGCGACAGCACAACTAATAGCCCTGTGGATAGAGCTGATGTCATGAGAGAGTTGATCG  
GAAAACCATCCGCACATTCGACAGAAACAGCGATGGAAACGACTGTGCCAGTAGATACGGCGGCGCCTGGTGGTTTCGGAGACGATTGCGCGAGGGTGAACCTACATGGCGATTTCGA  
AGAGAGCGGCAGACCAGGTGTCTGGTATGGAGTACCTCTGGACGCTAACAAAGATTGTCAAGATGGAATGAAAATTAGACCAATGGAATAAACTCCCCAATCAAAGAGAAGGAAGATT  
GTACAAATTTATTGCCCTGCAGGTTGCTGCTTTGATTTTTAACTTGCCAAAGTCGACTTAACGAATAGTCTATATGTTAACAGCGATTTTCTATACCGTTGAACTATACTTACTGAAC  
TTTTCTGATAAAAAACAATTAAGTCTATATCCCAGACAGCTTATAAATGTAAGTCGTAGCACGTGTGCATGTATTTATAGCTTGCAGTTAATTACGTTAAATAATAAACTTCCCAAAGCT  
GATTTTAAACGAGTATAGATTTAGAGAGATAATCAATCATTTCTCAACCTATCTCATATATCGACTTGCTTGATTAGTCTATATAGCCAATGTAAAGTGTATTGTATGTCACCATATTGCATGT  
AGTTTAGTACGTTCAATTCTAACTTGCCCGAAAACCGGTTGCCAAGGCGATTTATCGTTACTAATCGTTCACAATCGCACATGACTTTACTTTCTTTTCAATTTCTAGCGTCCAGTCCATAA  
GGTTATTAAGATGATCAGATCACATAGACCTACATCATGACATAGTGTACACCTTCCTGTTGAAACAGTTATCATGGTTATTGAATTAATAAACAATCACATATATCCATAGACGTTATTTTA  
AAGTGTTCCTTTCTTTCTTTCTTTCTTTCACTGTAAAAGAGAGAGCCCGCTAAGTTGCATATTTAGCAGGCCTATAGAAAAGCTTTGGACTTGCCAAAATCGATTATCCCCGAC

>comp139287\_c0\_seq1

TACATAACAACATATTAAGTAAATGCTAACGTCCTTAAAATCTGAAAAAGGTATTCTGATCATGCATATCATATAAATCAGTACGTATAGCTAACAAAAGCTGACTTCAATTAATGAATCAG  
CACATGTAAAAAAATCTTGTTTTTACAATTATTTCTTTATCCTGATAGCATATTTATAAGGAAATTAACAGTTACAATTAATAATGCTCAAAAACACAAGCTTAATTTGCATTACAAACA  
TGTTATAAGCTCAAAGAAATTTGCCATTGGATTTATTGGATGCTTGGAGATACGAAAGAAGGGCTTTGTTCTCTGGCTGAGCAGAAGAGCTTTCTTTCTAAGCATCATATTCTCCTCCATG

ATGCATTTGTTCTTCAAGTAAAGCTTCAAGTTCATCATCTTCATCTTCTCTCCCTTCAAGCTTTGGCTTCTCTTCATTGACCTTCTCGTCATCGAAGAAGCTGCCTTTGAATTGAGGAAGCG  
TGTAAGCTTTGCCTTCTTTAAGAATCTCTTCAGCAGAAGAGGAGAAGAGCGAACTCTGAAGGAGATTAAGTGGGAAGAACACATGTTTGCTTCTTGTGTAAGCTTGAGTTTGAATGAT  
AGAAGATAGATAGGATCTTAGGATGAAGGAGAATAACTATTATCATTGGTATTTATAAAGATGGATGGAAGCTTAAATTAATGGTTTACTGACCAATAAGGTCTGAATTTGCAGTGATAGAC  
CCCACGTGAAAAAATGTAGTTGAACATATCCTGCACTAAATTTAATGTAATAGATATTGTCATTAATTTCTAAACATACCTTTTATATTTTGCAGGACTAAGATCAAGACATTAATAAATAG  
TTGTTCTTTGCAATGAATTGTTTTATAATTCAAGAATCATTATCTTGTATCACTGGAAATATTTAGCAAGAGA

>comp139301\_c0\_seq1

CACCCGCACACAACCTAATTACTATATATAGGCCTCCTCCGCACTGCCACCCAACCTTACACAAGACGTCTTCAACCCAAATTTACCGAAACATAGTAAATTAATAAATCTATAAGCCACAACC  
ACAAACCAACATAAAAAAAAAAAAAAAAAAGAATTTACATACATAGTAATCCATTGTCTCCCTCTTTTCGCCCATCTCACATCAAACATAAAACAATAAAACAAATACCTTAGTTCTTTCCCCACAG  
CTTTCCATCGTCTCCTTCCCTCACCATATGGGAAGAATACTACTACTCGTCCCTACAAAAGAATTAATCTCTCACCTCTTACCTTCCCCTTCTCTCAGCACTGTTTCTTCTCTATCATCA  
CCCTCATCTCCGCCCTCTGCGCAACCCATAATCGCAAGTCACGTGCGCGTTCATTGCCTCCTAAATCAATATCTTTCATCAGAGGAACAAGAAGAAAAGGCAACAGTTGTGCCCGCAACCC  
ACGGGCAATCGGCCAACCGGACCCGCCAGCCCAACCAACCCATTATACCGCGACGGAAGCTGTCCATGAACCTGAGCCTGAAGCTTCCCGAAGGGCTGACGCGTGTGCGGACAGG  
GAGAAGGGAGGCTCATGAGGATAAGGAGGGGACGGCGACCGACGATTCGACGTGGATGAAGACTATTATTCTCGGAGAGAAGTGTAAAGTTCTGAGAATGGTGAGCGAGAGGATGAG  
GAGATTATTGTCTATGATGAGAAGGGGAACCGGCAGAGGAATTATCATCCAAGGACTCCGAGATCGATGCCTGTATCGAGGACTAATTCTTTACCATCCCTTCTTCTTGATTATCAATCG  
ATAATGTGAGAATAATCTGGCTCATGAAAATATCTTTTTTTTTAAATGAAAATAAGGTTTTCTTATTAATAAATTTTCGATCGGTGTAGCTTGTGTAATGTTATGCAAGATACGAGATAGAG  
ATGGTGGCGGGTTCATCGTCCACTGCCTCTTTCATTGATTAGTTTTCTTTTTGGAACAATTTGTATCTGTTTCTTTAAATAAATATTGATTAGAATTAATTTCTTTGAGAGACTATAATGTC  
CCACTAAGGGTCCGTTTAGATTTTCATAAATGTTATTGTAATGCTGCTG

>comp139349\_c0\_seq1

TTATAGAGGCAAAAGTATGAGAGCTTAAATAGCTATCAATAGAATAAGGCCAATTCCTTGTCTGCCAAAAGAAAATATTACATTGACCACCCCATTTGAATATTCTGCTCTGCCTTCCAC  
TTAAATGAGCAAAGCCTTTTTTACAGCCTGGATTCAAAGGCTTTATAATTGCATAAACTAATTATAGTTTAAAGGACAACATAACCGTGATTAATATATATAAACCACACAAGTCACTGAGA  
AAAAAAAAACAAATTAGTCGTGGCGCTTCATTTGTCTGAAACCACCATAGCTTCCCTCAGCAGAGCCATTTCCACTTTCATGTTTGATTGAGACTGATTCCACTGATTCAATATCGTCAGA  
AATTGTATTCAAAGGGTTTTAAACTATAATTTAAAGGACCACCATAACCTTGCCCAATTTCTTTGATGCCATGCTGAAGGCCTCTGTATGTGTAATCTCTGGCATTTCAGCTTTTATTCGCTGTATC  
TCCTGCCTCACGAAGACATTGTAAGCTGTTGGTTGCTTCTGCTTCTTCTTTGGAGGTTTTGCAACAGGAGGAGCTTCAGGTTTTTGTTCATAGAAGTTGATGAAGAAGCATCCGATTGCT  
GTCCCATAGTGAAATCCATTTGATAGTCAAAGTATTGAGAATTAGGTTTAGGTTTCAGGGCTAATGTAGGAGATATTGTTGCAAGTGCACACTTCACTGTAACAGTCTCCATCATTCTACTG  
CATGGAACCTTCAACCGCAAGAACAATGTTGCAAGTGTGAACAGTGAACATAACACAGCTTATCACTTGAAGAAGACAGATCCATAAGTAGAGGAGAAAATCAGAGGACGAAGAAGAAGC  
AGTAAGGATAGAAACCGTAGAAACAAAAGAGAGCAGGAAGAAGGAGAGAGTT

>comp139353\_c0\_seq1

AAGTTTTGTGCGGATGACCTGATAAAGTAGTTCCGCTGGCTTTTTCAGGTCTTTACAACCTGTTAGACAATCTGTTCTCCCAAAGAACCCGGCCCGGCCATTTCAAGAACCGTCCAATCTAT  
TTAAACTCATCCCCAGCAAGAACGGGTGCGCATTTTGCCTCCCTCCTTCTCCTCAGCGGCCCATACACCCCAATCTCGAAACCTAATACGAGCTATGGACCACGCATCCTCCTCCATCC  
CCTCCTCTGTTTCGATCCCCTCGCTCTAAATATACCCAAAACGCCAAAACACCTCGCAGCAGCCCAACTCCGCGGGTCTCGCCGCGTCACTTCCCAATTGACCCCGATCCTCCCCAA  
ATCCATCTCCTCCACCAGCTCCAGTAGTGAGGGGGATCGGTCATCGTCCACGACTCTGAAAGTAGTGAGGAGTGGGAAGCTCGGATTCGTCGAACATAAAGCCTTCGAGTCGTTCTT  
GAGGAAAAACAGATGCATGAGGTTCTACCTGGAATGGAATGCGTGCCTGACCGAGACCATTAGGAATGGGCAAGACCATAGGATTCAGTGTGAGGCTTTCCAAAGTTCTCAGAAATT

GCGTCAGGCTTTCCTAGATTTCTTCTTCATTTCCCTATCTCTTCTACTTATCAGATGGCAATCTGGAAGACTTTCTTGTTTCTTCTCTCTCCATCTTTTAATAATTAGTTTCAGTGTTTGAGAA  
CGGTAATGTGTGTCAGTTTTTCTAGGTTTTTCTTGAATGCTTTGTCTCTTCTCTTTATTAGGTAGTAATCAGGTCTTCGATGATCTTTAAGAATAAGTTTCAGTGTTTGGTCACTGAAATTGT  
AGTGCTGCCGTGTTAGAATCTGTAAATTTGAGATTCTTGAATGG

>comp139353\_c0\_seq2

AAGTTTTGTGCGGATGACCTGATAAAGTAGTTCCGCTGGCTTTTTAGGCTTTTACAACCTGTTAGACAATCTGTTCTCCCAAAGAACCCGGCCCCGCCATTTCAAGAACCGTCCAATCTAT  
TTAAACTCATCCCCAGCAAGAACGGGTCGCCATTTGCTCCCTCCTCTTCTCAGCGGCCATACACCCAATCTCGAAACCTAATACGAGCTATGGACCACGCATCCTCGTCCACCA  
GCTCCAGTAATGGAGGGGGATCGGTCATCGTCCACGACTCTGAAAGTAGTGAGGAGTGGGGAAGCTCGGATTCGTCCGAACATAAAGCCTTCGAGTCTGTTCTTGAGGAAAAACAGATGC  
ATGAGGTTCTACCTGGAATGGAATGCGTGCCTGACCAGACCATTAGGAATGGGCAAGACCATAGGATTCAGTGTTGCAGGCTTTCCAAAGTTCTCAGAAATTGCGTCAAGCTTTTCTAG  
ATTTCTTCTTCATTTCCCTATCTCTTCTACTTATCAGATGGCAATCTGGAAGACTTTCTTGTTTCTTCTCTCTCCATCTTTTAATAATTAGTTTCAGTGTTTGAGAACGGTAATTGTGTGTCAGTTT  
TTCTAGGTTTTTCTTGAATGCTTTGTCTCTTCTCTTTATTAGGTAGTAATCAGGTCTTCGATGATCTTTAAGAATAAGTTTCAGTGTTTGGTCACTGAAATTGTAGTGCTGCCGTGTTAGAA  
TCTGTAAATTTGAGATTCTTGAATGG

>comp139414\_c0\_seq1

GACAATGTGTGCGAGCATAATTACAAGAATGAAAACCCTACTGATGACTAACATGTTTATTTTATTTTGGCTAACTCGATCTCCATCCAGATCTCAGTCGACAGTTACTAAACCAAGCTAGCT  
AGCACTTCATCTTCTTCATCATTATCCTTCTCCTCCTTAATTAAGCAAGTACTATCAAATATCCATCATCTTCTCCTCCTACTACTAGCCTCCTCCACCTCTTGATTATGGACTTGGGATCTCC  
TTCAGAGCATCTTTGCTATGTTGCTGTGCCTACTGCACCCTGTTCTCGCGGTTGGAGTTCATGCAAGAGAATGACAGACACTGTGACAGTAAAGTGTGGCCACTGCAACTCCCTCTC  
CTTTCTCAATCCCAAACCTCCGTTCCAAACACTGTGCTCTGATCATCATCAAACGCTGCTTCAGAGGCCATGCAACTTTCTGTGGAAAGGGCAACATTCAGTAGCTTCTTCATCATCTACA  
GTTGCTGAAGACATGAACCCAAAAGCAGTGCCCTTTGTGCTTAAACCTCCGGAGAAGAAGCACCCTCCATCTGCCTATAATCGCTTTATGAGGGAAGAGATACAGAGAATCAAAGC  
TGCACAGCCTGACATCCACACCGTGAAGCATTAGTACTGCTGCCAAGAATTGGGCTAAATGCGACCCTCGCGCCCTTTTCTATTCTGCTACCGGTACCAGCGGAGCAAGGAGGGCAAC  
AACAGCCATTCAGCAAGAGAAAAGAAGTGGCGTCCCGGTGGAAAGCTTCGAAGTCTCCAAGCATGGGCAACTGCATCGCATGGAATAATTAATAAACCACTACATGTGCTATTTTCAT  
CCGTATATATATGACTGGGACTTTCTTAATTTTATGTACGTTAATGGATCTAAGACTCTTAAAAACAACCTGAAG

>comp139428\_c0\_seq3

TCTCTCTCACTCGCTCAAAGCATATTCGAAGAATTGAAGCCGGACGGCAGCGGCGGAGGCCATGAATCCAGTAAAATTTTGGCCGAATGCAACAACCTGCTCTACCCATTTGAATATAG  
GGAGCTCAGGACCTTCTGCTTTTTCTGCCCCACCTGCTACCATCAGGTGAAAGCCGATTAAGGAAAAAAATTTATGAGGCCTTCAGGGAGGAGACAATACACCTTTCTATGTACGAGCA  
GCCTCAGGTCTGCAAGATGCTTATGCAAATCGAACACTCCCCGCGCATGGGGTGTGCAATGTCCTGTATGTCATTATCCAGAAGTTGTATTCTTTCTGGTCACTCCTCTTTTTTTTATA  
CTTAATTTCTTTTTAATTTTATTCTAGCTCATGTATTCTTTTTATTCAAAGTGTT

>comp139479\_c0\_seq1

CGAGTCTTATTGTTAATTTATTACCCTCAAGTTTCTATTTAAGTACTTAGCCATTTGGGGTGAATTAATTAAGTTTGGACATGAGAGTAGAATGACATGTTATCTATAGAAATGTATATGG  
AATCTACCTGATCTAAGTTATAACACTTGGGTGGCTAAGATAGTTGGTTAAGTCCCTAAAGATGGATTTATTTTTTCTAAAAAAGGGGCAATTTACATAGACGTTTGCATAGCACAAAGG  
TGAATGTAAATTCC

>comp139640\_c1\_seq1

GTACGCCGGTACCTCACCGGCGCTTCTACCTCCCCCACCAGTACACACCCTCCGCATTCACCCGATGGCAACTGGTGGATAACAATCTGCTCTCCGCCCTATTCTCCACCATATCACCT

CTATCTTACCCTATGTCATCACGGCCAAGACCGCCCAAGAAGTTTGGCAAGTCTTGAACGTCGGCTCCAACCAACATGCCGCTCTCGCGTCATTCAGCTCAAAAACGAGCTCCACCGCG  
TTCAGATGAAAGATCTTACGATGCAACAGTACCTCAGCCACATCAAAAGCATCGTCGACAACATTGCGGCCTCCGGCTCCACCGTCGATCCGGAAGACATCATCATCCACATTCTTAATGG  
CCTACCCACTTCATACAACCCTTTCAAAGCGGGGATCCGCACCTATCCCGTAAAACCTTGAATTAGATAATCTTTACTCTCTTTTGTGCAGCGAAGAAATAAATGTCTCTCAAGAACAGCC  
AAAGAAACACTTCTGACTGCCAGCAACACCGCCCTTTACACCTCTTCTACAACACTCAACGCGGCAACAAATCCAAGAAATACCTCAAGCCCAAACAGCCTACGCAAAATCAGCATT  
ACCTATGACCTCTCAGGCTCCGCAGACTCA

>comp139644\_c0\_seq1

CGCTTTTGATGCGCTCTCGATTCAACATCAAATCCAAGTTTTTTTTTACATTGCTCCATAAAAGGCCTACAAGTGTGATATGTCCATTTTTTCGCAGCTTCCGCATTATACATTATTAATGGA  
TATGTAGCATTAAAGATAGAAACATAACATAAAGTTTTTATTATCCTGAGAAAAAAGATCATTGAACGAATGTTTCTAACCTAGTTTGTGCATATCGATGAACTGTGGCTGCAGGAATGCTTAAT  
GCTTTATTCAATTGGTTGATGAGCTAAATAGAATTGTCGCTCTCCCAAGATGTCAAAAAAACTTTGTAAATGAAGTTCATCTCAACATATAAGCCGCTTTCATATCCATCCAGTGCTAGCTGC  
AAGATGCATGATGCTTAGCACAGGCTATGATTACTTGGTAATGGTCAAGATCAAGGGTAAACAAATTATTAAGAATTGAAGTGAAGTTCATCTCAACATATAAGCCGCTTTCATATCCATCCAGTGCTAGCTGC  
GCACACGATGTGTTATAGCATTTCACGCCCATCATAA

>comp139728\_c0\_seq1

GATTTCAACGCTTATGTTAACTTCCCTCTTCTCCTTCGCGGTTGCGACCGGATCGCAGATGCGGGCGACATTCAATGTGACGGAAATGGCTTTCGATGATGAATACCTACCATTGTTCCGGCG  
AGCGCAACCTCCTGCGCTCCGCCGACGGACGGACAGTCAAGATTCTCTGAATCAACATTCAGGGTCAGGATTCATTTCTTGAACCTTGTATTATCACGGTTTTGTTTCAGTGCGTCGATAAA  
GCTCCCGTCTGCATACACTGCCGGCGTCGTAGTCGCATTCTACATGTGCAATGGGGATATATTTGAGAAGAATCATGATGAACTGGACTTCGAGTTTTTGGGCAATCTTTGGGGAAGAGAA  
TGGAAGGTTTCAGACCAACGTGTACGGGAATGGGAGCACAAAGTCGGGGACGAGAGGAACGGTATCGACTTCTTTTGTATCCGACGGCTGAGGCTCACCGTTACTCTATTGTTGGACTAA  
TACCACAATCATATTTTACGTGATGAGATTCCGATAAGAGAGGTAGTGCGAAGTCCGGCGATGGGCGGCGACTACCCATCAAAGCCCATGCTAATCTACGCCACCATCTGGGATGGCTCC  
AACTGGGCCACTTCCGGCGGAAAGCACAAAGTCGACTACAAATACGCACCTTTCGCCAGTGATTCTCTGAGCTCATCCTCAAGGGCTGTCGCTTGTATCCATACAGGAGTTGCCTGCG  
CATGCGCAGTGCCATGAGCAGGAGCTCGATATTGCTGTTGCAGACTACTCGGTGATGACAGAGCAGAAGCAGAAGGCCATGATGCAGTTCAGACGAGAGTACATGATCTACAGCTTCTG  
CTACGATGAGTTGAGATATCCATCCACCTTTCCTGACTGCAAAATCGTGGAGGAGGAGAAGGAGAAGTTTTGGAAGGACAGGGCATGTTATGCGACGTCCGTCCGCAAAGCCTGAAGTAA  
TGAAGGGAGCTCTGCCTGTGCGCAAACGAAGGCCGAAGAGACGCAATCAAGCCAGGAGTAGAATTATCATTGGTGAAACAGCCGAAATATGATTATATGTTTGTAGATGTCTAGCTTTTA  
TTTGAGATTGTTTACCAATTAATGTTTTATGGTATGATGATTATTGATAATTATAATTAATTGTTCAATAATGATTTCTTTTTGAATAATTTGTTATCTTGTTTAACTCATTTAATGTAGAGAAAA  
CATAGTTTGCTGTATAAATTGGTGATTACTATATCATACCGTGAC

>comp139824\_c0\_seq1

ATTTATTATATTGATATTTACTATTCTATATACCAATACTACTATAACATCGATCAATACATAATAATAAGACTAACACTGATAAAAATCATAATTTCAATCCGAACAAGAACAAGAAAACATAA  
ATCGATCATTGAATGAAACATTCATAAATGTGATTTAGGTCCACTTCTCTATGATCTTCTTCAAAAATCCTTTCTTCTCCTTTCTTTCCTGACGCGATCCTTCCATCTTCTCCTCCACATCG  
CCTCCTCCATTGCCACCCTCTCGATCTCCACATTTGTGTCTTCTCCTCAATCGCCATTTCTTTCACATCTCCCTTCTTCTTATGTTTTTCTGCATACATTTTATCCTCGATCTCATACTTCAA  
TTCATCATATTTTCTTCTCATTTTGTCTCCTCTGTCCCTCCCTCTTCGATTTTCATCATCTTCATCATTAGAGTAACAATAAATCCATGCTTCTCCTCATCTTCGTTCTCCGGCCATTGTTGAG  
GTTGATCTTGTGACGACGGTGACCAGAACCTCCGGCTTCTGTTTCGGCTGCTTGGTTTACCCTCTTCCATGTTTTCTTGAATAATCGAACAACTCCCGGTGATACCTCCCCGTCTC  
CCTCCTGCACGCTAACAAACCCGTTTCGTTGAGCTCCTTGCCCGCCATTGCC

>comp139845\_c0\_seq1

AAATATTACTTAAAAAATTATAAATATATCCACATTCACCATATAAAGGGGGAAGCTTGATTTAAAATTTGAAGAAGCTTTGAGATTTGAAAAATTTTAGAGTTCAACCTGATATTCAATGTTG  
ATGATCAATATGAATAATTGTTACTTGACGGTCGACAACCATCCACTAATGCCCAACCAATCACCCAACCTCCATTGTAAGATCACTATGCAAGATCACTATCACTTGCCTATCCTTGTC  
TCATCAACAACGTC AATGCAGAACATTGCTAGTAAGATTGACGCACGTTATGGACATAAACGCTAATACTTGTTGGTGCTTCCCCCGCCGTCATGACTAACATTCATCATCCACTGTCAAGA  
TCTATTATACTATATTAATCTTTAGCCAATTACAGCTAATGATATGCAAGTTGTCTAAACGCCTATGATTTTTGAATATCTTTATGTATTTTATGGATGCATAATATTTTTATTCTATTTTTTTA  
TGTTTTCAAAGTTTTGCCTTAAAGTCAAATGGTGATACTTAATATTTAATACCATCATGCATTACTTTGATCTATAACAATTCATCAATGC

>comp139869\_c0\_seq2

GTCCTACTACCTTCATTGCAGATTTCACTATGAAGTTTTTAACACCCTTATTTATCATATTCAACAAAAAGATGATGAATCTTTCTTTATCAAGAAAAAGGTACAGCAGTGAAAAAGTAAATT  
GAATTCCAAAAAAATCTTAATGAAATAACCCTCAAACATAAAGACGATTCCCCTTCTTTACAACAAAAAACTAAGACTAAATCTATGCAGCACAAATCTTTATCCCACAGTGGGAAAAT  
TTTCTTATAAAAAATTAATTCATAACTTAAATAAATTTACATAAAGATGAGTTTCGTGCCACCATTTATGTTGCATTTATAACTGTTGAAGAGTATGTGAAAGGATCCGCAACCTATGTGTT  
GAAAAGGTTCTCTCCACATCACATATTTGAGCCACACTTTGATATTTATTGCTCATATTTAAGAAAAACAAAAAGGTGCATTTGGCTTGCCATAATTTTCATCCTAAGCCTGAAACTGCT  
GTATCTGACACAAATTAATAAGAATTTCAAATAAGAGATGGTTAATCTGGCTTGACAGATGAGAGAAATTTGTAACGACAGAAAGAGCCATCGAAAAAGATATGTTTTTGGTTCGAGG  
TCGGCCAGTCTCCCTTATATTATTTCCAATCAAATTTGCATAATATAGCCTG

>comp139899\_c0\_seq1

TAAATGTAATTTCAAATTTGAAGCAATCAAATTTAGCACTACAAATCATGAAACTCTATTAGCACATTGGATTTTCATCAGCTACATAACTGCAGCCATTAACATACATCTTAGATTTAAACT  
CCATACATAACTACCCCATACAATTGGTTAAGGACATTCTGAAACTACAAAACAGCTTCATTACAGAAGAGCAATATCTCGATCTTGAAGAACAATTATGGCATGGTAGGTTCTGCTTTA  
TTAGACATTAATGGGCTAGAATTCAGGTCAGGGAGTGAATGAGAGTTGGCTTTAGCAAGCCTTTGCTTCATCAGCTGGATTAGCAGAGCTTGATTCTCTTGGTTTCAGAAGCTGCGCTTTCA  
TCTTCAACCTCTCGTTTTCTTTATGATGTAGTAGTTTTGAATGTACAGGTTGAAGTTGATCCTCTCCATTTACTTGATCGTTTTTCTCTCTTCTATACAGCTTCTCCAGTTCTTCAAGTTTC  
AGTGAAGGAAGCAACAGATAAGGAACCAAGCTGATCAGAAGAGGGAGATTCCAGTTATTGAAGAGGGTCAATATGATCTGTGTGATCTATGGGGTTAATTATAAGCCATTTACATATAAAT  
ATATGCATATATATAGTGCAGACAGAGCATAGGGAGACAGAAAGAAAGAGAAGAAAGAATGACTGCAGCACCAGTTTCATGCATGTGTTGTGTGCTCTCTGGCAGATCTT

>comp140048\_c0\_seq2

TGTATTATCACATTTAATAGGGATATTTTAAAGCATAATTCAAAAATCTTCTATTTGTTGCTTTAGCCATAAAAACTTGAGCAACACAACCTACCTGTGGCTATGTAATCTGCTTCAGCAGTGGAT  
AAAGCTACTAAATTTTGTCTTAGAAAACCAAGAAATAAGCGATGATCCTAAAAATTTGACAGGTTCCAGATGTACTTTTTCTATCAACCTTACAACCAGCATAATCTGCATCAGAATATGC  
AACTAAACTACATGATAATAAATTTTAGGATACCATAAGCCTAACTTATGAGTTCCAATCAAATAGCAAAATATTCTCTTAACTGCTATTAAGTGTGATTCCTTAGGATTTGTTTGAAATCTT  
GCACATAAACATACGACAAACATAATATCAGGCCGACTAGCAGTAAGATACAAAAGTGAACCTATCATACTCTATAAAGTTTTGATCTATTGATTTTCTGTTTCATCTAAACCAAGTCTA  
GTTGATGGGCTTATAGGAGTTTATTCAATTTGAATCTCTTCATATCAAACCTTTCTAATAATTCATTTATGATTTGGTTTGACATATGAATGTGCCAGACTCTAATTGTTTACTTGAAGTCC  
TAAGAAAAAGGTGAGTTCTCCCATCACTCATTTCAAAACCTTTTTGACATTAATGAGGAAAACTCATGACATAAACTTTTCATTTGTAATTTCAAATAATATATCATCATATAAATCTGTATA  
ATAATCAAATCATCTCCAATATTTTTGATAAAAAGAGTTGTATCTACCTTACCTTTTTCTAAAACCTATGTTCAATTAATAAAGTTACTTAACTTATCATACCAAGCACGTGGAGCCTGCTTTAAA  
CCATATAATGCTTTCTTTAATTTATATACATGATTAGGAAAATTAATACTTTCAAACCTGGTGGTTGTTCTACAAAAACATCTTGATCAATATATCCATTCAAATAATGCGCTTTTGACATCCAT  
TTGAAAAAGTTTGAAGTCCTTAAACAAGCGAAGGCAAGGAGTAATCTAATAGCTTCTAGTCTTGCTACGGGTGCAAAAGATTCTTCAAAGTCTATTCCCT

>comp140067\_c0\_seq1

TAGAGCCATTTTTATTACTTTTTACAAATGCACTGAAGAATCACGCAATGCTACCAGCATTGGATGCAATTCTGGGCCACAAGTCTGCACATTCCTTTGCAACTGGTCTGTGATGGCAGA

ACCTTTCATCTCGCCTTTATTATTTACTATGACCCCTGCATTATCTTCAAATATAGAAACACTCCATCTTTTCTCCGGTATGACTTTCGTTGTGCAATTACCACTGCTGGATGTACCTTCTTTC  
TGAGCTCTGGTTTCCCTTTCTTGACTGTGGCCATCACCATGTACCCACACCAGCAGCAGGAAGTCTATTCAATCGTCCCTTGATCCCTTCACAGAAATGATATAGAGGTTTTTGGCTCCC  
GTGTTATCAGCACAGTTGATCACTGCTCCAACCGGAAGACCCAAGGAAATCCGGAACCTTAGCACCAGAGGACCCACCACGTCTCTCGCTTCGACATCTTGAAGGCC

>comp140160\_c0\_seq1

CCTGCCAACCAATTACATTGGCTTTCCGGCAATAAGTTTTATGATAATACTCAAATCATTTAAAAAATAATTTCTCATTACAGAACTCCAAAGCATATCGCCACAACAAGTCTAGAACTTACA  
GATCTTCATCTCCTTCTGTATTCTTATCGCTGGTTAAAGTTTTTCCATTGACAGCTACAAGTTCAGTATCAAAAACCAGTGTGGCTCCTCCAGGGATCTTGGGAGGGGATCCTTGGGGCCCA  
TAGCCAAGCTTTGCAGGGATCTTTAGCTTCTTTTTCTCACCATGCACATACCAAGCAGCCCTTGGTCCCAACCTTTGATTACTTGACCGCTGCCAAGTTCAAACCTCAAAGGGTACCTC  
TTTTATAACTGGAGTCGAATACACTCCCATCAACAAGCATCCCATGATAATGCACTTTAACTTTATCTCCTTTGTGAGCTTGAATGCTACAAGTCTCTGGTTTGTACTTGACACCGATTGCA  
GTTCCGTAAACATCGCGGGATTTCTTAGCAGAAACAAATATAAGTAAAACGGCGAAGAATGCAACGCAAATTAATAATCCTCCCCATCGTTCTCTCTTTGGCCGGCACCGATCGCTTGGTCTG  
GCTTTCGATCTTCTTACACGGAATATGAATCCGGTATCGTCGAAGTGAACAAATCGA

>comp140224\_c0\_seq1

ATTGCGTGGACAAAGTTAAAAATAAAATAAAATTAATTATAATATGATAGACTATTTTTGAGATTTTATATTTATTTAAATTGATTATTTTTTTGGCTTCCGTTTCCAGGCGTTCTCATTCTTC  
CCCCTCTCCGCCTATAAATAACAGGCTCGGTGAACCTACGGAAGAAACCCCAAAAGCCTTTCTTTCTCCTTGAGGTCTCTTTCTTTTATATTTGATCTCTCATTTTTCTCCTCGAGGTCTC  
TTTCTTTCTATTTGATCTTTCACTTTTCATGGGCTCAAGTTCATAATGTCACTCTCTCTCCTCCTCCTCCTCCT

>comp140235\_c0\_seq1

CCAACCTAGGAACGTGTGTGATTCCAAATACATACCTGCCATTGAAGCAAAACAAAAAAAAAAAAAAGATTATAACTGTGCATGAAAAAACTTCACGAGATGGGCAAACTTTTCAG  
AAGAATTAGATGCAAAACTAAGCTGAGAATGAAGTAAAATATTGCTTATGTTGCAGTCACTCCAGAAACAGGGTGGGTAAAACAAAGTTAACATATTAATGGATACAATGAGAAAGA  
GAGATCAATCATGGAAGTTCAATACTTTGCTGCCTAACTTAGGAGGAAGTTGACCAAAGTAGTTCTAGTAAGGAGAGTTCCTTGTCGAGTGGACCGACTTATTAGCGAGTATAGAAGTT  
GTTGAAATACATAAGGCAATTAAGTTAATAGGTATGCTGATCCGGTTTATATCAATCCTAGGGTGGGTCTTTCTATCATTTAAGAGTGACGAGTCCCATTAACATGACAAATAATTGGAGCA  
TAGCTAGGACAGACTAGTATGTTGTAGCCACCATTAGGAGGATTAAGGGTTGACCATACTTATTGGATGATAGAAGACCTTATATTCTTTTTGAAGGCAGCAAATGCAATTTGTGTTGGTAG  
CTCTTATCGTTGGATTTACAAACCATAATGAGTCTTTCTTGAATGTAGGGGCAATGCAAATACATATAACATCGAAACTCGGCATCATTGCGTTAACCATCCATGTGGGCGCGACTCCACT  
TGCCATACCCACATCATAAACAGATACATGCGTCATTGTAAAGGTGATTTTCATCCAGCTCTTTTGGATTACCATGAGGCAAAAGCAAAGTCGGCAGGATAACATCATGTTGGTTGTCCTAT  
TGGCTTACTAAAAAATCTGAAATACATGAACCAACATCTGTGGAACATGGCTGCATGTGGCCTGTAGGTGTGTAGACAAAGGCTATGGTAGGTAGCCAAAGTGATTGGAACTACTCAA  
TGAAAAAGAAAAAAAAAAAAACAATACTTAGCACATTGACTTTGGTTTCGCGACTAAGAGAGCGATGTGTTGACAAGTTCTTGAATCCAATCTCCAGTCAATATGTAAAGGCATTTATCT  
TTTTGGGTTGAGTTATTGAGAAGTTATAGGGAAGGATGACTTTTGAGGTTGCCTATAAAAGGCAAGCTAAGGAAAGAGGTGGGGTTGACTTTCCATAAAGAGTTGGTTTGTGTTTGAAG  
GGGGTGAAGAAGTTTACTTATTAGGAGAAAGCATCAAGTACTCAAAAAAAGGAGAGATTATTGTGTCCGGACA

>comp140250\_c0\_seq1

TGAGCACAAAGAAGTCTTTAGATTACCATGAACTTATAATCATAAAGGGTAGATAATATTAATCATAATAATAAACACACAAGAAAGTAGAATACAAAGTACGAAATAGAAAAACAAAA  
TACAAGCTTGGCCAAAAACAATGGCACATGCACATCAAGCACATAGAACACATGACGATTATTCTATTTTCGACTTTGTATTCTACTTTCTTGTGTGTTTTATTATTATGATTAATATTATCTA  
CCCTTTATGATTATAAGTTCATGGTAATCTAAAGACTTATTTGTGCG

>comp140256\_c0\_seq1



CCTCTCCAATCCAATTAGGCCGCTGCCCGAGCTTTCTAATGTCCGTGAACATGTCCTTAAGACGGATCGCTCCTCTCCTCTCAAATTTGATCTGATCCTCGTGCTGTACTCAGGCAACCAC  
CTAAATTTCTTTCTCCTCGACCACCGCCGCTCGGAGTTTTTCTGCCGCCTGAAGACGCTGGAGCTCTGCCGATTTTCAGGAAACACAGGAATTCTGCACAACCTCCACATGATGCTGAAA  
TATTTTCCAATTAACAACAGAGTTCCCTCTTAACGCCAAAACCTCCGCCAAAGTGATACTGGAGTTCTCCTCGGCCACCAACAAATGTCGGACTTCTACCCGACGCCAGACCTTCACTCATC  
GTCAAGTTTCTACCCGATGTCGTACTTTTACTGGTTATCGAACTTTTGGCTGGACATTTATCTGAAGATGGATTTT

>comp140264\_c0\_seq2

CCAAGCTAATTTAGCTCCAATGCCATTATCCTTTTTACTCATCAAATTTCCATAAATTATTATCTTCCAAGACTTCTACCATCTAATCTTATTCTGGATGGCCAAATCTTGGTGGACTCACCA  
TCAACCCCTCTTCCATCTCAAGCAAAAATATGTGGCATATTTTATAGTTCTCTTTATCAAATACTCACGTCTACTGTGGTGGCACCTCAGATGTGTCTATAGGCTCAGGCCTCGTACCAACC  
TCAGATGTGTCTTTGGCTCAGGCCTCACACCAAAGTGTGCTGCTGCTACCGCTGCTGCTCGAATATCAGTAATTGAATTCGATTTTGGCACGGGATGTGATCGTATTATGTCAGGAAA  
ATTAAACGCTCCATTTTTCCCATGGATTGTAAGCACGGCCACATCATAAGCAATGGCGGC

>comp140341\_c0\_seq1

GAGTTATTGAGGAAAAGAAGCAAAGTAGAGGACGAGCTTAACTATAGGTAATCTCATTGCTGTGCAAGAAGCTCGCCAAATTTCTAAGCTTTTTTTTTATCTTCTGATCGATTCAAATGAGA  
GGATAGAAAGAAATTCGTTGGATCGTAGGGATTAGTTGAGTTCTGGTTTTTTTTCTCAACTTAACTCTGCTTCCCTGATCAGTTTTGGTCTGATTTTCTTATTTGAAATGGAGACGGTCCG  
CTGTGAAAGTTGCGGACGAAGCTTCCCGAGTACTAGATCGCTTGCAGTGCACACGAGGTCTCATGCTGTGCTGAAATCTGAGGAGGAGCCAATGTGTACGTATGGACTTAGAGAGAATC  
CGAGAAAATCATGGAGGTTGAAGGAGAAAGAGAGGGATATGCTTTGTAATAATTGCGGGGAAGGATTCGGTTCATGGAGTTCTTTTTTTAAGCATAACGAAATGTCATTCTGAGACGAGAA  
GAGATGTTCTTAGCGTGGAGGTTGATGAAGATGATGAGGATGAGGAATTCGAGGAAAAAGAGGAGGATTTACAGAGTAATGAAAGTTATGAGGAGGGAAAAGATGAAATGCAGAGCGA  
ATCTGAAAGCCAAGTTACTGCAGTTGTTTTCCGGCTAGAGAGCGGAGGAAGAGGAGGATCACCGGATTTATCGCCGGAAGATGAGAATGAGATAAAGTTGGGTGCTTTTTGTCTGC  
TGATGCTATCAAGAGGCACCGAGTCTGTTACAAATTCGTTCTGATAAAGTTTTCAATTGTAATAGAAGAGGAGGTGGAGAAGCAGAGAAAACAATTCAGTTTCCAGCATCCGATTTTGAAA  
TGAATGTGCTAAAAAATGTTCAATCTTTTTCAAAAATATGATTTTGGAAATGAATGAGCTCAAAAAGGTCCAATCTTTTCAGTCTGAATCTGAGTTTTCCATAAACTAAAGAAGTCAAAGGC  
CTCTCCCGATAAGAAGCATCTCAATTCTGTTGTTTCAGAGCTTGGAAAAGAGAAGCACATATAATTGTACGTTATGCAACAAGAGCTTTCATTCTTACCAAGCTCTTGGAGGTCACATGGCA  
AGCCATAAGAAGATCACAGAAAGTTTCTTATCTGAAATTCAGGAAGTGGAGAAGTCAAATTCAGAATCAAAGATCAAAGACTACTAAGAACAGTCATATGTGCTCAATTTGTGGCAG  
AATTTTTGCATCTGGTCAAGCTCTTGGTGGTCATAAGAGATCACACTTGGTTCCAGCAAAAATGCTGCTTCTGCTGATACTGTTCAAGCTTACCTGCAGTAATTGAGATAGAACAGAAG  
AGTTCTATCCTTGATTCATTGATCTCAACCTTCTGCTCTTGTATGATGAAATTTATGATAATTCTAGTGGAAGTATTGAAGATTGCGTCTGAGGCATTTGAAATTTACGTAGTCTCATGCGA  
AATCTGTTTGAATTTCTCCTTTGAATTTGAATCGGCTATTCATTCTTTTCATCCTCAGTTCAGGACATTTGAGGTGTTCTTACAAAAATGATCCAGTGAAGTAGGTGATTACTGGATTAAGAA  
GCTAAATGCTGCTGCACATTTCTTGTACTGCTAATCTGTTCTTTAATTCGAAATTTTTATTATTTTTTTCTTAGAAAACA

>comp140438\_c1\_seq1

TTTTTAGAAGAAAAAACATTTATTATCAAATATAAAAAGTAGACTGACATTTGTTCTGCATCTGATGACAATTTACAAGGTTACATAGTATTATTTTAAAGACTATTGCACAATACGAGACAAT  
ATTGACCATTAGTTGGTCTTATTCTTCAGTATCTTTAGCTATGAGGCTTTCACATGAACTTTTATTTTTGACTAAGGACAATAATTGAAAGCAGCCACTTCCACAGCCCTCTACTGTGTACT  
AAACCACCACCACAAGGATGGTGGTCCGTGTCCGTGGCAACCTCCTGCTTCTACGAAGCCTTTAGCGGCTGCCCCCTCCGTCGCCACCGCCATCTCCA

>comp140455\_c0\_seq1

AAAACGAAACATAGAGTTTGATTAATTAATATATAACAATTTTTCAAATCCCTCTCAGAAAAGATCATAAAGTCATATAGTTTTTAACAAAGCAAGGGTCTCTACATTGAACTAACATGGC  
AAGTCAAAGAGTTTCATGAACTATAATGTAGAAACATCTATTTTCTATCATTCCAATTCCTCCAGATTTAGTTCCCATGAATAAAAAGCTCTTCTCCATTTCTTAACTCTCTTCAGCTCCAGG

ACGCAGCACTACCACCCTAATTGGAGGGCAGTCTGCTGTTGTAAAGAATAGTGATGGCTGGGATCCATTAGATTTACTTGTAGAAAAGTTTCTGGAATCAAAGGAAGGCATGACTTCATACT  
CAGTGCTTGTGTGATGGCATCATGTTTATGTGTTGCTGCTGCTGTTCTTTTCATTATCAGCTATCTTATTTTCGGAGGTACATGTTATCATTTTTGCAGTTCCATCTCCCGCTTCTGCATGTACTCA  
ATCTCAGCATATAACAATTCATTCTTTTTAGATCTGATTTTTGTTGATGCCTTTCTCTAGTCTTGTTCAGTTGCTTGAGGTCCCTTAAGCTCATAGTACTTAAAGCCTCGCCCATCAGATTCC  
TGTTTGAGTTCTGTAAAGTTGGTGATTTGCTGACGAAGTTTTGAGGCTTCTTGCAGGTAATACTGAGCATTGTTTCAGATAATTGATCCAGAATTGGAATTATCAGCACTAGCTTTCTTGATC  
GCTCGATCGTTCCCTTTACTGTTATTGGCATACTCGTAGAGGGCGGCCACGGCTGGAGAAGATGACAAGGGCGACTTCAGCATCGCAGAGAACGGAAAGCTCGTAAGCCTTTTTGAGG  
AGGCCATTACGACGCTTACAGAAGGTGACTTGCCGTTCGTAGTGTTCCTATCCTCTTGATCTCTATCTTTCTCTTCCCATCTTTTCTTTGGCTCCATCATTTTTCGGTTTTCGTTGCTCTCT  
GCAACTGCTGCTGTGCTTCTTCCCTTGTGCCTGCGTGAAAATAAAGCCAGCTTTTGCTAAGAAAACGAGTCAGCTTGCAGGTTAAGAAGCTGATGACTTGAAGCTTTCCCTCTCTTTCTA  
CAAAGGAAGGACTGGGTAATAACTCAGGCAACCATTGCCGTCCGTTTTAGAAAATTTAGAATGTGGGGGGCATTAGAGAGAGAAAAGGGAGAGAGAAAAGAGTTAGAGGGAGAAAAGAGG  
GGAAAGCGTCTTTTTGAAAGGGATTATTAATGGTGTGTTGAATACGACGTTGGACTGAGTTGCACTCAAACCTAAAATGCTAGCAAAAATAAAACAAAAAGAACGGGGGAAAGATGAAAGCA  
ACGAGTGCGCCATTGTCCTTCAACATCCTCTTCTACCCCT

>comp140493\_c0\_seq9

CGACTTGGAGCAAAGGAGTATTGCGTCTCTTCTTCTTCTAAACTTCATGATGTATGTTACTGTGCTAGGTCTGGCTGGTTGGTCCACTGATAAGTATATCAACCACAACACTGCTCATCAA  
CGTATGAGAGGGCAACATTACTIONACTGATATTCTCGCTAATCGCCGGAGCGACGGGGGTGTGCGCGGTGGTGGCCGGACTGGTACATGTTTGTGCATGGCGTGGGGATAGTT  
TGGCTTCTGCTGTGCTCCTCCGCCCTCGTCTCTTGGGCCATGACAACCATTGCTTTTGGTCTTGCATGCAAGCAAATCAGTATGAGAAATCGACATACAGACTTGAAAGCTTTGGAGGCATT  
CATCATAATTTTGACAGTGACCCAACTGATCTATCTCATAATGCTCCATTTGGGCATCTTCAGCAGCAGGTATGGTGTGGGTTATAGGAACTACTGCATCAATGCTCCTATGATGATGGAGGA  
GGAGACTCCAAAGGATTCAGCAACTGTTGCAAGGCCATTGCTGCTTAGAGAAGATTTATAGTTATATAATATTTGTTAGGCATGCAGTATGTTCTATTGATTTCACTTCTAGCTTTTATTTT  
GGAAGACATTCTTGCTTAATAAAAAGCTAGAAGTGAATCAATAGAACATACTGCATGCCTAACAATATTATATAACTAATAAATCTTCTCTAAGCAGCATAAGGCCTTGCAACAGTTGCTG  
AATCCTTTGGAGTCTCCTCCTCCATCATCATAGGAGCATTGATGCAGTAGTTCCTATAACCCACACCATACCTGCTGCTGAAGATGCCCAAATGGAGCATTATGAGATAGATCAGTTGGGTC  
ACAGTCAAAATTATGATGAAGGCCTCCAAAGCTTTCTGAAAAAGAATAGAAATATAATTTCTTGTAAATGAATTTGCAATTTTATATTGCATTATTGCTATGTAAATTTTATCAAGTCTGTATGT  
CGATTTCTCATACTGATTGCTTGCATGCAAGACCAAAAAGCAATGGTTGTCATGGCCCAAGAGACGAGGGCGGAGGACACAGCAGAAGCCAAACTATCCCCACGCCATGCACAAAACATG  
TACCAGTCCGGCCACCACCGCGCACACCCCGTCCGCGGATTAGCGAGAATATCAGTAAGTACATCGTAGTAATGTTGCCTCTCATACGTTGATGAGCAGTGTGTTGGTTGATATAC  
TTATCAGTGGACCAACCAGCCAGACCTAGCACAGTAACATACATCATGAAGTTTAGAAGAAGAAGAGGACGCAATACTCCTTTGCTCCAAGTCGCCACCATTTTCTCCAATTACTTAGTT  
TTTTTTTCTTGAAGATGTCTGCTTGCCTTATATAAATGGTTAGGAAGAGAGAAGTGTGGCC

>comp140582\_c0\_seq1

AAAAAGTAGCGGGTACAGTTGCTCTAAGACCGCTGCAAGGAAAAAAGTAGCGGTTATAACCGTAGATATAGGTCTAAATTTATTCTACGGTAGCCCTATTTTTGGATCTTTAGGCAAATTT  
ATTGATATCAAGGGAGAAAATTCAAGTAAACATATATAAAAGGATTTGACTATTAGCCAACCCTTCAAAAACCTGGGGATAGTTCCAGTTAAAGATACATGGATCATAAAGCTTCTTTGGC  
AGCCAACCTTAGAAAAAACAGGTCAGAGAGTGCCTTGTGCATGCTCCTTCCAAAGGCCGAAGAGCTGCTCTTGAAGAAGAACAACAAGAAGAAGAAGAAGAAATGCCATTATCTCTTT  
CTTCTTCCACAATAGTCTCCATTAACCTTCGAAACCTTTTTCTTCTTCACTGAAACCAGCTGAGGCGGCGCCACCTCTGTAGCAAACCGCAAAGCCTTGGTCTTTGCCATTATATATCAT  
GAAGGAGAAACGAAGCTAGCTTGATTACAGGAGAAAAGAAAAGCAAGTAGAAAAGTTAAAGAGAGAAGTTGAAGAGGGGGGTGA

>comp140610\_c0\_seq2

AAAGCAGTAAAAAAGCTGTCTCAACCAACACCTTAATACAGTTTGTCTAAATTTGATGACAATAATGACTTTGGTTCGTATCGAAGCCATTGTTGATTGCAGGAACCTCAAAAATGCAACTAC

TTCTAATATCCTCTGTCTCATCTGCACCAGATTTATCACCCTATTGGTTCAGCTTTCAGTACTGGAAATCCGCCAAACGCGAATCTCTCAAGTCCTTTTCTCAGAATCAACGGCCAGGAT  
CCGTAGCAGATCATCGAATCCGACGCCGGCGGATTTCGTGCGACCCGCCGGAACGGATCATCTCGCGCACATCCTCGTTGCTGGCGGAAATCCCCGCCATTTCAAATACGCCTTCAGGTC  
GTGCAACCCACCCTTCCGTCTCCGTACGGTCCATCAAGCGGAAGGCCTCCTCCATTATCTCGCCGTCCTAGCGGCGTCGGGTAGGATGCGCTCAAACCTCGTCAACTCGACAAAGCC  
GCTGCAATCGGCGTCGGCAGCGGAGATCATGGCAGCGATGACATCGTCTGAGGCAGCGGGGACGCGAGAGAAGAAGGCGCGGAGATCGTCCGCGCTGATTCCGGCCGTCACGGTCCGC  
GTCGAGGACGTCAAGGCCGGCCGGATTTCGTGCGATTTAGCGGCAGGGTTGCGGTGGGGATGGCGGGCGGTGGGGCACATTGTGCGGTTTCTTTTCTGTGTTGGGGGATTTGATTACTA  
CTTTAGAGTTTTTAGAAAGGGGAATGAGAGGGGAGTAAAGAAGAAAGGTTGAAATTATGGCGTTGGGGAGGGGCATTTTTGGGAAAAAAATTAAGGTTGGG

>comp140650\_c0\_seq1

AAGAAGTATAATATTTTAAATAGCAAAGCATGTAAATGAAGGACATAACAATAACAATTAATGCTCAGATCACAAAGATAAAGAAAGGCAAATTTAATTTGTTTCCAAATCCAATATTATC  
TTACTATGTTATAAATATTTTCTTATTTAGTAACAGGTTTCTGTGCATTATCTACACCAAGGCCATTCAACACACCAGCCTGCTTCTCAGTTAAGCCATTTGGAAAGTAAGAGTCACAGAGCT  
TCCTGAAGGTGCAGGAGGTGACGAGGCTGTCAGAGCCCGCTGATGGCTGATCCCAACTCTCTGCACACCAACCATCTCCGCAATCTTACTGAGCCCCCATAAAGATTGTTGCAGAAC  
TTTATAAGATGTTTAAATGTCATACAGAGTCGGGAAGTAGATCTTCATGAGCTGAAAAAGCCTTCCCGGGTATCAGGAAGCTCTTTGCAAGTTAGTAGCTTTAGGAGGTAGCCGAAGTCAT  
AGCTGCCGTGGAAGGCGATCCAATGCACATCCTCGTTGAGAACAATGCCGGAGGACATGAAGAGCTCACCGAAACGAAGGGCGTCGACGCCGTGCTCTCTGTTCTTCTTGAAGTTGATT  
CCACACTGGCGGAGGAGCTCAATGGAATCGGAAGCGCAAATGTCGCGCTCGTCTGCAACTCCCGGAAATTGAACTGCCAGACGCAGCCGTAGCCGGTATTGCAGGTGGGGAGGTTTC  
CGCGCTCGTCGGCGAACGTGAGGCCGAGCTGGATCAGCTTCAACATATCGACGTTAGCCTTTAGCATCGCATATTGATAGTCAATGACGACTTGAAGTTTCTACCGGCCGGCAAACGA  
CCCCGGGAACTCCGTGTCCATGGCGACG

>comp140680\_c0\_seq1

AAACTATTTTTAAATTTTTTTTTGCCAATTTAGCACATGAACGAACACCAAATTTGATGTCAAAGTAAGAAAAAAAACCTTTAAAAAAAATGCAGATCAACTGCCCTCCATTATTGCC  
ACACGGGTACCTGGCGTTGCAGCTCTTTCACCAAACAAGAAAACTTAGTTATTTTACAGAGCAGATAGCTGAGCATGTTGTGAGGGATGTCATCGCTGCTCTACAATCTTCAGTTCATCA  
GAACTCAGGGAAAAAGCCATGGCCATAATCCTGTGGTTCATGAGAGAACATATCCACAGGAGCGTTGGTGCAATGGAAATTCTCACCAGTAAATTTGATGATCAAGATATATCACAATAA  
CTGTGATGTCGTCATGAATTTGACGCCTTTCTCCTTTGGGTGTTCCCTTTCAGGCTACCGTAACTCATCTTGCCTTCTTTGCGGCCTCATTAAAGCGCTGCTCTGACCAACCTCTTCGCAATT  
CCCTGGATGATCCCTTAATCCGCCACGCTCCTCTTATATGAACTAGTATACGGGAGTCATCTGGGTGTTGGTTGATCACCTCATTCCTGACTTCCTCGTCCTTACATTGTGATCAGAAGTT  
AATCTCTCCGCCACCACCTCATTTCCTCCAGGTATTCTGTTACGGCCGAGCACCGCCCTGGAATCTCCTAAATTCCTCAAATAAAGCATATCCTCCACTATCACCCAAACGAGGCAACACG  
AACCAACCGAAACAAAATGCGGACAAGACTGCCAAGAACGCCCCACCATTTGCAAGAACTCCTCCTCAGAGGCACGGAAGGCCTTCTTTATCACTTCGATTGACACCCCTCCATCCTCC  
GTAACAAACCTGTGGAGATTAGAGAACATCCGGGAGTTGAGGAATCGTGAGGCATCGGGGCCGATGACCGTCGTAACGCAATGAAGGTGCGGTAAGGAGTATTGAAAACCTGAC  
CCTGATCCTCGAACTGAGAGTTTGCCTGAGAAATAGCGAATGAGAAGTCTCCATAGTTGTGTGCTTGTGAGCGCTAAGTGCCATTGAAGCTCGTCTGCTGCGTGCAGAAAAGCCCACAACAC  
CGACTCATTGCCCTTAAAAAAGATCGTCACTCAATCTCCGTTTCTGATTGGCAAATGCAAATCAGCAATTTACTCCTCCCTTCAACTTCTTCGAGATCTTGGGGTTGTTAGGGTTTTAAG  
AGGCAATAGAAATTGAATTGAGCAGTGAG

>comp140692\_c0\_seq3

GTGGACAGCAGTTGTTCTTGAGATTTGTTGCCAAAGTGATTAGGAAATACCAATCGTGGGCTGTTTTTGACAAATTTCCGGCGGCTGAAATTTGTGCCGGCGAAGAGGAAATTTGCTGAAAT  
TGTTTTTCAGATTTAGAGATCGTCACCAAATTTCAAGCCGTAAGAGATGGCGGCTAAGAAGTTTGTGATGCTTTGGAGGAGCGAATTGAAGGGGAAATAAATCAAATCAAGG

>comp140756\_c0\_seq1

TTAATCGAATATCTGCAATAAATAAGATACCTCAATCATATCATAAAAAGATTTGATGGGAGGAAATTTTGAGGTCATAATTTTAAACACATTGTACATCTAAAAACAGAAAACCTAATTGACA  
CTTTATGGAACATGGCCTTTTTGCCCTTAGATGTATGCTTTGTAAACACTTCACTGTCTTTATCTCTCTCTCACTCACTCACTCTGGGTTAGTATCTTCTGATGCAAAAAGATCGATAGATG  
TCTGAATTTGAAAATCTGCTCAGTACATACATATAATGATGTAATTTCCAACCTTTGATTGCTAAGGCCTCCCTAAGGTGAACTCGATAATGGGCTTCTTCGAGCTGGTCTCTGATAGGCAGG  
ATGAGTTAAGATCCGAAATCATCTCAAAGCTTCTGGATTGCCTCTCACACTGATCAAAAAGGGGACATCTCCCTCTCCCTGATGAGGTGTATTCCCTTTGGTTTGTATGAAACAGCTCTTC  
CCTGGAGGAATGCTCCATAAAACCATAAGAATTCGTGCTATTTTGTCTGCTGACTTTCCATTTTCAACTGAAGATTCCGGTCCATGCACAATATTGTTTAAATCGAGCAAGTTGTCATCA

>comp140812\_c0\_seq1

CCTAAAAAATAAAAAAAAAAAAAAATTTCTTCTCAACAGGAAGAATGGATAGAAGTTCCTCTTCAAGTCATTGAATCAAGAAAAAGACAAACTACTACAGAGATGGCATCAAGAACTATAA  
ATCCGAGGTGTCATAGTTTGTAAAGCGTGAAGAAGGAAGCAGCCCTTTTCAAATCATTTTCTCCCTTGGCTCTATAGTTTTTGTCTTCCACTTCAATGTCGGAGCTGCTCAGTGCATGACG  
GTGGAGCCGACGTTAACTTTCGATTCTACGTCTCATAGTCTGCACTAATGCCGAATGCATGGCGCCCATTTTCAGACATGTCAAGAGGCGGCCGCTCGTCCACATCTTCTCACCCCTCTG  
CTTTCTGTTGAATGCTCAATATCTGCTCCTGCGTCAGCTCTTCGTCTGCATTAATCGTATTAATATCGATACCAATGAGGTTGTGTTTCATGAAAGTCATGCAGGTCTTGTGGCCATCACAGG  
AGAAGTAGTGATCATTATAATACTGATGCTGCTGTTGGCTGAGGAGAAGATTTGGTTGAATATCGGAACTTGCCTGCAATTGAGCTCGAAAACCTGGCGATTTGGCGGAGGACGAATTGCA  
GCTCGGCCTGTGCAGCGTTAATCCTTCGTTGGAGATCAACGATGATGCGGTAGCAGCCGCCGGGGTCTTGGGCACGAACATTCGATTGGAAGATGATGGAATTCATTGCCTCTTGAC  
GGCGTCTGGCTCGATGGATTTGAGTATTTTGGAGATGTTGGAGACGCCGAAGAGGGCGATGGACGTTGAGAACTGGCTTTGTTTATCGGCGGGGAAGAAGGGGGGAGAGTGCAATC  
GGAGGTGCATTTGCGGCGTTGGAATTTGCAGGCGGCGCAGGCGGTGCAGGCGGAAGCAGTGGGGATGGAGTAAGAAAGGTGAGACTCGGGGGTCAAGGGGTTCAATTTTCGGAGGAC  
GGGTGATGGGGAGGTGAAGGGGAATTTGGATGGACGAATAAGGCGTAGCGAATGCGAAGGCTTAGGCGGGGAATTCGTATGCTTTTTCTTTTTTCGCTTGATCTTGGTCATGCTTAGA  
GAGCAGTGGTAGTTTAGAAATGAGGGAAGGAGGAGGCGGAGGG

>comp140820\_c1\_seq1

GGCCCAAACGAAACCTTAATTTGCGGTGAAAAATAAAGAAGAAAAATTCAAATGATCATTATTAATGATGGATAGTAAAAACACTTCATCATTATGTCTTTTAGTGCCTTCGATCATTAT  
AATGGATAAATATCATAATGAACCTACGATAAACTCTTATTGTTTTGACGACCGTGTCAATTTTCTTCGATGGGACTTAAACGAGAATAGACCATAATACATGCACATCTTCGTATGGGCAT  
GACTTCACATCTTCATAAAGGATGTATATCCCTCGTCTTCTTGTGGCCATAATTCATGTGAAACCAGAGCTTCTTGAAGGATTGAAGCCAGCTCATTGAGAGGAAGAGGAAGTGAAGAG  
ACTGCTGGGTCAAGTTGAAGGAAATAAAGATG

>comp140895\_c0\_seq1

TTTTTAACAATCTTAAGAGTTCTATTTTGCATTTATAAGCATCAATAAAATAATTAATAACATTCACCGCAAAGAACACAGATAAAGCATATTGAAAAATATCATAAAATCAGTGAATCCTCT  
TTAAATCATAACCAAGAAACGAAAATGGAGCCATGCATTCACAAGACAAATGAGGAATTTAATGAGATGAATGAATTAGTAATGCCGGTGGCGATGAAGAAGGCTTGTGATCTTCTTG  
GCAAGCTTTTGAACCTTTTCCATCCCTTCTTGCAAGTGAACCGACAACCTTTGCCCTGCTGCACAAGACGTTTCAGCTCCTTCCCTCTTCTTCAGCTGCAGCTTCTTCTCCAAC  
CCACCATCTTCTCCCATCTCACCCATCTCTCAGACAAAGACAGAGAGAGAGAAAAGTAGCAACAGCTGCGAGAAAAAAGAAAGGGCTTGTATGGCTACGGCCTCTGATGGCCTGAT  
TTATAGCAAGAAAATGAGAGGAGGGGATTGATTTCTCTGGGTTTTAGTTGTTTTTTTTGCTTTGTTTGAAGAAACATCTTCGCTTTCCGGTGGATACGCGTAGACAGATATGAAATAATGAAA  
TCGTATTCTTCATAAGACCTAAATATGAGAAAGAGAGAGGGAGAGATAAGAAAGAAGATCGTTGTGTTGGATTGCAACAAGAATAGGGTGAATGGTTACAGCCGTGCATGGTTATGACT  
TCGTCAATGGCTTCCCGTGCAGTTTTGAACTCTAACGGTCCGATTCTATTGCTTGAACCTGACAATACAGCAAAAATAACTAGCACTTGCAACAGTTGCCATAATGGGGTTGATTCTTA  
AGCTGTAATCCATCCGGTCCGCTAGGTGACAAGTT

>comp140916\_c0\_seq1

AAATTGTTCTGATGAGATGGAATTGGAAAAAGAATTTAATTAATAATAACATCTGGGAAAATAAGAAAAAGAATTAATGATATTGTTGTAAAAACACTAATTCATGCACCATATGGTTTT  
GATGTTACATTTATACAAATCATTTTTATTATTCTGATAACATATATTCAACGCTTAAACCAACAAAGGGATCGATAGTACTCCTACAGTCCTACAGCACAATTTAAATAAACCAAATGAATAC  
TAAAAGAACAAATCGAACTCTGCGATAACAATCACTACGTCATGAGGAAGAAGATGAATCAGAGTGTAGATTCTGTTCCCTTCTGAGTGGGATACGGAGTGGAGCTTTTACAAGCTCTAGTC  
TTCTCTTCTGTAAGAACTCTGCAGCGATCTTTTCATTGACAACCTCGAATTCAGTACCTGGTGGTCCGGCGCCGGCGCCGGCTCCGGCCATGAACCACCAAGAGCAGAAGCTGACTG  
GCCGCTTCTTTCATCTTCTCCTCCATCTCCCTCTTTGCCATGCATATTATTGCCCTCGCTGAATCTCAGTGACGTCGCAGATGCAAACCTGGCCGCCATAGAAAATACTAATTTTCTGCTG  
CAGATCGCCGGCGGGGGTCCGGTGGACCTTTACCGACACCCCGGCCTTCCATCACCACTTTGGCTCCTGCTACTGCTCGACCGGCCGCCAGGCGTTAGAGAGAGCTCTGTGT  
CACAATCGATATTGCCGGACGCCATTCTTCACCTTAATCTTCCCTCAAATTTTATACCAGTTTATATCACTGAAATTCAAATATCCTTCTCCTTTGTGGATTCCACAAGAACTAGAGAGAGAA  
ATAGGATTGGAGATAGAGAGAGAAATAGGGAGAAAGGGCGCACGTGATTTATAAATTGCCTC

>comp140923\_c0\_seq1

CATTCTTTATATCATTCTCTTGCTCATCTCTTCCATCGATACCCATTGCTTCTCTTGCTTTAAGGGTTTCCTTTTTTCTTTCTTTTAAAGCAGTTGAGGAGAAGAAGTGATCAGGATGGGGAGG  
GGGAAGATAGAGATTAAGAAAATAGAGAATCCGACTAATCGGCAGGTGACTTACTCGAAGAGGAGGGCTGGGATTATGAAGAAGGCGAAGGAGATCACTGTTCTCTGCGATGCTGAGGT  
TTCTCTGATCATGTTCTCGAGTACCGGGAAGTTTTCTGAGTACTGTAGTCCGTCGACGGAACGAAGAAGTTTTTGATCGTTACCAGCAGTTATCTGGTATTAACCTGTGGAGCGCGCAG  
TACGAGAAGATGCAGAATACGCTGAACCAATTTGAAGGAGATCAATCATAACCTGAGGAGGGAAAGTAAGGTGGTGGTGGGAGATTGAAGGGCTAAGGGAGAAGAGTACTGGAGTGATA  
AAGCTACTAACGCGTTTACTTGTTTACTTTTTGTTTTTGGCTTTGGGAATTAAGTGTTAATTTATGTGATTTTTTTTTGGGTTGTCGTGAGAAGGCAGAGGATGGGGGAAGATCTGGAGGGA  
CTGGACATCAAGGAAGTGCAGCGTCTTGAGCAAAACATGGATGAGGCATTAAGCTTGTACGGAATAGAAAATATCATGTAATCAGTACCCAAACGGACACATACAAGAAGAAGTTGAA  
GAACTCGCAAGAAACACACCGAACTTAATGCACGAAATGGAAGTTGTTGAGGACCATACAGTCTTTGGGTTTCGACGATGATTCGAGCAATTATGAGGGCGTTCTTGCCCTCGCAAATG  
GAGGGTCTCACATGTACGCCTTTCGCGTGCAGCCAGCCATCAAACCTTCATGAAATGGGATATGGCCCGCATGATCTTCGCCTCGCTTGATATATGCGTAGTAAGTGCACACGAACAAA  
TGCATTAATTGCTCCATGTTACAAAAGCTATATGATCTTTGTTCTTGACATCCAATTATTGCAGAACTAACTGTAGCTTGTCTTATTTAAGATATAATTCTGTGACTAAGTGCTTATGAAACA  
TGCAATAAAGGTTTGTCCAGACAAATTTATTTCACTTTATTTGCTTTTTTATGTGTTTATTGTGCATTTGATAGATAATTGAAAG

>comp140923\_c0\_seq4

CATTCTTTATATCATTCTCTTGCTCATCTCTTCCATCGATACCCATTGCTTCTCTTGCTTTAAGGGTTTCCTTTTTTCTTTCTTTTAAAGCAGTTGAGGAGAAGAAGTGATCAGGATGGGGAGG  
GGGAAGATAGAGATTAAGAAAATAGAGAATCCGACTAATCGGCAGGTGACTTACTCGAAGAGGAGGGCTGGGATTATGAAGAAGGCGAAGGAGATCACTGTTCTCTGCGATGCTGAGGT  
TTCTCTGATCATGTTCTCGAGTACCGGGAAGTTTTCTGAGTACTGTAGTCCGTCGACGGAACGAAGAAGTTTTTGATCGTTACCAGCAGTTATCTGGTATTAACCTGTGGAGCGCGCAG  
TACGAGAAGATGCAGAATACGCTGAACCAATTTGAAGGAGATCAATCATAACCTGAGGAGGGAAAGTAAGGCAGAGGATGGGGGAAGATCTGGAGGGACTGGACATCAAGGAAGTGCAGC  
GTCTTGAGCAAAACATGGATGAGGCATTAAGCTTGTACGGAATAGAAAATATCATGTAATCAGTACCCAAACGGACACATACAAGAAGAAGTTGAAGAACTCGCAAGAAACACACCGA  
AACTTAATGCACGAAATGGAAGTTGTTGAGGACCATACAGTCTTTGGGTTTCGACGATGATTCGAGCAATTATGAGGGCGTTCTTGCCCTCGCAAATGGAGGGTCTCACATGTACGCCTTC  
GCGTGCAGCCAGCCATCAAACCTTCATGAAATGGGATATGGCCCGCATGATCTTCGCCTCGCTTGATATATGCGTAGTAAGTGCACACGAACAAATGCATTAATTGCTCCATGTTACAA  
AGCTATATGATCTTTGTTCTTGACATCCAATTATTGCAGAACTAACTGTAGCTTGTCTTATTTAAGATATAATTCTGTGACTAAGTGCTTATGAAACATGCAATAAAGGTTTGTCCAGACA  
AATTTATTTCACTTTATTTGCTTTTTTATGTGTTTATTGTGCATTTGATAGATAATTGAAAG

>comp140926\_c0\_seq1

ATAAACATGTTTCAGTTGTGGAGTTTAATTTGGTTAACTAACTATGAAGAAAATTTTTATGATAACTCAATAGTGAATCGATTAAAGTTTTGTTTGAGACGGCTTTCTTATCACTTCTTAAAT

CAATTTTCTATTACAAAAATTTAATTTAATACTAGAAAAGCTACATTAGAAAATAATAAGAAAGTTGTTTCAAACGAAGTCTAAGATTTTCGTTTGGTAAGGCTTCTTTCTGTAAAATTTT  
GTCCTAAGAAGCTGCATTATGAAGCAATAAAAAGCCGTCACAAAGGAAGCATAGGTATATGCCAATGTTTTCAACATTTGCAAGTTGTTTTGGGAATAGTACCGAATTTTTTTATGTCTTG  
GTTTCTTTTTTATGGGGGTTCTTTGGTTGATATTTAAGATATTACGATCATAAAAGCTTCCCGATTGAAACTATAATAAATTCTATAGTGATGGGAATAGAACATAGCTATTAATTGGATGAGC  
CTATGTAAAATTATTGTTGTGTT

>comp140927\_c0\_seq2

GTAGACGCGTACTCCGCTTCTCCGCCGCCTTAGCATCCACCGGCTTAGCTGCGTCACCATCCCCCTCCCCAGACTCCGAGCTGAATAAAGCAGTTTTTCGCCAGTAGAACTCCTTGAA  
GGCTCGAAACAAAGGGCTCTTCTCGAGGGCGCCATTGAAAGCGCGGTCAGGGAACCTGCTGCATGGGATTACAAATATCCCTTGACGGCAGGAGGAAGACAGTAATTTAAGCATGGGTT  
ACGGAGCACGATCTGCAGTAGAAAAGTCGCAATCTATATCCCCCTCCACCTTGATTTCTGTCTCAATCACCTTTTTGGTTATGCAGTTTGGGTAATTCAGCCCAGCGGGCTTAGAACTTCAG  
ATGCGCGAATTTCTTGAAGCTTAACAGCCAAAAAACCACAAAAACCCTCTACAATGTGGGAAATGCGATACAGATGCAGTGAGAATACTCGGGGGCTGTTTGGCAGCTAAAGGAGT  
CATGTACGCAGTTTGCTAAATCCTGCCAAACAGAAATTTGAACGCCCTCGTAAATCTCACGGCGGAAGGGAATAATCCTCCGTTTTGCTCTTTTTGCCGTAAATCCTGGATTGGTTGTAATC  
AGAAAAATTTAAATTTGTTGCGCTTAACTACTGCAGATCCCTTTACTTGGAACGCTTGATGAAATAAATTCTTATAATTGATTATTGGTTTATATTTAAATGCATGCCGG

>comp140942\_c0\_seq2

GTGTCCGAACACAATAATTCCTCCAAAAAAGTCCAAAAATATTTTATATTCTGTAATACAAAATCTTTCCTCATAGTAATATCTCATCGCTGCAAGCAGATTGGGCTTGCTCATCCTAACTC  
AACCTTCGAAGGAAAAATTGTCCTCTCTCTCTATAGGCCTCATCTGTTTAAACAAAATCACAAGTAAAATCACAGCGACAGTTATCAAATATTGTCAGGAGGAATAACGGAAAGTTTTCG  
TCCGGATTGTGAGTATATACACACTGTGTATAAACAGTGTCTACACAATTTGAATCAAATTTATGTATAAAAATTATACACAGCGTATACTACTCACAGTACGAAACGAGAAGTTCCCGTTCAGA  
CTCCGCACGGAATATTTCTCCATGAATTGAGAACATAATCTGAGTACTAACAACTAGGCTTTGTCTATGGATCTCTCAGACTTTAGAGTACTATCAATATCATTTGATATAAGCCGAGCATC  
ACTAGCTATTCCTTCTAGTCTCGGCGAGACAATCCTGCACTGTAAATTCATTCTCTCCTTTCCAGTGATCAGGAAATTTTCGAGCAGGAAGTCTTTTTTCATTACAGGAAGTCTTCTCGT  
CCTGAATTTACCTTTCTTGATTTGTGAATGGTCCCGACATCTATAACAGGAGATCTTCCACAGTGGCCTTGAGGAAAAATGGCCCATCCTTTGGTTTTTAAATCCCAAACCTTGATAAA  
TCTCCATACTTGATGTTGCTAAGCAAAATTTAAACGAATCAACAATAGTCAGTGGCATATTGTACTTCAAAGATGCATTCCAAAATTAATCATCTCTTTGCTCATCACCTGAACCTCGCCT  
CTCACACAAATGGAGGTGACGGCGCCGTGGCTGGAAAGATCGTAAGCTATCTCCATGCCCGAATTCCCCTACCAACAACCAGAACTCTCTTACCTTCGTAAGTACTAGTCCCGTCTTATAAT  
CCGCCGAATGAATCAACTCTCCAGTAAAACCTTCAATCCCTTCAATCTTCGGCACGTTTGGCTCCGCGTTCTCCCCCGTGGCAGCAACCAATATCTTCCACGTAAGTCTCTCTCCTCTCCA  
TTCTCCACCCTCTCACCTTACCACCCACTTCCCATCCCTTCCCTGAAAACCGCCGACTCCACGTCCGACCCGAACTCCGGCACGACGTCGAACTTAGCCGCGTAGTCGTCCAGGTAC  
CTAATGAACCTGTCCCTGGGCATGTACGTCGGTGAGTCGGCGGGGGGAGGCATGTGAGGGAGTTGGCAGAAGCGTTTGTGCGAGGTGGAGTTTCAGGCGGCTGTACGTGCGGTGGCGCC  
ATAAGGAAGCGATGCAGTCTCCCGTTCGAGGATGAGGTAGGGGATGGATCGGACGGAGAGGCAGGCGGGTGGCGAGGCCGGCCGCGCCAGCGCCGATTATTATGACGGGGTGAGC  
ACCATCCATTGCCGGTTGATTGATTGGGATAATTGTATAGGGTAATTGGATTGAGCATTTATTAATGGAGGGAGGA

>comp140942\_c0\_seq3

GTGTCCGAACACAATAATTCCTCCAAAAAAGTCCAAAAATATTTTATATTCTGTAATACAAAATCTTTCCTCATAGTAATATCTCATCGCTGCAAGCAGATTGGGCTTGCTCATCCTAACTC  
AACCTTCGAAGGAAAAATTGTCCTCTCTCTCTATAGGCCTCATCTGTTTAAACAAAATCACAAGTAAAATCACAGCGACAGTTATCAAATATTGTCAGGAGGAATAACGGAAAGTTTTCG  
TCCGGATTGTGAGTATATACACACTGTGTATAAACAGTGTCTACACAATTTGAATCAAATTTATGTATAAAAATTATACACAGCGTATACTACTCACAGTACGAAACGAGAAGTTCCCGTTCAGA  
CTCCGCACGGAATATTTCTCCATGAATTGAGAACATAATCTGAGTACTAACAACTAGGCTTTGTCTATGGATCTCTCAGACTTTAGAGTACTATCAATATCATTTGATATAAGCCGAGCATC  
ACTAGCTATTCCTTCTAGTCTCGGCGAGACAATCCTGCACTGTAAATTCATTCTCTCCTTTCCAGTGATCAGGAAATTTTCGAGCAGGAAGTCTTTTTTCATTACAGGAAGTCTTCTCGT

CCTTAAGCCATTTGTTTGCTAAGCTTTTATATCCGGTGGCAAACAATATTGTATCAAAGTAGTGCGATTCTCCGTTGGTGAATTCACCCAATCGCCTTCTATAAATGAAAGTGCTGGTAAAA  
CCTGAATTTACCTTTCTTGATTTTGTGAATGGTCCCGACATCTATAACAGGAGATCTTCCCACAGTGGCCCTTGAGGAAAAATGGCCCATCCTTTGGTTTTTTAATCCCAAACCTTGATAAA  
TCTCCATACTTGATGTTGCTAAGCAAATTAACGAATCAACAATAGTCAGTGGCATATTGTACTTCAAAAGATGCATTCCAAAATTAATCATCTCTTTGCTCATCACCTGAACCTCGCCT  
CTCACACAAATGGAGGTGACGGCGCCGTGGCTGGAAAGATCGTAAGCTATCTCCATGCCCCGAATTCCCCTACCAACAACCAGAACTCTTTACCTTCGTACTTAGTCCCCTTCTTATAAT  
CCGCCGAATGAATCAACTCTCCAGTAAAACCTTCAATCCCTTCAATCTTCGGCACGTTTGGCTCCGCGTTCTCCCCCGTGGCAGCAACCAAATATCTTCCCACGTACTCTCTCTCCTCTCCA  
TTCTCCACCCTCCTCACCTTACCACCCACTTCCCATCCCCTTCCCTGAAAACCGCCGACTCCACGTCCGACCCGAACTCCGGCACGACGTGCAACTTAGCCGCGTAGTCGTCCAGGTAC  
CTAATGAACCTGTCCCTGGGCATGTACGTGCGGTGAGTCGGCGGGGGGAGGCATGTGAGGGAGTTGGCAGAAGCGTTTGTGCGAGGTGGAGTTTCAGGCGGCTGTACGTGCGGTGGCGCC  
ATAAGGAAGCGATGCAGTCTCCCGTTGAGGATGAGGTAGGGGATGGATCGGACGGAGAGGCAGGCGGCGGTGGCGAGGCCGGCCGGCCAGCGCCGATTATTATGACGGGGTGGAGC  
ACCATCCATTGCCGTTGATTGATTGGGATAATTGTATAGGGTAATTGGATTGAGCATTTATTAATGGAGGGAGGA

>comp140949\_c0\_seq1

GCCGTCGGTGTGGGGCTGTTACCTGGAGCACTGATGTTGATGTTCTTGATTGTGACGCGGGCTGACTGGCCGATGAGGATGTGGAAGAAGCTTGCTGTCTATGAAGGAGATGGACTGGA  
GAAGTGCCTTGCTCACGCTTAGCAACTTAAGGGACGGTGGGAGTCTGCTGCCCTTCTTCTTCTGCCATGCAGTAGCTCCCTGACCATTAATCTTTCCGCTCCCAGTGATCAGCAAGCC  
ATTAACGTGCTGAAAGCAATCCATTTCCTTGTAACAACTGTAGATCTGTGCGGAGCAAGAATCACACCATCACTTCCACCACCATTGCACTCTTGCAAAGCCCTTGAAAACCTGACCCG  
GCCGATCAAGAATGTTCCCTCCGGTATCAACACTTTTCGCCCCGTCGAGCAATCCACAATCTGTTGAACATGCTTCGCTCCAAGCTTTGAGGAAAGCTGGCAGGCTATCATTTTTGCTTCT  
GGGGACGCGCTGTAGCTAGTCACATCAAACACTTTTTCGGTAAAATTTGGCCGCAACAACACTATTTTACGTGCTACGATGAGGACGAGGAGCAATAACAAGATCTTGAATCCATTG  
GATCGTTGTTATGCTTGTCTTCTTTTGGCGCCCCCTCGGAACCTCTCTCTCTCTCTCTCAATCTATCTGATCTTTTCATTTTGGATGCTTTTATGTTGATTAA

>comp141002\_c0\_seq1

TTTTTCTTAATCTACAAATCAATCATATCATAACGCTAAGCAAGTTGTCATAAATGCGTACCTATTAACATCTTAAAAAATATACATAACATCGGAAAAAAAAAAAAATAAACATAATTTTA  
TTTAGGAGGAGAATAAAAAGCGTTGAAACAGTACTAAACAAAACTCCAATGAATCTTCTCGATCGCTAAACTCCGCCGATGCCATCCCCGGCGCGATGGCCGCACGAGCGCAGGCGTT  
TGTCGTTGGCACCCACGGCGGTGAGCGAGTCGACGACGGGTTGGACGACGAGGATGGCCTCACACCACGACAGCGGAGAGCAGTGCGAAGAAGGAGGCGAGGTGCAGCGCCTGG  
CTGACAGGGGACGTTGGGACCCACAGCGCAGCAAGGGCTCGCGCCGCTATCTGGACTGAGAGGGCGGCTGTTACGGTGGCGGAGAGGGCGTAGAGGCGGATTCTGAGGCGTTTGTGTA  
TGACGATAGCAACGGCGCTCCATATCGCGGAGATGAAGAGGGGTACGTAGACGGCTGCGATGGCGGCAAGGAGTATTGTGGAGAAAAGTGATACACCCGAGGGGATGCGACGGTGAGC  
GCGGGCATGCCGTTGGGAGAAGGCGTCGGCAGCGGCGGCGGCGTGGCCGAGGAAATAGGGAGGGAGGCCGAGGCTGAGGAGGAAAAGAGTTAGGGAGGACCAGGAAAAGGGTGTGG  
AGGAAGAGGAAGGGGAGGGAGGTGGCGAAGGCTGAAGCGGAGGCAGAGAGGAGGGAGAGGGAGGTGCGGATATTGTGGGGATGGCTGGAGGCGCGGAGGAGAAAGAGGAGAGTG  
GAAAAAATGCGGGCTCGGCTAGGCAGGGGAAAGGAAAGAGTAGGCGGCACAAAGACGGGAGAAAGAGAGGACGGGAATTGGTGGCGGAGGAGTGGGAGACGGAGGAGTTCAA  
GGAGGGAGAGGAGGGAAGCGAGGAGGACGAGGAAGAGGGCAATGGACCAAGGGAGTTGAGGCCGTGGAGGCAGCGGAGCCGACAAGGGGAGGCGGAGGCACGAAATTTGAAAT  
GCAGGACAATGACAGCGGAAGCAACAGAGAAGGCTAGCTCGCCCGACGAGGGTTGCCACGATTAATCGAAGGGAGATTCCGCCGGTCCCTTCTGTTTCATCTCACATCTTTAATCT  
TCTGGCTCGTTTTGTTTTATGCTGCTTCCCTTTTCTGCATCAAATAGTTCACCTCCGCATCTCCACATCTCCGCATCTTCTTCTTTGATTGTTCCGATCTCCCTATCTCTCTCCACTTCTTGA  
TATTTTAATTTAATTAATAAAGAGAAATACTTGTGGCAGAAAGGATGGATTGAATTGCGGTGGGAGTCGGGCACCCGGC

>comp141109\_c0\_seq1

GCTGGATATGGTGTGGCTTTGGCAGTTAAGCCAATATTTGCTTCTTCCCTCAAAGGGCGTACATTTGAGACAGATCTTCTTGAGTTGATGATACAAAGTGGTCGAAATGGGAAAGCAAATG

GAAAGGGTTACTACTTGTATCAATCAGGAAGCAAACCAAAACCTGACCCCTCCATACAAACTGTCATTGATGAATCTAGAAAGCGTACTCTCATCACATCTGGTGTAAGGTTGCCTTTTA  
TCTTAGCTCCCTAGCAAAGATTAGCTTAGAAAAGAAACAAAAGAGATTATATAAAAAATGAGACACTAGTTGCCTTTTATGATTATACTAGTTGTATACTGTCAAATCTATGCAGCAAATC  
CCTAACATGTTTAAATAATGCTTCTTTTAGCCTGTGAGTGTTCGACCAAGAAATTGTGGAGATGATA

>comp141112\_c0\_seq3

TAATTCTTTTAATTTATTATTATCAGTCTTCTAGATACCAGACGTACATGATGAACAAAAAAGAGTCGATAAAACAAAAGAAGAAATAGAAGGTAAAATTTAGTTCTTGTATGGTCTTCTGAA  
TCCACTTGGAGAATGCGTCCATGGTGTTCATATCGGCTCTGTAATGCTTCTGGGTGAATTCAAGCAGGGCCGACCAAGTGAAGTCCGGATAAATCCTCGGGTTGTTGGAATCAACAAGCT  
CTGTCCGAGGCTGCACCAACTTATCCATCTCTGGGCTAAGGAAGAAAGCCAGCGACTTCTCTGGCTTTTACTGTTCCACCACCGCGCGGTGAAGGCAGCTTTTGTACCTCTGGTTTGACA  
GTGCCATGAAGGTGTCGCCGATGTTAACGATAAAGGCGTTGGTTTTGGGGCTGACGGTGCGCCACTTGTGTCAACGAAGACCTGAAGGCCACCGACGTCGTCCTGGTGGAGAATAGTC  
AATGAGGTTGGGTCGCAGTGGGGGCCCCGTCACGCGTGAGCACCGGCATCTGGCATGGCGGGTAGTAGTTGAGCCTCATTATGGAATCGTTGCCTTGAAGAAGTCACTGAAGTGTGC  
GCGGCCAACGCCGAGGCTTATCCAAGTATTCCATTATCTCAGCGACAGCGTTCATGGCCTCGCAGTAGTTCTGGTACACCTCCCCGAAGTGTCCGAATTGTTCTCCGAGCTTGCCG  
ACAAAATAGTTGAGGACGATGGACGAAGAGGAAGGGGAGAAGCGGAAGGAGAGCGTTTTCTTCCAAGGGAGTTTTGGAAGAGAAGCGGCCGGTGAAGTGTCTCGCGTAGCCGCAGCT  
CTCACCGGATTCCTCTGCGTTTTCTGCTTTTCGCTTAGCGGCATCGAGAAGAAGCTTCGACGCATCGGTGGGCATCGGCAACTAGCGTTGGGTCGATGCGATGGTTCACTACTTGAA  
GAACCCGTGCTTTGCGCAGGCTTCCCCACAAGCCGGGCCACCTCGGCCTCGGCCTCCGGCTGGCCTGAGAGAAACATGTCAAGGTGATAAGGGGAAGGGAGAGCTCGTCTGAGCG  
TCCGACTTTGGCGTCTCCTCTCAGGCCATACGAATTGGGAAGGTATTTCTGCCTTTTGGCTCATAACCGCGGCGTCAACACCAGTGAAGTTGTGACGGCGACGGATTGCACTTATGTA  
AATTGTCCGTGGCTTCCATGGGCCGTTGAGGCGATTCGGGAGGCCCGTCCGGCGCCCGACGGTGTACCATTGCTCCTGCTATACCGGTTTTAGGTCAATTC

>comp141156\_c0\_seq1

CTTTGCAACTTGAAGGCAACGTGTATTGGGAGAGATCTTGGTGTAAAGGTAAGTCTCAGCAGCCTTGTACATCTCATTGGCAAGATGCCACTGAATCCTTGGACGACGATGGTGTAGCTT  
AGAGGAGAATCTTGTGAAGAACTGGAGGTAAAGGAGAATATGTAGTCTTTCATAGGGTGGGGGAGAAATTCATTAACCATGGTGCAGGATGAGCACTGCAGAGGCCGCTACGGAGGCTG  
CAGCAGAGAGTATTGTCTTGGTTGTAGCCAATGATGGGATTTGAATCCTGACATTGTTAGAGAAAAGAGAGAAAAGAGAGAGATTATGAGTGATGGATATGGAGTAAGGATTTCTTTGAG  
CTTGCTGATTATGTAGTATAGCCTGCTCGCAGTCCGGTGGGTGGGCGGTGGCTTATGTTGTCGAAAATTAAGACCATTGGCGACGCTCAAGAAAAATTGCCTCTAAAACGGTGATTGCAGA  
TGCGAACTGGGACTGGGAGGAAATGGCTGCAGCGAGCCGGCGACCTCTTACGAAGACAAGATGATGAAGGCTACGGGAAGCGACTGCGAACAAGAGTGCTCCGTCTGTCTGGCGAT  
CGCTGAAATTTTACGAAGGT

>comp141267\_c0\_seq2

AACTGAACCAAAATACTCACTCAATTAACCTCCTTATTAATATATAATGATTCAATATCTAGCTAGCTAATAGTTCATATATACATATATATCGTTTGTCCGTTCTTTTGGGAACTGTTTTGGTG  
CTACTGTTGTTGCAGATGCAGTCTTTTTGGATGTTATTTCCCTCTTTACTTTGATTGGTATCGGGTCGTTTACTGCTCCGGGTAGCTATTAATCGAGGTGCTGGTCTTGTATGCTTGCTGCCG  
TTGGTGTCTTTCTTATTTGGATTTTTGTTGATTCCTTATTTGTTTTGCTTTTATTTTCTTGTAAATAGATAAGGATATATAATTTCTCAGGTTTTATTTTAAATACTGTTCTTTGAGTGAGCTTATGAT  
CCTCTAGGACCTGTAATTTTAACTTTATTTTATCTATCTATATATATATTGTGATATATCTCATCATCACCTCGATGGAGTTCTTCGATCTTAAAAATATATTATGTAATTTCAAATCCTTTTG  
AGCAATAAAATTAGTTCAAATTTGCAATTTTTTTTTTTAAAGAAAATGTTAATTAGTTGAATGTACAGTATTGTACACGCAAGAAGTATCAGGAAAATCCTATTGCATATAACTCATAACT  
CGTTAAATAAAACAAGTTCCAAGAACAAAATAAAAGACAGAACAATAAGTGAAGAGGTTTTACCTGTTTATTAGATCAGATGGAAGAAAGGAGAAAAGATCATATAGAATATGCGCGCG  
ATTGATATTAAGTCAATTTATTGCCGAAGCAGCATCAAGATTCTCAATCCTTAAGGAGTAGCTAGGACTATATATATTATAAATAAATTTGGCCCACGACAATGCTCATGATCTATATATA  
GAAAAAGAAAAGAATAATATTCTATTTATATGAAAATATATAAAAGAGTTAACTCCTTTCAAAGTTTGTGAATCTTGTATGGTGCCACACCAGCAAACAGTGACTGGCTAAGCATCTTT



CTTCAGCTAATTCAGCAGAACTCGTAACCTAATTAACCTGAAATCATGAAGAAGAATAAGCAGCAGCAGCAGTGGAGGAAGAAGACGAAGAAGAAGAAGGGTGCACAA

>comp141319\_c1\_seq1

AGACTGTCGACGACATTCAAATCCTACACCAGTCGGCAACCATACTGGCGAATCTACACATCCCCGTTGGCAACCATAACCAGTGATTCAATCTTTTGGCAACCATAACCAGAATGAATCCA  
CCACCGATTGCAACTATAACCATCGGTTATCTTTCGGCACGAATTGCCATATGCAACAACACCTCTCAATAATCGACATGCATCGTTGATCAGAGCTTGTGTCTTGCCTTGTCCAGTCCTCA  
CGAACAAACCATGACGGTATCCACGACAATCGCGATTACAGGCATCCACTCCAATATCGCTATCTACGAGCACCTCTACCTCTGATCAACTTTTCGCACACCCCCGCCGACACCTCCTTTGC  
AAAAACAGATGCTCCGCTACTCTCATTTTTCTCTTCATCTCCACCGTCCAAAACATGACCAAACAATCAGCCTCATTACAGAGTTCCCCGAACAGCACTTCCGGTGCTGATTCACTCGAT  
CGTCCCCGACCGCACCATAACCACTTGAGCATCCAGCATCCACCTCCGTGTGCAACACCAGCCCTCATCAACCTTCATCTACATAGCAACGTTTTCTCCATCACTTCTCTGTCTCTTGCTA  
CATCTCCCTCTCAGTTGATGCTGACATTGCAGCTTTTAGCAGGAGCAGGGGTGATCCAGACTCTACCAGGAACAAGTGATCGGCTGTAATATAAAGTTGGCTATTTGCTCCCTCCAGCTATT  
TGCTCGAAAACAAGTTAGTGGCGCCTTTTTAGATCCATCCCAAGTCCGCGACCAAATCTCGCTTTCATCGACTCCGCC

>comp141400\_c0\_seq1

AAGATTAAGGAAAATAAGTAATCTAACATATGAACATGACAGATTCCACCAGAAAATAACATAGAAAAGAAAGATGAAGGAAATGCCTTAGAGTGTATTTTAGCATAATTTCTTTACTTTGG  
GAATAAAATTTTAGTGAGAAAAGTGAGAGTTGGGTACTTGTCTATAAAGGATGTTGGATCTTGAGAGGAAGCTTGAGCTTCTTGATTAAGAGAGAGAGGGAGAGAGAAAAGGGAAGAA  
TGGAAGAGATGGAGAGGATTTTGGAGGAAAATAACTATAAGTTTATTGAATTTCCCTTAGATTTACAACAAGTCATCAACCTATAGCATCTATAATAAGTATCGAACACGGGTGTGGT  
GTCTTGTAATAAATAACCTAATCTAAAATTAACCAATTCCTTACAAAGGATTAATCGACTTTATCAGACTAATAAATAAAAATCAACTAAATAATACTAAATAATTTTCATAAATCAACTTTTAT  
GAAGTGAAAATATATATTGATGTTAATTTATTTAATCATGCAGGAACTCAAGCAAGGATTCTCAGCTCAGCAGCACGCAACGGTAGCCGCAAGAACCTGAAGATTTTGATGAGGAAA  
GGTAAAGAAGAAAAGCTATAAGTACAGGCCATTTCCAAAATGGAAGTAATTTCTCTAGGTAGGAGGAATGCTTTGATGCAGATTACATTCTTCAGAGCTATTGGATTTCTACCTGGAGTT  
ATCAAATCAAGAGATTTAAGACCAGAAGATTAATGGGTCTAGATCACCATTCCAGAATCTCGGTTACCTCTGCTTCTGATGAGATATCAGAAGGTTCAATTGATTAATCTGTGGTGGTTGT  
TTTAGTTTCTTAGGATATTCTGACATAATTATTTAAGTTTAAATTTTTACCCCATGATGAAATATTCAAACCTGCATTTTAGGACAACCTGTTTGAACAAATTAGCATTATTCATATTTGAGCAA  
TTCAAATTT

>comp141422\_c0\_seq1

GTGGCCGTTTCATATCGCAAAATCTTTCTTGTAACAACCTCCAACCACTTGCTCGAAGTTCATAGCCAGACCTATATTGCCTTAATTTTCATAATTTTCATCATTTTCATGCCACAGGACAACATC  
CTCGTCTTCCCCCAAGTATGTAGAAGACATCTAAAAATTTCAATTTGTAGTTGCTTTTGTCTTAGGATCTCATCTGGGCTATAAGCCAAACTTTCATGTATACGGCTACTTCCTTCTTCTATT  
AATTGGTTTGTAGGTGCGCCTCTCATATTTTCATTGACCTCTGAGAATATTTTGTAAATAATAAACTTCTTCTTGCTTAAATGTGGATTCCATGAACAAGGAGCGAAAAATGTTGTGAAATG  
GCTTGGATAATATTCAAGTCAAGTATGAAAGAACGTATAGAATACTATAATTTGCATGCTGAATATAAATAAGAGAGCATGAATAGGAGGTATTATGTTGTC

>comp141491\_c1\_seq1

CGGAAGTATGGTCGACGAGAGTGGAAAGCAGAGGTTGGAGAGGAGGCTTCGGTTGGATGTGGGAAGGTCCGAGCAGAGTGTAGGATCGGGAGTGAGCTTTTTTCGTGGAAGGAGAAGA  
GCGGTAGCTCGGGCGTGTAAGGAGGTCCGAGCTCGGTCTGCTCTTGACGGGATCGGACGGAGTAGTGAAGCTCGGGTTTACGGGAGGAAGAGGGATTTTCGTGTGAGAGGAGTCC  
GTGAGTGAACACAGCACCCGAAGCCTTCATCTCCTTCGGTATTTAAAGTAGCGAAAGGCGTCTAGTTGGCACGGGATTTGGGCAGAGTTCCGGAGAAGCGACGCAACGGCGCCGAGCT  
ATAGGAATTCAGCGGGATTTCTTGCT

>comp141510\_c0\_seq1

AGCCCCTTCTCTCAAATGGTAGAAACAAAACCTAATGACGTCGGTGCCACCACCTCCATTGAAGAAATTCATCCTGACATCCTTATTCAAATCCTGCGCCACCTCGACGGCTCATCACT

CGCTTCGGTGAATTCTGCCACCTCTTACCTCCATTCTATCTCCTCCGATCCTGACCTCTGGCGCCGCTTTGCCTCTCCACATGGCCATCCCTCCATCACCTCACATCTCCCTCTCATCAA  
CTCTCCCCCACCGCTTCTTCTCCGACGCCTTTCCCTACCCCACCTCGTTCACACCAGCCAATACTACTCAGACATCCCAGATAAACTCATCTCTGCCGTCGATCTCTACCAGCATGACATCC  
CAATATCTTCCCTTCGTTGTTGAGAGTGACACCTCTACCCCACCCCTTTAAATGTTCCCTTCGGAATCAAAGGACTAGATATTATAACGGACATGTTGCCAGAAGAGCTAACATTGAGTTGG  
ATTGTGATAGACCCAACGAAGGGACGGGCGGTGAACTTATCGAGCCGAAAGGCAATGGTGGTGAGGCGACATTATTGGGGCTGGGAAGCGGTGGCAGATTACATTGGCGAGAGATG  
GTTGGGTAGTGGGAGTGCTGGGAAAATGGTTGGATGAAGGATTGGGATTGGTTGAGTTGGGTCTGTATATTTGGGACGAGGGTGGTGTGCCTGTGTACAAGATGGAGGGATTGAGAGTC  
GTGATGGCAGCAATGGAGGCGGAGAGAAGGCGATGGGAGAGAAAGAGGTGAAGGAAGGATATTTGAGTATTGCAATATGAAGATAAATGAAGAAGAGCTAAGACAAAAGAGGGAGT  
GGCTGGGGATCTGAGCTTTGTATCGTAATCGCCATCTTCTAGCTTTTATTTTTCTGTAAATTTTCGATGACATTTGGTGAATTATAAAGTCACCTTTTTTTTTAATGTTGAATGTTCTTCGCT  
GCTTGTGTGCTGTGCAACAATGAGAATAAAATCTTCATAGCGTATTGTCTTGTGCATTTAGAGATGTAATGTAAGTACTGAGCCGAGCGAATATTTATTCATATTTGAGCTTGTTTATTAATACT  
TTGCTCAATCTCTGTTCA

>comp141602\_c0\_seq1

TGTCATGATTATTCAACAAGTTTTACGCTGGCAGTCGACTGCCTAACGCAGCCCTCCACTTTTCTCATCTAGGACTTGAGACCTGACAACAACAGTGTTTTAAAATATACTGGTGAAGAATA  
AACTTAAGCATATAATAAAAATAAAAAAATACACCCAAATAGATAAAATTGAAGTAAAAGAATTAATAAATAAGTTGTTGGAACAGATAAAAATGAATAAGAGTTGAAGAAAGATATAA  
CTGAAGAATAAGGACTCATAAAATCAAATCCAAATAGTTGGAGAGGTAAGAGGTTGAGCCACCATGCTTTGAGACTAGCCAAGAGTAGAGTCGGGCAAAAACACTATTTTATTGTTTCAT  
AATAGTGACACTTGTATTGCAACCTATATTGTTCAAAAATCACTATCTATAACAAGGCAGTACTGGTACACTTGACAATATAAAAAACTGATGCAGAAGGATGAGGAAGGACCTCAA  
AGG

>comp141749\_c0\_seq1

GCAACAATCTCTGACATTGCTCAAGGTGTTTCATGCCCCTCACCAAGCGCCCGGAGGAGATTGGTGCTGGTGACCAGGGACACATGTTTGGCTATGCCACAGACGAGACCCCGAGT  
ATATGCCTCTTAGCCATGCTCTTGCTACCAAGCTTGGTGCTCGCCTTACTGAGGTTGAAAGAATGGAACATGCTCTTGGTTAAGGCCTGATGGCAAGACCCAAAGTGACCGTCGAGTATCG  
CAATGAAAATGGTGCAATGATTCCTATCAGAGTCCATACAGTCCCTCATCTCTACACAGCATGATGAGACTGTCACAAATGATGAGATAGCTGCTGACTTGAAGCAGCATGTTATCAAGCCT  
GTGATTCCTGAGCAATACTTGGATGAGAAAACCATCTTTCATCTAAACCCATCGGGTCGTTTCGTCATCGGTGGACCTCATGGCGATGCTGGTCTTACTGGTAGGAAGATCATTATCGATAC  
ATATGGCGGATGGGAGCACACGGGGGTGGTGCAATTCTCTGAAAGGACCCGACCAAGGTCGATCGTAGCGGTGCCTACATTGTCAGGCAGGCTGCGAAGAGCATTGTGCGCAATGGAC  
TTGCAAGACGCTGCATTGTTCAAGTGCATACGCAATTGGTGTGCCGAGCCATTGTCAGTCTTTGTGATACTTATGGTACTGGCAAGATTTCTGATAAAGAGATACTTGAGATTGTTAAG  
GAGAATTTTGATTTACAGGCCTGGAATGATTAGTATCAACCTTGATCTGAAGCGTGGTGGCAATGGGAGATTCTTGAAGACTGCAGCTTACGGGCATTTTGGAAAGGATGATGCTGACTTCA  
CCTGGGAGGTAGTTAAGCCCCTCAAATATGAGAAATCTGCAGCTTGAGTTTTGAAGAATGGAATCTATCCATGGAGGGATGCAAGGGCAATTGTTTTGTATTCTCTGCTTTTTTCTCTTTT  
ATCTTCATTGTTACTACTTTTTCTTTTCTACGGGGTTGTTCCCTTATGATTTTATGTAGGTCTGCCATTTTTTTGTTTGAATCTGAAGCTGGCCTGAATGTTAAGGATGCTTTATCTGTAAC  
CAGGATATATAGGAGAAGACAAAACCTGGAAGGTCTGCTTTGAGTCAAATACTCGGTGTAATGCTTAAGAATATTGGATTTTCAGTAAAATGAACTTTTTGTTTCTCTATTATTGTAACACATG  
GTACTGTTCTGGATTTTCGATTTGCCT

>comp141777\_c1\_seq1

ACAATTAATTTTCTTTAACCAGACATAATAGGAACCAATCACCATCTGCACAGGATAACAAATAAACAAGCTCCAACAACACATCTTAAATAAATAAGATCTTTAAAACCTTTATAGACA  
GCAGTAGTAACCAGGAACATAAAAAATCCAATTCAGCATCATAGCTCCCAAATCATCAATCCCTCCAAACAACATATACATAAATACTTCCAGGATTGACAACATATCCATCCACAAA  
TATTCAAACCTTCTAAGAACGTCCAGAGAAATAAAAAGGAGAAATAAATGGATCGTGGGGGAAAATCCTACATACCAGAGCCGCGGCTTCCTTATTTCTCCCCACGTCTAAAATAATAT

CCATATTCACGAAAATAACAGCAATCCATCAAGAGACATAGCTTACAGCTTGAGGGATTAGATTATCGAGAAAGCCCGTCTCCGAAATACGGCGTTCCGCACCCGTCGGAGATCCCT  
TCCCTTCAGGGTTCTCCCCGCTCCCTCGAACACAGAGAACGACGTCGCGTGCATCTCTTACAATCAAGTGCGGCGGTAGCATCTCATCATCCGCCTCGCCTTCCCTCGTCATCGTCATCC  
ACCTCAATCAACGCTCCAACAGGTTTCCCTCATCCCCTCGGCCACGTCGGCACATTCACCGGCGCCGACTGATGGAATATCGTACTTGTCTCTCCGCTCCGGTCTCCCCGCTGGCACTT  
TGATTGCCGGTCGCCGTTTGTACACCGTTGCTCACCTTCCCTCCGCTAGGGCAGCCGAGAGCCCAAATCTCCCCGGCTGGAAAGAGCGGCGCCGGATGCTGGAGTCGCTGTCGCCGGAA  
CCTGGCCGGTTGGAGATTGGCCAGTTTCCACCGCCGGATGAAGGATCAGATTTAACGTCCGGTGCCCAAACGACGTCGCATTATCGAGATCGAAGTGGTTGTCAGGAGTCGGAGAAGA  
ATTTGAGTGGTCGGCGAAGCGGAGAAAGCGGAACGAAGAGGAGAAGGGAGAGGTGTTTTTGTGGATGGAGGAGGAAGGTGATCTTATCGTTGTGGTACCGTCCTCCGCCATGGCCAGT  
CGTCTTTCGCTTCTTTCCCCCATTTCGGCCCCGCGGCTTCATAATATAACCAGTTGACGGTGTAGTTTAGCTTATGTCAATTCCTTGGGCTCAGTATAACGCCTTAAGAATCTACGGGCTAC  
TGCATCTGAGCCGATCTCGTCGGGCGCCAAGGATTCCTCGGACGGTCAGAGCCGTTGGTGTCAACGAT

>comp142060\_c1\_seq1

CTACCTAAAATATTAGTTGCCGAATCACATAACCTGTTGAATTAGTCAAATAAAGTTTTCTAAACATAGAGAACGTAACCCATCAACACACGAAAAATAAGGATAAAGCAAAGATTCCA  
TTGATGGGAGAAAAAGCAGGTGAGCATGTTGTAATTCATAAGGTGATGGGAGGCCCAATGAATCAGGCGTTCAAATTTAGAGCAGACGGAGGCTTAAGAGGGCATTGTTGGAGAAGC  
GATTCATTTAGAGCATTAAATCGACCAAATAAGATAGAAGTGCAACAGTAGTATGACAACCTATGTAATAGTAATATGGCAGCTACGTAAATCACTAGTGAGATGTGTGTTGCTGTATTATTAT  
TATTCAAGCACGAATAATAACCGGGGTTTATTAGGCTATTTTGATTTTTTTTTTATTAATAATTGCTGTAGTATCTAGTTTATAACATGAAACACCTATTATTATGTAATGGAACCTTTGCTTTTTT  
GATCCAAGGAAAAATAAAACAATGGCAGATTTATCTCAATTCCTTTGCTTGGTCATTATAAAGACTAATGTTTTGTGCTTTTTTTTCGACTTATATAAGTTTCTTAAGAATGTTCAATTCGGAA  
GAAGTCTATATCCATTCTCTCAGGACTATCTAGATCTCTGCTGTAAAGAACAATCTTAGATTGTGTGGTCGCTTTTCAAAGATAAAGATGATTGATCCTTTAAAATAGGATGCATGGGGCTT  
TTGGAATTGGTAGGAAGTAAATAGGGCAAGAAAATTAGATTTTCTAGGAAATACCTCGAGTTTTTACTATTTTTTGGACCTCAACGGTAACCATTAAACAGGGAGCAAAGAACGTATAGTT  
TTACTTTTAGATGCATTGAAATAGGTCCCAGAAGTGGAAGGTGCTAGACTGACTCTACGAATGTAGAAGGTGAAGGCCGGCGGCGTTTCAATTAATGGAGAGAGGGAGAGGGAAACAGA  
AGATATTGGAGGAAAGGAGGAAGTTTTGAAAGAGGGAGTTCAGATTTTCAATCTAAACTTGATTTTCATGTCACAACTTGATATCTACTCTTAGAGATCCCAAAAAAATCTAGAAGA  
ATCTATTTAAATTCAAATGAACTAGAAGATAAACTACCCACAAAAGGGCTTACTTTTTAGATTCC

>comp142111\_c0\_seq1

CAAAGAAAAAACAATTAATAGCTGCAGAATCCGCAGTTGATTCTTACTTTGTAAAAAGACGATGATTCTAACGCTATAGTAAGAGTGCTTTAGAACATCCAAAACGCACAGAATAC  
CCTAAATTCCTAATTACAAATAACTACGGTACCAGTTCAGATCCATAACAAATGCAACAAAGATTTACAAATTGCACGACGATATAGTTCAATGTGTTGAACGGATGAAGCGACGAAGTAA  
GGAAAGATGCTCCGTACCTATTTCTCTTTAGCCTAAACCAAGCCTCCGCGCAGCGGCGGTGCGCGTGGCCCAATTCTCCCTTGCAGCCGCACCCAATCTGGATCAGCTTCCAACCCGCCG  
CCGCTGATTCTCTATCTCTGGTCTCAAATGACAGATCCGACAAACCTTGTCTCACCGCTGCACTCCACGATAAGTTCTATAAAATTTTCTTTATCGTTTCTTTTCCAGCATCCCCTTGT  
CCTGCTTAAAGCTCGCCGCCGACGGTGCATTTCCCTCATTTCGATGCCGCCCTGGCTCCGAAGACCTTCAAGCTCCCATCTCCGTCGGAAGAACAATCATTCTCGACGGAGTTCACCGTGA  
TAAACACGGATTCCTCCGGCGATATTCTAAATGATCCGGTCAATTCCTGCGTTGTTGTCGCCGGAGTGCATTACCGCCTCTCAGTGCATCGCATCAGAATCGTATGGTTTCAATTTAATCACA  
AAAAGAAGAAGGGCATAACGTTTCGATCGAAAAGCAGATGGAAATCCG

>comp142151\_c0\_seq2

AATCCTAAACAAGAAGCAAGCAAAATCCCACAAATTCAGATCTCAAGCCAGATTCTCCTTCTCCTCATCCACGATAAATTACACAAACACACATAACACGAAAAGGTTGAAAATAGTGGAT  
ATCCCCAAACGACTAAAGTTAGAGAAAAAGGTTAAGATTGGAGACCTTTCTTGTCCAGCGGTGTCCCAAATCTGAGCTTTGACAATCTTTTCGGAGACTTGGATGCTCCTGGTAGCGAAC  
TCCACTCCAATGGTGGACTTGGATTTCGAGGCTGAACTCGTTCTTCGTGAACCGCGATAGGAGATTTCGACTTCCCCACTCCCGAATCTCCGATCAACACCACCTTAAAAAGGTAGTCGTAG

TCGTCATCTGACATATAACGCCATTGCCAAGCTGCAGTCTCCGCCGCTCCTAATGGCGACAGGTTCTCTAACGTTTCCTCCTCTCAATATCGCAACTTCGTTTCTTCAAAGAGGAAAGAA  
GAATCGCGGTGGTGAGATTGCTCGTCATTGCCGTCGAGCACAGAGATGAACGATAATGGCGGAGAATCGAAGGATCC

>comp142153\_c0\_seq10

CACCACCTGAGGCCCTCGCCTTCGTCGGACCACCACCTGAGGCCTCACACTTGGCTGGATCTTCGCCTAAAGGCTTGAACCTCCACCTGACCAACACTTGAGACCCTAAACTTTGCGCGC  
CATACCATCAACTGCCGCCAGAATTCTGCCAAGATGCTGACATACTACTAATAACGCCAAAACCTTCCAAGGAACACCATATTTTACTAGATTTCAACCATACTGCTGACATTTGTAATC  
TGATCGTCCTTTGGGACGAGTCATCCCACTGTAATCAACTCAAATCTAGTGAAATCTTTCAACTGGAAGTTGGTGCCTCAGTTAGTAGTCTGACAATGAATTGGTAGAATTCTGGCGTC  
AATTGATAGTCTTGCAGAGTTTAGGTCCTCAAGGTTGGTATGAC

>comp142272\_c0\_seq1

AAAGAGTGATATCGGCTGTTGATCTTCGTCTCTTTCATTACCGTCGGATGTCCGCATCAGCTATCTCTTTGTTCAAGCATGAGGCTTATCTTTGCACTATCATTATCCCTTTATCTTTTCCTTCT  
TCTTTATCACACTTTGTGTATTATTTTCAAGTTCTTGCATTAGCATTGTCATTGCTTCTATCAAGGATCGTTGTGTATAACTACATATAGATTAACAACCTTTTTCATGATAGTAAGAAGGCTG  
AGTACTGCATTTAAGAAAAGAAATAGATGGGATGCCAACTTGGACTTATAGGCACCACATCTTTTATTATTTGTGTGTTTTATTGACACTTCTGTAGTATTATTGGGTTATTCTAAAGCTGGG  
GCATATTGTCCCAAGTGGAATAAAAAATAATTTTTTTTTTGAAGGTGGAGCAATCAATTCACCTAGTGCTGCTGCTATTTATATCATGACATGAACCTAAAAAATTTGAATTTCAACTTAA  
GCTAATGTTAGACTGCTAAATGGGATGCTGGTAAAGGCTTCTGGTATCAGAGGTGCATAAGCCTTAACTAATTAGATTTTTTTTTTATGTTTGTAAATAACTACTAATTCGTGGAATATTTG  
CTGGAGATCTATACATCATAGGTGCTTGTAGTCTCAGCACTGAGGCTAGATTATTTCTCCATTACACTGAATTGTGCATTTTACATTATGATACACTTTGACATTCTTTTCGGCTCACATT  
GCCTGGGCTAACTTTTTACTCATTGCTCATATATTACATGCGCTTGTATTACTTTATAAAATTTTGGTACTATTAAATAATATTTAACACACATATTTTATTCATGTCCATATTTATTTAGT  
GTTGTTGGTAAAAAATTTGCACCATTAACGATGGCAACCACAACATTTTGTAGTGTAAAGTTTGTAGTGTGCAGAAAAGAAGGTGTGGGTGTTCTGGCAATATGCTAAAGTTTGTG  
CAAGTTTATATTATCTATTATTTTGTCTATTTTTTTTTCATTCAGTTTGGGTGTTTTATTTTTTTTATCCTTTATGTTTACACTTTTTTTTTTTCATCCTTTTGATTTTCATGTCATATCTTTTACATTTTAGC  
GGACTTATTTTTGATCTTGAAATGTTCTAGTAAAATCAACTACACGTTTGCATTCTCCTGCAAGGGTGTAGCTAAAGTTGGCTATTCCCTCCCTCGCAATGTAGATAAAGATGTTTTGGGTG  
CATTGCATATTTGCTTGGGTCATATGGCTTGAAGGCTATCCCATCACACCAATAAAGGTGCTTAGGGGGCCATTTGAAAAACATTTTTGTGCATGTTTTTGAAAAAAAGGGGAGGTGG  
GCAAAAGTTCTTAAAAATTAATCATGGAATTCCTAACTAGTGCTTGAAGGTGTAGGAGCTAAGCTTGAGTGGTTTTGTAAGAAAGGAGTGGCAATGAGTGACAGTGAGGATGATAGAA  
AGGGAGTGAGAGTAGCAAAGAGCCATAGTTGTCTAGTGGGAAGGAGGAAATAGGGAGATGAGAGAGGATTTTTAAATGTTGCTTTTTTTTTTATATTATTTGTATGGCCTCCCATGTGCCTT  
TGCTTACGAAAGTCAAGAAAATGCCACCTTTAACAATGATGGCCGAGCGACCCTCTGCTTTTATGCATCATTTTGTGCTTGGCCATTCAAGGCACATGAAAAGGGGAAGGGCGACCC  
CATTAAGTCAAAATATGTTAAACTTCTAATTTTTTTTACTTACCCCTTCAGCATAGTTGGTATAAGTACATCACGGCTCATTAGGCTACAATAA

>comp142309\_c0\_seq2

CGTCCCAAACGAAGTCTAAATAAAGCAAATCCAGTAAAATTTGGAGTTGATGTGAGGAGTGCCAGTCGAGAATGTATCAAATAGGCTCGGCTAAATTGAGAATGATAGAAGTGCCTCCAT  
TATTGAGACAAGTGAGGATTCATCCACATGAGAGTTCTTCTCGGATGTTGACCTCTTTATATGAGTCTCTATTGAATTCAGCTGCTTTAACATTTCCCTTCAACTGCTTCTTTCTCTTTCAGA  
ATCCTCATGCAAGATAATCCTCTCATCCTCAAGCTTCTGCAGTCTTCTTTAAGCTGTTCAATATCAGAATGGGAAATAACATTTCCATTTCCAGGATCGATGAGATCCATTGATAATTAAC  
AGAAGTACCCTTTTTCGGTGTGCACATCTTGCCCAACTTTGCTATGATAGGCTCTTTAGCAGGCAAAGAGAACTTGGCCTCATTGTGATTGCCAATGAATGTTTTATTAAGGCCCTCATCAT  
GTTTGATAAGATAATCTGGAACCTTCTTTAGCATCATATTTGGCATTCAATCATGGAATTAGTCTCCGAGATTGCATCCTGCAATAATATCTTACAAAGTTCAACCAGGCTTGCAATCTTTGTG  
GCTCTCTGGAACCCCAAATATGTCATGGAATAAGGCAGAATACCTTGCTTTCCACTAAAATTTCTTGTTAGGCTAGAAGCATTTCATTATCTTCATATTGAGAAGGTGAACTAGAAAACGG  
CTTCATTATCTGACTTCATGCTTCCACTCGTTTAGAAGAATCAGTAGAAACATCACTAATAGGTGCAGAAAACCAGGAAGCCATGGAACCAATAGGTGAAGAAGTGCTTTGAACCTCAT

TGCCGGCCACACTGGAACAAGAACCAAATGCTGAATTTTTAGCCTTCAAAAACCCCTTATCCCTCCTGCTTACTTCTATAGCTTCATATTGCCTTCCAGGCTTTCCTTCGCTAGCTACCAGA  
TCATCAAACAAGTCATCTACTTCATTCTCACTCATCCCGATATGTTGATTTGTGAAATCACCAATCTTCCCTCCATACAGATAACTTAGAGGATAATATAGGACTTTCATCATCAAGGAATCTCT  
TATCGAAACTAAACTCATCCCCACGAAGTGAAGGCAAAGAAGCATTCCTTCTAAAAATACCATTACAACATGATTTGTTCTCACAAGCATCATTTCTCCGATGTCTGGAATGCTGATGCC  
ATGATTTGTCTGTTTTTGTCTGTTTGCCTTGAGTTGGAATCGGAGAGATTCAATCTCCAAGTCTTCTGCTGAACGACTTCTTCAAGCACCTCCAAGGTCTCTTCAGCATGGTTTATCCGTT  
CCTCTGCCATCCTCTTGTATTGACAAGCTTCCATCTTCTCTGCTGCTTTCTCTCTGTCAGGCGAAGGATCATAGATAGAGCTTCAGTAGCTGCAGTTGCTGAAGCTTCTCTTTCTCCTCTA  
ACTCAACGTACAGCTTCTTTATGATAAGATGTTGGTTGCGGAGAGCTTCCCTTAAAGCAGCAATTTCTCCTTTAGCCATATCTGGATATGGTTTTCTTGCTCCTAATTACCCTTAGTCACTCA  
GACACAGAAGATCCTGCCTCAACGCTTCTACTCTATCAGGCCTTTACCTTTTCTTGTAAATGTCAGAAAGAATGGAATGAGCACAAATAGCTCAGCAAACCTCCCTCCCTTACCTTTCTTTC  
ACGGAACAAAACATCTTCCCCACGAGCCGACAATATGCTTGCTTCGGTCTCCATCTTTTGTTCGCGTTTTATTGTTCTTCTCCTCCGATAAAATAGGCGACAGACAGACACAGAGAGA  
GAGAGAGACAGCTAAACAAAAGAGAGTTAATCCATATTCAAAAACAAAAATTAATAATAATATACATACACACACAAAAAAGGATAACTAGCGCCTCCCTCTCTCCATCCTCAGATTTT  
>comp142412\_c0\_seq1

GTAGGAATGTAGACATAATCGCTAAGAAAAGCAAAAACATTAATTGACTTTGAAAAAGCATATAATGATTAATAGAAAATATGATAAATTCTCACAGAGAATGAGAACGTTAATTTTGGCTA  
GTATACACAACAATTGGGCTTCTAACATTATGAGTACCATCACTCCAATCAAAGCACCCGAGATAATGGTCTCGTAAGCAACTCCTTCAAGTTTACTGAAAATGATTTCTTCTCCATAAG  
AGCTTCAAAAGATAAAACTTTCCGGCTCAACGTTGATCTTGAGGCTAGAAGGAGCATTAATAATAGCGTAATAAGTGGAATTTGGCACTCCCACATTAGTGACTATTCTTCGGAAAGAAAGTT  
GAAAAAGACTTTCCATGTTGAGTTTGCAGAGCAAATGTAGGATAATTGAGATCTAAAAGTGTCCATATTTGTAGAGGCACAAGTCTGCTGATCTCCAGTGACAAGTCTTAGAATTGTAG  
TGATGTAGCCTTACCACATAGCATTGATGTAGTCTATCTTGTAGCATCATATAAAGACCAGGACTCAAAGCTGCGAGTGGGTTTATGTGACCGGCCCCATAAGCAAGTTCTGCCTCA  
GCATTTCTTTGTTGAGTCTATCACATAGGCAAGTGGTATGAGAGCAGACTTTATGGCTGCTGGAGACCAAGATGGATTAATGATTTGACATAAGCGGCAACACCTGTTGTATGAGGGCAA  
GCCATTGATGTGCCTGATATTATGTTATATGGTACTTTAGGGTTACTAAGAGGTGACCATGCTGCTAAAATATCAACCCCTGGTGCTGTTAGGTCCGGCTTTAGTATGTTCCGGGGTAAGTGA  
TTTGACCGGTGATGAGAATGATAACCACATGTGGTGCTGCAGCATCGAAGACACCTTCACTTTTGTAAATGCTTGCCATAGGATTGCTTGTGTTGTTTGCATAATTTAGAACTTTTATGCTA  
TTGTTTATTCTAGCACCGAGACAGGAAGCACGAACTCAAAAGATACATCATTGGTCCAATTTGTGCCATAATTGCTCCAACGGCACCTGCAAGTAGTGGCCCAGAACCATAACGTATC  
CCATCACATAAAAACAACCTTTCCCTTTCACCAATTCTTCATCCAACGTCCCAACTTTGCAATATCTTGTAGTATTTGCATCATCACCTGCTGAAATATTGGGTGCATTTCCGCCGAATATCAA  
GGATGCATCTCACCATCCAAGCCATCGATGTTCACTGCCTTCCCCTGAAATTCTTCTCCATTACCAAGCTTAGTTCGGGCAACAATCTTGCGATCAATTGTGCTTGCTGCCACTGTGAGTAT  
CCATGGTGCCTAATTCTCAACGGTAAAATTATCAGGACCACCATTCCCAGCCGAGCTAGATGTCAGAATGTTTTCTTCATTGCATGGAAGATCCTATAGCTATGGAGTCTCGAAGTAGT  
TATTGGAATAACCACCAATGGAAATAGAGATGATGTGCAGCCATCTTGGATGGCATCTTCAAGGCGGCAAGTATATCAATGTCA

>comp142512\_c0\_seq1  
TTGGATTAGCGATTATTTCTTTGTACAGAATGATTGGGCTCCAAAAAAGAGGGGAAGAGTTGAGGGAGCTACCTATCCCCTTCATATAGGAGCGGAAGACTTGTGAGTATGTTGAAGC  
TTCTGATATCGAAGCAACGCTATGACTGATAGTATTTGCGAAGGTTGCCACGTTCCAAGTTCGGGTAAGCATTCTTCCGTTGGCATCTTTAATTTGAAGGTTCCATGCTTGACCACAAC  
CGCCACCAAGTAAGGACCTTCCCATAGTGGGGAGAGCTTATTGGGTTGAGGTCTTTTCCAGCAGCTTCGATGCTTCGCAGAATTAACCTCCCAATGGAAATAGTTCGAGATTTTACTCTT  
CGATTGTAGTGACGAGCGACCCGCTGGTGGTATGCAGCGATCCTGAGTGAGGCTATATCTTGCCTCGGAGAGGAGGTCAACTCACCAACTCTTCCGGCTCGTCGACGACCGATGCACTT  
ATGTTTCAAGACATCCTCTGGAATGTATATCCTGGACGGAGAAAAG

>comp142592\_c0\_seq1  
CATAATAATAATTAACCTCCTGTTTCAATGATATTTAGACCATTCTGTATTACAGATTTTTATTCAAATATTATAACACCTTAAAAACCAAATAGGATGAGCTTCTTTTTATTTTAACAACA

TCCCTCCATTCTTCCAAACACTTGGCAAAAATAAAAATAAGGAGATCTGAATTGTTACTTTCCGCACAGTTCTCTATCCATCATTCTAATATGTTCAAGCTTAGTCAACAACCAAACCATGTG  
ACCCCAATATATCTATCACATTCTCATGTTCTCTAGATCTAATTGAGCTTCCACTCCATCTTCATTTCCTTCTTGACCACAATGCTCTTGTTGTTGGTATTAAAAGTATTCTACGTAATTATG  
GCCGTAGTGGTAGCGGTCAAGGTGGTGGACATGATAGTAGAAAACGATTCCCTAACTTATCATCACTCTAAAAAAATTAATCATTATCTTATCATTATTAAGAATGTTTCATATATCATCCCACTA  
CTAAGCATGTCACTAGGAATAAACTAACTCAAATAATATGCCTTCTAAAACATTTTCCCAAAAATACTATGACTTGTCTACTACAAAACACAAAATACTATTATCTCCCATGTGATTACCTCT  
ATCCAACACTCCAATCAATTAAGACAATTTAATGGTCAACTTTGCGATTCCAAATTCATTCATCACTCTCTCACACATTATTTAGGGCTTACGTAACTACTCCTTTTACCCTTGATCATAAGT  
GCCATTATTGCTAGCACTAAAGATAGTCGTGGTACTCATGGACATG

>comp142676\_c0\_seq1

ATGCTTCAATTCATCCCAGGCTGAGCCTGCATACTCATCAGTAGCTTTATAGCACCAATGTTCTAGTTCAGCAAGTCTGCTTTAACATATTCTCCATTACTGAATGAGCAGCACTCTCTCCT  
CAGCAGAAGGCTATTAATAGCTGCACGTTGATGAAGGAAAATATCTGTGTGAACACCTTTCTAACTAAAAACGGGGGAACATGGTTTCCTTTTAAATGTATTCAAGAACTCCAAAGACT  
CCTTACAATCCCTTGCCAATGAGCAATTGGGGTTGATAGTCCTTGTGGACGTATAGCACCTTTGATTAGAATTGCTCTTGATGTTCTCGGTGCCTGAATGCACAAGCCAAGCAAGGGAGAG  
ATATCTTTTTTCAAATTATCCCGAATCATTCCATAAATTTTCTCCACATATGCTGTAAGTTGTTGTTTGAATAGCAGAGCAGGATATTTGGCTTCCACTTGCCGCAAAGTATCAACTCCACCA  
ACTAAGCCGCCATTGGCAAAAGAAAGGTTCACTCCCTGAGGAGTTCCCTGAAACTTTGAGCCATCCTCCCAATAAACTAGCTGATGAAGATCGACTGCGCTGTGGAGCCATCCACAGC  
TGCACCACTTGCCTTTAAAGTCCGTTGTAATAGTAATAGCAATGTTGAGGCATTGGAAAGCCAATAAGCTAACACATCATTGTCTTCTTGGGTCTCAATAGCATGCCCAATTGTCTGAATAA  
TTGATCAAAAAACACTAGTTCGCTCAACTTCAAATGATCTCCACTGGAGAAGACATTTGTATATGATACATGCTGCAACAGGCCTGCTCCCTGCAAATCCCAGGTGCTGTGCAATACACCT  
GATTAAGGCTCCTGGTTCCTGTTGCTTCTCATTTAGAGATCTCTGTGGTTTGTCTCTAACTCGGAAAGTTCCTTTACAGAAGAGGAGGAATGAATATCTGCAGAAGACTTTGGATCA  
ACATTGTTATGTCCGCTATCCGAACCTCCTATGTACAATCGATCTAGAACGTCCTGACAAAAATTTGTTAGGAGCCATGGACACAGCCTGCTGACGAAGAACCTGATTTTCAGATTCTAGATT  
TGACAGCTTTTCTCTAGCCTATTCAAATGGTCCCTGTAGATGCCGAGATTTTCTTCAATTCCCTCCAACCTTTCTTTGTTTTTCTTCACTTTTCTTCTGTTCTTTCGCCATATTTTCGCAAAGAA  
TCATCAGCTCGTTCCTTTTCTGAGCCTAAAGAAGTCTTACAGCTGTTCAACCTCAGCTGTCAATGAATCAACTTTCTGAGTATCCTGAACAAGAAGCAGTAGTTTCTTGTATGATAGGTGGCG  
CTTCTTCAATTGCTTTTTTTCATCGCCTCTCTTTCTTAGCAAGTAACTCATTAGTCTCATTAACCTTATTCTGTAGCACTTGCAAAGAGCTCTGCAACTTTGCAATCTCCTGCGCTTTTGCTTC  
CTCCAAGTCTGTCCTTAAGCGCTTCTCCAACCTGCAAACGCCATGTAAGTTCCTTCCACCTTTTTTCAAGTTTGTCCCTTCGCTTCTTTGAGTGCCCCAGTTTCTCTGGCTGCCATTTTAAGCT  
TCCTCAATTCTTTCTTGCAACCCTTCCCCTCCACTTAGTTTGTGTGACAATTGAAGCTCTCCTTAACTTTTTGTGATATGAATGGGCTTTGTGGCAACGCCATTGAGCCTGAATCTCTGTTG  
ATGCTTTTGTGTTGCTTCCATAATCTGAAATCATCTCGGGCAGCCATAGCCCTCAAACCAGTTTGAAGGACAAGAAGTACACCCTTAGACCTGTGTACTTATTTTTTGGCCAGTAAGATCG  
AAAATTTTTCTGCATTTAATGTCAGCCGACTCCTTCTCATGTGCTCATAACAGTTTTTGGAGCAACCTTCTTCTCCATGATGACTGCACTAGAAATGCTAGCCTTCCCTGTTGGCAGCAAACC  
GTTTATGAGTAATGTGCGTTCGTATCTGGCGCTGAATAGTCTTTGACGACTTGCAGGACTTTCAGCCCTCTAGCATCTAATTCAGCCATCTGACCAGCTCTAAGGAAAACCTTTTGTTTTT  
CCCATCTGCCAACCCTTTAGCCCCTTCTTCTTAAAATCTTTCCACAAGCAACCTTCTCATCGTAGTTTCTTCTAGAACTTCTGGAGCAAGAATGCCAAATCGATGAAGAAATTCATAAAA  
TGACGTCGAGTAGGATATCCAGCACAACTAATTCTGATAGCTTCCAGAACACCACCACAACGTAATTGTTGCATGACATTAACATTCTCAAAAATGGCAGGTTTAAAGAAGATTGTTGGC  
TTCACACATCTAATATAATGTGGTTCAGTTGAATTCAGTATCTCCATCAAAGATTGTAGTTGTAGCTTAAAACGAGCACCAATTGATGAAAATTTAGAAGACTTTGATGTATCCTCGGGTAG  
TGGAGGGAAGAGGCCCGAGACAAATGGGCATTTTGTAGTCACTCAGCAATTCTGGTGTCTGCTACAACGTAGTCCCTATTTTTATCTAGGAATTGTTTCAAGATTGATATTGAACCTCTCCA  
GCATAATGGGAAATGGTAAAGTCAGTTGGAGACAACCTTTGGTTTGACAAAACGCTTGTGCGTTTTTAAATGTCTGATAAAGCTTTTGAGAAAATGTCTCATATGTTGATTTTGGAAACATA  
ATGCTTCATCAAGC

>comp142678\_c0\_seq1

ATTATATAATTTGATAAATGTTATTGTAACTACTATAATTTTCATGTAGAAATCATCTATAAAGTACTATAGACCTATTTCTCTATGCAGTTTTTTTTAACTAGAAAGCCATCTATAAATTATTC  
TATATATTTCTTTCTTTTCAAGGTGCTTTTATCACTTATAGGCTCCTAGAAGAAAACATTTCTTTGCCACAAAACAAATTTGGAGACTTTCACAATAAATGGGCTTAAAGTTTATTATACTAATA  
TTGATAGCTCCAATTAGAGGTGTCAATTTGGGCTCGGGTCGAACCCGAACTGACCCGAGTTCAAACGGGTTGACCCTAACCTGACCCGGGTAGGAAAACAGGTTGGAAATCAGAACCC  
GGACCCGACCCGGCGGGTTGCCGGTTGACCCGACCTGACCTGCGCGGCAAAGAAGGAGCTCGGGTTTTGCGAGAGCGAGCGCGGCAGCAGGCGACGGCAGGCGCGAGCGTGG  
AACGACGACAGCGTAGGTTTCGGCAGCAAGCGTAGGGCGGGGCGCGGCAGCGGGGCGCGGGGCGAGCAGCGGGGCGAGCGGGGCGAGTAGCGGGGCGCACGAGGTAGCGGGTAGC  
TTGGGCGGGGCGAGCGGGCAGCGAGC

>comp142726\_c0\_seq1

AAAATTTAGGAATCAAAATAAGTCATATTATATAACATCAATAAAGGATTTTAAACACACATCATCAAATTAACAAGCGCAATAATTAATATATTTTCAACAATAAATAAACAATATAAAAAAAG  
CAAGGCCAAAATGTGCAGCAGCTCCTGTCAATAGATCCATCTGCATTCACCTTGCCCGTCACCATTAACACTATTCATTTAAGAAGAAAGCCGTGACCGACTGCGACCAGCTTGAAGAG  
AAGAGCTAGCGGGTGGAGGGCTCAGGATTGCCCTTATTGGAATCACATGGCGGCAGAGGACCATTTGAACTTGGAAAAGAAGGTGTGCTTCATTGACAGGCCTCATGCTGATACAAA  
ATTGGAGAATCTACACCTCCAAATATTTTCATCATCTGTAACACTCAAAGAACTTGTGACGCGCGGTGGTTGGCTTCCCGGTGGTATTGGTTCTCTCTTGGCATAAGCAATGATTGGTCA  
GCCTCGATGGCTTCATTAAGGCTCTTCTCCACGCCCGCGTTGGTTTCTTCCGACGACGCGTTGCCGTTGCCGGAGGTAGAGTGGCAGTCTGAAGCTGAATGGCTCCCGCGCTTGAC  
ATTCACCGAGATTTGATTGTGACACCGCCACGACGACAGAGATGAAGACGACGGGACGACGGGAGGGAGGCAGCTTGAGCTTGTTTGGATCGTTCCGGTGAAGGAATGGAAGGAGGA  
GTAATGTAGAGAAGAATTGCGTTATAATGTGCAAAAAGAAGCCA

>comp142836\_c1\_seq1

CAAACGAAGCCTAAATATCTCCAGATTTTTTGTCAATCTTAGCAGCCATTAATGTGTTCCGAGTTAGAACAAGAAGCAGATTCATAAACTGCGATGCCAATAACTTCTCCACCATCTTCCA  
GTCAATTGAGTTGCTGGTTGCATGAGAACCTTTAGCCAGCAAATCACTTGAAGATGAGAAGCCTGCAGGGTTCTCAAGCTGTGGATCGCAAAGACATTGTGGCACTCCTTTGATTCAAT  
TCCAATTCCAAATCCATGCAATGGTTCATAGCTAAAGCTTGCCTTTGTTCCATTTGAACAATTTTCGTAATGGTTTTGATCAGCTCTGAGGAAATAGCTTGGATTGTTAGTGCTGAAGCAGT  
GTCTTTTCATGAATTGGACTTTGTTTTTTGAATGCTCGGCATACTACCCAACCTTCTTCTGAGAATTAGGCGCTAGTTGATCACTTGAATGAAGGGGATACTCATGCATGATCCA

>comp142957\_c0\_seq1

TTTTCTCTCTCTCTCTCTCCACCCTTCATCTCTAGTCATACCATCATCCTTGAAACCGATGGCCATGGCTGGCTGAGTTCATAAACTTCAGATTTCCGGCCACTCCAGAAGTGGAAAGA  
GAGAGAAGGTGTAGCTCTTGAGTTCATTAATAAATCTCCGTAGATTACTGATAAGCTTTCCTGCAATACAAAGAGAGGAAAAAATAAGCAGATATATATAACTGATCAGCTATTGCAGGAG  
CCATGGAAAGGAACATGAAGGGAAGAGGTAAGATAGAGATCAAGAAGATAGAGAACACCACAAACAGGCAAGTTACCTTCTGTAAGCGTGTAAACGGTCTTCTTAAGAAGGCTTACGA  
GCTCTCCGTCTCTGCGACGCTGAGGTGGCGCTGGTCATCTTCTCAGCCGCGGTAGACTCTACGAATATGCCAACAAATAGCGTAAAGGGAAGTATTGAGAGATAACAAGAAGGCTAGCTC  
TGATCATTCCAATACCAGAACGATTTCTCAAACAAATTCACAGTATTACGAGCAAGAAGCCTCAAACTTCATCAGCAAATCACTAATTTGCAGAACTCAAACAGGAATTTGATGGGTGA  
GGCTCTCAGCACAATGAACTTAAGGGACCTCAAACAAGTAAAGTACTGAGAAAGGCATCAGCAAAAATAAGATCTAAAAAGAAATGAGTTGCTGTATAATGAGATCGAGTACATGC  
AGAAGAAGGAAATGGAGCTGCAAAATGATAACATGTACTTACGAAATAAGATTGCTGAGAATGAGAGAGTGCAGCAGCATCAGATGAACATGCTGCCTTCAACAAGAAATGATTGTGAA  
GTTATGCCTCCATTTGATTCTCGAAGCTTTCTGCAAGTAAATCTTCTCCTAGCAACAGGCAGCCTATACCTTAGTGGAAGAGATGTCAGGTACTGGAGATCAGGTTTTCTTCATGGAAATA  
AACCATAAATATGCATGAATTGTCAAGAATAGACTTTTTGTCCAGGAGCTTAATTTGTTGTATATATATTGCCAACTCTTTGTTTTATAGCTTGTGATGGCTTTGTATTGTTACAATAAACATA  
ATTTTATAACAAAATTTGGTCTTAGCAATCCACATATGTAACCTTAACAATTTGATTTTTCACATTGAGAATTCATAATTGACCTGAAAACACAAGACTT

>comp142957\_c0\_seq2

TTTCTCTCTCTCTCTCTCTCCACCCCTTCATCTCTAGTCATACCATCATCCTTGAAACCGATGGCCATGGCTGGCTGAGTTCATAAACTTCAGATTTCCGGCCACTCCAGAAGTGGAAAGA  
GAGAGAAGGTGTAGCTCTTGAGTTCATTAATAAATCTCCGTAGATTACTGATAAGCTTTCCTGCAATACAAAGAGAGGAAAAATAAGCAGATATATATAACTGATCAGCTATTGCAGGAG  
CCATGGAAAGGAACATGAAGGGAAGAGGTAAGATAGAGATCAAGAAGATAGAGAACCACAAACAGGCAAGTTACCTTCTGTAAGCGTCGTAACGGTCTTCTTAAGAAGGCTTACGA  
GCTCTCCGTCTCTGCGACGCTGAGGTGGCGCTGGTCATCTTCTCCAGCCGCGGTAGACTCTACGAATATGCCAACAAATAGCGTAAAGGGAAGTATTGAGAGATAACAAGAAGGCTAGCTC  
TGATCATTCCAATACCAGAACGATTTCTCAAACAAATTCACAGTATTACGAGCAAGAAGCCTCAAAACTTCATCAGCAAATCACTAATTTGCAGAACTCAAACAGGTAATAAATTAACATA  
CAGTCCACTTCACTATTCTCCGTTTATAAATTCATATGTTACAGAATCCTTATATGCCTATAGGAATTTGATGGGTGAGGCTCTCAGCACAATGAACTTAAGGGACCTCAAACAACCTAGAA  
ACTAGACTGGAGAAAGGCATCAGCAAAAATAAGATCTAAAAAGAATGAGTTGCTGTATAATGAGATCGAGTACATGCAGAAGAAGGAAATGGAGCTGCAAAATGATAACATGTACTTACG  
AAATAAGATTGCTGAGAATGAGAGAGTGCAGCAGCATCAGATGAACATGCTGCCTTCAACAAGAAATGATTGTGAAGTTATGCCTCCATTTGATTCTCGAAGCTTTCTGCAAGTAAATCTT  
CTTCTAGCAACAGGCAGCCTATACCTTAGTGGAAGAGATGTCAGGTACTGGAGATCAGGTTTTCTTCATGGAAATAAACATAAATATGCATGAATTGTCAAGAATAGACTTTTTGTCCA  
GGAGCTTAATTTGTTGTATATATTGCCAACTCTTTGTTTATAGCTTGTGATGGCTTTGTATTGTTACAAATAAACATAATTTTATAACAAAAATTTGGTCTTAGCAATTCCACATATGTAAC  
CTTAACAATTTGATTTTTACATTGAGAATTTCAAATTTGACCTGAAAACACAAGACTT

>comp142988\_c0\_seq1

AAATTAATAATTTTTATATTAATAAATTTGTTCTAAGAAGCACTAAAAAAGCGGTCGTAAACAAAAGCCTAAGTCAACACACTTCAAATAGTAGGGTAGGAAGGCTCCATGGCTAAGCCACAT  
AATCCTTCAACCGCAGACACGTCCCTCTCGATCCTCATATATCCGTTCTCCCCAGCTAGTCCCCATGAGTTCCTTACTAGCCAGTACTTGGTGCCGTCGGTATCGGTGCCGTACCCGAT  
GGCGGCCACACCGTGGTCAAGTTCCGTGCCACATGGCCAGTGAACAGTCCTCCACTGTACAGCTGGAACCTGAAGTCAACCGCGTCGATGGCGACTGACACTGGCTGCGCGGTACC  
GCCTTGAGCAGCGCGCCTCGTTGTTGGCCGGCACATCCTCAAAGCCGGAGATCTTAACAGCGCTGGTGGACGACTTCTTGGTGTTCAGGAGCCGTCGGCGGATTTGTAAGGGTAGTT  
TGCTTCGGTTGTTAGGCCGCCGTTCTCGATTATGAACTTGAAAGCATCGTCCATGAGGCCGCCGCTGCATCCTTCATCTTCCCCGTTACATCACAGTCGACCAGCTCCTGCTCCGAGAGC  
GATACCAACTTACCGTTCTTTATTTGGTTGATGCTCTCCGTAGCCGCCACAGACGAGAAAGCCAGCAGGCGCCGATTGGCCTTGACGGCAGTGACGGCCCTTTGGTCTC  
CAGTCTAAGCTGTTTGGCGCTGTGATATTCTCGTACCTGAAATTTAGGCGCGACGCGATTGAGCTGGACTTCTTACAGCCGGTGTAGAAAAGTTCTGAATTCCTGATTGGTTAAATCAG  
CGAAGCGGTTGGCTCCCAGCTGAAACTTGTTGTTGCCGGCATTGAAGCTCTCTATGTGCTCCATGTTGGCTTTAAATATTTCAAACCGTCGCGCTTCTCTGCCGCGTCACCATACTTTC  
CCGTGCTTCGCCATCCACCGTTCTGTGCTGCTCAGTTATGGACATCTCGACGGGTAGGAGTCCAGATAATGACGCAACAATGGCCACAGCCCCGAAGACTGCGAGAGCAAGAAGAAGGCT  
TCTCGTAGGAGCCATGCGAAAGGATAGTTAATTAATTAAGCTTGGTATGCTCAACGGGTATGTTTTGGGAGGGTTTATATAGAGGATTTGAACGAGAGTTGGACTCAATTCGACTAATAA  
TGGAGGCTGTAGAATTGCGTGCTGCTTGCCGTGGGGATTGAGCAGATTGAGACCTTCATCAGGAACTTTTATTAGGTCAGTTCACTGGACGTAGAACTACGTTCCGGCACCCATTCTTATAG  
CGCCACGTAGTAGCCGGAGACCCGCCAAACCCGTAGTGATTTGTCGCTTGGTACAGTGTTTTACAACATTTCCGGGCCACCCCGACTTATTTTAT

>comp143124\_c0\_seq1

TCCGAACAACCTACCCACCTACATCATAATACATGAATAGTAGTATCAACTTTATTTTTTCTCATAAGATAATGCAAAAAGCCAAAATACAATCCACGGAGCAGCAAAGCACACAGTGCCT  
ACGTAGTAAACGACGTTACCGCCAGAAGGAGCAAGTGAATAAACGAAATTATAAAACAAATTATGCAAACTAATTTGGGTGAAATTTCAAACGCCAGCTAAAGTACAATACCATTCC  
CCAAGCTTATTTATTAGATAAAGGATTCAAGTAACAGTATTGTTCTAATAAAAATCGCAGTATCTCCACAAAGCACAAAGTAATCAGCAAATGCCATCCCTAATCCACATTAATTAATTTATC  
TTACAGAATCTCATAATTATCCATTCTTAACTCGGCACGTGACTACAAATAAGCGGGTTCAGATCTGGAGACGCTGTAGTGTACGTAGGCCCGTCCGTCTATATATACGTCGCCCCGACCA  
CATGCATGCATGGAATAAGAACTACTTAGGAGTATAGTGCACGGCTGGACACGTGTCAGCTACCCAATCCAATCGGAGAAAGAACGGTCCGACAATGCTACTCTTCTTTCCAGATAAA  
TAAAAATATTAATAACTAATGTGGAGAGTTGATTTATAGCAGGCATTATTAATAATTTCTACTGCCTCAGTGTCCCTTACAACGAACGGGCAGAAGGAAAAGGAATTAGCTAACATTTTGT



CTCTTGTCTTCTTCCCTTCGTTCCCGTTTTACCCACCCTCAAAAAAGAAATATCATATACTAACAATCATATTTCCAATCTTTTTGTCTCTCTGTTTTTTTTTTTTTCTCTTTTTTTTTGTAACTCTC  
ACTTTTTTTAACTCTTTTTTCTCTTTTTTTTTTG

>comp143130\_c1\_seq1

AAAACCTCCACGAAACCTGCAACCGAAGACCCTGTTTTCAAAGGATTAAGCAATGGAACAGTAACGATAGCTTAATTTCAATTAAGTGGTAAAACTACTGTGCCTCCTCTATCGACAAGG  
CATATCACAGGAGAAAAATTAACAATGGCAATATCGAAAATAACTAAGTATTGAGTAAAAAGCTAATGATGAAGTCGTTAGGAGCAGAGGTGGAGAATAGGAATTCCTTCAGGGTAGTGGC  
CACGGTGGCAATCGTCCAGACAGCGGAAGTGGCCACGGTGGCAAGCCGTGAGCTGCTTATTAAGTCTTGGAAAGTATGCATAGTGTCTGGGAGATCGACGACATAAGCATTGTCGTTAATACG  
GAATATGTGAACTGCCTGCATCATCAGGAGGATGATACGGAAAAGAGATCCGCGACATTAAGGTCTTGGAAAGTATGCATAGTGTCTGGGAGATCGACGACATAAGCATTGTCGTTAATACG  
TTTGAGAATAGGCACGGGACCAATTTACGAGGACTCAATTTGAATTTGCACCGGTGGGAAAACGGTCTTTGCGAAGTCGTATGAGAACGAGGTCGCCAGGTTGAAAAGAAACATGAT  
GTCGGTGAAGATCAGCGGCTTTCTTGTAGGTGGAATTGGACGTGCTGAGCTTCATGCGAACTTCATCAAGAACAGATTGGCATTGGTCCGTCAAAGCTGTAGCGGACTTGTTAGCTCATT  
TGGGAAGAATAGCTATATCGAATAAGTGGTTCGGAGCCTTAGTATAGACGATAGCAAAAAGGACATTGTCCAGTTGATCGGTTGGGCATAGAGTTATAAGCAAACTCCGCCTGGCTTAATGC  
ATTTTCCCCTGTTTCGGCTGGTGTGTACAAGGCAACGCAGCATATTGCCAAGAGTCTATTGACGACCTCCGTCTGTCCATCAGACTGGGGGTGATAAGCAGAGCTAAGGTTCAAGGA  
GGTATGAAGTCGCTTCCACAATTCGCGCCAA

>comp143142\_c0\_seq1

TAATCAACCAAATAATGAATTCACAAACTTCGTCACTTTTAAAAACAAGAAGTACTTTAAAAACAATAAGCCTCAACTACAAGTAAAAACAATAAGTTCATACAAGATGAA  
ATTATAACTTATAAGAAATGCTTCAGTAAGCCATTAATTTGTCATCCATTAATAACTTCAACTTTGAACACGTTAAGGAGCACAGTTAAAAGAACATATTTGTTCATTTTCTCATTCAAGTAT  
TGATCACTGAACATAATCATCTACTTTCTCCTTATTGCCACCAATATCATTCCCTACATTTGAACCATGAGAGTCTGCGCTTTGATCAGTGACAGGTTCCCTTTGATCTATCTTTATCAATTTTT  
GGAAGGGCAAGAACTCAAGAGCAGTTACAACATCTGTAATGAGAGGACGAGTACTTGCCTCTTCCTGAAGACACATTGCTGCCACTGCAAGAGCTTGATATAGACTTTTTATGGGATAC  
TTTTCTTCAAGCAAAGGATCTGCCATCTCTATAAATCTCTTTTTATTTTTGAAAAGTGGTTCTGCCCATGGACTAGATTTTGTTCACTTGAAGGCCCTGGAGGTGTCGATGACTCTCCTCCT  
GTTATTATTTCCAAGAAGACAACACCAAAGCTATATACGTCGGACATAGTAGTAACTGGCCTGTCATTGCGTACTCAGGTGCACAATAGCCATAAGTGCCCATCACCTTGTGATACATG  
GCTTTTATCTCCAATGGGACCAACCTTAGCTAAGCCAAAATCAGATAACTTTGGTTTCGTAGTTTTCATCAAGAAGAATATTTGATGCTTTAAAATCACGATAAATAACTGGTGGTTTTGCAA  
TATCATGTAGGTATTCAAGGCCCTTAGCTGCACCTTGAGCTATCTTCAATCTTGTAGTCCAATCTAAAGGCTTCTTGTTTGGTGACAGGTCAAGAAGATGATCCTCCAATGAACCCAATGGC  
ATATATTCATAAACCAAATCTTTGATCTCCATCAGCACAATATCCAATTAAGTGAAGGTTTGGGTGGTGAAGAAGGCTCAACATTAATACTTCAACAATAAACTCTCTATTTCCCTTGA  
AGTCCATTTCTGTGCGAGCTGTTTTACTGCTATGCTCTGATTTGTGTCTTCTAGATGCCCTTTATATACTCTTCAAATCCACCTTCGCCTAGTAAACAGTCTAATTTGAAGTTGTTGGTTGCAG  
CACACAATTCAGCAAAGGAGAAGACTCGAGCGGTGGGATTTCCATTGCCCATCTTAAAATCTCTTCAGCTACAGCTCGATGCTTTTTACTTTTCAGCTTGGAAAGAGATGCTGTGAACGA  
GGCTGGAAGAGGGTGATTGCTTCTAGACTCCAATGTCTTCTTCCATGATTCCATTACTTCTTTATCTTTAATTGGTTTAAAGCAACAGAAGCAGCCCATCACCTTCTTTCCACCTTCCG  
TTTCTTCTTGTATCCACCTTCCTTTTTCTTCTCCGCTTCTTTTCTTCTTCTTTTATTCTTCTATAACTATTTGTTTAAATATAATGCCTCTTTGGATTGATCCAATTGAGTGGATC  
AAAGAAATCATAGAAATCATATAAATGGTCAAAGAAATCATAAATGCCAACAAGAAATGGATCTATAAATGATCGAAGTTTAAAGAGCTTACCAGAGAAAATTTATTCTCCAATATTTT  
TTTGTCTTTCGTTTTTTCATTAGGAGGAGTTTCTATTTCCGCTTCTTTGGATGATAGGATTATCAATGGAGAGAAGAAAACACGCGGTCTCTTGAAAA

>comp143205\_c0\_seq2

TTTAAATTCTAGAAAAGCATATCTAATAGAAATTCAAATATATAACAAATATTAATACATAGATTTACCAATAATAAAAATAAGAAAAAACAGAATTAGGAAAAATATATTAATTTCCCTAAT  
CTTAAAGTCAGCAACTTGTGACTCTCCATTTAAGTAGTCTAAGATTGCAATTAAGTCTTCAACAACAATGCTTGTATCAAAGCCAGGCTGCACCACAAGAGAATATAAATCCTTGCTTCCATT

CATCTCCTTGAATCCCACCTGAGCAGCAACAATTCCCTTGGAAAGTTACAATAGAGCAATTTCTCTGAGGAAAGGAGCCAATGACCTCAAAGTAGTAGTCTTTGTTTCATCCTCTTAGGTTCA  
ATGTAAATCTTTGTAGACCTTCTCAGTGCAAATAATGGCTTTGAGTCACTCAGACTAAAACTTTGTCTTTAGCCCCCTCATAATTCATTGTATATCCATTCCATTGAGAGCAGCTGCTAATT  
GCTTGAATGATGCCCCCTTCTTATGAATTAGAAGTATTAAGGATCCATCACTGTCTCTCACAACAAGTTCTCCCTTAGTTCCCAGAATTCCACAGCCATCAACACTGAAAGCTACCTTCTG  
GTTGCAATCAGAGACTACAAATCCACCTCCATTGATTACATGAGGCCTTCTGCGAACCACCAATGTTGAGAGGGAAGGAGAACAGAAGATCTTACTAACAATAGGCATAAGATTTGATGA  
TCCTTCAGCCATGACTAAGAGATGAGAAGGATTTGGGTTTCAGTTGAAGTGATGAAGAAGGAAGAGAGCAAATGAAGAGCTTAAGAAGCAAAGCGGGGAGGAGAAG

>comp143235\_c0\_seq1

AAGTTGAAAGAATAGCACGATACAGATATGTTTTACCTGTACCTCCAGGACCATCTATGAAGAACATGCCATGACGTTTGATTAACACGATTGATAATTTCTTCAAATGCGTTCTTCTGATT  
GAATTGAGTGTATGTATTATATTTAAATCTTCAGCTGGAGTAATGACATTTGCTCTTCAGATATTTCTCTATTATTGAGCTCATCATTTAAATCATGAAAGATGTCTTGTACATGTGGCAATTC  
AGGCAAGTCAAATCATCGATGGACCTTCCCATCTCTCAAGAAATAAGT

>comp143259\_c0\_seq1

GCGATATGAACGGCCACCTAGTATTATTAATTTTATAAAGGATCGTATTCGAGAATTTGGGTGCGATAGACACGGTAATGTTGAGCCGGGGATAGGAATATCAATGGTTGATATGGATCACT  
GTATTCTATATCAACATTGGTTCGCATAAAGAAGATAAATGGCTTTAGATAACTACAAAATGCTAATGCAATGTTCTCAGGGCGGAAAGGAGAGAAAATTTTAGATGGCGAAGATTGGAA  
CCACCTGCAACACGGATTTATGTACCATTCAAATGTTGTCCAACGCAAAACACAACCTCAAGGTCGTGTACGAAATCTGCTTAGGAAATGACTATGATGTGTTCTGAAAATGTAAGCAAATA  
TTAATATTTTATGTATAAGATTATGGTGTAACTATCTAAAATTTCTATCGGCCTTACATATAAATTTGTATTATTTTCATAAATAATAACTCATTCCGCATTTGCTTAAATTTAGCACATAATG  
TCATCATCTTCATCAAAGACCTCAGCAATAAAGCGCTCACCAGCTAGGGATTTCTTCATATAATTCCTAGAAAAGATTGATATATGATGGAACAATTCGATTGTCAGAATCAATGTCGTA  
CCCTATGGATGAATTTCTGGAGGAAAAAGCAAGAACAATGAATTTTTTCGATGTTGTTTACATGAATGATCTTGGTATGAAGACGATAGTTTATGGGAT

>comp143270\_c0\_seq1

GATACCAAACAGCCCCTTAAGGATCCCGAACCGTTTAGAGGGGTAATTTGCTCATTGCTTCTCGCAACAAACTCTTGCCCTCAATGCGCGCGGCCTTTTCGATGGTGGACAGCGATCCTAA  
AAAGAATCAAATCAGATACCAGAGAAAGGGTTAGGGGAGATAAATATGCCGCTTGGATAGGAAGGACAGAAAAACGTATATCTAAGGTTGAACGGAGCTGGTTCCTTCGGCCGTC  
GACAATCATCGGCGATGTATGGTGTGAAGATACAAGAGGTATCGAAGAAGCTGGCGCTCTGGCACACGCCGACCTTCAGTCCAATCATGAGCCATGATGACCTCGAGCCCATCTTGTGTT  
CGGTTGGATTTCATCTCCCCGCAAATGTGCCCCAGCCATCGACATCGACTAACCTGAACCAGCCGTCATCACCATCAAGAAGCCCGCCGGCTGATGTTAAATGGAAAGAGTACGCGTTCC  
CTTCGTCGGCGGCGGGTTCGGCTTTTTTCGCCCCGCCAAGGCTTCCATTTCCGATGATATGGGGGCTCCATCTCATTGCCTACAAGGCTTTTCTCAGCGCCTTAGAATGCTACATA  
GACCCACAGACGTCTCAACCTATTTCAATGTGAGTCCTTTCAATGATTCAGAGCTATGTCGATAACCCCATGCCTGAGGAAGAATTCGAGAAGGAATACCGACCAATGAAAGACATGG  
ACGCCGATGACTGTACAATTTATGTGTACCGAAAAGGCACCGTCTATAACTGGATGTTAGAACAGATTACAGCTTTGGAGTACAGAACTCAACGCTACGAAGAAGATGATGATCCTAGAA  
TCAAAAGCGGAGGTAGCAACACCGATCAAATCTTTATGGTTTCATGGGACAACCTTCTACCAGAAAGGTATGTTACCAGTCCATGTCCTTCGCCTGAAAATGCCGAGAAATAGAGCAACC  
TTTTTTTTTTTTTAAATTTTTTAAATTTGGGTTAAATATACTAGTGGTTAAATCTTATTTTTCAAGCCAAAAAGATTAAACTTGTGGGTGAGGGCCAACCATATAGTATTTCAACACAACAATG  
TTTTTTTTTTTTTCTATTATCTTATATGGGAGACTTATTTACCAACGATTTTACCTGAAGAGACTTATTTACCAACGATTGCGAAATATTTCAGGCCCTTAGTACCAATGATGCTGTCCTCTCA  
CAAAAATCACTTTTTGGTCAGGTAAGGTTTCGCTTTCCCTAAATTCATACCAAGCCCATCAACATATTTGCAAAAATTA AAAACAATTTTACCCCTCAACAAAAGCATAATAAAGCAAGCA  
AAGGCTCCTATTTTACTAAACTATCAAATTTACCGTCT

>comp143284\_c0\_seq1

GTAAAAAATTTCTTTTTTATTACTTTGTAAAATTTATTTTTAGTATAAAAACTTTTTAAAAACAGGAAAAAAAACAGTGGTCTAAAACTGTCCTAAACCATATAAGAATCAAAGCACAAATG

TTTTCTTTTAACTCATGGAATAAACAGTCATTTAGTTTAAAACCATTCATGCAAAAAGGTGAATTTTAGCATGAAGAATTAAGGATACAGAGCCCATGAATGTAACCTGTTTCACCATGCAA  
AAGGTTCGACGCCGTAGATATTGTCGCCCTATAGGAGGGATGGTTCAAGGGCTTTTCATAGAGAAGAAATATGGAAGTGTGTTCTAAGCAGAAGGTACAGAGGCCCTTAATGGGCGGGAG  
AAGGTTGCCTTTCTGCATGGATGACAAGAAAGGCTTCTTCTTCTTCTCCTCGTATCTTCAGAAATCAGCTTATCTCTGCACCTTTTGCTGCAGAACGCAACTCCCTATACATGAATGTAT  
CAATGCCGCGCCAATGCTGCGCTTGCAGAAGCCGCAAGCATTGAGGAAGGGGTCCGCATCGACGAAATGGGCCGCAATTCACCGATGATAGATCAGTCGAGTGCCTCTGTTTGACGTCT  
TTCCGTTTTCGGGGCCGGTTCGAATCTTTTCCGAGTGATTCTCATCCGACCAAGTCGGGGCGGCTCGACGGCCGAAGAAATGACGAGAAGCTCCGACAAGCTCGTCGTCCTCCTCATCGGACG  
TCAAGTTTACCTTCTCAACCTCGATCGCTGGTCCCGCGTTCCCGTCAAAAACGAAAATGTGTAAGGAAATAGAAAGGTACGTAGAGTTCGTTAAGCAGGATTGA

>comp143284\_c0\_seq2

GTAaaaaaactttcttttttattacttttgtaaaattatTTTTTAGTATAAAAACTTTTTAAAAACAGGAAAAAAAACAGTGGTCTAAAACTGTCTTAAACCATATAAGAATCAAAGCACAAATTG  
TTTTCTTTTAACTCATGGAATAAACAGTCATTTAGTTTAAAACCATTCATGCAAAAAGGTGAATTTTAGCATGAAGAATTAAGGATACAGAGCCCATGAATGTAACCTGTTTCACCATGCAA  
AAGGTTCGACGCCGTAGATATTGTCGCCCTATAGGAGGGATGGTTCAAGGGCTATACATGAATGTATCAATGCCGCGCCAATGCTGCGCTTGCAGAAGCCGCAAGCATTGAGGAAGGGG  
TCGGCATCGACGAAATGGGCCGCAATTCACCGATGATAGATCAGTCGAGTGCCTCTGTTTGACGTCTTTCCGTTTTCGGGGCCGGTTCGAATCTTTTCCGAGTGATTCTCATCCGACCAAGTCG  
GGCGGCTCGACGGCCGAAGAAATGACGAGAAGCTCCGACAAGCTCGTCGTCCTCCTCATCGGACGTCAAGTTTACCTTCTCAACCTCGATCGCTGGTCCCGCGTTCCCGTCAAAAACGA  
AAATGTGTAAGGAAATAGAAAGGTACGTAGAGTTCGTTAAGCAGGATTGA

>comp143389\_c0\_seq1

TTATGTGATTTCGTAAGAGAATCAAATTGAGTGCAGAGAAAGCCATTTTTATATTGTCGATAACGTGCTTCCACCAACAGGTTTTTGTTCCTCTATCAAAAATTTGAAGTTTGTTTTAGCA  
GAAAGGCATCAATAAATTTTTTTTTTAATCTTTAGGTTCTGTTATGTCAAAAATATATGAAGAAAAGAAAGATGAAGATGGATTTCTTTATGTCACATACAGTGGAGAGAATACATTTGGT  
ATTCTCACTTCAAACCTTCATTAATAGATTGCAGTAGAAGTTCAAAATTTATTTCTGCTGTTTTCATGTCTTGCCACAATTAATAAGTTGTACAGCTTGATTTCTGTAAATAATTAATGGGA  
TCGCCGTACTGTTGAACACTAATTTCCCTGAATAATCAGATCTTCTGTGATCTTTATGTTCTTTGTGATTTCTGTAAATAGTTTAATGAGATCTTCTAATACTGTTGAACACTAGTCTTTGA  
ATAATC

>comp143445\_c0\_seq1

AAGGCATGACATGAGCAGGGCTGCAAAAATTCATATTTTCAGAATAGCAAGTCCACATGTAGAGATAACATACAAGAATTTGGTTAAGACGGTGGGTTGATGGTTAGTCTGTGCATTAGTTA  
TTTGGAGCAGCTTCAACAATGATAACATTTGATGATTAATACTGTACTACAATTAACATAGAAATGGGAAAATAGTCTTTTCAGAAATACTTTTCTAGCTTTATGAAGAAGGCAATAAATAA  
TTATCTATCTATAATAATAACTGGTTGTTTATCTTTCCGGCATTAAAATAAATGCTTTAATTCTCCAAAAATGCTTTGTAAGTCTCATAAAAACAATTGCAGAGTAAGTGGCATACTGCTGCT  
CTAAGTTGAACTTCCATAATTCCTATGTTTAAATTTTCAGTTTCTTGAAAGTCGGCCAAAAAAGTTTTAGGATCATTATTCGAATATTGTTGTCAAATGACATACATATCACGTTTAAAAATA  
AATGAAATACAAGTTTGTTCATGGTATAATCGCACCAAATTTAAGCCTCACATTATGCAAAATTTTAAGAAGCTAAACAATCTGTCTATGAGTTTTTGTGATTTTCCGGGGAATATTTAA  
TTTACAACAAGAGATATTATCCATATTACATTTGAAACAATTGATATCAGATATTTTTTGAATGTTTTCCATCAAGTTAGGCATGAATGAAGTGCTTTGGAGCTCATAAATCCAAAGATTAATG  
CTAATAGGGTCAAATAAGTTTAACTACAGATCGAATTTATTTGCCTAAACTTGTTTTTGTGTT

>comp143544\_c0\_seq1

AAAAAAAAAAAAAAAAAAAAAAAAATGGTTTGTGGTTGGTCAAGTTTTTCCAACCTTTGTCAGTAAAAACAAAAGAACCAAAATCAAAAACCTAAAAACGAAATCTGATGTAAATTCAG  
CTGCATCTGTTTATGAGCTACTTGAAATTAAGAGTTTCGAATTTTCAGGCATTATGAGCTACTTGAAATTTGAGAGGAAGGAAGAGAGTACTTTTCAATCAATTTGGCAAGCTCAGCTTCAA  
AGTCTTTTCTAATTCATCTCCTCTGTCAAATGCTTTTGTTCAGCTCAATCTTCTCTTCATGAGATAGTATCAGTTTTGCCCTCTCAGCTTCAAACCTCCTCAACACCTTTTAACTGGC

TGGGAATGAACTTTTGCATCTCCTCTTCCCTGCTTTGCCTGCAGTCTACAATGGTTCAGAGTTGCTGACATCATACAAATTGACCTTTGCTCGCTCCTGTGACAAATCTTAGATGTCTTT  
TCCTTATCTTCTGTTATTTTATGTATTTTGTCCATTTGATCCTTGACAAATTTCTCTTGAAAATCCATCTCTTCTTTATTTTCTTCATGTTGAATCTTTGTTCTGAGCCTCACAAATCCGGTTTTCT  
TCCACTGTATCACGCAATTTCTGGCTCAACATGTCAAATGACACCTCAAGAGCCTTTGAGCGCTGCTCTTGTTTTACAACCTTTGTTCTTAAGCCAAATCAGCTTCTGGTTATCTTCACTCAT  
CTGCTTCATTGGGTTACAACCATTTCTCGGTAAGATCTCATGTCAAACCTTCAGGCATGCTTTCCCATGAGAATGTTGGTTGAAGATGATCAGATCTTCTTTGGATGCCAAGAAACCATATA  
GCTGACGCTTACCCCTGGATAGAACAGTGTAGGGCGCTTTTCCCAAGCATCCCGATCTCTTCCCTCACCTCTAAATTGCCTGTGCAATCGTTCAGCTTCGAAATATCCCAATGCAGAGGA  
TTCAAAGATTAGAACACTCATGCCTCGATGCCATTTGGACCATAGGAATGACGAGCTTTTACTGCTTCATAAGTATTAATAATTCAAGAAGCTTTGATTACCCATGCCTTTCCACTTATC  
TTTCTCATCTTTTCTAGTAGTGTATTTCATCACAACCACCATTGGAGGCCAGACAATCTCATGATCAGGTGTTGTCTCACACAGACCCATCCATTTTCCAAATGCTTCACCAGCTGGAATG

>comp143550\_c0\_seq1

AAGAATACCTAGTGTCTTTGGATTTGCATATAGGACAGCAAGATTCAAACCTTATCTTACCGAGGAATTGAATTCAACAACAAGAACAAAAAAAAAAAAAAAAATCAGCAATTCATTATTATTCT  
GAAACTACCATCAATTCTAACAAATCCTTATTTCCCTCGATCAGCACCAAAAAGAAAAAAAAAAATGAAAGAAAAAGTTAAGAAGATGGATCATATCTCAGAGAATGTTGGCGTTGCACC  
ATTGATATTAGGCAAAGGAGAGCTTCCAGGCAGCTCGGTGTATTTGTATAATGCATTGGGCAAGTCGAAGAACTCTGTGCTAAACCTTGCATGAACAACGGTACATCTGACAGCGGGCGG  
ATTGAGCTCAAAGTTGGTTGTCGCCGGCGTAACGGAGGGCCGTTGCTCCGGCGTCAATTGCAGTGTGTCATCCAATGATGGTTCGCTTAATCTTCTTTTTCTTTTCAACAGAGATCTTT  
CTTTTCTTGTTCAGATGGATGCTATCATATTGTTAGAAGAAGATGTGGTTGGATTGTCGTTAATGTCATCATTGGAAGAGCGGGAGAAGCCGGTGAGCTTTTGGACAAGGGCCATAAAAT  
CACAAGCCCGTGTGTGGATGATTTGGGGGACTGTGTGTAGATTATGACCGGCGGACGATATGAGACAGAAGAAACGGAGGTGGATGAGGTGGAGGTGATGGTGGTGGTGGAGACTTTA  
TTGAGCTTCATAATTGGTGAAGTTCGGACGAAGCCATTGATCTCCGGAGATGGATTTCATTGTGGAGGCCAAAATTGGTAGAAGTAGAGGAGAGGAGATGAGAAGATGAAAACGAAGGGAT  
GGGGGAGAGAGAGGGAGAGAGAGGTTGGGTACGGACGGGAGTTTGAATGGCTTGAATAGAAGAGGGGAGAGAGATAAATATGAGCGGGGAGAGGG

>comp143651\_c0\_seq1

AAAATAAATGCATGAGATTATTTTCTATTTAGTTTGAATAAAATGAGTGTAAATGTAAGTCCAAAGGTGTTGATGGTTGGTGATAGTATGATGGTGGGTAGCGGTGGCCAACGTTGGTGGC  
CTGCACCGATCTACAACATGTTGCGATGGTGGCGACGGTGGGGTGACTGGTGGGTTGTGGCCGACGATGTTTGGCGGTGGTGGTGGCCTATAATGGGTGGCGGCGACAACCTGGCAATGG  
TCAGTGGTCATAGGCAGTGGTCGATTGTCATGACAATGCTAGGTGATGACAGTACTGGCAGCGGTGGCGGCCAAATATATAAAAAATAAACTATAGGAAGAATTCTAAATAAACAAA  
ATTTTACACTATAATTGTTTTACTTCAGATCAAACACTAATATTTCTTAAACCCCTATGTTTAGAATATTTTATACCTGATTTACTTCAAACCAAACAATTCCTAAATTGGAGCACTTTACCCAT  
TAAAAGGTGAAGGCTTTCTTTAAAAATAAAATAAAAGGTGAGGGTTTTCTTCTCTTGAAGTAAAAAAGTTGTGAAAAGCATTCTCCATCAACTTGTGGACAAAAAGAGTGATTATAGTA  
AAATCCTTAATAAGATGGTCTTTAGGTGTCGAGGTGGCTCAATTTGAGCCAACAAATGTAATATCCTAGCTTCCATTTGCTCTATAACAAGATTTGGATTACTAGCATTATTATTGCTAGT  
TTACATAGAGATGAATATGATGCTTGAACGGCTATGTAATCACATATTATTGTAGATATATAATTTTACAATTATTTCTTTATGATCATCATTAACCTTTGTGTCATTATCATTAGCATCATATTTT  
GTATATTAATCAACTAAATCTTGTCTATACATATTTGTGTGATGATAAAAGTATTAATATTCATATGCTTATGTGCTAGGAAAACCTTTGTGCTTGCACCTTAAATTATTCAAAAATACTAATCAT  
AGCATTATATATATATATCCATAATTATGTTAATATTG

>comp143735\_c0\_seq1

ATAATAGATGTAATCTATGTCACCTTAAAGAAGTAAATATATGCTTTGCTAAACTTTATGGATTTAAAAAATATGATACATGAACTTTAATATAAAATTTCCAATAAGTATTTACCATAA  
AATAAAAAATTTTCAAGAAAGAAATATATGGTGAAGCTAAAAGAACAGCAAGTAAAGATTTAGAAATGGAAAAGCAAACCTCAAGAACCTTAAAGAGATGCTACTCGGCTTTGTGTGTTGAAG  
CTTTCCAAAAATGATTTGATCTCACAAATGAAAAGAACTCTTGAATAAACTCAAGGCTTCTCTCTCAAGATTTAGCATGTAAAGAAGAAAGGAAGTATGAAAGAATTGCTGGAGTTT  
TTCTTGTGTAAGCAGCCCTTATATGAGGAAGAAGAGAGGTATTTAAAGAGAAAAGGCAAGTAAAGGCTTATTTGAATAAAAATATTATTCTAATATGTTTCTATCAACTAATAATATTATATT

TCATTAAGAATTCATTTATATTAATTATATATGAGATTCAAACGGCTAGCCACATGGCAAGGTCAAAAAGTCATCATATGCATCCAAAATAGGGCTAAAACGGCTAGTAGCAGCTTTTATTTA  
AATCAGATAATGTTTGGAAATTCATTATAAATTCAAATGAAATCCAAATTAGTCATATAATATATCAATTTACATCTACTGAATCCAAGC

>comp143892\_c0\_seq1

CACATTTCTATTCAAATATCACATCAAATTTTATTGCAGACATTGTTGATTCATTGTTTACACCATAACTACACCAACATAATCCAAATTAATGCAACATCTTAACTATAATAGTCACAAAAA  
TAAGTAGCTCATCTCCCCACAATCTTCATTCTAATATGTATATTTGAAACACATTGAATTCCTCATGATCTCATTAATTTATTGAGAGAGGATTGCACTTAGACTCATCATAGAGCTCAACA  
TTTCTTTTCATTTGATGACTGAATTGGCCTGGCATTGTTCTGAAACTCTGGAGCAAGAGAAGATTTGATCAAAGCAACTTGCTCCTTGGAGACCTTCCTCACCTTGCCAAGAATATAACCATG  
TGACCTTCTCGGTACAAGGAGGAGTTGTGAGCGAGCCAACATATCTGAAGAACCTTCGACTATGACGCTTCAATGACTTGGTTTCGAACTGGACCAATTGGCACTTGAATCTCTTCATCCA  
GCGAGCAATGTTCCCTTAGCCAATTGAGCCACCCAATCCTTCAACTGATAGAGAAAAGGGTCAGTGTTACCAAAAATCATATAGAATAGCTACAATTGCAACATTGCCATCTTCATCTTCACTC  
TCATGAACCAATTTGAAGCTCCAATGGATATTTCTGATTGTCAATGGTGTGCTCTGATGGTGCATGCCAATGCAATTCCTTTAAAGAATAGTTCCTCCCATCTTGCAACAAGAGTCCCCACTT  
TTCTCAAATTTCAACATTACATTGAAGCCATTGTTAATAAGAGTGGCATTTCATCAACATAAAGCCTACTGAGGTCATGCAATTTGGAGTTTAGAGTGGCATTATCCTGCAAAATGTTGAT  
GGGAGATTGAATGGTCCGCTGGAGCAAGATTTGTACTCAGCAGCGAGATTTCCCAATTGGATGGGCCATTTCCAGCATAATTGAAGCTAACAAATCTTCAAATATGGTTCGAACAATTC  
ATCATTCTTCAAACAAGCACTATATGAGCTCTATCATGAACCCCGCTCCTTAAACATATCGTCGGTGTGTTAAGCCTGTAGCCAAGAAGCTCCTTTTGCATGCAGTACTCGATCATATTGAT  
GCCTTACCTCATTAACCTTCGTTGCAAACTATTCTTGTCCCTTTACACACCATCAATCCTAATGCCTTCCCAATTAAGCTCCCTTCATACACAATTAGAGCATATAGATGTCTTTTCCGAACAA  
GTGTCATTGTGAACTCATCTTCTCTTCGCATGTCATTCACGCCAATGCCTTCCCCTAATGAGCTCTCATCACTTGCGGCTGGTTTCATCAAGGCCTTCTCAATTATTTTCATTCTGAAACCTT  
CCCTTAGCTCACGGTATGAGCCTTCACATGGAAGAGAAGAAGATAAGCTAATCCCAAAGCTAAGAAAACCTCTTTGATAGACATTCCCTTAAATTCCTTATTGGCCTCTCCAACCTCTCTCA  
AAAATTTTGTCTCCCTTCTCAATCTTACCTTTTAAAAAGTAATGGGGGAAGAAGAA

>comp143892\_c0\_seq3

CACATTTCTATTCAAATATCACATCAAATTTTATTGCAGACATTGTTGATTCATTGTTTACACCATAACTACACCAACATAATCCAAATTAATGCAACATCTTAACTATAATAGTCACAAAAA  
TAAGTAGCTCATCTCCCCACAATCTTCATTCTAATATGTATATTTGAAACACATTGAATTCCTCATGATCTCATTAATTTATTGAGAGAGGATTGCACTTAGACTCATCATAGAGCTCAACA  
TTTCTTTTCATTTGATGACTGAATTGGCCTGGCATTGTTCTGAAACTCTGGAGCAAGAGAAGATTTGATCAAAGCAACTTGCTCCTTGGAGACCTTCCTCACCTTGCCAAGAATATAACCATG  
TGACCTTCTCGGTACAAGGAGGAGTTGTGAGCGAGCCAACATATCTGAAGAACCTTCGACTATGACGCTTCAATGACTTGGTTTCGAACTGGACCAATTGGCACTTGAATCTCTTCATCCA  
GCGAGCAATGTTCCCTTAGCCAATTGAGCCACCCAATCCTTCAACTGATAGAGAAAAGGGTCAGTGTTACCAAAAATCATATAGAATAGCTACAATTGCAACATTGCCATCTTCATCTTCACTC  
TCATGAACCAATTTGAAGCTCCAATGGATATCATTACATTGAAGCCATTGTTAATAAGAGTGGCATTTCATCAACATAAAGCCTACTGAGGTCATGCAATTTGGAGTTTAGAGTGGCATTAT  
CCTGCAAAATGTTGATGGGAGATTGAATGGTCCGCTGGAGCAAGATTTGTACTCAGCAGCGAGATTTCCCAATTGGATGGGCCATTTCCAGCATAATTGAAGCTAACAAATCTTCAAAT  
ATGGTTCGAACAATTCATCATTCTTCAAACAAGCACTATATGAGCTCTATCATGAACCCCGCTCCTTAAACATATCGTCGGTGTGTTAAGCCTGTAGCCAAGAAGCTCCTTTTGCATGCAG  
TACTCGATCATATTGATGCCTTACCTCATTAACCTTCGTTGCAAACTATTCTTGTCCCTTTACACACCATCAATCCTAATGCCTTCCCAATTAAGCTCCCTTCATACACAATTAGAGCATATAGA  
TGTCTTTTCCGAACAAGTGCATTGTGAACTCATCTTCTCTTCGCATGTCATTCACGCCAATGCCTTCCCCTAATGAGCTCTCATCACTTGCGGCTGGTTTCATCAAGGCCTTCTCAATTATT  
TTCATTCTGAAACCTTCCCTTAGCTCACGGTATGAGCCTTCACATGGAAGAGAAGAAGATAAGCTAATCCCAAAGCTAAGAAAACCTCTTTGATAGACATTCCCTTAAATTCCTTATTGGC  
CTCTCCAACCTCTCTCAAAAATTTTGTCTCCCTTCTCAATCTTACCTTTTAAAAAGTAATGGGGGAAGAAGAA

>comp143893\_c0\_seq2

TTGGTAATGTGAAGTTACCACTATGGTTGCATGAAAACCATATATCTTCATCTGAAACATCTGAAACACATTTAACATCAGAAAACCTGAAAATTTGGGTAAATATGGTGTATCTGTAT

AGTAAGTTGTGAATACTTTCAATTAACCTGGCTAATCTAGAAGAAAATTTGGTATTCCAGATCTGTTAATTCTGTTTAAATAATTCAAAAACCAGAGTAATATAAAGTACATGATCATATTCCT  
GTGAGACTAACAGCGACTGTAACAATAAAGTTTCATGGTGGTTTCCTTTATCTCCAGGCTTGAAGATTCCGCTTACTATTGCATCCTTCTTACCTTCTCAATCTCTTCAAAAAGCATAGCA  
TACATGAGCTCATTCCATGCGTCAGGGACCCCGGAAGGCACCAAGTGGCTACAATCCTGGCTCTTACTACCCTCTGCTTCGTCTCTGGGAAGCGGTACATGGAAGGATGCGCTTCCTTC  
CTGTAATCTGTCAATCTTGTATGTTAAGATAGAGAACAGGTGTCTTCATCTTCGATATGACCAACTCGAGTATGTTCAAGAGGTTTGGGTATTTTGCCAGATGCTTGTCTGCGAGGATCGG  
TAAAGTCTCTCCATCACAGCTGCCACCAGAGTCCATTGCCACCTCTGAAAGTGAGACCATGAGTAACCCCTAAAGAAGACTGTGGTGCGGTTAGAGTCAATATGCTCATCCAGCCACCG  
ACCCAGGTCGTCAAGGCTTTGTGATAAGCGTCATCAGCACTGAGCTTTCTATGAACATAGTCACCTTCTGGTAGAAGTCTCCCTTTAGAAGTCTTCTCATGCGTCCACCAGTGAAGCT  
GTGTTGAATATAATCACATCTGCTGTTTATACATGGAAGAAGTTTGGCCATTATATCAAGCCGAAGGGTCTCCTTTCGAGTGCCATCTGAGCTCCAAATCTCCCATTCTTGAAGTAAAGT  
GGTGCTCGAAAGAATCAATGTGCAATTGTATTAGTGAATCTGTAAGCATAGTAGTCTCATTCTGAATTCATTCTTGCCCGTTATGTCATATACTCCATTTTTGTTGTTCAAAGAATTTTC  
TCAGGATGCAGACCAGTGATTCCACATGTTTCGGTTCAGCGAGTCGCCAACGAAAGCAAGTCTCTTCCCTCTCAGTATCTCAAGCAGGTTTCTTCCCTCCAACCTGGGCATGGAACAAG  
CCTTAGGCTGCCACCGTAGCCTGGTGTAGTTAAATCCGGTCGTCCATTCTAAAGCAGTTAAAGCCTCTTCAACAAAACGGGCAAGACCCTGCCTCATACAAAGGCATCGTCTCTCCATC  
CTCCACCATCTCCATCAAACAGATCACAATGATACTTATCATTACTGCTTCTCCTCCTCCTCTTCTCCCATCCCTTCTTCATCTTCCCTTATTCTTCGCCGACCTTCGAAGCTCTTCG  
TCACTGGTCAGCGTCGGGAAGAAGAAGATGAGACCATGAGGTTGGCGTTGAGATCAATGGAAGTGAAGTAGTACATGAAGAGGAGGAGAAGTTGGTCATGAGAGGGAGAGGAGTT  
TGTTGGAGAACAATTATCTTAGTGGAAGGGTAACGGGCGGTGCATATGAAGAAGAAAAGTGGTGAGGACTGTGATGAACGTTAGAGATATTTGGAAGTAGGTGACTCCTTGCAACATGCA  
GTTCTTGCTCAGTTTCTTAACTTCATTTGAAGACGCCATGGGAG

>comp143916\_c0\_seq1

AGGAGGAGATTTATAGTGATATGGTGGCGGCGGAGACGAGTATATATATTTATTAGAGTCTGCCTCTACAGTCATGGCGGTCAAGCTAACCACCAATGCCAGTAATAGGCATGGCAACAGC  
CTCACCTGGCCTTGATCAGCCATGGTTGGCTGTTTGGGAGCTTATCGTAAAGCCACTTCTCCTCCCACCTCAATCTAATGAGATAACAACTAAGTGTGTTTATGCTTTGCAAGGCTTGA  
AGCCATCCCTTTATATAGCCCAACTTACCTTTGGATAGCCCAACTTATTTTTTATTTTTCAAATAGAACCTCCTAAAGCTCTCTCATTACTCCATCTTTTTTTCTCCAAGTTCTGTAGTTGGTTC  
CCATTAAGCAGGTTCTCCTTACCCACGTTGTATGTGAAAGAATCCAAAGTCTGAACAAAGAGTTGTAAAGTTTGAATCGCTGAACAGAAAAAGATTCTCAGAGCACCGAATAAAAAATTAT  
TATCTATATATGGCCCCGAGTTCAGTAGGTAGTATTCAATATTGTCCTCAAGTTGATGAACATTTTTGGCCTTA

>comp143946\_c0\_seq3

AAAATCAAAACCATACATAGGATAACCACAAGAAAATTAACAGCTTCAAGTCTGAAATCTCAAACAAAGGCCACCATTTCCGACCAAAAATGAGAGAATATAAATAGAAATGAGAAATT  
GAGACTCACAAAATGACGACTTGCGCACAAAAGAAGGCGCCGTACATAATCATTCTTTATTAGTTAGCTTGCAGATAACTGTTAAATTTTCATAGGGATAATAACAAATTAGGCCATTATTC  
TGCAATCATTATTCTCTAGCTCTAACGGGAAAAAAAACATAAATGAAATGAAATTTATGTAAGAAGAAACAGTGGAAACTCTTTCATGCCAGAAAACGATGAGGTACGTAGATGCAAT  
GCAACAGTTGGTGCCTAAATAAAACGCACCACTCACTGTCACTGCTATACTTCAACCATGAAGAATCTTCTTGGGATCCAATTCCCACTGCAGTAGCTAGACGGAACACAAGAGATAAC  
CAGACTGCCTGTCCATTCTTCGCTGGTTTTCAGTTTAAAGAGTTTCTCAATTACAGCCGGCGCCACGCACAGCATAACGCTTGTATTATCGTTCGCCAAAATCCGCAATGGCTTTGGCTTTC  
TTGTCCCAAGGATTTCAAACAACCGCATCTGGCATTCCCTCTTTCCACAGAACATAAGTTCTCCTCTTTTCATGATCTATTATTGCAATCTTGTAGGCGTACCAACGTAACCTCTGTCAATT  
TCTGATTCAAATGTAAGAGAATCTCCCTGATCTGTAACAGCTCCTTATTCTTCAAATTTGTCGAGATAATAATATGTCTCCAACCCCTCAACCCGACTTCACAAATATCAGAAACAGAGAA  
GTACGCATAGAACGCAAATGTAATGTAATGGCTTTCCATTTCTATTGATATTTCTTATGAGTTCCGACTGAGGGTTGCTCTGACACCTAGAGGGGATCTTATACTTGTATCACGCATAAGA  
AATATCAATAGAAATGGAAAGCCATTTACATTTACATTTGCGTCTATGCGTACTTCTCTGTTTCTGATATTTGTGAAGTGCGGGTTGAGGGGTTGGAGACATATTATTATCTCGACAATTTG  
AAGAATAAGGAGCGTTTTACAGATCAGGGAGATTCTCTTACATTTGAATCAGAAATTGACAGGAGTTACGTTGGTACGCCTAACAAAGATTGCAATAATAGATCATGAAAAGAGGAGAACT

TATGTTCTGTGGAAAGAGGGAATGCCAGATGCGGTTGTTTGAATCCTTGGGACAAGAAAGCCAAAGCCATTGCGGATTTTGGTGACGATGAATACAAGCGTATGCTGTGCGTGGCGCC  
GGCTGTAATTGAGGAACCTCTTAAACTGAAACCAGGCGAAGAATGGACAGGCAGTCTGGTTATCTCTTGTGTTCCGCTAGCTACTGCAGTGGGGAATTGGATCCCAAGAAGATTCTTCA  
TGGTTGAAGTATAGCAGTGACAGTGAGTGGTGCCTTTTATTTAGGCACCAACTGTTGCATTGCATCTACGTACCTCATCGTTTTCTGGCATGCAAAGAGTTTCCACTGTTTCTTTTACA  
TAATTTCAATTCATTTATGTTTTTTTTTCCCCTTAGAGCTAGAGAATAATGATTGCAGAATAATGGCCTAATTTGTTATTATCCCTATGAAATTTAACAGTTATCTGCAAGCTAACTAATAAAGA  
AATGATTATGTACGGCGCCTTCTTTTGTGCGCAAGTCGTCAATTTGTGAGTCTCAATTTCTCATTCTATTTATATCTCTCATTTTGGTCGGAAAATGGTGGCCTTTGTTTGAATTTGGAAC  
TTCTTGCTGCTTGATTTTGTGCTGGTTATCCTCTTCATGGTTT

>comp143946\_c0\_seq4

AAAATCAAAACCATACATAGGATAACCACAAGAAAATTAACAGCTTCAAGTCTGAAATCTCAAACAAAGGCCACCATTTTCCGACCAAAATGAGAGAATATAAATAGAAATGAGAAATT  
GAGACTCACAAAATGACGACTTGCGCACAAAAGAAGGCGCCGTACATAATCATTCTTTATTAGTTAGCTTGCAGATAACTGTAAATTTTCATAGGGATAATAACAAATTAGGCCATTATTC  
TGCAATCATTATTCTCTAGCTCTAACGGGAAAAAACAATAATGAAATGAAATTATGTAAGAAGAAACAGTGGAAACTCTTTCATGCGCAAAAACGATGAGGTACGTAGATGCAAT  
GCAACAGTTGGTGCCTAAATAAAACGCACCACTCACTGTCACTGCTATACTTCAACCATGAAGAATCTTCTTGGGATCCAATTTCCCACTGCAGTAGCTAGACGGAACACAAGAGATAAC  
CAGACTGCCTGTCCATTCTTCGCTGGTTTCAGTTAAGAGGTTCTCAATTACAGCCGGCGCCACGCACAGCATACTGTTTATTTCATCGTCGCCAAAATCCGCAATGGCTTTGGCTTTC  
TTGTCCCAAGGATTCCAAAACAACCGCATCTGGCATTCCCTCTTTCCACAGAACATAAGTTCTCCTCTTTTCATGATCTATTATTGCAATCTTGTAGGCGTACCAACGTAACCTCTGTCATTT  
TCTGATTCAAATGTAAGAGAATCTCCCTGATCTGTAACACGCTCCTTATTCTCAAATTTGTCGAGATAATAATATGTCTCCAACCCCTCAACCCGCACTTCACAAATATCAGAAACAGAGAA  
GTACGCATAGAACGCAAATGTAATGTAATGGCTTTCCATTTCTATTGATATTTCTTATGCGTGATACAAGTATAAGATCCCCTCTAGGTGTCAGAGCAACCCCTCAGTCGGAATCATAAGT  
CTGTGGCCAATATTTGTAGAAACCTTCAGGTGGCTTAAGAACTAAATCAATAAAAGTCTATAACTGCTTTCTTCCAAAGGTGGTGGAGTTTGATCAATAGCCCAAAATAGTTTCCCTCACA  
AAACCATGGTTTTTCATAGTTTTCAAGTCTCCGACTTGTGGAAAACATATAGGAATGCCGCCCCGATTCTATTTTGGAGGTTGGAATAAAGACTTTCTACTGAGAAAAGAAGCTTTCAC  
CGCGATCATTTTTCCATGATGTAACATGTCACCATATAGATAAACCTCGACGGAGCTTCCCTAGCCTCCTTAAACACGAACTTGTCCAGGCCATTGTTGCCTTTGCATTGCTGAATGTATG  
GCTTCGCCACTGCCATCTCTCAAACAAATTTGTCGATATTTCCCACTTCTTTCGACGTAATTTGCAATCTCTATTCTCACCTTTCTTAGTTCCGGTCACAGCACCAGTTAA

>comp143947\_c0\_seq1

TAATCTCATATTAGATCATTCAAAGTATGTTACTACAAATCTTATGACAAATAGTTGATAATCTGAGTTGTAATTTATCAACACCTAAACAATCTCCCCTTGTTTACCCCAATCCAAGTAAAT  
GTCAAGAAAATATAACACCACAACCATAACAAGAGAAGAAGCCATTGTAGCCATCGCACCCAAAACCCATAGGAAGAGAGGAAACGAGAAGTAACAAGCTCTGAGCCCCAACGACCA  
GCAGAAACTCCCTCTGTTAACCATGCTCGCCACATACTCCGACGCTCTACCCCTTTCCCAATGGCACTTGGGCGGCACGTTAATCAAAAAACTTGCATGACTGTAGTACCTCACCGACTGG  
ATGTTGAGGAGAAAGGAAACGAGAAAACATAAGAGTATGGAGAAGTAGTTTGTCTGGCAAGTTCTTTATTTTTCGTTGTTGGTGTAAATTTGTCATGAGAACCAGCAATCAAAGAGCAGAG  
CATGATCGATGTTGAGGCCATTAGTGTGATGCCATGATGTTGTTCCCTTAGCGTTTGGACTGCTAGGACTCCGTTCTTTATTGGGTCTCCATCATGATCTGAACCCATAATCGACGGTTAAT  
AGCGTTGATGCCTATGACGGTCTTGGTGGGGCGGTGAAGGATGTAGAGGAGAAGCCATAGATGATAACTTGCCAAAATTAGAAGCCGATAAAAAACGAGAATATAATCTAGCACCATTGC  
TAAAATAAGAGTTGAGAGAC

>comp143955\_c0\_seq1

TCCTTCGTTCTCTCTGGTTGACTCCGCGGACTCCTTTGTCTTCTCCACGCTGAATCCGCAGACTCCTTCGTTCTCTCTTTCGCGGACTCCGCAGACTCCCTCGCATCATCCCCTATATTT  
CTTGCCCTTCTCTGAAGCACTGTTTCGTTGCATCCTTGGCCAGTCTGCTGCAGACTTTCGCCCTATCCTCTGCCGTATCCTTACATTCGAGGCCCTCTCTTTGGCGCTCTCTGATCCTTCTCTC  
AGCACCTCCTTTGCTCGGTTCGGCAGCCTCTGCTGGCTTTTCCCGATCTGTCTGGCCCTAGCATCTTCATGATATGATGCTGATGCCTTGCAGTAGTTCTGAAAAGTTTTTCATGAAAAATC

AGGTAGAAAGAAGATAGAAACTAGAGCCATAGATTTTCATAGCTGTATTAACATTTTCACCTGCGTAGATTTGAGAGGGAACAAGATGTGCTTGGCCTTGAGTGCTGAAGGAGAGCGAAC  
TGGATAAGAGAGCTTGAGAAACAAGCCTCGGCTTCCGTTGAGCATGACAGCCATTTGCGTACGATTTGGAATTCCTACTTCTGTTGCTGGAAGATGAAGATATTTGTGTAGGAGGGTTGG  
GCAAATTTGGCTGTTAGAAATAGGCGAGGAAGATTGAGGATAGAGAACGATGACAGGTTGGGGATAGTGATGACACGTTGCATGCATGCACGGAGACTGCAGCTTAGTCACCGGCAGAG  
GAACGGGTAACGAACACCTGTGATGTTATGCATGTACTGTAAAGTAAAATATGCTCGGCCTTATTTTTTGTAAATAAAATGTCTGTTTGAGCGTGTAGTTGAACTGTTTTT

>comp143965\_c0\_seq1

ATACTCTGGAGCATGGTAGCCAAATGTTTCTAAAACCCGAGTTGAATGTAGACGGGCAGCTGTATCAGGAGACTGATTGGTTAAGTTAAAATCAGCTATCTTGGCCTCATAATCACCAAAC  
AAGAGTACATTGCTTGATCTGACATCCCTATGTACAATTGATGGCTGAACTTTCTCATGAAGATACTCAAGACCTCTAGCTGCACCATAAGCAATTTTCACTCTTGGCTCCAGCTCAAAAC  
AGGACCAGGTTCTGCACCTTCTACTCCTTTCTCCCATGTAAGATATTATGCAAGGAACCTAAAGTTGCTAATTGGTAAACAAGGATTCTATTGCCATCCTCCAAGCAATATCCCAGCAGCT  
CCAGAAAATATTCATTTTTGAGTCGGGAAACCAGTGATAACTGGGCAGAAAAGTCAGTATCAGTTTCTTGTGAGGCTGCGGGATCCAATTTCTTTATTGCCACAGCTTGCCTGTGCTCAA  
AATTGCTTGGTAAACCTTCCATAAGAGCCCTCCCAATCAAAGCCTTAGGACCAAAGTTTTTTGTGAGTTTGTAGCTCAGCCAAGGGTATGACCCGGTATCTCAATAGGTAAGACCTTT  
TGGGGAGCTCCACTTTTGGCTGCCGTAGGACCTCTTGGTCTTTGTGTCATGTGCGGTGACATTACGAGTTGCAGGGTGAACAGAAGGATTAATGGGTTGGCTATAGATATCCTCCTCTCCAT  
CACAACAGCAAATCATCTTCTGGTCACGAGCGCCCAAATCCTTTGCTCATCAACAACCTCCGCCTCCTCCTCCTTATTCTTATCTCCAATTTACGGCTGTTCTTGAGCAATTCAAATAG  
GCAAAAAGCAACCCTAGAAAACATAACTTTCAACTTCTCTGTATCGATTAACAAAACACATGAACAAAAGGGTGAAGATAATCAGAATTTTGATCGGATAATTATTTCCAGATCTAAATG  
GGCATCTGAATGATTATTTCCAGACCTTTTCTCTTTTCCACAGCGGCAGGTGTAAAGAGCGATGAACTTTGCCAGTTTGGCGGGAGAGCGAGAAGGATTGGGGAAGAAAGGCAATGGC  
ACAGCTGAGCAGGAA

>comp144105\_c1\_seq4

AGATAAAAAAATAAATATACACTCTTACCTGCTGAAATCCTACGCCATACCCGATTTCTGCGAAAATCCCGTTGCTACAGTAACCATGCTCTGTCATTTGGCAATTTGGTGCCGCAGT  
GATCAAATCCCATAATTCCTCCTTAGAAGCCTGACAACCTTCTCTATATCTGCTTATAAAATGAGAGCCAAATGGCTCTCTATTTGGATGGTTTGTGCTTCTCTCCCTCCAACCTAAAGTT  
GCAGAGCTCCCGTCGTTGCCTCCGACCCGACCTTCATTACTGATCAACCTCAAGCCGATCTCCTTATTCTCCATCTAAATCTACCGAGACCTCCTAGAGCTAAGGTAGGCACTTTTGTTC  
CCTGCTTCCCTTGAT

>comp144216\_c0\_seq1

TCCGCATCCACTCTCATAATAACCGCACGGTCCACCCATTAACCACCACGACCCCTTCGCTTCATATAATGCAACCCGCGCTCTCCTTCTCTCTCTCTTCTTAGCTTCATCTTTCTCTCT  
TGGTTTCTTGGGGACGATAATGGAGGGTCAGAAGCGGGGAAGGTGAATCTGGCGAGCCGAAGGCCCTTCGTAACGTTGTTGAAGTCTCAGCTAAAGGAGACTTCTTTCCCGACGATC  
CGTTCAGGCATTTTTCGGGGACGCCCGCGGCCGACGGTTTTGGAGCAGATTTCTATTTTGTTCCAATTCTCCAATGGATGCCCAATACTCTCTCGCCTTCTTTGGATGCGATTTCTTC  
GCCGGCGTTACCATTGCCAGTCTCGCCATTCCGCAGGGAATAAGCTACGCCAAGCTCGCCAGATTCCACCAATTATCGGCCTTTATTTCGAGCTCCGTTCTCCGCTGGTGTACGCCATGT  
TTGGGAGTTCAAACAACATGGCGGTGGGGCCGGTGGCAGCGGCTCGCTTCTGATGGCTGCGATAATACAAGAGATCGTCTCGCCGGAGGAGGAGCCGGAGAGATACGTTTACACCATT  
ATCACCGCGCGTCTTTTACCGGCCCTTCTGCAGCTGACACTAGGCATTTTCCGGCTGGGAATAATAGTGGATTTTCTGGCGAGGTCTACCATCACGGGATTCATGGGAGGGACGGCTATGA  
TCATAATATTACAGCAACTAAAGGGCTTTCTTGGCCTCAAGCATTTACCAACAAAACAGATGTCATCTCCGTGCTTCATGCAATCATCCAACACCGATCCGAGTGTAATGGCAGAGTGC  
GGTGTAGGCATCGGCCCTATGATCTTTCTACTTTTTCGCTCGGCAGTTGAAAAAAAATCCCAAAACTTTTTTGGGTAAACGCTGTCGCTCCGCTCGTTGTGGTAATAGTTGGAGGAGTA  
ATCGCATATTTGGTAGATGGAGAGACCCACGGAATTCCTATTGTGGGTGATTTAAAGAGGGGACTTAAACCTATTACGATATCAAACCTTCAATTCAAATCTCCATATGTTAGTGTGCCATG  
AAAGCTGGAATCATCACTGGATTCATTGCTCTTGCAGAAAGGAGTAGCTGTAGGTAGGAGCTTGGCTTTGCTAAAAAACGAGCAGATAGATGGGAACAAGGAGATGATTGCTTTTGGATTG



ATGAACATAGCTGGTTCCTTCACCTCATGTTATTTAACCCTGGTCCCTTCTCAAATCAGCAGTTAATTACCACGCTGGATGCAAAACGCCAATGTCAAATGCAGTGATGGCAGTATGTAT  
GATGCTGGTTCCTTTATTCTTAGCTCCACTATTCAAGTACACACCACTTGTGGCT

>comp144216\_c0\_seq2

TCCGCATCCACTCTCATAATAACCGCACGGTCCACCCATTAACCACCACGACCCCTTCGCTTCATATAATGCAACCCGCCGCTCTCCTTCTCTCTCTCTCTTCTTAGCTTCATCTTTCTCTCT  
TGGTTTCTTGGGGACGATAATGGAGGGTCAGAAGCGGGGAAGGTGAATCTGGCGAGCCGAAGGCCCTTCGTAACGTTGTTGAAGTCTCAGCTAAAGGAGACTTTCTTTCCCGACGATC  
CGTTCAGGCATTTTTCGGGGCAGCCCGCGGCCGACGGTTTTGGAGCACGATTTCTATTTTGTTCCAATTCTCCAATGGATGCCAAATACTCTCTCGCCTTCTTTGGATGCGATTTCTTC  
GCCGCGTTACCAATTGCCAGTCTCGCCATTCCGCAGGGAATAAGTACGCCAAGCTCGCCAGATTCCACCAATTATCGGCCTTTATTTCGAGCTCCGTTCCCTCCGCTGGTGTACGCCATGT  
TTGGGAGTTCAAACAACATGGCGGTGGGGCCGGTGGCAGCGGCGTCGCTTCTGATGGCTGCGATAATACAAGAGATCGTCTCGCCGGAGGAGGCCGGAGAGATACGTTTACACCATT  
ATCACCGCGCGTTCCTTTACCGGCCCTTCTGCAGCTGACACTAGGCATTTCCGGCTGGGAATAATAGTGGATTTCTGGCGAGGTCTACCATCACGGGATTCATGGGAGGGACGGCTATGA  
TCATAATATTACAGCAACTAAAGGGCTTTCTTGGCCTCAAGCATTTACCAACAAAACAGATGTCATCTCCGTGCTTCATGCAATCATCCAACACCGATCCGAGTGTAATGGCAGAGTGC  
GGTGTTAGGCATCGCCTTATGATCTTTCTACTTTTTCGCTCGGCAGTTGGTAAAAATTATTATTTTTTTTTTTTTTTTCATTCACTTTATTTAAATAAGCTGAAACTGGTCAATTATGCAGAAAAA  
AAAATCCAAAACCTTTTTGGGTAAACGCTGTCGCTCCGCTCGTTGTGGTAATAGTTGGAGGAGTAATCGCATATTTGGTAGATGGAGAGACCCACGGAATTCCTATTGTGGGTGATTTAA  
AGAGGGGACTTAACCCTATTACGATATCAAACTTCAATTCAAATCTCCATATGTTAGTGTGGCATGAAAAGCTGGAATCATCACTGGATTCAATTGCTCTTGGCGAAGGAGTAGCTGTAGGT  
AGGAGCTTGGCTTTGCTAAAAACGAGCAGATAGATGGGAACAAGGAGATGATTGCTTTTGGATTGATGAACATAGCTGGTTCCTTCACCTCATGTTATTTAACCCTGGTCCCTTCTCAA  
AATCAGCAGTTAATTACCACGCTGGATGCAAAACGCCAATGTCAAATGCAGTGATGGCAGTATGTATGATGCTGGTTCCTTTATTCTTAGCTCCACTATTCAAGTACACACCACTTGTGGCT

>comp144228\_c0\_seq1

TCCTTTGGGTTGGGATGGAAAAATTTAAATTTGGCCAATTTTTGGTAAAACCGGATTAATTTTTCAAATAAAGATTTTTTTTTTTCATAATAGCTTCACGACTACATTTATAAGACGCTATA  
GCTATTTGACCCTCAGCTCCTCTTCAAACCATATATGCACAAAAAATACCACATACATTTCTCCTTATATAATATAAATAATTTATCGGCAGAAAATCTGCAATCGAACAACATCAGCT  
CTTAATAAATATAAATAAAAAATAAAAAAATAAAAAACACCAAAGAGTAGAAGGAACAAGATAAATGGGGACATTTCTTGTATTTGATGCCTAAACCACTCTTCAGCTGGTCCATAAA  
GCTCAAATAAGAACACATTCTTGATGTTGGAACCTAAGCACTCATCTTCAACCTCTGAATTCAGATTTGGGTCTTCTTGAAGACGATTTGAGACCATTTCTTGCTCGACGGTGTGTTGC  
ATCCATATCTCTGAAGCTGCCGCCGCTGCCTCGGCGAGTACTGTGGAGAAGCAATGAGAGCCCCATCAGCCTCACCTTCAAAGTTGGCCACCATCTCTTGGGCCCTTGACATGTCTCTCT  
GCTGCT

>comp144354\_c1\_seq1

TCCACTTAATTACAAGAAATCAAATAAGCCTATAACAGAAAAATCATTGGTAACTTCATTTTAATCTTCCATATGCAATATTTAAAACACTTCAAATCCAACTATAGAGATCAATAATTTCC  
CAAATATATTAAGATACAGGACAAAGCAAGAAATATAAAGTAAAACCAATATTCGATCATCAATTAAGTGTAGCTACTGCCTCCTCACCAGAAAGGAAGTGCCGCAGTCACAGAATC  
CCTGATCACACTGCATAACTATGCGATGGAAGCTCCGATGACAACCGCAGGCCGCACACTTGAGCTCGTCTTCTTCTCCTGCCATGAACTCCCTGCATCCATCCACCACATACCCGCCTGC  
GCTCGCTGCATGGTTCCTTCTGCACTCGCCGTAGCTCTCCGCCGCACTGAAAGCCCGTTCACATCTTGAAGCACCACATAAATCTTTCATGGAACTCCTAGCAGTTACTTTGCCGTT  
GGAAGCCC

>comp144364\_c0\_seq1

AAAAGTGTAAATTACAAAAACAATAAAATTTACAACATTACCAACAAAATCTATTTTATTAAGTCTAAAGCATATCTTAAAGAAGCTTCATGCATATTTACAACCATAAACAATACATAAA  
GCAGTGCAACTTCATGATCTCCATAAAAGCAATATCAGCTTGAGTTCTGAACAAAATAACATTGCACATCAACTAACATCATATGACCCATCATAGCTTTACTGTCTTCCCATGTGGCCATCTCT

GAAGAAGAAAATGCAAAAGACAAAACAAAATCCAAATCAGGAAAACAAACATGGACATACCTTAGGTCTCATGAAAAGGTAGTGAAGCCCAGTTATCAAAAGTGTTTACTAAATGCCT  
AAACCACTCTCATGTGACCAAATAGATGGGGCCAAATGCATGAGAACAAGAAGAGTAATTTCTACTGCCAAGGCACATGTAAGGAGTCTCTGTCTCCTCTTCCTTTGTCTGTGCAAACCA  
AGAAGCAAGTGGTCCCAGCGCTGGCTTCCGAATGCTCCGGCGAAGGTGGCTGGAGGCTTCTGCTTTTCCACCAGTTATTGGTCTCTGAATGTGAACCATTGATTCTTCCATGTTCTTCTTTC  
TGGGCTGAGCTCTTCTTATCAGATTTCCCTCCACAAGAATGATAGCGATCTCTTCCATGACTTCTTCCCCTTACGAGTTTCGACTTCATCCGTCTTCGCGGGCGACGAATGGAATTTGGTTTC  
AATTTCAATTCTTCTTGCTTCTTCAAGATCTGATTCCAAAAGGAGCAATGAATCCAAAAGTCCATAGTCATACATGAATTGAGCATAATTTTGAAACTGTGCTTCAACTGATAAGCTTATAA  
TTTAAATCTATAAAAGTAAAAGATAACTCATGAGAAAATCTATAAAAGGTGTCTATCCAATTGCTTTGATTTATCAGTGCATTTACAGAGAAGCTATTTCTGAGACAATAAAGACAACCAGA  
CTACTATTTCCAGATCCACACTCCTGTTGAGAAAATTGTCTGTTCAGTCAATTCAGTTTATAGAACATCACAAAAGGACAAAAAAGGATTCTGAA

>comp144411\_c0\_seq1

GCAGATAAACGGATCGGTGCATTTCGCGACGTGGTAAAAGCGTTAAGGCATATTTGGTTCAGAACATCACTGAAACATCAATAAAGGTTTGTAAGGAAAGAAATACTAGTAGTTATAGAA  
CTTAAACTTGAGTGCCTACAGAGAAAAAAGAGATATTTGACGTTTACAAATATAAACTTTCTTTGACCTCAGCACCGTTCCACTGCTCGTTCATTTAGAAATCAGCAATTTCAAAGCC  
TGCTCTTTCATTTAGAAAGACCAATAACCGTAGCTGGTTCTTTTCATCATAAGTCAATGAAATCTTGGCTCATTACATCTCCATCACCATCATGATCTGCTTCTTCTATCATTTCCATAATCTCTTCG  
TAAGTGAAGCTTTCACCCAACCTTTTGGAGATGATCATAATGTCTGCCGCAGAAATTTACCATCACTGTCGTAATCAATAATTTGAAAAGCTTTCTGTAGGTCTTGTGAATTTCCCTTCT  
TCGATTTTTTTCAGTCACTCATGATAGAAATTCATCAAAATCAATTGTTCCACTTCCATCTTTGTTCCACTTCAGTAATCATCTCATCAATTTGCTCATCTGAAATTTCAAATCCCAAGGCCCTCA  
TGGCAATATTTAATCTTTGGCATCAATAGTTCCAGATCCATCTGTATCAAATAGCTCAAAGCTGCTTTGATTTCTTGCTTTTCTGCAATGATAAACCATAGTTACGACCTCTATTGTTGTC  
TCTCTTGGACCATGCTCTGGGACCTAAAGTTGCCATTTGATCTCGGAGATTGAATTCGAGTCAATCGCTCTCTCGCAAGCTTGTCTTACCTCGAGTTTTCACGCACTGCATGCAATGATT  
AAAAAATGCGGGGAACCGTTTATATAGCGTCAGAGCGCAAGAGAG

>comp144418\_c0\_seq1

GTCCGGATTCGTCGGAGGCGAATATGGACGTGCCACGTCACTCCAGGGCCCGATTATCCGAATGACGTGACGTATCCGAATTCGCCCTCTTACGATATGGACACCACAAGTAATAATCTC  
TCTAGAGACTGTGAGACCCGGCTCTACCAGCATTTACATGCAACTATTTTAATATGATTTAGATATTAAGATATTTTATAATTAATATATGACAATTTAAGCATTATATATATAATAGAAGTATA  
AGTATTCTCTGCAATTTAATATAATTTATAACAATCTGATTACGACAATTGAAACAACCTCCCGTCGAAGTTCAGTTAGCCCCGGCGCGGAGCGGAGGTAGTTCGACGAAAAAGCGCAGTGT  
CTCGTCTGCTACGCGGTGGCGAGTCTGAGTGAATCCAGCAGCTGCAACCAGGTGAAGTCTGGGAACTTCTTACGATCTCCGTTGCCGTCGCCATCGACGCCGGCGATGAGCTCCGGCG  
GTGGGCGGATGACCTTATCAAGCCTCGGGCTCACGAAGTAGGCGATTGACCTTCTTTCTTTGTCTGGGTTACCACCGCCCGGTGGAGGCAGCTCTTGTACTCTCCGTTGCTCAGCGCCT  
CGAAGGTGTGCGCGACGTTGATGACGAGGGCGCCGGGGACGGGAGGAACGGAGCTCCACCGCCCGCCGGTGAACACATCGAGGCCGGAGACTTCATCTGCTGCAGGATCGTGAATG  
CGTTGGGATCGGCGTGTGGGCCCGTCCCCAGCGTGAGCTCCGACTGCTTGCATGGAGGATAGTAATTACAGCGTGCGATCGCCTTCCCGTCTCGAAGAAGTCCGCGGTACCATTTCCGGT  
CTCCGGCGAGACTCATCCCTAGCAGCTCTGCTATCACCAACGACAACCTCCTGCATTGCCTCGCAGTAGCTCTGGTAGATCCTCCCCATTTGCTTGAATCCGGCCCCAGCGCCGACTGAA  
AATATTTCTCCACCGTGTCCGCTTCGTCCCCCTTAAAGCCATGAACGAACGTGAAGGTCTCCTTCCACGGAAGCAGCGCCAAGAACCGGTTCGGAATGCGCCACCGCATATCCGTCTACTC  
TCCCTTCCCCTGTCTGCTCCATCTTCTTTCAAACGGCAAATCAAATAGCCATTAATGGCGTTCATGGCCCGCGTAGATCTCGGCGTCAACTCCGTGGTTTATCACCTGAAAGAA  
CCCGTGTCTACGGCACGCGGCTTCGACTTGCTTAGCTGCTCTGCGTGCGGCGGCTTCATCGCCGTGAAGGAAGCCGGATAGGTCAATGACGGGGACTTCGAGGTTGCCAACAGCGGCCT  
GACGGTCGATGGCCGGCCAAGCGAAAAGCAAGAGGTATTTGGGCTGCTTGTGAGGATGGAAGGGTGTAGAGCCTCATTCTGGAGACCGTATTGTGCGAGGACGAAATTTGCCGGGGAG  
GCATTTGGGTGGCGTCGCCGAATCCATTGGTGGTTTTTGGTAAGATGTGAGAAAGGAAGAGGAGATT

>comp144432\_c0\_seq2

AGAAAAAAAAAAAAAAAAAATGAGATCTTTAATTCATTTGAAGCAGAAGCGCTTCTCAACTTCCCCGCTAAACTCCGGAGGCCTATTAAGCTTTTCCATTATCGCACTCCGGAAATTGAA  
GGTCTCACTAACCGGAGAGCTTGGTCTTCTCTCGACTGCTCGACGACGACCAGATCACTGAGGGGAACTCGCTTCCCCAAACCATGGCCCTCTGCCCTCTGCTTTAATCCTTTATCCAC  
CGCACCTTCGCCTCAAACGACTTCGTA TAGACATGAAACTCGGACTATTATCCGCAGAGTTCAATAAACGCTGGAAAACCCATTAGAAGCACCGCGGGCGCTCTTCGTGCGAGAAGG  
CGGGCAAAGCTTAGACCTGTGTTCAACCACCGCGGTGTGTTCTGTGCTGTGGAGGAGCACCTCCGCGTCTCAATAGGGCAGGGGATAGCAGAGGACATTGAATTGAAGAAGCTCTCAT  
CCATATCGGAAAGGCTTGTCTTCGAGACGATCTCGATTTAAGACGGTAAGTATCGATGCCGTTGAGTCTCTGGCTTTGGAACGATGCCTCGTCAAATCTTTCCTGTAATGGCTTATAAGAA  
CGAGATTTTCGGGGAAGAGATCGGAACTTTTTGGTTCTAACTGTTGCCTGAGCTCTCATGAGAGCTTGTATACTACGAAGAGTGGCCGCGGCTTTTTTCCGAACTATATAGCCTCGAACTA  
AAGCTTGCAGCTTAACCAGAGCTTTCAAAGCTCTCAAAGCCTTCTTTGCTAGATAACCTCTGAATACTGTTTGGATCTTAAGGGCTGCAAGCTGCTCATGAATGCCGCATAAAATGACACG  
ATGGCTTTGATTTCGTAGACGTACCACCGCCACTGCCGCTGAGCTGCAGCCACCGCTGCTTCGGCAGCTGCAGCTGTGCGGCTGCGACTGCAATAGCGTGCTTTCTCTGCTCCTTCTC  
TTTTCTGCATACATTGAACGGAGCCACGCCATGTCGCAGGAAATCCTCCCGACATGTA ACTCCACCTCTTCTTCTCCGTTTGGTTATCAATGCTTGGAGCTAAAGCGGCAGCGAACGCC  
ATTGTTTCTTTGTGTTCTCTGCCTTCTTTTTTGCTCCCAATAAGTTAGTAAGCCATCTGTAGCTCGACCCATTGTTGCTTTCTGGTTGATGCTTCAGATCTTTCGTGCTCGTGCGCTACA  
GTTTTGAACTTTGCGGCGATTACAAGAATCGGAGAGAATTGACTGATCCTCTCAGATCACGAACTGTGGAAAGAACTGAGAAGCAGGAAGCTGTAAGGAATGACAGATAGCAAGAGA  
AGGCAGATTTT

>comp144446\_c0\_seq4

CAGGTTTTTTTTTCAACCCTTTTTTCCCCTTAATTTTTTTTTTCTTTCTTTTGCTTGATATTTACACCAAAGATTATAGATTTTTACAATGAAGCTCCATGGTAACCGGAAGATTAGTATATA  
AATATAGTGAGATAGTCACAATCTAAAGCTTGCTTAATTGCTCTTCTTTTCATCACTCAACTGTTGTTATCTGTATATCATGTAAGCTAGTAGCTTCTTTTGTGAGTTGATTTAAGATCAACA  
TTATGACTGTTTATTATCCAACACCATCATATGCTGATAGCTTCTCTCTTTAAACAAAGCTCCCAACTGTTACAAATCTTGAAGATTGGAGAAATTAATAGCGCAGCCCCCTGACTAACAGCT  
ATCTTTCATCATTTCTCTGTTGAAGTCTTCCGACTTTCTAATATTA ACTCATCCATCACTTTTTATTTTGAATTTGTGTGTCAGCCTTACATTAACCTAAGGCATCCATCTAAAGGGCCGCA  
TTAACTTCACAGAACTAATAGATATGCTACCATCTCAAAGAATAGAAAAATTATCTGTGCCGACCAGGGATGGAGTCCGAAGACCAGTCAGAATGACTCACATCACTTTTTTGGCTTGGT  
ACCACTGTTTTCTGGATGATTTGGCACTTTCTGATTTGTCTCCGAACCGTCC

>comp144477\_c0\_seq3

TTTTAAAAGTTGAGAGACCAAATTACTCTCTCAAAGAGTTGGGGATCATTTTTGGTCTCTCACAAAGAATTGAGGGACCATTTTGGTATTCTCAAATCTAATGTTACTGTTTCATGATAAGTT  
TTTTTTAATGGTTCATTTCTTACCAACACCTCCCATGTGTTGACCTTATTTGATTACCTACCAAAAATAACTATTGCAACCACAACCTTGGCAAATCCTTACGTTTCATATCACATATCAGTACT  
TAAAGATAGGGCATACTATAATGCGCTTGATCTTTAAATGTTTTTGAAGGTTAATAGTTTGTTCCTTAGTAGAGAATCTTACAAGCCTGCATTTGGGATTGTAGGTGTTTCTGTAAATAATGC  
TAATTTTCCCTGCCGACCAGGATTAGCCAACCTT

>comp144581\_c0\_seq1

CAAATAGAAGATTCCATAGAGCATGAACAGGAAAGAAAAATTTTCAACAAGCTGTCAAAGCATGGAAGAGTAAAACTGGACAAGTTTCATGGTTTTATTAACACAGTAACAATGTGCA  
CACGAGCCCCTATTTCATTTCAACTTGGGGTCTAAACCACATCTGCCACA ACTCGTTGCAACTGATCCTTAACTCACTGAGGCCAGGGATCATGGCATCACCATGGATACTAGCTGGG  
TGCTTAATCTGCTGAGCCACA ACTGGA ACTCCTGTCTATTCA TTTTCTTCGCTGCGCAGCCTGGCATTGGGATTGGTGACCCTGATGGCCAGTTGGGCCGCTCTCTCGACGATGGCTTTGC  
GGTCTTGGAAAGAGACGTTGTGAGCAATCTCAGCACAGTATGATTTGTTGCACATTAGCAGCACTTCAAGCTCTTTTACATTGTGTACCAGAACTTCCGGAAGCCACTGGGCAGCATGT  
GCTTTGTTTTCTGTTGCTCCATAACCAATGTTGGGCATCAAGATCTGGCCCTTGAACCTTCTCCGCACCTGTTGTCAATGCCTCTGGGTTTCCGCCAGTTACGCTTAATTTTGACATATC  
GGTCTGACTGGTGCCGGATGAACTTCTTGGTCTCTTTTTGACGATCTTGGGCTTCAACAAGGGTCTGAGAGCAGCCATGATGCCAGGCCGGGCGATGGCTGCCACCTCCGTAAGGCAGC

GCCGAGGAAGAAGAGGACCAAGAAGTTCA

>comp144625\_c0\_seq1

GCCATACTCCATATAATTACTCCTGTTAGACACCATTTAGCATAAAACGCCTCTCGATCACATCCGACTGGAGAAGAGAACTATCTACGTAAACCGGCCGCTAAACTGTCTCGTGCACGGC  
TGCTGTTCTCCTCCATTCCTTTCCCTTCACGCGTTTCACCGCATGCGTTCTGTTTCTCTCCCTTTCCTCTGTTATCTTCCAAATACTTTTATCCATTTTCTTCCTTCTTTTATATCTTAGTAGTTAT  
TTGCTTGCTTCCATTTGTTATAAATACGACCACATTCAGAAGAGGCGGAGATATTTGTTTCGGCAGGCTTTTCCGGCGAGGGGTTCTGCATCGCGTCACCTTCCTCTCCCACAAGATCTTAA  
TGGAATCCTCGTCCGTGCCGCCACCACCTCCGGCGAAGCCCCGTCAGCTTCCAACCCGCCGCCACCACCTACGTTCAAGCCGACGCCAACACCTTCAAGGAACTCGTTCAGCGCCTC  
ACCGGACCCCACGAAGACCCCCCAACTACTTCCACTCCCATCCCAAAGCTCGCCGGCGTCCGCCGCCGCCGCCACCACCTACGTTCAAGCCGACGCCAACACCTTCAAGGAACTCGTTCAGCGCCTC  
TTTGAAGCCCCTAGTCAGCCCCCGCCCTCCTGCTGCCGAGTTAATGTTCTCCTCGCCCGGCCCTCAGCCCCATCGTCTCCCCGTCCACACAATTGTCGGTGCTTTCTATCTCTGAGGGA  
TGCAAGTCACCACCGCCTCCGCAACCTCCGCCACCTCCGCCACTTCCACCAGCAGCTGCGGCCCCCGAACTGAACGAGGATGAAGAGGAGAAGGCGATTAGGGAGAGGAGGTTCTATT  
TACATCCGTCGCCCGGTCTCGAACGAGAAGCGCTGAGCCGGAGCTGCTGACGTTGTTCCCACTAAACTCGCCGAGTGCCAAGCGAGGAAGGTGATGATTTGCCGATGCTTTAACAACC  
CAAAAATCAATAATATCATTCAACATATAACATAAAATATTACCTTTGTGCTATTTCTTTGCAATTTTTTTGATGTTATATGTTGAATTTACGTGTCAACGTATTGGGTGATTAAGTAATATTA  
ATATTGTTTTTTCGATCGGATTGATAGATATGTAAGCTGTTGGGTTTTTATGTAATTGTTTCATTTGCATGTTATTTTATATGGTAGGGGAGTACTTGCATTGTTTCATTCAAAGGAAAA  
AATAAAATTGGATGATTGAATTTAGATGTCAGAGTGTATATATGCAAAATATCATAAAAAAGTGAAGTTAGGTCCGGTTTGAAGGCATTCAATTGTAAAGATATTTTTGGCAGTCAAATTAATTG  
CATAAACTGTTGAGGGTTTATGTTAATTAATTAAGG

>comp144672\_c0\_seq1

TGGAGGGGAAGGGATGGGGGGAAGGGGAGGTCGTGGAAGTGGACAGAGGAGAGGGAGGAGGGGCCAGCCTTGGAGTTGGAGGGGAGCTTCGCTTGGCGGTTGTGGGAAGCC  
AAGGATGCAAAGTGGACGGCTAAGCCGGAGCGGGTGGAGAGAAGGAGGGACAAATGGAGGAGTTGGTTGAGGTGGCCCTGTACTGGGAAGGGAACCTACTACTCGGTTACTTCGCCG  
GTGTTTCGACATTTTCGCTGGCGAGTGGAGTTGGAAGCTTTAGGGGCCGTTTGGATATAGCATTTGTTGCAAGATTTGGTTTCAGGGCGAGTTAAACCTTCAATTTTTTCAAAGTTCGGCG  
AATTTAGGGGATTTTCGCTGAAGAAGCGCAGGAAAGAGGGCGAAAGATGGTTACTTCGCAGAGCGCGCCTATTGCGGCTTCCGATCCGACGGGGTCAAG

>comp144724\_c1\_seq1

ATTATTCTGTGCGGAGTCCGGACGAGAAGAACCGTTCGGATTATGAGTGTAACACAGTATGGACGCTAATTTGATACATATTGTGTACTCACAATATCCGAACGGTTTTTCCCGTCCGTA  
CTCCGCGCAGAATAATTTCTCCAAGTCTAGTGTATATGTATCATTATTTCTAAATTAATAATCATTGAAACTTTATTTTATTTTATTTTATTTTCTTTCTTTTCTTTCTTTGATGA  
AATTATTTCTCAGTACATGTAGTACTTAAACAGTTAAACTAGTTACCTTGCTGTTTTCTTAATATTCGTGAACCAATATTTTCTTCTCTTAT

>comp144747\_c2\_seq1

TAGTATGAAATAAAGTGGTATGTACATAAAGCCCCAACGTCAAAGTTCAAAGGTTTGGTCTCAAGTTTCTGAGCCTGAAACTAACTTTGAAAGCCCATACAAGTATACAACACTACAAG  
TTGTTCAATTTGCCTTCTGCTTCTCCACTCATGAATGATGAACCCGTGAAAGCTGGATATAAAATGTGGGAAATGGATAACTTTATTGAATGTTTCAAGGCGGAGGTCAGCATACTCATCT  
CCATAAAATCCAAAGATATAAACGAACAAGATGCAAGTTTCATCAGATTATATTGAAGGTTGCCAAGTCAAATAATCTGATGAAAATTCACCAAAAACAATGTCATTATCTTTCAGAAAC  
TCCATAGGCAATCAAGATGTCACTTTTCTAACTTGTAAATGCATGATGGGAAAAAATAATGAACGAGACAAAGGAAAGAAATTGCCGGGACAAATAAAGGGCCGAAAACCTCCTCAACGA  
CCATTTTTTCTCAGAAACAAAAGGCAAAATCGAACAAACATCAAACCGTAATAAGAACCAAAAACCACAATCTTCATCTCAACCACAAAATTGAGAAAGACCAGTAGGTGAGTTAGTGATC  
GAACACAAATACAAGCGATTTAATGGAGGTAATGGAGAATCTAAACTTCAAAGTAGTTCACCTCATCTT

>comp144868\_c0\_seq2

AAACACTTCTCCGTGTGCATTACTGTAAATAGACTTCTCGTTTAATTACTTTGCATGAGATAGTTGTTCTTAGCAGAAAAGTATATAAACTTGTATTGATATTGCGATTATCCTGTGCACTTATG  
TACTTTTCTCATCACTGGATATCTGTGGAATGCGGACATGCAGCAGAAAACCTACTGTACCAAAAAAGAAGATAAGAAGCAGAAAACCTCGCGTCATTGCCTGCAGAATCTGCCCTTACCAGGA  
GAAGGTAGAAGGAAATGACAAGATGAGACATGAAATAAATCTGACAGAGAAAACCTTTGGCTTACCAGACGCTTACGAAGATCCAACACTTCTCGCGCAAAGGGTGTTCATGTCTCG  
TTTGTAGCTATCCAAGAGTTGTATGGTCTATGGTAATAGGGAAAGCATGGAACAAACGTTTGCTTGCTGCAACCCAGGGTGCCTCAAACCTGGAGGAAAGAAGATAAAAAATAATGGTT  
GAAGATTGTTTATCAATTGAAGATCATGCCTAGATTAGATTTGACAGCTTTAAAAAATTAATAAAAATGGTGAAGATAATTCATCATTCCTTTTTATCTCTTTTAACTTTTTCCATGTGAGAACTA  
AAACTAAAGAATTCATTTTTATATTTTTTATGGTGATTTTTGGTCGAAATAATTTGTTTTTCACATTGGGAAGCCAACGTACAATTATCTCACATAGAGATAATTCTCCCTTTTCATCTTTTTT  
>comp144876\_c0\_seq3

TTATTTTTCAACTTCCAAATTTATATAACATAATTGGTCAACAAATCAAATATTCATGGAAATAGAAGCAGCAAGCAGATTCCAAAACATCAAAAAAAAAAAAAAAAAATTCCAGTGTCTTGGAA  
AGAAATTAAGAGGATGAAGCCAAGATAAGCTACAAATAGAATGAGAAAAGTGTAATAAACTTGAAAAGATTCTGCAGTTACCGGATCAGTTTCTCCAAATGGTTCTCCCTCTGTTTA  
TTTCCAGGCCGGTTCCCTGAAAGTCTCAAGAAGTGCAGGAACTGAAGATGATCACTTCCATGTCCATGCTGCTTGAGGGGATATCCATTGGTTCTCTCTGCAAGTAAGATTCTTCTGGTTC  
TGAGCTGGTAAGTGAATCAACCATGTCATCGTGCTGGCATTCTCGTCGATAATCCAAGGTAATGGTTTCGAGTTCGTGGGTGTGATGATTTCTTGCGGCATGCTCTCAAGGACCCAGCCG  
ATATAGGTAACATTGTTTACATGTTGATTTCATGTCTAAATCAGCTCTTCTGGGCACCAGTCCTAGCCGTGAATAATCTGCTGGATCTTTAAGTTTGGTAATTTCTTCAAGCTATCGTTCTCCT  
CCGGGAATGCTAATCTGGAGGTGTTTACAGAGATTTATTTACATGAGTTGAGAGGAGAAAAGTATAGATTGGTAAGCTATATGGTTGATAACAATAAATGGCTCGCATTCAAGCACAAATTCAA  
GACAAAATTTCAATACATAGTGAGCTCAGATCAAACCTAAGCAATGATTTGTACCTAATTT

>comp145011\_c0\_seq1

GAGGCTTAATAAAAGGCATGGAGGGATGAGGAAATAAGGGAAAAGCCAAAGTCGTGGTCTTTCTTTCTCCTAACACAGATCCCTAAGGATTTTCAGGAGTGGCGTAGCAGTAGTAGTATC  
AATGTTTCAATGCTCTGTAGTTTGGTAGATAAAGCTCATTCTTTTTGCGTTGTTAAGGGCCCGTCTTGAGCTCTCTCCCAACTTCTTTTGCTTTCATTCTCCCCCTGAAACAGTTCAAG  
GCATTGAGTTTCTTGAGAACACAGAAACCCAGGCTTCAATAAAGATGGTGAAGTAGCGTGATGATGAAATTTAGTACTCTCCAATGATTGAGCTCCCCTGAGTTTAGTTTGTG  
TGTGAGAAAGATGAAGTCCATGAACAATACCAACTGGTTGGGCTTCTCTCTCTCCCCCTCAGCTGGGAATGGAAGTTGCTCAAGATCCCCTTAAGCAGACAAATCTTCAAGCTACTCATCA  
ATCTTACCCGGCTAACGCTTCTCTTTTGTTCGAAGCAACTTTCTTCTTCTTATCCCCATTCAGCAGCTCTGGCATTGCTATGGAGCTGATGGAGAGAATGTAGGGTTTTACTCTCAGCT  
TTCATCAGTCATGCCAGTTAAGTCTGATGGTTCTCTCTGCATTATGGAAGCCTTCAGCAGATCACAGAAGGAATGGTGCCATCTCCATCCCCAAAACCTGGAAGACTTCTGGGCTGTGGT  
CCTAACATGGGGACCCATCCGTTTAGCAACAGTGACAGGGGAGCAATGGCTCTAAGCTTGGACAGTATGTATTATGGACAAAACATAGAGCACGAGAGCAATGAAAACCATTCTCTTGGAG  
CTCTTTCAACAACCTTTTCAGGCACCAAACTACTTTTCAGCCATTGCATGAGATGTATCAGGGTTCATTGGTTCGGAGATCAAATGTCCGATTGTAGATTCCAAAGCAATGAAGGAGTTAGTG  
ATGAAAGAGAGATGGGTTTTAGCTCTCTTGGATTACTGAGGCATGGTGTATCTAAGCCCTTGAGCTTATCCATGAGCCCTGGATCTCAATCTAGCTGTATAACTGCTCCACAGCAGCAGAT  
CACTTCTGCTTCAGAAAATGAGCAGTTGGCTTTGGAGCATTCAAAGAAGAGAGCAAATGAAAAGGAGCTGAGAAGCAGCCAGTTCACAGGAAGTCCATTGATACATTTGGCCAGAGA  
ACTTCTCAATACAGAGGAGTTACAAGGCATAGATGGACAGGTAGATATGAAGCTCACCTTTGGGATAACAGTTGCAAGAAGGAAGGGCAGACAAGGAAGGGAAGACAAGTTTATTTGG  
GGGGTTATGATTTGGAAGAGAAAGCTGCTAGGGCCTATGACTTGGCTGCATTAAGTATTGGGGACTTGCCACCCACATCAATTTCTCTCTGGAGGATTACCAGGAGGAGCTTGTACAAAT  
GAAGAACATGAGTAGGCAGGAATATGTTGCACACTTAAGAAGGAAAAGCAGTGGATTTTCTAGAGGGCTTCTATATATCGCGGAGTCACTAGGCATCACCAACATGGAAGATGGCAAG  
CTCGCATTGGGAGAGTCTCAGGAAACAAAGATCTTTACCTTGGAAACCTTTGGTTAGCTCCTCTAATTTCTTTTTACAATACATTCCATTTAATTTTCTCAAATGCTT

>comp145027\_c0\_seq2

ATAGGGAATGGATCAATAATAGCACCTTTTCATCATTGTCTAGTTAAAGACATAAAACCAAGCCTTTTCAATAGAAGAACTTCAGGCTTCGTTAAAAAAGGCAACGTTGAGATAAAAAGGA

AACAATGACAAAATCCAAGAAATCAGCCACAACCGCAATACAAAACTCCAACAAAGAAACCTCCTTAGTATAACAAAGCTTGCACTAGGGACTTAAATTCATCCAGGTGAAACAGAA  
TTATTTTAAAGCAAATGTTTCATGCCAAACCAATAGCATGGTACAATGAGAGACCTTCCCTGGAAGTTATAAATCAACCTTGTATAGTACTCGAAGAATTTGAATCTTAAAAGCAAACACA  
AATTTGAGTGAAAAATGAATATAATGAATTTTACATTCCTCAATATCCCTGTTACAATCAAAGTGAGCCAAAATTTAGCAGTCTCATAAATTCATAATGAACCATAATGTAAAAATCTA  
ACGTTGCAATATCAATATCCCTGAATTCATCAAAGTTCAAATCTCTCTATAAGTTGCAATTTTAGCCGATATGGAACCATGAAGCGACCACCAGTAAACTTCATATCACAAAACGCATTA  
ATGTAGGATTCTCAATTACAAAGCATGTTAGTCTATCACCTACCCAAATCTACTTTTAGCAGCCAGTGGATCAGCAATTTAAACAATTTCAATGAATCAACTTTAGGGATTAAACACAGTTGT  
AGGATAACAACAGAGAAAATAATATAGCCTACTTGTGAGCCACTCAATTGACCTATTACTAGAACTATTATAGAAAACTCAGTAGTAGGGAGAATAAGATCCAAGTACAGTATAATGATT  
TACTAAGCACCTAAATAAGTCTCATAAGCTTCTGGTGATGACTTCAGTATGACCATCAATTTGAGTTTGATAGGATGTTGCAAGTAAAGTTTAGTGCTAAATTTTTTTCATATGTTTTTCAA  
AAATAGCTCATAAATATCACATTATAATCAAAGATAATTATCTAGGGAAGCCCATGAAAATATTCTCTCTAAAGAAGATGAATGTCGTATGTGATGCATCTGATGTCCTATAACATTTTTAAT  
AAAATGTGTCATTTTAGAAAAGGTGATCAACAGCTACTAAGCATTAAAGCGTTGTACAGTATGGGACAATCCTACGATAAAGTTCATACTAAGATCATCTCATGATTTATGAGGGATTGGAAG  
TTGCTGTATAAACAGAGTTGAGTTTTTCATATTATGTCATAAGGAAAGCTATGCCATTGAGCAACAACACGGATTTATATCTTGTAATCTTTGCAAATAAAAATTTATTCCTTGTCATAGCT  
ATTATCTTATCACGGTCTAAGTGACCAGACACACCTCGTAAATGTATTTCTCAATGAGAAAATCTCACAAATGAAAAATCAGAAATACAAAGAGCTTTTTTTGAAAGAGTTAGCCATCCCTT  
AATAGTAGGTGCATTAGAATTTAAGAAGTAAAGTTTTGATGAAAATCTTTGCAATTAGGGTTCTACTCCTAACTTTATCAAATCCAATGCCATTTATACTCATAGTCTGGTTGCTATAAGA  
TTTTCAG

>comp145077\_c1\_seq1

TTGAGTGGTCGGTTGATGCATGTGTTGGCAGACCTGATTTGTAGCAAAGGCGATGTCCGGCCTGGTGTGAGAGATATTGGAGTGAGCCAGCGAGTCGGCGGTATAGAGTCGGGTTCATG  
AAATGGCTGGCTAGTTGAGACGTTGTGTTTTGATTTGGGAGATAATGGTGTGACAGCAGGTTTGCATTACAGCTAGTCCGGCGTCCCTTAGTAGTCTCTCGGCATAATGTTGCTGTGAAAGG  
AAGAGACCGTTGGGTTGCTGAGAGATCTTGATGCCAAGAAACAAAGATAGCTGATTTGATTGTTGAGAGAAAACCTGAGAGTGTAGTTTGGCTAGTAGAGCGGTGATGGCAGCGGAGTT  
GTTCCCTGTAATTAATGTCGTCTACATAGATTAATAAAGAAAATTTGTGTATGATTAAGTCGATAAGATAATAGAGACGGATCGGAGCGAGTAAACCTGAAGCCTTGTGTCTGAAGAAAG  
GAGGTTAGTTTTTCAAACCATTTGTCGCGGAGCTTGCTTGAGACCGTAGAGAGATTTATGCAATTTGCAGACGTAGGAAGGTGATGCGGCATTGATAAAGCCCGGTGGCTGTGTCATATAGA  
TGTTCTCGGTCAGGTCACCGTGGAGGAATGCATTTG

>comp145085\_c0\_seq1

GAGAAATAAGCTCTATTTTTAGATGTTATATATAACAAAGACAAAAAAAAAAAAAAGCAAAACAAATTAAGTTTTCTTGAAAGCAAATTTGACTTTATCATAGAGCAGATGGATCGCGA  
ATGCACAGAAAAAAAAAATCAACAAAACACAGAAAAAAAAAAGTAGAAATTAATTTAGAAAATGGCTTAACTATCTTCTGTATGTTGGGGATCTTGAGTGGTTCCCTTGCCCGCACTGGCCT  
CCTCCTCCTCCTTCTTCAATGAAGCAGTTTTAATCAAATCTTATAGTTACCTTTCTCCATAAAACAACTGAGAAAAATGGTGTGTTGCAGTAAAGAATGCCGTTTAGAGCAGCGTAGCTTGAT  
GGTGTGAGAGTGCATCCGCCATGAGAGCACTTGAAGCAGGTCTTGTGGTATGATTCTCCCTCCACATTCAGCTTCTTAGAGGATAAGCTGTCTTCTTACATACAGCACATTTGTCTTGTGT  
ACCAGAGAACATCTGTGAGACCTTGCTTGCTGTTCTGTTCAATTCAGCTTCTCTGCTGATTTGCTTGGGCTGTGAAATTTCTGGTGAAGGAGCCCCGTTTCTTGAAGAGCTGCTCAAAA  
TGGGGTTTACAGTAGAGCACACCGTCCATGGATGAGTAGTTACACATAGTGAGAGTGCCACTGCAATGGCTGCATTTGAAGCAGGTCTTATGATAAACCCTCCATCGGCGGTGAGCAGG  
TCGATGAAATGAACCGTCTTCCCGCACGCCTTGCACTTATCCTGAGTCCCACTGAAAGACATTGCGGTTGCTTTATCGACGACGGCAGACGTAAACCCTATCTCAGAAGCAGAAGAACAA  
GAAGATGATCCAGACGCTCTCCGATCCCTTCGGCAACAATTTGATGGGGAAAGGGGCGATTCCGGAAGAATGAATTAATGCTACGAGATTTAAGTTTCGGTCTGTTGAGGAGAAGAGGATG  
GAGAGGGAAGTGTGAGGAGAGGAGG

>comp145154\_c0\_seq1

TTTAACCAACGATTAACCTACTAGCATTGAATAAAAAACATGAAATACTTCAACATTTTAAGTAGAGGGAACATCACTAAGAGAAAAACCATCAGTGTTGGGGTACTATTAATCATAGTA  
TTAACCATGAGTTCTATGATCCATGCCATCCATAAAGAACCAATAACAGCATCATTAACATGTGGGGGTGAGGACAAAAGTGCCACCAGATTATCACCTAAATGAGGGTGAAGTTTGT  
GATATCCACAGCTGAATGTCTTAATGCTTTACACAAAATCGCAAAATGAAGGAGAAGCTTTCATTTCAACAGATTGAATGAAACCAAATGTATTTGGGCCAACACATATACGATCGGGATA  
ATGCTCGGAGATATCCAGCTCAACCAGTATGCGGGCAACAGAAGGTCTCGATCCAACGGATATTGCACTGTCAATTTTAAAGGTTTACCGGACAAAGAACCCAAACCATGAAGAACAAA  
TGAGGACGAAGATTAGGGAAGGATACCCATATCGGAATAACATGGGAATCCACGTTGACATGTAAGAAAGGCGACCATTTGTAAAGTTTCATGTAGCAGTTATGCACAAAATACAATCGAT  
GGGAGAAGTTGCGACTGTAATTCAAATCATTCTCAAGTTAATTAACACATGCTTGGGATTCAGAAGGGTAACAGAGAAAACCTCTCTTAAGCTTAAGATTGAAAAAGAAATTCCTAATTG  
AATCA

>comp145349\_c0\_seq1

CACAGGTAATTCTACAACCGAATTAGATAAACTCCTTTCTAATCTTCATCTTCATTTTCAGATGCGCAACCTTGGTTCTCTGTCACAATTTCTTGGCATCCAAACGTTCCAAACCGAGTCGG  
GCATCATCTTCATCAAGCAAACTACGCAAGAAAATTATAGATCGAGCCGGCATGACTCAATCAAAACCCGTCTCCACGCCACTCTCAACAAAAACAACCTGTTTCAACAAAATCGCAA  
GAACCGTATGATAACCTCATCTATACAGACAAATCATTGGCTCGTTACAATATCTTACACTCACGAGACCGGACATCCAGTTTCGCGTCCAACAATTGTGCCAACACATGCAGAACCCGC  
TGAACTACATCAAGAAGCACTCAAACGACTTATCAGATACATTCACGGCACCCAAACAGGTATCCCGCTATCTCGTAATTCTCTTTACTAACCGGTACGTCGATGCAGATTGGGC  
AAGCAATCAACAGGACCGGTATCCATATCCGGCTTTTGCAACTTTCTCGGAACATCTCCATTTTCGTGGCAAGTCAAGAAGCAAAGCACCATCGCGCGATTTCCACTGAAGCCGAATA  
CAGGGCCTTGGCATCCGAAGCAGCAGAAATCCTATGGCTCCGAAGACTACTCGAAGATCTTCACATACCGCAAATTACCCCGACCACCGTTTATTGTGACAACACGTCGGCAATAGCCCT  
CGCCAACAATCCAGTTTCCATGCACGTACCAAACACATAGAAGTCGACTGCCACTTTATCAGGGATTGCATCAAGAAACAT

>comp145373\_c0\_seq2

AAATGAGAGTTTCGGTTGGAGATGCCCTTATTTGATAGGACTTAAGACCTTATTAAGCATAGAAAAGAATACATATAATATAAAAAAATAAAAAAATAGAAAAGAAAGCTATAATATGACC  
AAAGTTCAGAATCTGATAATTCAACATTGTTCAAAAACAGAAATTAATGCACAACAAAAGTCATTATTTTACATATTCTCAACAAAGAATAAAGAAAGAAAAACAACAATGAAATCCT  
TTGAAGAATAATTACTTGCAATGGAATAATAAATATTTAAGCCTTGGAAAGCCTCAGAAGGCTCCTCCTTCAAGCTCTCCTCGCTCTTCACATTCTTCTCTGCTTCATCTTCCTTCTCCTTCT  
TGTCGCTCTCACCTTCTTCTCCTTCAATGGCTTTGGACTCCTCCGGCTTTGTTTCCGACTCGTCGGTCGTCGCTGCTTCCTTCTTCTCCTTCTCCTCCTCCTCTACTGTCTCCGTCGGCTCTG  
CTGCTTACAGCTTCTGGGGAGCGACGGGCTCGGTGGCTTGTGCGTCTCCTCGGGGCAACAACGGTGTGACTACAGGCTCCTCTGGAGCCTGTCCCTTAATGTCCTTGGGTATGCTTG  
CACAGGCACCCATGGACTTTTACTTGGAGGAAAAGAATTAGAGGATTTGAAGTAATATTGAGACGATTCTCAATAGTAT

>comp145373\_c0\_seq3

AAATGAGAGTTTCGGTTGGAGATGCCCTTATTTGATAGGACTTAAGACCTTATTAAGCATAGAAAAGAATACATATAATATAAAAAAATAAAAAAATAGAAAAGAAAGCTATAATATGACC  
AAAGTTCAGAATCTGATAATTCAACATTGTTCAAAAACAGAAATTAATGCACAACAAAAGTCATTATTTTACATATTCTCAACAAAGAATAAAGAAAGAAAAACAACAATGAAATCCT  
TTGAAGAATAATTACTTGCAATGGAATAATAAATATTTAAGCCTTGGAAAGCCTCAGAAGGCTCCTCCTTCAAGCTCTCCTCGCTCTTCACATTCTTCTCTGCTTCATCTTCCTTCTCCTTCT  
TGTCGCTCTCACCTTCTTCTCCTTCAATGGCTTTGGACTCCTCCGGCTTTGTTTCCGACTCGTCGGTCGTCGCTGCTTCCTTCTTCTCCTTCTCCTCCTCCTCTACTGTCTCCGTCGGCTCTG  
CTGCTTACAGCTGTCAAGCAATAATGAAGGCATTTGATGCACAATATAAGAGAAAATAGCAAAGCATTGAGACATATAAGTATAATTAATAGAACAATTGTCATAGAAAGTAAATATAAAT  
TTAGAATAAATAAAAAATCAAAATTTATAATACTTGCCCTTACTTTAGAATAAATAAACTCGATTTCTCAATAACTGATCAAAAATTAATAATTTATTTTGCTAAACTAGACTACTTTTTATT  
GTGTGCAGATATTGGACAGAGAACCGTTCGGATTTCTCTGTCTACAATTAAGCGTAGCTGCTACAGATTACAGTAAGTCAATTTGATTATAGACACAGAGAAATCCGGACGTTTCTC  
TACTGTTTGGTGTCCGCACATAGTAATATCTCTGACTAGACATATTATAGTTATGAGTAACCTCTTGGGGAGCGACGGGCTCA

>comp145409\_c0\_seq2

TTTAATAAAAAATATATTATTAGTAGTCAATGAACCAATTGTTAAAAATAGTGCATGCATGACAGCAAGTCATCTTCCACATTTGAAACTAATTCAACAAGCTGTTATGGTTCCAATAGGTTT  
GATTCTCCATAGAGAAAATTTCTATACATTCATTCTAAGTGCATCAATGTTCTCACAAAGTTGGAGCTATTTTGTCCATGAGCTCGAACTAGGTTCTCTATTGTTTGAATTTTGAATTTT  
GTTCCGATGATTTGAACTAGATTCAAGCAAGATTTTGACTAATTTAATTTAAAAATTAACACAGTAAAAATTTCTTAAAATTAGAAAATTTTGGTTGAATAGAAAAAATACAATGAATACA  
AACATATGATTGAATAGAAAATAAAAAATTTTAGCATGAAAAGCGGTTTCATTGAAAGGCCCA

>comp145436\_c1\_seq1

CTTCCTCCCTTTCTCTGTGCGATAACCAGACGTAAAATTCCAATGGCTTCTCGCTCTCCTCTTCACTCTGTGAAGCTCTTCGTCTTCTCTCATTCTCCTCTCCGCTTCTGCTTTTCTGAAAGACG  
CCGCAACGGCTACCCAGTTTCGGGTTCGGTGGACCGCTGGGATGGAGGAAACCGACCGGCTTCGAGTTCGGAACGTACAGCCAGTGGGCCGGCCGGAACCGGTTCCACGTCGGCGACT  
CCCTTTATTTCAAGTACGAGAAAGACTCGTTGTTGGTCGTCGACAAAGGCCATTACGACGAATGCAACACTATGAACCCGCTCTCGAGGTTCACTGATGGCAACACTACGTTTAGGTTCCG  
ATAGATTCGGCTATTTCTACTTCATAAGCGGTCAATCGGGCCATTGTAAGGCTGGACAGAACTCATTGTGCGTGTTCATGGTTACCCAGAGATGATATCAGCGCCGGCGCCGGCCCAAT  
GAGTGTACCATTTGTTGGATCAAGCCCAACATCTTGGTTCGGGATCGCCAGACCAGCCTGAGTCCAGTGGTTCTTGGAGAATTGGAAGGACTGATTATGCGTTGGCCATTGGCCTAATTGG  
AGTACTGGCTTGGCAGATGGTTTAATTCTTGATTAATTGTTTGTCTTTATACTTCCGAAGTTGGTTTTGTTGCTGTGAATGTTATGGTCATTTTGTTTTGGATTAGATGCTTCACTGTGAG

>comp145442\_c0\_seq2

AGCAGCAGCAGCAGCAGCAGCAGATGATGGTGGAAATACAGCAGCTCGCAGAGGTTGTGGCAGCGGAGAGAGAGCATGAGATGCTGAGGAGGAGAGAGCATGAGATACTGAGGAGCA  
TAGAGCAGCAACATGTATTAGCGAGGCTTATCGGAGATGGAAGCAGTGGTGGGGCGGCGGGCTGAGGCTTCTCCGCCGCTGGCGTTGGTTTCCCCGCACATTAGTGGGTTTGAAGGC  
TCGTTTTCGGAGCTGCAGCATCAACAAGGGTTGCAGTTCAGGAAGGGAGTGGCCTTCGCTTCATCATAATTTTCATCAGAGGAGAAGGTTTCGATGAGGAGAGAAGTGGAGAGGGTCC  
TTCTTCTTGACTTCTTAACTATTCGTTGAATTTAGACCGCGCTTGATCTTCTTTGGTGGTTCAGCTTTCAGCTTTTCAGCGTAGAGATTGCTGCATTCATCTAAGCTCCGACAGACTGC  
AGAGGTGGTCATTTGTTTCATCTGACACCACAATTAATTCATATGCTGACAGATTAATTCTCTGTGACGATGGATCACGTTTCAGGCCTATATTTCAAGCGCAAGAAAGGAACATATGGCG  
GGAGAGACCTGAAAGTTTTTTTTATTGATTCTTAAAGCAGTTTTTGAATACAAAAATTTAAATTTTGTACTAAAA

>comp145469\_c0\_seq2

TAAGAATTCTACATGCATTTTCGTGGGCTTCCCTCCCTATGGATTTCCGAAGAGGAAATTTAGCTTTAGCAGCTCCATTTGAATTTCTTTAGTTGGTAAATTCCTGATCGTAGGCCATCAC  
TTGATTCAATTAGGAATTTCTTTTCAATCTTAAGCTTAAGAGAGTTTTCTTTGTTACCCTTCTGAATCCCAAGCATGTGTTAATTAACCTTGAGAATGATTTGAATTACAGTCGCAACTTCT  
CCCATCGATTGATTTTGTGCATAACTGCTACATGAAACTTACAAAATGGTTCGCCTTTCTTACATGTCAACGTGGATTCCCATGTTATTCGGATATGGGTATCCTTCCATAATCTTTGTCTTAT  
TTGTTCTTCATGGTTTTGGTCTTTTGTCCGATAAACCTTTAAAAATGACAGTGCATATCCGTTGGATCGAGACCTTCTGTTGCCCGCATACTGGTTGAGCTGGATATCTCCGAGCATTATC  
CCGATCGTATATGTGTTGGCCAAATACATTTGGTTTCATTCAATCTGTTGAAATGAAAGCTTCTCCTTCATTTGCGATTTGTGTAAGCATTAAAGACATTCAGCTGTGGAATATCACAAAC  
TTCACCTCATTTAGGTGATAATCTGGTGGGCACCTTGTCTCACCCCCACATGTTAATGATGTTGTTATTTGTTATTTATGGATGGCATGGATGAGAGAATTCATGTGGTTAATACTGTGAT  
TAATAGTAGCCCCAACTCTGATT

>comp145495\_c0\_seq1

GGCGGCCACCAGCAGAGGACAATATTAGGCAGAAATTTGTTTACATTTGCCTAAAAATAGGGATGCCAAACAACGCCTAAATTTAATTAGAGATCTGGGAAGGGAGAGAAGAACGCGCA  
TTAGGGTTTTGTCCGAGATGGGTGGAGAGGAGGAAGACAAGAAGAGGGCTGATCGTGCGAACCTAATCGGCGACACGGGTCGACAGCTTTCTTCGTGATGTTGGACTACACGTTTCATT  
TCATCTTCTTCTGCTTTCTCTGCTACTTCTCGCCAAGATTTGCCCCGATTTAATCTGTTCTTCTCTATTTGATCGCATGTTTCTGAGAGGCTAGCGAATATATCCCGGTAGAACGTTCTCA



TCCTTTTTCTACAGTACTATGCTTTATCTTGGCTTTCCCATTTTTCTGTTTTGGAATTGTATTAGGGGGTTTGGTATTTAGCCATTAAGTGAAAATGGGGGTTTCATCTTGTTAGTCTGAA  
GGGCAAACGTACCCCTCTGACATAGATTAAATAAGATACTATTTTTTGTGATGTTCCTTTTAAATCGTCGATGACCAATTTCCCAAAGCAAGACATTTTTTAGAAGAATCAG

>comp145506\_c1\_seq1

TCTACATCATTTAACATGCAATGAAAGATTTTCTCCACACTGAAGGCTATGAAAAATTTCAAATAGAACAGTTCTAAGAACATATTTGCTATAGGCAGCCATGACTAGTTCAATGCTCATTG  
GCTCTCAAATTTTATTAATAACAACAAGCTCCAGAGGGATAGACAAGAGTAAGAAAAAGGAGACCACCAACAAGAATGTTGATGGCAAGAACAGACATAAACGGAATAGAAGGCGG  
CTATGATAAGCTCTTCTTATTTGAAAAGTCTTGCAAGATCAAGAAAATAACGCGAAGCTTAAGAATGACAAAAGACAAGAGGAACGAAAGACGGGGAGAAAAAGCTCGATAAGGATAG  
CGCCCTGTGAAAGTAACACGTTCTCCGCTATTATTGTGATGCTTCAATCTCTTCTTATATCCCTTCGATGCAAAAATCATCGAAGACCAATCTCTAGCAACCAAGAGGAAGAATGGGATCAT  
GATTCTCTAAGTCTCCCTCCCTGAGGCCATCTCCAAAAGCATAGGCAGATGGCACAAGAAAGGGCAAAGGAAGCCCTCCATTGAAGGCTTAAAGCCATAGAGAG

>comp145556\_c0\_seq1

AAAAAAAAAAAAAAAAATCAAATTAGAAAAATTTAGGTTAGAAATATCCAAACTTCAATGTACTTTAAAATCATTAAATATTTGAGATTGATGTAATACAATTATCTAATCATATTTTATCCATC  
TCAAAATAAATCTAACTCATTTTTATCTATGTTTGACACTGAACGTACATTGAATGATGGCCTAAATTTATAACTGTTGAGACACTCCAACCATTCAAGGTCATCTTTTTCGGTTCGAGCTTT  
CAAGGTCATCTTCGCTCCAGCTTGCATCGCATGCAACTTCAATGTTATTACTATTACCATGGAGTTCTGCCAAATTTATTTCAAAGATATAGTCAGCTGTCCAGGTCTGTATTTACACAAG  
ACCCACAAATATTTAGATTTGTTTCTCCACTTGCTTTCATGCTGTCAAATTCGATAGGTTCGTAGACGTTTAGGAGGTGGGCTGATGTCAGAACCGGACTCAAAAATGTGCTTTGGCAACCA  
TAATTTGATTCTCTTAAATTTGATGAATGGAGGCCTTTTCATCGAGAATATAGAACTTACAATCTCTGCTAATAGCATAAAAAGCGGCCATCACCAGCAAGGGAGATATCTATTATGCTTTTGCT  
TTCTTTCATCACAAGGCTCCACCTTTGACAATCATCGTCTGCATGCCTGCAGAATACAATATGTTATCTAGAAAACCTCATTGTTTTATCCTTTATCGTAACATTGCAGGCCACACCAATGCT  
TGCGTCAATGCTCGAAGAGACAACCTCCAGACGTGTATGCAATCTGCATTAATGTGAACGGTTGGTTTTACCTTTTTATAATGACGGAGTAACTTTGGGTATAAAGGGGGGAATATG  
AGTTTGCGTTTTGATACAGGATCAAAAAGAAGAATAATCCATCGTTCGTTGGTTAGAAAAGATAGACCAACCATTGAAACAACCAACAATGACATGGGATCAAATGATGAAAAAGGAAA  
GGAGATGACGTGAGGACGACTTTTATCATTGATGAAGTCCGAGTCCAAATAAAAAATGACTTCGGTTCTATGTCTGAAATGTACTAAGTAAAGCGGACAAGGATTCGGGGTAGGTGAGGC  
ATAACGCCATTGGGAGCAAACCTAAGCGAAAAGACAAAAGATCGGCATTTTGTAGCTTATTTCTAATGATTATCAATAGGTCAAGAGGAAGATCAGACCATGATGGAGACATTGAATATGGG  
AAATAGAACTTCGTATGAAATTGTTTAAATCTCGAATAAAGAATAATCATCATTT

>comp145556\_c0\_seq3

AAAAAAAAAAAAAAAAATCAAATTAGAAAAATTTAGGTTAGAAATATCCAAACTTCAATGTACTTTAAAATCATTAAATATTTGAGATTGATGTAATACAATTATCTAATCATATTTTATCCATC  
TCAAAATAAATCTAACTCATTTTTATCTATGTTTGACACTGAACGTACATTGAATGATGGCCTAAATTTATAACTGTTGAGACACTCCAACCATTCAAGGTCATCTTTTTCGGTTCGAGCTTT  
CAAGGTCATCTTCGCTCCAGCTTGCATCGCATGCAACTTCAATGTTATTACTATTACCATGGAGTTCTGCCAAATTTATTTCAAAGATATAGTCAGCTGTCCAGGTCTGTATTTACACAAG  
ACCCACAAATATTTAGATTTGTTTCTCCACTTGCTTTCATGCTGTCAAATTCGATAGGTTCGTAGACGTTTAGGAGGTGGGCTGATGTCAGAACCGGACTCAAAAATGTGCTTTGGCAACCA  
TAATTTGATTCTCTTAAATTTGATGAATGGAGGCCTTTTCATCGAGAATATAGAACTTACAATCTCTGCTAATAGCATAAAAAGCGGCCATCACCAGCAAGGGAGATATCTATTATGCTTTTGCT  
TTCTTTCATCACAAGGCTCCACCTTTGACAATCATCGTCTGCATGCCTTCCAGACGTGTATGCAATCTGCATTAATGTGAACGGTTGGTTTTACCTTTTTATAATGACGGAGTAACTTTGGGT  
ATAAAGGGGGGAATATGAGTTTGCGTTTTGATACAGGATCAAAAAGAAGAATAATCCATCGTTCGTTGGTTAGAAAAGATAGACCAACCATTGAAACAACCAACAATGACATGGGATCAA  
ATGATGAAAAAGGAAAGGAGATGACGTGAGGACGACTTTTATCATTGATGAAGTCCGAGTCCAAATAAAAAATGACTTCGGTTCTATGTCTGAAATGTACTAAGTAAAGCGGACAAGGAT  
TCGGGGTAGGTGAGGCATAACGCCATTGGGAGCAAACCTAAGCGAAAAGACAAAAGATCGGCATTTTGTAGCTTATTTCTAATGATTATCAATAGGTCAAGAGGAAGATCAGACCATGATG  
GAGACATTGAATATGGGAAATAGAACTTCGTATGAAATTGTTTAAATCTCGAATAAAGAATAATCATCATTT

>comp145556\_c0\_seq4

TTTTTATTAATTTACTTTGAGATGAATACAATAGAAGATAATTAATCACAAATAAGTATCGAATCCAAAATGTAACCTCATTTTTATCTTTTGTGGTGGACTGAATATTGAATGATGTTCCCGATA  
GTGATGGCCTAAAAATATCTGGGTCAATGTCATTATGCAAACGTCTAGGGCCATAGCTCCGGCTAGCATCGCATACTAGCATCGCATACAACATATATGTTATTACAATTAGCATGGAGTT  
CTGGCAAATTTATTTTCAAAGCTATGTGCGGCATTTTCATATCTATGTTGCTGAGCAGCCGCATAAATATCTAGATTTGTTTCTCCACTTGCTTTCAAGCCATGAAATGAGGTAAGTACACGTT  
TAGTAGGTGGGTGTGTCGTCAAATTCGGAATCTAAAATGTGCCTTGGCAACCATAATTTGATTTTTCATTAATTTGATGATTGGAGGTCTTTCATCGAGCATATAGAAGTTACAATCTTTGCCAA  
CAGCATAAAATCGGCCATCACCAGCAAGGGCGATATCCATTATGCCTTTACTTTCTTCCATCAGAAAAGCTCCACCTTAGACAATCACCATGTGCATGCCTGCAGAATACAAATCTTCTATCT  
GGATACACCGATGCTTTTTCTTTTATTCAACAATGCAGGCCACAGCGATGCTTGCCTGCTGCTCGGAGAGGCAACTACCTTCCAGAGGGATACGCGATCTACATCGTGAGCAGTTGGTT  
TTACCTTCTATAATAACGAAGAACTTTGGACATAGAGGGGGGAATATGAGTTTGGCGTTTGATACAGGATCAAAAAGATGAAGAATTTTCATTGTGGCGGGTTTTGAAGATAAGCCACCC  
GTTTGAACGAGAAAAAAGTGATATGGGAAAAGATGATGAAAAAGGCAAGGAGACGAAGTGTTCACGATATATATCATCATTTGATGCCCAAGGTGAACCGAATGATATTGTTTACTTCGTT  
GAATTTTACTTGGTAAAGTGGACAGGGATGTGGGATAGGTGATGCATAATGCCATTGGGAGCAAAGTGGCGAAAAAGAAAAAAGATTGGCATGAAGTGGTAGCTTCTTCTAATGCTTAT  
CAATAGGTCAAGAGGAAGATCAGACCATGATGAAGACATTGAATATGGGAATAGTAACTCTGTATGAAATTGT

>comp145582\_c0\_seq2

TTTTTAAATTTCTATTAATAAAAAAATTAATAATTAATCGTCAAAAAGTAGGATGGAACACCGTCCACATTAACCTATGCATTTGATTTGACTATAAAAAAATAATAACTAAAAAA  
ATAAAAAACAAAAGGACGGCGTGCCTGCATTGTAGGCGCAATTTACGTGGCTCTCTCGCTGCAAAGCAAACCGCGGTTACAGGATCCAAAATTTTGAAGACTATAATACCTCACCTTT  
TCGCTCCTTCCATATTCGAACAACGTTTCGCACCCCTCGCTCTCATCCATGGACAAAATTGTAATCTCAAATAAACCTCCTAACAAGCAACAACTAAACCCATTAACCCCAACCTTTC  
TGCTTTTCTTTGAGTCTCTGTAGCCCTCTTCATTCTTATAACCCTAAATCCTTCTTTTTCATTTCTGATAGCTGGAATCTCTCATCAAAAAGAAATCATTTTCTTCTACAGTAATCGGATCTC  
TTACCTTGCTCCTCACCATCTCCCTTACCCTACCAACAGGTTGCAACGGTGGCGTGAAGGCGGACTGGAATGACAGATGGAGGAAACAACTCTCCAGTGCCCGGAAACAATAAGCC  
GGAGGAATCTACGGCAACCGGAATTCTGGCGGAAAAACAACCCCGCAATGCTCTGTGATCATCGTGTACAAAGCTAAGATCGGTAACAAGCTCCGCAGGGTAACGGTAGTGTGGAACA  
AGACTCTCATCAACCACTCCCTCTCCATCTCCGTGACGGTTCCGGCGGAAGTTGCGATCCACCCTCCACCTGCAGAGTCGATCTCAAGCCATGGCCCTTCTGGAGCAAGAAGGGTTTCA  
AATCCGTGACGTTGGCGATCACCGAGTCGACCTTTTCTGGAACCTTCGCCACGCCAAATTCTCCGGTGGAGGTAGCCCGGAACCCACCGGAAGCTACTACGTGCTCTCGTCAGCGGC  
GAGGAGGTGCTCCTCTTCTCGGCGACTTGAAGAAGAAAGCCTATAAACGGACCAAGGCGCGGCGCTCGCTCGACGACGCGAAAATGGTTTTGAAGAAGGAAAAATGTGTTTGGGAAA  
AGGTCTTTCTCGACGAAGGCGAGGTTTGTGAGAGGAAAAGAGAGCATGAAATTGTGGTGGAGAATTCGATATCAGGGGTGAATGGGAAGGAGGATGCGGAAATGTGGATCAGAATTG  
ATGGGATTGTAATGATGCATGTGAGTAATTTGCAGTGGAAAGTTCAGGGGAAATGAAACGGTGTGGTGGAGGGTTCCGCCGTTTTCAGTTTTTCTGGGATGTTTCATGATTGGTTTTTTGGG  
GGCCGGGGATGGGGCAAGCGTTGTTTATATTTAAGCCTGGGGCGGCGGCTGCAACGGCGATGGCGACGGCACTGGCGGAGATGGCCTTGATGGAGGAGGAGGAGGAGAATGAGGAGA  
GGAGCGAGAGCGATTTGAGTTGGTCGAGTGAGAACGAGGGAAAGCAGCAGGTGGTTGCAGAGCAGAATGAGTGCGGCGATGGTTCGTCGAGTTTTGCTTTATGCTCTGTGCGTGGAG  
AGTGGAGAAATGAAAAGGAACTATGTAAGATAATTTGATATATATTTTATATTAGTATGAGATTATTTTATAGAAAATTTATTTTCATAGAATTATTTGGGAAAGTATATGTGGCCCAATATTTGA  
AGTCTGAAGATGCTTATTTCTTCAAAAACATACTTTTTGATTTCTTAATCATTAATTCATAAAAAAATTAATCCA

>comp145597\_c0\_seq1

TGGATCTATATATTAAGCAATGTCATATTTGCAATATAACGACTCATGGACAAGGCACGAGACTATATTTATCTCAGTCAGTGTCCAATACTTCTTGGACCAACATTATAGCATTAATTTCTTA  
TAAGTCTTCCATACACTCAGCAAAAATAATAAAGATAACAATAATTATAGTTATGGATCAATTTCAAATGGCACACTTCATGTTGTGCAACGTCCCATGCCATCGAGTTCTATTCTCCAG  
GAAGTGGTGTGGCTACCCGACATTCCAAGAATGATTATGTCCAATCATGATTTGAGTAATCTCTTGCCTGTTTTGTTATGTCCGAGTACTTAGGGATTAATTATTATGTACAGACACCGAAG

TTCATGCAGAGATCAATCAGAATTTGCCATGTCAGCCCTTCGCTCCGTGCTATGGCTCGGTAGTGCATATACCGTTGATGTAGCGAATTCTAATTGCTCTCCAGATGTCGTTCTAGATCCGAT  
CTCCCCTCATAATAATTTCTGCGGCATGCGAGACTTGCAGCTTTTCAATCCATAATTCCATATACTTCTCCGTCTTATACATGTAGATATAGCGCGATCAATGTCGCTCTCAATTAATTGGTGTTC  
TACTTTCTCTTACCTAATCCACACTCCAAAAAGCTTCGTCTCCTTTTTCCCTCTCCGCTATCCTCCTCCTCCATCAAATGCTTCGACTTCCCATCCTCCTCGTCCGACCCAGTAAGGTTCT  
CAACCCCTTCTACATCCTCCACAGGGTTGTGCGCGGTGCGCCGCAATGTTCCGACAGCGGAACGATATCAATCATGAAAACGATCTTCTCATCAACCTCCCTTCTCTTCGCAGCG  
ATAGAATACTACCGTATCCCTTGCATTCAAATCCATCTCCTTCAAAACTTGTTCCATCCTTTAGTGAATACGTAACCTTTGACTACTCCTCCAATAGCAATATCGAAACACCCATGTCTTATTC  
ATCCGGTCACGAAAATCCAGCAGAACTTCTCCACTGCGTCAGCAGTCACCGCCGGCAAGTATCGAGTGGCATGCTTCTTTGGTATCACCAGTCTATTCAGCTTTCGACATCACTCGGG  
GTCAGCTCCTTCTGAAACATTTCTCTACATATAACGCCTTCGATGAGGACCGGCGGAGCCTCCAATGCGGGTGCGCCGCGCCACCGCCGCTACCTGTGTTGGAGGATTGAATAGAACGG  
ACGAATTCATGAATTTGGATCCGTAGGAGCCATCCCTGATCATTTCGAGAATGACTTGGGTGGTGAAGTTGTCTGAAACGCGGGCTCATTGATAGTGATTTATCCCACGGGAAGTTGC  
GGTGGCCGGAGTCATCGCGATGGAGTTTCATGGCCGCGCTGTCATAAGCACGGGCTGCAGCTATTTCCGACTTGAAGGTTCCGAGCCATATGCGACTGTGGTTAACGTAGATCTGAGCGC  
CCCAGTTGCCGTTTTGTTGGAGCACTACACCTTTGTACCTCGCTATACCGGTTCCGAGCTCGCGTTGCTCTGCCTCTGTGATGGAATCTTAGAAGACGAGCCCTCATCGAACAGCTGTAG  
CGTCTCAAAGATTTGGAAGGCTTCAGTGGAAAAACTCTTTCTCCCGAGGTGAATTCATTGCTCGACTCGAGGTCTTCGATGAATGAAATTTAGGTTTTTGACGAAGACAAGGCGAGC  
AATTATATTTTTGGCTTGCGAAAATGCTGGGGATTGTTGAAGAAATGAGTGGCAAATTAAGGCTCAGCTGTGTGGGAATCTCTATTATGGGAAATATTGGTGAGCAAGTAACTTAATTT  
AGAAAAATAAAATAAATAAATAAATAAATA

>comp145599\_c0\_seq2

ATCAACCTGCAACTGGAGCATATTCACCTCGAATTGGAGCATATCGAGGATATCCATCTCTAACTGGAGAAAATCAACCTCCAAGTGGAGCATATCCAACATATTCACCTCCAAGTGGAGC  
ATATCCACCTGCAACTGGAGCATATCCGAGCATATCCACCTCCAAGTGGAGCAAATCAACCTCGAATTGAAGCATATCTACCTGCAACTGGAGCTTATCAATCTCGAACTGGATCATATCGA  
GCATATCCACCTTCAACTGGAGCATATCAACGTCCAACCTGAGCTTATCAACGTCAAAGTGGATTATAGCTTACCCATACTATTGTGCTTATTAAGCTATCAATCATGTTATTTAGCCTCTGT  
GTGTAGAATAATGGCTTGAACAGAGATGTGTAGCATAGCTACCACAGTTTTTGGGTTATTTATCAGATTTGTTTTATTTGCTTTGTGATTGGATTTCTATTTGTTATGTGATTGTGTGTAA  
TTAAGGTAGTTTTGGACAGCTTTTTTTAATGCTTTTTAAAGCAATTTTTT

>comp145634\_c0\_seq1

TTGAATTTAAGCAAACACAATAGAACTAACCATAGAAGCTGAATCCACTTACAAAATATGAACCACAAAGAAGTAGCAAGGAATACTACGATACATAACATCTTAAAAGTACAAAACCA  
GAAGAAACCGGACGACTTTCAGTGCTTCAAATGGCCTTCGTTAGCCTTCTGGAAGATCTTCCCTGCTCTGCGGCCATCTTCTCCGATTGAATGGCTGTATTGAAGGCTTCCCTGACCTGC  
TGAGTGTAAAATTAAGTTTTTACTCGCCATTGAGTTAAGAAGCGAAGCTGTTCCCTCACGCAGTAGGGCTCCATAGCCATCTTACGAGTGTTCCTCAAAGCTTCAAGTACGCTGAGGT  
TTCTTCCGAAGAGGATGCCGGTGCCTGACGTGCCAAAGACTTCGCTATTGTTCCCAATAGCCGAAGAGAACCAAAATGGCGGTTGGGTGAGTGAACCAGTAGTTGCATGAGAAG  
GGTGGGTGGTTCGGGTCAGGGATTAGAGGAGATGGATTGGTGGGGGAGGGGGGAGTGAGGGGAACTAGAGGAGTTGGTGGAGTTTGGAGAGATTGGTGTGGTTGGGCTTGGTGGATTCT  
CAGGGAGGGAAAGGAGTAGGAGTAATGTAGGGTGGAGTGTGAGTTACAGCCGCCGCCACCTCCACCGCCACCGCCGGAGCCCCGTGGGATGGGGTGGTAGGGCGGAGAGTAATGGAT  
TCCACCGCCATGAGACGGCGTCTGTTGGAGGAGAATAATGGATTCCACCGCCGTGGGATGGAGTTGTGCCAGAGCTAGGAGTTTGGCATAACGGGCTGTCATGGGAATGACTTGGCGAGC  
TCCATGCATGGGGATCATTGCCATAGTTGTTCTTCTGCTTCAACCTCAGCAAGATTTCTGCTTGTGACCAAGCAGAAATGGGTAGCAGACAGAACCACAAGAGAAGCGAAATCATCA  
TCTTCTCCTCTCCATCCCAACAAAACGCAAAGCTCAGAAGCTCAGAAGCTAGAAATTAATTTCTCTATCTTAGATGAACCGAAGCAATGGCGCCATTACAGCATTGGCTCTTAAATACA  
GAGAAGGAAACAAAGATTTGATTGTAGCCATTACATG

>comp145661\_c0\_seq2

GAAGATTCGTAGGGGAGAAACAGCGAGAATATCTGCTTCGTGATATCTGTGCTTTTACTCGCTTGTGGGGAAGGGTGAAGACTGTGAGTCGTTGGCCAAATGAGGCGGTTCTGTTGCTT  
CTGTCTTCTCGAGCCGGTTCCCTTTTTCTCCTCTCCCTCTTTCTTCAACACTTTCTCTCTCCTCCCTCGCTGTTGGCTTTAACTCCTCTCGCTTTCTCGAGCAGAGAGCGCTCTCCTCTCTC  
CTCCACCAAACAGTCCAAAATCCTTTTCTTTCTTCTCTGCAACACCTGCCACTATAAATAGGTTCCCTCCCTGATTATTTTTTCTCCAAGCTCTCTGTTTTCTTCTTCTCAGTAGCTCATAGC  
CAAAGAAGAGGAGCTTCTTCTTGTTCCTTGTATGCTCGTGGCAATGTCAGCTTGAAGGACAGGGAAAATGATCCTCGTATTGAAGGGATTGCTTCCCTCAATGCGCGTCATTCCGACTT  
CCCTAAGCCAGGGTTAAGTTCAAAGACATTACCACGCTGCTCCTCAATCCTAAAAGCATTCAAAGAACACTGTGGATTGTTTCGTGGAGCGCTACACCGCAAGGGCATTTCGGTTGTTGC  
AGGAGTTGAGGCTAGAGGTTTTATATTTGGCCCCCTATTGCCCTTGGCAATAGGTGCTAAGTTTGTTCCTTTACGAAAACCAAGGAAGCTGCCAGGTACAGTTATATCAGAAAAATATGTT  
CTTGAATATGGAAGTATTGTCTTGAATGCATATTGAGGCTGTCCAACCTGGTGAACGTTTATTAGTAGTTGATGATGTGGTTGCAACTGGTGAACACTTTGTGCAGCCATAAAATTACT  
TGAACGTGCTGGTGCAGAAGTTGTGGAATGCGCTTGTGTCATCGAAGTACCCCATCTTAAGGGCCGTGAAAAGCTGAATGGAAGCCATTGTACGTGCTTGTGGAACTGACTGATGCT  
GTTTATCTTCTCAAATCTGCTACTGATAAATTAATATTTGAAGCTTGAAGGGTTAATTAATATCTAGCATAGATTTAGATGGAAGCTGGCCTCATTTTGCCAGAGAATCAAGTAATTTTTTTA  
TTATTCTGACTGCTTTTCTGCCATATTTCAACTATGTTACTATGCAATGTAGTCTTTCAAATTTTTTTGCTTTGCATTGTGGTGTTTAAGATGCATTATGCTTGAATATTCAGCTGAACAGA  
AATGAATGAGTTGGCTATGCGGATGATCGAGACAAATATATACTCATTTTAAAT

>comp145779\_c0\_seq3

CTTCATTACCTCTGCAAAAAGTTCAGATGAGATGCCCTTCGACTGATTCTGATAGCCTCAGCCAATTCACCAATCTGGGAAGCAAGGTGATCAATCTTTTCAGCAAGATTATGCTTTCTCC  
TACTACTCTGCCAGTTCTTTCCGTTGAAGCAGAAGATGAAGGGACCTGTTGGGACCTGGTAGGCGTTTCGTCCACATCCTCTTCAATCTCGAAGTCTTCATCCACGACGACGTTTACATC  
GTCAGGAGCTACGATAGCGATCCCATCAGGATCCTCCTTTAGGTAGTTAGTAAATTTCTCAGTAAGATTGTCTTCACTGCAAATGATAGCCATCTCATCGTACATTTCAATAGGTTTGTCAA  
AAATGGCTCATCTTTAGGATTCGCCGCAATATGTGCACCATATCCGACATCATCCATGATGATTTTCTTTTCTTTTCATCAAATTTGTGTTGCTCAAACCTCTGAAGTCTCTTTATCTGCAAG  
AAGCGAGTCTTGATTGTTCTCAGGTGATTTTCAACATTTGAGTCACTACAAAGAAGCTTGAACCTTTCTGTACAGCCTCAGCAGCAGCAATGAATGCTTGCCTTTTAAAGGTTTATTGA  
CTTTCAATCCAAGCTTAGCCTGTTCTATGAGACATGAGAGAAGGAAACGACTCATTTGATGGGCTCCACCGAAAGTTGGTGCAACCTTTCTTATTTTGGCGTTGATACAGTTGTGGAGAATA  
GGTCCCTCTACAGCTGATGGGAGAACTCTTTGAGGCGCTCCTTCATCTCCATCAATTTCTCAGTCTTTTATTCATTCTCCACTGACCAGCTCAGAACAACTTTCTCAAGATTCTTTACAT  
TCTTCGAAGAAAGGGTAATCCTTACACGGTGAACCTTATCTTGTGCCTTTTCTCACAAGATATAGATTTCAATTGCTGGTAAATGCTACTTCTCAGGAGTAAAAATTCATCAATGCTGCCAT  
ATTCCAGGAATGAGATGGCTCCACAGAAACCGATATTAGCTCCAGAAAAACCCGAAGCACGCGTCTTGAAAATGGTTTCCGCTGCAAGTTTCGTAATCCGTTTACGTTGAAACAGACG  
CGCAAGTTGAGCTGAGATTTGGCCCTAGAAAATTCATGAGGAGAAATTCAGTTTCGTTAAACCTAACTGATAAATGTAAGCCGCGACCTGATGCTTCGACAAGGGGCTGATATCTTCATG  
GGAGGTGGATCAATTGTGCCATTTTCTCCATTTATATTGTCCACTAGCAGGAAAATCGTGATGGCAGAGCAATTTGGCAGCCTTCTGCACAAGAAATGGAAGACCGAAGAATG

>comp145806\_c0\_seq1

AAATCTTTTTTTTTTTTTTAAATTTTCATTATGATTGATTAAATGAGAATAACTACACATGTATAATCGAGTACAGTTGTTTTTCATGGGATCGCCTAAATTAGATAAAAGAGTTTAGATATGGTA  
AAAGTATTATGCAATATGATTATCATCCATCAACTGTTTLAGCTAAGTTATAATTTGCTCTTTGTTGCAGGGCATCTCAGAGTATATTTTTAAAAAGATATACAACGGGATGTACGATATGCA  
GACAAACCTTTTAAATGCTTATGAAGATGCCAAACTTGAAGGTGTTTGAATCTGATCTGACAGCTATCCCTGTGCCCTACATCATATTAGAGATCTGACTCCTACAGTGGAAGAGAATGTAA  
CTGTATTAACCACCTTCTTTATGCTTCCATTCAAGCACCATAAAGAGCGAAGGCATAAATCACACACGCACACGCTTATACCTATCTTTGAACCTTAGATCTCCTAATGGGTGACAAAGTCT  
TCAACTAACCAGCCTAAGGAGAGGGCAACATGACTTGTATCTAAGTTCTATGATTATTAACATTTCTCATGTATATTTATACTTCTATAACCTGTTCAATTTTTCTCCCTGCTAAGAATATG  
ATTGACCATTCTTCAAAAAATATTTAGTAAAATACAGCAGCTTTAGCTTGTAACTTGAGAAGAGGTGCTGATTACTTTGCACTCGCTGAGGTTTGTCAATCCTTTAACAAGCTAAGTAAAG  
CCAGCTGTAAATCGAAATTGTGCCCATGACTATCATGAATTCTGGTCCAGTGGTTTTGTTATCTATGATAGTGGTCTAAAGCTTCTACATGAAGCTTTACAAGGTCTCCGCAACTTTCAGC

GTTAATGATGGAATTTTGGCAGAAAGTTATGCAGATTGAATTCTATGGTGATTGATGATGAAATCATTGTTCCAGCTTTGACCTTTGGACAATTAGTCTTCTCTTTTGCACATTGTTGTGGAGT  
AATCCCAAAAAGTTGCGTCAGATTGGCGTTTTCAAATGCTAAAGTGGCCTCAGTACTGTGCTCTTCATATCAATGTGATTATGTATTTCTGGAATTACGATTTCCTTTCTTTCTTTTATT  
TGTTTATATTTATCTATCGTGCTTACTTTAAGTTGTCTTCAAGGGTCATCTGCTGCACCTTTGAATGTTGTTAAACTATGAGGTCATTCTGTCTTATCTGTCTCTCCAGACATTATTGCCAAC  
>comp145827\_c0\_seq2

GCCTATGGTATGAATATGTTTGTATTGATTGAATGGAAGAAGAAAAACATAACAGGCATCTATCATAAATGGCAAACATTGAATAAAGACAGAGCCCTTTGGAAAATTGGAACCTGCCAC  
CTGGTTTACTGACATTCTATAATTTAACGCACCCACTGAACAAGTCATGGCATGTTCTTGGTTTGGGCTATAATCCGAGCATCGATCGCTCGAAGATAGAAAATGCTGCTGTTTACATTACA  
ATGGTAACATGAAACCTTGGTTGGAGCTGGCAATGACAAAGTACAGGCCTTACTGGACCACATATATCAACTATGATCATTACATTAGAACTGCAAATGAGAAGATAACTATAGCT  
CAACAAAGGCATGATTAAATTGCATAAGAAGGAGTTTTTGTATCCTATTGAGGCCTTTCCTTACTCTGTCCAGTCTAATTTTGATGATGTACATTACATCTTTGTAAATTTATTCATCTTAATA  
GGGCACATGATTTCTTTGTTGAACAATTTACTGGTGCCTGATAGTTGTAGATATAACAATTTAACAGTACCAGATTGTTATTTTATTCCTTGTAGCTTGTTTATAAAGTAATGCATAGTTG  
GGATCTTCAGCTTGGCATTGTCATGGATATAGTTTGTGTTTGTGTTTGTGTTGTTGTTATTTTTTTGGCTTGAAGATGATTGTCTGCTAGTTTTC

>comp145843\_c0\_seq1

CAAGTGTTCAACAATACTAAGAAAAAATCTCCATAAATTGAAAAAATTATAAAAATCATTAAAAAAAAAACAGTAAATCCTGGTACTATAATCTCAGAACAAAAATCAATAAAAAA  
ATCTCTCACATGAATTCAAATAAATGGCAGATCAGTAGAACTAACAACCGCTTCTATTAATCACCTATAAAAAGAATAATATGCTTCTTCAAATTAGAAAAACAAGTAAACAAGACTTCATT  
TCAGCGCTCTGCTTCACATCATGAATGCTGCAAATCTGCTACTTTCCTGAAAAGCTGTAAACTTTTTTCTTCAATGCTTCTATTAGAATCAAAACTGTCACAAATTTCAATCTGAAGCA  
GGAAGGTTGAGATCCAGTGAATTCAGCTCTGAATTCTTCTGCTCAATCTCAATTACTGCCGCAGAAACAGTGGCAGCCGAAGCTGCAGAATTTCTGCAATCAAATGTGATCTCTTATGA  
CCACCCAGAGCTTGCCCTGAAGGAAAAACTTTTGCACAAATTTGGGCACTCATAAATTCTAAATTTCTGAGAGATAAGATTTTCGGCAACCGCTGCTAAAACAGAGGAAGAATCCACTCT  
GATCTTTTTATGGCTGCACAGTGGCCTCCTAGAGCTTGATAGGAATGAAAGCTTTTGTGTCAGCTTGCACACTCATCTTCTTCTGCTAAAATTCTCAATTCAGCAGCGAAATACC  
TTTTTCTTGATTTCCCTCGTGTCCAGATTCAAAAACAGAAACAAATTCACATCTTCCTTGAATTCAGCTTCATCCTCCTCTCCTCGTATGAAACCCAGATTGAGAAGGAAAG  
GGGTCAACTTTCTTGATCCCAATCTTCAAATATCAGATTCAGATCTCTTACCTCATTTCCGTCTGAAAAGAGCCTGCGTCTCTCGAGAGCATCATCAGACACATGGCACCATACTCTG  
GTGAGGAAGGTGCCGGGGAAGAAGAAGCAGAGATTGCTTCAACCAGCTTTAATCTCATTCCCTGTCTTGTCTAGGCTCTTGCATTCTGTATCACCTCCAGTTCTTCTTCTGATCA  
TCATCAACTCCAGTGCTCCATGTCTTTCTCCTCCAGCTCCACATCCTCATCATAAACCACCGCGATTTTTTCGGTTTTCTCTGAGTCCATATCTGCTCTCCAGCTTCCCTTGAATTG  
AAGGAAGATTTGGTCAATGATGATGAGACCTCATATGGCCTCCAAGGGATCTACCATTGGGGAAAGCTCGTTTGCAAATTTGCAGAAGTGCATTTCCATGGAAGAAGAACAGGGGAAGAGA  
GAAGGACGTGAGAGAAGAACAGATTTACTCAAATAGGTTCTAGTAATCTGGAGAAATTCGTATCTGTCTTGTGTTTGAATCGATCTGATACGAACACATTTGGTTTTGTATGGAAAACA  
ATCTCACGCTTTTCACTCAACTCTGCTCAGCTTCTTGTGTTCCACTGTTCGAG

>comp145874\_c0\_seq2

AAAAAAAAAAAAAAAAAACATCATGTACACTCTAGAAATTGATTTAGTACTGCAGTGTCTTCTAAAACCTGAAGTTCTTGCCCTCGAATGTCTGGCCAAAAGTCCACTTTGAAGGAACA  
GCATGCCAAGAGGTGGAGCGGCGGCAATCACCGCGGTGACTCTGAAGGTGAGAGAACGACCGAGGATGGCATCGTTTGGCAGTATTGGCCCAAGTTTGGCTTATGTTATCCA  
TGGCAGCCTGTGCCCTTTCACCTGAACTCGGCGAACATCACCAGCACCGGCGACATTCCATACTAGTATCAAGTTGAAGTAACGGTTGCCGTAAGTGTGAATCGGATTCTCCTCCTTC  
TTGCATGGAACCTTGCAGTAAAGAGACGGGAAACAATGCCGGCTTGGTACTGTGCGATATGGAGAAAAGCCGGCTGCGTGAGATCGAAGTGCAGCGGCGCGGTTGCACCAGCCGCGT  
TGTGCGCGGGGAGGTTGTAGTTTGGCGGGCAGAGTTGTTGCGGTTGACGAAGAGCGAGGGCTCGCCGGCGTTGCACCCTTGGGATCATCCAGCACATTTATCTCATAACAGCGCGG  
CAAGAGAGCCCATCGTTGAATAGCGCGAGCTCAGCGCCGCGTCTGTAAGCCGTAGCCTTGCAGTACCGTGTCCCAATACCCGCATGCGCCCTCTTGTGTTGAGAACCCTGCTGCCT

CCATAGAATGTGGCGTGTGCTGGGTACCATGGGCCGGGCTCGAACCTGCCATGGTACCTGTGCCTTGGGCGGGCCGAATAGGGCCCTGGCTTCTGTTCAGAAAGGCTCGCCGGAGCTC  
GCCGGTCCGGCCATGATGGTGGTGTGCTGGCCAGAAGCTTTTCGTTAAAAAAGCAACAAAAGGAACAAAAATGCCCGCTAGCTCTGTAGAAAACCTCGCAACGATTTTGCCATGGCGTTGT  
TGGTGAATAGTTTCTGTGTTCTTGGATGAAATTGATAAAGCTGTAGTTATATATATAAGCGTATAGGCTTAGTGGTCAGAATTGGTTA

>comp145874\_c0\_seq3

TTCATGCACAAAAAAGTTAATGCTCAGAATACAAGGCGTTTATTTTCATAATTGTAATTTTAAATTTTGTAAAACATTTTTTGCAAGGAACAATTTTCTCGAAATGTCCAAAA  
AAAAAACAATTTTCTCGAGTACTACATTAATGAGTTGTACCATTTGATTACCTCTTGTGTTGAGAACCGTCACTGCCTCCATAGAATGTGGCGTGTGCTGGGTACCATGGGCCGGGCTCGA  
ACCTGCCATGGTACCTGTGCCTTGGGCGGGCCGAATAGGGCCCTGGCTTCCTGTTTCAGAAAGGCTCGCCGGAGCTCGCCGGTCCGGCCATGATGGTGGTGTGCTGGCCAGAAGCTTTTCGTT  
AAAAAAGCAACAAAAGGAACAAAATGCCCGCTAGCTCTGTAGAAAACCTCGCAACGATTTTGCCATGGCGTTGTTGGTGAATAGTTTCTGTGTTCTTGGATGAAATTGATAAAGCTGT  
AGTTATATATATAAGCGTATAGGCTTAGTGGTCAGAATTGGTTA

>comp145893\_c0\_seq2

CTGCAACAACAAAGAAAAACATTCTCAAACAAGAGAACAAAATTGTTCTCTAAAGATCAACAATCAGAAGTTAAAGTTCAATTGAACTAATCAATCTGCTCTAAGAATTACTAAGCAT  
TAAAGAGGAAAACCTTGGCAAGAAATAACAACAACATAAAAAAAGGAACTAAATATATCCTCTTGCCTCTTAACCCACAGGCCCCCACTTTGCAACATCATTCCCCACATGGCACAAAA  
GCAGAACTACCAAAATTTGAAACCACTGGAGAAAAGGTGGAAGAGGCCTGATTCCTCCAGTCTTTTCCCCACAATACACAAACCTATCTCTACTTTCTTTTTACCTTCTCCTTTAC  
TTCATATCATCTTTGGCCTGCTCTCAACATAAGAAAAAGATTCAAGCATCATTCCATGCAGCATAAACAGGCGTTTGTAGCCATAGGAACTGAACTCCTAAGCTGGTTTCGATGTCGGCCCC  
CAGGAAATCAGTTGCGTTGTAGGACCGACAACTTGGTCGACAGAGGCGGCATCGAGGCCATAGGAAGAACCATAGCTTGTGCTTCGTTCCCTTGAGCTGCTCGAGTCACCAGTCGC  
CAAAGATACAGTATTCATTCTGTTGGGATTATTCTCCATGCCTTGCTCTTCTGAACTCCAACCTTTCCATTCAAAAAACCCATGGAAATTTGCCAAGAATGAACTGTTCTGATGATTGCCATT  
AGCTGATATAGATTGGTGATCCAGTGGTCTGAGTTTGTGAGCTTGTGTTGGTACTGGTAGAGTGTCAATTCTCCAATCAGATGCACTGGTGTGCTTCAGTAGAATCAAGTTCTCTA  
CTGTTGTGTTGATCTGTCAATGCTACATTGTGATAATTTGATAACTCCATTTCTCGAGCAAGTTCGCCGACAATAGAGTGCTACTTGCCATGATCTTATCAACATCATATCTTGACATGA  
TGAAATTTGTTACAGCATTTCGTTCCGCGAAATTTGATTGCAGCAATGTCATAAGCTTCAGCTGCTTCTTCTTGTGTACCAAAGGTTCCAAGGTAAAGATCTTTGTTTCTGAGACTCTCCA  
ATGCGAGCTTGCCATCTTCCATGTTGGTGATGCCTAGTGACTCCGCGATATATAGAAGCCCTCTAGAAAATCCACTGCTTTTTCCTTCTTAAGTGTGCAACATATCCTGCCTACTCATGTTT  
TTCATTTGTACAAGCTCCTCCTGGTAATCCTCCAGAGAGAAATTGATGTGGGTGGCAAGTCCCAATACTTTAATGCAGCCAAGTCATAGGCCCTAGCAGCTTTCTCTTCCAAATCATAACC  
CCCTAAAGTTTACAAAATGCAAAGAATAGGAGTTTGTGAGCATTGAGGAGGAAGTTAATGAACAAGTCATGAAAATCTCAAATAGAAAAGAAAGGCGCATATTTTGGTAAAGAAAGTAG  
AGGCATACCCAAATAAACTATTGTTGAAGTTTTTTGTTTCATGGTACCCCAAGGAAAGAACATGACAAGGAACCAAAGTTAGATAAAATATTAACAACTTTATAAAGGGAAATAAAAA  
AAAAACAGACCACAAAGCTTCAAACAAGATTTTCTTAACCAACCTTGTCTTCCCTTCTCT

>comp145893\_c0\_seq3

CCTGCAGCCTACCAACTAGCTGGTCAATTATTGGGTTGTTAGCAGTTTATTTTATATAAAATCTCATCAAATCATTATTGGGTTCTTAGCAGGTTTAGGGTCTGCTGGTTGGTTACTGTTGCAA  
TGATCATTTTTTTTTTTTGAAACTAATCAATCTGCTCTAAGAATTACTAAGCATTAAGAGGAAAACTTGGCAAGAAATAACAACAACATAAAAAAAGGAACTAAATATATCCTCTTGCCT  
CTTAACCCACAGGCCCCCACTTTGCAACATCATTCCCCACATGGCACAAAAGCAGAACTACCAAAATTTGAAACCACTGGAGAAAAGGTGGAAGAGGCCTGATTCTCCAGTCTTTTT  
CCCCACAATACACAAACCTATCTCTACTTTCTTTTTTACCTTCTCCTTTACTTCATATCATCTTTGGCCTGCTCTCAACATAAGAAAAAGATTCAAGCATCATTCCATGCAGCATAAAC  
AGGCGTTTGTAGCCATAGGAACTGAACTCCTAAGCTGGTTTCGATGTCGGCCCCCAGGAAATCAGTTGCGTTGTAGGACCGACAACTTGGTCGACAGAGGCGGCATCGAGGCCATAGGA  
AGAACACCATAGCTTGTGCTTCGTTCCCTTGAGCTGCTCGAGTCACCAGTCGCCAAAGATACAGTATTCATTCTGTTGGGATTATTCTCCATGCCTTGCTCTTCTGAACTCCAACCTTTCCAT

TCCAAAAACCCATGGAAATTTGCCAAGAATGAACTGTTCTGATGATTGCCATTAGCTGATATAGATTGGTGATCCAGTGGTCTGAGTTTGTCTGGAGCTTGCTGTGGTGACTGGTAGAGT  
GTCATTCTCCAATCAGATGCACTGGTGTGTCTTCAGTAGAATCAAGTTCTCTACTGTTGTGTTGATCTGTCAATGCTACATTGTTCGATAATTTTCGATAACTCCATTTCTTCGAGCAAGTTTCG  
CCGGACAATAGAGTGCTACTTGCCATGATCTTATCAACATCATATCTTGACATGATGAAATTTGTTACAGCATTTCGTTCCGCGAAATTTGATTGCAGCAATGTCATAAGCTTCAGCTGCTTCT  
TCTTGTGTACCTGGGATTATAATTTACTTAAAGTCAGCAAGATCTGGTAATATGGACATGGTGGATTAGTCAAACAAGAGTTTTGTAGCCACAGAAGAATCAGCCTTATAAAAAGGAGATG  
TACTGTTGAGAGAGAATTAAGAATTAAGAAAAGCAGTTGTTAGTCTGAAATGGCTTATTCTGAATGTTCTTTTTGAATGACAGGTAAGGTACATTGATAAATTTTGAGAATAAGCCAGA  
AACAAAATAGCATCAAGCATTGAGAAAATTAATGGAATGTATTGTA AAAAGAATTAGAGGAGCTAACCAAAGGTTCCAAGGTA

>comp145893\_c0\_seq4

CCTGCAGCCTACCAACTAGCTGGTCATTATTGGGTTGTTAGCAGTTTATTTTATATAAAAATCTCATCAAATCATTATTGGGTTCTTAGCAGGTTTAGGGTCTGCTGGTGGTTTACTGTTGCAA  
TGATCATTTTTTTTTTTTGAAACTAATCAATCTGCTCTAAGAATTACTAAGCATTAAAGAGGAAAACTTTGGCAAGAAATAACAACAAACATAAAAAAAGGAACTAAATATATCCTCTTGCCCT  
CTTAACCCACAGGCCCCCACTTTGCAACATCATTTCACACATGGCACAAAAGCAGAACTACCAAATTTGAAACCACTGGAGAAAAGGTGGAAGAGGCCTGATTCCCTCCAGTCTTTTT  
CCCCACAATACACAAACCTATCTCTACTTTCTCTTTTTACCTTCTCCTTTACTTCATATCATCTTTGGCCTGCTCTCAACATAAGAAAAAGATTCAAGCATCATTCCATGCAGCATAAAC  
AGGCGTTTGTAGCCATAGGAACTGAACTCCTAAGCTGGTTCGATGTCGGCCCCAGGAAATCAGTTGCGTTGTAGGACCGACAACTTGGTTCGACAGAGGCGGCATCGAGGCCATAGGA  
AGAACCACATAGCTTGTGCTTCGTTCCCTTGAGCTGCTCGAGTCACCAGTCGCCAAAGATACAGTATTCATTCTGTTGGGATTATTCTCCATGCCTTGCTCTTCTGAACTCCAACTTTCCAT  
TCCAAAAACCCATGGAAATTTGCCAAGAATGAACTGTTCTGATGATTGCCATTAGCTGATATAGATTGGTGATCCAGTGGTCTGAGTTTGTCTGGAGCTTGCTGTGGTGACTGGTAGAGT  
GTCATTCTCCAATCAGATGCACTGGTGTGTCTTCAGTAGAATCAAGTTCTCTACTGTTGTGTTGATCTGTCAATGCTACATTGTTCGATAATTTTCGATAACTCCATTTCTTCGAGCAAGTTTCG  
CCGGACAATAGAGTGCTACTTGCCATGATCTTATCAACATCATATCTTGACATGATGAAATTTGTTACAGCATTTCGTTCCGCGAAATTTGATTGCAGCAATGTCATAAGCTTCAGCTGCTTCT  
TCTTGTGTACCAAAGGTTCCAAGGTAAAGATCTTTGTTTCTGAGACTCTCCCAATGCGAGCTTGCCATCTTCATGTTGGTGATGCCTAGTGACTCCGCGATATATAGAAGCCCTCTAGA  
AAATCCACTGCTTTTCTTCTTAAGTGTGCAACATATCTCGCCTACTCATGTTCTTCAATTGTACAAGCTCCTCCTGGTAATCCTCCAGAGAGAAATTGATGTGGGTGGCAAGTCCCAAT  
ACTTTAATGCAGCCAAGTCATAGGCCCTAGCAGCTTTCTCTTCCAAATCATAACCCCCAAATAAACTTGTCTTCCCTTCCTTGCTGCCCCTCCTTCTTGCAACTGTTATCCCAAAGGTGA  
GCTTCATATCTACCTGTCCATCTATGCCTTGTAACCTCCTCTGTATTGAGAAGTTCTCTGGCCAAATGTATCAATGGACTTCCTGTGAACTGGCTGCTTCTCAGCTCCTTTTCCATTTGCTCTCT  
TCTTTGAATGCTCCAAAGCCAACCTGCTCATTCTTGAAGCAGAAGTGATCTGCTGCTGTGGAGCAGTTATACAGCTAGATTGAGATCCAGGGCTCATGGATAAGCTCAAGGGCTTGAGAT  
CACCATGCCTCAGTAATCCAAGAGAGCTAAAACCCATCTCTTTTCACTAACTCCTTCAATTGCTTTGGAATCTACAATCGGACATTTGATCTCCGACCAATGAACCTGATACATCTCA  
TGCAATGGCTGAAAGTAGTTTTGGTGCCTGAAAGGTTGTTGAAAGAGCTCAAGAGAATGGTTTTCAATTGCTCTCGTCTCTATGTTTTGTCCATAATACATACTGTCCAAGCTTAGAGCCA  
TTGCTCCCCTGTCCTGTTGCTAAACGGATGGGTCCCCATGTTAGGACCACAGCCAGGAAGTCTTCCAGTTTTGGGGATGGAGATGGCACCATTCTTCTTGTGATCTGCTGAAGGCTTC  
CATAATGCAGAGAGAACCATCAGACTTAACTGGCATGACTGATGAAAGCTGAGAGTAAAACCTACATTCTCTCCATCAGCTCCATAGCAAATGCCAGAGCTGCTGAAATGGGGATAAGA  
AAGAAGAAAGTTGCTTGGAAACAAAAGAGGAAGCGTTAGCCGGTGAAGATTGATGAGTAGCTTGAAGATTTGCTGCTTAAAGGGGATCTTGAGCAAATTCATTCCAGCTGAGGGGAG  
AGAGAGAAGCCCAACCAGTTGGTATTGTTTCACTGACTTCATCTTTCTCACACAAAATAAATCAGGGGAGCTCAATCATTGGAGAGTAAATTTTATCATAATCCTACACGCTACT  
TCACCATCTTTATTGAAGCCTGGGTTTCTGTGTTCTCAACTTGAAGAACTCAATGCCTTGAAGTGTTCAGGGGGAGAATGAAAGCAAAGAAGTTGGGAGAG

>comp145911\_c0\_seq1

CTCTCTCTATATATAGGTGTGTGAAGACAGAAGACTGTAGAGCATCGATATCCCTTCGTAAATCTCAAGAAGGATGACAGAGAAAGTAGCAGCGATGGGCCAGCAAACAACAACGA  
GACAAAGGCGTCTCATAAGAAGAAGAAGAGCAGCAGGTTTATGGGTTGCATGAAGGCCCGCTCAGAGCCTTACGATGCGCTCGTGACATGTACGTGAAAAGCCTTGGTGGCTGCGCA

GGAGCAGGTGGAGGTGGGCGTGGAGCCCCAATGACGGGAGTTACTGCAGGGATGGTGGCGATGATGCCGCGCGCTCGCAGCGTCAACGCATTTGGGAACTCAAATGGCTTTGGAGGAG  
GGAGTGGCCGGGATGATGATTTTAAGGAGCTTATTCGCGCGAATTCTAAGCAAGATCATGATGATGCAGCTGCAGGGATGGCACAAACGATTAAGAGGAGCCAAAGCGTAGCGCCTGCTA  
TTGGGAGGATTGATGAGGATGCTCCATGCGATGACTTTGATGGGGATATTATTAAGTTGGGGATTCCAAGGAGCAAGAGTTGCGCGGTGGTGCCAACTGCAAGAAGGATTAATGTCCTCG  
GTGTTACGCCACGGCTTGATTTGTTTCTTTTTTTTTTCCCTCATGTGATCGAGGGTGTGTGCGTGTGTGTCATGGGGTGTGGCGGGCGCAAAGATTTCTCGTCTAACGTTTTGTTTTGA  
GGTATGTCTATGTGCATGTAAAGCTTGCTTTCAAGTAGTGTTTCTATTATTTAAACTTCTAATGATTTTGCTGTGTGCTAACTTGCCCTCCGTTGGCGTCTTTTTGTTATAAAATGAATCA  
ATCACAAATATCTCAAGGATTTTTATCAAGACATATGCCACTATTGACTATTTAAGTCTTTTTAATATATATATACGTTTAGTGCATTTAAAAATATACTATATAACAATTATTATTATTAATCCT  
ACATCAAGCTTTCTTGAAAATTTAGTTTGGGTCCTATTTCTTCTATGAATTTTAGGACATGCAATTTAACGTTTTCTTGTAATGTAATTTTGTATTTCAGACACTACTAAAAAAT

>comp145934\_c0\_seq1

TGGCTGATCCAAATACTTTTTTTGTTCTCTTTAGTTAACTGATCATCAAGCAACCACCGCTACTTCTTCGGCACCACCACCGGAACTGATCAATCTCCCCACCCACGGATTTCCCTTC  
CTCCCAACCTCCCCGCATCCCTCCACCGTCTCATCGCTTCCAGACCGCGCTATTACACTTGAATCCCGATCCGAGCGCAATCTGCCACACCTTATCCCCCTCCTTTATCCTCCCCTTGGC  
CTCACAATACGCCAATTCATACCACAAAGAACTACTCGAAGTATTTCCCGAACCTATAAAGCGTCATCCTCGACGGCTCCATATGCCACTCACTCAACCCCATGCTCTTCTCCAGCTGATCC  
AGCACCGCTCTGCCTCCGGCGTGGATACAGAAATGTTGACTGCTTTTCGAAAGTTTGAACATAGGTACTCTGTTTTTTGTTTTGGAGCAGGACGCGGAAGGAGAGGAAGGCGAGAAG  
AAAGCGAAGCTGTTCCGAGAAAGGGGAGGATGAGGGGGCCGAGGGAGGAGATGTTGGTGCAGGAGTGCAGGTTGCGGCAACGGACATGAGGTCTTTGGAGAGG

>comp145941\_c1\_seq1

CTGCCAGAATACTCTGGATAACTGCACAACACCACCTATTAGAGCAACATAACATAAAGGCATAAAATGTAGAAAGAATTTTAGTGTTTGCCAATGGTAGCCTCCAATACCAAAAAGTTC  
AATAGGTATTAACGACTAACCTTCAAATGTTAATAAAAAGTACAAAAAAGTTAGGTAATGATGTAATGAGTAGTTAATAGGTTCAATTTAGGTATTACATAGTTAATAGGTGTTTGATAGC  
TCCTTATGGGTCTTATAATGCTATAAATGCCCACTTGCAGGGGAGTTAGAAAATGAAAATGAATGAACATAAGCTTTAGCTGCA

>comp145944\_c0\_seq1

TCTGCTTTAATGCTTTAAAAAATAGGGAACACCTTTTTTTTTTAATGCGGCTATAATTTGCTATTCTTAAGAACCTTATTCCTCAAATGGACAGTATGCATTTACATCCCAACCTTTTGCAAG  
CTTTTAGTTGATTGAAGATTGGGATATTCATAAGGATTGGAGAAGCTTCTACTTCTTTTTGCTATGTGTTGCCCTTTTACTAATTTTGGAGAGCTAGGAATGACATATTATTTGGCAACTCT  
TTTGACTATCATGCTACCCTGCTGTCAAAATTAGGAGAGTTGTCTTTATAAATTCTACAAATGGAAAACTATCAACTTTTTCAATGTCTGCTTCTCTGATCTTATCGGATGGTTGTGCTAT  
ATTTCTCAATCCTACTTTTGCTGATTGGTTTTGGCAGGCTGGAGGCTTAATTTGTGATCTCTAGATGATTTTTGGCTCGATGAATGGTCTTTTCTTGACAACCAGGTATCGGTTTTGAAGGAC  
AATGATGAATGCATGTTTATCTTTGCTTCCCTTGGACAGTCGGCTCTGGCATCCAGGATCTTTGCCATCTCTTTAGATAATTTGCTGCTGGGTGATCTCGACATGCTATGCATCGTAAG  
TCCTTCATTCCTTTTGTTCATTTCTATTTAGCTTCTGGTTTTGTATTTCTTTTTTCAGCAGCACTTGATGTATGTTCTTTTCATTTGCTGCACATTTTGTGTGCCTGCATATGGCTTCGG  
CCCCAACTTTCCCTGAAAAAATTGTACAAATATACATATAACATTATTGAATTT

>comp145985\_c0\_seq2

AAAACAAAGAAAAAGAAATTAATTAGACAAAATGTTGGACTCAAACGATAATAAAAAACATCGAGGAACAAGAAATTTGTTATCAGTAGCACTCCTGATTTCCATATAGGAGAATTAAGA  
CCATCCAGGTAGGGAATCTAGTTGACATAAAATGGTCGTCATTATCTTGAAGCTAGAAAAATAAAGCATAACATGCTGTGAGGAAGAAGAAGAGCCACCCAGTTAATACCTGAGAAG  
CAACTAAAAGTTTTACCAAAGTTTTTCATCTGAAAAGTTTGAGTTAAATAGCCTTAAAAATGCTAGCCGAATATTATTAAGACTACAAAATTTGTTGATGAACCTTTCTCCATTCCTTTCTTT  
TGATATATAATAACAAAGGCCAAATAGATAAATATAAATAAAATTTATATGTCAGTAGGTATGTCCATATGGTCAGCCACAAAATTCAAAATTTGCTGCAGGTTTGGCCTAAAAAGATAAG  
AAGAGCATCAAGACAAGATATTGCAAAGCAAATGAAAAGTAAAATCACATTTAAAGTAAAGTTGACTGGTGGTTTTATTTCGAATTAAGCATAAAACACATTTGTGATACACCTGAATGTT



TCTCTTAATCAAATTATTAGTAGTTTTCAAACCCCCCATTAATGC

>comp146092\_c0\_seq1

TATGATCAAACCAGCAGCAGTTGATGATTCAATTCAATTAATCATCCCAAATGAAAGTCAAAAACTACTTGCTAAAATTGACTCCCATCGTTACGAAAATACTAGCCGTTAGAACAGC  
AAAGAAACAGCCTTTGTTTAAATAAGAGCGAAGGAAAAGATGGTGGCCATCCATCTTAATTCTTCCTCTCCATTCTGTCTCAACAGAGCGCCAATGGTGGGAATGTCGCTGGATTACAGC  
AAAGCTCAGGCGGTGGTGGCAATAGACAGAGACAAAAACAGCCTACAAGCCGTGAAATGGACCGTCGACCACCTCCTGATCAATAATTACACCATTGTCTTCCTCCATGTTTCGACGGCC  
TTCCATTAACAGCCATTATGGGTTTGCCATGGCAGAGACCACTGATGATGCGGCAAGAGAGCAGTTTGAGGCTGAGATGAACCAGCTTTTTCAACCTTACAGAGGTTTCTGCGTCAAAAA  
AGGGGTGCAGGTGAGGGAAGTAGTGCTAGAAGACATGGATATCTCTAAAGCCATTGTGGACTACATAGCAACTAACAAAGTCCACAATGTTGTTGTTGGTGCCTCCAGTAGGAATGCTAT  
CACAAGAAAATTTAAAAATCCTGATGTGCCCTTCGAATGTGGCCAAATCAGCTCCAGATTCTGTACAGTATGTCATATCCAAAGGGAAGCAAGTAAAGTTCGATCAGCAAGAAGCCCTG  
CCCCTGCTAATCACACACCACCGAGGCAAGCACAGCCGCTTACTGTAGCGCCGAGCAATCATCTTGGCTCGGATGATTCTATCAAAGCACCATTGTAAAGAGGAAATTGGAGAGGAACA  
GTCCACCACCACAAATCCAGAGAGGAGGTCTTTTGAGAAAAATGAGCTGATGAAACCTCCAACAAGAGAAAAGATTTGTAATCCAATGAAAGGCTCACCATGTCATGCTTTGCATGA  
CAGTTTTGACGTCTACTGTTCCCAAAGGCCTGCAACTTCAACGCCTAGGGAATCCTTTTCAGAGGATTTTGATGTTCAAAGAAATATGGGATTCAGAGTTCTGATTTTCAGTGAGTCATTT  
GAGATGAATATGAGCAGCATCACTGACATATCCTCAACAAGTACTAATGCAAATAGAGACATAGAAGCTGAGATGAAAAGACTGAAGCTTGAGCTGAAGCAAACCATGGACATGTACAG  
CACAGCGTGCAAGGAAGCAATCACATCTAAACTGAAGGCAAAAGAGCTTCATGATAGGAAGATGGAGGAAGCTAGAAAAGGTAGAGGAAGCAAAAGTATGCAGAAGAAGCAGCTCTTGC  
TCTTGTAGAAAAGGAAAAGGCCAGATGCAAGGCTGCTATTGAAGCAGCTGAAGCAGCTCAAACCCTTGCAGAATTTGAGGCACAGAGAAGGTTAAATGCAGAGCTTAAAGGCCAAGCAT  
GAAGCTGAGGAGAAGTTGAGAGCTCTGAATGAACTGGCACTTAAGGATCAACGCTACAGGAAATACAATATTGATGAGATTGAGATTGCCACTGAATACTTCTCAGAATCACTAAAGATT  
GGGGAAGGTGGATATGGGCCTGTTTATAAAGCTTCACTAGATCACACTCCAGTTGCCATTAAGTTCTGAGACCAGATGCAGCTCAAGGGAGGAAGCAGTTCCAACAAGAGGTTGAGGT  
TCTGAGTTGTATAAGACATCCAAATATGGTCCACTACTTGGTGCCTGCCCGAGTATGGATGCTTGGTGTATGAGTTCATGGATAATGGAAGCTTGAAGACAGACTATTCCGACGTGGG  
CACAGCCCTCCTATCCCATGGCCGGTGAGATTCAAAATTGCAGCAGAGATAGCCACTGCTTACTCTTCCCTCCACCAGGCTAAGCCAGAGCCATTAGTCCATAGAGACCTCAAACCAGCT  
AATATACTCCTTGACCACAACCTATAACCAGCAAGATAAGTGATGTAGGCCTCTCAAGGCTTGTTCCTCCTCAGTAGCTGACAGCGTAACCCAATACAGAATGACTTCAACTGCTGGAACCT  
TCTGTTATATTGATCCTGAGTATCAGCAAACAGGAATGCTTGGTACTAAGTCTGATGTTTACTCACTTGGGGTCTTCTGCTTCAAATTATTACTGCTAAAGGCCCAATGGGACTAACTCATA  
TTGTAGAAAAGAGCTTTAGAAAAGGGGAACCTTAGTTGATTTGCTTGATCCTACGATAACTAATTGGCCAATGGAAGATGTTATAAGGTATAACAAGGCTTGCCTGAAATGCTCAGAGTTGAG  
GAAGAAGGACAGACCTGATCTTGGGACTGTTATATTGCCAGAACTTAATAGGTTGAGAAATCTTGGTTTTGAATATCAAGCTAGTTGTAATAGTAGTAGCAACGGTAGCACTGATGGTGGA  
AGTTTTGGAGTGCATCAAAGAGCTAAATCTGCTTGTCAAATAGGTTTACCAACGGCCAAAAAAAATATTATTTGAGAATGGAGATTTAAAAATGTAAGGCTTTTTTTTTAATTATTTTTGAC  
AGATTTTGTGAGATTTTTTAATCTATGATGTAACCTTTTTCTTATCTTCTCATCTTTTCAGCACAAAAGCTATTAATGACGATTAATTCATATGGTATTTTACTATTTT

>comp146112\_c0\_seq1

TGAGAAAAATACATTTTGAATGTGTGTCGAAAAGTTAATAAGTTTTAATTGTTTGGCGTTTGCAAATTAATGAGATGAAACAAGTAACTAAAGAGTTTGTAAAGGGGATAGGAAACGATT  
CGTTTTGATCCATGAACAGAATGTTGCGAGTTAAATTTAATCTGAAAAGATTTCAAAGAATCAATAAACAATGGTGGATGCTGAAAGACTTAACATAGTTTCAAAAAGCCCCAGTTATGTTT  
TGAGGAAACCAATGAGATGATGCACAAAATGAAAATTTAAGAAAAGAAAAGAAAAAAGAGATTAGTGACGCATAATTCAATTAGAATCTGATCAGTAATGGCAATCAAAGATCGCAGA  
TGTCAGCAACAGAATCGGTGCTCGGCTCTCAAAGGAGAAAAGCGGTGTCTTTGTCGCGGAAACAGAGGAAGGAGACTTCGCTGGATTGACATCTTCATCGCAGGGAGCAGGGAGGTTG  
AGATCCAGGGAAGACCGTTCGAATTCCTCTCCTTCTTCGCGGTTCCGGTAGGTTTGCAGGGCGGTGCCGCCGATATGTCCGCCGAGAGCCTGACCGGAACTGAACTCCGCGCCGCAT  
ATCGAGCATTGGTGAGTTCTGGCCTTTGCGGCGACTTTCGAAGGGAATGAATTCATGCTTAGCTGAATCGAATCCTCGTCCATCACCATCGTCTTCGTCGCATTAACCAGAAGCTTGGGTT

TTTTATGGCTCGCGCATGCCCGCCGAGCGCCTGAAAGGAGGGAAAGCATTACCGCAACTCTTGCATATGTAGATGTAAATTCCAGCGCGGCCCGCGGTGGTTCGTGGCGCCTCTACGA  
ATCGCTTGCTGTCAAGATTTTCATGCTGGTAGTCGGGTCCCTCTGTTATGTCAAGATCTGGCCTTTGATCGCCTTGGGCAAGGAGCATGAGACATTTAGCCATTTCTTCGTCTCCTCAGTTACG  
CAATCAGAGAACTCCGCGGAGGTGACGTATACGACACAGCCGACGCCGCCACCGGCGCAGCCTCCGCCAATGGAAGCTTTAAACCATTGCCGCTTGGTTCTCTTCCTTTTCACCATGGGC  
AAATCTTCCATTATACCTTCCATTGATGGGTAAGAAACAACCTTTTGTGCGAGAGAAGTGAAGGGTGAAGGTTAAGGGCTGTTATATATACTGAATTGGATTAGAAGCTGTGGACTTTA  
ATTTGCGAGTCAAAACCGGACATAAAAAGCCGCAAAATCACTCCTTTTTCCCTCCCCCTCTTTAAAAACCGCAAATGTTTCGCTATCTTCCGTTTTCAAGTTCACTTACTTCTCTCCTAT  
GGTTATTAATGGAACA

>comp146147\_c1\_seq1

AACTTTCAGAACTACACATTCTAGTAGATTTTGAATGTGAAAAGCTTATTCTCACTGTAAAACTACAAGAAAAATGATGAAATAAATCTAACAAAATATAGAGAGCAATGACTTCCATGT  
CTTACCTCTCTAACAAAGTTTTACCAAAACAGATGCATATTTATTTAATGTAAAAATATTTACAGCATGATTACAAAGGTGGAGCTCATAGTTCCCCTACCAAGTTACATAAAATAATAATA  
GGAATAATGATGACTCCCCCTTATACAGTCCCTGAATTACTATTTTAAATAAGAGGGAGAAACAAATTATCTAAAATTTAAGGTGAAATTTCTATAATATAGATAATTATATAAAAAAGGAGT  
TTAAGTTCTTTTCTATAGATAATCACATAATTTTTTTTTCTTGAATTTAGAAGAGATCACCCTATACCTTTTTGTATTCTACCAAAGATCTTATGAATGATTAAGGCTTCATTTGAGACGACTT  
TCTTATTGCTTCATAAAGCAGCTATATAGTATGAAAATTAATAATTTTATACTGGAAATCTGCTTTAAGAAGCAAAAAAAAAAGTTGTCCGAAACGAAGCCTAAATATGATAAAGCTACTATT  
GATGATGATGATACCTTCACAGCATCTTCTCAAAATTTGCAAGCTTCTTAACTCTTTGGAATGATCTTGCCAACAGCAACAAGAAAACACCAGCACCAATGAAAGCT

>comp146179\_c1\_seq1

TCCTGTTGTTGACGCTGCTCCGTCGGGATGGATCCTGAGGTGACGCTGGAGCAACAGGCTTACTACTTTCTGGTTATTTTTAAGAGAATCCTGTTGAACCTGCTTCTTCGGGTCCCTCAC  
GGCTTTTAGCAACAGTACCAGTAACAACAGTTTAGTCTTTCTTTTTTAGGCATGGCTTCAAGTCTGCAATACGCCGAAAGTGTCTGGGTATTAGCCAAGACCACCTTTCCTCGCCG  
GAAAATCCCTTGCCCTTTCTCAGTGGGACTATATATAAAGAGTAGGGAGGGGAAACCGGAGCTGTCACGATCAGTTTCGCTCCCCTCCAGGTTGGATATGCTAAAAACGATGGCCG  
CA

>comp146180\_c0\_seq1

ACCACCAAATCCCCCTTCTCTCCAACAACCAATTTCCCGCCTCCCAACCGCCTCCTCTGCGCCGCTCTCCCCTCCAACCTCCACCCGCTACTTCACCGGGCAAACCACTCATCCCCTC  
GCTTTCACCAAACGTAAAAGCTATAAAATCCTCCCCGCTTCTCCCATCTCAGAACCCGCCCAAGCCCTAACTCGATAGACAAATCGAGTTAAAGAAAAAACCTACAATCTTTCGCCGC  
CTCCCCGTCGCCGATCGCACAATGTATCGCGCAGTGGCCCTCGCCTTCTCCTCGTGGCTTCAGCCACCTCGGAGAAGCCCAAGCCCCGCGGCTTCCCCAAGTCTCGAAGGCCG  
CCGCTCCCGCCCCGTGAAAGCCAAGTCCCCACCACCGCCGCTCCGGCTAAATCCCCCTCCGCGTCCGCCAAACCCCTGTTTACCAGCCCCAAATCCAAGTCCCCGCCTGTCTCGA  
TCGCTCCCTCCACCTCTCCCGCCGCTCCCCAGCTGTCTTCCCGATCCCGCCGACTCTCCCGCGCATCCGGCCAGTTGCTCCAGCTCCCGCCCTGAATCCGCGGAGTTGCCGACC  
AGA ACTCTGGCGCTGTGAAAATTGGAGCTTTTATTGGTGGGGCTTTAGCTGCCTCTGCCTGGATCGCCGCTCTGCTTTCTAAGTCAAGAACATGAAAGAAGAAATGGAATACCGGAAAA  
AAGAAAACATAAACTGATGGGTAGCGGTTTCTTTCTGCAATCGTTTGTGTTTTTTTTTTTTTTTTTTTTTTTCTTTTAGTTTGTAAAGAAAACGAGGGAATTTGATTCTCATAGCTTGTGTTT  
TTCTATTGAATTTTGGTGTCTTTCTGATATAACAAGTTGGATTGATCTTGATAGTAACAGAGATGTTTTGAACTAGCAATTGTATTATTTTGGTTTGGAGGTTAGGGGCGATAGAGAAGGAA  
AA

>comp146183\_c0\_seq1

TTTATTTTTTCAACTAGAAAATTATTTAAGAATCAATAAGAAAACCGTCTCAAGCCTTAACTATTTGAAAATAAAGTTGATTAATTGAACTATAAACACACATGAACATCATATGATAACAA  
TAATAGCATGCCTATACAAGATTTTCTAAATTATAGGGAGGGAGAGCAAGAGCCACCCCTGCTCCTCTTCTCACTCACTCCTACTAAGCAAACCTATAACTTCTCTAAGTGAACAATTCTTC

TCAATGACACACTTAGTCAATCACCGATCCAATGCGGCGAAATTCACCGAACCCACGGCCGTTGTCGACTTCTCGCGCATATGCAACCCACCCATCACATCATCTTCAAATTCCTCCTTCC  
GCCGCCGTCGAAACCGGCGAAGATAGACATAAAAAGAGAAGACATAGGAGAAAAGATAGCGAAAACCTGACACAATTACAAACAACATGATCTCTCCATGAACAGTATAACCCTTTGTCTTGA  
GTCTGGCTGATGGCATCCAACGAGGAAGGGATGGAGACTGAGTCATTTGTCATTGCCATAGAGAAGAAAAGAAAAGGAGATCGAACAGAAAAGAAGGATCAGCCTCAACTTCAAATCT  
CCATCTTTATCAATCTCTATATAGCTACAGGAAGATAAAAAGGCCAGCGCTTGTGATGGAGCTGAGGGACAATGATTGCTTGAGAAAAGAGGACTTACTGTTTCTTATTTCAGAGGCAGACAGC  
CAAATATTCTGTGTGATGTATTATTGACTAAGTTTCACATTTTC

>comp146216\_c0\_seq1

TCAAGTTAACAGTAAAACCAAATACCCTGATTTTATTCCCATATCTATAGAGGATGAAGTAATGAATGTCAATGTTCAATACGAATGGAGGCCTAATCCGTGTGAGTTTTGTGAATCCCTCTT  
TCATTCGACTGCTACATGCCCTACTAATCCCAAAAACACAGTTGAGGACAATTCAAAAGAAAGTTGTTACCTTTAGAGGAAGAAGCACCTCCCCTGCTCCTCATAACGCCAGGGATAGAAG  
TTATATCCGCCTGGACGATCTAAGCAACTACCTTCACAGCGAAATCACAAGACTTCTGCTAGTCCGCAAAAACACCAGCCAAAGTCACCACTCCGATATCCCCTCATCTTCTTCCACC  
TCAAAATCTCCCAACATAATTATGTAGCCGATCAGATCTCGGCTTCAAACCTCCTCCACCACAAACCAACCCACAAACCCGACCCAATACCTAACCTTAACTTCCCTACCAATGAATCTG  
TTATCAGATCCATTAACACATACTCAAACCAAATCACAAGAGAACATTGTCTCCCCAACAAAGTTTGATGTGTTATCAGACAACCAAAAATGATATTGGTTCTACCAATTCAGATCCTATT  
AAAGTGGCAGAGGATCCATTTCCCTCCTAAAACAAAATCCACAGCATAATACAGCCACCCCCCTCCTCAGCCAAAACACTAGAGGCAAGAACAAGCCTCAAACCTCCAATTC  
AAAATCTCAATGACCCTTCCCTCAATCGCTTCGTGGAAACATTAGGGGATTTAATCACCCCTAGCAAAGTTAGTGCTTGTAAGCATCTTATCAAAGCTCATAACCTGGATTTGATTTGTATTATT  
GAAAATAGGATTCATTCTAGCTCCTTGGATGATCCTTGGTTTACTGCCGCTCACTCGGTTTTTTGATTCTGAAGTTAGCTGTAACAACCTCAATCTCAATTCCTCAGGGAGAATTTGGATTAA  
ATGGGCCGGGGATCGCATCTCTTTACCCCCACTTTCTTCTCTCTCAGCTTATTTGTGGTTTTGTTTCTATTGGATTGGCAAATTCTTTTTTCCCTCAGTGCTGTTTATGGTTCTAATTCGGTG  
GGTGAAGGTTGTTGTTGTGGCAACAACCTCTGTTCCAATGCTCCCTCTTCTGATATCCGTGGATTATTTGGGAGATTTTAATTGCTGCAGGTATCAAATGAGAAATCTGGGGGAACAC  
CGATCCACTTCAGCAGGTTGGGGGATTTAATTCCTTCATCTTTGACAATCATCTCATTGATCTTCCCTCTACTGGACTTTTTTACACGTGGTTCAACCAGCAAACCTGATAATGCTATACATAT  
CAAGCTAGATAGGGCTCTGTGAATGAAGCCTGGATTGGTACTTACCCTCTTTCTTACTACTTCGTGGACAAACCTTTTTGTTCTGATCATAGCCCTATGGTTCTTAAAGATGGGGAATTA  
ATAATAGCAGCAAACGGTTCCTTTTTAAAAACCTCTGGACTTCTAGGAATGATTATTGGGGACTTTTACTGGACACTTTTATGGAGCCTGTTAGAGGTAATCCACTGATGGATTTCTCTAAT  
AAGCTTAGGAAGCTCAAAGCTTCTATCAAACCTAGAGAATGGGCTTCTGCTAATGCCATTCATCTGATTTGTATAGTCTTCACGACAAGCAACAGTCAATTTTGAATTTACTGGACCAAG  
ATCCTTCTAATCCCAACCTTAATGTTGCTTTGAAGGGCATCAATGGGGAAATGCTGATTTAACTTATTCTGGACTTCTTGGGTTTTCTCAAAGAGCAAAAAGCAAATGGCTTAAAGATGG  
GGAAGATGACCTCAAATTTCTCTACTCTAAAATCCGCATGAGAAATTCCTTTAATAGTGCTGCTCTTCATAATGTCATTTGTGATAGTTCTGGGAATTCAAATTTATGCTAAGCAGAAGGTCAT  
CAATCATTTCATGATCTGTTAAACCCACGGCTAGTCACTCTCTACCTCAAATTTCTCTTTTCCCCTGAGGAGCAACCGCTTCTCAATCTGTGCTTTCAAATCTGATTTTGCCCATTTCTGA  
TCAGGAAATTAAGACAGCCGTTTTCTCTGGGGCTTCTTCCCTCTTCTCCAGGACCTGATGGGTTTAACTTTCACTTTTATAAATCGGGATGGCATATCCTTGGCCCTCTCTTTGCTTGGCTGT  
GCAATCCTTTTTTACTAAAGGATATATTCCTTCGGGGGTGAAATCTTCTGCGATTTTCTTAATCCCAAAAAGACCCATGTTAATCCATTTCTGATTTACAGGCCATCTCGTTATGTAATACC  
TTATACAAGATTATAGCAAAAATTTGGCTAATAGGCTGAAAAGCATTATGCCTCTCATCATTACACGGCTCAGGCCGGGTTTATTAAGCACCGAGTTGCTACGGATAATGTCATTTTAGCT  
TCTGAAAATTTAAGGTATTTCAAATAATGTACTAAAGTCCCTTACATGTGTGCCAAGTTAGATATCAAGAAGGCCCTTTGATTCTCTCTCTAGAGAATTCCTTTTGCAAAGAATGGCTCAGAA  
GGGTATCCCTACTTTATTCATTAATTGGGTTAAAGCATGTATTACTAATGTGAATTTTTCTATTGATGGACGGATGTCTGGAAGGGTATTTCTTCTTCTGTGCGGCTGCGTCAGGGCTGC  
CCCTTAAGCCCTTACCTATTCTGTATTGCCATGGATGCGCTCTCAAGTTTATTGATAATTCACACGACAGTCATTTTCAAGCCGGTTGATTAATGCTTTTTAAAATCTCCCATCTTCTTTA  
TGCGGATGATGTTCTGGTTTTTGGGGAGGCTACTACTTCGAATAGTCAGGTGCTGAATGACATTCTTACCAAATTTTCCAAGTCTTCTGGCCTCGTGATTAATCCTGAAAAGAGTTCTATTA  
TCCTTCAAGGGAATCCAACCTTTTTCAGGATTAATCACGAGGCCAGAAGACTTGAAAATTTGGTAAGAATGTCATTCAGCACCTGACTATTTCGAAGTAGTAGCCTCCCCAAAACCCAGA

ACATCATCCGCATAAAGAAGATGGGAGATTTTAAAAGCATTAAATATCAACCGGCTTGAAAGAATGACTGTCGTTGGAATTATCAAATAAACTTGAGAGCGCATCCATGGCAATACAGAATA  
GGTAAGGGCTTAAGGGGCAGCCCTGACGCAGCCCGACAGAAGAAGGAAAATACCCCTTCCAGACATCCGTCCATGCAAATAGAAAAATTCACATTAGTAATACATGCTTTAACCCAATTA  
TGAATAAAGTAGGGATACCCTTCTGAGCCATTCTTTGCAAAAAGGAATTCTCTAGAGAGAGAATCAAAGGCCTTCTTGATATCTAACTTGGCACACATGTAAGGGACTTTAGTACATTTTTT  
GAAATACCTTAAAATTTCAGAAGCTAAAATGACATTATCCGTAGCAACTCGGTGCTTAATAAACCCGGCCTGAGCCGTGTGAATGATGAGAGGCATAATGCTTTTCAGCCTATAGCCAAAA  
TTTTTGCTATAATCTTGATAAGGTATTACATAACGAGATGGGCCTGAAATCAGAAATGGAATTAACATGGGTCTTTTTGGGAATTAAGAAAATCGCAGAAGATTTACCCCCGAAGGAATA  
TATCCTTTAGTAAAAAAGGATTGCACAGCCAAGCAAAGAGAGGGGCCAAGGATATGCCATCCCGATTTATAAAAGTGAAAGTTAAACCCATCAGGTCTCTGGAGAAGAGGAAGAAGCCCC  
AGAGAAAACGGCTGTCTTAATTTCTGATCAGAAATGGGCAAAATCAGATTTGAAAGCACAGATTGAGAAGCGGTTCTGCCAGTGGGAAAAGAGAAAATTTGAGGTAGAGAGTACTA  
GCCGTGGGGTTTAAACAGATCATGGAATGATTGATGACCTTCTGCTTAGCATAATTTGAATTTCCAGAACTATCACAAATGACATTATGAAGAGCAGCACTATTAAGGAATTTCTCATGCG  
GATTTTAGAGTAGAGAAAATTTGAGGTCATCTTCCCATCTTTAAGCCATTTTGCTTTTGCTCTTTGAGAAAACCAAGAAGTCCAGGAATAAGTTAAATCAGCAATTTCCCATTTGATGCCCT  
TCAAAGCAACATTAAGGTTGGGATTAGAAGGATCTTGGTCCAGTAAATTTCAAATGACTGTTGCTTGTCGTTGACTATACAAATCAGATTGAATGGCATTAGCAGAAGCCCATTCTCT  
AGTTTTGATAGAAGCTTTGAGCTTCTAAGCTTATTAGAGAAATCCATCAGTGGATTACCTTAACAGGCTCCATAAAAGTGTCCAGTAAAAGTCCCCAATAATCATTCTAGAAAGTCCAG  
AGGTTTTTAAAAGGAACCGTTTGCTGCTATTATTTAATTCCCATTTCTTAAGAACCATAGGGCTATGATCAGAACAAAAAGGTTTGTCCACGAAGTAGTAAGAAAGAGGGTAAGTACCAA  
TCCAGGCTTCATTCACAAGAGCCCTATCTAGCTTGATATGTATAGCATTATCAGTTTGCTGGTTGAACCACGTGTAAAAAAGTCCAGTAGAGGAAAGATCAATGAGATGATTGTCAAAGAT  
GAAGGAATTAATCCCAACCTGCTGAAGTGGATCGGTGTTCCCCCAGATTTCTCATTTTGATACCTGCAGCAATTAATCTCCCAAAATAATCCACGGAATATCAGAAGAGGGAGCA  
TTGGAACAGAGTTGTTGCCACAACAACCTTTACCCACCGAATTAGAACCATAAACAGCACTGAGGAAAAAAGAATTTGCCAATCCAATAGAAAACAAAACCACAAATAAGCTGAG  
AAGAGAAGAAAAGTGGGGGTAAAAGAGATGCGATCCCCGGCCATTTAATCCAAATTTCTCCCTGAGGAATTGAGATTGAAGTTGTTACAGCTAACTTCAGAATCAAAAACCGAGTGAGCG  
GCAGTAAACCAAGGATCATCCAAGGAGCTAGAATGAATCCTATTTCAATAATACAAATCAAATCCAGGTTATGAGCTTTGATAAGATGCTTACAAGCACTAACTTTGCTAGGGTGATTA  
TCCCTAATGTTCCACGAAGCGATTGAGGGAAGGGTCATTGAGATTTGAATTTGAGGTTTGAGGCTTTTTGTTCTTGCTCTAGTGTTTTTGGCTGAGGATGAGGGGGTGGCTGTATTA  
TGCTGTGGATTTTTGTTTTAGGAGGAAATGGATCCTCTGCCACTTTAATAGGATCTGAATTTGGTAGAACCAATATCATTTTGGTTGTCTGATAACACATCAAACCTGTTGGGGGAGACAATG  
TTCTCTTTGTGATTTTGGTTTGTAGTATGTGTTAATGGATCTGATAACAGATTCATTGGTAGGGAAGTTAAGGTTAGGTATTGGGTCGGTTTGTGGGTTGGTTTGTGGTGGAGGAGGTTTTGA  
AGCCGAGATCTGATCGGCTACATAATTATGTTGGGGAGATTTTGGGTGGAAGAAGATGAGGGGATATCGGAAGTGGTGAATTTGGCTGGTGGTTTTTGGGACTAGCAGAAGTCTTGTG  
ATTTGCTGTGAAGGTAGTTGCTTAGATCGTCCAGGCGGAATATAACTTCTATCCCTGGCGTTATGAGGAGCACGGGAGGTGCTTCTTCTCTAAAGGTAACAACCTTTCTTTGAATTGTCCT  
CAACTGTGTTTTTGGGATTAGTAGGGCATGTAGCAGTCAATGAAAGAGGGATTACAAAACCTCACACGGATTAGGCCTCCATTCGTATTGAACATTGACATTCATTACTTCATCCTCTATA  
GATATGGGAATAAAATCAGGGTATTTGGTTTTACTGTTAACTTGAATACACACAGAGCGTATGTTAATCTCGTTTTCTGAGCAGTGAGGGCATCAACCGCTAGGGGGATACCTATTTGCT  
AGCAATACGCGAAATACCTTCCGAATCCAGACACAAAGCGGAAGGTCAATGAGCTTAACCCAAATCGGAACAGTAGTGAAATTCTCTTTTTGTGGCTTAAACCTAGGATGCCATTTCTG  
GAGGATGAATGGCCGACCTAGGAGAAAACCACACCCACCATTTCCACGCCATTTTATAATCCACGGGCGAGGAAAACCTTGATGAGGAAAAAACCATCGCTCAAGTTAAAGAGATGGATAG  
TACCTTGGAGCTTCCAAGTTTTCTTAAGAGCAGCAAGAAGAGCCTCGTAGTAGGGTCTCCTGCCAACGGAGAAAACCTACCAGAGAAAGATTCCACTCCTCAGCAGCGGCATCGGTCTTA  
GTACGCTGAAAAATGAGAACTTCGTTTGGATCTTCTGAAAATCCACGGGAGATCTTTAGACGACAGACAGTCCGGAGTCACAATGTTTCGTCCAGCTCCGAGGAGGAGGGATGAACGC  
AGAAACAGGGATAGAGGAGAGATGAGGGAAATCTTGTTTATTGAGAGGGGTTCCCATGGAGGAGGGAGCCCCCTCACGGAGAAAAGGAAAAAGGCGGCAAGGCAGAGCGGCGGGAGAA  
AGCTCTGCGAAACCCTAGCAGAGCGTAAGCTTAAATAATAATAATAAATTTGAATT

>comp146216\_c0\_seq2

CCCTCTTCAAATTGTTGCCTAAGTTTCCTTCTTTGGCCTCACTTGCTGCCGGCCCAGTAAACAAATTCAGGGAATTGTTTCCTACTGGAAAGGAAATTAATTTCTCCTCCTCATAACAGTC  
GGATTCTAGCCCTCTCTACATCCCGCCGTTTCCCCCTTCATTGGCTTGGAATTAACCTTATCTCCTCTGCATTAATTGAGTAACTATTTTTTTGGGAAAAGTAGGGCAAAGCCCAATTTCCA  
TTGATATAAAGAAACCTAGTTACATGTGTACATCAAAAGCAAAATTGTGAAGACCATAAAGGAAAAGGAGCACACACAAGGTGCCAAAATTACACATGATTGCAAAAACCTGAAAAAC  
CGGAAAAAACCCCTCAGAGCAGCTCAGAGCAGCCAACAGAATAGCATCCCGTATTTGGTTGAAAATTGATTTGGCTCAGGAAATCAGTCCACATCCTCAAAAAGATCGACCCCCGGT  
TGCCAATAATGCCATCAGGTGTAGACAAGTTGCAGTATTCGCCGTCCAGGGGGGAGGATGCAGACTGCACATCATCGCCCCTAGCCAACAGAATAATGAACAACCTTCTCGAGACAGAAG  
AAAAATAACGTCACTGGATCATAAAACCATGAAGTCATCATCCAGAAAATCGAACTTCAAGCACCAGAGCAACCATAAAATTCAAAATTTTTTCCATCTTCTTAGCTTGGTAACCACCGC  
CTTATTAATCAGGAGTTTGAGAGTAGAGATAGATCTTGTACGATGTGCAAATTTACGTTCATTTGCTCGCGCCAGATTGAATAAACAGCAGCCCAAAGCGTCAGCAGATTAACAGATAAA  
CTACCATAGTTCAATAAACTGAATTGGAAAAGAGTCAGAAATCTGATGTAAATTTGGCCTCAAGAGGAATGAGTTAATAACAGGTAGCAGTTTTGAAATAATGCAAAAGGTGTAATCA  
CACTCAAAGAAAAGGTGGGATACACTTTCTCATGGCAATGACAGAAAACGCATTTTGGATCAACCTCTATATTTCTCTTTCTTAAAGCGTCTGATGTCTTCAACCCGCCAACAAAACATA  
ACCAAGCATAGATAGAGAATCTTATAGCATGATGTTTATGCCAAACCACCTTGCTCCACATCACATCCTCCTGAAAACGTGAAAATTCCTCAAGGAAAGAACCAAATTTATGAATGCTATTC  
GATCCCAAGCAATACATCTATCTTACCATCACCAGAAATAGGAATAGAATTAAGCGTTTTTGTATGATAGAGTTCCAGGTAGTAGGGATGTTCCAGTGATCACCAGCCATGAGAACATT  
TAAAGTTATATTTTCAGGGAAGAAATTGATAAGAGAAGAGAGCCCATGAACTTCATGTATGCTCTGGCCATTAACCAATGATCCCACCGAAAATTAATGGGACAGCTTTCAGTAATTTTA  
AAAAGAATTTATGCTTAGCTTTAGACGCAGCATAACAAATGCTTTTCCACATACCCGAGGATGAAGGGGAATGGGGCTTCCAGGGGAGCAATGGGTGGAGAAGTACCAAGAAGAGAG  
GGGTGAAGACCCTTGTAGATTCTGAGAATTAGAGAGCAATCATAGGCAAATCTAATGGCTTGAAAACAAGGAATACCAAGACCACCTTAATTTTAGGCTTGCACGTATTAGCCCAAGA  
AACCATGTGAAGTTTCTCGCCTCTAAGTTCCCAAAAAACAGAACTTGGCAGAAATTTTGGCATCTTCTTAAGACAGGATTTAGGTATAATCGCACCCGCGGATCCAATATGCTATGGTG  
TTCCATATAGTAAATCTCAAAAACCTGAAGCTTGCCCTGCAAAAGACAGAGACTTAGCTTTCCATCCAGAAAGCTTATTAGTAATAGTGTCAAGAAGCGGGGAGAAGTGAGAGACAAGAAC  
TCTTTTAATTGATATAGGGATACCCAAGTAAGTGAATGAATTACAAGTATTGTGAATGTGTAGGGGTGTACATATCTCTTTGGTATTAGTTGGATTCCCTTGAAGGATAATAGAACTCTTTC  
AGGATTAATCACGAGGCCAGAAGACTTGAAAATTTGGTAAGAATGTCATTCAGCACCTGACTATTCGAAGTAGTAGCCTCCCAAAAACCAGAACATCATCCGCATAAAGAAGATGGG  
AGATTTTAAAAGCATTAAATATCAACCGCTTGAAGAATGACTGTCGTTGGAATTATCAATAAACTTGAGAGCGCATCCATGGCAATACAGAATAGGTAAGGGCTTAAGGGGCAGCCCT  
GACGCAGCCCGACAGAAGAAGGAAAATACCCTTCCAGACATCCGTCCATGCAAATAGAAAATTCACATTAGTAATACATGCTTTAACCAATTAATGAATAAAGTAGGGATACCCTTCTG  
AGCCATTCTTTGCAAAAAGGAATTCTCTAGAGAGAGAATCAAAGGCCTTCTTGATATCTAACTTGGCACACATGTAAGGGACTTTAGTACATTTTTTTGAAATACCTTAAAATTTTCAAGCT  
AAAATGACATTATCCGTAGCAACTCGGTGCTTAATAAACCCGGCCTGAGCCGTGTGAATGATGAGAGGCATAATGCTTTTCAGCCTATAGCCAAAATTTTTGCTATAATCTTGTATAAGGTAT  
TACATAACGAGATGGCCCTGAAATCAGAAATGGAATTAACATGGGTCTTTTTGGGAATTAAGAAAATCGCAGAAGATTTACCCCGAAGGAATATATCCTTTAGTAAAAAAGGATTGCAC  
AGCCAAGCAAAGAGAGGGGCCAAGGATATGCCATCCCGATTTATAAAAGTGAAGTTAAACCCATCAGGTCTTGAGAAGAGGAAGAAGCCCCAGAGAAAACGGCTGTCTTAATTTCC  
TGATCAGAAATGGGCAAATCAGATTTGAAAGCACAGATTGAGAAGCGTTCGCCCAGTGGGAAAAGAGAAATTTGAGGTAGAGAGTACTAGCCGTGGGGTTAACAGATCATGGA  
AATGATTGATGACCTTCTGCTTAGCATAATTTGAATTTCCAGAACTATCAAAATGACATTATGAAGAGCAGCACTATTAAGGAATTTCTCATGCGGATTTTAGAGTAGAGAAATTTGAGG  
TCATCTTCCCATCTTTAAGCCATTTGCTTTTGGCTTTTGGAGAAACCAAGAAGTCCAGGAATAAGTTAAATCAGCAATTTCCCATTGATGCCCTTCAAAGCAACATTAAGGTTGGGATT  
AGAAGGATCTTGGTCCAGTAAATTCAAAATTGACTGTTGCTTGTGCTGAAGACTATACAAATCAGATTGAATGGCATTAGCAGAAGCCCATCTCTAGTTTTGATAGAAGCTTTGAGCTTC  
CTAAGCTTATTAGAGAAATCCATCAGTGGATTACCTCTAACAGGCTCCATAAAAGTGTCCAGTAAAGTCCCAATAATCATTCCTAGAAGTCCAGAGGTTTTTAAAAAGGAACCGTTTTGC  
TGCTATTATTTAATTTCCCATCTTAAGAACCATAGGGCTATGATCAGAACAAAAAGGTTTGTCCACGAAGTAGTAAGAAAGAGGGTAAGTACCAATCCAGGCTTCATTCACAAGAGCCCT  
ATCTAGCTTGATATGTATAGCATTATCAGTTTGTGTTGAACCACGTGTAAAAAAGTCCAGTAGAGGAAAGATCAATGAGATGATTGTCAAAGATGAAGGAATTAATCCCCCAACCTG

CTGAAGTGGATCGGTGTTCCCCAGATTTCTCATTTTGATACCTGCAGCAATTAATAATCTCCAAAATAATCCACGGAATATCAGAAGAGGGAGCATTGGAACAGAGTTGTTGCCACAAC  
AACAACCTTTCACCCACCGAATTAGAACCATAAACAGCACTGAGGAAAAAAGAATTTGCCAATCCAATAGAAACAAAACCACAAATAAGCTGAGAAGAGAAGAAAGTGGGGGTA  
GAGATGCGATCCCCGGCCATTTAATCCAAATTTCTCCCTGAGGAATTGAGATTGAAGTTGTTACAGCTAACTTCAGAATCAAAAACCGAGTGAGCGGCAGTAAACCAAGGATCATCCAAG  
GAGCTAGAATGAATCCTATTTTCAATAATACAAATCAAATCCAGGTTATGAGCTTTGATAAGATGCTTACAAGCACTAACTTTGCTAGGGTGATTAAATCCCCTAATGTTCCACGAAGCGAT  
TGAGGGAAGGGTCATTGAGATTTTGAATTGGAGGTTTGGAGCTTTTTGTTCTTGCCTCTAGTGTTTTTGGCTGAGGATGAGGGGGTGGCTGTATTATGCTGTGGATTTTGTTTTAGGAG  
GAAATGGATCCTCTGCCACTTTAATAGGATCTGAATTGGTAGAACCAATATCATTTTGGTTGTCTGATAACACATCAAACCTTGTGGGGGAGACAATGTTCTCTTTGTGATTTTGGTTTGGAG  
TATGTGTTAATGGATCTGATAACAGATTCATTGGTAGGGAAGTTAAGGTTAGGTATTGGGTCGGTTTGTGGGTTGGTTTGTGGTGGAGGAGTTTTGAAGCCGAGATCTGATCGGCTACAT  
AATTATGTTGGGGAGATTTTGGGTGGAAGAAGATGAGGGGATATCGGAAGTGGTGACTTTGGCTGGTGGTTTTTTCGGACTAGCAGAAGTCTTGTGATTTTCGCTGTGAAGGTAGTTGCT  
TAGATCGTCCAGGCGGAATATAACTTCTATCCCTGGCGTTATGAGGAGCACGGGAGGTGCTTCTTCTCTAAAGGTAACAACCTTTCTTTGAATTGTCCTCAACTGTGTTTTTGGGATTAGTA  
GGGCATGTAGCAGTCGAATGAAAGAGGGATTCACAAAACCTCACACGGATTAGGCCCTCCATTTCGTATTGAACATTGACATTCATTACTTCATCTCTATAGATATGGGAATAAAATCAGGGTA  
TTTGGTTTTACTGTAACTTGAATACACACACGAGCGTATGTTAATCTCGTTTTTCTGAGCAGTGAGGGCATCAACCGCTAGGGGGATACCTATTTTGTAGCAATACGCGAAATACCTTCCG  
AATTCAGACACAAAGCGGAAGGTCAATGAGCTTAACCCAAATCGGAACAGTAGTGAAATTCTTTTTGTGGCTTAAACCTAGGATGCCATTTCTGGAGGATGAATGGCCGACCTAGGA  
GAAACCACACCCACCATTCCACGCCATTTCCATAATCCACGGGCGAGGAAAACCTTGATGAGGAAAAACCATCGCTCAAGTTAAAGAGATGGATAGTACCTTGGAGCTTCCAAGTTTTCT  
TAAGAGCAGCAAGAAGAGCCTCGTAGTAGGGTCTCTGCCAACGGAGAAACCTACCAGAGAAAGATTCCACTCCTCAGCAGCGGCATCGGTCTTAGTACGCTGAAAAATGAGAACTTC  
GTTTGGATCTTCTGAAAATCCACCGGAGATCTTTAGACGACAGACAGTCCGGAGTCACAATGTTCTGTCAGCTCCGAGGAGGAGGGATGAACGCAGAAAACAGGGATAGAGGAGAGA  
TGAGGGAATCTTGTTCATTGAGAGGGGTTCCCATGGAGGAGGGAGCCCTCACGGAGAAAGGAAAAAGGCGGAAGGCAGAGCGGCGGGAGAAAGCTCTGCGAAACCTTAGCAGA  
GCGTAAGCTTAAATAATAATAATAAATTTGAATT

>comp146311\_c0\_seq3

AAAATTTCTTTTTACCGCTTCTCCAACATCCAAACATTTGTTGACAAATTAGACCAAAAAGAAGAAAAACAACCTCAATCACAACTCAGAAAGCCATATTGCTTAGTGAATATAATATCTAT  
AAGCTTTCAAACGTTTTAAATACATAAAGGGAGCAAAACAATAATCATACCAGTTTGAATCTACCTCCCTATAATGATTTCTCTACAAAAAATGCCACAGTTATGACTGAACTTGATCATC  
CTATATCTGAGTTGGTGTAATCAAAGCTTGTATATACTATAATATTTGATTATATTCAGTTGGTAACAAAATAGAGAAGAAAAGCATGAAGGAGCTGACTCAGGAAGAAGCAGAAGCCAT  
TCCAGGTTCCATCTCAGCCACAAAGCTTGCTGCTTCTTGATGATCTGCTGCCTCCCAACACAACCTTTGAAAACAAAATCATCAGGTTGAGGAACATACTCCTCTAGTTTCTGACCAGCTCA  
TTCGCTGTTGGAGCAGAAACAATGATGTGACGGGCCTTCTGAGAAATAAATTCCTCCATGACAGCCATGTCAATGAATGAGAGCAATGAATTATAGTATCCATCCACGTTAAGAAGACCA  
ACCGGCTTCTGATGAATCCAAGCTGTGCCATGTGATGACTTCAAGCAATTTCTAATGTCCCATAGCCACCAGGCAAGCAATGAAGGCATCAGCTTGGCGAGCCATCTCAGCTTTCC  
TCTCGTGCATATCTGAGACTGCTCTAACTTCCCAACAGTCTCTCCAGTTATCTCCCTCGGCATCAAAGACTTCGGGATGACCCCTAAGACATGGCCGCCACCATCATGAACAGCGTGAGC  
GACGAGGCCATCAATCCAACGCTACCACCTCCATAAACCAAAATCAATTCCTCTCGCCACCAGTTCCTTTCCGAGCTCGACGGCCGCTTCCCTGTAACCCGCTTCTTCCCGGTGCTACTC  
CCGCAGAAGACGCAGATCCTCTTGAACAGGACAGGGAACCCACCTTCTCTCCGGCCGCCGTGAACCTCGACATTCGGCTTCTCTTCCATTCTTCGAGCTCTCTATTCTCCGTGGAAGAAA  
CAACGTGGAGATAACGAGAAGATGCGCAGGGCCCTACCCCTCGGAGTCCTTTGGGGGTTTTTATAGACGATGGATTAGCGGTGATTCAGAATTTGGACGGCTGTGATTCTGTTGCTTAGAG  
CTAATCGCCGACATAAATAAGGAGTGATTTCGGTTTTTTTTGTTTTAAATATTATTTTTTTTTATTTTTTGGTATC

>comp146322\_c2\_seq3

ATAAATAGAGCCCTCATTCTCATGAGAGGGGGACAGAAGAAAGAAGAAGAAGAAGAATAAAAAGGGAAAAAATTCCTCCTCGACCACTGCGGGATTCTACCCGACTTCGACGT

GGCACCGGAATTCCACCCAACCTCCAAGTGACACTGAAATTTGCGCTGACTTCCAAGTGACATCGGAATTCCACACAACCTCCAAGTGACACCGGAACTCTGCCCGACTTCTAAGTGAC  
GCCGAAATTCTTCCTGACTTTTTCAGTGACGCCAGAACTCTGCCCGATCTCCAAGTGACTTTGGAGTTTTGCCCGAATACCATCTAAAACAGAGTTCTCCTCGGCCGCCGACTGAATTCAG  
ACTTCTACCCAACGACGGACCACCGCTCGTCGCCAGATTTCTACCTAACACCGTACTTCTACCCGTTGTTGGATTTTCGTCGAATAACTATCCAATGTGGGTTTTCTATCTATAGCTGGACTT  
CTACCTGACGCCGCCCTTCTGATCTTCGTCGTCAGACAATGGTCTTCTAACCTTTGTCATCCAATGACTATAGTCCTTCTGACCTTTGTGCGCCGCCGACTACGATCCTTCTGGCTTGCATC  
GCTCACCTACTACTGTCCTTCCGACCTCAGTCGCCAGAATAGGGTCTTTATGACCTTCGTCGCCCGTCGACTACGGTCATTCTGACTTATGTCGCTGCCAACTACGGTCTTCTGACTTAC  
TTCGCCACCGACTACTGTCCTTCTGACCTCCGTCGCCTATTGACTACGGTTTTTTGACTTACGTTGTCCATCGACTACACTCATTCTGACCAAACGAATACGTCAACAGTAACTCTTTGT  
ATTCTCACATTGTAATGTACTGCATATGATGTACATAAAGCCAAAGCCTTCCCCCAAGGAAGGGCCTCATTGTAA

>comp146369\_c0\_seq2

TAATATGCTTTGGCTTCCACTTCTATAGGGATCTGTAACGTGAAACCTCTCTCTCTCTCTTCTATCTCTCTTTCTCTCTTTCAGCGGACCGGAAATCCATGCGGCTATGGCGGTCTCCC  
TCCCTTCTTCTCCTCCTGTTTTTCTCCCAATCCGTCATTTCCAAATATTTTCTCTCGTTTTACCTTATACCATTTCTAAGCTGAGCTAAATCCAAAAAAGTAAAGCTACTTCTCCGCCG  
CCGCCCTCCTCCTCAGCCGCCCGGGCTTAGGGGGAAATTTTTGCGGAGATCTTCTCCAGCCGCCGGGAGATCGCCTGCGAAACGATCTCCGATTTCCCGCTATCCTCCTCCGATCCG  
ATTGAGCTCCCGCCGCTGAGATCTAATCTGATCAGAGTTTCCGGGAACCTAACCTAGGTCAAGGATCAGCCGCCATCGCCCCCTATTTCGAAATAATTAGGACTAGAAAAAATCATA  
CTGTCCACGCTTACGATGCTGCTCCATTAATCTCATCTAACCGTTTGTCTTTTTGTCCTTCTTGTGGATAGCGGAGCGGACAAGGAAAGGAGACAAAAGGCCGACAGAGAAATATAG  
AAATAGGGAGAGGAAAAGAAAGAGAGAGATATTGAAATCGAACGAAGTGATGTCGTCGTCGAACTCGCCGTGCGCGGCGTGCAAATTTCTCCGACGAAAATGCATGCCGACCGG  
TTGCATATTCGCGCCATACTTCCCGCCAGACAATCCGACAAAATTCATTCATGTTACCGGGTGTTCGGCGCCAGCAACGTCTCCAAGCTTCTCAACGAACTTTTCGCCGGCGCAGCGCGA  
AGACGCCGTCAACTCGCTCGCTACGAGGCCGAGGCGCGCCTTACGATCCTGTGCTTGGATGCGTCGGCTATATCTCCCTGCTTACGATCGCCTAATGCAGCTCCAGCGGATCTATCC  
GCTGCTAAGAGGGAGCTTTGCTCTGCATCTGCCCGGGCCACAAAACCAATTCTATGCCGAGGCCATGGCCGTGAGGGCTGGGCTCGCCGGTCAGGGATCGGCTTCAACATCTGCGGC  
GCCACCGATGTATAAAGATCAACAACATCATCAATATCAACATCATCACCATCAGCAGCAGCAGCAGCAGCAGCAG

>comp146470\_c0\_seq2

TTAATATTGCATATAATATGTAAGAGCTACACTATTCTCAGTACAAATGCAAGAATTTAAAACCTCATTCTAACATAAAATACATACAGTATGCTCTATATAAATTATACACAATATACTTTCCTT  
AATTTAGAGAGAGAAATTAATTTCTCAAAACCCCTTTACAAAAAAAATAAAAAATCCTTTAATCTAAATGCAAGATGGAGGGATCATAAGGCCAAATGAGCGGCCCTTACATTAACACAA  
GAAGCAACAGCAAAATCTCCAGCAACACTGTACTTCAAATCTATGTTGCTCAGCTCTATATCTTACATGGCAATCTATCGCTGCAAACCAGATTTATAGCATTCTTTGTTCTTGTTCCT  
GTTATGTTTCTGAACTTACATACTGATCTTAACCAGAGATGGAGCCTTACTACCGCAGAGATTATGCGGGCAATATTTCTGATCAATAACAATTGGATTATCCACATTGTTTCATCACC  
TCTCAAACACAAGATCATATGCTGAAGAGAAAGTAGGAGACTCCTGCCAAGTCTTAATTCTAACACCAATCTCTGTATCACTAAAAGTGCATTTCTAACGCTAATCCAACAACATCAC  
CTTCATCTTTGCCTCCTCCAAGGCTTCCAATGCTTATGCCATGGCCGGGCCACACCGCACCCCTGATATCGATAGGTTTCGCCGTCCCCGGCCCGATCGATATGCAGTCGTCGCCGGTGTCTG  
ATGATGGATTGGTTTATACTAATATTTTTGATTCTCCCACGTGAATTCGTCGGTGTGGGGCTATTTTC

>comp146487\_c0\_seq1

CAAATGAATATGAACTTCTTAACTAATCAAAAAAAATTTCTTATATACTATATTCTTTATCATCCATACCAAAAACACAAAAACTCATATAGCTATCAAGTTCAAAAACACATTGAAAAAC  
ATAAACATACCAAACTTGAAATAGAAAACACTGAACAAGCAAATGAAAGGATAGTTCTCTGAATCTATCACTCATCTCATGAACTCACAATCGTTAGTCTCTCCAATCTTATTAACACA  
ACATCAAATCATAAAGTTTATAAGACTTCTTCATATCATGCGAGGCTAAGATCATGTGATTTCATATCTTATAACCAAGCAGATTTGGCTGGATTGGCTGAACAACCCCTGAAAGAAAACATCTG  
AGGACAATCATTCACCATTGGAATCGAGTTTTTCATAGACTCTGTTGTGGTTTTCTGCACTGAAAGCATAATTCGGATTGTCGCTTTTCATCTCCTGCTTTCATGGAAGCTTGAAGCTTTAAA

TATTGAGGCTTTTTCTTAAAAGGGAATTGTAAGGGAAGTGTAAGAATACTAACCAGTTCATGTACTAGAGCTCTGTAGGTCTCCCTGGTGCTTTTAAGCTTTTTCTTGTAAGTGTGAGTTTGT  
GTGGCGATCACATGATACTTTCTCTGCCTAACAATTCTTAGAGACTCTTCCAAAGTTTGCTCAAGACCGCGCAGTTTCCTTTATTTCCATCCCCTCCAGTTCTTCTCCCTTCTCTGCCTAATC  
TCCTTGCGAAGGTTTTGGTTGATCTCGTTGAGATGCTTCAGTGTATTTTGCATCCTCTCATATTGAGCATTCCATAGATCCATGCCAGTAACAACCTGGTACCTCTCATATACCCCTTAATAT  
CAGTAGAAGGGCTACAGTAATCAGCCAGCTTGCCAGTGTGGAGAACATGATGAGAGAGACTTGAGCGTCGCAGAGAACAGTGAGCTCCTTGGCCTTCTCAAGATCCCAACCCTCCTC  
TTAGAGTATGTCACTTGCCTGTTTCGTTGGGTTCTCTATCTTTTTAATCTCTATCTTCCCCCTCCCCATCTCTGTCTTGCTCTGTTTTGCTCTGTTTTGCTTTATTCTCAATCGTTCTTCTCTTCC  
TCCTCTCATATAAATAGAAAGAGAAAGATCAGTTTTTTAGAGAGAGAGAAAGGGGGTGGTTAATACAAGTGAGAATATTCTTCTATGCTTAAATTTTTACTAAAAATTCAGTTTTGATTGTT  
CCATTGAAATGCACCTTACAGTAACCTATCTATCAGAGCTTAATTT

>comp146487\_c0\_seq5

CAAATTGAATATGAACTTCTTAACTAATCAAAAAAAAAATTCTTATATACACTATATTCTTTATCATCCATACCAAAAACACAAAACTCATATAGCTATCAAGTTCAAAAACACATTGAAAAAC  
ATAAACATACCAAACTTGAAATAGAAACAACCTGAACAAGCAAATGAAAGGATAGTTCTCTGAATCTATCACTCATCTCATGAACTCACAAATCGTTAGTCTCTCCAATCTTATTAACACA  
ACATCAAATCATAAAGTTTATAAGACTTCTTCATATCATGCGAGGCTAAGATCATGTGATTTCATATCCTATAACCAAGCAGATTTGGCTGGATTGGCTGAACAACCCTGAAAGAAAACATCTG  
AGGACAATCATTACCAATTGGAATCGAGTTTTTCATAGACTCTGTTGTGGTTTTCTGCACTGAAAGCATAATTCGGATTGTCGTCTTTCATCTCCAGTTCATGTACTAGAGCTCTGTAGGTCT  
CCCTGGTGCTTTTTAAGCTTTTTCTTGTAAGTGTGAGTTTGTGTGGCGATCACATGATACTTTCTCTGCCTAACAATTCTTAGAGACTCTTCCAAAGTTTGCTCAAGACCGCGCAGTTTCCTTT  
ATTTCCATCCCCTCCAGTTCTTCTCCCTTCTCTGCCTAATCTCCTTGCGAAGGTTTTGGTTGATCTCGTTGAGATGCTTCAGTGTATTTTGCATCCTCTCATATTGAGCATTCCATAGATCCA  
TGCCAGTAACAACCTGGTACCTCTCATATACCCCTTAATATCAGTAGAAGGGCTACAGTAATCAGCCAGCTTGCCAGTGTGGAGAACATGATGAGAGAGACTTGAGCGTCGCAGAGAA  
CAGTGAGCTCCTTGGCCTTCTTCAAGATCCCAACCCTCCTTTAGAGTATGTCACTTGCCTGTTTCGTTGGGTTCTCTATCTTTTTAATCTCTATCTTCCCCCTCCCCATCTCTGTCTTGCTCTG  
TTTTGCTCTGTTTTGCTTTATTCTCAATCGTTCTTCTTCTCTCCTCTCATATAAATAGAAAGAGAAAGATCAGTTTTTTAGAGAGAGAGAAAGGGGGTGGTTAATACAAGTGAGAATATT  
CTTCTATGCTTAAATTTTTACTAAAAATTCAGTTTTGATTGTTCCATTGAAATGCACCTTACAGTAACCTATCTATCAGAGCTTAATTT

>comp146487\_c0\_seq7

TTCTCTGCCTAACAATTCTTAGAGACTCTTCCAAAGTTTGCTCAAGACCGCGCAGTTTCCTTGATGTCCAGTCCCTCCAGATCTTCCCCATCCTCTGCCTTCTCACGACAACCCAAAAAAA  
AATCACATAAATTAACACTTAATTTCCAAAGCCAAAAACAAGTAAACAAGTAAACGCGTTAGTAGCTTTATCACTCCAGTACTTCTCTCCCTTAGCCCTTCAATCTCCCACCACCCAC  
CTTACTTCCCTCCTCAGTTTATGATTGATCTCCTTCAAATGGTTCAGCGTATTCTGCATCTTCTCGTACTGCGCGCTCCACAGATTGATGCCGGACACCTGCTGGTAACGATCATATATACTCT  
TCGAGTCAGTGGACGGGCTGCAATACTCAGAGAACCTTGCCCGTGTGCGAGAACATTACAAGTGAGAGCTGAGCGTCACAGAGAACTGTCAATTCGCTCGCCTTCTTCATGATCCCAGCT  
CTCCTCTTCGAGTAAGTAACCTGCCGGTTCGTAGGGTTCTCTATCTTCTTATCTCTATCTTCCCCCTCCCCATGGATCTCTCTCGTTCTTTCTCTCCTTCTCCGAAGCAACAGAAGCAAAAAG  
AGATGAGATTGATAAGGGTAGGAAAAGGTTCAAAGTAAGCTTATAAAAATGGAGGCAGAAGAGACGAATTGAAGGCATGTAAGGCTGGGGAGGAAAAAAGTAGCAGCTGGGTTTCCAT  
TATCGGGCAATGGCCAAAGGGTTGTGCGTACTACCTCGCGTGCCATGTCTGGCCG

>comp146487\_c0\_seq9

CAAATTGAATATGAACTTCTTAACTAATCAAAAAAAAAATTCTTATATACACTATATTCTTTATCATCCATACCAAAAACACAAAACTCATATAGCTATCAAGTTCAAAAACACATTGAAAAAC  
ATAAACATACCAAACTTGAAATAGAAACAACCTGAACAAGCAAATGAAAGGATAGTTCTCTGAATCTATCACTCATCTCATGAACTCACAAATCGTTAGTCTCTCCAATCTTATTAACACA  
ACATCAAATCATAAAGTTTATAAGACTTCTTCATATCATGCGAGGCTAAGATCATGTGATTTCATATCCTATAACCAAGCAGATTTGGCTGGATTGGCTGAACAACCCTGAAAGAAAACATCTG  
AGGACAATCATTACCAATTGGAATCGAGTTTTTCATAGACTCTGTTGTGGTTTTCTGCACTGAAAGCATAATTCGGATTGTCGTCTTTCATCTCCTGCTTTCATGGAAGCTTGAAGCTTTAAA



TATTGAGGCTTTTTCTTAAAAGGGAATTGTAAGGGAAGTGTAAGAATACTAACCAGTTCATGTACTAGAGCTCTGTAGGTCTCCCTGGTGCTTTTAAGCTGCAAATACATGTAAGTGATTGCG  
ATTACTAGAATTCACCTTTGAAAAAATTGAAGTTTTTTTTCTGTGAGAATAATTGTGATATTGAAATCATATGAAATATAATTCTTACAAAAATTTTGAGAGCATGTATATAAGT

>comp146569\_c0\_seq1

AGTTGGCAAGCTTGAAGCGTTCGTGGCCCTTCAATCTGGTTCAGCTCTACAGTCTGCTACAGATCACAAAAGAATTGCTTCGTGCGAGGTAATACGATTAATAAATTTCAAATTTCTTTTC  
TTATTTTGATGTATTGCACACAAAAGCTGCTGATTCGACGTGTTTGAACGAATGCCAAGGGACGATTCTTCGAGTTCGAGCTGTCTCGACTCAATATCGGAGCTGAAGGTGAAGCTTCTA  
AGCTTGATGGAAGCTTACTCAGCCTTGGTCTTCTGCCTGTTTCAGAACCTTTCTCCATGCAAACAATACCGTTTCAGAAACATTTTGTTCATTGTTTGCAACATATTTCAGAAAAACACAGA  
AAAAAGAATTCCGGAAGCTCTTGGCCACCAACTCTTTACAATTTTCATGGGTCTGCCTCATGATCTCATTGGAAGCAATCCTTGTGATGCAGATACTGAATCTAAAGATTAATGCAAATGC  
AGATCATTGAAGCAGCAAGGTTGAAATAGAGATTATTTGATATAGTTTTCTTCATCATGCAGTAATTTCTTCTCGTTTCCCTGCTTCAATATTGTATGTTTCAGGCTTTCAGCTTCATTGTTGT  
TTCCATTTACAGGCATCAATGAATGCATACCCGTTTCTTTTCCCCTCTATTTTT

>comp146585\_c0\_seq1

TTTATTAAGTAACAACCTCGAGAATTTCAAAACAAAATAGAACTATAAATTTTCTCATATAAATTTTTTGAGCTTTCTAGCCTTATTTTTTTCTATTTGGAAGATGATGAAGGTTTAGCTGACCTT  
AAAGATGAGTCATTTGTGTCTCATTGCTTGTAGACTCATTTCATGAAGATGGATATAACGTCCCCTCTATCAATCATAACCTATAAAAACCTTGGTTATAAGTAAAATCATATATAAATTAAC  
ATCGCAAAGTATGTGCCCTATTGCTTGTAGAATCATTCATAAAAGATGGATACAATGTCCCCTCTGTCTGTTAGAACCTATAAAAATCTTGGTTGGAAGTAAAATCATATTTAAATTA  
TACAAAAGTTAATTTGTATAAAATGTCACAAGAGAGTGAAATAATGCTTAATTTACCAAAGAAATTATAAGTGTGAGCCACTAATAAGAGTAAGTTGAGGCCTGGATTTGAATCATAACA  
TGTTTCATCATCATATTGAGTGTAAGAGAAAAGATCGCTATCTTCATTGCGAGCTCCCCTTGTTACCTTCGTGGCAAGCTCCTGTTGTGCCTTCCAATATAACTAGAAGAACATTGTAGAAG  
AGGGTGAAGAAGCTTCTTTCTTCTGATTATAAAATGGCTACAGTTGACTTAATAGTTGTTTTGTTTTGGATCAATCTTAATTTCTTAAAATATAGTCACTTAATAATTGTAATTGAACACTCAA  
ATCTCTCTCCACTGTATTAATCTTATAGTTTGTATGTTCAAGATATTAATCACACTGTATTGTATCTATCATGTTTGAATCTTATTCAAACAGTGTCTGATCCTGCTTCAAACATATTCAATCA  
TTGTTCTATTTCGTGTTTGAACATTCTGAAAGTAATTTATATTAATTTGAATAAAATTTAAACATTTTGAACAAATTTGAATATATATTTTTTAATATAGCTACACTAGTATTTTGCTCAATGT  
TTATTCTTTTTTTTTTAATTATTGGAGGTTGAGATT

>comp146615\_c0\_seq2

ATTTTCGTGCGTCATTTATTTGAAAGCCGAGGGCACACACTGTACCTGCATTAGAAGAATCTGTGCTGCGTGCGTGGCCGACTTTTCCAGCTTTATATGTCACCTTTCACCTTCTTCTTCGCATTC  
CCACCACAGCCACCTTGAATCCATTTACAATGACGACGACAAAAACTAGCCGGCTCCGGCGCCGCCGCATCAATGGTACCCATCCCCTTCTCTCCCGTCGTGTTGCTTCTCCTTTGC  
CGCATATTCTAAATCGATCATCAACCATCTCCGATCATGCGGCGTCCCCATCGACGCCGCGCTGTCGACGAAGAATCACCGCCATCGAATCCACCCACCGCTTCCAGTTCCCGCCCCGAC  
CTCCGTTCCATCCTTCGTGAAGGCTGCCTGTGCGACCCGGGTTCCCAATTTGGCGTCCGCTCGCCAAATCAGCTCCAGATACTCCTCTCCCTCCCTACATCCGGCCTACTCCATGAAA  
TTTCCCGTCCCGGCGGCGATTCTTGCCATCGGCGTGGGACCTCGGCCGAATCCCTTACCCAATCAATCGCAATGGCCGATCCTTTCTATCCAGAGCGGCGCAATTGGTTCCAGTGTA  
CCGCCAGTTCTACATCGCCGGAACCCATGTTGGCCGGTAACCCCTTTTCTATATCCAGGCGGCGATGTACGATGCTGCGGGTTCGATCTCGCCGATTTCTATCGACGCGAGGAGATAT  
GTTTACTGCCGGCGCCGCGCCGGCGTGGACTGCGAAGGAGCCGAGGAGGTTGAGGTGTGGTCAGAGCTCGTGAAGCGGAGGCGGCGGTGGCGGAGAGAGCAGAATGGATAAG  
TTGATGAAGGAGGTGGGGAGGAGATTGAGGAGGGAGGGTGGTGTGAGGAGGAGGTAAGAGAGATGCTGATGGCGGAGGATCGAACGGTTACGATGAGAGTATGGATGGACATCGA  
AAGGGTGTGAAGGATCGAGAAGGAATGATGTGGCACGTGCGGGGCCTCGCACAGGTGATGCTTCGTGCAGGGTGGAGTAAGGAAGACGTCGCATACGCTTTAGGCGGGAGCGGACGG  
AATGCCGGGAGCTTAACTGTCGCTGGCCACGTGGACCAACAGTCTTCTTCAACGTCTAATTAGAAATTAGTAATTAATAATAATAATTATCTGCTAAACTAACATTTAC  
TTGTCTAAAAAATAAGCGGAAATTAATTTCTTTCACCTCTACGTTGTTATTTATTTATTTAGGTGAAGAGGTGAGGGAAATCAAAGCGTCACTTGTTTTTATTTATTTTATTATT

TCAACAAGTGTCAATAATATAAACCGAAAGATTTTATTTATTTATCAATCATCAAATTAATGAAGTAGAAAAT

>comp146616\_c3\_seq4

TTTTCTTTTTATACCAATTAATAAACGAGTTTTCTAAGGACAAAAATTAATAATAATCAAAAAAGAGGGAGTTTTAATGGAAATAGGGAAACAAGATGTTTGTAAAAAATATTTGCA  
CAAATAACTAAAGTTTTTTATGAAAAGAAAAGGGGTTTAGTTGTAAATATGAAAAGGGGAAGGGGCGGAACGCAGAAAGGCGCGCAGTAAATCCCTGCACCTTCACTACGCCCTCCC  
ATGTGCCTGTCACTGGCGGGCAGAGCCCTAACAGCGCAAGACAGATGTGGGGCCCCAC

>comp146694\_c1\_seq1

GTTTTTTTTTTTTTTTTTCTTAGATTTTTATTATCAAGTCGCGGGTGCACCAACTAGCGCATGTGCTTACAGAGCAAGCCACGATTTGTGCCCATTCCTGATCCTTGCCTTACCGGTT  
CCGGGCTGTCCCCGGTTTCATGACCTCCAAGTATCATCATCAGAACTTATAGGGCGTCCCTGCTGATCCAGTTGCGGCTGCGCATGCGGAGTTCTCGGGCTGGGTGTCCCGTTAAGCGT  
CGCCGACGATGAAGTCGCCGTGGTTGTCGTCGGCGTCGATGCGGGACTCGGTGTCTGGCTCAGCTTCGGGTCAGACAGCTGCCTATTAATAGCAAAGTACAGTTTCAGCGCCGGCAGCG  
TCTTGACAATTCCTTCCCTCCGTTCTCCTCACTGAAGCCAAAGCCGAGATCTAAGGAGCCCTCAACTCATCCAAGTCCCTCATCCGTCAGCTCCTGACCTCTCCCTCCTCCTCAC  
TGTCACCTCCTTCCATCCTCGTCTCTCACTCTCCTCCACCAATTCATCGCTGAGACTCCGCAAATACATCAGCCTCTTTTTCTCTCCCATTCTCCTCCCTCATCATATCTCTCATCGAA  
AGCTGCTTTGACAGAACCTTCTTTTCCACTCTTCTGGCCAACGTTGAAGGCGTAGGGAGGTTGTCATGACTTTCTCATCCTCTGTTTCACTTTCAGAGGAGGAATGCGGCGGCGACGGG  
TGTTGACAGCAATAGTTTATGCTGTTCCATCCCCGTTCATGGTTCTTCTATTGCTCAGCATCGCCGAGCCGGCGGTAGCCAGAATGGCCGCCTCGCTGCGACGAGAGAGTGGCGGTGAA  
GGAATAAGGAAATGCAAGATAAATGGTAGGGGTTAGAAAAAGGAGGAAAGAGTCGGTATA

>comp146729\_c1\_seq1

CGACTCGTAGTGATGGAAAGGAAATCAAAGCAAATAAACTTCACTTCAAAAAGAGCAATGACAAGTGTTTCATATAAACATGCTTCTTCAATTATCGCCTTCTCCTTGGAGGGCTTGCGCTTGAT  
GAATCTAGCCCTTTTTGGCCTGTTTACTCAACAATACAACACATATTGGAGGGAATATAAGCGTGTGATGCGCCTTGCTGATTTCTATGCACCATATGCATTCTTTAAAGGAAGCTTTGATG

>comp146741\_c1\_seq1

TGCCTGTCGACCTGGAATTCGCCAATTCGGCCTTAAGAATTGAAACCAACACAGCTTTTCTCATTTCCCGACAGCTCACCGTTAGCTTCATCGTCATCGCCACCTGAAAAATGTCTCCGC  
CGCCAATCGCACCGGCGGTGCCGTACCTCGCTGTTGTATTTTGGCCACCGGTGTGAAGCAACAGTGAACATCGTCTCCCCTGTGCGCCGTGACCCCGTCTGCCCTATCTGCGGCGACAG  
CTTCGTCGAGGAGCTCGAGGTACCGGAATCAGGGTCTTCATCTCCAACCAAGCCGGTGTGAAGATTCTACGATCGCCCCAACGTCGGCTCTCCCCTTCAACTCCTCTTCGGGCAGCGT  
GGAAATTAGAAATCCAGGAGACTTTGTCCGTCTCCTCGGCATGAATCCACTCCTCAATATTGCGGGCCATCCGAAAACCCTGGCTTCGATCCTCAGCTCTTCTTCAACGATTACATTCAA  
TCGATTTTCTCCGGCGGAGGAAGCATCCAAATCATGTTTGTATGGCGCCGGCGGCAGCTCTGCCGAAAACATCGGCGAGTACGTATACGGCCCCGGCCTCGAGCATGTGCTTCAACAACCTT  
TTTGAGAACGATCCAAACCGGTACGGTACTCCGCCGGCGTCGAAATCGGCGGTGGAGGCTTTACCGATCATCGAGATTTTCAGAGGAAATGGTTGCTGGAGACGTGCAATCGCAGTGGCG  
AGTTTGTAAGGATGAGTTTGGGTAGGTGCTGAGGCGATGCAGATGCCTTGAAGCACATCTACCATCAAGATTGTATCGTTTCGTTGGCTCGAGCTGCATAATTCGTGTCCGGTATGCAGG  
TTCGAGCTTCCCACGGAGGATCCTGATCACCTGCAGCGGGTTGCGAGAGCGCCGGCTGCTCGAGGAGGGCGATCGGGGGGAACGTGGGATTGAGTGGCCTGGCTTCAACAATTGGGG  
AAGAACAAGATCTTCGGGAAACAGGAATAGGCGAAGGAGGGTAAGAATCTCGCTTCCAGGGCCTTTAGCGGTCTCCTCGGTAATGCTGGTGGTGTGAACGATGGTTCCAGTAGTGCA  
AGCTCTGATGAGAATTTGAAGGTCGATAGATTAATGGTCCGGAGGATTAGGACTGGGCGATGAAGCTCCAATTTGGGAGTAATTATTATGTCCGGACATAGAACGCCTCCAGAGATTAAT  
ACTCATGGGTCATATCACCTGGAGCTCGGTATTGAGCACTCGGTATTGTTCCGTATAACGTTCAAATTTCCATTTTTTACCAGATGTAATAATTTTTCCAATTTTGAAGCT

>comp146788\_c0\_seq1

TTGTGCCCGTTATTCTCCTTCCCTCACCTCTCCGCTGTCTTTTCCCAAATAAAACAAACTCGCCCTAGAAAGACTCTACTCCAAATCCTTGCCGCTTAACCCCAACAATCCGGGGCTACCCCT

TCTCCCTCTCGGGATCAAACGCTCTATCTCTGGCCTCCCATTCTCTCCCTCCTCTGCTTTCCAATGAGCGATTTCCGCAGGGCCTATCGTATCTATAACACCACCAATGGCGATCGCCGCCAT  
CTCGAGGTCGTCTGCGGCAAGGCGTATAGCGCTGCTCAAACCTCTTACCTAACCTACGCACGCTCGTTGGACCACCCTCCTCCCCAAGGAGAGGGACAAGCCGGCCAGTGGCGTCGAA  
GTGGTGCTTCAAAGATCCAGAGATGAAACGGCGGGCGAAGGGTTGCAGGTTATAAAATGTATTCCGGTGGAGGGAAAGGTGAAGTCTTCATTGCGTAAAGGGATGCGATGGATTAAGGTA  
AGTGCTCCAAGCTCGTTCATGGATGCTAGGGAGCGACGGTGAAGGAGACGACATGGAAGAGGAGAAATTTGTTTGGTTTATGCTCAACTTTTTAAGTTCACAATAGTGGTGGAAATTTTA  
AGATTGTTGTTTATTGATTGATGGATTTTGTGTTTGAATCTTCTATGCTCTTATTTTAAATATAATCGTGATTTATTTGGTAATAAGTTTGTCTCCATATTGTTGTAATTTTCGGCTTCCTTTTTTT  
TTTTTTTGCATTTTCTTAAATTTCTTTGTTATTCTCCGCGTCTTAGGTCTTGTATACGGTTTTTGTAGTCTCTAGGGTTTATTTTTGATTTTGTCTTTGGTTGGATATTTGATGTGGTAG  
GGTTTCTAATTCATTGTTGATTGAATCGTATATGCAGCATGGTCTACTATGTTAACACAGAGAGGGAGAGAGTATATTTCTGACAGATTTTATAGTCTCATTGCTGAATTAATTTTCGCTGG  
AATTTTCTTACAACATATGAGAATCCATCTGTTGGATACATCTTTTACGTATTCAAAGCGGAAATTAAGATGAATTTTTGACAATTTGAGCTT

>comp146795\_c0\_seq1

ACAACAGGGTTTATCTTCTGCATCTTGCACCGATGAATAAAAACATGAACATCAACAAATGACCATACAAAAATAAAATCTAAGTACCTTACAATATAAACTCCAATCATTAAAGCAATA  
GAAAACAGACACCACAATTCAAATTAACGGTTCGACAGCCAACGGTAAAAAGTCATAAAATACTCAAAAATAAAATAACAATATCAATAGCATCATCATCCCTTCTATCTTCTTCCATAT  
ATCTCTTCTTCTATATGCCATATATAGAATCAATGAAGGTCTCTGGCACACCTGGTGATAAACTGCAGCCGCGGCGATAAGGGTTAGCTCTGCCATGGCGGTAACAGTTGTAGTAAGAA  
ACTCCGCGGGCGTTGCAGGGGACTTGGTTTCTCCTTAGCATTGCATAGCTGAGGAATCGGGCGGCTCTCGCCATGAGCTGGCGGGCGTTCGTCTGTTTCTCAGCCTCGTTGTCATTGAGG  
AAACAATTATTCTCAAACAATTGAAGTCGTTAATGGCGTATGAGGATATGGAGGTCGTGAGATCATCGATGGGGGAGGTGGCTGCGGTTGTGAGGGGGAGGAGGAAAATGAGGAGGAG  
GAGGAGGATTGTGAAGGGAGAGGGAGGCGTAGCCATGGCTTTGGTTTGTCTTTTCAGAGGAGCGAATAAAGAGCTGGGGAGAAGAAGAAGAGGAGGCCGGGGACAAG

>comp146864\_c1\_seq13

CATGTGGTCAGTCCCAAGCCATAGGTAAGTACTGTAAAGAAGAAGGTAAGTCAAGTTCAACCTTAATATGCTTCATCTATTAATCTCTCCATTTGGTTATTCCAATGACGAGGACATTGATTAAGG  
CCTCAACTCCATCAATCTTAGTAAGTAGATGATTCAAATACCGTCTTGAACACCAGTACCATCCGCGTTGACCCTCTAGACTCGTGCCCTTTGTTTCTGTTCCGATCGACAAATAAATC  
CCTAATATTTTTCTCCATTTCTCCAACGTATTTGCTCAAACTTCAGGTCCATTAACAATCTTTATGGCAGCAGCCTTGGTCAATGCCGGGACATGAGAAGTAAAAGAACTTGCTTCATCT  
AGTAAATCTCTCCTACTGGTTATTCCAATGAGGATGACATTATTAAGGCCTCAACCTCATCAATCTTAGTGAGTAACTAGTTCATAATACCATTTTGAACACCAAGACCATCTCACGTTGAC  
CCTCTAGACTTACAAAT

>comp146864\_c1\_seq7

CATGTGGTCAGTCCCAAGCCATAGGTAAGTACTGTAAAGAAGAAGGTAAGTCAAGTTCAACCTTAATATGCTTCATCTATTAATCTCTCCATTTGGTTATTCCAATGACGAGGACATTGATTAAGG  
CCTCAACTCCATCAATCTTAGTAAGTAGATGATTCAAATACCGTCTTGAACACCAGTACCATCCGCGTTGACCCTCTAGATTGTCAAGGAAAAATAATAGCCTCGTGCCCTTTGTTTCT  
GTTCCGATCGACAAATAAATCCCTAATATTTTTCTCCATTTCTCCAACGTATTTGCTCAAACTTCAGGTCCATTAACAATCTTTATGGCAGCAGCCTTGGTCAATGCCGGGACATGAGAA  
GTAAGAAACTTGCTTCATCTAGTAAATCTCTCCTACTGGTTATTCCAATGAGGATGACATTATTAAGGCCTCAACCTCATCAATCTTAGTGAGTAACTAGTTCATAATACCATTTTGAAC  
ACCAAGACCATCTCACGTTGACCCTCTAGACTTACAAAT

>comp146864\_c1\_seq8

AATTTACTCCATGGGACACGGAGTAAATTGTTGCAATAAATATTTCTTCATTATTGGCTCTTTTGCATTATATTTGAAAATATTTTGTACAATTTAAGTTGTATTCAACTACTAAAATTTTCTTC  
TTTTAATCCTTAATTTTATCACCTTTTAAAGTGTGATTATTAATTTTCATATGATTGATGTTCCATATATAGCATATCATTAATCATATTTTCAATACAAGCATATATAATCAATTTTGATACTATTT  
AAATTACTATTTTTCAAGGGGAAAAAAGAAAATTTTCTATTTCTAATTATTATATATAATGTAAATAATAATTTTTTCAAAGTTTCTATGTAACAAATATTGTTATTTTTTAAAAAATTCGA

GCATTGTAATGTTAGGTGGATGTTATGTGTAATAATTTTATTTAAAAAATAATGAGAATTTTTTTAATAAATGATTTTAGGAATTTAATCCTTATTTAAAAAGGTGAATGCACTGCCTC  
TTGTACAAAGTGAATTCAAATTTAATGGAGTCTTTCAGTTAAATAGGTATAATGTACAAAAGACTACCCAGTCTATGTGGAAGTGACATACCTTAATATGCTTCATCCATTAATCTCTCCA  
TTTGGTTATTCCAATGACGAGGACATTGATTAAGGCCTCAACTCCATCAATCTTAGTAAGTAGATGATTCAAAAATACCGTCTTGAACACCAGTACCATCCCGGTTGACCCCTCTAGATTGTC  
AAGGAAAAATAATAGCCTCGTGCCCTTTGTTCTGTTCGGCATCGACAAAATAATCCCTAATATTTTCTCCATTTCTCCAACGTATTGCTCAAAACTTCAGGTCCATTAACAATCTGCAC  
ATGTGGAGGCCGATCAGAGGGATCTCGCACGCCTAGAATCGGACGGTTTGGCTAGGGCTCGCGAACGGTAGAGAGGGGAGAAGGAGAGGGGATTGACGGGCTCTTGGGGGCTGCTTTTCG  
CCTGGGGTTTCTTACATGAGAGAGAGGGAGAGGTTAGTTTCTTGCGAATCCAAAGGAAGAGGAGATCATGGCGGCGTTTTGAGCTGGCCCTAAGAGA

>comp146894\_c0\_seq2

CTGATCAAAACCTTAAGCATAACAATTATTCATTTATGTTTTAAATGAGAGCAATCGTTTTATTCTTTGTAATAATGCAACCATTCACTCAACAACATAAAATGCAAATTAATATACCGCAAAC  
ACGCCAAACATTATGTAATAATACTGTTCCCTTAGGGGTTTGTGTTGCAAATCATTGATAAAAAATGGAGGCCGTGTCCTCACCGCCGGCGTCGATGGCTGCCGTCATCGCATCCGCTGCA  
CAAGATTCTGTCTGTTGGTAGAGCTGACTTAGCCTCCCTATCTCCTTGTTCAGTGTCTCATAGCAGCCATCTTAACGAAATCTCTTGTGCAAGGACAGCTATGCGCTGCTTGATTGGCTA  
TTCTGCATGACGAGCATCGACCGTTGGCAATCGAAGAAGGCAACTCTTGGCGTCAATGCCGCAACGTCCTTCCAACCTTTCCGACGCGTTTCTGCAGCTCGGAGATGTAAGTCAACTTC  
CTCTCCCTCGATCTCCGCGCTGATTGTCTGTTCCGAATATCCTCTTACCCTCTTGGGATCTTGAATGGGTAATTGAAGGGTATCGTCGGCCGAGGAAATCTCTCCTCAGAGTGGATAAA  
ATGAATTGGCTGGTTTGGATGGGCATGATAGTCAGGTGGGTTTACGTTGGGCTTATAGTTGTCTGCGTTGACATTGTTATGGTCGGAGGGAGGAGCGGACGACATTGTTGGGTTTGGCGG  
GCGGGAGGCTCGAGAGCGACGATAGAGTCGCTAAAAGCGCGACGATGGGAGGCTTTTGCATGTCAGCGAAGTTGAATAATTTGTCAACCCATGAGTCGCTCTCGGGAGAGAGACCGA  
AGGGGGAAGGAGGGGAGGAAGGAAGGATGGAGAGTTGAAGGGGGGATTGGGGGGGAGTCGATCAGCCATCTTATTTAAAAATAAATGGGTTAAATTAGAGATTTA

>comp146939\_c0\_seq1

CAAACAAAAAAGCAAGTTGAGACTGTCTCAAGTTTGGCTCGTTCATTCATGAAACTCAGCTCACGAGCCATTATCAATCAAGCAAGAGACGACTCAACTCAATTACACCTTAGACACA  
CCACATCTCATAACCCATTCAACTTTTGGCTTGCTCTAACATACATGCATCATATTGATATTTATGTATATCATATAAAAAATCTTACAATGCCATTAATAAAAAAAAAAATTGCATATGTTTTAT  
GCAGAGGCTCATATCTCTAAAACAAAAAGAAAAAGAAAAAATCTTTATGCTATTTCTTTCTTGGTAGATTTTTACTTTCCACCCACCAAACAATTCACAAAATCCACCTAAAAAACA  
TTAAATTCATAAAAAGAAGCTCACTTTCCCATCTCTATAAGTTTTTGTCTCCACCCACAATCTCACTCGTTCGCATGCCTGTGCAGCCTCATCATTCCAGTTGGTCTTCCAAAGCACAT  
AGCACAGAATCAAAGTCTGCAGTGCAGTTCCCAAAAGCATTCCAACCCATATAACCCTGAACTCCCACTGCAATCCATAACCCAGTAGGAATCCCAAAGGAAGGCCAAAGACATAATAG  
CAAGCCAAGTTTATATAAGCCACAAGAGCTTGCCATCCACCTCCTACTGCCACACCTGAAATCACTGGCTGTATGCTATTGAGGATCATGGTGATGGCAAGAAGATGAGCAATCTTAGAAA  
CGGCATGCTGAAGCTCTTCATCATTGTAATAGTACTGGAAAATGGTTACGAGCTGCGAGTATAAGAAACATTGCAAGGAGACCAATTACAAGGGAGGTGGCCACCACACAGCCACT  
GCGTGCTTGGTGGCTCTCGGCCCTCCTGAGCCGAGCTCGTTGGAGACCCGAACGCTTATGGCCGCGTTGATGCCGATGAACAACATTCCTTCCCAGCCGTTGATGTTTCATGCAGATAGAA  
AGAGAGCCAACGGCTATCTCGGCGTTCTCAAGATGTCCCGTAAGCACAACTAGCACCATCATGTACCAAATCTCCAGGCAAAGCATCACAGCTGAAGCGAGGGAGAGTTTGACGAAAG  
CCCACAGATCCCTAAATGCGCCCCAGGAGAGGCCCGCTCCCATCCGTCCCAACACCATCGAACGACGTACACCACCTGGGCAATGGAGACGATCCACTGCGAAATATCGTATGCGGCG  
GCGGCGCCGATGATGCCCCACCCGAATCTGTAGAGGAAGAGGTAGAGTAGAGCGATATGGATGAGCAGTGCAGCAAGCCTATGCAGGCGAGGACTGACACCTTGCTCTGCGCCTGGA  
GAAATTTCTGTGCCGGGAAGTTGATGGCGAGGGCGAAGATTTGGGGGATAATGGCGACGGTGAAGCGGCCGGCGGCGTCCGCGATGGCGGGGTCTTGGCCTATCAGCTTCAAGATGGG  
GGTAGAGAAGAGGTAGAGGGGGCACATAAAATGGCGGAGGCCGTGAGGATGATCCATGACCGTTGCATATAGATGCCGAGCTTGTCCACCTGCCCCGCGCCGTAGGCCTGCCCGCATA  
GAGTTTCCAGTGCCTCCCATGCTTAGAAGAAATCCAAAAGAGAAATTCGATATAACTGAAAGCCCGATTGCGACCGCCGATAACTCCAGATTTCCAAGATGTCCGGCGAAGATCTGCG  
TAGTAGAATTAACCCATATAGACAAATAATGCTGAATGCGATCGGCGTCGCGATCCACCACAGCTTCATCGACTCTCCACAAAAGGTCTGCCAAGCGTCGCGCAAGCTCCTTACCTCCGG

CTCATCGTCTACGTCCGGGAAGCCGGCGGGCACC GCATCGGCCAAATCCGCATCAGCTTCCGTCGTCGCAACAGGTGACGGAGACGGACCCGACCCGATATCGAAAGGGTGAATAGGCA  
TTTGGTCTCGTCGAGTCGTCGTAGTTGGTGAGAAGTGGGGAATCCATTGAAGCAATTGATTCTTTTTTCGTCATGGCTCTCCGGGGCTTCGGAAGGCGCAGAGAGGAAAGCGGAGGGTT  
TGCAGCTCACGACAGAGGTGCCGAGTGGATGGAGGGACGGAGG

>comp146956\_c0\_seq3

AACCAAACAATGTTGATTAGGACATATCATTTTTAAATCAATTATTTCTGATAAATGTCCATAACCAACCAATTCTCTGGTCATCTTATAATACAAAGTTCAAACAAAATCAAATAAAGTTTA  
CCAATTCATAAACTGTAAAATTATTTCTTCTTATATAGAAACATTCCAAATTGCACCATCACCTTCTCCACAAGCATTATGGACATCTTTCATCTTGTCCACCGATTTGCATATCCCCTGCAG  
GACCAATCAAATGATGCCACACAAAACATTTCCCGCTTGCATTTTCCACTCGCAATCTGGAGGAGTTCCACAGCACATAGTTCGATCATCTATGTGCTGCACGTCCAAGCCAATTAGCCATG  
AACCCAAAGAAACATCCTCATTTGCATATCTATGCAATATTGGCGCATTTATAGAGATATATGCTGCCAGATCCTTTGAGATGGCATATATTTGACCCGTAGCATGCCTGAAATACTTATTGCC  
TTCTTCTCCAAATTTCCAGAATCTGGTTCATGATTTTACCCCTTCTGTGATAGAACGGGCCAGACTTCATGCACCCGACATACACCCCTCGGCTTGGTTTTGTATCGTGAAAGAGTTG  
TTCCCAGCATTCCTAGATTTACATGCACGTGTCATCAACCTTACATAGAAATCTGCATCCCAGATAGAGACAGCCGTGGCGAAGAACACCCCTCGTCTTGGTTGACAGCTCGTGATAACC  
TTCCACATGCTCAAGCCTTAAAAAATCCTTTGTTTTCTGCTTCTCCGCGTCGATAGCGCGATCCAGTACTCCCCCAGGTGTGGCACTGTGACCGATTACAAATCGGATTATTATACCTTTCT  
CCTTCTCCAATCTCCAGAGCTTAGAACCTTTAGGCATCCAAGTCTCTCGAATCGAGTGGCGCCGCCTACTGCTGCTAAAGGCAGTGTGATGCCGATGACGACGAAAGCCTTTTGGAGGC  
CTCTGCCGGAAGAAGGTGGCCCCCAATTTTTGCTAGTTCTAGCCACTGCAAGCTCCATTTCAAGTGAAGAAATAGACTTTTCCAATGACTGAATGGCTTTATGGGTCTTTGACACCTCTCC  
GATTATGTCCTTCGAAATGCCCTCTCCAATCTTCTTATGCTGACACTCGATTGAGTTCCTTAGATTCATATGTAGTTACAGTTGTGGAAGAGTTTGTCTGCTTTTCTGTTCTCCGGCGACGA  
TGAAGATGGGAGCACAGCGATTCCGGCGGTGAAGAGAAAGCCGAACATAAAGCAGAGAAAGCACAGCGCCGCCACCAGCCTATGAGGCAACAATCTCCCCCTGATTTCTTCTCGGAT  
GATAGGGATCTCTCCGCCATGGCCTTCATGAAGCCGCGCAGGAGTAGCATTACGATAAATTTAGGGATAATTC

>comp147016\_c0\_seq1

CATAATGAAATTGAAATAGAATCCAACAAAAAAAAAAAAAAAAAGACTCAAATTTGTCAAAGAGAAAAAAAAATTTTTTCCAACATTATAATGTATGGCAAGGAAGAGCAGTCCCTTGCAGA  
CCTGATTGTCTATGGTCCATCCACATCTTGGAGGCGGAGAAATTATCCATGTCGAGTTCGGACTGGAAGAATCGTACGAATTGTGAGCTAGCGTATATAATATGTATCAAATTTTTATACA  
TACTGTTTGTACATAATGTGTATACTCACAATTCGGATAATCTTCTCCTGTCCAGACTTTACATATAATAATTTCTCCTGCAAGTGTGGGTTGAGAATTGGAGATATCTCATTATCATATTGTCCA  
GATCCAAAAAGAAGCCACAAAAGCAACTTATATTTTTTTGTAATAAAGGTAATTTTCTTAATATAAATATTATGATCTTGCAAAATGAAATCATCACAGAAGAGAAAAATCCCTCA  
CAGTCCCTTCGGAGCCATAAGGAGCTTAGTAAAAGAAATTGTTATATTACAGCAGCTTCTTCGCCCCATCATTCTTCTCCTAATCTCAGCCGTCGCCACCCGACCCGACCCCTTTCTCGCAA  
GAAATCACATCCGCCATTGCCGCATTAGCCAGATCATCGCATCCTTATCGGCCTCATCATCAATGGCCGCCGTCGTCACGTGAGCTGCTCGGCGACATCAACATACAGATCTGTACAATC  
GGCGACGCATTGATAGAGCATTGGATCAACGGCGCCGGCGGCCGCGGCTCCGTCTGTTGGGCGGAGAGAAAAGCGGCGGTTTGGGAGGCGTTATTGGCGGCAATGCGGACGGAGATG  
ATGGAGAGTAGGCGGAGGTCCGGCTTGAAGACGGCGGTTCCGGCGGAGAGGGAGGAGATGCAGAGTTTTTGTAGATTGGATGCGGTTTGGCTGCAGGCTTTGTGGATGAGGGAGGGGA  
TGCCCGGGTGGGCGGGCGGCGGAGATGAGGAGGGGATGAGGAGGGTATGAGGAAGGCGAGGATGGAGTATGAAGCCATTAAGGTTTTGAGGTGGCGAACGAGGAAGGAGGGG  
GGATTCATTAGAGGAAAAGGGGATTTGTTAATTGTTAGGACTTGGTGGTTATTGAGAGTTTAG

>comp147064\_c0\_seq1

CATTTTAAACAAAACTTCTTCATAGAGGAAATCTATCATTTTTTTTATATCTCCTCATTTTGGAGCTGCCAATGAAAAATAATTTATTTATCTATTCTCTAAATTTTAAACACACAATCATAATGT  
GAGTGTGAAACAATCATAATGTGAGTGTGAAGCACTATATTATATAGGAATAAGAGTCTAACTCGTAAATTTTTATCTTCTTAGCTTTGCCCAAAGGCATAAGTTCTATAAAAAATTTGGAA  
GATCCTGTGATTAGATTGTGTTTTCTGGGAAGCAACTATTTTTATTGCTCCTAGTGATGATGAATGAATACGCTTTTTGCATTCCACCTCAAGAAGTTAGTCAAGTAATTGCATAAAGCTGC

AGAGTTTAATTACTCTTTTAAGGTAGATTCTTTTATTATTTTATTTAGTTATATGCAAACAAAGCCTTAAGCGGCACAAAAAAAAGTGATATCTTTATTGAGAAAACAGACAGATTCCAAAT  
GTTAAAGAATTTTTGAAGTACTGAAACCCCTTTGATATAACAAAATTTTCAGTTTTATTTTTTAAAAGCAATGTCTTTTCATCACAATGGCCATTGATCTTTTCATTTCATCTAAGGCATTTTGCCTTG  
CATTTAAAGCTCAATTTGATAGAGCTATAGTCTTCATAGTAAAGTTTTAAGAGTAGTGTTGTAAATATTATTAATAAAAAAAGCACACCGAGTGATTAGGCTTATGTCAATGCATGCAAGATCC  
AGGATCAGGTTGATTATACAACCTGACCCTATTGTAAAGATTCTATTTCTATGATTGAACTACTGGATTTTAATTCAACAATGGAGGCAACTAGCCATTTCTCTAGGGCCACACTTAAATA  
CCGGTCATTCTTCATTATCTTTATTAATAAATTTGCTGCCCATATGTCCTGGTCTCCAGACTTAGCTGTACTATTTCCACCAAAAATCGTTACCATTAAACCTGGGCTGTTTGATTGGCTCTG  
TTCTTTCCGGAATTGTTGCTGGTTTCTTTGTACCTTGTATTAAAGGGCTTGAAAAGAATTTCTAATTTTCTTAGTGCTTAAAGAATTTATAGTTTCTAATTTTCTAATTTAATCGCTAGCTTTCA  
GCCTTTCAGTACTTTTCTCCAAGATAGCCTGCATATGGCATATTGGCTATCAAAGTCATGCTAGATTCCCTTCTAGTTTTTAATATCCTTTGGCATGATTAATGGATTGTTATGTATGAATGTGT  
AAAACCTCTTTTTTTTTGGAAGTTAACAGCTAAAATATAAATTTGATATCAGCGGGATTTCGATCTTAGAAAAGTTCAAAAACACTTTTAAGATCTTTATTGACTAAGCTAGTTGGCGCCTATAC  
TTTGGAATAGAACAATTGCTTGCTACTTTCTTT

>comp147077\_c0\_seq1

GAAGTGGTGGGAGACGGCCCCAAATATCTGAATGAACTAAATCAAAAATGTTAGAGGTAGAAGAGGTAGAATTCTTGAATGGTAACCTGCGGCTTTTAGCCAAGTTACAAGAATGACA  
ATGATTCTTATTCAGATTGTTACAAATTGCTGGAATGAATTTGCTAAGGACTTGAAGAGTCTGCCGAGCCGGATGGCCAAGACGTCTATGCCAAAGATTTGGTATTTCTTGAGCTGAAAAC  
AGAGCAAAACCGGAGGTGGAAGAAGAAGCGCGAATGGGGTAGAGCCCGTTAAGGCAAGGTCCCTTGAGAAGAGTGTGACCCGCTTCGAGTCCCTGGATTTTAAATTCATGAGCAGAAA  
ACTTGACAGAGCAGTGATTATCTTTGGTTAGCCGGTAAATGAAAATAAGGTTGAAAGACAGATTTGGTACATGAAGAAGATGTTGAAGACATAATTTACCTGATGGAGTCGGAAGAATAC  
CTTTTCCGGTGTGCTGAATAGGAAGTTGATAGCCATTTCCAATTGTGATTTGTTGGGTTCCCTGTGTAGGGACGACCGGATTGAAGGTTGGACGGATCGGATGTAAGATGATTTGATGCGCC  
ACTATCAAGAAACAGTCGGTAGTGTTCAGGTATCGGACGGAGTGATTAAGCAGTTTTGACAGATTCTTCGTTGTACGATGGATCGTTGCGATAACCAGCATTTTATTGATGAATGTCCG  
ATTTTAGAGCAGATCTGGCAGGTGATCCCGCTGGATGAGGTTTTATCTGAGCGGCTGCGACCACGGTTGGACGTTTCGGCCTTACCAGAATTGTTACGTCCGCGACCCCTCCGCGATAA  
GCGGCCAGAGCAATTGCAGGATCGTTGAGAGTAAGATTCTGGAGGGCAGTAGTGGTTTCTTGGGCTAGATTGAGTTCTTCACTGCAGAGCAAGGTGTACAAGTCGTCGAGGCTAAGAGG  
TTGCAGGTTTCGTGCGTATAGCAGTTTTGAAGGACTGATATTGCACCGGAAGCCCGTTAAGAGTGTAGAAGATCACTTCTTCTGGATCTAAGGGAGATCCAGTGGCAGCAATGGCATCAAC  
AATGGATTTGACAGCAAGAAGATATTGAGGCATAGACTGATTTTTCATGGACAGA

>comp147110\_c0\_seq1

TAAAAAAGAAAGAAAGAAAGAAATCACACAAATCTAATAATATTAGGATAATTCCATCATACTGTAATCCTTCCCTTGGGTGAATCAAAATTTCTGAATTTTATTTTACCATTGGT  
GCCAGCTAATTTTTTCTGGGAATAATGATTCTTTGAGCAACGGCGGTTGCTGGGCTTGGCCCTGCCGAAACCCCTTGACAGCTTGCACAGTATAACATCCTCCATGTCAGGCCTTTTCGT  
CTGGCTTTTCTGAACACAGGCCATTCCCAGCTTCAGCATCCATGCCTTCTCCAAATCTGTTTCAGCCATATCATCTACTTTCTCGAGCCTTTTCGCTTCAATGTCTTCGAGTATTTTCGCG  
CCGACTCAAACAGATTATTGTCCACCGTGTCTCTCCAAAAACGGTCTCCAGAACGACGATGCCGAAGCTGTACACATCCGCTTCTCCGTAACATTTTCCCTTGGACTGAACGC  
ACTCGGGAGCCACATAACCAGACGTCCCAGGTGCTGAGGTCCGCGTTGTCGATGTAGCCTGTAAGCCTCCCACCAAAAGCTTGGAGATGCCGAAGTCGGAGATCTTGACTCTCAATTC  
TCATCAATGAGGATGTTTTCCGGCTTTATGTCACGGTGAATGATCTTGGTCTCGCACTCGCGGTGCAGGTAGTGAATCCCCGGGCAACACCGAGAAGGATCCTGGATTGCTTCTTCCAGC  
TAGGGGGATCAGACTGTAATATCAGATTGGCGAGTGATCCCCTGCTTATGTATTTCGTATATCAAGAGACGTTTAGATTCTTCGTAACAGAAACCGAGCAAGCGAACCAGATTTCGCGTGGTG  
AGCTCTCCCGATGATCCTGATCTCTGCATGGAATCACTCTCCCTTTCTCTCTTCCGCGCTGAGTCTTTTCACTGCAACAGGGACGGGTTTGGCCTTCCATACATGGTCAGATAACCCT  
TGAAGACAATCGCGTGGCCTCTCTCCCAATTCCGAGGCGAAGGAATTCGTGGCCTTGGCTAGTTCTTGAAGGAGAAGCTCCGCGGCGGACCTCCTCTGAAACGCCAGCTCCCAT  
TTGCGCCATAGCAATCGGTACCTCCATAAAACAACCAATAACCTCCGGTGCCGGCGACCAGCAAGGCTAGAAAAGACGCGCGGCTTGATTGCCACGCACAAGAGCACGGCCTTCAGGTG

TATTAGGCTCCTCTGTTTCTCCTCAGTTTTGCCTATCTTGATGTAAGCAGTGCTAATGCCTGCGGTAAAGTTGGTACCTTTAGCAGCGCGACTGATCGGTAGCTTATGCTTGGCGCAGTTCTT  
GTTGAAAAACACGGCAGCCTCGCAGTTGCATTTCGGTAAGGCAGGTGCTGCTGCATTCATCCTCGCTCTCGACGGAGATAATGCTGTAGGCCTCTTCATACAACACTAAATTGTCAACGTG  
CTCCATCGGAAAGGTGGTGGTAGTATCGGAAGTGCCTGACCAACAGTTTTGGTTCCGGTAATACTTTTTCTGGCATCCATTGTCCGGAGCGCCGGAATCGGTGAAGTTGAATCCAGGCAGGCA  
GCGACACTCAGCGCTGCTGTTGCTGATCACGCAGTAGCTGTTTCATGCCGAAAAGCTTTCAGTCTGGCAAGCGTCTTGATGAGTAAGAATTCGTATACCGGAGTGGACCTGTTGGTGCC  
TAAGTTTCAGCGCAACAGCTGGAAGTATTTATTCGAATCTAGCGTTCGATAGTAGAGCATTTTTGTTTTGCTGTCTTTTGGGTTATACTGTGTCAAATGATCTGATTGTCAGCGGTGCTGA  
GGAAGAGACGGCCATCTTCGCCAAGGATCCACTTTGTGTACCTGATCGGCGAGGCCATGTCTGTAGTTGTATCACCATCCGCAGCAATATTCCTCTTGAACGAGTAAAGGACCAGGTTG  
GAGTCGCACTGCATGGTGAGAAAGTAAAATAACTGGTCGGTGCTATTCTGGCGGGAGGTCAGGCCGGTGGCCGAATTCAAAACCTGACCTCCCATCATTGTGTCCGGTCCGATTATCAAAA  
CTCTGCCAAGTGATAAAGAGTCGCCTTTGACGCCGCACTCCCAGGCTGGACGATATTACGCTGCAGTTCTTCGTAAAAGTCCAATTGTTGGAATCATAGACCACGAAGTTGCCGCTG  
TCGAGCATGCTTGCACCGGTGGACTCTGTACCGTTGAATTCGATGAGGGTTATGGTTTTGGCTCCGTTAGATGGCGTGAGAAGAAACCCCTGTTTTGTGAGGAATAGAACGGCTTCTTTG  
GAGATAAGCTTGATGCCTTGATCTCTTGGCGCTGTCCAAATTAACGGTTCCATCGTAGGGGAGACGTACATATTTATGCCAATGGAGAATCCCTTGCCTTCCCTGATAGAATCCGAAGGC  
GAAGCGGCCGGAAGGAGAGATCCAAGAGCTCGGGCCGGCGGAGAGTTGAGATGGAGGGAGGAGCCGACGGGGATCTCAGTAAAGGCATGTGTTTTAGCTGCGAAGCCTATTACTGCT  
TGCCCGACCGCGACGAAGGTGAGGAACAAGGCGAACATGGCTCAGTTTCTCGGGCCTTTCTGCAAGCTAGGCTTCTTTCTGTTTATCTAAGCAATGGAATGATGATAAATAGCGGAGAGT  
TCATTGACTA

>comp147131\_c0\_seq2

AGATGAACTCACATGATATATGACATCTGAATGTTGATTTGAATGTGCAGCTATTGCTAAAATCATGGCATTAAACCACCATGTCTCCAGGAATCTATCAAAGTTAGCATTCTTGAATAAGTTA  
TAATAATAGAGCTAATTTTATCTTGACATTGTGATATAATTATAAGTGTGTAAATTTGCCTTTATTTATGTATATGAAACCAATATTTTCATGAAAGGCAGTATTATATCATTATCA

>comp147140\_c0\_seq2

AGACTTGGATAGGGTGCTTCATGTGTGTAATGCAAGCAAGGCTTCCAGAAATTTGCAATAGAGTTTCCATCTCTGCATAATACACTGTAGCCACATAAATCCATCAAGAAAAAATTTGCC  
GATTAATTTAAGTATTTGTAGTTAGAACATAAGAAAAAATGAATCAAATCATATCAACATTTATCTGTTTTTTATTGTAATGATAGAAGTCACCTCAGAAAGGTGACACCAACAGTTTTCTT  
CAATAATCTTGAGCAGTGAGATGAGTGCATCTCTAACCCACCCAAGGGAATTCATGACTGCTGCAATTGAACTCGTTTCCTTATAAGACCCTCCAGTGACCATCCAGTCTTTTCAGAAA  
ATACACGGTCAATATTTTTTATGTGATTCCAGAGCGTGTAACCAACGTTCTGATAAGCACTTCCAGTCACTCCAGTCACTGCTGTAAGTCTCCAGTCACTGCTTTTCGAAATGCTTCTGCGG  
AACTGAATGCATCGGATTACAGCTCGGAGTTGGATTCCGAATTCACCGCTGTTATAATACTTCAGGAACCTCATGAATTCGTGGCCAAAGAGTTGCTTGAATGAGGAAAGAATTGTCTTTA  
TCTGGTCTATGTTCCCTCAGACTCAGAATAGAAATGACGGAATTATGATCAATGAATTTGCTACTTGTGATTGCTTCATAGAGGATCTTCGCATCACACAGAGCCATACTTGTGTGCAACCTT  
TCTCCACTGTAAGTTGAATTCAGATGGCTGAAATAATCTCTTTCAAGCTACCATTTGCCTTTGTTAAGATATCTTGCTCAAGTAAGGAAATGTATTTACCCGATATGCTTGTAAATTGAT  
AGTAGCTCTAATGAAGATCGAGTGCATATGATTTCCATGACAAGTTTGAGGTGAGTCTTATTAGCATAATTGCTCTTCGAATTATCTCTGCATCTCGATCACTGGGCTCACAAAGTTGAAG  
ATACACCATATACGAGAAAAGATCATTGTTTTGTGATAGGGTGTAAAGAACTTCCCTGGTCATAAAGATCACGTAAGGTCCGACGAAAAAGTTGGAGTTCTCCACCATCCCTGTGATTGTTG  
ATCTCCATCGCATTTTCGTTGGTCACTAGAGCCATTATTACCTGAGATAGTTCTGGAAAAGTCCGTGGGGTAAGTACCGGGATGTAATTGAGACGGTTCATGAAGCCCCAGATTGGAATATA  
GAAACTGTCCAGAGGGCATAAAGCGTGAGATTTGTTGAATGAATCGTAAGATCGCCATTCTCCTTCCATGACTGCTTCCGTCACCGTCGGCACCGTGGCCTGGAAGGCGGAGGGAGTT  
CGACGTTTTGGTACGTGACGAGCGGTTTTTTGTATACAGAGAGAGATAGAGAAGCGAGAATGAGCAGAATAACAACCTCCCGTGAAGGATGCTTAGCCTCTCCAAATTTCTCCAACGCGTC  
AGCATCTCCCGTTTCTTCCGGCAGTTGGATGGATGAAGAACGGGCAATTTATTTAGGTGCATAACTTTTAAATTTTTGTTATTTATTAATAACTAAAATTTATGTTTT

>comp147166\_c0\_seq11

TTCTTCTTCCCCATTACTTTTTAAAAGGGAAGATTGAGAAGGGAGAAACAAATATTTTTGAGAGAGTTGGAGAGGCCAATAGGAGAATTTAAGGAATGTCTATCAAAGAGGTTTTCTTA  
GCTTTGGGATTAGCTTATCTTCTTCTTCCATGTGAAGGCTCATACCGGATTTGTTAGCTTCAATTATGCTGGAAATGGCCCATCCAATTGGGGAAATCTCGCTGCTGAGTACAAATCTTGC  
TCCAGCGGAACCAATTCAATCTCCCATCAACATTTTGCAGGATAATGCCACTCTAAACTCCAATTGCATGACCTCAGTAGGCTTTATGTTGATGCAAATGCCACTCTTATTAACAATGGCTT  
CAATGTAATGTTGAAATTTGAGAAAAGTGGGGACTCTTGTGCAAGATGGGAAGAACTATTCTTTAAAGGAATTGCATTGGCATGCACCATCAGAGCACACCATTGACAATCAGAAATAT  
CCATTGGAGCTTCAAATGGTTCATGAGAGTGAAGATGAAGATGGCAATGTTGCAATTGTAGCTATTCTATATGATTTTTGGTAACTGACCCTTTTCTCTATCAGTTGAAGGATTGGGTGGC  
TCAATTGGCTAAGGAACATTGCTCGCTGGATGAAGAGATTCAAGTGCCAATTGGTCCAGTTCGAACCAAGTCATTGAAGCGCCATAGTCGAAGGTTCTTCAGATATGTTGGCTCGCTCAC  
AACTCCTCCTTGTACCGAGAAGGTCACATGGTATATTCTTGGCAAGGTAATGTGTTGGTATTTAGCCATCAAGTTATGTAGAGTACTCTCTTTTTCTTTGTGTTTTTATGATTTTTAGTATGAA  
TTATTGCGGTGTATATGAGATTAAGGTTTTGTTT

>comp147166\_c0\_seq13

TTCTTCTTCCCCATTACTTTTTAAAAGGGAAGATTGAGAAGGGAGAAACAAATATTTTTGAGAGAGTTGGAGAGGCCAATAGGAGAATTTAAGGAATGTCTATCAAAGAGGTTTTCTTA  
GCTTTGGGATTAGCTTATCTTCTTCTTCCATGTGAAGGCTCATACCGGATTTGTTAGCTTCAATTATGCTGGAAATGGCCCATCCAATTGGGGAAATCTCGCTGCTGAGTACAAATCTTGC  
TCCAGCGGAACCAATTCAATCTCCCATCAACATTTTGCAGGATAATGCCACTCTAAACTCCAATTGCATGACCTCAGTAGGCTTTATGTTGATGCAAATGCCACTCTTATTAACAATGGCTT  
CAATGTAATGATATCCATTGGAGCTTCAAATGGTTCATGAGAGTGAAGATGAAGATGGCAATGTTGCAATTGTAGCTATTCTATATGATTTTTGGTAACTGACCCTTTTCTCTATCAGTTGA  
AGGATTGGGTGGCTCAATTGGCTAAGGAACATTGCTCGCTGGATGAAGAGATTCAAGTGCCAATTGGTCCAGTTCGAACCAAGTCATTGAAGCGCCATAGTCGAAGGTTCTTCAGATATG  
TTGGCTCGCTCACAACTCCTCCTTGTACCGAGAAGGTCACATGGTATATTCTTGGCAAGGTAATGTGTTGGTATTTAGCCATCAAGTTATGTAGAGTACTCTCTTTTTCTTTGTGTTTTTATG  
ATTTTTAGTATGAATTATTGCGGTGTATATGAGATTAAGGTTTTGTTT

>comp147199\_c0\_seq3

CGTCTTTGTGGATTGTGATGTTGCCTCTGAAATAAATAAATAAATAAAACTGCATTTCAATTTTTAGCAAATAAATCCCAAATAAATCTTACCGATAGAAATTGACCGCTAAAATATCTC  
TTCAAAAAAAAAAAAAAAAACTTGTCTTCGCATGATCGTCGCCGTCAGCACTTAAACAACAAAAAGCCGGAGAAAATATCAAAAGAAAAGGACGGCGAACGCATCCATCCGTCCATCAA  
AAGCCTCAAACCTCATCAAACGGCTCTCATCGCATATCCGGCTGCACACCCTCGACACATCAGACTGCTTACCAGGCTTCAGGAGAAAATCCTCCGCCCTTCTTCATGCACATTGTG  
ATTCTAGTGGGGACGTTCTCTGATGACATGATGACCACAGGTATCTTCTTCCAGGTCTTTGATTCTTGTATCCTTTTAAAAGCTCGAACCCCGTCATCTCTGGCATCCAGTAATCTGTGATT  
ATCATGTTACATTCGGCTCCAAGCCAAGCATCTCCAGCGCCCGCACCCCGCTCTCCACAGTCGTCACTCTATGCTTAAAATTACGCAGTAGCCTCGCGATAACGGCTCGGTGCGACGGAG  
CTGTCATCGACAGCCAGCACATGCATCTCCCTCTCCCCGTCGCCGCCCGCCGAGCCGCCATTCCGGCAATTAGCACGGCCCTCAAAAATCCCAAGGAGCTCGCGAACC AAAGAGGGCA  
CCAAATCTCGCCGACCTGCGTGGGCCCGCAGCTCGATTCTTGTGAGATTTTCTCCTCTCTCTCACTAAAACGCAATCTACTTCTCTCTCAAAAAGTTGGAGTAAACGAGCGAATCTT  
CCTACGAGGGGACGTTAATAAATGGTTGCTTTTAGGGGGCGAGAAGCGTAAAAGTCCACTCGCCGACGGCGGGTGGCGTTGGGGAAACTCGCGGGGCTAAGATGACGTCAGCGAATCC  
ATTGAGATTACAATAAAGACGTAAGATTTTTGGGTTGGGATAATAAAGC

>comp147215\_c0\_seq1

AGTACATGATTTGCTCTTCTATCCAAAACCGAGATTTCTTGTCTCAGGCTCTTCGGTTTGCCCTAGACTTCCCCTGTTTCGCCGCTTCTCCGCCGATAGGGTCTCCACATAAGGCATG  
ATCGGTGGAAGGCGAAACGACAAAAGTCACTCAAATCACAATTGTGATTCATTTCAATTTCCGGCTTCCAATCCGTTTTCAATACCAATCCACTTCATCAGCACTTTGTATACCAATATTCA  
CAGTAAAAGCAAGAAGACGAAGCATCATATATGTTGGATAGTTGAATCACAATGTTAGCATCTTTGAAAGTTCTATCGGCAGCTTCAGAAACTGTTGAGAAAGGAATCCTGGAAGGATGT  
TTTGATGATTGCAGCAAGTAAGGCAGGAGTAATCCCGTTGTGAAGGGCAAGCTTGAAGCTC



>comp147269\_c1\_seq1

GGGGTGTCAATATTTGACACGACAGAAAATCCGACCCGGGCGCCGACCCGATTTCAAATGGGTCAGGTTTCGGGTTGACCCGGCGGGTTGTCAGGTCATCCCAGCAACCCGTTTAAAACG  
TCTGTCAAGCTGCCCCGTGGACCTGCCCCGACCCTACCCGCCCCCTGCCGACTACCCGAGGACCCCGCCCCGACCCCTGCCACGCTGCTGCCCTACCCCTGCCGCGAAGCTGCCAGCCTGC  
CCGCTCCTGCCAGCAGTTTCCGCGTGCCCTAGGCTGCTCGAGCTGCTCGCGTCTACCGCTCGCCTCGCCAGCCCGCGTGCCTCAGCGTCGGAGCCCGAGTCCGTGCCATCGTGGGCC  
CGCGTGAATCCGAGTTCGTGTGGGTCGGGTCAACCCGACAACCCGCCGGGTCGGGTCCGGGTTCTGATTTCCAACCTGTTTTCTACCCGGGTCAGGTTAGGGTCAACCCGTTTGAAC  
TCGGGTCAGTTCGGGTTGACCCGAGCCAAAATTGACACCTCTAATTGGAGCTATCAATATTAGTATAATAAACTTTAAGCCATTTATTGTGAAAGTCTCCAATTTGTTTTGTGGCAAGA  
AGAATGTTTTCTTCTAGGAGCCTATAAGTGATAAAAAGCACCTTGAAAAGAAGAAATATATAGAATAATTTATAGATGGCTTCTAGTTGTTAAAAAACTGCATAGAGAAAATAGGTCATAGT  
ACTTTATAGATGATTTCTACATGAAATTATGAGTGTTAACAATAACATTTATCAAATTATATAATTTGGCATTAAAAAAAAGAAGTAGAAGCATAGCTAACACAAGTAAAATAGGCAGGCCT  
GTAATATTCTCAAAGAGTTGAATAATTTGCAAAAAAAATTGATAATCCCCAAAAATTATTTATTATTAGTAGCATCAGCTGTAGTATTATAGCACGATCCAAAATGTCACCATCAAATA  
GCAAGCCTATTTTTAGAAAAGATTAGTTCCAACAAGATTGTTATCAAACATAGGTAGAAAAGTTTTAATGTTTTATAGTAGATATTGTTAAAGAAAAGCAATAGCCTTTTTAATTATTAATAAG  
GAATATTACCAATTTTAGTGGAGTAGGATCTGATATTATCCCCCAGATTAAGCTAACAAAGCCTTAGCCATTGTTGTCAGTAGAAATGTTTTTGATATGGGTAAATTTCTTTTATATTTTAG  
GAAAGTAATCTCCTCTCAATTATGACATCATAATTAAGGAATCATTATTAAGAATCATGAAAATTTTTCTATTAACTTAATATATGCGGTCACAACCTCATGATAAGAGAGAATAAGGCTTCG  
TTTTCGGATAACTTTCTTACTGTTTTT

>comp147307\_c0\_seq1

TGAGCCATATTACTTGCGGGCCTGGTCATGGAATAAGCATTGGAAGCCTTGAAAAAATGGCGTTGAAGACAATGTTGAGGGAATTCATATCTCCAACAGCCACATTTTAAACACCCTTAC  
TGGTATAAGGATTAAGACATGGCAGGGTGGGGCTGGTCATGCCAAGTCTATCTCCTATGAGAACATCAACTTCACTTCAGTTAAAGCAGGTGTCATAGTCATCGATCAGTACTACTGCCCC  
GAACTAAACTGTCCAAATAAGACGGGAAATGTGGCGATAAGCGAGGTATCGTATCTGGGTTTGAAGGAAGCTCAGTCAGTGATGTGGCAATCAAAGTGGCTTGCAGCTCGAGCATGCC  
GTGCCGCGACATCACCATGAGTGAAGTGAGCTTTACTCCTCAACAAGCCAATATCGTCTTCAATCTTATTGCATCAATGCACAAGGAAGTGAAGCGGGCATGTCCTCCTCAAATCC  
CTGCCTGCAACATTAGCTATATTTGTAATATTGATACTATCTGTGGGTTTAAACATTTACTTCTTTTGTGTTGGAATTCAGTTTTTTTTTTTTCTTCTTGTGTTGGTGAAGTCTGAGCTGTACGCGGAAT  
GAGACAATGTGGACAGAATTAGCATCTTTTTGTGATTATCTATAGGTTCTT

>comp147413\_c0\_seq1

CGAATGAACCAAAACAATTTCTTTTCTTTTACAAATCTAGCAAATAAAATTTTTCAGTTCTTGTATCGATATCCACTTTCAAATAGAAAATAAGTCAACATGCATCCATAACCACGTACATC  
AACAACTCAAATCATATAAACTCCTCCTAATTAACCTCCCAATAGAACTAAATGTTTATATATCCCTCAAGCAAATACAAATGAAGTGATGAACTCGATCTCATCTATCTTCTACCTCTCA  
CATCTGCTCAATCTCAGACGCCGGGTCATCCTCCTCCTCAAAAACAATCAATACCATAAGCTGCATGGCCATGCCCAAAGGCCTTTATATGATCCTTCAGAGACCTCTTGTGCTTGAAATCT  
GACCCACAAGTGCAATACCAGAGCTTTCCACAGTTTTTCTCATGGGTCCTCCAATCGCCTCGAACGGCGAAGGCTTTTCCGCATTTTCTGCACATGAAAGGCTTAATGCCGTGCTTGCCT  
TGTAATGGGCTGAAGCGTGCAGGAAAGTCTTTGAGGGGTTGGCTCTCGGGTGGTCAATGTTGTTGCGGCAGCCAGCCGCGCAGCAGTAGCAAGGTAGCCGTAGCATAGCCGTTGGTTGT  
GTGCCCTTAGGGACTCAGGTCCTTTTCTGTATTGTGAGCCGTGTCCCAATGTCATCTGCATATATATCATTCTGTAGGCCTTCATTAACGTATATGAAAAGAGTAAAAGCTGCACTTCT  
TTTATATGTGAAAGTGTTAATACATTTATAATGTTCTTGCTATAGAATATGGTTAGAAAAGATGTTAGCGATAAAGATATTCTTTTGTCTTGGAAAGATGCAACGCAGAAACCAGTACAAAAAAT  
TTTCACTTCTTAGGTTAGCTAAGCTCTATTATTTTGTCTGCTCTGGTAATTAATTAGATGCTCAATTTTGTGTTCAACCTATTTTCTAGTCCCTTCTCATCCTAATATAAAAATGTATATATAAGATA  
TCGAATAAGACAGATTAATAATTAATGAGTAATAAGTCACTATGAGTTCGGCTAATCTAATAATAAGATTTCTTTTATGAATGAGCTGCCCTATGGACTAGACTTACTAGTGGTTTGT  
GTTAGCTTTGCACGCAAGCAAATTC AACACAATGCAGTTCATCATGCCCTTAATCACATACTCACACGTTTCAATTCGGAGGAAAGAAGAAGCACAAAATCCCTGCCCGTAATACAGC

TTAACTTGAAC TAAGATCATCCAAAATCCCTTAGACAGAGAGAAGACTAAGGCAAGAACAACATACACAAAAC TGCACAACAAGGTT CATCTTGACCTGAGACTCACTCTCTCTTTCTCT  
TTCTCTTTCTCCATCTCTCGCGTGAGAGAGAGAGAGATGGGGTATGAACAGGTCAAGATGAACAGTATTGTGTAGTTTTTGTAGAGAGTGAGAGGGAGAGAGAGATTAGGCTGGATGAT  
GATGATGTTTTGCTTTAAGAAATAGATCTAGAGTGGCAGGGCTGAAAAGGGCTGGGGAGGGCTTTATTTCCAGAGAGAAGTGAATTTCTCTACATACATACTGAAGAAGCGCAACAGCCAA  
GGAGCAGTAAAAGGAAAAC TCCAAAAGTGCCAAAAGCATGAGAGGAACAACATACATATCTCCTTCTGTGTGGTTCAATCACATAAAAAGAAGGGCATGATAGAATCACTGTTTTGT  
TCTCTTCTCTT CACAAATAATAGACCAGTACCTTAGTTAAATATAGTTATTGAGAATAAGGAAGAAAAGAAGTGAGAAGTGTGACCTGCATGTTATTGTATCTGTTGAAGGTTTTG CAGCA  
GACTGGGCATGAGAACTGTGTGGGACCAATGAGGATCTGAGAAGGGGTTGGGATCCAGTACTGGCCTTTCGTAAGCTTGCCAATAGTGGGGCAGCCAAGAGGGATGTTGATGTTGCTGC  
TTCCATCCTCATCGTCTTGATCAAGGTTGTGATCTTCGTCGACCGTAGCGGAGGAAATCTAGAGATGAGATCGGCAGCGGTGGGGCTTGGGAGACCGATGTGGAGGGCGACGGTAACC  
GCCCCCTCGGTTTCGTCATCTTCTTCATCATCGTCAAGGGTATTTTTCTTCTCTTTTTTTGAGTCTGCTTCGGCTTCGCCGTGCAATATGGTGAAGGAGGTTTCATCTCCATCTTCAAGTTGA  
TGCTTTTGAGGGCTTAGTTTGAGGAGGGGAAGGGCTTCTCTTAGGGGAGGGGAAGGAGGGGGCGATTGGAGGAGATTGTTGTTTGTGTTTTGGAAGTAGTAGCTGTAGTTGTAGTTGTA  
ATTGGTGTAGAAGTTGTAGGGCGGAAGAGACGCTGGTGTGGTTGCGGAGGAGGAGGATGAGGAGGAGGAAGCGGAGGATTTGATGTTGAGAAAAGGATAATAAGAAAAGTGTCTCTTG  
AAGAAATTGGAATAAGGGTCTGCCATGGCTGGTTGTGGTTGTGTGAGGTTGAAGGGATGCAGAAAACAAGGGTACAAGACTATTATAGATTTCGTTTATGGAGAGAGAGAGAGAGA

>comp147432\_c1\_seq4

TCCACTCCCAGTCTCCCAATATTCAAACAAGTCAATTTACACACAATTTACCTTCTTTTTCCCCACACTCTTAAAGCTGCTACTCATAAATAGAGCTAAAATTCAAAAACAAGCCCATTACT  
CTTTCACCCCATTTGCCATCTTTACACATGAAACTCCATCAGGTAATAACAAGAAGGAATGCAATGAAATGAATAACGGGTAAGCTTACATCTAGGAATGACAAGGGCTTTGAACCAAAA  
GAACCTAGCTTTCAAGCTCCAAGCCTATTAGTAAATACTCTTCAATGGTTTCTTCGTTGTCTTCATCATCCTTTTTCAAACGTACTGTCAGCTTGAGACTTTGCGATAAAAAAAGCTTCACT  
TTCGCTCCCATCGTTTTTATACAGTGAAACTAAAACAGTGAAAGTTCTTCTTTTTTCATTCCAAGATAATTACTTACTCCACTAACCATGAGGTGATTGCAGTCTTTTCTTCTTGTGCTGGTG  
GCAGATAAATTGTTGATATCGATGAATTCATTTAAGTTTGGTAGATTAGCACAAATTTGATGATATTTCCAATGAAAATAAAACCTTTTGAGATATCGTTTTCTCCTTCTGTGACTCGCGAATCA  
TTGCATTATAGCAGGTAAATATATGCTCTCTTTCTGAAGGTT CAGGGAGTGAATAACATTAGTATTAGATTTCGAATAACCTCTTTGTTGATTCTCACCTGATGCAGCTAAGATAGCCGCGG  
CAGCTATGGTTGAAGGTCGGTAATCAATCAAATTCATAGCTTTTACAACCACAAAGATGAATCTGATGGCAATGGGGAGTAGCTTCTCGAGCAGTTCTCAAAGTGAAATTTTGATGCAAAA  
ATAGCTAAGGTAAGTAAATGGAGTGACTGAGTTCAGTCTCCATTTCCAATGCATCCAAGACAAGAAGTTCATTCTCTGTATCACTTTGTTGCTGAATCTGTAACCTTCGAATCGATACTCCG  
ACAAAAATGGCGGCTTGCAITCTTCCATCTTTGCCGCCAGGGATAAGCAAGCTATCGATAAAAAGCTTCATCGCCCAGATCTTCCCCTCATCGATGGTCCGCCGGAGTAGAAAACCGGTCTAA  
GAAAGTCACAGCGAGGTACGCGGTCTGTGAGCTGAAACCGAAGCCTGACTTCATTTGAGGATCCAACGGACGGATTTCGAATCTCTCGCTGTGCAGACGGTCGCCGGAGGAAGAATGG  
GTTGGGCTTGCAAAGGTAGTCTCTTTGGATACGAGAGTTTCTATATATTCGTCCTCTGCTTGGCAGAGAAAAGAGCTGTTTCGAAAAGATGAGTTTCGTTTGCTTCATCATCTTCTTCGTCGG  
AGAAAGCAAGGCGATTGCCGTCTTCCGGACAGAAGAGCTCCATGAAGAAAGCAAACAGAGACTTGAGGAAC

>comp147557\_c0\_seq1

CCAAAAA AAAAAAAAAAAAAAAAAACTCAGCACCTTTCTGCTTCAAAAATACACATGAAAAAATTTAAAAAACAAGCTGCTATGGAATCGATAGGGCTCAGGATAATTGTAACATATTGCAG  
TCGCCACACAGAGAGGAATGGGAACACCCCGGTTGCTAGGACCGCTTCAAGAAGAATTCAGGTTGCAAGAGACCGTCATCTGGGGGTGAGAGATGCAATCCAGCATCATTGCCCC  
CAAAATCCAGTAGCAAGCAGAGCCATCCAAAACGGGAAAACAGAGAGAAACGCATGAAAAACCTTCCAGTATGAGCCGTAATAAGAGTCCACACCCAAAAAATAAAAACTGGGC  
ATAGGAGAAGAACCGGCCACCTAAAGTAGTTCCAGCAAGAAGTTGCACTTTTCCATCTATGTACTTTTTGAAAAATAACTTAATCTTGATCAGAGTCGTAGCATGGCTAGACGAACAATG  
AGCAAACCTTCTCTCATTTCTTCTTCCACACATGATAAATAGTAGAACAAATGCAGAGGAAATAAAAGTTCTTAGTGTTAGAAGAAGAGGGACTGTCATCTATCCACTCAAACAGTTGC  
AACAGACTCGGAGTAAGCAGAATAGAGGAGCTATCATGGATTAAGAGGTGATGATACTGTGAGAGTAAGAACATTCAAAAAAGAGGTGCGTAGAGCTTTCAGTACATGGGCTATATTTG

ACACTCAACTGAACAAACATAGGAATAAGAACATGCCAATGATAAATATTTCAATTTGGTTTAAATTAATAGAAGAAGAATAAGACTTTATTTATGATAGTTTTTTTGGCCGCTTTTTGCAATAGT  
TTTCTAGCATACAATTTTCTATTGTGATAGTTTGTAATAAAGTTGTAAAAAATATCTCAAATGCACTTCATATCTAAAACCTTGAATTTTGGGTGCAACTTTTTAAGTAGTTTATGTTTA  
ATGCTTCTTCATATCCCATGCTTCC

>comp147578\_c0\_seq2

TTTTGAATTTTTTTTCCAGAGTATAAAACACCGGCGGCCTCCACCCTCCTCGTTTTAAAGCAGCGCTGTTGATCTCGCCGTCGGCGGCCTCCTCCTCCTCCTTCCCAACATTTTCCTGC  
CGGAGGAGGCAGTGCCATAAGCTAAGACGAACATATCGTTCTCACCGGCGGCCTCGGGCTTTCTGTGATCCCCGCGTTTTCTTCCGATACCCTTTTTTTTTTCTTTTACTTTTCTTTGAAG  
GCTTTTCATCGATAGAAGAAGGAACCGGAAGAAGTTGAACCTAACCTGGCTTCGGGCATTACTAGAGGAAAATCATGAAGAAGGCAATGCAGAAGGAATCCTTCGCTTGAAGCTGATTT  
CTATGGAAGTGTATGCCTTTGCTGATCAATATGACGCTTTACATTGTACGAGAGGCTGTGAAGTTATGGAGGAAGATTGCAATGGAGACTTGTGTAGAACTACAAATTTTATGGAGAAAT  
GGAAGCTTCTGCTTGCGGGGCTCTTTTTTCAGTATGTTTCATGGGGTTGCTGCTCACGGGATTCAATATTTGCATCGACCTGGACCTATTCTACATGATCTTGGTTTCAGTCTCCTTCCGGAGA  
TAGGGCCAGATAAAGCCTATGTCAGCGAAATCTTTTTCTCTGTCATCTTTTTCTCCTTTATATTGTGGACATTCTATCCTTTCATTATCATAGCAAACGCTTCTACACAGTTCTGCTATGGCG  
TAGAGTGTGGCAATTTTAGTTACTTGCCAGGCTTTGAGGATCATCACATTCTACTCTACACATCTTCCAGGTCCAAAATCACTGCCGCAAGGGTTCAAAGTATGCCACACTCGCTCCTC  
CTGAAAGAATATTGGATCTATTTCTCATTAAATGTCCGTGGAGTCTTTTATGGTTGTGGCGATTTGATTTTTTCATCTCATATGATATTTACACTGGTTTTTGTCTCACATACTATAAATATGGTT  
CTAAAAGGTTTATTAATGCTTGCATGGTTGATGGCAGTCATAAAAGTCTTCTTATAATAGCTTTCACGGAAGCATTACAGTGTGATGTTGTGGTTGCATGGTATACTACAACTTGGTG  
GTATATTTTATTGATACAAAATTGACAGAGATGCCTGACCGTTCTAATGGAAACCAGCCATTGCTCCCATTAGTCGCTAAAGAGAAAGAAAGCAAATCGGACGAGACCCACAAGCTATTG  
AATGAACTATAGGAACCAGGCGAATGGGAAGCATCTAGAAGACCGGAACTATGTACATTCTGAAACAACAAGAATGGCAGGCAGATAGGTGATGCCACACAGTTGTAATGGCTGATGA  
TTCGTAATTCATGGGAAGCTCCATGCCGAGCATTGAACTAATAGAAATGGGCGGCAGTTTCTTACTGTTGTGGTAATCTTCCCTTACCAAACGGATAATTCTGTTTTTGAAGCAGAAAT  
CTTTCGTAATTCATTAACATGAAACAGAAGTCAAATGTCTATATGTCCCTTACAACATATATTTTATATATTGATTC

>comp147603\_c0\_seq2

CAAATCAAAGTCTAAAGTATTTTTGAATGTTTAAAGAGCATTAAAGTGGATGACCAAATAAAATTCAAACCGTCTAGCTGCTTTGGAATTTTTTTTTTAAATTTTTTTTTTGAATTTCCGTTGCA  
AAAAAATCAGTCCGAAATATTTTATAGCGACAAATTCGTCGGAAATATTTCCGGTCAATTATTTGCCTTGGGAACAGCCTTATCCCTCCCCTTCTCCCTCGGTAGTCGGAACACTATATCCA  
CAAGAAAGTCAAAAATGTCTGTTTGGCCGATTGCTGCGGCGATATCATTCTTTGGAGAGTTTCGACGCTTGTCTTACGGCGTGAGTCCACCCCTTTTGGGTGAGCTGGAGGATGAACA  
TCTCGCAGGCCCGTGCGAAGACTACCGGCGCCTCGGCGGCGATCATCTTACGTCTCGTCAGCCTTCATTATCTTCTTGTGCGAGCCAGTGGGAGATTCTGATTTTTGAAATTTTTGGT  
TTGCTCGATCTCGGATACTGATTGGCCATAAGGTTTCGAGTCTTGTGTTGTTGCTGGTGGTAGAAATGCTGATAGGTAGCTTGGTAGGGTGTGCAGCGCCGGCGACCGGATTGGGC  
AGAGAGCCGCCATCATCGATTGCTTGGAGCGTGTGTGGTTTTGTTGATCCATTTAGATTGATTGAGTGGGCGTCGTTTTTCAGTCGAGGTTTTAGTCTGATCTAGAGGGGAAGCGGATGA  
TGGATTTGAATGAAGAAGAGAAGCTAGTTATATAGAAGGAAAGAGAGAATTTTTAGGGCAAGGAGA

>comp147603\_c1\_seq1

CGAACTCTCAAAGAAATGATATCGCCGAGCAATCGGCCAAACAGACATTTTTGACTTCCTTGTGGATATAGTTCCGGCTACCGAGGGAGGAGGGGATAAGGCTGTTCCCAAGG  
CAATCCTTTGTGGGAGATTCATTGTCGCACTACTACATGCAACAGTAATAGAGGTGGCAAATGAGTGCCCTGCTGCCTTCTATGATGTTGTTGGCCTTCACTAGTTTTCATAGCCTAAT  
TTCTTGAGTGTCTAAATTTAAAAAATATGACGTGCGGTGTGCGGAGTACAGATACCTTACAGAGGTCAATTCGGATGCGTCAAATTATCCAATACACAATGCATTGTATGATATGATGC  
ATCTGAATTGACCTCCAAACACGTTCTGACTCTGTACAGAATAATCTCTCTAAATTTATGTGGAATATTTTTGCGTTCTTATTATTATAATATGTGCTTTGGGATTCGTAATTGAAGCAGTT  
CGTTAGTTGATTA

>comp147671\_c0\_seq1

AGAAACGGATGAAATATAGGTAAAATTCAGAGCATAAAAATTGCAAATTATAAAGCTTTTTTTTTTAAATATCCGAAATTTATATAAGAATATGGTAAACTGAAGAATCACTCAAACCAAAG  
CTACAGGATAACAATAAATGTGATAGTCTGCACCTTAGAACTCCTATAAATTTCTCTCCATGAATGTAGTATTGGATGCCCTATTCGCGTCTTCCAGAAAAGAAGATCATTGTCTATTAGTC  
TAGATTCAAATTATTAGCAGAAATACCTGAAAGAAGAATGAACAATGGCCTCATTTCATCTACTTTGTAATCATCCGCTGTAACCTCCGAAAGCCACAGACCAGGGAACAGCGCATCGAGTT  
GTTTCTGCACGATCTTAGGCCTCTTTTTAGGTGCTGACTGGGCTTCGTCCCTTGAAGGCGTAGAAGTCTCTTCGATCTCCTCGCGAGATAGGGAAAACAGAGAATTCCTCCGCTTCCC  
ATTTTCGCCGACCATCGATTTTAGCATTCCGCCTTTGGCCGGATCGTCTTTTCCCAACAGAGGCTTAGCGTAAACAGTTTCTTCCGCTTTCCGATGGGGCGAAGCACGAAGCTCTTCTTGCC  
CTAAGATTCCACGGCCTGGCTGGCGCTGCAGCGGCTGCATCAGCGGGCGCAGAAGAAGGTTTCATCCTGCTCTGTCTCCTTTTCTTTGAACACTCCTGCTTCAGGAGAATATGAGGCTTGC  
CTCTTCTTTTCGGAGCTCTATTTGGGTTTCAGGAACCGTCGATCCAGCGGCAGAGCCGTCGATTCCAGCGACGGGGTTCACGCAGCGGAGAAGCCGTTGACTGCCCCAGTTCATCGTTGG  
AAAGGAAAAGTTGTGAAAACGAGATTGCCTGGCAGGGGAGCGCGTCGCTACCTTCTCTCCGGCGGCGCCGCCGACTTCTCCCCGACTCTCTCCGGCCACGCCCTGACCTCTCAACGACA  
TCGTTAGAGAGAAGCACAACGGGAAGATGAAGAAGAACAAGAGAGGGAAGAAGAAGGTGCAACGTTTCGTGTGGGGTATGCTCCACGGCTCCAGGTTATGTATCGATGCTGCAAATAAA  
TTAACGTACGGTACCTCGCATTTTAAACTATATGCGGGTAAATCTATCCACCGTCGAAATGAGTTTGTATTATTGAATTTTGCTTAATTTGGGGCCATACGATGCAAGG

>comp147689\_c0\_seq1

ACAAAATTAGAATAAAAAAATCAGTTAATAGTGCAAAAATAAAAAAATCAGTTAATAATGCAAATTAAAAAAATCATATATTTTACACATTCCTCATAGAATATTCATTCAAAAAT  
CTCTTTTCTCCACCTTCCCACACCTCTTCAATTCATCAGGTAAGTACTAGCTCTTTATAAAATGATCCAATTGCTTAATGGATGATGAGGCATACAACATAAACCAGCACTACAAAGGCTTACCA  
CCAACATTTATAAAAATAAAAATAAATACATTATTAATCCAGTACTATCACACTTTGAAATATTCCTCACCTTTCTTCCACCACCTTCCCTTCCCTTCACACAGCACATCAAGACTATACA  
ACACAAAACCATAACAACCGAACATATAAAGACCAAAACAGGCCAAATACCCACAACAGTAGAGGAAGAGCAGCATAGAACAATCTATTTCCAAAAGTATTAAGTAAAAAGCCCTTC  
TCCAGTAGGTCACAAACATATTCAGCTGTGATAATTACTGGAGAGGTAGAAGAAAGTGGAGTAGTGTGATGAGAAAAGCTAAGTGGCTTGTGAAGCGAACTGAGAGAGAGTAGCAGAT  
GAAGGCGAAGAGGAAGATGAGGAGAAGAGAAACGTATTTTAGGGCGACCATGAGCTCACCATGAGCTCCATAAATGGAGTCTGAGATTGGCTTTTTAACACTGTAAGTGCTGCTTAAGA  
CTGCAGCGAGAGCTGAGCAGAGGAGAATACAGGTGGTGGCCATTAAGGTTGAGCTCATTATGGCGTTTCGTAGTGTCTGTACTGCTAGCACGTTTTTCTTGTCTGAGTCCTTCATTATCGA  
ACGGACCCAAAGCCGGCGGCCGGCTGAGTTCAATCCGATGATGGTCCGGCGAGGCTGTGTCCTAACCTTGTGCCAAAGCCAGCCATGGTAGATGATGAAGAAGAGAAGGCTCACAGGA  
ACTAGTACAAGATCCATGTAGCTCTTTCTCCACACCATCCTCCTCAGTCCCTCCTTCTCTCTCTCTC

>comp147774\_c0\_seq1

AATAAGGAGAGATCCTCAAGCAAATTTAAATCGGAATCAAACAACATAAACTTCCAATCTTGTGTGATGTAATAAATAAATGAATAAATTCAAAGCGAGGATAATTACATAAATGGAA  
ATAATACAATCAGATATGAGAGATCAATCGATGATCACATAGTGGAGAAAAACATAAAGAAGAAGAAATTAGTGAATGAACAAATAGATAGAGAATGCCTCTTTCGTTGCTCTTTCCATTT  
CAGTCCTCGTCATTGATATTGAAGGAGATGACCGTGGCGCCTCCGACAGTGGCGTGTCCGTCAAAGGAGACGCGGGGTTAACTTCGGCGGTGGCCGCAGCGAGGTTGGTGGAGGATA  
AGGAGGAGGTGAGGGATTGCCACGAGGAGGAGCGGGCGCGGATGGGGTAGGAAACGGAGGACTGCGAAGGGCACGGAGCGTCCGCTGCAACGGCGCGGGAGCGATGGAGGGCGCA  
ACTGCAGTTACGGTGGTACGGCCTCCGGCGAATGTCGCCGTCGAATGACGGGATGCTCGCTTCCACATTCCTGACCTTTGAACCACCCTGGCGTCGCCGCCGACCCCGCCATCGATCT  
CTGTGCCCTTGTCTCCGATCCGATCGAAGCGCTGTAGATCTGAGGATTTGGGTTCTCCTCGATTGATCGATTAGGTTTTGTTCT

>comp147885\_c0\_seq2

TGCTTTGTAGCTATTCTTAACTACAAAAGAAATAATAGTGCATCAAACAAGTTGAAGTACAATCAATGCCATTCAAACCTTCAAATTTAGGAACTAATTAGTCTATAAAGTGAAGAGATG  
ATGTTTGAAGAACATCTGGAGTGAGCAATTTGAGAAATTCATATTCAATATGACTTGAAAGATCATTTTACAATAAAATTTAACTCATTATGTGGATTTAAGCCCAAGGTCTTCCTTG

TCTTGCCACAAAATAGATCCTTCGATTTAATCAACCCTGGAACCCATCCAAAAAGCGTGCCAAAGGGAAACTGAGCAACTGCTTCTTTTCTTCCTAAGGAAACCATTGCAATGGGCGGCG  
AAGGAGTATATGTCTCAAGCTTCTTATCAGGAGCTCCCCTCATCAATAGTTGCAGGTTTTTGGCCACCCTAAAGCATGCTTTTCTGCAACGAATCCTTGCTTGAGCTCATGGATGTCAGTA  
ATGTCTCCAATGGCAAAAATGTTATTGCGACCTCTCACTCTCAAGTTCGCATCAACCATTAACCGCCCCTTCTTGCCAAGGACTGCTTCAAGATAGAATCATGTAGCCATGATGAAGCCA  
CCGGCTTGCCACACAAAACAAAATGGCAATCAGCAGAGATGGTTTCTCCATCTGATGTCACATAAACTCCTCCTTCTGATATGGACTGTAGATCAACCGTTTGTCCAAAATCACTTCCAC  
TTTCTTTTAAATCAACCAATGAATGTCTTTCTTGATGCTTTTGGGCCTATGAATCTATTAACCTAGGCCCTTTATGAACAATGGTCACCTTCTTCTCCGGAAAATCAACAGCAATCTCTCC  
GGCAAGCTCAACCCAGTTGGACCACCACCAATGATTAATAATGGAGTTCGAGGCCTTAATCTTTTCATAATCTTGCTGAAAATGCTTGAGTCTATCCTTCTGTACTTTGGTAGAACCTG  
CGTGTCCAGTTGCTACCACAAGATAATCGAATGGAATGTTTGGCCATCATCTGTTTGGACATGATGATTAGTTACATTGGTTGCATGTGATGTGATGATTGTAGCATTGGTTAGGTATTGAG  
AGTGCTTGATCAATGTTCTTTCTGCAAAAAGATGGTTCTATCATTGACCTCAACTGTGCCCATGG

>comp147889\_c1\_seq1

ATCAATTAATGCTGATGCAAACCTATTTAAAAAAGTAGACAGGAGCACAAGAATAGTTAACAGCACACTGAATGCTATAATAGCAAAAATAATTTTTATTTTGTAAACCACAGATAAAAGTTT  
GTTGATATAACCTACCCTAAAGCTAGTTAAATACAGAATGGTATGTTATATGTAGAACAAATCATGAATAAAAGCAAACTTTCTTAAAGGGCAGTTGAGATTTATGCCCTCCATACCAGC  
TCAAAAAGAACAATCACACATGGAAAATTTAACCTGCTCAGTCCAAGTTCCTACGAGTAAGATGTAAAAAAGCAGAAAATCCCAACTATTAATAATGACAATTTAATCAGAAATGTCTT  
CCAAGAGAGAGTATCAAAATCCAAGCATTCAAACCAACGGTCTCTACATGATGTTACTCATGACAGCACATAGTTTATTTCAACTCACTCTGTACCGAGTGATATCCTATTCTGTACCGAGT  
GTTATCCTACTTTGTACCGAGTATTTACTGCTTTACCTCATAGCCTACTATGTACCGAGTGTTATCCTACTCTGTACCGAGTGTTATTTACTGCTTTACCTCATTCCGCTTATATATACTTGT  
AACCTGTCAATTATAATGATACATACGCTTTATCCTTCTTTGCTTTCTGCTTCGTTTTCTTTCTTCTCTTGGCTGTGAATCTCTCACATGGTATCAAGAGCCAGGAGATGGGAGATCA  
AGAATCAGCCTTCAATCCCTCCCGCCTCCACCCTACGCTCGTCCGCCCCATCAGATGACTAACAATCCCGGGCCTCCCAAATTCACATATCCAACATCAAGAATCTAATCGCTCACTCC  
CTCACCACCGATAACTACGCAATTCGGCGAATCCAATCTTTTCCAGAACCTCTCCACCAATGGGTACGCAGATTACCTCACCGGCAAAGCAACTCCTCCAGCTGATCTGCATTTGCCGAATT  
ATGCATGCTAGCGTCTAATCGACAGCAATCTAATATCCGCTCTATTCTCAACTTTCTCCCCACGCTTCTTCCCTACGTCATTACGTCTACTACCACCAAGAAGTCTGGGTGACGCTTGAA  
CCCCGGCTACAATCCTCTAGTCGCTCTCGAGTAATCCAACCTCAAGAACGAACCTACACCATGTTCAAATGAACAATCTCACGATGCAGCAGTACCTATCTCAAATCAAGAACATCGTGGATA  
ACATTG

>comp147918\_c0\_seq1

TCTTAGTAATAGTATATCTTAGTTAATAGAAAAGGAATTCAATTACACTTTTTTTGAAGCTTTTTTCCATGGAAATGTAACAAAGCTGCAACAAAATTTGGTTTCTGGAAACAAAAACAAG  
TAAATAACTGAAAAAAACAATAAAATGAAATGAATCCTCAGAGAGGAAGATTACTAGGTGAGCTTTGCACTCCTCTCTATCATTCTGTATCAATCTTATAATGCGAAAAACAGATTGAAA  
ATACAGATTGAGCTATGCTCACCAATAATCTCTCATTAACTCAGCTTTCAAAGCAGCCGAGAATTTCTTTGGGACAATTCAGCAGTTTTGAACTTTGCTGCAGTCTCCTCTGCCTTGA  
GTATGCCCTCTCCTTTCTTAGCCTCAATAATGGCTCTTCTCTTCTGCTGCCTTGTAATGGAAGCTATTCGTTTCATCATTTTCTCTGTGCGCTGTGCCTTCTTCTCTCATAAGCTTCTC  
CATCTTCTTAATCTCAGCTTCAATGGATGCCCTCTTAGAATTTTCCCATGTTGTAATGGATGACATCTTCTTTGAGCCTTGTTTTAAGTTTGGCTTTTTGACTGTCTTCCCATGCCTCTATG  
AAAGCTGTCTTCTCTCTTAGCAGACGGGCAAGTTCTAATTTGTGGACGATATGGGCTTTGGTGGTGCCATCGGCGGTGCTCGTCTCCGCCGACGGTGGCTTCATCGCAATCTTCACTT  
CTCCGGTGACCTTCTCAGCCATTGGTGGCGGCGGAGCAGCCTCGGTCGCGACCGTGGCCTCCACCTCTGCTTTCTCCAACCTCCTTCTCCTGATTATATCCACTTTTCC

>comp147935\_c0\_seq1

TAAAAAAGTCGTCCCAAATGAAACTTTAGTTCAACTCGTAAATAAGTAAAGCGTTTATTATAACATTCTTCAAATAAAAAATAAAAAATTGCAGCCCCAAGTCATCAGTAATAACCACAATCC  
AAGTAAAAATATTAGACTCCTTATGTGTAGAAGCTCAAATTAGAACCTTATTATTAGGGCCTGCTCAGTTCGCCAATGGCCAGGCAATTGTGACCATGTTCTTAAGCATTGTAATCCGGTC

CGTCAATGGCGATTTGATGGCGAACTCATTGAATCCATCCTCGCAGGAACCGAAGTTCGAGATCATGGAGCTTAGCATGGCATCTCGAGTGTGATGTCGCCAGCCTTGATGGCTTTGGTG  
GCGGATGCAAGGTTGTTCGAGGGCGGTGTCTGTAAGAAGTCGACGCAGTCGTGAAGGAGCTCGAGGGTTTTTGCACGGGAATGAGATTGTTTTGGTGAGCCAGAGGGTGAAGGCCTTGCCCT  
GGCGAGCCCTAACATCAATGGAATGCAGCAGGATGGCAAGGACGATGTTGATGTTGGCTCTTTTGTAGGGCGGGGAGCGATTTCTTTAATCGATTTGATGCAGAGACCGGAGTAGTCGGTGT  
GGCTACAGAAGAATTTGAGAGAGTTGTTTCGAGTTGGTGGCGGTGGCGGAAGGGTGTAAATAGGGCGGGCAGGGTGTAGGACGACGGCGAGAACGATGAATACCCCTCATCTTTGGGGGCGG  
CAAGAGAGGTTAGCGAGGAAATGGAGAATGGGGGAGGTTGAAGAGGCAGAGGGTTTAGGGTTATATGGAATGAAGGAGAGTAAATTTAGGGGAATTGATTGGATCTCCGAAGAAAAAG  
AATTGGGAGATAGGTCGTGGGTAACATAATTTTTTATATTTTT

>comp147947\_c1\_seq2

GACCTTAAATCAATATAAGCTGCGACATGAAATCACCCAAAAATGAAATATTATTCTGTGTGGAAGCAAAACCCATTCTTAAACCTAAGCCCGCGGCTCGGTACCGCTCCATACCATGGTA  
CCGAGTGTATGTACCACAGCTCGGTATGACTAACGTGACTCATTCTAATTGATATCCGATTGTAAAATGCATTTCGGCGTCCACGTAGAATAATCTCTCCCAAAAAACACACAAAAGCTAG  
ATAGAATACATACAAAATGACACCACAACATCTAGACTACAATAATCCAAAAGGGCAAAAACCGAAATAGAATTATATATGTTTCTGGAGAGAGAGAGAGAGACTGAAGAGAGAG  
AGAGGACTATACGCTTCTGAAGCTGGGTTCAATCTTTGATCAACACCATGCAAGAGGACAGAGATATGAGCGCCCTTTGAACTATTATTTGTTCGAGCATCTCAGCGTCATCTTGCATAGAA  
CACTACATCAACAATCCTTGCCTTAAATTACTCGATAATCTCCGTGATATCAGACCAGATTTTCTCAAAAACCTCAACAATCAGATCATGATACTCACTTGAATTCAGTAACAGATAGCAA  
GAAAGCAATTCCTCCAACCTCCTTCAATGAAAATAGATTGTTCTCAACAATCATGTCCACCATTGATTCTCTGAAATCTCCCTTCGGATCCGAAGAATTTTACCCTACGAAAAGTGTCTGT  
CAATCCCTTCTCTTCCCAATCTCTTCTGCACGAGCTTTGGTGACTTTATCCTCAGCTTTATCTGTTGAGTTGCAGAGGGGAGACCTGCTCCCTGTTTCGGACTCTGTTTTCTCCATTGAT  
CAGGCGGGCTTCGTCAATATAAGGAGGAGGAAGAGGATGATTGGGCTCTGTAAACGAAAATATCTGATGAAGAGGTGAAGAATTTGGCATCGAAGCGGTCATCGAGGCTGTGTAGGGGAG  
TTTCATGGGATGGCTGTGCGTTTAAAACAGCGGAGCTCAACAGCTTCTCTTTGGTTTTTCTTTGATTTTTTGGGTGAGTAGGAGAACGGGAAAGCGGCTCTGCTGCTCTTTCTTCGCT  
TGTAATGTAGTGAGAGAATCTATTTGTGGAAAATCTTGAATTTTAGGAGATTTGGGAGGTTCTGTTCTTGAGATTTGGCTTTTGTCTTTGGAATTATTAGCTTTCTGTACTCTGTTTCTCT  
GCTTCGCATGTTCTTAAGCTTATAGAACCACGAATATGGCATCAGGTCAGATAACCTGAACGTGTTGCTCCCTTTGCCATGAAAAATAACTGAAAAGAAGAAGAAGAAGAA

>comp147947\_c1\_seq3

GACCTTAAATCAATATAAGCTGCGACATGAAATCACCCAAAAATGAAATATTATTCTGTGTGGAAGCAAAACCCATTCTTAAACCTAAGCCCGCGGCTCGGTACCGCTCCATACCATGGTA  
CCGAGTGTATGTACCACAGCTCGGTATGACTAACGTGACTCATTCTAATTGATATCCGATTGTAAAATGCATTTCGGCGTCCACGTAGAATAATCTCTCCCAAAAAACACACAAAAGCTAG  
ATAGAATACATACAAAATGACACCACAACATCTAGACTACAATAATCCAAAAGGGCAAAAACCGAAATAGAATTATATATGTTTCTGGAGAGAGAGAGAGAGACTGAAGAGAGAG  
AGAGGACTATACGCTTCTGAAGCTGGGTTCAATCTTTGATCAACACCATGCAAGAGGACAGAGATATGAGCGCCCTTTGAACTATTATTTGTTCGAGCATCTCAGCGTCATCTTTGTCATTG  
AAAAAGATCAAAGCTTGATAATTTTATTAAGAAAAGAGGATCATATAAAAATATAAAAATAATTCAAGTTACTACCTTGCATAGAACTACATCAACAATCCTTGCCTTAAATTACTCGAT  
AATCTCCGTGATATCAGACCAGATTTTCTCAAAAACCTCAACAATCAGATCATGATACTCACTTGAATTCAGTAACAGATAGCAAGAAAGCAATTCCTCCAACCTCCTTCAATGAAAATAGA  
TTGTTCTCAACAATCATGTCCACCATTGATTCTCTGAAATCTCCCTTCGGATCCGAAGAATTTTACCCTACGAAAAGTGTCTGTCAATCCCTTCTTCCCAATCTCTTCTGCACGAG  
CTTTGGTGACTTTATCCTCAGCTTTATCTGTTGAGTTGCAGAGGGAGACCTGCTCCCTGTTTCGGACTCTGTTTTCTCCATTGATCAGGCGGGCTTCGTCAATATAAGGAGGAGGAAGA  
GGATGATTGGGCTCTGTAACGAAAATATCTGATGAAGAGGTGAAGAATTTGGCATCGAAGCGGTCATCGAGGCTGTGTAGGGGAGTTTCATGGGATGGCTGTGCGTTTAAAACAGCGGA  
GCTCAACAGCTTCTCTTTGGTTTTTCTTTGATTTTTTGGGTGAGTAGGAGAACGGGAAAGCGGCTCTGCTGCTCTTTCTTCGCTTGTAATGTAGTGAGAGAATCTATTTGTGGAAAAT  
CTTGAATTTTAGGAGATTTGGGAGGTTCTGTTCTTGAGATTTGGCTTTTGTCTTTGGAATTATTAGCTTTCTGTACTCTGTTTCTCTGCTTCGCATGTTCTTAAGCTTATAGAACCACGAATA  
TGGCATCAGGTCAGATAACCTGAACGTGTTGCTCCCTTTGCCATGAAAAATAACTGAAAAGAAGAAGAAGAAGAA

>comp147965\_c0\_seq1

GCTGGAGAAGAAGGCGATGATGGCGCTGGACAAAGTTACCAGAAGAGTTGCATGGATGGGCGTACCCGCTCTTCGGGTGGACGAGAGCGAAGAAGGGGGGTATCATGTGAGCCCTAGCA  
ATCTGCGTCGTGTATCGCGCCTGGCCGAGCGCGCCGACGAGCATTCCCGTGGTCATACCCTTGAGCGCACCAAGCGCTACTAAGTACTTGGCCCATTTTCATCCCGGCGGCAGCGAATGCG  
ACAGAGTAAGCGGCGTTGGTGTGAGCTCGGAGTATTTCTGCATCATACCAGAGCAAGTGCCATGGCGCAGTAAACGGCGGTGATTGCCGACATTGATCCAATTAAGCCAATAGGAATG  
TCCCTTGATGGGTTCTTAGTTTCTTCTGCCATGGTCGCCATCATGTGAAAGCCGGTGTATGCCCAATAGACGACTGCGGGCGGCACGGAAGACGCCGCTGGCACCGAATGGGAGGAATGGG  
GAAAGATTGGAGGGCTTGGCGTTAACAAATCCGGCGGCAATGACGAAGGCGATGACGAAGAGGGTAAGGACTGAGGCGATCCAATTGAGAATGGAGGTTCTGTGGGTGCCTAAGGCGG  
CAAAAGTGGAGCAGGAAATGAGGACGACGACAGCGATGGGGTTCGAGGAGGTTAAACCCCTCGGCGAGAGATGGAACGTGGATGCGAAGGGCGTCAGGATCGCGGCCAATTAGAGTTG  
CGAAATAGGAAGTCCAGGAACGCGCAAGCCCAGCGGCACCGACGAGAGCTTCTAGAAGAATGTTAGCAGCCGCAAGGTAAGCCGAGTGTGCGCAAGCTCAACGCGGAGGTAAGAGA  
ACGATCCACCAGCAGAGGGAATTTGACGGCGAACTCAGCGTAGCAGAGGACGGAGAGAAGTGCGGAAAGGCCGGAGGCAGCGTATGAGAGGACGATGGCGGGGCCGGCGTTGAGA  
CGTGCTTCTTGCCAGTGAGGACGAAGATGCCCGTACCCACTACGGATCCGAATCCAAGCCAGCCGAGATCCCACCACGTGAGGCAGCGGCGCATGGAGTTCTCGCTGCGGGCGGCGAA  
GGACGTCTACCTCATCGGAGTCAGAGGAACGGTGTAGAAGTCGGTTGCGGAGACGGGGGAATGTGCGGAAGAGGGCGGAGCGGTAAGAGGTTCCAGCTGCTAAAGGAGGGTTCTGGGGA  
AGAAATCGGATTTGGCGAATCTCCAGTAGCTTCTGGGGTTGAGGGATTCGCCGTCGGCGCCGCTGGCAGAGGTGTATGCCGGAGATTCGCCGGCCATCGTCGTAGATTCTGGAGCTGTGA  
GATCAGTTGGGGAAGAAGAACTGCGCCAAGAAAAGGTTCTGTCAAGCCGATTCCATTATGTTAGGAATTTCTCTAAAATTTGGGGAATTCGAATTTGGCAGCGGAAATTTCTGCTAT  
TTGGACGGCGGAGAGAAGCGTGTGCGTTTTTCATATTTTCTGTACCTGGACGGA

>comp147966\_c0\_seq1

TGGCGCATTCTGGTTGATCTCCGACTGACGTGGCGCATTCTAGTTGGTCTCCAGATGACGTTTCGACGTCCTCAAAGAATATTTTTTGCCAATGAACAAAGATTCAAACAAAATAATATTTTT  
TACTTATCCTTCTCTTAGCTTTCCTCTCAGTTGTTTCTTATCAATAACAAAATGAAATAATAGAATTGAAAGAAAAAGTAAAAGGCAGAAGAAAAAGATCACATCTTGATCTCATTTTTGTT  
CACCAATGTCTTTCTCAGCCTTCCACCTTATCCCACCTAATACCTCCTTACGTAAGCACGTTGAGCAGCTCTAGCTCTGTGCATCTTCATCTTCTCCCTCACAAACCTTTCATATATAAAA  
GAAGCCCCTCTGAATTGTGGAAGAACAAGCCAGGCCACCAGCAAAAAGCTTTATCTTATAACCATATTGGAATCCAGTATAAAAATAGGTGCTGCTATCATCTCCATGAGAGTGATGAATGAAT  
AGATGATCCAATAAGCTAACCATTTGCTCATCATCAAGCTTCGACGTGCTCTCTATTGCTTGAACAGAAGCGTATAAGGGTAAAGGAGCATGAGGGCTGGCCCAGCGAGAGAGATGAGAT  
GAGAGAGCAAAGTCCAGAAGACGTCCATTGTGAAGAAGTGGAGATTGAGACCTGGAAATTCAGAATTGATCGTCTCTCTATGGCTCACAGAATGAAGAATTTTATCCTTTTAATGGAAGA  
TGAGTAGAAAAAGAGAAAGAGAGAGAAATCTTTATTTATTT

>comp148000\_c0\_seq2

TTTTTTTGTTTTTTAGTTGTCAAATAATCTTTATTTTTCTTTGAGTTCTTAGCTAGCTGGGCATTCCACTGCACCACTGTTGATGTCATCTATGATGTCATGAGGGTGGCGGCCATCAACATT  
GCATCCCACAGACTGAGCAGTCCCCAGGATCTCTTAATGGTTCAGAAAGCTCTCTAGCTAAAGAGCGGTGCCGCATCTGCCGGGCAATGTTGACAATCTCATCAAAGTGATGTTTCC  
ACTGTGCTTAATGTTTTCTGCTTCTTCTGTCTCTTGGAGGTTCTTTAGAGCTTTGATGATCAGGGCAGAGGCAGAAGGTACCACCTCGATCTGGGCTTGTCTGTTCTGAATGGTCAGTT  
TCACTGTAATCCTCAGACCCTTCCAATCACCAGTTGCCTTGGCAATGTCATACCAACCTTTTTTGGAGACAGACCCAGGGGGCCGATCTTGGGGGCCAGGGCAGATGTAGCCCCGACTT  
CTCCACCGGTGCATCTCAGATACACGACTTTGATCTCGTTGGGGTTCGAACTTAGGCGGCATGGTGGAGGCGGCTGGTGTGCGATGAACCCGATTTCGGGACGACCGAAGAAAGTTGCAC  
CGTAGCCTCCTCCGAGCCGAAAGCCGAAAGACCGGAAGCCT

>comp148044\_c0\_seq2

ATCAATAGGTACAACAGTTTCCACAACAACCACAACCTCCATTCTCCGGAAGCAGAGCACCGCACCCCATTAATATTACAATGGCCCAAGCCCACAGTCACCATCGCCTCAGGAGGAA

GCAGTTCCCCAGATGAGACCAGATTAATATTACCTAAGCTCTCAACAGACGAATCTGAATTAACCAAACAATAGTTCTCCTTCACAGGATCAATAGGTACAGCTGTTTCCACAAGTCCATT  
CTAGAAGTAAGGAACACTTCCCTTAGTGGAGCGAGCTGACGACGAGCAGCAGAAGCGTCCCCAGGAGAGCAGTAGAAGCGCCCCAGGCGAGTAGCAGAAGCGCCCCATGGCATGG  
GCGTGCAAAGGAGAATACCCTAGCAGACGGGATGAGGTGGTGTCTTAGCCGCTTAGTTTTTGTTCATATTCCGATAATTTAATTTCTTCTAAAAGAAATTGCCTAAAAGGGTTATACTTA  
TTTTATCTCATATGTTAGTCATTCATGTTTATTTTTTAAATCTGATTTATGTTACTTTTTTAAAAGGATGTGCTTATTTTATCTCATATTCT

>comp148091\_c0\_seq2

TTTTTCAAATCACCAAAAAGAACACGCCTAATTAGTATTATTCATCTATCTTTATCATAAAATTACATCATGTGAATGCATTAATATCGACTAATAATACAAATATTTCAAATTTCTTTTTAT  
ATTATTTGACCCGGACCAGAAACACACTCAACTCCGGCCCCGCCGTCCCATCCGGGTTAATCATGTACAAGGCAACCGAATCCTTGGACCCCACCACCCTCTCAAACCTGGCCCCGCATGT  
ACGTCATCTCCCCGTCCAGCCCAACCTCGCACGGCACCCTCCGGCCCCATTGAAACGCCGCGCAGCAACTGCATTACCTGCCGAGAACAAAAAATAAAAAAATAACAGAAATTTT  
CAGATATTCAGTCATAAAAATTTAACTTTGATGGAAGTTTTCTTTTTGATTGTTAAGTTGAATCACCTGTTGTTTCGTCATCGGAAGCCTGGGAATGCTTTCTCCGAATCGAGTATCCAGA  
CTTACGGCCGTTGCAGAAAACAGCCCAACATATTCTTCCATGAGCTTTTTCTCTGCGTCTCGTCTCGCTCTCAAAGCAAGCTTAACGACTCCAGAAGCCATTTCTTGTGAAAATAG  
CTTGTAAGGATGGGAAGTTCTATGAGGAAAATGGGAGGAGATCGAGTGTGCTGTTGGATGGCGAGGGTGACTCTTCCCTTTCCGGTGGCCGAAGAGGGTTATGGTGGTGGCGTGGTCCGGC  
AAGGAAGTTGTTTTGCTTGAGGATCGGTTGAGGAGAGCTACCATCTTGCAGCCGGAGGAGAGAGCGGGGAGGAGTTTGAACATTCGAAAGATGCCGCCGCCGCCAGAGGCGGTA  
GACCGGAAGGACTTTGACGGAGTATGCTTGTGTTGGTGGTGTGGTTTTCTGCTCCGGAGTGACGAAGGAGGGAGAAGAGGGATGGGGTTTTAGCTAAGGATGGCATTGGTGGAGAGG  
GGAGTGATTTTCTAGTTTTTGGAGGAAGGCG

>comp148130\_c0\_seq1

ATAGTTTTATCAAAACTTAACTATCAACATGGTGATAATTAATATTATTGATAATTA AAAAGACATACTTTCCATATTAACAAGTAACATTTGCATGAATTTATTTATGTAGATCAACAAATG  
TTTAAGAGCTTCGAATTAATCTCTTAATTA AAAAGGAGCTGTGCTGATGTCCCGAAATCCTTCAAGCACGCCGAAGCTCCTTTTCTTGCCGATGAGATCGGATAAATCTGTATCGTCCAA  
GTCTGCTGCCTTCAGTAACGTTGAGCACCGGCTGCAAACCCTCAGTAAAATACTTAGAGCCTCCTCCATTGTCTTGTGTTGCTGAGCACATCTAAAGCTGCTTCCCTCGCGTACTGTATC  
TGACACAAAGAAAGAGTTCCGGGCTCTTTCTCTAAGGAGAATTTCTCTCTATTTCCAGCTGATCTGTACCCATTTCAATCACTGCAAATTTCTCCAGCATAAAAACAAGAGACGATAGGGA  
GGGAAGAGAGACGGAGGCTTCAGAGTAATAATAACAATAAGCAAATCCTTCAGCTTAAAACATCTTCGTACACGTGGCGAGAAAATGTGTTAATAGATGACACGTGGCAGCAGC

>comp148152\_c1\_seq10

TTCAC TTCAAAGGAGTGACCATCAAACATAACGAAGCTCTTATCCTCCAAGGACAACCACGATATGAGCATGTAGCAATAACTCGTGATTTGTCACTTGCCTTTATCTTGATATCATAGTT  
ATGTATTATTGCGTTGGAACGAATGCATTGTTGAAACTGAATGAATCCTCAAACGCGATCCCACTAGCAAATTAGCCTCTAAATCTGGAGTCTCAAGAAAGCCATCAGACATTCCA  
CCA ACTATTGCATCATTGTTTGCCATTTTGCTCCCACTTAAATCATGCGTCTCAACATGATGGCTATCACAAGTAATACCCATATCTTCTTCAAGCTCTTTCACAACAACAACCTCCATT  
TTGTTGGAATCAGAAGAATATGTAAGCATGTCCACTACATCAGTTTCACTTATAATGGGCCTGTAATTTTTAGGGGATGTTCCGTTAATGTGATAGTGTAGGTCATAGTCATGACCCCGTAGC  
CACGAGCATAATGCTTCGGTTCGTTCTTTTCAGTAAAATCAAATTAACATCATTTTTCTTAAGCTTTAAAGTTCTCTGATTACCACCAACATAATTTTAGCCTGTTCTGTCCCTTTACTGTGCTCC  
AATATCCTCCATATTTGAATACAATATGGCACCAATTGTTGGAATCCATATCTACCAAAGAAGTTATTAATGAGAAAATTTAATGATGA ACTATAATGAAGTAAA ACTAAAGGAAAAGGAA  
AAATTAAGTTCTGTAAAATGTAGAAATCTGTAAAATCACTATTTCT

>comp148157\_c0\_seq1

TTTATATAATTTATAATGTATTGAAAATGGAATAATTTATAATTACAAACAAACCCATCCATAATAATTTAATAATTTATGCCAAAGAACATACATCATTTAATTTAGAATGATTGAAAATGT  
CAAATATATATGATCCTTTACATTTATCCATTTTCTTCTTAAAACAAAGCACACGTGTAGCATTTCAATCAAATTA AAAAGTTCCAAATTTCTTATTGAGGGCACTCTGGTGGAGGGTTTTGG



AAACCTTTTAAACATCATTACAGTAATCATAGGTCATATATGTTCTCCTGACGTTCTGATAAGCCGATTTTTTCAGAAGCACTTAACTGTTGATATCTTGCTGAGTTCACCATAATGAGGGAGA  
TGAACAGTGAGCATCATGTGAACCTTACTGAAACGCATCCATCTACATCAAAACCTTGAAAAATTGCATTAATGGAGCATAAGACCAGTCTACTTTAGTCTTTCCCTCCATCAGTAGCCCAG  
CTATCTCCATTCACAAAGCTTGCTATTAATTGCATTGGTTGAGATGGATAACCCACTCCTATATTTCTTTTGTTAGCAAATACTCTAATTGGTGTATCATCCACATAAAACACTATTTGATTAGT  
GTTCCATAGTATTTTGTAGTCATGAAGGTCAGCAGAAGGATCAAACCATAATCTGATCCTTTGTTCTCTATTTCCCTTTCCCATTTGCAAAGACATTTGTCTGAAGAATTATGGGTTTCCCTTC  
AAGGTTGCCAAGGAACCTCAAAATCCAGTTTACAGCATGGTTGGTACTTGAGTCAGAAGCCAAATAGAAAGCAGTTACAACCTCCAGCTGAGTTTTTTTCTGGCAGCTTTATCTTCATATGGAA  
GAACCCAGAACCCTATTTAAGCTTTGATCCAAATCCAGAACCTGAAGCTTTGTCCATGAAAAGAGAAGCCTCAGTTTCCTTATCAATATCTGTATTCGATCTCCACCCCATGATCCTTCAT  
AATTTTCATAAAAACTTGTAGCTGGCCGATCACTCTTAGCCAGTCCATGCAAGCAGCTAAGAGAAGAAGATGAAGAAGAAGAAGAGGAAGAGTAGTAGAAGCCATTGCTTTTGTGGGA  
ATCATGAGAGATGAA

>comp148157\_c0\_seq2

AAAGATGACAACCTGTTAGCAGTCCATACTACTGCATAAAAAACCCCAAGATAAAAATTGATAAATAAATTTTCATGCTAAGAAATAATTTCTCCATAAATTTAAGAACAAGAGTTGCATATCT  
CAAAGCCTTAATTTTAACTATATTGTTATATCAACCCTTTTTTATCCAGATAAAAATAAAAATATCAAAATATTTAAACCTGAAGCTTTGTCCATGAGAAGAGAAGCCTCAGTTTCCTTATT  
CAATATCTGTATTCGATCTCCACCCCATGATCCTTCATAATTTTCATAAAAACTTGTAGCTGGCCGATCACTCTTAGCCAGTCCATGCAAGCAGCTAAGAGAAGAAGATGAAGAAGAAGA  
AGAGGAAGAGTAGTAGAAGCCATTGCTTTTGTGGGAATCATGAGAGATGAA

>comp148188\_c0\_seq2

TTTAAATAAATAAATCTTTCGTCATTTAATAAAATGTCAAAAATATTTCCAATTCATTAACCTGTAACCTAAAGTGATATACCCCACTGTAATTCAAAACCTTTCCCTTCAATAATGCATTAGGAAT  
ATATGGTTACATCTGAGCTCCCTTGTACATAACATTTTACAACCTTTGATGGTTGAAAAGCCTCAGTATCCAAAACTTTTAAACAATCTACACATTAATAATCTCATAACATAAAAAATTTTCAT  
ATCACTGGATTTGGCCCTTTTGCATCTCCCAAATAGAAAGCAATGCCATAAAATCAGCTTTAGATGCTGTTTTTTAGTCCATTTTGTGCTCGACCCTTTTGGGTGGCATGGATGCTTCCTTC  
AGCAATTTTCGACTCAGTGTATTGTAAATGCTCGGAATACTGCCTCGAAGCATTCCCTCAATCTGTTCCAGACTTCATCATTGCCTCGAATTCTTGGAATAAATTTCCCATCCTTGTCT  
ATATCAACATCTTTTATGATTTCTCGAATCACTTGATCATTCCGATCGAGGTGACCCTCGCCAAGAGCTGCTCTCAGCTCATCAATCTCAATATATCCACTACCATTCTTGTCAAAGTAGTTG  
AATGCTTGAGGCAGATGCTGCTCACTATTGACCTTCCTTAGATGCAAAGAGACAGTCAAAAACCTCATCGCAATCCAGCATTCCATTTCCATCTATGTCTGCTGCTTCCAATAGCATCCTGAC  
ATCGTGTCTGGAACAGGCTGACCAATCTTGTGGAACCCTTCCTGAAGTTCTTCAAGGGTCAAGTTCCCATTTTGATCCTTGTCCATCATATGAAACATCTGCATGATTCCATTAATTTCTTC  
TGAAGGCAACTGATCAGCTACAACCCTCAATGCTTTCTTCTTGAACCTGTTTCATCACTAGGAACTGCTTCAACCTAGACCTGACGGCCTCGCCGAGTGGAATATTTGGAGCTGAACTTGC  
ATTCGGCAACCAAGGATGTTCAAGAACCTGTTGAGCAGTAAGCCTTGTATCAGGGTCTGGATCGAGCATGCGCTTCAACAAGATCCTTGGCACTTTCTGAGACCTTTGACCATGGCTCCCT  
CTTGAATCAACAGCTGCCCTTATAATCGCCTGTGCAATTCCTTCATCACTATCTGCCAAAAGGGTGGGACTCCACAGAGGAGGATATACAGGATAATCCAGCACTCCACACATCAACC  
TCTGGTCCATAATTGCGCTTCAAGAAGTTCCGGTGCATGTAAAATGGACTTCCAACAATCTCGCTGAAGCGCTCACCAGGCTCAAAGAACACAGAGAGGCCAAAATCTATCACTTTCAAT  
GGAGAGTTTTCTGACTGATCTAGAAACAAAAAGTTTCTCAGGTTTTAGGTCCCTGTGTATCACTCCATGCTTATGGCATACTGGACAACCTCCATGATAGTCTTGGTAACGCTCGCCGCCG  
CCCTCTCCGAGTAATGCCCTCGCGCAACGATGCGATCAAATAACTCCCACCTCGCATAACTCCATGACAAGATATACGTTGTCCCAGTCCCTCGTAGGCCTCGATGAACCCGACCAGGTT  
AGGGTGAACGGGCAAATGCTGCATGATCTCCACCTCCCGCCGGACATCAGCCAAGTCTACAGTGCACCGCAATTGCCGCTTCGATATTGTCTTGCAAGCCAAAGCCTCCCCTGTCTCCAC  
ATTGGAGCAGAGCCGCTCACGCCGAATTCACCTCGACCTAGCTCCCGGCCGAGCTGGTATTGGTAGAGGAAATCGGCGGGGAGGCGGGGTTAGAGAGGACGAAGATAGGCGAAACC  
GGGGAACCGGAGGAGCGACGGAGGAGTCCGCGGGGAGAGGTTTTGATCTCGTCATCGGAGTCCGCGGGCGGGGAGTAATCGGAGGGATTTCCGATGCGCATGATTGTTGGTGATGG  
ACGGGGAGGAGTAGCACCCGCCCATTTATTGCCGTTGCCGTCGTCGCCGCCGCGGGCGGCAATTAATTGCTCGCTTGTGATTAGATCGATTCTGATTTAA

>comp148208\_c0\_seq1

CCATTATAAATTGAAAATGATTATCATTATGCTCTTCATTATATAAATTTATAGGATGCTATGCTTCATCTCTTTTTATCATTCCTGAATCAATTACTAAGAAAAGGACATTTTCAGGCTTGA  
CTGTATCCCTCTAGTTGATAAAGCTTTCTTCTCCGTCTGGCCGCAGTAAAATATTTATGTTATTGTGCGACTTGTAAGTGTGTGTGGGACCATCATGACCGGGTGATCGCTTTACTCGAGCTT  
CTGGCATCGAAGTTGTCATCTGTCTGGAGACTGCCGTCGCTTGATTATGGTTAAGATCAGCGGTGCCTGAGTTTAACTCAACTGTAGAGTAGCCCTGGGCCTCCTGGCCCTCCAGCTAGTC  
CTCCTATTAAGGAGTACTTTATATTTATAGACTCTAATCATTATTTGGTCAAGGATAAGCCTGATATTACTTCTCATCCCAGTTTCACTATCAAAGGAACAAAAGTTTAAAAGGTTCTTTTT  
ATTTTATAATTGAAATGGTTAGATTTTCGTGCTTCTCCACTCCCCCAGTCAGCAGATCAAAGAAAGTAGCTCAACGTTCTATTGGAACATTGCAGACAGATTATCAAAGTGCAATTCAGGAT  
GAATCAATAAAGTTTGTAAAGATTCTGTAAAATCGAACCCCTTTGATCGACAACATAATCTTCTCTATAACTCTGTGGAGAGAAGTACATCTACTTACTCTCTGCAAGGTTGTTGGAGATC  
GGATAGCCTGAATGTTAATATTCCTGAGGATAACCATGAGATAACACAGACAGTACTGATACATAAAAGTCATTCTCTACGCAGCATTATGGAGGAAGGAAGTGATTACTCTGGTGATGATA  
TCACAGAGGACGATGATATTGATCATGGATTTTCATATGGTTTATTGAACGGTTGGAAATTGAAGGAAGTCCAGAGTTATCTGATAATGCTAATTCTACAGAGGTTTTTCACCATGAAAAT  
GATAGGAAAGATTATCAGAATCAGAAGGAAAATGACTTAATGAAATCCTTTGATGTCTTACAGATCCCATGCATCATGAAACACTTTTCTCTATAGAAGTTTTGAAGCAACCTGATAGAG  
ATTGGCATGCTGATATTGCTGAGAAGGCTGTTGATGATGTTGCTGACTTTGGATGCTCATCAGAACATATTCCTACTTTATCAAGATCATTTTTCCGTGGCTAACCTCAGAGTAAATAAGACTG  
AATACGGCAAAAATGACTCAAGGCATAGAATCATTTTTCGTAGGTCTCGATCCTTTTCAGATCTAAATAACTTGAATATACTAGAAACAGAACATAAAAGTGGTGAAAAATATTTGATTCT  
GGGGATACTGTTGAGAAAAATGTCATTAGTTATCACTCTAATTTGCCCTACATGATGATGTTACTGGAAAAAGTTCCATGGTATGATGATAAGGAAGTGGGAGGTTCTCAGTTTGGTGAGAA  
GGAAAATCATTAAGTTTAAATGATAGTGATGGTAAATGCTTGAAGTTGAAGTTAGACATGGATAATAAAGCTGCATGCAACTCAAAGGTAATTTTAGTTTTGCAGACGCCTTGAGAAAATC  
TGAAGCAAGTAATGCTAATATCACAAGGGAGTTCCAACAGGAATCTTCTCACGACAATTGGGATCAACTGACCCCTCAAGAATTTAGTATAAGGAGAGTAGAAAATTGGATAAGTCAGAT  
TGATATCCATGGTGACCTTATTGTTGAAGAACAAGAAGCGAGTTCTACTACTGTTTCAAAGAGGAACCCCAAATTTTAGCTGCTGTGGATCCCCAAAATCTGAGACTCGAAGCAACCT  
GGCCATGGAGGTAGCTTACAATTATATCTCTTCCATGACTTCCATCTTCATCAGCGCAAATGGCAAATCTTGGGTTGGTTGCAGTCCCTGTTCTTAGTTCATTATCAGTTTGGCAGTACT  
AAACTTATCAGGCAATGCTTTGGTTAGATAACTCCAGGATGTCTTCAAAGGCCTCCACATGTTGAACTTGTCAAAGAATAACATATCAACTATTGAAGGCCTCCGTGATCTATCACGT  
CTTCGTGTTTTGGACCTCAACTATAACCGAATAGCTAGAATTGGCCATGGTTTAGCTTCCCTGTTCTCACTCAAGGAACCTTATTTAGCTGGTAATAAAATCAGTGAGGTAGAAGGTCTGCA  
CCGTCTCCTCAAACCTGAGCACCTTAGACTTGCGGTTCAACAAAATCTCTACTTCTAAAGGCCTTGGACAACCTAGCTGCTAACTATGACTCTTTGCAAGCAATAAATCTTGAGGGAAAATCCT  
GCCAGAAAAATGTTGGAGATGAGCAGCTGAAAAAGTTTCTTCTTGGTCTTCTTCTAATCTTGTCTACTACAACAAGCAGGCTATTGGAATGGGCTCAAAGGAAGTTTCAGACAGTGCC  
GCTCCGGCTGTTGCTTACCTCAGTTTGATAGAGGCTTAAAGAGTTGAGCACAAGAATTCACAAGGGGATCTCGTGGCTCAGACCTTAACTGTTGGCATCAAACAATGGACAGCAAATT  
CTTGCTACTCCACCACCATCAAGGAAGCCTTCCAAGGAAAGGCATGTGCGGTTGCAACTGCCACCTGCTTCATCTAAACCAACCAAGCTGCGTTCGGATACTGGCAAAAAACCACTTGG  
TATCAACACTAATGATGCTATGAAGCGAAGCTGAAGCACAGATGTACTTCGAGGCTTTTTCAAATTGTAATTGCAAGAGCAGATGAACTATGGCTTGTATGAAAGAGATACTGCTTGCAGT  
CTAGTCTGGTCTTGAATAAACTTCTGCCAGCACCACTTGTAAATTTCCAGGGTCATGGCTATTGCGCAGAAATAAATGATGGTACGTAGCTGTTGATAAATAATTGGAGGTAGGCTTTC  
TTTCATTTGTTAGTATTCATTCCTTTACCCCTTATAAATTGGAGAATTTAGTTATGTGATTATCAGACTCAGTTGAAAAGTTTGAACAAGAGTTAAAGTACATACTTGTAGCTCAATTATG  
ATAAAAACATCTGAGATTATAAATAAAAAA

>comp148323\_c0\_seq1

TCGTTTAAAGACAATAATAATCGAAATGGAATTACAATGTGGTGAGCTAGCTAGGTTTTATGAGATTAGAATTACTAGAATGCCTCTGAGGCTAATGGGCGTGCTGTCGGGTCTGGTGTTCAT  
GTAGAGGATGTAGGTGGCGAGGCCGGGTCCGAGCGCGCCGATGTATGACTGGCCGGCGATGTAGACATCGTTGTTCTTGTGTTTCAGGAAACCTCTTCATCCACCGCGCAATGAAATGGTA  
CATATCGGCGATGATCCAGAACTCCTGGGTTTCATATATGTCCTGATCATTGTGCGAGAGCGGAGAACCCAACCCCTACTGGTCCCTCAATGAAGAGAATATTGGCAAATTTATTCCATGAAA

ATGGGTTGGGGATCAGAGTCTGGCCGTCATCGCCAACAGTGTATGGCCCTACTTGCTGGAAGCAGGATAGCAAGGCCGAGGCCAGATCGTTAACAGATGGGGCGCCAATGTAGATTATGA  
GGGGCTTGGATAACGGTTCGAATATCTTCAGCCTCAACAAAATAGTAGAAGAAGCGTCTGATTGCTGACTGGTTCGGCGAGAAGATAACCCGAATACTGACGAAAATCTATGCTTTTCAGGCT  
GGTTTGGAAAGCTCGTCTATAAAATCGGCATCTTTGGCTAACGCGTCTGCTTGGCTGCGTCCGTTGCCGGCGAAGTTCCGCCGAAGAGAAGATGCGGGCAGATGAAGAAAAAGAAGAA  
GAAGAAGAGAGCTTTGGCTTCTTCCATTTCTGTGCTTAGGTTGGTAGAAATAGGTGGGAAGGAAAAATGGGATATTTAAGAAACTCAAATGC

>comp148365\_c0\_seq1

TTAATTCTCCCAAGAAAAAGCATAAATAACTTAGCAAAATTGATTTTCATGCACACTATCACACATCATTCCACCCTAAAATGGCAAATCCTCTCCCCCTTTTGCATTCTTCTTCTCTCTG  
CCTACTCCTCGCAACCCCCAGCTCCACCTCCTCCCCAACCTTCCCAATCCCCATCAACAGCGACCCGGCAATCTCACCTCCAATTTTACATCCACGACAAGATTAGCAGCCCCAACGCAAC  
CGCCATCAAGGTCGCCGCCGATCCCAATGGCTCCCGCGCCTCCGCCACTGGCCTCCACTTTGGAAGCATTTATGTCATTGACGATCCCATCACCGAAGGACCCGACCCGAACCTCGAAGCC  
CTTGGGCCGTGCCCGTGGCTTCTATTCCGTGTCTCTACGGATGGATCAGATCTTACTTACCCTAAATGTGATTTTCATGTATGGCATCTATAACGGGAGCTCTGTAGCTATCGTGGGGA  
GGGATCCCATTATTGAGAAGGTAAGGGAGCTGCCGGTGGTGGGCGGAACAGGTGTTTTCAGGCTGGCCCGTGGGTTTCGCCTTTATAAAGACGCATGCATTTGATACGGCCACCGGGGATG  
CTGTGTTGTTTCGTGGAGGCTTACATTCTCCACCATTGATTCATTTCTTTGCTTGTAGGTGTTTCGTTTCGATATTTTCGACAGAGGACGAGGGAAGGAATTAATGTTTTTATCCTTTTGTTCGT  
TTTGGTTTTAACGAATTAATGTGGTTGAATATTTGTCTCTGATCTTATTATAAATTTTTATTTTGGATTTATGGATTAATATGATGGAATTCCGATCTCTGTCTGTTTTTTTTTTTTTAATTTG  
TAGCTCTTTTGGAGATTAGTGAGCTTGAGGTCCCTTTAAGGACTTTTGTAACTTTTTCCCGATATTAACGCGTAGGCCCGTAGGAGGGTTTTTAACAAA

>comp148438\_c0\_seq2

ATAAGACAGACCACAACATTGAGTAATCTATAAATAACATTGAAGCAATTTGAATCAGTCAAATCTAAATAGCTAAAAATGCAACTCTTGTCTAGATTCACTCAAACCGACAGTAGCTGA  
GATTTCTAGATACATCGAACCTGGACGCTTCTACGAAATTCAGCTTACCAAGACGGCATTAGCCTATAACCATCAGCAGTTAATTGCCACAAACCATTAATGACTCATTGTGACATGGCAG  
TCCGCCCGCCATCGACCTCGCGCAATCACGTGCACGTACCTGGACGTCGTATTGAATTATGAAACGGGACGATCGGACGGCTTCAGTTCCGCTTTTGGCCAACGTGTTGCGAAAGTGCA  
ATTTTTGCAAAAAACCCCTTTAGAACTAAAACCTCAGTCCCGTGAAGTAAATGGAGAAAAATGTATGAATTATGAAATCAAGCCAGCACCTTGTTCCTCAATTTGACATAATAACCCC  
CTCAGTTATTATAAATGAAGAGCAATTTTGTGAGTTTTTTTTAAATCAGTAAAAACAAAAGTTGATAGGACTGCTATTTTTTATTATTTAAAATCAAATCTTATTATAAAAAATCATTATGGTA  
AATAAAAAGAACGAGATTCTAAATTACAAATAATTAAAAAAAGAGGGATAACTATGTCTCATGGTATAACGAGGTTTCATTCTACAAATTAATAATTCCAAAAGGAGGAAGATGAAAAGTTT  
TTCATTTTCATTAATGCACATTTCACTATAAATTTATATCTTGAGCCAGGATGGGAGGAAAGGAAAAAGAAAGGGAGAGCAATCAGAAACTTTTAAGATGGCGACAAGATAAAGAGGGCTA  
TGGCGCCTCTGGACGACAAGGCTCGAGCGCGGCTGTGGGACGGTGGCGGAGCAACCGCGGTGATCGCCGTTGGCAGTGAAGGGTCGACGGGGAAGTTGGAGGAGCTGGTGCACGCGT  
TCTACAACGATGAGATGTCCATCAGAGGAGAGAAAATTGAGGAGGAGGAGAGGCCGGCAGCGAAAATGGCGGAAGCACTGGAGTTGGAGCTGAAGGATGATTTGGCAGAGCCGGCGG  
TGAAGTGGATACGGGCAAAGGCGGAAGCAGCGGTCCGAGCCGCTGGTTTTGGAATGCGAGGAGGTCGTCAGGCGAAGGTTGGTTTCGCTGATGCAGGAGAGGGGCTTGGATGCAGGAA  
TTTGCAAGTCCCAGTGGCATAACACCTCCGGCATCTCTGCCTGCTCCCACGAATACATCGACGCGGTCGTCGCGGAGACACGTTACATGGTTGAGATCAACCTGGCCGGAGAATTCAAGA  
TCGCAAGGCCAACAGAAGACTACACGGAACTTCTCCGTTCACTACCAAAGCTTTCGTCGGGAGACCGTCGACACTTGAGGCAGTGATCAGGTTGATGTGCTCGGCTGCTCAAGAGTCC  
ATCAAGAAAGCCGGCATGCACGTACCCCCGTGGCGGGCGGACGAAATACATGCACGAGAAATGGTTCGGTGATTACCGGCATACACAGATACGTTTTCTTCTTCGGATTCCATAGGCAGG  
ACGGCTCCTACAGCTTACACGGCCAACCAACGCTGCAGAGGAGCCACAGGTAGCAGCAAACCTAGTAAATAGCATTTCCTAAGGGGAATGTGAAAGGGGACGATCATTTAACGGTTATA  
GGAAGCTTGTGATGTTTGTATTTTGCACATATATATATAACATTAGTTATTCTATTGAGGAGATTGTCATGGAGAGATGTTATTAATTAACCTGGAGGAACTGGGAGGATACAGGAGAAA  
GAACAGTTTTGAACTTTCAATAAATGATGTAAGATTTATTTTGGGTTTTTAAATAAAATGCACAAGAATGTCGTGCTAAAGGTTTATATCTTGCAGTTTAAAATCTTGTGTTGACTTTGAAA  
CAGTTTTTGATTTGACCATGTTCTTGAAGATATTTGCTGTTGAATCTGAGATGTGGATAAAAGACAATGGCAAGTCAATGTGTCCAATAACTGGTTTTAGTTAATATTATTCAATATTTCAAT

ATTAATGGAAGCTGATATTTAAATGAAAGTTTTAGCTTCAAGATAAATCTT

>comp148451\_c1\_seq1

TTTTTTGTTGTAGCCGGCTTGATGATGTTGTTGTTGTTGGAAATTAATTTCCAAATATTGGGACCAAGATTTGTATGACAATTCATTTGGGATAGTACAGCATTGACAGTTTTTCATGCACA  
AGGTAGCTTACAAGGAGTTTTGGAATAATAAGCTAGGAAGCAGTTAAGTAAGAACAACAATCTTGTTCTGTTTTCCTTTGTAGTTCCATTTTGAATTCATAATAATCAAGAACATGGAGCACT  
ACTTGGTAACTCCAAACCCTAACTCGATACTATTTCACTACGACATGTGAGTCAGAGGAGCAGCAGTCATCACAATTTGCATAGAGCCAGCAAACCTCCCTCAATCTCAAGTCACTAATGC  
TTCATTAGATCAACTTCAATATATCAATCACTGTAATCTATACGGAGTAAACATTAACATGCAGTTTATCATCTTTACTAGGCAGTGAAGTGATCATTGGTTGTACGAACAAATAGGAGGAAG  
GCAAAAAAGATAGCTGAATAGAAACCAGTATAAAGATTAACAGAACAACATAAAAACTGCTTGTAAACGCTGAAGGCTCTTTGAAATTATGAAGAGAATATGTGTCTTATGTCCCTAGCTA  
TCATAAAAGATATGAGGATTGGTGAATTCTCTCAAATCAAAGTGAAACTAGAGTTGGATATCACCAGCCAATCCCCTAAAGAAAAAAGATACTCTTATACTCAGAAAAACGATTAAC  
AAGAAAACAGAACCCGGAGGAAACAAAACTTTATCAACAATTTACTTCCAGACAATGAATTGTAATCAACAACTCTTTTACAATGAATGCTAACCTATAATTTTTATTTAAATT  
ACACATCTAGTAGTTTATTAGAGTCACATAAGATTGAAAATCAGGACTTAATCAGCAAATTTCAAAAATATGGCTAAAGTTTTGTTTGGGATG

>comp148474\_c0\_seq1

CATCTCTCTCTCTCTCTCTCGCTGGCTCGTGATATCCCTTCTGTCCATTGATTCCCAATGTCAAAATCCCATCTTGCAATCAAATAGTGCTTTAAATCAAATCAATAGTTTCTACCTCC  
CAATCTGAAAAAAAAAAGTTTTTTTTTCCAGAATTTCTTCCCTTCAATGCTCGGCGAACAAGATCCAAACCCATTTCTTGCGTTCTTACCAATCCCTCATAACTCCCAATCCACAA  
CGCGGAGCGTAACGGCGGCCGGAGGAATGGAGGACGAGGACAAGAAGGCGACAGGCTGCTGCCTTTTTGTCCCTTACAACCTCCTGCTCCGTCGCCACCCGGTCCCCGTCTCTCCCTT  
AACCCCATCTCCCATCAGCCGTCTCAAAGGTAGCATCCACAATTTCAATGCTCGGCGCCCCATTCCCAACCAAACCTCCGCGCTCTCCCTACTCCACCCCAAGCCCCGACCGCC  
GACCAAACCAAGTTAACACCACCCGGCCGATTTTCGAGGCGGGAAACGGCGGCATATCTCTGAACTAGACAGCATGATCTACGACCACCAACGCACCAAGGGGAGCAGCACTCTCGT  
CCGCGCTCCTCCGCAACTTTATGCTCTACGGTAATTTGGGAAATCTTCGCGCCCCTGGAGCCGTCACGCCAACCGCAACATCTTGAATACCTCCCGAAGACGGCCAAGGAGATGGA  
GAAGGCGAGGGGTGGAGGAAAGGTTGAGGCGTCTCCTCCATTTGCCGGGCGCTGTCGAGAAGGCTCGACCCGGAGGAGCTCAAGGAGATGGGTAACGAGGAGTACAAGAACGGGA  
GATATGCGGAGGCCGTTGCGCTCTACGAGAGGGCTATCTTGATTGATCCTGAGAAAGGCTTCTTACCGGAGTAATAAGGCGGCGGCGCTCATGGGCCTCGGCCTCCTTCTTGACGCCGTGG  
AGGACTGCAGAGAGGCTATTAGGATTGATCCTTATTATTTAGAGCGCATCAGAGACTTGCCAATCTCTATCTCAGATTG

>comp148484\_c0\_seq1

GTGTTTGGTGCGAGCGTGGAAGACTGGATTGTTGGCCAAGGCAATTGTGGACATGTTGTGCGCAGAAAATCAACTGGTTGATGATGATGAATACGGAAATCAGCTAGCAGCCTTTTTAT  
CCAGATCGTATCCGCTGTAGCTGAAGCTAGAGCACGGTATTTCAGATTCCGTTGGATGATCTTGAAACCGTTTTGTTGCTTCTTACGGTCCAAGAGATGAGTGTATCACCAGAAATGTACAA  
AATCCGGAAGTTGATTTACGGGAGATAGGATCGGACGCCAATCGGCATCCGAAAATGTGCGTAGCTTGAGGTACCTTTGGTGATTGGCAGTCCAATGCAGCGGTTCCCTTGATATACC  
GTAACAGTTTCTTACGATGAGCATGTGTAGATTGCTTGGTTTCGTGCATGTGCTGAGATAAAGCATTAAACGCATAAGAGATGTCTGGTCTCGTGATGGTTAAGTATTGTAAAGAACCTATT  
ATTTTGGCGTATCTTGGAGCGTCCAGCCAAGGCTTATCATTTGCATCTGAGACAGGCGATTTGGTAAAGAAGGATTAGAGACCGAATTGCATTTTGAATTCGGCCATTTGTACGATAG  
ACATTGCATAAGAGTATTGAGATAGAAAGAACTTATCAGTGGTGGTGTGATTTGAATGCCGAGGAAATGTTTTGGCTGTCCGAGATCCTTCATCGTGAATTGAAGTTTCATTTGTTCAATT  
ATTGTGTGCATGACACTGATATCGTTGCCGGTATGAGGATATCGTCTACATAGACTAGTAGGTATATTTGCAGATTTCCCTTATGCATAATCATCAACGATGGATCGGCTTACTGTGACGA  
AACCCGACCTGCGTAAGGTAGTTAGTAAATGATGTACCATTGACGAGGTGCTTGTCCGGAGTCCGTAGATAGCCTTCCGAAGTCTGCAAACATGTGTTGGATGGATGGAGTCTTCCAAT  
CCTTTAGGTTGATGCATATAGACTGTCTCTTAATATCACCGTGCAAAAATGCATTAGATACATCAAGTTGATGATTTTCCATTTGTGAAAGATTGCGATTGCTAGTAAGATGCGTATTGTAG  
GTAGCTTAGCGACCGGACTAAACGTATCTTGATAATCTAGTCCGTAATCTTGTGATTTCCCTTGGGCTACTAATCTTGCCTTGAATCTTGAATCGATCCATCTGAATTGATTTAATTTCGATA

TGTCCATTTTGTAGCCAAGAATGGAGCCGGTGGGTGGTGGCGAGACTAGTTCCCATGTACCCTGTTTTTGTAGTGCATAAAATCTTCCGCCATGGCGTGCCGCCATTCAGGGAACCTATTT  
GCATCGCTGTAGCATGTTGGTGTCTCGAGAGGGTGTGATTGTGAATTAGATTCAGTCTTTGAACAGATTTAAGTGAACCGGTTTTGGCTCGCGTGATCATCTGATGGTGAGATGTATAATT  
CTGTGTGTGTTGAGAGGTTGTGACGTTTGGAGCTTTACCGTGATCTTCAGTGGAAAGCCACTACGTTGTTATTTCCAGCTGAAATCATTGGAGTTGTAAGTGGCTGTATGAGTATTCATTTGAG  
ACGTGTTGCGAGACAGGGAGCGGGTATGAGCAGATTTGGATGATTAGTGCTGGGCGCCGGAGGAGAGATGTTCTGTCCTACTCGTTTTGTGGATTACAGCCAATG

>comp148569\_c0\_seq2

GAGTTTCCACCAGTAGATGTGGAATACAAAAGCGTTAAAAGCATAACGTTGAAAATATAATATGATGATCTAGGAAATAGGCCTGGCTTCATCAATGACTCGATAGAGTGGTAACTTGTT  
GTTTTGATTATCCAAAAGGGAAAGAATATTAGTCGCAGCAAAAACCAGGATATAGCAAAGCAAGCAAAAAATAGGCTAGCTGCCATCTCCTTCCCTGCGTACTTGGAAACTTTGGCTGCT  
TCTAGAAATACATCACTCATATCATGAAGGGCGAGAATTACAGTTCCAATGCGGAAGAAACCTGACAAGTAGGAATATCCAATTAAGTGAAGTAATTATGTGATGGGAGAACATAATAG  
AGAAATCTTTTCTTCGGGTTTCCCATGCCAGAAGAGCACAAATGCTGTAAAGATAAAATCCACACTGGCACATATAGAATAGCTTCATTGGCAACCCCAATCCTGGTTCGGCCACCCGTT  
AAAATACTCCTTTGTATTCAAGGCCAAGATGTTTTTTAAGGATTGAAATTACCCACAACACTGCACACTAGCATAGTATGTTAACTTCCACATTGACTCCGTGCACTTGATAAACTTTGATT  
TCTAGTCGCATCAGCTATCAAAGGAACAACATGACCGTACAACATTCTGATTGCCAGCCTCTTATATACGAGAGAATTTAGCAAAAACCTGGCCAGAGCGAAACACATGGCGAAAAAGAT  
CGCAATGAGCAAATGCGTGGCCTCAGGCGCATTGCCGAAATCCCAATCAAGGCCATGCCTTCAGCCGGCTCAGCGGGAACAACCTCCGAAAGCGCTCGGAAATGGATTAGCTGAAGATA  
ACCGTTCGATCTTGGAACAGCAGTGGCCAAGGGGCACAATGTGAAGATGAGAACCTCCGCATCCAAATCAAAGTTGCAGCGACAGAGAAAGCGCGTGAATAGGCGATGAATCAGAAGG  
AGATTAGGTCTCCGATTCTTAAAAAATGCTGGGCTGTTAATGTTTATCGATTGATAAATTAGAGGTGGGAGGCGAATGGAA

>comp148687\_c0\_seq2

TTTTTCTTTTTTCCGTCACCGTCCCGTCCCTTTCCCCCGCCATAGATCATTTTTCTTGAACCTAATAGATCTTTATTTTCGTTGCTTACGAACCTTACCGAGAGATATGCACGCTTTGTGCCGC  
GTTTCGTCACCGGCGACGGGCTATAGCTGCCCTGTTGTTGTTGTCGCCCTCCTCGCCGCCGGGAAGCTAGGGCAATGCCAGGACGACGACGATGATTATGACGACAGCGATGGCGATGAC  
GACGATGGCGGAGGAACTCAGCAGATGTCGCCCTCTTCGCCAACATTGTCTATGACCGTCTAATGAGCCTTACCGGAGCGTTCACTAAAGAGTTTGGCAACCAGCTCAAATATTGCATC  
AAGGATTCAGATAAAGATTGGAATGAGGCGTTAATTTTTCGGCGGATTTGAGATTCTTGGTTAATTGCATCAAGCAGAAAGGGGACCTCACATCACGCTTGTGTAATGCTGCAGAAATAA  
AATTTTACTTCAATAGCTTTTATGACAACACTGGAGAAAACGCAGCAAAAATCAATATACTTAAACCAAAACAAAATGCAACTTGACTTCATGGGTACCTGGATGTGAGCCAGGATGGG  
CATGCAACATCAATCCAAATCAGAATGTTAAGCTTAATGATTCCAAACAAATGCCTGCAAGGACTTATAAGTGTATCCTTGTGTCCAGGATTCTTCTGCCCCGTGGTATTACTTGCATG  
ATACCTTGTCTTTGGGTGCCTACTGCCCACTTGCTAAACTTAATAAGACCCTGGTGTGTTGTGATCCATATAATTACCAATTACCTCCTGGTCAACCAATCATACTTGTGGTGGTGTGAT  
ATGTGGGCTGATGTTTTATCTACTAGACAAGTGTGTTGCCCCGCTGGATACTATTGTCCGAGCACTATACAAAAGATTTCTTGCAGTAGTGGGCATTACTGCAGGAAGGGTCTACATCTGA  
AACAAAGTTGCTCTGTGTTTGTGCTCTTAATAATATACAACCTTCTTGCCAAATCCTTAGTAATCGTGAGAGGAGGCAAGCTAAATCAAGAGAAGCTGCTGCAAGGAGTGCTAGAGAAA  
CTGTGCAAGCTCGTGAAGGTGGAAATCAGCTAAAGATGTTGCCAAGAAACATGCTGTGGGACTTCAGGCACAACCTATCAAGAACATTCTCACGCAAAACGTCTAAAGGTTCCGGGCA  
ATCTCATGAATCATCTGACGCATCTAGTTCTAAAAATGCAGGCCTTCTCCTAAGAAAAAAGAATCTAGTAAACTTACAAAAGTTATTAGTCACTAGAAAGAGAATCCTGAAAAGTGACCA  
AGGTTTTAATCTACAAATTGGAGATAAGAACATAAAGAAAAATGTGCCAAAAGGGAAACAAATGCATACTCGCAGCCAAATCTTCAAGTATGCTTATGGTCAAATTGAGAAAGAAAAGG  
CACTGGAACAACAATATAAGAACTTGACATTCTCTGGAGTTATTTCTATGGCTACTGATACGGATTTAAGAACCAGGCCGAGAATTGAGATTGCTTTTAAGGACCTAACACTAACTTTGAG  
AGGGAGTAAGAAAAAGCTTCAAGAAAGTGTGACAGGCAAACTCATTCTGGCCGTGTGGCAGCAGTGATGGGTCTTCTGGGGCAGGCAAGACTACATTCTAACTGCTTTGGCTGGA  
AAGACAACGGGTGCGAGATTACAGGCCTGGTTCTTATTAATGAAAAAGTAGAACCAATCCGGTTTTATAAGAAGATTATAGGTTTTGTACCACAGGATGACATTGTTTCATGGAACTTGA  
CAGTGAAGAGAACCTTTGGTTTAGCGCAAGATGCAGACTTTCAGCAGACTTGTCAAAGGCTGACAAGGTTCTTGTGTTGAAAGAATTATCGAGTCCTTAGGATTGCAGACAATACGT

GAATCCTTAGTTGGTACTGTTGAGAAGCGTGGAATATCTGGTGGGCAAAGAAAGCGAGTTAATGTTGGACTTGAAATGGTTATGGAACCTTCTTTATTAATTTTAGATGAGCCAACCTCTG  
GTTTGGATAGTGCTTCATCATCTTTACTTCTTAAAGCCCTACGTCGCGAAGCACTGGAAGGGGTAAATATATGCATGGTGGTTCACCAACCTAGTTATAACCTGTACAGGATGTTTGATGAT  
TTGATACTTCTAGCAAAAAGGAGGTATAACAGTGTATCATGGATCTGTGAAGAAGGTTGAAGAATACTTTTCAGGCCTGGGTATCAATGTTTCTGAACGTGTTAATCCTCCAGACTATTATAT  
TGACATTTTAGAGGGCATAATTAACCAAAACACAACCTTCAGGAATAACTTGCAAGCAACTTCCTCTTCGATGGATGTTACATAATAAATATGATGTGCCTCGTGATATGCTTAATGATGATGC  
TACTGGAGATGTATCTAGCAGGGATAGTGAATACTACTGTAAAGGTCGAAAACACCATCTATTGCAGGAGAAGTATGGAACCATGTCAAGGATATTTTAGGGCAGCGAAAAGATGATTTT  
AAGTACCACTTTTTACATTCTATAGATTTATCAAATCGGAGCACTCCTGGTGTATGACGCAATACAAGTATTTCTTGGGAAGGGTAGGTAACAACGCTTTCGTGAAGCCAGAATACAAG  
GAGTGGATTTTCTTATTCTGTGTCTTGCTGGAGTCTGCCTAGGGACGCTTGCAAAAATGAGTGTGAAACATTTGGCTCGTTGGGTTACACATACACAGTTATAGCTGTTTCTCTATTATGT  
AAGATTGGAGCTCTCAGATCATTTTCACTTGAGAAGTTGCATTACTGGAGGGAAAGGACTTCTGGCATGAGCTCACTTGCTTATTTTCTTGCAAGGGACACCATTGATCATTTCAATACAA  
TCATCAAACCAATAGTTTATCTGTCAATGTTCTATTTTTTCAACAATCCTAGGTCCTCATTTGTAGATAATTACATCATACTGGTTGCTCTTGTACTGTGTAACCTGGTATTGGTTACTTCTTT  
GCCATCTTCTCCAGCCAGGAACAGCCCAGTTGTGGTCTGCACCTATGCCGGTTGTTTTAACGCTAATAGCAACTGAGGAGACAACCTCAAATCCCTGGCTAACATATGCTACACAAAAGT  
GGGCATTGGAAGCATTTGTTGTTGTCAATGCTGAAAGGTATTCTGGAGTATGGCTGATAACTAGGTGTGGTTCTATGATGCAAAGTGATTATGATATCAATGATTGGGCCCTTTGTATAATTG  
TTCTCATTTTATATGGCATGCTTTCTCGCTGCATTGCCTTTTTTTTGTATGGTCACTGTCTCAAGGAATTAATGTCTGAAAGCTTATGCTTTAGAATTATTCGTGTAGGGAAAATGCTTGTAGA  
ATTCTTGTCTGGATAGTCAGATACAGCAAAGTTCAACAATTAGGAATGCCTAAACAGCATGATTGTATTTTTGTAAATGAGCTTCTTCGTTCAAATAATGTAAAATTAGTACTCATTTATTTAT  
TAACTGAGTTTAAATGAGAAGAACTAACATGCTTAACTGCAGTTATTATGCAATAGCCCTATCCATATACGAAAAATTATTCTGTG

>comp148687\_c0\_seq4

TTTTTCTTTTTTCCGTCACCGCACCGCTCCTTTCCCCCGCCATAGATCATTTTTCTTGAACCTAATAGATCTTTATTTTCGTTGCTTACGAACCTTACCGAGAGATATGCACGCTTTGTGCCGC  
GTTTCGTCACCGGCGACGGGCTATAGCTGCCCTGTTGTTGTTGTCGCCCTCCTCGCCGCCGGGAAGCTAGGGCAATGCCAGGACGACGACGATGATTATGACGACAGCGATGGCGATGAC  
GACGATGGCGGAGGAACTCAGCAGATGTCCCCTCTTCGCCAACATTGTCTATGACCGTCTAATGAGCCTTACCGGAGCGTTCACTAAAGAGTTTGGCAACCAGCTCAAATATTGCATC  
AAGGATTCAGATAAAGATTGGAATGAGGCGTTAATTTTTCGGCGGATTTGAGATTCTTGGTTAATTGCATCAAGCAGAAAGATATAATTACCAATTACCTCCTGGTCAACCAAATCATACT  
TGTGGTGGTGTGATATGTGGGCTGATGTTTTATCTACTAGACAAGTGTTTTGCCCGCTGGATACTATTGTCCGAGCACTATACAAAAGATTTCTTGCAGTAGTGGGCATTACTGCAGGAA  
GGGTTCTACATCTGAAACAAGTTGCTCTGTGTTTGTCTTAAATAATATACAACTTCTCTGGCCAAATCCTTAGTAATCGTGAGAGGAGGCAAGCTAAATCAAGAGAAGCTGCTGCAAG  
GAGTGCTAGAGAACTGTGCAAGCTCGTGAAAGGTGGAATCAGCTAAAGATGTTGCCAAGAAACATGCTGTGGGACTTCAGGCACAACCTATCAAGAACATTCTCACGCAAAACGTCT  
AAAGGTTCCGGGGCAATCTCATGAATCATCTGACGCATCTAGTTCTAAAAATGCAGGCCTTCCTCCTAAGAAAAAGAATCTAGTAAACTTACAAAAGTTATTTCAGTCACTAGAAGAGAAT  
CCTGAAAGTGACCAAGGTTTTAATCTACAAATTGGAGATAAGAACATAAAGAAAAATGTGCCAAAAGGGAACAATGCATACTCGCAGCCAAATCTTCAAGTATGCTTATGGTCAAATT  
GAGAAAGAAAAGGCACTGGAACAACAATATAAGAACTTGACATTCTCTGGAGTTATTTCTATGGCTACTGATACGGATTTAAGAACCAGGCCGAGAATTGAGATTGCTTTAAGGACCTA  
ACACTAACTTTGAGAGGGGAGTAAGAAAAAGCTTCTAAGAAGTGTGACAGGCAAACCTCATTCTGGCCGTGTGGCAGCAGTGATGGGTCCTTCTGGGGCAGGCAAGACTACATTCCTAAC  
TGCTTTGGCTGGAAGACAACGGGGTGCAGATTACAGGCCTGGTTCTTATTAATGAAAAAGTAGAACCAATCCGGTTTTATAAGAAGATTATAGGTTTTGTACCACAGGATGACATTGTT  
CATGGAACTTGACAGTGGAAGAGAACCTTTGGTTTAGCGCAAGATGCAGACTTTCAGCAGACTTGTCAAAGGCTGACAAGGTTCTTGTGTTGAAAGAATTATCGAGTCCTTAGGATT  
GCAGACAATACGTGAATCCTTAGTTGGTACTGTTGAGAAGCGTGAATATCTGGTGGGCAAAGAAAGCGAGTTAATGTTGGACTTGAAATGGTTATGGAACCTTCTTTATTAATTTTAGAT  
GAGCCAACCTCTGGTTTGGATAGTCTTCATCATCTTTACTTCTTAAAGCCCTACGTCGCGAAGCACTGGAAGGGGTAAATATATGCATGGTGGTTCACCAACCTAGTTATAACCTGTACAG  
GATGTTTGATGATTTGATACTTCTAGCAAAAAGGAGGTATAACAGTGTATCATGGATCTGTGAAGAAGGTTGAAGAATACTTTTCAGGCCTGGGTATCAATGTTCTGAAACGTGTTAATCCTC

CAGACTATTATATTGACATTTTAGAGGGCATAATTAACCAAACACAACCTTCAGGAATAACTTGCAAGCAACTTCCTCTTCGATGGATGTTACATAATAAATATGATGTGCCTCGTGATATGC  
TTAATGATGATGCTACTGGAGATGTATCTAGCAGGGATAGTGAAAATACTACTGTAAAGGTCGAAACACCATCTATTCGAGGAGAAGTATGGAACCATGTCAAGGATATTTTAGGGCAGCG  
AAAAGATGATTTTAAGTACCACCTTTTACATTCTATAGATTTATCAAATCGGAGCACTCCTGGTGTATGACGCAATACAAGTATTTCTTGGGAAGGGTAGGTAACAACGTCTTCGTGAAG  
CCAGAATACAAGGAGTGGATTTTCTTATTCTGTGTCTTGCTGGAGTCTGCCTAGGGACGCTTGCAAAAATGAGTGATGAAACATTTGGCTCGTTGGGTTACACATACACAGTTATAGCTGT  
TTCTCTATTATGTAAGATTGGAGCTCTCAGATCATTTTCACTTGAGAAGTTGCATTACTGGAGGGAAAAGGACTTCTGGCATGAGCTCACTTGGCTTATTTTCTTGCAAGGGACACCATTGATC  
ATTTCAATACAATCATCAAACCAATAGTTTATCTGTCAATGTTCTATTTTTTCAACAATCCTAGGTCCTCATTGTAGATAATTACATCATACTGGTTGCTCTTGTTTACTGTGTAAGTGGTATT  
GGTACTTCTTTGCCATCTTCTCCAGCCAGGAACAGCCCAGTTGGTGAGATCAACTCTCTTGAAATTCAATTCTTCTCATTTAAATATTTTTTAGATTATTAACCTTGAGATTAC

>comp148782\_c0\_seq3

ATGGGAAAAAAAAAAAAAAAAACCGAGTACTAATTAATGCTTGCCTGGATCAACAGAAATACTGTGAAGGATACCAACAGAGCCAATCCATGGCAGAGGTGGCCATCAGGAGGTGGA  
GAAGCAGTGCTACCTCGCGGCAAGGAAGGATATTCATCCGGCGTCGGCATCACACATTCTGGCCATTGAAAGATATCTTCCTCGGAAATGGCCATCCTCCCTGAAATGTGAAAATAGCA  
GGGTCCTTTTTAAGCAATATTTCCGTCTGCACATTTCCAAACTCACCTTGTGTCAGCAGCAGGTCATTGTAGTACTTAATTTCCAGAACACTCCAGTGTCAATAAGTATTATACTGGATG  
AGAGGTTTATAGTTGAAACTGAAGACTTGAGTTAGGCTTTCAGATTGGGGTGTGCACCACTAGAGTCCAGTCACTATAGTTCTTCAGCATATTGAAGTTGTTGATAGTCACTTTAACCC  
TCCAATACTCCTTATAACTAAGCTTGAGATGCCAGTGTACACGGATTGGGCACATATGCTTGTGCACATAACGATATCAGGTACAGGATCATCATAACCTTGAGGCAACTGCAAAAATGTG  
GGATGTTGGCCATCGTTGGCACATTTTGGCGCTTCTGGTGATCCTTGACAACCACAGCTACAAGTAGGACATGGAACATCGTCTCGTTGTAAAAAGTAGACAAAGATACACAGCACTTG  
GGTGCTTGAGATTCTCTGAACTGGGAATATGAACAGCTAACCAGCCATGTTAGGAGGGCTTGTGTTTTGCGGCGACCTCCATCATCTGAACTTGGTAGGGGTACCACAGTAGCATT  
CTACATGTATATCCAGGCAAACCAAGACTAAAATTGTAGGGCTTTGGGGTTTCAGCATCGCTAACATTAGAGAAAAGGCCAGTACTTGAAGTCCCAACACTTATTTGGAAAGATGAATGGT  
AATTCAAATGGTCCTGAGCCAACGAAGCCAACACACCACCTTTGCAACAATTTTTAGTTTGCATATTATATGGAGCACCTGGAAGCAAGTCCACAATACTGGACTCTTGTACAACAAT  
GGGGGATGTTGCCTGTGAACTTAGAGCAGTTCCCTTGTCTCAGCAGCCTCAGCACCTTTCATCCATATTACTTCTTCCCCTCCCCATGTCAGCCTAGCTTCCAGCCAGGACTATCAATA  
TGACGGTATAGCTGGTAGTTGTATATATCAATCATGACCGTGTAGCCGTCATCACGGAAGTCTGAAAGTCCCCTTGATTGTGATATTCCCATTGGGGTCCATTGGATCGTACGCACCTGC  
AAGCATTTCAGGAAGAAAAGCTTCGAAATCTAATACAAAGGAAACATAGCAGAGATAAAAAAGAAGTACAACCTAGCAGACCGGCGAGACAGAGGTGGAGAAGAAGAAAAACGTATG  
TGGCCACCCACAGCAGAACTCCGCCACCTCCGAGCACAAAGACATCGTTGCGTAGCAGCAGATACTATTGGAGCTGTGAATGATTTGGGTTTTCAAGGAGGAGAGAGAAATGGAAATG  
GCAAACAGAGAGGGAGAGAGAGAGAGACAGAAGTGGAAACGCCTGCGCACGCGTTCCAATTAGGAATTCAGGGGAGACGAAAAAGGAAGGAGATATTGAATTGGTTGTCGCCATA  
TTGTTTTCCATAAAACGTCCGTATTGCTGTTCTTATTTTTGCGATCTGCTCGGTGTATCTTCGATCCACTTGGCTGGCACCAATTGGCGGTGGAGGAGGAGAAGCGACGGAACAAGGCG  
GAGTAGGCGGCGGTGGCGGAAAATTTAAAGCCAGGATGTTTTCTTGCCTGAACTTCGTTTCCTTGA

>comp148788\_c1\_seq1

TTGATAACTTGCTCATAAATGTCAAAGTGAAAACCAAAGCAGCAGAAGAAACCCTAAGTAGGAGCAGGCAATAGAGACAGTTGAGTGATAGCAGTAATCCTCAGCATGGTTACAAACA  
GGCTGCCAAGATGCATTTGCATTCCTTTATTTCCAATATAGCTCACCGCCGTCGCCGCCGCCGCCGCTATGACCAATCCCATCACTAACGTATCTAAGAAATGCATAGCGAGGTTTGA  
TCCGTAGCAAATGATAATGATCATTGAAGCAAAGGCGTAAATGCACGCAAATCCATTGCCGATCACAAAGAAGCTTGAAGCTGGTGAGAATTTGTAATTTGCAGTGAGTTGAAAGCCAGA  
GAGATGGATCTGCTCTTCGTTGAAGAGCATGATAATGGATGCGGTGAGGGTGGCCATGGCGGCGAGATTCCGTACAATAATCTGCACTACGCGCATTGAGTGTTCCTGACGTTGAGTGA  
ATCTGTAGTTTTTGGCGGCGGGCGGGCGGTGGTGATGATAACTCCGACGGTACAAGGGTGGTTGCGGAAACCTCCGGCACGGCTGACGTGGTGGCAGAGATTTCCCAATTAGGAATTT  
CGACGACTGAGAATTCGGCGGGGCGGAGCGGGCGAGGTTTTGACAGCCTTTGACGGCGCAGGCGAGGTGACGGCGGTTTTCCGTACGCTTGAAGCCGGCGATGAGCTTACGACGCG

CGAGAATGTTGACGACGAAGTAATCCGGCGGGCGGCTGGCTTTGCAAGAGGTGTCGTCTTCGAATGAACGGTGAGGGCCCCGAGCCGGCTTCGGAAAAGTGTGGAAGGTGAAAGCGAT  
ATCTGTTGGTGCCGGCATGGTGACCGGGTACTCAGCGGAATAGTGATGGAGTGTGGCCGGCGGCGAAGTCTTCTCCGGCGAGGCGGTTTGGTGGAGGAGCTGCGGAAATGAGAAAA  
GAATCTCATTTTATGTTTTATGTGAGTGAGGAGAACAGCGGGAATT

>comp148802\_c0\_seq1

ATAATTAATAATTATGTTACATCTGATTTTAAATACATGAAAAAAAAAAAAAAAAACAATTAGGCAAAAGTTTCCAGCGCGGGAGCAAAATCGGCCAAAGCCTCCGCTCCGCCACACAGAA  
AATAACAAGCTCAAAACGAAAATAACGACCTCCACCATCCACCTCCAGCCACTATTGCCAATTTGCCATTACTTCCGCATAAATCTTCGGGCTTAGCTTTCGTCTTCAGTCGCCCCCAA  
TTCTCCCAATTCATCCATGAAGGCATGAACCCGCGCGTAAAGCGTAAAGCGTAAAGCGTAAAGCACCGACGGGGCCAGCCAAGCGAAGTTTACCGCCACCTTCTTCAATTCCTTCTCT  
AAATTAATAAAAAAAAAATGGCGTCTTTGGAGGACATCAAGAATGAGGCGGTGGATCTTGAAAGCATACTATTGAGGAAGTCTTACCCAGCTCAAATGCACCCGCAATGGTCTCACCTCTT  
CCGACGGCGAGCTAAGGCTTCAGCTCTTTGGTCTAACAAGCTCGAGGAGAAGGAGGAG

>comp148865\_c0\_seq1

TAGGAATAATTAATCAATAAAAATAAATTTATACAGATTATATATTTCAAACTCTAATCTAAAATATGTTTCATTGATAATCAAACTTCCATCAAAAAAAAAAAAAATCTAGAATTCCTTTAG  
GACTCCAATCCCAAAAAGAAACAAGAAAATGTTCTCAACTCCACACTTTTCCGAGTGCTTCGATAACCTGACGGAAGAGCAGAAAGTCGACGAACTCCGCGCCCGACAGCACCACGAG  
GAAGAAATCTCTAGCCTACCTCGGCATGAAGGATGGCGACAGCTGTCTCTCCGCCTCTACAAAGTTTCTGGTTCCCCGAAGCCATCTCCCGGCGTTCCTCTCTCCGCCGCCACCTA  
CTACCCACTTCTTCCGACATCTTCTCGTCAGCTTCCCAAAATCCGGCACAACCTGGCTCAAAGCCCTCGCCTTTGCCATCAGCACCCGCAAGCCTGAATTACTCCAATCCCGCCACCCGC  
AGGACTGCTCCCCTAATCTGGAGACCTTCTTCGCCGGCCCCCGGTTCTTGACCTGGACGCGTTACCCTCCCAAGGCAGTTGAGCACCCACATCCCTACTCTGTCTGCCAAATCCG  
TCCACGACTCTCCCTGCCGGATTATTTACCTTTGCAGAGAGCCAAAGACACGCTCGTTTCAACCTACCACTTCGTCAATGGAATGCAACGCCCTGAAGCGGCCCGCAAATGCCGTTGA  
CGGAGGCGGTGGAGCTGTTCTGCAAAGGGCTGACAATGTACGGTCCGGTGTGGGAGCATCAATTGGAATACTGGCAGGAGAGCCAGAGGCGACCCGAGAAGGTGCTGTTCTCAAGTA  
CGAGGATTTGATGGCGGATCCAGAGGCCATTGTGAGAAGGATGGCGGAGTACATGGGGAAGCCCTTCTCGGGCGGCGAGGAGATGAATGGGATGGTTGGGGAGATTGTCAGATTCAGC  
AGCTTTGAGAAGCTTAGTGGATTGGAGATTAATAAGGTCGGATTGTGGGGGAAGCAGTTTCGATTTGGGCCATTTGGCTATAAAAAAGTCATCTTTTTTTAGAAATGGGAAGGTAGGAGATT  
GGACGGAGCATTTACCCGCCGAGATGGCTGAGAGGTTTGACGCCATTGCTCGGGACAAATTCATCAGAGCGGATTGACCCATTTCGATTTCATCTGTTTAATCCCTTTATATTTTAATTCG  
C

>comp148870\_c0\_seq4

TGTCCAAGTCAAGGCCAACAGCTGTTGCCATGCGATGTAATGGTTCCAACATCTCTTTGGTTGGAGCAGGTTGGTGTCTCAATAAGGAACACGATGGAAAATGCTTCAATATCTTTTTTGC  
AACAAAGAAATTGCAAGCCAACATAAATTCTTCAATCATCTGACTGGCTTCTATAATTGGATAATTTCCAATATCCAAAGGATCACGAGTTTCTGTATCCATCTGAAATTTAACTTCTGTTGA  
ATTAAATGTGAAAGCTCCTCCATCAAATCGTCGTTGCCTCATAAG

>comp148870\_c0\_seq7

AAATTACATAATAATTCTATCTTGCATAATAATTCTATCTTTTTCTTAATGGACCTATATATCTACATTATTGTGAAATAAATCTATACACATATACTCCATAGTCTCCACTTATGAAAGACTTGGG  
AATCTCATATGTGCTGGCACTTACCACACTATCTTCTTCTCCTTCTCCTTCTTCCCTCATGCCAACCTCAACAAAATGAATGGATAAATCAGTTGCAAAGACCTCTGAGCTCTCCTTCTTAG  
TATTCCTCACTTCTCCATGTATAAAATTCAGATCAAATTTGCTCGAAGCATCAAATTTCTCCTTCAAGCACAATTGAGTATTCCTATCGAAGTTGATTGTTTCATCAACTCTTGTGTATCAA  
AAATAAGTTGTTGAACTCTTTAGAGGGCATGGAATGGTCGATAAATGATTGTTCTTTCAGCTAACTTCTTCTTATGTGAACATCACACTCTTCTTAGAACATGTGGTGGTTACCCTCTTC  
TTCTGCACCCTAACTGGGATGTGATGAAGAGTATCGACAATGGATTTATAGAAGTCCTCTTTATCAAACCTTATGAACTAGCATTGGCTTCACAATTTCTTGTATTATGAGTGAAATTGA



AGCTTTGGCCTGTATGGCCACGTTCAACTACCTTCACATGAATCCTAACCATCTGCAATAAACAGTAACATAATTTGTGCCTTTCTTTGACAGTCTCTGATGTGCCTCATCTAAAATCCAC  
TCTTCCCCTTTACTTCCTCTCGATGTCAAGCAAATGAGCCCTTCAATGTCAAACCTGGGCACAAAGACTATGAACCCATAGGGCTTTATTTTGATTATTCTGGCTTCTGCATCCATAGGTCTG  
TTTCTTGAAGTATATAACATTGTGTAGGTAAATTGAAGCTCGGCTAGCCATCTTAGCATTTATTTGCTGATAATTCAAGTCTGGATATACATTTAACCTATTTACAATCTCTGTACGTCGTAAA  
CTATCTAGAAAATTTTCTGGAAGTTCTGATATTTCTAGAGCAGCTGCAAGCAATCTATGAACTATAATATCTGCATATCTCCGCATGGGAGAAAGTAAATGAGTATACAAAGGTGCTGCAAG  
TCCAAAGTGGTGAAACTCAGTAGGCTTCATATCTCCACTCCATGAGTAAATAACCTTTGTTCATGCACCTAGTAGCCAAAATCTTCATTTGTTTTTTGCAGTTTGGATCAACACCCTCAATAA  
GGAACACGATGGAAAATGCTTCAATATCTTTTTTGCAACAAAGAAATTGCAAGCCAACATAAATTCTTCAATCATCTGACTGGCTTCTATAATTGGATAATTTCTGCCCCAAAAGAATTTAA  
TCAATATCCAAAGGATCACGAGTTTCTGTATCCATCTGAAATTTAACTTCTGTTGAATTAATGTGAAAGCTCCTCCATCAAATCGTCGTTGCCTCATAAGCTTTGCTAATGAATCAAATTT  
CGTAGGTCAGTAATTAATGGATCAATCTTGCAGTATCGTCCATTAGGGCTTGAGCTTCGACATAAGATAATGCAGCACAAAGATTTGATCGTGCTCTTTGTGAATCTTGTAGAACTATATTT  
GCATCACGTGTCAATGTCAAAAATAAAGGAAAATGTGAATCTTTCTACACAGGGCTGAAGAGAACATATGCCTTCAATTAATATTTTTGGAAGCATGTCAATTTTCTTGTCAACAAGATACA  
CACATGTGCCCTCTGCGCAGCTCCTTATCAAGTGGAGTTCCAGGATGAACAAAATTAGTAACATAAGCAACATGGACTCCCCTGCAAAAATTTCCGTTTGGAAAGAGGCATA

>comp148945\_c1\_seq1

GTTTTATGATTCAGCTTATTATCTGCCAAAAAGGAACGACAACAAAACACACCAACTCTTATCAAATCAAAGATTGTCAAATAAGATGAAACATATGCCCAACAAAATTTGTAAAGAACT  
AAGCTCCCCTTGATCCCCAGCCCTTATGTGCATGCATACGAGATTTTTTTAGCGCAAAGAAAATTTAAAGCCAAATCAGACTAAATTAGGGCGTGGCATGAATATCAAGCTCCGAAAAGC  
ATAACAATATTAGCCACAATAGGGGCTCATTGGTAGCTGAAGTTAGAGAACATGTTTAAACAAAGAAGAATTGATTAATTTCTGTCATTTGAATGAATGAGTTTAGAAATCGATATTAGTT  
TTAAACTTAGCAAACATCTTCAAAT

>comp148978\_c0\_seq1

TTGAAATTACTACTATTACCGAATAATTAGGAACCACTGGTACTGTAATCTAAATTTAAATCTCTTCTGATACAACTCTAATCGTTGGAAACAAACACGTCGGAAAATTTAAAGAAACA  
ACTCAAAAACACCAAATCTTCACTTACCTTAAACACCAACAATTACGTACAATTCATAACACAAATGCGCTCAATAAAAAAGCATAGAAAATATCAACTTAAAGTTCTAATTTAAAGAA  
CTAACGATTCACTCTGCAGCCTTCTCTAGTCTTTGATAGCCATTTGAATATCAAGAGAGTGCTAAACGCTACCGCAAAAACGGGAACAGAACCACCGTAGGAAGTGAAGGCGGCGCT  
GGACGCCGGCGAGGGACCAGGTGACCCTGGAAACGGTGGGCGGTGAGAAGCCATGACGTCGATCATAAGCCTCTGACCCTTCTTGCAATGTTCAAAGTTGCTGCTAACGAAGTAGAAA  
AGGCCTGGCTTGTCGAAGAGGAAGACGGTCTTCCGTCCTTGAAAACGGCCCCATTGCCGCTCTCGTTGCAGTGATAGTAGCCTCTTTCTCCACCCGAATCACAGAGTCGTTTTTGTACT  
CGAACACAATTGAGTCGCCGACTTGAATCGGAGTTTGCTAGCCCAATTTGTGTACAAGTCCGTGTTATTGTGCTCTGGAACCTGCCACCCCTCCTCGCCACCAACCTTGTACTGGTTTTTC  
GGCTTTGACGAATAAGACGCTGAAGGAGGAAATGAGGAGGAAGATGAAGACGTGGATGGAGAGAGACATCTCTGTTTTTCGATTGGGATAGTTGGAAAAGAGAAGGGATGGGAGTTAC  
GAGAAAGTGTCTGATTTTTCTCTGGGGTTGGGGGAATGAAGTAACGGGGGTGACTAGAAAATGAGAAGAGTTTAAATGAGTTGGTTATAGGAAGCAGTCGAGGCGGTTCTGGGTTGCGAA  
GAGATGCGTAGATCATGCAGTTGTGATCCTTCGTAAGTGGAGCCGTTCCGAGTTTTGATTTCTTTTTTTTTTTTTGGTTTTTTGAAACTGTTTCAATTTGAAAGGAAACGAAAAATTTAT  
GGGACAAATTTTTAAACTAAATCTAATATATAATTAATTTATTTGATTAGGCATTAATAAATTAGAAATAGTCAAGTCATCCATTTAAGGGGGAACCTGGCTTTT

>comp149042\_c1\_seq1

AAAGAATTCGACAATCAGAAAAGAGCGAAAAGTAAAAATTCGCAAAGAAGAAAACACTAAAATTTAAACGAATAATGCCATCAGATCCAATAGCTGTTGCTGGGAAAACCAAACCC  
TATATCCCAAACCAAGAATAGCAATTACAGATTTAGAAAACAAGATCTCAAATTTACTGGAAGATAAGAACCCTAGAACGGTGCGGGTGCCTAGTAGAAGGGTCTTCTCCCAAATCCCC  
ATATCGATGCACATCGTAGTGCAAACTTCTTAAATCTTCTCAAATCCATGAGCAAAAATACCGAAACCAAAGATGAATCCAATGGCGATCACAAAAGAATCAATAGCAAACAGCAGCA  
GCAAGTCTTACCCGGACAACACATCTTTTGGTGAGGGGATTGCCGGAGTTCGGAGCGGAGAGACAGAGAGATCAAAAAGAGGTGATGGATTCCGTTGCCGTGAGGAGAGAATGCCTAT

AAAGATGAGGAGAAATGGATCGAAACGAATTTGTTACGGCACTCCAAAGATGGAATAAAAATTTGAACAAAAAACTGCATCAGACGCATTTAGCAGCCTGAATTTGCGTTCGTTTAG  
>comp149131\_c0\_seq2  
TCGGGTCATGTAGCAGCTCCGCCATTGCCATTCTATAACTGTAGCAAGGGAGTCTGTTGAGGCCTCCAAAAGATCCTGCAAAGACAAATAGTTAAATCTTTTTTTTTAAATAACGCTTTTA  
GTGTTGTAAATTAACCTATATTTTTTTGAATTTTGGCATCATTTATGAATTGAAGAAAAATTGGGATAATAACAGCTCCGATT  
>comp149131\_c0\_seq3  
AACTTGAACAAGCTAATAATAAAACAAATTCAAACACGAACACGAACACTCACATACTCGACTCAGTTCAGTTCGTTTGCAGCCCTAACGGTCTGCTTATTAAGTACATTAATGTGCACTCG  
TGGCGTGTTCATAATAATAGATGGTTCCATAAGTACATATTAACATATAGCTCTGGTTTGTCCAATCTCGCCACCGGCGCCACCACGAGCTCCTTTGCCAATTTAAAACAATCCAAA  
CTTCTCCTGAAGCTCCAGCGTCACATTCTCCGGCAACCGCCACTCGAAAGAATGTAGGAGAGAGGCAACCAAGTAAATAACCATCTTCTCTCCAATTCATACCCTGCGCACATCCTTCTA  
CCAGCTCCAAATGGCAAGTAGTAAAATTGATCATTCCTTTAAGATAAAAGTCGTTCAATTCCTTCCCGTTGCGAGGAACCTCTCTGGCTTGAACCTCTCGGCGTCCTCCCCCAGAAAT  
CGGGATCCCTATGAATCTTCCAGATGTTGACGATGACGGTGGTTCCGGCCGGAACAGAGAAACCGCGGACAACACATTGAGAGCTTGGGCTATGGGGAACGAGGAAAGGAGCTGGTGG  
ATGGAGGCGCAACGTTTCTTAATGATGGCGTTACATAGTGAAGCTGAGGAATGTCAGACTCTTCCACGACACGATGCTTTCGATGACATCGTCAAGCTCTTGTGAGCTATTCGCATC  
TTTTTCGGGTCATGTAGCAGCTCCGCCATTGCCATTCTATAACTGTAGCAAGGGAGTCTGTTGAGGCCTCCAAAAGATCCAAAATCAATTTAAAAGGTCATCCATGGTGAACGGCTCCT  
GCGGGTTTCCCTGTCTCGATGAGATCCAGCAATACTTCAAACATGTCCCTCCTTCGCTCCCAACCGCCATCTTCTGCTTCTTCTTCCACGACCTTTTCCAGATACTTAATTAACCACCC  
GTGGCCTTGTTCACCCGCCGCCCTAACCCCTGCGGGTCGAGCGGTGCCACAACAGGGAAGAAATCTGCAACATTGGGTGCAAAAAAAGGAATATATGCTCCCTGACCGCCCGCTGAAG  
GTGCTCCTCATCGCATTGCTGGCCCTTCGCCCCACAATATGCTCATCAACATGTTAAGCATGGTTAGAAAGGAAACATCCCGCATATGTAAGTGTACCCCATCTTCGCTCGGGCCATA  
CTCTCTCCACTGTGCGTCTCATTCTCGGCGACGAATTGGGGCCATGTCTTCAAGTCTGGCAGGATGGATCATCTCACGCGGACTATTTTGGCATTAGGCGCAATGACTGTGCTTGGG  
GGCCACAACAAATCGGGTCTGGAGCCATTGTAATTGAAGAGGATTGCCCGAGGGATGGAGCGGTTTGC AAAGGTGGCGTCTTGATCTTTAAGGATCTCGCGGGCGGTGGAGGGGGAG  
GAGATAACGACGTAAAGTTTGTAGCCGAGGCGGATGCTGAGGATTGGCCATAGGTTTGGGCCAAGTCTGAAAAGTACTGGTGTACGTTTGGTTTACGAAGGGGAGGCTGCCAAGAAT  
CGGCAAACCACGCGGGCTGGCGGGAGGGGGAGGAGTTGTTTTCTTTTCTTTGCTTTTTAAGCAGATGAGAAAGAGGAACAAGCGGGTGAGCGAGAGCGTTAGTAACGCGGTT  
ACTATTGCTATGCCAACTGAGATGTTTGAAGGAAACATCAAAGCCATCTACTTCTCAATCTCTTGCTCTGCAATTTGCTTCTCCTCCTCCACCATAACCACTAC  
>comp149131\_c0\_seq4  
AAGAAATCTGCAACATTGGGTGCCAAAAAAGCCATACATGCTCCTTCATGGCCCGCTGAAGCTGCTTCTCATCGAAGTCGCTGGCCGCCCCGTTCCGCCCCACAAGATGCTCGTCACAATG  
TTAACCATGGTTAGAAAGGTAGTCTCTCGTACAGGAACTGTCACACCCAACCTCGCTCGGGCCCATATGGTCTCCACTGTGCGTCTCATTCTCGGCGACGAATTGGGGCCATGGCTTCAA  
GGCTGGAAGGACCGAGCATATCACGCCAACTACTTTGCGCATTATGCGCCAATGACTATTGAAGGGTGCCCAAAACAAATCGGGTTTGGAGCTTTTGAAGTTGTAGATGACTGCCGCAG  
GGATGACGTGGTTGGCAAAGACGGCGTCTTGATCTTTAAGGATCTGGCGGGCGGCGGAGGGGGAGGAGACAGCGACGTATAGTTTGCAGCCGAGGCGGATGCTGAGGACTGGCCATA  
GGTTCGGGCCAAGTCCGAGAAGTAGTGGTGTACGTTTGGTTTGGAGGAGGGGAGGCTGCCAAGAATCGGCAAAACCACGCGGGCCTGGCGGGAGGGGGAGGAGTTGTTTTCTTTTCT  
TGTTTGTCTTTTAAAGCAGATGAGAAAGAGGAACAAGCGGGTGAGCGAGAGCGTTAGTAACGCGGTTACTATTGCTATGCCAACTGAGATGTTTGAAGGAAACATCAAAGCCATCCTACTT  
CTCAATCTCTTGCTCTGCAATTTGCTTCTCCTCCTCCACCATAACCACTAC  
>comp149144\_c0\_seq2  
ATTTCTGATCGTTAAGAAATCCGCATAGAATTCATATGCGGATTCCCAGCCACTGCTCTCTGTGCGTTGGCGAGAGATGCATTCGGCCACGTACTTTATTCCATTGGGAGGGAAAGAGAAA  
GCTTGCAAGAAGAGCGACAAATGACCGAATGAATAATAATCCTCAATCCCCGAACCGTCCGCTCGCCACATATACTGCCGGAACATCGCGGGCATTCCGACCAGGAGGCGACCATCAG

GCTCGCCGCCACGCCACCCAGCTTCGACGATGGCCCCGACGGGGAGGAAGCCGAATGCGGAGTTCATGGAGGATTTTCTCATCATCTCCGGCCTCATTGCTGTGCAGATCATAGGCGCTT  
TCTACATAGTGCTCTTGAAACCTATCCTATCCCTCGGAATCAAGCCTCTGTTCCCTCGTAATCATTGGAAGCTTGGCGATGGCCTTCTTCATCTTCCCCTTCGCAATTGCATTGGAGAAGAAG  
AAATGGCCATCAAAATTGAGCCTTACTTTGGTGGTTTCAGTTTATTCTGATTTCCCTTGGGAGGGGTGACTACATTCCAATCTCTAATGTTTCGTGGGAATCAAGAAAACCTCCCCAGCTATAGC  
CTCGGCCATGCCAACCTTGCGCCGGGGATTATTTTCATAATCGCGGCTTGTCTCAGGCTTGAAAACTAGACTTTAAGTGCAACTACACTAGAACAAGATCCTAGGGACATTGGTTTTGC  
TTGACTGGAGCAGTAGCCTTGAGCATCTTGCAAAGTCCTACAGATCCAACGGATTTTGGACGCTCTTCTGTCTTGCCTAATCCGTCGCCAGTTAATGTGTACAGGGACTGGATCATTGGTT  
GCTGCAGTCTGCTGGGAGCAGTTCTCGTTCATCCTGTAGCACGGTTTTGCAGGCTGCAACAATGATGGAGTTCCCGGCTCCCTTGTCTTGTGCTGTGTAACATCCCTGCTGGCCTCAGT  
ACTTACTACAATTGTGCAATTTATCATGGAAGGGAAGCTGGATTTTGGTCAGCCAACCTATCAGTATCCAAGCCATCATCTCCTTTGTCTTCCCTGGGAGGAATGTTGATTGCACTATGTGTTG  
CATTCCAAAACCTGGGCTGTGCTAAGGAAGGGGCCAGTAATGGTCTCTATGTTAATCCCAATCAGACCGTTTGTCCACGGTCTTTTCGACAATAATACTTGGCCAAGTTATCAAGTTTGAA  
AGCTTTGTAGGAATGTTGGCAATGTTTTTTGGTCTCTACATGGTTTTGTGGGCAAAGATGAAAGAAGGATTTGGGCTACCAAATACTGATGATCAGGACAAGCTAACAGAATCAACCACC  
AGTGAAGAAGAGGAAGAGGACATTGAGAGACCCCTTTAAGCTAACAAATTGTTTTATTTTTAAATTATTTTGGTCATCAATCCATATCCCTGCACAGTAGAAGTATTGTTGTTGGGGA  
GGCGTTTAGTTATTGGTTTTGCTTTCAATCTCTTTTGATTATTTAGAATATTTATGTGTATATTTTA

>comp149174\_c0\_seq2

CATCTGCAACTTTAGTGCTTCAGTAATTTGTAACCCACTGGCAACAAAAAGTATATTAGGATGTTTATCCGCTAAGCAGTATAAGAATAATAAAATAACAAGAAAAGATTTCAAATAGGATA  
GAGCAGATCGGCACAAAATTTAGATATCTTCTAGAGTTGATCTTCCCTCTACAGAATTTTCTGATTGTTATTTTCTACAAGAGAGAAAACAAGACTTTCAAATGCTATACTATAACCATTTTTTG  
AAAAGTAAACTAAGAGTTCCACGATCCAAAACGACTAATTGAATAAGGGAACCTTCTACCGTTAATTACTTTGAGGCTTGGTAATATAACAATGTAATTAGAGCATAAAATAATTCTAAAAT  
ATTAAAAACATGTAACATAATTTGCAATGCTTCCCTGTGAGGTATCAGAATGTTACCTATAATCCAAAAGATAAATTTAATAGGCTAAATTAAGAAAATGTGAGGAACCTTGCTTTGAAAGAG  
CTATTGTTCTCTGCCTAAGAATATCAATTGATTACATGAATAAGGAAGTGTGGGCTCCAAAATAACATACGACAATTGCTGGGAGAGTTAATAGTTTTGGGTCATATTTTCAGAAGACA  
TTCAAGATTTAAGATAAGACAATACTTAGAGTTTTGCTCCCGTTTCAAAAAAAAAATTATAATATAAGTTCCACATTTCCATGGCACAAGTCTTAGTTAATTTCCCTTCTATAATAAGAGA  
GAATTTTCAATTAAGCAAATCGTTAGGAGCTAAATACTTATATCTAGTAGAAGTATACTAGAAAGTATTTTGATATTGGGTCTGATGTTTACCATCTTATATTTAAAACAGGTGGTAGAGGAA  
GTGATGACGAACCAATGAAGATATCATGATTATGTCATTTAGTGCTATCATCGACCATAATTTGTTTAGTCAGATGTCAGAACCGGCTGGATTGGTTCAATTGAACCGGTCCCCTAACTAA  
AGCACACACAAGCAACAGAGCAAGCGGGCAAGCATGGGCAAGCACACGTGAGCATGAGCGAGTGAGCGAGCGAGCAAGCTTGGGATAGCACGAACGAGTAGACCAATGCGAT  
CGAAAGCATATAAATGTGACTCCTCGTGTGAGATATCAACTCCCGCTCTGTCCATAAATGTCACACGAATGAGAGAAGCCGAGAAAGCAGTGACTGAGAGGAAGAAAAGGAAATTGGGT  
GAGAGAGAGAAAATTTGTGTGCAAGAAAAAAATGGGTGGAGAATTTCTCTACTGTTGAGGTAGTCGAAAGATCTAGGATTAGCAAGACGAAGAAGAAGAAGGAAGAGCGGTTTGGAA  
GTTTCTATCTCTAACAACAGAGAAACTATAAGTGATTTAAATTTCTAGTTTTCTAATATTTTTTCATATATATGTACTTCGAAAATATATATTTGATAAGTCAAAAAGAATTTTTCCAAAATCAAC  
TGA

>comp149192\_c0\_seq4

ATGATGTTTCCAAAACAAAACAATCAATAAACAAAGATGAAAAATGGGAATAAAGCAAGCATATACGATCAATAGAATTTATGAGCACAAATCCTTTTCCAATTCATCTTGTTAAGTTATTG  
TTGTATACCAGAAATCAGAAATATGCATATATTAGCTTTGGAAAGTGCAGATGTTGAATTTTCATCATGTCTTGGCTATGAACTGGAGTACTTTGTTCTCTTGACTGAGGAAGAATGCTATCT  
ACCTATCCCTCTTGTTCAACCCAATGATGCAATGTTCTTCAAATAGAGTGTGATCTTCACTATCTTATCTTCTCTTCTTTATCTTCTTCCCAACTATAGCTTCTTCTTCAACTTTATTTT  
CCATATCCTCAGTGATAGCATCCTGCATGGATTCCTTCTGCTTACAGTCATCAGATACTGAAGAATTCAGACAACAGTGTTTCATCACCAGTACAAAAAATGCTCGATCTCATCCATCTGAG  
AGCTCTTCCAGCATCGCTGTACAGCACACCTTTTTTGACATCTGCTTCTCAACGTTCTCTGCACTAGATCTCCATGGCTTTCTCTCACCATTCTCTGCTACTATTACTGGATATTTTCAGC

ATCAGTTTCTCAGCTGGAGATGAAATGACTCTGTAGCTGGTGTGCGTTCCCTTTGTGCAGTTCGTTGCTTAGCTGGCGGATTTTTGTCTCGAGCAACCGGAGGCGGTCCATGAGCGTGTGCT  
TTACGTGAGCGTCTTCCATGGTGAAGTTTGGGGCTTGTTCCTAGCCCTAAGGTCTCCGGAGAAACAGCTCTCTTGGGGCCTCACTTTTCCCTCCAGCTGCCTCAGTCTAACGTCGATGTG  
ATTCAGCCTGCCTAGCAATGACTCGACTGAAGGAAACGAAGCAACAGCCCTGTAAGTTGACTTCTCATGGTTTCGTATACGATAAGCCATGGTTATTTTCGATTGCTTCCCTGTTGCAAGTTT  
ATACGCGCCTTTGTTGCTTGAGATTGATGAGAGAAAGAATGTGAGAGGATGATGGGTGGTCTATTCTATCTAACAAATGCAGATAATAGAGATAAAAAAGAATGGGAATGGTTATTATTGT  
TCAAT

>comp149192\_c0\_seq5

ATGATGTTTTCCAAACAAAACAATCAATAAACAAAGATGAAAAAATGGGAATAAAGCAAGCATATACGATCAATAGAATTTATGAGCACAAATCCTTTTCCAATTCATCTTGTTAAGTTATTG  
TTGTATACCAGAAATCAGAAATATGCATATATTAGCTTTGGAAAGTGCAGATGTTGAATTTTCATCATGTCTTGGCTATGAAACTGGAGTACTTTGTTCTCTTGACTGAGGAAGAATGCTATCT  
ACCTATCCCTCTTGTTCAACCCAATGATGCAATTGTTCTTCAAATAGAGTGTGATCTTCACTATCTTCATCTTCTCCTTCTTTATCTTCTTCCCAACTATAGCTTCTTCTTCAACTTTATTTT  
CCATATCCTCAGTGATAGCATCCTGCATGGATTCCTTCTGCTTACAGTCATCAGATACTGAAGAATTCAGACAACAGTGTTTCATCACCAGTACAAAAAATGCTCGATCTCATCCATCTGAG  
AGCTCTTTCCAGCATCGCTGTACAGCACACCTTTTTTGGACATCTGCTTCTCAACGTTCTCTGCACTAGATCTCCATGGCTTTCTCTCACCATTCTTCTGCTACTATTACTGGATATTTTCAGC  
ATCAGTTTCTCAGCTGGAGATGAAATGACTCTGTAGCTGGTGTGCGTTCCCTTTGTGCAGTTCGTTGCTTAGCTGAGAACCAGTAAGCGTCTCTTTAGAAGACGTTTGTATCTCAGGACAA  
AATGATGTAATACAGCTCTGAAAGTTTTATCAGATGCTCTTAATGATTTTTCAAGACTGTTTAAAATATGTGCATTAATACTAAGCAAAATTTTATTTTTTATTTTATTTGATGTTCTGTACATTTTTA  
TTTAGCTAATTAACATGTTTATTGTGAGAACCTGGCGGATTTTTGTCTCGAGCAACCGGAGGCGGTCCATGAGCGTGTGCTTTACGTGAGCGTCTTCCATGGTGGAAAGTTTGGGGCT  
TGTTCCCTAGCCCTAAGGTCTCCGGAGAAACAGCTCTCTTGGGGCCTCACTTTTCCCTCCAGCTGCCTCAGTCTAACGTCGATGTGATTGAGCTGCCTAGCAATGACTCGACTGAAGGAA  
ACGAAGCAACAGCCCTGTAAGTTGACTTCTCATGGTTTCGTATACGATAAGCCATGGTTATTTTCGATTGCTTCCCTGTTGCAAGTTTATACGCGCCTTTGTTGCTTGAGATTGATGAGAGAA  
AGAATGTGAGAGGATGATGGGTGGTCTATTCTATCTAACAAATGCAGATAATAGAGATAAAAAAGAATGGGAATGGTTATTATTGTTCAAT

>comp149262\_c1\_seq1

TGGGCTTCCCCAAAATGCTCTGAGGAGATTTTTGGAGAAGTAGGGCATGATCTATTTGGTGAGTGGTGGCAACACTAGTTACATTTATTTTCACCTCCTGTTCTTGTTTATGTTCCCTGTTAT  
TCAAAAAATTCATTTGCTGAGCATCAGCGATCTTTGGATGCTGATTTTCTTTATCTGGCGGAATGTGATCATCTGTTAAATTCATCCCTGAATTCCTCGACTCCAAGGCTTGAAAGCTATGAT  
GCACCTGATGATGGTGTACACGACCAGCATGTTGGAGAATACCATCCTTGTTTTTCAACATTTTATTTTGGCTGAACATTAGCTTTATGTGGATGCTGATTTTCTTTGACTGCTGGAATGCGAT  
CACCAGTTAAATCTTCCCTTTAATCATCATTCCATTTGTCCTTTTTCCCTTCTCCTGTATCCTTATTTCTTGAATATCTAGCATGGGCGCCCTTCCATGCTTCTCTTGCAACACTTTAAAT  
CTTTCCCTTCATCAACCCACCTCTGTCTCATTGTCTTAATCCTATAAAGATTCCCTCCCTTGATGAGAAGCTGACGAAGAGGTGGCAATGGTTTCTCTCCTTTGCTCCAAAGAACTTCAAT  
TGTGAATGTGTGTTGCTGCTTGGCAACACCATAACTTTCCCTTACAATACGACCAGCAACTGTCCTGGTGCCACATGGTGGACCAGTAGCACTCCTGGATGCGATGCTGAACATTTTCATAT  
ACATCTGTTCAAAGATGACCACATCTCCAGACAAGCATCACCTTGCAGTTAAACACAAAGCTCTCTGGTGGATATTTCTTCTCCCACAGCCATCAATGATCTCTTGGTGTCTCTAAT  
TCTGGAAATTAGGATTCCTTTGTTGCTGTTAATCTCAAACCATACTTTCTCAGGTAGACCTTGCATGATCAAGTGTAAGTTTCTCTAAATGGGCACCTTTGATAAGCTGTTCAACCATCT  
CAAAGGATTTCTATCCTTCTTATCCAGCTTGGGGATCTCATCCCCACAGTTTCCCTCTCGGATTCATCTCCAAGTTGCCATCAACAATTTTTGATCTCCTGGCTCTAGGTTTTCTTATGG  
AGAGCTTGGATATAGCAGAACGGGTTTCCCTCCAGATGCCGAAAGAGGGATCGTCTGTCAGAATCATCCGCACACTCAAACATCGGATCCGGACTCGTCTTCCATCTCGCAGCGGTGTT  
CTTGAAAAGCTTCGTCTAAAGCCATTGAATCCATTGTGAAGAAATATC

>comp149276\_c0\_seq1

ATTCCCCAAAATGTCAGCAGGCATTTTCATCCATTCAAATTTTAAAGGAAAATGACCACCATAACACTTAACCACAAAGAACCAATTTCTACATGCATTCATCTAAAAGTCAGCCTATGACAA

GCTGAAAAGTTCTGAATCATATGTGAGAGAATACCTAATTCCATATAACAGGAGGGATGTCCGCACTCTCATAGCACAAATAACTACGCCCATCCAGAAATCCTTCCCCTCCAGATTGA  
GCATTTACCAATGTGATTTGTTTCCATCTTCTTCAATCAACATTCCTTCTGATTTCCCTCACCAAGAATTCACCTTCTGTCAACTTCTGAATCCCAAGCCTTCCGCTTCTCTTCCCAGCAAAT  
TTACAAATTCATACTTCCAAACCCTTATAAATGGCTCACCAGCATCTGCTAGCTCCCCAATCTAAAGCCGCAGCAATCTTATAGCTGCTCCAACAAATGTAATTAATAATCGCAATCGC  
AGACGAAGAACCTGCCCTAAGAGCCGGGAGCAGGCGCCTAGGGCAGGAAGGTTGACAATACAGTTGAACCCCTCCAGGCTCCGAAGAAGAAGATGGCGATTGAGAACGACCAAAGGT  
AAGTAAGAAAGCGAAGGCCGGGCATGAGAATGCCGATCGGATTAATAATCCGGGAACAGGTCACCTTCCCTTCTCTCAGCCATAAGTCGTGAGAAAAG

>comp149276\_c0\_seq3

AAACGAAACATAAATCAAATCAATCATAAGAATGCTTCCACTCTTTAAAAGCTTATAAAAATGAGTATTTGTGTAGAGAACTATTCTGTTCAATTTCTGCAACCACTATGCCTTCAGCTTCC  
AAAGCCAACAAAAAATTTTTCAGAAGGAAGATTACTGAGGTAGCAGATAACCGATTTTAATGACATAGAAGAAAAGTAATACTGTGAACTGCTTGAGAAAAAACATAAATATATTCATTATTA  
CTTTTATACTGCATTAGCTGGACCAAAGAAGAGCTCCAAACAGAAGGATTGGCCACATATGAATTTACCTTATTGCCAACTTTGTCCAGATCTCGAACTGAAAACACTGCATCAAGCTGCCT  
TTAATGAAAAGCTGTATTAAGCACACGTAATAAAGGGCGACTACCAATCAACTTTTCATAGAAAATGACTCTCACATCTCCTGACACTTTTAAAGGGCTTTCAAAGTAGTAATCGATGCATT  
TCTTCTGGTAAAAAGCGGATCTTTCAGTATCCATCTGCATCACAAACACGAGGAGACACGTGTTTCAGTTTGTATCTGATCATTCCCATCATCAACATAGGAGAGGTAATAGCGAGGACTGGG  
GTTTCTGTGATATCCTTGTTTTACTTCTCTGCAACAACCTTTTGCAACTTCTATTGAAGGACGGTAGAGTTGGTTGGGAACATCTTGCATTTCCATGACAACAAAGAACACAGAGTTAATG  
TTGATGGTGTACATATAGGCGAATTCGGCGCAATTTCTCTGGTAACTGTTTCAGGCAAATTAACAGTGGGAGGTCCACGAAGCTTATCTTTGTGGAATGACAGCACCTGAGACCAGTACCTC  
ACATAACGCCTTTGACTTGGTATTGAAACCCCTTCATTGTTAGTAGTCTTCTATGAGCATACTGAAGTGTTCATCTACAGTCATCCCGCTATAAACAAGATAAGCACAAACCATTAA  
GCCAGTCCGACCTTTGCCAGCCATACAATGGACGACAACAATATTCTCTGGATCATTGAGAGCCATGAATATATACTTTACAAAAAAGTTTGATCATTGCCAGAGGAGGAACATGGTTG  
TCATCAAATGGATAAACCTCCACGCTCCATGAAAATGTGCCGGATCATAGTTTCTTCAATGCATAGGTTGTAACCTTGTACCGACCTGGATGTCTCATATCCAATACATGCTTGACCTG  
CCAAAGAGGGTTTCGATACATTGCTCGCACATGCTCGCCGGGTATGACATTGCCAACAAATGGTTTGTGATATATGACATGTCTAGATCATATCCAGCTACTAGCATGCGCCTCCGGCTTT  
TTGATAACCAGATTTGCAAGGAAGAAGGATGATGTGACATAGTTGAACATTTTGTACAGCGATTAGGACCACCAATCTTCTTGGACTTTGAAGAACCTTGTCTTGAGAATTTTCATCCCAT  
GCTATTCTGAATTTGACTAAGTTGACAATTTTGATTAGTTTACCTAAAAACACTGCTAGCTCCCCAATCTAAAGCTGCAGCAATTCGTATAGCTTCTCCAACAAATGTAATTAATAATC  
GCAATCGCAGACGAAGAACCTGCCCTAAGAGCCGGGAGCAGGCGCCTAGGGCAGGAAGGTTGACAATACAGTTGAACCCCTCCAGGCTCCGAAGAAGAAGATGGCGATTGAGAACGA  
CCAAAGGTAAGTAAGAAAAGCGAAGGCCGGGCATGAGAATGCCGATCGGATTAATAATCCGGGAACAGGTCACCTTCCCTTCTCTCAGCCATAAGTCGTGAGAAAAG

>comp149276\_c0\_seq6

AATATAGACACAATGCCCTAATTAGTATAGAATAACCATTAAGAGATTATTTAAATTTACTAAAGAGCAAAAAATAAAGCAAACATGCATAGCTGCACTAAATCAGCACCATTAAAAGTAGT  
GATTTGAGGTGTCTGTTTACTTAAACATACCAATGCGCACCCCAAGATCATGTAACAACCTTGTTTTTAGTATCAAAATTAACCTTGTACCGACCTGGATGTCTCATATCCAATACATGCTTGAC  
CTGCCAAAGAGGGTTTCGATACATTGCTCGCACATGCTCGCCGGGTATGACATTGCCAACAAATGGTTTGTGATATATGACATGTCTAGATCATATCCAGCTACTAGCATGCGCCTCCGGC  
TTTTTGATACCAGATTTGCAAGGAAGAAGGATGATGTGACATAGTTGAACATTTTGTACAGCGATTAGGACCACCAATCTTCTTGGACTTTGAAGAACCTTGTCTTGAGAATTTTCATCCC  
CATGCTATTCTGAATTTGACTAAGTTGACAATTTTGATTAGTTTACCTAAAAACACTGCTAGCTCCCCAATCTAAAGCTGCAGCAATTCGTATAGCTTCTCCAACAAATGTAATTAATAATC  
ATCGCAATCGCAGACGAAGAACCTGCCCTAAGAGCCGGGAGCAGGCGCCTAGGGCAGGAAGGTTGACAATACAGTTGAACCCCTCCAGGCTCCGAAGAAGAAGATGGCGATTGAGAA  
CGACCAAAGGTAAGTAAGAAAAGCGAAGGCCGGGCATGAGAATGCCGATCGGATTAATAATCCGGGAACAGGTCACCTTCCCTTCTCTCAGCCATAAGTCGTGAGAAAAG

>comp149276\_c0\_seq8

AATATAGACACAATGCCCTAATTAGTATAGAATAACCATTAAGAGATTATTTAAATTTACTAAAGAGCAAAAAATAAAGCAAACATGCATAGCTGCACTAAATCAGCACCATTAAAAGTAGT

GATTTGAGGTGTCTGTTTAGCTTAACATAACCAATGCGCACCCCAAGATCATGTAACAACCTTGTTTTTAGTATCAAAAATTACCTTGTACCGACCTGGATGTCTCATATCCAATACATGCTTGAC  
CTGCCAAAGAGGGTTTTCGATACATTGCTCGCACATGCTCGCCCGGGTATGACATTGCCAACAAATGGTTTTGTGATATATGACATGTCTAGATCATATCCAGCTACTAGCATGCGCCTCCGGC  
TTTTTGATACCAGATTTCTGAAGGAAGAAGGATGATGTGACATAGTTGAACATTTTTGTACAGCGATTAGGACCACCAATCTTCTGGACTTTGAAGAACCTTGTCTTGAGAATTTTCATCCC  
CATGCTATTCTGAATTTGACTGCTAGCTCCCAATCTAAAGCTGCAGCAATTCGTATAGCTTCTCCAACAAATGTAATTAATAATCGCAATCGCAGACGAAGAACCTGCCCTAAGAGC  
CGGGAGCAGGCGCTAGGGCAGGAAGGTTGACAATACAGTTGAACCCTCCAGGCTCCGAAGAAGAAGATGGCGATTGAGAACGACCAAAAGTAAGTAAGAAAGCGAAGGCGGGCAT  
GAGAATGCCGATCGGATTAATAATCCGGGAACAGGTACCTTCCCTTCTCTCAGCCATAAGTCGTGAGAAAAG

>comp149284\_c0\_seq1

TTTAAACATGCAATAATAGTTGGAAATTATTAATAATGAATCTCATATACCAACCCTTTAAATTCTACATGTATATTTATATTAATACTTAATCTTTTTAAAAATTTTCAGCTTACGCTTGCATAA  
AACATGCATAGAAAAATAATAATAATAAAGAAGCAGGTACCACTAAAAAAAACCCACAATCCTATAAACTTCATTAGAGGTTCCGAGAACGTCCCGTGGATCCCTAGCGAACGTAA  
TCCTCGCACGATATGGCTTAAACCAACGAGCGATCGACTCAAAGGGAAGGGAATCCACGAAGTGCCAATTCATCTTCCCTTAACTTCTTCATCGTTCTCGCCTGAAATTTCTCAAGCGA  
TTTCCCTTGGATTCCGGCACCAAAAACGTTAATAACATACCGACAAGATTGCAGCCTGCGAGCAGGAAGAGCGAATTCCTAACACCAATACCAGGAGGATAACCGTGGTCAGCCCGC  
CCGGATCGGGATTCTGCGCAAGATAAAGAAAGCCAAATGAGCCAATGATCGCGCCCAGCTTGCCGCTCGCCGCTGATATCCATGACAGGTTGACCTCAGCCTCGCCGGAAAAATCTCTG  
CCGGAACGATAAAGGTAGTGCTGTTAGGCCAAAATTGGCAAAGAAAAATGTGAATCCATACATTATAATGAAACCAATGTGATGGCCTGGTGTCTGTCAGTAAGTGTAGGGAATGGCTA  
GGCCAGCATGAACAGAGTCATCATCGCAAAACCCAACATTTGAATTGTGAAACGCCCGATGAAGTCGATTAACCGCACGGTGAGCCAATAGCCAGGTACGGTGCCGAGAGGGCGATG  
AGGGTCTGCGCACGCGCGATGCGGAAGACCTCCTCGAGTGCATTCATGGTTGCCCTTTGGGATCCACCCAATCGCGCTAAAAATGTCTTTTTGAAAGAGATTCTGGCTGTAGAAAGCG  
ATGTCAAGGAGGAACCATGTGGTGTGGTACCGACGAGGTGGAGGCCATGACGGCGGATGAACTCTTTCGAAAATAGCCGAAGCTGTTAGCTTTCGTTTCGAATGATTCGCACGATCTTG  
TCCGGCTCTTCCCTCGATCTCCACCTGGAGGACCTTAGACATGTCAGAAGCTGCCTGCTTGGCGTTCTTGGCGATAAGGGCGGTGTAGCGCGCAGTCTCCGGCATCTTCATTGCCAGTAAT  
AGGTGAGCGCGGGGGACAGAACCACCATGACGATTATGCGCCAGACATAATCCGCCCTCCGGGACTGTGGAGGCAATAGGGTGCAGGCATAGGCAGGTGCAGGGAAGTATTTTT  
AAAAGCGGCGGAGACAGCGATGGCAACCATACCGCCGGCCAAAATGCCAAACCCCTGCATCGCGAACACGGCGGCAATGAAAGCTCCGCGGGTTTTCTTATTTGCGTATTCGGACATGA  
TGTTGGCGGAAAGAGGATAGTCTCCGCCAATGCCGAAGCCGAGCCAGAAGCGG

>comp149333\_c0\_seq3

AAGAAGAAGAAGAAGAGGAAGAAGTAGAGGAGACTCACAATGAAGCCAGCCGGATGGGTGCTCGCGTGAGGAGAATACCGAGCAAAATGCGAGCGGGATGTGCGGTTTGATCCTCTC  
CGACTCTGTTACCTGATCCGCTTGAGTCGCGCGCAGGAAGGAGAAGAGGGATTGGATATGAACCTTGAATGGTTTCGCTTGAGTCGCGCGCAGGTAGGAGAAGAACCCTCGAATGCTCC  
AGCGTGCAGGAAGGAGAGAAGATCGACGAGACGATCACAAGAGTTTTAGTTGCGCGGAATTAGAGCTTTGGGCAGAGGCTAGCGGGGGTTAAATGAGGTATTTGCATCAGTTAAAACC  
GGTGCAAAAAGACATTTTTAGAAGCGGTTCTTAAACCGCTACTAATAACTGGTGCGAAAAATCCAATTTCTAGTAGTGTAGTACCGAGTAGTAGGTGATGTGGCGCATTTTCATTGAGT  
TCTGGATGGCGTTCGTCATCCACATAGAATAATTCACAACCTTTTGCCATCTTTATTGAAGAGTAAGTACTAAAACAACAACTCTATTAATAATAATATATGGATAAAAACAGGAAATAA  
CATCAATCTTTGGAAAAATTGTTCTGTGTGGGCGTCGGACGGTGTCTAGGGACCAACCAGAA

>comp149400\_c0\_seq2

AAAACACGATTTACCATTCAGCCTCTCAACCCCGTCCCTGTGATCTCTGCTACGGTTGCAGCTGCCCTTCTATAAATGTATCACTTCATCAATACTCTCTTCCCTCCAAGAAAGTCACACCT  
TTTACCTTTAGTTGGCTAACCATCTCTCTCCACATTCAGACCCCTCTCTTCAGCCTCTTCTCTCACTTCCCTTCTCTTACAAAATTTATTTCAAAGTCTTTTTGCCTGCCTCTTTCACCAA  
TTTGAAGTCCCTTTCTTCAACACAGCCATCTCCGTTGTTTACAAAATTCATTGCCATACCTCTTCTATATATGTCTCTTACAGCCTAGCTATTTCTGTGTTGTCTTCTCATAAGCTGGG

TCATGTGAGAGTGAAGGTTGTGGGTGCATAGTGGCCGGTGTGTTTGTCTCAAGACCGCGCAACGTTTCCATATTACACCGCATCGCTGTACTGGCCTATCAATTAGAGGAGCTTCTTCTTTC  
AGCAGAAGAGAAGAAAGAGAAGATCGAGTACTGATCAATGGATAGGTCTGCACGCCGATGCGCTGCTTATGGCCTGGCTGCGTGGTCTTGC GCAAGATAACACCGCTTATCCGCTCTTCT  
CTGTGCTTTTACACGCCATAGCTGTCTTTCCTCTGCTATCAAACTTTCTTCTTTTCGTTTTTTTTTTAATATCCTATCATGGCAAAAAAATAGCATCTATTCTTCTCCTTCCTTTACCACAGG  
CATTACATGGTTTAACTCGCAAGTGTTTTATTATCTCTTAGCTATTTCTTTCTTTTCTGTTATATTTTCATATTACATGGTTTGTCTTGTAGCCAATATCTTCGTATCATTATAGATGCAGCGC  
ATTTCTGTAAGAGAAAGGACAAAGACTCGACCTGACGTGGTTTGGAGCAGAAACCTAGCATCTCGCAGGATGGAATTGACGAAGGCAATCGCCGACAAGGAGGTTAGGATTTGGAAGA  
CACCGAGGCGGCCACGGCGCGTGC GAAAGGGAAGGCCGATCGCCCGGAATTTTGGCCCGAAGGGGCGGGCAGGTTCGATGCTGGCTAGCTGCCGACCCATCGGGTCACATCGGAG  
GCGACAACCAGGCCGGTGAGGGACGGCGTGTGCGCCACGCCGAACGGTCCCCTTACGCCCTTCTCTTTCCTCAGTTGGCATGTGGGGGCAAATTCTTTGTATGGTTCGGGTACGAGATG  
AGATCGGGTTGGACAAATGTGCGCGTTTGTGCTTCGCCGAGGAACTCATTATCCTTACGTTATTTATTTGAGACAAAAGAAAACGATGTGGCTTCGCATTCAATCCCATCCCTTTGTA  
ATGTTGGTAGTATTTATTAGTTTGTGATATAGCCGGTGCATAGGTTGAAATCTGCTGCACTGGGAAAGTCCAGCTCATTATGTGAGTTTTATCTACAGGAAATGATAACGGTGTGCTGCT  
ATATCTATATATATATATATATATCTCTCTATATGTTTACCTTCCAGTTTTATATGGCTTGTTTTCAACATGTGCAAAAAGAAGTCAGAGAGTGGCCTTCATGAGTCCAAATCTCACAGAGGAGC  
AGACTACGCCTCTCAAGTCTCTCAAGTCTACTTAGATACGCAATCAAGGGAGAACAAGTCATCAATCAAAAACAGAAATTCAGACTTCTTCAGCTCATCGCCAGAAAGATTGTTGAGCT  
GTATCAAGAACAGTGTTA

>comp149400\_c0\_seq4

AAAACACGATTTACCATTACGCTCTCAACCCCGTCCCTGTGATCTCTGCTACGGTTGCAGCTGCCCTTCTATAAATGTATCACTTCATCAATACTCTCTTCCCTCCAAGAAAGTCACACCT  
TTTACCTTTAGTTGGCTAACCATCTCTCCTCCACATTCAAGACCCCTCTTTCAGCCTCTTCTCTCACTTCCCTTCTCCTTCACAAATTTATTTCAAAGTCTTTTTGCCTGCCTCTTTCACCAA  
TTTGAAGTCCCCTTTCTTCAACACAGCCATCTCCGTTGTTTACAAATTCATTGCCATACCTCTTCTATATATGCTCTTACAGCCTAGCTATTTCTGTGTTGCTTCTCATAAGCTGGG  
TCATGTGAGAGTGAAGGTTGTGGGTGCATAGTGGCCGGTGTGTTTGTCTCAAGACCGCGCAACGTTTCCATATTACACCGCATCGCTGTACTGGCCTATCAATTAGAGGAGCTTCTTCTTTC  
AGCAGAAGAGAAGAAAGAGAAGATCGAGTACTGATCAATGGATAGGTCTGCACGCCGATGCGCTGCTTATGGCCTGGCTGCGTGGTCTTGC GCAAGATAACACCGCTTATCCGCTCTTCT  
CTGTGCTTTTACACGCCATAGCTGTCTTTCCTCTGCTATCAAACTTTCTTCTTTTCGTTTTTTTTTTAATATCCTATCATGGCAAAAAAATAGCATCTATTCTTCTCCTTCCTTTACCACAGG  
CATTACATGGTTTAACTCGCAAGTGTTTTATTATCTCTTAGCTATTTCTTTCTTTTCTGTTATATTTTCATATTACATGGTTTGTCTTGTAGCCAATATCTTCGTATCATTATAGATGCAGCGC  
ATTTCTGTAAGAGAAAGGACAAAGACTCGACCTGACGTGGTTTGGAGCAGAAACCTAGCATCTCGCAAGTGC GGGCATCCTCGCCATCTTCTTAAATTTTCATGATCATTGTTTCTT  
TTAATTTGATTTTTTTTTCTCTCTCTCTAAAAGCTGGTTTTTTTATGTATCTATTTATATACATATGTCATGTCGAAATAGTTCTTGGGAAAACGCAGGATGGAATTGACGAAGGCAATCGC  
CGACAAGGAGGTTAGGATTTGGAAGACACCGAGGCGGCCACGGCGCGTGC GAAAGGGAAGGCCGATCGCCCGGAATTTTGGCCCGAAGGGGCGGGCAGGTTCGATGCTGGCTAGC  
TGCCGACCCATCGGGTCACATCGGAGGCGACAACCAGGCCGGTGAGGGACGGCGTGTGCGCCACGCCGAACGGTCCCCTTACGCCCTTCTTTTCTCAGTTGGCATGTGGGGGCAAAT  
TCTTTGTATGGTTCGGGTACGAGATGAGATCGGGTTGGACAAATGTGCGCGTTTGTGCTTCGCCGAGGAACTCATTATCCTTACGTTATTTATTTGAGACAAAAGAAAACGATGTGGCT  
TCCGCATTCAATCCCATCCCTTTGTAATGTTGGTAGTATTTATTAGTTTGTGATATAGCCGGTGCATAGGTTGAAATCTGCTGCACTGGGAAAGGTTCCAGCTCATTATGTGAGTTTTATCT  
ACAGGGAATGATAACGGTGTGCTTATATCTATATATATATATATATATCTCTCTATATGTTTACCTTCCAGTTTTATATGGCTTGTTTTCAACATGTGCAAAAAGAAGTCAGAGAGTGGCCTTC  
ATGAGTCCAAATCTCACAGAGGAGCAGACTACGCCTCTCAAGTCTCTCAAGTCTACTTAGATACGCAATCAAGGGAGAACAAGTCATCAATCAAAAACAGAAATTCAGACTTCTTCAG  
CTCATCGCCAGAAAGATTGTTGAGCTGTATCAAGAACAGTGTTA

>comp149420\_c0\_seq1

CCATATTATTAATAAAAACTTTATTTTTAAGCCCTCTACTTAATATATTTACAAATTAATTTAATTTCTTACATCTGAAAACAATTCTCTATCTTCAATAGATGCTTGTTTTTTTCAGTTACACAT

AATTCCTGAAAAATGAGATACAAAAGGTACTTCTGAGCCATCCTCATAGAATTTTCATGCAGGATTTATGTTTCATAAATGTGTTCTATATTCTCACATGAATCCATTTTGTCTTCTAAGCC  
ATAGAGGAGATTTTCTTTATCAGTTCCATTGCCCAAATCTTCCAAATTTAACAACCTTAAACACTTATAACGCAAGACCAACAGTAATTGGATTAGATTAGCGCTTATATCTCCAGAACTATAT  
ATTCTGAATCAGTTTTGATCCATTTGCATCCATCCTCTACCTTCTCTTCTTTGTTTTCTGCAAGTACTTCATTGATGGTGGTCGAGGTACAGTTTGGGGATGAATCTTTTTGTGAATTAT  
TTTCTCAAGATCTTAGCTCAGAAGGAATAGTAGAAGATCATTAAAGAGATCAAAGAGAAAAAAGACAAAAATATGCAGCTTATACTAAATTCATACCTTTTCCACTTTTGATTCA  
GAAATCGAGTTCCTTAAACTTTGCTGTGTTGATAAGCAGCTTCTGCTTATAAACATTTTCTTGAGAAGGAAAGAGAGAGACCTTTGCCTGATCCCATTGTGATTATCAGAAAGCAGGTCTT  
TGAGTTTGTTTAAGGTGATCTTGGAATTGTCAGAATCATCTGTTGATTCTTACAGTTTTTTAGTGAAGAAATGTTGTCTGCTTCCAGAGTTAAGGAGGTGTTTAGAGAGTCATTCAGCGA  
GAAATCTGCTCCATCTGTGCTTGAACCTTAGCTGGAGACTTAGTAATTTGCTTATTTCTTGCTGCAATTTGATCACCTCTTCAATGTTTAGGTCTGAAATTTTATGTAATAATTCTAGAGTTTCA  
TAAGAATTTGTGCCATTTGTGAATCTTCTGCGGGTCATTGTTGCCAAATGTCCCAATTGCCAAAAATGTTTGTGCCAGTCTTTGAATTTTGAAGTGAGAAGAGCTTGGGCCAACTTC  
AAACCTCCTTCTTGTCTCCCATTGAGCTTACTTTGAACCCAGCTGAAAATCCTCATAACTCCACCAGTGCTGCAAGCTTCAGTCTTCTTTCAATATATATACAGAGAGAGAAGAACACTA  
GTAACCTGCATCGAAAAGGTTTCCAGGACAAGAAAAGAAAAGAATTTACAAAATTGGCTCTCTTTGTGGTCCCTCTCAATCTCAGAAATGGCTGCAAGTTATAAGAGAATTTATCAAGAGGA  
AAGCTATAGAGGATTTCTACCAAAGATACTAAGACATTGAGGGACTTAGGAAGATTAATAAGAACGAAAAGAACATGGCCACAGATTTCAATGAATTTGTTCCACTAGTTTCAGGACATTT  
CATCAGCTCAAGATCCCAAGCAAGAGTTCACCCATGCTTCTTGAACTTTTAAATTTGCCAGA

>comp149420\_c0\_seq2

CCATATTATTAATAAAAACTTTATTTTTAAGCCCTCTACTTAATATATTTACAAATATTTAATTTCTTACATCTGAAAACAATCTCTATCTTCAATAGATGCTTGTTTTTTTCAGTTACACAT  
AATTCCTGAAAAATGAGATACAAAAGGTACTTCTGAGCCATCCTCATAGAATTTTCATGCAGGATTTATGTTTCATAAATGTGTTCTATATTCTCACATGAATCCATTTTGTCTTCTAAGCC  
ATAGAGGAGATTTTCTTTATCAGTTCCATTGCCCAAATCTTCCAAATTTAACAACCTTAAACACTTATAACGCAAGACCAACAGTAATTGGATTAGATTAGCGCTTATATCTCCAGAACTATAT  
ATTCTGAATCAGTTTTGATCCATTTGCATCCATCCTCTACCTTCTCTTCTTTGTTTTCTGCAAGTACTTCATTGATGGTGGTCGAGGTACAGTTTGGGGATGAATCTTTTTGTGAATTAT  
TTTCTCAAGATCTTTTCCACTTTTGATTACAGAAATCGAGTTCCTTAAACTTTGCTGTGTTGATAAGCAGCTTCTGCTTATAAACATTTTCTTGAGAAGGAAAGAGAGAGACCTTTGCCTGA  
TCCCATTGTGATTATCAGAAAGCAGGTCTTTGAGTTTGTTTAAGGTGATCTTGGAATTGTCAGAATCATCTGTTGATTCTTACAGTTTTTTAGTGAAGAAATGTTGTCTGCTTCCAGAGTT  
AAGGAGGTGTTTAGAGAGTCATTCAGCGAGAAATCTGCTCCATCTGTGCTTGAACCTTAGCTGGAGACTTAGTAATTTGCTTATTTCTTGCTGCAATTTGATCACCTCTTCAATGTTTAGGTC  
TGAAATTTTATGTAATAATTCTAGAGTTTACATAAGAACTTTGTGCCATTTGTGAATCTTCTGCGGGTCATTGTTGCCAAATGTCCCAATTGCCAAAAATGTTTGTGCCAGTCTTTGAATTC  
TTGACTGCATGAATTTTGTCTTGTAGTATAGTGAGAAGAGCTTGGGCCAACTTCAAACCTCCTTCTTGTCTCCCATTGAGCTTACTTTGAACCCAGCTGAAAATCCTCATAACTCCACCA  
GTGCTGCAAGCTTCAGTCTTCTTTCAATATATATACAGAGAGAGAAGAACAAGTAAACTGCATCGAAAAGGTTTCCAGGACAAGAAAAGAAAAGAATTTACAAAATTGGCTCTCTTTGT  
GGTCTCTCAATCTCAGAAATGGCTGCAAGTTATAAGAGAATTTATCAAGAGGAAAGCTATAGAGGATTTCTACCAAAGATACTAAGACATTGAGGGACTTAGGAAGATTAATAAGAACG  
AAAAGAACATGGCCACAGATTTCAATGAATTTGTTCCACTAGTTTCAGGACATTTATCAGCTCAAGATCCCAAGCAAGAGTTCACCCATGCTTCTTGAACTTTTAAATTTGCCAGA

>comp149430\_c0\_seq1

TTTTTTTTCCATGAGATGCCCTCCCTTATAAAAAACAAAAAACATCTTTTAAGCTCTTACATAAATTTGTGTCAAATGTAATATATTTCAATTTGAAATAGCTTTATGCCTC  
TTCTCCCATGCCATAGTAATCCCTTAGGAACTTCTCACACATTGGTAAAGGCTCATCCTTGAGGAAGCCAAGAGAGTTGGCAAACCTAGCATTGTTGCTCATGCCGGTGTGTTGTCGAGAGC  
ACGACTTGGCGCCCTATCTTCCATCATGATCTTGTGCAATTTCTCAATGGGCTCTCGACGAGCACAACTCACAAATTTCTCCTCGTGATCATCTGCCACCTCAATTTGTAGTTGCC  
GGTGAATCCGTCACACCATAGCTGGTGTGCTCGATATTTCTGTTGCGAAGTGCGTGCCTCGACCTTAATCGTAGCCCTGTGATGTATTGGTGATATTTGTTTCAAAGCCGGCATGAC  
AATTGTCACAGTAAACACGCCCCACAACAAGAAAGATTGGGCTATTGGCTGAAGCCACCAAGGCGATGGAGGAGAAGAGGCAGAAGGCAACGATGAATACAATCTTCGCCATAACTTC



TTCTTTTCGGATTCTTTTGCCTCTCTCCTCTAATTTGAGAATGGACAAGA

>comp149435\_c1\_seq2

CTTTTCTTCCAAAGTGAGTTCAAGGCTGGGGCATCTTTTGTAGCTTCAATTCCTTAAGTGAAGGAAGGTTTTGCAAGCCTGGTATTGATGTCAACTCCCAGCAATCTTTGAAACATACAAAT  
TGCAACTTAGAAGGAAGTATCTCCTCCGCAGAGATCAAGAGATTATCACACCCTTTATTTCTAACTTTTCAAGTCTATGCAGACTACATAGCCAATGCAATGATGTTATTTGCAGGCAAGA  
TCTAATAACTAGTCTTTTAAGTGAGGATGACTGCACTACTTCTATATTTTTTAACATAACCACATTGAATGATGGAAATACTTTGAAGACATGGGAGATCTCTATCCAACACTTTACCTGATCC  
ATCCCATTTATTACACCCCTGAAGGGTTATATCTTGTAACCTAGAATACGAGGGATCACCAAGCCATGACGGGAATAGCATCCCAGGGTAATTATGTATCTCTAATGCTTTGAGGTTGTTGTG  
AGGCCGCAA

>comp149499\_c0\_seq1

TACCTTCCAAAAAAGGAATCTAGAAGAGATTCTCTTTAAGATGGTGATTCTTCTCCTCATTCTACTAACAATAAGATTTTCAAAGCCAGTGGTCGCCGCCGTCGACGGAAAAGCTCC  
GGCGACCTCCCATCGGCTAGCCGCAGCGCCAAAAGGAGCTCCATTTACAGAGGAGTAACCAGGCATAAATGACTGGGAGGTATGAAGCTCATATCTGGGACAAGAATACTTGAATAA  
ATCCAAAAACAAGAAAGGAAGACAAGTGTACTTAGGAGCTTACGACACTGAAGAGAGTGCAGCTCGAAACTACGACCTTGCTGCTCTGAAGTACTGGGGAATACTGATACGACCCTTAATT  
TTCTGTGGCGAATTACGACGATGACTACAAGGAAATGCAGGCGATGTCGAAGGAGGACTATTTAGCTTCGTTGCGCCGCCGGAGCAGTGGATTCTCCCGCGGAGCCTCCAAGTATCGCG  
GAGTAGCAAGGCACCATATAATGGAAGATGGGAAGCAAGAATTGGTGCATCAATGGCAACAAATATCTTTATTTGGGCACATTCAATAATGAAGAAGAGGCGGCACAAGCTTACGATC  
GTGCTGCATTGATTTATCGTGGCTCTCGAGCGGTGACCAATTTCAACATCAATCAATACACGGAGGTTTGAACACCGTCATCAGAACCGTTGCCACTACCTCACAACATCAAAACTTAGT  
TCATCCCATAACGCTCTCTAATCCAACCTGTTTCCTTTGGTGGAAACAATGGCGATGGTTGATGACAATAACGAACTCTCGTGGAGCGGCTCGCGAATGGGCTCGAGCTATGAAACCTTCTCC  
ATCTCTGATTTGTTCTTTGACTTTAATGTATCTGATGATCATGTTGGAGGATTCATCAATGACATTGGAGAATCATTGATGACATCGAAAAGGCTCTTTGATGAATCATGGGTCGATCATTT  
AGTGTGAATGGTGAAGACAATGAGAAGTCAATGGCAGCTATTTTCATCTGGTTCGATGAAATTATCTCAACTTCCTTAGTTTGAGACCAACATTTAGTGAAGAAGATATGAGTTGTTGAG  
AAGTTTTGGAAGCAATATGATTAGATATATGAGATTTAAGTTTTATTG

>comp149515\_c0\_seq1

TGGCTTAATCCACCACCCCTCTCGCATCCTCAAACAATCACCATCCTCTTTCATTCTACACACCCTACGTCTCCTTCTCCTCTCCTTCTCATTCCATCCCTCTCAACTCAACACCGAAAT  
CAGAGAAAAAAGTAATGCTCCTGCGGCTACAACCAATTCTGATCTCATGTACTCAGACGCCTCAATCAAATCCTCATTGGAAGAAGAGAGCTTTCAAACCGCCACAGCAACGTCTCCTTG  
CCCATGTCTCCTTACAGAACCTCTCCTTGGACTTCCCACACCAATCCCTTCATCATTCCGCCGGATCAAACCGACCTCTTCCCCTCCGGCACCGGTCTCATCGCCTCTCTCATTGCGGAAG  
AAGGCCACATCTACTCCCTCGCCACCTTCAACGGCCTTCTCTACACCGGCTCAGACAGCAAAAACATTCGGGTATGGAAAAACATGAAGGAGTTCACCGGATTCAAATCCAGCAGCGGC  
CTCGTCAAAGCCATTGTAATATCCCCCAAAGGTCAGATCTTTACCGGCCATCAAGACGGAAAGATTGGAACCTTGGAAAATCTCCCTCCAAAACCCCCAAATCCATGCCCGTCTCGGCACT  
CTCCCTCGCCTCAAAGACTACATTAAGAGCAGCTAAGCCGGCGAAAGATTCCGGCATTCCGATGCGGTATCCTGCCTCGCCCTAGACGACATCAACGGCTTCTCTATTCCGGTTCATGGG  
ACCGATCGCTCAAGCTGTGGCGGGTTTCGGATTCTCGCTGTCTCGACTCGGTAACGCGCACGACGACGCGGTTAATTCGGTAATTATCGGGTTTGATGGGTTGCTTTTTTCCGGTTCGGC  
CGACGGGACGGTTAAGGTTTGGCGGGTTGAGCCGAGCGGTAAGAGTCAGACCGGGCGCCGGTGGTGGAGGTGGCGGTGTTGGTGGCGCAGGAGTCGGCGGTGACGGCTTTGGGTGT  
GAGCGTGGGTGCGGGCGTGTGATTGTGGATCGTCGGATGGGCGGGTCAGTTTTTGGGGCGGAATTTGGTGGCTTTGGGAATTCTGAACGGTCATAAATTTCCGGTGTCTTTGTTGGCT  
TTGGCGGGGATTTGGTGTTCACGGGATCAGCTGATAAGGCGATCTGCGTGTGGGGGAGGGAAAGAGAATGGGACGAGACACGTGTGGCTTTCCGGTGTGACGGGGCACGAGGGGCCG  
GTAAGTGTCTCGCGGTGGAGGAAGATGTTAACGTGGAGGAGGCGGTGGGTGGTGGAGATGGGTGGTGTATAGCGGGAGTTTGGATAAGTCGATTAAGGTGTGGAAGGTAACGGATTT  
TGTGGGTGGGAAGGAGGGAGGAGGAGTGGGTTCTTATCGTGTTCAGCAATGATGATCCAATATTCGATGCGTTTTGATAGAATGTTTGTGACTTGTGAGGTAATAACATTCATGATGCA

TTTTTTATTATTGGAATTTTTTTTAGAGAGCAAAATTTGGTTATTATGATAAATTTAATGTTATTATGTTTGTGTTAAGATTGATGAAATATTAGTTTTGATTA

>comp149551\_c0\_seq3

AAGAAGTAGTAAAAAGCCGTACCAAATAAAACTTAAATCTCATATATCTAATCATATTTGCTTCCAAAACCTTCTCAACAACCTCATCTCTTCTTCCACTAAATGTTGGTCTCAAACCTAAGGA  
AGTTGAGATAATTCATCAGAACCAGATGAAATAGCTGCCATTGACTTCTCATTGTCCTCACCATTACACTGAAATGATCGACCCATGATTCATCAAAGAGCCTTTCGATGTCTTCAATGA  
GTTCTCCAATGTCATTGATGAATCCTCCAACATGATCATCAGATACATTAAGCCGAAGAACAATCAGAGATGGAGAAGGTTTCATAGCTCGAGCCCATTCGCGAGCCGCTCCACGAGA  
GTTTCGTTATTGTCATCAACCATCGCCATTGTTCCACCAAAGGAACAAGTTGGATTAGAGAGCGTTATGGGATGAACTAAGTTTTGATGTTGTGAGGGTAGTGGCAACGGTTCTGATGACGG  
TGTTTCGAACCTCCGTGTATTGATTGATGTTGAAATTGGTCACCGCTCGAGAGCCACGATAAATCAATGCAGCACGATCGTAAGCTTGTGCCGCTCTTCTTCATTATCTTTTTTTTTAGCAA  
ATTTGGGAGGAAATGAATAATATGAGTCTAATCGATAATGGTTAATAAATATTATATATGATCAAAGTAATATTTTTTAAAATAACAATGAACCAATCATCAAAGCTTTATATCGATAA  
CCGCTAGAGAACCATGATAAACCAATGCATCACGATCATAAGCTATATCTGACTATGTGGGGTCACATAAAATGGCGGACTTCCGATGACCCGGTTAAGAAAGTAGTTGTATTAGATTTTTT  
TTTTTTAAGTTGTATTAGATTTG

>comp149595\_c1\_seq1

TAAATTGAGTTATCATCATAATTTGAAAAATAAAAACGGATCCAAACAACATATAAAATAGAAAAATAAAAAAAATCCTGGATTTTTGTTAGTATTTGACCTTAGAATCAAAAGACAA  
CAGCCTCCTCCCTAGCTTTGAAAACAGAAAAAATTAGCAAGTAATGATCATTAAATGTAATACCCTCTCAGAAACTCAAAGGTAAGATATCCTCTCAGATTATGCTATTCGCTGCCTCTTC  
CTCCAATAACCGTAAATTTCTTCTTCTCCTCCTCGATTCCAACCTTCAGCTTCAAGAGGAATATAATCTTCAGAGGCGGAAATATTGTCTTCAAGAGGAATATAGTCTTCAGAGACGGAAAC  
ACCCAACAAGTTCTCTGTTCCGCTGCTTCAAGAACTGCGCCATCTTCATCTCCTCCACCTCAAGAGGGATATAGTCTCCGCTTTGCTGCAGAAAGCTGTCTGTTCTTCAACTACACGA  
TCATCACAAGTACGGCCGTAGACATTAAGGAACACGATATAGTCGGCTATGGAAGACAACGGACGAAGTCGGAAGACTTTCTCCATGCTTTCTTCTTCTTCTCTCTTCTTGGCCGTGGC  
AATCCACGGAATCTCATCATCAAAAACATCCTCCTCTTCTCGTCCATTCAAGCTGTCCAAGGCAAGAGGAGCGCAAGCTTCTTCTTTGGAGAGATTTTCTTCTTTTGTGACTTCCATT  
GTAATGTCCTAATAGTTTTCTTTTCCAAGGTGCGTCCTTTATGTTTA

>comp149595\_c1\_seq2

ATTACATATATTTGACAACAGATAATAAATAGAACTCCTCAATAACCTGTCAGTTCGAAGAAGAACTAAGTTTTACTATCATTACTTTTCGCTTAAATTCTGGTCAGAAGTCCAAAAGAAT  
GGAAATAACTAAAATTTGCAAAGAACTTCTGAATAGTTTTACAAGAGAATTTTTTAATTTGTGCAAACCTTGAAATAAAAAAAAACAATATTATCTAACAAATATTCTAAAATATCAAGCAC  
AACACTCATTTTTGTTGAAGCTCTCATAAACTCGAAGGTGCGATCCTTGCAGATTATGCTATTCGCTGCCTCTTCTCCAATAACCGTAAAGTTCTTCTTCTCCTCCTCTATTCCAACCTCA  
GCTTCAAGAGGAATATAATCTTCAGAGGCGGAAATACTGTCTTCAAGAGGAATGTAGTCTTCAGAGACGGAAACAGCCAACAAGTTCTCTGTTTCTCTGCTTCAAGAACTGCGCCATCT  
TCATCTCCTCCACCTCAAGAGGGATATAGTCTCCGCTTTGCTGCAGAAAGCTGTCTGTTCTTCAACTACACGATCATCACAAGTACGGCCGTAGACATTAAGGAACACGATATAGTCGG  
CTATGGAAGACAACGGACGAAGTCGGAAGACTTTCTCCATGCTTTCTTCTTCTTCTCTCTTCTTGGCCGTGGCAATCCACGGAATCTCCATCATCAAAAACATCCTCCTCTTCTCGTCCA  
TTCAAGCTGTCCAAGGCAAGAGGAGCGCAAGCTTCTTCTTTTGGAGAGATTTTCTTCTTTTGTGACTTCCATTGTAATGTCCTAATAGTTTTCTTTTCCAAGGTGCGTCCTTTATGTTTA

>comp149670\_c0\_seq2

TATCTCAATCAAGTAACTAGATGGAGCTTATAACTTCATATAGTTATGATGTAATGCATCTCAATCATTACGTATCATCTATCCCATTACATATGAATACACTCTTTTCCATTCCAATTCAGT  
TACGTGTTTGGCATTCTTTGGGCACTAGCCATATGCTTTTTTCTCCTGCATTTGTAGTTGATGTAGGCAAGGGGGGTCAAAAATTTTCTTTGGTCTTTGGGCTGCTGGTTGCTCTTGGGTT  
GGGCTTGGCTGCTTGGTTTTGAGCTGTGTTTTTGGG

>comp149690\_c0\_seq4

AGGATCTACTAGAGGCAAACCTAAGTAACTAACCCTAATCATAACGAAATCTCAGCCATTTTTTTGTTTTATTTTTCCAGCATTTGGCATGAACAAATTTCTTACTAACTCCAAGAAATCAAC  
ATCATCATCCGATTAATTCTGTGTGTTTTTCGTCTTTTTTGGGCATGAAGCCTGACATTTCTAACCAAAACCAAATCTCTCACGGTAAGTAATTAGAGTAACAATCTGATTAAGCATCACGAT  
CGCAAGAAAGCTTCTCCCAATCGAGCTTATTTCTAGCTTTTCTGCAACAAACTTTCTCAATCTCTGAGTCATTTCTATTGCCAAAATGGAGAAAGACGGTCCTTTTGCGCCAAACTGACAAT  
GACATTGCCCTTCGCTTTTACAGAGCGCAGATGGACACGGAGGAAGAGGGCATTGGCTGGGTGAGTACCTTTTTTAAGTCACCAGCAGCAAAGCACTAAAGATTAATTTTGATTCCT  
TTGTTTGGCCTTTTGGTCTCTTTACTGCTGATCAGTCATGAAAACCTTGGTGAGGGTTTTGGTCTTATGAAGGAGGTTGAAGACGGCTTGGCTGAGGAAGGGCTTCGGTTGAAGTAACTG  
CATTTTCTTCTCATTCCTTCTCAGCCATGGTGCCACAAGAGTTACCAAAGGAACCGATTGGTGTCTCAGAAATGAATAACCGACAATCTCATCCTGGAGGAATTTGTTATTGCTCTCACTG  
GAATAGTGTAGATCGTGGGTTGGTTCGGCCTCATAGCTTACCATCCAGCTTTCAGCCTCATGACACACAGATCCGTAGATCTGTTGAGCCTTTTTCAGTGAGATGTAAAGAGGATGATTTCT  
CAAGCTTTGACCATATACAGGGCCATGGCTTGTCACTAAGCCTTGGACCTGAGCTGGAGCTGGAGCCTAACAATGTTAGGCCATACGATTATAATCAAGCACAGATGGTAGAAAATGTTAT  
GAGAAACAAATCTTTGATTGAACTTATGTGTGAGCCCTTTGTTCTTGCGCCGAACGTTTAAAGTGATGACGGCATTATATGTGATCAAGATGTGGATGGTAGTATCTATAATTCAAGATGCT  
CAAATACGAAGTTCGATAACATGGCGCCAGTCATGAGTGTTCTTCAGAAGTCTCCATATCTTAAAGCAGCTCAGCAGTACTTGATGAAGCTGTTTGTGTGTGTAACCTTTGTTCCCGAGCC  
ATCTTCAGAAAAGGATGCGCACAGGAAGAATCAGATTAAGAGAACACACACACTGTGCACTTGTCAAGGGAAGAACAAGAGGTCAATAGAATGAATAAACTTTTTACTCTGCAGGAA  
GAGCTTGAGAAGCGACAGAAGATATATTTCCATCGAATGGATGAACTAGTAACATCCTTTGAAGCTGTAGGTGGTCTGGGTCTGCTGCTGCATACACAGCTTTACCTCACGAGCAATGT  
CTAAACATTTTGCTAACCTTAGGGAATCCATTATCAATCATATAGAGTCTTCAAGAGAGGCTTTTTTCCAAAAGATATGCCAAAAAACCTTAAACCAAAGAGGGAATCACTGCAACACCTGGG  
CTTGATCCATGTTGGACAAATCTGGAGGCCACTCAGAGGACTACCGGAAGACTCAGTTATGGTGCTTCGAGCTTGGCTTTTCGAGCATTTTC

>comp149690\_c0\_seq5

AGGATCTACTAGAGGCAAACCTAAGTAACTAACCCTAATCATAACGAAATCTCAGCCATTTTTTTGTTTTATTTTTCCAGCATTTGGCATGAACAAATTTCTTACTAACTCCAAGAAATCAAC  
ATCATCATCCGATTAATTCTGTGTGTTTTTCGTCTTTTTTGGGCATGAAGCCTGACATTTCTAACCAAAACCAAATCTCTCACGGTAAGTAATTAGAGTAACAATCTGATTAAGCATCACGAT  
CGCAAGAAAGCTTCTCCCAATCGAGCTTATTTCTAGCTTTTCTGCAACAAACTTTCTCAATCTCTGAGTCATTTCTATTGCCAAAATGGAGAAAGACGGTCCTTTTGCGCCAAACTGACAAT  
GACATTGCCCTTCGCTTTTACAGAGCGCAGATGGACACGGAGGAAGAGGGCATTGGCTGGGTGAGTACCTTTTTTAAGTCACCAGCAGCAAAGCACTAAAGATTAATTTTGATTCCT  
TTGTTTGGCCTTTTGGTCTCTTTACTGCTGATCAGTCATGAAAACCTTGGTGAGGGTTTTGGTCTTATGAAGGAGGTTGAAGACGGCTTGGCTGAGGAAGGGCTTCGGTTGAACCATGGT  
GCCACAAGAGTTACCAAAGGAACCGATTGGTGTCTCAGAAATGAATAACCGACAATCTCATCCTGGAGGAATTTGTTATTGCTCTCACTGGAATAGTGTAGATCGTGGGTTGGTTCGGCC  
TCATAGCTTACCATCCAGCTTTCAGCCTCATGACACACAGATCCGTAGATCTGTTGAGCCTTTTTTTCAGTGAGATGTAAAGAGGATGATTTCTCAAGCTTTGACCATATACAGGGCCATGGCT  
TGTCATAAGCCTTGGACCTGAGCTGGAGCTGGAGCCTAACAATGTTAGGCCATACGATTATAATCAAGCACAGATGGTAGAAAATGTTATGAGAAAACAAATCTTTGATTGAACTTATGTG  
TGAGCCCTTTGTTCTTGCGCCGAACGTTTAAAGTGATGACGGCATTATATGTGATCAAGATGTGGATGGTAGTATCTATAATTCAAGATGCTCAAATACGAAGTTCGATAACATGGCGCCAG  
TCATGAGTGTCTTCAGAAGTCTCCATATCTTAAAGCAGCTCAGCAGTACTTGATGAAGCTGTTTGTGTGTGTAACCTTTGTTCCCGAGCCATCTTCAGAAAAGGATGCGCACAGGAAGA  
ATCAGATTAAGAGAACACACACACTGTGCACTTGTCAAGGGAAGAACAAGAGGTCAATAGAATGAATAAACTTTTTACTCTGCAGGAAGAGCTTGAAGAGCGACAGAAGATATATTT  
CATCGAATGGATGAACTAGTAACATCCTTTGAAGCTGTAGGTGGTCTGGGTCTGCTGCTGCATACACAGCTTTACCTCACGAGCAATGTCTAAACATTTTGCTAACCTTAGGGAATCCA  
TTATCAATCATATAGAGTCTTCAAGAGAGGCTTTTTTCCAAAAGATATGCCAAAAAACCTTAAACCAAAGAGGGAATCACTGCAACACCTGGGCTTGATCCATGTTGGACAAATCTGGAGGC  
CACTCAGAGGACTACCGGAAGACTCAGTTATGGTGTCTTCGAGCTTGGCTTTTCGAGCATTTTC

>comp149690\_c0\_seq8

CTTTAAGAAGCAATAAAAAAGCCATCCGAAATGAAGTCATATGCTGTCCATCTTTTGTAGATGAATTAACATAAAGTGAATGGAAGAAACACAATTGTTAAGTTTATATTACCATGGTGT

CTGTTGATGTCGTAGTAAATATACTTATTTACCTCACTTGCATCACCTTTGCTTGATTTAATTTTATTTAAACATTTGAGTGAAAGTAAATTCCTTCTATTACCAAATAATTGACAGATTTAGAT  
GTAGATGTGGGGCCTTACTGTTCTAATCGATAGTTCCACGAAATTAACTCTTAACTATACAACCTTTCCAGCTTGAGAAGCGACAGAAGATATTTCCATCGAATGGATGAACTAGTAACA  
TCCTTTGAAGCTGTAGGTGGTCTGGTCTGCTGCTGCATACACAGCTTTACCTCACGAGCAATGTCTAAACATTTTGCTAACCTTAGGGAATCCATTATCAATCATATAGAGTCTTCAAG  
AGAGGCTTTTTCCAAAGATATGCCAAAAAACCTTAAACCAAAGAGGGAATCACTGCAACACCTGGGCTTGATCCATGTTGGACAAATCTGGAGGCCACTCAGAGGACTACCGGAAGACT  
CAGTTATGGTGCTTCGAGCTTGGCTTTTTCGAGCATTTTC

>comp149703\_c0\_seq1

GCAAATAAAAATATTTTCATGGGTCTTTATAAGAAAAATCGAAGAAGCACACAAGTTCTTAATAGTTAATACTTATAATTACATTAAAAAAACAGTTATTTAGATTACAAACCTCAATCACCA  
CATTGACAAAATATCTACCGAATACAAAGGTTCAACCTCTCAAAGCAAATGGTAAATTTGTAATATATTTATTCTTAAACATCAGATATATAAATAGCGATCTGGTTCTTCAGCGGTGCTTGCT  
CCTTGTCTCTCCACTGTACATCCAGTCGTAACAGTAGGCGAATTTGGCTGAGGCTCGTCAAACAGATCAGCCCCATGGTCTTGGTGTATGTTGCTCCCCGGGTTGAAAACGCTCCGC  
CACACGTTGGCCTTCTTCGCCGCTCTCCGGCGGCATCACCGGCGTTCGTGGTGTCTCCGGCATCGACATTGATCGTTGGAACGCCTTGCCAGCACTGCTTTCCTTCACCACCTTGGTTGA  
TGACGAGGGGCTTGGGGGAGGCCTTTCCGGCGAGCTTGCCGAGGCCTCTGTCCGGCTGAGGTCCGGCGAGCACATCGTCCCAAAGCTTTTCGAGAAGAACCATTTTAATAATATATTATT  
ATTGTTATTTTCTTTTAATCAAATTGTTTCTCTCTACTTTCTCGC

>comp149799\_c0\_seq1

AAATTTGCAATATGAGAGGTGCATGAGGGAGGGGTGTTTCTGCAATAATATATTTGTTGTTTCTGCCAGGGGAAGTAGAAAGTACTGGATGGAAGTCGTTTTCCATGTTTCTCGTACTG  
GATGGACGATTTTGCTAATTTCCCTTCTTCCCTTCCTTCTTAAGCTCTAATTCGCACATTTGCAATTATTATAAAATGCAATTAAGCCAACCATTATTTTCTCCATCCTTTGGCCTCGT  
CGTTTGTCGCTTAGCACCCCAATTTATTTATAATATCAAAAAGGGTTCCGATGTGGTTCAATTCGAAGAGGTAGAGGGAAATGGGTGATTTTGAGGCTGGAGAGATGGAATTTGATGGAGG  
AGAGGCTTCCAGCGTGAACGATAAGAAGGTGGAGGAGTTAGCCGGAGAAGAAGAGAAGTCTATGACACCGTCGCAGGTGGAGGATATGCTGATTGATATGGAAGAATCAGCTCAAAAG  
TTGATTTTTTCGGACGAAGAAGACGCCTTTCCTTCACTTGCTGATTTCCGATGCCTTTCTTCTCCATCGGCGTCGGCCTTATTTCATCGGCGGCTTCCACTTTCCTCAACAATCGACTTC  
CTCCTTCTTCTTCTCCTCCTTCTTCTCATCTTCATCACCGTGGTTCCTTCTCACCCCCACTGAGACTGATGGTGGCATGCACCCAGCGGCGGCGAGTGAAGACCCTCTGGCTCCCATC  
ACCGACGCCGATTTGATATTCTTGGTGTATATAGATCTATGGGAGACCTGCACGGACGAGCCTATCGAGTCCACGTGGGATTCATCGCGGTCTTCTTCCCGACGAAAGAAACTGGG  
CCGGTGGCAGCGCGGTGACCAGCAACCCGGGAATGAAGAAAAGTTGGGATTTTTGTCCGGCGGGGATGATTGCTCGTCGGAGGATTTAGCTAACGTTTTCTTAGAATGGCTGAAGGAA  
AACAAAGATTTGATTTCCGCCGAAGATTTGAGGAGCATTAAAGCTCAAGCGCTCGACAATTGAGTGCGCGGCTCGCCGTCTCGGCGGGGAAAACAGGGGCGAGTTCAGCTTCTCAAGC  
TCATTCTTGATTGGGTTCAAATCACCATCTCAAGAAGAGAAGACGACGCAACCCGCGATCAACAAGAGATCAGGAATTGCCAACTTACGCTGCTCCACCGCCTCTCCTTCTCCTCCAA  
CGATTCTCTTCCACCTACTCATATCGCAACTACTTCTAATCCTAATATTGACTTCTACCAGGAACTGTGCCCTGCAACTCTTGGATGCCTTATGCAGGGGATTCCTTGTGCCCTCCGGTGA  
TGCCCGTTATAGAGGCGAGGCTCCTGCTGTAGCTGTGCCGTCTTACCATTACTACAATGACCAGGCTTCTCAGCTCATCCATGGCAGCAGTTATTGTCACCGGCTCGACATCATCAGT  
GATTCATTACGCGCATTGGGCAGCAGTCGCCCTTACCAAGCCTGCAAACTTTCCAGTGCCGGTGCAGGTGCCGGTTCCGGTGCCTGTGCAGGTGCCGGTGCCTGTGCCAG  
TGCAGGCACCGCCGAGTATTTGCCAATGTATTATCCGGGCCAGACGGCATCGGCTACTAAAGAGGCTAGGAAGAAGAGAATGGCTCGGCATAGAAAATCTTCTCTTCTCACCCCCACA  
GAAGCCAACAGCAGCAGAACCAACAGCTACAGAGTTCGGATAATATAATTGTAACAGAGGAACTTCTTCTTCTCACTCTAGTGTTAATAAAGACAATGCAAGCAACTTGCCATCTCTAC  
CCGCCGACATTCGCTTTCGCCTGCGGCCACATTGGCTGCTGTGGCGCCGTCTCTCCCACCATAACGCCGATGCATGAGGAGAATTATCTACACAAGCGTACCACCTTACCTGGAGAGA  
GACGTCGGGACGGAATCAAGTCGGAAAATAACTATAAATTTTTGCTTCGGAAAGTGCTGAAGCAGAGCGATGTGGGAGCCTTGAAGGATTGTTCTTCCAAAAAAGAAGCAGAGATT  
CATCTCCAATGCTTGATTCAAGGGACGGAATACCAATTGAAATGGAGGATATAGGAGCCTCAAGGGTCTGGAATATGCGTTATAGGTTTTGGCCGAACAACAAGAGTAGAATGTACCTCT

TGGAGAACACAGGGGATTTTGTCAAATCAAATGGACTTCAAGAAGGAGATTTTCATAGTAATATACTCCGATGCCAAGTCTGGAAAATATATGATAAGAGGAGTGAAGGTCAGACAGGCAG  
TGGATGTGATCAAAGGCACAAGCAATAGGAACCCAGCTGGAAAGGCTCATCAGAAGAAGGAAAAGAGCAGCTCAACCATGGCTGCTGTGAGCCAATTGCTGGCCGATGACAAAAGGCA  
AATCTCTTTGTACTGATCAGGAATAATAAAGATTGAATATTTTGGCAAATCTCTCATGCATGCCAAGGATGCAAAGAACTCTTAAGAAACAGCATTAGAATGTATAATTTTGGCCGTTGGC  
AATGCCCCCATTCATTTGGATTATCTGTTTATATATTTATATCATAGAATATTTCCACAAATATAAAAAGTACTCACGAATAATTTTTCTTCTGCAGGAGGTAGTTATTTAGCATGCATGAGAA  
AGGTAGATATGATTCATCAAATCATATATGCCTGCATGCTTAATTTCAACTTCTATTTTCCTA

>comp149802\_c0\_seq1

AGGTTGAGAGGGCAGGACACTTAATTATTGTCCACTCATAGCAGGAAGAAGTTAAACCTGGTAGAAATCACAGAATCACTTTACAGATGACTAAGCTATCGTAACAAGCAATTCATATATG  
TATAATCATAAATAATATATGCAAAAAATAATCTCCCAAAATATGCTCTTATAGTATTTTGGATTCAACAACAATGATAAATCTTTGGCGCTAAGCATGTGGCATATATAGAATTAAGACC  
AACAAAACATAAGGAAAAAATAGTTCTCTTACAGAATAAGGAAGGTTTTAAATGGATGAGAATACAAGACAAGGCTAGCTTCTCAAGCAATCTGTAAACTCCATGGCTTATGTCAG  
CCATGGGTGTTGAGCGCCTCCACACCAAATTCCTTGCAGCCAAATTCCTAAAATTACGTGCTTGCAGTGCATTCTCAGAGTTGCCACAGTCATCCTGTTTGTCTCCATGAAACTGA  
CGCTCGAATACTGTAACCTTATGCTTCTTACAAAGCTCCTTACAAAGAGGAACAATTCTCCGAAGATGGCACCTTGGCAAGCGAGGAAACAATGGTGTCCACCTGAAACTGTAATCCGC  
CATGAAACCAATCCATCCAAGGAGAACAAGAAATGTCAAGGGTTCCATTGTCTGCTTCTCGAACCAGTCATTCCCCTGTGGCTGACCAACATAAACTGGAAGAGAAATGGCTGAGA  
CAGAACTGAACATGCTGAAGACCTGTAATAAAGCTGGCAACAACAACATAGCCCTTTCGCCCAATTCGGAAGGAATGAAATAAGGTAAGGGTACCAAATCCAGAACACGATCAC  
CCCAACAATCTCTGCCATCGGGAGGGGACCTTCTTCTTTGAGAGGAGGAGGACTATGGATTGAGCAAAAAGATTTAATCTTGGCAAGCACATTACAGGGTAGAAGGTTAAATGCTGGTA  
GCTGACCATGAACCTTGAATGGAATCAAAGGTCATCGTTCTTTCGTAGAAGTAGGAAGTGAGGGAGTTGAATAACTTAGAGGAGACGGCGAAGAGGGGAATATGTTGCAAATCTGGAT  
CAAAATCGAGACTATTGCAAGGCTATATGATGGGCATTGTGTGTTCTCTTCCACCATGCAATACTTATTCCGGTGAGGCAATTTCTGTGACGATTTGGGCCAATCGATTCAAGTTCGGGTTG  
AGCATGACGTTATAATGGCCGGAATCATGCCCTACCCATCCAGATTGGATCCATAGAAAACCCATAATCCCGCCAGCGACAAGGTGGGCCAGAGGCTGGTTGCGCCGACTACCAAGTAG  
ACCGAGGTGAAGAAGAGGGCGAACATAAAACAGAAAGAGAATAAAACCCCATGCCCTTTTCTTTCGAAGAAACCGAGCTTTGTGAACTCGGCGACAAGGCGCGGTAATCCTTAGATA  
CTTCGGAAGTTTGGTAGTCGGATAAGTAATATCCAACGAAGAATCGATCAAGAAGCTTCCAGGCCGGGGCTGGATGGTGAGCGACGAAGGCGTCGGTGACGTCCTGGCCGGCGAGATTG  
AGGAGCGGGATTTGCGCCGGGGATGGTCTTTGACCCAAGTGGTTACATCGTACACCTTGGCCTGGATTGATCCAAAGATCCGACGGGGCTTTGTGCTTCTCAAGCTCCTCCGACGAA  
ATGTAATCCTTTGCTCCGTTTCCATAACCATGGCGCCGGAAGAAACGGCTTGGCAGCCCTGCTTCTTTCGGCCAAAAGAAGCAGAAAAGAAAACCCCTAGATCTCCTTCCCTCCTCTAG  
ACGAGAAAAGAGGGTACGAAATGAAAAGGAAAAAAGACGGCCTTTTCTTCTCTCCGATCTTCTCTAAATAACTCGTTTTT

>comp149812\_c0\_seq1

TACATCGACAACCACACAAAGATCAAATACTAAGCTTTAAAAGAGGTGCATATAGTGAGATGACTAAAAACACACATTTTCATTAATAAGCTACTAAACAGTAACAATTATATAACTATTG  
AATAAAATATTAAGACAAGTGCCATGTAAGATAACAATCTTGCCAGGTTAGAAGATTATTAGCTAGACAAACAAGGCATCAAGAAGCTCATGCTCTCACAATGGATGCTTAGAAATGGT  
AATAGACTGGTGGAAAATATGCTAGATTGGAGGGGGTAAATCATGTAGCTATATGACCGGAAAAGCTACAGGCCCTTGGTCTATGAGGTAATCTCCAGCCTCTCCACCACATATTGCATTGC  
CCTGGTGTGATGGGCTCATATAAATGCCAAAATAATTGCTTGATTGGTCTTCTTAAACAGTGACGCCTCCAGAACCCTTCTTTCCACGTATAACAGATCCTGCCTCTCCCTGGATAACCAT  
ATATTTGTTGGGCCAAGAAACAAGCCAGTAGGAGCTAGGGATCCTGGTTCATTGAAATCATTCATAATAGCAGTGATTTCTGAGGCTTGAAGTGGGGAAGGAATCGCTCTTGGCCCA  
CACGTTGCCATCGTGGCCGACGATCGCAGCCGCGGAGAGGTGGTGACCGTCAATGTCGCACATCAGATGCTCATCAACATACGTTTGGCAAGACATTTTCGCTATCTTCCCTCAATTCCTAT  
CGATCTCTGTTCTCTCCTCTCCTCTTCTTCTCTCTCGCTGCTCTTCTCTAAATTTTGAATTTGGAGCAATTAATAAATATTAGTACGGAGAAAAAACCAGGATCTCAGGCGCTA  
GTCAGCCGCTCACGAAGTCATATTAGATTAGAGCCCATCGCGTCCGCTCTTTTTAGTATTTTCTTTAATTAATGAAATGTGAAAATCTGTACCCATTGGCTTGGAAAGAGTTAGGAATCTCC

GGCCCAACGGAAGAGCAACAGTTTCCTATTTCTGGTTGCCGGTCTATGGACCGGTGGCGGATTGCCGGTTACCGTTAGGCCGTAGCGCGCCAAATTCGTTATGGTGGGGCCCA

>comp150057\_c0\_seq4

ACACAGATCGTTTCCATTAAGAGCAACAATCAGAAGACTTCCAAATCAATCTTCTCACTGTAAAAGACGACGATACATTTAAATATATATTTATTCATAATGCCCCCGACATGTATTTCC  
ACACATAAATTAATATTTATGCAGATAGATTTATATATATTTATGAAGAATGGTTATGAGGTGTTTGCAAAGTTCCTGAGGCCTCGAAAGCATGACCATATGATCTGCCTCAATCTCCATCACT  
TCCTTAACCTGATTATTAATAATCATCCAACGCTGGTAATCTTCAGTAATGGCTGCATCTTGCTTGCAGACGATGTATACTTTATCAACTGAGCCATATCCTTCTTCAGAGAGAATGGGAGCC  
TTCTTCAGATCCTCTTGGAATAGTGATCCAGTTCCTTATCAGTGCATTTGCCAGAGTCAAATCCTTACTTACCATAAAAAAAAAATTATCATTACAGAATTCGAAGAATATAAAACCACAATAA  
TTTTCATTAATTAATGATTCACCTCAGGAGCACAAAGTTGGTACAGATGCTTTCCCATGAACTGAGGGCCAAACAACATTGTGATGAATGGTCTTCTCTTTTTTGGAACTCTCACCTCTTCG  
AATTCAGTATCCATCCATGCAACAGCTGAAATAGACTCCCCAAGCTGCTTTTGTACACATGAAAAGGTTAATTTTTTCAGCAGAAAAGTAATCAGCAGAAACTATATTTCTGGCATTTTTC  
GTCGGAAGAACAGCCGGAAATATTTGTGGCGAAAAAAATTGCCGGTGTGTTTTCTGACGCGATATTTCCGGCGTATTTTGATTGTCATACCTTACTAAAAACAGATGGAGGGGGAGAAA  
GAGTATCTGGCATGAAAGCAGATACGAAGACAGCAACGGCTATTTTTTGAGGAAAAGTTTCCATAGCGAAAAGCCAGATTCAGTCCTCCTAAGCTATGACCGACAAGGACGGCTTTTTCTC  
CTTCTGGAAGTTGAGCCAAAGTTTCCATCAAAGGCTGGGAGTACTCGGCGAACGTGAAAACATCTTCGACCATTCTCTTTTTGTTGATGCCCGATGCGGCAAGATCTAATGAGAGAACAG  
AATGGCCATCGGAGCGCAGAGCGGCCTCCACTTTGTACCAAGTCCAAGCTCCATGGCAAGCACCGTGTACTAAGATGATTTTTAGTTGCTGCTCTGGAATCATCTCTGTTATGCTTCTTGC  
ATGAGGAAGAAGATGCTTAATGAGAGAGAAAAGAGAGAGGGGGGACAGGGAGAGAAGAGCTGCAGGAATTTCTTATTCTTTATTCAATAGGCCTAATGGCTTAGTGCAAGAGG

>comp150057\_c0\_seq7

ACACAGATCGTTTCCATTAAGAGCAACAATCAGAAGACTTCCAAATCAATCTTCTCACTGTAAAAGACGACGATACATTTAAATATATATTTATTCATAATGCCCCCGACATGTATTTCC  
ACACATAAATTAATATTTATGCAGATAGATTTATATATATTTATGAAGAATGGTTATGAGGTGTTTGCAAAGTTCCTGAGGCCTCGAAAGCATGACCATATGATCTGCCTCAATCTCCATCACT  
TCCTTAACCTGATTATTAATAATCATCCAACGCTGGTAATCTTCAGTAATGGCTGCATCTTGCTTGCAGACGATGTATACTTTATCAACTGAGCCATATCCTTCTTCAGAGAGAATGGGAGCC  
TTCTTCAGATCCTCTTGGAATAGTGATCCAGTTCCTTATCAGTGCATTTGCCAGAGTCAAATCCTCAGGAGCACAAAGTTGGTACAGATGCTTTCCCATGAACTGAGGGCCAAACAACATTG  
TGATGAATGGTCTTCTCTTTTTTGGAACTCTCACCTCTTCGAATTCAGTATCCATCCATGCAACAGCTGAAATAGACTCCCCAAGCTTACTAAAAACAGATGGAGGGGGAGAAAAGAGTATC  
TGGCATGAAAGCAGATACGAAGACAGCAACGGCTATTTTTTGAGGAAAAGTTTCCATAGCGAAAAGCCAGATTCAGTCCTCCTAAGCTATGACCGACAAGGACGGCTTTTTCTCCTTCTGG  
AAGTTGAGCCAAAGTTTCCATCAAAGGCTGGGAGTACTCGGCGAACGTGAAAACATCTTCGACCATTCTCTTTTTGTTGATGCCCGATGCGGCAAGATCTAATGAGAGAACAGAATGGC  
CATCGGAGCGCAGAGCGGCCTCCACTTTGTACCAAGTCCAAGCTCCATGGCAAGCACCGTGTACTAAGATGATTTTTAGTTGCTGCTCTGGAATCATCTCTGTTATGCTTCTTGCATGAGG  
AAGAAGATGCTTAATGAGAGAGAAAAGAGAGAGGGGGGACAGGGAGAGAAGAGCTGCAGGAATTTCTTATTCTTTATTCAATAGGCCTAATGGCTTAGTGCAAGAGG

>comp150075\_c0\_seq1

TGAAAGGGAAATGATAGGTACGAGCTTTTATATTGGTGAATCCACCTGCAGTCAGGCGCCAATGCCTGAAGCCCAATCCAGGTCTCCAATGGCGGCTTCTCAGCTTCGTCATCTACAGCT  
ACCAGCGCTTCACTCATGGCGTCGAGCAAGGCTCTAATCCATATGCCTCGTCCGGAGTTTGGAAATAGCAGGGAAAAAATACTTCCCAGATTTCAATATGAGGTGAGGCAGCTCTTTCCCG  
TGCTTGTTTAAACAGTGCAATGTAGGATAATGAGCGTGGTTGCTGTGTGTAATCTGCATGTTGCCGATATTTCTCTGGTTTTCTATTACGTTCTATGATTTTTTTTTTTCATTGTTTCGGTTATCAT  
TCTTTTAATTCTTTAATTAATTTCTTAATCGACTCCTTGATATGGTTATTTTTGAAAATTTAGATCTGATTGAGTTGCTTACTTCGATATGTAGCGATATTTGTT

>comp150076\_c0\_seq1

CATCAATCATAATATTAACAATAACGAACTATAAAAAATATCAATGACATAATATTAATAATTTTAGGATTAGGGCTTTATAACAATAAAATGTTTTAGTGCCTGTGACAGACACTATCTAAT  
GCAATAAAACTGTTGTTTCATGAAAGCTAAAAGAAAATATATCTTCATTTAATGGATTGATTACTCATCATCTTCATCCTCATTTCATCATCCTCACGAGTGCTGAGCCCCCTTCCACGCAA

GCTATTTTGAATTTGATTTGCAATATTTGGCGTTAGCCGATCTGAGAAGGAATCCAAAGCATATCTAAGCATAATCTCCACTGCCTGCTCCACTTTTATCATATGTTGATGTGATAGTCTTGAT  
CGAGATTGAGCCTTGGAAAGAGTCATCTATGTGCACACCGCGAGTAGTCCTTTTAAAATTGGAGCTAAGATAATTGGATATGTGCGTATACAGTTGGGATTTTCCTGAGTTTGTGTCATCCTT  
CATCCATTTTTCAATGTCAACACCACCCTTATATTTACATGAGTCCCCACACCCCTGCAAAATTGGCTGCATAATCATCCATCTTTTGTATGTAAGTGTTTATCAATAAACTTGTCTGTACCC  
TTCTTCATATGTGTCATGTTACATAACTCTGCTTGTGTGGGCAACTTCTCTTGTGACATAGACATGCTGTTACAAGGAGTGATGAAAGAGATGGCATAACCATCATGCTTTGCTAATTCACCT  
TCCATAAGGTGGTTTGAATGAGCCACTTGTGATCGATCATTCTGGGCATCTATATTGCACTTATCAATCATTTGTAAGGACATGCATTTTGAATCCTTTTAGGATGGTTATCCGCCCAAGTA  
GAGATATCCTTAGAGCTAGTCCCCATTTTCGCAACATTGTGTGTTTCGCTTAAAATATGACTGACATGACTTTGTATTGTATCCTCCCAAGTACGTCGAAGAAGTGACCCTGGGGTTCATC  
AATGTAGCTATAACAATGCAGAAAATACTTCCATTGCCTCTCCCTCTCATCATGTTGAATGTCTCTCCAAGACATCCACGGTTCATCAATTCCTGTTTAGACTTTTGAATGCCCGAAGAG  
ATGCCTTTGGATTATTGAACTTCTCAGCTTCTGGTTCATTGAAAATTTCTTTTGGTCCATTGTATCGAATCACATCTTGCTCAAGAGTGAGTTCCTCTTGCTCCTCAATCTCAATTTGCTCGT  
CGTCTGGTGTCTTCACTTGTATCATGAGATCCATGGGTGGACGCCATATCTTAGAGCAACGAGCGTCTTTCTGTAGGGTTTTACTATCGTTGCTACTCCTATGGTTGCTAATGAGGCT  
CATTTCTGACTACCTCCACAGCACCATCGGGTAAAAGTTATAAGAACCCAAAATAGTAAAAGCAAAGTAAGGTGGGTATTT

>comp150077\_c0\_seq2

GTTTGCTCCCTTTTTCAGAAATTAAGGTTGGTTCCACCCTTGACCGAAGCCAGACAAGAGCACGAGAGAATTTCTGAAGCCACTGACTATCAAGAATATTGACAATAATGAAAAACAGGAG  
AGCCAAACGAGTAAAAATTTAAAATGTGGGAAGCAACAAAGAGGATGATTTTGATACCTGGAACAAATACAGCAGCACAATGATTTTGATCCCCATACCAAGCAATTATATATGATTGAT  
GAAGATTCAACCAACAAAAGAATGATAACATATGAATATTAGCCTCTTCAGTCAAATATTGAGCAAAAACAACAACAAAAAGTGGCAATCCAATCTCATTATTATCTCCCTTGTAGAG  
ATAAAAGATAAAGAGTTGTCAAGATAAATCCCCATAACTGAGGCGACGAGCCTGAGAACCATCCGCCATGGTAACGGTAGATAATGCCAAGCACGCATTCTGTCATGCACGATACATC  
GAAAGACTCGATGAAGCTAAGGTCCGAAATACGAGCTTTCGTGCCTGCAAATCGCACGTAATCTTCAAACACTGCAGTCAAGCACCAGTTTTGTAGTTTCTGAAACAGCCGATAAGGC  
TACCCGTCCGGTGTCTTCCACGCTTGCAGTGAACGAGGACAGGATGGTTTCTTATATCAAGCAAACTCTCAGCGCTCCCATGATGGAACCATTCGGTATGGTACCAAAGGCCTCTTGCT  
ACCGTCAATTCCAAACTGAAAGATCCGAATCCCAACCGAATTCATATATGCCGCCATGTCATCCGGGTAAGGCTCCGGGCACAAATAAACGACGGATCGCAGGTTTCAAGGAA  
TCCAATGTTTATTGTGCCAGGAAATCCAGAACGGTATATACCGTTGTCCACCATTGCAAAATTGGACGGTGGGAGCAACAACGCTTTACCACCGTCGTTGAAGTCCCCGCCGGGAAAGCG  
CGAAATTCATCACGATCGTTTCTTCTCCCGATTTCACACTATCATCTCCTTAATCTCATCATCTCTTTTCGCTCCAGAATCATCCCTCCCTCCTCTCCGAATTCACAGCTTGATCGA  
AAGAAACGAGAAGAGGCGACCACTCTCCTCTTCTTTCTTCTTTTATGCCTTCCCCTATCGACCCGTCGCACTTTCCG

>comp150083\_c1\_seq3

GATCAATGTACTCTGGTAACATGTCACTCAAATGATCTATAAAGTATATAAAATTTGGTCTAATACCGAGAACAAGAGTGATGATACAAGGAAAAAGTCTGATTAAACCCACAAACAAGGA  
GAAACCCTGAGATCCTTAACAGGGATCGAATGAAAGGAAGAACAAGAATTGAAAGCAATTAGCACAAGCTTGGAAACAAATATATCCACTATCTTTGCTTTTAAACTATTATCTATCTTCC  
TTTCAGTATTATCGATCACCTCTCTATTTTTAGAAGTACTCGCGACAACAAAGCAATATAACATATATAATCAAAGTTTTTGGTGCCTAAGCATGGGTTTTGCTTTGCCGGGCAGATCAATT  
CAACATTTTGTCCATTGAGGTCAAAAGCCAGGACCATCGATAAAGGTGTGATTTTGTAAAATCTTTTATCTTCTTGATGATAGTAAACATCCTCAAATTGCTCCACGTGCATCATGGCGTAA  
AGAGGCAACTATGGGAAAAGAACCATGTTTGTATCTCCTTGTCTTGGCAACGGCAGAGATTTGTACGTCCATAGATATCAATAGCAGTTTCTAATAAGTCATTAGA

>comp150083\_c1\_seq4

TCCTTGGAGCCAAAGCAACGACGATCGATGATGTAACTATTAAGGGAGGAGAAGCAACGATGGCAATAGACACCAATCTCTTCTTTTATTGTAAAAGTCACAGAAGGTGAGTGAATTG  
GAGGCTTCTCCAGCTTCACTGGGAAGTAATAACCAAGGCGATGGATGGAATTGAATTCCATTGGGTACATCGTTGAAATGAATAGAATTCCATGAGGTGCAGACAATAGAGAGTCGAAGG  
TAGTCTACAATGGGCAAATTC AATGAGATGTAATGGAGGAGATCTATTGGGAGATCAGACCATGTCAAAAATATTATTGTGTATGTGGTGG

>comp150083\_c1\_seq5

TAAAAATGGACTTATAATTTAAAAATATTTATATTACATGGTTAGCAAAGATTAAGATATAACAATTTAAGAAACTGATGGTTTTAAACCAAATTGAAGGGGGACAATTTGGCTGTGAATCCGA  
GTCAAGGAAATAATGAAATTGTTCACTATGAAGATCAAAAAGCCCAGCATCCTGATCAACGTACTCTGGCAACATGTTGCTCAAATGATCGGCAAAGTATATACATTTTGGTTTTAATTCTAG  
GAGAAAATGTGTGATGCAAGGAAAATGTTTGATTACATCCACAAATAATGAGCAACGCCCTAGATCTTTAACGGGGGTCCAATGAGATGAAGAACAAGAAGCGATAGCAGTCGGTACA  
AACTTGGAACAAAGATACTCATTGTCTTCATTTTCCAATAATTATCTATCTTCCTTTTTGTAGTATTGATCACCCCTCTCTATTTTTAGGAATGCTTCTGACAAAAAAGCAATATAGTACATGT  
AATCAGAGTTTTTTGGTGCACAAGCATGGGTCCTGAGTTACCGGGCAGATCAATTCAACATTTTTTCCATTGGCGTCAAAAAGCCAGAACCATCGAGAAATGTGTGATTGTGTAAAATATTTT  
ATCTTCTTGATGATAGTAAACATCCTCAAATTGCTTCGTATGCATTATGGCATAAAAAGGCAATTGCGGGCCGAGAACCCATGTTTGATCTCCTAGCCTTGCCAAAGCAAGAGATTTTGTAC  
GTCCATAGATATCAATAGCAGTTCCTAATAAGTCATTAGAAGAGACAATGATCTTCTGAAAATATATATCACGTAATCCTTCTCTCGTCTATGGTAAAATATGAGTAAATTCATTACAAAAAAA  
TCTAATAGACCTGTTAGAGCCATGTTTGGGGGTTATCATATGCCCTTTGTCTTTGGGGATGGTGAAAAGAGACGGGAACGATATTCAGCCTTTGTGAGAGGG

>comp150083\_c1\_seq8

TTCTTAATAAGTCATTAGAAGAGACAATGATCTTATAAAAATATATATCACATAAGCATCCCTCGTCTGTGCTAAAGTATGAGTAATTTTCATCACAAAAAAAAGTATGGAGTTGTTGGG  
GTAATATTGGGGCTTTATCATATGCCCTTGATCTTTAGGGATGGTGAAAAGAGATGGGAGCGATATTCGGCCTTTGTGAGAGGGTTAAAGAGATGAGGCTGCATATCTTCTTTGTCAAGGG  
TAATGAGTCATCCATCCTTAAAGCCAAAGCAGCGACGATTGGTGTATAACTATCAAGGGAGGAGAAGCGATGATGGCAACTGACACTGGCCTCTTCTTCTTTGATTGTAAGTCATGGA  
AAATGAGTGTGTTGGAGGCCTCTCCAGCTTCATTGGAAGCATTAGCCATGGCAGGGATGACATTGAATCCATTGGTTGCATTATTGGAAGAACAATAATCCATGAGGTGCATACAACG  
AAGAGTCGAAGGTAGTCAACAATGGGCAAATGTGATGAGATGTAATGGAGGAGATCTATTGGGAGATCAGACCATGTCAAAATATTATTGTGTATGTGGTGG

>comp150083\_c2\_seq1

CTGCACCTCATGGAATTATGTTCTTTCCAATAATGCAACCAATGGAATCAATGTCATCCCTGCCATGGCTAATGCTTTCCAATGAAGCTGGAGAGGCCTCCAACACACTCATTTTCCATGA  
CTTTACAATCAAAGAAGAAGAGGCCAGTGTGAGTTGCCATCATCGCTTCTCCTCCCTTGATAGTTATAACACCAATCGTCGCTGCTTTGGCTTTAAGGATGGATGACTCATTACCCCTTGACA  
AAGAAGATATGCAGCCTCATCTCTTTAACCTCTCACAAAGGCCGAAATATCGCTCCCATCTCTTTTACCATCCCTAAAGATCAAGGGCATATGATAAAGCCCCAATATTACCCCAACAAC  
TCCATCAGTTTTTTTTTTGTGATGAAAATTACTCATACTTTAGCACAGACGAGGGATGCTTATGTGATATATATTTTTATAAGATCATTGTCTCTTCTAATGACTTATTAGGAACAGTTGTTGCTA  
TCTATGGACGTCCAAAATATTTGGTTTTGGCAAGGCCAGGAGATCAAACATGGGTTCTCGGCCACAGTTGCCTTTTACACCATGATGCACGTGGAGCAATTTAAGGATGTTAATATCAT  
CAAGAAGATAAAATATTTACACAATCACACATTTCTCGATGATCCTGACTTTTGACCTCAATGGACGAAATGTTGAAGTGATTTGTTTCGGCAATGCAGGACCCATACTTGCATTTCAAAA  
AGTTTGATTACATGTGCTATATTGCCCTTTTGTGCGGGAGCACTTCTAAAAATAGAGAGGGTGATCGATAATACTGAAAGGAAGATAGATAATAGTTTAAAAAGCAAAGATAGTGGATATATTT  
GTTTCCAAGCTTGTGCTAATTGCTTTCAATCTTGTCTTCTCTTTCATTCGATCCCTGTTAAGGATCTCAGGGTTTCTCCTTGTGTTGGGGTTTAAATCAGACTTTTT

>comp150091\_c0\_seq3

GATCGTTGAAGGCATCAGTTCGTTAATACGTCTGCTCACAAATTTCAAACAAACCTATAAATATCTCTCTTCTATCGTCCGTAGACTTCCCCGAGAAGTCCCGTCTTTGTTGCAACCTC  
CATTAACAAAGAGAGGAGAAGCATCTTCCCCTCTCGCTCTCCTCCCTCCTTCACTCAATTTGGAGCAGAGCTCGAGTCGTCGACGCCAATACATGACGGCCTCCGGCGTCGCCCCGCC  
GGAGGCGCCGGCAAAGATCATCTTCGGCAAGTACGAAATTGGCAGGCTCCTCGGCTACGGAGCCTTCGCCAAAGTCTATTACGCCCGCCACATCCTCCAGGGTCACAGTGTAGCGATTA  
AGATCATCAGCAAAGGCAAAGGTTATCCGCGGGCCTCGTCTGTTACACCAAGCGCGAGATCGTCTGTTATGCGCCGCTCCACCACCCAAATATCGTTCGACTCCTCGAAGTCTCTCGCT  
CCCCTCCAATATCTACTTCGTTCATGGAGTACGCCAAGGGAGGCGAGCTTCTTCCCCTCGTCCCGTGGTACCTCTCCGAAGACCAATCCCGAAAATCTTCCACCAGCTTATCTTCG  
TATCGCCTTCTGCCACGCGCGCGGCTTCCACCCTGATCTCAAGCCTGAGAACCCTCCTCCTCGATGATTCCGGTAATCTCAAGGTCTCTGATTTCCGGCCTCTCCGCTGTGGCCGAACAG



ATTCGCTCCGACGGCCTGTTTCACACGCTTTGCGGTACTCCGGCTTACGTTGCCCTGAGATTCTCTCCAGGAAGGGCTATGAAGGGGCTAAGGTCGACATTTGGTCCTGCGGGGTCATC  
CTATTCGTTCTCAGTGCTGGATATTTACCCCTTCAATGATCCCAATTTGATGGCATTGTACCGTAAAATCTACCTCGGTGAGTACCGATGCCCTAAATGGATTTCTCCCGAGCTCCGTCGGCTG  
CTTTCCAGGCTTCTTGATACCAATCCGGAGACAAGGATAACCGTGGAGGGAATCTGAATGACCCCTGGTTCAGAAGGGGGCTGGAAGAGGGAAACATGTTTAGATTGATGAGATTCCG  
GGAGGATATCGAAGAACGGATTGCGAGGATCGAGAGGGAAAACGATGAGGACGACGACAGAGATCTCAATGCCTTCGATATAATTTCCCTTTACTCCAGATTTGACCTATCCGGCTTCTT  
CAATTC AACCGTTAAGGCGCGGAAGCGTTTCGTCTCGGCCGGCCTGTGATGCGGTGCTTGTGAGGGTGGAGACGGTGGGAAGGGAAGAAGGGCTCGTGGTTCGCCGGCGGCTGAG  
GAGTTTGAAGGGGCGTGGCGCCGCCCGCTGGAGGGTTGGATGGGGAACCTCATTGTTTGGGTGGACGTTTACCGTCTATCGCCGGAGTTAGTGATGGTGGAAAGTAGAGAGAGGGCGC  
GGCTTGGAGGCAGCGCGGTGGAGCTTTGAGTTCTGGAGGGAAAAGCTTACCTTGGGTCTGAGAAGTTCGGTGGAGCGAGCCGCCGACACCTGTCTGCGCGACGTCCGGTGGATTGTGCGA  
GCGGCCCGTCTACACCGGTTACCGGAGGGGCAAAAAGAATAGGGTCGGCGAGCGAACC GGCGTCCGCCGTTACGTTGAGGAGAAGGTGATGTTGGAAGGCGAACCAGCGATCAACG  
GCAAATGAATGATATTGTTCCCATCTTAGTTCGACCGTTGGAAGGCGCGTGATGGTATCTACACATGCATGGATCAGACTGGCTCATATCCTTGCATTATTCTTTATAAGTGTAATAATTTTATT  
ATGCATGTATGTATGCACACTCGATGGTAATGCATTAATAATTTTTTTTTTTTTTTTGTCTAAGAATAATAGTTCATGTATTCTTAAACTTCTTGGGAAGAAGAGTTGTGGTGCTCTTGATGAAG  
GGGGCTTGGGTGTA AAAAGTATTG

>comp150093\_c0\_seq1

GAAACTAAATGATTTTGTGCAGATAATTTGGTGCTATATCAACAGTTTTTCTCTCAATAACAAAAGAACGAATCAAAAACCTATTA TAGAGTTTCTATTTTGCATAAAATTATCAGTCTCATAT  
CACTTGTA AATTAGGGTTCATAGCAAACATGGTTCAAAGTATCAACAAAACAGGCAATGGAAAGCATAATAAGCAGCTCATCAATTCTAATAGATCAGTTTTTTCAGATGCTCCACAGCTTGG  
CCAAAACCTCACAGCAGAATATTAACATGTTTCATTCATGAAAGCCATGTCAAATATACAGAAGATGGCCAAGCCAAGAACACCCCAAAATCAGAAATATAAATTTAGTTACCCGCCGATTG  
GTGAAGCATGGCATCGATTTTCATCTCCATCTCCATCTCAAGCTCATGGGGAGTCTGCTCACCGCCAATCTACGGCCATCGAAGAGGAAGGCAATGGAGTCCGAACCAATAGACTGGCG  
CTCACAGTATGCATTTATTAGCTTCTTCAGTTGAGTATTGCGCTTGATCCTGAAGAAAAGCTCGTTGCCATCCTGCCCTTTCACCTTAAGATTGATATGCGTGCCACCCTGATCTTGCTTCTT  
TTCTCCCTGCGTTCGTTCTGACATTCTTTTATCCCCTCAATCGCTCAGAGAGAACTGAGAGAACCAGTGCGTAATCGAAGGAATAGGAAAGGGCCGATCGAAAACGAGAAGCCTA  
AATGGCCGTTTTATAGGGACATTCAA AATTACAGTTAATTGATTTTTTGGAGTCAGTATCAAATGAAACGGCCTAAGCAAACCAACACAGGCTGGGCGGGCCCTAAATATGGCCAAATTATT  
ACGTTGCGGAACGGAAGCGTGCCGAGGTCGGATTTAATATAGGAGAATATTATCTCTTCTAAATTTGTATGGGGAGAATCTATAAAAATTTGATACATATTATGTACAAATATGTACACAG  
TTCATATATCCGAACCGTTATTTCCGTCTAGGCTCCGCATAGAATAGTTTCTCCCAATATACAGTGTATAAGCCTGTGCGAATTGGCCTCCAGACAAATTCGACATCCGCACGTAATAATGAT  
AGCTTCGCAATTGCAACAAAAAATTGAGCGCCCCCTAAAATCCTTGTGGGGTGCTGCCCTTGACCCCGCAACTGGACGCCAAGTGG

>comp150105\_c0\_seq1

AGAAAGTTATTTTCCACATCAGCATTGATAAAAAACAAAGTTCCATAATAATCAAATAACGGTCTACGAACACCAAAATCTATCAATGCTGATAAAAAACAGTCCATCACGAAAAACCTAA  
TAATTGGACAAAAGCAGTCAACCTTGATATTTTTTACTAATTAACCCTAAAGCAAGTGCTAGATTTCCAACCGTCAACAAAAAGATAGCGAGTGAAGTAGAATGCAGATCATTGATAA  
CAGAGTCTGATGAGTCCGTTATTGTTCTCTGGTCTGGCGGTGATGCATTAGGCCCCGTTATCACCTTAATAATCATTCTCTCCCCCTTCGCAATGCCCAATTGACTCCGCTAATGAAATAAA  
AGAGACCCGCTCGCTCGAACTTGA ACTCGGTCTTGCCATTATTGGAAAAGAAGATTGGGTGCATCGATCGACACTTGT CATATTCTGACTCTGTCACTACTAAGACGGAGTCTTATTGTA  
CTTGAAGTTAATGGTGTCTGCAACTTTAAACCGGTTCTTAGCGGCCCACTTGTATAGAAATCTGGATCTTTGGAAGAGGGAATGGCCCAATCTCCATCGCCGCCGACGGCAAAGTCGGT  
GGACAAGGTGAGCAGGGAGGAAATGGAGAAGAGGGAGAAGAAGAGGAGGAGTTTGAAGGAGACGAGAAGTGTGACTTCCATGGCGTAATTA CTGTTTATTCTTCTTAAGAAAT  
GGTAGAGAGAAGAGGACTGTTGGAGAGCGAGACAAATAGGAGAAAAGTGAGAATAAGAAGCAGAGGGATTAGCGTAAGCAGTTAACAAGATGAGACCGTGGGGCTGCCGTGGCTTGGC  
GTGGAATTTGAATTGGTAATAGCCGTTGGAGATCGAGGCGGGAGGCAAGAAGAGAATCCGGGATGGAAACGTTAGATTTTTTTTTTTTTTAATATCCCTTTTATAGCTTTCAATTTATTTT

TGGTATGTTTAAATTATTTCTGAATGACTGGTTTTTTTTATTTGAAAAAAGAAAATCCAAGTCGTTTTAAAATGAATTTAATGAATGGAATTTTGTAGCTTTGCC

>comp150149\_c0\_seq2

AAAATATTAGCGCCTTCTTCTGTTTCGTTGGCTTTCTCTGATCTACAGAGAGGCGCTGAGGCGCAGAGATTTGAAGAAAGGCAATCCTAAACTTACATTTTGTGCGCAGCATCGAAGCTCTTC  
TCATCACATTGTAGCATCGAAGCCAAGATGTTTCATATCAGCAACAGCGTCATAGGTTTCCCTCAACGTTCTCACCTCCTCATATCCTTCCCCATCATCGGCACCGGCCTCTGGCTTCGCGC  
ACACGCCGCTCCGTGTGCGAAAAGTTCTCTCTATGGCCGATTATAATCATCGGCCTTCTTGTATGGTGGTGGCTTTGCTCGGGCTTCTCGGATCTTGCTGCAATGTGTCGTGTTTTCTGT  
GGATTTATCTCTCTGTTATGTTTCTGATGATTGTCGGGCTCTTTTGTTCACGATATTCGCCATTGTTGTTACCAATAAAGGGATCGGTGAGGCGGTCTCGGGGAAAGGATATAAGGAGTATA  
AGCTTGCGGATTATACAATTTGGTTGCAGAACAGGGTTGGGGATTCCAAACTTGGGGGCGGATTAAGAGCTGTTTGGTTGATGCTGGGGTTTGTGGAGAAGTTCAGCTCTTGGTTTTTC  
AGCAGTCCGATGATTTCTATATGCAAGGCATATCTCCATACAGGTATTATATTCTATATATTGTCAACGGAATTTGAAAATTGATGCTAGATTTTTATGCTAAGAAGAAAATTTCTTAAGCTCT  
CAAAATTCTAAATCTAATATTTATGAGCAATTTTGTAAAGGGTGTTTTTAAAATTGCTCATAAATATTAGATTTAGAATTTTGAGAGCTTAAGAAATTTCTTCTTAGCATAAAAATCTAGCAT  
CAATTTTCAAATCCGTTGACAATATATAAGATATAATACCTGTATGGAAGATATGCCTTGCATATAGAAATCATCGGACTGCTGAAAAACCAAGAGCTGAACCTTCTCCACAAACCCAGCA  
TCAACCAAACAGCTCTTAATCCGCCCCCAAGTTTGGAAATCCCAACCTGTTCTGCAACCAAATTTGTATAATCCGCAAGCTTATACTCCTTATATCCTTTCCCCGAGACCGCTCACCGAT  
CCCTTTATTGGTAACAACAATGGCGAATATCGTGAAACAAAAGAGCCCACAATCATCAGAAACATAACAGAGAGATAAATCCACAGAAAACACGACACATTGCAGCAAGATCCGAAGA  
GCCCGAGCAAAGCCACCACCATCAAGAAGAGGCCGATGATTATAATCGGCCATAGGAGGAACTTTTCGCACACGGAGGCGGCGTGTGCGCGAAGCCAGAGGCCGGTGCAGATGATGGG  
GAAGGATATGAGGAGGGTGAACAACGTTGAGGAAACCTATGACGCTGTTGCTGATATGAAACATCTTGGCTTCGATGCTACAATGTGATGAGAAGAGCTTCGATGCTGCGACAAAATGTAA  
GTTTAGGATTGCCTTTCTTCAAATCTCTGCGCCTCAGCGCCTCTCTGTAGATCAGAGAAAGCCAACGAACAGAAGAAGG

>comp150149\_c0\_seq3

AAAAAAGTTAGAAAAATATTGTTACAATAGACAGAAATTTCAAAGTAGCAATAGCACAAACATATGAAATCAAACCTCTACTTGTTTTACCTTCTCACATATACTCATCAATACAATCCA  
CTAATCCAAAAATTTTTTAATTATAACCTCTGTAACGTAAATATTGGTTATCTTTACAACCTATTCCTAAAGGCACAGCAGCCAATTGAATAAATGACAATGAGAAACACAAGGAGGCCAACA  
TTGAAAATTGCAAGTTTCTCCATTGCATTTTTATATTGCAAGTACTCCAGCTTTGCATGAGCTGCAGTCAAAGCACAAGCGATTCTGCTCATTGCTCCATGTCTTACAATCAATATCATT  
GAATTAGGATTATCTGATTTTGTAGACTGTCCAGTATGTGGCATTCACTTGTTTGTACCCACAATCTGAAGGTGGCTTACAGCAACCTGACTGGAATTAGGTTGATTTGTTTGAATTAGTAAT  
GGAAAGAATGGAATTAATAATGATTAAGTACTAGGACAGTTTGTAGAGGTAAATATAAGAATTTGCAGACAGTAATTTGGATCAAACCTTCAATCCATTTACTTCAAGACAAAGCAAGAATATGGCT  
ATTGAAAGAAAACAATTTGTTATTTATGCATTATAATTTTTGCTTGTAGCTCAGTAAAATCTGCTTTAGTTGAGGTTTTGAAGAAATCAATATTTAGATGGGATACTTGAATAAGTTAATGTT  
TTTTTATTACAACAACAACAATAACAATAACAACCTTTGACCCACTATTTGGGGAGCTCTAAGATTTCTAAATTTGAGATTTATAAGATTCGCTAAATCCTACTTCTAAGTGATCAACTAATC  
AACCCAGAAGTTTCTGGTAAGTCTTATTTGTACTCTACTATAAACAGAAGTTCTTTCAACGGCTACTAGTCCTGTATCAGAGTTCGGTGATGTTGCTATCAGAAGAATCCACAGAGGTTTT  
TAAGAGGTTTCATGTAATGAGTTTGGATCCAGTAGCTGTTTCGATCCTTGTGGCCGTTTGGTTCCATGGCTTTAGTGGTGCTTCTCCTCTGCCTGGATTCACATGTGTAGCTTACGATGTCATT  
TCAGCAACCTAAAGATCATTATTTTACACGATTTCAATCCAGGAAAATCC

>comp150171\_c0\_seq1

GCTATGGAGTCAATTCCTGTTTAAAGAGAAGAAGTTGATAGTGTATGTAAGCCTACAATAGGAATAAGTTTGTGGTTAATCATGCAAAGTTTCATGTTCCAACCATACCTAATGATAG  
ATTGTTATATCCATCACTCAGTTCCATCATATATCGTTTCATCTCATTACGGTAATGAAATCATCCTTGAAAAAATAGTTAATGAAAAACAAAGGGGGGAATTATTCAAACCTTTAAAGGTA  
GAGAAAACCTTAATTTCAATTTGTTTTGGCTACTTAGAGCTTTCAATTTCTAAATAGTTTCGAAATTTGAAGAACTGTATGAAACATCCTACCTTCCATTTGTTTCAACCTGAATCATGTAA  
TTTTAAAGTATCTCATCTAAGCATTATTTATCATTATAACAAGAAAGCATAAATAATTAACAATTAATAATATCATGTAAGGAATTCTAAATCTGGCTGGTGTTTAATTTCTTATTATCTA

TTTTGTAGAAAATCGATGACTTTTTGTTGCTAGGTATAATTAATTTGACTCTGCTACCCAACCTATCATGACACAGTTGTGGTTTTAGGAACATTCTATATTTATGTTGAAAATTTGAGCTTTC  
AGTGCCCCCTTTAGCTTCTATGCTACGTTGTTAGCATACTGTTACTTGAAAAGAATCCTAAATATCTTAAACGCTGGAGTTCTAACTTCACATATAGACTGATAAACACATACTAATCATCAC  
TGTTTGAATACTTTCAAGTAAGGAATAAATGATAGGGTTATGGTCTTTAATAGGCCAAAACAGTTCAAGCACGCTTTGATATCATGAAACCCCTCAAATTTCTTTCTTGCTTGCTTCCATGGCT  
AGGCTCGTTCTAATTTGCTTGCTTTATTTCAACTAGCAATATGTCATATAAACGATTTCATAAAGGCAACATAATCAAAGCACTAACTACTATAAATCTGACAACCTTTTAGGTCATTTTCTC  
TTCAAATATCCACCAGATCCAAATCTAACATATAATAGAAAAGTGAAACCACAGAATTTCCAATTAAGAATGCTTAAAATATCAGATGAAAAGTCAGGTATTGGGAAAGTACCAAAGATA  
TCAGCCACAGCCTCT

>comp150184\_c0\_seq2

AAACCCCAAACCTGGCGGCTCTTTCCCTGGTTTCCCTCATCCATTTCTCCCATGGCCGACTCGAAATGTCCTTCTTTATCTAGGTTTTCTTACATCGATCTACTCTGGTCTTAAACAGGGTTCTT  
ATTATCTCAAGAATTTGTCTAAATGCCAAGCTCTGTTCCCTCTCGGATATTCGCCCTAACCTATGCGAAGATCGATCGGCAGTTTTTGCCATTTTAGGCGGTGTGCGCTGTAAGCAGGAGA  
AATGCTCATTGGGTGAGATATCGGTAGGCTGAGATGAAGCTTGACGCTCTGCTGACCTCCGCAGGCATAAACATCGGCCTCTGTGTGTTCTTTATCTCGATCTATTCGGTGATCAGGAAAC  
AGCCTTCAAATTTGTACGTGTATTTTGGGCGGAGTCTCACCCAGGAGCGGAACAAGCCAAATGATTCCTTCAATATTGAAAATTTTTTGCCCTTTCCAGGTTGGATACTCAAGGCATGGGG  
ACCAACCGAAAATGAGATATTGGCATCCGTCGCGCCTTGATGCTGTTGTCTTTTTAAGGATGATTGTTTTTCAGTATCCGAATATTCTCTATTGCTTTCCCTCATCTGCATGTTGGGGTATTGCCA  
CTGAATTATTATGGACAAGAAATGACTCACAATCAAATTCCTCATGAATCTTTGGAAGTTTTTACTATTGCAAATGTTAAGGAAGGTTCTCAATGGTTGTGGGTTTCATTGCCTTGCCCTGCA  
TATTATCTCTTTCTCAGCTTGCACCTTCTTTACTTCGAATATCAAAGAATTTCCAAACTAAGACTGGATCATGTTACAGCACGTCCTCTAAACTTAGCCATTTAGTATTCTTGTTCCGGTC  
GATACCGAGATTAAGAGACATGCCACTTGATGATGTCATTAATAAATTTTTTCATAACTTATCATGGAATGAGTTACTTATCACATCAAAGAATACATCGGAGTGGAGCATTTCACAAAATTAT  
GACCAATGCGGAGAAGGCGTGTACGAAGTTTGTACGCCTAAGGGCTGCAAGTTTTGATCTTAAAAGAAGACCTGCTTCATATCGATGTGGTCTATGTGGTGGAACTTCTAGATCTTATGAT  
CTGTATGACAATGCCTCTGACGTTGAGGAGAGAAGAACTCCACTTAGCCGTTGAGATTCGGGGAAAAAGGAAGAGGATTGTTTCAGCTGCATTGGTATTTTTTAAGACACGGTATGCTGCA  
GTAGTGGCTTCTCGAGTTCTTCAATCATCAAACCTATGTTATGGGTTACTGATTTGGCTCCGGAACCTGATGACTTATACTGGTCAAACCTTTCAATACCGTACAGGCAACTTTGGATTGCG  
CCGAATATCAATAGTGGTGGCTACTATTCTATTTTTGTTTCTGTTTCTCATCCAGTTACATTTGTGCAAGGTCTTACACAGTTGGAGACATTACAGCAAAAACTCCCATTTCTAAGAGGTAT  
ACTAACAAAGAAATACATGATCCAACCTGGTAACTGGCTATCTTCCAGTGTCAATTTGCTTCTATTTTTCTATGCTGTACCACCAACAATGATGCTATTTTCTACTGTGGAAGGAGCTATCTC  
CCGCAGTGACAGAAAAAAGAGTGCATGTTGCAAAGTATTATACTTACGATTTGGAATGTTTTCTTTGTCAACGTTCTATCTGCATCTGTTATCCATCAGCTAATGTTTCATTTCCCATCCAAA  
GACATCCCTTTTGTCTTGCTAGAACTTTACCAGGACAGGCTACCTTTTTTATTACTTATGTCTTGACTTCAGGCTGGACAAGTTTATGTGCTGAACTAGTACAATGTTTTCCCTTACTTAT  
AATCTGCTACAAAAGTATGTATTGAGAAAAAAGTTAGATGATCCAAATATGGTGCCAACATTCCCATATCACACTGAAGTCCGAGAGTCTTGCTTTTTGGGGCTTCTCGGATTCACATGTTT  
TATTTTGGCACCATTGATATTGCCATTCTTGATGGTGTATTTCTTGCTTGCTACTTGATATACCGCAACCAGATGCTTAATGTTTATCGTACAAAATATGAGAGTGGGGGACAACCTATGGCC  
CGTTGTGCACAACCTCCACAATATTCTCCCTTGCTTGCACAGATAATAGCCCTCGGAGTATTCGGAATAAAGAAATCAACGGTTGCATCAGGTCTAGTCGTCCCTCTTGATATTACCC  
TCCTTTTCCATGAGTACTGCAGGAAACGCTTCTCCCAATATCAAAAACCTTCTCTGCACAGGTTGGCTCCCTGCTTGTGTTTGTACAACCTCTGCTGCCCTCGTTGAGATGGATAGAGAGGA  
TGAGATGCTGGAAGATGGAAGAAATCCACCTGCTACTTCAATCTGCTTATTCTCAGCCTGTACCCAAAGATAAAGATGAAGATGAAGATGATGTGGTTGATGGGGTGGAGACGGTGG  
AGCGGAGAACTCTGCTTCAAGTAAATTTGATTTTACTACAAGCAAATGAGCTGATTTTGTGTTGCGACGTGCTTGGTGCCATTTTGTAGTCATATTCTAGCTCATCAATGTAAGGATCTCCTTCT  
CCAGGAGCCACCTGGACAGAACCGTTTCTTGCTTGTAAATCTTAGTTGATCCAAGTATTAATTTCTTTTTTTTAAAGTGAATAATGTTTAAAATTTGTCAGCTTACCACAGCATTTTTCTA  
GGTACTGGCAATCTCGACCATGAATTTACTAGTGAATAAGAACATGATCCTCGAGCATGAAATCTTCATTGCGCTACTAAGCTGCCAATGAGTGTGGACTGCAGACAGAATGCAA  
AACCTCAGGTCTTTTGTGTTGTTGCATAACTAGAGGGTAGACTAAGATAGATATAGTCATCAAGCTCAAGTTGTAACCTTGACTTGCCATTTTCTTTTTCTATTGAGTAAATTAGACCAGTTTC

TGCTGTCTGAGATGTTTGCAGCATATATCATAAACCATATGGTTCGAATTTGGCTAAACAATTAACCCAATACTACTATGTATGCAAGCCCAA

>comp150184\_c0\_seq3

AAACCCCAAACCTGGCGCGCTCTTTCCTTGGTTCCTCATCCATTTCTCCCATGGCCGACTCGAAATGTCCTTCTTATCTAGGTTTTCTTACATCGATCTACTCTGGTCTTAACAGGGTTCTT  
ATTATCTCAAGAATTTGTCTAAATGCCAAGCTCTGTTCCCTCTCGGATATTCGCCCTAACCTATGCGAAGATCGATCGGCAGTTTTTGCCATTTAGGCGGTGTGCGCTGTAAGCAGGAGA  
AATGCTCATTGGGTCAGATATCGGTAGGCTGAGATGAAGCTTGACGCTCTGCTGACCTCCGCGAGGCATAAACATCGGCCTCTGTGTGTTCTTATCTCGATCTATTCGGTGATCAGGAAAC  
AGCCTTCAAATTTGTACGTGTATTTTGGGCGGAGTCTCACCCAGGAGCGGAACAAGCCAAATGATTCCTTCAATATTGAAAATTTTTTGCCTTTCCAGGTTGGATACTCAAGGCATGGGG  
ACCAACCGAAAATGAGATATTGGCATCCGTCGGCCTTGATGCTGTGTGCTTTTTAAGGATGATTGTTTCAGTATCCGAATATTCTCTATTGCTTTCCTCATCTGCATGTTTGGGGTATTGCCA  
CTGAATTATTATGGACAAGAAATGACTCACAATCAAATTCCTCATGAATCTTTGGAAGTTTTACTATTGCAAATGTTAAGGAAGGTTCTCAATGGTTGTGGGTTTCATTGCCTTGCCCTGCA  
TATTATCTCTTCTCAGCTTGCACCCCTTCTTACTTTCGAATATCAAAGAATTTCCAAACTAAGACTGGATCATGTTACAGCACGTCCTCCTAAACTTAGCCATTTAGTATTCTTGTTCGGTC  
GATACCGAGATTAAGAGACATGCCACTTGATGATGTCATTAATAATTTTTTCATAACTTATCATGGAATGAGTTACTTATCACATCAAAGAATACATCGGAGTGGAGCATTTCACAAAATTA  
GACCAATGCGGAGAAGGCGTGTACGAAGTTTGTACGCTAAGGGCTGCAAGTTTTGATCTTAAAAGAAGACCTGCTTCATATCGATGTGGTCTATGTGGTGGAACTTCTAGATCTTATGAT  
CTGTATGACAATGCCTCTGACGTTGAGGAGAGAAGAACTCCACTTAGCCGTTGAGATTCGGGAAAAAGGAAGAGGATTGTTTCAGCTGCATTGGTATTTTTTAAGACACGGTATGCTGCA  
GTAGTGGCTTCTCGAGTTCTTCAATCATCAAACCTATGTTATGGGTTACTGATTTGGCTCCGGAACTTGATGACTTATACTGGTCAAACCTTTCAATACCGTACAGGCAACTTTGGATTTCG  
CCGAATATCAATAGTGGTGGCTACTATTCTATTTTTGTTTTCTGTTTCTCATCCAGTTACATTTGTGCAAGGTCTTACACAGTTGGAGACATTACAGCAAAAACTCCCATTTCTAAGAGGTAT  
ACTAACAAAGAAATACATGATCCAACTGGTAACTGGCTATCTTCCAGTGTCAATTTGCTTCTATTTTTCTATGCTGTACCACCAACAATGATGCTATTTTCTACTGTGGAAGGAGCTATCTC  
CCGCAGTGACAGAAAAAGAGTGCATGTTGCAAAGTATTATACTTACAGATTTGGAATGTTTTCTTTGTCAACGTTCTATCTGCATCTGTTATCCATCAGCTAATGTTTCATTTCCCATCCAAA  
GACATCCCTTTTGTCTTGTGCTAGAACTTTACCAGGACAGGCTACCTTTTTTATTACTTATGTCTTGACTTCAGGCTGGACAAGTTTATGTGCTGAACTAGTACAATGTTTTCCCTTACTTAT  
AATCTGCTACAAAAGTATGATTTCAGAAAAAAGTTAGATGATCCAAATATGGTGCCAACATTCCCATATCACACTGAAGTTCGGAGAGTCTTGCTTTTTGGGCTTCTCGGATTCACATGTTT  
TATTTTGGCACCATTGATATTGCCATTTCTGATGGTGTATTTCTTGTCTTGGCTACTTGATATACCGCAACCAGATGCTTAATGTTTATCGTACAAAATATGAGAGTGGGGGACAACCTATGGCC  
CGTTGTGCACAACCTCCACAATATTCTCCCTTGTCTTGCACAGATAATAGCCCTCGGAGTATTCGGAATAAAGAAATCAACGGTTGCATCAGGTCTAGTCGTCCCTCTTGTGATATTCACCC  
TCCTTTTCCATGAGTACTGCAGGAAACGCTTCTCCCAATATTCAAAACTTCTCTGCACAGGCCCTCGTTGAGATGGATAGAGAGGATGAGATGTCTGGAAAGATGGAAGAAATCCACC  
TGCTACTTCAATCTGCTTATTCTCAGCCTGTACCCAAAGATAAAGATGAAGATGAAGATGATGTGGTTGATGGGGGTGGAGACGGTGGAGCGGAGAACTCTGCTTACAGTAATTTGATTTA  
CTACAAGCAAATGAGCTGATTTTGTTTTTGCGACGTGCTTGGTGCCATTTTTAGTCATATTCTAGCTCATCAATGTAAGGATCTCCTTCCTCCAGGAGCCACCTGGACAGAACCGTTTCCTTG  
GCTTGTAAATCTTAGTTGATCCAAGTATTAATTTCTTTTTTTTTAAGTGCAATAATGTTTAAAATTGTCAGCTTACCACAGCATTTTTCTAGGTTACTGGCAATCTCGCACCATGAATTTACT  
AGTGAATAAGAACATGATCCTCGAGCATGAAATCTCATTGCGCTACTAAGCCTGCCAATGAGTGTGGACTGCAGACAGAATGAAAACCTCAGGTCTTTTGTGTTGTCATAACTAGA  
GGGTAGACTAAGATAGATATAGTCATCAAGCTCAAGTTGTAACCTTTGACTTGCCATTTCTTTTTCTATTGAGTAAATTAGACCAGTTTCTGCTGTCTGAGATGTTTGCAGCATATATCATAA  
ACCATATGGTTCGAATTTGGCTAAACAATTAACCCAATACTACTATGTATGCAAGCCCAA

>comp150213\_c0\_seq2

ATGTCGTAGATCGCATTTACGCTCTAGGGTTTTCGCGACCGACTCTCCGCAACTCCCTAACTTCAATCGCAACTCCCCCTTGGTTAACGGCCTCGACTTCAATCGTGCCTGAATATGAGT  
CGCCATCGAGTTCGTCCTCTCAGAAGGTTAATAGAGCAATAACAATGCATTCTATACATACTCTCAACTGACAAGAAATGAAGCATTTAATTTATTTCAGCATCCAAGCAAATC

>comp150225\_c0\_seq1

TAGCGAACAATAATCCAACCTTTAAAGATCGACAACAATCCTTTCTTATTCCATACTGACACCTTATCTGGAATCTTAGCATGCAAACATATTATTAGACAAGACTTGTAACATAAGGCACAC  
ATCAACTGCTTGAGATTAACCCGAACATGTTGATTTGGCATATTCCCTTACATATATGTGCGAAAGGAACGATGAAGATCTCAATCTTAGTTCCTTCTCATCTTCTTCATCTTTTAGTAATTTT  
GCTTCAATGTGGATACAAAAAAGAGGCATTGGGTTTAAACTGAGCACATCTGTGCCCTCATTAGTTGAGCTTTAGGTATCTCAGCCTCGACTCCTCTTCGGTAACAGTGTTCCTGGCAC  
CGGAGGATTTGTAATCTGGGGCTGGGAAATGGCCAGACTCAATGTACTTGAGATCCTCAACAAGAAGTTTCGTAGTGGAGTTTCACCTCCTCCGCCGTCTTACCTCCGACGGCTCGGGCCA  
CATTTTGCCACCGGTCCGGCGTGTCTTGTGCATACTGCAAGTGCTCGCTCGAAGAGCTTGTCTGCTTCTGTGTCCAGGTTGAAGATGAGTTCCTTGAAGCCATTAATTGTGAGTAGTG  
AAACTGCGGGAGTGCTTGGATTGATGGTTGAAGAGTGGGAAGCAGGTGGGTTTCTTATATGGAGGAGAAGGGAGTTGAACTGAGCTGGAAATGGCGGTGGAGCCAGTTGGAGAATATC  
ACTTAGGAAAAGCTGGGCGTGGTGGTGGAATAAGGACATACTAGTTTATAGTTAATAGCCACAAGATTGAGCGAGAACAATGCGGAAGAATCTGCCTTACCATGGCAGAGAATG

>comp150245\_c0\_seq1

GGCGAAGGTGGCGAAGAGCTTGAGTTTTGAGAAGGAGGCGTTGATCTAGACCCTGCTGAAGGCGGTGAAGAGCTAGACGCTGGCGAAGGTGGCGACGAGGTAGAGTTTTGAGAAGGA  
GGCGATGAGCTAGATCCCAACGAGGGTGGTAAAGAATCGCCCCGATTTCGCATTGTCCGAAGAAGAGGAATTTTCAGAAGCAGGCGGAGAATCAGACTCAGACATTTCCAAAATTTTCT  
TCCCCTTAGCCGTTTTATTATTTACCTCAATTAATCATGAGAATCTTCTACACAAATTCAAAAACGAGGCAGCGTTCAAATCCTTCACTTCTCAGCGACAGAAAAACCTAAAATCTATTT  
TGTTTCAAGATGTATCTTCATTGCGTTCGTTGTCGTCTCCTGCACCGGTGGACAAGGA

>comp150255\_c0\_seq1

TTTTTGCTCCACAATTACAATTGCTTTGATGTTAATAAGAATTTTAAAGACAAATTGAACAATTTTAAAATTAACAGAGTAAAATTTCTTAAAATAAGAAAATACTGATTGAATAGAAAA  
ATTACAATGACTATAAACTTATGATTGAATAAAAAATAAAAAATTTAGCATCAAAAAGCGGTTTCATTGGAAGGCCATGCGTGTTCCTTCCGGATCTTTTCTTCTTCTTCGGGCGTGAAATCA  
TTTTCAATTTTAAATATTTGACGGATTTCTCTGGTGTTCATCGGATTATATTTGCGACTTCTTGCAAATCAAATCTATCAAGTCTTTCACGCCAAATAATTTGCTGCCATGATAAGAT  
CATAGAGGGCATCGGTATCAATGTCAACGAATTTGTTATCAAAGTCTCAAGCTCTTCAATTCAGGCAAGAAGTCCATGTGCTTCTTGCAGTAATCAAAGATATTAGAGAGGACGGAGG  
CGGTGACATTGGGTATTGGAATGACATCTTCTGTGAAATTGTCTTCAATCATGTGACGGATAATCTCAGACTTCATCGCTACCGCTCTTCCACCACCACCTCCTTTCCATCAGAAGCCATC  
ATTCTTATCATCTTCTTTCATCTCGTTGGCCATCCTCGTTCTACCATGTAAAAGCCGTTGCTCAATTTATAAATGTCCGGTTAAAAAAGCCAAGACCCACCCATTCTTATTTATTGCAAAGATTAG  
AATTGGTCAAGATTTAAATTTAGAAAAAGTATTTTCTTAATTTATCATACTTTTCGGCACCTCTCATTGAACGCCTAAGGAATAAAATTCCAAACATTGCGCAAGCTAGCATTGACTAAAT  
TAGCTTTAAAAAGATGAGGCCATGATTTAAACAAGCAAATCATAGAAAATTTTGTATTTTAAAGCTAAAACCTTAAAAAATAAAAAAATTTTAAATTTAAAAAGAGCCACAAAT

>comp150255\_c0\_seq3

TTTTTGCTCCACAATTACAATTGCTTTGATGTTAATAAGAATTTTAAAGACAAATTGAACAATTTTAAAATTAACAGAGTAAAATTTCTTAAAATAAGAAAATACTGATTGAATAGAAAA  
ATTACAATGACTATAAACTTATGATTGAATAAAAAATAAAAAATTTAGCATCAAAAAGCGGTTTCATTGGAAGGCCATGCGTGTTCCTTCCGGATCTTTTCTTCTTCTTCGGGCGTGAAATCA  
TTTTCAATTTTAAATATTTGACGGATTTCTCTGGTGTTCATCGGATTATATTTGCGACTTCTTGCAAATCAAATCTATCAAGTCTTTCACGCCAAATAATTTGCTGCCATGATAACAT  
TAAACAAAGAACGAAAATATATGATAATGAAACAAAGGACATAACAAAAAAGAAAATACTTGAACCTTGGATAATTTTACCATGATAAGATCATAGAGGGCATCGGTATCAATGTCAACG  
AATTTGTTATCAAAGTCTCAAGCTCTTCAATTCAGGCAAGAAGTCCATGTGCTTCTTGCAGTAATCAAAGATATTAGAGAGGACGGAGGCGGTGACATTGGGTATTGGAATGACATCTT  
CTGTGAAATTTGCTTCAATCATGTGACGGATAATCTCAGACTTCATCGCTACCGCTCTTCCACCACCACCTCCTTTCCATCAGAAGCCATCATTCTTATCATCTTCTTTCATCTCGTTGGCCA  
TCCTCGTTTACCATGTAAAAGCCGTTGCTCAATTTATAAATGTCCGGTTAAAAAAGCCAAGACCCACCCATTCTTATTTATTGCAAAGATTAGAATTGGTCAAGATTTAAATTTAGAAAAAGT  
ATTTTCTTAATTTATCATACTTTTCGGCACCTCTCATTGAACGCCTAAGGAATAAAATTCCAAACATTGCGCAAGCTAGCATTGACTAAATTTAGCTTTAAAAAGATGAGGCCATGATTTAA  
ACAAGCAAATCATAGAAAATTTTGTATTTTAAAGCTAAAACCTTAAAAAATAAAAAAATTTTAAATTTAAAAAGAGCCACAAAT

>comp150295\_c0\_seq1

ATCCTACCACATCCCATCTCCATGTCTTGTTCCCTTTCTCTCTCTCCCTCTAACCCCTCGCCGTCCCAGCAGGCCAGCATGGCCGGAGGAGAGAAACATGGGCCGTGGCCATTTT  
CTCCCTCCTCCTCCTCGTCTTCCTTCGCCTTCCTCTTCTCCTCTCCTCCACCACCGCTAAAAATCCCACCTTTACCCCTTCGGACATTTACCTCCTCGACTGCGGTGCCCTAAAAGCGTCC  
AACTTTCCGACGGTTCGCACCTTCGGCTCCGAACCCCAATCATCTCTTTCTGTGACCGGACGAAGACATCCGCCTCTCCTCCACCTCTCCTTTACCTTCCCTCTCCCTCTCTACCAAAC  
CGCCCGCGTCTTCTCCTCAACCTCCACCTACTCCTTCTTCATCACGAAACTCGGGATCCATTTTATTTCGCTCCATTTCTCCCTTCCCTTCCCTTCTTCTACAACCTCTCCTCCGCCATCTTC  
ACCGTCAACACCGAAGACTTCGTCTCCTCCGCGACTTCGTCTGTCATCCCTGCCTCCCTGTTCTCAAAGAGTACCTCATCAATGTGACAATGAACGCCTTTACCTCACTTTCAAAC  
CCAAAAAGGCTCCTTTGCCTTCCTCAACGCCGTGGAAGTTGTGTCCGCGCCGGAAACTCTCATCCCCACCTCCGCCGCGAGCGTCAGCCCGCAGGAGCAGTTCAGCGGGATCAACAA  
CTACGCGCTTGAAGTTATCAGTCGGATTAACGTCCGGTGGGGATAAGATTTTCATCGGAGAATGATACGTTGGCGAGAGAGTGGCTGCCCGATTTCGTTTCTGAAGCCGCCGGACACGGTGCA  
GAAAGTGGCTGTGGCGCCCGAGAAGGTTAAGTATCCTGAAGACGGAACAGTGACGCCGCTTATTGCGCCGAGGAGCGTATATGCGACGGCGGATAGCATGAGGGATGCGCATGTGTCCG  
AGCCGATGTTCAATATTACGTGGGATATTCGGTTCGACGGCGGGCGCATATTCGTACCTCGTTCGACTCCATTTCTGCGACATTATTAGCAGGACTCTTAATTCGCTTTACTTCAAACGTTTTCA  
TCAACAGAATTTTGGCGATTCCCAACCTCGATCTTTCTCTCTCACAGGTATTGTAACAAGGCTTATTAGCGCTTGCATTATCATTTCTCATAGCAGTATTAATTGGACAATCCGCCATGTC  
TGAAACTCTCAGAAGTGTATGAGCATTGACCGTTTGTGTATCTCGATCTTGTAGGTGGATTACGCATTGTTTCATCATCTTATTAATTATCTATGCTCTTCACATCTGAGAATACTTCAA  
ATCTAATATTATGTATGAAAATATATAAAGATTTTATCAGAGAAAATGAATCAAAATTTGAAAGTGAGAAGATGGG

>comp150295\_c0\_seq2

ATCCTACCACATCCCATCTCCATGTCTTGTTCCCTTTCTCTCTCTCCCTCTAACCCCTCGCCGTCCCAGCAGGCCAGCATGGCCGGAGGAGAGAAACATGGGCCGTGGCCATTTT  
CTCCCTCCTCCTCCTCGTCTTCCTTCGCCTTCCTCTTCTCCTCTCCTCCACCACCGCTAAAAATCCCACCTTTACCCCTTCGGACATTTACCTCCTCGACTGCGGTGCCCTAAAAGCGTCC  
AACTTTCCGACGGTTCGCACCTTCGGCTCCGAACCCCAATCATCTCTTTCTGTGACCGGACGAAGACATCCGCCTCTCCTCCACCTCTCCTTTACCTTCCCTCTCCCTCTCTACCAAAC  
CGCCCGCGTCTTCTCCTCAACCTCCACCTACTCCTTCTTCATCACGAAACTCGGGATCCATTTTATTTCGCTCCATTTCTCCCTTCCCTTCCCTTCTTCTACAACCTCTCCTCCGCCATCTTC  
ACCGTCAACACCGAAGACTTCGTCTCCTCCGCGACTTCGTCTGTCATCCCTGCCTCCCTGTTCTCAAAGAGTACCTCATCAATGTGACAATGAACGCCTTTACCTCACTTTCAAAC  
CCAAAAAGGCTCCTTTGCCTTCCTCAACGCCGTGGAAGTTGTGTCCGCGCCGGAAACTCTCATCCCCACCTCCGCCGCGAGCGTCAGCCCGCAGGAGCAGTTCAGCGGGATCAACAA  
CTACGCGCTTGAAGTTATCAGTCGGATTAACGTCCGGTGGGGATAAGATTTTCATCGGAGAATGATACGTTGGCGAGAGAGTGGCTGCCCGATTTCGTTTCTGAAGCCGCCGGACACGGTGCA  
GAAAGTGGCTGTGGCGCCCGAGAAGGTTAAGTATCCTGAAGACGGAACAGTGACGCCGCTTATTGCGCCGAGGAGCGTATATGCGACGGCGGATAGCATGAGGGATGCGCATGTGTCCG  
AGCCGATGTTCAATATTACGTGGGATATTCGGTTCGACGGCGGGCGCATATTCGTACCTCGTTCGACTCCATTTCTGCGACATTATTAGCAGGACTCTTAATTCGCTTTACTTCAAACGTTTTCA  
TCAACAGAATTTTGGCGATTCCCAACCTCGATCTTTCTCTCTCACAGGTGGGAACCTCTCCATGGCTTACTATAAAGACTTCGTCGTCGCTGGAACCACTCTCATCTCCGGCAACATCTC  
CATCCAAATCAGCCCACAGTGATGAACGACCCCGGTCTCCCAACGCCATTCTCAACGGCATTGAAGTCATGAAGATGAGCAACACCGCAGGAAGCCTCGACGGTCTGTATTCCGTCG  
ACGGTCTCTACCACAGCAATGAACCCGCTGCCACGGCAAAAGATAAAGGTTCTGGTAACCGTCTTTGGTTTGGCCATTTTCTAATGGCATTGGCGGGGATTATGTTTCTCCGGCGTCCCG  
GCGGCCAGACGATTGGGACAAAAACATAGCTTTTTTCTTGGTTGTTGCCTTTCATGTCAGCCATTACAGCCGGCCGGGTTTATTAGTAAGTGAATGGGAAGGGGAGCACCTCTTC  
TTCAAAGAATGAAAGGGGTTTGGGTCGCATAAGAGCAAGAGCGGGTATAAGAGTTATCTTGCATCAGGAGGGCTTGGCCTTGGGCGATTCTTACCTTCGGTGAGCTCCAGCAAGCCA  
CCTCCAACCTTCGACGAGAAGAACGTGATCGGGTCCGGTGGATTGGCAAAAGTCTACCTCGGCTTGTCTGACGACGGCACGAAGCTGGCCGTGAAGCGAGGAAATCCTTCGTCCGACCA  
AGGCATAAACGAGTTCATACAGAGATCGAGATGCTGTCAAAGCTCCGGCACCGGCACCTCGTCTCTGATCGGCTGCTGCGACGAGAACAACGAGATGATTCTCGTGTACGAGTACAT  
GTCCAACGGGCCCTTCGCGACCACCTTACCCTTCTTCTCCTTCGTTACACCTCTGTATGGAAGCAGCGCCTCGAGATCTGTATCGGCGCCGCCCGCGGCCTTCATTACCTCCACACC

GGCGCTGCCAGAGCATCATCCACCGGGACGTGAAGAGCACCAACATACTCCTGGACGAAAACCTCGTCGCCAAAATGTCAGATTTCCGGTCTCTCCAAAGCCGGCCCTTCTTCCCTTGA  
TCAAACGCACGTACGACCCGCGTCAAAGGCAGCTTCGGTTACCTCGACCCAGAGTATTTCCGGCGGCAGCAACTGACCGATAAATCGGATGTCTATTCATTCCGGGGTGGTGATGTTAGA  
GGTTCTCTGCGGAGGCCGGCGATCAATCCGGCGTTGCCGAGAGATCAGGTCAACTTAGCTGAATGGGCGATGCAGTGGCATCGAAAGGGAAAGGTTTCAGATGATCATTGACCCGCATT  
TGGTTGCAGGTGTCGGGCCGCGCTCGCTGAACAAGTTTGTGAGGCGGCCGAGAAGTGCTTGGCGGATTCGGCGTTCACCGGCCGACGATGGGGATGTGCTTTGGAACCTCGAGTA  
CGCGCTGCAGCTGCAGGAAGCATGGATAGGGCAGTCGTACGAGGACGACGCCATCTGACATCGGCAACGCCGGCGAAATCCATGTAGAGCACCTCGACAGCTTGCAAAGAAAGGAA  
ATTCCGTTTCGACGTTGAAGTTGTCTCCGTCGATTTCTCCACCCCGGCGGAGCCGTCGCCTCTGCTCCACGGGAGGTGAGCAAAAGATCATCAAGAAGAAATTGTGATGGAAAAAGGTGA  
CGCCTTGGATTTGCATAAGCCTTCCACAGTGTAAAAGATATGGTTTTTTTATGATGTGAAGTGAAGCTGTTTACATTTTATTTTTTGATAATTTGATATCTACAACGATTTTGAATGTATACT  
GTTGTAATAATACGCTGAAGGATTTTAGGAACCATTTTTTAAATTA

>comp150300\_c0\_seq1

AAAATATTTAAATTTGAAATGAACTTTCAACATATTTCTATAAGAAAGCATACAAGAAAATATTTTAGCTATACGTATTATGAGACATAAAACCGCAATTTTCCTTTTGATACAAAATTTCTAT  
CAACATAATTTTTTATTAATAAACCTCCAAACATAAGTATGAAGTTTCGGTTGGAGATGCCCTAACGAGCTTAGATAATGTCTATTTTGTCTAAGATTTATCCAACATATAATATATAACAT  
CTAAGAGATGCAGTAAAATTGACAACAATCATAAATAATAAGCGTCAATGCAAGAATTAATGATAATAATTTGAAGGGTCAGCCAAAAGAAGAGCCTGTGGAGATGATGCCTTTGCCTTC  
TTTTCTCATCGACATAATCATGGAACCAAATGGATCCAAATACTGAAAGAACCCAAAATAGCAGATGCGTACTAAATGATTGATGCGTACAGAAATCTGGAAGCATGCAAAAAGGATAA  
GAAAAGACTGATGCAAAGATACGAAGACGATTGAGTAACTTTACTATTAATAGTTTGATCGTGGGATCATAAAAGGCTGTGGAGGTCGAAGTCGATAGAACAGTTGATGAAGACGACG  
AACCTCTCTCTTTAACATGTCATTTTGTATGCATCTCATAAATTGTTGATGCAACATGCTGTTGAGCCGATGCTTCAGGACCTCATTTTCGAAGCTCAATATATAATTTGTCTATCCACATATT  
GCAATTGAGCTAAAACCTCCAATCCTTGAGCCTGTAATGCTTGAACGCAGTTCTCCAGCTCATTAATATATTGAAGATTTTGAACCCGAGACCTTTGAGGAAATTGCTGTTGAGGATTGGA  
ATGATGTTGAGGGCGATGCAAGTATAAGTCATTGGAAGAAGGACGATGAGTATCAGGCTCATCAAGTAATTGAATTAACCAAGAAAATGCTGCTCCATTGAAATGCTCTCAGGGGAGGA  
GGGCTGATCTGTTTACGCTCCTTTTTGATCCAGATGGACCACAATCCTCATGTACAGGAGTGCTAACATTGCTTGGGGAGGAGTTTTTGGTGGGGGTGAAGGGTTTTTCTCAAGGTT  
GTTGAGGTTGGCTTCTTCAGTCTTGCGCTCCTCCATTTTTCTAGTTCAACCTAGCCTTAGATGGAAACAAATAGCATTGCGGTGGTTCGAGATCAAATGCAAAGGAATCATCCATGAGGAG  
AACCTAGTAGGAGAGGAGGAGGAAGAGAGACGACGATCCGGTTGGAGAGAAGATTAAAAGAGCAATGTATGAAGGAAAAAAGGAGGAAGGAGAGAGATGGAGCTTGCAAATTTGA  
TGGAGCCTCTCCCTCAATCCCTCCCCACCCACAGGCTCAATGCCCAAAGGACGAAACCTAAATATTAGAAAGAGGACTAACTAAGATCGACGAGGTTACCTAAGGTA

>comp150300\_c0\_seq2

AAAATATTTAAATTTGAAATGAACTTTCAACATATTTCTATAAGAAAGCATACAAGAAAATATTTTAGCTATACGTATTATGAGACATAAAACCGCAATTTTCCTTTTGATACAAAATTTCTAT  
CAACATAATTTTTTATTAATAAACCTCCAAACATAAGTATGAAGTTTCGGTTGGAGATGCCCTAACGAGCTTAGATAATGTCTATTTTGTCTAAGATTTATCCAACATATAATATATAACAT  
CTAAGAGATGCAGTAAAATTGACAACAATCATAAATAATAAGCGTCAATGCAAGAATTAATGATAATAATTTGAAGGGTCAGCCAAAAGAAGAGCCTGTGGAGATGATGCCTTTGCCTTC  
TTTTCTCATCGACATAATCATGGAACCAAATGGATCCAAATACTGAAAGAACCCAAAATAGCAGATGCGTACTAAATGATTGATGCGTACAGAAATCTGGAAGCATGCAAAAAGGATAA  
GAAAAGACTGATGCAAAGATACGAAGACGATTGAGTAACTTTACTATTAATAGTTTGATCGTGGGATCATAAAAGGCTGTGGAGGTCGAAGTCGATAGAACAGTTGATGAAGACGACG  
AACCTCTCTCTTTAACATGTCATTTTGTATGCATCTCATAAATTGTTGATGCAACATGCTGTTGAGCCGATGCTTCAGGACCTCATTTTCGAAGCTCAATATATAATTTGTCTATCCACATATT  
GCAATTGAGCTAAAACCTCCAATCCTTGAGCCTGTAATGCTTGAACGCAGTTCTCCAGCTCATTAATATATTGAAGATTTTGAACCCGAGACCTTTGAGGAAATTGCCTTAGATGGAAACA  
AATAGCATTGCGGTGGTTCGAGATCAAATGCAAAGGAATCATCCATGAGGAGAACCTAGTAGGAGAGGAGGAAGAGAGACGACGATCCGGTTGGAGAGAAGATTAAAAGAGCAA  
TGTATGAAGGAAAAAAGGAGGAAGGAGAGAGATGGAGCTTGCAAATTTGATGGAGCCTCTCCCTCAATCCCTCCCCACCCACAGGCTCAATGCCCAAAGGACGAAACCTAAATATTAG

AAAGAGGACTAACTAAGATCGACGAGGTTACCTAAGGTA

>comp150300\_c0\_seq3

AAAATATTTAAATTTGAAATGAACTTTCAACATATTTCTATAAGAAAGCATACAAGAAAATATTTTAGCTATACGTATTATGAGACATAAAACCGCAATTTTCCTTTTGATACAAAATTTCTAT  
CAACATAATTTTTATTAATAAACCTCCAAACATAAGTATGAAGTTCCGGTTGGAGATGCCCTAACGAGCTTAGATAATGTCTATTTGTTCTAAGATTTATCCAACATATAATATATATAACAT  
CTAAGAGATGCAGTAAAATTGACAACAATCATAAATAATAAGCGTCAATGCAAGAATTAATGATAATAATATTGAAGGGTCAGCCAAAAGAAGAGCCTGTGGAGATGATGCCTTTGCCTTC  
TTTTCCTCATCGACATAATCATGGAACCAAATGGATCCAAATATATTAATTAAGTTTGTATCGTGGGATCATAAAAGGCTGTGGAGGTCGAAGTCGATAGAACAGTTGATGAAGACGACGAAC  
CTCTCTCTTTAACATGTCATTTTGTATGCATCTCATAAATTGTTGATGCAACATGCTGTTGAGCCGATGCTTCAGGACCTCATTTTCGAAGCTCAATATATAATTTTGTCTATCCACATATTGCA  
ATTGAGCTAAAACCTCCAATCCTTGAGCCTGTAATGCTTGAACGCAGTTCTCCAGCTCATTAATATATTGAAGATTTTGAACCCGAGACCTTTGAGGAAATTGCTGTTGAGGATTGGAATGA  
TGTTGAGGGCGATGCAAGTATAAGTCATTGGAAGAAGGACGATGAGTATCAGGCTCATCAAGTAATTGAATTAACCAAGAAAAATGCTGCTCCATTGAAATGCTCTCAGGGGAGGAGGG  
CTGATCTTGTTCAGCTCCTCTTTGATCCAGATGGACCACAATCCTCATGTACAGGAGTGCTAACATTGCTTGGGGAGGAGGTTTTTGGTGGGGGTGAAGGGTTTTTCTCAAGGTTGTTG  
AGGTTGGCTTCTCAGTCTTGGCTCCTCCATTTTTCTAGTTCAACCTAGCCTTAGATGGAAACAAATAGCATTGCGGTGGTCGAGATCAAATGCAAAGGAATCATCCATGAGGAGAACC  
TAGTAGGAGAGGAGGAGGAAGAGAGACGACGATCCGGTTGGAGAGAAGATTAAGAGCAATGTATGAAGGAAAAAAGGAGGAAGGAGAGAGATGGAGCTTGCAAATTTGATGGA  
GCCTCTCCCTCAATCCCTCCCCACCCACAGGCTCAATGCCCAAAGGACGAAACCTAAATATTAGAAAGAGGACTAACTAAGATCGACGAGGTTACCTAAGGTA

>comp150300\_c0\_seq4

AAAATATTTAAATTTGAAATGAACTTTCAACATATTTCTATAAGAAAGCATACAAGAAAATATTTTAGCTATACGTATTATGAGACATAAAACCGCAATTTTCCTTTTGATACAAAATTTCTAT  
CAACATAATTTTTATTAATAAACCTCCAAACATAAGTATGAAGTTCCGGTTGGAGATGCCCTAACGAGCTTAGATAATGTCTATTTGTTCTAAGATTTATCCAACATATAATATATATAACAT  
CTAAGAGATGCAGTAAAATTGACAACAATCATAAATAATAAGCGTCAATGCAAGAATTAATGATAATAATATTGAAGGGTCAGCCAAAAGAAGAGCCTGTGGAGATGATGCCTTTGCCTTC  
TTTTCCTCATCGACATAATCATGGAACCAAATGGATCCAAATATATTAATTAAGTTTGTATCGTGGGATCATAAAAGGCTGTGGAGGTCGAAGTCGATAGAACAGTTGATGAAGACGACGAAC  
CTCTCTCTTTAACATGTCATTTTGTATGCATCTCATAAATTGTTGATGCAACATGCTGTTGAGCCGATGCTTCAGGACCTCATTTTCGAAGCTCAATATATAATTTTGTCTATCCACATATTGCA  
ATTGAGCTAAAACCTCCAATCCTTGAGCCTGTAATGCTTGAACGCAGTTCTCCAGCTCATTAATATATTGAAGATTTTGAACCCGAGACCTTTGAGGAAATTGCTTAGATGGAAACAAAT  
AGCATTGCGGTGGTCGAGATCAAATGCAAAGGAATCATCCATGAGGAGAACCTAGTAGGAGAGGAGGAGGAAGAGAGACGACGATCCGGTTGGAGAGAAGATTAAGAGCAATGT  
ATGAAGGAAAAAAGGAGGAAGGAGAGAGATGGAGCTTGCAAATTTGATGGAGCCTCTCCCTCAATCCCTCCCCACCCACAGGCTCAATGCCCAAAGGACGAAACCTAAATATTAGAA  
AGAGGACTAACTAAGATCGACGAGGTTACCTAAGGTA

>comp150366\_c0\_seq1

TGATCCTCCTCCTCCTCCTCCTGCGTCGGCACTGCCACCATCATCACCACCGCCATCTTACCAGCCTCCATCTTACCAGCCTCCATCATCCCCGCCTCCAACGTCACCGCCGCCATCAT  
CTCCGCCACCCCTGCATTTCCCGCCGCCTCCTCCCGCTTCATCTCCGCTCTTCCAGCTTCATCTCCGCTCCTCCAAATTCAACTCCTCCGCTCAATATTCATCTCCGCCACCTCCAGATT  
CGCCTCAATATTCGTCTCCGCCGCTCCCGCTCCATCTTACCAGGCTCCATATTTTTCTCTCCGCCACCATATCACCTAATGAGTCTCCTCCCCATCACCCACCTTACCTCCACCCTTACC  
GACCTCCCCAACACCGCCCTCATCTTCAAAGGCTCTCCTCCTCCACCAACAACCATACCTCCACCCTTTCCGCCCTCTCCAACACCGCCTTCATCCTTCAAACCACCTCCTTCCGCCGAT  
GTTTTCTGCCACCTCCACCGCCAAAACGCGCAGCAGAGGCTCCTCCCCATTCTTACCCTCAACAAATGATTACAATGTTGATTCAAAAAAGTCATCCGGAGGCTCTCATGTCAATCTTC  
CAATGGTAGCTGGGATTGCTGCAGGCATCGACTGTTCTTTCTGATTATCGGCGTTGTAGCATGTGTTTGTGTCAGGAAAAAAGGGAAGGTGGCGAAGAAGAAGACTCCTAAT  
TCTATAAACTATTATCCTGATCCGGGGGTCAAAGGCAATAATTACTACAACATTGGGGCCAAGCTCCCACCACCTCCAGGCAAGGCTTGAATCCACCTCATAGTCCCGCAGCCATCAACA



ACGAAAACAGCGTTGGTTACTCAGAACCAAATGGTCCTCCAATTGGTTTCGTTAAGAGCTCATTAGCTATGAAGAGTTGGCAGCAGCTACAAATGGGTTCTCTGAGGAAAACATATTAG  
GACAGGGTGGTTTTGGCTATGTGCACAAAGGAATTTTACCAAATGGACAAGAGGTTGCTGTGAAGCAGCTTAAAGCAGGAAGTGGGCAAGGTGAGAGAGAGTTCCAGGCAGAGGTTG  
AGATCATTAGCAGAGTTCATCATCGCCACTTGGTCTCCCTCGTTGGTTACTGCATTGTTGGGTCTCAACGGTTGCTTGTATATGAGTTTGTTCCTAACAAGACTCTTGAG

>comp150386\_c0\_seq2

CGGACATCGAATGTCGTCTGAAGATCAACCAAAATGCGCTACATCATCATGTGCTTGGTACTGTGGCTCGGTATTGCTCGGTACTGCGGCTTGATACCGCTTACGTGATGCATTCTGATTGG  
TCTCTGAACGGCATTTTTTGTCCGGTCTCCAGACATAATAATTTCTCAGTTAAAGGGGGTTCAAAAAATCCCTTTGAGATCATTGGTTTAAACCATTGCTGTCTGTACAGTTAGTTGAGCAG  
AAGGAAATCAGTGGTAATAAGCTGTTGCGAGTTGGGCTACGTTTTGGGAAACTTTTTCAAAACTTCATTGTTGTATGAATTTGTCACAAATCTGCTTGGCTATAATTTAGTTCTCATT  
CATAAATTTCTGCGGTTAAAAACAAGTGTAAAGAACTTAAATATGTCAGTATAAGAAAGTTGTCCAAAAATTATAATATCCATAACGATTTTCTAAAAATTTGTTTTCCAACAACATTTCTA  
ACCACCCCATACAAATCTTGGTTTCATTTGAGTTGGCATAACGTTTTCTACTATTTCAATCGCAGTTTCCATTATGCATACCCAAAAGCAACTTTTTAAGGCAAAATTTAAAAAAGGCTGCA  
AAAAATGTATCGAAAAGAAGACTATTTAGTTGGATATTTCAATACCACAAAAACAGTGACAAACGAAAGCCTTAGTTGGAGTAG

>comp150408\_c0\_seq1

TTTTATCAAACGGAGTTAAGTATTTGATGTGTATTTATGATTTCTAATAAAAGTTGCTATCGAAAAATAAAAGCCCAGAAATATTATTGTTAACATTATTTGTGAATTTTATGATTAGTTAC  
TATTAAGTGTGTGCATTAAGTATCTCAAAATTCGGAATACTTTGCCATTATCTCGAAATTTGGACTACTTTGCCATAAGGGTGAAATTTCAAATATTTATGTGATGTGTCTGTTTCTATTTAT  
ATATGTTAAAAGTATTATGTTTATGTATTTGTGATTGAAACTGTGTGAGAAGAAAATATCGGGCGGATGTCTATTGATGCTTATGTGTATCCAAGGGGAGATATAAGGGTCCGATTCTAAATGA  
ATGAATGATGATATGTATTGAGAGTCATAAGGATCTAATATTGATATGAGCTAGAGTTATAAGAGCTTGATACTGATATGTTGTGCATAAAGAGCCATAAGATTTTGATTCTGTATCTATTCTAA  
GTTTGTGAAATATTTGAGAGACATAACTGTAATAGCCTCAAAATTTAATTTCAATGAAATTTTATAAACTTAATATTTGGTTAGGTGAGCTGCGGGCGCAAGATCTAAGGTTTATAAGGGT  
ATGAGTGAGCAGCAGCAGCATTGGGTCTGAGCTTTGTAGTACTGAACTAGAAATTAATAAAAAAGTATTTAAACCCATTTTGATAAAACCTCACCCCTAAGCTATCCCTCATTTCCTTT  
GCTTGGTCAGAAGAAAACAATAGAGAGGAGAAAACATGAAAAGAGAGGAGAGAGAAAAGCGGGGTTCCGGGACGATATTTTGTGCTCCAATTGCGAATGTATTCTGATCGTGGTAGGT  
AACAGAATACTATTTTGTTTTCAATGATTTTATGTTTTGTCAATTTTCTCCCTAAAATTAATAACTATGCAATATCTTATTTTAATGATTTTCCACTGCATAACTTTTGATATGTGATATA  
TGTAGAGTAAAGTTACTTACAATGAGTAAAATAACTTTCTATAAAAATTTATGAATAGAAAATATCCAAA

>comp150472\_c0\_seq11

TACCTATGGAACCTATAGTTAGAAGTACTGTAATCATGGTTCTTTTAGCAGTGAACCGAATTTTGTGTTGAAAACATAAAAAAGTTGAAAAAATAGAGGGGAAAAGAAACGGGTATGCAT  
TCATTGATGCCTGTAAATGGAAACAACAATGAAGCTGAAAGCCTGAAACATACAATATTGAAGCAGGGAAAACGAGAAGAAATTAAGTGCATGATGAAGAAAACCTATATCAAATAATCTCTA  
TTTCAACCTTGCTGCTTCAATGATCTGCATTTGCATTAATCTTTAGATTCAGTATCTGCATCACAAGGATTGCTTCCAATGAGATCATGAGGCAGACCCATGAAATTGTAAAGAGTTGGTGG  
GCCAAGAGCTTCCGAATCTTTTTTCTGTGTTTTTCTGAATATGTTGCAACAATGAACAAAATGTTTCTGAAACGGTATTGTTTGCATGGAGAAAGGTTCTGAAACAGGCAGAAGACC  
AAGGCTGAGTAAGCTTCCATCAAGCTTAGAAGCTTACCTCAGCTCCGATATTGAGTCGAGGACAGCTCGAACTCGAAGAATCATCCCTCGACGAAGCAATTTTGTGATCTGTAGC  
AGACTGTAGAGCTGAACCAGATTGAAAGGGCCACGAACGCTTCAAGCTTGCCAACCTTCTGCTCGGGCATGGAAGGAGGATTAATGCTAACGTAGCTTTGGTTTGAAGGGGGCTCCATCT  
GAAGACAAGCTCCAGAAGACAAAGGAGGTGATAGAAAGTTATTGATCACCTGCATGTAGGCATCAGTCAAACACTTGCTGCTCAAATTCGAGCAAAAAAGTGAATTTGATCATTTTTTAA  
TTTTTTTTTAAAGTTTTCAAGAACCAGAGAACATCTATGTTGCTCCTGTTGAAGCTTCTTGGGAGGTAGAGGCAACCGCGAGTTTGAATTAGAGGAAATTTGCTCTGAATTGAGTTCCA  
AACTAATGGCGAAGAACCATCGATGGCGTCCGAATGTGGCCGGAACAGAGCATAAGTTACCAAAAATAGCAAGGTTTTTGTCTTGTGCTGAGCAAGGGGAAAAGGGGGTTGGCGCGATG  
ACGCTAACGGACAAATGCTCGCCGCTTCCGATGCCTCCAGCGCAGGAAGCCGTGGCGGCGATGTTCTCACTGGTTGAGAAGGGCGGCGGATACTCTTCTGCTGGTCTTCTCTCGGAG

CTTCTCAAGCGCAGCGATTCCGAGCCCACGCTGCGGAATTTTATTGGGTTTGGGCTTCTTTGGCGATAAACCAGTTCTATCATTGCAGCCTCCATTGTTGGGATCTCCATCTTCTTGGAGTACC  
CAATTTTGGTTTACAAAGCGATCACAGAGTTGTAGAAAGAAATTTGTCTTTCTTTTAGATACAGGAGAGTACGAAGCTAGGTATTTGTGAGAAAAGTCGCCATCTTTGTATGGAAGTGATT  
GGAAGAGGAAGATATGTAAGTTGAAGAAGATGTTGGGGGACTAAAACGAAAGGGATCCAACTCCATGAAACGAAGTTATTGCCGGAAATCTGTAGGATGAGAATGGAAACGAATCCAAT  
AGCTATTGCAGATGGAGTCTTTCAGGCTATCGATTGAATCTGCAAATCTTCAAACATTTTGGAGAGGAATTAATTCAACCGAACGAGACAGAGATCCCCCCCCGCTCCCACCTTTGCCTGT  
TCATCCGACTGGCCTCCGTTTGTTTTATAAACGAAACATA

>comp150478\_c0\_seq1

TACTCTTCCATCAGTTCTCTTATTTCCCAATCGAAGGATGTGCACAGTTCCGAAAGTTCAACGCCGGCGAGGCCTGCGGCGAAGGCCAGGAGAAAAGCTGGCCAGTGGGCTCAATCCGTTCC  
GTGATACGACCCAAAATGCCGCTCAGTCTGCCCATGACATGGCCAGAACGCAGCCAGTCCACCAAACAGTCCGCGGAACATACCGGAGGGCTGATGCAGCAGGCTGGAGAACAAAT  
GATGGGAATGGCTTACGGTGCAGTAGAAGCTGTTAAGAATGCTGTCCGAATGGGGAGTGATAATAACACCACTGCAAATAAGACTAGCTCGTCCACTAAGAAGTGGTTCGGCTCGAATC  
AGCCTAATTTTGTCTTATTTGATTTAGCACTTAAATAAACGTAATGGTATCAGAATGACTAATTATGCCTTTGTAATGAGGATTTAGTTTTTCTATTTCTAATTTGGTTAATAATTGAGAAATG  
TTCTTGAGTTTTGATAAATTTTCAGCATTGGTCTTTGTTTTTTTTTTTTTAAAGAATTTGATTTTGCTAAATTATCAAAAATCAATTTTTTTTTTTAATGAAAGGCAACCCTCTCTTTCTATTTT  
GTCTAATATGAATAAAATTTAATTTAATTATTTTAGTATGTCTCCT

>comp150504\_c0\_seq1

TGTAAATATGTAAGTTTAAATTGAAGCTTATCATAAAAAATTTCTTTGCATTTTTTATAACATTTTTTTCCCTTCAAGGGAAATCAATTCATACCTAATAAGGCTTTCACTTCAAGTCTTTTTTGA  
CGCCATCATAATAAGATATCAATATCATACTTAGTTATTGTAGAATAAGAACAACCTTGCAGAATAAAACAAAAAAGCCTTACTTTCTAAGCTAGCTTTAGCCATAATATATGAAACCAA  
TCTCGTTCCAACCTTAGCCAAAAGTCTCCAATGCCGGTAGGTATAATTTTTGTTTTGGCTGCAGAATAGAACTCCAAAGTTGTCATAATTTCTTAAAACCTTTAATTTGTGACTGAGACAGG  
CCATCACCTCTTCTTTTATCTTGTGGAATGCCACAGTACTTTCATCTACCTGACTTAACCATCAAGCAAATTAATCAATCCATGGAAGAAAAAAAATAGGACCTCCCCTTTAGCATAATAA  
TTTCCCACTAGCATTCTTACAGTCATTCTTCCACAAAAGCAAAGTAAAAGCCTAAACAGTCCACCTTCAAGTAAATCTAGCCATTACATCCTCACTCTCAAAGCTGGATTCCAAAAAGC  
TAAAGCAGAGACACCAAACAGATCAGAGCTAGTGGTAGAAACAGTGGTGTGATGGTACCAATCTTTTTCTCATAAACTAATTACTATATGCAAATTTTGATTCAAATTTAGTTA  
AAACTTCGTTCTTTCGAATAAATCTTGATTCTGTAGCTGATAAGAACCTTCTGAAATCTTCAAAGGAGAGCTCATCCAGTCAGGTAGGCTTCAGATCCTGAAACATGGAGTCCCACCTCA  
TTTGGTCTGTATCGTTGTACCCAATCCAAGTAAAGCCATCATCATGGCCTTCTTCCCTTGAAGCAAGCAGTGCCATTGGGCTCATGGTCTGTGAAGCCGGGCTCCGACCGATCTGAACTGC  
CTTAACTCCATTGCCGACTACAGGGCTCAAGCTCTGTGAAGCTGGGCTCCGACAGAGCTGAACTGCTTTAACTCCATTGCCGACTACAGGACTCATGCTCTGCGAAGCCGGGCTT

>comp150504\_c0\_seq5

AGACTACATCAGTGATCTGCAACCTTCTTTCTTACCATAGCCAGCCTCCTGATCCCTCCGCTCACCATCTGTGCCCCCTCCTCCTGGCCTCGGCATAATCACCCTGCCTTGCTTGTA  
TGGTGGACTAGATCATGAACATACCTTTAGTCCCTCTCTGATTCCTCCTATGCTTAGAGATGCGGTCGAAATGTTATAGTTACCTTGTTAAGCAGTTGCAGGCTTCGTGGATGACTGTCAGG  
AGAGCGGCGACTGGTCCGGCCGGGGCGGTGATAACGGCGGTGGCTCTTAGCAAGCTTGAGGATCTCGAGGGGATGCTTGGCGACATCAATGCCATGCTGAGGAGAACTCGTGGTTCGA  
AGTGGGCGATGTCATCTTCTCGAGCTCGTTCTGGGAAAGAAGGACAGAGTACTCGTAGACCAGATTCCGGTTCGAGCCTCGAAGATTTTAAAGAGCCATGAGTACCAGTCCATGGTTCAGG  
AAGTAATTAAGCTTCTGATGGCAGATTCAGTTTAGTTAGGACTTATATAGTGAAGGGTATAAGGAGACATGTGAACCTTTGTTGAGGAATTTTTTTTAAAAAATACTGATTTCCGCGCTTT  
GGCTGTTCTTATGGAAGAAAATAGTTAAGCAAATCATATTAAGATAACCACATTTGCCGCTAGTTAACGGACGATAACTGGACGTCTGCTTTTCAGCAC

>comp150506\_c0\_seq1

ATAATAACCATTCCCATTCTTTTTTATCTCTATTATCTGCATTTGTTAGATAGAAATAGACCACCCATCATCCTCTCACATTCTCTCTCATCAATCTCAAGCAACAAAGGCGCGTATAAACT

TGCAACAAGGAAGCAATCGAAATAACCATGGCTTATCGTATACGAAACCATGAGAAGTCAACTTACAGGGCTGTTGCTTCGTTTCCTTCAGTCGAGTCATTGCTAGGCAGGCTGAATCAC  
ATCGACGTTAGACTGAGGCAGCTGGAGGAAAAAGTGAGGCCCAAGAGAGCTGTTTCTCCGGAGACCTTAGGGCTAGGAACAAGCCCCAACTTCCACCATGGAAGACGCTCACGTAA  
AGCACACGCTCATGGACCGCCTCCGGTTGCTCGAGACAAAAATCCGCCAGCTAAGCAACGAAGTGCACAAAGGAAGCGACACCAGCTACAGAGTCATTTTCATCTCCAGCTGAGAACT  
GATGCTGAAAATATCCAGTAATAGTAGCAGAAGAATGGTGAGAGGAAAGCCATGGAGATCTAGTGCAGAGAACGTTGAGAAGCAGATGTCAAAAAAGGTGTGCTGTACAGCGATGCTG  
GAAAGAGCTCTCAGATGGATGAGATCGAGCATTTTTTGTACTGGTGATGAACACTGTTGTCTGAATTCTTCAGTATCTGATGACTGTGAAGCAGAAGGAATCCATGCAGGATGCTATCACT  
GAGGATATGAAAATAAAGTAGATCACCTAATTATAACATGTAAAGACGGTTGTTTTTTTTTTTTCTGCCTTAGCTTGACCTTTTTCTTCCTCGCTTTATTACAACGTATTTCTTTGTTAGCCT  
ATCCGGTCTGTTTAAATGTTGGATCAAGTTTATCATATATTATTTGATCTCTTAGGATGCAAGAAGCAAGAAGTTAGCAGAAGCTGGTGAAAGTGAATGTTTCGAGATACATGGTAGGAATAA  
ATT

>comp150513\_c0\_seq10

TTGATATATAATAACCAACAATTGCAAGCTGGAGCTCTTCAAATCATCTTCTATTGCTTTTTTATCTTCTCAGGTTGTTTTATTTCATATAGATCTGAGGCCTGAAAGGAGATTTGTTACCCATTG  
AAGAATGTCTGCTCCTGCTGTTCCAGACCATGTTTGTATGTTCACTGCAACTTCTGCAATACCATCCTTGTGGTAAAGTGTTCAGGCAGCAATTTGTCCGCGACTGTGACAGTAAGATGC  
GGACATTGTGGGAATTTGCTGTCTGTGAATATGGGAGTTCTCCTCAGTCAATGCCATTTCAAGATCTTCAGGGCGCTCAGCTCTTACGTTGGAAGTGCGAATCATCTTCAAATTGTAACA  
GGATTTCACTGTTCAATGCCGTTGGCAGTAATCAGCTGGATATGCCTCCAATACATCGTAAAGTTTATCACAGTTCTGCAAAAGTTGCCATATTTTCCTTGTACAATTTTGACTTGTGAAAACTT  
TATGTACTTAAGAAATCATATCGTACTTCCAGCAAGACATTTAATTTTTTAAACAAAATTTGAAGTTTTTTTTTTTTTTTGAAGTGTAGGGATCAAATATGGGAGTCGGGGGAGGAATT  
TCTTCGCTCAACCACGGAGCTGCCCCACTAGTCCCTG

>comp150513\_c0\_seq3

TTGATATATAATAACCAACAATTGCAAGCTGGAGCTCTTCAAATCATCTTCTATTGCTTTTTTATCTTCTCAGGTTGTTTTATTTCATATAGATCTGAGGCCTGAAAGGAGATTTGTTACCCATTG  
AAGAATGTCTGCTCCTGCTGTTCCAGACCATGTTTGTATGTTCACTGCAACTTCTGCAATACCATCCTTGTGGTAAAGTGTTCAGGCAGCAATTTGTCCGCGACTGTGACAGTAAGATGC  
GGACATTGTGGGAATTTGCTGTCTGTGAATATGGGAGTTCTCCTCAGTCAATGCCATTTCAAGATCTTCAGGGCGCTCAGCTCTTACGTTGGAAGTGCGAATCATCTTCAAATTGTAACA  
GGATTTCACTGTTCAATGCCGTTGGCAGTAATCAGCTGGATATGCCTCCAATACATCCACAGGAGAAGAGACAGCGTGTTCCTTCTGCATATAACAGATTTATCAAGGAGGAGATACGTAG  
GCTAAAGGCAACAAATCCAGATATAAGTCATAGAGAAGCCTTCAGTGCTGCCGCAAAGAATTGGGCACATTTTCAAATATCCATTTCCGGTCTTAACCATGATGGAAACAGTCAGGTGAA  
GATTGATGATGCCATTCCTGCTCATGGAGTTCAGAATTTCAAGGTTACTACTGATCAATCATGGATTATTTGAGTTGATGTTAAAATAAATCTCCTTCTTAGCTACTTTAAATTTGAATTTTAT  
GAAGCAGAAATCAATGTGTTTGAAGATGATTATGATGCTCTTAATAAAGATTGTAATGTGTTTCATAGTATAATTAATTTGGTTAAA

>comp150513\_c0\_seq4

GATATTCATATGAAACTCTAGAATAAACTAACATTATTTCTTCTGTCTTAACACTGTTATTCCATAATATATCAATTACGGAGTCATTATAGGTTTACTATCTTGAACCCCAAACCAAGCAT  
GAATCTAGTTCTTCCAAGCACTTAATCAATAGCTGATCCAAATATGCTAAGCTTAATTACACATTATAGGTTTTTCCAAGCCCCAACTATTTCAAACAATTTCCAGCGTCCACCAAGCACC  
TTAGGCAACAAGATCCAGCTGGCATTGCTTTCTGAAAGAAATGGAAGATAAATGGTGTAAGCAGAAAAAGGGAAAAGTTAGTGACTGGAGAAAGGAGGGAAACCCAGCACAGACGTAA  
GTGTCCTTGCTGGCCCTATTCTTGATCTCTGAGAGCCCTCCTCTCTGCAATCATAATCTGTTGCAATGTGGAAGTGAGTGTGGTGCGGTTGGTGTGTTGGACCAATGCCTCTCCAGCTAA  
ATTAGTGGGAACGAGGTCCCCAACCTGACTTTTTATTTATTTATTTATTTGTAAGAAATTCAGGGCGCTCAGCTCTTACGTTGGAAGTGCGAATCATCTTCAAATTGTAACAGGATTTCA  
CTGTTCAATGCCGTTGGCAGTAATCAGCTGGATATGCCTCCAATACATCCACAGGAGAAGAGACAGCGTGTTCCTTCTGCATATAACAGATTTATCAAGGAGGAGATACGTAGGCTAAAGG  
CAACAAATCCAGATATAAGTCATAGAGAAGCCTTCAGTGCTGCCGCAAAGAATTGGGCACATTTTCAAATATCCATTTCCGGTCTTAACCATGATGGAAACAGTCAGGTGAAGATTGATGA

TGCCATTCTGCTCATGGAGTTCAGAATTCTCAAGGTTACTACTGATCAATCATGGATTATTTGAGTTGATGTTAAAATAAATCTCCTTCTTAGCTACTTTAAATTGAATTTTATGAAGCAGA  
AATCAATGTGTTTTGAAAATGATTATGATGCTCTTAATAAAGATTGTAATGTGTTTCATAGTATAATTAATTTGGTTAAA

>comp150513\_c0\_seq9

GATATTCATATGAAACTCTAGAATAATAAACTAACATTATTTCTTCTGTCTTAACACTGTTATTCCTAAATATATCAATTACGGAGTCATTATAGGTTTACTATCTTGAACCCCAAACCAAGCAT  
GAATCTAGTTCTTCCAAGCACTTAATCAATAGCTGATCCAAATTATGCTAAGCTTAATTACACATTATAGGTTTTTCCAAAAGCCCACTATTTTCAAACAATTTCCAGCGTCCACCAAGCACC  
TTAGGCAACAAGATCCAGCTGGCATTGCTTTCTGAAGAAATGGAAGATAAATGGTGTAAAGCAGAAAAAGGGAAAACCTTAGTGACTGGAGAAAGGAGGGAACCCAGCACAGACGTAA  
GTGTCCTTGCTGGCCCTATTCTTGATCTCTCTGAGAGCCCTCCTCTCTGCAATCATAATCTGTTGCAATGTGGAAGTGAGTGTGGTGCGGTTGGTGTGTTGGACCAATGCCTCTCCAGCTAA  
ATTAGTGGGAACGAGGTCCCCAACCTGACTTTTATTTATTTATTTATTTATTTGTAAGAAATTGCAGGGCGCTCAGCTCTTACGTTGGAAGTGCGAATCATCTTCAAATTGTAACAGGATTTCA  
CTGTTCAATGCCGTTGGCAGTAATCAGCTGGATATGCCTCCAATACATCGTAAGTTTATCACAGTTCTGCAAAGTTGCCATATTTTCTTGTACAATTTTGACTTGTGAAAACTTTATGTACT  
TAAGAAATCATATCGTACTTCCAGCAAGACATTTTAATTTTTTTAAACAAAATTTTGAAGTTTTTTTTTTTTTTTTTTGAAGTGTAGGGATCAAATATGGGAGTCGGGGGAGGAATTTCTTCGCT  
CAACCACGGAGCTGCCCCACTAGTCCCTG

>comp150524\_c0\_seq8

AATGGTGATGGTAAGATATCATCGGCGACTGAGCTGAGAGCAATCTTCGAGAACCCTCGTACAGCCTTTGATGGAGGACAAGCCATTGCGGATGATGGGCGAAGCTGATGCAGATGAGG  
ATGGCTTCGTCAGCCTAAAGGAATTCGATCGTAATTTGAACACTAAAATGGTCAATCCATCGACGACACTCGAGAACCACCTTCTTCTGGTTTTCTCAGTATTCGATTTGGATCATACTGC  
GGCCAATTATTACGTCCGGTCACGGACAGCCAGACACCCAATCCAGACACGTCACGTCACCCGAATACATTGTGTTCCGATGTATTTGGTAATGTGGCACGTCTGGATTGGTATCCGGAC  
GAATCCAGACACCGAGTGTAATAATTTTTCTGGTGACGGGGTGATTTGGCGCAGTGCCGGAAGATGATTGATGGCGTTGATCAAGACGGTGACAGTCTCGTTAACTTTGAGGAGTTTAT  
GCAATCATCCACAGAGTCTTATCTTAGCATTAAATATATATTTCAAATGTTTATGTTGAACTTCAAACACTAAGTGGCTCCTATTAAGATTTTTTTTTTTTTTATGGAAAAATGTTTGTACTAG  
TTGTCAATTTATTTATTTGTTTTTTGAAGCATTACGATAGTTAAAAAAGAAATTTATTATCTTTTCTTTTCTTTCAATTTTACTCCAATCTCATATGACAGTGTATATGTTTTAGGTAG  
AAAAGAGTGAACCTAATTTTCAACTTG

>comp150808\_c0\_seq5

CCACAATTATATTTGGTGCAGATGTGACTCATCCTCAGCCTGGTGAAGACTCAAGCCCTTCAATTGCTGCGGTAAGTTTTGATCCACTTATTGTGGAGCTTTTTTTTTTTTCTAAATGTTATTT  
GTGGCCCTTTTGGTCTGAATTTCCAGTTATTAATATTTTTTCGACATATGGTAGGTTGTTGCTTCTCAGGACTGGCCAGAAATAACCAAATATGCTGGACTTGTTAGTGCTCAGGCCCATCG  
TCAGGAGCTGATTGAGGACTTATATAAGCTTGAATCAGATCCACAGCGTGGAAATGTTTCTGGTGGCATGATCAGGGATTTACTTATTTCAATTTAAAAAAGCTACAGGGAGAAAGCCCGAG  
CGAATAATATTTTACAGGGATGGTGTAGCGAGGGACAGTTCAATCAAGTTCTGCTTCGTGAACCTTGATTCAATTCGTAAGTACGTGCATGCATAGTGTTTTTTAATGCTTTATCTTTGTGT  
TATTAATGTCAATGATTGTTTTTTTTTTTCAATTTGATTGTGTTTTACCAATATGTGATTTATGCACTGCACCACAGGCTTGTGCCTCGTTCCATCTTGATTATCGACCAAGATTACCTTTGTGA  
TTGTTTCAGAAAAGGCATCATAACAGGCTGTTGCAAACAACCATTTAGGCATTGAGTCAGTAGATGGGAACGGAAACATCCTTCCAGGGACTGTGGTTGATTGAGATATCTGTATCCATT  
TGAGTTTGATTTCTACCTATGTAGTCATGCTGGAATCAAGGGGACTAGCCGGCCAACACATTATCATGTTTTAGTGGATGAAAACAATTTCTCTCCTAATGACCTGCAAACACTTACATATA  
ACTTATGCTACACATATGCAAGGTG

>comp150877\_c5\_seq6

CGCCCGCGACTACAGTCTTCCGCGGACTATAGTCTTCTGACTCATGTCGCCGACTATAGTCTTCTGACCCATGTCGCCCAATTACGATCTTTCTGACCACCTTACCTGACTACGGTC  
TTTATAACCTCTGTCACCCACCGACTACGATCATTTCCAACCATCATCACTTGACTACGATCTTTCTGACATCTGTTGTCTGCCGATTATGATCCTGCCAACCAAATGAACATGTCAATACTAA

TTCTTCCAACCTCCCACCGTGTAATGCAGTCTATATGATGTATATTTTTTATATTGAGCAAAGGCCTTCTTCCAATAAAGGGCGTAATTTGTAATCAAATGCAAATAGGATTCATTTAAACTGGA  
CAATGGCCCGTTGTTTTTCTCCTTTTCAGGGATTTTCACATAAAAACTCTGTATCTCTTATGAAAAAATATCCCTCTTTTATCTATATGCATGTTGGATTTTCGTACAAAGCAAAGATGCTAA  
ATTTTATATTTTTCTACGGCATCAAATATTCTAGCACATAACAATAATTATTTTTTATCATAATATTTTTATAATTATTTTTATAGAAAGCCACATCCACCCCAATCGAATCCAAGCCACCTGCAA  
AAAAATAAGATTATCATGCATCAAACAACACCAAACATAGATTGAGAGAATCAAATCTTGACACTCGACAAAGTCTAAGGCCAACAAAGATCAATAAAGAAGTTCACCTTGGCTTTAGA  
TTCAGCTTTCTAGATTCACCTTTCTTGGGAGAAGAAATTTTATGGATCATAAGGCTAGTCCCAAATCTTGTTCAAATCAAATTCGAGTGAAGGCTATAACAAGAAGAAATTTCTTTATTTA  
TGGTTTTCTAATAGGAATAGAAGCACAGCAAATGATTTAGACGGCAACCGTCCATGCACACTCCTTCCTTTTTGAAAGTCATGATGACTCGTTTGGGGATGCACTGAGTCTAGTTTTGTGA  
GCGCCTATACCGATAATCTTATAGCCATTTATTTTTTATGTTTCGTGCATTTCTCATTTCTTATCATGATTATTCAAGGAAGTGTATATTAATGGTCTATTATCTAACAAAACCTATCATTTTTCT  
CATTCAAAACCTTGAAATC

>comp150910\_c0\_seq9

TGTAGCCAAGATAGAGAGGCCTACCCTCAAAGCAGGAAATGACGGAGGTGCTGAACGTGCAACCGCCAAACTGGATTCTGCCCCGCCGATCGCCTCTTTCCACCAGTGCCAAGGCCGTT  
ATTCCTGCTTCTTTGCTGACGGAAGCAAGCAGAATGTTCTAGGGCTTTATGCTTTAGTTTGGTTACTGCCAATTAGTGTGTCAGATGACTCCAAAAACTTTGTTATTTTTATTTTCAGAAGCA  
GGATTCGTGTTTTGATGACTGAATTTGCACATATCCTTCGCTATAATAACAGCAGATTCCAGATTTCGAAATCTTTGGTTCCAACAGAATCAATATTACTGATCCTAGCAGAATTAAGAAACC  
ATGGGGTGAAAACAGTTCAATAATGGGAAAATTTCTCGACTAAGTACAATTAATACTTGTATTAAGCATTTGAGCCTGTTTAAACAAAATTTAAAGGTCAGCTAGCCATTACCAGAAGAA  
AATTAAGTTTTATATAAGTCGCTGAAGTAATCTTTGACTTATGTAAGTCGCTCATTCAACGGGTGACAA

>comp150937\_c0\_seq1

TTATTCGGTGATCCATTTCTTGAATCTAACATCTTTTACAAAGTCTATGATAAAAAATAATACATGATAGTATCTTTTTTTTTGGATATTTAGGCCAATTAAGACAAACTCACACAATATCAC  
ATACGCAAGACTCTAAGCCAAAACCTCTTGGTTCGTAACCAAAACTCTCAACCATCATACTTTAATCGCCAAACTAAATTCACCTCACTATGAAGATAATGTAATCAACGAATGACTAAG  
TTTCTACATTGCTCTTCAAACATCACCCAAACTAAGCTAAATCAACGGCCACCCTCCCCCTTGTCTAGATTCCTAAACATCTGAGACTGTTTATTCTTTTGAATCTGTAAAAGGATCCTTTT  
TATATTTCTATTTAGTTTGTCCAGCTTACAGAACAACATCCCTTCTCTTCTTTGGATTAGCAGCATCTGAATTTCTTTTCCATCATTGCGACAAACTCCTCATAATTGATTCTTCCATCATT  
GTCAGAATCAGCTTCGGAGATCATTTCCTTTATGTCATTGGTTTCATAAAAATCCCTTTTCTTTTAGGGCTTGCTCAAGCTCTCTTTTGAATGAACCCACTGCTATCCTTATCAAAGTATTGG  
AATGCCGTAAAAAGATGTTCTTCTGTCCATTCTATTCAAGTGCATTGTTGCAGTGATAAATTCATCGTAATCAATAGTTCCATTCCCATCTGCATCAGCGGCTTCCAATAACTGTTTAACT  
TCAGCTTCTGAAAGCTTTGTTCCCTTGTCTTAGCAGCCCTTGCCCTAACTCTTCGGCTGTTATAGTCCCACTGTTATCAGAATCAATGTTTTTGAACATCTCTTTAAGGCCCTAATCTCTTCC  
TCGGATAAGCATCCTGCAATGACCCTCAAAGCAACTTGCTTGAACCTGTTTAGCTCTCTGAATTGCTTTAGCCTATTGAGAACGACATTATCAAGAGGTGTGTCAGGTGCTTCTCCATCTTC  
TTTAAATCCATGGATGGTTGAGAACGTCAAATGCTGTAAACCTCTTCTGCGGGTCTTTGCAGAGCATCCTCTTGACAAGGTCCTTTGCACCGTCTGATATTCTTGGCCAGGGTTCACCTTCA  
AATCGATGGATGCTTCGAGGATGGATTTGAAAATTCCATGCTCAGACTCTGACCAGAAAGGAGGAACACCACACAAGAGAATGTAAAGCATAACACCAATACTCCATATATCAACTCCG  
GTCCATATTTCTTTTCAGTACTTCAGGAGCAATGTAATAAGCACTGCCAACTATATCTTTGAAGACCTCACCTGGCTTGAAGAAAACGGAGAGTCCAAAATCAGTGGCTTGGAGAGGAG  
CATCTTCCGCTCTATTGAGCAATAGGAAGTCTCTGGTTTGGAGTCTCTATGCATCACCCCATGGAATGACAAGTATGAACAATCTGCACGATGGTTCGCAATAGGGCCGCGGCCGCCCT  
CTCAGTGTAAATGCCCTTCGCAATAATCTATCGAAAAGCTCTCCGCCGGCACAAAGCTCCATAACTAGGTGCACTGAATGTTTGTCTCATAGGCCCCCTTGAAGCTCGACGATGTTGGGC  
TGGCCGGTGAGATGGTGCATGATTTGGACCTCGCGGCGCACATCTTCAATGTCCTCAGCATTGACGAGCTTGCCTTTGGCGATTGCTTGCATGCGAATTGTTGGCCGGTGAATTTATGAG  
TACAGAGGTGGGTGATGCCGAATTGGCCGCGGCCGAGCTCCTTGCCAATGGAGTAGGTGGAGCGAACATCTTCCATAGGTGCGCCGAGGACCGGGCCGATGGGGGCGAGCTTGGGGG  
TTTCATGGTGGGTGGAGGGTTGGGGGAGGGGAATTTGGGAATGAAGAGTTGGGGGTATTGTGGTAGGAGGGGGTGGCATTGGTGATGGCGTGGTTCGACGGTGGCGGCCGGGGATTCT

GAAAGAAGGAGAAGCAGATTCCCATGGAGGGAAGGGTTGGGGTGTGAAAGAAAGGGTGAGGAGGGGAGGAGAAGGAGATGATATATCGATGATTTGTGCAAAGAGGCGGTGCGAATG  
TCGGAGTTGAACAGGTGGGAGGAATTTAAGGGAGAAGGAGAGGGGTTTGGGAATCAGTTGCGGCTTGCGAAGGGATTGT

>comp150986\_c0\_seq1

TTAATCGATCATCAACCCCTTTGTCCCATCATCGGCATCCTATGCATGCCCGAACGAAAGTCGAATCCGATGCGGAGACGTTGCATTACGAATCATTCTAATAAACTCGAATCCGATGTGGA  
AAATTCTACGGACGAGGTGACAGTAATACATGGCTTACATGTGTACATCTCACAGCACCTCTTCCATTGCTTAGAGAACAATCCATCCATTTTTATAAGATAACGGGCCATGGCCGTGCTT  
GG

>comp150988\_c0\_seq3

CCAAGGATCTTCCCTTCTCAATCCACCCTCTCCTTCTCTCCCTCCTTCAGGAGGCATCTCAATTTCTCTGCAATAGCAATGGCGAACTCAGCTTCGGGGATGGCTGTGGTCGATGAG  
TGCAAGCTCAAATTCATGGAGTTAAAGGCGAAGAGAAGCTTCAGGTTTATTGTCTTCAAATCGATGAGAAGAATTTGCAGATAATGGTGGATAGAGTCGGCCAACCAGATGAGAGCTAC  
GATGATTTCACTGCTTGTCTTCTCCTGATGAATGTCGCTATGCTGTTTTCGACTTCGATTTTGTACTGATGAGAATTGCCAGAAGAGCAAGATCTTCTCATTGCCTGGTCTCCTGATACA  
TCAAGGGTGAGGAGTAAAATGCTGTATGCCAGCTCAAAGGATAGATTCAAGAGAGAGCTCGATGGCATTTCAGGTGGAGCTCCAAGCAACTGATCCCAGTGAGATGAGCTTGATATCAT  
AAAAGGCCGAGCTCTTTAATTAATTTCTGGAATTGGACTTCCAGCCATTTCTGTCTTTCTACTCTTACTTTTCCATTCAAAAATATTTTTAATTTGGTTTGTATTTTCAAGATGGGACTTCA  
TTAGGTTAATGACTGTGGGCTTGTATGCTTAAATCTCTGATAAAAGTGATTATTTTTTCTTTAATGCATAATAAGATAAT

>comp150988\_c1\_seq3

TTAAAACAAGATTTTCATGATATTTAACTAATTAATATTAATTTACGTACATGTGTGAACTAAAGCATAAACATAACCAGGTTAACATATAGTGTGCCATAAATTGGAGATATTACTATTGAG  
GAGTCCGAACATAGAGAACCGTTTCGATTTTGTAAACAGTGAAGTGAATAAAATACAGTTACTGTTTACCCTGCACTATTACTATTCACAGTTACAAAACCAAACGATTCTCTATATCCGAACT  
CTGGACGTAATAATCTCTCCACGAATTAACAATCCTAATCTCATAAAATTAACCTGAAAAGTACTTATGAACTCCAGTTCTGTCTGTTAGAGAGCCCGACATCTTACAATGTCCAAGCT  
CATCTCGCTGGGATCTGTTGCTTGAACCTCACTTGAATGCCGTCTAGCTCTCTTTTGAATCTGTCTTTGGAGCTAGCATATAACATCTTATTCTAATTTTTGAAGTGTGAGGAGACCAGGC  
AATGAAGAAGATCTTGCTCTTCTGGCAATTTCTCATCAGTAACAAAATCGAAGTCGAAAACAGCATAGCGACATTCATCAGGAGGAAGACAAGCAGTGAATCATCGTAGCTCTCATCTGG  
TTGGCCGACTCTATCCACCATTATCTGCAAATTTCTCTCATCGATTTTGAAGACAATAAACCTGAAGCTTCTCTTCCGCTTTAACTCCATGAATTTGAGCTTGCACTCATCGACCACAGCCA  
TCCCCGAAGCTGAGTTCGCCATTGCTATTGCAGAGAAATTGAGATGCCTCCTGAAGGAGGGAGGAGAGAAGGAGAGGGTGGATTGAGGAAGGGAAGATCCTTGGAATATGGAAGGGAG  
AGTGGTTAATTTGGGTACTGATTTGAGGAGGAAAACGTGGGGTGGAGA

>comp151026\_c0\_seq1

TAGATACTAAATATCTTGTGTATAATTGCAACAAATTTGATATTGGTATTTGAAATTTATCATTCTACACTTAAAGTGAATGGCACGGGAATTATGACGAACTCAATTAAGATTTTCATGGTTCC  
ATCAACCTAAGTTGTTATGCTCACTGATCTACTTAGTCAAAGGAGTTAGTCAACCAAACCTTGACTAAAGGATAATTGTCAGTAGTAATGGGTTGCATCATCCCCGGCCTTGAAACGATC  
CTGCTATAGTGGTGGGTTCCGGTATCCTTGGTTGGAAATTTATGCTCTACTGCTGCTTTGGTCTTGAATGTTGTTGGCTGCTACATTGCATTCTTCTTATCTTCATAATAGTGAGAGAGATC  
TGCAACATTAAGTAGGTGAGATTTGTAGACTTCCAGGTAATTTAATTTGAAATGCATTATCATTAATGTGTTAAGGATACGGAAAGGTCCATCTGCTTTGGCTTTGAGTTTGTGTCATCC  
TAGTGTGGAAATCTTCTTCTGCTTAAATCTGATTCATACTAAGTCTCCCACT

>comp151031\_c0\_seq4

ACGCAACAATTTCAAAGTTCATTTTTTTTTTATTTGAAAGAATTAATAAGCAAGAGTCATTGTTGACTGTAACCGTTTATTTACCGACAAAACCCACGATTCAACCGCTCATTACCG  
ACTTGCCATGATCGGACACGACGATTCAACCACCGACATACTCACGGCATAAAACACTCTCTCACTCGGACGGTTAGGGAGATACGCACGCACACTCAAGAGAGACATATACAGAGAA

GAGAAAGAAAAGATTTTCAGAAAACAGACCTCTTCTCCCGACACCGTCCAAGCCCGACCTCGCCGT

>comp151095\_c0\_seq12

TTTTTCCAAAAAAAACGATTAGGCCTTTATGTAAAATTAATAACAATCTGTAGAACAATTTAAATTTGGCAAAATTTCTAAAAATATTCAACCGTATAAAAGATAGTTATTGCACTCTC  
AACTTTATATTCCTTGCAGCCTTTTCTCATTCTAAATCTCCTCACTTTGATGCAATATTTCAATCTTTCAAAAAAATTTATACAAAAAGAAAGGGATAAAATAAAGAAAGAATTGCACTATGG  
ATGCCCTCGTCTTCGGCTCTCTATTTAGGTACTTCAGAACTTCAGCAAAGCCCATGAAGGGCTAATGTATGGTCCGTATCTGTAGTCCTGATTTGGCGTCTAAATGAATGCATCATACTTG  
TATTACTCACATATTGAGTTGCCCAGCATCGGAAGTGGGTGAACCTGAAGGAACCTCTCCTCATTGATGCTTTTAGTCCTAAGCTTAAGCTCCCCTCTGCTGGTTGTGAGTTCATCCAAAAT  
TTCAGCACCATGGCCGAATGCCTCACAAAGCTTCCTGACTGCTGTCAGTGCACGCTGGGGATCCATCAAGCCGAAATGAGAGGTTATGGTTCGTGAATAGGAACTCCAGCAATTTCTTCATA  
TTCAGCTGCGTCCAGTTCCACAGATCCTGCCGGTGAAGAATTTGGGAAGAAGATGCTCTCTGATGCTAATTAACAGGTAATAATGGCAGTGGAAAAGAGAATTCCTGCTATAGGAATCCA  
TGTA ACTCCGAAGCATATTAGGAGATAGACCAATTGGAAAATTGTAAAGGTCCCTATAACCCTATAAGGAACTGATTCCACAAATGAAGCATGGATTCCCTCCAGGACCTTGTAACGTCTT  
CCTGGAGTAATGAATAAAAAGCAAATCCTTTCCAGAACTGGTTTCCAGGAAGGCTATCTATAGCCATGTATGCAAAAGTAGCCCCACAGAACTGATGTAGGAATCTTCTGATAAATGGTA  
TAGCTCCAAGACAGCCTCCAACCATAGGGATTGGCAGTGGTAAATTTCTGCTCATTACCCGAACAGGCAGGTGTGCATCAATGTGCTTCTCAGGATCAAATTCACCATTAAATC  
TCCACTAGACATGACAGCTTGTTTTAAGTCCTTCAATTCATCACCACTGTTGAGCACTGTTGCTCTTGTCCATTTCTATGAATACTTCTTGCAATTTTCCATATATTTCAGAATTGCTAGCC  
TGCAATTGTATGCTTTTCTTTGCACTCTCAACCATCTTCTTGCGAATCAACTGCCTCTTGAGAACTGCAAGACTTTTTGTATGCATTGGGGACTGGGGCAAGACCCCATTTGATGGAGGGA  
TTCTTAGAAGCCCGCAAATCAGAACCAGAACACCAAGGACAAAGATGTCATAATGATACGCAGATGGGTGTTTTGAGATTAAATTCCTTTTGTGAGCCATTTGAGATGCAATGCTGTGGT  
CAAAAAAGTAAAGGCCTGCAACCATTATAGCAGGCACTATTGCACCAAAAGATGTACAACGAGGGAACCAGCATCATATCCTTTGCAACAGACCAATTATGCAATGATTCACCCTGCCGAG  
GAAATGGAATAGAAAGCCTTCGGGGAACTCCTGAAGCAACATCTTTTGGAAACAGCATAAGCACTGCTGTCCATACCAATAAATCATAGGTACCCCATAGTCTGCTATCAAGCTTCTAAA  
CCAGTCTGTGCCGTATCTCCAGGCCCTTGCTCGTCTGCTCTTCAGAGAAGTGAATAGCACACCAAGTGAGAAAATAACACCCAGTAAACCGTTTTGTGTAAGCCCTCAAACCTGGTACTT  
GTGTTGATTATAATCTTCACCTACAGGAGCTGTAAACTCACTCATTATGCCCTTAATGGCTTCTTGCAAGAACAGAACAGTTATCAACATGCCAAAAAGTTCGCCTGCAACTCTTGTAAC  
CTAGTAATGATGTTGCATGCATTGAAAATAGCAAGAAAGAACAGCATAACGCTGTCCAGAAGCATAACCCTGCATGAGTAAGCAGCCAGCCAGGCCAAAAACAGACGGCTTCCAAGTA  
ATTCTTGCCCTTAGCGAAATGGTACAAGTAGGAATACATTATCACAGTGGGTTCTGCTACTCCTAATATCAGCATGGGTTGCCCCCAAAGATTGAGTGTACGATGCCACAAATAGAAGTT  
GAAGCAAGGGTCTCAAAAAACGTTAGTTCTCCATCTATAACAAAAGCAAAGATTTTCAAGCAAACAGCCCAATGACATCTCTTTTTTTTTTATTTTGAATAGCAGGATGACTTCTAAA  
AGATGAGGCATGCACCTCATTCAAATATCACCTACCTGTATCTCTGCTCAGTTGCTCCCCAAAAGCAATAACAGGAAGGGCCGAAGCAAAAAAGATGAACATAGTCGGAGCCAATATCC  
TCAAGCCTGAACGAAATCCACCAAGCCAATCTTGCTTATAACAACCTAGCTCTTCTTTGA

>comp151105\_c1\_seq1

TTTAAGCATGAAAAAAAATTATTAGGATACTCATGTTCAATTAACATGGATATACTGTTGATTGTCATTATTTACTCATATGAACGTTCTCTCCATAGCAAAGCAACAATTATCTTCAT  
TCCAAGTAGCCCAAAACATGTAAGTAAATATTTTCTTTTCCACTTAACAGGAAAAAATAAAATTAAGCTCTACTCATTTTCTCGTTGAGCCGCGCAGCCGCCGTGACAGAGTCGGC  
GACACCGCCCGGCACCGTCTCAAATCGGGCTATTCTTAGTTTCACTCCATTACTGCTTCAAGCTCTTCCCTGGTACCTCTTTGTCCGGCGCCAGCTTCGCCGTGCGATTGTTAAGC  
ACGTCACCAACCGTAATCTTATCCTCCTCCCTCGCAATCCTAGCATTATCTCGGCCGCCGACTGAGCCGCCGCGGCCACCCCTCTCGGTGCCGTCAATTTGATCGCCCTCACCTCCGCCGC  
CTGTATCGCCGCCGATCACTCTGTTCCACTGGCCTGTGCTCTGCGAAAGCCCTGCCGCTCCAATGCTTCTCCATAGTTATTTTCTCGCCAGGGACATCCTCTTCCGCCGGCGTCCCG  
TCGGAACGTGTAAATTAACGACGGTCTGGCCGGCAACCCTCTCGCGAACTATGCGGCAGCCAGGAGCCTCAGTTTCAAGTAACGGTACTCCTCGAATGGCTGCGTCTGCTGGTGAAGTCG  
TCGTGGCCGACAAGGCCGGCGCTCATTAAAGGTGGCAGCGGACTGCATGACGGCGGCAGCGCCGTCTTTTTGGGTCTTGCCGGTGATCTTGTCTCGGCGGTCTGCATCAACGCGGC

GTCGCGAGGTCGGATGGGTTACCGGCAAGGTCTCCTTGGACCGGAAAACGTCACCATACTTGATGGGTTCCATCCAGATGGTCGGAGCGGCGGGGGTTGTTTCATTCTTGCTCATGG  
CTGATTGGAGCTTCGGAATCGAAGTAAAACATCCCAGAGTACACCGGTGTATTTAAAGGGAGAGGTGAAGAGGAGATTGT

>comp151167\_c0\_seq3

TTTTTATGCTCAATGACCAAATGAAGTTATATTAAGAAATGCCGTAGTACAAAATTCATCTGCCAAAGAAAAGCACCTATATCTCTTTTAGGCTATCAGTATAAGTTTACAACGTCT  
GAAATAAAAAGTGATACAATGGACAGAAAAATATGCCCAAGCATTATACAAGTTGAATCACATAATCTACACTACCCTTTGAAACATTCTAGCTTGTTAATCTAGGAATCCAACACAGCA  
AGCTCATTTGCTATTGTATCCTACAAGCTCGCTTGAATCAGCCAAAACATATAAAGATATGAGTCTCTCTACTGCTAAATGCGTCTTGCCTTTTTCTGGCTAGTATCCTTACGGAACA  
AACAAATGGCCAATCTAGTTACTGGCGCAAAGAGTGCCAGTCAGCTTAAGAACACAGTTTTTATAATTGAAGGAAAATGTCTCTATGCCTGCTTGGGAACCTCCTCTTTCTTCATAGA  
CTCGATAAAAACAACCCTCACTGAAAGTTAAGTTTAAACCATTCAAGGGCATCAAACCTCGTTCAGACCAACAATTTCTCAATCGTAGCACCTTTCATGAAAATATCATGAAAAAATTTGGCT  
TCAAGCTCCAGCAAAGGTTCAATTGGCAACTGTTCCAACCTGTTTCTCTGGTTCTTAGATTTTAGCTGAGTCTCTTTCGTGGTGGAGTTGATCCTTTCTTTGTTAAGGTGTTAAAGGGAA  
ACAGATTGGCCGAGGCTTGGGCTATAGAGGTGCTCAACTGTGATGGCAAGCGTTGGGAATTGTTATAATTTTGCTTGTGGAGCTATAGATTTCCATCCTGTGGTAGATTTCTTTGGCATT  
TGACTCAACTCATGCCTTCTACCACATTGAAGTTGCATAATCTTTCTAATTTCTGATCGATTATTGGTCTTCTGGGCTTGACCTCAACTGATTTCAACTCATTAACCTCTTTTTTTCCGGCCA  
TCTTCTTTTCTTCCGAGGAGAGACACATAAGAAGCTTTTGCCCAATTCAGAACTCTCATACATGTCTGATTGTATGGCCAGAAGAGAGGTTTCATCATAGTCAAATTCTCCAACAACT  
GCCGCATGTTTCTGTACAGTAAGAAGAAGTTATAGAGCTGGGACTAGAAAATGAAGATTCAGATAGAGGATTTACCCTGTAACCTACATGAAGGACTTGACAAATCCGAATAAGTGAATT  
TACTCCATCTTTCAGTTGAATCAACTCAGACCTCTCAAGATTGAGATCAAATGTTGAAATCCATGTACCCTTCTATCTAAATCATCCATTGTCGCAAGAGATGTGCATGAACTCTCAAGAG  
ATCTATCATAAGAGAAATCTCTTCTCTCATAAGAACAACAGATTGATCATTCATGACCCCTCTTCTTTGAAAGTTCAACCTGAGATCAATTTGCAAAGGAAGTACAGTAGAATCAGC  
GTTCTCAGACTTCATCAAAGGAAGTGTGTCTATGAAAGACGGAGTCCAGCCATTCAACAGACAAAGATCTGATATATCAGAACTAAATAAGGAGGAAGATTACAGTCTGAAGACAACC  
ACATGCAAGTACTCTCATCAGACACTCCTTCGGCAAGTTTAGCTGCATCTCCAGATCAATATCTTCAATTTCTAACTCACAAAAAGCATCAGAAGTCTTTTATTGGGCACAGTTGCGG  
ACTTCTTCTGGTCGATTACTTGGATTGTTTTTCTTCGAGCTTGTGTTGATTCTAGGCAAAGCCCTGTCCACAGGCTGAGATGACCTATTGTAAGTAAGGAACCCCATTTCTTGCTTTGATAT  
AGCTGACTAAACTAGTTCCCTCAATGCACAGTTCTAGCTTTCAGAAAGTAAGCATTACAAAGAGATTTCTGAACAAGCACACCATCCAAATATCTCCTTCAAGACACAAACCCTCGAACGTT  
GGGTACGATGAGGGTTTCTCTTCCCTCCGCTCCAAG

>comp151237\_c0\_seq2

CCATACTTATACTTATAAAGTTACCCCTGAAAATTAAGTTGATTCTGCCCCTAGATATCCATATGTAGAGCTGCATTACAACCTTCCACTATACGAAACACGAATTTTGTGGCTACTAGATA  
GGATCCAAGCAGTTTAAATATTTTTTTGTAATGAGAACACGAAGTCATCCTCTGCAATCTAATTAGAATGGAGTGAAGAAAATAGGATACTGGTGATGAAGTGAGATTAGAGTGAAAAG  
TCAGGGAGGATGGCGCTGCCACCGTCTTCTTGATCGAGCATGCGGACGACATCAGCCACACCAGAAGACAACCTCAGTTGAGAAGGGGCCGACCGGCAGATCGAACTTTCGCCGCCTCG  
ATCCCGATTCCCGGTATGGCTGTGGATCCACCACCGAAAGCATGGCTTCCAGCTCGCGGGTCATTGACCTCTTAGCTGAGCGCACCATAAAGATCTTGACCTCTATGGCATCAACAGTGAC  
TAGAAGTATGATAATTTCTCAGAGAACCCTTCCGCTTCTTCTGCATCTTTAATATCCGATGACGATAAGAAAAATTTGAGAACAAGGCTCTAATCTCCTTCAGCTTGGACTTAGCCACTG  
CCAGATCCCTAAGAGAATGAAGAGCTTGGGAGCGTCTTGACTTATGATCTCTGAATGCTTCTGAATTGCCATTGCTGCATCTTGTGGTGATAGTTCTTTCTTCTTACCCTTACTTCCGTGTA  
CAGTTCTCTTGGCTAAAGCCTGTCTAACAATTTGCTGATCGGCTCCATCATCGATCTCCACGGGGCGTGCCATAGCCTTTTTTACTTTCTTTCTTTCTTAGCCCTCTCCCAAACATCTTGCG  
CTGACGCCGAAGCAGCATCGAACGTATACTTTACCTTTCCACGGGACTCTATCGTTCTTCTCGCGCTATTCTGAAAAGCTCCCTTCGTCTCCGCTGTGCACTTGTATTTTTGATCGAATCCTT  
CCCCTTATTTCCCTTGATCTCAGCAGTCCATTTCCATTTGCTCTCTTGGGGCCAATGTCCCGATCAAACCCAAGCTCGAGCATGGCAAGCCGATCGCCGAGGCCCGGACGCAAAGCT  
CTGCCCTCAGCTCGGTTATGAAAGATAAGATCCGAGGCTGCATCAAAGAAGTCCACATTTGGCAGTAACAAGCGAAAAGGATGATATTGATGATGATAATGAGGGTGAAGGCAATATG



AACGGGCGCGATCGACGGGAATGGAGCTAGGGTGTAATAATCGAATTCGAAATCAAGATAGTCTTCCGCTGGTTCCAAGCAGGAGAATCTCGGACTAGTAAAGCCGGCCTTTCGGCAC  
AGGTAGTGGAAGTAATGATCAAGAAGCTCAAATGAATTGAACGCACTCATTCTGGATATTGGGTTCATGGGTCGAGACGATGCCTTCCACTGTGGAAAGAAAGCCTAGGGTTTTTTTATT  
GCAGAGCGGAACAGAGATTGGAAA

>comp151256\_c0\_seq4

GCGCTTTAAAGCCAGCAGAGATAATTTTATTAGAGATTAATGTAGCATTCTGCAGTTCATGCAACGTACATAAATTCTGAAAACCGAAACCAAAGCATATGGTAGCTTTTTTATTCATGACC  
GAACAGTTTGTAAAAGCTCCAAATCCACAGAAAAAAAAAATTCTAAGTAGAGGAAAGCAAATCGCAAGAGGAAATCCGAGCTATGCACCATTTATCCTTTAATAATTAACAGACTCCA  
ATGCATCCCTACGATTGATATAACGTCTCAAACACTCCATGACTTCATCGGCAAATCTTTCATTACTAAGTTCGACGATGTCTTCATAAACATTAAGTTCTCCATGTTGGTTAACAGTATCTT  
CAAGTAATTTCTCCGAACACATTTCTAGTTTCACGAGCAATTTCTTTCAACAGTTTGGCCAAGATCAACCTGCTGCTCAACCTGCCGAGAAACATCGAGATCAGAAAGTCTCATCCCATCATT  
GCCTGTGTCTAGTCAAGTGCAACATGAAAAGTGAATAAAGTAAAAAATAGCTCATAGTCAGCAAAATTTTGAAGCTGATAGAAAATTCATCTTGTGAGTACCTACAAGTACGTCT  
TCTAGGTTAGATAACTCATTCAAATCAACTGAGTCGTTTGCATTATACGATTGTATAACTCAGGAGGTTTAAAGGTGGAATATGACATACCAGATTGTGTTCTGCATTCAAGTTGCCTGACCTT  
CAAGTGTCCGGACAGTATTAGATCCTGAAGGAGGCCCTGTACGTAGTGCAGAACCAGAAATTTGAGAAGCTGAAACTACAGGTACAAATTTCTTCTGCCTATAATGGACAGGGCGAGGG  
CGATGCACCCGAAATGGATGCAATGATTGATGAGGAAATGCTACATACAAAGTATTAATAATTAGATAGAATCCCCAAAATGACAAGAAATGGGAGTAATAGATACAGATATATGTGATTA  
TAATGGGAAAGATCAACCTCAACCATTATTTGATTTGGCCCTGTTGAAGATATATAACAGAGCCTCCAGTTTCTACAGATGACTCCCTTGGCCCTTCGCCAAGGCGTAGAGACATCGATG  
CTCGGCCAAGCTCTAAGAACAAGGCTCCCAGATGCTGCATTGCTAAACCAAAGTGCCTGCTCCAACTGTGTCTGACCTCGCAAGACTTGGTTCATCGCTGTTTTCTATTCTTAGCAAAT  
GTGTGGATAGATTTGAAAGAGCCGTGGTTGCATTTTCCCTAAGAAGCTGTGCTGCTCGCCACAAAACAATACTCAAAGTTTGAAGGGCTGGTAAAGTTGCAGTTATTGTGCCCTCGAAA  
GGATCTCATGCTGATCATTGTTCAAGTGAAGCAGCTGATGCTGATCATTGTTCAATGAGTTACAACAACCTTTGAAACTCCCCATTCATCCGATCAATGAAATCATTGACAGTCGTCAAAGTA  
TCAGGAAATAGCTCCTGTTCAATTGGAAATTCGCCAAGGCGATTCAAAAAATGAAAGAGAGGATGCTGGTTGACTCTGAAATATAAGCCCTAGATTTACTGAGTTAGTTGACCGAGTCCTT  
CTTGAGTTCTGAGAACTTCTGCTCCGGCACCTTGCTGGCTGCTACTTCTTGATGTCTCAGCGGCAACAGTTGAGGAAACAGGAACTAGCCGCTTTCAGCTAAATGCATAGTGTCTCCA  
TCTGTCAAATTTAGCTCCGATAGCAATTTGGTGATCCTTGAGAACCTTCCCTTTATAGAGTAGCCGCTGTTTTTCCAAGGGAACGCCAATTTTAGTCACTACCTCCTCCCTCAAAGCTAATAT  
GGGCATATTTTTATTACACGGAAGGAATGTGTTTGGAAATCTAGAGTTTTGATTTGATCTCAAACCTTGAGTCTGAACTTTCACCGGTGCCCTGGATTGAACTAGTGTCTTCAAGCTG  
GATTCATGCGCCATCCTTGACGATTTCCGAAATGGATAATAAGATTGATTTCCAGATGAAAATGCAGAGGATAGCCGTTGGAACCTTTTCGTTTGTAGCCTTCTTCGCTGACTGAAGGCATC  
TCAGAGCTCCTTCTTGAAGACTGTAAGCAGAGAAGAGGGCAACGCTTTGCCGCGTAAGTCGTAGACATGTGTGAGAGGATCCGTGTATGGAGCAA

>comp151256\_c0\_seq6

GCGCTTTAAAGCCAGCAGAGATAATTTTATTAGAGATTAATGTAGCATTCTGCAGTTCATGCAACGTACATAAATTCTGAAAACCGAAACCAAAGCATATGGTAGCTTTTTTATTCATGACC  
GAACAGTTTGTAAAAGCTCCAAATCCACAGAAAAAAAAAATTCTAAGTAGAGGAAAGCAAATCGCAAGAGGAAATCCGAGCTATGCACCATTTATCCTTTAATAATTAACAGACTCCA  
ATGCATCCCTACGATTGATATAACGTCTCAAACACTCCATGACTTCATCGGCAAATCTTTCATTACTAAGTTCGACGATGTCTTCATAAACATTAAGTTCTCCATGTTGGTTAACAGTATCTT  
CAAGTAATTTCTCCGAACACATTTCTAGTTTCACGAGCAATTTCTTTCAACAGTTTGGCCAAGATCAACCTGCTGCTCAACCTGCCGAGAAACATCGAGATCAGAAAGTCTCATCCCATCATT  
GCCTGTGTGAGATTGTGTTCTGCATTCAAGTTGCCTGACCTTCAAGTGTCCGGACAGTATTAGATCCTGAAGGAGGCCCTGTACGTAGTGCAGAACCAGAAATTTGAGAAGCTGAAACTAC  
AGGTACAAATTTCTTCTGCCTATAATGGACAGGGCGAGGGCGATGCACCCGAAATGGATGCAATGATTGATGAGGAAATGCTACATACAAAGTATTAATAATTAGATAGAATCCCCAAAAT  
GACAAGAAATGGGAGTAATAGATACAGATATATGTGATTTATAATGGGAAAGATCAACCTCAACCATTATTTGATTTGGCCCTGTTGAAGATATATAACAGAGCCTCCAGTTTCTACAGAT  
GACTCCCTTGGCCCTTCGCCAAGGCGTAGAGACATCGATGCTCGGCCAAGCTCTAAGAACAAGGCTCCCAGATGCTGCATTGCTAAACCAAAGTGCCTGCTCCAACTGTGTCTGACC

TCGCAAGACTTGGTCATCGCTGTTTTCTATTCTTAGCAAATGTGTGGATAGATTTGAAAGAGCCGTGGTTGCATTTCCCTAAGAAGCTGTGCTGCTCGCCACAAAACAATACTCAAAGTT  
TGAAGGGCTGGTAAAGTTGCAGTTATTGTGCCCTCGAAAGGATCTCATGCTGATCATTGTTCAAGTGAAAGCAGCTGATGCTGATCATTGTTCAATGAGTTACAACAACCTTTGAAACTCCC  
CATTCATCCGATCAATGAAATCATTGACAGTCGTCAAAGTATCAGGAAATAGCTCCTGTTTCATTGGAAATTCGCCAAGGCGATTCAAAAAATGAAAGAGAGGATGCTGGTTGACTCTGAA  
ATATAAGCCCTAGATTTACTGAGTTAGTTGACCGAGTCCTTCTTGAGTTCTGAGAACCTTTCTGCTCCGGCACCTTGCTGGCTGCTACTTCTTGATGTCTCAGCGGCAACAGTTGAGGAAAC  
AGGAACTAGCCGCCTTTCAGCTAAATGCATAGTGTCTCCATCTGTCAAATTGAGCTCCGATAGCAATTGGTGATCCTTGAGAACCTTCCCTTTATAGAGTAGCCGCTGTTTTTCCAAGGGA  
ACGCCAATTTTAGTCACTACCTCCTCCCTCAAAGCTAATATGGGCATATTTTTATTACACGGAAGGAATGTGTTTGGAAATCTAGAGTTTTGATTTGATCTCAAACTTGAGTCTGAACT  
TTCACCGGTGCCCTGGATTGAACTAGTGTCTTCAAGCTGGATTTCATGCGCCATCCTTGACGATTTCCGAAATGGATAATAAGATTGATTTCCAGATGAAAATGCAGAGGATAGCCGTTGG  
AACTTTTCGTTTGTAGCCTTCTTCGCCTGACTGAAGGCATCTCAGAGCTCCTTCTTGAAGACTGTAAGCAGAGAAGAGGGCAACGCTTTGCCGCGTAAGTCGTAGACATGTGTGAGAGG  
ATCCGTGTATGGAGCAA

>comp151256\_c0\_seq7

GCGCTTTAAAGCCAGCAGAGATAATTTTATTAGAGATTAATGTAGCATTCTGCAGTTCATGCAACGTACATAAATTCTGAAAACCGAAACCAAAGCATATGGTAGCTTTTTATTTCATGACC  
GAACAGTTTGTAAAAGCTCCAAATCCACAGAAAAAAAATTTCTAAGTAGAGGAAAGCAAAATCGCAAGAGGAAATCCGAGCTATGCACCATTTATCCTTTAATAATTAACAGACTCCA  
ATGCATCCCTACGATTGATATAACGTCTCAAACACTCCATGACTTCATCGGCAAATTTCTTCACTAAGTTCGACGATGTCTTCATAAACATTAAGTTCTCCATGTTGGTTAACAGTATCTT  
CAAGTAATTTCCGAACACATTTCTAGTTTACGAGCAATTTCTTCAACAGTTTGGCCAAGATCAACCTGCTGCTCAACCTGCCGAGAAACATCGAGATCAGAAAGTCTCATCCCATCATT  
GCCTGTGTCTAGTCAAGTGCAACATGAAAAGTGAAAATTAAGTAAAAATAGCTCATAGTCAGCAAAATTTTGAAGCTGATAGAAAATTCATCTTGTGAGTACCTACAAGTACGTCT  
TCTAGGTTAGATAACTCATTCAAATCAACTGAGTCGTTTGCATTATACGATTGTATAACTCAGGAGGTTAAGGTGGAATATGACATACCAGATTGTGTTCTGCATTCAGTTGCCTGACCTT  
CAAGTGTGGGACAGTATTAGATCTGAAGGAGGCCCTGTACGTAGTGCAGAACCAGAAATTTGAGAAGCTGAAACTACAGGTACAAATTTCTTCTGCCTATAATGGACAGGGCGAGGG  
CGATGCACCCGAAATGGATGCAATGATTGATGAGGAAATGCTCAACCATTATTTGATTTGGCCCTGTTGAAGATATATAAACAGAGCCTCCAGTTTCTACAGATGACTCCCTTGGCCTTCG  
CCCAAGGCGTAGAGACATCGATGCTCGGCCAAGCTCTAAGAACAAGGCTCCCAGATGCTGCATTGCTAAACCAAACACTGCACTGCTCCAACTGTGTCTGACCTCGCAAGACTTGGTCAT  
CGCTGTTTTCTATTCTTAGCAAATGTGTGGATAGATTTGAAAGAGCCGTGGTTGCATTTCCCTAAGAAGCTGTGCTGCTCGCCACAAAACAATACTCAAAGTTTGAAGGGCTGGTAAAGT  
TGCAGTTATTGTGCCCTCGAAAGGATCTCATGCTGATCATTGTTCAAGTGAAAGCAGCTGATGCTGATCATTGTTCAATGAGTTACAACAACCTTTGAAACTCCCCATTCATCCGATCAATGA  
AATCATTGACAGTCGTCAAAGTATCAGGAAATAGCTCCTGTTTCATTGGAAATTCGCCAAGGCGATTCAAAAAATGAAAGAGAGGATGCTGGTTGACTCTGAAATATAAGCCCTAGATTTA  
CTGAGTTAGTTGACCGAGTCCTTCTTGAGTTCTGAGAACCTTCTGCTCCGGCACCTTGCTGGCTGCTACTTCTTGATGTCTCAGCGGCAACAGTTGAGGAAACAGGAACTAGCCGCCTTT  
CAGCTAAATGCATAGTGTCTCCATCTGTCAAATTGAGCTCCGATAGCAATTGGTGATCCTTGAGAACCTTCCCTTTATAGAGTAGCCGCTGTTTTTCCAAGGGAACGCCAATTTTAGTCACT  
ACCTCCTCCCTCAAAGCTAATATGGGCATATTTTTATTACACGGAAGGAATGTGTTTGGAAATCTAGAGTTTTGATTTGATCTCAAACTTGAGTCTGAACTTTACCCGGTGCCCTGGAT  
TGAAC TAGTGTCTTCAAGCTGGATTTCATGCGCCATCCTTGACGATTTCCGAAATGGATAATAAGATTGATTTCCAGATGAAAATGCAGAGGATAGCCGTTGGAACCTTTTCGTTTGTAGCCT  
TCTTCGCCTGACTGAAGGCATCTCAGAGCTCCTTCTTGAAGACTGTAAGCAGAGAAGAGGGCAACGCTTTGCCGCGTAAGTCGTAGACATGTGTGAGAGGATCCGTGTATGGAGCAA

>comp151295\_c0\_seq1

ATGTTTTACTGTTTTCAAAAACCTGGTATGAAGAATAAGTTTATACATACAGCAGATTGGAACTAGAAAGACATACATATTAATAGAAAGAACTCTTTTTTCATGTTACTTCTTCTACTCTGTT  
CTTCTGTTCCATTGCTTAAACAGCAGTTTGATATCCCTTGCTTCAGAAGAGTTTGTGTTTACGAACTGATGTGTGTAGGTGCTGAATCAGCTGGATGGTATGCTGAAATGTCTGCCACA  
CTAAACGTGGATGGAGTATGTCTGAAGGTAATTCGACTGTGTAGGCATTGTCTGTCACCCATTGCTTGATAACAATAGATATGATCTTCCGTGGGCTTAGCTTGGAGTAAGTGCATGAAGG

AAATCATTCTTTCTCAATCGCACCATAACTAGTTCGCCTGGATGAAAGACTTTGGATGGGCGATGTGCATCTGCCTTTGACTTGTATGCTACATTGGACTGTTCCAGCTTCTTGCGAACTT  
TGCCAGAGTGCATTTAAAGTTTTTCGGCCAGTTTATGGGCAGTTGAATTGTGGCACTTTGGCAACACAACACTATAACCCACAACACGGTTAGGTGGTTTAGTATAGACAATTTGAAAGGGGTA  
CATACCAGTATATCGGTTTTGTCATCGAATTATAGGCAAACTCCTCATGGTTGAGTACATGATCCCATTTGTTTTCGGCCTTTTCGGGTGATCTTGCACTAAGCATCGCAACATGCTTCTAAGGGCA  
CGGTTTACCACCTCCGTTTTGGCCGTCAATTTGGAGGTGGTATGCGGAGCTTAACTTGATTTTTGTCTGCAACTATTTCAAAGCTCTTTCATAAGTGGGTGATAAACTTGACGTCACGATC  
TGAGGTAATGCTGCGAAGCAGGCCATGAAGGCGAAAAATCTCTCTAAACAATAATTTGGCAACTCCAGTGCATCACAAGTTTTCTTACAAGCTGTGAAGTGAGCCATTTTCGAGAAGTT  
GTCAACTACTACCATAATAGAATCAACTCCCTTTTTTGTGTGTGGGAGACCTAAAATGAAATCCATACTTTAAGTCCTCCAGATTGATATTGTCATCGGTAATGGGGTGTATAATCTAGTGT  
TTAATTGCTTCCCTTGTAACCTTGACATATTGGACACCTCTCAACAAATCTGATAACATCCCTTCGTAAGTGTGGTCAGTAGAAGTGCTCTTTGTAGATGGATTGAGGTTTTTCTCTGCTG  
AAATGTGCTGACAGACCTCCAGCATGCATCTCCTTGATCAATTGTTGTGCGACGGATGACAAGGGTATGCAAAGAGCATTGCCTTTAAATAAGAATCCATGGCGTAGTGTGTAGTCTTTAT  
ACGATCTCCCCACCTAATAGTTCTCCCATGGTATTAGAAAATCTGCATCACCAATTTATAACACTTTCAAGGATTCCAACCCTGTAATTCGGTTTTGAAGTTAATAATGAGGGCAGATCGTC  
TGCTCAATGCATCAACCACCTATTTTGAAGTTTGAATTTGTGCTTAAGGCCAGCTGAAATCTGTAGGAAAATCACCCATCTAACATACATCTGGTAAATGGGCTTCTGAGTGTTAATAAA  
TTGGACGGTTTTAATGATCACTGCATAGTACAAAATCTGGTGAAGCAAATAATGCTCCCCTATTTGAGGGCTCGATTAATTTGTGTATAACTCTTGCTCATAACCGACCCTTCTGTCTTGC  
CAGACTCAACTTCTCACTGTAAAATCAATTGGTCAGTTTTCCCGAGAGAGCACCGCTTCAATCCCACTGCTGAAGCATCAGTGTGAGCATTAAACGGCTTAGTGAAGTCTGACGTTGT  
TAGAATAGCTGCTGAAAATAATGCCGCTTTGATGGTCTCAAAAATACGTTGATGTTCTTCGTTCCAAGTGAAGGTGCTCTTCTTAAGACAATGCGCCAAAGGGGTCATAATCATACTGAAA  
CCAAGCACGAATCGATGATAGAAATGGCTAAACTGTGAAAATTTGAATGTCAGTGTGGAACGAGGCTGCGGCCACTCCTGGATAGCTGCAATTTTGCCTGGATCCACACTAACTCCA  
TCTGTCTAGACAATAAAACCCAGAAAATGGACTGCAGTGGTAGAAAATCATAACTACAATTTTTGACCTTTAGAGGGAGCATTGCACAATCCGAACGGCATCACCCACCATTTCATATAA  
GCCATAAGCATCTGGAAGGTCGTCGTCATTCATCTCCAGGGTGGATTCTGATTTGATGGTAGCCACTACGCAAGTCTAATTTTGAGAAAATTTGACTCCAGACAAGTAATCTACCATATC  
TTCCAGCCTAGGGATGGGAAATCGATATTTTCGATTGATCTTGTGATTGCACGCTGTCCACACACATTATCCACAACCCATCCTTCTTCGGGACTAATATGGCAAGTACTGCACAGGAGC  
TCTGGCTAGGTTGTTTTAGCTTTTTCTGTTATAATCTTCCACAATCTTCTAAAATTTGTTGATGCTTAGTGGGACATAGTTTATAATGCAATAAAATTTGGGCAAAGTGACGCCAGTACCAGATC  
AATTTGATGTTGAATAAAGCGTATGAGAGGGAGTTCATTTGGCAGTCTTGGGGTGTAAGATCTTCAAATCAGTCAACAATTTTCGTAGTTCAGGCAGGTAAGTAGAAGTATAAACCTCC  
TGACCTGCTTCAATAGTCGCAAGGGCTACCAAGGACTTCATCTCACGGCTGATCTGTAACAGAGACTTCCCTGACACAATACAAAGGGATGGTTTATTGGAGCTAAGGTTAGTTGCATTG  
GTTGGTGTGCTGGGTAGTAGTTGAAGTTTTTCGTCCCTT

>comp151303\_c0\_seq2

TCTACTTGAATCATTTGGCATTATCGATCGATCCCTAACTAGAATATTCCCCTGAGAAGATTAGCTGCAGTAGAGAGAGCTGCTCCAGTTATGGCGCACTGCACCAATTGCTCATGAGTTG  
TATCCTGCAGTGTTAAGGCTAGTGTCTCCTGTAACAGCCCCAGCAACCACACTGTTCTTCCAATCATGAGTTTCTCTGGCCTCTCTCAGCCCATATGTTATCCCTGAGTAAATGCCAGCA  
GTCAGTCCCCATTGAAAGATTCCCTCCCAGTATACCTCACCAGTGTTCAGAGATTCCCATATGTTCTCTCTCAGATCTGGGAACCTGCGCTTCTTGCACCCGGGAGCTCAGGCA  
CAGTGCCTGAATCAATACTAGAACCATCCACTGCACTGAAATAGACCTCTCGGGAAACTGCTTGGAGAGCACCAATCCAGCGGCCCTTGACGAAGCTCTCGGCAACGCGATTGAGGAGG  
GGATGGCCAAAGTCAAGAGCGAGCCCTGTCAAAGCTTCTCAGCTCGTCCAACAGACTCCTACCCTCCAAGTTCACCTCACTCATTTTCTTTCTTCTTCTGCTTTAACCAGAACAAAACAC  
TTAGAACAATAGAGAACGAAGTGAGAGAAAATAAAATGGATGGAGAAGCTTAAGAAGCGAATTG

>comp151306\_c0\_seq1

ACTTGAAGGGAAAAAAGAAAGAAATTGAAATCAATGATATCCGAGAAGAGTAAAAGAAAGCAGAGAGTAAGCGGAAACTTTGGATACAAACGAACAAGCAAAATCAACAGCTT  
TCCAGATGAATTTCTTTTCAGTGCATTTTCATTGTTTTTCAGAGTCAGTTACAGTCATCGAACCTTACCTCGAGAACGGCAAACGAAGTCGGTTTTCTTCAGTTCAAGCAAGACCGGAAGTCA

TGAACTCAGCTTCGGAGACGGCGGAGAGCTCTGCAGCATCTTCTAATGGAGCGGGGAGATTGAGATCAAATAAGCTCTCGCTAAGCTTAGCAGGGCGTGGCTGCGAAGTGATGGTAATG  
GCGGTTCGTCGAAGACGAAAGGTGGGATCTTTTGTGCCCGCCGAGGGCTTGACCACAGCCGAACCTCTCGGAAGCAGATTGGGCAAACATGAACGCTTTTTCCGTCGGCGTTCGGCATTTG  
CTTCCGTCGAGCCTTCAACATGGATCGGCGGGACACAGCTCCGCGACTTCTTGTGACTAGCGCGATGCCCGCCGAGAGCTTGGTATGACCCGGAATACCTTCTTGCAAGTGCCGACTGGA  
ATCGGCTTCGCCCTTCGCTTGCAAAGACCGCGGCTTAAAGTCAATCATCATCTCTCTACTCTTTCATCTGCTTTGTTCACTTCCTCATCTTGTCTCAAACATCACGAGACAGCAAC  
ATTAGGCTGATGGCAACGTCTCTCCGCGTGGTGTGCGGAGACAGAGCTAAGCAGTTCAGTCTCCGGTAGCTCCGGAGCCGGTTCGCTTTTTGCGGCGTCGATTGATTGTGATAGGGGAG  
GACTCCGTTTTGCTTTCTCGGTCTGAACAACCTGATGACGAGAACTCCGGATCGACCATGCGGAAGCTTTTTTTAGGATTCTCTCGAAGGCCGTAGCCCAGCCCTTTCGCCTCCTCTGCTT  
CGCGGGAGGAAGTTGAGGAAGATGAGTAGTCGGAAGAAGCGATTTACCGAGGCCGCGGCGGCAGCCGCGACAGCCACAACGTGAGAGCGCATGTGGCCGCAAGCGCGCGGCCAT  
TGGAAGAGCTTCGGTCACAGAGCTTGCAAACATGCCTCTCCATGTCCAAGAAGCAGAGAGATCGAAGAAAGAGATAGGGTAGATTCAGCTATTTCTCTTTCTTCTCCCTCTACTCCATTA  
CAAAATTGCTTTGCTGATAGCTCTTCTTCTCACTCAAAGAGGGGAGAGTGAGAGCGAGTGGAAGCTAAGAGGAGTAGGTGACAAGC

>comp151352\_c1\_seq14

TAAGACATTCAAATGTCCATCAAATGGTTCATGATCAAGGGATTCAAGATCGGCCGTCCATCCAACCACTCCAAACTTACCCTTGATCCTTCATATATTTACAAGTCATGCCACTCTCAAAA  
AACTATAAATAGCCCCCACTCTTCTCATGAGGAGGGGGAGAAAGAGGAGAAGGAAGGGAGAAATTTGGGAGCTCTCTTGCCGCCGACCATCGCCGACTTCCACGGGAGTTCCCGC  
CGACCACCACTGGGGTTCTGCCAACCACCGCCAGTATCTCTCAACCATCGCCGGATTCGCCGCCGACCACCGCCGGAGTTTCCGACCGTTCGCCGACTTCCACCCGTTCTCCAAC  
CACCGACGGACTTCTACCAGTTCGTCGACTGCCGCCGACTTCCACCAGTTCGACGACCACCGTTCGGACTTCCACCAGCTCAACGACCGCAGTTGGACTTCAGCCAAACCGTTGCCAC  
CGACGGACTTCCGCCAGTTTGTCTACCGACGCTGGACTTCCACCAATTCGCCAACCACTGACGGACTTCTGCCAGTCAGT

>comp151385\_c0\_seq1

CTCGTTCAAATTTCCATAATTGCATATAAAATCTGCCTTCTCTTGCTATCTGTCATTCTTACAGCTTCCCTGCTTCTCAGTCTTTCCACAGTTTCGTGATCTGAGAGGATCAGTCAATTCTCT  
CCGATTCTTGTAATCGCCGCAAAGTTCAAACCTGTAGCGCAGGAGCAGCGAAAGATCTGAAGCATCAACCAGAAAGCAACAATGGGTTCGAGCTACAAGATGGCTTACTAAGTTATTGGG  
AGGCAAAAAGAAGGCAGAGAACACAAAGAAACAATGGCGTTCGCTGCCCTTTAGCTCCAGGCATTGATAACCAATGGAGAAGAAGAGGTGGAGTTACATGTCCGGGAGGATTTCC  
TGCGACATGGCGTGGCTCCGTTCAATGTATGCAGAAAAAGAGAAGGAGCAGAGAAAGCAGCTATTGCAGTCGAGCCGCGACAGCTGCAGCTGCCGAAGCAGCGGTGGCTGCAGCT  
CAGGCGGCAGTGGCGGTGGTACGTCTGACGAATCAAAGCCATCGTGTCAATTTATGCGGCATTCATGAGCAGCTTGCAGCCCTTAAGATCCAAACAGTATTCAGAGGTTATCTAGTAAGTT  
TAATTCCTTATTATATGCCATTCATATTACTTCTCTGCGGTGATTCTGAGCTTCTTACGCCTAGCTATTCGTTTCAATTTCTCCTTTTGTGGTTTCTCGGCGTCATTTGCAGGCAAAGAAGG  
CTTTGAGAGCTTTGAAAGCTCTTGTTAAGCTGCAAGCTTTAGTTTCGAGGCTATATAGTTTCGGAAAAAGCCGCGGCCACTCTTCGTAGTATAACAAGCTCTCATGAGAGCTCAGGCAACAG  
TTAGAACCAAAAAGTTCCGATCTCTCCCCGAAAATCTCGTTCTTATAAGCCATTACAGGAAAGATTTGACGAGGCATCGTTCCAAAGCCAGAGACTCAACGGCATCGATACTTACCGTCT  
TAAATCGAGATCGTCTCGAAGAACAAGCCTTCCGATATGGATGAGAGCTTCTTCAATTCAATGTCTCTGCTATCCCCTGCCCTATTGAGACGCGGAGGTGCTCCTCCACAGCACAGAAC  
ACACCGCGGTGGTTGAACACAGGTCTAAGCTTTGCCCGCCTTCTCCGACGAAGAGCGCCCGGGTGTCTTAATGGGGTTTTCCAGCGTTTATTGAACTCTGCGGATAATAGTCCGAGT  
TTCATGTCTAGTACGAAGTCGTTTGGGCGAAGGTGCGGTGGAATAAAGGATTAAGCAGAGGGCAGAGGGCCATGGTTTGGGGAAGCGAGTTCCCTCAGTGATCTGGTTCGTCGTCGA  
GCAGTCGAGAGGAAGACCAAGCTCTCCGGTGAGTGAGACCTTCAATTTCCGGAGTGCGATAATGGAAGCTTAATAGGCCTCCGGAGTTTAGCGGGGAAGTTGAGAAGCGCTTCTGTT  
TCAAATGAATTAA

>comp151451\_c0\_seq1

CAGAATAGCTAGAGGAAACCAAGGGCTGTGAAAATGGCCAAAGCTCCAATTTTATGCCATCAGGTCCCCGACGGCGGTGCTGATGCTTCCTGTGAAGCTTTTATTGGAAATAGCACTT

AGGACAGTGATGGCAACCATGGCGAGGAACAGACTGAAGTTGCCGATGACCCACACGACTCTCGAAGAAAACCTTCGGCACATTGGCTCGAGCAACGTTGCAGTGATACCAAGAACAA  
TCGAATTCAGCAGCAGCCAAATGCACCTTGTTGAACTCCTTTATTA AAAAGCTTCAATTTCTTCTTTTGTGCCATTAGGATCGCCATGGTAGATCTCACGGCCCATCCAGTCAGTGTCTGAG  
AGGATGAAAGGGAACCATGCCATCCATGTGAGAGATGTCATAAGAAGAACAGAGAGCATTCCAGAAGGCAAGTTCTTGAAAGCTTTGAAAACAAAAAAGAATCCAGAATTCTCCTTTG  
ATGCCCTCTGCATCCAACCTCCGACAGCGGAACCTCTTTTGCAGATATGAGAGTAATTGCTAAACAAATTCCAAGGAATATCACTGCAATCAAGAAGGCACCTTCAGATTCGCGCATGCTTC  
ACAACAAGAATTTGTCATCAAGAATGGGAACCACTTGTGCCAACTTCCACTGGCACCAGAAGCATAACCGAGGATGTTTCCAAAAGCCATCCAAAATGCATAGATTATATTTCTGTGCT  
GCATCCATGGCTGCCAGAGAGATCAGCCATCATCGCTCGAGCTGGACCTTGAACAGCATTGTTAGAGAAATCCAGCACCCAAAATCCAACCACATAAATAAGAGCTGCTTTCCATCGAGG  
ACCAACATAGGTGCTGCAATTTTCTTTTGTGTCACCAAGTGCAGAGCCAATGTCAGATGAGAAACCAATAACCATTACAGCACAACATATAATAAAGCATCCAGCAAGAATGAATGGCTT  
TCTCTTCCAAATCTTGAACCACATCTGTCTCCACATAACCAATTGTAGGCCCAACAACAAAACCTGCTATGGGGCCACAAAAGCCACATGATAGAAGCCAGAGAATGAGGAAGCCCAA  
GTGTCTGTACATAAGGTGTAAGGAGAGAGAGCTGAAGCGCCAGCCATATTGCACTCCTCCGGCGACCATACATGAGAGGATAAGTCGCACTAAGCTTATTTCCGGATCCTGCACTCCATT  
TTCTGACACCATTTTGGTACTCGTTTCGATTCGCTCTTATTTTATATTCCGATAGCCAATTCACGTCGCCGGACACAAAGGTGATGGCGTTGCCGGAGCTCTGGTTTGTCTCCTTTTATA  
GCCTTCGCTCTGGCTCCCCACCGGTCTGTTGTGGCCGAGGTTGCGCATATTTGTG

>comp151456\_c0\_seq2

GCAGGCGTCGTCGCACTTCTCGGTAATTACTATTTCTGCCATTTTTTCATAGAAAATTTGATAATTAGCGAAAAGAATTATACTTAATTGAGTAAAAAATTACGGGAAAAGACTATGTGCAG  
CTAGCTTAATTGTAATTATGCGATCGAAATCTCTTTAAGCATTATTAATTAAGTGAATTATTAGTCTTTTATTATTGTTATTAGTCTCTTTGGCTTTATTTCGAAAACCGTACGCTTAGACATGT  
GCGCCTTCTTTATTAATGGATACAAGTGTGCTCTGGCATCTTGTGTTGTAGTGTGTACAGGATAGAATAGTAAGAAATATGTTTCATTTCAATTTAATTTTCGGAGATTTTCATTTCA  
TTTTCATTTTTTTTAAATTTCCGTCGATTTTCCATTATTTTTATTGAGAATAATATAAAATAAATAAATTAATTAATTATGCATTAATTAATCAATAATTTATGTTAATTAATAAATAGTTGTTGA  
AATGGGACCGGCTGTAGGCCGGCGAAACTGACGGGGAATGATCATAGGCTTGAGCTGGGCTTTGGGTTTGAAGAAATAATCTGTGAGGGCTTAAAATCTGTGAGGAGATCAATCAG  
AATACGCTACGTCATCTTCTTATTGATACTCAGCTCGATAATGAGGCTCAGTACCACTAGTTACCTTGGCATTTGGTACCAGAAATTCGATATCACTGATATGATTCAGTGAAGCGCACTACT  
AATTTTATTTTTATTCAATTTGACATTAAGTTGCTGTAAATTTCTTAAAGCACCATCCAAAAGTGGAAATAAGGCAGCAATCTTTATTAAGTCGTGGGACCCACATCATGAACCAAATCAACA  
AAAAATTTATTCGATGTGGGACCCATCAAGCCAGTTGCACGAATATCAAAGCATCGCAACAAGAAAATAATACTAAAAAAATGAAAGTGTCTTAAATGAAGCCAAATAACGTCGGTGGA  
TTTTGATAGGGTCGCACAGCGTGGGCCGG

>comp151463\_c0\_seq4

TCCTGGTTGTACATACATTGTAGTGATGGGCACATCAAGACACAACGTGACTTCGGGAAAATCATGTATTGGTGATGGTATGTTCAAGTCTGGAATATAAATTAAGATCTAGTCCTCAGCT  
TGTGGGGTTGTATATCGTTTAATCTACTGCTACTATTCCCTTCTTCCACCTTAGTGGCAACAACGCTCAATGGCTCAACGGTGGCACCACGGGAAGTTGATGCCCTCCAATGACAGCGCAT  
GTGCCCGCAAGTGCCTGGCCAGATGGAACTGTCGTTTACAAATTGAGCATTTCGTGTACTTTGGGTT

>comp151463\_c1\_seq3

AACCCAAAGTACACGAATGCTCAATTTGTAAACGACAGTTTCCATCTGGCCAGGCACCTGGCGGGCACATGCGCTGTCATTGGAGGGCATCAAGTTCTCATGGTGCCACCGTTGAGCCAT  
TAAGCGTTGTTGCCACAGAGCTGCAAGAAGGGAATAGTAGCAGTGGATTAAATGGAATACATCCTCACACACTGATGTTTCAGATCTTTAATTTCTACTCCAAACATGAACATGCGAGCACC  
AATAAATGATTTTCTGAAAGCCACGTTGCGGCTTGATATGCCAGCACTACAATGTATGTACAACCAGGATGGGAAAATGCGAGGGAGAATGCATTGAATGTAAATATAGAGGTGGTTGAG  
AGTAGGGAGGTGAGATTAAATGATCTTAGTGATCTCCTTGACATAAATGAGAGAAAGGTTGGCTCTACATGGTTGCAGATTGGCTTGAATCCATATCTAAGCAAGAGACTAGAGCTGATC  
AACCTTAACTCATATGCCAATCCTGATTTTGTGTTGTTTAAATTTGCGGTCATGTTATCGACGTTAAGACTTCTGAATTTATTTTATTATCGAATGAATAAAGAATGATTTATATTTATTTC

AA

>comp151480\_c0\_seq2

AAATTATTCTAAGAAATAATAAAAAAACTATGCCATACCAAACGTTTCATCAATTTAAAAATCTTGAAAAATGCTATCGACAAGTACATCTTGTGACAAGAAAGCTTCATTTTGCATTACAGT  
GGAAAGATCTGAATCAAGCCTTGGACTCTTACTCTTTAATGCTGCTCTCTACATAACAAGTTACTGGAAGTATATCAGAAGCTGCGTATACGCGAGCAATAAGTCAACAGTAGCAATTT  
CATGTCATAGATAAAAATTTGTATCAGAAGGAATGGCCATGGTTCAATTTGTCGCTTCTCTCAAAGAACAGGATTGCAATTCCTCTAGTAACAATCAAAATATCTACTCCAGCACCTAACCTT  
TCTACAAGAAGTTACAGGGCTCATGGAAGCTGACAAAGCCATTCTTCTACATCTGCTCGCATAGCTTCAGTTGCCTGATTCATGGAAAGCCTCTGCTGCCATATCGATAGTTTCCAACATC  
ACTCCTTTCAACTGGTTTGGCAAACATAGCACGAGTCTCTGACTCACCCTGTACTCACCTGAACTTTCTCCAGACCTCTGTGAGTTCGACAAATCTCGATTCTGCGGCACACGTCGATG  
ATACTCGCGACTATGACTACGGTACTCTTCGCTGTTTGGTGAGCTCCGGCGATCATATTCATTGGAGTATCCGTATTCAGAAGTGAAATCATCAGTTCCTAGTGCCGTTCTTCGAAATCTCTG  
GATATCTGCTGAATGCTGACCGGAATCATAAACTTGACTCTGACCAAATTTTCATGCCGTTGCTGAGGTCTTCCATATCTCCTTCACTGTCCAGGGCCCTCAAAACCTGAACCATACGGGGT  
CGTTTAGGAGCAGAATGTCGAACACATGCAGCAGCCGCTTCAATCATTCCGAACATCTCATTCTTTGCATAGCAATTCTCAAGTCTTTGGTCGACTAGTTGATCACAGTTTCCAGTTTCAA  
GGGCATGAACAAGGAGAGGCCGAGCCCATTCAACCAAGCTCTCATCCCCATTGGTTGACTAGCATCAACTGGCTTACGTCCAGTTATAAGTTCTAGTAGTACAACACCAAAGGAGAAA  
ACATCGGATCTATCAGTCAACTTTCCACTTGATGCATACTCTGGGGCCAAGTATCCAAAGGTTCCCATGACACGAGTAGACACATGCGTATGAGTATCATTGAAAGTTTTGCAAGGCCAA  
AATCAGCAACCTGTGCTTCCCAATCATTATCTATAAGAATGTTAGCAGATTTAATGTCCCTGTGGATGATTCGAGGGTGGCAGTCTTCATGCAAGTATGCCAATCCTTTGGCTGAACCAATT  
GCAATCTTTAGCCTTTTTGGCCAGTCCATAACAGGCAGCCACTTTCCATGTAAATGATGCTCCAGAGTTTTATTTCGGAACAAATTCATAAACAAGCAATCGCTGAGTTTCAAATATGCTATA  
ACCCACAAGAGAAAACCAAATGACGATGGTGAACACGACTAATGATCTCAACCTCTGCTCTAAATTCTCTCTCCTTGACCACCGCCTGCTTTGAGCTGTTTCACTGCAACGCATTTCCCA  
TCAGGAAGGGCACCCCTTGATACACACCCAAAACCACCTTCACCAATGAGATTTTCATGAGAAAACCCATTTGTTATTCCCATCAGCTCTTCATAGTTGAACCATGACTTACTGCCAGATG  
GGTCTGGCTGCGAGTAATAGTCTTGTCTCCGCTGACTGCCATACAAGCCAGAGGTATTCGATAATTGTGGTGGAGATCCATAATGTTGTTCTGAAAAGTTGGGATGCCCCATGGGGTTTTTC  
ATTTCTATGGTAATAATTATCTGACTTAACAGAAAAGCTAGGCGGGTCCGGTAGTGATCAACCAAAGCATCCAATCTTTTCTTCTCCTTCTGAGATCACAAGAAAATAGTCACCAATG  
TAATCGCAACTCCAACAAGGACCAAGCTAACTATAGCTCCAGTGGAAAGTACCTCCTTTATCAACAGAAAACATTGGATGATCCTATCGAAGGAGGACTCACGTGTGGGGTGGTTTGAAGTTG  
GTTTTTCATCAAAGAAAGGGAATCAGAAGGCGTCGCTGGGGAGCCATCTATAGATCCCTGTGAAGAATTAGGCTGAGACGGTTTTGATGGTGATTTACATCACCACCAGGAGGAGACT  
TGTCAGCATTCTGGTTACCCTGCGAAGGTGGAGATGGTAAAGATGAGGAGGAGGAGGAGGATTCATCTGAAGCAATAGAATTTGGGGGTGAAGGAGAAGAGCCAGATTTTGATGAAATG  
GGTGGAGACGAATCTCCATCTGAAGATTTGCTCTGTGAAGGAGAATCTGATTGAATAGGGCTTGAGGTGAAGGCGGGGGTGGTATTAATGATGGAGGAGATGGTGAAGAAGATGATGA  
ATTAGAAGTCCCTGGAGTTGACGATGAGCTAGGCTTTGATGGTGGAGGCAATATGCTAGACGGCGATGAGGGTGGTGAGGTCAAGCTAGACCCTGCTGAAGGCGGTG

>comp151537\_c1\_seq1

CTTATAGAATTTCCCTTAAGTGTCTATTTGATTCAACATTATTCAGATAATAACATTGAATATTTGCTTGGCTGCTTGATTACTCTGTAGGGGTTTGTCTTTATTTGCATTGAATTTAGGC  
TTTTTTCTGTCTTTCTTTTTGTTATATAGAGTAATAGATAGATACCCCAAACATTGATATCTGTGTAGATGAACCAATTGCAACTCCAAGAGAAATGTCTAGTTTGTCTTTCATGGCAAACATA  
ATGGCACTT

>comp151593\_c0\_seq2

AAAAGCAAGCGGGAAACCCGCGGGGAAGAGCGACGGCGCATCGTTCTCCGCTACCGCGCCTCCTTCATTTATTTCAATTACCAGAAAGCTTCTACGTTCTCCATCTCTCTCTCTCTCTTCA  
AATCGCCGATTTGCTCACGTAACATCTGCGGCGCAGATCGCTTCCCTACTTCAATTTAGAGGCGAAGCTCCTTCTTATTCCTCTGCTAGGGCTCTATTTCCGCTTTCTCTCTCTCTTCA  
AGATCGTGAATCTATTGTGGTCTTATCGTCTTTTTATTTTATTCCTAGGTTTATCTTCATCTGAAAGCTCAGTGGAGAGAAAAGTTCTTTGGGGATGAAGTTTGGGGAGACTTTTACAGGGT

TTCTTCACGGAGACCAAGAGTGGTTTTTGGACAATTGCTCGCACGTAGAGTACAAGAGGCTGAAGAAGGTTTTGAAAGCCTGCAGGTCGTTGCGGGATTTCGAATGGTAATGAGCAGGA  
AGAGAGCAATGACGGAAATGATAGTACCGGGTCAGAGCAAGTCTGCCAATGCGATATCTGTCCAGCTTGTGATCAGAAGTTCTTTGATGAGCTATCAAAGGAAGCTTCAGACATTGCTGG  
ATGTTTTAGCTCAAGAGTTAGGCGACTTCTCCATTTTCACTTTTCCAATGGATTGCAACGGTATATGCGGCGCCTTAGCCATTGCTTTTTCAGATGATCAGCAAACCTTCTGTTCAAGAAGTGA  
GGATGTTACTTGTATTATGTTACTATGAATGCCGTTGCTATAAGAAAAATACTCAAGAAGTACGATAAAGTTTCATGGCTCTGTTAATGGTAGAAACTTCAAGATGGTAATGCGTGCTAAACGG  
ATAGAACTATTGCAATCACCTTGGCTAATAGAACTGGGTGCATTTTATTTGAACTGCGCTGGTTCAGATGCAGGTGAACCTGGTTCATTTTTCCGAAAAGTTCTTGTGATCTATCTGATTCC  
CAACCTGTAATGACGATGGTTCTATTGGATTCCATTACCTATGAATACAGTTTGAGTTGCCCCATCTGCTTGGATACCGTATTTAATCCTTATGCTTTGGGTTGTGGACATCTTTTTTGCAAAA  
GCTGTGTTTGTGCTGCAGCATCAGTTCTAATTTGTGATGGTCCCAGATCTGCATCTCGCGAGGCCAAATGTCTGTATGCAGGGAGGTTCGGCGCCTACCGTGACCCAGTGCATATGTTAGA  
GCTGGATCATCTACTACGAAGCAGGTGCAAGGAGTACTGGAAAGAGAGGCTAAGAGAAGAACGCGCTGAGATGGTAAAACAAGCCAAGCTGTACTGGGAGAGGCAGACCATAACTGC  
GTTGGGATATTGAATCTGCTTATTTTTTTTATCTCTAACTGCATTTTTTCAGAATCTACAGACAATAAACCTTACTAGCAATGAAAAGGAATATGCGTATATGGTATATATAATGATTTGTTGCCA  
CAGAACCTGAAGAAATTATGGCTTTTACTGATTCATATTGTTTCATTTTGTTCATCTGGAATTTGGAATTTGGTCTCAGTTAGTTTGGAAATATTCTTAATTTTAATAATTTTGATTGTTGAAA  
AACATAAATTAATATAAAAAATGCGTAATTTTTTTTTTTAGTTTTAT

>comp151625\_c1\_seq2

ACCTTTTTCCATATATAACAAAAGCTGGTGAATGAGGAATGAAAGATCTTTCTTTCAATTCAAATAAACTTAAAACTTGTAAGGAACTCATATAGAATAATTGGTGATTTTTATTCTTT  
AATATTTTGAATATTCTTACATACATGTTTTGGCTTACGATGAGGTTGTTAATAGCTTGGTGATCCTTGCCAGACAGTTATCCGTTGGCCTTGGGTGAGGCAAGTATCTCACTGGACACTCT  
GGATTCGCACGTTCAAGTTTGTAACCCAAGAGAAAATAATGAAGGAAAACGGAGATCTCTATCCTGGCAAGGTCATTTCTGGACAAAAGCCTGCTACCAGCACCAAAGGGAAGAAAGG  
TCCCTGCCCTTGGTACAAGACCATCCCATCTAGATGGATTGAAACTCTTTGGATCAGGATAAACTTCAGGATCCATGTGGACATCCGATACCAAGTTTGAACCTTTCCAACCTTTTGGAAAT  
AAGTATCCATTTATGTAAACGTTTCGTTGTGCTTGCCTGAAAGACACAAAGGAGATGTTACAATCCTCAATGTCTCATCAATAATCTTTGAAAGATATCCATTTTTCGGACATCCTTGAG  
TGTTAATCCCTTCTGTGTGGGTAGCATATTTCTGCTGATTTCTTCTGTTCTGCCTAAAAACAATCGCCAAGATAGTTTTTCATTTAGTAGTTTATAGACCGATTAAGGAATGAAAATACCTT  
ACATTTCTCAGATGTTTTTTCATACTTTGGCTTTTTTCAAATATTCACGATTTTCTTGCAGGAATATGGTGGCCACATAGTAATATGGCCAGAAGATTCATGACCAGCGTTGAGGTACATGAT  
CAATGTGTCAATGATTTCTCATCGTCCAGTTTCTTCCATTTTTCATCTTCAACATCAATTAAGCCATCCATCATGTCCTTTGCCTTCTTAGAAGTCCCTCTGGCCCTTGAAGCCCTTCTAAT  
GTCCAGGGCAGCTTGGAGAACTTCCACCAATTTCTTCCCTAGCCTTCCAGGGCTCTCTGATATGCAAATCCAGGAAGTTTGATTGCCATTGCTCTCATGCCATAGTTGAGATCAGTGTATACTC  
TTTCAAAGACTCCATCACACTGTCACCCTCCATGCTAAGAAAAATATGCATTATAATCCTGAATGTAAGCTTCCGAATCTCAGTAAGGAACTCAATTTGTCCCATCTCTGCCACTTCTCC  
AGTGTGATACAACAGTTTCTTCAATGAACCTTCCAGATATGTGGAAAGTGCATCGTAACCATTGATAGGAGCTGATGTTAGTTTTCTGAGCCACTTGTGCTCCTCAGGAGATATTCCTATGAA  
TGACTTTTTTCCAACAAGTTCAACAGCAGCTTTAGGCCATCCTGTTACAAAAGTTCTCATCATCCATCAATACTGGTTTTGCAGGTTTTCAGGTATAGTAACCAAAAATTGTTGGGCTTCCAACA  
TAAATGACTTGTATATCCAATGCGGCCATATCTTTGAACAAAAGAATCAATAAAGGAATCAGGAACACCCGACTTGAATGCTCGGAGAAACGCCACATGTTGCCGATGAACGGAAAAC  
CTAAATCCCCAGGTGGAAGCCGACGGCGAAGATCATCGTCGAGATTCTCTCGTACGACCACTCGTGCACCAACCCGACTGCCCTCCACAAGCCCGCCGAGCCGCCACAGCGACGGC  
CAACGTCGCCGCCGCCACGCGCCACCAATCCGATTCAAATAACCCCATCGATGACTTCCCTTACCCCTTTTTCCCTTCTCGGATGACGACGTGGTAATTATGGAGGAAGAAGGAACGGAT  
TTTCGAAAATGGAAGGGAAAGGCTGGG

>comp151626\_c0\_seq5

TATTGTTAGTCTAATCTTGGCAAGCACAAGGGATCCAGGAATTATCCGAGGTATGAGAGCTCTCCTTCGGAAGATATTGCTTCTGTTAGCAGAGTAAGAAGCAGAAGGATCACCATTGAT  
GGCATTGAGATGAAGATTAAGTACTGCAGGATCTGTAAGATATTTGCCCCACCTAGAAGCTGCCATTGCCCTGTTTGTGACAATTGTGTGGAGAAAATTTGATCACCATTGTCCATGGCTAA

GCCAGTGTGTTGGGTTGACAGCTCGGGAGAATTTAAGCAAAGATATTCAAATTCTAGAAATCCTTATGATAAGGGAATGATAAATAACATAAAAGAAGCTCTATTCTCCAGATTGCCTCCT  
CCAAAAATCAATTTTCAGAGCAGCTGTTGAAGAAGCACAAAGATGGTTCAATTAGAAGCACAAAATCTCATGCTAATAGCATGAGAATGGATGGTGAAGGCACTTCTACCATGCAAATCAAT  
ATGAACCAAGAAGAAATTTAAAGAAATCAACCAAGATGAACAACCTTGACCTCTCTCTCTCTCTGTTTTTCTCACAAAGTCATGATTATGTTAATAAAAGTTAATAATACAGCGAAGTCTCA  
TTGTCAGTAATACTGTATTAATGTTTCCTTAGGCTGCAGCTGTAGTATCTTCTCTGCTATATTTGGATTAAGAGAAGTTCCCTTTCTAATCAGCTTTGAAAAA

>comp151667\_c0\_seq2

AAATTC AATCAATAAAAACCTTATATTTACTCAATTTAAGTAGATTTAATCCTAATTAATAAATAAAGTAGATTTTTGTTATTTTATTTTCTACTGAAAGCTCACCGGAAGAAGGGAATT  
TGGGGATTTCTGCTGGGTCTTCATTGACGGTGGCGGTGAGCGGCGCCGACCGGAAATCGTTCATCCAGCTGGGGGCAGTTTCGGAAGGGCCTCCCATCCGATGTGTGCCACGTGCTTAA  
CGTTGGTTGGGTATCCTATTTGCATCTCTTGCTCCTTCGGATCAAATATATTGGAGAAGTATCTGAAACCCCTGTAGATTCCTTCTTCATCTTGGCTCCCATGTAAGCACTTGAAGGAGGA  
ATTTCTCTTTGCTGGAGGGGAATTTGGCCTCCTCCAATCTTCTCTGAGGTTCCATCTAGCGAGAAGAATTGGAGAAAAATCTTCTGCGCTCAATTGGCCATCGCAATGCAAAGAGGAAGA  
GCAGATGGAAGAATGGCGGAGAGAGAGAAAAGGGGCCGTTGAAAGGAGAACACAGCTTGGACGGAGCGGCTGAGAAAATTTACGGAGGAAGGAGAGAGAAGCAGAGAGAGAGAGAG  
AGAAGAAGAA

>comp151748\_c0\_seq1

AATTCACGCTGGAAAATCAAACATTTGTCCATCCATTATTGCCAAACAGTCTAACACAAAAATTATAATAAATAAACCTCAATATCTGAAATTCCTGAAAATAAAACAATGATTAGTAAAG  
TGTTCAAGCAAGAGAAATTCATGCTCAAACACTACGAAAATATATATAAATCTGCAAAGAGAAAATCCAAGTTCCTTTAATCTTGAACCTCCCAAAACCCGGATGAGGCCATCTGTGTATCCTC  
CATAGAGAGTGGTTCCATCAAACACTCCAAGCTAAGCATGTGCAGTGCATCTTGCTGGTACCCTTACGATTCGTGGTGGGAGTTTCCAGCTTGATATCTTGACAACGGCCCTGTTATC  
CAAATCCCAGATCAACACACCCGTGCTGTGTGGCAGCGCAAAGCCAATACCTGTTGGGACAAAAGCACACCCGCATGGACGGTTGTCATTGTATTTAGCGAATACAACCTTCTTCCCCCATT  
AATATCCCACAACAGCGCCTCGTCATCCCTGCCTCCACTGGCGCATACAGATCCATCAGGACTCACAGTAACGGCGTTCACATATCCTGCATGGTCAGTCATCGTGCCTGGAGCTTACAG  
TTTGTGAGATTCCATACCTTACCCGTCTGTCATGATCCGGAGACGATGGTTGGCTGGGCGGTGCGGATAAACCGCACGCTGCTTACCCAATTGCTATGGCCACCACCATCTAAACCAT  
TTTGGATGGTGTACTTGCAGGAACCTATCGTATTCCAAAGCTTGATGGTTTTTGTACGGGAACCGGAGACGATCTGGCGGTTATCAAAAAGAAAAGGCGACGGAAAGAACGCTATTGGTGT  
GGCCAATGAAGCGGCGGGTGGTGCAGCCTTTTTCAAGGTCCCAAAGGCGGAGTTCACCGTCCCAAGATCCCACAGAGCGAACTGGCCGTGGAAGGAAAGGGCGACGTCTTGGATGA  
AGTGGGAGTGGCCAGTGAGGCGACGGCGTGAAGGCCGACAAGGGAGGGGAGGTCGTGATGATTGGGAAGCCAAGACTTGGTGAGATCCCAGACGACAATGGATTTGTCGCGGGAGG  
AGGATACCATCATGTCTCCATGGTCGATTGGAGTGGCGATGGCGGTCACGGCAGCCGAGTGGGCGCTGAGCATGCCTTTAAGAAAGAAAGGTTCCATTATTGCTATGGAGG

>comp151754\_c0\_seq1

AGTCCCCGGTCGCCCTTTTCGATCTCCCAAGCTAGCCTCACAAATTCACATATTGCTAGCCCCGGGATCTTCCATGTCTCCCCGCTAAACTCCATCCCTCTCCCTCCTCCCATCTTCC  
CAATTGCATCAATCAAAGAAGGGATTTTGATCAGCTTATAAAGATGTCGAGGGCGGCGACGGTCCCTCGCTCTCCTCCTCTCCTTCTTTGCTCTCTCCAATGCCGAAGACCCCTACCTTTTCT  
TCACCTGGAATGTCACGTACGGCATCATCTCCCCATGGGGTCCCATACCAAGCCATCATGATCAACGGCCAATCCCCGGCCCTGTCATCAATTGCACCAGCAATAACAATATCGTCATC  
AATGTCTTGAACAACCTTAGACGAACCCCTTCTTCTTTTATGGAATGGCATCCAGCACCGTAAGAACTCATGGCAGGACGGCATGCCGGGAACCAACTGCCCATCCCCCAGGCCAGAAT  
TTCACATATCACTGGCAACCCAAAGATCAAATCGGCACCTTTTTCTACTTCCCTTCCATCGGCATGCACAAAGCCGCCGGGCTACGGTCTCATCCGCGTCCACAGCCGCCTCCTCATCC  
CCGTCCCATTGACCCCCCGGCTGACGAATTCGACGTCTCTCGATTGGTACGGCCTAAGCCACAAAATCTAACCCTGATTTCTGACTCTAGCCGCCGCTCAGCCGAGCTCGCG  
CCGTCTCATCAACGGCGCTCAAACCTCCGGCGAGTCTCCTGCCTTACCTTCAAGCCGGAAAAGTTTATCGCTTTCGCGTTTGAACGTCGGCCTGAAGGCTTCTCTTAACCTTCGCA  
TCCAAGGCCATAAGCTGAAATTTGGTTCGAGGTGGACGGCAGCCACACGATGCAGAACGTGTACGATAACCTCGATGTCCACGCCGGCAATGCTACTCTGTTCTGGTCCACGCCGACCAA



TCTCCCCGCGATTATTACCTCGTCGCTCCACCCGCTTCCAGAAGACGATTCAATTAGCCACCGCGATTATCCATTACAGCGGCAGCAACCTCCCAGCAGCCGCCGAGCTCCCACCGGCGC  
CCATCAGCTGGGCCTGGTCGCTCAACCAATGGCGTTCCTTTAGGTGGAATCTCACCGCAAGCGCGGCTCGGCCAAACCCCAAGGATCCTACCATTACGGCCAAATTAACATCACCCGCA  
CCATAAAGCTCTCCAGCTCGACATCCATCGTCGACGGAAAGCTCCGTTTTGCTCTCAACGGGGTTTTCTCACCGCGACTCTGAGCTGCCGCTTAAGCTCGCAGAGTACTTCGGAGTGAACG  
GCAGCGTGCCGGAATACAACCAGATCACTGACGACCCAACCTTCTCCCGGTACTCCGGTGAAGTTAGTTCCTAATGTCATAACAGCTGAGTTCAGAACGTTTATTGAAATCATTTTTGAGAA  
TCCTGAGACTAGCATTCACTTACCATCTCGACGGCTACTCCTTCTTTCCGACGGGAATGGGGCCAGGAAAATGGACGCCGGAGAGTCCGAGCACTTACAACCTGCTCGACTCCGTGA  
GCCGACATACTATTCAAGTTTTACCCCAAGTCCTGGACGGCGATCATGCTCACATTCGATAACGCTGGCATGTGGAACCTTCGGTCTGAGATTTGGGACCGCCGTTACCTCGGCCAGCAGCT  
GTACATCAGTGTCTGTCTCCAGAGCGATCTCTTAGAGACGAGTATAACATGCCGGAGAATGCACTGCGGTGCGGCGCCGTTCTCGATTACCTCTTCCAAAGCCTTACTCTTGAAGTATG  
TGTGCAAAAAGATGCCATCTTTTGTCTCGGGGTTATGTGATTGTGCTTTGGATTCATTTGATTTTTTTTCTTAATTAACTCTATGTTTTGCGGGATCATTAATACTTTTTCTTTAATATG  
AAGATGTTGAGAATTGAGATGAATTTAGTTGAAGAGAGAAGGTATAGCAAATATCAAAGGCATGGTGAGTCAATGAAGCAATCCATGTATACCTTTGTATATTTATGATTGTGCTAATAAAT  
TTGTTATATATTTATAATTTATTTAAGAAAAGTTACACATCTTGAAGCGGTTGTCTATGATAATCTATGATTTTATGAATTATTTATCTTAAAGTTAGGCTGTATGTTAAGTTTTATGATGAGCC  
CA

>comp151757\_c0\_seq1

AAAAGACTACAATTATATAGGATTTTGAGGGATTGACTTTGAAATAGACACAATAGAAGAAAAAAATTC AACATTACAAGGGAAAGTAGGAGCTAATAAAATTTATTAATAATTATGGA  
AACTTCTATCAATTAGCTTTCCATTTAATGAGGGCCCATTCATTAGTGTATTAGCTCAACCTAAAGCCCACAATATTTGACTCCCAAAAAATGCTTATAACATACTCAATAAATTGTTGCACT  
AATAATGAATCCCTTATCTCTTTTTATTTCTCTACCATTCCACTAATCCCAAACCTAAAGCTTACATCTTCAATCTTCCACTTTTTCTTGCTCCCTTTATTTTGGTTCATCAACATCATCTG  
AAAGTGCACCTCCATTCTGCAACTCAACTATTGTAGGTTCCACCCCAACATCAGTAGTTCCTTTATGTGTAGGAACTTTCCAATATTTGATGCTTCCGCTTCTTTACCTTTGCCCCATAACA  
CCAAGTATAATCCAATCACAATCAACACAGCTCCTATAATACTCCCAATATGTAACCTTCTCATCAAGTAATAAGGATCCAAAAATGGCCACAATCACAAGCATGAGAGGGTTAAACACAGA  
GGCATAAAGTGGACCCTTTTTATTTATGCACCAAGCGAGTAAAGAAAAGTATGGGACCTGAACCAACCGCACCCGTGTAGGCTGCAGAGTAAAGTCGAATTCCAAGGCCCATATGCCAATC  
CTCCCAATTCCTCTCCATGCAAAGAGCAAAAATTATAGATTGAACCGAACCCATCAGGCACATGATTGCAACGCTCGAGTAATGATAAGGATAGTCCTTGCTCATTTTAGCCATAATCTTGG  
CGCAGTGCAGCCATCTGATTTCCACCATTACTATGTGATTTAGAAGATTGACATTTGTTGGGAGGTTGATTTCTTTTCCCTTCAAGAAGGTGAGGATCGTTGCACCGGAAACTCCAACGA  
GTGTTCTAGTATCTTTGCTTTCCCTGATTTTGTCTGATTCTTAAATGCTCTAATCTGAATATGACAGCCATGATGAAAGTTATGGCTGGTACAAGGTTTGTGATGGCTGAGGCAAAAAGTTG  
CAGATGTTAATTTTATACTAGACACATATAGGTTTTGCGCCAACATAGCCCCAAAGAACCCGCAGAAGAAAGCCTGCATCAAGATTTTCCATGTTAATTCGGCCAGTTCTTCTTTCAAGG  
ATGAACGCAAACGGGGCCACGGAAACAGTGGCGAAGAGATAGCGATATGCGACGAGAATCCTCATGTTTCATCCATCGTTAATGGCGAGCTTGTTAAAGATATTTATACCGGCGAAGAAT  
AATTGGATCACCACATTGCCATTGCCGGCTTCATCCCTCCAACAAGGTCCATGAACCTTTTTCTCCCTTCTTCATCTCCCATGCGGCAAGTTTTTGAACAACACTACGAGAAAGAAA  
TCCTTAACAAAAAA

>comp151757\_c0\_seq2

AAAAGACTACAATTATATAGGATTTTGAGGGATTGACTTTGAAATAGACACAATAGAAGAAAAAAATTC AACATTACAAGGGAAAGTAGGAGCTAATAAAATTTATTAATAATTATGGA  
AACTTCTATCAATTAGCTTTCCATTTAATGAGGGCCCATTCATTAGTGTATTAGCTCAACCTAAAGCCCACAATATTTGACTCCCAAAAAATGCTTATAACATACTCAATAAATTGTTGCACT  
AATAATGAATCCCTTATCTCTTTTTATTTCTCTACCATTCCACTAATCCCAAACCTAAAGCTTACATCTTCAATCTTCCACTTTTTCTTGCTCCCTTTATTTTGGTTCATCAACATCATCTG  
AAAGTGCACCTCCATTCTGCAACTCAACTATTGTAGGTTCCACCCCAACATCAGTAGTTCCTTTATGTGTAGGAACTTTCCAATATTTGATGCTTCCGCTTCTTTACCTTTGCCCCATAACA  
CCAAGTATAATCCAATCACAATCAACACAGCTCCTATAATACTCCCAATATGTAACCTTCTCATCAAGTAATAAGGATCCAAAAATGGCCACAATCACAAGCATGAGAGGGTTAAACACAGA

GGCATAAAGTGGACCCTTTTTATTTATGCACCAAGCGAGTAAAGAAAAGTATGGGACCTGAACCAACCGCACCCGTGTAGGCTGCAGAGTAAAGTCGAATTCCAAGGCCATATGCCAATC  
CTCCCAATTCTCTCCATGCAAAGAGCAAAAATTATAGATTGAACCGAACCCATCAGGCACATGATTGCAACGCTCGAGTAATGATAAGGATAGTCCTTGCTCATTTTAGCCTGAATTATCA  
GCCAGATTGCATAAGAGAAAACAACTTCCCTAGAGACATAATAAAGCCCATGATGCGATTACCATAATCTTGGCGCAGTGCAGCCATCTGATTTCCACCATTACTATGTGATTTTAGAAGATTG  
ACATTTGTTGGGAGGTTGATTTCTTTTCCCTTTCAAGAAGGTGAGGATCGTTGCACCGGAAACTCCAACGAGTGTTCCTAGTATCTTTGCTTTCCCTGATTTTGTCTGATTCTTAAATGCTC  
TAATCTGAATATGACAGCCATGATGAAAGTTATGGCTGGTACAAGGTTTGTCTATGGCTGAGGCAAAAAGTTGCAGATGTTAATTTTATACTAGACACATATAGGTTTTGCGCCAACATAGCCC  
CAAAGAACCCGCAGAAGAAAGCCTGCATCAAGATTTCCATGTTAATTTCCGGCCAGTTCCTTCCCTTTCAAGGATGAACGCAAACGGGGCCACGGAAACAGTGGCGAAGAGATAGCGATAT  
GCGACGAGAATCCTCATGTTCAATCCATCGTTAATGGCGAGCTTGTTAAAGATATTATACCGGGCGAAGAATAATTGGATCACCACCATTGCCATTGCCGGCTTCATCCCTTCCAACAAGGT  
CGTCCATGAACTTTTTTCTCCCTTCTTCATCTCCCATGCGGCAAGTTTTTGAACAACCTACGAGAAAGAAATCCTTAACAAAAA

>comp151763\_c0\_seq1

TTTTTGAAACTGAATCAGAAATCCCAACAAGGCACCAGAGAGGATGACTATCAAAACATACACAAAAATCAATCCTTTTCACTTAAGAAAAAAAACATACTGATTTTTCTTAAATTC  
AGACAAGCACTGCTTTCATACAGCATCACCAGTTCGTTCAATCAGAATCAATATATTGCTCGTGAAATTGCCCATTTTACAGGAGATGTAGAATCATACCAGAAATCTTTAATTTTTTCCCT  
AATACAAATGACAGTAGTTACAAATAGAAAAATATTTATCAGATTTCTATGACCTCAACCACCTCACCAGCCTTTTCCAATGAGCCATAACCAATCTAACGAAACACCTGAAAAATACC  
ACCCAAAAGAAACATAACCAGCACATTTCCCAAAGCATTTGCCTCCGGTCCCTTGTATCCCTTGGGTGCTTCGGTTAGAACACAAACAGTGAGATGACCATTAGTGAGCCCTAACAAACGA  
TGTTAACATGATCATCCAACCTTGCCTCCATATTTGCAAGTAAATAAAATGCAGGGATGAATAGGAAACGCGAGATAATAGCAATCATAAGGCCTTCCGTGATTCTATTGGAAGACATT  
TTATCAGAGGTGTGTATCTTCCAATAAGGTCCAGCACATTATACATTGCAATCAAGACAAGAACATACCATGATCCCAGGGCATGATTTCCAGTATCCTCAGACAAAAAGCCAGGGAAAAT  
TGACAGTGTGAGAACATAAATAAGATAACAAGCCAATTCATAATCCAAGTTCTGCATTAGCAGCTGTCTAATGGTCAAGCGTTCGTATTGCTTTGGGTCTTCTTCTGCCTCTTGTTTAATCTG  
CAATTGGACGCCAGCAGCTGCTAGGTCAGCAGAAACCGTCTTTGATCCTTCCGAAGCTGCCTTGGATCGATAATACTTGACAATTGGTAGCTTCGGAAAGATGTACGCATAAAGTAGAAC  
ACATAGCAGCTCTAAAAGGATGACACTGCAAAGAACATCATCGCTCCCTTTCGAAGACCATCATGACTGTGTTCAAAACCTGCCTTTGTAATCAGCCTCAAAGCAGATGTTAAAGCTCC  
AGAAGCAGCCAAACCAGCCATGAATGACTGAATAACTCTGGTTGCATAAGGGCCAAATCACCAACCATGCCTCCTTGGACATTAGCATCAGCAACACCAAAAGCTGCACTAATAAGGCAT  
ATGCCTACGAATGCTCCAACGCCTCCTTTTCCAGATGTTGCCAAATCTAAAATGATTAATAGAAACGAGCTTATGAAAAGAGGATGTAGCCAAATATGTTCCCTCATCTGGTATTGAGCTT  
TGCTTCATGATATGTGAGTATTGCAATAGTCACGAAAGCAAAAGGCTGATAAACTAGCGTAAAGTATTCTTGTGGGATGGTACCTCGGGAATACTTCAGCATAATAGTCTACAATTGTTAGCA  
TGCTATTCCATGAGATGAGAGAGCCATTTCTAGGAACCAGCAAACAACAATAGCAGCAAATCTCCCTTTTTTCGGTACTGCTTCCTCATTTTCAGTATCATAAACCATGATTACTCTGCTT  
CACCTTCTCCCTGAAGCCGGACTTGATGATTTCTTGGAGATCTCCACACGGTGAGAGATATTCAGGAATCTGAATATCCTATAAATGAATTCCTTACAAAGGAAAGAGAACGGGTCAAATG  
TGAAAGTTCAGCTG

>comp151799\_c0\_seq1

TTATTTGGCCAGGAATTAGACCAAGCTCTCTTCTTTCTTTAATCTTCTTTTCTTCTCTCTCCCCGTTAGCAACCAACGGCCAGAATCCATTCAAAAAATAGTTAGCCCAGAGCTTT  
AATAAAGAAGAAAAACAAACCTTCTTCTTCTCTCTCCGGCATTCCATTATCTAACTAGAACGAGAAACCAGAGCTTGCTCGGACGCGCCAAGCCTTCACAGCCATGCCGAGCAAGCT  
CCGGCGAACCATCGATGCCGTGAAGGACCACACAAGCCTCAGCCTCGCATTAATCTCCGGCTCCTCCGACACCCACGTTCGCAGTTCTCCGCGCCACCTCACACGATCCTTCCCCCTCTGA  
AGAGAGAACGGTCGCCGAGCTTATCTTCTCGCTCCTCCTCGCCGGAACGGGCCGTCGTTCCATCAACCGCCGACTCTCCCGCACCCGCAATTGGATCGTCGCCGTCAAGTCTATGTT  
ACTCATCTCCCGCGGCATCACCGACGCCGGTCCCGACTTCCGCCGGAAGCCCTCGCTGCCACCGGAGAAGATGGACGGCGCCGCTCCTCGACCTTTCCAGCTTCCGCGACGAATCCG  
GGCAGTCTCCCCGTGGGACTTCACAGCCTTTGTGCGCACCTTGGCGCTCTACCTTGACGCTCGGCTGGAAGCTTCCGCTGCAGGCAAGCTTTTGGCGCGCCGCGCCGCTGCCCTGTTT

CAAGCCTCAAGCCTTCTGTTCTCGTGGATCGAATCGGACATTGGCAGAGCCTCCTCGATCGGGCGATGGGGACCCGACCTACCGGTCAAGCCAAGGCGAATCGCCTCGTCCGACTCACA  
TTCCATTCCGTCGTCCGCGAAAGCTTCGACCTTTACCGTGACATCGCCGACGGAATCTCATTCTCCTAGATAGCTTCTTACATCTCCCCATTGACTTATGGCCTCACATTTTCCAAGCGAG  
CAAAGCCTCGGCGAAGCAGTTTAAAGGAGATTGAAGATTTCTACGCCGGATGCAAGAAAATGGGAATCGGAAGGCAATCTGAATACCCAAGCCTGATCAAGATTACCGATTCTCTTCTAGA  
AAAGCTTGAAGAGTTATTGAAGGAGGGTGAAGCGGCAAAGATTTAAAGTCCACCGAAGAAGCTGATCCTGGAGCCGGAAGGAATGAAGGAGGTTCAATGGACTCGGAAAAGTGGGA  
GCTTGCTCTGCTTGAAGCATGAATGAATTGAGCATCAAATGTCAAGGAGAAGGAACGAAGGCAAAGAATTGGGAAAATTTGAACCAGGAATCGCCGATTAATAAGAATCAGGCTTTCA  
CTACCAGCTTTCAGAATCCTTTCTGCGTGCTTCGAACGACAAAAGCTTGATGGCAGTGACGCCGTCTCCGTGAGCTTTAGAGCGGCGCCACTGAAGAAGGATTCCATGATTGCAGCTA  
AAGATCGAAGCTTGATGACGTTGACTACATCACCGTCGCCTTCGCCGTGCGCGATGAGATTGGGTCTGGGATTATAGCAATCAAAGGAAGGAGAAGATGATAGAGGAAGAGCAGGAA  
GATCCGTTTCGATGAGTTGGCGAAACGGGAGCGTCTCCATTGATGTCGGAAGCTGCCAGAGATTTCCGCGAACAGTATCACAGGCACAGGTCCACGAAACCGTGATTTCTTTTTGAATAT  
TTGTCTTCAGCTTTGTCCACAGACCATTGTTTTGCGGCTAATTTTACATTGAGAAAATATGAAAATAATTTTTAAGTAAAAATAAAATTCTGTATATTTATATGAAGATGTTCTTCATTTAATT  
AATTCATAAACCTGCAG

>comp151805\_c1\_seq3

GAAACCCATTTTATTGATTTACAGAACTTGTTACAAAAACAAAAAAAATATAGTACATTTACTGTTGATATCATTTTAGGCTTCATTTGAGACAACCTTTAAACCATAACATTTTCTTA  
TTTTTAAGATATTTTTTAACTAAAAATAGCTTTACAAAATAGTAAACGAAACATTAGTGTGCCGATATACTGGGCCCGCTTGCAAGAAAAAATTCATAAGATTATCATGGCCTTTGAT  
AAATTAATTTTATAATTATTAATTAATTTTATAGATAATATAATATAAAATTTTAAATATTATATTCATCTGAAAAGAAATCTAATAATCTGATAATCGTCATGATTAGATATCCTGTTTTTTTTT  
AAACCACTCAGAATCTCCGTCTCGGCAAAGAGGAATCGCCGACACCTTATTCTTGCCCTGAATGGCCGGGCTGAGGTCAACGAAACTAAGCAACCCATGCCTCTGAAAAGGCAGAGG  
CGTTTTTCTCTCCGCTCCTCCGCCGCCGCCGATTGCGCGTGAATGCTTCTCATGCGCCGATACCGGCGGCCGACTTCCTCTTCTAACCGTCTACCGCCTCCCGTCTTCTTTCTCTCC  
TGCTCTTATTATTAACAAAGAAGCAGAGGGCAAACAGTATACTTCTGCAGAGGATCTTTGCTTCTCTTCCAGTAGCTCGCCCTTCCGACGCGCTCCGAAACAGAAGCAAATCCTT  
CAGTCTGGGCCACTTCTGCTTAACACACACTTCACGGGATTGGCCGATGGGCTTCTATCTTTGCGGAGGAGTCCCTTCGTTTCTTAAAGGAGAAAGCGATCTTGATTTCTTCCGCCGTTA  
CTCAGGGAATTTGGGGCCAACAAACTCCGGCCTCTTTCTTGCAGCGGCCGGATTCTGCCCTTCTCAAAGAGCTTATCGGCCGTTGTTATCTCCGGTGACAGGCGATGACGGTAGTTGCTC  
GGAGAAAAGCGAATTCGAACATATCGCCACCGTTATCGTTACGGCTGCAAGGGCTGCAAGGGCTGCACTGGGAGTAGATGGCCGCGGCTTGGGCTGGGCTGCCTGGCGCGCTGGTGTAGTGATATCG  
GTAGTTGAATTGGTCGCCGAACGGGAACGGGCTCGACGGAGCGCTT

>comp151836\_c0\_seq14

TCCCTTCCCACTCTTAAATGCTCATAACCACCACACTTCCATAAACAATAAAGTCCCACTTCATCAGTTCATCCATAAAATCCAGCAACAATATTTCTATGAAACACCACTAGCTAAACTC  
TTCATTCTTCCACTAGCCATGGCTGCTGCTTCTGCTTCTGCTAATGGTGGCGGCAGCATGCTTAGTGGTGCCTTAGCAGAGGGACAAGGACTGGTGCCTGCCGTGATGATCTTCGGCG  
ACTCGGTTGTGGACACAGGAAACAATAACTACTTGTCACTCTCGTCAAATCCAATTTCTCCCTATGGCCGAGACTTCACCACCACCCGCGGCCCCACCAGGAGTTCTGCAACG  
GCAAACCTAGCCACTGACTTCACCGTGGAACCTGGGTTTCAGCACATACCCGCCAGCTTACCTCAGCAGAGAAGCAACTGGGAAGAACCTCCTCACCGGTGCCAATTTGCCCTGCT  
TCTCCGGGTACCTGGACAGGACTGCAAACCTTTATGTGCGGTTTCTTCTGAAACATTTGAACATTTTTCATTAATAATACATGTAGATGTAATCTGTATATTAACAAACAATATGATGTGTT  
TATGGGTTGCAGCATGCAATAAGCTTAACCCAGCAGCTGGAGAACTATAAGGAGTACCAGAGCAAGGTGGAGAATATTGTAGGTGGAAGAGCAAAAGCTGCCGGAATATTCTCCGGCGC  
CATCAACATCTCAGTGCAGGGGAGCAGGATTACGTACAGAACTACTACATCAACCCCTCATCAATGAAGCCTACACTCCTGACCAGTTCCGCAACTTGCTCGTCTCTCCTTCGGTTCCG  
TTTGTTCAGAACATGATGGCCTGGGAGCCCGGAGGATTGGTGTGACATCGCTGCCGCAATCGGTTGCTTGGCCGCCGAATAACCTGTTTGGTGGTGGCAGCAATAACTGTGTTGATC  
GCCTGAACAATGATGCAGTTGCCTTTAACAAGAAGGTGAGCGCAGCTGCAGAAACGCTTAAGAAAAGCCACTCGGATCTCAAACCTTGTATATTGATGTGTACAATCCCTTGTAGACC

TCATCAAGAACCCTGGGAACAATGGTTTCTTCGAGGCACGAAAGGCATGTTGTGGAACAGGCACCATTGAGACTTCTCTTTTGTGCAATGCGAGGTCGCCGGGGACTTGTGCCAATGCT  
ACTGGCTATGTTTTCTGGGACAGTTTCCACCCTTCAGAAGCCGCCAACAAAATTTGGCTGATGCACTACTGCTTCAGGGTATAGAACTCATCTCCTAGATAGACTTAGCTAAGTTACCTA  
GCATCCTCTCCCTCCAAAATGGTGTAGGACGATAGATGCCGCAACAGTAACATTCAGTGATGCTGTTCCACAGCCATATTGTGGAATATAAACGAAGAAGTCGCAGATCTCGCACTCCTTA  
GCTGAAAGGCCGGTACCCTCGTTGCCGAGAAGGAAAGCGGTGCTCCTTCTGAAAGGCTGCTGAGTGATAGGGACTGCCCCATCAACAATCTCCACGCCACAGATATCGCAGTTCCTCTC  
CTCCTTCAGGTATAGGCGGGCTTGAGAGAGTGAATGGAAATGTCGGAATCGGAGATGGGCGGTGGAACCGTGACTGCCAAAGGCGTTGAAGTCACGGCGCCCGACGAGAACCATCTCT  
GAGACACCGAAGGCAGTGGCGCTTCGGACCATCGTCCCGATATTGTGTCTCTTCGCTACGTTGTGAATGATCAGCACGCTCTCCGCAGCCGTAGGAGCTGGCGCCGGCGACGGAGAAGC  
TTCAGCGGCCGCCATTATTTGGGTCTGTTGTTTGAAGAAGCGCGGAGCTGGGGTCACT

>comp151836\_c0\_seq2

TCCCTTCCCCTCTTAAATGCTCATAACCACCACACTTCCATAACAATAAAGTCCCCTTCATCAGTTCATCCATAAAATCCAGCAACAATATTTCTATGAAACACCCTAGCTAAACTC  
TTCATTCTTCCACTAGCCATGGCTGCTGCTTCTGCTCTTCTGCTAATGGTGGCGGCAGCATGCTTAGTGGTGCCTTAGCAGAGGGACAAGGACTGGTGCCTGCCGTGATGATCTTCGGCG  
ACTCGGTTGTGGACACAGGAAACAATAACTACTTGTCTACTCTCGTCAAATCCAACCTTTCCTCCCTATGGCCGAGACTTCACCACCACCCGCGGGCGCCCCACCGGCAGGTTCTGCAACG  
GCAAACCTAGCCACTGACTTCACCGTGGAAAACCTGGGTTTCAGCACATAACCCGCCAGCTTACCTCAGCAGAGAAGCAACTGGGAAGAACCTCCTCACCGGTGCCAACCTTGCCTCTGCT  
TCTCCGGGTACCTGGACAGGACTGCAAACCTTATCATGCAATAAGCTTAACCCAGCAGCTGGAGAACTATAAGGAGTACCAGAGCAAGGTGGAGAATATTGTAGGTGGAAGAGCAA  
AGCTGCCGAATATTCTCCGGCGCCATCAACATCCTCAGTGCGGGGAGCAGCGATTACGTACAGAACTACTACATCAACCCCTCATCAATGAAGCCTACTCTGACCAGTTCGCCAA  
CTTGCTCGTCTCTCCTTCGGTTCGTTTGTTCAGAACATGTATGGCCTGGGAGCCCGGAGGATTGGTGTGACATCGCTGCCGCAATCGGTTGCTTGCCCGCCGAATAACCTTGTGTTGGT  
GGTGGCAGCAATAACTGTGTTGATCGCCTGAACAATGATGCAGTTGCCTTTAACAAGAAGGTGAGCGCAGCTGCAGAAACGCTTAAGAAAAGCCACTCGGATCTCAAACCTTGTGATATT  
TGATGTGTACAATCCCTTGTTAGACCTCATCAAGAACCCTGGGAACAATGGTTTCTTCGAGGCACGAAAGGCATGTTGTGGAACAGGCACCATTGAGACTTCTCTTTTGTGCAATGCGAG  
GTCGCCGGGGACTTGTGCCAATGCTACTGGCTATGTTTTCTGGGACAGTTTCCACCCTTCAGAAGCCGCCAACAAAATTTGGCTGATGCACTACTGCTTCAGGGTATAGAATCATCTCC  
TAGATAGACTTAGCTAAGTTACCTAGCATCCTCTCCCTCCAAAATGGTGTAGGACGATAGATGCCGCAACAGTAACATTCAGTGATGCTGTTCCACAGCCATATTGTGGAATATAAACGAA  
GAAGTCGCAGATCTCGCACTCCTTAGCTGAAAGGCCGGTACCCTCGTTGCCGAGAAGGAAAGCGGTGCTCCTTCTGAAAGGCTGCTGAGTGATAGGGACTGCCCCATCAACAATCTCCA  
CGCCACAGATATCGCAGTTCCTCTCCTCCTTCAGGTATAGGCGGGCTTGAGAGAGTGAATGGAAATGTCGGAATCGGAGATGGGCGGTGGAACCGTGACTGCCAAAGGCGTTGAAGTCA  
CGCGCCCCGACGAGAACCATCTCTGAGACACCGAAGGCAGTGGCGCTTCGGACCATCGTCCCGATATTGTGTCTCTTCGCTACGTTGTGAATGATCAGCACGCTCTCCGCAGCCGTAGGA  
GCTGGCGCCGGCGACGGAGAAGCTTCAGCGGCCGCCATTATTTGGGTCTGTTGTTTGAAGAAGCGCGGAGCTGGGGTCACT

>comp151846\_c0\_seq1

TCATTTTACTCTTACCACATTTTTCGCCGGCGATTGGAAGGCCATAGAGGAAAAAGATGCCGCCGAAGCACGATAGCGCTGAAGGCATTGTTCTCGGCTTCGTGAACGAGCAAAATAGAC  
CACTAAATTTCCAAAATGTTGCTGATGCTCTGCAAAAAGTATAACCTCAAAAAGTCTGCAATCCAAAAGCTTTGGATACACTTGCTGACAGTGGGCAGATTTCAATTAAGAGTATGGCA  
AGCAGAAGATTTACCTTGCTCGCAAGATCAGTTCAAGATACCCAGTAATCCGGAGCTTGACCAGATGAAGAAGGAAAATTGCCAATTACAAGAGCAGATTGATGTCCAAAAGAAGGCT  
AGAAGTGAAGATTGAGGCTGAAATTCGATCTCTGCAATCAAATTTGACACTGGAGGAAATACGGGCAAAAACAGTCAATGCTGCAAACAGAGGTTAATGAAATGGAAGCAAAGCTGAAGA  
AATTGCGGGATGGAGTAATTTTAGTGAAACCAGAAGAGAAAAAGTTAATTGAACAAACATTCAGTGAAAAGATGAACCATTTGGAGGAAGCGGAAGAGGATTTTAAAGATTTGTGGGAT  
GCCATAACAGAGAATTCACCAAAGGATGCCAAAGAATTCAAGTTTTTTTACCTGTGAAATCAACCTTTTCTATTTCTTTAGATTTTACTAACAGCACCATTACTTATCACAGGAGGAGCTCG  
GCCTTGAATATGATGAAGATGTTGGAGTTAGCCTGCAATCCTATAGTGAAGTGAATGCCAATAAGAAAAGAAGAACTGCACAATGAGTTATCCTGCAATCCTTTTAAATTTAGATTTGT

AAAGGGATTTTAAAGCCAAACTCTTCCAATGCATGTATTTTCCCAAACAGTAATTGATCAAAGTTTCACACTTATGTGGACCTGTTACCGTAAATGCTTACTGCTATAGTACTTCCATGTTA  
ATCTTAAAAAG

>comp151847\_c0\_seq2

TCATATGAAGTCAAAATTTCTCATAATATGCAGTTAAAAAAAAGGAGAAAAAAAACCTTTGTCTTGCACCGACTCTATATACAAAAGATTTAGCACAAAATCATAAGGAAAAAAAATA  
TATCAGTCTATCAAGGTTTTTCGGCATGCGATTAAACGGCAAGAAAAGGTTCTGTTTGTATACAGATTCAACCTATGAAATGAACGAAAAAAAAAAAAAATTCAAGAAATGGTAGTTCT  
ATATATCTGAAATTGTTCCCGAGATTAACCAAATAGAGAGACAGAAAAGAGATTGATCTCATCTTGACAAGGACTTAAGGCATGAAGATCTGGACGGCGCCTTCCTTCGAGCTATTGCA  
GATGGGACATATGACAACCGTCTTTTCACATTCCAGGCACAAGCAAATATGGCGGCAAGGAAGAAGGAGAATGGACATTTCATACAACCTGGCAAACCTTGCAAACCATCCGTGCGCGAA  
CTTTCTCGCTGCTCTCCGGCTTCTCTTCCGATCTTTAAGCAGGACTGCTCGTCATTAGCAGGAAATGGCATCCCATCGGTATCGCCGTAACCTCAACCTCCGGCGGAGGCGCCGTCTC  
CGCAGCGGTTGTCTGGATTAAACTTGTTCGAGGGTTGCCTTGAGCCTGGAGACTAATGCCTCATTTTGACTGGCAGACTAAACAACATCTGGTTCTCGGAGCACAACCTGGAAGATCTT  
TTCTCCAGCTCAGAATTTCTCCGATTCACGTTCCGAGCTCGGCATCCTTATCCAGGACCCGCTTCAACGCAATCTTCTCCAAGATAACAATAAGCGAACTAAAGTACCTCTTTTGCCTCT  
CCTCAATTCCTTACGAATCATATTTCTGTAATGATTTAACAGAGTATCAATTCGATGTTCTGATCTCTGATATGCGAAAGAACTCCTGCGATAAAGAACAGCCAGGCTGCGAGGAAACC  
CCTCTTGGCGGACGCTGCTGGTACACGCCCCAGTAGATTGGAACACCCGGATCCTCTGATCAATGGGCATAGGCAATCCAACCGTAGAGGTAACCGGCATAGCCGCAAACGCTAGATTA  
GGTAAAACGGTTTGCTGAGGTTGGATTACTGGCGCAGCTGCCCTGGAAGACAAGGGAACATTTGACTCCCTCTTCCAGAGCCAGAGACATTGTAAGCAGCCCGGGCGGTGCGCCGTGCG  
GCTGCTGATCGCCATTATTGATTTGAGCCTGCTGGCGCATCGAAGGAACAGAGTTTCCAGTCTGATGCTCAGGATTCTGCCACATCCGAAGAACTTCAAGAACACAGCCTTCCTGAGCCC  
TGTCAATCTGATAACAGAAATAATAGCGAAAGATCCGAAGGGGATAAATAAATGGTGAAGAAATGGAGGGAAGGAGCCTGACGAAGCGCTCTTCAAAAAGAAGAAGAAAACGGGGTT  
GGCGTTGAGGGGAGTGGTACCTGGAGCGTAAATATGGGGAACCGCCATTTTATACAGGACGTGCGTTGTTTTCAGTGAATCCGCGCACGCTCTGATTGCCTGACATTTTCGTTGGTTCGTG  
GCGCCGAAGGAAGGTTATATCGGGCTATCGGTTAGGATGGAGAAGGCATTGGAGTTCTGGTTTTGCTGTTGCCGTTCTAAATTTTCAGGCGGGGGATAATTCTAGAGAGGGAGGTAGGGC  
GTATTGACGTGAGAAGAGGAGGGGACGGTACCGCTACGTGTGCCGAACGCCGATGGATTTGTATTATTAGGGTAAGGGGAAGAGGATTAGGGCTGATTAG

>comp151849\_c0\_seq1

AAATTAATAAAAAAAAAAATCTATCCCCTAAAAATGTTAAAGAGAAATCTGTCCTAAAAATTTGTCCAAAAGCTGAAAATAATATCGTCAAATTCAGCCAGAAAGAACGCTTTTTATCAT  
ACTCAGCAAGCAAATTTTCTTATCAATATATATGTCCACCGGTACTTGCCGATCATCTCAACCAAACAAAATAAGCTGTTTCGACCAAATAAAGAATCACATCATTTAGTTCTTAACAAAATG  
AAATTCAAAGAAACGAAAATCAAACGTTCAAACAAAAGCATCAAATGATCATTGATCACTTATAATCCACAAACATCAAAGAACAAGCAAAAAACATTCCTTCTCGAGCTCTCTCAT  
TACTGCTGCTTCTCTTTCAGCAGGAGCATCTTCAACATTGAATTCAGAGACTTCCGGCTTCGATTCTGCCTCTTCGGCCGCGGCTTTCACATTCTCTCCCCCGCAGCACCGGCGGCCTCCT  
CGGCCTCTTCTCCTGGAAGTAATTGCTGAGTGAATTTGGCCTTCAGCCTCCTCTGACTTGGCCGCTCCTGCTCCTCCCCGAGCCGGCTTCTCAGCCTTGACGGGTTACGAACGT  
CCTTACCGGTTTAAGAGCCTCCGTCTCCTCCTTCAAACCCAGCGGCTTCGTGGCGCAACCCCCATTCTCTCTCTTCCGATTCTCTCCGAAGGTTTCGAAATTGATCAGAGAGAGAG  
AAAGAAAGAAAGAGAGAGGAGAGACAGAGAATGAGAGATGGAGAAAAGAGAATGCGAGAGAACGAAAAGAGCTTATTGAGAAAGCGATGCAGCTCCACAGATTTTATAATAGGAACCT  
CCAATTTCTCGCCGATATATGCTCGCCGTTGCCTTATGAATGGGTGGCCAAACGAAATAAATGGGTACAGATGTGAAATTTACATCTA

>comp151890\_c0\_seq1

TGTTCTGCGAATGAAATTAGCAACAATATTTTCTTCCAACATGCCTAACATATTTTCAATTGGCAATTTATATCACAAAAGCTCTAAACACATGCAAAAATAAAGAGAGAGAACTAAGACA  
TTAAGAAGAAAAGTGTAGAGTTATGGACACGATCTAGGAGCTTTTGTATGCCAAGTTACAGATGTGCACCATGCTTTATTAGATTTCAACACTAAATACATTGCTAACATTAATACCAGCA  
GTGGAATTATCAGCTTATTTGTATGTAACATTAGGCAGTATTATCTTCTTAACAATGTCAAACCTTTGAACTAAGCTAGCCCTTTTCTCTGATGAACATAATCTGAAACAAGTAGATAGTTCT

GCTATAGCATCATCAATGCCCTCATACTATAGTTCATTCCAACCTGCAGAAGATTCTTGTTAGGTATCTGCAGATCAACAAAACCCTGCCTGCAGTTCCTCCTCAAGAAATCGTAAACAT  
AATTGACAATCACTCTCTTGAGCAAAGAAGAATTCTCACTGGCCCTAACCTCACTGTGACCCAGCAAGTAAACCCTCCAGCTTCTCTTGATTTCTCTAAGAACCTAATCTCCTCCCCTTC  
CACACTAGAGTCCCCTTCTCCCAGCTCTCATTCTTATGAAGTTCTTAAGGTTCTCCATTAACAAAAGCTCAAATCTTCATTCCCAATTCTCCTGTCTCTATAACCATATCTTGCAATGCA  
CCTATACATCTTGTAGTCCCTTAGGTCCAACCTTTGACGACAGAAACCGCTCCTCGGCCGGCACTGTGTTAACTGGCAAGTACTTAACAGAGACAAAGACAAGAACAGAGTGGATTGCTG  
GCAAGTTTGTGAGAAAATGAGGAAATATAGCAGGGATTCCATGAGTGAGCTCAGTATACAGGAGGCCAAGTCCTGGGACCCTTGAGATGCCAAGGTTAGAACCAAGGCTGTTTAAAGTAT  
TCTGTTGAGACCTTTTGTCTACTTCAAAGTTATGACGCTTTGTCTGCACATAATTCCATACATACATTACAAAGTATAGAACGGAAGCAAAAAGTAAGAGGAAGGTAGCCTCCACTTGTGA  
ACTTGTACAGCACGGAAGAGAAGTAGACCAGCTCAAAGGAGCCGAAGCTTAGCACAAAGAGTGTACTAGTGGGAGGCTTGTCTGCCAGACCATTAACATTATCAGAATAACAGTGA  
AGAGGTGACTAACATCACTCCAACCACAGCGATACCATACGCATTTCCAATATTGGTGGTTTCTTGAAGGATGCAGTGACAAAACACAGGCCAACATGAGTAGAAAAGTTAATCTCAGG  
GATATAAACCTGGCCTTCATGTTTGTGCGATGTGTGAATGATTCTAACTCTTGAAAGCAGCCTAACGCCATTGACTGCTTTATGATAGCAAAAAGTTGCAGAAATCATTGCTTGGCTAGCAA  
TGATTGATGCCATGACAGCAGCAACAAACATTGGCCAGTAAACAGACTCTGGAATTGATTTGTAGAAGGCATCGGTGATATTTTCGGGGAATATAGACAAGTAAGCAGCTTGTCCAACAT  
AAGCACATATCAAACATGGATAAACTATTCTGAGAAAGCGATCTGAATTGATCTCACTGAGAAATGCCCTAGATCAGCAAAACATAGCTTCAGTTCCCGTCATGCAGAGAAACAACACCGC  
CAAGTGAGATCCATGCTGCTTTTGGATCTCTCTTGAAGTATGAAATGATGTAGATGGGGTTAAAGGCTTTGAGAACAGTACTATCATGGCGGAGAATATTGAAGATACCAATGCTACCTATT  
AACATGAACCACACAAGGATAGAAGGAGCAAAAAGTGAACCGACTTTATCTGTGCCAAACCTTTGGATCGAGAAGAGCATTACTAATATGAAAATTGAGATCATAGCTACAACATCTTTA  
CTCATCCCAGTATCAAATTTCTTACTCCATCCACCGCGGATAGAACTGAAATGCAGGGAGTTAAGATCCCATCTCCAATAACCATACATGTACCAAGAAGTGCCATGGAGAGCAGACCAG  
TCTTAGCACAAATAGCTACTTTCCAAAGCCTCCTTTATTCTTTGAGCCCGCTTCAAATCTTTGTTTGGAAATTTTATAGTTTATAGGCAGATAGCTCCATCTCTTGTCTCTCATTGGAATCGC  
ACTGACCTTGGAAATCTCTGCATATCAGTGAGTACAGAGCAAACGTTCCCCATCTCCATTGTCAATTGCCAAGAGGACAATGAAAACATATTTGATGAGCGGGAAGAGAGTAAGAGTGTA  
GATTATGAGAGACAGAGCGCCAACGACGTCGTTCTTGTCTGGGAACTCTGTTCCGAGAATGTGCTTGAACAACATAAAGAGGCGAGGTGCCGATGTCCCCGTACACAACCTCCAATGCTCT  
GAAAAGCAAGTTGTAGAACGGTGGCTATGGATACAACTTTAGAAGCACTGTGTAACACTAGAGATCTTGTGGCTTCTTATCGAGGGAATCCAAGCTGTGGAACCTGTTTTTCTTCTGGTT  
CTCTTCTTCGTGCACTTCTTCCAATGGTTCTCCATCTTCTCCATGGGTTCCAGATCCAAGCGTTTCTATGTTCAACACTACATCATCTCCCATGGTGAAGTAAACTGCTTAGAGACTAAGAAT  
TATCTGCTAAGCGAGCCTGCTCTCCAAGATCACTAGGAGAAAATCAGAGCTTTTAAAAGCGGCAAAGGACGTGAACAATGCGGTAATGTTACCTTATCCCGCCACCTTGGAGGAATGGAC  
TCGCCGACTACTCGTACCACGTGAGGGAA

>comp151890\_c0\_seq5

TGTTCTGCGAATGAAATTAGCAACAATATTTTTCTTCCAACATGCCTAACATATTTCAATTGGCAATTTATATCACAAAAGCTCTAAACACATGCAAAAATAAAGAGAGAGAAACTAAGACA  
TTAAGAAGAAAAGTGTAGAGGTTATGGACACGATCTAGGAGCTTTTGTAGCCAAGTTACAGATGTGCACCATGCTTTATTAGATTTCAACACTAAATACATTGCTAACATTAATACCAGCA  
GTGGAATTATCAGCTTATTTGTATGTAACATTAGGCAGTATTATCTTCTTAACAATGTCAAACCTTTGAACTAAGCTAGCCCTTTTCTCTGATGAACATAATCTGAAACAAGTAGATAGTTCT  
GCTATAGCATCATCAATGCCCTCATACTATAGTTCATTCCAACCTGCAGAAGATTCTTGTTAGGTATCTGCAGATCAACAAAACCCTGCCTGCAGTTCCTCCTCAAGAAATCGTAAACAT  
AATTGACAATCACTCTCTTGAGCAAAGAAGAATTCTCACTGGCCCTAACCTCACTGTGACCCAGCAAGTAAACCCTCCAGCTTCTCTTGATTTCTCTAAGAACCTAATCTCCTCCCCTTC  
CACACTAGAGTCCCCTTCTCCCAGCTCTCATTCTTATGAAGTTCTTAAGGTTCTCCATTAACAAAAGCTCAAATCTTCATTCCCAATTCTCCTGTCTCTATAACCATATCTTGCAATGCA  
CCTATACATCTTGTAGTCCCTTAGGTCCAACCTTTGACGACAGAAACCGCTCCTCGGCCGGCACTGTGTTAACTGGCAAGTACTTAACAGAGACAAAGACAAGAACAGAGTGGATTGCTG  
GCAAGTTTGTGAGAAAATGAGGAAATATAGCAGGGATTCCATGAGTGAGCTCAGTATACAGGAGGCCAAGTCCTGGGACCCTTGAGATGCCAAGGTTAGAACCAAGGCTGTTTAAAGTAT  
TCTGTTGAGACCTTTTGTCTACTTCAAAGTTATGACGCTTTGTCTGCACATAATTCCATACATACATTACAAAGTATAGAACGGAAGCAAAAAGTAAGAGGAAGGTAGCCTCCACTTGTGA

ACTTGTACAGCACGGAAGAGAAGTAGACCAGCTCAAAGGAGCCGAAGCTTAGCACAAAGAGTGCTACTAGTGGGAGGCTTGTCTGCCAGACCATTAACATTATCAGAACTAACAGTGA  
AGAGGTGACTAACATCACTCCAACCACAGCGATACCATACGCATTTCCAATATTGGTGGTTTCCTTGAAGGATGCAGTGACCAAAACACAGGCCAACATGAGTAGAAAAGTTAATCTCAGG  
GATATAAACCTGGCCTTCATGTTTGTGCGATGTGTGAATGATTCTAACTCTTGGAAAGCAGCCTAACGCCATTGACTGCTTTATGATAGCAAAAAGTTGCAGAAAATCATTGCTTGGCTAGCAA  
TGATTGATGCCATGACAGCAGCAACAAACATTGGCCAGTAAACAGACTCTGGAATTGATTTGTAGAAGGCATCGGTGATATTTTCGGGGAATATAGACAAGTAAGCAGCTTGTCCAACAT  
AAGCACATATCAAACATGGATAAACTATTCTGAGAAAAGCGATCTGAATTGATCTCACTGAGAAAATGCCCTAGATCAGCAAAACATAGCTTCAGTTCCTGTTCCATTGGAAAAAGACCACTT  
TTTTTTTTAGTGGCAAAAAGGTGTAAAGCTCAGAGCACTTCTAAGAAGGTTAGAGAGCTCAGAAAAGCATAACCCGTCATGCAGAGAACAACACCGCCAAGTGAGATCCATGCTGCTTTTG  
GATCTCTCTTGAAGTATGAAATGATGTAGATGGGGTTAAAGGCTTTGAGAACAGTACTATCATGGCGGAGAATATTGAAGATACCAATGCTACCTATTAACATGAACACACAAGGATAGA  
AGGAGCAAAAAGTGTAACCGACTTTATCTGTGCCAAACCTTTGGATCGAGAAGAGCATTACTAATATGAAAATTGAGATCATAAGCTACAACATCTTTACTCATCCCAGTATCAAATTTCTT  
CTCCATCCACCGCGATAGAACTGAAATGCAGGGAGTTAAGATCCCATCTCCAATAACCATACATGTACCAAGAAGTGCCATGGAGAGCAGACCAGTCTTAGCACAATAGCTACTTTCCA  
AAGCCTCCTTATTCTTTGAGCCCGCTTCAAATCTTGTTTGGAAATTTTTAGTTTATAGGCAGATAGCTCCATCTCTTCTTGTCTCTCATTGGAAATCGCACTGACCTTGGAAATCCTGCATAT  
CAGTGAGTACAGAGCAAAACGTTCCCCCATCTCCATTGTCATTTGCCAAGAGGACAATGAAAACATATTTGATGAGCGGGAAGAGAGTAAGAGTGTAGATTATGAGAGACAGAGCGCCAA  
CGACGTCGTTCTTGTGTTGGAAGTCTGTTGAGAATGTGCTTGAGAACACATAAAGAGGGCGAGGTGCCGATGTCCCCGTACACAACCTCCAATGCTCTGAAAAGCAAGTTGTAGAACGGTG  
GCTATGGATACAACCTTTAGAAGCACTGTGTAACCTAGAGATCTTGTGGCTTTCCTTATCGAGGGAATCCAAGCTGTGGAAGTGTCTTCTTCTGTTCTCTTCTTCTGTCGACTTCTTCCAA  
TGGTCTCCATTCTTCTCCATGGGTTTCAGATCCAAGCGTTTCTATGTTCAACACTACATCATCTCCATGGTGAAGTAAACTGCTTAGAGACTAAGAATTATCTGCTAAGCGAGCCTGCTCT  
CCAAGATCACTAGGAGAAAATCAGAGCTTTTAAAAGCGGCAAAGGACGTGAACAATGCGGTAATGTTACCTTATCCCGCCACCTTGGAGGAATGGACTCGCCGACTACTCGTACCACGT  
GAGGGAA

>comp151914\_c0\_seq3

ATGACAGGCTGATTCATACATTCCACTTCAGGAGGAAAAGCAAAACACATTCTTATAATTTTTACAAAACCTTACTTCAAATTCATGCACAGAAAAGCTAGAAGTTGAGCAAATCCTGCACA  
AAATATAGAAAATTTGATACATTCTGTGCTGAGATGTAGTTACATGATGAAAAATCCGAGAACCAGCTCTTGCCATTCATGCGACTGTAGAATGTACATAAGAAGAAATTATTAGGTGCAGAC  
ATCAGACGGAGAGAATCATCTGAATTTCTTTTATCTACAGTAAAAGCACAGTCAAAGCATTGCTGCTACAGTAACTGCGATTTTATTGTAGACAGAAAAGAAATTCCAAATGATTCTCTATGT  
CTGGTGCCACACCTAATAATTTGCCGTACATGAGACCTTTCCCCTCAGCTTTAGCTGGTTTTCACTGGCTTTAAACATGTGGATCATCTCGTTTATGCAGAATCAGGTTGATGAAGATACAA  
TGATCTCTGCCTCTTCAAGTCTTACTACCTCATTAGAAGATGGTAGTGCATAAAACAAAGTTTCGCTAGATATCTGCAAGTATTTTTGACATCATGCCTTTGATCTGCTTCGAAGAAAGACC  
CAATCCTTTAAGATCATCAATTTCCCTGAAAGGTTTCAGGAGTCTCTTACGAAGTTCAAGTATATATGTTGCTCTCTTCTCCCAATCCCTTCAATTGCTTGAGCTCCTCCTTGCTAGCACT  
GTTTAAAGAAAACCAAGTATTCATCAACCAGCGATTTCTTCAAGTCTAGTACTTCTTGTTTTAAACTTCTCTTGCAGGGTTGCAAAACTCTCAAATTTTGAATTACAGTTGATCTTTGAACTTA  
ATGAAAATCTTGGAGTTTTAGGCTCCACACTATCCACTGTAAATTGCATGTTACATGAACTACCTGTTTTTATTGATTCGCACATGTTTATGGGTTGAGAGCTCAGAGTTCTTAGCTGTTCAAGTT  
AAGGTTGGTAAAAGTTTAAACATTTTCAAAGCATGACTTCTGCTGTTTCAATTTCCATAGAACTACCTTCCAGGCTATGAGATTCTTAATGTGCGATTGCAAGAGGACTATCAACACTTTGTTT  
AATATGATCATCTGGAATGGAACATCCACTTCCAATGTAGAAGAAGCCAAAACAACATTGGATGCAGCAATCCCCTCTTTTTTGAAGATTGCCAGTTTCTGAGTTTTTCCAAGGGGA  
CTAGCAACATTAACAACCTTTCTTTCCCTTTGACCAACATGGGGGTGGAGTGGGTTTCTTTATTCTATTACCATGGCCTTTGAATCTTCCATTACTTGTGGATATGCTTTTTTTTATCTTCTTTC  
TGCTTGATCCCCTTGATAAATCCCCCATTTATTATTGTTTTATCAAATGGATGGATTCCACTAACAGAAGAACTTGTTCGAAAATATCTTCTACATTCTTTACTGGTCATTGCAAGGTCGT  
GCTTTTGTCTATTGACAAATTGGCATGACCTGGAAGCCAAGCTAATCACAGGAAAAGTTTGTGGGCATAAATTGGGACTCAAACATGTTATCAGCACTGCATTGTTTACGCGACATGAAA  
AATCTTGCAACAATCTAGTTAATTTGTTTCTCGATAGGGAATGTATGTTTTCATCACGATTTAGCGCACTCACAACATTATGCAATGCATAGAGTGACTTATTAATTTAATGCATTATATAA

AGGAGCTTGTCCATCAGTCCTTTTTTCGAACTTCCTCATATCCTGCCAATTCATGAAGTTTAGCTTTCCAACAAGAGAACTTTTGATTTCCTTGTCAACCGATGTAGCATGCATAATCAAGC  
CTTTGTGACTTCTAACTCTGGGATCATTTC AACCTTTTGTGGATGATTTTCGTTGGTTGCTTATGTGAAAATAATATTTCTCAAATCTGAGAGTGATTTACAGGGATCTTAGAAAAGTCCTT  
TCAGTTGAATTGCCTTTTCAGCATCTCCATAATCTGGACCTCTTTCTCTTTACAATCCAATAGATCATATATATGATCATTATACATTTTCATAACATGATATGGTCATAGAGCCACCAACTTCC  
TCAATAGAAGAAAAGATTTACAAAATGCCATCATTGCAAGACCGGGAGTCTCCACAGATCCCTGAATCAATTGGGTTTTCCCACTTCCTTGAACACCATAAGCAATAACACAACAATA  
TCACCATGAAGAATGCCCTCAAGGAGAGGCTTCACCTCATGAGCAAAGAGTTTACTGTTGCTCATCTTGTTTCATAGCAGTCATCCAGTATGTAAGTATCTTTGCGACCTTTTCGCTTGATCAT  
GCAATATAACGGAGGCATGGTTGTTTCTCTAGAAATGGTAATTTGAGAAGGACTCTCTGAGCAGTGCTTCTCGGATTCGGTAAATGGCCTGATTTTGCAGACGACTCGAACTCCCTTCCT  
CGCTGCGGGCTTCGGCCCCGAAATTTCTCGTTGCTCCTCCGAGCTGACGAAGAGTCCATGGCTTGAGGCAGTTTTCGCCAGAAAGGCCCGGAGAGATTGCAGGCGAGGAAAGAAA

>comp151914\_c0\_seq4

ATGACAGGCTGATTTTCATACATTCCACTTCAGGAGGAAAGCAAACACATTCTTATAATTTTTACAAAACCTTACTTCAAATTCATGCACAGAAAAGCTAGAACTTGAGCAAATCCTGCACA  
AAATATAGAAAATTTGATACATTCTGTGCTGAGATGTAGTTACATGATGAAAAATCCGAGAACCAGCTCTTGCCATTCATGCGACTGTAGAATGTACATAAGAAGAAATTTATTAGGTGCAGAC  
ATCAGACGGAGAGAATCATCTGAATTTCTTTTTATCTACAGTAAAAGCACAGTCAAAGCATTGCTGCTACAGTAACTGCGATTTTATTGTAGACAGAAAGAATTCCAAATGATTCTCTATGT  
CTGGTGCCACACCTAATAATTTGCCGTACATGAGACCTTTCCCTCAGCTTTAGCTGGTTTTCACTGGCTTTAAACATGTGGATCATCTCGTTTATGCAGAATCAGGTTGATGAAGATACAA  
TGATCTCTGCCTTTCAAGTCTTACTACCTCATTAGAAGATGGTAGTGCATAAAACAAAGTTTCGCTAGATATCTGCAAGTATTTTTGACATCATGCCTTTGATCTGCTTCGAAGAAAGACC  
CAATCCTTTAAGATCATCAATTTCTTGAAAGGTTTCAGGAGTCTCTTCACGAAGTTCAAGTATATATGTTGCTCTCTTCTCCCAATTCCTTCAATTGCTTGAGCTCCTCCTTGCTAGCACT  
GTTTAAGAAAACCAAGTATTCATCAACCAGCGATTTCTTCAGTCTAGTACTTCTGTTTTAAACTTCTCTTTCGCGGGTTGCAAAACTCTCAAATTTGAATTACAGTTGATCTTTGAACTTA  
ATGAAAATCTTGGAGTTTTAGGCTCCACACTATCCACTGTAAATTCATGTTACATGAACTACCTGTTTTGATTGCGACATGTTTATGGGTTGAGAGCTCAGAGTTCTTAGCTGTTTCAGTT  
AAGGTTGGTAAAAGTTAACATTTTCAAAGCATGACTTCTGCTGTTTCATTTCCATAGAACTACCTTCCAGGCTATGAGATTCCTTAATGTGCGATTGCAAGAGGACTATCAACACTTTGTTT  
AATATGATCATCTGGAATGGAAACATCCTCTTTTTTGCAAAGATTTGCCAGTTTCTGAGTTTTTCCAAGGGGACTAGCAACATTAACAACCTTTCTTTCTTTGACCAACATGGGGGTGGA  
GTGGGTTTCTTTATTCTATTACCATGGCCTTTGAATCTTCCATTACTTGTGGATATGCTTTTTTTTTATCTTCTTTCTGCTTGATCCCACTTGATAAATCCCCATTTATTATTGTTTTATCAAATG  
GATGGATTCCACTAACAGAAGAACTTGTTCGAAAATATCTTCTACATTCTTACTGGTCATTGCAAGGTCGTGCTTTTGTCTATTGACAAATTGGCATGACCTGGAAGCCAAGCTAATCAC  
AGGAAAAGTTTGTGGGCATAAATGGGACTCAAACATGTTATCAGCACTGCATTGTTACGCGACATGAAAAATCTTGCAACAATCTAGTTAATTTTGTCTCGATAGGGAATGTATGTTT  
CATCACGATTTAGCGCACTCACAACATTATGCAATGCATAGAGTGACTTATTAATTTAATGCATTCATATAAAGGAGCTTGTCCATCAGTCCTTTTTTCGAACTTCCTCATATCCTGCCAATTC  
CATGAAGTTTAGCTTTCCAACAAGAGAACTTTTGATTTCCTTGTCAACCGATGTAGCATGCATAATCAAGCCTTTGTGACTTCTAACTCTGGGATCATTTTCAACCTTTTGTGGATGATTTT  
GTTGGTTGCTTATGTGAAAATAATATTTCTCAAATCTGAGAGTGATTTACAGGGATCTTAGAAAAGTCCTTTCAGTTGAATTGCCTTTTTCAGCATCTCCATAATCTGGACCTCTTTCTCTT  
TACAATCCAATAGATCATATATATGATCATTATACATTTTCATAACATGATATGGTCATAGAGCCACCAACTTCCTCAATAGAAGAAAAGATTTACAAAATGCCATCATTGCAAGACCGGGAG  
TCTCCACAGATCCCTGAATCAATTGGGTTTTCCCACTTCCTTGAACACCATAAGCAATAACACAACAATAATCACCATGAAGAATGCCCTCAAGGAGAGGCTTCACCTCATGAGCAAAGA  
GTTTACTGTTGCTCATCTTGTTTCATAGCAGTCATCCAGTATGTAAGTATCTTTGCGACCTTTTCGCTTGATCATGCAATATAACGGAGGCATGGTTGTTTCTCTAGAAATGGTAATTTGAGAA  
GGACTCTCTGAGCAGTGCTTCTCGGATTCGGTAAATGGCCTGATTTTGCAGACGACTCGAACTCCCTTCCTCGCTGCGGGCTTCGGCCCCGAAATTTCTCGTTGCTCCTCCGAGCTGACG  
AAGAGTCCATGGCTTGAGGCAGTTTTCGCCAGAAAGGCCCGGAGAGATTGCAGGCGAGGAAAGAAA

>comp151928\_c1\_seq1

ATGTGCAGAGTGCTTCAATAATTTCAAGTCAATGATGATAGATAAAATAGACATAGTAAAAGATTTTACACTTGAATTTTTAAGTCAATACTATTATTTGGGTTTGGTCACCATTATGAACAA



AGCGCAACAAATGACAATACAAAAGTTCTGGACGATTTTCAAGTCAATAGATTTTCCAACAATTATTTGAAGGAGAGATTCCAATAACCATTGGCCAACCTTACTTCTCTTCAAGTGCTC  
AACATGTCACATAACTATTTGACAGGAATTGGTATCTTTGCATTTCTTGGATTATTTAAACCTCTCATACAACAAGTTAATAGGAAAAATTCCAGTTGGAGGTCAATTCTCCACTTTCC

>comp151934\_c0\_seq5

GCAGTGGCCCGCTGAGAGCTTTTCGTCTTGCCAGGCTTGAGAGCTTATGCTGCTTCAACATATTCCTTCTTGGATGTCTGAGGCCATCAATTACATGTAAACCATTAATTAGCTTACATTTG  
TTGATTGGTTAGGTATTAGATGGGAGCTCTTTTAATTACGGTAGTCTTTTGGATTGGATCAGATGGATGATATGCAGAAATAGCATTGAAAGTTCCAAGTATATAAAAAAGTTATGATTACAGCGAG  
TGATGTGACATTTGTGATCATTATTTATTGTATTGATGAAGGGATTGCGATTTTGTAAAGGAGAATCATTATTAATCACTTTTTAAGAAGATTTGTATTAATAATAATGATCAATTGTTTCTT  
TGTGTTGTTAATGGCGATTTCAAGCTTCTCAAGGGCTCTTTTAGTCTTGCCCAAGATGTAAAGAGAATAACTCAAATGATACTTAGCATGTGTTGGTTTGAGTTCTAATATGCTCGATGA  
GATCAATGACTATGAAGTTCTTGATAACAAAGCCATTGAGGTTTGTGAGAGTATGATTAAGTCTTTGTTTGGAGGATTTTCTTATTGCGTCATATAACATTTTAAATTTTTTATATTATAAATTT  
GTTTTAAGACTTAGCTTGAATCCTTGAAAACATGTAGCTTATTTTGTGTTGGGTTATTGATTGGGGTGCCTAACATTGGCGCTAAGTATTGCCCAAGTCATTTTATAAACATGAGCAAC  
CTTGTTTAAAGTGGTGTGATTGATGTTTGAATAAAAATGAGATCTTTTGTAAAGAACGGTATCTATAGCAAGTGTGGTTAGCTTGTGATTAAGTTGTAATGTTGCTGTTCAAATATATTAGCATT  
TGTATAATTCATTAAGCTTTATATGATTTTGTCAATTTTGTGTGATTCAATAAACTTTTTAGTTTCTTTTGGGACAGTCTTTTGTATCTTATAAAATTTTATTTTGTAGTACAAAATGATGCTG  
TCAGATTCAAGATAAGCTTATTGTTGTTTAAATTCATTATGACTTGTTAGAGAGGCATCAGATGCTCTAAGAGCATCTCCAACCAAACGCTAAACTTGCGTATAGCGTTGTTAGGTCGTTCC  
AGTCGAATGCCAAATCTCCGTTGTTTACTTGCGAATGAACAGTGCAACGCTAAATTGGTGTGTACTATTACCTACGTTATTTTGTCTCTCAATCGAAAA

>comp151955\_c0\_seq1

CTCATTAATAATATGATATTATGTCAAAAAGCAAATACAAAAAACACCGAACATTAATAATTCATCAGATGAAAGCATAAAAGAACTTAAATTGCAACCTAAAATATAAATATTT  
AAAGAATAATAATAAATTTCTTCTAATTACCATTACTTATATTAATAAAATCCCAGCCATCCATCATCGTTGGCCATTTACCGTCATCAAGCGGCGCGGGCCGCTCCAGCGCCGCGCAAG  
ACTTCTTCGACCTCATCGCTGGCGAGGTCAATTCTCAGGCGCCATCGCCCTGCGGCCACCGCCGCAACTATCGTCTCGGAATGAGAACGGTGTAGCAAACTATTTCGCACTGAGTTGAGTT  
CTCGTAAAGCGCCGAGATCCCTTCCACATTGACCATCGCCGGCAATCGGAACTTCTTCATAAACTCCTTCCCTCTCTATCTCTGTCAATCGCCGCTTCCGCGGAACTCAACTCAGTGCGA  
ATCACCGGGTATCGCGAATCCTCCAGCTCCACTCTGATTTCTCTACTCTGGAAGATCGGCAGACAAGAGGTAGGAATCGGGCGTTTGGATCCAACGAACATTGTTATTAGCAT  
GGGATTGGGCGCGGAAGAGCAAGGCATGGGGAAGAAGATTGGCCATGGCGAACCGTGAATTCTGTAGAGTTCCATGGTAAGGGAGAGCAAGGGAGAAATTGAAGGGTAGCGACAAG  
GAAGAGAGAAAGAAGGATCTTTTAAAGCGGAGGAGGATATTGTAATTAACATAATTATAGCAT

>comp152013\_c0\_seq1

TTTGCTTAGCTTTTTCGCAACGGGTTTGGCCAGGACACAGGTGTCGTGAAAACCACCGTTAAACCTAAGCCAAAATGGGAAAGGAGAAGACCCACATCAACATCGTTGTCATTGGGC  
ACGTAGATTCAGGGAAGTCTACCACGACTGGCCATCTGATCTACAAATGTGGCGGGATCGACAAGAGAACAATTGAAAAGTTCGAGAAGGAGGCTGCCGAGATGGGAAAGGGCTCCTT  
CAAATATGCCTGGGTCTTGGACAACTTAAAGCTGAACGTGAGCGTGGTATCACCATTGATATCTCCCTGTGGAAATTTGAGACCAGCAAGTACTATGTTACCATCATTGATGCCCCAGGA  
CACAGAGACTTCATCAAAAACATGATTACAGGCACATCCCAGGCTGACTGTGCTGTCTGATCGTTGCTGCTGGTGTGGTGAATTTGAAGCCGGTATCTCCAAGAACGGGCAGACCCGT  
GAGCATGCCCTTTTGGCTTACACCCTGGGTGTGAAACAATAATTGTTGGCGTTAACAAAATGGATTCCACTGAGCCACCCTATAGCCAGAAGAGATACGAAGAAATTGTTAAGGAAGTC  
AGCACCTATATTAAGAAAATTGGCTACAACCCCGACACAGTAGCATTGTGCCAATTTCTGGCTGGAATGGTGACAACATGCTAGAACCAAGTGCTAATATGCCATGGTTCAAGGGATGGA  
AAGTCACCCGTAAGGACGGCAATGCCAGTGGAAACCACCTGCTTGAAGCTCTGGATTGCATTCTGCCACCAACTCGCCCAACTGACAAACCCCTTGCCTTTCCTCCAGGATGTCTATA  
AAATTGGTGGTATTGGTACTGTCCCTGTGGGTGCTGTGGAGACTGGTGTCTCAAACCTGGCATGGTGGTCACCTTTGCTCCAGTCAATGTAACAACCTGAAGTGAAGTCTGTAGAAATGC  
ACCATGAAGCATTGAGTGAAGCCCTTCTGGGGACAATGTGGGCTTTAATGTCAAAAACGTGTCTGTCAAAGATGTCCGTCGTGGCAATGTGGCTGGTGACAGCAAAAATGATCCACCC

ATGGAAGCTGCTGGCTTCACAGCTCAGGTGATTATTTTGAACCATCCAGGCCAAATCAGTGCTGGATATGCACCTGTGCTGGATTGTCACACAGCTCACATTGCTTGCAAGTTTGCTGAGC  
TGAAGGAGAAGATTGATCGTCGTTCTGGGAAAAAGCTGGAAGATGGCCCTAAATCTTGAAATCTGGTGACGCTGCCATCGTTGATATGGTTCCTGGCAAGCCCATGTGTGTCGAGAGCT  
TCTCTGATTATCCTCCCCTGGGCCGTTTTGCTGTGCGTGACATGAGACAGACAGTCGCTGTGGGTGTCATCAAAGCAGTGGACAAGAAGGCAGCTGGAGCTGGCAAGGTCACCAAGTCT  
GCCAGAAAGCTCAGAAGGCTAAATGAATATTATCCCAATACCTGCCACCCAGTCTTAATCAGTGGTGGAGAACGGTCTCAGAAGTGTGCTCAATTGGCCATTTAAGTTAATAG  
TAAAAGACTGGTTAATGATAACAATGCATCGTAAAACTTCAGAAGGAAAGGAGAATGTTTTTGTGGACCATATGTTTTGTGTGTGGCAGTTTAAAGTTATTAGTTTTTAAAATCAGTACTTT  
TTAATGAAAACAACCTTGACCAAAAATCTGTCACAGAATTTGAGACCCG

>comp152041\_c1\_seq3

CCTATTTTCGGACTTCAAAAATTATAAAGTCCGAAAATAAATATTTTACCTTCTCCTGAATATCAACAACATAAGCAACAAAAATGATAAACATAATTATAATTAATTTCTCTAAATTTTCA  
AATTATTTGTTAATAAGATGAATATCAATTTTCGATATATAAAAAAAAAAAAAATTGATTGGTACATGGTATGCTGTTGATCGGGTTTTTGGATTTATTTGTTGGCTTAAGCTATAATAATTTAAT  
GTAAGCCATTAACCATACATTGCATTAAGCCATGAAGCCATACGTTACAGGATCTATATATAGGCTTCAATATATAATGGTGGCCATAATGATACTAGTTCTCATGCAAGCCCTTGATCT  
TCCTACGGGACTGCCTTCTCCATACGTCCAGAAATTTGTTTTATTTCTTATTATATATTTTTTTTTTTTATGCGGACGTTTGGGCTTCTCAAAGCAGAATTATTTGAGACAGCTGCAATGCC  
GGTTCGTTATTTATTTAATTTTGCCTTTTAGACTCTCAAAGTTTTATTAATACTAATTAATTTGTATTTATTTTATAGAAATTTCTAGAAAACTCTTCATCTTCCCCTCTTGCAACTATAAATA  
CCCCTTTTGGGGAGGATGAAAGGCACAATCCCTTGTGCCGGTCCAAGCCCTCTCTATGGATTGGTAGCTCGGGGATTGTCAGCGGGATCAAACCTTGCTCTCTTGTGCCGGTCCAAGC  
ATTCCTGGATTGGTAGCTCGGGGAGCGTAGGTGGAGATCAAAGCGAACATTGGCGGCGATCAAAGCCTAGTTCTCTTGTGCCGGTCCAAGTTTTTTACTTGGATTGGTAGCTCGGAGAA  
TATTGGTGGTGATCAAAGCTTTGCCCTCTTGTGTGCGGTCCTTTTGTGGATTGGTAGCTCGGAGGGTGCCTACGACAATCAAAGCATTGCCCTCTTGTGCCGGTCCCTTGTGCCGATTGGTAG  
CTCGGAGGGCATTGATGACGATTGAAATTTGCTTTCTTGCAAAAAGGTAGAAACAACCTCGACGGTGGCTTCCCTTGGGGAGAGATTTGACAATAGAAATGCCTTGAAGAAGATTTGATTAT  
AATCAACGGACAGGTAGAATCTGTAATATGTGGCGACTGGGTTGAAGTTCGATGGCAGTCAGATGAAAGTCTGACATCGATCGAGAAGAAGTACAACGGTGGGAAGAATCCGACGA  
AAGTCTGTGACGGGTAGAAATCTAACGATGGGAGAAAAGTCCAACAACAGGAAGAATTCTAACAAAAGTTATGCGACGAGCAGAAGTCCCAACGACGGGTGGAAGTCCAGTGTGCGAG  
AGGAAGTTCAGCGTCAGGGAGAATTCAGACAAAAGTTATGTGACAAGTAGAAGTCCAATGATGGGTGGAAGTTCGATGGCAGTCAGGTGAAAGTCTAACAGCGATCGGACTGAAATCC  
AACGTTGGTTCGAGTAAAAGTTTTGAATGCCAATGAATGCCTCTTGAAAGTGGATAGGCGGATTCCGACGTAAGAGAACAGACGATGAGATGATGATAATTAAGCTGCATTTTATTGAA  
AATAGAAGGTATGCATGATGACATTAACCTTGTATGAAAAATGATGAGAAAATCCATCAAGGATGAATGACCTATCTTAGGTTGTTTGTGATAGCTTCACTCGATGACATTAACCTGTATGGA  
AGAGGTCAAGGAAATCCACTAAGGATGTAAGACCTATCCGAGGTCGTATGTGCGAGCCCTGCTCGACGACGTT

>comp152095\_c0\_seq4

TTTTTTTTAGGAACTACTCAGCAATTTTCCATATATCATCAAATTTGAAGATTCTTAAAGCAAAGAAATGAACATGTTAAGGCCAAAAACAAAATACAAGTTTTATGTCAAACCTGGGAAAT  
GAAAAATGTAATTAGCATTGAAGAAAATCTTAAGTTTGA AACCTGCGTTCTGATTGTCCGCAGGAACAACAATAAAGAATTTAAAATTTCTTAAAACCCTGTTGGTCATTGAAAAGTG  
TCAGAAGAACGTAAATATAGGTTGTTGAAAGCCATCACAACCTCATCATCCATATAATCATCATCGGAGTCATCACTTTCATCACAGTGCTTGCTAAGGTCTTGACAAAAGGACCTTGTGATT  
TGTTCTGGTTTTAAAGAACTGCTTTTTATCAATCCGTGAGCTTTTACAGAAAGATGAAATATACTTTGAGTATGTCTGTGCCTCTTGTATTCTTTACCTGCTGGAAGATCGTTCCAGTCGT  
GTACTCTGACCCAGATCTTTCACCTGTGTCCAACCTTCTCTAGTGTGTGGTCTAGCATTCTCACAAAGACCATCCAGCAGTTCAACAACCTGTTTGCCTGCCATTTCTGTAATCAGTGTAT  
TTCCCTTCAAGACGACTTATAGAATCCATTCCATTAATACTCGATCTCTATCTCGTCCGCAATCGCGTTGCAAGCGGAGCATTGCTTCCACGCTAATAACCAAGGAGAGGTTTGAAG  
AATGA

>comp152173\_c1\_seq1

CTCTCTCTCTCTCTCTCTCTTCAACATGCATGCCATCTTGTCCATACATCATTAACATCCGCCATTCCCTTCAGCAACCTACTCTTCAAGAGAAGGCCGAAGAAGATCTGTATAAATCATAA  
GGAGCCCAGAGATAATCAACCGCGCAGGGCTTCTAGAATCCAACCTCAACCATGGCTTCCCCTTCCACTCCAATGAAGCAGGCTAACAGGCCCTGGATGAAGATTCCTACACCGGCC  
TCTATATTATCCCCTCCAAGCCCATGCTGGTTCCATTTATGATCCACAGCCTTGATGTTTCCAGCTAGAACAAGCAGAAACGGAGGTAACGATCCAAGCTGATATATTCTTTTCTTCTTCTGC  
ACAGTCATCCAATCTCCACCATCTCGTATAACCCGCCGCCCTCCATTTCTCCACGTCCATCACCATCACCCCGTGTGAAATAACATGCAGGACGCCCATCGAACGTTCCGGGCCAGGA  
CCGGGTCGGCCAGAATGCGTCGGTGAAGTATTTGGTGAAGTTGGCGTGGCAGTATTCGGGCGCGGACGACGAGGCTTTCGAGGTCGACGGCCAGAGGGTGCGGATGTCGTCGAC  
GACGATGACGTCGGAGTCGAGGTAGATGACGCGATGGACATTGGGAGGGAGGATATCGGCGAGGTAGATGCGGGCGTAGTTGAGGGGTTGGTCGAGGGCATGGCGGACGGAGCGGGA  
GATGCGGGAGCGAACCGCGGAGGAGTCAAAGAGGTGGAGTTGAAAGTTGAGAAAAGGGAAGGTGGAGCTGATGATGGCGGAGATAAAGGGGTTGGAGCGGGAGGAGAGGAAGTGG  
AAGGCGACATTTTGGGGGAGGAGGTGTGTTGGAGGATGGAGAAAACGGCGCGATGGTCCGCGGAGGTAGTTGGCGTCGAGGGTCATGGAGATGTGGATGAGGATGGGAGGGGAG  
CACTCATCGGCGTTGCGGAAGGCGGGGGCTTACGGAAGTGGGGGAAGGGGGGAGGAGCGGAGGACCGGCGGATGACGTCGATGCGGAGGGGGTGA

>comp152197\_c0\_seq1

GTTGTTTAATAATAAACAGTAAATTGAGGCAAATAAAAATTGCACAAACCATCAATATAAGCAAAAATGTATAATGTAGTGGTTTTGTGTCTGTCTACAATACTAAAAGTATAAAAAATGAA  
TTCCTTATTGATAGGCTCCAAGCATATAGGAGTTCTGAACGTATATGTTGTTAGCATAGCATTGAATGTATAAATGGTGCACAATGATCTGATGCTATTGATACAATTGAATAGATACTTAC  
TACTCACAGACCAATAATGCACAATAAGCACCATTCTAGAAAAGCAGCAAGCTATATTAGCATAATCATGAAAGTATAAACTCTTTGACCTCAGATGACAGAAAATCAATCACTAGTTACG  
ATTCCGGCTGTGACTTGAACCTCGAGCTCGAAGTCAAAGATCTATGGCTTTCATTATGCTGCAACTTCTCTCTTGTGCACTCCAAGAATGTTGGAATAATGCTCTTTGATGCTTGGCGATAT  
TAACTTCTTGCCTGTTGCACATTCGAATTTGGATTACAAGATGGTTGGTGAAGAGTCTCACTGTTCACTGAATCCATTGAGGAAGAACGGCTAATTTCAATTTCCAAAAGAAGACAAC  
TTGCTATACATTGAGCTAGAGCTTTGATTGAATTCTAGCAATCTTTGTAAGTGCATTGGGCCGCTTGATCTGCTGCTTCCATGGCGGGAATTTTCGCTGTGACTTGAATTTGAATGGCTTCTT  
TCGACACCGTCTATTATTATTGGTTTCAGGGGATGGTATTGAGTTTTTTCTTTCAGGGACTGGTGGTTTACTATGTGGGAAGGAATGGAGGAGGCTTCGGAAAGAGGCGGCCCTCAGCG  
AGGAAGCTGAGGGCTACTACAACATCGGCCATGAAAGGGCGAACAGAAGCTTCTTCTGTAGGCACATGGCGGCAACACCAACAGCTTGGTTAAGGCCAATTACTGGATATGCACGTTT  
GAGAAGGGGGTCAACTAGTTCTGGGAATCTCTTCTGATCTTTGAACATTGGTTGTGCCAAGCAACCAAAATCTGCTCGTTTGTGGATCGCCTTGTGTCGATGACTCTTCTTCCAGTGATC  
AGTCAAGAAGAACTACTCCAAAATGTAACATCTGATCTGAGGGTGAAGCTCACCAATTCTGGCATATTCAGGTGCACAGTAGCCATAAGTGCCATTACACAAGAAGCAACATTGAAC  
TTATCACCTCCAGGGCCAAGTTTTGCAAGGCCAAAGTCTGAAAGC

>comp152251\_c0\_seq4

CTCTTCGTTCTTGGCCATGACTGGTATGCCGAAGCTGTTCTCAACCTTTGTTATTTATTTTACCCCATTCCTTTATCGAAGTCCGCGATAGATTATGCTTTTTTTTACCTAAAGATCTTATTTG  
GGCAGTGGACACGGAAGCTTTTTCGAATAATCACAACCTGAACAGTGTGTTGGCCATCTCCTTCACTCCTCATTCTTGTGCCCTACCATGGATGGAGAATAAGCCACAGAATCATCATC  
AGAACCACGGCAATGTGGACAAGGATGAATCTTGGCACCTCTGTCTGAAAGTGTATAGGAGCTTGGATACAACAACCTAGGAATCTTAGGTTACATTTCTTTCCCAATGCTCGCCTT  
TCCCTTTTATTTGTGGAGGCGAAGTCCAGGAAAGAGTGGGTCAACTTCAACCCAGAGAGTGATTTGTTTGGTGCAGAATGACAGGATAGATGTCATCACTTCTACAGCTTGTGGATGGC  
AATGGCTGCTTTGTTAGCTGGATTAACCTTTGATTATGGGTCTCTGCAATTGCTCAAGCTCTATGCAATTCCTACTTGGTTGACCTTTCCTCTTCTTATTGTAGAGCTTTTTTCTAATTTAAG  
TGTGAGGTCATAAACAACCTTAGTTATGTGGATCTAATTGCAGATATTTGTTATGTGGCTGGACTTAGTAACTTATTACATCACCATGGACAT

>comp152301\_c0\_seq1

ATCCATAAAAGAATCATCTAGCGTTTATCATGGACGATTCTCCTTAAACAACAAATCAACCAGCGCTTTTTTTGCTTTCCTTGAATGACACCGGCCAGGTAGGGGTTTCGACGAATCCAC  
GTCGAGGATCCGGTGACGGGACCAAGAACTCCTTCTTGGGGGAGGGATCACCACCTGAAATCCTCAGGATACAGAAACCCAAAAGCAGTGTA AAAACTACTCAAATATTATTCATCTC

AATCTCCCCTTATTACAAGACCTTGGCTACCTATTTATAGCCAACAAGGAAGCATCATACTAGGCTACATACAGAATAAGAATGCATTAACCTTTATATCCCTATACTACCAAATGGCATTAA  
TATAGCCTGAAGTTTAATAC

>comp152326\_c0\_seq2

ACCTATGTTAAATTATGTATATCTATGCTTGTAAATCGGTTTCATTGGAAGATCAATGATTTATGTGATCAAATCATCTAAGACGACACTCTAATTTTATCTGCCACAGGCTACTTGTACCTTTTCA  
CACAGATTTACACTTGCCTCTAAAATTCACCCTCGTTGCCAAACTACCATCTATCTCAAAAAATGATCTAGCACTCCTATGATTTAACCATGCCATAATCAAATCATTTGAATTTGGAGCGAA  
AGCCAGAAATATGGGTTGAGACTTGAGATTGAGATTTTATTGCGGAATTCGGTATTTGGTAGAAATTTGATGAATTGAGTTTACAAATCGTCAAGATTGGCAAGGAATGTATGAATTGCCTT  
AGTATGATTTAAAGTTAAGGCTGGTATGCTTTTGTATGATTTAGTTAAGGCTGGTATACTTATCCGTCATGATTTCTCTCTTCACTTTCAGCTTTCTAAAAGAAGGGAAAATTTGCTAAACTA  
TATGCCTTTCTCAGTGTTACTCCAACCTTGCCAAATACCTTTATCAATGTGGCGCGACACCAAATAAGCGAACGTACAAACCCAACAATGGCTAGCCCCCGCAAGTCGTCGCTTTTTGG  
GCGACGGCCCTCCTCGCGGGCTACCTTCTTTCTCTCCGGCAACGCCTCTCTCGGCGTCAACTGGGGCACCATCACCTACCACCGCCTCCCTCCCAAAACCGTCGCTCGCCTTCTCCAC  
GACAACGGCATCAAAAAAGTCAAGCTTTTTGACGTGACCCCTACACCATGGAACTCTCTCCAACACCGACATCCAGGTATGATCGCCGTCACAAATCTCCTCCTTGGCCGATGAAC  
GACTACGCCACCGCCAAAGCTTGGGTGAACGTAACGTACCCATTATCGCACTCATTGGAAGGTCAACATCAAATACGTGGCCGTCGGGAACGAACCTTTTTCTCAAAGACTACAAAGA  
TCGATTCACAAATGTAACCTTTGCCCGCCCTCAAAAAACATTCAAAAAGCTCTCGATGAAGCCGGACTGGGCGAGGAAATCAAAGCCACGATTCCGATCAATGCCGACATCTACTACTGCC  
GTGGTATAATCCTGTCCCCTCCGCCGAAAATGGCGCGACGATGTCGCCGGTCTTATGTCCGACATTGTCAAATACTATAATCAAACCGGCGCGCCTTTTACCGTCAACATTTACCCATTTT  
TCAGCCTTTATATCGACGCCAATTTCCCCTCCGACTTCGCCTTCTTCGACGAAAGGCCGAAGCCAGTCGTTGATGGAGATTTAATCTACACGAACGTCTTCGATGCGAATTACGACACGCT  
GCTCGCCGCGCTGAAATCGGAGGGCTGCGGCGACGTTCCGATCATCGTGGGCGAAGTTGGTTGGCCGACCGACGGCGATATACACGCCAACGTATCGATAGCCGAGAGATTCTACAAAG  
GAATAACGCAAAAGATAGCAAAAAAACCGGGACGCCGACGGCCTAAGGAGGATATAGAAGTTTATCTCTTCGGGCTATTTCGATGAAGAAGCAAAGAGCATACTTCCGGGGCCTTTT  
GAAAGAAGCTGGGGCATTTTTTCAACCGACGGAAGCCGAAGTTTCCGGTGGACTTATCGGGCGGCGGAGTGGCCGAAAAGCGGCTGTCGCGGGCGGTGGAAGTTAATTACTTGGCGA  
AGAAATGGTGCCTTTTGAACAAAGAGGCGAAGCAGGCGAAGAATGAAAGCAGAGTGAGTGCGAATATGGATTACGCTTGCGGTTCATGGTGTGATTGTATGCCGTTAAGTTACGGTTCA  
TCTTGCTCGGGAATGGATTTGGAAATGCAGGCTTCGATGTCTTCAATTCGATTTTTCAGGCGCTTGGACAGGGGACTGGGACGTGTGTTTTTGTATGGGTTGGCGAAGGAGACGACCAAG  
GATTATAGCAGAGGGAGCTGTAAGTTTGGATTGGGATCAAGGCGTATAATCTTGGTGAAGTGGAGGCGCCGCCCCGGCCCCGGTGAACAGGATGAGGATTCTCCGGCGAAGGTACA  
TGGTAAACATGCTCATGTTGGAAATGAAGCTTCTGAGGGTAGGAGGAGAAGCATGTGGAAGGTTGGATCATTGATAATGGCGTTTGTGTTGGCTGGATTTTTGTTAGATTAGCTAAGAATG  
GAGTTGAAAGGATTTTTTTTTTGGTTTGGGAGTTTGTGTTCTGTGGTTTGTGCCTGTGGTCTGGCAGATATCCCAAGGAAAGAAAACAAAAGGGAGATGACCGGTATTGTTATTTTA  
TTTTTAT

>comp152347\_c0\_seq1

TCGGAAACTAGCAATATTCCTATAGTGTGCTTCTATGCATCTACACTTGATGATGAATTATTCAATTTGGGCTAAATTTATGGCTATGTGATTTAGCTTGTGTTGCACGCTTGAAAGTTAAGG  
CTAATATTTTGTTTTAAATTTTATCATTTAGAACATCATTTCTAAAATTAGTAGTAATAATGATCGAACAAACATCATATTTGAGTACATAAAGAATATAATTAATTTTTTCATTTAATTATATTTT  
TATTTTTTTTTAAAATCTTATCAATATACATGATGTATATGTAATGGTAGATTTTGCATGATATTATTTTTTGTAGAAACAGCTTTAATTTTTAAGGTTGTTATCTTCTATTTCAACTGTTCTACTAC  
ATTGCAGATCCAAAAATAAAAAAAGATAAATGTAACAAAGCTATTACACACTCAGCAGTACAATAAATCTTAAACATATAGGATTTAGTTGTATTTTATAGCGAGAGTACCAGGATGCTA  
CAGAAGCGGGATGACGAAGGAGGGTGACCTCGAGACCGGCCTTTATCTCCTCGATGGTTAAGATCTTTCCAAATCCT

>comp152389\_c0\_seq1

TGAATATCTTGAGCCAATTGTTTTCAATGATTGCATGCACTTGAGAGTAGTATAACTAAATAAAATTATATCAGGAAAAAACTTAACGAAAAATTCCATAAAACAGGTCTGTAATTACGT

GGATTCTGATAGCATTAGCCTAGACTACTAGTCAATAGATATACTACAACGCATAAATAATGAAGCTTGGAAAGCTAAACATTTAAACTCAAAGATAGAGGAGTCAGTACCAGCAACTCAT  
TTGTGCTACTTGTATAGTCACAAACTTGTAGTGCCATGCCTTGCCCAATGATTCCTCAAATCAACTCCATATGAGAGGTCCTGTCTTCAGCCACAAGTCTTTGAAGTAGCTTTGTGTAAGC  
TCCAATGCTCATTTCCTTCCAGCCATCCGCGAACCCGGCCTTGTCTGGGCTCACTGGGAGGGGATATTCCGACAAGCCTGTGGTGCAACAAGATGACTGCCAACCACCAGCTCCCCACCT  
ATAGCATTGCCGCGGCATGCCGGTGCAAGAACATATAGGTGCAGGGACACCTGAAAGATCAATCATAACACCATTGAACATATCATCTTGATTCTTTTCTCTCGCTTTCTCTGTTGACATAG  
AACCTCCTTTCTTTGTGCCCTTTCTGCTTTAGGTCTTAGAACCTTGGTAGCGACATTTTTTGCCTTGTCTTTGAAGATTGTTGCTTTCTGGCATTAAATGGGGTTAGCAGCAATGGGAG  
ATTCCGGCACTGAACTATTAGATTGAATTGGCATGCTTGACATATTGAACGTTTCTGAAATCACAGGCATTGTCTGTAAGTGATTAATGGTTTTTGTGGGATGAAGAAAGCTTCTTTGTGGA  
ACCCATGTGAAGCTTACAGAGGATGCTTCAGAACGGTGTTCATCCATCACAGTAGTGCATCAGAGTATGCACCAATCTTCAGGAAACCAGGTTGATAAGCTGAAGAATTGCTCTCTGGG  
AAGGAGACACCCAAACCGGGCTTGAACATGGATTGCGAATGCCGATTATCAGTGAAGTCCCAATTTCTTAGATTTAATTTGCTCTTTCCATCCATGAATAAGAGAGAACTGACGCCTGG  
CTACAGTTTTAAGATACGGCTTAAGAAATTTCTTCTGTTCTTTCCAACTCCTCAGCTACATCTCCTGTCGTTTTGTAAATATTTTGTCTACATCTATATTTTTATTTTTCATTAAGATGTCCA  
GCTTTCTCCTTCTTAAAGCAGAATGAGTTATACCCTTCAGGGAGACCAAGAAATAAGGCGGGCACTTCTTTATTGGCGCTGCACCAATTCCATGGAGAATTGATGAAAACCTTTATTGC  
TCTACAGATGTTGACATTGGCATCAATGATGAGAGTCTGACTTGTT

>comp152402\_c0\_seq10

CCCCCTGCTTGGATTAAGGCCAAACCGGCAATGGCTCGTTGGAGTCCTGTACTACTTCTACTTAGTTTTCTCGTGATATTACAAAAATCTATCTTCAACTCCAAATCATGTACAGCAACTA  
CCAGGCTCAAAGGGCAGCTTCCCTTCCAAATGGAACTGGGTATTTGACGGTGGATGAAGTTAATGGCGTGGAGTTGTTCTACTACTTCATTGAGTCGGAGAGAAACGCCAGCGAGGA  
CCCACTCCTCCTCTGGCTTAGTGAGGCCCCGGTTGTCAAGCTTCTCAGCTCTCTTCTTCCGAAATTGGTCTGTTAAATTTCAAATAGATGCTTATGATGGGAGTGTGCCAACTCTTCTTT  
ATAATCCTTACTCTTGGACCAAGGTATCTAGCATTATCTTTCTGGATTACCCGGCTGGGACTGGATTCTCAGTCCCAACTGTATCTCAAACCTATATGACAGGGGATTCTTCTTCTTCTAATC  
AAGTTTATGGGTTTCTAAAAAAGTGGTTAGTAGAGCACCTCGTTTTCTGCTCAAACGGCTTTTATGTTGCTGGAGATTCTTATGGCGGCATGTTAGTCCCGTCTGTTGCTCAATTTATTGCA  
GATGGAAATGATGTGAAAGAACAACCCTTCATTAATCTTCAGGGTTATATTATTGGAAATCCAAGAACGGGTGAAAGGATTGATACTAAAGCCCGAGTCCATTTGCCCTTGGAAATGGGCA  
TCATCTCTGATGAATTTGCAGAGCTCGTTGAAAAGGATTGTGCTGGACAAGATTATGAAAATCCAAAACTGCAGAGTGCCTGCTCGCCTCGATACCTTTAAAAAATACCGTTGGGAGC  
TGTCGGAGACAGACGATTGGAGCCCAATGTGCGACGGACTTCCCAAGGCCTAAAGACATCGCCAGAGAGTACTATAAGAGATCACTGAATGAGGACAGCTTTGGCCGGCTCTTCCGT  
CCACCGAAGGCTCCCGAACTCCGCTGCAAAGGCTATGCTTATTACCTTGGTTATTTCTGGGCAAACGAAAATGTCACCAGAGAGGCCCTTCAAATCAGGAAGTGTGCATGCATGATCGAG  
CAGGGAACAGTGAGTGAATGGCAGAGGTGCAACAACCTTCGATTACCTGAAAGACATCCCAAGCAGTTTACCTTATCAGCTGAATCTATTA AAAAGAGGTTACAGAGCTCTTGTTTACAGC  
GGTGACCATGACATGTTGATCCCATTTGTGGGCACCAAGCTATGGATTAATCCTTAAATTTAACGGTTGTGGATCCATGGAGATCATGGAGTGTGATGACCAAGTTGCAGGGTATACAG  
TTCTGTATTCAAACGATTTAACTTTTTCGACAGTGAGGGCGCCGGACACACTGCGCCAGAGTTCAAGCCTCAGCAATGTTTCGCCATGTTTCGATAGGTGGACTTCAAAGAAACCTCTCT  
GAAATATATTTCAAGGGAGGTGACTCCAAAATTTACATTATAATATCTTTATGATTATATGTAATATTATCCGAGTTCAACATTTTCTATTTCTACTATTTTCTACTTTGTAGTAATCATTGCA  
AAAATGATATAAACCTATAGTCAGTGGCAGACTCAA

>comp152510\_c0\_seq1

CCCGCACTTTATGGTGACCGGTAGTCTGTTGCTTCGCCAGCTTGAAGCCCAGGGACAATCTGACGGATCTTAACCTACGGTAGCTACGAGCTTCTCCACGAATGGAACGCCAACC  
ATGGACTATCCGCCGCGGAAAAATTCCTTCGAAATGCTTTGCAGTTACGAGCTATCAATTCGTTGGAACAGCGCATTATGTATAAAATCGGCATTCTGTGTTCTCTCTGGCGGTGGCCGTC  
GTTTTCTCTCCGATCCGAATTGAAAAAAGACGAGGAGAATTCAAACCCGATTCCAAAACCTAGGACCTGTTGAGATCGCCGGCGAGGAAGAGATGGGGCCAGGAAAGGAGGAGGG  
GTGGCGGCGCAGCCGAATTTAGCCTGGCTAGGCTTTATTTCTGTTGCATGGTCGCCGAGGGGTACAGTATGGCTGGGCTCTCCAGCTTCTCTCCTCACTCCCTATGTCCAGACGCTTG

GGATACCACATTACTTGGCTTCCGTTACGTGGCTTTGTGGACCCATTCAGGGCTGCTTGTGACCTACTGTTGGTTTATTGAGTGATAGATGCAGATCAAGATTTGGCAGAAGGAGGCC  
ATTTATTCTTGCTGGATGTATTACTATCTGTGTTGCTGTGATTTTGATTGGGTTTTTCATCAGACATAGGATCTGCATTGGGTGATACAATGGAGAATTGCAGCACATATATTGGTCCTCGATGG  
AAAGCTGCTATTATCTATGTGGTGGGTTTTTGGGTTCTCGATTTTGCTAACAAATGTCGTACAGAGTCCAACACGTGCAATGATGGCTGATCTCTCTGGAAAACATGGATGTAATGCAGGAA  
ATATAATCTATGCCTTTTGGATGGCCTTTGGAAATGTCCTAGGCTATTTATCTGGGGCTGTTGGAGGCTGGTATAAATGGTTTCCCTTTCCTAATGACAAATTCTTGTGTGAAGCCTGTGCTA  
ATTTAAAGGGTGCCTTCTTGGTTGCAGTTGTTTTCTGTCTCTTTGCTTAAACGGTGAGTCTAACATGTGCAAAAAGAAGTTTCTCTCTGTAATTGGACCCGGCATCTGTGTGGCAGGAAAA  
TTATGGATTACTTTCTTTGTTAAAAGCCTTTAAAAGCTTGCCAGTTGGAATGTTGTCTGTGCTTCTTGTGACATCTATTACTTGGATGGCCTGGTTTCCCTTCCCTTTTATGACACAGACTG  
GATGGGACGAGAAATCTACCGTGGTGATCCCAATGGAACAAAGGCTGAAATTGATGCTTACAACAACGGTGTCCAACATGGTGGATTGGCTTGCTCCTGAATTCGATTGTTCTTGGGGT  
CAGCTCAATTTTTCTTGAGCCTATTTGCCGGAATCACTTCAAGGATTGTTTGGGTCCTTGGCAACTTACCCTTTTCATTGCCTTGGTCGCAATTACAATTCTAAGTCTGATTCTAAGAA  
TCTACATGCTGAAAGCATGAGTACTGTATTTGGAGAACTTGGAGTAAAAATTGGAGCTTTGGTTATCTTCGCAGCTCTTGGGTTTCCCTTAGCTATTCTGTTTAGCATTCCCTTCGCCAGTG  
CGGCGCAGCTTGCTGTGAACGAGGGAGGCACCAACAGGGACTGTGCATTGGTATTTGAACATCTCCATTGTCATTCCCCAGGTGATCGTTGCTCTTGGTGTGGTCCATGGGATGCTAT  
CTTTGGCACTGGTAAACATTCCAGCGTTTGTCTGGCTTCAGCTTTTGTCTAACAGGAGGCTTTATTGCCCTTGTCTTACC GAAGCCCCCACATCATCCTTGAACACTACGGATATGGGC  
CTGTGCAAGATCGTTAAAGAAAAAACATATAGGAAAAATAACAGCTGTAATCAAAGAGCATAAATTCCTATATGATTTGATGAGAATATTACATAATATATATAGCCAAAAACAAGAATGA  
ACTAGCAGACCATCGAACATCCTGGAGGTGAATCTAATATGAATAAAGTTGGAGAGCAAGAACATAACATTCAAACATAATTATAGCTTTTATTATGAAATCAATCTCTTTTAATACAGT  
AATTCTTTAATCCCTCTCTCTTGTGTTGAGAGTAAGGCTTTGTTTCG

>comp152510\_c0\_seq3

CGAATGCTCTTAAACGGGGGAACATTTGGGTTTCAGAATTCTTTCCCTTTTAAACCAAGCCCTGTCACCCACCACCCTCTTCTTCCAGACGCCGATCGTGAGAAAATTTTTAAAAGAATTG  
TAGAAGATATATCAAGCAGAGAAATCTGGAGATCGTCGACTAGGAAAAATGGATTCAAGGAGAGGAAAACGAGAAGTCCGGTGAAGCCCCAAATAAGCCTGGTGAGACTAATCTTCGCCTG  
TACGGTCCCGGAGGAGTGCAGTATGGCTGGGCTCTCCAGCTCTCTCTCCTTACACCCTACGTACAGACGCTTGGGCTTCCACATTCATTGGCTTCCATCATGTGGCTCTGTGGCCCCGTA  
GCAGGATTTGTTGTTGGACCTTCGATTGGTTATTGGAGTGATAAATGCCAATCAAGATTTGGCAGGAGGAGGCCTTTTATTCTAGCTGGATGCATACTTATATGCTGTTGCGTGCTTGTGGT  
TGGATTCTCATCTGACATAGGATCTGTACTTGGTGATACAAAGGAAAACACTGCAGGACTTATGTTGGCCCTCGATGGAAAAGCAGCTATTATCTATGTGGTTGGCTTTTGGGTGCTGGATTCT  
CAAACAACGCAGTCCAGGGTCTGCTCGGGCAATGATGGCTGATCTCTCTGGACAACATGGATGCAATGCAGCGAATATAATATATAGCCTTTTGGATGGCTTTTGGAAATATCTTAGGCTAC  
TCTTCCGGGTCTACTGGAGGCTGGCACAAGTGGTTTCCCTTTTCTATTGACAAACTCTTGTGTTGAAAACCTGCGCAAACTTAAAGGGCGCCTTTTTGGTTGCAATAGTGTTCCTTCTCATT  
GTTTGACAGTGACACTGCTCACTGCAAAAAGAAGTTCCACGATATGAGTTGGACCCAGCTGAAGCAGCACAGGGAAGTTCTGGAATATTTCTGTTTTCAAACACTCTGAAGAGTTTACCA  
ACTGGAATGCCCTCTGTGCTTCTCGTGACATCTCTAACCTGGCTTGCCTGGTTTCCATTCATCTTTACGACACAGATTGGATGGGTGCTGAAATCTATCATGGTGATCCAGCGGAACAA  
GGGAAGAAATTGATACTTATAACAAAGGTGTGGAAGATGGGGCATTGGCTTGTGCTAAATTGATTGTTCTTGAATAACCTCATTGCTGCTTGGCTCCAATGTCCGGAATTGACCTC  
AAAAGTTGTGTGGATCATTGGCAACTTTATTTTGTTCCTTGCCATGGCTGCCATAACAGTTCTTAGTGTTATTTCAACTAATGGGTACCGTGGCAAAATCCATTCTGCAGTTGCAGGACACG  
ATGAAGTGAATAATCGGAGCTTTAATTATATTTGCTGCCCTTGGATTTCCTTTAGCAATCTTTATAGCATTCTTTTGTAGTGCCTCACAGCTTGTGTGAATGAGGGAGGCAGCAAACAA  
GGACTGTGCATTGGTGTCTGAACGTATCCATTGTCATTCCCCAGGTTATAGTTGCTCTAGGTGCTGGCCATGGGATGCCATCTTTGGCAAAGGCAACATCCAGCCTTTGCTCTTGCTTC  
AGGCCTAGCTCTACTTGGTGGTTTCATTGGCTTGGCCATTCTGCCGAAGCTCTCAGGGGATTCTTTAAAGAGCAGCAGCTTTGGTTCCATTCACTAATGCTCTCTTACATCCGGGAATCAC  
AGAAGTATATAATAGTTGCTTCCAAACAAAAGAGTTAGCATTTTATACTCTATATAGTAAACCAAAGAATAGAGTTTTTAGCTTAATTTTATGTCATTTGACTTACTGGGCATTGCAATTTGT  
ACAGTGACTIONACTGACTTTGGAATTTGAGAAATTTTTTTTGGACAGCTATAGAGTAGAAATGTTACATCAAATTAACAATTGATTTGTAAC

ATGACTTTGTATTTACCCAATTTGGTATCAATTTAATGAATTTATTAATGG

>comp152510\_c0\_seq4

CGAATGCTCTTAACGGGGGAACATTTGGGTTTCAGAATTCCTTTCCCTTTTAAACCAAGCCCTGTCACCCACCACCCTCTTCTTCCAGACGCCGATCGTGAGAAAATTTTAAAAGAATTCG  
TAGAAGATATATCAAGCAGAGAAATCTGGAGATCGTCGACTAGGAAAAATGGATTCAGGAGAGGAAAACGAGAAGTCGGTGAAGCCCCAAATAAGCCTGGTGAGACTAATCTTCGCCTG  
TACGGTCGCCGGAGGAGTGCAGTATGGCTGGGCTCTCCAGCTCTCTCTCCTTACACCCTACGTACAGGTTGGACCTTCGATTGGTTATTGGAGTGATAAATGCCAATCAAGATTTGGCAGG  
AGGAGGCCCTTTTATTCTAGCTGGATGCATACTTATATGCTGTTGCGTGCTTGTGGTTGGATTCTCATCTGACATAGGATCTGTACTTGGTGATACAAAGGAAAACCTGCAGGACTTATGTTGG  
CCCTCGATGGAAGCAGCTATTATCTATGTGGTTGGCTTTTGGGTGCTGGATTCTCAAACAACGCAGTCCAGGGTCTGCTCGGGCAATGATGGCTGATCTCTCTGGACAACATGGATGC  
AATGCAGCGAATATAATATATGCCTTTTGGATGGCTTTTGGAAATATCTTAGGCTACTCTTCCGGGTCTACTGGAGGCTGGCACAAGTGGTTTCCCTTTTCTATTGACAAAACCTTGTGTGAA  
ACCTGCGCAAACCTTAAAGGGCGCCTTTTGGTTGCAATAGTGTTCCTTCTCATTGTTTGACAGTGACACTGCTCACTGCAAAAAGAAGTCCACGATATGAGTTGGACCCAGCTGAAGCA  
GCACAGGGAAGTTCTGGAATATTTCTGTTTTCAAAACTCTGAAGAGTTTACCAACTGGAATGCCCTCTGTGCTTCTCGTGACATCTCTAACCTGGCTTGCCTGGTTTCCATTCATCCTTTA  
CGACACAGATTGGATGGGTTCGTGAAATCTATCATGGTGATCCAGCGGAACAAGGGAAGAAATTGATACTTATAACAAAGGTGTGGAAGATGGGGCATTGGCTTGTGCTAAATTCGAT  
TGTTCTTGCAATAACCTCATTGCTGCTTGCTCCAATGTGCCGAAATTGACCTCAAAGTTGTGTGGATCATTGGCAACTTTATTTGTTCCCTTCCATGGCTGCCATAACAGTTCTTAGTG  
TTATTTCAACTAATGGGTACCGTGGCAAATCCATTCTGCAGTTGCAGGACACGATGAAAGTAAAATCGGAGCTTTAATTATATTTGCTGCCCTTGGATTTCCCTTTAGCAATCTTTATAGCA  
TTCTTTTGGCTAGTGCCTCACAGCTTGCTGTGAATGAGGGAGGCAGCAAACAAGGTTAGTTTGATTTGATCCGTTTTTCCCTTCTGTACTGG

>comp152510\_c0\_seq5

CCCGCACTTTATGGTGACCCGGTAGTCTGTTGCTTCGCCAGCTTGAAGCCCAGGGACAATCTGACGGATCTTAACCTACGGTAGCTACGAGCTTCCCTCCACGAATGGAACGCCAACC  
ATGGACTATCCGCCGCGGAAAAATTCCTTCGAAATGCTTTGCAGTTACGAGCTATCAATTCGTTGGAACAGCGCATTATGTATAAAATCGGCATTCTGTGTTCTCTCTGGCGGTGGCCGTC  
GTTTTCTCTCCGATCCGAATTGAAAAAAGACGAGGAGAATTCAAACCCGATTCCAAAACCTAGGACCTGTTGAGATCGCCGGCGAGGAAGAGATGGGGCCAGGAAAGGAGGAGGG  
GTGGCGGCGCAGCCGGAATTTAGCCTGGCTAGGCTTTATTTCTGTTGCATGGTCGCCGAGGGGTACAGTATGGCTGGGCTCTCCAGCTTTCTCTCTCACTCCCTATGTCCAGGTTTGT  
TCTTTTCTATCCCCTTAAACAATACTAACCTTTTCTATCCAATCAGCCCCTTAATTCCATTGTAGTAGTTGTTATTGATCCAAATAGCACATAGGTGAGGATATCTTGATCAAATTTGGT  
AAAATAAGTCTT

>comp152510\_c0\_seq8

CGAATGCTCTTAACGGGGGAACATTTGGGTTTCAGAATTCCTTTCCCTTTTAAACCAAGCCCTGTCACCCACCACCCTCTTCTTCCAGACGCCGATCGTGAGAAAATTTTAAAAGAATTCG  
TAGAAGATATATCAAGCAGAGAAATCTGGAGATCGTCGACTAGGAAAAATGGATTCAGGAGAGGAAAACGAGAAGTCGGTGAAGCCCCAAATAAGCCTGGTGAGACTAATCTTCGCCTG  
TACGGTCGCCGGAGGAGTGCAGTATGGCTGGGCTCTCCAGCTCTCTCTCCTTACACCCTACGTACAGGTTGGACCTTCGATTGGTTATTGGAGTGATAAATGCCAATCAAGATTTGGCAGG  
AGGAGGCCCTTTTATTCTAGCTGGATGCATACTTATATGCTGTTGCGTGCTTGTGGTTGGATTCTCATCTGACATAGGATCTGTACTTGGTGATACAAAGGAAAACCTGCAGGACTTATGTTGG  
CCCTCGATGGAAGCAGCTATTATCTATGTGGTTGGCTTTTGGGTGCTGGATTCTCAAACAACGCAGTCCAGGGTCTGCTCGGGCAATGATGGCTGATCTCTCTGGAAAACATGGATGT  
AATGCAGGAAATATAATCTATGCCTTTTGGATGGCCTTTGAAATGTCCTAGGCTATTTATCTGGGGCTGTTGGAGGCTGGTATAAATGGTTTCCCTTTCCTAATGACAAATCTTGTGTGAA  
GCCTGTGCTAATTTAAAGGGTGCCTTCTTGGTTGCAGTTGTTTTCTGTCTCTTTGCTTAAACGGTGAGTCTAACATGTGCAAAAAGAAGTTTCTCTCTCTGAATTGGACCCGGCATCTGTGT  
GGCAGGAAAATATGGATTACTTTCTTTGTTAAAAGCCTTTAAAAGCTTGCCAGTTGGAATGTTGTCTGTGCTTCTTGTGACATCTATTACTTGGATGGCCTGGTTTCCCTTCCCTTCTTTATG  
ACACAGACTGGATGGGACGAGAAATCTACCGTGGTGATCCCAATGGAACAAAGGCTGAAATTGATGCTTACAACAACGGTGTCCAACATGGTGGATTGGCTTGGCTTGCCTGAATTCGATTG

TTCTTGGGGTCAGCTCAATTTTCTTGAGCCTATTTGCCGGAATTCACCTCAAGGATTGTTTGGGTCCTTGGCAACTTCACCGTTTTTCATTGCCTTGGTCGCAATTACAATTCTAAGTCTG  
ATTTCTAAGAATCTACATGCTGAAAGCATGAGTACTGTATTTGGGAACTTGGAGTAAAAATTGGAGCTTTGGTTATCTTCGCAGCTCTTGGGTTTCTCTAGCTATTCTGTTTAGCATCC  
TTCGCCAGTGCGGCGCAGCTTGCTGTGAACGAGGGAGGCCACCAAACAGGGACTGTGCATTGGTATTTTGAACATCTCCATTGTCATCCCCAGGTGATCGTTGCTCTTGGTGCTGGTCCA  
TGGGATGCTATCTTTGGCACTGGTAACATTCCAGCGTTTGTCTGGCTTCAGCTTTTGTCTAACAGGAGGCTTTATTGCCCTTGTCTTACCGAAGCCCCCACATCATCTTGAAC  
CGGATATGGGCTGTGCAAGATCGTTAAAGAAAAAAACATATAGGAAAAATAACAGCTGTAATCAAAGAGCATAAATTCCTATATGATTTGATGAGAATATTACATAATATATATAGCCAAA  
ACAAGAATGAACTAGCAGACCATCGAACATCCTGGAGGTGAATCTAATATGAATAAAGTTGGAGAGCAAGAACATAACATTCAAACATAACATATTATAGCTTTTATTATGAAATCAATCTC  
TTTTAATACAGTAATTCTTAATCCCTCTCTCTTGTGTTGAGAGTAAGGCTTTGTTTCG

>comp152517\_c0\_seq2

AGCAATAAGAAAGTCATCCCAAATGAAGCCTTAGTTATCTATAAATTGCTTGATTACTTGTAGTTTTTTTTTAATGAAGAGAATACCAAATTGTACGTATGGACAATCAATCAGATTTTATC  
AATGATTGTATATAAAATTTTGATTGACTGTCAGCAAGTATAGATTCACATATCCAAACCAAATTAATGATTTCTAAAAAAAATAAGAACTATAATCAGTCAAAGAAATTATCATAAATTA  
AAAAGGAAAGTTTGGTCACCTTTCTTCTTTCCATATGCTCAATTTCTTTCTGCAATTGACATTATAGTCATTATCTTCATTTGAACTTTTCATGAATTAATAGTTATTCTAAAAGCGTCACCA  
GCAAATTTAAACACCAGATATATATTTATCAAAGTCATACTAAAGTACACATGTATTTCCCTTTCGCTGATTATTGTTTTAGTGCCTAATTATTTGAGATTATAGGGGTGTATTATTTTAA  
TTATTGTATACCTTATATAACTTTTGAATGTTTAATATATGCAAAGTTTTAAATATGTAAGATGACAGTTTGGCTATATATTCAATTGACTCATATATAAATTTCTGAAATAAAAAAGAAAA  
TAAGAATCATATATTTTGTGGATTTTGTGAGATTTTTTTTTTAAATGATGAAAGATAAATAATATGTGGCTATAATTTATGAACTTAGACAAATTAAGAATATTCACCTTGATCAATTGCTTCTT  
CATGAATCCTTTCCATTTAACACTTAGTATAAAAAATTTAATTTATGTAATAAAATTTGTTTTAATTTTTTAGTAAAAGATTTTTTCAACTAAAATTTTATAATGAAAAATTACTTACGAAA  
GGAATAAAAAAGTTTTCCCAACAATTTAAGCTTTAATCTCTCTAAGGCTTTG

>comp152527\_c0\_seq2

TCCAGAGATCCTGTTCTCCCGAACGTCTCCTGCGGCAGTGGCCCGGATCTCGTCTTAATGCGATTCAAGCCGTGGGAAGAGGACAGATTTCGGAGACAGAAAAGACCCCGAAGTCACCC  
CTCCCTCCTTGATCGCGCCACCTTCCAAATTTACCCGGGGCCGAAGCAGCTGTTTGGGGCGAGTGTTCGCGGCCTCTTTCCCTTTCTGATCCTTCTCTTTCTCCTTCACCTTCTCTTTC  
TCTTTTTCTTCTCCTTCTCCTTCTCCTTACTCCCGCGGCCGCAATTTGCCTTCGGAAACCGCTCGCCATCGCCACCAGCGTCTCCCTCAGTGTGCGTCCAGAGTCTTGCCTTCACCA  
CGAAATCCACCCCTACCTTCTTTTTGGCCACGTGCGGTGAAAGAACTGAGGAATTTGGCATTATACGAGCAGTCGTAATTCCTCGGTACAGACGGCATAAGATTTCTGTGAGTGATAGGAC  
GATGTAGGCATCGTCTAACGATTCGCCGAAAAGCCATTCGAAGAAGTTGAGGGAGTCTGGTCTGGATCGCACTGATCGCGGGAGGATGAAGCCGCGCACCAATAGCGGGAGGATGGA  
GGCGCGGGAAGACGACGAGCTTTGCATCCATCCATTCCGGGCTCTGGTGCTTCCAGTTCGCATAGAAGGATTGCAATCGCTTGGGAAACTTCTTTAATTGTGATTCTCTTCTGATG  
ATCTCATGATGGAATCTCGATCAAAAACAAGAAGAAGATGCTGTTGCAGACGAACAGAGGTAGATGGGTGTAACAGAGGGAAAAGGCGGTGGTTTCTATGGATACCCCACAGATCCC  
TCCCTTCTATTTCTCGGCACTTAGG

>comp152533\_c0\_seq1

ATGACCTAAACAAGCCATTGTGCGTACTGAATGAAGTGTAACAACACATTTTCATGTAGAATTCACACCTGTTTATTTAGCTTCGAAGAAACAAATCAAATAGAAAAAATTGCATATTAATTC  
TTCAAAAATATAAGACATTTTTATAATATCTGCAAGAAAAATATGTTGCAGCGCAGAAGAGAATACTCAAACTCATAAATTTTGCATGATAAAATTATAATGTCAAATATTTTGAATCAA  
ACGCCGGCCTTTAATTTGTTATCCACTTCAAAAATATCTTCACAACCTCAATAAATTTATTGCAACCTTGCCTTTCGAAATCACCTTTGTCTTCCCTGAACTCTTCATGATCTTCA  
CATCACACTCCACCTCCATCTTCATCCGCCACAGTGTACACCCCCAAATCTCCACCCTCACCGCGTTGCCACCGTCAATCTTAGCAGCACCGCTGCTTCGATCCCTGTAGACTCTTCTC  
CGCTTCTCCATGACAGCTTCTTACCCCATGAAGCGCCATGCTGAAACTTCTCGACTCCCTGGCCTTCAAGTTAATTGGGGCGACTCTCCATCCGCCAAATTTCTCTTTATAACTAA



GCTTCGCCGCTCGCGCAATGCTCTTCTCGATCAAGTATCCCATAACCAATACTTGGATTTGTAACATCCATTAAGATCTCGCGCTGAGTTTTTCGAGTCAATTACAACGCGATCGATGTTGAAG  
ATGGGAGCAGATGGGCGGACGACAATGTAGAAGATGAGGGTGGCGATGAGGAGAGGAAGCGCTATGGAGATCAAGATGCAGAGGAAGCGGAGCAAGAAGTTCAGGCAAGGAGAGCG  
CTTTTTTCGCAGTGGCGGAGATGGGCGGATATTCTCTGCGAGACGAGCATTCTCTTTGGGCGGGATGCGGTAGATCTGATCTTTGGGGACCTGCACAATGTAGGTGACGAGGGCGGA  
GGAGAAGGCCTTGTTCATCGGAGCTAGGAGGGCGAGGAAGCGGGGACGAGAAGCAGGAGATGGCGTCCCCTCCTCCATCGAGAGAGATAGAGAAG

>comp152550\_c0\_seq5

CAAAATCTTTATCCCTTACTGCTTATTACAAGCCTAAACATATCTATTTAAAGACTCCTAAAGGCTATACAAATAGCCCCACATATGGCTACATATGCCATACATAAAACCTATAACAAGAA  
AGAATCATAAATCTAGGAACAAAACACAACAATCTCCAACCTGGGCCTAGATTTACAAAATAAAAGATAACAACCTGTTCTTAAAGAACAGCCTGTCCGGTCTCCTCCGCCAAAAGCGTCC  
ACCGACATTCTAGCTCCACCTCCCGACAAATCTCTGTGCAACTACGTCCAACGCAGCCAATCCCGAGCACCTCTAGCCCGGCTTCCACGCCCTGTGCATCCACCAGCACCC

>comp152563\_c0\_seq1

AAAGAGAGAGAGAGAGAGGGGAGAGTGAGTGCGTGCCTGTGTGAGAGAGAGAGAGGCGATTTGTTCTTAAAGAATTCAAAAAAATTGATGATTTTATTCTCATATCTATAACAGGAAAAG  
AAAATAGGCAATTTCTAAGGCACCATGTCAGAAGAAGAGCAACAACGAACCCCTAAGAAGAAACAATCAATATATCATCTCTGAAAACCTTCTCCTCAGTATGTCACTGAAACTCCTC  
AAAAATTGCTTCTTCTTCTCCTTACTCCATTCAAACCTCCCATCCTCCACCTTCAACCTCCTGTTCTCAAAAAGCACGCATTTTCCATCCTTCCGACTCCTCACCAATGGCGACCCACC  
ACCTCCCTCAATCTTCTCAATTCCTTCCATCTCTCCCATGAATTTGCTCCTCACCACCACTGGCTTCTCCACCATCCTCCACTGCTCCATCGAAGAAGTCGCAGCAACCAACGCCTTCA  
GCACCTTCACACTATCCGTCGCCGACGCCCTACTCACCTTCAAGCTTTCTAATTCATGCTTTAACCATTTCATCGCGTCATCTTTCTCCCTAACCAATCCTTGATGCTACAATTTCTGCTC  
TCGCAATTTCCAACGCTTCTTACAGCAGTAGCCTCGTTACCGCTTGCTTTAAATATCCCTTAGCTTCCATATCTCTCCCTCGAATCCCGATTCAATTCCATTAATCTCCTGTTCTCTTC  
TCTGATTTCCATTAATTTGTTTTCTGATGCCTTTATACAGTTTATAAAGACTGCTTCTTCTCATCTGCTTCTTTTTTCAGCTTCTGCGATTCTTACCAGGCTCTCGGAGTTTCTCCTCCGCA  
AATCTTAAAGCGGTTTCTGTGCTTCTTAGCATAGCCTTGGTTTGTGTTTGTAGTCTGTTAGAGACTTCTATCAAAGCTAGAGCTAGAAGCTCCATTGCTTTCCTGCTCCTCCTCGCCCTGCAA  
GGCTAAGCTGAGCTCGTTCTGAGATTATGGAGCTCATCGGACAGTTCTTTGTCTAAAGAAAGGATTTTTAGGGATTACGGAGGGAATCTATTTGAGCTTGGATTCTTCAAAGATATCT  
TTGTTTGTCCAGCCGTTTCGTTTGGGAGACGAGGGATTCCAGCATTTTTCTTTCTGATTCTTTGCTTTATTTGCCTCGTTCTCATGGAATTCGATAAAGCCTCTGGTTTTCGTTCTTATTTT  
CTCCAGATCTTTTAGCGCTTGGGAGCGTTCTTCTCGTGCTCTGGTTAGCTCCTGCTGGAGATTAATCAATGCTGTTGAATCTCTAATGCCCATCCATTAGATTTCTTTTCTGAGTATTATAT  
GAATGAAGCAAAGAGAGATTCAAGGAGTCATGGAACCTAAACCCACAAGCTT

>comp152567\_c0\_seq3

TAAATTTATTGCTTACCCGAAAGCAAATGTTCTGATTTATAATTGCTATTATCCCACCATAACGTGACCTCAAAATCTAAATGCAACAACCTGTTGCATAAACAAGCTGTCTTTGTACATGAA  
CAAAGAAAAGTGAAGCATTAGCAGCTTAAAAGACTATGAAACCAGTGCTATGAGGCATCATCAATCAGAAAATAAATTGCATTACAGCAGAGTTAGTGAGGTTTACAGACAGAATCAGTA  
CACAAATATGTTTGTCTGCAACATGAAAGGAGATCAGTTGAAAGAACCAGATGCTTGCATTTGCAGCTTGAATTTGGAATTTGTTGAAAATTTCTTCAAATGGAAGATGCTGTTGAT  
CTGTTCTTGTGTGTCTGTAAGTGGTTTATCAATAAGCATGTAATATTGATTCTACGAGATCATGGAGTGGTGGGAGCTCTCGTTTGTCAATCAACTTAAATTCGTTGGCCCTGCTGACATTGT  
TGAGCAGGTAGTAGGTGTGCAAAATCCGTCGAGAGGCCATACAAAAGTTTGCCTGATTGAAGAAGTCGATCGTGTGACAGCAAGCCACTCATTAAGATTTTCTCCAGGGGGTAATC  
GAACAGCCTCTTTTATGTTTCCAGTACCAAGGTTGCATCAATGTACTTTCTGAGCTGAACACCCTTATTCCAGAAGGAGCATTTTTCTTGGGCCGGAAGGTTTTTCTGATTCTGTTTCCA  
AAGCCGAAGAGACTCATCTCTGCAAGCGATGATAAATTAAGACGAGGAGGAGGAGGAGAAGCAGCTGATTTCTTTCTTTCTGCCCAGCCGCCCTTCTCCTTCTTATTCCGATCAAC  
ATTGGAGACGCTCAGGGAATTTACTCTTGTATTATTAGATGGAAGGAAGAAGAGGACAAGAGGTGGAGAGAAGAGAGAGAGAGATGGACGGG

>comp152586\_c0\_seq6

TTAAATTAATTTGCCATCATTAGAAAAGAAAAGTTGGAATACATCAGAAGTAAAACCATCCGAAAAATTATGCACACAGATTCACAATTTTAGAAATTAGTAGTGAAAAAGATTTATTTTA  
AATAGATGCCAACCTGGTGAGTTAGATAGTGATTAGGATGATTTACAGAGAAGAAATGTTCAACATGCTGGCTAACTGATTCATCGGGATCAGGAGGAACATTCCTTACAAGGACAGTGA  
ATTGATCTGGACGGCGACTTTGAGATGCAAGAAAACGCAATCTCATCGATGTTATAAGCTTGTATTCTTTGTATAATGTATAGCATGTCCAAAAGGTAAAGACATAAGCCATGGTTAAATGT  
GCCAAAACCTCTGTGAGCCTGGGGGAATATTCGAGATAGAAAGCTTGTCTAGATCACTAAAAGTTAGATCTTTGCGATGATCCAAATATCGGCCCGGTACATTAAGTGGCACAAAACG  
GCAAAGGCCAGCACGGAAAGAGGAACAAATATCTTCAATCCAAGTAGATATATTCTGATATACATAGCCGAATCAAATCCTGCATGATCAATAAGCTCCGGCTCTGGCATTTGTAATGCTGC  
TGGCATCCAACCTCAAAAATTTATATATGTCCTGCAGTCCAAATTAACAAATTTTTTTACAGAACCTCCTGAATGCGTTGGGCTGCTTCTTATCCCTTTAAGGTACCACTTGGGAAAGTATAC  
TCTATCATTGAATGGCTGAAGCCTTAATATAGCAAACGCCACAAAGAAGGCAAACGCTGATAGAATATTGATAGCCCGAGCCATACAGATATCTCCAATTGTTGCCATATGTTGCTCGGAAA  
ACTAGTTCTCCTCGCGGAAAGGCTCGCTCTACCTTGTGAAAACAAAATGGAGGAGAATCTTTACGGCTTCTTCCGCAGGAAGACAGAAGTGACGACCAACTAGCCAGGTCTTCTACAC  
GCCAACCATTTTTGCCCTCTTAAATCGGCCATTTTCTCG

>comp152619\_c0\_seq2

TATTACCTTGAGAATTTTCAGTATAGAGAGGATTCGGACCTCGGGCTGAGAAGGAAGGGATCACAATATTTTTTCGTAGTGAAAGGCATGTGACTTCTCAATCTTCGCCACAGGTTTCCCTTTA  
CTGCCGAGGCTATCAATATACTCTCTAATGATAGCGCCACCTTCCTTGGATACCATCGTCGCCGGAAGCTCGAATGTTTCCGCCCGGTCCACCGGCATTATCATCTCAATAACCAACCCGAC  
TCCGCCGGCGGGCTTGACCACCTTGTGCGCCGTTTCTGCCGACCCTGTGATCTTACACACCACGATCTTCCCTTACCTTCTCAGGATCCAACGAGTCCGGCCCCACACATCTGAGCCGA  
GAATGTCATTCCGATGGTGGTTCGCATCAATCCCAGCACCAACGGCCGGAACCTTATCGGTCTGGAAAGTATTAACCGATGTCCCGTAATCTCTTCCATTGCCGAGCACAAATATCC  
GTCCCAAACCTGCCGGTCATGCGTGCTGGCCCCGACGGTCAACATCCACGGCGAGTAGTTAATGACGGTGCGATGATCGGTCCCATATTGCCCGCCGAAGCGACAGTCAGGATTCCCGC  
ACGCATGGCATGGTAAGCCCCGACGGCGAGGGCGTCCGTGAAAGACTTCCCGGGATCTTCGCCGACGGATAGGTTGATGATGTCGACGCCGTCGGAGATGGCGGCATCGAAGGCAGCG  
AGGATATCCTCGTTCGTTGCAGGCGTGTGACGCTAACAGGCTTTGTAGGAGGCGATGCGGGCCGACGGGGCGCCGCCGGGGCTGTGCCTTGGGCTAGCCCGTATATGTTGGCGTTGGAT  
ATGGGATTGCCGGCGGCTGTGGAGGCCACGTGGGTTCCGTGGCTTTGTTGTCTTGAGGAGCCATCACGTCGTTGGAAGGGGCTTTGCGGTCTAGCCGAAACCATTTCGCGCCGATTAGC  
TTGTTGTTACATTTGAACACTTTGGTGCCGGTGCATTTGCCCGCCATCTCGCCGGCGGTGGACCGTAGCCCTTCCCGCTGAAGCTCGCGGAAAAAGGATCGATCCCGGAATCTATGACG  
CCAACGATGACGTTGCTCTCAAGTGTATGATTATGCGGGGCGGTTTGTAGGGAAGCCTATGAAGTCCAAGTACGGGTGGTGTGTAGTTTCCGGGTACGGGGCGGGGAAAACCGAGACGAC  
GCCGTCGAGCTCGGCCAGCTGAGCTGCCTCCTCGTCGGAGAGTTTGGCGGCAAAGGCGTTCATGCTTAGAGTGTAAGTGTGGAAGATGGAATCCTTGGCGGCATCATGGCTTCCAAGAA  
TATCGGAGAGAAGGCGGTGGTGTATGGCCAATGGCGTCGAAGCTGCGGTGAGGCTCTTTGCCGAGGTATACTATGAATTTCTTTTTTTCAGGTATGGTGGCCGCGAGAGCGGCGGAGGAG  
AAAAGAAGCACTGAAAAGAGAAGATGGAGAAGAAGAGACGACGCCATGTTTGTATGGCCGCGGAGAAGAGAGGAAGTGAAGTTGGATATCTATATGAAAGTTTTTTTAAATAGGGAGTT  
TTATATAAATAGAGAGAGAGAGAGGATCAAGTGGGATTTGAGATTTGTTAGCTTGTATTGTTTCTGATGCTGTTCCGGGGAGGAGAAGATGGGCCCTACAAGGAAAAATGCTCTGC  
ACCTGCCTCCAATGCCACTAATGGGAGCCCAACTTAGGCAACTACCCGCTATGTGTGCTAAAGGAGAGATTATTTGTGCGGTGTTTGAACCTGTTTGGAGACTAATTTGGATGGGCCACG  
CCATCTAATGTACTGTGCATTTGGGTGACTTGACGCATCCAGACACCGTGCATATATTTTTTCTCATAAGACAGCGATGGTCCACATGGCTGGTGAGTTTGC

>comp152657\_c0\_seq1

GGAAGAGAACTGAACAAAAAACAATTTACACAGATAGAACCAAAGGAAAATAGTGGGCATTAAGCTAATAAAAGACTCGGAAAAAGCCTAAAACCATAGAAACAACATGATTTTCA  
GGATCCAAAAAATAGTTCGCTGCGGTGGATACAGGTTGCCTGAAGGCGATAAACGAAGCTGAAAGCAGGGGGCGGTCAGACTAAAGGCCATCTCAGGACCACCAGGAAGCGACAAGT  
TACCCAGGAGATCGAGCCAGGTTGCCATACTAGCCGTCCGTAGCTCGAGAGGGTAGAGGAAGGCCGAGCTCATCATCGTCAAATAGCTATAATGCCACCCTGTTGCCTTTGGAACACCG  
TGAAGTAAACCCAGGAAATGAAGACATAGTTCCCAAAGTCGGATTGGATAGTAGAGGATCGAAAACCTCAAACCATCCAAAAAATGTTCTCCCCAGGTCTGAAAGTAAAGCAATCA

GAAAAATGAGCCAAATGCATAACCCCGAAGTCAGCAGAACCAAACATCAAGTCTAGCCAGTCGTGAAGAGTCCAAAAAATTTCTCCAGAATGTTGGGAACCATGTGATCCCGCAATGAA  
ACACAGAAAAACAGCCAAAGTTAAGAGCCAGTAAACCTCCTTAATAATTTCTTGTGTTTCCATTTTGAAATCTTGAAATGAATTGCCATGGAAATATTGCATATGATCTTGGTGACATT  
GTTTGAAAGAAATTAGAGAAAACGGCGGGAGTTTCTTTCTTTCCAAACATGGTAAATGATACAGCTAATAATAAGGCAACAGTAATCCTTTTCCACTCTACTAAAAAGTGTATTAGATTCAATAA  
AATCATAAATCTGGCCTAAGGTTCGGCTAAATAAAAAGCAGTTTAGGTTTCGGCAAAAAAGTTTAAAGGATGTAAAAAGAAAAATCGCATCCAAAAACAGATGAGTGTGGTTTTCCGCAT  
GGGAGGAACAAAAAGAGCAGTCAGTATTAACCTGTATGCCGCGTGATAATAAATTGTCCGCCGTTTTAAGTTTACCCAAGATTGCCATCCAAGTGAAGCAAGCAAATTTGAGAACATGTT  
TTTTATGCCAAACAGAAACAGACCAGTCAACTCTAGGTAAAGAGGAGTAAAAATGATCAGTAAAGAGTCTGAACACCCAAATAGTCGAACCTTTCCAAAGAATTTCCGATTTTTCCCCA  
GGTTAATCGCAGAGATGCTATCCAAAATATTATGAGGAATAGAAGCAGGCAGGACCAATTGGCATTGGTAATGAGATCTCCCACACATTTCCGGTCCAGATCCAGAGAAAAGAAAGTATT  
CAGATAAACTGGTCCCATTGAGCCATGGATCCCACATGAAAAGAGAATGTACAAGCTTGAGACACAGAGAATGAAAAGACTGTACTTAAAAAGAGTAAGTGTCAATAATTATAAATTA  
AAGAATAGATTATTTATAAATTACATTCACCTTTTAAATAAAAATCTAAAAATTT

>comp152680\_c1\_seq1

GTAAAATAAATATAATATAAACTCCAAATATAAGCCAGTTGTAAGCCGATGGGCTGTGGCTGTCCGCAATGGCAGGTGATTGCCAATGAGCATTAGTCATAGGTGCCGCAATGGCTGGTGG  
TGATATGCAGGCGGGAGGTGGCGACGACATAGTTAGCTTACTCATCCAAAATCTAAAGAATTCTAAATACACTAAAATTTTACTATATTTATTTACTTCAAATCAAATATCAATATTCTCA  
AAATCCCTGCATTTGAAATATTTTACATAGCTTTTACTTCAAACCAATAGCCCCTAAAACATTTTTCTCTTACTATAATCCCCTCATCCTCTACTGTAATCCCCTCAATAGTGTCACTTCC  
TCCTACCAATCTTTTAGCCAATATTATACAATTAATACTTTAATAATCATACAAATCTGTACATTATAACTACAGAATTACAAACAATATTATATTTATACACACACGAAAGTGGCCCTTCTTT  
TAACTACTTCAAGCTCTATTCCGCCGACTAAATTAATGGCCTTTTGGGCCTCCAAATCCCAATCAATCCACCATGTTGCGGCAACGATAGAAACAGCACACGTTATTTGGGCGGACAAAA  
GCCCAAAAGAAAGCCCAATGAAACCCACATTTAACCCGAAAGGCCAACAAAATGGCCACCGGTGCCCGGACCAAGTAAAAAGAGTAGAGGTTAATGGCGGCGCCTAAAGCCGGGCGGG  
CGCACCCGCGCAGCACTCCGCACCCCACCGTCTGCGGGCAGTTTCCAAGCTCACATAACCCGATTAGGGGGAGCGCGACGCGTGTACATCGTAGAACGTGCTATCGGATGTGAAAACC  
CGGGTCCACGCATCTCGGCCAGCGTGGCCACGAAAAGCTGAAGCAGGAAGCTAGAAGGGACAAAGCCATCGCGATTGCAGCCGCGGCTCGAGCTCGGGCGGGCCGGCCCGCCCCG  
AGTTCTTTGCCACTCGAGCCGATGCCGCCGCTGATAGAGTCGCCGGAAGAGTGTAGAGCAAGGCGGTGGTTTTGGATGACGATTCTGCGGCAGCAAGGGAAGATTGTGGGTTCGGTTAA  
ATACCCGGCGCGCATGGTCATGATTAGTTCGTACCACCACCATTCTAAGCAGACGGACAGGCAGCTGGGAATTGCGAGATGGAGAAGCGGCAACCATGTGTGCGATGATGGCGGCGGGC  
GCGGAGGAGGAGG

>comp152767\_c0\_seq1

TAGAACCATTTCTTCTCTCTCCTGTCTTCCCCCTTCGTCGTATGTCACCCTTCAGGGATCAGCGGTGAGGTGCGTGGGGAGGATAGCGGGAGACAGAAAGTTGCCAGAGTTTTATCTGCCA  
GGCGCTTTCGCTATCGTTACTGAAACTTTTCGATTTTTTGATTTCGGTGATCAAGCACAATAGCCGTTTCGCTTCGGGGGAACAATAAGGAATCAATCTGCGTTCGTAGGTTTTGTTCCCAATCAGA  
TCTTTCTTAATCGATTGGGATTTTATTCAATTATGCATTAATTTAGCAATTTATGGATTTTGAGGCTTTTAAATTAATGCGTTTCTTATGGGTAGTTCGCTCCAATTTGCAGCTTTCTAGGTTT  
TAAATGTTTATTGCTCTGGATGAGTTTGTTCACCTAGATTTTGGGAGAGGTTATTTACCCGGGGTTGGAAGGGATTTTGATCAACGCCGTGGTATATGATTATTCGCAATTTGTTATTGGG  
CGCACGGAAGTGTGATTTTGAATCGAAGAAAGATGAATGTGTCGAAGAGCAAGATGGGCGAGGAGCACGGGGATTTCTACTCTGTGTCGCCGAAGATGGATTGGAGGATTAGGTTGT  
TAAGAATAATCTGGGGTTTGGTGATATTCATGGGAGGGGCTTTTCTGGGCTTGTCCGTAACCTCCCGGTATAATCAATACTTGACTACGCAAACTAATGATCTTTTCTTTCCGACGAAGATG  
TTCACTACAAATTTGTGATATGCAGAGGTTAAGTATAAAGAGTTTTGTTTATCCCATGCATCTTTTTCATGATTTAACTGATGAAGAGCTGTTCTGGAGGGCAACCTTGGTGCCAAAGATTGA  
AGAATATCCATAACAAGAGAGTGCCCAAGGTGGCTTTCATGTTCCCTTACACGTGGACCGCTTCCGTTTGTCTCCCCTTTGGGATAGGTTCTTTAGAGGACATGAACGCTTCTACTCTGTTTATG  
TGCATTCTATTCCAAACTACAAGCTCAATGTCTCAGAACTTCAGCATTCTATGAGCGCCAAATCCCTAGTAAGGAGGTTTTCATGGGGATCGATTTCACTTGTGGATTCAGAAAAGAGACT

TTTGGCCAATGCTTTATTGGATTTCTCCAATGAACGGTTTGTTCCTCTCTCAGAAAGCTGCATCCCTGTTTATGATTTTCCCACAGTCTACAAGTACCTTATCAGTTCCAAGCATAGTTTTGT  
CGAGTCTACGATGAAGATTCGCCCGTGGACGTGGTTCGTTACAACCGTCACATGTACCCTAATATCAAGCTCAGCAAGTGGAGGAAAGGATCCCAGTGGTTCGAGCTTAACCGGGAGTT  
AGCTGTGAAAATAGTTGCAGATTACAATTACTATGCCATATTTAGAAGATACTGCAAGCCCTCTTGCTACCCGGACGAGCATTACATCCCAGCTACTTGAACATGTTCCATGGAGAATTGA  
ATGCTAACCGGACTGTAACCTGGGTCGAT

>comp152767\_c0\_seq4

TAGAACCATTCTCTCTCCTGTCTTCCCCCTTCGTTCGATGTACCCTTCAGGGATCAGCGGTGAGGTCGTGGGGAGGATAGCGGGAGACAGAAAGTTGCCAGAGTTTTATCTGCCA  
GGCGCTTTCGCTATCGTTACTGAAACTTTTCGATTTTTTGATTTCGGTGATCAAGCACAAATAGCCGTTTCGCTTCGGGGGAACAATAAGGAATCAATCTGCGTTCGTAGGTTTGTTCCTCAATCAGA  
TCTTTCTTAATCGATTGGGATTTTATTCAATTATGCATTAATTTTAGCAATTTATGGATTTTGGAGGCTTTTAATTAATGCGTTTCCCTATGGGTAGTTCGCTCCAATTTGCAGCTTTCTAGGTTT  
TTAAATGTTTATTGCTCTGGATGAGTTTGTCAACCTAGATTTTGGGAGAGGTTATTTACCCGGGGTTGGAAGGGATTTTGATCAACGCCGTGGTATATGATTATTCGCAATTTGTTATTGGG  
CGCACGGAAGTGTGATTTTGAATCGAAGAAAGATGAATGTGTGCAAGAGCAAGATGGGCGAGGAGCACGGGGATTTCTACTCTGTGTGCGCCGAAGATGGATTGGAGGATTAGGTTGT  
TAAGAATAATCTGGGGTTTGGTGATATTCATGGGAGGGGCTTTTCTGGGCTTGTTCGGTAACTTCCCGAGGTTAAGTATAAAGAGTTTTGTTTCATCCCATGCATCTTTTTTCATGATTTAACTGA  
TGAAGAGCTGTTCTGGAGGGCAACCTTGGTGCCAAAGATTGAAGAATATCCATACAAGAGAGTGCCCAAGGTGGCTTTCATGTTCCCTTACACGTGGACCGCTTCCGTTTGCTCCCCTTG  
GGATAGGTTCTTTAGAGGACATGAACGCTTCTACTCTGTTTATGTGCATTTCTATTCCAAACTACAAGCTCAATGTCTCAGAAACTTCAGCATTCTATGAGCGCCAAATCCCTAGTAAGGAGG  
TTTTATGGGGATCGATTTCACTTGTGGATTCAGAAAAGAGACTTTTGGCCAATGCTTTATTGGATTTCTCCAATGAACGGTTTGTTCCTCTCTCAGAAAGCTGCATCCCTGTTTATGATTTTC  
CCACAGTCTACAAGTACCTTATCAGTTCCAAGCATAGTTTTGTTCGAGTCTACGATGAAGATTCGCCCGTGGACGTGGTTCGTTACAACCGTCACATGTACCCTAATATCAAGCTCAGCAA  
GTGGAGGAAAGGATCCCAGTGGTTCGAGCTTAACCGGGAGTTAGCTGTGAAAATAGTTGCAGATTACAATTACTATGCCATATTTAGAAGATACTGCAAGCCCTCTTGCTACCCGGACGA  
GCATTACATCCCAGCTACTTGAACATGTTCCATGGAGAATTGAATGCTAACCGGACTGTAACCTGGGTCGAT

>comp152771\_c0\_seq5

ATTATTGATATACCAAGAACATAACAGCGACAATTGATTTGGATTCCTATCACAACATCTTCTAATAATTTGCAACACTGTTGCTTACAAGTCTTACTCTGCTAACATTCAACATATAGTA  
GGAAATACAAATTAACAAACACGCAGCGCAGCAGCAACTGCAGTACACAATAAGTGATTAGGCAACAACAAAAGATTTAAAGTCTACAGAAAAGCTTCCAAACTCGTCATCT  
CCGATATTCCAATCCCTTGAAACCTCGAACTTTCCCCATCAAATCCATCTTGAAACCATAATTACTCGAACCAGAAAACAGTCGTTATTACGTTGCATCACTCCCTCTGCTCCTCTTCTT  
CTTTTTCCATAACCTCATAATGCAAAAAATTGTTGTTCTCTACTTCTTCAGCTCTAATATCTTCCCTGCTCCCTCCATCAAATTGTGTCATCATGGGCTTGGGCAAAGCTTCTGCTGTGGAA  
GCTCAGGGAGTTGGTCTAAGTATTGATCCGACATAAGAAAGTTTCCACCTATTCTGCCAGACATGTTTTCGAGGGCCTGGTCTGGCCGAAAAGAATTGGATGGCGAAGGAAGAGAAGAA  
GAAAGGGTGGAAATAAACTTAGCTGACTTCCCACGACGGGTCTTTTCGGCAGCCACCACCAACGGGAATGCTGCGGAGAGAGCCTCCTTTGGTCCAATAGCGGCGACAGCCTTTACATAA  
GTAGCGGGTTGAGCGAGGCAGTAGTTGTTGTAATAACAGAACTTGGTGTGGTGAATCGCAGCGGGGCAATTGGGCGCGACTTCTTCGACTTTGGGCGCCATCGGCGGTCTGTTAT  
ACCAACCCCAAAATCTGCTCTTATCCTGCTCAAAACCTACTGTACCAGCAGCCCATACCCCTGCCAAGAAAAATCTCTGTCAAATCCATCAAAGATGCACCTGCCCCGTCAAATTTCTAC  
TCCATTCTGCAGTAGCCACCTGTTTTTGTTCAGGCAAGTGGAAATAAAAAAAGACTAGCTTATTATGTTTTCTTAAGTATCCCTCTCATCTCTCTATTCACTCACATAAGCCCCACTCC  
CATTTCTTGAGTTCCTGCAGCTCTCCACGTAAAGCTCCCCACTGCCAGCAGCACCTCCACCTCCATCCCATTCTCCCTTTTCTTTCAGCAAACCACTCCATAACCCACGGCAGCCCT  
CTCCTCTCCACTACAACAACTCACATAAGCAGCCATTCTTTCTTTCTTACTACTCAACCACCTACAACAGCTCCTATTTTCATACAGCAGATCTGAACCCCATACAACCCCTCAACCAT  
GCTCAATCTCTTGCAACCAAGTAACGTCTCTCTCTTCCAACCTCA

>comp152784\_c0\_seq1

AGAAATTGCTCAATCATATAAAACTTGAAAGAAAATAACGTGTATTGTCTCAATATATAGAATATACAACCTCAACGCTCAAAAAACAGGTTTTTGTAGCAAGAATAGTAGAGACAATTAGAAG  
TTAGAAATCAGAAATAAAATGTGACATCAAAGAATCAAGAGCAGGAACATAAGGGAGAGCAGAAAATGCATCTCTACACGAAATAAACAAAAAGAGCGACGGTTCGACTATCGAGTGATTA  
AAACAGAGTAAATCCCTCCTATAAAGTTTTAACAGTCAGCCAACAGACTAGCTTAATCCTCCTCATCTTCCTCGTGCATGGAAGCTTCCCCTTCGATGACTTCATCCCTGAGCCAATTTTTTT  
CCTTGTAATTACCGGATGAATTAAGTAATGAAAGAGATCGGATATAATAAATTGCCTGCACGTCAGAGGTCCAGAGAGTGAGGTTCTCTCGGAGGAGTTGCATGATCAGAGTGCTGTCT  
TATATGATCTTCGCCAACAGTGTCCAGCTCAGCGATCGCATCATCAAATGCCTGCTTCGCAAGAGCGCAAGCCCCGATCAAGAGCGTTCAATATCTCATAGTAGAACACGGAAAAAGTTGA  
GCGCGAGTCCCAAGCGAATCGGATTAATCGGTGCAAGCTCTGCCGTAGCAATGTCTGGGCAGATGTGTAGGCGGAAAGCGTGTATCGGCGGCCTCCTTTCGTTTCAGATCCGGTCTTGA  
ACTCGGCAAGATATCGATGGTAGTCGCCCTTCATCTTTAGAAAAAAGACCTTGGAGTCAATTGGACAATGCCGAGGGGAGGAGGTGAGATTCCAGCAGCTTGAGTATTCTGCCACAAATGG  
ATGTTATCTCCGACTCGATCTTAGCCCTAAATTCCTTGATAGCGGGCAGGTGATCATCATTCCCAGACTCTCCTCCTTCTGCTCTATCGACGACACGATCCTCCACGAAGCCCGGCGTGCG  
CCGATCACGTTTTTTGTAGGCTACCGAGAGGAGATTCGCTCTTCAATGGAAAGCTCCCCATTCTCCGTCGCCATCTCCGTAACCTTCTCCATGAACTCCGCCATTTCTCATACTCTCAGC  
CTGCTCAGCGAGCTTCGCCATGTAGACGTTATCCTCCCGGACTCTGCCATCATTACGTTTCGCACAAAACAAACCCTAGAAGAGATTGAGAAGAAGAATAGAATAAAAAACAGGAATAAATC  
GAAGGAAGGAAGAACTTGATTTTTGGTGAAGAAGCTTTGTTTCTCTGTAATTTATTCGTTTTGGGAAATGGTTTTCTGCGGTGGCGCGTACGAGGAGGAACAGAGACCAGCCGCGAGCGC  
ACAGCTGTACAAAC

>comp152784\_c0\_seq3

AGAAATTGCTCAATCATATAAAACTTGAAAGAAAATAACGTGTATTGTCTCAATATATAGAATATACAACCTCAACGCTCAAAAAACAGGTTTTTGTAGCAAGAATAGTAGAGACAATTAGAAG  
TTAGAAATCAGAAATAAAATGTGACATCAAAGAATCAAGAGCAGGAACATAAGGGAGAGCAGAAAATGCATCTCTACACGAAATAAACAAAAAGAGCGACGGTTCGACTATCGAGTGATTA  
AAACAGAGTAAATCCCTCCTATAAAGTTTTAACAGTCAGCCAACAGACTAGCTTAATCCTCCTCATCTTCCTCGTGCATGGAAGCTTCCCCTTCGATGACTTCATCCTGCACGTCAGAGGTC  
CAGAGAGTGAGGTTCTCTCGGAGGAGTTGCATGATCAGAGTGCTGTCTTATATGATTTTCGCCAACAGTGTCCAGCTCAGCGATCGCATCATCAAATGCCTGCTTCGCAAGAGCGCAA  
GCCGATCAAGAGCGTTCAATATCTCATAGTAGAACACGGAAAAGTTGAGCGCGAGTCCCAAGCGAATCGGATTAATCGGTGCAAGCTCTGCCGTAGCAATGTCTGGGCAGATGTGTAG  
GCGGAAAGCGTGTATCGGCGGCCTCCTTTCGTTTCAGATCCGGTCTTGAACCTCGGCAAGATATCGATGGTAGTCGCCCTTCATCTTTAGAAAAAAGACCTTGGAGTCAATTGGACAATGCC  
GAGGGGAGGAGGTGAGATTCCAGCAGCTTGAGTATTCTGCCACAAATGGATGTTATCTCCGACTCGATCTTAGCCCTAAATTCCTTGATAGCGGGCAGGTGATCATCATTCCCAGACTCT  
CCTCCTTCTGCTCTATCGACGACACGATCCTCCACGAAGCCCGGCGTGCGCCGATCACGTTTTTTGTAGGCTACCGAGAGGAGATTCGCTCTTCAATGGAAAGCTCCCCATTCTCCGTCGC  
CATCTCCGTAACCTTCTCCATGAACTCCGCCATTTCTCATACTCTCAGCCTGCTCAGCGAGCTTCGCCATGTAGACGTTATCCTCCCGGACTCTGCCATCATTACGTTTCGCACAAAACA  
AACCTAGAAGAGATTGAGAAGAAGAATAGAATAAAAAACAGGAATAAATCGAAGGAAGGAAGAACTTGATTTTTGGTGAAGAAGCTTTGTTTCTCTGTAATTTATTCGTTTTGGGAAATG  
GTTTTCTGCGGTGGCGCGTACGAGGAGGAACAGAGACCAGCCGCGAGCGCACAGCTGTACAAAC

>comp152807\_c0\_seq1

ACCCCAAACATCAGTATGAATTAAGAAAATGGTCTCGTAGTATTGCTAGTAGAGATAGGAGAAGCTAATCGGTGGCTCTTAGCCACTCTACAAGTATTGCAATGCAGAGAATGAAATTTA  
GTA AAAAGAGAGGGAATATGCTGTTTGTAGATGTTGAATAGTGGGAGCCGCCGGGTGGCCAAGCCGCTTATGCCAGAGATGAGGAATTTCTTGAGCCGAGAACAGCGCAAGTGTGGTAG  
GCCAAGTGGTGGGTCGGAGAGGATATAAGCCGTCAAGACATGGACCCTTGAACAGAAGACGTCCCGTCTTCAAATCCTGAGGGGGTGGGTAGAATACCTTTGCCGGAGTGCTGAATAGG  
GAGTTGTGTCCGTTACCTATTGTGATTTGTTGGGAGCCGGTATATGGACGGCTGGATTGAATTTGTGAAGGATCTGATGTGAGATGGCTGGTAGCACCCTGTCAAGAAACCAGTTAGTT  
GAGCTTGCTGATCCGAAGGGGAGAATAGAGCGGTTGCGGTTTGTCTTCCGTGTAGTTGGGATCATGACGGTGCCAGCATTTTAGCGCCGAATGTCCTGTTTTGAAGCAGATTTGACAC  
GTCATGGGAGAGGGCGTGTCTTGTTCGGAGCGGTTGCGATTGTTACGATACGTGTTGGAGGACCGACCGCGGTTGTTGTTGGTGTACGGCCACGACCACGGCCGCGATAGGCAGCTAG

AGCGGTGGAAGGTTTCAGCAATATTCAAATCTGTAGGTCCTTGATGGTTTCTTGGGCAATATTTTGTCTTCGCTGCATAACAAGGTGTAGAGGTCGTCCAAACTGATTGGTTGCAGATTT  
GTGCGAATGGCGGTTTTGAAGGCTTGGTATTGAGATGGTAGGCCGTTAAGGGTATAAAGAATTACATCTTCGGGGTCGAGTGGGCTGCCGGTGGCGGCAATTGCGTCGACTTTGGATTTG  
ATGGCAAGTAGGTACTGAGACATAGTTTGGTTTTTCATGGAGAGATGGTGCAGTTCGTTACGAAGTTGGATTGTGCGAGAGCGGGTAGTAGATTGCAGGCGACGCGCGATGGTTTGCCAA  
ATGTCAGAACAAATGTTCTAAATAAAGGACGTAGGGAAGGATGCTAGGGGAGATGACCGAGTAGAGGGCTGCGGCCAAATTTTGATCAAGAAGTGTCCAAGTTTGGTGGGAAATTGACGT  
CGATGAGTTGTGATCGACCGGGGGACAGGGAAGAGTACCGTCCAAGAAGCCTTCGAATCCATTGGCCTTGAAGATCTTGAAGACTTGTGAGCTCCAGATGGGGTAATTTTCGGTGGTAA  
GGGTGATGGAGATGATGCCCTTGATGTTGCTTAGGAGAAATTTGAGCTGAGGGGGAATTGAATGGGCATCAAGAAGATTACCGGTGATGGTGGCGGAGTTCGTGGTAGAGTCCGACGAG  
GCCGCTGATGAGGCCATGAAGACGTCCGTAAGGTCGGAGCAAAAGAGGGGGATGGAGGAGGGAGAAGAA

>comp152829\_c0\_seq6

AAAAGAAAAAGAGATATATATACATAATTATAGTAATATATATGTTGACCTCGTTTTTCGCTCAAATATCGTCGAGCGCATTTCGATCAATTCGATTGAACCTCGTTGAGCCAAATCCGACCTC  
GAATTCGATCTGAATTGATTTAATTTGACTCGACCCGTTCATCAAGCCCGAATAGTTCGCTTTGACTGCTACGAGTTCAATTTGATCCGAATCGTCTTTAATTTGATTTGATCAAATTGA  
TCGAGCCTAATCCGCCTTTAAATCAAGCCGATTTGAATCAAATT

>comp152867\_c1\_seq1

TGTAATGTGCTCTATATGATGATGTTTGTATACATTGAGTCAAGGCCTTCCCCACGAAGAATAGCCTCATTGTAATCAACAATAAATACTAGTAGAATCATTTTAACTAGGTCAGACCTCAC  
GATTTTTCCCTTTTTCAAGGTTTTTACATAAAAATCTTGGTGTTTTTATGACTTTTGCATCCCTCTCTTTTATCTGTGTCAGTGTGCTGGATCTTCATACAAAGCTTCGATGCTAAATTTTATAT  
CTCTACTGTCGTGAATATTCTCGAATGCAACAATCTTTGTCCTTCAAATTTGTATGAAGAGAAATTGTTAATGTACCCCTATTTTGAAGCTTAGTGAAAATTTGATTTATGTGTTGGCATTG  
ATGTTGGTGGATCCCATCGAACTATGCAAATTTGCGTGCTAAGTTGATTTACATCTTCTCATGCTTTGCTTTTCACTCATAAATATTGAGATTTCAATTCATCTCCCCAAAATATCGTAGA  
TTCGGAATTTTAGAGAAATCATCGAAAGCAAACCTTCTGTGCAGATGCGAAGAGATAAAGAAGTTCTGGATCCCTTTGGATCAGAGAATTTATTAAGTGCAGTAGCCGATACAGAAGAA  
ATGAAAAAAGGTTTGTACAGTATTTATCTGCACTTATTTGCATAGAAAAGATTAAACCAAACCTGACGAAGATAAGTTCTTCATCGATAAAACAGAACGCAACAGAACTGAAATCAGAGAA  
CAGTAATTCATCTCACGTCAAACAAAACAATAACTCAACAAACGCTTAAACGACGATAGCAATGCAAACCCTACAATTAAGATTAAGTCAATGATTTAGGCAATCTTGACCTCGATCTTCT  
TGGTCTTGTCTGCTCAGGCGGCGGAAGCTTCTCCACGGTAACGGTGAGAACCCCTCCCGGCAAACCTGCAGAGATGACTTCGACATTGACGTTATCCGGGAGGGTGAACCTGCGCATA  
AATTTCCCATCCGGCGTTCAATCCGAAGGTAATTTCTTCTTCTCGTCTTCTCGTCAATCCGCAAGCGCTCACCGGTGATGACGAGCAGGTTTTCGTCTTGTATCTCCACATTGATGTC  
GCTATATTTGAGACCAGGCACATCGAGCACGAATTCGTAGGCCGACGGCAGCTCCTTGACGTCGGCCGGCGTTGAAGCCATCGCCCGTGTGTCGCGCACGAATGATTTATCGGGGAGTT  
TACGGAGTTCTCCCATTCCTCCGGCAGATCTACCAGATAATGCAGCGTTGAGATGAGCGGGTTTTCCAAACTGAGACTACGGAAATCCATTGTTGGCGATCGATCTCCCTTCTACTGTGTG  
TTTTCTCTTTTCTGATATTCGATTACTTTACCCTATATATAAGAGCGAATCGGGGATGGAAGGCGAATTGTTCTAAGAGTGCAGGAGAAGCGGAGAGAAGCTTTCCTTGGTTTTGGATTGAGA  
TGAAAAGCCAGCAAATCGAAGTTCTGAGCTAAAGGATTATATTAAGATTTTATTTGGGGCCGTTTTCTATGCT

>comp152892\_c0\_seq5

TATATACACACACATATACATATACATGAAACAAAATCTTTTTAAGGTATACTAATGAAATCCTAAGAAGAATCTTTTTAATCAGTCTTCCACATGTTGGTTAATGATCGGTTCTTAGGCC  
ACATTAGTCACAAGTTCGAGTAACAACCTGGAACGTAATAAGTATTGTATTTCAGCACAAAATCTCTCCCAAAGAAAAGGAATTAGTACACTGAAAAATAAATCTATATAGAATCATATGT  
GGTCTACTTTTTTCATGTAGCTCTTTAAGTGGGAAAGAATCTCACACTACTATTTGAGAAACGTCTTTATTGGTCCACTTAATCAGCATAAGTTTTGTGTTAGTACTTTTACCTTAATTTTT  
TTTTGTAATGGGTATTTCCATATATCTTAATGAATCTTATATCTTGATTAATTGCACTAATCCAACAAGGATCCAACAACACAAAAGCATTGCTTGATTGAATTTTGTGCGCGAATGTTCT  
TCATTTCTAGGCCAAAATCTATGAAAGCTGATATTTGGCGCTATTTGTTTTCTGTGGTATTGAATAGAAACCCAGTTAGGGTTTTCTCAACAAAATTTTTATGAAAAGCTGTGCAAGTATTCTC

ACCCAAACTCCTATCTGCTACGAGGCAACGTGTTTTGTAATCTTACCAAACGATGCCAACTTAGTAAAAAATTACAAATTATGTACAATATTACTTTTTTGTATTTCATCTTATTTCTTTGTGTA  
TTTTAGAAGCCTAAGATAATAATTTGTGCTGCCAACTGATCTTCTCTTTTTCTAGGTATCGCTGTGGTTGGAGTGATGTTAGTCACCTCTTCACTGTTAGTTCTGATAATGTTAATGGTCTG  
GCAGACAAGCCTCCCCTAGTAGCACTCTTTGTGCTAAGCTTCGGCTCCTTTGAGCTGGTCTACTTCTTCCGTGCTGTACAAGTTCACAAGTGGAGGCTACCTTCTCTTACTTTTTGCT  
TCCGTTCTATACTTTGTAATGTATGTATGGAATTATGTGCAGACAAAGCGTCATAACTTTGAAGTAGAGCAAAAAGGTCTCAACAGAATACTTAAACAGCCTTGGTTCTAACCTTGGCATCTC  
AAGGGTCCCAGGACTTGGCCTCCTGTATACTGAGCTCACTCATGGAATCCCTGCTATATTTCTCATTTTTCTCACAAACTTGCCAGCAATCCACTCTGTTCTTGTCTTTGTCTCTGTAAAGTA  
CTTGCCAGTTAACACAGTGCCGGCCGAGGAGCGGTTTTCTGCTGCAAAGAGTTGGACCTAAGGACTACAAGATGTATAGGTGCATTGCAAGATATGGTTATAGAGACAGGAGAATTGGGA  
ATGAAGAATTTGAGCTTTTGTAAATGGAGAACCTTAAGAACTTCATAAGGAATGAGAGCTGGGAGGAAGGGGACTCTAGTGTGGAAGGGGAGGAGATTAGGTTCTTAGAGAAATCAAGA  
GAAGCTGGAGTGGTTTACTTGTCTGGGTACAGTGAGGTTAGGGCCAGTGAGAATTTCTTTTGTCTCAAGAGAGTGATTGTCAATTATGTTTACGATTTCTTGAGGAGGAAGTGCAGGCAG  
GGTTTTGTTGATCTGCAGATACCTAACAAGAATCTTCTGCAAGTTGGAATGAACTATAGTGTATGAGGGCATTGATGATGCTATAGCAGAACTATCTACTTGTTCAGATTATGTTTCATCAGA  
GAAAAGGGCTAGCTTAGTTCAAAGTTTGACATTGTTAGAGAAGATAATACTGCCTAATGTTACATACAAATAAGCTGATAATCCACTGCTGGTATTTAATGTTAGCAATGATTTAGTGTG  
AAATCTAATAAAGCATGGTGCACATCTGTAACCTGGCATCAAAAGCTCTAGATCGTGTCCATAACCTCTACACTTTTTCTTCTTAATGTCTTAGTTTCTCTCTTTTATTTTGCATGTGTTTAG  
AGCTTTTGTGATATAAATTGCCAATTGAAAATATGTTAGGCATGTTGGAAGAAAAA

>comp152921\_c5\_seq1

CATTAACCTCCCTTCCCTGCTTTATACCAGCCTTGGACTCCCATGACCTCCTCACATCATGATGTACATCATTTACAGGCAACAATTCAGAGTTCTGCCCTTACCAATCCTTCCATATCAA  
CATTCTGAAAACCAATTTGTTCCATGTTACAAATGTTGTTCTGTACCGAAATTTCCATATTAACCTCCTGCAATTGTGGATGCTCCATATTATTGATTTCGTTCTGTACCGAGCCATCCTCAAT  
AACATTTCCGATTTGAGTATAATCCATGATATTTGATTCCTTCTGTATCTTGTCTTTCAACTTCCCTCCCAAATCTTGACCACCAGTCTCCTTCTGCACCTTATCAACAACCTCTCCAAACAGA  
ATTAGAAGAAGGATTATCTGCTTGTCTAACAGATTGAGGTCTCTGTCCAGATTTATTAACAGATCTCTTCTCCTAGTGACAATTGTCCATTCCCCTTGATCAACATCTACAACCTACAGA  
GTTTGAGACTCTCCCCTTACCATCAAGCAGGGTCAATGCTTCAATCCCGAACCAGCTGCCCTAATACCTCCCAGTTTCTGTGAATACCAATCTCTAAGCCCTGCTGCTTAGGTAGAACA  
CAAGACTCCTTACACAGCTCAGCTTTATGGCCAACCTTCCACATCTTAAACATATTTGAGGAATGCCTTCATATTCAATTGGTTGGAAGAACATACCTTCCAAACCATGAGCCCAAATACC  
CTTAGGTAATCTCTTAGATAAATCGAGTCTAATACAGATGCGCGCAAATGCACATCTATTCCAAAGCTTAGTTTGTCTCATCCATTAATAATGGTTCCCAATGCCCTCGCCAACCTAGCCAA  
ATTAGCTTCATCCCAATATTCTAACGGTAAAGTTTGGAAAGTCTTACCCACACAGGAGACGTAAATCCTCTAAAAGATTTAGATGAAAGCCCTGTTGACCACTGCTCCACCCCAATGATCTGA  
TCAGCAACATACCAAGGACCACCAATAAGAACATTATCCCCTGCTTCCATATTTACAAACCAACAGAGAAAGCAGTCAGATCCCAATGGCTTAATCTGAGTCAAACCAAG

>comp152922\_c0\_seq1

TATAAACATAGGCGCGGATCAAATTTACAAAGGACCCCCAAATAGCCATGCTTCTTCCACAACAAGAACAATAATAATTAATAAAAAAAAAAACTAAAACCCCAAAAATATGGCTGAAAA  
AAATGAGAGAAAATAAATAAAGAACAAGGAGGCTCTCATCAACCATAAAAATCTGAATGGGGTAGCCTTCAAATAGCTCAAAGTCCATTTGGATTAATGCTAATGAACTTCAAATTA  
ACAAGGCCTATAACACATAATTAATATCAATCAATATAAATAGTCCTCACAAACCAACTCCTTCACTTGTCCCAACCTTCTCCTCCATAGCCACAATGGCGATCCACGTCGCTTTCTTCT  
TTCTCCTCGCAAGTCTTCTCAAAGCCGTTAGCTCAACAACGTTCAACTTCAACCAATTAAGTCCCCACGCCGTGTGGCCCGCCACCCTCGCAGGTGCAAGCTCGCCGCTCTGTCCACCA  
CCGGCTTCCAGCTCGCCGCCAGCGCGTCTTTCTCGCTTACGCCCCATCCAACCTGGTCTGGCCGCATGTGGGCCCGCACTAACTGCTCAACTAACGACTCCGGAGAATTCCACTGCCTCA  
CCGGTGAAGTGTGGTACCGGCAAACCTCCAGTGCCACGGCGCGGGCGGCATTCCTCCGGCGAGCCTCGTGGAGTTCACCCCTCAACGGCGCTGACGGAAAGGACTTCTATGACGTCAGCCT  
CGTGGACGGCTTTAACCTTCCGGTTGCAGTGGCTCCGAGCGGCGGCAGACCGGGCTGCGACGGCGCCACCGGCTGCGCTGCCGATATAAAGTCTTTGTGTCCGCGGAGCTGAGGGAG  
CCGGCGGCGACGGCTGATGGAAGCATGGTGGGGTGAATAGCGCTTGTGGGTTTTCTGGGCTGGACGAGTACTGTTGTACTGGAAAGTACAACGATCCCGACAAGTGCGGGCCCACTAA

ATATTCCATGGTGTTC AAGAAAGCTTGCCCTTTGGCTTACAGCTACCCTTATGATGATGAGACGAGCACTTTTACTTGTATTGGAGCTGACTATCTTATTACCTTTTGCCCGGCAAAGATTTT  
CTAAGTCAATAATTATGTGAATGAATATTTAGGATTCTCGTCCCTAATAAAATTTAGAGAATTATAATAATATTAGAAATATATTTGAGAGAAGAAAATAATTTTTATATTATTAATTTTGCTCTT  
TTTTTTATATATGTATTATTTTTTTATGTATCGAGCAGTGGCCAAATCAAAAATTTTTAAAGGGGC

>comp152922\_c0\_seq3

TATAAACATAGGCGCGGATCAAATTTACAAAGGACCCCCCAAATAGCCATGCTTCTTCCACAACAAGAACAATAATAATTAAAAAAAAAAAAACTAAAACCCCAAAAATATGGCTGAAAA  
AAATGAGAGAAAATAAATAAAGAACAAGAAAGGCTCTCATCAACCATAAAAATCTGAATGGGGTAGCCTTCAAATAGCTCAAAGTCCATTTGGATTAATGCTAATGAACCTCAAATTA  
ACAAGGCCTATAACACATAATTAATATCAATCAATATAAATAGTCCTACAACCCAACTCCTTCACTTGTCCCAACCCCTTCTCCTCCATAGCCACAATGGCGATCCACGTCGCTTCTCTCT  
TTCTCCTCGCAAGTCTTCTCAAAGCCGTTAGCTCACCTCGCAGGTGCAAGCTCGCCGCTCTGTCCACCACCGGCTTCCAGCTCGCCGCCAGCGCGTCTTTCTCGCTTACGCCCCATC  
CAACTGGTCTGGCCGCATGTGGGCCCGCACTAACTGCTCAACTAACGACTCCGGAGAATTCCACTGCCTCACCGGTGACTGTGGTACCGGCAAACCTCCAGTGCCACGGCGCGGGCGGCA  
TTCTCCGGCGAGCCTCGTGGAGTTCACCCTCAACGGCGCTGACGGAAAGGACTTCTATGACGTCAGCCTCGTGGACGGCTTAAACCTTCCGGTTGCAGTGGCTCCGAGCGGCGGCAGA  
CCGGGCTGCGACGGCGCCACCGGCTGCGCTGCCGATATAAAGTCTTTGTGTCCGCCGGAGCTGAGGGAGCCGGCGGCGACGGCTGATGGAAGCATGGTGGGGTGAATAGCGCTTGCT  
GGGTTTTCGGGCTGGACGAGTACTGTTGTACTGGAAAGTACAACGATCCCGACAAGTGCGGGCCCACTAAATATTCCATGGTGTTC AAGAAAGCTTGCCCTTTGGCTTACAGCTACCCTT  
ATGATGATGAGACGAGCACTTTTACTTGTATTGGAGCTGACTATCTTATTACCTTTTGCCCGGCAAAGATTTTCTAAGTCAATAATTATGTGAATGAATATTTAGGATTCCTCGTCCCTAATAAA  
ATTATGAGAATTATAATAATATTAGAAATATATTTGAGAGAAGAAAATAATTTTTATATTATTAATTTTGCTCTTTTTTTTTATATATGTATTATTTTTTTATGTATCGAGCAGTGGCCAAATCAAAA  
ATTTTTAAAGGGGC

>comp152948\_c0\_seq1

TAATAAGTTTTCCCGTTTCCCTTTCCCTGATTTTGTCTAGCATCAAATCCTATGAGAAATTTCTCACAAGATTGTAATTAACATGTATAAGCTCATCTCAAACGATTGAGTAATAAACTT  
TCACACAACATACAAACGAAATTCAGTAACATTCAGAACTTCTGCAAGCGTTACGAGTACATGAGGACTAGAGCTGGATATGTACAGATCTCAGCAGGTCCAGAGAAAAGTCCAGAATC  
TTTTGAGAAAGTCTGAAAGTAACCTCTCGATCGGAAAACCAAAAAGAAAATTAATAAAAAAGTATCTTTCAGCTAGAAAAGAAGAACTGAAAAACAACGACAGAGGAAGAAACAACAC  
TTCTTAGCGGGTTGCCATTGCGAATGCCATGTCAGAAGAACTGACGAGTGAAGGTAATTGCAACAGCAAAACACCGGGTAGATCAATTCATGATCTACTCCGCCACCTTGATGCCGCCAT  
TCTCGCCCTGAGAGGGGTTTTTGCCGGCGTTGATGCGATTGGCCTTTCTGTTGCTCCATTCTGTTGCCCTTTCCCTCGGCCCTTCGCGGCTGTCGTAAGCCCGTCGAAGTTCTCCGTTTTTC  
CCAAGGAAGATCTCAATCTTGGCTTTCCCTGATGAGCCGACCCTTTGTTTCGTCCTTGGTTCCGATGGTTCGAAGTCAGAATCTTCTTCTCAGTTGCTAGGCCCTTTGTTCTTCAGGATCTCCGC  
GACCGTAACAACCTGTACCGATCGCCATGCCAAGAGCAGAAAAGCTCGATCTCGTTGTATTGCTGCATGTACCTCTTGGCAAGATTGACGTAGAAGTAGAGCGGCTTCTTCTATTAGAGACC  
TGGATTTCGATTCCGCTTCTGCGGATCGACCACCAATTCGAATCCACCACCGCCAACGGATCATTGATCGCCTCCGCCACCATAGTCGCCGCCATCTCTGTCTTTTTCTCTATGGATGCTCT  
GGTTCGATTGCGCTTTTGGATGACATTGTGGTTAGAAGCGACGATTAATAGCCGGTGAAGCTGCGCGGGGTGGCGAAGCGCGCTTGTAGAGGGAATTGGTGATCGTTTTTTTTTTCTTG  
GCTATTGGCGGGTACGAAGCGGCTTTTGCCGTTGAAATCTTGCCTGAGGTTGGTGGTCTCAAGCCCG

>comp152990\_c1\_seq1

AATAAATAAATTATTAGTCTTGTGTAAGGATTCAGATACTCTTATTATCATAGTACAATTATCCATTCTAATTATTGAATTCACCTTTGGATGGTTAAGATTAACCTTTTTTCAAACCTATAGT  
AATTTTTCAAACCTTGGATATTATTAATCTCAATCATCAAAGTACATTGGATGACATGGATGGCTCACTGCACAAGGTAATTCATTATGATAGTTACAGAGAATCTAATCCTTATAAAAGAG  
TATTAATAATTATGCAAATTTCAACCCCTCAATATAAAAAAACATTTGAATTGTTCTTCAAATAACAACCTTCCACTCCCTCACATTTGGACGGTCTGAATTGGACTCAATACCTCGAA  
AATAAATATTTATGAAGTGGTACATACTACCCTTTCTCCTGTAACAAGAAAGAGATAGAGAAATGGAAAAACAATAATGTAATAGTGACAACCATCAAACCTTTTTTATCTTTTACTCCCTCT



TGTTACTCATTGGATCATAATATAATTTTTTCGTTATAGAAATAGTGATAAGAAATACAATACACCTATTACAAAAAGCATAATAATTCTCCATAATTAACAAGAGGGCCAATTTTTTCTT  
TCAAAGAAATAATAATTTAAGTGTGTCTTATAATGCAAGAAAACCTTATATTTTAATTTT

>comp152995\_c0\_seq1

TTTAAGCAGCACAGCAAAAAATATTTTTATTAGGAGTAAGAAAAGAACTAAAAAAAACAAAAACCCAATAAAACAACCTCAAATGTTGCATTTAGATTCAACCTTTCAACTTGTGCTAA  
CACATGTTCTTACCAAGTGCAGGAAAAAATCTAAACCTATTTGCACTCCTTATGTGCTTGAAGTTAACTAATAAAAAGTATCAAAGCAACTCCAACCCATCACAGAGGAACCATGAAAAA  
GAAAAGCCATGAAGTTTACTATTGATAGTTTCAAGTTCTCTGTATTTTGTGGGCTGAGGCCTCACAGTTTGATAAGAGAATCCTGATGATGCTGCTGTCATGGCAGAAAACAGATGAGGAG  
AGTACTTGCAGTGAAGCTGCAGATGCTGGCCACTGGATTCCGCCGCCATTGCAGAAACCCGGCAGCCTTCGAGGCTGCTCGTTGCTGCTGACCGATAAAGAAAATAGTCCTAAACCT  
TCATCTTTTGTTCATTCATGGCTACTGCTTCGAAATTGCTTATGGTTAGCAAATCAAGCCGATGGGCCTGGAGGACTGGAGTTTGGATATATATGCTGCTTGGAGGATGATGATTAGTT  
CTGTAATGCTCTTGTTCAGGCAGGTTAGGCTTGTATCGTACTTGCCTCCAGTGCTTCTAATCCATTCAGGTTTATAACTCATTGAACTCTCTGATCCATGATCATCAAGCCATCATCTTCA  
ATCGGTGCAAGACTTCTTTAGAGCTGAAGCTCCCAAGTGAGATCCAAATTATGATCAGCTTCTACATCTTCAGAGTTGAGCTCTTCTCCATATTTCTTGGGTCGAAGTTGGTCACTG  
CATCCCTCCATTGAGCCTTATTGCAGCTTATCATAAGCCCTAGCAGCTTCAACTTCTGTATCAAATAAACCCAAATAAACATATTTCTTGCCTAAAAGTTGGCCTAATCTAGCCTCCCATC  
TGCCACATTTGTGAAGGGTAACCCCTCTAAACTTAGAACTTCTCTAGGAAATCCTGTACTTTGCCTTCTAAGAAGAAGAACAAATTCCTCCTTTGTTAGATTACCCATCTGCTTCAAGTTCA  
TCCTCATAGTCACTCAGGATGAAATTAATGTCTGCTTCAACGCCACGAACTTTAGGGCAGCTCTGTCCATAAGCTCTTGCAGCAGCATGAGCTGTGTGCAATCCTCCTAAATAAAGTTGTT  
TGCCACAATCCAGATGTGGGATTCCCAACGACCGGTCTCCGGTAGAAGGTGACACCGGTAAGTGTGAGCTCCGTGATCGCGGGCCCCGCGGCTCTTTTGTGATTGGCTGCGAGACC  
ACCATGTTCTTGACAACGCCGCCGGCCATGGCCGGCTCCGACAGCTTCAATCCGAACCTGGTGTCTGCTCCGGCGGCATACCACCGGCGCCTAAAGTAAGCAATGGTAACTCCGGCTTC  
CGTTCACTAATCGGAAAGAACTGGTGCCTACTACCGTCTCACTTTTCGCTGAGTAGCTCTCCTCGAACCCTCAAGTCCCTCAACGCCGACTCCACCGTTGAGTGTCTGATCAGCAG  
GGTAGAGGAGCTGGAGTTTTCAGTAGACCCGCTCCAAGCTCCATCACCATGGCTTCGGAACCGCTGAGGAGATCTCCTCGACTTGGGATATCGCAGCATTTCTCTGGTCCGGCGACTC  
ATTGAGATCCACATCTCTCAGCTTTTCAAGCAAAATCCAATCTTTCTTCCAAAATTTTTTCTCCAGCGAACTTTAGAGAAGAAAGGCGGGCTTCTTTAGAGAACAATTTGTGGCAAGCTT  
CCCCCTTTCTCTGCTTCCCCTCTTTCTACAGTAAAATCTAAAGCGCAAAGAGGCACAAACTTTGCCAAACTCGGCCGACGAAATCTAATGAGAGAAGTTCAAAGAGAAATCTAAGATATG  
AGTAAAAAAAAGACGCAGGAGGAAGAGACCAAGTTGGCCTTCTTCTCTACCGTTATTCTTCTCTCTTCAAAAATCAAACATCCTCCCCACACGCTCCCCGCTTTGGTTACTTGTAAATGG  
CAGCTA

>comp152995\_c0\_seq2

TTTAAGCAGCACAGCAAAAAATATTTTTATTAGGAGTAAGAAAAGAACTAAAAAAAACAAAAACCCAATAAAACAACCTCAAATGTTGCATTTAGATTCAACCTTTCAACTTGTGCTAA  
CACATGTTCTTACCAAGTGCAGGAAAAAATCTAAACCTATTTGCACTCCTTATGTGCTTGAAGTTAACTAATAAAAAGTATCAAAGCAACTCCAACCCATCACAGAGGAACCATGAAAAA  
GAAAAGCCATGAAGTTTACTATTGATAGTTTCAAGTTCTCTGTATTTTGTGGGCTGAGGCCTCACAGTTTGATAAGAGAATCCTGATGATGCTGCTGTCATGGCAGAAAACAGATGAGGAG  
AGTACTTGCAGTGAAGCTGCAGATGCTGGCCACTGGATTCCGCCGCCATTGCAGAAACCCGGCAGCCTTCGAGGCTGCTCGTTGCTGCTGACCGATAAAGAAAATAGTCCTAAACCT  
TCATCTTTTGTTCATTCATGGCTACTGCTTCGAAATTGCTTATGGTTAGCAAATCAAGCCGATGGGCCTGGAGGACTGGAGTTTGGATATATATGCTGCTTGGAGGATGATGATTAGTT  
CTGTAATGCTCTTGTTCAGGCAGGTTAGGCTTGTATCGTACTTGCCTCCAGTGCTTCTAATCCATTCAGGTTTATAACTCATTGAACTCTCTGATCCATGATCATCAAGCCATCATCTTCA  
ATCGGTGCAAGACTTCTTTAGAGCTGAAGCTCCCAAGTGAGATCCAAATTATGATCAGCTTCTACATCTTCAGAGTTGAGCTCTTCTCCATATTTCTTGGGTCGAAGTTGGTCACTG  
CATCCCTCCATTGAGCCTTATTGCAGCTTATCATAAGCCCTAGCAGCTTCAACTTCTGTATCAAATAAACCCAAATAAACATATTTCTTGCCTAAAAGTTGGCCTAATCTAGCCTCCCATC  
TGCCACATTTGTGAAGGGTAACCCCTCTAAACTTAGAACTTCTCTAGGAAATCCTGTACTTTGCCTTCTAAGAAGAAGAACAAATTCCTCCTTTGTTAGATTACCCATCTGCAAGAAAA

AATAAATGCATTTTGGCTAAACTTTTTCAATAAAAATTACTGATCAATTACTTGCCTAAGAACCTATACCTGCTTCAGTTCATCCTCATAGTCACTCAGGATGAAATTAATGTCTGCTTCAACGC  
CACGAAACTTTAGGGCAGCTCTGTCTATAAGCTCTTGCAGCAGCATGAGCTGTGTGCAATCCTCCTAAATAAACTTGTTCACCAATCCAGATGTGGGATTCCCAACGACCGGTCCTCC  
GGTAGAAGGTGACACCGCGGTACTGTGAGCTCCGTGATCGCGGGCCCCGCGGCTCTTTTTGATTGGCTGCGAGACCACCATGTTCTTGACAACGCCGCCGATGGCCGGCTCCGAC  
AGTTCATCCGAACCTGGTGTCTGCTCCGGCGGCATACCACCGGCGCTAAAGTAAGCAATGGTAACTCCGGCTCCGTTCACTAATCGGAAAGAAGTGGTGCCTACTACCGTCTCA  
CTTTCGCTGAGTAGCTCTCTCGAACCCAAACAAGTCTCAACGCCGACTCCACCGTTTCAGTGTCTGATCACGACGGTAGAGGAGCTGGAGTTTTTCAGTAGACCCCGCTCCAAGCTC  
CATCACCATGGCTTCGGAACCGCCTGAGGAGATCTCCTCGACTTGGGATATCGCAGCATTTCTCTGGTCCGGCGACTCATTGAGATCCCACATCTCTCAGCTTTTCAAGCAAAATCCAATC  
TTTCTTCCAAAATTTTTCTCCAGCGAACTTTAGAGAAGAAAGGCGGGCTTCTTTAGAGAACACTTGTGGGCAAGCTTCCCCCTTCTCTGCTTCCCCTCTTTCTACAGTAAAATCTAAAG  
CGCAAAGAGGCACAAAATTTGCCAAAACGCGCCGACGAAATCTAATGAGAGAACTTCAAAGAGAAATCTAAGATATGAGTAAAAAAGACGCAGGAGGAAGAGACCAAGTTGGCCT  
TCTTCTACCGTTATTCTTTCTCTTTCAAAAATCAAACATCCTCCCCACACGCTCCCCGCTTTGGTTACTTGTAAATGGCAGCTA

>comp153093\_c1\_seq1

GATACTTCTGAATCTCATAGCAGTTTTGTCTGGAAGGTGAGGCTGAGATAATAAGCATTAGAATTCTTGAAGAATAGAATGCTCAACAAATGAAAGCTTGTCTTATAGCTGTAGTGTATGG  
TTACACAAAATTATATTTGGAAGGTTCTCCATATGGAGTGGTGTCTGTTAATTTGGATGCAGCATTATTAACAAAACATTATAGGAGCCTTGTGAAATGATGTGTTGACGTTGTACACCCTTC  
ATGGCAAAGTGTGTGTTCCCTTTGCCATATCGTGCTGCTGTATTGT

>comp153169\_c0\_seq1

CATGTCGATGATTCTCCGCCTCCAACGAGATAAAGCAGAGGCCAGATGGACGCACGTGAGTTCAAGCGCCTATCCGAGGAGAAAATGTCTCATGATCAGCAAGAGATTGCTCTCCTTGA  
AGATCTTCTTTTCAAGCGAGAAGAAGCTGTGCAATCCTTGTCTGCGAGCTCCAGGCTTACCGTCACTGTCTCCTCTCCTATGGCATCGACCCTGCCACTATTGAATCCAATTCCTCCAAC  
GCCGTCACCGCTGCGACCACCTCAACAGCCGCTGGGGACGGCGCAATGCCTATTCCTCTCTCCGCTGTGAATTGGCCGATTTCAAGGACAAATGTTGTGGACCCGGAGCTCAAGTATGCC  
GCCGGTGACAAACCCCGTAGTCCCATTACAGCGCATGCCTAGTATCATCATGAAAAGGGTGTAAATCGAAAATAGCCATTACCCAGCTGGGCACAGCGGGCTATGCGCCGGCTTTCCATT  
GACAGTTTGGGTTCTGCTTCATCCCGACAGGAGTTTGAAGCACTGAGTTACCATCCATGGCAGATTGCGCCTCTGATGCATGTACCGGTGTGAGGGATGACATAAGTGATCGAGTGTGC  
ACTATTGATGCCGTGCACGACGTGGATGGATGTATGATAGGGCTGATATGAGCACGGCGAGGGACTTTTTAAGCAGGAGGGATGCGGGTAATAGAAGTGTGGATGAAGGAGAGGTTAA  
GAAGCTCTATATGAGGCTGCAAGCGTTGGAGGCAGACAGGGAGTCAATGAAGCAGGTTATCATGACGATGGGGACGGATAAGGCACAGAGGATTCTGCTTAAAGGAGATTGCTCAGCAGT  
TGTCTAAGGAGGTGGTGCCAGAGACGAGGATTGTAAAGAAGCCTTCTTTAATAAGGAGTTTCTCTATAATGTCGGTGGTTAAGTGGGTGGCATCATTTTTCTCTTGGAGGAAGAAATCAC  
CAAGGATCAAGTACCCCATGGTTTATCAAATCAGAAGACCGGCTTATTGATTCTTCTAGAAAAGTCCAAGCGCAAGAGGCTGAAGAGGTGTCTCACCAGACTACCCAGTTGATTATAAT  
CATCACCTTCTCCATGGGACTGTATTTTGGCTTCATAAAGTTCAATTGGCTTATTATAACTACATATTAATTTCTTTTATTATAAACCAGAAAATAGCTTACTGTAAGAGGCTATTTTGTACATTTT  
ATTCTATTCTATTCTATTTTTTGTGTTAAGAATTAAGGAACTTTACCTTAGCACCAGCTGAGTTCAAGAGAAAATTTGTGCTTTGAACGCTAGCAGAATTTGTTTGATTGACTGT

>comp153204\_c0\_seq1

TCGAAAATTCAGAAGAGTTTTTAATTAATTCCTAAAGAACGTCAATATAAATTTATTTGTCAAATTAGCTTTCCAACAGTGAACACATTGATGATTTCTTTTTCCGAAAGAATAATTGGGT  
TTTCACCTGTGCAGTACTGAGAGGAGATTGAATGTTCAACGCAGATAGATTAATCAGGGACGTGGTAGTCTGCCGGTGAGATGGACGGAAGCAACAAGCCGGGGAAGAGTTGATCTAGC  
TGCCGTTGAATGTGTTTTGGCCGCTTGGTAGGCCGCCGGCTAGGGCGGGATCCTGTTATTGCGATGAAGTCTCTTCGATCTCTTTTCGGGAGAGAGAAAATTGAGAAGTTTGGCCAAGAA  
TCACGCTTCTCCGGTTTTTCAGCCCGGAGTCGGACGCTCTTCTTTGACGCTCTTCTCTACCACAGGTGGAGGAGGTGGAGAAGGACTGGAGCACCGCTTTTTGCGGATCGGCACTCTC  
CTGCTTCTCATATTATACGTTTGGTTACATCGGAAGGCGAATTTGAAGAAGGTGTTTGGACCGGCATTGGAGCCGACAGGAGCGCAGGAAAAAGGTGCTCGTGGGACTTCTGGTTGGTGA

TCAGGTTCGGGCTCGTATATCCTGCAATTAGGAGCGGGCCCTCGCGGAGTCGGGGGAGGAGATTGGCCTTGCCCTCCCTCGGAACCGTCGTCATTTTTAATGGTGACGTGATTGTCATCCT  
GTCGTAAGTTAGCAGACGGCCCAATTAGGTCCGATTGGCGGTGGCCGGCGATAATCTCGCCCTTGCGATTAACGTTTCAGGCAGCGGAGGACCCGCTGCTTTCCCCAGGTGCTGAGAAAC  
GGGAATCGAAGTCATGGAGATTAGATCGGAACGAACTCGACGCCGCAACCGTGGTTCTGGTGAAACCGGAGGTGCGAGGGGTTCTCTTGGCGACGGAGGAACCTTCTCAGCGGAGA  
TTGCCATTGATGGGAAGATAGAGGTGACAGAAATGGCGGATCAGCGGAGGAGAAACAGAGCAGAATGTATAGAATGTGGCTGGCTCGCGGGAGAAGAATGATGGAGCGACGACGCTAA  
GAGGCGGAGAAGAAAAGCTCTGGGAATTTGGGGGCGATGAACAGTTGTGAAACTACGCGCTCAAAAATCTTTAAGTAGGCAGAGAGCAGACGTCCGCATGGTAAGCCGTCGGGTTT  
CGTTCGCATGCGAGTTTTCGATTTTCTCTCTCCCACTATTCCATTGCCTCTCGCTTCTCTCTCGTGGATTTGAATGACTGATTAATAGGCGACGTTCTC

>comp153395\_c0\_seq7

CCGAACTAGAAACCAAATCATTAATAAATTAATTATAATTAACAATCACTGGGATCAAAGATTACAGAGTAAGATCTCTTAATACACCTACAGGAAACTATAATCAGCTTGTTTTTTCATGT  
AACTATAGATGTTGGTACTTCATACAACGCACTGCTAAAAGCTGTATGGAACTTAAACTAATTAATTTCTATATCACAACCTGTTGCATCTGTCTTCATCATATCAATTTCTACTGCAGCA  
TTTATAACCTCCTTCCCTAACTCATGTTCTAATTTCTCAATCTTTCAGCTCTTAGTAGAGCTTGCAATCTCTTCTGGATTTACAACTTGACCCTTGAATATAATCTTCAGCCTCTCTTTTGT  
AATTTCTTGTTTTTCGGTCTTATTGTCTCAGCAATCCTTGATTCCTTCTCAAAGTTGTCATCTCTTTGAACGAGCAATTTCAATCGTATCACTACAATCTTGATATCTCTTCTAACAAC  
ATTTTCGGCAGATCAATCCCCCTTCAGACTGTTTTGGCTCTAAAATTTGAACCTCTCCTTATAAATTTGCATCTCTTTTTTGTATCTCTCCTTGTCTCTCCTTGCA

>comp153420\_c0\_seq1

TAAATAAAGGGCTATATATGAATACAACAAAGGGGGCATATTGGCCCCAAATAGCAAGTTGATTTTATTTTAGAAAAACAGTTGTTCCAAACCAACTATCTTTTGTATTTTACGGCATTAAA  
AACAGACAGCCATACAAAATAACCGACGCCTATAAAGCCCCACCTATTCCTTGCTTACTCCTTCAACATCTCCAAAACAAAGCTTCGAAATTCTATTCTCATGGCAACTTCTTCTGCTCT  
CCTACTATACTCTTATCAATATCTTCTTCTTTTTGCTTCTAATAGACAAGAATTCTCTAGTATCAGCGCGACGACTTGCCGGAGAATACGATGTCATCGATGTCGAGTCATTGCTGCCGGGCA  
AATCCTGCTCCATGTCTGATAAAGTCATGGGCCCCGTCATGATCATGCTGGTCCAACGATGCGGACCGTGTTCACCTCTGGCGTGTGAGGACAAGCTATCCCCTGAGGATATATTTTCATCA  
GATATTAACCGTGACCAAGCTCGGATCGACTACATCCACAAGCTCCGGAAGCTCGCCACCAACTCCTTAGCTTCAACCCACTTGGCAGATCTCTTCCGCAACAGTTCCAGCAAAAAGA  
TGTTTTTGTGGTAGCTAATTACATATTAATGATATTACTTTTTGCTAATTACATATTAACGTTATGTTTAAAGATGTTACTTTTTCTAATTACAAATTAACATTTTATTATTTTATTATAAAGATTG  
ATGAAAATATCTTCATTAGTTTT

>comp153449\_c0\_seq1

TGACACAAAAAATACATGATGAAATATTACTATATCTTCAAATAGTTGAATAATAATTCTATTAATAGATAAGATTCAACTCTTTCTCACATAACAACCCCTAAAAGCTATAAAACCAACAAT  
AAAAATCAAATCATAATCAATAACAAACATCAATTACGAAAGGGGTATTTACATTCAAGTCACTTTATTTCTTGTTATTTAAAAATCTAACGTCCGAAACATTAATATTACATGCCTATCATT  
TATAAAATAAATATGAATGTATGGAATAAAATATTAATAAATTTAATAATTTAATAATAGATATATAAATATCATAAAATAAATGATATGCATATAAATCCC  
CCATTACATAAACATTTCAACTACTTAATCCATCATCCTCACAATCACTCCCATGCAAACCACCTGTTCAAACCGATCTCAGACAAGCAAAGCAAAGCTGAACACAAACTTCTAACAC  
AACATATCATCCCTTCTCCTCTGCTGAACAAATTAACCTAGAAGGTACCCGACAGCCCTGCAACGGTGCAGCGCGCCGCCCCACAAAGCTCGCTCCAAGAAATGAAGCCGCGCTCTTGAA  
CTTAGACTCAGTGTCATGGCCGGCAGATATGCACTCGCCGGAGCGCTATAGAAGCCGCATCGCTATCAGCAACTGTATCAGGAGAGGGGCTTTCCGCGGAGGGAACGGCGGCGTATG  
GTGTAAGGAAGGAATTGGATGGGGAAGCCAATGGAGCATCGGAAGCTCTGATTATTGTGATTGGAAGGGCTAAGAGGAGAAAAAGTATGGCGAGTTTTGCCATTTTTGTTGATGGAATTG  
GGGCCGCGAGCTGTTTTTTGTAAAGAAGAGGAGGATTTATGGGGTGAA

>comp153473\_c0\_seq3

TATTGTATGGTTAATTTATTTGCACTGTTACATATGTTTATTAGTAGTTCGTTCACTTTTTAATTTGTGCCCAAAAACGTGGATTGCATCGACAACCTGTTGCGGCTCGAAAGCTAGGAAC

TTGGATTGCATCAACAACCTTGTGAGGTTTCGGAAGTTAGGAACTTATAATGGATCGACAACCTGTTGCAGCTTGAAGCTAGGAACTTGGAAAGGAACCACTTTTGGCGTCTTTCAAC  
CTCAGAACTCGGAATGCAACAACAATTTTGGGTGGCTTGAAGCTTGGAACTTGTAATGCATCTAGTGGCAGCCGCTGATACAACACAATATTTAGCTTGAAGACAGTGGAGCATA  
ATGGATTTTGTGTTTGTGCTCATAATCAAGGAACTAAGTGAAGTTTTATTTATTTCTCCTTTCTATTGTATGGTTAATTT

>comp153488\_c0\_seq1

GAAAAGTGGTAATAATTGTTTACTTATATATTAATAGATTTATTAATAAAAAAAAAATTAATATATAGATTCAAATAAACTCAAACAATCGGAATTTATTTTCAGTGAATAGCAAATAATAATTA  
GAAGATTGAAGACATCCGGTCAATGAAGATATTGAACGTCTCCTCACGTTCCAGCAAGCTGATCCTCACATACTTGTGTCCGTCCCAAAATGCTTCCCGCTCCGAGTCAACATGCTGTGT  
TCTGTCTCAGGAAGTTCGCGGTGTCTCAATGTCAAGATTTCTTTCGTACTTCAGCCATGCGAAAGCAGGCAAATGAGAGGTCTCCTCTCCCATGAAGCCACAATAAGCTGGGGGCGG  
GTACTCCACCAAGCTGAACGCGCCATTCGCCGTGACAACCTGTGCGAGCCGGTTCCACCGTTCTGTATCACCTTCCCTTCCAAAATGGAAAAGTTTGTAAACCGCCGCCCTTTCGTAGCC  
ATCCGCCACCGCCCTCAAATCGTGGCCGCGGAAGCTGAGAGTCTTCGACACGCCGATGGTTCCAAGTTCCACGAACCTGGACCATTCTCCTCGCCACCTCCTTATCTTTCACCAGCGC  
CCAGCCCAGCCGGCTCCCGGCATGGCCTGTGCACTTGGAGACGCTGAAGAGCATTATATTGTATCAGCCGCGTTTGTGATTGGCGTGTATTGGGGCCAGTAGTAGGCGAGGTTCGTGGAT  
ATTATTCGTTATTTGTTTGAAGACGGAGGCGTTCAGGCGGCCGTCGGGGTTGTTTGGCGAGCAGATGACTTCGATAAAAAGGTCTGTTGTATGAGGATCAAAGGAGTTAGCGTCACCGGC  
CCATTTGTAGAGCGCGGATTGGAGGACGTCTGTAGCTGCCGATAACCCTGTAGACGTTTTTCATTATGGAGATGCATAAGTTTACCATTCAATTGTTATAATTAATTATTGGGGTTTTTATT  
GATGTATTATCTTAAAATGAAGTATTTAATGTAATAGTATTTAATTTGTTTCTTATCAATATTGTTTATTATGTTTTGCTATTAACACTTAAAAGTGGTTGGCTATGATGAATTGGCAAAAATA  
CATATGCTCCAACCTCAA

>comp153488\_c1\_seq2

TTGCACTCTATATATAAGAAGCTGGGACGAGCTAGGAGAGATGCATGGTGCGGCGATTTCGAACGTAGCAATTAGATTGGTAGTGAAAGGAATCGGCAGAGGCAGAGGCAGAGGAGGTAG  
CTCGTGGCCTCGACGACACCGCAAGCAGTAGAATGGCGGATCCCGTCTGCTGCTTGTGACGGACTTGTGCTTCCCTGCCTCTAATGGCCTCCCCCTCACTCCCAGGATTCGGTCATCAATCT  
CGACCATGGGGATCCAATGATATATGAGAAGTTTTGGAAGGAAACAGGTGATGTGTCTTCATTTAAAATAGAAGGATGGGAAAACCTGAGCTACTTTTCCAACCGGAATAATCTCTGTTGG  
TTTCTCCACCATGAGTTTGCTAGTCAAGTCCGTGCAATCCATAGACTCGTGGGCAATGCTTCTGTGATGAAAATTGCCACATTGTTGTAGGTAATGGCTCCACACAACCTATATCAAGCCGC  
CATCTACGCTCTCTCCACTCATCAAGCTTGGCTGAGACCTGCCGCCCATACCCGTCGTCTCCGTTGTTTCCCTACTACTCGGGTTATCCGGCAGCTACAGACGTCCTCCAATCCGCGCTCT  
ACAAATGGGCCGGTGACGCTAACTCCTTTGATCCTCATAACAACAGACCCTTTTATCGAAGTCATCTGCTCGCCAAAACAACCCCGACGGCCGCCTGAACGCCTCCGTCTCAAACAATAA  
CGAATAATATCCACGACCTCGCCTACTACTGGCCCAATACACGCCAATCACAAACGCGGCTGATCACAATATAATGCTCTTCAGCGTCTCCAAGTGCACAGGCCATGCCGGGAGCCGGC  
TGGGCTGGGCGCTGGTGAAGATAAAGGAGGTGGCGAGGAGAATGGTCCAGTTTCGTGGAACCTTGAACCATCGGCGTGTGCAAGGACTCTCAGCTTCGCGCGGCCACGATTTTGGGGC  
GGTGGCGGATGGCTACGAAGAGGGCGGCGGTTACAACTTTTCCATTTTGAAGGAAGGTGATGACAGAACGGTGAACCGGCTCCGACAAGTTGTCACGGCGAATGGCGGTTTCAGC  
TTGGTGGAGTACCCGCCCCAGCTTATTGTGGCTTCATGGGAGAGGAGACCTCTCATTGCTGCTTTTCGCATGGCTGAAGTACGAAGGAAATCTTGACATTGAGGACACCGCGAACTTC  
CTGAGGACAGAACACAGCATGTTGACTCGGAGCGGGAAGCATTTTGGGACGGACAGCAAGTATGTGAGGATCAGCTTGTGGAACGTGAGGAGACGTTCAATATCTTCAATTGACCGGAT  
GTCTTCAATCTTCAATTAATTTTGTCTATTAATGAAATAAATTCGATTGTTTGAAGTTTTATTTGAATCTATATATTAATATTTTTTTTTTAATAAATCTATTAATATATAAGTAAACAATTATTA  
CCACTTTTCTGGTATTTCTAAGATTTTAA

>comp153489\_c0\_seq2

TCGAATGGAGCAAACCAGCTACCCCTTACAATTAATTTGGAGTTCGGCTGAAGACGTCCTAACAAGAGATAGGATTGGAATAAAGTACAAGAGAAAGTTGAAGTACAACATCATCTAACAA  
AGCATCCAGTATTAGACATTCTAGGTCCAGCTCAACATCTTCAATATCATATTGGATATTTATCCATCCATCATCTTTCGTGAAATTTTCGAGACACAATGCTTCAAATTTATGCCTGCCTCG

GGTTGGCCTTTCAGATGCCAGCAGATATTTGCCCATATCTCTTCTAAAATATGGTCACCCATAGGCATTGGTCTATTGTTAGTATTGAAACGAGATAGCCAGGGGAAAAAATAACCAAATA  
TTTCTCATATAATTTCCACCCAAGTTTCATTTATCAGATCAAACAAAAGCTGGTGTTCACAAAGATATCATGTTTCATCTTCTGTAATGTCAAGTTCATGAGATAAATCTTCTCCTTCATTAAG  
ATTAAGGGATCCATTGGCTGATAGGGGAGAGTTCCAAGCTCCAAGAAAACCACTGCGACTAAATCCAGATCTCGTCAGTATCTCTCACATAATTGAATGTAGCTTCATCCTTTTGGTCAAT  
TCGAAGATGTAAGAATCAAAGCAATCAATATCTGGGAACGGTTTTGCTTTTGAAGATCTATTTTCATTAGTGTGACAAGACCATCAGCAGCATTGCTATCAAAAAGACTGGAGTATTCT  
GATGGATAATTTGTGTTCTAAACCTCGAGCAAGTGCCCTGTTGCATATGCTAGGGTTGGTTTTGTTGGGTCATATGTGTGTGCTTCATCCAGTAGATTTTCTCCTTGTGGAGTGACAGA  
GTTTTCTTCTTATCAAACCATCTTTCGTCAATTTTTTAAAAATTTGGCATGATTCACCTTTGTTCTTTTTTCACTTTTCAAGTGGAATTTCCAACAATCAGTCACAATCCATTTTGA  
TCTTGTGTGGTAAATTCCTCTGATTCTTCTTTTTCTGTTATTTCCCTCTGTATGTGAAGTAGTTAAATTCATAGGAGATGAAAAGAGCGCTTCACTTTGAGCATTTTTTTCTTGATGA  
ACAATATG  
TGATATCGGGAAGAGAGAATACTCTTCCATAAAGATTTTACTTCCCATCTTTCGGGAAGTCTTTCAAATTTCTTTTTGATATAGAGTCATACAAATGGGAATACTTGTCTAAGGAGTCA  
TAA  
GAGATTGAGATCTATGGATAATTTTCTTGACATTTTGTGATCTTGTCCAACATACAGGCATCAAGCCTCCCTGTCTGCCTTTTCTACAGTTAACCCATCCCTCCAACCGAATTTACTTT  
CTTCACGGGTTCTATCACCTTCTTCCAAAAGGGATTTTATGAAGAATCCCATCCATAAAGATGCGATGGTGCTCTTTTTTGTGATGTTTGTAGGGCCATAAATCGACTAGAATGGGAGGAT  
TATTCCTCACATTTTGAATATACTTGTGAAGCTAACACTGCAGAATGGTTATTGGACTCTACAAGTTTTTGTATTTCTTCTCATCGCCATCCATCATTCTGCATTTGTTGTATCATCTTGA  
ATTATATCAGTATATACACGCGAGTTTTCTGAATGAACTTATAACTCTGCTTGGCAAGAGATTCACTCTCAAATTTTTATGATTGATTTGAAATTGGCCATCATTTTCTTACTAGCAACG  
GTGATGATGGGAATGAATAACCCCTTGTTAACTCTGCTTTGGAAGCTTGTGGCTTGAAGATAATGGGAAAAATAAAGCTCGGATCATCAAGAATATTTCGAATTA  
ACTCTATGTTTCCA  
TTAAATAGCTTCATCATAGCCAGAAATCTTGTGATGGATAACAAGATAACATCTCCTTGCAGCTCCTTCGCATTTGTATGTTGCTGTGCAAAGAACCACCTCAGCTTCATTCTGAGTATC  
GCTAAGATGCGGTTGTTTTATCTGTAAAATACTTTCAAGTTCATCAGTTTTCTTGGACCGAAGGGACCATTTTACTATAAGCCATATTTCTCATCACATTGTTTCTCAAATTTGTGCTCATC  
AAAACAACATGCTCGCTCACTGCTTGAAGAAGCTTTATTCAAATCTACATTTTGTCTTAATGAATGAAATTTCTAACCCAAAATTCACATTATCCACATGATCCTCACTCCAATGATGAATAG  
AGGTAGTTCGAAACA  
ACTTGGGAGCTGGCTGTGAAGCTTTTTGTTTCTGTTATGCTCTCTTGATTTCCACTTGGCAATAGATAATCTCATTGATGACTTCAGTGGTGTGTTTTCTGGTGCTG  
GATTTGTCTTCCACCCCAAGGTAGGCATCTTCAGTACAAACATATGGCTGGCTAGTTGAAGGAGCATCTGGATCTGTTTTAGGCTCTTTGTTTCTAGCAGCACGCTTGCCCTCGCTATGCTT  
CCTGTATGTCAGCAACTTCATCTTCTGAGACGAAGATGGTGATGGAGATTTATAAAGTGAAACAGGCCTTTCATGCAACCCGGAAAAGACCGGCCGTAGCTCTCCTCTTCCATTTAATCC  
TCGCAACCAGCAACAACGAACAAATCGTTAGATAGTAAAGGAAGCGGGAGGTTAGGGTGACGAAATCTAGAGTCTTTGGAAAGGCCACCCCTTTTTTATTT

>comp153489\_c0\_seq3

TCGAATGGAGCAAACCAGCTACCCCTTACAATTATTTGGAGTTCGGCTGAAGACGTCCTAACAAGAGATAGGATTGGAATAAAGTACAAGAGAAAGTTGAAGTACAACATCATCTAACA  
AGCATCCAGTATTAGACATTCTAGGTCCAGCTCAACATCTTCAATATCATATTGGATATTTATCCATCCATCATTCTTCGTGAAATTTTCGAGACACAATGCTTTCAAAATTTATGCCTGCCTCG  
GGTTGGCCTTTCAGATGCCAGCAGATATTTGCCCATATCTCTTCTAAAATATGGTCACCCATAGGCATTGGTCTATTGTTAGTATTGAAACGAGATAGCCAGGGGAAAAAATAACCAAATA  
TTTCTCATATAATTTCCACCCAAGTTTCATTTATCAGATCAAACAAAAGCTGGTGTTCACAAAGATATCATGTTTCATCTTCTGTAATGTCAAGTTCATGAGATAAATCTTCTCCTTCATTAAG  
ATTAAGGGATCCATTGGCTGATAGGGGAGAGTTCCAAGCTCCAAGAAAACCACTGCGACTAAATCCAGATCTCGTCAGTATCTCTCACATAATTGAATGTAGCTTCATCCTTTTGGTCAAT  
TCGAAGATGTAAGAATCAAAGCAATCAATATCTGGGAACGGTTTTGCTTTTGAAGATCTATTTTCATTAGTGTGACAAGACCATCAGCAGCATTGCTATCAAAAAGACTGGAGTATTCT  
GATGGATAATTTGTGTTCTAAACCCCAAGGTAGGCATCTTCAGTACAAACATATGGCTGGCTAGTTGAAGGAGCATCTGGATCTGTTTTAGGCTCTTTGTTTCTAGCAGCACGCTTGCCCTCG  
CTATGCTTCTGTATGTCAGCAACTTCATCTTCTGAGACGAAGATGGTGATGGAGATTTATAAAGTGAAACAGGCCTTTCATGCAACCCGGAAAAGACCGGCCGTAGCTCTCCTCTTCCA  
TTAATCCTCGCAACCAGCAACAACGAACAAATCGTTAGATAGTAAAGGAAGCGGGAGGTTAGGGTGACGAAATCTAGAGTCTTTGGAAAGGCCACCCCTTTTTTATTT

>comp153489\_c0\_seq4

GACATACAGGAAGCATAGCGAGGGCAAGCGTGCTGCTAGAAAACAAAGAGCCTAAAACAGATCCAGATGCTCCTTCAACTAGCCAGCAATATGTTTGTATTGAAGATGCCTGCCTTGGGG  
TGGAAGACAAAGCCAGCACCAGAAAACAACCAGCGAAGTCATCAATGAGAATATCTATTGCCAAATGGAAATCAAGAGAGCATAACAAGAAACGAAAAGCTTCACTGCCAGCTCCCAG  
GTTGCTTCGAACTTCTCTATTTCATCATTGGAGTGAGGATCATGTGGATAATGTGAATTTTGGGTTAGAAAATTCATTCATTAAGCAAAAATGTAGATTTGAATAAAGCTTCTTCAAGCAGTG  
AGCGAGCATGTTGTTTTGATGAGCACAATTTTGAGAAAACAATGTGATGAGAATATGGCTTATAGTAAAAATGGTCCCTTCGGTCCAAGAAAACCTGATGAACTTGAAAGTATTTTACAGAT  
AAAACAACCGCATATTAGCAATACTCAGAATAAAGCTGAGGTCGGTTCTTTTGCACAGCAACATACAAATGCCAAGGAGCTGCAAGGAGATGTTATCTTGTATCCATCACAAGAATTTCTG  
GCTATGATGAAGCTATTTAATGGAAACATAGAGTTAATTCGAAATATCTTGTATGATCCGAGCTTTATTTTTTCCCATTATCTTCAAGCCAAACAAGCTTCCAAAGCAGAGTTAACAAGGGG  
TTATTCATTCCCATCATCACCGTTGCTAGTAAGGAAAAATGATGGCCAATTTCAAATCAATCATAAAAAATTTTGAGAGTGAATCTCTTGCCAAGCAGAGTTATAAGTTTCATTCAGAAAAC  
CGCGTGTATATACTGATATAATTCAAGATGATACAACAAATGCAGAAATGATGGATGGCGATGAGGAAAGAAATCAAAAACTTGTAGAGTCCAATAACCATTCTGCAGTGTTAGCTTCATC  
AAGTATATTGCAAAATGTGAGGAATAATCCTCCCAATTCTAGTCGATTTATGGCCATCAAACATCACAAAAAAGAGCACCATCGCATCTTTATGGATGGGATTCTTCACGGGTTCTATCACC  
CTTCTTCCAAAAGGGATTTTATGAAGAATCCCATCCATAAAGATGCGATGGTGCTCTTTTTGTGTATGTTTATGGCCATAAATCGACTAGAATTGGGAGGATTATCCTCACATTTTGCAAT  
ATACTTGATGAAGCTAACACTGCAGAATGGTTATTGGACTCTACAAGTTTTTGATTTCTTTCCTCATCGCCATCCATCATTCTGCATTTGTTGTATCATCTTGAATTATATCAGTATATACACG  
CGAGTTTTCTGAATGAACTTATAACTCTGCTTGGCAAGAGATTCCTCTCAAAATTTTTATGATTGATTTGAAATTGGCCATCATTTCCTTACTAGCAACGGTGATGATGGGAATGAATA  
ACCCCTTGTTAACTCTGCTTTGGAAGCTTGTTTGGCTTGAAGATAATGGGAAAAAATAAAGCTCGGATCATCAAGAATATTTGCAATTAACCTCTATGTTTCCATTAATAGCTTCATCATAAGC  
CAGAAATCTTGTGATGGATACAAGATAACATCTCCTTGCAGCTCCTTCGCATTTGTATGTTGCTGTGCAAAAAGAACCGACCTCAGCTTCATTCTGAGTATCGTAAGATGCGGTTGTTTTA  
TCTGTAAAATACTTTCAAGTTCATCAGGTTTTCTTGGACCGAAGGGACCATTTTTACTATAAGCCATATTCTCATCACATTGTTTCTCAAAATTTGTGCTCATCAAAAACAACATGCTCGCTCAC  
TGCTTGAAAGAAGCTTTATTCAAATCTACATTTTGGCTTAATGAATGAAATTTCTAACCCAAAATTCACATTATCCACATGATCCTCACTCCAATGATGAATAGAGGTAGTTGCAAAACAACCTG  
GGAGCTGGCTGTGAAGCTTTTTGTTTCTTGTATGCTCTCTTGATTCCACTTGGCAATAGATATTCTCATTGATGACTTCAGTGGTTGTTTTCTGGTGCTGGATTTGTCTTCCACCCCAAGG  
TAGGCATCTTCAAGTACAAAATATGGCTGGCTAGTTGAAGGAGCATCTGGATCTGTTTTAGGCTCTTTGTTTCTAGCAGCAGCTTGGCCCTCGCTATGCTTCTGTATGTCAGCAACTTCAT  
CTTTCTGAGACGAAGATGGTGATGGAGATTTATAAAGTGAAACAGGCCTTTCATGCAACCCGGAAAAGACCCGGCCGTAGCTCTCCTCTTCCATTTAATCCTCGCAACCAGCAACAAACGA  
ACAAATCGTTAGATAGTAAAGGAAGCGGGAGGTTAGGGTGACGAAATCTAGAGTCTTTGGAAAGGCCACCCCTTTTTTATTT

>comp153515\_c0\_seq1

CAGGTCAGTTCGGATTGGACCCGAACTCGACCCGCGACTCAATTTAAGAGCCCTAAATAAAATGGTAAGACATACTAATGGCTAGTATAATAATAATGATAATAATAACAATATAATAAG  
CATAGGATATCATTCAAGGTCGTGTTGATACACATTTGACACAAATTTATCACAAAGATCCGATAGAAGTCCCTTCTCACTGCCATTATATTTCATGGAGTGCTAATTGACAATTAACAAAA  
AAGTAATATGGTCCATCAAACAGCAGATAGAAACATCCGTCCATGAAGAAGTTGGTCTCCTCAAGCTCATCGTGAGTTAGCAGCGATAGGCGGGCTGCTCGCAGAGGCGCCGGCGAAGT  
TCTGCTGCTCCACATCCCCACCTTGCTGCCAAGCCCAACAATGTCTGCAACGACGGCTTCAACCCCTTATCACAGAACTGCTGGAACCTCAAGCGTATCCCCTGCGGACTTCTTACCT  
CAACAAAATGAAAAGACGGGGTCACTCAAATATCTCCGCATCAATCGCCAACAGTCCCTTCCCTTCCCTTCTTCCCTTCTAATTTACCTTCCCATCCTTCTTACTACCCTAAAACCTC  
CCCGTCTGCGCAATCTCCTCAAACCTTGACACAATCGCAGCCGCCGGCTTCTGAGTCGTAAACCTCGCCTCCGCCGAATCCCCTCTTCCCACACCCTTCAAACAACCCCGACAAATCA  
AACCCCTTTGACAACGATATGATATCAAATGCATTTAGACTGGTTGGTTTCATCGAGAAAGCCGCGTCCACGACACCCGCGGGTTCGTCGTTTCGCTTCGACCGGCTTAAAGCCCTTCTTAA  
ACCAGGGGGATTGACGAGTTTAGGGATTGTGATGCGGGTATTAGGGTTAGGATCAAGGAGGCGGACAATTAGCTTGGCGGCATCGGGAGGGAACCAATTAGGGCATCGGAAGTGGCT  
TTTGACATTTTGGCGTACATTACCATGAGATTGGAGTCGTGGAAAGGGAGGAATCCGGCGAGGAGGACGAAGAGAATAATGCCGCACGACCAGATGTCGGCTTTGGGGCCATCGTAGCC  
GCGTTTGTGATGACTTCCGGGGCGACGTAGGCGGGGGTGCCGAGGTGGTGTGGAGTAGGCCGTCTGACGGCGATTGTGACGAGGGCGCTGAGGCCGAAGTCGGTGATTTGAGG

TCGCCATTTTCATCAAGGAGAAGGTTTTTCGGGTTTTAGGTCGCGGTGGTAGACGCCGCGGCTGTGGCAGAAGTCGACGGCGCTGATTATTTGCTGAAAAGTAGCGTCGAGCTGCGTCCTCC  
TTGAGCCGCGCCGCGGGCGATCTTGTGAAGAGCTCGCCCCACGAACATACTCCATGGCAAATAAATTTGGTCTTACTCGCCATCACCTCGTAGAGCTGCACAACATTGGGGTGTGCGC  
ACCAGTCTCATAACCGAGATTTCCCTCTTAATCTGCTCAATCATCCCCACCCTCAATACCTTCTCCTTTTCAATTACCTTAATAGCAACGCTCTGCCCCGTCGTCAGGCTCCGTGCAAAGTA  
CACCTTCGCAAAGGTTCCCTGCCGAGCAGCCTCCCCATCTCATACCGCCGCATCAATATCCAATCTCCCTTCTTCTGTGTCATAGTTACCGGCTAATTCATCTGCAATGAAACTCACA  
GAAGGGCTTTGCTGTTGAACAGTGAAGAGGAAGCATGAGATGGGTTTCGCATTGTGCTCGGGGAAGAGAGGAGGAATGCGGATGGAGAGGAAAAGAGGAGTTAAGGTTAGGAATAGCG  
GTTCAATTTATGGCCAAGGAGTAAATGATGGTTGGGCACGTTCAAAGATAGTATGGATGCTATCTTTGAACGT

>comp153535\_c0\_seq1

ACAAATGAGTAATCTCTCCATATAATACATACATATGTGAAACATATAAATGTTTCAGAAAACACCATTGTCATTCTTTAAACAAACATTAATGTAATGATTCTATATATAATTCAAACAAATTTCT  
CAGTTACTGATCATCAAATGAAACTAATGACTAACAAATGATTTAACAATATTAATAAAATATGCGTTGAATCTTCCCAATGTATCAGTTGCAGACATACTTAAGCACACCTGGTATGTGAAT  
GTTGTAAAAGTACTCATCCCAATCTATATCTTTGGATCAAAATCGAATATTTGACTATCATTGTGCTTCTTTGTTGCCATTCTCAATCTCTCCAAGTTAAAATCATCAAAACTGCATGAAAT  
CAGGCTTTCAGTGAAGATATTATAATATATAAATTTGGAGATCGAAATTATCAATGAGGTCCATAATAATTTTACATAATTATATATGCATAATTTAGTTATAACTACAGGTCAAATAGAGCATA  
CATCCCTTGAAGAAGCAGTAAGGTATGTAGAGATCAATGAGAAGCATCAAAAATTTGTACTTTCTGCTAAGCTCGTTGTACTTCTTCGAAAATGGGCAACAAAATATGGCATTGACCAAAC  
GCAACATCTGCAAGGGAAACAAATTTGAAGATTACAATTTTCATCAGGGCTCTATAATTCATAATAATAATTTATCATGTTCAAAGAACACTGACCTCTAATGGCAGCCAATATCGAATA  
AACAAAAAATACGAAAATGGCCAATTTCTTGAATACAGGAACTTTTTGCAGGCTGATTTCCCTTCCATTCTTTCCAAATAATGGATTTTGGAAAAATAACGGTACCCACATTGCTCTAA  
AATTGAGTACTTGACAGGATTTCTTACAGATGAGCTTATGTGATAGATGAATTCGCTTGATGATTTGAGTGAGCGACCACCATTGCTATCAAAGCATTGACAACCATATCTCCAGGAATCA  
CATCCATTGGAGATTCAATGTCGGCAACAAAGCAAGGAAGGGTTCCCTTTGCATAACCAACAATTATGTTGTCAATTGTTCTATTTCCCTTCAATCCAACCAGGAAAAGGCTCCTTCCATGT  
ACTGTTATAATTGTTGGGCGAGCTATAACAAGAGGCAAGCTTCCCTCTCAACTGCCCAAGCAACATCTACCCATTGCCTTTGTGAACACATATGTATTTGGCCACCCAAAATGTCGAGCC  
CTCTCAATGCCAATTTCTTTCATGGCCACTTTCTCAACATCCATTGTTGAATTATCAAGTTGCAAGAGTTCTTTCTCCTTCTCTCCACCAATTTTATCTCAGCATCTATGTCCAAATACATAT  
TGCTTTGAGTGTTCACCTTGCCAAAAGCCTTCTCTAATAGGAGTCCCTCTTTTTCTCCAGTAACATAGGCTGTTGAAACGTGGAGAAAAACTTCAAGTTTACTGCACTTTTTTTGCAAA  
ATTCATGGCATTCTTTCACCTATAACGTTAATATTCAAAGCAATATCATACCTGACATAGAAATGGTTGTTGCTGCTACATGGATGACCATGTTGATATCATTCCAAATTAATTCTCTCAATT  
TTATGTCTTCTATTCCCAATTTCTCATGGATAATATCTCCTGGGATAGCACAAATCTTCTGTGATAAACGAATGGAATTCCTTTCCATGCTTCTTCCCTCAGACAATCAAATAATTCTTTTTCT  
ATCACCTCGTTTTGCAAGCGCTTCTCAGCGGACTTGGTATCACTTGTCTCACAAGAAGGTAGAGCCTTTCACCTTTGGCTGAACTCTAAGCACCTTCTCCACAAAGAGCTTTGCTAAG  
AAGCCAGTTGAACCAGTAATGAGAATGCTCTTGTCTTCCAAGGCATCGACTATCCCCCGAACTCCATTTTCAGTAAGTAGAATTCACAACCTGTTAGAGAGA

>comp153535\_c0\_seq10

ACAAATGAGTAATCTCTCCATATAATACATACATATGTGAAACATATAAATGTTTCAGAAAACACCATTGTCATTCTTTAAACAAACATTAATGTAATGATTCTATATATAATTCAAACAAATTTCT  
CAGTTACTGATCATCAAATGAAACTAATGACTAACAAATGATTTAACAATATTAATAAAATATGCGTTGAATCTTCCCAATGTATCAGTTGCAGACATACTTAAGCACACCTGGTATGTGAAT  
GTTGTAAAAGTACTCATCCCAATCTATATCTTTGGATCAAAATCGAATATTTGACTATCATTGTGCTTCTTTGTTGCCATTCTCAATCTCTCCAAGTTAAAATCATCAAAACTGCATGAAAT  
CAGGCTTTCAGTGAAGATATTATAATATATAAATTTGGAGATCGAAATTATCAATGAGGTCCATAATAATTTTACATAATTATATATGCATAATTTAGTTATAACTACAGGTCAAATAGAGCATA  
CATCCCTTGAAGAAGCAGTAAGGTATGTAGAGATCAATGAGAAGCATCAAAAATTTGTACTTTCTGCTAAGCTCGTTGTACTTCTTCGAAAATGGGCAACAAAATATGGCATTGACCAAAC  
GCAACATCTCTAATGGCAGCCAATATCGAATAAACAAAAAATACGAAAATGGCCAATTTCTTGAATACAGGAACTTTTTGCAGGCTGATTTCCCTTCCATTCTTTCCAAATAATGGATTT  
TTGGAAAAATAACGGTACCCACATTGCTCTAAAATTGAGTACTTGACAGGATTTCTTACAGATGAGCTTATGTGATAGATGAATTCGCTTGATGATTTGAGTGAGCGACCACCATTGCTAT

CAAAGCATTGACAACCATATCTCCAGGAATCACATCCATTGGAGATTCAATGTCGGCAACAAAGCAAGGAAGGGTTCCTTTTGCATAACCAACAATTATGTTGTCAATTGTTCTATTTCCCTT  
CAATCCAACCAGGAAAAGGCTCCTTCCATGTACTTGTATAATTGTTGGGCGAGCTATAACAAGAGGCAAGCTTCCTCTCAACTGCCCAAGCAACATCTCACCCATTGCCTTTGTGAACAC  
ATATGTATTTGGCCACCCAAAATGTCGAGCCCTCTCAATGCCCAATCTTTTCATGGCCACTTTCTCAACATCCATTGTTGAATTATCAAGTTGCAAGAGTTCTTTCTTCTCTCCACCAA  
TTTTATCTCAGCATCTATGTCCAAATACATATTGCCCTTTGAGTGTTCACCCTTGCCAAAAGCCTTCTCTAATAGGAGTCCCTCTTTTCTCCAGTAACATAGGCTGTTGAAACGTGGAGAA  
AAACTTCAAGTTTACTGCACCTTTTTTGCAAAAATTCATGGCATTCTTTGCACCTATAACGTTAATATTCAAAGCAATATCATACTGACATAGAAAATTGGTTGTTGCTGCTACATGGATGACCA  
TGTTGATATCATTCCAAATTAATTCTCTCAATTTTATGTCTTCTATTCCCAAATCTCATGGATAATATCTCCTGGGATAGCACAAATCTTCTCTGTGATAAACGAATGGAATTCCTTTCCATGC  
TTCTTCTCAGACAATCAAATAATTCTTTTCTATCACCTCGTTTTGCAAGCGCTTCTCAGCGGACTTGGTATCACTTGCTCTCACAAGAAGGTAGAGCCTCTTCACCTTTGGCTGAACTCT  
AAGCACCTTCTCCACAAAGAGCTTTGCTAAGAAGCCAGTTGAACCAGTAATGAGAATGCTCTTGTCTTCCAAGGCATCGACTATTCCCCCGAACTCCATTTTCAGTAAGTAGAATTCACAA  
CTGTTAGAGAGA

>comp153535\_c0\_seq13

ACAAATGAGTAATCTCTCCATATAATACATACATATGTGAAACATATAAATGTTTCAGAAAACACCATTGTCATTCTTTAACAACATTAATGTAATGATTCTATATATAATTCAAACAAATTTCT  
CAGTTACTGATCATCAAATGAAACTAATGACTAACAATGATTTAACAATATTAATAAAATATGCGTTGAATCTTCCCAATGTATCAGTTGCAGACATACTTAAGCACACCTGGTATGTGAAT  
GTTGTAAAAGTACTCATCCCAATCTATATTCTTTGGATCAAAAATCGAATATTTGACTATCATTGTGCTTCTTTGTTGCCATTCTCAATCTCTCCAAGTTAAAATCATCAAAAACATCCCTTGAAG  
AAGCAGTAAGGTATGTAGAGATCAATGAGAAGCATCAAAAATTTGTACTTTCTGCTAAGCTCGTTGTACTTCTTCGAAAATGGGCAACAAAATATGGCATTGACCAAAACGCAACATCTCTA  
ATGGCAGCCAATATCGAATAAAACAAAAAATACGAAAAATGGCCAATTTCTTGAATACAGGAACTTTTTGCAGGCTGATTTCCCTTTCCATTCTTTCCAAATAATGGATTTTTGGAAAAATAA  
CGGTACCCACATTGCTCTAAAATGAGTACTTGACAGGATTTCTTACAGATGAGCTTATGTGATAGATGAATTTGCTTGTGATGATTTGAGTGAGCGACCACCATTGCTATCAAAGCATTGAC  
AACCATATCTCCAGGAATCACATCCATTGGAGATTCAATGTCGGCAACAAAGCAAGGAAGGGTTCCTTTTGCATAACCAACAATTATGTTGTCAATTGTTCTATTTCCCTTCAATCCAACCAG  
GAAAAGGCTCCTTCCATGTACTTGTATAATTGTTGGGCGAGCTATAACAAGAGGCAAGCTTCCTCTCAACTGCCCAAGCAACATCTCACCCATTGCCTTTGTGAACACATATGTATTTGGC  
CACCCAAAATGTCGAGCCCTCTCAATGCCCAATCTTTTCATGGCCACTTTCTCAACATCCATTGTTGAATTATCAAGTTGCAAGAGTTCTTTCTTCTCTCCACCAATTTTATCTCAGCA  
TCTATGTCCAAATACATATTGCCCTTTGAGTGTTCACCCTTGCCAAAAGCCTTCTCTAATAGGAGTCCCTCTTTTCTCCAGTAACATAGGCTGTTGAAACGTGGAGAAAAACTTCAAGTTT  
ACTGCACCTTTTTTGCAAAAATTCATGGCATTCTTTGCACCTATAACGTTAATATTCAAAGCAATATCATACTGACATAGAAAATTGGTTGTTGCTGCTACATGGATGACCATGTTGATATCATT  
CAAATTAATTCTCTCAATTTTATGTCTTCTATTCCCAAATCTCATGGATAATATCTCCTGGGATAGCACAAATCTTCTCTGTGATAAACGAATGGAATTCCTTTCCATGCTTCTTCTCAGAC  
AATCAAATAATTCTTTTCTATCACCTCGTTTTGCAAGCGCTTCTCAGCGGACTTGGTATCACTTGCTCTCACAAGAAGGTAGAGCCTCTTCACCTTTGGCTGAACTCTAAGCACCTTCTCC  
ACAAAGACTTGGAACCGGAAACAACATTAGAAAGGAAAAAATATTATTTCATTCCATAAAAATTACACAATGAATAA

>comp153535\_c0\_seq6

ACAAATGAGTAATCTCTCCATATAATACATACATATGTGAAACATATAAATGTTTCAGAAAACACCATTGTCATTCTTTAACAACATTAATGTAATGATTCTATATATAATTCAAACAAATTTCT  
CAGTTACTGATCATCAAATGAAACTAATGACTAACAATGATTTAACAATATTAATAAAATATGCGTTGAATCTTCCCAATGTATCAGTTGCAGACATACTTAAGCACACCTGGTATGTGAAT  
GTTGTAAAAGTACTCATCCCAATCTATATTCTTTGGATCAAAAATCGAATATTTGACTATCATTGTGCTTCTTTGTTGCCATTCTCAATCTCTCCAAGTTAAAATCATCAAAAACATCCCTTGAAG  
AAGCAGTAAGGTATGTAGAGATCAATGAGAAGCATCAAAAATTTGTACTTTCTGCTAAGCTCGTTGTACTTCTTCGAAAATGGGCAACAAAATATGGCATTGACCAAAACGCAACATCTGC  
AAGGGAAACAAATTATTGAAGATTACAATTTTCATCAGGGCTCTATAATTCAATAATAATAATTTATCATGTTCAAAGAACACTGACCTCTAATGGCAGCCAATATCGAATAAAACAAAAAA  
TACGAAAAATGGCCAATTTCTTGAATACAGGAACTTTTTGCAGGCTGATTTCCCTTTCCATTCTTTCCAAATAATGGATTTTTGGAAAAATAACGGTACCCACATTGCTCTAAAATTGAGTAC



TTGACAGGATTTCTTACAGATGAGCTTATGTGATAGATGAATTCTGCTTGATGATTTGAGTGAGCGACCACCATTGCTATCAAAGCATTGACAACCATATCTCCAGGAATCACATCCATTGG  
AGATTCAATGTCGGCAACAAAGCAAGGAAGGGTTCCCTTTTGCATAACCAACAATTATGTTGTCAATTGTTCTATTTCCCTCAATCCAACCAGGAAAAGGCTCCTTCCATGTACTTGTTATAA  
TTGTTGGGCGAGCTATAACAAGAGGCAAGCTTCCCTCTCAACTGCCCAAGCAACATCTCACCCATTGCCTTTGTGAACACATATGTATTTGGCCACCCAAAATGTGCGAGCCCTCTCAATGCC  
CAATCTTTTCATGGCCACTTTCTCAACATCCATTGTTGAATTATCAAGTTGCAAGAGTTCTTTCTTCCCTTCTCTCCACCAATTTATCTCAGCATCTATGTCCAAATACATATTGCCTTTGAGT  
GTTTCACCCCTTGCCAAAAGCCTTCTCTAATAGGAGTCCCTCTTTTTCTCCAGTAACATAGGCTGTTGAAACGTGGAGAAAACTTCAAGTTTACTGCACTTTTTTGCAAAATTCATGGCAT  
TCTTTGCACCTATAACGTTAATATTCAAAGCAATATCATACTGACATAGAAATTGGTTGTTGCTGCTACATGGATGACCATGTTGATATCATTCCAAATTAATTCTCTCAATTTTATGTCTTCT  
ATTCCCAAATTCTCATGGATAATATCTCCTGGGATAGCACAAATCTTCTCTGTGATAAACGAATGGAATTCCTTTCCATGCTTCTTCCCTCAGACAATCAAATAATTCTTTTTCTATCACCTCGT  
TTTGCAAGCGCTTCTCAGCGGACTTGGTATCACTTGTCTCACAAGAAGGTAGAGCCTTTCACCTTTGGCTGAACTCTAAGCACCTTCTCCACAAAGACTTGGAACCGGAAACAACATT  
AGAAAGGAAAAAATATTATTCATTCCATAAAAATTACACAATGAATAA

>comp153540\_c2\_seq13

CCCCACCTGATCCATTAACGCTTGGGAACCAATTTCACTTCACTGGAACGTCCACCAACTTTCCCTGACCATCCGTCTCACAGCAAGATTAGGAACCCGAAACGGTTCAGCGTGCTCTAC  
AATCACAGTGCTAGACAGAATAGGCATGCCCGGATTCACATCAGAAATAACAACACCTCCATCAGCATTAGTATGACATCCCGAACTGGCGGTAACATCCACAGCAGGGGATCTATCCTTA  
CTAATACAAAACAACATCCACAGGAGACACAACAGGTTCCGAAATATTAACAAGAATAGGAGTATCAACATCAACCTCATTAATAATAGTATTAACAAGAGGAATATTAAGACCAGGTT  
GAAACCCAACCACAGTATCACAAAACCCGAAGCATCAACCTCAGCATCAGAAGGAGATAACAGATTCACACC

>comp153540\_c2\_seq5

ATGATTGGTTGGTCATGGTAGGCCGATCTTAGGGCTCATGTGGATAGGTGCTTTTCTATAGTTGGACTGGAATATGTAAAGGTGAAGTCGCTCGCCCGGATGAAAGCGATTAGAAGTGATG  
GCCAACCTCCCTTTTTTTTTGTCAAAACATTATAATATATTATAAAAAGACAAACAACGGTTACAACAGCTAAAGCCAGGGAAGAAAAAATCAAAAAGATAAAACCTCTCAAAACAAAGG  
AAAAACCCCGGAAACAATGGGGGCTCAGTAGATGACCGAGGCTACCAACAACCTCGAAAACCGCACAAAGGACCATCCAGTAAAGGTTGCCACAAGGAGGCGACAAGGAGAGGAGC  
CCTGGTCCCATCATTGCCCTGCAACCAACAACAGAAAAACCAAATCATCTTATTCTACCACCTCTACCCCAAAATTTTCCACGCGAAGTTCAAGATAAAGGTCTAACACGAACCATACTA  
AATTCATTTCTGGATCAGAATAGGAATCAGAATCAGAATCGCATTCCGACGAATTATTCAGT

>comp153548\_c0\_seq3

GGTCGTCTAAACATAAATGATATGTTATAAAAATTAACGACAAAAATGTTCAATTTTTTAGCTCCACCGACGAAGATTCTGATATATCTCGTTTCCCTTACACCTTTCCCTGAAAATCACCGAG  
CCGATGTCCATTATCAGCTTCGGCGAGCACGGCGGCGAGCCGATCGCCGGCATCCACCAGAAGCTCCTTACACAATTGCAAGCCGTCGTTGTCAATGGGGCCCTTAGCCAGCTTATGAAG  
CTCGTTAGCTTTTTCATTCGAGCTTCGACGTGAGTTGTGATCACCTTAACGGCGGCGGATAATATCGCCGGCGGAAGATGTGTCGTTGATGGCGCCGGTGAGGGTGCCTCACATGCAT  
CTTTGTAGGATGTCGGTGCGCAGAGAACGGAGACAGAGGACTTAACGGTGGTGGCGAGTTGGCTGGAAGCAGTAGGCTTGTGAAGGATCGGGAGGAGATGGCGATGACGCTGATGAC  
GGCGGCGACGACCAGGATGGCGGAGAAGCCGCCGATGGCAGCTTTGTTTACCATTTTTGTTGGGGGTGGAGACCGATGAAGGATTGTGGGGGAAGGGATGGATTGGTTATTTATGGGC  
TTGTTAGAGGCTGTCAACGGTTAG

>comp153557\_c0\_seq6

TTCTCTCTTTGGCTTTCTCTCTTTCTCTCTCTCCATCTTCTTCTCTAACGTACCTATGGACTATGAAAGGATTCACAAAGTTTCAAGATGGGCCTTATTTCTCCAGCAAGTTACGCAT  
GAAAATACTTGGAGCTCAATATATGAAAAGGAAGGAAGAAGGGTGTTCCTCAAGAGTTTCCCTTCCAAGCTTGAGGACATAGAGTATGCTAAGAAAAATTTACTGGCTGGCGATCTTGA  
TGATGAAGTTGTTGGCTTTAAGGACTCGCCGGTTTCATCGATTAATGCTAAGTCTCAAAAATCAGAGTTCTGTAACAAAGAACTCTCACGCTATGGTGAAGGCTTTCAAACCTCAGTCTTCT

ACTGCAAATTCCTTTCTAAAGGAAATTCTGAGACAAAATATTCAAGAAACCAGAATAATAGTTCTAATTCTTCTTATCAATCCAAACTTGGAAACAACACTACTGCACGGTGCACCCTATGA  
AGCATCAAGAAGTGGATGATGATGGTTATGACAGTGGGCATGAGAGTGCTAGCAATTCTAACTTCGAGTTCATCGTAGAGGAAAAGTTTCCCAACTTCCAATTATGGGTCAATTTCTCTAG  
GCATATCCATCAAAATGGAATGATGCAGAAAAATGGCTTGTTAATAAGCAAGTGGTTCATGAAAATGGATTAAGAACAATTCAGTGCAGTATCAGTGC AATAGGTTGGTGAATTCAGT  
TTGGCAAGGATTGCTCCAGAATCCATTAATATAGATCAGAAACCTTCTGTAATTCAGCCTTCAGCCAGCAATTC AATTTCTCAAAAATATGGTGGACAAGTTCTCATTGTTTCTCAGGGCTT  
GCATGCTAATTCAGCTTCATTGAATGATGAAAGTTGCGTGACAGATCCTTCTGAGGGTATAAATTATAAAAAATTCATCAGTCTCTGAGGGTTTTCTTCTGGA ACTACAGACATTTCTGCCA  
AACAGCTGGTTTTCAATGAGAGATGTAGGCACAGAGATGACCCCGATTCTAGCCAAGAGCCATCAAGAACAGCAACCCCTATTGAAAATTTAACACCGAGCCGCAGCCCATTATCTTCAA  
ACCCCTCATCTCCGCGAATTGGATCAGTAGCAGTGGATAGAATGCCGTCCACTGATGAGAATGAGAAGGATTACCAGAAAGATGGTAAAAAGGTAGAATTTTCTGAAAAGAGAATTGCAG  
CTGAAA ACTAGACAGGAAATTGCAGCTCTAGGCTTACAGCTTGGTAAACTGAACATAGCCTCTTGGGCTAGCAAGGAGACAGAGCAAAATTTCTCAATTTAATAAAAAAACTGACGAGGA  
AGAACAAGTGA AACAGGAATATGAAGCTTGTGCTGCAGCTTGGGAAGAAGCTGAGAAATCCAAGCACTTGTCCAGATATAAACGAGAAGAAATCAAGATTCTAGTATGGGAAAGCCAC  
CAAAGAGCAAAATATGAGGCTAGTTTGAGAAAAGTAGAGGTAACACCCCATTTTTATCATTCATGGTGTTTAATTCATATAGATGACATTAATACGTTGCAGCATGCAAAAGTTTTCTATT  
TTTTGATTGAAGGGAAGATGAAGAAAGAACCATATTCGGTTC AAATTTAGCTTTTTTTGTCTCTCCCTTTCAATTTTGTAAAGCCAAAAGCTCTGCTAAATCCATGCATTCATAAGTGATT  
GTAAGCCTCATAATTGGGCAATTGCCTATCTTTTCAGTAGCTCAAATCATATAACCAATAAAGTGATCCTAGCGGCAGACCAAGCTTTACTTTGTTTCTTTACTAACCACCATCTTCTTG  
ATAAACTATCAGATCCGAGCAGTAAATATGAGATCTCGCGCAGAGGCAGCCATGGCAGAGAAGCTCCGTCGAGCAGAGCGGAAGGCGGGAGAAAACGAGCCAATGCCGAAGCCATAA  
TGA ACTTGCAGACTGCAAGGATATCTGATCAAGCAGACTCGATACGTCGATCCGGCCGAGTTCCTTCTCATTTTAGATGCTGCAATTTGGTTTTCTTTAAAGCTCAATAGAGAATTCAGATTC  
AGATTTAAGTGTGGTGTGGAATTTTACCCTTACAGAAGACCAAGCTAGAATGCTCATTGCTCAATCTTCTTCTTATGTTGCTAGATTCACCCACTTCATAGCTTCACCTTTTGATCCTAAT  
GTAACCATCTTACGTTTGAGACGGCTTTCTTACTGT

>comp153568\_c0\_seq1

CAATGGAGGTTACACCATTGAGGTGGAGATCCACGATGGGCCTTACAATGTGATCAAAA ACTGGA ACTACACTGCATTGGTGGATGCCATCCACAATGGGGAAGGCAAGTGCTGGACTA  
CAAAGGTGCATTGCGAGGAGAAGCTTATTGAGGCAATTGAGACTGCTACGAACGAGAAGGAGGACTGCTTGTGCTTCATTGAGGTTATCGTGCATAAGGATGACACCAGTAAAGAGCTT  
CTGGAGTGGGGTTCTAGGGTTTCTGCAGCTAACGCCAGGCCACCGAATCCACAGTAAACGCAATCTTAGTTGGATTGTAGCTTTTTATAATTTATTTCAATTTTACATTATTTTATTCAATTTTA  
TTCTTTATTGATATTATAAATATCAATATAGAATAAATACGGATCTTTTCGTTTAAAGTATTATCAGACACTCTCATCTAATCATCATCCCCTAAGTAGAGAAAATTTTCTATCAAGGTACATTT  
TGACGAGTTCCTCCATGATTGAATCTTCTCTTTTCTTCTCTGTTTCATTTTCACTATTGCAAGTATTTGCTGTA AAAACATTGGAGTAATATGCAGATCCTTGAAGTTATTTCTGCTAGTAGAA  
ATAACTTCAAGGATCTGCATATTACTCCAATGTTTTTACAGCAAATACTTGAATAGTGAAAATGAAAACAGAGAAGAAAAGAGAAGATTCAATCATGGAGGA ACTCGTCAAAATGTACCT  
TGATAGGAAAAATTTCTCTACTTAGGGGATGATGATTAGATGAGAGTGTCTGATAACTTTAAACGAAAAGATCCGTATTTATTCTATATTGATATTATAATATCAATAAAGAATAAAAATG  
AATAAAATAATGTA AAATGAAATAAATTATAAAAAGCTACAATCCA ACTAAGATTGCGTTTACTGTGGATTTCGGTGGCCTGGCGTTAGCTGCAGAAACCCTAGAACCCCACTCCAGAAGCT  
CTTTACTGGTGT CATCTTATGCACGATAACCTCAATGAAGCACAAGCAGTCTCCTTCTCGTTTCGTAGCAGTCTCAATTTGCCCTCAATAAGCTTCTCCTCGCAATGCACCTTTGTAGTCCAG  
CACTTGCCTTCCCCATTGTGGATGGCATCCACCAATGCAGTGTAGTTCAGTTTTTGATCACATTGTAAGGCCCATCGTGGATCTCCACCTCAATGGTGTAACCTCCATTGTTGATGAGGAA  
GATGATACTGTTCTGCCCTGCCTAATCATCGTTGACACGTCCTGCGCTGTCACCTGAAAGCTTCCATCACC AATGAAGGCGAGGACGCGCTTATCCTTGGCAGCCTGAGCATATCCAAGT  
GTTGCTCCGACCGACCAGCCAATAGAGCCATACTGCATTTGGAATC ATAGCCGCAACCTTCCGGCAAGTTGAGCTTCTGGCAGTTGAACCAGGAGTCGCCGGTCTCTGCGATCACCGC  
AGTCTACTTTGAAAGCAAATCTGTATGTGATTGAAGAAGACATTTACCCG CAGAGGTTCTTGGGATTGGATTCTAGAAGATGTCCATTCCGCACGAAGATGCGGCTGTAAATCTCATAA  
GCAGTTGTGTTTTTCTTCAACCTCTTCGATAGCGCCTGGAGGAAATCCTTCATAAGAATGCACCCGAAAAGTCTGGCCATTGGCGACCACCACACGGTCTGGTTGGACGATTATGGCCTTCT

CTTTCTTGAGAAGGAGGGAGTAGCCGACGGAGCTGTAATCGTTGAAGATTGGTCCGACGAAGAGATAGGCGTCGGCGGATTCGACGATCTCTGCGCAGAAGGTGGTGCTTACGGCGCCC  
CAGTAGGTGCCGATGAACCTGTAGAGTTGTTTCGGGAACCAATCCTTTTGCCGAAGGCATCACGGCCACGGGGTACCCACATGCATCAGCAAGCTCCACGAAGGCTTCCCGGCCTTCGC  
CACCCCTAGCTTTGGCCCGCCACCAGCACTGGTTTCACCGCCTTGTTTCAGGAAGTCCGCGGCGGCCTTCACTGCGCACTCGAGACCCATTTTATTGCTCAATCTGTACAAATGGTTTCGC  
TAACCTTATATATATAGCATAATTGCGGTACCTTAAATAGTTTCGATTAATACCGTTCCTCTAAAAGAGATTTTTTAAACACAAAAGTGTAAATCTAATTTTTTAAAGCTTATTATGTGTTCCGTC  
TTTTTCTAGCTATAACATATGGGCATCTTCAACCAAAAAATCTATTTTTCAACTTTAAAGTACAATAACAATCATATTTTTAGTATTAATAAAAATTTTGAGCTCACGGAAAAATTTGGAATGAAT  
GAATCATTAATTCGTGCTCCTTAATAGAACAGGGAAACGTAGGTGGAGAAGGAACAATTCAGAACCTCGGAGTTAGGAAGAATGGAAGTGGCTCATGGCAGAAGGTTGGATGGGGAATG  
GCTGGAAGATTACATGCAACGCTGATGTAAACTGGCTTGCTCTCCTTGAGAGCAGTTGATATGGCGGTGTCGATCAGCTCATGAGCGTCATCCAAATTATTACAACCGCCTGAAAGCAG  
GTGACGGTCCGAAAGCATTGAAGCTCTTGGGAGAAATCGGGGAGGCCGATGGTGTGATGCAAGATTTCGGTTGGTGCCATAATCATTGGAATTCGGACCACCGACAATGCAGATGACGGG  
AAGATTCTCGCTGTAGGCTCCTGCGATGGCGTTGAGGATGCTGAGCCACCGACGGTAAAGGTGACGACGCACGCTCCGACGCCGTTTCGCGGGGCATAACCCATCGGCTGCGTACCCTG  
CGTTGAGCTCGTTGCAGCATCCTACATTGGTGTAGTCCGGGCTCGGCGATGAGATGGTCAAGAAGCGTGAGATTGAAGTCCCCCGGACGGAGAAGATGTCGCGGATGCCGATCTGGACG  
AGGCGGCGGGCGAGGTGGCGGCCGAGGGTGGCCTTCCCTGCCGGCGCCGCTGGTATCACCGTGTGTCAGGACATCGGAATGCTCCCAACACCGCCGTTTGTGCTTTTCGACGGTACGTC  
TACGGATCCTACCTTGGTTTCCATGGGAGGAGTTGAGGGCAGAGAGAAGATTTTCGTAGTTTG

>comp153568\_c0\_seq2

CAATGGAGGTTACACCATTGAGGTGGAGATCCACGATGGGCCTTACAATGTGATCAAAAAGTGGAACTACACTGCATTGGTGGATGCCATCCACAATGGGGAAGGCAAGTGCTGGACTA  
CAAAGGTGCATTGCGAGGAGAAGCTTATTGAGGCAATTGAGACTGCTACGAAACGAGAAGGAGGACTGCTTGTGCTTCATTGAGGTTATCGTGCATAAGGATGACACCAGTAAAGAGCTT  
CTGGAGTGGGGTTCTAGGGTTTCTGCAGCTAACGCCAGGCCACCGAATCCACAGTAAACGCAATCTTAGTTGGATTGTAGCTTTTTATAATTTATTTTCAATTTTACATTTTATTCATTTTAA  
TTCTTTATTGATATTATAAATATCAATATAGAATAAATACGGATCTTTTCGTTTAAAGTATTATCAGACACTCTCATCTAATCATCATCCCCTAAGTAGAGAAATTTTCCATCAAGGTACATTT  
TGACGAGTTCCTCCATGATTGAATCTTCTCTTTCTCTCTGTTTCATTTTCACTATTGCAAGTATTGCTGTAAAAACATTGGAGTAATATGCAGATCCTTGAAGTTATTTCTGCTAGTAGAA  
ATAACTTCAAGGATCTGCATATTACTCCAATGTTTTTACAGCAAATACTTGAATAGTAAAATGAAAACAGAGAAGAAAAGAGAAGATTCAATCATGGAGGAACTCGTCAAAATGTACCT  
TGATAGGAAAAATTTCTCTACTTAGGGGATGATGATTAGATGAGAGTGTCTGATAATACTTTAAACGAAAAGATCCGTATTTATTCTATATTGATATTATAATATCAATAAAGAATAAAAATG  
AATAAAATAATGTAAAATGAAAATAAATTATAAAAAGCTACAATCCAATAAGATTGCGTTTACTGTGGATTTCGGTGGCCTGGCGTTAGCTGCAGAAACCCTAGAACCCCACTCCAGAAGCT  
CTTTACTGGTGTATCCTTATGCACGATAACCTCAATGAAGCACAAGCAGTCTCCTTCTCGTTTCGTAGCAGTCTCAATTGCCTCAATAAGCTTCTCCTCGCAATGCACCTTTGTAGTCCAG  
CACTTGCCTTCCCCATTGTGGATGGCATCCACCAATGCAGTGTAGTTCCAGTTTTTGATCACATGTAAAGGCCATCGTGGATCTCCACCTCAATGGTGTAACTCCATTGTTGATGAGGAA  
GATGATACTGTTCTGCCCTTGCCATAATCATCGTTGACACGTCCTGCGCTGTCACCTGAAAGCTTCCATACCAATGAAGGCGAGGACGCGCTTATCCTTGGCAGCCTGAGCATATCCAAGT  
GTTGCTCCGACCGACCAGCCAATAGAGCCATACTGCATTTGAACTCATAGCCGCAACCTTCCGCAAGTTGAGCTTCTGGCAGTTGAACCAGGAGTCGCCGGTCTCTGCGATCACCGC  
AGTCTACTTGAAGCAAATCTGTATGTGATTGAAGAAGACATTTACCCGAGAGGTTCCCTTGGGATTGGATTCTAGAAGATGTCCATTCCGGCACGAAGATGCGGCTGTAATTCTCATAA  
GCAGTTGTGTTTTTTCTTCAACCTCTTCGATAGCGCCTGGAGGAAATCCTTCATAAGAATGCACCCGAAAAGTCTGGCCATTGGCGACCACCACACGGTCTGGTTGGACGATTATGGCCTTCT  
CTTTCTTGAGAAGGAGGGAGTAGCCGACGGAGCTGTAATCGTTGAAGATTGGTCCGACGAAGAGATAGGCGTCGGCGGATTCGACGATCTCTGCGCAGAAGGTGGTGCTTACGGCGCCC  
CAGTAGGTGCCGATGAACCTGTAGAGTTGTTTCGGGAACCAATCCTTTTGCCGAAGGCATCACGGCCACGGGGTACCCACATGCATCAGCAAGCTCCACGAAGGCTTCCCGGCCTTCGC  
CACCCCTAGCTTTGGCCCGCCACCAGCACTGGTTTCACCGCCTTGTTTCAGGAAGTCCGCGGCGGCCTTCACTGCGCACTCGAGACCCATTTTATTGCTCAATCTCGGAGTTAGGAAGAA  
TGGAAGTGGCTCATGGCAGAAGGTTGGATGGGGAATGGCTGGAAGATTACATGCAACGCTGATGTAAACTGGCTTGCTCTCCTTGAGAGCAGTTGATATGGCGGTGTCGATCAGCTCATG

AGCGTCATCCAAATTATTACAAACCGCCTGAAAGCAGGTGACGGTCCGAAAGCATTGAAGCTCTTGGGAGAAATCGGGGAGGCCGATGGTGTGATGCAAGATTCGGTTGGTGCCATAAT  
CATTGGAATTCGGACCACCGACAATGCAGATGACGGGAAGATTCTCGCTGTAGGCTCCTGCGATGGCGTTGAGGATGCTGAGCCCACCGACGGTAAAGGTGACGACGCACGCTCCGACG  
CCGTTTCGCGCGGGCATACCCATCGGCTGCGTACCCTGCGTTGAGCTCGTTGCAGCATCCTACATTGGTGAGTCCGGGCTCGGCGATGAGATGGTCAAGAAGCGTGAGATTGAAGTCCCC  
GGGACGGAGAAGATGTCGCGGATGCCGATCTGGACGAGGCGGGCGGAGGTGGCGGCCGAGGGTGGCCTTCCCTGCCGGCGCCGCTGGTATCACCGTGTTCAGGACATCGGAATGC  
TCCAACACCGCCGTTTGCTGCTTTGACGGTACGCTACGGATCCTACCTTGGTTTCCATGGGAGGAGTTGAGGGCAGAGAGAAGATTTCTGTAGTTTG

>comp153587\_c0\_seq1

TTTTTCTACTGTTTTTCTATTTTCTATTTATTTCTCGTTGAGTGTTTTTTTTTCCAACACAAAATAAGAAATTATGGTAGGTTAAACATATAAAGGCTTTTTAATATTTATATAATTTAATTAT  
TGAGACTGTGCTCCATGGACAGCCATGAAGCCATGAAAATTACAAGTTAATAATAAAAATATAAATCACAGGCTTATCTCTTTATTTTCCCAAATTCCTCAAGAAAAAAAAAAAAACAAAATT  
ACAAAGCTTCATAAGAAAAAAAAATAAAAATAAAAACCACCTGCAAGTAAAGCCGACTCCCCACCTAGAAAAAGAACAGACTAACTACTCTTCTCCGTCTAGCCTGAAGACGACGGCGG  
AAACTCGTCGGAATCCTCCCATCTCGTCGCCGGGAAACTCGTCCCCAAATTCCTGACTGCCCAAATACCCCATCCTCTGCTGCTCTCCTCTCCCAATCCATAAAACGTATTCAAACA  
GAGGAAGACGATGTTGAAGACGACGACGACGTTGAAGAAGAAGAAAGAGGGGAAGCTGAATTCAAAATATTCTCATTAAAGCAAGTTAGCATATTGTCCCTCTCCTCTCAACAATCTTGA  
ATACTCCAAGTAATCCCTCGACGCAGTGGAAACAGGGGAGCCAAGAAACTGGCCGCTTGAAACTATCTCCGGCGGCTGGAGACGCGCGTTTTCCGGGAAGTTGAGCTTCGCACGGCTG  
CCACGAAAGCGAAGAGCGGCTTCATCGTAAGCTCGTGCGGCGGATTTCGGCAGTATCGAAGGTTCCAAGCCAAACGCGAGCAGCTTTATGCGGGTTCGCGGATTTCCGCCGCCATTTTCC  
CCATGGGCGCTGCCGTACTCCCTGTATCGCCGGCGAGGTTGGTTTTCTAGTTTCTACTTGGGAAGGAGTTGTTTTCTTCCATTGACGGAGCTTGGCAGGAGGATGCGGAGTGAGAGATGGA  
GGCTGGTGCTGTAATTGATGGAAGACTATTTGTTAAAGGTTCAATTTTTGAGCGTTTGATTCTTGAAAAAACGATTTTGAAATGCAAGTCATGCAAAAAAGAAGTCCGATAATGAGAAA  
TGCACGTTCAAATATTCTGAGAAAAAAATATTTTTATGTATAAAAATCATTATTAATAATTTTATTTCTTTGTCTTATTGAAGGAAAAGAAAGATAGGATTTTGGCATTCTCATAATATCAG  
AGTCTATTGAAGACAAAAAAAAGCTCTCTTTTTGTTTACTGTGCTGCTTCGACACATGAAATAAAGAAGTTTGTGA

>comp153587\_c0\_seq4

TTTTTCTACTGTTTTTCTATTTTCTATTTATTTCTCGTTGAGTGTTTTTTTTTCCAACACAAAATAAGAAATTATGGTAGGTTAAACATATAAAGGCTTTTTAATATTTATATAATTTAATTAT  
TGAGACTGTGCTCCATGGACAGCCATGAAGCCATGAAAATTACAAGTTAATAATAAAAATATAAATCACAGGCTTATCTCTTTATTTTCCCAAATTCCTCAAGAAAAAAAAAAAAACAAAATT  
ACAAAGCTTCATAAGAAAAAAAAATAAAAATAAAAACCACCTGCAAGTAAAGCCGACTCCCCACCTAGAAAAAGAACAGACTAACTACTCTTCTCCGTCTAGCCTGAAGACGACGGCGG  
AAACTCGTCGGAATCCTCCCATCTCGTCGCCGGGAAACTCGTCCCCAAATTCCTGACTGCCCAAATACCCCATCCTCTGCTGCTCTCCTCTCCCAATCCATAAAACGTATTCAAACA  
GAGGAAGACGATGTTGAAGACGACGACGACGTTGAAGAAGAAGAAAGAGGGGAAGCTGAATTCAAAATATTCTCATTAAAGCAAGTTAGCATATTGTCCCTCTCCTCTCAACAATCTTGA  
ATACTCCAAGTAATCCCTCGACGCAGTGGAAACAGGGGAGCCAAGAAACTGGCCGCTTGAAACTATCTCCGGCGGCTGGAGACGCGCGTTTTCCGGGAAGTTGAGCTTCGCACGGCTG  
CCACGAAAGCGAAGAGCGGCTTCATCGTAAGCTCGTGCGGCGGATTTCGGCAGTATCGAAGGTTCCAAGCCAAACGCGAGCAGCTTTATGCGGGTTCGCGGATTTCCGCCGCCATTTTCC  
CCATGGGCGCTGCCGTACTCCCTGTATCGCCGGCGAGGTTGGTTTTCTAGTTTCTACTTGGGAAGGAGTTGTTTTCTTCCATTGACGGAGCTTGGCAGGAGGATGCGGAGTGAGAGATGGA  
GGCTGGTGCTCCGGAATAGTATCCTATCACTGACTCCTCGTCTCTCTCTTCACTCCGCCACCGCCAACACCCGCACCAAACATAGAATGCGGGGATAACAGAGAAGCATTATACAAAG  
AAGACGGTGGTGCTGACTTTGAACCAGCAGAATCCAAATAGCCGCCACCCATCGTCGGCTCTTCGCCGGCGACAACCTCGTGTTAAAGCCGAAACCATCGCAGACATCTCTCCGCCCTC  
CACCGACCCGAGAACATTGTTGCTGCTGTCGCCAACTCTTCCCTCCCTCCCTTCCGTTGCCGGCGAAAATTCGGTGGATTTCGCCACTTTAAAGCACATTAATAAGAGGATAAGCCGAATTA  
ATAACGTAATAAATACTGTTTCCAATTATCTGAATTTGTCTCAATATTTGAAACTTTTTCAAGAAAGAGAAGAGTGGGGATGGCTTTTATAGAAGAAGAAGATGAGTGGCAAAGGCCAATGC  
CAACGTGAAGGTCAC

>comp153594\_c1\_seq1

TGGTTCCTATACTCCTTTCAATCTCAGGAAGCAATGGAGGAATTCTCAATGGAGGTCCTTGGTACATGGGAGGTTTTGTCAATTGGACTTGATAAATGGACTCCCAATTTTTCTCCTTATTCCT  
TAGATGGGATTTCTTCTCCTATTTGGGTTTCGTCTTCCCCTTGCCGTTACATTGCTGGGACAAAACCAACATCACGAGAATTATTTGAGTATAGGGACTCCATTATTATTGGATGGCAACAT  
GTTTATATGCGGGAGGAGGGAGTTCGCTAGAGCATGTGTTCAGGTTAAATTGAACTTGACACTCCCTAGTGGTATTTGGGATGAAGGTATTC

>comp153662\_c7\_seq11

TAGGAGAAGAGGCGGGCTGTGCGAACTGCAAGGAGGAGATGAGGATTGCTCGGGAGTTGGAGTTCCTTGCTTAGACTTCACGCAGGAGAGGGAGAGAGAGCAGTTGTGCGTAACTGT  
TGGGTGGTTTTGCGAAATAGGGCTGGGAGATCGTGGGATGGAGAGAGAGAGAGGGGCTGTGTGAGAGGGTTTTCTGTGTGTGAATCGGAGATGAGATGAAAGTTTTTTGGGGAGTTG  
GAGTTCGGTTCGTCAGAGATGG

>comp153673\_c1\_seq3

CGGGATACCTAACCTCCATAGCATTTCAGCTTACACACATCTTTCCAAGCTATAAGATGCATATTCTTTGAGTGAATATTTCCATGAAAAGAGAACTTATAACAACCTTTCCTAATAAACTT  
GAAACAATATTTAGGCAGAATCATACTCTAATCCAGTAAGCAATATAATTAGTAATAGAAAACCTCGAGAAATTGCACTCTACCCGCAAATGAGAGCATTTTAGCCTTCCAACCGGAAAAT  
AAATCAGTAACTTTATGAAAAAGAGGAGAAAAATCAGCAACACTTAGTCTCATAATAGAGATAGGAATACCCAAATAAGTGGTACAATCCTGAGAGTAAGGAAAGTTCAGAACATTACA  
AATAACATCTCTTTCCAGTGTATCTTTTGAGAAGATAACCATACTTTTATGCTGATTGACATGAAGACCAGAGCAACTATAAAAAATAATCCAGAATATTTGAAGCATCTGAGCATTGCAAAT  
TGTAGCTTTACCAAAAATAAGCACGTCATCCACATATAATAAATGGGAAATATTAGAATTTCTCATTTTAAGATCCTCAAAGTTAAAATCAGATAAACTGCTATCAATTAAGTTAGAAAAAG  
CATCTATGATAATACAAAATAAATAAGGTGAAAGAGGACACCCCTTGACGCAATCCTGAAGAAGAGCTAAAGAATCCTTCTAAAGAACCATTAATAATAATAGAAAAATGAGTATCATCAAT  
ACAACCTAATCATTTTATGAATTTGTCCGGGAATCCTTTTTGAGCCATTATATGTAGAAGAAAATCCTTTGAAACTGTATCAAAAAAGCTTTTTGAATGTCCAACCTTAGCACAAAAATATTTT  
TCTTTGCAATAATAAAACCTTCTCAAAGTATCAGAAACAAGAAAAATATTATCAATGGAAATCCTTTTTTAATAAATCCATATTGACTAGGATGAATGATGATCGGCATCACGTTTTTCATA  
CGATTAGCCAAAATTTTTGCAACCATTTTATAAAAAACATTACATAAAGAAATAAGTCTAAAATCAGAAATATGAGAAGCATGAGAACATTTAGGAATAAGGCAATAGCTGTAGCTTTAGTA  
GCTTTACTCATATAACCAGTAGAAAAATAGTGACAAATAGCTTTACAGAAAGAAAGGGCCAACAATATCCTAAGATTTTTTGAAAACTCTAAAGTATAACCATCTGGCCTCAGAGCTAAAG  
GAGCAGAAAAATAACATTTTTAATTTCTCTAAAGATATAGGAGCAATAAGATTATAAATAGCAATTGAAGGAACCTTAATACCACTA

>comp153690\_c0\_seq1

CTAAAAAGTCGTTTTAAGAAGCAGGAAGACATCCGTCCCAAACGGAGCCTAAAATGACCTACATATTCCTTCGAAAAAAGCATCCTGATGCACCAGGCACAAATTATGTTAGGATATCCT  
GATGAAAACCAATCAATCTGAAAGATCTTATGATTTGCAGTGACATGAGTGTATATAAGATAAGATATCTTATATAACACTAATGTCACTACAAATCATAAGATTTTGAATTCATTTTGATG  
TAATGTGCAGGAGGATAATCCTATATTTAGTGGTGAATTTCTCGAAGCAGACAAGCCTGTTATCTGCGAGCCTGGATTTAAAGGCAGCGGTCTTGTACTGAGCCCATGTGAAAGCTCTGTACC  
TGCTCTGCTCTTGGTCTCCAAGCAGCTGGGGCAGAGGCTCAATCCTCGCAGCTAGCGGCGGGCCCCGAAATATATCATCGAGAACCTTGACTTCTCCCGTTGGTCACCACCCTGTGCC  
TCACGCTCCGGAATCTCCCATTTGTGACACCTGACATCAAAAAATTTAACCAATTCAATTGCCCCCATCAATACCCCCACGTTCTTCACATATTTTGACACTGTACATCTATTAATTATTTA  
TTAATCAATCAAATCGATCGAAAACCCGACCCACAAATCCCATCTTTTCACACATTAATAAACAGTGACCGCAACGGAGAGATGAGAGAGATAAAGGTAACCAAAATTGAAATCTTTTAC  
TTCGTTTCTTCTTTGATTGTGATGCATGCAATCATTAAAGCAATGTATATATTGCGCTAATTTAGTCTGATTTTTGTGGGTCAAATTGAGCGATTGTGTTGCCTCGTGTTGACACGAAAGTAA  
GCTTTTACTGCACTAAGTCTTTGAAAGGGTATGGAATGAATGACTAAACTGAGTTTCATGGTATTTAATGGATCAACCAAAGTAAAGTGGAGCTTAGAGCATCTCCAACCGAACGTC

>comp153690\_c0\_seq2

CTAAAAAGTCGTTTTAAGAAGCAGGAAGACATCCGTCCCAAACGGAGCCTAAAATGACCTACATATTCCTTCGAAAAAAGCATCCTGATGCACCAGGCACAAATTATGTTAGGATATCCT

GATGAAAACCAATCAATCTGAAAGATCTTATGATTTGCAGTGACATGAGTGTATATAAGATAAGATATCTTATATAACACTAATGTCACTACAAATCATAAGATTTTGAATTCCATTTTGATG  
TAATGTGCAGGAGGATAATCCTATATTTAGTGGTGATTCTCGAAGCAGACAAGCCTGTTATCTGCGAGCCTGGATTTAAAGGCAGCGGTCTTGTACTGAGCCCATGTGAAAGCTCTGTACC  
TGCTCTGCTCTTGGTCTCCAAGCAGCTGGGGCAGAGGCTCAATCCTCGCAGCTAGCGGGCGGGCCCCGAAATATATCATCGAGAACCTTGACTTCTCCCGTTGGTCCACCACCTGTGCC  
TCACGCTCCGGAATCTCCATTTGTGAGCAGCTGAAGAGAATCCCCACGTTAACGAAGAAGGAATCCTGGTCAGGAGGAACCAGGACCCAACCTCCCGTCTTTCAGAGCAATCTGAAGC  
CCATCCGAGTCATTGATCTCAAAACGGAAATAATCTGCGGATCCGTATGCTCCCCAAATCCGTTCAAGTTGTTGTTGTCGATCCCTGCAACATCGGCCATGGCGGGTAGTGATTCAGCCTGA  
AGAAAGAATCGCTCTTTTCGTCATTCACAAATTTACTCAACACATTCTCTGCTCCAATCCCAGTCCCTCCGCCATTAACCTCAAGCATTTCCGACGCCAACTTCTCTGTTGCCGAAACATAC  
TCCTTCAAAGCAGAGCAAAACGAGCTCGCCCATGACTCCTTAAGGAAGGGAATCGTTAAGGACGGGTTTGGAGGTGACTTCGAGAAGGAGATATTCTAACCAACCAACATCTCCATTGCA  
GCCAATCTTCTTGTTCATAGCCGAAGGGGTTGGCCATGCCGGCCTTCTCCAACCTTCTCCACTCCGGCAAGGAAAAGAAGTCTATTGCAGCGGCCTCCAATCTAGCCGTTAGGCTCTT  
GGAGACCCCGTGGTTGGTGACTTTGAAGAAGCCGAAATCGATGCACGCAGCGACGATGTCGGCAGCGCGGTCGGTGCGGTGATGTCGATTGCCGGCACGTTGGAGAAGGAAGCGCA  
GGGCTTGGAGGATTTACGAGGAATATGCTTCCAGGGATGGACTAGTGAGGACCCCATAGTTGTTGGTTGAAGAGCAGAAGAAAGGGTAAGGGGA

>comp153762\_c2\_seq7

AAAGAAGGATGTCAAAGATAAAAAATGTAACATTCATAGATTATAGAAATCAGTTAATGGCAAAACTCAGGCGAACAAATCAAAGAAAATCTTCTTTGATTTCCATTCAAGAAAAT  
TGAATCTTTCCATATCTTTGTTATCAAAATCAGTAGATTAATGATAGAAATGTATATAAAAAAAATCAAGTAGATAAGGCAATAATTGGAGAATCTATATAAAAGAAGTATACCTAAACTC  
ATCGATGCAAAGAGAGGTTTGTATCAGGATTTCTAGGGCTGGAGATCAGATGGCGTCGGGTTTCGATTGGCTAGGGCTGGTGACGACATGTGGTATTTGGCCTTAGCATCGTGCAGCACAGA  
GAGGCGATGAACAAAGGAGCGACGGGCTGGTTCTTGCAAGTTTTCTTCCGAGCGAACAGAGAGCAGACGAGAGAGAGATGATCGAGCTCAGGGTTTGTCCGTTGGGTTTCTCACACCT  
GGATCTGAGAGGAGGATTCGGGCTTTTTT

>comp153787\_c0\_seq2

TATTTAAAAATCCCAATAGTCAACAAAAGAAATATAAAATGCTTTTTATTATAATGGAAGATGACCAACCGAGGTGCCAAACCTCACGGTAAAAAGCACAAATAAATCGCAAGTAACC  
CGCAGCCCAAAACCCTATCCGGCCTCATCCCCCTCCTCGGCAAAATCACCAATGCCACATCACCCCGCCGGCCAAAAACCCACCGTCTCAAAACAGCTGGAGTCCATCTCCACCAGT  
GCCGCGCCCGCCACGTCATCCACGCCGACATCCCTATCGGAGCCCCTAACCCACCAGCACATTAACGTCGGCCCCGCATAACACCCCGACACCGCCACCTGTATCCCGCCGTCTCCG  
CCTCCCTTCGCCATCGCCACCGCCGCAATTAGATCCCCCAAAGAATCCCCCATGCTAAAACAGTCAACCCAAGCGACGCCGGGCTGATCCCAATCACGGTCCCGATAGAGACCAAAAAG  
CGAGACGAGCTCCTTCGCCGTGACGTAAGTCCACGTCACGCTCATAAGGAAGCCGCCGGTGAGCCACGGAAGCCGGAATTTGGTCCGAGGATTTTACTCTCCGTTGTAAGAAGCGG  
GCGATGCCGGTGAATAAGCCGACGAGAGCGCCGTTAGAAGTTGGTTTGGAGAAAGAAAGAACTGCTAAGAGGACCGGCGACATTGCGGGCGGATGTAACGGCGAAGGGTTTCGACCAA  
CGGTCTTCGGAGACGTCAGGAATGGTTATTCGCTCTTGGGAGATCGAGCGCGAGCTTGAGAAGACGAAGATATTTACAGAGATGAGGTTTCAGTCGTCGGCCTGTACTATTGGTTTCTTGA  
TTTTGTTTTATCGTGGTTAGAAGAGGGGTTTCAAGTTCTTCGGTAGCCGCTTCGGCGTCGAAGATGGTCAGCTTCTCCTCAAATGCCCAATTCCTCCAAAAAGATGAGTGATGCAGACC  
GACAAAACATAGAGCAGGTAGAGCAAAGGGAAAGCCAAGGCAACCCAAACGTTTATCTTCCAGCAACCAATATGACCGTTAAACTCAACAGAACGAGCAGCAAGAAGCAGGCATCC  
CTTACGAAGTCGATCTTCTCCACCGGACTTTCTTCGGCGCTACTAAAACGCTAACAACGCCAACAACACTACAGTAGTCACAAACAGAGCTCCTCCAAGTATGCTATTCAGGCCAAAGTCG  
CAGGCGGCGCCGCTGCCGCCCCCTTCTCGAAGGATACGATGCTTGAGAAAACATCGGGTGCGCCATTTCCGAGCGAGAGAAGGGTCGTTCCGGCGATGGCCGGAGAAAGCTTGAGGA  
GTCTTGAGAGACCTTCAAAGCTCGAACAGAAGTAAGTGGCGGCGGTGCTGCCGAGGAGGTAGAAGAGGAAGATGAGCCAGAGAAGTAAGACGGTCAGGCCTAGAGGATGCAGGTGAT  
GGCTGAAGAAGCAGTAGTAGAGGTGGAGGTAGTTATGTAGCCTTTCGGGCTGCATTGGTTGGAGGATTGTAAGAAGTCGCACTTAGCTTTGTCGGATTCAAGATTTATGAAATTACAGG  
ACTTATTTTGATCAGTGAGATTGAATCTTCTGAAGATGGGCTTTGCTGATTTTTGAAGGAGAGCTTGAGATGATGAGAACAGGAAGAGGAAGATGATGAAGAGGAGAAAGAAGAGGTTT

GACAGTAGACGAGAAGATGAAGAAATTGATGCGTAGTTTGCCATGAGAGAGGCTGCTAGCTTCTCAAGTAGAAGAAATGGAAGGCTGCATGGGTAGCTGTTAGTTATATCAATGGAGGA  
GATAAAGATAGTTTGG

>comp153797\_c1\_seq2

TTTTTGTAATAAACTTCCAACCTTATTCAACCGAAACATTGCAAGTAGCTACCACAACCTCTATTTAAAATGACAAGAACATGATGAAAAAACATAGTTCCAACGTAAGACTAGAAGGA  
CACATTGAGCCAACTATAGACAAAAACAGTAGGAACCACCATCTAAAATTAACATAAGGCGGTCTTATTTCGCATTCAACGTTTAACTCAATTATGATAACGGCAGGCTCGCTGAGAGCC  
TAGCTGGTGGATGCCATGGCAGCTAAGACCTTCTTGCTAGCTTGGCGGGATGTTATGGCATCCCACCAGGCCTTACATGAGGACGAGAGTTAATGAGGGAGCCATGCGGCGTGTTGTTG  
ATGAGGTGGTAGCCATAGGGGAGATGATGGAGGTCAGCGAGGCTGTAAAAATCACCTGCAAGAACTTTGTCTTTGAAAGCCTGGCCTCATAAACATCAAGTACCTTACCCAGCTTATCC  
AGATCTAGTAACACCACATTCTGGTCAGTGTGACCTCCAAATAAGAGTGGAAGGAAGACATGTTGAAAAACAATGGCGGAAATGGGCCCATGAAGTGTGTGTTCCACCTCCATCCA  
CTGATCCACTGCAACTGTGTCAACGAAGCTCTTCTGTTTCAGGAGATAAGTCCCCTTGCCATATTTTTGCACCAAGTAGCGAGTAATAACCCGAGATTCAAATAGAACCAGGCCGCCATCC  
TGGAGGGCAGGGATTTGACAGAAGGGTTTCTGTGAGAATGAGGTGGTCTTTGGTGCTCGCCGGCTTCAAGTCGACGGGGACAAGCTCGTATCGCAAGCCGATCTTCCATGCAAAG  
CATCACTCGAGCTGTGCAGGTCGAAACAGGGGAGCCGAACAGCTTAACAACCATCTTCCCTATTGCTATTTTTCTCTAAATCTCTTCCCTTACTCTGAGCTGATCAGTGTGTTGCGATTTGAT  
GA

>comp153812\_c2\_seq2

CCAATCTTGCAAACCTGATTTATTACATCGACATATAGTAACATAGATCAGTATCCTCCACAAACAAACAACATAATAAACATCCAAACCAGACAAGATTGGGTTACCAGCGACCGTAGCAA  
AAAAGAATAAAGTACTTCCCTATAGTAGGAGAAATTATTCTGTATGTAATCCGAACACGTTCCGGATGCTGCGTATTTACTGC

>comp153816\_c0\_seq1

AGCATTTACAAATTTAAGCAGTCCACGAGTTGTCTTGGTGGTGAAGAAGCTGGCTGACCATAGGCCAGGTACCGAGTTCGAATCCCATGGCAATTCGTGCAAAGCCTTAAGTGTGGCCCG  
GATGAGTATGGGGTGGGTTGTCCGCTAGGTCGACCGGAGAGATTAGTGGCCGAAGGTTGATAATCCTTGACTGTAAACGGGATCTTCAAACATGGGACGAACACACGACTTAGTGACAT  
CAACCCAATTCTGTAGTTC

>comp153849\_c0\_seq1

AAAGCATGAGTTAATTAGTAAAAAAAAGATTATGTCACGATATTCTGATGCAAAATATATGAAAATTATTTTACAATCTTATTATATTACCTTAAATTTTAAATTTTATAAACAATATAAAAATTT  
TAAAATCATTATATGAAACAATTTTAACTAGTAAATAAGAGAAAGACGAATAAGATAGATTATTTCCACACAACCTCTCATGGAGGAACCAGCGATCGCAGGGCCAAGTTGCGACCCCTTGG  
CTTCCCCTGCGCGGCGGCGATACCTCGGTCAAATGCCCCACGGCGACCCCCGGCCGTCGGAGGTGAGGGCACGTATTTCCCTCATAAGTTGTGAAGATGAACACACGCACCCACAATT  
ACACCCACATCCACAACCAACCTCCTGACGAAACCTCCACCGCCACCCATTCTCCACCCTGGCCCTCCGCCGTAGCCGAAGGCGGCGTTCCGGCTCTGGTAAGCCATCGGTGATCCTCC  
ACCGCTTACTCGGCCGAGGTTCCGGGTGCTCCTCACCCGGTGCATCCCTCCGCAGCCTGCATAGTGCGCCGGTTGGGGGGTGGGAAGACCACCGTTTATGGCATCGACGTATCGTTGATC  
GAGAGTGGCGGCGGGTTCCGCTGCCGCGCAGTCGCCACCGCCGAGGGGAAGGGAAGAGACGGAAGAGAGGGGAGGAGGCGACGGTGGGGGATCGGGGGCGGTGCGTAT  
TCGTGATCATGTGGTAAAGATCTTCGTCCGTTTTGACGGAGACGAGGGTGTCCAGATCCTCTGCCATCAGCTGATACTTCAACACCAAATCCGCGTTGAACATTCCGGCGATCTTCTCCT  
TCAGCTCTGCAAAGGTGAAGAGGAAGAAATAAGATAAATTCCTGAACTTTCATTAAAGATTGAAAATTTGGGGGTCATTGTTCTAGCCTTTAAAGGAGATGAAGCGGGGAACGGATAG  
AACGCGAGTATCGCCGCCGACGTAGCGGAGGTGGCCGTCTGAGGGGCGCGGGAGAATACGGCCGCATAGCTACAGAGAACTTGAGGCGGTTTCTGGGGGAAGATTGGGTTTTCTCC  
ATGGATGGGACTATGAGCGAAGATGCTATTACTAACGAAGGTGATAATGGCGGTGAAGTTGTGATTACGATGATGATTTCCGCTTTGAACGGTAAGAAGTTAGTGGAATGAGATAAATTT  
GCGCGCGTCCGTTTCGATTAGGGATAACAGATTGGACAGAATTGAACAAATCTACATAGATATATATTGTGTGGGGCTATTTCTATTAATATTTTTATTCTGATAGG

>comp153849\_c0\_seq2

AAAGCATGAGTTAATTAGTAAAAAAGATTATGTCACGATATTCTGATGCAAATATATGAAAATTATTTTACAATCTTATTATATTACCTTAAATTTTATAAACAATATAAAAATTT  
TAAAATCATTATATGAAACAATTTTAACTAGTAAATAAGAGAAAGACGAATAAGATAGATTATTTCCACACAACCTCTCATGGAGGAACCAGCGATCGCAGGGCCAAGTTGCGACCCCTTGG  
CTTCCCTGCGCGGCGGCGATACCTCGGTCAAATGCCCCACGGCGACCCCCGGCCGTGCGAGGTGAGGGCACGTATTTCCTCATAAGTTGTGAAGATGAACACACGCACCCACAATT  
ACACCCACATCCACAACCAACCTCCTGACGAAACCTCCACCGCCACCCATTCTCCACCCTGGCCCTCCGCCGTAGCCGAAGCGGCGTTCGGCCTCTGGTAAGCCATCGGTGATCCTCC  
ACCGCTTACTCGGCCGAGGTTTCGGGGTGCTCCTCACCCGGTGCATCCCTCCGCAGCCTGCATAGTGCGCCGGTTGGGGGGTGGGAAGACCACCGTTTATGGCATCGACGTATCGTTGATC  
GAGAGTGGCGGCGGGTTCCGCTGCCGCGGCAGTCGCCACCGCCGACGGGGAAGGGAAGAGGAAGAGACGGAAGAGAGGGGAGGAGGCGACGGTGGGGGATCGGGGGCGGTTCGTAT  
TCGTGATCATGTGGTAAAGATCTTCGTGCGTTTTGACGGAGACGAGGGTGTCCAGATCCTCTGCCATCAGCTGATACTTCAACACCAAATCCGCGTTGAACATTCCGGCGATCTTCTCCT  
TCAGCTCTTTAAAGGAGATGAAGCGGGGAACGGATAGAACGCGAGTATCGCCGCCGACGTAGCGGAGGTGGCCGTCTGAGGGGCGCGGGAGAATACGGCCGCCATAGCTACAGAGAAA  
CTTGAGGCGGTTTCTGGGGGAAGATTGGGTTTTCTCCATGGATGGGACTATGAGCGAAGATGCTATTACTAACGAAGGTGATAATGGCGGTGAAGTTGTGATTACGATGATGATTTCCGCT  
TTGAACGGTAAGAAGTTAGTGGTAATGAGATAAATTTGCGCGCGTTCGGTTCGATTAGGGATAACAGATTGGACAGAATTGAACAAATCTACATAGATATATATTGTGTGGGGCTATTTCTAT  
TAATATTTTATTCTGATAGG

>comp153911\_c0\_seq2

AAAATCTAAATCTGATCATGAATCAAACTCAACTCATCATAACAGCACAAATTATAACTCTATAGATTACATTCTTCAGGCAACTTTGGGTATCTTTCAGCATCCCTGCAGTAATCATAAAT  
AACAAGGTTTCTTCCCACCCAGGTGAAGTCTCAAGCTGATTATCATCAAGGCTCCAAGCCTCATACTGATCCCACCAATGCTCGGTTCGTCTTGAAACGCAAGCAGGGTAAGGGTCCCTC  
CCACTGGCAGGCATCGACGCTGAAGTCTTTGTAAGTTGAAACGAAGGGTGAGTCTTCCAGTTTGTCTTCTCAAGGCCTCCTCTGGTAGCCCAGTCGTGCGGCTTCCATATGCTTGAGAA  
TATGTACATTGGCTTCTCATTGGGAAGAAGCTGTTACGTTTACCGTTGTTTTGTACTCTTATGGCCACTCTGTCCACGAAGAAGCTGCAAGTTTGGTGCAGGGGAGATGAGGATTT  
CGACATTATAAAGAGCCGTTTGGTTGCAAGTTTATTTAAATTTAGTTGGAATTAAGGCCAAGTCTTGCCAAATAATCTTTAGAGAAATTCAAAATTTAATAGCTGTCACAGCTTTAGT  
TCGATCCTTTCAAATTTATCAAACATTATTTACTAAGGGCATCTCCAACGAAAAATCTCATTTTTTACTCTAAAATGCCCTGAAACTAAAAAAGAAGTGATTCTCTAATCGAACTCC  
ATTTTGCGCCCTTCGCAGA

>comp153912\_c0\_seq2

TAATTTTATGTTTTTCTTTTTAATGACAAATATTATGATCCATAAAACATTACAAATCTCATCATCTAATAGAGTTTTACTTTAAATTTGAAGGATACTTTTTTATAACACAAAAGACCTGA  
TAAAAAAGTGCATAATCACAGCAAACCTCCACAACAAATCAGTATTATATACGTTCTGCAAGAATTACGCATTCCACCCTCAATTAATTAATTTAAAAAAGTGCATAAAGGCCGAACCGT  
CATCGAACCCGGCCTCATAACCTGAGCCGTCGGAGATCATATCGCCAATGAGAAGCCCTCCAAGAGCGCCGCCATAATCCCCGCTGCCAGCCCCATCCCCGAACTACCTTTATTCCAGG  
CTTCATTGACACCGGTGCCGAGCCGGTGTGGAGCTCCATAACCGTATCCAGCCAGCGGGTAACCATAACCAGCAGGCGAATAACCATATCCAGCCGGCATGCCCGGAGCAGCGTTCCC  
ATATGGCTGTTGGGACAGGTAATATCCCGCCGGCGGGTATGCAATCACCGGCTCCTGAGCCGGCTTTTCCGCCGGTGGTGGAGCGACGAAGTGAAGATGAGGGTAGGGGGAAGGCGGCG  
TGATAGGATCGCTGATCTTATATGAGAAGTTGAGGACGCCTTTGGGCTTATTGGAGAAGGGGCGGCGGACCTGGTAGCTGAGAAACCGAGTATCTCCGGCGTTGGCGATCATGTCGCGGA  
GAGGGATTTGAACGACGCCGACATAGCGGTCTCCGAAGAAGCGATCAGCGCAGAGAAGGATGCGGAGAAAAAGGTTGCCCGGATTCCCGCGGGGAAGGTGAAGTGGATCGTAGCGT  
TCCAATTTGGGGTTCCGGCCACCGTCGCGGTTCGGGGGCGATGCGCTGCCGCGACAGCGGGCTGTCCGAGTACATGGTGACGATGGCGTAGACGCGCATTCTGGTGAAGAGGTTAACATTT  
TTTAGGTCATTTGCGGAGATGAGGGTGAGGTCTAGCGTGCAGTATGCCATTGCCGGACGGTAATTTGGGTTAGGGTTTCGGGATAGCGGACTATAAATTGATGTGAAGAGGTTAGCGAGT  
GGTGGCGGGAACCC



>comp153968\_c0\_seq1

TCAATAATAAATATGCATTA AAAAGTAGGTTCTTCATTA AATAGTTATAAATCAGATACAATAGAACCATAGACATTTCAATGAATTA AAAAGTTCCAAAGAAAAGCTTTAGAACAAAAA  
CCAAAAATAAAATTA AAAAACCAAGCCATACATATGAGGACTTGAAAGAAAAATAACTAAATAAATAATAAATGGTCCATAAAAAGAATATATATATTA AATGTGATTGGCAAAACATGTTTT  
GAAGCTCCTGTTTCCACGCCATTGTTAGTTCTTAATGTATGTAGTAAGCGAAGAAAGAGATGGTGGAGGCGACAATGGCAACTACGAAGACAGGCGTGACTACGAAAGCATCACTGGAG  
GGGCCTGGTGCCGGGGCCTCAGCCGCCAAGGCTGATGTTGCAGAGACAACAACGACCAAAAAGGGTGACGAGGAAATTCTCCATCTCCATTAATGCTAGCTATCGAAGGCAAGGGGATT  
GTAATGGAAGATGAAGTTTTAAGCGGTGAAAAGGAGAATGAGGGAGGTGGATTTTATAAGGATGGTGGTTGTTAGGCTTTTATTTAAGTAGCCAGGGTTGGCTGGCTTTGGCCTAATTT  
AGGGTTTTGTTTTTGTGAGATTAGTGGAGGGGCATATA

>comp153971\_c0\_seq2

TGGATGCAAAATCTTTTGAATAAGCAATACATATCCCACAGTAAAATACATTCGAATTTATGAAAATAGAAGACATGGACTTCATCGTCTTCTACTTATTATCAAATTTTCATATTTTCA  
AGAGCATTACAGATTTTACATAAAATAGTCCATTCTGATACAGTTTCTATATGAGATGTTGATACCAAGATCCTATAATATATTTCCCATCTGTTACATAAAAAAGAGAAGAACACATCAACGC  
TTAGCAATGATCAAAATCAGGACCCCTCAAATATCTCATTCCATGGCCAGTTAGGCTTAAAGCCCTCAGTCTTCTCCACAGCCAGACTTGTTGAGGCCAGAGAGCCAGCAGGATTACTACTA  
TTGCCAATACTTCCACTGCTGTTACTCAATTCATTCACTGCGGCACTGCTTCTGTTGCTGCTACTGTTGTTTGTGAGATAGTGTGAAGAGCAACCCTCACACCAGTGATTAGGAATCTCTG  
ATGGTGGGATACAAAAGGGCTTGCTGAGTGTATTGTTAGATCGCAATGCCTGCAGAGCAAAGCTCGATCCTCCAAGCAGAAAAATAACCAGCTTTTTCTGGCAGATATCACAACCGGG  
CAATTTGGAGGTAGCAGAGGCGGCGCTGGGGAGGAGGAGCGGTACTCTCTGGTGTTCGCGGCTAGCTTGTGGCTGCATGCACCTTCTCGTCGCAATCCAGCAGAGCGCCGCTCAT  
CCGCGCAGCAGAGCACAAACCGCTTCTGCCTTCTCGCACGCATCGCACTGTATCTTCATATCTCCGCCACTGCGATCTTCAATCACAATGTAATCTTTGCCGGTCTTCCAGCAAAATCAGATT  
CCGGCAATCTACGGACGCCACGACAGCTAACCGGAATAAGATCAACGGCTTCAGAAAGCAAAGATGCAAACCCACCGCTAAGCTTAATTTGGGAATCAAATACGGCTGGCCCGCGGCGA  
GGTTTTCTGCTACAGAGAAAGAGAGAGCAGCGCGGAGTTGAGGGGAAGAAGATGCT

>comp153992\_c0\_seq2

CCACTCGGTCTTGTCTTCATACCTGCCAAACAAAGGAAATAGTTAAGGGATGATCTTCGGCTCAGATAATTGGATTGTAATAAAATTGCAGAATATTCTGATGCCAATGCAATTTTTTATAAA  
TATCAGCATAACAAAACA ACTACTAAATTAATTCATTGAGACAATTCATCGATACTAATCGTACTTACCAGCAAGATATGACGGAGATTGCTTCTGCGACCGTAGCAGAATCGAGTGGCAC  
ACGGGGAACAACAAGGGCGCCGGGAGGCCTTCCATACTTGATAGCCGGATGATCGGCAAGAGGTTCGTCCTGAAACTCCGAAACAGGAATAGATTCCGCGAGCACGGCAGAATTTCCA  
AATCTCTTAGAAAGAAGATTGGGATCGAGCTCATCATCAAAATCCGTTGCGGTGAGTGGCCTCTTCTGCATCTCAACATCATCCAGATCCAAAGGGGACTGAATCTCCCGCCGAGAGTAA  
TCAGTAATCGAAGGTGGATCAAAGCCATAAAGTGCGAAGCGGCGAAAGAGGCATCCTGTCCCAACATAAACGGGACCTTGGATGCCATCCAAGGCTCGCATGTTGCCGTGGAAGAAGA  
CGGTGTTGTGATTGGCGTAGCGGTGCGAGGGATCGATGTTCTCGAAGCGTTGGGGGAATTGAATGTAGCAAATATCTTCGCGCCACGATCCATCATGAAGCACATGCCTTCACGAACAG  
CAAGGGAGTTGTAGATGTAATGATCGCAGTCAAGGTTGAGGATGAAGGGGGCGTTGGACATGACGGCGGAGGCGGAACGAGAGCATTGATG

>comp154072\_c2\_seq3

CTCCTCTCTCTCTGTTTCGACAAATTTACAGGATTTGGCCGAAAAGCGCGCGTGAGGGAGAGGGTTACCTTCAGCCAGCGAGCTCCCGTGCCTTGTCTCCGATCAAAATGAGTGACTTCC  
GATCCGAATAGGAAGGGAGAGTCGTCAAATGAGCGAAGTCGAGCGGCGACCGAGGAGATGGAGAGGGGCTCGGGTTCGGATCGGCGTCCGCTTGGGGAAGATGTCGGAACAAGAGGG  
CTTGGCCGGCTCTGTTTCGTGGAGGCAGAGGGAAACGAGATCGGGGAGCTCGGCTTCGGACTGGATGGAGGAGCTCGGGATTGAGAGAAATGCAGAACTTGACACTATTGAATTGCTACA  
AAATTTACCTGCTTTGCAACAGCTACTTTTCCGCTGCTTGGCTGCCAGCCACAGGGAGCTGCCATTTACAATACTGTAATCCACCGTGCATGTCAATTATGTCCGTGAAAGTATAAG  
ATATACATAGCAATTAATATCTGTATCCTTAATTTGGTTGACAAGTTCTTTGATATGCAGCAACGTGATGCCATTAGAGCACTTGAAATTTACCGAAGAGTTGGGCCACAGGCTAAGAGTCT

GTTGAAGTTTTATGATTTCTGTAGAAGGTCTGATTTTGGGCGTGGCCAAAAATTTGTTAAAATCGAGCAGCCTCCTGCTTCATTTGTTGTAGCAATGGAGGAGTATGTGAAGGCTCCCTCA  
CCACAGTTATTGGGTTACAAAAATGTGGTTGAACCTAACAAAAGAATAGTTGGCCCTATGCCAAAGATGGCCCTTGAACATAAGAAAGTAGACCTTCATGACAAAATTCAACGACAGCCT  
ACAACAGCACCAATCCAGCTAACTCACTTGGTACCTAATCTACTTGTAGCTGAATATGCCAAATCTCTTGTCCAATACCAGATCCAGTTAATGATCTCCTGCACCTGGACGATTTTCATGA  
CCGCGCAACTAATTTGGAAGAGATAAATCTTCAATCTTCGCTATAGTTTCCGACGATAATCTGATGAATAATGTAAATCTTCTGATCGCTCTGGTGGATCAACAGAATGGGAAGTGGCTC  
TAATGACAGCTTCCAGTTCAAATACTGCATTGGTGGCTCCCTTCAACAACTAAAGCTTGAAGCCTGTATGCCGATCAAATTTCAAGAACAACAACCAAAAATTCAAGTTATCCAAATC  
CGTTCGAGTCAGATCAGTACACCCATGACCCATTTTATGCTTCAGGTGGCATCGATCTGCCGGCCAATTTGCAGAACCAAGCAATGGGGCTTGAAAACAATCCATTTGGACCAACTGGTG  
TTTCATCTTTTCCCTGCCAGGATCCATATACAGGTTTGATGTAATTTTTTTTTTTTTTTTCCAATTTTGTTCAGTTCAAAGATGTACATAACTAGACAGAAAGTTATTGAGATTTCAATCAG  
>comp154072\_c2\_seq8

AAAAAAAAAAAAAAAAAATTACATCAAACCTGTATATGGATCCTGGGCAGGAAAAGATGAAACACCAGTTGGTCCAAATGGATTGTTTTCAAGCCCCATTGCTTGGTTCTGCAAATGGC  
CGGCAGATCGATGCCACCTGAAGCATAAAATGGGTGATGGGTGACTGATCTGACTCGAACGGATTTGGATAACTTGAATTTTGGTTTGTGTTCTTGAAATTTGATCGGCATACAGGCTTT  
CAAGCTTTAGTTTGTGAAGGGAGCCACCAATGCAGTATTTGAACTGGAAGCTGTCATTAGAGCAAGTTCCCATTCGTCGGAAACTATAGCGAAGATTGAAGAATTTATCTCTTCCAAAT  
AGTTGCGCGGTCATGAAAATCGTCCAAGTGCAGGAGATCATAACTGGATCTGGTATTGGAACAAGAGATTGGGCATATTCAGCTACAAGTAGATTAGGTACCAAGTGAGTTAGCTGGAT  
TGGTGCTGTTGTAGGCTGTCGTTGAATTTTGTATGAAGGTCTACTTTCTTATGTTCAAAGGCCATCTTTGGCATAGGGCCAACTATTCTTTTGTAGGTTCAACCACATTTTGTAAACCCAA  
TAACTGTGGTGAGGGAGCCTTACATACTCTCCATTGCTACAACAAATGAAGCAGGAGGCTGCTCGATTTTAAACAAATTTTGGCCACGCCAAAATCAGACCTTCTACAGAAATCATA  
AAACTTCAACAGACTCTTAGCCTGTGGCCAACTCTTCGGTAAATTTCAAGTGCTCTAATGGCATCACGTTGCTGCATATCAAAGAAGTTGTAACCAAAATTAAGGATACAGATATTAAT  
GCTATGTATATCTTTATACTTTCACCGACAATAATTGACAGTGCACGGTGGATTACAGTATTGTAATGGCAGCTCCCTGTGGCTGGCAGCCAAGCAGGCGGAAAAGTAGCTGTTGCAAAG  
CAGGTAAATTTGTAGCAATTCATAGTGTCAAGTTCTGCATTTCTCTCAATCCCGAGCTCTCCATCCAGTCCGAAGCCGAGCTC  
>comp154080\_c0\_seq10

AGATTCCACCTTAGTTGGTTCTTCAACCTCCTGAAAGTCTCTTGCTTTTCTGAAAGCTCGAAAGCCGAAGCCTAAATCTAGATATATATGGGGAGAGTTCCTTGTGCGATAAGAACGGTT  
TAAAGAAAGGTCCGTGGACGCCAGAGGAGGACCAGAAGCTCATTGATTATATACAGAAGCACGGCCATGGCACCTGGAGAACCCTCCCGAAGAATGCAGCACGATGTGGAAAGAGTTG  
CAGACTCCGATGGGCGAACTATCTTCGACCAGATATAAAGAGAGGAAGGTTCTCCTTTGAAGAAGAGGAGGCCATCATTCAATTACACAGTGTCTTGGGCAACAAGTAAGAACAACATAT  
ACCACTAATTAATATTACAGTAACTTGAATTTTTTATTCCTTCAACTAGCTAAATGAACGATCGATCTTCGCTAATTGATCAGATGGTCAGAAATTGCTGCGCGCTTACCTGGAAGAACTGA  
TAATGAGATCAAGAACTACTGGAGGACTAGAATTCAGAAGAAGGTTAAGAATGGCGATGCAGCCGATTACTCGAGCCAAATGATCATTGATGAGGCCAGCACAAAGCCATACAAGTAGCA  
TTGAAGAAGGAATAGCTCAGCAAAGTTATCCCGTTCACCCAAATACAAATCCTGAAGGTTATCCTCCTTCATACAACACTGGTGAATGGGAGAGAAGTCTTGGAGTGTGGAGGATTTCT  
GGTCAATCCAATCTGACCAATCTCTTAATGGTGATTAATTAAGTTAGATATCAAGAAACCATCATGCTTATATGTAAGAAGTATTGATGAATGAGGTAAATGGCTTTGATCAGCTTCAGGAAT  
ATATATAATTATATGATTGTGCTGGTTCGCGCTTGTATTTGTACAAAAATGCTAATTATCATGGTTACAATGTAATAAATCAAGTGAGAGATAGCATGCGCTTGGTTTGTCTTAATTTACATGT  
AGCATCGGGAGCTAAAGATTTCAATAAGACTCAAATAATAATTTGTATAAATGTTCTCTGAGCTTTCCAAGGAATATGGCAAA  
>comp154080\_c0\_seq11

AAAAATAGCCTTTAAACTTCAAACACAAATTATGGGCCGCGTTACCTCATTGATGAACAACGGATGGCACCAACTCCCTTTGACTCTCTCTCTTCTTCTCCTTCTAACTGTAGTTATATATA  
TCCATATTCATGTTCCCTCTTCTTCCATTCCACCTCAGTTTGTCTTCAACCTCCTGCAAGCCTCTTCTCCCTCTGTGCTCTCCTCATCCTTTACTGAAAGCTCTAAAACCGAAGCCAAAA  
TCTTGATATATATGGGGAGAGTTCCTTGTGCGATAAAAATGGCCTTAAGAAAGGCCCGTGGACGCCAGAGGAGGACCAGAAGCTCATTGATTATATACAGAAGCATGGCCATGGCACTT

GGAGAACCCTCCCCAAGAATGCAGGTCTTGCAAGATGTGGGAAGAGCTGCAGGCTTCGATGGGCGAACTATCTTCGACCAGATATAAAGAGAGGAAGGTTCTCCTTTGAAGAAGAGGA  
GGCCATCATTCAATTACACAGTGTCTTGGGCAACAATGGTCAGAAATTGCTGCGCGCTTACCTGGAAGAAGCTGATAATGAGATCAAGAAGCTACTGGAGGACTAGAATTCAGAAGAAGG  
TTAAGAATGGCGATGCAGCCGATTACTCGAGCCAAATGATCATTGATGAGGCCAGCACAAAGCCATACAAGTAGCATTGAAGAAGGAATAGCTCAGCAAAGTTATCCCGTTCACCCAAATA  
CAAATCCTGAAGGTTATCCTCCTTCATACAACACTGGTGAATTGGGAGAGAACTTTTGGAGTGTGGAGGATTTCTGGTCAATCCAATCTGACCAATCTCTTAATGGTGATTAATTAAGTTAG  
ATATCAAGAAAACCATCATGCTTATATGTAAGAAGCTATTGATGAATGAGGTAAATGGCTTTGATCAGCTTCAGGAATATATATAATTATATGATTGTGCTGGTTAGTAATGCATAAATGTCGCGC  
TTGCATTTGTACAAAAGTTGCTAATTATCATGGTTACAATGTAATAAATCAAGTGAGAGATAGCATGCGCTTGGTTTGCTTAACTATTACATGTAGCATCGGGAGCTAAAGATTTTCATAAGAC  
TCAAATAATAATTTTGTATAAATGTTCTCTGAGCTTTCCAAGGAATATGGCAA

>comp154080\_c0\_seq12

CAGTTAAAAACTTCAAATTTCTTGCTATATATATCTCTTAATTTGCGGGTTAGAAAAGTCCTATATGAAAAGAGTTGTAGGTTTGATTAATAAAGATCATGACCAATCTTTTTGTAGGTTT  
AGCACGATGTGGAAAGAGTTGCAGACTCCGATGGGCGAACTATCTTCGACCAGATATAAAGAGAGGAAGGTTCTCCTTTGAAGAAGAGGAGGCCATCATTCAATTACACAGTGTCTTGG  
GCAACAAATGGTCAGAAATTGCTGCGCGCTTACCTGGAAGAAGCTGATAATGAGATCAAGAAGCTACTGGAGGACTAGAATTCAGAAGAAGGTTAAGAATGGCGATGCAGCCGATTACTCG  
AGCCAAATGATCATTGATGAGGCCAGCACAAAGCCATACAAGTAGCATTGAAGAAGGAATAGCTCAGCAAAGTTATCCCGTTCACCCAAATACAAATCCTGAAGGTTATCCTCCTTCATACA  
ACACTGGTGAATTGGGAGAGAACTTTTGGAGTGTGGAGGATTTCTGGTCAATCCAATCTGACCAATCTCTTAATGGTGATTAATTAAGTTAGATATCAAGAAAACCATCATGCTTATATGTA  
GAACTATTGATGAATGAGGTAAATGGCTTTGATCAGCTTCAGGAATATATATAATTATATGATTGTGCTGGTTCGCGCTTG

>comp154080\_c0\_seq13

AAAAATAGCCTTTAAACTTCAAACCACAAATTATGGGCCGCGTTACCTCATTGATGAACAACGGATGGCACCAACTCCCTTTGACTCTCTCTCTTCTCCTTCTAACTGTAGTTATATATA  
TCCATATTCATGTTCCCTCTTCTTCCATTCCACCTCAGTTTGCTCTTCAACCTCTGCAAGCCTCTTCCTCCCTCTGTGCTCTCCTCATCCTTTACTGAAAGCTCTAAAACCGAAGCCAAAA  
TCTTGATATATATGGGGAGAGTTCCTTGCTGCGATAAAAATGGCCTTAAGAAAGGCCCGTGACGCCAGAGGAGGACCAGAAGCTCATTGATTATATACAGAAGCATGGCCATGGCACTT  
GGAGAACCCTCCCCAAGAATGCAGGTCTTGCAAGATGTGGGAAGAGCTGCAGGCTTCGATGGGCGAACTATCTTCGACCAGATATAAAGAGAGGAAGGTTCTCCTTTGAAGAAGAGGA  
GGCCATCATTCAATTACACAGTGTCTTGGGCAACAAGTAAGAACAACATATACCACTAATTAATATTACAGTAACTTGAATTTTTTATTCCTTCAACTAGCTAAATGAACGATCGATCTTCG  
CTAATTGATCAGATGGTCAGAAATTGCTGCGCGCTTACCTGGAAGAAGCTGATAATGAGATCAAGAAGCTACTGGAGGACTAGAATTCAGAAGAAGGTTAAGAATGGCGATGCAGCCGATTA  
CTCGAGCCAAATGATCATTGATGAGGCCAGCACAAAGCCATACAAGTAGCATTGAAGAAGGAATAGCTCAGCAAAGTTATCCCGTTCACCCAAATACAAATCCTGAAGGTTATCCTCCTTC  
ATACAACACTGGTGAATTGGGAGAGAACTTTTGGAGTGTGGAGGATTTCTGGTCAATCCAATCTGACCAATCTCTTAATGGTGATTAATTAAGTTAGATATCAAGAAAACCATCATGCTTATA  
TGTAAGAAGCTATTGATGAATGAGGTAAATGGCTTTGATCAGCTTCAGGAATATATATAATTATATGATTGTGCTGGTTAGTAATGCATAAATGTCGCGCTTGCATTTGTACAAAAGTTGCTAAT  
TATCATGGTTACAATGTAATAAATCAAGTGAGAGATAGCATGCGCTTGGTTTGCTTAACTATTACATGTAGCATCGGGAGCTAAAGATTTTCATAAGACTCAAATAATAATTTGTATAAATGT  
TCTCTGAGCTTTCCAAGGAATATGGCAA

>comp154080\_c0\_seq14

AGATTCCACCTTAGTTGGTTCTTCAACCTCCTGAAAGTCTCTTGCTTTTCTGAAAGCTCGAAAGCCGAAAGCCTAAATCTAGATATATATGGGGAGAGTTCCTTGTGCGATAAGAACGGTT  
TAAAGAAAGGTCCGTGGACGCCAGAGGAGGACCAGAAGCTCATTGATTATATACAGAAGCACGGCCATGGCACCTGGAGAACCCTCCCGAAGAATGCAGCACGATGTGGAAAGAGTTG  
CAGACTCCGATGGGCGAACTATCTTCGACCAGATATAAAGAGAGGAAGGTTCTCCTTTGAAGAAGAGGAGGCCATCATTCAATTACACAGTGTCTTGGGCAACAATGGTCAGAAATTG  
CTGCGCGCTTACCTGGAAGAAGCTGATAATGAGATCAAGAAGCTACTGGAGGACTAGAATTCAGAAGAAGGTTAAGAATGGCGATGCAGCCGATTACTCGAGCCAAATGATCATTGATGAG

GCCAGCACAAGCCATACAAGTAGCATTGAAGAAGGAATAGCTCAGCAAAGTTATCCCGTTCACCCAAATACAAATCCTGAAGGTTATCCTCCTTCATACAACACTGGTGAATTGGGAGAG  
AACTTTTGGAGTGTGGAGGATTTCTGGTCAATCCAATCTGACCAATCTCTTAATGGTGATTAATTAAGTTAGATATCAAGAAACCATCATGCTTATATGTAAGAACTATTGATGAATGAGGTA  
AATGGCTTTGATCAGCTTCAGGAATATATAATTATATGATTGTGCTGGTCGCGCTTGATTTGTACAAAAATTGCTAATTATCATGGTTACAATGTAATAAATCAAGTGAGAGATAGCATGC  
GCTTGGTTTGTCTTAACTATTACATGTAGCATCGGGAGCTAAAGATTTCATAAGACTCAAATAATAATTTTGTATAAATGTTCTCTGAGCTTTCCAAGGAATATGGCAA

>comp154097\_c0\_seq16

TTTTTCAAGAAAACAAGCTTCATTATATAATAAGAAAATTAAGAATAGGAAATAAATTACACAGGCCTCTGTCCCAATAATAGTTCATGTAAACTATTCCTTTCAGAAAAGTTCATAGG  
AAGAAAATCTCCTGCATTTATGGAGAAGCTCACAAATTTCAAGAAATATTATTACAAGCCACATCCACTACACAAAATATACTGGATCAAATATAGGGACAGTGAGATCTCCACAACGGAC  
ACATAGCTTGAATTATTCCTCTTATTTTCATGTAGGAGAATTCCTTCTCTGATCGTTTCAGTCCTCTGATCATATATGAATGTTACTTCTGGGAAATTACATGCTCGAAGGAGAAGAGACCAT  
ATAGTGCATGGAAATTTTGTATATATTTATATAGAAGAAAGTCTTTCTATTAATCTTACTTTTCTTTTCCATTTTTTATTTTGTACAGAAATCTGTGTTATTTTAGACACACAAAGGTTCACTGA  
TGACAGGTTGGAGTTGATTTGGCATTTCAGGTATAACTTCTTCATAAGTAAGTGGAAAGATGACTTTGTGTTTCAACAGGTTCTTCGGAGGTTGTGGGGAATGAAGAGCTTGAAGAATATAT  
AGATGTCACAGGGGATGAGACCAGAACCTTCTTTCTTTCTTTCTTTAAAGGTTTTGGTATCTCGGGGCACGAGCTTTCTATAGAATTTTCAGATGAAGAACTGATTGCCATCTTCTGG  
GTTGCTTAAACTCAAAATCATTCAAAGAAGCTGAATTGAAACCATTAGAGATGCAGGGGTAATATCCGATGCAGACTTGTATTTACTCATCCAGCTGGGCGCGTGTATTGAATCGCTGTC  
GAAGCCAATGTGTGCAATATGCCTCACATCTGTAGGGTGCCTATCTCCATCTCTTGTTCCTTCAATGAAAAATAAATTATAATCCTGAAAAGAGAAAATATAACTCAGAAATTGGCTTTTCTA  
CCCCTTCCAAACGCCATTCTCCATCTTCTTTCTTCTTCTTCTTCTTAAAGGTTTTGGTATCTCGGGGCACGAGCTTTCTATAGAATTTTCAGATGAAGAACTGATTGCCATCTTCTGG  
CAAATAAAAATGTGAAATTCAGATTTCGAAAGAGGAAATGGAGTGAGGAGATAGAGAAACGACGGTAAAAGAAGCGTTTTTACTCAGTTTGGGAGTTG

>comp154097\_c0\_seq23

AATTATTATGTGCGGCGTTCGGATCCGTCTTGCACCCATCACGTCCTCAGGGCCAGTGCATCCGGGTGACGTGGCGAGTCTGGATTAATCTCCGAAGAGTCCGTACACTGCACGTAATAA  
TCTCTCAAGATAAAGAGAGAGAAAACAAGCTGTGAGAAAACCAAGAGGTCTCGATAGACTGACCAAATCATTCAAAGAAGCTGAATTGAAACCATTAGAGATGCAGGGGTAATATC  
CGATGCAGACTTGTATTTACTCATCCAGCTGGGCGCGTGTATTGAATCGCTGTCGAAGCCAATGTGTGCAATATGCCTCACATCTGTAGGGTGCCTATCTCCATCTCTTGTTCCTTGTAAC  
AAAGATCTGTGAGATATACTTTAATCCCTTGAACAAACCCTTACCTTTGGGGTCATCGGAAGAGGCTTCAATGAAAATAAATTATAATCCTGAAAAGAGAAAATATAACTCAGAAATTGGC  
TTTTCTACCCCTTCCAAACGCCATTCTCCATCTTCTTTCTTCTTCTTCTTCTTAAAGGTTTTGGTATCTCGGGGCACGAGCTTTCTATAGAATTTTAAAAACAAACAAAAAGG  
CGATGTTACAAATAAAAATGTGAAATTCAGATTTCGAAAGAGGAAATGGAGTGAGGAGATAGAGAAACGACGGTAAAAGAAGCGTTTTTACTCAGTTTGGGAGTTG

>comp154097\_c0\_seq25

TTTTTCAAGAAAACAAGCTTCATTATATAATAAGAAAATTAAGAATAGGAAATAAATTACACAGGCCTCTGTCCCAATAATAGTTCATGTAAACTATTCCTTTCAGAAAAGTTCATAGG  
AAGAAAATCTCCTGCATTTATGGAGAAGCTCACAAATTTCAAGAAATATTATTACAAGCCACATCCACTACACAAAATATACTGGATCAAATATAGGGACAGTGAGATCTCCACAACGGAC  
ACATAGCTTGAATTATTCCTCTTATTTTCATGTAGGAGAATTCCTTCTCTGATCGTTTCAGTCCTCTGATCATATATGAATGTTACTTCTGGGAAATTACATGCTCGAAGGAGAAGAGACCAT  
ATAGTGCATGGAAATTTTGTATATATTTATATAGAAGAAAGTCTTTCTATTAATCTTACTTTTCTTCTTCCATTTTTTATCTTAGGCATCCATAGTTCATCAAATGACAGAAATCTGTGTTATTT  
TAGACACACAAAGGTTCACTGATGACAGGTTGGAGTTGATTTGGCATTTCAGGTATAACTTCTTCATAAGTAAGTGGAAAGATGACTTTGTGTTTCAACAGGTTCTTCGGAGGTTGTGGG  
AATGAAGAGCTTGAAGAATATATAGATGTCACAGGGGATGAGACCAGAACCTTCTTTCTTTCTTCTTTAAAGGTTTTGGTATCTCGGGGCACGAGCTTTCTATAGAATTTTCAGATGA  
AGAAACTGATTGCCATCTTCTGGGTTGCTTAAACTCTGTAATGAGAACAAGCAATAATGTATGAGGATTCTGTCAATATAGGATTTGAAATGCGTTTATATATGTATCCTTAAATTGTATTGCA  
ATTAAGTAATTGGATAGATTGAAGGTTTGTATCTCAGAGCATAATAAATAGGCAATCTGATTATATCTTCATGGTTCTCTCTTATGGAAGAAATGCCAAACAACTTTCATTTTTCTTAAAAAT

GAACTGTTGGATATTGAAGGAGTATGATGGAAATACCTCAAGATCATGAGAAAACCTGCATTTCACTACTGCTTTCTTTATAGTCAACAAAATCATTCAAAGAAGCTGAATTGAAACCA  
TTCAGAGATGCAGGGGTAATATCCGATGCAGACTTGTATTTACTCATCCAGCTGGGCGCGTGTATTGAATCGCTGTGAAGCCAATGTGTGCAATATGCCTCACATCTGTAGGGTGCCCTAT  
CTCCATCTCTTGTTCCTTGTAACAAAGATCTGTGAGATATACTTTAATCCCTTGAACAAACCCTTCACCTTTGGGGTCATCGGAAGAGGCTTCAATGAAAATAAATTATAATCCTGAAAAG  
AGAAATATAACTCAGAAATGGCTTTTCTACCCCTTCCAAACGCCATTCTCCATCTTCTTTCTCCATTATTAATCTAACAACAAGGAAAGAAAATGCAGAACATGGCCTGTTTGTCCA  
TATATTAACAAACAAAAGGCGATGTTACAAATAAAAATGTGAAATTTTCAGATTCGAAAGAGGAAATGGAGTGAGGAGATAGAGAAACGACGGTAAAAGAAGCGTTTTTACTCAGT  
TTGGGAGTTG

>comp154097\_c0\_seq27

TTTTTTCAAGAAAACAAGCTTCATTATATAATAAGAAAATTAAGAATAGGAAATAAATTACACAGGCCTCTGTCCCAATAATAGTTCATGTAAACTATTCCTTTCAGAAAAGTTCCATAGG  
AAGAAAATCTCCTGCATTTATGGAGAAGCTCACAAATTTCAAGAAATATTATTACAAGCCACATCCACTACACAAAATATACTGGATCAAATATAGGGACAGTGAGATCTCCACAACGGAC  
ACATAGCTTGAATTATTCCTCTTATTTTCATGTAGGAGAATTCCTTCTTCTGATCGTTTCAGTCCTCTGATCATATATGAATGTTACTTCTGGGAAATTACATGCTCGAAGGAGAAGAGACCAT  
ATAGTGCATGGAAATTTTGTATATATTTATATAGAAGAAAGTCTTTCTATTAATCTTACTTTTCTTTCCATTTTTTATTTTACAGAAATCTGTGTTATTTTAGACACACAAAGGTTCACTGA  
TGACAGGTTGGAGTTGATTTGGCATTTCAGGTATAACTTCTTCATAAGTAAGTGAAGATGACTTTGTGTTTCAACAGGTTCTTCGGAGGTTGTGGGGAATGAAGAGCTTGAAGAATATAT  
AGATGTCACAGGGGATGAGACCAGAACCTTCTTTCTTTCTTCTTTAAAGTTTTGGTATCTCGGGGCACGAGCTTTCTATAGAATTTTCAGATGAAGAAACTGATTGCCATCTTCTGG  
GTTGCTTAAACTCAAAAATCATTCAAAGAAGCTGAATTGAAACCATTTCAGAGATGCAGGGGTAATATCCGATGCAGACTTGTATTTACTCATCCAGCTGGGCGCGTGTATTGAATCGCTGTC  
GAAGCCAATGTGTGCAATATGCCTCACATCTGTAGGGTGCCCTATCTCCATCTCTTGTTCCTTGTAACAAAGATCTGTGAGATATACTTTAATCCCTTGAACAAACCCTTCACCTTTGGGG  
TCATCGGAAGAGGCTTCAATGAAAATAAATTATAATCCTGAAAAGAGAAATATAACTCAGAAATTTGGCTTTTCTACCCCTTCCAAACGCCATTCTCCATCTTCTTTCTCCATTATTAAT  
CTAACAACAAGGAAAGAAAATGCAGAACATGGCCTGTTTGTCCATATATTAACAAACAAAAGGCGATGTTACAAATAAAAATGTGAAATTTTCAGATTCGAAAGAGGAAATGGAGT  
GAGGAGATAGAGAAACGACGGTAAAAGAAGCGTTTTTACTCAGTTTGGGAGTTG

>comp154097\_c0\_seq8

TTTTTTCAAGAAAACAAGCTTCATTATATAATAAGAAAATTAAGAATAGGAAATAAATTACACAGGCCTCTGTCCCAATAATAGTTCATGTAAACTATTCCTTTCAGAAAAGTTCCATAGG  
AAGAAAATCTCCTGCATTTATGGAGAAGCTCACAAATTTCAAGAAATATTATTACAAGCCACATCCACTACACAAAATATACTGGATCAAATATAGGGACAGTGAGATCTCCACAACGGAC  
ACATAGCTTGAATTATTCCTCTTATTTTCATGTAGGAGAATTCCTTCTTCTGATCGTTTCAGTCCTCTGATCATATATGAATGTTACTTCTGGGAAATTACATGCTCGAAGGAGAAGAGACCAT  
ATAGTGCATGGAAATTTTGTATATATTTATATAGAAGAAAGTCTTTCTATTAATCTTACTTTTCTTCCATTTTTTATCTTAGGCATCCATAGTTCATCAAATGACAGAAATCTGTGTTATTT  
TAGACACACAAAGGTTCACTGATGACAGGTTGGAGTTGATTTGGCATTTCAGGTATAACTTCTTCATAAGTAAGTGAAGATGACTTTGTGTTTCAACAGGTTCTTCGGAGGTTGTGGGG  
AATGAAGAGCTTGAAGAATATATAGATGTCACAGGGGATGAGACCAGAACCTTCTTTCTTTCTTCTTTAAAGTTTTGGTATCTCGGGGCACGAGCTTTCTATAGAATTTTCAGATGA  
AGAAACTGATTGCCATCTTCTGGGTTGCTTAAACTCAAAATCATTCAAAGAAGCTGAATTGAAACCATTTCAGAGATGCAGGGGTAATATCCGATGCAGACTTGTATTTACTCATCCAGCTG  
GGCGCGTGTATTGAATCGCTGTGAAGCCAATGTGTGCAATATGCCTCACATCTGTAGGGTGCCCTATCTCCATCTCTTGTTCCTTCAATGAAAATAAATTATAATCCTGAAAAGAGAAATAT  
AACTCAGAAATTTGGCTTTTCTACCCCTTCCAAACGCCATTCTCCATCTTCTTTCTCCATTATTAATCTAACAACAAGGAAAGAAAATGCAGAACATGGCCTGTTTGTCCATATATTA  
AAACAAACAAAAGGCGATGTTACAAATAAAAATGTGAAATTTTCAGATTCGAAAGAGGAAATGGAGTGAGGAGATAGAGAAACGACGGTAAAAGAAGCGTTTTTACTCAGTTTGGGAG  
TTG

>comp154131\_c0\_seq4

AAGGTGTTTTGTATCTTGGGATTGTTGTTTTTCAGCTGCACCGGGGACTTCCTGCAATTGGAATTTGTGATCGAAGACAGTATAACATGAAACGATATAGCCCTCGCAAAAATTCCACTGAA  
CCTCGTAGGTGAATCGGCTTGTGAATTCAGAAAAGAGCCTCAGTAAATCAAATAGTTGATTCTATGATTCCTTTTTTTAGTACTACGTGTTGTTCAATGCGTTTTGGTTCATTGGGTTTCAGAG  
TTTTGTTGGGCTACGGTTACCCATGTCCATTGTTTTGTGCAGAAGAAAGGTTCCCTGAGAGTATTGTAATGAATCCACAAAGTTTCAGTTGCAATCTGTGCATTATGTGATGTTTTCAACTTTCA  
CAATTCTAGCTAGCATGATCATGTTTAAGGACTGGGACTCGCAGAATGCTACACAGATTGCAACTGAACTTTGTGGATTTCATTACAATACTCTCAGGAACCTTTCTTCTGCACAAAACAAT  
GGACATGGGTAACCGTAGCCCAACAACTCTGAACCCAATGAACCAACGCATTGAACAACACGTAGTACTAAAAAAGGAATCATAGAATCAACTATTTTGATTTACTGAGGCTCTTTTC  
TGAATTCACAAGCCGATTCACCTACGAGGTTTCAGTGGAAATTTTTGCGAGGGCTATATCGTTTTCATGTATACTGTCTTCAATCACAAATTTCAATTGCAGGAAGTCGGTGCAGCTGAAAACA  
ACAATCCCAAGATACAAAACACCTTGTAAATAGTATTTCTTTTTCTCTTCATTTTTTGTCTTTGGTAACTTCATATTGTTCTAGTTCTGTTTTCAAGTAAAATTCGAATTGGAGACTGAAATC  
GAGCTGATTTGTATATATAAGCCC

>comp154161\_c0\_seq3

GGAGAAAGCTAGCAGAGACGCGAAACGAACCGTAGTCGTCCGGCGATCTCGCGGGAACAATCGTTGATCGACGGAATCTTCGCCAGTGACGAAGATTAAGAAGCAAGGTAAGAAGATC  
GGCGATGGGCCGAAGCGATTGACCATTTTCGTCCACCGCGAGTGGTGAGACGACCTGCACAGATGGGGAAGTGCCTCTCTTCCAAGGATCCTAGGGCTCTTGCTAGAAGGAACCCAGTT  
ATTCCATCAAATAGATTTGCAGTTGCACCGTCAAGGAGTAAAGCTCCCAGGCCATCAAAGAACAAGCTGTTCGTACCATCAGAAATTGATTTTACTGCACAAAATATACCAAGGCGGCC  
ATATCATCAGTGAAAGCTTCAATTGCACTATCACTTTCTCCAAATGAGGATGCAGACAGAACTGGCTATGTGGAGAGCAAGCCAGTGATGCATGGAGATGTGGAAGACTTTCAACAAATA  
ACTAGTTATGGAAATGTTGTCATATTTACATATGATGAGTTGAGATTATCAACCAGGAACTTCCGAGAAGATCTAATCCTAGGAGAGGGTGGCTTTGGGCTTGTTTATAAGGGAGTCATAGA  
TGAGAACATTCGGCCAGGTCTCAAGCCCATGTTTGTGCTGTTAAGGATCTCAACCGAAATGGTCTACAAGGTGATAGGGAGTGGCTGGCTGAAGTTAATTACCTCGGGCAATTGAGCCA  
TCCTAATCTTGTCAAACCTCATTGGATACTGTTGTCAAGATGATCACCGGATATTGGTTTACGAGTATATGGCTTTGGGTAGCCTAGAGAGGCATCTTTTCCAACGTATGCTGATGAATTCTCA  
AAGATATCATGATAATGCGTTGTTATTTAAATTTATTTATAAAATAACCATTTTATTTTAAACATTCATATTTGGAAGTGGTTTTCTTGGTATCAGCACTTTTATGGAAGCCCGCAAGTA  
ATTTCTTCAAGTTAACCAACAAACACCGTTGACACTGAGTTCTTGTGGAGGGTAGTCATAATCATAAATGATGCTTACAAATGAAATGATTACTGAAGACTGAAGCAGCATGTTATGTAC  
TTTGAGTTCAGGAAAAAATGT

>comp154169\_c0\_seq2

TTTTTTAAGACCAGCATTAGCAAGTTATTCTCTTTACAACCTCTCCCTTTCTTCTCTCCCGTCTGCTTTCTTATAAAGCTACTTTATTAGAGCTGCAGCAGACGAAAACAGGTATTTTTG  
TTGCTTTCTTGTGATTTTCATATCTCTGTCTTTGTTTTCTTTATTTCCCTTTGTTCTTAGATCTTTTCGAGAGGTTCTGCGCTCTTCCAATTTGCTGGTGGAGATGGTTTTTCTGTCCATCAGCA  
GATTCAATGTCGGAAGGCTCTGAAATCTTCTTGATTTCTCTTATCCCTCATATGGTCTGAATCCTTCATAAAAGACTGCAGCAATTCTTCTTCTACTGTTCAAAGAGAAGGTTGTAGCAA  
GTACATTGCCTGTTCTACATATAGAGGAGAGAGATTCTCTCCATTAATGAATTTTGAAGAATTGAATATAGAGTTGAGATTTCAAGGTCTGATAGGTATTGGAGCGTACAGTAGGGGCTTGA  
TGAAAGCAGAGAAATGAAGTCGCCATTGTCTGGAAGAAAAAGGATTGTGGTGCCAAAAAGCCTACTAAGCCTCAGGTAACGAATACAAGATCCTTATCTTTGGGCTACTTCAGTGTG  
GAATCCTTCTTGTGCTTGCCTGTCTCACAGCATCGTTGCTGTTTCTTCTTATACTGCCGCCATTGCCGCCACCGCCGGTTATGCTGCTTCTTCTTCTATAGGAATTCGCTTGTCTTT  
TGATTCTGGCGTTTATGCATTCAGATATGAGGGATGTTTCTTACTTATGAAGAGCAAAAAGTCTGATTGAGATTGTTGTAGCTGTCTGTCAAATTAGTTGTGAAAAAAGAGTTTTTAAAA  
ACTACTGTCTGCACATGTAATAAATTATTTTCGTTTTAAAAAAGAAGT

>comp154169\_c1\_seq6

ACAACAATCTCAATCAGACTTTTTTAAACGAAAATAATTTATTACATGTGCAGACAGTAGTTTTTAAAAACTCTTTTTTCACTAATTTGACAGACAGCTACAACAATCTCAATCAGACT  
TTTGCTCTTCATAAGTAAGAGGAAACATCCCTCATATCTGAATGCATAAACGCCAGAATCAAAGAACAAGCAGAATTCCTATAGGAAGAAGAAGCAGCATAACCGCGGTGGCGGCAAT

GGCGGCAGTATAAGAGGAAGAAACAGCAACGATGCTGTGAGACAGGCAAGCAACAAGAAGGATTCCACACTGAAGTAGCCCAAAGATAAGGATCTTGTATTTCGTTACCTGAGGCTTAG  
TAGGCTTTTTTGGCACCAATCCTTTTTCTTCCAGACAATGGCGACTTCATTTCTCTGCTTTCCATCAAGCCCCTACTGTACGCTCCAATACCTATCAGACCTTGAAATCTCAACTCTATAT  
TCAATTTCTTCAAATTCATTAATGGAGAGAATCTCTCTCCTCTATATGTAGAACAGGCAATGTACTTTGCTACAACCTTCTCTTTGAACAGTAGAAGAAGAATTGCTGCAGTCTTTTATGAA  
GGATTCAGACCTGCTCAGAATCAAAGATTAAAAAGTGTTAGAAGTCTAAATCAAATCAACAGAGTAGAAATTTTTGAAAGAAACCAAATTTGATCATATGAGGGGATGAGAGAAATGA  
AGAAGATGATAGCTTCAACTCATTAAAGATTGAAATGGTTTTAGAGCTTGGCAGCCCATTGAGGGCTGTTGGATTCCGATTCTTCAAAAACCTCTCTCACAATATATATTTTATCCTCTTC  
CGACATTGAATCTGCTGATGGACATAAAAACA

>comp154172\_c0\_seq1

AAAAAAAAAAAAAAAAAATTACGTAAAGATAATCCCGTGAGACCGACCGTTTTAGTCCGACCGTACAATATACAAAACCTCCAAATTTATCTTCCCATCTCAATCCTTCCCGACGATCGGCT  
CTGCCCTTAATTTCCCCAAAAAAAAAAAAAAAAATCCCTTCCCGACAACGTCGCGTGCGACAAAACCACCACACTCGATCTCCAGCCTCTACTCATACTCTCCTACCATTTTCAACTCTTCATAA  
CTAAATTCGGATATGTCCGCCGAGCCGCCGCCGACGCCGTTGATCAATCTTACCCTCCCTTCCCTCTCCGGCGCTGCCATGCCTCCTCCACCGCCAGGCCATGAACCGCTCCACGTTT  
CTCTGATTGACTTGGAAAATCTCGAACACAAACGGCTCGGCGACGTTTTGCCGATCACTTGGCCTCTTCCGGCTCGTAAACCATGGCCTGCCGCGGAGCTCTCGGACCGGGTTCAGGCT  
GAGACGCGCGGATTCTGGAGATGCCGTTTGGACAAAAGCGAGCGGAGATGTCTGAACCGGACGGCGGGCGGGCCGGTGGTTTTATTTTTGGGGCACGCCTGCCGTGAGCTTGAGTCTTC  
GGAGCGTCAACTGGGTGAGGGGCTCCACGTATCGCTAGCCGGAATCCGCTCCGGGGACGGACTGGACTGCTCTGCTTCCCTCCGGTCTTAATGGAAGATTACGGGAAACATATGGTG  
CGCATTGTGAGAACCTATTCGAATCAATGGCGCTGGATCTCAAACCTGGATCCAATCTTTTAGATTTCGTGCATGGATCCATCTAACGGCATCTTTCGAATGTACCGTTACCCTTGCTTACCC  
AAGGCTCAAAGCTGCTTAGGAATGGGAGCTCATAAGATAGCTCAGTCTTACTGTGGTAGACCAGGATGATGTTGGTGGCTTGGAGATCCTCCATGATGGTTCATGGTCCATATAATGC  
CAGTTGCTAACACTCTCATCGTCAACACTGGTGATATGTTGCAGGCAATCAGCAACGACGAATATAAAAAGTGTGGAACATAGAGTGCTAGCTAATGGAACCAAGGAGAGGATGTCTTTGT  
GCTTCTTTGTTTTTCTAAGGAGGATTTCAAGATCAGGAGCTCGAGTTACAGAGAGTTCACTTACAGTGAGTTCAAGGCTCAGGTGCAGGAAGACATTAAGGAAACTGGCGATAAAGTT  
GGGTTGAAGAAATTCAGGCTGTAATGGATGAAAAATCTCTGGATTTTGAATGAATTGAATGATTAAGGCTTACATTTGTTTTCATTTGATTAATCATCTTTATTTTTGTGTTGCACTAATT  
GAGATTATGATTTGGTATGTTGGAGATGCTTTTATGATTTAATTGTTAATGCTTCAATTAAGTTTTTGCTA

>comp154194\_c0\_seq1

AGTCTCCAATAGAGGAATCTCATAATGAAAACCTGTTACATAGTTAATTTTTGCAACTAGGCCAGGTCCCGTGATTTTTCCCACTCTGCAGCTATGTTGGTTGGGAACTTTTTGTTACCAATCAA  
GAGGTTTTGGGATCCAGCCTTGCGCAAGTGATTTGTGTCTAAACCCTAAACTCTTAATCCTAAACCCCCCAAAAAAAAAAATACTGATGGTTCGAACAAAGCATGAAAAGGTTGGCAGTATG  
ATAATTATCAAAGTACAGAGTTTAAATCCGCATTGCATCCTCCATTTAAACACAAAATTGAAGCAATTGCATCCTTATTGTTACAGTTGTAACCTTTATGGAACAAATAAAGTATTCAAACAA  
AGAGTTCACAGAATCCATCACTCGACCATCAAAGGTATTCATGTATTTTACTTTCAGCTGCAGCACTGGCTGCGCTGAGATCTACAGACAAATCAAGCTCCTTCCCGGTTATCTTTCTGT  
ACATGGATATCACATCTTGAACGGTTGATTCAAATGGGTTGTTGCATCATAGCTTGTGAAATGAAGCAACTATCCTTCTGACTATTATCACTGGCTCATATCTATCATATATATCAAAAA  
GGTTTCATCTACAGGTCCAAGCAGATCCATTCCAGGTTTCAATTCAACCTCAGGTCGGTCTCAGCTTCAGTTGAAACAAATGCAATATATTTTCCCTCTGGAGCTATGTTATGAGAAT  
AAGAGCAGCAGAAAACGTACATGTCAGATTTGCGGCCCAATTGTTTCTGTGGAAGAATGATCTGCACTGAGTCTGAATTATTGGTATCTGTAATGGGATGACTCATTATGCAAATAGCACG  
TGTTACTCTTCCAACTTTTTTCACCTTGTGAGGCAAGTAGGAAGGATCACAGACAACCTTTTTTACACTTTGCAGTCTCTCCTTCAGATGTAACCTCATATGCTTTTCCATTTTGGTCAAACCT  
CAACCTTGCATTCTGGTTTTGTTGAGCATATAGGTGCCACCATAAACAGCACTAAGACGAGCAAAACCCTGTGGTAGTTCTCCAAGCCATATTGAGGGTAAATATAAGGAGATCCACCTTG  
AAAGCGTGCAAGTGAATCTGCATATAGCTTCATTCTCTTTACTGTGTCAATGGCAGGCTTGTCCAGGTAATCATATTTCGTGTGAAGTGCCAAAGCATGCCCGATAAAGTCAACTGTGTTG  
TCATCTAGCCCATATTCGCAAAAACCTCTCTAGTTGTGACTTTGTTGAGGTCTAGTCCTTCATGAGATTTGGGATCATTCTCATCATAATCTTGAACATAAATGAACAGCTTTTCGAGCACGG

CGTTTCTCAAAGAGCCCCATAAGAGTGGATTTTAGTGCTTCAACGTCTGTAGCAGGCACTTTATAAATCTTCCCCTTATTGTAAACAAAACCTCCATCAACAGCCTTGAAGTTAAGATATTT  
CGTCACACTCGTGTGGATGAGCACACGGACTAGAGCACCGTTAGCCATCATAAACTTAGGGACCATGTCAACATTGTAATCCTTGGTTGAGCCCAGACTTTCAGGAGGTTTTTCATCACCT  
CTAAATCGCTTCCAGAGCTGAACTAGATTAAGTGATGTTGATTCTCCACCATAGTAATCATTCTATCCATGTGAAGAACCTCCTCCTCATCTCAATATGATTTTCTCCCAGGATCCGAGCT  
ATGGCGTCTCCCCGTGGTCCATGAAAGTTGAGCTCGCCACCACAAAGAACGCCAAGGACCTCGTTTCTAAATGCATTTCTTTCTCCCATTGGACTTCGACTCCCTTGACGCCATGAATC  
GTCTCCTTCTGAAGGGCAACTGTGGCCATCATAACCTCCTGAAGCTGCCTGCAACAGCTCGT

>comp154196\_c0\_seq1

AAGAACAGGAACGAGACGGAGAAAAGGCTAATTCATTTTCATGTAGTATTGAGTTACAATGTGTATTAATAGAGATGAAACAGTAGCTGTAACCTAATAGGACTCGGACACGTGTCTAGTA  
CAATCAAGAAAGACTAATACGTGTTACTAATATCTTAACACGCCCCCTCAAACCTATTGCATCGGACGATGTAACCTAGTTTGTCTTGAGAGAAGCTGAAACCGTGGAGCTGCGAGCGTCTTA  
GTTAGTAGATTTGCAAGTTGGTCCGTAGTTGATATGTGATGAATTTGGATGGTGTGTCTTTGATGTAATTTCCGGATGAAATGGCAGTCAACCTCTATGTGTTTGGTGCAGCGTGGAAAGAC  
GGGGTTATTGGCCAAAGCGATGGCGGATGTGTTGTGCGCATAGAATGGGCGTAGCCGTGGATTGCGGGCTGTTGAGTTCTTGGAGAAGACGCCGTAGCCAAGTAACCTCGGCGGCGGGCGG  
ATGCAAGTGCCCGGTATTCTGCTTCGGTAGATGAACGAGCGACGGCGTTTTGTTTTCTTGACGCTCCAAGATATGAGTGACGATCTTAGGAAAGTGCAGTAGCTGGTGGTAATTTTCGGTC  
GGTCGAGTCTCCAGCCCAGTCGGAGTCCACATATGCACGTAGGTTGAGATTTGAGTTTGCAAACAGAGAAATACCAAATGGAGGTACCTTGAATATACCGCAATAGTCTTTTAAGAGCA  
TCAAAGTGGATGTTTAGAGGATTTTGCATATGTTGACAAACCTTGTGACGGCGAATGAGATGTTGGGTCTTGTTAGCATCAGGTATTGAAGTGAGCCTGCAAGTTGACGATATAGCGTGG  
GATTGGAGAAAGCACCGGAGTTGCTTTGTTTGGAGGGAGGTTTTAATTGGGACGGCATAGGAGCAGATTTGCAATTTGGACATTCCAGCCCCGGAGAGAATCGTTTGGGCAAAGTGAGTT  
TGATTTAGGTGTAGTCCATAAGAGGAGTGGACAGCTTGAAGACCCAAGAATTGAGATAGCTTCCCTAGATCCCGGATAGTGAATTTGCTTTGAGATTTTGCATTAGATTATGTATAGATTT  
GGTGCAATTTTCGGTAAGGAGAATATCATCGACGTAAACCAAGAAGTACATAGGCACGCCATTTTATTGTAGATAAGAAGAGAAGGGTTCGGACGTACTAAAGGAAAAGCCGAGCGACT  
GTAAGTAACCGGATAGCGTGGAGTACCATTCCGCGAGGGGATTGTTAAGTCCATAAATAGCCTTTTTAAGTTTACAAACGTAGTTGGGATGAATGGTATCTTTAAATCCGGTAGGTTGTTTC  
ATGTAGACGGTATGATTTAGACTACCGTGGAGAAAAGGCATTAGAGACGTCGAGCTGGTGGATAGGCCATTGCTGATGAAGAGAGACTACAAGAAGGACCCGAACCTGTAGGGATTTTGGC  
CACAGGGCTAAAGGTTTCGGTGTAACTAAACCATATTTCTGGTTGAATCCCTGAGCTACGAGTCTGGCTTTATAGCGGGAGATGGTACCGTCCGCAAGATATTTTGTGCGAAAGATCCAC  
TTGGAACCAAGAGTATTTTGATCGGGTTGCGGAGGAACAAGCTCCCAGGTACCTTGAGATTGGAGGGCTTGAAATTCCTGAGACATAGCGTCACGCCAGTGTGTTTGTGCTGCGGGC  
GCATAGGTAGTGGGATCAGACCTGGCTTGTGATGAAAGAGATTGAAAATAGTTTTGGGTTTGGAGGTTACCTGTTTTGAAACCTAGTTTGCATGGGGTGAGTCAGATTTTGTGCTGCGGGC  
AAGATAAGACGAGACGGACTTGAATTTCTAGAAACGGTGGATGGGAGAGAAGGAGTTTGGTTGGCAGGAGGAGATGGCACGGAGTAATGTGAAATAGAATTAGTGTGTGCTTGTATG  
CGGTGATGTTGTTTGGGATTTTAGAGAGCCGGTTTACCTGATAGGATGGATGTAGGAACGAGAGTGAGAGGTGGGATGAATTCAGGTGTTGAGGCTTCTTGAGTGATTTGAGATCCTGC  
TTGATAGGGGAATATAGATTCATTAAGATAATGTGCCGAGACGTGTAGATTTGCTAGTTTTTGGATTAAAACATCTATAGCCTTTTTGAGACGAGGCGTAACTATGAATATACCGGCGT  
AGACATAGGTGAAAATTTGCTAGCGGAGTATGGTTTGGAGCAAGGGTAATAGAGGCAGCCGAATATTTTAGATGATTGTAAGAGGGTGATTTTGAATAGCTTGTGGTAAGGGCTGTGA  
TTGGCAAGGGATTGAGTGGGTAGCCTATTAATGAGATACACGGATGTGTGAAGAGCGTCATCCCAGAATGATTGAGGAAGATTGGCTTCAATAATAAGACTACGAACAGTTTCGAGGATG  
TGTCTATGTTTTCGTTCGGCAACTCCGTTTTGAGAGGGAGTATAGGAGCAACTGTATTGATGGATTATTCCTTGTGTTTGCAGAACGTTTGAATGCATGATTTATGTATTCACCTCCACCG  
TCGGATCGGAGCATTTAATATTGGTGTAAATTGCCGATTGATCATTTTAGAGAATTCGATGAATTTATGGATCACCTCAGATTTATGAATGATAGGGTATACCCAACCTGTATTTGGAGAAAT  
CATCGATAAATGAAACGTAGTATTTAAAGCCATTTATAGAAAAAATAGGAGATGGACCCCAACATCAGAATGAATCAGATCGAAGCAAGAACGACTAGAAGTGCAAGATCTATTAAT  
GGTAACCGGTGGCTTTTAGCCAACCGACAAGAGTTACAATGGGAATCATGTGCGGTGGTACATAAAGAAGAAATGTATCTAGACAAATGCTGAAGAGTGATGGCTGCCGATGACCAAG  
ACGTTTATGCCATAGTTGAGGCACGGCTTGAGTAGATAGAAGGGCTAGGTATTGGTGCAGGAGTAGTAGACCGGATGGGATAGAGACCGTTAAGGCAAGGTCCCTTGAGTAGAAGACGAC



CCGTCGTCGAATCCGTGCGGAGTGGGTAGGACGCCTTTACTTGAATGTTGAATGGGAACCTGATACCCATCCCGAGAGTGACTGGTTGTTGGCCGGCATAACGGTTTGACAGATTGGATG  
TTGGAAAGGTCAGAAGTGAGGTGAGTTGAAGCACCCTGTCAAGATACCAATCAACGTTGTTATTGGATTATGAAGGAGAGAATAGAGCTATTTTCTGTGATTGGGTATCCTCGGTATAGG  
AAGTGTGGAGGCGGTACCAGCATTTTAAGGCTGAATGGCCAAGTTTCGAGCAGATTTGGCAAGTAACTGGATTTCGGAGCATTATTCTTGTCCGGGATGGCGAGAGTTGGGACGCGGAGAT  
CTATTTGAATACGATGAACGTCCCCGATAATTGTTCTTACCTCTTCCACGACCGCGGGGCGCAAACAAAGCGACGGATGAGTCGGTGATTGGAGATTTTGGAGATCTTTCATCGCTTCTT  
GGGCAAGATTTTGTCTCACTACACAAAAGAGTGTAGAGGGTATCCATGCTAAGGGGTTGAAGATTGGTGCGGATGGCAGTTTTGAACGCTTGATATTGATTGGGAGACCGTTTAAGG  
TATAGAAAATGACTTCTTCCGAGGTAAGAGGAGAACCAGTCGCGGCTATGGCGTCAACCTTAGTTTTAACAGCCAGCAAGTATTGAGACATAATTTAGATTTTTTCATGGAGAGATAGTTAAG  
CTCGTTGCGGAGTTGAATGGTGCCTGATCTTGATGAGGACTGGAGACGGTGAGAGGTGTCCCAAATATCGCTGCAGTGATCCAGGGATAAGACATAAGGAAGGATGCTAGGGGAGATGA  
CAGAATAAAGAGCAGCCGCTAGGTTTTGGTCAAGAAGATTCCAAGATTGAGAGGAGAGGGAGGATGAGGAGGAAGAATCATTTGGAGAGGGGAGCGGCAAGAGCCATCAAGAAAAT  
CATCAAAACCATTTGCTCTAAAAATTTTATAACTTGGGATCTCCACATTGGGTAGTTTTCGGCTGTGAGGGGGAGGGAGATGATGCTTTTGATATTACCTATGAGAAATTTAATTGCGGT  
GGGATGAGAGGGTAAGACAGGGTAGCAGTTTCTTGAATTTCTTCCGGACCTCCGGTGGCGGACGAGACTGCCGGCACCTCCATGGAAGACGGGAAGAAGAAGAACGCAGAATGGAAA  
AAGAAATCACGGACGAAGGCACTGAACCGCCTGCTC

>comp154196\_c0\_seq2

AAGAACAGGAACGAGACGGAGAAAAGGCTAATTCATTTTCATGTAGTATTGAGTTACAATGTGTATTAAATAGAGATGAAACAGTAGCTGTAACATAAGGACTCGGACACGTGTCTAGTA  
CAATCAAGAAAGACTAATACGTGTTACTAATATCTTAACACGCCCCCTCAAACCTATTGCATCGGACGATGTAACCTAGTTTGCTTGAGAGAAGCTGAAACCGTGGAGCTGCGAGCGTCTTA  
GTTAGTAGATTTGCAAGTTGGTCCGTAGTTGATATGTGATGAATTTGGATGGTGTGTCTTTGATGTAATTCGGATGAAATGGCAGTCAACCTCTATGTGTTTGGTGCAGCGTGGAAAGAC  
GGGTTATTGGCCAAAGCGATGGCGGATGTGTTGTTCGCATAGAATGGGCGTAGCCGTGGATTGCGGGCTGTTGAGTTCTTGGAGAAGACGCCGTAGCCAAGTAACCTCGGCGGCGGCGG  
ATGCAAGTGCCCGGTATTCTGCTTCGGTAGATGAACGAGCGACGGCCTTTGTTTCTTGACGCTCCAAGATATGAGTGACGATCCTAGGAAAGTGCAGTAGCTGGTGGTAATTTTCGGTC  
GGTCGAGTCTCCAGCCAGTCGGAGTCCACATATGCACGTAGGTTGAGATTTGAGTTTGCAAACAGAGAAATACAAAATGGAGGTACCTTGAATATACCGCAATAGTCTTTTAAGAGCA  
TCAAAGTGGATGTTTAGAGGATTTTGCATATGTTGACAAACCTTGTGACGGCGAATGAGATGTTGGGTCTTGTAGCATCAGGTATTGAAGTGAGCCTGCAAGTTGACGATATAGCGTGG  
GATTGGAGAAAGCACCGGAGTTGCTTTGTTTGGAGGGAGGTTTAATTGGGACGGCATAGGAGCAGATTTGCAATTGGACATTCCAGCCCCGGAGAGAATCGTTTGGGCAAAGTGAGTT  
TGATTTAGGTGTAGTCCATAAGAGGAGTGGACAGCTTGAAGACCCAAGAATTGAGATAGCTTCCCTAGATCCCGGATAGTGAATTTTGCTTTGAGATTTTGCATTAGATTATGTATAGATTT  
GGTGCAATTTTCGGTAAGGAGAATATCATCGACGTAAACCAAGAAGTACATAGGCACGCCATTTTATTGTAGATAAGAAGAGAAGGGTCGGACGTACTAAAGGAAAAGCCGAGCGACT  
GTAAGTAACCGGATAGCGTGGAGTACCATTTCGCGAGGGGATTGTTAAGTCCATAAATAGCCTTTTAAAGTTTACAAACGTAGTTGGGATGAATGGTATCTTTAAATCCGGTAGGTTGTTTC  
ATGTAGACGGTATGATTTAGACTACCGTGGAGAAAAGCATTAGAGACGTCGAGCTGGTGGATAGGCCATTGCTGATGAAGAGAGACTACAAGAAGGACCCGAAGTGTAGGGATTTTGGC  
CACAGGGCTAAAGGTTTCGGTGAATCTAAACCATATTCTTGGTTGAATCCCTGAGCTACGAGTCTGGCTTTATAGCGGGAGATGGTACCGTCGGCAAGATATTTGTGCGAAAGATCCAC  
TTGGAACCAAGAGTATTTGATCGGGTTGCGGAGGAACAAGCTCCCAGGTACCTTGGAGATTGGAGGGCTTGAATTCCTGAGACATAGCGTCACGCCAGTGTGTTTTGACGGCTTCA  
GCATAGGTAGTGGGATCAGACCTGGCTTGTGATGAAAGAGATTGAAAATAGTTTTGGGTTTGGAGTTACCTGTTTTGAACTAGTTTGCATGGGGTGAGTCAGATTTTGTGCTGCGGGC  
AAGATAAGACGAGACGGACTTGAATTTCTAGAAACGGTGGATGGGAGAGAAGGAGTTTGGTTGGCAGGAGGAGATGGCACGGAGTAATGTGAAATAGAATTAGTGTGTGCTTGTATG  
CGGTGATGTTGTTTGGGTATTTTAGAGAGCCGGTTTACCTGATAGGATGGATGTAGGAACGAGAGTGAGAGGTGGGATGAATTCAGGTGTTGAGGCTTCTTGAAGTATTGAGATCCTGC  
TTGATAGGGGAATATAGATTCATTAAGATAATGTCCGAGACGTGTAGATTTGCCTAGTTTTTGGATTAACATCTATAGCCTTTTTGAGACGAGGGCGTAACCTATGAATATACACGGCGT  
AGACATAGGTGAAAATTTGCTAGCGGAGTATGGTTTGGAGCCAAGGGTAATAGAGGCAGCCGAATATTTTAGATGATTGTAAGAGGGTGATTTTTGAAATAGCTTGTGGTAAGGGCTGTGA

TTGGCAAGGGATTGAGTGGGTAGCCTATTAATGAGATACACGGATGTGTGAAGAGCGTCATCCCAGAATGATTGAGGAAGATTGGCTTCAATAATAAGACTACGAACAGTTTCGAGGATG  
TGCTATGTTTTCGTTTCGGCAACTCCGTTTTGAGAGGGAGTATAGGAGCAACTGTATTGATGGATTATTCCTTGTGTTTGCAGAACGTTTGAAATGCATGATTATGTATTACCTCCACCG  
TCGGATCGGAGCATTTAATATTGGTGTAAATTGCCGATTGATCATTTAGAGAATTCGATGAATTTATGGATCACCTCAGATTTATGAATGATAGGGTATACCCAACTGTATTTGGAGAAAT  
CATCGATAAATGAAACGTAGTATTTAAAGCCATTTATAGAAAAAATAGGAGATGGACCCCAACATCAGAATGAATCAGATCGAAGCAAGAACGACTAGAAGTGCAAGATCTATTAAT  
GGTAACCGGTGGCTTTTAGCCAACCGACAAGAGTTACAATGGGAATCATGTGCGGTGGTACATAAAGAAGAAATGTATCTAGACAAATGCTGAAGAGTGATGGCTGCCGGATGACCAAG  
ACGTTTATGCCATAGTTGAGGCACGGCTTGAGTAGATAGAAGGGCTAGGTATTGGTGCGGAGTAGTAGACCGGATGGGATAGAGACCGTTAAGGCAAGGTCCCTTGAGTAGAAGACGAC  
CCGTCGTCGAATCCTGTATGTGAAATTCATGAGGAAAGAACTTGACGATGCAGTTGTTATCAGAAGTTAGCCGGTGAATAGAAATATTAAGGAGAGATTTCGGAACGTGATAAAGATTGT  
TCAGATTAAGCTTACCGTGCGGAGTGGGTAGGACGCCTTACTTGAATGTTGAATGGGAACCTGATACCATTCCCGAGAGTGACTGGTTGTTGGCCGGCATAACGGTTTGACAGATTGGA  
TGTTGGAAAGGTCAGAAGTGAGGTGAGTTGAAGCACCCTGTCAAGATACCAATCAACGTTGTTATTGGATTATGAAGGAGAGAATAGAGCTATTTCTGTGATTGGGTATCCTCGGTATA  
GGAAGTGTGGAGGCGGTACCAGCATTTAAGGCTGAATGGCAAGTTTTCGAGCAGATTTGGCAAGTAACTGGATTTCGGAGCATTATTCTTGTCCGGGATGGCGAGAGTTGGGACGCGGAG  
ATCTATTTGAATACGATGAACGTCCCGGATAATTGTTCTTACCTCTCCACGACCGCGGGCGCAAACAAAGCGACGGATGAGTCGGTGATTTGGAGATTTTGGAGATCTTTCATCGCTTC  
TTGGGCAAGATTTTGTTCCTCACTACACAAAAGAGTGTAGAGGGTATCCATGCTAAGGGGTTGAAGATTGGTGCGGATGGCAGTTTTGAACGCTTGATATTGATTTGGGAGACCGTTTAA  
GGTATAGAAAAATGACTTCTTCCGAGGTAAGAGGAGAACCAGTCGCGGTATGGCGTCAACCTTAGTTTTAACAGCCAGCAAGTATTGAGACATATTTAGATTTTTTATGGAGAGATAGTTA  
AGCTCGTTGCGGAGTTGAATGGTGCCTGATCTTGATGAGGACTGGAGACGGTGAGAGGTGTCCCAAATATCGCTGCAGTGATCCAGGGATAAGACATAAGGAAGGATGCTAGGGGAGAT  
GACAGAATAAAGAGCAGCCGCTAGGTTTTGGTCAAGAAGATTCCAAGATTGAGAGGAGAGGGAGGATGAGGAGGAAGAATCATTTGGAGAGGGGCAGCGCAAGAGCCATCAAGAAA  
ATCATCAAAACCATTTGCTCTAAAAATTTTATAACTTGGGATCTCCACATTGGGTAGTTTTCGGCTGTGAGGGGAGGGAGATGATGCTTTTGATATTACCTATGAGAAATTTAATTGCGG  
TGGGATGAGAGGGTAAGACAGGGTAGCAGTTTCTTGAATTTCTTCCGGACCTCCGGTGGCGGACGAGACTGCCGGCACCTCCATGGAAGACGGGAAGAAGAAGAACGCAGAATGGAA  
AAAGAAATCACGGACGAAGGCACTGAACCGCCTGCTC

>comp154220\_c1\_seq15

TCACGACAGTTCCGAATTGCCCCATCCCCTCTCAGCAATTCACGAACCGTTCTCTCTCCATATTCGGAAGCCACCCAGCCTTCTTACGAACTAACGCACAAAACCACACGGAAAAAT  
CCCAGCCCCATTCACGAATCGCACTCCTCTCCACTACTCCTCTCTATTCGCACAGAAGGAAAACCTCCAGCCCATTGTTCTTCTCTCTACAGTTCCAAAATTCCTAAACCACCCCATCCTC  
CCTGCAGAGCGAACTGCCTCCCCCTCTCTTAACTCCCGAACACCCTCTCTCACATCCCCTCTCAGCAATTCACAAACCGTCCAAGCTCTCTCTCACTCAGCGGTTACAACCCAACGGC  
TCCTCTCTCTATCTCACACAGAGAGAATCAAACCTCCCACGAACTCCAGCCTCCTTCACTACAGTGCACGAAACCCCAATCTCCTACAGTTCGCTAACTGCTCCCTCTCCCTGACTCCCTC  
TAATTCACAAAAACCACCGCTCCCCCTCTAAGTTCAGTTCACAACTCCAGTCTCTCTCACTCTCTAATTCGCATACCTCCAGCCCCTGACTCTACCAAGTCGTGAAACCAGTCCAAAATCC  
ACTGCTTTCTTACCAGCTCTGTCAAATCCCTCGTTGTTTCTCTCGGCTCGCAAGAAGCTCCAACGCAGAATCCTGAAGGCCGCTCTTCTTCTGCATCCCGCCGCTTCTAGTTGCTCAG  
GCCATTGACGCAGAACGTTTGACTGTAAGGAGGAGTGCCTAATATAGAGCAAATTCAGGTTAATGGCTTCATCAATCTCTCTCTCCGATGACATCCACATCTTCTACAATAAAATTTTTCAA  
ATGTCCAGCCCAGATGATAATGTGGAAGAACCTTATCTCATCTCAACTTCATTTACAATGTTGACGGGGACAGCATGGAGCATGATATTATTGCCACGTGAGAACATAACTTCACTGAATG  
CAATCCATCTTTTCTTCGAGCTTTGATTGAAGAGAAGGAGCCTCTTCCATTGGATGAAATGATTGATCCACAAGATGCTGAGATTTCAAGAGAGGGAATCTCAAACCTTCTGGCTTTGCTG  
GTAACGATTGTGCTCGGGTTGAAGGGCTAAAGATATTGGAGGTTGACGTCAATTGTAGATATCAGTCTCGAAGAAGAAGATTATGATTTTATGGGATTAGATGATGCGGACTTCTTACG  
AGAGACGGATGAATTCGTTGCAGAAGAATGTTTAAAAATTTGGCAAAGGCTGAGAAGGAGAATGAAATTTGTGCTATTTGCTTGCAGGAGATGAAGGTGGGGGAGGAAGTGGCTTGC  
ACGCCTTGCCTTACCGATTTTCATCATACTTGTATTAGTAAGTGGTTTCGAAAAATCTGGCTTTTGCCATTATGTCGGTTCAAGATTGATCCATCTTGATGGAGGATTACTTTTGTATCTTAA

TTTTGTGTTTTTCATTTATCTAGTTTAAATTGTTCAATTGTGGAAAATTAAGAAACAGATGTTAACATAAATCTTTTTAATATATAAATTCATTGCAATTTTCTAGCTAAAAA

>comp154232\_c0\_seq9

ATATATATAGGCAATAGAGGGGAACTAAACAATCACTTAAAAGAGAATATAGAAGGTCAAGAGACCACTAATGAACAGCCCAACCAGCTGTCCAAAACAGCAGCCCAAAAGTCCATAAA  
TCTGGCCAGAAACAGTGAAAAATTCAGCAGAAAACTGCACTGAAAAACAATGGAAAGACTCTTGGAATCTCCCCAAAACAGCCCAAAAACAGTCCAAATTCAGTC  
CAAATACTATTTCATTTCCCATTTAAATTAAGAAATGAAAAAGCCAAGAGGCACA

>comp154239\_c1\_seq5

TTTTTTAAAAAGAATAGTCATTTATTCAAATACTGCATATTTCAATAATAAATACTGATTGGTCAAAGGGAACGTGACATAAATTATACTGGTTCCCTTCAGCAGCATCAGCAAGAAAGCAA  
ATAACTTAATATTGAAAACATATAGAGAGCATTGATAGGAATAGTAGCAGAAAGTAAGTAACTATGTTCCATATGGCAGGATCATCTTCAGCACGCAGAGCAAAAGACAAAGGTCCAGTCC  
ATCCATCACACTACATATGTATATATCTATATAGGATAGAGGTATTAACAAAGTACTATGGTATTAACAAGTGAATCCTGCTATTATTGTTGCTCTGCTAATTTCCATGAAAGCTTTACCCAC  
CTCAGCCGTAGGCGGCCTTGTTGCTTCTTGATCGGCTTCAGTGTGTAATCCCTTGGAACATGGCTGATATCAAATTCGTCAGCCCTCCGACCAGATCATTGACCCCTCGGCTAGGTTCA  
AACAGGTTGCTGCTTCCGACTTTCCAGCTTCCATCAACCTGTTTACAGACAAGTTGTGAATCGCCCTTGCGTGAATCTCTTTGTAGCCATTTTCAGTAGCTTTCTCAATTCCTACAATCAA  
GCCCTCATATTCTGCAACATTATTGGTAGTAAAACCCAAAGGCTTGTTACCCGAGCAACCACATCTCCCTGGCATTGCGTATAACTGCTCCAGCGCTCCTTTTCCAGGATTTCTTTGC  
AAGCACCATCAAACAGTGCAGGATTTGTTGGACATCGTTGAAAATAGCAATCCGTGAGACACAGAACTGAGGAGAGGAGAAATCAGAGAGACGCATTCTGATCTCGAACCGAT  
GGGAATTTAAAGAGAAGGGCGGAGAGCGCTAGGGTACTGAAGTACATATCTCCAGATGAAAGTCTGACCACCACGTGGTGTAGTGACTTAGAAATCG

>comp154270\_c0\_seq3

TTTTTTTTTCTCTTTTTTTTTTCAATAGGAAATAGATTTTTTCTTTTTAAATTTATTGGTTAGGTATTGGTCACAGAATAGGCAAGGGCGCGTAGTAGAAGTGCGGCGCTTTTTGGCATCTC  
AGCCGTTGGATGCCGATCCGCGGTCTTTTCGCTTTCCAAGCCGCGCGATGGCGGTGAGTACAGTACCCGGCGTGAGAGCAGAGTAGCCGAATCACAGCCGTTTCGATGCTGCCTCA  
ATCCCGGCAGTCGTATCGTAGCTCTCCATCGCGGCGCAGCATTCTGCCAAAGACTCCTGATAATATTTGTAGAAATACCCCTCAACAAAACAAGAAATAAAAAAAACATATAGAATAAGAG  
GAAAATGTAAATCTATGGTTATGCGCGCACTTTATTGAGATATTCACAGCAGAGCAGGGCAGTGCGGAAGGAAATGAAATGAGCAGGGAAGAGTTCGCGCGCGGGCGGAGAAAGCGCT  
GCCGAGCGATACCGAAGGCTTGAACCTCGAGCGATTTGACATCGTTTTGGGATTTGAAGAGGATCTGAGAGGCGTGGGTCTTGAGAGATTGGATGATGATTGGATTGCCAGGGGAAA  
GTAGGATGTGAAGAATCGGAGAAAGGAGAAGGGCGTGATCGATCGCATCCGCCATTCAAGCACGCCGAGCACGAGCAGTTCCATTCGCCGGATGGTCCGTGCATCGAAGATGAAGCCCT  
CCTCCCTCTGCTCCGAACAATTTGGGGAAAATGTTGAATCGATCGGATCGAGATTGTTTCGATAGAAGAGGTGAAGCTAGCTTCACGGTACCTGTAAATCAGCAGGGGAGAACTGGTCTT  
CTTCATCTTTGAGGCGAGGGAGACGCAGGAAATGGCGAGGAGTCGCGCGATCCATGGCTTCTCATTCCGGATCTCGCGTTTGGCGAGGAACCGATCGATATAGTTGACAGCAAGGTAGG  
CTAGTGCTGGATCGAGATTATTGCTGAACTGGGCTGGACGATAAGGGAGAGGGCATGGCAACGGGTGGAGAGCTGGTCCAGAGCAACCGCAAGCGAGCTCATGTGGTCCGATTACAGC  
TGAGAAAAGCAACGAGGGCTCGTCGAGTCTGTGCAGCCGATGAATAGTGCTTTCGAGAGTTGGATGTTTTGCTCATCGCTACCGGAGAACGGGTTCTCAAGGTGGAAGTCGAAGTCCA  
TTGCTAGTTTCTTACTCTTCAATCCGGCTGTGTGAGAAGAGGAAGAGAGAGAGAGA

>comp154281\_c1\_seq1

ACAAAAAAAATGTTTGGATGGGAATTGACGAGAAGTGAATAATCCATTAAGTTTTCATGTAAGATCGAGACTTTCCAGATGAAGAACTCGGATCCATAACTAATTTAAGTAAAGTAA  
AATTAGTAGAAAAGATTCATACAGAACTAGAAAAGAAAAAAATCCTTTCAACACAATAAAAAAAACGAAAAGAACTTTCTAGGACCTGCCTGTATTTTCTCATTAGAACCGTCCA  
TCTAACTGCCACGTCTACACGTGTCCATTTTAATCTCCCGCCAGCGCACGTGTCTCCCGCTCTTCAGCGACTACTGTTCTAATCCCACAACCGTGAACGAATTACAAATGATCCCA  
TACTCACACCAGCAACTCGATCGTTTTCTCTGATAAAATTTCCATCACCGAACTCCTCTCTCGCTAACATGATGAACATCGTCGCCATCGTTTTATCCTCTCTTCCATCGCCGCCGCTT

CTTTCTTCTCTTCTCCTCCCGTCCCCGGCCAGGACCACCACGTCTCCGCGAAGGTCACCGCCTCATTGTCTGGAGTTCGACCGCCAGATTCCACAATCCTCCTCCTTCGCACCAAGCG  
CTAGCGAAGCTAACGATGAGCCCTCGATGCCGCTTCCGTCCAGCCAATGTCGGCCAATCCGTGTCTCAAACCTCAAAGGCAAAAATTTCTTCTGTCTTCACAGATGCTAAAAATAAGG  
CTAGCCAGTTTGAAAAATCGACCGCCGATGCTCTTAAATCCGTGGCCGAGAGGCTCACTCATAAAGCCGCTCAAATCGAAGAATCTGTCTCCGACCGCCTTAAATCCGGCGCCGACGAG  
GTCAAGCAAAAAGCCTCCAAAATCGAAGACTTCTCCTCCGCTGCTCTTAAAAACGCCGCCGAAAAACCAAGCAAAAAGGCCACCCAATTCCATGAATCCACCGCAAAGCCGCGAAGA  
ACGCTTCGGAGACCGCGGAAGCGGCCAGCAAGGGCGTCTGCTGGCAATATTTCTAACATGGCGGGTGGCGGATGAGGGAGATCCGGCGGAACCTGACCGAAATCCTTCAGCGAGCTTG  
GGAGCTTGGCCAAGACGTGGGAGCGTTTGTGAGCGCGGGGGCGGCCGAGGCCGCGCGGTTCGGCTGCCGCGGTGACCCACTTGCTAGGGTTTGCAACGGCGTATGGCACGTGTATGTGG  
GTGACGTTTCGCGTCAAATCACGTGCTGGCGTCTGCACCTGCCACGGCAGCAACTTGGGATCGTGCAGAGCCGGATTATCCGGTTTATTTCCGGTTTTTGGCTGTAGCCGTTGGTGTTCGCG  
TCGCGGGTCATATTCTGAATGGGAAGGAGAGCGTGCAGCGGTATAATTTGATGGCGATGCTGGCGCTTGTGTTGCTGAATCTGATCTGGCTGGAGCCTAAAGCTACCAAGGCTATGTTTGA  
GAGGATGAAGTTGGAGAAGGAAGAAGGAAGAGGGATGGATGTTGCTGATGTCTCTACTGAGCCAACCAACACGCCAGTTGCTGATGCTTTAGCCATAAGGAAGGAGGTGGCCAAGGGC  
CGAATGACTGAGTTGAGGAAGAGACTAAAGAGTCTCAACAAATACTCGTCCTTTCTGAATGTGCTCACTCTAATGGGGCTAAGCTGGCATCTTGTCTACCTTGCTTAGATTTTGTATGTCTT  
CTAATTCTGAGTGTTGTAATAGTTTATTTTTCTTCTTTTAAAGGCTTTGTTT

>comp154352\_c0\_seq1

TAAAGAACACAAACCATCTTATAATTTATATAAAAAATATATATAGCATCAAACCTTATATTTATATAATCCAAATTCTGATCATTAAATTTTTGTACAATTGGAAGTAAAATAACAAAATAATTCTT  
CAGACTTTCTTACCCAGTGTAGAGCCTTAGACGAGACGTAATGTTTGTCTACAGATAGGACATTTTCGACAGGTGATTCCCGCATTGTCTGCAGCATGTATGGCCACATCCGAAGGCCAA  
ATCCTTCGCATTTGTCCAGCAAATCGGACATGCCTCGTTACGGTTCATCAGCAATACTGGGATTTGAAGTGCTTGTCTCTCCTGAAAGATAATCGTTGTTTGTTCAGGTTGAGGAGGA  
GGTCTAAACGTTACTTGTTCGCTTCCCAGTGCACGCCCAGAAATGCCAAGTTCTTTGGTAGCTTTGTACTGGATGGGAACCTCCATTAGAGCAGCCAGTGCAGAAAGCTGCTTCCTTCT  
CTGCTGGGCTAGCATTTTGGCCATGATCTTGGAGAAGTTAACGAAGTCAAATTTGTCAAAGGCTCGAGCTGGAATCTTATCATCAAATTTTTGCATGTCTTCCCATGGTCCATCCCCAACT  
CCTACTAATACAATTGACAATGGAACACAGCTGATAATTTCAAATTTGGAACAATTTTCCCTGTAGCATTCGAGAATTCCTCAAAGCCATGACAAGGAGAGTGATCGCCATGAAAGCTGA  
ACACCTCCCTATCATGAGTTGTTGCATCGCCAAATCCAAAGCATGGGATGAGATTGTCTTCGTCAAATGGAGCTAAGGTCTTCCCTATTATGCTGATGGCTTCTTCATATGGATTTTCGTTTAT  
CACCAATTCATGACAGGCTCTGGTTATTGAATGAGTATTTGCCTGCCAATCATGCTTTTTGTAAAATCAATTCCTAGGATCAAGTTTGATGACTCCAAGCCTGCTTCTCTTAGGGCTGCT  
GTAACCTGGTTCGAGAGAGTTATAGTTGTCAGGTATGTACGAGTACTTCTAGTTATCATTCTCCTATTGCTTCACTGTTTCTGCGACTCGTGTCTGGTTGATCTGTTATAACCCCTGTCGCA  
GCCGACGCCGGCGATGGATCCCGGCGATCAACGTCGCTCAGATTCCGGCCACCCCGGCCAAAGAAACCTCCCCAAGAAAGTGCGAGGAAGATGTTCTTTAGCTTTGCTTTTGGCCCTCC  
AATCGGACAAAGGAGAACCTTCTGCGTTTCTCCACAAAGTGTGCTTTTTTACCTGCCACTTCAT

>comp154352\_c0\_seq2

TAAAGAACACAAACCATCTTATAATTTATATAAAAAATATATATAGCATCAAACCTTATATTTATATAATCCAAATTCTGATCATTAAATTTTTGTACAATTGGAAGTAAAATAACAAAATAATTCTT  
CAGACTTTCTTACCCAGTGTAGAGCCTTAGACGAGACGTAATGTTTGTCTACAGATAGGACATTTTCGACAGGTGATTCCCGCATTGTCTGCAGCATGTATGGCCACATCCGAAGGCCAA  
ATCCTTCGCATTTGTCCAGCAAATCGGACATGCCTCGTTACGGTTCATCAGCAATACTGGGATTTGAAGTGCTTGTCTCTCCTGAAAGATAATCGTTGTTTGTTCAGGTTGAGGAGGA  
GGTCTAAACGTTACTTGTTCGCTTCCCAGTGCACGCCCAGAAATGCCAAGTTCTTTGGTAGCTTTGTACTGGATGGGAACCTCCATTAGAGCAGCCAGTGCAGAAAGCTGCTTCCTTCT  
CTGCTGGGCTAGCATTTTGGCCATGATCTTGGAGAAGTTAACGAAGTCAAATTTGTCAAAGGCTCGAGCTGGAATCTTATCATCAAATTTTTGCATGTCTTCCCATGGTCCATCCCCAACT  
CCTACTAATACAATTGACAATGGAACACAGCTTGTATAACAATTGAGTTGATTGTGCTTTCCTCCTGTGGACTCAGATCCTTACCTTCTAAATCAACACTTCTGGTAACCTGCCATCTGC  
TATAATAACCAAAACGTGATACTGTCTCCGCTGTTCTCGACGATGTGAACCGCAGCTTCTACTAGAGGTGCAAATGACGTCGGGCCGATAATTTCAAATTTGGAACAATTTTCCCTGTAG

CATTGAGAACTTCCTCAAAGCCATGACAAGGAGAGTGATCGCCATGAAAGCTGAACACCTCCCTATCATGAGTTGTTGCATCGCCAAATCCAAAGCATGGGATGAGATTGTCTTCGTCA  
AATGGAGCTAAGGTCTTCCCTATTATGCTGATGGCTTCTTCATATGGATTTCGTTTATCACCAATTGCATGCAGGCTCTGGTTATTGAATGAGTATTTGCCTGCCAATCATTGCTTTTTGTAA  
AATCAATTCCTAGGATCAAGTTTGATGACTCCAAGCCTGCTTCTTAGGGCTGCTGTAACTGGTCGAGAGAGTTATAGTTGTCAGGTATGTACGAGTACTTCTAGTTATCATTCTCCTAT  
TCGCTTCACTGTTTCTGCGACTCGTGCTCGGTTGATCTGTTATAACCCCTGTCGCAGCCGACGCCGGCGATGGATCCCGGCGATCAACGTCGCTCAGATTCCGGCCACCCCGGCCAAAGA  
AACCTCCCAAGAAAGTGCGAGGAAGATGTTCTTTAGCTTTGCTTTTGGCCCTCCAATCGGACAAAGGAGAACCCTTCTGCGTTTCTTCCACAAAAGTGTGTCTTTTTACCTGCCACTTC  
AT

>comp154401\_c1\_seq4

GCAACAAGAAAGGGGAAGAAGAAAAGAGAGAGAGAGAGGTTAGAGGGAGAGGGCTTTTGTACTCAATGTTTCCATTTTCTAGCAAATTTTCATCTAACACAACTACTCTCTAACATAC  
ACATTTTCACAAAACAAACACTTTACCTTTCACACTTATACTTCTCCCAATCCTAAAATCATACTATACTTTTCTTATCAAAAATATTTTTAAACATTTCAATATTCAAAGCACCTTTC  
TACACATTTCAAATTTCAACACATACATTTATCATTTCAAAATAATACCTTTCATTTTCCAAAATCACAAAATTCATTTTCAAACCAAAACACACACTTTTCAAATGCACATGCTTTATTT  
CCAAAATCTACACCTCTCACCTTCCAAAAGTTCACACTTATACTTTTCAAACATACTTTTCAAACATGTATTTTCATCTTCCAAAATACTTCACCTTTCAAATACTCCCAATCAAAGTA  
AAGTACTTTTCTCAAACCTCTTTCTTTTCCAAAGCATGAAGAGATGTCGTGTATGTATAGCATGAAGCACAACCCTGCATGACATCTCCCATCAAATATTTTCCACCACAATTCCACATATA  
TCTACTTCCCAACTCAAAAATTTTCCCAATTGTAGTTTAAAATAAAAAGAAGATTTGTTGCAAGTCTACTCTTTCCAAAGTTAAGAAAACATCCCAACCAACATAAAGCAATATAATATTT  
GGATTTATGCAAACTCACATTTGAAGCGTATACGTGGATATTTTCAACACAATTTTCAACCTTCACATCACATGCTATCATACTGTGGAGGAAACTTTCTGAACCCAAATTCATATATTT  
CATTAAAGCACGA

>comp154423\_c0\_seq1

TTATTGAGTAGGAGTTATAAAGGAGGTTATGAATATATTGGGATGAAAATAAAAACCCAGCTAATTCAATAGTAGATAATTCTTTAGAAAAAACAAGTACAAAGTACAACAACAACCTTATT  
GTTGAATGTCATTATATGTAAGCAACCACAAAAACAACGAAGAGTATAAGAAAAATAAAAATAAAAAATAAAAAATAAAAAATAAAAAATAACAATACCGGTCATCTC  
CCTTTTGTCTTTTCTTGGGAATATCTGCCAGACCACAGGCACAAACCACAGAACAAACAACTCCCAAACCAAAAAAATCCTTTCCAACTCCATTCTTAGCTAATCTAACAAAAATC  
CAGCCAAAACAACGCCATTATCAATGATCCAACCTTCCACATGCTTCTCCTCCTACCCTCAGAAGCTTCATTTCCAACATGAGCATGTTTACCATGTACCTTCGCCGGAGAATCCTCATCC  
TGTTCCACCGGGGCGGGGCGGCGCCTCCACTTACCAAGATTATACGCCTTGATCCCAATCTCAAACCTTACAGCTCCCTCTGCTATAATCCTTGGTCTGCTCCTTCGCCAACCCATCAA  
AAACACACGTCCCAGTCCCCTGTCCAAGCGCCTGAAAATACGAATTGAAGACATACGAAGCCTGCATTTCCAAATCCATTCCCGAGCAAGATGAACCGTAACTTAACGGCATAACAATCAG  
CACCATGACCGCAAGCGTAATCCATATTGCACTCACTCTGCTTTTATTCTTCGCCCTGCTTCGCCTCTTTGTTCAAACCGCACCATTTCTTCGCCAAGTAATTAACCTCCACCGCCGCGACA  
GCCGCTTTTCCGGCCACTCCGCCGCCGATAAGTCCACCGGAAACTTCGGCTTTCCGTCGGTTGAAAAAATGCCCCAGCTTCTTTCAAAGGCCCGGAAAGTATGCTCTTTGCTTCTTCA  
TCGAATAGCCCGAAGAGATAAACTTCTATATCCTCCTTAGGCCGCTGCGGCGTCCCGGTTTTTTTTGCTATCTTTTGCCTTATCCTTTGTAGAATCTCTCGGCTATCGATACGTTGGCGTGTA  
TATCGCCGTCGGTCGGCCAACCAACTTCGCCACGATGATCGGAACGTCGCCGACGCCCTCCGATTTACGCGCGGCGAGCAGCGTGTGCTAATTCGCATCGAAGACGTTTCGTGTAGATTA  
AATCTCCATCAACGACTGGCTTCGCCTTTCCGTCGAAGAAGGCGAAGTCGGAGGGGAAATTGGCGTCGATATAAAGGCTGAAAAATGGGTAAATGTTGACGGTAAAGGCGCGCCGTT  
TGATTATAGTATTTGACAATGTCGGACATAAGACCGGCGACATCGTCGCGCCATTTCCGGCGGAGGGGACAGGATTATACCACGGCGAGTAGTAGATGTCGGCATTGATCGGAATCGTGG  
CTTTGATTTCTCGCCAGTCCGGCTTCATCGAGAGCTTTTTGAATGTTTTGAGGGCGGGCAAAGTTACATTTGTGAATCGATCTTTGTAGTCTTTGAGAAAAGGTTTCGTTCCCGACGGC  
CACGATTTGATGTTGACCTTCGAATGAGTGCATAATGGGTGACGTTAGCGTTCACCAAGCTTTGGCGGTGGCGTAGTCGTTTCATGGCGCAAGGAGGAGATTGTTGACGGCGATCAT  
GACCTGGATGTCGGTGTGGAGAGAGTTTCCATGGTGTAGGGGTCGACGTCAAAAAGCTTGACTTTTTTGTATGCCGTTGTCGTGGAGAAGGCGAGCGACGGTTTTGGGAGGGAGGCGG

TGGTAGGTGATGGTGCCCCAGTTGACGCCGAGAGAGGCGTTGCCGGAGAGAAAGAAGGTAGCCGCCGCGAGGAGGGCCGTCGCCAAAAGACGACGACTTGGCGGGGGCTAGCCATT  
GTTGGGTTTGTACGTTTCGTTATTTGGTGTGCAAGAGGAATTTGTTCTAATGTTTTATACATGTAAAGGGGGAGGGAGAAGGAATGGCTATACGGTTTCGACGGCGAGGGAGGAAGAGAG  
AGAGAGGAGGTTTGTGGAAAGAACAGAGTATAATGTACGTTTATAGGATGGAAAATACTTGTGGAGAGGAGAGAATTGCTCTGAGGAGGGAGTTAGAGAGAAGGAACCTCAGTGTTTTTT  
TTGGACATTTAGGTCAATTA AAAACAAACTCACACACAACAAATACGCAAGAGTCAAACCTCAACATCTTTTAGTTGATAGCCAAAGCTTCAA

>comp154424\_c0\_seq1

TTATATATAACAAACAATAGAGGCTCGCAAGAGTTCACCAATACACAAAATAGTAAAAACATAATCAGAGAGCCGCACAATTTGCCAGGAATTACGCCATTTTCCTCAGCCCGAGATCTC  
TATGGACATCACGCCAACCTTCTTAACCTCCTCCTTAGGTACCGTGACGGTGAGAACGCCGTTCTCCATGGCGGCCCTCACGCCGTCCACCTTCGCATTTTCCGGTAAACCGGAAGTGTCTG  
TGGAAGTTGACACTACTGCGCTCCATGTGATGCCAGATTATGCCCTTCTCCTCTGTTTCCCGCTTCTTCTCCCCGCTGATCCAAAGCCACCGCCCTTGTTCCTCCACCTCCACCTTCACCTC  
CTCCTTCTTCAGCCCTGGGAGGTTCGGCCTTGAACACGTGCGCCTCTGACGTCTCCTTCCAGTCGAAACATACTTCGGCAAATTTGAAATCTTGCCACATATACTAGATCGGGGATGGGA  
GAGGCTGTTGGATCCGAAGTGAAACTCCCCAACGAGTCGAAGACGTTGCCTCGGCGAATAATCGTCATTTCTCTCTGATCTC

>comp154424\_c1\_seq3

TGATTATGTTTTACTATTTTGTGTATTGATTTGCTCTTGCGAAGTGCTTTTGTATGCATTCCTATCAAAATCTGAGACATGTTTTTCTTTGATATCTAAGAATCGAATAATCTACATATCTTAAC  
CTGTGAAGTATTCAAATCATGTTGAATTAATGCATAAATTCATGGCTTCGTGCGGTAAATTTTGGATCAACTAAACTGTTACATAAGCC

>comp154447\_c0\_seq1

ATTCTATTTATCCGACCGTTCCCCAATTATGAATCCAGCTTTCACTTTTTCCCATCACAGAAAGAGAAACAGAGCGAGAGAGAAAGATGGCGTCTCCAATCATCTCGCTTCGCTCTCGCAT  
TTCTGGTTATCCTCCTGGCAGCGGCGCACGCTCGAAACACTCTACAGAAAGAATCCAGTCAGGATCCCAGTCTTGTACCCGCCCTTCCCGCCAACCGCCGGTGAAATTTCCGGCACTACG  
CCGGGTACATCGCATGGGACCGACAAGCCAAGGCGCTTCTACTGGTTTTTTGAGGCCGAGCACCGCCCCAGTGAGAAGCCTCTCGTTCTCTGGCTCAACGGAGGACCAGGATGC  
TCATCCGTGCGATACGGCGCGGCGCAGGAAGTGGGGCTTTTCTGGTACGGAGTAACGGCCCCAACATTACGCTGAATCCATTGCGCTGGAACAAAAGTGGCCAATCTTCTATTTCTTGAA  
GCTCCAGTTGGTGTGCGCTTCTCCTACACCAACCGATCATCGGATCTTCGAAAAGTGGTGATCGAGTCACCGCCGAGGACTCCTACTCCTTTCTTCTCTCCTGGTTCCGCCGCTTCCCC  
GCTTCAAGTCCCACGACTTCTACATCGCTGGGGAGAGCTATGCCGGACATTATGTTCCCCAGCTGGCGGAGAGAATATACGAAGGAAACAAAGCTGCAAAGCAGATCTCATTATTAATC  
TCAAGGGATTCATGATAGGGAACGCGGTTCTAAACGACGCGACGGACCAAATGGGGATGGTGGAGTACGCTTGGAGCCACGCCATTATCTCCGACGAGCTCCACGCCATCATTCTCAAG  
GAGTGC GGCTCCTTCCAGCAGGATGGTGACCGGCCGGCCGGCCGGGATGCTCTCCAGCCCTGCGAGCTTTTCTCCAAGCCTATTCCGACATCGACATCTACAGCATTACACGCCGGTC  
TGCCCTCTCATCATTTGGCCGTTCTAGCCGCCGGAAGTCTAGACTTGTAGCTGCCCTCTGCTCTTCTCTCAGCAAGACCTCTGGCCGGGAATGAGCAGAGTGGCCGCCGGCTATGATCCAT  
GCACGGAGGACTATGTCGAGACATACTTCAACAGGGAAGATGTTAGAGAGCTTTGATGCCAATGTCACGCAACTCTCTACCCATACTCCTCGTGCAGCGAGGTGATCGAGAAGTGG  
AACGACTCGCCGGCCACGGTTCTGCCCCTCCTCGCCGGCTATTGAACGCCGGCCTCCGCATCTGGGTCTACAGTGGCGACACAGACGGAAGGGTTCCGGTGACATCAACTCGTTACAG  
CATCAACGAGATGCATCTAAAGGCGAAGCAGGACGAGAGGAAAGGGAAAGAAGGAATGGGGTGGGTGGAGAGCTTGGTATCATAAGGAGCAGGTTGCAGGATGGGTAGTGAATA  
TGAGGAAGGGCTTTCATTGGTGACAGTGAGGGGGCCGGCACCAAGTCCAGTCTTTGCCGCTGCCCGTCCCTTGCCTCTTCTCTCACTTCTCCTCATGGCCGGACGCTCCCGGCTGA  
CCGCTTCGCCGGGCCTAATTTGCTTTTGTGACTGACTTCTTCCCTCGTCTTCTTCTCTGTGCTTGCTCTGTAGTGAGGAGTTCTGCTCTGCAAGCTACACCAATTGTTTGGGTATT  
TCATTTACAGTTTTATTTTTGCCATCTTTGATTTATTTTGTATCGATTGATTTGGTTGGTAAGACACCGAGTTGATGTTGGAGTAGAATTTACGTTAATGGAATTAATTGATTT  
CTGATAATTCAGACGTGCTATTTAAGCTTCT

>comp154464\_c0\_seq1

TTATTCCAATGGCACTAATACAGTTGGAGGTGCTCATGGTGACACTGCACAGGATTTCTGCCTTCTAGTTTCTGTCCAAAGAGAACATCTACCTGCCTGTTTCTCCCCCTTTATGGAGGA  
AAATCCACTATGGGCCATTTACCCAAATAAACCTCTTAATGCGTTTATTTTCAACTTTTTTTTTTGGATATGAATTTTCTCTTATGAAACAAAGTGTTGGGTGTCCCCATCCCTCCCTCACC  
CCCAACAGCCAGATAAGTCCCTGCTGTGAGGGCATTCTGTTCCTCTGAAATCTACAAATAAATATTGAAAGAAAACAGCATCAAGTGTTCATGTTGAGTGATGGCACGAAGTGGGCCCC  
AGAAACCTGTCAAGCAGAGCATTCTGAGTCTGGACAGTCTCAAAGTGTCTGGAGAATGTGGGGGGCTTGTGCTGTGGTCACCTGTCCCTGGGCGCGGGGGCTGCGCCAGTCCCAC  
TGGGCAGCAGGCTGCTGAGAAGCCGCCTACAATTTGTCCAGGAAGTTGTCCAGGGCCGGAATACCTTCCCTCAGGCCCTTGTGCGTTGCGTGTCTCTGCCACCACCTGGCTGGGGCGACT  
GGTGTGTCGAAGGGATCCCCGGGCAGGATCTGCCAGTGGTGAACACACACTGGGGAAAGGCCTGGCCGCCTGTGTTGGATCTCAGGTCAGCAGTAAAGCCAAAGGATTCATTGACA  
GGCAAGTAAGCCTTACAACAACATGGGGGTACCAGCCACCTGGGACTCCTCAAAGACGTGGCCCCGCTTCTGTTCAGGACACCATAAATGCCACCAACCACTTGTCTGGACACTG  
GATCTCCACAAGGTAGATGGGCTCCATGAGCCTGGGCTGGGCAGTCAGCACACTGGCATAAAGGCAGCGCCGTGCAGTAGGGATGATCTGGCCACCACCAGGTGGATGGCGTCGGCGT  
GCAGTGTACATCGTGGACATCAAATCGCACACCCCGCATGTTCTCCTCACACAGCGCCCCCTCTTTGGTGGCCACTGGAAGCCAGCCACCACGCTGTCTTGATCTCGTTGAGGTACT  
GCACACCCTTGGTGTATGTCAGTGAGGATGTTGGGGCCAGTGCCATCAGGGCCAAAGCACCAGATCTGCGGGCCTCAGCCACGTCCCCTCAGTACTTCTCAGCTAGGTAGCGGGCCCCG  
TGCTTGAGTTCTGGCGGGCAGACACCTCTCCCTTGTGATGTCTTCAGCCAGGCCGTGAGGGAAAGGCCTTGTCTTCATGTATAGCCTGTTGTGCTTGTGGGGGACTTAGACAAGCAG  
AGCACATTTGACTCCTCACTGACAGTCTCACGGTAAGAGACAACCTGGGTCAGATTTCTTGATAGGAATGCAGGCGTGGTCTCCTCCAGGTCCTCAGGCAGATCTCTAGGTGCAGCTCT  
CCAGCCCCTGCGATGATGTGCTCCCCAGACTCCTCAATGATGCACTGCACCATGGGATCTGACTTGGCCAGCCGCTTCAGGCCCTCCACCAGCTTGGGCAGGTCAGCCGGGTTCTTGGCC  
TCCACAGCGACCCTGACGACAGGGCTCACGCTAAACTTCATCACTCGCATGTTGTGGGCGTGCTCAAAGGTGGTGTGTTTCTGTCTTACCAGGAACTGGTCCACGCCACCAAGCC  
CACGATGTTCCCAACAAGGCACGTCTCAATGGGCTCCACGTAGCGGCCATCATAAGGATTGTCCTCTGGATTGGCTTCAGGTATAGGTCCTCCTTCTCCAGGGGTGTAGTTGGGCCCC  
ATGATCCTGACCTTACAGACCGGTAGACACCAGCCCTGAGAAGACCCGGCCGAAGGCATAGAACCGACCTTTGTGCGAGGTGCGGCACCATTTTGGAAATGTACATCATAAGTGGGCCTTT  
GGGGTCACAGCTTTAATGCCATGGCTGCCTCGTTCGTCGGAGGCCCTCATAAGGAGCTCACAGCGGTACTTCTGGGCCGTACGGGGGAGGGCAAGTGGATGGTGTATCTGTA  
GCAGCGCATCCCCGGCGGGCAGCCAGCGGCGCATCACAGCCTCAGCAGTGGTTTGCCTTCTTTGTCTTATCTTCACTGTCCAATTTGATGTCTAGTTTTTCAATCAGTTTTGCTGTCTCC  
TCTTTCTTGAATTCATGATGGCATCAAACACCTTGAAGATAGGGTCCAAGATGAGCTGGCAGAAGGTCTCGGCAGCTTCTTGCCATCAGGGCTGGTGGCTGACTTGCTGAATTTACCA  
TTGGCTGGATCAAAGTACCGGTCTCCCCATAGCTTTTTTTCATCATGTCTCCACCTTCTTGGCCCCGCTCAGCAGGCCCAACTGGCCCTCGCCCTTGGCGGCAAACTTGGCAACGTACATCT  
CTGCAAACTGCTTCAGGGTGAAGGCCCAACCGTGGAGACCAGACCCAAAGCCAACAGTACCAAGAACAGGATCAATCATGATGTTGCCCATGGGGCCACTCTCGCCCTCCCCATAGGTG  
GAAATGATGACATTGACATTCTCCACAATGCGCTGGAAGGTCTGGTAGAGCTCCTCGGGCTCCAGCTGCAGCTCGAGCAGGGCCCGGTCCATCTTGTTCATCATCAGCACAGGCTTGATG  
CGCTCAGCAATAGCCTGGCGCAGCACTGTCTCTGTCTGCACGCACACACCTGACACACAGTCCACCACCACCAAGGCACCATCGGTGACACGGAGAGCTGTCTGCACCTCTGAGGAGA  
AGTCCACGTGCCCAGGTGAATCAATGAGGTTGATGAGGAAGCCAGAGCCATCTTTGCTCTGCTTGATGAAATTCAAGTCATTCTCTGAGAGCTCATAGAAGAGGGAAATGGCCGTTGATT  
TGATAGTGATGCAACGTTCTGCTCATCTTCCGGGTGTCAGTGAAGCGGGTCTCCCCAGCCCGGGCGGAGGCGATGATACCAGCCTTGCACACCAATGAGTCCGTGAGAGTGGACTTG  
CCATGGTCCACGTGGGCAATGACGGACATGTTCCGGATATTAGCCTTCTTGTCCATGATGGCCCGGATCTGGTCTACTGTGAAGTTCACCATGGTGACGGATGGCGGTGGATTCTACCGGG  
CAGATCCGAGTAAGGTTAGTCGCGCCGAGGATGGC

>comp154610\_c0\_seq10

AAAAGGTGCAAACCGATTCAATCAATCTCGAGATAGAGCCCTAATTTGATAAATTCATTAAGTAAAGAAATGATGATTCATAGAAGCCCTTCGCTAACCGAAAAACCTAATCGGCTAATC  
CCAAACAGAATAGTTTCCGCAATATGAAGCTAAAGAGACCCCCACTCCCTCAGAATTTCTCCACTACGTCGCCGTCTCCGCTTCCACTCCGTGATCATCTCCACCACCTCCTCCTAT  
GCTCTCCGACTCCGAAGAACCCTCGCCGATTCTTGAAGGCCGAAACCCTCGGCCCGCCGCGCCGATAGCAACGGCGAGAGGTGGTAGAGCGGCGGGGAGGGCAGTAGTGCGCCGG

CGAGGGGTTGGCGCCATAGAGTGTGGTCCCCGCTGCCACGGCCGAAGCTGCTGCTGCTGCTGACGTGGCGTACCCTGGTGGGACCCAGATGCCTCCTAGGACTACAAGTTGCGGGCCCA  
CCGCTGTTGTTCGGCGGGCGGTGGCGGGCGTTGCATTGGCCTTCTTGTGTGGAGCCTGTACTTCTGCGCATCGGTTAAGCAAAAAGAGTCAAAAAGGAGTCCGTTTGTAGTCAAAGCTTTCAG  
GTTGTAGAAGAAAAGTTCACCTCCTCATTACTTATTTCTGTACAGAAAATTCCTATAATCATTCTTATAGAAAATTTAGATAAAAAATCCGTAAGATATAATCTTTTTTGCAAATTATGTA  
AATTTCTTTTTGAATTTATATCGCTGTTTGATTATTTCTTGTGATTATAAACTAAAAAAGAGTGCCGTTTTGTTGAGGAAGGGCCATTGGCTCCTCCCCTAAAACTCTATTTTGTGATATGAG  
GTTCTGTGCATTCATGATTAAGAGCACTCAAAGTCTATAATAAATAAATAAATAAGAAAAGCATAATTAGTCAAGCTTTACACAATGTTGAGAGAGAGAGAGGACCTGCAGATGGCTTT  
TCACCTCATCATTGGTAAGCCCATCAACGTTTATTAGCTCTCTGATTTGCTTTGGAGTGGCAACTTGAGACCCACCCAATATATGCAGGGCATTGACAAACCGCCGGTGCAACTCCGGTGA  
CCAACATCTCCTCGCCTTCTCTGAGTAGCCGCGGTGCCGCAACGTCGCTGGAAACACTACAACCTTCTTCTCGCTTACCCTGTTTCTTCTTACCTTCTACTACTACAGCTCTCCT  
TCTCCTCCATCTCCTTCTGAATAGAACGAGCCAAAGCAAGTTCAGAAATATCTTTTTCTTCTGCTTTGAGAAAGGTTGAAATGCTCCTCCAATCTTGGTTTAGCATCTAGTACCAGCTTA  
GAGCTGAAAGTCACCAATGAATGCTCCTCTTCCCCTTGCTTTGCAGAGTCGGCCTCATCAGCAGCCGGGCTGCTCCATAGCTGTGCCGACACCATCCAGTTCGCCATCTCAGATTCTTCGA  
CGCTCGTCTTCTTCAATGGGATGAATTCTTCGAGCACTGGCTGAGCTTCTTGGCTTGCTTGGTATGTCTCCAATTGCTTCTGTATGCCTCCATGGCGTTGTTGAGTAGCTGCATGCAAAGT  
GGGAGCTCACGCTTGAAAGCTTCAATCTTGAGACTCTCCTCCTCAAGACGAGCAAGAAAATCTTGCAGCTTGTGCATGTGATCTGCAATTGGATTCTGATTTTGGTTAATAGAGTAGCTAC  
TGATTAGCTTGTAACTAACTAATTAGCTCTGAAGAAGAAGAAGCCATAAGAATGAAATGAAGCAAATAAAATAGTTGTTTTGGTTATCGTCTCCTATGAATGATGATTATGATGATC  
ATGGAGTTGGTGTGATGAATGAAAAGAGGAGCCAAATGGATGAGAACGCAGAGGAAATTGAAGAAAGGATCCCCTTCTTTTATGTGTGAGTGCAGGAAGGGAATAAAGTGAAGTTG  
AAGAGAGGAAAAGGAAAAAGAAGTAATAAAAAAGTA

>comp154610\_c0\_seq1

TCACTTTATTCCCTTCTCGCACTCACACATAAAAGAAGGGGATCCCTTCTTCAATTCCTCTGCGTTCTCATCCATTGGCTCCTTTTTCAATTCATCACACCAACTCCATGATCATCATAAT  
CATCATTATAGGAGACGATAACCAAAACAATAATTTTATTTGCTTCAATTCATTCTTATGGCTTCTTCTTCTTCTTCTCAGAGCTAATTAGTTGGATTACAAGCTAATCAGTAGCTACTCTATT  
AACCAAAATCAGAATCCAATTGCAGATCACATGCACAAGCTGCAAGATTTTCTTGGCTCGTCTTGAGGAGGAGAGTCTCAAGATTGAAGCTTTCAAGCGTGAGCTCCCCTTTGCATGCAG  
CTACTCAACAACGCCATGGAGGCATACAGGAAGCAATTGGAGACATACCAAGCAAGCCAAGAAGCTCAGCCAGTGCTCGAAGAATTCATCCCATTGAAGAAGACGAGCGTCAAGAAT  
CTGAGATGGCGAACTGGATGGTGTCCGACAGCTATGGAGCAGCCCGGCTGCTGATGAGGCGACTCTGCAAAGCAAGGGGAAGAGGAGCATTCAATGGTGACTTTCAGCTCTAAGCT  
GGTACTAGATGCTAAACCAAGAATTGGAGGAGCATTTCACCTTTCTCAAAGCAGAAGAAAAAGGATATTTCTGAACTTGCTTTGGCTCGTTCTATTTCAGAAGGAGATGGAGGAGAAGG  
AGAGCTGTAGTAAGAGTAATGAAGGTGAAGAGAAACAGGGTAAGCGAGAAGGAAGTTGTAGTGTCTTCTTCTCACCTTCACTACTCTTACTACAGCTCTCCTTCTCCTCCATCTCCTTCTG  
AATAGAACGAGCCAAAGCAAGTTCAGAAATATCTTTTTCTTCTGCTTTGAGAAAGAGTCCGCTCATCAGCAGCCGGGCTGCTCCATAGCTGTGCCGACACCATCCAGTTCGCCATCTC  
AGATTCTTCGACGCTCGTCTTCTTCAATGGGATGAATTCTTCGAGCACTGGCTGAGCTTCTTGGCTTGGTATGTCTCCAATTGCTTCTGTATGCCTCCATGGCGTTGTTGAGTAGCT  
GCATGCAAAGTGGGAGCTCACGCTTGAAGCTTCAATCTTGGAGCTCTCCTCCTCAAGACGAGCAAGAAAATCTTGCAGCTTGTGCATGTGATCTGCAATTGGATTCTGATTTTGGTTAAT  
AGAGTAGCTACTGATTAGCTTGTAACTAACTAATTAGCTCTGAAGAAGAAGAAGCCATAAGAATGAAATGAAGCAAATAAAATAGTTGTTTTGGTTATCGTCTCCTATGAATGATG  
ATTATGATGATCATGGAGTTGGTGTGATGAATGAAAAGAGGAGCCAAATGGATGAGAACGCAGAGGAAATTGAAGAAAGGATCCCCTTCTTTTATGTGTGAGTGCAGGAAGGGAATAA  
AGTGAAGTTTGAAGAGAGGAAAAGGAAAAAGAAGTAATAAAAAAGTA

>comp154610\_c0\_seq2

AAAAGGTGCAAACCGATTCAATCTCGAGATAGAGCCCTAATTTGATAAATTCATTACTGAAAGAAATGATGATTCATAGAAGCCCTTCGCTAACCGAAAAACCTAATCGGCTAATC  
CCAAACAGAATAGTTTCCGCAATATGAAGCTAAAGAGACCCCCACTCCCTCAGAATTTCTCCACTACGTCGCCGCTCCTCCGCTTCCACTCCGCTGATCATCTCCACCACCTCCTCCTAT



GCTCTCCGACTCCGAAGAACCTCGCCGATTCTTGAAGGCCGAAACCGCTCGGCCGCCGCCCGATAGCAACGGCGAGAGGTGGTAGAGCGGCGGGAGGGCAGTAGTGCGCCG  
CGAGGGGTTGGCGCCATAGAGTGTGGTCCCCGCTGCCACGGCCGAAGCTGCTGCTGCTGCTGACGTGGCGTACCCTGGTGGGACCCAGATGCCTCCTAGGACTACAAGTTGCGGCCCA  
CCGCTGTTGTCGGCGGCGGTGGCGGCGGTTGCATTGGCCTTCTTGTGTGGAGCCTGTACTTCTGCAGATGGCTTTTCACCTCATCATTGGTAAGCCCATCAACGTTTATTAGCTCTCTGATT  
TGCTTTGGAGTGGCAACTTGAGACCCACCAATATATGCAGGGCATTGACAAACCGCCGGTGCAACTCCGGTGACCAACATCTCCTCGCCTTCTCTGAGTAGCCGCCGGTGCCGCAAC  
GTCGCTGGAACACTACAACCTCCTTCTCGCTTACCCTGTTTCTTTCACCTTACTACTTACTACAGCTCTCCTTCTCCTCCATCTCCTTCTGAATAGAACGAGCCAAAGCAAGTTCAG  
AAATATCCTTTTTCTTCTGCTTTGAGAAAGGTTGAAATGCTCCTCCAATTCTTGGTTTAGCATCTAGTACCAGCTTAGAGCTGAAAGTCACCAATGAATGCTCCTTCCCCTTGCTTTGCA  
GAGTCGGCCTCATCAGCAGCCGGGCTGCTCCATAGCTGTGCCGACACCATCCAGTTCGCCATCTCAGATTCTTCGACGCTCGTCTTCTTCAATGGGATGAATTCTTCGAGCACTGGCTGAG  
CTTCTTGGCTTGCTTGGTATGTCTCCAATTGCTTCTGTATGCCTCCATGGCGTTGTTGAGTAGCTGCATGCAAAGTGGGAGCTCACGCTTGAAAGCTTCAATCTTGAGACTCTCCTCCTCA  
AGACGAGCAAGAAAATCTTGCAGCTTGTGCATGTGATCTGCAATTGGATTCTGATTTTGGTTAATAGAGTAGCTACTGATTAGCTTGTAAATCCAACTAATTAGCTCTGAAGAAGAAGAAG  
AAGCCATAAGAATGAAATGAAGCAAATAAATAGTTGTTTTGGTTATCGTCTCCTATGAATGATGATTATGATGATCATGGAGTTGGTGTGATGAATGAAAAGAGGAGCCAAATGGATGAG  
AACGCAGAGGAAATTGAAGAAAAGGATCCCTTCTTTTATGTGTGAGTGCAGGAAAGGAATAAAGTGAAGTTTGAAGAGAGGAAAAGGAAAAGAAAGTAATAAAAAGTA

>comp154610\_c0\_seq5

TCACTTTATTCCCTTCCTCGCACTCACACATAAAGAAGGGGATCCCTTCTTCAATTCCTCTGCGTTCTCATCCATTTGGCTCCTCTTTTCATTCATCACACCAACTCCATGATCATCATAAT  
CATCATTATAGGAGACGATAACCAAAAACAATTTTTATTTGCTTCATTTTCACTTCTTATGGCTTCTTCTTCTTCTCAGAGCTAATTAGTTGGATTACAAGCTAATCAGTAGCTACTCTATT  
AACCAAAATCAGAATCCAATTGCAGATCACATGCACAAGCTGCAAGATTTTCTTGCTCGTCTTGAGGAGGAGAGTCTCAAGATTGAAGCTTTCAAGCGTGAGCTCCCCTTTGCATGCAG  
CTACTCAACAACGCCATGGAGGCATACAGGAAGCAATTGGAGACATACCAAGCAAGCCAAGAAGCTCAGCCAGTGCTCGAAGAATTCATCCATTGAAGAAGACGAGCGTCGAAGAAT  
CTGAGATGGCGAACTGGATGGTGTCCGCACAGCTATGGAGCAGCCCGGCTGCTGATGAGGCCGACTCTTCTCAAAGCAGAAGAAAAGGATATTTCTGAACCTTGCTTTGGCTCGTTCTA  
TTCAGAAGGAGATGGAGGAGAAGGAGAGCTGTAGTAAGAGTAATGAAGGTGAAGAGAAACAGGGTAAGCGAGAAGGAAGTTGTAGTGTTCAGCGACGTTGCGGCACCGGCGGCTA  
CTCAGAGGAAGGCGAGGAGATGTTGGTCACCGGAGTTGCACCGGCGGTTTGTCAATGCCCTGCATATATTGGGTGGGTCTCAAGGTAATAAATTGAAGTACTATTGAACATAAATTTTTCA  
ATAAACTAATTATGTTTTATAAAAAATTTATCTTTTAAATTAATAATGAAATTATGTGTAATATGGTGTCACTGTAACGTTGCTCTTTTCTATTAAAATGTTAATTCTTCAAATTTAAAGCAGATT  
ATGAATCTGATCATTGGATTAATACTACTCTTCTCAATTGAGTTATCAATCTGTCCACAGTTGCCACTCCAAAGCAAATCAGAGAGCTAATGAACGTTGATGGGCTTACCAATGATGAGGTG  
AAAAGCCATCTGCAGAAGTACAGGCTCCACACAAGAAGGCCAATGCAACCGCCGCCACCGCCGCCGACAACAGCGGTGGCGCCGCAACTTGTAGTCTTAGGAGGCATCTGGGTCCCAC  
CAGGGTACGCCACGTCAGCAGCAGCAGCAGCTTCGGCCGTGGCAGCGGGGACCACACTCTATGGCGCCAACCCCTCGCCGGCGCACTACTGCCCTCCGCGCCGCTCTACCACCTCTCG  
CCGTTGCTATCGGGCGGCGGCGGCCGAGCGGTTTCGGCCTTCAAGAATCGGCGAGGTTCTTCGGAGTCGGAGAGCATAGAGGAGGAGGTGGTGGAGATGATCAGCGGAGTGAAGCGG  
AGGACGGCGACGTAGTGGAGAAATCTGAGGGAGTGGGGTCTCTTTAGCTTCATATTGCGGAACTATTCTGTTTGGGATTAGGGTTTTTCGGTTAGCGAAGGGCTTCTATGAATCATCA  
TTTTTTTCAGTAATGAATTTATCAAATTAGGGCTCTATCTCGAGATTGAATGAATCGGTTTGCACCTTTTTTTTTGGTGGGAAAAAA

>comp154614\_c0\_seq13

ATATATACATCCACGTTGAAGCAAGCTCTGAATTTGTCTTGCAAAGCAAAGCTGAGATTTAATTTGGTGAGCTCTGTACTGTTAGTTACAACTCAGCCTTACTTGCTATTATATGTAGGCA  
ACATCTTGGTTTTGGCACCATTTCTCGTAGTTGTGGGCATGCACTGATTTTCGACATTTGTTGGGATTCAACATATCTGGAAGCAATTCATTATAGAGACGAAGTTGAGGACAGTTGCTTATTTT  
TAAGAAATGGAGGAAGACTTGGACTTGCAGTCTGTTAAAAGTTTCAGAGTTGAGCAGAAAGAAATCTCAAGTGAAGATAGATTCATTTCCCTACAGTTCAAAAAGTTAAGCTTATGCA  
TCTATCAATGGTCAACGATTGAAGGCCATTGGGAAACCGTCCAAGAAAACGAGATTTGGACAGCTGCTTATATTCAGTCTTGCAGAGTGGTGACCCTTTCTAGCGCAAAAAGCTCTTT

CAGATGGGAGCAATCCCATATCCTTAGTTGCTTTAGTCTAATGAAATTTTTCTCAATGAGATAGACTTCAAATGAACACAGGAGCAAAAAAGCGGGCCATTTATCTGTTTCAAGAATAGC  
CTCATCGTAGTCCAAAACACATATGTTTTCAAAGAATGTATATTTTTCTCAAGCCATAGCTTGATCTGCTCACTGCTCCTAACAAATAGTTCCTTTGTGTGATTCTTATTATAAGGTATG  
TTATATCTTTGACACCAGTCTATGAGCTTTGGGCTGTAAAAAAGTTCTAGTTGAACCTGAAGCGTGAAGGGAAGTTGATCTGGTGGTGGGAGCAGAAGCTCGGGACACTCAAATATTCTT  
AGGTTTCTAAGGGAGAAAAGTTGTTCCAGCCCAGGCAAGCACAAGATCTTGGGGCAGTTGCTTATGAGCAAGAAGTGAAGTTTGCATGGCAAATTGTGGTCTAGCGATAGTGAGAATTG  
AGGACATTCGATTATTTCTAATTTTTCAAGGGATTCCATCATCTTTAATCCAGGCAGACATGTCAGAGCCGTGCAATGCCATATTTCAACAGCCTCAGTGCAGGAAAAATTTAGGTACGGAG  
GAAAGAACATCAGACGTTGACATGAATTAAGATGCAATGTTTGCAGACTGCACAGAATCCATTCAGCTTTGAGGATGTCACCTTCATCAGACTCGAGTATATGCAAACCTTTTTAAGGAGA  
CGAGATTCTTTGAGCAATAATAATATATTAATGGCTGGTCTCTCGTATGGTCAACTCCTCCATCTTAGATAATTCCTGAATAGTACTTTTGAATCCATATCTTTGGCACCATTTTTCTAATCGA  
GGGCAATTGACAATCTCCAAAACACTAGGCATGGTTGAAAGCTTTTTCTTCTAAAGGGAGTCTAAGTTTCGGACATAATTGTAGCTTCAATTCCTCAAGTGAACAAAGGTCTTGCAGGCCT  
GTTATTGATGTCAACTTCCAACAATTTGGATCCATAGAACTGCAACTTGAAGGAAGTCTCTCCTTTGCAGAGATGAAGAATTTATAAACTCTATTATTTCTAACTTTTCAAGTCTATTC  
AAACTGTATAGCCCATGCAATGTTGTTATTCAGGGCATAGTCTGACAACCAGTCTTCTAAGTGAGGATGATTGTACTATTTTTATATCTTTTATCTTAGCACAAATTAATGATGGAAATACTTT  
GAAGACA

>comp154655\_c0\_seq7

GAATTAATATTACTGCTATCACTTTAGGATATTTAGAATTGGTTGTAAGTTCCCATGTCCAAATATGTCTGATATCCTAGCGTATCTTCTACTTAATACCGTGCATTTATAGAATTTCTTATTTT  
ACATGTGAAATGTCATTGCAGAATCCAAGATTTCCGATGAGGTGGAATATTTAAACAAATCTAACTTTTTATGAGCCTTTTCCAGTTTAGCCTGAAGACTGAGCAAATGAGTTTAGTCTCC  
AAGTCTCAAAGTTAAGCTTCAAATGTATAGTGTATGATATATATTATCCCAACTATTTGAGTTTTTGGCATAATTTCACTCATTTTAACTGTGGTATGCCAATTTGAATATCATTCAAAC  
TCCATAGCCAATATAAAGAATTAAGATTTGATATAATTTATTGTTAAAAAACTCTTTTGCTATTCTAC

>comp154663\_c1\_seq6

AAGGAAATCTCTAAACAGTCCCTAAATTCAAATTTCACTCTTAATCCCCAAAAAATCATTCCTATTCCGGCTCCCTTGAAGCTTGCTGATCATGCGACTCTTCTGGAGGCGGAAGAGTTC  
CACCTCAAATTACGTAAGCCAGTCCCTGTCAGACCGCTAGACCGGAAGAGTTCCACCTCAATCAAATCACCAATCAAATCAACATAATTAGGAAAATAATCAACTCCCTATCAAATAAATAA  
TGAGCCATCAAAGCTTTACAAAATAAACTTATTTGTAATTGAAAGTAATTCCAAATCAACAAAAAACCTTATTGGTATATCTACTCTTCCATCATTAACTTTGTGATGAATCAATTTTTA  
CTTGTTACAAAAACTTCAAAGTACCCACCGATGCTTAGCTCGATTGGTGGGCATGCTTGGTTGGGAACCCCCATCCCGAGTTCGATTCCCTCGAGTGGCACTCGGCCTTTAAGTGGGGG  
CTTCAAAGCGCCGGCTATGAGTTTGTGGCTTGGGTGGCCATTAGGTCAGTCGGGGTTTACGGACTGCCATACACGCTCGATGAAGTCGGGTGAGGCAGCGGATGGCTCCTCGTCATAAA  
AAAAAAACCCTTCAAAGTTACATTAATTCATATCATATTACTTTAGTGCACATTGCGAGCACCTTTGTGGATGGTGACATAAATCGGCCACTCTATCACTGCACCACACCCACCAGAAA  
GAAAATCAAACATTTCAAGCTAGAAATAATACTTTTTTCTCCACTAATCTATTTACAATATTATTTTAAAAAAGCTGATGCCAGATGTTTCATATTAGGTGGTCTCATTTCAATAATCTAGTTT  
ATTTGAATTTTTGGTAGCTACCCACCCACCTCGCATCTAATGAAATTTTAGTAAATAAAGTGGTCGCCACATATCAATTTGAGTAGTGTATAAGGCATAATTTGGAACAGTTTTTTTAC  
TATTTATAAAGCAGTTTTTAAGTATACAATTTTTAATTCAAAAATTTTTTATTAAAAAATTACTTTACAAAATAGTAAAAAGACTGTCCCAAACGAAGCCTTAGGCTTTGACTTTTTTGGC  
GCTTTATTTATAAAAAACTTATAAAGCAGTTTTTATTAGTAAAAAATATCTTGAACCTAGAAATTTTTGTATTAGAAAACTATTTTAGAAATCAGGCTTCGTCTGGGACGACTTTTTTCTGCT  
TTCTTAAAGCGG

>comp154760\_c0\_seq5

AGATCAGCCTTTGCTGATCTGGAGGGATGCCCTCCTTGTCTGGATTTTGGACTTAACGTTCTCGATGGTGTCCGAACCTCTCTACGTCAAGGGTAATAGTCTTCCCTGTGAGAGTCTTGAT  
GAAGATCTGCATCCCTCCCCGAAGACGAAGAACGAGGTGTAGGGTAGACTCCTTCTGGATGTTGTAGTCCGAGAGGGTTCGGCCGTCTCAAGCTGTTTCCCGGCGAATATCAGCCTCT

GCTGGTCCGGTGGGATTCCCTCCTTGTCTGGATTTTGGTCTTAACGTTCTCGATCGTGTGCGAACTCTCCACCTCAAGGGTGATTGTCTTGCCGGTGAGGGTCTTAACGAATATCTGCATC  
TATAACAACACCGAAGAGCCTCGAAATATTAGATCAGACAAGAAAAACACCACCACAAGAACGGGATCGAATGACATCAGAATAAATAAATGAATATTAATTGCTAACGTAAGCAACCATA  
AAATAAGTAGTCAAAGAAAAATATCAGAACAAAATGGTTG

>comp154760\_c0\_seq6

AGATCAGCCTTTGCTGATCTGGAGGGATGCCCTCCTTGTCTGGATTTTGGACTTAACGTTCTCGATGGTGTCCGAACTCTCTACGTCAAGGGTAATAGTCTTCCCTGTGAGAGTCTTGAT  
GAAGATCTGCATCCCTCCCCGAAGACGAAGAACGAGGTGTAGGGTAGACTCCTTCTGGATGTTGTAGTCGGAGAGGGTTCGGCCGTCCTCAAGCTGTTTCCCGGCGAATATCAGCCTCT  
GCTGGTCCGGTGGGATTCCCTCCTTGTCTGGATTTTGGTCTTAACGTTCTCGATCGTGTGCGAACTCTCCACCTCAAGGGTGATTGTCTTGCCGGTGAGGGTCTTAACGAATATCTGCATC  
TTGAGCGAAGATCGGAAACCTATCAATCCACGCGAGAAGATTGAGAATGACTATCGATGGCCGTCTTGTAGGTTTGTGATCCTTTTATAGCAGTATTAACCGACTCTCTCCGTAATTATAC  
GCAACCGGTACGATTA

>comp154760\_c0\_seq9

GATTGGTCATAACATACAAGTAAAAAGGAGCAGCTAAATAACTCCAGCAATGGTGACAGTACGTCCGATTCCGACTAATTTGAAAAATAAATACGATTAGCAAAAAATGTAGTGGAACAAA  
CTAAGAACTACATCGAAACAGAATATATTCAAATATCAAGACAGATGAGATTAGCCATGATTACCATCACAGTTCATATAGCATTAAAAAGATTAAAGACGATATCAAAGTGCACAGAAA  
CGAGGAACAAAAAAGACGAGGACAATAATAGAAAAATGTGACAAATCCCATTTGACTAGAACTTATCAAGGCCAGAGTACGATACGGCTAAAACGATAACCATTCCAAATCTATA  
GATCATAGCGACGACACAAGAACGGAGCAGGACTGCCATTCACTGCCACCGCGAAGGCCAAGAACGAGGTGAAGGGTTGATTCTTCTGTATATTGTAGTCCGCGAGAGTGGCCCGT  
CCTCAAGCTGCTTACCAGCAAAGATGAGCCTTTGCTGATCCGGCGGAATCCCTCTTTATCTTGAATCTTCGACTTCACATTCTCAATTGTATCCGAGCTCTCCACGTCCAGGGTGATCGTT  
TTACCAGTAAGAGTCTTAACAAAAATCTGCATTCCACCACGAAGGCGGAGCACAAGGTGAAGGGTGGATTCTTCTGGATATTGTAGTCAGATAGGGTTCGGCCATCCTCAAGCTGCTTA  
CCGGCGAAGATTAGCCTTTGCTGGTCCGGAGCGATGCCCTCCTTGTCTGGATCTTCGACTTCACGTTCTCAATGGTGTGCGAGCTCTCCACCTCGAGTGAATGGTCTTGCCTGTGAGGG  
TTTTGACAAAGATCTGCAT

>comp154796\_c0\_seq2

TGCTTTCCTTCTCCACTCCCTCGGCCATCCCTTCTCACAACTGAAGCACCTAAAAGCAAAGGGGAAGCTCGACGGCGGCCTCCTATTTCCGTCGAGCCACCCCTTCTCCTCTCCTT  
GGCATTCCCACGATGGACTCGGCCGCCGGCGCATCGGACTCACATTGCCCCTCTTTTCGCTCTACGCCGCTTCGGTGATCTCCACTCGTAGCGATAATGTAAAAGGAGTGGTATATGATG  
CGCGTTCTTTCATTATTAACGGGAAGAGAGAGCTTCTCTTCTCTGGCTCCATTCAATACCCCGAAGTACTCCGGAGATGTGGCCAAATATTATTGCCAACGCTAAGGCTGGTGGGCTTAAT  
GTGATTCAAACCTATGTTTTCTGGAATGGACATGAACCCATTCAAGGGCAGTATAACTTTGAGGGAAGATATGATTTGGTGAAGTTCATTAATTTGGTCCAGCAAATGAGAATGTATGTAAC  
ACTCAGGATTGGACCCTTCATTCAAGCCGAATGGAATCATGGTGGACTACCAGTCTGGCTAAGGGACATTGAGAACATTACCTTCCGGACTAACAACCCTCCCTTCAAGTACTACATGGC  
GAAATTTGTGAGAAAGATTGTTGATATGATGAAAGAAGAAAAGCTATTTGCCTCACAGGGCGGGCCATCATCTTAGCTCAAATTGAAAATGAGTACAACATGGTGCAGATGCGTTCAA  
GGAAGGAGGCAAGAAGTACATACGGTGGGCTTCTAACTTGGCCTTGAGCTCGGGGGCTGGAGTTCCATGGATGATGTGCAAGCAGCAAGATGCTCCTGGTCCAGTGATCAATGCCTGCA  
ATGGAAGGAAGTGTGGTGACACCTGGATTGGACCGAATCATCCAATAAGCCTCTTGTCTGGTCTGAGAACTGGACAGCACAGTATCGTGTGTTTGGTGACCCACCATCACAAAGAACA  
GTTGAGGATCTTCTACTCAGTTGCTCGATTCTTCTCCAAGAATGGCACTCTTGTTAACTACTATATGTATCATGGAGGGACCAACTTTGGCAGGACTGGTTCTGCTTTTGTGGCAACACG  
GTAATATGATGAAGCACCTCTTGTATGAATATGGTTTGGCGAAGCAGCCCAAATGGGGACACCTGAAGGACTTGCACCAAGCTTTGAAGCTAAGCAGGAAGGCAATGCTCTGGGGCACTT  
ATAGTTTCTGTACATCGAAAAGACTTTGAGGCTAGAGTTTATGAGATTCAAATAAGAAAGTGTGTGCCGCTTCCCTTACAAACACCCATGCTACTATAGATAACAACGGTTAAATTCGT  
GGTGTAGACTATTTCTACCTCACCGTTCCATCAGCATCCTCCCAGATTGTAGGACTGTGGTTTTTAATACTCAAAGATAAATGCTCAACACAACCTCGAGGAGCTTCACTCCAGTAGTTG

AGGTCAGGAAGAAGAGAAAATGGAAGATGTATAAAGATTATTTACCCAGATATCAAGATCAAGGAATTGTTTCGTAACATGAACCCTTGAACATAATGAACATGACCAAGGATAACCTG  
ATTATCTGTGGTATACCACAAGCTTCCACATTGAAGAAGAAGACTTGCCAGAACATGACATTCGTCCTGTGCTCCAAGTGGCAAGCCTTGGCCATGTTGTGCATGCATTTGTCAATGG  
GAAGTACATCGGAAATGCACATGGTAGCAAATGAGAAAAGCTTTGTTTTCCAAAAGCCCATGAAGCTGCATTCTGGAATCAACCACATCGCTATTCTTGCCTTGACAGTTGGTTTTCT  
GATAGCGGGCCTTATCTGGAACATAGAATGGCTGGAATTCACCTCTGTGGCCATCCAAGGTCTTAACACTGGAACCCTGGATCTCACTAGCAATGGATGGGGACATCAGGTTGGTCTTTTGG  
GAGAGAAGCTCCAAATTTATAGCCAGGAAGGTTCTTCTAAAGTTCAATGGACTCAACCTGTGGGCAACACAGCTCTTGTTTGGTATAAGAGATACTTCAGTACTCCACTAGGTAATGATCC  
TGTTGTCCTGGACATGAAGACCATGGCCAAAGGTCTTGCTTGGGTTAATGGGGAATGTATTGGTAGATATTGGGTTTCCAACACCTCCCCTCTTGGCACAGCCACACAGACACTCTACCAC  
ATACCTCGTGAATTCATGAAGCCAAAGGGTAACCTTCTGTTGTGTTTGGAGGAATCTGGTGGCAACCCCGATGGGATCAAATATTGACTGTAAAGAGGGATGAGATCTGCACCTATGTCT  
CTGAATACCATCGTTCATGGTCAAGGAGGAAAGGGAAAGGTCGCTCTATTGCGGAGCGTGTGAAGCCAGAGGCACAATAAGCTGCCCAACCAAAAAGATCATCAAATCTATCACCTTT  
GCCAGCTTCGCAACCCCACTGGAGTTTGTGGAACTTCACCGTTGGAACTGCCATGCTCCACAAACCCAGTCCATTGTTGAGAAGACCTGTTTGGGTAGGAATTCATGTGTGATTTG  
GTGAAGGGAGAGGACTATTTAGCAGATGAAGATTGCCAGGAACGACGGACACGCTTGCAGTTCAGGTCCTATGCACTCTGTAGTAGAGCCTCACAGTTTGAGGAGATTCTTCTTTCGC  
ACTAAAAATTTGGATTATTATTATTATTTTTTAAAGCCGAAGTGCACAACTGAACTGTGATGACGATTGAAGCTTTTACTAGCAGCACTTGTATACTGGGAAATTGATAGGAGCTGCT  
GCAATGCGCATCAAACAGATTTTCTTCAAACCTATTCAACACTTGTATCTTTTCTCTATGGCTATTCTTAAAAAATTATAAGAAAAA

>comp154796\_c0\_seq4

AATCCCACCGGAAGAAAGGGGAAGGAAATTTCTTCTTCGATCGTCTCCTTCTTCTTCTTCTTGGCATCCCTTCTCGTCTACAATGGCTGCCGCCGGCCGGCGCTCGGGCTACT  
CCTTTCCTTTCGCCACCGTCGTTGCGGTATCTGCTCGCAATGGCGGAGTTAATAACAGAGGAGTGAGTTACGATTCTCGCTCGTTCATCATAATGGAAAGAGAGAGCTCTTGTCTCT  
GGTCCATTCAATTATCTCGAAGCACGCCAGATATGTGGCCTGGTATCATTGCCAATGCAAAGAAGGGCGGAATCAACCTGATCCAAACGATGTTTTCTGGAATGGTCATGAACCAGTTC  
AGGGACGGTATAATTTGAGGGGAGGTATGACTTGGTGAATTCATCAGGTTGATTCAAAGGAGAAATTATATGTCACACTTAGGATTGGACCTTCATTCAGGCTGAATGGAATCATGG  
TGGATTTCCATATTGGTTAAGGGAGGTAAGAACATCACCTTTCGAACCAACAACCCCTCCATTCAAGTATCATATGGAGAAATTTGTGAGAAAAATTGTTGATATGATGAAGGAAGAGAA  
GCTCTTTGCTTCTCAGGGAGGTCCTATCATCCTTGCTCAGATTGAAAATGAATACAACATGGTACAAGCGGCATTTGGGGAAGATGGCAAGAAGTATGTACAGTGGGCAGCTGACTTTGC  
CTTGAGCCTTGGGATTGGAGTTCATGGATGATGTGCAAGCAACAGGATGCTCCTGGACCAATAATCAATTCTTGCAATGGAAGAACTGTGGTGATACCTGGAAGGGACCTAACCATCC  
AACTAAGCCTTATCTGGGCTGAAAACTGGACTGCTCAGTACCGAGTTTTCGGGCACC CGCTCTCAAAGGTCAGCTGAAGATCTTGCAATTCTGTGCTCGTTTCTTCTTAAGAAT  
GGGACTCTTGCAAACCTATTACATGTATCATGGAGGAACA

>comp154796\_c0\_seq5

GTATCATGGAGGAACAACTTTGGAAGAACTGGTTCTGCTTTTGTGCGGACACGGTACTATGATGAAGCACCTTGTGATGAATATGGTTTACAGAAACAGCCAAAATGGGGACACCTGAA  
GGACCTCCACCATGCTCTGAACTTAGCAAGAAACCCCTACTTTGGGGTCTTACAGTTTCAGAAAACCTGGGGAAAGATGTTGAGGCTAGAGTCTATGACCTTCCCTAGTAAGAAAGTGTG  
TGCTGCTTTCTCACAAACAAGAAGGCTGACCGAGATTACACAGTGAGCTTCCATGGCGTCAACTACTTCTTGCCACGCCATTCTATTAGCATTCTTCCAGACTGCAAGACTGAAGTCTTC  
AATACTCAGAGGATTAATGCCAGCACAACTCAAGGACCTTCATTCGATTTGTGGAGAGGAAGAAGAAAAAAGATGGGAGATGTACCAGGATCATATCCCCAGATATCATGACAAAGG  
AATTGTTTCATAGCCCGGAGCCATTGGAGCTCATGAACATGACCAAGGATACCACTGATTACCTTTGGTATACCACCAGATTTAAGCTGCAGCAAGAAGACTTTCCATGGAGGAATGATATT  
CATCTGTGCTCCAAGTTGCAAGCCTTGGCCATGGAGTGCACGCATTTGCCAATGGCCAATACCTTGGAAACGCGCATGGTAGCAAGATTGAGAAGAGCTTTGTCTTACAAAAAGTCATG  
AATCTGAAGCCTGGAACAACACATTACCATCCTAGCCATGACCGTTGGTTTCCCGGATAGTGGTCTTACCTTGAACGCCGGCTTGCTGGAATTCGCTCGGTGCGCATCCAAGGCCTTA  
ACACAGGTACCCTGGATCTCACTGCCAATGGTTGGGGCCATAAGGTTGGCTTTAGAGGAGAAAAGCTCCGGATCTACTCAAATGAAGGACTATCCAGAGTTCAATGGACCAAAGCTAAG

AGCAACTTACCCATTACTTGGTACAAGAGATACTTCGATACACCCCATGGAAACGATCCAGTCATCATCGACATGAGCACCATGGCCAAAGGTCTTGTCTGGGTCAATGGCGAAGGCATT  
GGCCGATACTGGGTTTCCAATCTCTCCCCTCTTGGGACCCCAACTCAGACTGTCTATCATATCCCTCGCTCATTCTTGAACCAAAACAAAGAACCTTCTTGTGTGTAGAGAATCTGGAG  
GAAACCCCGAGGGAATCCAAATTTTTACAGTTAGGAGAGACGACATATGACTTACGTGTCTGAATATCATCCTGGTGTACCAAATCTTGGTCGAGGAAGGAAGGCCAACTCAGGTCCG  
TTGTTGAGGATGTTAAGCCAGAATCTCACCTCAAATGCCAGACAATAAAGTCATCCAAGCCATCACCTTGTAGCTTTGGCAACCCAGCGGCGTGTGTGGAACTACACCATTGGAA  
GCTGCCATGCTCCACAAACGAAGCTTGTGTGAGAAGGTCTGTTTGGGAAAAGCTTCTTGTGTGCTGCCAGTGAAAGGGGAGGTTTATGGTGCAGATGCAAACCTGTCCAGAACTACG  
GCGACGCTTGCAGTTCAGGTCTTTTGTGGCCGTAAGTAGAGCTATATCTAAGGATTGAGATTACACATTTGTAGTAAAATTTGTTCATTTTTTTTATTTTTAAGGGGAAATGTAATAATCATG  
GTGATTAATGAATCACTGTGTCGAGTCTTATTGTAATATTTGAACAATTCAAAGGCATGCCTTCATATTTACTTTTATCAATTTTGTAGAAAAAAA

>comp154821\_c0\_seq1

ATCGTTCTCTTCTTTCGCTCGTTTTTTTCGCCAAGTTCGATAGAGATAAAAAAATGATGAAGATGAACAGTGTAACACCAATATTGTCATCCCATTGTTACCCGCAACCAATAACAAAAAT  
TTTACCTTCGGTTGGAGCTGCCGAGGGACATCATTGACGCGTTTCAAGCTGGGTTGGAGATATCCTAAAATTCGCTTCTCTATGCCAATAAATAACGAACACTCGTAAATCCTACCACAGT  
CGGCAACCAGAATTTTCGCTCCTCCTTTTCGTTTGTAGAGAACCAATAACCTAATATTTTCTTCGTCGATGGCGCGTACGAAGCAAACCTGCCCGGAAATCAACAGGAGGAAAGGCTCCTCGG  
AAGCAACTTGCAGCAAGGCTGCAAGGAAATCGGCGCCGACTACCGGAGGAGTTAAGAAGCCTCATCGTTACCGTCTGGAACCGTCGCTCTCCGTGAGATTGCAAGTATCAGAAGA  
CCACGGAAGTGTGATCCGCAAGCTGCCGTTTTCAGAGGCTGGTGCCTGAGCTTGGCTCAGGATTACAAGACGGATCTGCGATTTTCAGAGCCATGCCGTGCTCGCTCTTTCAGGAAGCCGCG  
GAGGCGTATCTCGTCGGCTTTTTGAGGATACGAATCTCTGCGCCATCCACGCGAGGCGCGTCACCATCATGCCCAAGGACATTCAGCTTGCT

>comp154821\_c1\_seq1

CTACACTATTAGACTTCATTACCAACTTTTAAGTCTTACGAAAAAGAAAAATCTAAAAATTAAAAAAGCAACAATAGAACTGCCATGGTTGATCAACTTAAGCACGCTCGCCCCTAATA  
CGCCTAGCAAGCTGAATGTCTTGGGCATGATGGTGACGCGCCTCGCGTGGATGGCGCAGAGATTTCGTATCCTCAAAAAGGCCGACGAGATACGCTCCGCGGCTTCTGAAGAGCGAG  
CACGGCATGGCTCTGAAATCGCAGATCCGTCTTGTAACTCTGAGCAAGCTCACGCACCAGCCTCTGAAACGGCAGCTTGCAGATCAACAGTTCGGTGGTCTTCTGATACTTGCAGTCTC  
ACGGAGAGCGACGGTTCCAGGACGGTAACGATGAGGCTTCTTAACTCCTCCGGTAGTCGGCGCCGATTTCTTCGACGCTTGGTTCGCAAGCTGCTTCCGAGGAGCCTTTCCTCCTGTTGA  
TTTCCGGGCAGTCTGCTTCGTACGCGCCATCGACGATGAAAAGAATCGGTTAGGGTTTCTCTATACGCGGAAGCGAAAGAAGGAACGAAATTCGGTTGCGAATGGTGGTAGAAATTATG  
AGCGCTATTTATAGACGTAGAGAAGCGATGTGTTATGGGGTTGGGCCGGGTCGGTTTCGCTTACGGCGTTCCAATTTTGAAGTTCTGATCGAACGGAATGGGATTCATTTGAGAAATTAGCG  
ATCCGTGTGCTCTGTTCTATTGGTTCAAATGCCATTGACATGGATTAAGAACTTAATTTTCTCTCCATTCTTCTTAATAATATGCGGAAGAGC

>comp154823\_c0\_seq1

AAAAAATTCCTCAACAAAGTTCACATGTCTCCTTATAACCCTTCACTATATAAGTCTAACTAAACTGAATCTGCCATCAGAAGCTTAATTACTTCTGACCATGGACTGGTACTCATGGCTC  
TTAAAATCTTCGAGGCTCGACCGGAATCTGGTCTACGAGTACTCTGTCTTCTTTCCAGAACGAGCTCGAGGAAGATGACATCGCCACTTCGACCACGAGTTTCTCCTCAGCATGGGC  
ATTGATGTGCCAAGCATCGCCTCGAGATCCTCAAGCTTGTAAAGAGCCACCGCCGTTATCACCGCCCCGGCCGACCAGTCGCCGCTCTCCTGACAGTCATCCACGAAGCCTGCAACTGC  
TTAACAAGGTATGTTTATGATCTAGTCCACCATAACAAGCAAGGCAGTGGTGATTATGCCGAGGCCAGGAGGAGGGGGGCGACAGATGGTGTGAGCGGAGGGATCAGGAGGCTGGCTATGGT  
GAAGAAAGGAAGGTTGCAGATCACTGATGTAGTCTGCAATGGAGTTAAGGCAGTTCAGCTCGGTGCAAGCCCGGCTTCGCAGAGCATGAGTCTGTAGTCGGCAATGGAGTTAAAGCA  
GTTACGCTCTGTGCGAGCCAGCTTACAGAGCTTGTAGCCCTGTAGTCGGCAATGGAGTTAAGGCAGTTCAGATCGGTTCGGAGCCCGGCTTACAGACCATGAGCCCAATGGCACTGCT  
TGCTTCAAGGGAAGAAGGCCATGATGATGGCTTACTTGGATTGGGTACAACGATACAGACCAAAATGAGGTGGGACTCCATGTTTTCAGGATCTGAAGCCTACCTGACTGGATGAGCTCTC  
CTTTTGAAGATTTGAGAAGGTTCTTATCAGCTACAGAATCAAGATTTATTCGAAAGAACGAAGTTTTAACTAAATTTTGAATCAAATTTGCATATAGTGATAATTAGTTTATGAGGAAAAA

GAATTGGTACCATCAGCACCCTGTTTCTACCACTAGCTCTGATCTGTTTTGGTGTCTCTGCTTTAGCTTTTTGGAATCCAGCTTTTGAGAGTGAGGTATGAATGGCTAGATTTACTTGAAG  
GTGGAGTGTTTAGGCTTTTACTTTTGCTTTTGTGGAAGAATGACTGTAAGAAATGCTAGTGGGAAATTATTATGCTAAAGGGGAGGTCCTATTTTTTTTTCTTCCATGGATTGATTAATTTGCT  
TGATGGTTAAGTCAGGTAGATGAAAGTACTGTGGCATTCCACAAGATAAAAGAAGAGGTGATGGCCTGTCTCAGTCACAAATTAAGTTTTAAGAATATTATGACAACTTTGGAGTTTCTA  
TTCTGCAGCCAAAACAAAAAATTATACCTACCGGCATTGGAGACTTTGGCTAAGTTGAAAGAGATTTGGTTTCATATATTATGGGCTAAAGCTAGCTTAGAAAAGTAAGGCTTTTTTTGTTT  
TATTCTGCAAGTTGTTCTTATTCTACAATAACTAAGGTATGATATTGATATCTTATTATGATGGC

>comp154823\_c0\_seq2

AAAAAATTCCTCAACAAAGTTCACATGTCTCCTTATACCTTCACTATATAAGTCCTAACTAACTGAATCTGCCATCAGAAGCTTAATTACTTCTGACCATGGACTGGTACTCATGGCTC  
TTAAAATCTTCGAGGCTCGACCGGAATCTGGTCTACGAGTACTCTGTCTTCTTTCCAGAACGAGCTCGAGGAAGATGACATCGCCCACTTCGACCACGAGTTTCTCCTCAGCATGGGC  
ATTGATGTCGCCAAGCATCGCCTCGAGATCCTCAAGCTTGCTAAGAGCCACCGCCGTTATCACCGCCCCGGCCGACCAGTCGCCGCTCTCCTGACAGTCATCCACGAAGCCTGCAACTGC  
TTAACAAGGTAACATAACATTTTCGACCGCATCTCTAAGCATAGGAGGAATCAGAGAGGGACTAAAGGTGACTAATTCGCCTCATAGGTTTTTAAAAATTTTACATAATTGGTCATTATATA  
TAATATGGAAATTTTCATCTTTAAATTTTCGACCCTCCCTGTAAAATTTGGGGTAAATTTTGTGTGATCCATGGCAGGTATGTTTCATGATCTAGTCCACCATAACAAGCAAGGCAGTGGTG  
ATTATGCCGAGGCCAGGAGGAGGGGGCGACAGATGGTGAGCGGAGGGATCAGGAGGCTGGCTATGGTGAAGAAAGGAAGGTTGCAGATCACTGATGTAGTCTGCAATGGAGTTAAGG  
CAGTTCAGCTCGGTTCGAAGCCCGGCTTCGCAGAGCATGAGTCTGTAGTCGGCAATGGAGTTAAAGCAGTTCAGCTCTGTCCGAGCCAGCTTCACAGAGCTTGAGCCCTGTAGTCGGC  
AATGGAGTTAAGGCAGTTCAGATCGGTTCGGAGCCCGGCTTCACAGACCATGAGCCCAATGGCACTGCTTGCTTCAAGGGAAGAAGGCCATGATGATGGCTTTACTTGGATTGGGTACAA  
CGATACAGACCAAATGAGGTGGGACTCCATGTTTCAGGATCTGAAGCCTACCTGACTGGATGAGCTCTCCTTTTGAAGATTCAGAAGGTTCTTATCAGCTACAGAATCAAGATTTATTCG  
AAAGAACGAAGTTTTAACTAAATTTTGAATCAAAATTTGCATATAGTGATAATTAGTTTATGAGGAAAAAGAATGGTACCATCAGCACCCTGTTTCTACCACTAGCTCTGATCTGTTTTG  
GTGTCTCTGCTTTAGCTTTTTGGAATCCAGCTTTTGAGAGTGAGGTATGAATGGCTAGATTTACTTGAAGGTGGAGTGTTAGGCTTTTACTTTGCTTTTGTGGAAGAATGACTGTAAGAAA  
TGCTAGTGGGAAATTATTATGCTAAAGGGGAGGTCCTATTTTTTTTTCTTCCATGGATTGATTAATTTGCTTGATGGTTAAGTCAGGTAGATGAAAGTACTGTGGCATTCCACAAGATAAAA  
GAAGAGGTGATGGCCTGTCTCAGTCACAAATTAAGTTTTAAGAATATTATGACAACTTTGGAGTTTCTATTCTGCAGCCAAAACAAAAAATTATACCTACCGGCATTGGAGACTTTGGCT  
AAGTTGAAAGAGATTTGGTTTCATATATTATGGGCTAAAGCTAGCTTAGAAAAGTAAGGCTTTTTTTGTTTTATTCTGCAAGTTGTTCTTATTCTACAATAACTAAGGTATGATATTGATATCT  
TATTATGATGGC

>comp154839\_c4\_seq7

TCTCTCTCTCTCTCTCTCTCTCTCACACAGCCGGATTGAAGAGTAAGAACTAGCAATGGAGTTCGACTTCGACCTTGAGAACCCGTTCTCCGGTAGCGATGAGCAAAACATCCAAC  
TCTCGAAAGCACTATTCATCGGCTGCACAGACTCCGACGAGCCCTCGTTGCTTTTCTCAGCTGAATCGGACCACATGAGCTCGCTTGGCGTTGCTCTGGACCAGCTCTCCACCCGTTGCC  
ATGCCCTCTCCCTTATCGTCCAGGCCAGTTCAGCAATAATCTCGATCCAGCACTAGCCTACCTTGCTGTCAACTATATCGATCGGTTCTCGCCAAACGCGAGATCCCGAATGAGAAGCC  
ATGGATCGCGGACTCCTCGCCATTTCTGCGTCTCCCTCGCCTCAAAGATGAAGAAGACCAGTTTCTCCCTGCTGATTTACAGGTACCGTGAAGCTAGCTTCACCTCTTCTATCGAACA  
ATCTCGATCCGATCGATTCAACATTTTCCCAAATTTGTTCCGAGCAGAGGGAGGAGGCTTCATCTTCGATGCACGGACCATCCGGCGAATGGAAGTCTCGTCTCGGCGTGTGAT  
GGCGGATGCGATCGATCACGCCCTTCTCCTTTCTCCGATTCTTACATCCTACTTTCCCTGGCGAATCCAATCATCATCCAATCTCTCAAGACCCACGCCTCTCAGATCCTTCAAATCCC  
AAAACGATGTCAAATCGCTCGAGTTCAAGCCTTCGGTATCGCTGCGGCAGCGCTTCTCGCCGCCGCGCGGAACTTCCCTGCTCATTTCAATTCCTTCCGCACTGCCCTGCTCTGCTG  
TGAATATCTCAATAAAGAGTCTTTGGCAGAATGCTGCGCCGCGATGGAGAGCTACGATACGACTGCCGGGATTGAGGCAGCATCGAACGGCTGTGATTCGGGCTACTCTGCTCTCACGCC  
GGTACTGTACTCGACCGCCATCGCGCCGGCTTGAAAGCGAAAAGACCGCCGGATCGGCATCCAACGGCTGAGATGCCAAAAGCGCCGCACTTCTACTACGGCGCCTTGCCATTCT

GTGACCAATACCTAACCAATAAATTTAAAAAGAAAAATCTATTTCTATTGAAAAAAAAAAGAGAAAAAAAAAAGAAAGAGAAAAAAAAAGAGAGGAAAATTTGAGATTCTTTTGCCG  
TCGCCGCTGACCCCTGAAGGTATAATCTCCAAAACCTTAGATTTCCCATTTCTCGTTGTTTCGTGGCGGATCGGGGAACCACTATACGCGCTCTCGTAGCACGGTGGGAGGGAGCCCGGTGCG  
ATACCTACGACGAGACGGGTAATCACCTAAAACCTCATATTTCCATTTTCGATGTCTGCTGCGGACCGGGGAACCACTATACG

>comp154839\_c4\_seq8

TCTCTCTCTCTCTCTCTCTCTCTCTCTCTCTCACACAGCCGGATTGAAGAGTAAGAACTAGCAATGGAGTTCGACTTCGACCTTGAGAACCCTTCTCCGGTAGCGATGAGCAAAACATCCAAC  
TCTCGAAAGCACTATTCATCGGCTGCACAGACTCCGACGAGCCCTCGTTGCTTTTCTCAGCTGAATCGGACCACATGAGCTCGCTTGGGTTGCTCTGGACCAGCTCTCCACCCGTTGCC  
ATGCCCTCTCCCTTATCGTCCAGGCCAGTTCAGCAATAATCTCGATCCAGCACTAGCCTACCTTGCTGTCAACTATATCGATCGGTTCTCGCCAAACGCGAGATCCCGAATGAGAAGCC  
ATGGATCGCGGACTCTCTGCCATTTCTGCGTCTCCCTCGCTCAAAGATGAAGAAGACCAGTTTCTCCCTGCTGATTTACAGAGGGAGGAGGGCTTCATCTTCGATGCACGGACCAT  
CCGGCGAATGGAAGTCTGCTGCTGCTGCGCGTGTGAATGGCGGATGCGATCGATCACGCCCTTCTCCTTTCTCCGATTTTACATCCTACTTTCCCTGGCGAATCCAATCATCATCCAAT  
CTCTCAAGACCCACGCCTCTCAGATCCTCTTCAAATCCCAAAACGATGTCAAATCGCTCGAGTTCAAGCCTTCGGTGATCGCTGCGGCAGCGCTTCTCGCCGCCGCGCGGAACTCTTCC  
CTGCTCATTTTCATTTCTTCCGACTGCCCTGCTCTGCTGTGAATATCTCAATAAAGAGTCTTTGGCAGAATGCTGCGCCGCGATGGAGAGCTACGATACGACTGCCGGGATTGAGGCAGC  
ATCGAACGGCTGTGATTCGGGCTACTCTGCTCTCACGCCGGTACTGTACTCGACCGCCATCGCGCCGGCTTGAAAGCGAAAAGACCGCCGGATCGGCATCCAACGGCTGAGATGCCA  
AAAAGCGCCGCACTTCTACTACGGCGCTTGCCTATTCTGTGACCAATACCTAACCAATAAATTTAAAAAGAAAAATCTATTTCTATTGAAAAAAAAAAGAGAAAAAAAAAAGAAAG  
AGAAAAAAAAAGAGAGGAAAATTTGAGATTCTTTTGCCGTCGCCGCTGACCCTGAAGGTATAATCTCCAAAACCTTAGATTTCCCATTTCTCGTTGTTTCGTGGCGGATCGGGGAACCACTAT  
ACGCGCTCTCGTAGCACGGTAGGAGGGAGTCCGGTGCGCCGCTACGACGAAGCGGGTAATCACTTTAAATCCATTTTCGACGTTTGCGGCGGACCGGAGAACCACCTATACG

>comp154856\_c0\_seq1

TTATTAGAAATGAAGTATGCTTACATTTTGCCACAATTAGGAGTGCAACTGAGTCAAGCCGACTTGCAAGCCAACCTCAGACTTGACTCGATAATAGGCTCAACGAGACGAGCTTATCGAG  
CTCGAACACAATTCAAGCTCGATGGCTTATTGAGATCGAGCTCAAACAGGCCTCGGACTTGACTCATCGGCTGGACAAGCAGCTCGCGAAGGTGACTGGGCGGAAAAATGAAATATTT  
GTTGTTGCGGCCAGGAGGACGAATCAAAGGTCAGGCGAGAAAACCAAAACGACAAGTGAGCTCAGGACGACGGATCTCGACAGCAGATGTGATGATGACTGATCTTGACGACGAACG  
CGACAACAAGCTCGTGACAACGGATCTCGACGACATAGCTCAAGATGACAAAGCTCCACAACAACGCGACGTTGATGAACCTCGGGACCATAGAGAACGCGACGACGAGCCAACCT  
GGGACTAAGCTCAACGAGCTGCTCAACATGAGACGATTCGAGCACGAGCACGAATTTTGAGCTTG

>comp154859\_c0\_seq3

AAAAAACTTCTGTGCATGGCTTCGAATCTGAACAGTAGTCTTCGATCCTATATGCTCTGCAAAAATGATTCATGGTGAGGAACAGAGGAAAGCTTGATATCCAGAAAGCTTTCAAAGG  
TGTCATGGTAGTTAAAGAGAGACGCTTATAAGGTGACGCAAGTCACCTTCTATTCTTCGCCAGGCTCGGCCATGAAGTTTCAGTGCTTCCAGAAATTTATTGTGCTCTTCAGCAGTCCATC  
TTTCTCGTTGTTTCGTTATTATGTAAGGTTTCCTTACCTTGATAGCATGTTTCAGAAATTGATGAATCAGCTTCTGCCATCGGGTGGAGACAATTTGCAGATGAGGCTTCTCCGTCCACAC  
ATTCTTTGGAGAGGAATAAACAGTACTGTGTAATCCTCGCTGTTCCACCGAAGAACGCTGGAATAGGGTCTTCTCGCCGCCGATAGCCCTTCTTAGTTTTGCCGAAAAACCTCCGGCGA  
AGTGAATTCGATTGAGAGAGAGAGAGAGAGTGTGAGAGAGATGGGAGAGAGAGAGAGTGTGAGAGATAGATAGAGAGAGCAAGAGCAAGAG

>comp154859\_c0\_seq8

TCATCATCATCATCATCATCAACAACAACAGACGAAACAGCTGCAGCCATCAAATCTACAACCTGAAATAAAAACGAGAGAAGAAGATAAAAACAGAGTGGGCAGAATCATCTCTAATCA  
CCTCAACAACAATAATTGATAACAGTTGAGAGATTCTGTATCCTCTACTGACACCCAAGCTTTTCCAATAGCTACTTCTTCGATGTTGGCCACAGGTGTGCGCGGCCGTTCTTCTCAAC  
TACACATCTTTTGTAAGGCACAAAGCCTCTGTTAGAGTTTGCAGAAGATGGAATCAAACCTGCTGAAAGCTGAGTTCTTGCTTGGCTTACGACTGGTGCTGGAGGAAATTTCTTCATTTG

AATACCAATCTCAGCTGCCTCAGAATTGCTATCAGAGGTAGTGCTGGAATCAGTTTGAGAACTTTCGTTATGTA AAAAGCTCTCATCTTTGGAAGGCATTGGACTTTGATCTGATGGATTCA  
GAGCTCCTGAAGAGTGGAACGGCATAACTCCATACAAGTTCCACAAAAGAAGGAAATGAAACCATATTAGGTTCCCTGATATTCCGACTGATTCTTCTTACTCGAAGGCTGCTGCTGCAAGC  
CAGCTACTACAACGGTCCCTTCCAAACAATCTAAGACATGTTATGTTCTGTCCTGTAAC TGGAGCCTCTTTAGCAGCAAAAACAATCTTGAATGCTTAAGTCTAATTCCATAGGAGATATATCT  
TGCAGGGTCAAGGAAGGAGAGGTATCCGATGATTTATTACATTTGTATTTCAGCTGAGGTAATTTGTTCAACCAATATTTCTCTACCGAGACTGTCTTATCAACAGATGAAACTGGTGACAT  
ACAAGGCTTTAGGGTGTGAGCAGCAGTTGTTCCACTTGTATCAGATCCAAATGCAGACAACACCGATGTGCGGATTTACTCTCCTGCTCGGAAACTGATTGATTTGCTATGGAAGGCCA  
CAGCTGTGCATCTATAAGAGGGCCTTTTCATGATGGATAGATGACCCAATTTACGGGGGTATGGATGATTTGGTTTTCCTTTTGGGTGCTGGAGGAGGTATCTCCATAGCTTTGACAGTGCTTG  
GATTATTGCTTGATGACTCCCGTGTACCTTGGAAAAAACTTCTGTGCATGGCTTCGAATCTGAACAGTAGTCTTCGATCCTATATGCTCTTCTATTCTTCGCCAGGCTCGGCCATGAAGT  
TTCAGTGCTTCCAGAAATTTATTGTGCTCTTCAGCAGTCCATCTTTCTCGTTGTTTCGTTATTATGTAAGGTTTTCCTTACCTTGATAGCATGTTTCAGAAATTGATGAATCAGCTTCTGCCATCG  
GGTGGAGACAATTTGCAGATGAGGCTTCTCCGTCCACACACATTCTCTTGGAGAGGAATAAACAGTACTGTGCAATCCTAACATCAATTACATAAAAATCAGATCTTTAAATAACATGACG  
TACAGAAACCTAATAACTTGTGACATACATGCTATTAGCCCTCTTAAGAAACAAAGAAAAGGACATTTGGCCTAAATAATATTCCACATAATACTGCCTAATTCAGATTTAACTTAAAAATA  
TATAGAATAGCTCCTCTTGGCATATATACGGCTTATTGCCTTGTTTCAGCAACAGAAAACCTGAATTGCGCATATAAATAACAAGCAATACCATTCTTAGAAAGGAGTTAAAAACACAAGTT  
ATTTAGACAGATTCTGTTCAATAACAATAATTACTGTATGACAGCCTAAAATTTGCCTACTATCATTGTAAACATAATTTTTTTTTTTCATCATTCTGCAAGGAAGAATCTCTGTTCTTAGAA  
TTAATAGGAAGCGGACTGTCTTTGCGAACGCCAAGAAATCGTCAACAGCCAAGATGGTGCCATGGAAACTTGGATGCTGAAAAAGAGTGAATTCTGTAACCTGTGAGTTCTAATCATGAC  
CCCTGGTAGCCATATGTATGCTCTTGATTTGATATGAAAAACTAGGCATTATATATAACAAAATTTAAAATTAATAACGTTTAAACGACTTGGAAAATTGTTGGCCATATCAATATTTAGTAAAA  
TCCTACAAAATAGGGTAATAATTTTGT

>comp154860\_c0\_seq2

GAGAAATAATCAAAAATAAACACCATGTTTAATTTAAAAATTCATATTAATTATGTTTCTAATCAAACCCCAAGCAAACTTATTTGCTTCCATCCAATCCCTTCATTCAGCACCTACGTACA  
GACCCCTACAAAAAATACCTTAACCTAACAGATTAATAATCCTATAATTATGAAATAAATATCTAATAGAACTTATCAATAGATAATACAATTGATGCATAGCGACCTGTTAGTATTCAAAG  
CAAAGGTTTTCAAATCCCATGTACTCTTGATGCCGAAGCTTCTGGATCATCCGCGAAATACCAACCCCACTAAAGAAATAGCGCTTATAAAGATTGTA AAAAGCCAGTATGAAGATGATGA  
TAGAAGCTCTCCCAGAATAAGTATGATCTTTCTCACAACTGTTGGCCAATGAAAGCCGCAACTGTGGCCACGGCAGCGAAGTATAAAGCATAACGGGACCGGAAACGACGTAAAAGG  
TAGTATTCGACGACGGACATCGAAGCAGAAAACGTCATAGCAAAGGTTGCCGTAGCACTTGACACCTGAGGTGGAATTCCTAACTCCAGGAAAAGAGGGCCGAGAACAATCCTCCTC  
CTAAGCCGAGCAATCCTCCAATGATGCCAGCAAATACACCAAATAAGCAGTATATTACAAGCTGATGAATCTTCCACTCTGTAAC TACTTCTCCCTTTGATGCGATCACTCTTCTCCCTTTGT  
ACAGACTAACAGCTTCATATAAACTGACACCAACAGCAACTGGAATCTGTAGAAAATTCAGCACCCAATACCAAACCGAACAAGTTCCTGTATGGTTCTGTATAAAGTTTACACAAGCAA  
TGTC AATAGATTAAGAGTTGCAGATTA AAAATGGCAACGAAAGCTACCTGCAGGAATTGCTCACTTTTGAAATCTGTAGTGTTAGAAAGGATATCCAGACAAATAATAGAAGGCCGAGCT  
CCTTCCAGGAGACATTGTCAAAGATTGAAAACCTCTTTCAGAAGATGACTTAAGTTCCCTTTGAGCATTGTTACCTAGACCACCAGGTAGTGGCCTGTATTCTACTTCTTCACTCTCACTA  
TTAGAGTCGAGGTTTTTCGCTGCATTCTTCTTCATCAATGTTTCCCTTCTTCCATGTCTCAACACCCTTTATACATGCCTTGGTAGAGGTA ACTAAGAAGAGGATGATCAGAAGAACTGTAAC  
CATCCAATCAGGAAAAACTACATTGAAGATGACCCCGATGCTAATCCCAAGCATGAGCATAGGTTGGAAAAGCAAAGCAAGATCATAGTCAATGAGCGGTATATCTAGAGTAGGATGCCT  
CAGCCTCAGATTATAGTAAACAGTCGAAGCGGCGGCACCTGTGATCATACTTTGACATTGCAGTAGAAGATTTAGGATCAAACCCAATGATCAAAGCGAGCATGGGAACAAAAATCCC  
TCCACCACCGACACCTCCCACGCTCCCTAATGCTGCTCCAAAGAATCCAATCACTGAACCAACTACGATTTGCCATCCGAATTTCAATGGCGGCCAAACATGCTGATAACCGAGATCTATCA  
GCTCGCTTCAATAAACCCAAAACCTTCATGAAATAGCTCGACTCATCCATGTCTCGCTCGCCACGGCCGGAATGAGCTTGATTAACCCCGATCAGCCGAAACCAAAGCTGCCATGACA  
AAGATGAGAAGAATTGAGGAGATCAAACCCAGCCCTCTCCTCCATTTTCTCCCATTTTCAGTTGATGAAGAACGATTAGGCTCAAGCAAGAAAAGAGGAAAAAGCGCAGCGTTCCCTCCA



CAAAACAAAGAGGAGATTCTTCCAAACCAATTTAGAATCTGGATGTGAGAGAGCACGGGAGAGGTTG

>comp154895\_c0\_seq11

CCAGTTTGTAGCAATGGTAGCATAGTTTTAAAATTTGACTCAGTGGATTGGGGTGAATATTCCAAATGATTTGGTTAGTTTGCTTCTTTTTAATTTTTTTTAATATTTTGCTCCTTTTCCTAATT  
TAAATTAACAGCATACTCCTTTAAAAAAAATCCCATCTCAAATAAGTAAGATTTACTTTGAGATTATACAATAACAAATTTCAATGAATTACTCATATATATTACGCTCACCTCAAATCAATA  
ATCTTAAAACCCATCTAACTAATTTATGATCAAACGATCAAATATCATGACCCAAAATTTCTATGTTCAAATATAAGCAAATGAAAATGATAAAAAAACTCACAGAACATATTGAAAGT  
TCAAACTCATTTACGCACACTTTGCAAAGGCAAACCTCTCTTCAAATGCCCTCTCCCTCGCCACTATTGCCTGCAAGATCAACCATAACATTTGAACACCATTGTAAAAAGTTATTTAAAT  
AAGCTCATTAACCATACCTGTTGTTGCCAGTTAGTAAAAGTAGTTATTATTCCGAGAAGAAGGCTTTGAATCACAGCACCTGCTAATATACCAATCCACAGACCCTTACCTCCAATGTGGA  
AGAAAAAGCCTAACAAAACCTGCGATTGGGATTCCGACGAGATAAAATGCTCCGAGATTCACATAGGCTCCAAGGTGCTGCCACCCACATCCGCGAGCGATTCCAGAGAGCACTCCAAGA  
CAGCCATCGGAGATAACTGAGATAGAAACAAGAGGGGTCACTCCCTAACATAATCCACAACCTCCTTCTCGTCGCTATAGGCATGGCCAACTAGCCGGCGAAGGCTGAAGAGAGTTAA  
ACTGACCAAACTGCCTCTGTAATTGTGATTGATGTGGCCACACGTACAGCAAGATGAGCTTGCTCTGGATTCCCAGCTCCTAGTTTCGTTTGACACGCGTGTGCTTGCAGCACAACCAAG  
TCCATATGGTATGGTGTAGAGCAAGGAAATGCTTGTGAGGCATATAGAAAGAACAGAGGTTTCAAGCTTTGGATTGGTAGGAGACCTGAGAGCAAGACAAGAAGCTCGAAGGACCACC  
ATTCGAGGCATATCATTACTGCTGAGGGAATTGCTAGCCTCAAGAACTCATTAAATGCCCCACAATGCCTCCATTGATAGCGGTGCACGAGTTGCATTGCAAGAATCTGAATATTTGATGTAA  
AATGCAAGAATCAACACATTGATCCAATAGGAAATGCTTATAGAAAAGTGCTGCTCCAACGTTGCCAACCCTGTTTTGAACACCATGACCCAGCACAAAGGAATGTGGACGCAGAGGGT  
CACAAATGAGCTCAGAAGCATAGGAAGAATTAAGCTCTGAGACTGAAGAAATTCATAAGAGGTTGGGCAATAGCAAAGGCGAAGAGGCCTGGGATCATCCATACTGCATAAATGCCAG  
CCTCTTGGGATATTAAGGGATCCTGGCCTATGAGTGAGAGAAGTTTCCCCATTGATACCCAAATGAGAGAAATTGGGAGGCAGACTAATACAAGTGAGAGTATGGCTCTGTATGTGTGAAT  
TCCAAGCTTCTTGTATTGTTTTGCACCATATGCTTGGCCACAGAGAGTATCCAAGCCACTAGCCATTCCCTAGAAGGACACTGAATCCAGTAACGCTGGAGAGTGAAGTGGCAATGGCGGA  
GCTGGAGAGCGCGAGCTCACCGAGATGTCCGACCATCATCGACGAGGTGACCTGAACCAGGTACTGCGATAGCGTCAACCCACCATCGGCCCGGCCAGGTAACCCAGCCTCCGCGCCT  
CAGCTGTAAAATCACAGTACCATCCCTCACCGTTCTCCCTCCTCCCTCTCCAAAGCCCTTCTCCATTTCCGTAAGCTGTCCCTCTCCTCTTTCGTTTCCCTTTTTCTTAGATGAC

>comp154895\_c0\_seq18

CCAGTTTGTAGCAATGGTAGCATAGTTTTAAAATTTGACTCAGTGGATTGGGGTGAATATTCCAAATGATTTGGTTAGTTTGCTTCTTTTTAATTTTTTTTAATATTTTGCTCCTTTTCCTAATT  
TAAATTAACAGCATACTCCTTTAAAAAAAATCCCATCTCAAATAAGTAAGATTTACTTTGAGATTATACAATAACAAATTTCAATGAATTACTCATATATATTACGCTCACCTCAAATCAATA  
ATCTTAAAACCCATCTAACTAATTTATGATCAAACGATCAAATATCATGACCCAAAATTTCTATGTTCAAATATAAGCAAATGAAAATGATAAAAAAACTCACAGAACATATTGAAAGT  
TCAAACTCATTTACGCACACTTTGCAAAGGCAAACCTCTCTTCAAATGCCCTCTCCCTCGCCACTATTGCCTCCAATGTGGAAGAAAAAGCCTAACAAAACCTGCGATTGGGATTCCGACG  
AGATAAAATGCTCCGAGATTCACATAGGCTCCAAGGTGCTGCCACCCACATCCGCGAGCGATTCCAGAGAGCACTCCAAGACAGCCATCGGAGATAACTGAGATAGAAACAAGAGGGT  
CATCTCCCTAACATAATCCACAACCTCCTTCTCGTCGCTATAGGCATGGCCAACTAGCCGGCGAAGGCTGAAGAGAGTTAACTGACCAAACTGCCTCTGTAATTGTGATTGATGTGGCC  
ACACGTACAGCAAGATGAGCTTGCTCTGGATTCCCAGCTCCTAGTTTCGTTTGACACGCGTGTGCTTGCAGCACAACCAAGTCCATATGGTATGGTGTAGAGCAAGGAAATGCTTGTGAGG  
CATATAGAAAGAACAGAGGTTTCAAGCTTTGGATTGGTAGGAGACCTGAGAGCAAGACAAGAAGCTCGAAGGACCACCATTTCGAGGCATATCATTACTGCTGAGGGAATTGCTAGCCT  
CAAGAACTCATTAAATGCCCCACAATGCCTCCATTGATAGCGGTGCACGAGTTGCATTGCAAGAATCTGAATATTTGATGTAAAATGCAAGAATCAACACATTGATCCAATAGGAAATGCTTA  
TAGAAAGTGCTGCTCCAACGTTGCCAACCCTGTTTTGAACACCATGACCCAGCACAAAGGAATGTGGACGCAGAGGGTCAAAATGAGCTCAGAAGCATAGGAAGAATTAAGCTCTG  
AGACTGAAGAAATTCATAAGAGGTTGGGCAATAGCAAAGGCGAAGAGGCCTGGGATCATCCATACTGCATAAATGCCAGCCTTTCGGATATTAAGGGATCCTGGCCTATGAGTGAGAG  
AAGTTTCCCCATTGATACCCAAATGAGAGAAATTGGGAGGCAGACTAATACAAGTGAGAGTATGGCTCTGTATGTGTGAATTTCCAAGCTTCTTGTATTGTTTTGCACCATATGCTTGGCCAC

AGAGAGTATCCAAGCCACTAGCCATTCCTAGAAGGACACTGAATCCAGTAACGCTGGAGAGTGAAGTGGCAATGGCGGAGCTGGAGAGCGCGAGCTACCGAGATGTCCGACCATCAT  
CGACGAGGTGACCTGAACCAGGTACTGCGATAGCGTCACCCCACCATCGCCCCGCCAGGTAACCCAGCCTCCGCGCCTCAGCTGTAAAATCACAGTACCATCCCCTCACCGTTCTCCC  
CTCCTCCCTCTCCAAAAGCCCTTCTCCATTTCCGTAAGCTGTCCCTCTCCTCTTCGTTTCCCTTTTTCTTAGATGAC

>comp154895\_c0\_seq6

CCAGTTTGATGCAATGGTAGCATAGTTTTAAATTTGACTCAGTGGATTGGGGTGAATATTCCAAATGATTTGGTTAGTTTGCTTCTTTTTAATTTTTTTAATATTTTGCTCCTTTTCCTAATT  
TAAATTAACAGCATACTCCTTTAAAAAAAATCCCATCTCAAATAAGTAAGATTTACTTTGAGATTATAACAATACAAATTTCAATGAATTACTCATATATATTACGCTCACCTCAAAATCAATA  
ATCTTAAACCCCATCTAACTAATTTATGATCAAACGATCAAATATCATGACCCAAAATTTCCCTATGTTCAAATATAAGCAAATGAAAATGATAAAAAAACTCACAGAACATATTGAAAGT  
TCAAACTCATTTACGACACTTTGCAAAGGCAAACCTCTCTTCAAATGCCCTCTCCCTCGCCACTATTGCTGTTGTTGCCAGTTAGTAAAAGTAGTTATTATTCCGAGAAGAAGGCTTTG  
AATCACAGCACCTGCTAATATAACCAATCCACAGACCCTTACCTCCAATGTGGAAGAAAAAGCCTAACAAAACCTGCGATTGGGATTCCGACGAGATAAAATGCTCCGAGATTCACATAGGC  
TCCAAGGTGCTGCCACCCACATCCGCGAGCGATTCCAGAGAGCACTCCAAGACAGCCATCGGAGATAACTGAGATAGAAACAAGAGGGGGTCATCTCCCTAACATAATCCACAACCTCCT  
TCTCGTCGTATAGGCATGGCCAACCTAGCCGGCGAAGGCTGAAGAGAGTTAACTGACCAAACTGCCTCTGTAATTGTGATTGATGTGGCCACACGTACAGCAAGATGAGCTTGCTCTG  
GATTTCCAGCTCCTAGTTTCGTTTGACACGCGTGTGCTTGCAGCACAACCAAGTCCATATGGTATGGTGTAGAGCAAGGAAATGCTTGTGAGGCATATAGAAAGAACAGAGGTTTCAAGCT  
TTGGATTTGGTAGGAGACCTGAGAGCAAGACAAGAAGCTCGAAGGACCACCTTCGAGGCATATCATTACTGCTGAGGGAATTGCTAGCCTCAAGAATCATTAAATGCCCCACAATGCCT  
CCATTGATAGCGGTGCACGAGTTGCATTGCAAGAATCTGAATATTTGATGTAAAATGCAAGAATCAACACATTGATCCAATAGGAAATGCTTATAGAAAGTCTGCTCCAACGTTGCCCAA  
CCCTGTTTTGAACACCATGACCCAGCACAAGGAATGTGGACGCAGAGGGTCACAAATGAGCTCAGAAGCATAGGAAGAATTAAGCTCTGAGACTGAAGAAATTTCAAGAGGTTGG  
GCAATAGCAAAGGCGAAGAGGCCTGGGATCATCCATACTGCATAAATGCCAGCCTCTTGGGATATTAAGGGATCCTGGCCTATGAGTGAGAGAAGTTTCCCATTGATACCCAAATGAGA  
GAAATTTGGGAGGCAGACTAATACAAGTGAGAGTATGGCTCTGTATGTGTGAATTCGAAGCTTCTTGTATTGTTTTGCACCATATGCTTGGCCACAGAGAGTATCCAAGCCACTAGCCATTC  
CTAGAAGGACACTGAATCCAGTAACGCTGGAGAGTGAAGTGGCAATGGCGGAGCTGGAGAGCGGAGCTACCGAGATGTCCGACCATCATCGACGAGGTGACCTGAACCAGGTACTG  
CGATAGCGTCACCCCCACCATCGGCCCGGCCAGGTAACCCAGCCTCCGCGCCTCAGCTGTAAAATCACAGTACCATCCCCTCACCGTTCTCCCCTCCTCCCTCTCCAAAAGCCCTTCTCC  
ATTTCCGTAAGCTGTCCCTCTCCTCTTCGTTTCCCTTTTTCTTAGATGAC

>comp154947\_c0\_seq26

GGAAGATAGCAGCGTTTTATAAAGTTGGTTGTGAATTTGTTGTGACTAATGTAACCTAGCTGCTTTGATTGTAAAAAGCAGCTTTTCATCACATAAATTTCTGAAGAATAGTAAGAAAGCAA  
TAGTCAAATAAAATTTGATGTTGATATCTGAAAAACAAAGCAGTTAAAAATTTGTCACCAACAGACCCTTATAAGGGGTGATGGGAGAAATGTTGAAATTTGCGTGAAGTTTATATTGGATCT  
GATAAAATTTATGAAACCATAACAAGAAGCTAAATGTTATATCTCAACCACTCAACAAAAAGATTGCCACACTGTATGTTTCATTAAGCCTAAAAAAAACCTTAGCCTGATGCATTTGATAAA  
GCCAGGAGAAAGTCTCTGTAGTTGTCATCATCAAGAACTCTCTCAACAATGGCTTCTTCAAGCTTACCTTATACCTCATTGAAATGCTTCCTTACCTTGTTCATGCCGACCTCCCACT  
GCCTATCATCACTTTGTCAAAACCACCTTCTTGTCTACCTCAGCGACCAAACTCATATATATCATCTCAGAGTAGTACTCGTAAGGGGCACACATGCATTGTATGACAACTCTGAGGGAGT  
CTTCAAAGTTCCCACTTCTATCTTCAAGTGCCTGAAAGTTTCTCATGAATAGTTAGTTATTTGATCACTTAGGGGCTCTAAAAAGTTATGTTCAATTGGCACTTATATGATCATTGTTTATAGT  
TTTTTTTAGTTGGTGAAGTCACTTAAAATCGGCGGTGACACGGTCAAATCGTTGGTTAATGTGACGCGCTGAAGAAAAACTGGAGGTATATATGTCCGACGATCAGTTTGCCGCCGATGTT  
TTCAGCAGTTTATTATGAAAAACCGCCAGTAATTTCCGGCAGTCAAATGACCGCCGGTAAATAGCGAATTTCCCTGTAGTGTACTCAGAAGATTTGTCTATTAATATAGTAGTGATGTTAGCCA  
CAAATTCCTCCCCATCTCCATCTAATATGATATCTAAGAGAATTTGTGCTCAGTATATTCTGAGAGTGAATGGCCTGACATCATTCTTATAGTGAAACCCCTTACAGATAATCTTGGTTCA  
AACCATTAAGCCATAGCATTTTTTACTTAGATTTTCTTCCCAACTACTTTTTTTTTCCCAACTACTTAATTATACTTTCAACACATTATATGAAGGCATAAATACTACTCAATCACCTCAATATA

ATCATTTCCATATATATGCCTGTAACAAGAGAATGCCAGCCTCAGCTGCGGTAAGCTTCTCTTGCTGAAGATCTCTATAATAGAAGATTCATCCATTCTCCATCACTTTTCTTCAATGCCTCA  
TTCAATCTCTTAGCATCACAAATTGGCAATGTGTTGGCTGATCACTTCGTCATGGTGAGATCTATGTGAAGTTGCAAGAGCTGCAAGAATCTTTGGTCCCAGGTGTTCTGGCTCCACAGAAA  
GGATATCTTTGTCCATATGGCTTCTGCACTTAGCAAAAATAAGCCTGCTTGCTGGCAAAGAGATGGCTCGACTTTCTGCGCACATAGATCTCGACGATCGCCTTGTAGTCATCGGCACCTTCCC  
CGTTCTACGGCATCCTTCGCCACCACTGCGTCGCGCTCGGGCTGCTCCATCATCCATAGCCACAACCCAAAGTAAACTGGTTCACCTTCTGGATTGGCTTCCCTAATCCTAAGGAGTTCGA  
CAAGTCTTCGCCATAAATAGCTCGATAAAGCTCTTTAATCTGCCGCTTCTCATCTGAAGATTGTCCTGCCAAGACAAGAACAAGATGATTCGGCTGGTTCTGGTTCATAAAAATTTCTCTA  
CATACTTTCTCATCATATCGGTTCGACTGTGACTGAGGAGGAAGGAACCATGGTTGGGAGAGTTGAGGTGAAGCTTTGAGAACTAATGAGCATTCTGAAAGAAGTTGTGATTTTTCTGA  
GGGCTTAGGAGCTTTATGTAGTGTGGAGGATTGTGCAAGTACTGTAACCTTAACCTTGGGGTCTTTTCAGCTTGAGTTGTTTCCAGCAATGAGAGAGTATTTGTG

>comp154947\_c0\_seq36

GGAAGATAGCAGCGTTTTATAAAGTTGGTTGTGAATTTGTTGTGACTAATGTAACCTAGCTGCTTTGATTGTAAAAAGCAGCTTTTCATCACATAAATTCTTGAAGAATAGTAAGAAAGCAA  
TAGTCAAATAAAATTGTAGTTGATATCTGAAAAACAAAGCAGTTAAAAATTGTCCCAAACAGACCCTTATAAGGGGTATGGGAGAAATGTTGAAATTGCGTCGAAGTTTATATTGGATCT  
GATAAAATTTATGAAACCATACAAGAAGCTAAATGTTATATCTCAACCACTCAACAAAAAAGATTGCCACACTGTATGTTTCATTAAGCCTAAAAAAAACCTTAGCCTGATGCATTTGATAAA  
GCCAGGAGAAAGTCTCTGTAGTTGTCATCATCAAGAACTCTCTCAACAATGGCTTCTTCAAGCTTCACCTTATACCTCATTGAAATGCTTCCTTCACCTTGTTCATGCCGACCTCCCACT  
GCCTATCATCACTTTGTCAAAACCACCTTCTTGTCTACCTCAGCGACCAAACTCATATATATCATCTCAGAGTAGTACTCGTAAGGGGCACACATGCATTGTATGACAACTCTGAGGGAGT  
CTTCAAAGTCCCACCTTCTATCTTCAAGTGCCTGAAAGTTTCTCATGAATAGTTAGTTATTTGATCACTTAGGGGCTCTAAAAAGTTATGTTCAATTGGCACTTATATGATCATTGTTTATAGT  
TTTTTTTAGTTGGTGAAGTGGCTATTCAAATGCTGGAAACCATTAAAGAAGTTATTTTTTTGTCATTAGTTTCATGTAGAACTAAGCTATAGCTCATAATAAGGGTAAGCAAAGTTTGTATG  
AAGCTCCTCATGACATAGAAAAACTCTCATAGTAGTATATATGTAGAAGAGCTTCTCCAATGAAGTGAAGTAGATTAGGGACACTTGAACATGCACTTGGTACACAGTGAAGTGTCA  
ATGATTGTGGCTGTTCAAACTAAGTGAATAATTAGTTCAGGTTATACCACTATTGGAAAATCATCAATTAGCGGGCGCTTTTTTCGGACAGTTAAAGTAAGTTTTCTGGCGGTTTTGAAAATT  
TCCGGCAGTCGGCCTGTATTTCAAAAACCGCCGAATCAATTAACCACGTAGAAAAGGAATTCCGACAGCCTTTTATCGGTGGTCAAACCTTTCCGGCGGTTTTCCGGTGGCTTGACAGC  
CGGAAAAAAGTCACTTAAAATCGGCGGTCAAGGCGATCAAATCGTCGGTAAATCTCGACGCCTGAAGAAAAACTGGCGGTATATATGTCCGACGATCAGTTTGCCGCCGATGTTTTCAGC  
AGTTTATTATGAAAAACCGCCAGTAATTCGGCAGTCAAATGACCGCCGGTAAATAGCGAATTTCTGTAGTGTACTCAGAAGATTCAAATTCCTACCCATCTCCATCTAATATGATATCTAA  
GAGAATTTGTGCTTCAGTATATCTGAGAGTGAATGGCCTGACATCACTTATAGTGGAAACCCCTTCAGATAATCTTGGTTCAAACCATTAAGCCATAGCATTTTTTACTTAGATTTTCT  
ACCCAACTACTTAATTATACTTTCAACACATTATATGAAGGCATAAATACTACTCAATCACCTCAATATAATCATTTCATATATATGCCTGTAACAAGAGAATGCCAGCCTCAGCTGCGGTAA  
GCTTCTCTTGCTGAAGATCTCTATAATAGAAGATTCATCCATTCTCCATCACTTTTCTTCAATGCCTCATTCAATCTCTTAGCATCACAAATTGGCAATGTGTTGGCTGATCACTTCGTCATGG  
TGAGATCTATGTGAAGTTGCAAGAGCTGCAAGAATCTTTGGTCCCAGGTGTTCTGGCTCCACAGAAAGGATATCTTTGTCCATATGGCTTCTGCACTTAGCAAAAATAAGCCTGCTTGCTGG  
CAAAGAGATGGCTCGACTTTCTGCGCACATAGATCTCGACGATCGCCTTGTAGTCATCGGCACCTTCCCCGTTCTACGGCATCCTTCGCCACCACTGCGTCGCGCTCGGGCTGCTCCATCAT  
CCATAGCCACAACCCAAAGTAAACTGGCTGCACATGAAAATCGCAAACTATTTAACAATCAAGTTGCATTTTTTATAATGTAACATGTAAAGTACTGTAACATAATTACTTCACTTTCTGGA  
TTGGCTTCCCTAATCCTAAGAAGGAGTTTCGACAAGTTCTTCGCCATGGATAGCTCGATAAAGCTTTTTAATCTGCCGCTTCTCATCTGAAGATTGTGGAGACAAGACAAGAACAAGATGAT  
TCGGCTGGTTCGTTTCATAAAAATTTCTCTACATACTTTCTCATCATATCGGTTCGACTGTGACTGAGGAGGAAGGAACCATGGTTGGGAGAGTTGAGGTGAAGCTTTGAGAACTAATGA  
GCATTTTCTGAAAGAAGTTGTGATTTTTCTGAGGGCTTAGGAGCTTTATGTAGTGTGGAGGATTGTGCAAGTACTGTAACCTTAACCTTGGGGTCTTTTCAGCTTGAGTTGTTTCCAGCAATG  
AGAGAGTATTTGTG

>comp154947\_c1\_seq1

AAATGCTCATTAGTTCTCAAAGCTTCACCTCAACTCTCCCAACCATGGTTCCTTCCTCCTCAGTCACAGTCGACCGATATGATGAGAAAGTATGTAGAGAAATTTTTATGAACCAGAACCA  
GCCGAATCATCTTGTCTTGTCTTGTCTCCACAATCTTCAGATGAGAGGGCGGCAGATTAAAAAGCTTTATCGAGCTATCCATGGCGAAGAAGCTTGTGCAACTCCTTCTTAGGATTAAGGAA  
GCCAATCCAGAAAGTGAACCAGTTTACTTTGGGTTGTGGCTATGGATGATGGAGCAGCCCCGAGCGCGACGCAGTGGTGGCGAAGGATGCCGTAGAACGGGGAAGTGCCGATGACTACA  
AGGCGATCGTCGAGATCTATGTGCGCAGAAAGTTCGAGCCATCTCTTTGCCAGCAAGCAGGCTTATTTTGTAAAGTGCAGAAGCCATATGGACAAAGATATCCTTTCTGTGGAGCCAGAAC  
ACCTGGGACCAAAGGCACTTGAAGATAGAAGTGGGAACCTTGAAGACTCCCTCAGAGTTGTACATAATGCATGTGTGCCCTTACGAGTACTACTCTGAGATGATATATATGAGTTTGGT  
CGCTGAGGTAGACAAGAAGGTGGTTTTGACAAGAGTGATGATAGGCAGTGTGGAGGTCGGCATGAACAAGGTGAAGGAAGCATTTCAAATGAGGTATAAGGTGAAGCTTGAAGAAGCC  
ATTGTTGAGAGAGTTCTTGATGATGACAACACTACAGAGACTTTCTCCTGGCTTTATCAAATGCATCAGGCTAAGTTTTTTTTTAGGCTTAATGAAACATACAGTGTGGCAATCTTTTTTGTGTA  
GTGGTTGAGATATAACATTTAGCTTCTTGATGGTTTCATAAATTTTATCAGATCCAATATAAACTTCGACGCAATTTCAACATTTCTCCCATGACCCCTTATAAGGGTCTGTTTGGGACAATT  
TTAACTGCTTTGTTTTTCAGATATCAACTACAATTTTA

>comp155004\_c0\_seq2

CGGACCTAATAATTTTCCAAAGAAGAGGCAAATAGGTGTAAAAAACTTTTCATGGAAAGCAAAAAACAATTTTACAACCTTGTACAGAAAGCATAAATTCGAGGTTAGAGGAAGATTTCCCC  
GTATCACCATTGATTTTTCTCAAATGCTGAAGGGGAACGGAAAACCTGTTTCCAAATCATGGAAACATAACAACACAATAAGACTAAAAACTATTTCTACCTATATTTTTAGCAGCAATG  
AAAGTTCGAACGAAACATTCCATAAACTAAAAATAAAATTGCATCTTGCACAAGACGAAAAAGGCTTGGAAAGAGAGTCAAATAACCAGCTGCTGAGATATCTGCCATGAATGAAGGAA  
AACAGTTCTTGAGTCTCTGTTTTATGCAGACGCAGGCACTGGAGGTAAAGACCCAGAGCGGCCATGGGTGCAGCATTAGAGGCCATTTGATCAAGCCTGTGGTGTCTATATCGCC  
GCCTCGGCCAGAAGGGACCGCCACCCCTACCCCTCTGTTCCCAAATCAGGCCTGTAAGTGTCTCTCCCCACCTTCCATAACCCCTCCCTCCACCATAATATCCACGACCCCTCAT  
TCCATTACCGCGGTATCCAGCTCCTCTAACAGGTGCAAACCTTGTGGTTATTCCTCGTGGAGCATGGTTCTTTTTCTCAACATAAGCTTTACGACCACCAATCAATACAGGTGAAG  
CCTTAATTGCATTTTTAACGGCATCAGCCACCTCAAACCTCCACAAAACCAAAGCAAAACCCATGTAACATATTGCGTCTAACTTGTATGCCATTGGGCTTGATTGGACCAAAGATTTTGA  
AACCTCTCAAGTTGAGCACAGGTAGCATTCAAAGGCAGCCGTTTGTATGTATATAAGAATACCCCTCAGCTTCTGACTCCTGGGCAACGTTGGTTTTCTGCAGCATAAGAACCTCGGGCAGG  
AACTTTTGCTGCCCGTGCTAGTGCTGGTGTGGTGTAGGAGCAGCAGGAGCTTTCTGTTCTGTATCAGAAGGTAAGTGCCTCGTTGGGAGCAGATTTGGCAACTGATACAGGTGCAGGTTT  
TTCTTTTCATCGCCATCACAATTGAAGCATAGGACACATTTGGCTTCCGGCCAGTTGAAGGATTTGAACCAGCCACAGTAGGCTGCAAAGCAGTTGGAACCTTCAATGATCTCCTTCTCGACA  
TGCTCTGCTGTATCATTTGAAGATTTCCCGCCATGTTCCGAAGGATCATAAACTTCTTCTTCAGTTATTTTCATCCTTTTTCCGGTTCTTCTTCACTTTGCTCAGAAGGATAATGCTCCTGGGGT  
GTAACAGTACCATTCTCTGCAGAAAAAGGAACCCAGGTTTCATTCGCCAAACCCCTGCCGCTCCTGTTGCTGGTCTCTTCTTCAACAAATCGGAATATATCATTTAAAACATAGAAGCCTG  
TCTCCTGGGTGCGAAGAAGGAAGCTTTGGGTGAAACCTCTCCTGACATCATCCTTCCCAAATAGGTAACCCGTGACAAGGACAAGGACCCACCGTTAAGGGTTTTCTGTGCATCCACT  
GTCTTTATCTGAGTTCGGTACTCGCTGTAGTCCATCGATAAGAATCTTCTCGTTGATGTCCTGCAAGGAGGAGGTGCGGGTCACTCGCCATTAGGTCCAGGACGTCCAGCTTGCTACTTTC  
CTTGTAAGATCGATGAAGCTGGTCCGGTGAATATGCAGGACGAGGAAGAATTGCTGCACAAATGCATTTCCACCAGTTGAGCATAGCGCACAGATCCCGCAGGAGTGGATTGTTGGG  
AGGCCATCTCTCGTTGTTAATCTCGAAAAGGATGAAGAACTCAAGAAATTGATCAAGCGAGTGCTTTAATCCGTAAGGACGGGTGATCAGCAGCTGAGACCGAATGAAAAGCTCAAT  
GACGCATAGCATCGGCATTCGATCGGATAAATAGCTGAAGCGGGGTCGCCTAAGACGAACTTTCGGCGCTATTGTAGGGAGCACTCTGTGGTTTAGACTTTAGATCCTCGGATCTGGCAG  
GAAAGAAAGGAGCCGAAGAGCAGACGGAGCCGAGTCTCCGTTTC

>comp155008\_c0\_seq1

CAAGGCCCTGTAAACATATAAGGAAATTGACTTGAACAGTTAAAAAGGGTAGCAGATTTCAAATTTGTGATTACAAATTTTGTATCAACCTACAGTTCACCGGATTTCTTTTACTTCACTTTC  
CTTTCATCCAAACCTAGCCTAAAGAAACAACAATCATATCTGCTAACATAAATTTCTCCAATCACAACAGGACAATAACTTCTAAATGGTCTATTGATTAGATATCTTGTAAGAAATATACATAT

AAAACCACCATGAAGCTAACTGATACAGAGTTTCATACCTTTCAGCATTCTGTTTAAATCCTGTTTCCTTGATCTTTGACAATGCTTTAGGTTGAATTTTAAACAGAGAATATTTGATTCTAAG  
CTAGAAGGCATTGAGTTTGCTTCATCGTGTCTTTTCATGGCTTCTAAACTCTGAAGTTAGATGTACAATCTATTTCTCAAATGCTTTGCCTTCACCTAGCATTCAACCTTGGCTGTTTTAG  
AAATCTTCTTTCAAGTGCTGAAACTTTGGACTGTTCTTTCTAGCTGATCAAGGTTAGAATCTCTGATGTCTGAAACTGAGGCCATTCTTGATACTTTGAAGCTAGGCACTGAGCTCACCG  
TTTCCGGCAATGCTAAGCAATATTTTCCCCTCATATTCACCAGGTGATTTGACAACACCATGAAACTGGTCTTTGTTGGTGAGATGTCTGACCTCAGAGCCATTTCGAGCCTCTAAAATTCC  
TTCAACACTCTTTCTTTGAGATGTTCTTTAGCTTCTGCAAGGCTTTGATTACTGTCTTATCTCCCGACATTTCAAGAACCAATACCTCATAATCTTCTACAGATGCCTCCCACCGCTCCAT  
CTTGGCATTACAATCTGCTCTCCTTAGGCGAGCCTTGCTGTATTTTGGTCGTAATAAGAGCAGCATTGCAATCTTCAATGGCTTTTTGCCATTCACCAAGCTTAGACAGGCAAGCAGCT  
CGATTGCTTAGTAGGATTGCATTCTGAGGGTCATGTTAAGGCCATTGCCATAGGCAAGAGATGCCTCAGAAAATTTGGAGGCCTTGAAAAGATTATTACCCATTGACCGAGCTGATGCAA  
CTGATCGAGCCTTTTCGAGCAACAGCAGCAATTTCCCTGCTTCCAGGATCTATTTGTGCCGCCATTTGAGCTAATGAAACTGCATTTTCAAATTTTCTTCAGCCATATCAACCTGTGCTCTT  
ACCGAAAGATAATATGCGTTGCTCTGGGCGCCAAAGAACTTTGTTGAAGAAGTCTCAAATTTGGGCGCATCAATCATTGATTCCTCTGCATCTTCCAGCTTGCGGAGCATCAATAAGGCCT  
CAGCTTGGTAGGCAAAGATCTGAGGAGATGAATCAGCACCAGCAGAAAATTGCAGACTGACTCTCTTTAGCAAAAATATCCAGTTTCTTGATTTCTTCGCTTCACTGCATTACAAAATGA  
AAACCTGTATGTCCTTTGCATGCGAGATGTCATCATAGCTTGCTTCATTTTTCGCTAGTTTATAGTGTTAGCTGCTCTTTCTGGTTCTCCCAATCTGAGATAGAGATTGGCA

>comp155061\_c0\_seq9

ATAGTATTTACATAAAGATTTAGAACAAAACATATAAAATTACATGAAAACCCCAAAAAGAAAAGAATAATGAGATTTAGCCTAGATGAAATAATTTTACTAATATATGTCATTGATTACAAAT  
GATGACATTTCCCATGATTGAGAAAGATGTAGACTTAAATTATGCAGAGCAAATTTCTATGGTGACAGATTGAAGAGTCTTGTGGAATGGCAACTATTTTTAAGAGAGTTTAGAGTGAATGT  
AAAGTTCTGCAGCTCCTGTACCATTACCACCATCACTTAGTCCAGGCGATAAGCATGACCCGGATCTTCTCGAACCTCGTGAGGTTGGTGATGAACTGGACGAGAGGCTTCTTGAAGTTG  
TTGGAGTTGGAGCTCTTGGTGAAAGGTTTGTGAATCTAGAGCCTGCGTTCTCAACTCCGCCGATAATCTGCAACGCAACCAATCCTAGGGCCTGCACCAGTACACCATTTCAAGCTCA  
CTTGATGCCCAAGCTGATAAGAACTCGATTCCATCTTCGATTTGATTTCTCTTCAATAGCCTTCTCAGAAACATCCGCCATTGGACTCTGAAGCCCACCGATAGAGTCTTCTGTAAACT  
TTGGCTTTGTTACCTTTGCCATCAACAATTCAGAATCAATGGGGTCTTCTGAGGGTTCTCGGTGAATGTTCTTGCAAGGATTGAAGAGGTGTAGGTTTAGAGATGCGTGAGGTCTCAC  
CCAGTTTCTTAGCTTGGGTTTTCAGTGTTTTTGGTGTCATCATAATCGTCGCTGGACGATGAGCGTATCTCAACTGCGGTTAGATCAATTCATTTTCTTTGAGGTAGTTCAATAATTGGTCAA  
GGTCTCATCAGATGGTCTGTAATGCCCACTGTATGCCCAAATAGCCTTGAGAACTCCATTCTCTGCAACGAATCTTCCAGCTGCTAGAGTGTGCTCCAGCGAGGAAGCTGGAATGGT  
GAAACATTTCCCTTCTTTTTTCATGCCAGCATAACAATTTCTTGATGTGCACATGACGAAAATCCATTTTGCTCCTTCAGGTCCCTTCGTTGTATCAAGAGGTTACCGGTTCTCTGGTGTACA  
ATTTTTCCATCAACTGGTATATATTGATATTGTAGACGCTCTAGCTGAGGTGGAGCTCTGCCGCAAAT

>comp155065\_c0\_seq2

CTTGGAGCTACCCTTGCATTGGAGGATGCCAAGGCTGCATAGTAGGTGGTTCATTGATGCTTATGGGAAACAAGAAAATGTTAATCCCATATTGCTTGAGTTGGCCAAACTAGATTTCAAC  
ATAGTACAGAGCATTATATGACAGAGCTTAAAGAAATCTCTAATTGGTGGAGAAATCTTGGTGTCTTTGTGATGAGCTTGATTTTATAAGAGACAGGCTAGTGGAGAACCATTTATGGGC  
TTTAGGATTTACATTTCAACCTAAATTTTGGAGAAGCAAGAAAACAATCACCAAGATTAATTTTGGTAACAACAATTGATGATGTTTATGATGTTTATGGCACTCTAGATGAGCTAGAGA  
TCTTTACAAATGCCGTTGAAGAGTAAGGAAATACAAAAATTAATTAATGTGCATACATAAGTTTTAATTAGCTTTGATTATCAAATATGTATAAATAATAATATTATTATAATCTAATGTAATT  
AAATTTAAGTATTGAATTATCCTTGATTAAATTATTGCTAAATTAATTTGAACTCCCAGTTGGAAAATGGATGCAGCTCAACAACCTCCAAATTGTATGAAGATATGCTTGATGGCACTTTT  
CAATACAATGAATG

>comp155065\_c0\_seq3

CTTGGAGCTACCCTTGCATTGGAGGATGCCAAGGCTGCATAGTAGGTGGTTCATTGATGCTTATGGGAAACAAGAAAATGTTAATCCCATATTGCTTGAGTTGGCCAAACTAGATTTCAAC

ATAGTACAGAGCATTATATGACAGAGCTTAAAGAAATCTCTAAGTATTTTGAATTTTTTTTTTAATATACATGATCAATCCTTCTCATAATTCTTCTAAGAAATATTATTTCCTTTCACAGTTGG  
TGGAGAAATCTTGGTGTCTTTGTGATGAGCTTGATTTTATAAGAGACAGGCTAGTGGAGAACCATTATGGGCTTTAGGATTTACATTTCAACCTAAATTTTGGAGAAGCAGGAAAGCAA  
TCACCAAGATTAATTGTTTGGTAACAACAATTGATGATGTTTATGATGTTTATGGCACTCTAGATGAGCTAGAGATCTTTACAAATGCCGTTGAAGAGTAAGGAAATACAAAAAATTAATTA  
ATGTGCATACATAAGTTTAAATTAGCTTTGATTATCAAATATGTATAAATAATAATATTATAATCTAATGTAATTAATTTAAGTATTGAATTATCCTTGATTAATTTATGCTAAATTAATG  
GAACTCCCAGTTGGAAAATGGATGCAGCTCAACAACCTTCCAAATTGTATGAAGATATGCTTGATGGCACTTTTCAATACAATGAATG

>comp155097\_c0\_seq4

TTTTTATTTTTTATTTATTTTTCAACCATTCTCTCCATGCTTTTAGAGAAAATAAAGCGAAGAGGAATGGAAGAAAATATAGAAGGAAGATTAGGAGGGAGAGAGGGAGGGAAGATAAA  
TCAAATACAGAGATACATATAGTGAATATGCCTGCTGTGGGGTTAAAAAAATTCACATTTATAGGTTTAAACAAAGCTTCAGGACTGTCCGCAGTCTGAAGAATGATGCAGGGA  
TCAATTTCTTCAGGTGTTTGAATGATTTCTGAGGATCGATTCTTCTCCAGTTCTGATCTTGATTCCACACATAGTTTGGACTTTGAGCCATGCGATAATATGGGTCTTTAAGGTTGATT  
TTGCATGAAGAAGTCTGTAGTATTCCTCTTGATCAGCACCAGGCCAAACATTTTAGCTGACATGGTTAAATTAATTGTATAGCTTTGTGCACTGTGGGCAACTAGATTAATCGTCCAGT  
AATTTCTTGACCAGACAAGACATATATTGGCTGGGAAAGGAGACAACGCAGTTGATACCAATGCGTGGTAGGAGCACCAGGTGCAGTAGTTAGCCATCTTTGAACAGAACCAAAGAGAA  
GATACGTGGCTGCGGTTGGGACTCCTGAGCAGAGACAACCTTCGGCTGGATTGGTTGGAATGGATTTGGAGACCTCCAAAACAGCAAAACGAGGAT

>comp155153\_c1\_seq4

ACATGTGCATTCATATGGAAAAGGAACCAAAGGGAATGCCGCTCTCAGATTTTTGTAAGAAGCAAGTACTGTCATTTTTTTAAGATTATCATGAAGAAATAGAAATAGGAGATGGAGG  
AAGGAAGGAATAGGAGAAATGAAAGAAGAAGAAGGAGAAAAGGAGAAAGGAGGGGAAAGGGAAGAGTACTCACCTTGCAAGATGGGGAAGCTCGGGTATATCCAGGTAACGA  
TCCTAGTACTTCGGATCTGGTTCAGGCGTGAAAGCCGAGAGCAGGAAAAGTCCGGTAGCTGCTGTCGAGCTCAGGTTCCGGTCCGGAGAGGTCGGGGTCCGGTCCGGGCGGCGAGAGC  
AGGGAGATCGGTGGCGGCCATTGAGGTGCATCCTAGGGGTCGGACGACTGGTCCGAACGTGCGAAGCCGAAAGCGGAAGCAGGAAGGGGTTCCGCCTGGCTGCTGTAGATCGGACCG  
GGGAAAGGCTTTGGCCTCGGCTAGGGCAAGGGGAGGTCGGCTTCAAGGCTCTGCTCGAGAGTCCGAGCTCGGGATCGGTCCGCCTGGGGGCTTCTACCGAGAGTGAGAGAGGAGAAGG  
AGCCGAGAGAGAGCCGATCCTTGGCCTAGAGAATCGAGAGCTTTTTTTTGGAGATGATCCTGTTGTTTCGTCCTCTCGATCCTGCTTCCAAACGCTGAACCGGGCTCTGTCTCACTGCTC  
CCCGTCGCTCGACCACTGTATTCTTCCAAAATGAGCATATACAAGCTCAAGCATCCCAGTAACGGTAGAGTTAGGATACGGGAGATCAGAGCCATCGGTTCGATTTCTTGATTTAGGA  
ATCAAATTCAAACTACTTAGAAAAGACAAATGGGCCATAATATAATTAATTAGGCTTATTTGAGTTAGGTTTGAATGCGAATTTGACTCAAATTTGGCTCGATTAGAATCGGGCTAGGTTTCA  
TCAATTTGGTCAAATCAAATTAAGACGATTCCGATCAAATGAACTCGTAGCAGTCAAAGCGAACTATTCGGGCTTGATTGAACAGGGTCGAGTCAAATTAATCAATTCAGATCGAA  
TTCGAGGTCGGATTTGGCTCAACGAGGTTCAATCGAATTGATCGAATGCGCTCGACGATATTTGAGCAAAAAACGAGGTCAACATTCCTTTGTACACAACAGAGTGTACAGTTTCATCAAG  
GTCCAGTGGTTGTTGACTGGTGC AAATCGCTGTTTTGAATGCTTGATATGTCGCCGGCAAGCCGTTTAAAGGTATGAAGTATGATATCCTCGGGATCTATCTTGCATCCAGCGGCTGCAATGG  
CGTCTACTTTGGATTTTACAAGAAGTAGATATTGTGTCATCGAACTTTCGCCTTTAGTGAGAAATGCAACTCATTCTTTAATTGCATTACTCGAGATCTTGTGTAGCTTGAAGACGATGAT  
TCAGCGTAGACCATATTTCTGTACAGTGCCTTAAAGGATAATACATATGGTAGGATAGAAGGCCGAAATTACCGACATTAACGCTGCCGCAAGATTTGGTCCAGTAGCATCCATGTTTCATAC  
GTTGATTTTGCCTAGAATTTGAGTTTTACCATTTGTATTACTTTGCGGAGGGCAAGAGCACGAACCGTCGAGGAAACCTTTGAATCCATTTGCAGCGAACCTTTTTCTACCTGTGATC  
GCCATAACGGGAAGTTGTCGGCGGTGAGTGTGATGGAGACGAAATCTTGATATTTCCGATCAAGAATTTAGCTGGGGAGGAATCTGGACAGCGCTAATAGAGGATATGCTGTGACAG  
ACGATGTCGATCCTGCCATTGTGTCTTTCTGTCGGAGAAGATGTCTGAGATTGAAAACCAAGAAAGCGGCGAATCAATCCTGCTCTGATACCATGTTACAAACAGAGAAGAGAAAGTAGCA  
AAGAGAGAAGACAGTTGGAGAATTCTGCTGTGACAAGCAGATTTCAATTTTCACTTTTCTGTATAATACACCTCTATTTATACTTTGTATACTAGCTTATCCGTACAATACAGCTGGC  
GTGGTAACTGAATTAGTTTCTTGATTTACATTATGCCTAATACCCTCCCTCAAGCTAATGTTGTCGGTAGAAGAGATTAGCTTGTGCGGATAGTTGTTTGAACCGAATAGAGGAAAGTGATTT

TGTAATAAATCCGCAATTTGATCTTTGCTTGAGATGTGATGAACATGTATTGTTTGTCTTTAATGCAATTTCTGATAAAATGACAGTCTACCTCAATGTGTTTTGTGCGAGCATGATAAAC  
TGGATTATTTGCTAGTGTCTATGGCTGATGTATTGTGCGCAATATAGAGAGGTAGGCATTTGTTGTTTGAATCTAGTTCTTTGTAGTAGTTGTCTTAACCATATAATTTCCGGTGGCAGCCGATGCT  
AGAGCACGATACTCCGCTTCTGTAGAGGATCTTGCAACTGTTTGTCTTTTTAGCACTCCAGGAAATAAGTGAATTTCTTAAGAAATTACAAAATCCTGTTGTTGATTTTCCGGTCCAGAT  
GATCTCCTGCCAATCAGAATCAACGTACGAG

>comp155210\_c1\_seq5

GAATTTCAATATGCTAATAACTTTAATGATGTCAAAAATAATGATCAATCACCCAATACAAAAAACTAAATGAAAGTGGGAAAATAATCTTCTTAATATGAGGCTAAAAGTACATGTTTC  
TATCTTTCTCATATGAATATAACTTACGGCTAAGATTAGAGCTAGCTTTGCAGAACTATTAATAGGTCTCATTAAATAGTTTCCTTGTCTCAAAAAGTGTCTTACATCTCAAAAAGCCAAAAATC  
AGCACATTAACGAACCAAAAAAGAAAGTGCAAGAAAAAATTAGGAAACAAGGAAGTTGGTGGCCCAATAGGAGGTGCGTGGGCGGTGGGCCCAAGTGGGCTGTGGGCCACCACC  
AAGTTCACATCAACATTGACATCCATCACCCAGAAATGAAAAGCAGAGAGCTTTCCGCCACCTGTTACTGCAGGATGGGAGAAGGAGACATCACCGGGTCTGCCACGTGGTCCAACC  
CCACCTCCAATTGTAACCTTACACGTCATCATTGACCCTGTAGCTGACTACCACGTGGCAGATTTTTTTTTCTCTCTCCATCACTTACTCTTTCTTTGTCTCTCTATTATTATTCAATTAAGT  
AGCATCTACAATATGGGAGCACTTGATGTGGCAGAAGCTTTTTTTAGACCAATGAAGATTTGAGCTACCAAACCAACCCCTGCAATTTGAGCCAGCTTTCATGCCTTTTTTTGAAAGTCC  
TTGCATCTTGAAATATTTGCAGCAATAGAGAGATATATACTTTAGTGTCTTAGCTTTGTACGAAGATCATATACCGAACAAATAAAAAATAAGGTTGTATGTTTCATCAGAGAGACCACAAT  
TTTTACATGGAAACCCCTAAAAAGGGAGAAAAAGCATGGGGAATTGCCAGTTTAAATGAATTCAGTAGTGT

>comp155222\_c0\_seq2

TTGGAATTTTTAATTATTATTAATCAATTATTTAATTAATAATTCAATTTCACTTAAAATTAATTAAGCCTAAGTTTGCTGTCAAATAATTTTTGTTTTATTTTTCGTTTTGTTAAGGGTTTGATT  
CTGGTCAGTTAGAGGTCTTACTCATATTTTTTTGGAGTTAAAATGGATTTATTACATTTTCCAGAAGGTTAATGACTTAATTAAGATTTAAATTTAGGAAAATTAATTAGGGGACTTAAAGA  
TCTCTAAAACAGTGAAAGTTTTTGATGGGCTGAGAGTGTCACTAAGTTTAAGAGGTTAAAATTTCAAGTTCAAATGAGGTGTATCCTAATCACAAATACATTTTCTAAGTTTTCTAAATAA  
AGTCCCTAATTATTGTCCTAACGGTGTGCTAAATTTAATAGGCTTGAATCAAAGTTTTGACTAACCTTGACTAAACATATAAGAGAAAATGCATAAAAACACAATCAAGTCCCTAAAAAC  
TAGGAGAGCCTAGGCTAGGTGGTGTGTGCACCCTAAGCATGCAATTAACAAGATAAACTTGATTAATTAAGGGATTAACCAATGAACAATTAATAAATTGCTAATTAATTAACCACCAC  
TCCCCATTAATTTTTGTTCAAGTATGCTTAATCAAAGTTTAAAATTTCAAGGGATCTCTCAAGATTTAAAGATCTAAATAAGTAAAATTTTAAAATAAAT

>comp155230\_c0\_seq1

ACTAAAAGTTGTTTTAGAAAGCTGTCCCGGCTTTGTTTGAAGAGCTTTTACTACTTTTTCGTTGATTTTAATAAGTTTTTACGCTAAAAGTTGATGTGAAAAATAATAAAAAATTT  
ATTACAAAAGAAGTATATGTATAAACGGGACTTTGCAATTTGATAAAAATAGTTTTTGTAAATTTTTTTTATAAATACTCTTAACTTTTTTTTTTTGGATTTTTTAATGAAAAATTAACTATCA  
TCAAATTTGATGGTTGGAGCCTTGCAATTAATCTTGTGCCAACGTGTCTTCAGTTCTTATACTTGCCCGCTAAGGAATTGAGGCACCAGTAGATTTTTTTTTTTCTTCCCGTTCACTTGATTA  
TAAAGTGAACAAGACAGCTGCTTTCTTTGGTCAGAACTTGTCTTACCATGCATATGTAAGAAGCGCGTCTATGGTTATCTACAATCATATCCAAGATATTACATATATAAAAGATTCACT  
ATTAATTTAAAATTAATCCATTAATTTAAGTGTCTATTCTTACGAGTTAGTCTGCTTCAACGTGTGACTTTTTATTCTGTGCAAATTTCTGAATGAAGGAATCGTTCCGATTTTTCTTTGTT  
TAGAGTAAAACACAGTCAAAACATATTTGCTATAGTAACTATATTTGACTGTAGACAGAGAGAAAATCAAACGGACAGAGAAAAATCGGACGATTCTCTTAATTTTCTCCTAACCTGG  
GGCTTTTTTTCAGAGAAAAATCTTTCCACCGACACCTCTACAGCTAAAGCACGCCTTCATAAGTCTTTATCTTTAAATATGTCTTTATTATTATTACTGTTATTTTTATGATTTGCATGAAT  
ATATATCTATTTGGGAATGATGTGAGACTGTCAGTAACGAAGAAGGAAGCTCACCTGTTCCCCACCTTGAATGGAGATCCATGATCAGCAACTGTTCTTCCAGGCGTGATGTTCCACGGC  
GGACTGATAATGAGATAAAAACTATTGGAGAACAAGAATCCAGAAGAAAGTTAAAGATGGTGAACCAGTCGATTGCTCGAGCCAAATAGTGAATGATGAAGGTAGCTCTAGCCATGCC  
GGCGGCCTTGAGGAAGCCATGGCGGCACAGCCAAGCTATCCCATTTATTAGATATTGCCAATCCTCACGAAGCTTATGTTCCAGCTGCCTACAGTGAAGTATCAATACTAGCGAGACCT

ATTTGAGTGCTGAGGATTTCTGGGCCGTACAATCTCTGAATGGGTTATAGATCTGGAATAACACTCCATGATGCTTGACTGATGAAGGTTGGTAGCTTTGCTTAGGATCAATCTTGATGTAT  
AAATGTAAC TAAGGTTTCATTTGGGATGACTTTCT

>comp155230\_c0\_seq2

AGGAATCAGGACCGTACCTACTCCCTTTGATCTCCCTCGAGTTAAACCTTTTTTTTTAGGACTAATGAAGATTTTAAAAGCGAAATCCTTGCTTTTATTTTCTATAAATCTCTCAACAACCTC  
AAGCCTCCTTGACATTCCCTAGTCTCCCTACTCTCTCTCTCTCTCTCGACCATGATGGGAGATCAAGAGGAGGCCATTAGTGTGGATAAGAGGATTAACAACAACGAGGAGTCTGAGG  
TAGTGAGGAAGGGACCGTGGACCATGGAGGAGGACCTCATACTCATCAACTACATAGCCATTCATGGTGAGGGGGTTTTGGAACAATCTTGCTCGATCGGCAGGTCTTAAGAGAACTGGA  
AAGAGCTGCCGGCTTCGGTGGCTGAATTACCTCCGCCAGACGTCCGCCGTGGGAACATCACGCCTGAAGAACAGTTGCTGATCATGGATCTCCATTCAAGGTGGGAAACAGGTGGTC  
CAAAATTGCGAGGCAACTCCCAGGTAGGACTGATAATGAGATAAAAACTATTGGAGAACAAGAATCCAGAAGAAAGTTAAAGATGGTGAACCAGTCGATTGCTCGAGCCAAATAGTG  
AATGATGAAGGTAGCTCTAGCCATGCCGGCGGCCTTGAGGAAGCCATGGCGGCACAGCCAAGCTATCCATTTATTCAGATATTGCCAATCCTCACGAAGCTTATGTTCCAGCTGCCTACA  
GTGGAAGTATCAATACTAGCGAGACCTATTTGAGTGCTGAGGATTTCTGGGCCGTACAATCTCTGAATGGGTTATAGATCTGGAATAACACTCCATGATGCTTGACTGATGAAGGTTGGTA  
GCTTTGCTTAGGATCAATCTTGATGTATAAATGTAAC TAAGGCTTTGTTTGGGAC

>comp155230\_c0\_seq3

AGGAATCAGGACCGTACCTACTCCCTTTGATCTCCCTCGAGTTAAACCTTTTTTTTTAGGACTAATGAAGATTTTAAAAGCGAAATCCTTGCTTTTATTTTCTATAAATCTCTCAACAACCTC  
AAGCCTCCTTGACATTCCCTAGTCTCCCTACTCTCTCTCTCTCTCTCGACCATGATGGGAGATCAAGAGGAGGCCATTAGTGTGGATAAGAGGATTAACAACAACGAGGAGTCTGAGG  
TAGTGAGGAAGGGACCGTGGACCATGGAGGAGGACCTCATACTCATCAACTACATAGCCATTCATGGTGAGGGGGTTTTGGAACAATCTTGCTCGATCGGCAGGTATTCTTTACATGCATG  
AATACATATATCTGCATGCATGCATGACGCATGCTCTCTCCCGATCTTTCTTTTTTTCTTTCAATACCATTATGTTTGGTTTTGGTTGGTACAATTTGCATAATTGAGAAGGTCTTAAGAGAA  
CTGGAAGAGCTGCCGGCTTCGGTGGCTGAATTACCTCCGCCAGACGTCCGCCGTGGGAACATCACGCCTGAAGAACAGTTGCTGATCATGGATCTCCATTCAAGGTGGGAAACAGG  
TGGTCCAAAATTGCGAGGCAACTCCCAGGTAGGACTGATAATGAGATAAAAACTATTGGAGAACAAGAATCCAGAAGAAAGTTAAAGATGGTGAACCAGTCGATTGCTCGAGCCAAAT  
AGTGAATGATGAAGGTAGCTCTAGCCATGCCGGCGGCCTTGAGGAAGCCATGGCGGCACAGCCAAGCTATCCATTTATTCAGATATTGCCAATCCTCACGAAGCTTATGTTCCAGCTGCC  
TACAGTGGAAGTATCAATACTAGCGAGACCTATTTGAGTGCTGAGGATTTCTGGGCCGTACAATCTCTGAATGGGTTATAGATCTGGAATAACACTCCATGATGCTTGACTGATGAAGGTTG  
GTAGCTTTGCTTAGGATCAATCTTGATGTATAAATGTAAC TAAGGTTTCATTTGGGATGACTTTCT

>comp155230\_c0\_seq5

AGGAATCAGGACCGTACCTACTCCCTTTGATCTCCCTCGAGTTAAACCTTTTTTTTTAGGACTAATGAAGATTTTAAAAGCGAAATCCTTGCTTTTATTTTCTATAAATCTCTCAACAACCTC  
AAGCCTCCTTGACATTCCCTAGTCTCCCTACTCTCTCTCTCTCTCTCGACCATGATGGGAGATCAAGAGGAGGCCATTAGTGTGGATAAGAGGATTAACAACAACGAGGAGTCTGAGG  
TAGTGAGGAAGGGACCGTGGACCATGGAGGAGGACCTCATACTCATCAACTACATAGCCATTCATGGTGAGGGGGTTTTGGAACAATCTTGCTCGATCGGCAGGTCTTAAGAGAACTGGA  
AAGAGCTGCCGGCTTCGGTGGCTGAATTACCTCCGCCAGACGTCCGCCGTGGGAACATCACGCCTGAAGAACAGTTGCTGATCATGGATCTCCATTCAAGGTGGGAAACAGGTGAGC  
TTCTTTCTTCGTTACTGACAGTCTCACATCATTCCCAAATAGATATATATTCATGCAAAATCATAAAATAACAGTAATAATAATAATAAAGACATATTTAAAGATAAAGACTTATGAAGGCGTGC  
TTTAGCTGTAGAGGTGTCGGTGGAAAGATTTTCTCTGAAAAAGAGCCCCAGGTTAGGAGAAAATTAAGAGAATCGTCCGATTTTTCTCTGTCCGTTTGATTTTCTCTCTGTCTACAGT  
CAAAATATAGTTACTATAGCAAATATGTTTTGACTGTGTTTTACTCTAAACAAAGAAAAATCGAACGATTCTTTCATTGCAATTTGCACAGAATAAAAAAGTACACGTTAGAAGCAGA  
CTAACTCGTAAGAATAGACACTTAAATATTAATGGATTAATTTTAAATTAATAGTGAATCTTTTATATATGTAATATCTTGGATATGATTGTAGATAACCATAGACGCGCTTCTTTTACATATGC  
ATGGTAAGGACAAGTCTGACCAAAGAAAGCAGCTGCTTGTTCAC TTTATAATACAAGTGAACGGGAAGAAAAAAAATCTACTGGTGCCTCAATTCCTTAGCGGGCAAGTATAAGA



ACTGAAGACACGTTGGCACAAGAATTAATGCAAGGCTCCAAACCATGAAATTTGATGATAGTTAATTTTTTCATTAATAAAATCCAAAAAAAAAAGTTAAGAGTATTATAAAAAAATTTA  
ACAAAAACTATTTTTATCAAATTGCAAAGTCCCGTTTTATACATATACTTCTTTTGTAAATAAATTTTTTTATTATTTTTTCACATCAACTTTTTAGCGTAAAAACTTATTAATCAACGAAAA  
GTAGTCAAAAGCTCTTCCAAACAAAGCCG

>comp155230\_c0\_seq7

TGAAAAATGAAATTTTCGGTTGGAATTAGGACTTATAAACTCAAATTTCTAATATAATTTGTGTTTACTTGCTCTAGCATTATATAGGTTAATTTGTCTTCATATTTCAATTTTCATATTATATTAAT  
TAGTATAAATATATACTATTATTCATGGACCAATATAAGTGCTTAATAATCTCCTCAACATTTACCCAAAAAATAATCTCCTCAACAAACCACTAAAAGTTAAGTAGGCATACTTTCTCT  
CCCTA

>comp155230\_c0\_seq8

AGGAATCAGGACCGTACCTACTCCCTTTGATCTCCCTCGAGTTAAACCTTTTTTTTTAGGACTAATGAAGATTTTTAAAAGCGAAATCTTGCTTTTATTTTCTATAAATCTCTCAACAACCTC  
AAGCCTCCTTGACATTCCCTAGTCTCCCTACTCTCTCTCTCTCTCGACCATGATGGGAGATCAAGAGGAGGCCATTAGTGTGGATAAGAGGATTAACAACAACGAGGAGCTGAGG  
TAGTGAGGAAGGGACCGTGGACCATGGAGGAGGACCTCATACTCATCAACTACATAGCCATTCATGGTGAGGGGGTTTTGGAACAATCTTGCTCGATCGGCAGGTATTCTTTACATGCATG  
AATACATATATCTGCATGCATGCATGACGCATGCTCTCTCCCGATCTTTCTTTTTTTCTTTCAATACCATTATGTTTGGTTTTGGTTGGTACAATTTGCATAATTGAGAAGGTCTTAAGAGAA  
CTGGAAGAGCTGCCGGCTTCGGTGGCTGAATTACCTCCGCCAGACGTCCGCCGTGGGAACATCACGCCTGAAGAACAGTTGCTGATCATGGATCTCCATTCAAGGTGGGGAAACAGG  
TGAGCTTCTTCTTCGTTACTGACAGTCTCACATCATTCCCAAATAGATATATATTCATGCAAATCATAAATAACAGTAATAATAATAAAGACATATTTAAAGATAAAGACTTATGAAGG  
CGTGCTTTAGCTGTAGAGGTGTCGGTGGAAAGATTTTTCTCTGAAAAAAGAGCCCCAGGTTAGGAGAAAATTAAGAGAATCGTCCGATTTTTTCTCTGTCCGTTTGATTTTCTCTCTGTCT  
ACAGTCAAAATATAGTTACTATAGCAAATATGTTTTGACTGTGTTTTACTCTAAACAAAGAAAAAATCGAACGATTCCTTCATTGAGAAATTTGCACAGAATAAAAAAGTCACACGTTAGAA  
GCAGACTAACTCGTAAGAATAGACTTAAATATTAATGGATTAATTTTTAAATTAATAGTGAATCTTTTATATATGTAATATCTTGGATATGATTGTAGATAACCATAGACGCGCTTCTTTTAC  
ATATGCATGGTAAGGACAAGTTCTGACCAAAGAAAGCAGCTGTCTTGTTCACTTTATAATACAAGTGAACGGGAAGAAAAAAAAAATCTACTGGTGCCTCAATTCCTTAGCGGGCAAGTA  
TAAGAACTGAAGACACGTTGGCACAAGAATTAATGCAAGGCTCCAAACCATGAAATTTGATGATAGTTAATTTTTTCATTAATAAAATCCAAAAAAAAAAGTTAAGAGTATTATAAAAAA  
ATTTAACAAAAACTATTTTTATCAAATTGCAAAGTCCCGTTTTATACATATACTTCTTTTGTAAATAAATTTTTTTATTATTTTTTCACATCAACTTTTTAGCGTAAAAACTTATTAATCAACGA  
AAAAGTAGTCAAAAGCTCTTCCAAACAAAGCCG

>comp155232\_c0\_seq12

CTGTACTTCGATTATTCTGTGCGTACATCAGACCATTTGGAGGTGAATCAGAATGTGGCACGTCACCCATTACACAGCGGTACACAGCAAAAGGTAACGTGACATGTTCTAATTCGTATCC  
GAATGGCGTCCACATTCGCACAGAATAATTTACCTATGCTACTCAAAGAAACCATAGCAGAAATCAAATAATATAAAAATATATGTTGTAAGGGACATATAGACATTTGACTTCTGTTTCAT  
GTTAATGAATTACGAAAGATTTCTGCTTCAAAAACAGAATTATCCGTTTGGTAAGGGAAAGATTACCACATTTCTCTTAGTTCAAATGCTCGGCATGGAGCTTCCCATGAAATTACGAATCA  
TCAGCCATTACAACCTGTGTGGCATCACCTATCTGCCTGCCATTCCTTGTGTTTTCAGAATGTACATAGTTCCGGTCTTCTAGATGCTTCCCATTCGCCTGGTTCCTATAGTTCAATAGCT  
TGTGGGTCTCGTCCGATTTGCTTTCTTTCTCTTTAGCGACTAATGGGAGCAATGGCTGGTTCCATTAGAACGGTCAGGCATCTCTGTCAATTTTGTATCAATAAAATATACCACCAAGTTG  
TAGTATACCATGCAACCACAACATCAACACTGTAATGCTTCCGTGAAGCTATTATAAGAAGACTTTGTATGACTGCCATCAACCATGCAAGCATTTAATAAACCTTTTAGAACCATATTTAT  
AGTATGTGAGAACAAAAACAGTGTAATATCATATGAGATGAAAAATCAAATCGCCACAACCATAAAAGACTCCACGGACATTAATGAGAAATAGATCCAATATCTTTTCAGGAGGAG  
CGAGTGTGGCATACTTTGAACCTTGCAGCAGTGATAGTTGGACCTGGAAGATGTGTAGAGTAGAATGTGATGATCCTCAAAGCCTGGCAAGTAATAAAATTGCCAACACTCTACGCC  
ATAGCAGAACTGTGTAGAAGCGTTTGTATGATAAATGAAAGGATAGAATGTCCACTGCAAACTTCAAATTACTTCGTACGTTGGAAAAGAAAGGAAAAACAAAGGAATTAATAAAT

GATGCATCATAAGCAGAAGGCAATAGTGACATGGTTAATACAAAGCATTCCCAACACGGAAAATCCTGGGAACTTCAACTAGGTTAGGAAGGCTCAATTCCTACAAATAAAGAAAGTGC  
AAGGGTAAAATATGTTATCAT

>comp155232\_c0\_seq7

CTGTACTIONCGATTATTCTGTGCGTACATCAGACCAATTTGGAGGTGAATCAGAATGTGGCAGGTCACCCATTACACAGCGGTACACAGCAAAAGGTAACGTGACATGTTCTAATTCGTATCC  
GAATGGCGTCCACATTCGCACAGAATAATTTACCTATGCTACTCAAAGAAAACCATAGCAGAAATCAAATAATATAAAAATATATGTTGTAAGGGACATATAGACATTTGACTTCTGTTTCAT  
GTTAATGAATTACGAAAGATTTCTGCTTCAAAAACAGAAATTATCCGTTTGGTAAGGGAAAGATTACCACAACAGTAAGAAACTGCCGCCATTTCTATTAGTTCAAATGCTCGGCATGGAG  
CTTCCCATTGAATTACGAATCATCAGCCATTACAACCTGTGTGGCATTACCTATCTGCCTGCCATTCTTTGTTGTTTCAGAATGTACATAGTTCCGGTCTTCTAGATGCTTCCCATTGCTCTGG  
TTCTTATAGTTCAATCAATAGCTTGTGGGTCTCGTCCGATTTGCTTTCTTTCTTTAGCGACTAATGGGAGCAATGGCTGGTTTCCATTAGAACGGTCAGGCATCTCTGTCAATTTTGTATC  
AATAAAATATAACCACCAAGTTTGTAGTATACCATGCAACCACAACATCAACACTGTAATGCTTCCGTGAAGCTATTATAAGAAGACTTTGTATGACTGCCATCAACCATGCAAGCATTTTAA  
TAAACCTTTTGAACCATATTTATAGTATGTGAGAACAAAACAGTGTAATATCATATGAGATGAAAAATCAAATCGCCACAACCATAAAAGACTCCACGGACATTAATGAGAAATAG  
ATCCAATATTCTTTCAGGAGGAGCGAGTGTGGCATACTTTGAACCTTTCGGCAGTGATAGTTTGGACCTGGAAGATGTGTAGAGTAGAATGTGATGATCCTCAAAGCCTGGCAAGTCTG  
CAGGAATAATCTTCATCAATATAAAGGAGAAAAAGATGACAGAGAAAAAGATTTGCTGACATAGGCTTTATCTGGCCCTATCTCCGGAAGGAGACTGAAACCAAGATCATGTAGAATAG  
GTCCAGGTCGATGCAAATAATGAATCCCGTGAGCAGCAACCCCATGAACATACTGAAAAAAGAGCCCCGCAAGCAGAAGCTTCCATTTCTCCATAAAAATTTGTAGTTCTACACAAGTCT  
CCATTGCAATCTTCTCCATAACTTCACAGCCTCTCGTACAATGTAAGCGTCATATTGATCAGCAAAGGCATACAGTTCCATAGAAATCAGCTTCAAGCGAAGGATTCTTCTGCATTGCC  
TTCTTCATGATTTTCTCTAGTAATGCCCGAAGCCAGGTTAGGTTCAACTTCTTCCGGTTCCTTCTATCGATGAAAAGCCTTCAAAGGAAAGTAAAAGAAAAAAGGGTATCGGAAG  
AAAACGCGGGGATCGACAGAAA

>comp155232\_c0\_seq9

CTGTACTIONCGATTATTCTGTGCGTACATCAGACCAATTTGGAGGTGAATCAGAATGTGGCAGGTCACCCATTACACAGCGGTACACAGCAAAAGGTAACGTGACATGTTCTAATTCGTATCC  
GAATGGCGTCCACATTCGCACAGAATAATTTACCTATGCTACTCAAAGAAAACCATAGCAGAAATCAAATAATATAAAAATATATGTTGTAAGGGACATATAGACATTTGACTTCTGTTTCAT  
GTTAATGAATTACGAAAGATTTCTGCTTCAAAAACAGAAATTATCCGTTTGGTAAGGGAAAGATTACCACAACAGTAAGAAACTGCCGCCATTTCTATTAGTTCAAATGCTCGGCATGGAG  
CTTCCCATTGAATTACGAATCATCAGCCATTACAACCTGTGTGGCATTACCTATCTGCCTGCCATTCTTTGTTGTTTCAGAATGTACATAGTTCCGGTCTTCTAGATGCTTCCCATTGCTCTGG  
TTCTTATAGTTCAATCAATAGCTTGTGGGTCTCGTCCGATTTGCTTTCTTTCTTTAGCGACTAATGGGAGCAATGGCTGGTTTCCATTAGAACGGTCAGGCATCTCTGTCAATTTTGTATC  
AATAAAATATAACCACCAAGTTTGTAGTATACCATGCAACCACAACATCAACACTGTAATGCTTCCGTGAAGCTATTATAAGAAGACTTTGTATGACTGCCATCAACCATGCAAGCATTTTAA  
TAAACCTTTTGAACCATATTTATAGTATGTGAGAACAAAACAGTGTAATATCATATGAGATGAAAAATCAAATCGCCACAACCATAAAAGACTCCACGGACATTAATGAGAAATAG  
ATCCAATATTCTTTCAGGAGGAGCGAGTGTGGCATACTTTGAACCTTTCGGCAGTGATAGTTTGGACCTGGAAGATGTGTAGAGTAGAATGTGATGATCCTCAAAGCCTGGCAAGTAAC  
TAAATTGCAACACTCTACGCCATAGCAGAACTGTGTAGAAGCGTTTGTATGATAAATGAAAGGATAGAATGTCCACAATATAAAGGAGAAAAAGATGACAGAGAAAAAGATTTGCT  
GACATAGGCTTTATCTGGCCCTATCTCCGGAAGGAGACTGAAACCAAGATCATGTAGAATAGGTCAGGTCGATGCAAATAATGAATCCCGTGAGCAGCAACCCCATGAACATACTGAAA  
AAAGAGCCCCGCAAGCAGAAGCTTCCATTTCTCCATAAAAATTTGTAGTTCTACACAAGTCTCCATTGCAATCTTCTCCATAACTTCACAGCCTCTCGTACAATGTAAGCGTCATATTGA  
TCAGCAAAGGCATACAGTTCCATAGAAATCAGCTTCAAAGCGAAGGATTCTTCTGCATTGCCCTTCTTCATGATTTTCTCTAGTAATGCCCGAAGCCAGGTTAGGTTCAACTTCTTCCGGT  
CCTTCTATCGATGAAAAGCCTTCAAAGGAAAGTAAAAGAAAAAAGGGTATCGGAAGAAAACGCGGGGATCGACAGAAA

>comp155255\_c0\_seq6

CAGCAAGACCGACCGCACCGAGTCCAAAGATTGCCACCTTCGATCCTTCTTCGACATTCGCCGTATTCCAAGCCGCTCCAACTCCGGTGGAGACGCCGCAGCTGAGAAGACACATTCTG  
CTAAGCGGGCGCATCAGCGGGGACTTTACAACACACGCAGAGTCGATAACCGTGTACTCAGCGAAGGTTCGACGTGTTCAAAAAGTGGTAAACAGGTCGTCGTTCTTCATCAGGTCCGAC  
CCAAAAGAACCTAACCCGCCCGTCAGCCCTCATTACGCTCCGCAGCGGGTCCACCGCAAACCCGAGCATATGTTAGTCTTATCCGACCGACACATGTCGCAGCACCCGCATTCCCCGGT  
AAAAACCGGTACCACCCGGTACCAGGTCTCAAATCCTCCACCCCTCCCCAACACTTTCCACAACCCCCGCGGCTCGTGGCCCAGAACACGAGGGAAGATCTGCTGCAGTTTGTCT  
CGCCCTTCCAAGCACTGAGGTGGTGTGGCATATTGAGGTGAAGAGGATTGAAAGCCGACTTCCAAACGCTGAGGAGGCTCCACCTCTATTCCCTCGATCTTAAAGGCCCTCCCGGA  
CCCCAAAGCACAGCCGCTTTCATGTGATGACTTTGCCGGCCGTTTTACCACCGCGTCTCCGTGCTCTCCGGCGTGAAGCCATTGGAGTTCTCCGAGTTTAAAGCTTCCATCTTCTCTCT  
CTCTCTCTCCCTTCTCTGTCTCTCTATATATCCTTCTCTTTATT

>comp155318\_c1\_seq9

CAAGCTCATTTTTTTTTCTCCCTCACGTGACAAGAAGCTCTCATGAGTCTTGCTCTTGGGATAGACAAAAAAAAAAGAGGACTCCTTTTTTCTCTCAAGGAGAGCAACCGGCCCTACG  
GCTGGAGCCTCTGTCTTCAGTTCCCTCTCTGGCTCTTGTTTTCTTGGACGTCCGCCTCCCGTCGCCCTAGCAGCCGAACGCCCCAGGCTCCCGCTCCATCTCGGTTCCCTCCCTGC  
AAGCCGATGCCAAGAGATGAACAAGCCGAAGCTACCTCGATCTCTCTCGCCCTCTCTCTTTTTCCCGTTTACGAAGCCCAGGAGAGAGCCAAAGTCGCCTCTCCCTAGCCGAGCCCC  
ACATTGACGCAGGCCCTGTCGCCGAAGTTCCAATCTTGGCCGACCAGCCTTCTTCTATAGCAGCAGGTA

>comp155352\_c0\_seq1

TATTGTATGAATTTATAAGAGCTCAAGACATGAATTAATTATTTATTTAATTAATTCATGTCTTGAGCTCTTATAAATTCATACAATAATTATATTAATAATTAGAGTCCAAATTTCTTCATTT  
ATATGTAGAGTCTTACAAATCTATTTTCACAGGCCAATAAGCCAAAGATTAAATAAAAATCTCCACATCGCCGTGCAATCAGTCAAATTAGGAACCTGGAAAACGAGATTGCATGGCCATG  
ATTAGTCCACCCGTTACATTCCTCCTCCCCGCTCCTCAATGGCACCCATTCTGAAACTCTGAGGTAGACAGAGAAAGAGAAACAGAACTCGCCAGAGGACTCATGGCCATGGCAG  
TGCCATAGCCCTCTTCTCCTTCTTGGTCTTTTAGTCGCCCCCGTCGCAGTTGCAGATGAGGCCGAAGTCTCTCTCTCAAGGCCTCCCTCACCAACGCCAACGCCCTCTCCTCCTG  
GTCTCCGGGAAATGGCGTCCCTGCTCCACGCCTCCTCGTGGGACGGCGTCACATGCGACGCCGGCGCCGTGCTAGCCTCCGACTCGCCGGCCTTGGACTCTCAGGCAGCATTGACG  
TCAACGCCCTCGCTCGCCTTCTGGCCTCCGCTCCATCTCATTAGACGACAACTCATTCTCCGGCCCCATCCCACCCTTCTCCCGCTCCACGCCCTCAAATCCATTTACATCTCCGGCAAC  
TCCTTCTCCGGCCAAATCCCGGACGATTTTTTATCGTGCCTGCGATCTCAAGAAGCTCTGGCTCTCAAACAACGCCTTTGAAGGCTCCATCCCGTCTTCTCTCTCCAAAGCCGTTAGCT  
TGATGGAGCTCCACCTCGAGGGAAACCAATTTACCGGCGGAATCCCTAATTTACCAATGCCGACGCTAGCTTCCCTTCAACGTTTCAAAGAACCAGCTTTCCGGTCCCATACCGTCGAGCC  
TGAGGAAGTTCAACGCCAGCGGTTTTGCCGGAAACGTGGGGTTATGCGGGCCCGCCTTGAGAACATCTGTGTAGATGCTGCAGCGGCAGCGGGAGCGTCTTCCGGGAGTTCAGCGGC  
GGCAGTGGGATTAGTGTGGTGCATAATTCTGGCGTTGGGGGGAGTAATGGCTGTGCGCCGAAAACGTCGAAATAATTCTGGTTTCAGGACGCTCAGCCTCGAGCACGCGACGCCGGGCA  
TTCATATGGCGGAAAGGAGGGAGAGGGAAGCACAGCAGCCTGAGGTTACCACCTCCGCTGCCGTGCGGAGTCGACGGGAAAGGGGAAGAGGAGCAGCTCATCGGTAAAAGGAGGA  
AGAGGGAGCGGGAAAATGAGTTGGTGTGGTGAACGAAGCAAAGGGGACATTCGTATTGTCAAATTTGATGAAGGCTGCGGCGAGGCGATGGGGAACGGAGGAATGGGATCAGCTT  
ACAAAGCCGTGATGGCGAATGGTTTACTTTGGTGGTGAAGAGGATGAACGAAATGAATCGGGTAGGGAAAGGAGACGTTTCGAGGTTGAGATGCGACGGCTCGGCAGACTCAGCCACCC  
AAATGTACTCCCGCTGTTGGCCTACCTTTACCGGAAGGACAAGAAGCTTCTAATTTCCGAGTACATTCCAAAGGCAGCCTCCTCTATATCCTCCATGGGGACCGAGGAAAAGACCACGC  
GGCGTTGAATTGGCCGACGAGGTTGAAGATAATACGAGGAATAGCTCAAGGAATGGCGTTTCTGCACTCGGAGCTGAATTTTCATCGTTATCCCCATGGCAATCTTAAATCCGCCAACGTT  
CTTCTCGCCCCGACTTTGATCCTCTGCTCGTTGACTACGGATTCTTCTCTCGTCAATCCTTCGCATGCCTCGCAGACAATGTTTGCCTTCAAGTCGCCGGAGATTCTCGTCAACCGCCA  
CTTGAGTCCAAAAGCCGATGTCTATTGCCCTCGGCATCATCGTCTCGAGCTCCTCTCTGGCAAGATTCCATCACTGTATCTCAACGACACCAAAGGCGGGACTGATCTCGAGCGCTGGACT  
AATTCGGTCCCTCGCGGAGAACATTCGTTGGAGTATTATTGATCCCTTCATCACGCAGGGGTTAAGTCTGAGGTGTTTGGAGATGGAGCAGATGGTGCAGTTGGGGCGGAGTTGATAGAT

GCCGACATGGACCGGCGGCCGGATATGAAGGAAGCTGCGAGGAGGATTGAGGAGGTGGCGGAGAAGGCCGAGGGACGGAGAAAGGAGGACGGCAGCGCTTCGGCTGGCTTAAATGA  
ATCGTTGATGAGGGAGGGGACACCCCGCGGATTAAGTGGAGATGGCGTCGGAGTGCGCCGAACGGCGAACACCCCAAAAAGGTCGAAGAGCATTGAGGATTATCTGTAGTATGTCA  
TCTCTTGATTCTGCTTCAAAATTTGGTGGGTGGGGTTTTAAAGGTTTCAAGGATTGGAATATGTGGTATTTATTTTTTTTTGGGGAAAATGTTTGGTATTTTCAATTTACTATTTATAGTATCAC  
GATTTTTTTTCTTTAAATAGATTTTCTTTTTTAAATTTACTTTCAAATTTAGTATATTGTTATTTTTAATCTTTATAGGTTAGGCTTTATTTGA

>comp155352\_c0\_seq3

TATTGTATGAATTTATAAGAGCTCAAGACATGAATTAATTTATTTAATTAATTCATGTCTTGAGCTCTTATAAATTCATACAATAATTATATTAATAATTAGAGTCCAAATTTTCTTCATTT  
ATATGTAGAGTCTTACAAATCTATTTTCACAGGCCAATAAGCCAAAGATTAAATAAAAATCTCCACATCGCCGTCGAATCAGTCAAATTAGGAACCTGGAACACGAGATTGCATGGCCATG  
ATTAGCTCACCCGTTACATTCCTCTCCCCCGCTCCTCAATGGCACCCATTCTGAAACTCTGAGGTAGACAGAGAAAGAGAAACAGAACTCGCCAGAGGACTCATGGCCATGGCAG  
TGGCCATAGCCCTCTTCTCCTTCTTGGTCTTTTAGTCGCCCCCGTCGCAGTTGCAGATGAGGCCGAAGTCTCTCTCTCAAGGCCTCCCTCACCAACGCCAACGCCCTCTCCTCTG  
GTCTCCGGGAAATGGCGTCCCCTGCTCCCACGCCTCCTCGTGGGACGGCGTCACATGCGACGCCGGCGCCGTCGCTAGCCTCCGACTCGCCGGCCTTGGACTCTCAGGCAGCATTGACG  
TCAACGCCCTCGTCTGCCTTCTGCGCTCCGCTCCATCTCATTAGACGACAATCATTCTCCGGCCCCATCCCACCCTTCTCCCGCTCCACGCCCTCAAATCCATTTACATCTCCGGCAAC  
TCCTTCTCCGGCCAAATCCCGGACGATTTTTTATCGCTGCGTCGCATCTCAAGAAGCTCTGGCTCTCAAACAACGCCTTTGAAGGCTCCATCCCGTCTTCTCTCTCAAAGCCGTTAGCT  
TGATGGAGTCCACCTCGAGGGAAACCATTTACCAGGCGGAATCCCTAATTTACCAATGCCGACGCTAGCTTCCCTTCAACGTTTCAAAGAACCAGCTTTCGGGTCCCATACCGTCGAGCC  
TGAGGAAGTTCAACGCCAGCGCGTTTGC CGGAAACGTGGGGTTATGCGGGCCCGCGCTTGAGAACATCTGTGTAGATGCTGCAGCGGCAGCGGGAGCGTCTTCCGGGAGTTCAGCGGC  
GGCAGTGGGATTAGTGTGGTGCATAATTCTGGCGTTGGGGGAGTAATGGCTGTCGCCGCAAAACGTGCAATAATTCTGGTTTCAGGACGCTCAGCCTCGAGCACGCGACGCCGGGCA  
TTCATATGGCGGAAAGGAGGGAGAGGGAAGCACAGCAGCCTGAGGTTACCACCTCCGCTGCCGTGCGGGAGTCGACGGGAAAGGGGAAGAGGAGCAGCTCATCGGTAAAAGGAGGA  
AGAGGGAGCGGGGAAAATGAGTTGGTGTGGTGAACGAAGCAAAGGGGACATTCGTATTGTCAAATTTGATGAAGGCTGCGGCGGAGGCGATGGGGAACGGAGGAATGGGATCAGCTT  
ACAAAGCCGTGATGGCGAATGGTTTACTTTGGTGGTGAAGAGGATGAACGAAATGAATCGGGTAGGGAAAGGAGACGTTTCGAGGTTGAGATGCGACGGCTCGGCAGACTCAGCCACCC  
AAATGTACTCCCGCTGTTGGCCTACCTTTACCGGAAGGACAAGAAGCTTCTAATTTCCGAGTACATTTCCCAAAGGCAGCCTCCTCTATATCCTCCATGGTAAATCAGATTGTTACTTGAAGT  
AAAAATCATACTTTAGCCTTAAGTACCCTTTTAGTTTTTCAAAGCAAGGATTTCTTTTCTTTTCTTCTTACAGGGGACCGAGGAAAAGACCACGCGGGCGTTGAATTGGCCGACGAGGTT  
GAAGATAATACGAGGAATAGCTCAAGGAATGGCGTTTCTGCACTCGGAGCTGAATTTATCGTTATCCCCATGGCAATCTTAAATCCGCCAACGTTCTTCTCGGCCCCGACTTTGATCCTC  
TGCTCGTTGACTACGGATTCTTCTCTCGTCAATCTTCGCATGCCTCGCAGACAATGTTTGCCTTCAAGTCGCCGGAGATTCTCGTCAACCGCCACTTGAGTCCAAAAGCCGATGTCTA  
TTGCCCTCGGCATCATCGTCTCGAGCTCCTCTCTGGCAAGATTCCATCACTGTATCTCAACGACACCAAAGGCCGGACTGATCTCGAGCGCTGGACTAATTCGGTCCCTCGCGGAGAACAT  
TCCGTGGAGTATTATTGATCCCTTATCACGCAGGGGTTAAGTCTGAGGTGTTTGGAGATGGAGCAGATGGTGGCAGTTGGGGCGGAGTTGATAGATGCCGACATGGACCGGCGGCCGGA  
TATGAAGGAAGCTGCGAGGAGGATTGAGGAGGTGGCGGAGAAGGCCGAGGGACGGAGAAAGGAGGACGGCAGCGCTTCGGCTGGCTTAAATGAATCGTTGATGAGGGAGGGGCAGA  
CCCCCGCGGATTAAGTGGAGATGGCGTCGGAGTGCGCCGAACGCCCAAAAAGGTCGAAGAGCATTGAGGATTATCTGTAGTATGTCATCTTGTATTCTGCTTCAAAAATTT  
GGTGGGTGGGGTTTTAAAGGTTTCAAGGATTGGAATATGTGGTATTTATTTTTTTTTGGGGAAAATGTTTGGTATTTTCAATTTACTATTTATAGTATCACGATTTTTTTTTCTTTAAATAGATTTT  
CTTTTTTAAATTTACTTTCAAATTTAGTATATTGTTATTTTTAATCTTTATAGGTTAGGCTTTATTTGA

>comp155354\_c0\_seq1

AGCTGGGTACCCTATACTTGTGTGGGACGATTTTCCCGTGCACACTCGGCACCTAATAATATTGACCCAACCCAAAAATCCAACCTCGAAAATTTGGTGGTGGACCCAAAACAGGTCAGG  
TTTAGGTTCAAAAAATCAACTCATTAAAGAAATGAGTCAGGTTTCGAGTTGACCCGGAAACTCTGAAATCACCCGGAAAACATGTTTGCCTCTCTGACAGCCCTTGTGCGCGTCTGCC

CGCATCGCCTACCAGAGTCGCCTGCCCCGGCTGCCTGTGTAGCATCAGTAGTGTGTCTGGCCCGCGTGCTTGTATCATGTTGCCGCTTCCGACTGTCGCGCCTCTCTGCTGCTGGAGG  
ACTGGACCACTAAGTTATGGGATTTGGCTCAACAAGCGCGTGAGTTATGGGAATGAGGTTTAAAGACTTACGGGTCAATTCAATTCAGGTCCAAAAACATACCTATTTTCAAAAACGGAT  
TGGGTTAGGGTCAGCCCCGAATAATAACAAGACCAATTTTAGGTGGGTCAATACCACCAATTTTGTGACGCTCTATAAATAAATTACAATGGATTTATTTGCAATGACCAACCCATATGCCGCTA  
TAAAAAAAATGAAGAAAAAAAATTGCAATGACCAATCCTGCAATAAAATGAAATCATTTTGTATTTCTTTGAAAGCTTTTCCAATCATTCTCTCTCTCTCTCTCTCATTTTTATCAG  
AGCTTAATCGCAGCGGGCACAGACACTTCATCAAACACAATAGAATGGTCGATGTCTCTTACTAAACAATCCCGACAAATTAGAGAAGGCGAGGCAAGAGATCGATGACCAATCGG  
ACATGATCGCCTCCTCGAAGAATCAGATCTCATCAAACCTCCATACCTCCACTGCATCATCAACGAAACCTTCCGTCTGTATCCCGTCGCCCTCTCCTCATCCCTCACGTAGCAAGAGAG  
GACTGCGAGATCGGAGGCTACGCCGTGGACCGAGGAACTCTGCTCTTAGTAAATGTTTCATAAAATCCATAGAGATCCTGCGATTTGGTCTGAACCGACCAATTTCTCCCCGAAAGATTT  
CAAAATGCGAAGGAAGAAGAAGGGTGAAGATGACGATGATGCCATTTGGGATGGGGAGGAGGAGATGTCCGGGAGAAGGGCTTGCATTGAAGGAGATTGGATTAGTGTTGGGGATTC  
TAATCCAATGCTTTGAGTGGAAGAGGATTGGAGCAGAAGAGGTGGACATGACGGAAGGGTCAGGACTTACAATGCCGAGAGCTAAGCATCTTGAAGCTCTGTGCAGGCCACATCAATAT  
ATGATGAATGTGTTGTCTCAGATATGACTTTTATGTTCAACTTTATGGTGAGATTAATAAGAATAAAAAGTATTTTGCTTGATTTGTTTTATTATGTTTGTGAGAAAAGGATTATGTAAGCTTT  
TAGACTGTACTATGGAGAAAATAAAAATTTAAAAATTATATACTTCATTTTGAACCTACCAATATGATCTGTTTTTTTTTTTTTTTTTAATATATATTATATAGACATGTCATGTAATAACTCTAGCA  
GCGGCCGGCAATCCAAGCTGCGCGGCCACCGCTCAAATTAACGGTGGTGGCCGCCACCGCCGCCGGGCTCGGCCCGACGGCAACCTCTCCATCCACGAAGCCATAATCTCTTTAGCC  
TTCTCGTATACTCTGCTCGACGGAAGGATCCTTGTCTCTCTTAAGCTCTTCTGACATCGTTTCGTATGGCAGTAGCATTCTGCGTGCTCGCCACGACGATGACGAAGACGACGAAAG  
TGACGAAAAGTAGAGCTCGATACCTTCGGCAACTCATGCTTGACGCTTCTTCGTGGAATTGGGGAAGAGGATTGATTATCAGACGAGAACTGGAGAGTACTTATT

>comp155354\_c0\_seq3

CAGAACCCCTTCTTCTCTCCCGCCATGGACGCCATGAAGATCCTCACCAGCTTAGCTCTCTTCTCTCTCTCCTCCTCGTAATCAAACCTCTTCATAACCAACAAGAACAAGAAGAGGG  
AGAAGAAGAAGCCGCTCCAAGCCCTCCTAATTCGTTTCCCATCCTCGGCCACCTCCACCTTCTCCAGAAACCCCTCCACCAATCTCTTGCAAGTCTCTCCACCCAGCACGGCCCGATCC  
TCTCCTCCGCTTCGGAACCATCCCGCCCTCATCGTCTCTCCGCTCCATCGCCAATGAATGCTTACCACCAACGACATCGCACTCGCAGACCGCCCTCATTCCCTTCCATGGCCGT  
CATAACCTACAACCACACCAGCCTCCCCTTCGCCGCATACGGACCCCACTGGCGCGAAATGCGCCGAATCGCCACCGTCGAAGCTCTTTCCGGGCCCCCGCCTCGCCTTCTTCTCCGATATT  
CGGGCGGACGAGGCTCGATCCCTGGCCCCAAGCCTCTTCCATTCTCGGGGAAAGTGGAGATCAGTTCAAGCTTGTTCGGGCTTGCAATGAATGTCATGATGAGGATTATAGCAGGGAA  
GAGGTATTATGGGGAGAAAGGTGAAAAGGAGGAGGCGCATAATTTCAAGGACGTGATAGAGAAGATCTTCTCGCTTACCGGCGCGAACAACGTGAGACTTTTTGCGGCGGCGATCG  
GGTGGTTTGCACGTCGAGAAGTGGATAAGAAGCTGGCGAGGTATCACAAGTACAGGGATGAAATTGTTCAAGTCACTTATAGAAGAGCACAAGAGGAGAAGAAGGGCAGAGGAGGAAG  
AAGAAGAAAAAGAAGGGGATTGAAGCAGAAGCAGAAGATTCAAAAACCATGATTGATGCTCTGCTCTCTTTCAGGACGACCGCCGGAGCAGTACTGATGTCTTCAATAAATCG  
CTTATTAATAGCTTAATCGCAGCGGGCACAGACACTTCATCAAACACAATAGAATGGTCGATGTCTCTTACTAAACAATCCCGACAAATTAGAGAAGGCGAGGCAAGAGATCGATGAC  
CAAATCGGACATGATCGCCTCCTCGAAGAATCAGATCTCATCAAACCTCCATACCTCCACTGCATCATCAACGAAACCTTCCGTCTGTATCCCGTCGCCCTCTCCTCATCCCTCACGTAGC  
AAGAGAGGACTGCGAGATCGGAGGCTACGCCGTGGACCGAGGAACTCTGCTCTTAGTAAATGTTTCATAAAATCCATAGAGATCCTGCGATTTGGTCTGAACCGACCAATTTCTCCCCGA  
AAGATTTCAAAATGCGAAGGAAGAAGAAGGGTGAAGATGACGATGATGCCATTTGGGATGGGGAGGAGGAGATGTCCGGGAGAAGGGCTTGCATTGAAGGAGATTGGATTAGTGTTG  
GGGATTCTAATCCAATGCTTTGAGTGGAAGAGGATTGGAGCAGAAGAGGTGGACATGACGGAAGGGTCAGGACTTACAATGCCGAGAGCTAAGCATCTTGAAGCTCTGTGCAGGCCAC  
ATCAATATATGATGAATGTGTTGTCTCAGATATGACTTTTTAGTTCAACTTTATGGTGAGATTAATAAGAATAAAAAGTATTTTGCTTGATTTGTTTTATTATGTTTGTGAGAAAAGGATTATGT  
AAGCTTTTAGACTGTACTATGGAGAAAATAAAAATTTAAAAATTATATACTTCATTTTGAACCTACCAATATGATCTGTTTTTTTTTTTTTTTTTAATATATATTATATAGACATGTCATGTAATAAC  
TCTAGCAGCGGCCGGCAATCCAAGCTGCGCGGCCACCGCTCAAATTAACGGTGGTGGCCGCCACCGCCGCCGGGCTCGGCCCGACGGCAACCTCTCCATCCACGAAGCCATAATCTC

TTTAGCCTTCTCGTATACTCTGCTCGACGGAAGGATCCTTGTCTCTCTCTAAGCTCTTCTGACATCGTTCGTATGGCAGTAGCATTCTGCGTGCTCGCCACGACGATGACGAAGACG  
ACGAAAGTGACGAAAAGTAGAGCTCGATACCTTCGGCAACTCATGCTTGACGCTTTCTTCGTGGAATTGGGGAAGAGGATTGATTATCAGACGAGAACTGGAGAGTACTTATT

>comp155387\_c1\_seq1

CTGTATGCTTTGGGTATTATATGGGATGCCCTTCGTGAAGCCTAACAGCACCTAATAATAACCATTAATGGAGCCGGCACTATGATAGAGCTCATCTATATCATTATCTATGTCCTTTACTCG  
GATGGGTCAAGACGGATCAAAGCCCTTTTACTTCTCTTCACAGACATTGCCCTTTATTGCCGTCGTCGCTGCTATTGTTCTTTCCATCTTCAAATCCCATGAGGAACGAACACTAATTGTTGG  
TATTCTATGTATTGTTTTCTGCATCATGATGTATGCGTCACCTCTCTCTATTATGAAAAGGGTGATAAAAACAAAAAGTGCAGAGTACATGCCTCTCTATCTCTCTATTGCTTACTTCTTTAAT  
GGGCTATGCTGGACTACTTACTCGCTCATCCATCTTGATGTGAACC

>comp155388\_c0\_seq6

ACCCGAATAGCTAAAGGTTAATGTTGATGAATCTCTACTTTCTTCTTATAACAACAGGTATTGCTGGAGTATTAAGGGATTGCAAAGGCAACTATTGGCTTTCGGTAGACCTTGCCTTCAATG  
GGATATAGCATAATTGGAGCTTCTAGCAATTCATTCTTTGAAGGAGGTGATCAAGGATTGGATGCTCAAATACAGGTATCATAATTGAAGGTGAAAATTCGAATATCATTCTTTCTTCAAG  
GTATTTGGAAAAAAGTTAAATACAAAGAAGAAGAACTTGGCTTTCTTAAGGAGTTAATTATGTTATTTTCAATTGTATAGGTAGAGAAAGCAATAAGTTAGCAAATTTGTGTGCTAATTA  
TGCTCTTTTAGCAGCTTTAGTTGGGAAGAGTTTTCTTCAATAAGGTTCCCTCTTCTTTAATATTTGAAGGAGGAATCCACTTTGTAATTGTTCTTATTTTTTCTCTAGTTTTAATATAT  
GCAAGCTCCGGCTTTAGTCTCAGCATTGGAAGTGGATCAAAAAAGCTAAGTTGAATGCTCGGGTGGAAAGTGTTTTGGTGGAGAGTAAGTAAAAATGCAATCCCTTCATTCAAATTTCTAT  
GGTACAGAAGACTGATGGATAGTGCCAATTGTCTTAGAGGATGCAATGATATTGAAGATGTGGAGCATATTGTGTGCAACTGCTTGAAGTTAAAAGAGGTTGTTCATCATCTAAACCAATG  
GGGGTTTGGAAATTCCTTTATTTCTAAGCTTTGAAGATTGTATTAATGGCTAGAATCTATTGCATTGAAGAAAGGATGCTCGTTAATTTGTAGTGTAAATGCAGTCTTTTTATCATGGAAAGC  
TAGGAACAAAAGTATTCATGAAGGAGTGGAAAGACATCCCTGCTTTTATTGCTTCCAATGCCATATGTTATACATCGGTTTTCTCATAGTTTTAGCCATTTCTATTTGGGCCACTAGGATGTTAA  
CCAGTCGATCAGACTGTCAAATACTTGGCATCCTCCTCC

>comp155396\_c2\_seq3

AGTGACAAATGATATGAAGCTTGGAAACCAACAAAAAGAGAGGGACAAATTTTATAAATGTGCATTGAAGCTGATGTTTTTCATTTTTTCTGGGGAAATTATTATGTGGGATATTGTACGA  
AGGTTAATTGGGATGTGCCATATCATTAAATTTATTATGTATTGTTGTGTATCGAGTGTGGCACGTTCTGATTGACATCCGGCTGGTCCGCTGACCGCGGTAATAATTTTTCATTTTTCTA  
ATGGTTTTGTGTAGTCATAAAAGAATTTAGGAGATTTATATATATCACTCAAAGTATATCTAAATTTTATTATTTCTTTTAGTATCTCAATTAATTCATGCAACTCATCTTCGTGTGTGGATTGGA  
AGCTTTGATTATCAATTAACATATTTGAATTTGAGTCTTACGTATGTGATGTGTGCATAGATTTATCTTAATTGGTCTAAATATAAAAAAATGCATATCATTAAATTTTGTGATGAGAGATATT  
AATCATAATTAATTAATTAGGATCATCATTGGACCCATTAATATCTTCTTATTGTGGGCTTATGTTCCCTTTATATATGGACATAAAACTTTGAGTCACCCCTTTCTAGGAAAAATTATTTGTG  
GACACCGAATGTCATCTGGAGACCAATTAG

>comp155409\_c0\_seq7

GGAGATGAGCAAAACAGAGGGGACGCTTCTTATTTGGGGAAGGAAACAGCTCAGTTTGTTCAGTGAGATTTCAATTTTTTCATCCTTTCCCTCAACGTGGGTCCCACTCCACCTTAGTG  
GGACCCACCAGGAGGAGGAACAGCCCTCCTCTGTTCTTCTGGTTCCTCATGACGACAGAGTTTTCTTCTCCCAAATTTTAGTCTGATCTGTTTTTCTCTTCTCATAGACAATCAAA  
AAGGGGACTTTTTGATCTCCAGATGGGGAAGAAATGGATTTCTGCAGTCAAAAAATCTTCAGTTCTGAATCTACGGGGAACCATACCTTCGAGAAACCAGATAAGAAATTGCGCAAATC  
AAAGCATCAAAGAATTTGTAGATCCTCTTGAAGATTCAAAGAATGGACAAAGCCAACGCGCTTATTCAGCGGCCGAGGCGGCCATGGCGGCAGCTCGGGCGGGCGGAGATGGCC  
AGATTAACCACATCATTAAAGAGCCTTCCATGAAAGACCAAGAAAGGAGTTGCAGCAATCAAGATTCAGGCTGCCTTTAGAGGCTATTTGGTGAGAAGAGGAACAGGAGCTTTGAGAG  
GATTGGTGAGGTTGAAGCTAATGGCCAACCGAAGGGCAGTCAAGCGCCAGACTATAAACACATTGCACAACATGCAAACCCTAGCAAGGGTTCAAGCACAGCTAAGGGAAAGAAAAGT

CAGATTGTCAGAAGAGAACCAGACTCTACACAAGCAGAGGCAACTCAAGCGTGAGAAAGAACTGGAGAAATTTAAGCTGGGAGAGGATTGGGTTGACAGTCCGCACTCAAAGGAACA  
ATTTCAAGCTAAAATACAAAAGAAGCAAGAGGCTGCTCGAAGAAGAGAAAGAACTAGCTTATGCCTACTCACATCAGTGGAGGAGCAATTCTGCCAGGTCCAAGAAACCAGCTCTC  
ATAGATCCCACAAAAGCAACAGTGGGGCTGGAGCTGGCTTGAGCGCTGGATGGCAATCAGGCCATGGGAGACCAACCAAGCTTTATCACAGGCAGAGATTCATCCTCTAAAAAGAATGG  
AGGCTTAAACAAAGCTCCCTCAGTTGCGTCAAATGATGATATCTGTGGCTTGTTTGGCTTTCAATCTGAACAACATAAGAGAAGGCACAGTCTTGGCAGTTCATTTGTTTTGGAGACGTT  
GAGAACAGAGGTAAGTACAGGTTCCAGGCGCCGCTAACTGGCAAGTCAAGGCCAAGAAGCCATTGCCGTTAACTTCTGCTTCAAGGAGGCTTTCAGGCCCCCAAAGGATGGCAGGAT  
ATGGGAAGCTATGGTAGTGAAAGTAAGTTGGTGATGTTTTTAAATTTCCATCAATGAATGTTAATGATGT

>comp155442\_c0\_seq1

CCAATCCTATAAGAGATCAAGCAAGCAAAACGACTAAGTATAAGCTGATATATCTTTCTACGATCAATTACTTCGAAGATCGAGAAAATGACAGAAATAGTAGCCACCAGCCTCCTCAGGT  
TTATCTCTGAAAACTGGCATCAAAAGCTATTGCAGAGTTTGCAATGCAGACCGGCATCGACAAAGAACTTCGAAAGCTTGAAAGGACTCTTCAACCATAACAAGATGTGCTTGAAGAT  
GCCGAGGCTAGGCAGGTGAAGGAGAAAGCTCTTAGGAGCTGGCTAAGTCAGCTCAAGGAGTTGGCTTATGATGCCGATGATGTGCTTGATGAATTTTCCTTCAAAGAGGCCAAAATTGAA  
GAAAGCCAACATGAAGGAGAAGGTACGCAACTTACTTTACCTCCCTAAGAACATTGCTTTCCAGCGTAAGATTGCACTGAGGGTGAAGGAGATCAATGAGAGATTGGATGAGATTGCAG  
AAGTAAGATCTAAGTTCCATCTCAAGGAAGGAGTAGTTGGAAGCTTTAAGCTAGAAAGAAGCATGACAAGGGAAGAAACAGGTTCCCTTTATAAAGGAATCAGAAGTTTATGGAAGGGA  
AGTAGATAAAGAGAAAATAGTAGAATTTCTCATGAATACTTCCGTTGGAGATGATATTGGCGTAATAGGTATTGTTGGCTTAGGAGGGCTTGGCAAGACAACACTTGCAGGATTAGTCTAC  
AATGATGAAAGGGTTTGTGGGCATTTCCAGAAGAGGATGTGGGTTTGTGTATCTGAGGAGTTTGAACCTAAAAGGCTTGTTAGATTGATTATAGAATCAGCAACAGGAAGTGAATTTTCTC  
CAATGAACATGGATGCAATGCAGAGATCCCTTATAAATCAACTCCAGGAGAAGAGATTTTACTAGTTTTAGATGATGTGTGGAGTGAAAGTCATGAAAAATGGGATAGTCTCAGGGCTTT  
GCTTACAGTTGGTGCAAAGGGAAGTAAAGTCATAGTAACCACAAGGAATGAGCATGTTGCATCCATAATGGGCACAATTTCTCCTCACCGGTTATCGAATTTGTCGTTGCATGATTGTTGG  
TTGCTGTTTGGAGAGAAGAGCTTTTGGCAATGAGGTTGAGAGGAATCCAGATTTCTGTTGCGATCGGAAAGGAGATTGTGAAAAAGTGTGGGGGTGTTCCCTTTGGCTGCAAAAGCGTTGGG  
TGGCCTATTGAGATTCAAAAGAACTGAGAGTGAGTGGCTAGCTATCAAGGATAATGAGCTATGGAAACTTGCTTCTGATGAAAACATGAGGTTTTACCTGCTCTGAAGTTGAGCTATGAT  
CATCTATCTTCGTGTTTGAACAGTGCTTCGCTTATTGCTCAATATCCCCAAAGATTTTAAATATAAATACTACCACATTGGTTAAGTTATGGGGTGCTGAAGGCTTCCCTTGAGCCATCTGCA  
GGGCATATTCAGTGGGAGCAAATGGTTTGCAATGTGTGGAAGAGCTGCAGGCAAGGTCACTCTTCAAGTGAACATGATAGAGCAAGGAGGCGTCATAACACAGGTAAAAATGCATGA  
TTTAGTACATGATCTCGCTCAATCTGTTGCAGGTATTGAATGTTCAATCGTGGATGATCTCACTAAAAGATATCCTTCACAAAATTCACGCTATGTTTCTTTCAATTTGCAATCAAAAGCCACT  
ATCTGCAACTTTAGAATTGCTACGTGATGCAAAGAAACTGCGAACGTTATATTTGGATTACAGAAGAAATGTTGACAGAGAGACAGAACAGAGCGTCCAGGAAGTTCTTCATGTTATATC  
ATCTGACATTAATCTTCTAAGAGCTTGCACCTACAAAGTTATCCCTTAAAAGCTCTGCCACATACCTTCAAGAAACTCAGGCATCTAAGGTATCTTGATCTTCTAGCACTCCTCTTGA  
TCTTTCCACAGTGCATCAACACGCTACATAGCCTGCAAAACTTAACTCTGCAATTTCTGAAATCAAATCAATACCAGACTCAATCGGTGACCTTCAACCTCTGTACCTTGA  
AAATTAG  
CCATTGCTTTAATCTTACATCATTGCCTGGTTCCATTGGCCGACTCAACTGCTTACGTGAATTAGACTGCTCTCGCACAAAATAAACTCACTTCTGAATCAGTTTGTACTCTCTCCAACC  
TTCATACTCTGGGGCTTGAAGATTGTTTTTTCATCCATGAGCTTCCACAGAACTTGAGCAATATGAAAAGCCTTGTC AACCTCAACATACATGGATGCATTAATTTAACTTGCATGCCTATG  
AATCTCAGGAAACTGAAGCAACTTCGAACACTTCCAATTTTCACTCTGGAGGGAAGAACA  
ACTGCACCCTCAAAGAGCTGGGTAGTTTGA  
AACTTGAAGGTATATTGCAGCTGAAAA  
TCTTCAGAATGTGAGGTGCGTTGAAGAAGCCAAGGCCGCGCAATTGAGTGAAAAGCATAATATCAGGTCACTGAAGTTATCTTGGTTGTGCAATTCTTACATAAATTCAGTGGAAGCCTT  
CGATGAATATGACACCATTTGTGGA  
AATTTCTGCTTGCA  
GAAGATGTACTTGAAA  
GCCTCCAACCAAGCAA  
AAGCTTAGAAGAGTTAAAA  
ATAGAAGGATATGTTGGAAGAGCTTTCCCTT  
TTGGATGAACTTATCACTTTCAAATCTGTCCGCTCACACTAACTTGTGCGCTTGTA  
AAAAATCCCAACACTTGGGCTGCTACCCCGCCTCCAAGTTCTTAACTCGTAGAACTTCT  
CTAGTCAAGCATCTAGGTTCTGATTTCTATGGTGGCGCCAATGCATTTCTTCGTTGCAGGAGCTGGA  
ACTAACTGCTTGACAGATTTGGAGGAATGGTGCAGTGCAGCAGGAGAGAAA

TTTCTCCCTCGCCTTCACACACTAATTCTGCTGGACTGCCCAAAGCTGAAAGCTTTGCCCTCAGTTTTCTCATCAGTTGAAAATCTCATTATGAATGTGGACGATAAGCTGCTACTGTCTTC  
CCTGCAACATAGAGGATTTCCAAATCTGAAGCATTAAAGATGAAAACTATGATGATAAAGACCCGATCCCTGAAATAGTGACAGAGCGTGCCGAATGTCTCATTAGCTGGACGATGGA  
AACAAAACCAGAACCCAAGGAAGGTGATCCTACAACATATGCTACTTTCAACTTTGGCATGGTAACTTTGAGGTTTGAAGAGGGAAAGGGCACAAAGCAAAGTGGATCCATTCTCTGT  
TTCTAGGTAGATAGCGATGTTTTCTATAAATAATATAGCTATTTATGTTATTTTTGCTTTAAGAAATGCGAAGTTATTCAGAAAAGATCAAAGATAATTATGGTTCTTTTTTATTGTATTACATTC  
AAGCAATCAAATTATGTAACATCTAAATGTCATCAAA

>comp155464\_c1\_seq3

AAAAAAAAAAAAAAAAAACTTATAATAGATTGATCTAATGAATTATGTGCGCTGCACCCCTCCCAATTATCACGATAACAAGAGAAGATTCAAACCTGAATTAGAACTCTAAAGTTTAA  
AGTTCATCAGGCAAATCCAAGCTGAAGATTATTAGAGAACTTTGATCTAGTTGTCTGTCTTTTAACTGTAACTCAGCTGTTGTTGACCATGGCAGAAAACAGCATCTGATTTATATCCT  
CGTCAATATCCTTATCATCACCTGTCCTTGTTTTTAGTTGAAGCTTCCACTCATCAATGATCTTCTGAGGTAGTAGCCAAGTGGGAGCTAAGAAAGACTCGAACCCAATGCCTCTTAGTTGG  
TAGCCTAAGCTC

>comp155485\_c1\_seq1

CTAATTGATAATAAATCACTTAATCTACATTCTCTTTTCTAATTTACAACCAACTAAATGAATCAATCAAATCCTAAAATATAATCCCTAAAATCAATCCTAAAATATTAATTTAACTCTAA  
TTGAAATCTCTCTTTTGTCTCTAACAAATCAAAAATGCAAACAATTTCAACTAAATCATCTACATAGGATATATCCAAAATCACACAGCCTACACACACCTTAGACCGGTTTGATTAGGA  
CACTACTTCTGGTCTAGGTTAGGTTTACATTTCTCTTTTGTATTCAGTATTTACTACTTATAATGCAATTTCTACATTTCTGTCAGTTATATTTTCTTACTTGCATTTCTTT  
TCCGAACGGCATCTACGCTTATATATATGTTTTCTTTTGTCTTACTTTGCGAGGTACATCCGGTGTTCATTGTCAATGATCAAGCGGCGTCAATTGCTTATAAGCTTTTAAAGTGGCAACGCC  
ACATACAGTCAGATAACGATGATTGGTTCCCTTTTTGGCCTCTCTGAATTCACCTGGATGGTTTCACTTCCCTCGGCTCAGGCAATCGGATGATTTTTTATTAGTGTACTACGCGCTGATTGT  
AAACATGAAATTTTTGTTACCATCTAAGTCCAAACTATTTCAATCCCTTTTATTTTGTAGTTTTTTAGCATTCCCTTTTGGACATACTTAGTTATATTTTTTATATCTTTTTGTATACTGAG  
CAATG

>comp155491\_c0\_seq10

TTTAACTAAAAACATTTATTAAGGCAAAATAAAAAATAGAAATTCGGAGCAAAAAATTAGAAAATAAATAAAAGAATGAGCTGCTTGCTGTTCTTTATCAAAGCAGGACAAACAAAA  
CAAAAATAATTAGCAAGACAGCTAACTAGTCCAAAAGAGTCTTAAAGCTCCTTGCCAGGGTTGTTAGCCTGACATCTTATGCAGAATGCCGTTAAAAGATCCCAAATAAAGAAGAA  
AACTTTACAAGTCGCTGGCGATTGATTAAGCTTCACCAGCACCTTTACCTGCACTGATCGGCCCTCCGCTCTGTTGCGGATCTTGGCCCTTTAAATCTGCAGGAGCTTCTCCGAATGGC  
CACCAGCTTCTGCTGAGTGTCTACGGGGCCACCAGAGCCTCCGTTGCCGCGGCCTCTGCGGCGGCGGAACCCCCCTGCCATATCCGCGCCTCCTGTTGCCTTACCTCCATCCCCGG  
AATCTACCATAGCAGGTCCATTTCTCTGCCCTTGCCTCTGATGAGATTGCCACGGCCTCTACCTCGACGAGCAGGATAACTCTCTCTCTCGCTGTCATATTTAGCGTATAATTTACCTGAT  
CTTCAGATAAAGTAGATTGGTATCCAGCAGAAGACCTATCAAGTTCTTGCTTAGAGAGTGTAATCGCGATTACTGACACAAGCCTAGTAGTTTCCAGTGGAAAGTAGGCCTTCTCTAAAGG  
CACCCATGAATCAGTAATGAATGTGGATCCTATTTTAGTATCTTGATGAAGACCAGCAACCTTCTCTTAATTAGCTCCACAATCAAGACAGTCTTATTAATAGCTCTCCCCATTGCCTTGAT  
GACAATTTTATTGCAATCTTTGTCCAGAAGCAAGTTAGTGGCATAAGTGATATAACCGCGCATCCTTCCCATAGAAGTTATACGAATTTCAATCTCCTTAGAAGGCGAAACTTCCCTGGGCT  
TCAGCACCTCTGATACCGATCCATCTTCTCTCGAAAACCTTGGCTGCGTAATAATTTTCGGCCCTGAATTTCTGCTCCCGCAACGGCTTCACTTCATAATCCGCTTCTGAAGCGAATTGGT  
CTTCTTCTCGGCAAGGGTTTGTTCATTACGTGGCGAGAATTTGAGCAGTTTACGGTCAAGAATGATTTCTGCTCGATCGAGGCACGCAAAATCGTATTTTTTTTAGCATATGATGTGCGG  
CTCTGCGGGTTGCCATATAAAATTT

>comp155491\_c0\_seq13



GGCTTTATAAAGAAGAAAATCTTGCATGCAACCAATGATTTACTAAGCTTCGCCAGCAACTGCATTGATGGGACCATTTGACCTCGCATCGCGGCCCTTCCTTGACGAATTTGCCGTCGG  
CCACCTCCTCGACCTCGGCCCTGAACGGGAGCATGAGTAGCATCCTCAATGTAGACAGCATTGTCTTGCTGATAATTGGAACGACCACCGTAGCCTCCTCCTCGCCCCAACCTCTGAAA  
CCACGGCCTCTACCACGTCCCCAACCTCCCCTGCCAAATCCACGCTCTCTATTGTCCAATTCCGTTACCATAATCTACCATCATAGGTCCATTTTCTCTCCCCTTCTCTACCATGACCA  
ACACGGCCTCTTCTCGACCAGCAGGAGAAAACCTCTCCCTCATAATCATATTCAGCAGATGGTTTACCTGATCTGCCGGTAAAGGAGATTGATATCCAGCAGATAACTTATCCAGCTCCA  
TTTTAGAGAGGGTTATGCTGATCATTGATACATGCCTTGTCTGTTTCAAGTGGAAGTAAGCCTTCTTCTAATGGCTCCCATGTATCAGTTATGTCTAAAGACCCGACTGCAGTATTTTGATGAA  
GACCAGCGACTCTTCTCTAATTAGCTCCACAATCACAACAGTCTTATTAATAGCTCTCCCCATTGCCTTGATGACAATTTTATTCTGAATCTTTGTCCAGAAGCAAGTTAGTGGCATAAGTG  
ATATAACCGCGCATCCTTCCCATAGAAGTTATACGAATTCATTCTCCTTAGAAGGGCGAACTTCCCTGGGCTTCAGCACCTCTGATACCGATCCATCTTCTCTTCGCAAACCTTGGCTG  
CGTAATAATTTTCGGCCCTGAATCTGCTCCCGCAACGGCTTCACTTCATAATCCGCTTCGAAGCGAATTGGTCTTCTTCTTCGGCAAGGGTTTGTTCATTACGTGGCGAGAATTTGAGCA  
GTTTACGGTCAAGAATGATTTCTGCTCGATCGAGGCACGCAAATCGTATTTTTTTTAGCATATGATGTGCGGCTCTGCGGGTTGCCATATAAAATTT

>comp155491\_c0\_seq2

TTTAACTAAAAACATTTATTAAGGCAAAAATAAAAAATAGAAATTCGGAGCAAAAAATTAGAAAATAAATAAAAGAATGAGCTGCTTGCTGTTCTTTATCAAAGCAGGACAAACAAAA  
CAAAAATAATTAGCAAGACAGCTAACTAGTCCAAAAGAGTCTTAAAAGCTCCTTGCCAGGGGTTGTTAGCCTGACATCTTATGCAGAATGCCGTTAAAAGATCCCAAATAAAGAAGAA  
AACTTTACAAGTCGCTGGCGATTGATTAAGCTTACCAGCACCTTACCTGCACTGATCGGCCCTCCGCTCTGTTGCGGATCTTGGCCCTTAAATCTGCAGGAGCTTCTCCGAATGGC  
CACCAGCTTCTGCTGAGTGTCTACGGGGCCACCAGAGCCTCCGTTGCCGCGGCTCTGCGGCGCCGGAACCCCCCTGCCATATCCGCGCCTCTGTTGCCTTACCTCCATCCCCGG  
AATCTACCATAGCAGGTCCATTTCTCTGCCCTGCCTCTGATGAGATTGCCACGGCCTTACCTCGACGAGCAGGATAACTCTCTCTCGCTGTCATATTTAGCGTATAATTTACCTGAT  
CTTCAGATAAAGTAGATTGGTATCCAGCAGAAGACCTATCAAGTTCTTGCTTAGAGAGTGTAATCGCGATTACTGACACAAGCCTAGTAGTTTCCAGTGGAAGTAGGCCTTCTCTAAAGG  
CACCCATGAATCAGTAATGAATGTGGATCCTATTTTAGTATCTTGATGAAGACCAGCAACCTTCTCTTAATTAGCTCCACAATCAAGACAGTCTTATTAATAGCTCTCCCCATTGCCTTGAA  
AACAAATTCATTTGACTTTTTTCTGAAGAAGGCTAGTGGCATAAGTGATGTAGCTGCGCATCCTTCCCTGAGTTGTTATGCGGATCTCATTATCGTTAATAGGTGTTTCTCCCTGGGTTT  
TTCCACCTCCGGTACCGATCCATCTTTTCGTCCCGAGACCAAAAGCAGAATTGAGAAATTTTTAAAAACGAAATCAACGCAGAACTCAAATCCAAAAACATATCTACCGCCTATCCTTCC  
TCAGTCCATCCAATATCTCGCACAAAAGACACACACACAAAAATTGTTCCACGCGAAGACAGAGAAAAAAACGCCTAATTCCTAGCTTCCCTCAGCCCAAGAAACCTCCCAAGCACA  
GCAATTATCCATCAAGGTAAGCAAAAACAAAGAGAAATCACTGTGCCATAAATCGAAAGCAAACAGATCTTAAACAAAAATCCAATCTCACAAACCATGACGCCAATCGAAGAAGAGCCC  
TGACGAGAGAAAGACAAACCCGGAATCCAAAAATAATAATGAAAAAAAAAAAAACAAAATAGAACACCGTCGAAACCAAAGAACAAGCTAATTAGAAGATTTGGTTTCTTGGAAAT  
GAGAACAACGACGATTGAAGAAAAGGCAAAACAGAGACTCCATCCTAGCATTTCATACCTCGATCTGCTCTGTTCTCCTTTTTCCGCCCTTAATCCACTTCCCACACTTATCCGCTATGT  
CGCTATATATAAACCCGCGCCGGAGGAACTGCTCTCTAGGGTTTCGTTAACCAGAAAAGCGC

>comp155491\_c0\_seq21

TTTAACTAAAAACATTTATTAAGGCAAAAATAAAAAATAGAAATTCGGAGCAAAAAATTAGAAAATAAATAAAAGAATGAGCTGCTTGCTGTTCTTTATCAAAGCAGGACAAACAAAA  
CAAAAATAATTAGCAAGACAGCTAACTAGTCCAAAAGAGTCTTAAAAGCTCCTTGCCAGGGGTTGTTAGCCTGACATCTTATGCAGAATGCCGTTAAAAGATCCCAAATAAAGAAGAA  
AACTTTACAAGTCGCTGGCGATTGATTAAGCTTACCAGCACCTTACCTGCACTGATCGGCCCTCCGCCCTGTTGCGGATCTCGACCCTTATATCTGCTGGAGCTTCTGCTGATTGTC  
TGAGGGGCGCCAGAGCCTCCGTTGCCACGGCCTCTGCGGCGCCGGAACCACCCCTGCCGATCCACGCCTCCTGTTGCCTTACCTCCATCCCCGGAATCTACCATAGCAGGTCCATT  
TCCTCTGCTCTTGCCTCTGCTGAGATTGCCACGGCCTTACCTCGACGAGCAGGATAACTCTCTCTCTCGCTGTCATATTTAGCGTATAATTTACCTGATCTTCAGATAAAGTAGATTGGTA  
TCCAGCAGAAGACCTATCAAGTTCTTGCTTAGAGAGTGTAATCGCGATTACTGACACAAGCCTAGTAGTTTCCAGTGGAAGTAGGCCTTCTCTAAAGGCACCCATGAATCAGTAATGAA

TGTGGATCCTATTTTAGTATCTTGATGAAGACCAGCAACCCTTCTCTTAATTAGCTCCACAATCAAGACAGTCTTATTAATAGCTCTCCCCATTGCCTTGATGACAATTTTATTGCAATCTTTG  
TCCAGAAGCAAGTTAGTGGCATAAGTGATATAACCGCGCATCCTTCCCATAGAAGTTATACGAATTCATTCCTTAGAAGGCGAAACTTCCCTGGGCTTCAGCACCCCTCTGATACCGATC  
CATCTTCTCTTCGCAAAACCTTGGCTGCGTAATAATTTTCGGCCCTGAATTCTGCTCCCGCAACGGCTTCACTTCATAATCCGCTTCGAAGCGAATTGGTCTTCTTCTTCGGCAAGGGTTG  
TTTCATTACGTGGCGAGAATTTGAGCAGTTTACGGTCAAGAATGATTTCTGCTCGATCGAGGCACGCAAAATCGTATTTTTTTTAGCATATGATGTGCGGCTCTGCGGGTTGCCATATAAAA  
TTT

>comp155491\_c0\_seq25

TTTAACTAAAAACATTTATTAAGGCCAAAATAAAAAATAGAAATTCGGAGCAAAAAATTAGAAAATAAATAAAAGAATGAGCTGCTTGCTGTTCTTTATCAAAGCAGGACAAACAAAA  
CAAAAAATAATTAGCAAGACAGCTAACTAGTCCAAAAGAGTCTTAAAAGCTCCTTGCCAGGGGTTGTTAGCCTGACATCTTATGCAGAATGCCGTTAAAAGATCCCAAATAAAGAAGAA  
AACTTTACAAGTCGCTGGCGATTGATTAAGCTTCACCAGCACCTTCACCTGCACTGATCGGCCCTCCGCCCTGTTGCGGATCTCGACCCTTTATATCTGCTGGAGCTTCTGCTGATTGTC  
TGAGGGGCCCGCCAGAGCCTCCGTTGCCACGGCCTCTGCGGCGGCCGGAACCACCCCTGCCGTATCCACGCCTCCTGTTGCCTTACCTCCATCCCCGGAATCTACCATAGCAGGTCCATT  
TCCTCTGCTCTTGCTCTGCTGAGATTGCCACGGCCTCTACCTCGACGAGCAGGATAACTCTCTCTCTCGCTGTCATATTTAGCGTATAATTTACCTGATCTTCAGATAAAGTAGATTGGTA  
TCCAGCAGAAGACCTATCAAGTTCTTGCTTAGAGAGTGTAATCGCGATTACTGACACAAGCCTAGTAGTTCCAGTGGAAGTAGGCCTTCCTCTAAAGGCACCCATGAATCAGTAATGAA  
TGTGGATCCTATTTTAGTATCTTGATGAAGACCAGCAACCCTTCTCTTAATTAGCTCCACAATCAAGACAGTCTTATTAATAGCTCTCCCCATTGCCTTGAAAACAATTTCAATTTGACTCTTT  
TTCTGAAGAAGGCTAGTGGCATAAGTGATGTAGCTGCGCATCCTTCCCTGAGTTGTTATGCGGATCTCATTATCGTTAATAGGTGTTTCCCTCCCTGGGTTTTTCCACCCTCCGGTACCGATC  
CATCTTTTCGTCCCGAGACCAAAAGCAGAATTGAGAAATTTTTAAAACGAAATCAACGCAGAAACTCAAATCCAAAAACATATCTACCGCCTATCCTTCCCTCAGTCCATCCAATATCTCGC  
ACAAAAGACACACACACAAAAATTGTTCCACGCGAAGACAGAGAAAAAACGCCTAATTCCTAGCTTCTCAGCCCAAGAAACCTCCCAAGCACAGCAATTATCCATCAAGGTAAG  
CAAAAACAAAGAGAAATCACTGTGCCATAAATCGAAAGCAAACAGATCTTAACAAAAATCCAATCTCACAAACCCATGACGCCAATCGAAGAAGAGCCCTGACGAGAGAAAGACAAAC  
CCGGAATCCAAAAATAATAAATGAAAAAAAAAAAAACAAAAATAGAACACCGTCGAAACCAAAGAACAAGCTAATTAGAAGATTTGGTTTTCTTGGAATGAGAACAACGACGATTGAA  
GAAAAGGCAAAACAGAGACTCCATCCTAGCATTTACATACCTCGATCTGCTCTGTTCTCTTTTTCCGCCCTTAATCCACTTCCCGCAACTTATCCGCTATGTCGCTATATATAAACC CGGCC  
GGAGGGAAGTCTCTTAGGGTTCGTTAACCAGAAAGCGC

>comp155491\_c0\_seq8

TTTAACTAAAAACATTTATTAAGGCCAAAATAAAAAATAGAAATTCGGAGCAAAAAATTAGAAAATAAATAAAAGAATGAGCTGCTTGCTGTTCTTTATCAAAGCAGGACAAACAAAA  
CAAAAAATAATTAGCAAGACAGCTAACTAGTCCAAAAGAGTCTTAAAAGCTCCTTGCCAGGGGTTGTTAGCCTGACATCTTATGCAGAATGCCGTTAAAAGATCCCAAATAAAGAAGAA  
AACTTTACAAGTCGCTGGCGATTGATTAAGCTTCACCAGCACCTTCACCTGCACTGATCGGCCCTCCGCCCTGTTGCGGATCTCGACCCTTTATATCTGCTGGAGCTTCTGCTGATTGTC  
TGAGGGGCCCGCCAGAGCCTCCGTTGCCACGGCCTCTGCGGCGGCCGGAACCACCCCTGCCGTATCCACGCCTCCTGTTGCCTTACCTCCATCCCCGGAATCTACCATAGCAGGTCCATT  
TCCTTGACAGAGATGAAAATACATCGTTTCATATATTGTGCTAAATCCTATAATAGACATTTAGAGCATCAAATTAATAGCACCTCTGCCCTTGCCCTGATGAGATTGCCACGGCCTCTAC  
CTCGACGAGCAGGATAACTCTCTCTCTCGCTGTCATATTTAGCGTATAATTTACCTGATCTTCAGATAAAGTAGATTGGTATCCAGCAGAAGACCTATCAAGTTCTTGCTTAGAGAGTGTA  
ATCGCGATTACTGACACAAGCCTAGTAGTTTCCAGTGGAAGTAGGCCTTCCTCTAAAGGCACCCATGAATCAGTAATGAATGTGGATCCTATTTTAGTATCTTGATGAAGACCAGCAACCC  
TTCTCTTAATTAGCTCCACAATCAAGACAGTCTTATTAATAGCTCTCCCCATTGCCTTGATGACAATTTTATTGCAATCTTTGTCCAGAAGCAAGTTAGTGGCATAAGTGATATAACCGCGCA  
TCCTTCCCATAGAAGTTATACGAATTCATTCCTTAGAAGGCGAAACTTCCCTGGGCTTCAGCACCCCTCTGATACCGATCCATCTTCTCTTCGCAAAACACTGACACCAATGAGGTTCGG  
AAGGGAAGAAAATTAGGTATCCAATATGAGAAAATTTATCCTTGCCCTGCTCCACCCTGTACCTTGGCTGCGTAATAATTTTCGGCCCTGAATTCTGCTCCCGCAACGGCTTCACTTCATA

ATCCGCTTCGAAGCGAATTGGTCTTCTTCTTCGGCAAGGGTTTGTTCATTACGTGGCGAGAATTTGAGCAGTTTACGGTCAAGAATGATTTCTGCTCGATCGAGGCACGCAAAAATCGTAT  
TTTTTTTAGCATATGATGTGCGGCTCTGCGGGTTGCCATATAAAATTT

>comp155518\_c0\_seq13

AAACATAATGGTTCGAATAGAAATTGTGATTTTCAGTCTGGAAAACAAAACCAAACCCTTTTTGAGAACCGAACCGAACGGCCTGTTCAACCGTGAACCGGTTCAGATGGCTGGTTTCGA  
TCCAACCTTACAAAAGTTTGTCCGGTCTGATTTTCAACAACATTGAGCAAAAACAAAAGAAAAGTTGTTCCAAATAAAGCCTATATTACAAAATTAATTATTCAACAAAGAGAAATATAACCAA  
GGTGTGTGGAGACAAAGAAATAGAGCAACAAATGCAAGGACGCACCTTCAGAGATGAAGAAGCCTAATAGTATCACGTTCCCTCATTGTCATTTCGCGAATCTGGAAAGTAAATCGCAA  
GCACTTGAGGGCACATGTATTTCTTTCAGGTACCGAATAATTCATGAACCTGCAGGAGCCATACATCTTTGTTGGTTGATTCCAATGAGAGAACAGATTTGAGTTGTTACACATAAGTAG  
GAACGGGAAAAATATCATCTATCATGAGTAAATGCAATGCGTATGCTTATTAATTGTAGCATAAAACTAACGTAGAGTCATGACAAATCC

>comp155531\_c0\_seq1

GAATTTAAGGAAGTGGATATTGCCATTGTGAAGGCGACGAATCACGAAGAATGCCACCAAAGGAAAGACACGTTAGAACTACATCTGTTGCTCGACCACGGGCTGACATTGCCTATTGC  
ATATATGCACCTTGCAAAGAGGCTAGCAAAGACACGAAATTGGGTGGTTGCAGTTAAAACATTGATAGTGATTCACAGAATTTTTCGCGAGAAGGTGACCCTACATTTAAAGAGGAGCTCTTG  
AACTATTCGCACAAGGGACAAATTTTACAAATTTCCAATTTCAAGGATGACTCGAGTCTTTTGTCTGGGATTGCTCTGCATGGGTTCGTACATATGCACTCTTTTTAGAAGAAAGACTTG  
AATGCTTTGGAGTTTTAAAATATGACATCGAGGCAGAGCGTTTTGATGAAAAATGCACAAGGTTCTGCCAAGGGACATACTAGAACTAGAACTTTATCTTGCCAGATCTGCTAGAGCAAAT  
GCCCGCCTTACAACAGCTATTGCATCGGCTTGTAGGATGCCAGCCAGAAGGATCAGCATCTGGAAACAATCTTATACAATATGCATTGGCATTGGTTATAAAGGAGAGTTTCAAATTTATT  
GTGCAGTTAATGACGGGATCATCAATCTTGTGATATGTTCTTTGAGATGCCAAAATATGATGCCATTAAGCGCTGGAGGTATATAAAGAGCTGGTAAACAGGCAGAAAATCTTTCTGAT  
TTCTATGACTTGTGTAAACATTTGGAACCTCGCTAGAAATTTTCAGTTTCCGACTCTAAGACAGCCACCTCCATCATTCCAAGCTACAATGGAAGAGTACATACGTGAAGCTCCATGTATGA  
GCAACATTTCAACTAAGAATTTGGTGAGTGAATAAATTTAACGAGCATATAACGCTCACATAGATCACCATAATGTTTTCTTTTTTGATATGATTGAGATGTTTACCAGAGTAATGAAA  
TCAATCAAGTGCTACAAGTTTTATTATTAATTG

>comp155588\_c0\_seq2

TTTTTTGCGTAGAATAATTCCTTCATGTAAGAAGGGTGAGGATTAATATAAAAATGATACTATGTACGTGTCATTTTCAGGAGCATCATGTGCATGCCATGTTACATTGCCACATATATATAA  
CGCACAGTTTCAATCAATAATACTGACGCACCCATCCAGTAGTAGAAAGCACCCAGCCTGGCCTTCGATGAGCCACTTGGGAGTTCCCACAAATTTACATCAAATGGATCTCTGAATATCT  
TCTTTCTTTTACATCACCACGTCATTAGTTATTAGTACACACACCCTGCTCATGAAAGTGACTGTTGAGCTTTGAACTTGGTGAGGGTTCTCCTGGTTAGGTGATGAGAACAGAGCAAGTT  
GAATATGGACAGAGAATTCAGCAGAAGCCACTTTTTCTAATAGTACGTCTTGTTCACCCCCATTATAACAAAAGAGCTAAATAAACGAGTGCAACAATTTTTATTGATCATCTTTCTG  
GTTTCAGGATGTTGTTTCTACAGCATTGACAGGAAGAAGAAAAGGGAAAGAAAAGAACAAGTTGATAAAAATAAACAGAGAAGAATAATAAAAAAAGAAGCCATGGATGGATGCTGGAGA  
TCTACACATGGATTTCTAATCTTCGTTGCTATTTCTTTAGAGCAGATTGTTCTCGTCTTCTTGCCCTGCAGTTTGGTGCTTGATTTCAGAGCAGCGAAGATTGAAGATAATTACCAATATGATT  
CTTCAAAGCAGCCTCTTTCTGTGTAGGTAGAGCAGAAGTTGGCACATTTACTCAATAGCAAACAAAAAAGAGAGAGAGATTGAGGAAAAAATGATAACAAAGAAGAAAAACCAGTGC  
CCACCTTGCAATGGTTTTGCAGAGAAACCACAGGAGAGTTCCAAGACATCATCCACAAGGTGATTCTCTGCTGCTGCTGCTGATGCTACTGGTAGCCTCGGAGAAACAGAGCAAGGGAGA  
ACTTGCAGTGTCTATAGGAAGGAAGAGTGCTCCTGGAGTCTTCTTTGCTTCTGCAGGTTCTCTTCTCAGCCTTTCTTCTTCTGCTGACCCATTACGGGCAAATGCAGAGAGACCTAAA  
TCTCGATCATTAGAACAATAGTAAAACCTTGATGCAAGTTTCTTCTGTGCCATGTGGAGGACCAGAAGATGCATCGGAGAGCATTGACAAGTCTCTTCTTCTCATCTTTCATGAACGGAGACTT  
CTCCTCCGCTAGGAGGAGTGGAGGTGGAAGGGCTGTATGCGACTGGCAAAGGTACAAAGTCCAGCCAGATTGACATCCACTACTGCATTTCAGAGAAGCCCTCTCTCCCTTTACCACG  
AACTCCTCCAAGTCTCAACTTTCTCCATGACGAGCACTGCTTGACGAAATCAGAGTAAGGCGGGTTCTTCTTTCCCTCTGTGATTCAGGGAATGGTAGGAGAAGAAAAAGGGAGAAGA

AGAGGAGTTTGGAGCTTTGCGCGGAAAAACAAAGAATTGTTTGGCACCCAAATCTCAGACCCATCTTGTCAATTTACCCAATCCATCCCTGGAACAACACCATCTCGGTTTCCTCGCTGTGT  
ATGAAATTA AAACTGCCAGTTGGGAATGGTGGGAAGGGAGAGGAAAATCCCCAAGTCTCTCATTTTTACGCTTCACTGTGTACATAGAAGATAGAAAAGAAAGAGATAGAAAAGAGAAA  
AGACTTCACATTTACATGCAATACAGCGTGGCGAAGTGTACGCCCTACACCTTCATTATATCTCTGGAATCCCGTGAGGACTAAGAAGTTGAAG

>comp155610\_c3\_seq1

TTTTTTTTTTTTTGAAGAAGTGCATCAAATTGCATTAAGAACAAAACAAGACTTAATTACAGGTAATAAACGGATCACATTCCTTCTTGATTAATAATTAACAACAAGGAAGGAATGTTCTCA  
AAATAAAAACCTATCAAAAAAGAACTACTCTCCAATGCCATAGAAGCACAACAATTAGCTATTTTTTACAACCTTCTATAAGCATGGAAGAAAACAACCTTTATTGAAATCATTAAAGAAACA  
CAAACCTTTGTTCGGCCATCTATCAACTTTCCACTTATTCTTCTTTAGAGGGTCTTGAATGAACTTGATAACATTGGTATTATCACTATCAATGATCAGCCCTTTACATTCAAACATACAGCTTC  
TCAAAAACCTCCTTACCAGAGAAAACCTGCTTCTAGCTCTAATTGAGCAATATCCAATGAGCTCCATTCTTCCCAAATGCACTTATAAACCTACCTTTGTGATCTCTAAAAACACCACCAAC  
ACCAGCCAAATTGGAAC TAAGCAAAGAGGCATCTACATTGATCTTAATTCAATCTTTTCGGTGGAGGGCACCAAGCACTTTGAGACTCCCTAAGGAGATTAGTACCCAGCTAGTATGATAT  
GGACCAGATTTGAAATGGCTGAGAACAAGCATTAGACGAAAACCATAGAGCATGGAAAAGCAGTCTTATTGTGCTTGACAACATTACAATTCTTCCAAGAGTGTATACAATATTGCAGT  
AAATATGTACAATCACAGATTTATTTTTTGTCTATCTGTTTTAACCCAGTAAACAGCAATTCAGAGA ACTAAAAACAGGAATAGAAATACCCCATTCACCCATCTTCACGATGACATCAGTC  
ATATATTTACAGTGTACCATTATATGTTTCATATGTTTCACTCACTTGGCATCCTCTAGGACAAAGATCATTATCTGAAATTTCTACGGTTCTTCAAAAAAGATTGGTAGGAATCGCTGATTTTC  
CCAACCTCCACCAGAAGATCTCCACCTTTTTCTTAAGTTTTAATTTTTGCAACCAGCTGAAGTAATCAGCATCCTCCAGGGTATACTTGTGGACAACACTTGTCTACACCAATGCAGA  
AATTGTCTTTCCCGAGCACATCTTCATCAATTCTAGCTGATCCTCCTCCTCAAACCTCAATATGAATTTGGCTAATCAAGAACACTAGATTGGGATGGAAGGCCCTTTGCAACTTGGTACAAT  
TCCACACACTATTTCTAAGCAAAAACCTGTTGTATGTACATTCCATCTAGAAAATCACAGTCAACATAAGTTGGCCAACGGTTGATACATCTATCAAGCAGCCATGTATCATTAAAATATTA  
TCTTGTACCCCTTGCCACTCTCCAACGAACAGCCATTTTTCAAATATTTGCCACCATCCACCAAAATTTGCCAAGCTGTGGAAGTAATCTTGCTTTGGGTCCATTTCATCACATCATTACCA  
TATCTAACTATCATTGCACGATGGAACAAGATTGCGATTTCTGGATAAAATCCAAGCCAACCTTGGATCTTAAAGACCCAACCTTAAAGGAGGGGAGAATGCAAACCAACCCCTCCCAA  
CTTCTTGGTTTTACAAATATCACCCCAAGCAACATAGTGCATACCATTGGTCCCATCATTTTTATGCAAAAATAAACTTCTACAAAGTTTCTCCAACCTCATGTA AACCCCTCTTGGGGACTATA  
TAATGAGTAATTAAGAAATTAGGCATAGAAAAGCAAAGA ACTATCAATGAGAATCAGCTTACCTCCAATGATAGGGACTTCTTACTCCAAGCATTGAGTTTATCCATAACATTA ACTAAGAAT  
TTCTTGAAAATCAGCCATTTTAAGTCTATTAAGGGACATCTTCACTCCGAAATACTTCATCTCTTTAACAACCTTTGAAGCCAAGAACCTTAGCTATTCTCTTCTCATGGAGTA ACTAACCA  
CCTTGTCAAATATCATCTGAGATTTGCTTACATTGATT CATAGTCCAGTCCACTTACAAAAGTCTCCACAATAGTCTTCAAAGCATTAGCTAAATCCACGGATGCATGAGAAAATATTAAC  
ACATCGTCTACATAAAGGAGGTGTGTGATCATAGGTCCTCTAGGAGAAAATTTGTATGCCAAGCTTCTGTCCCCTTTGCACAAGCGAGTTGGACAAGAGTTGAGAGCACAATATAAAAAGA  
TACGGAGAGAGTGGACACCCCTTGACGGAAACCCACTATGAGAATTAATCGACTTAGAATTTCTCCATTGATGATAATAGAGAATCTCACATCTACAACACATTCCATGAGAAGGTTAGAAA  
AATCAGTAGGAAAACCATACCAATCAAGATGTGCCGAAGAGATGCCATCCCATACTATCATAACGCTTGTCCATATCAAGTTTTAAATCCATCAAGCCCTTCTTATTTTTAGAAATTCTGA  
ACTTGTGAAAGATCTCCTGAGCCAAAAGGCAATGCTCTGCAATAGATCTTTCATGGATGAACGCCACTTGTCTCTGAAATCATCTTGGAGATAACCTTCTTTAATCTATTA ACTAACATG  
GTAGCCACAATCTTATAATTAGTTTGGCAAAGGCTAATAGGCCTAAAGTTAGAAGGAGTCATAGGGTTCTTAATCTTAGAGATCAAGACAATCAAAGTATTCTTCCACTCCCTATGCATATG  
GCAGGATTTAAAGAAACAGCTAACTGCATTCCAAAGAGTCTCCATACAATACTCCAATAGATCTTGTAAAAAGAAGAGGTGACTCCATCCAAGCCTGGTGACTTGTGTTTCCCTTGCTG  
AAAAACCAATTTTGCAACTCATTACTGAAAATCTGCATTGAGCACATCCATATCATCAGCTGCAATCTTCTGGTTTTAAAAAACTGTAGGCCAACCCGTCACCTTACAATCCCTGTGCT  
TCCATTTCTTCTCAAAAAAATTAATGAAGACCTTCTCAATTATCTCATCCTCGTCATACAAATGTTGAGCTCATCTTAAATTTGAATGATCCTATTTCCATTTCTTCTAGCCGAGGCATAATTA  
TGAAACAATTTGAGTTTGTATCACCT

>comp155617\_c0\_seq3

CAGAATAAATGTTCAATAAGTAAAAAAAAAAAAAAAAATCTATAGATTTTATTTTTATAACCTGATATTTGCATATTTGATATATGATCAAATTTGTTTTGAATTTGACGGAGAATAAAGTTCTCTAAA  
TTGTAAGTGACATGAAGAAATAAAAGGTTTTATAATATCTACAGCGAAAATAGTCAAATACTATGTAGGTGTTGATGAATTGAATGAGAAAAAAAAAAGGAGAATAATAAGAAAACA  
AGAATGAGATTATTATAGGTTTATCCCACCTTTTATTTTTATTTATTAATCTATACTTGTATTAATCTGCTCCGCAGAGTCGCCTGCAAGCTCTTTTCACCTCCCCTTGTCTGCTTCATCATT  
TTGCAATCCTGACGCGCAGCTTCTTCAGAGTTTTGAGATGGGTCGTCAACTTCATGAGCTATTATTTAGCCATCCAAATGTCGATGTTTTGTGGAGTTCTCCAGGACCTCAGTGATTT  
AGAAGAATTTCTTCTCCTCTATTTTCCAAGGATCGTTTAGCCATATCAAGCGCAATGGCGGCATTATAGGCTTCGAAAAACAGCTTCCAGCGCTTTCACCTCTCCAGCCCATTCTTACCA  
TCGCTACATGGCGAAGATAATCCCCCTTCATCTTCTTAAAGAAAGCCCTAGACTCCGTAGTCATCGCCTTAGCCGCCAGCCCTTCTTCGGAGAAAAGTACGCTGCGATCAATGAAATTGAC  
AATATCCGCACAGTTTTTGGAGATCTCATCCGCAAGAAACTCTGATATTCTCTGGCGGCTTCCC GCCGGGTAGGGCTGGTGGTCATATCGGCCGCTACGAAAGCGAGGTAGTGCCAGGT  
AGTAAGTTGGCGATCGAAATAGAGGTAGCAGGCCAAGCTGTAGCAATTACGCTCCTTTTCAGAGAGATCTTCGTTCCGCATCACGATTTGAATGAGCTTCTTCATGTAGTTGAGCATGTAT  
TCGTAGTTCTCGCTCTCCTCGGCGCATCGAGCGAGAAGGAAGAGCCCCCTCCCTCGTCTCCTCCGGATCCTGCACTACCTCTGGCCTTGTCTCCTTGTCCATCCTCTGAGTGAATCCCTTCG  
CTGTCCATAGAATGCTGGTGAGAGAATCTGTAGAAAAACACAGCTAAATAGGGTTTTGGGTTTCAATTTTTGTATGAATTTGACTTAAATGATCTAAATGTCCCAAAAAAATATGTAG  
AAGAAGGAGAAA

>comp155617\_c1\_seq2

TTTTTTTGGGACATTTAGATCATTAAAGTCAAATTCATACAAAAATTCGAAAACAAAACCCTATTTAGCTGTGTTTTTCTACAGATTCTCTCACCAGCATTGTATGGCGACAGCGAAGGGA  
TTCCTCAGAGGATGGACAAGGAGACAAGGCCAGAGGTAGTGCAGGATCCGGAGGAGACGAGGGAGGGGCTTTCCTTCTCGCTCGATGCGCCGAGGAGAGCGAGAACTACGAATAC  
ATGCTCAACTACATGAAGAAGCTCATTCAAATCGTGATGCCGAACGAAGATCTCTCTGAAAAGGAGCGTAATTGCTACAGCTTGGCCTGCTACCTCTATTTTCGATCGCCAACTTACTACCT  
GGCACTACCTCGCTTTTCGTAGCGGCCGATATGACCACCAGCCCTACCCGGCGGGAAGCCGCCAGAGAATATCAGGAGTTTCTTGGCGATGAGATCTCCAAAACCTGTGCGGATATTGTCA  
ATTTCAATTGATCGCAGCGTACTTTTCTCCGAAGAAGGGCTGGCGGCTAAGCGGATGACTACGGAGTCTAGGGCTTCTTTAAGAAGATGAAGGGGGATTATCTTCGCCATGTAGCGATGGT  
GAAGAATGGGCTGGAGAGGGTGAAAGCGCTGGAAGCTGTTTTCGAAGCCTATAATGCCGCCATTATGATTTATAGATATGTTCCATCTGTAGGAAGAGGTATTGCAGTTGCCGGAGGCGA  
ACCTAACTCGACTACAGTTAGCCCTCAGTTTGGCTCTGTTTCATGCTGAGATATGTGAATCACCCAAAATGGCTGTTTCTGTTGCAAGAGAGGGCGCTTGATATGGCTAAACGATCCTTGA  
AAATAGAGGAGAAGAAAATTCTTCTGAAATCACTGAGGTCTGGAAGAACTCCACAAAACATCGACATTTGGATGGCTAAAATAATAGTTCATGAAGTTGACGACCCATCTCAAACT  
CTGAAGAAGCTGCGCGTCAGGATTGCAAGAATGATGAAGCAGAACAAGGGGAGGTGAAAAGAGCTTGCAGGGGACTCTGCGGAGCAGATTAATACAAGTATAGATTAATAAAAATAAAAT  
AAAAGGGTGGGATAAACCTATAATAATCTCATTCTGTTTTCTTATTATTCTCCTTTTTTTTTCTTTGTTCTCATTCAATTCATCAACACCTACATAGTATTTGACTATTTTCGCTGTAGATATT  
ATAAAACCTTTTATTTCTTCAAAAA

>comp155625\_c0\_seq2

TTTCAGCTATTTTTCTAAAGATATTATATAACAATCAATTTGATTTGTTAATGCAGTACTAATATAAGCTTTTCTTTCACCTGGTCAACAATGTCAGGCTTAAAGAGCAACACTAACAGCCA  
AGCAACTTTATCATCAGCAAAGCCCCTCTCAAAGCGCTGGCAGTAGTGAAAAGTGCTTTTGGCATGAAATTCTCTTATTTTTATTGTGAATTACAATTTTGCAGAAGTTTCAAAACATCAA  
CATTAAGTAAGCCTCTGTCCAACATTTTGGTGTAGCCAACAGAGCTTCTATGACTCATCTGATGCTGAAGATATTTATATTTCTCATATAGATAGTTTCTTCAATTTGTTGAGTGATGCCCC  
TTAGGGTGTGGCAATCTGTAAATATTAGTATACATTATTTGATTCATTTCTATATGTTTTTTATTTGCTAAAAAGAATTATTTGTTGAACTCATTGAAAGGAGCTTTATCATGTTTGAATATAG  
TAGGGATTTTTAAAAAAA

>comp155697\_c1\_seq2

AATGCTGTAAAAAAAAAACGCTTAATCGAATTTTAATTTAGAACAAAAAATATTAATCTCAGTTTTATCCGTCGCAACGAGAAAAATCTATGTGACATAATAATGTAATAAAAAATATG

CACCCATTAGACAAAACCTAAAAAGTTAAATGGGAATGTGTTATGAGGGGTAGAAATAGCCTTAATTTTCATGTGGGAAAACCTATAAGTAACCATAGGGTTGTCAATATTGGATCCGACCC  
GAAAACCCGATCGAAACCTGATCCGAAAATTTTGAGTTTGGGTTGACCCGAATCCGAAAACGGGTCGGGTTCCACAATTCGACCAGTTTCAAAAATCAGATCAGGTTGACCCTT  
TGACCTAAAATTGACTCGTTTTTTAACTGAAAATTCATTTTTGACCCGGCAACCCGAGATTTACCTGTTTTTGACCTGAAAAGTGGAGGTTGACCCATTTTTGGGCCAGAAAATTAGCAGT  
TTTTTGTTAGCACCGGGTCATTTGGGTCTGGTCGGGTTGACCCGGACCTGAAGTAAGTCAGCTTTGAGTTGACCCGAATAGTGTCTGGGTCTATTTCCGATTCAACCCGAACCCGACCCGT  
GACCCAA

>comp155751\_c0\_seq2

CAACATGTCATGGTCACCGCTGTTTTTAAAAAAAAGTCTCACTAATTATAAAGTTTTATTCTTGTAAATTAAGAGCCAGCATTAACTTAACCTGTAAACAAGAGCTCTGTAACCTCTTT  
TTAATAGATTCAGCTGATAAGGTAAACTGCTTGGGATGTCTTTCAGGTAATCGAAGTTGTTGCACCTCTGCCATTCACCTCACTGTTCCCTTCTGATTTGAAGGGCCTCTCTGGTGACATTT  
TCGTTTGCCAGAAAATAACCAAGGTAATAAGCATAAGCCTTTGCAGCGGAGTTCGGGAGCCTTCGGTGGACGGAAGAGCCGGCCAAAGCTGTCTCATTCACTGATCTCTTATAGTACTCT  
CTGGCGATGTCTTTAGGCCTTGGGAAGTCCGTCGCACATTTGGGCTCCAATACGTCTGTCTCCGACAGCTCCCAACGGTATTTTTTAAAGGTATCGAGGGCAGCAGCGCACTCTGCAGTTT  
TTGGATTTTCATGATCTTGTCCAGCACAAATCCTTTTTCAACGAGCTCTGCAAATTCATCAGAGATGATGCCATTCCAAGGGCAAATGGAACCTCGGGCTTTAGTATCAATCCTTTCAACCGTT  
CTTGGATTTCCAATAATATAACCCTGAAGATTAATGAAGGGTTGTTCTTTCACATCATTTCATCTGCAATAAATTGAGCAACGACGGGGACTAACATGCCGCCATAAGAATCTCCAGCAAC  
ATAAAAGCCGTTTGAGCGAAAACGAGGGTGCTCTACTAACCCTTTTTTAGAAAACCCATAAAGCTGATTAGAAGAAGAAGAAATCCCCTGTCATATAGGTTTGAGATACAGTTGGGACTGA  
GAATCCAGTCCCAGCCGGGTAATCCAGAAAGATAATGCTAGATACCTGATCACACACAAATATACATATATATGCGCGCTAGCTAGTAATTGAAGAATTTTTTTTTCTTTCTTTCTTACTTAT  
GGAAAAAAAAGTTATTGATTTAGTGATCCAATCGCTTATTTATTACCTTGGTCCAAGAGTAAGGATTATAAAGAAGAGTTGGCACACTCCCATCATAAGCATCTATTTGAAATTTAACAG  
GACCAATTTGGAAGAAGAGAGCCGAGAAGCTTGAACAACCGGGGCTCCACTAAGCCAGAGGAGGAGTGGGTCCTCGCTGGCGTTTCTCTCCGACTCAATGAAGTAGTAGAACAACCTC  
CACGCCATTAACCTTCATCCACCGTCAAATACCCAGTTTCCATTTGGAAGGGAAGCTGCCCTTTGAAGCCTGGTAGTTGCTGTACATGATTTGGAGTTGAAGAGATAGATTTTTGTAATATCA  
CGAGAAAATAAGTAGAAGTAGTACAGGACTCCAACGAGCCATTGCCGGTTTGCCTTAATCCA

>comp155751\_c0\_seq3

TAGAGTTTATGGTCATACTATCAATTAATAAATATTGAAAACCTAATTTATGTCGCCACTGTGGAAAAGTACTTTTGAGTCTGCCACTGACTATAGGTTTATATCATTTTTGCAATGAATTACTA  
CAAAGTAGAAAATAGTAGAAAATAGAAAATGTTGAACTCGGATAATATTACATATAATCATAAAGATAATTATAATGTAATAATTTTGGAGTACACCTCCCTTGAAATATATTTTCAAGAGAGGTTTC  
TTTGAAGTCCACCTATCGAACATGGCGAAACATTGCTGAGGCTTGAACCTCTGGCGCAGTGTGTCCGGCCGCCCTCACTGTGCAAAAAGTTAAATCGTTTGAATACAGAACTGTATACCCT  
GCAACTTGGTCATCAACACTCCATGATCTCCATGGATCCACAACCGTTAAATTTAAGGATTTAATCCATAGCTTGGTGCCCAAAATGGGATCAACATGTCATGGTCACCGCTGTAAACAA  
GAGCTCTGTAACCTCTTTTTAATAGATTCAGCTGATAAGGTAAACTGCTTGGGATGTCTTTCAGGTAATCGAAGTTGTTGCACCTCTGCCATTCACCTCACTGTTCCCTTCTGATTTGAAGG  
GCCTCTCTGGTGACATTTTCGTTTGCCAGAAAATAACCAAGGTAATAAGCATAAGCCTTTGCAGCGGAGTTCGGGAGCCTTCGGTGGACGGAAGAGCCGGCCAAAGCTGTCTCATTCACT  
GATCTCTTATAGTACTCTCTGGCGATGTCTTTAGGCCTTGGGAAGTCCGTCGCACATTTGGGCTCCAATACGTCTGTCTCCGACAGCTCCCAACGGTATTTTTTAAAGGTATCGAGGGCAGC  
AGCGCACTCTGCAGTTTTTGGATTTTCATGATCTTGTCCAGCACAAATCCTTTTTCAACGAGCTCTGCAAATTCATCAGAGATGATGCCATTCCAAGGGCAAATGGAACCTCGGGCTTTAGTA  
TCAATCCTTTCAACCGTTCTTGGATTTCCAATAATATAACCCTGAAGATTAATGAAGGGTTGTTCTTTCACATCATTTCATCTGCAATAAATTGAGCAACGACGGGGACTAACATGCCGCC  
ATAAGAATCTCCAGCAACATAAAAGCCGTTTGAGCGAAAACGAGGGTGCTCTACTAACCCTGCAATATGCGAGATGTATATAACAAGGATTGGAGCTAGCGCTCAGGAAAATAAAGTT  
AAAAATGTATTTGATCTTCCAAAATATAGATATTTGTATGAGCTAGAGACAGGGCAGCTGCATCAGACCTTTTTTAGAAAACCCATAAAGCTGATTAGAAGAAGAAGAAATCCCCTGTCATAT  
AGGTTTGAGATACAGTTGGGACTGAGAATCCAGTCCCAGCCGGGTAATCCAGAAAAGATAATGCTAGATACCTTGGTCCAAGAGTAAGGATTATAAAGAAGAGTTGGCACACTCCCATCAT

AAGCATCTATTTGAAATTTAACAGGACCAATTTTGAAGAAGAGAGCCGAGAAGCTTGAACAACCGGGGCCTCCACTAAGCCAGAGGAGGAGTGGGTCCCTCGCTGGCGTTTCTCTCCGA  
CTCAATGAAGTAGTAGAACAACTCCACGCCATTAECTTCATCCACCGTCAAATACCCAGTTTCCATTTGGAAGGGAAGCTGCCCTTTGAAGCCTGGTAGTTGCTGTACATGATTTGGAGTT  
GAAGAGATAGATTTTTGTAATATCACGAGAAAATAAGTAGAAGTAGTACAGGACTCCAACGAGCCATTGCCGGTTTGCCTTAATCCA

>comp155758\_c0\_seq1

AGAATATTATCAAAAAGTAAAATTCATACATTTTTCTGCAGAAAGAATGATAAACTTACAAGAATTCTCAGCTAATTACACATTCACACTGTCAGATTGTCTTCAAATATACAAAATCATATAA  
TTTTAAAAAAGCAGAAATGATATACACACATGAATAAAACAAACAGGACTGGCCACCAGCATATGGATCTACTGAATTCCCGAATTTCTGCTCCATGATAAGAACGAAGGATCTCCAAGTTT  
CCTAGGCGTTACCAAATATAGCACAGTGAAGGCTGTTGCAAGAAAGAAGCACAATCCACCAACAGAGAGATATGCAATGCCAAGGAAATCATTTTTTCTCCAAGCCAGGATGTGGTTG  
AAAGCACAAGTTTTTTCTTACCACCAAACTGTATGTGTTGAGTTGTTTTCTAGGTTACAGTAATGATGTCGTTCTCCTTGAGATCCATCTCTATCTTCCATACTTTCTAAAGGTTG  
GAAGGGCTGCAGTACGCATCCACACAATGAGATCCTCTTGCTTGCTCAAAGGTTTCTTAGAATCAAGCTTTCCACCACCTATCAGAGCTCCATTCTGGAAGTTTTTGGGATACACATCATA  
TCCAACTTGTTGATCCCTGTCACTCTTCCAGGAAATATCCTTCTTGTTACAATCAATGATTCACCATTGCCATGGGTGAAGCTGTATGTATCATGAACAACTCCATGCTATAAGCCAC  
AAGGAACAATAGGAGTTCCATCTACAGTGGTTTTTTCCGGGTCACAACCACTTGTTCTATAAGCTTTGCTAGCATCCCTCAACTGCTTATCATTTCCGGCTCTTTACATACCTCTGTGATTCT  
GATAGAAGTTATCAAGCTGATAGTACACATATATGGGCTTGTTCCATGTCTTGGGTACCTTGAGCACCCGAGAACAAGCTTTGCTGATGGCTGGATTCTGAATGTACCCAACCTTATCATT  
ATCATGCTGGGTGGAACGCAGGCAGTTTCATACCGATCAACAATTTCAACAACATCGTTGGAAGCAAGCAGCGAAGCTAGGCCAATAGGAATGAAGATTATGCCAACCAAAGTGAACAA  
TGAGATAACCCATAGTGGGGTGAGAATCGGCTTGCAAGGCTCCTGCTGAGTAAACCTCGAATATTTGGGTCTCTTGGAAATCCTCCGGTGCCTGATCCCGAACTCGACCCCGC  
CGCAGAAGCGCTGACATCGTCCATCATCGTAAGTACTGAACTACTGGCGGAAAGAAAAGCTTTGTATCTCCCTTTGATAAATGTCTCTTCCCTTCTATCTCCCTTTCTCGCTCCTTACC  
TATATAGCTCTCTCTCCCGAAAATTTCTGTATGGGTACAAGGAAGAGAAGGGGAGACAAAGAGAAGCGCGAAGCGATCGAGAGAAGCGACCGCGGAAGAGGGGAAAACCGTTAGCAC  
CGATGACAAGCTGACCCTCACCGCGCAGACGCGCTTTTAAGAACGCGAGTCCGGTCAAGTTCTCTAGAA

>comp155759\_c0\_seq7

AATATTAAGTTTTAGATATATGTATGTATCCCCGAAAAAAGAGAGAGTGAGAGAGAGAGAAGAAAAAGCGAAAAGAAGATTATTTGGTTGCTTAGTTCACCATGCGTTGTCCCCATCAT  
TTGAAAACGTTAGCATCCGGATGGCGTGAGGCAATCAAGAACCTTATAATGCCTTCAGAACCTCTCAACTTTCCTACTCTCAAACACACAGATATAAATAGAACTTAGCACAGAGAGCTC  
GGCCAAGTAGAAGAAAAGAGAAAGCTAAAAGAGAAATGAAGCAAACGTCATATAGCAGCTTTCCGCCGATCAAGGCGGAGAAGCTCGGCCGTTCTGCTGTCTGTACTTGCTTTCTTATTA  
CTGTCTTCTTCATCACGATAATTAAGCAAAGCTCTCATCCCTTACCGTTATCAAGTTTCCAGCTATCGGTGAGGACCAACTTGCCTTGTTGGAAGGTGAAGGAATTTCAATTAGGAAGCTTT  
ACTAAGCTACGAGGCAATGAAAGTATAGTGTCAAAACAAGTCACTTATCCAAAGAACTCCATAGGAGAACAGATGCTACAAGGCAATGAAACTGAAACCTTATCACTAGATCTGGAAGA  
AAATAATCAAGTTAATGTAAATATTAAGAGGATAGAAGTACATCAAATGCAAATCAGAAGCAAGAGAAGGTTACACCTTTGCAAGCAGATCTGAGGAGCAAACTACATAATTTCAAG  
CAGTGATCAAGAGAAGAATAAACTGAGTGGAAAGTAAATACACATCACAAAAGAACTATCCACAGCATAACCACCAATAACGAATAGTTCCCAAGTTCAAAGCACAATAATCAGAAGTA  
AACAACTCTCTGGAGTTCAATACATATAAAAGTGGCTAAGCTGAATCTCATTATATATATTAATGTTTTGTTTGGACATCTTTCTTATATTTTATGAAGCAGTTTTTTACTACAAAATTT  
TACATTAATAAAATTTGTGCTAAAAAATTTGCTTCATAAAGCAGTAAGAAAAGCTGTCCGAAACGAGGCGTAAGATTTGAACTTAACTGTAGCCTTACAATACATATGAGAGGAAGCCCAA  
CTTAACTAATTTGATTCAGCATCTAAGCAGAACCCTTTATATTCAATATATGTAGGTGATATTGGTCAAGAAGGCAAGATAATCTGTGATTTTTCGGAAGCCAGATCTGATACCTGTTCCAT  
GTTTGGTGATATAAGAGTGCATAGTAGCTCCTTACCATCTTTGAGCTATGTCTCTCAATCTCCCTTTCCCTTGGAAACTATAACGCACACTATAAACTTGAATATAAACCATGCAGTT  
CCTGCCATCATCTTCTACAGGTGGATTTCTAGGCAATTTCTCCACGACTTCACTGATGTTCTGATCCACTCTTTGTACCTCTCGCCAATTCATGGGAATGTTCAAGTTCCCTGTAAC  
GACTTCAATGATAAGTGGATCAATAAGTACAGACCAATTCTACAAGGCCCTTTCCCGCTTTGAGATCATTAATATGGACATACAGAAGATTATCCATTGCTTCCCTCCGTTTCATGTTGGTCTA

AAAAGCCACAAAGTCCTTGGTATCTATCCTTCGAAGACTCCAAAAGGCTATACTATGTTTGACTTCAAAAATTTTCTCAGAGAAATATTTTCACTTAAAAGGGGTCTATAGTTCAGAAGA  
AATCAAGAAGAAAGCCAAGATTACTGATGATACTAAGAAAAGGATCAAGATCAATAATGAATGAAAAAGAAGTAATCGTGATGGCTCGAAGAATTGGTTATAAGGTGATCACTGCAAGA  
CCAGAAGAGATGAAGGAATTGCCAAAAGTTTGTCTGATATTGTGAATTCATGTGATGTGATGATGGGAGTTCATGGGGCTGGGTTAGCTAATATGGTGTTCCTTCCAGAGAAATCAACAGTGA  
TTCAAATAATTCCATTGGGAGGTTTAAACATGGGCTTGTAGACATGACTATGGTGAGCCTGCTCCAGAAATGGGGATTAAGTATTTGGAATATGAGATTACAGATAATGAAAGTTCATTAATA  
AAACAGTACCCAAGAGATCATGCAGTCTTCAAGGATCCTTTTTCAATCCATAGGCAAGGTTGGAATCAGTTATGGTCTATCTTTCTAGACAAACAGAAGGTCAATATTGATGTTGGGCGAT  
TTAGGGGTTTGTGTTGGAGGTTTATCATTCTATCAAACAATAGACAGTGGGTATTTTCATCTATTTCTCATCATTATATTTTTACATGATCAAAGTTGTAAAGAATAATTGCCTGCGTTCATATC  
AAGGAATCTTGTACATATGAAAGCTAATTTTGATAATTTTATCAAAGAAGAGCATTGATAATTTCTATAATAGGTTGTACGTGTCTTCCAGTCTCACCAATAGGAGAAACGTATCACTTGCA  
AGTTGGAACACACTTAAAAAATAAATAAGCAGTTCATCGTCAAACCACCTAGGAAATTCTAGTATGAAGATTAGTATATAAATTTCTGTGACGTTCAATTA

>comp155772\_c0\_seq2

TTTTTGAAAATAAAAACGCAAATTTAAATTTATTGATAGAGAGACATTTGTGCTCAGGTGAGCACAATCAAAGTTACATGACATAAAATATCATTTCCTTATTGCACAATCCATTATTATTTAT  
TCTATGTATTAGAAGACAGATACTCCTGTTCTTCAGCACTTAGTTTGATAGCACACGAACCATCTCTACACCTGAACGTAATCAATTTCAATCTTGCCGGCATCCAAATTTGCGATAGTT  
GAGAAAGCCTCTTGGGAGAGATCTATGGTGCCTCGGCAACCAGAAGGGCAATAATCGACAATCTTAACCACAACGCTTGCACCTGTACACGGGTGAAGATCACAGCATTGGTTGGACC  
CGTACAGGTCACCTCGATAATTTTCGTCCGACGGCCGACGATTATCCCATATTGTATCGCTCGCCGACGCAATCAGCGTACCCATGTCTCATACCCGTAACACGAAGAAGGTGTATATGGAG  
GGGTATAGTAAGTTGCAAGTCCATCAATGGCAGAAGAGAGAGCAAAGTGGCAGAGAACAATGGTGAGGGCAAGAACAATATGTTTCTCCATTCTTCGATCTCTTAAATCTCTAATCGAAT  
ACTAACAATATATCTCAACTATGATCGATGGAAGGTAAGGGGAAGAATTGGTCCTCTTTTATAGGAGAAGATCGATAGGCTAAACG

>comp155793\_c1\_seq1

TAACAATCACCAACAGAAAATGTAAATGGATAAAGTGCTGATTTTGTGCCAAAGCAAATAAAACTGAAGAATCTCTCCTAATTCTTATAAAATTGGACTACATGATTCAAATTTAAACG  
CTTTAAATAGAATTTGATCCTTGCAAGTAACAACAATATGAATTATCTTCATGACTTGAAAAACATCATCATTACAGCAAATGTTCCAACAAATCCACCTTCCATACTCCAACAAAAATTCA  
ACAATAAATGCTTGAATGAGCGGCATTCGGAAAAATAGAAGCCAGGGAACCAATTCCAAGTTAGTCATCAAACCAAAAAGAGAAATTTCCAGCACGAATACCCAGCAAATGAAATTT  
GCAGCTTCCCTTCTGATGTTACACGTTCTTTTTGAACAAAGCAGAAATCAATGTTTCTCCACATTAAGGGATCCCAGCGGACGGAAGCGGGGAGCCGGTCTCCCCCTTCGATTTGCG  
TCGCCGGGATTGCTTCGGAACGGAGGGGGAATCCCGTGCCGGTGACTCGGATCCCGTGGTGATACTTGTAGCGACGGCGGCTGCGTCGGAAGCTTCCATCTGAAGGCTCCTTGCCG  
AGTAGTCGGCGGCAGCGGGGACGAGCCTGCGGATTGTTGACGACGGGAGTGGCGGTTCTCGCGGTTAGAGGAATCCTTTTCGCGACTGGAAAGGGAGTCTGTGCCAAATGGAGAGTC  
GGGTGCGGAAGAGCGCCGCCGATGCGGCCTCCTCACCGGCGACTGTGGAACGGGTTCTGCACTCTGAGATCTTGCAGGGGTTTATCGATAACTCGCGCATTTCTTGAGTGGGTGCCTCTAG  
GCCTTTCCATTGTTGGCTGGCGTCAATTGATACTCTCCATCCAGCTCGGTGCATTTGCAGAAGGTCCATCGCATCCAAAGTGAGCCAAATGTTTGACATCTGTAGGGTAGCCAATCTGC  
ATCTCTTTCTCCTTCTTTCATCAAATATTTGAGAAATGTATCTCAGGCCCTTTAACAGGCCCTTTCATCTTATTGTTTCATCATCAGCAAAGCAGATTATATGATGCTCCTCTCAGCTCCACCTC  
AAATGTATATGAAAGTCACCAACCGATTCTCCTCTCGATCTGGCGCCTCCTCATACCATAATCTCAAGATCAAATTTATGTATTCAAATGATTGAGAACCTTACAGAAACGATTTGGGA  
GATGGGAGGCGGCAACAAAAGATGCTATCAAAGATAACAATGCTACAGAGGCCCGCCGAAGCCCCGCTGGAAACAGCAATATCCAGAAAGGAGGGAGCCTGCTTCTTTCCGTTTCAG  
AAGATTGATTATTTCTTCTTTTTTTCTTTAAAGACTTTAACTTTTTTTAGCCAAGTTTCCTTTTTTTAATTTGTTAATTATTTTT

>comp155799\_c0\_seq5

TTCTTTGAATCCGAAAGTATTTATACAGAAGAAATATGTAACAGAGAGGCTATACAGCAGCTACACATACATCAATACGTCTATATGGAACTTATTTCTAAATTTTGTCTCGACGCTCCGACG  
TCAAATAGAGATAAAGAATCATGAATGAAGATTTTTGTCCCTAATTTAGACGTCTTATCCTAATTTCTTTTTGATCTTCGTGCTTCTCATGTGACTCCATTGGTATATCATGTGGATCTAT



AATTTTATCATTCGTTGCTTCTTTGCATTTTCTATTCTTTGATATCCTTCATGAAGCTTCCACTTCGAAATCTCCAGCTTGATCGACGCATCTGAAGCTTCCTTCAACTGCTTTCTCTTCACT  
CCAGCAGATAAATGCCCACTTGGTTTTTTGCTTCAAAGCTTGTGTTTGGACGAGCAGACAAGTTCAAATCTGGTTTGTGAGCTTGCTAATAGAATAATCTGTAATATTATTTTCAGAAGTTGC  
AGCAATAGGTTTAGCCCACTCAGCAGCAACCAGCGCTTTCCAACCTTAAATGAGAGTCCTAACAAAGTTTTTGAATCTGGCTACAGTTGTGTTTTTCGTAAGGCATTACAGTTCTTCCAATT  
TCAGTTTCTTTCAGAGTTTCTACAGACAATTGCATCAATTGCAGACTTCTTAGTGATTACACAAGAGTGAATCAGACTCATATAAGTGATTATTGGAAAGAATCTCCTTTATCTTCATCACC  
TCTCCAACTATCTGATCATCTCTCCGGGCTTGTACATAGTTTTTGGAGCCGTTTAACTCCTGCTTGGGATGTTCAACATCGCCATTATTGAGAGAAAGATGGCAATTGTTGATCTTCTCGAC  
AATCAGATCCTTTCTATCATTAATTCCTTTGGGTAATCCACCATCGCTATGAGAATCGCTTTGTCAATCAACTCAAAGATACCTGATTTGCGACATCTGAAAAATTTTCTCCAATAATCCAG  
TGAATCTTTTGTCTCCGCCATTGCCACAAATTAAGACTGCTCCTTTCTGCGCTGCCCATATCCTGCACAAATCCACGCAGTCTGCAAGCAGCCTCGAATGCAGTCGCCCATCCATCGCC  
TCCCTCAAGTATCCGCGCTCCTTGTTAAAATGCCGATGGAATGAAGCCTTTGCTTCTTCTTCTTCGACTGTACACACAAGAGAGCTCAAAAATTTTCTCATTTCTTCCATGTTCAATCACAA  
TCCCGACCGAACTCCATCACAGGCCGCCGCCCTTCTCTCTGCCTGCATCCAACCTTCATCGAACTCAAACAACAGCCCTCGCCTATCTTCCACGCACACGAAATCGAACCTGTTTCGAC  
TCTCCAACCTTGAGCCGCTGCATCCCGCAAGCATCCGACTCCCTAGCCAAAGCCTGTCTGGCCTTCTGTTGAGGCCCGTGCATCCAACCAGTCCGTTTCGCTATACTCGCCGAGC  
TCGTCACCCATTGACGACTCTTTCTTCCATCCTGTGCAATCCTTACCATCTCAATACCTAACCTCACGGCTATATAACCACCTGTAATAGCCGCTCAAACCTTCTCCATAGCCGAGA  
AATCCCACATAGAAACCTAGCCTGCATCTTCTTCTGCGCCAGATCCGGCTCCAATCCTTGCCTCAGCTGGTATATGTTTTGTATTGC

>comp155819\_c0\_seq1

TAGAACTTATATTTTGGATATTAATTAAGATATAGATCTAATTGATTTTAAATTTCAAGGACCACGATTTCAATTTGCAAGCTTAAAATTCATACACATACCTTGTAGACATGATTGTCGTCAAAAT  
CCTGTAAGGCATTAGAATTAGTGTTAGAATTTTCGAGGATGAGGATTTCAATTTTATAAACATACCTCGTCGAAAGTCGTCATTAGAA

>comp155828\_c0\_seq1

TGGAGGAGGAGGAGGAAGAGGAGGTGGAGGAGAATGAGGCAGTGGTGGAGTAGTAGATGGACCTCCAAGAGATGCTGGAAGTCCCTGGGACAAAAGATCTGCAGAACTTGGAGTAG  
AAGTTTCAACTAGTAAGGTTTGTCTATTTGATGATACCAAGGGTTGAAATGGTGGAGACGTTGCTCCATGACCTTACAGAAATAATTTCTTGTCTGATAGGGCGGTGATAAAGGTGGGTG  
AGAAGTGAGAAAGGGAACTCACCTTTCTTAAACAATATTCGGAGAAGGTGTAGGAGGTATTGTTAAAAGGTCATTTATAGCACGTTTAAACATTGATTGGAGGCAAGGGAGGTAGGTAAGA  
TGCAAGTAATCAAGAGCACTTTGTTTTTCCCTGAAAGGGGGTGTGGAGGAGGAGGAGGTGGTGGTGTAGGAGCTTGAATATTCCTCTCCATTTGGAAGTAAGAAAGAAGAGAGCA  
GACCATTGGAAGTGTATGATGAGATCTGGATAAGAGGCTGAATAGATTGATGAGCATGAAGGGTTTGGGGTTGGAGGTGGGGTTGCAATTGAGGGTGGAGGCGTTGAAGGTGGAGGT  
GGAGGTGGGTGAGGGTTGAAGGTGGTGGTGGAGGTGGGAAGGAGGTGGAGGGATTGGGGTGCTGAGCATGGCTGTGGCGATGGAGGAGATGCAGGAGCTATCCTGTTAGTTGGA  
AACTCAGAAAGGAAGGGTGTGGGATGCGGGGAGAGAGGCGGTGAGAATGGTGTCTGGTGCGGGTGACAATGTAGGAGGTTCCGTAACATGTAAGTACTGATGACTGAGGTGGGGAAGGTATGA  
TATTAATTAGAGCAGTAGAAAGCAAAGGTGAGGTAATGAAAGGAGTAGCAGAATCAGGAGGTATAGAAGAAGCTAGTGGAAAAAGAGGAAGTGATGATGATGGTGGATTTAGAGGAGG  
TGGAGATGGTGGAGTTATGCTTTTGGCTAGAGCAGTTGAGTGAAAAGTTGGAGGATAAGGAGGTGGTGGGGGAGGGTTTCGGATAGGTGAAGGGGAAATTGAAACATGCTCTTCCCTG  
AATTTTCAGAGTTGAAAGAGATAACTGTGGAGTTGGTGGTGGGGTGGGCAAGGGGTTGTAGAAGTTATGCCAATGACGGGAGCAGCTGTAAGCAAGGATTCCGGAATATGCAGGGACTTT  
GTGAGGGAGTGGGTGCTGATATAACAATGATATTTCTCTCCATTATGGGGTGACCAAGGTGGAAGAGGAGGTGGGCTTGGAGGTTTGTAAAGACCTGGGACTTGAGGAGCCATGCCTTT  
GACTGGAGAAGAAGAATGGAAGGGTTGTGCTTGGGGTTCGAAGGAGTAGCAGTAGTAGATGAAAGAGGTCCTAAATATAACGATGGAGTTTGTGCAGTTAGTAAAGTAGGAGAGTTAT  
TTTCAGAAACGGCATCTGGTAAAGTAGGAGAAGAAATGTTTTCAAGTGGAAAGGGTGAAGTAGCATTTAAGTGATGTGTTGTAATGACTGAGAAAGAGGAATGGGGTGAAGTCTGTGTA  
GAGGTGGCAGAAGATGGGCAAGCCTTCGTGAAAGATGGTAGCAAAGGTAATATACTGTTGATTCTGTAGCAACATTTGGTGACTCTGTGGATTCAACTTCTGCAAAAATGTGGAGGTT  
CGTAAAGAAGGTAGCAAGCTGTTAAGCATGAGTGAAGGAGATGGCAGGCGGATCACATTCGCATTAGAATATTTGTTGGCAGATTTCCTTAGAAGATATTGTTTGTGATTCTCATGTTTGG

CATGATTTTCAATCAATTTCTGTTGTTCCCCCTGTTGCACCGTTATAACTGAATCAGAAGGCATATCCACTGTGCAATTTGGTTCGTCTTGTCCAATAGTGAGAAGCTGTTCCCTGAAGCTTTT  
CTCTACAGGCACCAACCAATGAATTTTCACAAAGAACCTCAAGCAACTCCTTAGGCTGGGTGACAACATCATCTATTTGGAAATCACGAGCTTTGCTATTAATCTCATCAATTTCTGACCT  
CCCGAATGACTAGGCTCGCTACAACGGATTAAGTTTATTGCAGGAAAATCAGCACTAACATCCTTTTTGATATTTTCATCTTCCAAAGCACTTTACCAAGCAAAAATGGAGTTTCCCAA  
CTCTCAGTCATCTCACCTGAAGCAATTGGCATAGTGCCCTTCAAGCCCTGTCTCAAACCTATGGGATTCTAAGGAGGTCATTCTTGAACGTCTGAATTAAGAGTCTCCTCTGCGTCTTTCT  
GAAATCAGTCATGCTAGAGGTCCTAGAGTCAGGAACATTTTCATCAAAAACAGATCCCATTCTATAAACTCCTTATCTAGAACCTTTTTAAAACTTCATTTACTCCACAGTCTCCTCAATT  
TATCTGTAGACACAGTTTCTAACCTGCTACTTCCATCACCTACTACACTTGAATCAATTAAGCCTAAAGAATTGGCGTCTGTAAGGCACTCTGCTTCTGATTCAAGTAACCAACAAACGG  
TGAAATCATCCCTTCATTTACAAGAGAAACATTTTTTTTAACTTCTTGTATGAGGTCAAACATTTTAGGAGTTCTAAATATAGGACTACCATCATGAAATGATTGTTCCCTCGGTGTCGTCATC  
GTCAGCATGATAATTGGAAGGTTTGATTTCTAGGTTGTTCTTATCTTTATCCAGGGATGAAGTGATACAATTGATACTGCAATCTTTTCCAGAATCATCTAAGATAGAAATTTCTTGGGCAGA  
ATCAGTCTTAAGGTTCCATGCTTTACCATATTCCAGTTTACGACTGAATAGACCTTCCCATTTTGAAATTCAGATGGAGTGCTATCATTTAGAACAGTTCGAACTGTACGAATATCCGAATC  
TCTAGATCCGTCTTGCAATCAGCATTGCTAAAGATCTTCTGCTTCAAAAAATTCTCCGCTTCCAATTCATCTTACCTACCGCTGCAACTCTCCGGTGGTTGTCAGAATCCTTGTCTATA  
TTCTGAAAACAGTACCTGGTTCAGGCATCAATGTACATTCAACATCCTGAGTATCAGAGATAAACTAGAAATGAAAAGTAAAATAACAACCAGGAGTGGAT

>comp155852\_c0\_seq1

CTCTCCCAACAACCATGCAATCATATGCCTTAATTTCTCCCATTTCTTCTGGCCTCCATCAAAACCCTCAGCTTTCTCCTCTCCGTCCCCCTCTTCGGCCTTCCCCACCCCGCCGCTGTC  
TCCATGGCCAGTCAGGCGGCCATGGCTCCTCATCTTCTTACCTTGCTACTCGACCATCACCGTCGAATCCGCCGGCGCCGAGGAAGGGGAAGCACTTCTCAGATTCAAAGCCACC  
CTATCAATCGATCTCCATCGTGGATCCCCGGCCCCGACCCCTGCACTCTAACTCCACCCTTGGGAAGGCGTCATCTGCTTCAATGGCCGCGTTTGGGGGATTGAGTTCGAGAACAGA  
AGCCTTTCCGGGACCCTAAATCTCCGACCTTTAATACCCCTACCTGGCCTCCGTACCATCAGCTTCATGGGCAATAAGCTCGAGGGACCTTTGCCTCCTGATCTTAAGCTCCTCGGCGCTCT  
CAAGGCTGTTTATCTCTCCAGGAATAACTTCTCCGGCGAGATTCCGGCGGATGCGTTTGGGGCATGAGATCCCTAAAGAAGCTTTTTTTATCGAATAATGGCTTTTTTCGGTCTCTGTTCCGA  
GATCGCTTGTGGCCTTGGTAAGCTGCTTGAGCTCCGTCTCGATCACAATAAGTTCGCCGGCGGTATACCGAGTTTCGGCCAGCGCCGCTCACGATTGTTGACGTGCTTTTTAATCGTTT  
GGAGGGGGCTATTCCAAATAGACTCAGTAGGATGGACCCCGCTTTATTTCAAGGAAACCCAAAGCTCTGCGGGCGCCCCGCTCACCGTGATCTGCAACAACAAAATCCAACCAGCAAAAC  
ATGGAGGAAGCTCCGGCTGGCGTCTTCTCTCATAATCATTACTGCCTGCATATTTCTTCTCCTCCTCGTCTCCTCCTCCTCCTCAGCACTTCGCCGGCGCCAGAAAACCAGTAAGGTGATT  
GGTCGCCCGTGCGCCACCACTGAAGACGACGGCGAAAAGCTGGAGCTGGGTACGGATTCAAAGCACCAACAGCCAGCCACCGCCACAGCAGCCGGACCGGTGGAAGGAAAAACTTC  
CGCGGACGAAAAAGCGAGTGCGGGAGGCTGGCTTTCTGTTCAAGAAGGAAGGGAGAGATTGAGCTCCACGACCTGCTTAGGGCATCGGCCGAGGTGCTCGGAAGCGGAAACTTTGG  
TTCGTCTTTCAAGGCGGTGTTGTGCGCCGGTCCCACCGTCGTCTCAAGAGGTTAAGGAGATGAACGGAGTGGGGAGAGAAGACTTCAACGAGCACATGAGAAGGATAGGGAGGCTC  
TCACATCCTAATCTCCTTCCATTGATCGCATATTACTATAAAAAGAGAGGACAAATTGCTCATTACTGAATTCATTGCAAATGGAAGCTTGGCTCACATGCTCCATGGTAATCGTGGGTCAACT  
CTGCCGCCGCTCGACTGGCCGACGAGGTTGAAGATAGTAAAGGAGTAGCCCGTGGATTGGCCTACCTTTACGATGAGCTGCCGGTGCTAACCTCCCCACGGCCACCTCAAGTCTC  
CAACGTCTCCTCAACGACACCTTCCAACCTCTCCTCACCGACTACGCTTTGGTCCCAGTTATGAACTCAGCCCACGCAACACAGGTCATGGTTGCCTACAAGTCTCCGGAAGTCGCCCA  
ATTTGGCCTCCCGTCGAAGAAGAGCGATGTGTGGAGCCTTGGCATACTAATACTCGAGATCCTTACAGGCAAATTTCCGGCGAACTTCTCCACAAGGGCTCCAGCGGCAGCACCGATCT  
TGCCACCTGGGTGGGTTTAGTGATGGAAGAGGAATGGAACAGCGAGGTTTTCGATTGCGACATGCGGGACACTGAAAATGGCCGAGGTGAGATACAGAAGCTACTGAAGATTGGACTT  
GACTGCTGCGAGGAGATTGTGAGAATAGAATGGAGATGAGGGAAGCACTTGAAAGGATTGAAGAGTTGAAGGAGAGGGAGGATTGATTCAAAGAGCAGATCTTGAATGAACTGGA  
GAGCCTGGAAGTGAAGCTGGAAGTGTTTTATGATGCTGTGGGTGGAGGCCAATTCTACGACTTATAAAATCTTTAATTTTGCATTGTTCTTCTTCGTATGGAGTTTTTTTGTGGCATT  
GATACAGTGCAGGTGATAAAAGTAAAGATGCCTTATTTCAACTTGTGCTTTTGTCTTACATAAAATCTACATACATGATGAATTGTAAGTACTGCGTATGCTGCTATAAATAACACATT

>comp155972\_c0\_seq3

TTTTTGTAATATCAAGTATTTAAGCAGCTAGACATTTATAACCCATTGCATCTCGCATGCAATGGATTTGAAAAACATGCATTTATATGCTTCATTTCGACAAATCTACATTATCATTAGCCATA  
AAAAAGACAGACTCTCAGGGAATAGTAGCATATAATGTTTGATTTTCGAATCTGCCATCATTCTCAACCAAGCCTATAGTACTTTTAAAGTCTTGTTTTCTTAACCTCATGCTCACCTTTCC  
AGAGTACGTTGATTCATAATAACTTCTTACAGGGAGAGGATGCTAGGTAAGTCTATCTAGGAGATGAGTTCATACCTGAAGCAGTAGTGCATCAGCCAAAATTTTGTGG  
CGGCTTCTGAAGGGTGGAAACTGTCCAGAAAACATAGCCAGTAGCATTGGCACAAGTCCCCGGCGACCTCGCATTGCACAAAAGAGAAGTCTCAATGGTGCCTGTTCCACAACATGCC  
TTTCGTGCCTCGAAGAAACCATTGTTCCCAGGGTTCTTGATGAGGTCTAACAAGGGATTGTACACATCAAATATGACAAGTTTGAGATCCGAGTGGCTTTTCTTAAGCGTTTCTGCAGCTG  
CGCTCACCTTCTTGTTAAAGGCAACTGCATCATTGTTCCAGGCGATCAACACAGTTATTGCTGCCACCACCAACAAGGTTATTGCGGCGGGCAAGCAACCGATTGGCGGCAGCGATGTCA  
CACCAATCTCCGGGCTCCCAGGCCATACATGTTCTGAACAAAACGAACCGAAGGAGAGGACGAGCAAGTTGGCGAACTGGTCAGGAGTGTAGGCTTCATTGATGAGGGGGTTGATGTA  
GTAGTTCTGTACGTAATCGCTGCTCCCCGCACTGAGGATGTTGATGGCGCCGGAGAATATTCCGGCAGCTTTTGTCTTCCACCTACAATATTCTCCACCTTGTCTGGTACTCCTTATAGTT  
CTCCAGCTGCTGGGTTAAGCTTATTGCATGATAAAGGTTTGCAGTCTGTCCAGGTACCCGGAGGAAGCAGAGGGCAAAGTTGGCACCGGTGAGGAGGTTCTTCCCAGTTGCTTCTCTGCT  
GAGGTAAGCTGGCGGGTATGTGCTGAAACCCAGGTTTTCCACGGTGAAGTCAAGTGGCTAGTTTGCCGTTGAGAACCTGCCGGTGGGGGGCGCCGCGGGTGGTGGTGAAGTCTCGGCCA  
TAGGGAGGAAAGTTGGATTTGACGAGAGTGAGCAAGTAGTTATTGTTTCTGTGTCCACAACCGAGTCGCCGAAGATCATCACGGCAGGCACCAGTCTTGTCCCTCTGCTAAGCGCAC  
CACTAAGCATGCTGCCGCCACCATTAGCAGAAGAGCAGAAGCAGCAGCCATGGCTAGTGGAGAATGAAGAGTTTAGCTAGTGGTGTTCATAGAAATATTGTTGCTGGATTTTATGGGA  
TGAAGTATGAAGTGGGACTTTATTGTTTATGGAAGTGTGGTGGTTATGAGCATTTAAGAGTGGGAAGGGAAGCCCAGGGGCTGTGGCTTGAATTCGTGCCTTTCTTTATA

>comp155972\_c1\_seq1

GTTTGTAGTTGTATCACGTTGTTAGTACTTTTTCAAGGTAAACTTGGCTTTTCTATTGGGGGGATTACATAAAAAACACAAAAATCTCACCTATTTACAAAATGACTCATATGGATATGCATG  
TCACAATCAACTCATTAAAAATTTGACAAGAGAAAAATATCTGTTGATGTTTTGTTGAGTATTTAATATTAGGGTGAATTTGACTGTCATATATATGCCCTCTTATGATTTTGTGTTGCAA  
ATAAGAACTGAGGCATCAACACAAGTTAGGTAGTGCCTATATTATTGAGAATCAGTTGAATTAATTTTCATGTCTATTGTCTAGTATCTATCAGTGGTCAAATTTACTGCTTCGCGGC  
CTATATTTATTGTTGGTGTGATCATGCTTTAGACACTTTGCCACATTTATAATATGTCAGTCTCACACTGAGTGGATACAGTGCAGTCCATTAACACAAAGGTGTCATTTTATGTCTGTCAA  
AGAACAGAGATTGCATGTGGCGTTGAAATGCCTTTGACACCTTTATGAAACCCTTTAATGGAGCAGAGCTATGAATGAAATATATCTTAGATTTTCATGTGGGACGGCTTTCTTACCGTTT  
TTAATATAAATTTTAATTTTTGTACTTAAA

>comp155978\_c1\_seq1

CAAACAGAAATTGTGATTGTGATTTGAAAAATAAAATAAAAAAGATTGTCCCAAACCAAACATAAATAAATCAACCCGAGATCTTATATTGACAACCTCAACTATTATAACAACACCACC  
TAGTAAAATGATTACAAAAGGATTACAAAAAATTTATAGTTGGTAACCTTCTTCAATACAATTTACTCTCTTTGGTCTATAAAAATAAAGTAATAAATTTGCTAGTAAAACAACAAA  
AAAAAGCTCACAGCAGAGCCATGAACAATAGAAAACAACCTTTGTAAACAACCCCGGTTTCAGTTGAATTCATCACATAGGAGGGAGAGTGTCACTTGCATGGGACTGCACTGTTGT  
GTTGGAGCTCTGCGGTGGAAAATCACCTCAGTTAGTTGCATAGGCTCTACATAGCAAGCGATTGTAGAACTTTTTGCGCTTGCAGAGCTTTTTTAATTTGTTGAACTTTTTTGAAGGCT  
GAGCATTTTTAAGTGGTTGATCATTCTGATCTTGCCGGAATGGAAGAATGTTGGGATATTGTTGCTTGTAAATGACAAAAGGGCGAAGATTCTGCAGGTCAGGGTCAGTAATGAAATCATA  
TGGGATCTTCGAGTCATCCATCTTCTAAATGTA

>comp155984\_c1\_seq3

ATGAAGCCTTAATTGTTTAAATATAAATTAAGATTTATTTATGGTCTATTTTCGGACGGCTTCGATGTTTTATAAAGTCCATTGCGAAATTAAGTAGGCAAAACATAGATATTTTAGTTGCACA  
AAATTAGTTTTTTCTATTTTTTTCCAAAAAATAAATTAACAGTAGAGTCTATTATAAGACTTATATAGTAAAAAATAATCCAAAAAATAAGTAAACTATTTTGGGCTTTTGACCAAT

TATTCTAAAAAAAAAACCGAGCTATATTTAGATTTCATCCCAACCTTTTTTTCTGCCAAGCTAAAAACAATGGGTGCCACATTTTCATTACAACCTCCCCTTATATTCCAAAACAACAAACCCAAA  
AACACCCAAAAATCCCACCTTTGAGCCCTTCGCTTCTCCTCCCTCTCTCTCTCCCCGCACCATGCCAATGAAGAAGACTTCAACGAATCCATGTCTCTCCACAACCGCCGCCACCCCA  
CGCCGGCCGCCCTTGTGTTCGGCGGCAAAATCCAAAGGCGGCGCCCTCCTTCTCTCCATCCTCCTCATGTTTCATCATGATGCACATAGTCCTGTCCATCTTCTTCCCTCTTCGTGACATTGCC  
GTCGTCATAATCCTCCTATGCATCGCCACCGTACCATTGCCGCGCGCTTCTTCCAACAACCAGACATCGAAAGGCGCGACCTTTCGCGAGAAGAGATTTCGCTACCTCCTCTATTTCAG  
ATCCGCCGAATTGGTCTCCGACGAAATATAAATCTGGCTGTATTGAATGATCTTGAATTCATGAGTTTATGCACATCACAGATCTGCTTGATATGACTATAAGCATGTAAGATTTAAGATCA  
CTTGATCTAATTATTAATATCAAGAAGTTTTTAATTATGTTTGAAATGTTTAATTTGAGCTCGGAGAAGGGTGGGATCACTTGTGCTGTTGATGTGTTAAGTCTTTAAAATGTTCAATTCGAC  
TATAAGTTTATCAAATTCGGC

>comp155986\_c0\_seq3

ACAAACAAAAATAATTTACATCCAAAACACTAAGTAATAAATCACAACAAATCATGCTGTAAAAAATTATAATTTTGATCTCAAGCGTACATCATGAAATGATAAAGGAGCAAATCTCTAT  
AAGAAATGAAGAATTATTTATAGAATTTCTGAGACGACCACCATTTGATCTGCAACATATCAGACAAATCACTAAGAAGTGATTGATTTCCATCCAGAATCCAGCCCTCCAGTCTCACCGG  
CGGCGGCTACTGCTACTCCGGCTGCTCGCGTCTGTTCTCGGCGATCTCATCTGCGAGTTGCCCTTGAATACTGAAGCACGACAATGTCGGTGGCCCTCCTCGGCTTCCCCCTCGAACTCCCTT  
CGTCTCCTTTACCTCCGCCTCCTAACCTCCATCGCCGGAATTTCCGACCTCCACTTCTTCAACTTCTTCTCCAATGCCACCCGCTCCTTCTCCCCACCCCGCCCCCGACCCGCTCTTA  
TCCAGCCCGGCTCCCTCTGCTCCGGTGGCAAGATCAAAGCTTTGACCTTTTTTCGCAGGCCTAGCCATAAGATCGTGGTAGGCGAAAGAAGATGCGCCGAGATCGGCGTAAATGGGGAG  
ACTTCGGACATACGCGTCAATGAGAGCAACGCCGATGTTGAGAATACCTTGCGGGCGTAGAGAGGAGGGCCGGCGGATTTGCAGGGCGACGAAGTTGGTGGCAGGGGAGGGGCGGAG  
AGTGCTGAGAATAGCGCGAGAAGTGCCGAGCAGAGTGTCCGATCCGGGACGATAGCGTGGGCGGGCGGCGTAGATGTCGACGTGGATGGCGGAGGTGTCAGAGCGGAGAGTGGAGTC  
GTCGACGCGGAAGACGAACCTTGTGCTCCAGGTGGGCTCGGTGTGGCCAACGGCGTTCGAGGCGGTGCGGAGGCGCTGGTTCGAGCGGAGCCAAGCGACGGCGTAGGTGCGCATGGA  
ACGGGACGAGGGGAAGAGGTCTTGAGCGGAGATGAGAGTGACTTCGAGGAGGTGGAAGTTGAAAGGGAACGGCGGGCGGGGAAGGGAAGTACCCGCCCGCCCGTTAACATCGCTA  
GGGGCGAGGGAGGGCTGGGGAAGAAGGCGGGGAGGGGAAGGAGGGCGTTGATGGGAAGGCGGAAGGAGGGATGGTGGCGTGGTGGGGTTTGTAAATAGGGGAGGCGGAGGAGC  
TCTCTTATTTTGGTCGGAAACCGTTAGGTTCTAATGCTTGAAATATTTAGTAGGAGCTGTCATTCTCTGAATTTGAGAGAAATGGGGGTTTGGTGTAGGTGTAATTAATTTAGTTGGTGATA  
TTTAAAAAAAATATTAGTAAATTTCAAGATTTAATTTG

>comp155987\_c0\_seq6

AGTTTCGTCCGGTGACAGCTGAGATGGGGTCAAACATAAAAAGCCAATGGATCAGGATGAGCTACAATAATTAATAATTTCTATTGACTTTTTAGTTGATAAATAAAAAATCTCAACCAAGAAA  
TCAAGATGAGCTGCTAAATTAATTTCTATTGACTCACCGAACAGATATTATAACGGTCAGCCAAATGGCCGAGAAAGATGGGTCAAAAAAGAAAATCTAATACCAAAAAGAGAGATCGT  
TTCTTCCAAGTTTCGATCAAAGCGGCTCTGTGGCATAAACTTTCAAATAAATTAATAATTTTTAAATATGTTCCGGTAGAATTTTTAAAGGAGCATATTAATCTTTTAAATTAATCAAAAAG  
CTTAATGAATATTAATTAAGGAACAATTATTTGGTTCGGTGAACGTACGCTCCTCTATGTTTCAGCCATCAACCTTTTAGCGCCACGTAGCACGAAGAAAAGTCGCCAACCCGACCCGTT  
GTTTTTTGGGTTCTAGCGCATGCGTTTTTTTTAATTCCTTGACGAGCCGATCAACATTCATCAACTTTTGGATATATTTTAAATATCTAGCAAATACCGAGTTG

>comp155993\_c1\_seq13

AGGAGAAGGGTCTTCCCATTCGCATCTCTCCAAGGACTCGGACGTCTCCAGCTCTTCCCCATGCTCCCGTCTCTCCCTCTGTTAGGAAAAACAAGAGAAGCCGACGCTCCTCTCTTT  
GGTCTCTTCCCTCAGTTTCGCACAAAACAAGAGGAGCCGAAACCCCTCCCATTTTCTCTCTCTCTGTTTCGCGAATCCAGGCGGAACCAAGCTCCCTCATCGACTTGCCCTAGCAGCCGG  
CTACCACTTGCAAGAGTAAAATATGCTAAATGGAAGGAAGAATGTCGCCAGATGGATACTCATGTTGGTTGTGGTACCATTATCCCAAGCCCCAATAATCACTGATGATGGAGAACCAATC  
AAGTATTCTCTTGTCTAATGCAAGCTGTGCCATCTGCTGACCTTCTTGATGATTTTGGAGCCAGTGAAGGAAGCCATGATGAAACCCAAATACATATAACAGACAAAAAATTTATTCAGT

GCAAACAACTTCACATCAAATTGGTAGGTATTATTTGTTTCAGCTCCAGTACTGTTTTTTGAATTATGTTATTTCTTTTCATTAGGCAATTTATGACTTACTACCATAGCAGGCTCTTTTTTTGTC  
ACCATTGAAATGCCCTTTTTAAATTAGAAAAGTGTGGTATCCTTTTTTTGAATGTGTAAGCTCCATCTTGTATATTTATTTGGGTTTCATCATCGCTC

>comp155993\_c1\_seq2

GCACTCCCCTCTCTCCATCTCTCTGTTTCTCTCGCTCGGATCCACTCAGACGGACAAGCCGAAGTCCTCCCTCGCTCCCTTCCCTGTTTCTCTCGCGACCTAGTTGAAGCTGGACCTTCC  
CCGTTCTGCTCCAGGCATTTCGACCCCTAGAGGCAGAACTCCGCCCTATCCTCTATCTCGCACGGCAAGCGACGGGACTCCGCTCCCTTTTCGAGCTTCCCTCGTGAGCAGAGCCCCGACG  
AGCCCCCTCTCACGTACGGCTTCATCTCCAGGTCCGAACCATACGACGACTCGAGTTCCTGCCTTGGCCCTCCTCCCTCGAACAGAGTAAAATATGCTAAATGGAAGGAAGAATGTCGCCA  
GATGGATACTCATGTTGGTTGTGGTACCATTATCCCAAGCCCCAATAATCACTGATGATGGAGAACCAATCAAGTATCTCTTGTCTAATGCAAGCTGTGCCATCTGCTGACCTTCTTGATG  
ATTTTGGAGCCAGTGAAGGAAGCCATGATGAAACCCAAATACATATAACAGACAAAAAAATTATTCAGTGCAAATACTTACATCAAATGGTAGGTATTATTTGTTTCAGCTCCAGTTA  
CTGTTTTTGAATTATGTTATTTCTTTTCATTAGGCAATTTATGACTTACTACCATAGCAGGCTCTTTTTTTGTCACCATTGAAATGCCCTTTTTAAATTAGAAAAGTGTGGTATCCTTTTTTTGAA  
TGTGTAAGCTCCATCTTGTATATTTATTTGGGTTTCATCATCGCTC

>comp156008\_c1\_seq2

AAAAAAAAAAAAAGAATTGCCGAATTAATCAAAACCCTTTGATTTCTCTCCACCAATAAATCTTCAATAATTTCCTTTGTAAAGAAAATAACATTTGAGCTACTCAATATAAAGAGCTTCCTA  
TCAAAGAACC GTTCAACCTTTCTTCTTCTTCTTCTTCCCTTCGATCTTCTTCTGATTTTCGGGCCATGGGTTTCGGGTCTCGGGCCGGGCCTTCTCTGTTTCGCTCTGTTTCGCAATGGTGT  
GGAGGGGTGCAACATGTTCAACGGAAGCTGGATCGTGGATGAGTCGTACCCGCTTTACGATTCGGAAAACTGCCCGTTTATAAGGAAGGAGTTTGATTGTGTGAAGTATGGGAGGCCTG  
ATAGGGAGTATTTGAGGTATAGATGGCAGCCGGATGGTGAGTGCGTGCTGCCGGCGTTTGATGGGATGGAGATGATGAGGTTGTGGAGGGGGAAGAAGGTTTTGTTTCGTGGGGGATTCAT  
TGAGCTTGAATATGTATAATTCGATGCTTTGCTTGTGTATGCGGCTGCTCCGTATGGGAGGTTGAGCTATGTTGATAATGGAGTCCTATTTGAGGAATCAATCTCACAGTATCATATTACAT  
ATCACATTATCTTGTGACATTGTTGAGGAGAAGATTGGAAGAGTCCTGAAGTCAACTCTTTCAGGCCAGCAAAGAGTGGCTCTCAGCTGATTTGCTCATCTTCAACTCTTGGCATTG  
GTGGCCCTCGCGCCGGACCGACACAACCGTGGGATTACATTCAAGATGGAGACCTAATAGTGAAGGACATGGACCGGACATTAGCGTTCTCTAAAGCTCTAACTACTTGGGCTAATTGGGT  
TAGAGCCACCATTGACCCCTATGCTAAGAAGGTTTTCTATCAAGGAGTCTCTCCTTCCCATTACCATGGTAGTGATTGGGGTAAATCCTTCTCGAAGAGTTGCTCGGGAGAATCAGAGCCG  
TTGGATGGATCAAAAATACAGATATCAGCAATCACCACAAGAAGCCATAGTGAAAGAAATAATCCCGAGAGAAATAGTCACATTGCTCGACATCACATTTCTCTCAGAGCTGAGAAAGGAT  
GCTCATCCTTCCAAATACAGTGAATCAGAACCAGAAATGACTGTAGCCATTGGTGCCTTGCTGGCTTGCCGTGATACTTGAATCTGCTTTTGTATGCGTTTCTTATACAGTAATTTTATTCT  
GATTTTTGCTTTCAGAAGAAAAAATAAAAGAGAGAGAGAGAGAGAATAA

>comp156008\_c1\_seq6

AAAAAAAAAAAAAGAATTGCCGAATTAATCAAAACCCTTTGATTTCTCTCCACCAATAAATCTTCAATAATTTCCTTTGTAAAGAAAATAACATTTGAGCTACTCAATATAAAGAGCTTCCTA  
TCAAAGAACC GTTCAACCTTTCTTCTTCTTCTTCTTCCCTTCGATCTTCTTCTGATTTTCGGGCCATGGGTTTCGGGTCTCGGGCCGGGCCTTCTCTGTTTCGCTCTGTTTCGCAATGGTGT  
GGAGGGGTGCAACATGTTCAACGGAAGCTGGATCGTGGATGAGTCGTACCCGCTTTACGATTCGGAAAACTGCCCGTTTATAAGGAAGGAGTTTGATTGTGTGAAGTATGGGAGGCCTG  
ATAGGGAGTATTTGAGGTATAGATGGCAGCCGGATGGTGAGTGCGTGCTGCCGGCGTTTGATGGGATGGAGATGATGAGGTTGTGGAGGGGGAAGAAGGTTTTGTTTCGTGGGGGATTCAT  
TGAGCTTGAATATGTATAATTCGATGCTTTGCTTGTGTATGCGGCTGCTCCGTATGGGAGGTTGAGCTATGTTGATAATGGAGTCCTATTTGAGGCCAGCAAAGAGTGGCTCTCAGCTGAT  
TTGCTCATCTTCAACTCTTGGCATTGGTGGCCTCGCGCCGGACCGACACAACCGTGGGATTACATTCAAGATGGAGACCTAATAGTGAAGGACATGGACCGGACATTAGCGTTCTCTAAA  
GCTCTAACTACTTGGGCTAATTGGGTTAGAGCCACCATTGACCCCTATGCTAAGAAGGTTTTCTATCAAGGAGTCTCTCCTTCCCATTACCATGGTAGTGATTGGGGTAAATCCTTCTCGAA  
GAGTTGCTCGGGAGAATCAGAGCCGTTGGATGGATCAAAAATACAGATATCAGCAATCACCACAAGAAGCCATAGTGAAAGAAATAATCCCGAGAGAAATAGTCACATTGCTCGACATCA

CATTTCTCTCAGAGCTGAGAAAGGATGCTCATCCTTCCAAATACAGTGGAATCAGAACCAGAAATGACTGTAGCCATTGGTGCCTTGCTGGCTTGCCTGATACTTGGAATCTGCTTTTGTA  
TGCGTTTCTTATACAGTAATTTTATTCTGATTTTTGCTTTCAGAAGAAAAAATAAAAGAGAGAGAGAGAGAGAATAA

>comp156046\_c0\_seq2

CCTCGCCGCTTGGTTGTGCGCCACCAAAATTCGAAAGGTACCGTCTGAACCATTTATTTCCAGGGGCATTTACCCTTTATACGGGGGTTTACCCTTAATATCCCGCACCCCTCCTTTACTCTCC  
CACCTTCCGCTCTCGCCATGGCCGCCGAAGATACCTTCTCCTCGACGTCGGCTGCATTATGTTGTATCTCTCTCCCTCCTCCCCCTCCCTGCGCCGCTATGGAGCACCTTTTCGGAGCCGA  
CTCGTCCGATCGTTTCAACCCGCCGGGGCCAACCTTTTCTGAGCCAACCCGCCTATGGAGCACCTTGGGCTACGCTTCAGGGTGGCCTTGTGCGCGAAGCGGAGGCCACTTCGTCACAA  
ATCGTTGGGAAAGGTCTGGACCCCGCTGAAGCAGTTGCTTGGGAGCTTTTCACGCCGCTTCACCCGCTACTCCTCGTCGCCATCATTGCCATTGCGTCTGCGGAGTCAAGGCGGTCCCAG  
AGAATCTCGCAGCTTCAGCGAAATGTGGAATAGGGATGAGGCGCTCAAAAAACATCCAAGCAAACCTTGATAATTTGTGCGAGCAAATAAAGTTTATCAAAGACCAGTTTCTACACCA  
GTCTGCCGCTTTCTGCAGGATACTGAGCACTTTATAATTGGAGAAATGACAGAGGCAAGTGAAGATAAATTCTCTCATCTTGGTACTCGAGCATTGCACCTCAATCCTGATAGTGGTATTGT  
CCCTCTTTGTAGTAGCCAATCAATTAATAACAAAGGATGTTTACATGAATGAGATGAGCAAAGGAAGATTGTCCGTGAACAATCACGAAATCGCATCGGAGCTAGAGGAGCGCAGAATGTC  
CGATCTGTCAGATTTTTGTTGCGAGTGTGCGTCTCTGCAGATTTTCAGCCTGTAGAGCTGAGCACATTAGCAGCAGAGCAGGAGCTTTACAACCTTCGAAATGAATGTGAAGAGAAGGA  
TGCCAACATCAAGGAACCTACTGCTACTGCCATGCTTCCAGTGTGCTTACTCTAAGAGGATTGCAGAACTGGAAGAGGTCATAAGAAGGAAAAACATGATAACCACAAAGCTGAGGA  
AGGATATGTTATTTTAGAGCAACAGATTAGCAAATTAATAAGGCTTCGAAGACAATCCTCGCCTTCTTCTTCTTCTGTCATTTCAACCACCAAACAACCTCCACGCATGACGGAAAAAT  
ATTCTCTATGACATGAGCAGCACCAGCTCCTCTTCTCGGACCGTGATTCTCCTGACAGGGATAGAGTGAATCCGGTTCTTCTGCGAAGTATGGAACAGAGCAGGCAAGTCTCAGCAATG  
CCTCTGAGTCTTTTGTCTCAAAGAACAGCGCCAATCAGTCTCTCAAGGAAAATCGTATGAGCAGGAAAGTTGAAGCAAATACTACAGTGAGGCAAGTCAATTTGAAGCAAATCCT  
GTAGTGAGGCAAAGGAAATAGTTTCTCCAAGTATGGATAATAAGAAGTCTCGGAGAAAAAGCTTGAAGGAAGATAAGAACATGAAGACTTCTCAGAAGAAAAACAGATTGAGGTGCGG  
TTTGATCCAATTTTTTCTGGATGGTAATATTATTGTTATTTGATGATTTTCAGATTTTGGTAGCAATTTATTTATTAATATATCATGGTTGGTTCAATGAGATGTAGCTTAAAGAATTAATGAT  
TTTTTTAATTTATTAATATGATGATAACCCTTTTCCCATGCCAGTGAATTTGGCAGAGGATTTTTGATGTATTGACATTTG

>comp156046\_c0\_seq4

ACTTTTCAATGTCAATCTCCGCAAATGTCACCTACATCAAAAATCCTCTGCCAAATTCCTGGCATGGGAAAAGGGTATCATCATATTAATAAATTAATAAAAAAATCATTAAATCTTTAAGCTA  
CATCTCATTGAACCAACCATGATATATTTAATAAATAAAATTTGCTACCAAAATCTGAAATCATCAAAATAACAATAATATTACAATCCAGAAAAAATTTGGATCAAACCGCACCTCAATCTGTT  
TTCTTCTGAGAAGTCTTCATGTTCTTATCTTCCCTCAAGCTTTTTCTCCGAGACTTCTTATTATCCATACTTGGAGAAACTAATTTCCCTTGCCTCACTACAGGATTTGCTTCAAATGACTTT  
GCCTCACTGTAGTATTTGCTTCAACTTTCCCTGCTCATAAGATTTTCCCTGAGAGGACTGATTGGCCGCTGTTCTTTTGGAGACAAAAGAAGTCAAGAGGCAATTGCTGAGACTTGCCTGCTCTG  
TTCCATACTTCGAGAAAGAACCGGATTCACTCTATCCCTGTGAGGAGAATCACGGTCCGAAGAAGAGGAGCTGGTGCTGCTCATGTCATAGAGAATATTTCCGTCATGCGTGGAAGTTG  
TTTGGTGGTTGAAATGACAGAAGAAGAAGAAGGCGAGGATTGTCTTCAAGCCTTAATAATTTGCTAATCTGTTGCTCTAAAATAACATATCCTTCCCTCAGCTTTGTGGTTATCATG  
TTTTTCTTCTTATGACCTCTTCCAGTTCTGCAATCCTCTTAGAGTAAGCAACACTGGAAGCATGGGCAGTAGCAGTAAGTTCCCTGATGTTGGCATCCTTCTCTTACATTCATTTCGAAG  
GTTGTAAAGCTCCTGCTGCTGCTAATGTGCTCAGCTCTACAGGCTGGAATCTGCAGAGGACGCAACACTGCAACAAAAATCTGACAGATCGGACATTCTGCGCTCCTCTAGCTCCGA  
TGCGATTTGCTGATTGTTACGGACAATCTTCTTTGCTCATCTCATTGTAACATCCTTTGTTTAAATTGATTGGCTACTACAAAGAGGGACAATACCACTATCAGGATTGAGGTGCAA  
TGCTCGAGTACCAAGATGAGAGAATTTATCTTCACTTGCCTCTGTCAATTTCTCCAATTATAAAGTGCTCAGTATCCTGCAGAAAAGCGGCAGACTGGTGTAGGAAACTGGTCTTTGATAAAC  
TTTATTTGCTCGCACAAATTAAGTTTTGCTTGGATGTTTTGAGCGCCTCATCCCTAATTTCCACATTTGCTGAAAGTGTGCGAGATTCTCTGGGACCGCCTTACTCCGACAGACGCAAT  
GGCAATGATGGAGACGAGGAGTACGCGGTGAAGCGGCGTGAAAAGCTCCCAAGCAACTGCTTCAGCGGGGTCCAGATCTTTCCCAACAATTTGTGACGAAGTGGCCTCCGCTGAAGCA

GTTGCTTGGGAGCTTTTCACGCCGCTTACC GCGTACTCCTCGTCGCCATCATTGCCATTGCGTCTGCGGAGTCAAGGCCGTCCCAGAGAATCTCGCAGCTTCAGCGAAATGTGGAAATT  
AGGGATGAGGGCGCTCAAAAACATCCAAGCAAACTTGATAATTTGTGCGAGCAAATAAAGTTTATCAAAGACCAGTTTCTTACACCAGTCTGCCGCTTTCTGCAGGATACTGAGCACTTT  
ATAATTGGAGAAATGACAGAGGCAAGTGAAGATAAATCTCTCATCTTGGTACTCGAGCATTGCACCTCAATCCTGATAGTGGTATTGTCCCTCTTTGTAGTAGCCAATCAATTA AAAACAA  
AGGATGTTTACATGAATGAGATGAGCAAAGGAAGATTGTCCGTGAACAATCACGAAATCGCATCGGAGCTAGAGGAGCGCAGAATGTCCGATCTGTCAGATTTTTGTTGCAGTGTTCGCT  
CCTCTGCAGATTTTCAGCCTGTAGAGCTGAGCACATTAGCAGCAGAGCAGGAGCTTTACAACCTTCGAAATGAATGTGAAGAGAAGGATGCCAACATCAAGGA AACTTACTGCTACTGCC  
CATGCTTCCAGTGTGCTTACTCTAAGAGGATTGCAGAACTGGAAGAGGTCATAAGAAGGAAAAACATGATAACCACAAAGCTGAGGAAGGATATGTTATTTTTAGAGCAACAGATTAGC  
AAATTATTAAGGCTTCGAAGACAATCCTCGCCTTCTTCTTCTTCTTCTGTCATTTCAACCACCAAAACA AACTTCCACGCATGACGAAAATATTTCTCTATGACATGAGCAGCACCAGCTCCTC  
TTCTTCGGACCGTGATTCTCCTGACAGGGATAGAGTGAATCCGGTTCTTCTGCGAAGTATGGAACAGAGCAGGCAAGTCTCAGCAATGCCTCTGAGTTCTTTTGTCTCAAAAGAACAGCG  
GCCAATCAGTCCTCTCAAGGAAAATCGTATGAGCAGGAAAGTTGAAGCAAATACTACAGTGAGGCAAGTCAATTTGAAGCAAATCCTGTAGTGAGGCAAAGGAAATTAGTTTCTCCAAG  
TATGGATAATAAGAAGTCTCGGAGAAAAAGCTTGAAGGAAGATAAGAACATGAAGACTTCTCAGAAGAAAACAGATTGAGGTGCGGTTTGATCCAATTTTTTCTGGATGGTAATATTATT  
GTTATTTTGATGATTTT CAGATTTTGGTAGCAATTTTATTTATTAATATATCATGGTTGGTTCAATGAGATGTAGCTTAAAGAATTAATGATTTTTTTTTAATTTATTAATATGATGATACCCTTTTC  
CCATGCCAGTGAATTTGGCAGAGGATTTTGTATGTATTGACATTTG

>comp156059\_c0\_seq1

TAAACCCAAAAAAAAAAAAAAAAATCATAACAGCATAGCACATTACAAATATTTCAAACGAAGAAAAAAGAAAAACTTATTTTGCTTTTTGCAAATTCAGAAAAAACTAAAACAAGAATT  
CCATTGATTTTTTTTCATCCAACAAAAAGTGTTATTTATTGCATGTTTTCCCCACCAAAAAATAATCAAAAAAGCTACCCGAAACAACTTTATTATTTAAAGAAA AACTAAATTTGTAGTAA  
CGGCCATCCTATTCAAATCTGAGATTCAAAGGAGGCTAATACTCGAAATCTGGGACAGGAATTTACAATTTCTTTTCAATGAGAATCTATATATAAAAGAAGAAAAGGAATGCTAACTTGC  
GATATGCGGTGAGGAGAGTTTTTCTGGAGAAGAATGAGCTGAGCCTCCTCTGTCTTCTCCATGGCTCTGATCATTATTCTACTAGTTGGATTTACATCACCAGGCCTCTCATCATTTAGTCT  
CTCTGCTGTATCCATACGAACGGAGAGATTAGAAGATTGCTTGCTGCATTTTATCCAACTTCTGCTGTGTGTTTTTATCACCTCTGTCATTATTGTAACCAACCCTGTGATTTCTTTTGCTT  
GAATGTCGATCTCTAAAGCAAGCTCTAGGCTTTGTGGGGTTGGTTCCAGTACCAGTCCAATAACTTGGTGGTCCATTTCCATATCTATCACAAACCTTAGATGACCTGATAGGAACTGGCT  
GCAGAGGAGTAACTGGAACCAAGTGAGGGCCATCATAGCCATGACCTGAGTTAAAAAGTTGATGTTAGGTCTTCTAACAAGACCATCCAATGGATAACGATCCTGTAAATATACAGGAG  
GAATCATAACAGGAGGAGAATAGACAAACGGTACATGATTTGAGGTGTTCTGACAGACCCTTCCATATTGTAAATTTTGCCAATGGCTATCAAATCACTATTTAACATATCCTTTACGTGC  
ACTTCAGTACACTCCAGAGCTGCAGCACTTGTGGTACTTGGAGATCTGTAATTTTGTCTCCATCAACAAGGTTTATTGAACCATCAGAATTTGCCCCATCGGCTGGAAAATTGTACACAG  
GAAACATGGCTACTGGACCTGCAGGATAAAAAGGACAGTGGAGCTACATCTGAATTATCCACCGCATTTTGCAACGAACCTCCAACAATCGCGGGTTCTAATGGAGTTGATGTATCTGCTG  
CACTTATTTGTGTGGTTAAGTGCTGCATTTTCATCAGAGTGAATATGCAAACCTTCGTTTTTCAGTTTTCAGAACCATCGATGGACCCAGCATCTTGATCATAACCATGCGTCACTTCTCTCCATCCT  
CGGGGCTAGTCTGGCCAGAATTCTCATTGACAGGATCTGCTTCTACTGAGTTTGAGTTTGGGTAGCATTAGTAGAATAATAGGGCAGCTCTGATGAACCGAAACCTCCAGAAA AACTGCAT  
AGAATATGCCCAGGAAGGGCCAATCAACGTAAACAATGGATGGAACAATTCAGTCAAATTTCTCTGAGCATAACCCATTGAAGCTAGGCCAGGAGACGAAGGAAGAGGTA AATGACAAG  
CGAAATACATGGTTGGACCAGGCCAATTGAATTATGATTCACTGAAGATTCCATTAGATTAGCCAGATCCTGCGGTTCCCTGTTGTTGTAACCTCAATGTCTCAGTATCAGAACCAAGCCCTG  
CACTCATGGCTGTAAA AACTAAAATCATCTTGATAACCATTTGAGATTATGCTTGAATCAGTTGGACCTTTAAGGCTATGATGAGATGAGCTTTGCCACAGAAGCTTAGAAGCATAACCACCT  
GAAGCACGTCCCCCTCAAACCTGACTCTGGGACTAGTGATGCCTCTAGAATTATTAGGACCCCTATTTGGGCAATTGATTGAAGGATGCAAGGAGCAAATACTAGAGATAAGGACATCA  
GGCCGATTGCTGCCACTTCCATGCCTTTCCAGGTGTTCCATAAAAAACCAATTGACTTCTGCAATCAGATTCTCGTTTGGACAATCAAGTAAATTTGGCCAGCTTTTTGGCTCCAAATGCAA  
ATGCATAGCGTATCCTGTAGAAGTTTCCTTTATTGACACTTCGCCCAAGATTATTGCTTGTACGTAAAGGATCAATAACATTGAAATGCTTGGATGCAAATCTTCGACCTTGATTTTCTTGAC

CACCAAGAGAAACAGCATAAATTGACTACAAGCCTCAAGAAAGGCTTCATCAAATAACAACCTTACCACCATCATTTTCGAGGAAGCTCCGCTGTTATATCTGGAATTGAACTGATTGGAA  
CTGGGCCCCAAAGGCTGACACAGAAGTTATTCCAATCAAATACTGAAAAATTGCAGGAACCGATAACAATACCTAATAATACAGCGCAGTCCAGGTCAATGTGCAATATGTTTCAAGTA  
ACAAAAGATAATATAAAGAAAAAACATTACCTCAAATGGTCCAGCAAAGGTATTATTGAAAATATGAAATATGTAAAGAACAAGGATCTCTAAAGCATATGTGATATAAGCCCATGAGGA  
GCACCAAGTATCCGGCTCTCATAGTAACTCCAGGCTTTGATCAATATTATGCTCCTCTTCAAAGATGGTTCTGGTTTATAAGATGATCAACCTCTTCAAGAAAACATAGAGTGCACAACCC  
ACCAACCTGACCGAAAGATATATCTACAATTATATTTTCAAACAAGACACTTTATTACTTTTACTTCTGCATGAATGTACTTCACTTCCCTCACACGAAATTCAGCATCCTCAAGCTCTTTTTT  
ATTCTCTAGCACATTGAGAACCGCATTGGCCCAAGTATTTTTCGTGTATTTACTGTTACTAAAAATAGTCAAGTCAATGTCTCCATCCGGTAAGTAGGTCTTGAGGGGTACTGAACCAAACA  
TGAAAACCTCACAAGAGAAGCACTTCTTGATAAGCGTCCGGACATAGTTGGCCACGGCATTCCGGAGTCCCTCAGATGGCCGGTTGGGCTGAATACAATCTATTAGTTCAGCAGTTCTCT  
CCTCAACCTTGGACCATCTCTCTGCATCAAGCAGCCTAATCACATTGTCCGTTTCAATTGGGCAGAAGGCCATTTAGCAGCAGCTCACCTGGATGTGACAAGGCTCCAAGGTGCCCCATATA  
AGGCCACTAAAGATTACTAAAAGCAGTGGCTTTAATGGCGATACTGTTGCCGTTTTAATGACGAAGAAGTAGAAGAGGATAAAAGGACCACGAGCACTAGCCAAAGCTGCAATGGCGAT  
ACTGCAGATGGACGAGCAACCAAAGGAAGTCGTGGTGTATGCCAAATTCTAACAGCTTGGCCCAAAGCGAAACAGAGGAGGAAGATACCAAAGCAAACCCACACAATCAGAACCAA  
ATTCCAAACACACCGAGGCGATCAAAGTCCCGTCTTCCACCGCGCATACTATACGCCCGGAACCAATCTCCCAATGGCGGAATTCCTCCCATAAACTCACACACAGGCAAGCAGA  
GTCCCTCGAACAACCTAGTTACAACGAACAAAACCTACATAAAAGAAGAACCAGCGCTTTTCAATGGGGCTGCGAATTTGCCGGCAAATTGAAACTT

>comp156059\_c0\_seq3

TAAACCCAAAAAATAAATCATAACAGCATAGCACATTACAAATATTTCAAACGAAGAAAAAAGAAAAACTTATTTTGCTTTTTGCAAATTCAGAAAAAACTAAAACAAGAATT  
CCATTGATTTTTTTCATCCAACAAAAAGTGTATTATTATGATGTTTTCCCCACCAAAAAATAATCAAAAAAGCTACCCGAAACAACTTTATTATTTAAAGAAAATAAATTTGTAGTAA  
CGGCCATCCTATTCAAATCTGAGATTCAAAGGAGGCTAATACTCGAAATCTGGGACAGGAATTTACAATTTCTTTTCAATGAGAATCTATATATAAAGAAGAAAAGGAATGCTAACTTGC  
GATATGCGGTGAGGAGAGTTTTTCTGGAGAAGAATGAGCTGAGCCTCCTCTGTCTTCTCCATGGCTCTGATCATTATTCTACTAGTTGGATTTACATCACCAGGCCTCTCATCATTTAGTCT  
CTCTGCTGTATCCATACGAACGGAGAGATTAGAAGATTGCTTGCTGCATTTTATCCAACCTTCTGCTGTGTGTTTTTATCACCTCTGTCATTATTGTAACCAACCCTGTGATTTCTTTTGCTT  
GAATGTCGATCTCTAAAGCAAGCTCTAGGCTTTGTGGGGTTGGTTCCAGTACCAGTCCAATAACTTGGTGGTCCATTTCCATATCTATCACAACCTTAGATGACCTGATAGGAACTGGCT  
GCAGAGGAGTAACTGGAACCAAGTGAGGGCCATCATAGCCATGACCTGAGTTAAAAAGTTGATGTTAGTCTTCTAACAAGACCATCCAATGGATAACGATCCTGTAAATATACAGGAG  
GAATCATAACAGGAGGAGAATAGACAAACGGTACATGATTTGAGGTGTTCTGACAGACCTTCCATATTGTAAATTTTGCCAATGGCTATCAAATCACTATTTAACATATCCTTTACGTGC  
ACTTCAGTACACTCCAGAGCTGCAGCACTTGTGGTACTTGGAGATCTGTAATTTTGTCTCCATCAACAAGGTTTATTGAACCATCAGAATTTGCCCCATCGGCTGGAAAATTGTACACAG  
GAAACATGGCTACTGGACCTGCAGGATAAAAGGACAGTGGAGCTACATCTGAATTATCCACCGCATTGTGCAACGAACCTCCAACAATCGCGGGTTCTAATGGAGTTGATGTATCTGCTG  
CACTTATTTGTGTGGTTAAGTGTGCATTTTCATCAGAGTGAATATGCAAACCTTCGTTTTTCAGTTTTCAGAACCATCGATGGACCCAGCATCTTGATCATAACCATGCGTCACTTCTCCATCCT  
CGGGGCTAGTCTGGCCAGAATTCTCATTGACAGGATCTGCTTCTACTGAGTTTGTGTTTTGGGTAGCATTAGTAGAATAATAGGGCAGCTCTGATGAACCGAAACCTCCAGAAAACCTGCAT  
AGAATATGCCAGGAAGGGCCAATCAACGTAAACATGGATGGAACAATTCAGTCAAATTTCTCTGAGCATAACCCATTGAAGCTAGGCCAGGAGACGAAGGAAGAGGTAAATGACAAG  
CGAAATACATGGTTGGACCAGGCCAATTGAATTATGATTCACTGAAGATTCCATTAGATTAGCCAGATCCTGCGGTTCCCTGTTGTTGTAACCTCAATGTCTCAGTATCAGAACCAAGCCCTG  
CACTCATGGCTGTAAAACATAAATCATCTTGATAACCATTTGAGATTATGCTTGAATCAGTTGGACCTTTAAGGCTATGATGAGATGAGCTTTGCCACAGAAGCTTAGAAGCATAACCACCT  
GAAGCACGTCCCCCTCAAACCTGACTCTGGGACTAGTGATGCCTCTAGAATTATTAGGACCTCATTGGGCAATTGATTGAAGGATGCAAGGAGCAAATACTAGAGATAAGGACATCA  
GGCCGATTGCTGCCACTTCCATGCCTTTCCAGGTGTTCCATAAAAAACCAATTGACTTCTGCAATCAGATTCTCGTTTGGACAATCAAGTAAATTGGCCAGCTTTTTGGCTCCAAATGCAA  
ATGCATAGCGTATCCTGTAGAAGTTTCTTTATTGACACTTCGCCCAAGATTATTGCTTGTACGTAAAGGATCAATAACATTGAAATGCTTGGATGCAAATCTTCGACCTTGATTTTCTTGAC



CACCAAGAGAAACAGCATAAATTGACTACAAGCCTCAAGAAAGGCTTCATCAAATAACAACCTTACCACCATCATTTTCGAGGAAGCTCCGCTGTTATATCTGGAATTGAACTGATTGGAA  
CTGGGCCCCAAAGGCTGACACAGAAGTTATTCCAATCAAATTAAGTAAATGTCAGGAACCGATAACAATACCTCAAATGGTCCAGCAAAGGTATTATTGAAAATATGAAATATGTAAA  
GAACAAGGATCTCTAAAGCATATGTCGATATAAGCCCATGAGGAGCACCAAGTATCCGGCTCTCATAGTAACTCCAGGCTTTGATCAATATTATGCTCCTCTTCAAAAGATGGTTCTGGTTT  
ATAAGATGATCAACCTCTTCAAGAAAACATAGAGTGCACAACCCACCAACCTGACCGAAAGATATATCTACAATTATATTTTCAACAAGACACTTTATTACTTTTACTTCTGCATGAATGTA  
CTTCACTTCCCTTACACGAAAATTCAGCATCCTCAAGCTCTTTTTTTCATTCTCTAGCACATTGAGAACCGCATTGGCCCAAGTATTTTTTCGTGTATTCACTGTTACTAAAAATAGTCAAGTCAAT  
GTCTCCATCCGGTAAGTAGGTCTTGAGGGTACTGAACCAAACATGAAAACCTCACAAGAGAAGCACTTCTTGATAAGCGTCCGGACATAGTTGGCCACGGCATTCCGGAGCTCCTCAG  
ATGGCCGGTTGGGCTGAATACAATCTATTAGTTCAGCAGTTCTCTCCTCAACCTTGGACCATCTCTCTGCATCAAGCAGCCTAATCACATTGTCCGTTTCATTGGGCAGAAGGCCATTTAGC  
AGCAGCTCACCTGGATGTGACAAGGCTCCAAGGTCGCCATATAAGGCCACTAAAGATTACTAAAAGCAGTGGCTTTAATGGCGATACTGTTGCCGTTTAAATGACGAAGAAGTAGAAGA  
GGATAAAAGGACCACGAGCACTAGCCAAAGCTGCAATGGCGATACTGCAGATGGACGAGCAACCAAAGGAAGTCGTGGTGTATGCCAAATTCTAACAGCTTGCCCCAAAGCGAAACAG  
AGGAGGAAGATACCAAAGCAAACCCACACAATCAGAACCAAATTCCAAACACACCGAGGCGATCAAAGTCCCCGCTTCCCACCGCGCATACTATACGCCCCGAACCAATCCTCCCA  
ATGGCGGAATTCCTCCATAAACTCACACACAGGCAAGCAGAGTCCCTCGAACAACTAGTTACAACGAACAAAACCCTACATAAAAGAAGAACCGCGCTTTTTCAATGGGGCTGCGAAT  
TTGCCGGCAAATTGAAACTT

>comp156063\_c0\_seq1

GCCTCAAATTTTTTTTATGAACAGAAAAAAGGAAGAAATCCATAGGGTATCAAATGAGGTATCACAGTTAAATCAGAGTACAAAAACAAGGAAAAAACTTCAAATCCTCTGTAATTG  
TGATGGTCCCTTATCACTAATTTCTACCTATAAAAAAATATAAAAAATAAGCAATGAATGAATTTGAAGAAGCAAGAGGGAAAAGATCGAGTGCATCAGGAAGAAGGTTATGTGTTTAGGAG  
AGAGAATTTGTTTATGCAATCTCCTTTAGGTCTCTATCCAAGAAAGAATCCAAAGTAACCTTCGCATCAGATTTCTCATCATCTGCTGTAGTTTTAGTTTTCTGGGGGAATGATGCCCTGCTTT  
AAGAGTTGTTTTGTTGCTGCTGCTGAGTCTGAGAAGCTCTCAAATTAAGATATGTGTAGAAAGACATTCCAGAGAGAGCAACAATGGCGCCGCACAGGCTTACAATCCTGGATCAGAA  
TTGAAGAAGAGGTATCCACCAAGCATAATCACACAAGTCTTGAAGTGGCCTAACACAACATGAGAGGTCGCAGATGTTGCACCTAGAGCAAGAGCCCCAGACCATTGAAGGAGAAACC  
CAAAAACAGCAGATATTAAGATAGCCGTTAAGTTGTTGGAATCCCAATTGAAAAGAGAGCAACCCAGGCGGGTCTAGCAATGGCATCAACGCCAAGAAGAAGAAGATAGTTATTGGAGTA  
GTTTTCCACATCAACGAAAGAGCCGTCCAGTTGCCAGTTTGTCTGCATGTTAGACCATAGAATTTTATTAACAGCACTTGGGACAATCCAGGCCAATGATATGCTAGCACCAAACAATTGA  
ACTCTAGATCAGTGACAGTTGCAACAGCCACACCTATAGAAACCACACCAAGTGCAAGAACCCTGTAGAGAGTAACCTTTTTACTGAAAAAAGGAATTCAGCAAGAGCAATTGTTGGT  
GTAACGGATATCTTGGCCATCTGATAGAACCCAACACTGTTGTGCTTCAAACCTTATATTAGAAAGTCCTGTTGAAAACGACATAACAGCACCCAAGAGAAATAAAGAGGAGAATGGTGTG  
GATTTTGAAGGAGGGGATACAGGAAGCAATGAGAATAATCTAAAGACTGCCATCAGAAAACCATGCAGTACATAAGTGTATCAAAGATAGTGCACCGGGAAATTGAAACCGATTTTGCCC  
ATCACCAATTTATTTGCCATGATTATTCCAACAGAGATCATGAAATTTAAAGACATTGCCACAAAAGGACCACAATATGTCTGTTGTTTCCGCTTGTCTCCCTCTGAAGTATTGAAATCATT  
TACAAAGAGCTGCGAAATTTCAAGCGAAAGACCTAGTTCCCCTGCATCGCTATCCTTCTTTTGTATGAACCTCCTCGCGTTCTTCCCCAAAACAGAATCAAGCAGACTCATTTTGCCGA  
AATCCAGGATATATCAGAGCATAGCTTTGAGCCTTTGAATCAAAGGAATCAAGACCAACCTTTCCTTAATCGTCCAATCACTTTATACGTTTTTTAAGCTACGATTTCCAAGGAAGAAAAGA  
GAAATGGAGATATGCGAATAGAGAGCGACAGAGAGAAATCAGGGGCAGTCTGCAGAATGAACGAAGACGGGGAGGAGCTGCGTTGT

>comp156071\_c0\_seq9

TCAACATTTCAAACAATACTCAATATGAAGGAATGAAAAATGACAATTCATAGAACAAAACACAAATAGTTAGGATAATGATGATGATTTTGGGAAAAACGAATAATAAGATCTACAATAAA  
CAAAGTTCAAATAATTTGTCCACACTGCGAAGATGCAGAGTTAGATCCTCAAAGCTGCTGAGAAGAAAACCTATTCTTCACTTTGCCAAACTTACTTCTATCCAGGACAATGCAAT  
CATTGTGATAGATGTCATAACGACTAAGCCAACCTCCAGTGCCATGCCACCAAACACCAAGAGATAGTGTCCCCAGAAGTTATTGTGTGGCCACAGCGAGGAGGGTGATTGCCCA

GGAAGCTTAACTGAGTCCAACCTGGTGTCTCATTCTCTTCCACAAGAAAGGTATAAGTATCTCATCAGAATCATAAAA

>comp156074\_c0\_seq6

GAAGTTAACTGGGACTAAGTCAAAGAGGACCTAGTTTTGATTGAAATCTTCTATGTAGGTTTTGATAGGGTTTTCAAGGTTAATAAGCATCATGCCCCATGCTGGCTTTCTCCTAACAGTTG  
ATGCAGGACACAACAAAGCAAAAGTTGTAAATCATACTCATTATTTTTATTATAATTCTAGTCATCGAAAAAGACATCAAATTTAAAACATCTTAAACACAAACTAATACCATAAGCCAAAA  
AAAAAACTATCAAATTTGTATTTCCCAAATAATTTACAGAGTCAAAAAAACAAAAAAACTATAAACGGCACCACACACATTATATCGGCAACATTGAAGGTGGATGAGACAT  
TGTAATCTCCTGGAAGATTAATTTGATAGGCATTGTAATATTTTTTAATGACCATGAAAGGCTGATATTTATGTTTAAAGTTCCCAAAGAACCATGAGGAAATCGATCTTCCCTTAGCTTGA  
TCCACACGAGGTCACCTTCTTTGTAAGTTATATAGCTATTTGGGACTTATTGGCGTGGGTTTTGACACTTGGTATTCTGTTTCTGGATCAGTCTTGGACTTGTGGTGCAGTTCTGAATTC  
AAAACATCGTTGTGCTCCTTCAGGACTGAAATGGTGGCCGGCACTTTTGGGAATAAGATCAAGTAGTGTTTTAGGATTACTGCCGTATACAATTCAGAAGGACTTTTAGTTGTAGCTTGA  
GTGGTGGATCTATTGAAGGTGAATTCGACTTGAGCCAAAATTTGATCTCATTGTCGAATGTTTTGCCTATGAAACAACATAGAAGATTAACCAAACCTTTGATTGATAGTCTCCATTTGTCC  
GTCCGTTTGTGGATGGACGGTGGAACTAACTAACTGAAGTTTAGTCTCTAGCTTACCCCAAAGAGTCTTCCAAAAAATGACTCAAAAATTTTACAGCAAGATTTGAAGTATTCATCTTG  
GAGATTGCGTACAAGCAAACGATCTCTTTAAAATATAAATCGGCCACATGGGCATCATCAAGAGTCTTATTG

>comp156101\_c0\_seq1

CTCCCTCCGTTCTTTCAATGGCTCAAATGCCGCTCTTTCCCTCGTCGTTCTCACAGACATTTCCGGCTGGTGAGTGGTTCAGCTGTTATCGATCTCTAATTTTAGAACCGGAATCTCTCGC  
TCTCTCTCTCCACCTTTCTTTCTCCGGCTTTTAACTAATGGTCGGCTCGATTTGCACCACAGAGGATTTTCATCTGTGGCGGCAATTTTTCTGTTATGCTGGATCGATATATATCTCTTTCTC  
TCTGCTTGTAGATGTTGATTTTCTCGTAAAAATTAGTCGTCCAGATTGCGGGTTTCCGTAGTTTCAGATTTTTTTGAAGAAAGTTAGCGGTTTGAAGTTTCCAATTCCAATATCTGCTGAATA  
CGAATTGATGCGTAGTGTCTTATGATGCATTTGTGGTAGGAACTGACTTCCCAGAAAATAAAGGTGGAACTTTTTCTCCTTCAAATGCAACGCTCATTCAACTGTGATGGGTTTTTTG  
TTCTGTAAGTAGATAGTTTTGGCAGAATGGATTCAAGGAAGGGAGAGGATAGTAATAACGTTGGAGTAGTTGGTGTGAGGCTATGGAAAGATCAATGTCTCAGTTGAAAGGACATGGGA  
GCTTCAAAAATAGGGATATTTATTTAGGGCTGATCAGATTGATCTCAAAAAGTCTAGATATTAGTTGGAGAAAAAAGCTTTCCAAGATTTGGCTGAATGATGTGCTTGGCTCTAGAAGATCC  
AAGAAGGAATGGGAAATTTGATCTTTCTAAGCTTGAATAAAGGTATCTTGTAGCTCAGGGGACACATGGTACTGTGTTTTCGAGGCATTTATGATGGTCAAGATGTTGCAGTGAAACTATTGG  
ACTGGGGAGCAGATGAACATGCAACAGATACTGTTACTGCTGCTCTTCGATCATCATTTCAACAAGAAGTTGCTATGTGGCACAACCTTGACAACCTACATGTGACAAAGTTTGTGGAG  
CATCGATGGGAACCGCTGACCTGAAAATCCCAAGCAGTAACTCACTTCCAGCACAAGCATGCTGTGTTGTTGTGGAATACGTTCCCTGGAGGCACATTGAAACAATATCTTATCAGACACA  
GTCGAAGGAAGCTGCCTTTCAAGGTTGTGATTCAGCTCGCATTAGATCTTGCTCATGGCCTGAGTTATCTTCACTCAAAAAAGATCGTCCATCGAGATGTGAAAACTGAAAATATGTTGCT  
GACTGCCAATAGAAGTGTAAAGATTGCTGACTTCCGGTGTGCTCGTGTGAAGCTCAGAATCCCAAGGATATGACAGGTGAAACTGGGACTCTTCAATATATGGCTCCAGAGGTGATCTTT  
CATAAAATGTTTTATTGTTCAAGCTGAAATATGTTATTTTGGCTTGAATAAGGTTTTCTGAGTGATTTTTTACAGAGTCTTAAAGCTTTTGTAGGTTCTTGAAGGAAAGCCTTATAATA  
GAAAGTGTGATGTCTATAGCTTTGGTATTTGTTTGTGGGAGATATGTTTGCAGATGCCATACTATAAGCTTACTTTTCAAGTGAAGTTTCTTACGCTGTAGTTTACAAGGATTTGCGACCAA  
AAATACCACGATGTTGCCCAAATTCATTGGGAAATATTATGAAAAGATGTTGGGAATCAAATCCAGACAAAAAGGCCAGAGATGGACGAGATTGTCAAACCTTTTAGAGGCTATTGACACAA  
ACAAAGGGGGTGGCATGATCTCTGAAGACCAGTTTCAAGGTTGCTTTTGTCTTGCAGCTCGTGGCCCTTAGAAAATTTAATATGTTTTTAAAAGCTGAAAGAGTAATTAGGATGTGCATTA  
TTATATCCATTGTAGTTTCTGAAGTTTAACTTATATTTATTGATCATTTATTTGCCCTTTTGTATTGAATCATATCTGCTTATTTGGGGGCTCAAAATGATTTTTGTTTTTCTAATGTTA  
GAGATTGTTTGAAGTATTGTTGAAAGTAATATTCATTGATTTA

>comp156101\_c0\_seq3

CTCCCTCCGTTCTTTCAATGGCTCAAATGCCGCTCTTTCCCTCGTCGTTCTCACAGACATTTCCGGCTGGTGAGTGGTTCAGCTGTTATCGATCTCTAATTTTAGAACCGGAATCTCTCGC

TCTCTCTCTCCACCTTTCTTTTCTCCGGCTTTTAACTAATGGTCGGCTCGATTTGCACCACAGAGGATTCATCTGTGGCGGCAATTTTTCTGTTATGCTGGATCGATATATATCTCTTTCTC  
TCTGCTTGTAGATGTTGATTTTCTCGTAAAAATTAGTCGTCCAGATTGCGGGTTTCCGTAGTTTCAGATTTTTTTGAAGAAAGTTAGCGGTTTGGAGCTTTCCAATTCCAATATCTGCTGAATA  
CGAATTGATGCGTAGTGTCTTATGATGCATTTGTGGTAGGAACTGACTTCCCAGAAAATAAAGGTGGAACTTTTTCTCCTTCAAATGCAACGCTCATTCAACTGTGATGGGTTTTTTG  
TTCTGTAAGTAGATAGTTTTGGCAGAATGGATTCAAGGAAGGGAGAGGATAGTAATAACGTTGGAGTAGTTGGTGTGAGGCTATGGAAAGATCAATGTCTCAGTTGAAAGGACATGGGA  
GCTTCAAAAATAGGGATATTTATTTAGGGCTGATCAGATTGATCTCAAAAAGTCTAGATATTCAGTTGGAGAAAAAACTTTCCAAGATTTGGCTGAATGATGTGCTTGGCTCTAGAAGATCC  
AAGAAGGAATGGGAAATTGATCTTTCTAAGCTTGAATAAGGTATCTTGTAGCTCAGGGGACACATGGTACTGTGTTTCGAGGCATTTATGATGGTCAAGATGTTGCAGTGAAACTATTGG  
ACTGGGGAGCAGATGAACATGCAACAGATACTGTTACTGCTGCTCTTCGATCATCATTTCAACAAGAAGTTGCTATGTGGCACAACCTTGACAACCTACATGTGACAAAAGTTTGTGGAG  
CATCGATGGGAACCGCTGACCTGAAAATCCCAAGCAGTAACTCACTTCCAGCACAAGCATGCTGTGTTGTTGTGGAATACGTTTCTGGAGGCACATTGAAAACAATATCTTATCAGACACA  
GTCGAAGGAAGCTGCCTTTCAAGGTTGTGATTCAGCTCGCATTAGATCTTGCTCATGGCCTGAGTTATCTTCACTCAAAAAAGATCGTCCATCGAGATGTGAAAAGTAAAATATGTTGCT  
GACTGCCAATAGAAGCTGTAAAGATTGCTGACTTCGGTGTGCTCGTGTGAAAGCTCAGAATCCCAAGGATATGACAGGTGAAACTGGGACTCTTCAATATATGGCTCCAGAGGTTCTTGA  
AGGAAAGCCTTATAATAGAAAAGTGTGATGTCTATAGCTTTGGTATTTGTTTGTGGGAGATATATGTTTGCACATGCCATACTATAAGCTTACTTTTCAGTGAAGTTTCTTACGCTGTAGTTCA  
CAAGGATTTGCGACCAAAAATACCACGATGTTGCCAAATTCATTGGGAAATATTATGAAAAGATGTTGGGAATCAAATCCAGACAAAAGGCCAGAGATGGACGAGATTGTCAAACTTTT  
AGAGGCTATTGACACAAACAAAGGGGGTGGCATGATCTCTGAAGACCAGTTTCAAGGTTGCTTTTGGCTTTGCAGCTCGTGGCCCTTAGAAAATTTAATATGTTTTTAAAAAGCTGAAAGAG  
TAATTAGGATGTGCATTATTTATATCCATTGTAGTTTCTGAAGTTAATCTTATATTTATTGATCATTTATTTGCCCCCTTTTGTATTGAATCATATTCTGCTTATTTGGGGCTCAAAAATGATTT  
TTGTTTTTTCTAATGTTAGAGATTGTTTGTAACTGATTTGTTGAAAGTAATATTCATTGATTTA

>comp156111\_c0\_seq5

ACGCACTCTATCTACTCAAATTTTATAGCACATAACATCTTAGTTTACAATCAATTCATATAATACATTATTATGTGCGCTTGCTCCTATAAAAACAAAGAACAAAAAACAAGAGGAA  
GAATTACAATCAAATTCCTTATCAACTATCAAGTATAACAAAGCAAATAAATATAAACTAAATGAATAAAATGATAAAAAGGTTACATTTTGTGCACACTTCAAGCAAAGAAATGCATTTA  
AAAATAATGAAAATCATCGTCGTCATCATCATAGAAAAAATCAGGCAGCTCCGATTCTGTCCTGCCTTCCGTCCGTACTTGCCTCATCCATCTTCGAAAAGAATAGTTATGCAGCTTCATAA  
ATGCTTAATCAATTAAGAGAAATGTTACAAACATATATATCGCAAATTTATTGAAACAAGACTATGTTTATTCACTTATTGTGCTTTAGGCTTCTTTGGGACGGCTTTTCTCTTC  
TTTCTTAAAAACATCTTTTTATTATAAAAAATTTTAAAGTTTTAACCTAAAAAATTGTTTTAAGAAGC

>comp156111\_c0\_seq6

ACGCACTCTATCTACTCAAATTTTATAGCACATAACATCTTAGTTTACAATCAATTCATATAATACATTATTATGTGCGCTTGCTCCTATAAAAACAAAGAACAAAAAACAAGAGGAA  
GAATTACAATCAAATTCCTTATCAACTATCAAGTATAACAAAGCAAATAAATATAAACTAAATGAATAAAATGATAAAAAGGTTACATTTTGTGCACACTTCAAGCAAAGAAATGCATTTA  
AAAATAATGAAAATCATCGTCGTCATCATCATAGAAAAAATCAGGCAGCTCCGATTCTGTCCTGCCTTCCGTCCGTACTTGCCTCATCCATCTTCGAAAAGAATAGTTATGCAGCTTCATAA  
ATGATTTACGCGGAGACTCATATTAGGTACATCATCCGATCAATGAACTTCATTAGTCCATATACAGTCACAAATAGCACCAGGAGATGTTTGTGCTGAAGAAATTAGCCACATCCATG  
TTCTTCATCTTCTTCTTCTTCTTCTTAGCTTTTCTATTCTC

>comp156111\_c0\_seq7

AATGCTCTAAATCCGGATGTGCGAAACCTTAAGGGGCCTAAATCCTGAAAAGTGTGTTTGTAAACATTCATGATAACTCTTGTTAAATCTCATGTGATTGTTGGCCATATAGTGGATTTAACGA  
GCAGACTCCTCGCAAGCCGTTGGATTTTCGTAATTTGGCAAATACAAGATTTCAAAAATCCAGGATTTAGCACGAAAAGATGAAGTTTTTGGTATATGGCGCCTTCATTTGCCGTGAG  
ATCTGGCTTTGCATTTTAGGCCATTTGGCTGAATTTGCTCAAAAACCGCCTCAAATCCGGCCTAAATCCTGCTACCAAACAGCCCCTAAAGACCCTCCTAATCTTAAAAAGATGAAAATGTT

TTATGGCCTTACATTTACGCGGAGACTCATCATTAGGTACATCATCCCAGATCAATGAACTTCATTAGTCCATATACAGTCCACAAATAGCACCGCGAGGATGTTTGATCTGAAGAAATTAGCC  
ACATCCATGTTCTTCATCTTCTTCTTCTTCTTCTTCTAGCTTTTCTATTCTC

>comp156168\_c0\_seq1

AATTATATATTTTTATAAATAATTAATGAGATAAAAATGCAATATATAAAACTCATTAAAATAAATAATATTAATAATTTGTCACACAATTTTTAATTTTTTTTCTCACAAAATAAAGGCCTATC  
TTGAATTATCTAACCCGTGAGCAGAGAGAGGAGCACCGGCTGCGATAGAATTTTTAAGCCTCTGCATCTCCTTTCTCTTTCTCCTCGCATCGGCAGCTGCCAATCTCCGGCAAGCCGTGCGGT  
AAACCTCCTCCTGCCTCCGCCGCATCTCGTCAGCGGCTGCGGCAGCTGCGGCAGAAGCCGAAGCTAGATCTTCTGCACTCATGTTCAAATCCGGAACACTACGAACTCCCTTCCGCCGCCGA  
TGCCTTTCCACTCCGGCCAAAAACGAAGCTCTCTCTGTTTATAATCTGAAATCCCTGATTTGAAATAACCCTGGATCAAATTTGGCAGGATTCACGCGATTCTACATCTACCGGAGCTTTC  
AATGGAGAAGCCAGATCATCATCTTCTCCTTGCAAAGAGAGAACGAAATCGGCAGCGCATTAGAGCTCGAAACAGAAATAGGTTCTCCAGCATAAGAAACAGGAACAGTAGCTGAAG  
CGTGAACGGAACGCTTCTCTTCCCATCCACCTCGGGAACCCGAAATCCAAACCCATTGTTTTTGAACCTCCGGCGATCAAACCGACGATCGGAAACGGAATCTTGCCGGTGAAGAAGA  
TAGATGATTATATCTGCTACCTCTCGCTCCAAAATCGTGGGCTCACCGTCTCCCGATTCCGGATTCTTCTTTCTCTTTACAATTTTTCCCATTTGATTCCAACCTGAAAAAGGTAGGGCGGCGAC  
ATTTGAAAGGAAGGAAGAAAGGAAGAGAAGCAAGAAAAGAAAGAAGAGAAGAAATAATTTTCATCAGCATATAAAAGCCAATTAGTAAATGCTCTGCTACGAGTGGGAAGAATAATCTT  
ATAAAAACCTTGATAACTTCGTATATGTATTTAAAATTATTAAGGAATTTGATCAAAAA

>comp156190\_c0\_seq1

AAAAAGAAACTACAATGGATTTGCTAAATCTTTACTCTTTTTGTTATTTTTTAAGCTCTAGCATAGTTTATTTTCAAGTGATCAATATACATCGTAAGGGTATCTCCAATCGAAAAACTTATTT  
TTCATTCCAAAATACAATAATGCTCCAAAATGATGTAATTCATCTCTAAGTGAGCTCTAAAATATAGTAGCGCTCCAAAGTGACCCGGTTTAGTTTTAATGTTAGTTTTGTTAGTACGACGA  
GGTTGATTAGATTAAAAAACAATAAAGACCAAAACAAAAGAGAATCCGAACATGTTATATATAACATGATTATATGACATGATTTTGATATGTAGCTCTTCTTGATTTGTTGGTTGGTTGGGAG  
TTTACTCCCAACTAAGAGGTGTTGGATTGAGTCTTGCAATAAATATTGTGTGCGTTTGGGCATTGCTCCTAATTTCCCAAAAAAAAAACATGATTTTGATAGTTAAACCTTTAGTACTTTAA  
TTATTGGCCAGTTCAGACACGACAAAATGTTGAGCTATTAATTAAGAAGTTGAAAACAATATAAATGTGAAATTATTAGTTAAAAAGTTTGCCATATTCCTTGGAAGCTCAGAGAACATTT  
ATACAAAATTTATTTGAGTCTTATGAAATCTTTAGCTCCCGATGCTACATGTAATAGTTAAGCAAACCAAGCGCATGCTATCTCTCACTTGATTTATTACATTGTAACCATGATAATTAGCAACT  
TTTGTACAAATGCAAGCGCGACATTTATGCATTACTAACCAGCACAAATCATATAAATATATATATTCTGAAGCTGATCAAAGCCATTTACCTCATTCAATAGTTCTTACATATAAGCATG  
ATGGTTTTCTTGATATCTAACTTAATTAATCACCATTAAGAGATTGGTCAGATTGGATTGACCAGAAATCCTCCACACTCCAAAAGTTCTCTCCCAATTCACCAGTGTGTATGAAGGAGGAT  
AACCTTCAGGATTTGATTTGGGTGAACGGGATAACTTTGCTGAGCTATTCTTCTCAATGCTACTTGTATGGCTTGTGCTGGCCTCATCAATGATCATTGGCTCGAGTAATCGGCTGCAT  
CGCCATTCTTAACTTCTTCTGAATTCAGTCCCTCCAGTAGTTCTTGATCTCATTATCAGTCCCTCCCTGGAAGTTGCCTTGCAATTTTTGACCACCTGTTTCCCATCTGGCATGCAGCTCCA  
TGATCAGCAGCTGCTCCTCCGGCGTTATGTTCCCTCCTCACGTCTGGCCTCAGATAGTTCAGCCATCGAAGCCGGCAGCTCTTCCCTGTTCTCTTCAAACCTTCTCATAAAACCCACCA  
ATATATATATCACCTTAATCAATCAAATCATTCTCAAACCTCAAAAAATAAAAATCCTTCAAGAAATATTGCATCTCAATCACCTGCAGATCTGGCAAGATTATCCATACTCCCTCTCCATGG  
TTGGCTATATAGTTTATGAGGATGAGGTCTCTTCCATAGTCCATGGCCCTTCCCTCACCTCAGCCTCCTGGTTTCCGTTTATCCTCTTATCCATGTTGCTCGATTCTTCCACCATGGCAGAGT  
CGGCGGAAGAGAGAGAAAAGTTAGGTTTGTAGTATGGTATGATATGAGAGAGGAAAGAGTGTGTGGAAGAGAGAGAGGGGGGGTGGTGAGGACGGCAGGAAGTTGTTGGTGAGGTCTTT  
ATAAAGAAGAATAACAAGTACCTTGTCTTCATTAGGCTTAATTAACGATGTTAATTATTGCATATATTGATGTTAACGTCATAGAAATTGATCAAGGTTTATTATATATAGCTCTAGGGGAA  
CGTGTAACGATCTTGAACGCTTCTTAAGAAAACGCAAGCTTGCATGGAACCTATTGTTGTAGTCCGCTGGAACCAAGTTAGCCACGAGGAATAATATCTTTTTAATCCCTCCAGAAAAGTCTA  
GACGGTGACAGGCTTCCGCTCTATGCTTTACAATTTAGACGTGCTGGTTCATCGTAACGCAGCTTTTGAGGCAAATATACTGTTTTTTATTTTTCATAAACTCAAATGAAATTTATGTAATTTA  
CCCACAGAGATTTATGGTGGTTAGTTGATTAGCTTGATTAAGAATCCCCATCCGAATTTGAATCCCCCTATTACAAAACCTCATTTTTTTCAGTAGGGCAAAGCAAGTGTGGGCCAAAAGACG

GAAGGTGAGCTCGCTAGGTTTCAGCTGACGGATTATTTATGCCGTCAAATACTTTCTGATACCCGTCAAAAAATTAGCTTGATCGGGCACGAA

>comp156190\_c0\_seq10

ATTAATTAACATAACATTAATTAATTAATTTAAATAAACTAATTAAGTTATTTAAATTAACAATCAACTAATTTAAATTCGATAATTAACATAATTTACTAGAACTAGTATTTTCGTCAG  
AAAAATCCATCAGAAAAGGGCGTTCTCTGTGGTGGGAAAAGCTCTAGCATTCTACCTTTCAAATGTTTTAGTTTAGCCTCTAAGTTAGAGAAAATTATTATCATTTTTTTAATCTATT  
TTTAACAAAGATGATCTTGTCTACACTATTGATTATAAGTGGGTCCTCTCTCTCACCTACCTAGACTTTAATAGCATAATTTTTAATTTTTTAGAAGTTGCTTTGTGGGCACCACAACATC  
AACGTTGTCGAGGCCCAATTTGAGCTCTAAAGAAAATGGAGAAAATGGAGGAATACAATGTGTTCTTCACCTCAGTGCTGAGGCACATATGAAGATTCTCTCGGAGCATAGCGGAGCTG  
AGGAATTGAGTGCCAAAACACTAGGCCCAAACTTCATTTTTATAATAAAAATATCTTGTGAGGATTCAAAGAGTAGAGAAAAGGGAGAGAGGGAGGTGAAGAAAAGAGAAGAGAGAGA  
GAGAGAGAGTTTCATTAGATTGATTTCTGA

>comp156190\_c0\_seq11

TTGATATTAAACTCTATTTAAGAAGTAATAAAAAGGTAACTTAAATCATTTCGTAGATGAATAATTTAACGAAAATCTTTTATAATTATCTGTATGATTATCATGACCACACCTGACATA  
AAATTAATTATTGAATTGATTAATAGAAAAAATAGATAGAGAGTTATACTTCTACACCAGGCAAACTTTATAAATATCCATTTTTTAGCTTCTGTTATCCACTTTCATAGTTTCTTCTATGA  
CAGCTTAAAGAGGATGCAGG

>comp156190\_c0\_seq2

AAAAAGAACTACAATGGATTTGCTAAATCTTACTCTTTTTGTTATTTTTAAGCTCTAGCATAGTTATTTTCAAGTGATCAATATACATCGTAAGGGTATCTCCAATCGAAAACTTATTT  
TTCATTCCAAAATACAATAATGCTCCAAAATGATGTAATTCATCTCTAAGTGAGCTCTAAAATATAGTAGCGCTCCAAAGTGACCCGGTTTAGTTTTAATTGTTAGTTTTGTTAGTACGACGA  
GGTTGATTAGATTAAAAAACAATAAAGACCAAAACAAAAGAGAATCCGAACATGTTATATATAACATGATTATATGACATGATTTTGATATGTAGCTCTTCTTGATTTGTTGGTTGGTTGGGAG  
TTTACTCCCAACTAAGAGGTGTTGGATTGAGTCTTGCATAAATATTGTGTGCGTTTGGGCATTGCTCCTAATTTCCCAAAAAAACAATGATTTTGATAGTTAAACCTTTAGTACTTTAA  
TTATTGGCCAGTTCAGACACGACAAAATGTTGAGCTATTAATTAAGAAGTTGAAAACAATATAAATGTGAAATTATTAGTTAAAAAGTTTGCCATATTCCTTGGAAAAGCTCAGAGAACATTT  
ATACAAAATTTTGGAGTCTTATGAAATCTTTAGCTCCCGATGCTACATGTAATAGTTAAGCAAACCAAGCGCATGCTATCTCTCACTTGATTTATTACATTGTAACCATGATAATTAGCAACT  
TTTGTACAAATGCAAGCGCGACATTTATGCATTACTAACCAGCACAAATCATATAAATATATATATTCTGAAGCTGATCAAAGCCATTTACCTCATTCATCAATAGTTCTTACATATAAGCATG  
ATGGTTTTCTTGATATCTAACTTAATTAATCACCATTAAGAGATTGGTCAGATTGGATTGACCAGAAATCCTCCACACTCCAAAAGTTCTCTCCCAATTCACCAGTGTGTTGATGAAGGAGGAT  
AACCTTCAGGATTTGATTTGGGTGAACGGGATAACTTTGCTGAGCTATTCTTCTCAATGCTACTTGTATGGCTTGTGCTGGCCTCATCAATGATCATTTGGCTCGAGTAATCGGCTGCAT  
CGCCATTCTTAACTTCTTCTGAATTCAGTCCCTCCAGTAGTTCTTGATCTCATTATCAGTCCCTCCCTGGAAGTTGCCTTGCAATTTTTGACCACCTCGTGGGAGAAAAGAAATGAATTTTAA  
AGTGTAATTAGATCATAAAGTCAAGAGGGTGAATTAATTAATTCCAATATGTTAGTATATACTTTTACATTGATAATCTTTCTAAGCTGTAAGACAGTTCTTCTATTCTATAAATTTATTAT  
TTTATAATCATCTTGATTGTTTTCTTGCAAAGTAAAAGCAAATAATTACATTAATCTAATAAGATTTTATAAGCAAATAATTGAAATCCCTAGTTAACTTTCAATAACAACAATCTTTAT  
CTCACTATGTGGGGTCGGCTACATGA

>comp156190\_c0\_seq9

AAAAAGAACTACAATGGATTTGCTAAATCTTACTCTTTTTGTTATTTTTAAGCTCTAGCATAGTTATTTTCAAGTGATCAATATACATCGTAAGGGTATCTCCAATCGAAAACTTATTT  
TTCATTCCAAAATACAATAATGCTCCAAAATGATGTAATTCATCTCTAAGTGAGCTCTAAAATATAGTAGCGCTCCAAAGTGACCCGGTTTAGTTTTAATTGTTAGTTTTGTTAGTACGACGA  
GGTTGATTAGATTAAAAAACAATAAAGACCAAAACAAAAGAGAATCCGAACATGTTATATATAACATGATTATATGACATGATTTTGATATGTAGCTCTTCTTGATTTGTTGGTTGGTTGGGAG  
TTTACTCCCAACTAAGAGGTGTTGGATTGAGTCTTGCATAAATATTGTGTGCGTTTGGGCATTGCTCCTAATTTCCCAAAAAAACAATGATTTTGATAGTTAAACCTTTAGTACTTTAA

TTATTGGCCAGTTCAGACACGACAAAATGTTGAGCTATTAATTAAGAAGTTGAAAACAATATAAATGTGAAATTATTAGTTAAAAAGTTTGCCATATTCCTTGAAAGCTCAGAGAACATTT  
ATACAAAATTATTTGAGTCTTATGAAATCTTTAGCTCCCGATGCTACATGTAATAGTTAAGCAAACCAAGCGCATGCTATCTCTCACTTGATTTATTACATTGTAACCATGATAATTAGCAACT  
TTTGTACAAATGCAAGCGCGACATTTATGCATTACTAACCAGCACAAATCATATAAATATATATATTCCTGAAGCTGATCAAAGCCATTTACCTCATTCATCAATAGTTCTTACATATAAGCATG  
ATGGTTTCTTGATATCTAACTTAATTAATCACCATTAAGAGATTGGTCAGATTGGATTGACCAGAAATCCTCCACACTCCAAAAGTTCTCTCCCAATTCACCAGTGTGTATGAAGGAGGAT  
AACCTTCAGGATTTGTATTTGGGTGAACGGGATAACTTTGCTGAGCTATTCCTTCTCAATGCTACTTGTATGGCTTGTGCTGGCCTCATCAATGATCATTGGCTCGAGTAATCGGCTGCAT  
CGCCATTCCTAACCTTCTTCTGAATTCTAGTCCTCCAGTAGTTCTTGATCTCATTATCAGTCCTCCCTGGAAGTTGCCTTGCAATTTTTGACCACCTGTTTCCCCATCTGGCATGCAGCTCCA  
TGATCAGCAGCTGCTCCTCCGGCGTTATGTTCCCCCTCCTCACGTCTGGCCTCAGATAGTTCAGCCATCGAAGCCGGCAGCTCTTCCCTGTTCTCTTCAAACCTGCAGATCTGGCAAGATT  
ATTCCATACTCCCTCTCCATGGTTGGCTATATAGTTTATGAGGATGAGGTCTCTTCCATAGTCCATGGCCCTTCTCACCTCAGCCTCCTGGTTTCCGTTTATCCTCTTATCCATGTTGCTC  
GATTTCTCCACCATGGCAGAGTCGGCGGAAGAGAGAGAAAAGTTAGGTTTGTAGTATGGTATGATATGAGAGAGGAAAAGAGTGTGTGGAAGAGAGAGAGGGGGGTGGTGAGGACGGCA  
GGAAGTTGTTGGTGAGGTCTTTATAAAGAAGAATAACAAGTACCTTGTCTTATTAGGCTTAATTAACGATGTTAATTATTGCATATAATTGATGTTAACGTCATAGAAAATTGATCAAGGTT  
CATTATATATAGCTCTAGGGGAACGTGTAACGATCTTGAACGCTTCTTAAGAAAACGCAAGCTTGCATGGAACTATTGTTGTAGTCCGCTGGAACCAAGTTAGCCACGAGGAATAATATCTTT  
TTAATCCCTCCAGAAAAGTCTAGACGGTGACAGGCTTCCGCTCTATGCTTTACAATTTAGACGTGCTGGTTCATCGTAACGCAGCTTTTGAGGCAAATATACTGTTTTTTATTTTCATAAACT  
CAAATGAAATTTATGTAATTTACCCACAGAGATTTATGGTGGTTAGTTGATTAGCTTGATTAAGAATCCCCATTCCGAATTTGAATCCCCCTATTACAAACTCATTTTTTCAGTAGGGCAAAG  
CAAGTGTGGGCCCAAAGACGGAAGGTGAGCTCGCTAGGTTACAGCTGACGGATTATTTATGCCGTCAAATACTTTCTGATACCCGTCAAAAAATTAGCTTGATCGGGCACGAA

>comp156207\_c0\_seq3

AATGAAAAATATTTGATCTAACAGCAAGGCATGTTTGAAAGCAAAAATAAGTTCAAATATACTTAATTATAGTTATTTGCTTTCACATTAAGAAAAAAGAAATCTTTAAAAGCAAGCCAG  
ATATGTTCTCAGCTTTAGCTAACAAATGGCACAGATGCATCATGCGGATAAGTTAATGGCGTCCCATACGGGCTCTTCTGGGGCATAAGGTGAGTGGAGCTTTAATTAATTGCTTTAATG  
TTCTTTTTTATGTATTGTGTTAATTTATGTGAACACAGGAATTGGAGGAGGTTGGAGGGAAGGAGGAATTGGAGAAGGAGATTAAGAGAAGGATTAAGGTTTTTAATAGCAGCTCCAATG  
CTAGCTAGCTGAACTTCTGGTTTTATTGTTTTGATTTAATATTTTCTTAGGTTTTGTTTGGGACGGTTTTTTT

>comp156209\_c2\_seq1

TTTGGAAAAATTCAGATTTCAATTCAAAATTCAGATTTCAATCTATGAACAATTTGATAGAAGTCAAATCCATATTCATTTTTTACATGATTTGCTATATAAATTTGATGCATAAAAAAAAAAAGT  
TTTTTTTCTGAATTATACATAGTAAACCATGCCTACTTTAAGCAACAAAAGAGTGAGGCACACTTAACTGAAGATCAGGAGCTCTGCAATTCCTGCTAAGGAAAGCATAAACAATATCTATG  
GCCAATTTCTTTATCAAGGAAGATGAACTCCTTGCCTTAGCGTAAGAGTGTCCAGTAATGTATACCACACCAGATTCTTTAGCCTTAAGGATCTCCATAGATTGCTCACTTCTAACAAAACC  
CTCTACCAGACCAAACCTCTCCAGGTTTTACTAAACCTGCATTCTCTTCTGATTTCAGAACTTCTTCCATCTCCACAAAATGAGATAATTTTAGACACAAGCCTGTTCTCAAAGTCATAGTTTT  
CTTGGCGCAAATCTTTGTATCCATATCTACAATGCATCTGAACATTAGATGTTCTTCCGGCCAAATCCAGCCGACGAGAAATCTTTCACACTCAGGGATGAAGGGAACCTGAACTGATTT  
AATGCACACAAAGATTAGAACTTGATGAAAGGCTGGAAGGCTCATCGCAAAAATGTCCAAAACAGCAGGAACACCCGGTCACCAAGTCAGTATAAACCCAGTCCAATGCCCGGCACCCGA  
ACAAGTCCAAGGTTAGGACCTAAAGCTAATATCTTCTGAACTGAGACCTTATTCTGTAAATCAAATTCATGCTTAAGCAGTGTACCATAGTTCCAGATGTACATCACACACATAAAGATTAT  
AGAAAGTGTAAAGAGGTATCCAACCCCTTCAGGGATCTTGATGAAGGAAGCTGAGATGTATATAAGCTCTATAGATCCAAAGAATATAAGAAAAATGATAGCTGAAATAATCTTCTGTTTC  
CAGACAATTATTATCACCAGAGACATCAACCAAGTTGTTACGAAGATCACAAATTTGTGACAGCAAGCCATATGCATGTCCAATCATATTTGTATTTCTAAGTCCAATTGTTACAGCCAAACA  
AAGGCACATTAGAATCCAATTGACCTCTGGGATGTATATTTGACCATATATGTGATTTGAAGTATGAATAATTTTCACTAGAGGGAAGCAATTCAATGCACAGCACTGGCTTATAATAGAAA  
AGGTTGCTGAAATCACAGCCTGACTTCCAACCTACTGCAGCGCATGTTGCTATTATGAATACAGGCCAAAATACAGTTTCTGGTATAGCTTTATAGAAGCTTCTCTGTATATCATCGTGGTGC

TTAGAAAGAAATGCAGCCTCACCCATGTAAGCAAGAACGAGGCAAGGATAGACCAGAAAGGAGAAAGCAATCTTAATTGAAACTGGAGAGAAATGACCCAAATTGGCAAACATGGTCT  
CTGCACCTGTAATGCATAGGACCACACCCCCAAAGAAACCAACCTTCTACCCAGTACTGCTGAGAAATTTGTACATGTACACTGGTGAGATGGCATGGAAGATACTTGGATTCCATTT  
AAATATGTTATATATAACCAATAACACTAATGCACAGAAGCCAAGCAATTACAATTGGAGCAAATATGAAACCAACTCGATGTGTTCCAAAGCGTTGAAGTGAGAAGAGTGCCACCAGGAT  
CAAACATGATAGTGCCACTATATAATTTTCATGAAGATGAGTTATTTTCACTCCGAGTCCAGAAACAGCAGAAAGAAGTGGAGATTGTGGGAGTGAGCACCCCATCACCATCGACATGCA  
AGTTCOAAGCAAAAACAACAATTAGAAGCCCATGTTTTAATCTCGGGTACCTACTGAAAAAATCATTAAAGCATAACACTCTGCCAAGTGTCTGTAGATCCTTCAACATCATAAGTTGACAAA  
TTCTCATCAATAGCTTGTGGTTAGGCAAAATTGACAATCTGGCATGCCGACATAGCAGAGAGTATAGTGCAAATGTACCGCCTTACCATTATCATCAGCTGATAAGACAAAAGTAAATGTA  
TTTGAACAGTGGAATGAGAGTGAGAGTCCAAAATATGAAAGAAAAAACCCCAAAAACCTTCTCATCACTCTCGTGCAGGCTCAATTTCCCTGAGAAAGTAGTCTTATAAACATACAAAAG  
GTGAAGTGCTAAGATCACCATACACCACCCAGACTTTGGTAAGCAAGTATGAGTACATCCTTGTAAAGAAGATTCTTCGGATTGGAGGGTTCTGGGCCTTCTCCTGTGCAAATGCTG  
GTGGTTTTGAAGAGCTCATGAGGAAGAGGGAAGCGGCTGAAGCAGTGATGAAGGAGGGAGGAAGGTTAAGT

>comp156217\_c1\_seq1

ATTATCTGAAAACATTATGGGCAATGTGAAGGAATCGGAGAATGGTGAGGCATATTTTTACATTTAATGGCTGATCATTCAATTAATTATTTAAATTATTATTCATTTTTATATTTAATTGTTCTACT  
AATAATTTAATTAATTATTTAAGTGTGAGTAAGTTAGTTTTAATAATAAATTATACTACTAATTATCTCAGTAATCACCTAATTAGTTTTAATTATAAGCGATAACTACAAAAGTTGGTTGCTCCT  
TAAAATGTTAAGCCGAAAGAAAAAAGTAGAGGAAGAGGAGATAGAGAGCAAGAGACCCTACTTCTCACTCAAAGTCAAAGCAGTTAGAATATCTTTGAGATCAAAGAGAGATGAGGC  
CAAGAAAACCTTTCACTATAATAAAAAACAAAGGCATGGAATATCCGGCTGTAGATATGACTAAGTTTTATCAATGAGACAAAAAAATCATAAGGAGAACCTTTCAATCTGAAATTGTAAGCA  
AATCAATATATAATTATAGATTGAGATAGTGGTTAAATTTCTTTATGAGACCTTACATGCTAAATTAGGTTTACATACTAGAACAAACCAAGGCCTCCTTTATTCCTTAAAGACTTATGAAT  
AAAGATTCTAATTTTATGGTTGATAGAAAATGTGATGTAAATTTTGTGATAACAAGGCAATATACTGGTGATGTTACATGTGCTATAATTCCTTTAGATGTGTGTCATGTAATCCTATAGAATA  
CATTTTATTGAATAAATAATTTGATTATAAAAGATAGCAAACCTTATAATTTTTAAAAAATAGTAATAATTATGTGGAGCATAAGGCAATTGCATAGGTGAAGGACATAAAAGAAGCACAAT  
AAGCATGATAGAAGAAGATTGTTTTCAATGATTAGAGCCTTTTTCAATAGTATTTAACTAAATAAGAGTGTCAAATCTAAAGCATAAAAGGAGGAGGCAAGTGTATAGTGCATCATA  
AACCTATCATAAGGTCAATGACAAAAGATTAGTGGCAATAATCAACCAAGGTGTCTTCATATGATTCCTAAATTTGTGGGGAGCCACACCAAGACTTATGCAATACATTTCCAACATCAAG  
GGATAACCAAGTGTGCTACAAATCATTTTCCACTACTCAAGAAGCCAAACAATGAACACTTCTCAAATAAGTGTCTACCTTGACATCACCAAGAAAGTGCCAAACCACCTCGGCATTC  
AAGGAACCACACCAACTTAAAGAGTTTTTTTTATCATAAGGCACAACCTTGTATTATCAAAGATGAATAACAAATTATAGTGTAAGGTCCTCATAGAGTCCTAGCGCATAACAATGGTGCCG  
CATGTGCTATTGTAAACATGGAATGATAAAACAATATGAAAAAAAAGTAAAAAAGTAACTAATACTGAAATACACTCTAGAAAATTTTCAAAAACAAAATGTAGTTTAGAAAACCTGATTT  
GTTTGTTAAGTAGCAAATTTTGGGTTTTAGGCTTACCTATTAATGAGAAGGCCTTCAACTACGATTTTAGCTAAAGGAATCATCTAAAAAAAACATAAAAAATCATAGAGAACCTTAACTT  
TATTGCTCAAAGACTAAAAGTTATGGGATGAGACAACCTGCCTAATATGGACCTCAATAGTGAACAAAGGTGCAATGGAAGGTTAAAGCTGAATGCAAGCTTGCCATTCCATTAAGGTGT  
CCTTTGATTCCTTACTTATTTGAAGAATTTTGTATCAACATATTTTTATTATAATTCATAATAAAAGAGAAAATATGTGCTACACAATAAGATGATGAAGAGCTCGATGACAATTTG  
TCTATTTTACATCTTATTTTAAAGTTCAAATGAGTTTCAAAGTAAGGAGACCTAGTATCAACCACAATAACATCAAGCCTTTATCCC

>comp156256\_c1\_seq3

AGGATGCTTTTTTTTTTTTTTAAATCAATAACAATTTTCAGAAAATCTATGAACCTTAAACAATCTTCCATGCTGTTCTTATAATTACACCTTCCAGGCTTGCAAGATTTACCTTAAAAATATAT  
AAATATATATACAAATTAACCAAAAATAAATAAACAGATTCATGAATATGAATAGAGAGGGGAAGAGAAGTATATGAAGAAGGCTATAAGTGAAAGGAGGAGCTACAGCAAGTCTAAGCC  
AGGAGCCAGAAGTCTTGTGTGCTTTGTGTTGAGAAGATAACCTGCATTCTGACCTTCTTCTGGACTCCAACGCAGAGGCACTTGCAGTGTCTATCAAGAAGTCTGCAGTGTCCAAC  
CCTCTCCCACTCATGCTTCCACTGAGCTTGCATCAGTTGGAGATCACGAGGTTCCAGCTTCTTCATGATTCGTCCGGCATGTATCCCAATCCCAACAACACCGCTTTGATCCTCCGCTCA

CATCGGCGATTCTTCCATGTCATCATTTTCATCAGAGAAATTACTCTTCGAAGCCATGGATATATATGCGAGTCAAATTATAAGCAGGAAAATCATCCAAATAAGCAACGATGTAG

>comp156256\_c1\_seq5

AGGATGCTTTTTTTTTTTTTTAAATCAATAACAATTTTCAGAAAATCTATGAACTTAACAATCTTCCTATGCTGTTCTTATAATTACACCTTCCAGGCTTGCAAGATTTACCTTAAAAATATAT  
AAATATATATACAAATTAACCCAAAATAAAATAAACAGATTTCATGAATATGAATAGAGAGGGGAAGAGAAGTATATGAAGAAGGCTATAAGTGAAAGGAGGAGCTACAGCAAGTCTAAGCC  
AGGAGCCAGAAGTTCTTGTGTGTCTTTGTGTTGAGAAGATAACCTGCATTCTGACCTTTCTTCTGGACTCCAACGCAGAGGCACTTGCAAGTCTATCAAGAAGTCTGCAGTGTCCAAC  
CCTCTCCCACTCATGCTTCCACTGAGCTTGCATCAGTTGGAGATCACGAGGTTCCAGCTTCTTCATGATTCGTCGGCATGTATCCCCTACAAAACATCAAAGACAAGGAGATGATTAG  
TTGAATAAATGAACAACGAACAAATATATTGAACCTCAAGAAGTCAATGGTCATGCCAATCCCAACAACACCGCTTTGATCCTCCGCTCACATCGGCGATTCTTCCATGTCATCATTTTCAT  
CAGAGAAATTACTCTTCGAAGCCATGGATATATATGCGAGTCAAATTATAAGCAGGAAAATCATCCAAATAAGCAACGATGTAG

>comp156256\_c1\_seq6

AGGATGCTTTTTTTTTTTTTTAAATCAATAACAATTTTCAGAAAATCTATGAACTTAACAATCTTCCTATGCTGTTCTTATAATTACACCTTCCAGGCTTGCAAGATTTACCTTAAAAATATAT  
AAATATATATACAAATTAACCCAAAATAAAATAAACAGATTTCATGAATATGAATAGAGAGGGGAAGAGAAGTATATGAAGAAGGCTATAAGTGAAAGGAGGAGCTACAGCAAGTCTAAGCC  
AGGAGCCAGAAGTTCTTGTGTGTCTTTGTGTTGAGAAGATAACCTGCATTCTGACCTTTCTTCTGGACTCCAACGCAGAGGCACTTGCAAGTCTATCAAGAAGTCTGCAGTGTCCAAC  
CCTCTCCCACTCATGCTTCCACTGAGCTTGCATCCGAGAAATGAAGAACCCGAACGGCGCTGACCAATAACAAGCAAATCGACTCCAAGTACCTTCGTCTGCGACAGAATCACCGCCGC  
CTTTTCCCTTCCCTCCATCTCCACCTTCTCTACCTGAACCTTAACTTCGGCTGCGCCGCTTCGACGCGCTCTCATCGCTCCAAGAAGTCTGACTCCCCCATCCCCGACCCAGCTG  
ACACTACCGATCCAGACGACGACGAAGACGACGAAGACGAAGATGACGTCGACGTTAGAGCCAAGTCTGATGGTGTGCTGGTTTCCAGCACTTCTGACGACATCGGCCGGCG  
GAGGAAAGCCGATAAGCCGCCACCGCCGCTGACTAGGGTTGACGTCGACGTTGAGGAGAATGAGGTCATCTTGTTCGAGAATGGCGTGGGAAAGGGCCATTGAAGGGCGACG  
GAAGATTCGCGGCTGGCGTGGCGATGACCATGACCCGACGCTTGGTTGGAGGGAGAGGGCCGCGCGATCGGCGGAATCCATGGCGACCGACGGCGCCGTGTCGTCGCGCGGCTGA  
GCTTTTTTCCCTAACGCTATTACAGGTGGCACTAAGAGGGCATTTTTGTAAAGAGAAAGGTAGAATAGTGGTTGTGGTTTCTGGAGCGGAACAAA

>comp156315\_c0\_seq1

CTCTTTCACCTCTTCTTCAGGCCTTCCGGCCAAAAAAGCTCGGAGAAAGACTAGCTAGGCGGGGAGAAGAGGAAGATAATAATAAAACTACGTGCGTGTCTTCCATAAAAACTCCAT  
TACCATCTCTCCCGCCATGGCAGCCTTCTCCGACGAAGAACAGCGGAAGCGCCGCTACAGGCGGATCGCCGGCTCCATCGCTTCTCTATTCTCCTCCTCGCCGTCGTCGGCACCAGCCTG  
CACGCTCTACAGCCAGAGAAAGACTCCTTCTCCACATCGTCACATCCGCCACTGCCGTTCCCCCGCCACGCAACTGCATTCCACCGCCAAGTCCATTACAGGTAATGTGCGAATC  
CACCGATTACAAACAAACCTGCGTCTCCAGCCTCAACAAAGTCGTGAAGAAGAACCACCGACCCCAAGAACTCGTCAAGGCCGCGCTCGCCGTTGTTCTCGACGAGATCAGCACG  
GCCTTCCGCCGACCCGCTCCTAGCCGACAAGGACCCGAGAGTTTCGTGGCGCCGTCGAAGACTGCCGGCAGCTGTTGAGGACTCCAAGGACGAGATCAAACGTTGCTCGACGACA  
TCGCTCCACCGGCATTGAACATATCCCAGGAAGTCGCGGACATCAGAACATGGCTGAGCTCTGTCATGTCGTATCAACAAACCTGCATTGACGGTTTCCCTGACGGTGAGCTTAAGG  
TGAAGCTGAAAAGACGTTGAAGACAGCAAGGGAGCTAACGAGCAACTCTTTGCAATTGTTAAGGAGCTATCGAGCTTTCTTGAATGCTGGAGGTTCCGGGATTGACCGTTAGTGGA  
AGGAAGCTGCTCGCTGAGAAAGAAGAACTGCACCAATTTGACGATGAGGGCATTCTTTCGTGGGTTTCATGAGGATGAGAGAAGGGTTCTCAGGCAGGTCATAACGAATCTAAAGCCAA  
ATGTTACGGTGGCTAAGGATGGGACCGGCGATTACACGACGATTTCAATGGCGTTGGCGAAGATTCCGAACGAGTACACTGGAAGGTATGTGATCTATGTTAAAGAGGGAGGTACGAGG  
AGACAGTAAATGTCACGAAGAAAATGCCGAACCTTGACCGTTTACGGCGATGGAAAGTGCGAAGACGATCATCACTGGAGAGAAGAATTTTCGTGATGGCGTCAGAACTTTCATGACTGCT  
ACGTTTGTGGTCTCCGGCGACAACCTCATGGGCATTGGCTTTGGCGTCCGCAACACCGCCGAGCCATCAAGCACAAGCCGTGGCAATCCGGGTCCAATCCGATCGTTCCATCTTCTTC  
GAATGCCGCTTCGAAGGCTACCAAGACACGCTCTACGCCAAGCCAAGCGACAATTCTACCGTAGCTGCGTCATCGCCGGCACCGTCGATTTTCATCTTCCGGCGACTCCGCCTCTGTCTTC



CAAAACTGCCTCATGGTCATCCGTCGCCCCCTCGACAACCAACAGAACATCGTCCTCGCCACGGCCGCGTCGACCGCCACGAAACCACGGCTTTGTCCTCCACAAATGCAAGATCAT  
CGGCGACGACAAGCTGTTGCCTTTCAAGAACAAGATCAGGAGCTACCTCGGCAGGCCGTGGAAGGAGTACGCGCGGCATGTGATCATGGAGACGGAGATCAGCGATGTTATACATCCCG  
ATGGGTATTTGCCATGGGAGGGGGATTTTCGCGCTCAATACTCTATTTTACGGGGAGTATAACAACACAGGGCCAGGGGCGAAGTTTGATGGGAGGGTGAAGTGAAGGGCGTGAGGAAA  
CTGAAGAGGTCGGCGGGCAGGTTACGGTGGCGGACTTCATACAGGGCACTGAGTGGATAAATAATGAGAGAGGGGGAGTCACCATTCTGTGCGTTATGGCTTGATAACTGAAGGGA  
ATTGCAAAGCTGTAGCGTTTGATTTGCTGTTAATTCGTTTGGGAGGGGTTTGATTTCTGTTTATTAATTTGTGTTTGTATCGACCGTTAGAAAAGATACAAATTAATGAAGGGAAAAAAGAA  
AAAGCTGTTGCTTGCAAAGCCATTTG

>comp156316\_c0\_seq1

AATAAATAAATAAATATTGTGAACCTTTTCTCTCGCTCCTTCCGCTTCCATGGCCGTTTAAACCAATCTTTCAACCGCGATTTTAATTCGTTTGTATGCCCCAGATCCCAAATGTTGATAGAA  
ACCCGGTAAAACCTCTGCAAATCCCATGGATTCTGATTCGCTTCTCCTTATATTGCCTTCACTCGTAGCTGTACGCATGAACGTGTCTCAGAGAGGAACAGGGAACGAACTCGTTGAGAA  
AATTCTCGAATGTCAAGAATCGGATGAATCAAAATTTTCCAAAAATTTGTAATGCGTTCGTTCAATTTCCCTATCACTGCAATCGACGCTGCAAAGTATTTTACAGCCCCGTGCACAAA  
GCCGTGCTCACTCGCGATCATGCTGCCCTAAAGCAAATCCTTGCCGCTATTCCCCGCATCTCCCCGCCTTCTCAAAGCCTAACCGAGGCCGAATCCATCGCCGAGGAAGACAAGGCCAAC  
GCCATTTCACTGTCATTGATCGCCGCGATGTCTACGAGCGTGAAACCCCTCTCCACCTCGCCATCAAACCTCGGCGATGCCACCGCCGTTGAGATGCTCATGGCCGCCGAGCGGATTCA  
AGCCTCCAAAACATGCAGGGATGGAGCCCTCTTCAAGAAAGCCATCTGTGCTCGAGAGGAACAATCGCAAAAATCATTTGTTGAGCATTACCAGGCCTTAGCCTGGGTCAAGTGGTGTAC  
CGAATGCCACGCATTGTGGCTGCCATGAATCGGATGAGAGATTCTATATGGAGATCAATTTCCATTTGAAAGCTCCGTGATCCCTTTTCATATCAAGAATTGCCCCATCTGATACCTACAA  
GATATGGAAGCGGGGATCGAATCTGAGAGCAGATATGACGCTTTCGGGCTTCGATGGTTTGAAGATTAAGCGAGCCGAGCAGAGCGTTTTGTTTTTGGGAGCAGGTTTCGGTTGATGGGAA  
GATAAAGCCTGCTAGGTTGTACGTAATATCGCATAAGGATAAGGAGGTTCTTGATGCTTTGGATGGAGCAGGGGACTTGGTTTTCTGATGCTGACTTACAACAGGAGGTTGCAGCTCTGTTT  
AGAACCAATGTTCTTCGACCAGGGCTTGATGTTACCCGTACGGTGTAGTTCCACAGATGAATTTGGAGAAAGCAGCAAAGGTTGGAGATGGTTGGGCCATGAAAGCTAAGGTCTACAA  
CATGCATCATGTAGTTGTTAGTATAAGGTCACGGCGGGTTCCCTGGTGCCATGACTGATGACGAGCTATTCGCTGTTAAGAATGATGGAGAGGATGTTGGGTTTGGTGATGAGCTTACTGAG  
GGAGAGAGGAACAAATTTGAGGCAGCTTTAAAGATGGAAACTTCAGATTCTGGCTATTTCACTCAGCAAAATGATCAGGGCCCCGTTGTTGATATGACTCCTACTCGTAATGGGGGATGT  
AGTGATGTAATAAAGAGCGGAATGGATGGTTTGGAAATTGGAATAATGGTAAAGCTCCCAAGCATGGCTTGGAGAAGAAGGATTTAGTTTCAAGGCAATCTCTTTGTGGTGAAGAGAA  
GGTAAATGATCTCCCGAAGGGTTCATCAAAGATGCCATATAAGCAAGAAAAAATTTCTATTGATAGGAGTAGAGATGAGTCCAAAAAAATTTGCTGCAAGTTTGGAGAATGGTCATCAACT  
CAAGGAGAGTGTAAGAGAGAATGAATATAGCAAGGGTTTAAAACAGTTCTATGGCTTTCTCCTAATTTCCATTGCAAACAGAGGAGCTTCTCCCTTTGCTGGATGTTCTTGCAAACAA  
GGTTAAGGCTGTACGTCGTTTGAGGGAACTGCTTACCACTAAGCTTCCAAGTGGCACGTTTCCCTGTGAAGGTTGCCATTCCAGTGATCCCAACAGTTAGGGTTGTGATCAGTTTCACAAA  
GTTTGAAGAACTACAATCGACAACCTTCTGAAGTATTCCGCACACCCTTCAACCCCTAAGAGGGAAATCCCCTGTAATAAATTTCTGCTAATTTGGGCTCAATGGTTAATTTCTTCCCTACTCTA  
CTGATAACTTCCAACCTAAAGCATCACCAGAACATAGCAACTTTCATGGATTTGCAGGATCCCTTCATTATTCCTCCTAATTATGAGTGGACAACCTCTGAAGCAAAGAAGAAGAAGAA  
GAAGAACCAAGAGGCTAATGGGAAACCAAGAAGCGGCAGGGTTAGTACATATGTTGACTTCTCAACAATGTTACTTTTCATGATTTGTTAATACAACCTGAGATTACAGAATTATTAAGTG  
AAATACATAAGTATTTGGAAGGTGAATGAAGTCTGCATAGTAAAAATCTTGCTTGCAGGTTATGTAATTTGTGATTTTTTTTTATAATATGAAAATTGCAATAGCACTTGCAAGCTTTAACTTG  
CTCTCTATGTTGAACCGATACACCTATTTATGAAGG

>comp156318\_c0\_seq3

GAAATTATGATTTTTTCCTAAGTTTAGGCGGAAAATTCTGAATTTTTCAGTCGATTTCTGACGAAAATATTTTAATGATAAATTGAGCGTCGACAAAAAAGTTTTACGACGGCTGTCCGAC  
GGAAACTCAAAGGGAATAACTAAAAAAGATTTTAAAAATTTAATTTTGGCATCTGTCCGTCAAACGTAAGTCCGCCAACCATGCCGGCCCTTAGTAGCGCCCGCCCATGTGGCTCGCA

CCAGCCCTAGTGCGCCCGCGCACAGCACCCGCCCGCATGGCCTGTATCAGCCCGCGGTGCGCCCAGCGCCCACCCGCATAGCCAGCGCAGGCGCCGCCGAAAAAAGTACATGAAAATTT  
GTCGGAAATATTTTAATGTAACCCGTCTAAAATCCACCAAAAAGATCTGTAGATAATAAACACTTTTCTTGTAGTGCTCGTAATTTTCTTGGTCGTTAGTGAAGAATAAACCAAGTTCATAAG  
GAGCAAAAATACCTTGAAAAAGCCAGCATTTTTGCATGCCATGCCGATTTTCAGTGACCACCTTGTGGCGATGAGGGCCATTCAGACCTGAAAGATCAATCACAGGGATGGCTTCACCTGA  
GTTTTCGACGCCATCGAGCTCTGGTCGGTCACCGGCCGGTCGTATGTAGTTTGAGGGAATGAAGGGAGAGTCAGAGGCAAAGTCGGCAAGGAGAACTTGAAGGAAGACGATGCCGCC  
ATTGTTGACCTACAAAGAGAACTAAGTTTTGAATATCTCTCTTTATAAATTCTATCTTTGCTTGCTCTGAAGGAGGAAGGAAGCAGGTGCCACATTTATATACACGAATGGCGAGTCTT  
TAGTTGCGGCTAGATCTGTTCTTTTGCGTTTAGATGTAACAACGGGGTGATGTCATGTGC

>comp156329\_c0\_seq4

CCAATCTGTCTATAACAAGACTAGTAAAGAAGGAGATGGAGAAGAAGGAAATAGTTGAGGAGGAATATGCGCAAGAGGTTCCAGATCTTCAACCTATGGAGGAAGATGTAATAGAGGA  
GATTGAGATGATCTTGCAGTATAGATTTAGGAATAAAATGCTTCTTGCTCAGGCATTCACCCAGTCATCTTTAACAACCCTTTCAAAAAGGCTGGGAAATCTTATGAACGATTGGAGTTCA  
TGGGTGATTTCGGTGCCTTGGCCCTTAATGGCTAGAGAGGTATTTTCTTCTTATGAAGATTTGCTCCGGGACAACCTTACACTTCTAAGGGCTGCTAATGTTGATACTGAGAGGCTAGCTCGA  
ATAGCCATTAATCTAATTTTCATCGATTTCTACGTCATAATGCTCCTCAGCTTGAATGGCAGATTAAGGAATTCATGGAGGGCATAAATCAATATCCTATACATTCAAATGGTCTCCTTGATC  
CACCAAAAGCCCTTGCAAACATCGTTGAATCTGTCATTGGAGCCATTTTCATCGACAGCAATAGTTCTTTAGAGATTGTCTGGAAGACATTCAAGAAGTTAGCAGATCCACTGATCAGCCT  
CGATACACTAGGAAAACACCCTGTGAGCGAGCTTTATGAACTATGTCAGAAGAACAAAATGAATGTAAATTTGAGAAAAGATACATGGACGAAGAGCATGACGGTCAAAGTTTTTATCAA  
CGGAAACTTGTATGGAAGTGGCACTTACGGTCATAAGAAGGAGATCGCTCAAAATCGGGCTGCAAAAAGCTGCTTTGGATAGACTCAGGATGATACTTCAGAAAGCACAAATTGGTTTCAT  
GTTATTCTACATCAAACCTAGTTAAGGCTATTGGCATGGTCAGATCCACCTTAAGATCGGGGGACGAAGCGTATAACGATGAACAAATATGGGTGGAGAGGCAGCGCCCTCAATACAAATTC  
TGGTTGTAAAGATATTTATGAAAAAAAATTACATTTTACTTATAAGTTTGACCCCACTGAAAATTAAGGCTGGATCCGCACCTGACTATTGAAATATTCATACACTTATTTTTGAAGATG  
AAACAAAAGAAATGTAGATATGTCATTGATCCCTCCTCACATAACATGTACATATGTTATGAAGCTTATTCAAACAAATAAAGATTTCAGAGGGTTTTTATGATGATATTGTGTTTGTATTGA  
AAATTTTCATTTTATATTCTGACATAAAGTCATGCTGTTTTTTCTTTTCATTATAATATTTT

>comp156382\_c0\_seq6

AACTTCAAGCCATGCAGCAGCTGCTCCTGTCTTTCTTAATTCCACCTGCGCATACGAATCTATGTTCTTTTTCTGATTTTACAAGAACAAGGAAGCTCAAGAAATTGCCACGGATTCCCTT  
TTTCCAAGAGCAGTGCCTATCCATAATCAAGAAGTACTGGTCTTCCCTCCCTGAAAAGCTTTACTCTCCCATCTTCATCGCCCCAAGCTAAGAAGAGATGAGAAATGCTATGAGATTTCTC  
TGTGAAGATTGTCAAAGGCCTACCGCAGCTGATGAGCTCCAAGTATTGGATTCTCATGGAGTAACTATTATTCAAATTGTTGGGGTTGCAGCTTTAGTAGTGGAGCTGCACCACTTAGGCA  
TCACCTCTCATGGATTTCTAGCTTTCTATGCTATTCCCTATGTTCCACAAACTATTGAACAAGACAGAGAGGCTACAACATCAAGGCCTGAAGGGATCACACCACCATGCATGCCTGAAGG  
GGTCCAGTTTGTAGTTGCTAACACTGCCAGTAGATAAAAGGGCTATTGGGGACGGAGATGGCTTTACTGCCTATGTCAATATAACAGAGCCAAGGGAATTGAGGCTCGTTCCCTCAAAAAGT  
TATAGATGCAACCAAATTGATGGAAAATGCTCGTGATGCGAAGGACTTTAAACTAGTAAACTAATTAAGAAAAGCGTTATTGAATTTGGATATAGGTAAATCATATGCGTAATCACACTAA  
AAATGTAAAATGTTTCCAATAACATATCTTTTCCCTGACAGATTCATAAACCTTCCAAATCAGCAAGAGGTTCTCGCACGTAATAACAGAATCAGATTAAGGGGAGTTGATGCACCTGAGA  
TTGGTATGAAATATGGAGATGAAGCTAAACAGGTGCTAGTGAACATAATAAAGGGAAGTGCCTCAAGATTTCATGCTATAATGAAGATAGATATGGTTCGAAGTGTGGAGATGTTTACTG  
TAATGACATCTTTGTACAAGAACAATTGTTGAAAAGAGGTTGTGTATGGCACTATTTGGCTTTTGATCCTCGTCCAGAATTTGCAAAGTGGCAAAAAGGAAGCACGCGATACTCGTAGAGG  
CTTGTGGGCTTACCAGATCCTGAGAAACCTTGGGAATGGAGGAGAAAATAATCCACGAGAACACAGTAGAGAGAAGCCACTATTTTGTTCAGAGATTCTGATTCAATAGAAAATACTAGG  
ATAAAAATTACTAGTGTATGTTTATAGATATTTGTACAAAATAATTTGCTTGTAGGTTTAGACATG

>comp156382\_c0\_seq9

AACTTTCAAGCCATGCAGCAGCTGCTCCTGTCTTTCCCTAATTCCACCTGCGCATAACGAATCTATGTTCTTTTTCTGATTTTACAAGAACAAGGAAGCTCAAGAAATTGCCACGGATTCCCTT  
TTTCCAAGAGCAGTGCCTATCCATAATCAAGAAGTACTGGTCTTCCCTCCCTGAAAAGCTTTACTCTCCCATCTTCATCGCCCCAAGCTAAGAAGAGATGAGAAATGCTATGAGATTTCTC  
TGTGAAGATTGTCAAAGGCCTACCGCAGCTGATGAGCTCCAAGTATTGGATTCTCATGGAGTAACTATTATTCAAATTGTTGGGGTTGCAGCTTTAGTAGTGGAGCTGCACCACTTAGGCA  
TCACCTCTCATGTATGACAATTTTATATGTTAGGAATTTGATTGGCTTTTCTTATATAAATTGTGTAACATGTCATTATTTATACTACAGGGATTTCTAGCTTGGTATGCCATTCCTTATGTTCC  
ACAACTATTGAAGAAGACATAGAAGCTACAACAACAAGGCCCTGAAGGGATCACACCACCATGCATGCCTGAAGGGGTCCAGTTTGTAGTTGCTAACACTGCCAGTAGATAAAAAGGGCTA  
TTGGGGACGGAGATGGCTTTACTGCCTATGTCAATATAACAGAGCCAAGGGAATTGAGGCTCGTTCCTCAAAAAGTTATAGATGCAACCAAATTGATGGAAAATGCTCGTGATGCGAAGG  
ACTTTAAACTAGTAAAATAAATAAGAAAAGCGTTATTGAATTTGGATATAGGTAAATCATATGCGTAATCACACTAAAAATGTAAAATGTTTCCAACATAACATATCTTTTCCCTGACAGATTC  
ATAAACCTTCCAAATCAGCAAGAGGTTCTCGCACGTAAATACAGAATCAGATTAAGGGGAGTTGATGCACCTGAGATTGGTATGAAATATGGAGATGAAGCTAAACAGGTGCTAGTGAAC  
ATAATACAAGGGAAGTGCCTCAAGATTCATGTCTATAATGAAGATAGATATGGTCGAAGTGTGGAGATGTTTACTGTAATGACATCTTTGTACAAGAACAATTGTTGAAAAGAGGTTGTG  
TATGGCACTATTTGGCTTTTGATCCTCGTCCAGAATTTGCAAAGTGGCAAAGGAAGCACGCGATACTCGTAGAGGCTTGTGGGGCTTACCAGATCCTGAGAAACCTTGGGAATGGAGGA  
GAAATAATCCACGAGAACACAGTAGAGAGAAGCCACTATTTTGTTCAGAGATTCTGATTCAATAGAAAATACTAGGATAAAAATTAAGTAGTGTATGTTTATAGAGTATTTGTACAAAATAAT  
TTGCTTGTAGGTTTAGACATG

>comp156405\_c0\_seq1

TGGATATTTAGGTCAGTTAAGATAAACTCACACCTAATAAATTTTCATCATTGTTGTAAGAAAAGAAAAGTCAACACCATCAGCACAGAAATAAAAGCAAGAGCTTGATAAGATTCCACATATAAC  
ATGCATTAATTTTAAATAAAGATAATTTATGTACAAGATAATCGCATATCATCTTCGACGATGAAAGCACAGAAATTAGTATGTAATCGACCAGACCAAACCTCAGCATTCAAACGCCAAAT  
TTAACTCGAAGCTTTACCCTCACTGCTTCCCTGCTCTGGAGGACGCCCCAAAAGGGCACGGCAGGAACCTCGCAGAAAAGCCTTCACTCCCAACGGGTTATTCTTGCTCGTTAGGCAAGTTC  
CGGCCGAAGATCGCAAACGGGGAAATCAAGAGGGCAGCAGCTGCTCTGGTCTGACAACAGGTGGCGGCTTCGAGGGGGCAGCAGCCCCAAGCAAGGCAAAGCCGGCCGTACTCAT  
ATACACAGCAGCAAGTGGTGCTTGCTGGGCAGGAGTAATAGTTATCGCAAAGCTTAGGAGGCTTTACAGGAGCGGGAGGGCTTGGGGTTGGTTTTGGTGGGTTTGGACCAGTTTTGATA  
GGATAGGAGGCCTGCATTGCAATTCGCATTTGCCGCTGGACGAATTCACATTACGCTCCATCCTTATGAAGCCTTCCTCTCCCCAGTCTGCGCCCCAGGAGTTCTTCACGACCCAGTAAT  
CCTTGCCGTGCTCAGTCCCGTAGCCTACTGCAAGAACACCGTGATCTAGTTCGGTCCGGCAACTTCCAGTGAAAATGCCCGATTGATACAGCTGGAATGCCCTGCCAGCAGCTTCTATGG  
CGACACTTACAGGCTGATTTGCAACTGCCCTTCTGCAAAGCCTTTTCATTGTTTACAGGCACATCTTCATATGAATCAATAGACACGACCCTAGCATTTCTCCTGTAAGAATCACATTTGCCA  
TTACGGCCGCTGTAAGGATAATCCTCCTCAGAGTCAATGCCACCGTTCCTAATGATGAATTCGAAGGCATCATCCATAAGGCCGCCGTTGCATCCCTGATTGCTGCTCGTGTGCAATCCAC  
CAACTCTTGCTCTGATAGCGAAATGAGGTCTCCGGTCAATCTGATTAATCCCTTCCACGGCCGCAATGCTCGAGAAAAGCCCAGCAGCTCCCGCAAGTGCCTGGTCCCTTGACAGGGGC  
AACGGCTCCCTTGGCCCTCAATCAACAGAATCGGGCAGGGCCTCACCAAAAAGCGACGTGGTAACGGTCACTAGGATTCCGACGGTGTAGATGTTGCCGTGTACCAAGGTAGGATGCGC  
GGTACTCTTCATTGGTGAGATCGGCGAAGCGGTTGAGGCCGAGGCGGAAGGAGTGGACGCCGGCATCGGCAGCGGCATTGTGCTCGTCTATGTAGCGGAGATTCTCCTTGAAGACTTCG  
AATCGCCGCTCCTTCTCGTCTGAGCGGTTATAGTTCGGCCATGCTGCTCCATCCACCTCTCGTAGATCTCCCGCATCTCTGCTCGCCCCATCGAGTCCCCCGCATGCCATGACGTTCAAC  
GTAGCTTATGATCGACATATCTGGTCCATTGCCGCCGGCACCCGGGGCAGCCGCTACGCCGTTGAGGAGGAGGAGGAGGAGAGAGA

>comp156445\_c0\_seq12

TTTGTCTACAAAAAGTTATAATTGCCATTTGAAAGGCAAAAACAATAAGAAAAGATATCCCAAATTTATGACATAGATAATGGATGACAAATTTATGACATTTTAAATGCTCTCCAAAGTAGGTTA  
TCTCAATAATATTTGTCTAGATTACAAAAGAGTGAGAGGAGATTCTCTTAAATTAGGGCCTCTAAAAAGAGAGGATAATGGAGAACCACATAAAGAGAAGGGATGACAAATTTTCTATCT  
TCAACTAATGATGATTTCTGCCTCTTTTATCTCTCTTCGAAATCCACACCTTCAAAAAAATATTTCCAATTTTTTTTCAAAGAAAATTAAGAGTCTCTAACCAGAAAAAAAATATTAAT

TAAGATGCATCGCTTAACCCATCCAAAACCTATAAATCTTCTCAAATTTCTCACCTTTATCGAAGAAAGAAAATGAATTTCCCTGATATGGAAGATCTAATACCAGGCCTTCCAGAAGAAAT  
AGGCTTGGAGTGCCTTATTCGAGCCCCCACAAAACCCTCCATCTTCTTCAACAAGTCTGCCGGAGGAAACAAGCAACTGAATCCCCCTTCTTTACCACCTCCGTCACCTCTGCTGGTTC  
CTCCCACCATATCATCATCTTCATAGAGTCCCACAGCGCAGCCAGACGCTCCCTCAGGTTCTTTTCTCCACCCCTACTGCCGTCTCGCTACCCTCAACCAGTCCACTGGTGAGTGGGCT  
CCCCTCCACCAATCCCTTTTCTACGTACGCCACCCCTTTTCTTTTGTATCGTTGCCTCCGGCCTCCACCTCGTCGTCATTGGCAGCTTGTATCGAGACTCCTTAAGTTGCAATGATAGCGTA  
TATGTCTATAGCTTCCCTCCAACACTTGGCATCTCGGTACAGCCCTTGCTGGCCCCACCCGCTTCTTATTTCGCTTGCGCCGGCAGCCAGACAACCAAGTTTTTCATCGCTGGGGGCCACG  
ATGAGCGAAAGAATGCCCTGAAATCGGCGATGGTTTATGATATTGCCAAAGACAACCTGGACAATGTTGCCGGAGATGGCGAGGGAACGTGAGGACTGCACGGGAGTTTTTGCAGCTGGA  
TTGTTCCAGGTAATTGGTGGTTCGATGCAGAAGAGATTAGAGTGGAGTAGAGAGGCATTTGATGTAGGAGAATGGCGATGGCGAGCAATGGAGGAGGATGCGGTGCCGGAGGAAGAGT  
TTTTGAGGACCTGCGTAATGGGAGGACTTGGGCGAATTTATAAATGTGGCGTAGGAGGTAAGATGTTGCTGGTCAAGGAAGGAGAGGATTGGAGGGAGGTGGCAGAGTTGCCAGAGGA  
CGTCAGAGGTTCTCCAATAATGGTATCTTGGGCTGAAAGATTGATGGTGGCGAGGGTGGAGTCTAGTGGCTGGCCTTCGGCTATGTTTGTATTGGAGATGAAGAAAGGGGTGGCCATTGG  
GTGGCGAAGGGTGGCGTTTCCAAAGAAATATCATGGATATATTTATACTGCTTGTGTTGATATCTAAAGCAGGCTACATTAGCTCTGGCGTGCTTAATGATCGAAGATAAGCGTATATAAAT  
CTAGTATTCTGATTTAGCTATATCAGAGAACTGTTGTGTTATTGTAGTTCGAATTATGCATTTTGATTTTGTGTTTGGAGATATAAGAACTATTCTTCAGTGTTCCTCAAGAGGAATTTAGGCTT  
>comp156488\_c0\_seq1

GGGATTTGTTGAGTTTACAGACGTGATTTGGAAGCTGAGGATCTTCAAACCCCTGTGGTTGACGCATGTAGATTGCTTCTGGTAGATCGCCGTGAAGGAATGCATTAGTAACGTCGAGTTG  
TAGGATGTTCCATTGACGATTGACTGCAAGAGTTAACAGCATCCGAATTGTGGTCATTTTAGCCACAGGGCTAAATGTTTCCGTGTAGTTCTCGCCGAATTTTTGTTTCATATCCTAGAGCAA  
CGAGACGTGCTTTGTGACGATCAATTTGGCCGGATGGCAAAAGTTTGGTCTTGTAAAGTCCATTTACATCCGAGAATGCGAGTGTGGGAGGCGGTGAGACAAGGGTCCATGTGTGTTGCT  
GTTGAAGGGCACAGTATTCAGTCTGCATAGCTTGTGCCAGTGAGCATGAGGCGCGGCTTGTGTTAGGTAGTGGGAGTAGGAGGAGCGGTTCTTGGGAAATCTTTTATTTTCGATCTTGT  
TCTGGTTACGGACGAGGCATAGAGAGCAGAGCCGAGTTGTCAATAGATTGCTGTTTATGCAAGTCTTGATTAATGTAATCTCCTCGCTGCAAAGCATGGAGTATAGGTTGTCAAGATC  
GGCTGGAAGAGCAGAGGTG

>comp156510\_c0\_seq2

TCAATGCAAGCTGGCTTGATTCAATCATAATCACTTGCCTCCACGGTTAAAAAAAATAATTGTACATAAACATATCTTCACACAATCTCGCCAGGAAAATATGGCGTGGTGTGTTTTTATTA  
ATCTTATTGAATCAATCCTTATCACCGCTGCTCTATATAACAAAAGCAAGACAAATAGATATATATAGGAAAAACAAGAACAAGGATATTTAGAGATCGAAGAGAAAACCTGAATACTACACC  
CACCATCTAAAATGCCTCAAACCCAGATTGATCCATAGAGCTCCAATCTCCAACCACAAGTTCTTGAAAATGATGATTAGATCCAATTTCTTGCTGTACCCGCGTAGACGCCACGGCGAGA  
TTCTGCTCCTGCGCCGGCCACGGCATAATTCGGATAGACCCGAACCCCAATTCATGGAAAACACATCTCCCCCGTTCATCTCCGGCAACATCGAAGATGAGTACTCCAAGCGAGGAAACACA  
ACAGACTCCTCCATCCCACAATTGCTCGCCATAAATCCCAGATTGCCTTCATCTGCTTACTAACAGTCTGGCAGTTCATATCAGTTGATGGTGTGACGACGATGACAACCTCGGCTGTCA  
CGGATCCAATAAATCCAATGAATCGTCAATCTCTACAGGCAATTTATCAGGCACCTGGTTTAAAGTACCTAGCATACTAATACTGCCATATCTATATTGAAACCGCCGGAATCCGAACTCGGG  
TAATAAGTGTGCAACATGTCATCGAGTGTGGTTCAGGGCGAAGCCCGGAGTCCAGTACTCTGGTGGTATCAATCCGTAGGCTGCTGCTTGTGATGATGTGGAGGAGGTTATTGAATCGGAG  
GAAAGTCGAGCCGATTTACCACGGCGTTTTTTCGGGCAACCGCTCCGACGGGGACGTTGCGGAGTGAGCCGCCTTTGGTCCAGTACCTTCGACAGCCCTTGCAGAAGTACCGGGGCT  
GGGTGAGACTGTAGTTGTTGTAATAGCAGAATTTGGTGTGTTGAGGAATCACAGCGAGGGCAATTCGGGGCTATCTCTAGTGACGGTTTCCATCTCCGGTGTATCTACCGGCGCCGATCTCGT  
CGCGTAGGATAACATACGGTGATCTTCGGGTGAGAACATCGCGAGGTGGAAAGAGGGAGAGAG

>comp156524\_c0\_seq3

ACCAGCAACTGGCTAGCCAAAACCTGATCTTAGCCCCCAGACATCCCAAAGAACCACATGAAGCCAAGAAGTCAACAACATGAGCACCAAAGTTACATTCATCTCTAGCAGAAATAGCAGA

CGAACTTAAATGCTGAGATCTATGGAGGACAACCTTGTAGTAGCATAAGAAGGCGTATCCACAAGAAACGAGTCCTCATTCTCTCCTGAAGGCAGTTGTAGAGTGATAGCTCCTAAAGGG  
TTTGAAGAAGAGAAAAACCCATAAACTCTAATACCTTGTAATCAAAGATGCTCAAAGGAACCTCACAAAGAAATCTTCTTCTCC

>comp156530\_c0\_seq4

ATCTTCATTTTTGCCCCAAAAAATGAGTTTCTGATAATAGTATGACATCAACATTAACATTGCACTGCTCACAGCCTTAAAAAAAATTATTGTTAGCGTTCAGATGTAGGCTCACAGTA  
GCTGTAACGAACATTTGCAATTCAGTTGGAGATGCCCTAAACGCATCAAAGTGGATAAAAGTTGTCAGTATATAAGATTCAAATGCAAATTATATTATAATAAATTTTAAAAATTTATGATATA  
ACAAAAATCATAAATTTTAAACCTATCCTCTTTGTAGTAGTCTGATTGGAATCAGCAATTGGGAAATAATCCAAGAAAAATGCAAAGAATATTGATTATGCCTTCATGGGATGTGATTGTAG  
GTGCGCATGACCGATTATGGGTTATTTACATTAATAATAATAATAATGCATTACTTCTCTATCTTGTCCCTGTTCAATTTTCATTAAGCAGAGAAGTTGCCAAAACAGTTGAACTATTTGCA  
CTGAGATAAATTCATCTTTCTTCCAAAAATCCTGTCAGAGTTTATACATAGTATGGCCGCTTGTGATAATGATCAGGAGTAAGATTTCCCCACTGCCTAATGAACCGAGGATCTGGAGA  
CATCTCAGGCTGATCAAAATCCATCGGTGGATCGCTTGTGCACCTGCGTTTTACCTTTCTGTCCATTTTCTCAAGCAGAATACCATCCCTACAACCCTTGCTCATGCAAATACTCCTAACTTC  
TTTTTGCGTCTTTGTTTCGCGTTTAGAAGCTTCAGCAGGAGTTTATTATGGAAGTGCAGTAAATACTGTTTCATTAAGGTTTCATGCAGGTCTCCAGAGCTTTTACTGCTTCAGCCATGGTGG  
GTCTCCCCTTGGGATTCTCGCTGAGGCACTGGTAGGCCAAGTTGCCGGCTATCTGTGCAGCTTTGTGAGAGTATTGACCTGCCATTCTGGGATCAATAATCCTCAGCAGCTTATGGTGGCG  
GATGAGAAGGGGTCGAGCCACTCGACGAGGTTGTGCTCGCGTCCGGGCTGCTGGTGTCAAGTGCTTACC GCCGGCGAGCATTCTAGGAGTACAACACCAAAGCCATAGACGTCAC  
TTCTTGACAGTTAGATGGCCAGTCATCACATACTCTGGAGCTGCATATCCATAGGTACCCATTACTCTGGTAGAAAACATGTGTTTTGTCACCTATTGGTCCCCTGCTTCGCAAGGCCAAAGTCC  
GAAAGCTTGGCATTGTAATCCGCGTCAAGCAAGATGTTAGAGGCTTGAAGTCACGATAGATTATGGGTCTTTTAGCTCCATGAAGAAAAGCAAGCCCCTTTCGCAACATCCAAAGCAATT  
TTTATCCTAGTGTCCACGCAATTGTTTGGAGTACCCGTTGGAAAAGATGCCTCTCTAGGCTACCCAAAGCCATATACTCGTAAACCAATATCCGGTGATCATCTTGACAACAGTATCCAAT  
GAGTTTGACAAGATTAGGATGGCTCAATTGCCCCGAGGTAATTAACCTTCAGCCAGCCACTCCCTATCACCTTGTAGACCATTTCCGGTTGAGATCCTAACAGCGACAAACATGGGCTTGAG  
ACCTGGCCGAATGTTCTCATCTATGACTCCCTTATAACAAGCCCAAAGCCACCCTCTCCTAGGATTAGATCTTCTCGGAAGTTCCTGGTTGATAATCTCAACTCATCATATGTAATATGAC  
AACATTTCCATAACTAGTTATTGTTGAAAGTCTCCACATCTCCATGCATCACTGGCTTGTCTCCACATAGCCAGTTCTGTCTGCATCCTCATTTGGAGAAAGTGATAGTGCAATTGAAG  
CTTTCACTGATGATATGGCCGCTTGGTATATTTGGTGCAGTAAAATCAATTTCTGATGGTACGACAGCTTTGTTCTTTGATGGCCTGGGAGCTTTACTCCTTGACGGTGCAACTGCAAAT  
CTATTTGATGGAATAACTGGGTTCCCTTAGCAAGAGCCCTAGGATCCTTGGAAAGAGAGGCAGTTCCTCATCTGTGCAGGTCGTCTCACCCTCGCGGTGGACGAAAATGGTCAATCGCT  
TCGGCCCATCGCCGATCTTCTTACCTTGCTTCTTAATCTTCGTCACTAGCGAAGATTCCGTCGATCAACGATTGTTCTGCGAGATCGCCGGACGACTACGTTTTCGTTTTCGCGTCTCTG

>comp156576\_c0\_seq1

CGAACGAATCCCTTTGATTTTTTATTGCTTTTTTTTTTAATTAATAAAAAAATCATTCCCTCACTTTCAAAGCTCTATGAATTCTAAGAACTCATATGATATAATTATTATATACAACCTAAGTGCAAA  
AAATTAAGCTTTCCCAAACATTAACCTTTAAAGAAGTGATTAACCATTTCAGTAATACACACTTAATTAACCACACTGGTTCTCCTTACGGCAACAGAAGCTTTTGCAGTGCAGCAATAG  
CAGCTTGAATGGCATTCTGTAACCTCCATAGTGCTTTCATCAGAAGAGGAAAACGTAACGACGGGGCCACAAGAAGCCCGCTGTTCCGCCGTGACGTCCGCATCGACGCGGGAGCA  
GAGAAATCTCCCCGCCACCGCCGCCAGCCACCTTCCCGTGGATTGCAGTCGCGGGAGAAGGAGTAAGGACTTCGCCGCAATTCTCGCTTGTCTTTCATGGGCTTGAAGAAGAGAAG  
CGGCTCTATCAAGCTCGCATATTTCTTCCATAATCTGCCAACACCTTCGTCTTCTTCTTCTGTTTTTCTGCTTCTCTGTCTCCTCGCTTCTTAGCCACTTCCGGAGAGCGAAGAAGGT  
GGAGAAAGGTTTCGCCTTTGTGCGTTCCTTGAATTCTCCGTGGTTGGAGGAGGCGTCGGCGCCGCTTCAATGACTCTGTTTGTGTTTGGTTTGTCTCCGTGTTTTTGCAGAGGTTGTGT  
TCTGTTTCGATTGAGGCGTTGGAGGCGCGGTGTGAGAGGAAGTGAAAGGGGAGGAGGTGGCCGTGGAAGAAGATTCGTCGGCCGGGAGAGGTGCAAGTTCGAGGAGAGGGGCGGC  
GGGTTCTTTGAGCTTGAGGGAGGCACTGGTGTGGAAGAGAGAGGGGTGGAGAGAGATGGTGAAGGAGAATTCATGGGATGGGGAAGAGTTTAAAGGAGGAGGAGGTG  
ATGAAGGTGGTGATTCCGGCGGTGGCGGAGGCTCCCGCGCCGAGGCTGGTGGTTTGTGATGTTTCTGTTTCCATGGTTTGGTTTCTGATGCTGGATTTGAGGAGAGAGGGAGAATGCA

GGGAAGTTGATAAGGGAAGTCGAGAGATAAGGAGGAAGTGAAGGGAGAGAAAAGAGGAGGAGATGGAGGGGGTGAGGAGAGATTCATGGGCCATATGAGCTTAGTTACATGTCTCTTT  
GT

>comp156588\_c0\_seq3

TATCATAGTCAGACAATTGATTGAACTTCATTATGATCTTTTCGAGATCATATGTTGTTTCCCCTTGAGTCTGACTATAATAATTTAGATAAATTTAAAATGATAATAATTCTGACAAAAATTATA  
ATATGCAAGTAAATCTCCCATATTTATTTTTATGAAAAAAATGGTTGAAAAAGAGGCAGAAATAGAATAAGTATATGACATAACCCACACGAGAAAGGAAAGAAACGAAGAATTGCAGG  
CCTTACAAGTCATTCAATCACCGCTGGCTACTGCTGCTCCAGCTACTCGTGCTACTGTTATCATCTTTCTTCAATTCTCACCCGCATATTGCGCAGCAAGATTAAAGCAAGACATCGCCCTAGG  
CCGCTCGGCTTTGCCCTTCTGGACCCCTTCATCATCAGTTGCCGCCGGCGATTGCCCCCTTCTCCCATCCCATCTGATCCTCCACGGCCAAATCTCCGATCTCCACTTCTTCAGCT  
TCTTTTCCAAAACAACCTCGCTCTTCTCCCCGACCCGCCACCGACCCGTTTCTATCCAGAGCCGAGGCTCAGGCTGAGGTTGCGGAAGCCGTGGCTGAGCGGGCAGCAATCCCTTT  
AACCCATCCTTCTTCTCGGCTTGGCGGACATGGCGGCTGCCATTAGATCGTGGTAGGCGAAAGCGGAGGTGCGGAGATTGGCGTAGAGCGGGAGGCTACAAACGTAGGGATCGGCGAT  
GCCGATGCCGATGTTGAGGATAACCTGCGGACGGAGGGAAGTTGGGCGGCGGACTTGAGGGGCGAAGAATCGGGTGAAGGGGAGAGGTAAGGGTACTGAGAATGGCGCGGGTGGT  
GCCGAGGAGAGTATCGGGGCCGGGATGGAAACGAGGGCGGGCAGCGTAGATGTTGATTTGGATGGCGGATGTGTGCGGAACAGAGAGTGAATCGTCGATGCGGAAGAGGAATTTGTGCG  
TTCCAGGTGGGTGACGTGTGACCGATGGAGTCGAGACGGGTGCGGAGGCGGTGGGAGGGGTGGAGCCAAGTCACGGCGTAGGTGTGGAGGGAGCGGGAAGAGGGGAAGAGGTCTTG  
GGCGGATATTAGGGTTAGCTCGAGGAAGTTGAAGGTGGACGGAGGCGCGGTTGGGGAGAGGAGGAAGTCGCCGCCGCTGGTGGCCACTGACATCCGGCGACATTTTAGGAGGAGGTGG  
TGGAATTTGGGGTGGAGGAACGAGGAAGGACGGAGATCGTGTAGGTAAAGAAGGGGGAAGAGAGGAAGGTGCGGTGAAGGGAAAGCGGAAGAGGGCGCCAGGGAGGGCGGGA  
CGCGCGTTAATTTAAAGGAGAGGGAATAATTTGCTTAATTTAGTATGATTTTGTAAATATGTTAGGAATATTTAGGCTAATCTGGGAAATAAAAAAATAGTAAGAAAATATTGT

>comp156601\_c0\_seq1

CACCGCCGCTCCGCCGCTTAGAAGCCGAAGCAGATGGTGTGCTCTCACACAAAAAGAGATCTTTGCTTCAAATATTTCTTCTCTGCTTCTTCCATCGAAGCCGATGACCATATCTCC  
TTCTCGCCGGCACCACAACCGGCAGTATCATCTAATGAGCTGATACAACTAGAAGACTCTTCTCCACCTGTAAGAGCGAGGAGAAGAGATGTTTCATCTAGAAAGACTTGAATTTAACCTT  
GCAAAAGCTCGAGCTTCCATCACAATTTGCTGCACAAAATCCAAATAAACTTCTGCAGAAGATAAAGATTATGTCCCAATCGGCCAGTTTACAGGAACCCCTATGCATTTACAGGAGCT  
ATCTTGAAATGGAGAGGCTCTTTAAGTCTATGTTTATGAAGAAGGCGAACCAGCCATTATTCCATGATGGTCCCTGCAGAAGTATCTATCAATGGAAGGAAGGTTTATTATAACATGGAG  
ATGGGAAATAGATTTAGAACCAGGAATCCTGAACAAGCACACGTTCAATTTCTTCCATTCAGTGATGTAAGTAAAGTGAAGTTCATCTACCAGCAAAGACATTTGATATAAGCCCCATTA  
AAAGAACTATTGTGGATTACATAATGTTATATCTTCAAGATATCCCTATTGGAATAGAAGCCTGGGAGCTGATCATTTTCATGCTCTCTTGGCATGATTGGGGGCCACATGCTTCCAAGTCTCT  
CCCTTACCTTACTCCAACCTCCATCAGAGTCTTCTGCAATGCCAACACTTCAAGAGGCTTCAAACCCCTCAAAGATGTCTCCCTCCCAGAAATCAATCTTAAGACCGGGGTCACCGCCGG  
CTTTCATCGGGGGCATAACCGTCTCTCGCCGCTCAATTTCTCGCTTTTTTCGCCGGCGGCATGCACGGTCCGATCCGGCCAATTCTCCTCAAACACTGGAAGGACAAACATGACAATGACAT  
GCAGATCCATGAATATTTGCCGAAGGTGTGGACTACTATAAGATGATGAAGAGTAGTAAGTTCTGCATTTGCCCAAGTGGCTATGAGGTAGCAAGTCCAAGAATAGTGGAGGCAATCTAT  
CTTGAATGTGTGCCGGTATTATATCAGATCACTATGTTCTTCCCTCAGTGATGTTGGAATTTGGAAGTCTTCTCGGTTCAAATTTCCGGTTGATCAGATACCTGAATGAAAGAACATATTG  
GCGAGGATATCGAAGGGGAGTATATAAGGATGTGGAGAAGGGTGAAGATGGTGCAGAAGCATTGTGTTGGAATAGTCCGCTGAGAGATTTGATGTGTTTCATATGATTTTGCATTCTA  
TTTGGCTTAGGAGATTGAATTTTCGTGTTTCAGGATTTGGATTGATTTATTTGTTGGGGAAATAAAGAAC

>comp156630\_c0\_seq2

AATTTTAAAAAAATAAAAATAAAATATAAATAATTA AAAA ACTTCTTTATCAAAAAGCTTAATGAATTTACAAAGCCAAGAAAATTTGGATACTATAGCTTGATTTCATAACCTGATTCTCTTAT  
GAAAGTGAGAACACCCATCAAATGTTTCATAAAGCTACTACATATGAGAAAGTTGATTGTAAAAAAGCAGTTTCTTGCAAAAAAATAGAAAAAATAGAAAAAATAGTAG

CCGAACAAAATATAATTGTGATTGTGGTTTAAAAAGCAAAGCTATGAGAAAGAGACCCTAAAATCACTTTGTTCCACATACAAAAAATATATATAAAACAACATAAATTTATATGAGAGCAA  
AAATTTTATGGCACTCAACCTAACAAAAGCTCATTAGAACAACATTAATACAATGTTACAATAGAAGCCTTACATATAATGTTAAAAGATGCAAAACATATAATTTTAGTCAACTTAACTAC  
CCATCCTTTTGGGAAGGCGCTAGATAAAGACTTATAGAAGAAAAGAAAATGAGAGACTCGGCCGGTTGACTCGAATGAAAAAAGAAAAAAAAAATGTGAGCGCTTTCGTCTTCAATGA  
GGAATAAGGGACGGAGCTTGAAGAAGCGAGCCTAAGCTATTACATTGCTTTCTATGGCTGATTAGTCTTAGTCAAGCGCTAGCGCCCCTCTTAAGTAAGGTAAGGCTATTCTACTATCAAT  
GAATTTTTCGTTGGAATGACGAGACTGATTCCCCAGCGCTGAAATGCAGCAATAATGGAACGCATCGGCCGGGCACAGCTACGCATGGAAGACGGTCAACTTTACTAACTGAACAAAC  
TAGCACCTTTTTTTGGTTTGAATGCACCCAAAATAGTCAGGCGTGGGGAATATGGTATCCACCCTGACAGTTTGGAGGAAGAGACGACTGTCTTGATGATATCATCTCTTCTATCTCCCC  
TTCTTGAATGGCAGAGCGCGAACCCCTCTTCGTGCAACTCTTCCC GGGAAGTGAATTTGCTTCTTCTCTTTTTTCAGAAAGACTGAGTGAGTGGTCCCTTCAAGCCACCCTTGTCTCC  
AGATCGATTTCCATCAATGTGAGATACTTTAGAAGAAAAGAACATGAAAAGAGCTACAAGCAAACTCAGACCACATATTAAGAGACAACTAATTGAAACCAATAAAACCAAGAAACA  
AGACATTAATAAGATCTAATTTATCATTCTTAACTTAAAGCTAGGTTAAGTTAGAAGGGCAAAGTATTTGAATGTACAAGAGAAATCAAATGAAATAAACTTTAAATAGAGTGCATAA  
CAAAAAGAATCATATTGAGAGCTAAGAGAGCCGTAACACATGAGACCAA

>comp156659\_c0\_seq7

AAGAGCAAGGAAATAGGGGCGAGCGAAGTGGTACAGTGGAGGAGAAAATGGCATGGCTTCTTCTTTGATCCATATCTTCTCTACTACCTCATTGCAAGAGCTCCAGTCTCCAGTGGCT  
GGGGAATAGAGGGCCATGTCATGGTCTGTAAGATAGCACAGGAACATTTCACTAACTCAACAATGAATGCGGTGTTAGAGTTGGCTGGGGGAGAATTAGCACCGTTGTGCCCTTGGGCTG  
ATGATGTTAGAAAACAGTACCGTTGGTCAAGGACTCTCCACTTTGCTGATAGCGCTGGTACTGCACCTTCCAGTATTCAAGGGATTGTCACAATACCAAAGGAGAGATAAACATGTGCA  
GTTGGAGCAATCAACAATTATAACAGTCAGCTCCAGAAACGCAAAGATTCATCAAATAATTATAACTTAACAGAAAGCTTATTGTTCTTTCCATTTTGTGGGAGATATCCACCAACCTTT  
ACATGCTGGTTCTGAGCTTGATTTAGGAGGTAACACCATCAAAGTGGAGTGGTATGGAAAGAATACCAATCTTACAAGGTCTGGGATGAGGATATAGTAGAGAAAGCCAAGCAGAAATT  
CTATGATGATGATATTGATACAATGGTTGAATCCATTCAAATTAACAATAGAGTAAGTTCATTGTTTTATGAATCTTTGATTGTTTCATCATGAAAGTTTTCTGGATATTTATGTAATTGTCAGTT  
GTTTTCTTCTGAATTGCAAGCTATCTACAGGACATTTGGTCAAGTATGATCAATGGATGAATTGTTCTACAAAAACTTTACTTGTGGAAGCATCTATGCTTCCGAGAGTGCCCGCCT  
GGCCTGCGACTATGCTTATAAGGACGCCAAGCAAGGTTCAAGTCTTGGAGATGAATATTTTCATCTCTCGTCTTCCAGTAGTGGAGAAGAGAATAGCACAAAGGTGGAATTCGCTTGGCTGA  
GATACTCAACAAAATTTTTGATGATGATTCTGGTCAAGAAAGATCAGAAGCTGCTCAAAGAGAGAAGAATTGGTGGTGTATCAAGCTTAATCTGCCGCATGCCATGAAAACTGCTTATT  
TGGAAGAAGTTTGGAGCTTTAAGTAGTTTTTTTTTCTAGACAATGAAGCTTGGTTTGGATAGATTGAAGTGAAGAAAATTAATAAAAATTCTAGTGATTATGGACAGATTTTGAACCTATA  
CCTATCGATTAGAATTTTA

>comp156682\_c0\_seq5

GGCAAGAAAATCTTGTGTTGATTTTTATAAGTAAATTTATAGTATTCACAATAATTAATAAATGTTTTTTTTATATCAAATCTATAGTAACTTTTAAAAACAATTGCAATCATCCAAAAA  
ATCCTAACATGAAGAAAGAATACTAACCTTTCAAACCTTGATAACTTGGCCAAGTATTATTGTCGAAAGAACCGTGGAGCAAACGGTCTGAATGGGATTAACATAGAGACCATTACTGG  
CCCCTTCCCTTAGCACAGCCCAAGTTTGGAAATGCAACACATAGTGCAATCAACATTCCTCCCAGGAAGACAAAGGAGATGATGGCTTGGATACTGATAGTTGGCTGACCAAAAATCCAGCTT  
CCCTTCCATGATAAATTGCACAATTGTAGTAAGTACTGAGGCCAGCAGGGATGTTACACAGCACAAAGGACAAGGGAGCCGGGAACCTCCATCATTGTTGCAGCCTGCAAAACCGTGTCTAC  
AGGATAGAACGAGAAGTCTCCAGCAGACTGCAGCAACCAATGATCCAGTCCCTGTACACATTAAGTGGCGACGGATTAGGCAAGACAGAAGAGCGTCCAAAATCCGTTGGATCTGTA  
GGACTTTGCAAGATGCTCAAGGCTACTGCTCCAGTCAAGCAAAACCAATGTCCCTAGGATCTTTGTTCTAGTGTAGTTGCACTTAAAGTCTAGTTTTTCAAGCCTACAATGGAAATCAATCT  
CATGTATTACTGGTCCATTGCAATCCCAATA

>comp156725\_c0\_seq12

TTTCAATAAATTGAGATGGTTTTCTCCATCAGTAACCGCGTCCTCTCCGCTTCTTTTTTTTTTTTAAATACTGGAACAATAACATGCAAATGTCCATCAAGAAGACAACAACACGATTAAC  
 CAACAAAGCAAGCAAGATCAAACCATGCATGCAACCGCTTATCTACTTGTAATGAGCGTACAGGTGCAAGTTATCCTCCAGCTTTTGAGAAGAACCTGTCACCAGATCTATCAAACCATG  
 CATCCAATCGGCTACCTCTTTCTTTTGGTTAGGGGTTGTGATCTCTGCCTTTCTAAATTTCTAGTATTGTTGAGTGTCTTTCTTGATTCTTTACACTGAGTTCTGTATGATCTTTACGGCTTATG  
 TTTTTTTTTTTTTTTTATTTGAATGGAATGGAAGATAAGAATTAATAATAGATAGAATTCATTGAGATTATTGAGATTTTTATGGAGGAAATAGTGGATGGATTGGGATGGTTTTATTTTTTTAA  
 CCTTCAAATGATAATGGGTCAATCACTGATCACAGAAAAGTACGGGCTCCTAGGATTTTATCTCATGAAGAAAATAAAAATGCACAAAAGATAGAGACCAATGGAATGAATAGAAAGAT  
 GAGAAATAGTGGGAAAACCTGGAAGAAATTGAGGAAAACAAAT

>comp156725\_c1\_seq2

TGTCACACGATCTCGCTGGATCTGCTAAACTCCAAGATCATCACAGTGGCCGCATATAGATTCCCATCTTCCACACTTTTCTAAGCAATATCTAAAAAACCTAAAGCACTATAGCTGGAA  
 AAAAATCAAAAATAAAGAAGTGCAGCGGAAAGCCGGAAAACCTCGATCTCCTCTTCTTCTTCTCTACTTCACTCTTCAACCATCTTCTCTGCTTCGCTGATTTGAATGCTGATCTGCTGG  
 CCAGTAATGAGCATAAGAAAGCAGGCTTCGAAGCTCCCAGGAGGGGCATCCCTTCTTCACTTCAACTTCACTATCTGAGCAGGATGAATGGTTCGCCGGGACCGCCTCCTCCGT  
 CGCATTTACAGTTGTTAGAAGCTTGCGCAGGCGAGTTGCAGTGCCAGCTCAATCCATCTCGTGTAAGAATCAAGAAAGCAC

>comp156735\_c0\_seq7

TAAATTGAAGAGTTTAAATGCAATTAATAGTAATAGAATTAATTTGCAACAATAATCTACAGGTCTTATAAGCAGTACTTCAGTGACAATATTTTGTTAGTTAAAGTCTACAAATGCAAACAAAAC  
 TGAAGTGAATGCATTACCAAGTAAATAACAAAGCAAGGTACATATAAATCTAACTCACCTGTCTAACATTTCACTGTAGACTATTGCCCGTTTATATGTTAAATAAACCTCTATTTTAAG  
 AAGCTCAAATGCTCACATTTGGGTTTGATTATTCTGATTCTTCTCATTGTTTCCTCAATGCCTTCAGCAGATGGTGGTAGACCACCATGCTTCTTACTTCTTCCCTGGCAATAACAAGAATG  
 ATGAAAATCCAACATTTGTGAATTTGTGATCAGCAGTGGAAATAGGTTTTAGAAGCTATATCAAAGCTATTATACTGTATGAGAATTTCTTCTAAATTTAAGCTGTGACTTTGGGGTGTACACG  
 AGTTGAGTAATGACGCTATCGAGCTCGACTCGTCAGTCAAAACACCAGCTCGAACTCGAGCTCATCCTATTATAAATGAGCTCGAACCAAGCTCACAAGCCTTAGGCGTAGCTGGCATTAA  
 ATGCTGCAGGATACATTAATGATATAGCATAACTTTAATATTTAATATGTTGTTAGCTCGGTTCACTTCTAGCCCACCCGATTCGCCGAACTGTGACTTCAAGCACATTTTAGGCGGGATTAT  
 AAAAAATTAATTTTCAATTTAAGAATGATTTAGGCGGGATTAATAATATATATGATTTTAAATAATTTAATTTAATAAAATAAAAAAAAATATTTCAGACTAGCTTGCGAGCCGAGTCTCAT  
 CAAGCTCGAACTCAAGCTCGTTTAAATAAAGCTTGTAGTTTGTGCTCAAGCTCATCTCGTGAGCCATAAATGAGTAAAGATCGAGCTAGCTCACGAGCCGGCACCGTTTTCACTTACA  
 CCCTAGCTGTGACCCCTCTGCCACTTTTGACTCCTAGAATACTCGAGAAATAGTTCTAGTCATAGAAAAGATTAC

>comp156769\_c2\_seq1

CTAAGCGGCGCTTCCATGAGGTGAGCTTGCTCCCTCACTTCAATCCTCTTCTTTTGTTTTAAATTGAACGCCCATGAGCCAATAATTTGGATTGGGATTTGTTAGGAGTAAAGGATATGCTT  
 GGAGAGTTTTTTTTTTTTTACTTATATTACCATTTTTATTTGTTGTCATTTTTTCAGACTACTTGCCTTTTGATGGTTTGATTGTTCTAATAACTTTTTTCTATGGTTTTGTTAATAACTGGTC  
 TGCAAAGAGCTAAAGAGCCAGGTATATGATTTAAGAGCTCTGAATTTGGTTATTTTCCATTTATCTTAGGCTGGACAATTTCTTAATGCTTCTAAAACATTTTTAATAACACAAATTTAA  
 TCTGAAAAATTTGTACTGAAAAAGGCGTTTCAGAAAGTAGACAGAAAGCTGTCTCAATTAAGACCTAATTTAGGCTCCGAAAAGTTTTGGATAAACATAGAAAATAGTGTAGAAAAAAT  
 TATTTTTATTTAATTATGTTGAGTATTATTTCTTTTTTTTAAATAATAATAATTTTTCTTATAGCTATCAGCTTTAGTAGAATAAAAAACTTTTTCTCATGAAAAACAGAAAAGGGAA  
 ACCTCAGCCAAGAACC

>comp156769\_c3\_seq2

TTTTTTTTTTATAAAATAAAAGCACTTTCTTATTAATTTAATTTATGAAGCAACTTTTAGTACAAACTTTTTTAATTTAAAAACTGCTTTAAAAACAGTAATAACAATCATTTCATTCGCCGAGAA  
 TTCTGAAGGAGACTAAGGGCATTATTTGCTGTAAAAGTCTAATATGCTGGTGTCTTCTGCGCTTCGTCTTCGCATACGAGCTCCCCAAGAGAGATTTTCTTCTGAATTTTCATTGTGCTCCT



CCTGCTTAGCTCCACAAGCTGATCATGAAAACGTTTCTGCAACCAAGATTCCCTTCTCCATTTCCCTAAATCAAGAGGAAACCATACGAACAGCCGCATTAGGAACTAATTTCTAAAAAATT  
TTGGACAAAATGATTGAATGAATGAGAAAACCTTCGTTTCAGTGAGGAATAAATGCAGAACCAGAATAACAGGAAGGAGGCTATTTCATTTAATTTTCATTGATCAGAACCGCCCTGTTTCTA  
TCAGAGAAAACCAAACAGTTTTTTCGGTTCGTGCAGATGGAGAAAAGTCAATGGAGTACTGGACAATTTTTTTTTCTTTTAAATGTATATATATGTGTGGTGTGCATAATTGCATGTCTATTT  
TCCATGTGGCAAGAGAAAAGAGAGAGAGAGAGGGATCTATGAATTAATAAATATATTTAAGTTTTTTTTGGGACAATTTTATAATGTTTTTTAAAGCAATATTTTAGTTAAAATTTTTAAATTC  
AAAATTATTTTATTCTAAAATAGTTGTTTTTAAAAGTAAGAAGT

>comp156769\_c3\_seq3

AAAAAGCCGTCCCAAACGAAACCTTAATTAGCAGCAATGCTAAAGAAATTTACATCACTTAAGCTTCTAATTGATCTCACACTTGAGGCATTTGCCACTTTCCACTTTCTTTGAAGCAACT  
GATCTTTGTAGAGAGTAAGAAATTGGTGAGATCTATAGATACAGCCTTACTGCTGAATCCATAAATCTGATGAAGCTTCAGGCATGATTGAAGAAGCCTAATCGGCTAAAGATTCCGCCCTT  
CGCTTTTCGCATGCGAGCTCCCAAGAGAGATTTTCTTCTGAATTCTTCATTGTGCTCCTCCTGCTTAGCTCCACAAGCTGATCATGAAAACGTTTCTGCAACCAAGATTCCTTCTCCATTT  
CTCATGGAAGCGCCGCTTAGCGGTGGAGAAGGCCAGGTGGAGATCGCTGCGAGCAAGGTTGCGATCATAGATGGCACGGTGACAAGGATCTAAGAGGGTGTGCATAGGCCCTCTTTACCT  
CGATAAACCGCTGAGTATACTCCTCCGTGCGATCCGGGGGTGAGACGTCAGGATGGTACTTCCTCGCGAGGTGCTTGTAGGCGCGCTTGATATCGTCGGTGTCCCCTCGCCGGAATCC  
CTAGAAGCTCGTAGAAGCTACCCTTCGTCTCCGGAAGCTCGACAACGGCCCCGAAATCCCTCATGGCCCGCCGCGGCCAGAGATTAAGCGCGACTTGCGCGGTAGAGCCGTCAGCTG  
CGTCCCGCACGGCCGCGGCATCCAACCTTTGGTAACAGCCTCCGGCGCGGGCGCGAGGCTGGTGGTTCTTAGAAAAGGCGAAATGGAGCTATTTCTGCAATTCGGAACGGCGGATTG  
AGACTTGATCATTTCTCTCGCTTGCTCTCT

>comp156769\_c3\_seq5

TTTTTTTTTATAAAAATAAAAGCACTTTCTTATTAATTTAATTTATGAAGCAACTTTTAGTACAAACTTTTTTAATTTAAAAACTGCTTTAAAAACAGTAATACAATCATTTCATTCGCCGAGAA  
TTCTGAAGGAGACTAAGGGCATTATTTGCTGTAAAAGTCTAATATGCTGGTGCTTCTGCGCTTCGTCTTCGCATACGAGCTCCCAAGAGAGATTTTCTTCTGAATTTTCATTGTGCTCCT  
CCTGCTTAGCTCCACAAGCTGATCATGAAAACGTTTCTGCAACCAAGATTCCTTCTCCATTTCCCTCATGGAAGCGCCGCTTAGCGGTGGAGAAGGCCAGGTGGAGATCGCTGCGAGCAA  
GGTTGCGATCATAGATGGCACGGTGACAAGGATCTAAGAGGGTGTGCATAGGCCCTCTTTACCTCGATAAACCGCTGAGTATACTCCTCCGTGCGATCCGGGGGTGAGACGTCAGGATGGT  
ACTTCCTCGCGAGGTGCTTGTAGGCGCGCTTGATATCGTCGGTGTCCCCTCGCCGGAATCCCTAGAAGCTCGTAGAAGCTACCCTTCGTCTCCGGAAGCTCGACAACGGCCCCGAAAT  
CCCTCATGGCAGCCCGCGGGCCAGAGGTTAAGCGCGACTTGCCCCGTAGAGCCGTCCAGCTGCGTCCCGCACGGCCGCGGCATCCAACCTTTGGTAACAGCCTCCGGCGGCGGGCGC  
GAGGCTGGTGGTTCTTAGAAAAGGCGAAATGGAGCTATTTCTGCAATTCGGAACGGCGGATTGAGACTTGATCATTTCTCTCGCTTGCTCTCT

>comp156769\_c3\_seq6

AAAATAACTCACAATAATTAATAAAAATAATTTTTCTACACTATTTCTATGTTTATCCAAAACCTTTTTGGAGCCTAATTAGGTCTAGTTTGAGACAGCTTTCTTTCTGTTTTCTGAAACG  
TCTTTTTAGTACATAATTTTTTCAGATTAATTTGTGTTATTAATAAAATGTTTTAGAAAAGCATTAAAGAAAATTGTCCAGCCTAAGATAAATGGAAAATAACCAAATTCAGAGCTTTAAATCA  
TATAACCTGGCTCTTTAGCTCTTTGCAGACCAGTTATTAACAAAACCATAGAAAAAAGTTATTAGAACAATCAAACCATCAAAAAGGCAAGTAGTCTGAAAAAATGCAACAAAATAAAAA  
TGGTAATATAAGTAAAAAATAAAAAACTCTCCAAGCATATCCTTTACTCCTAACAAATCCCAATCAAATTTATTGGTCTATGGGCGTTCAATTAACAAAAGAAGAGGATTGAAGATGA  
AGGGAGCAAGCTCACCTCATGGAAGCGCCGCTTAGCGGTGGAGAAGGCCAGGTGGAGATCGCTGCGAGCAAGGTTGCGATCATAGATGGCACGGTGACAAGGATCTAAGAGGGTGTCA  
TAGGCCCTCTTTACCTCGATAAACCGCTGAGTATACTCCTCCGTGCGATCCGGGGGTGAGACGTCAGGATGGTACTTCTCGCGAGGTGCTTGTAGGCGCGCTTGATATCGTCGGTGTCC  
CACTCGCCGGAATCCCTAGAAGCTCGTAGAAGCTACCCTTCGTCTCCGGAAGCTCGACAACGGCCCCGAAATCCCTCATGGCCGCCCGCGGGCCAGAGATTAAGCGCGACTTGCGCGGT  
AGAGCCGTCCAGCTGCGTCCCGCACGGCCCGGCATCCAACCTTTGGTAACAGCCTCCGGCGGCGGGCGCGAGGCTGGTGGTTCTTAGAAAAGGCGAAATGGAGCTATTTCTGCAATT

CGGAACGGCGGATTGAGACTTGATCATTCTCTCGCTTGCTCTCT

>comp156771\_c1\_seq2

AAATCTGCTGCGACAACAAAGTCAATGTTGAGCACTTCATTCTGATTGCGTCGCCCTCGAAATAAGCTCTGTTGTCTGTCTGCCATTTCTCTTAGATCACCGCCGTGCTTTTTGAACTC  
TCTTGCATGGTGGGTGCGGGTGAAGTTTGGACTCACAAACGGTTGCACCGCTGGCATCCCCAATCGATTGATAAGAGACCATATAGAACCCCCAAAACAACAATCATAGAATATAAGCTC  
CATCTTTTATGAGCTGGAGATATGGTGTGCTTTCACAATCATTCTTTTCAAAG

>comp156809\_c0\_seq3

TATATATATATATATTATTTTCTACATAATAACTTCCTAAATTATTATGTAGAAAATAATATATATATATAAATATAAGCAGCACCGTTATCATTCCCTGTAGATAAAACTCACATAATGAGCTGG  
ACCTTTCACAGTGCAGCAGATTTCAACCTATGCACCGGTATATCTGACAACTAATAAATACTACCAACATTACAAAGGGATGGGATTGAATGCGGAAGCCACATCGTTTTCTTTGTCTC  
AAATAAATAACGTAAGGATGAATGAGTTTCTCGGCGAAGCACAAACGCGCACATTTGTCCAACCCGATCTCATCTCGTACCCGAACCATACAAAGAATTTGCCCCACATGCCAACTGA  
GGAAAGAGAAGGGCGTAAGGGGACCGTTTCGGCGTGGCGCACACGCCGTCCCTCACCGGCCCTGGTTGTGCGCTCCGATGTGACCCGATGGGTGCGCAGCTAGCCAGCATCGACCTGCC  
GCCCTTCGGGCCAAAATTCGGGGCGATCGGGCCTTCCCTTTCCGCACGCGCCGTGGCCGCCTCGGTGTCTTCCAAATCCTAACCTCCTTGTGCGGCGATTGCCTTCGTCGAATTCATCCT  
GCGTTTTCCCAAGAACTATTTGACATGACATATGTATATAAATAGATACATAAAAAACCAGCTTTTAGAGAGAGAGAGGGGGGGGAATCAAATTAAGGAACAAAATGATCATGAAAATT  
TAAGAAAGATGGCGAGGATGACGCCGCACTTGCGAGATGCTAGGTTTCTGCTCCAAACCACGTCAGGTCGAGTCTTTGTCTTTCTTACAGAAATGCGCTGCATCTATGAATGATACG  
AAGAATATTGGCTCAAGCAAACCATGTAATATGAAAATATAACAGAAAAGAAAGAAATAGCTAAGAGATAAATAAAACACTTGCAGGTTAAACCATGTAATGCCTGTGGTAAAGGAAGG  
AGAAGAATAGATGCTATTTTTTGGCATGATAGGATATTAACAAAAAAGAAAGAAAGTTTGTATAGCAGAGGAAAGACAGCTATGGCGTGTGAAAGCACAGAGAAGAGCGGAT  
AAGCGGTGTTATCTTGCACAAGACCACGCAGCCAGGCCATAAGCAGCGCATCGGCGTGCAGACCTATCCATTGATCAGTACTCGATCTTCTCTTTCTTCTTCTGCTGCAAAGAAGAAG  
CTCCTCTAATTGATAGGCCAGTACAGCGATGCGGTGTAATATGGAAACGTTGCGCGGTCTTGAGCAAAACACCGGCCACTATGCACCCACAACCTTCACTCTCACATGACCCAGCTTATGA  
GGAAGACAACACAGGAAATAGCTAGGCTGTAAGAGACATATAGGAAGAGGTATGGCAATGAATTTGTGAAACAACGGAGATGGCTGTGTTGAAGGAAAAGGGGACTTCAAATGGTG  
AAAGAGGCAGGCAAAAAGACTTTGAAATAAATTTGTGAAGGAGAAGGGAAAGTGAGAGAAGAGGCTGAAGAGAGGGGTCTTGAATGTGGAGGAGAGATGGTTAGCCAACTAAAGGTA  
AAAGGTGTGACTTCTTGGAGGAAGAGAGTATTGATGAAGTGATACATTTATAGAAGGGGAGCTGCAACCGTAGCAGAGATCACAGGGACGGGGTTGAGAGGCTGAATGGTAAATCGT  
GTTTTGTGGGTACCATGGCATTGAAGGGTTTTGACCCTGTTATTTGGCCTTCCGTTTCAATAAACGATATGTAGTGCTTAAGCTCCGCGTGTTAATTTGTTAGCTTCATTAACCCCTCTGAT  
TAAGCACACCGTTTAAATCACTGAGTATCTATCTCAAAGCATTC

>comp156821\_c0\_seq2

TGCATCTATATTATTGTACACCTTAAATGCATCAAACCAAACAGTCTCTAAGCCATTTGACACAATAACATCACATTAATCGTTAAAAGAAAAAAATCATATTTTCTTAGCTCACATTTCTC  
ATTCTTGCTTGAACAGTTTTGTACGCCCTAAAAACTGTCATATGCAAAAGGCGTGGGTAATAAATAGAATCCGAATAAAGTGGGATTGTTAGAGAGAAATTAGGGTTCGAGATGTTCCCG  
AGTGGCAGCTGGGCAGCTTGTGACGGCTGCAACGTAAGTTTAGCCAACTCAAATCGTTACGACCGTTAGGGTTCAGAGCATGGTGGGTCCGGAAAGAGCTTTGCTCCATTTTCTCCTT  
CTCCCCGGAGAAAGCAGTGATTCCAAAGTGAGATAGGGAGAGCCCTCTCAACGGCTCCTCCCATCTCCTTCTTCTACTCTATTGGAAGGAGAACACACCAGCAATGGAGAATGAAGAGA  
ACAATGCTGAGTCAGGGTTGGAGATTGTAGAGGAACCTGCTGCAATCAAATACTATGGCTGGAAAACAATGCCTTATGTCATAGGTAAGTCAATAAGTTAGCTGAGGAAGAATAAAATAA  
AATATATATGCAACTTTCAAAATATTTTGAACGTAATGCCATGCTCAGGATGTATATAACAAAATTTCCAAAATTTATGAGGAAATGAGTGTCTCCCTTTCCATGGATTTGTTAGAATTGCT  
GAAATTTATGAGGAGTCTCTAGTGAAATCTAATCTTATACGTACACATGAAGATTTCTGCATCATTCCTCTTTGATTGGTATGAAATTAATATTTTTTAAAGTTAAACAGGCAATGAAACAT  
TTGAGAAGCTTGGGGGCATTGCCACAGCATCAAATATGCTTGTCTATCTCACCCTGTCTTCCACATCAAAGCATCCATGCTGCAACGATCCTTAATGTTTTAATGGAACACAAGCCTT

GCTACTGTTCTTGGGGCCTTCATCTCGGACGCCTTCTTAGGACGCTACAAAACCTTGGGTTTTGCTTCTGTAGTTACACTTTTGGGTATGTTTGTTCATCATGATCACTGCTGCAATCCCAGC  
TCTGCATCCACCTTCTGTGTACAAGGAACAACCTTGTTCAGGTCCACAACAATGCAGCTTGCTATGCTTGGCTCTCAGCTTTCTATTTCTAGTGATCGGAGCGGGCGGTATCAGGCCCTGC  
AATCTTGCCTTCGGTGCTGACCAGTTTAATCCAAAACTGAATCTGGAAAGAAAGGAATTAGCAGCTTCTTCAACTGGTATTATTTTACCTTCACCATTGCAGTCATGATCTCCTCGACATT  
CATAATCTATATTCAGAGCAATGTGAGCTGGACACTGGGCTTGGCTATCCCTGCCATCATGATGCTCATCTCTTGCATCTTCTTCTTCTTGGCACGAGAATTTATGTCAAGGTGAAGCCTG  
AAGGGAGCCCTTTTATTAGCTTTGCTCAGGTTCTAGTGGCAGCACTCAGGAAGCGGGCGTTGGCAATTATCAGATGATCCAAAGCAGTCTCTCTTCAGTCCTCCTCATTTCAGCTCTCTCAT  
CTCCAAGCTTCCACATACTAATCAGTTCAGATGGCTTGACAAGGCTGCAATCATAACAACTCAGATGAAATCAAATAGACTCAGCTGCGGCGAATCAATGGCGATTATGTAGCATCCAG  
CAGATTGAAGAGGTGAAATGCCTCCTAAGAATAGCTCCAATTTGGTCCACAGGCATCCTATACTACATCGGCATGGCACAGCAATCAACATATGTTGTTCTCCAAGCAATGCAATCTAACC  
GTCACATCGGAAACAAAATTTTGGAGATTCCGGCCGGCTCCTTCTCCATCTTTTCCCTTCTCGCTCTCTCCATATGGTTACCGATCTACGATAGCATTGTCATCCATGGCTAAGAAAAATC  
ACCAAAAAGGAAGAAGGCATCACACTTCTACAAAGAATGGGAGTTGGAATGGTGATTTCATAATGGCAATGATTGTTTCAGGAATGGTTGAAGAGAGGAGGAGAAACACTGCTCTTCA  
TCAACCAACTATTGGAATCTCAGTAAGTGGTGGAGCCATTCATCCTTCTCTAGCCTTGGTGGTTCCTCAGCTCATGCTTTCAGGCCTGGCTGAGGCATTCAACACAATTGGGGCAATG  
CAATTCTACTACAATGAGTTCCTGAACACATGAGGAGTGTTCAGGTTGTTTGTCTTCTGCAACGTTGCACTTTCAAATTACTTGAGTGGATTCTGGTGACGATTATAAATCGAGCTGG  
TGGCGACGATGGGAGTTGGCTGGCTGGGGATCTTAACAAAGGGAGTTGGAGAATTTCTACTATCTAATTGCTGGGATTGGAATTGTGAACACTACATGTACTTCTTATTGGTTCAGGTGG  
TACAAATACAAAGGATCTGAGATTTCCAGAAAGTAAGTAGCTCTGAGTGTCAACCAATTTAACACATTGATTAAAGCTAAACAGGTGGATTTCATTTTGGTTTTTAAATGGAATTTTCGAG  
ACTACATTTATCTATATGATATGCAATCATTTCAGTTGCATACTAAACAGTTTTGGAGTATTATTTATCATAGTCATGTGGAAAAGATATTGATATGGGAAGAACTGATCTGTGTTACATTATT  
ATACCTTATAATTATTAATTGGATATTACACCTCTCA

>comp156821\_c0\_seq3

TGCATCTATATTATTGTACACCTTAAATGCATCAAACCAAACAGTCTCTAAGCCATTTGACACAATAACATCACATTAATCGTTAAAAGAAAAAAATCATATTTTCTTAGCTCACATTTCTC  
ATTCTTGGCTTGAACAGTTTTGTACGCCCTAAAAAACTGTCATATGCAAAGGGCGTGGGTAATAAATAGAATCCGAATAAAGTGGGATTGTTAGAGAGAAATTAGGGTTTCGAGATGTTCCCG  
AGTGCGACGTGGGCAGCTTGTTCAGGCTGCAACGTAAGTTTAGCCAACTCAAATCGTTACGACCGTTAGGGTTCAGAGCATGGTGGGTCCGGAAAGAGCTTTGCTCCATTTTTCTCCTT  
CTCCCCGGAGAAAGCAGTGATTCCAAAGTGAGATAGGGAGAGCCCTCTCAACGGCTCCTCCCATCTCCTTCTTCTACTCTATTGGAAGGAGAACACACCAGCAATGGAGAATGAAGAGA  
ACAATGCTGAGTCAGGGTTGGAGATTGTAGAGGAACCTGCTGCAATCAAATACTATGGCTGGAAAAACAATGCCTTATGTCATAGGCAATGAAACATTTGAGAAGCTTGGGGGCATTGCCA  
CAGCATCAAATATGCTTGTCTATCTCACCCTGTCTTCCACATCAAAGCATCCATGCTGCAACGATCCTTAATGTTTTTAAATGGAACACTACAAGCCTTGCTACTGTTCTTGGGGCCTTCATCT  
CGGACGCCTTCTTAGGACGCTACAAAACCTTGGGTTTTGCTTCTGTAGTTACACTTTTGGGTATGTTTGTTCATCATGATCACTGCTGCAATCCCAGCTCTGCATCCACCTTCTGTGTACAA  
GGAACAACCTTGTTCAGGTCCACAACAATGCAGCTTGTATGCTTGTCTCAGCTTTCTATTTCTAGTGATCGGAGCGGGCGGTATCAGGCCCTGCAATCTTGCCTTCGGTGCTGACCAGT  
TTAATCCAAAACTGAATCTGGAAAGAAAGGAATTAGCAGCTTCTTCAACTGGTATTATTTTACCTTCACCATTGCAGTCATGATCTCCTCGACATTCATAATCTATATTCAGAGCAATGTGA  
GCTGGACACTGGGCTTGGCTATCCCTGCCATCATGATGCTCATCTCTTGCATCTTCTTCTTCTTGGCACGAGAATTTATGTCAAGGTGAAGCCTGAAGGGAGCCCTTTTATTAGCTTTGCT  
CAGGTTCTAGTGGCAGCACTCAGGAAGCGGGCGTTGGCAATTATCAGATGATCCAAAGCAGTCTCTCTTCAGTCTCCTCATTTCAGTCTCTCATCTCCAAGCTTCCACATACTAATCAGT  
TCAGATGGCTTGACAAGGCTGCAATCATAACAACTCAGATGAAATCAAATAGACTCAGCTGCGGCGAATCAATGGCGATTATGTAGCATCCAGCAGATTGAAGAGGTGAAATGCCTCC  
TAAGAATAGCTCCAATTTGGTCCACAGGCATCCTATACTACATCGGCATGGCACAGCAATCAACATATGTTGTTCTCCAAGCAATGCAATCTAACCGTCACATCGGAAACAAAATTTTGA  
GATTCCGGCCGGCTCCTTCTCCATCTTTTCCCTTCTCGCTCTCTCCATATGGTTACCGATCTACGATAGCATTGTCATCCATGGCTAAGAAAAATCACCAAAAAGGAAGAAGGCATCACAC  
TTCTACAAAGAATGGGAGTTGGAATGGTGATTTCATAATGGCAATGATTGTTTCAGGAATGGTTGAAGAGAGGAGGAGAAACACTGCTCTTCATCAACCAACTATTGGAATCTCAGTTG

TTTGTCTCTTCTGCAACGTGGCGCTTTCAAATTACTTGAGTGGATTTCTGGTGACGATTATAAATCGAGCTGGTGGCGACGATGGGAGTTGGCTGGCTGGGGATCTTAACAAAGGGAGGTT  
GGAGAATTTCTACTATCTAATTGCTGGGATTGGAATTGTGAACTACATGTACTTCTTATTGGTTCCAGGTGGTACAAATACAAAGGATCTGAGATTTCCAGAAAGTAAGTAGCTCTGAGT  
GTCAACCAATTTAACACATTGATTTAAGCTAAACAGGTGGATTTCATTTTGGTTTTTTAATGGAATTTTCGAGACTACATTTATCTATATGATATGCAATCATTTTCAGTTGCATACTAAACAGTT  
TTGGAGTATTATTTTCATCATAGTCATGTGGAAAAGATATTGATATGGGAAGAACTGATCTGTGTTACATTATTATACCTTATAATTATTAATTGGATATTACACCTCTCA

>comp156821\_c0\_seq6

TGCATCTATATTATTGTACACCTTAAATGCATCAAACCAAACAGTCTCTAAGCCATTTGACACAATAACATCACATTAATCGTTAAAAGAAAAAAATCATATTTTCTTAGCTCACATTTCTC  
ATTCTTGCTTGAACAGTTTTGTACGCCCTAAAAAACTGTCATATGCAAAGGCGTGGGTAATAAATAGAATCCGAATAAAGTGGGATTGTTAGAGAGAAATTAGGGTTTCGAGATGTTCCCG  
AGTGCGACGTGGGCAGCTTGTTCAGGCTGCAACGTAAGTTTAGCCAACTCAAATCGTTACGACCGTTAGGGTTTCAGAGCATGGTGGGTCGGAAAGAGCTTTGCTCCATTTTTCTCCTT  
CTCCCGGAGAAAGCAGTGATTCCAAAGTGAGATAGGGAGAGCCCTCTCAACGGCTCCTCCCATCTCCTTCTTCTACTCTATTGGAAGGAGAACACACCAGCAATGGAGAATGAAGAGA  
ACAATGCTGAGTCAGGGTTGGAGATTGTAGAGGAACCTGCTGCAATCAAATACTATGGCTGGAAAACAATGCCTTATGTCATAGGCAATGAAACATTTGAGAAGCTTGGGGGCATTGCCA  
CAGCATCAAATATGCTTGTCTATCTCACCCTGTCTCCACATCAAAGCATCCATGCTGCAACGATCCTTAATGTTTTAATGGAATAACAAGCCTTGCTACTGTTCTTGGGGCCTTCATCT  
CGGACGCCTTCTTAGGACGCTACAAAACCTGGGTTTTGCTTCTGTAGTTACACTTTTGGGTATGTTGTCATCATGATCACTGCTGCAATCCCAGCTCTGCATCCACCTTCTGTGTACAA  
GGAACAACCTGTTTCAGGTCCTACAACAATGCAGCTTGTCTGCTCAGCTTTCTATTCTAGTGATCGGAGCGGGCGGTATCAGGCCCTGCAATCTTGCCTTCGGTGCTGACCAGT  
TTAATCCAAAACTGAATCTGGAAAGAAAGGAATTAGCAGCTTCTTCAACTGGTATTATTTTACCTTACCATTGCAGTCATGATCTCCTCGACATTCATAATCTATATTCAGAGCAATGTGA  
GCTGGACACTGGGCTTGGCTATCCCTGCCATCATGATGCTCATCTCTTGCATCTTCTTCTTCCCTGGCACGAGAATTTATGTCAAGGTGAAGCCTGAAGGGAGCCCTTTTATTAGCTTTGCT  
CAGGTTCTAGTGGCAGCACTCAGGAAGCGGCGTTGGCAATTATCAGATGATCCAAAGCAGTCTCTCTTCAGTCCCTCATTTTCAGCTCTCTCATCTCCAAGCTTCCACATACTAATCAGT  
TCAGATGGCTTGACAAGGCTGCAATCATAACAACTCAGATGAAATCAAATAGACTCAGCTGCGGCGAATCAATGGCGATTATGTAGCATCCAGCAGATTGAAGAGGTGAAATGCCTCC  
TAAGAATAGCTCCAATTTGGTCCACAGGCATCTATACTACATCGGCATGGCACAGCAATCAACATATGTTGTTCTCCAAGCAATGCAATCTAACCGTCACATCGGAAACAAAAATTTTGA  
GATTCGGCCGGCTCCTTCTCCATCTTTTCCCTTCTCGCTCTCTCCATATGGTTACCGATCTACGATAGCATTGTCATCCCATGGCTAAGAAAAATCACAAAAAGGAAGAAGGCATCACAC  
TTCTACAAAGAATGGGAGTTGGAATGGTATTCCATAATGGCAATGATTGTTTCAGGAATGGTTGAAGAGAGGAGGAGAAACACTGCTCTTCATCAACCAACTATTGGAATCTCAGTAA  
GTGGTGGAGCCATTTTCATCCTTCTTAGCCTTTGGTTGGTTCCCTCAGCTCATGCTTTTCAGGCCTGGCTGAGGCATTAACACAATTGGGCAAATGCAATTCTACTACAATGAGTTCCCTGA  
ACACATGAGGAGTGTTCAGGTTGTTTGTCTTCTGCAACGTTGCACTTTCAAATTACTTGAGTGGATTTCTGGTGACGATTATAAATCGAGCTGGTGGCGACGATGGGAGTTGGCTGGCT  
GGGGATCTTAACAAAGGGAGGTTGGAGAATTTCTACTATCTAATTGCTGGGATTGGAATTGTGAACTACATGTACTTCTTATTGGTTCCAGGTGGTACAAATACAAAGGATCTGAGATTT  
CCAGAAAGTAAGTAGCTCTGAGTGTCAACCAATTTAACACATTGATTTAAGCTAAACAGGTGGATTTCATTTTGGTTTTTTAATGGAATTTTCGAGACTACATTTATCTATATGATATGCAATC  
ATTTTCAGTTGCATACTAAACAGTTTTGGAGTATTATTTTCATCATAGTCATGTGGAAAAGATATTGATATGGGAAGAACTGATCTGTGTTACATTATTATACCTTATAATTATTAATTGGATATTA  
CACCTCTCA

>comp156825\_c1\_seq2

CAATATCTCATTTGTTGCCCTAGCCGACCATATTCGACTCCTTCACAACCGCAACCTTCATCTTCGTCGGAGATCATCCACGCTGAATCAGCTAGCCTTGATGCCGAAGCCTCCCATGTCAA  
CGCCGAATCTTGCTATCTCGATGTCTAATCCTGTTATCCCAGTACAAAATCCACCCATCTTGATGCAAAAATCCAGCCGTCCTGATGCCTAATCTAGCCATCTCGATGCAAAAATGAACCATCGC  
TAACCATTTGTTGGTGTATCTAGAAGAACCAATCCCTTCTTAAAAGAGGAAAATGTGGGAAGAAGAATAAGTCTGGACTCATCTTATTAGACTATTGCTCCAAATTTGAGAAACAAAT

>comp156863\_c0\_seq1

CATATATTTCTTCAAAAATTCACAACATCAATAAAAATTGCAGTTACATAATTTAGAAAATGCTACTAGAAGGACCTCAATAATGTTAAATCTTTGTATAATCCTATTTTTTAAATTTGTCTCAGCT  
CAAAGCCTTATAATTTATTTCAAATAAATCAGGATGAAGACTAATACCAACTGCATTTGTCTCTGAGAACTTTACAGGCCTATTACTGTTGGAATCAATGGCAAGATTACATATAATATGCC  
TGTGACTCTTACCCTTACCAAGAACCCTACAAGATATCCTTGGCTAGCCATGTCCAAGTTTAGTGTCATTGGAGCTTTAATAGAAGTTCTTGACAGATCTAAGCCCAGGCTAGCTCCATAA  
AGAGGAACCTGGTCACCCATCAGAATGATAGACTTAACCTTGATGGTTTTTTCTGGGCAGATAATACTCCTCCACCTGATTTACAGCAACCCGTATTTTGAATAGAAGAGACTAACATGGG  
TAGAGGTAACATGAACGCCAAAATATGGAGCAGGATTGAACACGTTGATCTTACAGTACAATTAAGACCAAGCATTTTTGTGGCACTCCAGTACGATCTTGTCCAATTCCAGCATGAA  
AGTAATTCACAACCAAGCTCTCCACTGCCACCTCAGGTGCATATTGCCTGCTTACCCCCATATGATGAAGCCAGCAACAGTACATATCAAATAAAAAGCAACTAAACCAAAAAACATCTT  
GAATACAATTGAATGCCTTTCAACATCACCATAATTGAGCTCCTCGTCAATGGTTGAATAATCAAACCATCTTTTTTCATTCAGCCTCCTCCTCTCCTGCGGCCCGTCGTAGATAAATTTAA  
GGACTCAGAAATCAGGCTGGCCGATGAAAACCTTGGCGGAGAATCTGAAGGGCTTTTGTAGACTGGAGTGGTTCTTGACGAGGACTTATTTCCATCATAAGAATCCCCAGATGGGCTCTG  
CACATAGTAAGCTGGAAGTATATTTGCGAATCGATATGGCGAGGAATCATTTAGGGTTGAGACGTCTGAATCAGAAATAGTTCTCATCATCTTGACCTAAGGGAGCAGTAGAAAGACGAA  
AAATCTCGTCTTGCAAGGGGTGATTTGCTTTAAAAGAGGAAAAATCTCAAAGGACAAAATTTTCAAGGAAAACCAGTACATGAAAGAATCAGAACAATG

>comp156883\_c0\_seq2

AGATATGTAGGAATACAAAGCTAGGTAGAGACAGATGGAATCTGAGAAGATAATTGCTTAAGGCCTGCATTATGGAGAAAGATACATAAAGAATTATTATTTTTTAAAAAAAATTGAACG  
ATATATGTGATGTTTACAGAGGTAGACATGTGGACTAAAGCAGATGCCTTAAACACTAACATTTAAAGTGGTGGCATCGTTTCTTCTATGCGAAATGAAACAGAAAGAGCGACATTGGGGTC  
AATTATATCTAGCTTTTTCTTTAACGAGAATTTTTCCACTTCTTTGGTGTGATGAGTAGAAGAAGTATAATTTTGATAGTTCTTATTAATGCGTACAAGAAAATGTAGAAAATTCGTTTCTTCT  
CTTCTTTTCTTCTTTTAGATCATCTCCAACAGAACTCCATAACCATTATATGTCATCCGCCATTTACTCCATTAGAACTCCAAATCGCACGCCAAATTGTCGTGGACTGTTACCTGTGCC  
GAAAATATTCGCTGCGAGATTTGTCAAATAAGCGCGCTAAAAGAAAAGAAAGCGCGCCAAAGATGATTACCATCGCAGGAAGAGCATGAAAAAAGAAGAAATGATGTTCTGTTGGAAA  
AGAATTATTGCATTTTAAAGTTTTACTATATTTTGAATGAAAATGACTTTTTGGGTTGGAGATGCCCTTAAACTTAATGGAGGCAATTGCTTCTTTGGATTCTTCTGTTTACGGCTTCT  
TCGCTACAAAACAAAATGGGCTGCCGAAGTAGAAGCAATCGAATTATCCCCACCGTAATATAAGGAAAGCATCTTCAAGTGCTCATGTTGCTGTTTAACTTGAAAGCATTAAAATAATA  
ATATATT

>comp156900\_c0\_seq1

CTCCCCCTCTCTCTCTCTCTCTTATGCCTCCGAATTC AACACGAGGAATTTTGGGAACGGCCTTCCCTGTTTGCCATAATTTATAATTTCTTCTAAGAGAAAATATCAAATAACAGATT  
TTTTTGTAACCTTTCGTATTTTACACATTGAATACAATAATAAAAAAGCGGGTATGCACATAGATACTGATACTGTCACTTTTTGCTAATTAATTAATTTACGAACTAAAGCTCTTAATT  
TT

>comp156907\_c1\_seq5

AAAATTATATATAAACTTAAATCATATCAACTTTTAGTCAGGAGAATGAATAAAAATATTCTCAAACAGGTGTAAGAAGCTCTCCCATCTAAGAAAATGGCTCCACAAGAACTTTTGTATA  
ATTTTTTTGAGGAGCTTAAACAGTATTCTCCTCCCCTAAAAGCAAACCACTACTTATTATTTTATATAGGATGCAATACAGAGAGCTTCATCCTATATTATCAGCACTCTACCTTGTGTTAGTA  
AGCTCAAGAACATATACATTAGTTTGATTTAAACTACATTTGGGACAAATTTCTTACTACTTCTTGAAGCAGTTTTTTAGTATTGTATTAATAAATCTGCTTTAAGACGCAGTAAGAAAGTCAT  
CCCAAATG

>comp156910\_c0\_seq1

AGCTCGAGGAGAAGGAGGAGAGCAAATTGCTTAAGTTCCTAGGCTTCATGTGGAATCCCCTGTCATGGGTCATGGAGAGCGCTGCTTTGATGGCCATTTTCTAGCCAATGGCGGTGGAA  
AGCCGCCGGACTGGCAGGACTTCGTGCGCATCGTCGTTCTGCTCATCATCAACTCCACCATCAGCTTCATCGAGGAGAATAATGCTGGTAATGTCCGAATTTGGAAATGTTAATCAACAG

GTAATTAGAGCCGCATTTTATTAAATTATGCATCGACAGGTAACGCTGCGGCCGCGCTGATGGCTGGACTCGCCCCGAAGACCAAAGTCCTCCGCGACGGCCGGTGGTTCGGAGCAGGACGCCCATTTCTCGTTCCCGGGCGACATCATCAGCATTAAAGCTCGGGGATATCATCCCCGCCGATGCTCGTCTTCTAGAAGGAGACCCACTTAAGATCGACCAATCCGCCCTCACCGGGCGAACTCTTCCAGTCAATAAGCACCCCGGGCGACGAAGTCTTCTCCGGCTCCACCTGCAAACAGGGCGAGATCGAAGCCATCGTAATTGCCACCGGGCGTCCACACCTTCTTCGGCAAGGCGGCCACCTCGTTCGACAGCACCAACAACGTCGGACATTTCCAAAAGGTTCTCGCTGCCATTGGCAACTTCTGCATCTGTTCCATCGCCATTGGCATGCTCGTAGAGATAATCGTCATGTACCCTGTCCAGCACCGGCTGTACCGCGACGGCATTGATAATCTCCTCGTTCTCCTCATCGGCGGAATCCCCATCGCCATGCCACCCTGCTTTCAGTCACCATGGCGATCGGGTCCACCCTGGTTGTTCGCAACAAGGTGCCATTACCAAGCGGATGACCGCCATTGAGGAAATGGCCGGCATGGATGTGCTCTGTTTCAGATAAACTGGCACCTTGACGCTTAACAAGCTAACCGTTGACCGCAGTCTGATAGAACTTTTACCAAGGATGTTGACAAAAGACGGTGTGTTGCTGTACGCCGCACGAGCATCCCGTGTGCGAGAATCAGGACGCCATTGACGCCTGTATCGTCGGCATGCTCGCCGACCCTAAAGAGGCACGCGCCGGGATAAAGGAGGTTTCATTTCTTACCCTTCAACCCTGTTGAGAAGCGTACCGCCATTACCTATATCGACGAACAGGGGAAGTGGCATCGGGCCAGTAAAGCGCGCCGGAGCAGATCATCGAGCTATGTGCCCTTAAAGAGGACGCTAGTCGGAAAGTACATGCATTAATCGACAAATTCGCTGACCGCGGTCTGAGATCCCTCGGCGTGGCGCGTCAGGAGATTCCTGAAAAGACGAAGGACAGCGCCGGTGATCCATGGGAGTTCCTCGGTCTGCTCCAGTCTTCGACCCGCCGCGGCATGACAGTGTGAAACCATTCTCCGGGCTCTCAACCTCGCGTCAACGTCAAGATGATCACCGGTGACCAGCTCGCGATCGGGAAGGAGACCGGGAGGCGACTCGGGATGGGAACCAACATGTACCCTTCATCAACTCTGCTCGGCGATAAATCAACAGAGTTAACCGGAATCCAATCGACGAACTCATTGAAAAAGCCGATGGATTCGCCGGAGTTTCCCGGAGCACAAATACGAGATTGTGCGGAGGCTTCAAGAACGAAAACACATATGCGGAATGACCGGCGACGGCGTCAACGACGCGCCGGCGCTGAAGAAGGCGGACATCGGTATTGCGGTGGCCGACGCCACCGACGCGGCGAGGGGGCGCATCTGACATAGTATTAACAGAGCTGGGTTGAGCGTGATAATAAGCGCAGTGTGACAAGTCGCGCCATTTCCAGAGAATGAAGAACTACACCATCTACGCCGTGTCCATCACCATTCGAATCGTTCTAGGATTCATGCTCATCGCTTAACTGCGCTTCGATTTTTCCCTTCATGGTTCTCATCATCGCCATCCTCAACGATGGAACCATCATGACCATCTCAAAGGATCGCGTGAAGCCATCCCTGTTCCGGATTCATGGAAGCTGAAGGAGATTTTCGCTACGGGTGTCATCCTCGGCGGTACATGGCCCTCATCACCGTCTCTTCTTCTACCTCGCCACGATAACCGATTTCTTCACCGAGAAATTCGGGGTTCAATCCGATTAAGAAAAAGCCGACGAGCTCACCGCGCGCTTTACCTGCAAGTAAGCATAATCAGTCAAGCCCTTATCTTTGTACAAGGTGCGAGGAGCTGGTCTTCGTTGAACGGCCTGGATGCTGCTGTGACCGCCTCCTCGCAGCGCAGTTAGTTGCGACGGTGATCGCCGTGTACGCCTCCTGGAGCTTCGCCAGAATAGAAGGAATCGGTTGGGGATGGGCCGGCGTGATTTGGATCTTCAGCTGCATCACTTACTTTCTCTCGACGTACTCAAGTTCACCACCCGCCACACTTTAAGCGGCAAGGCGTGGGATAATTTGTTACAGAACAAAAGTGGCTTACGAACAAGAGGATTACGGGAAAGGCGAGCGGAGGCACAGTGGGCCGAGCGCAACGCACGCTTCATGGACTTCAGACCGTTCGAGACCTCCGACCTTTTCCATGATAATAACAGCTATCACGAGCTCTCCGAAATCGCCGAGCAGGCTAAGCGCCGTGCAGAAAGTAGCACGGCTGAGAGAGCTGCACACGCTCAAGGGACACATGGAGTCCGTGGTGAAGCTCAAAGGTTTGGACATTGAGACGATTCAGCAGCATTATAACCGTCTAATAAGGAGAAGCAACCGCCATTGATGAGCAAAAAAAGAGCAAATCATTGGTGCCTTAACTTGAAGGTTCTGGGCCTCAAGTTGGAGAAATATTAATCCTGCGGAGTTTGAACGTTTCGGTTCGGATGCAAAAAAATGAGAAATTTATTCTCAAAATCTCATTTTTTTGAACGTTCTAAATGAATTACTTTTTTAATAGGAGTTTTGAGCGTATTTGTACTAAAACAATTATGTTGATATTTACTATACTAAATCTAGAATATTTATTTTAAAAAAA

>comp156910\_c0\_seq3

AGCTCGAGGAGAAGGAGGAGAGCAAATTGCTTAAGTTCCTAGGCTTCATGTGGAATCCCCTGTCATGGGTCATGGAGAGCGCTGCTTTGATGGCCATTTTCTTAGCCAATGGCGGTGGAAAGCCGCCGACTGGCAGGACTTCGTCGGCATCGTCTGTTCTGCTCATCATCAACTCCACCATCAGCTTCATCGAGGAGAATAATGCTGGTAATGTCGGAATTTGAAAATGTTAATCAACAGGTAATTAGAGCCGCATTTTATTAAATTATGCATCGACAGGTAACGCTGCGGCCGCGCTGATGGCTGGACTCGCCCCGAAGACCAAAGTCCTCCGCGACGGCCGGTGGTTCGGAGCAGGACGCCCATTTCTCGTTCCCGGGCGACATCATCAGCATTAAAGCTCGGGGATATCATCCCCGCCGATGCTCGTCTTCTAGAAGGAGACCCACTTAAGATCGACCAATCCGCCCTCACCGGGCGAACTCTTCCAGTCAATAAGCACCCCGGGCGACGAAGTCTTCTCCGGCTCCACCTGCAAACAGGGCGAGATCGAAGCCATCGTAATTGCCACCGGGCGTCCACACCTTCTTCGGCAAGGCGGCCACCTCGTTCGACAGCACCAACAACGTCGGACATTTCCAAAAGGTTCTCGCTGCCATTGGCAACTTCTGCATCTGTTCCATCGCCATTGGCATGCTCGTAGAGATAATCGTCATGTACCCT

GTCCAGCACCGGCTGTACCGCGACGGCATTGATAATCTCCTCGTTCTCCTCATCGGCGGAATCCCCATCGCCATGCCACCGTGCTTTCAGTCACCATGGCGATCGGGTCCCACCGGTTGT  
CGCAACAAGGTGCCATTACCAAGCGGATGACCGCCATTGAGGAAATGGCCGGCATGGATGTGCTCTGTTTCAGATAAAAAGTGGCACCTTGACGCTTAACAAGCTAACCGTTGACCGCAGT  
CTGATAGAACTTTTTACCAAGGATGTTGACAAAAGACGGTGTGTTTCTGTACGCCGACAGGATCCCCGTGTCGAGAATCAGGACGCCATTGACGCCTGTATCGTCGGCATGCTCGCCGAC  
CCTAAAGAGGCACGCGCCGGGATAAAGGAGGTTCAATTTCTTACCCTTCAACCCTGTTGAGAAGCGTACCGCCATTACCTATATCGACGAACAGGGGAAGTGGCATCGGGCCAGTAAAGG  
CGCGCCGGAGCAGATCATCGAGCTATGTGGCCTTAAAGAGGACGCTAGTCGGAAGTACATGCATTAATCGACAAAATTCGCTGACCGCGGTCTGAGATCCCTCGGCGTGGCGCGTCAGG  
AGATTCTGAAAAGACGAAGGACAGCGCCGGTGATCCATGGGAGTTCCTCGGTCTGCTCCCAGTCTTCGACCCGCCGCGGCATGACAGTGTGAAACCATTCTCCGGGCTCTCAACCTC  
GGCGTCAACGTCAAGATGATCACCGGTGACCAGCTCGCGATCGGGAAGGAGACCGGGAGGCGACTCGGGATGGGAACCAACATGTACCCTTCATCAACTCTGCTCGGCGATAAATCAA  
CAGAGTTAACCGGAATCCCAATCGACGAACCTATTGAAAAAGCCGATGGATTGCGCCGAGTTTTCCCGGAGCACAAATACGAGATTGTGCGGAGGCTTCAAGAACGAAAAACACATATGC  
GGAATGACCGGCGACGGCGTCAACGACGCGCCGGCGCTGAAGAAGCGGACATCGGTATTGCGGTGGCCGACGCCACCGACGCGGCGAGGGGCGCATCTGACATAGTATTAACAGAGC  
CTGGGTTGAGCGTGATAATAAGCGCAGTGTGACAAGTCGCGCCATTTCCAGAGAATGAAGAACTACACCATCTACGCCGTGTCCATCACCATTGCAATCGTTCTAGGATTCATGCTCAT  
CGCTTTAATCTGGCGCTTCGATTTTTCCCCCTTCATGGTTCTCATCATCGCCATCCTCAACGATGGAACCATCATGACCATCTCAAAGGATCGCGTGAAGCCATCCCCTGTTCCGGATTCAT  
GGAAGCTGAAGGAGATTTTCGCTACGGGTGTCATCTCGGCGCGTACATGGCCCTCATCACCGTCATCTTCTTCTACCTCGCCACGATACCGATTTCTTACCAGTCAGTATTATTATTACC  
CTTGTTACCCGCAATTCATCAAACTTCTTATTACATAAAAATCAATCTTTTTGCAAGGAGAAATTCGGGGTTCATCCGATTAAGAAAAAGCCGACGAGCTACCGCGGCGCTTTACCTG  
CAAGTAAGCATAATCAGTCAAGCCCTATCTTTGTGACAAGGTCGAGGAGCTGGTCCTTCGTTGAACGGCCTGGGATGCTGCTTGTACCCGCTTCCTCGCAGCGCAGTTAGTTGCGACG  
GTGATCGCCGTGTACGCCCTCCTGGAGCTTCGCCAGAATAGAAGGAATCGGTTGGGGATGGGCCGGCGTGATTTGGATCTTCAGCTGCATCACTTACTTTCTCTCGACGTACTCAAGTTCA  
CCACCCGCCACACTTTAAGCGGCAAGGCGTGGGATAATTTGTTACAGAACAAAAGTGGCTTTACGAACAAGAAGGATTACGGGAAAGGCGAGCGGAGGCACAGTGGGCCGACGCGC  
AACGCACGCTTCATGGACTTCAGACCGTCGAGACCTCCGACCTTTTCCATGATAATAACAGCTATCACGAGCTCTCCGAAATCGCCGAGCAGGCTAAGCGCCGTGCAGAAGTAGCACGG  
CTGAGAGAGCTGCACACGCTCAAGGGACACATGGAGTCCGTGGTGAAGCTCAAAGGTTTGGACATTGAGACGATTACGACGATTATAACCGTCTAATAAGGAGAAGCAACCGCCATTGA  
TGAGCAAAAAAGAGCAAATCATTGTTGCCTTAAACTTGAAGGTTCTGGGCCTCAAGTTGGAGAAATTATTACCTGCGGAGTTTTGAACGTTCCGGTCCGATGCAAAAAATGAGAAAT  
TTATTCTCAAATCTCATTTTTTTTGAACGTCTAAATGAATTACTTTTTTAATAGGAGTTTTGAGCGTATTTGTACTAAAACAATTATGTTGATATTTACTATACTAAATCTAGAATATTTATT  
TTTTAAAAAAA

>comp156929\_c0\_seq18

TAATCCAATATCTAATGAGCTGGTAGTCTGAGAGTAACAGGAGAGAGAAGGTGAGCAGGCCATTTATTTATCGAGATCTTGCTTCCATGTGGGATTCGAGCGACAGCCACAGCAGAGCG  
ACAGATTTAGAGAGAGAATTCAGCCAGCGAATGCTGAGACGATAACTGAGGAGATCGAGAGGACGGTGGCGGCAAAAACAGGAAGCGAATCCGGCCTGCCCTTTACGATTCGGATCTC  
GGATTCTCCGCCGATCCGCTCGTTCCGATCCGTAAAGGCAGGATCCCGCCTGCTCTATTTAAAGCCCGCACGATTCAACCTATCCTTCTCGTGTCTTCAAGTTTGATATTTTCGTCGCGAT  
TTCATCGTATATACAATTTGATCATCGACGTAATGTCTTACAGAAAGAGGCGGAGCCGCGGTTGAGGGCAACGGGAATTGCACGTTCTCGCCGTCGATGACAGCTCCGTCGACCGCGCCC  
TCGTCGCTCACCTTCTGCGTAGCTCTAAATTCCTGACTACGGTGGATAGCGGGAAGCGTGCCTGGATCTGCTGGGAATGGAGAGGAATGTGAGCATGATAATTACGGACTACTGGATGC  
CGGAGATGACCGGACTGGAGCTGCTGAGAAAGATTAAGGGTTCGTCGGAGTTAAAGGCGATTCCGGTGGTGATTATGTCGTCGAAAACGTCCCAACCGTATACGCACGTACGATCATT  
ATTTTGTTTTTAACATTTTTTTTATTGAAATGGTAAATGTGTAATATAGTTATTTTCGTGGTGATTTAGGTGTTTGGATGAGGGCGCTGAGGATTTTCTTCTGAAGCCGCTGCAGCCGTCGG  
ATGTGTCACGGTTATGCAGCCGCGTGTGAGATGATTCTGGCCGCTGATTTTGTACTGAGCTTTTCTATCGGCTGGGTTTCGTTTTGTTTTCTGGGTTTTACTTTGCTAGCATTGTGAA  
AATTTTAGGAATTTACTGGTAAAGAAAGAAGTTAGTTACCTGATATTTGCCTTTTTATATCGAATAAATG

>comp157049\_c0\_seq2

TGGGTAAAATACTGTCGTTTATTTGCAATTTGGCATTCACATTTGGGACCAAATAATATTTGTACTIONTATGAGAAAACGTTGCATAAAAACATTGAAGAAGACTGGGGAATCTTTAATTGCTGT  
AATTAAGAGGAATCAAAAACAAAACAAAATAGAGTAACGACGAGGTTGCGAGCCACTCTTAGAGATGGATACGCAGAAATTTATTTGGCGTCGTTGAAGTAAAAATAGCGAGACGAAAC  
GCAAATATGCCAGGTTTTTGTTCACACAGTGCCTCTCGACATCTCTTCAAGGACCTGCTTGTCACTGGCCCCACTATCGCTGATGTGCTCTGCACGCCAAAGTCGGACGGGGAGACCGT  
GCTTGGGAACAGGGAATGGACTATACTCCACCGAATTGCGAGACCAACCACCTCGAATCTGTATTGAGTCACCAAATGGTGGATAAAGGAAAACATCTCAAGCTTGGCGATCTCGTTCC  
CAGGGCAAGAGTGAACGCCATTTCCGAAGGGCATGAAGGTGTTGGGCTTAGGTGAGACCTCAAATCTAGAAGAATCAAATTTCTCCGGGTCTGAGTAAAATTCCGAATTGTGATGGATAT  
TCCTGAATAAAGGCATCACCTTCCATCCCTTGGGGATAAGATACCCTTTATACTCCACATCGGCCACAGCCTCCCTAAACGTGAAAGAGATGATGCTTGCCATCCTTAAGCTCTCCATTATA  
ACCCTATGAGTGAGAGGCATGCTCCTGGTTTGGGCCCACGTCAATGGCTGTCTTCCACATCCATTCGACTCATAAATCGCCATCTGTTCCGGCCTTACTTCCATGAGAAGTTTTGGGTCGTC  
GTTGAGATACTTGACGATCCACGTAAGAACGCTGGCCGTTGTGTCCTGCGCCGCGAAGAGTACGCCGATAATGTTGTCGGAGATCTGTTCACTCAATTGTTCTCCTTTCTCATCTCTC  
CACTCTACAAAACATGACAATAGATCCTTCTCCACCGCTGCTTCTTTCTCTCTCCTTCTCCTTTCATGATCTCGTTAAGTATCCCCCGAAGCCTTCTCCTCGCCTTAATGGCGTTGCTGAACAG  
AGTTCGGGAAAGTTGGTGGGAAAGAATTGTATCCCTTGTCAACGATGAAGTAATTTTTTCCAGCGCTTCTTTCGCTGCTCAAAATGGCTGCCGAAGATGACGAGGATGCCGAC  
GTCGAAGGAGAGCTTCTCATAACTTTGAAGGTGCTGAGGACATTGCCATCCCAGGAGCGGAGAATGGCAGCTGCGGTGCCTTCAATTTGATGGACAAGACGGCGGAGCGACTCCGGC  
GAGAGCGAGGCCTGCACGAGCTTCCGTATGCGGGCATGGTAATCATCTGATGGAAGAAGAGCGCCAAAGGGCCGATCATCTGCTCCTTGCTCCGTGGGTAGGTGGGCTTGAAGAGATG  
AGCCTCGCTACCAACACCATCCTCGCCGCTTCTGGGCTTGCCAGCATCACGCACGGGTAACCTAGCACATGCGTCTTAAAGATCTCACCATACTTTTTAAGCCTGGAGGCGAAGAAGAC  
ATTTGGGTCCTGTGAGTAAAGCTGGAACGTCTCGCCGATGTAGGGCAAGCCCATGGAGCCTGGTGGCAGGCGCAGCTTCTCATTTGCTTGCCATGTTTCGTAATACGGAGACAGGAGA  
AAAGGGCAAGGGCGAGGGACGTGATTATTATAAACTGCAAGAAGTTTTCCATTTGCAACTCTATTCTTAATCTTCTCTATTGCTAGAGGAAATGCTGTTGGAGACAGAGGAATGAGGCCG  
CTCGGCGAGAGGAGAGGTGGGGGAGCTTTTATATATAGAAGAACAGAGCCGTTACACACGCGTCTATCTCACAGAATCGCACTGTATTTATAGAATTGCGCATCAGAAACGGATGGAAG  
AAGTCATAAATTTTTCATGAATTTAAAGGTGAATAAACACAAATCACCATTAATAATTGGAATCCCAATACAACCTTAATTGAAATCCGCCCATGATTC

>comp157061\_c1\_seq11

TTGCCGAGCAAATCGACTAATACCTAGTAATACCGAGCAATACCTAGCAAAAATTGAGAAATATTGAGCCATCCTGGGTCCGTTCCGAATCAGATTATCGGGCCGCGTGATAAATAATGAG  
AACGCGTGGCGCCATCTGACCGGACCAAATAAAAGTTTACAGTAAAAAGACATTTCTTTCAAAAATTTTCTATAAAAGATTCTTGTAGAATCTCTGTCATACACGCAAATACCAACCTGCCTCA  
ACTAGCTAGAGAACTCTTCCAAAAGCTTATACCTCCTCACCTTTCTCTAAACACCTGTCTGTCCTCCCTCCAGAACAGGCGACAGCTCCTCCCCGCTGCCCGGTGCGCGGAATCCGCCG  
GTGGCTGCAGCCGCTGTACCCAATCTCTGCTTCTTACCCGGTTTATTGAGAAGCTGTGGCGAGAACGCCCCACGAGCGAGCTTCAATCCCAGCTTGTGCCACCTACCGGAGAAGAG  
GAAGCTGAAATAATTCGATCAACCGTCGCTGTTCTACCAAAAAGTAACCTGCTTCTGCTTCTTCTCAGGCACCAGTTACAGGCTCGATAGACCTCTGCTCTCGGGTATAGATCGCTGC  
AATATCTAATATCAATCAAATATTCATCAATCAGGTGGGGATTAAGATGGAGGAGTTGAAGACCAAGAAAAAATTGAATTGGATCATAGCCTTCATAGGGATTGAAGCAAATTTGAGAG  
CTTGAATTAGACTATGTTAATTGTT

>comp157061\_c1\_seq2

AAATTAATTAATTTAATTATGTAAGAGATAATAATTAACCGGCAGTTCTTAAAGAAGTTGGAACCTGTTTTTTTCTGGTACAACGCAAACCGATTTTGAAAATAGTTTAGGCCGACTA  
CTCAATCAGTTCTAATTCGGCTTTCAAAAATAAAGGTAGTAATTCGCGAACAAATCTCTACAAAAGATAAAAACTTAACTAAATACAATGATCAATTGATCATATAGAATCCCATAGTAAAA  
GACATTTCTTTCCAAAATTTGCTATAAAGATTCTTGTAGAATCTCTGTCATACACGCAAATACCAACCTGCCTCAACTAGCTAGAGAACTCTTCCAAAAGCTTATACCTCCTCACCTTTCC  
TCTAAACACCTGTCTGTCCTCCCTCCAGAACAGGCGACAGCTCCTCCCCGCTGCCCGGTGCGCGGAATCCGCCGGTGGCTGCAGCCGCTGTACCCAATCTCTGCTTCTTACCCGGTTT



ATTCAGAAGCTGTGGCGAGAACGCCCCACGAGCGAGCTTCAATCCCGAGCTTGTGCCACCTACCGGAGAAGAGGAAGCTGAAATAATTTCGATCAACCGTCGTCTGTTCTACCAAAAGTA  
ACCTGCTTCCTGCTTCCTTCCTCAGGCACCCAGTTACAGGCTCGATAGACCTCTGCTCTCGGGTATAGATCGCTGCAATATCACATACTTGTGTTGGGAGCGAAAGGCGCAGAGTTTGCACC  
GAAAGAGCTCCCGTGATAGCCCCCGATCTCCGCACATGCAACAAACCACCGACGGCGACGACGGGAGACGACGGGGATTGTAGTGCGCCACCACCTTTGCTACCCATTCTCTCTTTCC  
CCTCTCTACTGTATCTCAGGCTGTTTCGACTTTATTATGTGCGCCACAAACGTGGAAAGAAAACGATGGGGGAGGTGGAAGATGAGCTTCATTGATCAGTATGTGGCAGCCATTGTAGTT  
CGATTTTGTGAGTAGTGGTTGAGAAAACAAGTCAACAAATACTGCAGCTTTTGTGGCCTTTATACTTTATAGGTTTATTTATGGAGAAATTATTTTATGTAGGCATCGGATTGTTCCGAAGTG  
AATCAGAGCGTACCACATCATCCAGTACACAGCTGCGGTACTCAGCAAAGGGATGTCGTGGTGTGCTCTGATTTGACTTC

>comp157061\_c1\_seq6

TTGCCGAGCAAATCGACTAATACCTAGTAATACCGAGCAATACCTAGCAAAAATTGAGAAATATTGAGCCATCCTGGGTCCGTTCCGAATCAGATTATCGGGCCGCGTGATAAATAATGAG  
AACGCGTGGCGCCATCTGACCGGACCAAATAAAAGTTTCAGTAAAAAGACATTTCTTTCAAAATTTTCTATAAAGATTCCCTTGTAGAATCTCTGTCATACACGCAAATACCAACCTGCCTCA  
ACTAGCTAGAGAACTCTTCCAAAAGCTTATACTCCTCACCTTTTCTTAAACACCTGTCTGTCCTCCCTCCAGAACAGGGCGACAGCTCCTCCCGCTGCCCGGTGCGCCGAATCCGCCG  
GTGGCTGCAGCCGCTGTACCCAATCTCTGCTTCTTACC GGTTTATTTCAGAAAGCTGTGGCGAGAACGCCCCACGAGCGAGCTTCAATCCCGAGCTTGTGCCACCTACCGGAGAAGAG  
GAAGCTGAAATAATTTCGATCAACCGTCGTCTGTTCTACCAAAAAGTAACCTGCTTCCTGCTTCCTTCCTCAGGCACCCAGTTACAGGCTCGATAGACCTCTGCTCTCGGGTATAGATCGCTGC  
AATATCACATACTTGTGTTGGGAGCGAAAAGGCGCAGAGTTTGCACCGAAAGAGCTCCCGTGATAGCCCCCGATCTCCGCACATGCAACAAACCACCGACGGCGACGACGGAGACGACG  
GGGATTGTAGTGCGCCACCACCTTTGCTACCCATTCTCTCTTTTCCCTCTCTACTGTATCTCAGGCTGTTTCGACTTTATTATGTGCGCCACAAACGTGGAAAGAAAACGATGGGGGA  
GGTGAAGATGAGCTTCATTGATCAGTATGTGGCAGCCATTGTAGTTTCGATTTTGTGAGTAGTGGTTGAGAAAACAAGTCAACAAATACTGCAGCTTTTCTTGCCTTTATACTTTATAAGT  
TTATTTATGGAGATATTATTCTATGTATGTATCGGATTGTTTCGGAAGTGAATCAGTGCATCACATCACTCAGTACATAGCTGCGATATCCAACAAAGGGATGACGTGGTGTGCTCTGATTT  
GCCTTTGTACGAC

>comp157077\_c1\_seq2

ATCTAGCATTCTAGATAGTATTATGAAATGTGAATATCTTTTTATGATGTGAGGAAAATTTGCTGTTTCTTTTGATTAAGATGCAAAGACATGGGACAATTAATAGTGGCAAACAGACATAC  
ATTTACATTCATCCAGATGATAAGCAAATATTGTGTAACCTATATGATGATGTTGTTCAACAAAGAGATCATCATCGTTATAATCACCCAACAATTTGCAGCCGGTTTAAAGATCCTTCTCTCT  
ATTCATTTCTATCTAGCATTGTATGTAGTGCAAACTTTAGTTTATGCAAGTTATTATTTAACACAGAAGGCAAAAATTAGCCTTGATCTACTAATCTACTAGTTCTATTTCAATGACTTATGAGCC  
AAATAACTGTTATCAGCAGAAACAAAATCACACAACACAAATACAATGAACATGACGATTTATGTGGTTTGGCGAAAATGCCTACATCCACAAGGAGGGGATGATAATTTACTATATTGG  
AGAACAATAAGGATTACAAATGGGCTCTCTTTTATCTCATGCATACATTTAATGGCCCTCAAGCCCAATTTAAAATTTGAAATAAACACAGTAAGGAAAGCATAATCAATAAGAAAATAA  
GAAATCTAATCATGCCATAATTAGATATCTTAATCAATACATAAATCAAATCTCCTAATTAATACAATAATTAGATCCCCTAATTAATGCATTGATAGGAAACACTTAAAGATCTCAAGTATTTT  
CTGTCAATCTTCGGA

>comp157078\_c0\_seq1

TGAGACAAGTTATTTGCTCACTTCACTTTAATTTTTTTCTCTTATTCAATATTTATCATTATTACAACCATTTGAGCTCCACCCTCTCTATGAACAGAACTACCATGCACAAGATTTTTTTT  
TTTTTCAAGTGATTATTTCTCCTTGTAAGAGAATACATCAGATAAGTAAAACAAGTGACATAATAATATACATTATATAAATGCTTCTGCCTTCCAATGATATCTTAAATTATGTACAAGATAT  
TCTTTTAAATCATCCTTAAATATGGAAGCGATACTTCAAACAGCAGAGATGAAGAAGGTATTGAGATTTGAGACGTTTAAATGGCCACATTCAGCAACACGTCTCTTCTATTATTAGTAAACC  
CAAGAAGGAATCGCAGGAATGCGCCGCGAAGCCTTACCCCCAGCGGGTTGTTCTTGGCCATAAGGCAAGTTCAGAATGAACATCACACAGAGGGTAATCTGGAGGGCAGCAGCTGT  
TGTGATCTTCACAGCAGGTAGCGCCATCAACGGGACAACATCCCCATGCAAAGCAGAGCTTGCCATACTCATATACACAGCAGCATGTGGTGTAGCAGGACAGGAGTAATATTTATCACA

TTCTGTGGGGGGTTTTACGGGAGCAGGTGGTCTTGGTCTTGGGCTTGGGCTGGGTTTTGGCGGGTTTGAACATGTTTACTGGATAAGAAGCTTGCATCGCAATCCGCATTTGCCGCTT  
GCTGCCTTCACATTGCGCTCTATCCTTACAAAGCCTTCCCTCTCCCCAGTCTTACCCCCAGGAGTTTTTAACAATCCAGTAGTCTCTTCCATTTGCAGTGCCATAGCCAACAGCGAGAACGC  
CGTGGTCTAACTCGGTCCCACAGTTGGCGCTGAATATGCCCCGATTCATACTGAAAGCCCTTCCAGCGGCTTCTATGGCGACGCTGACGGGCTGATTTGCAATCGCCTTCTGTAGAGC  
CTTCTCGTCGTTTACCGGAACATCTTCATATGAATCAATAGAAACAACCCGAGCATTTTTTCTGTAAAGCATCGCATTTGCCACCATGGCCTTTATAAGGATAGTCTTCTCCGAGTCAATGCC  
CCCATTATTGATGATGAATTGAAAGGCGTCGTCCATAAGACCACCATTACATCCTTGGTTTCTGGCGGTATCACAATCCACTAGCTCTTGCTCTGATAGCGATACGAGCTTGCCAGTCACAA  
TCTGGTTGATCCCTTCCACGGCAGCAATGCTCGAAAAAGCCCAGCAACTCCCGCAGGTCCCCTGATCCTTGACAGGGACAACGGCGCCCTTTGCCCTCCAGTCGACGGAAACAGGGAG  
ACCCTCGCCAGCAGCGAGGCGGTAGCGATCGCTGGGGTACTGGGGGTGAGGGGAGCGACGGAAGCCAAGATATAAAGAACGGTACTCTTCGTTGGTGAGATCGGCGAATCTGTTGAGA  
CCGAGGCGGAAGGAATGAACGCCGGCGTTATGCTCGTCGATGTAGAGGAGATTGTCCTTGAAGATCTCGAAACGCCTCTCCTTCTCGTCAAGTTCATTGTAGATCCGGCCATGCCTCGCC  
ATCCAGTTATCGTAGAGCTCCCGCACATCTTCTTCGCCCCGCTCGAGCTCCCGTGTTCATGGCGCTCCCCGTAGGTTATGATCGACATATCCGGCCCATTGCCACCCGCGATCGCCACTGC  
GATGGAAAGAGAAAGTAGGAGAGCAAGCGAAGTAATGGAAAAGTGGAGCCATTGTAGAGAGAAAGACAGCTTAAATTGCGGGCGGGGCTTCTTGGATTTCGCCTTCTTCCATCAGAGCT  
CTCCTGGAAGTTATTTATAGGTATAGAGGAAGAAGGGGCGCAAGCTCGGCAAAAAG

>comp157186\_c0\_seq1

TTTTTTTTTTTTTAATATATAAAATTTTTTATATAACGCGATACTAACACAAATAAAAATGATTCTTAAAGCTTATTTTCATATCTTTGTGATTGAACTGCATAGTCAGAATCCTTACAATCTCCA  
TGTAATAAATGATAAGCACCTTTTATCCACTTACAAACAATCCACACACAATACCCTTTAACGTACACACTTAACCACTTAGAAATAGAACCTTATTGCGAGGAGTTTCACCATTTCAA  
CTTAGCAGGAAAATACTTCTCAATGAGAGAAAGGTAGTATGGTTTACCTTCTCCACATCAATCCTAACCTTGCTTTTACTATAGAGGTCATATTTGTTGAATACATGCAGCCATTTAGGTT  
CTCTTTGTCTTCTCATTCATCAAGTATGAGTAGGCTCCAAATCTATGGAGTGGATAGAAGGAATGGTATCTGATGATGAAGAGAGCAGCTGAAGGCAAAGTAGTCTTGTCTCCTTAGCC  
ACCAGATACATGTAATCATCATGACCCCATGACATTAGCACATTCTCAAGGCCACACCCTCAGAATAAACACCATACTTGGTATTGAACTTGGGATTGTGGTAGTCTGAGTTCCTTCAA  
AAACTGAAATAATGCAATGTAATTCTTTGTGAGCAATATATAGATCTTTAATCATTTCTACAGAACATTTATAAGGCATAAATGTTTTATAGGACCTTGTGGTGACATTAGATTCATCAA  
AGCACAGCCACAGGAAATGTGTACCAACAACAGCCCATTGAGGAAGCTCACCAAACTAGGATGAAGAAGAACCCTTTCCAAGATCATGAATAAGGCCAGTCAAGTGAAGCCAATCC  
TCGTTTGGATAATCCTTCTGATAGCTTCTGCAGTCTGCAACAAATGCTCAATCTGGGGCTCATCAAGATCAGGATCACTGTCATCGACGAATTCATTAAGCAATCAATGCTTTCCCATAT  
GCTCATCTCCACTCTATTTAGCTTCCCATACTCTTCTCTCATCCTCTTCACAAAAGCATAAGATTGATGAAGATGATTAGTGCGGTAGAATTCTTCGACCGTCTTTTTCTCTCAGATTCAGC  
ATTGTAATCCCTGAAAGTCTGGCCAAAGGCGTTTGTCTGGAACAGAGAAAACCGCCATCTAAATCCAGTTCGTTTGTATCAGGGATTACAATGCTGAATCTGAGAGGAAAAAGACGGTC  
GAAGAATTCTACCGCACTAATCATCTTCATCAATCTTATGCTTTTGTGAAGAGGATGAGAGAAGAGTATGGGAAGCTAAATAGAGTGGAGATGAGCATATGGGAAAGCATTGAATTGCTTA  
ATGAATTCGTGATGACAGTATCTGATCTTGTGATGAGCCCCAGATTGAGCATTGTTGTCAGACTGCAGAAGCTATCAGGAAGGATTATCCAAACGAGGATTGGCTTCACTTGACTGGCCT  
TATTCATGATCTTGAAAGGTTCTTCTCATCCTAGTTTTGGTGAGCTTCTCAATGGGCTGTTGTTGGTGGCTAAGGAGAACAAGACTACTTTGCCTCAGCTGCTCTTTCATCATCAGA  
TACCATTCCTTCTATCCACTCCATAGATTTGGAGCTACTCATACTTGATGAATGAGGAAGACAAAAGAGAACCCTGAAATGGCTGCATGTATTCAACAAATATGACCTCTATAGTAAAAGCAA  
GGTTAGGATTGATGTGGAGAAGGTGAAACCATACTACCTTTCTCTCATTGAGAAGTATTTTCTGCTAAGTTGAAATGGTGAAACTCCTCGCAATAAGGTTCTATTTCTAAGTGGTTAAGTG  
TGTACGTTAAAGGTTATTGTGTGTGGAATTGTTTGTAAAGTGGATAAAAAGGGTGCTTATCAATTTTTTACATGGAGATTGTAAGGATTCTGACTATGCAGTTCAATCACAAAGATATGAAATA  
AGCTTTAAGAATCATTTTTATTTGTGTTAGTATCGCGTTATA

>comp157186\_c0\_seq18

TTTTTTTTTTTTTAATATATAAAATTTTTTATATAACGCGATACTAACACAAATAAAAATGATTCTTAAAGCTTATTTTCATATCTTTGTGATTGAACTGCATAGTCAGAATCCTTACAATCTCCA

TGTA AAAAATGATAAGCACCCCTTTTATCCACTTACAAACAATTCACACACAATACCCTTTAACGTACACACTTAACCACTTAGAAAATAGAACCCTTATTGCGAGGAGTTTCACCATTTCAA  
CTTAGCAGGAAAATACTTCTCAATGAGAGAAAAGGTAGTATGGTTTCACCTTCTCCACATCAATCCTAACCTTGCTTTTACTATAGAGGTCATATTTGTTGAATACATGCAGCCATTTACAGGTT  
CTCTTTGTCTTCCCTCATTCATCAAGTATGAGTAGGCTCCAAATCTATGGAGTGGATAGAAGGAATGGTATCTGATGATGAAGAGAGCAGCTGAAGGCAAAGTAGTCTTGTCTCCTTAGCC  
ACCTATGATTAATCATTATTAGAGAAAACCTGAAGGAAGAAGTCTGACTATATATAATATCAATGTATTAATAATTTTGGTGTCTGCAAAGTTTACGGATATTTGATTTTAATTGAATGCCATA  
TAATAGAGTTGCAATTTGGTATTTTACTTCAATTGGATGTTCCCTATAATTATAAATACATTTCAAAAAGACTATTTGATAAGAACTTGT

>comp157282\_c0\_seq4

GCTGGAATAAGTGGACAGCAAGCAGAATTCCAGGTTTGGGAGGTAGAAGACTTCACGTTGGATGGAGGACGGGAGGATTTAATGGAGGAAATCTAAACAGACTAGTGGGAATAGATGG  
ACAGCAGGTTGGTCTAGTAAAACAGTAGCATTGAAGCTTACATCCTGGAAGACACTTAATAGTTGCTGGAATTTCTGGCTGCAGCCTTAGAAGGCAGAAAACCAACGTCAGATG  
GAGTTTGGGAGAAAATTTGTGGAAGGAAATTGATATACGGGAATTGGGAAGTTTCAGCCAGCCGGGGATGAAGGCCTGACGTGATCTCCAATTTAATTCAATGGGGTTGGAAAGATTTA  
ATGAGGTGAATGCATCAAGGGGAATTTGACCAGGTCATGAAGATGGGTTTTAAATTTCTTTCAAGTGGGAATAGAGGATTAGGAAATAAATCCAGGAGATTTATTAAGGGCTAGCAGTT  
TAAAGATGGAGGAGATTGGGGAGGTGATTTTGGGTGCTTAATTTAAGGCTTTAAAATTTAGGAAAAGTGTTTAAACATATCCTATTTG

>comp157318\_c0\_seq4

CCCTTAACTTTTTTTCATCCAGATTTAAGACCTGGCAACGAAATGTAGACATAAAAAGACTTTTTGTCTCAGGCAAATAAATATAAAAATTTCCCTAAACTTAAACAACTCAAACAATGTTCTTG  
GATAAATGCATGACATCATAACCACAAAAAAGTTTACCATGATTTTCACCTTCAAGACAATGTGCCTTCTTGCATCATTTCCAAGGCGAGTGCAACGTTTTTCATAA  
GCACTTTCAGAAATGCATCTACTTTATATTAAGGTGTAAGTACTAGAAGAATCATTGAGCTAATAGGAATAGAATAATTGTATTTCTGAACACTCTTTTCTGATTTTTTTCCACCAATCTTCTGC  
CTCCTGCTCGGAAAATCTTCGCTTGTGAATTTGACTCTTTTGAAGAGCTTAGTGCCATCTAGTAACTGCAAAGAGTGCATATATAACCAGGCTCAAATGCTCCATCAATTCACCTTCTC  
CCTTGTGTTAATTTCTTTTAGAAGCTCGAGGTGACCTTGTGACTCTCCATGCTTTGGCGATTTGAGTATTAGGAGACTCTATGCTTGGTGTGGCACTTGAAGGCAGCTCTGAAGCTC  
GGGTTTTGTATTTTCTAGAAAACAATCTGCTGAAATAATCATTGATTTTATGTTGTCACCTAGGTCATTAGGGACTTTCTGAGCTACATCCTTCATCTGGGCTTCAATGTCCGATAAGCTC  
AATGGCAGCATTAAACTTAGCAGATTTTGTGCAGCTACAAAACTTCTTTAGCTTCATTTGAAACATTATGTGCAACTGCATCTTGTATTTCTAGTTTTTGTTTAAGACTTTTGATCTCCCC  
TTGCAGCTTTAGGACTTCTCTATCCCAGTGCTCATTAGTCTCTTTATAGTCTCCATTAAGTTTCCAGAAAATCAGGAGTTGTAGATAGTGAAGGGTTTGGCTTCCATGAGTATGGAGTTA  
CAAACCTAGAAATTTGCAGCAGGCAATGGTGGAGGTGCTGTGCGGTGTCATGATTGGCCTTGAAGTCGTTTGAAGTAAGCTCAATGAGCTTGGGAAGGCAATATCTTTTAGCTGTGAACGAG  
ATGAAACTTGAGAAATTCGGTTTGAAGTTCGTTGATTCTTACTATATCTAATATCATTATATCTTCCAACCTCCTTAGGAACAAGTAAAAGCCTTGAATATCTAATTTTTCCCTTCTCAAACAT  
TTCCCTAGTATCAATAGATTGACGAGAAATCACATTATTTCTACCAACAACCAAATGCATAACCAGTTTCCGCAGCTTTAAGTTTTCGAATAGCATGAATCACATACCCGATGAGGTTTGCCTG  
GAGTTGGTGCCAATACAGCTTTCAAACCTTTTCTGGAACCTGCAAGCATGACAATATACTAGACCACAATTATAGCAATTATGTCTTTTTCTAGTAAATCAAATGCTTGTGACAGCCGGTG  
CAGACCGATTGGTCAGCACTAGATACCACTTATGCATGCAAATACATGCTGTGAAATTAGAGCCACAAGAGATACTTTAACATGCCTGTCTTTCAAAGCTTCAACAAGAATGGGTGTCT  
TTCTGTCATCAGTATCTCCATGTCCTAGTCTTCCATTAGCACCTTCTCCCATGAATAAACTTCACTTCGTGAAGTTAATACCACAACATGATGGGATCCACAAGCAATCTTCAACTAACT  
CACCTACTAATCTATCTTGCATAAACAGGGAACCTTACCATCAAATTTGGGATTTCCGAGCTCGCCATACATGGAATGTCCATGGTGA AAAACATGCCCAGAAGTTGAGAGGGCAATGGT  
AATATTATGTCCGCAAGCCAACCTGATGAAAGTTGTAATCAATAAGTGTGCAACACAAGTTGGAACCAATCTTGTCTCCTTATCACCATGGCCTAGACGGTATCCATCGCCATCGCCCCATG  
TAAAGAGTTTACGTGATAACAATTCGTACCAGCATGTCCATTACTTCTACAATTTGCGGCCGTATGCCACACTCCGCATGCAATCCTAATGGTTTCGTAAACCACTCAAAGATTCGATTTCC  
CTGGGATAAGCAACTCTCTCGATCACCATGGCCAAAACACCAAATGAACCATACCAAATGAATATATTTTCCATTTGAAGTAGCCAGTACAGTATGCCATGTGCCACATGCAACTA  
AAGACACTTGAAATCCTTCCAAAGTTCCAGAAACTCTTTAGGCATCCAATGGCTGGCCTCAATACCATGGCCAAGAAGTCCAGTATTATAAGCTCCATCACCCCAAGTAAACAAGTCAC

CTGCTGTAGTTATAGCACAAAGTATGAAACTCGCCACATGCAACAGAATCCACATTGGATAACGCTAATGATTCAACTAAACGAGGTGCGACTAATATCAATATCAGTTCCATGCCCAAGTCTA  
CCACCGCATCTTCACCCCATGTAAATACTT

>comp157318\_c0\_seq5

CCCTTAACTTTTTTCATCCAGATTTAAGACCTGGCAACGAAATGTAGACATAAAAAGACTTTTTGTCTCAGGCAAATAAATATAAAAATTTCCCTAAACTTAAACAACTCAAACAATGTTCTTG  
GATAAATGCATGACATCATAACCACAAAAAAGTTTACCATGATTTTCACCTTCAAGACAATGTGCCTTCTTGCATCATTCCCAAGGCGAGTGCAACGTTTTTCATAA  
GCACTTTCCAGAATGCATCTACTTTATATTAAGGTGTAAGTACTAGAGAATCATTGAGCTAATAGGAATAGAATAATTGTATTTCTGAACACTCTTTCCTGATTTTTTTCCACCAATCTTCTGC  
CTCCTGCTCGGAAAATCTTCGCTTGCTGAATTTGACTCTTTTGAAGAGCTTAGTGCCATCTAGTAACTGCAAAAGAGTTCGCATATATACCAGGCTCAAATTGCTCCATCAATTCAACTTCTC  
CCTTGTGTTAATTATCTTTTAGAAGCTCGAGGTGACCTTGAGCTACTCTCCATGCTTTGGCGATCTGCAGTAACTCTGATATCATTAAATGACCGATTTAATATTATTTGAGCATTGTCAAC  
GGTAGAGTTTTCAAAGCCATTTTTCTGATGTACTTGAGTATTAGGAGACTCTATGCTTGGTGTGGCACTTGAAGGCAGCTCTGAAGCTCGGGTTTTGTTATTTCTAGAAACAATTCTGCTG  
AAATAATCATTGATTTATGTTGTACCTAGGTCATTAGGGACTTTCTGAGCTACATCCTTCATCTGGGCTTCAATTGTCTGATAAGCTCAATGGCAGCATTAACTTAGCAGATTCTTGTG  
CAGCTACAAAACTTCTTTAGCTTCATTTGAAACATTATGTGCAACTGCATCTTGTATTTCTAGTTTTTGTTTAAGACTTTTGATCTCCCCTTGCAGCTTTAGGACTTCTCTATCCCAGTGTCT  
CATTAGTCTCTTTATAGTCTCCATTAAGTTTCCAGAAAAATCAGGAGTTGTAGATAGTGAAGGGTTTGGCTTCCATGAGTATGGAGTTACAACTTAGAATTTGCAGCAGGCAATGGTGG  
AGGTGCTGTCCGTGTACATGATTGGCCTTGAAGTCGTTTGAAGTAAAGCTCAATGAGCTTGGGAAGGCAATATCTTTTAGCTGTGAACGAGATGAACTTGAGAAATTCGGTTTTGAAGTTCTG  
TTGATTCTTACTATATCTAATATCATTATATCTTCCCAACTCCTTAGGAACAAGTAAAGCCTTGAATATCTAATTTTTCCCTTCTCAAACATTTCCCTAGTATCAATAGATTGACGAGAAATCA  
CATTATTTCTACCAACAACCAATGCATACCAGTTTCCGCAGCTTTAAGTTTTCGAATAGCATGAATCACATACCCGATGAGGTTTGCCTGGAGTTGGTGCCAATACAGCTTTCAAACTTTT  
CTGGAACGTGCAAGCATGACAATATACTAGACCACAATTATAGCAATTATGTCTTTTTCTAGTAAATCCAAATGCTTGTGCGACAGCCGGTGCAGACCGATTGGTGCAGCACTAGATACCCCTT  
ATGCATGCAAAATACATGCTGTGAAATTAGAGCCACAAGAGATACTCTTAACATGCCTGTCTTTCAAAGCTTCAACAAGAATGGGTGTCTTTCTGTGCATCAGTATCTCCATGTCTTAGTCTTC  
CATTAGCACCTCTTCCCATGAATAAATCTCACTTCGTGAAGTTAATACCACAACATGATGGGATCCACAAGCAATCTCTTCAACTAACTCACCTACTAATCTATCTTGCCTAAACAGGGA  
ACTTTACCATCAAATTGTGGATTTCCGAGCTCGCCATACATGGAATGTCCCATGGTGAAAACATGCCAGAAAGTTGAGAGGGCAATGGTAATATTATGTCCGCAAGCCAACTGATGAAAAGT  
TGTAATCAATAAGTGATGCAACACAAGTTGGAACCAATCTTGCTTCCCTATCACCATGGCCTAGACGGTATCCATCGCCATCGCCCATGTAAGAGTTTACGTGATACAACATTTCGTACCA  
GCATGTCCCATTAATTCTACAATTGCGGGCCGTATGCCACACTCCGCATGCAATCCTAATGGTTTCGTAACCCTCAAAAGATTGATTTCCCTGGGATAAGCAAACTCTCTCGATCACCATG  
GCCAAAACACCAAATGAACCATCACCAAATGAATATATTTTTCCATTTGAAGTAGCCAGTACAGTATGCCATGTGCCACATGCAACTAAAGACACTTGAAATCCTTCCAAAGTTCCAGAA  
ACTCTCTTAGGCATCCAATGGCTGGCCTCAATACCATGGCCAAGAAGTCCAGTATTATAAGCTCCATCACCCCAAGTAAACAAGTCACTGCTGTAGTTATAGCACAAAGTATGAAACTCGC  
CACATGCAACAGAATCCACATTGGATAACGCTAATGATTCAACTAAACGAGGTGCGACTAATATCAATATCAGTTCCATGCCCAAGTCTACCACCGCATCTTCACCCCATGTAAATACTT

>comp157318\_c0\_seq6

CCCTTAACTTTTTTCATCCAGATTTAAGACCTGGCAACGAAATGTAGACATAAAAAGACTTTTTGTCTCAGGCAAATAAATATAAAAATTTCCCTAAACTTAAACAACTCAAACAATGTTCTTG  
GATAAATGCATGACATCATAACCACAAAAAAGTTTACCATGATTTTCACCTTCAAGACAATGTGCCTTCTTGCATCATTCCCAAGGCGAGTGCAACGTTTTTCATAA  
GCACTTTCCAGAATGCATCTACTTTATATTAAGGTGTAAGTACTAGAGAATCATTGAGCTAATAGGAATAGAATAATTGTATTTCTGAACACTCTTTCCTGATTTTTTTCCACCAATCTTCTGC  
CTCCTGCTCGGAAAATCTTCGCTTGCTGAATTTGACTCTTTTGAAGAGCTTAGTGCCATCTAGTAACTGCAAAAGAGTTCGCATATATACCAGGCTCAAATTGCTCCATCAATTCAACTTCTC  
CCTTGTGTTAATTATCTTTTAGAAGCTCGAGGTGACCTTGAGCTACTCTCCATGCTTTGGCGATCTGGGCTTCAATTGTCTGATAAGCTCAATGGCAGCATTAACTTAGCAGATTCTTG  
TGCAGCTACAAAACTTCTTTAGCTTCATTTGAAACATTATGTGCAACTGCATCTTGTATTTCTAGTTTTTGTTTAAGACTTTTGATCTCCCCTTGCAGCTTTAGGACTTCTCTATCCCAGT

CTCATTAGTCTCTTTATAGTCTCCATTAAGTTTCCAGAAAAATCAGGAGTTGTAGATAGTGAAGGGTTTGGCTTCCATGAGTATGGAGTTACAAACTTAGAATTTGCAGCAGGCAATGGT  
GGAGGTGCTGTCCGGTGTGATGATTGGCCCTTGAAGTCGTTTGAAGTAAGCTCAATGAGCTTGGGAAGGCAATATCTTTTAGCTGTGAACGAGATGAAACTTGAGAAATTCGGTTTGAAGTT  
CGTTGATTCTTACTATATCTAATATCATTATATCTTCCCAACTCCTTAGGAACAAGTAAAAGCCTTGAATATCTAATTTTTCCCTTCTCAAACATTTCCCTAGTATCAATAGATTGACGAGAAAT  
CACATTATTTCTACCAACAACCAATGCATACCAGTTTCCGCAGCTTTAAGTTTGAATAGCATGAATCACATACCCGATGAGGTTTGCCTGGAGTTGGTGCCAATACAGCTTTCAAAACTT  
TTCTGGAAGTGAAGCATGACAATATACTAGACCACAATTATAGCAATTATGTCTTTTTCTAGTAAATCCAAATGCTTGTGACAGCCGGTGCAGACCGATTGGTCAGCACTAGATACCCAC  
TTATGCATGCAAATACATGCTGTGAAATTAGAGCCACAAGAGATACTCTTAACATGCCTGTCTTTCAAAGCTTCAACAAGAATGGGTGTCTTTCTGTCATCAGTATCTCCATGTCTTAGTCT  
TCCATTAGCACCTCTTCCCATGAATAAACTTCACTTCGTGAAGTTAATACCACAACATGATGGGATCCACAAGCAATCTCTTCAACTAACTCACCTACTAATCTATCTTGCCTAAACAGG  
GAACTTTACCATCAAATTTGTGGATTTCCGAGCTCGCCATACATGGAATGTCCATGGTGAACAACATGCCAGAAAGTTGAGAGGGCAATGGTAATATTATGTCCGCAAGCCAAGTATGAAA  
GTTGTAATCAATAAGTATGCAACACAAGTTGGAACCAATCTTGCTTCCTTATCACCATGGCCTAGACGGTATCCATCGCCATCGCCCCATGTAAGAGTTTACGTGATACAACATTTCGTAC  
CAGCATGTCCCATTACTTCTACAATTGCGGCCGTATGCCACACTCCGCATGCAATCCTAATGGTTTCGTAACCCTCAAAGATTCGATTTCCCTGGGATAAGCAACACTCTCTCGATCACCA  
TGGCCCAAAACACCAAAATGAACCATCACCAATGAATATATTTTTCCATTTGAAGTAGCCAGTACAGTATGCCATGTGCCACATGCAACTAAAGACACTTGAAATCCTTCCAAAGTTCCAG  
AAACTCTTTAGGCATCCAATGGCTGGCCTCAATACCATGGCCAAGAAGTCCAGTATTATAAGCTCCATCACCCCAAGTAAACAAGTCACCTGCTGTAGTTATAGCACAAAGTATGAAACTC  
GCCACATGCAACAGAATCCACATTTGGATAACGCTAATGATTCAACTAAACGAGGTGACTAATATCAATATCAGTTCCATGCCAAGTCTACCACCGCATTTCTCACCCCATGTAATAACTT

>comp157331\_c0\_seq6

AAGTTGCTGATTTTCTTGTCTGCATGGATCCCTCCAGAATCAAGCTTTTGAAGTGGACGAGATGGATGAAATTATGAACGGATGTGTTGGTGCAGGGCGCATTTGCCGAAGCATTGCATAA  
GGATATCGAAGGGATTGATTCCACCAATCTGGCAGCTTCCATCACCAATCGCAATGCTGGAGTATTGACTCTGGATGATAGCTCCACCACATTGAAGAATAATTTGCAATTCCTAAACATC  
TAACTCAGTTGGAGCAAGTAAAATTTTTCTTCTCGCTATCAAATCAGCATATTGATTCTCAATTACAATGTGATCATAGACTACTACAGCATGGAAATACACATTGTGAATGGCAAAAA  
GGGCATTCAGATAATTTTTCTCGGCAAAATGTTGATAATAACCCATCCCAAGACATACATCAGCATTCCAAGGTACAAAAGCAGAAAAGTCCAGCAGTTCAATAATCAACAACCTCCCAATA  
CTGACCTTTCAAATAATTCCTTGAAGTGGAAAGATACCGAAAAATTCCTGGAGTTGAATATGTTAGTTCCACAATTACAGCCTCTCCTTGATAAAGACAGGTCAATGCTGCTTCGGGATTT  
GTATATTAATTAATGAATAATGAAATTAGTAAGGAGAACTACTTAAAAGTTTGAATAAAGTTGTTGCGGACCGAATGATTAGAAGAGAGGGTGCAGTCCATCAAGCGCAGATGCAGAAC  
CCAGTGCAGTCACAATCTCAAAGTCTCTATCTAATTCGTGGAAGTACATAAAATTTCTCCAAAGAAAACGTCCCATTTGGTAAGAAAAAGACGCTTGAAACTTCAGGGAAGTCCCAACCC  
CAAGCAAGGTGAACAGTTCCATTGATCATTTTTTAGTTATCTTGATTTCAACAAAAACTTACTAAATTTACTTTATGTGATTATCTGATTCCAAGTATGTTAATAGCAAAAAGCAGAAG  
ACTAGTGGAGCTTTCCTGGATCAAAGCATTGAACAGCTTAATGATGTGACTGCTGTAAGTGGAGTCAATCTAAGGGCAGAAGGGGAGCAACTACTTGTGCTCGGACAGAAGGAACACA  
AGCTTCAGAGGCAATTCAAAGAGTTGTACAGGAGGAAGAAGAAACATCAATTCGCAGAAGGGACCTTACTGAAAAAACTGACGCAAATCATTTCAGATGTGGTTTAGGAGGTATAA  
GTAAAGACGTGGAGTATTGTCTATCTATGTGTAGAGGAACGTTTGCAGGATTTTCATAGGCAAATTGATAAGATTATCTAAGCAGCACCAGATTTTGTCTATGAATCAAAAAGCCAAGAA  
AGAACGGGAGAAAAACAAGCTGAGGAATCAGAAAAGTTTGTAAAGCTAGACAATGCTTTAGCTGATGCTGAGAAAAGATGCAGAAAAGGACAAAAGATAACAGACCTTCTAAGAAACAT  
AAGTTTCACCGGGAGGAAGACGATAAGATGCGAACGACAAATGCGGCTGCTCGAGCTGCCATTTGGTGCAGATGATACGCTTTCTAAGTGGCAGCTGATGGCTGAGCAAGCTCGTCATAA  
GCGTGAAAGCAAACTGGGTGTATCTTCCAGTCACCAACAAGGTAAGTATAGATGAGAACCCTCCCTCAACTTCAGAGAAAATCTGAGAAATCTAGAGGAAGATGGTGGCATGAGCA  
GACATGGCCGAAGCATAGGAAACGTGTCTAATCCTAAAATTTGATCATACAATTTCTTATTAAGGATGTCATTGCAGCTCTTGAGAGGGGAACCAATGATGTCGAGATCAACCCTTCTGTGTCG  
TCTCTATGAAAGAAGTCTAGCGGTTATGGTGGCGGATGATCTGCAGTTAATGAGCTTCCATTTAGCAGGTACACAATTTCAACTTTGATTGGTTAACTTCGGGGTAAATATTTCAACTTT  
TTGATGAAATTTGAAAAGAATTTGATATTACCCATCAAGCATTATTATGATTATCTTTAATTTGATATGTATATAAATTTTTTTATTGATT

>comp157334\_c0\_seq4

GGGCTAAGCCTCATCATTTTCAACAGAAATAGAGGAAGATTGCATTA AAAAGTAGAGGAAAACCACTGCCTTATGCAGAAGTAAAACAATTTCAAGGGTAGAAGTGATAGAGCTGGATCC  
AGCTGAAACAAAAGAGAAAAAAACAAATGAGCACAACCTGTGTTGCTATTTGCTAATGAAATGTCAAAGAAGTCTTTTTTCCACTGGAACATGCCCCGTTCTGGGC  
AAAAGATCATTCGCTGATCTCCTCCGCTTCTGCTCGCTGCTTCCGCTCCATCCCTTGCTTCTCACCAGCCTTATTAGCGGCCTTGGCGGTGCGCCGATTGCTGTTGGCGCTGCGCTCTG  
TTCTTGACGCCGTGATAAGATCACTCGAATTCTGCGTCTTGCTCAGCAAGATCTCAATCTTGGCTTTGCGAACAAGACGCGCCTTGGCTTCGCTTGGTGCCAACAGTAGAGGTCATGAT  
CTTCTTCTCAGTAGCCAGGCCGTTGTTCTTGAGTATCTCGGCGACGGTGACGACTGTGCCGATGGCCATGCCGAGGGCAGAAAAGTTCGACCTCGTTGTGGCGCTCCATAAACCTCTTGGC  
GAGATTTACGTA AAAAGTAAACAGGCTTTTTATTGGTGGAGACCTGAATCCGATTCCCCTTCTGTAGACCGACAACCGCCGCGGGATCTTTGATCGCCACCGCCGCCATCATCGTCTCCATC  
TCTAACTCGATCTGGCTTACCTGTCTGTACTCTCTTAATTTCTCTCTGTATCTCTTTGGCTCTGGCTCGCGCTCGAAGGA

>comp157357\_c0\_seq11

AAAAAATAAAAAAAGTGAAAAAAAATTAAGAAAATTGATGACCAAATAAAAATGTGTCACTTTTATTATAACTCCACTAAGAAATCCCATTC AATAGATGCTATGAATAATACTCAGA  
AAACAAAGATCTATGCTCTATAGCCCTATTGTATTATGCATGCATCATCATCATATTCCCTTGATAGCTCAACATGCAAAGAATTA AAAAAATAAATTTGTTCTAACAACCTTAAAAAAAAT  
AAAAAATAAAGTCTTCAGTTTTTATTGTTCTTTTCACTATCATCACCTTTATCAAATGCTCTTGATGGTCCAGCCTCAGGATCAACACCCTTACATACTTCCCACGCCGGCGCCGATCA  
AAAGCCTGCCATCCCTCAGCCTGACGAAGATAATCATTGGTGATTTGTGTGCCATAAATACTAAGAACTGATAGTTTTTGGCAA AATTTGAACAAAGTTGAAGGAAGCGTTTTGAGGTTAT  
TGAGACGCAGATGCAAAACCTTCAGATTTTCGTAATTGTCCAAATGTTTCTGGTAATTCGGTCAA AATATTAGCTGATAAATCTACCTCATTAAGCAAGGAACAATTTCCAATGCTAGCAGGC  
ACCGAGCTTATCCTATTGCTTCGTGCTTTAAGAATCTGAAGTCGATTAAGACATCCTAATTCATCTGGTAAGCATGTTATCTTGTTCA TTGAAATATCGAGTTCACTCAGAGAGGTCAATTCA  
CCCAAAGAAGGCGACAAAAGTAGTTAATCTGTTTGTGTTAAAGATAGTACTGTTAAAGACTTCAACTGTGAAAGGCCATCCCAGCTAAACTTCTCATCGCATAAATGGTTATCATT CAGGT  
ACAGATTC AAGGACTTCAA AATACCAATTTTATTCCGCAATTTCTCAATAGAATTGGAGCTGAATTCATCTTTATTA AAAACGGTGCACAATCCCAGACATCATCAGGCAAAGCCTCTATG  
TGCTGATCCAGAGTAGCTATCATATTAGTTTGGAAACCATCAGTTATCTGCACTGACCTCAA AACTCACTACATCTGCATGAATTTTGCCTTTAAATATGAGTTTCTGACAGCGAGTGAGGAC  
GTCGGTAAGGGAGTGGAGGCGGGATTTAAGATCCAGAATGGTAGATT CAGGCGAAAGGGTAACTGAGATCTTGC GGCCGCTGAACTTTACGTGGACGGTGTATGGGATCATCAGCTCGAA  
TGAAGGAGGCCGCGGCTTTGGCTTTTTCACTTTCCTCTATCCTCTCCATGGCCGCTGCTGCAGTTAAACGGAATAGCTTAATCGCGGAAACTGTATCTCCCTGTTGCAGATAATCCTTTGGG  
AAAGAACGGAGCATATTTACGGGATGTTGGCGGCAGGATTTTCGCCGTATCCACGCCGGCATT TTTGGGTGCCAGGAGGGGGAACA

>comp157357\_c0\_seq13

AAAAAATAAAAAAAGTGAAAAAAAATTAAGAAAATTGATGACCAAATAAAAATGTGTCACTTTTATTATAACTCCACTAAGAAATCCCATTC AATAGATGCTATGAATAATACTCAGA  
AAACAAAGATCTATGCTCTATAGCCCTATTGTATTATGCATGCATCATCATCATATTCCCTTGATAGCTCAACATGCAAAGAATTA AAAAAATAAATTTGTTCTAACAACCTTAAAAAAAAT  
AAAAAATAAAGTCTTCAGTTTTTATTGTTCTTTTCACTATCATCACCTTTATCAAATGCTCTTGATGGTCCAGCCTCAGGATCAACACCCTTACATACTTCCCACGCCGGCGCCGATCA  
AAAGCCTGCCATCCCTCAGCCTGACGAAGATAATCATTGGTGATTTGTGTGCCATAAATACTAAGAACTGATAGTTTTTGGCAA AATTTGAACAAAGTTGAAGGAAGCGTTTTGAGGTTAT  
TGAGACGCAGATGCAAAACCTTCAGATTTTCGTAATTGTCCAAATGTTTCTGGTAATTCGGTCAA AATATTAGCTGATAAATCTACCTCATTAAGCAAGGAACAATTTCCAATGCTAGCAGGC  
ACCGAGCTTATCCTATTGCTTCGTGCTTTAAGAATCTGAAGTCGATTAAGACATCCTAATTCATCTGGTAAGCATGTTATCTTGTTCA TTGAAATATCGAGTTCACTCAGAGAGGTCAATTCA  
CCCAAAGAAGGCGACAAAAGTAGTTAATCTGTTTGTGTTAAAGATAGTACTGTTAAAGACTTCAACTGTGAAAGGCCATCCCAGCTAAACTTCTCATCGCATAAATGGTTATCATT CAGGT  
ACAGCTTCTACACAATTAAGGCACAAAAGGCTCCATATTTACATTTAGTAAGGCTAAAGCTCAAAGCTAATCATATTTTCAAAGGGAATGTTTCA ACCAGATTA AAAAAACAACATAAA  
ATAATGTATTATAAGAAACATACATTCAAGGACTTCAA AATACCAATTTTATTCCGCAATTTCTCAATAGAATTGGAGCTGAATTCATCTTTATTA AAAACGGTGCACAATCCCAGACATCA

TCAGGCAAAGCCTCTATGTGCTGATCCAGAGTAGCTATCATCATTAGTTTGGAAACCATCAGTTATCTGCACTGACCTCAAACCTACTACATCTGCATGAATTTTGCCTTTGTCTAAAAGATG  
ATCAATATAAAGTGCTTTCTGATAAAATCTGAAACAGAATTTAAATTAAGCAAACCTGTTCTACAAGCTCTATGTCCGCCCTCACTGATGTCAACTATCGACTTAGGTTCTTGCTAATTT  
GGCTTCCATCTTGCTTATGAAACCCTTTAAATATGAGTTTCTGACAGCGAGTGAGGACGTCCGGTAAGGGAGTGGAGGCGGGATTTAAGATCCAGAATGGTAGATTCAGGCGAAAGGGTAA  
CTGAGATCTTGCGGCCGCTGAACTTACGTGGACGGTGATGGGATCATCAGCTCGAATGAAGGAGGCCGCGGCTTTGGCTTTTTCACTTTCCTCTATCCTCTCCATGGCCGCTGCTGCAGT  
TAAACGGAATAGCTTAATCGCGGAAACTGTATCTCCCTGTTGCAGATAATCCTTTGGGAAAGAACGGAGCATATTTACGGGATGTTGGCGGCAGGATTTTCGCCGTATCCACGCCGGCATT  
TTGGGTGCCAGGAGGGGGAACA

>comp157357\_c0\_seq8

AAAAAATAAAAAAAAAAGTGAAAAAAAATTAAGAAAATTGATGACCAAATAAAAATGTGTCACTTTTTATTATAACTCCACTAAGAAATCCCATTCATAGATGCTATGAATAATACTCAGA  
AAACAAAGATCTATGCTCTATAGCCCTATTGTATTATGCATGCATCATCATCATTCCCTTGATAGCTCAACATGCAAAGAATTAATAAATAAATTTGTTCTAACAACCTAAAAAAAAT  
AAAAAATAAAGTCTTCAGTTTTTATTGTTTCCTTTTCACTATCATCACCTTTATCAAATGCTCTTGATGGTCCAGCCTCAGGATCAACACCCTTACATACTTCCACGCCGGCGCCGATCA  
AAAGCCTGCCATCCCTCAGCCTGACGAAGATAATCATTGGTGATTTGTGTGCCATAAATACTAAGAAGTGTAGATTTTTGGCAAATTTGAACAAAGTTGAAGGAAGCGTTTTGAGGTTAT  
TGAGACGCAGATGCAAACCTTCAGATTTCTGTAATTGTCCAAATGTTTCTGGTAATTCGGTCAAATATTAGCTGATAAATCTACCTCATTAAAGCAAGGAACAATTTCCAATGCTAGCAGGC  
ACCGAGCTTATCCTATTGCTTCGTGCTTTAAGAATCTGAAGTGCATTAAGACATCCTAATTCATCTGGTAAGCATGTTATCTTGTTTCATTGAAATATCGAGTTCACCTCAGAGAGGTCAATTCA  
CCCAAAGAAGGGCACAAGTAGTTAATCTGTTTGTGTTAAAGATAGTACTGTTAAAGACTTCAACTGTGAAAGGCCATCCAGCTAAACTTCTCATCGCATAAATGGTTATCATTCAAGGT  
ACAGCTTCTACACAATTAAGGCACAAAAGGCTCCATATTTACATTTAGTAAGGCTAAAGCTCCAAAGCTAATCATATTTTCAAAGGGAATGTTTCAACCAGATTAATAAACAACATAAA  
ATAATGTATTATAAGAAACATACATTC AAGGACTTCAAATAACCAATTTTATTTCGGCAATTCTTCAATAGAATTTGGAGCTGAATTCATCTTTATTAATAAAGCGGTGCACAATCCCAGACATCA  
TCAGGCAAAGCCTCTATGTGCTGATCCAGAGTAGCTATCATCATTAGTTTGGAAACCATCAGTTATCTGCACTGACCTCAAACCTACTACATCTGCATGAATTTTGCCTTTAAATATGAGTTTC  
TGACAGCGAGTGAGGACGTCCGGTAAGGGAGTGGAGGCGGGATTTAAGATCCAGAATGGTAGATTCAGGCGAAAAGGTAAGTGTAGATCTTGCGGCCGCTGAACTTTACGTGGACGGTGA  
TGGGATCATCAGCTCGAATGAAGGAGGCCGCGGCTTTGGCTTTTTCACTTTCCTCTATCCTCTCCATGGCCGCTGCTGCAGTTAAACGGAATAGCTTAATCGCGGAAACTGTATCTCCCTG  
TTGCAGATAATCCTTTGGGAAAGAACGGAGCATATTTACGGGATGTTGGCGGCAGGATTTTCGCCGTATCCACGCCGGCATTTTGGGTGCCAGGAGGGGGAACA

>comp157383\_c0\_seq1

TGTCTAATAATTATCAAAATAGGAACGACTTCGTTGCGGTTTGGGTTTCTGCATGAGAGATCGGGAGGGGAATGCGGGAGGAAAGAAAGAGCGCGAGCAACGGTGCATAGCCAGCGAT  
GAGTTTTCTCAAGGCTTAAAATCTCTGATTGATTCCCTTCCCAACCCTGCATTCAGTTTCTCAAAAATTTTCGCTGGTAATCCTCTTCCAGCCGATCATTCACACAGAGCTACGGAACCCTA  
GCTGTAACCCTAGCATGTCTCTTGTTCGGACCTACACGTCTCCGCAATGTCTCTGACTCCGCAGGGTTTCGTTGCCGTACGCGGGGAATCCGAGGCGGATGCCGTTGCTCCGCCTCATT  
AGCAGCTACCGCATTCCTTACCCGAGCCAGCAGTTCTTCTCTGAATCGGCGAGAACACGCGCAAGACTCTGTTCTTTTCTTGCCGGCAGCAATGCCTCCATGGTCCCCTCCGA  
AAGGGAAAATAGGCCTGTATGGGGAAGGGCGCCGAATGGAGCCATTGATACTGCTCCGCTAGTTTTGGGAGGCTCCTCTTCTTGGCCCCGCTTTATCGGAATCTGCCAAAGCCTCTACCAG  
ACCTTCATTGATGAATGGCCCCCTCCCTGGGCTCTAACTCTCTTGGCGGTGGAAATAATGGCGATGATGTTGGAACCAAGTGGTAGATTTTCCAGTAATGGTATCCCTCATCATCTTCTT  
CAACATCAAGTTCAACGGAATTATCTCAGAACATGACAGATAAGTTGCCTGATAAGGGCAATAACAGCAATTGGGACCATCGTCTCTGTAATCCCATGGCTGGGTGGATCAAGGGGATC  
GACGGAGGAGGCATGGTGGCAGCAACCGAAGGGGAAGCTATGGAGGCAGGCGTGATGAGGACCGTGTTCCTGATTTGGAGTTCTTATAGGCCTCTGAGTGTAGAGATTCCCACTTG  
CAGCGAAATCACCCGAGCCATGCAATCATGCGACCTCATATGCCTGCTATGGTGCCATTGTATGGCCCTCCCTCCGTTATCCAACATTTTCTGGCCCCATGGCCTACCCTGATATCCACCT  
CCAATGTATTTTTTCCCAACTCACCTCATCCCGAACCTTTCGGAGGGTACCCATTGTTCCTCCCAACCCAGCACCTCCTGCAATACAAGAACCCTATGTTTTTCCATCTGCGGAACAAAAAC

GCACTTTGATATTGAAGCAAATTGAGTATTACTTCAGTTCAGAGAACTTGTGCAGTGATTTATTCCTGAGATCGAACATGGATAACAATGGGTGGGTTCGAATCGATTGATTGCTAAATTC  
AATAGAATTAAGCTATTAACAGATAGCATACCATTATATTGGATGCAATCAGGCCCTCAGATGTTTTAGAAGTGGAGGGCAACAAAGTCAGAAAACGTGACGGATGGCAGATTTGGTTAT  
TTAACCCACGACAAAATAAGGATAACACGGAATCTGAACCTAATTCTCAGACTACCACAAAACAAGATTCTCTTGTCTCAGATGGAGAATATTGCGCTCAACGAAGGAAATACTCGGA  
CCAATTGAAATCTTTATTTGGGTCAGGCGACTTTGCGACTGTAGCCTTTAAGGTAACAAAAAAAAAAAAAAAAACTGTATAGTTTTTTCCCCTTATTATTATTATTGGAGTCCTTTTTGGGTGCTG  
CTGCTGCCTCCTCCTCCTCCTCATGATCATTGTGAACTAACTAACCTCTCCATCGTCTTTGGTCTTTCTTATTCTCTTTCTCGAGTTGCAGAACTTCCATTCTTTTGTGAGTAGCGG  
AGTCGGAGAAGTGATTCAATATCATTCTCCTCGCTCTCTAATCCTCCTACTTACAAAATTACTCGTCTCTTTTCTCCTGAAGAACTTGCATTATATTACTTAAAATGTATTTTTTTTTTTTT  
AATTTCTGCTGGATCTGCTTTCACATTGAGCTTTCTTCATGTTTCATAATATCATATGAATCCTTTATCTATTTTATTATTATTAATTTATTTGTTTATTTATTCTGATATTTCTAACTCATAATGT  
>comp157421\_c1\_seq4

AATTATATATTTTTCCCCAGAAAATATGATTAGTTAGAATATGTGCTTTATTACACAAAGGAAATAATCACCTCGGATTACAGTACAAATAAGAAAAAAAAATGCACACAATCACACCAAACA  
AGTACAGATTGGGCCATGAAAGCTTACAAGCTAAAACACCAAGCTTCTTACCCTTCTTATTGACCAAACACTACATAAACAAATAGTATAATTCTTGAGGCCAGAAAATAAAGCATCTGCCTC  
AGTACAAGCCACCGCCAGTCTCGTGCAGTCCGGTTTTGTTTCAGTGCCGGCAAGTGGCCATCAGTCTGTGCAATCCCCGGCCCCACTAGTCGGCTCAACTAAACCGATATGGTGTC  
GAACTCCTGTGTGATGCTCACCAAGCCAGTTGAGGTACGACACCATTGTGATGCCATCCAAGCCGGTTCGGTTTTGGTGGCCGACTCCTAAGTGTGTGCTTCTCCTTTTAGTATGGC  
ATTCTCCTTGTACGCCTGCTGCTTATCAGCTCAGCTTGACGAATCTTCTCCTCCTTCTTCTCCTCCACCATTTCTTTTGCAGTGGATCCCTTGTCTTCAATTTCTCGATCTTCGATGGAAG  
AGTTTCGCGATTATCGACGACGAACAGGAGAGAGAGAGAGAGAGAGAGAAACGGTGTCTATATTCTCTCCATCTATTGCTTCTCTCGCCCTGTTTCTGCGGTCTAGACGGGAGAACAA  
GAAAGATATTGCTAGTTGTCCATTCAAAGGGATTCCAATTTATGGGCATTTATTAAGCTCGCCTCGGGGCTCGTATTTCTTGTTCGGGAAAACGCGAGGACGGTTTATTTATCGCCAATCTT  
TTATCGCCC

>comp157449\_c0\_seq1

TATGCATCATATTCATATTACATAGTATATAAATTTCTTCAATGGAGTCTTCAATATTTGTAAATTTTACCCCATGGAATCTTCTTCTCTAAAACGACAATGAATCTTTAATTTGTTTCTTC  
CTCCGTTAAACAAATACATATAAAGATTAAGATCCATGGCGCAGCAATTACCCAAGTTGACTAACGAGACGAACTGCAGTGCTTAGTCTTGCCTAAACCTCGACTGAATCATTAGCATTAC  
TATGTTAACGACTTCCACCTCGGGAACCTTGGTCGCCCGCGCAAGAATTTCTTGATGGCAGCGGCCCGCCAGTCCCAGGCGTTGAGTAGCACGAATACGGCGATTCCGCCGATGAGCCC  
GTACGCAATGGAGTATGTAAGTGGCATCAAGATTAGAGTTATGAAAGCTGGAATTCCTGTCTCATATCCGCCATTCGATCTCTGTACCCGCTTCATCATCATCACCCCAACAATATCA  
GCGCCGGCCCCACCGCCATGGAGGTATTGACGCCAGCAATGGCGTGAAGAACAGCGAAAGGATAAAGTACGCCGCCCGGTCAGCGCCGTTAGCCCTGTTCTTCTCCTTCCCGGATA  
CCTGTTGACGATTCTATAAACGCCGTTACCGGCGACGTCCCAAGTAGCGAGCCGGCGACAATAGCTGTAGCATCGGACATGAAGGCGAAGTATTGCCCTTCAAATTCCCCGTTCTCTTCG  
ACGAATCCTGCGAAGCGCGCCATGGAATAAAGAGTGCCGGTGGTGTCCAGAATGTCGACGTAGAGAAAAGTGATGACTGCTTCCAGAAAACGGCCGCGGGCGATGTCGGAGAAGCTGA  
GGCGCCAGCGGTGGAACCTATTGAATGAAAGTCGACGACTTTTTTGAATAAGCATAGGATTCGTTGCCGGCGAGAGTGTACGGGAAGGCAGTGACGGCGGTGCCGCGAACCAGGA  
GATGGCGGTGACGAAGACGATACCGTAGATTATGCCGCCGTTGATATTTCCGGATGAGGCAGTAGGAGATGATGAGGAAGCCGGCGGCCGAGCCAGAAAGTGGGGCTCTGCATGCGAC  
CGTGGAGGCAGAGGAGCTCGCCGAGACGGTGGCGCCGGGATGAGGGAAAGGGTGCCGTTTGAAGGGTTTTGGACAGGGGCTAGGGAGGCGCGGGAAGAACGCGGGCAAGCGCC  
AAGGGTGAGGAGAGTAGATGGGCTGAAGCCGACAAGCCCTATGCCCTGATTGTTCTGCAGGCCGATAAACGCGAGAAATAAACCGATTCCGACTGAAGACGATGACCTAACTGGGCGG  
GGAATGAGACGGGCCAGACGAGAGCGGAAGCCGAGAAGAGAAAAGGAGAAGGAATAAACGCCCTCGATGAACACGGCGGCAAGGGCAGAGCGGTAAGGCACGCTGCCGGAACCGT  
GGAAACCGACAATGGAATAAGCAAAAATAAGCGTTTGTTCCTTCCATTCCAGGGGCGAGTGCATGGGGAGATTGGCGAAGAAACCCATTAGAACAGATCCTATTACGGATGATGCGGCGGTG  
GCGACGATGAGGTGCGGGCGAGCGCGGGCAACGCAATCAGCGTAGCCGGGATCGATAGCTGGTGGGAATTTGCAGGACGGAGAAGGATGGAGGCAATCGGAGACGGAGCAATTCGCG



CCAGAGTCGGAGACGATGGAGGCGTTGACGGCGAGGATGTAGGCCATGGTTAAGAATGTGGCCGTACCGGCACGGAGCTCAGTCGAAAAGGTGGTGCCGCGTTCTGAGAGCTTGAAGC  
GCCGTCCAAACCAGGAAGACGCCACCGCCGCGTTTCAGATTGCGGAGGGCGGGAGGGCGGGGGCGGTGGATGCATGGTTGGCCGCTGCCGGCGAGCCGAGGAAACGGGAGCAGAGAG  
TTTGCTGAGGGGCGAGATTTATGGGGTGGATTGGCTATAAGACATTGGGGGTTTTAGTTTCAGAGGTTATCTGCATCTTATGTAATGTTTCGTTTGTGGGCGGTTGTGGAATTATGGTGATAA  
GAAAAGTTCATTTCTAGAGGGGAAAAA

>comp157450\_c1\_seq12

TATTTTCGTAAGTACATGTTATCATTTTGCAGCTCCATTTCCCTGCAACAAAATCAGTTTCAAGTGTATATATAATCTATTTTCTTGGAGCTAAATTTGCTTGGCTGCTTTTCCAGCTGCAAAAA  
TAAGCAGATATATAGAAAGCAGAAAGGAGAGTTTGGTGGATTAATAGGAACAAGCTTCTTGTTTTACCTTCTTCTGCATGTACTCGATCTCATTATACAGCAACTCATTCTTTTATAGATCTT  
ATTTTGTGATGCCTTTCTCCAGTCTAGTTTCTAGTTGTTGAGGTCCCTTAAAGTTCATTGTGCTGAGAGCCTCACCCATCAAATTCCTATAGGCATTTAAGGATTCTGTAACATATGGAATTT  
ATAAACGGAGAATAGTGAAGTGGACTGTATGTTAATTTATTA

>comp157450\_c1\_seq2

TGGAATTGCTAAGACCAAATTTTTGTTATAAAATTATGTTTATTTGTAACAATACAAAGCCATCACAAAGCTATAAAACAAAGAGTTGGCAATATATATAACAATAAAGCTCCTGGACAA  
AAAGTCTATTCTTGACAATTCATGCATATTTATGGTTTATTTCCATGAAGAAAACCTGATCTCCAGTACCTGACATCTTCCACTAAGGTATAGGCTGCCTGTTGCTAGGAAGAAGATTTAC  
TTGCAGAAAAGCTTCGAGAATCAAATGGAGGCATAACTTCACAATCATTTCTTGTGTAAGGCAGCATGTTTCATCTGATGCTGCTGCACTCTCTCATTCTCAGCAATCTGAATAATTTATAAGT  
TTCAGACAGAAAAGTAGTGATAAAAATTCATCTTTCAGTGCATTAATGCAGAAAAATAAGGAAGTTTCCATTTATTTCTATGTATGATTAATAATTTACAGAAAAGTAGACCTTATTTTC

>comp157450\_c1\_seq4

CCTTCATCCTTCTCTTATCAGCTACTGCTCATATGAACTATTGAAAAACCATCAAATAAGATTATGATACTCCTACATATAATATCTTATAAAGTCTCAACATTGAACAAGCCTATGACACCAG  
TTCCATAAAATAATATAGAGAAAAGTCTATTGCACAACCATCACCAACTCTTAAGCTTTGCATCCAGACTTTCCTTACAAAACATACCAAATATATTTTCTTCTGATACTTGAGAAACTCAGC  
TAGCATCTCCAAGCTATCATTGCAGCAATTCTCCATTACCCAAGTTGCAGAGCTGTTTGTGCTGGTGAGCATAATGATCATTGGGATCCAACAGATTAACCTTGAGAAAAGCTTCTGGAATC  
AAATGGAGGCATAACTTCATATTCTGCGCTTGTGATGGCAATATATTCATATGCTGATGCTGCTGTGCTCTTTCATTATCAGATATCTTCAAAAATATATTCACAGTTATTTTTAGAAAAAAAT  
TATATAAAGTTGATATTTTTCAATAACATACAGTATATCACAGACAAATGTGTTGATTTTGTGAGAGTAAGAGATATTTTATTAATTAATTTATTTATTGAATAGTTACTACATTGAAAATAATTT  
ATGGTGTGAGAATTTAAAGACTGAGGTTTTATTTGGGACGGCTT

>comp157450\_c1\_seq7

CCTTCATCCTTCTCTTATCAGCTACTGCTCATATGAACTATTGAAAAACCATCAAATAAGATTATGATACTCCTACATATAATATCTTATAAAGTCTCAACATTGAACAAGCCTATGACACCAG  
TTCCATAAAATAATATAGAGAAAAGTCTATTGCACAACCATCACCAACTCTTAAGCTTTGCATCCAGACTTTCCTTACAAAACATACCAAATATATTTTCTTCTGATACTTGAGAAACTCAGC  
TAGCATCTCCAAGCTATCATTGCAGCAATTCTCCATTACCCAAGTTGCAGAGCTGTTTGTGCTGGTGAGCATAATGATCATTGGGATCCAACAGATTAACCTTGAGAAAAGCTTCTGGAATC  
AAATGGAGGCATAACTTCATATTCTGCGCTTGTGATGGCAATATATTCATATGCTGATGCTGCTGTGCTCTTTCATTATCAGATATCTTATTACGCAGGTACATGTTGTCAGTTTGCAGGTCC  
ATTTCTCTTTTCTGCATGTAGTCAATCTCAGCGTGCAACAGTTCATTCTTTTTAGATCTTATTTTGTGATGCCTTCTCCAATCTGTTTCCAGTTGTTTCCAGGTCCCTCAAGCTCATGGTGG  
TGAGAGCATCACCCAGCAAATTCCTGTTGGAATTTGTAAAGTTGGTGATTTGCTGACGTAGTTTTGTGGCCTCTTGTGGTAATACTTGTTCAGAAATAGAGAAATGTCAGAGATAGAGAT  
CATCAATTTGACAAAACATATATAATTTAAATGGAATAGTGATATATTTGATAAAATCCTATTATATAAGAAAATCAACATAATTGTAGACTGAAGGCTAGCTAAGTTACTGATGACCAA  
TCTGGTTTCATGATCATGAAATATCCAGACAAAAGTTGAGCAATGATCGATTGGCAATTTCAAAAACCTTTCATTTGGCCTAAATGTTTATTCAATTGCTAGTTATTTGCTAAATAAAATAGAT  
TAATGACAGTTCATTTAATGCATGTTCTCTACTAAAAGTATCATAAGGTTGTATAAATTAGCTCCTTGATAGGGTGTGTATGTTTTGATTAAATCCAGTTTTGGTAATTTTATAAAAAAAA

TTAACTTAAAAGGCATTATTATATTTAAGGTTTCTACTTCATTTCGATTTCTATCAGTATTGATCCATTTTTAGACTTCGTTTGGGACGGTTTTCTTACCACATCTTAAATCAGCTTTTTAGTGT  
AAAAATTTAAGTTTGTACTAAAAGCTGCTTTAAGAAGTACTAAGAAAGCCGTATCAAACGTAGCCTAAAATGATGATATGTCTATCTAGATAGCTAGACTCGGAGCTTCATTTGTAATTTT  
TTGACTAAAATTCCGTTTTATGAAGCAATAAAAAA

>comp157487\_c0\_seq7

TTGTTTCATATCAAATATAATGAGAAAACAACGACTAATAAAAAGAATGATACACCTATTTCTTTAAATAAGTTCGGACGCGATTATGAGCGATTTTTTTTTTAAAGTTTAAAAAGAGTGAGTTT  
GAATAAATATTTGCATGCATAAATCTCATTTTGACCGAATCAATATATGAAATTTCTGCACAAATTAATAATCATTATGTCAAAAATCATGTTAAATTTTTTATGCTATTTTTTTTTTACCG  
AAAATATATTTATAATAATTTTCATTTAGATAAGATAATAAAATTAACAGTACATTTGCATTGTAGTGCCTTGACAGACAAATGGAAATTGACTCATGAGATGTATACGCCAATATCACTTTTTT  
TTAACTAAGAAACAATACTAAGTATATCGTTATGCACAAATTTCTCAATCGATCATGAATGATATACATAAGATGCTATATAAATGATACTAAACATGCTTCTTAAACATCTTTCTTGAAGTT  
ATAATACATGCGAACGTCACCTTAGGCACCATGAAAAGAATTATGCATTTGATCACATGATTTGATTGTGGCTCATAGTAGTGGTGCAACATATAGGCAAGATTCTTATGGAAATAGATCACCA  
ACCATGACAAGAATCTCAATCCTTTCCCAATAACAATATTAAGAATAAGCTTAACATGATTTTTCTTAGCTCTCCCAAATACTCAGGTTTATACATGTACACAAAACTAGCATTTGGA  
GAAAAATCATTGATAGATCCAAGAAAGAAAATAAATTTATTTCTCCCTTAAGTATTTTTTATTCTCCACAAACCAAATACCTTTATTTTGAAGTTATAAATCTACTCATTTAAATTTAGAAT  
ATGAAGCTACTTATTCTCATCACCAAGCTTCGTATCTATGATCGTATACAAATATATCATCG

>comp157487\_c1\_seq1

TTTTTGTCTTAGATGTCACATAATGTTATAGGGGAACGAAAGGAGGTGTTTTCTAGCCCTTCTAGACATCGTGCAACGCTATATAAACTATATTTTTTATATTGACTTTAGAAGCGAACAA  
TTTAGAAGAAAATAAAGATATTCATGATATACAAATAACATTACCCGAAGCCATTTTCGTTTCATTGTTTCATTTTCAATGTGTATATGTTAGATGCAAAGTAAAAGAATGTGGTATATTTACAA  
TAACAATAAGCATGCAATTTGTGAGATTCATTTCTTTATTGACAACACATATACATACACCAAAGTATAAACTGTACGAATTCGATACAACCATAAACTATATATAATGACCATGGTACA  
AAGCATATTTCTCATTGTAATGATGCATGCTTGTATTAATATATTAATATCATCATTCAAATGTATATATCAACACCCCAACAACCTCTACATAAATCTTTGGCAATTAGATGTACAACAACAATT  
AAAACAAGAATAAGTGCCTCCGACTAGGTTTCATGAAATTAATCAGCCACCTTAAGGTTTGGAGGGTTAACAAAGTTGCTAGTTTTATTGATTCAAGATAACAAGAAGAGAGATTCACCTA  
GTCGATCACTATTTATTTCTTAAATGAAGATAATTAATAATAATAATATTAATAATAACGAGATTATCTTAATATATAACTACTCCATTCTCCCAAGAAAATTTAGTTCAAACATGCTTAGGA  
GAAAATTCAAATTCAAAATTTCCCTTACAGGAAAACCACATCCATAATGTTCTTACAAGAAGGCTAATTGGAACGAGATAGTCATTTCAATCTATTATTTAATATAACATTAATTAAGAAAG  
GAGAATAGAAGAAGGTTTGACAAAAGACTAATGTTGTAGTATTTCCCTTTTTTTTTTTTGGATGACTA

>comp157561\_c1\_seq1

AGCTTCTAAATACCATTTGAACGCATAACCATTTTTTAATTGATAAAACATCTCCATCTCCCAAATTCGAAAAATAATTAATAAAAAAAAAATCAACAATTTCAATAAATAGAAAGTTTTTGT  
GATAACAATTCAAAGATAGCCATAATCTTTTTAAGTATCCTTCTCCCAACAAAGCATCCCAACATTTCTTATTGATCAAGAAAGGCAATTCACAATCAAGCAAGCAAACAACTTCAGAAA  
AATGTAGAACAAACGCTAGTGGACTAGAAATCTTCTTCATCTTATTGACTTTTCGTTACTTTTTGATCTGTAGTAGCTTAAGAGTAAAACCTTGTAAGTCTTTGCCTGGAGTATGATCTGCC  
TTAAACCTCCGATTGGTGAGAAGACCATCAACAAAACCTCCAGCATAATACAAATCCAGTTGATTATCCATGACAAAACCTGAACTTCTTAGGCTTGATAGATAGCAAGCCACATGACACAGG  
GAAGAAAGTATGTTGTTGGGGAAAAAGCAAAGCCTCCGAAGAATCCAAGGAGGGCACCGAAGAAAGGAAAGGTTATACCAATAAACATTGTGACAGCAACATAAACACTTCGAGCAAT  
CAAGCGAAGAGGAAGGCCTGGAGGGAAAAAGAGTTTCTTAAGTACAGCAGTTTCGATCATGTGCAACACAGGCATGACATAAATCTGATAGCTCCCAATAACATGGATCACAACGAACA  
TATTAGCTGCAGCAATCAGCCACTTTGGGCTTTTTCAAGGGTGATAAGAATATTATCATCAACATTTTCCAAAAACATAATCCCAACAAAAGCGACTGGTAAAGTAGCAGATTGCAACTATA  
ATGTATGCAACAATGACTCCCTTCCACATAGGCTTCTTGGATGGCTTATCAGGCGAGGAAGGGATTGTTGCTTGGATCTCTAGAACAACATTGTGGCCTGCATAGGCAAAAAGCAACATCTC  
CTAGAGCATTAAGAAATGAAAACGTTATCAGCGTTGTCTTTCCAGTTAAGTCATAGTGCACCTTCTGGCTGCTTCCCTTTCGCTCCAGATGCAGCCCAAGCAATGGTCAATAGCTGAG

AGACATGACAGCAGCAGCCAAGGAAACGCCAGAGATTGAGTTGAAGTTGGGGAGCTGGGCAAGAACAAAGTGAATAGAAGCAAAGATCATGATAAAGTAAGACAGTCTAATGTTACTG  
CAGTCTGGGCAAACAAGGTCATGGAACCTTCTTGAGAGATTTGCCCCCTGTGACCATGTACACAATGTGACACCCCAACTTCGACTATAAGCTGTTGGGGAACAACAATCCAGAGCCCAAG  
TTTGTGCGCCGAAAGCGTGCTGCCAAGCTCATGGTAACGGTCAAAACGTTTCCCTGGCGCCCTATCTGGCATTTCGTGCATCTCCACCATTTGCCACAAGGTGTAAAGGGTGATGATCCAT  
GACAGAATCATGACAGTGATTCCAGGACCCCATCCAAGATGCGACATCGCGTAGGGCAAGCTGAGAACACCAGCACCGACCATGGCCGTACATTGTGGAAAGCCGAGTACCACCATTT  
AGCATTCTGGACGAAGTAATCGGAAGCCAGTCATCCAGCACCTTCGCCTTCTGTACCTGCGTCTCCTTATCTCAAGCTCCATTTCAACCTCGATTGAATCCGATAGCAACGAACGAAC  
GGGGAAGGAGGAAGGACAATCTTGAATGAACAGTAAACGAGAAAGCTCGATCGATGAAAAAGAAGAAGAATATCTGCCAATGAGGCGAGGAGTCTCTTTCTTCTTCTCCTCCAC  
TAACCCATTGCCATCAGGCCTCCGGTCTTGCTTATGTAGCGGTGGAGATTACCATTTTTAGAATCACAGCTCGCAAAAACCTAGACG

>comp157561\_c1\_seq10

AAGCCCAAGTGGCTGATTGCTGCAGCTAATATGTTTCGTTGTGATCCATGTTATTGGGAGCTATCAGATTTATGCCATGCCTGTATTTCGATATGATCGAGACGGTTTTGGTAAAGAAACTCGAT  
CTCCCACCGGGCTTAGCCCTCCGCTTGATTGCAAGGAGTCTATATGTTGCCTTTACAATGATTGTTGCAATCTGCATCCCTTTCTTTGGTGGCTTGCTTGGTTTCTTTGGAGGATTTGTATTT  
GCCCAACCCACATATTTTCTCCCTTGATCATGTGGCTTGCTATCAAAAAGCCTAAAAGGTTTTGGCTTGCTCCTGGTCCATCAACTGGATCTGCATCATTCTGGGAACAATGCTGATGATTCT  
TGCACCAATTGGAGGGCTCAGGTCAATCATCCTCAGTGCCAAGAGCTACAAGTTCTTCTCATGAACTTCACTTGATGGAAATGATAGCAAGGTTCTTTCTTTAAGGGCCTCGTGCTTGC  
TACCCAGCATGTCTATAATTAATAATGCTATATGAAGTTGTCTCTTAATCTTCAATTGTGTAGGAAAAAGATTTCAATTGCTACTTAAGGTGGATAACCTAATTATGTTTTCTCAAGTATTTGTG  
CTCCTAAGACCATTTTTTTTATAACCATGATTATGATCGGGTCTGACAGACTCACTGAAGCAAATGTATGTTGGTATAAATTTACTTTTTATTCTGCTGCAAGTATGGCTGTGTTATGTGTATG  
TGATTTCTACTACAATTTAATTCAGCCATACTTGACAGCAGGAATAAAGATAAAAATTTATACCAACATACATTTGCTTCAGTGAGTCTGTACGACCCTATCATAATCATGGTATAAAAAATG  
GTCTTAGGAGCACAAATACTTGAGAAAACATAATTAGGTTATCCACCTTAAGTAGCAACGAAATCTTTTTTTCTACACAATGAAGATTAAGAGACAACCTTCATATAGCATATTAGTAGTTAT  
AGACATGCTGGGTAGGCAAGCACGAGGCCCTTAAGAGAAAAGAACCTTGCTATCATTCCATCAAGTGAAGTTCATGAGAAGAAGTGTAGCTCTTGGCACTGAGGATGATTGACCTGAG  
CCCTCCAATTGGTGAAGAATCATCAGCATTGTTCCAGAATGATGCAGATCCAGTTGATGGACCAGGACAAGCCAAACCTTTTAGGCTTTTGTAGATGAAGCCACATGATGAAGGGAG  
AAAATATGTGGTTGGGGCAAATACAAATCCTCCAAAGAAACCAAGCAAGCCACCAAAGAAAGGGATGCAGATTGCAACAATCATTGTAAAGGCAACATATAGACTCCTTGCAATCAAGC  
GGAGGGCTAAGCCCGGTGGGAGATCGAGTTTCTTTACCAAAAACCGTCTCGATCATATCGAATACAGGCATGGCATAAATCTGATAGCTTCCAATGACATGAACAACAACAACATATTAGC  
CATGGCTATCAACCAGCGAGGTTTCACTAGACTGAGAAGTATGTTATCCTCAACTGAGTTGCCGAATGCCAGTATCCAACCTAGAGCTACAGGGAAGTAGCAGAGAGCCACTACGATATA  
GGCAACAACAACACCTTTCCACATTGGTTTCTTTGAAGGCTTTTCTGGAGTAGAAGGAATGGTTGCTTGGATTCAAGTACCACGTTATGACCTGCATAGGCAAAGGCCACGTGCGCTAA  
TGCACTGAAGAAGTTGAATACAGTCCAGCAGTGCTGTGAGCTTTGTATCCATAATCAACCCCTTCTTGTTCCTTGTGAGCTGATGCTCCCCATGCAATGGTGGAGTAGCTTAGGGAC  
ATAACAGCAGCGGAAGAGAGACACCAGAGATGGAGTTGAAGTTAGGTAGTTGGGAGAGGACAAAGTGAACGGAGGCGAAAATCATGATGAAGTAGGAAAGCTTGATGTTCTTACAAT  
CAAGACATACAGTATCATGAAATTTTTTGAGAGATTTGCCTCCAGTTACCATATAAACAATACAAACACCAACTTCACAAATGAGCTGCTGAGGAACTACTATCCATAATCCAAGTTTTCT  
CCAAAAGCATATTGACCAAGCTCATGGTATCTATCAAATCTTTTCCAGGCACCATCTCATGCATCTCAACCATCTGCCATAATGTGAATAGAGTGATGACCCAAGACAGCACTAAAACCTGC  
AACCCAGGACCCCATCCAAGCTCAGACATGGCATAAGGCAAGCTGAGCACTCCAGCTCCAACCATAGCCGTGACATTGTGGAAGGCAGAGTACCACCATTTTGCATTTCTTGAAGATGT  
GATTGGAAGCCAATCATCAATAGCTCTTTCTCTATCAGACTTCGTTAACTCGGTAGTACTGTTGTGCGACATCTTTCTCAGAAGGAGCAACTGCTTTCATGGCGGCAGAGAGACTTTGTGAA  
TGGGATGCAGTCAGAACTCTATGTCAGAAAGAGAGCTCGCAAGTAAAGAAGGGGAAGAAATATCGTGGACTGAGGAGCTTTGAGAGAGAGAGTGAGAGAGTAAAATGGATGTTGCGAG  
ACACAAGAAGGTATGCGGGAAGGTAGGAGTTATATATAGAGTATAGAGAGAAGAGTCTGAGTTTCAAGTTAATTTGGACTTTTAAAGACACGCTGTAATGACCCATACTCCGGCCACTCCG

>comp157561\_c1\_seq2

AAGCCCAAGTGGCTGATTGCTGCAGCTAATATGTTTCGTTGTGATCCATGTTATTGGGAGCTATCAGATTTATGCCATGCCTGTATTTCGATATGATCGAGACGGTTTTGGTAAAGAACTCGAT  
CTCCCACCGGGCTTAGCCCTCCGCTTGATTGCAAGGAGTCTATATGTTGCCTTTACAATGATTGTTGCAATCTGCATCCCTTTCTTTGGTGGCTTGCTTGGTTTCTTTGGAGGATTTGTATTT  
GCCCCAACACATATTTTCTCCCTTGCATCATGTGGCTTGCTATCAAAAAGCCTAAAAGGTTTGGCTTGTCCCTGGTCCATCAACTGGATCTGCATCATTCTGGGAACAATGCTGATGATTCT  
TGCACCAATTGGAGGGCTCAGGTCAATCATCCTCAGTGCCAAGAGCTACAAGTTCTTCTCATGAACCTCAGTTGATGAAATGATAGCAAGGTTCTTTCTCTTAAGGGCCTCGTGCTTGGC  
TACCCAGCATGTCTATAATTACTAATATGCTATATGAAGTTGTCTCTTAATCTTCATTGTGTAGGAAAAAGATTTCAATTGCTACTTAAGGTGGATAACCTAATTATGTTTTCTCAAGTATTTGTG  
CTCCTAAGACCATTTTTTTTTATACCATGATTATGATCGGGTCGTACAGACTCACTGAAGCAAATGTATGTTGGTATAAATTTACTTTTTATTCTCTGCTGCAAGTATGGCTGTGTTATGTGTATG  
TGATTTCCCTACTACAATTTAATTCATTTTTATTTGTGTGTATTGCATGTTCTTCGATCAGATTTCTGTATTTTTATCTGTTTGTAGCACTTGTAGTCAGCGACGGAGTCAGAAATTTATTTAGAG  
AGAGGGCCTAAATTTAAATAGTCATGTTTGCATCTCATATAAAATGTTAGAATGCATTTAAATTTGGTGTGGATATGTGACATAAACTTGTGAGGATCATTATTAAGGCTTCATTTAGAACA  
GTGTTCTTATTGTTTTGAAAAAAA

>comp157561\_c1\_seq4

AAGCCCAAGTGGCTGATTGCTGCAGCTAATATGTTTCGTTGTGATCCATGTTATTGGGAGCTATCAGATTTATGCCATGCCTGTATTTCGATATGATCGAGACGGTTTTGGTAAAGAACTCGAT  
CTCCCACCGGGCTTAGCCCTCCGCTTGATTGCAAGGAGTCTATATGTTGCCTTTACAATGATTGTTGCAATCTGCATCCCTTTCTTTGGTGGCTTGCTTGGTTTCTTTGGAGGATTTGTATTT  
GCCCCAACACATATTTTCTCCCTTGCATCATGTGGCTTGCTATCAAAAAGCCTAAAAGGTTTGGCTTGTCCCTGGTCCATCAACTGGATCTGCATCATTCTGGGAACAATGCTGATGATTCT  
TGCACCAATTGGAGGGCTCAGGTCAATCATCCTCAGTGCCAAGAGCTACAAGTTCTTCTCATGAACCTCAGTTGATGAAATGATAGCAAGGTTCTTTCTCTTAAGGGCCTCGTGCTTGGC  
TACCCAGCATGTCTATAATTACTAATATGCTATATGAAGTTGTCTCTTAATCTTCATTGTGTAGGAAAAAGATTTCAATTGCTACTTAAGGTGGATAACCTAATTATGTTTTCTCAAGTATTTGTG  
CTCCTAAGACCATTTTTTTTTATACCATGATTATGATCGGGTCGTACAGACTCACTGAAGCAAATGTATGTTGGTATAAATTTACTTTTTATTCTCTGCTGCAAGTATGGCTGTGTTATGTGTATG  
TGATTTCCCTACTACAATTTAATTCAGCCATACTTGCAGCAGGAATAAAGATAAAATTTATACCAACATACATTTGCTTCAGTGAGTCTGTACGACCCTATCATAATCATGGTATAAAAAAATG  
GTCTTAGGAGCACAAATACTTGAGAAAACATAATTAGGTTATCCACCTTAAGTAGCAACGAAATCTTTTTTTCCTACACAATGAAGATTAAGAGACAACCTTCATATAGCATATTAGTAGTTAT  
AGACATGCTGGGTAGGCAAGCACGAGGCCCTTAAGAGAAAGAACCTTGCTATCATTTCATCAAGTGAAGTTCATGAGAAGAACCTGTAGCTCTTGGCACTGAGGATGATTGACCTGAG  
CCCTCCAATTGGTGCAAGAATCATCAGCATTGTTCCAGAAATGATGCAGATCCAGTTGATGGACCAGGACAAGCCAAACCTTTTAGGCTTTTTGATAGCAAGCCACATGATGCAAGGGAG  
AAAATATGTGGTTGGGGCAAATACAAATCCTCCAAAGAAACCAAGCAAGCCACCAAAGAAAGGGATGCAGATTGCAACAATCATTGTAAAGGCAACATATAGACTCCTTGCAATCAAGC  
GGAGGGCTAAGCCCGGTGGGAGATCGAGTTTCTTTACCAAAAACCGTCTCGATCATATCGAATACAGGCATGGCATAAATCTGATAGCTCCCAATAACATGGATCACAACGAACATATTAGC  
TGCAGCAATCAGCCACTTGGGCTTTTCAAGGGTGATAAGAATATTATCATCAACATTATTTCCAAAAACATAATACCCAACAAAAGCGACTGGTAAGTAGCAGATTGCAACTATAATGTATG  
CAACAATGACTCCCTTCCACATAGGCTTCTTGGATGGCTTATCAGGCGAGGAAGGGATTGTTGCTTGGATCTCTAGAACAACATTGTGGCTGCATAGGCAAAAAGCAACATCTCCTAGAG  
CATTAAGAAATGAAAACGTTATCAGCGTTGTTCTTTCCAGTTAAGTCATAGTGCACCTCTGGCTGCTTCCCTTTCGCTCCAGATGCAGCCCAAGCAATGGTTCGAATAGCTGAGAGACAT  
GACAGCAGCAGCCAAGGAAACGCCAGAGATTGAGTTGAAGTTGGGGAGCTGGGCAAGAACAAGTGAATAGAAGCAAAGATCATGATAAAGTAAAGACAGTCTAATGTTACTGCAGTCT  
GGGCAAACAAGGTCATGGAACCTTCTTGAGAGATTTGCCCTGTGACCATGTACACAATGTGCACCCCAACTTCGACTATAAGCTGTTGGGGAACAACAATCCAGAGCCCAAGTTTGTG  
GCCGAAAGCGTGCTGCCAAGCTCATGGTAACGGTCAAAACGTTTCCCTGGCGCCCTATCTGGCATTTCGTGCATCTCCACCATTTGCCACAAGGTGTAAAGGGTGATGATCCATGACAG  
AATCATGACAGTGATTCCAGGACCCATCCAAGATGCGACATCGCGTAGGGCAAGCTGAGAACACCAGCACCGACCATGGCCGTCACATTGTGGAAAGCCGAGTACCACCATTTAGCAT  
TCCTGGACGAAGTAATCGGAAGCCAGTCATCCAGCACCTTCGCCTTCTGTACCTGCGTCTCCTTATCCTCAAGCTCCATTTCAACCTCGATTGAATCCGATAGCAACGAACCTGAACGGGG  
AAGGAGGAAGGACAATCTTGAATGAACAGTAAACGAGAAAGCTCGATCGATGAAAAAGAAGAAGAATATCTGCCAATGAGGGCGAGGAGTCTCTTTCCTTCTTCTCCTCCACTAACC



>comp157675\_c0\_seq1

ACGTAATAATTGTTTCCTTAGAGATGCTTATTATTCTCTCTAAAACGTGTGTAATTAATGATTGCTTTTAAATGCCAACTGAGTAATTAAGGTTCAAGTTTCTTCTCTTTGTGAGCTCTTCTCCCTG  
CTCAGCGCCATGAAGAAAGCATCAACGGAAGAAGTATGGTGAGGAGAAGTGGTCGTCGGTCTGGAAGACAAGGAATCGGATGTTTACGACCAGGTTTTGAAGGCTGATCTAGCGGCA  
GAGCAGGTCGATGTTTTTCATTGTTGATGCTTCGTCTGTTGAACACGAGCAGTTTTTAACTCATTGAGGATGAACAGCTTCAAGTACCTTCAATGGAGTCCGATCGTTTAGCTAATGGTG  
ACGAGCTGGTGTTCGGGTGAGCCAGTTCGGTTCGGTTTTGCGTTCGCTTTGGAACGGGATTCTTCTTCGTTTCGTCATTGCCTCGACCTTCCGTCTGCGAATTCGAGTTCGAATGTAT  
CTCGTTCTTGCAGGCTGGGGAGATCGAACCACAACCTCCGGCGAGTAGCGTCTCGAGCGGCTCCGATCAGGCCAGGCAAGTCCGACTTCTGCTATGGAACCAGGCGTTTCTGGATCAG  
GGAAGGTTCAAACCTGCAGCTTTGGTTTTCTTGCAAATCAATGCTAGTCTGACTGCTGGTTTTGCACTCAATATGAGCAATGGTGGATCAGAAAATTGCGAAGGACTGTAGGTATTTGAATGA  
TCCTATGGATTCTACTGTTTGTCTGAGATTGATCGCATGCATGTAAATACATTAGATGAAGCCATTGATGTTATTTGTAAATCTGCAAATTACAAATCAGGTGTTTGTGCAAATGCCTCTACC  
ATAACTGCTTGCTTGAATGGCCAAACTACTTATTTTCAACAATCCTCCAAGCATCCAAATGGTGCTAAACCTGCCATGACCTATCCTATGTATGGAATAGGTTGGACGTAATCAAAATTGA  
TGATGTTCTAAGCGCGCAGTTATGTTAGATGATGGAAGTTCTGTGACTTTGAACATGGAGTCCGTCATGCCAACTTAGTTAGGCTTGAAAGATGGCTAGTGTGCAAGCTTATTGGGTGA  
AGGTTACCTTACTTTGTGCTAAACAACGAATTAAGTTTTGAATGGTCAATATTTGAAGATTTTCAGCTCCTTTCCATTTCCCTGGATTCTTTCATTTGCCTCTTTGAAAGTGTGCGGCTTTGG  
ATGCTGTCTTATGGGTAGACTGTGGGTATTGGTGGGTATACACAACCTTCTGCCCCTGTTTTGTTTGTGATGTTGTTTTAGGAAAGGTTTTTTGCATTCAGATCTACTTGCCAATTCG  
CTTCATTTCTTCAACATAGATTGAACTATGTGAGACATAAGCCACCCATTGCCCTTCAAGGTAAATCCTCTCTTATTTTATTGATGTTGAGATTTTTGATGTGGTGAATCCTTTTTCTATA  
TCTTGCTTGGTAAATTTTTCTTGGTTGCCAAGCTTGGAGATTATCATACTTTTATTTACACTTGCCTCTAATGTATTGGGACAACACCAATCTTGTCTGATAGCTTTTTTCTTTGGACCA  
CCTCTATGAGTTGATGCTCAAACAACTCCTAGGGGAGAAATGCTTTTGCTCGTATTTGCGTGCAGATGGATTTGGTGCCAAGCTTCCCTCCAGGAGTTTGGATCTCTGGGCTCCATGGCAA  
GTTTTTTTAAAGGGCGGAATATAAGGATATCACTCACCTTTGCTTCCAATGTGGCTTTGTTTCGACACAACATAAGTAATGTCCCAATGTTCCCTCAATCCTCCAAGCTGCCACACAACAAC  
CTCAATGTAGATCGAATCCTCCATGTGTTTTGTGCAAGATTAGCAGCACCCCTCTTCTAGTGACCCTTGTGCTACTAATAGTTGCCCTCCAATGGCGATTAATGACCCAAATTCATCTCTAT  
GATCCAGCCAACTCTCTATCCACTCCGTTGGAATTCGCGACTCTCCTTCTACTATCAAGCATAAGTGAAGGAAAGGAAATTTAGAAACCTATGGGCCTTGGAGTCTTGTACAAA  
AAATCTAGGAGACATAACAAGAAGAATTCCAATGTAGGTATTGGAGATCAGAAGTCTTTTCTCCCTTCTTGCAAATCTCAAGTGGGGAAGTTAATGTTCCAACCAAGCAAGTTGTTTCAT  
CTAGGGATGGTGATATCTCCAACATACCCTTCAAGTTTTCCACTGAGGCTTTCCTCATGCATCCAAGAAGATCTGACCCAAGGTATGATAGAGTCTATAAGACTCGTTTTGCTAAGGATCTT  
CATCGTTTGGGGGCCAATTAAGTATAATCCTAGGAAGTGAAGGAGGGTGGCGGGGACGACTCTCGTTAAGGTGTTCAATATTGGGGGTCTTACATGGTCTTCTTGTAAAGGGGCGCCTC  
AATCTCTTGGTATCCCCCTTTTGGAGTGGACCTTACCCTATTTGTTTGATACTTGCTAGGAGCTCTGGTGTGTCCTCACTTTGACAACAAAACAATGATTTTTTGTCCCTTTTTTGTGAAG  
TATAGGCATATTTGGGAAGTTTTAGCTTGTCTATGCTTCTCACTTTTTTATTTTGTTTTATCTTGGGAGGTTCTTTTTTATGCTTCTTCTAGATTATACTCATGTATACTTTTTG

>comp157692\_c0\_seq3

ATTTATTTTATTTTAGCATTATTTAATTTAATTTAACAAAATGAATAATTTGAATATTACTAATTAATTGTCATTTTCTAAAAAAATTTAATTTGTCAGAAATCCATCGGAAAAGCTAGCATA  
AAATGCGTCAGAGATACCTTCAAAAAATTCGTTGGAATTTTGCAGGAAAATTTGTCTGAAATATTTTGCAGGAAAATTCGTCGGAATTTCTGAAGGATTTATTTCTGCCGG  
AAATCAATGTTTTTCTTGTAGTGTGGATAACTATTATGCACCTAATAACCCGTTTAGTATAATAATTTATATACTGCACCTTTGATTATATCGTACTTTGAAAATTTATGAAAATGTTAAGAA  
AGGAAATATTA AAAACTTAAGATTGGTGGTTTTTGCCTGCAGGCTTTTGTAAATCACTATGGCTATGCTTTTTGTTTTTAGGATCTGAGAAAATGAATGAACATGTTGACTAGCAGTTCAG  
AATCTAATCTATAATTTATAGTTATTTCTTTATTTGTATTTTAAACGGTTATAGTAATTAATTTTAGATGTTTTACTTTGTTCTCCATTCAGTAGCTCGGCACTATAGTGTAGATTTTATATATAC  
ATTTTGTAGAAATAAAAGAGATTGTATAAACGAGTTTATTTTCACTTACTGGATAATTTTAGTAGCTATGATTCAATATTTATTTAAATGTTTAAATTAGATGAAGAAATTTGAAGCATTTTT  
CAAACTAGAACATGGGATAAGCATGTGCGAGCCTAATAAGATAGGACCTGTTCTTTTGCATTGGGTTGAAAATGTATCATAAGATAGAGCTATATGAATTAATCTATAAGTCAAAAAGTTA

AGATAGTTTTGAGTCTATTTGACTGTTCAATTATTATTTATTATCATGTGTATATATATTTAGTTGCATATTTTGTGTGATTATGTATCCGACGAACCCAAATATGATAGATGGATAGAGTGCTAGT  
CGGACAACCTCTTATATATAGTACTGCTCAGATAGTGAGTTTAAATAAAAATTTCTCAGTTTGCCTGTCTGATAACACAAATGATGGGTGAGGCATAGAGTAGGATTCCTGCTATTAGATCTAAT  
GATGTAGATAAAACACTTTTCATATATTTTTGAGATTGAAGCCTTTAAATTTGAGGGTGTATTGAGGACTAGTTGAGGAGGCTTGAGCATATATTTGACAATATTTAGTTTCCTCCTTAAAGGA  
AAGTATAATTGGAAATTATTCTGTTAGATGGTAAGGCAGGGCACTGGTCGATTGACCAGTAGAAGAAGAAGTTTTTAAGGGAAATTGAATTATCTGATTAGGTGGTAGGAGTTTATTAATGT  
TTTTTAATCCTAGTTTAAACAAGCATCTGCACGTTAGTAGATGTAGGAGACATTTCTAAGATTGGTTCAAGGGAGTAAGATTGTGATATAACATGAGACGGAGTAACTATTTTGGTTATATA  
CTCCGTAGTTGGTTAGAACTCTCGTAGATAAGTGTTACATATTTCTAAGAAGACTTTAAGATAGTTTAAAGATAGACACTAGTATCATTTTCATATTTCTAATAATGTCACTAATAAGTTACTTGA  
CAAAATTTGAAGTTAGTCTTCTCCTAGTAACATTTTTTTTACTTTGAGGATTATTAAGGGCTTTATCTTATTGATGAGATGTTAAAAGTTAAAGGCTTGTATATTACGTCTAAATACCATTTTT  
TTTCATTTTGATACTATTAATCGTGTGTTTTTAATGGCCCTATTACTGCTAGGGTTTGGTATATTTGGAGAATACTTTTGAGTTAAATATTAGTAGCACTAAGAGTAGTTGTTTTAGTTTTTTA  
TTTGACTGGTTTTGCAATATGCCCAAAGGTCATATTCTCACGATTATTCTTATGATCATTTTTTTGGTTTTTGTTCGTCCTGGAATATTCGC

>comp157705\_c1\_seq1

GTTACCTTCCATCCATTGATACTAATTAATAAAATTTATGTCAATGTACGATTTTATAAAAATGACTATATACAAATGAAATTACATTATAAAAATTTAGAACAAAGACATCTGAAAATAATTTATA  
AAACGCTGCAACTCCTTATCTAGCAACAAACAACCAATAAAGTCGTTTAAAGGAGAAACCAACAAAATATACACTATCATAACCTTCAATCTTCTCATTTAAATCTCGGTCACTATCACA  
ATCCCTCCCTCATCATGTTGTCTCAAACCTGAATGCACTTATACCACATGGCGCATAGTATGTAAAGCACTAAATCCACAGCGGTCAAAGCTGCAAGGAGGAAGAAGAACCGGTCTAGG  
CGACCGAATTGAGGTTACTCGGAATCCATCCAGGTCTCGTCCGCTTTCGGTTCGCAGCCATTACAACACTAACAAGCAAGATGCTCACGTAGTTGCCGAGTGAGATGGAAGCCATGTTG  
AGGGAGCTCCCAAAGCTCTTGATGCCATCAGGTGCTTGCCATTGAAAAATTTAGCTGCCAACATACATAAACACCTCTGAAGCTCCAATGAGGGCATACTGTGGAATTTGCCAAGTG  
ATTGGGAGTGAGCTCTCCTTATCTGGAGAAGCAACTTTCTTTAGCCTAGCTAGTTCAACAACACCAGCAGCAATCATTGCCAGCATAGCGATTAATAAGGCCAACACCCATCCGCTGGAGT  
TCGGATAACCCATCAGGATTCTTCGTAAACTTCGCTAGCACTGGCATAAGAATCCGACGATAGATAAAGATGAAAAATATAACACTAATAATGTCAAAGACCGACATGCTGGCAGGAGGGA  
TGGTGAAGGAACCAAACTGTGTAATCATCATGGCGCCTTGCTCGACAAAGAGGGAGGCCATCTGGGTGAAGACAACCTGAGTAAATTATGGTGCACAGCCAGATGGGAAGCATCTTTAGC  
ACACATTTAACCTCCTCAACCTGAGTCACGCTGCACAGCTTCCATGGACTCTTGGCCTCAGGCCGCACAGAGTGTACATCAGTTGTCATTGTTGCAGCTTTGTCCAAGAACCGAAACCCA  
TTGCTGTGGGAGATCTTCTACTCCCTGCAATGGCAGATTCTTCCCTTCCACTTCATAAAGCAAGGCGTCATTCTCAGGAACACTAACATTCCACTTTCGAGCCGCAGCAACAAAGACTT  
GTGCAATGCGAGTCAAGGGGTTGCCTGATGCCTTGAAATGCCTGTATCTTGGAGTTCCAAGTAAGAAAAGAAGAAAAGCAATAACAGCTGCACCAGTTGATGTCCAAAATCCAATAACC  
CACTGTCCAGAGTCCTCATAGTACACTAAGATTGTGTTGGAGAAGAGAGAACCTGCATTAAGAGCAACATAGAAGTAACTGAAAAAGGCTGCCTTTGAATCACTTTCTGAAGGGTTCATC  
TCATCAAACTGGTCTGATCCAAATGTAGCTATTGTGGGCTGATATCCCCATTGCCAAATGCAATTAGATATATTGATATATAAAAAGATAGCAGTTCCAAGAGCTGAAACTGGTTCGCATTCC  
AGTTTCCATCACCACATCCAGAAGGATTCACCAATAAAAATCCAAGACGACAAAGATAAAAAGGGCTAGTCCCATGATGAAGATTAACCTGAAATATAGCGCAGGTTAAGTAACGGCCCCAG  
TAGGAATCACTCAAGAATGCTCCGACGAGTGAAAATATGTACTGTGCCAGTCCATTTGCTGACATATTTGCTGCGTCTGCATTCTCTTGTTCATGACTCTTGTAGGAAGAGAACAA  
GATTAACCCCAAGTCCAAAAAATGCAATGTGACAAGACCATAGTTCACAGTGCACATGTTCTGGATATTTCTTTTTTCCATTTTATGAGAACAATTTTGGAACACACAAGAAAAAGACC  
ATCACAGAAGAAATTAAGTTTCAAGTTCACTCAAGCAGGTTTAGATGCATTCATTGGCTGTTAATATAGTCAACCTAGCAAAAAGAAATGCAGATTTCCATCTCCAGTTTTTGTATTTGAGT  
GCAGGTTTCCCATCCTGTCCAACGTGCCATCCTCAGTGATGGGAGAGATTTCCCTTTCATCCACACCAGCCGTGTTTTCAACCACATCTTCTTCTTTAGAGGAACGCCATTGATTC  
TAGAGCTTCCATTACCTCTTAAGTAGTACGTTGCCGACGGATTCCGGTGAAGGTGAAGAAAGCGAAGTGATGAAGGATATGAAATCAGTCCCAGAATCTAGAACGAGATCCAAAAGTCCCT  
TGCAATTTGAAGAACTCCTGTAAACCTATTGTCATTTATGTCGCCGACTGCTCTATGCGTTCCACAACAACAAAATGCCCCCTTCTCCAATTCGCACGAGACG

>comp157766\_c0\_seq3

AAATGGGACTCTCTCTTTATTCTTGGTTGATTAATCTTCAAAAGATTTTACCAAATTTCTAGAATGAATCATTGTTCACGGAATATTCAAATTTATTTTTCAGTTTGAACCTCAATAAGAATTG  
ATTGACAAAAACTCTTCAATTTTTACCTGCCAACATTTTTTACGTAAAGCTTCTCCATTCACAGTACATAAACACAGAGAACAGTCCATACAAAGGGTACATATACACGTCCTTCCAAG  
AGCGCGCCACTTACATCTCACACGGCAACACGGCCCCGCCACGCCAAGCTTTACGGCGACCTCAAACCTAGCTAAGATCTGCGGCACCATCGCCGCAGACGAGAAGCGGCACGAGGCGGC  
CTATTGCAAGATCGTTCGACAAGCTCTTCGAGCTCGACCCCGATGGAGCCGTCATCGCCTTCGCCGATATGATGAAGAACAAGATCACCATGCCGGCTCACCTCATGTTTCGACGGCCGCGA  
CCACCGCCTCTTCCACCATTTAGCGCGGTTGCTCAGCGCCTGGGAGTTTACACGGCTAAGGACTACGCAGATATTACGGAGTTTTTGGTTGGGAGGTGGAAGGTGGAGAGCCTCGTGG  
GTCTATCTGATGAGGGGAGGAAGGCGCAGGATTTTGTGTGTAGGTTGGCGCCAGGTACAGGAAGCTAGAGGAGAGAGCTCAAGGACGGGCTAACAGGGCTTCACTACTGTGCGTTT  
CAGTTGGATTTTCGACAGAGAAGTACAGGTATGAGCTGTGGAAATTTCTGTGCTGTTCAAGATAGGAAATTTCTTATAAATCGGTTGTTATATAATATTATGTTAATTGATGAAGATTAAG  
ATGTTGTGACTTCTTGAGACTCTACTTTTCATAGTATTTAAATACAGAATATGTAATATGACTGGTGTATATTGCGCTTCATTATAATTAAGATTTTGTTTTATGATGGATTAATA

>comp157771\_c0\_seq1

CCAAATCAAACCTAAATTATCAGCAAGCAGAGTTCACATAATCTGCCTCCATAATATTGACAAAATTAACCCAAAAACTTCAAACAGAGCAGCCAAAAAGTACCAGCAAATTCAGAAA  
TTAGAAAACTTTAAAGATCAAAGTACACAATAACAAAATAGGTTCAAAGGAGGAAATATTTACATATAAGTGATAAAACCATCATGATTTTTCAACTAAGAGATGAAAAGAGACAAACCTA  
GCAACCATCCTCAGTTCATCAGTGTTCAGACTTTATAGAGCTAACTTCCATCTGCTTCAGTCACTTATCCAAGCTGATTAAGCTGTGCTACAGAACTGCTGTAAATTGATCGAGCAACAGA  
ATTCCATCTGAAATTATATTATATACTGTCATCCATCATCTGAATCTCTTAAATGGTTCAACACTTCAATCATTGTTGGCCTTTTGGCTGGCTCATCAGTGGTACACATCTTGGCAACCCTC  
AGAACACACATCATTGCTCTCTCCACAAGTTGATAGGTGAAAGGGATGGATCAAATACCTCATCAACCAACCCAAAGCCCTCCATCCACCTCACCCATTCCACCAGATTACCTCCCCCT  
TCTCTTCTTCTCGCCAGTAGGAGTTCTTCCAGTCAACAACCTCCAACAATACAACCCCAAAGCTGTAAACATCACCTTTGCTGTTGCCCTTCATTGTTAAGCCGTA CTCTGGTGGGATATA  
GCCAAAGGTCCCAGCAAGGTGAGTACATGAGTCTCAAGCACTGATAATACGAGCAAGACCAAAGTCCGCAACCCTGGGCTCGAAGTATTGGTCAAGAAGGATGTTACTTGATT  
TCATGTCCCTGTGAATAATGTGAGGGACAAAGCCATGATGCAGGAAAGATAGCCCCGGGCAGCGCCTAAGCAGATCTTTAGCCGAATTGACCAGCTAAGTGTTCATCAGCATCAGCTT  
GTTTCCCTAAGCCATTGCTCAAGACTCCCATTTTCCATGTA CTGTAAGATTAGAAACCTCTCTTACCAAAGACACAGTAGCCAAGCAAGGGAACAAGATTCTGTGCTCACCTTTCCAAT  
AGTCTCCATTTAGCCAGGAACTCCCGGTCACCCTGAAAATGTCTCCCACTATTGAGCCTTTTAAATTGCAACAACCTGGTTTTTCAGGTAAAGACGCCTTATAGACCGTGCCGAATCCACCA  
TCCCAATAATATGAGACTTGCTAAACTCATTGTTGCTTTCATGATATCAGCAAGAGTGATGCGAAACAAAGCATGCTCAAAGTGGCAATGTTGATGCTGACTGGCTCCTTTAGTCTTTT  
GCTCAAAGCTCCTCAGAGGATGCTGGCTCAATAGCTGATGACTTGGTCTTATTTGCTGGAGCGAGGGCTAAATTTTTCTGGTAATGTCTCCTCCATTTGATAATAATGAAAAAATTAACA  
CAGAAATAAATGCGACAGAAATAATAATACCCAAACTAAAGCTCGACCAAGCAATCGTGCAGAAGGGTATGCAGCCAATGGCTTTGAGATAATGTGACTCCCTACACATGCCTGGGACA  
TCGTGCAGCTCTCTGGTGCAAAACTGTCAAATTTATTGCCAGAAAAATTCACAAATGTGAGCCCAACTATGCTGCAAATCTTACAAGGGATGGCATCCTGGAGATTGTTGTTAGAGACATC  
AAGATAAGTGAGAGAATTTAGACTGGACAATAAAGATGGAAGACTTCCAGTGAAATTTATTGTTATGGAGGTGCGAGAATAGAGAGAGAAGTTAGGTTTGAAATAGACTCTGATATAGCACC  
AGAGAATAAATTATTGCTGGCATTGAATATAATAAGTGAGCTAACTCCACCATCAATGTCTATGAGAAACGATATAGACCCAGAGAGAAAATTTAGGCTAGTGTCAAATGCGTAAGGCTC  
TTAAGAACAAAAAGAGATTAGGAAGAGGGCCAGTAAGTCGATTACTTGATAAGTTAAGCTTCACTAACTTGGCATCATCAAGCCAAGATTATCAGGAATTGGACCCTTAGATGGTTG  
TTTGACAAAAGTAAGCCCTGAAGGTTCTTTAAAGAGA ACTGTGCAGACAATAATGTACCTGAAAGAGAATTGAAAGAAAGATCAAGGACAGCCAGGTTCAAGGAGGTCATTAAGCTCAG  
GAGGGATGATGCCATTAAGCTTGTTCCTTGCAACATTAGCTCTTTACTTCCACACAGTCTTGATTGTTTTTGGAACTGACCTTAAAGATTGTTATATGATAGATCAAGCACACCATAAT  
GCTGATTGAATTCAGAATCCGGGTGCTGCGCCAGCTGAAACCCCGCACAGATTTATCAGGTATTTACCAGATAATAGATTGTTGGAAAAACTAGATCACCTAGAAGCTTCAACTGAG  
ATATGACCTTAGGAATAGACCCAGACAATCTGTTTGATCCAATGTCAAGTCTACCAGGTTAGTACAGTTGAAGAGATCTAATGGGATCCCCCAGAGAGTTTATTCCCATGAAGTGACAA  
ATTAGTTAAGTTGCTTAATTTCCAATAGAGTTTGGAAATGACTCCTTCAAAATAATTATTGTCAAGTTGCAACCTCCGAAGAAGAGATAAACCTCCATTGCTATCTGGGAGCTTACCGCTAA



GTTGATTGTCACAGAGATAGATTTCAACTATGGTTTCAGACTGCAACAATTGTGAGGGAAGTAAGCCAGAGAAGTTGTTGTGCGAAAGCTCTAGGGTAACTAAAGGCAACTCGGCTAAAT  
AACCTGGAACCTGTCCGAAGAAGTTGTTCCCGTTAAGATTAAATCAGTGAGGTTTGAGCATCCTCTGAAGGTTTCATGAATGCTTCCTGTGAGTTCATTGTCAGCAAGAGAAAGATGAG  
AGAGTGACTCAGCCTCACAAATATCAGCGGGGATCTCCCCTGACAGATGGTTTGCATCAGCAGTGAATGAGGTCAAGTACTGTAGCCTTAAAGAAGGCAGAGTCCCAGTGAAGTTGTTT  
TTCTCCAAACTGATGAATCGTGCCATGCTCCAATTTGACAACCAGCCAGGAATGGTCCAAACAAATGGTTATCATCGACAAGGAATGAGTTGATGGATTCAAGCGCAAAGAGACTATCT  
GGCAATGGACCATAGAAGTGATTGAAGGAGAGATCCAATATCATCAGATTCTTCAGATTTCCCAACTCCTCGGGTATCTTCCCAGTGAGTCCAGCATGGGATGCAACGAGGTAATTAAGAT  
TTGTCAGTTCCCAATACCTGGAGGAAGCTCCCCTTCAAAGTTGTTGTCAGATATGTCCAGGTCTGTTATTTTCTTGAGTTTGGAGATCTCACTGGGAATTTTCCCAGTGAACCTGTCAGCT  
AGGGATTGAAAAGATTTTCGAGCTGTTCAAGATTTCCAATTTCCACTGGAATACTCCCATTGAAGCCATTAGGACCCAACCATAAAGATATTAGACTTGACAACCTTCCAATATCTTCCGTTA  
GAGGTCCTGTAAAGCTGTTAGAAGAG

>comp157801\_c0\_seq1

GATAGAATCAAGAAGTGAATTTACTCTTTTAAATTACCTATACGAGGGGTTATTAGGGGAAATAAGACTAGCTTTTAAACATAAAAAACGCCCAAATTACACAGCATTTCAGCAGAGATCGAT  
ACATATAGACATATATGGAAGATACATGCATGCTTAAGAAAAAATATTTATGAAAACAAAATTATGTCAAAAAGATATAGATTATAATACGATGAGCTTGAAAATTTTTTAAATTTTTTTTTGAGA  
TTATTAATGATAGTAAATGAAGAATTTGTTTTACACAAATCTTAATAGAAATTTAATAATTTTCAAGCTCATGCATATATAAGTACATGTGGACATAATTTTCTTCATATTTATGTATGTATGTA  
TATATATGTATACATACATGATACCAGTTAAACGAGATCCTGATCAACCTCACCATCTCAGAGTGTCCAGCCGTAGAGCCCCTCGCCGGCGATCACCGGCGTCTCAAACACCACCGACTC  
CATCAAAACCTCACCGTAATCTTCCACACTTTCAAACCTCTCACCATACAACTCAAAACGATCACCATCTCCATAACCACCTTCTGCCTTGAAATCCGGCGGGCGAAAGTCAAAGATTCCA  
GCTTGGTCTAACCCGCCCGCTGCGAGCAGATCAAGAGGGCTGTAGCTGTGCGAAACGCGGCCACCCTGGCCGCCGAGGATGGCCTGCCAGTAAGTCGGCGATGTGAGAGTCTCTGC  
CGTGAGTTCCCTGTACGAGAGCTCGGAAATCAGCAACAGTAGTTGTGACTCTCACGGGATTGGAGAAGTGAACCACTTAAATTTTCTGCTGATTCATCTTCTTCTTCTTCGTCGGCTCGAT  
CTTAGTTTGCTTTAAGAGATTTTGATGAGCTGGTCTTGAGGTGTGATCCATGGCGGCATAAGTTGGAGGTGGCGATAATTAGGGGTAAAGGTGATGTTTTTATATGGAAAGATCTTCCCTT  
TTTGTAGGATTGGAAAGGAGAAAGAGTTTGGTTTCCAGGAAGGCAGAGAGAGATGTGGAAGAAAGAGGGGATAATTAATAACAGTGGCTTTTTTTAAGGGAGAATAATTCTAG

>comp157827\_c0\_seq1

AGATTTGAATTTTATTGATGTTAGCTTGACAATCAATCATAACAATTGTATAGAAATTCATAAAAAGAAGTATAGTTTATTTTATTATGCAGAATCTCTTAATTCATTGGTGTCTTACAAAA  
CGCGCTATTTATGATCACCATGAATAAGAGTAAGAAAGTTACAAAAACTTGGAGATTGCTTTTGTACAGATAATATTTTTTTGGTCATCCAACCAGAACCAGAAAATTTAACAAATAACG  
GTCGACAAAATTTGAATCCAATCCGATAAAGATGTACTGTACTGAAAGCAACTGTCGCCATGCCGTCATTTTATTTAGGTCGTAAATATAGGACCTAATTACTGGCTGTAAATGCAATG  
TCAAGAAAGGGAAGAACACCAAACCTCTAAAACAGTTTGTGAGCTTCTAGAGATCATAACCAAGACGCAACAGGGTAGTTGAAGTCGAAGGAAATCACTTACTAATGTGAGCTGGAAT  
GTCTGAAGAGTCGACGAGTCTATCTTCGTTGTTCTCAACGCCATCTGCGACTGTGCTGAGACCTCACCAATCTTGTCTAAAATCTTTGCCATCTGCCCTTTAACATGTCCCAATTGCT  
CCGTATGCTATCTTTCATCATTAGCAAAGCTAGGCATTGGCATCACATCACTAAACTCTTCGATCTTCGCAAATCTACCTCGAACTCGAGGCCTGCTATCAGCTAGGATCTTCTACATGTG  
TACTTGATCGTTTTGCTAAAATTCCTCTCCTTCTTCTTCTTAAGATACCTATCTAACTTCTTCTCCTTTCTCCTCCGGTGTAGCTCGACTAACTTTATTGTTTGTGATCATCCATCTGGGGATATC  
GGAAGGCATTTGTAATGGAGCAATACTGGTGCTACACATTGGCCTTACATTTTGGTTATCTCTCAGTACTTGTAAGTTCCGGGGCTGTAGAGTCTCGGCATAGGTTTCATATGTGTAGATTC  
CTCTTAGATTGCAGGCTTCTGCAGCCTCCATCGGCCTCACGGGCATGCCAACACTAGTATTTTTCCCATCCCATCATCTGCTACAAATGTCCGCATTCTCATTCTTTCAGCATAAAGCTGCC  
CTCCAATTCACCATTAGCATCCATGAATGAGCTGCGCTGCATTGCTGATGGCTCCATGCCATATATCCAGGCAAGCCCAAATGACCCGAAGGAAGCTGCTGGTTCACTACTGAGTTTGG  
CGGGTTAGATGTGAAGGGAGGATTACAAATCATTGGATTGGGCTGATTCATAGGATGGATTGGAGCCATTGATGCAGCTGGAAGTGTGGAAGCTATTAGGTTCCGGTTCAGGTGGAAG  
TTGAGGATTGATAAGAGAGGATATTAGTTCTGAGTTGAAGGAATTGTCATAGCCGGGCAAGTTGGCGATGTTTCGTATCAGGTTCAAGGAAGGTTATTGTGACGGGGACGTCCGAAGAACA

AACACCATTGTTGGTTGAGGATAAGACTCTTGGTGAGTAGCCAGCTTCTCGAAACAAGTTATCTTCGTAATCAAAGTTGGGCATTTTGTCTTTTACAGAAGTGGATAAGCACTCATCAAGG  
GATGGATGCACCGGCGATCGAATCAAATCCTCCAGCATTTTGTCAATACAAAGCGATTCCGAAGAGGGAGTTCTAATTCCTTTTTCCATTATCAGGGGAATGCAGAAGAAGAAGAAATTA  
AGGAACGGAAAAAATATTGGTTGATGCATGCAATGATGAGGCTGTAGATGTTTATAGGGGCGGCGAGCGAAGAAAAACAGACAATTTATGCCAGCTTTAGAATGTGCCTATTTGCCTCCG  
GACTGTAAAGGAAGCGACCAGTTTTAATCACGGGCCCTTTTGGACCCACCAATAATTTTGGCCACGTCAGCTATTAGTTATGTGGAATGCGAATGTGGCACAATTGAAACTTAAAATGTA  
ACAAAAAACCAGTAATTAGTTGAGAGGCTAGCTGTAGTAAACGGATTGCTCAATCTA

>comp157827\_c0\_seq10

CTGTTCTGATCTGCAAAAAAGATTTGAATTCTCTCTTCGTGTTTCGTCTTGACAAAATGCTGGAGGAATTGATTCAATCGCCGGTGCATCCATCCCTTGATGAGTGCTTATCCAGT  
TCTTTAACTGACCAAATCCTCAACTTTGATGATGAAGATAACTGTTTCGAGAAGCTGGACTCAACAAGAAGCTTATCGCTAACCAACAATGTTGTTTGTCTTCGGACGTCCCCGCCA  
CAGTAACCTTCCCAGCAACTGACACCACCACCGACTTGCCCTGCTATGACAATTCCTTCGACTCGGATCTAATATCCGTTCTTCTCAATCCTCAGCCTCCACCTGAACCGGAACCTGA  
TATCGTTCATCACTTCCAGCTGTATCAATGGCTCCAATCCATCCTATGGATCAGCTCGATCCAATGATTTGTAATCCCTCCTTACATCTTACTCGCCAAACTCAGTAGTGAGCCAGCTTCC  
TTTGGATCATGTTGGCTTGCCTGAATATATGGGCATGGAGCCATCAGCAATGCAGCTCTGCTCATTATGGATGCTAATGGTGGAAATTGGAGGGGAGCTTTATGCTGAAGGAATGGGAATG  
CCGATATGTGTAGCAGATGATGAGGTGGGATATATGCCAGCGTTGGCATGCCAATGACGCCAATGGAGGCTGCAGAAGCCTACGGTCTAGGAGGAATCTACACATATGAAGCTATGTCG  
GGCGTCTACAGCCCCAGAACTTACAAGTACTACGAGATAGCACCAAGATTGCTCCATTACAAGGGACTTTTCGATATACAACAATGGATGACTCAAACCATAAAGTTGGCCGGCTGTTT  
GTTGCGATTTCGACTTGGCTGCTTGGCGTGACGCCCTTCGACGACGTCTCCTCGCCGTTCTTCTGCAGGATTGGAAGGAAAAAGACGACGGGAGCTTGCTCGTAGCGAAGGTAGCG  
ATCTTTCTTCTGCGGATTCTTCGGCCAAATCCCAGAAATCCTGTTTACAGGATATAGCTTAAATCCTGCTCTAATCCAGCATAAATCCTGTATC

>comp157827\_c0\_seq11

AGATTTGAATTTTATTGATGTTAGCTTGACAATCAATCATAACAATTGTATAGAAATTCATAAAAAGAAGTATAGTTTATTTTATTATGCAGAATCTCTTAATTCATTGGTGCCTTACAAAA  
CGCGCTATTTATGATCACCATGAATAAGAGTAAGAAAGTTACAAAACTTGGAGATTGCTTTTGTACAGATAATATTTTTTTGGTCATCCAACCAGAAACAGAAAATTTAACAAATAACG  
GTCGACAAAATTTGAATCCAATTCGATAAAGATGTACTGTACTGAAAGCAACTGTCGCCATGCCGTCATTTTATTTAGGTCGTAAATATAGGACCTAATTACTGGCTGTAAATGCAATG  
TCAAGAAAGGGAAGAACACCAAACCTCTAAAACAGTTTGTGAGCTTCTAGAGATCATAACCAAGACGCAACAGGGTAGTTGAAGTCGAAGGAAATCACTTACTAATGTGAGCTGGAAT  
GTCTGAAGAGTCGACGAGTCTATCTTCGTTGTTCTCAACGCCATCTGCGACTGTGCTGAGACCTCACCCAATCTTGCTCAAAAATCTTTGCCATCTGCCCTTTAACATGTCCCAATTGCT  
CCGTATGCTATCTTTCATCATTAGCAAAGCTAGGCATTGGCATCACATCACTAAACTCTTCGATCTTCGCAAATCTACCTCGAACTCGAGGCCTGCTATCAGCTAGGATCTTCTACATGTG  
TACTTGATCGTTTTGCTAAAATCCTCGCCTTTTTCTTGCTCACATACCTATCTACCTTCTTCTCCTCCTCCGGTGATGCTCGGCCAACTTTATGGTTTGTAGTCATCCATTGTTGTGATC  
GAAAGTCCCTTGAATGGAGCAATCTTGGTGCTATCTCGTAGTACTTGTAAAGTTTCTGGGGCTGTAGACGCCGACATAGCTTCATATGTGTAGATTCTCCTAGACCGTAGGCTTCTGCAG  
CCTCCATTGGCGTCATTGGCATGCCAACGCTGGCATATATCCCCACCTCATCATCTGCTACACATATCGGCATTCCCATTCCTTACAGCATAAAGCTCCCCTCCAATTCCACCATTAGCATCCAT  
GAATGAGCTGCGCTGCATTGCTGATGGCTCCATGCCCATATATTCAGGCAAGCCAACATGATCCAAAGGAAGCTGGCTCACTACTGAGTTTGGCGAGTAAGATGTGAAGGAGGGATTACA  
AATCATTGGATCGAGCTGATCCATAGGATGGATTGGAGCCATTGATACAGCTGGAAGTGATGGAACGATATCAGGTTCCGGTTCAGGTGGAGGCTGAGGATTGAGAAGAACGGATATTAG  
ATCCGAGTCGAAGGAATTGTCATAGCAGGGCAAGTCGGTGGTGGTGTGCTAGTTGCTGGGAAGGTTACTGTGGCGGGGACGTCCGAAGAACAACAACATTGTTGGTTAGCGATAAG  
CTTCTTGTGAGTGTCCAGCTTCTCGAAACAAGTTATCTTCATCATCAAAGTTGAGGATTGGTTCAGTTAAAGAAGTGGATAAGCACTCATCAAGGGATGGATGCACCGGCGATTGAATCA  
ATCCTCCAGCATTTTGTCAAGACGAAACGAACACGAAGAGAGAATTCAAATCTTTTTTGCAGATCAGGAACAGATAAAATATTGGTTGATGGATGCAATGATGAGGCT

>comp157827\_c0\_seq13

AGATTTGAATTTTATTGATGTTAGCTTGACAATCAATCATACAACCTTGTATAGAAATTCATAAAAAGAAGTATAGTTTATTTTATTTATGCAGAATCTCTTAATTCATTGGTGTCTTACAAAA  
CGCGCTATTTATGATCACCAATGAATAAGAGTAAGAAAGTTACAAAAACTTGGAGATTGCTTTTGTACAGATAATATTTTTTTGGTCATCCAACCAGAACCAGAAAATTTAACAAATAACG  
GTCGACAAAATTTGAATCCAATTCGGATAAAGATGTACTGTACTGAAAGCAACTGTGCGCATGCCGTCATTTTATTTAGGTCGTAAATATAGGACCTAATTACTGGCTGTAAATGCAATG  
TCAAGAAAGGGAAGAACACCAAACCTCTAAAACAGTTTGTGAGCTTCTAGAGATCATAACCAAGACGCAACAGGGTAGTTGAAGTCGAAGGAAATCACTTACTAATGTGAGCTGGAAT  
GTCTGAAGAGTCGACGAGTCTATCTTCGTTGTTCTCAACGCCATCTGCGACTGCAATTCAGCAAAGAAAATATTCAGAAAATCTGCCACTTCAGAATTGCATTCATGTTGATAACAAAACG  
TTTTTTATATGCAGAATCTTTTGTGTTTCGCATTGACATGCTTTACTAAGAAATGTATTCTTATTCAAGACGGCAATTTATTGACTGAGGAAGGAAAGACGAGGATTATGTCTTTCTGTTTT  
GTTCTATTGATCATTCTATCAAGGTAGTTTTCTTAGTACAGTGTTCATATCAGATTGTCTCCCAAATCTATACAGATTTGA

>comp157827\_c0\_seq5

AGATTTGAATTTTATTGATGTTAGCTTGACAATCAATCATACAACCTTGTATAGAAATTCATAAAAAGAAGTATAGTTTATTTTATTTATGCAGAATCTCTTAATTCATTGGTGTCTTACAAAA  
CGCGCTATTTATGATCACCAATGAATAAGAGTAAGAAAGTTACAAAAACTTGGAGATTGCTTTTGTACAGATAATATTTTTTTGGTCATCCAACCAGAACCAGAAAATTTAACAAATAACG  
GTCGACAAAATTTGAATCCAATTCGGATAAAGATGTACTGTACTGAAAGCAACAATCTCCATGCCGTCATTTTATTTGAGTAAATATACGACCTGGTTAATGGCTGTAAATGCAATGTTA  
AGATAGAGAAAGAACACCTAAATCTAAAACCTGGTTCTAGAGATCATATCAAAGACTCAACAGGGAAGTTGAAGCCGAAGGAATTCCTCCAGTAATATAAGACAGTATTTCTGAAGAGTC  
GAGGGGCATATCTTCATCGTTCCTCGACGACGTCGCTTCATCATCATATCCACCGTTAGCAGAGCTAGGCCTTTGCACCACCTCACTGAACCTCATCGTTCCTTCGCAAAATCTACCTCGAACTC  
GAGGCCTGCTATCAGCTAGGGTCTTCTACATGCGTACTTGATCGTTTTGCTAAAATCTCTCTCTTCTTCTCCTAAGATACCTATCTAACTTCTTCTCCTTCTTCTCCGGTGATGCTCGACT  
AACTTTATTGTTTGAAGTCATCCATCTGGGGATATCGGAAGGCATTTGTAATGGAGCAATACTGGTGCTACACATTGGCCTTACATTTTGGTTATCTCTCAGTACTTGTAAAGTTTCCGGGGCT  
GTAGAGTCTCGGCATAGGTTTCATATGTGTAGATTCTCTTAGATTGCAGGCTTCTGCAGCCTCCATCGGCCTCACGGGCATGCCAACACTAGTATTTTTCCCATCCCATCATCTGTCTACAAA  
TGTGCGCATTCTCATTCTTTCAGCATAAAGCTGCCCTCCAATCCACCATTAGCATCCATGAATGAGCTGCGCTGCATTGCTGATGGCTCCATGCCCATATATCCAGGCAAGCCCAAATGAC  
CCGAAGGAAGCTGCTGGTTCACTACTGAGTTTGGCGGGTTAGATGTGAAGGGAGGATTACAAATCATTGGATTGGGCTGATTCATAGGATGGATTGGAGCCATTGATGCAGCTGGAAGTG  
ATGGAAGCTATTAGGTTCCGGTTCAGGTGGAAGTTGAGGATTGATAAGAGAGGATATTAGTTCTGAGTTGAAGGAATTGTCATAGCCGGGCAAGTTGGCGATGTTTCGTATCAGGTTTCAG  
GGAAGGTTATTGTGACGGGGACGTCCGAAGAACAACACCATTGTTGGTTGAGGATAAGACTCTTGGTGAGTAGCCAGCTTCTCGAAACAAGTTATCTTCGTAATCAAAGTTGGGCATTT  
TGTCTTTTACAGAACTGGATAAGCACTCATCAAGGGATGGATGCACCGGCGATCGAATCAAATCCTCCAGCATTTTGTCAATACAAAGCGATTCCGAAGAGGGAGTTCTAATTCCTTTTTTC  
CATTATCAGGGGAATGCAGAAGAAGAAGAAATTAAGGAACGGAAAAAATATTGGTTGATGCATGCAATGATGAGGCTGTAGATGTTTATAGGGGCGGGGAGCGAAGAAAACAGACAATT  
TATGCCAGCTTTAGAATGTGCCTATTTGCCTCCGGACTGTAAGGGAAGCGACCAGTTTTAATCACGGGCCCTTTTGGACCCACCAATAATTTTGGCCACGTCAGCTATTAGTTATGTGGA  
ATGCGAATGTGGCACAATTGAAACTTAAAATGTAACAAAAAACCAGTAATTAGTTGAGAGGCTAGCTGTAGTAAACGGATTGCTCAATCTA

>comp157827\_c0\_seq8

CTGTTCTGATCTGCAAAAAGATTTTGAATTCTCTCTTCGTTGCTTTGACAAAATGCTGGAGGAATTGATTCAATCGCCGGTGCATCCATCCCTTGATGAGTGCTTATCCAGT  
TCTTTAACTGACCAAATCTCAACTTTGATGATGAAGATAAATTGTTTCGAGAAGCTGGACTCAACAAGAAGCTTATCGCTAACCAACAATGTTGTTTGTCTTCGGACGTCCCCGCCA  
CAGTAACCTTCCCAGCAACTGACACCACCACCACCGACTTGCCTGCTATGACAATTCCTTCGACTCGGATCTAATATCCGTTCTTCTCAATCCTCAGCCTCCACCTGAACCGGAACCTGA  
TATCGTTCATCACTTCCAGCTGTATCAATGGCTCCAATCCATCCTATGGATCAGCTCGATCCAATGATTTGTAATCCCTCCTTACATCTTACTCGCCAACTCAGTAGTGAGCCAGCTTCC  
TTTGGATCATGTTGGCTTGCCTGAATATATGGGCATGGAGCCATCAGCAATGCAGCTCTGCTCATTATGATGCTAATGGTGAATTGGAGGGGAGCTTTATGCTGAAGGAATGGGAATG  
CCGATATGTGTAGCAGATGATGAGGTGGGGATATATGCCAGCGTTGGCATGCCAATGACGCCAATGGAGGCTGCAGAAGCCTACGGTCTAGGAGGAATCTACACATATGAAGCTATGTCC

GGCGTCTACAGCCCCAGAACTTACAAGTACTACGAGATAGCACCAAGATTGCTCCATTACAAGGGACTTTCGATATCACAACAATGGATGACTCAAACCATAAAGTTGGCCGAGCATCA  
CCGGAGGAGAGGAAGAAGAAGGTAGATAGGTATGTGAGCAAGAAAAAGGCGAGGAATTTTAGCAAACGATCAAGTACGCATGTAGGAAGACCCCTAGCTGATAGCAGGCCCTCGAGTTC  
GAGGTAGATTTGCGAAGAACGATGAGTTCAGTGAGGTGGTGCAAAGGCCTAGCTCTGCTAACGGTGGATATGATGATGAAGCGACGTCGTCGAGGAACGATGAAGATATGCCCTCGAC  
TCTTCAGAAATACTGTCTTATATACTGGAGTGAATTCCTTCGGCTTCAACTTCCCTGTTGAGTCTTTGATATGATCTCTAGAACCAGTTTTAGATTTAGGTGTTCTTTCTCTATCTTAACATT  
GCATTTACAGCCATTAACCAGGTCGTATATTTACTCAAATAAAAATGACGGCATGGAGATTGTTGCTTTTCAGTACAGTGTACATCTTTATCGGAATTGGATTCAAATTTTGTGACCGTTATTT  
GTTAAATTTTCTGGTTCTGGTTGGATGACCAAAAAAATATTATCTGTACAAAAGCAATCTCCAAGTTTTTGTAACTTTCTTACTCTTATTCATTGGTGATCATAAATAGCGCGTTTTGTAAAG  
ACACCAATGAATTAAGAGATTCTGCATAAATAAAAATAAACTACACTTCTTTTTATGAATTTCTATACAAGTTGTATGATTGATTGTCAAGCTAACATCAATAGAATTCATTTTTTTTTCTGGGA  
TTAAACCTGTAATGGTTGTTTTATTGAAAGTTTCTGCTTGATATCGAAGAAGATTGGGATAGTCTCAAATAGCAGGGTGATAATTGTTGCGA

>comp157827\_c0\_seq9

GCTCATTTCATGGATGCTAATGGTGGAAATTGGAGGGCAGCTTTATGCTGAAAGAATGAGAATGCCGACATTTGTAGCAGATGATGGGATGGGGAAAAATACTAGTGTGGCATGCCCGTGA  
GGCCGATGGAGGCTGCAGAAGCCTGCAATCTAAGAGGAATCTACACATATGAACCTATGCCGAGACTCTACAGCCCCGAAAACTTACAAGTACTGAGAGATAACCAAAATGTAAGGCCA  
ATGTGTAGCACCAGTATTGCTCCATTACAAATGCCTTCCGATATCCCCAGAATGGATGACTCAAACAATAAAGTTAGTCGAGCATCACCGGAGGAAAGGAGGAAGAAGTTAGATAGGTAT  
CTTAGGAAGAAGAAGGAGAGGAATTTAGCAAAACGATCAAGTACACATGTAGGAAGATCCTAGCTGATAGCAGGCCCTCGAGTTCGAGGTAGATTTGCGAAGATCGAAGAGTTTAGTGA  
TGTGATGCCAATGCCTAGCTTTGCTAATGATGAAGAGATAGCATAACGGAGCAATTGGGACATGTTAAAGGGCAGATGGCAAAGATTTGAGCAAGAATTGGGTGAGGTCTCAGCACAGT  
CGCAGATGGCGTTGAGGAACAACGAAGATAGACTCGTCGACTCTTCAGACATTCCAGCTCACATTAGTGAAGTGATTTCCCTTCGACTTCAACTACCCTGTTGCGTCTTGGTTATGATCTCT  
AGAAGCTCACAACTGTTTTAGAGTTTGGTGTCTTCCCTTTCTTGACATTGCATTTACAGCCAGTAATTAGGTCCTATATTTACGACCTAAATAAAAATGACGGCATGGCGACAGTTGCTTT  
CAGTACAGTGTACATCTTTAACGAAATTGGATTCAAATTTTCTCGTCGGTTATTTGTTAAATTTTCTGGTTCTGGTTGCATGGCCAACAAATATAATCTCTCACTGGTGCTTGTCAAGTGGTT  
TTCGATCGTAGCACCTCTATTTGAAAAAAAATGGAGATGACTGATCTCCTTAACTTCTCCCTCCAAGCCATTACTATTGTTACTTTATAAAGATCTTCAATTTGATGTTCTTCCCTCTTGGC  
GGCTGAAATGTTGAGCAGATTTCTCCTCCTTGTAGCCCCAAATCTGCAGTTATTCTTCTTGTGGTGGCTGAAACATATAGCTATTCTCCTTATTATTGCTGGCAAATGTAAAGCTGTTT  
TCCCTCTATTGTTGGCTAAATCTGCATCAAATCCTCCCTCTATTGCTGGCCGAAATCTGCTATAGGA

>comp157865\_c0\_seq1

TCGGAACACAAAATATAATACAATAAAAATAAAAATATATTTGCATTCCTCCAATAAAAATGCAAATGATGACAACATATAACCATTTTCATACCAAAACGGTCATATTTCAACAATCATCAGAT  
TGAAGAAGCATTAAATCTCCAACGAAGACAAAATATGCTAATAATCTATAAATCAGAGCCATAGCTGCAAGAATCCATATTTCAATTCCATTGACTGTACAGATTTATAGTGTCAAATGATGG  
TGAACTTTGAAGACTTCGGCATCCTCCTTTGCTTTGGCAATCATAGAGGAGATTTCTGAATACTGTACTTTTTCAGAAAGTCTGAATCCATGATGCATGAAAGATACCTGCTTCATCCACC  
TCATGAATCTGGGTAGGTGCTGAACATAATAGCCTCCAGTGAGCAGAAACAACATTAGCACCAAAGAGGCCATAAATCCTGCTCTTTTTACATTTAGAGTAGCTGCTCCGAATAGCTCTCC  
TGTTCCCTGGCTTGTGACAACAATTAACAATATAGCAAATAGCGTCAGGAAGAAATGAGATGCTGATCTTCTCAAATCCACCATGAAGTACAAAATGAGAAGAAAAATGGTAGGATAGAA  
AATATGGGCTATCATGTCGAGAGAGTGTGAAACATAGTACACACTTAGTCTATACATATCTGCTTTTTTCTCCTTACCAAAATAAGCCTTCTCAAATGGAATAACATACTGCTCCAAA  
TAAAGCAGAAGATGTCCAAAATATGCATAAGTAGAACATTAGCCCAACCTGATCTCTGAGTTGCGCCTCACTTCTTATTTAGATTTCCACCAGAGAAGGCCAAGAAGAACTGCAACTCC  
AACAGTCTGTAAGTCTCAACTTGTCCAAATAGTCCATGCTTCTTTTCTGAATGTTCTCTTGGATATTATCAAGAAGTCTCAATCCATCCTATTGTCCAATCCTTCTTTACTAAAATGTC  
CAAATCAGCTGCTTCGGTATGGTGTCTTCTGATGACTCTCCTCTCTCTCGTTGGTTTCTATATCTGATTTATACTTTAATTGTAGAACTTAATGACTTCCGTCTCAAATCTTGTGGATTC  
AGCGATTTTCTAAGATCTTCGGGTATCTTGATATCGTTAACTTGACCAGTTGCAAGATCTAATAAGAAGTCTGCAGGGTTCATGGCAATCTCAGGTACAAATCCTAGTGAAGAGAAGTACC



ACGGCGAACTCTGAGATAGATAGAGAAAGAAGACTAATAAGAAGAATAAGAAGAAGAAGAAATGGAGAGCCCACCAGAAAGCGCTAGGTCGAGCCCGGAGGCGGAGGTGGGAATGC  
GAGTGGAAAGATCTATGGGAAATCCAGGAGCCGCAACTCAGCCCTCTGAGAAGCTCAATTCCTTGGCTTTGAGAGTATTTTCGTGACCTCTTCCCACAAGCCCCTTCATCTCAAGTCATAG  
AGATACCTTCAGATTCAGCTTGGCTGATGCTGTCAAATTTCTATCTAAGAATAAGATTATGAGCGCTCCTGTGAGAAATTTAAAAGCTCCGAAAAATGCTAGTTGGATTGATAGATACATT  
GGAATCGTAGAATTTGCTGGGATTACTGTCTGGCTTCTGCATCAGTCAGAATTGGCAGCCAGTGAGAAAAGGTGCTGGCTCTCCTATAAAAGGGCCTATCACAGAAGGAATCGCGGCCAGG  
CTTAAAAGTGTTAAAAGTGAAGAGTAAAGATGATGGAATAACAACCTTCTGTTCTTGATGCAACTGATTCTATGGGTGGAACATTCCTTGAAACTCTGATAACTTCAGACTTCTATAAGAAGA  
CAAAGGTTCAAGACATCTCAGGATCATTCCGCTGGGCACCCTTCCTCGCATTGCAGAAATCTGACTCTTTTCTAACTATGCTTCTGCTGCTCTCGAAGTACAGGATGAAGAGCCTTCCTGT  
AGTTGTTCTTGGCGAAGAGAAGATTGATAATATAATCACACGATCTGCTGTTGTACACATGCTTGCAGAATGCGTTGGGCTCCATTGGTTTGAGAACTGGGGAAAAATGAAGCTTCATGA  
GCTTGGCCTGCCAAGTAACAGAAATAAAATTTAAGGTTAGCGAAGATGACTCCATTATAAAAGCCTTCCAAGTATGAGGAAAAAAGAATTGGTGGGGTACCTGTTGTTGATAAAAAG  
TGGGAACAAGGCAATTGGAAATATAAGCATCAGAGATGTTTACGTACCTTCTTACAGCTCCAGAAATGTATAAGGTTACAGGTCGATAACAGCCAAAGACTTCATAAGGTCAATTAAGAG  
CTATCTGAACACGCATGATGATGCTTACCAGGATTTCTTGGCGTACTAACTTGCCATAGTGAAAATACAATCAAAGACATAATTCTAAAGCTGGATGCAGAGAAAATGCAACGGATCTAT  
GTTGTTGATAAGGATGAAAACCTTGGAAGGAGTGATTACACTTAGAGATATAATATCGAGGCTGGTTCATGAGCCAAATGGCTACTTTGGTGATTTCTTTGATGGTGTTGTTCTTTACCTCA  
GAACAGCAGGGTTTAAAGATTTAACTACTAGTAACTGTTTTCAATTATCATTCTCTTTTAGCTTCTGTTTCCCCTGTATTTGGTTTTCTTAGTATCTTTTATACTTTGTTTTTTTTTTTT

>comp158030\_c0\_seq11

CCCCTCTGAGATTTTACCTTTCAGCCCTTTTCTTCGCGCCGCGCTACGTCTTTTCTCAAGCTCTTTCGTATGTCTCCCTGGGCTCTTCTCGAGCGCTCCACATCACTGATATTGCCTATTA  
GGGTTTCTCTTCTGTGGCATTTCGGCGATCGGGCTCTACGTAGTGTTGATCTCGATTTCGCTATTCTGAGATCTCTTCTATTCACTACAGGAATCGGCTCCAGGAAAATGTGTACTTAATGGA  
CTGCACCCCTAACTGCAGTGATAAGAAGACTCTAAACAAGTGGTTCTTCATTGACAAAATGGTTGGGTAGTTGATCACCAACACGCTAAAGAATAAAATAACAAGTTCCTTTACTTTTGG  
AATATTGGACATCACAAAGGATCTGAAGCAGAGCCACAATTCTCCAGTTCTCACTGATCAAGTGCCTGCAAGTCAAGTCCAGGTTGGGAATGTCTTCTAGTTTGTACCTTACTCACCACC  
ATCTGCAACGTTTTTCTTACTTCTACTTAAACAATTCCAAGGAGAAAGCCTATTAATGACTGCCTCGATGCCATGAAATCGTCTTCTCCTCCTTGCAAAAAAGTTAGTAAAGATATCAGCT  
TTGATGCTGCTTTTGAGGAAGCTGATGCAGTTTATCGAAATTGGATGAGCAAGTATCCTTCAGCTCTGACATCGTTTGAACAGATCACAACTATGCTAAGGATAAGAAGATAGCTCTCTT  
CATGGACTATGATGGAACCTTTTCCCCTATTGTGGACAATCCTGATCTTGCATTTCATGTGCGAGTGTATGCGCACTGCAGTTAAACATGTCGCAAGTATTTTCTACTGCCATTATTAGTGG  
GAGAAGTCGTGATAAGGTTTACGAATTTGTTGGGTTGAAAGAAGTACTATGTTGGCAGTCATGGTCTGGACTTGGTTGGCCCAGTCAAATATTCTGAATCTATCGCTACAAATCACAAT  
TGCATTAGTCTACTGATGAGCTGGTCAGCACTGCAAACTTGTTCAAAAGTCAAGAGAGTTTTTACCCATGATTGATGAGGTTTTTCCAGATCTCTCATCGAGAAAACAAAGGATATTAAG  
GCTCAAAAATTGAGAACAATAAGTTCTGCCTTTCTGTGCATTACCGTCTAGTAGACGAGAATAGTTGGACTGTGATTGCTCAGTGTGTTTCATGACATTCTCAAGAACTATCCTCGTCTGGA  
GCAAACTTATGGGATGAAGGTAAATAACTCACAATTTTTGCATATTTGATCATTATTTGCTATGATTGCTCTGTATTGATAATGCTATAATTCTAAGACAGAACTATATGAAGCCAGAAT  
ACTAACCTTACAGATTGCATTAATAATTAATGAGCTACACTAACCTAAGAATCTCCCAAATGGCTAAGGTGCTATGTTTTGTATTGCATATGCTTCATGGCTTTGCAAATTGTAATTTTTATT  
TAATAGTTGTTGTGGTGCAGGTTTTAGAAAATTCGCCAATAATTAAGTGAATAAAGGGGATGCTGTAGAATTCATGCTTGAATCTTTAGGACTAAATGATCGCGGGGCCATGCTTCTATAT  
ATATTGGAGATGATCGTACTGATGAGGATGCATTCAAGGTCTTAAGAGAAAAGTAAACAGGGGTTATGGTATTTTGGTTTCTTTCAGTTCCTAAAGAACTTATGCCATTTCTCATTGAAAGAT  
CCATCTGAGGTCATGGTGTCTCAGATCTTGTGAGATGGAAGAAGTCTCAAATAGCAGTAAATAGATCTTCGTGATCTTTTCCAGTATATCTATTATCCAGTAAAACAATAAAGGATCC  
AGGCTTTTATTTTCTATCCTTAAAGCTCTTTAAATAAGTTTCTTTTGGCCGTTTTGTGCGGAAAGCAAGCTATGTTAATGTAAGATCTGATTGTATGCTACATATAAAACTCGATCCAATTGA  
GTTTTATATGTAGCATAACAATCAGATCTTACATTAACATAGCTTGCTTCCGCACAAAACCGGCAAAAAGAACTTATTTAAAGAGCTTAAAGGATAGAAAATAAAAGCCTGGATCCTTTAT  
TGTTTTACTGGATAATAGATATACTGGAAAAAGATCACGAAGATCTATTTACTGCTATTTGAGACTTCTTCCATCTCACAAAGAGATCTGAGAAACACCATGACCTCAGATGGATCTTTCAAT

GAGAAATGGGCATAAGTTTCTTTAGGAACTGAAGAAACCAAAATACCATAACCCCTGTTACTTTCTCTTAAGACCTTGAATGCATCCTCATCAGTACGATCATCTCCAATATATATAGGAAG  
CATGGCCCCGCGATCATTTAGTCCTAAAGATTCAAGCATGAATTCTACAGCATCCCCTTTATTCCAGTTAATTATTGGGCGAATTCTAAAACCTTCATCCATAAGTTTGCTCCAGACGAGG  
ATAGTTCTTGAGAATGTCATGAACACACTGAGCAATCACAGTCCAACCTATTCTCGTCTACTAGACGGTAATGCACAGAAAAGGCAGAACTTATTGTTCTCAATTTTTGAGCCTTTAATATCCT  
TTGTTTTCTCGATGAGAGATCTGAAAACCTCATCAATCATGGGTAAAACTCTCTTGAGTTTGAACAAGTTTGCAGTGTGACCAGCTCATCAGTAGGACTAATGCAATGTGATTTGT  
AGCGATAGATTCAGAATATTTGACTGGGCCAACCAAGTCCAGACCATGACTGCCAACATAGTACAGTTCTTTCAACCAACAAATTCGTAAACCTTATCACGACTTCTCCACTAATAATG  
GCAGTAGGAAAATACTTGGCGACATGTTAACTGCAGTGCATAGCACTCGACATGAATGCAAGATCAGGATTGTCCACAATAGGGGAAAGAGTTCCATCATAGTCCATGAAGAGAGCT  
ATCTTCTTATCCTTAGCATAGTTTGTGATCTGTTCAAACGATGTCAGAGCTGAAGGATACTTGTCTCATCAATTTTCGATAAACTGCATCAGCTTCTCATAAAGCAGCATCAAAGCTGATATC  
TTTACTAACTTTTTTGAAGGAGGAGAAGACGATTTTCATGGCATCGAGGCAGTCATTAATAGGCTTTCTCCTTGGAAATTGTTAAGTAGGAAGTAGAAGAAAACGTTGCAGATGGTGGTGA  
GTAAGGTGACAACTAGAAGACATTCCCAACCTGGACTGACTTGCACGCACTTGATCAGTGAGAACTGGAGAATTGTGGCTCTGCTTCAGATCCTTTGTGATGTCCAATATCCAAAAGT  
AAAGGAACTTGTTATTTTATTCTTTAGCGTGTGGTGATCAACTACCCAACCATTTTGTCAATGAAGAACCCTTGTTTAGAGTCTTCTTATCACTGCAGTTAGGGGTGCAGTCCATTAAGT  
ACACATTTTCTGTAAACTGGAGCCGATTCTGTAGTGAATAGAAGAGATCTCAGAATAGCGAATCGAGATCGAACACTACGTAGAGCCCGATCGCCAAAATGCCACAGAAGAGAAAACC  
CTAATAGGCAATATCAGTGATGTGGAGCGCTCGAGGAAGAGCCCAGGGAGACATACGAAAAGAGCTTGAGAAAAGACGTAGCGCGCGCGAAAGGGCTGAAAGGTAAAATCTCAGAGG  
GGAGGGAGAGCGAGTGGGAGAGAGAATGAAAACAAAAGAAAGGGCCAACGGTATTTATAGAGCTCCGCCGTGACGGATAGGATCCGCTTGTGCAACTAGCTAGTCTAA

>comp158030\_c0\_seq18

CCCCCTGAGATTTTACCTTTCAGCCCTTTTCTTCGCGCCGCGCTACGTCTTTTCTCAAGCTCTTTTCGTATGTCTCCCTGGGCTCTTCTCGAGCGCTCCACATCACTGATATTGCCTATTA  
GGGTTTCTCTTCTGTGGCATTTTGGCGATCGGGCTCTACGTAGTGTTCGATCTCGATTTCGCTATTCTGAGATCTCTTCTATTCACTACAGGAATCGGCTCCAGTGATAAGAAGACTCTAAAC  
AAGTGGTCTTTCATTGACAAAATGGTTGGGTAGTTGATCACCAACACGCTAAAGAATAAAATAACAAGTTCCTTTACTTTTGGAAATATTGGACATCACAAAGGATCTGAAGCAGAGCCAC  
AATTCTCCAGTTCTCACTGATCAAGTGCCTGCAAGTCAAGTCCAGGTTGGGAATGTCTTCTAGTTTGTACCTTACTACCACCCTGCAACGTTTTCTTCTACTTCTACTTAAACAATTCC  
AAGGAGAAAAGCCTATTAATGACTGCCTCGATGCCATGAAATCGTCTTCTCCTCCTTGCAAAAAAGTTAGTAAAGATATCAGCTTTGATGCTGCTTTTGAGGAAGCTGATGCAGTTTATCGA  
AATTGGATGAGCAAGTATCCTTCAGCTCTGACATCGTTTTGAACAGATCACAACTATGCTAAGGATAAGAAGATAGCTCTTTCATGGACTATGATGGAAGTCTTTCCCTATTGTGGACAA  
TCCTGATCTTGCAATCATGTGCGAGTGTATGCGCACTGCAGTTAAACATGTCGCCAAGTATTTTCTACTGCCATTATTAGTGGGAGAAGTCGTGATAAGGTTTACGAATTTGTTGGGTTGA  
AAGAAGTGTACTATGTTGGCAGTCAATGTTGACTTGGTTGGCCAGTCAAATATTCTGAATCTATCGCTACAAATCACAATTGCATTAGTCCCTACTGATGAGCTGGTCAGCACTGCAAA  
CTTGTTTTCAAACCTGCAAGAGAGTTTTTACCCATGATTGATGAGGTTTTTTCAGATCTCTCATCGAGAAAACAAAGGATATTAAGGCTCAAAAATTGAGAACAAATAAGTCTCGCTTTCTGTG  
CATTACCGTCTAGTAGACGAGAATAGTTGGACTGTGATTGCTCAGTGTGTTTCATGACATTCTCAAGAACTATCCTCGTCTGGAGCAAACCTTATGGGATGAAGGTAAATAACACTCACAATT  
TTTGCATATTTGATCATTATTTTGTATGATTGCTCTGTATTGATAATGCTATAATTCTAAGACAGAAGTATATGAAGCCAGAATACTAACCTTACAGATTGCATTAATAATGAGCTACA  
CTAACCTAAGAATCTCCCAATGGCTAAGGTTTTAGAAAATTCGCCAATAATTAAGTGAATAAAGGGGATGCTGTAGAATTCATGCTTGAATCTTTAGGACTAAATGATCGCGGGGCCAT  
GCTTCTATATATATTGGAGATGATCGTACTGATGAGGATGCATTCAAGGTCTTAAGAGAAAAGTAAACAGGGGTTATGGTATTTTGGTTTCTTTCAGTTCTTAAAGAACTTATGCCATTTCTC  
ATTGAAAGATCCATCTGAGGTCATGGTGTCTCAGATCTCTTGTGAGATGGAAGAAGTCTCAAATAGCAGTAAATAGATCTTCGTGATCTTTTCCAGTATATCTATTATCCAGTAAAACAA  
TAAAGGATCCAGGCTTTTATTTTCTATCCTTAAAGCTCTTTAAATAAGTTTCTTTTTGCCGGTTTTGTGCGGAAAGCAAGCTATGTTAATGTAAGATCTGATTGTATGCTACATATAAAACTCG  
ATCCAATTGAGTTTTATATGTAGCATACAATCAGATCTTACATTAACATAGCTTGTCTTCCGCACAAAACCGGCAAAAAGAACTTATTTAAAGAGCTTAAAGGATAGAAAATAAAAGCCT  
GGATCCTTTATTGTTTTACTGGATAATAGATATACTGGAAAAGATCACGAAGATCTATTTACTGCTATTTGAGACTTCTTCCATCTCACAAGAGATCTGAGAAACACCATGACCTCAGATG

GATCTTTCAATGAGAAATGGGCATAAGTTTCTTTAGGAACTGAAGAAACCAAAATACCATAACCCCTGTTACTTTCTCTTAAGACCTGAATGCATCCTCATCAGTACGATCATCTCCAATA  
TATATAGGAAGCATGGCCCCGCGATCATTAGTCCTAAAGATTCAAGCATGAATCTACAGCATCCCTTTTATTCCAGTTAATTATTGGGCGAATTTCTAAAACCTGCACCACAACAACTATT  
AAATAAAATATTACAATTTGCAAAGCCATGAAGCATATGCAATACAAAACATAGCACCTTAGCCATTTGGGAGATTCTTAGGTTAGTGTAGCTCATTAAATTTAATGCAATCTGTAAGGTTA  
GTATTCTGGCTTCATATAGTTCTGTCTTAGAATTATAGCATTATCAATACAGAGCAATACATAGCAAAAATAATGATCAAATATGCAAAAATTGTGAGTGTATTACCTTCATCCCATAAGTTT  
GCTCCAGACGAGGATAGTTCTTGAGAATGTCATGAACACACTGAGCAATCACAGTCCAATAATTCTCGTCTACTAGACGGTAATGCACAGAAAGGCAGAACTTATTGTTCTCAATTTTTGA  
GCCTTTAATATCCTTTGTTTTCTCGATGAGAGATCTGAAAACCTCATCAATCATGGGTAAAAACTCTCTTGCAGTTTGAAACAAGTTTGCAGTGCTG

>comp158030\_c0\_seq24

CCCCTCTGAGATTTTACCTTTTCAGCCCTTTTCTTCGCGCCGCGCTACGTCTTTTCTCAAGCTCTTTTCGTATGTCTCCCTGGGCTCTTCCTCGAGCGCTCCACATCACTGATATTGCCTATTA  
GGGTTTCTCTTCTGTGGCATTGTTGGCGATCGGGCTCTACGTAGTGTTCGATCTCGATTGCTATTCTGAGATCTCTTCTATTCACTACAGGAATCGGCTCCAGGAAAATGTGTACTTAATGGA  
CTGCACCCCTAACTGCAGTGATAAGAAGACTCTAAACAAGTGGTTCTTCATTGACAAAATGGTTGGGTAGTTGATCACCAACACGCTAAAGAATAAAAATAACAAGTTTCTTTACTTTTGG  
AATATTGGACATCACAAAGGATCTGAAGCAGAGCCACAATTCTCCAGTTCTCACTGATCAAGTGCCTGCAAGTCAAGTCCAGGTTGGGAATGTCTTCTAGTTTGTACCTTACTCACCACC  
ATCTGCAACGTTTTCTTCTACTTCTACTTAAACAATTCCAAGGAGAAAGCCTATTAATGACTGCCTCGATGCCATGAAATCGTCTTCTCCTCCTTGCAAAAAAGTTAGTAAAGATATCAGCT  
TTGATGCTGCTTTTGAGGAAGCTGATGCAGTTTATCGAAATTGGATGAGCAAGTATCCTTCAGCTCTGACATCGTTTGAACAGATCACAACTATGCTAAGGATAAGAAGATAGCTCTCTT  
CATGGACTATGATGGAACCTTTTCCCTATTGTGGACAATCCTGATCTTGCAATTCATGTGAGTGTATGCGCACTGCAGTTAAACATGTCGCCAAGTATTTTCTACTGCCATTATTAGTGG  
GAGAAGTCGTGATAAGGTTTACGAATTTGTTGGGTTGAAAGAAGTACTATGTTGGCAGTCATGGTCTGGACTTGGTTGGCCAGTCAAATATTCTGAATCTATCGCTACAAATCACAAAT  
TGCATTAGTCTACTGATGAGCTGGTCAGCACTGCAAACTTGTTTCAAACCTGCAAGAGAGTTTTTACCCATGATTGATGAGGTTTTTTCAGATCTCTCATCGAGAAAACAAAGGATATTAAG  
GCTCAAAAATTGAGAACAATAAGTTCTGCCTTTCTGTGCATTACCGTCTAGTAGACGAGAATAGTTGGACTGTGATTGCTCAGTGTGTTTCATGACATTCTCAAGAACTATCCTCGTCTGGA  
GCAAACTTATGGGATGAAGGTTTATAGAAATTCGCCCAATAATTAAGTGAATAAAGGGGATGCTGTAGAATTCATGCTTGAATCTTTAGGACTAAATGATCGCGGGGCCATGCTTCTTATAT  
ATATTGGAGATGATCGTACTGATGAGGATGCATTCAAGGTCTTAAGAGAAAAGTAACAGGGGTTATGGTATTTTGGTTTCTTCAGTTCTTAAAGAACTTATGCCCATTTCTCATTGAAAGAT  
CCATCTGAGGTCATGGTGTCTTCTCAGATCTCTTGTGAGATGGAAGAAGTCTCAAATAGCAGTAAATAGATCTTCGTGATCTTTTCCAGTATATCTATTATCCAGTAAAACAATAAAGGATCC  
AGGCTTTTATTTTCTATCCTTAAAGCTCTTTAAATAAGTTTCTTTTTGCCGGTTTTGTGCGGAAAGCAAGCTATGTTAATGTAAGATCTGATTGTATGCTACATATAAAACTCGATCCAATTGA  
GTTTTATATGTAGCATAACAATCAGATCTTACATTAACATAGCTTGCTTTCCGCACAAAACCGGCAAAAAGAACTTATTTAAAGAGCTTAAAGGATAGAAAATAAAAGCCTGGATCCTTTAT  
TGTTTTACTGGATAATAGATATACTGGAAAAAGATCACGAAGATCTATTTACTGCTATTTGAGACTTCTCCATCTCACAAAGAGATCTGAGAAACACCATGACCTCAGATGGATCTTTCAAT  
GAGAAATGGGCATAAGTTTCTTTAGGAACTGAAGAAACCAAAATACCATAACCCCTGTTACTTTCTTTAAGACCTTGAATGCATCCTCATCAGTACGATCATCTCCAATATATATAGGAAG  
CATGGCCCCGCGATCATTAGTCCTAAAGATTCAAGCATGAATCTACAGCATCCCTTTATTCCAGTTAATTATTGGGCGAATTTCTAAAACCTTCATCCCATAAGTTTGTCTCCAGACGAGG  
ATAGTTCTTGAGAATGTCATGAACACACTGAGCAATCACAGTCCAATAATTCTCGTCTACTAGACGGTAATGCACAGAAAGGCAGAACTTATTGTTCTCAATTTTTGAGCCTTTAATATCCT  
TTGTTTTCTCGATGAGAGATCTGAAAACCTCATCAATCATGGGTAAAAACTCTCTTGCAGTTTGAAACAAGTTTGCAGTGTGACCAGCTCATCAGTAGGACTAATGCAATTGTGATTTGT  
AGCGATAGATTCAGAATATTTGACTGGGCCAACCAAGTCCAGACCATGACTGCCAACATAGTACAGTTCTTTCAACCCAACAAATTCGTAAACCTTATCACGACTTCTCCACTAATAATG  
GCAGTAGGAAAATACTTGGCGACATGTTTAACTGCAGTGCATAGCACTCGACATGAATGCAAGATCAGGATTGTCCACAATAGGGGAAAGAGTTCCATCATAGTCCATGAAGAGAGCT  
ATCTTCTTATCCTTAGCATAGTTTGTGATCTGTTCAAACGATGTCAGAGCTGAAGGATACTTGTCTATCCAATTTGATAAACTGCATCAGCTTCTCAAAGCAGCATCAAAGCTGATATC  
TTACTAACTTTTTTGCAAGGAGGAGAAGACGATTCATGGCATCGAGGCAGTCATTAATAGGCTTTCTCCTTGGAAATTGTTAAGTAGGAAGTAGAAGAAAACGTTGCAGATGGTGGTGA



GTAAGGTGACAACTAGAAAGACATTCCCAACCTGGACTGACTTGCACGCACTTGATCAGTGAGAACTGGAGAATTGTGGCTCTGCTTCAGATCCTTTGTGATGTCCAATATTCCAAAAGT  
AAAGGAACTTGTTATTTTATTCTTTAGCGTGTGGTGATCAACTACCCAACCATTTTGTCAATGAAGAACCCTTGTTTAGAGTCTTCTTATCACTGCAGTTAGGGGTGCAGTCCATTAAGT  
ACACATTTTCTGTAAACTGGAGCCGATTCTGTAGTGAATAGAAGAGATCTCAGAATAGCGAATCGAGATCGAACACTACGTAGAGCCCGATCGCCAAAATGCCACAGAAGAGAAACC  
CTAATAGGCAATATCAGTGATGTGGAGCGCTCGAGGAAGAGCCCAGGGAGACATACGAAAAGAGCTTGAGAAAAGACGTAGCGCGGCGCGAAAGGGCTGAAAGGTAAAATCTCAGAGG  
GGAGGGAGAGCGAGTGGGAGAGAGAATGAAAACAAAAGAAAGGGCCAACGGTATTTATAGAGCTCCGCCGTGACGGATAGGATCCGCTTGTGCAACTAGCTAGTCTAA

>comp158030\_c0\_seq41

CCCCTCTGAGATTTTACCTTTCAGCCCTTTTCCTTCGCGCCGCGCTACGTCTTTTCTCAAGCTCTTTTCGTATGTCTCCCTGGGCTCTTCTCGAGCGCTCCACATCACTGATATTGCCTATTA  
GGGTTTCTCTTCTGTGGCATTGGCGATCGGGCTCTACGTAGTGTTCGATCTCGATTGCTATTCTGAGATCTTCTTATTCACTACAGGAATCGGCTCCAGTGATAAGAAGACTCTAAAC  
AAGTGGTTCTTCATTGACAAAATGGTTGGGTAGTTGATCACCAACACGCTAAAGAATAAAATAACAAGTTCCTTTACTTTTGAATATTGGACATCACAAAGGATCTGAAGCAGAGCCAC  
AATTCTCCAGTTCTCACTGATCAAGTGCCTGCAAGTCAGTCCAGGTTGGGAATGTCTTCTAGTTTGTACCTTACTCACCACCATCTGCAACGTTTTCTTCTACTTCTACTTAAACAATTCC  
AAGGAGAAAGCCTATTAATGACTGCCTCGATGCCATGAAATCGTCTTCTCCTCCTTGCAAAAAAGTTAGTAAAGATATCAGCTTTGATGCTGCTTTTGAGGAAGCTGATGCAGTTTATCGA  
AATTGGATGAGCAAGTATCCTTCAGCTCTGACATCGTTTGAACAGATCACAACTATGCTAAGGATAAGAAGATAGCTCTTTCATGGACTATGATGGAAGCTTTTCCCCTATTGTGGACAA  
TCCTGATCTTGCAATCATGTGCGAGTGTATGCGCACTGCAGTTAAACATGTGCGCAAGTATTTTCTACTGCCATTATTAGTGGGAGAAGTCGTGATAAGGTTTACGAATTTGTTGGGTTGA  
AAGAACTGTACTATGTTGGCAGTCATGGTCTGGACTTGGTTGGCCAGTCAAATATTCTGAATCTATCGCTACAAATCACAATTGCATTAGTCTACTGATGAGCTGGTGAATCACCATTAA  
TAAAATGCTAAATATTTGCTTTGTTTCTTAAAGACCACCACAACATTA AAAAGAAGAACAAGATCAGACACAACCAATAAATTTAGATATCTATTTCTATAGTTTGCTTCGGTTGTAAATATA  
TTGCTTAAAGTATTTTCTGCAGGTCAGCACTGCAAACCTGTTTTCAAACCTGCAAGAGAGTTTTTACCCATGATTGATGAGGTTTTTTCAGATCTCTCATCGAGAAAACAAAGGATATTAAGGC  
TCAAAAATTGAGAACAATAAGTTCTGCCTTTCTGTGCATTACCGTCTAGTAGACGAGAATAGTTGGACTGTGATTGCTCAGTGTGTTTCATGACATTCTCAAGAACTATCCTCGTCTGGAGC  
AAACTTATGGGATGAAGGTAAATAACTCACAATTTTTGCATATTTGATCATTATTTGCTATGATTGCTCTGTATTGATAATGCTATAATTCTAAGACAGAACTATATGAAGCCAGAATACT  
AACCTTACAGATTGCATTAATAAATGAGCTACACTAACCTAAGAATCTCCCAAATGGCTAAGGTGCTATGTTTTGTATTGCATATGCTTCATGGCTTTGCAAATTGTAATATTTTATTTAA  
TAGTTGTTGTGGTGCAGTTTTAGAAAATTCGCCAATAATTA ACTGGAATAAAGGGGATGCTGTAGAATTCATGCTTGAATCTTTAGGACTAAATGATCGCGGGGCCATGCTTCCTATATATA  
TTGGAGATGATCGTACTGATGAGGATGCATTCAAGGTCTTAAAGAGAAAGTAACAGGGGTTATGGTATTTTGGTTTTCTCAGTTCCTAAAGAAACTTATGCCATTTCTCATTGAAAAGATCCA  
TCTGAGGTCATGGTGTCTCAGATCTCTGTGAGATGGAAGAAGTCTCAAATAGCAGTAAATAGATCTTCGTGATCTTTTTCCAGTATATCTATTATCCAGTAAAACAATAAAGGATCCAG  
GCTTTTATTTTCTATCCTTAAAGCTCTTTAAATAAGTTTCTTTTTGCCGGTTTTGTGCGGAAAGCAAGCTATGTTAATGTAAGATCTGATTGTATGCTACATATAAAACTCGATCCAATTGAGT  
TTTATATGTAGCATAACAATCAGATCTTACATTAACATAGCTTGCTTTCCGCACAAAACCGGCAAAAAGAACTTATTTAAAGAGCTTAAAGGATAGAAAATAAAAGCCTGGATCCTTTATTG  
TTTTACTGGATAATAGATATACTGGAAAAAGATCACGAAGATCTATTTACTGCTATTTGAGACTTCTTCCATCTCACAAGAGATCTGAGAAACACCATGACCTCAGATGGATCTTCAATGA  
GAAATGGGCATAAGTTTCTTTAGGAACTGAAGAAACCAAAATACCATAACCCCTGTACTTTCTCTTAAAGACCTTGAATGCATCCTCATCAGTACGATCATCTCCAATATATATAGGAAGCA  
TGGCCCCGCGATCATTTAGTCTTAAAGATTCAAGCATGAATTCTACAGCATCCCTTTATTCCAGTTAATTATTGGGCGAATTTCTAAAACCTTCATCCATAAGTTTGCTCCAGACGAGGAT  
AGTTCCTGAGAATGTCATGAACACACTGAGCAATCACAGTCCA ACTATTCTCGTCTACTAGACGGTAATGCACAGAAAGGCAGAACTTATTGTTCTCAATTTTTGAGCCTTTAATATCCTTT  
GTTTTCTCGATGAGAGATCTGAAAACCTCATCAATCATGGGTAAAAACTCTCTTGAGTTTGAACAAGTTTGCAGTGTGACCAGCTCATCAGTAGGACTAATGCAATTGTGATTTGTAG  
CGATAGATTCAGAATATTTGACTGGGCCAACCAAGTCCAGACCATGACTGCCAACATAGTACAGTTCTTTCAACCCAACAAATTCGTAAACCTTATCACGACTTCTCCACTAATAATGGC  
AGTAGGAAAATACTTGGCGACATGTTTAACTGCAGTGCAGCATAGCACTCGACATGAATGCAAGATCAGGATTGTCCACAATAGGGGAAAGAGTTCCATCATAGTCCATGAAGAGAGCTAT

CTTCTTATCCTTAGCATAGTTTGTGATCTGTTCAAACGATGTCAGAGCTGAAGGATACTTGCTCATCCAATTTGATAAACTGCATCAGCTTCCTCAAAGCAGCATCAAAGCTGATATCTTT  
ACTAACTTTTTTGAAGGAGGAGAAGACGATTTTCATGGCATCGAGGCAGTCATTAATAGGCTTTTCCTTGGAAATTGTTAAGTAGGAAGTAGAAGAAAACGTTGCAGATGGTGGTGAGTA  
AGGTGACAAACTAGAAAGACATTCCCAACCTGGACTGACTTGCACGCACCTTGATCAGTGAGAAGTGGAGAATTGTGGCTCTGCTCAGATCCTTTGTGATGTCCAATATTCCAAAAGTAAA  
GGAACCTGTTATTTTATTCTTTAGCGTGTGGTGATCAACTACCCAACCAATTTTGTCAATGAAGAACCCTTGTTTAGAGTCTTCTTACTGCAGTTAGGGGTGCAGTCCATTAAGTACA  
CATCTTCTGTAAACTGGAGCCGATTTCTGTAGTGAATAGAAGAGATCTCAGAATAGCGAATCGAGATCGAACACTACGTAGAGCCCGATCGCCAAAATGCCACAGAAGAGAAAACCCCTAA  
TAGGCAATATCAGTGATGTGGAGCGCTCGAGGAAGAGCCCAGGGAGACATACGAAAGAGCTTGAGAAAAGACGTAGCGCGGCGCGAA

>comp158030\_c0\_seq48

CCCCTCTGAGATTTTACCTTTTCAGCCCTTTTCTTCGCGCCGCGCTACGTCTTTTCTCAAGCTCTTTTCGTATGTCTCCCTGGGCTCTTCTCGAGCGCTCCACATCACTGATATTGCCTATTA  
GGGTTTCTCTTCTGTGGCATTTTGGCGATCGGGCTCTACGTAGTGTTCGATCTCGATTTCGCTATTCTGAGATCTCTTCTATTCACTACAGGAATCGGCTCCAGTGATAAGAAGACTCTAAAC  
AAGTGGTCTTCATTGACAAAATGGTTGGGTAGTTGATCACCAACACGCTAAAGAATAAAATAACAAGTTCCTTTACTTTTTGGAATATTGGACATCACAAAGGATCTGAAGCAGAGCCAC  
AATTCTCCAGTTCTCACTGATCAAGTGCCTGCAAGTCAGTCCAGGTTGGGAATGTCTTCTAGTTTGTACCTTACTCACCACCATCTGCAACGTTTTCTTCTACTTCTACTTAAACAATTCC  
AAGGAGAAAGCCTATTAATGACTGCCTCGATGCCATGAAATCGTCTTCTCCTCCTTGCAAAAAAGTTAGTAAAGATATCAGCTTTGATGCTGCTTTTGAGGAAGCTGATGCAGTTTATCGA  
AATTGGATGAGCAAGTATCCTTCAGCTCTGACATCGTTTTGAACAGATCACAACTATGCTAAGGATAAGAAGATAGCTCTCTTCATGGACTATGATGGAAGCTTTTCCCTATTGTGGACAA  
TCCTGATCTTGCATTCATGTCGAGTGTATGCGCACTGCAGTTAAACATGTCGCCAAGTATTTTCTACTGCCATTATTAGTGGGAGAAGTCGTGATAAGGTTTACGAATTTGTTGGGTTGA  
AAGAAGTGTACTATGTTGGCAGTCATGGTCTGGACTTGGTTGGCCCAGTCAAATATTCTGAATCTATCGCTACAAATCACAATTGCATTAGTCCACTGATGAGCTGGTCAGCACTGCAAA  
CTTGTTTTCAAAGTGAAGAGAGTTTTTACCCATGATTGATGAGGTTTTTTCAGATCTCTCATCGAGAAAACAAAGGATATTAAGGCTCAAAAATTGAGAACAATAAGTTCTGCCTTTCTGTG  
CATTACCGTCTAGTAGACGAGAATAGTTGGACTGTGATTGCTCAGTGTGTTTCATGACATTCTCAAGAACTATCCTCGTCTGGAGCAAAGTATGGGATGAAGGTAAATAAACTCACAATT  
TTTGCATATTTGATCATTATTTTGTATGATTGCTCTGTATTGATAATGCTATAATTCTAAGACAGAACTATATGAAGCCAGAACTAATACCTTACAGATTGCATTAATAAATAAGTGA  
CTAACCTAAGAATCTCCCAAATGGCTAAGGTGCTATGTTTTGTATTGCATATGCTTCATGGCTTTGCAAATTGTAATATTTTATTAATAGTTGTTGTGGTGCAGGTTTTAGAAAATTCGCCCAA  
TAATTAAGTGAATAAAGGGGATGCTGTAGAATTCATGCTTGAATCTTTAGGACTAAATGATCGCGGGGCCATGCTTCCTATATATATTGGAGATGATCGTACTGATGAGGATGCATTCAAGG  
TCTTAAGAGAAAGTAACAGGGGTTATGGTATTTTGGTTTTCTCAGTTCCTAAAGAAAATTATGCCCATTTCTCATTGAAAAGATCCATCTGAGGTCATGGTGTCTCAGATCTCTTGTGAGA  
TGGAAGAAGTCTCAAATAGCAGTAAATAGATCTTCGTGATCTTTTTCCAGTATATCTATTATCCAGTAAAACAATAAAGGATCCAGGCTTTTATTTCTATCCTTAAGCTCTTTAAATAAGTTT  
CTTTTTGCCGGTTTTGTGCGGAAAGCAAGCTATGTTAATGTAAGATCTGATTGTATGCTACATATAAACTCGATCCAATTGAGTTTTATATGTAGCATACAATCAGATCTTACATTAACAT  
AGCTTGCTTTCCGCACAAAACCGGCAAAAAGAAAATTATTTAAAGAGCTTAAAGGATAGAAAATAAAAGCCTGGATCCTTTATTGTTTTACTGGATAATAGATATACTGGAAAAAGATCAG  
AAGATCTATTTACTGCTATTTGAGACTTCTCCATCTCACAAGAGATCTGAGAAACACCATGACCTCAGATGGATCTTCAATGAGAAATGGGCATAAGTTTCTTTAGGAACTGAAGAAAC  
CAAAATACCATAACCCCTGTTACTTTCTTAAAGACCTTGAATGCATCCTCATCAGTACGATCATCTCCAATATATATAGGAAGCATGGCCCCGCGATCATTAGTCTTAAAGATTCAAGCAT  
GAATCTACAGCATCCCCTTTATTCCAGTTAATTATTGGGCGAATTTCTAAAACCTGCACCACAACAATAAATAAATAAATAAATAAATAAATAAATAAATAAATAAATAAATAAATAAATAA  
ATAGCACCTTAGCCATTTGGGAGATTCTTAGGTTAGTGTAGCTCATTTAATTTAATGCAATCTGTAAGGTTAGTATTCTGGCTTCATATAGTTCTGTCTTAGAATTATAGCATTATCAATACAG  
AGCAATACATAGCAAAAATAATGATCAAATATGCAAAAATTGTGAGTGTATTACCTTCATCCATAAGTTTGTCCAGACGAGGATAGTTCTTGAGAATGTCATGAACACACTGAGCAATC  
ACAGTCCAATATCTCGTCTACTAGACGGTAATGCACAGAAAGGCAGAACTTATTGTTCTCAATTTTTGAGCCTTTAATATCCTTTGTTTTCTCGATGAGAGATCTGAAAACCTCATCAAT  
CATGGGTAAAACTCTCTTGCAGTTTGAACAAGTTTGCAGTGCTG

>comp158030\_c0\_seq49

CCCCCTCTGAGATTTTACCTTTTCAGCCCTTTTCCTTCGCGCCGCGCTACGTCTTTTCTCAAGCTCTTTTCGTATGTCTCCCTGGGCTCTTCCCTCGAGCGCTCCACATCACTGATATTGCCTATTA  
GGGTTTCTCTTCTGTGGCATTGTTGGCGATCGGGCTCTACGTAGTGTTCGATCTCGATTTCGCTATTCTGAGATCTCTTCTATTACTACAGGAATCGGCTCCAGGAAAATGTGTACTTAATGGA  
CTGCACCCCTAACTGCAGTGATAAGAAGACTCTAAACAAGTGGTTCTTCATTGACAAAATGGTTGGGTAGTTGATCACCAACACGCTAAAGAATAAAATAACAAGTTCCCTTTACTTTTGG  
AATATTGGACATCACAAAAGGATCTGAAGCAGAGCCACAATTCTCCAGTTCTCACTGATCAAGTGCCTGCAAGTCAAGTCCAGGTTGGGAATGTCTTCTAGTTTGTACCTTACTCACCACC  
ATCTGCAACGTTTTTCTTACTTCCCTACTTAACAATTCCAAGGAGAAAGCCTATTAATGACTGCCTCGATGCCATGAAATCGTCTTCTCCTCCTTGCAAAAAAGTTAGTAAAGATATCAGCT  
TTGATGCTGCTTTTGGAGGAAGCTGATGCAGTTTATCGAAATTGGATGAGCAAGTATCCTTCAGCTCTGACATCGTTTGAACAGATCACAACTATGCTAAGGATAAGAAGATAGCTCTCTT  
CATGGACTATGATGGAACCTTTTCCCCTATTGTGGACAATCCTGATCTTGCATTCATGTGAGTGTATGCGCACTGCAGTTAAACATGTCGCCAAGTATTTTCCCTACTGCCATTATTAGTGG  
GAGAAGTCGTGATAAGGTTTACGAATTTGTTGGGTTGAAAGAAGTACTATGTTGGCAGTCATGGTCTGGACTTGGTTGGCCAGTCAAATATCTGAATCTATCGCTACAAATCACAAAT  
TGCATTAGTCTACTGATGAGCTGGTGAATCACCATTAATAAAAATGCTAAATATTTGCTTTGTTTTCTTAAGACCACCACAACATTAAGAAAGAAACAAGATCAGACACAACCAATAAAT  
TTAGATATCTATTTCTATAGTTTGGCTTCGGTTGTAATATATTGTCTTAAGTATTTTCTGCAGGTCAGCACTGCAAACCTGTTTTCAAAGTCAAGAGAGTTTTTACCCATGATTGATGAGGTTT  
TCAGATCTCTCATCGAGAAAACAAAGGATATTAAGGCTCAAAAATTGAGAACAATAAGTTCTGCCTTTCTGTGCATTACCGTCTAGTAGACGAGAATAGTTGGACTGTGATTGCTCAGTG  
TGTTTCATGACATTCTCAAGAACTATCCTCGTCTGGAGCAAACTTATGGGATGAAGGTAATAACACTCACAATTTTTGCATATTTGATCATTATTTTGTATGATTGCTCTGTATTGATAATG  
CTATAATTCTAAGACAGAACTATATGAAGCCAGAATACTAACCTTACAGATTGCATTAATAATTAATGAGCTACACTAACCTAAGAATCTCCCAAATGGCTAAGGTTTTAGAAATTCGCCCA  
ATAATTAAGTGAATAAAGGGATGCTGTAGAAATTCATGCTTGAATCTTTAGGACTAAATGATCGCGGGGCCATGCTTCCTATATATATTGGAGATGATCGTACTGATGAGGATGCATTCAAG  
GTCTTAAGAGAAAAGTAAACAGGGGTTATGGTATTTTGGTTTTCTTCAGTTTCTAAAGAACTTATGCCCATTTCTCATTGAAAGATCCATCTGAGGTCATGGTGTCTCAGATCTCTTGTGAG  
ATGGAAGAAGTCTCAAATAGCAGTAAATAGATCTTCGTGATCTTTTTCCAGTATATCTATTATCCAGTAAACAATAAAGGATCCAGGCTTTTATTTCTATCCTTAAGCTCTTTAAATAAGTT  
TCTTTTTGCGGTTTTGTGCGGAAAAGCAAGCTATGTTAATGTAAGATCTGATTGTATGCTACATATAAACTCGATCCAATTGAGTTTATATGTAGCATAACAATCAGATCTTACATTAACA  
TAGCTTGCTTTCCGCACAAAACCGGCAAAAAGAACTTATTTAAAGAGCTTAAGGATAGAAAATAAAAGCCTGGATCCTTTATTGTTTTACTGGATAATAGATATACTGGAAAAAGATCAC  
GAAGATCTATTTACTGCTATTTGAGACTTCTTCCATCTCACAAGAGATCTGAGAAACACCATGACCTCAGATGGATCTTCAATGAGAAATGGGCATAAGTTTCTTTAGGAACTGAAGAAA  
CCAAAATACCATAACCCCTGTTACTTTCTTAAAGACCTTGAATGCATCCTCATCAGTACGATCATCTCCAATATATATAGGAAGCATGGCCCCGCGATCATTTAGTCTAAAGATTCAAGCA  
TGAATTCTACAGCATCCCTTTATTCCAGTTAATTATTGGGCGAATTTCTAAAACCTTCATCCATAAGTTTGCTCCAGACGAGGATAGTTCTTGAGAATGTCATGAACACACTGAGCAATC  
ACAGTCCAACTATTCTCGTCTACTAGACGGTAATGCACAGAAAGGCAGAACTTATTGTTCTCAATTTTTGAGCCTTTAATATCCTTTGTTTTCTCGATGAGAGATCTGAAAACCTCATCAAT  
CATGGGTAAAAACTCTCTTGCAGTTTGAACAAGTTTGCAGTGTGACCAGCTCATCAGTAGGACTAATGCAATTGTGATTTGTAGCGATAGATTGAGAATATTTGACTGGGCCAACCAAG  
TCCAGACCATGACTGCCAACATAGTACAGTTCTTTCAACCCAACAAATTCGTAAACCTTATCACGACTTCTCCACTAATAATGGCAGTAGGAAAATACTTGGCGACATGTTAACTGCAG  
TGCGCATAGCACTCGACATGAATGCAAGATCAGGATTGTCCACAATAGGGGAAAGAGTTCCATCATAGTCCATGAAGAGAGCTATCTTCTTATCCTTAGCATAGTTTGTGATCTGTTCAAAC  
GATGTCAGAGCTGAAGGATACTTGCTCATCAAATTCGATAAACTGCATCAGCTTCTCAAAGCAGCATCAAAGCTGATATCTTTACTAACTTTTTTGAAGGAGGAGAAGACGATTTCA  
TGGCATCGAGGCAGTCATTAATAGGCTTTCTCCTTGGAAATTGTTAAGTAGGAAGTAGAAGAAAACGTTGCAGATGGTGGTGAAGGTGACAACTAGAAGACATTTCCCAACCTGGAC  
TGACTTGCACGCACTTGATCAGTGAAGAACTGGAGAATTGTGGCTCTGCTTCAGATCCTTTGTGATGTCCAATATTTCAAAAAGTAAAGGAACCTGTTATTTTATCTTTAGCGTGTGGTGAT  
CAACTACCCAACCATTTTGTCAATGAAGAACCCTTGTTTAGAGTCTTCTTATCACTGCAGTTAGGGGTGCAGTCCATTAAGTACACATCTTCTGTAAACTGGAGCCGATTTCTGTAGTG  
AATAGAAGAGATCTCAGAATAGCGAATCGAGATCGAACACTACGTAGAGCCCCGATCGCCAAAATGCCACAGAAGAGAAACCCTAATAGGCAATATCAGTGATGTGGAGCGCTCGAGGAA

GAGCCCAGGGAGACATACGAAAGAGCTTGAGAAAAGACGTAGCGCGGCGCGAA

>comp158030\_c0\_seq6

CCCCTCTGAGATTTTACCTTTCAGCCCTTTTCCTTCGCGCCGCGCTACGTCTTTTCTCAAGCTCTTTCGTATGTCTCCCTGGGCTCTTCCTCGAGCGCTCCACATCACTGATATTGCCTATTA  
GGGTTTCTCTTCTGTGGCATTTCGGCGATCGGGCTCTACGTAGTGTTCGATCTCGATTGCTATTCTGAGATCTCTTCTATTCACTACAGGAATCGGCTCCAGTGATAAGAAGACTCTAAAC  
AAGTGGTTCCTCATTGACAAAATGGTTGGGTAGTTGATCACCAACACGCTAAAGAATAAAAATAACAAGTTCCTTTACTTTTTGGAATATTGGACATCACAAAGGATCTGAAGCAGAGCCAC  
AATTCTCCAGTTCTCACTGATCAAGTGCGTGCAAGTCAGTCCAGGTTGGGAATGTCTTCTAGTTTTGTACCTTACTCACCACCATCTGCAACGTTTTCTTCTACTTCTACTTAACAATTCC  
AAGGAGAAAAGCCTATTAATGACTGCCTCGATGCCATGAAATCGTCTTCTCCTCCTTGCAAAAAAGTTAGTAAAGATATCAGCTTTGATGCTGCTTTTGAGGAAGCTGATGCAGTTTATCGA  
AATTGGATGAGCAAGTATCCTTCAGCTCTGACATCGTTTTGAACAGATCACAACTATGCTAAGGATAAGAAGATAGCTCTCTTCATGGACTATGATGGAAGTCTTTCCCTATTGTGGACAA  
TCCTGATCTTGCATTCATGTGAGTGTATGCGCACTGCAGTTAAACATGTGCGCAAGTATTTTCTACTGCCATTATTAGTGGGAGAAGTCGTGATAAGGTTTACGAATTTGTTGGGTTGA  
AAGAACTGTACTATGTTGGCAGTCATGGTCTGGACTTGGTTGGCCAGTCAAATATTCTGAATCTATCGCTACAAATCACAATTGCATTAGTCTACTGATGAGCTGGTGAATCACCATTAA  
TAAAATGCTAAATATTTGCTTTGTTTTCTTAAGACCACCACAACATTA AAAAGAAGAACAAGATCAGACACAACCAATAAAATTTAGATATCTATTTCTATAGTTTGCTTCGGTTGTAATATA  
TTGTCTTAAGTATTTTCTGCAGGTCAGCACTGCAAACTTGTTTTCAAAGAGAGTTTTTACCCATGATTGATGAGGTTTTTTCAGATCTCTCATCGAGAAAACAAAGGATATTAAGGC  
TCAAAAATTGAGAACAATAAGTTCTGCCTTTCTGTGCATTACCGTCTAGTAGACGAGAATAGTTGGACTGTGATTGCTCAGTGTGTTTCATGACATTCTCAAGAACTATCCTCGTCTGGAGC  
AAACTTATGGGATGAAGGTTTTAGAAAATTCGCCAATAATTA ACTGGAATAAAGGGGATGCTGTAGAATTCATGCTTGAATCTTTAGGACTAAATGATCGCGGGGCCATGCTTCTATATATA  
TTGGAGATGATCGTACTGATGAGGATGCATTCAAGGTCTTAAGAGAAAGTAACAGGGGTTATGGTATTTTGGTTTCTTCAGTTCCTAAAGAAACTTATGCCATTTCTCATTGAAAGATCCA  
TCTGAGGTTCATGGTGTTCCTCAGATCTCTTGTGAGATGGAAGAAGTCTCAAATAGCAGTAAATAGATCTTCGTGATCTTTTTCCAGTATATCTATTATCCAGTAAAAACAATAAAGGATCCAG  
GCTTTTATTTTCTATCCTTAAGCTCTTTAAATAAGTTTCTTTTTGCCGGTTTTGTGCGGAAAGCAAGCTATGTTAATGTAAGATCTGATTGTATGCTACATATAAAACTCGATCCAATTGAGT  
TTTATATGTAGCATAACAATCAGATCTTACATTA AACATAGCTTGCTTTCCGCACAAAACCGGCAAAAAGAACTTATTTAAAGAGCTTAAGGATAGAAAATAAAAGCCTGGATCCTTTATTG  
TTTTACTGGATAATAGATATACTGGAAAAAGATCACGAAGATCTATTTACTGCTATTTGAGACTTCTTCCATCTCACAAGAGATCTGAGAAACACCATGACCTCAGATGGATCTTTCAATGA  
GAAATGGGCATAAGTTTCTTTAGGAACTGAAGAAACCAAAATACCATAACCCCTGTTACTTTCTCTTAAGACCTTGAATGCATCCTCATCAGTACGATCATCTCCAATATATATAGGAAGCA  
TGGCCCCGCGATCATTAGTCTAAAGATTCAAGCATGAATTCTACAGCATCCCTTTATTCCAGTTAATTATTGGGCGAATTTCTAAAACCTTCATCCATAAGTTTGCTCCAGACGAGGAT  
AGTTCTTGAGAATGTCATGAACACACTGAGCAATCACAGTCCA ACTATTCTCGTCTACTAGACGGTAATGCACAGAAAGGCAGAACTTATTGTTCTCAATTTTTGAGCCTTTAATATCCTTT  
GTTTTCTCGATGAGAGATCTGAAAACCTCATCAATCATGGGTAAAAACTCTCTTGCAGTTTTGAAAACAAGTTTGCAGTGTGACCAGCTCATCAGTAGGACTAATGCAATTTGTGATTTGTAG  
CGATAGATTCAGAATATTTGACTGGGCCAACCAAGTCCAGACCATGACTGCCAACATAGTACAGTTCTTTCAACCCAACAAATTCGTAAACCTTATCACGACTTCTCCACTAATAATGGC  
AGTAGGAAAATACTTGGCGACATGTTTAACTGCAGTGCGCATAGCACTCGACATGAATGCAAGATCAGGATTGTCCACAATAGGGGAAAGAGTTCCATCATAGTCCATGAAGAGAGCTAT  
CTTCTTATCCTTAGCATAGTTTGTGATCTGTTCAAAAAGATGTCAGAGCTG

>comp158030\_c0\_seq69

CCCCTCTGAGATTTTACCTTTCAGCCCTTTTCCTTCGCGCCGCGCTACGTCTTTTCTCAAGCTCTTTCGTATGTCTCCCTGGGCTCTTCCTCGAGCGCTCCACATCACTGATATTGCCTATTA  
GGGTTTCTCTTCTGTGGCATTTCGGCGATCGGGCTCTACGTAGTGTTCGATCTCGATTGCTATTCTGAGATCTCTTCTATTCACTACAGGAATCGGCTCCAGGAAAATGTGTACTTAATGGA  
CTGCACCCCTAACTGCAGTGATAAGAAGACTCTAAACAAGTGGTTCTTCATTGACAAAATGGTTGGGTAGTTGATCACCAACACGCTAAAGAATAAAAATAACAAGTTCCTTTACTTTTGG  
AATATTGGACATCACAAAGGATCTGAAGCAGAGCCACAATTCTCCAGTTCTCACTGATCAAGTGCGTGCAAGTCAGTCCAGGTTGGGAATGTCTTCTAGTTTTGTACCTTACTCACCACC

ATCTGCAACGTTTTCTTCTACTTCCTACTTAACAATTCCAAGGAGAAAGCCTATTAATGACTGCCTCGATGCCATGAAATCGTCTTCTCCTCCTTGCAAAAAAGTTAGTAAAGATATCAGCT  
TTGATGCTGCTTTTGAGGAAGCTGATGCAGTTATCGAAATTGGATGAGCAAGTATCCTTCAGCTCTGACATCGTTTGAACAGATCACAACTATGCTAAGGATAAGAAGATAGCTCTCTT  
CATGGACTATGATGGAACCTTTTCCCCTATTGTGGACAATCCTGATCTTGCATTCATGTGCGAGTGTATGCGCACTGCAGTTAAACATGTCGCCAAGTATTTTCTACTGCCATTATTAGTGG  
GAGAAGTCGTGATAAGGTTTACGAATTTGTTGGGTTGAAAGAAGTACTATGTTGGCAGTCATGGTCTGGACTTGGTTGGCCCAGTCAAATATCTGAATCTATCGCTACAAATCACAAT  
TGCATTAGTCTACTGATGAGCTGGTCAGCACTGCAAACTTGTTCCTCAAACTGCAAGAGAGTTTTTACCCATGATTGATGAGGTTTTTTCAGATCTCTCATCGAGAAAAACAAAGGATATTAAG  
GCTCAAAAATTGAGAACAATAAGTTCTGCCTTTCTGTGCATTACCGTCTAGTAGACGAGAATAGTTGGACTGTGATTGCTCAGTGTGTTTATGACATTCTCAAGAACTATCCTCGTCTGGA  
GCAAACCTTATGGGATGAAGGTAAATAACTCACAATTTTGCATATTTGATCATTATTTTGCATGATTGCTCTGTATTGATAATGCTATAATTCTAAGACAGAAGTATATGAAGCCAGAAT  
ACTAACCTTACAGATTGCATTAATAATTAATGAGCTACACTAACCTAAGAATCTCCCAAATGGCTAAGGTTTTAGAAAATTCGCCAAATAAATACTGGAATAAAGGGGATGCTGTAGAATTC  
ATGCTTGAATCTTTAGGACTAAATGATCGCGGGCCATGCTTCTATATATATTGGAGATGATCGTACTGATGAGGATGCATTCAAGGTCTTAAGAGAAAGTAACAGGGGTTATGGTATTTT  
GGTTTCTCAGTTCCTAAAGAAACTTATGCCATTTCTCATTGAAAGATCCATCTGAGGTCATGGTGTCTCAGATCTTGTGAGATGGAAGAGTCTCAAATAGCAGTAAATAGATCTT  
CGTGATCTTTTTCCAGTATATCTATTATCCAGTAAAACAATAAAGGATCCAGGCTTTTTATTTTCTATCCTTAAGCTCTTTAAATAAGTTTTCTTTTTGCCGGTTTTGTGCGGAAAGCAAGCTATG  
TTAATGTAAGATCTGATTGTATGCTACATATAAACTCGATCCAATTGAGTTTTATATGTAGCATAACAATCAGATCTTACATTAACATAGCTTGCTTTCCGCACAAAACCGGCAAAAAGAA  
ACTTATTTAAAGAGCTTAAGGATAGAAAATAAAAGCCTGGATCCTTTATTGTTTTACTGGATAATAGATATACTGGAAAAAGATCACGAAGATCTATTTACTGCTATTTGAGACTTCTTCCAT  
CTCACAAAGAGATCTGAGAAACACCATGACCTCAGATGGATCTTCAATGAGAAATGGGCATAAGTTTCTTTAGGAACTGAAGAAACCAAAATACCATAACCCCTGTTACTTTCTCTTAAG  
ACCTTGAATGCATCCTCATCAGTACGATCATCTCCAATATATATAGGAAGCATGGCCCCGCGATCATTTAGTCCCTAAAGATTCAGCATGAATTTCTACAGCATCCCTTTTATTCCAGTTAATTA  
TTGGGCGAATTTCTAAAACCTTCATCCATAAGTTTGCTCCAGACGAGGATAGTTCTTGAGAATGTCATGAACACACTGAGCAATCACAGTCCAATTTCTCGTCTACTAGACGGTAATG  
CACAGAAAGGCAGAAGTATTGTTCTCAATTTTGTAGCCTTTAATATCCTTTGTTTTCTCGATGAGAGATCTGAAAACCTCATCAATCATGGGTAAAAACTCTCTTGCAGTTTGAACAAG  
TTTGCAGTGCTGACCAGCTCATCAGTAGGACTAATGCAATTTGTGATTTGTAGCGATAGATTCAGAATATTTGACTGGGCAACCAAGTCCAGACCATGACTGCCAACATAGTACAGTTCTT  
TCAACCCAACAAATTCGTAAACCTTATCACGACTTCTCCCACTAATAATGGCAGTAGGAAAATACTTGGCGACATGTTTAACTGCAGTGCATAGCACTCGACATGAATGCAAGATCAGG  
ATTGTCCACAATAGGGGAAAGAGTTCCATCATAGTCCATGAAGAGAGCTATCTTCTTATCCTTAGCATAGTTTGTGATCTGTTCAAACGATGTCAGAGCTGAAGGATACTTGCTCATCCAAT  
TTCGATAAACTGCATCAGCTTCTCAAAAAGCAGCATCAAAGCTGATATCTTTACTAACTTTTTTGTCAAGGAGGAGAAGACGATTTTCATGGCATCGAGGCAGTCATTAATAGGCTTTCTCCT  
TGGAATTGTTAAGTAGGAAGTAGAAGAAAACGTTGCAGATGGTGGTGAGTAAGGTGACAACTAGAAGACATTCCAACCTGGACTGACTTGCACGCACTTGATCAGTGAGAACTGGA  
GAATGTGGCTCTGCTTCAGATCCTTTGTGATGTCCAATATTCAAAAGTAAAGGAAGTGTATTATTTATTCTTTAGCGTGTGGTGTCAACTACCCAACCATTTTGTCAATGAAGAACCA  
CTTGTTTAGAGTCTTCTTATCACTGCAGTTAGGGGTGCAGTCCATTAAGTACACATTTTCTGTAAACTGGAGCCGATTCCTGTAGTGAATAGAAGAGATCTCAGAATAGCGAATCGAGAT  
CGAACACTACGTAGAGCCCGATCGCCAAAATGCCACAGAAGAGAAACCCTAATAGGCAATATCAGTGTGTTGGAGCGCTCGAGGAAGAGCCAGGGAGACATACGAAAGAGCTTGAGA  
AAAGACGTAGCGCGGCGGAAAAGGGCTGAAAGGTAAAATCTCAGAGGGGAGGGAGAGCGAGTGGGAGAGAGAATGAAAAACAAAGAAAGGGCCAACGGTATTTATAGAGCTCCGCC  
GTGACGGATAGGATCCGCTTGTGCAACTAGCTAGTCTAA

>comp158085\_c0\_seq7

GAGAGAGAGAGAGAGAGAGTCTGTTTTGCAATCAGGGATTGAAAATTTACAATCTACTTCATATATTTTTTCCATATTATTAACAAATTCATGACAGGATTGAAACATGCATAATTTGCA  
AATAGACTGTTCAAATCAAGAAAAAACAATTACAAGAGAACTATAAGATTCCAATTAACCCATTCATACTTCATTAATAATGACTCACAAAAAAAAGAGAAAAATGCTCCACTTTTA  
ACATTCTGATTAAGATTTTCGTTTGTGATAACTTTCTTATTGCTTTCTGAAACAGAATTTAATATCAAAATTTTTAATTCAAAAAATTTTTATACTAAAAAAATTTACTTTATAAAGCAGTAAGAA

AGCTGTCCCAAATGAAGCCTTAATTTAGATCTAGAGTTCTCAAGAACTCGTCTTCTGTATT

>comp158085\_c2\_seq1

AAGATTTAAATGAAAAATTAACCTTCAAACAAAACATATTTAATAAAAATTCAGGTAGCCCATACAACGTAGCAGGATAAACTTGTGTTGTTTTAGCCCTAATGAAAAGGGCTCACAAATG  
ATGAATATTTTTTTCTTTGAAATTCAGACCCGAAACCTTTCATCCCCAAGGCTCCAAATGCCCGTGCTTAAAAATTAATAATTGCTGAAACCCCGACAACGTAGAACCGAAAGTCGCGAA  
GGGTTTCGACCAGCAGTGTGTAAACAGAAAGACGAGTCTTGAGAATTGTGGATCTAAGTTAAGGTTTCGTTTTGGGACAGCTTTCTTACAGCTCCGTAAAAACAGCTTTCAAGTAAAAAAAT  
AATGAGAGAACAAACGTAAACCGGGGAAGGAATGAGATTTAAGATCCTCTAGGATTTAGATGATAAAAAAGCAAGGGCTCGTTTGTTCACGTTATTTCTCCTTTTTTCCGTTTGAAACT  
GGAAAACGCAGTCGTGGAAGATGTTTGGATGTGTAGCAGACTTTTTTAAAAACTCCGTTTTGTATTGTTTTGAGAAGCATTATTTATTAGCTTCTCCGTTTTTAAAAAGAACCCTTTCTCCT  
ATTGGCGTTTTTATACCGGAACGGGAAAAAAACCAAACGAAGCTTTAAGATAGCATCAAATAGTTAGAAAATTAATTAATAAGATTATTGTTATTAGTACATAGTAATTAGCAATATGATT  
ATGATTAGAAAAATAAGAGAATGACAATTAACGTGAAAGAAGTTTTATGGGCTTAATATTTGTTTTCTTTTAGTTTATTGTTATTGAAAGAGAGGAGGGGTTCTAGTGAGAGCTGGTTCT  
GAAGCTGGATCGTACCGGCCACCAGACCGGTTACGGTTCGAACCGGTTGAACCGGCCGGTCCGG

>comp158087\_c0\_seq18

AGACAGCAGAACTGGTCTAATTTACTCAATAGAAAAGAAAATGGCAAGTCAAAGTTACAACCTTGAGCTTGATGACTATATCTATCTTAGTCTACCCTCTAGTTATGCAACAAACAAAAG  
ACCTGAGGTTTTGCATTCTGTCTGCAGTCCAAACACTCATTGGCAGGCTTAGTAGCGCAATGAAGATTCATGCTCGAGGATCATGTTCTTATTCACTAGTAGAATTCATGGTGCAGATTG  
CCAGTAACCTAGAAAAATGCTGTGGTAAGCTGACAATTTTAAACATTATTGCACCTAAAAAAGAAAATTAATACTTGGATCAACTAAGATTTACAAGCCAAGGAAACGGTTCTGTCCA  
GGTGGCTCCTGGAGGAAGGAGATCCTTACATTGATGAGCTAGAATATGACTAAAAATGGCACCAAGCAGTCGCAAAACAAAATCAGCTCATTTGCTTGTAGTAAAATCAAATTACTGAA  
GCAGAGTTCTCCGCTCCACCGTCTCCACCCCATCAACCACATCATCTTCATCTTATCTTTGGGTACAGGCTGAGAATAAGCAGATTGAAGTAGCAGGTGGATTTCTTCCATCTT  
TCCAGACATCTCATCCTCTCTATCCATCTCAACGAGGGCCTGTGCAGAGAAGTTTTTGAATATTGGGAGGAAGCGTTTCTGCAGTACTCATGGAAAAGGAGGGTGAATATCACAAAGAGG  
GACGACTAGACCTGATGCAACCGTTGATTCTTTATTCCGAATACTCCGAGGGCTATTATCTGTGCAAGGACAAGGGAGAATATTGTGGAGTTGTGCACAACGGGCCATAGTTGTCCCCA  
CTCTCATATTTGTACGATAAACATTAAGCATCTGGTTGCGGTATATCAAGTAGCCAAGCAAGAAAATACACCATCAAGAATGGCAATATCAATGGTGCCAAAATAGAACATGTGAATCCGAG  
AAGCCCAAAAAGCAAGACTCTCGGAACTTCAGTGTGATATGGGAATGTTGGCACCATATTTGGATCATCTAACTTTTTTCTGAATACATACTTTTGTAGCAGATTATAAGTAAGGGGAAAA  
CATTGTACTAGTTCAGCACATAAACTTGTCCAGCCTGAAGTCAAGACATAAGTAATAAAAAAGGTAGCCTGTCCTGGTAAAGTTCTAGCAAGAACAAAAGGGATGTCTTTTGGATGGGAA  
ATGAACATTAGCTGATGGATAACAGATGCAGATAGAACGTTGACAAAGAAAACATTCCAAATCGTGAAGTATAATACTTTGCAACATGCACTCTTTTTTCTGCCACTGCGGGAGATAGCTC  
CTTCCACAGTAGAAAATAGCATCATTGTTGGTGGTACAGCATAGAAAAATAGAAGCAAAATGACACTGGGAAGATAGCCAGTTACCAGTTGGATCATGTATTTCTTTGTTAGTATACCTCTT  
AGAAATGGGAGTTTTTGTCTGTAATGTCTCCAACGTGTAAGACCTTGACAAAATGTAACCTGGGATGAGAAACAGAAACAAAATAGAATAAGTAGCCACCACTATTGATATTCGGCGAATC  
CAAAGTTGCCTGTACGGTATTGAAAGTTTGACCAGTATAAGTCATCAGGTTCCGGAGCCAAATCAGTAACCCATAACATAGGGTTTGATGATTGAAGAACTCGAGAAGCCACTACTGCA  
GCATACCGTGTCTTAAAAAATACCAATGCAGCTGAACAATCCTCTTCTTTTTCCCGGAATCTGAACGGCTAAGTGGAGTTCTTCTCTCCTCAACGTCAGAGGCATTGTCATACAGATCAT  
AAGATCTAGAAGTCCACCACAAAGACCACATCGATATGAAGCAGGTTCTTTTTAAGATCAAACCTTGCAGCCCTTAGGCGTACAAACTTCGTACACGCCTTCTCCGCATTGGTCATAAT  
TTTGTGAAATGCTCCACTCCGATGTATTCTTTGATGTGATAAGTAACTCATTCCATGATAAGTTATGAAAAATTTTTAATGACATCATCAAGTGGCATGTCTCTTAATCTCGGTATTGACCG  
AACAGAATACTGAAATGGCTAAGTTTAGGAGGACGTGCTGTAACATGATCCAGTCTTAGTTTGGAAATCTTTGATATTGCAAGTAAAGAAGGGTGCAAGCTGAGAAAAGAGATAATAG  
CAGGGCAAGGCAATGAACCCACAACCTGAAAACAATCATCTTAAAAAGACAACAGCATCAAGGCCGACGGATGCCAATATCTCATTTTCGGTTGGTCCCATGCCCTTGAGTATCCAACC  
TGGGAAAGGCAAAAAATTTTCAATATTGAAGGAATCATTGGCTGTTCGCTCCTGGGTGAGACTCCGCCAAAATACACGTACAAATTTGAAGGCTGTTTCTGATCACCGAATAGATC

GAGATAAAGAACACACAGAGGCCGATGTTTATGCCTGCGGAGGTCAGCAGAGCGTCAAGCTTCATCTCAGCCTACCGATATCTGACCCAATGAGCATTCTCCTGCTTACAGCGCACACC  
GCCTAAAATGGGCAAAAACCTGCCGATCGATCTTCGCATAGGGTTAGGGCGAATATCCGAGAGGAACAGAGCTGGGCATTTAGACAAATTCCTTGAGATAATAAGAACCCTGTTAAGACCAG  
AGTAGATCGATGTAAGAAAACCTAGATAAAGAAGGACATTTCCGAGTCGGCCATGGGAGAAAATGGATGAGGAAACCAAGGAAAGAGCGCGCCAGTTTGGGGTTTGGGAGGAAAGATGTAG  
GGGCCACAATGTCATGATACTGCACGCGTGCCTTTCGCTATTGATTGAACC

>comp158119\_c0\_seq1

TTTTTTTAATTAAGACTTCTATTTCTAAAAACAAATCCATTATACACAAAAGATACCCATACGTCTCATTCTTTCTTTTCTTTTTTTTTTTTTTTTTTGTGTGTTTTTTCTAAATAATACATATGCTTA  
TGCTATCGCTATTAAGGCTTTGTTGGACGACTTTACTGTTTCTTAAAGAAAATTAAGTGAAAATTTACTTTAAGAAGCCCTTAAAAAGCCATCACAAAGGAAACCTAGCTAAGTTTLAGGA  
GCAGAAAGTCCAAATCTGGCTAGCAAGTACTTGCACACTGCACACACATTTCCAGTA

>comp158162\_c1\_seq4

CAAGGCTAATTTTAAATTTATGTATGTAGTAGAGTCAAATTACAAATAAGTATGCATGATCCAGCTACTAAGAGAGGGTATAAAAAGTAGATACAGATCGAATTGCACATAGGGAGATATTGA  
GTATTTATTTTAAAAAGTCTCCAGGTGTACTCAAAGAATATTAAGTGAATAATTACTATGAGTGGTTGATTTCAAGAATCAAATGCTGGGTAAACTATATATTTAAATGAATTAGGAGAGAAA  
AAAGTAACTAAGCTCTATTACTCTGTGGCTAAACAAAAAAGTGAAGATTTTGGTCTTTATTTCTTTTTCTGTCATCCCATCTCCAGCTGTACCACGGTTTGTTAATTTCTTTTCTTGG  
CCTTTCCTTATCACCCAAGAATGACGAAAATCTATACATGCTTGTGCAATCAGTTCCATGAGTGTGCAATGATCTGGATTTTTACCTGAAGAATCAGTTTTTCTGCAATGGCTTTGTGTC  
CTTTTATGCTGTGTTTAGTCTCAGAAAATCGAGAATCTTCTATAGACTTCTTTCTATCTTTGATTGAGTCAATTCAAGGATGAATCAGTGTAGTTTTTGCACAAGCAACCAGGAATAGGATT  
TGCGTAAAAATTTCTTCTAGCTTTGATGTGGGTCAGCTTGCCTTCGATGGTCTCCAAGTCTTCTAGCATGGTGCCTTCTAAGTGTGATCTTCAAATTTCTCCCATGTTATGGTGCCTT  
GTCCAATTTATCTATCAATCCCCTATCTTCCGCCTGTCAGGATTTATGGTTTTAAGGAATCCTTTAAATCTTCTGTGGCCTTTCACCGTTTTCCGATATACCATCATAGGTATACAAAA  
ACATCACTGTTTAGGGCTACAATGTAGTGCATTGCAGCAAGCCGGTTATGGTATGGTTGAATGGTCTCAACTCTTCTTCTGTTGCTAAGCTTTTATGTGTATGAATGTGGGATACTCTTTC  
TTTAAAGAAGCCATGCTGTGCGTCCAAAAGTTTCTCCAGCAACTATGTAGATGTTGGTTGTTGATGGATATCCCATGGCTTTTAAAGAATAAAGCAGCCTCTCGCGGTGTCAATGGACACC  
CTCCTTGAATTTCTCCTCTCTGCACCATTTATACTCTTTCCTTCCAATGCTTCACTCGGTATCTCATTAAATGAAGAATTCTGCCTCCTCCTTTGTAAGGTTGTGACTGCAACCAGTGAATG  
CAAGCATGTCCTTCTCATATCTCAAATGCAGTGAATGTAGTGATTGCTTCCATTTCTTAGCCTATCAACCAGTTCCTTCCAAGCTCTTCAATCTGTGGTGTGTATCTCAGTGCCAGATAGT  
TAACCCGGCATCGGAGCCTCTGGATCGACGGAGGAAGTCCATTGTTGCAATTCGAGAATCGGTCTTTATGAATACCACCACCTTCCGTTTTCTTAAATTTTGGCAAAGTCTCTATAGTAC  
GGGCTCTTGAATAGGAGATTGGCTCCTAATGAGTGGTTTGATTCCAGCATATTTGTGTGGTAGAGATTCTACAATCTCAATATCCTCTCTCAATGCATTCACAAAGTGCTTCCAGTCAAA  
AATATCTTTGAATCCACTTGAATCTTCCAGAAAGAATCATGATCTAAATGGGGAAGAACAAGTGTGTCATCCATTAAGTTAGCCGCTGCCACCATATCACTTATTCTCATTTGATT  
CAGTCCGCCATTGGCATGAACTATGAGATAGCCATTGAGGTTGAAGTTGCAGGCTTATTTTTATCTTTTGGTCTGGAGATGCATTGCTCGTAGCCTTCGTTATAAGGTTTTCTCATATTTT  
TGGGACCGGAGCGTGACTCTTTCGATGGCCGTTAGCTTGTCATCTCTACATTGAACGCAAGGCCGCCGCCGTCGCCGGCGATCGGATGGTGGTGCAGAACGCCGTCACCGGTGTAAT  
TCTGCTCATCTGAAAAGACGCTCGCAAAGCCAAATAGCATTAAACGCGCGAGCATGAGCACAAGCGCTGCCCCCTCCTCCCTCCCCCTCCCTCCTCCTCCTCATCCGCGCAGGCGGAGTCTC  
CTCTCCGTATCATCGGAATATGCTCGTTCGATGTCGCCGGCCATGTTGTCTGTACATGGCGGGCGGTCGGTCCGAGAGCCTCGGGCTTTGCGGCAGACTTGTGCTGGTTTTCGGCCCCG  
ACGGCAACTGCCATTGCCCGCCCGGTCGGATTGAATGAGACTATTTATATTAACATAGAGAGAAGTGAATGAGAGAAAACGGATCGAACGAAAGAGAAGAAGAGGCCGGGAACCG  
CTTCTCCCTCTCCTAATAACGAAAATTCGGCCTTCAATTTCTGATTTGGTTCTATTTTTGTGATAA

>comp158162\_c1\_seq5

CAAGGCTAATTTTAAATTTATGTATGTAGTAGAGTCAAATTACAAATAAGTATGCATGATCCAGCTACTAAGAGAGGGTATAAAAAGTAGATACAGATCGAATTGCACATAGGGAGATATTGA

GTATTTATTTTAAAAAGTCTCCAGGTGACTCAAAGAATATTAAGTGAATAATTACTATGAGTGGTTGATTTCAAGAATCAAATGCTGGGTAAACTATATATTTAAATGAATTAGGAGAGAAA  
AAAGTAACTAAGCTCTATTACTCTGTGGCTAAACAAAAAAAAGTGGAAAGATTTTGGTCTTTATTTCTTTTTCTGTCCATCTCCAGCTGTACCACGGTTTTGTTAATTTCTTTCTTTGG  
CCTTTCTTATCACCCAAGAATGACGAAATCTATACATGCTTGTGCAATCAGTTCCATGAGTGTGCAATGATCTGGATTTTTACCTGAAGAATCAGTTTTTTCTGCAATGGCTTTGTTGTGC  
CTTTTATGCTGTGTTTAGTCTCAGAAAATCGAGAATCTTCTTATAGACTTCTTTCTATCTTTGAATCAGTGTAGTTTTTTGCACAAGCAACCAGGAATAGGATTTGCGTAAAAATTTCTTCT  
AGCTTTGATGTGGGTCCAGCTTGCCTTTCGTATGGTCTCCAAGTCTTCTAGCATGGTGCCTTCTAACTTGATCTTCAAATTTCTCCCATGTTATGGTGCCCTTGTTCCAATTTATCTATCAATC  
CCACTATCTTCCGCCTGTGAGGATTTATGGTTTTAAGGAATCCTTTAAATCTTCTGTGGCCTTTCACCGTTTTCGCCATATTACCATCATAGGTATACACAAAAACATCACTGTTTAGGGCTA  
CAATGTAGTCGATTGCAGCAAGCCGGTTATGGTATGGTTTGAATGGTCTCAACTCTTCTTCTGTGCTAAGCTTTTATGTGTATGAATGTTGGGATACTCTTTCTTTAAAGAAGCCATGCTGT  
TGCGTCCAAAAGTTTCTCCAGCAACTATGTAGATGTTGGTTGTTGATGGATATCCCATGGCTTTTAAAGAATAAAGCAGCCTCTCGCGGTGTCAATGGACACCCTCCTTGAATTTCTCTCTCT  
GCACCATTTATACTCTTTTCTTCCAATGCTTCACTCGGTATCTCATTAAATTGAAGAACTTCTGCCTCCTCCTTTGTAAGGTTGTGACTGTCTATCCTTTTAAAGGGACGGGAAGGTACCTCA  
AATGCAGTGCAATGTAGTGATTGCTTCCATTTCTTAGCCTATCAACCAGTTCCCTTCCCAAGCTCTTCAATCTGTGGTGTGTATCTCAGTGCCAGATAGTTAACCCGGCATCGGAGCCTCTGG  
ATCGACGGAGGAAGTCCATTGTTTGAATTCGAGAATCGGTCTTTATGAATACCACCACCTTCCGTTTCTTAAAATTTTGGCAAAGTCTCTATAGTACGGGCTCTTGGAAATAGGAGATTGG  
CTCCTTAATGAGTGGTTTGAATCCAGCATATTTGTGTGGTAGAGATTCTACAATCTCAATATCCTCTCTCAATGCATTCACAAAGTGCTTCCAGTCAAAAATATCTTTGAATCCACTTGAATC  
TTTCCAGAAAAGATCATGATCTAAATGGGGAAAGAACAAGTGTTCATCCATTAACCTTAGCCGCTGCCACCATATCACTTATTCCTATTCTCATTGATTGATTGAGTCCCGCATGGAATGACTAT  
GAGATAGCCATTGAGGTTGAAGTTGCAGGTCTTATTTTATCTTTTGGTCTGGAGATGCATTGCTCGTAGCCTTCGTTATAAGGTTTTCTCCATATTTCTGGGACCGGAGCGTGACTCTTTTCG  
TATGGCCGTTAGCTTGTCCATCTCTACATTGAACGCAAGGCCGCCCGCTCGCCGGCGATCGGATGGTGGTGCAGAACGCCGTCACCGGTCGTAATTCTGCTCATCTGAAAGACGCTCGC  
AAAGCCAAATAGCATTAACACGGCGAGCATGAGCACAAGCGCTGCCCCCTCCTCCCTCCCTTCCCTCCTCCATTCGCGCGCAGGCGGAGTCTCCTCTCCGTATCATCGGAATATGCT  
CGTTCGATGTGCGCGCCATGTTGTCTGTACATGGCGGCGCGTCCGTCGGCAGAGCCTCGGGCTTTGCGGCAGACTTGTGCTGGTTTTCGGCCCGACGGCAACTGCCATTGCCCGCCCG  
GTCGGATTGAATGAGACTATTTATATTAACATAGAGAGAAGTGATCGAATGAGAGAAAACGGATCGAACGAAAGAGAAGAAGAGGCGGGAACCGCTTCTCCCTCTCCTTAATAACGAAA  
ATTCGGCCTTCAATTTCTGATTTGGTTCTATTTTTGTGATAA

>comp158171\_c1\_seq2

TCACATCTCTATTACCTTAATGTAGATTGAGAGAATTTTCCACTAAAGTTCATTCATCCGGCCATATTATAATATCATAACAAGGTTTTTCTCCAATATTGGATAAATAATGACCTGGATCCAT  
GATATGACCTTCAACTCTCTTTATATTTAAGCTTATAAACTTCCAATACAATGTTAAATCCACTCATAACCCCTTTTAAATAGGGTCCATTCACTACATAAAAAGTTTTCTTTTTGCGGCACAC  
AAATCCACCGCAAATAATGAAATCTGTATATAACAATTAGTGGTAAATTTGCAACGAAATATAATATGACGCAAAAAGTGGCATCGTAAAATTTATTTGCGGAAAAGAAAAATATGCTGCAA  
ATATTTTTATGATGAATTTGCCACATATTTATGGTGAATTTTAGCCAAAAAATCAAAAAAATAATCATAAATTTTCGCTAGCCGGGTATGCTGCCAGCACCTGACTAGACTGCCTGCTT  
CATCTCCAGCCAGTCTGACTGGCTTGCCCTGCACCTGTTTCGCTTCTGCTGATCTGACCGGACTATCCGAGATTCGAACCTTGTCCAACAAAAACCATTGCCCTCTCCACTCGCCAGAGGA  
GACAAAATAGCTTAAATAGCTTTTTTTTTATTTATAGTATAACTCATCTTGAACAGATTTGTGGCAACAAATTCGGTCAACTGCTCAAAAATAGCAAAAAAATTTGTGCAAAATTTGTC  
TTCATTTTTGACAGAAAACAATCCGTTGTAAAGTCCGTCGCAAATCCACATCAAGCTGCTAACTTTCCAGTAGTGCTTGAGATATTTAAATGAAAACTCTACCACATGGCTAATAGAGT  
TTCCCATGGGAAAGATTTCAACCTACTGATGTTAGACTAATTTAGGCTTCATTG

>comp158173\_c0\_seq2

TTGTCATGCAATTTGGCTTCGAAATTTATGAAGGAGCTAAGACTGCCGCAAGAAGAGCCAACAAAGATTTGTGTCGATAACAAGTCAGCTATTGCCTTGGCCAAGAATCCTGTTTTTCAT  
AATCGAAGTAAACATATCGACACACGCTATCACTTCATCAGAGACTGCATCACACGAAAGGATGTGCAAATAGAGTATGTGAAGACTTATGATCAAGTAGCTGATATATTCACCAAGCCAC



TCAAGCATGAAGATTTTACAAGGATAAGAAGATTGCTCGGGATAACAAATCAAGTTAAGAGGGGGTGTGAAAATTAACCTTGATTAATTGGGCCCTTGATTGAGTGGGCTTTCTAATTG  
AGCCCATAGCCTAGAAAAGTCTTTAGAAAAGTCTAGAAATCTACTTTATGGTGAATGTTTTAGAGGATTCTAGAAATATATTCTAAAAAGAGTTGTTTAGAGTATTCTAGAAATATGCAATTA  
TGACTTTTGTAAAAGAAGATAGGAGAATAATCTAGAGAGTCAATATTAGCCATTGGATTAATAATGTGTTGGCACAATCCTAAGGGGGAAGTCACTAGTATAAATAGGTGTGGAGTCTTTGT  
GTTTATGTAAGAAATATAATCAAGAGTTCAAGAGTGAATAAAAAGTGAGTTTATAAGTGTTCCTCTTCTCTTCTAAAATTCTTCTCTTTCTATAGCCTCTTATTTTCCAACAAATTGGTATC  
AGAGCCGAAGTTTCTTCTAAAGAGATGGCGAGCAATGGTATGATCCCTTTCCAAGTCCCAACGCTCAACAATAGCAACTATGACAATTGGAGCATCAAATGAAGGCCCTTCTGGAGC  
GCAAGATGTATGGGAGATGATAGAGAAAGGCTACAATGAGCCACAAGATGAGTCAAGTTTATCCCAATCTCAAAAGGATAGTCTAAGAGATTCAAGGAAGAGAGACAAGAAGGCTCTCT  
ATCTAATCTTCAAGGATTAGATGATGACTCTTTTGAGAAGATTCCGATGCGAAGTCTGCCAAGAAGCATGGGAGAAGCTTCAGACCTCTTACAAAGGAGC

>comp158194\_c0\_seq4

CTATAGGCATGCCGTTTGAAGTGGCCGAGGAAGTTCTTGTGATAAAACATTACTGGGATGACTGGTTATATTGCACGTAAAAAAGACAACGCTCCAGTTCACAAAAATATGCATGTTAAA  
TGATGATCATAATACATTCAAACATATGAATGTTCCATAATATTAACCTACTCTATAGGCATGCGACTCTTTAAGTCCCTAAATGAAGATGGATTGAACAGTAAAAACAATTTGTATTATCTT  
CATTCAGGCCTTAATGGAAATACAGCGTACAATCCAAATATTCAATAATAAAAGCCAGGTCTAGGCAGAGAATTGCGTCCCCCTTGTGAGTTTAAAGGTCACGTACTGAAGTTATGAAAGGG  
AACCTCTCTTTTAGTAAGGGTACAATTGCATAGATTAACGACCATTCTAGAGCCATATTGATATGATCCTCATCTCGGCTATGCCCTTTTTTCTTATAGGTTTATGGAAGGATGCAAGTCT  
ACATATATCTGCTTCATGATTAATTCCTCAGAGAAGATCATCAGATGAATAATGCAATTCAACTAGCCAAAAACAATATGAATAGTCTTGCAGAAATTTGCAGAAAAAAGCATCATAATGT  
AGAAGGACGAATTTGAACATTTTATTTAACTGAATCCTTACCAGTTACTCATTCTTGAATGATTGTCATAAGATTCGAAAATGGCATCCTAGCAGTCCACGGCCATGCCAGTGTCTAGGTG  
TTATAGTGAAATTCATTAGAATGCCCTGCCTCATTATCAGTACAGAAACAGGATGGCCCTCATTGACTGTGCTTCTGAGGCAAGCCTTACCATCAATGCATCACCAATTTCAACATTCCCA  
AATTTATTATCTGGTCACCAAGCTGTAAACCATCTTCTGCTGCTGGAGAAGCATCGCTTATTTTCAATCACAGCAAAAGGAATCCTTGCAATCGAGTCCACAACCATGGGAGAAGTTT  
GAGATGCTCTATCATGAACAGAAGCTGATGGATCTGAATGTGGTGGACGTTGTAGATCGTTTCTAGCTAACTTGGCTGAGTGCAGAACTTGCAAATTTTTCATCTATTTTGCAGTGATAGCC  
TTGTGATCATTCCGAAGCGCTGATACAAAAGTAAAAACAAAAACAAAAAATGGCCAACAGGTTTTTAGGGATAAAAACTAAGCATAAAATAACAGCATTCTAACAAAAAGAACCAAATTT  
CACCTCCAAGCTAAAACATAAAACAATATATCATTCAAACACAAGGAATCAAACCTCACTTGGCTCTCATTATTTCAACAACAAAAAATCATCAATGGCAAAAGGTTTACAAAGAAA  
AGCATAAAAGGAAAATATGACAACCTAAACAGGTAAGCAATTTGCTCGTATGCAAATCGTATGGCGAGATGATTAATAATATATATCGACAGAAGGACTAATAATATGAAAGTAAGTACTAT  
AGATAGCCTTCAGATGTTACTTTCAATTAATAGCCACAAAAAACCAGATGTTCCGATATTCAAACAAATTTTATGTCTTACAATCTCGATATCCAACTCAAAAAACAATGTTCTG  
ATGTCCCCCAATCTAACCCGTCTACCTCTCATATAGGGGTGTCAAATGGATTTTTAGGTCAAGCTCGGGTCCAAGCTTCAATTGACCCAACACGACTAGGAAAATGGGTGAGAAATCCA  
AACCCAACCCGACCCGACCCAACCTCGCTAACCCATAAGTAGCCATGCCCGAGCGATGCATGTTTTTAGGTTGGGTGAGAAATAAGTTGATTTGCGGGTGAAAAAAGTTGATTTGCGGGT  
TTTAGGTTGGGGTCAAAAAAAGTTGATTTGAGTGTGACACAAATGAACCCGAAATTTTAAATGGGTGAGAAATGAAATATAAACCCGACCCATTTGCAAATGGGTTAATC  
CAAACCTAGAATTTTTGGGTTTGGTCTAGGTGCTGTTTCGAGTCGGGTCAAATATTGACATCCCTACTCTCATAATCAAAATCTACAAGAGCCAAAAAATGACAAGAAGGCAACAAAC  
TAGCTCACTAAATCTCAATGACCCTGCCTCCATTATTTGGAACATCAAAGGATTCATATGCACTGATAAAGTCCCTCAGTTGTAAGGAGCTTACCCACACTTTTGTCTAAACATGCCCTGC  
ATTCTAAAGGCAAAGATAAACGGTACAGTGTGCTCATACCTTGGTTTTCTTCTCACATAATTTTTGTTAATGAAGAAAGCTGCCACAATTTTTATTTTTCTAAAAAATAGAAGAATTTA  
GATCAAATGGAACCTCTAAAATCTTTTACCTCCTCTTCTTCTCAAGCCAAATGATACATGGGACCATCACTGTTGGGTCCCACCCCTCTTTTCAAACATCTATAGTTTATGCTTCTA  
ATTTCTTTGGATGAAAGGCTCCTTTCCGATCAAATCAAAGCCATCGTTGATAGTTCTTCTCAGCCTTGAGCAATCTTTGGTGACTTCAATTGCTATAAGTATCATTTTAAAAAAGCAGGTGG  
CAATCCTATTACATAAGAGACCTATTACATAACAGCAAGCTCTGGGATTTGAGTCTCTTATATATGATATCAGTAAAAAATAATGGCATTTGTTATTTTTTTTACTTGGTTAATCAAAGATC  
AAATTATCTATACATATCAAGTTGGATAAAATTTTTTATTAATCAGATACAACCCTAGATGTTATAAAATTTTGTCACTGGGACGGTAAGAGAAGCAATTCTCACTCTTATTATAGGATCGAC

AACCCTAGACGTTATATCATTCCTCCTCATTCTGCAATCCAATCCAATCGCCTTATTTCAAAAAACCACATGTTATTTAAAACTATTGGACTAAGAATGCCAGCTATTGGGAAATTCATCA  
GGGTTTTCTCTCAAAACCCCAATTGGAAATCCTATCTCATCACTCTACCAAAGCTTCAAATCTTAAACCCCTCATTAATAAGCCTGGGCTTCCTCCACCTACCTAGCCACCACCTCTAT  
GACTGACCTCCAACAACAACAACTTTATATCTTTAACTGGATCATGGTCCTTTAAACACCTTTCTAACTATCTTTGAAGAATGTTAACAGACTACTTGTCAAATGCTCCTCCTCTTG  
GGCTTCTTTGATCATCCAAAGGTCCAAAGCAAATGGCTTTCTCATGGTGAATGATCTCAAGTTTCTAAATGCCAAGATGAAAATAAGACAAAACACTACAACAGAGTTAAAAAGCCATC  
ATCGCCTGTTGAACTCCATACTCAACACGGGACTCTATTAATGTTATATCTTTCACTTTCAAAAACCTTTTCAATACCCCACTAGCCCTGGGCTGACTTAACTCTCATTCCACTAGGCTCA  
ATAAATCCCCCCCCACCTCATTGCTTCTTACTTCCCCAGTGCAGATGATGAAATCCAATATATCATTCTCTAATCCTACCTCTCAGTCCTTGGTCTTGATTGATACACATTTGAATTCT  
ATAAAAGTGACTGGAATATTATTGGACCTCAAGTTTACAAGGCTGTTAAATTCTTTTTTCAACATTGCTATTTATCAATGAGAGACAAAGCCACAGCTATAATTTTGATTCTCAAAACCAATC  
ATGCTAATAATATTTCTAACTTCATGCCTATTTCTATTTGCAATATATTTTATAAAGTGATTGCAAAAATT

>comp158194\_c0\_seq5

AAAAAATAACAAATGCCATATTTTTTTTACTGATATCATATATAAGAGACTCGAAATCCCAGAGCTTGCTGTTATGAATAGGTCTCTTATGAATAGGATTGCCACCTGCTTTTTTCAAAAT  
GATACTTATAGCAATTGAAGTCACCAAAGATTGCTCAAGGCTGAGAAGAATACTCAACGATGGCTTTGATTGATCCGAAAGGAGCCTTTCATCCAAAGAATTAGAAGCATAAACTATAGA  
TGTTTGAAAAGAGGGGTGGGACCCAACAGTGATGGTCCCATGTATCATTGGCTTGAGAAGAAAGAGGAGGTGAAAGAGATTTAGAGGAGTCCATTTTGATCTAAATCTTCTATTTT  
TTAGAAAAATAAAATTTGTGGCAGCTTTCTTCAATTAACAAAAATATTATGTGAGGAAGAAAAACCAAGGGTATGACAGCACTGTACCGTTTATCTTTGCCTTTAGAATGCAGGGCATGTTA  
GAGCAAAAGTGTGGGTAAGCTCCTTACAACAGGACTTTATCAGTGCTATTGAATCCTTTGATGTTCCAAATAATGGGAGGCAGGGTCATTGAGATTTAGTGAGCTAGTTTGTTCCTTC  
TTGTCAATTTTTTGGCTCTTGTAGATTTTGTATGATGAGAGTAGGGATGTCAATATTTGACCCGACTCGAAACACGACCTAGACCAAACCCAAAAAATTCTAGGTTTGGATTAAACCCATTTG  
CAAATGGGTCCGGTTTATATTTCAATTTCTGACCCATTTAAAATTTCCGGGTTCAATTTGTGTCAACCTAAAAACTCGAAATCAAGTTTTTTTTGACCCCAACCTAAAAACCCGAAATCAACT  
TTTTTTTTACCCGAAATCAACTTATTTCTGACCCAACTAAAAACATGCATCGCTCGGGCATGGCTACTTATGGGTTAGCGAGTTGGGTCCGGTCCGGTGGGTTGGATTCTGACCCAT  
TTTCTAGTCGTGTTGGGTCAATTGAAGCTTGGACCCGAGCTTGACCTAAAAATCCATTTTACACCCCTATATGAGAGGTAGACGGTTAGATTGGGGGACATCAGGAACATTTTGT  
TGAGTTTGGATATCGAGATTGTAAGACATGAAATTTGTTTGAATATCGGAACATCTGGTGTTTTTTTGTGGCTATTTAATTGAAAGTAACATCTGAAGGCTATCTATAGTACTTACTTTCATAT  
TATTAGTCCTTCTGTGATATATATATTTAATCATCTCGCCATACGATTTGCATACGAGCAAATGCTTACCTGTTTAGTTGTCATATTTTCTTTTATGCTTTTCTTTGTAAACCTTTTGCCATT  
GATGATTTTTTTTTTGTGTTGAAATAATGAGAGCCAAGTGAAGTTGATTTCCTTGTGTTTGAATGATATATGTTTTATGTTTTAGCTTGGAGGTGAAATTTGGTTCTTTTTTGTGATAATGCTG  
TTATTTTATGCTTAGTTTTTATCCCTAAAAACCTGTTGGCCATTTTTTGTTTTTTGTTTTACTTTGTATCAGCGCTTCGGAATGATCACAAGGCTATCACTGCAAAAATAGATGAAAATTTGCA  
AGTCTGCACTCAGCCAAGTTAGCTAGAAACGATCTACAACGTCCACCACATTCAGATCCATCAGCTTCTGTTTCATGATAGAGCATCTCAAACCTTCTCCCATGGTTGTGGACTCGATTGCA  
AGGATTCCTTTTGTGTTGATTGATGAAATAAGCGATGCTTCTCCAGCAGCAGAAGATGGTTTACAGCTTGGTGACCAGATAATAAAGTTTGGGAATGTTGAAATTTGGTGATGCATTGATGG  
TAAGGCTTGCCCTCAGAAGCACAGTCAAATGAGGGCCATCCTGTTTCTGTACTGATAATGAGGCAGGGCATTCTAATGAATTTCACTATAACACCTAGACACTGGCATGGCCGTGGACTGCT  
AGGATGCCATTTTCAATCTTATGACAATCATTCAAGAATGAGTAACTGATTCTTAAAACAGTGAACCTGGAAATTTGGGGAAGAAATTACGAAGTGAACGTAAGCATAATCTCCTGATGCAT  
GAATGGAACCTTCACTGACTTCCAAATTAGAAAGGAAAGGGAACCAGCAGGTTCTGCAGCAGTTGCATTAATTACGTCCTCAACAACCTTCTTTCCTTGGCCCTGGTCTCCAAACCTG  
CCCTCAGTAATGGATCTACAATAAAATGCTGACATCCCCATTTTCACTATCTGTAGTTGCTGCTTTAAGGGAATGTGTCTATTCATTGTTACCAAAGGCAAAATATAACCTTTAAATCTT  
CGTACTTCTGGAAGTGTGAAATCCATTTGTGATCTGTTGCAACAAATTTAAGATACTTGCCAATCAGTAATCGTGGAATAATGGAACCTATTTATTTTCTCTGCATGCAATAGCTTGTATC  
GTAATGACTAGTCATTCTCTATGACTTTTTTTTTGCCAGGTTAAAAGTCGTTGCATGTGGTGTCCCTAGCGATAAGAAATGTTTTACTGGTAAAGTTACGGCTGGTTTGGACCATTGTGCT  
TGCTGCTGATGCTTTTTTCTATATATATATTTTTTAGGAGATGCTTTAGGATGCTTCTTTACCTTTAACTCCAGTATAAAAGTAGCAAAAAAAAAAAGGCTTTAATCAG

>comp158236\_c0\_seq4

TAAACTGGCTTGCTCTATTTAGCTCTGGTTGCTTGAGCTTCTTAGCCCTTTATTGATTCTGGAAGATAGCAAGAATTTGCAGAGGTTTATGTGCATTTCGAAGAATGAAACAGTTGTATCTGAG  
GAGCAGAAGCCTCAAGCGTCTCTTCTCCTCCCTCTCTCCCTCAGGCATCTCCAAGAAGGGCTCTACTGAACTTCCATTGATTCCGGCAAGGCCGAGCCTGCAGTGAAACCAGCACCGA  
AGCCCACATGGAGGTGTTTCTCCTATGAGGAGATTCACAAAGCTACTAATGGATTCATCAAGATAACTTAGTTGGAAGTGGAGGGTATGCAGAAGTTTACCGGGGAGAAGTTCGAGAACG  
GCCAAGTAATTGCAGTGAAGCGGCTGACAAGAGCAGGCAATGATGAACAGAAGGAGAAGGAGTTCTTAACAGAGCTGGGAAGTGGTTCATGTCAGGCATCCCAATATAACTGCATTG  
TTGGGCTGCTGCATTGATCAGGACCTGCATCTCATCTTCGAGTTCTTCTCGTGGCTCCGTTTCTTCCAATCTCCACAGTACAAATTCTCCTCCAATGGAATGGAAACTCCGGTACAAGAT  
TGCTCTCGGAACTGCTCGAGGCCTCCATTATCTGCACAAGGATGCCAGAGGAGGATCATTATAGGGACATCAAACATCAAACGTTTTGCTGTCAGATAGCTTTGAGCCTCAGATTC  
AGACTTTGGGCTAGCAAATGGCTTCCAACAGAGTGGAACCACCGTGCCTGCGCACCGATCGAGGGCACCTTTGGATGCTTAGCGCCTGAGTACTTCACACATGGGATTGTGGATGAGA  
AGACTGATGATTTGCATTTGGAGTTTTCATATTGGAGATGATATCAGGGAGAAAACAGTGGATGGATCCACAAAAGCCTGCTTAGCTGGGTATTTTGTGCATCTGAATTTTTAATTATATC  
TCTAATGACATCATTAGTTATATAATCTATTTTGGCTTTGATGTACAAATTGTCACAGGCAAGACCATATTTAAATGATGGAAAATTAGAAATGTTGGTAGATGCAAGATTAGGAGAGGATTA  
TGATATTAATCAATTGAAGAGACTCACCTTCATAGCTTCCCTATGCGTCAGGGCAAATGCAGCATGGCGACCTTCCATGACAGAGGTGTTGGATCTCATTGAGCATGGCGATATGTCGTCGG  
AGCGGTGGAAGATGCCAAAGTCGGAGGAGGAGGAAGAAGAGGATGAAGAGAATGAAGAAGAGGAGGAGAATGCAGAGGGGAGCGCGTAGGCCGGAATGGTAGAAAAATAGGTACA  
AATGAATTAGGTTGCTCTCTGTGTGGATTTTAGGTAGGATGAATGTGGGTTTTTTCGGCCCTTTGTGGCACATTGTGTGTGTTTTCAGATTTAGGCCTTTTGTGAAGATTGGTGTCTGCTTCT  
GTGAACTGTTGGTGTGTTTTCTTTCTTTTTTTTGTTTTTCTTGGAAATGTTTTCTGTCGTAGATTCTTCAACCATTCAACTTGTGTTGGATGAAAGAATACTTTCTATATGTACTTTTTTGTTTTT  
GATATAAAGTTAGATATTGTTAACTTTTTTTTCTTATATATTGGAAGATTCCCTCAAAAAA

>comp158263\_c0\_seq8

AAAAAAGCTATTATTTCTCTATCAGAAATGGGTTATGAAGTTGTTTGTATATTTGCATTGAATAACTACATCAAAAAGTCGCTTTTTTTTTAATGGCACGCAATAAATACTATCCTTTATGC  
ATGAGAAAAGGAACAAAATAGTCCCTCGACTCTTTGTGAGGGATTAATGGTCTTGAAGTCAATTTAGGGACCAATTTGGTCCCTCAAATGAGTTCAAGACCATTTAATCCCTCACAA  
AGAGTCGAGGGACTATTTTGTTCCTTTTCTCATGCATAAAGGATAGTATTAATTGTGTGCCATTTAAAAAAAAGCTACTTTTGTATGATTTATTCAAATGCAAATATAACAA

>comp158302\_c1\_seq7

GGTATACTCACATATATGCCTTTTCTCCCCTGTACTAGAAATAGGAATAACTAACTAAAGTGCTTTATGCACGGCAGCAACATAAAAAACAGAAAGTTAAGTAGTGGAGAAAATTCTACTGCA  
GTCTAAAATAAAAGTAATAATACTGTAGTAATATTATAAGATAACGTGTTCCCTTAGCTGTAGATGATCCTCATCACATTCCCAACCTCCTCGCCCTCTCCACCTCCTCCTCATTCCCTCCTCC  
CAATATAACCCACACACCGCCGCACACGCGCTAGCTTCCCCTCCCTCCTCCTCCTTCCACAGCCGCGACGGCCGACGGCTTTTCGAGATCTCCATCAACACCTTCAGCAGTCTTGTG  
GCGGCCTCCGCATCACCGGCCGGCGTTTCGAGCCACCATCTCGTATCCCAGAGCCAGAAGCGCGTCTCCAGTCATAAGCTCTGTTCCGAGGGAGAATTCGGTGAGGGGATGGTGGCTGAT  
GACGGCGTTGTGGGCGTGTCTGACGGCGTGGATGAGTTGGAGGGCGCAGGCAGCGTTAATGGCAAGGTTAGGGTCTCCGCCGACGAGTTCGGAGGGCGAGGCAGAGGGAAGGGGC  
GATGGTCCGGGGAGTGGAGGAGGAGAGGAGGGCGGTGGATTGGGGTCTTGACGGAGGGGTGGAGAGTGGTGGGGAGGCTGCGGAGGAGATGGGAAGATATATCGGCGTTGGCGGTGGC  
GAAATAGGATTGATCGGAGGCGGTGGTGGAAAGGGTTAGGTTGGGGCCCTTGGGGCGGCTGAGCCGGCGAGGCAGGATTGCCGAAATTTGAGCTGGTTTTAAAGGAGCAGGGGATTGAG  
ACAAAGGCTGCTGCCATTTTTAAGAGAGAGAGAGATAGAGAGAGAGTGCAGGTGTGGTTCTGTACTTTGTAGGGGTGGGGGAAAAGCAAGGAGCTTTATAGTAAGGTTGCGGGAGAAAT  
GCGACCACCGCTGTGCCGTGAACCAGACTCAACCCTTAAGTCTTCTTTGACGCATTTTAAACGATAGAGGAGG

>comp158306\_c0\_seq4

AATACGGAGATTTATATAATGAGGTCGGAGCTTAAATGTCATAGTGCAATTTCTTTTCAATTTAATAACCCAATTAGGTAGAGTACCCATATCCAATAATAACAAAGACTTATAACCACAAATT



>comp158332\_c1\_seq1

CAAATTCCTCGTTTAAATCTAATAGAGAAAAAATTAACTCAATCTTCCTTCCAATGAAATTCAAATGGGAGAGAGTCAATAATGAATATACAATCCAACAACATATGGAAAATAGATAATC  
TCTGTCAATATGCACATTAAGGAACAATCAAACAAATTCATTCATTATTGCCTTGAAATGAATTAATTACTTTACTTCTAATTCTTCTCAGCAACAGTATCTTCAGAAGCCTTCT  
CTTCAAATGGGGTACCACCACCTCTTTGACATCCTCTCCACCTGCGCTCGCTTTTTTCATCTTGAGATCCGGATCCTTCAGCAACGAGCTTTTTTCGCCTCTCCATCACTTACAATCACA  
ACCTCCTTCTTTACCACTGAAGAATCTTCAACTTCCGAGATAGAATCAGCCAGCGAGTGATCATCATCTTGTTTTCAGAACATTTCCAGCAGCAATAGCTTCTCGTCTTCTCGACGAGA  
AATAGCGGTCCGGCGAGTCTTTGGAGATGAGAGGAGCCGCCACCACCTCTTTGCTCAGAAAGCAGCAGAATCAACCGGCGGCAACGAGGTATTCGACGGTAAAGGATTGTTTAAATTGA  
AGGGATTGGCGGCGACTGTGTTGCCGACGGCGACCTCGTCTTGGAACACCGCACCCCATGGTTTGGAGGAAGAGAGAGATCGGCGGGGAATTGAAGAAGGATTGGGGAATTTAAG  
GGTTTTGGAAGGATATAGATTGGTTTTGTTTATAGTTTTGGCAATGATCTGTTTATGGGGAGAATGGGAGGATGGCTTTGGATTG

>comp158385\_c1\_seq5

AAGGCTGGCTAACCCAGGTCCGGTCGAGCTGAATATGACCGCCGATTAGAAATCTGGAAACAAATTGGCGCTCCGCAAGTGCGGCCACCACTCTCCGACGAAGTAGAATCTTCCATCTCC  
GGCCTTCTCCTTACAAGAACTCTTTTCAACCGGAATCCGGCATTGGCGAAGGAAAGAGGGTGGCCACTGGCGCATTACCTGTAATTGCCTTAGCCATCAAATCGGGCTCGTCCGGCGCTG  
CCGCCAACACCCTTCTTGCCTGACAGAACTCTCCGCCTCGTTACATGAGTCCGAATTGCTGGAGAAATGCTTCGCCTCCGCGG

>comp158391\_c0\_seq1

ATCATCGCTTCTTCTCCAGCCTCGACGTCTCGCGAGTGTGTCTCCATTAGCACCTCTTCATCTTCATGCTCATGGCCGTGGCGTTGCTCGTCAGAAGATACTATGTGAGAGAAGTCAC  
TCCAAAATCCAATCTTTTGAAGCTCAATTGCTTGTCTTTCTTGATCATCGGTTTCATCTGTTGGGATATCAGCGTACTGGAAGTCAAGGGGCGAAGGGATGGATTGGTTATGCAATTGCTGTGC  
CGTCTGGTTTTTGGGCACGCTTGGGTTGACGGTGGTGATTCTCAGCAGCGGACGCCTAAAGTGTGGGGAGTTCCGCTGGTGCCTTGGCTGCCATCGGCCTCCATAGTACTAACATTT  
TTCTCATGGGATCTCTTGATAACCAGGCATTTGTGAGGTTTGAATCTGCCTGTGGTAATGCTGGCCTATTATGTGCTTATTGGTGTCCATCGACTTATGATGTTGCTCATGAGGAGGAA  
GATGATAAGTTGGAAGGCTTGAAGGTGGAAGTGGCAGTCGTGGAGCTTAGATTATAAGATATCAGGACTTTTCCGTTAAAAAATATAAATTTATAAAAAGAAGATCAAAGAAATTTTA  
TCAGATATTCAGATTATGATTTTTATTTTTTCTCACAAGAGGGAGGCTGTGCAGCAGAGTTCCAATCTCAGCTGTGCTGCTATAAGTAATGAAGCTCGAACTGAGCTGAAGATCTCCA  
TAGAAACAAAGCCTGCTCTATAATTTGTTCTTCTTGACTTTTCTTTTATTTTCAAAGGTTTGGAGAAGCTATGTATCTGTTATGGAGAGCTTTAGTCTTTGTTTCTTGTGTTTATGGCTG  
CTTGATATCTTGCAATTGTAATGTAAAGTCTCCCTGCTAAAAAGTTGTCAGAATCTGGCTTAAATTTTATGATCTGAGAATCTGTGATCATGTTTGGAACTTTTATGTTTTTAAACATAGAA  
AGCG

>comp158429\_c0\_seq9

TTACTGTACTGTATTAACAGAAAGAGAAAATAAAGAATACTTTTCTTTCACTGTTTACACGTCTTCTTCTTTTCCAATCTGTTCTTGGCGGGAAACTTAAATCCAAAGTTTCTACAAATATC  
ACATATAACATCTTTAAAAATATAAAAAAAGGGTAAACTCTATTTGTGGTAAAACAAAGAACAAGGCCTAAAATTCATTTAATTAAGTTCACACTGAAAAAGCAATCCCACTTCATTTTCA  
TAGTTTCAATCAAAGAACAATTTTAAACATTAACATGTAATTCATTTTGCCTGTAACCATTTGAATCCGTGTATGGGGTAGTTGTTACGAACAATTACCTGTTGCACGACACGAATATCCAA  
CTGATTACTGTCAATTGCTTATGCAAATAGGGATCCACAATGACTTGGGGAATGAAATCTGGTTTCAAGTACCGTGAAAGCAAATCCGCATATAATTCATAACGAGCAGTCATTGCAAAGCC  
CCATTTATCCTTTAACTGTCTGCAAAGATTCAAGTCCATGTCAGAGACTAGCAAACCATCTCTATATCTTGACAGAGATGGAGTGCAAGATGCATCTGACATGGACTTGAATCTTTGCAGA  
CAGTTAAAGGATAATGGGGCTTTCGAATGACTGCTCGTTATGAATTATATGCGGATTTGCTTTTACGGTACTTGAAACCAGATTTCAATCCCAAGTCATTGTGGATCCCTATTTGCATAAG  
CAATGACAGTAATCAGTTGGATATTCGTGTCGTGCAACAGGTAATTGTTTCGTAACAACACTACCCCATACACGGATTCAAATGGTTACACGCAAAATGAATTACATGTTTAAATGTTAAATTTGT  
TCTTTGATTGAAACTATGAAAATGAAGTGGGATTGCTTTTTTTCAGTGTGAACTTAATTAATGAATTTAGGCCTTGTCTTTGTTTTTACCACAAAATAGAGTTTACCCTTTTTTATATTTTTA

AAGATGTTATATGTGATATTTGTAGAAACTTTGGATTTAAGTTTCCCGCAAGAACAGATTGGAAAGAAGAAGAAGACGTGTAACAGTGAAAGGAAAAGTATTCTTTATTTCTCTTTCTGA  
TAATACAGTACATTAACCTATTTATAGAACGTATATGTAATGGCAATATATAAGGTAATATACATGGCAACATATTCTAATGTCAAGTCTTATTTGTTGTTACTAATAATTTCCATGCTTCTTCG  
GTCATCGCATTTCGCAAGTAGCCGAGCATCATTAGTATAAAAATGACAATTAGAGCAAAGGCAGCCATGTTGAGCTATCGATTAGAAGTAGGCAACTGTTCTCTTGAACCTTCAACAAGTTTCA  
CCATTTGAAGTTCTTTGACTTCCTTTCTAAACATTCCCTAGCTTTGAACTAGCTGCTGAACATTCCCTGGGAATGAGGCTTGCAGATTCCTTGGTATAGATCCTTCGATGCAATAACATTGAA  
AGCATCTGTAGGATGGTAAGGATCCCAAGAACACATACTCTGACCGGTTTTGGCATGGAGTAAAACTGGTAAACAGAGGATCTGACCTTTTCGATTTGCCGCCACCACAGCAGGCTGTGTT  
TTGGTTCTTTGAAGCCATAGTTGGCATAAGTTTTGGATGACATTGATGCCAAAGGAGAATGCATCCCAGTAGAGGAATGTTGATTCTTTGAGCTGTGCATTGTACTGATCAACCATCTCCTTAA  
GCTTTCTGTTATAGTGAGATACCAATAGATTGACTGATTCAACACACGCACCTGTATCACTTTCCCTGCGCTGCCAACTGGTTCGGTAGGCAGCCGGTAGGACTGATATTGACTATCAAGAAT  
TTCTTACACCCAAATCATACAAATACTTGAGTTGTCTTCCAAATTGTTGAATGAGTAGATTGGTGAAAGCTTCAGGGGTGATTTCGTAATGTATTTTTGAAAGTGGAAGAGATAGTTATT  
GATATAGTCATTGCTGCCTTGAGCTACAAAGAAGAGAGATCTTCTTATGTGGTCTTGGGTCTTGTCAGAAGCATTGTGCTTAGTTCTTCTATTGTTGCATTGAAGTTTTGTAGCTGTTTCATC  
CATGGGGATGCGCATTCAAAATTTTCTCCAGTGTCAATTGAGAATTCAGATGCTGCAGAGGCATAGTTAACTCCTTGAAGTATTGCAATGCCATGTGTGTCTGGATTGTTGAATGCTGGAA  
TCAGAGGAAGTCCCAAAAGATAACCCAAATGATCAACGAGTGTCCACCATTGCAAAAACCTTCC

>comp158429\_c1\_seq2

AGGCTTGATGTTATTGTTGTTGTTTATGAATTCATATCATAATTTAATATATTGCCATAAAACTCAACATGAGAGTTAAAAAATAAATTAAATTGACTTGCATGATATACTCTATGTCCAT  
AAGGGCACTTCCATCCATATATTCATGCAACCCCGCACGTGTGTAGCACACATGCTCGACAGCACTAAAAAATAAAGAGATTTTTCCCTCGTAGGTTATCTTCTGGGGCTTCTCTGATTC  
CACCATTCAACAATCCAGACACACATGGCATTGCAATACTTCAAGGAGTTAACTATGGCTCTTCAGCATCTGGAATTCTCAATGACACTGGAGAATTATTTGGAAAGCGCATCCCCATGGA  
TGAACAGCTACAAAATTCATGCAACAATACAAGAACTAAGCACAATGCTTCTTGACAAGACCCAAAGACCACATAAGAAGATCTCTTCTTCTACTAGCTCCAGGCAGCAATGACTATAT  
CAATAACTATCTCTTACCATTTCAAAAGACGTTCCAAATACACCCCTGAAGCTTTTCGCAATCTACTCATTCAACAATTTGGAAGACAACCTCAAGGATTTGTATGATTGGGCGCGAGG  
AAATCTTGATAGCCAATATCAGTCCTATCGGTTGCATACCGAACCCAGTTGACAGCGCAGGACAGTGATACAGGTGCGTGTGTTGAATCAGTCAATCTAATGGCATCTCACTATAACAGAA  
AGCTTAAGGAGATGGTTGATCAGTACAATGCACAGCTCAAGGAATCAACATTCCTCTACTGGGATGCATTCTCCTTTGGCATCAATGTCATCCAAAACCTATGCCAACTATGGCTTCAAGAA  
CCAAAACACAGCCTGCTGTGGTGGCGGCAAATCGAAAGGTCAGATCCTCTGTTTACCAGTTTTTACTCCATGCCAAAACCCGGTCAGAGTATGTGTTCTGGGATCCTTACCATCCTACAGAT  
GCTTTCAATGTTATTGCATCGAAGGATCTATACCAAGGAAATCTGCAAGCCTCATTCCCAAGGAATGTTCCAGCAGCTAGTTCAAAGCTAGGAATGTGTTAGACCCGACGGGACCGGCTTAC  
GCGAAGTTCGGCGGAAGTCTCCGCCTCTGTACGCAGGAGCCGACCGCTCGGTCTTCACAAAATCAATTTGGAAGGATTTCTTAGGGAGTTAGAAGGGAAATTTGAATGTACGAACTGT  
TTATAGATTTCTTTTGATTTGTACGCATTAATAGTTTGTTTTCTAG

>comp158429\_c1\_seq8

ACATTTCTCTCCTCGACAATGAAAGCACACAACCTCCACCTAATGTCAACGTACTTTTTTATTAATCAAAGAAATAAATGACCTTAAAACCTTAACCCAGAAAGAGTTCTTCCCTCTCATTCA  
GCTTCTAAAATTGAAGAAGACAGAACGTGAAAAAATAAAGGTTGCTTTCCTCTTCCAGATTCTGTCATTTAATAACAAGTGTATCAGGATAAAACATGCAATTTACTGAAGTCATTT  
ATTCTATGCAGCAGAAATATGGGAATTAAGCTTTATATAAGGCTTGTGCTATTGGTCTTTGAGTAGCCATGGCTTCTCTGTTCTTCTTCTTCTGTCAGCTTCTTTTGGAGTTGGGAAGGAG  
TTTCGTTGCCGGAGCAGATCAGGTTCCGGCCATGTTTCGTGTTTGGCGATTCATTAATCGACCCAGGAAATAACAATCAGCTATTAACACTGGCCAAGGCTAACTTTAGACCCGATGGTATA  
GATTTTCAAGAGGGGACGACTGGAAGGTTTTGCAATGGTGGAAACAGTCGCTGATCATTGGGTTATCTTCTGGGGCTTCTCTGATTCCACCATTCAACAATCCAGACACACATGGCATTG  
CAATACTTCAAGGAGTTAACTATGGCTCTTCCAGCATCTGGAATTCATGACACTGGAGAATTATTTGAAAGCGCATCCCCATGGATGAACAGCTACAAAACCTCAATGCAACAATACA  
AGAACTAAGCACAATGCTTCTTGACAAGACCCAAGACCACATAAGAAGATCTCTTCTTTGTAGCTCAAGGCAGCAATGACTATATCAATAACTATCTTACCCTTTCAAAAATACATT

ACGAATACACCCCTGAAGCTTTCACCAATCTACTCATTCAACAATTTGGAAGACAACCTCAAGTATTTGTATGATTTGGGTGTGAGGAAATCTTGATAGTCAATATCAGTCCTACCGGCTGC  
CTACCGAACCAAGTTGGCAGCGCAGGAAAAGTGATACAGGTGCGTGTGTTGAATCAGTCAATCTATTGGTATCTCACTATAACAGAAAGCTTAAAGGAGATGGTTGATCAGTACAATGCACAG  
CTCAAGGAATCAACATTCCTCTACTGGGATGCATTCTCCTTTGGCATCAATGTCATCCAAAACCTATGCCAACTATGGCTTCAAGAACCAAAACACAGCCTGCTGTGGTGGCGGCAAATCG  
AAAGGTCAGATCCTCTGTTTACCAGTTTTTACTCCATGCCAAAACCGGTGAGAGTATGTGTTCTGGGATCCTTACCATCCTACAGATGCTTTCATGTTATTGCATCGAAGGATCTATACCA  
AGGAAATCTGCAAGCCTCATTCCTCAAGGAATGTTGAGCAGCTAGTTCAAAGCTAGGAATGTTTAGAAAGGAAAGTCAAAGAACCTCAAATAGTGAAACTTGTGAAGTTCAAGAGAACAG  
TTGCATACTTCTAATCGATAGCTCAACATGGCTGCCTTTGCTCTAATTGTCATTTTTATACTAATGATGCTCGGCTACTTGCGAATGCGATGACCGAAGAAGCATGGAATATTATTAGTAACA  
ACAAATAAGACTTGACATTAGAATATGTTGCCATGTATATTACCTTATATATTGCCATTACATATACGTTCTATAAATAGGTTACTGTACTGTATTATCAGAAAAG

>comp158462\_c0\_seq13

CCTTAAGAGAGCACACTTTGTTTGGCCAATCAGAAGAATTGTTCTTTTCGTTCAACCCAAAGTGGAGTATTTAGGGCATGTGGTTTCAAGAGGGACTGGCAGCTGACCAGAGTAAGATTG  
AGGCCATGCTCAGATGACTTGTACCCAAGACTTTAAAGGAGCTAAGAGGATTCTTATGACTCACAGGCTACTACCATATATTTGTGAAATGATACGGTCTATAGCGAGGCCATTGACAAA  
ACATCTCAAGAAGGATAACTTTAAGTGGGGATAGTCATCCACCCAAGCTTTTGGAGGAGTTAAAGGCTATGACCAGTGTGTCAATATTAGCTCTTCCATATTTCAACCAGCCCTTTCTAGTTG  
AGATAGATGCCTCAGGTCTTGGGTTGGGAGCAATACTCATGCAGAAACAAAGATA

>comp158469\_c0\_seq1

TTGAATCACAATACATAACTTATATTTCCATTACTAAGAATCATTAGAAGAAAAATAAATAACAACATAAAATATTACATTGTCAAAAATGTGGCAAAGAAACCAAAATGTTATAAAGCA  
TAAATCAGCAATATTATGGAAAATCGTGCAAAACAATAGGGAAAATAATGAAATGTGTCACTTGTACTCAGGAGTAGTGGCGATATTGTTTGGGGGATCAGATACATACATTAGGCTCTGCAAT  
CCCGGTTTTAATTCCTGTTATAGAACTCCTCATACTCTCCTCTGTACCTGCTTTCTTCTCACCTCCACCATCACAAAGTGAAGAAGTCAACTCAAATATCTCTGCGGCTATTGTCAATGGC  
CCCTTCTCTCCCTCCCTAGTCCCTTCCAAGCTCACCTGGAAGTCTTTCTTCTCCTCACTGTGAAGCTCACCAACTTTGCAATGTCCTCCAATTTTGATATAATCATAGGCACGGGCTCACCAGA  
TACAAACCTTGCCCTCCTCCCCCTCTCTTCAAACAATCCAGAAAAGATTAACCTTTGCGAGAAGGATATGATGTGCGAAAGCATTCAGGCTGGCTGGTCTGGGAAGCCCCATTATCAGCCC  
CTTAGAGATGTACATTGTGGCAGGGCAGGAGGCCGCGGAGCAATCGGAATCGCAGCCAGAATCCGACGTCTCATCATGCTTCTCTGATGACGGAGTCTCCGGGGCATTGTAGGAGGCG  
ACTCATCGATTTTCATCGATGCTGTGGAGCTTGTCAATCTCGATGTAGAATCGAATATGGCGAAACCCTTTTTTGAACCACAGATTCTCCATGATTTTCAGGAATGGTGATCCGCGTCTGGGGA  
TTCGTGTCCAGAAGGCGAAAGAGAAGCTTGCTGAGATCGGGGGAGAACCAGCTAGGGCATCGAAATGCCCTTTTATAGATTTTTCGGGTACATCGCCAAGACGTTCTGATCGTGGAAGG  
GAGATAGCCAGCCATAAGCACGAAGAGAATGATCCCAGATGACCAGATATCAACCCTAGCCGCGTCTGACCTTTTCTGGAGAGCACCTCCGGCGCGACGTACGCCGAGTACCGCAAA  
AGGTGTGGAAGAGCCATCCTGCCGAATCTGATCGGAGACCGCGCTGAGCCAAAATCAGAGACTTTGAGATCCCCCTTTTCGTCAAGTAGTAGTTCTCCGGCTTGAGATCCCCGATGG  
AAAACGCCGCGGGCGTGGCAGAAACAACGGCCGATATCAATTGCTGAAAGTATTGGCGGGCCGCTCCTCCTTTAGCCGGCCTTTAGCGACTTTGCTGAAGAGCTCCCCTCCGCGGAC  
GTAATCCATCACAAGTAAATCTTGGTCTTGGTGGCCATGACCTCGAAGAGATGGACAATGTTGGGGTGGCGAACACGGCGGAGGATTCCGATCTCGCGCTTGATGTGAGCGGCAAGGC  
CGCTCTTTAAGATGCGCTCCTTGTCAGGACCTTAATGGCGACAGATTGCTCGGTCTTCAAGTTTTTCGCGTAGAAAACCTTGGCGAACGTGCCTTGGCCAAGGAGTTTCCCCAGTTTCGT  
AACGGCCAAGGATGACAGCGCTCTGCCTCTCCTTCTTAGGCTTACGCGACGGCTCCACCGCCATGGGAGCCATAGCTCCTCGAAAGAGCAAAACTTTGTTCTCTACGTTTATAGAAGGG  
AGGGGAGGGTATAGTGGCCGTCTCCAGAGGTGAAAATAGAGGCGACACGGTAGGTTGGAATGGGCGAATTGG

>comp158513\_c1\_seq1

CTCTCTCTCTCTCTCTCTCTACGTCCCCAACAATGCACTTACTCCACCTTTACAGGCCATCTTCATTGAAAGAGAAGTCTGGCTCATCCGGCTTCATGATCAGCTTCGGCATCTTCAC  
ACTGAGGGAAACAGTATCGTCCCGCTTAAGCTTTTGATTTGCTCCTCTCTTCGTGTTCTTTGCAAAGTTGGCATTGCCTCCAAAAGCACTGTACCAACATCCGCATATTCAGCGAGCAAT

GGAGCATCGGAATCCTCATTAACCGGTATCGTTTCAGCCATGGCTGGTGAGTAGAGATTCTCTTGCTTAGCCAGTTCATTCTAGCTTCTTCTTCTTGTATCTTCTCCATGCAGTTTGG  
ATGAAGCAGGCTCCCCATGCTCTCCATTGATGGGAATAGAACCCTGAAAGCATGCTGTAGCTTCTTGTGTGGAGACGTTTGAAGTATTGCAACAAATTTTAGGCTTTCAGCTCGAAGC  
GCAAATGCCTCTACTTCGCTAAGGGCTCTAACAGTTTCGGGTGGAGAGTGGTAGATTGACGCTTGGATTTGGCATGAGACCCCATGTGAGAAGCTCTTCACCGCAGAAATCTCCGGGTCTT  
AGGGTTATGGAGTTGAAAAATCCAGTTCTTCCGCCGTCTGTAGTTGAGCTCTCGAGCTGACCGCGGATAATAAAGAGCATCTCGTCCACTGGGTACCTTCCCGGACAATGTAAGTATCTT  
TGGTGCTCAGGGATGAGACTAGTCGTTTCGCATATTGCATCTAGTAGTTGGTCATCCATTTGGGAGAAAAATGGAACCCTACGAACTAGAGCAAGACAAAGATGTCTTCTAATTTACAGAC  
GAAGGTCCAAAGGTAAGGAGACCAAAATTGAGTCTTCATCAACACCTCTTGTAGCAAGCCATTTGACTGAACAAACCTCCTAACCCGTTCTTGCAAATCTGGTGGTAGTTGACGATGTC  
TCATCCATTCTCAATGTCTCTTCTTTTAATCTCCATTCTTCAAGCCTCACAGTAATGGATTGCAAATAGGTCTGCATATTTCTATCAAATGTGAAAACAGAACAAGGCCATTATACATAT  
TAGAATGGCAAATAAAGTTTCCCAATGTAAGTGCTTGTAGCCAAATTCTGTCCATACGAGCTCAAATTTTGAAGCCCCACCAGAGACAATACAGTACTTTTGTATGAAGGTTGCTCCA  
ACAACTTCATTATTCAATGCATCAGAGAACATGCCAAAATTGAAATTAACATTACTACTAGTTGCATCACAATTGCTTATCACTTTAGTAGCATTGATCCAGGCTTTTTCGCTCAGGTAGATTA  
AGACTATTACAGTCCAGAAAATTTGGATTGCACAGTGGCATCTTCATGGTGCCATTCTCTTTCATGCATTCTGTCAACCAGCAAGTATATTGGCGTTCCATTGATAAAAGATACCATAAAGC  
ACCTAAAACATGGCTCGCAAGCATATATAGGAGAAGATTGTACGCAGCTCTGCCATGCAGTTTTTCGTAACAACCTCCGGTGGCTTTGACGATCCGTGAATTAAGAGGAAATATAAGAAA  
CAACCTTGAATGTACTGAATGAAGACAATCATTGACAGTGTGTTGTTGGTGTGATTGGCTGATGAGCTACTCACTGCCGGTATTACAAACCAGATTAGTATCTGAGGAATCGGAAGCATG  
GCAGCAAGATCGATGAAAAAATCCCCTTTAAGGTATCTCATGGCGATCTGATGGGGGTCCTTACAAGATCACCCCTCCCAAAAACCCTGGAGCTAGGCGCAACAAAGGCCGTGCGAAA  
CTTCAGAAGCATGTGAGCGAGATAAAACAAGTCAGCTACCGTGCGAAAAGAAGGTAACAATAATGCCGATGCCCTGATCAATCCGCATGCAGGCGGGACCGCCGATGAACATTAGATAGA  
AGTAGAGGGGATCGAGGAAGAGTGCACAGGAGGAGATGAGGAAGATACGGTTCCATTTGAGGACGACATCGCCACCAGGATCGAGGATACGGCGAGGCCGGTGCCACTTTTTCGCG  
GAGGAGATTCGGTGTTCGATAACTCCCCTGCCTGAAGGGGAGGAATTCGACGCCGGCGAGGGAAGCCGAAACCGAGAGCGTTCATCTTCCATGAGGAGGTGAACGGGAAGGAGGA  
GGAGGACGCGGACATTGAGGCGGGCCAGAAATTATGTCACCTCCATGTTTCTGACGGGTTTGGAGGAAAGCCGGTAGTGGCCGAGCGTTTCTCGGAGGCGACATTGTTGGGGCAATGCAG  
AGGTGATTAGAGAAACAGCGCCGTTTATTGAAATCTTCTTTTTTTTATATCCCGCCAACCAACCGTTTCCCTTT

>comp158532\_c1\_seq19

TAATTGTA AAAACTGCTATAATATCTCAAATTAATAAGAGCTTTTCGTTGTTCTTAAAAAATATGACTCATCATAACCCCTCTATAAAAAAACAACAAACAACAACAAACAAAACAAA  
TTTCTCAACAAGGAGACGCACAGATCTGAAAAAGAGCACATTGGAGATGAACACCTTACCGATTATGAGGAAAAATATAAGTTGTGTTGCCAGCATTGTAAGAGGAATAAGAACTCA  
TGCTCTGGACGAAGTAGAAGAAATGTGACCTGCAATTCGTTACTTCCATAAAAAAATAAAAAATAGCCTTTCATCTTTCCCAAAGGGCCTAGCTTATTTGATCCAACATTTGTAGAAAG  
AAGAAAGACCAAGAAGGTAAGAACGCAGATAATC

>comp158640\_c0\_seq2

GCAACAACGATTTGGTAGCCAAGGCGCAAAAAAGCAAGTTTCCTTCATCTTCCAAAACATTTATCCCTATATTTATACCATCCTCTCCGACGATCCATCGATCGATATATTTAACGATGGAT  
CAATCTATTTCTCTCTACATATGAGGAAGCTTTGCCCAAATCTAGAGCGAGAAGATGCCCTTGACACCGTCTCGAGGTTCTTTACCGGAGGAGATGTTTCCCAACCGGAAGGGAGGA  
TCGTCTGTCGTCATCGACCGACCAAGACAATCACTACGCTTGGCTCAAGTCGCAAGCTTTCAACAAAGCCACTGACAGCCCGCCGTGATGCTTTACAGCCGGACCGCCGAGCTGCAGCT  
CCTCCTCAGCGTCATCGGCTCGCCGCTCATCCCTATGCCCGTGCCGTTTCGACACCGCATTAGTAACCGCTCCGTCTGTGAATCCTCCATTGGCCTAGACCCGCGCTCAACGGCAAATCTC  
TTGCTCGACGCAGTCTGCATCGGCGAAAAATCATAAACGGCGAAGAATGCTTCAATTCTAAAGCTCGAAGTCAGCCCAATGTCTCAAATCCCAGCAGCGATCCAGCTTCGACATTATC  
CGCCACACCGTTTGGGGCTACTTTAGCCAACGCACTGGTCTCCTTATGCAGCTGGAAGACTCTCATCTCCTCCGTATGAAATCTGGCTGCAGTCGCATCTCCGCTCCACCCAGATCAGCT  
GCAAAAGCATCAACAATGATTCTCCATATTCTGGGAAACTTTTATGGAATCCATCATTGACGATTATCGCTACATTGATGGCATCAATATCGCTACAATGGCCGAACCGTCGTCCTCTGT



TCAGATACGGTGAGGGATCGATTAATCATAAGCGCCGGTTGGAGGAGTGTGGACGATTGAGGAGGCCGATTTCAATCTGCATGGCCTTGGCGATGGATTCTTTTCTTCCACCGTCAGATCT  
TAAGGTCGATTGCGACTAGAGTTTGTGAGTTTTTTCCCTTTTCGATTAGTTGATTTTTTTGTTATGATGTACTTTTAATTGCTCTTATTATTTGTTTCATTTTAAGTAATTAGGAAATAGTGA  
AGAGGGAGGAACTGTAAAGATGGAGAGCAGGGTTTTCCATTGTTTTTATTTCGTTTTTCATTTAACACCAAGAAAGGATTTGTAAGTTAAATCCAGAGTTTGGAGAAATTAGTGAGAAAGTGT  
AACTCATTATGTGTTGAATTGTTATTGCGATGCAAATCATTATCATCAAAGAGTATAAAGTAGTACAAATTAAGCATGTGTCTAGAAAAGATAGAATTACGAGGC

>comp158656\_c1\_seq12

TGGTAGCCGGTGGCGGGTAGTCCACGGGATGACTAGTGAGCATCCAAGTACGCTGAACAAGATGCGATTTAAGTAATCCTCCACGGAAGAATCCACGTCAAAGTTTACGTGCAAGAAAG  
GGGATTCAAGGACGTTGGTTCGTCCTTCAAATCAGCAATCCCCTTAGCCTCAATAGTCTGGACAGCAACCTGGAATAGCTATGGAATTCTGGACGGCAACGGAACCTTTGGGTTGAGAG  
ATAATGTGTAGATATGCCCGCAGAAATCTGTGGACAGCAATGGGGCCTTCTGGAGCAGCAGTTTTGCAAAGGTATTGGGCTAGAATCAATGATGAAGACGTCTCAAACCTCTGGACAAC  
AGGATCACTCCAGAAGGAATTCTGTTTCAGCCATCACGGGGAAGATCTGGACGGGCTAACAAGTGGAGGAAGGGGCAAGGCTTTGGGCCAGATTTGGGCTCCGTAGTTAGGAAGCCAA  
GGAGGGAAATTCTGAAATGTATTTCAGATTTGATGAATTAGGAATTAGGAGGGAGTTCGAATTTCAAACCCCAAGTAATTAAGGAGAGTAAAGGGGTGGCTGATTTGTGGAGTTATTAAG  
GTGATT

>comp158679\_c0\_seq3

CGAGCATATTTGTGAGATATATCATCTCTTTGATGGTACTATAACAAGATAATTTTCACATCTCTTCAATCATGTAGTTGACTACCATATCCTTATCATTGAGTTCTTTGAAACCTTCATTTAG  
GTTCTTTTACATCTCTGATATTGTAAACGATTTACCTCTCTTCTGATGCCCTTTCGAACCAATTGGGCCCAACAAAGAAAATCACCTCATTCAATCAGATTGTGATGATTTTAATTGAGG  
GAGAGGGGAGAGCTTTGAATTGATTGATGTTTGAATGAAGGTAGACAAGTTGAAGTAACTTGGTTATACTGGGCAGCATAAGGAGTAAAGATAGAACCAGCAGAGAGGTTTGTTCAGC  
GCCTCGAACAGGAAGGCCAGCCGTTCTGATTTGCTTCAAACCGGTATTACATAGAAGTACTCGGAATTGTTCAAAGAAGCAGTAAACCGGTCCCGTTTTTCATATTATTGGCCGGTTC  
ATCTGCGATATATTTGAACAATTCAGTGAAGATAGGACGGCTCAAGTAAGCTTATACAAAACCGAAGAAATAAAAAACCTACCATTCAATTCGACGGATTGTATCTATTGTGTCTTCCCA  
ATTCTTACTAGTTCGGGAAGCCAACCGAGGAGGAAGCAAAAAATAGTTTTTGGGACAATTTTCTAAATGCTTTTAAAAACAATTTTAGTAAAAAAAATTAATTT

>comp158680\_c1\_seq1

GACTTATTTATATTCCTGATGAGATCTGTGTATTGCCACAGATAAATTTGAAGTCAGCCATGATCAAATTTGAAATACAGTTCTTCAATACAATACCACATTTATATAATAACATTATCCTGTA  
CAATCAGTAAGCATTCAAATAGAAAATTCATGCACATACTTTTCTTACAATAAGACTGCATTGCTTTATATTTTCAAGAACAAATAGCTTCCAATTGTGCTCAAATATCTTAACTTCTGATGCA  
AAACCTGACGAGAGCTTAAATTTGGAGAGATTGCTATGACATATAGGAGCGCTGATTTACATTTATCGGCAATCATCTCCTATTAGTAGATCTCTCTTTTGCCAACCAAGCGCACAAATTGCA  
TGAATGCGAGAGACTGCGTGAAGAAAAAGTTCTTACCTTTTTCCGCTCTGTCTATTTGATTGGAAGAGAACGACGACGACAAAGCTGAAGGGATAAATAAAGCCAGAGAAAGCACA  
ACGGGAAGACACACAAGACAAACATCAAGGACAAACAGACAAAAGAAAAGAAATATAAAAAGGAAATAGGGAGATCGACAAATACGGGAATAAGCAATTAGCAAAGTTTTTTTT  
TTTTTTTT

>comp158685\_c0\_seq1

GGGCAATGTGAGGATTTGAGAAATTGAGATACTTGTCAAATCTGTGAAAGCTCTCACCACAGGTCTCAACAGCACCATTTACATTGCCCTTAAGATCTATTAACCATAAAGGTGTTAAATC  
CTTCTGAACAACAATATCATCATCTAGGAACAAGATTTTGTTCAGCTTAGGATAAACTTGTGGTAGATAAAACCTCAAGTGATTAAGCATTGAAAGGTATTTGGATTTCCGTATTTCAAAT  
TGTCAGGACCAGATGAAAGGGTTGTGGGATGAGCAGCCATGAAGTAGTATTCTTTTCATGGGTACAGATTCAAGCTGACGAAGGACTGGGCAATATGAAGAATTCAACCACTTGAATCAT  
CAACGTTCTCCACATGGATGGTTGCATCTCCTGGTGGATTCAACAGAAACCACATGTTTCATGGCTCCGAAGTTTAGTTTATCAGTAACTAGATGAAAGACATGTTTCGCTGGCTCCTTAGC  
ATTCATTATGGTTGAGTTCACTACAACCTGAGGCAGCCAATACATTGTCTAGAGAAGAGTGCATAATGGTAGAGATTTGGGTTCTCAAATTTTCACTTTTAGGAAATTTCTTTGCTCTGGAG

GGAGAAGGTAATAGTCTATGCTCAGACGCATTGATAAACAATGAATGGCATTGGAATTGTTTTGCTGCCAATTGACTAAGGAATGTACTTTGCTTCTTCAAGCCTCTAACCCGCTCATCC  
GCAGATTGAAGCATCCCTCTTAGATTCCGAATAAATATCTTGCAATCATAAAGCTGACCTTTTGCTTTTAAACAAGACTTGATTCAATTGCTCTGATTGTCTCCGGTGCACCTTTGTGGGAGATC  
GGCATCAGCATTAGCCTTTCTAGGACGCGCTGACTTTTCTTGAGACGATTCAATAACTCTTCATAAATACCAATCTTACTCTTTGACTTAGCAAGGGCCATATAAACCTTTGACATAGTCAT  
TTGATCTCGCATGAACCTTACTTTTCGCATCAGCATGTTCAATTATCATATCTCGCCTCCATAGATTATAATTTACCAAGTACTGCAGAGTCCACAGCTATTGAGTGCTCGATGGCAGCATTTTCG  
AGTTGAACAAATACTTCATCATCCACTTTGTTAGAAACATTTGCAAAGCTGCTTTGATAATTGGTCAAGGTGGTCAGAGTTCCAAACACCACCGGGACAAACAGCGGCGCCAGAAGCGA  
AAGAACGAGGAATTGTACGATTAGAGCGCGAAAGCCTCGGAAGCTCGGGTACAAACCGCCGCTCGAGAAAGAACGTGTCAAAGGAACCATGGCAGGCAATCGGAGACCGGATCAACG  
GTGGGCTGGGATCGAAGTAATGGTGTCCGGACCCTTCGGTGACCGCACATAAAATGCGGAGGCCCTTCTTCTTGAATCGGAAATCAGGGGAGTTGCGGTTGCTTTTT

>comp158685\_c0\_seq2

GGGCAATGTGAGGATTTGAGAAATTGAGATACTTGTCAAATCTGTGAAAGCTCTCACCACAGGTCTCAACAGCACCATTTACATTGCCCTTAAGATCTATTAACCATAAAGGTGTTAAATC  
CTTCTGAACAACAATATCATCATCTAGGAACAAGATTTTGTTCAGCTTAGGATAAACTTGTTGGTAGATAAAACCTCAAGTGATTAAGCATTGAAAGGTATTTGGATTTCCGGTATTTCAAAT  
TGTCAGGACCAGATGAAAGGGTTGTGGGATGAGCAGCCATGAAGTAGTATTCTTTCATGGGTACAGATTCAAGCTGACGAAGGACTGGGCAATATGAAGAATTAACCACTTGAAATCAT  
CAACGTTCTCCACATGGATGGTTGCATCTCTGGTGGATTCAACAGAAACCACATGTTTCATGGCTCCGAAGTTTAGTTTATCAGTAACTAGATGAAAGACATGTTTCGCTGGCTCCTTAGC  
ATTCATTATGGTTGAGTTCACTACAACCTGAGGCAGCCAATACATTGTCAGAGAAGAGTGCATAATGGTAGAGATTTGGGTTCTCCAAATTTTCACTTTTAGGAAATTTTCTTTGCTCTGGAG  
GGAGAAGGTAATAGTCTATGCTCAGACGCATTGATAAACAATGAATGGCATTGGAATTGTTTTGCTGCCAATTGACTAAGGAATGTACTTTGCTTCTTCAAGCCTCTAACCCGCTCATCC  
GCAGATTGAAGCATCCCTCTTAGATTCCGAATAAATATCTTGCAATCATAAAGCTGACCTTTTGCTTTTAAACAAGACTTGATTCAATTGCTCTGATTGTCTCCGGTGCACCTGAAAACATAATTT  
TGTATTATAATAACTACACATCACATTAGTTAAATAGAAAGGAGGAAACCTTTGTGGGAGATCGGCATCAGCATTAGCCTTTCTAGGACGCGCTGACTTTTCTTGAGACGATTCAATAACT  
CTTCATAAATACCAATCTTACTCTTTGACTTAGCAAGGGCCATATAAACCTTTGACATAGTCATTTGATCTCGCATGAACCTTACTTTTCGCATCAGCATGTTCAATTATCATATCTCGCCTCCAT  
AGATTATATTTACCAAGTACTGCAGAGTCCACAGCTATTGAGTGCTCGATGGCAGCATTTTCGAGTTGAACAAATACTTCATCATCCACTTTGTTAGAAACATTTGCAAAGCTGCTTTGATA  
ATTTGGTCAAGGTGGTCAGAGTTCCAAACACCACCGGGACAAACAGCGGCGCCAGAAGCGAAAGAACGAGGAATTGTACGATTAGAGCGCGAAAGCCTCGGAAGCTCGGGTACAAACC  
GCCGCTCGAGAAAGAACGTGTCAAAGGAACCATGGCAGGCAATCGGAGACCGGATCAACGGTGGGCTGGGATCGAAGTAATGGTGTCCGGACCCTTCGGTGACCGCACATAAAATGC  
GGAGGCCCTTCTTCTTGAATCGGAAATCAGGGGAGTTGCGGTTGCTTTTT

>comp158685\_c2\_seq1

TCTTTGGATTCCCTTAGGTCTCCGATTGCCTGCCATGGTTCCTTTGACACGTTCTTTCTCGAGCGGCGGTTGTACCCGAGCTTCCGAGGCTTTCGCGCTCTAATCGTACAATTCCTCGTTCT  
TTCGTTCTGGCGCCGCTGTTTGTCCCCTGGTGTGTTGAACTCTCACCACCTTGACCAATTCTATAGAATAACGAGGTTCTTAGGTCGTTTGGGATGCAATTTCTGCATTTATTTGGAAA  
TTTTGATTTTAACTGGATGGCGGAAGGCGCTTCTTGGTTTGGGA

>comp158704\_c1\_seq1

TTGGCATAGCTCTTCGCACGGCACACGTAGCCCTCCATTCGGCTCTTACCCAAGCAACGCAAGGGAAGGCCACATCTTTCCATCGCTGGAAGCCACAAGTCCACACAAGCAGGAGAGAG  
AAGCAGCTGAGGGAACCTCATCGAATCTGACGGTAAAGAGGGTTTTTCTCGCGGATTGCGGCGTCGATATCTATGTTATACGCTATTCCGGCGGCCGAAGGCGCGGTAGCGAGTTCAGAG  
GACAAGCAGGATTTCTGCGGACTCTTTTCATCGTCATCATCATCAGCAGCAGCAGCAGCAGCAGAAGGTTGGCCAGTGCCTCTCGCCGGCAATCCATGTCAAGGAGGCTCATATCC  
CCTGTGCATGAAGTGGACAAAAAATATCGCATTAAAAAATAAATGGGCATTTATAATTCATGCATGATGTGATCTAAAAAATGAACCATATATATTTTGGGTGCAGCATGCATTAATT  
ATTTGAAGTGAGATGCCGTTTTTATTTAATGATGGTAGGTAGACTAGTAGTTTTTTATTTCCCTCAAAACCTAATGTAGGTTTATGGATCAATTTTCATATGTTATTTGTATTAATTTATATTAAT

GAATTCATATTTATTAATATAAAATAATATGAAATAATATATTAAGTCGAATAATATATACTCTCCTTGAATGAGAGGAATTATTAGGTGGTGATTTGCACGGTTGTGCAAAGTTGAATTTAGGG  
TCTTGGATTTAATGAACCTTATGTATATGTATCTTATGGAGTGTTGGTGGCTCATGAGTGTGAGGTAATAGAAATATTTTATATGCATTGAATCTATACATTTCTATGATAAATATAAATTT  
ACTCATAATATCCACTTGGTGACTC

>comp158731\_c0\_seq11

CTAAATTAGGCAAAGAAATTGAGAAGTAAGAAAATATTTTGACGGACATCCACTGGAGAAATCATTTGCCCTAATGCGTCATTGCTCGCGCCATGACGTAGATGGTGGTGGCCAACTTGA  
ACATGTGTGCCACGCCGAGCCATGCGACATGGCGCATGCCATTTTGTGCCATTGACAAGTATGAAGGGCTCCCATCCCTTGGCTCATAGCTTTGGTCATTTTGGATCTGGTACTTCACACA  
ACTAGGAATATATATTGAGCACAAATGATTAATAGTAAGTGCATATGAGTTTGATAGTCTTTGGATGAAAACATGATTACTAATTGGGTATTCTGTTTTGGCTTTAGAATTAGGATCATAATAG  
GGACTCTTGTGAACCTTTGTGGATGTTGTTGACAATATTTTGTATAGGCTACAGTGCCTGATTATGATTTGGGATTACCTGAGAACAATTGATTATGATTATGATTTGCATGCTTAGAAA  
GCTGGGTAGTGCCATAATGGTAAGTTTTTTTTTTTTTAATTCTAAGTGTTCAGTCCACTCCGTATAAAAATAAAAATAAAAACATTAGTTTTCAAATTGTTAGAAAAAGATAGTGATAAAC  
GAGAGAATTACAAGAAGCACAGACAAGC

>comp158743\_c0\_seq8

TAAGAAGGAAAATTGGTTTAGTCCTGAGGGAAGTTCACAGAGGCAGCAAGGGAATTTAGTGGGAAGGTTTCATCTACTCGAGTTTAAAGAGTTCTAAATGTGTTTTGGCTCTAATCAAGTA  
AAGGCATGCACCTTAGTGGCACCTTGTACAACCTGCTAATATTTTTTAGGTAGCTTTCAGGAAGTAGTTTTATATCATTTAGACTTCATTTGAGACAACCTTTTTAATTCTTTTTAAATCAGCTT  
TTTAGTAAAAAAGAAAAAAATTGTACTAAAAAATTGATTTGAGAAGCAATAAAAAGACCGTCCCAAAGGAAGCCATAGTTGATATCTATTATCCTTTCTTTCATCATAAATAGTGCATCAT  
CTTTCAATTGAGTTGCATTCAGTGGGCATTCTCTAATGCACAAGTCCAAATCTTTATATATTTTGTCTTTTTCTCTCAATTTCCCTCTCCCCTATCTTGTCTTGGGGGCATTTCATTTGTTCTTC  
TCAGTTATGTCTAATAATAGATGTGTTATGAAAGATTTTGTGATATGATTAAGGAATGTGATTTATCATATAAGAAATTTTCATGCATCTAATCTTACTTGGCTGAATGCTCACTGGAATCCTTT  
TCCTCCGGCTTGATCAATCCCTTTGAATCTTTGCTCACAATTCAACTCAATTGAACTCCTCCAGATCATTC

>comp158759\_c1\_seq2

CTTCTCTCCCTTGTCTGCCGATTCTTTTTTCCCCGGTCTAGAAAGTCAAAGTGTGTGATTTTGCCTGCAATTAATCGAATTCGAGAATTTGTGCTACGTGCTGCGATATGAACTTGCGA  
AGAGGTCTAACTCCTTTTCTCCGTGGCTTTTTTGAACCTTTATTACGGAGATTGAGATGCAAGTCCACCTCCTTGTGCGAATTCGAGCGTTACGGATTCTCAGAGACCTGCAAAAATGTCC  
CTGAATTTCTTAGCCATTTGGGGAACACACGAATGACTTGATTAATTTGCTACAAAAAAGTTTGGCCTGCCGTTGTCTATGTCTCTCATGAAAAGGGAATTGGAGGATCTGGGATCAT  
CATAGATTCGGATGGCACAATCTTGACCCGCGCTTGTACTCGTTTTTCTATGGATTCTAGAAGCAAGATTAATGTCAGTCTACATGATGGAAGAGAATTTTCAGGAACTATTCTGGAGTCCA  
ATGAGGATCATCATCTTACTCTTTTAAAGATACAATCAGAATCTCCCTTACCAACAACAACGTTGGATTATTTCGAAAAGATTATAAGGGAAGAGAATTCATTTCTTTTGAACGTCTATTGAGA  
AGAACAACCTTATCCAAGACTTTCAAGTCAAAATGAATTAGATAATGAGATTATTATTAGTCCACATGATGGAAGAGAATTTTCAGAAACTTTTCTGGAGCCCAATGAGGGCAACTTAATGC  
TGTCAAATGAAGAACTCATGTCTAAAATTGATATTGACAATTTTCATTTGGGTAGTTGTGGAGGGCCAATTGTGTCTCTTGATGGTGTGTTGTTGGAATTTGCACTAAAATAATATGCTTT  
GGCCTTGCCTTAATGGTAATTATTGTGGAACCTAATGCAATGGACATTGAGGAAGCCTTATGCGAAGTAGGATACATAACAAAATGATCGTTGGAATTTAAAACAGTTGAAGATGTTTAA  
AGTTATTCTGCACGACGTGAGCATCATGAGAAGGTTGAATGGTCTCTACATTTTAAAGATTGTTCTTTTTAATTTATTACTAAATTTGTTGTGATTTACAATCTTTATGGCAGATGATTAA

>comp158777\_c0\_seq1

GTAGTATAGAAGAAAAAACTCTCATATTAGACAATCCGAACTGAGAATGGATCAATCAAACATTTCCGAGAAGAGAAAAAATCAATGCAGAACTAACGGAATTAACACGACATTCCGA  
TTCTCGTCCGGCACGACAAAATCGCTAACAAAAAATAGTAACCAGTCAAATAAAGAACTCATAAATAACAGCTCGAAATAAATCCCTTTTTAAATCCTTCGCCATGAAACCTTCCGCC  
TCACCTTCCAACATGGCCGGAATTTCACTTCCCCTTCTTACCGGCCATCCATTCCCACCCTCCTTCTCCTCCTTCATCTCGTCTTTCTCTTCTTCCCTACCGCCATCCTCTCCATCGGTATAA

ACTATGGAACCTTAGGCAACAACCTCCCGCCTCCAGCTGAAGTCGCATCGTTCATTAATCTCGGACAACGATCGACCGGGTGAAGATCTTCGACTGCAATCCGGACATCCTCCGGGCCT  
TCGCCGGCTCCGGCATCCCCCTCGTTATCACCGTCCCCAATGGCGACATCCCCTCCCTCTCTCGCCTCCCCAGCGCCACCGCCTGGGTTGCCGCCAACGTTTCCCCCTTCTATCCCGCCAC  
GAACATCTCCCTTATCGCGGTTCGAAACGAGATCTTGCCACCGGCGACCGAAACCTAATCGTTCACCTCGTCCCTGCAATGCGATCCCTCTTTTCCGCCCTAACAGCAGCCGGATTCCCC  
TCTATTTCGCGTCTCGACACCTCACTCCCTCGGCATCCTCGCCGCTCCCAACCCCTTCCGCCGGCCGCTTTTCGCTCTGTTTACGACCGCGCCATCTTCTCCCCGATGCTCGATTTCCACCG  
CCGCACAAAAACACCTTTCCTCTTCAATCCTTATCCCTACTTCGGCTACACAGATGAGACTCTTAATTACGCGCTTTTCAAGCCGAATCAGGGAGTATACGATCCGGCAACGCAGATTACTT  
ATACGAATATGTTTCGATGCACAAATGGATGCAGTGTCTCCGCCATGAATCAGTTAGGGTACGGCGATGTGGAGATTGCGATCGGGGAGACCGGATGGCCGACTGCGGCTGAACCAGGGC  
AGGCAGGGGTCGATCCCGCTGCCGCTGCGTCTTATGTTACGAATCTGATCCAGCATGTGAATTCGGGAAAGGGACGCCGTTGATTCCGAATCGCAAATTTGAGACTTATATATTCGCGCT  
TTTCAACGAGAATTTGAAGCCTGGGCCGATTGCCGAACGAAATTTGGGGCTCTTCCAGCCTGATTTTACACCGGTGTACGACTCCGGCGTTCTCCTCGGCGGAGGCAAGGTCATGGGAG  
GCCGAGCTGCCAAGTGGTGCCTTGCGAAGCCAGGAACGAGCGTGGCGGCCCTACAGGCGAGCGTCAACTACGCCTGTAGCGTGGTGGGTGTAAGTGC CGGCCATTCAAGAAGCG  
GGCGTGTTTAAGCCCAACACAGTCCAAGCCATGCAAGCTATGCCATGAACGCCTACTACCA

>comp158795\_c0\_seq13

ATTTTCTAAATCCAAATTTAGAGGATTTGAAAGTTAAATCTATTCGGATACCAAACAACCCCTTACTTTTCTACCCATTTAAAAGATCTCTTTATTTTTTCTTAAACCTAGCAGTCAAGAGC  
TGTTGATTTTCGCCCTTCGCGCCCCATCAAATTCAGAACTTCTGTGATACAAACCTCGATATGAACTTGAGAGGAGCTGTAACGCCCTTTGCCCTTGGCTTGTTTAAACATAAAGGAACAT  
GGAGACGCACGTCCGGATCCTGGTGCAAATTCGAGCCTTACGGATTCCCAGAGACCAGCAAAAAGGAAGAAGACAAACCCAGTAAAATATATCGGCGATTTGGGCCACGCTCGGATTCC  
TTCGTTAAATTTTCAACGGCGAATGTTTGCCCTGCTGTTGTCATTGTTTCTGCTGAAAAGAGAAATGGAGGGTCTGGAATCATAATAGATTCCAACGGCACAGTCTTGACCCATGCTCGTA  
ACATTTTTTACCGGACTTCAATAGTAAGATTAATGTCAGTCTACATGATAGAAGAAAATTTTTCAGGAACTATTCTCGAGGTTAATGAGGATCATGAGCTTGCTCTTTTGAATAACAGTCA  
GAAATTCCTTACCGACAACAATGTTTGGATCTTTGGGAAATTACAAGAGAAGCGAATTGATCTCTGTTGAACGTCTATTTAGAGAAAAGGATTACCCAAGAATTTTCGAGTCCAAATGATG  
TAGGTGAAGAGGCCAAGTTGATGTTGTCAGGTGAAGAAATCATACTAGATGGAAGTACGAACAATTTTATTTGGGTAATTGTGGAGGACCAATTGTGACTCTTGATGGTGAACCTGTTG  
GAATTAGCACTAAAATTCGTTTGCTTAAATCTCTACATAATGATGCGAGCTTTGGAATATTGATGCAATGGGAATTGAGGAAGCCTTAAAGCAACGTGGGATACACAAGAAAAATGATAG  
GAACAATTACTTTTCTTCTGCTGCAGATTCTTGGGGTGATTAATAAATGAAGGTGGATAAAGCTCTTGAAGGGATCTTATATTCTAACTATAATTTGTTGTATGATATGGCCAACATGAGAAGG  
TTGAGTGGTCCTTTACTTCTTGAATTTTCTTTCATATTTTATTACTATATAAGTTGAAATATGATGCTTTTTTATTATTCTCTATAGAGATCTTAAAGACTTTAATTATGAGAGATATGATTATGAT  
TTTATATTTAAGTTTGTGCAGCAATTTCTTTGTGTTGATATTAAGAATTTAATTACATGTCGTGATTACAATTATTGCCTTATATTTTCGTGATAATT

>comp158795\_c0\_seq27

ATTTTCTAAATCCAAATTTAGAGGATTTGAAAGTTAAATCTATTCGGATACCAAACAACCCCTTACTTTTCTACCCATTTAAAAGATCTCTTTATTTTTTCTTAAACCTAGCAGTCAAGAGC  
TGTTGATTTTCGCCCTTCGCGCCCCATCAAATTCAGAACTTCTGTGATACAAACCTCGATATGAACTTGAGAGGAGCTGTAACGCCCTTTGCCCTTGGCTTGTTTAAACATAAAGGAACAT  
GGAGACGCACGTCCGGATCCTGGTGCAAATTCGAGCCTTACGGATTCCCAGAGACAAGCAAAAAGTTTCGATAAGATTTCTGTCAAAAAGCTCTCTTTTTCTCCTTATTGTCTATCTCTTT  
TTAATTCCAATTGGGTCTGTAGAGGAGGAAGACAAAGCCACCAAAAATTTTTCAGCGATATGGGGAGATGGAGGGTCCGGAATCATCATAGATTCCGATGGCACAGTCTTGACCCAAGCTC  
GTAACGTTTTTTCACCGGTTTTTCAGAGGCAAGGTTAATGTCAGCCTACATGATAGAAGAAAATTTTTCAGGAAATATTCTCAAGGTTAATAAGTATCATGATCTTGCTCTTTTGAAGATACAA  
TCAGAAATTCCTTACCGACAATAATGTTTGGATCTTTGGGAAATTACAAGAGAAGCGAATTGATCTCTGTTGAACGTCTATTTAGAGAAAAGGATTACCCAAGAATTTTCGAGTCCAAATG  
ATGTAGGTGAAGAGGCCAAGTTGATGTTGTCAGGTGAAGAAATCATACTAGATGGAAGTACGAACAATTTTATTTGGGTAATTGTGGAGGACCAATTGTGACTCTTGATGGTGAACCTG  
TTGGAATTAGCACTAAAATTCGTTTGCTTAAATCTCTACATAATGATGCGAGCTTTGGAATATTGATGCAATGGGAATTGAGGAAGCCTTAAAGCAACGTGGGATACACAAGAAAAATGA

TAGGAACAATTACTTTTCTCTTGCTGCAGATTCTTGGGGTGATTAATAAATGAAGGTGGATAAAGCTCTTGAAGGGATCTTATATTCTAACTATATTTGTTGTATGATATGGCCAACATGAGA  
AGGTTGAGTGGTCCTTTACTTCTTGAAATTTTCTTTCATATTTTATTACTATATAAGTTGAAATATGATGCTTTTTATTATTCCTCTATAGAGATCTTAAGAGGAATAATAAAAAGCATCATATTT  
CAACTTATATAGTAATAAAATATGAAAGAAAATTTCAAGAAGTAAAGGACCACTCAACCTTCTCATGTTGGCCATATCATAACAATAATAGTTAGAATATAAGATCCCTTCAAGAGCTTTA  
TCCACCTTCATTTATTAATCACCCCAAGAATCTGCAGCAAGAGAAAAGTAATTGTTCCCTATCATTTTTTCTTGTGTATCCCACGTTGCTTAAGGCTTCCCTCAATTCCCATTGCATCAATAGTT  
CCAAAGCTCGCATCATTATGTAGAGATTTAAGCAAACGAATTTTAGTGCTAATTTCCAACAAGTTCACCATCAAGAGTCACAATTGGTCTCCACAATTACCCAAATAAAAATTGTTTCGTA  
CCATCTAGGTATGATTTCTTACCTGACAACATCAACTTGGCCTCTTACCTACATCATTGGACTCGAAATTTCTGGGTAATCCTTTTCTCTAAATAGACGTTCAACAGAGATCAATTCGCT  
TCTCTTGTAATTTCCCAAAGATCCAAACATTATTGTTCGGTAAGGGAATTTCTGATTGTATCTTCAAAGAGCAAGATCATGATACTTATTAACCTTGAGAATATTTCTGAAAATTTTCTTCTA  
TCATGTAGGCTGACATTAACCTTGCCTCTGAAAACCGGTGAAAAACGTTACGAGCTTGGGTCAAGACTGTGCCATCGGAATCTATGATGATTCCGGACCCTCCATCTCCCTTTTCAGGAG  
AGACTGTGACAACAGCAGGGCAAACATTCTCCGTTGAAAATTTAATGAAGGAATCCGAGCTTGCCCCATATCGCTGAAAAATTTGGTGGCTTTGTCTTCCCTCTACAGACCCAATTG  
GAATTAATAAAGAGAGATAGACAATAAGGAGAAAAAGAGAGCTTTTGACAGGAATATCTTATCGAACTTTTGCTTGTCTCTGGGAATCCGTAAGGCTCG

>comp158795\_c0\_seq30

ATTTTCTAAATCCAAATTTAGAGGATTTGAAAGTTAAATCTATTTCGGATACCAAACAACCCCTTACTTTTCTACCCATTTAAAAGATCTCTTATTTTTTCTTACCGCAGCACTTCTGTGATA  
CAAATTGCGATATGAACTTGAAAAGAATTGTAACACCCCTTTGCCCTTGGCTTGTTAAACATAAAGGAACATGGAGACGCACGTCCGGATCCTGGTGCAAATTCGAGCCTTACGGATTC  
CAGAGACAAGCAAAAAGGAGGAAGACAAAGCCACCAAAATTTTCAGCGATATGGGGCAAGCTCGGATTCCTTCATTAATTTTCAACGGAGAATGTTTGCCTGCTGTTGTCACAGTC  
TCTCCTGAAAAGGGAGATGGAGGGTCCGGAATCATCATAGATTCCGATGGCACAGTCTTGACCCAAGCTCGTAACGTTTTTTCACCGGTTTTTCAGAGGCAAGGTTAATGTCAGCCTACAT  
GATAGAAGAAAATTTTCAGGAAATATTCTCAAGGTTAATAAGTATCATGATCTTGCTCTTTTGAAGATACAATCAGAAATTCCTTACCGACAATAATGTTTGGATCTTTGGGAAATTACAA  
GAGAAGCGAATTGATCTCTGTTGAACGTCTATTAGAGAAAAGGATTACCCAAGAATTCGAGTCCAAATGATGTAGGTGAAGAGGCCAAGTTGATGTTGTCAGGTGAAGAAATCATACC  
TAGATGGAAGTACGAACAATTTATTTGGGTAATTGTGGAGGACCAATTGTGACTCTTGATGGTGAACCTGTTGGAATTAGCACTAAAATTCGTTTGCTTAAATCTCTACATAATGATGCGA  
GCTTTGGAATTTGATGCAATGGGAATTGAGGAAGCCTTAAGCAACGTGGGATACACAAGAAAAAATGATAGGAACAATTAATTTTCTCTTGCTGCAGATTCTTGGGGTGATTAATAAAT  
GAAGGTGGATAAAGCTCTTGAAGGGATCTTATATTCTAACTATATTTGTTGTATGATATGGCCAACATGAGAAGGTTGAGTGGTCCCTTACTTCTTGAATTTTCTTTCATATTTTATTACTATA  
TAAGTTGAAATATGATGCTTTTTATTATTCCTCTATAGAGATCTTAAGAGGAATAATAAAAAGCATCATATTTCAACTTATATAGTAATAAAATATGAAAGAAAATTTCAAGAAGTAAAGGAC  
CACTCAACCTTCTCATGTTGGCCATATCATAACAATAATAGTTAGAATATAAGATCCCTTCAAGAGCTTTATCCACCTTCATTTATTAATCACCCCAAGAATCTGCAGCAAGAGAAAAGT  
AATTGTTCCCTATCATTTTTTCTTGTGTATCCCACGTTGCTTAAGGCTTCCCTCAATTCCCATTGCATCAATAGTTCCAAAGCTCGCATCATTATGTAGAGATTTAAGCAAACGAATTTAGTGCT  
AATTTCAAACAAGTTCACCATCAAGAGTCACAATTGGTCTCCACAATTACCCAAATAAAAATTTGTTTCGTACTTCCATCTAGGTATGATTTCTTACCTGACAACATCAACTTGGCCTCTTAC  
CTACATCATTGGACTCGAAATTTCTGGGTAATCCTTTTCTCTAAATAGACGTTCAACAGAGATCAATTCGCTTCTCTTGTAAATTTCCCAAAGATCCAAACATTATTGTTCGGTAAGGGAATTT  
CTGATTGTATCTTCAAAGAGCAAGATCATGATACTTATTAACCTTGAGAATATTTCTGAAAATTTTCTTCTATCATGTAGGCTGACATTAACCTTGCCTCTGAAAACCGGTGAAAAACG  
TTACGAGCTTGGGTCAAGACTGTGCCATCGGAATCTATGATGATTCCGGACCCTCCATCTCCCCATATCGCTGAAAAATTTGGTGGCTTTGTCTTCCCTCTACAGACCCAATTGGAATT  
AAAAAGAGAGATAGACAATAAGGAGAAAAAGAGAGCTTTTGACAGGAATATCTTATCGAACTTTTGCTTGTCTCTGGGAATCCGTAAGGCTCG

>comp158830\_c1\_seq4

GATGCTGTTGTAATGTATGATCAGACTCAGAGGCCAAGAGGCTTTGGTTTTATAACTTTCACTTCAGAAGATGTTGTTGACAGAGTTTTGCAGAATTCCTTTCATGAACTGAATGGAA  
AGATGGTGGAGGTCAAAGAGCTATCCAAAAGACATCTGCCAAGGACCTACTAACTATGGCTTGAATAGATTCAACAGTTCTCTCAATCTATATGGTCAAGTGAACAATCCAAGCTCTCT

CGGTAGCTTTCGGCCAGCGATCGGCGCTCGGAACGGGTCCCCTTTCACCTCCTGGTTATGAAATTGGGTTGAGTTTGGAGCATGGAGTGAGCCCAAGCTATGGAGAAAACCTAAATTTAAG  
TAGCAATATTGGTTATGGACAAGCCTTGAGCCCATATTATAGTGGGAATTGACTAGATTTGGTGGCTCTATTGGTTACAGTGCAGGTTGTGGTAATCCTGGTTCATCTTTTGATTCAAGAGC  
TCTTAATTTATGGGACAATGGTGACTATAATATTATCCCTGCAAGTGCAAATTCCTTCGCAGCCTCTGGAATAGGGAGCATTAAATGGTTTCGACAATAATATTATCAGAAATCTGGATGATAC  
TTTTGGTTTTTCTAGTGATAATTATCCAAGGCGTTATGACATTGGCTCTCTTAGTGTCTTTTCACAGCTAGAAGAACTATATGGATTTATATGGAAGTGGTTCAATTTATGGAGATCTTTCT  
TGGCACTCAGGGTTGAATGAACTTGATGAATCTAGTTTATTTGGTTATGGGCTTGGCGCCACAGCTACAGATGTAATTTCCAGTGGTTCAATAGATTACATAAGTGATTATGATGTTACAAAT  
AGGCGTATAAATAGAGAGGGATGAGCGTTCATTTTTTACAATGATCGGGACATCAGATCGTGGAGAGTCTATCAGAGACATGACCGTCAATCTATGACAACGATTGAGTCACTGTATTTTCT  
TGAGTTGTTTTATATAATTTTTTATTATGATATCATATGTATTTATTTATTAGTTTGCTTATTTATTTTCCCCTGTGTACCATTTTATTA

>comp158918\_c1\_seq7

GAACCTTTGTATACGCTATTAAGTCAAAATCATATTGCAATCACCATGTTTCAACGAAGCAGCTTGAGACGACTTTTCTCTGTCTAACCTCTCCTACTTCTTCTCAAACCAGAA  
AAAGAATAATCACATTACTCCTCTTTATTTCCCTCACCATTTTACTGAATCAATGTTCCACCTTCAACCACATAAGCCAAGCTCATACCTTTATGCTCTCCCGAGGCCTCGATCAAGACAAA  
CTCCTCTCAGCAAGTTCATCCATGTTTGTCTTCGTTAGGCTTCGAAGACTACGCCTTTACGCTTTTTAAACTCGAACAAAGTCCTGATCTTCACCTCTATAACACCATGATCAGAAGTCT  
CTCTCAATCGGATTGAGCTGGAGAGGCTATTAATTTGTTTAAACAATATTCAATTTGCTGGCTTTGACCAAACTTATTCATTTCTTTTGTGCTGAAAGCTGCCGCACATTTATCCAACGT  
TGAAGTTGGCAGAGAGGTTACGGACAGGTTTTTCGACTTGGTTTTGAATACGACATTCATGTCTCAACAGGTCTAGTTCATATGTA

>comp158921\_c0\_seq5

TTATATTACCAAACATGCCATGTACTGAGGCTATCTTAAAGCCTATATATACTAGACTCTGTACCGAAGGCTAAATAAGAAAATACATTACTTTACTTTCTTCTCCACTTTTCGGCTCTTTGCTT  
TGTCCTCTGTCTTCTTGAGATCTTCTTGTCTCCTGGGCAAGAACTGGATCAATATCCAATAGTTCTTCAATATTGCTATAGTAGAGGTTGGACAGCTTCAAGAACTGATGATCAACTCTCATTC  
TCTTCCATTAGCATCAGTAAGTAGGCTTCTAGAGCGGACTGCAGCTCCCGGATGAATAAGGATTTGTTCAATAAATTTTGTTTTTTGTATCTCCTCTTCTATAAATGCTTGTGACGGCATGAGA  
ACCAACTATTTACCTTAGAGTAAGAAAAGTAATTGTTTGCAGCTCCATGTATTGTTTTTCGGTCATATTGCCGAGGTCGACCCAATAGCAAATGACAAGCATCCATTGGTAACATTGCACA  
AACTTGATCTCCAACTGGCCAATTGAGAAATCAAAAAATACTTTTTACAAACCTGTACTTCTTTATTTTTTTGAATCCATGATAAGGTGTAAGGATGTAGATGGTCCGTAGTGTCCAAT  
TGAAGCTTATCAACCATAGTGGCAGCGACGACATTTTTGCAACTTCCGAAATCAATAATAAATTGGCAAATCCTCCTTTTACCCTGATCTTGTTTTTGAAAATATTGTGATGGGGCCAAAA  
ATATGGGGTATTTACTTTTACTGATGCCAG

>comp158940\_c0\_seq2

TCCGGTGTCCGGACCTAATAATTTCCCTAAAACAAGAGAGCTTAATAAAAAGAATAAAAAGCTTTTGGTCAGATGTTAGTAAAAAAATCTTCAGGTTTTGCGGTTACGAAGATTTGGAGATGT  
CAGAAGGCCGAAAGCAATTTGCATGAGTTCAGAGTTGTTATTCTCAGTTCATAAGTGATATGTTGAACAATATGGGCCAGTACATTAACATCTTGCATTGCTCTATGGCAGGACCCTCC  
ATAGGAATCCTGTAATGTTACGGAGTGCATTTAGTGAGAAAGAGCCAAGCTTTGAACCATCTGACTTTCTCAACTGGCGTGCAAGATAAAGTGTATCTAGGAAGTACCAATCTTCAGGA  
ATTTCCATAGAGCAACGTTTGAATTCCTAATGAGGAAAGGCACATCAAATCTCCGTCCATTATGAGCAATCCACAGGACTGGTCTGCTACTCCTTTGACGGCTACTTACAAATTCAGTA  
GGATTGGAATAAGTTCCTCAAACTTGAATCCCAGGCCTGCTAACCATATCCGAGCTAATGCCATGAACATCGGTATTTGGTACAGCTCTTCCAGGATTTATAAGTGTGTTGAAATGTACTG  
TTCTTACCCCGATTAGATCTCGAATTGCAATTTCAATTATCCTTCCCCGTTCTCTACTAAGACCAGTGGTTTCAGTGTCAAATACTAAAATTGTAGCAGGTCTGTATATGCTTTGTCTTCTG  
AACTTTCTGGATACTGCAATACTCATCAGACTTGTATTGATGAAAATCTGACTTTGTTTTACTAATATTCTTCAAGATTTTCAGCAGCACCACCAGGAACCCTAAGGTTGATGTCAAAGCA  
TCACTGTTGTGTGACCACTGACTCCTTCGTTCTACTTTTGTATGCTAAAGTCCGTAGACAGCATATCCTAGGTTCCAATAGTTTTCCAGGGAAGAACTCAGCGTGGGATTTGAGAATAGTGA  
GAGTACAACTGCTCCTGACGCAGATCCTACATTTCTTCAAGGCAGCGAATAAATTGTTGGCATTCTTTGCCGAATAAAAAATATCTATGTTGCCCCCATCTAAGAAAACATGGCCTTAAA

TTTTGGTACCTATGTGTATGAGAGATGTACTCTAGGAATTATATCTGCATTAGACAATGTAAAGTAGTATGAGGTTATGAAATATAAAAAAATATTTATAGTTTAAATTAACCTAAATGAAAT  
TAGGACTCACCAATAAA

>comp158944\_c0\_seq3

GGCAATGAGAACAATCCTGCTCTCACCATCACCAACTCATAATCTTGCATAGCAGTTGGGCATGCAAGAGTGATTAATCAAGCGTGCTATGTTTCCTCTGTTTGTAGCATCGATAACTA  
CTTCATCACTGATCTTAAAAAGATAACAATCTTTCCCTCCAAACGGTACCGGGTCTCCCTCAAGTCAGCAACGCTACGTCTGACCTGCTCACCCGATATCCAGTATCATTCTCCTTCT  
TGAATCTTTCTACAAGCAAACAGGCCCATCCATGAATTCCAGATCTACCAAAACATACTCTACTTCTCTCAGTCGACTGCAAATAACGAAGGTGCTCCCTGAATGTTGAAAACGATTTCT  
TCACATCCTTAGATGCATTCAAGCATTCAATTTATCTAAAGAATGATGCAGTGAACCTCTCACTTGGTGCGGGATGCCAAATTCTCTGTTTTGCTGATTTTGCATCTTGTATAAGCTATGC  
ATCTTGCAGCATCTGAGGGGCTAGACTGATTGTTGGGTAACTAAATTGAGGGGAGCATCTTTCTTAATTAACCGTGAGCCAGATTTCTTATCATTATTCTTGAGCAACTTTTTGCTAGAG  
AAGATACCAGAAGGCGTGTGTATAATCAAACAGTGTCTGGGTAGGTGCCCTGTGGAATGAACAAAATGATAGCTTTTTTGTGTCTGTATTCCATTCTTCTCAAAGCAATGTAACCTCAT  
GCGATATCCAGCTCTTGATGCACACATTGCATGATAATAGGTTGAACACTTACAACATTGTGCACATGAACCATGCTTTTGCTTACATATTACACATATCTTCATAAAAGACTGTGGTGGTAT  
ATTCAATATTCCCACAGCAGGCTCCATTGTTATGTCGTTAGCAAAGAAACAGTGGGCTGAAACCAGGCACATGTAACATGAACCCACAAACAATCAACATCAGTTGGCTTCAAAGCCCC  
ACCTTTTACTGGGCAAAGGCAGCATTCTTGTTTTGTGAGGTGTTTCACATGCTGTGCAAACCCAGGATGTGAAATCTCGTTCACCTCTCACCCCATAGCATTCTGGTGGACAGCTACC  
TGACATCTGATGCAAATGATGATTTTATTATAATCCCAGTCTCAATCCATCTGCAAATTGCACACCTTTCAGTTGTCCATTTAGCATAGACTGGTTCATAAGCCTCTTGCAACAAAGTAACT  
AGTTTTTGTTTTCTCTCTTTAAGAGACGGTGTGTTAGCGTGATTGGCTGGTATTGTATTGTTAAGGTGATATCCAATCCATTCCCCGAGTGGCCTCATGGTACTCTTGATTTTGACGCTGATC  
TTCCATTTTTTACTTCTACAACCTGTATGACGCTCCCATTCACTAAGTTTGGCTTTTTTCCCGTTGCAAGTGTGGCAATGACATATCACACATGTTGCTCAGGTAAGTATGTCCCTCCACA  
CCACAACAGCAAACAAGAATCTTCTGGGGTGCAGAGACTTGCAAATTTCTAACTTGTCTTTTTTCTTCTGTATCTGGTAAATCAAACCTTATTCTGCAACTCGCACTCAAGAGATGAAT  
AATCACCATCTTCCAGACTCTGCCTGGTGTGGGCTTTTTTCAAAGCGAGCCTTCTAAATCACCTTCACTTTCTTTATGCTTGCAATTGAAAGGCAAGCCACATAATTGTCACAATGAAG  
GCCTGGATTGTTACAGTCTGTAAAGCATTCTGATCATGGTTGGAGCCTGTCGCTTCTGAAACTCACCATAGAAAGGATCACGAGGATATGTGTGCAGCCTGGACATGTCCATCCCATCC  
ACCTCCATTCCCATAAAACCATGCTCAGCCAGGAAAGCCTCCTCTATTGCCAACCTTAACTCAGAGGGCTTACTGTTATATAATTCTGTCTGCCCTGGAACCTGTCTAGATTGTCTATAAAT  
GGAAAACCATCTCTTGCTTCACCAAAGCACACTTGCGCATGACTTCTCCACTTCCAGAATACCCAAAGAGCATCACACAAATGGATCCAACGTTAAGGGATTTAGAAACTGGCTCGGG  
AGCTTGTGGCGTTAGGTTTACGACGATAGCTGGCCAAGCAGGATATGTGTTCCCTGGCTTAGCCCAGACCACATCCCCCACAGCAAACCTTCATGGAAGAGTTTAGATATTCTCTGTGAC  
ATTTTATCAGCCGATATATTCCCCAAATTTCTCACCGATTCTAGATTCCGCAACGCCGGGCAAACCATCACCTCCTCTCCCTCCGACGACTCATGAAGAAACGTCAAAGTGCTCGGTG  
AAAGAGATTTCTCATTGATTTTATATTCCAGCACGCTCTGTAACAATCCTGTTTTCTAATAATTCGAATGAATTCTTCGACTCAGTTTCAGTCACATTAACCTTCTCCGAAATCGGAATCAAT  
AACCCAGACTCGAACTTCTCCTTCCCTCCAGGTTTCAATGGTGAACGAATCACCGAACCGGAAGGAAGCACCTGCGCACGTCCCCGCTTTGTTCTCACAGCCAGCGACCGCCGCC  
GCGGCTGGCCCCAGCTGGCTATCGACCCGATACGACCTCGCCGGAGCTCGTAGACGGCCCCAAGTCATTACATGCGGCGTACGGAATCCCCGGCGAAACTGCCCAAATCCCCAAGCATC  
TCCAATAAGAAGTAATCCCCCTTGCTGCTCTTCCACCGTTTCGCGCTACGCCAACGCCAACCCACCCCGCTCCTTCGTCCGAATCCGCCCTGCAACGCTTGAGGGCTCGGCATTTGCGCCC  
TGTGCGAACGCTTTATGATCATCTCCGCAAATACCGATGTAATTCATAACCCTAGACTCCGGCGTGCATTGGAGGCGCAACCGACACAAACAGAGGATTCGATTCAAATATCCCAATCG  
GCAATCCCACACTTGAATCGACTAGTTTGCAGAGATGCAATAGGAATGAGAACCAGAAGAATAACCTAATTCAGGGAGAAAAACGACGGATCTCCGGCTTACCCAGACCTCCAA  
AACGAGCGCGGTATGAAATATTTCTATTTATCACGTAATAAATAAAAAAGAAGAA

>comp158945\_c0\_seq6

AAAATAAGATAAAAGAGAAATATATATATGAGCATAGACGCCATTCAGAAAATAAATGCAAGTAAGTAAAAAATATAACTAACAGGAAATTTAGGAATTGCATTTATAGAACATGTGCACG

CAGTAAACACTGAACAACAAAAGAAAGACATTGGCCTAACCTAAAGTTAGTAGTCGTGTCCTAGCAAACCAATCTAAGTTTGTGTAGGTTAGGTAGTTTTGGATGGGTTTATGTAGGGAA  
GTTTAATTATAATTGCTTTCATTTGATTTGTTAAAAGGCCAAAAGAAAAATTTTAAAGTTTAAATATTAATGACTTAAGATTTATTTTAAAGAAATTTATTTTGTGTTAGTTGATTTATTTT  
AATTGGTTGTAAATTAATAAAGTAAAAAGATTTTAAATAATTTATAATCAATTAAGGATTAATTAATTAATTTTCAATCAACTGGTTCATGGCATTGTGC

>comp158970\_c0\_seq1

CGCTCGTCGGGGCCCATGCGGGTTATATGATTGCACTTGCCCGCTTTTGTGTACATATGTGCATACATATTATAGTGCATGTGCGGGGGCATTCTTAAAATATTTGTAAACGCCTTCTATCCGC  
TTGCATAGATGTTGTGGATCCGGTGGCGTGGCGTCGTGCTCAGTGGCCCGTGGTTCTTACTACTGATTCCCTGCTTTTGCCTTACATGTGAATCGTAACATTGTACCTGATTCCCACAAAAT  
ATCTCATTGTTCTGGTGTAAACTCCCTTTTCTCATTCACTGGGAGGTCTTTCTAAGGCACGTTTAAATGATTGCATTCTTACTGATGCGTGTATCCTTTTCAAGATCTACAGTATTGTGGATT  
CTATAAGATGTAGCCTCCATGGTTAAGTAGTTGGCCTTTGAGATAAGTTGAGGTATTTAGGTGCTCTTGTGCTTCTGACTTCTTCAATAAGAACAATAGTCTGATCGTCATAAAGATATTGA  
AGGAATTTATATTTTATTGAAGGAACCTTGAACACCAAGAAGTTTAGTTTGAATTTGCTCAAATATCTCTTCCATTCTTACATGTGCCATTCTCATAACAAGGGTTCTCTTCGAGGAGTAAAC  
CGATGCTCGTATTTGTCATATGCTCTTGTATACTTTTGTGTCCACATGGGTCTTCCACAATGTACCCACTGTTGTTGTCCACAAAATGGATCATGTCTATTTACAGGGACCGGTCATATTCAGTA  
CGATCTCTTGAAAAGTGTTCGTAGAAGAGTCATTATTCCTGTATCATATCCACCTTTCCACAATTTCAAGTGATTTTTATGCACTTGTGGCGGTAGTGAGTTGTATACAGCCTGTTGGTGTG  
ATTGCAAAGCATCACAGCCTTTAGTATCTCTTGTCTTACGTGATTTATTGAATGCGATAGGTTTTCCCTATTAATTTTAGGTGCTTCTATTTCAATCTACAAGAGAACTGTCATTTGTATAAC  
AAATCATCTTTTCATCAATTTCCAGTGTGTTATCTCAATCTACAGGCTAACTACTATTTGATTGAGGCTCTCATCGATGTAAGTAGGAGACACCTGTGTATTCTTCAGTCAATTGATGTTGC  
TTACAAGTACATTGTATTTGACTACATAGGACTATTGTAGGAGTTTATTGTATCTGCATCATGTCCACCTTCATCATTACAGGTGATTTGGTGTATTTGTTTGCAGTGATGGGCCTTCTACT  
ATCACTTGCCACTGTAGCAATCTCAAACATAAGCATTGTTGCTTGTGTTAGGGATTCGTTGATGCATGTGGGAGACATCCATGCATTCAAGTATTGGTTGTTGTTTGAAGTACAATGCA  
TTCAACCTCATAAGGACTATTATAGGAGTCCACTGCATCTATCAACATCATTTGTTATGTACCGTATATTCAGGTATTGATGATTGATCCCCGTTTGTAGCTACTCATATTAATAATCATTCAAT  
GCATGTATGCCTTGGGGTCTTTATTCATTAATTGTCAATGTGCCCTCTCAATATAAATGCTAACTGTTGTTTGCATGATGGGTCTTTGATCGTTGCATGTGAGTAGTACTTGTGTATTTTGA  
GTTGACTGATATTGATTATAAGTCAGTTGCACCTGAAAGTTTTCCCACTGCGAGTCCCCTGCTTATGGTTTGTATTTGTTTGAATAATCAAATATCATTATTTTTTTTGTATTTTGAATATT  
ATTGTGCATTTTAGGGTTATGTTCCCTGCAGTTTAGTTCAAGCCCCCTGTTATAACAAGTCTCATGTGCATCTGTTTCAAGTTAGGTGCATTTATGTTTCAAGGTACAGATACTATGTATTACTACTC  
AAGTTAATCCTTCTTTTTTGTTCAGATCTGTATACTTCAATGTAAATTTCAACAACATCCCACATATCCCTCGTTTGTAGGGAGATATGGGGACTGAGCCATCCCCTACGCTACTAGAGC  
GTGTATGGTAG

>comp158970\_c0\_seq2

CGCTCGTCGGGGCCCATGCGGGTTATATGATTGCACTTGCCCGCTTTTGTGTACATATGTGCATACATATTATAGTGCATGTGCGGGGGCATTCTTAAAATATTTGTAAACGCCTTCTATCCGC  
TTGCATAGATGTTGTGGATCCGGTGGCGTGGCGTCGTGCTCAGTGGCCCGTGGTTCTTACTACTGATTCCCTGCTTTTGCCTTACATGTGAATCGTAACATTGTACCTGATTCCCACAAAAT  
ATCTCATTGTTCTGGTGTAAACTCCCTTTTCTCATTCACTGGGAGGTCTTTCTAAGGCACGTTTAAATGATTGCATTCTTACTGATGCGTGTATCCTTTTCAAGATCTACAGTATTGTGGATT  
CTATAAGATGTAGCCTCCATGGTTAAGTAGTTGGCCTTTGAGATAAGTTGAGGTATTTAGGTGCTCTTGTGCTTCTGACTTCTTCAATAAGAACAATAGTCTGATCGTCATAAAGATATTGA  
AGGAATTTATATTTTATTGAAGGAACCTTGAACACCAAGAAGTTTAGTTTGAATTTGCTCAAATATCTCTTCCATTCTTACATGTGCCATTCTCATAACAAGGGTTCTCTTCGAGGAGTAAAC  
CGATGCTCGTATTTGTCATATGCTCTTGTATACTTTTGTGTCCACATGGGTCTTCCACAATGTACCCACTGTTGTTGTCCACAAAATGGATCATGTCTATTTACAGGGACCGGTCATATTCAGTA  
CGATCTCTTGAAAAGTGTTCGTAGAAGAGTCATTATTCCTGTATCATATCCACCTTTCCACAATTTAGATGGATTGATGATAGAATTTGATGCAGGGACAGATCTTTGATTACTACATATGGAT  
AAACTCATACTTTGCAATTGTCTGTTGTTGCTTACAAGCATAATACATTGACTTTATAAGGATTGTTGTAGGAGTCTGTTGTATTTCATCAGTATCATCCACCATGATTTTTGTCTCATGTGT  
TCATAAGTTTTGGTAATTAAGATTGTTTATGATTGTTCAAATACTGTGAATTGATTACTGTTTATTGCTTGTATACATCAAGGTCCCTGTTCCGCCACA



>comp159055\_c0\_seq4

ATCTTAGCTCTATTTTCCATGACCACTTTCACTCAAAAATTTTGATTTGACACACTCTTCACTGCTACATATCTTATTAATGGCTCCCTTCAAAAACACTACATAATACATCCCTCTATGAGC  
ATTTATATCACCATCCTCTAGACTACAGTCACTTTAAAACCTTTGGTTGCCTATGTTATCCTTGGTTCCCAACCAAACTTACAAAATAAACTTCAACCTCATTCCAGCCCGTGTATCTTCTTG  
GTTATGTTGCTCATTCAAAGGCTATATATGCCTTGATTCCACTACGGGTCATTTGCATATTTTCTACATGTCCAATTCATAAATCCATTCATTCTCCTTGGTTAATTTCTCTTTACTATTTGG  
TTAATTTCTCTTTGTATTTGGTTAACTGGGCAAAAAGAACTTAGATAATTGAGTAAATGTGGAGACAAACATGTCCAATGAAGAGCAGGAAAAAGCAACAAGATTGCTGATTGCAAGCAGT  
ATGTACAAGCGCACAAATTGGATTAAAATCAAAAAATAAAAGCAATATGCACACGTTTACAAGGTAGTTAATACCAAAACAAAAACAGTATGTTAAAAGAGCTAAGGAAAAATAAAATGGA  
TTTGAAAAATAGCATGCATTTGAAAGATTTCAAAATAGTTTCGGCGAGCTTATATGAAATGCGATGGGGAGTTCAAGCCAACCTGGTGATTTGATGGTTTTGGCGATCCACAAAGACGGATG  
AGGGGTTGTGTTCCGGCGAGAATGAGATGAACGAGAACGTCAAAGAGTTAGAAAGCGAAAAGAAGTGAGAAAAGTGATGAGTTTCGATTTTAAATGGAGATGTGTTCCGGCAAGGTACCTTTT  
CAGTGCGGCGATCGGATTTGGAACGGTCGGGATGGAGAAGTAACCGATCGGGTGTAATGCATATGCTTTGGTGCAAGTGAAACGGCATGTTGCGGCAGGCGGAAGTGGAATGCTCGGG  
TGTGATAGCTTTTCGAAACGGTCCGGAGGAGATGAAGTCGATCGCCTGGAAGATGATCCGTTCCGGCTAGGGTTATTGTAACCTTGCGGGAATGCAAAGACGAACGGACGCCCGGAGTGAT  
AGCATCGGAATTCGTTTGGCTATAAGATGTACGCTTTCCGGCTAGGGTTAC

>comp159070\_c0\_seq10

ACAAATAGGTAAGTGAACAAATATCCGTAGAAGAGATTTAACATAACAACTATAAAAAGACTAATGAAATAGTTCTAAAATAAAAAATCACTCAAAGAACGAAAAGATTTTAAATTATAATC  
TCATTAGTAGCCGAATACATCATTCAATTTCTTCTTGCCCGACTTGGCAACATCTCCAGCTTTGGTCTTGTTTACACCACGGATTTTCTTAGCTCTGTTCTTTCTTTCTTTTCACTGCTTCTTG  
ATTTCTCCACCTTTGTGGCCAATCCATTCTGCCAATTATACACAATCAGCACACAGGTTTGTATTGAGAAGCAACAAATTTAAAATGTTTTAAGCAAGCATGAGAGAAATATTTGAAATGAT  
GATGAGGAAAGTGCCAAGTAAAATATGTACAATCCATGTTAGTGCCAAGAAATATCATTTTAAATGTCTGCATAGCTAAATAATATGGTTTCTACAAGTATAAATGATAAAAGATGAAGATCT  
AATTTTTAGATTTTAAAGATTACTTTCTAATCTGAAGGATGGGTATCATTGATGATTAAGGGTCCACTTCATGATTAATTGTTCTGTATGGATACCAACGACGTCTGGAGATCAATCAAATG  
TGCTACGTCACCCGTGCGTTTGATACCGCGGCTCAGTACAGCTGACATGGCGCATTTCTGATTGGCCACCGGATGGCGTTCAACGTCTGGTCTCCGCACAGAATATTTCTCCCACTTAAAT  
GGTCTCTACTTGTAGAACTGCCGTGGGTGTTATTAACTACCATGATAACATGCCCAATTTTAAAGTTTAAAAGTTGAATGAGAAAATTATAGCTGAATAGAATTCTGCCAACTATCTGATAG  
CTAAAATTGAAGATCGAGTTCTGATCCTTAACATCGTACAGCTTCGCTAGCTTCTCTTTCAACTCAACCTTTAGACAAGCAAGCAACAACAATCAAATTTTAAACAAAGAATGAAACCGA  
AACGATCGAAAAACTCAAATTAATAGCTAGATCTCAGCGTA

>comp159070\_c0\_seq9

CCCGGATGAAGAACATCGATCACCTTAAACACAATACAAATTAACTCAAAAAAAGATTTAAAATCAAAGGCTCGCTCTCAGAAAATAGACAACCTGAGGTTTTAGGATTAACCTCACGAAC  
TGCTTGCAGGAGAGAAGGCGATTAGTCATGAACTTTCCGGGTCCTGATGGTAACTGCTTTGGAATCTGCCATTGTTTTTCTCCCTCCGATCAGGAAAAGCTCGCGCCGCTGTTTCAGGTG  
GATGTGTGATTTTACTCTTAGAGACGGAGTGTGAAACGAGTGTATATGTGAAAAGTTTGGAGTGGCTTTGGTTCGCATAAAATGTCCGTTCTCTGATGACCTGGTAAATACGAGAGCAGATG  
TATTAGATTTGATCTATATTAATGCGGAGGTAGACCTAAAAAAAACCTGGTTAGAAAATATT

>comp159092\_c0\_seq3

TAGGCAAGCCTTTCTTTGTATCTTAGAAGAAAACAGCAAATGGCACGTTAGGCATGTTAGGAATGTAAACGTGATGCGCTTTCATTGATTCGTGCACATAAACTGTCCGGTTTTAATCAGG  
CAATTGGACAACTTTAATAGGCGGAGGATAACGGAGGAAGAGACATTAACGTGGATTCTCCAGCTGCCAGCCTTCTTAAACAAAACCATTGACCTTACAAGCTGCCCGGACATTCCC  
ACATCGCTCGCCGGCGGCCAGCCCACCCCTCTCTATATCTCTGCCCTTACCCCCGCGCGCCGACGAATTATCTATATTGTATACCACCCCTTTCCGCTTCCATAGCCAAAACAGATTA  
GACAGAAAACGCTTAGAAAAGGCAGCAGCGACGCCCGGTGGGCGCGCGTTCGCAATGACGTGTCACGAGGCAATGGTGGAGGCGAGCAACTGCCGCAATGAAGGACAAGCGGAG

CGTGTACCTGAGCCGAGTTGCGGGCGGTGGGCATCGAGCTGAGATGGAGGCTGCCGTGATTCACGCCACCAACCACGATGAGCGCTCCATCGATTACAAGAACGCGGCGAGGGTGTTCCCTGGGCGCGCACCTCGCCCGCTGCCTTGCCCTCTTCTGCGAGCGCTTACGCGCCGTGCGACCCGACGCGCTCGTGGGCTGTGGCGCTCAAACCCTGCTGGTCACTCACGGCGTCTCTCTGCTCCGCTGCCGCCCCGTGCGTCGGCCGCCTCCCATTCGACTTCTCCGACTTTCGTGATCAATCCGCTTGCCCTCGGTAGCCTCCTACGGCTTCTCCGCCTTCGTTTCGTGCCTACTTCCAATTCCTCGATTACCGCTCCGTCTCTCTCATCTAGTTCCCAATTTGATAACCAAGACAACAACAATCCTCTCCGTC AATTCAATCGAAGGTGATCTCGAGATGTTGGCGAA GATGCAAGATCTGCTCGAGCTGTTAATGCAGATCCGGCCATATGCTGACGGAATGGAGTGGGGCTCATCCTTGAAGCGATGAATTTGTGCATCATTGAGATCTTTGAGGTATATAGCTGCA TTTGTAGAGGCATCGCCAGATTCCTCATCGATGTGCTCGGCTCTGATGTTTCCAACCTCTGCCTCCCACACCCGCGTCGCATCCTCAAAGGCGAAGATGGCCGTGCCTTCCGAGGAGC GGAAGCGACTGGGTATAGCAGGGATGAGGAATCTGGCGATGCCTCTACAAATGCAGCTATATACTCAAAGATCTCAATGATGACACAATTCATCGCTTCAAGGATGAGCCCCACCTCCAT TCCGTCAGCATATGGCCGATCTGCATTAACAGCTCGAGCAGATCTTGATCTTCGCCAACATCTCGAGATCACCTTCGATTGAATTGACGGAGGAGGAGTTGTTGTTGTCTTGGTTATCA AATTGGGAACTAGATGAGGAGAGGACGGAGCGGTAATCGAGGAATTGGAAGTAGGCACGAACGAAGGCGGAGAAGCCGTAGGAGGCTACCGAGGGGCACGCGGATTGATCACGAAAG TCGGAGAAGTCGAATGGGAGGCGGCCGACGCACGGGGCGGCAGCGGAGCAGAGGAGGACGCCGTGAGTGACCAGCAGGGTTTTGAGCGCCACAGCCCACGAGCGCGTCCGGGTGCG ACGGCGCGTAAGCGCTCGCAGAAGAGGGGCAAGGCAGGCGGGCGAGGTGCGCGCCCAGGGCAACACCCTCGCCGCGTTCTTGAATCGATGGAGCGCTCATCGTGGTTGGTGGCGTG AATCACGGCAGCCTCCATCTCAGCTCGATGCCACCCGCCGCAACTCGGCTCAGGTACACGCTCCGCTTGTCTTCATTGCCGCAGTTGCTCGCTCCACCATTGCCTCGTTGACGACGT CATTGCGACGCGCGCCACCGGGCGTCTGCTGCCTTTTCTAAGCGTTTTTCTGTCTAATCTGTTTTGGTTATGGAAGGGCGAAAGGGGTGGTATACAATATAGATAATTGCTCGGCGCG CGGGGGTAAGAGGGGCAGAGATATAGAGGAGGGGTGGGCTGGCCGCCGGCGAGCGATGTGGGAATGTCCGGGCAGCTTGTAAAGTCAATGGTTTTGTTTAGGAAGGCTGGCAGCTGGA GGAATCCACGTTAATGTCTCTTCCCTCCGTTATCCTCCGCCTATTAAGTTTGTCCAATTGCCTGATTA AAAACCAGAGTTTATGTGCACGAATCAATGAAAGCGCATCACGTTTACATTCCT AACATGCCTAACGTGCCATTTGCTGTTTTTCTTAAGATACAAAGAAAGGCTTGCTAGGGCTCCGTCGCTTCCGTTTGATGGGCG

>comp159094\_c0\_seq9

ATTTTGTAAAATTTAATCAAAAAGTGAAGGTCTTCAACATCTACAATGCATTGTGGGTGATTCTGGTTCCGATGGGTCTTATGCTAAGATGCCTCTTCTCCAGCAAAACTTTGGCTGGCC TGGATAATATTTTCTATGCTGTTGAACTTGATTCTGCGGCAGGACTACGTGTTTTCAATTTCTTCTAGATTTTGGTGCCTCTTGGGTTTTTCATGAAGAGAAGTATAATGTTGCTATTATCTATA GGTACGGTTCGCTTTTTTTTTTCTGCTGTTCCATATAGAGGATATGGTTTTGGAGGTGATTTTGTAAACCTCACTCCTTTAGGCTGTCTTTTCATGCCTGAGTCTCCTAACTTAGATCAAT CCCTAAACATCAGTGATGGGGACATCAAATTTGACACGTGTACCATCGCCG

>comp159122\_c0\_seq1

AAAAAGGAAGGGAAAATAAGAAAAAAATATAAAAATCAAAGCTAATGAGAAATAAAATAAAATTTACATAGGGTTATGGAATATAATAATCACTTTTAAATTCTCAATAAATTCAT AAGACCATCCAGCACTGTAGTATTCTATGCCTTACATGTCTTATATTCTTATTCATAGAAGCGAGGATTGTATCTACATGCGCCGCCAATAGGATCCGACGGCAACACCAGGAATCAAGACG TGGGTTTTCGCAATCGGAACAACCTCTGCAATTGGCGCCATCGTCTCCGTCGTCAAAGTTAAGTGCCTAGCTGATAGGGTCGTACCTGAAGTCTCAAATTGGCGGCCTGATGATTCCC GATCAGCCTCCGGCAACATTCCTTCATCTCCGGGAGCTCCATAGCCTTTGCACGGATCCACGACGGCGTTGATCGAATCACCGATGCCTCCACCACCGGCGGATCTCCGAATTGGCAAC GCGACTGCAACAAGGGAACCTGATTATCGGCCGGGTTTTATGGCGCGGCATGGAGAAGGTGATGCGCCAATGTTCTGGTTCGCGGCATTCCATTTCCAGTGAAGAATTACTCTAGGGTTA GGGTTTTGGAAGAACGGAGCAAGGTGATGAAGGCGGAGCAGTCCATTTATAGCTTCGGAGGGAAAGGGGTGGATAACGACGACGCGGCCGAAGAAAGAAAGACCGTTTCGGTTTCGG TTTTCGGTGGAAAAACCTTCGCGTCGAAGGCATTAACGTTATTTTCATGGGAGTAGTTACGATTTTCGCGGTCATTGGAAGAATTTTG

>comp159139\_c0\_seq5

ATAGTCTATAAAAGTTTTTGTGAATCTATTTTGAATAAATATATTATAAATTTATTTTTTCTTAATTATTACACTTATTTTAAAATAAATTTAATGACCTTACCTACAATCAAATTA AAAATTT

GATCATATATCCTGAATATAATTTCTTTGCCACTGCCTACTCTTCTTTTTTGCATGCATGCAAAAGCTTAGAGTCTCCGAAACCATGACGAACGCACCGCTGATCCTCACCTTAGATTGTGAC  
A

>comp159218\_c1\_seq3

TTTGATTAATGCATTTTTCCCTTCTTACAGATGCAAACCTTTGATAAGCCGTGCACAGATGGATTCATTAATATCATATTATAATCCGCTGGTCTATTATTGTTATATATGACAATCCCATGTTCC  
AAATTATTACAAATACAAACCAAACACACAATATACCCGTCTTTTATCTCTCGCCACCCATCGACAATATAAAGGTGCGACAAACGGAGAGTAATGGTTCATTGATTCTGGCTTCTCAGTGC  
AAACTGCTCATAGCAGAAGCCTTGAAGTTCTTCGTTGAGAGCCTGGGAAGTACAAATAAACCAACAATACCGCAAACGAAGGCAAACACTGAAGCAACGGCAAATGCAGGCATGTTCC  
CCTTCTTGAAGATCCCATCCCATGGACCAGCTCCAAGTGCAATTACCACCTGTGGTATAACAATAGATATATTAAGTACTCCTGTGCACAGTCCCTTGACCACCTCCTTCGTTAGCAGCTAAT  
TGTGCCGTGACTGCAAATGGCAGCTGTACAGAAGTCTAAAGGAGCGCCAGAACCAGCAAGACGACCAAGGCAACAGCCTTGACGCTACCGTCTGGAGAGATGATAGCATCATGAA  
TGCTGCCATGGTAGCTGTGCACAGACCAGCTGCTGATGATGGCGGTGGCGGCCATGCATATAAACATGCAGAAGTTGCACATAACCCACACTATTCTTGTGTGAATTTTCGACACAATGG  
CTCTATCAAAATTGAGGTCCTCAAGAACCACAGAGTTTATGAGCAAGCCTAATGCGCCTGCTCTGACTCCATTATCATAAGCTTTCATCTGAGCTGGAGTTCCTTTGGATCCTCATGGA  
ATATTTCTCGGCCCATCCAATCTGTATCGTAGAGTTGAATGGAAACCATGACAGCCAGGTGAGGGAAGTGACTAGAGAATATAAGGCATTTTTTGGTGGAAAGATTCTTGATAGTTCTGAA  
GATTTCCATTATGCCAACCTTTCTTCTACTGTAGATGGAGCTACTTCTTCTTACCAGCAATCGAAGTCACGAGTACACTTAGCAGAAGAAAGACCACAGCAACTAAAAATGCTCCTTTC  
AAATTTGCGCAAGCTTCACAGCAGGCTCTGTTAGAAAGGAACGGAAACCACTCGTGCCACTTTCCACTGGCACCAGAAGAATAGCCTAAGATGTTCCCGATGGCCATCCATGAGGCAA  
TATTGCATTTGCTTTACTGCATCCATGAGTCCCTGTAACAGACAGATCAGCCATGAGGGCTCGAGTTGGACCCTGAACTGTATTATTTGATAGATCGAGCAGCCAAAATCCGGCGACGTAG  
ACTATTGCAGCCCTCCACCGTGGGCCGTGGTAAATGCTGCAATCTTCCTTGGTATCGCCTAACTTGTATCCAATGTCAGAAGAGAAGGCAATTACAATCACTGCAAAAACAAATAAAGATGC  
AACCGACGAGTATGAATGGTCTTCTCCTTCCAAATCTTGAACGGCATCGATCGCTCCATAAACCAACGCATGGTTGAACAACAAAGCCAGCTACAGGGCCGCATAGCCATATCAAAGAAG  
ATAAAGTATGAGACAGTCCCAGCGTCTGGACGTAGGGAGTGAGCAGCGATAGCTGAAGCGCCCATCCGTACTGTACTCCCCCAGCCACCATGCAGGAGAAGATCAGCCTCACTAGGCTT  
ATCTGTTTTCCACCGCCGCCGCCGCCGCTGCTTCGCCAGTCTTCCTCGAACGATTCCGTCCACGATGCATGTGGCGCTCACAGTACTTCTGGTTGGGAACCACGTCACGCGAACA  
CCGCCATTTCTTTCCATCCGTCTTCTACACCTCCCCGGCTCCGGCTCCAGACTGTTCCCTGTAGTCCAAACACAGATCTCCGCATCCCAAACGCAGTTGGCAGCGGCGACGCTTTTCCAT  
ATGGGGAGGACAAGGTGCAGCGGACGGGGAGGCCACCCGCCATGTACTTGTAGATGAGGGCTTGATGCTCCAGCTCTTGCATTTGCATGAATGTAAAAATCGTTTTTTGGGGGGGCT  
GGAAACGGAACCTCCATTGAGACCTAGTTGAAGGGCGAGGGTTAGAGGGGAGGGAGACGCCATGGCCGCGGCTTCTTGTGACGTCGGATATGAAGAGAGACGGGGGATCTTGGAAGG  
AGGAAGAAAAGGGGAGTGTGCTGTGGAAGATGTGTGTTCTTTGGTTGCCATTGTGGTTCTAATGGCACGAGAGCTGATGAAATATGAGTTGTGTGCCCTCGGCTTGGTCATTTGAG  
ATGCAGGGCGGAAGCTGCTGCGTTCAGATCGAGGGAATGATAACAGAAGAGCTTCAAAGTTTTATTGGCCTGTGCTCTATGAAATATGAGTTGTGTGCCCC

>comp159231\_c0\_seq1

CCGACCCCATATAGTGGGATAAATGCTTGTTATTGTTGTTGTTGTTAATAAAAAAAAAAAAACTATTATTATTTTAATACCTTCTAATTTAAATATTTTACCTTATATTATTAGCATCTTA  
TTTTAATACAAAATGTATCACGATATTAATACAATTTTGTGTTGCAATACACAATGTGAACGAATGGATATGAGTAGATCGTTCTAAACAAAACAAAAACAAAAACAAAAACAAAT  
GCCTTCCGGCTGAAACGTCAATCAATCGTTCATCTTCAAATGTAGAAACCAAAAAGCTAAAGAAAATAGAATAAAGAAAAGCCAATGGATGGATGCATGGATTAGCAAGGCAATCCGA  
TCTTGCAGTTAAGGGTCCCAGAGTAGCGTGTGAGCCTAGTTACGAACGTCCCTGGCTTGGCCCTCATCATATCATGCCTCGTGTATCTGCTAATAAATCGTTGCCCTGACTCAACGAAGAA  
CGCTCCATTTATCATCAGATCACCTGCGACTTCCACGTCCACTGGCTCCAGATAGCCTCCGGTGCATAATCCCTTTTCGTCACCTGCTTGGCGTTGATATCCGGCGGAGCAATGTATCGAT  
TCCCTGACTGATAACAGTGGGATGCTGGCTTCCCCGACGGCGTACATTTGCCAATGTGTGTAGTCATTGTTGACGACATGGACAAAGCCCCACGGCAACGCGGCATCCGTTGCACGA  
GTCCACGCCCCAAGTGGTTGAAGGCAACCGTTACCTGCATAAGGGCATCCCCGGCGAAGGAGTCGCTGGCGCCAAAGAGCATTACATCGTCATGATTTGTCATGTGACAATTGGAAATG

GTGATGGCGGTGGATCCCATGATGGCGTCTATTAGGCCATCAGCACAGTTGGACATGGATATGTGGTCAATCCATATGTTGGAGGCACCGTAGATGGAGATGCCATCACCATCGCTGCGAG  
TGCGAATGCCATAATGTGAAGGGGAGTCGCGGATCATGCCGCCGTTGCCAGGGCTGAGATGGTGGATGTGGAGGTTGTGGATGATGATGTGGTGGACGAATTGGATGGTGATTTGGGCGC  
CATAGGCGATGTGGATGTTGGCGCCACGACCGTCGATGGTTTTGTAGCTATTTACTATTAGCTCCTCGTTGAGGCGGATCACCATGTCACGGGCGAACACTATCCACAATGGCTCAGCCTA  
AGTATATATCATGCGAAAGTTGTGAACCTGAATAACGGCATGGCGAAGTGTCCCCGGCTTGGGGTTGACAAGATCATTGTTCGGACGCATCTGTCACTACATAGAAGCGACCTTTGACACC  
ACCCATGGCATTGCGGCCAAAGCCCTTAGCACAAAAGGCCAATCTCTTGCGGTAAGTGGCCCAATTAGATTGGCAGCGCCAGCATCGATCAATGGGGTTTTGTGGCCAGCATGGATCTGT  
AGGACTTCGCTTCCTTGATATTAGGGATCTGTGTGTATTGTTCTTCTCCAATGCCATGAACACATCTCTATTGAAGTCGTTGGTGGCCCCATGTGGGTCGGGGTTATAAGACTCACGGACCT  
TAGCGCGGAAGCCTCAGCCCGCTTCTGCCAGAAATCGTCGAAATCACCAATGTGCGAGCGAACGGGCGCGGTGAGGATGAGGGCCGAGAAGAGGATGAGGAAGCAAGGCCTGAACT  
GTACGCACTCCATTCTTCTTCTTCTTCTTCTTCTCGCTTTTTTCTTCTGTTTACAGTGCCTGTTTTCTTCTGTAATCGTGTACTTTTTTTTTTTTTAAATCGGAAAGCAAAAAAGATTACAG  
ATGGTTCGGAGAGAGTCTGGAAAAAAGTTTTGGAAGCAAAGCAGGATAACCAGACCCGACCGCTGGCCGAGCGAACCTCGAAGATCGCTAGAATGTGAGGAACATTGGGTTGGTGG  
GGTGGGTATGTTTTAGGGCTTCGGCTAGGGAATGGAGCTATATAGGATTGTTATGGAATCCAGTAGGAATAAACAGAGGAAAAAGAGGATCGGGCCGACAAGAGTGGCCAGCCATTAGC  
AATTCGCATTTAGGGACGGGAGATTTGGCTGCGCATATTAGTTTATCTGGCTCTGCGTATTTGCATATCTGGCGGTTATAGATCTCCTATATTGTTAATATTTCCCTTGATATACTTCTCTTAGC  
ACGGAAGGTGAAGGATGAGGAGAGAAAATAGAGAGGGTGGTTGTTAAGGGCGATTGGATCGTTTATGAAATCGGGAAATT

>comp159231\_c0\_seq10

TCAATAATTGTTGAACAACCTTCAGCATCTATTCAAATGCCCTTATTCTCAATCATCAAAGAATTTCCAAACATTCATTCAATGTACCTATATATAATATTCATGATACAGTGCTTCTCCATTCCA  
ATTACTACAACCTTTAAGAAAGTACTCAACATATAATTTAAAAATAATTAAAAAAAAAAACACAGTCAACAATATGAGAATCACATATGATATATCCATAAAAGAAGCACTTTTATGAA  
GAAAAATAAAGAACATGAAATAAATTCATATACTTTCCCAACACCAAAGGAGTGAAGCAATCAGCAGCTCAACACTGCCTTCCAACCTTACAACGCAAAGTTCCCTGCAAACCTCGTC  
AATCTCTTCAAAAAGTGCCAGGCTTGGCTTTTATCATGTCTGCTTCGTATATTTCTTATGAACCTCTTCTCCCCGACTGAACAAAAACGCCCCATTTAACATCAAATCCCCTTCTGAT  
CTCCAATGCCAATTCCTCCATTCCCATCCCCAACATAATCCCTATGCGTCACTCCTTCGCCGCCGATTTGGTGGCGCGATATACCTATTTCTTGACTCACTATCGTCGGATGACTACTC  
CCACCAACCGCATAACATCAACCAGTGCCTGTAATCGTTATTACCCACATGAACAAACCCCCAACGACACCTCGGCATTCTCTGCACCAATCCCCTTCCAAAATGGTTAAAAGCTACAGTTA  
CCTGCATCAGAGCATCCTCCGAATACGAATCGCTCGCACCGAACAGAAACACATCGTCTGTTGTTGTCATGTGGCAGTTGGACACAGTGATTGCCGTGACCCCATGATCGCGTCGATCA  
GCCCGTCCGCGCAGTTGGACATTGAAATGTGATCGATCCAGATGTTGGAAGAACCCTAGATCGAAATCGCATCGCCGTCGCTGCGGGTGCAGGAAAGCCGTAATGGTTGACGGAATCGCGA  
ATCATGCCGCCGTTGCCGGTTTTGATGTCTGGATGTGGAGGTTGTGGAGGATGATGTGGTGAACGAATTGGATGGTGATTGGGCGCCATAGGCGATGTGGATGTTGGCGCCACGACCG  
TCGATGGTTTTGTAGCTATTTACTATTAGCTCCTCGTTGAGGCGGATCACCATGTCACGGGCGAACACTATCCACAATGGCTCAGCCTGAATAACGGCATGGCGAAGTGTCCCCGGCTTGG  
GGTTGACAAGATCATTGTTCGGACGCATCTGTCACTACATAGAAGCGACCTTTGACACCACCCATGGCATTGCGGCCAAAGCCCTTAGCACAAAAGGCCAATCTCTTGCGGTAAGTGGCC  
AATTAGATTGGCAGCGCCAGCATCGATCAATGGGGTTTTGTGGCCAGCATGGATCTGTAGGACTTCGCTTCCTTGATATTAGGGATCTGTGTGTATTGTTCTTCTCCAATGCCATGAACACA  
TCTCTATTGAAGTCGTTGGTGGCCCCATGTGGGTGCGGGTTATAAGACTCACGGACCTTAGCGCGGGAAGCCTCAGCCCGCTTCTGCCAGAAATCGTCGAAATCACCAATGTGCGAGCGA  
ACGGGCGCGGTGAGGATGAGGGCCGAGAAGAGGATGAGGAAGCAAGGCCTGAACTGTACGCACTCCATTCTTCTTCTTCTTCTTCTCGCTTTTTTCTTCTGTTTACAGTGCCTGTT  
TTCTTCTGTAATCGTGTACTTTTTTTTTTTTTAAATCGGAAAGCAAAAAAGATTACAGATGGTTCGGAGAGAGTCTGGAAAAAAGTTTTGGAAGCAAAGCAGGATAACCAGACCCGAC  
CGCTGGCCGAGCGAACCTCGAAGATCGCTAGAATGTGAGGAACATTGGGTTGGTGGGGTGGGTATGTTTTAGGGCTTCGGCTAGGGAATGGAGCTATATAGGATTGTTATGGAATCCAGT  
AGGAATAAACAGAGGAAAAAGAGGATCGGGCCGACAAGAGTGGCCAGCCATTAGCAATTCGCATTTAGGGACGGGAGATTTGGCTGCGCATATTAGTTTATCTGGCTCTGCGTATTTGC  
ATATCTGGCGGTTATAGATCTCCTATATTGTTAATATTTCCCTTGATATACTTCTCTTAGCACGGAAGGTGAAGGATGAGGAGAGAAAATAGAGAGGGTGGTTGTTAAGGGCGATTGGATCG

TTTATGAAATCGGGAAATT

>comp159231\_c0\_seq13

CCGACCCCATATAGTGGGATAAATGCTTGTTATTGTTGTTGTTGTTAATAAAAAAAAAAAAACTATTATTATTTTAATACCTTCTAATTTTAAATATTTTTCACCTTATATTATTTAGCATCTTA  
TTTTAATACAAAATGTATCACGATATTAATACAATTTTGTGTTGCAATACACAATGTGAACGAATGGATATGAGTAGATCGTTCTAAACAAAACAAAACAAAACAAAACAAAACAAAAT  
GCCTTCCGGCTGAAACGTCAATCAATCGGTCATCTTCAAATGTAGAAACCAAAAAGCTAAAGAAAATAGAACTAAAGAAAAGCCAATGGATGGATGCATGGATTAGCAAGGCAATCCGA  
TCTTGCAGTTAAGGGTCCCAGAGTAGCGTGTGAGCCTAGTTACGAACGTCCCTGGCTTGGCCCTCATCATATCATGCCTCGTGTATCTGCTAATAAATCGTTGCCCTGACTCAACGAAGAA  
CGTCCATTTATCATCAGATCACCTGCGACTTCCACGTCCACTGGCTCCAGATAGCCTCCGGTGCATAATCCCTTTTCGTCACCTGCTTGGCGTTGATATCCGGCGGAGCAATGTATCGAT  
TCCCTGACTGATAACAGTGGGATGCTGGCTTCCCCGACGGCGTACATTTGCCAATGTGTGTAGTCATTGTTGACGACATGGACAAAAGCCCCACGGCAACGCGGCATCCGTTGCACGA  
GTCCACGCCCGAAGTGGTTGAAGGCAACCGTTACCTGCATAAGGGCATCCCCGGCGAAGGAGTCGCTGGCGCCAAAGAGCATTACATCGTCATGATTTGTCATGTGACAATTGGAAATG  
GTGATGGCGGTGGATCCCATGATGGCGTCTATTAGGCCATCAGCACAGTTGGACATGGATATGTGGTCAATCCATATGTTGGAGGCACCGTAGATGGAGATGCCATCACCATCGCTGCGAG  
TGCGAATGCCATAATGTGAAGGGGAGTCGCGGATCATGCCGCCGTTGCCAGGGCTGAGATGGTGGATGTGGAGGTTGTGGATGATGATGTGGTGGACGAATTGGATGGTGATTTGGGCGC  
CATAGGCGATGTGGATGTTGGCGCCACGACCGTCGATGGTTTTGTAGCTATTTACTATTAGCTCCTCGTTGAGGCGGATCACCATGTACGGGCGAACACTATCCACAATGGCTCAGCCTA  
AGTATATATCATGCGAAAAGTTGTGAACCTGAATAACGGCATGGCGAAGTGTCCCCGGCTTGGGGTTGACAAGATCATTGTGCGGACGCATCTGTCACTACATAGAAGCGACCTTTGACACC  
ACCCATGGCATTGCGGCCAAAGCCCTTAGCACAAAAGGCCAATCTCTTGCGGTAACTGGCCCAATTAGATTGGCAGCGCCAGCATCGATCAATGGGGTTTTGTGGCCAGCATGGATCTGT  
AGGACTTCGCTTCCCTTGATATTAGGGATCTGTGTGTATTGTTCTTCTCCAATGCCCTTAGCGCGGGAAGCCTCAGCCCGCTTCTGCCAGAAATCGTCGAAATACCAATGTGCGAGCGAAC  
GGGCGCGGTGAGGATGAGGGCCGAGAAGAGGATGAGGAAGCAAGGCCTGAACTGTACGCACTCCATCTTCTTCTTCTTCTTCTTCTCGCTTTTTTTCTTCTGTTTACAGTGCCTGTTTTTC  
TTCTGTAATCGTGTTACTTTTTTTTTTTTTAAATCGGAAAGCAAAAAAGATTACAGATGGTTCGAGAGAGTCTGGAAAAAAGGTTTTTGAAGCAAAGCAGGATAACCAGACCCGACCG  
CTGGCCGAGCGAACCTCGAAGATCGCTAGAATGTGAGGAACATTGGGTTGGTGGGGTGGGTATGTTTTTAGGGCTTCGGCTAGGGAATGGAGCTATATAGGATTGTTATGGAATCCAGTA  
GGAATAAACAGAGGAAAAGAAGGATCGGGCCGACAAGAGTGGCCAGCCATTAGCAATTCGCAATTTAGGGACGGGAGATTTGGCTGCGCATATTAGTTTATCTGGCTCTGCGTATTTGCA  
TATCTGGCGGTTATAGATCTCCTATATTGTTAATATTTCTTATGATACTTCTCTTAGCACGGAAAGGTGAAGGATGAGGAGAGAAAATAGAGAGGGTGGTTGTTAAGGGCGATTGGATCGT  
TTATGAAATCGGGAAATT

>comp159231\_c0\_seq15

CCGACCCCATATAGTGGGATAAATGCTTGTTATTGTTGTTGTTGTTAATAAAAAAAAAAAAACTATTATTATTTTAATACCTTCTAATTTTAAATATTTTTCACCTTATATTATTTAGCATCTTA  
TTTTAATACAAAATGTATCACGATATTAATACAATTTTGTGTTGCAATACACAATGTGAACGAATGGATATGAGTAGATCGTTCTAAACAAAACAAAACAAAACAAAACAAAACAAAAT  
GCCTTCCGGCTGAAACGTCAATCAATCGGTCATCTTCAAATGTAGAAACCAAAAAGCTAAAGAAAATAGAACTAAAGAAAAGCCAATGGATGGATGCATGGATTAGCAAGGCAATCCGA  
TCTTGCAGTTAAGGGTCCCAGAGTAGCGTGTGAGCCTAGTTACGAACGTCCCTGGCTTGGCCCTCATCATATCATGCCTCGTGTATCTGCTAATAAATCGTTGCCCTGACTCAACGAAGAA  
CGTCCATTTATCATCAGATCACCTGCGACTTCCACGTCCACTGGCTCCAGATAGCCTCCGGTGCATAATCCCTTTTCGTCACCTGCTTGGCGTTGATATCCGGCGGAGCAATGTATCGAT  
TCCCTGACTGATAACAGTGGGATGCTGGCTTCCCCGACGGCGTACATTTGCCAATGTGTGTAGTCATTGTTGACGACATGGACAAAAGCCCCACGGCAACGCGGCATCCGTTGCACGA  
GTCCACGCCCGAAGTGGTTGAAGGCAACCGTTACCTGCATAAGGGCATCCCCGGCGAAGGAGTCGCTGGCGCCAAAGAGCATTACATCGTCATGATTTGTCATGTGACAATTGGAAATG  
GTGATGGCGGTGGATCCCATGATGGCGTCTATTAGGCCATCAGCACAGTTGGACATGGATATGTGGTCAATCCATATGTTGGAGGCACCGTAGATGGAGATGCCATCACCATCGCTGCGAG  
TGCGAATGCCATAATGTGAAGGGGAGTCGCGGATCATGCCGCCGTTGCCAGGGCTGAGATGGTGGATGTGGAGGTTGTGGATGATGATGTGGTGGACGAATTGGATGGTGATTTGGGCGC

CATAGGCGATGTGGATGTTGGCGCCACGACCGTCGATGGTTTTGTAGCTATTTACTATTAGCTCCTCGTTGAGGCGGATCACCATGTACGGGCGAACACTATCCACAATGGCTCAGCCTG  
AATAACGGCATGGCGAAGTGTCCCCGGCTTGGGGTTGACAAGATCATTGTCGGACGCATCTGTCACTACATAGAAGCGACCTTTGACACCACCCATGGCATTGCGGCCAAAGCCCTTAGC  
ACAAAAGGCCAATCTCTTGC GGTA ACTGGCCCAATTAGATTGGCAGCGCCAGCATCGATCAATGGGGTTTTGTGGCCAGCATGGATCTGTAGGACTTCGCTTCCTTGATATTAGGGATCTG  
TGTGTATTGTTCTTCTCCAATGCCATGAACACATCTCTATTGAAGTCGTTGGTGGCCCCATGTGGGTTCGGGGTTATAAGACTCACGGACCTTAGCGCGGGAAGCCTCAGCCCGCTTCTGCC  
AGAAATCGTCGAAATACCAATGTGCGAGCGAACGGGCGCGGTGAGGATGAGGGCCGAGAAGAGGATGAGGAAGCAAGGCCTGAACTGTACGCACTCCATTCTTCTTCTTCTTCTTCTT  
CTCGCTTTTTTCTTCTGTTTACAGTGCGTGTCTTCTTCTGTAATCGTGTACTTTTTTTTTTTTTAAATCGGAAAGCAAAAAAGATTACAGATGGTCGGAGAGAGTCTGGAAAAAAGGTT  
TTGGAAGCAAAGCAGGATAACCAGACCCGACCGCTGGCCGAGCGAACCTCGAAGATCGCTAGAATGTGAGGAACATTGGGTTGGTGGGGTGGGTATGTTTTTAGGGCTTCGGCTAGGG  
AATGGAGCTATATAGGATTGTTATGGAATCCAGTAGGAATAAACAGAGGAAAAAGAAGGATCGGGCCGACAAGAGTGGCCAGCCATTAGCAATTCCGCATTTAGGGACGGGAGATTTGGCT  
GCGCATATTAGTTTATCTGGCTCTGCGTATTTGCATATCTGGCGTTATAGATCTCCTATATTGTTAATATTTCCCTTGATATACTTCTCTTAGCACGGAAAGGTGAAGGATGAGGAGAGAAAAT  
AGAGAGGGTGGTTGTTAAGGGCGATTGGATCGTTTATGAAATCGGGAAATT

>comp159231\_c0\_seq17

TCAATAATTGTTGAACAACCTTCAGCATCTATTCAAATGCCCTTATTCTCAATCATCAAAGAATTTCCAAACATTCATTCAATGTACCTATATATAATATTCATGATACAGTGCTTCTCCATTCCA  
ATTACTACAACCTTTAAGAAAAGTACTCAACATATAATTTAAAAATAATTAATAAAAAAAAAAACACAGTACACAATATGAGAATCACATATGATATATCCATAAAAGAAGCACTTTTATGAA  
GAAAAAATAAAGAACATGAAATAAATTCATATACTTTCCCAACACCAAAGGAGTGAAGCAATCAGCAGCTCAACACTGCCTTCCAACCTTACAACGCAAAGTTCCTGCAAACCTCGTC  
AATCTCTTACAAAAGTGCCAGGCTTGGCTTTTATCATGTCTGCTTCGTATATTTCCCTTATGAACTCCTTCTTCCCGACTGAACAAAAACGCCCCATTTAACATCAAATCCCCTTCTGAT  
CTCCAATGCCAATTCCTCCATTCCCATTCCCCAACATAATCCCTATGCGTCACTCCTTCGCCGCCGATTGGTGGCGCGATATACTATTTCCCTTGACTCACTATCGTCGGATGACTACTC  
CCACCAACCGCATAATCAACAGTGC GTGTAATCGTTATTACCACATGAACAAACCCCAACGACACCTCGGCATTCTCTGCACCAATCCCCTTCCAAAATGGTTAAAAGCTACAGTTA  
CCTGCATCAGAGCATCTCCGAATACGAATCGCTCGCACCGAACAGAAACACATCGTCGTGGTTCGTATGTGGCAGTTGGACACAGTGATTGCCGTGACCCCCATGATCGCGTCGATCA  
GCCCGTCCGCGCAGTTGGACATTGAAATGTGATCGATCCAGATGTTTGAAGAACCGTAGATCGAAATCGCATCGCCGTCGCTGCGGGTGC GGAAGCCGTAATGGTTGACGGAATCGCGA  
ATCATGCCGCCGTTGCCGGTTTTGATGTCTGGATGTGGAGTTGTGGAGGATGATGTGGTGAACGAATTGGATGGTGATTGGGCGCCATAGGCGATGTGGATGTTGGCGCCACGACCG  
TCGATGGTTTTGTAGCTATTTACTATTAGCTCCTCGTTGAGGCGGATCACCATGTACGGGCGAACACTATCCACAATGGCTCAGCCTGAATAACGGCATGGCGAAGTGTCCCCGGCTTGG  
GGTTGACAAGATCATTGTCGGACGCATCTGTCACTACATAGAAGCGACCTTTGACACCACCCATGGCATTGCGGCCAAAGCCCTTAGCACAAAAGGCCAATCTCTTGC GGTA ACTGGCCC  
AATTAGATTGGCAGCGCCAGCATCGATCAATGGGGTTTTGTGGCCAGCATGGATCTGTAGGACTTCGCTTCCTTGATATTAGGGATCTGTGTGATTGTTCTTCTCCAATGCCCTTAGCGCG  
GGAAGCCTCAGCCCGCTTCTGCCAGAAATCGTCGAAATACCAATGTGCGAGCGAACGGGCGCGGTGAGGATGAGGGCCGAGAAGAGGATGAGGAAGCAAGGCCTGAACTGTACGCA  
CTCCATTCTTCTTCTTCTTCTTCTTCTCGCTTTTTTCTTCTGTTTACAGTGCGTGTCTTCTTCTGTAATCGTGTACTTTTTTTTTTTTTAAATCGGAAAGCAAAAAAGATTACAGATGGTGC  
GAGAGAGTCTGGAAAAAAGGTTTTGGAAGCAAAGCAGGATAACCAGACCCGACCGCTGGCCGAGCGAACCTCGAAGATCGCTAGAATGTGAGGAACATTGGGTTGGTGGGGTGGGT  
ATGTTTTTAGGGCTTCGGCTAGGGAATGGAGCTATATAGGATTGTTATGGAATCCAGTAGGAATAAACAGAGGAAAAAGAAGGATCGGGCCGACAAGAGTGGCCAGCCATTAGCAATTCCG  
CATTTAGGGACGGGAGATTTGGCTGCGCATATTAGTTTATCTGGCTCTGCGTATTTGCATATCTGGCGTTATAGATCTCCTATATTGTTAATATTTCCCTTGATATACTTCTCTTAGCACGGAAA  
GGTGAAGGATGAGGAGAGAAAATAGAGAGGGTGGTTGTTAAGGGCGATTGGATCGTTTATGAAATCGGGAAATT

>comp159231\_c0\_seq2

TCAATAATTGTTGAACAACCTTCAGCATCTATTCAAATGCCCTTATTCTCAATCATCAAAGAATTTCCAAACATTCATTCAATGTACCTATATATAATATTCATGATACAGTGCTTCTCCATTCCA

ATTACTACAACCTTTAAGAAAGTACTCAACATATAATTTTAAAAATAATTAACAAAAAAAAAACAACAGTACACAATATGAGAATCACATATGATATATCCATAAAAGAAGCACTTTTATGAA  
GAAAAAATAAAGAACATGAAATAAATTCATATACTTTCCCAACACCAAAGGAGTGAAGCAATCAGCAGCTCAACACTGCCTTCCAACCTTACAACGCAAAGTTCCTGCAAACCTCGTC  
AATCTCTTACAAAAAGTGCCAGGCTTGGCTTTTATCATGTCCTGCTTCGTATATTTCTTATGAACCTCCTTCTCCCGACTGAACAAAAAACGCCCATTTAACATCAAATCCCCTTCTGAT  
CTCCAATGCCAATTCCTCCATTCCCATTCCCCAACATAATCCCTATGCGTCACCTCCTTCGCCGCCGATTTGGTGGCGCGATATACTATTTCCTTGACTCACTATCGTCGGATGACTACTC  
CCACCAACCGCATAACATCAACCAGTGCCTGTAATCGTTATTACCCACATGAACAAACCCCCAACGACACCTCGGCATTCTCTGCACCAATCCCCTTCCAATAATGGTTAAAAGCTACAGTTA  
CCTGCATCAGAGCATCCTCCGAATACGAATCGCTCGCACCGAACAGAAACACATCGTCGTGGTTCGTATGTTGGCAGTTGGACACAGTGATTGCCGTCGACCCCATGATCGCGTCGATCA  
GCCCGTCCGCGCAGTTGGACATTGAAATGTGATCGATCCAGATGTTTCGAAGAACCGTAGATCGAAATCGCATCGCCGTCGCTGCGGGTGCAGGAAAGCCGTAATGGTTGACGGAATCGCGA  
ATCATGCCGCCGTTGCGGGTGTGATGTCGTGGATGTGGAGTGTGGAGGATGATGTGGTGAACGAATGGATGGTGATTGGGCGCCATAGGCGATGTGGATGTTGGCGCCACGACCG  
TCGATGGTTTTGTAGCTATTTACTATTAGCTCCTCGTTGAGGCGGATCACCATGTCACGGGCGAACACTATCCACAATGGCTCAGCCTAAGTATATATCATGCGAAAGTTGTGAACCTGAAT  
AACGGCATGGCGAAGTGTCCCCGGCTTGGGGTTGACAAGATCATTGTTCGACGCATCTGTACTACATAGAAGCGACCTTTGACACCACCCATGGCATTGCGGCCAAAAGCCCTTAGCAC  
AAAAGGCCAATCTCTTGGCGTAACTGGCCCAATTAGATTGGCAGCGCCAGCATCGATCAATGGGGTTTTGTGGCCCAGCATGGATCTGTAGGACTTCGCTTCCCTTGATATTAGGGATCTGTG  
TGTATTGTTCTCTCCAATGCCCTTAGCGCGGAAGCCTCAGCCCCGTTCTGCCAGAAATCGTCGAAATCACCATGTGCGAGCGAACGGGCGCGGTGAGGATGAGGGCCGAGAAGAGG  
ATGAGGAAGCAAGGCCTGAACGTACGCACTCCATTCTTCTTCTTCTTCTTCTTCTTCTGCTTTTTTTCTTCTGTTTACAGTGCGTGTTTTCTTCTGTAATCGTGTTACTTTTTTTTTTTAAAT  
CGGAAAGCAAAAAAGATTACAGATGGTTCGAGAGAGTCTGGAAAAAAGTTTTGGAAGCAAAGCAGGATAACAGACCCGACCGTGGCCGAGCGAACCTCGAAGATCGCTAGAAT  
GTGAGGAACATTGGGTTGGTGGGGTGGGATGTTTTAGGGCTTCGGCTAGGGAATGGAGCTATATAGATTGTTATGGAATCCAGTAGGAATAAACAGAGGAAAAGAAGGATCGGGCCG  
ACAAGAGTGGCCAGCCATTAGCAATTCGCAATTAGGGACGGGAGATTGGCTGCGCATATTAGTTTATCTGGCTCTGCGTATTTGCATATCTGGCGGTATAGATCTCCTATATTGTTAATAT  
TTCTTGATATACTTCTTCTTAGCACGGAAAGGTGAAGGATGAGGAGAGAAAATAGAGAGGGTGGTTGTTAAGGGCGATTGGATCGTTTATGAAATCGGGAAATT

>comp159231\_c0\_seq5

TCAATAATTGTTGAACAACCTTCAGCATCTATTCAAATGCCCTTATTCTCAATCATCAAAGAATTTCCAAACATTCATTCAATGTACCTATATATAATTTTCATGATACAGTGCTTCTCCATTCCA  
ATTACTACAACCTTTAAGAAAGTACTCAACATATAATTTTAAAAATAATTAACAAAAAAAAAACAACAGTACACAATATGAGAATCACATATGATATATCCATAAAAGAAGCACTTTTATGAA  
GAAAAAATAAAGAACATGAAATAAATTCATATACTTTCCCAACACCAAAGGAGTGAAGCAATCAGCAGCTCAACACTGCCTTCCAACCTTACAACGCAAAGTTCCTGCAAACCTCGTC  
AATCTCTTACAAAAAGTGCCAGGCTTGGCTTTTATCATGTCCTGCTTCGTATATTTCTTATGAACCTCCTTCTCCCGACTGAACAAAAAACGCCCATTTAACATCAAATCCCCTTCTGAT  
CTCCAATGCCAATTCCTCCATTCCCATTCCCCAACATAATCCCTATGCGTCACCTCCTTCGCCGCCGATTTGGTGGCGCGATATACTATTTCCTTGACTCACTATCGTCGGATGACTACTC  
CCACCAACCGCATAACATCAACCAGTGCCTGTAATCGTTATTACCCACATGAACAAACCCCCAACGACACCTCGGCATTCTCTGCACCAATCCCCTTCCAATAATGGTTAAAAGCTACAGTTA  
CCTGCATCAGAGCATCCTCCGAATACGAATCGCTCGCACCGAACAGAAACACATCGTCGTGGTTCGTATGTTGGCAGTTGGACACAGTGATTGCCGTCGACCCCATGATCGCGTCGATCA  
GCCCGTCCGCGCAGTTGGACATTGAAATGTGATCGATCCAGATGTTTCGAAGAACCGTAGATCGAAATCGCATCGCCGTCGCTGCGGGTGCAGGAAAGCCGTAATGGTTGACGGAATCGCGA  
ATCATGCCGCCGTTGCGGGTGTGATGTCGTGGATGTGGAGTGTGGAGGATGATGTGGTGAACGAATGGATGGTGATTGGGCGCCATAGGCGATGTGGATGTTGGCGCCACGACCG  
TCGATGGTTTTGTAGCTATTTACTATTAGCTCCTCGTTGAGGCGGATCACCATGTCACGGGCGAACACTATCCACAATGGCTCAGCCTAAGTATATATCATGCGAAAGTTGTGAACCTGAAT  
AACGGCATGGCGAAGTGTCCCCGGCTTGGGGTTGACAAGATCATTGTTCGACGCATCTGTACTACATAGAAGCGACCTTTGACACCACCCATGGCATTGCGGCCAAAAGCCCTTAGCAC  
AAAAGGCCAATCTCTTGGCGTAACTGGCCCAATTAGATTGGCAGCGCCAGCATCGATCAATGGGGTTTTGTGGCCCAGCATGGATCTGTAGGACTTCGCTTCCCTTGATATTAGGGATCTGTG  
TGTATTGTTCTCTCCAATGCCATGAACACATCTTATTGAAGTCGTTGGTGGCCCCATGTGGTTCGGGGTTATAAGACTCACGGACCTTAGCGCGGAAGCCTCAGCCCCGCTTCTGCCAG

AAATCGTCGAAATCACCAATGTGCGAGCGAACGGGCGCGGTGAGGATGAGGGCCGAGAAGAGGATGAGGAAGCAAGGCCTGAACTGTACGCACTCCATTCTTCTTCTTCTTCTTCTTCT  
CGCTTTTTTCTTCTGTTTACAGTGCGTGTCTTTCTTCTGTAATCGTGTTACTTTTTTTTTTTTAAATCGGAAAGCAAAAAAGATTACAGATGGTCGGAGAGAGTCTGGAAAAAAGGTTTT  
GGAAGCAAAGCAGGATAACCAGACCCGACCGCTGGCCGAGCGAACCTCGAAGATCGCTAGAATGTGAGGAACATTGGGTTGGTGGGGTGGGTATGTTTTAGGGCTTCGGCTAGGGAA  
TGGAGCTATATAGGATTGTTATGGAATCCAGTAGGAATAAACAGAGGAAAAGAAGGATCGGGCCGACAAGAGTGGCCAGCCATTAGCAATCCGCATTTAGGGACGGGAGATTGGCTG  
CGCATATTAGTTTATCTGGCTCTGCGTATTTGCATATCTGGCGGTTATAGATCTCCTATATTGTTAATATTTCCCTTGATATACTTCTCTTAGCACGGAAAGGTGAAGGATGAGGAGAGAAAATA  
GAGAGGGTGGTTGTTAAGGGCGATTGGATCGTTTTATGAAATCGGGAAATT

>comp159231\_c0\_seq8

CCGACCCCCATATAGTGGGATAAATGCTTGTTATTGTTGTTGTTGTTGTTAATAAAAAAAAAAAAAACTATTATTATTTTTAATACCTTCTAATTTTTAAATATTTTTACCTTATATTATTTAGCATCTTA  
TTTTAATAACAAAATGTATCACGATATTAATACAATTTTGTGTTGCAATACACAATGTGAACGAATGGATATGAGTAGATCGTTCTAAACAAAACAAAACAAAACAAAACAAAACAAAAT  
GCCTTCCGGCTGAAACGTCAATCAATCGGTCATCTTCAAATGTAGAAAACCAAAAAGCTAAAGAAAATAGAACTAAAGAAAAGCCAATGGATGGATGCATGGATTAGCAAGGCAATCCGA  
TCTTGCAGTTAAGGGTCCAGAGTAGCGTGTGAGCCTAGTTACGAACGTCCCTGGCTTGGCCCTCATCATATCATGCCTCGTGTATCTGCTAATAAATCGTTGCCCTGACTCAACGAAGAA  
CGCTCCATTTATCATCAGATCACCTGCGACTTCCACGTCCACTGGCTCCAGATAGCCTCCGGTGCATAATCCCTTTTCGTCACCTGCTTGGCGTTGATATCCGGCGGAGCAATGTATCGAT  
TCCCTGACTGATAACAGTGGGATGCTGGCTTCCCCGACGGCGTACATTTGCCAATGTGTGTAGTCATTGTTGACGACATGGACAAAGCCCCACGGCAACGCGGCATCCGTTGCACGA  
GTCCACGCCGAAGTGGTTGAAGGCAACCGTTACCTGCATAAGGGCATCCCCGGCGAAGGAGTCGCTGGCGCCAAAGAGCATTACATCGTCATGATTTGTCATGTGACAATTGGAAATG  
GTGATGGCGGTGGATCCCATGATGGCGTCTATTAGGCCATCAGCACAGTTGGACATGGATATGTGGTCAATCCATATGTTGGAGGCACCGTAGATGGAGATGCCATCACCATCGCTGCGAG  
TGCGAATGCCATAATGTGAAGGGGAGTCGCGGATCATGCCGCCGTTGCCAGGGCTGAGATGGTGGATGTGGAGGTTGTGGATGATGATGTGGTGGACGAATTGGATGGTGAATTTGGGCGC  
CATAGGCGATGTGGATGTTGGCGCCACGACCGTCGATGGTTTTGTAGCTATTTACTATTAGCTCCTCGTTGAGGCGGATACCATGTACGGGCGAACACTATCCACAATGGCTCAGCCTG  
AATAACGGCATGGCGAAGTGTCCCCGGCTTGGGGTTGACAAGATCATTGTCGGACGCATCTGTCACTACATAGAAGCGACCTTTGACACCACCCATGGCATTGCGGCCAAAGCCCTTAGC  
ACAAAAGGCCAATCTCTTGC GGTA ACTGGCCCAATTAGATTGGCAGCGCCAGCATCGATCAATGGGGTTTTGTGGCCCAGCATGGATCTGTAGGACTTCGCTTCCCTTGATATTAGGGATCTG  
TGTGTATTGTTCTTCTCCAATGCCCTTAGCGCGGGAAGCCTCAGCCCCTTCTGCCAGAAATCGTCGAAATCACCAATGTGCGAGCGAACGGGCGCGGTGAGGATGAGGGCCGAGAAGA  
GGATGAGGAAGCAAGGCCTGAACTGTACGCACTCCATTCTTCTTCTTCTTCTTCTTCTGTTTTTCTTCTGTTTACAGTGCGTGTCTTTCTTCTGTAATCGTGTTACTTTTTTTTTTTTTAA  
ATCGGAAAGCAAAAAAGATTACAGATGGTCGGAGAGAGTCTGGAAAAAAGGTTTTGGAAGCAAAGCAGGATAACCAGACCCGACCGCTGGCCGAGCGAACCTCGAAGATCGCTAGA  
ATGTGAGGAACATTGGGTTGGTGGGGTGGGTATGTTTTTAGGGCTTCGGCTAGGGAATGGAGCTATATAGGATTGTTATGGAATCCAGTAGGAATAAACAGAGGAAAAGAAGGATCGGGC  
CGACAAGAGTGGCCAGCCATTAGCAATTCGCATTTAGGGACGGGAGATTTGGCTGCGCATATTAGTTTATCTGGCTCTGCGTATTTGCATATCTGGCGGTTATAGATCTCCTATATTGTTAA  
TATTTCCCTTGATATACTTCTCTTAGCACGGAAAGGTGAAGGATGAGGAGAGAAAATAGAGAGGGTGGTTGTTAAGGGCGATTGGATCGTTTTATGAAATCGGGAAATT

>comp159231\_c3\_seq2

AAAACCCACCAACGGGCCTACGAGTTAAATAAAAAAGGAAATACAAGATCCTTAAAAGGATCTCCAGCTCATAATTGCTCTAACGAGCTACAATAGAAAATAAAAAAGATCCTAAGAGT  
CGGAGTTCCAAACTAAGCACAAATTACAAGGCAACATAAGAACATTCTAAAAATCCAAAAAGAAGGAAAAAATTGAACATGTTTCAGCACCCGCTTCTCCACCAAAAATAGAATCCTGCA  
CAAAATGAGAACTGATCTCAAAAACCTGAAAGACAGGCAGTTTCAGGCCTTGGCTTCCCTATCCTTCTTCGGCCCTCATCCTCACCGCGCCCGTTGCTCGCACATTGGTGATTTGACG  
ATTTCTGGCAGAAGCGGGCTGAGGCTTCCCGCGCTAAGGTCCGTGAGTCTTATAACCCGACCCACATGGGGCCACCAACGACTTCAATAGAGATGTGTTTCATGGCATTGGAGAAGAAC  
AATACACACAGATCCCTAATATCAAGGAAGCGAAGTCCCTACAGATCCATGCTGGGCCACAAACCCCATTGATCGATGCTGGCGCTGCCAATCTAATTGGGCCAGTTACCGCAAGAGATTG



GCCTTTTGTGCTAAGGGCTTTGGCCGCAATGCCATGGGTGGTGTCAAAGGTCGCTTCTATGTAGTGACAGATGCGTCCGACAATGATCTTGTCAACCCCAAGCCGGGGACACTTCGCCAT  
GCCGTTATTAGGCTGAGCCATTGTGGATAGTGTTCGCCCGTGACATGGTGATCCGCCTCAACGAGGAGCTAATAGTAAATAGCTACAAAACCATCGACGGTTCGTGGCGCCAACATCCAC  
ATCGCCTATGGCGCCCAATCACCATCCAATTC

>comp159250\_c8\_seq4

AATAATTAATAATTATTATAATTAATTAACAAAACAAAAAGTCTCTCTTTTTTTTTTTTAAATTTTGGCTGAAGAAGCCAAAGGGAGAAAAGTTACCTATACAGCAAGCGGACTCCCGTTCTTC  
CCCCGATCAAAATGTTGCAACTTCCGATTTTCGACAGGAAGGGAAAGCCGTGGAAGGAGCGGGGTCGACCGGCTAGGGAGGGGGAAGACCGTCCGGCTTGGACAGGAGGTAGGGAGAT  
CTATCTCTTCTCTCTTCTCTCCCTTTCGGGAGTTGGCCGAAGGAGGAGAAGGCACGGCACAGGTGTTTCGGAGGAGGCGACGAGAGCTCGGCGGGCTTCAGTCGCCGGAGTAGGGATT  
TGCGAACGGGAGAGGGGAGATCGG

>comp159426\_c0\_seq1

GGACGAAATAAAAGTTCCTAGGAGAAGATAGGCTGTACCAAAGAATTCTATAGTAATATGGTCTTATTATTAATAATAATAATAATCATATATATATATATATATACTACGGCATCATTAC  
AAGAACTTGAAAGAATAATGAAGGAGAAACCTCAAACAGAGAACACCCCCAAATCTGCGATGTGAAAGCCTACCACACGGAGACCAGTCAAATCGGAGAGGATTCTTACGTATTTTTG  
AGCACTCAATTGGATAACATTTGCAGGGTCTGTTTCACATCTGAACGGCTGCATGTGAAAGAACTCTCGAAGAAGTTGTCGGACCTCCGGTATGTTAGTGGAAGCTCCGGCGAGCACGA  
CCTCATCAACGGCTTCTTTCTCGATTCCGGCTTCCGTTAAGCACCTCATGATTCCGCTGCGCAGAAGGTTGAGATTCATCTCCACCAACGATGCACGACTGAGCGTTTCTATCACCTCCCT  
GCCTTGATAGATCAAACTTAAGCTCCACGGAATCCGAGCCCAAACAAAGGATGTTCTTGGCGCGCTCGCATTCCGTTCCGGATGCCAATGAGAGCCTTGACGTCCTGGTGAATCGAATTC  
GAGCTTCGACGAAAGCTCTGAAAGCATGACGTGGAAGTGGGCAGCCCAAGTCGGAACGGCGGCCTTTACAATTAGATCTAAATCTTTGGTGATCAGAGAGATTTCAAGAATGCGAT  
CACCGAGTTTCAATACGAGGACGGTTTTTGGTTCCGGTCTGAGAGAGTCGTAATAGGCGGGCGCAAGAACCAGGTTTTCGATGAAAAACAGAGGGTGAGCTCCGGCAGCGGGCGGAGC  
GTCAGAGACTTGTGATTGATACACTGGGGTGTGCTGCTGGCGGGGAGGATGAAAATGATATTATCGACTCCGCAGCCGGTGATGCTTTCCATGTCGGCTTTCTTTTCCCTGAAATGTACC  
GTGCTGACTTGGGCGGGAGTAAGGAGCTTTTGGCTCGTTATCGGCTTGGGTCGTCACGTAGTAGCGAGTGCCTTCGGGGGAGACATAACGCCTGAAAGGGTACAGGCGGGGAGAAACC  
AGTCTTTTCCGGCGGGAGTGACGGTGGACGACGCAGTTATCGGGACAGCGGTCCATGGCGGGTTTTCTTGTCTCCTCTTGCCCTTCTGAGCTTCTTGGCTTCAGGAAAGACGAGGATTA  
TATTATAGCGAGGCTTCTTCTTGGCTTCTCATTTTTTAAGTGGGAGCGTTGTTTTAGCGAGGGAATGCAACTTAAGGTTAATTTTGGAGCCTTTTCTATGGTTTTTAAATAGAAT

>comp159470\_c1\_seq3

GGCCTTTGATTATGTCCACATAAGCCGACAAGCCTTAAAATATTCCTTCACAAATCAGAGCCTCTAACTTCATTTCAATTATTTAAAATTTCTCTGTTTCATCAATCATTCTTTACATTA  
TTGATATCAAAACTCAGCAAAATGATAAAATATGTTTGAAGCAGAAATCTTTTCATTTTCTATGAAATAAAGTACAGAAACTTTTTCAATAACTCCACATTTATTAGCACTCCAGAATGGCTC  
ATTTCCATTTATTCTGACTCTGCTCAACTAAAATTTGCAGACCTTAGCAGGATTCCTGAACACAGACGACCTTGCCACACCTAATCGTTGGCCTTAAAATGAACCAGCAACACCTGCAACC  
TTCAATGAAACAAGCAGATAAAAGTAAGCTTTGTAAGCCACTATAAAAGATTTTACTCCATTTCAATTATCTTCCAAAACAAAGAAAAATTTGAAACTATCATAACCGTTGGATTATCGAT  
GAAATTAGTGCAATATATGAGTGATCAATCAAAGTATTTATTACAAAAATTTCAAAAATAAATTCATAATTTAAAGATTTTGAATCAGAATATTCTTATCCAAAAATTTCTGTAAGGAAAC  
ATACCTTGGGGGTGAACAAGGTTCTTATGTTCTTAACTGAGCCAGAGCTCCTGTGCTTGTGATGAAGAGTAGAAGAGCCATTAGCCAGAGGAAAAGCGTAAGTAGATTTCTCCCC  
TTCATTCTTCTTATTCTGTGACACCAGAAAACAAGAGAAAGAGATTTTAGGCTGCTGGGTAGGAGATGAGCCGCCGACGCTATTTAACTGGTAGGACTTGAAAGAAGAATTTTGGGA  
TGAGTTTCCGTAATCAAATTTCTTTGAATTTTATAAAGATGTTAGATCTTCGCAGTATCTGTTTTAATAAAAAAGGCAGCAGACCTTCGTGGTCCATTACAGCTTCAAGGAAAGACACCAA  
TGACAGGTCAAAGACAAACAGGTTGGATATTTGACATTAATGACTTTGTGCGTCAAGTTTTGCTGCTAGTAGAATAGCACCCTGGAATGTGACCAGAGTAAAAAAAGGCTAATAATGCA  
GCCACAATTTGGGAGGGTGGTGAATAATGACTTCTAATTAGGGGGTGCAAGATAAATTAATGAGTTGTTAAGTGGTTCCTCGAGGATTTTGAATCAGATCTGAAGATTCAAAGTTCA

ACTAAGATTTAGGCTTTGCTTGGGACTGCTTTTT

>comp159479\_c0\_seq2

TACCGACTGCGGTCCGGTGATCAAGGAGCGAACAACTCGGCGTCAGATTCAGCCGACTTGTATAGATTAGCAAATCCCGGGCGAATTTGCAGATGAGCGTCTTTGGCGGCCCCACCTT  
GGTGGGACCCAAGGAAGTCTTGGCTGGCAGATTGCAATAGGGTCTGTTCAATGGAAAGATTGACACCTGGTAGAAATTTACTGTGAGTCTTTGTTGGATTCCCATTGAAACTTATCAACA  
AGTTGCAAGAGGTGCAAATCTGCTTGAGCAAAAAATCTTCT

>comp159484\_c2\_seq1

AACTACCACACCAGCACTGTAAATAGACAAGTCATCCATTCAATATTAACATGAATTTTGTAAATAACAACATATATCATTCTATACAGATCTTTTGAATTAAGTCTCTCTCATTCTGCACCAA  
TAAAACAAGACCAATCTCTCTCTCTCATTCTGCAGCAAGAACACAGAAGACCAACTTCACAGTTCTTATCAAGCCTCCCTATAGAAATATAGTTATCTCAGGTGCTGAACGCATACAA  
ATTGGTATCTTTTAGCATAAAACAGATGCTATAATTTACAAAATTTTACATTTAAGAGACAAAAATTTACATATGACGCCTATCAAGGCATAGGAGAAGAATAGAACAGAAATAGCTGAAA  
GATATTACATACTAAGAAAGAAGGATTGATTATATCCTCAACTGGAAGATCCTACGAGGAGCCGTTAGAGGGGAATAGTATCATTGGGTGGTCCCTTGCAAATTGAAAAGGTGTAAGAAGCT  
ACCAGATTCAATGATCAAAAAACTACCAAATGGATATTTTTGTCTGTTCCATGGTAAGATGAAA

>comp159508\_c0\_seq4

CCTTTTCATTCATCCCTCTTAAGTTTCTTCAACCAAGCTTCTCTGATCCTATCATCCTCTAATCGACTTCCAAACCCTTAAGAAGTTTTTATTAATTGCTTACACGAATAATTTTTCG  
ATTAGGGCTAACTCAATTTCAAATGTCAATTCGAAAGATGAGGAAGTGACTAGTGAGAGGCTGGAAGAGCTTGTGCGACTCCTCAACCTCGTCTAAGCCGCTATTGGAAAAGGATGATT  
CAGGTGAAGCGGTTATGCAAGGGACAATGGCGGATAAAAAATGAGCGGCGAATAGAGCTTTCTATTTCTTTATCTAGAAAGGAGATCGAAGAGGACTTCCTTAAAATGACGGGGAGAAAG  
CCTAATTTTAAACCTAGAATGATACCAAAAATCATGCGAAAGCAACGTGATGCTCTATCCCTGGACTTGGGCTGCCAGAAATCACAAAAGATATGCTTGAAGAAGATGATTGAGATGATT  
CTTTATCTACTTTTAGATAATGCCACCTGAAAATTTATATCAACAAGAACAAGATATGATCTTCTTGGTAGAAGGAGCAACAGAGGACATGTCATTCAACATTTACAGAATGGAAGTGATT  
ACAAGTTGCAAGGCAGTTACTACTATTATTTAGCTTTTGTGTTGAATGACATGTCCTCTGTTGCTCCTTCTACCAAGAAGATCATATCTTGTTCCTTATTGATATAAAATTTTCAGGTGGCAATATC  
TAAAAGTAGAATAAAGAATCATCTCAATCATCTTCTTCAAGCATATCTTTTGTGATTTCTGGCAGCCCAAGTCCAGGGAATAGAGCATCACGTTGCTTTTCGCATGATTTTTGGTATCATTCTA  
GGTTTAAAATTAGGTTTTCTCCCCGTGATTTAAGTAAGTCCTCTTCGATCTCCTTTCTAGATAAAGAAATAGAAAACACCTTTTGTGATCATTTTTATCGTCCACTGTCCCTTGCATAACC  
GCTTTACCTGGATCGTCATTTCCCAATAGTGGCTCAGACGACCCTGAGGAGTCAGACGACGTTGAGGAGTCCGGAAGCTCTTCTAGCCTCTCACTGGTTTTCTCCTTATCTTCTGAAATTG  
GCATTTGAAAAATGAATGGGC

>comp159508\_c0\_seq8

CGGTACCGAGCGGAACCGAACAGTATCGGGGTAACGTGGTGCATTCTAATTATTCTTTGGATGACGTTTGGTGTCCGCACAAATTAGACTGTTAGAACTTCATGCTGATGGTAAACTAAAA  
AATACCAATATAAATTCCAATAGTCTTATTAAGAAATTTAAGCATGAATATGACAACTTGAAAATTATTCAAACAAAAGCTAAATAATAGTGATAACTGCCTTGCAACTTGTAATCACTTCC  
ATTCTGTAAATGTTGAATGACATGTCCTCTGTTGCTCCTTCTACCAAGAAGATCATATCTTGTCTTGTGATATAAAATTTTCAGGTGGCATTATCTAAAAGTAGAATAAAGAATCATCTCAAT  
CATCTTCTTCAAGCATATCTTTTGTGATTTCTGGCAGCCCAAGTCCAGGGAATAGAGCATCACGTTGCTTTTCGCATGATTTTTGGTATCATTCTAGGTTTAAAATTTAGGTTTTCTCCCCGTGA  
TTTTAAGTAAGTCCTCTTCGATCTCCTTTCTAGATAAAGAAATAGAAAACACCTTTTGTGATCATTTTTATCGTCCACTGTCCCTTGCATAACCGCTTTACCTGGATCGTCATTTCCCAATA  
GTGGCTCAGACGACCCTGAGGAGTCAGACGACGTTGAGGAGTCCGGAAGCTCTTCTAGCCTCTCACTGGTTTTCTCCTTATCTTCTGAAATTGGCATTTGAAAAATGAATGGGC

>comp159519\_c0\_seq23

TCCAGAATGCCGCTGGGATGATTTAAGTTTTGTGAACGTGCAAGATCAATCAATTTACATAAAATCTATTACATGTTTTCTTTTTTCGTGGAAATAATGTAAATTATGTGAATCCTAAGTCAG

GCTCCTCAACACTCATCTTATAAAAATTTTAGAAAATTTGTTTTTTCTTTACCTGCTACAAGGGGTAAAAAGTTCTTTAATTTAGTTAATCTATCTTTTATTTCTTTCTCATATTTGATACTGTA  
GGATTTGTTTCTTGCTGCAGTTGAATCAAATCTGTGTACGTTGGAAATCTTCCTGCAAGCATATCCACTTCTGACCTTGAGCAAGAGTTCAGGAACCTTTGGTAGAATCAAACCTGACAGA  
GTTACTATCAGAAGCCGGAAGGTAACCTTGCCTGGAACCTTTATTTGCAAGTATATTGTTGTAGGCAAACCATGATCTTTAAGTTTCTTTTTTGATAGTTGAGTAGCATTGATATGTTTCACT  
TATATTTTCATCCACCATTTGATCTGTTTCACCTTTTTTGAAAGTTGAGTAGCCCTCCATCCCTTTCCGCTTTTGTGCTAAGTAAATTTAAGCTCACAAGAGGTGTAAGGATTTTCTAACTTTCT  
GAAACCACTGCTCTGCCTTATTTG

>comp159529\_c1\_seq2

GAGTTTTAGCTATCAATTAAGAAATTTAAATTTAATCTAACGTATGTAATTTTATCTTAATTATCCAGTCTCCTCCAAAATAAAAAATCATTAAATCCCAATAATTTCTCATATTTCCACACATTAC  
CATTACCTTATAATCATAACAAAAACCCCTAAACATAACAAATCTGATTCACATTACAACGAACATTGACGCATCAGAATTCATATCATCTATCGATAAACAGACAAAAATCAAACCTTACGT  
GATTAACAAAACATACGAAATTATCATTCCGTAAGAATCAAGTGGCCAATCCCAAAGAGTACCATGCAATTACAGAACATATTATTATCAGCTTCAAATAATCAAATAGCAACCAACAACC  
CATCTCAAAGAAATTCGGCGACGACCTAACCGCCGAATCCATAAATGGTACGGCCAAGGCGCTTGAGGGCGTAGACAACATCCATAGCAGTGACGGTCTTGCGATGAGCGTGTCCGGT  
GTAGGTGACCGCATCACGAATAACAGTTTCGAGAAAGATCTTGAGGACGCCTCTAGTTTCCCTCGTAAATCAAGCCGCTGATCCGCTTAACTCCGCCGCGCCGAGCAAGTCGCCGGATCGC  
CGGCTTCGTGATGCCCTGAATGTTGTCACGGAGAATTTGCGGTGGCGCTTTGCCCGCCTTTTCCCAAACCTTGCCTCCTTTCTCTTCCAGACATTTCTCTTCTTTAGTTTTGCGA  
AAAAA

>comp159616\_c1\_seq5

TATTTAATTAATAAATAATTAATAATAATTAATAATAATTAATAATAATTTCCAAAATTTCCCAAACACTTGGGAATCTCTCCTTAGGTCATTCTGACCTTTGGAGTTGATTTCAAGGAGTTGGGACTTCATT  
TGGAACAAAATCCCAAAGGGGCTCTAATTAACAATTTTAAAATCCATTAATAGTCAAAAATTTGAATATTCATAACTAATTCAACAAAATCCAAATTGACTAACTCAATTGCATT  
CAACTCATAATAAGGCCTAATATTTGTTAAAAATGTTAAACTCCAGAAATCTGTAATATTTCAAAAAGTCAACTCTTTGGTCAACCATAGGTCAAAAATAGTTCAAAAATTCAAACCTTTGT  
AATAAAATATAGAAAAATCCGATTTGACGTAAGTACTGTCTAAGTACTGATCGTAGTAAGATCTAGAATTTTAATAAAATGCTAGCTGTCCAGAATTTGACCTTAATTAATAAAAGTCAATTTTGA  
CCCTTTAATTAATAATTAATAATTTCCAAAATTCATAAAAATTTGAAATTCATTTTAAAATC

>comp159631\_c0\_seq3

ATCTGTCCACCGCTACACCATCATCTTCGAGCAAATCGGACCCATCCATCCTCAGGCTCTCAAATGAGCAAAGGCAAATTCGACTCATCGAATCGAATCAGAATGCTTGATAAGTCAG  
CCCCCTGATTCGATTCGATGAGTCGGAATTTGCCTTTGCTCATTGAGAGCCTGAGGATGGATGGGTCCGATTTGCTCGAAGATGATGGTGTAGGCGGTGGACAGATCACGCCGAATTCG  
ATCTTGGAAGACCCCTTGACGTACAAGGGGAGCAATGGGGATCGAGTGCCTGTTGATGGTGGTAGGGGTGCCGCGGAAGAAGCGATGCGGCGAAGAGAAAGAAGAGTGGTGGCGGG  
GCCGGGGGCGGTGGTGGCGGCGGTGGTTCGAAGTTTCTTTCCAGGAATAGTGTCTCTCTCAGTAACAGGAGGAAGGGGGCTCTCATAGGTCTCCCCTATCTTAAAATAGTTAAGGGAG  
CATCAGCTTGATGAAGCTAGTTTAGGTACTAGTGTGTCATGTTAATTTGCTTTAATGGTATCAAATTACTGTAGATTGTCATGCCCGGAATACCCTTGCTAACTCAGTTATGGGGTATTAT  
GGGCATAAATGTTATGGTATTTGGCTGTTGGCGGTTTGGAAAGGGGGAATGGGCATTTCCATTGCCTGCTAGGTGGTTGCAGCAGGTCAATTTGAGACTGCAGTGGCTGCCAATTTTGTATT  
TAGGTGATGGAATATTGCATACTTCTACATGATCAATATATATATAATTTATGTAATAAAAAAAAAA

>comp159684\_c1\_seq10

TTTGGGAAAAGGAATAATATGGAGTCTTTTTTAAGGCTAGTAACATTATTCATTCAAGAGTAAGAGAATAATAAGAGGAAGAAGAATTCTCTCTCTGTGATCTCCTGATCATTATCAGAT  
ATCAAATAAACTAACGGTCATCATATTTAAATCTCACAGATGGTACTATCTATGCCCTTCTATCATCTATGACTTCTATTAGATTTGAATGAAAGAAAAAGAAAAAGAATACACACACACA  
CATTAATAAATCTAATCGATAGGTATAGGTTCAAATCTGTCCATAATCACTAGAATTTTATTTAATTTTCTTCACTTCAATCTATCCAAACCAGGCTTCATTGTCTCAGGAAAAAAACTAC

TTAAAGCTCAAATTTCTTTCCAAATAAGCAGTTTTTCATGGCATGAGGCAGATTAAGCTTGATAAACACCACCAATTCCTCTCTTTGAGCAGCTTCTGATCTTTCTGACCAGAATCATCA  
TCAAATATTTTGTTCAGTATCTCAGCCAAGCGAATCCACCTTGTGCTATTCTCTTCTCCACTACTGGAAGACGAGATATGAAATATTCATCTCCAAGATCTGAACCTTGCTTGGCGTCCTTA  
TAAGCATAGTCGCAGGCCAGGCGGGCACTCTCGGAAGCATAGCTGTAATTAGTTAACTCTTTTGAATACTGATATCTCATTGAATTAATAGGCAGGCCCTTGTGTGAAAGATTTTCATGGGA  
AACATTATATTTTTTTTTTATCTTACTGCTATCTGAACATTCTTAATTTTGCTAAAGACAAAGGAAGTGACATAGAGAGCACAATGAAGTAGAGGAAAAACATAGAGTTCATTAACATAATTGA  
TTCAGAGAGTTTCTAGAAATTGAAAAAGATTGAAAAGAAATCTTTCAAATTATTCAATCAAAAAGAAACCACCAATATACAGAGGCCTACAAACGTTTTTAAAAGAAATCCTTAACAACAA  
CAAATAAGAAAATTGTAATCACATCGCTGAATCATTAAAAACAGTCAAATGGCATCTAACTTGAACAATAAATCATTCAAATATCAATTTGGCCACCTAAATGATGGATTTACCCAAAAT  
CACCCAGGTGGAGACTGTTTCAGGATGTTGCTTCCCTCAAAGAAGTTGTATCATACGTCAAAGTTAAGCTTTATTTAAGGTTTTGGCTGAATTAAGGCTTGGGGGCCCTTTGGGTGGTCTTT  
GAGCATAAACTCCTCTTTTTGTGTTGCATGGAATGATAGTATTAGAAAAGAAGTATGAAATTCAAATGAAAATTTTATAAAGTTAAGTAGAATGGGAATTGACTTCAGTAATCTTACTTCAA  
ATCAAGTCAACTCACATTACAAATACATGAGTAGAACACTCACGTAAAGCATAGATGAACAATGAAAGAACTTGCTTCTCAAGTTCATTTGACTAGCACAATAACTTCATTTTAGTTAAT  
ACCATTTTAATATTTTATTGATATTATATATCATAATACATCATAAATTAGAAAAGAAAAGTGCATGTAAGTTTGGGGTTAGTTACATGCCAGGAAGAGGGAATTGAGAAGTGTAGTTCATTC  
TACCTTGGCAGAAAATGTGCATCCCTCCATCTCCATCTCTGTGTGTGTGTGTATATATTTTATACTTATATAATCAAATGATAATTTGAGTTAGTTTATTTTTCTGATTCATATTTATAAAT  
ATTTTGAATGAGTTAAATATAACTTATTTTTCTGTGTTGAATAATTTCTTCAGCCAGCTCAAATAAAGCTAGTCCGAGAGTCAAACAGGTGAGTTATGCCTTGACAATAAAAGCCAAC  
TCAATCTAATTATGATTTAAATTGAAAATCATTCAATTTCCAGTTAAGATTGCTCAATTTGAACAGTAACTCAATTTCTTGTGCATCCTACTTTTTCAATTAACATAAACCTCCGATCAAGATGCC  
AGGCTTAGAATAAGAAGAACTGCCAATTAAGTCTCAAATTAATAAATGGAAATCTTACATGCTCCACAAGTAAAGTTTTTGGTAGAACAATTCATCCATTGATCAATCTCATCTGACCAA  
ATGTCTCTATTGTTAATTTGAATGGATTCAACCATTGTATCAATATCATCATATAGAAATTTCTGCTTGGCTTCTCTACTATATCCTCATCCAGACCTTGTGAAGATTGGTATTCTTTCCATAC  
CACTCCACTTTGATGGTGTACCTCCTAAATCAAGCTCAGAACCAGCATGTAAGGTTGGTGGATATCTCCACAAAATGGGAAAGGAACAATAAGCTTTCTGTTAAGTTATCTAAAACAA  
ATTTGATGAATGATTGTTAGGACTATAACAATATAGTGTAGGCACTGAATTATCCAATTAATAAAAATAGCAACTTTATGAAAGATAATTGTACAATTATTTGATGAATCTTTGCGTTTCTGGA  
GCTGACTGGTATAATTGTTGATTGCTCCAAGTGCACATGTTTATCTCTCCTTTGGTGTGTGACAATCCCTTGAATACTGGAAAGTGCAGTCACCAGCGCTATCAGCAAAGTGGAGAGT  
CCTTGACCAACGGTACTGTTTTCTAACATCATCAGCCCAAGGGCACAAACGGTGTCTAATTTCTCCCTAGCCAACTCGATCACCGCATTCAATTGTTGAGTTAGTGAAATGTTCTGTGCTATCT  
TACAGACCATGACATGGCCCTCTATTCCCCAGCCACTGGAGACTGGAGCTCTTGCAATGAGGTAGTAGAGGAAGATATGGATCAAAGGAAGAAGCCATGCCATTTCTCCTCCACTGTAC  
CACTTCGCTCGCACCTATTTCTTGCCCTTTATCAGCTTCTGTAAAGCTTTAGAGCACACGGAGATATTATTCTGT

>comp159684\_c1\_seq12

TTTGGGAAAAAGGAATAATATGGAGTCTTTTTTAAGGCTAGTAACATTATCCATTCAAGAGTAAGAGAATAATAAGAGGAAGAAGAATTCTCTCTCTGTGATCTCCTGATCATTATCAGAT  
ATCAAATAAACTAACGGTATCATATTTAAATCTCACAGATGGCTACTATCTATGCCTTCTATCATCTATGACTTCTATTAGATTTGAATGAAAGAAAAAGAAAAAGAAATACACACACACA  
CATTAATAAATTCTAATCGATAGGTATAGGTTCAAATCTGTCCATAATCACTAGAATTTTATTTAATTTTCTTCACTTCAATCTATCCAACCAGGCTTCATTGTCTCAGGAAAAAAACTAC  
TTAAAGCTCAAATTTCTTTCCAAATAAGCAGTTTTTCATGGCATGAGGCAGATTAAGCTTGATAAACACCACCAATTCCTCTCTTTGAGCAGCTTCTGATCTTTCTGACCAGAATCATCA  
TCAAATATTTTGTTCAGTATCTCAGCCAAGCGAATCCACCTTGTGCTATTCTCTTCTCCACTACTGGAAGACGAGATATGAAATATTCATCTCCAAGATCTGAACCTTGCTTGGCGTCCTTA  
TAAGCATAGTCGCAGGCCAGGCGGGCACTCTCGGAAGCATAGATGCTTCCACAAGTAAAGTTTTTGGTAGAACAATTCATCCATTGATCAATCTCATCTGACCAAATGTCTCTATTGTTAAT  
TTGAATGGATTCAACCATTGTATCAATATCATCATATAGAAATTTCTGCTTGGCTTCTCTACTATATCCTCATCCAGACCTTGTGAAGATTGGTATTCTTTCCATAACCACTCCACTTTGATGG  
TGTACCTCCTAAATCAAGCTCAGAACCAGCATGTAAGGTTGGTGGATATCTCCACAAAATGGGAAAGGAACAATAAGCTTTCTGTTAAGTTATAATTATTTGATGAATCTTTGCGTTTC  
TGGAGCTGACTGGTATAATTGTTGATTGCTCCAAGTGCACATGTTTATCTCTCCTTTGGTGTGTGACAATCCCTTGAATACTGGAAAGTGCAGTCACCAGCGCTATCAGCAAAGTGGAA



CCTTGGGATGCACCCGATGAAATGGTTGTTGGCGAGGATGATAGCGGAAGCGGGAGAGCTGCCGAGGTTTTCCGGGATGGGAGAGTGGAAAGCGGTTGTCGTTGAGAAATACCGCATCG  
AGGGCCTTATCAAAGAGCTCGGCGGGGAGATGCCCTCGAAGTCGTTGTACCGGAGATCAAGATACTTGAGAGCGGGCATGGAGAGAACAGCGGAGGGGAAAGGACCGACGAACCGG  
TTGTTGCTGGCGTCCAACCTCGTGGAGGAGGGAGAGGCGGGATAAGCTCTTGGAATGATGCCGCAGAAGCGATTGGAGTTTATGTGGATAAGTGCACGTCGGTGAGGAGGCCAAGCT  
CGGCGGGGAGGTAGCCAGCTAGGTCGGCGCCATTGAGGTCGACGCCAGCGACGTCGACGAAGGGGTCATCGAGGGCGGGGGCGCAGAAGACGCCGGTGTAGTTGCAGACATCGG  
GTCCAACCCAATTGCCTGTTGTGTTGAAGGGGTCAGAATATAAGGCTTGTTCAGGCGTGAAGGGCGACGTAGGCGTGGCGGAGGCGAGTATTTTTATGTGGACGTCGATCTTGACGT  
TGAACTCAAAGTCTTCAGGGAGGTCTCCGTTTTCCGGGAGGTTATGAAGCTGGCGGGCGGGCGATGGTGGCGGGTTCGAAGTTGGGAATTGAGGAGGCAACGGCGAGAAGAATACAGAA  
GAGGAGGAGGAGGAGAGGAAGGTGGAGGGATGGGAAGCAGTCCAAGGCCTGCATCGCGCATGAACCCCTCGGAGGGGCCTTAGAGAGAATGGAGGATAACGAAAGAAGAGTAGGGGA  
GGTTATAGTGGGAATGGGGAACAGAAGCCATAGGCGGGC

>comp159705\_c0\_seq17

CTATATCAATCAACCAATTCTATTTTTATCATAACAACCAATTTATCCAGTCATATCATTAAATCATTCTCGCTAGTATATTAGTTATTCAATTATAAGGCAGTGTTAGTATCTGTATTCCGTAACAA  
TAAGCAGTAACAGAAATTAGTGTCCAAAAGGTCAATGTCCGTACAGTTCCAATTTGAATGTGTTTTGCGGAGAAAATTAGGAGAGAGGGGTCGGAGCGACTGAATCCGAAACCACGTGC  
GAGGAGAAAGGTGGTAAATTTCTGAAACCACTGACGTGGAGCTTGTGTTGAGTCCGTATAAGGATTTTTGTAGTTTGCAGACGTGGTTTGGAAATTGAGGATCTTCAAAACCTTGTGGTTG  
ACGCATGTAGATAGCGTCGGGAAGATCTCCGTGTAGGAAGGCATTTGTGACATCGAGTTGAAGAATGTTCCAGTTGCGGTTGACGGCGAGTGTAAGAAGCATTCCGATAAGTCGTCATTTT  
GGCCACCGGGCTAAATGTTTTCCGTATAATTTTACCAAATTTTTGTTTCATATCCTAATGCGACAAGCCGTGCTTTGTGGCGGTCTAGCTGGCCGGAGGGAAGAAGTTTAGTCTTATACGTCC  
ATTTGCAGCCCAGAATGCGAGTATTGGGCGGTGGTGCGACTAAAGACCAGGTGTTTTGATGTAGAAGAGCTCGGAATTCTGTCTCCATTGCCTTTTGCCAGTGAGGTTGAGTCAAGCTT  
GTTTGAACGTGGTTGGAGTAGTCGGTTTTGTGACCTAAACAAGAAAATAGAAAAGCAAGAAGAAAGCAAACTGACAAAAAAAATTACCCACCAGAAAAAATAGTATAGCAGGTTTC  
TATTGTACCAAACACTAGTAACGTCTTGTATAAGCTAGTGTGTTTGTGCATTCCTTTGCAAGTTTGCACAAACAGAGCAGCAATCCATGAATCTCTGTTGAAGTTTTCACCATAAGAAAAGAG  
TTTAAAGTAGAACTAAGTTTTTGTAGGCGAGACTACCCAAGTGCAAGTCCTATATTAGCTGTTTCCTTGATCGAGATTACCCCTTAATAAAAAATTTGTCTGATTAAGAAATCTACAATGGTTT  
GATGTTTCAAACATTTATTGTAGATGTTGGTGAAGTCTGGATCAGCTTAATAAAGCTCCTTGAGGAATGCGCAGCCCGTAGTTCCTACTGGTTTTGTAAGCCACCATCAAGGAAGAGCAGT  
GACTTAAAGCATCGGACACTCTATTTGTTTTAGTGTAAACACAAAATTGAATTTCTACAAGAATAAAATCCATCTCGTTTGTATCCTGCTACATGTTTTATGGGTCTGTAAGCAATGCGA  
GGTCTGATAATTACATAATAGCAAAAAATCCTGATGATGAAGGTAGTGCTCCCACTGCTTGAGCGTGCGAACGATTGCAAAATAATTCCAATTTATAAACAGTTCACCTCTGTTGTAGCAAAC  
CCAATTTCTCATTGAAGAACTTAGCTGTTGATCTTCTTGTGATAAGACAATGCTGATGCCGATAGCTGAAATGTCCGTATCAATCAGGGAAGGCTTGTCAAAAATTAATGCAGTCATGAA  
AAAAAGTGAAGCACATGTTGAAGTCAAAACTTACGTGTTGCAAATTTGAAATTTATGTTCTTACTTAGGTGTAGCAAATTTGAAACTTAGGGTGTGTCATGCGCACTACCTAGCATGAAAA  
AGTGAACACAGTGTGAAAGTCAAAAATAACATAATATCTTATATTGTTGAACCACATCTTCCAATATAAGTGACCTTTTTAGCACTCGGAACATGAGCATCTACATGCATTCATCAATGGA  
TCATCTACCTTAAAATATGACATATATCAACTCTCATAGAAAATATCCCTTGGGGTATTTGATAATCTCACTAAAGCTTCCAATACAATAGAGAATAACCTACTGATAGTCTCCATTCAATGC  
TGAAATTGCTCAAATGTCCATCTTATTAATTCATTATGCAATATAATATAAGGTGGTTGCAAAAATACTTGTCTCACTTGTGACTGTGATGACTCCCCGACCGAT

>comp159720\_c0\_seq1

TTTTTCTTAAAAAATTCATATTAGAAGAATTTGAAAACAAGTTTATATAACAAGAGACTAGAGAGAGAGAGAGATTCTACATTAATTAATCATGGTACAATAGCTGGTCTAACTAACCTTG  
CACTTAATTCATAATTAATAATTCATTAATCTAATCAGCAAAACATACTCCACCAAAACAACCTCTTAAGATAAATCACTAAACCCTAACCCCTAATTTAAAAAAAAGAAAAGAAAAGAAA  
GAAGAAGTAATCTATGTGGTGATAGTACAGTTAATGGTTTCAACCTTGGGCACATCAACAGGGAACCTTATCAATCTCCTCCAGCCATGGATAGCTCCCTTTGGATTTATATCTCTCAGCGC  
CTTCCAACCCACACTGTTGCACTTAAATCCAGAACCAAATCCGATTTGCCAGACCCTATCCCTTTCTTAAACCCTGTTCTTCGCTCCGAATACCCCTAATTCATACCACAACGAGCTGCTCG

AAGTGTGCCGAATCTGTACAGAGTCATCCTCGACGGCTCCATCTGCCAGCTTCCAAGATCCAATCTTTTCTCCAGTTCGTCTAATATCGCCCTTCTCCGGCGTGGATGCAGAAGTGCTC  
GAAGGCTTTTTTGAAATCCGGCACATAGGGTTTCGAAACTGATGAGTGTGGGCCGAAGCATTGTTGAGATTAGGGAAAAGGCCAAGCGGAGTTGTTTCGGACAAGGGGAGGACGCGG  
GGGCCGAGGGCGGTGATGTTGGCCTTCAGGGCGCCGCCGGCGACGGACATTAGGTCTTTGGAGAGGGAAAACGCCGACTTTGCCCTGATCGTCTTCTTCTGAGAGACGCAGAGATAGG  
AGGAGTCGTCGGAGCCTCTGTGAGTGC GGATCAGGTCGGATAGAGAGTACTTGGCGCGGTGGAGATCGGAGCGGGCGTTGGAGAGGAGGACGGCGGGCGGCCATAACGGAAGAGGC  
AGTTGGTGACGAGCATAGGACGGTTGTTGCCGTAGTAGCCATGGAGGGTTAGGTTTTCGGTGCTGACTATGAGGGCGTAGCTGTTCCGGCTCACCTTGAGAAGGTGGCGAGCGAGATCA  
ATGGAGATAACACCAGCGCTGCATCCCATCCCCTAAGATTAAGCTCGCCACATCCTCCCTCATCTTATACTTGTTCACAATCATGGCCGACAGAGAAGGCGTCCGCCCCGAACAAGCTAC  
AGTTAACCACCAAATACCGATCTCCTTCCCTCACATCAACTCCGGTCTTCTCCAACAGTCGATCCACAGCACCGAATATCATCATCTCCGCCTCCTTCCCTGGCTCCGCTATGAACAAGGC  
CGGCGGTATTCTCGCCACCGCCTCCGGGAAGTAAGTGGAGTGGCCGACGCCGGACCTCTCCAAAATCCGTTTTTGGAAAGCCACATTGTCTTTGGTGAAGGTTCCGAGAAGTATGCTGC  
GTTTCGACGTAGGCTTGGTGAGTTTGGCTGCACGATTCGGTGGCTTTGTGGCAGGCCAAGTCGATGAGGAGGATTGTGTTGTGGCGGCTCAGTAGGAGCTGGAAGAGGAGAAAGAGGAG  
GACGACGACGACCAAGAGGAGGAGGACCAGAGTGAAGAAAAAGCTCATTGTCAGGTAATCAATAGTTGATCTTGTATGAATCAAAGTTATTG

>comp159725\_c1\_seq1

AATCTCTCTTTTTTTTTTTAATGTAGGGGTGATGCTCTTGAAGTAAATACATGGTTGAGACGTCATACAAAATTGAGTATGGCTCGTGATTGGCATGTACGCAATCTCAAAAACAAGTCAA  
AGTATGATTCGGGCTTCTAGTATTTCTGCACTCATGGACAAAACCACACGTAAACTTTCAAAGATACCTGATGAAAAAAAAGTTGAATTAGATCTCCACTGTAATGATACTACTTTTATTTT  
GAATGAGGACAACAGAAAGTTCCCTAAAGTTAATGATGAGAATGCAGATTACATCATAGATGGCTTAACTCCTAATTGGGCCGATTTAGATGTTAATATGCATGTGAACAATGTCAAGTACA  
TTCTGTGGATTTTTGAGGTAATAAATGATTAGCTTTGTAAAATTTGTTATCATTTTACCCCTCTTCGTTCTATTTAAGAAAAATAAATAAATAAATAA

>comp159725\_c1\_seq15

ATGCTTTCTTGTCTTAATTTTGGCTTTATGAATCTTATTAACATTCATTTTTATTCTAAGTGGCCACATTAGATCTTAATTTTATTATTAACAAATATTTTTGCATAACATAGTTATTTTTGC  
TAATTTCTTGAATATATAAGTGGTGAATAGAACTACCTTTGCACATTTGTAGTTCATGCCATATCTTGCTCACATATGCAGCTGTCCGGTGCAACATTGCTCATTTGAATTGGTTAACAAGAA  
AATTGAAGGCCTTACTATTTTCTTCAACTTGGATTTGGCAGGCCATTCCAATTTCTATCTGGGAGACTCATGCGATGTCCAGCATGGTCCTTGAGTTTAGGAAGGAGTGTAAGATGGGCG  
ACGTATTGCAATCCCTCGTTGTTGTCTCCTATGTAAGTCCAATTCCTCATCTGAATTTAAGATTGAGTGTAGGCATCTGCTCCAGCTTAAAAGTGGACCTCCGCTTGTGCAAGGACTAACT  
ACTTGGATACAGAAGGTTTGA AAACTAGATGACTTCTTGAGCAACATCCCTAACACAAAAGTTTCAACCACTTGAAAAGATAAATGTAATTTCCATAATAAAAATAATGACAGATAAGTTCTTG  
TCCCTACTTAAAAGCTCAAACGATGGCCTTCGCCTCGGCTTCTAGCGAATAATTATAATAAATTGAAGGTTTGGTGTCTTGTGGTATCCTTGTCTATAGTCTTCAATTAATATATTACGAGT  
TAGTAGTTGTTGCTTATATGGAGGAATTGTAAGCCTTGTAATCCCATGTATATCTTTCGGTCAAATCTGGCTCTTATGTTTCAGAAAAAACTTTGTTTACATATGATATAAGTGTATTAACCTT  
ATAATCTATATATTATATTATCTTGGTTGCAGCATGAAACGCTCTACTATGATGTTACCGATTTGGATTTT

>comp159725\_c1\_seq18

TCTCTCTCTCTCACACTCTCTTCGTTTGAAGAAAGCCGGCATTGATAACGGCTTCTTTGAGGTGTGAAAGTAGCACAATCATGACTGCTTCAACTGCTTTCTCAACCATCTTCTCAATT  
CTATCATCGTCACACCCAATTTATCCTCTTGGACTGGTTCGTTTGATGTTTCATTTGCTTTTACCAGTGGAGTGAAAGCTAAATTTCCATGTTCTTAAAGGCTTTTCAAATCAAAGGATAT  
GTCAAAAGGCCAATACTGTTACTTTTAGCTTTAAGAGTGA CTTAGCAAATGTTGAGGAGCCTAGGAGGCCTGACCTGTTTCGATGATTCATTTAGTCATGAACAGATAATTGATAATATTA  
CATGCAGAGAAACTCTATCAAAGTATATGAGATTGATGCTACTGGA AAAAGCATCGCTTGGAGCAATAATGAACCTTTTACAGGAAACAAATGTCAACCATTTCAAATTTCTTGGGTTTTTG  
GATGATTCTATTTCGTTACATCCCAAAGATACATGGCGAAACGATATATTTGTCATACTAAAATGCATGTTCAAGTGAACATTATCCTTCATGGGGTGATGCTCTTGAAGTTAATACATGG  
TTAAGACATCATAACAAATTGAGTATGGCTCGTGATTGGCATCTATGCAATCACAAAACAGGTCAAAGTATGATTCGAGCTACGAGTATTTGGGCACTTATGGACAAAACAACACGTAAAC

TTTCAAAGATACCTGATGAAAAAAAAAGTTGAATTAGATCTCCACTGTAATGATACTACTTTTATTTTGAATGAGGACAACAGAAAGTTCCCTAAAGTTAATGATGAGAATGCAGATTACATC  
ATAGATGGCTTAACTCCTAATTGGGCCGATTTAGATGTAAATATGCATGTGAACAATGTCAAGTACATTCTGTGGATTTTGGAGCCATTTCCAATTTCTATCTGGGAGACTCATGCGATGTCC  
AGCATGGTCCTTGAGTTTAGGAAGGAGTGTAAAGATGGGCGACGTATTGCAATCCCTCGTTGTTGTCTCCTATGTAAGCTCCAATTCCTCATCTGAATTTAAGATTGAGTGTAGGCATCTGCT  
CCAGCTTAAAAGTGGACCTCCGCTTGTGCAAGGACTAACTACTTGGATACAGAAGGTTTAAAACTAGATGACTTCTTGAGCAACATCCCTAACACAAAAGTTTCAACCACTTCAAAGATA  
AATGTAATTTCCATAATAAAATAATGACAGATAAGTTCTTGTCCCTACTTAAAAGCTCAAACGATGGCCTTCGCCTCGGCTTCTAGCGAATAATTATAATAAAATTGAAGGTTTGGTGTCTTG  
TGGTATCCTTGTCTATAGTGCTTCAATTAATATATTACGAGTTAGTAGTTGTTGCTTATATGGAGGAATTGTAAGCCTTGTAATCCCATGTATATCTTTCCGGTCAAATCTGGCTCTTATGTTTCA  
GAAAAAACTTTGTTTACATATGATATAAGTGTATTAACCTTTATAATCTATATATTATATTATCTTGGTTGCAGCATGAAACGCTCTACTATGATGTTACCGATTTGGATTTT

>comp159725\_c1\_seq2

TCTCTCTCTCTCACACTCTCTTCGTTTGAAGAAAGCCGGCATTGATAACGGCTTCTTTGAGGTGTGAAAGTAGCACAATCATGACTGCTTCAACTGCTTTCTCAACCATCTTCTCAATT  
CTATCATCGTCACACCCAATTTATCCTCTTGGACTGGTTCGTTTATGATGTTTCATTTGCTTTTACCAGTGGAGTGAAAGCTAAATTTCCATGTCTCTTAAAGGCTTTTCAAATCAAAGGATAT  
GTCAAAAAGGCCAATACTGTTACTTTTAGCTTTAAGAGTGACTTAGCAAATGTTGAGGAGCCTAGGAGGCCTGACCTGTTTCGATGATTCATTTAGTCATGAACAGATAATTGATAATATTTA  
CATGCAGAGAACTCTATCAAAGTATATGAGATTGATGCTACTGGAAAAGCATCGCTTGGAGCAATAATGAACCTTTTACAGGAAACAAATGTCAACCATTTCAAAAATCTTGGGTTTTTG  
GATGATTCTATTCGTTTACATCCCAAAGATACATGGCGGAAACGATATATTTGTCATACTAAAAATGCATGTTCAAGTGGAAACATTATCCTTCATGGGGTGATGCTCTTGAAGTTAATACATGG  
TTAAGACATCATAACAAATTGAGTATGGCTCGTGATTGGCATCTATGCAATCACAAAACAGGTCAAAGTATGATTCGAGCTACGAGGTTAGCCGTTTACGTTGTGTGAGAATTTCCACTAC  
ATGCCAAATGAAATATATCAATTTTAAATGTGATTATGCTAATTATGGTTTCTTTAGTATTTGGGCACCTATGGACAAAACAACACGTAAACTTTCAAAGATACCTGATGAAAAAAAAGTTGA  
ATTAGATCTCCACTGTAATGATACTACTTTTATTTTGAATGAGGACAACAGAAAGTTCCCTAAAGTTAATGATGAGAATGCAGATTACATCATAGATGGCTTAACTCCTAATTGGGCCGATTT  
AGATGTTAATATGCATGTGAACAATGTCAAGTACATTCTGTGGATTTTGGAGCCATTTCAATTTCTATCTGGGAGACTCATGCGATGTCCAGCATGGTCCTTGAGTTTAGGAAGGAGTGT  
AGATGGGCGACGTATTGCAATCCCTCGTTGTTGTCTCCTATGTAAGCTCCAATTCCTCATCTGAATTTAAGATTGAGTGTAGGCATCTGCTCCAGCTTAAAAGTGGACCTCCGCTTGTGCAA  
GGACTAACTACTTGGATACAGAAGGTTTAAAACTAGATGACTTCTTGAGCAACATCCCTAACACAAAAGTTTCAACCACTTCAAAGATAAATGTAATTTCCATAATAAAATAATGACAGAT  
AAGTTCTGTCCCTACTTAAAAGCTCAAACGATGGCCTTCGCCTCGGCTTCTAGCGAATAATTATAATAAAATTGAAGGTTTGGTGTCTTGTGGTATCCTTGTCTATAGTGCTTCAATTAATAT  
ATTACGAGTTAGTAGTTGTTGCTTATATGGAGGAATTGTAAGCCTTGTAATCCCATGTATATCTTTCCGGTCAAATCTGGCTCTTATGTTTCAGAAAAAACTTTGTTTACATATGATATAAGTGT  
ATTAAACTTTATAATCTATATATTATATTATCTTGGTTGCAGCATGAAACGCTCTACTATGATGTTACCGATTTGGATTTT

>comp159725\_c1\_seq9

TAAAATGCATATTCATGTGGAACATTATCCTTCATGGGGTGATGCTCTTGAAGTAAATACATGGTTGAGACGTCATACAAAATTGAGTATGGCTCGTGATTGGCATGTACGCAATCTCAAAA  
CAAGTCAAAGTATGATTCGGGCTTCTAGGTTAGTCATTCATACATGTCAGAATTTCTCCTTCAAGCCAAACGAAATATATCGCTTGTAAACTGATTATGCTAATTCTGATTTCTTCAGTAT  
TTCTGCACTCATGGACAAAACACACGTAAACTTTCAAAGATACCTTTTGTAGTTCATGCCATAGCTTGCTCACATATGCGGTTGTCAGAACAACATTGCTTATTTGAATTTCTTCAACTTG  
GATTTGGCAGAGCATTTCAATGTCTATGTTGGAGACACATCAGATGTCCAGCATGGTTCCTTGTAGTTTAAAAGGAGTGTAGAATGGGCGATGATTGCAATCCCTCGCTGTCTCCTCT  
GTAAGCTCCAATTCCTCATCTGAATTTAAAATTGTGTGTAGGCATCTGCTCCAGCTCAAAGTGGGCCTGCTCTTGTGGAAGGACTAACAACTTGGGTACAAAAGGTTTAAAACCAGAT  
GATTACTTGAGCAACATCCCTAAATCAAATGTTTCAAGACTTCAAAGATAAATATAATATCCATAATAAAATAAAGACAGCTAATTTCTTGTCCCTATTTAAAAGCTCAAATGATGGTCTTTG  
CCTCGGCTTCTAGCGAGCAATTACAATAAATTGGAGGTTTGGTGTCTTGTGGTATCCTTGTCTATAGTGCTTCAATTAATATATTACGAGTTAGTAGTTGTTGCTTATATGGAGGAATTGTAA  
GCCTTGTATTCCCATGTATATCTTTCCGGTCAAATCTGGCTCTTATGTTTCAGAAAAAACTTTGTTTACATATGATATAAGTGTATTAACCTTTATAATCTATATATTATATTATCTTGGTTGCAGC



ATGAAACGCTCTACTATGATGTTACCGATTTGGATTTT

>comp159725\_c2\_seq2

TTTTTTTATTTTTATTTTTTTAATTTTTTTTTAATAAAAAAGCCCCGTTGAAATTTATATAAACCATGAATTGCAAAAGAAATAAAGCAAGCCTTAACAAAACCTATTAGGCTACAAAAAGGACC  
TTCTAACAAATTAGTTCAGGTAAATGGGCTAAAGATGAAAAACAAATCAACTGACTACATTGACATGATCATTACAAAATGGAAGGGATTATAACCCCAATATATAGAACATGTGCAGCAAA  
TTCAAGAAGATTGATAACGACATGCTTGATCATGCGAGCTTTTTGACTAACCATTTTCATTAACAAAATACAATTAATCAATAATCAATGAGGAAAAAACAGCATTGACAAAATTGTGAAG  
AACCGGTCCATGAATTTAGAGTAGACCAAAGAATTTATAGAGTATCGAAAAGGACAAGATCTAGCTAATAGAATATAAAAGATTGGTTCGAAATACTAGATTCAACCGAGGCTAGCCTTA  
ACCAAATCACTTGATCATGGCTGAGTAGACCATGGTAAAACCACCTAATGGTCAAAGGGAAAAGTAAGAGTAAAAGAAAAAGGCATATTTCAATGATCAGATAGTAAATTATTCCACGAA  
GGAATCAATATCAATAAAATCTCTAAGCCAAGCTTAGTATCTCTCTTTGTTTATGTTTCATTTTTACTGACTCTTTCCACAATCTCAACAAAACCTTGAAATTGTGAAATATTTGATCAACCAG  
CCTATAACTAGACTTGTATCGGTATAAAATTTAGTCGAATAACTTGGAGCTAATCTCATACTCCCAAGCAATCCGCGAAGCTTTAGCTAATCAGTGGTTATCGCCTCCACAGAAGTTAGAA  
GTGAGATATGCTTGATGACTAGTCTTACATATCAAGTTTCATTCAATTAAGGCTAATCTCGAACATTATATACGGCGAAATCCCCTTATTACCAAAAAATCTGAGATTTCAATTGAATAGC  
TGTAACAACGATACGAACTAATCAATCCAAGAAAACAGTGCAGAATATTAATGCCGATAACGAAAGAACCATTCTGGAAAAGAACGTTTGCCGAAAAAGATGAAAGATGTAATGTAG  
GACGCTGGTTTGTATTGGACTCTTACAAGATCTTACCCGTTATCAAATGCCGGCTTTCTTCAAACGAAGAGAG

>comp159755\_c0\_seq2

CTCATTCAAGTTATTTATAGTATTTCAAATTTATGTTTATTTTTCTCTTTTCAAGGACTATCAAGATATTTGTTCAATAAACCCCTAGCTCCTTGCCTAGTTGGTTCGAGGAGGAAGAAAAAC  
CTATAACCCTCCATATAACTCTTTATTAATGATCATATGGCTACTACTCATTTTATAACATTGAAGATTTAATGCATTATCAAGGAAGTTTCGAACATCGAGATTGCTTATGAATTTATCTACA  
GGTGGGATTTCTACTACAACACTACTCTTTCATTGAGTTCGTTGTTTCTATTGCACCTGAGTACGATGATGCAGAGCATATTTTATGATGAACCTTGACTTGGAAAAATGCTGGGCACAAAT  
TCTTGATCAAATGGACTATCGCCTCTATCAGATGATACGTAGATTATAAAAGTAGAATTGCTAAAGCTTGTGCTGATCTCTTGGTTGATTATACTATTGCTAACTCTCTACAGCAGAGTTCCCT  
TGCGGTTAATGGGAGTTAACCCAATATCTTTTTTGTATGATGATTGTTTCATCCAAATTAGTACACGGAATTCTACTGTAGAGAGTTAGCAATAGTATAATCAACCAAGAGATCAGCAACAAG  
CTTTAGCAATTCTACTTTTATAATCTACGTATCATCTGATAGAGGCGATAGTCCATTTGATCAAGAATTTGTGCCAGCATTTTTCCAAGTACAAGTTCATCTAAAATAATATGCTCTGCATCA  
TCGTACTIONAGGTCGAATAGAAACAACGAACCTCAATGAAAGTAGTAGTTGTAGTAGAAATCCCACCTGTAGATAAATTCATAAGCAAATCTCGATGTTTCGAAACTTCCCTTGATAATGCATTA  
AATCTTCAATGTTATAAAATGAGTAGTAGCCATATGATCATTAATAAAGAGTTATATGGAGGGTTATAGGTTTTTTCTTCCCTCGACCAACTAGGCAAGGAGCTAGGGTTTATTGAACAAA  
TATCTTGATAGTCCCTGAAAAGAGAAAAATAAACATAAATTTTGAATACTATAAATAACTTGAATGAGGAAGAGGGAATAGGAATCAAACCTCTAAGTACACAATAAGAGCACTCCGCAT  
ACGCAACTCGGATTAATGAAGGAAAAAGCTACTAACAACCTAATGGTCTCATCAAATGATTTATTTCATCAATAATCCAAAAGCAATTAGTCATATTTATAAAAGAAAGCAAACCCTAAAAAA  
GGATGAAATTATTCTAATACTTTAAGATTTAATCTAATAATAAAAAATTGAAAAGAAATACTACAAAAATAAAAAACACACAAAAGACACATATTAAGTTTACAAAAATTTTTAATTAAGTATTA  
AA

>comp159764\_c1\_seq4

CCTACCTACTTTTCAAATGTGCTTATTTTAGCACATGCAACCTAACGTCTCGTCCGCTCCTCCCTTCCCCTCCACTACTTCTCACACAATCGGTCCTTTTTCTCCTCAAATCCCTAATTTCC  
ACACCTTCGCACGTTCTAACTACCTTTACCCTACCAAAAATTCAACAATTTTCGTCATTTTAGTAAATTTCAATGGGCCAAATTTAAATCTTTTATTCTCGCCGT

>comp159767\_c1\_seq1

GCTCATTAGTTTAGTTTCCAATCATAGTACAATAACAAATGATGTGCACGTATACTATAATGATTTTCATCATTTTTTTTACAGAAATCAAATTTCTTATCTGCCAAAAATTTGAAAAGCAACC  
CTGAAAGTTGTTATCAAAAAGGATATAGAATGCATGCCATTTACATCACGAAGAGTTGCTGAATACTAACATTGTTTGATCAGACAAAAATGAGTTACTCACAGAGGAATTTATGCCATA

AATCAGGCAAAATCATCAATCCAATCCCCATAGATGCGACTAATTTTTTTCAAAGTAAGAGTTCTAATTTTTGGCTGAGATACAGCAGCTTCTCTGGACTCTCTAGGCTCTGCCGTTGTCTT  
AGATAAAATTTTCATCAGTTATGTTAATAGCACATTTGGGACGAGCTGCAACAACATTCTTCTCAACCAATTCATCATTATCCCCTCCGAGCTTCCTTAATTCTGAATGTCCATGAGCATAACT  
GCATTGATCACCATATGAGCAACTACCAGAAGTCGACCCTTATGACAAATCTTTGTCTTCCAACACATAGGTTTCTGACTGGGTAAGGAGCTATCCTGAAGCGAACCTGGCTGTACATGA  
CTAAAACCTGCACTTGTCCACATAAGGACAGAGCTCACCATGATAAACTTCCAGCAAACCTTTGTTCCCTATGCAGCTTTTGTCTTCTCCCTTGCATCAAAAAGTTCTGAGGAAACAAGGCTC  
TCACATCCACATTTCCAGCAGGCCTGCGGAGTTCTTCAATGCTGTGAGCGAAGTTGCAGCTGCCACCTTTGGAACAGGAACCAGACATGAATTTACACACATACGGGTCTTGAAATATA  
CTGATTGAGGTGTACTGGAGCCGTGGTATGTTAGATTCTGGGAAAAAAGGTGGAATTTGAGGACAATCCCATTCTTCTGAGATTCTCTGTTCCGGGGTGATCGAAAAGTCGAATGGGC  
CAGGGAAAGCAAAGGGATGATCCATGGTTGAACAGAATATTTTTAATAGCACAGGAGAAAGGCAAAGAGCTACAATGGGCTTCAAGATAAATGAAGGCGATATATCAACAAAGCATGG  
AAATTACTAATGTTTCAAAAAGAAAAAGTAATATATATGAGAAATGCAGGAAAACCAACAGTGATATATGAAAAGACAATCAAACCTCAGAATCAAGATTTAGGTTTCATCATCTAAAGAC  
GAACCTCCGCGTAAGAGATACGAGGATTCAATTATAGAATGAGGAAAGTCGTCTATATCAGAATTAGATAGGCCCGGGACGAATTCAATCGAAAATGGCGGTGAATAAGAGAAACCCTAG  
AATCGACGAGAGAGATCAACGAGGGTTTTGATTTGAAAACCTAAAAATTGAAGAAATGCCTTAAGCCTTAAGGAGTATAATAATAAAGGAAATTTTAGGATTTAATCCATCCGAAAGTT  
TCCGTTAATAGAATCTTTGTTGCTTAGCACGTCTGCCCCGCCTCTGCCCCGCGAGATTTTCCGCGCGTTAACCGTACGGAATAGAACCAGCCTTATGGCAGCGCGGGTGGGGGCC  
CACG

>comp159767\_c1\_seq4

GCTCATTAGTTTAGTTTCCAATCATAGTACAATAACAAATGATGTGCACGTATACTATAATGATTTTCATCATTTTTTTTTACAGAAATCAAATTTCTTATCTGCCAAAAATTTGAAAAGCAACC  
CTGAAAGTTGTTATCAAAAAGGATATAGAATGCATGCCATTTACATCACGAAGAGTTGCTGAATACTAACATTGTTTGATCAGACAAAAATGAGTTACTCACAGAGGAATTTATGCCATA  
AATCAGGCAAAATCATCAATCCAATCCCCATAGATGCGACTAATTTTTTTCAAAGTAAGAGTTCTAATTTTTGGCTGAGATACAGCAGCTTCTCTGGACTCTCTAGGCTCTGCCGTTGTCTT  
AGATAAAATTTTCATCAGTTATGTTAATAGCACATTTGGGACGAGCTGCAACAACATTCTTCTCAACCAATTCATCATTATCCCCTCCGAGCTTCCTTAATTCTGAATGTCCATGAGCATAACT  
GCATTGATCACCATATGAGCAACTACCAGAAGTCGACCCTTATGACAAATCTTTGTCTTCCAACACATAGGTTTCTGACTGGGTAAGGAGCTATCCTGAAGCGAACCTGGCTGTACATGA  
CTAAAACCTGCACTTGTCCACATAAGGACAGAGCTCACCATGATAAACTTCCAGCAAACCTTTGTTCCCTATGCAGCTTTTGTCTTCTCCCTTGCATCAAAAAGTTTCAAGAAATTTATGGGATTTT  
GTTTCAATCCTTCTACTGCCGTCTACCTGAGGAAACAAGGCTCTCACATCCACATTTCCAGCAGGCCTGCGGAGTTCTTCAATGCTGTGAGCGAAGTTGCAGCTGCCACCTTTGGAACAGG  
AACCAGACATGAATTTACACACATACGGGTCTTGAAATATACTGATTGAGGTGTACTGGAGCCGTGGTATGTTAGATTCTGGGAAAAAAGGTGGAATTTGAGGACAATCCCATTCTTC  
TGAGATTCTCTGTTCCGGGGTGATCGAAAAGTCGAATGGGCCAGGGAAAGCAAAGGGATGATCCATGGTTGAACAGAATATTTTTAATAGCACAGGAGAAAGGCAAAGAGCTACAATGG  
GCTTTCAAGATAAATGAAGGCGATATATCAACAAAGCATGGAAATTTACTAATGTTTCAAAAAGAAAAAGTAATATATATGAGAAATGCAGGAAAGCACCAACAGTGATATATGAAAGACA  
ATCAAACCTCAGAATCAAGATTTAGGTTTCATCATCTAAAGACGAACCTCCGCGTAAGAGATACGAGGATTCAATTATAGAATGAGGAAAGTCGTCTATATCAGAATTAGATAGGCCCGGGAC  
GAATTCAATCGAAAATGGCGGTGAATAAGAGAAACCCTAGAATCGACGAGAGAGATCAACGAGGGTTTTGATTTGAAAACCTAAAAATTGAAGAAATGCCTTAAGCCTTAAGGAGTA  
TAATAATAAAGGAAATTTTAGGATTTAATCCATCCGAAAGTTTCCGTTAATAGAATCTTTGTTGCTTAGCACGTCTGCCCCGCCTCTGCCCCGCGAGATTTTCCGCGCGTTAACCG  
TACGGAATAGAACCAGCCTTATGGCAGCGCGGGTGGGGGCCACG

>comp159784\_c2\_seq18

AAATCCAAAGGCATAGTCCATGAACCATACCTGTAAGAAAAATAAAATGAAACAAACTTCCAAACATAATCAGAAAAGCACATTTCCCAAAAAAGAAAAAATACACCACCAAAACAGA  
AGCTGATCAATAACCAGATGACCAGCAAACACAAATAACCAGCCAGAGAACAACCAGATAAGTCCACCACCAAAAAAAAAAACCACCAAAACACTTGCTAAAAAAACCATACCATAA  
GGCCAAAGCACTAGAGGAACAAAACATTGCCCAACACCAATAGCAGAATAATCCAAAGACTGATTAGAATGAGCATAGATCTAGTAGTTCTGCCAACAATTTTTTTTTTCTGTAAAA

CCCACGGAGGGGTGTACACGTTTATAATAAAAAACGATTACAAAATCATTAAGGGAGACCATTAGCTCGCTACTTCTCAAACGAGCTATAGAATAAAACAAAAGAAAACCTAAGAGCTGA  
TTTTTCCACTAAGCCAGATTAATAAAAAAGACCTAATAACATGCTAAAGATGCTAAAGCCAAGCAACAAAAAAGAAAGATCAAGATATGAACTTTAGGCACAATCTTTTTGCAAAACCTT  
TTGAAGACAGCCATGAGCCAATCCACTTGAAAATAATAGAAGCTACAACACACAAAATTATAGCACAAAAGAGCATATATGTAATATAATTAATAGCCAAAATCTAAATCAAGAAAAAGT  
AAATATAAAAAAGTACTGTAAGTAAAAGGAAGCTGCCAGGAAATAGAACCACCAATAGGATAAAGACTCATAGAGCTCAGGTAAGAATTAATCATGAAACATCACCCAAGTAATCCACAC  
GCCACTCAATCCTACCAACAAGAGTAAGCATAAACACCAAATCATAACAGGACACAGCAGAACAACACAAAACCTCCAAGTTAACCCCAACCGTTAGGCCAAGAAATAAAGATAAAGG  
CAACCCAGCCAAAAACCCAACACTAGAACAGAAACATGGAATCCCCAAAGCCCCAAATGCTCATATATATATATATATATATTGTTTTAACACACATGATTGAAATAATTTCAACTACAAAA  
CAAGAACACAAGACTACAGGCTCTGAAACTATAATCTTCATCTTCATCAGCAACGTCATATATAATAATTCCAAGAACTCTCGACCGTTAGCTTTGGAAATTCATGCTGTTTCTCCATGTTG  
AAAGATGCAGAAACCTTGATCAGGTAGTGTGGCTAAAAGTAGCGGTGAAGCGAGGCAAATTGGTCGCTGATCAAAGCACGATCAGCCTCGTGCTATTGCTATAGTTGGTCCAGTGAG  
CGATAGACTCCTGGATGTGTGTTTCCAAGCACATCTCTAAGCAGTCAAATTGCTTTATCATAGTATCATTAAACGATGTTGATATGTAGGTGCTGGTGTGGTTTTGGTACCTCTGGGACTGG  
TAGGGCTCCTCTCGAGATCATGCTCCTCCTTTGCATGCTAGGCCTCGTGGCGTCTGTACCTAAGAACAGGTGGAAGGAATTATCCGTGTAGTATGAAGGGAAGAGGTCGTTGGGTACAT  
GAGCTGATATTTTGTATCGAAGACATAAGCAATAATGTGTCATAGAGCTAGATTTTGCCTACGTCGGACTCCAATATTTCTAATAGATGTCAGATTGTCAATATAACAGATAATCATATCCGTT  
GCATTGAATTTTGTGTCAGACATAATAAGTAACTATAACAACAAGGGTGATGTTTATCCTATCTCCAGCCTTAAGGTAAAATAAAAAGTTCTAAGAATATGTTGATCTTGCTGGATGAT  
GCATGCATTCTGGGTAGGAGTGTTCCTAGAGGTAGGTGATGACTGATAGGTGCATTTCCAATGGAAAGATTTATTTAGGTCCAGTCATAGTCTCCCTAGAGCTAACACTAAGCAGTGCT  
ATACCTGTGATAGAAAGATGTAAGATTTTCATCAAGGTCTTGATTACTAATTTATACTGGACGCCTACAGACCTAAGATTGCATTATGTTTTTTTTCAGCATTAAATTTTAGACTTGAATGCAATA  
AATGGAGTTTGATAACTACCACTTACGAGATTTTTTGGTCAGTTCTATAGAAATATTATTTGCATATATTATATGTTATTATCCTTGGAATAATATCATCATCCCTTCTTTTACTTTTTATTAT  
GTAATGTGTGCGGTGTACCACATCCTCCATCTACATTAAGATGGGAATACTTTCTTTTGTATTGTTCAACCTCCAAAATACTTGGTTTTCTTCTCAACTCCCACGCACAGCATATGAA  
AAGCCCTAAACAACAGACTACAAGAGACGATCTACAGATCTACATAAGATTGTAGTTAAGAACTTACAAATAGAGCCCTTAAAATCTCAAATTTAACAAGCTTCTTCTATTCAATTATCT  
TAAGAAAGCACGTTATAATCAGGGCGCTTTAAAGTGAGATAGGGTTCGAAGAAATTGACA

>comp159794\_c0\_seq12

AAATTCATATAATATGGTGGCATAGAAAGAGAATAAACTCTTTGAGCATAATATTGAAGATAAAAATAATTGACTTGGTAACAAATTACAAATTATTGGAATTGTGATGAATGTAATGAGCCA  
CCTTGTGGGGACTTATTGTTTTACAATACATCCCCGGTCAATCAAATTGTTTGCAGTTATTTCTTCATATCATTTTCGCTCTCTCTGTACTIONTATCTATCCAACTTCTAATTATTTCCACTTCTAGC  
GTCCTTTGTTCTATAAGCCAAGTTGGATCTTCTTCTGTAGCAGATCTGAAATCTACATGATGAGCACCTTTTGCCGTGACAAGAGCAACAATGGATGATGACAGGTTCTCAAGTACCCCTC  
CTCTGCTCCATGGGTCTTTTCAATCCATTAGAGAATATTATGTTGCTTCCAAATCTGGAAAGAACTTGCTTGATGTTATGGCCCTCCATACTCTGTAGTAATCCAATGGGGCCGAGGTCTTACAC  
CATACGTTTTCTTGCAATGGTCTCCAAATCTTTATAATCATATGCTGATGGTGGGAACATGCTTTTTGTTAGAGCAAGTCATTGGCATGACCATTTCTGTGCAAGCCTGCCAATCCCACCCAT  
CAAGTCCATGAACATCAGCCTCATATCTATATAAACAAGATTGACTGCCTGAATAGTTGTAATACAAGCTTGCAGCTGAAAACACTTTGGTGAGTATGTCAACCTCTGGTGGGAATCC  
ATCTATGATTCTGCACATCTCCTGAACTGGATTGGCTGGCAATGGTTTCATGAAATTTGCTTTTTGTTGGATAATCAACCATGGCCGTATATACAAATGCTTCCCATAGCCAATCTCGTGCTTGA  
TATACTGAATGAAGATTTAATAATTAGAAGAAATCTCTGAATGAAATCGATAGATGAAAATGCCAAAAAATCAACTTTCCCTCTCTTGTGGCTCTCCTCTTCTTCCCCCTTTCCCTCTCTTCT  
TCCACGACAAGCCGCGCTCAAATGGGGGAGGTGGCGGCACTGAAGCAACTTAATGCTTACGATTTAGAGTAATAAATATACATAAATATTGTTAGTAGCCTAGCGTTGCAACGCTGCATGC  
TGAATCCAGAATTACTGTAATAAGAACTCAAACATCGCAGCATCAATTTCTAGCGCCGCTGTGGTGTCTTAAAGCATAGCACCTCATCGTTACAAAACACAGTGCTAAAGCATTATTATTA  
TATTTTTTATTTAAAATATTTTTCATTTCTCGGGTTGTTAGAATTAATGACTTGAAAACACACGTGGTAAGAGTGCGAGTTGTGCTCTTTACAATTTTTAAATCTGCACCTAATGTTGAA  
ATTATGAAAATTTATTTTGTCTTTAAAAATTTGTTCAATTAAGAATTGGTCAACTTGTGTCAAATAAATCATGTCTCAGGACAAATTTTAAAAAATAGTATGATAAATAATTTAATTATTACAAG

TATATATATACAAAAAAATTTATGTAGTTGCTCG

>comp159794\_c0\_seq16

AAATTCATATAATATGGTGGCATAGAAAGAGAATAAACTCTTTGAGCATAATATTGAAGATAAAAAATAATTGACTTGGTAACAAATTACAAATTATTGGAATTGTGATGAATGTAATGAGCCA  
CCTTGTGGGGACTTATTGTTTTACAATACATCCCCGGTCATCAAATTGTTTGCAGTTATTTCTTCATATCATTTCGTCTTCTCTGTACTTATCTATCCAACTTCTAATTATTTCCACTTCTAGC  
GTCCCTTTGTTCTATAAGCCAAGTTGGATCTTCTTCTGTAGCAGATCTGAAATCTACATGATGAGCACCTTTTGGCGTGACAAGAGCAACAATGGATGATGACAGGTTCTCAAGTACCCTGA  
ATTCAAATTAATGGCATTAAAAATCAAGGACATTTGATAGAATCTGATTGATCTCTTTTAAATAGCAATTTTGTAGTTGAAAAATATAATGTTAAATGAACACAATAAGATATTCAATCCTCA  
CCCTCCTCTGCTCCAT

>comp159794\_c0\_seq7

AAATTCATATAATATGGTGGCATAGAAAGAGAATAAACTCTTTGAGCATAATATTGAAGATAAAAAATAATTGACTTGGTAACAAATTACAAATTATTGGAATTGTGATGAATGTAATGAGCCA  
CCTTGTGGGGACTTATTGTTTTACAATACATCCCCGGTCATCAAATTGTTTGCAGTTATTTCTTCATATCATTTCGTCTTCTCTGTACTTATCTATCCAACTTCTAATTATTTCCACTTCTAGC  
GTCCCTTTGTTCTATAAGCCAAGTTGGATCTTCTTCTGTAGCAGATCTGAAATCTACATGATGAGCACCTTTTGGCGTGACAAGAGCAACAATGGATGATGACAGGTTCTCAAGTACCCTC  
CTCTGCTCCATGGGTCTTTCAATCCATTAGAGAATATTATGTTGCTTCCAAATCTGAAAGAAGTTGCTTGATGTTATGGCCTCCATACTCTGTAGTAATCCAATGGGGCCGAGGTCTTACAC  
CATACGTTTTTCTTGCAATGGTCTCCAAATCTTTATAATCATATGCTGATGGTGGGAACATGCTTTTTGTTAGAGCAAGTCATTGGCATGACCATTTCTGTGCAAGCCTAAATGAAAAACAA  
GCAAAAGGAATGTAATAAAATCCAAGAAAGTTATTCTAAAGAAAATAAGCATTACATGTGATCATTTAGGACTAAAGAATTCCTTCTTTCTAATTATGGCAAGCATGTACATGAAGATTTAT  
GCAGATGAACACAGAAGATATTGAAATTCATCAGTATTAAGATTTAAATCAAGACAATTACTAATATGTCCTAAGAAATTAATTGCTCCAGCTCAATTTAATCTTTCTTAGGGGCCATTCT  
GTGAAAGATTTAAGTCGAAAACCATTTGAATCAAACTCCCTCTACTATTAAGGAAAACCTGCTATTATCCGATTGTGTGCTGTTGA

>comp159796\_c0\_seq1

CTACAAAATAAGCTAGACCACAACTTTAGCAGGTTGATACAGGAACTGTCAACAATCCAATTAACAAAGATTATTGAACAACAGAATAATTTAAAAAACAGATAATCATTTCAGATATCC  
ATAGAACATTGACTGCAATATCCTTATTATTTATAAAAATAGATTTATAAGAGAATGAGGGGTTAATCTAATGTGACAGTTTCTCCTGTTTTCAACGCTTACCACAGCTTATCGTGTAGAAC  
AATCACAGGCAAGCAAAACCAACTTCCCCGATCCAACGGCTGGTGATCCTCATCAGCTCCGGTGGACTCCCCGCCCTCGCCTCTCTCCTTTATCTCCTTGAACATATATATATACTAATAC  
TGATCATAATCGATCAGTATCAATCACAAACAGTAATCTTCAGCATAATTTTTGTGAAGTCACAAAAAAGCTTACGAAATTAAAACCTTTGTGTATATCCTCCCCTGTTATATGGATAGCCCC  
CACCTCCCGTCGCCGGTAGCTTCCCCTGCATCCCATCCCTAGCGTACTGCTGCCACATCAGCTGCTCCTCCACAAACAACCTCTGCTTCTCTCCAGCTCCGACATCTGGACCCACGGAGG  
CGGCGCTACTGCCGCCGAAGCCTCAAAAGGGTCACTGACCCGCTTGCTCTGACGCCGCCGCTTGCCGGGGCCGGCAATGCCAGCATCCCCTGCGCCGCCGGTGGCCATCACAGCCATAT  
TGCTGGCGTTTTCTCCAATCTAGCATCCGTAGCGGTGCCCTGGCTGTACATTCCCTCGAGCATCAGCATGTCGAATCCGCTGGCTGACGCCGGCTTCTGCTCGTGGAAAGGTGCTCGCGG  
ATTCGACGAGTGCCATTTCCCAATCGGCCGTTTTCTTGAACGGCTCCCATGGCTGCGCCGGAGGCGGCTCCGCCGGAATGCCGTGCAACAGGGCGAGAGCGAGGCTGTCCGGGTTACGT  
TCGCTGGTGCGCCGCTCTCCTGAATATGGAGCAAGTCTGCCAGCTTCTCCTCCTCTGTAGTCGACGAGGCGCCGCTTCCGGGGCTGCTGCCAACTCTACCAACTCATTTCCAATCTCCT  
CCACCTCCTCCGGCGGCTCCTCAGGCGGTGGCGCCTGAATGGACTTGACGTCCTTGACGGCTTGAAAAGCGGCATCCTGTTCTTGGCTGGCAGGGCGTTGAGAAAGCTGGCGGTCCGG  
GAGCGAGGAACGTTCTCGGATGAATCTTCCATAACTTTAAGTTGTTCTCGGTGATGTGCTCGATTTACAGGGTAATCGGAGGGGCGGGCGATGCCGGCGGCGGTGACCAGGAGTGGA  
AGGAGTCGAGCTCCTCGAATTGCTTGGAGAGCTTGGAGAAGAGATCGTGAACGCGGACGAGTCCGTAACGAGAAGCTCCGTGAAGCGGTCTACGAAAGCGGAGGTGATCTCCGTCAT  
GTCCAAGTATATTTGGAAGCTCTCTTTGATGATTGGGTACAATGCCATTGCTACGATCCTGTCTGCTTGGCAACCCCCGTTGGACGGCAGGCAAGCAATCTGTCTAGCAACATCTGGAGA  
TGATGCGCCTTCACCAACAATCGATCCGTCTTCATCTCTCTACCGGCGTCAATCTCGCCGGAGTCAACCGCTCCCTCCCCCTCCTCCCCCTCTCATCCCTCCCCATCCTCCTCCATCCCGA

CCACCCACCGTCGCGGACAACAACGTCGCCGATCCTCCCCTGTACCTCCTCCCAAACATCTTGTATTCCAACCTCTCATCAAGGTACCTCGCATAAGTCCTCACAAAGGCCGAAAAATC  
CCACGCATCAGACCTCGATCCCGCGTCCCTAAAATCCGCCATATTGAGCATCCGCGTGCCGCGCCGCGTCCCGAAGAAAACCTCCCCTCGTAGGCGGGATCACCGTCGGCGAGCAGGC  
GGTGGATGAGCACAAGGGCCTTGAGCGCCACAGCCCAGCTCCGGGTTTTGCCGAGCCGGCGGGAGAGGAGAGCCACGCAGGCGGCGATGTTGGTGCGGGAGTAGGATGTCAGGGAAA  
GTATCTCCCGCACATGCTTCTCCTCGGGGGGACTCGTCGTGGCGGGTTGCTTTTCACGATGGCAACCTCGAGCTCCGCCAGCGTGGTGTCTGCTACTTTTGCAGGCCATGCTCGT  
TTGATCTTTTACTGCGCCAGCGCTTTTCGTATCTTGCTTGGTGCCATTTTTTCCTTTGTTGGGTTGTTCTGATCATGTAGTTTGGAGATATTGAAGAAGAGAGGAGGAAGGGGAGATGAG  
AGAGAGGAGATAGATCAATGGTGTCTCTCTCTCGCTTTGGCTCTCTCTCTTGTCTGTTTGTGATTTCTTGGCGATTTTGATTTCTGTTTTTGGTAATGGTTTCTCGTGTCTGTTTTCT  
CTTTGCGGATGAAAGGGCAGGCTGCAACGGATG

>comp159806\_c2\_seq6

AATTTTTTAGAAAATATCTAATCAAAAAATATTTATAAAATCCTCAAATTGACAAGTTCCATGGGTCTAAGCTTAAATTCTGGTTTGTATTTATATTCATACTATTTATGTATGCGAGAAATG  
CTTCGTTCTCAAAGCCATAAAATTGAAGTATTTAATCATTATAAAGTTGAGCATCTCAAATATATAAAAAACAAGATTAAGAACATAAGAAAATCAGATATTAACATAGAGGGCTTTCT  
TGATTCAGACCCGAGACAATCGAAGAAATGAGCTGAATATTGAAGGAAGAACTTAAAAAAGAAAACCAACCACAGAAAATACCATACATCCTGGCAAGTGAGCGACTGCGGCTGTCAG  
AAGCGCACCGGAGATGTATTGTGCACGGCTGCTGTGAAGGCAGAATCGTACAGAAGCAGAAACGGTGCGTAATGCTCTTCTCAGGGAGATTGGGTGTGCGACTTTGCAGATGAATAAG  
ACAAGAGCGAAGAAGCGGCAAGTAGCGTGGAGCGGTGTAATCTGCGCTA

>comp159808\_c0\_seq3

GAATGAATTTGAAATAGCAACATGTACTTTCATGGCTCTTCTTACATTTGCAACAGTGTCAATTGTCACCTCAGGCTCCAAGTCTGCATTGCATATAACACATGAAATAAATTTACTGAA  
TCTGTAATGAAATTGGAGTGTGGGGTTTAAAGCTAAGAATCTGATACATATTGGTTAAGAGTAGGATGAAGCCAGCCTGTGGTTATGGCTTTGATGGTTGCGATCGCCTCTAGGCCCCC  
AGAAGCTCCCAGGCAATGTCCAATCAGAGACTTTGTAGCATTCATTTAATTTCTGAAGTCTCCTTGAAAACCTTTCTTAATAGCATTTACCTCAGCTAAATCACCAGCAAGGGTTGATGTTG  
CATGAGCATTGATATAATTTACCTCCTCAGCTGAAACTCCGGCATCCTCTAAACTCTTTTCTATAACAAGAAGAACTCCGAGCCCATCGGAGCGGGGATTGGTCATGTGATGAGCATCACA  
ATTTATAGCTCCTCCCAGATACTCTGCAATTATAACTGCGCCCCCTTCTTCTTGCATGCTCCAAGCTTTCCATGACCTTTGATACAGAAAAATACAAAGATCACACCAAATTAGTTAGATAATT  
AACTCTTTCAGATGCTATATGGTTCACTCTGGTTTGAAGTGTGTTCAAATTTTGCTTACGGTGTGTTGATGTCAGTTTTCAAGCATTTTCTAGTTTAAACAATGGAGAAATTATTAGTTGCGGA  
AACCAGGCACAGAGAATCA

>comp159810\_c2\_seq2

AGTTTTAAATTGAGTTTGTCTCCAAATTTCTTTAATTCAACTTTTCACATATCTCCAAATGAAGCATATATTTAGATCCAATGGTCAAGATGTATGCAACAAAAGAGATATATCTTAATGCTT  
TTCCAGGAAAAGATATCAAGAGGACAATGGTTCACTTTTGTCTTTTCAGAGAAAGAAATTGCTCAATTAGATCTCAGCCGTCTAATGGAGAGAGCTCCTCATAATGAACTCTTGGAGGG  
AATGAGGATACGGGGACATGGACAGAGAAATCTTGGTCTTCCGAGGACTTCAGCCGGCCCTAGCTCCTCATCCCCAGGCCTTTCTTCTCTGAGATGGCTCTCATAAGCAAGCAA  
CAGGGGAGAGCTCCTCGGCCCTCATGACAAGACACGATTTCTCACACTAAGAGGCAAAGAAATGTTCTCTTACCATCTCGACCGCACGCCGGCAACCCCGATGTCGACCTCCGAGCTCA  
TGGTCCACTATCGTTGGTGTCCAGTTCTTGTCTGTCGACCCAGCCGCTCACTCGCCGCCGCGACAGTTCTCTCGAGCCATTCTCCTTCCAACCTCTTCCGCCATTCTCTTGGCCACGAC  
ATGGGGTCCGTCGTCAATGCCGACCAGCTGACCCAACCCAGCGGCGTTGCCCCCAACCTGTCGCCGGCCGTTAATAAGCCGCCGGTTCGTTTACCACCAGCTATTCTCCTCCAGCCACT  
GGCGCAAACCCCTTGCTCGGTCCGACGCCAAACCTGGCTCCGACGTCATTGACCACGATCTCGATTCTATGAGGTCCATGGGAAGGCGTTAGAAAATGTTGAGTTTCGAGATTCAGACC  
ACCTCGTGTCTTTGAAAATTTCACTCATTGCTTGGGACTCAAGTCCAAGTAGAAATGTAAGTCAAATTTATATGTAATCCATACTTGATGTTTGTACTATGGATCATAACCACTTTTCAGCT  
AAAAAAAAGGTTGATAGAAGGTGCATTCTGTAATTTCCCATGTTTAGGTGACGTCGTTTGGAGACTTTCAATGTTTCGTCGGTTAGTGATGAGAGTTTATATCCTCTCATTGCTGGTCAT

TTAATGAATATTGCTATGGAAA

>comp159812\_c0\_seq1

GCGAGCAAGCCTGAACTGTTCAAATTCCTTCAACATTGCAACTTGCAAGAGATTATCTTTATTTATATTTAATAGTTTAATTCGTACATAAAGAAAAATCTCCCTAATTTTAACCAAGAAAA  
AAAATCATATAAAAATATTCTAACGTAATTTATTTACAAATTCACCTGAACTTATATGCTTAATCTCAACATAAATTCGTCTCCCTTAATTAAGCCCATAAGCCGCCGCCGGCAGCCTCGGCG  
TCGCCATCACCGCTAGCGGCACAGCCTTCGGCAACACCAACCCCGGCCCTTCTCCATGTCCAGCTCCCCAACCCCTTCCGGCAAACTCCAATCAAAGGCATGCACCAACGTTCCCAAAT  
AATACTGCACCATCACCATCCCCGCTAGCTTCCCCGCGCAAATCCTCCGCCCGGCTCCGAACGGTATGAGCTCGAAATCATTTCATCGGATCGATCCTCGCCATCTTCCCTTGCAGAAA  
CCTCTCCGGGTGGAACACCAGCGGGTTCTCCACACGTCCGGGTCCCGCCAATGGCCCATATGTTGACGAGCAGCCAAGTCTTGGCCGGAATGTGGTAGCCTTCCACCTCGCAGGGAT  
CGCGGGCGTAGTGCAGTATGCTGAGCGGCGTTGGAGGGTGCTTTCGGAGAGCTTCTTGCATATGGCTTGGAGGTAGGGGAGGTTTGGTATGTGGATTTCGTCGAGAAGGCGGTGGCGG  
CCGACGACGCGGTGCGTTTCTTCTGTGCTCGTCGGAGGATTGATGGGTTTTTAAGCATTTCGCCATCGCCACTCTATGACTATGGCGGAGGTGTCCGTCCCCGCCACGAATAGGTCAG  
AGATGAAGCCCTTAATATTATCTTCAAAAAGCCCTTCTCCATCCTCACCTTAACTCACTAGCCAAAAACAAGATCCAGCAGATCCGGGTTCCCCCGCCTCTCCCCTGCAGTCTCAGCGTG  
CTCCACCAGCAACTTACGCACCATCCTATCAAACCTCCGATTCAATCCCAGCATCTTCTTCTCACTCCCATCGGATCCAACCACCCGATCGCCGGCACCAAATCCTCCATATTGGAAGCCC  
CCTGCCCCACCAACAGCTCCTTAATCATCTCCTTAACTCCTTCGCCTCCTCCCCGTCTCGTGAACACTCTTTTGCTCATCGGATCCTCCCAATCACATTGCCATGGCACAACCAAC  
AAATTTGGTAGCAGAACCGGCTTTTCCGAATCGCTGTGTTTCTTCAAGAATTGAATCATGGACAAGGCCCTCGTCGCGCCGCACGCCGGCCAGCGAGACATGGCCTTGGAGCCGAGGAG  
ATGGAGGCTGGAGACTTTGCGGAGGAGCTTCCACTTGGGGCCGTAATCGGCGAAGACCATGTTCTGGCCGTTGTAAGTGAATTCCTTGGAGATGACGCCGGAGGGGGCGGTGCGGAGAAGT  
GGGAGTCGAAGGTTTTGAGAAAGTTTCGAGCGGCGGGCGGAGGAGGCGACGACGCTGCGGATGCCCATCTTGGAGAACATGATGGGGCCGTATCGGCGAGCAAGGAGGGCGA  
GGCCGGAGTGGGGCATGGGGCCGATGAAGGAGAGGGCGCCGATGATGGGGAGGTTTGGGGGGCCGGGTGGGAGGGGTAAAGCGGCTGCAGTAGCGGCGGGGAGGAGGAGGTGGAGA  
GAAAGGCAGAGGAGGAGTGACGCGATGAGGAAGAGACATAGTTGAGTTTGTAGCTTCAAGAGCCTTTCACATGCGAGTGCTTATATAGCAATGGGAATTATGTTAAGGGGGTTG  
GAAAAAAAAAACATTCGGTACGTACACAAAATATATTTGCATAT

>comp159863\_c0\_seq3

TTTGATAGAAGAAATGCAAAGCTCCCATAACTAATCACAAACAAGCAATGCAACATAAGTTAATTCCTGCTGCTACTTGGCCAATCTCACAGTCTTACATTCGTTAAGCCAACCCTAAA  
CGGCTAAACTTGAATGGCATAAGCTATTATAAAAACTGATCATAGATAGCATCATAGCAGTAAACAATGGAATTGAAAAAATCTTACACCAAAAATAAACTGATTACATAAATCATATTTAAT  
TAGGGAGATTTATCCCATCCATGAATTAATTACAGGAAGCAAAAAGAATTAAGTCTTCTGGGCTTTCTTTGCAGGAGGTAAAGTCCCAAAACAATATCCACAATGAAGATGTGATC  
CCAAAACCCTTGGTTTGAATTTGAAGTGATGGTTTAGATGATAACGCTTGGAGATGTCTAGCTGGTCTATGGATGGTATCCATGGTGGAGGTAGTAGTGTGTGCAATCATAGATCACATA  
ACCGAGCAAACCACCAGCAAATATGGCAGGAGCAGAAGCTGGGGTCGATAAGAGTCTAATTAACCCCAATAACAGTAACTTTTTGTCTTACGTTGAAAAGGAATCGATGCAATGTGTA  
CTCGAGCAATGTCCATACCAGTACTCCAGTCATAATCAGCAAAGCAGCCGAAATGGCAACATTCCCATGCGAATTGAAATCAATGCAGACCAGCAAACAAGTGAAGCCATACAATTGG  
GATAACCCACCATAATGTTTCGCGTCAAGAACTCCATAAAGTTATTTTCAAAAAACGTGGTCTTCTTGTCTCACAATAGGCTGATGAACCCATTCTTGGTAAGCTTCTCAAGTTGACCG  
ACCTGACAAACTAAAGGCTTGTTTAAGTCCACTTTGAACTCCTTTGCAACCATTGTGATTCCCAGTGTGCTCAAGAAAAAGGAAAGAAAAAAACTGCTAACTGATCGGCAGCCCCCCC  
TGCGACTGCAAAATCGCGAACCCCTTCAAGGGTTTTCTCTTTCTGTTCTTCTCTCCTTCAAAAAGGCGGCAAAGATGAGGAAGTATAGCCACAGATCGGAAACCAT

>comp159863\_c0\_seq7

GAAGTCCAATTTAAAGGGTACAATGAGCAATACATAATAAATAAGAAATTTAATATAAAAAATATTATACTCCTACCTCAACATATTATGACAAACCATTTTTATGAATACATATCATGAAAA  
CATAACTGAAAACGATACAATCTTAAACCAAAAAGTAAACAATTCACATAAACTAGGTTAATGAGGGACAATTATCCCAACCTTCAAAGAATCACAACCATTATAAATCTGCAATGAAAA

GAATCAACTACTCTTCTGAATTTTCAAAGCAGGTGGCAAAGTCCCAAACACAAAATCCCACAGTGAAGAAGTGATCCCAAACCTTTATCTGAATTCTGAAGTGATGACTAACATGATA  
ACGCTTGAGATACCGAGCTGGCTGGTTGGATGGTGATCCATGGTGAAGATAGTAATGAGTGCAATCATAGATCACATAGCCCAATAAGCCACCAGCAAATATAGCAGGAGTAGCAACAGG  
GGTTGATAGAAGCCTAATTAACCCCAAAATGGAATGCATATAATAGCAGCTGCAGCAGGGGGAAAAACAAGGCGCAGGCTATCCATTGGGTGCTTATGATGACATCCATGAAGCAGATA  
ATGCATTGTATTTGACCAATAATTTTTGTACTCATGTGGAAAATGAATCTATGCAAAGAGTACTCCACTAATGTCCATATTAACATTCCAACCATGACTAGTAGAGGAGCTTGAGTAATTGA  
TATCCCATGCGAATAGCCATTACCAAACAGCAGCTCACTACTGGAAGCCATACAAGCGGAATGATCCACCATTTTGTGCGTGTCAAAAACTCCATGATATCATTTTCAAAAAGCCGTGGA  
CCTTCCTTGCTGACAATAGGCTGATGAACCCATTCTTGGTAACCTTCCCCGAGATGTCCAACCTGAAAAACAAGAGGCTTGTTC AAGTCCACATTAACTTCTCTGCAACCATAGTGATTC  
GTGTGCGATTCATAATTTAGTCGAGAGGCGCTCCAACGAAGAAATCATCTTTCTACATCCAAAACACCAATCCAGCAGAAAAATCAACAATGCGGGCTCCCGAAACCAATCCAACCCCC  
AAAACAGTGAAAAAGCTTCAAAAATCTCCAGACATAATGAAGAAACCAGCAAAAGAGAGATGCTTGTGCGCTCACCTAATGAGATCTGGCGATGCGCTTCTGTTCTCCTCTTCTCCCG  
ACAAGCAAAGAAGAAGAGGAAAGAGAGGC

>comp159873\_c3\_seq1

TCGCAAAATAAGATAAAAGAGAAAGAGATATATGAGCGTATATGCCATTCAGAAAAGGAAATACAGGTAAATAACAAAAGTATAACTAACAGAAAATTAATATAACTAACAAAGAAATTTAA  
TAATTGCATTTATAGAACATGTATATGTAACAAGCATTGAATAACAAGAGAAAATGTGAGCCTAACCTAGAGCTAAAAGTCTTATCTAATCAAACAAGTCTAAGGTATGTGTAACAGGTTG  
TATGGTTTTAGATAGGTCCTATGTAAGATAGTTTAATTATAGTTACTTTTCATTTGATTTGTTGAAGGGCAGAAGGAGGATTTTGATTTAAGTCTAAATATTAGTACTTTTAGGATTGATTTAG  
AAATTATAGTTTAGGATTTGATTGATTATTTTATTGGTTGTAAATTAAGAAAAGGTGTATTAGATGATTTATTATCGATTCAAGGATCAAATTTAAGTTTGTATCAACTGGTTCGTGGC  
GTTGTG

>comp159897\_c1\_seq9

TAATTTTATTAATTTTTTATAATATTATTATTATAATTATGTCAAGCATGGACCTATTCTTCCGATAACCTTATGATATCACTATTTTTTTCCGAAAATTGGATGGCGGAAAACAAGAGGACCTT  
GCACGAATTTCCAAAATCAATAGATATCCAAGCAGGTTAGGCGAAGCCTTCATGTTGGCGGAGCTGTCAAGCTCCAGCGACGCCATG

>comp159902\_c0\_seq4

TATGCTCCACTGTCTTCAAGCTAAATATTGTGTTGTATCAGGCGGCTGCCACTAGATGCATTACAAGTTTCCAAGCTTCCAAGCCACCCAAAATTGTTGTTGCATTCCGAGTTTCTGAGGTT  
GAAAGACGCCAAAAGTGGTTCCCTTTCCAAGTTTCCCTAGCTTCCAAGCTGCAACAAGTTGTGCGATCCATTATAAGTTTCCCTAACTTCCGAACCTCAACAAGTTGTTGATGCAATCCAAGTTC  
CTAGCTTTTCGAGCCGCAACAAGTTGTGCGATGCAATCCACGTTTTTGGGCACAAATTAAGTAATGAACGAACACTAATAAACATATGTAACAGTGCAAATAAATTAACCATAACAATAT  
AAAGAAGGAAATAAATAAAACTTAACTTAGTTTCCTTGATGATGGGCAAAAAACAAAATCCAAGCATAATTGTATGCTTCATTGTCTTCAAGCTAAACATTGTTTTGTATTGGGCCCCCA  
CTAGTGGGATTCCGAGTTTCCGAACCACCACAAGTTATTTATGCATTCCAAGTTATCGAGCTTCCGAGACGCCAAAAGTTGTGCGATGCAATCCGAGTTCCCTAGCTTCCAAGCCGCAACAA  
GTTGTTGATTCAATCCAATTTCCCTGATCCAGCTGCAACAAGTTGTGCGAGCTTCTGAGCCATCTCAAGTTGGACCAACAATAGAAAATCCAGTGCTGAAATGTATGCTTATAAGAAAGT  
GACAATCCTTAATGTTAATTTACACATTTCTTACAAAATACCATGAAAAAAGTTTCAGCCCCTTCATAAACTTAAAAAACATTAACAATTGCAAAAATTACAATGTACGTTGATCCGAA  
GAAACCTCCCCTTATGCAAAAAGATCAAAGAGCTAAGACCAGAAGTACAATAGCCGCTGAAAAACCATATAGATCACACAATGTATACAACCATCATACAAAATTAGATAAAGTAAAGA  
ATATTCTGTTAGGATAATAAAAAAAGTTAGAAATCATTATGCTTTGGAATATGGATCATCAATTTTTAATAATATGTTAATATAGAAAACAATAATAAAGCAGCCATTTCCAACCAACATTC  
TTCCGTAAGCGATTACCGCTATCGCTCGAACGTATTGAGGGCTCAAATAG

>comp159904\_c1\_seq11

CCTTTTTAGCCAATGTTTCGCCTCCCTGATCAGAGACAACCTCATTGAACTACAATGCCTCCGGGTGATCATTATCTTCTCCATTCTCAGAGATTAACCAAATCAATGTTTTCTAAATC

CAAATTTGAAGAATGAATGCTTCATCTTCCTTTTTGAGGTCCGATTAACCAAATCCCAGACGCAATTTCCAATCCCTCCGCAAGGCAATCATCCCGTCGACAGCGACGAATGGGAAATGAGGACAAAATTCCTCCAGCTGTGGCTTGCTCATCTCTACAACGCCTTCTTCCGCCGCCGTGCTGGATCAGCCCCGCTCTCCTCGCCACCCCTCTCCTTCCCCTATTGTTCGCCAATGCCTCCCTTTCTGGTGGAAAGCAGCCATAGTACCAAGCGGGCGCTCCTGGCCCCGACCAATCCCCTGCCGCCGTACACCAAAGATCCTAGTCTCCCCAAGCCTGCCGCGGCCGCTGTCCCAGATCAAACCAATCGGCCATCCGCTGGTCGCGGGCTGCGGCCACAAACCACCAGCAGCATATCGGCAGATCTCGACAGTATGATCTACGATCACCAACGCGCCAAGGGGAGCAATACCCTTGTCGCGCTTCTCTGGTAACGTCATGCTCTACAGCAATTTGGGAAACCTCCGAGCTCCCGGCCGCTCACTCCGAACCGCGATGCTCTCGACTATCTCCCCAAGACGGCAAAAGATGGAATCGGAGGTGAGGCGTAGAAGTAGCTCTGAGTATGAGGCTGAGATTCCGGTGTCCATGTGCCGGGCGCTTTCAAGAAGACTTGATCCTGAAGAGCTGAAGGAGTTGGGGAACGAGGAGTATAAGAACGGGAGGTATGCGGAGGCCGTGGCGTCTACGATAGAGCGATAGTGATTGATCCAGAAAATGCTTCTTACTGGAGCAACAAAGCGGCAGCGCTAATCGGCCTCGGCCGCTCCTTGAAGCTTTGAGGAGTGCAGACAGGCTATCAGGATTGATCCTTGTATTTAAGAGCGCATCAGCGCTTGCCAATCTCTATCTCAGATTGGGTGAACCAGAGAGCAGCAATCACTATAAGCTAGCAAAGAGTGAAGCCAGTCATGAAGACATCTCTAGAGCTAAGGCTGTGCAAGTTTTTCATTGGCAAGTGCAGTGAAGCAAGGAAACAGAGGGACTGGAATGCTGTATTA AAAAGATAGTCAGTCTGCCATTTCCACCGGTGCTGATTCAGCTCCACAGGTTTATCTCCAGTTTCTTTAAATATTTATTCCAAGCGGAGGCCTTTCTGATGCTCCTCAGACAGGAAGATGCGGAGGAAACCATGATTGATGCACCCAAATTCGAAACTGATGCTGCTACACAGTCTTTGGCGCCCTTAGCAATGCATATCACCTTTCAATAAGAGCACAGGTTGATATGGCTACAGGAAGATTTGAGAGTGCTGTTTCATTAGCTCAAATGGCTGCACGGATTGATCCTGGCAGCAGGGAGATTGCTGCTATTGCTCGAAAGGCTCGGTCAGTGGCATCAGCTCGCTCAATGGGTAA TGATCTCTTCAATCCTACTATGCAACCGAGCTGCTTGCCGGTGCAAACTTGGGCAATGGGAAAAGGCCATTGAAGATTGCAATGTTGTTCTTAATTTGCGGCCAGGTACAGCAAGGCTCGGTAAGGAGGGCTGACTGCAATGTCAAGTTGGATCGGTGGGAAAGATTCTATAAAAAGATTATGAAGTATTGGCTCTTCAAATGCCGGGAGATGAAACAGTAAACAAAGCCTTGCAGGATGCTAAAGCGCATGTCAGGCGAAGACAAAAGTGAAGGCCTTAAACAGATGGCAGATGACTCTGCCGTTTCATATCACTACAAAAGACCAGTTTCGTAGTGTTATCACATCATGTGGTACGTGTCATTAGCATTAGAGATTCTTAAAAAATTAAGGAATGCTACATTAATGTTGGCATCTGGCCAAAGCATATGGAGATTGGCGATTGTTACATTTAAAACGTGCTTGCATAAGAGACACATTTCTGTGCCATATGCCTTACTGATTATCATTCCATCTACCATGTAATATGTGAAGAAAATGCAATTTTTGTGTGCTACATGTTAATGTTATGCACGTAGCTAACCCCAAGTAGTATTTGTATAAGGCTAATGATGACGATATATGATGCATTTGATAATATCCCCTCTTTAAATTTCTTGCTTCATGTAATGGATTTTGATAATTGTTAGGTTGGCATGACATTGAGACCCTTTCATATCATCCA CTGTTTAGGAAAAAAGATCAAATGATTCAGACTATTTATAGGAGGTAGTTTTGATTTGAAGCAATTTAATGTTCTAATTTAATTCCTCGACTCTTTAAACTAGATTCAAAAATAACCCATTGACATCTCAAATTTGATCCAAAATAATTC AATAGTAAGACTATTTTGGATCATTTTTAATTAGTTAAAAGAATAAATG AACACATTAGATCGTTGGAACATAAGTGATATCATACAAATTGTGCAAATTCACCTTTAGCCTTTTTCTCTATTGTTTTGATTACATTTTAATGAGAATGTTAAGTTATTATGCAACTGCTAAAATCTGTAAATTACTTAAGTTCTTAATACATAGTTTCATGGCATCTA TGTTTTGGCAGGACTGTCGCTGGCACTATTCTATGACCAATCAGATGAAGATTCAAAGGAATATTGCATCATCTAGAGCAGCTCTGCAAGCAACACACGTCTGTGACTTTTTCTCAAGTTGATATCCATACAGGTGAACATGAAGGAACAAGCTAGCATTGTAAGTTCAGAGAATGTGAGTTCAGTGCCTATTTTCAAATTATACAAGAATGGCTCCAACATAGAAGACGTTCCAGTTCTGACATAGAACAGCTAGAGAGGACTCTCCAAATTTTCAGCCGTTGTTGAAATGAGAGGCTATAAAGAAGCATTTAAAATTTTGAAATATCCATGCAATCAAATAAAGGATTGTACATCTTATTTCAAAGGCTTGAAGCCATAGACGAAAAAAGAAGATAATGCAAAATTAATTTCTGGAAGCTCAGAATTTTTTTTCTTGTTAAGATTGACTAAGCCATTACTTGGTATTAATGAAATTGAGGACATCAAAGAATGTTGAAGGGACACATTTAGTAAATGTCATAACTGTACAAAATACCATTACGCTGCAAAATTAAGGACGTATGTTCCAAATAAAAATATCTTATTTTTTTAGGAAA

>comp15904\_c1\_seq12

TTTTGTTATCTTCAAACCATTTGATTAATGTATTGGCCAAGGAAATAGTGTATTTTTTTCTTCTATCCAGCTATGAACTTACACAAAATAAAAAATAAAAAATTAGATTGGGTGAACCAGAGAGAGCAGCCAATCACTATAAGCTAGCAAAGAGTGAAGCCAGTCATGAAGACATCTCTAGAGCTAAGGCTGTGCAAGTTTTTCATTGGCAAGTGCAGTGAAGCAAGGAAACAGAGGGA CTGGAATGCTGTATTA AAAAGATAGTCAGTCTGCCATTTCCACCGGTGCTGATTCAGCTCCACAGGATTTGCCTACCAAGCGGAGGCCTTTCTGATGCTCCTCAGACAGGAAGATGCGGA



GGAAACCATGATTGATGCACCCAAATTCGAAACTGATGCTGCTACACAGTTCTTTGGCGCCCTTAGCAATGCATATCACCTTCAATAAGAGCACAGGTTGATATGGCTACAGGAAGATTT  
GAGAGTGCTGTTTCATTAGCTCAAATGGCTGCACGGATTGATCCTGGCAGCAGGGAGATTGCTGCTATTGCTCGAAAGGCTCGGTGAGTGGCATCAGCTCGCTCAATGGGTAATGATCTCT  
TCAATCCTACTATGCAAC

>comp159904\_c1\_seq43

CCTTTTTAGCCAATGTTTCGCTCCCTGATCAGAGACAACCTCAATTTGAACCTACAATGCCTCCGGGTGATCATTATTCTTCTCCATTCTCAGAGATTAACCAAATCAATGTTTTCTAAATC  
CAAATTTGAAGAATGAATGCTTCATCTTCTTTTTGAGGTCCGATTAACCAAATCCCAGACGCAATTTCCAATCCCTCCGCAAGGCAATCATCCCGTCGACAGCGACGAATGGGAAATGA  
GGACAAAATTCCTCCAGCTGTGGCTTGCTCATTCTCTACAACGCCTTCTTCCGCCGCCGTGCTGGATCAGCCCCGTCTCTCCTCGCCACCCCTCTCCTTCCCCTATTGTGCGCAATGCCT  
CCCTTTCTGGTGGAAAGCAGCCATAGTACCAAGCGGGCGTCTGGCCCCGACCAATCCCCTGCCGCCGTACACCAAAGATCCTAGTCTCCCCAAGCCTGCCGCGGCCGCGTGTCCC  
CCAGATCAAACCAATCGGCCATCCGCTGGTCGCGGCGTGGCCACAAACCACCAGCAGCATATCGGCAGATCTCGACAGTATGATCTACGATCACCAACGCGCCAAGGGGAGCAATAC  
CCTTGTCCGCGCTTCTCTGGTAACGTCATGCTCTACAGCAATTTGGGAAACCTCCGAGCTCCCGGCCCGTCACTCCGAACCGCGATGTCTCGACTATCTCCCCAAGACGGCAAAAAGA  
GATGGAATCGGAGGTGAGGCGTAGAAGTAGCTCTGAGTATGAGGCTGAGATTCCGGTGTCCATGTGCCGGGCGCTTTCAAGAAGACTTGATCCTGAAGAGCTGAAGGAGTTGGGGAAC  
GAGGAGTATAAGAACGGGAGGTATGCGGAGGCCGTGGCGTTCTACGATAGAGCGATAGTGATTGATCCAGAAAATGCTTCTTACTGGAGCAACAAGCGGCAGCGCTAATCGGCCTCGG  
CCGTCCTTGAAGCTTTGAGGAGTGCAGACAGGCTATCAGGATTGATCCTTGTATTAAAGAGCGCATCAGCGGCTTGCCAATCTCTATCTCAGATTGGGTGAACCAGAGAGAGCAGC  
CAATCACTATAAGCTAGCAAAGAGTGAAGCCAGTCATGAAGACATCTCTAGAGCTAAGGCTGTGCAAGTTTTTCATTGGCAAGTGCAGTGAAGCAAGGAAACAGAGGGACTGGAATGCT  
GTATTAAGAAGATAGTCACTGCTGCCATTTCCACCGGTGCTGATTCAGCTCCACAGGTTTATCTCCAGTTTCTTTAAATATTTATTCCAAGCGGAGGCCTTTCTGATGCTCCTCAGACAGGAAG  
ATGCGGAGGAAACCATGATTGATGCACCCAAATTCGAAACTGATGCTGCTACACAGTTCTTTGGCGCCCTTAGCAATGCATATCACCTTCAATAAGAGCACAGGTTGATATGGCTACAGG  
AAGATTTGAGAGTGTGTTTCATTAGCTCAAATGGCTGCACGGATTGATCCTGGCAGCAGGGAGATTGCTGCTATTGCTCGAAAGGCTCGGTGAGTGGCATCAGCTCGCTCAATGGGTAA  
TGATCTCTTCAATCCTACTATGCAACCGAGCTGCTTGCCGGTGCAAACTTGGGCAATGGGAAAAGGCCATTGAAGATTGCAATGTTGTTCTTAATTTGCGGCCAGGTACAGCAAGGCTC  
GGCTAAGGAGGGCTGACTGCAATGTCAAGGTGAGCAGAACCTTTTATCCTTTGTGATGAAATTTCTTTATCTGGAAGCTAAAGGTTGTCACATCTTGAATCTTGTATTAGTTGGATCGGT  
GGGAAGATTCTATAAAGATTATGAAGTATTGGCTCTTGAATGCCGGGAGATGAAACAGTAAACAAAGCCTTGCAGGATGCTAAAGCGCATGTCAGGCGAAGACAAAGTGAAGGCCCTT  
AAACAGATGGCAGATGACTCTGCCGTTTATATCACTACAAAAGACCAGTTTCGTAGTGTATCACATCATGTGGTACGTGTATTAGCATTAGAGATTCTTAAAAAATTAAGGAATGCTAC  
ATTACTATGTGGCATCTGGCCAAAGCATATGGAGATTGGCGATTTGTTACATTTAAAACGTGCTTGCATAAGAGACACATTTCTGTGCCATATGCCTTACTGATTATCATTCCATCTACCAT  
GTAATATGTGAAGAAAATGCAATTTTTGTGTGCTACATGTTAATGTTATGCACGTAGCTAACCCCAAGTAGTATTTGTATAAGGCTAATGATGACGATATATGATGCATTGATAATATCCCC  
TCTTTTAATTTCTGCTTCATGTAATGGATTTTGATAATTGTTAGGTTGGCATGACATTGAGACCACTCTTCATATCATCCACTGTTTAGGAAAAAAGATCAAATGATTCAGACTATTTATA  
GGAGGTAGTTTTGATTTGAAGCAATTAATGTTCTAATTAATTCCTCGACTCTTTAAACTAGATTCAAATAACCCATTGACATCTCAAATGATCCAAAATAATTCAATAGTAAGACTAT  
TTTGGATCATTTTTAATTAGTTAAAAAGATAAATTGAACACATTAGATCGTTGGAACATAAAGTGATATCATAAAATTGTGCAAATTCACCTTTAGCCCTTTTTCTCTATTGTTTTGATTACAT  
TTTAATGAGAATGTTAAGTTATTATGCAACTGCTAAAATCTGTAATTAATTAAGTTCTTAATACATAGTTTATGTCATGTTTGGCAGGACTGTGCTGGCACTATTCTATGACCAATCA  
GATGAAGATTCAAAGGAATATTGCATCATCTAGAGCAGCTCTGCAAGCAACACACGTCTGTGACTTTTCTCAAGTTTGATATCCATACAGGTGAACATGAAGGAACAAGCTAGCATTGT  
AAGTTCAGAGAATGTGAGTTTCAAGTGCCTATTTTCAAATATAACAAGATGGCTCCAACATAGAAGACGTTCCAGGTTCTGACATAGAAGCAGCTAGAGAGGACTCTCAAATTTTCAGCCG  
TTGTTGAAATGAGAGGCTATAAAGAAGCATTAAAATTTTGAATATCCATGCAATCAAATAAAGGATTGTACATCTTATTTCAAAGGCTTGAAGCCATAGACGAAAAAAGAAAGATA  
ATGCAAAATTAATTTCTGGAAGCTCAGAATTTTTTTTTTCTTGTTTAAGATTTGACTAAGCCATTACTTGGTATTAAGTATGAAATTGAGGACATCAAAAAGAAATGTTGAAGGGACACATT

TAGTAAATGTCATAACTGTACAAAAATTACCATTTACGCTGCAAAAATTAAGGACGTATGTTCCAAATAAAAAATATCTTATTTTTTTTAGGAAA

>comp159919\_c1\_seq4

TTTTACTAGAAAGCTGCTTCTTACAATATTAATAAAAAATACTAACAACAGCTTTACAAACACCTTTACAAAAGTTGTGGTCGTCTCTAATAGACCCTAAATTACTTGATAATATAATTTGTTA  
CTTTCATCTAAATAGTTATAAGAGCTATTGCATCTGATATAAAATTTAAATTCATGTATTCTATTATTTGTAACATTTACAAATGTTACAAATAACAAAAATGAAAATTCATTTGATCCCAAATT  
TATTTTTATTTTTACAAAAAATTTAAATACTAATGATTTTTTTCTTTTACTTTACTTATACTAGACATGGCATAATGCATGGTTCAATCAACACCGAGACCATATAAACTCCAGCACATCTCTGT  
ACAGATCCATTTGCTAAACAAGATTTCAACTTTGTGAACGTGGCAGCAGTGAGCAAATCTCTGATCCAGCCTGGTGACAGGTTCCCATCCTCTTACCCCAAGTAGCCCTGCGAGCTTG  
TTCAGCCCGCCATAGAAGTTAGAGCAGATCTTCGTCAAATGCTTGATGTCATAGATGTTTGGAAAATACAGCCGCAGAGAATGGAAGAAATCCTCCTGAGAGTCCGGCAGATTGCGGCAA  
GTTAACATTTTGAGAAGATAACCGAAGTCATAGCAGCCATGGAAAGTGATCCATTGGACGGTGTCATTACAGCACGACGCCAGAAGCGATCATGAGTTCCGGCAAAGCGATTGGCAGCGAC  
GCCGAGGCAGTGATTCTTTTCGAAGTTTATTCCACTACGGCGGAGAAGCTCGATGGAGTCAGGGGCGAAGAAGTCGCTTGCAGCATTGAATTCGCGAAAGTTGAACTGCCAAATGCAAG  
GGCGAGGGGGAGAGCCGAAGGAAGGGAGGTGGCCCTGAAGAGTCAAAGAAGGTGAGGCCGAGTTGGATGAGTTTGGAGATGTTGACGTTGAGTTGGAGAGTCTGGTAATTGAATTTGG  
TTATTGAATTCGGAGAAGTGACGACGGGGAGAATTGCAACGCCAGGGAATTCGGTGTCCATGGAGACGAAGGGGTAGTCGGCGACAATAGAGCTGATGAGAAAGAATTCCTCCTCCAG  
ATTAATAATCCATACCTCGCGAATCTCAACAGAGTCGACGGCATCGACGGCAGCGGCATAGTACCATAAAGCATCTGAGGCGCCGAAGTCATGTTCAAATAGTTGTGAAGGGAGAAGG  
AATTGTTTTTTTGAAGGAATTGTTTAGCAATAGGGTTTAAAAAGAAAACTTTAAATCCTATAAATAGTTATTCTCCTCTGTTGACCCGTAATTCCTGCAATT

>comp159946\_c0\_seq1

TGTCCTCATTGTCAGCGGCGAAATTCATTGCGCATTTTCGCGGATAAATTTACGAAGTATTACCAGCTAGCTCGCGTCTCGCGCTCTTTTCGCTCTATAAATACGGAATTCTCTGTGAGCG  
GATCTGCGGACTATCCTAGTTGAGACGTGGTGATGGGGAACGCGAGCGATAAGGAGGAGATAGATAATGGCAGCGACGACTCGAATGAGAGATCGGACGGCGAAGCTAATCACCGGAG  
CGGCGGTGCACGCCGCTCGCGCTCGCTGGAGCTGATCCCGGGCTCACCGCCGGACAGGTCCAATCGGTCCCTATCGCCACTCTTGTTTGTTCCTCAGGTTCTGTAGCTCCCTTGAATAG  
GCCTTCTGATGTCCTCCAGTTTTCAGTCAATACTGGATGAATGATCCCTACGTTGTTTTCAGATACTCCCCGTGAAAAGGAAATTCGGGTGTTAATAACGTGGAACATAGGTGGAAACAGT  
GTTTTAGTGGAAGGATCATGGGATGACTGGTCTTCTAGGTACAAGCTTTTTAATTAATAGAGCTCTATGGAAATCTCATCGCTTCATTATCATTATTTAAGTTACATTATGTAGCTATTCCTGT  
TTCTAGGAACTTAAAAGGTTGTCAAACATATGAGCATAGTGTATATGCAGGAAAACCTCTCCAGAGAACTG

>comp159946\_c0\_seq2

TGTCCTCATTGTCAGCGGCGAAATTCATTGCGCATTTTCGCGGATAAATTTACGAAGTATTACCAGCTAGCTCGCGTCTCGCGCTCTTTTCGCTCTATAAATACGGAATTCTCTGTGAGCG  
GATCTGCGGACTATCCTAGTTGAGACGTGGTGATGGGGAACGCGAGCGATAAGGAGGAGATAGATAATGGCAGCGACGACTCGAATGAGAGATCGGACGGCGAAGCTAATCACCGGAG  
CGGCGGTGCACGCCGCTCGCGCTCGCTGGAGCTGATCCCGGGCTCACCGCCGGACAGGTCCAATCGGTCCCTATCGCCACTCTTGTTTGTTCCTCAGATGAAGGATTCAAATACCATTCC  
TGAGATTTATATCAAGAAAATGAGAAAAGTTCACATTGTAGATAATGTGGTAGAGGCATCTGATGATACATGTAATGATGATTACAGTCGTAATTAAGAAGCGCAGAAGGATAACTTCCAAG  
AATTT

>comp159949\_c0\_seq1

AGGTCCTCGCCAAGCAAATTCCTAGAGCACTCGCAGATGAAATAATGAGATAAAGAGTATTATTTCTCTCTTGTATCTAGCAATATCGAATACCTGCCTAGAGAATTTAAAAATGTAGGTAA  
AGTGATCAGAGTGGCAAATGTTTACCTCTGAGATCTTTGTAAGGCCCTACTCGGGCTTTAAGTTTCAAGTACTCCTGCTGACTACTCTGGGTCTCTTTGATATTATATTTGTTTCTGGGC  
CTTCATAATTGCATTTTTGGTACCGTTCCAAAGTCTTCAACATACTTGAGCTGCTGCAGAACTCGTAAAGCTTTCCGCGGTTGGAGAAGATGATGAGAGCGACCTCCGCATCGCAGAGGA  
TGGAGAGCTCATAGGCCTTTTTGAGGAGGCCGTTACGGCGCTTGGCAAAGGTTACTTGACGGTTAATCTTGTTCTCAATCCGCTTCAGCTCCACTCTCCCTCTCCCCTCTCTTACTCTCGT

CCGGTTCCTCACTTTTCAAAGCCGCCGACGATCGATGGAGAGGGAGGAGTAGAGACGAGAGGCCAAAAACGGGGCTTGCTTCCGGCGAGTGGTAGGGATGAGGCCTTCCCTTTTGCTAT  
TTATAGGACGAGAAAGCGAAATATGAAGAGGGAGAGGGCCCTCTCCCTTCGTTACCCCAAGTCTCCCCATTTCCCTTAGCTTTTTACCTTTTGATCTGTCTGCTCTTGTGGGCGGTGAA  
AGAACTTAGAAATCTAAATAG

>comp159949\_c0\_seq5

TTTTTTTTGAAAGCAAAACCTATCCAACAAAGGATATGATTGCTAAATATTTGTCTTCTATTACAAAGTACAAGCACAGCTGTTTTATAGATAAGAATTCCAAATAATTATGACCGGGATGAC  
TTCAAATAGAAATAGACATCTTGTACAGACATGGCCACAATTGACACTAAAAAAAAGTTTTGAGGATACAGAACATAATAAGGTAGCAAACAAGAAATTTTTAGCCTTTCATACGAGCCA  
ACCAGGCGGCATGTAATTACTGACGTTTGGAGCAGTCGTTGGTGCCATTGTTATATCAGAATGATACCTGTTTAAAATAAAAATAACAAAAGGAGAAAAATAATGTAGTCATATTTAGAAA  
AATTAGAATCTCTGTTCTTTACGTTTAAAGAAATGATGATAGTGTGTGCAAGCAACCTGCAATACTAAGTCTAAGTGAACATAAAAATCGACAGTATTCATGTATAAATATTGACAGAGTTG  
GTGTTAAGAGTATTTCTATTTTTATTTGAGCTACCATTCGTTAATAACTACCGATAATGTCCAAGAAAGGAGAAATTATTAGGTGCAGAGTTCGGACACAGAGATACGTTCCGGACATCCACT  
TAAACGTGAGACGTGGAGCGCGCTTTGATTGTACTTTTTTGTGTCATTTATTTGTGTTTTACCTACACTTTAGTTGTGCTTTGACTGCTCTTTTGTACAGTTTTTTACTGCGCTTTGGTTG  
TGCTTTTGATGTGTTTTGCTTAAAGTTCCACGGACACATTACATATATGAAGAAATAAGTCAATTGAAAATCCATGTGTCCACTCTACATGTCAACATTTTTATTGGAGTCCGGACATATATC  
TATATCCGTACTCCTCACCTAATAATTTATCCTGCTTCTGAGCTTGTCTTAATTGACTGAATCCAACAGCATTAAATGACAGAATAACAAGTTTACATATTGAACTACGCATGATCAAAAC  
TGCAACAGGACTAAAGATTATCTGGAAAAAAGAGGAACAAATGCAACAGCACAAAGTTTGAAGCTTACTCAGAGGTAAATTTTTATACTAAC

>comp159954\_c3\_seq19

GTATCAATCTGTGACATATGTGAGAAGCTTCAGTTACCATTTGATAAAATGTTTTTTCTAGTTTATCTGATTAAATAATACGCAGCCAAACAAAAACAATTTAATTTCTTACTCCAGTCTCCT  
CCTTCACCTCTCGAACAGCACCATTAAATATTTCTTCAATTCTCAAGGATAAAACCTGTAGGTAATTTCCAAACATCTTCAAATGAATAATGATGCTTCTCTTGCCTACAAGAACCCTCATTTC  
TGTGATTGAGAACAAAACCACCAACTCCTACTTGATGTGATGCATTAGCAGGAAGCATGCAAGGCCCTTCAGGAATCCAATATGTTAGCATCAAATATGTTGCTCAGCATGATGGTACTT  
GAAGCCCTCCTAACAGCAACTGGAACAAACTCAGCTTGATCCAGTGGCAGTCTAAGCCAGACCCCTTCTTACCCTGCAAAATCATTCAATAGAAAAAGTTTATTCTGAATTATGGAAGCT  
CATTTAAGGATAGATAACACGAATACACGAAGGCCACTATATGTGAAACCTAACTGCATTCTAAGGCTT

>comp159954\_c3\_seq22

CATTTTCATGTGAACATTACTACTTGAAATCCTTTGTAACATGGACAATATCTACAAAAGAGCTCTTTTTGATTTCCAAATATCATTATTTCCATAGAATTTGTAATTATCATATTGATATACATGT  
TCCTCTCAATATAATTCTATAGCAGCAGCACTTATGCCACATCTAAGACACTTGGCAGCTATAGTCTCAGGCTCAACTACATTATAATACAAGGTAGAAGATCTAGAATCAAACCTTTGAAAT  
CACCTGATGAGCCGTTAATCCACAATAACACTTTCCGAGCCGCGCAATGCAGATGTCGATAATCTTCTTGAACATGTTGTCTTCTTGAATGCACGGTTGCCTCACAACTCAGCCAGAGGC  
ATCCACTTGGCTGCTTGTATTTTCGAGTTCATCTACAACAATTTGAGTTGATAAGGGTTTTAGCATGCAGATGAAGAACAGATCAGACTTCTCAAATGCAACATGGTGAACATGCCTTTGTTT  
TAAAAATTGATGTGATTAGGCATTTGTTTCTTTGGACAGTGTTAGACTGGTTCATTGGACGGGTCAAACCGGTCCCTACGGGACCGACTCAAGCGGAATAGAGGTGGAACCTCCGCCTCT  
CCTGTACGCGCTGAATGCACACTTTTCTTCCCTAAAAGCAATTACTTCCAAGAATTCTGTATCAATCCAGTCTCCTCCTTACCTCTCGAACAGCACCATTAAATATTTCTTCAATTCTCAAG  
GATAAAACCTGTAGGTAATTTCCAAACATCTTCAAATGAATAATGATGCTTCTTGTCACTACAAGAACCTCATTCTGTGATTGAGAACAAAACCACCAACTCCTACTTGATGTGATGCAT  
TAGCAGGAAGCATGCAAGGCCCTTCAGGAATCCAATATGTTAGCATCAAATATGTTTCGCTCAGCATGATGGTACTTGAAGCCCTCCTAACAGCAACTGGAACAACTCAGCTTGATCCA  
GTGGCAGTCTAAGCCAGACCCCTTCTTACCCTGCAGCTTCCAGTGGAAAAGAGATGATTGAAGGATAGTAGCAAATGCATCTGCTGTTTGTGGAAGGCATTCTGGTCTAATTATGACTCC  
TCCATACTCATCTTCATCAGCATCAAGCATGTAACCTTCTTCTTGTGATGATATCCATGGATAAGCATCATAGCTTCCATTTATACTAATTTTTCTTTCCCCCATATATTTTTAGAAGTCAAAGCTA  
GTATTTTCATTAGGGTTTTGGCAATCAGGTAGGAAGACTTAACTGAAACATCT

>comp159954\_c3\_seq9

CATTTTCATGTGAACATTACTACTTGTAAATCCTTTGTAAACATGGACAATATCTACAAAAGAGCTCTTTTGTATTCCAAATATCATTATTTCCATAGAATTTGTAATTATCATATTGATATACATGT  
TCCTCTCAATATAATTCTATAGCAGCAGCACTTATGCCACATCTAAGACACTTGGCAGCTATAGTCCTCAGGCTCAACTACATTATAATACAAGGTAGAAGATCTAGAATCAAACCTTTGAAAT  
CACCTGATGAGCCGTTAATCCACAATAACACTTTCCGAGCCGCGCAATGCAGATGTCGATAATCTTCTTGAACATGTTGTCTTCTTGAATGCACGGTTGCCTCACAACTCAGCCAGAGGC  
ATCCACTTGGCTGCTTGTATTTGAGTTTCATCTACAACAATTTGAGTTGATAAGGGTTTTAGCATGCAGATGAAGAACAGATCAGACTTCTCAAATGCAACATGGTGAACATGCCTAAAAG  
CAATTACTTTCCAAGAATTCTGTATCAATTCCAGTCTCCTCCTCACCTCTCGAACAGCACCATTAAATATTTCTTCATTCTCAAGGATAAAACCTGTAGGTAATTTCCAACATCTTCAAATG  
AATAATGATGCTTCTCTTGCCTACAAGAACCTCATTTCTGTGATTGAGAACAAAACCACCAACTCCTACTTGTATGTGATGCATTAGCAGGAAGCATGCAAGGCCCTTCAGGAATCCAATA  
TGTTAGCATCAAATATGTTGCTCAGCATGATGGTACTTGAAGCCCTCCTAACAGCAACTGGAACAAACTCAGCTTGTATCCAGTGGCAGTCTAAGCCAGACCCCTTCTTACCCTGCAGC  
TTCCAGTGGAAAAGAGATGATTGAAGGATAGTAGCAAATGCATCTGCTGTTTGTGGAAGGCATTCTGGTCTAATTATGACTCCTCCATACTCATCTTCATCAGCATCAAGCATGTAACCTTC  
TCTTGATGATATCCATGGATAAGCATCATAGCTTCCATTTATAACTAATTTTTCTTTCCCCCATATATTTTAGAAGTCAAAGCTAGTATTTTCATTAGGGGTTTTGGCAATCAGGTAGGAAGA  
CTTAACTGAAACATCT

>comp159968\_c0\_seq1

CCAACCTCTCCCGTGCTCTCTCACATCCAGATTCTAAATTGGTTTTGGAAGAATCTCCTCTTTGTTTTGTGGAGGGAACGCTGCGCTTTTTCTCTTTCTTGCTTGAGCCTAATCGTTCTTCAT  
CAACTGAAATGGGAGGAAAATGGAGGAGAGGGCTGGGTTTGATCTCCTCAATCTTCTCATCTTTGTTCATGGCAGCTTTGGTTTTCGGCTGATCGGGGTTAATCAAGCTCATTCCGGCCGT  
GGCGAGCGAGGACATGGATGAGTCGAGCTATTTTCATGAAGGTTTTGGGTTTATTGAAGCGAGCTGATAGATCTCGGTATCAGCATGTTTGGCCGCCATTGAAATTCGGATGGCAAATCGTA  
GTTGGTTTCAGTGATTGGATTCTTTGGAGCAGCATTAGGGAGCGTGGGAGGTGTCCGGTGGTGGAGGGATTTTTGTTCCCATGCTCGCTTTGATCATTGGGTTTGATCCTAAATCTTCTACTGC  
AATGTCGAAATGTATGATCACAGGTGCCGCCGCTTCGACTGTTTACTATAATCTGAGGCTGAGGCATCCTACTCTAGATATACCGCTCATTGACTATGATCTTGCTTTGCTTTTCCAACCTAT  
GCTCATGCTTGGGATTAGCATCGGGTCATCTTCAATGTAGTTTTTCTGATTGGATGGTTACAGTTCTTCTGATCATCCTCTTCTTAGTTACCTCTACCAAGGCATGTATAAAGGGTGTGA  
GACATGGAAGAAAGAAACATTGATGAAGAAGAATGCAGCGAAAAACCTCGACTCTAATAGTGAGAGTGAAGAAGTAGAATACAGGCCACTACCTGGTGGTCTAGGTAACAATGCTCAA  
AGGGAACCTAAGTCATCTTCTGAAGAGGAGTTCCAATCTTTGACAATGTCCTCGAAGGAGCTCGGCCTTCTATTATTTGTCTGGATATCCTTTCTAACACTTCAGATTTCAAAAAACCA  
TACAGGAACCTGTTCCGGTTTTGGTATTGGGTGCTGAATTTTTCTACAGATTCAGTTGCTGTTGGTGTGAGTTTATATGAAGCTGTTAGTCTGTACAAAGGGAGAAGAGTGATCGCATCAAAG  
GGAGAAGTAGTTACAGAGTGAAGATTTCATCAGCTTGTAAATATACTGCTTATTTGGTGTATTTGCTGGCATAAGTTGGAGGATTGCTCGGCTTAGGAGGAGGATTTGTTCTCGGCCCTCTTTT  
CCTGGAGTTAGGAATCCACCTCAGGTGTCAAGTGCTACGGCAACCTTTGCTATGACGTTTTCTGCTTCGATGTCCGTCGTCGAATACTACCTTTTACGTCGTTTTCCCGTCCCGTATGCTT  
TATACTTCGCTGCCGTGGCCACAGTTGCGGCTTTTCATTGGCCAACACGTTGTGAGAAAGATCATACTTATTCTGGGGAGAGCTTCTATCATCATCTTCATACTGGCTTTTACAATCTTTATAA  
GCGCTATTTCTTTAGGCGGGGTTGGTATTTGCGGGATGATCCAGAAGCTTCGGCATCAAGAGTACATGGGATTTGAAAACCTTTGCTTTGAATACTAACAGGTCGCTATGCATCAATTGTAT  
TATCTATTGATAAGTTTCTATTAGATATTTATTTTATAATATAGGATTTTAAATCTGTTAGGTTAAGGTATTTTTTTGTAAGGGTCTGTACGTAGGTGCTGAATGAAGGGATTGGATGGAAGCAA  
ATAAGTTTTGCTTGGAGTTTGATTAGAAACATAATTAATATGAATTTTTAAATTAACATGGTGTATTTTTGATATATTTCTCAGTGATAGTTTATAAAAAAATGTTTCAATT

>comp159979\_c0\_seq2

CCATTCTCTTCTTCTTCCCTCTCAATTTCTCCTCTTATTCTTCATTCTCTCTCTACTTAAAGGGTTCTTGAATTTGATTCCATCCTTCTTTCGCTGTATCGCATCTCTTTGTCTGTTTTCGAACC  
CGCAAATGGATTCTTCGTTGATTGATTGAGGGAATATTTCAACACTTGATATTTGTGAGATATTGCATATTTCTGTGAAGATTAGAAGTATGATCAAGGCCATAGAAATGAAAATAAGTTTCGGC  
TTGTGATTTGGTTGTGCATTGGAACAATTCATCAGTTTACATCCGAGGAGAATTTAAGTTTGATTTTTTTGGTGTATTCTGTGCTCCTGCAACGTTTGACCATGTCTGCTGTGGAGGCACA

GAAGAGGAGAGCTATGGTCCACCAGCTAACCAGTATACAGCTCCACCTAACCGCCCAACTCCTGGCCACGATAGGGAACCAAGAGGCCCAATGCTGCCAGGAGTGGAGCTCCACAAG  
AGATCCTTCCTATTGAGATACCTTCCATATCCTTGGCAGAGCTGAAGAAATTAACCAGTGATTTTGGACAAAAGCTCTTATTGGTGAAGGTTCTTATGGAAAGGTTTTCCATGCCATTTTA  
AGCACAGGAGAATCTGCTGCAATAAAGAAAATAGATCCCAATGCATCTCAAGAGAGCGATTGAGAAATTTGCTGCTCAGTTAGCAATGGTTTTCCAGGTTGAAGCATGAATGCTTTGTCCAG  
TTATTGGGTTACTGTTTGAAGCAAATAATAGAATACTGGTCTACCAGTTTGTACAAAAGGATCCTTACATGATGACTGCATGGTAGGAAAGGGGTGCAAGATGCTGAACCTGGCCCTG  
TACTTAGCTGGATTGAGCGAGTGAAAATCGCCTATGGAGCAGCTAGAGGTCTCGAGTACCTACATGAAAAAGTCCAGCCTTCTATAGTCCATCGTGATGTCAGATCCAGCAATGTTCTTCT  
CTTCAATGGCTTTGAATCCAAATTGGCGGACTTCACATTAACAAACCAGTCTCCTGATACTGCTGCTCGTTTGCATTCAACTCGTGTTTTAGGGACTTTTGGCTACCATGCTCCAGAGTATG  
CAATGACAGGGCAGCTGACACAGAAGAGTGATGTTTATAGCTTTGGT

>comp159987\_c0\_seq13

GCCTTGATATATTGACTCAACTACCCACAATACCCTCTAAACAAAGTCCCAAAATAATAGAAGAGAAACAGCCTCCCAAAATCCAAAATAAAACAAATCCTTTTCTTTTGCATATCTC  
CCAAAATTCATCTTTTAGAAACAAATGTGAATCAATAGAAAAGAAAATCTGTACTACTAAACATTAACCTTGCTCTAAAAAGATATTAAGGGGGTCACTACTCAAAGCAAATCATAACATTAG  
AAGTTCCAAAATGCCTTACGAAAATCCTAAATGAAATACTACACAAAATTCACATAAAGCTTCTACCAAAATCTTTTACACAAAAGACAATCAAGTGCTTCTTATATTTGGTGTGGGG  
TAAACATAAAGCTTTCCAACAATAAAGTTGTATAATACCCCTCGTTGTAAAGCCTTCACGAAACTCATCGTACAAAACCTTTTAAACAAAACCAA

>comp159987\_c0\_seq15

CAAATTGAAGTTTGGCTGCATGAGTGTGTTGGTTCGAAACAAGCAGAAAAAATAAATTCTGTAGAAGAACTTATCTTCCTATTGACACAAATCCTGTTGCTTTGGAGGAAGGTTGGT  
CGACTAGAGCAGAGATTCCAACGACTAGACTTGCATTGGGCTCGGCTGGGAAGTCGGAGCCGGGTTCATCGGGTTTCGGTCCAAACAGAGGCGAGTGTAGGGCTTCGGTTCGGAGAGGGTC  
GGGGCCAGATCGTCGGGTTTCGGTCTTGAAGGCGAAGTCGGCTGGGAGACGGAGGTCGGTCTCAGCATTGGAGTCGAATGGGAGGGATTTCGCTTGGCTGTGCGAAACCGAGAAGGATA  
GAGCCGGGGTTTCGTCGCCTGACCTCCGTGAACCAAGGGAGAGAAGCTGGGGTTCCGACCTCCAGTGTACATACGAATCACAAGGAGACAGAGATCTCTGCTAACGGGGGAGACGGAC  
AGAGCTTCGGCTCCTTAGGATTTTGAACGGGAGAGAAAAGGGAGACCGGGCATGAGGCTTCGGCTCTTCTCCGACCCAAAGAAGACGGAGAGATAGGGAGGTAGAGCCGGCGTGCC  
AGCAGAGAGATCGGGAGGGAGCTTCCGGTTGTGCGAATGTAGAGAGTCTCGGGAGAGAGGGAGAGCGGCCTGAGTGATCCCACTGGGCGTGAATGAGAGAGGTTCCGGCCTTAGTTAG  
GGCATCATAGGGAGAGCGGCGTGAGTGATCCGAGCCGTGGATCAAATTATTGATCCAACGGTGATTGAGATTGGCTTCGAAAATCAATCGAATTTTGATTATGGATTAGCTAAAAGATCG  
GAAGAG

>comp160017\_c0\_seq1

AACCGCATGAACCTTCTCTCAGTCCAGATGGCTTCTCCTTAAAATCTAGGACTTGTGGCTGTTAAGGAGGTACCGATAACTGCTAACAACCTCTTTTTTCCGCATATCTCGCAGATGAT  
CTATATATGTTCTTGAATAATCGATCTATCTTTTTCTCAATCTTCTCGCTCGTCTCCCTTTCCTTCTTTGATTCAATGCTAACTCCATCGATTGACGCCGAATTGGGAAGAAAGAAGGTA  
AATTCATCGATAATTAGCAATTATGTCGCTGGAAATCACGCCGAAGACTTCTATAAGAATGTGACGGCGAAGCAGGAAAGAGTGTTCTGCTTCCATGCGATTATGACTACCTCGACGGGC  
ATATGGCTCGCAGACAACCCCTCTTGTCTCCCTTCTCCTTCTTTTTCAGATCGTTGTCGTTCTCATCTTCACACGCATCAGCCACTCCATCCTCCGGCGCCTCTCCATTCTATCGTC  
ATCTCGCAGATCATAGCGGGGATTCTACTGGGCCATCCTGTATGGGACGGATCAAACCCATCGAAAGGATTCTTTTTCTCCCTCGCAGCTGGGAACAGCTAAACACCATCTCGCTTCTCT  
CCTTCATGCTCTTCTCTTCTCATCGCCTGAAAACGGACCTCAGCATGATCCCAAAAGCAGGCAGAAAAGCCTTCGCCATCGCCATCTGCACATCCTTCTTCCCATTCGCGATCATCGT  
CCTCACCGGCTTCTCTGAAATCCAGCATCCCTTACGCTTCAAACAGAGATTCTCATACCAACTTAGCGTCTCTGAGCATGACTTCTACACCGTCTCATGCGTCTCGCC  
GATCTCAATCTCTCACATCAAACCTCGGCCCTCGCAATGTCCGCCACTCTAATCACCGAGTTCACCAATCTTTCATCACCGCGTAATCGGCTCTTACTTGTGGGAAGCAAGGGCG  
ATTCTGCCCTAATGGGAGTGACATCAATGGCTGCTTTTCTAGGGTTTATGGCGTTTCTTGTGTTTGTGGCGAGGCCATTGACGATTTTGGCGATAAGAAAAACAACGCCGGAAGGTGGAAT

GCTCGATGAGGCGTGCTTTGTTGGGGTGATTCTCCTTGCTTTTCGTTTGTGGGTTTGTGAGTGAGCTGATTGGGTATCATGCGACGATGGGGCCGTTTATGTTGGGATTGATGTTGCCGGGA  
GGGGCGCCATTGGGGGTGACGATGGTGGAGAAATTGGAGAGACTGGTGGTGGGGGTATTCTTGCCGGTGTCTTGGCGTCGGCGGGGCTGAGGTTGGATTTGTGGACATTGGGGGATAG  
GGTGGAGGAATGGATGGTTTTGTTCTTCTATTTGATGATTGGGGTTTCAGCGAAGTTTGTCCGGTGGGGTGGTGCCGTGCTTCTATTGCAAGATGCCGATGAGGGATTGTCTTGCCATTGGG  
TTGATGATGATTAGCAAAGGGATTTATGAGATCGATTCCGGCTTGCAGGTGGCAGGATAACAGGATTGTTGACCCGGCAGCTATTACAGTCTTAGCTATCGTAGTTGTGGGTGGCG  
GCTCAGCGCCACTAGTCAAACACATCTACCGTCCCGAAGACCGCTTCGTAGCTTACAAGCGCCGCGCCATCCAATTCCTCAAGAGCAAACAGCGAGCTCCGCATCCTCTCCTGCATCCACG  
GCCAGGAACACGTTAACGGTATGCTCACGCTCCTCGACAGCGCCACCCTACCGCTCTAAGCCCCGTCTGCCTCTACGCTCTCCACCTAAAACCTCTCGCTGGCCGCGCCGCCACACTCC  
TCGCCCTTATACCCGCCACCGCACCCCTTCGATGCCTCCGCCGCTCTGACACCGACCACATCTTCAACGCCTTCCTCCAAGCCGAGCAGCTCTACACTGGCTGCTCCATTCTCCCCTA  
CGTCTGCATCTCTCCTTACGCCAGCATGCATGAGGATATCTGCTCCCTCGCTCTTGACAAGAAGGTCTTCCTCATCATCGTCCCCTTTACAAGCACCTCGCCATCGACGGCTCCGTCTCCG  
CCCCATAACCCGCCATCCAAGCAGTCAATTCGGCCGTCTTCGCTTCGCACCCTGTTCCGTTCGCAGTCTCTCGTCAACCACGGCCTCGCAGCAGAATCGTCCGCCCTCCGCGCCGGCGGCA  
TTCCGCACGCCCGGTATACTTCTTCGGCGGACCGGACGACCGCAAGCACTCGCTTTAGGGCTCCGCATGGCCGAAGACTCCTCCGTCCGGCTCACCGTGGTGAGGTTTCGACTACCG  
AATGCCAGTATGGAGGGAACAGAGGAAAAGACTGGATGAAAGAATGATGGAGGATGTGAGGATAAGGAAATCGGATGGAAGCAGAGTGGTTTACAGGGAGGAGGTGGTGAAGACGGG  
GAGGGGACGGTGGCGGTGATTAGGGAAATAAGCGTGAGGTTTAGTTTGTGTTAGTTGGTCGGGGCGATGGGAAGGAGACGGAGCTGACGTCGGGATTGTCGATTTGGAGTGAGTTTGC  
GGAGCTGGGGACTATCGGGGATTTGTTGGCCTCGACGGATTTTGGAGGTAGGGTTTCGACTCTGGTGGTTCAGCAGCAGAGGAGGGTGGCGGGGAATGGGAACCCGGAGAGTGTGAGG  
ATGGGTAAAGCGTTAAGAACGAAGTTGATGAAGAAGATGATTGATTTGGGAGACAAATTGAAGATTTTGAAGAAGGAATCGACGGTTTAGTGAATCTGAATGTGATTATTAGAGTTGA  
ATACTGATAGTATAGTTTTTTATTTTCTTCAATTAGTGCGACGAGCTCTTCGGTGAACGAATTTCAATGAGCTAAGCGTCGTTCCGGTGTATTATTATTATTTTATTATTTGCAGTATTT  
TCTTGAGAGAAATGCTATTTTTTCAATATCTTAAATTTATATATTTGTGTGGTGACTGGCAAGCACATTAAGGCTTC

>comp160038\_c0\_seq4

GCGCTAACTCTTCCTCTCTCGCCGAGGACCGCGCGAAAGGGGAAAAACAATTTTTTTTTATTATTTAAAATCTCAGAACGTTTTTTTTGATCAGCAGGGAGTAGGGAGAGCTTATAAACC  
CTAACCCGACTTAACAATTTGGTCGTCGCTGCTTCTTTTCGGCGGCAATGGCGACCACTAACGTGCCTGCTCCGCAGTCTCCTTCTACATCTCGACCCACAGCCCTCGCCGGGACCAC  
TTCAGGCCGCGGCGTTCAGCAATGCTTCTTTACGTCGGCGATCTCGACAAATCTGTTACGGAGGAGCAGCTCTTCGAACTCTTCAACCAGGTTTCCCCCGTCGTCTCAGTGAGGGTTT  
GCAGGGATATGATCAAGCGGGTGTGCTTGGTTACGGTTACGTCAATTATCGCACACCCGAGGAAGCTAGCCGTGCCATGGAAGCTTTGAATTTTACTCTATTAAGTGGAAAAGCTATAAG  
GGTTATGCTCTCGCAACGCAATCCTAGCGTTAGGAAAAGTGGATATGCTAATATATTCATAAAGAATCTTGAAACAACAGTTGATAACAAGTCTTTGCATGATGTTTTTGTGTCCTTTGGTC  
CTGTTCTTTTCATGCAAGGTAGCTGTAGATAGCAATGGCCAGTCGAAAAGGTATGGCTTTGTACAGTTTGAGAATGAGGATTCAGCTCAACAAGCTATCATAAAGCTTAATGGTATGCTTATC  
AATGAAAGAAAAGTGTATGTTGGCCTCTTTATACGTCGACAGGACAGAGATAGAGAAAAAGGATCTCCTAAATTTACTAATGTATATGTAAGAAGCTTTCCTGAAACATTTAATGAAGAGG  
ACTTGAGAAAGGAATTTAGTGAGTTTGGTGATACAGATAGTTATAATTATGAGAGATGCTGATGGAGTTTCAAGAGGTTTTGGTTTTGTTAATTTACGCAACCAGATGCTGCTGCTGCT  
TCAGTTGAAAACCTTAATGGAAAACTATAAATGATAAGTTTTTATATGTTGGGAGGGCCAGAAAAAGGTTGATAGAGAGGCTGAGTTGAAGCGAATTTTGAACAGGAGAGAAATGGA  
CGATTGGAGAAGCTTAAGGGTGCTAATTTATATCTGAAGAATCTTGATGACACAGTGAACGACAAAATACTTCATGAGCTTTTTGCTCCGTTTGGCAAATTTATCTCCAGCAAAGTCATGC  
TTGATTCACCTGGGCAAAGCAAGGGTACTGGTTTTGTGCAGTTCTCCTCGACTGAGGAAGCTAATAAGGCTGTAAATGAGATGAATGGGAAGATGATTGGGAGGAAGCCATTATACGTTG  
CAGTAGCTCAGCGGAAAGAAGAAAAGGGCTAAACTGCAGGCTCATTTTGTCTCAGCTTAATGCTCCAGGGCGATGAATCCTCCAATGCCTGCTTTGCTGTTTTTACCCTGGTCCAC  
CTAGGCTTCTTCCGCAGCAACTTTACTTTGGCCAGGGAGGGGCTGGACTGGTACACCACAACCTGCTGGCTTTGGCTTTCAGCAGCAAATTTATCCTGGAATGCGCCAGGTGTTGCCA  
CAAATTTTCATGATGCCTTATCATCTTCAAAGACATGGACAACCTGGGCAGCGGATGGGTTTTAGGAGAAGTGGAAATTCACAGCAGATGCAGCAGCAGTTCAACCATAGGAATGCTAATC

AAGGCTTCAGATACATGCAAAACACTCGTAATGGTGTGATCCATTGGTGCCTCAGGGCCTCATGGCTCCAGTGATGCCTTTGTTAATTGAAGCAAACAACGTCTACACTCCTCCCGCCGA  
TGCAGTTCGAAGCCCGATTCCAATATCGGCGCTTGCATCTGCTTTAGCTTCCGCATCGCCCGATCAACAGCGAGTTATGCTAGGCGAGCAATTATACCCTCTTGTGCAACAAATCGAACTG  
GATCATGCAGGGAAGGTGACTGGGATGCTACTGGAGATGGATCAAACAGAGGTTCTTCATCTTATAGAATCGCCGGATGCGCTAAGGAAGAAGGTTGGAGAGGCCATGGAAGTTCTTCG  
ATTAGCAAATGCAACTGGTTCAGATGCTGTGGATCAGCTTGGTTCAATTGGACTTAATGACTGAATGCATTGATGTGATTAGTTTGATTTTGACCATTTATTAGGTTTTTTGAGATTAAGTGA  
TTGGCACCAATTTTTGTAGTGTGTTGGTTAGAAATGCTGAGTAAGAAGAGTTTATTACACGGATGGATTTAGGTTTTTTTTTAATAAAAATTTTAATGGTGTGTTGAATGTATGGATCAAA  
AAA

>comp160065\_c0\_seq8

ATCAATCACGAAAAATCAACATAAAAATCCAAAAGCACAAGAAAAAGAAAGTAAATTTTTTCATTGCTCGCCAAGAGCAACTCCATGCCTCCATACAAGCTCGTGATTCTTAATTACATTCA  
ACAAATATTACATAGTAAAATATTACTTTTTCTCAAGTAAAAATAATTGCAATTAACCTACCTACCCAAAAAACTGTGAAACTATCCTGAAACTATACAATTAATAATTTGAAATGGCTGATAA  
AATGGTCTACACAGAGAACATCAAATCAAAGAGAGCCAAAAATATAAGCTCTGTTGAGATTGAATTACTTCATCTACAAAATTCCTCAATGATCACCAAATTTCCACCATCTTGCATCGGT  
GAAAAAGTTTTGTGCTTGGCTTTCCAGCTGCATAAGCAGCCTTCTCATCTCCTCAGAGCTTTTCAATGTTGAGCAAGCAGAGAAAAACAAGCAGTTCTATCAGAACAACCTTAAGAGCTGT  
TTTCAGCTTGTCTGCTTCCACTTTGGTAGCTTGTAGAAAGCACTTTTGCTCATATTGAACTTCGCTTTAAACTCAATAGAAGATAGATATGCTTCTCGTTTGGTTACATCGATATCTGTAAC  
AGGGTCTGTGGATGATGTTAATAAGCATTATAAGGGTAAGTAGGAAGATCTTCTTCATCATTGACTTCTCTTTTGGATCTTCGCTTATGGTGAGATTTCCAATTCGGCCACTCAATGCGCT  
TCCATTGTCTGTGGACTCTGCTTTAGTAGTCTAACTGGAAGCCTCACTCTAGATAATGGTTGCCAGATGATTGTGCTGCCGATTCAAAAAGAAGAAGTTAGTGCAGCTATTGCTGCAGAA  
CGAGGAGCTGTCTTTGTATCTGATAGTGAAGATTTTGGATAAATTTTCCAACAACCTGGAGGAGTTGAGAAATTTCTGGAGTTCAGATTCTCAAACGTAGAAGCTATTGCATTGAAGGCAG  
GAGATCTTCTCTTGGACGATGTCTGTCTGCGGTGCTGGAAACACTTCGGGAACGTGGAGATTTGTCCGTTAAAATGACCTTCCACTGTACGTTGGTAAAAGCCGCTTGGATTTAGTTAT  
TACTGGAGTGACTCCATGTTTTACTATGGCAAGCTTCTTTGATATGAATTACCATGCACTGCTGACTTGGAAAGAGTCCCAACTGAAAAGCGAGTGAAATATTGAGGTTCACTTCCCTCT  
GTAACAATAAATATTGGAGTTTCTCGATATAACTTCTCCATAAGGAAATCACGTTCAAGAAATTTCTTTTCTATGTTTAAAGCCTCCAATTTACTCTTGGAAATCCACCTGCTGCCAACCCAG  
ACGAAGATGTCTGATTGACAGTCCAAAATGTAGATATCTTCTGTATCAAAATCATCTTGACTAAAGTTGAAAACCTTCTTGAACCTTCAATGTGCCTTGAGAATAGGAGCAAAAAGAAAAGG  
TGAGGATCACTTGCGGGTGTGTTTTGCAATTTTTTCATTGGGGTGTCTCTTTTACCCCCAAGTAAATCCCAAAATGCTCCGTTTCTGCTCCTTCTTTCAGAGGCTTGTACTGCAAATTTGG  
CTTTATCAGATCTAGTTGCCTTTCCAGAAGTTCATGATCCTCTGAGGTAGTAAGGTTTCCAGCCCATGTGTAAGGGCATTACAAGCCTGGAGTATGAAACAGTATGATGAATTCAAAGAA  
GATGCCACCGCATCAACTTGGATGGCTTGCATAATATCTGGTCCCAAACCTTGAACGCGAAAAAGAGCAGTTCATCTTCTTTATACGAATCATCAACAATGTTTCCCTCTGAAATGAATTT  
CTTATACCCAGAGCTATAGCCACCCTTCAACACTATAAATCTCTGGAAGATGGCACAGAATTGGAGAGGTTCCCTTCTTCAAATATATGAACCTGAACTGCCCGAGACTTACAAGATAGA  
GCCATCTTATAAGCTATTGAAATAGCATCAGCCCTTCTTCTCAACGCTCTTCTTCCCAAACCATGTGCCAATAAGATACTCTCACCTTCTTCTCCAGGAGATGTATAATGAAAAACATAA  
CAATCTCCAGTATAAAGCTTTGACTGCTCTGAAGATGAAAGAAGGGCCTTTTCATTGCCATCTATACGCCAAACCTGTAAAACGCCTGAGCTATCAATGCATGGTTCAGGCTTCTCTTTTAC  
AGGATCAGATTTTATAAGGCCCTTTACATCAAGACCTTGAAGCTTCAAGAGAGCTGCAACTTTGCCACGGCCATCTTCCGATGCAGCCACATTAGATGTCTCAGGCCATGAATCAAACCTTA  
GATTGAAACATCACAGTTTCAAACCCCTCAATTATCCGAATCAAATGAGTTTTTTGTGATCTGGATCTTGAACATAATCTTCTGCAACAACACTTGCCTTTTTCTATCATCGAGGGATGT  
ATATCTGCCATCCACACAAAAACTTCAACTCCACAATCGATCATGTAACACTTGTGTTGACTCCAATAATCTCTAGTCAACAATCAGTTTCAATGGTGTGTTGCTTCCCTTTGTGAACAC  
ATAATAGCTTTGCTGAAAAGGCCCTTTCAACATTTTACGCCACTGAGGTTGCTTTTTATGAAGAGGGCGAAAAGCCACCAAAAAGAGACCAGAACTCTCCAGCATCAACATCAGCCATGA  
GCTTTCCATCATCAACAACCTGCGACCTCACACTTCCCATCATGGTGTGTTTCCCTAATGTACTGCACAACCTTCTAGAGCTTTAGCCCTCTCTTGAATGGATGAATTGGACCCATTGAATTGA  
AAAACCTTAGACTTTGTGTCCAAAATGAATACA

>comp160065\_c0\_seq9

ATCAATCACGAAAAATCAACATAAAATCCAAAAGCACAAGAAAAAGAAAGTAAATTTTCATTGCTCGCCAAGAGCAACTCCATGCCTCCATACAAGCTCGTGATTCCCTTAATTACATTCA  
ACAAATATTACATAGTAAAATATTACTTTTTCTCAAGTAAAAATAATTGCAATTAACCTACCTACCCAAAAAACTGTGAAACTATCCTGAACTATACAATTAATAATTTGAAATGGCTGATAA  
AATGGTCTACACAGAGAACATCAAATCAAAGAGAGCCAAAAATATAAGCTCTGTTGAGATTGAATTACTTCATCTACAAAATTCCTCAATGATCACCAAATTTCCACCATCTTGCATCGGT  
GAAAAAGTTTGTGCTTGGCTTTCCAGCTGCATAAGCAGCCTTCTCATCTCCTCAGAGCTTTTTCAATGTTGAGCAAGCAGAGAAAAACAAGCAGTTCTATCAGAACAACCTTAAGAGCTGT  
TTTCAGCTTGTCTGCTTCCACTTTGGTAGCTTGTAGAAAGCACTTTTGCTCATATTGAACTTCGCTTTAAACTCAATAGAAGATAGATATGCTTCTCGTTTGGTTACATCGATATCTGTAAC  
AGGGTCTGTGGATGATGTTATTAAGCATTCCATAAGGGTAAGTAGGAAGATCTTCTTCATCATGACTTCCTCTTTTGGATCTTCGCTTATGGTGAGATTCCAATTCGGCCACTCAATGCGCT  
TCCATTGTCTGTGGACTCTGCTTTAGTAGTCTAACTGGAAGCCTCACTCTAGATAATGGTTGCCAGATGATTGTGCTGCCGATTCAAAAAGAAGAAGTTAGTGCAGCTATTGCTGCAGAA  
CGAGGAGCTGTCTTTGTATCTGATAGTGAAGATTTTGGATAAATTTTCCAACAACCTGGAGGAGTTGAGAAATTTCTGGAGTTCAGATTCTCAAACGTAGAAGCTATTGCATTGAAGGCAG  
GAGATCTTCCTCTTGGACGATGTCTGTCTGCGGTGCTGGAAACACTTCGGGAACGTGGAGATTTGTCCGTTAAAATTGACCTTCCACTGTACGTTGGTAAAAGCCGCTTGGATTTAGTTAT  
TACTGGAGTGACTCCATGTTTTACTATGGCAAGCTTCCCTTGGATATGAATACCATGCACTGCTGACTTGGAAAGAGTCCCAACTGAAAAAGCGAGTGAAATATTGAGGTTCACTTCCCTCT  
GTAACAATAAATATTGGAGTTTCTCGATATAACTTCTCCATAAGGAAATCACGTTCAAGAAATTTCTTTCCTATGTTTAAAGCCTCCAATTTACTCTTGAATCCACCTGCTGCCCAACCCAG  
ACGAAGATGTCTGATTGACAGTCCAAAATGTAGATATCTTCTGTCAATCATCTTGACTAAAGTTGAAAACCTTCCCTGACCTAAAAAATATTATTGCTATGGTTAAAAGTTAAAATCTT  
AAAACGAGTTAGTAGTTGAAAATCTACCAAAGTAATTTATGTAATTAAGCACTAATTCGGAATTTATATTGATATGTTGTGATGAAGATTCATATCAAGATGTCAAATTTGTAGAGCTCCCA  
CAGAACAAACCTTCAATGTGCCCTTGAAGATAGGAGCAAAAAGAAAAGGTGAGGATCACTTGCAGGTTGTTTTGCAATTTTTTCATTGGGGTGTCTCTTTTTACCCCAAGTAAATCCAAA  
ATTGCTCCGTTTCTGCTCCTTCTTTCAGAGGCTTGTACTGCAAATTTGGCTTTATCAGATCTAGTTGCCTTTCCAGAAGTTCATGATCCTCTGAGGTAGTAAGGTTTCCAGCCCATGTGTAA  
AGGGCATTACAAGCCTGGAGTATGAAACAGTATGATGAATCAAAGAAGATGCCACCGCATCAACTGGATGGCTTGCATAATATCTGGTCCCAAACCTTGAACGCGAAAAAGAGCAGTT  
CCATCTTCTTTATACGAATCATCAACAATGTTTCCCTCTGAAATGAATTTCTTATACCCAGAGCTATAGCCACCCCTTCAACACTATAAATCTCTGGAAGATGGCACAGAATTGGAGAGGTT  
CCTTCTTCAAATATATGAACCTGAACCTGCCCCGAGACTTACAAGATAGAGCCATCTTATAAGCTATTGAAATAGCATCAGCCCTTTCTTCTCAACGCTCTTCTTCCCAAACCATGTGCCAA  
TAAGATACTCTCACCTTCTTCTCCAGGAGATGTATAATGAAAAACATAACAATCTCCAGTATAAGCTTTGACTGCTCTGAAGATGAAAGAAGGGCCTTTTCATTGCCATCTATACGCCAA  
ACCTGTAACGCGCTGAGCTATCAATGCATGGTTTCAAGCTTCTCTTTTACAGGATCAGATTTTATAAGGCCCTTTACATCAAGACCTTGAAGCTTCAAGAGAGCTGCAACTTTGCCACGGC  
CATCTTCCGATGCAGCCACATTAGATGTCTCAGGCCATGAATCAAACCTTAGATTGAAACATCACAGTTTCAAACCCCTCAATTATCCGAATCAAATGAGTTTTTTGTGATCTGGATCTTGA  
ACTAATCCTTCTGCAACAACACTTGCCTTTTCTTATCATCGAGGGATGTATATCTGCCATCCACACAAAAAATTCAACTCCACAATCGATCATGTAACACTTGTGTTGACTCCAATAATTCT  
CTAGTCAACAAATCAGTTTCAATGGTTGTTGTCTTCCCTTTGTGAACACATAATAGCTTTGTGAAAAGGCCTTTCACATTTTCAGCCACTGAGGTTGCTCTTTTATGAAGAGGGCGCAA  
AGCCACAAAAAGAGACCAGAACTCTCCAGCATCAACATCAGCCATGAGCTTTCCATCATCAACAACCTGCGACCTCACACTTCCCATCATGGTGTGTTTCCCTAATGTACTGCACAACCT  
CTAGAGCTTTAGCCCTCTCTTGAATGGATGAATTGGACCCATTGAATTGAAAAACCTTAGACTTTGTGTCCAAAATGAATACA

>comp160069\_c0\_seq1

CTACTATATTTCAAACATGATAAAGCTCCTTTCAAATGAGTTCAACAAATAATTCTTTTTAGCAAATAAAAAACATATAGAAATGAATCAAATAATGTATACTAATATTACAAGATTGCCACA  
CCCTAAGGGGCATCACTCAACAAATGAAGAACTATCTATATGAGAAATATAAATATCTTCAGCATCAGATGAGTCATAGAAGCTCTGTTGGCTACACCAAATGTTGGACAGAGGCTT  
ACTTTAATGTTGATGTTTTGAAACTTCTGCAAAATGTAATTCACAATAAAAAATAAGAGAATTTATGCCAAAAGCACTTTTCACTACTGCCAGCGCTTTGAGAGGGGCTTTGCTGATGAT  
AAAGTTGCTTGGCTGTTAGTGTGCTTTAAGCTTGGAGATTTCAAGCCATCTTTAGAATTTATAGGCTTCAAAGCACCTTTGTAGCAAGAGAGGTTGGAGATTTCAAAGAATCCTTCA



ATTTTGAATGGATCACAGTTTCCTGTGCAATCTTTGGTTGCAATGGCTTAGCTACACTTGATTAACTCTGGACATCTTTTCTTTGTACCATTACCATTGATTAGCCTGTTCTGCTCAGGGA  
GGTGAGAGAACTCAATAGCACTAACTAACCCACTGGTTTCCAAAAGACAGCCATTATATGCATCACTTAATCCTTCTTCTGAATCTACACCATTGACTGCCACAATCTGAAAATCTGCCGG  
ACAACCTCAAACCAGGTTCTTCACCAGAATGCTTTGAGTGACACAAGCTTTCCCTCTTGTGCTTGTATCCACAGAGTGCTGCGAACTTATTTTCAGAATGTCTGTGCTGTTGTCTGAGTTA  
TCAGAATCTAAAGAAGCTTCATTATTAGATCTGACGATCCTTTGAACTGATAATCCCAGGCCTTGTGGGAAGTCAAATCTTTTGAGGACATTTTCAGGAGAGAAGGATGAGTGCCTCAA  
ACAAAATTACCATGTTTTACATGGTTTACACCAGAAGAGAATGTTCCGGTTTCCCTGAGCATTGTCAGCTTTTCAATCTCCTTATCTTTTCCCTGTCATTGGCTTCTTTAAGCAATGCTACCTGT  
TCAGTCAAATCTTTGACATCTTTGCTCTCTTTGTTACTACAAGCAGCACCTAACTCTACTCCAGACACTCTTTTCAGCAAATTTCAAGGCACTTAACTCTCTGAATATGACTTTACATCTGG  
ATTTATCTGCACAAACATAAGTGTTTTTGCATGGCCACCCAAGGAGCTTTGTAAGACTTGAGTGAGCTTGTCTATTTCTGTATGGAATATGAACACTTTTCTGGGACAGAGCAAATATGACGT  
CGCCTAGAGCCGACAAGGATTTGTTAATATGCTGAGTTTCCCTGAGCCTATCTCCAGTCACTTCAGAGCGTTCAACTCTCTCACTCCCAGCAAGGTCTATGAGATGAAGGGATCCAAACA  
GAGTTGTTCCAGCCTTCAAATCACTACCTCGGACATGAACGGTTACAACACTATGTGAACGGCTGCTACTTTGATTTAGAGCAGTGGCACTTATAGCCCTGTTAGCTTGTCCAATCTGCAT  
CAGTTTCAGCACATCAGAGGTTGAATCAACGGAGTGCATGCTTGCATCAGGGATAGCAAGTCCACTAGCTTGAGATCTACTCACAATCCCATCTCTTTTGTGAAGCATCATTGGAAAAGTAG  
ATCACGAACTTGTTCATTATATATCTCAATCATCTGCACACCAACTTCATATTCTACAGTACTTCTACTTTCGAGATATATGAAAAAGATCATTCAAAGCTCGATAATTGACTCCCCATTCTTCT  
TTCGATGGTGAATCGGGCCATTCAATTGTGTATGTTTTGCCTGATCCAGTTTGTCCATATGCAAAGATACAGACATTGTATCCATCAAGAAGTATCGCACTAAAGGCTGAATATCTGAGAA  
CACTTCTCTTGGGTAGCAGCTGGACCAAAGACCCTATCGAATTTGAACATTTTTTGTCCATCCTTCCCTTGTTTGGATGGATTTACAATAGCAAGCTCGCCATTCTCACCGATATTGTGAT  
GACTGTAGACTTCGTATCTTCTCCAGAAAGTAAAGGCCTTATCCGACAATAGACTCGGATATTACCTTTCAATCTTTGAACCTCATTGTACAATTTTATATTCTCTAAGAAAATAGTGTGATA  
ATTTTCAGCAGCCTTTGTTAGTACTTTCAACTTTATCCCAAACCTTTGCAATTTCTTCTCTCCATCTTCTTGCACATCTATAACTTCTTCTTTTATTGATTGAGAAGACGTCCTCAAGACCTGC  
AACGATTGCAATTTCAAACACATTAATTTGTTGAAGATGTGCTCCTTCTGGTTCCAGTTTTGACACTTTGATTCTGAATAAACCTCCAGTTCCCTTTGACCTCCTCCTTGACTCTTCTAAAAG  
GGCTTCAACCTCCTTTATTTTCTTTTCTAGCTCAAACCTTAGTTTCGATTGGCTTCCAGTTTCTAGGCTCTGATAATTTTGTTCATATGAATCTTTGGTTCGATTCTATAGCCAGCTTAAGTTCTGAA  
ATCATGCTATCACTATTTTCTTCTCCTTCATCAGCCTAAATACTTCTCCTCCCCGAGTCTCTTTTGTCCACAAATTTTTTCTTATCTGCCTGTAGGAGCTGGACCTGGTTTGCAGTAATCC  
GTGTTTCTTCATTCGTTCCCTTAGCGAGTGTCTCAAGCACTTTGATCCTTGATAGATACTTCTCCTCACGCGCTTTCATCATATTACTTTGATGTATGATATGCCAGCTTGAGTTGTAACACG  
CCTTTCGATTTCTTGCAAAACCTTTTTCAACAAGCACGCCACACGCTGATGTAATCCCCATTTTTTTTCTCAATGCTTTCATCAAGCATCTCATTGGCAACACTCAAAGTAATTGTGTTG  
GAGCAATATCTAAAGTGTTCAGTTTCAAGATTTTCGAAAATCTTAGCAGAAGGAAGTTCAGAAAACCTGCCACGTTTTAGCTGGAAAACCTCATGAAGTTTATTTCCAGCATATTGAGATAA  
AGGACTAGTTGTATCTGGGAAACAAGACTTCTCGAGGCATGTTGGAACCTTCCCTTCAGCAAAACCTTGATTTTTATCATCTCCGAAGACTGGAGAACTCTGCCACCATGAATGCCATCA  
GTTAATAAACCATCCAGGCTTTCCCTATGCTTCCACTTCCGAATTTGCAGGCTCTTGCACCTAGTTAGTGGGCTCAAACCTTGTCTTTCCTAACTGTGGAATCTATGTGGCTCCGAATGGC  
GAGAAGGCATTCCAAAACCTGCAGAAAAATTTCCCTTCTCCAAATCTGAGACTTGAAAGCTGGGCAACCCCAAGTTATTGACGACAGAGAGGAACAGCTTCAAATTTCTGGGCGCCTCT  
CAGAAGGAACATAATCAGCGTATCTAATCTCGTCCACAGCACCAGCATTCAACATCCTAAGAATCCATTAAGAACAGAGCCATCAAACAGCTGCACTCTGAGCTCCCATTCCGTGGCCT  
CCTCCGGCAATTTAGCTCCGGGAATAAACTATTAGCCATGCAACTACTTCCGCTCGCATCTTTGCATCGTCTGCTTCAAATTTGAGGCTTCCCATGTAGTCTCCGTCTAGGGTTTCCCTCC  
AGGCCAGACGAACAATGCAAGCAGAAATTCGAAATCGGATTCGGCAATCGAATTAAGCCATGGATCAAACCCCTAAAAAAGACGAGAGGGAAGAGTTTCTTGATTGAACGCTGGGGG  
CCAAAACGCGGGAGGGTTCTTCCGTTGTAGAGGAGCTCAAAGTAGGAGAAGAGGCGGAGAAGAGGGAAATGCGGAACCAGTCTGTTTCCGCTAAATTCATGTCAATTTGTTGCTTCT  
CAACGGCCAGGAAAGATGCCGGGAATTCAAAAGTGGTTTCTTGATTGA

>comp160089\_c0\_seq2

CAATCCTTCATCGGTCTCCACCCCAACAAAAATGGTAAACAAAGCTGCCATCGGCGGCTTCTCCGCCATCCTGGTCGTCGCCGCCGTCATCAGCGTCATCGCCATCTCCTCCCGATCCTT

CAACAAGCCTACTGCTTCCAGCCAACTCGCCACCACCGTTAAGTCTCTGTCTCCGTTCTCTGCGCACCGACATCCTACAAAGATGCATGTGAGCGCACCCCTACCGGGCGCCATCAACGA  
CACATCTTCCGCCCGCGATATTATCCGCGCCGCCGTTAAGGTGATCACAACCTACGTCGAAGCTGCGAATGAAAAAGCTAACGAGCTTCATAAGCTGGCTAAGGGCCCCATTGACAACGA  
CGGCTTCGAATTGTGTAAGGAGCTTCTGGTGGATGCCGGCGATCGGCTCGCCGCCGTGCTCGCCGAAGCTGATAATGGACATCGGCTCGATGATTTTCAGGCCTGGCTCAGCATGGTCGT  
CTCCTACCGCACCAACTGCCTAGCCAGCATCGAGTCGGAAGAGCTCAACGCCGAGATGGCCACCGCCCTCCGCAACGCCACCGAGCTCACCGACAACGCCATCGCCATTATTACGGCCG  
TTTCCGACCTCACAAAAGATCTCAACCTCGACTTGAATGCCACCGTCGCCGCATTAACGGGGCGCCGCTCTTGAACCTATCCCGAGTGGGTTCGGGGCGCCGACAGAAAGCTTCTGGCT  
GCCAGATGGAACGATCAGAAGCTGCCACCCAACGCCGTGGTTGCGAAGGATGGCAGTGGACAATTCAAGACAATCAACGACGCGCTCAATGCCATGCCGGAGACTTACAGAGGGCGCT  
ACGTGATATATGTGAAGGCTGGTGTGTACAATGAGAAGGTTACTGTAGATAAGACTAAGCCAACTTACTTATTTACGGGGATGGGCCGCGAAAGACTCTGGTGACGGGCCGGCTGAATT  
ATGCAGAGGGGGTTGGGACCTTCAAGACCGCCACTTTCTCGGTATTGGCCCCGGCTTCATCGCCAAATCAATCGGCTTCCAGAACAACGCCGGCCGAAAGGCCACCAAGCCGTCGCC  
CTCCGCCTAAACGCCGACGCCGCCGTCTCTACAACCTGCCGCATCGACGGCTTCCAAGACTCCTTCTATTCCCAATCCGGCCGCCACTTCGTCCGCAACTGCGTCATTTCCGGCACCATCG  
ACTTCATCTTCCGGCGACTCCCAAGTCGTCATCAAAAACCTCCCTCATCATCGTCCGCCGCCCAATGGACAATCAACAGAACACCGTCACCGCACACGGCAAAGACACCCCCACGAACGC  
ACCGCTCTCGTCATCAAAAACCTGCCGAATCGTCCCGACCAATTCCTCTTCCCGACCGCTTCAAAAATCGCTAGCTATCTCGGCCGCCCATGGAAGCAATTCTCCACCCTATTGTCATGG  
AATCCACTATCGGGGATCTTATTAGACCTCTGGGGTGGATGCCGTGGAACGGAGATTTTGCCTAGACACGCTTTATTATGCCGAGTATAACAACAGGGGACCGGGCTCGGTTACCAAGTGG  
CAGGGTTAATTGGAAAGGATTCATGTGATTAACAGGAAGGAGGCGGTGAGGTGGACTGCAGGCCCGCTGCTGGCCGGCGTGAACCTGGATTCCGTTCCGCCGGCGTGGCCCATGCGCTTA  
CCCTCATCAAGTGATCGGGTCGGGAGAGGCGATGATGGAGAAAGAACAGAGCGATTAATTAATGTTGATTACTTGTATACCATATTACGGATTTTCACATCTGCTTGACTGCTTCGATATG  
ATTTTATTTTGGTTTCTGACATTCTGATTATTGTCACCTTATATTTATGATTTTCGCAGAAATTTAATTAATAATTGTAGAATTTAGTTGTTTTAAGATCATTTAATCACTTTTAT

>comp160089\_c1\_seq2

TTTTATTAGTATTTTGGATTTAAAAAATTGTTTTGATAAAAAAATTATCTTATTTAGTATCTTCAAAAATAAATAAAATATTAGAAAACCAAATGAATTCCTTGCTACAATTATTCAAAAATATA  
ATATGATTATCGCAGCCGTGCAAGCACCCGGATTCATAGCCCGGTGATGGGATTCACGAACACAGCCGGACCAAAGGGTCAACAAAGCTGTAGCTCTCCGGCTAAACGCCGACGCCGCA  
GTGATCTACAACCTGCAGAATCGATGGTTTCCAAGATTCCTTCTACTCCCAG

>comp160091\_c1\_seq1

AGGAGGCAAATTAAGAGATTTGAGAAAAAAGTCTTGTGAAGATCGAGATGGAAGCAAGCAGAGAAAGGATGGAAGGAGATGAGGTAAAGATGAGGAGGCTTCACATAGTTTACTTC  
TTAAGCAGGAAAGGGAAGATCGAGCAGCCTCACCTCATCACAGCTCACCACTCAATAACAATGGTGTTCACCTTTGAGAGAGCAACAAGCAAGGAAAGAAGAGCTCCTGAGGTGAT  
GAAAGATCAATTTTAAATGGCAACGGTAGAGGAAAAGTAGCAGCAGCTGGGAAGAAAAGTAAGGATCGGCCAGCAGATCGTACAACCTGGAAGACTAAAAGACAAGCAATTACTGTAGA  
AGGAAACTATGTTAGAATGCTTGGAAATAAGGATGAGTTCGAATATGCTTATATTTGTTTTGAGATTAATGTTATATTTCGAAGAGTTTGTATTGCATTTAATTAAGTTTTTTATAGTAGTGTAGC  
AATTGTTATGATTAATGGGTAGTTTGTGTAATTGAATAATTAGTGTAACCTACATTGTAATTTGCTTGAACTACTGTAAACAAAACCTTCAATGGCTCGCAGGGGGGCCAAAATAGAATTT  
CCCTGCATGTTCTCCTTAT

>comp160152\_c0\_seq1

AGTCGTCCCAAACGAAGCCTGAATCTCATGGAACCTACCCACCTTATCTTCATCTGCCGTGCTCATGCTCTCCAAAGCCATGGCTGCACTTTCCACATGCCTGAGAAGGATCTCATAAATC  
TTCTTCTCACCTTTTACACGCTTCGGCATCATATCCTCCAATAGAAAAGCTTTCTTTTCGAGCGTTTCGACAGCCCAAGATTTATCCTTGGCACTGATTGTGGCCAACCAGTCATCAACTCG  
CTTCAGTTGACACAGTAAAGATGCAATCTGAGACTCTTTGCTTTACAACCTCTGTTGCTATGGATAACATCTAAGAATTTCTCAATGTATCTTAGAAAACCATCTGTTGCATTCAGATTGCAG  
TGCCTTTGCCAAATCAACAGTCATTATATTGCAGTTAATGTCGTTGGAAGAGCACTTACAGATGACAACCTCAGTGCTCTTCTTTGCTGCTAATGGAGGTATGTGGCTTTCTGTGAGAAG

ATGAGGATTCTATAGGATCTACAGTGGTGTGTTGTTATCCTTGGAGATTTTGAGACTTCTGCTTTTCAGTGCTGCTTTGATGCATGAAGCTGCGCATTTCCTTCTTTCTGATGCATCTTTTGCTG  
CCTGTATAGTGGAAAGTTGATATAGACTGAGAAAAGCTGGAATTTGTTTTAGCCAATGACTGAGTAGATAAGGCGGCTCTGGAAAGGTCTTCATGGAAGTCCAAGAATTTGTCTACTACCTT  
CTGGGGATTACGGTCTTTGTTGGCTTGTAGCTCTGAGTATGTGCTGACAAGAGAAGATGGAACAGAAAAAAGCAGCAAAGTTGGAAAGTATTAGGCATTTTTTTGATTGAAATAAATAC  
CCAAGAATTTCTCGGATTGAGGTAAAAAGAAAGGATCCACTCACAGTACTGGAACCTTCGCGTTTTGAGGATAGGCTTGTCTCGCGCTTCCATCCTTCATGAACTCATCAGGTTCCCGAGA  
TCTTCTCACCGTCTTTGGCCTTGAATCATCGACACAAAAAAGATGCGAGGAAGAGTTCGAGATGCTAGTAATAACTGAAGACTTATCAGACTCGTCACTCTCCTCATCAATATGTGAAAC  
ACCTATCTTCATCGGCTGTCTCACCACAGAGAAAACCCTGTCTATTTCTTCTCTTTGTGCGCGAACTCGGACAAGAATTAGAATGCAGCATCCCATGCCAACCTTCCGCCATCCATCT  
TCCAAGTGTTCGCAGACCGCGGCTGCCGCTTCTTCTCTCTGCGCTGGCTGGGCAAATCGTCAACATGTTCCGGACGACGTGGCGTGTATGGCCGCGGTGTGCTGAGGGAAGGGACGC  
CGGCCTGGGATGAGACGTAGGCCGTGGAGGATGGGAACAGGAGACGAGGCTTCGAGACGGCGGACGAGGATGAGCTGTCCGAGCTGGAGATTGTCGCTGAGGATGAGATCGTCGTGG  
CCCGCGGTAGGGAGACGTAGGTGGAATGCGAAGAGTCGGAGACCTGGAGATAAAACCCTCGGTCAGGGAAAAGATCGGAGTCGGCCAGGGCAGGGACGATGCCGGTCACTTGAAGG  
ATGGATGAACCGTCTGATGCTGCTGCGGAGAGATAATCGTTCGGCGAGGAATCCGGAGTCGGAGGAAGATGACGACTTTCATGTCGCGAATGAGCTTGAGGAGGACGCCGGAGCTCA  
AGTTCGCCATTGCTGGGGCTTGGGCGTGAGGCCTAACAGGCAGAAGGAAATAGAAAAGCTTTTCGCTCTAGCAGTTAATCAATGGTTTCGGCTTCGATTCTGGCTGCAGGGAAGGCTATA  
CGGTTGGGAAGGGCGGGCGGGGAAAGGAAAAACGTTGGTGAGAAACGATAGATCACCATCCGTTACTGTGAGATTCTGTGTTTTTGTATGCGATGGAAGTTGATCCATTGTTTCTT  
GCAGCTAAGAATTCGAATGGGATTTCTGTCCAAGTTGGGGGGTCCAAACGGAAATAACTGCCGATATTCTTGTGGGAAAGGTCAAGACG

>comp160152\_c0\_seq7

AAAGGACTATGGTATGAGAAAAGTCTGGAAATTGCTTTTAAAGTGCCAACCAGCACCAAGAATGATATAGAAATCAGATTTTGCATTTCCACCAGGAGATTCACCATGATTTCAAAGAGA  
AATTGCAAGTCATTAGACCTATTACAAGCATTTTAATTAGGTTACCCATATACCAATGAACGATCCTAGTGTCCCTTGATTTCTAGTTAATCCCTGATGTAAGGGATTATGGAATCATTCTAT  
TATGCCTGGAATTCATAAATTAAGCAAGTTGATTTTGTCTGTTCAATCAATATCACCATATACAGCACATGAAGTTTCACTTTCTTTTTCATGTAAGTATTCATGCTATAAATCTATGAA  
GGACAAATATGAACCTTGAATGTATCTCACCTCAGACATCCAAGTAACCTCTCCAATGCACATGCCTCCTGCAAGGAATCCAAGTAGCATAGAGAGCGCTATCCCTTCTTCTCAAGACT  
TCCTTCCATACTTTACTAAGTTAGATGGAAGCGATCCCCACAACACATTGCTGTCTGGCCACTTCATAACATCATATGTACTTAATGGAATTGTTGTAGAAGGATTCTTTGTGGACGCCTTG  
CTTGCAGTGAGAATCTTCTTTTGGCAGAATTACTGAGAAGTACCTTTAATTCTTCTCCATCTCTTTTTCCAGCCCATGATTCCTCCAAACTTTCACCTTTGGATATGCAGGAACTATAATGG  
GCAAAATTACCAGTACTGGAACTTCGCGTTTTGAGGATAGGCTTGTCTCGCGCTTCCATCCTTCATGAACTCATCAGGTTCCCAGATCTTCTCACCGTCTTTGGCCTTGAATCATCGA  
CACAAAAGAATGCGAGGAAGAGTTCGAGATGCTAGTAATAACTGAAGACTTATCAGACTCGTCACTCTCCTCATCAATATGTGAAACACCTATCTTCATCGGCTGTCTCACCACAGAGAA  
AACCTGTCTATTTCTTCTCTTTGTCGGCGAACTCGGACAAGAATTAGAATGCAGCATCCCATGCCAACCTTCCGCCATCCATCTTCCAAGTGTTCGCAGACCGCGGCTGCCGCTTC  
TTCCTCTCTGGCGTGGCTGGGCAAATCGTCAACATGTTCCGGACGACGTGGCGTGTATGGCCGCGGTGTGCTGAGGGAAGGGACGCCGGCCTGGGATGAGACGTAGGCCGTGGAGGA  
TGGAACAGGAGACGAGGCTTCGAGACGGCGGACGAGGATGAGCTGTCCGAGCTGGAGATTGTCGCTGAGGATGAGATCGTCGTGGCCCGCGGTAGGGAGACGTAGGTGGAATGCG  
AAGAGTCGGAGACCTGGAGATAAAACCCTCGGTCAGGGAAAAGATCGGAGTCGGCCAGGGCAGGGACGATGCCGGTCACTTGAAGGATGGATGAACCGTCGTCCATGTCGTCGTCGGA  
GAGATAATCGTCGGCGAGGAATCCGGAGTCGGAGGAAGATGACGACTTTCATGTCGCGAATGAGCTTGAGGAGGACGCCGGAGCTCAAGTTCGCCATTGCTGGGGCTTGGGCGTGAGGC  
CTAACAGGCAGAAGGAAATAGAAAAGCTTTTCGCTCTAGCAGTTAATCAATGGTTTCGGCTTCGATTCTGGCTGCAGGGAAGGCTATACGGGTTGGGAAGGGCGGGCGGGGAAAG  
GAAAAACGTTGGTGAGAAACGATAGATCACCATCCGTTACTGTGAGATTCTGTGTTTTTGTATGCGATGGAAGTTGATCCATTGTTTCTTGCAGCTAAGAATTCGAATGGGATTTCTGTCCA  
AGTTGGGGGGTCCAAACGGAAATAACTGCCGATATTCTTGTGGGAAAGGTCAAGACG

>comp160244\_c0\_seq2

CTCCAAAAACAATTCATGAGAATCTGTATTCGGTATTATGTAAGATATTTCCCTCTAGAAGACAGTTACATTCAAACCGTTTTGCATTTGAACTATCACGTCCTTTAACAGAATTTTGT  
ATATAATTTCTCGACAACAAAAACCTGAAGGTTGATAGTTTTTGTAAATCAAGCTCCTTTAGGTGCAAATATAGGTCAGGATGCATCTTATGTAGGTACCGTTGAGCATAGGGAAGAATCC  
AATTAATTAAGAAGCTTCATAATTGTTGTCTGCAATACCATATGAAATGGCTTCACGAGATATGACCTCTGCAAGTGCACGAATACCTATGTTTTGCATAAATATGGAAACCTTTCCACAA  
AGCATTTCCCTCTCATTGGTAGTAAGTTCACCAAATTTGTAATATGAACATCATTGAGATCCTTAAATTGCTCCATTCTTTTCGTCATCATCAGTCCAACATACGGTACCGAATGTTGGATTA  
AGGGAAACCCATGTATCCTGCATCGTTGGAAGCACTGTGTTTTCTGATTTTAAAGAAAATATTTTACGTCATTATTTTCATCACAACCTGAATAATCCAGATTTCAAATCATCGGCCCACTTG  
AGAAATACCCGAAAAAECTTCATGAGCAACCTCTGAAGGTAATGCAACATATGATAAATGACGCAGTATTGTAAGGTAAGCACGGAACGAAGGTGCTTCAGGTATAACCACAGATAGTCACA  
AGAAAATTATAAGATCTGGATATAGAATGGACAGTGTCAAGCATGTTGGAAGCTTTGTTGCACCTTGCTGGGTTCATGCGAATGGGTTAATTCCTCAATCTTCCCACACAACCAGTTGCAT  
CATGCCAGCATAATTTATCTGGAAGCATAAATGTACCAGACACAACATCCTTGTTTTTCAGATTTACATACTGATGGAACGAATATGACAATATTTGATTTTCACATCGGTGATCTTTTCCCTTTGA  
TTTAGCCAATTCTTCTTGAACAAAAGTGTAATTTGATTCATCTGAAATATGCTGGAAGAAGTCTTGGAGGTTCTCCAGAGCTGTAGCACTCTGATAGCATCATCAAGTGTAACCTGAACC  
TTAATCCAATATCCTTTACAAATCTTTTGCTCGAAGCCTTTGGAACAGCATATGGAGCAGCAGTTCCCGAATAGATTGAACTGCCTTGCAATTATAGAAAAGATCTTCAGGGCAGTGAA  
GTTTCATCATCAATGCTAGAAGCTACCCATTTAAATTTACGTATACATCTCATGAATGAGGACTCAAAGTCTTCAATTGCACTCCACATTGAAAAGGATTATGACATGTAGATTTCAAGATAT  
AAAAATCATCCCACATTTTATCAAAAACCTTCCAGCAGATATTTAACTTATCCAAATGTTTCTTTGTTGAAAGTGCAGATAGTAAATTGATTAACCTCAGGCGACTCCCAATCTTCAATGATTG  
TTTACCATCAATAGCATCACCATAAECTGGCATGCTTTTAGAATCCATGTCTAAAACTCTTTTAACTTTTTTCTACTCGTCTTACTTGCAAAAAATCAGTGATACCTAATTCATTA  
ATTCTCTCCACTTGTTCAAACCATAGATAATGACTGGGTGCTGGGATGTTGCAAGTAGCAGTTGTCTAATTCATCCACTCAATATCGATATCATCTATCAATCTTTCATGTACAAGGATT  
GCCAAATCTTTGCTGAAATGGATCGGCTTTTTCAGTAGGGCATATGTAACCATGATTTGTTGATATAATTGACCGTCTCTGTAGCTCAGAGATGATGTCTCTTCTTTCTGTATCACAACCTGGA  
GCAGGCAGATTGAAGATGTGTCAATATATAAAGAGGTAAGTACTCAGTCATCAAGTCTGCGGACACACCGGAAATCTTCCATAAGAAATAGATGGCAAAATATGATTTCTGATAACATCATGT  
GAAGACAATTGCCGCACACCGATTTTCAACAGGATTCGGATAAATTTGCTCACTACATTCCTCTCAAATGCTACTCTCTGAAAATTTGTAGAAAATAGGAGGGGATTTACAATCCTCAG  
GTTGGAATAAAGACCAGGAAGTTGCTTTAGAACATTTCCACTTTCATGTTTCAAAGTGGAAACATCAAAGGGCAACCAAACTGGCCCTTCTGCTACTGAGACGTATGAATCATCAGATAG  
TGGAATAAATGAAAGGCCTTTTAATTTTTTGACAAGGCTGAATTCATTTTCAGTATTTGCTGATGCTAAATCTTGGAAAGCATTAGATGAAATGGAAATACAAAGAGCATTAAAGCCAACAA  
GACAACCACTCTATGTTCAATAAACTAGTCCCACCTGAACGACATGCAGAGGATTGGAGTTCAACTAAAAATTCAGGTCCATATCTTGAATACCCAATCTTTAGCCAATGAATCATGCA  
AGAATATGTCCCTATGCAAGTAACCTAAGACCTAAATGCTGTTGAAGCAAACTATTGACAAAAAGTTTTCGAAGCTGCTCATCACAATTTGAAAGTACTCTACAAGGAGGAACCCACTCAA  
CACTAGATCCATCCAAAAGTAAGCATTTTGACTTGCGAAGTCTTTTGAATCATTCTGTTGGAAGATCTGAGAAAAACCATGAACTTCACCCATCAAAGGAACAAAACTCATGAAAGTTG  
TAACTGCTTTCCCGAGATTCTTCTGAAAGCAAGGAAGTGAGCAGAATGACTCCTCTGCAGAGACAAAAAGTTCTGGTATCCTTGATAACAAGTACTGGTTCCAAGCACTATTTCCATCAA  
CTTCTTCCCTAGAAGAAGGCAATATAAAATCACCTTGAGAATGAATTTAAGGCCATATTTTCTTAAAGGAAGAAAAGCAAAAAACATGTTGTTGATCAAGCTGCGCTTTATATTTTGAAT  
TCTGACTCTTCAAGTGGGAAAGCTAATGTGATCTTTGTAGTTTGAACCTCAGGACGGATCAAAGTTGGTTTTAGATTTTGGTTAACCAACAACCAATTCATTTTATCTTTCCAATAGAAAC  
CGTAGCTATGCCATTTTCATCACTTCCCCTTCTGAAGACAACCTAATTCATTGGATATCATATCTTATATCTGATACACTAAGATGCCGAAGAAAAGTAACAAGTGAGGATGAATATCTGA  
AAACATTGAGGGAATCGGACTCATACCTTGCCCTTTTAAAGCTCTGATTTGAATGGAAGCACAATGCAACTGTTCCAGAAGGTGGCATGTGGTTGGTCAGAATCACATATCACTTGCCCT  
CTAAAAAGTCAATATCGCATGGGGTATTATAGTTGGTAGGACAAAACCAATCTGGCCATCATTAAATATCAAACCTTGACATGAAAACCATGGAGTGAATTTCTGGAGCATCTGTTACCCG  
GAAAACCTGATTTGAAGCAATACCTTCTGCCCAATGTAGCCACCCTTGATCCCTTCTTTGTTGAATTTCCAACATCACAAAGTGCCCTCATATTTCTGAGCAGAAAACCCACCTCATTG  
TTTAAACAATAACTCCATTTTCTGAAGAATGAAGACCAGCGTAGGCTCCACGTTTTCTGGATAGCTATTATCATCAGCATTTTGTATCAGCTCTAGGATAAATGTGAATCCTGTGAATAC  
AACTCTGTGAAAGACAATTGAGTGCTCTTCCCTAAACGAGCATGTTGCTCTTTAGTAAGTCAGTATCTGCAGTATCTAGATCCAAACCAATTCCTCCCTTCGAATTTGTTCAATAAGAGC



>comp160316\_c2\_seq1

ACTTCAACGATCTGCTCTTTCCCTCAAACGTTCCGAAACATCCAAAGAAGGCCAACTCCAGTCGTTTCGCACGAACCTCTCCAGTCCGTCGCTGCTATTTCGCACAATCCAGTCCATCTCC  
CTCAGCCATTTCGAAATCCAAGGCCGAACCTCCCTCAGTTTCCCATCTCTCGCAAAATCGAAGCCCCAAGGAGATCCGACATTGGCTCTAGCCACTGGATCGAAGTCTTAGTTCCACCGACT  
TCTTCTTGATATTGGTAAAAATCTTCTTCTTCTTGCTTGCTTAAGGAATACATCAATCCTTTATTCTCTTGAG

>comp160397\_c0\_seq1

TCACTAAGGTCCGCCCCATCTAGAATCACTAGATCTAAACTTCCTTCTCTCCCAAAGAATGCATAACTAAATGTTTCTCCACTAAATATGTACCTGCTACTAGCCCATTGCTACTGAGTTG  
CTGATATTTTATCTCAATCAAATACGTTCTCTCCACTAGCTTAGAGAAATAAAAATATGAAATAGAACCATCAGTCATCTTAAAATATCTCAGGATAAGTGGCCGAAGCGTCAATCTGGAC  
ACATACCCTCGCATAGGTTAAACGGGATTTGTTTCGCAGTAAGATCGTCTACAGCGAGGGGGATACCAATTTTGGTAGCAATTTTTTATATTCTATCGGGGTCCAACAGCAGAGAGGTAGG  
TCAAGGATTTTGATCCAGATTGGGACCGAGGTGAACCTCCTCCTTTTTGGGGTGAACAAAGGCGACCACTTTTGTAGAACAAAAGGTTTTCCAAGATAAACCAGACACCCTTATTCCAT  
ACATATTCAAAGTCTCAATTGAAGAAAATTTAAAGAGAAAAGAAGCCATCACTCAAGGAAATCATTTTGTAGACTACCTTTAAGCTTCCATACCTTGTTTACTGCAGTAAGGAGGGAACCAT  
AGTAAGGCCTCTTACCAAGGGAGTATCCTACCAAAGCAAGGCTCCATTCGAGGAAGCTTCGACCACATCCTCGTGAGCGAACGGGATGATGTCCTCCGGAGTTGGGAAAGCAGCGGATA  
TCGAACTTGCTCTGGTTCGGCCTGTTCGGCCAGGATACGCGTCCAGGGGAGCGGGTTTTGCGAAGAAGCAAGCGGCGAAACCTGGTGCATATTAGGCAATGGCGGGCTGGAAGGGCGAA  
GCGGCGGAAAAACGGAGTTTGAAAGGGAGGGATCCATAGATCCCTCCGCCAACAGGTCGGCGAAGCACGAGAGACGGCGCGGCGCAGAAAAAACCTAGCAGAGCTTTTTCTTTCT  
TTA

>comp160397\_c0\_seq3

TTTTCATAGAACATGCATATAACAAATTGGATAAGAGCAGATGCATACGTACAGTAAGGAAAAAGTATTACATTGTCTTCTTACTCAAAAAGAAAATATGATATAACAATGAAGGTTGAGGC  
CATCCAATACAGAGAAAATATAGCATAATGTTTCTTCTTCGACCTATATGGAATGGCATCTGTACCTTGCATGTAGTGTATGGCGTCCTAAGAGGTCTATCCCTCAACTCGTGCAACTCTGC  
ATGATGCGCAACTGCCTCCTCATATGTAGATGGAATGACCGTATGAATGTAGTCATATATATGTGGGCCAAGATGGAATGTTAAGCGGTGTCAGCTGGCACAAGAATCTTGAGATGACAGT  
GCTCTTTGTAAGATAATGGGCTCGCAACCATGCTATGTGGTTGCACAAATGATGGGGTGCCATTGAAGTAGGTGTACTAGGTATGTGTAGCTTATGTATAATGATCATCTTCGATATGCATAT  
GTCTTCACATATCATGAATCAAGTCCCTCATATGGTTCGATAGCTGGTTGGATCACTCCTAAGTCATGTCTACCAAATATGGCTGCAATGTGGTCTCTGAATTGAGAAAGTAATTACGTTGCA  
CATATAAAGCTTTGTTGGTTAGAGATGTATGGCTACAAATTTTTACGTACGAACACACTGAATTGAAAATTTTAGGTTTTTATGACTAACTATAACGACGCTCCAAGGGTGTACATTGGTAGTA  
AGTGATTGGAGGCTCAACAGGTGGTTTTCGGCATGTACAATGTTTCCCATGAATGAAAACACTACAAGTAAGGATGAATGAGTCGTTCAATTATCAAGATCTACAGCTATACCTTGCAGAATA  
CAAACTGATTGTCTCCCATGCCAATGATTATGATAGTATATTATCCAATCTATGTA AAACTTCCGGTGACCATCTGAACGGATGAAGCTAGGATATCCAGTGGAAGTATATCAATTGAAG  
GGACATACCCAAATTGTATTATCACTTTATCAGGAAAGTTCTACTCAACTCTCGTCCAGTAATCAAAGGCACATGTGCCATCCAGATCTGCTCTCCTATGAGGCATATTTCTGGAAGTTGT  
GCACAAACATCTAGAGTGTATGGCTCCCAAATAATCTATACAAATTAATAATTTGTGTAAGTGTGATATCGTGAATTTTTAGTTAACAATATAAGAAAATTGCTTAAATTTAAGGACTTG  
ACTATCCAAAAGTCCATCTAGCTCATCTTTATAAGTACTAATGGTTGTTACGAGAAGCTATCTCGCTTTAGCTTCATTCCACCTGTAAGTAAACATGAGAAAATCAGTAGTGCCAAATATATA  
AAAATTAGACATTCCAAACACTTACTTTTTTTTTCTTTTTTACCTTAATTGATGCTAAGATCTTCAAGAGGGACATGTTGTGGAACATGGAGTGTGGTCCGGAACGAGAATGTGCTCC  
CAACACTATATTTGTAGTAAGTTGATGCACCCAGCAATGTTAGCCCAATTGGGCTTAGTAGCAAGAGCGAACTCTCTATAGTGGTGACCTAAAATTACTCCACTAAGGGAGTAAGTGATGA  
ATAATCCCAAATCTTCTAGCAAGTAGATTCCTCAAGTGTATCTCAAATCTCAAGGTATCATGAAGCAGGTAGCATGCATCCTAGCAAGAACAAAATGAATGCTCTAATGTGCCTATAGACTT  
CCATCTCACCTAAATCAATGTAAGAATCCTACCTAAATGTTTATTGAAGCCAGCGAAGTGGTAGGAAAGTCTATGCATGTGGCTGACCCATCTTGAACCTTATAGCTGATATGACGGTTTGT  
GAGTCATAGTAAACAACATCAGGCTTGGGATAGTACCCTAGAAGATCATAACAACAATCTGGCCAACATATGCCAACATCTTCTGGACTTTCTACATTGTGGCCAACAATGTGGGGCCAT

CAATTTGAACACCAAGGATAATATCCACATCCTACAAAGTGATCGTCATCTCACCAACAGGGAAGTGGAATGTGCTGGTCTAAGGTGACCAACACTCGACCAAAGTAGTAAGTACTAGGTTAT  
GATCCATCCTGATATATCGTAGCTGACTGATACAAACCAAGCCCATCATTTACAATGTAGCCACGAAATGAGGGCAATTGATCAGTCATTCATGCATCATGAGCAAGTATGATGTAAGTCTCT  
AGAACTATTCCATAAATAGCAAAAAAATTAAAAAAATTCAAATCATAACATCATACTGAAAAAATATTATATTAACCTCGTCTAAATGTGTAGCTCTATGCATACCTCGTAATGATGCAATA  
CTGGGGTGCATATCTACCAAGGGAGATGATTGCACTTCTTCTTCATCCTTTTGTGGATGTCGAGATCGACATCTACAGGCCTTATCTTGGTTGCCTTCCATGAGTCCCTCCATAACATAAAATG  
GAAAAAATGATTAGAACATTTAATTCTAATAAAGAGTAAACAAAAATATTTGCAAAACTTTTACATGAATTATGAAATGAATAAAATAGGAAAAAATATGTGCTACTCAACATTAAGTA  
GTGGAGACTCATCAACCATAATTGGGAGAAAAATTTCTATCTCAAATATTCTATTTAATATAAAATTTCCATGTCTTCTAAAAAATTAGTAGAGTATTACCTAGTGGGACATGTGCTTCTGTTG  
TGACCACTGACATGGAAAACACTACAAACTCTACCACTCTGGCTCCTACTTTCATCAATCGTATTCCAATATGATGTATTCAAGGCCTTCTGGTCCACTCCTATAGTTTGGTGTTTGGAG  
AGGGTATAACTCGAAGGCAGGATCATGAGAAACATAATATTATCTATCTAGAATTACATGAATGATCTGAGTATGTTAATCTTAAAGTTTTTCAAACATAATACTCTAAGACATATTGCTAATG  
ACTTTGCCTAAGTGTGGAAACACAAGCAGTCACATGTGCACAAGGCATGTGGTAAATAATTGTTTTGCCACAACAGTATATAAAGATATCGTCAGGGCCCAAGTCAACTCTATAGAATCTT  
CAAGTCATATCGAATACCTGAAATTTGTTCAATTGTAATCCTAGTTGGCTCGGCTAGTCTCATTGCCTCCATTTCTAATTTATGAACTTTAGCATGTGCTTTAGGGGGCCAAGTGTCCCTCATATA  
TATGTTCACTGTTATTTTTTTTTGTCATTTCAACAAATGAAAATGGCTACAATGTTGTAATAAACTAATGTAATTAATGCAATGTCACACTTCAGTGTCTAAGAACCTGTGTCTTAGGCTGG  
TGTAATTTAACCTTGTGCGAACTTATAAGGGATAGTTTTTACCTCCAATCTTTGAACTTTAGCTTGCCTTTAGGGGGCCAAGTGCCCTCATACCAATGTCCATACAAATTTTTTATGCCAT  
TTCAACAAATGAACATGGCCTCGTGCTCTTTCAGTACTCCATTGAAGAACTTTAAAAACATTAGTAGTCATCCCTTCATATCTATACCCACCATCATGCATTAACCCCACTTCTTCACATCC  
CTATAACCTAATCATTGATGTAGTTTGGGTTTTATGTTGATGATATCAACCATGCGTTTTGTTGAACAAGAATGGATCATCTATGTACTAGCCACATACATCTTCTGGAAGATGTAGTCAACATC  
TAAATCCCCAATTAAGATTTTTTTTTTTTGAATTTCTCACACAAGTGCCGCAAAAAATGATTGTTTCATGGTATTGGGGAATATTTTCATTACACCCACATACCTGATCGACATGCTGATCTG  
GGATGATACATAGATTTAATCTAGTCCCAATGGATGGGAGTAGCTCATTACAGGGATGTAAGAAACCATATATAGGATTCAACACACTCTGACCAAAATATAGCAAATACCAACATGAAAAAG  
TTGTTACTGGCATCCAGA

>comp160422\_c0\_seq1

CGCTTCTCAACCGATTACCTCACGTAACCTAAACCCATCAAGCTCTCGCTTTCTCCTTCTCATCTCACATCCGACGATGACGGTGGCAAATGTGACTAAAGCCTGGAGCGGGATCGGTA  
CTTGGGCTCTCGAAGCTGAACGAGCCGAGGCAGAGGAGAATGAACGCGCTGCTGCGGACTCCTCTACCGCTCGCCCAACTTTCTCGCCGATGAGCCAATGCAGGGCTTTCCAAGCCTC  
AAGGAAGGAGCAAGAAAACCTAAGAAGAAGAAAGGCGTCTCTCTTACGCTTTCCGAGTTCACCTCCGGCACCTACGTCGGCCCTGGAGGTGCTCTTCGCAAGCCACGTTTCGATTCCA  
ATGGTCTCACAGTCGAAGAGATGGCCCGCTTCTACTGGTCCCCGTC AACGCACGGCTGATGAGATAGATCATTACGCCTCGGTGGTGGCTTTTCGTTCTAATGGTTATGGCGGCGGCGC  
TCCTCCTCGCCACCTGAGTGAGGAATTTACCAAGGACTCAGATCGCGATCGTCCCTCGAGGGCTGATGAGGTAGATAACTGGTCTCATTTTAAGAAGCCGTTTTCCATGGATTCCGGCCG  
GCAAGATCGTTACGGCTCCCTGGGCACATCCAAGGCGGACGAGGTTGATAATTGGTCTTTAGGAAAGAAATCTGTTGCTCCTCCATCTAGGCACTCTGGCTTTGGATCTGGATTTCCGGGA  
CTCTTTCCGGTCCGGGATGCATTCTGATCGTTGGGATAAAGGAAGCGTGCCTTTTCCGAGGAATGGGAGAGAGAAAGGCCGAGATTTGTACTCGATCCTCCAAAAACAGATTCTGAATC  
ACAGCCAGAGCCTACGCGTAGCAGGCCGAGTCTTTTGGTGTGCAAGGCCAAGGGAGGAGGTGTTGGCTGAGAAGGGGGTGGATTGGAAGAAGATGGAAATCGATATAGAAATGAAG  
AAGACTAGTGGCTTCACAGACTCTTATTCAAGCAGGACATCCAGTGCAGTCAAGCAGGCCTGGGAGTTCGGGCTCACAGGCTTCATCAGAAGGAGGGGTGCCAAAGCATCGGCCTA  
AGGTTAATCCTTTCCGAGATGCAAAACCTCGGGAGGTTCTTTTGAAGAGAAGGGAATGGATTGGAGGAAGATTGATCAGGAACTGGAGCATCGTGGGATTGAAAGGTCTGAGACTGA  
AGAAGAAAAGAACTGAAAGAAGACATTGATAATCTGAAGAAGGAACTTGCTAAGGAAACTGAGGATAATGTGAATGGTATTCTTCGCATCTTCTACTGAACAATACGATAGCTTGC  
TTGAGCAAATAAGGAAGATGGAGAAAGAGCTGAAAATCTAATACGCGAATTAGATGATAAGGTGCGGTTTTGGTTCAGAGAGCCTTTGCTAATGGCAGGCCTGGTTCTGGATCTCGAAGA  
ACTCCTTTCTCTGCAGAGAAGCCATCAGTGCAGACTGGCTTTTTCAGAAGATTCAAGGCAGACCGAGTTTGTAGACAGGCCTCGATCTAGAGGGACGGGTGATTCATGGTACAGACCCTT

CATTGAAAAACGGGGATTCCAATCAAACAGGGATTCAACCCTTCACGCCAACAGGAACATGGATAGGCCAAAATCCGGGGAAAGATGGTGAAGGAGCTTATATTTCTTCTGGGGCCATT  
AATATTTTTTATGCTGAATCTGAAGGCTCTGCTCTTTTCTCTTTTTTCTTTTTTTTTTTAGAAATGTTGAGCG

>comp160462\_c0\_seq3

GCGGATGCCGAACGTCTTCCAGAGCTCAATGAAAATGCATCACGTCACCTCCACTTGGTACCGCGGCTCGGTACTCGATGACGTGGCTGTACCTGATTCACCTCTGGACGATAAGCTATGT  
CCGATGTCCGCCCAGAATAATCTCTCGTTGGAGAGGGGAACTAAAGGGATTAAATTTAGGTTTATACACATTAATCAAATCCAAACATCTCAACAGTGCACCTCTTCATATCATCATTATCTT  
GCACTTTCACCAACATAAAAAAACTCTCGATGTAATATTTTTTCTAGAAATATGAGATCAAACCAATACCCTCACACTGTTTTGCTGGACCAAGAATTTCTACAATTTATGTTTCAAATAAAT  
CAAAATTATGATATGATACTTTCTATAATCCATCGCAAAAACAACCTGCAAAACAAAACAAGAACATAACCTAACCATTTCTCTCTGCTCTAATCAAATTCTCCCTCAGGTTGAAGTTCTGAG  
CTGCATTCGGCATCAAATATGGTCCTGCTTCTCGGCGCCTGCCCTGAATACGGCTGCCTCGTCTACGAATACATGGCCAACGGAAGCTTAGACGACCGCTCTTCCGCCGGAACAACAC  
CCCTCCCATCCCCTGGCAACACCGATTCCGCATCGCCGCCGAGATCGCCACCGGCCTCCTCTTCTCCACCAAACCAAACCCGAACCCCTCGTCCACCGTGACCTAAAACCCGGCAACAT  
CCTCTCGATCGCAACTTCGTAAGCAAAATCAGCGACGTGGCCCTCGCCCGCTTAGTCCCCCTTCCGTCGCCAACACCGTCACCCAATACCGAATGACTTCCACCGCCGGCACCTTCTG  
CTACATCGATCCCAGTACCAGCAAACCGGAATGCTCGGCGTCAAATCCGACATCTACTCCCTCGGAATCATGCTTCTTTCAGATCATACCGCCAAACCCGCCATGGGACTCACCCATCAT  
GTCAGCCGAGCCTTGGAGAAGGGGACTTTCGAGGAGCTCTTGGATCCGAGCATCGCGGATTGGCCGGTGGAGGAGACGGTGAAGTTGCAGAAATGGCTTTGAAATGCTCGGAGTTGA  
GGAGGAAGGATCGGCCGGATCTCGGGACTGTGCTGCTTCCCGAGCTGGAGAGGTTGAGATCGCTTGGGGAAGATAATATGCACAACCTGTGTGATGCTGAGAAGCGGAATAGCTCGCCT  
CTGAACAGTCAGGTTTTCTTGCAGGATGTGCTGAGTGATCCCAATATGATTGAGTCTGGATATTATGAGAGTTCCACCAAGACCAATTCTGGTTTTGTCTGGAGAAAGAAGATCAAATTTGA  
GTTGAGAGATAGCAACAGGTGATTGTTTTCAGTTATTTATTCCTTTGTTTTTTTTGCTTTGTCTTGCAACTTTTTGAATGGTGTATGGATTGGCCTCAGAATGATTTGGCTTAAGAGTTAAA  
TTTTTTTTTCTTGTGTTTATATTAGTAGCAAGCTTTTACATTCATGATTGTATGAATTTTCATGTAATAATCTATTATG

>comp160462\_c0\_seq4

AAAAAAAAAAAAAATCTCATTTTTGAAGGCAGACAAATTAAGTTTGAAGAGTGTCCATTATTTTTGTTTGAAGAATAATTTTGTCCATCTATTCAAGTGATGCTAATACAGAATTTT  
TTTTCTTTGGCCATCCTTTTTGCAGGTCACCATTACAAGGGGAAACCGAGTGAAATCCAATGCAGATCTGTTATATAATGATACTGACATATCTTTTTGTGAGCTCAGGGAGGCCGAGCATT  
GATAGATCATTTCACCAAGGCATTCCAATGCTTCAGATGGCCATGATCATAGTTTTGAGTCAGCTCGCACACCAATTCGCTCCGTTGATTCATACTCGTTCCGGGAATGAGTTCTTCTGG  
TTCCGGGGCCAGTAGTTCAAACCTCTTGGTCATCTCAAACCATGGATGATGTAGAGACTGAGATGAAGAGACTGAGGCTGGAGCTCAGGCAAACCTATGGACATGTACAATGCTGCCTGCA  
AAGAAGCACTTATCTCAAAGCAGAAGGCTCTTGAGCTCCACCGATGGAAGATGGAAGAAGAGCATAAGCTGGAAGAAGCCCGCTTGCCGAGGAATCGGCCATGGCGCTTGTAGAGAG  
AGAGAAGGCAAAGTGCAAAGCAGCCCTGGAAGCTGCTCAGGCGCAGCAGAGGATAGCAGAGTTGGAAGCTCAGAAGAGAAGATATGCAGAGATGCAGGCCTTAAGAGAAGCAGAGG  
AGAGGAAGGCAATGGATACTTTTTCTCTACTGTTAGGTACCGAAGATACAGATAGAGGAGATTGAAAAGGCTACAACTACTTTGCTGAGAATCTTAAGATTGGTGAGGGTGGTTATG  
GTCCTGTGTATAAATGTTTTTATGATCACACACCTGTTGCTGTTAAGGTACTCAGGCCGATGCTGCTCAAGGAAGAACACAGTTTCAACAGGAGGTACAAAACCTTTACTCGTCTCTTTA  
ATTTGCTTGCTTCTTTTTCATACTTCATGAACAAGCCTGCAACTTTTCTCTTTTTTACTTTGAAAGGACTTGAATAGTGGGTAATTCAACTGCCAGAACTTGGGAAATGATTGAGTTATG  
AAAAGTATTTAAATATAAAAAATTATGATACTGGTCTCTTCTTTCATCTGTTGCAGGAAAAAAATTGGCACTAT

>comp160462\_c0\_seq5

TCGATCAGCGGCAGAGAAACGAAGCGAGAAACCTATCCGACAATGAAGGGGAACCTCAGATGGCGAAGATCGAGAGAAAGAAGCTGGATAACTACCATAAAGACTTCATTGCTCCTTC  
TTCTCTTCGTCCTCTTCTTCGTCCTTTGGAAAAGGCAAGGATACAGATTATTTACAGGAAATAATCAAGGAAGAGGAGAAAGATGAAGGATCACGACGCCATCGCCGCATATCCGTTG  
GTAGCTGTGGCCATTAGCAAGGATAAAAGCAGCCAGAATGCTCTGAAATGGGCGGTTGATAACCTCGTCGCCAAGGGCCAGACTCTCACCTTAGTCCATGTTAACATTCAGGCTTCAGCT



TCACAGCAAACGATCCATCCGATGGCTACAAAGGCGCTGTGGATCCTCAAATGAAGGAACTATTCCTCCCATTTCGTTGTTTCTGCACGAGGAAAGATATACATTGCAAGGATGTGGTG  
CTTGAAGACACAGATGTGGCAAAGGCAATTGTAGAATTTGTGTCTCAAGCTGCAATTGAGAAGCTTGTTGTTGGAAGCTCCATCTAAAGGAGGATTTATTAGATTTAAGAGCGCAGATGTC  
GCATCACACGTCTCTAAGGGAGCACCAGACTTCTGCACAGTTTATGTTATCTCTAAGGGAAAATTGCTTTCAACTAGAAAATGCTGTGAGACCAGCTCCGGTGATGTCTCCACTGCGAGCT  
CAGATACAGAGCCAGGCCAGCTTCAAGCCTGATACTGGAGAGCCACACCAATTTGTTGGGAACAAAAGGTGAAATTACATCTAGAGCTCACAGCCCTCACAACTTGCATGATGAATCAAT  
CAAGTCACCATTACAAAGGGGAAACCGAGTGAAATCCAATGCAGATCTGTTATATAATGATACTGACATATCTTTTGTGAGCTCAGGGAGGCCGAGCATTGATAGATCATTTCAACCAAGG  
CATTTCAATGCTTCAGATGGCCATGATCATAGTTTTGAGTCAGCTCGCACACCAATTCGCTCCGTTGATTCATACTCGTTCGGGAATGAGTTCTCTTCTGGTTCCGGGGCCAGTAGTTCAA  
CTCTTGGTCATCTCAAACCATGGATGATGTAGAGACTGAGATGAAGAGACTGAGGCTGGAGCTCAGGCAAATATGGACATGTACAATGCTGCCTGCAAAGAAGCACTTATCTCAAAGC  
AGAAGGCTCTTGAGCTCCACCGATGGAAGATGGAAGAAGAGCATAAGCTGGAAGAAGCCCGCTTGCCGAGGAATCGGCCATGGCGCTTGTAAGAGAGAGAGAAGGCAAAGTGCAAAG  
CAGCCCTGGAAGCTGCTCAGGCGCAGCAGAGGATAGCAGAGTTGGAAGCTCAGAAGAGAAGATATGCAGAGATGCAGGCCTTAAGAGAAGCAGAGGAGAGGAAGGCAATGGATACTT  
TTTCTCTACTGTTAGGTACCGAAGATACACGATAGAGGAGATTGAAAAGGCTACAACTACTTTGCTGAGAATCTTAAGATTGGTGAGGGTGGTTATGGTCTGTGTATAAATGTTTTTTA  
GATCACACACCTGTTGCTGTTAAGGTACTCAGGCCCGATGCTGCTCAAGGAAGAACACAGTTTCAACAGGAGGTTGAAGTTCTGAGCTGCATTCGGCATCCAAATATGGTCTCTGCTCTC  
GGCGCTGCCCTGAATACGGCTGCCTCGTCTACGAATACATGGCCAACGGAAGCTTAGACGACCGCCTCTTCCGCCGGAACAACACCCCTCCCATCCCCTGGCAACACCGATTCCGCATC  
GCCGCCGAGATCGCCACCGGCCTCCTCTTCCCTCCACCAAACCCGAACCCCTCGTCCACCGTGACCTAAAACCCGGCAACATCCTCCTCGATCGCAACTTCGTAAGCAAATCAG  
CGACGTCGGCCTCGCCCGCTTAGTCCCCCTTCCGTCGCCAACACCGTCACCCAATACCGAATGACTTCCACCGCCGGCACCTTCTGCTACATCGATCCCGAGTACCAGCAAACCGGAAT  
GCTCGGCGTCAAATCCGACATCTACTCCCTCGGAATCATGCTTCTTACAGATCATCACCGCAAACCCGCCATGGGACTCACCCATCATGTCAGCCGAGCCTTGGAGAAGGGGACTTTCGA  
GGAGCTCTTGGATCCGAGCATCGCGGATTGGCCGGTGGAGGAGACGGTGAAGTTTGCAGAAATGGCTTTGAAATGCTCGGAGTTGAGGAGGAAGGATCGGCCGGATCTCGGGACTGTC  
GTGCTTCCCGAGCTGGAGAGGTTGAGATCGCTTGGGGAAGATAATATGCACAACCTGTGTGATGCTGAGAAGCGCGAATAGCTCGCCTCTGAACAGTCAGGTTTTCTTGCAGGATGTGCTG  
AGTGATCCCAATATGATTAGTCTGGATATTATGAGAGTTCCACCAAGACCAATTTCTGGTTTGTCTGGAGAAAGAAGATCAAATTTGAGTTGAGAGATAGCAACAGGTGATTGTTTTAGT  
TTATTTATTCCTTTGTTTTTTTTGCTTTGCTTTGCAACTTTTTGAATGGTGATGGATTGGCCTCAGAATGATTTGGCTTAAGAGTTTAAATTTTTTTTTTCTTGTGTTTATATTAGTAGCA  
AGCTTTTACATTCATGATTGTATGAATTTTCATGTAATAATCTATTATG

>comp160501\_c0\_seq1

AATCACAAAGCAAATAAAAAACAAATCTGATAAATAACCCAAAAACTGTGGTAGCTATGCTACACATCTCTGTTGCAAGCCATTATTCTACACACAGAGGCTAAATAACATGATTGATAGC  
TTAATAAGCACAAATAGTATGGGTAAGCTATGAATCCAGTTGGACGTTGATAAGCTCAAGTTGGACGTTGATATGCTCCAGTTGAAGGTGGATATGCTCGATATGCTCCAGTTCGAGGTTGAT  
AAGCTCTAGTTGCAGGTGGATACGCTCGATATGCTCTAGTTGGAGCTGGATATGCTATAGTTGGAGGTTGATAAGCTAGAGGAATTCATAAGTCTCGTATCCACTAAAATG

>comp160521\_c0\_seq38

TGCAGTGACAAATATTCATAAAAAATTCTACTCACAGTTTCAGTTTTAGCCAAAATAAACTTTGCATAGATATAAATTGTCATCCACTAAATCAATCACAGGATTTAGAATAAAAATGAG  
AGGAAACAACAGTAGAAGAAGAAGTTTAAAGGGGAAGAAGGAAGAGAAGGGGATATACCTGCTGTAAGAAAGAAGTGAAGCCCTAGCTAAAGCAAACCGTGCACAAGCTTGTGCTGC  
CTTGGCTCGGCCAGGTGGGAGAGGCGGAACAGGGAGTTCCGGTTCGTCTGAGATTCGCGAAGCAGCGAGAGAAAGGGGGTCCGGTCCCGAGGGTTTCGCACACCTGGAGGTCGGACGG  
GAGCAAGTCCACCGCCTCGGCTAGGGCAGCATTGGGTTCCGGCAAGGGAGGAGTGGCAGCGGCTGGGTTCGTACGAATGGAGAAATCAGGGAGGCGACGGGCTCGGTCCAGACGTGCG  
ACATCGGGAGCTCGTCGGGTTAGAGGGGCTCCGCTCGGGTCAGCCACACGAGAGAGGGAAAGGAGCTGGAGTGCAGCTCTGCGAACAAGGAGGAGGAGATGGACCAAAGGAGGGGCT  
TCAGCCTCTAGGAACCTGCGAACCAGCCGGAGATGGAGAGAGCTAGAGCCTCTCTTTTTTTGTGTGCCGCTTCTCTTTTCTTCTCCACCGAGCCCGAGCGAGAGAGGGAGGCT

CGGCCTCAAATTAGGGCACGAGAGGGAGAGAAGGGAGATCAGAGCCATCCGATGAAATTCCTTGATCCAACGGTAGGATTCAAACCGGTTTGGAAATTCAATCAAATTTGATTAGGAC  
CTAACTAAACCCAAGGGGCTGAAATCAGGTTCAAGATTGAGTCAGGTCTGGTTTCGATCCGAGTCAACTCGAGCTCACCTCGACTCGACCAAACTAATTCATAAAAATAGGATAAAAATAA  
ATCGAACTCAAATTAATATTAATTCGAACCGAATCGGGCTCGACGAGGCTCGATCAACACGATCAAATACGTTTCGAGGGAAAAGCTAAGCTAAAAACGAGGTCAACAACAACAAACCAT  
GGAAACAAAGGCCCGAAAACAAAAGCAGCTAGATAGAATTATATAGTGAAGCAACAATACTCTCCAACATTCGGTAGAAACAGAAAATCAAAGACAGTAAGCATCTCGACAAA  
GGCATGAGTGAGTCCATGGACACACACACCCAGTATAGATATCAAACCAAATGTTGCCAGTTTAGTCTAGCAAAAATATAAGATGATTTATCATTATAGACTCCAAAATGAAATAAAAA  
ATACTACAATTAAGGCAATAGCAGAACAACTGCAAAAAAAAACTCTAGCATCAAAGTGCTAATGAAATGGACGGAAGCTAGAAACCCCAATTGGCACCACCATCAAGGATCCAAAGAAG  
CCTTCATTTAAAATACACTCATT

>comp160634\_c1\_seq3

AAATGGCACATTCCTTATTCTTTTTTTCAGTATCAATGCATCCCTACACGAAATTGCGCATTCCTTTGTAAAAAATTCATGTGCTTGAATGAAATGTCTATACATGCGAATGTTTTACTCGC  
CGGATAGAAAATATCCCAAGGTGAGTTTCTCTTAACCTTATCCCAGTTTTTTTTTACTTGCCTCAGCCTTTCACCGATGGCCCTCTATCCTCGATTTCTTCTCTCAGAACATCATATTTTT  
TTTTCTCCATATAGATATTTCTTATTCATATTTGTACCTACCAAATCTTAATATTGTTCCTTTTATTTTTTTTTTTGTTTGAAGTCACTATACTACTACAGTTTTATCTCTCAAGATGCTTCTTAGA  
CTGTGCAACAACCCTTCGCTCTATTTGAAGTTTTTTTTTCATTTGATTTCTTATACATTCAAAATACTTCGCCCTTCTAACTTAACTGGCTTAAAGTTAAAGAATGATAAATTAGATCTT  
ATTAATGTCTTGTCTTGGTTTTATTGGTTTTCAATTAGTTTGTCTCTTAATATGTGGTCTGAGTTTTGCTTGTAGCTCTTTTCCATGTTCTTCTTCTAAAGTATCTCACATTGATGGAAATCG  
ATCTGGAGGACAAGTGGTGGCTTGAAGAGGACCACTCACTCAGTCTTTCTGAAAAAGGAGAAGAAGCAAATCACTTCCCGGAAGAGTTGCACGAAGAGGGTTCGCGCTCTGCCATT  
CAAGAAGGGGAGATAGAAGAGATGATATCATCAAGACAGTCGTCTCTTCCCTCAAAGTGTAGGGTGGATAACCATATTCACCGCCTGACTATTTGGGGTGCATTTCAAACCAAAAA  
AGGTGCTAGTTTGTTCAGTTTAGTAAAGTTGACCGTCTCCATGCGTAGCTGTGCCGGCCGATGCGTTCCATTATTGCTGCATTTACGCGCTGGGGAATCAGTCTCGTCATTCCAACGAA  
AAATCATTGATAGTAGAATAGCCTTACCTTACTTAAGAGGGGCGCTAGCGTTGACTAAGACTAATCAGCCATAGAAAGCAATGTAATAGCTTAGGCTCGCTTCTCAAGCTCCGTCCTT  
ATTCCTCATTGAAGACGAAAGCGCTCACATTTTTTTTTTCTTTTTTTCATTTCGAGTCAACCGCCGAGTCTCTCATTCTTCTTCTATAAGTCTTATCTAGCGCCTTCCCAAAAAGATAG  
CCAACCAATAATTATCCGCGCCTGCCCGAGTGCTCAAAATCTTTCTCCCGGGGCTGCTTGTGGTTGAGTGTATCGCCAGTGGCAGCCACGCTCATTCTAGATTATCTCTCTGGTTGGG  
CATCCAGGGCACATAAAGTTCCATAGAACCATTAGAATTAGTTGGTGAGGACATAAGGAATTGAACAACAATTGCTAAATACTTGTACGGCTCCAGTGAGACTTCCAGGTACGCAACTT  
CATCAAGGACTTATACAGGTTGGTGATTTGGATCATTAGCAGAACTCCTGGGCTTAGGGCGCAATCCAGATTAGGATTAGAAGAACACCCTGGGCCCACTACCACTTCATCTAGCAAAAGTC  
CAATCCCTGGGCAGGGATTCAGGTAATCCATTAGAAAAGAAAAGAGAAAAGAAAGAAGAGAAAGAAAAGAAAGAAAAGAAAGAAAAGAAAGAAAAGAAAAGAAAAGAAAAGAAAAGAAAAGAAAAG  
AATCAAAGAAAACAGAGCATCAATTTCCAGGTCTATCTATTCTACGTTATTTTACCAGATGCGAGTATCCGAATCCTTCTATTACATGCCAATCCAGAGACTCGAGGGGACTCAGGCTATTC  
CTGTTCTCCGTGCAGCAGCTATTCTACTCGGGAAAACTTTTGCGGGGACAGTCTTATTGTTCTGTGCCGGTGAATTCCTTCTT

>comp160634\_c1\_seq8

GGAAGTGGCAATAAAGTTTCTCCATCCATTTTACGTTGGTCCAATCGATGTCTGGGAAGAGATGGTCACGGCATAAATCTACTTCAACAATTTTATATCCTAATAATAGTGGCTTCTTC  
TCTTATTGGATAGTTAATCCATCAACCCATCAGTTCGTTCAAACACTCCTTCGATTTTCATCTCTTTTCCATGTTCTTCTTCTAAAGTATCTCACATTGATGGAAATCGATCTGGAGGACAA  
GTGGTGGCTTGAAGAGGACCACTCACTCAGTCTTTCTGAAAAAGGAGAAGAAGCAAATTCATTCCCGGGAAGAGTTGCACGAAGAGGGTTCGCGCTCTGCCATTCAAGAAGGGGAG  
ATAGAAGAGATGATATCATCAAGACAGTCGTCTTCCCTCAAAGTGTGAGGGTGGATAACCATATTCACCGCCTGACTATTTGGGGTGCATTTCAAACCAAAAAAAGGTGCTAGTTTG  
TTCAGTTTAGTAAAGTTGACCGTCTTCCATGCGTAGCTGTGCCGGCCGATGCGTTCCATTATTGCTGCATTTACGCGCTGGGGAATCAGTCTCGTCATTCCAACGAAAAATTCATTGATAG

TAGAATAGCCTTACCTTACTTAAGAGGGGCGCTAGCGCTTACTAAGACTAATCAGCCATAGAAAGCAATGTAATAGCTTAGGCTCGCTTCTTCAAGCTCCGTCCCTTATTCCTCATTGAAG  
ACGAAAGCGCTCACATTTTTTTTTTTCTTTTTTCATTTCGAGTCAACCGGCCGAGTCTCTCATTTTTCTTTCTTCTATAAGTCTTTATCTAGCGCCTTCCCAAAAAGATAGCCAACCAATAATTAT  
CCGCGCCTGCCCGAGTGCTCAAATCTTTTCCCTCCCGGGGCTGCTTGCTTGGTTGAGTGATCGCCAGTGGCAGCCCTCTTCTAAAGAGAAAGAGTCTTTAGGGCAGGTCTACTGCTCG  
AAAAA

>comp160654\_c0\_seq2

TCAGTATACTAGCTGACTTTATTAGGAGCTCAGCAACGTAAGATTAAGATCCTAAATGGACGGGAACGGGCGGCGATTTCTCGCGCAGAGGAGTACGGGTGCTCTGAGGTGGCCGGATCC  
ACGAGAACTTCGGGCGGGCGGACCCACGAATCTGTTGCTTTACTGCTCTCGTGTTCATATCTGGAAGTACAAACCTCGACGTAATCCCTCGCTACGGCCGCTTAGGGCGACGAAAGG  
ATCAAGGACCGGTGCAAGAAGAGGTGGCGGAGAGAGTTTCGATACGTTGCTGAATTCGATCTCATTGGCCTTTAGAGAATACTTCCGTAATCCGATCATAATGGCCGATGATAAGCAGAAG  
GCCGACCATGAAGACGAGTTTTTTACTGAGTACGGTGAAGCAAGCCAGTATGAGATAATGGAGGTTATTGGAAGGGGAAGCTATGGTATAGTTGGGTCCGACAGTGGACACTAAAAGTGG  
GGAGAAGGTCCCATCAAGAAGATCAATGATGTCTTTGAGCATGTTTCAGATGCAACTCGAATCTTAGAGAGATCAAGCTTCTCAGGCTGCTTCGGCATCCTGACATTGTAGAAATTA  
GCACATAATGTACCTCCATCTCGTAGGGAATTTAGAGATATTTATGTTGTTTTGAGCTAATGGAATCAGATCTTCACCATGTTATAAGGGAAAATGATGACCTTACTCCTGAGCATCACCA  
ATTTTTCTGTATCAGCTTCTTCGTTTATTGAAGTACATCCATTCAGCTAATGTATTTTCATCGGGATTTGAAGCCCAAAAACATCCTTGCCAATTCAGACTGCAAGCTAAAATCTGTGACTT  
TGGACTTGCTCGGGTGTCCTTAATGACGCTCCATCGCTATTTTTGGACTGATTATGTGGCAACAAGATGGTATCGTGACACCAGAATTATGCGGTTCCTTTTCTCCAAATACACCCCG  
CTATTGATATGTGGAGTATAGGGTGCATCTTTGCTGAAATGATAACAGGAAAGCCACTGTTTCCCTGGGAAGAATGTGGTTTCATCAGTTGGATCTCATGACTGATCTTCTAGGCACTCCTACT  
CCTGAAACCATCACAAAGATACGAAATGAAAAGGCTAGAAGATATCTAAGTAGCATGCGTAAAAACATCCACTTCCCTTCTCAGAGAAATCCCTAACGTTGATCCCTTGGCTCTTCATC  
TACTCGAACGCTGCTTGTCTTTGATCCTCAAGATCGTCCACTGCTGAGGAGGCACTAGCTGAACCATATTTTCGATGGATTGGCAAATGTAGAGCATGAACCTTCAACGCAACCAATCTC  
AAAAGTGTGATTTGAATTTGAAAGGAAGAAATTGAATAAAGATGATGTAAGAGAATTGATT

>comp160660\_c0\_seq3

ATATTAAGTCAAATATGTTAACAAAAGAAAATTTAATTTGGGAATAACATAATAATGGTTTATTCATGTTTCGAATGCATCTATCTTAAAAAAGATTTTACAAGATTTTACACCAAGACAGAT  
GCAAAAATCGTACCTTGCAAGTTATCTTAGTGTGTGATGAGGAGGAGGTGGACAAGGCAGAGGTAGCGAGGGAGGAAGAAGAGCCTATACACTTGGAGGTGGCTGAAGTTTCATTGAA  
CTCTGTTGTAGAATTCACATTGAATCACACTATGAAGGTGAGAGGCTAGATATGAGAAGGGCGGTGGCAATCCTGATGGACAAATGGGGCATAAACTGATAGATACGAGATGTTTTGG  
AGTGATGATGGGCATGGGGAAGGTGGAGATAAAGCAGAGGGATATGTCAAGGTTTGGGGGTAGAATTGCAGGGGATTCACATCAAGGAGGATTTCTCCGATTGAAGTTTGTAGTACTTAT  
TTGATTCTAGGAATGAAATGGCTACAAATATTGGGGGAAACTAGGGTAAACTGCAAGGCATTATCTATGGAGATCCAGGAGGAGGGGAGAAAAGTGATAATTAAGGGAGACCCCAACTTA  
TCCAAAGCCATGGTTTCTTTGAAAATCCTGGTTAGTGCGCCACAAGGGAAAGGAGAGGGATTCTTGGTAGAGCTCCAGAGTTTAGATGGAGGAGAGACAAAGGATGTAGAGGACATTTCC  
AAACATGGTCCAGCCACTTCTTCAGCAATTTAGGGAGGTATTTTTGCTTCCCAAGGATTGTCACCCCTCGAGAGCATGAGCACTATTTTATTATGAAGGAAGGAATCTCTCCAATTAGTA  
TCCTTCCATACCGCTACTCTCGGGCCAGAAAGGATGCGATT

>comp160709\_c0\_seq4

GCGACGAAACGTCGAAACCTAGATCTCGGGCACGCTTGATTTCTACCACGTCGGAAGGCCATTTCCCGACGAACTCGCCGGAAGAGGATCAAAGGCTTCGTTTCTCCTCTGAT  
ATTCGACCTTTTCTTCGATTTTCGCGCAGTGGCTTCTGCATTCGGAATCAGCCATTTTTTCCATTATAGAGGAAAGGTTATTCGGGGTCTTCCCGAGATTGGATTGCATAGGATTTTGATCG  
GAAGAACATATTGCAGCTATTGATGAGTTGATAAAGGCTGATCCTCTCTGAGAGCTCGTTCCGATGTATGATGGCTATGAGAAGTGATGTTCTTTTAGCCGCGTGCGGGTTTTTTTCTAG  
TATTTGCCGTACCGAGGGGTTTCGAGAGGAAGGCGAGCGGGCGATGGATTGTTCTTTGGATCCGAGGATACGATGGTAACGGATTTGTCAGGTACGGGAGAAGAAATGGTAAGAATTGTTT

TGGTATTATTATTGATATTTGATATAAGA AACTTGATCTTTTTCTTCTTGC GCGTTCCTTTCTTTGGCGTAGAAATTTTCTCATGTGAATAGTAATGATATGAAATGCTTCGGTGTTAATTGCAATA  
TGATTTTGTTTGATTGAGTATT

>comp160713\_c0\_seq12

AAGCCTTAGTGATTATTTTCTCATTACTTAAAAAAAAAAAAATTGTTCTATGAAGCTGCTTTCTGCAACAGCCTTAAAAATCACTTTATCTATAGCAGCTTTTCAAAAATTATCCCAAATGAAGCA  
GTAATCACAACAAA AACTAATAACAAATAAAAACCCAATATTTGAGCATATTACACATACATATTATATACATCTTAGAAAATTACAAAAACATAGAGCTTAATATCTCTACATGTCAAAAAGCCATT  
ATATCTGCCTGAAAAATGCCATCATAGAATCATATACTACTTGCTTTGCAGAGACTCCCATTATGAAATCAGCATGAGCAAAGTTCTGTACATAATGAAGA AACTAATTGATCAGTTTCATGCA  
GCTTTAGATCCTGAAGCAAATGCTCCACATCTTCTGTATCAGACAGAGAGTCTCTCCACCATAGCTTAGGTAAAGTGGCAGACTGTTGGGAATATTTGATAAATTGTATACAGGAGGTGT  
GCTCTGACCATATCTTTGTATGTTATTAACACCATAGTTATATTTTGTAGGGCTCCATCCCTGAATGTTTGTGCTAAATGTACCATATTTTTGGTTGATGTTGGCTGTGGTTCATACTGGAGG  
AATAATTGAACTGTTGAGCCATTAAGACAACAGTTGTTACCTGTAAATGCTGTCAGGAGATCATAGCAGTTCACATCTGGATAACTACAGAGTATTTTCAAATATTTGGATGCTTCCAGCCT  
GCAATTGAAGCTCACAGCTTAGTAGAGAATGAAGTAGAAGAAAAATGGTGTGTTGGATTCAATTTTATTATGTTTGTCTTATTCTTACCCTTTGGGATTGAACTCTGCAAGTCCTAGC  
AAATTGCTCAAGATCTCACCCACAAAGAGTCTGGCAGCCAGAATGCCTAATTTTGTTTTCATGTGATCAAGGTAGGCTATTGGACACAAAAGTGTGCTGCTGATCTTAGCTTGTCCACCAGCC  
TTCCTTCTGAGAAAGATGCCAAAGCAATGAGCGTTCCTGCAATTATTTACAATCAGAAGCTTTGCACTATGTACAAA AACTATAAATTTGGCTAAGTAAAGCTGATGAAGACAAAAGAAGA  
AGAAGAAGAAGTTTCTTACACACCAAGGAGTGCCCAACATAGTGCAGCTTCTGCTTTGTCTGTTGGCAACCAAGTCTACCATAGCTGGGAAATCATTCTCCACTAGTTCATCCCATGAC  
CATGCCCAATAAGCCTATGAAGGATCAAATTAAGGCCAAAATTTTCATAAAAATATTAACATATGCACATATTAAGACTTCGTTTGGGACAGTTTTATTATTTTTCTTTCTTTTCGAATTGTAA  
CTATAATTTCTATTTAGTTATTATTTTTACCGTTTTTTTACTCACAATAGTTTAATTTATAATCAACTTTATAGAAAGCTGCAGTTATTCCAAACGGATGTTAAAAGCATGCATACTTCAAATAT  
TTTATTATTATTGCACACAATTTTCATATGTAATATTATTTCTTTTTTTGAAGAATAAAAATATGTCACTTAGTTTTATGTTGCTTATTATGGTGTAGTTAATAGATATGTTGGAATGAGCACA  
GAGGGTTTGATATGAAAATATTGAAATGTTGCTGGACTTTAATCTTAATTATCCCAAAGATTAATGAAGGATTAGAAGAGTTAAGTTAATCATGAGGGATTAGCCTAGTAATGGAAGTAGT  
TTAACTTTAAAGAGATCGTCATATATATATGTAAGGAAAAATGATTCAGGGTGGTAAATGAAAATTACACACCCGATCGGATGGCGTAAAGAGACACGTGGCGATTGCTGGAGCGAGTGCCT  
CTAATATTACCGATCCACACATCAAATCCGTTATCGGCTAGCACAAAGGCCAGGGATTGCTCCGGAGAGTTCAATAGCCAGGTCATCCCATCCATAAGAACACCGTGTTCAGCAATACTG  
GCTGCCTTGCCCTCCAATAACTCCATTGCGCCCCACAGGTATCCTCTGCATGCCAGTATGTAACCATCCTCAGTTGTCACCTATCTCCATAAATTTATCTAAATTAATCCACTTTTCTTCAT  
AAAATCAACATAAATATGATCAGATTAATCGTTCATAATCAATATAAC

>comp160713\_c0\_seq16

AAGCCTTAGTGATTATTTTCTCATTACTTAAAAAAAAAAAAATTGTTCTATGAAGCTGCTTTCTGCAACAGCCTTAAAAATCACTTTATCTATAGCAGCTTTTCAAAAATTATCCCAAATGAAGCA  
GTAATCACAACAAA AACTAATAACAAATAAAAACCCAATATTTGAGCATATTACACATACATATTATATACATCTTAGAAAATTACAAAAACATAGAGCTTAATATCTCTACATGTCAAAAAGCCATT  
ATATCTGCCTGAAAAATGCCATCATAGAATCATATACTACTTGCTTTGCAGAGACTCCCATTATGAAATCAGCATGAGCAAAGTTCTGTACATAATGAAGA AACTAATTGATCAGTTTCATGCA  
GCTTTAGATCCTGAAGCAAATGCTCCACATCTTCTGTATCAGACAGAGAGTCTCTCCACCATAGCTTAGGTAAAGTGGCAGACTGTTGGGAATATTTGATAAATTGTATACAGGAGGTGT  
GCTCTGACCATATCTTTGTATGTTATTAACACCATAGTTATATTTTGTAGGGCTCCATCCCTGAATGTTTGTGCTAAATGTACCATATTTTTGGTTGATGTTGGCTGTGGTTCATACTGGAGG  
AATAATTGAACTGTTGAGCCATTAAGACAACAGTTGTTACCTGTAAATGCTGTCAGGAGATCATAGCAGTTCACATCTGGATAACTACAGAGTATTTTCAAATATTTGGATGCTTCCAGCCT  
GCAATTGAAGCTCACAGCTTAGTAGAGAATGAAGTAGAAGAAAAATGGTGTGTTGGATTCAATTTTATTATGTTTGTCTTATTCTTACCCTTTGGGATTGAACTCTGCAAGTCCTAGC  
AAATTGCTCAAGATCTCACCCACAAAGAGTCTGGCAGCCAGAATGCCTAATTTTGTTTTCATGTGATCAAGGTAGGCTATTGGACACAAAAGTGTGCTGCTGATCTTAGCTTGTCCACCAGCC  
TTCCTTCTGAGAAAGATGCCAAAGCAATGAGCGTTCCTGCAATTATTTACAATCAGAAGCTTTGCACTATGTACAAA AACTATAAATTTGGCTAAGTAAAGCTGATGAAGACAAAAGAAGA

AGAAGAAGAAGTTTCTTACACACCAAGGAGTGCCCAACATAGTGCAGCTTCTGCTTTGTCTGTTTGGCAACCAAGTCTACCATAGCTGGGAAATCATTCTCCACTAGTTCATCCCATGAC  
CATGCCCAATAAGCCCGATCGGATGGCGTAAGAGACACGTGGCGATTGCTGGAGCGAGTGCCTCTAATATTACCGATCCACACATCAAATCCGTTATCGGCTAGCACAAAGGCCAGGGAT  
TGCTCCGGAGAGTTCAATAGCCAGGTCCATCCATAAGAACACCCGTGTTGCAGCAATACTGGCTGCCTTGCCCTCCAATAACTCCATTGCGCCCCACAGGTATCCTCTGCATGCCCA  
GTATGTAACCATCCTCAGTTGTCACCTATCTCCATAAATTTATCTAAATTAATCCACTTTTCTTCATAAAATCAACATAAATATGATCAGATTAATCGTTCATAATCAATATAAC

>comp160713\_c0\_seq2

AAGCCTTAGTGATTATTTTCTCATTACTTAAAAAATAAATTTGTTCTATGAAGCTGCTTTCTGCAACAGCCTTAAAAATCACTTTATCTATAGCAGCTTTTCAAATTTATCCCAAATGAAGCA  
GTAATCACAACAAAACCTAATAACAAATAAAACCCAATATTTGAGCATATTACACATACATATTATATACATCTTAGAAATTACAAAAACATAGAGCTTAATATCTCTACATGTCAAAGCCATT  
ATATCTGCCTGAAAAATGCCATCATAGAATCATATACTACTTGTCTTGCAGAGACTCCATTATGAAATCAGCATGAGCAAAGTTCTGTACATAATGAAGAATAATTGATCAGTTTCATGCA  
GCTTTAGATCCTGAAGCAAATGCTCCACATCTTCTGTATCAGACAGAGAGTCTCTCCACCATAGCTTAGGTAAAGTGGCAGACTGTTGGGAATATTTGATAAATTGTATACAGGAGGTGT  
GCTCTGACCATATCTTTGTATGTTATTAACACCATAGTTATATTTGTTAGGGCTCCATCCCTGAATGCTGCAAATTCATCCAGAAAAAATTGAAATCTGTAAATTATATTTGAAAATTTGATG  
AAAACCTGATATGAATTTAGCTTATAAATGATTAATATTTGATATTTTATATGGACGGTGAAAGTTCTATAAGAAGGTGGTGGAGACCTGCAATGTTTTATGGCGTAGACTGTCCGGCCCTCA  
AAAGAAAAGCATAAAATTATGTCAAGTGTGAAGAGAAGAGGATGCTCAGGTGGATTAGTGGCTTTACACTTAGAGACGGAATGCCAAACGAGTATATACGTGAAAATGTTGAAGTAGG  
CTTAGATTTATGGTTTGGTCCACAAAATTGTCAGCCTTCTGATGACTCAGTTAGTAAAGTGGATGTATTAGGTCTGATTTATATTAAGAAAAGATAGAGGTAGACTTAAAAAGATTTGGTTAA  
AGAATATTAGAAATGACTGTTCTTTATTAGTAAAAGAGAATTTGACTTGTAAACAGAACAATGGAGACCCAACGTAGTGGGATAGAGGCTTGTGTTGTTGTTAGACCCTATTATAGGGT  
AAGCTTGTATTATTCATGTAGTTACTAAAAGGCTTATCGAAAATTTAAGTGAGCCGAAGGTCTCCCTCAATCACCCCTTGTTCACAATAGAATACGAGTGGGTTTACAAGTAACTCATCC  
AAGAACATTCATGCGAATGATCAACATTTACATGTCTATGACATATCAAGCATTTGGGTTACTTGCAAGTTATTTCAAGTTAAGTTTTATATGATAGTTAAAACATCTGTGTTTTATTTGGA  
TATGTTTTATGTTATAAATAGTTCAATGCCTTTTTAGTATTGTTTTAATTGAATCGTTGAGGTTTGTATTGTTGATCTATTAACGTAATGAAGTGCCTGTGAGCTGCTCCTGATTTTCTGA  
AATTATACCCTTGCTGGTCTGATTTAGTATATATTCTGGGACTATAATCCATTCATTTGTTATACCGGTGCAGAGATCTTGGAGCAATTGCGGGAGTTGTATATGTTCTATTTTGAACCATTG  
CAATTTCCGGTGACCCCAACGGCAGGATTTTATGGCT

>comp160713\_c0\_seq21

AAGCCTTAGTGATTATTTTCTCATTACTTAAAAAATAAATTTGTTCTATGAAGCTGCTTTCTGCAACAGCCTTAAAAATCACTTTATCTATAGCAGCTTTTCAAATTTATCCCAAATGAAGCA  
GTAATCACAACAAAACCTAATAACAAATAAAACCCAATATTTGAGCATATTACACATACATATTATATACATCTTAGAAATTACAAAAACATAGAGCTTAATATCTCTACATGTCAAAGCCATT  
ATATCTGCCTGAAAAATGCCATCATAGAATCATATACTACTTGTCTTGCAGAGACTCCATTATGAAATCAGCATGAGCAAAGTTCTGTACATAATGAAGAATAATTGATCAGTTTCATGCA  
GCTTTAGATCCTGAAGCAAATGCTCCACATCTTCTGTATCAGACAGAGAGTCTCTCCACCATAGCTTAGGTAAAGTGGCAGACTGTTGGGAATATTTGATAAATTGTATACAGGAGGTGT  
GCTCTGACCATATCTTTGTATGTTATTAACACCATAGTTATATTTGTTAGGGCTCCATCCCTGAATGTTTGTGCTAAATGTACCATATTTTGGTTGATGTTGGCTGTGGTTCATACTGGAGG  
AATAATTGAACTGTTGAGCCATTAAGACAACAGTTGTACCTGTAAATGCTGTGAGGAGATCATAGCAGTTCACATCTGGATAACTACAGAGTATTTCAAATATTTGGATGCTTCCAGCCC  
TTTGGGATTGAACTCTGCAAGTCTAGCAAATGCTCAAGATCTCACCCACAAAGAGTCTGGCAGCCAGAATGCCTAATTTTGTTCATGTGATCAAGGTAGGCTATTGGACACAAAAG  
TGCTGCTGATCTTAGCTTGTCCACCAGCCTTCCTTCTGAGAAAGATGCCAAAGCAATGAGCGTCCCTGCAATTTTACAATCAGAAGCTTGCCTATGTACAAAACATAAATTTGGCT  
AAGTAAAGCTGATGAAGACAAAGAAGAAGAAGAAAGTTTCTTACACACCAAGGAGTGCCCAACATAGTGCAGCTTCTGCTTTGCTGTTTGGCAACCAAGTCTACCATAGCTGGGA  
AATCATTCTCCACTAGTTCATCCATGACCATGCCAATAAGCCTATGAAGGATCAAATTAAGGCCAAAATTTTCATAAAATATTAACATATGCACATATTAAGACTTCGTTTGGGACAGTT  
TTATTATTTTCTTTCTTTTTCGAATTGTAACATAAATTTCTATTTAGTTATTATTTTACCGTTTTTTTACTCACAATAGTTAATTTATAATCAACTTTATAGAAAGCTGCAGTTATTCCAAACG

GATGTTAAAAGCATGCATACTTCAAATATTTTATTATTATGTCACACAATTTTCATATGTAATATTATTTCTTTTTTTGAAGAATAAAAAATATGTCATTACTTAGTTTTATGTTGCTTATTATGGTG  
TAGTTAATAGATATGTTGGAATGAGCACAGAGGGTTTTGATATGAAAATATTGAAATGTTGCTGGACTTTAATCTTAATTATCCCAAAGATTAATGAAGGATTAGAAGAGTTAAGTTAATCAT  
GAGGGATTAGCCTAGTAATGGAAGTAGTTAACTTTAAAGAGATCGTCATATATATATGTAAGGAAAAATGATTCAGGGTGGTAAATGAAAATTACACACCCGATCGGATGGCGTAAGAGA  
CACGTGGCGATTGCTGGAGCGAGTGCCTCTAATATTACCGATCCACACATCAAATCCGTTATCGGCTAGCACAAAGGCCAGGGATTGCTCCGGAGAGTTCAATAGCCAGGTCATCCCATCC  
ATAAGAACACCGTGTTCAGCAATACTGGCTGCCTTGCCCCCTCAATAACTCCATTGCGCCCCACAGGTATCCTCTGCATGCCAGTATGTAACCATCCTCAGTTGTCACCTATCTCCATAA  
ATTTATCTAAATTAATCCACTTTTCTTCATAAAATCAACATAAATATGATCAGATTAATCGTTCATAATCAATATAACCTCAAACCTCTGGCATTTATAACCCATATGGGCGCACCACAGCCTCG  
CAGATTCCTACTTCTTCAGGCGAAGGAGAGAATCCCCCTCGCCAAGGAAGAACAAGAAGAAGATGATGATGAAAGGAAGCTG

>comp160713\_c0\_seq35

AAGCCTTAGTGATTATTTTCTCATTACTTAAAAAATAAATTGTTCTATGAAGCTGCTTTCTGCAACAGCCTTAAAAATCACTTTATCTATAGCAGCTTTTCAAATTTATCCCAAATGAAGCA  
GTAATCACAACAAAATAATAACAAATAAAACCCAATATTTGAGCATATTACACATACATATTATATACATCTTAGAAATTACAAAAACATAGAGCTTAATATCTCTACATGTCAAAGCCATT  
ATATCTGCCTGAAAAATGCCATCATAGAATCATATACTACTTGCTTTGCAGAGACTCCATTATGAAATCAGCATGAGCAAAGTTCTGTACATAATGAAGAATAATTGATCAGTTTCATGCA  
GCTTTAGATCCTGAAGCAAATGCTCCACATCTTCTGTATCAGACAGAGAGTCTCTCCACCATAGCTTAGGTAAAGTGGCAGACTGTTGGGAATATTTGATAAATTGTATACAGGAGGTGT  
GCTCTGACCATATCTTTGTATGTTATTAACACCATAGTTATATTTGTTAGGGCTCCATCCCTGAATGTTTGTGCTAAATGTACCATATTTTTGGTTGATGTTGGCTGTGGTTCATACTGGAGG  
AATAATTGAACTGTTGAGCCATTAAGACAACAGTTGTTACCTGTAAATGCTGTGAGGAGATCATAGCAGTTCACATCTGGATAACTACAGAGTATTTCAAATATTTGGATGCTTCCAGCCC  
TTTGGGATTGAACTCTGCAAGTCCTAGCAAATTGCTCAAGATCTCACCCACAAAGAGTCTGGCAGCCAGAATGCCTAATTTTGTTCATGTGATCAAGGTAGGCTATTGGACACAAAAG  
TGCTGCTGATCTTAGCTTGTCCACCAGCCTTCTTCTGAGAAAGATGCCAAAGCAATGAGCGTCCCAAGGAGTGCCCAACATAGTGCAGCTTCTGCTTTGTCTGTTTGGCAACCAAGTC  
TACCATAGCTGGGAAATCATTCTCCACTAGTTCATCCATGACCATGCCAATAAGCCGATCGGATGGCGTAAGAGACACGTGGCGATTGCTGGAGCGAGTGCCTCTAATATTACCGATC  
CACACATCAAATCCGTTATCGGCTAGCACAAAGGCCAGGGATTGCTCCGGAGAGTTCAATAGCCAGGTCATCCATCCATAAGAACACCGTGTTCAGCAATACTGGCTGCCTTGCCCCCT  
CCAATAACTCCATTGCGCCCCACAGGTATCCTCTGCATGCCAGTATGTAACCATCCTCAGTTGTCACCTATCTCCATAAATTTATCTAAATTAATCCACTTTTCTTCATAAAATCAACATAAA  
TATGATCAGATTAATCGTTCATAATCAATATAACCTCAAACCTCTGGCATTTATAACCCATATGGGCGCACCACAGCCTCGCAGATTCCTACTTCTTCAGGCGAAGGAGAGAATCCCCCTCG  
CCAAGGAAGAACAAGAAGAAGATGATGATGAAAGGAAGCTG

>comp160713\_c0\_seq40

AAGCCTTAGTGATTATTTTCTCATTACTTAAAAAATAAATTGTTCTATGAAGCTGCTTTCTGCAACAGCCTTAAAAATCACTTTATCTATAGCAGCTTTTCAAATTTATCCCAAATGAAGCA  
GTAATCACAACAAAATAATAACAAATAAAACCCAATATTTGAGCATATTACACATACATATTATATACATCTTAGAAATTACAAAAACATAGAGCTTAATATCTCTACATGTCAAAGCCATT  
ATATCTGCCTGAAAAATGCCATCATAGAATCATATACTACTTGCTTTGCAGAGACTCCATTATGAAATCAGCATGAGCAAAGTTCTGTACATAATGAAGAATAATTGATCAGTTTCATGCA  
GCTTTAGATCCTGAAGCAAATGCTCCACATCTTCTGTATCAGACAGAGAGTCTCTCCACCATAGCTTAGGTAAAGTGGCAGACTGTTGGGAATATTTGATAAATTGTATACAGGAGGTGT  
GCTCTGACCATATCTTTGTATGTTATTAACACCATAGTTATATTTGTTAGGGCTCCATCCCTGAATGTTTGTGCTAAATGTACCATATTTTTGGTTGATGTTGGCTGTGGTTCATACTGGAGG  
AATAATTGAACTGTTGAGCCATTAAGACAACAGTTGTTACCTGTAAATGCTGTGAGGAGATCATAGCAGTTCACATCTGGATAACTACAGAGTATTTCAAATATTTGGATGCTTCCAGCCC  
TTTGGGATTGAACTCTGCAAGTCCTAGCAAATTGCTCAAGATCTCACCCACAAAGAGTCTGGCAGCCAGAATGCCTAATTTTGTTCATGTGATCAAGGTAGGCTATTGGACACAAAAG  
TGCTGCTGATCTTAGCTTGTCCACCAGCCTTCTTCTGAGAAAGATGCCAAAGCAATGAGCGTCCCTGCAATATTTTACAATCAGAAGCTTGCCTATGTACAAAATAAATTTGGCT  
AAGTAAAGCTGATGAAGACAAGAAGAAGAAGAAGTTTCTTACACACCAAGGAGTGCCCAACATAGTGCAGCTTCTGCTTTGTCTGTTTGGCAACCAAGTCTACCATAGCTGGGA

AATCATTCTCCACTAGTTCATCCCATGACCATGCCCAATAAGCCCGATCGGATGGCGTAAGAGACACGTGGCGATTGCTGGAGCGAGTGCCTCTAATATTACCGATCCACACATCAAATCC  
GTTATCGGCTAGCACAAAGGCCAGGGATTGCTCCGGAGAGTTCAATAGCCAGGTCATCCCATCCATAAGAACACCGTGTTCAGCAATACTGGCTGCCTTGCCCCCTCCAATAACTCCATTG  
CGCCCCACAGGTATCCTCTGCATGCCAGTATGTAACCATCCTCAGTTGTCACCTATCTCCATAAATTTATCTAAATTAATCCACTTTTCTTCATAAAATCAACATAAATATGATCAGATTAAT  
CGTTCATAATCAATATAACCTCAAACCTCTGGCATTATACCCATATGGGCGCACACAGCCTCGCAGATTCTACTTCTTCAGGCGAAGGAGAGAATCCCCCTCGCCAAGGAAGAACAA  
GAAGAAGATGATGATGAAAGGAAGCTG

>comp160732\_c0\_seq14

ACAGTAAATGCTTGTCTTTTAGTCTTCCATCTATACGCTCTGTTGGCAGATCCCAACTTTTCTTCCCAATTGCTGCAACTTTTCCCTACTTTATCTCTATCTTTCTTCGCATCAGAAGCTCTTC  
TTTCCCTTGTGCTCTCTAAGTACTGCTACGGTTATTCTTTCTACTACCCTCTGATTTTGATTGCCAGCTCTCATAATAAAGTCCTTCGTCCCCACCATTCTACTTCTCAGAAAATCTTTTCAG  
AACGAATGGTGCCAGCTGCGACCATTATCATCACTCGAAGGTGAACACTATTGTTGTTGAGGTGGTGAACCTGTGATGAGGTGAGGCTGCTCGA

>comp160732\_c0\_seq8

CTTGCAGGGAAATTTCTATCTTGGCCCCCTGCGAGCCATTGAAGTTTTTATTTATAGAAGTTTCAAACCAAATACAAAGTAGTTACACACTAAATATTCAATTACAAGCAATATACCCACTAA  
TCATACAATTGCCTACACTAATATTGAAAATTTAGATTAATAATATCATCATACAAAATTGTATCAGGATGAGTTTAAATACTGCTAAATTTATCTTGAATTAGTGTAGTGCAAATCTTCAAATA  
TAACTCATCATGATACCAATTTGTATTAAGATATTCTAACCAAGTTTTCTTCTACAATAATTGCTTAAATGAAAATTTGCTTGTCTTTTATTCTTCTAGTTCACCTTGCTGCTGCTATTTTTCTCC  
ACTATTTCCATTTAATATTGATCTTTCATCACCTCAAACAGAAAAATTACCTAAGTACTGTTGCTGCTATTCTTTCTACTATCACTCTGATTTTGATTGCTCATAACTCTCATAATAGAGTCCTT  
CGTCCCCACCGTTCTACAACCTCAGAAAATCTCTCAAACAAATGGTGCCACCTGCGAGCTTTATTCTCACCCTTTCTTACTTTTACCTTCAGTAACCTGCCTCCCATTCTCCACAGGA  
ACTATTTCTTACAGCTGAGTTTCTCTACTCTTTTCATCTCCTCCTTTGAAGAATCTATCTTGAAAATGTCAGTTTTCCATTGGGCTTCTTCAGAGCATGAATTCAATGTTTCTATTGGCGGC  
TGTTCCTCTAATTTCTGTAGGAGGCTTTAGAGAAGCAATTTTTTCTCCTTGCAATATTTACCTGGCATTCTTAAAGTTGTAGGAGCAGCAAAGGACTTTGCTTCTTCTTCAAATTTTTAAA  
GGTTTTGATGGGAGAGAGGATAGATCCTTTTAATACATACTCACAGTAGCAGGTGGGCATGATGAGGTCATCGTCGGTGAGGTCTGCCATATATAACCGGTTTTGTACTTCTCTTGTATG  
ACCAAGTAAAGGATTCGGCATTCTTTTCCCCTGAGCTCAGATAGCCATCTCTTAAATCTCGAAGGTAAACACCATTGTTGCTGAGGTGGTGAACCTGTGATGAGGTGAGGCTGCTCGA

>comp160772\_c0\_seq6

TAATTCCTCCGTTAACCTACGCGGCTTCCTAACGGCTAGTTCAAGTAGCCGTTACGAGCGTGGTCAACTAATTTTAAACTCCAGCCCCTGCCGTTCTTCTCTCCTCGCCACTCACTCCTCTC  
ATCCACAACCTGTCATTCCCTTCTTTCTCCTCGTTATCAACCGTCTCCCCACCTCCCCTCCCTCATTTCGAATCGAATCTCCATCTCCTTCCCCACCCCTCGCCGTTCTCCTCCATGGACGC  
GGCTGAACTCAAACGCGTCTTCCAACCTATTCGACCGCAACGGGGATGGCCGAATCACCAAAAAAGAACTCAGCGACTCTCTCCACAACCTCAGGATCCACATCCCGGACGACGAGCTC  
CAGTCCATGATCGACAATATCGATGTCAATGGCGACGGTTGCATTGATATCGACGAGTTCGGGGTGTCTATCAGAACATAATGGACGAGCAACGCGGCGACGAAGACGAAGAGGAAGA  
CATGAGAGAGGCTTTCAATGTCTTCGATCAGAATGGCGATGGTTTCATCACTGTGGATGAGCTAAGGTCTGTTCTCTCCTCGCTTGGGTTGAAACAGGGGAGAACCCTGGAGGATTGCCG  
GAAAATGATCAAGAAGGTTGATGTGGATGGAGATGGGAAGGTTAATTATAAGGAGTTAAGCAGATGATGAAAGGAGGAGGCTTCGCCGCTTGACGTGATCAGATTTGTATTGGCTTTG  
GCATTGGTGAGGGCCTGAGAGGGGCGATGAGCTGATGCCCTAGGTTAGTGAAGAAAAAAGAAAAAAATGGTTTGTGTTTGGATTTTTGTGAAGAATAACTGAATCTGGAACTTTGGAG  
ATTTACAAAAAAAGGCCAGTTGACCCCTTACAGGCTTATTATACACATCATTATTATAGGCAGTTGTGCAATGAAGGCTTCCATGTTCTCGCAGCCAAACATAAATGCAGATCGCTTG  
CAGACTCGCATGTTTCATGAATATTGTAATCATAAAGAAAGTTGAAATGTTTAGTATTTCTAAATAAAGAAAGGTTGAGTATTGAGGTATTTTTTGTTCGTGAGATGAGGTATAAACCCAAGGC  
TTTGAGGCGTAAGTCTTAAATTAGAAATTTGCATAAAGTCAAATGAGGATATCATTGCTAGGACTTCTTTCATAAATATAATTTGTTGATTTAGAATAATTCATTTTTTTCTG

>comp160776\_c1\_seq34

CGACGGGAGCTCGCTCGCTGCAAAGAAGAATGGGGATCAACTCCATAGAGCTTGCTGGCCCCGCTGAAAGCTCTTCCTCCAGTGGACTTTTGTGTGCTTATGGTTCCTCTCTCCTTTCCA  
ACAACACAGACAAGTCTTCTATGGTGGACTATATCATAGGGGTAGCAGACCCAGAAAAATGGCATGCAGAAAATTTTGAAAGGAACAAGATCCATTACTCGAGGTGGATGTCAATTCTAG  
GGCCAAAAATGATCACTTGTGTTGCTGATAAAATTGGGGTTGGGGTCACTTCAATCCATTTGTGGAATGGAGAGACAAGATAATAAAATATGGTGTGTGAGGATGCAGGATTTGGCACT  
GGATATATTGACTTGGGATAGATTCTATCTTAGTGGTCTGTTTGCAGAAACCTGTACACGTTCTTGTGATAATTGGGACATAAGAAAGGTCAACTTAGTCAATTTGAAAGCTGCCACTTGTG  
CTGCGCTTCTTCTTCTGCCTCCTGTTTTCACTGAGGAAGATCTTTATGTCAAAAATTTGTAGCCTTTCTTACATGGGTGATCTACGCATGCAATTTGCAGAGGACAAAGATAAGGTTAAGAAG  
ATTGTCCAAGGGAGTTTCAGAACATTCCAAGTAATGTACAAGCCTCTTTTAAAGGAGTATGCAGCTGAAGGGTACTGGAATTCGGATATTATCCTCATTCCACATTTCAACAGGACTGCG  
GAGTGTCTGCCACAACATCACTCTTCTCTTCTTCTTCTTCTGCAGTACATCGCAGGATGTTTTGGGGAAAGCACAGGCCGTGCATGACTGGTGAAATACCATCAGAATTTTTTATTACCTCT  
AGAGAGCAGGCTTCTAGCTGTGTTCTCAAAGCACTGCGGGTATAGTTCTGGTTTCAAGTGCAGACAAGCAGTTTCTGGATTGCTTGCAACTGGAGGAGTTAATGCTGCTCGCTATCTC  
ATGAGGAAGATGTCCAAAGCATGGAAATCCCGGACTGCATGATTCTTCAGAAATGGAGCTGTTTATCAAGTGCACCTATTTCGCGGATTGATCGACCAAGAAAGCATTTTGGTTGAAAGG  
TTCTTCTGCGTATTTTAAAGGAGGGCAGGCGATCACCATTCAAAGAGAGTTCATCCAATCCAATTCGTAATTTTGATATACCGATGAAAGAGAACGTACACATTTTCCATCAAATACTCAA  
TATTTTTACCATAATCTTTTAAACCCCTCTCTATTTTAAAGATGTAGAATAAGTGTATTGCTTAATATTAGCAAACCTCTAACAAAATTACAGATTCACTACAGGACCCACCTGCACGAAACTC  
ACTTCTTGCCTATCCTTGATCATATTAATTATCCTGCTTAAGTTTTCGTTACTTTTAAAGTTTGACCGTCAGTTTATTTGTGCAATGATTAGTAATTGTTTCTGCATCTTTATGTTGTATCGATTG  
CGTCCGCATTGTTTCGCACATTTTCTCATAAAGGATTGTTTATTTCTTCTTCTATGGAGCGATCCATATGTTTTATTGTATTATTGAAATGGAATGATCTTTTCATGATAAATTGGCACTT  
TGTGTTCAAGTTTAAAAAA

>comp160796\_c0\_seq18

AAATCTATAAGTTTAAAAGATCTATTTAAAACGGTATCCTCCAATTGAGGAACTACCGACAATATAATCATTAAAACAATTTTGTCCAGTTAATTGCATCATTCCTTTCTTAGCCATGGCCG  
CTTGATTTGGTCTTTACATGTGATTATATTGCAAATTTATCACCTTGATCTTTGGTTTTGATTGTTTTGTACAATCGTCCAATCTTTCAGAGACCTCTAATAACAGTAAAGCTTGGCCGTAG  
GAGCAGTTTGAGGAAGAGTGGAGCTCCATCTAACACTAATTCATAATTTTCAGAGATGGCCTCTTCCCTCAGACCGCACCACCATCACATAACCAACTCCTCATCTTCAAATAACACACAA  
ACCAATCCATCACCACCATCTCCAACCCCTCCGGCCGCTCGGCACCACCGCCATCATCCTCACCACCACCACCAGCCCCCTCCATCCCTAAGCCCTCCGACCACCTCAGCACCACCTCCA  
TCATCACCAGGCAGATCTTCTCCACCCCTCACCTCCCGTGCCTCCACCGTCAACAACCCCTCCAACGCCGCCATCATCGTCCAAGTCGCCGCTTCTTCCGGCAATTCGCCCCACCTCCCC  
CGCCAAAACGGCCGGCGAAGCCCTCGCCTTCTACTCCAACCCCTACATCTGATGATAAAAATGCTAATTCAGAAAATCATCAGGTGGATCTGATTTCAATTTGCCTCTGGTGGCTGGAGT  
TGCTGCTGGCATTGCTCTATTTATCTGATTATTGGCATTACAGCATGTTTCTGTTGTGGGAAGAAAAAGAAGAAGAGGAATCATAACGCAATGCACTACTACTCAGATTCTGATGTTAAAG  
GAAGTGATTACTACAGCAGTGGAGCAGGCCCTCTTCCGAAATGGCATAAAGGAGGACCAAATGCTGCCATCAATATGCCAATTTCTCAAGGAGTGGCTTGGCATGCACCTCCTCCCCATT  
CCATGAACAGTGAAGCGAGCATGGAATACTCAGGACCACATGGACCAGCCTTGCCTCCGCCCTCTCCCGCCCTTGCCTCGGCTTCATTAAGAGCACATTCAGTTATGAACAATTGGCAT  
CAGCAACAAATGGATTCTCTCATGAAAATCTAATAGGACAAGGTGGCTTTGGTTATGTGTACAAGGAGTTTTGCCAAACGGGAAAGAAGTTGCTGTGAAACAGCTCAAGGCAGGTAGC  
GGGCAAGGAGAGAGGGAGTTCCATGCAGAGGTTGAGATTATTAGCAGAGTTCACCATCGCCATCTGGTCTCTTGTGGTTACTGCATTGCTGGCTCTCAACGATTGCTTGTATTGACT  
TTGTTCTAACAAGACTCTTGAGTTCCACCTGCATGGTAAGGTTGCCTGCATTTTCATTCATGTCTACTTAGGGCATCTCCAAGTGAAGTCC

>comp160796\_c0\_seq2

AAGGTTTACTAATTTCTTTTGTAGCTATTCAATATTAATTTTCATCTACCTCTTTTAAATATCACTAGCCTAATTATAACATCTTCTCATAATTTAAATGAAACTGAAGGATTGATGATACCATCTTAT  
CATAAAACACTGATGAGTCTAATTTCTTTATATTTTAAACCATCATTATCAAACCTCTGTGTTAAATTTGTTCTATTTTAAAGTTTTGAAATCTCCTTGTCTGATTCTTTCTGTGGTTGCTGAACTGT  
ATTAAAGTTACAGAATGATGAAGTTCGTCTCATTGCAGGAAAGAACCAGCCAACAATGAACTGGCCTACCAGAATGAAGATTGCTTTAGGATCAGCGAAAGGCCTTGCCTACTTGCATGA



AGATTGTCATCCTCGCATCATCCATCGAGACATCAAAGCTTCAAATATTTTACTGGATTATAGATTTGAGGCGAAGGTTGCGGACTTCGGACTGGCTAAGCTATCTTCAGACAACACTACACCC  
ACATCTCCACTCGTGTTCATGGGAACGTTTGGGTATCTAGCTCCTGAATATGCATCAAGTGGCAAGCTTTCTGAGAAGTCTGATGTCTTCTCATTTCGGTGTGATGCTTCTGGAGCTTATAACA  
GGAAAGAGGCCAGTTACAGCAATCCTATGGAGGATAGCTTGGTTGATTGGGCAAGGCCTCTATTGACACAGGCATTAAGTATGATGAAAACACTATGAGGAGCTGGAGGTGCTGGTTGATCC  
AAGACTGGAGGGAAATTACAGCAAAATGGAGATGGCGCGGATGGTAACATGCGCTGCTACTAGTGTTCGCCATTCTGCTAAAATGCGTCCAAAGATGAGCCAGATTGTAAGAGCACTGG  
AAGGTGACTCATCTCTTGAGGACTTAACTGAGGGCGTGAGGCCTGGGCAAAGCATGCAGTTTACTTCTAGTTTCAGAGCATGAATCAGGCTCCTACGCCTCTAAGATGAGGCGTTTCAGAA  
AGGCTGTATTTAACAGCAATGATTTGAGCCAAGAGTACAGTGGACAGACTAGTACTATGGCCGCAATCCCTCATCATCAAGCAGTTCTGAAGAGATCCGCACAGACTGGACTAGAGAA  
GTGAAAACATAATATAACAGCAAAACAAAATCACTTAATCTATCTACTGGTGTCTGTTGGAGGGGTAGGGACTTGGTTTATGTGCTATACTTTATATATATATTCTGAGCAAGAATGGCTTT  
TGTGATTCAAAAAGACTGGAGACTTCTGATATTCTCTTAGTTGCCATCAAGTTCATATTTAGAATTTTTTCATGATCAAATATTGTTAAGAGAAAAGTCTCTCATTTTCCCTAAATTTAATGGTT  
ATTATGAGCTCTTATTGAACTATTATGATGATGAGAATTTATGTTTTATGTTTTAAAAGGGAGAGGGGAAGCTCCACCAAATGCACATACATCATATTCC

>comp160796\_c0\_seq7

TGCATATATTTTTTCTCAACGGAATTTTTTACTTCAAAAAAATTCGTTGGTGAACAATGGCATCACACTATTCACCTTTGTTACATTACCATGTGAATTGGAATTTGGTTAAAGCTGTCGGTGG  
ACTGCATACGCATGTGCTCCCTTGGAGAAGAAATTATTATGTGCAGAGGCCGGACACAGAAGGCTGTCTGGAGACCAATTAGCATGCGAGCCACAATACCGGTACCAAGCGAAGGGGTG  
ACATGTCCCATTCTGATTAGTCTCCGGACAACGTTCAACGTCCGCGTCTGATGTTTGATTGATTTTTAAACCAGACATAGTAAATACAAAAAGGGTCAAATATTGCAGGAAGTGATTACTAC  
AGCAGTGGAGCAGGCCCTCTTCCGAAATGGCATAAAGGAGGACCAAATGCTGCCATCAATATGCCAATTTCTCAAGGAGTGGCTTGGCATGCACCTCCTCCCCATTCCATGAACAGTGAA  
GCGAGCATGGAATACTCAGGACCACATGGACCAGCCTTGCCTCCGCCCTCTCCCGCCCTTGCCTCGGCTTCATTAAGAGCACATTCAGTTATGAACAATTGGCATCAGCAACAAATGGA  
TTCTCTCATGAAAATCTAATAGGACAAGGTGGCTTTGGTTATGTGTACAAGGGAGTTTTGCCAAACGGGAAAGAAGTTGCTGTGAAACAGCTCAAGGCAGGTAGCGGGCAAGGAGAGA  
GGGAGTTCATGCAGAGGTTGAGATTATTAGCAGAGTTCACCATCGCCATCTGGTCTCTCTTGGTTGGTTACTGCATTGCTGGCTCTCAACGATTGCTTGTATGACTTTGTTCCCTAACAAG  
ACTCTTGAGTTCCACCTCCATGGAAAGGACCAACCAACAATGGATTGGCCTACCAGAATGAGAATTGCTTTAGGATCAGCTAAAGGCCTTGCCTACTTGCATGAAGATTGTCATCCTCGCA  
TCATCCATCGAGACATCAAAGCTTCAAATATTTTACTGGATTATAGATTTGAGGCGAAGGTTGCGGACTTCGGACTGGCTAAGCTATCTTCAGACAACACTACACCCACATCTCCACTCGTGT  
ATGGGAACGTTTGGGTATCTAGCTCCTGAATATGCATCAAGTGGCAAGCTTTCTGAGAAGTCTGATGTCTTCTCATTTCGGTGTGATGCTTCTGGAGCTTATAACAGGAAAGAGGCCAGTTC  
ACAGCAATCCTATGGAGGATAGCTTGGTTGATTGGGCAAGGCCTCTATTGACACAGGCATTAAGTATGATGAAAACACTATGAGGAGCTGGAGGTGCTGGTTGATCCAAGACTGGAGGGAAATT  
ACAGCAAAATGGAGATGGCGCGGATGGTAACATGCGCTGCTACTAGTGTTCGCCATTCTGCTAAAATGCGTCCAAAGATGAGCCAGATTGTAAGAGCACTGGAAGGTGACTCATCTCTTG  
AGGACTTAACTGAGGGCGTGAGGCCTGGGCAAAGCATGCAGTTTACTTCTAGTTTCAGAGCATGAATCAGGCTCCTACGCCTCTAAGATGAGGCGTTTCAGAAAGGCTGTATTTAACAGCA  
ATGATTTGAGCCAAGAGTACAGTGGACAGACTAGTACTATGGCCGCAATCCCTCATCATCAAGCAGTTCTGAAGAGATCCGCACAGACTGGACTAGAGAAGTGAAAACATAATATAACA  
GCAAACAAAATCACTTAATCTATCTACTGGTGTCTGTTGGAGGGGTAGGGACTTGGTTTATGTGCTATACTTTATATATATATTCTGAGCAAGAATGGCTTTTGTGATTCAAAAAGACTGG  
AGACTTCTGATATTCTCTTAGTTGCCATCAAGTTCATATTTAGAATTTTTTCATGATCAAATATTGTTAAGAGAAAAGTCTCTCATTTTCCCTAAATTTAATGGTTATTATGAGCTCTTATTGAAC  
TATTATGATGATGAGAATTTATGTTTTATGTTTTAAAAGGGAGAGGGGAAGCTCCACCAAATGCACATACATCATATTCC

>comp160796\_c0\_seq9

AAGGTTTACTAATTTCTTTTGTAGCTATTCAATATTAATTTTCATCTACCTCTTTTAAATATCACTAGCCTAATTATAACATCTTCTCATAATTTAAATGAAACTGAAGGATTGATGATACCATCTTAT  
CATAAAACACTGATGAGTCTAATTTCTTTATATTTTAAACCATCATTATCAAACCTCTGTTAAATTTGTTCTATTTTTAAGTTTTTGAATCTCCTTGTCTGATTCTTTCTGTGGTTGCTGAACTGT  
ATTAAGTTACAGAATGATGAAGTTCGTCTCATTGCAGGAAAGAACCAGCCAACAATGAACTGGCCTACCAGAATGAAGATTGCTTTAGGATCAGCGAAAGGCCTTGCCTACTTGCATGA

AGATTGTCATCCTCGCATTATTCATCGCGACATCAAAGCTGCAAACATTCTTCTGGATGATAAATTCGAAGCTATGGTTGCAGACTTTGGACTGGCCAAGTTAACTTCGGACAACCTACACC  
CATGTCTCTACTCGAGTCATGGGCACATTTGGATATCTGGCTCCTGAATATGCATCCAGTGGCAAGCTTACGGAGAAATCGGATGTTTTCTCGTTTTGGTGTAATGCTTCTGGAGCTGATTAC  
TGAAAGAAACCAGTAGACAGTGATGCAATGGAGGATAGCTTGGTTGACTGGGCAAGGCCTTTATTAGCAGAAACATTATCTGAGGAGAACTATGATGAACTAGCTGATCCAAGATTGGA  
AGGAAATTTTAGCAATCTGGAGATGACACGGATGGTAGCATGTGCTGCTAGTGTTCGGCACTCGGCGAAAAGACGCCCAAGATGAGCCAGATTGCTCGAGCACTGGAAGGTGATT  
CATCCCTGGATGACTTGAATGAGGGGGTCAAGCCAGGACAAAAGTATGCTCTTCAGTTCGAGTTCAGACCATGACTCGGGCTCCTATGCCTCTAACATCAGTCGTTACAGAAAGGTTGCAT  
TTGGAAGTAATGAAATCAGTCAAGAGTACAGCGTACGAACCAGTACTATGGGGTTAAACAATTCAACATCAAGCAGTTCTGGCGAAGTGAAGTCAGTCAGACCTCGTTCTAACAAAGGT  
GGTCCAAAGCAGTGAAAATAAGCAAAAAGAAAATAATCAAGATCATGGTTAGATTTTACTGATTCCTTATACATTAATAAACTTATAATTTATAACAGATTCAATTCTTCAATGTGAAGG

>comp160804\_c0\_seq3

CCTCTCCAACCTCACCCGCTATAAACCCGGCTCCCTGATCCTTCTTCTTCAATTCAGCCCTCAAGAGCTGCTTCTGGTTCGGTGGTGAAGAGCCAGGAGAGTGAGAAAGATATCGGAAG  
ATAGAAAAGGAAATCGGCCTAAGATATTGCTGATGGCGGTGGCCGCGATGGCTGCGAAGACTCCGGCGGCAAGCCCTGCCGCGCTGCCACTGTCCGACTTGGTGGCGAGAGACACGA  
TCATTGCCTGGTACAGAGGCGAGTTTGCAGCTGCGAACGCAATTATTGATACGCTCTGCTCCCATATCGTCCAGATAACCGGCGTTCTTCCGAGTATGAGGCCGTGTTCCGCTGCGATCCA  
CCGCCGCGCTTGAACCTGGATCCCCGTCCTTCATATGCAGCGATATTTCTCCATTGCAGACGTATCAAACGAACTCCGCCGCGTCGCCGGAATCGCAAGCCCTGAATTCACCCGCTGTC  
AGCGAAGCTCAGAGTGATGCCGCTGTGACGCCGATTAATAGGGATGTGCCAGGCACTGGATCAGATGTCACCCGCTGTTGAAGAGATCAGAAGGTCCCTCGACGAGGAGCGGTCTTCAG  
GAAGAATATCGGAGGGCACCCGAGAGGAACATTCCTACTGCTTATTCATCAGATTGTAATATTGCAACGGAAGGCAAATCTGTTGATGCCGAGTTTGCCGATGACGGAGGATCTCATCAAG  
CGTTGACAGAAAATGATCAAATATGCACGCATCATGAGGAATGTGTGACGCGTCTGAGAAGATCAAGTTTTTAAAGGGTTTTGTTGCAAAGGAGCCTGTGAAAGGGCATATGGTCAATG  
TGGTGAAAGGGCTGAAGCTTTATGAAGACGTGTTCAAACTTTGAACTACACAAGCTTACTGAATATATAAATGAACTCCGCTTTGCGGGCCGAAGGGGAGAAGTATCAGGTGAAACAT  
TTATTTCTTCAATAAGCAGATGAAAGGCAACAAGAGAGAGATTATCAACTTGGCGTTCATTATTTCAACCAACAAATGAAGAGACAGCAAGCAGCATTGAACCTATTCCTCAAATCT  
GCTATCAGTCATAGATCATCTGACGCAGTGGCACTTAATACCAGAAATTAAGGGCTAATAGTTGTCTTATACATTTCTTCGATGAGGATGAGCACTCGCAACCGTACTTCAAACCTCCGC  
ATTTAGAAAATCCCATCTCTACACTTTTTCTTTCTGAGACAACCATAGCTTTTGGCCGGGTGCTCTCCAGTGATCAAAATGGAGATTATAAAGGCTCCCTTACACTCGCACTCTCCGAAGG  
GTCCTCCTGGTGATGCGTGGTAACAGTGCAGACATGGCAAGGCATGTCATATGTCCGTCTCCTAACAAAAGGGTAAGCGTTACCTTCCTGAAAGTCCGATCTGCTACAAACCAATCGA  
ACTACCATCTCCCGCCTCCAGCAATCTAAAGCCATTACTCTATGGCAACCCCCACAACCAGTCGAAAGTGCCTGAAACAGGGCCTATTGCTTATGGACCACAAGCCATGGTGGCACCATG  
GGGGCTTTCTTTCGAGCTCCTGTGTTTATGTTAGCGCCGACGGCGACGAGGCCAATGGTCATGAACCAAGGGAGGAGAGGTGGACGCGGCGCACCCGAGTGTCTTGGCGTGGAAAT  
GTGGGTCCAAAGAGGTACACCAGGCATCTTCTCCTCGGTTTCAAAGAAGGAGACCACTAGAAGCACAAGTGGAGAAAACAAAAGTAAGCCTCTTCTTGTGTTTTCTCAGTTTGCTAA  
AAAGAAATACTGTAGAGATTAATATTAGGAGGAAAAGGCTTGTTTTAGTAGTCTTTCTTGTTCGACTGGTACTGCATCGATTTTTGCTTAGTTGGGTGATTTTTTTTTTTTTTTGGTTG  
TGTT

>comp160824\_c1\_seq9

CGCCTCTATAAGTTCCCTCCCTCCCTCCCTTCCCTCTCCACACCTCAAACCAACCAAGCCAATTCTCAACAATGGCGCCATCACTCTCCCTCCTTCTCCTTCTCCTCCTCGTTGCAG  
CGGCCTCCGCCGATGACTACGGCTGGGAAAGCGCCACGCAACCTTCTATGGCGGCGGTGATGCCTCCGGCACAATGGGAGGCGCCTGTGGTTATGAAATCTGTACAGCCAGGGGTAT  
GGCACAAGCACGGCGGCACTAAGCACCGCCCTATTCAACAACGGCATGAGCTGTGGATCTTGCTACGAAATGCGGTGCGATGATGATCCTAGATGGTGCCTAGCCGGCTCTATAATCGTC  
ACGGCCACCAACTTTTGGCCGCCAACAACGCTCTGCCAACGACAACGGCGGGTGGTGCAACCTCCCTCCAGATTTTCGATCTCGCCGAGCCCGCCTTCTCAAATCGCTCAATAC  
CGTGCTGGCATTGTCCCCGTTGCCTTCCGCAGAGTCTCCTGTGTGAGGAAAGGAGGGATTTCGGTTCACAATCAACGGACTCTACTTCAATCTGGTGCTAATCACAATGTGGCTGGC

GCTGGTGACGTGCACGCGGTGGCTATTAAGGATCGAACACCGGATGGCAAACAATGTCGCGAAATTGGGGTCAGAATTGGCAGAGCAACTCGTTTCTCAACGGGCAGAGCCTGTCCTT  
CCAAGTGACCACCAGCGACGGCCGCCACTACTAGCTACGATGTTGCGCCCCCGGATGGCAGTTCGGGCAGACCTTTGAGGGTAGCCAGTTCTGAACGTTACGGCGGAATAATTAAG  
AGTTGTGAGCCAGATTTGGAGCTGTGGTTGCTTCATATTGTTTAGCACCCGCTGTGGCCTTTCTCATTATAGTTAGGTATAATAGTTAACTAGAAATATTTATTAAGAATTTGTGCAGGTAA  
ATGGGGTGTATGAGCTTGATTTGTGTGCAGAAAGGGGCCATGGGAAAGGAGTTTCTAGATTTGTCATGTTGTTAGAGTAGGCTCTGAGAAAGGAGATCTGGGCCTCACATGGGTGATATA  
AATTAGTGGTTCTATTGATAAAGAAATTATTGGTTGTTAGTCTTTACGATGCTTCACCTGATTGTTTTCGGCGCTTTTTATTAATGTGGGTTGTTGACATCTTCACTCTTCTTGTGTAAGATCA  
GGCTTCGCATGGATTTTAAGTTTTACATTATTTAACCTTTAAAAACAATAATTACCTCAAAAAAAAA

>comp160866\_c0\_seq1

AAAAGTATAACAATGAGTATAATCTAGGAAGAAGCATAAAAAAGAAACCTCCCAAGATAAAAAAAAATAAAAAAGTGAGAAGCATAGAACAAGCTAAAACTTCCCAATATGCCTATACTT  
CACAAAAAAGGGACAAAAATCATTGTTTTGTTGTCAAAGTGAGGACACACCAGAGCTCCTAGCAAGTATCAAACAATAGGGTAAGGTCCACTCCAAAAGGGGAATACCAAGAGA  
ATTGAGGCGCCCCCTACAAGAAGACCATGTAGAGACCCCAATATTGAACACCTAACGAGAGTCGTCCCCGCCACCCTCCTTCCACTTCCTAGGATTATCAGTAATTGGCCCCAAACGA  
TGAAGATCCTTAGCAAAACGAGTCTTATAGACTCTATCATACTTGGGTCAGATCTTCTTGGATGCATGAGGAAAGCCTCAGTGGAAAACTTGAAGGGTATGTTGGAGATATCACCATCCC  
TAGATGAAACAACCTTGCTTGGTTGGAACATTAACCTTCCCCACTTGAGATTTGCAAGGAAGGGAGAAAAGACTTCTGATCTCCAATACCTACATTGGAATCTTCTTGTATGTCTCCTAGA  
TTTTTTGTAACAAGACTCCAAGGCCATAGGTTTCTGAAATTTCCCTTCTTTTGCATATGCTTGATAGTAGAAGGAGAGTGCAGCAATTTCCAACCGGAGTGGATAGAGAGTTGGCTGGA  
TCATAGAAGATGAATTTGGGTCATTAATCGCCATTGGAGGGCAACTATTAGTGACAAGAGGGTCACTAGAAGAGGGGTGCTGCTAATCTTGCACAAAACACATGGAGGATTTCGATCTACA  
TTGAGGTTGTTGTGTGGGCAGCTTGGAGGATTGAGGAACATTGGGACAATTACTTATGTTGTGTGCAACAAAGCCACATTGGAAGCAAAGGTGAGTGATATCCTTATATTCGGCCCTTAA  
AAAACTTGCCATGGAGCCCAGAGATCCAACTCCTGGAGGAAGCTTGGCACCAATCCATCTGCACGCAAATACGAGCAAAGCATTCTCCCCTAGGAGTTTGTGTTGAGCATCAACT  
CATAGAGGTGGTCCAAAGAAAAAGCTATCAGAACAAGATTGGTGTGTGCCAATACATTAGAGGCAAGTGTGAAATAAAAAGTATGAATAATCTCCAAGCTTGGGCAACCAAGAAAAAT  
TTACCAAGCAAGATATAGGAAAAAGGAGTTCACCACATCAAAAATCTCAACATCAATAAAAATAAGAGAGGATTTACCTTGAAAGGCAATGGGTGGCTTATGTCTCACATAGTTCAATCTA  
TGTTGAAAGAATGAAGCGAAATTGGCAAGTAGATCAATAACCCACAGTCTACCCATAAGGACAGCATCCAAAGCCTCAGCACTTTCAAAGAGGCAAATGAAAGAATCCAGGGAAATGG  
AAAGGAGCTGAAAATCTTCAAATATTGACCATTCAACTTTAATTCGTTGTTTAGCACAAAGTAAGGTAACCTTCACCCAATAAGCTTGACACTAGCCATCTTCAAGCCTAACTAAGTT  
GGCATGGACGGACTCCATGTTCAAAGTCACAGAACTTCCATCATCTAACATAACTGCCGCCCTTAGGAACATCATCAATTTTGATTACGTCCAACCTATTCCATACATAGGATAGGTCATGGG  
CAGGTTTAGCACCATTTGGATGCTTGGAGGATTGTTGAAAATAAGTAGTTTGGCCATTCAAGCAAGCAGTTATGGTAGAGGCATTTGCACAAACACCTGATTTGTAATTTGCAGATTTACA  
AATAACATGAATGGCTTCATCTAATGTATTACATGCATGCGATCAATCTCAGAACAAAACAGTAGAATCCATAGGATCATTCAAATACCTACAGTCTTCGCAATTTCTGATCCACCATTGCT  
CATATTGACTGCAAAACCAGCAGTCAGACTAGCATTGATTTGCAAGAAAACCAAAGCTGCAGTTTGAACCTTCCCTGATCCAGAAAACGCTGGTTCCATAGCAGAAGTCGGACTTGCCT  
GGCCTGATCGGAGCCGCTCGAGACGCTACTCGCCGGAGGTTGTGGTTGATCTCCCAGCCTGCAAGAACGAGATACATTGAACTCGAATTCGCAGACGGAAAGGTTCGAGGCAATG  
ACGAACGAACGAAGAAGAATCCCGTTCCAAAGCGAACGCAAAACCGAACGGAAGTGGCTCACCCGACACCAGCTCGTCACCATAGCTAAACGATCGGACTCCATTGAAGGTACTTGA  
AGCTGTTTCATCCTCAAATGAGTTAAAAAACTGCTCGTGTTCACAGACGAAGCATCAACAATGAAAACATCGACCTGCTCTGCCGCTAGATCAGCCTTCAAAACCTGGTCGTAAACATCC  
GATTCCTTGTCTTCCAGAACCGACGACCACTTCTCCTCACCATACTTCTCCGTTGATGCTTCTTTCATGGCGCTGAGCAGGGAGAAGAGCTCACAAAGAGAAGAACTTGAACCTTAAT  
TACTCAGTT

>comp160902\_c0\_seq7

GCGGTCACCATTAATGATAATTTGATTATAATGTACTATAATAGGTGGTGCATCAAGACTAAGCTAGTGATGATCAACGAGCAATAACTGAAAATGAAAATTTGGAGAAGGATTATTTTCAT

TTGGTTGGATCCAACAAAAACATGCATTAATATTTGTACTTTTTTATGAGTCAGCTCATTTCCTTGAGTAATGGATTTTGAGATAGGGGTGTCAATTCAGGTCAATGGGTCGGGTTGTGGTC  
GAACCCAACTTGACTTGACCATAAACGGGTTGACACTAACCCGACCCGTTTTTGCTAATGGGTCAAGATTGTCAACCCAGACCCGTCTCGTGCGGGTTATCAGGTTGACCCGACCCTAGC  
CGCGATGGCTAGAAATCACTGGAGCCATCTATGGCAGGACGAATAGTGGCATCTTTACTATTGGACGGATGCACTCAGCAGCAGCAGTTCGGACAGTCGGACTCGACCAGATGTCCGGC  
GCAGCTCGGACTCAACACAGATGTGATGGAAAAACAAGACACATACATATGCGGGTTATCGGGTTACGCGCTGAAACCTAACCTGACACGAGTGATCGATGCAATGACTCACGACGCT  
AAATCAAGTGACACAACGACTCACGCTGACGCGTACTGGCAATAAACGGGTCAACCCGGGTTGGTTTTGGGTTTTCGGGTCGACCCAATTTTACAAATGGGTTAGAATTACAGACCAG  
AACCTGAT

>comp160916\_c0\_seq5

CGACTTTATTTCCAAAAAATTTAAAATATTTCAAGAAAATTTAGGCACCCAATTTCTCAAATAACATCCATTTTAGCCAAAACTAAAAATTTTTACTACAATTAGCAGAATCCAGACG  
ATAAGTTCATGAATAAAATGAAAAATAATTTAAAAGAATAAAAATACTAGCAAATTCATTTCTAGAACAGCATAGGTCATACCATCACGCAACTGGGCTTGTGTTCCATAGTTTGTAAAGC  
GCAGCCTAAGTTCCTGCAATCTCTGCAGCCAAACCGGTTGTGTCTCTGGAATAAAGTAAGTTGCGCAGATAGTGTGTAGCTTCAGTCTGAAGAGTTTGAACCTCCTCTCAAGATCAG  
AAATATAGCGTGCCTTTCTTTCTTTAGAGCGAGCCGACACTGTGCGATTAGCTAAAATCCTTCTTGCCCTCTTTGGATCAATGGCCGTGAGCTCCGCTAGCTGCTCCGCCGTCATGGCCTTC  
TTCGCCTCCAGAATCTCCCCAAACACTACCTCGCCCTTCTGGCCGCCATCGATGAAACTGACGAACCGTCCAACGAGTTGCTGTGCCGATGCTTCGCCCTCGAGGTCTCCGCAGACTCG  
CCATCTCCTGCATTGCCCGTCTCGGCTCCTGGTCCCCACCTGAGCTCTCCGCCACCCGATCTTGACCCACGCCGTCTCCGACCCCGATCCGCTTCCCTCCAACCTTGCATCCGATCTTCTC  
AATGTCGATATAAGTAGAAAAAAGTCTTCTCGGACCCGATCTTTCGAAGCTACCCGTCTCCATAGGATCCCCGGAGCTCAGGCCGAGGTCTTCAGGGATCCGCAGAAAAAACTCGGA  
TCTAGCACGCTATGGAGCGGGCTGCAATTTGGAACCAACGAAGTGCCCGTAGCTCCAGTAGCCACCGCCGGTGGCAACACCGTGCACAATGCATTGCTCCCCACCTGCCGGGAGAAAC  
TGGGGTTTAGGCCAGTGTAGTGCTCAAGGTTTGAATGGATCTATGGGATTGTTTTGCATTTCTTAACCTCACCCGTCGTTTCATAAGACAGAGAGCGAAGTCGGCGGGGAGGGACGGA  
AGGATCCCAACGGAACGAAGAAGCTGAAAGTCTCCTTTTATCCTGGTTCTTCTGCGAGCCAGAACCAGCACCGTGCATGTTGACGCCTATACAGGGAGAAACAGAATCCGATTGCGA  
CGTTTGAGCCTTAAACGCGCGCAGATCTAGCGGATTGATTTCTTTAATAACGTAACCTTCT

>comp160945\_c0\_seq3

AAATTTAAGTAAATTTTAGCTATAAATTTAATTAAAAAAAGGTATGATTTATTCATTGAAATCAATAGTTATAATGAGGTAAAAAATAGAATAAAATAAAAGAATTATAATGAGGTTGAGGGG  
AAAATTTATTATCATTATATAATTACAAGAATAATGTAAGTGTATATTTATCAATAGCATTTTCTCAACTAAAATTTCCAACGGACATAAGAAGATAATAAAGTTAAATATTAAGCCAAAAATTA  
AAAAAGTACTCGTTTGAATCAAACGGCCCAAAGCTAATTTACCAGAAATCCACAACCCCTTACCCAAACGACCGGGAGCACTCTCTCTATCTCACTCTCGAGAGAGTTAGCTTTCAACT  
ATACACGCAGTATATAATTTATAACTGCAAACTTCTATTGGACCGGATAGACTTCCGGGCCCCGATGACCAATCAGCCATTGAACCAGATCAATCATCCAAAGTACCTTAATACCCCCACTTG  
GGTTACAAGCTCACGTTACCGAGCTTAGCGACTATCAACTCAAATGAGAAGTCTATATCTATAATATTTTCAAATAATTCAGCGATGTG

>comp160945\_c1\_seq3

TCTACAGCAAGTAAGCGATAAAAGATAATTTATTATGCTAAGTTCCACCTTTTCTGCATATTAATCCACGTCGCTGAATTACTTTTAAATATTATAGACTATAGACTTCTCATTAAAAAGTC  
GTTGAGCTCGGTAACGTGAGCTTGTAAACCAAGTGGGGGTATGAAGGTAATTAGGATGATTGATCTGGTTTAAATGGCTGATTGGTCATCGGGCCCCAAGTCTATCCGGTCCAATAGAAGTT  
TGCAGTTATAACAATTATATACTACGTATATAGTTGAAAGTTAACCTCTCGAGAGTGAGATAGAGAGAGCGCTCCCGGTCGTTTGTAGTAAGGGTTGTGGGATTTCTGGTGAAATTAGCTTTGG  
GCCGTTTGATTCAAACGAGTACCTTTTTTATTTTTGGCCCTTAATATTTAACTTTATTTT

>comp160999\_c0\_seq15

ATATTATAAATGCTAAGGTGGTGGCATGATATTATCTTACAAATTAAGATGTGTTTCAGCTTAATAATTGCAAATAGATGAAGCAAAAACCCCAATTCAAAGTAGATGCATCTTCAGTTGCGTT

ACAGATTTATTGCAGAAATCTTTAATAAGAATACACAGACTAAAAACATTTAAGGTGGTGGTAAGTAGTGAGCATCATGTGGAACCTGATATGGAGGATACATCACGTTGGTAAGTGCAG  
AAGTCTCCATTGCTGATCCAATTGTTTTGTCTCAGGATCATAAGTTGACAGCCAGTTTATCAATGGATCAAACCTCAGGGGTAGACAAATTGATGATCAAATTTTTACCAATATTAACA  
GTTTTTGCAGTGATTGGATCCATCTCCTTAAGCTTTTGCAAATACATTCCCATTGTGCTATTGATATCAGGGTCAATCAAAGTACCAATGAAGTTGTAAACCTTAGAAAACCTCTGGAATGGC  
AGCATGAAATGATTGTGCGACTCCCTTGCTCTGGTGCTTCAGAAGTAACCTGTGATGTGCTTGAAGTCCAGTCCAACTAACATTGTGGTTATAGATATTTGTCAAGCCCAGTGTTCATTAT  
CACATTCAAACCTCACAGAGGGCATTGTAGTAATTTGAAGAGGACATTGCATCATTGGAGGTGTAATCCCTCAGGAAAGATGGATCATCCCAACTGGAAGACGAAAACAATAAGACCAGTG  
GATGCAGATGGGCAGATCATAGATGACTGCAGCTGCAGAGTTGTTGGATCTGCAGAAGAAAATTGTTGGTCGGTCTCCATATATTATCATTTTAATATAACTTGTAAGAAGTCCTAATCAAA  
ATAAAGGAAAGAGAAAACCATCATCAGGTTTCTTTGGATATGGATGAGTAGAATTTCTTTTTGGACGGGCCGGGGGTACATGTGCCATTATCCATTCTTCTGAACCTTCAAGAAGTATTTT  
TGAGCATGACTGCGGATCTGTATCACTGTCTTTGTGCCAACAATACTTCAATTTTCTTCCATTCTCGACAAAACAAGTAGTGCCTGAGGAAGCGCTCATGCTCCTCATCCGACCACC  
TATCTCTGGACTTGGTAATGGTATAGGGCTCCGCAGCTTCTTGATCGTTCCATCTGCGTCCATAGATAAGAGGTGTGGTGAGATCCAAGTCAAGAAGAAAACAGAAGCATATCATCTGCT  
TGGAAACAAAAGTAAAGGTGAAACGGAGAACAAGAATGGAAAGGAGGGAGA

>comp161031\_c0\_seq3

CAGGCGTCTAAATATCTAAATAAACATATAATCCATAAAAGGTACATAGCTATCAAACAAGTGACAAAAGGAATTAGCAAACAATTAATAAAAGTTTACAACTAATCTAACCAATCAAAG  
AGATTACCTTAAGAACATAGTTATAAAAAATTGAGAATAACATAGAAGTCCTTTACCATGACTACTAATGACTTTTCGAGATGAATTAGCAGAAAACCCCTTACGAAATACTGAGTAGGTATC  
TACTACACTTGAACAGTGTGAAGCCAAAGACAATAAGCTTAAATACATAGTACTGCAGTCATGAAGCAGTTACAATATCAATATCAGTAGCACGCACATATCTCATGAACATCACTGAAG  
TTCTTCATATTCTAATGAACTGCTAAAAAGCTAATATTAATAATTCATTTAATTAAGAGGAAAGTAGTAGGCTAATAGTGTACTTATTTCCCTGCAAGTTTGGCTGGATGGGCTGCACACGA  
AAGGTCAATGGCATCTGAGCTGCATACTCCCTATCTTTCTGATGATAGCCGATGTCCAGTTCTCTCATGCTCCCTTCCATTGCTAGTTGCTGATGATGCTGTGAAATTGAAAACAGCGATTT  
CCAGAAATAAGAGGCAAATGAAACTTACAAGAACTATCTAGGAAAGATGAGCTCAATTGCAATATGAACAACAATAAAAAATTAAGAAATATAAGTCTTGTGGCAGGATTGTTT  
CAAGTTTAAACACAATTAATTATTGAGGCAATTTTTGTTGAGCCTCAAATTAATAAAATTATATAAAGTGAAAATAAAAGTTAAAGTTATTTTTATATAACAGCCAAATAATATGTTAA  
ATGATGGTATATTAACCTTTCTATGGAACCTATGAAGTA

>comp161059\_c0\_seq12

GGTACATTGGAGCTTAATGATCGGAAACTGAACGCGACCGTCTGCTTACAAGCTTTTGAGTGGCAGCGCCACATACAGTCAGAACAAGAAAATCATCGGATCGATTAGTTGTGTATTC  
TTGGGACTGTTTTGCGGGAATTAGAAACCCGCTCATATTGAGCGGGTTACAAATTTGCTCGACGAAAATTCCTTGGCGCGGTCGTTACTATTCCGCTTCAATTGCTTCGCACGTGAAGACCC  
CTACCAATTGCTCAAGTAAAGGATCTCACTTATGGCAGCTATAGTTTCATATAAAAAGGCACAATTAATTTATCATTGTAAATATTATTAACATCTGATTATCTTTTTTTTTCTTATATAGATAT  
ATTAACATTTAACTAA

>comp161068\_c1\_seq2

TCATTGTCCATATCCAAAAGAACTAAGGCAGCCAAAATCATAAAAAAAACCCAAAATAAGGCCAATAAATTATTTCTTTCTCGACTTTTCGTTTACGATTTCCGACAATATTATCCAACGA  
ACCAATTTCCAAATCACCATCAAAGTATCCTCGCCTTCAGACAGCAAATCATCGTGTAAACCAATCACATTGCCACCGGGTATTGTTCTTAGCTAGATGGGCTTGTAAGTTAGCGTTTAAAA  
TAACCGAAATAGGCACTTCCACCAGCAAATACACCAACCCCTCAAGGTATGATCGCGGCAGTGAGTGGCGTCTTGGAGGTCCGGCGGGAAGTGAAGAAGTTGAAGGATCTATCACC  
TTCTGCACAACAGCTTTGTCACTGGAGTTAGCAGATGGAACATGTGAGGGCGGCCACGGGAGCGGGAGGGCGGGTACGTCGCTAGGCCGGCGAAGAAGGGATCATTAAGAAGCT  
CGGCGGCGGAGGGGCGGGAGCGGGGAGTGCCGAGGCAGCGTTCAATGAATGTCTGCACTTCGGGGTACGGACCTTGTGAGGGAGGCGGGACGAACGCCGGCGGTGACCTTTCGGGT  
AGATTTTAGGTACAGAGTCGCACTCGCTGTAGGGGATTTCTTTTCGTCATCATCTCAAGGACGCACATGCCGAAGGAGTAAATATCTACTTGTCTCCGTGTAGTCTCCTCGTAGAGCTCCGG

CGCCATGAACTCCGGCGTTCCGAGGATCGAGTGGGCTAAGTGGCTCTGGCCAACGATGGCGGCAAGACCCAGGTCGCCGATCTTCACCTTGCCGGTGTCCCATTCATGAATACATTGCT  
GCAGTTGAGATCGCGGTGAATGATGCACGGATCGTGCTTATGGAGATAATCCAGACCAACGAGGATCTGGCGACTCCACTTTTTTCATGGCCTTCAGAGAGACGTGACAATGCTTTCTTCG  
GTATTCTCTCAGATTACCTGAGGTGCATACCTCTGTTATAAAGTTTCAGGGTGTGGTCTCGTCGTCGGTCCACACGTTATACAGCACATAATGTTCTCGTGACGCAGAGACCGGAGAAGA  
CGAACCTCCGAGAAAAGTCTCTTAAGCATCTGCGAGTCTCTTTGAAGCTCTGCAGCCTCACTTGGTTCAGGCTACCTCAATACCCTCTTCCTGGTTCGAACCCTCTGTAAACCTCTTTGG  
TGGCGCCGATAACCGAGGAGATCTGCATATCTCCATACCTTCCCGTTGGATCCATCTCCACAAAACGGCTCTGCATCCTTGTCCGACGGATCCGGCCTTACGCACGGCATCCTCGCTCTAAG  
CGCAACCAAATCCAAAACACTTGCTAAATCTCCGGCACCCGGCAATCAGGAGAGCCGAGTCGGAGAAAACCTGCAGCGATCAAATAAACACGGAGGCGGCACAGATCACAAGGAAAT  
ATGAAGTTCTTGATTTCTCAGGTGGCGATTACTACTTGCCATCGGAAACCTAAAAGGAACGTAAAATCAATGGAAACCCTAGGGTTTCTGCCTTTGATTGAAAAATACCGAGAAGGAT  
CGAAAAGAGAAAAAGACGAGAGAAAAAGAATCAAATCAACTAGCGGAAGATGCTTGAGCTATTCCCTCTTCCGAATCCAAGGAAGAAGAACATCAAGCGGCTGCGAAAACCTTTGCGG  
AGAAAGCTTGCGAAGAATTCTGGATAGAAAAAGAAGGTTGTGATAGCCTAGCTGTATTTATAGGAAGGAATAACTTT

>comp161130\_c0\_seq3

TTTTTAATCCATCTAAAACAAAATCTTAATTATAATGAAGCGCAATATACACCAGTCATATTACATATTCTGTATTTAAATACTATGAAAGTAGAGTCTCAAGAAGTCACAACATCTTTAATCT  
TCATCAATTAACATAATATTATATAACAACCGATTTATAAGAAATTTCTATCTTGAACAGCACAGGAAATTTCCACAGCTCATACTGTACTTCTCTGTGCGAAAATCCAACTGAAACGCACA  
GTAAGGACCCCTGTTTAGCCCGTCTTGTGCTCTCTCTCTAGCTTCTGTACCTGGGGCGCAACCTACACACAAAATCCTGCGCCTTCCGCCCTCATCAGATAGACCCACGAGGCTCT  
CCACCTTCCACCTCCCAACCAAAAACCTCCGTAATATCTGCGTAGTCTTAGCCGTGTAACCTCCAGGCGCTGAGCAACCGCGCTGAAATGGTGGAAAGAGGCGGTGGTTCGCGGCCGCTCG  
AACATGAGGTGAGCCGGCATGGTGATCTTGTCTTCATCATATCGGCGAAGGCGATGACGGCTCCATCGGGGTGAGCTCGAAGAGCTTGTGACGATCTTGAATAGGCCGCTCGTGC  
CGTTCTCGTCTGCGGCGATGGTGCCGAGATCTTAGCTAGTTGAGGTGCGCGTAAAGCTTGGCGTGGCGGGCCGTGTTGCCGTGTGAGATGTAAGTCGCGCGCTCTTGAAGGACGT  
GTATATGTACCCTTTGTATGACTGTCTCTGTGTTTATGTACATCCACAACCAATTAGATACTGTATCGTCTTCTCGATCTGCCTCATATCCACTCTTCCACAAAGATAAAGATACTGCTTA  
AGCAAGTCCCATGCCTGTCTCTTCTGAGTCCATCCTCTCGTCCAAATAGCCCAGGATGTGAGGCTTGGCCCTGTTTCATCCCTCACACCGTCAAAGGTGTTTACGATTGTCTGGTAAG  
TTGGAAGAGCTTCTCTGTGATCAAGTCCCAACTAAGCATAACGTAGTAGTCATCAGGGATCTCTTTAGCCCTCTTCTCAGTTCTCCTCACTTGCTCATAGAACTCACTCGATGCAGGAGA  
AGGTAAGAAGTCTGAGGTTGCCATGAGCTCTCCACTGGTTTCAGATGAGTCAGTATGTTCTGCTCTGCCACTTATCTAAGGACTTGAATATCTCCATCTTTTCTGATGGCATGGAATGAA  
TTATTTGATTTTCTACTTTCATGTGGAGGTCTGAAAGGCTTCTTATGAGTGCTTACTTCCGGTATAAGTTGTGGAGGTCATGGAAACCTTTGGGGAACCTTCCAGTAGCTTTGGTGGAGTTAGCA  
GATAAGCGTAGCGTTTTTTGGAAATAGTTCCGTGGAGAAGAGAGACTAGACAAAGCCATTTCTCGAGAGAGAAAGAGGGGAGAGAAACCCTAAACGAGCAGAGAGAGGATGGAGGCC  
GCGGGTTGCTTCAATGTTCCGAACTCTCTGCCCTCTTTATACTGTAGGAGACTAAGGCAGTAACCTGTTGTTAGAATCGCCCACCGAGTCTGTTCAACGCTTAAAGTTTTATTTAATCTAA  
GCAGCTGGGTGATGTAAT

>comp161132\_c0\_seq13

CGAAATATCCAACAGAAATATTTCCGGTGAATATATACTACGTCGAAAATATAAAAAAATGAAGAAAAAAAAAAAAAAAAACCGTATGCAATGAACATGTTCTTCATCAAATTTTGTGAACT  
GTATGTGTACATTATGAGATACTACTGCAAAAAAATTACACAACTCAAGGCATGTACGCACTTAATGTGGTGGACCAATACAAATTTTTTCGAGTAAAAGCGGGCGACGTTTTTCATT  
ATGCTTGAACCTTGTGACTGTTAAGATTGCTCCAAAATTGATTGGTTCACCCATAAAAATTGGTCCAAATAAATTTTATGTGTGCACAGATTCTGGTGAATATTTGATATGATCTGT  
TTGAAAGTGCAGCACTGAAAGCAGGAAGCAACTCTAAACGCAAAGAAGTTTGAATTCGTTGAAGCTTCCAATCGTGAACCTGATGGGCGAAAACCTGGAGTCCCTCTCATTGGAAGATCT  
GAATAAGTTAGAAGGTCAGCTTGAACAAGACCTAGGCAACATTAGAGGAATAAAGATTCGCTTGTATCAGGGCAGGTAACACACCTTAAAGAAAAGACGAGGGTGTGTCAGAGGAA  
AATGAATTGCTACAGAATCAATGCAAGGAGACCCAGCTAATCTTAGATTCCACCCGGTTGGTGGCTCTCGAAGACAACAATAATCAGCACAAGGATGTAGAAACCGACCTGTACATTGGA

TGTCCGGGAAAAAAAAAGATCTAATAATGCCAGAGAGGGTGACCATCTACAGTCTCAAATATTCAATAACAAAGGTTTTCTTCTTAAAATAACTCCACCAATTCTCTATAATAATTGGATGT  
CCGGACAGAATAATAGATGATGTAGTTATGTTTACATAATCTTCTATTCATCGAAGTTGCATAAAGCTGGTTATTTTGTTTAGCCTGAATCGTCTACGAACTTAACTTGACGATAAACGTTA  
AAGGCATTTTATACATTGTACTTTGCTTTCTGCTGGCACAGTCTAGACAGAATTGAGTTTCTGGAGATGATAATTAATGTATATATACAGAGAACTGGTCTTGTGTGTGTGCTTCAGATATG  
AAAAGAAATGGTCTTTGCCTCTGATAAAAAAA

>comp161132\_c1\_seq5

GCTGGGTCTCCTTGCATTGATTCTGTAGCAATTCATTTTCTCTGACAACACCCTCGTCTTCTTTCAAGTTGTGTTACCTGCCGGGATAGCAACCGAGACTTTATTCTCTAATATTGACTA  
GGCCTTGCTCAAACCTGACACTCGAACTTGTTTCAGATCTTCCAATGAGCAGGATTCCAGGTTTTCGCCCATCAGCTTACGATTGGAAGCTTCAAGGAAGTCAATCTTCATCGCATTAGAGC  
TGCTTCTGCTTCCAACGCTGAATATTTTGTCTAGTTGCACTGCTAGTGCTGCTCAAGTCTACCAGGTTCAATTTATATCGCTCGATGACATTTTGCATGCTAAGACATTTTATAGAAAAATG  
AAAAAAATTAGATTATACTCTGCCTGTTGCATAAATAATCAGCACGCGCACACCCTCTTTACAGTGAATTGACAAGCACAGTGTCTCTTTAGAGATGTGAGTGCCTGCGCCAGTTGGGGA  
GTGAATTTAATCAGAAGGCCAAAAAAATTTAATAATATTGAAAGATATTTAATCAGAAATATAAGACACTTGTATAATAACTGCAAAGCAATTATTTTGCAGGAAAAAATGACACTCAAAGC  
TCATTATTAGTCCCATGAAAAA

>comp161170\_c0\_seq13

ATGATTAATAAAATTAATAAAATTTAAGCTCAAAATTGTTCTACTGTAATACAGATTATAAAAATTGCACAAAAAGATAAGCTTCCTATCATTAATAAAATTTCACTGCTCCGGGAGAGAAAT  
ATATACATAAAAGCTGCTTCTTTGATTAACCAATATCAACTAATTGAGATAAAGATCAAATTGATTTCTCTCTCTGCTTCGGTGCATCAATCTCTTCAAAAAGAAGCCAAATTTTGTGATGA  
ATTCGGAGAACTAAGCTCGAGATATAGCACTCCTGCGTTGAAACATCGACGCCGGCGTTGATCAAAAAGGCCCAAACGAATTCGCAAATCTTCCAGGTTTCAGATCCGAGTACCAATCG  
TATTCCTCCTTTATCGCCGGCGCAGCTGGCGGAACTTGCGCCGCGCCTGAGCTGCGATTCATATCCACTGCTTCGTGACCCAAATCATCCAAATCCGGCAACTCGATGTCAGATTCGGGCG  
TCCTGAAACTGTCTCCGTCAAGTCCGTCTCTCTCTCGGTATCCTCTCCCACCCTTTCTTCTTATTATACAATCGGCACAGCACCCAATCATCCAACTGCAACAAAAGTTCCATCTTTGAT  
CAGTCTTTACCGTTTTCATTTCCCAATTTATAAAAAAATAATAATAAAGCAAACTTTGGATGATTGATTATTACCCGCAAGCTCCCATTTCTTCTCGCGCTGCGATTGGCATCAGCGAGGC  
GATACTCATGCATGATCCAATCCGTCTTTGCGCCTTTCCGGCGGCTTCCCGTCGTAGAAAACCAGGGCTTTCTTTATACCAATCGGCCGGGAATATCCCGCCGGCGTCACCGGCTTGTCGCG  
CCCTGTTGCTTTCCAGTACCCTCGCCCGGCGGCGGTTTCGGCCGTGATCCGTTGGGGTACTTCCGATCTCGCGGCGTGAAGAAGTACCATTCCCGCGTTCGGAACAACGCCTTATCTGC  
TCCAAAAAATCCAGTTCAGCGAGGAAAATGATATAACCATAATAAAGCGAATGAAGACAAGCTGTTTCGACGAAAAGTACCAGGTAAGTCCCAAGGGTTATATTTGTACAAATCGAGCTCG  
GCGATGATGGGAACGGGGAGAAGCTGATGAGAAGCTCTCCGGCAGAGGTAGTGGACCAGAAGCTCTTCGTCCGGTGGGGTGAACCGGAATCCCGGCGGCAAGTTGAGCTCCGCCTCC  
GCGTCTCCGATCCTTCTTCCCATATCTTTCTATCTATTCTCTCGCTCTCCGCCGGGTTCTTTGGCGAGGTATAAATACTTGGATATTTCCGGCGGGACTAAGCGTGCATTGCGTCCGGTCCGAC  
ACGTGGCGGGTGGGTGCTGGCCGGTTTGGAATCCT

>comp161261\_c1\_seq1

ATTTTATAATGCAACACTCTCTATCTAAGAAATAAAATGATTGCATTATGATATAACTTCAAAAATTTATGGGCTATGATTTATCACTAAATCCATTATTTTTAGAATCTTTCACATTTATCAATA  
TGAAATAAATAAACATTCGAGTACTATTATTTATAACAACATGACCTCAAATTTAGGCTTCATTTGGTATGGCTGCTTCACTGTATCTTCTTAAAGCAGCTTTTTAGAAAGCTGTTTTAAGAA  
GCAG

>comp161264\_c2\_seq1

TTTGAAAAAAGAAGCTTAAAATAATATGATTAACAATAAGCATAGGTACTCAATAAGAAAAAAGACTAAACTATTGTGCACATTCAAACAAGTTTCTAAACACAATAAATAGACATTT  
TTTTTAAAAAAGGAGACAACCTATATAAGAGTTTATGCTACTACACAAAGATTCACAAAAGCACGCTCGTAAATTAATAAATAACATATTGAGGAAAAATTTACCAAGTATTCAATCCCAT

TCAATTCTTCTCACCTTCATCATCACCATCATCATCACCATCACCATTGTCATCCTCAGCATCTTCATGATGACCATCACCATGGTCATTCTCAGCATCTTCATCATCACCATCACCATCTCCA  
TGGTCATCCTCAGCATCTTCAGCATCTGTCATATTATTAATCACTTCTTCAA

>comp161275\_c0\_seq1

CTGGGTCATTCTCGGGCTTTTGGGTCAACCCGAACCTTACCTAATTTTTGAAATGGGTGAGTTTGTGAACCCGAACCCGAACCTGGCGGTTTGGGTTCTCGTGCACGATTTGAGAAATC  
GTTAGTGTGGGTATGGGTAGGGAGGTGCACGACTTCCAGTATGGGAGATTTCTTTTGATAAAATAAGTCAACAATTATCTTTGTGGCCCTCATCACCTCCATTATGTTTCATCAGTATCCTCT  
ACTATTGTAACCTTCACCGATTTCCCTCAAAATGTATATAGCACTTTGAGATTTAACCTAACTCGATGAAAAGATCTGATACATCACCAGACGTAATCAATGAAATTTTGCTATGATAACAAT  
GATTCAGATAAAGTTATTCCTTAAAATAAACTCTATTGATTTATGATATGCTATACGTGGGAAACAATTGTATTCAAATTCTGCCAACATTAATTTTTGGAACGTCATGTTTTTTCTCATGA  
ATAAAGTTGTAAGAAATGCAAACCTTATGAATCCAAAAAACTTTCACAAGAAAATACTTTTAAAAGTTGTTACATAGCAGCAACATTCTATGACTTGGCTTCATTATACCTACCATCTATTTTC  
TCAGGCCATTGATATCTCCTTCCAATATATTCCGCAGACTTTTTCTTGGCTTCCTTATCAACTTTGCAACATGTGGGGTTCATCCATGGTATCCTGTATGGAACTTGATTGTTTCATTGGCGA  
TTTATATGTGTTCTTTAGTGTACAGTACTGCATATTTCTTCTCCAAGAGATCTTAGCCTATTGAGCTCTGGTAGTACCTCTGTGGCAAGGTCTGGCCGGTCTTCCATAGGAGCGCTGCACA  
CTTCAGTGCATCTCAGCAAATTTTCATGGTTTCCCTCAATTGGCCAGTCTGTAACGTGTTGCATCCAGTAACTCCAGGAAGGTCTCGTTCTCAATTGCACCACTAACATGGTTTTGCTAACCCCA  
TAGCTGGTTTTGCAGTGATGATCTGGAGCAGAATGATTCCAAGAGAGTAGATGTCAGATTTGACTCCCAACATGCCTGTCTGCTGGTATTTCGGGATCTATATAGCAGAAAGTTCCTGCAGC  
AGAAGTCATCCGGTATTGTGTGACCCTGTTAGCAACTGAAGGAGGAATCAGGCGAGCAAGCCCTACATCACCAATTTTGCTCACATAGTTTTGATCAAGGAGGATGTTGCTCGGCTTCAA  
GTCTCGGTGTACCAATGGCTCAGGCTTTGTTGATGCAAGAAAAGTAGGCCTGTGGCAATCTCTGCAGCAATGCGGAATCGGTGTTGCCAGGGG

>comp161275\_c0\_seq3

CTGGGTCATTCTCGGGCTTTTGGGTCAACCCGAACCTTACCTAATTTTTGAAATGGGTGAGTTTGTGAACCCGAACCCGAACCTGGCGGTTTGGGTTCTCGTGCACGATTTGAGAAATC  
GTTAGTGTGGGTATGGGTAGGGAGGTGCACGACTTCCAGTATGGGAGATTTCTTTTGATAAAATAAGTCAACAATTATCTTTGTGGCCCTCATCACCTCCATTATGTTTCATCAGTATCCTCT  
ACTATTGTAACCTTCACCGATTTCCCTCAAAATGTATATGCACTTCTATGCCTTCTTTGTCTAACTCTATGGATGGCTTGATCCTCCTTTCTTTACTTTGACATTTCTCTTCTCTAGATGCGCT  
ATTGAAGATCCTCCTTACTCAATTTTTTTGTCATTGGTGTCTCTCCATTTTCACGCATCGCCATCATTATGACTAATCCTACATTATCTCCCTTGACATCGTTGTCATTATTTGGCTCGCC  
AAGCTCTAAAAGTGGACTGCCTAGACCCTTCTTGCTCTCATTGACTACAATCTTGGAATCCTATGTTTACCCTTATAGGCTCAAGAAGATGGTATATTGTCAACTGAATCTCTCCTATC  
GACTAGATCAATTATGAGCTTTTTTTTTTCAAATGCAAGTTGAGAGCTGCTGCCTCAAGTTTGAGGGGAATATTACCATATCTATATTATCACATGTTCTAAATATTATAGAAGGAATATGC  
AATTGTTACTATTATAATATATTTTCAATTATTAAGGATATCTTATTTATGTGTTTCTTTATATTTCTATATCTCTTGTATATATACACATACTTGCCTATCATAATCAATCAAGTAAAAGATA  
TAAACCCATGATGTTTTCTATCACGCTGAAGGAATGCTACTACTTCCATCCATGGCATTACCCAATCAGTTCACACAAGGTAGAAGATTTGATCTTATCCAATCCATTTAGAGATGATTTA  
TCTAGTCCAGGCCCTCATATGAACTCGCATGATTTTGTATGTCATTGGAATGTTATGGTGAGAAGATTGTTTTAACTTTAAAGTTTGCACCATTGGAGTATGTTTGTATCTCAAAAATAAATTTTTT  
AAGTAGTAGTTTAAATTTCTTTTAGCACTTTGAGATTTAACCTAACTCGATGAAAAGATCTGATACATCACCAGACGTAATCAATGAAATTTTGCTATGATAACAATGATTCAGATAAAG  
TTATTCCTTAAAATAAACTCTATTGATTTATGATATGCTATACGTGGGAAACAATTGTATTCAAATTCTGCCAACATTAATTTTTGGAACGTCATGTTTTTTCTCATGAATAAAGTTGTAAG  
AAATGCAAACCTTATGAATCCAAAAAACTTTCACAAGAAAATACTTTTAAAAGTTGTTACATAGCAGCAACATTCTATGACTTGGCTTCATTATACCTACCATCTATTTCTCAGGCCATTGAT  
ATCTCCTTCCAATATATTCCGCAGACTTTTTCTTGGCTTCCTTATCAACTTTGCAACATGTGGGGTTCATCCATGGTATCCTGTATGGAACTTGATTGTTTCATTGGCGATTATATGTGTTT  
TTTAGTGTACAGTACTGCATATTTCTTCTCCAAGAGATCTTAGCCTATTGAGCTCTGGTAGTACCTCTGTGGCAAGGTCTGGCCGGTCTTCCATAGGAGCGCTGCACACTTCAGTGCAT  
CTCAGCAAATTTTCATGGTTTCCCTCAATTGGCCAGTCTGTAACGTGTTGCATCCAGTAACTCCAGGAAGGTCTCGTTCTCAATTGCACCACTAACATGGTTTTGCTAACCCCATAGCTGGTTTTG  
CAGTGTATGATCTGGAGCAGAATGATTCCAAGAGAGTAGATGTCAGATTTGACTCCCAACATGCCTGTCTGCTGGTATTTCGGGATCTATATAGCAGAAAGTTCCTGCAGCAGAAAGTCATCCG



GTATTGTGTGACCCTGTTAGCAACTGAAGGAGGAATCAGGCGAGCAAGCCCTACATCACCAATTTTGTCTCACATAGTTTGGATCAAGGAGGATGTTGCTCGGCTTCAAGTCTCGGTGTAC  
CAATGGCTCAGGCTTTGTTGATGCAAGAAAAGTAGGCCTGTGGCAATCTCTGCAGCAATGCGGAATCGGTGTTGCCAGGGG

>comp161297\_c0\_seq1

AAAAATTCTCAGCGCTCTTAATTCCACATAACTTTTATGTTTCAGTAGGTCGCTATTGTTGACAGACAAACATATATAGAAAAAAATGAAAATCTATGAAGTTTTAAGAGGAATTCTCTCTG  
CCTTCTGGCACCAATTTATTTGGATTGTAGCTGTACCCTAGAGATCCTTTTGAACAAAAGATGATGACAACAACAGTATTCTTATAGTTTAACTACACTAAAACCTTACCAATTCTTACAAATC  
CTTTAGATTCACACAACAAGCAGCTTGGAAGCAAGCCCTCCACTGTTAATTTTACCTTCAACTTCTCCAGTATAAAATATGCCAAATCAGCTTACAATGTAAGTGGACTTAGCACCA  
GCACATCTCTGCTCATCATAAAGAAAACCCAGACTTCCTTTGGCTGTGATGCTTGTGCAATGGTGGGGTAATGCATGAGAATATGTAAGGCTTCTTTCGTCTCTGCCGAATAAGAAAGTT  
CTGAGTGGAACCTTAGACCTTGTAAGACAGTGTCTGAAGTTTTGGTATTGTTGATACCCATTTGAAACTGAGAGATCGAAGCTCTCCCTCAGCTTGGAGAGAGACTTGGCAACCTGAGAC  
TGAAGAGCCTTACATGGTCCAGACCGGTTTGCAACTCCATTGCAACTTTGTTGTTCTCTTGTTCATGTTGAGCAGTTCACCCGAACCTTGTCTGGTATGGTGTGATCTTGAATGC  
TCTCCCTCGGTATCGATTGAGGCTTTGGAAATCTTCTCCCTGGATGTTGCAGAGGGATGTAAACCGGTATTGAAGCTCTCCCTCAGCAAGTCGTTTTGTTCTAACCAACTTGGAGCTCTG  
TATGGAGCTCCCTTAGCTTCTTATCGAGTGGCCAGGTGTCTGTTTTGATGAATGCTTTGGGGATGCAGGAGCTGATCCACCTTCCTTGGGATCCTTCGTCTTATCCAGGCCAGCAGCTTCC  
AACTCCTTGAATGATGCTGCAAACTTCTGTATTTGATGATATGAGGTGCTGAATCTTAGCCAGAAGTTGAGGTTCTCATCTAGAAGAGTGTCTAGTTCAGCTCTGAACTTTTCTCAATCGG  
TGAAGTTGAGTGCTGCTGATCTAAATGGCATAATTTGATCTGCTCTCAGCTTCAATGATCTCGATAGGAGATTCTGGTTTTACTGCGAGCATTTCATGGAGCTTCCATGCTCTTCTATGTT  
CTGTATATGAGTTTCTTTATAAGTGCTTGTGCAACCTTGAAGAAGTGTGATAGAGCAATTTACTCCTCAAAGCTCTGATCTCTTGGTCTTGGACAGCATTACACTCTCAGCTCCTGAA  
TCTGAGCCATCATCTCAAATGGTTCTCTTGGTTCTTCTCTCCATCTCGGCTAGTTTTTCTTTGTGCTTTGTAGTTGTGGAGAATTGATGAATATCCACACAGCAGCAATTTCTCTCTGC  
CTTCTGGCCACTATTCAATAGATGCTGCAAGTCTGGAATATATCATTGTATCAGGCTCCAAATCCTTCAATAAAGATGAAAACATTGCACTGAGATGTTCTCCCTTACCATCGATGAAC  
TATAAACAACCTCAGTCTGATCCTTTGTATCTCAGCGTTGGGCTCAATCTGCTGCTTACAAGAACCTCATTCTCCTCAGCTGTTGCATCACTTCTCTCATTTTTGACATCCTCTTTTATTC  
TTTGTCTGCTCCAAGTTTTCAATATTTGAAGAAGCTAAACTTCTATCCTTCTCCTTAGGGCTGGTAGATTGAAGTTTTTCTGATATATCATTAAAGACTATTGCAGGCCTCTATAAAATGAGTT  
TGAAAGATCCCTTTCTCATGATGCACGATTTTCTCAAGATCCTGAACTCCATGCAACTCATCTTCTGCCTGCCTCAGCCTCACATTTGAGCTGTTTGAAGTCAATTATCAAATTAACTTTTTCT  
TCTTCCAGGCATCGGAGGTGCTTCTCAAGCATGTCAGTCTCTGACCTTAGTGTGTGATTTTGCCTGTTTGGGATGAGACTGCTACCTCAAACCTAATGACTTTCTCCACAAGTTCATCAAT  
TTTCTCAGCAAGGTTCAACAAGTGAAGTGTGAGAGTCCATCTGGAAGTGTGTTTACCCGTGCACATACAGAGAACAGGTCTAGCCGCTCATTTTTTAGGATAAAATCTTCTCCCTCTTCA  
TTACTTCTTTCTTGGTTAAAGGTTTCTCTATTTCTGGCGAGCATTTTTACCCCTTGAAGAACTTACAGCTGTCTTTGACTTCCCTGATTCTTTTATATTCTATCTCTGCCTCTTACCTGATT  
CTTCTGTTGCTTCTGTAAGCTGACTAGGCTTTCTTCGCATGATTGATTGCTGTGGCTGCCATCAAGGCCCTGGCTTCAATTATCTTCAATGATAGAACTTGCCTGTACTCATCCTGAAAGGT  
GCAGACCTCGTCTTGTAAATCAGATATCTTGTCTCAATCTCCAGAACTTTGCAAGGCTACTTTCATAGGAACCTTGTACAAATCTTTTCTCAGTCTGGAGAACAAGGATTTCTTTCTGA  
AGCTTGTCTATTTCAATTTGCGCATCTCCTTGGTGATATGAGAACAACCTTTCTTATGGTGTCTTTTAAAGGCAGTCAACGCATCTCTGCTTTTGTCTGAAATTGATCTGTGGCACCTCC  
CCGGGTAGGAGCTTGGCGAACTTACTGATATCTACGCCTGTGAAAGCCGTTGGGGAAACCATCTTATCGTCACTTGCATTGCAAACTGGACTTGTAGGGAAAGCTGACGCAATGGTG  
TGGTTGGCCTTATGCAGTTCTCCAGATATGTGATCATATCGGTGGCCAAAGCTTTATAAGCCTTGTAAAGTCTCTTCAACAAATTTTATAGTTCTGGTCTTCTCTGGTAGTACATCTCTGCCT  
TTTTAGCGAAGGAGTCAGCATCCACTTCTATAAGCATGATCATGGCTTTCACCTTCTCCTCCATTTCTTGGAGGTTGCTATCAAGCCACTTAGATTGCTTGGTCCGGATGTTACTCGCCAC  
CACCAAGAATAAGCGTTGCTTGTCTGCTGCTGAGCATTTCTCCCTCCCCTCTCTATCTCTCTTTCTCTTCTCCAGCTCTGCAGACTTCAATGTGGCGAAAGCACGAAGGATCGTAT  
GGAAAAATTCGAATGAGGAGAAGGGAGAGAAGGAGAAGAGGAAGAAGATAAAATAGAGAGGAATAGGTTTGTCTGTCTGGCAAGGAAAATGTGAGGCATGGAGGGAGACAAACAG  
ATGTCCTCGGCTTCTCCGGGACGGAAGGGGGAACCTGAGGCGGAGCGGTTGATGC

>comp161305\_c0\_seq1

GTGAAGAAGGGGAGAAGCCAATAAGCGGTGGGATCGATAGCAATGGCGGCCGAAAACCAGCCCGGCTCCAACAACAACAACAAGGCAAAAAGAGAAAATTTTTGCCTCACGGTAAAC  
CCGTTAAGAAGGGGTTGTATCCGCTTCGCCCAGGAGTGCAGGGTTTCTTCATCACTTGTGATGGCGACAGGGAGCGACAAGCCACAACGAAGCCTTGAATCTGCTTCAATCGCGGACT  
CCTGCTACTATCCGGGATCAGTGCCGTCAAGTTTTATTCAGTATCAATATTCGGAATCTGTGCTGTGCCGGTTATTCTGGAATCAGAAATTTTTATTTTGTAGTTTATCTATTTTACTCTGCA  
AATGCCTCCCGCTTCTTCTCAGCGATCGTTGACAACCCCAAGTATTTCCGGTGGCCTCAACAGATCGAGATAAGCCACACAGGCCTGGGCCTTCTTTTGAGTCAGCTCCCAATTGGGAGAA  
GAGATTCTGCTCTCAAATGAAATGGAGAGACTTCTGTGAAAAGAAGAGAGTGGTTCATCTTTTCCCGAAAAGTGCTAGATTGGGATGACGCGCGGGAAAAGAGGCCTTCGACAATGCTA  
AAGCTCGTTATTGGGCACAAATTAATAATCTCCCTTCGGAAATTCCATCGCCGGATCCAGATATGTACGTCCAAGAGGTTGATTATGACGCTTATATTGACCCTTCGCTGCTAGAAGATTGT  
ACGAACTGCCGCCGCTCCTCCAGAGACTCCAGACCCGAGTTCCATTAATAATTAGTGAAATTATAACCAACTGGATGGGATGTGGAGGATCCTCAATCAACAACATTCCAAAATATATTTT  
TATCAAACCATCCACAGCTGATGACATAGTTGATAATTCTGCTCCAACCTACCTACAGGATGTGCTGATGGTGACAAAATTGACATTACTGCTGCTTCAATTACCATCATTCTACAGGTTG  
GGTGATGAGGAAAATGTTGAGCCCAACAATGCTGGAAAACAAGAATGTGGAAAATGTTCTTGAAAATACAGAGAATCATAGTACTTACTGGCAACAAGATAAGAGAAAACGATACTATGT  
TTTCTAGTGAAAACTCAGTTCCTTTGAACAAAAGGATCGACTCCCGAGATCGAAGATATCGAAGGAGTAGCAGAGATCAGTTCCTTCGATTTAAATCCTGCAAATCTAAGGTGTCATGAGC  
AAGGTTATCATAAGGAGAGATGGACAAAGTACATCAAAGAGCAGTATTTTTGGCGTCAAAAACACTCTTTGGCTAGAGGGCTCTCTTGTACACCTGAGAATAATTAGCTAAACACAGACG  
AGACCTGAAATTCCTTAGAAAAAAGAAAACCTTTGGAGGTTCTTTACTTGATAAACTTCTTTGTTAGCAGGAATAGGTATAAGAACTTGCAAGGAAGGCAAAGTTCAGTTTTACAGATTT  
CTTTTATTACTAACCTTCTTATGAGCTAGTATGAGCTTGGTAACATTTGCATAGGCTTTTCGTGGGATAACGGTATTTTGCCGTAGAAATTCCTTTGTAATGTTTGATATTTTGTGCTTGGCTAAT  
TTGTTTCTGTTCTTTCAAGTGTATGACATTCTATTATTTGTATTAATTTTTGTTTGTGCTGACATAATGTG

>comp161305\_c0\_seq5

GTGAAGAAGGGGAGAAGCCAATAAGCGGTGGGATCGATAGCAATGGCGGCCGAAAACCAGCCCGGCTCCAACAACAACAACAAGGCAAAAAGAGAAAATTTTTGCCTCACGGTAAAC  
CCGTTAAGAAGGGGTTGTATCCGCTTCGCCCAGGAGTGCAGGGTTTCTTCATCACTTGTGATGGCGACAGGGAGCGACAAGCCACAACGAAGCCTTGAATCTGCTTCAATCGCGGACT  
CCTGCTACTATCCGGGATCAGTGCCGTCAAGTTTTATTCAGTATCAATATTCGGAATCTGTGCTGTGCCGGTTATTCTGGAATCAGAAATTTTTATTTTGTAGTTTATCTATTTTACTCTGCA  
AATGCCTCCCGCTTCTTCTCAGCGATCGTTGACAACCCCAAGTATTTCCGGTGGCCTCAACAGATCGAGATAAGCCACACAGGCCTGCGTTGGAGGTTATTGGAACATGGGCAATAGGCGG  
TGGAAGAAAAGGGCGCCGGGTTGGCAGCGAAGGGACGCAGAGTTCACACAATGCTTCGGATGCTCGATCGACAGTCGGCGTCTCCTGGGCCTTCTTTTGAGTCAGCTCCCAATTGGG  
AGAAGAGATTCTGCTCTCAAATGAAATGGAGAGACTTCTGTGAAAAGAAGAGAGTGGTTCATCTTTTCCCGAAAAGTGCTAGATTGGGATGACGCGCGGGAAAAGAGGCCTTCGACAA  
TGCTAAAGCTCGTTATTGGGCACAAATTAATAATCTCCCTTCGGAAATTCCATCGCCGGATCCAGATATGTACGTCCAAGAGGTTGATTATGACGCTTATATTGACCCTTCGCTGCTAGAAGA  
TTTGTACGAACTGCCGCCGCTCCTCCAGAGACTCCAGACCCGAGTTCCATTAATAATTAGTGAAATTATAACCAACTGGATGGGATGTGGAGGATCCTCAATCAACAACATTCCAAAATAT  
ATTTTTATCAAACCATCCACAGCTGATGACATAGTTGATAATTCTGCTCCAACCTACCTACAGGATGTGCTGATGGTGACAAAATTGACATTACTGCTGCTTCAATTACCATCATTCTACA  
GGTTGGGGTGATGAGGAAAATGTTGAGCCCAACAATGCTGGAAAACAAGAATGTGGAAAATGTTCTTGAAAATACAGAGAATCATAGTACTTACTGGCAACAAGATAAGAGAAAACGATAC  
TATGTTTTCTAGTGAAAACTCAGTTCCTTTGAACAAAAGGATCGACTCCCGAGATCGAAGATATCGAAGGAGTAGCAGAGATCAGTTCCTTCGATTTAAATCCTGCAAATCTAAGGTGTCAT  
GAGCAAGGTTATCATAAGGAGAGATGGACAAAGTACATCAAAGAGCAGTATTTTTGGCGTCAAAAACACTCTTTGGCTAGAGGGCTCTCTTGTACACCTGAGAATAATTAGCTAAACACA  
GACGAGACCTGAAATTCCTTAGAAAAAAGAAAACCTTTGGAGGTTCTTTACTTGATAAACTTCTTTGTTAGCAGGAATAGGTATAAGAACTTGCAAGGAAGGCAAAGTTCAGTTTTACAG  
ATTTCTTTTATTACTAACCTTCTTATGAGCTAGTATGAGCTTGGTAACATTTGCATAGGCTTTTCGTGGGATAACGGTATTTTGCCGTAGAAATTCCTTTGTAATGTTTGATATTTTGTGCTTGGC  
TAATTTGTTTCTGTTCTTTCAAGTGTATGACATTCTATTATTTGTATTAATTTTTGTTTGTGCTGACATAATGTG

>comp161305\_c1\_seq4

TTTTTGCAGCAAACAAAAATTAATACAAATAATAGAATGTCATACACTTGAAAGAACAGAAACAAATTAGTCATGCACAAAATATCAAACATTACAAAGAATTTCTACGGCAAATAACCG  
TTATCCCACGAAAAGCCTATGCAAAATGTTACCAAGCTCATACTAGCTCATAAGAAGGTTAGTAATAAAAGAAATCTGTGAAAACCTGAACTTTGCTTCCTTGCAAGTTCTTATACCTATTCC  
TGCTAACAAAGAAGTTTATCAAGTAAAGAACCTCCAAAGTTTTCTTTTTTCTAAAGAATTTAGGTCCTGTGTGTTAGCTAATTATTCTCAGGTGTACAAGAGAGCCCTCTAGCCAAA  
GAGTGTTTTTGACGCCAAAATACTGCTCTTTGATGTACTTTGTCCATCTCTCCTTATGATAACCTTGCTCATGACACCTTAGATTTGCAGGATTTAAATCGAAGAAGTATCTCTGCTACTC  
CTTCGATATCTTCGATCTCGGGAGTCGATCCTTTGTTCAAAGGAACTGAGTTTTTCACTAGAAAACATAGTATCGTTTTCTTATCTTGTGTCAGTAAGTACTATGATTCTCTGTATTCCA  
AGAACATTTTCCACATTCTTGTTCAGCATTGTTGGGCTCAACATTTTCTCATCACCCCAACCTGTAGGAATGATGGTAATTGAAGCAGCAGTAATGTCAATTTTGTACCATCAGCACA  
TCCTGTAGGTATAGTTGGAGCAGAATTATCAACTATGTCATCAGCTGTGGATGGTTGATAAAAATATATTTTGGAAATGTTGTTGATTGGAGGATCCTCCACATCCCATCCAGTTGGTATAAT  
TTCATAATTTAATGGAAGTCCGGTCTGGAGTCTCTGGAGGAGCGGGCGGCAGTTCGTACAAATCTTCTAGCAGCGAAGGGTCAATATAAGCGTCATAATCAACCTCTTGGACGTACATA  
TCTGGATCCGGCGATGGAATTTCCGAAGGGAGATTATAATTTGTGCCAATAACGAGCTTTAGCATTGTGCAAGGCCTCTTTCCCGCCGCGTCATCCCAATCTAGCACTTTCCGGGAAA  
GATGAACCACTCTCTCTTTTACAGAAAGTCTCTCCATTTCAATTTGAGAGCAGAATCTCTTCTCCAATTGGGAGCTGACTCAAAGAAGGCCAGGAGACGCCGACTGTGATCGAGCA  
TCCGAAGCATTGTGTGGAAGTCTGCGTCCCTTCGCTGCCAACCCGGCGCCCTTTTCTCCACCGCCTATTGCCATGTTCCAATAACCTCCAACGCTGCGCAGAACAAACAGATTGAAAG  
GAAAAAAATACAGAAATTACTCCTTCCCTTCCGCTTTAAGTACACAGAACGGAAGAGAAGTCCGGCGAAGAAAACGTCGGACCAGAGGATTGTGTCTTTGCATGCGAGAGGAGGAAAG  
GATTTCCGATGATGCTCTAAATCAAGCGGGCCACGATAATTTATAGGTGAGGAGGAATATTGGATTTCTTTAATATTTACTGAATATTGAAATCTGAACAAAATAAAGATAGATTCC  
CTTTTATTCTATTTCTGTTATTAATTTGCTTTAAATAGAATATAATTAATTTTGCTTAAATAACTTCTATTCAAT

>comp161322\_c1\_seq2

AATGTGATCGTCATGAATCTACTACCACAATTGAGGAGCATTTCGAAGATAAAAGAGCCGGGGGAAGAGTTTACCCAAAGACGAGAGCTTACGAAGCTTCCCGTTTGATCATCAAGGTAC  
TGGATGAAGAACAATAACAGTGCCAAAAGCTGGGAGACATTCAGGAAGGTGATCCTTGACTTCTTGGACAGCAGGGCAGCAAGAAGATAGCCACTAAATCGACTGGACAACAAGTGGG  
GATGCGTAGGCAGCAACAATTGTTGGTGGAAAACCCCTTTTGGTCTTCCAAATACTCCCAACAGCAGTTTGACAGCAAATTAACACAAGGGGACAGCAGTTTGTCTGTCAAGTGAGGC  
TTATGCAGCCATCCGGGCTTACTGGAGAAGGCAGAACAGTACTCTTAGGCTGCTGTAATTCACGGCCACATCCAGGAATTATATTGACATAAAATCAGATTTCTGGAAATGAAGGGAGGA  
GTTGGGTGGAGATCTCAAGCCAATTCAGGGAAAGTACTCGGGTAGGAGAAAGGACTTGAGGAAAATTTAGTTTTTCTGAAACTGAATTTTAGTGAGGAGAAATGGGGGAAGCTGATTT  
GAAAATCCAATTAATTTCCAAAAGGAAGGGCCAACGGTTAGTGGGGGATTAGGGGTTAATGGGAGGCAATTAATGTAATTGAAAAGAGAATTAATGGGCAAGGGTGGCCGGCCATAGA  
GCAAGGAGAGAGAGGCGTGGAAATTTAAAAGGAGGGGCCACGTTTGAATAATTAATTCCTAATCAAATCTGAAATTATAATTTAGATTTGATTGAGAGAATTATTTATCCAAACGTGGGC  
CCCCTTTCTAAATTTCAAAGCCTATCTCCTTACTATATGGCCGGCCACCCTTGTCCCTTAATTTCTCTCTAATTGCCACCTAATCATCTCCTGATATTTCTTTTATCTCTTTCCCTCTAAA  
CCGAATTTGGATTTCAAACCTGAACTTCAAATCCGTTATTTTCTCCTATTCAAACCTGAAATGAGAATTCAGTTTTTCTCTTACACAAAACAGCCACCACTTCTCTCTTCTC  
TCCCTCCCAACCGAGATCCCACATCTCCTTTAAACCCACGGCTCAAATCCTCTCCCTCTCCAAGCCGCCGCCCTCTCTCCCTCCCATTGGAGATCCTCTTGGCGGATCACCCGTTCTC  
ACTTGCAAGCCGAGTGGAACTTCGGGTTTGGAGTACGACAACCAAGGAAAAGTTGACATCCTCAAATCACCTTCTTCAACGTAGGCTTTGATTTAGACGACACCGTCAAGAATATTTG  
GATCGGATTCTACCAACACTAGTGGATTCCATCGACGACCAATTCTCCGACTACACGTGGATCATCGAAGGTCATCCACCGTGCCACCTCCACCTCTGAGTT

>comp161332\_c1\_seq3

GGGAAATTTTTCGCTCGCAAATAGCAGAAGCCTCAACCATCAGAAAGCCGTGGGGGAAGAAAGAGAAATCCCGTAACTCCTACGCGCGAGGAGGGGCGCTAATTCGAGTAGGGGAAGT  
TTCCCACTCAAAAATAGCGGAAGCCTCAGCCGCTAGAGAGCCAGAGGGAGAAAAAAGAGAAGTTGCAAATTTCTAAAGGCCTAGGAGGCTTATTTATAGGTTTTGAAGAGAATAGGA

GGGAGTTATTGACATTTTCGAATTTCCGTATTTTCTAAATTTTTTCGAATTTTTTAAAATTTTTTGAGATTTTTTTGGAATTTTAGGACCCAAAAAACAAAAAGACATCTTTTCGCGT  
TTGTGGGGCCCAAAAGGCGGTGGGTCTGAACACCTCTTCTCTCCTCAAACCGCGCGGACAGCTCACGGATCCACGAGCATTCAAGCGGATCGAGACAGCAGCTCCCGCGGCTG  
CAGCGGCGGCAAGCATTCTCGCGAGCATTACGCGGAAGCGGTCCGCGGAGCAATTCGTGGAACAGTCATCGGAACCAGTCCGTGGAAGCGGTCCGCGCCGCGGACCGTGTAGGCC  
TCTGCGCGGGAGTGTCCGGCGGCCGTTGTTCCGCGCCGCCGGCACCGGCGTCTGAAGGCCGGCCGGTTCGGCCGCCCTGTCCGTTTTGGACCTGTTTTTTTCCCAGAAATAATCAAATTC  
AATATTTTTGGGGTCCCCAGACACGTTTTTTGACGTTTGAACCTCAATTTTTCAACTTTCAAGGCTCAACGAAGCCTCTATCATTAAAGTTTCGAGAAACACTTAATTTTTCAGAATGCAATTT  
TTGGCGTTTTGACTGATACAAATTTTCGAAGCATATATCTTCGGACTCCTGGAGCTTCGATGTACGAAAATAGGAGGGCAACTGATACGGCATCACAAAATTATCTCGATCGGGCAAGAAT  
CTCGGGGCAAAAGCTAGTTGGAAACTTCA

>comp161332\_c1\_seq4

GCCCGCTTAAATCTCGCCGGCACCTTCAACACCAAGTCATTAGGAAAATGAAATTTTTTTTCTGAAAGAGATGAAAGAGTCTTCGGTAATGGTGGAGATGACATCGTCGGCTTTTGTGCGC  
CTTAGAAGTCTTCTTCGAACCTTCTGAACGGGCAGTAGGACGATCTTCTACAACAGAAACATCTTTTGTAGAGATGCGATCACCCATTTTCAATTGCTTAAGGAAGGAGGAAGAGGAAGA  
AATCTCGTAGGCTTCTGCACGGAAGAGGGGCACTAATTCGAGCAGGAAAAATTTCAACTCGCAAAATAGCGGAAGCCTCAATCGTCAATAAGCCGGGGGAAGAGGAAAAAATTCC  
GTAGGCTTCTGCATGCGAGGAGGGGCGCTAAT

>comp161344\_c3\_seq1

TTAAATAAAATCTAAAAATTTAAAATTCATCTTAATTAATTTTTTAAAAAATTTGGGAACCAAACCTTATTCTTTCAAACATATTTGTAATCATAATTTATTTAATTAACATTGATATTCAATG  
CTCAAATTTATTTTCAACTAAAAAACGATAGGCTTGATAAAAAAGCATAAAAAATCATAACGATGCCCCCTTTCATGCCCACGTTAAGGGTTCGGGGCGGGTGCGAAAACCTCCCGGT  
AGAGATAAGGTCAAACAACACCTTATTCGCGGCATCAGTATAGTGAACCTCCGTCACACCACCTTTTTTGATGGCTCGGGGCACGATCTTCCAAGCAAACCTCACTGCCGTTACCGT  
TGCCGTGCCCCACACCGGATGTTGTAGTCGAAATGTACTTGCCACCACCGTACCCGCAGCATAACCTCAGAGGGTCTCAAACCCTTGCTAAAAGAGGCACCCACCTCAGAAACTTCC  
TGGCCCGCATTTGATTGGACCCCACTTAAGAGGCATTGCCGCTGGAGGGGAATCGAGCACGGGTTACTCGCCACCAATCAAGCTAATCATCGGTGGGTTAATCTAGTTTTTGATCCTCAA  
TAGATACATAGGATGAATAAAATGACAAGTCTAGTGCTAGCTCAGATCACACATGCTACATGCATCATTAAACATTCAATATAAAATGACCAAGGGATTTGATGTTGTTGCTAGTTTTAATTG  
TAGCTAACCAACAAGAACAAGAGCATTTCATTAATAATGATCCTTCTTGGATGTTAAGAACAATTTATATATATGGCAGAGGGTAATTATGAGATGGCAAAGTACCTGCAAAATGTCAA  
AACCTTTT

>comp161365\_c0\_seq3

AAAAAATACTATAATTAATAACAATATATGGACACTTCATATATCCTCATCACATCCATAACAATGTTCTTTTTTACATATATTTGCCATGGCCAAACCCAAACCAACCCATTTCATCTCATCAAC  
ATACCAACTCCTGAAAAAGAATAATAAAAAATTTATGCGTTTTTAATTATTATTTTATTCGATACGACTTAATATTAATAATTAAAAACTATCAATATTAATAATATCAACAATTTTCTGACT  
CTAAACGGGAAAAGTACCAAGCAATCAAAAATTATCTGATCAGCAATTAAGATAAAATCTTAAAAATTTAATTTTTTTTTTAAATGAATATAGTATAAAAAATTAATATTCATTTAGAATAA  
ATTTAAAAATAATAAATTTATCTTAATTAATAATTTGATCACTTCTCTTTGGCCATCTGAAACGTCCTCTTCAAGAACCGGTTAGCCACCTCGTCGTCCTGTGACAGATCACACGCAAAATG  
GTATTGGGATCCGATCTGTTCCACTTCCCCGTCGTCGGCGGCATGGGCACCTTATGCGCTCCGATCCCACTCGCCTCGCACGCCACCGTCGTAAACTCCTCCAGCAATTTCTCAGTAGGCA  
AAGCCATGAGGGCCACGATCCCCTCCGCCACCTCCATCTCTTCTCCACTACCTCCTCTGCCACCAACCCCTCACCCGATGTGCAGAAAACCTCGCCGAAAACCTTCCAAATCCTCCGCGA  
CCATCTCGCTGTCACCCCGCCGAAGGCTCTCTCGCTTCCGCCGGCCAAACACCATCAAAAAGGCTTCTAGTGCCGCTTCATCACCTCCCGCACCCGCCACCGGCTGAGCCCTGTGCGG  
TTAAAATTTGTGACGATGAAGTTTAGGTTCTGTTTTAGCAGGCGGAGGGAAGGGCGGATTTCGGGCGGCGGCAACGCCCGCGGCTAGAGGCCTTGGTAGAAGGCTTGGTGGGAGTCGAC  
GAAGATGAGGCGATAGGCGGCCACTTCGGAGACGTGGAAGATGGCGGATTGAAGGGAGGAGCGGGCAAGGTCTGAAGCAGGTGGGGGCGATGCGGCGGCGGGAGGTGGAACCGGGG

CGGCGAGGCGGGGGTGAGGGGAGCGGGAAGAGTTTCGGCCAAAGAAAGAGAGGGATTTGTGCGATGGAGTGGAGGACGGCGAGGACGTAGTGGAGGGAGTTGAGGCGGATGTAGAAG  
CGTTGGGTGGCGCGGCTGGTGGAAAGGCGGGGATGGTGGCTTTCGGCCGGAGTGGGTTTCTTTCTGGTTTTGGGATGGACTAATCCGATCAAGGCCTGAGCTTCTTCCATAGAGTGGTG  
AATCTTGAGTCTGGTTGCATCTGGTTAGCGGTGGGAGGTTGGGGATGTAGCTCTGCTTCGTCGCCAGGAAGCAACGAAGGAAGTGTAACTCTGGAAGAGGTTTTCCAGGCCATCGGC  
GAGTTCCTGAACCAGCTCTCCCTTGCAGCCACCGGTATTTCAAAGAATCATCCACTGTTACTTTAGCAAGCTTCATCAGATCAACTGCAGACTGTGCGTAGGGCTCTGATTTGGATTTT  
CGTTCCAGGTCTCTGTTTCTTTGCTCTGCTGAAGCACTCCCTGCCAATTCTCAGCCTTCCCCTTATCCAATTCTTCATCAGGCTAAGGATAATGGAGTCCACATCGTAGAGCACCATCTC  
CCTCACGATAGCCTTACCTCCATCATCGCAGTTGGCTGAGTCTCCACCACCATCTGTACCAGCGTCTTCTCCAGTTTTCCGGCGGTCTGAAGAACCCGAACAGTCTCATTTTTCAGTCCA  
GGGATTCTAGCCAAGTACTGCTTCAACACAATTCCGTAGCAGTATGGAGTGTGCGCCACAGCCACGGCCATCGAACCAGGATGCCATCTCTGGAGCACCGGACTGTAAGTCTCCTTCTCG  
AGGGCCACCAAGGTCTCTGTGTCTTTGGCTAGATGCACTAGAGTCTCGCTAGGTTCTTCGCTACCTCCACCACCATGCTGTCCACGTTCCCGTCCCGTCTCTAGTATCTTAGTGAATGC  
GCTTTTGAGGGAAGACTTTATGTAGCGTTCGATTGGGGACACCGCAGAATTGATGACCTCGCCATTGCCGTCTTCATCGGCTGAGTTTCGTTGGTCGTCGTTTCATGATTTTGGCTGTGGTG  
AGAGCCAGCGAGAGAACCCTTCCATGAGCGCAACGGAACATTTCCCGCGGAATACAGTGTGGTAATCAAGCAGCTTCTTTCCGGCCCACGCTAGCATCGACGACATCACCGGAGAAAAG  
GACTTTGAGGAATTCGCTCTTTTTTGGCTTCGGTGGCGATTTCCGCCGAGGATGATCAGCGACGCGCCGAGCAGGTCTGCTCGATCTGTCTGTCTTTACGTAAGTCTCGAACATCGTC  
CAGGCCAGGCAGACATTGTGTGTCATCTTGTGATGCCAAGCGTAATCCATGTCTTCTTCATCAGCTCGATCAGCTCGTTCGACCTCCTCGAGCACCACGGTTTTCGTCGCGGAGGTGCAAG  
ATGGATCGGAGGAGGAAATATAAAGGTGGATGTTAAGGGGAAAGCCGTCGGCCCAATGGCAGGCCTCAGCGGGGGATCCATTGGGATTCGCCACGCGAGGGAGACGACTGCATTGC  
AGAGAGCTTTAAGGGATTCGGAATCTTGTCTGTTGTCGATGGGTTTGGAGCTCGCCGAGCGAATTACCTCACGGAGGCGCAGTGCCGATGAGTTGAGGCGATCAAGGGGGATGGAAGGG  
TGATGGAGCAGGCCGGCTCGAGGATCTTCAGCTGCCGCCGTTGCCACTGATGGTATTCCTGCGCGTTCGCTGAATTCGATGGTTTTAGATGCCTCAAAAGCTCCAATGGGAGGATGATG  
GTCTCCGCTCTCTTTGCGGCCTGGCCGACGAGCGTGCATATAGGTTTTCCGGAGGCGGTTGTCGCTCTGCTCGGTGACCCCAATTTGCTGCCGCATGATCTCCGCGGAGGTCATGGGG  
CGTGCTTGAGCCGGCCGGCACCGGGGATGAGGCTCCGGCGGCCCCGCCCTACCGATACGACGGGTGATGAGGAGTGTGCGCTCATGACGCGCATCGGTGGCGAGCCGCGACGGGTGC  
GGAGGCCGAGTGCAGGCTTGATCCTGCTGTTGACGACCATAATGCCGGTGCCGAGGTAGCCGCGGTGTTACCTCCTTCCGGGGATGGCGGGTGGTGGTTGAAGGGTAGAATGAGAGG  
GGGTTTCTACCGCCGAAGCCGGGTGAGGAGCGGCATGAGGCCAAGAAAATCTCGTAAGCCGTTTCGCGGAGTTCGCCGCGATCGACGGCGTTCGATTCTTCCGAATGGCCATTTCGACATC  
GGCATCGCCGCTTCGGAGTCGTGCCCCACGGAATGGTGAAGTCGGAGAAGGAGGAAGCGGAGGGATGATGGTGAAGCCATACGCGCGGCAGCCGCGGCGCGGCGGCGTAGGAGGGT  
GGTCA

>comp161365\_c0\_seq6

AAAAAATACTATAATTAATAACAATATATGGACACTTCATATATCCTCATCACATCCATAACAATGTTCTTTTTTACATATATTTGCCATGGCCAAACCCAAACCAACCCATTCATCTCATCAAC  
ATACCAACTCTGAAAAAGAATAATAATAAAAAATATGCGTTTTTAATTATTTATTTATTCGATACGACTTAATATTAATAATTAATAAACTATCAATATTAATAATATCAACAATTTTCTGACT  
CTAAACGGGAAAAGTACCAAGCAATCAAAAATATCTGATCAGCAATTAAGATAAAATCTTAAAAATTTAATTTTTTTTTTAAATGAATATAGTATAAAAATTAATATTCATTTAGAATAA  
ATTTAAAAATAATAATTTATCTTAATTAATAATTTGATCACTTCTTGGCCATCTGAAAACGTCCTTCTCAAGAACCGGTTAGCCACCTCGTTCCTGTGACAGATCACACGCAAAATG  
GTATTTGGGATCCGATCTGTTCCACTTCCCCGTCGTCGGCGGCATGGGCACCTTATGCGCTCCGATCCCACTCGCTCGCACGCCACCGTCGTAAACTCCTCCAGCAATTTCTCAGTAGGCA  
AAGCCATGAGGGCCACGATCCCCTCCGCCACCTCCATCTCTTCTCCACTACCTCCTCTGCCACCAACCCCTCACCCGATGTGCAGAAAACCTCGCCGAAAACCTCCTCAAATCCTCCGCGA  
CCATCTCGCTGTCACCCCGCCGAAGGCTCTCTCGCTTCCGCCGGCCAAACAACACCATCAAAAAGGCTTCTAGTGCCGCTTCATCACCTCCCGCACCGCCACCGGCTGAGCCCTGTCCG  
TTAAAATTTGTGACGATGAAGTTTAGGTTCTGTTTTAGCAGGCGGAGGGAAGGGCGGATTCCGGCGGCGGCAACGCCCGCGGCTAGAGGCCCTTGGTAGAAGGCTTGGTGGGAGTCGAC  
GAAGATGAGGCGATAGGCGGCCACTTCGGAGACGTGGAAGATGGCGGATTGAAGGGAGGAGCGGGCAAGGTGCAAGCAGGTGGGGGCGATGCGGCGGCGGGAGGTGGAACCGGGG

CGGCGAGGCGGGGTGAGGGGAGCGGGAAGAGTTTCGGCCAAAGAAAGAGAGGGATTTGTCGATGGAGTGGAGGACGGCGAGGACGTAGTGGAGGGAGTTGAGGCGGATGTAGAAG  
CGTTGGGTGGCGCGGCTGGTGAAGGGCGGGGATGGTGGCTTTCGGCCGGAGTGGGTTTCTTCTGGTTTTGGGATGGACTAATCCGATCAAGGCCTGAGCTTCTTCCATAGAGTGGTG  
AATCTTGAGTCCTGGTTGCATCTGGTTAGCGGTGGGAGGTTGGGGATGTAGCTCTGCTTCGTCGCCAGGAAGCAACGAAGGAAGTGAATCCTGGAAGAGGTTTTCCAGGCCATCGGC  
GAGTTCCTGAACCAGCTCTCCCTTGCAGCCACCGGTATTTCAAAGAATCATCCACTGTTACTTTAGCAAGCTTCATCAGATCAACTGCAGACTGTGCGTAGGGCTCTGATTTGGATTTT  
CGTTCCAGGTCTGTTCAATATAATAAATCTTTGCCGTCAGTTAATTCACACGAGATTTCTCTATAACACCCATGATTTGACGTACTTCTTCATGAAAATGCTAAAAAATCATTTGATGACA  
AAATCAACTAACAAATTTGAAACAATATAGTTTATTCCAACAGAAATTGATGTTTTTAAATTTGAGACATCGAATATTTAGGGGGAGATAGTTTCGCTCTGCTAGGGTTTTGGCGGGGTTT  
TGCTTCGCCCCGCGTTTTCTTCTCCGTTTGGGGAGGGCCTCCTCCCCTCCCCTCCGTGCATCCGATGGCGTCTTCTTCTACACTTCGGACTTTCCTCCGCTTCTGCTCCGGCTCATCT  
ACGCTCTCCGCTCCTCCCGCCTCGACTTCATCGGTAATCTTACCAAACA

>comp161365\_c0\_seq8

AAAAAATACTATAATTAATAACAATATATGGACACTTCATATATCCTCATCACATCCATAACAATGTTCTTTTTTACATATATTTGCCATGGCCAAACCCAAACCAACCCATTCATCTCATCAAC  
ATACCAACTCCTGAAAAAGAATAATAATAAAAAATTTATGCGTTTTTAATTATTATTTTATTCGATACGACTTAATATTAATAATTA AAAACTATCAATATTAATAATATCAACAATTTTCTGACT  
CTAAACGGGAAAAGTACCAAGCAATCAAAAATTATCTGATCAGCAATTAAGATAAAATTCTTAAAAATTTAATTTTTTTTTTAAATGAATATAGTATAAAAATTAATATTCATTTAGAATAA  
ATTTAAAAATAATAAATTTATCTTAATTAATAATTTGATCACTTCTCTTGGCCATCTGAAAACGTCCTCTTCAAGAACCGGTTAGCCACCTCGTCGTCCTGTGACAGATCACACGCAAATG  
GTATTGGGATCCGATCTGTTCCACTTCCCCGTCGTCGGCGGCATGGGCACCTTATGCGCTCCGATCCCACTCGCCTCGCACGCCACCGTCGTAAACTCCTCCAGCAATTTCTCAGTAGGCA  
AAGCCATGAGGGCCACGATCCCCTCCGCCACCTCCATCTCTTCTCCACTACCTCCTCTGCCACCAACCCCTCACCCGATGTGCAGAAAACCTCGCCGAAAACCTCCAAATCCTCCGCGA  
CCATCTCGCTGTCACCCCGCCGAAGGCTCTCTCGCTTCCGCCGGCCAAACAACACCATCAAAAAGGCTTCTAGTGCCGCTTCATCACCTCCCGCACCCGCCACCGGCTGAGCCCTGTCCG  
TTAAAATTGTGACGATGAAGTTTAGGTTCTGTTTTAGCAGGCGGAGGGAAGGGCGGATTCGGGCGGCGGCAACGCCCGCGGCGTAGAGGCCTTGGTAGAAGGCTTGGTGGGAGTCGAC  
GAAGATGAGGCGATAGGCGGCCACTTCGGAGACGTGGAAGATGGCGGATTGAAGGGAGGAGCGGGCAAGGTGCAAGCAGGTGGGGGCGATGCGGCGGCGGGAGGTGGAACCGGGC  
CGGCGAGGCGGGGTGAGGGGAGCGGGAAGAGTTTCGGCCAAAGAAAGAGAGGGATTTGTCGATGGAGTGGAGGACGGCGAGGACGTAGTGGAGGGAGTTGAGGCGGATGTAGAAG  
CGTTGGGTGGCGCGGCTGGTGAAGGGCGGGGATGGTGGCTTTCGGCCGGAGTGGGTTTCTTCTGGTTTTGGGATGGACTAATCCGATCAAGGCCTGAGCTTCTTCCATAGAGTGGTG  
AATCTTGAGTCCTGGTTGCATCTGGTTAGCGGTGGGAGGTTGGGGATGTAGCTCTGCTTCGTCCTGCAACCAAGAGCGTCAAGTAACGAAGAAAACA ACTAGCTGGAAATTTAGTGAA  
TAAATAACATCAGTTGCTTACCGCAGGAAGCAACGAAGGAAGTGTAATCCTGGAAGAGGTTTTCCAGGCCATCGGCGAGTTCCTGAACCAGCTCTTCCCTTGCAGCCACCGGTATTTCAA  
AGA ACTCATCCACTGTTACTTTAGCAAGCTTCATCAGATCAACTGCAGACTGTGCGTAGGGCTCTGATTTGGATTTTCGGTTCCAGGTCTCTGTTTCCTTTGCTCTGCTGAAGCACTCCCT  
GCCAATTTCTCAGCCTTCCC GTTATCCAATTTTCATCAGGCTAAGGATAATGGAGTCCACATCGTAGAGCACCATCTCCCTCAGGATAGCCTTACCTCCATCATCGCAGTTGGCTGAGTCCT  
CCACCACCATCTGTACCAGCGTCTTCTCCAGTTTTCCGGCGGTCTGAAGAACCCGAACAGTCTCATTTTTCAGTCCAGGGATTCTAGCCAAGTACTGCTTCAACACAATCCGTAGCAGCT  
ATGGAGTGTGCGCCACAGCCACGGCCATCGAACCAGGATGCCATCTCTGGAGCACCGGACTGTAAGTCTCCTTCTCGAGGGCCACCAAGGTCTCTGTGTCTTTGGCTAGATGCACTAGAGT  
CTCGCTAGGTTCTTCGTCTACCTCCACCACCATGCTGTCCACGTTCCCGTTCCTGTTCTCTAGTATCTTAGTGAATGCGCTTTTGGAGGAAAGACTTTATGTAGCGTTCGATTGGGGACACCG  
CAGAATTGATGACCTCGCCATTGCCGCTTTCATCGGCTGAGTTTCGTTGGTCGTCGTTTCATGATTTGGCTGTGGTGAGAGCCAGCGAGAGAACCTTCTCCATGAGCGCAACGGAACATT  
TCCCGCGGAATACAGTGTGGTAATCAAGCAGCTTCTTTCGGCCCACGCTAGCATCGACGACATCACGGAGAAAAGGACTTTGAGGAATTTCTGCCTTTTTTTGGCTTCGGTGGCGATT  
CGCCGAGGATGATCAGCGACGCGCCGAGCAGGTCTGCTCGATCTGTCTTACGTACTGCTCGAACATCGTCCAGGCCAGGCAGACATTGTGTGTCATCTTGTGATGCCAAGCG  
TAATCCATGTCTTCTTCATCAGCTCGATCAGCTCGTCGACCTCCTCGAGCACACGGTTTTCGTCGCGGAGGTGCAAGATGGATCGGAGGAGGGAAATATAAAGGTGGATGTTAAGGGGGA

AGCCGTCGGCCCAATGGCAGGCCTCAGCGGGGATCCATTGGGATTCCGCCACGCGAGGGAGACGACTGCATTGCAGAGAGCTTTAAGGGATTTCGGAATTCTTGCTGTTGTCGATGGGT  
TTGAGCTCGCCGAGCGAATTACCTCACGGAGGCGCAGTGCCGATGAGTTGAGGCGATCAAGGGGGATGGAAGGGTGATGGAGCAGGCCGGCCTCGAGGATCTTCAGCTGCCGCCGTT  
GCCACTGATGGTATTCTCTGCGCGTGCCTGAATTCCGATGGTTTTAGATGCCTCAAAGCTCCAATGGGAGGATGATGGTCTCCGCTCTCTTTGCGGCCTGGCCGACGAGCGTGCGCATTAT  
GGTTTTCCGGAGGCGGTTGTCGCTCTGCTCGGTGACCCCATTTGCTGCCGCATGATCTCCGCGGAGGTCATGGGGCGCTGCTTGAGCCGGCCGGCACCGGGGGATGAGGCTCCGGCGG  
CCCCGCCTACCGATACGACGGGTGATGAGGAGTGTGCGCTCATGACGCGCATCGGTGGCGAGCCGCGACGGGTGCGGAGGCCGAGTGCGCGCTTGATCTGCTGTTGACGACCATAATG  
CCGGTGCCGGAGGTAGCCGCGGTGTTACCTCCTCCGGGGATGGCGGGTGGTGGTTTTGAAGGGTAGAATGAGAGGGGGTTTCTACCGCCGAAGCCGGGTGAGGAGCGGCATGAGGCGA  
AGAAAATCTCGTAAGCCGTTTCGCGGAGTTCGCCGCGATCGACGGCGTGCATTCTCCGAATGGCCATTCGACATCGGCATCGCCGGCTTCGGAGTCGTGCCCCACGGAAATGGTGAAGT  
CGGAGAAGGAGGAAGCGGAGGGATGATGGTGAGCCATACGCGCGGACGCCGCGCGGCGGCGGTAGGAGGGTGGTCA

>comp161371\_c0\_seq7

TTTTTTTTTGTGTGTTTATATTCTATAGAGGGTGCTCGAAAAATTAGGGGAGAGGTAAATCTATAATCGAAAATAGAAAAAGTTCTTCACTTACAAGATACAAACCTTCTCGTGTATCCT  
TAATAAATATATTCTCTTTAGTTATAAAATCATCATATCAGAGCTCTATCAATCTGAGAACTTCATTGGAGAATGTATTGGTGAATTTCTATTTTATAAAGTAAATCAACATTGTTAAAATTATT  
ATTATACTTTTTTTTAATTCATTCACAAG

>comp161375\_c0\_seq1

TAATTAATCTTTCAAAGCAATGCAAGCCTACGTTCTTCAAAGGATATCTCCGTCTCCTGTGGCTCCATTTTCAGTGCTGTAGCCTCTTGGGCAAATCAGGTGGGTCAAGCTTTGTTGTCA  
TGCTTTGGCGTAGACACCGTTCTGGGTGAATTCAGAGCTGAGACTGCTGAAGAACCATAGGTATCATGTTTTCTCTTCGGTGTGCTTATACGTTTATATGGGGATGGTAACTGTATGCT  
GTGGGGACGGCTTAAGGGCGTGAAGGGCCTACGAGGAGTCTCTACGTCAGAAGCGTCAGGATCAACAGATTGAAATTTCTGGGTCTCCCGTGCCTCCAGAAAGAGAATCAGGCGTCTTT  
GCAGACGAAGGAGACTTGAATGAAGGAAGTGAATCTAATCTTGTAGGCTGCAATGTGGCTCCCCGACCGATAGCCTTCTGGTTGGTCCCTAAAGGTAAAGTTCAGCAAATTTCTTGCC  
GACTGGGACTTCGAAAGAGTTGGTTTTGATCCAAACATTACTTCCCTCTCGGCTACAAGCTGCCCTTGAAGCCTTCTCTGGTCCCTCAGTCTCTTTCTTTTCATGTTCTTTCTCTTGCCCTAG  
GATGGTGTGCTCTTCCAGCATGGACAAAAGGCTGACACCATCATATTTGAATTCGGTCCCCCTCTCGTTCTCCCATGACATAATTTTGGTGGTCAAAGTCTCCACAATCGCTGGAATTTTGC  
TGACAACTGCACGGGCTTTTTACGCGCCTTGAGCATAAGGTGAGTTCCTTTTCCGGCGTTATAACGATTTTCATCCCTGTTATAATCTTCAAGCCAGGACTCTTCCTCACAAGCAGCAA  
CCATTTCTCAACCCTTTCAAGAATCTCCTTCCTGCTGAAGGCTTCCCTTTTCAGAATTGAAATTTGAGCCTCGATCTGTTCCAAAACCTAGGGAGGAATCAAGAGATTCAAGAAAACAGTCA  
TTTTCTGCAACAAGATGTGTGCGTCGGCACAGCTCATCCAGCTCAATCTTCTTTTTCAAATCAAGTCTTCAACTTGCTCGCTTTCAGCGCTTCGAGTCGTGTAACCTTCGGCTTTCACAT  
AATTGATGAATCCCATTTGAAAGCGACTTGGGTCTGTTATTTTCATGCTCTGAAGCAGCAATATTACATGTTAAATTTCTGAAACTGCTGCTGCTCTTCAGTTGGAGTATCCATCAGATACCAA  
AGCTCCAACATTGCGGTTGCCAGATCTTGAAGCATGCGCATTTCGTTGTAACCTTCCCGCAGTCTCTGCGTGGTACTTATGAGCCTCTCAATTGTATCGCTATTGACATTTTTTGACTCA  
TCGGGTCCAACTAACTAGGATGAACTTCACTGGCTGTCTGTTTGAATCTACATCTAGCACTGAACATAAAGAGTTCAACGTATTCAAGTGGTGCAGCACCTTCCCTTAGGCGGTCAATCT  
TCTCTTTATGGAGTGCATCTAAGCGTCTGTGAAGATCTTGTAGATTTCTTATGGACAAATCAGATTCATCAAGAACTATCTCAAGGCCAGGTTTCAGGATTAATCTCGGTTGAGACGCACAGT  
ATTTGCTCCCTTACTTTACGAAATTGACTCAATCTTTCATTCTTTCTTCTTCGCAAATCTTCTAGTTGCTGAATGATGACCTTATGCTCTTCTTTCAAGCTTCTGTACCCTGTCTAAAATGAA  
CTGGCCTCTCACCCATCGCAGAGCATAAAGTTGCAATCTCTGCTTCAGAATCTGCAATAGTTTGCCGAAGCTGAGCTCTGTGCCTGTTTGTGGTCAACCTTTCTTCTATATAAATCTAGG  
CACTCTTTCTTAGTTGGAGTAACATCACATCTTTTCAACATCTGATTCTCCAATATCATCCATATAGTCTGAAGTTCATCTAAAAGAGAACTGCAATCTATATCATTGTCAGAAGAGGA  
CCACGTTTACCTTTCTCCATCATGGAACCTAACCGAAATCGGCGGCCCTGCAAGGGGTATTGAGTAATAACTGCTGCTCGTCTTTCAGGTTGAACACTTAGAGGAGGAGAAGAAGA  
AAGAGGAAAAGGAGAACAAGAAGGAGAAGGACGA

>comp161375\_c1\_seq1

AGAAGGCTATCGGTCGGGGGAGCCACACTGCAGCCTACAAGATTAGATTCACTTCCTTCATTCAAGTCTCCTTCGCTCTGCAAAGACGCCTGATTCTCTTTCTGGAGGTTTGGTCCCTTGTTG  
ACTGAAATGCTTTTCTCTTTGCTTCAACCATATTTACTATATAATGTTATATTATTAGTAGTATGATTTCCACGTATTTTAAATTACTATTTATATCATATTTTAGTGATATTAATCTAGATATCATAAC  
AACCTAATGACTTAGAAATGTCAAATGTATTTTTCTTTGGAGTAT

>comp161439\_c0\_seq16

TCACTCAAGTTATATATTTGCACTGGTATATCTAAGAAGTAAGAAATAGCTTTAAGAGCATCATCCTCTGGTCATTAATTTAGGAGGAATATATCTTTTTATTTCATTAATATCAGAATGTTTATA  
AAGTGAATATGCCGATTCCACCCCTAATTTTGCATCTAGAACTTCTAAAAAAGTAATATTTAGTTATTTAATTAATGTTTAAATCATATATGATACAAACTGCCAGGGCCTCCTAATTTTTG  
CCTAAAACTTATTGTTGATGAGAATACATGGATGCAGTGTAACATTTCTTTCTTTTCATGGAAGAATAGTGAAAACATGAATAGATTTTAAATTCCTGCCACCATGACATCTTGGCTAACTT  
CATGGGGATGCCTTCATCTTCTTTGGAAGTTCAGAGCTTTAATTGAAAATCCGAACAAGAAGGCAAAGAGTGTTGGAAACCAACAATTGCAGCTGCAACTACTCCTAAGAAATCATGTC  
TGAATCCAAAATAGTTTCTCACAATAAGAGACAACCTCACCAGTGTCAAGCTTGTCTTCTATATCTCCAAACTGTGAAGCTACCAATCCATAAAGTGCCATGAAACTGGGCATGCCCA  
GAAATACCATCTCCACCATAACCGAACCCTCTGTTGAAAATAATCTTTTTAGTTCATCCACATTAATAAACAACAACTATCTGCAAATTACAACCTACCGGTCGTGGAATTATCATACCCG  
AGAAAAGATTCCATAATAAATAAAACCATGTAGATGCTATCGTACCCACGTTTAAATTGGGTGTGAAGCCACACACATCATTCCATAGTATGTGAAGTATAGGAACGTGAAATACATAATG  
AACAAATACCAAAGAAGCTTGGCAGTTGTCCATTCAAATCCAATCATTGAATAGACTATGACCCCATAAACGATAGCCTGACCCAATACATATGGGATCTCAATTGCGACCTGTCCAAATG  
CATATGGTAAACTTGAGTACATTCCTGCTGCTCTTCCCTATAAAAGACAGTTCTCTCGACAGACACCACAGGTTGAACTGAAGAAGCATTGAAATCCAAGAAACAAAACAGAAGCAT  
ACATTGAACCCATTGCATTAACAAATCCTGTTGTTTGTCTTTTTGCCACCTAGATCCCAAAAAATTGTTCCAAATATCAAGGCTATGATCAATGTGAAGAAAAACCGCACTGCTGTGTAT  
GGTGGATTTCTCCAGTATGACAAATGCTGTTTCCAAAGGCTAGCCATGCATTGAGAAACGAAGGTCTGCGAGTACTGTGTTGGGAAGAAAAGATCATTTGAACCAGGTGGAGGTATGCTC  
AACTCCTTGATCAAAGCCTTATTCTCTGAAACAATTCAGAATTTCTGTAGACATCAGTGAAATCAACCCCTAGTATTTCTCTTGTGCTATTGTTGTCACCTTAACATCCATGTTGCTGGG  
TTATAGCTATCCTTATTTTGTCTACTCCTTCAATTCCTCAAAGTAACTAATCAGTTGACTAGAATGGTGACCCAATGGTCTACATAGATCTCTTTTCCACCACGTTTCATTAGGAAGAGC  
TCATCAAATGCTTCAAATATGTCTATGCTAGGTTGATGGATTGTGCACACTACAGTTCTGCCAGTGTCTACAGTATTCCTTACTGTTCTCATGACAATAGCAGCAGCTCTGGCATCAAGTCC  
AGATGTAGGCTCATCCATGAATATAATAGCTGGATTAGCAACGAGCTCAACTGCAATGGTCAATCTCTTGCGTTGCTCTGTTGATAGTCCATTTACTCCTGGCAATCCACCAATGCTCCCC  
TCAATGGAGTAAGTCCACAAGCTCCATTATCTTCTATAAACATCTTTCTTTTTTTCAGAACCAACCTCAGCAGGCAATCGAAGCCATGCTGAATAAACCAAAGACTCATAAACTGTACAC  
ATAAGGGGAATTGATATCATTTTGTTCACAATATCCTGAAACTCGAGCAAAGGTTTCTGTTTCTTAGGATAACCATTTATCATGATGCTTCCTTCTATATATCCTCCAGTTTTTCTTCCGGCC  
AATACATCCATCAAAGTTGTCTTACCAGCCCCACTAACACCCATCAGCGCTGTGAGCACACCTGGTCTGAAAGATCCACTTACACCTTTAATAGCTCCAAACGGTCTTCTTGAATCCCTT  
TGGCCTTCATTTCTCTGGCATGTCCACAGAGTATCTTATATTGTCAAATGTCTGCTGAGTGGAGTAAAAGGAAGAACCATTCTTTCTTGTTCATTTGGATTCTGCAATGGCTTCTACAT  
TTTTTGTTCATCCTGTTCTCATTCCTTCAGAGCTCTTTGCTGTTGATGATATTCAGTTATCTCTCCAGTAATATTTGCTTGTCTCTCCTTCAACGCTCCTCAGATATGATTGGCTGGGAT  
TTTCCAAATGGTTTTACAAAGGTAAGAGCCACCGTGAAAAGAAAATTA AAAAGGAATATGAAGCCAATCAATGCTCCAAAACCTATCCAATACCATTTTGCTTCTGTAAAGGTTCCACGA  
GACTTCAAGATGGTCACCCCTAATGATTCTGTTGACCCAGGAAGAATATGTTTCCAGCTTTTCCCAAGGAACTCATTGTTGCTAGAGCATTCAAGGAGTACATCATAGGTGAGATCCAGT  
AGCCCCATATCCACCATTTCTTCATGTCATCGTGTGATAGAACAATCCAGCCAATGCTACGACCACAAGCAGTGCAAATGATCCTAAAGAATTAGCAACAACCATGTCTCTGCTCAATCC  
AGCAATTAACGAAAGAACGCAGACATTGCCTGTTGGAGTGCTAAAAACAGCAAATACTGTTAAAAAACCTTCCAACATTAGGATCATAACCTATAACATAATAGCTGACAAACACCCA  
GGTACCAACTTCAACTAGAGCTATGGGAATCTCAGAATCCACGAAGGTAATGTATATGCCATGCAGGATAGAAGAGGTAGTCTCTTGTCTGAGGAAGACTGGGAGTTTCCAAATAGTC  
AATGGAATCTCTGTGAGCCCATTAACACGATCGTCTGTATAGAGAAGAACAATGAACCCACAAAATTCACCATCCAAGACTGAATCACGGTGCATATTTGCTCTTAGGAACAGCGTC



ATTGCAATAGATGCTAAAAGCAGTAGCTGAATTGCTCTGAAAACATATGCAAACCAGTTGCGCTTCATCAGCAATAATTCTCTTGAGATGCAAGCTTTTAGCAGTTCCTTTTTGCTCACACC  
ATATTTTGAAGTTGTTAAAGCTGCAGGATGTCCCTTTCTCGCGTCGAATGGGACAGCAAGCTCCTTCGTAAATTTGTACCCGATATGGAATGATTGGAATGCTTCTGAGAATTCTCTTGACAG  
TTACATATCTGTAAGGTTCTTCGTCACGTGCCAATACTGCTGCTGATCTTTCTTTGATGTAACCTTCCGCAAGAAATCCGCAACCCCTTTTCTCTCCGGGCATTTGAAGCCCATCAATTCA  
AAGAATTCAAGGACATTCTCACGAGGGCCATGGTACACAATTTGAGCATCCGAGAGAAGAATTATATCATCAAGAGGTCAAATGTTTCTGGTGTGGCTGGAGAAGGGAAATAACAGCG  
GTTCCATCAAGTATATGTATATATTGTCTCAATGAGCTGACAATTTGGTAAGTTGTGGAGGTGTCAAGTCTGTGGATATCTCATCCATGAACAAAGCACTTGCTGGTCCAACAATCATCTC  
ACCTGTTGTAACCTTTTTCTTCTGTCTCCAGAAATACCTCTAATCATCTCATCTCCAATCATTGTGTCAGCACAGATGTCCAGCCCTAAAATCTTTAGTACATAATCAGTTACTAGACCCGT  
CTCTTGTCTTCCATTGAACTTGCCCTCATAAAGACATCAACGTCAGGGTCTGGCTTTATATTTGCTGCTTTCTCTCTCCTTGAAAGCTCTGCCAACATATCATAACGTTTACCAACTCCTTG  
ACACCTTGACAGAGAATGATAGTGTCTCGAACCGTCATTTCTCCGATATGGACATCATACTGGCTGATATAGGCAGCATTCTTTGAGGTACAAACTTATTCATTTCTTGACCATTGTAAGT  
CACTCTTCTGAAACCTTCACATCAGAGTCCAATTTCCAGCTAGAGCCAGCAGTAAAGTGGTCTTCCCTGAACCAGGAGGTCTAAGAGTAGAGTCATCCTTCTAGGCTTTATGAGTCC  
ACTAACATTATGAAGTAAGGTTAATGGTTTCTTCCCTGCTTGGTAGAATGTGAAGGTTGTTGGCAAAGCCTCAAGCACGTTTATTACAGAATTGAGCAGCGTAGGCAATCCTCTGTTGCC  
ACATATGCTTCAGCTTTAACATTAAGGTTCTCATAACCGTACTTCGATGGTTGGCAATTCAATCCCAACATTATCAATCCTGTTTCTGATTCTCAGCAAGAAGCTTCTCATTATCATCATCTGCCA  
CTCTCACCAACTTCTCCAACAACCTCCCTCCTCTCCAGAAACCCGAGACTCTCTATATCAACTTCTTCTTACCTCCTTCAGCCAAGTTCAGAATGCCTTTCTCATTCTATTGTAAGTCGGC  
AGCCTCTCGATGGCTGCCCATGTTAGATCCTCCTCGTCGTCTTCACTGTGCCTGGACCTTGAGAAGACCTGATCTCCATTCCATATGGAAGAGCGGGGACCTTGAGCTTGTGGCACGC  
AGAACAGACCCAGCTTCCATTTCAATGAACACCTTTCCTTCTCTTGAATGCAATGGACAAGAAGTAAAAGATACCAAGAAAATGAGATTGTTTAGTATGGTAAGAAGAACGATTCTGA  
TGAAGTTTGAAAAAATATTTTGAATGGAAGGGTTTTAAAAAGGTTCAAGCATAGCGGAAACCATTATGAAGGACAACCTGCTTTACAGTGAAAGGTTTACCCCTC

>comp161439\_c0\_seq17

TCTCCAGTAATATTTGCTTGTCTCCTTCAACGTCCTCAGATATGATTGGCTGGGATTTTCCAAATGGTTGAGATAAGAAAGAGCAACGGTGAAAAGAAAATTGAATACAAACATGT  
ATCCAAGCAATGCACCAATACCAATCCAGTACCATTTTGCTTGTGTAAGACTCCACGTGACTTCAATACTTGTACCCCTAGGCTTCTTTTTGTTCCGGCAAAAATGACTCCAAGCGTGG  
CCAAGGAACTCGTTTGTGAAATAGCATTCTGGGCATACATAAGAGGTGAGATCCAGTAGCCCCATATCCACCATTTCTTGACATTATCATGTGATAGAATGAATCCTCCAAAATAATCAT  
CACCAACAATGCAAATGATCCAAAACATTGGCAACAATTAAGTTTCTCCCCAGTGCAGCAATGAAACGAAATAAAGCTGAGGCCATTTGGTTGACAGCTAGTAGTAAAAAATTGTTT  
AAATAACCTTCCAACATTAGGATCATATCCTATGACATAATAGGAGAGAAATACCCAGCCACCAACTTCCATAACAGTTATAGGAATCTTGAGTATCCATGTTGGAATTGCATAAGCCCATG  
CAGGATAAAAGAGATAATCTTTGTTTGAAGAAGACAGGGAGCTTCAAATTTGTCAATGCAAGCTCAGAGAAACCATTGAACATTATCATGATAATTGAGAAGAAGAGTGAGCCCATAT  
AAATTCCTCCATCAGGGGAGATATTATCTCTATGATATTAGTCCCTAAAAAGAGTGTCAATTGTTATGGTTGCCATCACCATGAGCTGAAATCCTCTAAAACCATAGACAAATGAATTCCTTT  
TCATGAGCAAATATTCTTGAAAAACAAGCTTTAAGAAGTTCTTTGGTGCTAACACCATATTTTGAATTTGTAAGAGCTGCAGGGTGTTCCTTGCTTATCATATGGGACAGAAAGCTCA  
TTCATTAGTTTCTCTCCAACATGAAAGGATTGGAATGCTTCTGCAAATCCCTTACAGGCACAAATCTGTAAGGTTTATTGTGACGTTGCCAGTATTGTTGCTGATCTTTCTTAGATGTTACT  
TCTTGAAGAAATCAGCAACACCTTTCTCTCTGGGCATTTAAAGCCTAGAGACTCAAAGAACTTAGCACATGCTCGCGGGGACCGTGATACACAACTTGACCATCTGATATAAGAATTA  
TATCATCAAAGAGGTCAAATGTTTCTGGTGTGGCTGGAGAAGGGAAATAACAGCGGTTCCATCAAGTATATGTATATATTGTCTCAATGAGCTGACAATTTGGTAAGTTGTGGAGGTGTC  
AAGTCTGTGGATATCTCATCCATGAACAAAGCACTTGCTGGTCCAACAATCATCTCACCTGTTGTAACCTTTTTCTTCTGTCTCCAGAAATACCTCTAATCATCTCATCTCCAATCATTGT  
GTCAGCACAGATGTCCAGCCCTAAAATCTTTAGTACATAATCAGTTACTAGACCCGTCTCTTGTCTTCCATTGAACTTGCCCTTATAAAGACATCAACGTCAGGGTCTGGCTTTATATTTG  
CTGCTTTCTCTCCTTGAAAGCTCTGCCAACATATCATAACGTTTACCAACTCCTTGACACCTTGACAGAGAATGATAGTGTCTCGAACCGTCATTTCTCCGATATGGACATCATACTGG  
CTGATATAGGCAGCATTCTTTGAGGTACAAACTTATTCATTTCTTGACCATTGTAAGTCACTCTTCCCTGAAACCTTCACATCAGAGTCCAATTTCCAGCTAGAGCCAGCAGTAAAGTGGT

CTTCCCTGAACCAGGAGGTCCTAAGAGTAGAGTCATCCTTCTAGGCTTTATGAGTCCACTAACATTATGAAGTAAGGTTAATGGTTTCTTCCTGCTTGGTAGAATGTGAAGGTTGTTGGCA  
AAAGCCTCAAGCACGTTTATTACAGAATTGAGCAGCGTAGGCAATCCTCTGTTGCCACATATGCTTCAGCTTTAACATTAAGGTTCTCATACCGTACTTCGATGGTTGGCAATTCAATCCC  
AACATTATCAATCCTGTTTCTGATTCTCAGCAAGAACTTCTCATTATCATCATCTGCCACTCTCACCAACTTCTCCAACAACCTCCCTCCTCTCCAGAAACCCGAGACTCTCTATATCAACTTC  
CTTCTTACCTCCTTCAGCCAAGTTTCTCAGAATGCCTTTCCCTCATTCTATTGTAAGTCGGCAGCCTCTCGATGGCTGCCCATGTTAGATCCTCCTCGTCGTCTTCACTGTGCCTGGACCTTGAGA  
AGACCTGATCTCCATTCCATATGGAAGAGCGGCGGGACCTTGAGCTTGTGGCAGCAGAACAGACCCAGCTTCCATTTCAATGAACACCTTTCTTCTCTCTTGAATGCAATGGACAAGA  
AGTAAAAGATACCAAGAAAATGAGATTGTTTAGTATGGTAAGAAGAACGATTCTGATGAAGTTTGAATAAATAATTTTGAATGGAAGGGTTTTAAAAAGGTTCAAGCATAGCGGAAA  
CCATTATGAAGGACAACCTGCTTTACAGTGAAAGGTTTACCCCTC

>comp161439\_c0\_seq27

TCACTCAAGTTATATATTTGCACTGGTATATCTAAGAAGTAAGAAATAGCTTTAAGAGCATCATCCTCTGGTCATTAATTTAGGAGGAATATATCTTTTTATTTCATTAATATCAGAATGTTTATA  
AAGTGAATATGCCGATTCCACCCCTAATTTTGCATCTAGAAACTTCTAAAAAAGTAATATTTAGTTATTTAATTAATGTTTAATCATATATGATACAACTGCCAGGGCCTCCTAATTTTTG  
CCTAAAAACTTATTGTTGATGAGAATACATGGATGCAGTGTAACATTTCTTTCTTTTCATGGAAGAATAGTGAAAACATGAATAGATTTTAAATTCCTGCCACCATGACATCTTGGCTAACTT  
CATGGGGATGCCTTCATCTTCTTTGGAAGTTCAGAGCTTTAATTGAAAATCCGAACAAGAAGGCAAAGAGTGTTGGAAACCAACAATTGCAGCTGCAACTACTCCTAAGAAATCATGTC  
TGAATCCAAAATAGTTTCTCACAAAATGAGAGACAACCTCACCAGTGTCAAGCTTGTCTTCTATATCTCCAAACTGTGAAGCTACCAATCCATAAAGTGCCATGAAAAGTGGGCATGCCCA  
GAAATACCATCTCCACCATAACCGGAACCTCTGTTGAAAATAATCTTTTTTAGTTCATCCACATTAATAAACAACAACTATCTGCAAATTACAACCTACCGGTCGTGGAATTATCATACCCG  
AGAAAAGATTCCATAATAAATAAAACCATGTAGATGCTATCGTACCCACGTTTAAATTGGGTGTGAAGCCCACACACATCATTCCATAGTATGTGAAGTATAGGAACGTGAAATACATAATG  
AACAAATACCAAAAGAACTTGGCAGTTGTCCATTCAAATCCAATCATTGAATAGACTATGACCCCATAAACGATAGCCTGACCCAATACATATGGGATCTCAATTGCGACCTGTCCAAATG  
CATATGGTAAACTTGAGTACATTCCTGCTGCTCTTTCCCTATAAAAGACAGTTCTCTCGACAGACACCACAGGTTGAACTGAAGAAGCATTGCAAATCCAAGAAACAAAACAGAAGCAT  
ACATTGAACCCATTGCATTAACAATAAATCCTGTTGTTTGTCTTTTTGCCACCTAGATCCCAAAAAATTGTTCCAAATATCAAGGCTATGATCAATGTGAAGAAAAACCGCACTGCTGTGTAT  
GGTGGATTTCTCCAGTATGACAAATGCTGTTTCCAAAGGCTAGCCATGCATTGAGAAACGAAGGTCTGCGAGTACTGTGTTGGGAAGAAAAGATCATTGAAACCAGGTGGAGGTATGCTC  
AACTCCTTGATCAAAGCCTTATTCTCTGAAACAATTCAGAATTCTTGTAGACATCAGTGAAATCAACCCCTAGTATTTCTCTTGTGCTATTGTTGTCACCTTCAACATCCATGTTGCTGGG  
TTATAGCTATCCTTTATTTTGTCTTACTCCTTCAATTCCCTCAAAGTAACTAATCAGTTGACTAGAATGGTGACCCAATGGTCTACATAGATCTCTTTTCCACCACGTTTCATTAGGAAGAGC  
TCATCAAATGCTTCAAATATGTCTATGCTAGGTTGATGGATTGTGCACACTACAGTTCTGCCAGTGTCTACAGTATTCCTTACTGTTCTCATGACAATAGCAGCAGCTCTGGCATCAAGTCC  
AGATGTAGGCTCATCCATGAATATAATAGCTGGATTAGCAACGAGCTCAACTGCAATGGTCAATCTCTTGGCTTGCTCTGTTGATAGTCCATTTACTCCTGGCAATCCACCAATGCTCCCC  
TCAATGGAGTAAGTTCCACAAGCTCCATTATCTCTTCTATAAACATCTTTCTTTTTTCTCAGAACCAACCTCAGCAGGCAATCGAAGCCATGCTGAATAAACCAGACTCATAAACTGTCAC  
ATAAGGGGAATTGATATCATTGTTTCAACAATATCCTGAAACTCGAGCAAAGGTTTCTGTTTCTTAGGATAACCATTTATCATGATGCTTCCTTCTATATATCCTCCAGTTTTTCTTCCGGCC  
AATACATCCATCAAAGTTGCTTACCAGCCCCACTAACCCCATCAGCGCTGTGAGCACACCTGGTCTGAAAGATCCACTTACACCTTTAATAGCTCCAAACGGTCTTCTTGAATCCCTT  
TGGCCTTCATTTCTCTGGCATGTCCACAGAGTATCTTATATTGTCAAATGTCATGCTGAGTGGAGTAAAAGGAAGAACCATTCTTTCTTGTTCATTTGGATTCTGCAATGGCTTCTACAT  
TTTTTGTCCAATCCTGTTCTCATTCCTTCAGAGCTCTTTGCTGTTGATGATATTTCAAGTTATCTCTCCAGTAATATTTGCTTGTCTCTCTTCAACGTCTCTCAGATATGATTGGCTGGGAT  
TTTTCAAATGCTACAATGATATGGAGGAATGGTTCATCTACTTTAATTTACATAATGTTAATATTGTATGGTACGTTTATGTGGATACTTAGTTGGAATGATACCTACGTTTTACAAAGGTAAG  
AGCCACCGTGAAGAAGAAAATTAAGAAAGGAATATGAAGCCAATCAATGCTCCAAAACCTATCCAATACCATTTTGTCTTCTGTAAAGGTTCCACGAGACTTCAAGATGGTCACCCCTAATGA  
TTCTGTTGACCCAGGAAGAATATGTTTCCAGCTTTTCCCAAGGAACTCATTGTTGCTAGAGCATTCAAGGAGTACATCATAGGTGAGATCCAGTAGCCCATATCCACCATTCTTTCATGT

CATCGTGTGATAGAACAATCCAGCCAATGCTACGACCACAAGCAGTGCAAATGATCCTAAAGAATTAGCAACAACCATGTCTCTGCTCAATCCAGCAATTAACGAAAGAACGCAGAC  
ATTGCCTGTTGGAGTGCTAAAAACAGCAAATACTGTTTAAAAAACCTTCCAACATTAGGATCATAACCTATAACATAATAGCTGACAAACACCCAGGTACCAACTTCAACTAGAGCTATGG  
GAATCTTCAGAATCCACGAAGGTAATGTATATGCCCATGCAGGATAGAAGAGGTAGTCTCTTGCTTGAGGAAGACTGGGAGTTTCCAAATAGTCAATGGAATCTCTGTGAGCCCATTAAAC  
ACGATCGTCTGTATAGAGAAGAACAATGAACCCACAAAAATTCCACCATCCAAGACTGAATCACGGTGCATATTTGTCCTTAGGAACAGCGTCATTGCAATAGATGCTAAAAGCAGTAGC  
TGAATTGCTCTGAAAACATATGCAAACAGTTGCGCTTCATCAGCAATAATTCTCTTGAGATGCAAGCTTTTAGCAGTTCCTTTTTGCTCACACCATATTTTGAAGTTGTTAAAGCTGCAGG  
ATGTCCCTTTCTCGCGTGAATGGGACAGCAAGCTCCTTCGTTAATTTGTCACCGATATGGAATGATTGGAATGCTTCTGAGAATTCTCTTGAGTTACATATCTGTAAGTTCTTCGTCAC  
GTGCCAATACTGCTGCTGATCTTTCCTTGATGTAACCTGCATGCCAATAGGCAATTTGCTATTTTTTACCTTTATATATATTTCAAGATCAATTGAGAGCATTGAGGAAGGCGAACAACGG  
ATAATTCGAAATTTTATTCTATCGTGGAACAGATCACATTGATGCACCCAAAAGCATTGAATATATCAAAGAAGAGCCATTCGTGCGTTGCTCAATTGAAAATGACGATGAAAAATAATGGTT  
GGCAAGCACGATACTCCATAAAATTATCCTCATGAATCAAATCATCAAATGGATTGAGCCGATGTGATGTATTGCGGGCATCAAATTTACATAAGAGGGGATCCCTCACAATGGAAGATCT  
AAATTAACAAACTACAGATGGAACAATATGAGATGTTGACCAAATGTCTTGCAATTCGAAAATCCTGCTGCATATAGATACTGCAAGGTTTACTACTAAAATCCTGCTGCAGCAGTTGC  
CCTATCCTAAATCTGTCAGTTCAGTGAAAATAAAAAATCTCTGTTAAGGTAAAATCATCTCCACTTTCTATTCAATTAGGGCATCTACAACCTAAAATGATTTTTTCAATTCAAAATACAGT  
AACATTCATATCAAATGTTAATTCATCTCCAACCAAATCTACTTCAACCCTATTTTTATTCTAAAAATAAGTCTCTATTAACCTTCAAAAAATGTGCTGTCAATATTGACATTTATTTATTCA  
CGGAGGAGAAAAATGAAAATAATGTGTTTGGGTTTGGGGTTTGGGTTTGGAAATTTGGGTGGGAGGCTTGCGGCAGCTGTAAAGGCCTGTTTGCAGTTGATTGAAGATGAACTTATATA  
AGCAAATACACTTGAACCTCCTCTGACCCTTCTCCCTCTCTGTTTGATTCTACCAAACCTCCATCTCCCTTATTCTCTCTTAGTCTAACGCAACCAGCACGAACTCCTCTCCACTCAC  
CCTACTC

>comp161439\_c0\_seq28

TCACTCAAGTTATATATTTGCACTGGTATATCTAAGAAGTAAGAAATAGCTTTAAGAGCATCATCCTCTGGTCATTAATTTAGGAGGAATATATCTTTTTATTCAATTAATATCAGAATGTTTATA  
AAGTGAATATGCCGATTCCACCCCTAATTTGTCATCTAGAACTTCTAAAAAAGTAATATTTAGTTATTTAATTAATGTTTAATCATATATGATACAACTGCCAGGGCCTCCTAATTTTTG  
CCTAAAACTTATTGTTGATGAGAATACATGGATGCAGTGTAACATTTCTTTCTTTTCATGGAAGAATAGTGAAAACATGAATAGATTTTAAATTCCTGCCACCATGACATCTTGGCTAACTT  
CATGGGGATGCCTTCATCTTCTTTGGAAGTTCAGAGCTTTAATTGAAAATCCGAACAAGAAGGCAAAGAGTGTTGAAAACCAACAATTCAGCTGCAACTACTCCTAAGAAATCATGTC  
TGAATCCAAAATAGTTTCTACAAAATGAGAGACAACCTCACCAGTGTCAAGCTTGTCTTCTATATCTCCAACTGTGAAGCTACCAATCCATAAAGTGCCATGAACTGGGCATGCCCA  
GAAATACCATCTCCACCATAACCGGAACCTCTGTTGAAAATAATCTTTTTAGTTCCATCCACATTAATTAACAAAACACTATCTGCAAATTACAACCTACCGGTCGTGGAATTATCATAACCG  
AGAAAAGATTCCATAATAAATAAAACCATGTAGATGCTATCGTACCCACGTTTAAATTTGGGTGTGAAGCCCACACACATCATTCCATAGTATGTGAAGTATAGGAACGTGAAATACATAATG  
AACAAATACCAAAGAAGACTTGGCAGTTGTCCATTCAAATCCAATCATTGAATAGACTATGACCCATAAACGATAGCCTGACCCAATACATATGGGATCTCAATTGCGACCTGTCCAAATG  
CATATGGTAACTTGAGTACATTCCTGCTGCTCTTCCCTATAAAAGACTGTTTCGCTCAACTGACACCACTGGTTGAACAGAGGAGGAATTTGACACCCCGATGAATAAACAGCAGTATA  
CATTGAGCCCATTGCATTGAATAAGTCTTGTGTTTTCTCCTATTGTAAGCCATTGTAATTAATAATGCATAAGTTTCATGATTGATATGTGAGAGAATGGAAATAGGATACCAGTATTTTGATG  
CAATTGAATAAATATTAACCTTACATTTTACTACCAAGATCCCAGAAAATTTGTTCCAAAGATCAAGGCTATGCCCGATGTGAATAAATACCTCATTGCAGTGTATGGAAGATTTCTCCAGTATG  
AAAGGTGTTGTTCCATAAGCAAATCATAATTGTGAAACGAAAGATTGTGAGTACTTGGTTGCGAAGTAAAGATCACTTGATTTCAGGAGGAGGTATGCTCAGCTCCGTGATCAAAGACT  
TGTTCTTTCTGCATTAACATGAAATTTGTGTAAGATTACAGTAGATCCTTTCTCAAAGCAAAAACATAGATGTGAAAAGACTACGAATTCAACTCACTGAAATAGCGCAGAGTTCT

>comp161439\_c0\_seq29

TTAATTTTCATATCTTAGACACAATTGAAAATCATATAATCTACAAAAATAATTACAAATAAAAAATAACTTTGCCCTTAGCATTTCCTAAAATCATAAAGAAATGAAGAAATACATCAAGGTC

ACAAGACCGTTCTTCTCACAGAACACATAACAAACAAATTTTGCTTCAATCATGACTAGTAGAACTTCTTGGTTTACTTCATCAAATCCTTCATCTTCTTTGAAAGTTCAATGCTTTAATGG  
CAAACCCAAATAGGAAGGCAAAGAGTGCTGCGAATCCAACAACACTACAACAGCAACCACTCCCAAGAAATCATGTTTGAATCCAAAGTAGCTTCTTATAAATTGAGAGATGACAACATCA  
CTATTTTCAAATGTCTCATGTAAATCTCCAAATTTGTGAAGCTACCAATCCATATAGTGCCATGCAACAGGACATGCCCATGAATACCATCTCCACCAGACAGGCATCCTTGGTCGTGGAAT  
AATAAAGCCAGAGAAGAGGTTCCACAATCCATAAAATGCTGAAGATACTATGGAAGCGATGTTATAATTGGGTGTTAAGCCTACGGCCATCATGCCATAGTATGTGAAGTATAGGAATGTG  
AAGAACATGAAGAACAAGTACCAAAAAGAATTTGGCAGCTGTCCATTCAAACCCAATCATTGAATAAACTATGATCCCATATATGATTGCTTGGATAAAGACATAAGGGATTTCATTTCCAA  
CCTGTCCAAATGCATAAGGCAAAGCTGAGTACATTCCTGCTGCTCTTTCCCTATAAAAGACTGTTGCTCAACTGACACCACTGGTTGAACAGAGGAGGAATTTGACACCCCGATGAATA  
AAACAGCAGTATACATTGAGCCCATTCATTGAATAAGTCTTGTGTTTTCTCCTATTGTAAGCCATTCGTAATTATAATGCATAAGTTCATGATTGATATGTGAGAGAATGAAATAGGATA  
CCAGTATTTTGATGCAATTGAATAAATATTAACCTTACATTTTACTACCAAGATCCCAGAAAATTGTTCCAAAGATCAAGGCTATGCCCGATGTGAATAAATACCTCATTGCAGTGTATGGAAG  
ATTTCTCCAGTATGAAAGGTGTTGTTTCCATAAGCAAATCATACTGTGAAACGAAAGATTGTGAGTACTTGGTTGCGAAGTAAAGATCACTTGATTGAGGAGGATGCTCAGCTCC  
GTGATCAAAGACTTGTCTTTCTGCATTAACATGAAATTTGTGTAAGATTACAGTAGATCCTTTCTCAAAGCAAACATAGATGTGAAAGACTACGAATCAACTACTGAAATAGCGCA  
GAGTTCT

>comp161439\_c0\_seq30

TCACTCAAGTTATATATTTGCACTGGTATATCTAAGAAGTAAGAAATAGCTTTAAGAGCATCATCCTCTGGTCATTAATTTAGGAGGAATATATCTTTTTATTCAATTAATATCAGAATGTTTATA  
AAGTGAATATGCCGATTCCACCCCTAATTTTGCATCTAGAAACTTCTAAAAAAGTAATATTTAGTTATTTAATTAATGTTTAATCATATATGATACAAACTGCCAGGGCCTCCTAATTTTTG  
CCTAAAACTTATTGTTGATGAGAATACATGGATGCAGTGTAACATTTCTTTCTTTTCATGGAAGAATAGTGAAACATGAATAGATTTTAAATTCCTGCCACCATGACATCTTGGCTAACTT  
CATGGGGATGCCTTCATCTTTTGGAAAGTTCAGAGCTTTAATTGAAAATCCGAACAAGAAGGCAAAGAGTGTGGAAACCAACAATTGCAGCTGCAACTACTCCTAAGAAATCATGTC  
TGAATCCAAAATAGTTTCTCACAAAATGAGAGACAACCTCACCAGTGTCAAGCTTGTCTTCTATATCTCCAAACTGTGAAGCTACCAATCCATAAAGTGTCCATGAAACTGGGCATGCCCA  
GAAATACCATCTCCACCATAACCGAAACCTCTGTTGAAAATAATCTTTTTAGTTCCATCCACATTAATTAACAACAAACTATCTGCAAATTACAACCTACCGGTCGTGGAATTATCATAACCG  
AGAAAAGATTCCATAATAAATAAAACCATGTAGATGCTATCGTACCCACGTTTAAATTTGGGTGTGAAGCCCACACACATCATTCCATAGTATGTGAAGTATAGGAACGTGAAATACATAATG  
AACAAATACCAAAAGAAGTGGCAGTTGTCCATTCAAATCCAATCATTGAATAGACTATGACCCCATAAACGATAGCCTGACCCAATACATATGGGATCTCAATTGCGACCTGTCCAAATG  
CATATGGTAAACTTGAGTACATTCCTGCTGCTCTTTCCCTATAAAAGACAGTTCTCTCGACAGACACCACAGGTTGAACTGAAGAAGCATTGAAATTCCAAGAAACAAAACAGAAGCAT  
ACATTGAACCCATTGCATTAACAAATCCTGTTGTTTGTCTTTTTGCCACCTAGATCCCAAAAAATTGTTCCAAATATCAAGGCTATGATCAATGTGAAGAAAAACCGCACTGCTGTGTAT  
GGTGGATTTCTCCAGTATGACAAATGCTGTTTCCAAAGGCTAGCCATGCATTGAGAAACGAAGGTCTGCGAGTACTGTGTTGGGAAGAAAAGATCATTGAAACCAGGTGGAGGTATGCTC  
AACTCCTTGATCAAAGCCTTATTCTCTGAAACAATTCAGAATCTTGTAGACATCAGTGAATCAACCCCTAGTATTTCTCTTGTGCTATTGTTGTCACCTTAACATCCATGTTGCTGGG  
TTATAGCTATCCTTTATTTGCTTACTCCTTCAATTCCTCAAAGTAACTAATCAGTTGACTAGAAATGGTGACCCAATGGTCTACATAGATCTCTTTCCACCACGTTTCATTAGGAAGAGC  
TCATCAAATGCTTCAAATATGTCTATGCTAGGTTGATGGATTGTGCACACTACAGTTCTGCCAGTGTCTACAGTATTCCTTACTGTTCTCATGACAATAGCAGCAGCTCTGGCATCAAGTCC  
AGATGTAGGCTCATCCATGAATATAATAGCTGGATTAGCAACGAGCTCAACTGCAATGGTCAATCTCTTGCCTGCTCTGTTGATAGTCCATTTACTCCTGGCAATCCCAATGCTCCCC  
TCAATGGAGTAAGTCCACAAGCTCCATTATCTCTTCTATAAACATCTTTCTTTTTCAGAACCAACCTCAGCAGGCAATCGAAGCCATGCTGAATAAACCAAGACTCATAAACTGTCAC  
ATAAGGGGAATTGATATCATTGTTTCCACAATATCCTGAAACTCGAGCAAAGGTTTCTGTTTCTTAGGATAACCAATTTATCATGATGCTTCTTCTATATATCCTCCAGTTTTTCTCCGGCC  
AATACATCCATCAAAGTTGTCTTACCAGCCCCACTAACCCCATCAGCGCTGTGAGCACACCTGGTCTGAAAGATCCACTTACACCTTTAATAGCTCCAAACGGTCTTCTTGAATCCCTT  
TGGCCTTCATTTCTCTGGCATGTCCACAGAGTATCTTATATTGTCAAATGTCATGCTGAGTGGAGTAAAAGGAAGAACCATTCTTTCTTGTTCATTTGGATTCTGCAATGGCTTCTACAT

TTTTGTTC AATCCTGTTCTCATTCCCTTCAGAGCTCTTTGCTGTTGATGATAATTCAGTTATCTCTCCAGTAATATTTGCTTGTTTCTCCTTCAACGTCTCCTCAGATATGATTGGCTGGGAT  
TTTCCAAATGGTTTTACAAAGGTAAGAGCCACCGTGAAAAGAAAATTA AAAAGGAATATGAAGCCAATCAATGCTCCAAAACCTATCCAATACCATTTTGCTTCTGTAAAGGTTCCACGA  
GACTTCAAGATGGTCACCCCTAATGATTCTGTTGACCCAGGAAGAATATGTTTCCAGCTTTTCCCAAGGAACTCATTTGTTGCTAGAGCATTCAAGGAGTACATCATAGGTGAGATCCAGT  
AGCCCCATATCCACCATTTCTTCATGTCATCGTGTGATAGAACAATCCAGCCAATGCTACGACCACAAGCAGTGCAAATGATCCTAAAGAATTAGCAACAACCATGTCTCTGCTCAATCC  
AGCAATTA AACGAAAGAACGCAGACATTGCCTGTTGGAGTGCTAAAAACAGCAAATACTGTTTAAAAAACCTTCCAACATTAGGATCATAACCTATAACATAATAGCTGACAAACACCCA  
GGTACCAACTTCAACTAGAGCTATGGGAATCTTCAGAATCCACGAAGGTAATGTATATGCCCATGCAGGATAGAAGAGGTAGTCTCTTGCTTGAGGAAGACTGGGAGTTTCCAAATAGTC  
AATGGAATCTCTGTGAGCCATTA AACACGATCGTCTGTATAGAGAAGAACAATGAACCCACAAAAATTCCACCATCCAAGACTGAATCACGGTGCATATTTGTCCTTAGGAACAGCGTC  
ATTGCAATAGATGCTAAAGCAGTAGCTGAATTGCTCTGAAAAATATGCAAAACAGTTGCGCTTCATCAGCAATAATTCTCTTGAGATGCAAGCTTTTAGCAGTTCCTTTTGTCTCACACC  
ATATTTTGAAGTTGTTAAAGCTGCAGGATGTCCCTTCTCGCGTCGAATGGGACAGCAAGCTCCTTCGTTAATTTGTCACCGATATGGAATGATTGGAATGCTTCTGAGAATTTCTTTCAG  
TTACATATCTGTAAGGTTCTTCGTCACGTGCCAATACTGCTGCTGATCTTTCCTTGATGTAACCTGCATGCCAATAGGCAATTTGCTATTTTTTACCTTTATATATATTTCAAGATCAATTGA  
GAGCATTGAGGAAGGCGAACAACGGATAATTCGAAATTTTATTCTATCGTGGAACAGATCACATTGATGCACCCAAAGCATTGAATATATCAAAGAAGAGCCATTCGTGCGTTGCTCAATT  
GAAAATGACGATGAAAAATAATGGTTGGCAAGCACGATACTCCATAAAATTATCCTCATGAATTCAAATCATCAAATGGATTGAGCCGATGTGATGTATTCGGGGCATCAAATTTACATAAG  
AGGGGATCCCTCACAATGGAAGATCTAAATTAACAAACTACAGATGGAACAATATGAGATGTTGACCAAATGTCTTGCAATTTGAAAAATCCTGCTGCATATAGATACTGCAAGGTTTACAC  
TACTAAAATCCTGCTGCAGCAGTTGCCCTATCCTAAATCTGTCAGTTCAGTGAAAATAAAAAATCTCTGTAAAGGTAAAATCATCTCCACTTTCTATTCAATTAGGGCATCTACAACCTAAA  
AATTGATTTTTCAATTCAAAATACAGTAACATTCATATCAAATGTTAATTCATCTCCAACCAAACCTCTACTTCAACCCTATTTTTATTCTAAAAATAAGTCTCTATTAACCTCTAAAAATGT  
GCTGTCAATATTGACATTTATTTATTCACGGAGGAGAAAAATGAAAATAATGTGTTTGGCTTTGGGGTTTGGGGTTTGGGAATTTGGGTGGGAGGCTTGCGGCAGCTGTAAAGGCCTGTTTG  
CAGTTGATGAAGATGAACTTATATAAGCAAATACACTTGAACCTCCTCTGACCCTTCTCCCTCTCTGTTTGATTCTACCAAACCTCCATCTCCCTTATCTCCTCTTAGTCCTAACGCA  
ACCAGCACGAACTCCTCTCCACTCACCTACTC

>comp161439\_c0\_seq33

TCACTCAAGTTATATATTTGCACTGGTATATCTAAGAAGTAAGAAATAGCTTTAAGAGCATCATCCTCTGGTCATTAATTTAGGAGGAATATATCTTTTTATTCAATTAATATCAGAATGTTTATA  
AAGTGAATATGCCGATTCCACCCCTAATTTGTCATCTAGAAACTTCTAAAAAAGTAATATTTAGTTATTTAATTAATGTTTAATCATATATGATACAAACTGCCAGGGCCTCCTAATTTTTG  
CCTAAAAACTTATTGTTGATGAGAATACATGGATGCAGTGTAACATTTCTTTCTTTTCATGGAAGAATAGTGAAAACATGAATAGATTTTAAATTCCTGCCACCATGACATCTTGGCTAACTT  
CATGGGGATGCCTTCATCTTCTTTGGAAGTTCAGAGCTTTAATTGAAAATCCGAACAAGAAGGCAAAGAGTGTGGAAAACCAACAATGCAAGTGCACACTACTCCTAAGAAATCATGTC  
TGAATCCAAAATAGTTTCTCACAAAATGAGAGACAACCTCACCAGTGTCAAGCTTGTCTTCTATATCTCCAAACTGTGAAGCTACCAATCCATAAAGTGTCCATGAAACTGGGCATGCCCA  
GAAATACCATCTCCACCATAACCGGAACCTCGGTGCTGGAATTATCATAACCCGAGAAAAGATTCCATAATAAATAAAACCATGTAGATGCTATCGTACCCACGTTTAAATTGGGTGTGAAGC  
CCACACACATCATTCCATAGTATGTGAAGTATAGGAACGTGAAATACATAATGAACAAATACCAAAAAGAACTTGGCAGTTGTCCATTCAAATCCAATCATTGAATAGACTATGACCCCATAA  
ACGATAGCCTGACCCAATACATATGGGATCTCAATTGCGACCTGTCCAAATGCATATGGTAAACTTGAGTACATTCCTGCTGCTCTTTCCTATAAAAGACTGTTGCTCAACTGACACCAC  
TGGTTGAACAGAGGAGGAATTTGACACCCCGATGAATAAAACAGCAGTATACATTGAGCCCATTGCATTGAATAAGTCTTGTGTTTCTCCTATTGTAAGCCATTTCGTAATTATAATGCAT  
AAGTTCATGATTGATATGTGAGAGAATGGAAATAGGATACCAGTATTTTGATGCAATTGAATAAATATTAACCTTACATTTTACTACCAAGATCCCAGAAAATTGTTCCAAAAGATCAAGGCTAT  
GCCCGATGTGAATAAATACCTCATTGCAGTGTATGGAAGATTTCTCCAGTATGAAAGGTGTTGTTTCCATAAGCAAATCATACTGTGAAACGAAAGATTGTGAGTACTTGGTTGCGAAG  
TAAAGATCACTTGATTGAGGAGGAGGTATGCTCAGCTCCGTGATCAAAGACTTGTCTTTCTGCATTAACATGAAATTTGTGTAAGATTACAGTAGATCCTTTCTCAAAGCAAACATAGA

TGTGAAAGACTACGAATCAACTCACTGAAATAGCGCAGAGTTCT

>comp161439\_c0\_seq4

TCACTCAAGTTATATATTTGCACTGGTATATCTAAGAAGTAAGAAATAGCTTTAAGAGCATCATCCTCTGGTCATTAATTTAGGAGGAATATATCTTTTTATTTCATTAATATCAGAATGTTTATA  
AAGTGAATATGCCGATTCCACCCCTAATTTTGCATCTAGAAACTTCTAAAAAAGTAATATTTAGTTATTTAATTAATGTTTAATCATATATGATACAAACTGCCAGGGCCTCCTAATTTTTG  
CCTAAAACTTATTGTTGATGAGAATACATGGATGCAGTGTAACATTTCTTTCTTTTCATGGAAGAATAGTGAAAACATGAATAGATTTTAAATTCCTGCCACCATGACATCTTGGCTAACTT  
CATGGGGATGCCTTCATCTTTTGGAAAGTTCAGAGCTTTAATTGAAAATCCGAACAAGAAGGCAAAGAGTGTTGGAAACCCAACAATTGCAGCTGCAACTACTCCTAAGAAATCATGTC  
TGAATCCAAAATAGTTTCTCACAAAATGAGAGACAACCTCACCAGTGTCAAGCTTGTCTTCTATATCTCCAAACTGTGAAGCTACCAATCCATAAAGTGTCCATGAAACTGGGCATGCCCA  
GAAATACCATCTCCACCATAACCGGAACCTCGGTGCTGGAATTATCATACCCGAGAAAAGATTCCATAATAAATAAAACCATGTAGATGCTATCGTACCCACGTTTAAATTTGGGTGTGAAGC  
CCACACACATCATTCCATAGTATGTGAAGTATAGGAACGTGAAATACATAATGAACAAATACCAAAAAGAACTTGGCAGTTGTCCATTCAAATCCAATCATTGAATAGACTATGACCCATAA  
ACGATAGCCTGACCCAATACATATGGGATCTCAATTGCGACCTGTCCAAATGCATATGGTAAACTTGAGTACATTCCTGTCTCTTTCCCTATAAAAGACAGTTCTCTCGACAGACACCAC  
AGGTTGAACTGAAGAAGCATTTCGAAATTTCCAAGAAAACAAAACAGAAGCATACTTGAACCCATTGCATTAACAATCCTGTTGTTGCTCTTTTTGCCACCTAGATCCCAAAAAATTGT  
TCCAAATATCAAGGCTATGATCAATGTGAAGAAAAACCGCACTGCTGTGTATGGTGGATTTCTCCAGTATGACAAATGCTGTTTCCAAAGGCTAGCCATGCATTGAGAAACGAAGGTCTG  
CGAGTACTGTGTTGGGAAGAAAAGATCATTGAAACCAGGTGGAGGTATGCTCAAATCCTTGATCAAAGCCTTATTCCTCTGAAACAATTCAGAATTCCTGTAGACATCAGTGAATCAAC  
CCCTAGTATTTCTCTTGTGCTATTGTTGTCACTTCTAACATCCATGTTGTCTGGGTTATAGCTATCCTTTATTTTGTCTACTCCTTCAATTCCTCAAAGTAACTAATCAGTTGACTAGAATGGT  
GACCCAATGGTCTACATAGATCTCTTTTCCACCACGTTTCATTAGGAAGAGCTCATCAAATGCTTCAAATATGTCTATGCTAGGTTGATGGATTGTGCACACTACAGTTCTGCCAGTGTCT  
ACAGTATTCCTTACTGTTCTCATGACAATAGCAGCAGCTCTGGCATCAAGTCCAGATGTAGGCTCATCCATGAATATAATAGCTGGATTAGCAACGAGCTCAACTGCAATGGTCAATCTCTT  
GCGTTGCTCTGTTGATAGTCCATTTACTCCTGGCAATCCACCAATGCTCCCTCAATGGAGTAAGTCCACAAGCTCCATTATCTCTTCTATAAACATCTTTCCTTTTTTCAGAACCAACCTC  
AGCAGGCAATCGAAGCCATGCTGAATAAACCAAGACTCATAAACTGTACATAAGGGGAATTGATATCATTTTGTTCACAATATCCTGAAACTCGAGCAAAGGTTTCTGTCTTTCTTAGGA  
TAACCATTTATCATGATGCTTCCTTCTATATATCCTCCAGTTTTTCTTCCGGCCAATACATCCATCAAAGTTGTCTTACCAGCCCCACTAACACCCATCAGCGCTGTGAGCACACCTGGTCTG  
AAAGATCCACTTACACCTTTAATAGCTCCAAACGGTCTTCTTGAATCCCTTGGCCCTCATTTCTCTGGCATGTCCACAGAGTATCTTATATTGTCAAATGTCATGCTGAGTGGAGTAAA  
AGGAAGAACCATTCTTTCTGTTCAAATTTGGATTCTGCAATGGCTTCTACATTTTTTGTTCCAATCCTGTTCTCATTCCCTTCAGAGCTCTTTGCTGTTGATGATATTCAGTTATCTCTCCA  
GTAATATTTGCTTGTCTCTCCTTCAACGTCCTCAGATATGATTGGCTGGGATTTTCCAAATGCTACAATGATATGGAGGAATGGTTCATCTACTTTAATTTACATAATGTTAATATGTATGG  
TACGTTTATGTGGATACTTAGTTGGAATGATACCTACGTTTTTACAAAGGTAAGAGCCACCGTGAAAAGAAAATTA AAAAGGAATATGAAGCCAATCAATGCTCCAAAACCTATCCAATACC  
ATTTTGTCTTGTAAAGGTTCCACGAGACTTCAAGATGGTCACCCCTAATGATTCTGTTGACCCAGGAAGAATATGTTTCCAGCTTTTCCCAAGGAACTCATTTGTTGCTAGAGCATTCAA  
GGAGTACATCATAGGTGAGATCCAGTAGCCCCATATCCACCATTTCTTCATGTCATCGTGTGATAGAACAATCCAGCCAATGCTACGACCACAAGCAGTGCAAATGATCCTAAAGAATTA  
GCAACAACCATGTCTCTGCTCAATCCAGCAATTAACGAAAAGAACGCAGACATTGCCTGTTGGAGTGCTAAAAACAGCAAATACTGTTAAAAAACCTGCATTTTTTTTTTATTTTGTAA  
ATGCTGTAACACATTCGTCCTTCTAGGAAGGCCAACTAAAGCATATATCGTAATGCATCATCACCTTCCAACATTAGGATCAT

>comp161439\_c0\_seq40

TCACTCAAGTTATATATTTGCACTGGTATATCTAAGAAGTAAGAAATAGCTTTAAGAGCATCATCCTCTGGTCATTAATTTAGGAGGAATATATCTTTTTATTTCATTAATATCAGAATGTTTATA  
AAGTGAATATGCCGATTCCACCCCTAATTTTGCATCTAGAAACTTCTAAAAAAGTAATATTTAGTTATTTAATTAATGTTTAATCATATATGATACAAACTGCCAGGGCCTCCTAATTTTTG  
CCTAAAACTTATTGTTGATGAGAATACATGGATGCAGTGTAACATTTCTTTCTTTTCATGGAAGAATAGTGAAAACATGAATAGATTTTAAATTCCTGCCACCATGACATCTTGGCTAACTT

CATGGGGATGCCTTCATCTTCTTTGGAAGTTCAGAGCTTTAATTGAAAATCCGAACAAGAAGGCAAAGAGTGTTGGAAACCCAACAATTGCAGCTGCAACTACTCCTAAGAAATCATGTC  
TGAATCCAAAATAGTTTCTCACAAAATGAGAGACAACCTCACCAGTGTCAAGCTTGTCTTCTATATCTCCAAACTGTGAAGCTACCAATCCATAAAGTGTCCATGAAACTGGGCATGCCCA  
GAAATACCATCTCCACCATAACCGGAACCTCTGTTGAAAATAATCTTTTTAGTTCCATCCACATTAATAAACAACAACTATCTGCAAATTACAACCTACCGGTCGTGGAATTATCATAACCG  
AGAAAAGATTCCATAATAAATAAAACCATGTAGATGCTATCGTACCCACGTTTAAATTGGGTGTGAAGCCCACACACATCATTCCATAGTATGTGAAGTATAGGAACGTGAAATACATAATG  
AACAAATACCAAAAGAAGCTTGGCAGTTGTCCATTCAAATCCAATCATTGAATAGACTATGACCCCATAAACGATAGCCTGACCCAATACATATGGGATCTCAATTGCGACCTGTCCAAATG  
CATATGGTAAACTTGAGTACATTCCCTGCTGCTCTTCCCTATAAAAGACAGTTCTCTCGACAGACACCACAGGTTGAACTGAAGAAGCATTTCGAAATCCAAGAAACAAAACAGAAGCAT  
ACATTGAACCCATTGCATTAACAAAATCCTGTTGTTTGTCTCTTTTTGCCACCTAGATCCCAAAAAATTGTTCCAAATATCAAGGCTATGATCAATGTGAAGAAAAACCGCACTGCTGTGTAT  
GGTGGATTTCTCCAGTATGACAAATGCTGTTTCCAAAGGCTAGCCATGCATTGAGAAACGAAGGTCTGCGAGTACTGTGTTGGGAAGAAAAGATCATTTGAACCAGGTGGAGGTATGCTC  
AACTCCTTGATCAAAGCCTTATTCTCTGAAACAATTCAGAATTCCTGTAGACATCAGTGAATCAACCCCTAGTATTTCTCTTGTGCTATTGTTGTCACCTTCTAACATCCATGTTGCTGGG  
TTATAGCTATCCTTATTTTGTACTCCTTCAATTCCTCAAAGTAACTAATCAGTTGACTAGAATGGTGACCCAATGGTCTACATAGATCTCTTTCCACCACGTTTCATTAGGAAGAGC  
TCATCAAATGCTTCAAATATGTCTATGCTAGGTTGATGGATTGTGCACACTACAGTTCTGCCAGTGTCTACAGTATTCCTTACTGTTCTCATGACAATAGCAGCAGCTCTGGCATCAAGTCC  
AGATGTAGGCTCATCCATGAATATAATAGCTGGATTAGCAACGAGCTCAACTGCAATGGTCAATCTCTTGCCTGCTCTGTTGATAGTCCATTTACTCCTGGCAATCCCACCAATGCTCCCC  
TCAATGGAGTAAGTCCACAAGCTCCATTATCTTCTATAAACATCTTTCTTTTTCAGAACCAACCTCAGCAGGCAATCGAAGCCATGCTGAATAAACCAAAGACTCATAAACTGTCAC  
ATAAGGGGAATTGATATCATTTTGTTCACAATATCCTGAAACTCGAGCAAAGGTTTCTGTTTCTTAGGATAACCATTTATCATGATGCTTCCTTCTATATATCCTCCAGTTTTTCTTCCGGCC  
AATACATCCATCAAAGTTGTCTTACCAGCCCCACTAACACCCATCAGCGCTGTGAGCACACCTGGTCTGAAAGATCCACTTACACCTTTTAATAGCTCCAAACGGTCTTCTTGAATCCCTT  
TGGCCTTCATTTCTCTGGCATGTCCACAGAGTATCTTATATTGTCAAATGTCATGCTGAGTGGAGTAAAAGGAAGAACCATTCTTTCTTGTTCATTTGGATTCTGCAATGGCTTCTACAT  
TTTTTGTTCCAATCCTGTTCTCATTCCTTCAGAGCTCTTTGCTGTTGATGATATTCAGTTATCTCTCCAGTAATATTTGCTTGTCTTCTCCTTCAACGTCTCCTCAGATATGATTGGCTGGGAT  
TTTCCAAATGCTACAATGATATGGAGGAATGGTTCATCTACTTTAATTTACATAATGTTAATATTGTATGGTACGTTTATGTGGATACTTAGTTGGAATGATACCTACGTTTTACAAAGGTAAG  
AGCCACCGTGAAAAGAAAATTA AAAAGGAATATGAAGCCAATCAATGCTCCAAAACCTATCCAATACCATTTTGTCTTGTAAAGGTTCCACGAGACTTCAAGATGGTCACCCCTAATGA  
TTCTGTTGACCCAGGAAGAATATGTTTCCAGCTTTTCCCAAGGAACTCATTGTTGCTAGAGCATTCAAGGAGTACATCATAGGTGAGATCCAGTAGCCCATATCCACCATTCTTCATGT  
CATCGTGTGATAGAACAATCCAGCCAATGCTACGACCACAAGCAGTGCAAATGATCCTAAAGAATTAGCAACAACCATGTCTCTGCTCAATCCAGCAATTAACGAAAGAACGCAGAC  
ATTGCCTGTTGGAGTGCTAAAAACAGCAAATACTGTTTAAAAAACCTTCCAACATTAGGATCATAACCTATAACATAATAGCTGACAAACACCCAGGTACCAACTTCAACTAGAGCTATGG  
GAATCTTCAGAATCCACGAAGGTAATGTATATGCCATGCAGGATAGAAGAGGTAGTCTCTTGTGTTGAGGAAGACTGGGAGTTTCCAAATAGTCAATGGAATCTCTGTGAGGCCATTA AAC  
ACGATCGTCTGTATAGAGAAGAACAATGAACCCACAAAAATTCCACCATCCAAGACTGAATCACGGTGCATATTTGTCTTAGGAACAGCGTCAATTGCAATAGATGCTAAAAGCAGTAGC  
TGAATTGCTCTGAAAACATATGCAAACAGTTGCGCTTCATCAGCAATAATTCTCTTGTAGATGCAAGCTTTTAGCAGTTCCTTTTTGCTCACACCATATTTTGAAGTTGTTAAAGCTGCAGG  
ATGTCCCTTTCTCGCGTCGAATGGGACAGCAAGCTCCTTCGTTAATTTGTACCCGATATGGAATGATTGGAATGCTTCTGAGAATTCTCTTGCAGTTACATATCTGTAAGGTTCTTCGTCAC  
GTGCCAATACTGCTGCTGATCTTTCCTTGATGTAACCTCCTGCAAGAAATCCGCAACCCCTTTTCTCTCCGGGCATTTGAAGCCCATCAATTCAAAGAATTCAAGGACATTCTCACGAGG  
GCCATGGTACACAATTTGAGCATCCGAGAGAAGAATTATATCATCAAGAGGTCAAATGTTTCTGGTGCTGGCTGGAGAAGGGAAATAACAGCGGTTCCATCAAGTATATGTATATATTGTCT  
CAATGAGCTGACAATTTGGTAAAGTTGTGGAGGTGTCAAGTCTGTGGATATCTCATCCATGAACAAAAGCACTTGTCTGGTCCAACAATCATCTCACCTGTTGAACTCTTTTCTTCTGTCTC  
CAGAAATACCTCTAATCATCTCATCTCCAATCATTGTGTCAGCACAGATGTCCAGCCCTAAAATCTTTAGTACATAATCAGTTACTAGACCCGTCTCTTGTCTTCCATTGAACTTGCCCTCA  
TAAAGACATCAACGTCAGGGTCTGGCTTTATATTTGTGCTTTTCTCTCCTTGAAAGCTCTGCCAACATATCATAACGTTTACCAACTCCTTGACACCTTGACAGAGAATGATAGTGTCT

CGAACCGTCATTTCTCCGATATGGACATCATACTGGCTGATATAGGCAGCATTTCTTTGAGGTACAAACTTATTCATTTCTTGACCATTGTAAGTCACTCTTCCTGAAACCTTCACATCAGAG  
TCCAATTTTCCAGCTAGAGCCAGCAGTAAAGTGGTCTTCCCTGAACCAGGAGGTCTAAGAGTAGAGTCATCCTTCTAGGCTTTATGAGTCCACTAACATTATGAAGTAAGGTTAATGGTT  
TCTTCTGCTTGGTAGAATGTGAAGGTTGTTGGCAAAAGCCTCAAGCACGTTTATTACAGAATTGAGCAGCGTAGGCAATCCTCTGTTGCCACATATGCTTCAGCTTTAACATTAAGGTT  
CTCATAACCGTACTTCGATGGTTGGCAATTCAATCCAACATTATCAATCCTGTTTCTGATTCTCAGCAAGAACTTCTCATTATCATCATCTGCCACTCTCACCAACTTCTCCAACAACCTCCCT  
CCTCTCCAGAAACCCGAGACTCTCTATATCAACTTCTTCTTACCTCCTTCAGCCAAGTTCAGAATGCCTTTCTCATTCTATTGTAAGTCGGCAGCCTCTCGATGGCTGCCCATGTTAGAT  
CCTCCTCGTCGTCTTCACTGTGCCTGGACCTTGAGAAGACCTGATCTCCATTCCATATGGAAGAGCGGCGGGACCTTGAGCTTGTGGCACGCAGAACAGACCCAGCTTCCATTTCAATGA  
ACACCTTTCTTCTCTTGAATGCAATGGACAAGAAGTAAAAGATACCAAGAAAATGAGATTGTTTAGTATGGTAAGAAGAACGATTCTGATGAAGTTTGAAAAAAAATATTTTGAAT  
GGAAGGGTTTTAAAAAGGTTCAAGCATAGCGGAAACCATTATGAAGGACAACCTGCTTTACAGTGAAAGGTTTACCCCTT

>comp161447\_c0\_seq1

AGCTTGTAACCCAAGTGGGGGTATTAAGGTACTCCGGATGGTTGATCCGGTGGGCCACCGGCTAATTTTCATTGCGCTGAGGTGCCCGACCCGATAACAAGTTTGCAGGAAAATGCTGTG  
GGTTTGCAGATAAGTAACTGCGTTTATAGGCAGGCGAAAAGCCTGGGTTTAAACGGCGGACGTGAGAGAGAGAAGAGTGCTCCCCGTCGTTGGGTTAATGGTATTGGTATGGGTAGCTGG  
GCCTTTGGTTTAGTGAAATTAGCCTTGGTCGTTAATTCAGACGGGTACCTTTTATGTTTTTACCTTAATTAACCTTTATTCTTTTCTTCTGT

>comp161448\_c0\_seq5

TAAAATTTTTGCTGCCACAAAGACTATAAATAAGAAAAATTATTTTGTGCGGGCGTCGTACAAAGGCAAATCAGAGCACACCACGTCATCCCTTTGTTGGATATCGCAGCTATGTACTGA  
GTGATGTGATACGCACTGATTCACTTCCGAACAATCCGATACCTACATAGAATAATATCTCCATAAATAAACTTATAAAGTATAAAGGCAAGAAAAGCTGCAGTATTTGTTGACTTGTTC  
AACCCTACTCAACAAAATCGAACTACAATGGCTGCCACATACTGATCGAATGAAGTTCATCTCCACCTCCCCATCGTTTTCTTTCCACGTTTGTGGGCGACATAATAAAGTTGACACA  
GCCTGAGATACAGGAAAGCAAATAGAGAGGGGAAAGAAGAGAGAATGGGTAGCAAAGGTGGTGGCGCACTACAATCCCCGTCGTCTCCGTCGTCGCCGTCGGTGGTTTGTTCATGTG  
CGGAGATCGGGGGCTATCACGGGAGCTTTTCGGTGCAAACCTCTGCGCCTTTCGCTCCCAACACAAGTATGTGGTAAGAAACATGAAAGGATGTTGTAAGATTATAAATTTCTTCTGTTT  
TTGAAAAAAAAAAAAAAAAAACTGATAACAATTAACATAGTCTAATTCAAGCTCTCAAATTTGCTTCAATCCCTATGAAGGCTATGATCCAATTCAATTTTTTCTTGGTCTTCAACTCCTCCA  
TCTTAATCCCACCTGATTGATGAATATTTGATTGATATATTAGATATTGCAGCGATCTATACCCGAGAGCAGAGGTCTATCGAGCCTGTAAGTGGTGCCTGAGGAAGGAAGCAGGAAGCAG  
GTTACTTTTGGTAGAACAGACGACGGTTGATCGAATTATTTAGCTTCTCTTCTCCGGTAGGTGGCACAAGCTCGGGATTGAAGCTCGCTCGTGGGGCGTTCTCGCCACAGCTTCTGAAT  
AAACCGGTGAAGAAGCAGAGATTGGGTGACAGGCGGCTGCAGCCACCGGCGGATTCCGGCGACCGGGGACGCGGGGAGGAGCTGTCGCCTGGTTCTGGGAGGGGACGACAGGTGTTT  
AGAGGAAAGGTGAGGAGGTATAAGCTTTTGAAGAGTTCTCTAGCTAGTTGAGGCAGGTTGGTATTTGCGTGTATGACAGAGATTCTACAAGGAATCTTTATAGCAAATTTTGGAAAGAA  
ATGCTTTTTACTATGGGATTCTATATGATCAATTGATCATTGTATTTAGTTAAGTTTTTATCTTTTGTAGAGATTTGTTTCGCGAATTAACCTTTATTTTAAAACCGAATTAGAAGTATTG  
GCTAG

>comp161536\_c1\_seq1

GGTTCGGTTGACCGGATGCAAGAAGCATCCGGTCTGAGGAAAAAAAAGGCGGTACCGAGGTGTACCGAGTTTTTCAAAAACTCGGTACACCACGGTACCGAGTTTTTTTTGCCTACG  
ACCGGATGCTTCTTGCATCTGGTCAATCGAACCAATAAAAGTTCTCCCTACACAATAATGAATACAGATTACACAAACCCAGCAACTTCATAATTTCTGAATTAATAAAAAAATCCCA  
TCTGCAAATCCCTTACTAATCTCTCCGCTTCCACCTCTGTTTTTGGCCTTTTTGCTTCCGG

>comp161576\_c1\_seq16

AAAATTCATTTGAAGAGTGAGAAATTGTACAGTTTTTCACTATTGCAATATTATACAGCCTTCAGACTTTCATACACAGAGCATAACCACCGTTAAGTAACAATTTACAAAAGGTGAAA



AGAAAAAGACTAAGTTGGACTACAACAACGTGATGTTGGACCTACTGCGTCTTAGTGTTGGGTTCTCTCTCTCACAAACGGGTGGTCCATAGTGCCTTAGGCCTTCTCCAACCAAACCTCCA  
AACGTATGAATGATGTCGCTTGCCAGCTCCAGCCAAACTGTAGCCAGCTCCAGCCAAACTGTAAACCTTTCGGTATTTGGTTGCGGGTGA

>comp161633\_c0\_seq2

ATAATTAATGAATTATTATTTCAGATAAGTAATCGATTACAACCTCAACTCGATCCTTAAGTAGAAGCCAAGAAGCCAAGAAGCCAATAGAAGCTTCTAGCATTATCTCGATTTTCTTTGAACA  
AAATGCCAGCCCGTCATCCGCCCTATATATTCCTCCCTTGATCCCTAACACTTAACATATTTTCAAATCTCAAGAAAAAGTTGAGCAAGAACAAGAAGACAATGGATGGTCAGTTTTT  
CGGAATGCGGAGCCAAATTTCCCGTCGCTGCCGATCGTGCCAGAAGACGTGCCGGGAGAACGGGAGAAACTGGCGAAGATCTGTCTTCGCGAGATGAGGGAGAGTGTGCCGACGCTG  
GCAAACGTCAAGGAGATGCCGTCGGCCTACGAATTCGTAGTCGATATGCCTGGGGTCAAATCTG

>comp161644\_c0\_seq1

CAAACAAAGCCGAAGTCGAGCAATTATAAACATCGATACAGTCAATCAAACAAACTCTGCTAGCGTTCCAAGCACAAATTTTCTTGAAGTCAAGTGGTAAAGTTTCCTTA  
ATTCTTAACAAACAAAAATAGAATAGAATAAAATGTACAAAATAGCCTCTTACAGTAAGCTATTTCTGGTTTATAAATAAAAGAAATTAATATGTAGTTATAATAAGCCAATGAAGTTTATG  
AAGCAAAATATAGTACCCATGGAGAAGGTGATGATTATAATCAACTGGGTAGTCTGGTGAGACACCTCTTCAGCCTCTTGCGCTTGGACTTTTCTAGAAGAATCAATAAGCCGGTCTTCTG  
ATTTGATAAACCAATGGGGTACCTGATATTATAATAGCTTGCGGGCTTTAGTTAACTCTGATAATACGCTACAAGGTAGAGACAAAAAACAAACACCCAATGTGCATACTTGATCCTTGGT  
GATTTCTTCTCCAAGAGAAAAATGATGCCACCCACTTAACCACCGACATTATAGAGAACTCCTTATTAAGAAGGCTTCTTTACAATCCTCGTCTCTGGCACCACCTCCTTAGACAACCT  
GCTGAGCAATCTCTTAAGCAGAATCTCTGTGCCATTATCCGTCCCATCGTCATGATAACCTGCTTCATTGACTCCCTGTCTGCCTCCAACGCTTGCAGCCTCATATAGAGCTTCTTAACCT  
CTCCTTCATCCACAGTTCTATTACCCGCATCCCTCCTGCTTAAAAAGTCCCTCGCCGTGCTCATATCAGCCCTATCATAATCCCATCCACGTCGTGCACGGCATCAATAGTGCACACTCGAT  
CACTTATGTATCCCTCACACCGGTACATGCATCAGAGGGCGAATCTGCCATGGATGGTAACTCAGTGCTTCCAAACTCCTGTGCGGATGAAGCAGAACCCAAACTGTCAATGGAAAGCC  
GGCGCATAGCCCGCTGTGCCAGCTGGGTGAATGGCTATTTTCGATTACACCTTTTCCATGATGATACTAGGCATGCGCTGAATGGGACTACGGGGTTTGTACCCGGCGGCATACTTGAG  
CTCCGGGTCCACAACATTTGTCTGAAATCGGCCAATTCACAGCGGAGAGGAATAGGCATTGCCCGCTCCCAAGCGGCTGTGAGGTGGTGCAGCGGTGACGGCGTTGGAGGAAT  
TGGATTCAATAGTGGCAGGGTCGATGCCATAGGAGAGGAGACAGTGACGGTAAGCCTGGAGCTCGCAGGACAAGGATTGCACAGCTTCTTCTCGCTTGAAAAGAAGATCTTCAAGGAG  
AGCAATCTTGTGATCATGAGACATTTTCTCCTCGGATAGGCGCTTGAAGTACGTCGTCATCTGGGCCTCTGCTTTATCTCGTTGGAGGCGGAGAATCATCGACATGGCCTCGGAT  
GCGGCAGTGAAGCTGCAGCCCGCTCCTTCTCGAGCTCGGTACAGAGCACCTGCATGGATTGCTGCTGGTTTGCAGGGGCTTCCCGAAGAGCAGCCGCTTCTATCTCGATCTCGACGCG  
CGCCACATCCTCCGGACGCCCGCACTGAGCGTCTCCTCCATTTGCTCAAGCTTGCCTTCAAGGCTCTGGGCAAGGGGAAGAAGGTTGAGAACCAGAACCGCAGTAAGGGCAAGAG  
CAAGAGCAATTGCATGGCTGAAAATTAACGCTACCCAGCCGCGCTGCTGATCTCCACATCCATAAACGTGGTGGAGGCAGCGACAGCAGCATCAAGAAAGTATCGGCTCCGTCCGG  
CTTGATTGTATCTTTCCTACGTCGGCGAATGCAAGTCGTTAAAGACAGCTTTCGCCTCTCTAGCTATGCTGAGACGGAATTAGCGAAAGGAACAAGGTAAACAATAGAATGATAAGAA  
AGAGAAATGCCAGCGATATCCGTGGAATCGTAATTCGAAGCTGCATGGAACGAGGGAGGGAGGAGGATTTGAAACCCTAGGAGGTCCTTTTCTTTTCAGTTTTTCATTCTTTTGACCTC  
GCTGTCGTTTGTGCTGTTTTTCTCTCTCTAACTGAAATTTTCTGCTTCGATTTGCTAATTTAAGAGAATAATAATACGTGCAACAAA

>comp161798\_c0\_seq2

CCGCCACTATCTACCTTATGTTATGTTTATTATCTTTAGTTTCTTACTCTTATTCTCTAGCTTTTGTCCTTTTTCAGTTACTTAAGTATGCTATAACTTTTAGTATGTGGACCTAATATTGT  
AATAGAAGGAAATACATAGAAGTATAAGCAGGGAAAGAAACAAAGGGGAGGCACCTTTTTGTTTTTGGAGAAAGAATTTCTAACATTTAGTGGAATCCCTGTTTTATAAGCTGCTTCCCTGT  
ACTGTTTTTTCTTGATAAGTCCACTTAAACAAAATTAGTATGGATTACATGTTTGACAATATATTTGAACTCTGTAAGAGAAGTTATAAAATTTGTGGCAAATATCGTCACCCAGAAAGAA  
GGCATCAGCTGGAATAGCCCACTCTATGTTTTTGTCTTGCTATGCATGATGTCCCGTTGCAGGGATGCTTTAGTGCTGGATCATCTGCAAGTGGATGCTGCCCAAAGATAATCTCACAGCTT

TTGTCTTCAA AATTAGGAACCATGTTGGTGGGCATCCCAAGTGAGGTGTTGATGAACTTTTGAGAAGGCAACTTGCAGAGATTAGTGCACATTCCTACACAATTTGTGGCCTCCAAAAAC  
CTGCATTTAGGAATGTAGACCACATTCTTCTCCCTCTCCCTTGAAAATCCGACTCCCTGACCTCACAGGGACCTACGAGCCAGGAGAAAAACACTGTTGTGAAGATTGCGAAGAATTCT  
CTCGAAAACTTTGATGGTGGTAGAAGAGCCTTCAACAGTAGACTCTTCCCTCGACCACTTTCGGAATCCACCTGGCAGCCTACTGATGCCAGAGTTCTGCCCTAACGTCAACTGATGCCA  
GAGTTATGCCCAGTTGTTGACTGACATTGGAGTTCTGCCCGACTTTCACCCGTCGT

>comp161798\_c0\_seq5

TGTATTCTTTTTACTTCAAATCAAACATCAACATTTTCAAAAATTTCTGTATGTGAAATACGTTACACTCCTAATGTAGCAAACCAAATGATCCCTTTGTCAAATCAGAACCTCAATATAAT  
CTTTAGAAAATAGTTTTGATAAATTTCAAACAGGTCATTGTTGTTTCATATTTGGAGCTTTTGTAAATATTGCTTCACGCTACCAATTGCCAACATTCAATGCTTGTTTTTCAAATTTGTCCACCA  
ATCTTCTTGTAAGGAAGATGACCAATCTTGCAGCCTCCTAAAGTCTGCCATTTGCTAACTTCGACATCCACCAACAACATACATCTAATGTTAGCCAACCTTCGATGTCCAAAAGTCCATATG  
TTAGATCGCTCAACCTCTTTTCATGTAACGAGAGCAATTAATTGAACTCTTGTATTGTAATAGATAACATTGATGCTGCTTTCAATTGCCTTTTTGTTTTGGAGAAAGAATTTCTAACATTT  
AGTGGAAATCCCTGTTTTATAAGCTGCTTCCCTGTACTGTTTTTTCTTGTATAAGTCCACTTAAACAAAATTAGTATGGATTACATGTTTGACAATATATTTGAACTCTGTAAGAGAAGTTATA  
AAATTTGTGGCAAATATCGTCACCCAGAAAAGAAGGCATCAGCTGGAATAGCCACTCTATGTTTTGCTTTTGTATGCATGATGTCCTGTTGCAGGGATGCTTTAGTGCTGGATCATCTGCA  
AGTGGATGCTGCCCAAAGATAATCTCACAGCTTTTGTCTTCAA AATTAGGAACCATGTTGGTGGGCATCCCAAGTGAGGTGTTGATGAACTTTTGAGAAGGCAACTTGCAGAGATTAGTG  
CACATTCCTACACAATTTGTGGCCTCCAAAAACCTGCATTTAGGAATGTAGACCACATTCTTCTCCCTCTCCCTTGAAAATCCGACTCCCTGACCTCACAGGGACCTACGAGCCAGGAG  
AAAAACACTGTTGTGAAGATTGCGAAGAATTCTCTCGAAAACCTTTGATGGTGGTAGAAGAGCCTTCAACTGTGATGGCTGCAATGCTGCTTGAGAGATGATGGATGGCTAGGCGGCCAA  
ACCAGTCGTCTTTATATACTGTCCTCTCCTCCATCGCCGGCGTTGATTTTGTTCGGGGATTCTGTAATTGGCAATTTACAGGGCTATTTCGGGTCTGTAATCGCTGCCATCGTCGACAGCTTCT  
TTCTCGAACACCGCATCGACATGGAGCACCAGGTTGACTGACGGCAAGTTGGGAGAGGGATTAAGCCTCCAAGCTGAACAATAAGACCCCTTTGCATGATTTCTGCGTATGAGGAAGAC  
GAAGTGAATGTTGTAGCGTTGAGCCT

>comp161812\_c1\_seq1

CAAATCTCTGCTTTATTGTAGATGCTCGCATCCATTGTAGTTCTTTGGCATTATTCTTAGGTTGTATGTAATATTCGTA CTGGAGCGCCAGTAGAAGCTCGTGTGAGCTTGTATCTGTCGTA  
TTCTTTATCCACTTGTGTAGTATCTGGCTTACGTAGTACATCCGTCACTGCTGTATGTAGGTAGATAGATGTTTTT

>comp161816\_c1\_seq2

TCTTGCCACAAACAGAATTGAAAGCCTGGATCCAGGCTTGCTTCGGCCAGGACGCATTGATAGAAAAATTGAGTTTACTCTTCTAATGTCAA AAGTCGGCGAAATATTTTTGAGATACAC  
ACTTCCAGGATGACACTAGCTGATGATGTCAATCTTGAAGAATTCGTGATCACAAAGGATGAATTTTCTGGAGCTGATATAAAGGCCATATGCACTGAAGCTGGTTTTGTTGCTTTGCGTG  
AACGCAGAATGAAGGTA ACTCATGAAGACTTTAAGAAGGCAAAGGAAAAAGTCAAGGTTAAGAAGAAGGGAGTGCCGGAGGGACTTTATTTGTGATAATGACGAGTGTTGTAATGTGA  
AATGATATCCAGTACTAATCGAACAGGATTCAACTAACCAACATGCCAGTTAAAAACAAGTTTTAGGCAAGAAAAGGGATGTTGTGCTGTCAAGCGAAGCATTACTTCTAAAGTACATT  
ACCTCCTTCAATGCTCTAATTTGAAATTCAGTTTCATAACTGCTACATTTCAATTTCTGCTTGTGTGGTTTTACTTTGGGTCAAGAAAAAATACAAATGCTCATGTCACACCACAATTC  
TTTCTACATTTGACTTTGCTTTTTCTTCATAATTTTTAAGACACCAATTTCTTTGTTCTGTCCTGCACATACACTCACTTGTCTCTATGGGGTTTTCAATCACAATTATAGATAATTTTTATT  
GCAAAGTAGCATGAGAAAGATGGCGATTTACTTTGATTTAGCATAGTGA ACTCTGGTGCAGATTTCAATTTGAATAA

>comp161823\_c4\_seq6

ATCGAGGATCAAGTCCAGGAAGCTCGTGATTATTTCTACGACGTAGAGGTGAAGGCCTTAGAAGAGGAGCTTATGCAGGATGGTTTTCATCAAAGGCTTTATGAAGGGTGTTCTGTGCTGTG  
AAACGCAGAAATGGAGGGGACATCGAGGGGTTGACCCCAAGCCAAGCTTCTGGTGATCCTTCTCCAGATTCCGACGACGAAGAGTTGGAGAGTGAAAGGCAAAGGATCTTTGCGTTGG

AAGAGGACGACGAGGATGATCTTGAGATTCTGTAAAATTATTTTGATGCTTTCCGTGTCACTTTTATTTTTGTTACGATGATTGTTTCGTGTGTTGCTGCTGCTTGCCTGTTGCTGTCGCTCGC  
GTGTTGCTATTTTTGGATGTTGTACTTGATGTTTCGTGGGTTTATATAAAAAAGACAATATTCTTCTTATATATGTTACCTCCTGTGTTGAGGAAGTCTTTCTAATTTGCATGAATATGAGAGAT  
ATCCGCTTTGGGATACTCTGACCTATCCGAGGTTGTTAATCAAAGCGTTTGCTTGATGATTTAACCTGTGTGGAAGAGGTCGGACCGGGTCCCCCTGGGATTGGTCGTTTACTGATTGAG  
ATACAACATAGGTTGTGTGTTTCTCGAATCATAAAAGGAAGCTCAGAACAGAAGAGACGATGCAATGATAAAGTAAACATCACATTACTGTATTTAAGAAGATAGTATAATAATTCCTAAT  
ATAACTTAGGAAATTGAAAAAGAGTTCTCCCAATCAACACACAAGGTGTGTATGAAAAGTCAGCATAAAAACTTGAAAGATACAAAGTATAACCCTTAAGGGGACATAACACGAGAC  
AAATACTACCAACAACATAACATGAGATAAATAGTATTATCAACTTCTACTGATAGTACTTATGAAGGTTGCCAACATTCCAAGTTCGGAGGAGCATTTTTCCACTAGCATCCTTCAGTTTG  
AAGGTTCTGGCTTGACCATAATTGCTACCAATAAAGGACCTCCAGAGGGGGGAGAGTTTGTACGTTGAGGACCTTTTCTGCTGCCTCGATGCTACGTAGAACCAAGTCTCCAATT  
GAAATATGTCGAGGTTTCATTCTTCGATTATAATAACGGACAACCTTTGATGATATGCAGCAACTTTAAGCATTGACGCATCTTACTTCCGGAAGGAGATCTAAATATTTCCGAGCTTC  
TCCTTATTACTGTTGAAGTCAAATCTTGGACTCTAGGACTTGGAATTCCAATATCGATGGGAAGTACTGCTTCTGTGCCAAAACATAGATTATACGGAGTTTCTCCTGTTGGAGTTCTGGT  
GGTGGTACGGTAAGGCCAGAGGACATTCAGGAGTTCATCAAC

>comp161860\_c0\_seq5

GCCGAAGATGAAGTCGACGGTGCCTGAGATGCGGCAGTCGCGGTAGAATTGGCGGAGAGAGTGGCGTAGAGGGTGTCTTGGTAGCCGCGGATGCCGCAGCGGTAGAAGACGGAGAG  
GTCGGAGTCAGATCGGAGAGCTACGGCTTGGTGTGGATGGTCCGGCGGTGTTCTCGAACGTTATATCGCGGGCAATGAAGCCTTTTCCGGCGACGGCTGTTGTGCAAGTAAGTGAATG  
ATTAATTTAGTACAATTTTCTTATTATTTAATTTTTAAATAACCCTATAATTTTACTATTATTTTTCATTATTTTAAATTTATATATCATATAAATTTAAAAAATAATGAAAAATA  
ATAGTGAATAAAATTATAGTGGTTATTTAAAAATTAATAATAAGAAAATTGACTAAATTAATCATTCACTTACTTGCACAACAGCCGTCGCCGAAAAGGCTTCATTGCCCGCATATA  
ACGTTTCGAGAACACCGCCGACCATCCAAACACCAAGCCGTAGCTCTCCGATCTGACTCCGACCTCTCCGCTTCTACCGCTGCGGCATCCGCGGCTACCAAGACACCCTCTACGCCAC  
TCTCTCCGCCAATTCTACCGCGACTGCACCATCTCCGGCACCATAGATTTTATCTTCGGCGACGCCAAAGCCATCTTCCAAAACCTGCCAAATCTTCGTTTCGCAAACCGCTCGAAAACCAG  
CAAACATCGTCACCGCACAAAGCCGCAAGTCCCGTCAATCCGCCACCGCAATCATCTCCACAACCTGCACCATCACCGCCGACCCCTCTTTCCCCCGCCTTCCACGCCAAGAACCCT  
ACCTACCTCGGCCGGCCGTGGAAGGAGTTTTCAAGAACGTTTGTATCCAGTCTTTCTCGATACGCTCGTGCATCCTAATGGGTGGCTGCCATGGCTCGGGGATTTTGGGCTGAGGACG  
TGCTTTTATACAGAGGTGGAGAACAGGGGACCGGGGGCGGATAAGAGCCTCAGGGTAAAGTGAAGGGGGTGAAGAATATTAGCTATGCGCATGCGCAGAAGTTTACAGTTGAGCGTTT  
TCTGTGGGGAAATGACTGGCTCCCTTCGACCCAGGTGCCATATAATCCGGTATTGTTGCCGAGTCGTTGCCTGAAAGGATTCATGATGAGAGATTTCTTCTTGTGTTGCTTTCATATAACA  
TATCCTTGTCTTCCATAAAAGAGATGAAAGTTAGTATCTTTATGATGCATACGTTGTTTTGTCTTAAAAATTTCATTTTTTTTCTTCCGGTGTTCGGATGCCTGTAAAAGG

>comp161913\_c0\_seq1

TCCATCACAAGATGAACTGAATTCCTGTCTCATATGAGCCCTTGAATTCACATAATTTGATTGACCTGTAAAGTGTGCAAGATTTGCATCTCCCTCTTGATATCCTCCTTATCATTTTTAT  
GAACAAGTTTTCGCTTTGAGATCGACTTGCAGGCGTAAGAATGGCCTGTGGCAATCTCCTTGCAGAAATAGGTGACCCGAATTGGCCGCGCCAAGCTCCTTGCCGAGTGAATAATGG  
CTGCGAACATCCTCAAATGGCTTGCCAAGGATTGTGTTATTGGTTGGGGCAGGCTTGGGTGGAGATGCAATCGGTGGGTTTGGCTTAGCCGGAGATGGTGGAGCATAATGGGTTTCCGGC  
GATGGACGTGAGGGTTTACCGGTTGTACCGTCGCGGGAGGCTGGTGGGAATGGCCATTGGCTTCCAGCCCTGTTCTTTTCCCTTTTCCGAGCAAGATCCCATCTTCTTCTTCCACAGT  
CGATACTTTTGATTTGATTTGATTCAACTTCTTCTAGGAAACCTTGATGATCCAGATCTTACAAAATCTTGCAAGTTAAGAAGATATCAAATGGCCAAAATCATTTTTTTCTTTTTT  
TCCTTTCAGTGGAAAGATGATGGGAAGGAACCGGTTATCCAAATTAATAATAATGACAGGAACGATTCGGAATCTGATAAATGTACAAAGGAGGAAGAAATGGAAAGGAAAGCCT  
GTTAGCCCATATTGCGTTAACAGATCAGTGGCAGAAGGAAGTTAGGCTCTTCCAACGAAAAATGATTCACGGCCATTATTTTAAATTCCTAAATTTAGGATAGGAATGTGGGCC  
GAACGACGAAGTCT

>comp161913\_c0\_seq2

TCCATCACAAAGATGAACTGAATTCCTGTCTCATATGAGCCCTTGAATTCTACAATATTTGATTGACCTGTAAAGTGTGCAAGATTTGCATCTCCCTCTTGATATCCTCCTTATCATTTTTAT  
GAACAAGTTTGGCCTTTGAGATCGACTTGCAGGCGTAAGAATGGCCTGTGGCAATCTCCTTGCAGAAATAGGTGACGCCGAATTTGGCCGCGGCCAAGCTCCTTGCCGAGTGAATAATGG  
CTGCGAACATCCTCAAATGGCTTGCCAAGGATTGTGTTATTGGTTGGGGCAGGCTTGGGTGGAGATGCAATCGGTGGGTTTGGCTTAGCCGGAGATGGTGGAGCATAATGGGTTTCCGGC  
GATGGACGTGAGGGTTTACCAGTTGTACCGTCGCGGGAGGCTGGTGGGAATGGCCATTGGCTTCCAGCCCTGTCTTTTTCCCTTTTCCGCAGCAAGATCCCATCTTTCTTCTTCCACAGT  
CGATACTTTTGATTTTGATATTGGATTCAACTTCTTTCTAGGAAACCTTGATGATCCAGATCTTTACAAAATCTGGAGTTTTAAACGCAGGGAAAAGAGCATGTTTAGGGTTTGAAGTTTTCGA  
ATAAAACTCAAGCCAGATAAGAAATCCCGTGAAGTTTTCTAAAAGACAGCCGAGAAAAGAGACACCTTGAAGTTAACATAAGATCAAAATGGAGAGAAAACAATGAAACGGAACAGG  
AGAAAACGAGAAAATTTGAATTTGCTTCAAACGCTCTCCAGAAATCCACGGCAAGAAAAGTAGATGAGGAGAGGTCTGGTTTTTTCAGCTTTTGAATACCAATTAACCCCAAGCAA  
AGAAAAGAAATCGCGTGAAGCTTTCTCAAGATACAAAAACCAAGAAAAGGCGACACCTTGCAAGTTAAGAAGATATCAAAATGGCCAAAATCATTTTTTTCTTTTTTCTTTTCAGTG  
GAAGAATGATGGGAAGGAACCGGTTATCCAAATTAATAATGACAGGAACGATTTCGGAATCTGATAAAATGTACAAAGGAGGAAGAAATGGAAAAGGAAAGCCTGTTAGCCGCC  
ATATTGCGTTAACAGATCAGTGGCAGAAGGAAGTTAGGCTCTTTCCAACGAAAAATGATTCACGGCCATTATTTTATTTAAATTCCTAAATTTAGGATAGGAATGTGGGGCCGAACGACGA  
AGTCT

>comp161924\_c1\_seq7

ATGATGACACTATAAAGGACGCATGGAACGCAGGAAGCTTTAGTGTCTGGCCTTGTGGTCATCATCTCCTAGTCTATTCCATACGCAGTGTGGACTCCACTGAGAAGAAGCAGCAAGAG  
CTGAAGAGCAAATAAAGAAGAAGAGAAAGCGGGCCGAAGTAGTATCTCCTTCCGGCCGGAATTTCTGGCTTCTCTTTGATTACCGGAGCAGAGGAGGAGCAATTGCATAATTATGG  
TAACAGTATGAAGTGTGATGCAGAAATGTCAGTACCCTAATCGACAGACAGCTGGTTTGGTCCCTTTCCAATTTCTTCTGGCGGGCCAAGTTCACAAATCTGAACCTTTTTTCACTTTTT  
GCCTTTTTTTTACCTCCAGTCTCCTCCACTTCCATTGAGCAGAGCAGTAAGAGAGGCTCCTGTCTTCCATTTGTCTTTTCCCCTCCAAGAATATAGCTTTATGATTCGCTTTTATTCTTCCA  
CTTTCTTTTCAITCTCCATCATTGTATCCCCTTTTCTCCAAGTTTATTGTCTGAGAGTGTTTTTATTCTTCTATCTGCAAGTGATTTTTTGCCCAATCTCTCAACTTTTGGAGCAATGAACT  
GAGTTTTGACCTGGAAGTTGATGTCAATGGTGAGGAGATCTTTTTTGTAAACAAGGAAAACTTTGTTCAITCTCTGGCAAGTTAAACAAATTATTAAGCAAAGCTCCAGTGACATCGGTT  
ACAAAGCCTCTGAAAGTGATTTCAATGATTTACCAGGAGGGGCAGAGGCCTTTGAACTCTTGATAAGGTTCTGCTATAACAATGGCAGAATCCAAATTAATCTCAAACAACACTTGCCTC  
CTCTACTTTCATAGCTCAATCCATGGAAGTGACTGAAGAAGAAGTTCATTCTGACAGTTAATCAAACAAAAGTGAAGAGCTGTTGAGAGTATCTCATATTGGTCTTTGCCTGAAGTCT  
TGATATCTCTAAAACAATGCCAAAATTTTTCAATTATCGGAATCTTCAGGCATCCTTGACAAAGTAATTGATTCTCTTGTAGCTAGAATTACCACAGCAAGTGATACCAGCCCTTCAGCTT  
CTTCACCTGATAGCTCTTTCTCCGTATCTCGTTTCGATACAAAGAGTAACATTAGCACGAAGAACAGTCATCGTCGAGCTTGGTGGTTTGTGATCTTGTTCATATTAACATTGAAATGATT  
GATAGGGTTATTGGAAGGATGATTTCTCTAAAAGTACTAGAGCATAATAAAATCAGCAAATTCCTCTTTTACTATCTGAAGTGCAAGCTCTCCTCAGCTCCTGATGAGAAGAGGATGGTGACCG  
AGACTGTCATCGACCTACTCTACTCGCTCGATAAAAAGTACTCGGTATCATGCAAAGGCTTGTGTTGATATTCTTCGCATCTCTTCTCAAAATCTCAGTGGTAGCTGCAGAGAAAGATTGGA  
GAATATGATTGGTAGCCAGATCGATCAAGCTACTTTGGACAGTCTATTGATTTCCCTCTCCTTCTAGAGTTTCCCAAGGCATGCGAAGAATGTCATCGATGCTTATTTTATCAAAAACCGTTGTC  
GGAGAGGCTGGCATCCATGGCGTTGCGCCGCGGATGGTGTAAACTTGGCAGCACTCTGTTTCGTAGCCAGAGGTGATCATGGCGCTGGCAATGTGGCGGAGACGGGTGGTGTCTTTGGT  
GATCAGGGTGAGGGGATGTCAGGTCAGCGGAGGGGGAATCAGGAGTCGCGGAATGATCGGAGAGATTGGGTTGGAGAACGCAGCGATCGGGCTCGTGTACGAGACTGAATGACGGGC  
GGCGTTTAGGCTTGGATGCGCCGGAGGTGGAATCCGAAGGGGGTTTCTCGACTTGGAGGAAGATTGCTTGACAAGAATGGAATGAAACTCGTCTTCTAAGAATGCCATGGCGTGGTGG  
ACGACGGCGCCGATTTCTGTTTATGGCTTGGTAGTACTGGGGTTCCGAGCCGGAATTCAGAGAGGGCGGCGCTGAGTTTAGAGGGCGGCTCGACGGAATCGAGAAACGAGGCAACTT  
CATGGGAATCCGAAGAAGACCATCGATCGCCGCCGAATCGTACTTGGCGATCTTTTCTCGAGCAATGCGCCGAAGCGGGAAATGGCGATATCAGGAATCTCCGGAATGGTCTCCGGCG

AATTGTGGAGGATTGCGAGGAACTGGTTCGATGTCATCGGAGAGGGAAAGGAGATCGTAGTGGTCGGGGATTTCTCCGGCCGTTGTGGCTGTCTCGTCGTTGTTGCCTGCTTCTCATTAG  
CGGGTGAATCTTCTTTCTTCTCGTTCCTCATTATCGTCTTTTTCTACCTTGTTTTCGTCGCGACTTCAGCGACGTCTCCGGAGATGGGATGAAAGTGGAGAGAGCTGAGGGAGAGGTT  
GCGATCGGAGCCGCGGAGTTTCTCCTCGCGAGAGGAGATGAAGCTAGAGGATTTCTGGGGAATGTGAGAATGGGTTCCATTGTTTTGTTCTTCTTTGCTGCTATCCAAAAGAAGA  
GAGGACAGATAAAGGAAATGGGCATGAAGGGAAGGGAGGGGGAGACTGAGGAAGATGAGGAGGGGGAGGAGAGAAGGGAAGAGAAGAGGTTGAAACGGTATTGGGGCTTTCATAC  
GACGAGAGGTTGGGGGAGTAGAAGCCTGCACGATGCGCGCTGGTTCGATTAGATAATGGCCAGCCCGGTTTTTAAA

>comp161932\_c0\_seq2

AACGTCTTCTCCTGCTATTTCTCCCTCTGTAACAAACCGTCGCATCTCTATAAATAGACAAGCCATGCAGGTTAAATTATTTTCGGCTCCGCACGGCCTCTATCGAGTATCTTCCAGTCTTC  
AGTTTCAGTTGAAAATTATTATTGTTTCGTTTCTCAAGAGAGTTTTTTGATAGAGGCAAGAGTAGTACTTGACATGGATGAAATGGATGGAAATATGGCCATTTTTTATGATTGGGCGGCTTT  
CAATCCTAGCCCAATAAGGCAATAACCTATGAGTTTTTCAACGAGGATTTTGTTC AAGGCCTATTCTTGATTTTCGGAGAAGATGATAGTCAGAGTTCTTCTATCACAATGGACTTTGAGAA  
GAAGAAACCACCTATTAGCTTCGAAGAGGGGGGAAAAGAAAATGGGTTTGGACTGCACGAGTGACGATTCTTCAGAATTAATAGGATTTAATGTTTCAGAAATCATGCTTGAAAAGGGGTTCA  
TAATGAGAAAATGGCAGAAATGGCTCGTTTTAAACATGTTAAAAGCTTTTTGTGAGTCAAAGTGATCAAGAGAATATCATGTTTGAGGTTAATTCTAGTCAAAAACGAGTCAAAGAATCTTATA  
TCATCATTGCCAGAGGAATCTTCTTCATATATGTTGCTTTTCGCCAGGCGTTAATCTTTCATCAATGGAGTATCTAGATAATTTTTTCAGTTTCTCTGGCCTTACCAGACAATAATGCATCCCTTC  
AAGAAAATTTTCGAGCTTTTGGAGCCGTTTGGAAAGAAAAGAGAAAACCTCATGATATTGCTGCTAATCAAAAAGCATCCCATTTCTTGATGTGAATGGAAAGTCCCCCACCTCCACCCCTG  
ATGACCATCAAAAATGCAGAAAAGGCGTCAACGTAGAGTTCTCATCCTTTCTGAAAGTGACCCAACAAGGATGGTTATAACTGGCGGAAGTATGGCCAGAAACAGTTGAAGGGCTGT  
GAGTTTCTTGTAGTTATCATAAGTGTACCCACCCAAACTGTCCTGTTAGAAAAGATTGAACGATCTTTCAGGGCCATATCACTGAAATAATCTATAAGGGCTCTCACAACCACCTTA  
AGCCTCCTCCAAATCATCGGTCCAGTTTCTCATCTTCAAAACAACCTTCATGGTCCACAATCAGTCAGTGCAGATCATCCTGGTTCGGTGGCCAATTTTAAAGGAAATCCCTCATTTGGCAAG  
TTCTTATGATGGATTTAAAGGACCCGAACGGAGTGATGGTTTCGGAGGTACTTCTTCAGCTTCTTTTACTGAGTTAATGACCTTCTAATGTTTTGAAGAGCTCTCAATTAGAATTGGAGT  
CGATGGAATCCTCATCATGTGTAATATCTATTGACAAGGAAGATAATGAGGCAACTCATAGCAGCTTATCCGCTGATTATAATATTGACCAAGAGGAGATGGAATCGAAAAGAAGGAAGCA  
GGAACTCTGCTCTATTGGCAGGAATACTACTTCAAGGGCCATGCGTGATCGTTCGATTGTGGTGCAGATTCCTAGTGATTTAGATATCCCCTATGATGGGTACCGATGGCGTAAGTATGGGC  
AGAAGGTTGTCAAAGGAAATCCAAATCCAAGAAGCTACTATAAATGTACAAACCGTGGATGCTCCGTCCGCAAACATGTGGAGCGAGCTTCAGATGATCTAAATTCAGTAATCTGTACAT  
ATGAAGGCAAGCATAACCATGATGTCCCTTCTGCAAGAAATATCAACCTCGCAAGATATTTCCATCCAGCCTTGCTGAAACCGCAGCAATGCAGCTTCTGGTCTTTACACAAGGCCAG  
AATTAGCTCAAGACAGCTTCATGAGTCTTGAAAACGTGCTCCAATATGTACATATGGCCTTATTGGTAGAGGAAAGCAACTTGAACCAACAACACTAGTTTTTCTTTTCGGGTTTCGACCAATC  
AAATTTGGCGAGCCTTTGCCATCGGGTTCAGACTTAATGAGGCGATTCAAGATGCCATTTTTTCTCCAATACATCAAACATGGATCGGCAGGTTAGCAGTGGAAATATTATAACCAATGA  
GAGAACCGAAGAACGAACCGATGTAAGAGTCTGATGTGCCGCAATTGCCAATACAGATGCAGGTTATCAGCAATAGTGGAGTCGGTTAGTTTTTTTTGCTTTTTGTTTTATGACTGTGTG  
CCTGAGATCATACTCCTCACACACACACACTCATATATATATAAGGCTTGATTTGCTAATGATATAATTTTGTGCAAGCTTTGTGGCTGTAAGAAGTTTTCTAAGTTATTTGATTAGCA  
AATTGGCGTGTTTTTGCCAAAGAGATGCTTCTAAGAAAATAAATTTGTTATTTAAA

>comp161933\_c0\_seq1

GAGAGAGAGAGAGAGAGATGGCAACGCTCAGAGTTCCATTGCATGTTCTTCTGCAGTAGAAGATGCAAAGAATCTCTGGATGGCCTGCGAAGGAAGCATTATACTGTTGGATGTTCAA  
TCATGTCCAGAGAGGAGCAATCATAGCTAATATGGCTATGTGGAATGGTTAGACTATAGAGCAATCGTCGAGACGGCGTATCAACTCAACAAAAGAACTTTTAGAGGTCAAGCAAGC  
CTACCATGATCTTTTCAAGCGTTCGTTGGAGGAAGATGTTGCAAAAATGACTAATGGCGATCTTCGAAAGCTCCTTCGATCGGCACTCAACAAAGAGAAAATTGACGATAATACACTTGC  
TCGAATTATTGTCACTCGAGCGGAGAAAGATTTACAGGAGATCAAAGATATGTATGAAGAGAG

>comp161933\_c0\_seq15

GAGAGAGAGAGAGAGATGGCAACGCTCAGAGTTCATTGCAAGTTCCTTCTGCAAAAGAAGATGCAATGAATCTCTGGATGGCCTGCCAAGGAAGGGAGGCAGATGAGAAAACATT  
GATCGATATTTTAGCGCATAGAGATGAAGCACAGAGGCTACAAATCATCCAATCTTATGAAGATCATTACAACGGAAATCTCATTGATAGACTTGAATATGAGCTATCGGGAGAATTTAAGG  
AAGCATTATACTGTTGGATGTTCAATCATGTCCAGAGAGGAGCAATCATAGCTAATATGGCTATGTGGAAATGGTTAGACTATAGAGCAATCGTCGAGACGGCGTGTATCAACTCAACAAA  
AGAACTTTTAGAGGTCAAGCAAGCCTACCATGATCTTTTCAAGCGTTCGTTGGAGGAAGATGTTGCAAAAATGACTAATGGCGATCTTCGAAAGCTGTTGGTTGGTTTAGTGAGCACATA  
TAGATATGATGGCAAGGAAATTGTCAAGAGCCTTGCATTATATGAAGCAAACATTCTCCATGATGTTATCAGAAAGAACTCTTCAATCATGATGAGGTTATAAGAATCTTTACCACAAGGA  
GTAAGCTCAACTCATTGCAACTTTCAATAAATACAAGGATGAGTGTGGAATATCAATCTTAAAGGACTTGTCAAGTGGGAGTCCAGATCTCTTTCCTTCGGTGCTTAAAATTATCATTTCGT  
TCCATCATTCTCCTCATAAGTACTTTTCAGAAAGCTCCTTCGATTGGCGCTGAACGGAGAGGTAACCGACGAAAATGTGCTTGCTCGAATTATTGTCACTCGAGCGGAGAAAAGATTTACAGG  
AGATCAAAGATATGTATGAAGAGAGAGGAAAAATGAGTCTGATAGCTGCCATAAACAACAAAACCTTCAGGGCACTTCAAGAACTTCATCTTGAATTGATTGGGAATTGAAGATGAAATA  
CTTCAGAACTACTTCTATGTTTGTGCGTAATAAGAAAAAATCACAACACTATTGGATATATATTTTTGAAATTAAGTGTGATGACAGTTTGTATTTTCAGTAGGCTTCGTTTCGGAACAACCTTCT  
TACTATTCTTTAAGATTGTTTTTTAGTACAAAAAATTTAAGTTCAAAAAAATTTTGTACTAAA

>comp161933\_c0\_seq16

GAGAGAGAGAGAGAGATGGCAACGCTCAGAGTTCATTGCAAGTTCCTTCTGCAAAAGAAGATGCAATGAATCTCTGGATGGCCTGCCAAGGAAGGGAGGCAGATGAGAAAACATT  
GATCGATATTTTAGCGCATAGAGATGAAGCACAGAGGCTACAAATCATCCAATCTTATGAAGATCTTTACCACGAAAATCTCATTAAAGAACTTGAATGAGCTCTCAGGAGAACTGAAG  
AAAGCATTATGCTCTTGGATGCTCAATCCTGCCAGAGAGGAGCAATCATAGCTAATAAGGCTCTGAAGGAAGGGTTAGACTATAGAGTAATCGTCGAGACGGCGTGTATCAACTCAACA  
AAAGAACTTTTGGCGGTCAAGCAAGCCTACCATGATCTTTTCAAGCGTTCGTTGGAGGAAGATGTTACAAAAACGACTAATGGCGATCTTCGAAAGCTGTTGGTTGGTTTAGTGAGCACA  
TATAGATATGATGGCAAGGAAATTGTCAAGACCCTTGCATTTTATGAAGCAAACATTCTCCATGATGTTATAAGAAAGAAACCTTCATTCATGATGAGTTTATAAGAATCTTTACCACAAG  
GAGTAAAGCTCAACTCATTGCAACTTTCAATATATTCAAGGATCATCATGGAATATCAATATCAAAGGCCCTTGTCAATTTGGGAGACCAGATCTCTTTACTTCGGTGCTTAAAATTGTCATTCT  
TTCCTTCATTTCTCCTCATAAGTACTTTGAGAAGCTCCTTCGATCGGCACTCAACAAAGAGAAAAATTGACGATAATACACTTGCTCGAATTATTGTCACTCGAGCGGAGAAAGATTTACAG  
GAGATCAAAGATATGTATGAAGAGAGTGGGAAAATGAGTCTGATAGCTGCCATAGACAACAAGACTTCAGGGCACTTCAAGAACTTCATCTTGAATTGATTGGAAATTGAAGATGAAA  
CTCTTCAGAACTACTTATATGTTTGTGTAATAAGAAAGAACTCACAACACTATTGATATATATTTTTATATTAAGTGTGATGACATTTTGGATTTATTCATACGACGTAGATTTCAGTAGAGTT  
GGAGATAGAAAAAGCTAGACTGCAACCCGTCTTTTTGATGAAAAAGCATTTCCTCGGATCCGAGAAAAACAAAACCTTCATGCCACCCATGGGAAAAAGTCATAAACCGTCTTTCCCTT  
AGTGAAGTCACATTTCAATCTGGAAATTGTCAATCAACATGGGGTCAAAGTCATAAAA

>comp161933\_c0\_seq3

GAGAGAGAGAGAGAGATGGCAACGCTCAGAGTTCATTGCAAGTTCCTTCTGCAAAAGAAGATGCAATGAATCTCTGGATGGCCTGCCAAGGAAGGGAGGCAGATGAGAAAACATT  
GATCGATATTTTAGCGCATAGAGATGAAGCACAGAGGCTACAAATCATCCAATCTTATGAAGATCTTTACCACGAAAATCTCATTAAAGAACTTGAATGAGCTCTCAGGAGAACTGAAG  
GTACCTGATGGTGTGTAACATATTCAACAATATCACTATAGGAAATTCGCAAATAACCGCGGGACTTTCCAGCTGTTTTAAAAATTCAGGCGGTTTTAAAAATTCATTATCACCGGCGG  
CCAAACCGCCAGTCATATGCGACGCCAAACAAAAAATCGGCAGCATATTTGGTAGTCATTTACTGCCAGCATTTCCGGCGGTTTTTTATTAAGAACTGCAAGTTTTAATCGGCGGTCAC  
ACAGCCGGTTTTAACCTCCAGTAGTTCCGGCGGTTCTTTGACTGCAGGTAATTGATGATTTCTGTAGTGCATATAAAGAGCCTAACATTTCAAATTTGTTTTATTGCAGAAAGCATTATGC  
TCTTGGATGCTCAATCCTGCCAGAGAGGAGCAATCATAGCTAATAAGGCTCTGAAGGAAGGGTTAGACTATAGAGTAATCGTCGAGACGGCGTGTATCAACTCAACAAAAGAACTTTTG  
GCGGTCAAGCAAGCCTACCATGATCTTTTCAAGCGTTCGTTGGAGGAAGATGTTACAAAAACGACTAATGGCGATCTTCGAAAGCTGTTGGTTGGTTTAGTGAGCACATATAGATATGATG

GCAAGGAAATTGTCAAGACCCTTGCATTTTATGAAGCAAACATTCTCCATGATGTTATAAGAAAGAAACCCCTTCATTCATGATGAGTTTATAAGAATCTTTACCACAAGGAGTAAAGCTCA  
ACTCATTGCAACTTTCAATATATTC AAGGATCATCATGGAATATCAATATCAAAGGCCTTGTCTTTGGGAGACCAGATCTCTTTACTTCGGTGCTTAAAATTGTCATTCTTCCCTTCATTTCT  
CCTCATAAGTACTTTTGAGAAAGCTCCTTCGATCGGCACTCAACAAAAGAGAAAATTGACGATAATACACTTGTCTCGAATTATTGTCACTCGAGCGGAGAAAAGATTTACAGGAGATCAAAGAT  
ATGTATGAAGAGAGTGGGAAAATGAGTCTGATAGCTGCCATAGACAACAAGACTTCAGGGCACTTCAAGAACTTCATCTTGGAAATTGATTGGAAATTGAAGATGAAACTCTTCAGAAA  
ACTTATATGTTTGTGTAATAAGAAAGAAGTCAACTATTTGATATATATTTTTATATTAAGTGTGATGACATTTTGGATTTATTCATACGACGTAGATTTCAGTAGAGTTGGAGATAGAAAA  
AAGCTAGACTGCAACCCGTCTTTTTGATGAAAAAGCATTTTCCGGATCCGAGAAAAACAAAACCTTTCATGCCACCCATGGGAAAAAGTCATAAACCGTCTTTCCCTTAGTGAAGTCACA  
TTTCAATCTGGAAATTGTCAATCAACATGGGGTCAAAGTCATAAAA

>comp161933\_c0\_seq5

GAGAGAGAGAGAGAGATGGCAACGCTCAGAGTTCATTGCAAGTTCCTTCTGCAAAAAGAAGATGCAATGAATCTCTGGATGGCCTGCCAAGGAAGGGAGGCAGATGAGAAAACATT  
GATCGATATTTTAGCGCATAGAGATGAAGCACAGAGGCTACAAATCATCCAATCTTATGAAGATCATTACAACGGAAATCTCATTGATAGACTTGAATATGAGCTATCGGGAGAATTTAAGG  
AAGCATTATACTGTTGGATGTTCAATCATGTCCAGAGAGGAGCAATCATAGCTAATATGGCTATGTGGAAATGGTTAGACTATAGAGCAATCGTCGAGACGGCGTGTATCAACTCAACAAA  
AGAACTTTAGAGGTCAAGCAAGCCTACCATGATCTTTCAAGCGTTCGTTGGAGGAAGATGTTGCAAAAATGACTAATGGCGATCTTCGAAAGCTGTTGGTTGGTTTAGTGAGCACATA  
TAGATATGATGGCAAGGAAATTGTCAAGAGCCTTGCATTATATGAAGCAAACATTCTCCATGATGTTATCAGAAAGAAACTCTTCAATCATGATGAGGTTATAAGAATCTTTACCACAAGGA  
GTAAAGCTCAACTCATTGCAACTTTCAATAAATACAAGGATGAGTTTGGAAATATCAATCTTAAAGGACTTGTCAAGTGGGAGTCCAGATCTCTTCCCTTCGGTGCTTAAAATTATCATTTCGT  
TCCATCATTCTCCTCATAAGTACTTTTCAAGGTAAGTAAGTAACTTGGATCGAAATTACGTACAAAATTCATAGCGCACTAGTTGGAAATAAATTTGAAAAATCTGATAGGTAATATTCAAAGG  
CTCACCTCTCGTAAAGAAAAGATTAGGAACAAAATCATATATATAAAATGTTTCAAGAAATATCTTATAACAAAAGGTTGATCTCATATAGAATTAAGTATAGAAATGTAACATTCTC  
TTTCATATATTTTATGTTAAGGGGTTCTTCTAAAAAATTTGAAGGTGTTGTAGAATTTGAAAATATATTAGTTCATAGCTACAAAATGTTGCTACAAATGTCTATTATCTTCTTATTAGAAC  
ATCTTGCTAGAATTTTATCCTTGGTGATATATCTTCGGGTGAAAAATTTATGAACCTAACTTATGAAGAAAACCTTTGGACCAATCGCAGCTCCTTCGAATTAAGAGCAATGAAAATTGCAG  
CTATCGCTCTATAAAATTAGGAAAAACCTTTGGAAATTACAATCAACACACCATTAATCCAAAAATCTTTTCAATTGTTGTCTTCACAATTCAAACAGAAATATTTCAAGAAACCAGTCA  
GCCAGTAGTATGTCAGCTGCAGCTATTTGCACATACGCGAGTTTACAGGTCAACAACACTACTATTTCATCGTCCCATGTCCATTTGGTTGCCTCGTCATCATCTACTAATACATACCGCCCTGA  
CATCACCTTAATGGGCATCGTTGA

>comp161933\_c0\_seq9

GAGAGAGAGAGAGAGATGGCAACGCTCAGAGTTCATTGCAAGTTCCTTCTGCAAAAAGAAGATGCAATGAATCTCTGGATGGCCTGCCAAGGAAGGGAGGCAGATGAGAAAACATT  
GATCGATATTTTAGCGCATAGAGATGAAGCACAGAGGCTACAAATCATCCAATCTTATGAAGATCATTACAACGGAAATCTCATTGATAGACTTGAATATGAGCTATCGGGAGAATTTAAGG  
AAGCATTATACTGTTGGATGTTCAATCATGTCCAGAGAGGAGCAATCATAGCTAATATGGCTATGTGGAAATGGTTAGACTATAGAGCAATCGTCGAGACGGCGTGTATCAACTCAACAAA  
AGAACTTTAGAGGTCAAGCAAGCCTACCATGATCTTTTCAAGCGTTCGTTGGAGGAAGATGTTGCAAAAATGACTAATGGCGATCTTCGAAAGCTGTTGGTTGGTTTAGTGAGCACATA  
TAGATATGATGGCAAGGAAATTGTCAAGAGCCTTGCATTATATGAAGCAAACATTCTCCATGATGTTATCAGAAAGAAACTCTTCAATCATGATGAGGTTATAAGAATCTTTACCACAAGGA  
GTAAAGCTCAACTCATTGCAACTTTCAATAAATACAAGGATGAGTTTGGAAATATCAATCTTAAAGGACTTGTCAAGTGGGAGTCCAGATCTCTTCCCTTCGGTGCTTAAAATTATCATTTCGT  
TCCATCATTCTCCTCATAAGTACTTTTCAAGGTAAGTAACTTGGATCGAAATTACGTACAAAATTCATAGCGCACTAGTTGGAAATAAATTTGAAAAATCTGATAGGTAATATTCAAAGG  
TTCCAAAAATCTTTTCAATTGTTGTCTTCACAATTCAAACAGAAATATTTCAAGAAACCAGTCAGCCAGTAGTATGTCAGCTGCAGCTATTTGCACATACGCGAGTTTACAGGTCAACA  
ACTACTATTTCATCGTCCCATGTCCATTTGGTTGCCTCGTCATCATCTACTAATACATACCGCCCTGACATCACCTTAATGGGCATCGTTGA

>comp161938\_c1\_seq1

ACCGTTCATATAAAAATTAATATAGAAAAAGAAATATCTAAATATTTCTTCTATACATATTGAGCTATTCCTTTGTAAGTAAATAACCTAATAAAAAATGTCATTTCTTTAATGAGTTAACCATCGA  
AAAATAGAAATGGTAAAGGGTCACATCCTGGCTCCAAGATGTTATTGTAATTAGATCGATCAAGAAAATTAAGGACTCGAACAAATCTCCATTGTTAATCGCAGCCTCAACATTATTGCAAT  
CCTGATTGCTAGTGGAAAGCTCTTTCCACCATCTGTTCTGACTCGCCAGTCTTTGCAAACCTTCCTTAACTCGAGGTCTGCTGTCTGCAAGTGTTCGGGCTGCATACTTGATTTTCTTG  
CTAAAATCTCTTTTCTTTTCTTATTTTGTATCTTTTCGAT

>comp161940\_c2\_seq11

GCTATCAAAAACCTTTTTAGAAACCATGCAATTTAGTTTGATTCAATACATTTCCACATCAATGGAAATTTTCAGTCACAATGACCTATTAACCCTATGAACTTCCCATCAATGGAAATTTTC  
AGTATGCTAGCTGGTACTAATAAGCAATTTATTAGACCAAAGTAACAATCCCAGTGAAGCTTTTAGTCTTTTGCTAGGAGAAACAATGAAGAATACACAAACAGGAATCATACTACAGGT  
TATCATCTTGTTTTACATCTTTGAAATGACCTTCTCATTCACTATCATACTAGACTTTTATAAGTTTCTAATGCACTATTTGTCACCCAGCAGAGTGAGCAGAAAATCCCTGTAATAACCAG  
AGGTATCTCCAACAACATCATCATGAAGTGTCTGTTGTATCTGTTCTTATACTCCTCTTTGATCAGCTTCATATCGATTTCTGCTCGAGTAACAATAGCTCTTGTAAGAGAATCCTCATCTGT  
TCCAATCCAATGATTGAGGTATTCACAACCTGGGCGAAGTGTCTTCTGGCGACTGTAAACAACAGATAGCAACTTTTATGATTGATGAGAGCTTCTTGTCATCACCCTGTTGCACTCT  
ATGTCCTCAATTATGGATATCCATATCTTGTTTATAATGCTGGAAAATAGCATTAAAGGTGAGCCTTGCTCCTTGCTGCTGAGTACACGAATAACCTCATGATAAGGCCTCTGCTCTTTATAG  
CACAGAAGAGTGAGTTTGCTTACAGATTTACCAGTTGCTCATCCACATCCTCCCTTCATACCTATAGGAGCTCACAAGACGCAACAAAAACTGCAGAAAATATATCTTTCTCAGTGGTAA  
AGCACATACAGGTTATATATTAATATCGCCATATCATCATATTCAGTAGCCTTATCCTAACTATTTAAAATTGGCTTTATTATCACTATCTTATAGAGGAAAAAGTAAAAATAGTCCGTTT  
AGTATTTATGTGTGAGCATTTTAATTCCAAACTACTTAATATGCCATATTTAGACTTCGTTTGGCACGGCTGCTTCTTAAAGCAGCTTTTTATAATAAAAAATAAAATTTTTTAATAAAAAAT  
TACTTCAAAAAGAAGTAAGAAAGCCATCGCAAACGAAAACATAGTCTCATCTTAAAGCTGAAGCTTTGGTTTTATTACGAGCGATATTATTTTTATTAGGATGAGCTTATTTGTTTGAATA  
TCAATTTCTTATCTAACCAAAATTTATCAGAATATTCAGCTGAAGAGAAGAGTCTATCAGGATCTTCGCTTTATTCCAGTGTCAACTGTAAGTTCTTTCATGCTTAGAGGAAGAAAA  
TGTTGAATTAGGCGCACGCTTCTTAATGCTTTCTTTTTACTACCTATGTGAACAGTTTAAATCTCTTTTTCATTACATAATTTACTTTACACATCTCAGTAAGTAAAAGCAGAAAACATGAA  
GTACTGACCGCTGTTACCTTTCACAGACTTGGAGTTGAAGCTTAGTATTGTTGTGCTTGTACATTAACCTTTGTATGGTAAGGTTCTTTCAAGTGAGTGAATTGATGTATGACATCAATAGG  
ATTCTTGTTAAGAGGAGCTCCACAAGATTGCAATTAGCTCTTTGAGTCATTTTAAAATAATTATCCCTATCAACCACAACCTATCATTTGT

>comp161940\_c2\_seq2

GCTATCAAAAACCTTTTTAGAAACCATGCAATTTAGTTTGATTCAATACATTTCCACATCAATGGAAATTTTCAGTCACAATGACCTATTAACCCTATGAACTTCCCATCAATGGAAATTTTC  
AGTATGCTAGCTGGTACTAATAAGCAATTTATTAGACCAAAGTAACAATCCCAGTGAAGCTTTTAGTCTTTTGCTAGGAGAAACAATGAAGAATACACAAACAGGAATCATACTACAGGT  
TATCATCTTGTTTTACATCTTTGAAATGACCTTCTCATTCACTATCATACTAGACTTTTATAAGTTTCTAATGCACTATTTGTCACCCAGCAGAGTGAGCAGAAAATCCCTGTAATAACCAG  
AGGTATCTCCAACAACATCATCATGAAGTGTCTGTTGTATCTGTTCTTATACTCCTCTTTGATCAGCTTCATATCGATTTCTGCTCGAGTAACAATAGCTCTTGTAAGAGAATCCTCATCTGT  
TCCAATCCAATGATTGAGGTATTCACAACCTGGGCGAAGTGTCTTCTGGCGACTGTAAACAACAGATAGCAACTTTTATGATTGATGAGAGCTTCTTGTCATCACCCTGTTGCACTCT  
ATGTCCTATCCATCCAGAGTTTGCTAATACATTAGTGACTGGTTTTTAAGCTAAAACCTCCACAGTTAGAAGACAAACATACTATTGCAATAGGTCGCTACTGCTTAAACAGTATAAATGAC  
GCTTAGATGAAAAATGAGCATGTATTTCTCATGCTAAATTATGTTAACTTGTATAGAACTACACAAACACAGAGAGAAGATGACACTATGAAATATTACAACTTCAGGAACCTGTCTGT  
GGGTGATTTATACAATATCCATGTATCATGCAGAGGTTGATTTAGTTCTTTATATTGTGAAGTGGAGGAACTCACTCATTGATCTAGTTAGGCAATGAAAGAACAAAAATTTAGAGAAA  
ACGAAAAGATTTATCCCAAACCTAAGGGGAATTAACCTTTTACAACATTCAAAATTAACAAGAGGACTTCCATGGAAATACTTCTAGGGGGAGTTATAAATGTGTGGTTTCAAGTGGTAAGC  
TGATAGGAAATATATGCACTTTTCAAAAATCAGCAGATGAAATATGAGAATTGCTGAATTAAGAAGAACACCCAAAAAACAAGATACAATTGAATCTTCAACTGGAGAGGAAGATTGCA



CTCTCCCAAACCCCTAGCCGTCCACTAGAGTCCCTCCTTCTCCTTAGGAAAAACAAAACCTCAGCAAAATGAACGATAGCCCAAACCCCTACGAAACAATCCTACTAAAAACATACAAAAATT  
CTCTCCGATTCCAAAACAACCCCTCATTTTGAAATTTCCCTCCTAATCTCTCTTTAATTTTAATTAATTTGCCTGCTGGACCCCAACCCCAAAAGGGAGCGTCATTGACCGAAGCGGAACAG  
CCTCTGGTAAACCAAGGCCGGTCTAGGCTAGACCAGCTAGACCGATCCAAGGACTAGTCTAACATAAGGCCAAAAAACCAACTTGATCGTTTCATCATTAAATTACCACATTACTGATGTTA  
TCTTGATTAAGCATGGTAATGGCATATTAAGAGGGAAATATTTCAATGTGCTAGTTAATAAATATGGAATAACTATTATTGAATGACTTATGGATAGAAATTGCAGCGTCTGGACTAATGAAT  
TGCTTCCACAGGGATCTATAAATGTTCCAGCTTAAATTTTACTGCAAATGGCATATTGCGTACCTCAATTATGGATATTCCATATTCTTGTTTATAATGCTGGAAAATAGCATTAAAGGTGAGCC  
TTGCTCCTTGTGCTGAGTACACGAATAACCTCATGATAAGGCCTCTGCTCTCTTATAGCACAGAAGAGTGAGTTTGTCTCAGATTTACCAGTTGCTCATCCACATCCTCCCCTTCATACCT  
ATAGGAGCTCACAAGACGCAACAAAACCTGCAGAAAATATATCTTTCTCAGTGGTAAAGCACATACAGGTTATATATTAATATCGCCATATCATCATCATATTCAGTAGCCTTATCCTAACT  
ATTTAAAATTGGCTTTATTATCACTATCTTATAGAGGAAAAAGTAAAAATAGTCCGTTTCAATTTATGTGTGAGCATTTTAATTTCAAACCTACTTAATATGCCATATTTAGACTTCGTTTGGC  
ACGGCTGCTTCTTAAAGCAGCTTTTTATAATAAAAAATAAAATTTTTTAATTAAAAAATTACTTCAAAAAGAAAGTAAGAAAGCCATCGCAAACGAAAACATAGTCTCATCCTTAAAGCTGA  
AGCTTTGGTTTTATTACGAGCGATATATTTTTTATTAGGATGAGCTTATTTGTTTGAATATCAATTTCTTATTCTTAACCAAAAATTTATCAGAATATTCAGCTGAAGAGAAGAGTCTATCAG  
GATCTTCGCTTTATTCCAGTGTCAACTGTAAGTTCTTTCATGCTTAGAGGAAGAAAATGTTGAATTAGGCGCACGCTTCTTAATGCTTTCTTTTTTACTACCTATGTGAACAGTTTTAAATTC  
TCTTTTCATTACATAATTTACTTTACACATCTCAGTAAGTAAAAGCAGAAAACATGAAGTACTGACCGCTGTTACCCTTCACAGACTTGGAGTTGAAGCTTAGTATTGTTGTGCTTGTTACA  
TAACTTTGTATGGTAAGGTTCTTCAAGTGAGTGAATTGATGTATGACATCAATAGGATTCTTGTTAAGAGGAGCTCCACAAGATTTGCATTAGCTCTTTGAGTCATTTTAAATAATTATC  
CCTATCAACCACAACCTATCATTGT

>comp161940\_c2\_seq9

GCTATCAAAAACCTTTTTTCAGAAACCATTTGCAATTTAGTTTGATTCAATACATTTCCACATCAATGGAAATTTTCAGTCACAATGACCTATTAACCCTATGAACTTCCCATCAATGGAAATTTTC  
AGTATGCTAGCTGGTACTAATAAGCAATTTATTAGACCAAAGTAACAATCCAGTGAAGCTTTTAGTCTTTTGTAGGAGAAACAATGAAGAATACACAAACAGGAATCATACTACAGGT  
TATCATCTTGTTTTACATCTTTGAAATGACCTTCTCATTTCACTATCATACTAGACTTTTATAAGTTTCTAATGCACTATTTGTCACCCAGCAGAGTGAGCAGAAAATCCCTGTAATAACAG  
AGGTATCTCCAACAACATCATCATGAAGTGTCTGTTGTATCTGTTCTTATACTCCTCTTTGATCAGCTTCATATCGATTTCTGCTCGAGTAACAATAGCTCTTGTAAGAGAATCCTCATCTGT  
TCCAATCCAATGATTGAGGTATTCACAACCTGGGCGAAGTGCTTCTCTGGCGACTGTAAACAACAGATAGCAACTTTTATGATTGATGAGAGCTTCTTGTGCATCACCCTGTTGCACTCT  
ATGTCCTATCCATCCCAGAGTTTGCTAATAACATTAGTGACTGGTTTTTAAGCTAAAACCTCCACAGTTAGAAGACAAACATACTATTGAAATAGGTCGCTACTGCTTAAACAGTATAAATGAC  
GCTTAGATGAAAAATGAGCATGTATTTCTCATGCTAAATTATGTTAACTTGTATAGAACTACACAAACACAGAGAGAAGATGACACTATGAAATATTCAACTTCAGGAACCTGTCTGT  
GGGTGATTTATAACAATATCCATGTATCATGCAGAGGTTGATTTAGTTCTTTATATTGTGAACCTGGAGGAAACTCACTCATTGATCTAGTTAGGCAATGAAAGAACAACAAAATTTAGAGAAA  
ACGAAAAGATTTATCCCAAACCTAAGGGGAATTAACCTTTTACAACATTCAAAATTAACAAGAGGACTTCCATGGAAATACTTCTAGGGGGAGTTATAAATGTGTGGTTTCAAGTGGTAAGC  
TGATAGGAAATATATGCACTTTTCACAAAATCAGCAGATGAAATATGAGAATTGCTGAATTAAGAAGAACACCCAAAAACAAGATACAATTGAATCTTCAACTGGAGAGGAAGATTCTGA  
CTCTCCCAAACCCCTAGCCGTCCACTAGAGTCCCTCCTTCTCCTTAGGAAAAACAAAACCTCAGCAAAATGAACGATAGCCCAAACCCCTACGAAACAATCCTACTAAAAACATACAAAAATT  
CTCTCCGATTCCAAAACAACCCCTCATTTTGAAATTTCCCTCCTAATCTCTCTTTAATTTTAATTAATTTGCCTGCTGGACCCCAACCCCAAAAGGGAGCGTCATTGACCGAAGCGGAACAG  
CCTCTGGTAAACCAAGGCCGGTCTAGGCTAGACCAGCTAGACCGATCCAAGGACTAGTCTAACATAAGGCCAAAAAACCAACTTGATCGTTTCATCATTGTCTTGATTAAGCATGGTAAT  
GGCATATTAAGAGGGAAATATTTCAATTGTGCTAGTTAATAAATATGGAATAACTATTATTGAATGACTTATGGATAGAAATTGCAGCGTCTGGACTAATGAATTGCTTCCACAGGGATCTAT  
AAATGTTCCAGCTTAAATTTTACTGCAAATGGCATATTGCGTACCTCAATTATGGATATTCCATATTCTTGTTTATAATGCTGGAAAATAGCATTAAAGGTGAGCCTTGCTCCTTGTGCTGAGTA  
CACGAATAACCTCATGATAAGGCCTCTGCTCTCTTATAGCACAGAAGAGTGAGTTTGCTTCAGATTTACCAGTTGCTCATCCACATCCTCCCCTTCATACCTATAGGAGCTCACAAAGACGC

AACAAAACTGCAGAAAATATATCTTTCTCAGTGGTAAAGCACATACAGGTTATATATTAATATCGCCATATCATCATATTCAGTAGCCTTATCCTAACTATTTAAAATTGGCTTTATTAT  
CACTATCTTATAGAGGAAAAAGTAAAAATAGTCCGTTTCAGTATTTATGTGTGAGCATTTTAATTCCAACTACTTAATATGCCATATTTAGACTTCGTTTGGCACGGCTGCTTCTTAAAGCAG  
CTTTTTATAATAAAAAATAAAATTTTTTAATTAAAAAATTACTTCAAAAAGAAGTAAGAAAGCCATCGCAAACGAAAAACATAGTCTCATCCTTAAAGCTGAAGCTTTGGTTTTATTACGAGC  
GATATTATTTTTATTAGGATGAGCTTATTTGTTTGAATATCAATTCCTTATTCTTAACCAAAAATTTATCAGAATATTCAGCTGAAGAGAAGAGTCTATCAGGATCTTCGCTTATTCCAGTG  
TTCAACTGTAAAGTTCTTTCATGCTTAGAGGAAGAAAATGTTGAATTAGGCGCACGCTTCTTAATGCTTTCTTTTTACTACCTATGTGAACAGTTTAAATCTCTTTTCATTACATAATTTACT  
TTACACATCTCAGTAAGTAAAAGCAGAAAACATGAAGTACTGACCGCTGTTACCCTTCACAGACTTGGAGTTGAAGCTTAGTATTGTTGTGCTTGTACATTAACCTTTGTATGGTAAGGTT  
CTTTCAAGTGAGTGAATTGATGTATGACATCAATAGGATTCTTGTTAAGAGGAGCTCCACAAGATTTGCATTAGCTCTTTGAGTCAATTTAAAATAATTATCCCTATCAACCACAACCTATCAT  
TGT

>comp161963\_c0\_seq1

TCCTCTTCTTTCTTTAAAGCTATTTTAAAACTACAATGTACTATAGCTACTGTGATATATGTGCAGGACTATAAATGCACTCGTGTGTGTATTCTTCTTTTTTAGGGAAAACGTATTTCAA  
ATTTCAATGTAATCCTTCTATGTAATGGCATTTCATGAGCTGTAATCCTCAAGATGATTATAAAGACATCACGTTTTGTTTATGAAATGTCAGTGGAGTGTATATTTTCACTTGATTTTGTCCCT  
ATGAAGGGCAATCTTTAAATCACTAATATTGCAGCTTTATTTCCAGTTTTTCTCGACTAAACCTCTTGCCTGCGATCCTTCTAGCTTGCCATAAATATCCTCCAAGTAAGGAATATGATGTTA  
AACTTCGAGATGTGGAAGCAAGGAGGCAAAAAGCTGCAGCTTTAAAGGCAAGCCATTTGATTCTGGAAGGAAAAGGCCATTGGATAATAAACCTATGACCGGGCAAGAAGCCAACGG  
AGACCCAAAGAAGTGGCGTGAGCAATCAAATACCAAAAGTACGAGTGAGAAGTACAGTCCTTTAGAAGAAGTTGGTTCAGGGTCCCCATTGATCCTCCAGAGGAGCTCCACATGGCT  
TGTCTCATTCCAACACTACATTGCACCCCAAGTGCATTTGGGAAGAACGATGATATCAGGACGATTCTTAACCAAGCATCTAGTACTATGTGGGCACCCAACGTTCCACGATTACGATCTCA  
GAGATCATATATGCCTCAGAATAGTGGTGGCATGGACTTTGCCAATTCAAAGAGCAATATGAGCTCCACGTATAATAGGCTTGATGTTGCTGAGTCACTGAGAAGCAGCATGTACTAGATA  
GACCTTCTTCTACCTATAAGGGAGATGACAAGGTTGGAGCCAAGGAAGCTGTCATGAGTTACGGTGGAAAAAACAAGAATTCACTACTCAGGGCCATTAATGCCCCAGGTGGTAAC  
ATAGAAGAACTGCTTAAAGAGCATGAGAGGCAATCCAGCAGGCTGTGCGCAAAGCTCGTTTAGACAAGGTAAAAACAAGAAAAATTTCTAACAAGAGCCTGAAGATTATCTCCTCC  
AATGTAAATGTCCCTTTTCCACAGAATTTACTATTAATATAGCAGTATATTTGCCTCTTCTGTCTAATTTCCGAGATTCTTGGGAAGTTGCTTCTAGTGAATTAGAATCCATCTATGTACTGCT  
TGCACAGCTAGAGCTACCCATCTGTAAAAGTTTATTTATGCTGCTAAATGCACATTTAGTGTGCAAGTCTGAGTTATATTCTTAGTAGAAAGTTTCATTGTGAGTTGATTAATAATTTATTGTT  
TTGTTAACATTGCTGTTTTATTTTTCAGTATCTTTCCATGACTGTTTTAGCCC

>comp161963\_c0\_seq13

TGAATATATGGATCATGATCTTGCAGGACTTGTGCAACACCTGGAATCAAGTTCACCGAGCCGAGGTTAAGTGCTTTATGCAACAATTACTTCGTGGCCTCGAACATTGCCATAAACGC  
AAAATTTTACATCGCGACATCAAGGGATCTAACCTTCTGGTTGACAGCAATGGAATCCTCAGAATAGCAGACTTTGGCCTGGCTACGATTTTCGATCCTGATCAGAACCAGTCCTTAACAA  
GTCGTGTGGTGAATCTATGGTACCGCCTCCTGAGCTTTTGGCTTGGTGTACTGAATATGGTGTGCTGTTGATTTATGGAGTGTGGTTGCATCCTTGCAGAATTGCTTGTGGGAAACCT  
ATCCTGCCAGGAAGAACAGAGGTTGAACAACCTACATAAAATCTTCAAACCTTTGTGGATCCCCACCAGAAGACTTCTGGAAAAATCTAAGTTGTCGCGAGTCTACTATTTTTAACCTCAT  
CACCCCTACCTCGGCGTATTGCAGAGACATTCAGGGAGTTTCTCCTTCAACATTTGTCTCTTCTTGATACCCTTCTCGCAATTC AACAGAGGATCGAGGAACAGCATCTTTGGCTCTGC  
ACAGGGAATTTTCTCGACTAAACCTCTTGCCTGCGATCCTTCTAGCTTGCCTAAATATCCTCCAAGTAAGGAATATGATGTTAAACTTCGAGATGTGGAAGCAAGGAGGCAAAAAGCTGC  
AGCTCTTAAAGGCAAGCCATTTGATTCTGGAAGGAAAAGGCCATTGGATAATAAACCTATGACCGGGCAAGAAGCCAACGGAGACCCAAAGAAGTGGCGTGAGCAATCAAATACCAAA  
AGTACGAGTGAGAAGTACAGTCCTTTAGAAGAAGTTGGTTCAGGGTTCCTTCCATTGATCCTCCAGAGGAGCTCCACATGGCTTGTCTCATTCCAACACTACATTGCACCCAGTGCATTT  
GGGAAGAACGATGATATCAGGACGATTCTTAACCAAGCATCTAGTACTATGTGGGCACCCAACGTTCCACGATTACGATCTCAGAGATCATATATGCCTCAGAATAGTGGTGGCATGGACT

TTGCCAATTCAAAGAGCAATATGAGCTCCACGTATAATAGGCTTGATGTTGCTGAGTCATCTGAGAAGCAGCATGTACTAGATAGACCTTCTTCTACCTATAAGGGAGATGACAAGGTTGG  
AGCCAAGGAAGCTGTCATGAGTTACGGTGGAAAAACAAAAGAATTCACTACTCAGGGCCATTAATGCCCCAGGTGGTAACATAGAAGAAGTCTTAAAGAGCATGAGAGGCAAATC  
CAGCAGGCTGTGCGCAAAGCTCGTTTAGACAAGGTAAAAACAAAGAAAAATTTCTAACAAGAGCCTGAAGATTATCTCCTCCAATGTAAATGTCCCTTTTCCCACAGAATTTACTATTAAT  
ATAGCAGTATATTTGCCTCTTCTGTCTAATTTCCGAGATTCTTGGGAAGTTGCTTCTAGTGAATTAGAATCCATCTATGTACTGCTTGCACAGCTAGAGCTACCCATCTGTAAAAGTTTATTTA  
TGCTGCTAAATGCACATTTAGTGTGCAAGTCTGAGTTATATTTCTTAGTAGAAAAGTTTCATTTGTGAGTTGATTAAAATTTATTGTTTTGTTAACATTGCTGTTTTATTTTCAGTATCTTTCCATG  
ACTGTTTTAGCCC

>comp162027\_c0\_seq7

GGTCCCCCTCCTGGCACCCAAAATGCCGGCGTGGATACGGCGAAAATCCTGCCGCAACATCCCGTAAATATGCTCCGTTCTTTCCCAAAGGATTATCTGCAACAGGGAGATACAGTTTC  
CGCGATTAAGCTATTCCGTTTAACTGCAGCAGCGGCCATGGAGAGGATAGAGGAAAGTGAAAAAGCCAAAGCCGCGGCCCTCCTTCATTGAGCTGATGATCCCATCACCGTCCACGTAA  
AGTTCAGCGGCCGCAAGATCTCAGTTACCCTTTCGCCTGAATCTACCATTCTGGATCTTAAATCCCGCCTCCACTCCCTTACCGACGTCTCACTCGCTGTCAGAAACTCATATTTAAAGGG  
TTTCATAAGCAAGATGGAAGCCAAATAAGCAAGAACCTAAGTCGATAGTTGACATCAGTGAGGCGGCGGACATAGAGCTTGTAGAAACAGTTTGTCTAATTTAAATTCTGTTTCAGAATT  
TTATCAGAAAGCACTTTATATTGATCATCTTTTAGACAAAAGCAAAATTCATGCAGATGTAGTGAGTTTGGGTCAGTGCAGATAACTGATGGTTCCAAACTAATGATGATAGCTACTCTGG  
ATCAGCACATAGAGGATGAACCAAGTACAAAAGATGGAGAAGACTATTTAAGTATTGGCGGTTCTTTTACCAGAACTCAAAAAGTTGCCATTGCAAGGGCTATGACAATATCTCGACGTA  
AACGTTGGAAGAAAAGTGGTGTGCTAATTGGTCGGGGAGGGCCTGAAGGCTTTGCCTGATGATGCTGGGATTGTGCACCGTTTTTAATAAAGATGGAATTCAGCTCCAATTCATTGA  
AGAATTGCCGAATAAAATTGGTATTTTGAAGTCCTGAATGTATGTTTCTTATAATACATTATTTTATGTTGTTTTTTAATCTGGTTGAAACATTCCCTTTGAAAATATGATTAGCTTTGGAGC  
TTTAGCCTTACTAAATGTGAAATATGGAGCCTTTTGTGCCTTAATTGTGTAGAAG

>comp162029\_c0\_seq1

TCATAACTGAATAGAAGTCATATAATCATCAACCAAGCATGGGTTGTAGTATAAGTTAAAAATAATCAAGAAATCTCTAAGACCAAAGCCAACCATCCTACTAAAAAGTATTAAGGAATT  
TATAGAATGATACATATTTCAACTTACAATAAACATCATATAGCCAATTTTCATCAACCAGTGAGAGTTGATAAGGGCATGTCATATGTGAGGGATCATGCGAAAGAAGTATTATTTGCTAAGA  
GAGCATAACTTCAATAATTAATGGGTTGATGGCTTGCTGAACAGTGAACATAAACATTAATAACAACAACACTCAATATAACAACATAACTTCCAAATACAAATATAACAGCATAACATATCCT  
CTGAATATAGAAAAACATAATTGGAACCAGATATAACTGAATAGAAGTCGCATAACCATCAAAACAAGCATGGGTTGTTGAAACAGCAACTCAGCATAACAGCTAAGGGTGTCAATAATTTAC  
ACGATACAATCTCTAATAACAGCATAACGCCATAACACCATAATAGCATTAACTTAACAAAAAACCAGCACAAACTAAATAGAAAACCCAGCACATCGAGCTCGACTTGGCTCGTTTGCA  
CATCTACTGCGATTGATTA AAAACCAACAAAAGACTGAACAAAAAAACCAGCACAAACAAAAAACTACTCTAAAACCAGATTTAATTAACAGCATTTCATCAATTTTTCGGCCAAAAACA  
ACACCAAACCAGAAAGTATGTCAATCCAGAAATGCATGCCAAACTTTACCAGATTTTCAAAAAAACCTGCTATAATATTCGAGATAACAACAAATCAGCAAACAACAACAAATCGGAC  
AAACCCTAAACCCGAAAATTTCTTACGAACTTCAGAATAATTTGATCAAAACAGCAAGATAGCCCTCAACTCTGCTCATAGATCAAGCTTCTAAAAGAAGAAAAAAGAAAAAAGATAAG  
AGAAACAAATAGCGAGCAATGTAAGTGTTAGTGTGAGCCAAACGGGATGTACACGATGAACACCACGGACCAACAATATGCCAGAGAAGGAGAAGAGAGGAAACCGTTGACAGAGC  
CAGAGATCTGAGGAGATTCGAAGAGAAGAAACGGAAACCCCTAAACGAGACAGCGAAGGAGAGGAGGATGAAGCGGACGCGAAATGAATATGTGCGAATGCGGAGCCCTAATTTAA  
TCCTCGTCGCGTGAAATGAAAATACGCAGGTCAAACGGGTCCGATTTCCGGTTGTCAGGTTAACCCAGACCTGACCCGAAAGTTGAACAAGGTCATTTTACTGAACCCGAACCCGAC  
CCGTTTTGA

>comp162056\_c0\_seq2

TTAATGCCTCCCATAGTCCCATTTCTATCCCGATTTCGTATCCCTCCTACAATTCCTCTTCGTCTTCTTCTTCTCCTTCTTTTTTCATCTGCTTCTAGGGTTTATCTGACTGACGAGTTAGCC

AAAGCAGCCATGGAGCGGAAGAAGTATCCGATCCGCGCGGAGGAGTACGAGCTTTACGAGATGGTTGGACAGGGGGCAAGCGCCGTCGTGCAGCGGGCCTTATGTGTTCTCTCAACG  
AGATCGTGGCTATCAAGATTCTTGACTTTGAGCGCCACGGAAGCGATCTGAGCAACATCTCGCGGGAGGCACAGACAATGATTTTGATAGACCACCCCAATGTCCTGAACGCGCACTGCT  
CCTTCGTGAAGGACCACACCTTTGTTGGGTAGTCATGCCGTACATGGCAGGAGGGTCTGCCTCCATATCATGAAGTCAGCATTTCAGATGGTTTTGAGGAATCGATTATTGCCACGATTTT  
GAAGGAGGCGCTGAAAGGATTGGATTATCTTCATCATCATGGCCATATCCATCGTGATGTGAAAGCTGGCAACATCCTAGTTGATGCTAAAGGTGGAATTAAGCTCGGAGATTTTGGGGTT  
TCTGCTTGCCTTTTTGATTCAGGTGATAGGCAACGTTCAAGAAATACATTTGTTGGGACACCTTGCTGGATGGCACCTGAGGTGATGGAACAATTGCATGGCTATGATTTCAAGGCAGACA  
TATGGTCTTTTTGGAATAACTGCTTTGGAACTTGCTCATGGTCATGCTCCTTTCTCAAATAACCTCCAATGAAGGTTCTATTGATGACTTTGCAAAATGCACCCCGGGCCTTGACTATGAA  
AGTGACAAGAAGTTTTCAAGGAACCTCAAGCATATGATTGCATCCTGCTTGGTTAAAGATCCTTCAAAGAGGCCTACTGCTCATAAGTTGTTAAAACATGCATTCTTCAAGCAAGCTCGAT  
CACAGGATTATTTGACGAAAAATTTGGAGGGTTTTGGCTGCACTTTGGCGATCGATACCAAGCGCTAAAGGAGAAGGAAGAGAGCTTGCTTGCACAAAAGAAAATGCCTGATGGAAA  
GAAAGAGGAGATCTCGCAGAATGAATATAAAAGAGGAATCAGTGGGTGGAACCTCGATATCGAGGATTTGAAGGCCCAAGCATCATTGATCACATGTAATGAAGATGCAGGAAAAGATC  
AAGGAGTCTCAAATTCCTTTTTGAGTGTGACAATTTGCAAGATAGAATGTCAGATAGGCCCTATTCCAGAAAATTGTTCAATCAAGGAACATACAGACATTCAAAGCGATGGGTTGCAGG  
ACAAATCATGTACTGTTTTACCGCCAGATGAAACATCATGTTCTCAAAGAAACCGATCTGATGGATCTGATAACGAGCTGAAGAATATGGGGGCAAGCGATCAACAAGTTGTAATGCAGC  
TCCAAAAGACTGAGATGGATAATCTTACTAAAAATTGTGAAAAGGGTTAAATGGACGGTCTGTTTTCTCTGAGGGTGAAAAGAGGATTTCAATCGCTTCCAGAAATTGATGAAAAAATG  
TGAATGTTTTCTCTACTTATAGTCCCAGAGGCCAAGGACTTTTACGAATTGCCCAATCGATGTTCCCTTCATTATCCAGAGGAGCAAGCCTGAAGCAACAAAATCAGCAGCAAAACAACA  
TGAATCCAATGGAGAGGTTTTCCAGACATCAAATGAATCACCTGCTGAGATTGTGCCAAAAGGGTCTAAACCAATGGCTCCAAATGGTGATGACATTGATGACAAGTCAAAGCCTCCTG  
TTGTTCAACAAAAGGGCGTTTTCAAGGTGACCTCTGAAAGCATTGATTTTGATAAGCCTTCTTCCATTGGTCTACAAAAGAGTCATAGCATTACAGGTGATTTCTCAACTTCAACCGCAA  
GCCTTTCACCGCTGGCTGATTCTTCTCAAGCTATGCGAACTCATTCTTCAACAGTTGCAGCTTATATTGCAGAGTAATATTGTTCAAAGGGATCATATTCTTAGCATCATGAAGCAGATAA  
GCACCGGTGATCCATCAGGTATGGATTTTTTCATGCTCTTCTCATTTTTGAATATATTCAATAAGTATTTCCGAATGCAGCTAACCGCTCAGTTGACGGAGCCTCTTTACCTTACCTACTAC  
AGCACCTGAAAAGTCATTGGTAAGTTTTGTTTACAGTTCTTTGGCAGCCTGACAGTAGCATTATTTCTCTACATTCTGAGTTGGATACAACTATAAAGGAACAAACATTCAATATTCATA  
CTTGTTTTCATGAGCTTATTTATTTAGCAAAAACATAATGCTTAACATTAAGTATTTTTCTTATGTATAGTACACTCTACAATGGAAAAGCCAATATGTTACACACTTTTTTATGACAAGTTAA  
AACATCTTGATACATGCTATACGCATCGTAGTTACTGCTATCAAATGTACAAGGTCTAAAATATGACTATATTGTGAAGAAAATAAATTTTGTATAAATAGATTAATAAATATTGCTTGTTA  
ATGAGCTCCTAAATGGAAAATAGTATAAT

>comp162110\_c3\_seq3

TCATGCAATAAGTGTCCCACCATGTTATGATCACATAATCACACAGTGCTCATGCAATCATAACGTCATCATAATCATGCAATCAAGCAGTCGCATTATCAAATCACAATATTATATAATTA  
GATAAACATCACATAACCATGCTACATTCAACTAATCATATAACAATAATTTAGTCATATCTCAATCATGCAATCACATAGTATCCACACCACCGTATGATAAATATGCAATAATCATCTAATCA  
CATCGAATCACATGCTAACACACAAGTGATCATGCAATAATCACACAACAATCATAAACTATGCAATGATCACACGATCACACGATAATCCAATCATCCAATCATGCAATGGTCATAT  
GATCATGCAACCAACCTAAATATCCAACAATCACTCAATCATAACAAGCGATCAAGTATATAATGATTATCCATAATCACAAAATTTATGTAATGACCGCGCACTCATTCAATCAACCACA  
TAGGCATGCAATGCTACCCAATCATGCAAGCATGGTGGGACAAAAGAGAGAAAAGAAACCAACGTTTCGCTAACCAATAGAAATGGAGAACATGCACAACCTGATACTCACCTAAC  
AGATCGAAACAGTGAGAACAAGCTAAAAGAAACCAACACTCACCAACCAACCGAAAACAGTTAGAAAGAGTGAGGAAAACAACCTCAACAATCACTAGTGAAGTGAACAACCGCT  
C

>comp162111\_c0\_seq1

CCAAAAAAAAAAAAAAAAAACAATATGGCATTAAAAACAATGAGCCGCGGGCGCTATATATCGGCAAATTATTCTGTGCGAATGCCGAAAATCATTCATAGACCAACTATAAAGCGCCATGTAC

CCCCGTTCCGGTACGGCAGCTCGATACCTCGTTCGGTACCATGCTCAATACTGCTGACGTTGCACATTCTGATTGGCCTCCGAACGATAAACTAAGTTGGGCGTCCGAACATAATAATTTCTC  
GCTATACACCACACATACTTTCAACTCCATATAGACATATAAATAATTATTATTCTACGTGAACACTAAAAGTGGTTCCCCTCAAAAATCTGACCAAAAACGCCAGTTCCTCGGCACCACATT  
CAAAGACTGCACCGTCCTCCCATCACTCGTCGTCACCGAAAACGAAACACTCCTTCCCACCAACTTCTCCGACGTCTGCCAAACCTGCCCCCAATTCTGATCATCGCCGTCCATCCACC  
CCCGTCCGCCTTACGGAAACAGCCGTACATCCCCATCCCCAGCGACATTGAACACAACCACAAATGGCGTCCACTGATTCCCTTCATTTGGAACCTTATCCCGCCCTTTCTGTTGCAGG  
TGACGCGGGCGGAATTGGACGGGAACTATGCCGGCGTGATAGTCCTTTGTGATCTTGACGAACATCGGCATGGAGAGATCGAAGTGTTTTAAGGGTGGGTTGCACCAATTTTTCGTAGGGTT  
TGGAGTAGTTGGGAGGGCAGAAGTTGGTGGCGGTGACGATGATGGAGCCGGGAGCGCACCACTGGGGGTTCGTTGAAGCATTGGATTCGTAGCAGGCGCCGCAGGTGGCGCCGCCGTT  
GAACAGGGCGGTGCTTAGAGCGGTTGTTTTGAGGCCGTAGATTTGCAAGAATAAATCGCTGTATCCGCAAGCTCCACCTATGGTTTACCGCCGCCATATCGCCATAAAAAGTTCGCATGG  
GCTGTATCCCATCCTCCATTGTCGGCACCATTAAGCCGAACAACCGAGAGAAAGAGGAAGGAAAGACAAATCCAGAAGAGATTTCATGGCTGGCTTTCTCTCAAGAATTTGCGAGAGGAG  
CTGTTCTTT

>comp162111\_c1\_seq1

ACAAGAACAGCTCCTTCCCTCGCTAATTCTTGAGAGAAAGCAAGCAAGCCATGAATCTCTTCTGGATTTGTCTTTCCTTCTCTTTCTCTCGGTTGTCGAGCTTGTGTTGCCGACAATGGA  
GGATGGGATACAGCCCATGCGACCTTTTATGGCGATATGGGCGGCGGTGAAACCATAGGTGGAGCTTGCAGGATACAGCGATTTATTCTTGCAAATCTACGGCCTCAAAACAACCGCTCTAA  
GCACCGCCCTGTTCAACGGCGGCGCCACCTGCGGCGCTGCTACGAAATCCAATGCTTCAACGACCCCCAGTGGTGCCTCCCGGCTCCATCATCGTCACCGCCACCAACTTCTGCCCTC  
CCAATACTCCAAACCCACCGGAAATTGGTGAACCCACCCTTAAAAACTTTCGATCTCTCCATGCCGATGTTGTCAGATCACAAGGGACTATCACGCCGGCATAGTTCCTCGTCCAAT  
TCCGCCGCGTACCTGCAACAGAAAGGGCGGGATAAAGTTCCAAATGAAAGGGAATCAGTGGACGCCATTTGTGGTTGTGTTAATGTGCTGGGGATGGGGATGTGACGGCTGTTTCC  
GTGAAGGCGGACGGGGTGGATGGACGGCGATGATCAGGAATTGGGGGACAGTTTGGCAGACGTCGGAGAAGCTGGTGGGAAGGAGTGTTTCGTTTTCCGGTGACGACGAGTGATGGG  
AGGACGGTGCAGTCTTGAATGTGGTGGCAGGAACCTGGCGTTTTGGTTCAGATTTTGGAGGGGAACAGTTTATGTTTCATGCAGAGTAATTATCAATTATATCTTTATATAGAGATGAA  
AGTTTGTGTGATGATAGCGCTTGACGCCGCGGCTTATTGTTTCAATGGCAGTTTGTTTTTACGTGGTCTGTATTGGGAGAGATTATTCTATGCAGATATCGGACGGACACTCAGGTATTGA  
GAGTTATCGAGTACCGAGTACCGTTCGGTATCGGACGTGACGCATTTT

>comp162134\_c0\_seq1

AAGGTCCTGGAGGAGAAGCGTAAGAGCACGAAGGTTCAAGGCTGTGAGGTCGCTCGACATTAGTGGGAAAGCTGGATGGTGAAGAGGAGATGACTGGCCTTGCACAAAAGCTTGAG  
GATGTGGTGGCAATCCAGGATAGTACTGTGGATCCTGCAAAGACAGATGGTCTAGTTCTACCAGAAACCATTGAGAAATCGTCAGAAGAATTTCTGAGAACAAAAATGCATGATATGT  
TTCTTTGGTAATCATAAAAATCACAGTGATAAAAATCAAAGGAAGAAAATCTTTTTTATGTGAGGATTGCAAGTACCAGATAGCAACTTTTTATGTCCTGCATGTTGAGAAATGGCATGA  
GCTCCTCAGTCCAAGAAGCAAAAAGGAAGATAAACCCCTTTGAAGGTAACAAAGAGCAGTCTCCATCATGCGTTTTCTTCCGCAAAAACCTCGAATAAGAAGATCAAAAAATCTAGAAAA  
AAAACAGGAAAAAAAGTCATCAGCAAGTCTTTGGGAAAGGTATGAGAATGGTTATCCTACAGTGGGACCATTGGGTGAGCCAAGTGGGAAATTTGATTATATAGTAGAGTATGCGACT  
GAAGAAGGAAAAAGAGAGTACTATTAGACACATCTTATGATCAGATCATTTCCACAGGATGGGATGTAATTAATTAATAAATGTCATAATAGCTTAATTGTTTCTTTAGTCATGATGT  
TAGTCTAATCTTATGACTGAATAATCATGTTGTTAGTCTAATTTTATGCTTAATTGCTGCTTTTTAAAAGTCCCCTTTCATTGAAACATTGTTTTGTACTTAGTTTGAATTTAGTTTATTTTAC  
TTGTGGAGTTTCTGTGTGAAAAACAATTTATGTTTCGGTTATGTAATCTCTA

>comp162134\_c0\_seq2

CTCTTCAATCAGGAGCGAAAACGAATTTGGACAGGAGTGACGGTATTCTTAATCTTCCATGAATTTTTATTCATCTTTGCATCTTATATATTGTGGTTGTATGTATGTATGTAGATGCTT  
GATGGAGCATAAGCCAGAAAAAAATGACTGATTATGAATTTGGACTTGAGTTAATTACGCCGACGCAATTTTTGCTGGTAACTCCGCCCGTAATTACCGGTGGAAAAATGCGCTGAA

AACCTTTAAAATATCGGTGATTACGCGATGGAAATTGCGTAGGATATTCGCAGTTAAGCTACCGGCGGGTAATTTAATATATTTTTTAAAATTATTAATAAATGAAATAAATAGCCAGGATATTT  
TCAAATGATTAAAATGATCACGGGGATGGAACTCAAGCCACAATTATAATTGTAGTATGGATATAGAGATAGATATGATTAGCATGATGAAAAGTTCTAACAACCTTTGTAGGCCATGCATTT  
ATCTGTCATAAATCAATTAATAAAGTTGTTTCGTTTGTGTAATAAATAATAATACATTCATATCCATCAATGAAAGCCAAATAAAGAATTTTGCCTGATCTCGACCAAAACAAAACATTG  
AATGTCCATCACTCATCATGTGTGGCAATCTCGATCGGCAATATATAGAAAAAATGGCAGATCAAAGCCAAAAAACCTTCCACCTTCCTTCGATTTTTATTCATCTTATTGCTGTTTTA  
TATGTACATATAATGTTGATTTATATATGCAGATGTCTGAGAAGGAGAATAAGCCACGAAAAAGTCTATGAATGCTGGAAGGAAAAGCATAAGAACACCAAGAGCAGGTTCCATCATGCGC  
TTCTTCCTGCGAACTGGAAGAAGAAGGTCAAACAAATCTAGAAAAAACTGGGAAGAAAAGTCATCAGCAAGCCCTTTGGGAAAGGTACGTGAATGGTGATCCTACAGTAGGACCA  
TTGGGCGAGCCAAGTGGGAAATTCGATTATATAGTCGATTATGCGCCTTCAGAAGGAAAAACAAGATTATCATTAGACGACATCATTCCCACAGGATGGGATTGAATTAATACTAAATCACAA  
GAGCTTAATTGCGCGCTGGTTTTAATCATGTTCTTAGTCTAATTTTTATGCTTAATTGCTGCTTTTTAAAGTCCCCTTTCATTGAAACATTGTTTTGTACTTAGTTTTGAATTTTAGTTTTTCA  
CTTGTGGAGTTTCTGTGTGAAAAACAATTTATGTTTCGGTTATGTAATCTCTA

>comp162166\_c1\_seq4

CTTTTTCAGGTGTTTTATAAATTCCTTCAATCAAATAAATTCAAAACACATAAAATATGAAAATTTTAAATTCACAATGGTTTGTTTTTTTTCATTTCCATTTTTCAAATCAAATCTTAACAA  
CTAAACACAATAACATGCACTAGTTATTTACGCCTTAAAGGCTAAAACACATCACACAATCAACTACTGTTCAATTACAAAATATTTACGCGCAAAGGCTAAAAAAATAATAAACAA  
TAATTAACATATAATTAAGGGCTTCTCCATTGTTATTGAATAGAGATCATTTCGGGCAAATTAGAATGCGCCAGGTCAACGAATACACAACACCAATATGACGTGGCACATACTGATTTG  
CCTCTAGGCGTCATCCAATGACTGCATGGAATAATTTTCAGAACTAAGTGGATACATATCTTAGAATAAAAATGCCGTTCTTTTCTCATAGTAGCCAGCGCGCTCCTTCTCAC

>comp162305\_c0\_seq4

TTTGCTCAACTCCCCATTTTCGGCCCAAAGAAATAGGAAAGACAACCTCCGGTGGTTGCTTGGGTGCTTGAGAGGAGGTAGACAGCTACCACGAGCCTTCGAGATGTAGCGGGACATCAAT  
ATGGACTTTAGAGGCAGCGGGACAACAATAGGAGGTTGCCATGATTGCTGGACAGCAGCTTTGGTACTTGAAAAATCCTGGACAACAGATTAAATACAAGAGTCTAAACAGCAGCTTTA  
GGTTTTTAGAAGTCTTGACAGCAGCTCTCTTGTGGAAATCCCTGGAC

>comp162324\_c2\_seq12

GTCGAACCAAATCAAGGCAACTCAAACAAAGTATTTTTTTGTCATTATTGACCCATTTTCTTGTAGAGAAGAGTCGAGCAAAATTAATGCAACACCAGCAGTTACTTATGGGTGTCAAT  
TTTGGGTACGGGTTCGGGTTCGGGTGAATCCGAAATAGACCCGACACTATTCGGGTCAACTCAAAGCTGACTTACTTCAGGTCCGGGTCAACCCGACCAGACCCAAATGACCCGGTGC  
TAACAAAAAAGTCTAATTTCTGGCCAAAAATGGGTCAACCTCCACTTTTCAGGTCAAAAACAGGTAAATCTCGGGTTGCCGGGTCAAAAATGAATTTTCAGTTAAAAAACGAGTCA  
ATTTTAGGTCAAAGGTC AACCTGATCTGATTTTTGAAACTGGTGAATTTGGAAACCCGAACCCGACCCGTTTC

>comp162329\_c1\_seq3

ACATTTTTTACCAATGAAAAAGGATTCGACGAGAAGAAATAGATAAGCAATGGAAATATTGCAATCAGTATAATAGATGAATAAGTCTTATTATAATTTTTTTTTTTTTTGGGAATTTCTTA  
TTATATTGTTAGGATAGTTATTTTAAAATATTTATCAGTACAGACGACATTGAAACATTAAGCGTTTTTGGCGTGGATAGAAAAGTGCATCTCAGCAGCCTTCCATCATCCTCTCACAAATC  
ATCATAGCTGATTTGCCATCTCCATCCATGTCTATCTGACTTATCATTTTCGTTCAACTCCTCATCACTCAGTTTCTGTCCAAGGTTTGGCCATCACTTGACGGAGCTCTGCTGCAGAAATGAA  
GCCATCCTGATCTTTATCAAAGATGTTGAAAGCTTCCCTAAGTTCCCTCTCAGTTTCTTTGTTTTGCTCGTCATAAGATTCAGAACTCTGGGAAATCAATGGCGTTATTTTATCAGCATC  
AAACTCACTGATCGTATTCTTCAATTGCAGTTCAGTAGGATTTAGGCCAATGATCTCATGACTGTACCAAGCTCTTCGGAAGTAATGAAGCCATCGCCATTCTTATCGAAGAGGTTGAAA  
ACCTCCTTGAGGTGTGCTATCTCTGCACTCGTCAGCCTCTCCATCTTTTGTGTTGAGCTAGAAGAAAAATAAAAAGAAGACAAAGTTATACTCTTCTCCCCTTCTTCTATATCTATCCCCT  
TCCTTGATTGGATTAGTGAAGGAGAGGATGAGTTGAGAGAGCTT

>comp162329\_c2\_seq1

AAGCTCTCTCAACTCATCCTCTCCTTCACTAATCCAATCAAGGAAGGGGAATAGATATAGAAAAGAAAAGGGGAGAAGAGTATAACTTTGTCTTCTTTTATTTTCTTCTAGCTCAAACAAA  
AGATGGAGAGGGCTGACGAGTGCAGAGATAGCACACCTCAAGGAGGTTTTCAACCTCTTCGATAAGAATGGCGATGGCTTCATTACTTCCGAAGAGCTTGGTACAGTCATGAGATCATTGG  
GCCTAAATCCTACTGAACTGCAATTGAAGAATACGATCAGTGAGTTTGATGCTGATAAAAATAACGCCATTGATTTCCCAGAGTTTCTGAATCTTATGACGAGCAAACAAATTAAGTGAAG  
AAGGGACTTAGGGAAAGCTTTCAACATGTTTGATAAAGATTAGGATGGCTTCATTTCTGCAGTGGAGGAAAGCACTCAGCTTCTACTCTCCATTAAAGCACAAATAAAATGGAGTTTTTTAA  
AGCTATCTGAATTGTGGGACATTTGCAGCTCGGTCAAGTGATGGCAAATCTTGGGCAGAACTGATTGATGAGGATTTGAACGAAATGATAAGTCAGATAGACTTGGATGGAGATGGGCA  
GGTCATCTTTGATGAATTTGTGGTGAAGATGATGGAAGGTCAGTACTGAGATTATAGTTTCTATCCATGACAAAAAGGCTTAATTAATGTTTCAAATGTCATCTGTACTGAAAAATATTTAAAAT  
AACTATCCTAACAATATAATAAGAAAATTCCTCAAAAAAAAAAAAAAATT

>comp162372\_c1\_seq1

CATTGTTTGATTTATCCTTAGACTAGAGCAATTAAGGGTTAAATCCTACGCACTAGTCAGCCACATGCGCAAGAAATGAAAAGGGAAATCACGTAATTTTTCAGTACAGGATCTGAAT  
TTTTAAAGTCAAAATCCCAGCACTTGGTGCACAGAGCATTAACAAGCTCAACAAATAAGAAAATTTAGAATATTTGCAAATTCGAATTAATTTTCAATAAGAATGCAAATATGGTATTTTGTCTG  
CTTTTAAAGTCAATTTTGTAAGTCTGTAATGTTGACTATTGATATTCTCACCGAATAAAAAAAAAAGTTTCTTGTGCTAGTCCCAAGTTCTTACTAATTTTGATTAATGGGTGAACTAGTGG  
AAAACAAAATGCTGGGTGTGAACAGCTTTTATTCTGTGTGGACACCGGACGGTTCTCCAGTCAGGTTAAGCGCTCGGTACCGAGCGGTACCGAGGGCGGGTACCGAGCACATTACATTT  
TTGGGGTGACGTGGCACAATTTTATTGGTCTCCAGACGCCCTCCGGACTCCACACAGAATAATAAATCGTGAAGTACTAGTGGATCACAAAATGCAAAGTTATTTTCAATATTACTATTTTGA  
CGACAACCTTAGGATATGCAGGACCTAGGAAAATTGAAGCATTATTAATAGTTTTTGCTCATGTCAGCTTTGATAACAAGCAGTCATATTTGCTTTTGACATATCAATTTTCATAACATCATA  
GCACGAAAACACCATGACCCAAATAGACTGGCGTCTACAATAAAAAATAATAA

>comp162397\_c1\_seq11

TTTTCTTCTCTAAATGCGGCTTCGTTCTCCTTTGGAATCCTAGCTTTAATATGAGTTCCATGATATCGCACCAATACAATCCTAAAGTTGACACAAAAGTATATTTAGGATACCGTAATAAAAAG  
AGAGAATTTAATTGAATAAAGATTGATTATACCTTGAAAAATGGCATGAACATATTACTTTGATTTAATCTTATATGGAGTTTCAGGAAGTGGAGGCTTGATATACTCATGGCGTAACTCCCCT  
ACAACATGTAATGCAGCTTTGAAGTACCTACTAGCAATTTACCAGAGCGATGAAAGTTAAATCGGATGACTCGGTTACGAACACTATGCCCGAGTGTATGTAATAACATAGCAACTTGTT  
CCTCGATTCTAACATTCAGTGTGTCTAACAACAATCCTCGTGTACGCATTAATCACATAATTTGAAAAAAGGCGTTGCGCTTATGCGTACCATATCAACACAGTCATAATCACGTCCATTAT  
ATAACCTAGAAAAGATATGTGTACGTTGTATATTCGTTGAGGATCATATTGATGAGGACATCAGATTTTCGACATGTGTA

>comp162408\_c0\_seq3

TTTTTGAAATATAACCAATGTGTTATTTATAGCAGCATAACGAGTACAATTCATCATGTATGTAGATTTTATGTAAGAGCAAAGCACAAGTTGAAATAAAGGCATCTTTACTTTTATCACCT  
GCACTGTATCTAATGCCACAAAAAACTCCATGACGAAGAAAGAACAATGCAAAATTAAGATTTTATAAGTCGTAGAATTGGCCTCCACCCACAGCATCATAAAACACTTCCAGCTTC  
ACTTCCAGGCTCTCCAGTTCATTCCAAGATCTGCTCTTTGAATCAATCCTCCCTCCTTCAACTCTTCAATCCTTTCAAGTGCTTCCCTCATCTCCATTCTATTCTCCACAATCTCCTCGCA  
GCAGTCAAGTCCAATCTTCAGTAGCTTCTGTATCTCACCTCGGCCATTTTTCAGTGTCCCGCATGTCGCAATCGAAAACCTCGCTGTTCCATTCTCTTCCATCACTAAACCCACCCAGGTG  
GCAAGATCGGTGCTGCCGCTGGAGCCCTTGTGGAGGAAGTTCCGCCGAAATTTGCCTGTAAGGATCTCGAGTATTAGTATGCCAAGGCTCCACACATCACTCTTCTTTCGACGGGAGGCCA  
AATTGGGCGACTTCCGGAGACTTGTAGGCAACCATGACCTGTGTTGCGTGGGCTGAGTTCATAACTGGGACCAAAGCGTAGTCGGTGAGGAGAGGTTGGAAGGTGTCGTTGAGGAGGA  
CGTTGGAGGACTTGAAGTGGCCGTGGGGGAGGGTTAGCACCGGCAGCTCATCGTAAAGGTAGGCCAATCCACGGGCTACTCCCTTTACTATCTTCAACCTCGTCGGCCAGTCGAGCGGT  
GGCAGAGTTGACCCACGATTACCTTGAATAAAGCGGGTCCATCCTACTGAGTCTATTTGGAATAGCCCCCTCAAACGATTAAGACACGTCAACAATCGTGAGGCGGCGCTGGCC

GAAACTCGGTATACCGCCGGCGAACTTATTGTGATCGAGACGGAGCTCAAGCAGCTTACCAAGGCCAACAAGCGATCTCGGAACAGGACCGAAAAAGCCATTATTTCGATAAAAAAAGCT  
TCTTTAGGGATCTCATGCCCGCAAACGCATCCGCCGGAATCTCGCCGGAGAAGTTATTCCTGGAGAGATAAACAGCCTTGAGAGCGCCGAGGAGCTTAAGATCAGGAGGCAAAGGTCCC  
TCGAGCTTATTGCCATGAAGCTGATGGTACGGAGGCCAGGTAGGGGTATTAAGGTTCGGAGATTTAGGGTCCCGGAAAGGCTTCTGTTCTCGAGCTGAATCCCCCAAACGGGCCATTG  
AAGCAGATGACGCCTTCCCAAGTGGTGGAGTTAGAGTGCAGGTGCGGGGCCGGGATCCACGATGGGAGATCGATTGATAGGGTGGCTTTGAATCTGAGAAGTGCTTCCCCTTCTC  
GGCGCCGGCGGATTCGACGGTGTGGTTCGAGTAGGCAAGGTAGAGGAAGATGAGGAGCCATGGCGCCGCTGACTGGCCATGGAGACAGGCGGGGGTGGGGGAAGGCCGAAGAG  
GGGACGGAGAGGAGAAAGCTGAGGGTTTTGATGGAGGCCAGAAGAAATGGGAGGAAATTAAGGCATATGATTG

>comp162437\_c0\_seq1

GGTGTTCGCACAGAATAATTTCTGTTACATAAAAATTTAAAGATGTTTCACATGATTAGATTAATTCAAATATAGCGTGACTTCTCAATACAAAATCTAACGGTCTTCAATCTTCAAATCA  
AATTAACATCCTCCTAATAAAAAACAGAGGTGCATCTAATAATTTACAAATCTCAACCTTCCCCTACATAAGTACAAAATTTAAGAAAAGTATGCTGCACACTACCAATCAAGCTCATCAAC  
CCCCCTTCTCCTTCTTCCCTAAATTCCTCATTGTAAGAATGGCCAATATCAGGCGGGCTTATCGCAATCCACAACAAGGAGATGGTAATGGCAATCAACCCCGACCACATAAATAATGG  
TCGGAGTCTTCCCCCTTCTTCCCATCAGCCCCTTACAGAAAGGATACATATGAGCCAAAACCCAGAAGCTAAAGAACAATCCGCCAATCAATTTGCTCCACTGCGGAATAACGCTGTAGA  
GCGTCTCGATACGCCGATGAAGATAGCAATGATGTTGATAGCGAGGATAGTGAGCGGCGGGACGAAGAGAGCGGTCCACTTACTATATAGAGGTCGGCGAAGAGATCTTCGTCGTCCT  
CGTTAGCAGATTTGGAGGTGAGAGTGAAAGAGATGTCGATGCCGGCAATGACTTTGAGAAGGCCTTGGAGGACGGCGGGAGGTGGGCGGAGGTGCCTCCGATGACCCAGAATTGTTT  
GTTCCGCCAGTATTCTTCGAGGGAGATGCCGGACATTTGACTTCGAGGATGGAGAGGAGAGAGGGGTGAGGGTGTAGGAGGAGGTAGATGAGGAAGGTGGTGTGAGGGATTGG  
ACGACGAATTCGCCGGTGAAGAGGGAGACAGCGGAAGAAAGCAGTAGATCACGAGGAAGATGGAAGTAAAGGGGTAGATTCCGACGTTGATGTAGGCGACGCGTTGGAGGAATTC  
AGGCGGGAGCTCGCGAGCAGAGCATTGTTCTTGGAGAAGAAGATCTCCACGGACCCTGTAGCCCACGGAGCACCTGATGCAGGCGGTCTGTCAAGTTAATTGGTGCCGTCCCTCTAAA  
CGCGTCGCGCTTAGGAATGCAATACACTGACCTCCATCCCCGATTATGCATTCTGTATCCCGTCACCACGTCCTCCGTCACCGACCCGTAGATCCACCCGATCCTATCCCCCATCCGTCTT  
ATCCTCATACCAGCAAGAAATGACAGATACAGCCTCCGCGACTGTCAAAGCATCCAACGGCGGCCGAGGAGCAAGCAACGCACCAGGCGGCCTTCCATTCTTACAGACGGATGGTCTG  
CCAATGGCCGCCCTTGAAACTCCGCAAATGCAATCGAATCCAAAAAATACCGGAGTTGCCAAATCTTTCTGGCATGTCAAGATCTGGATGCTCGTTTAGCGGCTGAGACTCATCATCTCC  
CTCCCCCTCTTTTCGCACAACCTCTGCTTTCTTGTGTTGCCGTAAGCCCAAATACTCGTTTCGCACGCGGTGGACAGAAACCGTAGAGCGCGTATCGCCGGAATAAGCATCCAGTT  
CCGACATACATTGGACCCTGTAATCCATCCAATGCGCGCATGTTCCCGTCGAAGAAAACTGTGTTGTGGTTTCGCATAACGGTTCGGACGGATCGATTCCCTCGAATCGTTGGGGATATTGAA  
TGTAGCAAATTCGGTCGCCGCCTCGATCCATCATGTAACACATACCTTACGAATGGCGAGCGAATTGTATATGTAATGATCACAGTCGAAGTTGAGGATGAAAGGGCCGTTGGAGAGGAT  
GGCAGATGCGCGCACAAGAGCGTTCATTGCGCCGGCTTTTTTATATGGTTCGTAGCCTTGGCGTTTCTCTCGGGAGACGTAGACGAGCATTGGAACCCGAATGTCGACGGAGGTGAATTC  
GATGAACGGATGGTCCCCTGTGTTGCCGTAGACAGGGCTGTGGTTCAGGTGCTTTGATCATGATTTGAAGAATGCCCGCATGGTCTTTGTTGGAGTGGTCAGGGGAAGGGGATTTCCAGGT  
ACCGGGCCAGTGGGTACCGTCGGCCATCCATGTCGCTATTGGAATGTTGGATTTGCTGCGGCGGGATCTTCTCCATTTCTTTCGCGAGGTTTACGGCTTCTTCTGTTCTTTGGAGTTA  
GGGTTTTGGAGCGCTTTCGGATGGATTCAGGAAGGCCGTTGATCCGGACCTTGAATTCGTCGATTTCCGCGTTGATCCAGCGCCTATCCTTACGAAATCTGGTTGCTTTTTGTTTTGGTT  
GGATCCAGTTTGAGGTTGAAATAGGCCTCAGGGTTGCGAGGCTCGACACAGTGTTCGCGCAGAAGGGCACCCAGATTTCCGGCAAGGAGGCGGCTTCCGCCATGGCTTCAAAGGTGA  
GGAGGGCGGCGCCGTCGTCGGAGACATAGATGGCGAGTTTATCAACAGGGTACTCTGTGGCGAGGACGGAGAGGATGGTGTGGCAGTGACGAGAGGGGGCTTTTCTCCGGATCGGC  
GGTGGAGATGAACACATCGATTCAGGGAGGTTCGGAGAGGCCATTGGGTTTCGACGGCGAGGGAGACTCGAATTTCTCCTGGAGTGGCGGAGGTCCGGCTGCGCGGTTGATGGGGTTG  
ATCTTTGTGAGGATGTGCGAGGAGCCAGGAGAAAGCAAACCAGATCTCGCAGGCGGTGGATAATCCCATAGCCATAAAGCATCTGTGTTTGCATTGTTATTCTCCAAATTAGGAAGCCG  
ATTAGACAAACCAGACGGCCCAACACCAACAACCTGTATGGGCTTAGAATTACGGCTGGTACTCGGACTTTTTCTGTGAGGGGCTTCCATGGCTTATCCATGAAATCCGACATATTATGC



CGCCACCGGCATCATCATAGCCGCCGTCCGGCGACCAAAGGGCGTTGCCAATGCCGTACGTTCCCTTTGACTCAAAAAGCCACCTGTTGTGATCAAAATCGCCGGTTTGGCTCCGGAGA  
AGCATCGACTTATTCTGACTCTTCAATAAAGATAAACGTCGGTCCATCTTGGCAGCCGAATCTCCTCCTCTCCCGCCGTCGTCATGCTTTCTAGCACCACCGCCACGCTGATTCGTTTCGCTT  
GGCTGCATTGGTAGGCGGTGGAGGAGGGAGGTCTTCAGACTTGGTGCTGGAGCTGCCGACGGCGGTGTAGGGCTGGTTGTCAGGGGTGGGGGGCATGAGTACGGTGTAGCTCATGAAG  
TCATTGGGCCCCCGGAGGACGTGGAGGTGAGCTCCGGACCGCCGGATTTCGATGTCGCTGCGGGAGGAGCTCAACATGCGGCCGCTGGAGGTCCGGCGAGTGGATTTTACCCCCGATTT  
CTTTGGTGATGATGACGACATGTCGATTTCTTTTGGATTTTTTTTCTCGGGCCGTAGTATTA

>comp162444\_c0\_seq1

GACGGAGGCGCTCTCCTCACCTTCGAGGCTATGGCGGAGGCGGCGAGCTTCGCAAACATATGGGTACCGTTCTGCCGCAAACACGACATCGAGCCGAGAAATCCAGATAGCTACTTCAA  
CATTAAGGGGGACCCACGAAGAACAAGTGGCGGACGGATTTCTGTTAAGGATAGGAGGAAGGTGAAGAGAGAGTATGATGAGTTTAAAGGTACGGATTAACGGGTTGCCGGATTCTATTC  
GCCGACGATCGGATGCGTTTAATGCAAGGGAGGAGATGAAGATGATGAAGCATCTAAGGGAGGCCAGGGGTGACTCGGTGGAGCCCATGAAGCTTCCGAAGGCCACATGGATGGCTGA  
TGGAACGCATTGGCCTGGGACTTGGACTACAGCCGCTCCCGATCATACTAGAAGTATGATGTCGCGGCATTCTTCAGGTGATGCTCAAGCCTCCATCAAACGAGCCCCCTTTTGGCCTCGCC  
GAAGAAGGAAACCAGATGCTCGACCACAGCGATACCGACATCCGCCTCCCATGCTCGTGTACGTCTCACGCGAGAAACGACCAGGCTACGATCACAATAAGAAAGCCGGCGCCATGA  
ATGCTCTCGTCCGCGCCTCCGCCGTCATGTCCAACGCCCCCTTCATCCTCAACCTTGACTGCGATCATTACATCTACAACCTCCCTTGTCTGTTGCGTGAAGGCATGTGCTTCATGATGGATCGT  
GGCGGCGAAGATATTTGCTACATTCAATTCACCCCAACGCTTCGAGAACATCGATCCCTCCGACCGCTACGCCAATCACAACACCGTCTTCTTCGACGGCAACATGCGAGCCTTGGATGGC  
ATCCAAGGTCCCGTTTATGTTGGGACAGGATGCCTCTTCGCGCGCTTCGCACTTTATGGCTTTGATCCACCTTCGATTACTGATTACTCTCGGCGGGAGATTTCAGTCCCCTTTGGATCTGGA  
TGATGTTGAGATGCAGAAGAGGGCCACTCACCGCAACGGATTTTGGATGATGAGCTCGATCCCAATCTTCTTTCTAAGAGATTTGGAAATTTCTGCCGTGCTCGCGGAATCTATTCTGTTTCG  
GAGTTTCAGGGACGACCTCTTGCCGATCATCCGGCTATCAAGTATGGAAGGCCTCCCGGCGCCCTTGTGTTCCCCGTGTGCCACTCGATTCTGCTACGGTTCGAGAAGCAATCTCCGTCA  
TATCTTGCTGGTATGAAGACAAGACCGAGTGGGGAGACCGGTGGGCTGGATCTACGGCTCGGTGACAGAAGACGTGGTACCCGGTTATCGTATGCACAACCGCGGCTGGCACTCCGTC  
TACTGCGTCACCAAACGCGACGATTTTCGCGGATCTGCTCCCATCAACCTCACTGACCGCCTCCACCAAGTACTGCGATGGGGCCACCGGCTCCGTCGAGATATTTTTCTCACGCAACAAC  
GCCCTAATCGCTACCCGCCGCTCAAGTTCCTCCAGCGCATCGCATACTAAACGTCCGCATCTACCCTTTCACCTCCGCCTTTCTCCTCGTCTACTGCTTTCTCCCCGCCCTATCCCTGTTT  
TCCGGCAAATTTATCGTCCAAACCTTAACGTTCGATTCCCTCATCTACCTTCTTACTATCACCTCACCTCATCGGCCTTGCCATCCTGGAAGTCCGATGGTCCGGCGTAGGGCTTGAGGA  
GTGGTGGCGTAATGAGCAGTTCTGGCTCATATCTGGAACCTCCGCGCACCTCTATGCTGTTGTGCAGGGGATTCTTAAAGTCGTGGCTGGGATTGAGATTTCTTCAAGCTTACATCCAAG  
TCGGCAGCGGAGGACAATGAAGATATATACGCTGATCTTTACGTGCTCAAGTGGACCTCGCTGATGATCCCGCCAATTACAATTATGATGGTAAATCTCATCTCCATCGCCTTTGCTTTTGC  
GAGAACTATTTACAGCGAAATCCCTCAATGGAGTAAGCTTATGGGCGGGGCGTTTTTTAGTTTTCTGGGTTTTGGCGCATCTGTACCCATTTGCGAAGGGGGCTAATGGGGAGAAGGGGGAA  
GACACCTACTATTGTGTTTGTGTGGTTCGGTCTTATGCTATCACATTATCTTTGCTTTGGATTTCCATAAGCCCACCAAGTCTCCGGCACAGTGGCAGGCGGGCGGCAATGGCGGT  
GGATTCCAGTTCCTATGATCAGTGGAAATTTGGTTTTATCTTTGATATTTCTTCTTGTGTTGATCTGAAAGATGGTAAGGAAGAGTTTGAATTTGTTATTTTGTTTAAATTTTAAATTC  
TTTTAAGATTAGGGGATTAGAGTGCATTTTTTTTTTAATCGGAGGAACATTAGATTGCAGATTTCAGGTTTTAGCTTATAGATTGTACACACAATCAGAGAATAATGGATTAATAATTTATGGT  
TTTTCTTTTTGTGTGTAATTTTTTTGGTGTATATGTATATATCAGCTTAAACACTGAGGGCCCCCTTTAGTTGAATTTGTCTAACCACATTTACTGAATTTATTTAATGACCA

>comp162460\_c0\_seq1

CAATACTTGTGAAAATTTGTTATCAGACCTAAACTTATATCCCAGCGGCTAACAAAGAGGAGGGTAAATTTGGTAATTAATAAATTTCCCTCTTTAATTTTTAAACCAATAAAAACTTTAAA  
AACTTTTTGTAAAAAGATTTTTATAGAAACAATTTTTCAACCAAATTTTCAAAAAAATAAATTTCCGGGAATAAAGTGGCGGGAGTTTCGAAGTTGACGGCCGCTGGCCCTCTCTCA  
TTCCGGAAGCCGAAGAAACCGCGCAGAGCGTCCCTCGCTCCGAAACTCCCTCAGATCCCCAGATTTCGACAACAGAAACCGATGACGCCACACCGCCTCTCACCTCTCGGCCAATTACAG

CAAATCCGAATTCGTTAATGGCCATACGTAGGCTCGGTTATCCGTTTCTGCTCCTCTCAACCTATCTTGAAAGCGAACGATCTTCCAAACCTAACCTTTTGAATGGAGAAGGTTTCCG  
ACGCCGACCTGTCTAGGGAGGCCGCCACTGCTGCTGATGGCGGCAGAGGAGGAGAGATAAAGAGAGTGAGATGGACGTTGATGACCTCGTCCTTGAGCTCCTCGAGACTGTTGAGAC  
CGTGCAGTCTTTTTCCGATTACCGCCGCACGCAGAGGAAAGAGTGCCATAACCTCATTCCGCCGATGAAGCTCGCAGTGCCATTGCTCGAGGAGATCCGCGATTTGGAGATCCCTGTGCC  
CGACGATGTCTGCGCCAGGCTCTACAGGCTCCGGACGGCTTTCACCGCTGCCAAGAAGCTTCTCAGATGCTGTCATGACGGAAGCAAGATCTATTTGGCTTTGGAGAGCGAGGCAGTGA  
TGAATAGATTTCACTTTGTTAATGAGAAATTGACTCAGGCGGTGGATGGCATGCCTTATGATGGCCTTTGTATTTCTGATGAGGCTAAGGAACAGCTTGAGCTAATGTGCTCTCAGCTAAAAG  
AGAGCTAAGGGGAGGACAGATACTCAAGACATGGAGCTAGCGATGGATTTGATGGTTTTGTTATCTCAAAAGGAGGAAGATCGGAATGCAAACAGTTGCATATTAGAACGCCTTGCTAAA  
AAGTTAGATCTGCATTCACTCCCAGACTTGGGAGCTGAAGCAATGGCCATCAAATGCTTATAAAAGAAAGATCTGGGCAAATATAGAGTCCACACAGCAGATCATAAGTCTTCTGAGC  
AAATTCAAAACAAATGCTGGTATTGAAGATTGCGATGGCTTAAATGAAATCATGTTGCCAAATATCTTGAGAAATGCCCTTCCTTGATGATTCCAAATGACTTCCTTTGTCCAATATCTCTA  
GAGATAATGACGGATCCTGTTATTATTGCTACCGGGCAGACATACGAGAGATCAAGCATAACAAAAGTGGTTGGATGCAGGCCACCGAACTGTCCAAAACCAGACAGCCTCTGGCTCA  
CCTTTCTCTTGCCCTAACTACGCCCTTCGCAATGTGATTCTCAATGGTGCATGAAGAACAAAGTTGAGTTAATGAAGAAGGACTCGTTGGTTAATTCAAAGCCTAAGGACCACAAGGA  
AGAAATCGAAACTCTGGTTCAGGATCTATCTCCTTACACCTTGATACACAGCGAAAAGCTGTTAAGAGAATTGCAATGCTTTCAAAGGAGAATCCAGAGAACAGAATTCTAATTGCCAA  
ATGTGGGGGAATCCCTTCACTTGTGAGTCTTCTCTCTACCCTGATTCAAAGATTCAGGAGAATACAGTGACTGCTCTACTGAACTTATCTATTGATGAAACAAACAAACAGCTTATAACTA  
AAGCTGGGGCAATCCCACCTATCATTGGAGTTTTGAAAGGTGGAACCATGGAAGCTCGAGAGAATTCTGCGGCCGCGCTGTTACGCCATCCATGCTTGATGAGAACAAGTTTTGATTG  
GGGATTTGAATGGCATTCCACCATTAATAGATCTCTTGACAGAAATGGAAGTCTCACAGGTAAGAAAGATGCCACCATTGCTCTCTTCAATTTATGTTAAACTCCATGAATAAGACCAGAGCC  
ATAAAGGCCGGTATTGTGAAACCTTTGCTTCAAGTACTTGATGACAAGCAATTAGCCATGATCGATGAAGCTCTTCTATTTTGTCTCTTCAACACAGTCTGATGGGCGTGCTGAGAT  
TGGAGAGCTATCTTTCAATTGAAAACTTGTGGTTATATAAGAGATGGGGCACCGAAGACTAAAGAATGTGCCTTATCTGTTCTTCTTGAGCTTTGTGCACACAAGCCATCGTTTCTGTTG  
GTCTCGCTCCAGTTTGGAGTTTATGAACATCTATGTGAAGTTGCAGAAAGTGAACCCAAAGAGCTCAAAGGAAAGCAAACCTTTGCTGCAACTTATGAGAAAAACTGGCCAAATTTT  
ATGAAGATTGTATATTTCAATCGCAAACCTTATTACATTTATCATTTTTATTATTAATCTTTGAATAGATTCTATTATCTTTTGGTCCATAAGTGAGTAATTTGTGTCATAAATATTGGGCTATTA  
AATATTACTGTAACATCTTTATTGCAGGGTGTATGTAATAATCATT

>comp162502\_c0\_seq1

AGACTATTTTTTATGAATGCATATGTATGAGTTAGAAATATCAGAATAAATAAACAATAAATTAATAAATAAATAAATAGATAAAGGATTCATATGATATTATGAACATGAAGAAAGCTCAAT  
GTGAAAGCAGATCCAGCAGAAATTAATAAAAAAAAAAATACATTTAAGTAATATAATGCAAGTCTTCAGGAAGAAAAGAGACGAGTAATTTGTAAGTAGGAGGATTAGAGAGCGAGG  
GAGGAATGATATTGAATCACTTCTCCGACTCCGCTACTCACAAAAGAATGGAAGTTTCTGCAACTCGAGAAAGAGAAATAAGAAAGACCAAAGACGATGGAGAGGGTTAGTTAGTTTAC  
AAATGATCATGAGAGGAGGAGGAGGAGGCAGCAGCAGCACCCAAAAAGGACTCCAAATAATAATAAAGGGGAAAAAACTATAACAGTTTTTTTTTTGTTACCTTAAAGGCTACAGTCGA  
AAGTCGCCTGACCCAAATAAAGATTTCAATTGGTCCGAGTATTTCTTTCGTTGAGCGCAATATTCTCCATCTGAGAAACAAGAGAATCTTGTTTTGTGGTAGTCTGAGAATTAGGTTTACA  
TTCCGTGTTATCTTATTTTGTGCTGGGTTAAATAACCAAATCTGCCATCCGTCACGTTTTCTGACTTTGTTGCCCTCCACTTCTAAAACATCTGAGGGCCTGATTGCATCCAATATAAATGG  
TATGCTATCTGTTAATAGCTTAATCTTTAGCGGCTGTGATCTCAGTCGGTTCGGATGCGACTGAGCCGTCTCTTCAACTTCTTTACCCGCGGACCCCGGAACACATTCCGTAGGCTGTGTTT  
CTTCGACACTCTGTTTACGCGCCTTTTCTGGATCACCAGCCGACTCAGAACCAACTTCAGTAATTTGCTCGGTAGGAGGCTTTGACATGATCGAATTGATGCTATCCAGGTAGTCTTCCCA  
CGGATTACTGTT

>comp162502\_c0\_seq5

AGACTATTTTTTATGAATGCATATGTATGAGTTAGAAATATCAGAATAAATAAACAATAAATTAATAAATAAATAAATAGATAAAGGATTCATATGATATTATGAACATGAAGAAAGCTCAAT

GTGAAAGCAGATCCAGCAGAAATTAATAAAAAAAAAAATACATTTTAAGTAATATAATGCAAGTTCCTCAGGAAGAAAAGAGACGAGTAATTTGTAAAGTAGGAGGATTAGAGAGCGAGG  
GAGGAATGATAATTGAATCACTTCTCCGACTCCGCTACTCACAAAAGAATGGAAGTTTCTGCAACTCGAGAAAGAGAAAATAAGAAAGACCAAAGACGATGGAGAGGGTTAGTTAGTTCAC  
AAATGATCATGAGAGGAGGAGGAGGAGGCAGCAGCAGCACCCAAAAAGGACTCCAAATAATAATAAAGGGGAAAAAACTATAACAGTTTTTTTTTTGTTACCTTAAAGGCTACAGTCTGA  
AAGTCGCCTGACCCAAATAAAGATTTCAATTGGTCCGAGTATTTCTTCCGTTGAGCGCAATATTCTCCATCTGAGAAACAAGAGAATCTTGTGTTTGTGGTAGTCTGAGAATTAGGTTTCAGA  
TTCCGTGTTATCCTTATTTTGTGCGTGGGTTAAATAACCAAATCTGCCATCCGTCACGTTTTCTGACTTTGTGCCCCTCCACTTCTAAAAACATCTGAGGGCCTGATTGCATCCAATATAAATGG  
TATGCTATCTGTTAATAGCTTAATCCATTGTTATCCATGTTTCGATCTCAGGAATAAATCACTGCACAAGTTCTCTGAACTGAAGTAATACTCAATTTGCTTCAATATCAAAGTGCGTTTTTGT  
CCGCAGATGGAAAAACATAGGTTCTTGTATTGCAGGAGGTGCTGGGTTGGGAACAAATGGGTACCCCTCCGAAAGGTTCCGGGATGAGGGTGAGTTGGGAAAAAATACATTGGAGGTGG  
AATATCAGGGTAGGCCATGGGGCCAGGAAAATGTTGGATAAGCGGAGGAGGGCCATAAATGGCACCATAGCAGGCATATGAGGTCGCATGATTGCATGGCTCGGGTGATTTTCGCTGCAA  
GTGGGAATCTCTAACACTCAGAGGCCTATAAGAACTCCAATCACGGAACACGGTCCCTCATCACGCCTGCCTCCATAGCTTCCCCTTCGTTGCTGCCACCATGCCTCCTCCGTCGATCC  
CCTTGATCCACCCAGCCATGGGATTCACGAGGACGATGGTCCCAATTGCTGTTATTGCCCTTATCAGGCAACTTATCTGTCATGTTCTGAGATAATTCCGTTGAACTTGATGTTGAAGAAGA  
TGATGAGGGATCACCACTACTGGAAAATCTACCACTGGTTCCAACATCATCGCCATTATTTCCACCGCCAAGAGAGTTAGAGCCCAGGGAGGGGGCCAATCCATCGAATGAAGGTCTGGT  
AGAGGCTTTGGCAGATTCCGATAAAGCGGGCCAAGAAGAGGAGCCTCCCAAACTAGCGGAGCAGTATCAATGGCTCCATTCCGGCGCCCTTCCCACATAGGCCTATTTCCCTTTTCGGA  
AGCGGGACCATGGGAGGCATTGCTGCCGGCAAGAAAAGGAACAGAGTCTTGGCGGTGTTCTCGCCGATTAGAGGAAGAACTGCTGGCTCGGGTAAGGGAATCGCGGTAGCTGCTGAA  
TGAGGCGGAGCAACGGCATCCGCTCGGATTCCCCGCGTACGGCAACGAACCCTGCGGAGTCAGAGACATTGCGGAGGACGTGTAGGTCGAAACAAGAGACATGCTAGGGTTACAGC  
TAGGGTTCCGTAGCTCTGTGTGAATGATCGGCTGGAAGAGGATTACCAGCGAAAATTTTGAGAACTGGAATGCAGGGTTGGGGAAGGAATCAATCAGAGATTTTAAGCCTTGAGAAAA  
CTCATCGCTGGCTATCGCACCGTTGCTCGCGCTCTTTCTTCCCTCCCGCATTCCCCTCCCGATCTCTCATGCAGAAACCCAAACCGCAACGAAG

>comp162537\_c0\_seq4

AAAAAAAAAAAAAAAAAAGAGATTTTGAAGAAAGCACTTCTAAAAAATCCGCTTCGAAGGACATCGGAGAACACTTTCGCTCCCAATCACTCTTCTTTTTCAAGAGTTTGGCCTTCCA  
GCTCTGTTTTCTTACCCTGTTTCTTATCACAAATCTGCGCAAAATCCTCAGAATTTCTCCTCCTTCGGGCTATCCAGCGCGCGCTTCTCTTGTCTCCTTCTTCTCCTCAGCCTCCTTGTTCCTCA  
AAGATGCCCGGCGAGCGCCGCGCATCTCTCCCGCCGCTTACTCTTCAACACCTTCAGCAACTCCTCCATGGCCTTCTCTTCTCATACCTCCTGCTTTTTATCAACACTTCACTGACA  
TCCGCCGGGGTTATCTCCGCCGCTCCACCGCCGCTTCAAGCTCTCTAATCAGTATATCATTCTCTTTTCCATTTCTCAATTCATCCTCACTTATTTCCCAAGTAATCCACATCAAAAATCTTTA  
GCGCCGGGAAAGAACAGTAGCTCATATGGATATGCATGTCCATCCTTCCAGAACGAAGCAACGCAGGGTCGAGCTTCTCGACATGGTTCGTGCGTGAACACAAAGATCTTCTCACTGCCGC  
AGCAGGACCACAGCCCCTCGGTAAGTTTCAGCAAGCCGGAAAGCGTCACAGACTTTGTGATACTGCAGCAGATGCAGGGGAGGTGAAAATATCATCCATCGAATGCGGCGGGCGGATT  
AGCAGCCGGGTGAGGAAGGTGCCGCGAGTTGTGAGAGAAAACAGAACAGTCTATGTCTTCGATAACAATGATGGATTTTGGAGGTGGTTTTTCATAAGAAGTTTTTCGGAGCTCAGAGTTGG  
TTTGAATTCGGTGAGCTCGAGGTCGTAGATGTCGTAGCCGAGGAAGTTGGCCATGGCGGCGATCATACTGGACTTGCCAGTTCCCGGTGGACCATAGAGGAGATAGCCGCGCTTCCAC  
GCGCGGCGGTTTTCTGATAAAAAGCTTTTTCCGGCGGCAAACTTACGGAGATCGGCAATGATGTCTTTTTTTTCGGATGGGATCCATGGCGAGGGTGTGCAAGGTGGAGGGGTGTTTGAAC  
GGGACCGACTCCCAAGGATAGCCGCGAGCGTCCATGGAGCCGACGAGAGTTTGTGTAAGAAGACGGTCTGATTCCGGCGGCGGATATCGGCGGCGACTTCCATGATGTGGTTCGAG  
ATAGCGGGGAGGATGAGAGGTTTGTCTTTTTACGAATGCGGAGAGTGAAGCTGCGCTTCTCGTCGGGAGAGAACCCATGAGAAGGAAGGTGAGGAGCGTTGGGTTACGACGTGC  
TCCAAATGGCAGTAATGCCGGCAAAAGAGTGCAGGAGGATCGTTGTTGGACAGGCCAATGTGAAGTTGGAGGAGTTGACGGGGCGAGAGAGTGAGAGGGCGAGAGGGCGGAGAC  
CGAGGCAGAGGAGGAAAGGTAGAGTTGGACGGCGCCGTAGAGCTCGTTTGTGCTGACCCGTCGATTTCCGTAATGTGCAAGTAGCAGTAGGCAGAAAAGTTGTTGAAGATGCGCTGG  
AAGAACTTAGCAACGACATGCCGGAGCTCGTGCGGTAAGACGGAGTGGAGGACGCTCTGAAAGAAAGCGAGGGCGCCGAGGAGAGAAGCCACTGAACCAAAGGTCCACACCTCCTT

CATGTTCCCCGAATAACCAAAGGTCGGATCTTTCTCCCTAGTTTTGCACGTCTTGGCAGAAAGTTGGGGGCTTTGAGCGATTTAAATAAAAAAGATCGTATCTTTTCGGGGAACATGAAGG  
AGGTGTGGACCTTTGGTTCAGTGGCTTCTCTCCTCGGCGCCCTCGCTTTCTTTTCAGAGCGTCCCTCCACTCCGTCTTACCGCACGAGCTCCGGCATGTCGTTGCTAAGTTCTTCCAGCGCAT  
CTTCAACAACCTTTTCTGCCTACTGCTACTTCGACATTACCGAAATCGACGGCGTCAGCACAAACGAGCTCTACGGCGCCGTCCTAACTCTACCTTTCTCTCTCTGCCTCGGTCTCCGCCTCT  
CGCTCTCACTCTCTCGCCCCGTCAACTCCTCCAACCTTACATTGGCCCTGTCCAACAACGATCGCTCGTACTCTTTTGGCCGATTACTGCCATTTGGGAGCACGTGCTAACCAC  
GCTCTCACCTTCTCTCATGGCGTTCTCTCCCCGACGAGAAGCGCAGCTTCACTCTCCGCATTGTAATAAGGACAAACCTCTCATCTCCCCGCTATCTCGACCACATCATGGAAGT  
CGCCGCCGATATCCGCCGCCGAATCAGGACCGTCTTCTTTACACAACTCTCGCTGCGGCTCCATGGACGCTCGCGGCTATCCTTGGGAGTCGGTCCCGTTCAAACACCCCTCCACCTT  
CGACACCTCGCCATGGATCCATCCGAAAAAAGACATCATTGCCGATCTCCGTAAGTTTGGCCGCCGAAAAAGCTTTTATCAGAAAACCGGCCGCGCTGGAAGCGCGGCTATCTCCT  
CTATGGTCCACCGGAACTGGCAAGTCCAGTATGATCGCCGCCATGGCCAACCTTCTCGGCTACGACATCTACGACCTCGAGCTACCGAAGTTCAAACCAACTCTGAGCTCCGAAAAAC  
TTCTTATGAAAACCACTCAAAATCCATCATTGTTATCGAAGACATAGACTGTTCTGTTTCTCTCACAACTCGCGGCAGCCTTCTCACCCGGCTGCTAATCCGCCGCCGATTCGATGGAT  
GATATTTTACCTCCCCTGCATCTGCTGCAGTATCGACAAAGTCTGTGACGCTTCCGGCTTGCTGAACTTTACCGACGGGCTGTGGTCTGCTGGGCAGTGAGAAGATCTTTGTGTTTAC  
GACGAACCATGTCGAGAAGCTCGACCCTGCGTTGCTTCTGTTCTGGAAGGATGGACATGCATATCCATATGAGTACTGTTCTTTCCCGGCGCTAAAGATTTTGATGTGGAATTACTTGGGA  
ATAAGTGAGGATGAATTGGAGAATGGAAGAGAATGATATACTGATTAGAGAGCTTGAAGCGGCGGTGGAGGCGGCGGAGATAACGCCGGCGGATGTCAGTGAAGTGTGATAAAAA  
GCAGGAGGTATGAGAAGAGGAAGGCCATGGAGGAGTTGCTGAAGGTGTTGAAGAGTAAGGCGGCGGGGAGGAGATGCGGCGGCGCTGCCGGGCATCTTTGGGAAGCAAGGAGGCT  
GAGGAAGAAGAGGAGCAAGAGAAGCGCGCTGGATAGCCGAAGGAGGAGAATTCTGAGGATTTTGCAGATTTGTGATAAGAAACAGGGTAAGAAAACAGAGCTGGAAGGCCA  
AACTCTGAAAAAGAAGAGTGAATTGGGAGCGAAAGTGTCTCCGATGTCCTTCGAAGCGGATTTTTTAGAAGTGCTTTTTCAAATCT

>comp162582\_c0\_seq13

TTTTTTTTTTTTTTCATTATTATTATTTTTGGATTCCGGGTTTGTCTTCTCTCGTCAGGGCTCTTCTTCGATTGGCGTCATGGGTTGTGAGATTGGATTTTTGTTAAGATCTGTTTGTCTTTCGA  
TTTATGGCACAGTGATTCTCTTTGTTTGTCTTACCTTGATGGATAATTGCTGTGCTTGGGAGGTTTCTTGGGCTGAGGAAGCTAGGAATTAGGGTTTTTTTTCTCTGTCTTCGCGTGGAA  
CAATTTTTGTGTGTGTGTCTTTTTGTGCGAGATATTGGATGGACTGAGGAAGGATAGGCGGTAGATATGTTTTGGATTTGAGTTTCTGCGTTGATTTCTGTTTTAAAAATTTCTCAATTCTG  
CTTTTGGTCTCGGGACGAAAAGATGGATCGGTACCGGAGGGTGGAAAAACCCAGGGAGGAAACACCTATTAACGATAATGAGATCCGCATAACAACCTCAGGGAAGGATGCGCAGCTACA  
TCACTTATGCCACTAGCCTTCTCAGGAAAAAGAGTCAAATGAAATTGTTTTCAAGGCAATGGGGAGAGCTATTAATAAGACTGTTGTGATTGTGGAGCTAATTAAGAGAAGGGTTGCTG  
GTCTTCATCAAGATACTAAAATAGGATCCACATTCATTACTGATTCATGGGTGCCTTTAGAGGAAGGCCTACTTCCACTGGAACTACTAGGCTTGTGTCAGTAATCGCGATTACACTCTCT  
AAGCAAGAACTTGATAGGTCTTCTGCTGGATACCAATCTACTTTATCTGAAGATCAGGTGAAATTATACGCTAAATATGACAGCGAGAGAGAGATTATCTGCTCGTCGAGGTAGAGGCC  
GTGGCAATCTCATCAGAGGCAAGGGCAGAGGAAATGGACCTGCTATGGTAGATTCCGGGGATGGAGGTGAAGGCAACAGGAGGCGCGGATATGGCAGGGGTGGTTCCGGCCGCCGAG  
AGGCCGCGCAACGGAGGCTCTGGTGGCCCCGTAGACACTCAGCAGGAAGCTGGTGGCCATTCCGAGGAAGCTCCTGCAGATTTAAAGGGCCAAGATCCGCAACAGAGCGGAGGGCC  
GATCAGTGCAGGTAAAGGTGCTGGTGAAGCTTAATCAATCGCCAGTGACTTGTAAGTTTTTCTTCTTTATTTGGGATCTTTTAAACGGCATTCTGCATAAGATGTCAGGCTAAACAACCCCTG  
GCAAGGAGCTTTTAAAGACTCTTTTGGACTAGTTAGCTGTCTTGCTAATTATTTTTGTTTTGTTTGTCTTGTGATAAAGAACAGCAAGCAGCTCATTCTTTTATTTATTTTCTAAGTTTT  
TGCTCCGAACTTCTATTTTTTATTTTTCTTTAATAAATGTTTTTTTAGTTATTTTTATTTTGAATATAAGTCAAAATATTCTTGAATAACTCGAAACAACTTTTTAAATGTTTTTCATTTTTT  
AATGCAAAACAACCCAACCACCGGCCACCACCTGCTAGCTTCCCTTTGCCGCTTCCATTACATCTTATGTCAAAATAATATAATTTATTTAGGTTATCAAATGATTTTTAATTAGTATT  
AAAATATTAATAAAAAAAGAAGAATGCGATCCCAAATGGCCCTAAGTTTTTAAATACATTTGGTATTTCATGTGTATCTATATTGGTTTTTCTTTGGTCCCTTGAAGCTGTAAGTACTAGCTC  
TTCATTGCAGGTTCTGGAAAGGGATAAAATTACAAAATGGTTCCA

>comp162582\_c0\_seq16

TTTTTTTTTTTTTCATTATTATTATTTTTGGATTCCGGGTTTGTCTTTCTCTCGTCAGGGCTCTTCTTCGATTGGCGTCATGGGTTGTGAGATTGGATTTTTGTAAAGATCTGTTTGCTTTCGA  
TTTATGGCACAGTGATTTCTCTTTGTTTTTGCTTACCTTGATGGATAATTGCTGTGCTTGGGAGGTTTCTTGGGCTGAGGAAGCTAGGAATTAGGCGTTTTTTTTCTCTGTCTTCGCGTGAA  
CAATTTTGTGTGTGTGTGTCTTTTGTGCGAGATATTGGATGGACTGAGGAAGGATAGGCGGTAGATATGTTTTTGGATTTGAGTTTCTGCGTTGATTTTCGTTTTAAAAATTTCTCAATTCTG  
CTTTTGGTCTCGGGACGAAAAGATGGATCGGTACCGGAGGGTGGAAAAACCCAGGGAGGAAACACCTATTAACGATAATGAGATCCGCATAACAACCTCAGGGAAGGATGCGCAGCTACA  
TCACTTATGCCACTAGCCTTCTTCAGGAAAAAGAGTCAAATGAAATTGTTTTCAAGGCAATGGGGAGAGCTATTAATAAGACTGTTGTGATTGTGGAGCTAATTAAGAGAAGGGTTGCTG  
GTCTTCATCAAGATACTAAAATAGGATCCACATTCATTACTGATTCATGGGTGCCTTTAGAGGAAGGCCTACTTCCACTGGAACTACTAGGCTTGTGTGAGTAATCGCGATTACACTCTCT  
AAGCAAGAACTTGATAGGTCTTCTGCTGGATAACCAATCTACTTTATCTGAAGATCAGGTGAAATTATACGCTAAATATGACAGCGAGAGAGAGAGATTATCTGCTCGTCGAGGTAGAGGCC  
GTGGCAATCTCATCAGAGGCAAGGGCAGAGGAAATGGACCTGCTATGGTAGATTCCGGGGATGGAGGTGAAGGCAACAGGAGGCGCGGATATGGCAGGGGTGGTTCCGGCCGCCGAG  
AGGCCGTGGCAACGGGAGGCTCTGGCGGCCCTCAAACAATCAGCAGGAAGCTCCTGCAGATATAAAGGGTGCAGATCCGCAACAGGGCGGAGGGCCGATCAGTGCAGGTGAAGGTGC  
TGGTGAAGCTTAATCAATCGCCAGTGACTTGTAAAGTTTTTCTTCTTTATTTGGGATCTTTTAAACGGCATTCTGCATAAGATGTCAGGCTAACAACCCCTGGCAAGGAGCTTTTAAAGACTCT  
TTTGGACTAGTTAGCTGTCTTGCTAATTATTTTTGTTTTGTTTTGCTCTGCTTTGATAAAGAACAGCAAGCAGCTCATTCTTTATTTATTTCTAAGTTTTTGCTCCGAACCTTCTATTTTTTA  
TTTTCTTTAATAAATGTTTTTTTAGTTATTTTTTATTTTGAATATAAGTCAAAAATATTCTTGAAAATACTCGAAACAACCTTTTTAAATGTTTTTCATTTTTTTAATGCAAAAACAACCCAACCAC  
CGGCCACCACCCTGCTAGCTTCCCTTTGCCGCTTCCATTACATCTTATGTCAAATAATATAATTTATTTAGGTTATCAAATGTATTTTTAATTAGTATTAATAAATATTAATAAAAAAAAAAAG  
AAGAATGCGATCCCAAATGGCCCTAAGTTTTTAATACATTTGGTATTCATGTGTATCTATATTGGTTTTTCTTTGGTCCCTTGCAAGCTGTAAGCTAGCTCTTCATTGCAGGTTCTGAAAG  
GGATAAAATTACAAAATGGTTCCA

>comp162582\_c0\_seq23

CACATCATATGCTAAAAAATACGATTTTGCCTGCTCGATCGAGCAGAAATCATTCTTGACCGTAAACTGCTCAAATCTCGCCACGTAATGAAACAAACCCCTGCCGAAGAAGAAGAC  
CATTTGCTTCGAAGCGGATTATGAAGTGAAAGCCGTTGCGGGAGCAGAATTCAGGGCCGAAAATTATTACGCAGCCAAGGTACAGGGCGGAGCAGGGCAAGGATAAAAATTTTCTCATATT  
GGATACCTAATTTTCTCCCTTCCGACCTCATTGGTGTGAGTGTTTTGCAGAGAGAAGATGGATCGGTATCAGAGGGTGTGAAGCCAGGGAAGTTTCGCTTCTAAGGAGAATGAAAT  
TCGTATAACTTCTATGGGAAGGATGCGCGGTTATATCACTTATGCCACTAACTTGCTTCTGGACAAAAGATTGCAATAAAAATTGTCATCAAGGCAATGGGAAGAGCTATTAATAAGACTGTGT  
TGATTGTGGAGCTAATTAAGAGAAGGGTTGCTGGTCTTCATCAAGATACTAAAATAGGATCCACATTCATTACTGATTCATGGGTGCCTTTAGAGGAAGGCCTACTTCCACTGGAACTAC  
TAGGCTTGTGTGAGTAATCGCGATTACACTCTTAAGCAAGAACTTGATAGGTCTTCTGCTGGATAACCAATCTACTTTATCTGAAGATCAGGTGAAATTATACGCTAAATATGACAGCGAGA  
GAGAGAGTTATCTGCTCGTCGAGGTAGAGGCCGTGGCAATCTCATCAGAGGCAAGGGCAGAGGAAATGGACCTGCTATGGTAGATTCCGGGGATGGAGGTGAAGGCAACAGGAGGCG  
CGGATATGGCAGGGGTGGTTCCGGCCGCCGAGAGGCCGTGGCAACGGAGGCTCTGGCGGCCCTCAAACAATCAGCAGGAAGCTCCTGCAGATATAAAGGGTGCAGATCCGCAACAG  
GGCGGAGGGCCGATCAGTGCAGGTGAAGGTGCTGGTGAAGCTTAATCAATCGCCAGTGACTTGTAAAGTTTTTCTTCTTTATTTGGGATCTTTTAAACGGCATTCTGCATAAGATGTCAGGC  
TAACAACCCCTGGCAAGGAGCTTTTAAAGACTCTTTTGGACTAGTTAGCTGTCTTGCTAATTATTTTTGTTTTGTTTTGCTCTGCTTTGATAAAGAACAGCAAGCAGCTCATTCTTTTATTTA  
TTTTCTAAGTTTTTGCTCCGAACCTTCTATTTTTTATTTTCTTTAATAAATGTTTTTTTAGTTATTTTTTATTTTGAATATAAGTCAAAAATATTCTTGAAAATACTCGAAACAACCTTTTTAAATG  
TTTTCAATTTTTTAAATGCAAAAACAACCCAACCACCGGCCACCACCCTGCTAGCTTCCCTTTGCCGCTTCCATTACATCTTATGTCAAATAATATAATTTATTTAGGTTATCAAATGTATTT  
TTAATTAGTATTAATAATTAATAAAAAAAAAAAGAAGAATGCGATCCCAAATGGCCCTAAGTTTTTAATACATTTGGTATTCATGTGTATCTATATTGGTTTTTCTTTGGTCCCTTGCAAGCT  
GTAAGCTAGCTCTTCATTGCAGGTTCTGAAAGGGATAAAATTACAAAATGGTTCCA

>comp162582\_c0\_seq25

TTTTTTCGAGCTACTTTGCCATTCTGTAATATGACGTGAACTCAAATCTATACGTTATTAATTCATACAGAAATCTGTCTATACAGTTGCTGCAGGTTTTTTTTGAGTTGTCTATACAGAAATCT  
ATCTTGCAGAAATATGTCTATACAGAAATCTGTCCAGCATGAAGTCAGCAATTCCTTTTTGCTTGAGATTATCTTCCTTTTTTCTAGTTCAATTAAACTTTGGTTAAGATTATTTCTTACAGCTT  
CCAGTACAATGACAAACAGGAGAGAATAATGCATAAATTTGATCAATAATTCAACATAACAACCTTACAAAACCCCTTGACCAACACATCAATAAAAAGGTTACAAAACCTGAACATAACAAAA  
ACAACCTTTTCTGCAGTCGACACAATACGTTACAAACACAAACGGATGATTACATCAACAACAACAATTACAATGAAGACTTTCATCAAGAACATCATCCATTCAAGCATATTAATAACCT  
TCGCCTCAAACACTTTGCGCTCATCGTCTATACCAAAGATGCATCTTCAACTTCATCTATCCATCTGAAGTATCTGCAGTCGTCATCAGTTCGGTTATTCACGCACCTATAAAAATTTTCTTC  
CATTATTAGGTCCACGGTGGCAAGTGTACAATACACAATTCAGGTGACAGTGACAATAAACTTCAGATCGTTGGCGTCTATCTCTCGTAGCGGACGAATTCGTTGAACCTCATTGAAACGT  
TTTGAATAAACCAACCTTTTCTTACCTCGCCTGCACCTAGGACGTTCCGGTCATGAACTAGGCACATCGATTGCGAGCTTCGCACGATGTCCACACGACTTATGCACGATCTCAGTTCGAT  
GTTAATACGAGAATGAAACGAGGCTTCTGTCTCTGTTCTTCCACTCGCATTGAAAGCTTAGTATGTTGTTTCATCTCAATCATAACAACCGAACCTCTTGTACCTGCCTTCTTCATCATCAATC  
CATCAATTCGGCTTCAACCACCAAACTCCAAGTGGTCCCTCAACTTCTGTTTGATTGAGCCCCAACTAGCCGTCGGATTCTGTTTGCAGAAATCTCCCGCA  
GTTATATCTGAATCCCTCACCCGCTTTTTCTCTCAATCAGCCCGAATAAGGTTTCGCATACTCCTTCCTTATTCGAAACCTGCAGCCATATATCCCCCTTCTTGTACTGATCCCAACTTTCC  
ACACCTCCGTTTCATACACCCCAATCAGAGACCCACGTCGGAGCCCAATACAGCCATCGACACACTTCTCCTCCCTACTGCAAACGCCAACTCCATTTCATCCGCCAGCCTCCCAATCG  
CAAATCGCACCCCTCTCCCATCACTATCTCCCGATCTACCAAGCCTGCTGGCCGATTAAAGCTTGTAGCCAACCACTAGCCTCATTCATCCGAGATCCATGAACTGCCCGTCTGATCGATCCG  
CAGCCGCACCCTACCTACGTGTGTCGAGCACTCAAAGCAGCCAACCGAACTGAGCTCAACAGAGCTGAGTAGCTCTTGTACAATAGATACCAATCTACTTTATCTGAAGATCAGGTGAA  
ATTATACGCTAAATATGACAGCGAGAGAGAGAGTTATCTGCTCGTCGAGGTAGAGGCCGTGGCAATCTCATCAGAGGCAAGGGCAGAGGAAATGGACCTGCTATGGTAGATTCCGGGGA  
TGGAGGTGAAGGCAACAGGAGGCGCGGATATGGCAGGGGTGGTTCCGGCCCGCCGAGAGGCCGTGGCAACGGAGGCTCTGGCGGCCCTCAAACAATCAGCAGGAAGCTCCTGCAGA  
TATAAAGGGTCGAGATCCGCAACAGGGCGGAGGGCCGATCAGTGCAGGTGAAGGTGCTGGTGAAGCTTAATCAATCGCCAGTGACTTGTAAGTTTTTCTTCTTTATTTGGGATCTTTTA  
ACGGCATTCTGCATAAGATGTCAGGCTAAACAACCCCTGGCAAGGAGCTTTTAAGACTCTTTTGGACTAGTTAGCTGTCTTGCTAATTATTTTTTGTGTTTTGTTGCTCTGCTTTGATAAAGA  
ACAGCAAGCAGCTCATTCTTTTATTTATTTTCTAAGTTTTTGCTCCGAACTTCTATTTTTTATTTTTCTTTAATAAATGTTTTTTTAGTTATTTTTTATTTTGAATATAAGTCAAAATATTCTTGA  
AAATACTCGAAACAACCTTTTTAAATGTTTTTCAATTTTTTAAATGCAAAAACAACCCAACCACCGGCCACCACCACTGCTAGCTTCCTTTGCCGCTTCCATTACATCTTATGTCAAATAATATA  
ATATTTATTTAGGTTATCAAATGTATTTTTAATTAGTATTAATAATTAATAAAAAAAAAAAGAAGAATGCGATCCCAAATGGCCCTAAGTTTTTTAATACATTTGGTATTCATGTGTATCTATAT  
TGGTTTTTCTTTGGTCCCTTGCAAGCTGTAAGTCTTTCATTGCAGGTTCTGGAAAGGGATAAAAATTACAAAATGGTTCCA

>comp162582\_c0\_seq28

TTTTTTCGAGCTACTTTGCCATTCTGTAATATGACGTGAACTCAAATCTATACGTTATTAATTCATACAGAAATCTGTCTATACAGTTGCTGCAGGTTTTTTTTGAGTTGTCTATACAGAAATCT  
ATCTTGCAGAAATATGTCTATACAGAAATCTGTCCAGCATGAAGTCAGCAATTCCTTTTTGCTTGAGATTATCTTCCTTTTTTCTAGTTCAATTAAACTTTGGTTAAGATTATTTCTTACAGCTT  
CCAGTACAATGACAAACAGGAGAGAATAATGCATAAATTTGATCAATAATTCAACATAACAACCTTACAAAACCCCTTGACCAACACATCAATAAAAAGGTTACAAAACCTGAACATAACAAAA  
ACAACCTTTTCTGCAGTCGACACAATACGTTACAAACACAAACGGATGATTACATCAACAACAACAATTACAATGAAGACTTTCATCAAGAACATCATCCATTCAAGCATATTAATAACCT  
TCGCCTCAAACACTTTGCGCTCATCGTCTATACCAAAGATGCATCTTCAACTTCATCTATCCATCTGAAGTATCTGCAGTCGTCATCAGTTCGGTTATTCACGCACCTATAAAAATTTTCTTC  
CATTATTAGGTCCACGGTGGCAAGTGTACAATACACAATTCAGGTGACAGTGACAATAAACTTCAGATCGTTGGCGTCTATCTCTCGTAGCGGACGAATTCGTTGAACCTCATTGAAACGT  
TTTGAATAAACCAACCTTTTCTTACCTCGCCTGCACCTAGGACGTTCCGGTCATGAACTAGGCACATCGATTGCGAGCTTCGCACGATGTCCACACGACTTATGCACGATCTCAGTTCGAT  
GTTAATACGAGAATGAAACGAGGCTTCTGTCTCTGTTCTTCCACTCGCATTGAAAGCTTAGTATGTTGTTTCATCTCAATCATAACAACCGAACCTCTTGTACCTGCCTTCTTCATCATCAATC

CATCAATTCGGCTTCAACCACAAAACCTCCAAGCTAGGGTCCCTCACTTCAACCAAGCTCCTTCAACTTCTGTTTGATTGAGCCCCAACTAGCCGTCCGATTTCTGTTTCGAAATTCTCCCGCA  
GTTATATCTGAATTCCTCACCCGTCTTTTCTCTCAATCAGCCCGAATAAGGTTTCGATACTCCTTCCTCTATTTCGAAACCTGCAGCCATATATCCCCCTTCTGTACTGATCCCAACTTTCC  
ACACCTCCGTTTCATACACCCCAATCAGAGACCCACGTCGGAGCCCAATACAGCCATCGACACACTTCTCCTCCCTACTGCAAACGCCCAACTCCATTTCAATCCGCCAGCCTCCCAATCG  
CAAATCGCACCTCTCCATCACTATCTCCCGATCTACCAAGCCTGCTGGCCGATTAAAGCTTATAGCCAACCACTAGCCTCTGATTTTCACAAACCTCCCTCCTATTCTCTCATTATCCGA  
GATCCATGAACTGCCCGTCTGATCGATCCGCAGCCGCACCTACCTACGTGTGTCGAGCACTCCAAAGCAGCCAACCGAACTGAGCTCAACAGAGCTGAGTAGCTCTTGTACAATAGATA  
CCAATCTACTTTATCTGAAGATCAGGTGAAATTATACGCTAAATATGACAGCGAGAGAGAGAGTTATCCTGCTCGTCGAGGTAGAGGCCGTGGCAATCTCATCAGAGGCAAGGGCAGAGG  
TGCTATTAATTTGATGCTCTAAATGTCTATTATAGGATTTAGCACAAATATATGAAACGATGTATTTTCATCTCTGTACAAGGAAATGGACCTGTATGGTAGATTCCGGGGATGGAGGTGAAG  
GCAACAGGAGGCGCGGATATGGCAGGGGTGGTTCCGGCCGCCGCAGAGGCCGTGGCAACGGAGGCTCTGGCGGCCCTCAAACAATCAGCAGGAAGCTCCTGCAGATATAAAGGGTC  
GAGATCCGCAACAGGGCGGAGGGCCGATCAGTGCAGGTGAAGGTGCTGGTGAAGCTTAATCAATCGCCAGTGACTTGTAAGTTTTTCTTCTTTATTTGGGATCTTTTAACGGCATTCTG  
CATAAGATGTCAGGCTAACACCCCTGGCAAGGAGCTTTTAAGACTCTTTTGGACTAGTTAGCTGTCTTGCTAATTATTTTTTGTTTTTGTTTGTCTGCTTTGATAAAGAACAGCAAGCAG  
CTCATTCTTTTATTTATTTTCTAAGTTTTTGTCTCCGAACTTCTATTTTTTATTTTTCTTTAATAAATGTTTTTTTTAGTTATTTTTTATTTTGAATATAAGTCAAATATTCTTGAATACTCGAA  
ACAACTTTTAAATGTTTTCATTTTTTAATGCAAAAACAACCAACCACCGCCACCACCCTGCTAGCTTCTTTGCCGCCTCCATTACATCTTATGTCAAATAATATAATATTTATTTAG  
GTTATCAAATGATTTTTAATTAGTATTAATAATTAATAAAAAAAAAAAGAAGATGCGATCCCAATGGCCCCAAGTTTTTTAATACATTTGGTATTTCATGTGTATCTATATTGGTTTTTCTTT  
GGTCCCTTGCAAGCTGTAAGCTTCTCATTGCAGGTTCTGGAAAGGGATAAAAATTACAAAATGGTTCCA

>comp162593\_c0\_seq8

AGTTTTTTAGTACAAAAATTTATGCTCAAAAATTTTTGTACTAAAAACAATCTTAAAGAATAGTAAGAAAGTTGTTCCGAACGAAGCCTACTGAAATACAAACTGTCATCAACAGTAA  
TTTTCAAAAATATATATCCAATAGTTGTGAGTTTTTTCTTATTACGACAAACATAGAAGTAGTTTCTGAAGTATTTTCATCTTCAATTCCCAATCAATTCCAAGATGAAGTTCTTGAAGTGCCT  
GAAGTTTTGTGTTTATGGCAGCTATCAGACTCATTTTTCTCTCTCTTTCATACATATCTTTGATCTCCTGTAAATCTTCTCCGCTCGAGTGACAATAATTCGAGCAAGTGTATTATCGTCAA  
TTTTCTCTTTGTTGAGTGCCGATCGAAGGAGCTTTTCGAAGATCGCCATTAGTCGTTTTTTGTAACATCTTCTTCCAACGAACGCTTGAAAAGATCATGGTAGGCTTGCTTGACCGCCAAAAG  
TTCTTTTGTGAGTTGATACACGCCGTCTCGACGATTACTCTATAGTCTAACCTTCTTTCAGAGCCTTATTAGCTATGATTGCTCCTCTCTGGGCAGGATTGAGCATCCAAGAGCATAATGC  
TTTTCTCAGTTCTCCTGAGAGCTCATTTCAGTTTCTTAATGAGATTTTCGTGGTAAAGATCTTATAAGATTGGATGATTTGTAGCCTCTGTGCTTCATCTCTATGCGCTAAAATATCGATC  
AATGTTTTCTCATCTGCCTCCCTTCTGAAATAAAAATGCATGATATATGATATGAAGGCTTAAGAAAACAATATGCTATAGTATGAAACATATAATGTTTGTCAAAAATTTAATGGATTTT  
TGATGTAGCTAAAATGTTAAACAAGGAAAGATGCATGCTTTTGTCTGTGCTCCAGCATAATAATTTCTTAAAAGTGATAGAACATATCACTACAGAAAAATCGTCTATTACCGACAGATTCC  
TGACGGATTTACTGGCGTACTATTTTTGTGCGGATTTCTATGAAATAGTTCCGATAGATTTTTAGTGAGATTTTCCAGCGGATTTTCTGAAGGATTTTAATTAATTTCAATATAAAGAGTAAGT  
ACTTTAACATATTTTTCTTCCAGAGCAAAGTGGTTGCAGGTTCAAGCTTCCAACTCCACAAAAGCACCGCGGGTAGGCAGGTAGCGTAGCAACCGGGCGGGTAGCGCACGCAATCT  
ATTTTTACTGTTCCGGCTGCTTTTTCCGGCAGAAGAAATTCGTAGGAAAAAATTTTTCAACGGCAAATTTTACCAACGCTCGATTTACCGTCGAAAAAATTCGTCGGCTATTCCGCAAA  
AAATTTAATATCCGCCTGAAACTTCACAATTTCCGCCAGAAATCCATCGATAATGACTGATTTTTCTGTAGTGTATGCGGAAAGAGAGGGAAAGTCTGAGATATAGATAACAAAATACA  
AAACCTTGGCAGGCCATCCAGAGATTCATTGCATCTTCTTTTGCAGAAGGAACTTGCAATGGAACCTGAGC

>comp162666\_c0\_seq8

TCTTACTCTTATTTATATATTTTATCTGAAGTATTTACTCTTAAACGACCACATACCAAAAATTAATAATAATAATAATAAATTATTACCAAATGGAGTACATAAAGCTACAAACAGACAAA  
ATCAAGACAGCTACAGTGCAGTGATGAAGAAAAAGTAGGGTTATTTAGTAAAATTATCTGTGCGGATACGGTCGCCGTCCGGAGGAGAATCAAATACGTACATCACCATCCAGTTTGATGT

GTACCGCTGTGTGCCGGATGATATGGTGTCTGATTCGTCTCCAAATGATCCGGTGTCTGCACAAAATAATTTTTCTGCTGCTTATAGCCAGTCAAAACCCATCTTTTCCCATGAAACAAGA  
TGAACCCCTCCA

>comp162700\_c1\_seq7

TAACTTATTTCCCTAAAAGCTCCTCACGCCTAAGGGACCCCTTGTTCCGTTCCATTCGGCCGCACGCGAGAGAAGAGGGAGGAGGTGACAGGAGAGCTCAGGGAGTGGCGGTCCGGCTTG  
ATTTGCCGGCGAGATCTTTTAGGAAAACGTTAGAGGAAGACTTGGAGAAGCTAGAAAGTTCGAACCTAAGACAAGTTTCGATTCAAGGAATTGTGCGAAGAAGTTTAAACGAAGGAAACCT  
AAGGACACGTACGTTGTTCTGACTCCTGCTGCGGTAGACGCTGCAGGTTCAAGATGACGATGCATATGTTCCGTCCATCGTATTATGATATCGAGTTGTTCAAGGCCTACCGGCGCAATAT  
CAAAAAGCAAGTACCAGCAAAGGCACAATCTCCTGTTTGACACTATAAGATGGTCACAAGCTCTTATACGGTATAACAAGAAATAAATTGAAGTAACCTTGCTTTGTAATAAACTAGTGTGT  
GATAGGCTAAAACAAATTAGTTTATTACAAAGCAAGTTACTTCAATTTATTTCTTGTTATAACCGTATAAGAGCTTGTGACCATCTTATAGTGTCAAACAGGAGATTGTGCCTTTGCTGGTACT  
TGCTTTTTGATATTGCGCCGGTAGGCCTTGAACAACCTCGATATCATAATACGATGGACGGAACATATGCATCGTCATCTTGAACCTGCAGCGTCTACCGCAGCAGGAGTCAGAACAACGTG  
ACGTGTCCTTAGGTTTCTTTCGTTAAACTTCTTCGCACAATTCCTTGAATCGAACTTGTCTTAGGTTTCGACCTTCTAGCTTCTCCAAGTCTTCTCTAACGTTTTCTAAAAGATCTCGCCG  
GCAAATCAAGCCGACCGCCACTCCCTGAGCTCTCCTGTACCTCCTCCCTCTTCTCTCGCGTGC

>comp162736\_c0\_seq11

TCACTCTCTCTCTCTCTCTTACAAAAATAAAAAGAAGTATTCTCAACAGATATGTTTATGGTTATAGAAAAGTTGGCTTCATTTGATCAAAAAGCAGCCAACAACACCGAAACAAAA  
AAACCCCGCTTCAAACCTTGTTTCGAAATCTTTTTATTTCTTGTGTAACCTTCTTGTTTTATTCCTATGAAACAAAAGAAAAAACCATCTAAAAAATCCCAAACCTTAAAGCAACCTTTATATTG  
AGGCGACGCAACCACACGGAGTGCAATATCATGTGAAATGCATCGAATCGCTTAGGCGGGTGGTTTAGTACAAAATGGTGGCGCACCGCCCTAACTCCGGCCATCAACCGCATCACCTCC  
TCCTCCCCACCGCCATTAACACCTCTTTCAATCGCGGTATATCTTCCACCGCCATCATCACAGAAAATTCCTTCCACTTCAACACATCACTGAATGGCAATACGTACCCATTTGAGATGAT  
CACAGGTATACAACCAGCGTAGATGGCCTTACCACCGAGGGCTCGCTACCTAAAATTGTAAAGATATCTCATATCCGCTGGGGCAGAGGCAGAAGCGAGATCGCCGCATATAGGAGTA  
GTAGGCATCGGCGCCGGGGGAAGTACTCGTGAACCTCGAGATCCGGGTCACGGCCCTTCCAGTGGCTGAGGAGGATCGGTCTGACGGGGCCGTGGACCCCTCCGGCGAAGAAGGC  
GAGAAGTCGGCGTGGAGAGGATTCGGCGGGGACGGAGAGAGAAATTCGGGGGCATGTCACCGGAGACGAGGTTTATCTCCGGGATGCTGACGTCCTTCCGGCGCCGGAATCCCTCC  
GACGTGTTGGCGTTGCAGAGCGCTCGAATGGCGTTTTTGTACAGTAATGGGTTTCGCACGTGAAGCGTGGGGGCCCTGCGCAGTTGTGAAAGAAAGAACAATAATTTACGGGTAGGCTGC  
AAATCAGCTTTGAGGGGTTTAAAGAAAAATATTTAGGGTATTTGATCAGATATAATGAATAATTATAGTAAGAAATAAATAATAATTTTAGATAAGTGCTAAAATATCTTACATAAATGCAAA  
TATCTTAATTAATTTATGTATAATTATCGAATATAAAGTACGGACAACATAAAGAGTCTGTGCTGAAGTAACAATTAACAATTTTACTTCGCAGTTGAGCGGGTTTGAAAACCCCTCCA  
CTGGGCAAATTTAGGTCATACATAAAAATACATTTGAATTTCTCTCTATCTATAAAAATGCAGTCAAATCACAGTACTATACCAGTTGCGCTTTGACTGTGCTTTTAGTGTAGACAGAG  
AGAAATCCGGATGATTATCTCTGTCCGGTGTCCGCACCTAATAA

>comp162736\_c0\_seq3

TCACTCTCTCTCTCTCTCTTACAAAAATAAAAAGAAGTATTCTCAACAGATATGTTTATGGTTATAGAAAAGTTGGCTTCATTTGATCAAAAAGCAGCCAACAACACCGAAACAAAA  
AAACCCCGCTTCAAACCTTGTTTCGAAATCTTTTTATTTCTTGTGTAACCTTCTTGTTTTATTCCTATGAAACAAAAGAAAAAACCATCTAAAAAATCCCAAACCTTAAAGCAACCTTTATATTG  
AGGCGACGCAACCACACGGAGTGCAATATCATGTGAAATGCATCGAATCGCTTAGGCGGGTGGTTTAGTACAAAATGGTGGCGCACCGCCCTAACTCCGGCCATCAACCGCATCACCTCC  
TCCTCCCCACCGCCATTAACACCTCTTTCAATCGCGGTATATCTTCCACCGCCATCATCACAGAAAATTCCTTCCACTTCAACACATCACTGAATGGCAATACGTACCCATTTGAGATGAT  
CACAGGTATACAACCAGCGTAGATGGCCTTACCACCGAGGGCTCGCTACCTAAAATTGTAAAGATATCTAAAACAATAAGATATAATAACATAAAAATTTCCCAAATTTAAATGCTGACC  
TCATATCCGCTGGGGCAGAGGCAGAAGCGAGATCGCCGCATATAGGAGTAGTAGGCATCGGCGCCGGGGGAAGGTACTCGTGAACCTCGAGATCCGGGTCACGGCCCTTCCAGTGGCT



GAGGAGGATCGGTCTGACGGGGCCGTGGACCCCTCCGGCGAAGAAGGCGAGAAGTCGGCGTGGAGAGGATTCCGGCGGGGACGGAGAGAGAAAATTCCGGGGGCATGTCACCGGAGA  
CGAGGTTTATCTCCGGGATGCTGACGTCCTTCCGCGGCCCGGAATCCCTCCGACGTGTTGGCGTTGCAGAGCGCTCGAATGGCGTTTTTGTACAGTAATGGGTTTCGCACGTGAAGCGTGGG  
GGCCCTGCGCAGTTGTGAAAGAAAGAACAAAATTTACGGGTAGGCTGCAAATCAGCTTTGAGGGGTTTAAAGAAAAATATTTAGGGTATTTGATCAGATATAATGAATAATTATAGTAAGA  
AATAAATAATAATTTTAGATAAGTGCTAAAATATTCTTACATAAATGCAAATATCTTAATTAATTTATGTATAATTATCGAATATAAAGTACGGACAACATAAAGAGTCTGTGCTGAAGTAAC  
AATTAACAATTTTTACTTCGCAGTTGAGCGGGTTTTGAAAACCCCTTCCACTGGGCAAATATTAGGTCATACATAAAAATACATTTGAATTTCTCTCTATCTATAAATAAAGTGCAGTCAAAT  
CACAGTACTATAACAGTTGCGCTTTGACTGTGCTTTTAGTGTAGACAGAGAGAAAATCCGGATGATTATCTCTGTCCGGTGTCCGCACCTAATAA

>comp162777\_c0\_seq2

TTGATTATATATTGGCACAAGTGTGGGAGATGGATTTCTGGAGTCCTAAGCAAGAAGAAAATAAAAATAAAATTTTATTTCAAATGAACAAAGATGATGAAACACAATAAAATTTCCC  
AATTTACAATGAATTTACATGCTAATAGAGGATAAAAACAAAAAATAAAAAATAATGGGTAACAGGAATAAGTATCAATAATAAATAGTCTAAATAATTCATTGAAACTACTTAT  
TATGAGACTAATAGTTAGCCGTGTCATACATCAATCCCTCCACCGGAAGAAAAGTTGCCTTGAGTTTTGCCACTTCAAAGATAATTCATTTGGAGGGAAATACTCAAGGATATCAACAAC  
TGAAAGTATTAGAGATGTTCAATCTTGTAAAGCGTTGCACCAATTTTTTGTAAACATGGGAATATGACCAATCTTCTTAACTTTGAGCATGCTATATGTGCCAAAGGTAATAAATTTTTTCAGA  
TGTACAATCACTGTACACCTCTGTAAATAATTTGAGGTGCCATTGTTGATCTACAACCATCTTGTAAACGTTAATTAGCATCTTCAAGATATTTCTTCACCTCTTGATGAATTGGAGACACCAA  
GATCATAGCCAAAACAAGATCTCCAAGAGATCCACGATGACCGCCAATATAAAGAAGACGGTGACTCCCCCTTCATAGAACTCCGCTCTTTTGCCATCTATAACCCGGTCCCCTCTCC  
TCCAGCCATTAATCCCTAATCCAATCTCCTCTTTACTTTCCCTAAGCAGACGACTCGAATGAAGCAAAGAGCGTAAGAAGAACAAGTGAAGGGAGCAGAGATGTAGACGGAAGAAGA  
AGACAACGACGACGACTTAT

>comp162784\_c1\_seq2

TTTTTTTTTTTAAAAAACAACCTTGGCGTTATTTATTTACTTATAATAATACATAGCATATAAGCGCCAAAGATGAGATTTAGATACTTGATGCGTTATTATATGTAATGTAACCC  
CAACGAGGTTTCGTACATCATTGGTCTATTTCTCGGCAGTGGGCAATTCAATAAGGTGCTCCAGCACATGCGCAGTAGACCAAACCTCTGGCCCGTATATGACCGCATTGCCATTTTTCTGCA  
TGACAAGCACGTACTCGCCAACTTGCCCCCTCTTCGTCTCTGAGTTTCTCCACACAGTTCTGTATTATCATCTTTGATTTCTAGCCCCCTTGTGATTCAGCCTAGCAAAGCAATTTCT  
CCAAAACCTCTTGTCTCGTATGCCACAAGATCTCCCCGTTTCTTTCTGGAGAACCAACTCGCACTCTTTTGTGCATGATGAAATTGTATCCGTCGTCGGTGAGCTTGCCATCGTTGTATAG  
CACCTGGCCGGAGAATAGCACGTTGTAAACTGACGGACAATTCTGTAGATTATTCGTCGAGGAGACCATCTCATTGCTGCTATTACTGCTGCTGCTGCTTATGCTTTCCGCCCGCCGTACA  
GACCAGACTTCTGGCCGTAAATAGATACCTTGCCCTCAGGGAGGAGGATGGCAATGTATTTGCCGACCTTAGAGTTGGCATTGGAGCTTATCCACACTTGATGGCCAAGAGGGTTGCGG  
ACGACAAGGCGGCCATTGTGCGTTAAGGAAAGGAAGCAGTTTGGCCGCGGAGGACAGAAGTTTTTGGAGTACCAGATGGGCTTGCCGTGGCGGTCATACAAAAGTGGTAGCAGTCAT  
GCCGCATTAACAAGTTGACGCCGCTGTCCGCATAGCTGAGCTTGGCTTGGGTTCCAGGCTCTGCCCTGTCAGCAAAACGTTAGTAACAGCCTTGCTACGGCTTGCTGATATTAGAATAT  
CAGGAGGAAGAAACATAAATGAATGATATTCAGGAAGGAATCATTGCGACCGACGGCGGCCATTACGATGAAGCTGCTGTGTATAAGATGGTTGTTGATAAATATGATGGAGCTTCTCT  
ATTTTAGTGGAAATTTATAGTTCCATGCAGAGGTTTGGATTACTATTCCATGCATGTTAATCATGGGAACTTTACCGACAAAACAATAAATGCTTGCTTCAACATCTTCTACTATTTA

>comp162786\_c0\_seq7

ATCGGAATTGTGGCCAAATGAACGAGGAATACGGCAAACCCAATTGGAAGTGGCGCAAGAATCTGCAAACAAAATCCATTTTTTTCTTCAAATCGTATATCAGAAAAGATAAACTAATATA  
CTCTCGCAAATCGCTTACAGATACTGTAACAAAAGCTCTCACTCTCCATGCTAAACTGTTTGATCATACTACTGTTGATTTCAGATTTTCGTTTGGGACGGTTT

>comp162815\_c0\_seq4

TTCGAATCAAACCTTCGAAAGACTAGTTCCGGCTGTGAGCTGTCATCATATCCAGATACAGCGGCTTCAATGGCAGAGATTCTGATATGGCTTCAGTTGATGCCGCCATTGATTTTGACTTG

TGACGCTTGAAGAATGACCGGAATTTTTCCATCGGAGTTAGAAGATGGAAGAATTGTGGGAAGGAATCGTTTGTTCGCAAGCCAAATTTGGCGTATGATCAGATTTAGATAACGGAATAG  
CATTTTACAACCATTTTATCTCTGGTACCAGCTATTATTGGGCAATAATCCTCACTGAATTCCGTTAAGATTGGACGACTAAAAGAGATGGGAGCAGCGCGCAGCAACTAAAAGGCCGGGA  
AATGCGTTATTTTCAAACCTTGAACGAAATATTCAAGAATAATATGATCATGATGCAGAACTTGTCAAGGAAATGGTTTGAAGCCATCTGAAAATTACGAGAGAGAATCTCCGAGATTGGCT  
CAATCGATCCTTGTAAATGTCCGGTGCAGAGAAAGGACTTAGACATCATGACCTTAAACTCCTCAAAGTTAACGAGGCCATCACCGTCTGATCGACGCCGTCGATCATCTTCGGCACTGCG  
CCAAAGACACCACCTCGCCGAGGTCACGCATCACGAGAGCCAACCTCCTCCGCCGAGATTACACCGTTACGATCCCGATCGAATACTGAGAAAGCTTGCCGAAGGTCCTCGAGCGCCGTC  
GATGGATCGACCATTTTGGTGTTTCAAGATCGATGAATCTTTTCAAGGCTGACGAAGCCATCTCCGTCCGCATCCGCTTACCCATCATCCGCAGTAGCTCCTCCTCCGCCAAAGGTTGCCCTA  
GGCTCTCGAAGATTACTCTCAACTCAGACGATGATATCTTACCATCACCATTGGAATCAAACCTTCTGAAGACACGTTCAAGTTCGTCCATTTGCTCTGCCGTTGTATCCACATACATCGAC  
TCCAATGGCGGAGATTCTGATTTGGCGCCGCTGGCTGTGGCCGGTGATTTGACTTCCGACGCAGCTTGAAAAGTGATCGGAGTTTTCCATCGTGTGACAGAGAGAAGGGTCGTGGA  
AAGGAATCCTTCATAAATTCATCGCTTCATTAATGTTGGCTGCCGTGCGAGCTATTATTG

>comp162815\_c0\_seq5

TTCGAATCAAACCTTTTCGAAAGACTAGTTCGGGCTGTGAGCTGTCATCATATCCAGATACAGCGGCTTCAATGGCAGAGATTCTGATATGGCTTCAGTTGATGCCGCCATTGATTTTGACTTG  
TGACGCTTGAAGAATGACCGGAATTTTTCCATCGGAGTTAGAAGATGGAAGAATTGTGGGAAGGAATCGTTTGTTCGCAAGCCAAATTTGGCGTATGATCAGATTTAGATAACGGAATAG  
CATTTTACAACCATTTTATCTCTGGTACCAGCTATTATTGGGCAATAATCCTCACTGAATTCCGTTAAGATTGGACGACTAAAAGAGATGGGAGCAGCGCGCAGCAACTAAAAGGCCGGGA  
AATGCGTTATTTTCAAACCTTGAACGAAATATTCAAGAATAATATGATCATGATGCAGAACTTGTCAAGGAAATGGTTTGAAGCCATCTGAAAATTACTTAGAAAAAACAAGGAAAT  
GAATTAACATGGCAATAATGGAGAGAAAGGATTTTGGATTTTCTGTCTAAAAGTTATAGGAGATGGTTATTTCTTTATGAGTTAAATTTATCGAATATTTTCGATCTGGGATTGATTCATTTT  
AGCCATTGCATCTTTAGGAAAAACTCTAAAGGAAATTCGTCAATTAAGTACGCGGATTTTTTCTGGAGCTTTTTGACAGATTATTTCCGATGGCTTTTCAACATATTTCTGGCGGAATATGTCC  
GACTAATTTTTCTACATATTTTTCGGCAGCTTTTCAACCAGCTTTGGTTCCGGCGACTTTTCCGTCCGATTTTAAATTTTATATTTTAAATAAAAACAATGTGACATTTAAATACTTTTGTCAATC  
CAATAAATTGGTTGGGTCGTTGAAATCAAACCTCACTTTTGAATCCAGCGATGCCGAAAACACGGACAAGCAGTCGAGCAGGTTACGCAGGAGGTGGCAGGTAGCAAGCAACCTAGT  
TTTTTTAATTGATTTTTTTTTTTTTTTTCTGGCGGCATTATCCGCCAGAAAAGCTGCCGAAAAAATTTATTGCTTGAAAAGTTGTCCGAAAAATTTTACTGCCAGAAATTAGCCGCAAGTTGTCC  
TTTCTACGTGCCTTTTACCTGCGGAAAAATATTCCGCCAGAAAGCCGCCAAAAATCTTAATTTCCATCGGAAATTTTCAATTTTGCCTGAAAAATCCGTTGGTAATAGACGATTTTTCTG  
CAGTGAAATGAAAAAAATTAGGTATAAAAAACATATACAAATCACCCACACGTGACAATCACTTACCGAGAGAGAATCTCCGAGATTGGCTCAATCGATCCTTGTAAATGTCCGGTGC  
AGAAAGGACTTAGACATCATGACCTTAAACTCCTCAAAGTTAACGAGGCCATCACCGTCTGATCGACGCCGTCGATCATCTTTCGGCACTGCGCCAAAGACACCACCTCGCCGAGGTC  
ACGCATCACGAGAGCCAACCTCCTCCGCCGAGATTACACCGTTACGATCCCGATCGAATACTGAGAAAGCTTGCCGAAGGTCCTCGAGCGCCGTCGATGGATCGACCATTTTGGTGTTTCCAG  
ATCGATGAATCTTTTCAAGGCTGACGAAGCCATCTCCGTCCGCATCCGCTTACCCATCATCCGCAGTAGCTCCTCCTCCGCCAAAGGTTGCCCTAGGCTCTCGAAGATTACTCTCAACTCA  
GACGATGATATCTTACCATCACCATTGGAATCAAACCTTCTGAAGACACGTTCAAGTTCGTCCATTTGCTCTGCCGTTGTATCCACATACATCGACTCCAATGGCGGAGATTCTGATTTGGC  
GCCGCTGGCTGTGGCCGGTGATTTGACTTCCGACGCAGCTTGAAAAGTGATCGGAGTTTTCCATCGTGTGACAGAGAGAAGGGTCGTGGAAGGAATCCTTCATAAATTCATCGCTT  
CATTAATGTTGGCTGCCGTGCGAGCTATTATTG

>comp162853\_c0\_seq2

GATCATGGCCATAGCTTGATTTGCTGCTACAGCTGAAGCATTTCTTTCCCTCCTCTAGTTCCTTGTATAGAATACTCAGGGATTGCTGGTCTATTTTAAATCTGTTTTTTTAAACGTTCAACTGAA  
ACCTCTCGTTCAATTTCACTAACAAAACCTCCATCTGCAAACCTCTGAACATGATAACTCAGCCTCAGGCTTCTTATTAATACTTGGCAATCCATTAAGCTTAAAGTATGAGATAATTTGCA  
CTCATTATCCTTTCGGGCACCATGAATGATATCATTCCAAGGAGATTGAAGCCACCTAGGAGAGAGAACTTGGGACAGACGCTGCTCAGGTCTTCATGGATTCTAGCAGATTCCCTTGTC

AGGGCAATCTCAGTTAATTCTGTAGGCTCGTTAATCTCAACATGTGAAGTACAAGATGTTCCCTAAAACATCTTCTTCTGAAGGATCTATTGTA AAAATGGCAATAATGAAGTTTTAGTACAAA  
AGAATTTGAACATAAAAAGTATGATTAGGCAAAGCAGATCGTAATCTGATCTTTTTCTCACCTTTAACTTTTTGAGATTCTGTAGGAACTGATTTGGTTACTATTTGAGATGATGTTAGCAGAA  
TTGGTCTTCTTCAAATGGGTCCGGCTGATTTCTTCAAGCCATGATCATAGTCAACATTGGATTCAAGAAAAGATTATCACAAGAACCATCTCATCATGTTGACTCTTCAAACTGA  
AGCAGAACCAACAGAAATAACAGGATCAGGATGAATAAGCTTCTCTAGGACTATATCGTCTGTAATCAAAGATGTTTCTGGGGAATTAGTAATAGATGAAAACGACTTCAAACCTCGTTCA  
AAATATTTTTCTTGACATCTTCGGTTCTGCACGGCATAAGAGGTTGATCATCATCCGATAATGGAACCTTCTGACTCGGGCTCTGATGTACTCTTCAACTCTCTATATTTGAAGTGAGAT  
AAAAGGTCAAACCTCTGACCTCCTGGCTTATAATCTGCTAATCGTACAGAAAGAACTTCTTTTTGCCTTGTTCAATCCGTCTTCAAGATGTGCCCGAGCTCGCAATTTTGCCTAGATAATG  
GACTGCCATGATAATCAAACCTTTTTGAAAATAGGTTTGTCTTAGATTCTCTATATGCATAGGGTTTATTTCTGAGTGCTGAGAACAGCATGAGCAAGGTCTTGTGAGTGGAGAACCAGCA  
TCATTATCTTGTGCAGTAATGGAACCTTTCACAATCTTGTCTGAGAATGAAGTAAAATCTGATTTCCATTATCAAGGGCCATGCTGAGTTTGTCTAGGAAAAATTTATATGTTTCCAAAGTA  
TAATCTTTTTAGCAAATGAAAGAAGACAAGTTTACATATTTACGTGCATCAACAAGCTTTTTGTGAATATGACAAAAGGTAAGCGATGATATCTCAAACCTATGGGTATCACAAACAA  
GATCCCTATAAAATCCCAACTTCTCATCGCCTAATAGATAGCCAAACCTCGAGCACAACAAGCAGGGGGTCTGTAATTTCCAAGAACGAAATATCTTTGATGCAAAGTATAAGAAAAATGC  
ATCAATTAGCAATAGAATAATCAATATCCATTCTGAGAAAAGCAGAAGAGAGAGCTGCTAAAAACTGGGAAGGGCCCCCTTTTTGTTTGGTGGGAGTTGCAGCCATGATATGAAGGGCCAG  
ATCAAACCTCCAGAGAAAAGAGAGACTCCAAGCTCCCAATCCTAGCAGCATTAAAGGATTGGATTCCCCAGATTAGATATCGGCTCTCGCTTGCGCCATCTCAAATGGCCTGCGACCGCG  
AGACGAGCGAGAAGGCAAAGTTTCGCTTTTTTCTGTAGGAAACATCCGCAACCATAAAAAGTGGAAAGAGGAAGAGAGATTGGCAGGATTTGGGGTACTATCTCGTCTCTGACTGAAAC  
ATCGGAGGCGGAGCGGAAGAAAAGTCGGAGACCCAAAAATAGGGAAGAAATTGAAATATATTAGAGAAAAATTAATAAATAAAAAAGAGTATTAACAACCTGTACGACTGTCT  
GTATGAAAACCTCTATGCGAGTACCAGATC

>comp162868\_c0\_seq2

CGATTTTAAGGTTATCTTAACTAAAATTATATTAATAATATCGTGATATATATAATATAATTAATAATTTCAAATCTTTCATAAAAATATAATTATCTTTAAAAAAAATATCGTTAGACGCTGCAAATAAA  
AGCTAACGGAATAACAACATAAAGAAAACAAAAATCATAATCGTATCTGACGAGTCCACGTGTGCGGAAATGACAGGGTTTGGGGATTACGTTGTTTCGGGATTGCATACATGTTTCGTTCA  
CGACGGGCTTGTACACCGGAGATTTCCCGTGGGCCAATCGCCGACGTGCCTTATTTCCGGCGAGTAGCCGCTGCTCATCAGATCCACCATTTCGGACAAATTTGAGGGCGTTCCCTATGG  
GCTTTTTATGGGACCAAAGGAATTGGAGGAGGTAGGTGGTTCTGAAGAGTTGGAGAGAGAGATAAAGAGGAGGATTAAGATGCAAAAACAAATAACTCCAGCTTTATTAGCTGACGACAA  
TTTTGAAGTTTTTTTTTTTAAATTTTATTTTATGTATTATCATTTTTTTTTGGGGAAAAAATTAACAGGAGTGGTTAGTTTGGTTTGGTATGTGGAAGCTTTGTAGCCGAGTCTATGATAGGAT  
ATTTAAATGGATGCGTGTTAATTTTCTTTTCATGATTTTAAATTTTTTTATGTGATTGAAGCTTGGAAATTTGTAGTCTTTGCTCGACTAGTGGTAGACTAT

>comp162907\_c0\_seq1

TTATTGGTTCGCTTTTCATTCTTTACAAAAGATGTTAAGAACCTTTCTGAAAATTATTTGAAAAAGTAGTTCAAATTTGAGCCTGATTTCTCTCATGTTTATGAAAATTAGCAACCAATTTG  
ACCTCATTTAAGTATAACCAAGTTAAATGTAATCATTATGAAGCCCTGTCTTGGTTGATATAGTTAAAGCTGAAGCCAAGCTCGATTGTAACCTTTTTAAAAGCTTAATAGTCAATATAGTTTC  
TATTAAGCTTTGGTTATATCTTTTCCATCAATTTGGGTTTTTATAGTAGTTGCCTAGTTAGACCAATCAGCTTAGAGTACAAAGGAGTAACTGCATCCTCTCAACGCTACAAAAACAGTTGG  
AAGAACAAAACAGACCCCAACCATTACCACCAATCCACCTCTGCTTATCAAGTAGTAGACCCAGACTTCTTGTGGTCATGATGCCTGTTGGGTGCTGGGATCATGCATGAGAAGAAGGA  
TTGTTTCTTTTCGCTTTTCGCCGAACAAAAGAGTTCTCAATGGAACCTTAGATTTTGCCTCCAGTGCCTAGTGTGTTTGGTTTTTTTGGTTCCCTTGGAAACCCGAGAGATTGAAGCTCTTC  
CTCAATTTTGATAGAGCCTTGACAACCTCGGATTGAATTGCTTTACATGATCCAAACCAGTTTGCAACTCCTTCGTAACCTTATTGTTTTCTGCTGCATGTTGAGCAGCTCGCCCTGGAG  
CTTTACTGCTAGGTAAGGAGTGAACCTCGAGTCTCAATTTAGTGTCACTCGAAGCCTTTGAAATCTTCTCCTGCATGTTGCAGAGAGTTTTGAACTGAATTGAAGCTCTGCTTCCAGT  
ATTTCAATCTGCTCTAGCCAAACTTGGAGCTCAGTATGAAACTCCCTCAGTTTCTTATCGAGCAGCGACATATCTTGTTTTAATATTTGCTTTGGGGATGCAGCAGCTGATCTAACTTCCTTA

TTATGCCCTTGAGCATCTCAGGTCAGCTTGCACCTCCTTGAAGGTTGTTTCAAACCTTCTGTATTTGATAATAAGAAGTGCTGAATCTTAGCCAGAAGTCGAGATTCTCATCAAGAAGAG  
TGTCAGCTCAGCTCTGAACCTTTTCTCAATGGGTGAAGTTTATGCTGCTGATCTAAATAGCATAGCTTGACTTCCTCTTCGGAGCCAATGATCTCAATTGGAGAATCTGATTTGGTTGTA  
GTTACTTTAATGGTGCTTCCATTTTCTTTGCTCTGCATTTGAGTTTCTTTCCGAGAAGCTTGCTGCACCATTTGGTAGTGTGAGAGAACAGTTTCTCCTTAAAGCTCTTATCTCCTGGTCC  
TTCACAGCATTACACTCTTCAGATCCTGAATCTGTGCCATCATGTGCAAGTGGTACTCTTTGTTCTTCTTCCATCTCGCTCAGTCTCTTCTTCGCATCTTTGTAATTCGCAGAATCGAC  
GTGTACTCATAGAGTAGTATTTTATGCCTCTCTTCTGGTCCCTTATTAACAGCTCCTGCCACCCAGAAATACCTTCGTTGTCTTCAAGCTCATTATTCTCTACTATTGATGAGTCCATTCCAT  
CAAGTTGTTCTACTTTTGATTTCTCTGAAGCATTAACTATCTGAGAAGAAGCTTCATTAGAATGTGAAATAGCACTAGGCTCATGCTGCTCCTTCATATGTACCTCATTCTTTTGAGCTGCAT  
CACCCTATCATCTTTAGAGTTATTTCTCAGTTCTACTCCATTACTCTTCTTCTCCAATTTTCTGTTATTTTAGAAGCTGAACTGCTATCCTTCTCCTTATGACTAGGAGACTCTAGTTTTTCT  
GAAATATTATTAGACTGTTGCAAGCCTCCACAAAATGAGTTTGAAATATCCCTTCTCATCATGCACGTTTTTCTCAAGATCCTGAATTCTATGCAGCTTATCTTCTGCCTGCCTCACTCTC  
ACATTCAATCCTTTGGAATCAGTTATCAAATTTCTCTATCTTCTCCAGTTCCTCCAGTTCCTGCAAGGTTGCTTCTGAAGCTCATCAGTCTCCAACCTCAATGTCTGTATTTGCGCTGTTTGTGATGAGATT  
GTTACCTCCAAGCTTATAACTTTTCTACAAGTTCATCAATCCGTTTCGGCAAGATCAACAACCGATGTGTGAGAGCTAATCTGGAAGTGTGCTTACCTGTAAACACATAGAGTACAGAT  
CCAGCCCACCATTTTATGGTGAACACTTCATCGTTGTTCTTGTGCTTCTTTGTCAGACATCTTCTCCATTTCTGGTAAGCAATTCTCCTTGGAGAACTGTAGTCTGTTTCTAGCTT  
CCCTGATTCTTTAGATTCTATGTCTGCCTCTTCACTCGATATCTTCTGTTGTTTCTGCAAGCTGACCAAGCTTTCTTTCACATGATGTGATTGCCGTGCGCCCATCAGGGCCCGGGCTTCAT  
TGCTTTCGATTATGGAACCTGCACTAACTCATCCTGTAAGGTGTATATCTCATCTTGAACCAGTGATCTGACTCTCAATCTCCAGAACTTGGCAAGGCTGCTCTCATAGGAACTCTTG  
ATGAATCTTTCTCCGTCTGTAGAATGAGAATTTCTTTCTGAAGCCGATCTATCTCATCCTGCGCATTCTCCTGGTGATATTTGAGCTTGCTTATTGCGATTCTCTTTCAGGGTGTAGGCAT  
CTCTACTTCTGTTTCTCAAGTTAATCAGGGGCAAATCAACTTGTGGCGCCTTGGCATGCTTACTGGTATCTATTGCAGTGAATTCTTCTGGCGAGCCATCGTCTGTCATCGTCTCGCATTGCA  
AACTGATCCGGGAAAGCTGCCGCTAGGGCATGGTTGGCCTTGTGCAGATCTCCTGAAATCCGATCGTATCGATCGGCCAAAGCTTTGTAAGCTCGATAGGCCACTTCGACGAAGTTAAC  
AATTCTGGTCTCCTCTGGTAGTACATCTCCGCCTTTTTGGCGAAGGAGTCGGCGTCCACTTCTATAAGATTGATCATGTTCTTACCATTTCTTCCATTTCTGCAAAAAGATATAGGAGCTGA  
AATCTTCTTACTTGTACACAGGATATGCATTGTTACAGGTATTATTCATCTCTTAGCTGAAATGTAGATATGTAGAATGCAGGGAAACCTCATTGATCTCTTAGCTACTTATCTTTTCCAAA  
TCACCATCTTCACTTAAGAATTTTGATTTAAGAATCATGCTATTTA

>comp162908\_c0\_seq2

CCAGCTCAAATAACACCACCAAATAACATCTTTAATCATGCCATAAACTGCAACCAAATAACCCCTTATACTAACAAGTTAGGGATATGATTTCTTTTGGGTTAAGTATCACTACAACACTT  
ACGTAATAATGTTGACCAGTGAAAACCTATTTTGGAGAAGATAAGTAAAGAAATATGGAGAAAGTGCTCAGCTTTTCTTGGTTCCATCCGTAAGCAGATCCACCACATGTTCTTGT  
GATGATGCAACACGTAGAGGTTTCCCTTAGATGAGTGGGCCAGGCATGCTGCTCTGGTACCATTGCAATATCTGAAGAATCATTGGAAGAATTCCTAAGTCGGGGTTAAGTGCGGGTTA  
AAATTGGCGTAGGCGATTGAAATTAATTAGGTAAGAAGTTGAAGAATTCAAAGTAAACAATCTGA

>comp162909\_c1\_seq4

GCCTTATATTGATTTCAAGTTGTATGTTTTTTGTAATTGCTGAGCTACTCACTCATTGCATTATTTAAATGATTTTAGGTAAGAAGCCTTCGATTTGAGGCTTAGTTGGGATACTAGTGTAATTTT  
TATTCTACCTCTCTCGTTTATATATCTTTTGTGACCTATAAAGGCTATTATATGTAATATTTTGAACCTTTTACCG

>comp162915\_c1\_seq11

AAGGGATTTTCCCTCGTATATGTCGAGAAGCCGCCAAAATCTCCCGAATTCCTCGCAAGAAATCCCGCATACTGACATGGTTTCGGCGCTGACATCGCTCAGTTACGCGATTCTGCTTA  
AATCCCGGACAACCTCCTCGATCGTCCCTTGTTCGTGTCTTTAAATACCGAACAAACGAGACCTTCGCTGATTGCTTCTCCTCCACAGACACGACTTCCCTGCATCTCTTGTCTTCTG  
AAATCCCGAGTCGGACCTCCCACTGCTTCCGCCAAGAATCCCTCCGATCTTCTCCGACTGAGCTCCTTAACCCACGACAGGGCTGA

>comp162920\_c1\_seq1

CCGCCTCAATGCTGTGCTCCACCGCGTCGCTCTGAAAGTGCTTGCATTTAGCGCCACCGTCGCGCCTGCATGTGGGCTATGCAGTTAGCTGAACAATTTCTCTTTGGGACGAGCTTCAAA  
GGTATTATGTTATGAGATTGAGCGAGCTCATGAGTGGCTTTTTATTATTGTGATTTTGATTAATAATTGAAATCCTATTATTTTCATTAAGGTTTTGTTGGGACGGCT

>comp162920\_c1\_seq4

GAGTCATGTCAATTTTTGACACCCTTGGTCGCACATATTTGAATCATTTGCATCATCAAAACACAAAATAAAATAGTAGAACATATAATAATCTTTTGAATATTCAACTAGATACATCAACTT  
CTCAACATGCTTAAATCCAAAAAGACCAAACTCAACTCCCATAAAAAGTTCTTCACATTAATCAATCACAAATATATCAATATAAAAAGTTTCAATGATTTCAATAAAAAAACAATCAATAT  
ATCTCTAATAAACTCTTTCTGGACCAGCTACCTCGCTGGCCGAAGATTGAGAATTAGTTAATAATCATCATCGAGTGAGTAGGCCTTGAGCAGCTCGGCGCAGACAGGGAGGGCTTCGTCC  
TTGAGAAAGCCCAAAGAGTTGGCATAACCGCAAGTTGTTGGCTTGGCCGCTATTTTCGGTGAGCAGAATGCGCGCTTGCTCTCTGTTCTCGACGATCTCAGCGCAATCGGCTCGCGGGCTC  
TTAAGAAGCTTCACGTAGCAAACCTCCTCCTCGTGGTCGTCGGGGACGCTGATGGTGTAATAGCCGCCGGCGCCGCTCACCGCCTCAATGCTGTGCTCCACCGCGTCGCTCTGAAAGTGC  
TTGCATTCTAGCGCCACCGTCGCGCCTTCAATATAATCGGTGATATTGGTGACGAATCCAGCGCGACAGTTATCGCAATACAGCGGCCCTCAACTTGGAAATGGACATCGGTGGCAATGG  
TGACGCCGGCGAGGAGGCAGAAGGCGGCGACGACGAGGGGCAAAGTTGGATCTTGGCCATGGCGAAGACTCCTTTTGAATGGTGGAAAGGAAATTATGGTTGAGAGGGGTGAGAGG  
AGAGAGACCGCGGTTTTGAAAGATGATGCGGGACTCTGTTTATATAGTGTGGCAAGCTTCCATTTTATAGCTATTTGATGCAGTTCATACAGTTTCTAAGGCAGGGAGGGGCTCCA  
TTCCAGTTTTTGAATGGCACCGAGGCCGCGTCGGGCTTCCGGTAACCGGTCTACGTGCGC

>comp162923\_c0\_seq3

AAAAAGGAAGATCTCATCATCGTCAAGCCATCTACTTCAGTTGATGAAGCTCTCGAAAAGCTAGTGGAGCATAGGATCACTGGTTTTCTGTGATCGATGATGATTGGACATTGGTTGGAG  
TTGTTTCTGATTATGATTTGCTGGCATTGAAATCCATATCAGGGTGTGGACTAACTGGTAGAAGTATGTTCCCTGAGGTGGATAGCACGTGGAAGAAATTTAATGAAATTCAGAAGTTGTCA  
AGTAAAACAAATGGCAAGACCGTTGGTGAGTTGATGACACCTGCACCTCTTGTGTTTCGAGAGACATCTAATCTTGAAGCAGCTGCCAGGCTATTGCTTGAACCAAGTACCGCAGGCT  
TCCAGTAGTGGATGTTGCTGGCAAATTGATTGGAATCATCACAAGGGGAAATGTTGTTAGAGCAGCGCTAGAGCTCAGAAATGCTAGGGCAAAGAGAGCTTAAGGGAAGCAATATTTACT  
TCTTATTTCTGTTTGGGACAACCTTATTTGCTGTTTTTTAAAACGACTTTTTAGTAAAAAAAATTTGAATTTGAAAATTTTATACTAAAAAATTGCTTCATTTGGAAAATAAATGTTACAATTT  
GGAGGCACAATAGCAGTTTCTGAGTCTCTTCTCATTATCTTTCCTGCAGCAGTCTAGGAATAGACTGAACAAACACCACTCTCCTCACCTTCTTGTATGGAGCCACCTTCTTAGCTACA  
AATTTTACTATCTCAGCAGCTGAAATATTGCTATCATGTCTCTTAACTACAAATGCAACAGGAATCTCTCCTGCTTCCCTCATCAAATCAGATGTCACTGCAGCATCGATGATTTAGTGTG  
GAAGTCAGCACAGCTTCCAAATCTGCTGGTGCTACCTGAAACCCCTTATACTTTATTACATCTCTTAAACGATCGACGATAAATAAGTATCCATCATGATCAAATAACCAATATCCCCTGTC  
TTCAACCAGCCATTTCTGTGCGATTATAGATTCTGTCCCCTTTTCATCATTTAAGTAACCTTTTCATAATAGCAGGTCCACGTAACCATAATTCTCCCATTTTGCCAGGAGGCAAAAATATTCTGT  
CTTCTGATCAACCCTTTGGCTTCCATATTTGGAGCTAAGAGCCCTGAAGATGTATAATTTCTTGAATTTTTGTTATTGAAACCGCGAGTTCCGACTGCGGTGCGACTCAGTCATGCCATATC  
CCTGGCCAAAATGTTTTTAATTTTTAGATGTAAGAAAGAACAGTCATCAAAAATAAATTTTAAAACCTTATCCATCTTATCAGTTTATTAGTGAAAGATGGACTCCATAGTCATCTTCATT  
AACCAAGCAAGAGCAAAAATTTATCAAATGGCTTATTTATTTGATAGAGTCTCCTTCATGTTCAAGGATTGTCTTCAATCGCATTAGGAAATTTGTGAATCATAAGAAGTTAATCCATTCTGTA  
GAACTAAATGTAGAAACATGTTTGTATGTCAAATCTGAAGTAAATTTGGCATCTTCTGCTGGATTCAAAGTTAAATAATTTGTATGATGATATCCTCTACTAAACATAAGCAAGTTTTTATGTG  
AAGTTAAGTGAGAATCTAAGCTTAACTTACAAAGCCAAATCAACCTTATCTAACGAGTAAAAATTTTCATTGCCAGCAGCCATCACTGTTA

>comp162923\_c0\_seq9

AAAAAGGAAGATCTCATCATCGTCAAGCCATCTACTTCAGTTGATGAAGCTCTCGAAAAGCTAGTGGAGCATAGGATCACTGGTTTTCTGTGATCGATGATGATTGGACATTGGTTGGAG  
TTGTTTCTGATTATGATTTGCTGGCATTGAAATCCATATCAGGGTGTGGACTAACTGGTAGAAGTATGTTCCCTGAGGTGGATAGCACGTGGAAGAAATTTAATGAAATTCAGAAGTTGTCA

AGTAAAACAAATGGCAAGACCGTTGGTGAGTTGATGACACCTGCACCTCTTGTGTTTCGAGAGACATCTAATCTTGAAGCAGCTGCCAGGCTATTGCTTGAAACCAAGTACCGCAGGCT  
TCCAGTAGTGGATGTTGCTGGCAAATTGATTGGAATCATCACAAGGGGAAATGTTGTTAGAGCAGCGCTAGAGCTCAGAAATGCTAGGGCAAAGAGAGCTTAAGGGAAGCAATATTTACT  
TCTTATTTTCGTTTGGGACAACCTTATTTGCTGTTTTTTAAAACGACTTTTTAGTAAAAAAAATTTGAATTTGAAAATTTTATACTAAAAAATTGCTTCATTTGGAAAATAAATGTTACAATTT  
GGAGGCACAATAGCAGTTTCTGAGTCTCTTCTCATTATCTTTCCTGCAGCAGTCTAGGAATAGACTGAACAAACACCACTCTCCTCACCTTCTTGTATGGAGCCACCTTCTTAGCTACA  
AATTTTACTATCTCAGCAGCTGAAATATTGCTATCATGTCTCTTAACTACAAATGCAACAGGAATCTCTCCTGCTTCCTCATCCAAATCAGATGTCAGTGCAGCATCGATGATTTCAAGTGTG  
GAAGTCAGCACAGCTTCCAAATCTGCTGGTGCTACCTGAAACCCCTTATACTTTATTACATCTCTTAAACGATCGACGATAAATAAGTATCCATCATGATCAAATAACCAATATCCCCTGTC  
TTCAACCAGCCATTTCTGTGCGATTATAGATTCTGTCCCTTTTCATCATTTAAGTAACCTTTCATAATAGCAGGTCCACGTAACCATAATTCCTCCATTTTGCCAGGAGGCAAAAATATTCTGT  
CTTCTGATCAACCCTTTGGCTTCCATATTTGGAGCTAAGAGCCCTGAAGATGTATATTTCTTGAATTTTTGTTATTGAAACCGCGAGTCCGACTGCGGTGCGACTCAGTCATGCCATATC  
CCTGAATCAAATCAACATGTTCAAATCTACATAAAAACTCCTTGATCAGCTTTTACTCAGTGGAGCTGCCCCACATGAAACCTGCTTCAATGATCTCAGAACACACCCAGTGGCATCCTT  
TGCTTTTATGAGAGCTGCCATTATGGTGGAAACAAGTGGAAAGATGAGTTACTTCATACCTATCCATGGCTCTAATTGCCTCATGAGCATCAAATCTCTTCATAACAACAATAGTGGAAACAA  
GAGATAGCAATCCAAACACAAACAATGACATTCCATACACATGAAACATTGGTATTGTAGCAAGATAAACATCCTTCCAGCTCTCCTTCTCATACTGTGAGGCCTCGAACCGCACGAAAA  
GCTCAACCATGGCAATGAAGTCCCATGAGTCAAGATGACAGCTTTACTAAATCCAGATGTGCCAGAAGTGAAGAGTATGGCTGCAGGGTCACTCTGCTGAATCACAGGCCTGAAAGTA  
ATTTGTTGCTTGCAAGAAATCATCTTATCAAAAAATGTAAATTTTGACGAATCATAATCAAATCACTTGGGACAGAAACAACAGGAACACCCAATGAATCCAAGGTTCCAACCTTTCTCCA  
ATTGGGCGAAAACCTAGGCCTATATTCAAACCAGCGGTTAGCTTCTTGATCTCTTGGGGGCTACTGAGGGGATTCATGGTGGTAATGATGGCGCCAAGGGAGAGGACGCTAAGGAGTACGA  
TAGGGAAGAAGATGGAGTTAGGAAGAAGGATGAGGACTACTTGGCCTTTCAAAATCCCAACCTGATGGAGACCAGAAACCAAAGCTTCGACCTTGGAGCGGATATCAGAGTATGAGAA  
ATAGAGACCGGATAGGGAGTCAATGAGGGCCTTTTCTCCCTTGTGCGGTTTGGAGAAAAGGAAAAGTGACCAAGTCTTGAAGTGGGTTTTGGGTAAGAGGAATTGGGGAGTGTGTTGCTGG  
TGTAATTTCCAGTTTTTGGACAGAACCAGATTGGCTTTGGATGAGAAAGAGCTTCCATGAGAAGACGAGGAGGAGGAAGAGAAATATAGAAAGTAGACGAAGAGA

>comp162932\_c1\_seq10

CCCCACGTCTCTCTACTCCCTCTTATCTCAGCATTGTTGAAACCACTCAACGGCTCAACCCACTCTCTCATTTCGCAAAAAACCACCACCCATTTCCCATACAATGGACGAACTGCCCCA  
GCTCCCTTTCACGGTCACTCTCTCCCTCACGCATGAGAAGCCAGAATCGCACTCTCTACTTCCCTCTTGGACGTGAGAAGAAACCCAGGCGGACAGCCCCATCTTCCCTCTCTGGATCA  
CACGAGAAGACTCAGGCAAAACCTCAGAATCCAGCCTCGGTTCTCCCTGCATTTTCGTGAAGACCCTAGCCCTTTCTCTGAAATTTGCATGAAGCATAGCCCACTCACCTCTCGGCAG  
TTCACAGAAAATCGGCTCCTCTCCCATTCATTCGCACGAAGCCAGGAAGTTCGCCCATAGAACAATTCACGAAGTCTCTCAAACCC

>comp162938\_c0\_seq1

TTATTTCAATAGTCTTAAAATAAATTCATGACTTGGAGATCCACCTTATACAAAATTTAATTTAGTATATTCTAACACAATTTTGTGTTTATAAATTTCAAGAGCTATCTAAACCGTAATTGTTAC  
ACCCTATTTTCTAACACACTAAAAACTAACGATAAAAGAAACGAACGAGGAACCCGCAAAAAACTTGATTAACGCGTAGGCCCTGTGTGACTATTCCAAAAAAAAGATAAAATAAG  
TGAGGGAGCAACTTAAATACATATTTATGTAAGTCGTTAAATACTAAACAACCCCGCTTAGATTTGCTTTTATTATTCACAATCACTTTCAAATTTTTTTGAAAATGATGAGCGATAAATCA  
CAAAGTTTGCAGCTTAAACGATCTTGGAGAGGACAACCAACTCCTTTTTAACTAATAGGTCACATATCTTCTCACACTTTCTAAAGTTCATGAAAGATTGAACTTGCAAACCTTTCATAGTCT  
GGCGCATGTTTAAATTTTTATGATAACGTGACTTATTTCAATTTATTTTTTTTTTCTTATTACTTATTCTTATATTTTTATAGGACAATTGGGGATCCTTCTTATTGTCATGGAATAGAAATC  
CTGCAAGTCAATAGATGTTCCGATGTCAGTAATGCTTATCAATGTTGCTTGTATTCAAATATCCTTCCATCTGCTTAAAGATATAAGCTTACTTTGTATTTGAAATCAGTTCTAACAAAA  
TTTTCTAAGTAGTGTATGATTAATTACTTGGATCGTCGCCATTCTCCAGCTGAACCTGAAATTAACCTCCTTTACTTGCAGAATCTTTTCTGCCAGCTTTTTTTATTTTTTATGTTGAGTC  
TGTTGTTGTTCTCATTTATCAACCTGAAGAGAGTATTTGTCTCAAACGTTTGAATTATAGTCATGGCTATGTAATAAATTTTATGCTATTATGTTTCAAATATTATAAATATTGGGAGCCCAA

ATTGAGGCTTCGTTTAATCGTTTGGGTTCAGCTTTAATCCTTTTTTTTTTTGTGGTTTCAAAAAATTTGTGCTAAAAAGCAATTTTATAAAACATTAAGAAAGTCTTTCAAAGGAAGCTTG

>comp162967\_c1\_seq10

ACGATAACATAAATCATAAAAGTACAAGAAGGCCTTAAGCATAACTTTAGTGCGTGAGAAATGATAAAAGTACCGAAAATTGAAGCGGCTGTGGTTGTACAAGCATGTATCCATTCCCATA  
TATTAGGCACCTTGGCTTAGCATGTTTATACAACAAAACTTCTCAGGCTCCACATGGGGACACATAAGCATAACCTCAACATGAAAATCACTAGAATACTCATTGCTTGGTTTAAAGCAATT  
AATTATAACCTATGTTTTATACATAAAGATGATATGAAAAAATAGCACCATTAACCTTTCTTCTTAAAAACGCACAAGAATTGATCAACTCTGCAGTTCAAGGAATCACTCCCAATGATG  
ATACTTTCTTCTGGAGCTTCCCCTTGAGCTGCCTGATTTTGGCATCCACTCTTGCAGTGAAACCAATCTTGGTTTCTGCCTCGCTTTGGATCGCTCTCTTGTCCACATTTGCTCATCCGTAA  
GATCCTTCTTGAAGTACTTAATCTCCTGAATCACATGGTGATCTAGTGGATAGAACAATCTTTGGTAGGAGAGGTGAGCAAAGTAAGGAAGGTTGCAAGCTGCTGCCACAAGGAAGGTTG  
TGATCCAGTATATTGGAGCTGGGCCAAGGACTCAATTAATATGTAAAGGCGTTCCAGAGATGACTGGTGACATGAATCCATAGCCAAAACAGGAATAGGTACCACGTGCTCACGCTTC  
CCCACACAAAGAGATGCTGAATCCAGGTGAAGTGGCTCATAGTGAGGGCAATCTGCAAGTTTACTGCCAGATAATGCAAGTGAACATGGTGGTTCCCATGGCAGCCATGTCGGCAGTTT  
GCCCTTCAGACTGGAACGCTTGATCGTAGAAGATGCTGATGTTGATGAAAAATACTACAATGGATGAGTAGAGACCATTGCCCGTCCATGCAATAATCCTTGACCAATCAAAGAACAAATT  
CTTGGGTCTTGTGGTACAAAGCTGGGAACCTGAAGGCATACTTGAGAGGACACATCTTGTCTAAAACTCCTAGTGATATGACCGGTAATGATGTGAGAATGATATTGAATAATATCATG  
TACCAGTCTCATAAACTGATTGTCCTGAAAAGCCAGTGTATGCCTCAAAATAAAACAAAGTGAGGCCAAATGCTATATTCTTGTAAGAAATAGCATAACCATCTGTGCAATCCTTTTATA  
GCACCAATGACCGTGGACAACAAGAAAGTCTTTCCAGACAACGGAATTGAGCAATAGAGAAGTCGCTAGCCATCACAGCCTGCATTCCTTCCACTCCACTGATTCCAACGCCAATATCAGC  
CTCTTGTATCATACCAACATCATTGACCATCTCCTATAGCTAAAGTAGTTTTTCTGTCTCTTCTTTCACAAGACGTGTTACCAGTGCTTTCTGCTTTGGGGAAACCCGACAGCATATGAC  
AGAAGCACAAATCAACAGCTAGACCAAGAAAATGGTGCTTCATATCATCCTCCAAAGCATAACTCAAAGCTTTCCCATCAATGATTAGAGCAAATGCTGCATGAGGATCCTTCTCTAGCTTG  
ACCATTGAGAAAGCATTGGTGATTTGCAGCAAAATATTATCTTTGATATTCTTCTTTCATCTTGGTCCAGAAAATCCGTATTCAATTGTTGATATGGAGATTTGTTTCAATCCTAATCGAAGCA  
AGCTGCATGCAAATCCTATGTTTACGGCTGTTTCCATTTTGTCTCCTGTTAGAAGCCAGATCTTTAAACCAGCTTGTGCTAGTTTGTCTATACACTGAGGAACCCCTTTTTGTAGCTTATCCT  
CAACAGCAGTTGCGCCGATAAGGACTAATCCCGCTCCATCAAATCAGCAACTTGCTCCAGCTGAGCATCTCTATCAAGTCCAATAGCTGTCTTTGCTCTGAGAAATTCTGCATTCCATGT  
TGAGTACTCTGATTCATCTAAAACCTTGTATGCCAAAGCTAAGGTACGCAGGCCTGCTTCTCCAAATTCATTTAGATGCTTCATGGTATCCGCTTCATACATTTTTCCATTCTTTGACAGTCTA  
TCAAAAATGATGTCTGTCTGCGCCTTTGCAGAAAAGAATTATCTGCCAGAAATCATCCCGAACAATGACAGACATTCGTTTTCTTTTGGCTATTGAATCCAGTAGATTCAGAAATCTAAATTC  
CCTTTCCAATGGATTTGGATAGCTTTCTCGGATGAAAACACTTGACTGAGTCTTTTTAAAGAACTCAAAGCCAAATCTCTCGCAGCAACAAGAAAAGCTCCTTCATCAGGTGACTCCGC  
CTCGTATGTGAAGGTGCCATTTCTCATCATGCTCCGGAATTGCTGTGTGACAAACTGCAAGAACCCGGAAGAACATTTGAAGGGTCCCTCGACTAGGCTCCTTCACCCAATTGCCTTG  
CATTAGACGGTCATCCTCAAAGCTGAATCCTTTAATCTTAGGTTTTGGATCCTTGACAACCTTGCAAGGTAGTACCATCCTCCAATTGAATTACTGAAGAGTCACCCACATTGTTATCCCAAT  
AATCTGCTGGGAAGCAATTGTGCCCTGGAGAACCAGAGAATTCTGAAGCGATATGCTTTGCAGCAGCAATTTCAACTTCACTCGAACCTACACCATAAGACACTCCTGCAATAGAACACT  
TCAGGAAGTCCATCTGGTTGCAGGTCAATGTGCCTGTTTTATCTGATAAGATTGTATCAACCTGCCAAGCTTTCATTTAAATTTGAGGTTCTGGCTTCACTGGCTTTCCAGTATCCTCAT  
CATACATCTGAATATCCTGGTTGATGAACATAGCTTGTAAAGACCTTACAACCTTATAGAAAACATAGAGAGAACTGGAATGAGATATCCATACATGATGAGAGCAGTCACAAGATGAAA  
TATGCCAGATAATGCAGGCATTAATGGGTTGTACAGAGTAGAAGCATTCTTCTGGTTGAAGGTACCACCAATTCGCAATTCCAAACCTTAGTGTATACTGCGTAGCCAATTGAGCTGATCAATG  
AAATCAAAACAAGCAGGGTGAACAGAATGTATATGATGTAATCCATCTTCTTCTCAATGCTGCTCCGCTTTGATGGTGATTCTGTTGAATTTTGCATGACCTTACTATCATGACCCGTGAAA  
ATAACCACTCCATAGATGTAAGATGTGTTCCTAAGCTTTGAATCCCTAAGAAGAATTTGGTTTGGATCCAAGGAACACACCTGCTTTTACACTCCAAATTTCCACAAAAGGTGATAAACT  
AGGATTGGGGTCTTCACACCTAATGGTGGCATAAAAATCCTTGAAAGTTTTATCCTCATCAAATGTAATGTCACATCCAATGCCCTTTCACCTTCAAATTTGTCTCCCCATCAAATTCAT  
AGTCTCCACATAGCATATCCCGTCTCATAACTCGAGGAAAGCAGAAGCAAATCAGCAGGAAAAAAGTGATCTTTCTCAACCTTCACTACATCACCAACAAAGATTTTATGCCACTTCTTG

TAACAAAAGTTCCCATCCCCTTTATGAATACTAACCTTCCTTTTATTACCTTCATGTCCTGCATAAATCTCCTCCAATCCTCGACGGCCTCCTTAGCCATGCTCAGCCAACTACAAACGCC  
AAGGGAGCAATCATGCTCACAGCCGAGAACGGTGCAATGGGGGTGAGGGAGAGGACGGCAGCCAGGAGAAAGTAGAGATTGGCGACACGCCGGAAGTGTTCAAATATGGCTTTAGGC  
AGGAAGGTTATGATGTTGTACTTGGTCGTGGAAATGTAATTGGATGGATAATGGAGAGGTTTCCGACGGTGGAGGCTCGGTTGGTTACATTGCACCTTGCGGGAGAAGCCGGGGCCTTGA  
AGACCATTGAATGGATTGGCGAAATCGATAAGCTCAGGGTTCGCTCGGGCACAATTGAAAGTATATATCTTGTCCATCGGAGCTTCTCTCGCCGGAGCTTATCCCTAATTTTCTCAGCCCG  
AGTCATCCTTTTATCTGCGATGAAATGCCTTCCCTCTTGCACGAAGGTGATGAGAGGAAAAGGACGAACGTATGTAATTATAGATAAGAGGAAAAAGACCATGAGGATGCCAGGAATCAGCA  
CCCGATTTCTACCCTACAGATGAAAACCTTGGGCTTCACGCAGAAGAATCTGTTGAGATGTGTCAAAATGTTCTGAAAAGAAGGCTTATAAGAAAAAATGGATTTAACGGAGCTCAAAAT  
TTCCAATTCGCGAAATGTTGGCAGAATAAAAATGATCCGGCTTTTGGAGAATAAAGAATAACACAAAAGTTTCTTCAAGAATAACACAATGCAGCTCGTGCGAATAAAGAATGTGACATC  
TTTCCATTGGAGCTAAAAAATCGCTCAAAATGGATGTGAAATTTTTGCAGAAACGTGAAGGAGATTTGGGTTGATGCAGAAATCAGAAGGCTTAGAGAAGAATTCGACCCGGGAATGTATA  
CGAGACGCGCTGCCGACGAGAACGGAGAGGGATGGGGTGATTTGCGGGCTCAACTAACTCCAAAACCTTCTGCTCGGCTTCTTTCTGCAATCTTTT

>comp162967\_c1\_seq19

ACGATAACATAAATCATAAAAGTACAAGAAGGCCCTTAAGCATAACTTTAGTGCGTGAGAAATGATAAAAGTACCGAAAATTGAAGCGGCTGTGGTTGTACAAGCATGTATCCATTCCATA  
TATTAGGCACTTGGCTTAGCATGTTTATACAACAAAACTTCTCAGGCTCCACATGGGGACACATAAGCATAACCTCAACATGAAAATCACTAGAATACTCATTGCTTGGTTTTAAGCAATT  
AATTATAACCTATGTTTTATACATAAAGATGATATGAAAAAATAGCACCATTAACCTTTTCTTCTTAAAAACGCACAAGAATTGATCAACTCTGCAGTTCAAGGAATCACTCCCAATGATG  
ATACTTTCTTCTGGAGCTTCCCCTTGAGCTGCCTGATTTTGGCATCCACTCTTGCAGTGAAACCAATCTTGGTTTCTGCTCGCTTTGGATCGCTCTCTTGTCCACATTTGCTCATCCGTAA  
GATCCTTCTTGAAGTACTTAATCTCCTGAATCACATGGTGATCTAGTGGATAGAACAATCTTTGGTAGGAGAGGTGAGCAAAGTAAGGAAGGTTGCAAGCTGCTGCCACAAGGAAGGTTG  
TGATCCAGTATATTGGAGCTGGGCCAAGGGACTCAATTAATATGTGAAAGGCGTTCCAGAGATGACTGGTGACATGAATCCATAGCCAAACAGGAATAGGTACCACGTGCTCACGCTTC  
CCCACAAAAGAGATGCTGAATCCAGGTGAAGTGGCTCATAGTGAGGGCAATCTGCAAGTTTACTGCCAGATAATGCAAGTGAACATGGTGGTTCCCATGGCAGCCATGTCGGCAGTTT  
GCCCTCAGACTGGAACGCTTGATCGTAGAAGATGCTGATGTTGATGAAAAATACTACAATGGATGAGTAGAGACCATTGCGCTCCATGCAATAATCCTTGACCAATCAAAGAACAAT  
CTTGGGTCCTTGTGTTACAAAAGCTGGGAACTGAAGGCATACTTGAGAGGACACATCTTGTCTCAAAAACTCCTAGTGATATGACCGGTAATGATGTGAGAATGATATTGAATAATATCATG  
TACCAGTCCTCATAAACTGATTGTCCTGAAAAGCCAGTGATGCCTCAAAAATAAAACAAAGTGAAGGCAAAATGCTATATCTTGTAAGAAAGAAATAGCATAACCATCTGTGCAATCCTTTTATA  
GCACCAATGACCGTGGACAACAAGAAGTCTTTCCAGACAACGGAATTGAGCAATAGAGAAGTCGCTAGCCATCACAGCCTGCACAACGCTGAAGCATTATGAGACTATTCTCCAGCAAG  
GAAAAAGGTTTTTGAAGTACTAGGACCAGAACAGACAGGAGATTTGTACTCAGCACAATCCGTTATAGAATGGTTTGCAAGCCTGCATTCTTCCACTCCACTGATTCCAACGCCAATATCAG  
CCTCTTGTATCATACCAACATCATTTGCACCATCTCCTATAGCTAAAGTAGTTTTTCTGTTTCTTTTCCACAAGACGTGTTACCTAGAATAGAAGAATTGCAACAAATTGGAAAGAAATTA  
TCTTTTAACCAACTAAAGTCGTGGTGTCAATAATTTAAGAACAATAAACCAGTGCTTTCTGCTTTGGGGAAACCCGACAGCATATGACAGAAGCACAATCAACAGCTAGACCAAGAAAA  
TGGTGCTTCATATCATCCTCCAAAGCATAACTCAAAGCTTTCCCATCAATGATTAGAGCAAATGCTGCATGAGGATCCTTCTCTAGCTTGACCATTGAGAAGCATTGGTGATTTGCAGCAA  
AATATTATCTTTGATATTCTTCTTTGCATCTTGGTCCAGAAAATCCGTAATTCATTGTTGATATGGAGATTTGTTTCAATCCTAATCGAAGCAAGCTGCATGCAAATCCTATGTTTACGGCTGTT  
TCCATTTTGTCTCCTGTTAGAAGCCAGATCTTTAAACCAGCTTGTGCTAGTTTGTCTATACACTGAGGAACCCCTTTTTGTAGCTTATCCTCAACAGCAGTTGCGCCGATAAGGACTAATTC  
CCGCTCCATCAAATCAGCAACTTGCTCCAGCTGAGCATCTCTATCAAGTCCAATAGCTGTCTTTGCTCTGAGAAATTCTGCATTCCATGTTGAGTACTCTGATTCATCTAAAACCTTTGTATGC  
CAAAGCTAAGGTACGCAGGCCTGCTTCTCAAATTCATTAGATGCTTCATGGTATCCGCTTCATACATTTTTCCATCTTTGACAGTCTATCAAAAATGATGCTGTCTGCGCCTTTGCAGAA  
AAGAATTATCTGCCAGAAATCATCCGAACAATGACAGACATTCGTTTTCTTTTGTCTATTGAATCCAGTAGATTGAGAATCTTAAATCCCTTTCCAATGGATTTGGATAGCTTTCTCGGAT  
GAAAACACTTGACTGAGTCCTTTTAAAGAACTCAAAGCCAAATCTCTCGCAGCAACAAGAAAAGCTCCTTCATCAGGTGACTCCGCCTCGTATGTGAAGGTGCCATTTTCTCATCATG



CTCCGGAATTGCTGTGTGACAACTGCAAGAACCCGGAAGAACATTTGAAGGGTCCCTCGACTAGGCTCCTTACCCAATTGCCTTGCATTAGACGGTCATCCTCAAAGCTGAATCCTTT  
AATCTTAGGTTTTGGATCCTTGACAACCTTGCAAGTAGTACCATCCTCCAATTGAATTACTGAAGAGTCACCCACATTGTTATCCCAATAATCTGCTGGGAAGCAATTGTGCCCTGGAGAA  
CCAGAGAATTCTGAAGCGATATGCTTTGCAGCAGCAATTTCAACTTCACTCGAACCTACACCATAAGACACTCCTGCAATAGAACACTTCAGGAAGTCCATCTGGTTGCAGGTCAATGTG  
CCTGTTTTATCTGATAAGATTGTATCAACCTGCCAAGCTCTTCATTTAAATTTGAGGTTCTGGCTTCAGCTGGCTTCCAGTATCCTCATCATACTCTGAATATCCTGGTTGATGAACATAG  
CTTGTAAGACCTTCAACAACCTCTATAGAAAACATAGAGAGAACTGGAATGAGATATCCATACATGATGAGAGCAGTCACAAGATGAAATATGCCAGATAATGCAGGCATTAATGGGTTGTA  
CAGAGTAGAAGCATTCTTCTGGTTGAAGGTACCACCAATTCCGCATTCCAACTTAGTGTATACTGCGTAGCCAATTGAGCTGATCAATGAAATCAAAAACAAGCAGGGTGAACAGAATGTA  
TATGATGTAATCCATCTTCTTCTCAATGCTGCTCCGCTTTGATGGTGATTCTGTTGAATTTTGCATGACCTTACTATCATGACCCGTGAAAATAACCACTCCATAGATGTAAGATGTGTTCCTA  
AGCTTTGAATCCCTAAGAAGAATTTGGTTGGATCCAAGGAACACACCTGCTTTTCATACTCCAAATTTCCACAAAAGGTGTATAAACTAGGATTGGGGTCTTACACCTAATGGTGGCAT  
AAAAATCCTTGAAAGTTTTATCCTCATCAAAATGTAATGTCACATCCAATGCCCTTTCACCTTCAAATTTGTCTCCCCATCCAAATTCATAGTCTCCACATAGCATATCCCGTCCCTCATAAC  
TCGAGGAAAGCAGAAGCAAATCAGCAGGAAAAAAGTGATCTTTCTCAACCTTCACTACATCACCACAAAGATTTTATGCCACTTCTTGTAACAAAAGTTCCCATCCCCTTTATGAATACT  
AACCTTCTTTTATTCACCTTCATGCTCTGCATAAATCTCCTCCAATCCTCGACGGCCTCCTTAGCCATGCTCAGCCCAACTACAAACGCCAAGGGAGCAATCATGCTCACAGCCGAGAAC  
GGTGCAATGGGGGTGAGGGAGAGGACGGCAGCCAGGAGAAAGTAGAGATTGGCGACACGCCGGAAGTGTCAAATATGGCTTTAGGCAGGAAGGTTATGATGTTGTACTTGGTCGTGG  
AAATGTAATTGGATGGATAATGGAGAGGTTTCCGACGGTGGAGGCTCGGTTGGTTACATTGCACCTTGCAGGAGAAAGCCGGGGCCTTGAAGACCATTGAATGGATTGGCGAAATCGATAA  
GCTCAGGGTTCGCTCGGGCACAATTGAAAGTATATATCTTGCTCCATCGGAGCTTCTCTCGCCGGAGCTTATCCCTAATTTTCTCAGCCCCGAGTCATCCTTTTATCTGCGATGAAATGCCTTC  
CCTCTTGACGAAGGTGATGAGAGGAAAAGGACGAACGTATGTAATTATAGATAAGAGGAAAAGACCATGAGGATGCCAGGAATCAGCACCCGATTTCTACCCTACAGATGAAAACCTGG  
GCTTCACGCAGAAGAATCTGTTGAGATGTGTCAAAATGTTCTGAAAAGAAGGCTTATAAGAAAAAATGGATTTAACGGAGCTCAAAATTTCCAATTCGCGAAATGTTGGCAGAATAAA  
AATTGATCCGGCTTTTGAAGAATAAAGAATAACACAAAGTTTCTTCAAGAATAACACAATGCAGCTCGTGCAATAAAGAATGTCGACATCTTCCATTGGAGCTAAAAAATCGCTCAAAT  
GGATGTGAAATTTTTGCAGAAACGTGAAGGAGATTTGGGTTGATGCAGAAATCAGAAGGCTTAGAGAAGAATTCGACCCGGGAATGTATACGAGACGCGCTGCCGACGAGAACGGAGA  
GGGATGGGGTGATTCGCGGCTCAACTAACTCCAAAACCTTCTGCTCGGCTTCTTTCTGCAATCTTTT

>comp162967\_c1\_seq23

ACGATAACATAAATCATAAAAGTACAAGAAGGCCTTAAGCATAACTTTAGTGCCTGAGAAATGATAAAAAGTACCGAAAATGAAGCGGCTGTGGTTGTACAAGCATGTATCCATTCCCATA  
TATTAGGCACTTGGCTTAGCATGTTTATACAACAAAAACTTCTCAGGCTCCACATGGGGACACATAAGCATAACCTCAACATGAAAATCACTAGAATACTCATTGCTTGGTTTTAAGCAATT  
AATTATAACCTATGTTTTATACATAAAGATGATATGAAAAAATAGCACCATTAACCTTTCTTCTTAAAAAACGCACAAGAATTGATCAACTCTGCAGTTCAAGGAATCACTCCCAATGATG  
ATACTTTCTTCTGGAGCTTCCCCTTGAGCTGCCTGATTTTGGCATCCACTCTTGCAGTGAAACCAATCTTGGTTTCTGCTCGCTTTGGATCGCTCTCTTGTCCACATTTGCTCATCCGTAA  
GATCCTTCTTGAAGTACTTAATCTCCTGAATCACATGGTGATCTAGTGGATAGAACAATCTTTGGTAGGAGAGGTGAGCAAAGTAAGGAAGGTTGCAAGCTGCTGCCACAAGGAAGGTTG  
TGATCCAGTATATTGGAGCTGGGCCAAGGGACTCAATTAATATGTGAAAGGCGTTCCAGAGATGACTGGTGACATGAATCCATAGCCAAAACAGGAATAGGTACCACGTGCTCACGCTTC  
CCCACACAAAGAGATGCTGAATCCAGGTGAAGTGCTCATAGTGAGGGCAATCTGCAAGTTTACTGCCAGATAATGCAAGTGAACATGGTGGTTCCCATGGCAGCCATGTCGGCAGTTT  
GCCCTCAGACTGGAACGCTTGATCGTAGAAGATGCTGATGTTGATGAAAAATACTACAATGGATGAGTAGAGACCATTGCCGTCCATGCAATAATCCTTGACCAATCAAAGAACAAATT  
CTTGGGTCCTTGTGGTACAAAGCTGGGAACTGAAGGCATACTTGAGAGGACACATCTTGTCAAAAACTCCTAGTGATATGACCGGTAATGATGTGAGAATGATATTGAATAATATCATG  
TACCAGTCTCATAAACTGATTGTCTGAAAAGCCAGTGATGCCTCAAAATAAAAACAAAGTGAGGCCAAATGCTATATCTTGTA AAAAGAAATAGCATAACCATCTGTGCAATCCTTTTATA  
GCACCAATGACCGTGGACAACAAGAAGTCTTTCCAGACAACGGAATTGAGCAATAGAGAAGTCGCTAGCCATCACAGCCTGCACAACGCTGAAGCATTATGAGACTATTCTCCAGCAAG

GAAAAAGGTTTTTGAAGTAGGACCAGAACAGACAGGAGATTTGTACTCAGCACAATCCGTTATAGAATGGTTTGCAAGCCTAGAAAATTAATTTTCATGCAAGTCGGACATTCAAAAAGAA  
GCGTTATGAACAAAGATTCATGTTATCAACTGAGAACTAACTGTTATTCAAGAAGCAATATCACGAAACAACCTGGCAAACCTGCATTCCCTTCCACTCCACTGATTCCAACGCCAATATC  
AGCCTCTTGTATCATACCAACATCATTTGCACCATCTCCTATAGCTAAAGTAGTTTTTCTGTTCCCTTCTTTCACAAGACGTGTTACCAGTGCTTTCTGCTTTGGGGAAACCCGACAGCATAT  
GACAGAAGCACAATCAACAGCTAGACCAAGAAAATGGTGCTTCATATCATCTCCAAAGCATAACTCAAAGCTTTCCCATCAATGATTAGAGCAAATGCTGCATGAGGATCCTTCTCTAGC  
TTGACCATTGAGAAGCATTGGTGATTTGCAGCAAAAATATTATCTTTGATATTCTTCTTTGCATCTTGGTCCAGAAAATCCGTATTCATTGTTGATATGGAGATTTGTTTCAATCCTAATCGAA  
GCAAGCTGCATGCAAATCCTATGTTTACGGCTGTTTCCATTTTGTCTCCTGTTAGAAGCCAGATCTTTAAACCAGCTTGTGCTAGTTTGTCTATACTGAGGAACCCCTTTTTGTAGCTTAT  
CCTCAACAGCAGTTGCGCCGATAAGGACTAATTCCCCTCCATCAAATCAGCAACTTGCTCCAGCTGAGCATCTCTATCAAGTCCAATAGCTGTCTTTGCTCTGAGAAATTCTGCATTCCA  
TGTTGAGTACTCTGATTCATCTAAAACCTTTGTATGCCAAAGCTAAGGTACGCAGGCCTGCTTCTCAAATTCATTTAGATGCTTCATGGTATCCGCTTCATACATTTTTCCATTCTTTGACAG  
TCTATCAAAAATGATGCTGTCTGCGCCTTTGCAGAAAAGAATTATCTGCCAGAAATCATCCGAACAATGACAGACATTCGTTTTCTTTTGTATTGAATTCAGTAGATTCCAGAATCTTAA  
ATTCCTTTCCAATGGATTTGGATAGCTTTCTCGGATGAAAACACTTGACTGAGTCTTTTAAAGAACTCAAAGCCAAATTCCTCTCGCAGCAACAAGAAAAGCTCCTTCATCAGGTGACT  
CCGCTCGTATGTGAAGGTGCCATTTTCTCATCATGCTCCGGAATTGCTGTGTGACAACTGCAAGAACCAGGAAGAACATTTGAAGGGTCCCTCGACTAGGCTCCTTCACCCAATTGC  
CTTGCATTAGACGGTCATCCTCAAAGCTGAATCCTTTAATCTTAGGTTTTGGATCCTTGACAACCTTGCAAGGTAGTACCATCCTCCAATTGAATTACTGAAGAGTCACCCACATTGTTATCC  
CAATAATCTGCTGGGAAGCAATTGTGCCCTGGAGAACCAGAGAATTCTGAAGCGATATGCTTTGCAGCAGCAATTTCAACTTCACTCGAACCTACACCATAAGACACTCCTGCAATAGAA  
CACTTCAGGAAGTCCATCTGGTTGCAGGTCAATGTGCCTGTTTTATCTGATAAGATTGTATCAACCTGCCAAGCTCTTCATTTAAATTTGAGGTTCTGGCTTCAGCTGGCTTTCCAGTATC  
CTCATCATACATCTGAATATCCTGGTTGATGAACATAGCTTTGTAAGACCTTCACAACCTCTATAGAAAACATAGAGAGAAAAGTGAATGAGATATCCATACATGATGAGAGCAGTCACAAGA  
TGAAATATGCCAGATAATGCAGGCATTAATGGGTTGTACAGAGTAGAAGCATTTTCTGGTTGAAGGTACCACCAATTCGCAATTCAAACTTAGTGTATACTGCGTAGCCAATTGAGCTGAT  
CAATGAAATCAAAACAAGCAGGGTGAACAGAATGTATATGATGTAATCCATCTTCTTCTCAATGCTGCTCCGCTTTGATGGTGATTCTGTTGAATTTGCATGACCTTACTATCATGACCCGT  
GAAAATAACCACTCCATAGATGTAAGATGTGTTCTAAGCTTTGAATCCCTAAGAAGAATTTGGTTTTGGATCCAAGGAACACACCTGCTTTTTCATACTCCAAATTTCCCACAAAGGTGTAT  
AAACTAGGATTGGGGTCTTCACACCTAATGGTGGCATAAAAATCCTTGAAAGTTTTATCCTCATCAAAATGTAATGTCACATCCAATGCCCTCTTCACCTTCAAATTTGTCTCCCCATCCAA  
ATTCATAGTCTCCACATAGCATATCCCGTCCCTCATAACTCGAGGAAAGCAGAAGCAAATCAGCAGGAAAAAAGTGATCTTTCTCAACCTTCACTACATCACCAACAAAGATTTTATGCCAC  
TTCTTGTAACAAAAGTTCCCATCCCCTTTATGAATACTAACCTTCTTTTATTCACCTTCATGTCTGCATAAATCTCCTCCAATCCTCGACGGCCTCCTTAGCCATGCTCAGCCCAACTACA  
AACGCCAAGGGAGCAATCATGCTCACAGCCGAGAACGGTGCAATGGGGGTGAGGGAGAGGACGGCAGCCAGGAGAAAGTAGAGATTGGCGACACGCCGGAAGTTCAAATATGGCT  
TTAGGCAGGAAGGTTATGATGTTGTAAGTACTTGGTTCGTTGAAATGTAATTGGATGGATAATGGAGAGGTTTCCGACGGTGGAGGCTCGGTTGGTTACATTGCACCTTGCGGGAGAAGCCGGGG  
CCTTGAAAGACCATTGAATGGATTGGCGAAATCGATAAGCTCAGGGTTCGCTCGGGCACAATTGAAAGTATATATCTTGTCTCCATCGGAGCTTCTCTCGCCGGAGCTTATCCCTAATTTTCTC  
AGCCCGAGTCATCCTTTTATCTGCGATGAAATGCCTTCCCTCTTGCACGAAGGTGATGAGAGGAAAGGACGAACGTATGTAATTATAGATAAGAGGAAAAGACCATGAGGATGCCAGGAA  
TCAGCACCCGATTTCTACCTACAGATGAAAACCTTGGGCTTCACGCAGAAGAATCTGTTGAGATGTGTCAAATGTTCTGAAAAGAAGGCTTATAAGAAAAAATGGATTTAACGGAGCT  
CAAAATTTCCAATTCGCGAAATGTTGGCAGAATAAAAATGATCCGGCTTTTGAAGAATAAAGAATAACACAAAGTTTCTTCAAGAATAACACAATGCAGCTCGTGCGAATAAAGAATGTC  
GACATCTTTCCATTGGAGCTAAAAAATCGCTCAAATGGATGTGAAATTTTTGCAGAAACGTGAAGGAGATTTGGGTTGATGCAGAAATCAGAAGGCTTAGAGAAGAATTCGACCCGGGA  
ATGTATACGAGACGCGCTGCCGACGAGAACGGAGAGGGATGGGGTGATTTGCGGGCTCAACTAACTCCAAAACCTTCTGCTCGGCTTCTTTCTGCAATCTTTT

>comp162967\_c1\_seq3

ACGATAACATAAATCATAAAAGTACAAGAAGGCCTTAAGCATAACTTTAGTGCGTGAGAAATGATAAAAGTACCGAAAATTGAAGCGGCTGTGGTTGTACAAGCATGTATCCATTCCCATA

TATTAGGCACTTGGCTTAGCATGTTTATACAACAAAACTTCTCAGGCTCCACATGGGGACACATAAGCATAACCTCAACATGAAAATCACTAGAATACTCATTGCTTGGTTTTAAGCAATT  
AATTATAACCTATGTTTTATACATAAAGATGATATGAAAAAATAGCACCATTAACTTTTCTTCTTAAAAACGCACAAGAATTGATCAACTCTGCAGTTC AAGGAATCACTCCCAATGATG  
ATACTTTCTTCTGGAGCTTCCCCTTGAGCTGCCTGATTTTGGCATCCACTCTTGCAGTGAAACCAATCTTGGTTTTCTGCCTCGCTTTGGATCGCTCTCTTGTCCACATTTGCTCATCCGTAA  
GATCCTTCTTGAAGTACTTAATCTCCTGAATCACATGGTGATCTAGTGGATAGAACAATCTTTGGTAGGAGAGGTGAGCAAAGTAAGGAAGGTTGCAAGCTGCTGCCACAAGGAAGGTTG  
TGATCCAGTATATTGGAGCTGGGCAAGGACTCAATTAATATGTGAAAGGCGTTCCAGAGATGACTGGTGACATGAATCCATAGCCAAAACAGGAATAGGTACCACGTGCTCACGCTTC  
CCCACACAAAGAGATGCTGAATCCAGGTGAAGTGGCTCATAGTGAGGGCAATCTGCAAGTTTACTGCCAGATAATGCAAGTGAACATGGTGGTTC CATGGCAGCCATGTCGGCAGTTT  
GCCCTTCAGACTGGAACGCTTGATCGTAGAAGATGCTGATGTTGATGAAAAATACTACAATGGATGAGTAGAGACCATTGCCGTCATGCAATAATCCTTGACCAATCAAAGAACAAATT  
CTTGGGTCCTTGCTGGTACAAAGCTGGGAACTGAAGGCATACTTGAGAGGACACATCTTGGCTCAAAAACTCCTAGTGATATGACCGGTAATGATGTGAGAATGATATTGAATAATATCATG  
TACCAGTCCTCATAAACTGATTGTCCTGAAAAGCCAGTGTATGCCTCAAAAATAAAACAAAGTGAGGCCAAATGCTATATCTTGTAAAAGAAATAGCATAACCATCTGTGCAATCCTTTTATA  
GCACCAATGACCGTGGACAACAAGAAGTCTTTCCAGACAACGGAATTGAGCAATAGAGAAGTCGCTAGCCATCACAGCCTGCACAACGCTGAAGCATTATGAGACTATTCTCCAGCAAG  
GAAAAAGGTTTTTGAAGTACTAGGACCAGAACAGACAGGAGATTTGTACTCAGCACAATCCGTTATAGAATGGTTTTGCAAGCCTAGAAAATTAATTTTCATGCAAGTCGGACATTCAAAGAA  
GCGTTATGAACAAAGATTCATGTTATCAACTGAGAACTAACTGTTATTCAAGAAGCAATATCACGAAACAACTGGCAAACCTGCATTCTTCCACTCCACTGATTCCAACGCCAATATC  
AGCCTCTTGATCATACCAACATCATTTGCACCATCTCCTATAGCTAAAGTAGTTTTCTGTTCCCTTTTTCACAAGACGTGTTACCTAGAAATAGAAGAATTGCAACAAATTGGAAAGAAA  
TTATCTTTTAAACCAACTAAAGTCGTGGTGTCAATAATTTAAGAACAAAAATACCAGTGCTTTCTGCTTTGGGAAACCCGACAGCATATGACAGAAGCACAATCAACAGCTAGACCAAGA  
AAATGGTGCTTCATATCATCTCCAAAGCATAACTCAAAGCTTTCCCATCAATGATTAGAGCAAATGCTGCATGAGGATCCTTCTCTAGCTTGACCATTGAGAAAGCATTGGTGATTTGCAG  
CAAAATATTATCTTTGATATTCTTCTTTGCATCTTGGTCCAGAAAATCCGTAATTCATTGTTGATATGGAGATTTGTTTTCAATCCTAATCGAAGCAAGCTGCATGCAAATCCTATGTTTACGGCT  
GTTTCCATTTTGTCTCCTGTTAGAAGCCAGATCTTTAAACCAGCTTGTGCTAGTTTGTCTATACACTGAGGAACCCCTTTTTGTAGCTTATCCTCAACAGCAGTTGCGCCGATAAGGACTAA  
TTCCCCTCCATCAAATCAGCAACTTGCTCCAGCTGAGCATCTCTATCAAGTCCAATAGCTGTCTTTGCTCTGAGAAATTCTGCATTCCATGTTGAGTACTCTGATTATCTAAAACCTTTGTA  
TGCCAAAGCTAAGGTACGCAGGCCTGCTTCTCCAAATTCATTTAGATGCTTCATGGTATCCGCTTCATACATTTTTCCATTCTTTGACAGTCTATCAAAAATGATGCTGTCTGCGCCTTTGCA  
GAAAAGAATTATCTGCCAGAATCATCCCGAACAATGACAGACATTCGTTTTCTTTTGTATTGAATTCCAGTAGATTCAGAATCTTAAATTCCTTTCCAATGGATTGGATAGCTTTCTCG  
GATGAAAACACTTGACTGAGTCCTTTTAAAGAACTCAAAGCCAAATCTCTCGCAGCAACAAGAAAAGCTCCTTCATCAGGTGACTCCGCCTCGTATGTGAAGGTGCCATTTTCTCATC  
ATGCTCCGGAATTGCTGTGTGACAACTGCAAGAACCCGGAAGAACATTTGAAGGGTCCCTCGACTAGGCTCCTTCACCCAATTGCCTTGCATTAGACGGTCATCCTCAAAGCTGAATCC  
TTAATCTTAGGTTTTGGATCCTTGACAACCTTGCAGGTAGTACCATCCTCCAATTGAATTACTGAAGAGTCACCCACATTGTTATCCCAATAATCTGCTGGGAAGCAATTGTGCCCTGGAG  
AACCAGAGAATTCTGAAGCGATATGCTTTGCAGCAGCAATTTCAACTTCACTCGAACCTACACCATAAGACACTCCTGCAATAGAACACTTCAGGAAGTCCATCTGGTTGCAGGTCAATG  
TGCCTGTTTTATCTGATAAGATTGTATCAACCTGCCAAGCTCTTCATTTAAATTTGAGGTTCTGGCTTCAGCTGGCTTTCCAGTATCCTCATCATACTGAATATCCTGGTTGATGAACAT  
AGCTTGTAAGACCTTCACAACCTCTATAGAAACATAGAGAGAACTGGAATGAGATATCCATACATGATGAGAGCAGTCACAAGATGAAATATGCCAGATAATGCAGGCATTAATGGGTTG  
TACAGAGTAGAAGCATTCTTCTGGTTGAAGGTACCACCAATCCGCATTCCAAACTTAGTGTATACTGCGTAGCCAATTGAGCTGATCAATGAAATCAAAAACAAGCAGGGTGAACAGAATG  
TATATGATGTAATCCATCTTCTTCTCAATGCTGCTCCGCTTTGATGGTGATTCTGTTGAATTTGCATGACCTTACTATCATGACCCGTGAAAATAACCACTCCATAGATGTAAGATGTGTTCC  
TAAGCTTTGAATCCCTAAGAAGAATTTGGTTTTGGATCCAAGGAACACACCTGCTTTTTCATACTCCAAATTTCCACAAAAGGTGTATAAACTAGGATTGGGGTCTTCACACCTAATGGTGGC  
ATAAAAATCCTTGAAAGTTTTATCCTCATCAAATGTAATGTCACATCCAATGCCCTCTTCACCTTCAAATTTGTCTCCCCATCAAATTCATAGTCTCCACATAGCATATCCCGTCTCATAA  
CTCGAGGAAAGCAGAAGCAAATCAGCAGGAAAAAAGTGATCTTTCTCAACCTTCACTACATACCAACAAAGATTTTATGCCACTTCTTGTAACAAAAGTTCCTCCATCCCTTTATGAATA

CTAACCTTCCTTTTATTCACCTTCATGTCTCTGCATAAATCTCCTCCAATCCTCGACGGCCTCCTTAGCCATGCTCAGCCCAACTACAAACGCCAAGGGAGCAATCATGCTCACAGCCGAGA  
ACGGTGCAATGGGGGTGAGGGAGAGGACGGCAGCCAGGAGAAAGTAGAGATTGGCGACACGCCGGAACCTGTTCAAATATGGCTTTAGGCAGGAAGGTTATGATGTTGTACTTGGTTCGT  
GGAAATGTAATTGGATGGATAATGGAGAGGTTTTCCGACGGTGGAGGCTCGGTTGGTTACATTGCACCTTGCGGGAGAAGCCGGGGCCTTGAAGACCATTGAATGGATTGGCGAAATCGAT  
AAGCTCAGGGTTCGCTCGGGCACAATTGAAAGTATATATCTTGCTCCATCGGAGCTTCTCTCGCCGGAGCTTATCCCTAATTTTCTCAGCCCGAGTCATCCTTTTATCTGCGATGAAATGCC  
TTCCCTCTTGACGAAGGTGATGAGAGGAAAGGACGAACGTATGTAATTATAGATAAGAGGAAAAGACCATGAGGATGCCAGGAATCAGCACCCGATTTCTACCCTACAGATGAAAACCT  
GGGCTTCACGCAGAAGAATCTGTTGAGATGTGTCAAAATGTTCTGAAAAGAAGGCTTATAAGAAAAAATGGATTTAACGGAGCTCAAAATTTCCAATTCGCGAAATGTTGGCAGAATA  
AAAATGATCCGGCTTTTGAGAATAAAGAATAACACAAAAGTTTCTTCAAGAATAACACAATGCAGCTCGTGCGAATAAAGAATGTGCGACATCTTCCATTGGAGCTAAAAAATCGCTCAA  
ATGGATGTGAAATTTTTGCAGAAACGTGAAGGAGATTTGGGTTGATGCAGAAATCAGAAGGCTTAGAGAAGAATTCGACCCGGGAATGTATACGAGACGCGCTGCCGACGAGAACGA  
GAGGGATGGGGTGATTTGCGGGCTCAACTAACTCCAAAACCTTCTGCTCGGCTTCTTTCTGCAATCTTTT

>comp162967\_c1\_seq30

ACGATAACATAAATCATAAAGTACAAGAAGGCCTTAAGCATAACTTTAGTGCGTGAGAAATGATAAAAGTACCGAAAATTGAAGCGGCTGTGGTTGTACAAGCATGTATCCATTCCATA  
TATTAGGCACTTGGCTTAGCATGTTTATACAACAAAACTTCTCAGGCTCCACATGGGGACACATAAGCATAACCTCAACATGAAAATCACTAGAATACTCATTGCTTGGTTTTAAGCAATT  
AATTATAACCTATGTTTTATACATAAAGATGATATGAAAAAATAGCACCATTAACTTTTCTTCTTAAAAACGCACAAGAATTGATCAACTCTGCAGTTCAAGGAATCACTCCCAATGATG  
ATACTTTCTTCTGGAGCTTCCCCTTGAGCTGCCTGATTTTGGCATCCACTCTTGCAGTGAAACCAATCTTGGTTTCTGCCTCGCTTTGGATCGCTCTCTTGTCCACATTTGCTCATCCGTAA  
GATCCTTCTTGAAGTACTTAATCTCCTGAATCACATGGTGATCTAGTGGATAGAACAATCTTTGGTAGGAGAGGTGAGCAAAGTAAGGAAGGTTGCAAGCTGCTGCCACAAGGAAGGTTG  
TGATCCAGTATATTGGAGCTGGGCCAAGGGACTCAATTAATATGTGAAAGGCGTTCCAGAGATGACTGGTGACATGAATCCATAGCCAAACAGGAATAGGTACCACGTGCTCACGCTTC  
CCCACAAAAGAGATGCTGAATCCAGGTGAAGTGCTCATAGTGAGGGCAATCTGCAAGTTTACTGCCAGATAATGCAAGTGAACATGGTGGTTCCCATGGCAGCCATGTCGGCAGTTT  
GCCCTCAGACTGGAACGCTTGATCGTAGAAGATGCTGATGTTGATGAAAAATACTACAATGGATGAGTAGAGACCATTGGCCGTCCATGCAATAATCCTTGACCAATCAAAGAACAATT  
CTTGGGTCCTTGTGTTACAAAAGCTGGGAACTGAAGGCATACTTGAGAGGACACATCTTGTCTAAAAACTCCTAGTGATATGACCGGTAATGATGTGAGAATGATATTGAATAATATCATG  
TACCAGTCCCTCATAAACTGATTGTCCTGAAAAGCCAGTGATGCCTCAAAAATAAAACAAAGTGAGGCCAAATGCTATATCTTGTA AAAAGAAATAGCATAACCATCTGTGCAATCCTTTTATA  
GCACCAATGACCGTGGACAACAAGAAGTCTTTCCAGACAACGGAATTGAGCAATAGAGAAGTCGCTAGCCATCACAGCCTGCACAACGCTGAAGCATTATGAGACTATTCTCCAGCAAG  
GAAAAAGGTTTTTGAAGTACTAGGACCAGAACAGACAGGAGATTTGTACTCAGCACAATCCGTTATAGAATGGTTTGCAAGCCTAGAAATTAATTTTCATGCAAGTCGGACATTCAAAGAA  
GCGTTATGAACAAAGATTCATGTTATCAACTGAGAACTAACTGTTATTCAAGAAGCAATATCACGAAAACAACTGGCAAACCTGCATTCTTCCACTCCACTGATTCCAACGCCAATATC  
AGCCTCTTGATCATAACCAACATCATTTGCACCATCTCCTATAGCTAAAGTAGTTTTTCTGTTCCCTTCTTTTCAAGACGTTTACCAGTGCTTTCTGCTTTGGGGAAACCCGACAGCATAT  
GACAGAAGCACAATCAACAGCTAGACCAAGAAAATGGTGCTTCATATCATCTCCTCAAAGCATAACTCAAAGCTTTCCCATCAATGATTAGAGCAAATGCTGCATGAGGATCCTTCTCTAGC  
TTGACCATTGAGAAAGCATTGGTGATTTGAGCAAAAATATTATCTTTGATATTCTGTTCCAAGCATGAAAAGAAAAGCCTTCTTTGCATCTTGGTCCAGAAAATCCGTATTCAATGTTGATATG  
GAGATTTGTTTCAATCCTAATCGAAGCAAGCTGCATGCAAACTCTATGTTTACGGCTGTTTCCATTTTGTCTCCTGTTAGAAGCCAGATCTTTAAACCAGCTTGTGCTAGTTTGTCTATACAC  
TGAGGAACCCCTTTTTGTAGCTTATCCTCAACAGCAGTTGCGCCGATAAGGACTAATTCCCCTCCATCAAATCAGCAACTTGCTCCAGCTGAGCATCTCTATCAAGTCCAATAGCTGTCT  
TTGCTCTGAGAAATCTGCATTCCATGTTGAGTACTCTGATTCACTAAAACTTTGATGCCAAAGCTAAGGTACGCAGGCCCTGCTTCTCCAAATTCATTTAGATGCTTCATGGTATCCGCTT  
CATACATTTTTCCATCTTTGACAGTCTATCAAAAATGATGCTGTCTGCGCCTTTGCAGAAAAGAATTATCTGCCAGAAATCATCCGAACAATGACAGACATTCGTTTTCTTTTGCTATTGA  
ATTCCAGTAGATTGAGAATCTTAAATCCCTTTCCAATGGATTTGGATAGCTTTCTCGGATGAAAACACTTGACTGAGTCCTTTTAAAGAACTCAAAGCCAAATCTCTCGCAGCAACAAG

AAAAGCTCCTTCATCAGGTGACTCCGCCTCGTATGTGAAGGTGCCATTTTCTCATCATGCTCCGGAATTGCTGTGTGACAACTGCAAGAACCCGGAAGAACATTTGAAGGGTCCCTCG  
ACTAGGCTCCTTCACCCAATTGCCTTGCAATTAGACGGTCATCCTCAAAGCTGAATCCTTTAATCTTAGGTTTTGGATCCTTGACAACCTTGACAGGTAGTACCATCCTCCAATTGAATTACTG  
AAGAGTCACCCACATTGTTATCCCAATAATCTGCTGGGAAGCAATTGTGCCCTGGAGAACCAGAGAATTCTGAAGCGATATGCTTTGCAGCAGCAATTTCAACTTCACTCGAACCTACAC  
CATAAGACACTCCTGCAATAGAACACTTCAGGAAGTCCATCTGGTTGCAGGTCAATGTGCCGTGTTTTATCTGATAAGATTGTATCAACCTGCCAAGCTCTTCATTTAAATTTGAGGTTCTG  
GCTTCAGCTGGCTTTCCAGTATCCTCATACATCTGAATATCCTGGTTGATGAACATAGCTTGTAAGACCTTCACAACCTCTATAGAAACATAGAGAGAAACTGGAATGAGATATCCATA  
CATGATGAGAGCAGTCACAAGATGAAATATGCCAGATAATGCAGGCATTAATGGGTTGTACAGAGTAGAAGCATTTTCTGGTTGAAGGTACCACCAATTCCGCATTCCAAACTTAGTGTAT  
ACTGCGTAGCCAATTGAGCTGATCAATGAAATCAAACAAGCAGGGTGAACAGAATGTATATGATGTAATCCATCTTCTTCTCAATGCTGCTCCGCTTTGATGGTGATTCTGTTGAATTTG  
CATGACCTTACTATCATGACCCGTGAAAATAACCACTCCATAGATGTAAGATGTGTTCCCTAAGCTTTGAATCCCTAAGAAGAATTTGGTTTGGATCCAAGGAACACACCTGCTTTTCATACT  
CCAAATTTCCACAAAAGGTGTATAAACTAGGATTGGGGTCTTCACACCTAATGGTGGCATAAAAAATCCTTGAAAGTTTTATCCTCATCAAAATGTAATGTCACATCCAATGCCCTCTTCACC  
TTCAAATTTGTCTCCCATCCAAATTCATAGTCTCCACATAGCATATCCCCTCCTCATAACTCGAGGAAAGCAGAAGCAAATCAGCAGGAAAAAGTGATCTTTTCTCAACCTTCACTACAT  
CACCAACAAAGATTTTATGCCACTTCTTGTAACAAAAGTTCCCATCCCCTTTATGAATACTAACCTTCTTTTTATTACCTTCATGCTCTGCATAAATCTCCTCCAATCCTCGACGGCCTCCT  
TAGCCATGCTCAGCCCAACTACAAACGCCAAGGGAGCAATCATGCTCACAGCCGAGAACGGTGAATGGGGGTGAGGGAGAGGACGGCAGCCAGGAGAAAGTAGAGATTGGCGACAC  
GCCGGAAGTGTCAAATATGGCTTTAGGCAGGAAGGTTATGATGTTGTAATGGGCGTGGGAAATGTAATGGATGGATAATGGAGAGGTTTCCGACGGTGGAGGCTCGGTTGGTTACATTG  
CACCTTGCGGGAGAAGCCGGGGCCTTGAAGACCATTGAATGGATTGGCGAAATCGATAAGCTCAGGGTTCGCTCGGGCACAATTGAAAGTATATATCTTGCTCCATCGGAGCTTCTCTCG  
CCGGAGCTTATCCCTAATTTTCTCAGCCCGAGTCATCCTTTTATCTGCGATGAAATGCCTTCCCTCTTGCACGAAGGTGATGAGAGGAAAGGACGAACGTATGTAATTATAGATAAGAGGA  
AAAGACCATGAGGATGCCAGGAATCAGCACCCGATTTCTACCCTACAGATGAAAACCTTGGGCTTCACGCAGAAAGAACTGTTGAGATGTGTCAAAATGTTCTTGAAAAGAAGGCTTATA  
AGAAAAATGGATTTAACGGAGCTCAAAATTTCCAATTCGCGAAATGTTGGCAGAATAAAAATTGATCCGGCTTTTGAATAAAGAATAACACAAAGTTTCTTCAAGAATAACACAATG  
CAGCTCGTGCGAATAAAGAATGTGACATCTTTCCATTGGAGCTAAAAAATCGCTCAAATGGATGTGAAATTTTTGCAGAAACGTGAAGGAGATTTGGGTTGATGCAGAAATCAGAAGG  
CTTAGAGAAGAATTCGACCCGGGAATGTATACGAGACGCGCTGCCGACGAGAACGGAGAGGGATGGGGTGATTTCCGGGCTCAACTAACTCCAAAATTTCTGCTCGGCTTCTTTCTGCA  
ATCTTTT

>comp162967\_c1\_seq32

ACGATAACATAAATCATAAAAGTACAAGAAGGCCTTAAGCATAACTTTAGTGCGTGAGAAATGATAAAAGTACCGAAAATTGAAGCGGCTGTGGTTGTACAAGCATGTATCCATTCCATA  
TATTAGGCACTTGGCTTAGCATGTTTATACAACAAAACCTTCTCAGGCTCCACATGGGGACACATAAGCATAACCTCAACATGAAAATCACTAGAATACTCATTGCTTGGTTTTAAGCAATT  
AATTATAACCTATGTTTTATACATAAAGATGATATGAAAAAATAGCACCATTAACCTTTTCTTCTTAAAAACGCACAAGAATTGATCAACTCTGCAGTTCAAGGAATCACTCCCAATGATG  
ATACTTTCTTCTGGAGCTTCCCCTTGGAGCTGCCTGATTTTGGCATCCACTCTTGCAGTGAAACCAATCTTGGTTTCTGCCTCGCTTTGGATCGCTCTCTTGTCCACATTTGCTCATCCGTAA  
GATCCTTCTTGAAGTACTTAATCTCCTGAATCACATGGTGATCTAGTGGATAGAACAATCTTTGGTAGGAGAGGTGAGCAAAGTAAGGAAGGTTGCAAGCTGCTGCCACAAGGAAGGTTG  
TGATCCAGTATATTGGAGCTGGGCCAAGGACTCAATTAATATGTGAAAGGCGTTCCAGAGATGACTGGTGACATGAATCCATAGCCAAACAGGAATAGGTACCACGTGCTCACGCTTC  
CCCACACAAAGAGATGCTGAATCCAGGTGAAGTGCTCATAGTGAGGGCAATCTGCAAGTTTACTGCCAGATAATGCAAGTGAACATGGTGGTTCCCATGGCAGCCATGTCGGCAGTTT  
GCCCTTACAGACTGGAACGCTTGATCGTAGAAGATGCTGATGTTGATGAAAAATACTACAATGGATGAGTAGAGACATTTGCCGTCCATGCAATAATCCTTGACCAATCAAAGAACAAT  
CTTGGGTCCTTGTGTTACAAAGCTGGGAACCTGAAGGCATACTTGAGAGGACACATCTTGTCTAAAAACTCCTAGTGATATGACCGGTAATGATGTGAGAATGATATTGAATAATATCATG  
TACCAGTCTCATAAACTGATTGTCCTGAAAAGCCAGTGTATGCCTCAAAAATAAAAACAAAGTGAGGCCAAATGCTATATTCTTGTAAGAAGAAATAGCATAACCATCTGTGCAATCCTTTTATA

GCACCAATGACCGTGGACAACAAGAAGTCTTTCCAGACAACGGAATTGAGCAATAGAGAAGTCGCTAGCCATCACAGCCTGCATTCCCTTCCACTCCACTGATTCCAACGCCAATATCAGC  
CTCTTGATCATACCAACATCATTTGCACCATCTCTATAGCTAAAGTAGTTTTTCCCTGTTCCCTTTTCCACAAGACGTGTTACCTAGAATAGAAGAATTGCAACAAATTGGAAAGAAATTAT  
CTTTTAACCAACTAAAGTCGTGGTGTCAATAATTTAAGAACAAAAATACCAGTGCTTTCTGCTTTGGGGAAACCCGACAGCATATGACAGAAGCACAATCAACAGCTAGACCAAGAAAAT  
GGTGCTTCATATCATCTCCAAAGCATAACTCAAAGCTTTCCCATCAATGATTAGAGCAAATGCTGCATGAGGATCCTTCTCTAGCTTGACCATTGAGAAGCATTGGTGATTTGCAGCAA  
AATATTATCTTTGATATTCTTCTTTGCATCTTGGTCCAGAAAATCCGTATTATTGTTGATATGGAGATTTGTTTCAATCCTAATCGAAGCAAGCTGCATGCAAATCCTATGTTTACGGCTGTT  
TCCATTTTGTCTCCTGTTAGAAGCCAGATCTTTAAACCAGCTTGTGCTAGTTTGTCTATACTGAGGAACCCCTTTTTGTAGCTTATCCTCAACAGCAGTTGCGCCGATAAGGACTAATTC  
CCGCTCCATCAAATCAGCAACTTGTCTCCAGCTGAGCATCTCTATCAAGTCCAATAGCTGTCTTTGCTCTGAGAAATCTGCATTCCATGTTGAGTACTCTGATTTCATCTAAAACCTTTGTATGC  
CAAAGCTAAGGTACGCAGGCCTGCTTCTCAAATTCATTTAGATGCTTCATGGTATCCGCTTCATACATTTTTCCATTCCTTTGACAGTCTATCAAAAATGATGCTGTCTGCGCCTTTGCAGAA  
AGAATTATCTGCCAGAATCATCCCGAACAATGACAGACATTCGTTTTCTTTTGTATTGAATCCAGTAGATTGAGAATCTTAAATTCCTTTCCAATGGATTTGGATAGCTTTCTCGGAT  
GAAAACACTTGACTGAGTCTTTTAAAGAACTCAAAGCCAAATTCCTCTCGCAGCAACAAGAAAAGCTCCTTCATCAGGTGACTCCGCCTCGTATGTGAAGGTGCCATTTTCCATCATATG  
CTCCGGAATTGCTGTGTGACAACTGCAAGAACCCGGAAGAACATTTGAAGGGTCCCTCGACTAGGCTCCTTCACCCAATTGCCCTTGCAATGACGGTCATCCTCAAAGCTGAATCCTTT  
AATCTTAGGTTTTGGATCCTTGACAACCTTGCAAGTAGTACCATCCTCCAATTGAATTACTGAAGAGTCACCCACATTGTTATCCCAATAATCTGCTGGGAAGCAATTGTGCCCTGGAGAA  
CCAGAGAATTCGAAGCGATATGCTTTGCAGCAGCAATTTCAACTTCACTCGAACCTACACCATAAGACACTCCTGCAATAGAACACTTCAGGAAGTCCATCTGGTTGCAGGTCAATGTG  
CCTGTTTTATCTGATAAGATTGTATCAACCTGCCAAGCTCTTCATTTAAATTTGAGGTTCTGGCTTCAGCTGGCTTTCCAGTATCCTCATCATACATCTGAATATCTGGTTGATGAACATAG  
CTTGTAAGACCTTCAACAACCTCTATAGAAACATAGAGAGAACTGGAATGAGATATCCATACATGATGAGAGCAGTCACAAGATGAAATATGCCAGATAATGCAGGCATTAATGGGTTGTA  
CAGAGTAGAAGCATTTTCTGGTTGAAGGTACCACCAATTCGCGATTCCAAACTTAGTGTATACTGCGTAGCCAATTGAGCTGATCAATGAAATCAAAAACAAGCAGGGTGAACAGAATGTA  
TATGATGTAATCCATCTTCTTCTCAATGCTGCTCCGCTTTGATGGTGATTCTGTTGAATTTGATGACCTTACTATCATGACCCGTGAAAATAACCACTCCATAGATGTAAGATGTGTTCCTA  
AGCTTTGAATCCCTAAGAAGAATTTGGTTGGATCCAAGGAACACACCTGCTTTTCATACTCCAAATTTCCACAAAAGGTGTATAAACTAGGATTGGGGTCTTCACACCTAATGGTGGCAT  
AAAAATCCTTGAAAGTTTTATCCTCATCAAATGTAATGTCACATCCAATGCCCTCTTCACCTTCAAATTTGTCTCCCCATCCAAATTCATAGTCTCCACATAGCATATCCCGTCCCTCATAAC  
TCGAGGAAAGCAGAAGCAAATCAGCAGGAAAAAAGTGATCTTTCTCAACCTTCACTACATCACCAACAAAGATTTTATGCCACTTCTTGTAACAAAAGTTCCATCCCCCTTTATGAATACT  
AACCTTCCCTTTTATTCACCTTCATGCTCTGCATAAATCTCCTCCAATCCTCGACGGCCTCCTTAGCCATGCTCAGCCCAACTACAAACGCCAAGGGAGCAATCATGCTCACAGCCGAGAAC  
GGTGCAATGGGGGTGAGGGAGAGGACGGCAGCCAGGAGAAAGTAGAGATTGGCGACACGCCGGAAGTGTCAAATATGGCTTTAGGCAGGAAGGTTATGATGTTGTACTTGGTCTGTTG  
AAATGTAATTGGATGGATAATGGAGAGGTTTTCCGACGGTGGAGGCTCGGTTGGTTACATTGCACCTTGCGGGAGAAGCCGGGGCCTTGAAGACCATTGAATGGATTGGCGAAATCGATAA  
GCTCAGGGTTCGCTCGGGACAATTGAAAGTATATATCTTGCTCCATCGGAGCTTCTCTCGCCGGAGCTTATCCCTAATTTTCTCAGCCCCGAGTCATCCTTTTATCTGCGATGAAATGCCTTC  
CCTCTTGACGAAGGTGATGAGAGGAAAGGACGAACGTATGTAATTATAGATAAGAGGAAAAGACCATGAGGATGCCAGGAATCAGCACCCGATTTCTACCCTACAGATGAAAACCTGG  
GCTTCACGCAGAAGAATCTGTTGAGATGTGTCAAAATGTTCTGAAAAGAAGGCTTATAAGAAAAAATGGATTTAACGGAGCTCAAAATTTCCAATTCGCGAAAATGTTGGCAGAATAAA  
AATTGATCCGGCTTTTGAAGAATAAAGAATAACACAAAAGTTTCTTCAAGAATAACACAATGCAGCTCGTGCGAATAAAGAATGTGCACATCTTTCCATTGGAGCTAAAAAATCGCTCAAAT  
GGATGTGAAATTTTTGCAGAAACGTGAAGGAGATTTGGGTTGATGCAGAAATCAGAAGGCTTAGAGAAGAATTCGACCCGGGAATGTATACGAGACGCGCTGCCGACGAGAACGGAGA  
GGGATGGGGTGATTCGCGGGCTCAACTAACTCCAAAACCTTCTGCTCGGCTTCTTTCTGCAATCTTTT

>comp162967\_c1\_seq4

ACGATAACATAAATCATAAAAGTACAAGAAGGCCTTAAGCATAACTTTAGTGCGTGAGAAATGATAAAAGTACCGAAAATTGAAGCGGCTGTGGTTGTACAAGCATGTATCCATCCCATA

TATTAGGCACTTGGCTTAGCATGTTTATACAACAAAACTTCTCAGGCTCCACATGGGGACACATAAGCATAACCTCAACATGAAAATCACTAGAATACTCATTGCTTGGTTTTAAGCAATT  
AATTATAACCTATGTTTTATACATAAAGATGATATGAAAAAATAGCACCATTAACTTTTCTTCTTAAAAACGCACAAGAATTGATCAACTCTGCAGTTCAAGGAATCACTCCCAATGATG  
ATACTTTCTTCTGGAGCTTCCCCTTGAGCTGCCTGATTTTGGCATCCACTCTTGCAGTGAAACCAATCTTGGTTTTCTGCCTCGCTTTGGATCGCTCTCTTGTCCACATTTGCTCATCCGTAA  
GATCCTTCTTGAAGTACTTAATCTCCTGAATCACATGGTGATCTAGTGGATAGAACAATCTTTGGTAGGAGAGGTGAGCAAAGTAAGGAAGGTGCAAGCTGCTGCCACAAGGAAGGTTG  
TGATCCAGTATATTGGAGCTGGGCAAGGACTCAATTAATATGTGAAAGGCGTTCCAGAGATGACTGGTGACATGAATCCATAGCCAAAACAGGAATAGGTACCACGTGCTCACGCTTC  
CCCACACAAAGAGATGCTGAATCCAGGTGAAGTGGCTCATAGTGAGGGCAATCTGCAAGTTTACTGCCAGATAATGCAAGTGAACATGGTGGTTCATGGCAGCCATGTCGGCAGTTT  
GCCCTTCAGACTGGAACGCTTGATCGTAGAAGATGCTGATGTTGATGAAAAATACTACAATGGATGAGTAGAGACCATTGCCGTCATGCAATAATCCTTGACCAATCAAAGAACAAATT  
CTTGGGTCCTTGCTGGTACAAAGCTGGGAACTGAAGGCATACTTGAGAGGACACATCTTGTCTAAAAACTCCTAGTGATATGACCGGTAATGATGTGAGAATGATATTGAATAATATCATG  
TACCAGTCCTCATAAACTGATTGTCCTGAAAAGCCAGTGTATGCCTCAAAATAAAACAAAGTGAGGCCAAATGCTATATCTTGTAAAAGAAATAGCATAACCATCTGTGCAATCCTTTTATA  
GCACCAATGACCGTGGACAACAAGAAGTCTTTCCAGACAACGGAATTGAGCAATAGAGAAGTCGCTAGCCATCACAGCCTGCACAACGCTGAAGCATTATGAGACTATTCTCCAGCAAG  
GAAAAAGGTTTTTGAAGTACTAGGACCAGAACAGACAGGAGATTTGTACTCAGCACAATCCGTTATAGAATGGTTTTGCAAGCCTGCATTCTTCCACTCCACTGATTCCAACGCCAATATCAG  
CCTCTTGTATCATACCAACATCATTGACCATCTCCTATAGCTAAAGTAGTTTTCTGTTCCTTCTTTCACAAGACGTGTTACCAGTGCTTTCTGCTTTGGGAAACCCGACAGCATATGA  
CAGAAGCACAATCAACAGCTAGACCAAGAAAATGGTGCTTCATATCATCTCCAAAGCATAACTCAAAGCTTTCCCATCAATGATTAGAGCAAATGCTGCATGAGGATCCTTCTCTAGCTT  
GACCATTGAGAAGCATTGGTGATTTGCAGCAAATATTATCTTTGATATTCTTCTTGTGCATCTGGTCCAGAAAATCCGTTATTCATTGTTGATATGGAGATTTGTTTCAATCCTAATCGAAGC  
AAGCTGCATGCAAATCCTATGTTTACGGCTGTTTCCATTTTGTCTCCTGTTAGAAGCCAGATCTTTAAACCAGCTTGTGCTAGTTTGTCTATACACTGAGGAACCCCTTTTTGTAGCTTATCC  
TCAACAGCAGTTGCGCCGATAAGGACTAATCCCCTCCATCAAATCAGCAACTTGCTCCAGCTGAGCATCTCTATCAAGTCCAATAGCTGTCTTTGCTCTGAGAAATCTGCATTCCATG  
TTGAGTACTCTGATTCATCTAAAACCTTTGTATGCCAAAGCTAAGGTACGCAGGCCTGCTTCTCAAATTCATTTAGATGCTTCATGGTATCCGCTTCATACATTTTCCATTCTTTGACAGTCT  
ATCAAAAATGATGCTGTCTGCGCCTTTGCAGAAAAGAATTATCTGCCAGAATCATCCCGAAACAATGACAGACATTCGTTTTCTTTGCTATTGAATTCCAGTAGATTCAGAATCTTAAATT  
CCCTTTCCAATGGATTTGGATAGCTTTCTCGGATGAAAACACTTGACTGAGTCCTTTTAAAGAACTCAAAGCCAAATTTCTCTCGCAGCAACAAGAAAAGCTCCTTCATCAGGTGACTCCG  
CCTCGTATGTGAAGGTGCCATTTTCTCATCATGCTCCGGAATTGCTGTGTGACAAACTGCAAGAACCCGGAAGAACATTTGAAGGGTCCCTCGACTAGGCTCCTTCACCCAATTGCCTT  
GCATTAGACGGTCATCCTCAAAGCTGAATCCTTTAATCTTAGGTTTTGGATCCTTGACAACCTTGCAGGTAGTACCATCCTCCAATTGAATTACTGAAGAGTCACCACATTGTTATCCCAA  
TAATCTGCTGGGAAGCAATTGTGCCCTGGAGAACCAGAGAATTCTGAAGCGATATGCTTTGCAGCAGCAATTTCAACTTCACTCGAACCTACACCATAAGACACTCCTGCAATAGAACAC  
TTCAGGAAGTCCATCTGGTTGCAGGTCAATGTGCCTGTTTTATCTGATAAGATTGTATCAACCTGCCAAAGCTCTTCAATTTAAATTTGAGGTTCTGGCTTCAGCTGGCTTTCCAGTATCCTCA  
TCATACATCTGAATATCCTGGTTGATGAACATAGCTTGTAAAGACCTTACAACCTCTATAGAAAACATAGAGAGAACTGGAATGAGATATCCATACATGATGAGAGCAGTCACAAGATGAA  
ATATGCCAGATAATGCAGGCATTAATGGGTTGTACAGAGTAGAAGCATTCTTGGTTGAAGGTACCACCAATTCGCAATTCCAAACCTTAGTGTATACTGCGTAGCCAATTGAGCTGATCAAT  
GAAATCAAAACAAGCAGGGTGAACAGAATGTATATGATGTAATCCATCTTCTTCTCAATGCTGCTCCGCTTTGATGGTGATTCTGTTGAATTTTGCATGACCTTACTATCATGACCCGTGAA  
AATAACCACTCCATAGATGTAAGATGTGTTCCCTAAGCTTTGAATCCCTAAGAAGAATTTGGTTTTGGATCCAAGGAACACACCTGCTTTTCATACTCAAATTTCCACAAAGGTGTATAAA  
CTAGGATTTGGGTCTTACACCTAATGGTGGCATAAAAAATCCTTGAAAGTTTTATCCTCATCAAATGTAATGTCACATCCAATGCCCTCTTACCTTCAAATTTGTCTCCCCATCCAAATC  
ATAGTCTCCACATAGCATATCCCCTCCTCATAACTCGAGGAAAGCAGAAGCAAATCAGCAGGAAAAAAGTGATCTTTCTCAACCTTCACTACATCACCAACAAAGATTTTATGCCACTTCT  
TGTAACAAAAGTTCCCATCCCCTTTATGAATACTAACCTTCCTTTTATTACCTTCATGTCCTGCATAAATCTCCTCCAATCCTCGACGGCCTCCTTAGCCATGCTCAGCCAACTACAAACG  
CCAAGGGAGCAATCATGCTCACAGCCGAGAACGGTGCAATGGGGGTGAGGGAGAGGACGGCAGCCAGGAGAAAGTAGAGATTGGCGACACGCCGGAAGTGTTCAAATATGGCTTTAG

GCAGGAAGGTTATGATGTTGTACTTGGTCGTGGAAATGTAATTGGATGGATAATGGAGAGGTTTCCGACGGTGGAGGCTCGGTTGGTTACATTGCACCTTGCGGGAGAAGCCGGGGCCTT  
GAAGACCATTGAATGGATTGGCGAAATCGATAAGCTCAGGGTTTCGCTCGGGCACAATTGAAAGTATATATCTTGTCTCCATCGGAGCTTCTCTCGCCGGAGCTTATCCCTAATTTTCTCAGCC  
CGAGTCATCCTTTTATCTGCGATGAAATGCCTTCCCTCTTGCACGAAGGTGATGAGAGGAAAAGGACGAACGTATGTAATTATAGATAAGAGGAAAAAGACCATGAGGATGCCAGGAATCAG  
CACCCGATTTCTACCCTACAGATGAAAACCTTGGGCTTACCGCAGAAGAATCTGTTGAGATGTGTCAAAATGTTCTGAAAAGAAGGCTTATAAGAAAAAATGGATTTAACGGAGCTCAAA  
ATTTCCAATTCGCGAAATGTTGGCAGAATAAAAAATTGATCCGGCTTTTGGAGAATAAAGAATAACACAAAAGTTTCTTCAAGAATAACACAATGCAGCTCGTGCGAATAAAGAATGTGACA  
TCTTTCCATTGGAGCTAAAAAATCGCTCAAATGGATGTGAAATTTTTGCAGAAACGTGAAGGAGATTTGGGTTGATGCAGAAATCAGAAGGCTTAGAGAAGAATTCGACCCGGGAATGTA  
TACGAGACGCGCTGCCGACGAGAACGGAGAGGGATGGGGTGATTCGCGGCTCAACTAACTCCAAAACCTTCTGCTCGGCTTCTTTCTGCAATCTTTT

>comp162967\_c1\_seq41

ACGATAACATAAATCATAAAAGTACAAGAAGGCCTTAAGCATAACTTTAGTGCGTGAGAAATGATAAAAGTACCGAAAATTGAAGCGGCTGTGGTTGTACAAGCATGTATCCATTCCCATA  
TATTAGGCACCTTGGCTTAGCATGTTTATACAACAAAAACTTCTCAGGCTCCACATGGGGACACATAAGCATAACCTCAACATGAAAATCACTAGAATACTCATTGCTTGGTTTAAAGCAATT  
AATTATAACCTATGTTTTATACATAAAGATGATATGAAAAAATAGCACCATTAACCTTTTCTTCTTAAAAACGCACAAGAATTGATCAACTCTGCAGTTCAAGGAATCACTCCCAATGATG  
ATACTTTCTTCTGGAGCTTCCCCTTGGAGCTGCCTGATTTTGGCATCCACTCTTGCAGTGAAACCAATCTTGGTTTCTTGCCTCGCTTTGGATCGCTCTCTTGTCCACATTTGCTCATCCGTAA  
GATCCTTCTTGAAGTACTTAATCTCCTGAATCACATGGTGATCTAGTGGATAGAACAATCTTTGGTAGGAGAGGTGAGCAAAGTAAGGAAGGTTGCAAGCTGCTGCCACAAGGAAGGTTG  
TGATCCAGTATATTGGAGCTGGGCCAAGGACTCAATTAATATGTGAAAGGCGTTCAGAGATGACTGGTGACATGAATCCATAGCCAAACAGGAATAGGTACCACGTGCTCACGCTTC  
CCCACACAAAGAGATGCTGAATCCAGGTGAAGTGCTCATAGTGAGGGCAATCTGCAAGTTTACTGCCAGATAATGCAAGTGAACATGGTGGTTCCCATGGCAGCCATGTCGGCAGTTT  
GCCCTTCAGACTGGAACGCTTGATCGTAGAAGATGCTGATGTTGATGAAAAATACTACAATGGATGAGTAGAGACCATTGCCGTCATGCAATAATCCTTGACCAATCAAAGAACAATT  
CTTGGGTCCTTGTGTTACAAAGCTGGGAAGTGAAGGCATACTTGGAGGACACATCTTGTCTCAAAAACCTCTAGTGATATGACCGGTAATGATGTGAGAATGATATTGAATAATATCATG  
TACCAGTCTCATAAACTGATTGTCCTGAAAAGCCAGTGATGCCTCAAAAATAAAACAAAGTGAGGCCAAATGCTATATTCTTGTA AAAAGAAATAGCATAACCATCTGTGCAATCCTTTTATA  
GCACCAATGACCGTGGACAACAAGAAGTCTTTCCAGACAACGGAATTGAGCAATAGAGAAGTCGCTAGCCATCACAGCCTGCACAACGCTGAAGCATTATGAGACTATTCTCCAGCAAG  
GAAAAAGGTTTTTGAAGTACTAGGACCAGAACAGACAGGAGATTTGTACTCAGCACAATCCGTTATAGAATGGTTTGAAGCCTGCATTCTTCCACTCCACTGATTCCAACGCCAATATCAG  
CCTCTTGTATCATAACCAACATCATTGACCATCTCCTATAGCTAAAGTAGTTTTTCTGTTTCTTTTCAAGACGTGTTACCAGTGCTTTCTGCTTTGGGGAAACCCGACAGCATATGA  
CAGAAGCACAATCAACAGCTAGACCAAGAAAATGGTGCTTCATATCATCTCCAAAGCATAACTCAAAGCTTTCCCATCAATGATTAGAGCAAATGCTGCATGAGGATCCTTCTCTAGCTT  
GACCATTGAGAAAGCATTGGTGATTGTCAGCAAAATATTATCTTTGATATTCTGTTCCAAGCATGAAAAGAAAAGCCTTCTTTGCATCTTGGTCCAGAAAATCCGTAATTCATTGTTGATATGG  
AGATTTGTTTCAATCCTAATCGAAGCAAGCTGCATGCAAATCCTATGTTTACGGCTGTTTCCATTTTGTCTCCTGTTAGAAGCCAGATCTTTAAACCAGCTTGTGCTAGTTTGTCTATACT  
GAGGAACCCCTTTTTGTAGCTTATCCTCAACAGCAGTTGCGCCGATAAGGACTAATCCCGCTCCATCAAATCAGCAACTTGTCCAGCTGAGCATCTCTATCAAGTCCAATAGCTGTCTT  
TGCTCTGAGAAATCTGCATTCCATGTTGAGTACTCTGATTCATCTAAAACCTTTGTATGCCAAAAGCTAAGGTACGCAGGCCTGCTTCTCCAAATTCATTTAGATGCTTCATGGTATCCGCTTC  
ATACATTTTTCCATCTTTGACAGTCTATCAAAAATGATGCTGTCTGCGCCTTTGCAGAAAAGAATTATCTGCCAGAATCATCCCGAACAATGACAGACATTGTTTTCTTTTGTATTGAA  
TTCCAGTAGATTCAGAATCTTAAATTCCTTTCCAATGGATTTGGATAGCTTTCTCGGATGAAAACACTTGACTGAGTCCTTTTAAAGAACTCAAAGCCAAATTCTCTCGCAGCAACAAGA  
AAAGTCTCTCATCAGGTGACTCCGCTCGTATGTGAAGGTGCCATTTTCTCATCATGCTCCGGAATTGCTGTGTGACAACTGCAAGAACCCGGAAGAACATTTGAAGGGTCCCTCGA  
CTAGGCTCCTTACCCAATTGCCTTGCATTAGACGGTCATCCTCAAAGCTGAATCCTTTAATCTTAGGTTTTGGATCCTTGACAACCTTGCAAGTAGTACCATCCTCCAATTGAATTACTGA  
AGAGTACCCACATTGTTATCCCAATAATCTGCTGGGAAGCAATTGTGCCCTGGAGAACCAGAGAATTCTGAAGCGATATGCTTTGCAGCAGCAATTTCAACTCACTCGAACCTACACC



ATAAGACACTCCTGCAATAGAACACTTCAGGAAGTCCATCTGGTTGCAGGTCAATGTGCCTGTTTTATCTGATAAGATTGTATCAACCTGCCCAAGCTCTTCATTTAAATTTGAGGTTCTGG  
CTTCAGCTGGCTTTCCAGTATCCTCATCATACATCTGAATATCCTGGTTGATGAACATAGCTTGTAAGACCTTCACAACCTCTATAGAAACATAGAGAGAACTGGAATGAGATATCCATAC  
ATGATGAGAGCAGTCACAAGATGAAATATGCCAGATAATGCAGGCATTAATGGGTTGTACAGAGTAGAAGCATTCTTCTGGTTGAAAGTACCACCAATCCGCATTCCAACTTAGTGTATA  
CTGCGTAGCCAATTGAGCTGATCAATGAAATCAAAACAAGCAGGGTGAACAGAATGTATATGATGTAATCCATCTTCTTCTCAATGCTGCTCCGCTTTGATGGTGATTCTGTTGAAATTTGC  
ATGACCTTACTATCATGACCCGTGAAAATAACCACTCCATAGATGTAAGATGTGTTCCCTAAGCTTTGAATCCCTAAGAAGAATTTGGTTTGGATCCAAGGAACACACCTGCTTTTCATACTC  
CAAATTTCCACAAAAGGTGTATAAACTAGGATTGGGGTCTTCACACCTAATGGTGGCATAAAAAATCCTTGAAAAGTTTTATCCTCATCAAAATGTAATGTCACATCCAATGCCCTCTTCACCT  
TCAAATTTGTCTCCCCATCCAAATTCATAGTCTCCACATAGCATATCCCGTCCCTATAACTCGAGGAAAGCAGAAGCAAATCAGCAGGAAAAAAGTGATCTTTCTCAACCTTCACTACATC  
ACCAACAAAGATTTTATGCCACTTCTTGTAACAAAAAGTTCCCATCCCCTTTATGAATACTAACCTTCTTTTTATTCACCTTCATGTCTGCATAAATCTCCTCCAATCCTCGACGGCCTCCTT  
AGCCATGCTCAGCCCAACTACAAACGCCAAGGGAGCAATCATGCTCACAGCCGAGAACGGTGAATGGGGGTGAGGGAGAGGACGGCAGCCAGGAGAAAGTAGAGATTGGCGACACG  
CCGGAACGTTCAAATATGGCTTTAGGCAGGAAGGTTATGATGTTGACTTGGTCTGGAAATGTAATTGGATGGATAATGGAGAGGTTCCGACGGTGGAGGCTCGGTTGGTTACATTGC  
ACCTTGCGGGAGAAGCCGGGGCCTTGAAGACCATTGAATGGATTGGCGAAATCGATAAGCTCAGGGTTCGCTCGGGCACAATTGAAAGTATATATCTTGCTCCATCGGAGCTTCTCTCGC  
CGGAGCTTATCCCTAATTTCTCAGCCCGAGTCATCTTTTATCTGCGATGAAATGCCTTCCCTCTTGACGAAGGTGATGAGAGGAAAGGACGAACGTATGTAATTATAGATAAGAGGAA  
AAGACCATGAGGATGCCAGGAATCAGCACCCGATTTCTACCCTACAGATGAAAACCTGGGGCTTACGCAGAAAGAATCTGTTGAGATGTGTCAAAATGTTCCCTGAAAAGAAGGCTTATAA  
GAAAAAATGGATTTAACGGAGCTCAAAATTTCCAATTCGCGAAATGTTGGCAGAATAAAAATGATCCGGCTTTTGAGAATAAAGAATAACACAAAGTTTCTTCAAGAATAACACAATGC  
AGCTCGTGCGAATAAAGAATGTCGACATCTTTCCATTGGAGCTAAAAAATCGCTCAAATGGATGTGAAATTTTTGCAGAAACGTGAAGGAGATTTGGGTTGATGCAGAAATCAGAAGGCT  
TAGAGAAGAATTCGACCCGGGAATGTATACGAGACGCGCTGCCGACGAGAACGGAGAGGGATGGGGTGATTTCCGCGGCTCAACTAACTCCAAAACCTTCTGCTCGGCTTCTTTCTGCAAT  
CTTTT

>comp162977\_c0\_seq1

TCACTTGACTGGTTATTAATATTTGTATTTAATATATCTCCATTATTTATCATTATTTTCTTCTGTATAGCCCTTGCTTAACTTTGCAATTCCTGATCCTACTTCTATCTGGTATGCTAGTTATA  
TTGTATGTTAACTATGGTCGGTTTGTGGATCAAGCATCCACATAACCTTATTCCTGCGTCTCTCGGGAGATACAGTATATGCTTACAAGAAGTAAGCTGCATTTTGTAAAGTTAAGGTTT  
TTGGTTTGTGTATACATTTGACTGCTTAAACTATAGATTGGATGATTTTTCAGCTGGCTACGTTATAGCAAGTATAGATACAGAAGTTGAAGCATTTAGAAAACCATAAAGGGGAAGCGT  
CATATTTTATGCAGTTTGGGAGGCCAGCGGAAAAAGATGGATTCAGCTGCATACTTTTTCTTTGTTTCTAACCAAAAATAAATCTGAGTTTGACCTACAATTTGGATGTTAAGCTTGG  
GACAATGGTTTCAAGTAGAAGGAAATCTATATTTAACCGTGTGCAGGGTCATTGTTATCCATGCACGTTGACAAATTCGTGGTTTCTAAAGGAGTATACTCTATTTCTTCAATTAGGGATTA  
TCTTTCACTTTTATGAACCTTATGCTTACACTTGGCATTATCTTCTTTTATCTTGTGATTGTGCAGCCATCTCTTTTGGGTTTAGTGGAATGTTGTGCATAGCTGAAGATGCTTCAGCATCTAA  
CTTAACCATCAATAATGATCA

>comp163039\_c0\_seq2

GTCCGCACCTAATAATTTTCCAGTTAACTCAGGTTCTTTCTACAATTTTTCAGTACATTTCTCTGTAAGAACTACATATGAATCAAGCAGAACTCCCTCACCAACAGGCGAATTATTACGTCC  
GGTCACCGGACATCCGGACATCCAATCCAGACGCGCTACATACCCAAATACACCGGTGCCAATGTATTTGGCTGACGTGACTGGGGCCCGGTGATTTAGGTGACGTGGC

>comp163057\_c1\_seq1

ATACTCCAAACTCCAATCACCCAATTTTCTCTACCTCTTATATAAAATCCGCACCTCAACCCCAAACCGCTCACCAAACCTATCATCCAATGGCTTCCCTGCTCCTCCTCATCGCCGTCCCTC  
CTCACCGCCATCTCGCCGTCGGAATTCGCCGCCACGGAAAACCTCCTCCGATTTTCATCCGTGCGAGCTGTGCTGTAACCTCTCTACGCCAACTCTGCTACAACCTCCCTGAAACCATAACGAAT

CCACCGTCCGGCAGAGCCCCTTAACCCTCGCCATCGCCGCCGCAACGTCAGCCTCGCCAAGATAAAAAAGCGTCTTGCAGGCGGGGAGTTGCGGCGCAGCAGCGGGGAGGGT  
CAGCGCGGCCCTGCGTGAAGTTGCTGGGGACGGCGGGGAGTTGACTAAGCAGTCCGCAGCAGAGATTGAGAACTGGGCTGGCGGCGCAGTCGGGCGGGCCGAGTTT  
GCTTGGGAGGCATCCAACGCTCAGACGTGGATGAGCGCTGCCCTGACTAATGAAGATACCTGCATCGACGGATTAACGACGCCGGCGGCTCCGCCCGGGTGTGACGGCGTTCCT  
TACGAAGGTTGGGAGGGTGGAGCAGTATAACAAGTAACGCTCTTGGCGTGTCTAATGCTCTTGTGGATGGTTGATTGATTCTCTGTGGGACGTTCTTCTGTGTGGTTAATGTTATCTAGCC  
GTACAATTAACCTTGGACGGTTAATACCGGATTCCTCAAAATTTATTCTCTTATCCCGTTAAATGATTAGAATCAGAACAGTGTAAATATCTTATACATAAAATATTTTAACTGTTTGCA  
AGTTGGTCTTCTCAGGTGATGGCGAGTACTGCGTGTGAAAAATTATTATGTGCGGTGTTACGGCTTTTATTGTTTCGGTATTGGTGCTTGATAACGTTATATACTGAATGACATGGTACATTC  
TGATTGATTTTCAGACCATCTAGGTGTCTGCATAGAATAATTTCTCGTCCCATGAATTGTAAGAAAGAAATTTACATGGCTCTGTTTGTCTAAATTTGTATTCTTCGTGTAAGCAAGAAGAAAT  
AATATATTTACTCTAAATTTTCAGCTATTTAACATGAGGCAACATGGATGAAATTTTACAAGAAATTTATTAGTGAAGAGTAGCTACACCCGCAAGTCTCGCCATCCGCTCCAACGC  
>comp163057\_c2\_seq4

AATGCAGTAGGAAATAATCAATTTTGTACAATATAAAAAATCTATATAATAATTAATTTGAAAATTACATTACTGAACATATAAATGCAGTTCTCCAAGCTTTGGTCAAGCCACAGA  
GGAAGCCCACCTTCTCCTCGCCTTTTTTGTGTCTTTGTTGGTCAATTTGTGAGCCACCGCAGCATTGTCCAACAATAATACCATACGAACCCATTGCCTCATGGAAGAAAGTTATAACA  
GGTAATAATAAGAAGCCACGTGCTTCTATCATCAAATCTATCTATTTCTCATCTCTCGCTCTCTGCCCGTGCCTGCACCCATTTTCTCTAACTATATTATTGATCAAAAACATAATA  
TGATCATGGGTTAAACAAAGGGGCCCACTTGTGGGGTCTGTTTCGGCTCATGCACTTTAGGAACCTATTATTGCCTTTTTTAGGGTTGGGGAAGATCATAGGAGGAGACTTCAAAATGGTA  
AAATAATAAAAAGAAAGTTATGAGAGTTCATCTTAGGATCTATTTGGAGAGAAATTTTGTGCAGACATCTGAACAGTCTGAAGACTAATCAGAACGTACCATGTCATTCAATATATA  
CGGTAATGAGCACCAATATCAACAATAAAAGCCGTAGCACATAATAATTTTACACACACCACTCGTCACTTACCTGAGAAGACCAACTTGCAAACAGTTAAAATAATTTCTGTATAAGA  
TATTTAACACTGTTCTGATTGTGATCATTTTGACGGGATAAGAGAGAATAAATTTGAGGAATCCGGTATTAACCGTCCAAAGTTAATTGTACGGCTAGGATAACATTAACCACATAGTAGA  
ACGTCCCACTGAAGGAATCAATCAACCATCCACAAGAGCATTAAAGCAGAGCAAGAGCGTTACTTGTATACTGCTCCACCCTCCCAACCTTCGTAACGAACACCGTCAACACCGCGGGC  
AGCCCTGCCAGCGTCTTAAATCCGTCGATGCAGGTATCTTATTAGTGAAGGACGCGCTCATCCAGTCTGAGCGTTGGATGCCTCCCAAGCAAAATTCGGCCCGCCGACTGCGCCG  
CCGGCCCAAGCTTCTGAATCTCTGATGCGGACTGCTTAGTCAACTCCGCCGCCGTCACAGCAATTCAACACAGTCACGCAGGGCCGCGCTGACCCTCCCCGCGCTGCTGCGCCGCAAC  
TCCGCCGCTGCAAAGACGCTTTTTTATCTTGGCGAGGCTGACGTTGGCGGCGGGGATGGCGAGGGTTAACGGGCTCTGCCGGACGGTGGATTCTGATGGTTTCAGGGAGTTGTAGCA  
GAGTTGGGCGTAGAGAGTTACAGCACAGCTGCGACGGATGAAATCGGAGGAGTTTTCCGTGGCGGCGAATTCCGACGGCGAGATGGCGGTGAGGAGGACGGCGATGAGGAGGAGCAG  
GGAAGCCATTGGATG

>comp163077\_c0\_seq1  
CCCCCTTTCCTCGGGGTAGGAAAATCCGGGTAAGACAAGGAGGAAGAAGATGATAAAGACGATGGTGTGTTTGGGTGATGAGCTCGATGAGGATGAGAAGATCACCTCATCCGATCCCC  
GATCTTCATCGGAGTTCGATTTCCGTACCGATGCGGTTCCGATTCAAAGGTTGGTTCCGATCACAGAATTGACCGCAATTTTCGTATCTGAAGAATTATCAGTACAACCGTTCTCCTGT  
GGCCTGATGAGAATCGGGAAGATGATTCCGGTGAAGGCGCCGCCACCGGCGCTGTCGATTGCACGGCCGAAACTCCGGCAGGACATGGACCGCTGTGATCTGTTCTTGGCCACAGG  
CGAGAAGCAGAGAAATTGAGCAATCTTCATCTTCTGTGAGGTCAGGTGTGCGCCATGGGTTCTTCTCTCATGACATGGCGGCTCGATCGGCAGTTTATAAGCTAGCGGGAGGGGAAAG  
GGGCTGCGAGAAGAACCATGGCCGACACCTGACCTACAAGAAGATGAAGATAGCTCAATTTCTCTGCTTCTCGCCTGTGGCCAAGGAACAGATCACAGCGGTCCATGTCCTGCCGGA  
GTTTCGGCCGTGCAATCGACAGCGCGGTGGCGGGCGGCCTCACCGGAATCATCTTCCCGATTCTCATCAGGCCACAGGAGAACGGTTGTAAGTACTGATAATTTCTCAGATACGAAAATTGG  
CGGTCAATCTGTGATCGGAAACCAACCTTTGAATCGGAAACCGCATCGGTACGGAAATCGAACTCCGATGAAGATCGGGATCGGATGAGGTGATCTTCTCATCTCATCGAGCTCATC  
ACCCAAAACACCATCGTCTTTATCATCTTCTCCTCCTTGTCTTACCCGATTTTCTACCCCGAGGCAAAAGGGGGGAGTGGAAACGGGCGCGGAGAGGGCGGTATGCTCTGTTTCTTG

GTGGTGAGCTTGATAGTGATGGTATTCTGCGGCCGGATCTGCGCAATTCTGTGGACGGCATCGGGTCTCTGCTTTCTTCCTCGCCGAAACCGGCTACTGAGACACCTGAGCTCGGTGGT  
GTGGAGACGCCAGCGTCGGCTGCATCGGCGCTGCCTCCGGCGGAGGACCGCCTGCAAAAGCGATTATGTGAGTATAACAAGAGGCGGGTTGTTCTGGAAGGATTTCTAGGAAGAAGCA  
AACAAAGTTTAAAGAAGGCATATAGGAATGAAATAAAGTTGGTACCCAAACGAGTGAAAATATGTTTAGTTTTTTTTTTGGATTTATGGCCATAACTTTTGCTGGTAAATCTATAAGCTAGTC  
CTGCTGCTGTTTCAATTTTTTTTTTTAATGTTAATATGTTAAATTTCTCTGTTCTCTCCAAAATAATGAAAATCTACTTTTTTTGCTTTGGAAGTGGCGCTGTAAACGAGCAGGTTTGAGCG  
GACTCA

>comp163081\_c2\_seq1

ATGCAAAGGGAAGGGATCTAAATCTGGTGCGTCAATGAGATGCCCTGGCTGTCAGGGTTCAGGCATGAAGGTCTCTATTTCGCCATCTCGGGCCATCTATGATTCAACAAATGCAGCACCC  
CTGCAACGAGTGCAAAGGCACTGGCGAGACCATAGGTGAGAAAGACCGCTGCCACAATGCAATGGCGAGAAAGTCGTCCAGGATAAGAAGGTTCTTGACGTTCTTGTTGAGAAGGGC  
ATGCAAAATGGGCAAAAGATCACCTTCCCCGGAGAGGCTGATGAAGCTCCTGATTGTGTCACTGGAGACATTGTCTTTGTCTACAACAAAAAGACCACTCCAAGTTCAAAATAAAGGG  
CGATGATCACGTCGTTGAGCACACTCTCTCCCTAACCGAAGCCCTCTGTGGCTTCCAGTTCACGTTAACCCATCTTGACGGCCGGCAGCTGCTTATAAATCAAATCCCCGAGAAGTTGTA  
AAGCCTGATCAATTCAGGCGATCAATGATGAGGGAATGCCAATGTACCAGAAGTCATTCTTGCGAGGCAAACCTCTACATCCACTTCAATGTAGATCTCCAGATTCATTGACAGCGGATC  
AGTGCAAAGCTCTTGAGGGCATCCTTCCCTTGGGGATCCCGTCGCAGCTGATCGACATGGAGCTTGATGAGTGCGAA

>comp163085\_c0\_seq1

AGCTGTCCCAAACGAAGCCTCAATTCAAAACCTGGGAGGGGTGGATTGGCAAATTCCAAACCTAACATAATAAAATTAACCATAGAAGGTTACCTGCTATGTAAGGAATATCACATGGATT  
TGAACCTACCTAATTCAACCTATTTAAACAAGAGCATAGATCAATAGCCAAAGGAGAAGTAGGATTATTAATGCCTTAATCGTACTAGGGATAGGGTTTTTCTCAATGATACTTTGATTGCTT  
TCAAGAAAGCAAGTAGTAATGGTCAAAAAGGTATATTGCATCCAAATCTAACCCATTGAGAAAAGAACATTTGGATTCACTATTTTTAAACACCATTAGCAGTCCTTGAGGTTTATAGAA  
ATAGCTTGTATAGATTATTTAAAAAAGATTGATAATGTTTCTATGGAAATGATTGCAATCATTTTATAGCTCAAACCTTAATACAACAAATGTATAAAACAAAATTTTACCTGATCATCCCAAG  
CCTTATCCTTATTATATATGACAGCAGCACCAAGACTACGTGCAGGATTAATGCCAGTTCAGTGATTGGAATGGTGGCGAGGTGGACCATAAACACCGCAAATCCAATGGGAAGAGGGG  
CCAAAACCTTGAACAAAACACAAAAAATGGTAAGATATTGCATAATAAGGGAATAGGTGTTTATAAAATAAAATTTGCAAGATAAATTCATGAGATAGTGATTGAATTAAGAGTTGATGCAA  
AGAGAAGTTCAAAGCTGATTTATTGGGTGCCCATGGTGATAAAGACCACAGAGTCTCATGCAAAAAGGAATGGAATCTACTAATTGGGTCTACTTGCTTTATCAATTTGGAGGTTCCCCCT  
TCCACTTGGGGGGTCAACATCTTCTTGCTATAACTTGTTTAAATTGTAATTGAGAAACTTCTAGTAGCTCACAAACAAATTTAGAAATGATGACATGGGCAAATGCTCATTACTTTAATCTT  
TCTCTTACAGCTACAATTTTTTCCATCTTATATGCTTATTCAACTTTTTTTTTCTTGAATAACATTGATGGTGTTGAAAATATGACTAAAAAGTAGGATTTCTTAAGTGCAGCTCATATGAAG  
CATTCTAGATTGCAGATCTTTAGATCTCCAAAATTAGAAGATAGGATGAATTTCAATGTTTTTTTTGTAATTAAGTAAAATATATATTTTACAATTCATGATCTCTATAGTTGAAAAA  
TTCTACAAAACAAAAGTTAAAAATATCTTAGTTTTAAACCAAATAACATGCATCTATCTTACTTACAAAAAATTTCAATTGAAAACAATTTTGGAGAAGTACTTCTAAAATAATTTTATA  
AATCAATTTTGAACAACAATCTCTCATAAGCCTCCAATGTATGAAGAACATGCTCAATCAATAATATCAAATCAAATCAAAGACTACGTAAACTGCTAGTTTAAAGCCTGCAAGTCATTTTC  
CATTCAAGTGTATTCTTAATCTTTTATTACTCATAAGTAAGATTAGTTCTAAATAGTGATAAATGTTGTGAAAATAATAAAATATTTTCAAAAAAATGTTAAAATTCATATGAGATTTAAAAG  
TAAAATAAAAAAGAAGGATGATTGTTGTGTGGATGGTGCAGTAATCGGGTCCACATAGCTGTAATGAAAGCGAAAAGAAGACTACAAACGCAATACCCAGAAATTTGTAGCCACCTC  
CGCCCTACTTCCCACACTAATTATAATAGAGAAGTCATTTTCAACCTTGACTGGATTAATATAAATTTGAGATGCTGGTACTTTGCGAGATTTATGGGAGAACTACTGAAGCATGTGAAGCT  
CCTCGTATAATTTATAAAGGATCAATAGAGTTTGATTATATAATCTTATGAACTCATGTTATTAGATATCGGTGTTAAACTAATACAGATATATTTAATTTATATGATTTCTTCTTTTTAAATAACAA  
CAACAATTAATGAGATTAAGGTTTAAATCTCGATAACTATTGCCATTTTTTTATAAAATATGATGAATAATAAAATAAAATAAAGCAGACGATTTTCGATCATTTTTTAAAAGAAAATGTTTTTT  
AAAAGAATTGTCATTTTTCTCCTTTAGATGGCAGGATATTTGGCATATTATTTTGAATCAGGTTCGAGAGAGTGGCAATTCCTGAGCCTGCGGCTTAATTGTCTTCCTCAGCCTGTTTTTG

GTTTCTTTCCTCATCCGGTTTTTGAGATTTTTCTATCTCTGAGAATTTTATTTTGCTAAACTGTTTTCTTCTCTAGTATTTGCTTTGGGGATTTTGTCTGCCCCATTTTGGACCTTGTAGG  
TTTTGGCAAGGTTTTTTTCTACTATTTTTCTTCTTCATTACATGTAAGTATGTTTATAATGAAAAGGCTACGGCCATAATTTCCCAAAAAAAAAAAAAAACTCAATCCAAAGATAATTC  
GTAATCAATGAATACATTGCTTC

>comp163085\_c0\_seq11

AGCTGTCCCAAACGAAGCCTCAATTCAAAACCTGGGAGGGGTGGATTGGCAAATTCCAAACCTAACATAATAAAATTAACCATAGAAGGTTACCTGCTATGTAAGGAATATCACATGGATT  
TGAACCTACCTAATTCAACCTATTTAACAAGAGCATAGATCAATAGCCAAAGGAGAAGTAGGATTATTAATGCCTTAATCGTACTAGGGATAGGGTTTTTCTCAATGATACTTTGATTGCTT  
TCAAGAAAGCAAGTAGTAATGGTCAAAAAGGTATATTGCATCCAAATCTAACCCATTGAGAAAAGAACATTTGGATTCACTATTTTTAAACACCATTAGCAGTCCTTGAGGTTTATAGAA  
ATAGCTTGTATAGATTATTTAAAAAAGATTGATAATGTTTCTATGGAAATGATTGCAATCATTTTATAGCTCAAACCTTAATAACAACAATGTATAAAACAAAATTTTACCTGATCATCCCAAG  
CCTTATCCTTATTATATATGACAGCAGCACCAAGACTACGTGCAGGATTAATGCCAGTTCAGTGATTGGAATGGTGGCGAGGTGGACCATAAACACCGCAAATCCAATGGGAAGAGGGG  
CCAAAACCGGAACATGAGAATCGCGGGCGCTGCGTTGGGATCTGTAGCAGAGAAAACGGTATAAACTAGAACA AAAAGTTCCAATAATCTCAGCAGCAAGTCCCGTCCCCTTTGAATAA  
CCAGGGGCCAGCACATTAGCCCCACCATTATACCTCACATAATACGCCTTCTGAAACCCCTTACCAGACCCACCCCAAAATCGCCCCAGACACTGGGCCACCATGTAAAGCAAAGCC  
CTCACCAGCGACACCTTCCTCGCCAAGAACAACCCGAATGTCACCGCCGGGTTTATGTGCCCGCCCGAAATCCCCGCCGTGCAGTACACCAGAATGAAGATCATCCCTCCGAAAGCCCA  
GGCGATGCCGAGCACGCCGACACCAGCGCAATCAGAGTCTACAGGGAAAGCATCTTGGTCTGACTGGTGTGTGTAGCCGATGACGGTGGCGATGGTGATGTAGAGGAAGAGGAGAGTG  
GCGATGAATTCGGCGATTATGGCACGGTAGAACGACCATTTGGTGAGCTCTTCGGCGTCGATTAGAGGGGCGGGAGGGGGGTGGTGTAGTCCCTGCCGGTGAATTCGGAGCTGGGGGC  
GGCGGAGGATGGTACTTCTAGGCTTTTGGCCATTTGGGTCTGTATGGGCTGGACAAAGGAGAGTGAGGAGAGGATGGAATTGGGGGAATGAAGGGGTGGTATTTATTGGGTTGGAGAGTG  
AGAGCTCTATCGGGAGGGAGGAAATTTGAGGATAATAAAATTAAGTTATATGAT

>comp163085\_c0\_seq7

AAAGAACTTTTTCACCTAAAAATAATAATCCATCCATATATATTTACATAAAATTTCTGATCATAATCATTTTATATTGGGCAATCATGTAAGAAGCCTGAAAAGCAAAGGAGCTTTCATAC  
GCATGCTAATATAAACTTTTTCAAAGAAGAGTTCAACACTTTTCAAAGACAATAAGTGATACAAGAAAGCTAACTTAGTACTCCCAAAGAAAAAAGAAGAAGAAGATAGCTTAAAG  
TCAATAAGGGGAAAGAAAATAAGAGCTCCCTCATCAAATTTGAAGCTTGCTTACAATATCTGCAACAAAGTCTAATTTCTTAAACAACAGTTCCCTATTTGAAAGATGGGAGAAAGTAGCA  
GTACTAATAGAAGAAGATTGCCTTCAGTAATATTAAGCTATTACACGTGAGGGTTGCTCCTGAATGATCCCAAGGCCTTGAGAGCTCCTGCCCTCAGCACATATTGATGGTATGCTGCTGCT  
ATCGCCGCACCGATGAATGGCCCCACCCAAAATATCCACTGATCATCCCAAGCCTTATCCTTATTATATATGACAGCAGCACCAAGACTACGTGCAGGATTAATGCCAGTTCAGTGATTGG  
AATGGTGGCGAGGTGGACCATAAACACCGCAAATCCAATGGGAAGAGGGGCCAAAACCTTGAACAAAACACAAAAAATGGTAAGATATTGCATAATAAGGGAATAGGTGTTATAAAAT  
AAAATTGCAAGATAAATTCATGAGATAGTGATTGAATTAAGAGTTGATGCAAAGAGAAGTTCAAAGCTGATTTATTGGGTGCCATGGTGATAAAGACCACAGAGTCTCATGAAAAAGG  
AATGGAATCACTAATTGGGTCTACTTGCTTTATCAATTTGGAGGTTCCCCCTTCCACTTGGGGGTCAACATCTTCTTGGCTATAACTTGTTTAAATTGTAATTGAGAACTTCTAGTAGCT  
CACACAAAATTTAGAAATGATGACATGGGCAAATTGCTCATTACTTTAATCTTTCTCTTACAGCTACAATTTTTTCCATCTTTATATGCTTATTCAACTTTTTTTTTCTTGAATAACATTGATGG  
TGTTGAAAATATGACTAAAAAGTAGGATTTCTTAAGTGCAGCTCATATGAAGCATTCTAGATTGCAGATCTTTAGATCTCCAAAATTAGAAGATAGGATGAATTTCAATGTTTTTTTTGTAAT  
TAAAGTAAAATATATATTTTACAATTCATGATCTCTATAGTTGAAAAAAAATTTCTACAAACAAAAGTTAAAAATATCTTAGTTTTAAACCAAATAACATGCATCTATCTTACTTACAAAA  
AAATTTCAATTGAAAAAATTTTGGAACTGACTTCTAAAATAATTTATAAATCAATTTTGAACAACAATCTCTCATAAGCCTCCAATGTATGAAGAACATGCTCAATCAAATAATATCA  
AATCAAATCAAAGACTACGTAAACTGCTAGTTTAAAGCCTGCAAGTCATTTCCATTCAAGTATTCTTAATCTTTTATTACTCATAAGTAAGATTAGTTCTAAATAGTGATAAATGTTGTGAA  
AATAATAAAATATTTTCAAAAAAATGTTAAAATTCATATGAGATTTAAAAGTAAAAATAAAAAAGAAGGATGATTGTTGTGTGGATGGTGCAGTAATCGGGTCCACATAGCTGTAATGAA

AGCGAAAAGAAGACTACAAAACGCAATACCCAGAAATTTGTAGCCACCTCCGCCCTACTTCCCACACTAATTATAATAGAGAAGTCATTTTCAACCTTGACTGGATTAATATAAATTTGA  
GATGCTGGTACTTTTGGGAGATTTATGGGAGAACTACTGAAGCATGTGAAGCTCCTCGTATAATTTATAAAGGATCAATAGAGTTTGATTATATAATCTTATGAACTCATGTTATTAGATATCGG  
TGTTAAACTAATACAGATATATTTAATTATATGATTTCTTCTTTTTAAATAACAACAACAATTAATGAGATTAAGGTTAATCTCGATAACTATTGCCATTTTTTTATAAAATATGATGAATAA  
TAAAATAAATAAAAGCAGACGATTTTCGATCATTTTTAAAAGAAAATGTTTTTAAAAGAATTGTCATTTTTCTCCTTTAGATGGCAGGATATTTGGCATATTATTTTGCATCAGGTCGAG  
AGAGTGGCAATTCCTGAGCCTGCGGCTTAATGTCTTCTCAGCCTGTTTTTGGTTTCTTCCCTCATCCGGTTTTTGGAGATTTTTCTATCTCTGAGAATTTTATTTTGGCTAACTGTTTTCTTT  
CTCTAGTATTTGCTTTGGGGATTTTGTCTGCCCCATTTTTGGACCTTGTAGGTTTTGGCAAGGTTTTTTTCTACTATTTTTTCTTCTTTCATTACATGTAAGTACTAGTTTATATTAATGAAAAGG  
GCTAAGGTCATAATTTTTCCCAAAAAGAAAAAAATATTTCTGGTAATTCCTGATAACTTTTCTTCTGTTTCTGCACCTTCTAATCAAGCTTTTTGTCTTTTTTTTTTTTATTGGACATTT  
TTTTAAGTACTCTTTAAGCATGCTACAGATGTCATATATAGGTTTTTGTATTTATTTATTTTTTAAATTATTGAATTAATTTATTGTGATACTGAAGGAATACTTCCAAAATAGAGTTTTTAA  
GTCGATATTATAATTATTGGAGTGGAAAATAAAAGTACTTATTGAAATTGGCTATATTTTTATTCTGGTGAAGTAATGAATTATTTAATATTTTTCTTCTATTATTAATTTCAATAATCTATAAGA  
GAAATATTAACCTGATTGAGATGTCGTGTTTTATTGCTTGGCTCTGTGTGAAGATTACATGACCTAAATGAGGTGGGGCGC

>comp163085\_c0\_seq9

AAAGAACTTTTTCACTTAAAAATAATAATCCATCCATATATTTACATAAAATTCGTATCATAATCATTTTATATTGGGCAATCATGTAAGAAGCCTGAAAAGCAAAAGGAGCTTTCATAC  
GCATGCTAATATAAACTTTTTCAAAGAAGAGTTCAACACTTTTCAAAGACAATAAGTGATACAAGAAAGCTAACTTAGTACTCCCAAAGAAAAAAGAAGAAGAAGATAGCTTAAAG  
TCAATAAGGGGAAAGAAAATAAGAGCTCCCTCATCAAATTTGAAGCTTGCTTACAATATCTGCAACAAAGTCTAATTTCTTAAACAACAGTTTCTATTTGAAAGATGGGAGAAAGTAGCA  
GTACTAATAGAAGAAGATTGCCTTCAGTAATATTAAGCTATTACACGTGAGGGTTGCTCCTGAATGATCCCAAGGCCTTGAGAGCTCCTGCCCTCAGCACATATTGATGGTATGCTGCTGCT  
ATCGCCGCACCGATGAATGGCCCCACCCAAAATATCCACTGATCATCCCAAGCCTTATCCTTATTATATATGACAGCAGCACCAAGACTACGTGCAGGATTAATGCCAGTTCCAGTGATTGG  
AATGGTGGCGAGGTGGACCATAAACACCGCAAATCCAATGGGAAGAGGGGCCAAAACCGGAACATGAGAATCGCGGGCGCTGCGTTGGGATCTGTAGCAGAGAAAACGGTATAAACT  
AGAACAAAAGTTCCAATAATCTCAGCAGCAAGTCCCGTCCCTTTGAATAACCAGGGGCCAGCACATTAGCCCCACCATTATACCTCACATAATACGCCCTTCTGAAAACCCCTTACCAGA  
CCCACCCACAAATCGCCCCAGACACTGGGCCACCATGTAAAGCAAAGCCCTCACCAGCGACACCTTCTCGCCAAGAACAACCCGAATGTCACCGCCGGGTTTATGTGCCCGCCCGA  
AATCCCCGCGTGCAGTACACCAGAATGAAGATCATCCCTCCGAAAGCCCAGGCGATGCCGAGCACGCCGACACCAGCGCAATCAGAGTCTACAGGGAAAGCATCTTGGTCTGACTGGT  
GTTTGTAGCCGATGACGGTGGCGATGGTGTATGAGAGGAAGAGGAGAGTGGCGATGAATTCGGCGATTATGGCACGGTAGAACGACCATTGGTGAGCTCTTCGGCGTGCATTAGAGGG  
GCGGGAGGGGGTCCGTGTAGTCCCTGCCGGTGAATTCGGAGCTGGGGGCGGCGGAGGATGGTACTTCTAGGCTTTTGGCCATTTGGGTCTGATGGGCTGGACAAAGGAGAGTGAGGA  
GAGGATGGAATTGGGGGAATGAAGGGTGGTATTTATTGGGTTGGAGAGTGAGAGCTCTATCGGGAGGGAGGAAATTATTGAGGATAATAAAATTAAGTTATATGAT

>comp163157\_c0\_seq4

GCTGTGTTCTCAAGATGCAGACCGATGGAAATCTCGTAATATATAGTGGCAGCAGAGTGATTTGGGCGAGCAATACCAATCGCCAAATGGGAATTATTATCTCCTCCTCCAGAGAGATCG  
CAACGTCTCATATACGATAGCGTAACAATGCTATTTGGGCGACTGGAACCAACGTTGGCAATGCTGCTGTTGTCATCATCCCGCATAGCAACGGCACGACGGCGGGCCGGCGCGGC  
GCAGAACAAGGTGAAGGAGCTGCATCCTTGAAGAATAACATCAATACAGAGACGATGAAAGAAGTATTAATTATTAGTATATATTTTGAATAAAAAGGCATTGGCTCCTGCGATGCTATTG  
CCGGCCTAAACAAGTTAATTTGCAGTGATTGTGTGTTGCTGCGGTATGAAAGACTGTATCAAATAATTAGTTTCTTATCTAAATTATATATTTACAGAGCTTTTTGCTGGTTAAATTATTGGG  
TTGAGTAACGAATTTGAATGAATCTATCTGCATGTAATAGGAACGAGAGATATAATTTGTTCAAAGGAA

>comp163176\_c0\_seq3

TTATTATTTAAACAACATTTTCATTAACATTCTCACTTCTTTAGCAAAAAGTTCTTTAAATGAAATAAAATACTCTTAGAAAACAAAGAAAAATGAAAAATTGGATAAAAGATAAGAGAAGA

AATGAATGTTTTACAAAGTTTAGACATAAATAGCTATTTTCATGATGATCATCAAAGAACAATCCCCCTTTTGCTTCCATGAAATCACTGATCCTTTGGCTTAGTTATAGCTGATTACTGAAA  
TCTTTGCCTGGAGTCCTCCTTGAACATAAAACAAAAATGAATGGTTTGTGGGTTCAAAACCTTGAGCCATTCAGGAAGAACATACATTCTTCTTGTGTTGGTGAAGTCCCCAAAG  
AGGACCTGATAGGTTCTCTATTGCCAGCTTTAGATTGGTGATTGGCTTTCCACTTTTGTATTGATAGTCACCTTGTGCCTGTAGTATTTAACTCCTTTGTCTGAGTACCATGTATTAGTGATT  
GAATGGAAGAACTCTACAGGATTCACAATAACTGGGGAAGGGCTTCTTGTATTGTAGGAGGGTATGGTTTAGTCTTTTGGCAGCATAACCTGTGCGAATGATTGGGGTTGGATTTTTT  
TCTCCCCTGAAAGAAATCCTTGTGAAAGGGAATGCAGCTTAGCGAATAGGCCAACAAAGAGGGGCATTTCCAGCAATGGCAGGTTTCAAGTTGCTCATAATTGGACCGTTGATCAACAAAC  
TGATCTTGATGATCAGGACCTCCCACAAGAGCTCCTAAGATAACGTTTGGATTTCCCTTTTTGCTATCATAACCATTGCTCAAAGCCTTGAATGCATCCCACAACAGCAGGAAGAACAGATT  
TTGACTGAATCGAAGCACCTCTATGATGCACATTGATTGGATACTGCCCTTGGTACCCAACCAGGTAGCTCATCAGTTTTGGATTCTTTCCGAGAATGTAATCAGCCTGTGATTGAGCAAAC  
TGAAGGATTTGATGAGGAGTGACTTGTCTTCAGGGCAGTTGAGATTGGAGTTGGTTGGTGACAGATAGTCAGCATAGACCGCCATTAAGAAAGCTGAAGATGAAACATACTGCATGTTG  
TTCCACTCATCAAAGTATAGCAGGCCTCCTGGTGTGCATGGCAACATTATAGCCATTGTTCTTCTGAAGTGAAGAACAGAGGAAGAACTCGGCCTTGGCCTGGTACTGCTTCAATGTGGCA  
GTGTACGATTCACTTCTCCTTGCTTTAAACCTTTGCCATAAGTATTTGCAGGCCTGCATATTTGTTGTCCCATGAGAACTCTTAACCGCCCATTCAGTGCCTCCTAAAGAGCCAGAATT  
GTCCACCACATAATTTGAGATATTTCTCATCGTCTGTGGCTCAAAAAGCCAAGCAGCAGCCAAAAGTAGCTCATCATCGTATCCTGAAGAACGATAGAATTCCCGAACAACTGGGATTGAA  
TCATCATATTTCCCCTAAATGTATCAGCAAATGTGAATAGTTGCTTGGCATGAAGCAGTAGAAGCTGCGAGTAAGAGGAATTGTAAGGTCTGAAAGCTATGGAAGCTGCAGCCAATGCA  
GCAGCAGTCTCTCCAGCAACATCTGAGCCTGGATTTTCAGTATCAACCTTAAAGCAGTTCTTGGTGTGTCATGTCTTGCCTCTCCCAGCAGTAATGGTCAGTATTTCCATCTCCAAC  
CTGAGCCATAAGAGATTGGGCTGCTTGTGAGCCTTGATGAAGTAATCAGTGCCTTGGTATGAGCATACTCCAGTTGGTTAGCAGCTGCTATTTCTTTCTCGAACTCGACC  
AAACTCCAAGATAGCATTGTCAATGAATAAGCTATTGGTAGGCCAAATTTACATGATCACCTGAGTCATAATAGCCTCCAACCAATCCACTCCTTGCAGGAAGCCATCTTGAGTCCGGA  
ATCACCACGCCACTTCACTCTCTGATCTGCCGGAAGCTTGGCAGACCTTTGAGCCTCGAAGAAGAGCAAGCTTTGCTGAGAGCATCTCCATAGTCAAACCCACCACCAGCTACAGAAG  
ACAAGGATGACAATAACAAAAGGAAGCTAAGGCTAGAGGAAAGAGGAGATACGCCATGCCCTTTTGGCTTGAATGAAGCTGGTAGAGAGCAGACAATGCAGAGTCAGATGGGCTGTG  
GAGATTGGTTTGTCTAAGTATTTTGGCGTTCTTATAGGGATCATAAGGTGAGGGAATTATTCTTTTTCAGATAGTTTGTGAGAGGAGCTTACGAGTGTATGTCTTTGAAAGCTCGTCCCA  
AGAGAAATTGTTGAGCTAACTGCATAGCCACATGCAGGCGCGACGGTGGCGCTAGAATGCAAGCACTTTTCAGAGCGACGCGGTGGAGCACAGCATTGAGGCGGTGAGCGGCGCCGGC  
GGCTATTACACCATCAGCGTCCCCGACGACCACGAGGAGGAGGTTTGTACGTGAAGCTTCTTAAGAGCCCGGAGCCGATTGCGCTGAGATCGTCGAGAACAGAGAGCAAGCGCGCA  
TTCTGCTCACCGAAAATAGCGGCCAAGCCAACAACCTTGCAGGATGCCAACTTTTGGGCTTTCTCAAGGACGAAGCCCTCCCTGTCTGCGCCGAGCTGCTCAAGGCCTACTCACTCGATG  
ATGATTATTAATAATTCTGAATCTTCGGCCAGCGAGGTAGCTGGTCCAGAAAGAGTTTATTAGAGATATATTGATTTGTTTTTTTATTGAAATCATTGAAACTTTTATATTGATATATTGTGA  
TTGATTAATGTGAAGAACTTTTATGGGAGTTGAGTTTGGTCTTTTGGATTTAAGCATGTTGAGAAGTTGATGTATCTAGTTGAATATTCAAAAGATTATTATATG

>comp163180\_c0\_seq7

ACAAATAACATCATTCTCCTCAAAAATGGTACGCATGTTGAGTTCATCAACAGCAGTTCTCCGTCTCCCGTTTCATGGCTTCAAACGTATCCCGTTTCATGGCTTCTAGTTTTCCATGGGTGAT  
AGAATGTAAAATCTCTTTGGGCCACCTAGCATGCCATCTGCCTTAAAGATCAGTCCGGAGACTTAGTTCGTGATTCCCTCTTTGTATGAGGATTTTCGTTACTAGAACACAGCATCTTGCCAATAA  
TTATTGGTCATAACAACAAAACAAACAGGTCTTTAGAAGTACAAAATCTTTAAAGAGGACGTAC

>comp163227\_c0\_seq12

ACGGCGGAATCTGTAACGATAAGGAAATATTCCACTGATTTCAAGCGAATAATTTCAAGAAATCAAGAACATCAAATTGAGGGAATCTTCCAATATATAAGAAAAAAAAAGTTTAAACAATAT  
CTAACTTTATATCAAAAACAAAAAGTACATATAGAAAAGTATTCTTTCATCCAACAACAAGTTGAATGGTTGAAAGAATCTACGACGAAAACATTTCCAAGAAAACAAAAAAGAAAAG  
AAACACACCAACAGTTCACAGAAGCAGAACACCAATCTTCAACAAAAGGCCTAAATCTGAACACACACAATGTGCCACAAAGGGCCGAAAAACCCACATTCATCCTACCTAAAATCCA

CACAGAGAGCAACCTAATTCATTTGTACCTATTTTTCTACCATTCCGGCCTACGCGCTCCCTCTGCATTCTCCTCCTCTTCTTCATTCTCTTCATCCTCTTCTTCC

>comp163228\_c0\_seq1

CGGGCTTGAGTCGGTCACTGTACATTATGTTTATAATTGATAGCATGCCCTTGGTCCCACCACCATTACTGGATTAATAAACTGAAACGAGATGGAGATTTTTCGGTTATAGATCGATCG  
TTTTCTAGTTCATCTTTTGAATCCTCCCGCCAATGCCAACGATTGCGCTCGCAACCCTTTTGGGATAGAGTAGACATAGCCATTGCATCCTTAGCCATAGACATGAAAATACATATAATGATA  
TATGAAG

>comp163234\_c0\_seq17

GCGGAGTTTGGTTCGAGGGTTAGGGGAAGAGGGGAGGAGGAGGAGTTCGTGGATGGTGAGATTAAGAGGGGATGGGGAAATTAGGGTTGGTGGGCTGTCAAGTGGATCGTCGAAGGG  
GTGGGAGAGGGCAGGAATGGCCTGGATCGGAGACGGGGTTGGGATTTGAGGGTGAGCGGAGTCGTCGGCGGTGAAGAATCCATTGCCGGCGGTGCTGGGAGAGAACTCATTAGGGT  
TTTGGGAAGGAGAAAGCCAAAGGCCTCTGTATCTCTCTCTAGCTCTTTCTTTCTCAAATAGTTTCTGGAAAAGTTGAAGGAGAAAGAAGGTATATAAATGTCTCTCTGTGTTCGATTTT  
TTTTGGGTGTTTTGTACCTTAGTTAAAAGAGGAAAAGTGCCAAGGTTCCGGTTGAAGAAGGACAGATTATAGCCGTTGGAGATGGGAGTCATAGTTTTATTTGTTTACAGTTTTTTTTTCT  
GGAGTGGTGGGGTCCATTTTTTAAATGGTAAGAGTAACGGGTCTGTGAATGCCTTAGGAATTTTTTTTTTATTTAAAAAAATTTGTTAGGTTCTTCTGTATGAGATTTAAACAATTTTAAGACT  
CATAATTTTAAATGTTATATGATAAAATTATGACTTTGATTTTCATGAACAAATTTTAAAAATAATAAATATATTTGTTTTAA

>comp163234\_c0\_seq25

TGATTATAAATGCAATATTTTGTGCAATAGACAATTTAATGGATAATAGAAGCATTACTGTTTTACAACTTGTGAGAGAATTTAACAAATCATAGGGAGGTAATAAAGGCTAGTGTGAT  
GATTAACAGTTTTTTTTGTAGAGAGAGTTACAATTGTGAACCAAAAAATTTGACATCTTATACAGCTTTTGCAGCAGTGTGTAGTGTGTACATACATGTAGGAGACGGTACATTATTTAGTA  
TTAGCAGATAACCTTGGCGGGCGGTTCCCTAACCAAGTTTCTGCACCTTTTAACTTTGCCTGTGCTTTCTCTTCTATCCTGTTTTATTGATGTTCTTCTTTCGCCAGTCCCCCTTCTCACG  
GCTGTCTTGTAAACATCTTCTACTTCATATTCTGAATGTAAGGTGACTGTTTCATGATGATAGCGAAGGATAACAACAGTGAATGCTGCAAAGATTTCGCATCTTTACTGAATATATT  
CCATAACAGAGCTGCTACTGATATAGCTACCAACTTCTCCGAGAACATGATCTCCATGACTCTAAAACATAGCTTCTTCCCTTCTCAACTCTCTGTTGTATCTGCTGGTAATAGCAAGAGT  
ACAATTTAGGCACAGTGAAGCTTGAGAAAAACCTATTGCTAGAAGTCTCCAGGGAGTAGTGAGATGACCATATTTGGCCATGAAGAGAAGAAGTGGAGCCACCTGCAACCAAAAGCGA  
ACACAAGTGATTCCAACAAAATAGGACAAGGAAACAGTAAACTATGTGTCCATTACTTTGAGAGTCATCACTGGTCTCCAGAGAAAAGTTCTTGGCTTTTTGAAAGAGCAGCATTAACT  
ACTGGCAAAATAATCCGAGCAACTCGAAGAAAATCCTTCTGTTAGCAGCATCGGTTTGGCTTTCTTCTTCTTCTGTTTCTGTAATAATCATACTTATTTTCTGAAGGTGCAGAGTAGAAA  
GAAAGAGAGAGAGAAACAAGTACCTCTGTCTAATCGAGTCGTTGAGGAATGCCAAGCACAAAATCAGAATTCCTAAATGAGATACTGCTGATACTATGCTGAACCCAACATCACTTGAG  
AGAATGGAGGAGAGAAATAAAATCGATCCAAACCCAAACCAAGACTAGATTTAGCAACATCTTCCACATCACCAGATCCGAAACTGCTTTACATATACCTTCCAAGCTACTTTGTTTCAT  
CTACAGTAATGTCATCTTGTCTGAACCTCAAAGAAAACTAAGTTACCATAGCACCAACAAGTAGCTTAGGAAGAAGGAAGACACGGGATCAAGCTCAGCGTTTCTTTCGAGGAA

>comp163267\_c0\_seq2

CTTCAAATCTCTATGAATAAAGCTTTGATGAGCAAGACTATGCAAATACTCTACCCCCCTCGCTACATCCAGGGCGATGCTCAACCTCTTCTTCCACTCCAAAGGCTTCAAACCTTCTTCTT  
TCCAGCCAAACAGGTGGCGGCTTAGCGTCCCCTGTGGCATATACTCATAAACCAAGAGCCTCTCAGACCCTTCGGCACAGTAGCCAATTAAGCCGACAAGATTAGGATGATGCAGCATCA  
TTAACATTAGAACTTCCACAAGAACTCATTACTTCTTGTAGCCATCTCGATTAAGTTGCTTGATTGCCACTACCTGGCCATTTTCAAGTTGGCCCTTAAAGACCCTTCCAAAACCACT  
TCGCCGATCAAATTTGCCTCCCTGAAATTTTGGGTAACCATCTCGAGTTCTTTAAAAGTAAAACCTTTGTGTACAGTTGCTATTATCTGCTTTCGGAGACAACGGGTTTGTTCATTCTCTGC  
GAATTTGAAGAGCCATGTAATGTTTCGATCTTTGGGGTTATAAGAAAAAGTAAAACGGGATTAATAAATTTAAAAAGAAAAAATAAATAAATAAAGACCAA  
GAATTCCTATATATCCTGTAACAGAAGACCCTCAAACCCATTCAAATCTCCTTCTGAAGTGTCCATAAACTAGTTTCATATCGATCCATGGCTTCTTACAACCTTCATCCAGGGCCGTATA

ACCAAAGCCCTATCGCCATTGATGAGCACAGATGGCTCTCTCTCGTTCAAACCTGCTCTAAGCGAGACGATTGACGAAGAAGATGCAAAAAGTTAAGGTACAGGTCTGTATCTTCTTCGTCC  
CCAAAGGCTTGTTTTTTCAACAAGCCAGAAGCTTTCATGCCTCAGCTGTTTCGCGATTGGGCCTTACCATCACTGGGTTCCCTCATCTGTATGATATGGAGCGTTATAAGCTTGCAGCTGCAAG  
GAAGTTACAGTGCAGACCTTAATTCTCTCTCACTGGAGGAACCTTGTTCGCTTCTGAAGCATGACCAAAGGATTTCGCTTACTATCATAAGTACCTGGATTTTAGTGGAGAGACACTT  
GCCTGGATGATGGTGATAGATGCCTCCTTCTTGCTTGACTTCCTTCGCAACTTCATAGTTGATGTAGAAGCTCAGAAAGGCAAACAGAAATTATCTCAGTGGGAAACTCCAAGGATGAAG  
ATGGCTTACACCATGGTCAACCGAGACATTATCATGCTTGAGAACCAGATGCCCTTCTTCTTACTTAGAAAGATCCTCCGTCGATGCCGACAATTCTCTTCTGCAAAACTTGCAGAAGAAC  
AACTCTCCAGATGCTTTTAGGCTTTGTAAAGGAGGTTTCCCCTTTCATATAGTTCCTAGCATCGCATCCATTGATGTCAACCAATATGATCATCTTCTTCAGCTCCTCTATTTTCATGATTGT  
TCCCAAAGTAAACGAAGAAGAATTTCGATCAGCCACACGAGATTGATTTGACCGATGTGCTTGATTTGGAGGAAGAAGATGGAAGAAAAGCATGTGGGGTCTATGTGGAAGATCTTTAATTC  
TGTTTGGAACTATGCCTCAAATGTGAATAAAGGAGCTACTATTGAGACAATCAAAAAGGTTCTCATCAAAGGTCCAATCAAATCTTGATTAAGCTTCCATGGAATATCCTCACTAGCTTCC  
CTGGGATCTCAATCATAAAACAACCTATTGAATCTTTATCTGCAGTGGAAGTGTTAAGGAAAAGGATGATGATGATGTTGTTGTCCCGATGGAAAGAATTCTGTTTCAAAGCAGCCATT  
GGTTGAAGAGATAACCATAACCATCAGTGACAGAGCTAACAGATGCAGGAGTCAGATTCATGCCTTCTAATGGAGATCTGACAACAATAAGGTTTGATAGGCAGCAAAAACCTGCCACCAT  
ATACCTCCCAAAGGTGAGCTTAGACATAAATACAGAAGTAGTGCTAAGGAATTTGGTGGCTTATGAGGCATCGGCAGAGCCAGGGCCAATGGTCTTACAAGATACTGAGCTCATGAA  
TGGAGTTATAGACTGAGGAGGATGTGAAGATACTAAGGGAGAAAGGATCATTGTGAATCGAATGAAGAGTGATAAGGAAGTAGCAGATCTTGGAAATGGAATGAGCCGTTCTGTAA  
AGCTCTCAAAGTTGAATTCATGGATAAATTTTAGAAGATGTGAATAGTTACTATAACAGCAGGTGGAAAGTGAAGAGCAAGAGATTTATAAGCAAATATGTGTTTGGATCTTGGCAGTT  
TCTTACGTTGCTTGTGCCATTGCTCTGTTACTGACCTGTTTGCAGGCCCTTCTGCAATGTTTATAGTTGTGGTAAACGTTGGTTCAACGTTAAAGAAGAATAGTAAATGGCCAGTTAGC  
TTGTGGTATGATTTTATAAAGGAAAAGGTTCCCTACGCCATTGCTGATCAATCTACTTGGTTTGTGTTTGTCTAAAATTATGTATGATAATGTGTTCAAGTGGTTAAGTGAGACGATGTTATCG  
TTGGATATACATGATGTATTTTTTTTTTTTTTTGTAGTGGACTTAAGATGAAAGATTATTTTTTTGTACATCATGATAACTCAATCAA

>comp163320\_c0\_seq1

TGCAAGAAATAGAAGAATGAAGACCTGGAAGATTCACACAAAGAGCTTATAGGAAAGAAGATATTTGTACCAACTCAGTTGTTCAAATAATCTTATATTCAAATATTTATGAAGCTCCAAG  
GAAACAATATGATTTTACCTACACTAAAACATTAATAATCTCATTGCCAAAGAGGCATGATTAAGCTCCAAAATATCCAACAGAGCCGATGCTAATGATTCAATTACAAAATATGACA  
GATATTCAAATGTAGGAAGAACCATCTTCAAACACAGGCTTCCCTTAGACTCCATTGTAGCACAGAAAGAACAACAGAATTGCAATCCTCAAGAGATTGTATGAGGAAAACCTATGTAGT  
TTTGTAGCTGTTGAAGAAAGAATGGTGGCTCTGTTGGCAATGATGTCTCATCTGTAGCTAATCATCCTTTAGGAAATGAAATTTATTCTAAGAAGAACAATTAATTATCTACATTCATCTCA  
ATCTCATATAGAAGAGCTCGGTAAGCTGCTCTCCAGGAATCACTTTCTGAACCGCTTCTGAAAACCAATTTGCATCACCTGAAGTTCTTCTGGGTTAATCTACGAAAGATTGACCTCAGGA  
CATGCTGGATCTTATCGTCTGAAATTGAATCAACGGGTTCTAATGTGCAAATGTCAATGCCAAAAAATTTCCCTTGTGTTCTGCTGAAGCATTGGTTGCGAAGAGTAATTTGTTGATCCA  
AATCCAAATCCACTTGGTTTTTCTTCATAGATTTTCAGGGTAGAGTTCATATTGGCTTCAATTTTTGTTGATGAACTCGACTTGGATGCCAGTACTCCGAGCAGCGACGATGAGGATCGAG  
GCATTCAATAAACTGATATATTGATGGGGACAGAAAACCAAAACATTTGAGCCCATCGATGCTCCAGGAGGTTGAAGGGGAGGGAGTTCTTGGTTCATTAAGCTGCACTGCTTTATGATC  
TCTTGGTTTAGTCTCTCTAATCAAATCCCAGCATTGCGAGGGGAGAAGAATGAATAAAAAGTATCTTCTGGATTATCTTCAAAGGTAACCTTTTGGGAAGATGGCTTTTGCATTACACAGT  
GTCTTCCAAACATTACAGTTCCAAGATGAAGTGCCTCAACAAAGTACTTGGATTTGGTTAAATGCTTCTCCCTTTCAGCATTAGATGAACTCAACCCAGTGGAAATGGTTGAGCTGCTGTT  
GAAAGGCCGGTTGCCTCAGAATTTGAATTAATAGAAGATGTGGTTCATGTGGCTGAAGTTCAATGCCAAACAACCTTGCCGAAGACTGACTACCTTTAGAAGGAGAAGCTTCATGCCT  
CCATTTGCTTTGAAAAGGAGAGGAAGGAAAAAATCAAAAAGAATTGCCAAGGGGAACTGAAGATCCACCTCCAGGGCTTGACCTCAATGGTGTACTGGATGTTGCTATGGAATCATGCT  
CCATATCCTGTTCTACTGCAGTCGAAGTACAATCTTCCCTTAATGCTTTTAATTGCTCTCGCCATTTCTATAAGGCCAGCCTTGAATTTCACTTATAATCTTTGGTTAAGTTTTCTTGTG  
AGGTCCAAAACCACTTTGGCTCCTCTCCCATACATTATCATCATCAGAAAAGATTTTATTTTCCCTTGAAGCAATACCGTGGCGCATATTTTCAGTATATTGTGGAGTTGCTAAGTCAAGA



TTAATATGGGAGGTGCCTCTATTCAAGTTATCACTTTCCAATTCTGTTTTTACACGAGTTGTGCAAGATGTTTCTGGCTTCTGCAAACCTGCATTGGCTTCTATATCACAGTTATTTGTAGGC  
AAGCTCGGCCTACTAATATCAAAAACCTGCTTCCATATGTTGTGAGCATGCCATACTATTGATCTCACTAGGACGATCAGTAGCTCCACATGAATGCCCTCCACTCTTCAGACTAAAGATCTC  
AACACTAGCAACGTTGATATCTACCAATCCTTTTCATTGAAGTGGATGTACTTCTCTGCAATGGTACCTCGGAATCAGATTCACCTATCAGTTTTAAGCTTTCTGAATCTTCATTACATTACAATA  
TTAGGTGAAACCAATCCCAGATCATATGAACCCCAATCTTGCACTGCACTTGCATACCCTTCTAAAGCTTGAAGTAGAGTGTCAACTGATCCATAGTGTAGCGAAAAAGGAAAAATTTTT  
GGTTGGGTTTACAAGAACAAGAAAGCTCTGCATGGTTTAAAGCAGGCATAACGATCCAATGAGCATTACAGCCAGCAGCAGATAGGTGAAGATCATAAAAACAGAAAAAACATTCTCTC  
TCCTTTGACAAATCAAAGATACTATCCATTTTCTTGTCTTTGTAGGATCACAATGAGAATCTCTTCGTTCCCTGTTCCATTTCTATTCTTTCCAGTATAGCCTTCGTCAATGTCCCTTCTTTT  
CGAAACACGCTGCCATTTAAGTTACTGGGTTTGTGATCCTAACAGAAAAATCTCCAGAGAGCTCTGACAGCTTCTCTTGCAGCACCCATTAATAACTTGTGCATGGGAAATGGATGT  
CTTGCGGCGCTGTTTCGTATAAAGCTCAACCGCACACTGACCATGAGATAACCAGTCCATGGGAGCAACATTCAGTCTTCTGCACAGTTGAATCCACAATTG

>comp163349\_c0\_seq1

CCTATTGAATTTTGTCTTCTATTAAACTTAAAGTTTGTGGGTTTGGCATTGAATCACATTTATAGACCAATATAAATAGTTCATGGACTATTTTTATCTCTCTATCGCACTTTCTCTCTTTCTTT  
CTCTCTCTCTATAAAAATCACACACAAATTTAACAATTACAAGTAAAAATTCATGTAAAATTCACACAAAAAAGGGAAAAAACACAACAATTATGTTTTTTTTACTGAGCATCTGATTCTTT  
ACTATTCATTAATGCTAGTTTCAGTCAGGTAAGTTCTCTCTGTTGGCGAACCAAGAACAAGGAACAAGCCTCTGCCTCCAAAACTGGCCGCATGAACGAATCATCAAATCTGCGCC  
AATGGTGATGACTGATACGTAGGGCTTGGCGAGGAGCATGCGAAGATTCGGTAGCCCAATAATACTATCCCCTGCTGCTTCAATCTCAGATCCCCTGGCCACTTTCAAGAAGCCGGGAAA  
GGAAGGATTTTGGACTTAAGGGATCCGAAGACATGCTGCTCAAATGCTTTGGTGGATGAGGAAGAAGAAGCCTGATTAGAGGCTTTGTGAGTAAGCCAAACACCACAGTACTAAACAGA  
ACAACAGTGATAGTACTGGTGATCATGATAGCATTGCTTCGCAGCTGTGTGTGGCCTGCTCTTGTGAACTGGTTATATGCAAGTGCAGATTGAAACTGCTCCTCTCATGAGTCCAGCCCACC  
ATATTATAACTTGCTGTCTGAAGTTGATCTTCTCTGTGGAAGACTTTTTGGCAAGGTTAGACAAAAATGAGAGTGGGAAAAACAATGCAGCTCTTCCCCTAAAACCAGGCCTACAAGCA  
GTGAGCTCAAACCTAAGTTTGTAGAGGGCTGTCACTAACAAATCGCCACTTCTCAATGTCCAATGCATCCATGCCAACATACAGAAAGAGAAATATCTCTGAGATAAATGACAATGTTGC  
GAAAGCATGCTTTGTAGTAGTTCTAGAACTTTCTGTGACATTGTGCCAAGTATAGTGTGACATTACTATCCCACAAAAGAATACTGTGAGGATACTGCTTAGATCTAATAGTTGAGCAATCA  
TGTAAGACAGATAAGCCATGAGCATCATAAGTGATACTTCACGATCAGTAGAATGTCTGCCAAAATATAACTTTTTTATGATATAAGCACTAAGCAGACCTGCCACTGCTCCAAGAATGGTG  
CTCGTCACAAATAGATAGAAGAAGTTTCCAATAAGCTGAAGAACAATAACAGCATCCAAGTGAACAAGATCAAACCTTCTGGATAGCATTGAAGAGCACTACTGACGTTGCATCATTGGCA  
ACACCCTCACAAAGACCAAGCTATAAAGAAATGGTGTCTCATCCTGATTGAGCACCTGTAAGGTGCAAAACAGAATCTGTTGCGGAAAAGATTGCACCGATCGCAAGATAATCACCAATA  
TCCAGTGAACCTATATTCAATCTTCTAAATAATCCAATTGCTCCAAATGAAATTATCGTAAAAGATATCAAGGTCCCAGCTACACCAAACATCATAATTGTCAAGAAGTTGCGAAAGAACTG  
CTTCTTTTTAACCTGGAAACCAGCATTAAATATAATTTGGCGGAAGCAGATATATGAAGAATAGATCCTCACTGAAAACCAGAATACGTGAGCTTTTCCCTTTTGTGGTAAGAAGAATAACA  
ACTCCACTTATGAGCCCAAGAAGAGAGCCGTTATTGATTCATTATCCAGCGATTCTCCTCCAGCAGGTGACCAATAACAATACATGCACAGAGAAGAGCAACAAAGAGGGTAATTGAT  
GCAACATAGGAATAATCAGATTTACAAGCAACTTTGTGTTCAAAAGCAGCCCTCCATATCCAAGCCATCTTTCTCTTCTGAAAAATAACTCCTTAAGCCTCCAAGATCACACCTT  
CTTGAAGATAAACTTCCGCACAAAGGCTCGGATCGTCTCCTGAAAAGATTTACAGAAGCTTACACCACAATTCTTAGCATTATGTCCTCAATCGCTTCCAAACTTTATGCACAGAAGCA  
ACCCCTTCAGATCCAAATACCTCTTTCTCTTCTTTATCAACGATAAACTTCTATTCAAAGGCTCAAGTCCGTCTCCGGCGAAAACATTTAAAAAGCTTTCTCAATAATTATCCCATTATC  
TCCGTCAATCGCTCCACTGGTGTCTTCGCCGCCCGGTGGATCAAAAAGTCTTCGAAGACAAAATGAAAGGCTTACAGGAATAGAGAGCGACTCTTCCCTCCCTCTTTAATAATGTCGT  
CGTCGTTTCTCAGCTCCACAGTAATTCGAGCACTTGCAGATCATTGGATGCATTATAACAATAGGGGTTTCCGATGCCCGAGCTGAGAGCGAGCGGATGATCCGACGAACTCTGGATTGCC  
GTATGATTGACGCTTTATAATTAGCCAAATCTGGCTGAAAGGGCGGATTCTTCGCTTGCTCATTGTACATGTAACGGCTCCCCAATCTCAAACCATTGAGGTTAAAGATTTCCCTTCA  
TCTCTCTCTCTCCG

>comp163391\_c0\_seq10

AATTTTAAACCTTAAGCTCATATACCCTTGATCCCTATTATTTACTCAATAAACATGGCCTTGCTTAATATAAATGCTTGTAATGCTCTTCCCTTATCATATAGTGAAGCTTTCTCCTTACCAATTT  
GCATGATAATGAATAAGAAAACCTGCACAAATATTCTTAGATAGAAAAATGACAATAAAATATTGTATGCATCTTATCATAACGAAAACATTACATATATTCTTAGACAATAAAAAATGTATATCTT  
TTACTATTTTCATTTTACTCGTGAAGTAGTGGAAGGAAACCATGTCCCAGTGCTGCCATCCAAATTTTGTCCACATGAAATACATTCTCTCCACATTCATTTGCATCCCATCCCTCTAATCCAT  
GAATTATTCCAGCAATACGCCATGCACTCATTACCCTTCTAGGCAGCCAATTCTCACATGAGTGCACATTTTGAATTCATTTGGAATCTTCATGGCTGGAGTACTATAGTAAATGCAATCAT  
TTCTAACTTTTTTGGGAGGAAAATAAGAATATGGAATGAATATTGTTCCATTTTGGCCTTCCATTGCTCTACATCATCTATAACCATCTCCGACTAACCAAACCTGAAAGACAAATTTTTTGA  
AGTCATTTTCATGTATTATACTATCACAACCTATAAAGGATGTTCACTGATATAAGGGATGAAAACCAATTATGAATGCTTAAACGAATGCAAACTTTTATACACGAATGTTTAGATAAAAAAT  
AAATTAGGCATCAATATATTGTAAATATAATTATAATGTGCCCAAGTGATTTTCATTTGTTCCCTTGATTTGTTTTATGTTGGTTGCATGAGTGCCTAAGAATGATAATTGAATCATAATGTTGAATTA  
TTTTTGTGCTATTGATTGCATCAAACCTCCTAGCTATTTTTTAAATGTTTATGATGAATCCTAAAAAGTTAATAATACTTATAGACTTTTCTCAATCATTAATAAATTATATTAGTTGAACCATTCTC  
CCGTCATAAACTAAAGGAACTCATTACCTTAGGCATATAATTATTTGAAAAGTATAAGATGACCCTGTGTAGTTCCGAACATTAATGGCTCCAACATACAGTAGTCATGCGTGTGTTGTTATTAC  
AACCTTTATACCTTTGTTGCATAGGCTCTGAATCACTGTGCAAGCAACCTTTGAAATGTTACCTTTTCAGTAAAAATTTGTTTTGTGCCTTTGGGAATGTTGTTAAGAATCACAGCAACTGCCA  
AGCTACTTCCATCCACAATCCTTAATTTAACTTTGGATACTTTTGAAGGTAAAACCTCACCCTTCTATTGAGTTCTTTCACCTGATTGAAGAGCCCTAAACTTAGAACTTTAATTCCTTTGG  
TTTTAGCCTGTAGAATAGACTTTTCAATCAAATTATTGATTTTCTCCTTCTCCCATGATAAGCCATATTGGAAATTGTATATTGGCATGACCCATGTTTGCATTTTGATGTTCTTCAACTATTTT  
CTCTCAACAATGAAGGAAGAACTATAAAACCATGTGAGCAACATCGACATCCATGATAATGGCAACATCATCCGATCATAACCACTTAGAATATTTGTATGGTTTAGAGGCCAAAGATGCAA  
TTCCAAGTCGCAGATGATATATTGATTGCAAGGTGGTTGGATGTGTAAGGTGAACAACATCTATAGTCTCTTCTTTCCTTTCAATGAGATTTTCATAGACTTCATCAGTTAACTTATCCCTCG  
TGTTGTACAAATAGTCATAGAATGGCATGAATAAGGAATAGTTTGTCCGAAATTGCGTGTGATGAAGAGAATGAAACGAGGAAGTGTATATGAGGTATTTCAATGGTGGAAAGATAGAAA  
ACAACCACTTTGGAACCAATTCAAAGTTGCAGTGCCCATATTGTTTCATGAAGTCAATGTAGAAAACATATCCGACAAATTGTATCGTCGAGGCTGTTTCTGTATAGGCTGTAGTCAACAA  
TGGGACAGCGAACAAACATAGAGTAGACAATATGCTCCGCAAATGGATGAGTAACAGATGTGATTGGTTCTGTGACAATAGAGGCATGATGGTGAAGAATGGTAGCGCGAGTAGAGAAAAT  
GATGGTGAATGCTCGATGAAACCAATAGTAGAGGAACTCAACTGGTCCAGCATGTAATAGAATGTTTAGAATCACACCGTTAGTTCCGCCACATCGACATTTGAAAAGTAGAAGGGATCA  
GGGGGAATCCCATATAGAGGAGAATTCATTAAAGAGTATCTGGTTCATCCCAGTTCCTCTCACGATCAACCTGCTCAAACCTCTATACTTTTGTCAAGTATCCGGTGAGGACTTCTGGCAGTT  
TGCCAGCGAGAAATGCTTATCCATATCTGATTGTGGAGCATCCTCAGCAGCATGGAAGGGAAAATCAGAAGATAAGGTATGGAGACATCCTTCATCTCCTTTGTTGCAAGTAAGTAGAAA  
CTTTGTATCACCCACGGAGCTATAACCAAATACTTGAAGTTGCCGAGCCTATGCCATGGCCACTCTGTGAGCAATCCTGGTCTTGAAGCCATTAAGCTCACCAAGTTATCAACTCCAAGAG  
ACGCTGCAACTATGTACACTTTTCTTCTATGTAGATGGTCCTTTTAAAGCGAACTTTTATTTGGTACATTCACTGGACGTAGAGGAAGGTTT

>comp163391\_c0\_seq15

AATTTTAAACCTTAAGCTCATATACCCTTGATCCCTATTATTTACTCAATAAACATGGCCTTGCTTAATATAAATGCTTGTAATGCTCTTCCCTTATCATATAGTGAAGCTTTCTCCTTACCAATTT  
GCATGATAATGAATAAGAAAACCTGCACAAATATTCTTAGATAGAAAAATGACAATAAAATATTGTATGCATCTTATCATAACGAAAACATTACATATATTCTTAGACAATAAAAAATGTATATCTT  
TTACTATTTTCATTTTACTCGTGAAGTAGTGGAAGGAAACCATGTCCCAGTGCTGCCATCCAAATTTTGTCCACATGAAATACATTCTCTCCACATTCATTTGCATCCCATCCCTCTAATCCAT  
GAATTATTCCAGCAATACGCCATGCACTCATTACCCTTCTAGGCAGCCAATTCTCACATGAGTGCACATTTTGAATTCATTTGGAATCTTCATGGCTGGAGTACTATAGTAAATGCAATCAT  
TTCTAACTTTTTTGGGAGGAAAATAAGAATATGGAATGAATATTGTTCCATTTTGGCCTTCCATTGCTCTACATCATCTATAACCATCTCCGACTAACCAAACCTTAGGCATATAATTATTTGA  
AAGTATAAGATGACCCTGTGTAGTTCCGAACATTAATGGCTCCAACATACAGTAGTCATGCGTGTGTTGTTATTACAACCTTTATACCTTTGTTGCATAGGCTCTGAATCACTGTGCAAGCAA  
CCTTTGAAATGTTACCTTTTCAGTAAAAATTTGTTTTGTGCCTTTGGGAATGTTGTTAAGAATCACAGCAACTGCCAAGCTACTTCCATCCACAATCCTTAATTTAACTTTGGATACTTTTGA

GGTAAACTCACCCTTCTATTGAGTTCTTTACCTGATTGAAGAGCCCTAAACTTAGAACTTTAATTCCTTTGGTTTCAGCCTGTAGAATAGACTTTTCAATCAAATTATTGATTTTCTCCT  
TCTCCCATGATAAGCCATACTGCACATAAAACAAATGATTGAGTTATTTAGAATTATCAAAGAAAGAAATGAAATCTTTCAATGACTTTTATACTTGGAAATTGTATATTGGCATGACCCATG  
TTTGCATTTTGATGTTCTTCAACTTATTTCTCTCAACAATGAAGGAAGAACTATAAAACCATGTGAGCAACATCGACATCCATGATAATGGCAACATCATCCGATCATAACCACTTAGAATATT  
TGTATGGTTTAGAGGCCAAAGATGCAATTCCAAGTCGCAGATGATATATTGATTGCAAGGTGGTTGGATGTGTAAGGTGAACAACATCTATAGTCTCTTTCTTTCCCTTTCAATGAGATTTTCAT  
AGACTTCATCAGTTAACTTATCCCTCGTGTGTACAAATAGTCATAGAATGGCATGAATAAGGAATAGTTTGTCCGAAATTGCGTGTGATGAAGAGAATGAA

>comp163391\_c0\_seq2

TCCTTTTCTCTTTTATTTATTTGAAATAGATTTATTCATGAGATCTGAGAAGAAATGCTGAAAAATGTTTTTTGATGATGAAACAGGTCTAAACAGCTTGAAATTTCTAATAATTGAGCTC  
ATTCTAACTTAAATACTCTATGGGCTTAGTTGAACACAGGTCGCCTCATCACATTCATAGCTTCTTTTGATTTATATGTACCAAATAAGATTCTCAGTTAGTGCATATTTATGCTACTCACCA  
TCCTGAAAAGTTAGTAGAGTAAATTTATCACTATAAAGCTAATCTTGACCAAATTTGGCCTTATATCCAAATCCAACTTTCTTATGATGGTTTAAATTAACTTTTAATGATACAACTGCAT  
AGATTATAATAATTTACTAACTTACATGTGATTGGTTCTGTGACAATAGAGGCATGATGGTGAGAATGGTAGCGCGAGTAGAGAAAATGATGGTGCAATGCTCGATGAAACCAATAGTAG  
AGGAACTCAACTGGTCCAGCATGTAATAGAATGTTTAGAATCACACCGTTAGTTGCCCACATCGACATTTGAAAAGTAGAAGGGATCAGGGGGAATCCCATATAGAGGAGAATTCCATTA  
AAGAGTATCTGGTCATC

>comp163391\_c0\_seq24

AATTTTAAACCTTAAAGCTCATATACCCTTGATCCCTATTATTTACTCAATAAACATGGCCTTGCTTAATATAAATGCTTGTAATGCTCTTCCCTTATCATATAGTGAAGCTTTCTCCTTACCAATTT  
GCATGATAATGAATAAGAAAAGTGCACAAATATTCTTAGATAGAAAATGACAATAAAATATTGTATGCATCTTATCATACGAAAACATTACATATATTCTTAGACAATAAAAATGTATATCTT  
TTACTATTTCAATTTACTCGTGAAGTAGTGAAGGAAACCATGTCCCAGTGCTGCCATCCAAATTTTGCCACATGAAATAACATTCTCTCCACATTCATTTGCATCCCATCCCTCTAATCCAT  
GAATTATTCCAGCAATACGCCATGCACTCATTACCCTTCTAGGCAGCCAATTCTGCAACATTATTTACATTTAGCAGTAAGATGGTTGTACAATTAATCCAAATGAACATTTTACTTAGAA  
ATTATTGGTATCAAAGGAAGGTGAGGGAGGTGAATTGAAAGTTAAATGATTTGTCGTTGACTCAAACCTTTAGCCATATATTTGAAATGTTATCTCTTTTGTTCATTTCCCTTTCATTCAA  
ATTCCGAGAATCCAAACATAGGGCAAGTAGCAATATTATTGAAATGCTGAATTAATAATTTATTTTATTATATAAATAGTTAGATTCTCATCATGCTTTTTAACTTGTGTTAATGAATATATTAC  
CTCACATGAGTGCACATTTGCAATTCATTTGGAATCTTCATGGCTGGAGTACTATAGTAAATGCAATCATTCTTAACCTTTTTTGGGAGGAAAATAAGAATATGGAATGAATATTGTTCCATT  
TTGCGCCTTCCATTTGCTCTACATCATCTATAACCATCTCCGACTAACCAAACCTGAAAGACAAATTTTTTGAAGTCAATTTTCATGTATTATACTATCACAACATAAAGGATGTTCACTGATATA  
AGGGATGAAAACCAATTATGAATGCTTAAACGAATGCAAAACCTTTTATACACGAATGTTTAGATAAAAAATAAATTAGGCATCAATATATTTGTAATATATTTATAATGTGCCCAAGTGATTCA  
TTGTTCCCTTGATTTGTTTTATGTTGGTTGCATGAGTGCCTAAGAATGATAATTGAATCATAATGTTGAATATTTTTTGTGCTATTGATTGCATCAAACCTCCTAGCTATTTTTAAATGTTTATGAT  
GAATCCTAATAAAGTTAATAATACTTATAGACTTTTCTCAATCATTAATAAATTATATTAGTTGAACCATTTCTCCCGTCATAAACTAAAGGAACCTATTACCTTAGGCATATAATTATTTGAAAGT  
ATAAGATGACCCTGTGTAGTTCCGAACATTAATGGCTCCAACATACAGTAGTCATGCGTGTGTTGTTATTACAACCTTTTATACCTTTGTTGCATAGGCTCTGAATCACTGTGCAAGCAACCTTT  
GAAATGTTACCTTTTCAAGTAAATTTGTTTTGTGCCTTTGGGAATGTTGTTAAGAATCACAGCAACTGCCAAGCTACTTCCATCCACAATCCTTAATTTTAACTTTGGATACTTTTGAAGGTA  
AAACTCACCCTTCTATTGAGTTCTTTACCTGATTGAAGAGCCCTAAACTTAGAACTTTAATTCCTTTGGTTTCAGCCTGTAGAATAGACTTTTCAATCAAATTATTGATTTTCTCCTTCTC  
CCATGATAAGCCATATTGGAAATTGTATATTGGCATGACCCATGTTTGCATTTTGATGTTCTTCAACTTATTTCTCTCAACAATGAAGGAAGAACTATAAAACCATGTGAGCAACATCGACAT  
CCATGATAATGGCAACATCATCCGATCATAACCACTTAGAATATTTGTATGGTTTAGAGGCCAAAGATGCAATCCAAGTCGCAGATGATATATTGATTGCAAGGTGGTTGGATGTGTAAGGT  
GAACAACATCTATAGTCTCTTTCTTTCCCTTCAATGAGATTTATAGACTTCATCAGTTAACTTATCCCTCGTGTGTACAAATAGTCATAGAATGGCATGAATAAGGAATAGTTTGTCCGAA  
ATTGCGTGTGATGAAGAGAATGAAACGAGGAAGTGTATATGAGGTATTTCAATGGTGGAAAGATAGAAAACAACCACTTTGGAACCAATTCAAAGTTGCAGTGCCCCATATTGTTTCATGA

AGTCAATGTAGAAAACATATCCGACAAATTGTATCGTTCGAGGCTGTTTCTGTATAGGCTGTAGTCAACAATGGGACAGCGAACAACATAGAGTAGACAATATGCTCCGCAAATGGATGAGT  
AACAGATGTGATTGGTTCTGTGACAATAGAGGCATGATGGTGAGAATGGTAGCGGAGTAGAGAAAATGATGGTGCAATGCTCGATGAAACCAATAGTAGAGGAACTCAACTGGTCCAG  
CATGTAATAGAATGTTTAGAATCACACCGTTAGTTCGCCACATCGACATTTGAAAAGTAGAAGGGATCAGGGGGAATCCCATATAGAGGAGAATTCATTAAAGAGTATCTGGTCATCCCT  
GTTGTTGATGAAATGAACGTTAATTATACTTATTATATTCTATAATGCCGCAGAGTCTTTTGAACACCCGTTATTTTTGTAAGGGTGCTTCAATGAGATGACTTTACCTATGTTAAACACAAAT  
GTAAGGTAGGATATTTTTGCACTCTGAAACTTTTTGAAGTTGCCTCTGGTTTGGATGTTGAAGAGAGATTAACCTTTGGTTTGGGTGTTGCTATAGTTAATTTGTAATTACCAAAAAATTGAAG  
ATGTTTCAGACATTTTTTACAATACAAGTTGGTTTGAAGTAAGTGACACTTGTTCCTGCTTCAACATCTGAACCATTCAATTAATATCGTTCAACATAAAATCATATCCCTTCGACCTCG  
TCTCGCCCCGACGTCGTCCACGAAACTGCTGGCTGGTCTCAAACCCGGCATTGCGACCCGCGTAAGCCTGGCCATGTTGGTCTCGCCCTTGCCTTGTGTTAGCTGGCCCTCATGCACAGA  
CCGCGGTGACTCGAGCAGGTCTGACGGTCTCACCGGCTCATCCACAGGCCGAGTTGCACCCGCGCGTTGGCCTTGTGCGGCACACTTTTCTAGCCCTGGCCCTACATGCCTGCAGCT  
GCAGTTTCACGTCCGCCTCGCATGCTTTCGGGTTTCATATTTGCAAACAAGTCGCGGGTCAGATTGGGTCAACCCAGTAACCCACACGGGTCTGTGTCGGGTTGACAAACCAGTTCCTCT  
CACGATCAACCTGCTCAAACCTCTATACTTTTGTCAAGTATCCGGTGAGGACTTCTGGCAGTTTGCAGCGAGAAAATGCTTATCCATATCTGATTGTGGAGCATCCTCAGCAGCATGGAAGG  
GAAAATCAGAAGATAAGGTATGGAGACATCCTTCATCTCTTTGTTGCAAGTAAGTAGAAAATTTGTATCACCCACGGAGCTATAACCAATACTTGAAGTTGCCGAGCCTATGCCATGGC  
CACTCTGTGAGCAATCCTGGTCTTGAAGCCATTAAGCTCACCAAGTTATCAACTCCAAGAGACGCTGCAACTATGTACACTTCTTCTATGTAGATGGTCCTTTTAAAGCGAACTTTTATTT  
GGTACATTCAGTGGACGTAGAGGAAGGTTT

>comp163391\_c0\_seq27

AATTTTAAACCTTAAGCTCATATACCCTTGATCCCTATTATTTACTCAATAAACATGGCCTTGCTTAATATAAATGCTTGTAATGCTCTTCCCTATCATATAGTGAAGCTTTCTCCTTACCAATTT  
GCATGATAATGAATAAGAAAATGCACAAATATTCTTAGATAGAAAATGACAATAAAATATTGTATGCATCTTATCATAACGAAAACATTACATATATTCTTAGACAATAAAAATGTATATCTT  
TACTATTTTCACTTACTCGTGAAGTAGTGGAAGGAAACCATGTCCCAGTGCTGCCATCCAAATTTGTCCACATGAAATACATTCTCTCCACATTCATTTGCATCCCATCCCTCTAATCCAT  
GAATTATTCAGCAATACGCCATGCACTCATTACCCTTCTAGGCAGCCAATTCTCACATGAGTGCACATTTTGAATTCATTTGGAATCTTCATGGCTGGAGTACTATAGTAAATGCAATCAT  
TTCTAACTTTTTTGGGAGGAAAATAAGAATATGGAATGAATATTGTTCCATTTTGCCTTCCATTGCTCTACATCATCTATAACCATCTCCGACTAACCAAACTGAAAGACAAATTTTTTGA  
AGTCAATTTTCATGTATTATACTATCAAACTATAAAGGATGTTCACTGATATAAGGGATGAAAACCAATTATGAATGCTTAACGAATGCAAACTTTTATACACGAATGTTTAGATAAAAAAT  
AAATTAGGCATCAATATATTGTAATATATTATAATGTGCCCAAGTGATTTCAATGTTCCCTTGATTTGTTTTATGTTGGTTGCATGAGTGCCTAAGAATGATAATTGAATCATAATGTTGAATTA  
TTTTTGTGCTATTGATTGCATCAAACCTCCTAGCTATTTTTTAAATGTTTATGATGAATCCTAAAAAGTTAATAATACTTATAGACTTTTCTCAATCATTAAAAATTATATTAGTTGAACCATTCTC  
CCGTCATAAACTAAAGGAACTCATTACCTTAGGCATATAATTATTTGAAAAGTATAAGATGACCCTGTGTAGTTCCGAACATTAATGGCTCCAACATACAGTAGTCATGCGTGTGTTGTTATTAC  
AACCTTTATACCTTTGTTGCATAGGCTCTGAATCACTGTGCAAGCAACCTTTGAAATGTTACCTTTTCAGTAAAAATTTGTTTTGTGCCTTTGGGAATGTTGTTAAGAATCACAGCAACTGCCA  
AGCTACTTCCATCCACAATCCTTAATTTAACTTTGGATACTTTTGAAGGTAAAACCTCACCTTCTATTGAGTTCTTTCACCTGATTGAAGAGCCCTAACTTAGAACTTTAATCCTTTGG  
TTTCAGCCTGTAGAATAGACTTTTCAATCAAATTATGATTTTCTCCTTCTCCCATGATAAGCCATACACTTAGAATATTTGTATGGTTTAGAGGCCAAAGATGCAATTCCAAGTCGCAGATG  
ATATATTGATTGCAAGGTGGTTGGATGTGTAAGGTGAACAACATCTATAGTCTTCTTCTTCTTCAATGAGATTTTCATAGACTTTCATCAGTTAACTTATCCCTCGTGTGTTGACAAATAGTCA  
TAGAATGGCATGAATAAGGAATAGTTTGTCCGAAATTGCGTGTGATGAAGAGAATGAAACGAGGAAGTGTATATGAGGTATTTCAATGGTGGAAGATAGAAAACAACCACTTTGGAACC  
AATTCAAAAGTTGCAGTGCCCCATATTGTTTCATGAAGTCAATGTAGAAAACATATCCGACAAATTGTATCGTTCGAGGCTGTTTCTGTATAGGCTGTAGTCAACAATGGGACAGCGAACAACA  
TAGAGTAGACAATATGCTCCGCAAATGGATGAGTAACAGCAGTTCCTCTCACGATCAACCTGCTCAAACCTTATACTTTTGTCAAGTATCCGGTGAGGACTTCTGGCAGTTTGCAGCGAG  
AAATGCTTATCCATATCTGATTGTGGAGCATCCTCAGCAGCATGGAAGGGAAAATCAGAAGATAAGGTATGGAGACATCCTTCATCTCCTTTGTTGCAAGTAAGTAGAAAATTTGTATCAC

CCACGGAGCTATAACCAAATA

>comp163391\_c0\_seq28

AATTTTAAACCTTAAAGCTCATATACCCTTGATCCCTATTATTTACTCAATAAACATGGCCTTGCTTAATATAAATGCTTGTAATGCTCTTCCTTATCATATAGTGAAGCTTTCTCCTTACCAATTT  
GCATGATAATGAATAAGAAAACACTGCACAAATATTCTTAGATAGAAAATGACAATAAAATATTGTATGCATCTTATCATAACGAAAACATTACATATATTCTTAGACAATAAAAATGTATATCTT  
TACTATTTTCATTTTACTCGTGAAGTAGTGGAAGGAAACCATGTCCCAGTGCTGCCATCCAAATTTTGTCCACATGAAATAACATTCTCTCCACATTCATTTGCATCCCATCCCTCTAATCCAT  
GAATTATTCCAGCAATACGCCATGCACTCATTACCCTTCTAGGCAGCCAATTCTCACATGAGTGCACATTTTGAATTCATTTGGAATCTTCATGGCTGGAGTACTATAGTAAATGCAATCAT  
TTCTAACTTTTTTGGGAGGAAAATAAGAATATGGAATGAATATTGTTCCATTTTGCGCCTTCCATTGCTCTACATCATCTATACCATCTCCGACTAACCAAACCTTAGGCATATAATTATTTGA  
AAGTATAAGATGACCCTGTGTAGTTCCGAACATTAATGGCTCCAACATACAGTAGTCATGCGTGTTTGTATTACAACCTTTATACCTTTGTTGCATAGGCTCTGAATCACTGTGCAAGCAA  
CCTTTGAAATGTTACCTTTTCAGTAAAATTTGTTTTGTGCCTTTGGGAATGTTGTTAAGAATCACAGCAACTGCCAAGCTACTTCCATCCACAATCCTTAATTTTAACTTTGGATACTTTTGAA  
GGTAAAACCTACCACCTTCTATTGAGTTCTTTACCTGATTGAAGAGCCCTAAACTTAGAACTTTAATTCCTTTGGTTTCAGCCTGTAGAATAGACTTTTCAATCAAATTATTGATTTTCTCCT  
TCTCCATGATAAGCCATATTGGAAATTGTATATTGGCATGACCCATGTTTGCATTTTGTATGTTCTTCAACTTATTTCTCTCAACAATGAAGGAAGAAGTATAAAAACCATGTGAGCAACATCG  
ACATCCATGATAATGGCAACATCATCCGATCATAACCACTTAGAATATTTGTATGGTTTAGAGGCCAAAGATGCAATTCCAAGTCGCAGATGATATATTGATTGCAAGGTGGTTGGATGTGTAA  
GGTGAACAACATCTATAGTCTCTTTCTTTCCCTTTCAATGAGATTTTCATAGACTTCATCAGTTAACTTATCCCTCGTGTTGTACAAAATAGTCATAGAATGGCATGAATAAGGAATAGTTTGTCC  
GAAATTGCGTGTGATGAAGAGAATGAAACGAGGAAGTGTATATGAGGTATTTCAATGGTGGAAAGATAGAAAACAACCACTTTGGAACCAATCAAAGTTGCAGTGCCCCATATTGTTCA  
TGAAGTCAATGTAGAAAACATATCCGACAAATTGTATCGTCGAGGCTGTTTCTGTATAGGCTGTAGTCAACAATGGGACAGCGAACAACATAGAGTAGACAATATGCTCCGCAAATGGATG  
AGTAACAGCAGTTCTCTCACGATCAACCTGCTCAAACCTCTATACTTTTGTCAAGTATCCGGTGAGGACTTCTGGCAGTTTGCAGCGAGAAAATGCTTATCCATATCTGATTGTGGAGCAT  
CCTCAGCAGCATGGAAGGGAAAATCAGAAGATAAGGTATGGAGACATCCTTCATCTCCTTTGTTGCAAGTAAGTAGAAAACCTTTGTATCACCCACGGAGCTATAACCAAATA

>comp163391\_c0\_seq29

AATTTTAAACCTTAAAGCTCATATACCCTTGATCCCTATTATTTACTCAATAAACATGGCCTTGCTTAATATAAATGCTTGTAATGCTCTTCCTTATCATATAGTGAAGCTTTCTCCTTACCAATTT  
GCATGATAATGAATAAGAAAACACTGCACAAATATTCTTAGATAGAAAATGACAATAAAATATTGTATGCATCTTATCATAACGAAAACATTACATATATTCTTAGACAATAAAAATGTATATCTT  
TACTATTTTCATTTTACTCGTGAAGTAGTGGAAGGAAACCATGTCCCAGTGCTGCCATCCAAATTTTGTCCACATGAAATAACATTCTCTCCACATTCATTTGCATCCCATCCCTCTAATCCAT  
GAATTATTCCAGCAATACGCCATGCACTCATTACCCTTCTAGGCAGCCAATTCTGCAACATTTTACATTTAGCAGTAAGATGGTTGTACAATTAATCCAAATGAACATTTTACTTAGAA  
ATTATTGGTATCAAAGGAAGGTGAGGGAGGTGAATTGAAAGTTAAATGATTTGTCGTTGACTCAAACCTTTAGCCATATATTTTGAATGTTATCTCTTTTGTTCATTTCCCTTTCATTCAA  
ATTCCGAGAATCCAAACATAGGGCAAGTAGCAATATTATTGAAATGCTGAATTAATAATTTTATTATATAAATAGTTAGATTCTCATCATGCTTTTTTAACTTGTGTTAATGAATATATTAC  
CTCACATGAGTGCACATTTTGAATTCATTTGGAATCTTCATGGCTGGAGTACTATAGTAAATGCAATCATTCTAACTTTTTTGGGAGGAAAATAAGAATATGGAATGAATATTGTTCCATT  
TTGCGCCTTCCATTGCTCTACATCATCTATACCATCTCCGACTAACCAAACCTGAAAGACAAATTTTTTGAAGTCATTTTCATGTATTATACTATCACAACCTATAAAGGATGTTCACTGATATA  
AGGGATGAAAACCAATTATGAATGCTTAAACGAATGCAAAACCTTTTATACACGAATGTTTAGATAAAAAATAAATTAGGCATCAATATATTTGTAATATATTTATAATGTGCCAAGTGATTTC  
TTGTTCCCTTGATTTGTTTTATGTTGGTTGCATGAGTGCCTAAGAATGATAATTGAATCATAATGTTGAATATTTTTTGTGCTATTGATTGCATCAAACCTCCTAGCTATTTTTTAAATGTTTATGAT  
GAATCCTAAAAAGTTAATAATACTTATAGACTTTTCTCAATCATTAATAATTTATATTAGTTGAACCATTTCTCCCGTCATAAACTAAAGGAACCTCATTACCTTAGGCATATAATTATTTGAAAGT  
ATAAGATGACCCTGTGTAGTTCCGAACATTAATGGCTCCAACATACAGTAGTCATGCGTGTTTGTATTACAACCTTTATACCTTTGTTGCATAGGCTCTGAATCACTGTGCAAGCAACCTTT  
GAAATGTTACCTTTTCAGTAAAATTTGTTTTGTGCCTTTGGGAATGTTGTTAAGAATCACAGCAACTGCCAAGCTACTTCCATCCACAATCCTTAATTTTAACTTTGGATACTTTTGAAGGTA

AAACTCACCCTTCTATTGAGTTCTTTACCTGATTGAAGAGCCCTAAACTTAGAACTTTAATTCCTTTGGTTTCAGCCTGTAGAATAGACTTTTCAATCAAATTATTGATTTTCTCCTTCTC  
CCATGATAAGCCATACACTTAGAATATTTGTATGGTTTATAGAGCCAAAGATGCAATTCCAAGTCGCAGATGATATATTGATTGCAAGGTGGTTGGATGTGTAAGGTGAACAACATCTATAGT  
CTCTTTCTTTCCCTTTCAATGAGATTTTCATAGACTTCATCAGTTAACTTATCCCTCGTGTGTGACAAATAGTCATAGAATGGCATGAATAAGGAATAGTTTGTCCGAAATTGCGTGTGATGAAG  
AGAATGAAACGAGGAAGTGTATATGAGGTATTTCAATGGTGGAAAGATAGAAAACAACCACTTTGGAACCAATTCAAAGTTGCAGTGCCCATATTGTTTCATGAAGTCAATGTAGAAAAC  
ATATCCGACAAATTGTATCGTCGAGGCTGTTTCTGTATAGGCTGTAGTCAACAATGGGACAGCGAACAACATAGAGTAGACAATATGCTCCGCAAATGGATGAGTAACAGATGTGATTGGT  
TCTGTGACAATAGAGGCATGATGGTGAGAATGGTAGCGGAGTAGAGAAAATGATGGTGAATGCTCGATGAAACCAATAGTAGAGGAACTCAACTGGTCCAGCATGTAATAGAATGTTT  
AGAATCACACCGTTAGTTCGCCACATCGACATTTGAAAAGTAGAAGGGATCAGGGGGAATCCCATATAGAGGAGAATCCATTAAAGAGTATCTGGTCATCCCTGTTGTTGATGAAATGA  
ACGTTAATTATACTTATTATAATTCTATAATGCCGAGAGTCTTTTGAAAACACCGGTATTTTTGTAAGGGTGCTTCAATGAGATGACTTTACCTATGTTAAACACAAATGTAAGGTAGGATATTT  
TTGCACTCTGAAACTTTTGAAGTTGCCTCTGGTTTGGATGTTGAAGAGAGATTAACCTTTGGTTTGGGTGTTGCTATAGTTAATTTGTAATTACCAAAAAATTGAAGATGTTTCAGACATTTTT  
TACAATACAAGTTGGTTTGAAGTAAGTGACACTTGTTTTCCCTGCTTCAACATCTGAACCAATTCATTAATATCGTTTCAACATAAAAATCATATCCCTTCGACCTCGTCTCGCCCCGACGTC  
GTCCACGAAACTGCTGGCTGGTTCTCAAACCGGCATTTGCGACCGCGTAAGCCTGGCCATGTTGGTCTCGCCCTTGCTTGTGTAGCTGGCCCTCATGCACAGACCGCGGTGACTCGAG  
CAGGTCCTGACGTTCTCACCGGCTCATCCACAGGCCGAGTTGCACCCGCGGTTGGCCTTGTGCGGCACACTTTTCTAGCCCTGGCCCTACATGCCTGCAGCTGCAGTTTCACGTCCG  
CCTCGCATGCTTTTCGGGTTTCATATTTTGCAAACAAGTCGCGGGTCAGATTGGGTCAACCCAGTAACCCACACGGGTCGTGTCCGGGTTGACAAAC

>comp163391\_c0\_seq31

AATTTTAAACCTTAAGCTCATATACCCTTGATCCCTATTATTTACTCAATAAACATGGCCTTGCTTAATATAAATGCTTGTAATGCTCTTCCCTTATCATATAGTGAAGCTTTCTCCTTACCAATTT  
GCATGATAATGAATAAGAAAATGCACAAATATTCTTAGATAGAAAATGACAATAAAATATTGTATGCATCTTATCATAACGAAAACATTACATATATTCTTAGACAATAAAAATGTATATCTT  
TTACTATTTTCACTTACTCGTGAAGTAGTGGAAGGAAACCATGTCCAGTGCTGCCATCCAAATTTTGTCCACATGAAATACATTCTCTCCACATTCATTTGCATCCCATCCCTCTAATCCAT  
GAATTATTCCAGCAATACGCCATGCACTCATTACCCTTCTAGGCAGCCAATTCTCACATGAGTGCACATTTTGAATTCATTTGGAATCTTCATGGCTGGAGTACTATAGTAAATGCAATCAT  
TTCTAACTTTTTTGGGAGGAAAATAAGAATATGGAATGAATATTGTTCCATTTTGGCCTTCCATTGCTCTACATCATCTATACCATCTCCGACTAACCAAACTGAAAGACAAATTTTTTGA  
AGTCATTTTCATGTATTATACTATCAAACTATAAAGGATGTTCACTGATATAAGGGATGAAAACCAATTATGAATGCTTAACGAATGCAAACTTTTATACACGAATGTTTAGATAAAAAAT  
AAATTAGGCATCAATATATTGTAAATATATTATAATGTGCCCAAGTGATTTCAATGTTCCCTTGATTTGTTTTATGTTGGTTGCATGAGTGCCTAAGAATGATAATTGAATCATAATGTTGAATTA  
TTTTTGTGCTATTGATTGCATCAAACCTCCTAGCTATTTTTTAAATGTTTATGATGAATCCTAAAAAGTTAATAATACTTATAGACTTTTCTCAATCATTAAAAATTATATTAGTTGAACCATTCTC  
CCGTCATAAACTAAAGGAACTCATTACCTTAGGCATATAATTATTTGAAAAGTATAAGATGACCCTGTGTAGTTCCGAACATTAATGGCTCCAACATACAGTAGTCATGCGTGTGTTGTTATTAC  
AACCTTTATACCTTTGTTGCATAGGCTCTGAATCACTGTGCAAGCAACCTTTGAAATGTTACCTTTTCAGTAAAAATTTGTTTTGTGCCTTTGGGAATGTTGTTAAGAATCACAGCAACTGCCA  
AGCTACTTCCATCCACAATCCTTAATTTAACTTTGGATACTTTTGAAGGTAAAACCTCACCCTTCTATTGAGTTCTTTACCTGATTGAAGAGCCCTAAACTTAGAACTTTAATTCCTTTGG  
TTTCAGCCTGTAGAATAGACTTTTCAATCAAATTATTGATTTTCTCCTTCTCCCATGATAAGCCATACTGCACATAAAAACAATGATTGAGTTATTTAGAATTATCAAAGAAAGAAATGAAAT  
CTTTCAATGACTTTTATACTTGGAATTTGTATATTGGCATGACCCATGTTTGCATTTTGTGATGTTCTTCAACTTATTCTCTCAACAATGAAGGAAGAATAAAAACCATGTGAGCAACATCG  
ACATCCATGATAATGGCAACATCATCCGATCATACCACTTAGAATATTTGTATGGTTTATAGAGCCAAAGATGCAATTCCAAGTCGCAGATGATATATTGATTGCAAGGTGGTTGGATGTGTAA  
GGTGAACAACATCTATAGTCTCTTTCTTTCTTTCAATGAGATTTTCATAGACTTCATCAGTTAACTTATCCCTCGTGTGTGACAAATAGTCATAGAATGGCATGAATAAGGAATAGTTTGTCC  
GAAATTGCGTGTGATGAAGAGAATGAAACGAGGAAGTGTATATGAGGTATTTCAATGGTGGAAAGATAGAAAACAACCACTTTGGAACCAATCAAAGTTGCAGTGCCCATATTGTTCA  
TGAAGTCAATGTAGAAAACATATCCGACAAATTGTATCGTCGAGGCTGTTTCTGTATAGGCTGTAGTCAACAATGGGACAGCGAACAACATAGAGTAGACAATATGCTCCGCAAATGGATG

AGTAACAGATGTGATTGGTTCTGTGACAATAGAGGCATGATGGTGAGAATGGTAGCGCGAGTAGAGAAAATGATGGTGCAATGCTCGATGAAACCAATAGTAGAGGAACTCAACTGGTC  
CAGCATGTAATAGAATGTTTGAATCACACCGTTAGTTCCGCACATCGACATTTGAAAAGTAGAAGGGATCAGGGGGAATCCCATATAGAGGAGAATTCATTAAGAGTATCTGGTCATC  
CCTGTTGTTGATGAAATGAACGTTAATTATACTTATTATATTCTATAATGCCGCAGAGTCTTTTGAACACCGGTATTTTGTAAAGGGTGCCTCAATGAGATGACTTTACCTATGTTAAACACA  
AATGTAAGGTAGGATATTTTGCACCTCTGAAACTTTTGAAGTTGCCTCTGGTTTGGATGTTGAAGAGAGATTAACCTTTGGTTTGGGTGTTGCTATAGTTAATTTGTAATTACCAAAAAATTG  
AAGATGTTTCAGACATTTTTTACAATACAAGTTGGTTTGAAGTAAGTGACACTTGTTCCTGCTTCAACATCTGAACCATTCATTAATATCGTTCAACATAAAATCATATCCCCTTCGACC  
TCGTCTCGCCCCGACGTCGTCCACGAAACTGCTGGCTGGTTCTCAAACCGGCATTTGCGACCGCGTAAGCCTGGCCATGTTGGTCTCGCCCTTGCCCTGTTGTAGCTGGCCCTCATGCAC  
AGACCGCGGTGACTCGAGCAGGTCCTGACGGTTCTCACCGGCTCATCCACAGGCCGCAGTTGCACCCGCGCGTTGGCCTTGTGCGGCACACTTTTCTAGCCCTGGCCCTACATGCCTGC  
AGCTGCAGTTTCACGTCGCCCTCGCATGCTTTCCGGTTTCATATTTGCAAACAAGTCGCGGGTCAGATTGGGTCAACCCAGTAACCCACACGGGTGCTGTCCGGGTTGACAAACAGTTTC  
CTCTCACGATCAACCTGCTCAAACCTTATACTTTTGTCAAGTATCCGGTGAGGACTTCTGGCAGTTTGCAGCGAGAAATGCTTATCCATATCTGATTGTGGAGCATCCTCAGCAGCATGG  
AAGGGAAAATCAGAAGATAAGGTATGGAGACATCCTTCATCTCCTTTGTTGCAAGTAAGTAGAAAATTTGTATCACCCACGGAGCTATAACCAAATACTTGAAGTTGCCGAGCCTATGCCA  
TGGCCACTCTGTGAGCAATCCTGGTCTTGAAGCCATTAAGCTCACCAAGTTATCAACTCCAAGAGACGCTGCAACTATGTACACTTTCTTCTATGTAGATGGTCCTTTTAAAGCGAACTTTT  
ATTTGGTACATTCACTGGACGTAGAGGAAGGTTTC

>comp163391\_c0\_seq5

AATTTTAAACCTTAAGCTCATATACCCTTGATCCCTATTATTTACTCAATAAATCATGGCCTTGCTTAATATAAATGCTTGTAAATGCTCTTCCCTTATCATATAGTGAAGCTTTCTCCTTACCAATTT  
GCATGATAATGAATAAGAAAATGCACAAATATTCTTAGATAGAAAATGACAATAAATATTGTATGCATCTTATCATACGAAAACATTACATATATTCTTAGACAATAAAAATGTATATCTT  
TTACTATTTCAATTTACTCGTGAAGTAGTGAAGGAAACCATGTCCCAGTGTGCCATCCAAATTTGTCCACATGAAATAACATTTCTCTCCACATTCATTTGCATCCCATCCCTCTAATCCAT  
GAATATTCCAGCAATACGCCATGCACTCATTACCCTTCTAGGCAGCCAATTCTGCAACATATTTTACATTTAGCAGTAAGATGGTGTACAATTAATCCAAATGAACATTTTACTTAGAA  
ATTATTGGTATCAAAGGAAGGTGAGGGAGGTGAATTGAAAGTTAAATGATTTGTCGTTGACTCAAACCTTTAGCCATATATTTTGAATTTGTTATCTCTTTTGTTCATTTCCCTTTCATTCAA  
ATTCCGAGAATCCAAACATAGGGCAAGTAGCAATATTATTGAAATGCTGAATTAATAATTTATTTTATTATATAAATAGTTAGATTCTCATCATGCTTTTTAACTTGTGTTAATGAATATATTAC  
CTCACATGAGTGCACATTTTGAATTCATTTGGAATCTTCATGGCTGGAGTACTATAGTAAATGCAATCATTTCTAACTTTTTTGGGAGGAAAATAAGAATATGGAATGAATATTGTTCCATT  
TTGCGCCTTCCATTGCTCTACATCATCTATAACCATCTCCGACTAACCAAACCTTAGGCATATAATTATTTGAAAGTATAAGATGACCCTGTGTAGTTCCGAACATTAATGGCTCCAACATACA  
GTAGTCATGCGTGTGTTTATTACAACCTTTATACCTTTGTTGCATAGGCTCTGAATCACTGTGCAAGCAACCTTTGAAATGTTACCTTTCAGTAAAATTTGTTTTGTGCCTTTGGGAATGTT  
GTTAAGAATCACAGCAACTGCCAAGCTACTTCCATCCACAATCCTTAATTTTAACTTTGGATACTTTTGAAGGTAAAATCACCACCTTCTATTGAGTTCTTTACCTGATTGAAGAGCCCTA  
AACTTAGAACTTTAATTCCTTTGGTTTCAGCCTGTAGAATAGACTTTTCAATCAAATATTGATTTTCTCCTTCTCCCATGATAAGCCATATTGGAAATTTGATATTGGCATGACCCATGTTTG  
CATTTTGATGTTCTTCAACTTATTTCTCTCAACAATGAAGGAAGAACTATAAAACCATGTGAGCAACATCGACATCCATGATAATGGCAACATCATCCGATCATAACCACTTAGAATATTGTA  
TGGTTTAGAGGCCAAAGATGCAATCCAAGTCGCAGATGATATATTGATTGCAAGGTGGTTGGATGTGTAAGGTGAACAACATCTATAGTCTCTTTCTTTCCCTTTCAATGAGATTTTCATAGA  
CTTCATCAGTTAACTTATCCCTCGTGTGTTGACAAATAGTCATAGAATGGCATGAATAAGGAATAGTTTGTCCGAAATGCGTGTGATGAAGAGAATGAAACGAGGAAGTGTATATGAGGTAT  
TTCAATGGTGGAAAGATAGAAAACAACCACTTTGGAACCAATTCAAAGTTGCAGTGCCCCATATTGTTTCATGAAGTCAATGTAGAAAACATATCCGACAAATTGTATCGTCGAGGCTGTTT  
CTGTATAGGCTGTAGTCAACAATGGGACAGCGAACAACATAGAGTAGACAATATGCTCCGCAAATGGATGAGTAACAGATGTGATTGGTTCTGTGACAATAGAGGCATGATGGTGAGAAT  
GGTAGCGCGAGTAGAGAAAATGATGGTGCAATGCTCGATGAAACCAATAGTAGAGGAACTCAACTGGTCCAGCATGTAATAGAATGTTTGAATCACACCGTTAGTTCCGCACATCGACA  
TTTGAAGTAGAAGGGATCAGGGGGAATCCCATATAGAGGAGAATTCCATTAAGAGTATCTGGTCATCCCTGTTGTTGATGAAATGAACGTTAATTATACTTATTATATTCTATAATGCCG

CAGAGTCTTTTGAACACCGGTATTTTTGTAAGGGTGCTTCAATGAGATGACTTTACCTATGTTAAACACAAATGTAAGGTAGGATATTTTTGCACTCTGAAACTTTTGAAGTTGCCTCTGG  
TTTGGATGTTGAAGAGAGATTAACCTTTGGTTTGGGTGTTGCTATAGTTAATTTGTAATTACCAAAAAATTGAAGATGTTTCAGACATTTTTTACAATACAAGTTGGTTTGAAGTAAGTGACA  
CTTGTTCCTGCTTCAACATCTGAACCATTCATTAATATCGTTCAACATAAAATCATATCCCTTCGACCTCGTCTCGCCCCGACGTCGTCACGAAACTGCTGGCTGGTTCTCAAACCG  
GCATTTGCGACCGCGTAAGCCTGGCCATGTTGGTCTCGCCCTTGCCCTTGTGTAGCTGGCCCTCATGCACAGACCGCGGTGACTCGAGCAGGTCTGACGGTTCTCACCGGCTCATCCAC  
AGGCCGAGTTGCACCCGCGGTTGGCCTTGTGCGCGCACACTTTTCTAGCCCTGGCCCTACATGCCTGCAGCTGCAGTTTCACGTCCGCTCGCATGCTTTCGGGTTTCATATTTGCAAAC  
AAGTCGCGGGTCAGATTGGGTCAACCCAGTAACCCACACGGGTCGTGTCCGGGTTGACAAAC

>comp163411\_c0\_seq22

TGCCTAATAAACTAGCAGGTCTTCTTAATTCTACCATACGCATCAATCCTAAGAACAATCAATAATTGAAACTAATTGTGATTCTAGCATAACGCATCAATATATTATTCGTCAAAATAGATGA  
TTTTGGTTGCAAATGATGATAACGATGATGATATAGGGTTTAGATATACATGAAATACATGGGTGATTTGTTCGAAAATATATATAACAATATCCATTTAAATTATTAGTGTATGCCAAAAC  
AACAAAGGATGACTAAGTAAATCTGTGAAAAAGAACAATTATGAGTGAAGATGTGCAGAGAGCATCTAAA

>comp163418\_c0\_seq15

GTCAAGAAATCTAAGTAAACAACAAGTTTATGCACTTATATTCAAAATTAACAAACATTTATATTTAATTGCAAGATAACTGTTTTTAATTAATACTACTCAAGCTCATTCCTTTTCT  
AAAAAATAAGATATTTTTATTTGGAACATACGTCCTTTAATTTTGCAGCGTAAATGGTAATTTTTGTACAGTTATGACATTTACTAAATGTGTCCCTTCAACATTCTTTTGATGTCCTCAAT  
TTCATAGTTAATACCAAGTAATGGGCTTAGTCAAATCTTAAACAAGGAAAAAATTTCTGAGCTTCCAGAAAATTAATTTTGCAATTCTCTTTTTTTTTTCGTCTATGGCTTCAAGCCTT  
TGAAATAAGATGTACAATCCTTTATTTGATTGCATGGATATTTCAAATTTTAATGCTTCTTTATAGCCTCTCATTTCAACAACGGCTGAAAATTTGGAGAGTCCTCTCTAGCTGTTCTATGT  
CAGAACCTGGAACGTCTTCTATGTTGGAGCCATTCTTGTATAATTTGAAAATAGGCACTGAACCTCACATTCCTGAACTTACAATGCTAGCTTGTTCCTTCATGTTACCTTGAGAAAAGTC  
ACAGACGTGTGTTGCTTGCAGAGCTGCTCTAGATGATGCAATATTCCTTTTGAATCTTCATCTGATTGGTCATAGAATAGTGCCAGCGACAGTCCACATGATGTGATAACACTACGAAACTG  
GTCTTTTGTAGTGATATGAACGGCAGAGTCATCTGCCATCTGTTAAGGCCTTCACTTTGTCTTCGCTGACATGCGCTTTAGCATCCTGCAAGGCTTTGTTACTGTTTCATCTCCCGGCAT  
TTCAAGAGCCAATACTTCATAATCTTTTATAGAATCTTCCCACCGATCCAATAACAAGATTCAAGATGTGACAACCTTTAGCTTCCAGATAAAGAAATTCATCTGACAAAGGATAAAAG  
GTCTGTCTACCTTGACATTGCAGTCAGCCCTCCTTAGCCGAGCCTTGCTGTACCTGGGCCGCAAATTAAGAACAACATTGCAATCTTCAATGGCCTTTTCCCATTGCCAAGTTTCGACC  
GGCAAGCAGCTCGGTTGCATAGTAGGATTGTATTATGGGGGTCATGGTTAAGACCACTCCCATAGGCAAGGCATGCCTCTTCAAAATTCGAGGCCTTGAAGAGATCATTACCCATTGAGCG  
AGCTGATGCCACTGACCGAGCCTTTCGAGCAATAGCAGCAATCTCCCTGCTGCCAGGATCAATCCGTGCAGCCATTTGAGCTAATGAAACAGCACTCTCAAATCTCCTGTAGCCATATCA  
ACCTGTGCTCTTATTGAAAGGTGATATGCATTGCTAAGGGCGCCAAAGAAGCTGTGTAGCAGCATCAGTTTCGAATTTGGGTGCATCAATCATGGTTTCCCTCCGCATCTCCTGTCTGAGGA  
GCATCAGAAAGGCCTCCGCTTGGTAGGCAAATACCTTCAATGCAAAAGAAAAAGGGAGAAAATACTTCTATTAGTCAGGCTGCTTAATAAAATTTTTAGTAAATTGGAACAAAAGTGTAC  
CCAACCAATCGGAGCATTTTCTTTGTCGTTTACCACTGTATCGGCTCTTAATTTTGGGGTACACGTTGTGTGTTTTTTTTCATCAGCGACTAATTTTTTTTTTCTAAACTTTACAGGAATA  
AATATTTAAAGAACTGGAGATAAACCCTGTGGAGCTGAATCAGCACCGGTGGAAATGGCAGACTGACTATCTTTAATACAGCATCCAGTCCCTCTGTTTCCTTGCTTCACTGCACTTGC  
CAATGAAAACCTTGCACAGCCTTAGCTCTAGAGATGTCTTCATGACTGGCTTCACTCTTTGCTAGCTTATAGTGATTGGCTGCTCTCTCTGGTTTACCCAATCTGAGATAGAGATTGGCAAGC  
CGCTGATGCGCTCTTAAATAACAAGGATCAATCCTGATAGCCTGTCTGCACTCCTGCAAAGCTTCAAGGAGACGGCCGAGGCCGATTAGCGCTGCCGCTTTGTTGCTCCAGTAAGAAGCA  
TTTTCTGGATCAATCACTATCGCTCTATCGTAGAACGCCACGGCCTCCGCATACCTCCCGTTCTTATACTCCTCGTTCCCAACTCCTTCAGCTCTTCAGGATCAAGTCTTCTTGAAGCGC  
CCGGCACATGGACACCGGAATCTCAGCCTCATACTCAGAGCTACTTCTACGCCCTCACCTCCGATTCCATCTCTTTTGCCGTCTTGGGGAGATAGTCGAGGACATCGCGGTTCCGGAGTGAC  
GGCGCCGGGAGCTCGGAGGTTTCCCAAATTGCTGTAGAGCATGACGTTACCAGAGGAAGCGCGGACAAGGGTATTGCTCCCTTGGCGCGTTGGTGATCGTAGATCATACTGTGAGATC



TGCCGATATGCTGCTGGTGGTTTTGTGGCCGCACGCCGCGACCAGCGGATGGCCGATTGGTTTTGATCTGGGGGACACGCGGCCGCGGCAGGCTTGGGGGAGACTAGGATCTTTGGTGTGA  
CGGCGGCAGGGGATTGGTCGGGGCCAGGACGCCGCCGCTTGGTACTATGGCTGCTTCCACCAGAAAGGGAGGCATTGGCGACAATAGGGGAAGGAGAGGGGTGGCGAGGAGAGACGG  
GGGCTGATCCAGCACGGCGGGCGGAAGAAGGCGTTGTAGAGAATGAGCAAGCCACAGCTGGAGGAATTTTTGTCTCATTCCCATTCGTCGCTGTCGACGGGATGATTGCCTTGCGGAG  
GGATTGGAAATTGCGTCTGGGATTTGGTTAATCGGACCTCAAAAAGGAAGATGAAGCATTCTTCAAATTTGGATTTAGAAAACATTGATTTTGGTTAATCTCTGAGAATGGAGGAAG  
AATAATGATCACCCGGAGGCATTGTAGTTCAAATGAGTTGTCTCTGATCAGGGAGGCGAACATTGGCTGAAAAAGGAAGAGAGAGGAGGAAAAGAAGATGACGGT

>comp163418\_c0\_seq16

GTCAAGAAATCTAAGTAAAACAACAAAGTTTATGCACTTATATTCAAAATTA AAAACATTTATATTTAATTGCAAGATAACTGTTTTTAATTA AAAATACTACTCAAGCTCATTCCTTTCCT  
AAAAAAAATAAGATATTTTTATTGGAACATACGTCCTTTAATTTTGCAGCGTAAATGGTAATTTTTGTACAGTTATGACATTTACTAAATGTGTCCCTTCAACATCTTTTTGATGTCCTCAAT  
TTCATAGTTAATACCAAGTAATGGGCTTAGTCAAATCTTAAACAAGGAAAAAAAAAATTTCTGAGCTTCCAGAAAATTAATTTTGCATTATCTCTTTTTTTTTTCGTCTATGGCTTCAAGCCTT  
TGAAATAAGATGTACAATCCTTTATTTGATTGCATGGATATTTCAAATTTAATGCTTCTTTATAGCCTCTCATTTCAAACAACGGGCTGAAAATTTGGAGAGTCCCTCTCTAGCTGTTCTATGT  
CAGAACCTGGAACGTCTTCTATGTTGGAGCCATTCTTGATAATTTGAAAATAGGCCTGAACTCACATTCTCTGAACTTACAATGCTAGCTTGTTCCTTCATGTTACCTTGAGAAAAGTC  
ACAGACGTGTGTTGCTTGCAGAGCTGCTCTAGATGATGCAATATTCCTTTTGAATCTTCATCTGATTGGTCATAGAATAGTGCCAGCGACAGTCCACATGATGTGATAAACTACGAAACTG  
GTCTTTTGTAGTGATATGAACGGCAGAGTCATCTGCCATCTGTTAAGGCCTTCACTTTGTCTTCGCTGACATGCGCTTTAGCATCCTGCAAGGCTTTGTTTACTGTTTCATCTCCCGGCAT  
TTCAAGAGCCAATACTTCATAATCTTTTATAGAATCTTCCCACCGATCCAATAACAAGATTCAAGATGTGACAACCTTTAGCTTCCAGATAAAGAAATTCATCTGACAAAAGGATAAAAAG  
GTTCTGCTCACCTTGACATTGCAGTCAGCCCTCCTTAGCCGAGCCTTGCTGTACCTGGGCCGCAAATTAAGAACAACATTGCAATCTTCAATGGCCTTTTCCCATTGCCCAAGTTTCGACC  
GGCAAGCAGCTCGGTTGCATAGTAGGATTGTATTATGGGGGTCATGGTTAAGACCACTCCCATAGGCAAGGCATGCCTCTTCAAATTCGAGGCCTTGAAAGAGATCATTACCCATTGAGCG  
AGCTGATGCCACTGACCGAGCCTTTCGAGCAATAGCAGCAATCTCCCTGCTGCCAGGATCAATCCGTGCAGCCATTTGAGCTAATGAAACAGCACTCTCAAATCTCCTGTAGCCATATCA  
ACCTGTGCTCTTATTGAAAGGTGATATGCATTGCTAAGGGCGCCAAAAGAACTGTGTAGCAGCATCAGTTTCGAATTTGGGTGCATCAATCATGGTTTCCTCCGCATCTCCTGTCTGAGGA  
GCATCAGAAAGGCCTCCGCTTGAATAAATATTTAAAGAAACTGGAGATAAACCTGTGGAGCTGAATCAGCACCGGTGGAAATGGCAGACTGACTATCTTTAATACAGCATTCCAGTCC  
CTCTGTTTCCCTTGCTTCACTGCACTTGCCAATGAAAACCTTGACAGCCTTAGCTCTAGAGATGTCTTCATGACTGGCTTCACTCTTGTAGCTTATAGTGATTGGCTGCTCTCTGTTT  
ACCCAATCTGAGATAGAGATTGGCAAGCCGCTGATGCGCTCTTAAATAACAAGGATCAATCCTGATAGCCTGTCTGCACTCCTGCAAAGCTTCAAGGAGACGGCCGAGGCCGATTAGCGC  
TGCCGCTTTGTTGCTCCAGTAAGAAGCATTTTCTGGATCAATCACTATCGCTCTATCGTAGAACGCCACGGCCTCCGCATACCTCCCGTTCTTATACTCCTCGTTCCCAACTCCTTCAGCTC  
TTCAGGATCAAGTCTTCTTGAAAGCGCCCGGCACATGGACACCGGAATCTCAGCCTCATACTCAGAGCTACTTCTACGCCTCACCTCCGATTCCATCTCTTTTGCCGTCTTGGGGAGATAG  
TCGAGGACATCGCGTTTCGGAGTGACGGCGCCGGGAGCTCGGAGGTTTCCCAAATTTGCTGTAGAGCATGACGTTACCAGAGGAAGCGCGGACAAGGGTATTGCTCCCTTGGCGCGTT  
GGTGATCGTAGATCATACTGTGAGATCTGCCGATATGCTGCTGGTGGTTTTGTGGCCGCACGCCGCGACCAGCGGATGGCCGATTGGTTTTGATCTGGGGGACACGCGGCCGCGGCAGGCT  
TGGGGGAGACTAGGATCTTTGGTGTGACGGCGGCAGGGGATTGGTCGGGGCCAGGACGCCGCCGCTTGGTACTATGGCTGCTTCCACCAGAAAGGGAGGCATTGGCGACAATAGGGGA  
AGGAGAGGGGTGGCGAGGAGAGACGGGGGCTGATCCAGCACGGCGCGGAAGAAGGCGTTGTAGAGAATGAGCAAGCCACAGCTGGAGGAATTTTTGTCTCATTCCCATTCGTCG  
TGTCGACGGGATGATTGCCTTGCGGAGGGATTGGAATTCGCTCTGGGATTTGGTTAATCGGACCTCAAAAAGGAAGATGAAGCATTCTTCAAATTTGGATTTAGAAAACATTGATT  
TTGGTTAATCTCTGAGAATGGAGGAAGAATAATGATCACCCGGAGGCATTGTAGGTTCAAATGAGTTGTCTCTGATCAGGGAGGCGAACATTGGCTGAAAAAGGAAGAGAGAGGAGGA  
AAGAAGATGACGGT

>comp163418\_c0\_seq17

GTCAAGAAATCTAAGTAAAACAACAAAGTTTATGCACTTATATTCAAAATTA AAAACATTTATATTTTAATTGCAAGATAACTGTTTTTTAATTA AAAATACTACTCAAGCTCATTCCTTTTCT  
AAAAAAATAAGATATTTTTATTTGGAACATACGTCCTTTAATTTTGCAGCGTAAATGGTAATTTTTGTACAGTTATGACATTTACTAAATGTGTCCCTTCAACATTCCTTTTGATGTCCTCAAT  
TTCATAGTTAATACCAAGTAATGGGCTTAGTCAAATCTTAAACAAGGAAAAAAAATTTCTGAGCTTCCAGAAAATTAATTTTGCATTATCTTCTTTTTTTTTTCGTCTATGGCTTCAAGCCTT  
TGAAATAAGATGTACAATCCTTTATTTGATTGCATGGATATTTCAAATTTTAATGCTTCTTTATAGCCTCTCATTTCAACAACGGCTGAAAATTTGGAGAGTCCTCTCTAGCTGTTCTATGT  
CAGAACCTGGAACGTCTTCTATGTTGGAGCCATTCTTGTATAATTTGAAAATAGGCACTGAACTCACATTCTCTGAACTTACAATGCTAGCTTGTTCCTTCATGTTACCTTGAGAAAAGTC  
ACAGACGTGTGTTGCTTGCAGAGCTGCTCTAGATGATGCAATATTCCTTTTGAATCTTCATCTGATTGGTCATAGAATAGTGCCAGCGACAGTCCACATGATGTGATAACTACGAAAAGTC  
GTCTTTTGTAGTGATATGAACGGCAGAGTCATCTGCCATCTGTTTAAGGCCTTCACCTTGTCTTCGCCCTGACATGCGCTTTAGCATCCTGCAAGGCTTTGTTTACTGTTTCATCTCCCGGCAT  
TTCAAGAGCCAATACTTCATAATCTTTTATAGAATCTTCCACCGATCCAACCTTGACATTGCAGTCAGCCCTCCTTAGCCGAGCCTTGCTGTACCTGGGCCGCAAATTAAGAACAACATTGC  
AATCTTCAATGGCCTTTTCCCATTGCCAAGTTTCGACCGGCAAGCAGCTCGGTTGCATAGTAGGATTGTATTATGGGGTCATGGTTAAGACCACTCCCATAGGCAAGGCATGCCTCTTC  
AAAATTCGAGGCCTTGAAGAGATCATTACCCATTGAGCGAGCTGATGCCACTGACCGAGCCTTTCGAGCAATAGCAGCAATCTCCCTGCTGCCAGGATCAATCCGTGCAGCCATTTGAGC  
TAATGAAACAGCACTCTCAAATCTTCTGTAGCCATATCAACCTGTGCTCTTATTGAAAGGTGATATGCAATTGCTAAGGGCGCCAAAGAACTGTGTAGCAGCATCAGTTTTCGAATTTGGGT  
GCATCAATCATGGTTTCTCCGCATCTTCTGTCTGAGGAGCATCAGAAAGGCCTCCGCTTGAATAAATATTTAAAGAACTGGAGATAAACCTGTGGAGCTGAATCAGCACCGGTGGA  
AATGGCAGACTGACTATCTTTAATACAGCATTCCAGTCCCTCTGTTTCTTGTCTTCACTGCACTTGCCAATGAAAACCTTGACAGCCTTAGCTCTAGAGATGTCTTCATGACTGGCTTAC  
TCTTTGCTAGCTTATAGTGATTGGCTGCTCTCTGTTTACCCAATCTGAGATAGAGATTGGCAAGCCGCTGATGCGCTCTTAAATAACAAGGATCAATCCTGATAGCCTGTCTGCACTCC  
TGCAAAGCTTCAAGGAGACGGCCGAGGCCGATTAGCGCTGCCGCTTGTGTTGCTCCAGTAAGAAGCATTCTTCTGGATCAATCACTATCGCTCTATCGTAGAACGCCACGGCCTCCGCATAC  
CTCCCGTTCTTATACTCCTCGTTCCCAACTCCTTCAGCTCTTTCAGGATCAAGTCTTCTTGAAGCGCCCGGCACATGGACACCGGAATCTCAGCCTCATACTCAGAGCTACTTCTACGCC  
TCACCTCCGATTCCATCTCTTTTGGCGTCTTGGGGAGATAGTCGAGGACATCGCGTTTCGGAGTGACGCGCCGGGAGCTCGGAGGTTTCCCAAATTGCTGTAGAGCATGACGTTACCAG  
AGGAAGCGCGACAAGGGTATTGCTCCCCTTGGCGGTTGGTGATCGTAGATCATACTGTCGAGATCTGCCGATATGCTGCTGGTGGTTTGTGGCCGCACGCCGCGACCAGCGGATGGCC  
GATTGGTTTGTATCTGGGGGACACGCGGCCGCGCAGGCTTGGGGGAGACTAGGATCTTTGGTGTGACGGCGGCAGGGGATTGGTCCGGGCCAGGACGCCGCGCTTGGTACTATGGCT  
GCTTCCACCAGAAAGGGAGGCATTGGCGACAATAGGGGAAGGAGAGGGGTGGCGAGGAGAGACGGGGGCTGATCCAGCACGGCGGCGGAAGAAGGCGTTGTAGAGAATGAGCAAGC  
CACAGCTGGAGGAATTTTTGTCCCTATTTCCCATTCGTCGCTGTGACGGGATGATTGCCTTGGCGAGGGATTGGAAATTCGCTGTTGGATTGGTTAATCGGACCTCAAAAAGGAAGAT  
GAAGCATTCAATCTTCAAATTTGGATTTAGAAAACATTGATTTTGGTTAATCTCTGAGAATGGAGGAAGAATAATGATCACCCGGAGGCATTGTAGGTTCAAATGAGTTGTCTCTGATCAG  
GGAGGCGAACATTGGCTGAAAAAGGAAGAGAGAGGAGGAAAGAAGATGACGGT

>comp163418\_c0\_seq18

GTCAAGAAATCTAAGTAAAACAACAAAGTTTATGCACTTATATTCAAAATTA AAAACATTTATATTTTAATTGCAAGATAACTGTTTTTTAATTA AAAATACTACTCAAGCTCATTCCTTTTCT  
AAAAAAATAAGATATTTTTATTTGGAACATACGTCCTTTAATTTTGCAGCGTAAATGGTAATTTTTGTACAGTTATGACATTTACTAAATGTGTCCCTTCAACATTCCTTTTGATGTCCTCAAT  
TTCATAGTTAATACCAAGTAATGGGCTTAGTCAAATCTTAAACAAGGAAAAAAAATTTCTGAGCTTCCAGAAAATTAATTTTGCATTATCTTCTTTTTTTTTTCGTCTATGGCTTCAAGCCTT  
TGAAATAAGATGTACAATCCTTTATTTGATTGCATGGATATTTCAAATTTTAATGCTTCTTTATAGCCTCTCATTTCAACAACGGCTGAAAATTTGGAGAGTCCTCTCTAGCTGTTCTATGT  
CAGAACCTGGAACGTCTTCTATGTTGGAGCCATTCTTGTATAATTTGAAAATAGGCACTGAACTCACATTCTCTGAACTTACAATGCTAGCTTGTTCCTTCATGTTACCTTGAGAAAAGTC  
ACAGACGTGTGTTGCTTGCAGAGCTGCTCTAGATGATGCAATATTCCTTTTGAATCTTCATCTGATTGGTCATAGAATAGTGCCAGCGACAGTCCGCAAACATAGATGCCATGAACTATG  
TATTAAGAACTTAAGTAATTTACAGATTTTAGCAGTTGCATAATAACTTAACATTCTCATTAAAATGTGAATCAAAACAATAGAGAAAAAGGCTAAAGTGGAATTTGCACAATTTGTATGAT

ATCACTTTAGTTCCAACGATCTAATGTGTTCAATTTATTCTTTTAACTAATTA AAAAATGATCCAAAATAGTCTTACTATTGAATATTTTGGATCAATTTGAGATGTCAATGGGTTATTTGAA  
TCTAGTTTAAAGAGTCGAGGAATTA AATTAGAACAATTA AATTGCTTCAAATCAA AACTACCTCCTATAAATAGTCTGAATCATTTTGGATCTTTTTCCTAAACAGTGGATGATATGAAGAGT  
GGTCTCAATGTCATGCCAACCTAA CAATTATCAA AATCCATTATATGAAGCAAGAAATTA AAGAGGGGAATATTATCAA ATGCATCATATATCGTCATCATTAGCCTTATACAA AACTACTT  
GGGTTAGCTACGTGCATAACATTA ACATGTAGCACACAAAAATGCATTTTCTTACATATTACATGGTAGATGGAATGATAATCAGTAAGGCATATGGGCACAGGAAATGTGTCTCTTAT  
GCAAGCACGTTTTAAATGTAACA AATCGCCAATCTCCATATGCTTTGGCCAGATGCCACATAGTAATGTAGCATTCTTAATTTTTTTAAGAATCTCTAATGCTAATGACACGTACCACATGA  
TGTGATAA CACTACGAAACTGGTCTTTTGTAGTGATATGAACGGCAGAGTCATCTGCCATCTGTTAAGGCCTTCACTTTGTCTTCGCCTGACATGCGCTTTAGCATCCTGCAAGGCTTTGT  
TACTGTTTTCATCTCCCGGCATTTCAAGAGCCAATACTTCATAATCTTTTATAGAATCTTCCCACCGATCCA AACTTGACATTGCAGTCAGCCCTCCTTAGCCGAGCCTTGCTGTACCTGGGCC  
GCAAATTAAGAACAACATTGCAATCTTCAATGGCCTTTTCCATTGCCAAAGTTTCGACCGGCAAGCAGCTCGGTTGCATAGTAGGATTGTATTATGGGGGTGATGGTTAAGACCACTCCC  
ATAGGCAAGGCATGCCTCTTCAA AATTCGAGGCCTTGAAGAGATCATTACCCATTGAGCGAGCTGATGCCACTGACCGAGCCTTTCGAGCAATAGCAGCAATCTCCCTGCTGCCAGGATC  
AATCCGTGCAGCCATTTGAGCTAATGAAACAGCACTCTCAAATCTTCTGTAGCCATATCAACCTGTGCTCTTATTGAAAGGTGATATGCATTGCTAAGGGCGCCAAAGA AACTGTGTAGCA  
GCATCAGTTTCGAATTTGGGTGCATCAATCATGGTTTCTCCGCATCTTCTGTCTGAGGAGCATCAGAAAGGCCTCCGCTTGGTAGGCAAATACCTTCAATGCAA AAGAAAAGGGGAGA  
AAATACTTCTATTAGTCAGGCTGCTTAATAAAATTTTATAGTAAATTGGAACAAAAGTGTACCCAACCAATCGGGAGCATTTTCTTTGTCTGTTTACCACTGTATCGGCTCTTAATTTTGGGGT  
ACACGTTGTGTGTTTTTTTTTTCATCAGCGACTAATATTTTTTTTTTCTAAACTTTACAGGAATAAATATTTAAAGAAACTGGAGATAAACCTGTGGAGCTGAATCAGCACCGGTGGAAATGGCA  
GACTGACTATCTTTTAATACAGCATTCCAGTCCCTCTGTTTCTTCTGCTTCACTGCACCTTGCCAATGAAA AACTTGACAGCCTTAGCTCTAGAGATGTCTTTCATGACTGGCTTCACTCTTTC  
TAGCTTATAGTGATTGGCTGCTCTCTGTTTACCCAATCTGAGATAGAGATTGGCAAGCCGCTGATGCGCTCTTAAATAACAAGGATCAATCCTGATAGCCTGTCTGCACTCCTGCAA  
GCTTCAAGGAGACGGCCGAGGCCGATTAGCGCTGCCGCTTTGTTGCTCCAGTAAGAAGCATTTTCTGGATCAATCACTATCGCTCTATCGTAGAACGCCACGGCTCCGCATACCTCCCCT  
TCTTATACTCCTCGTTCCCAACTCCTTCACTCTTCAAGATCAAGTCTTCTTGAAGCGCCCGGCACATGGACACCGGAATCTCAGCCTCATACTCAGAGCTACTTCTACGCCTCACCTC  
CGATTCCATCTCTTTGCGCTTGGGGAGATAGTCGAGGACATCGCGGTTCCGAGTGACGGCGCCGGGAGCTCGGAGGTTTCCCAAATTGCTGTAGAGCATGACGTTACCAGAGGAAG  
CGCGGACAAGGGTATTGCTCCCCCTGGCGCGTTGGTGATCGTAGATCATACTGTGAGATCTGCCGATATGCTGCTGGTGGTTTGTGGCCGCACGCCGCGACCAGCGGATGGCCGATTGG  
TTTGATCTGGGGGACACGCGGCCGCGCAGGCTTGGGGGAGACTAGGATCTTTGGTGTGACGGCGGCAGGGGATTGGTCGGGGCCAGGACGCCGCGCTTGGTACTATGGCTGCTTCCA  
CCAGAAAGGGAGGCATTGGCGACAATAGGGGAAGGAGAGGGGTGGCGAGGAGAGACGGGGGCTGATCCAGCACGGCGGCGGAAGAAGGCGTTGTAGAGAATGAGCAAGCCACAGCT  
GGAGGAATTTTGTCTCATTCCCATTCGTCGCTGTGACGGGATGATTGCCCTTGCAGGAGGATTGGAAATTGCGTCTGGGATTTGGTTAATCGGACCTCAAAAAGGAAGATGAAGCATT  
CATTCTTCAAATTTGGATTTAGAAAACATTGATTTTGGTTAATCTCTGAGAATGGAGGAAGAATAATGATCACCCGGAGGCATTGTAGGTTCAAATGAGTTGTCTCTGATCAGGGAGGCGA  
ACATTGGCTGAAAAGGAAGAGAGAGGAGGAAAGAAGATGACGGT

>comp163418\_c0\_seq24

GTCAAGAAATCTAAGTAAACAACA AAGTTTATGCACCTTATATTCAA AATTA AAAACATTTATATTTTAAATTGCAAGATAACTGTTTTTAAATTA AAAATACTACTCAAGCTCATTCTTTTCT  
AAAAAAATAAGATATTTTATTTGGAACATACGTCCTTTAATTTTGCAGCGTAAATGGTAATTTTGTACAGTTATGACATTTACTAAATGTGTCCCTTCAACATCTTTTGTATGTCCTCAAT  
TTCATAGTTAATACCAAGTAATGGGCTTAGTCAAATCTTAAACAAGGAAAAAAAATTTCTGAGCTTCCAGAAAATTAATTTTGCATTATCTTCTTTTTTTTTTTCGTCTATGGCTTCAAGCCTT  
TGAAATAAGATGTACAATCCTTTATTTTATTGATGATGATTTCAA AATTTTAAATGCTTCTTTATAGCCTCTCATTTCAAACAACGGCTGAAAATTTGGAGAGTCTCTCTAGCTGTTCTATGT  
CAGAACCTGGAACGTCTTCTATGTTGGAGCCATTCTTGTATAATTTGAAAATAGGCACTGAACTCACATTCTCTGAACTTACAATGCTAGCTTGTTCCTTCATGTTACCTTGAGAAAAGTC  
ACAGACGTGTGTTGCTTGCAGAGCTGCTCTAGATGATGCAATATTCCTTTTGAATCTTCATCTGATTGGTCATAGAATAGTGCCAGCGACAGTCCACATGATGTGATAA CACTACGAAACTG

GTCTTTTGTAGTGATATGAACGGCAGAGTCATCTGCCATCTGTTTAAAGGCCTTCACTTTGTCTTCGCCTGACATGCGCTTTAGCATCCTGCAAGGCTTTGTTTACTGTTTCATCTCCCGGCAT  
TTCAAGAGCCAATACTTCATAATCTTTTATAGAATCTTCCACCGATCCAACCTTGACATTGCAGTCAGCCCTCCTTAGCCGAGCCTTGCTGTACCTGGGCCGCAAATTAAGAACAACATTGC  
AATCTTCAATGGCCTTTTCCCATTGCCCAAGTTTCGACCGGCAAGCAGCTCGGTTGCATAGTAGGATTGTATTATGGGGGTCATGGTTAAGACCACTCCCATAGGCAAGGCATGCCTCTTC  
AAAATTCGAGGCCTTGAAGAGATCATTACCCATTGAGCGAGCTGATGCCACTGACCGAGCCTTTCGAGCAATAGCAGCAATCTCCCTGCTGCCAGGATCAATCCGTGCAGCCATTTGAGC  
TAATGAAACAGCACTCTCAAATCTTCTGTAGCCATATCAACCTGTGCTCTTATTGAAAGGTGATATGCATTGCTAAGGGCGCCAAAGAAGTGTGTAGCAGCATCAGTTTTCGAATTTGGGT  
GCATCAATCATGGTTTCTCCGCATCTTCTGTCTGAGGAGCATCAGAAAGGCCTCCGCTTGGTAGGCAAATACCTTCAATGCAAAAAGAAAAGGGAGAAAATACTTCTATTAGTCAGGC  
TGCTTAATAAAAATTTTAGTAAATGGAACAAAAGTGTACCCAACCAATCGGGAGCATTTTCTTTGTCTGTTTACCCTGTATCGGCTCTTAATTTTTGGGGTACACGTTGTGTGTTTTTTTC  
ATCAGCGACTAATATTTTTTTTTTCTAAACTTTACAGGAATAAATATTTAAAGAACTGGAGATAAACCTGTGGAGCTGAATCAGCACCGGTGGAAATGGCAGACTGACTATCTTTAATACA  
GCATTCCAGTCCCTCTGTTTCTTGTCTTACTGCACCTTGCCAATGAAAACCTGCACAGCCTTAGCTCTAGAGATGTCTTCATGACTGGCTTCACTCTTTGCTAGCTTATAGTGATTGGCTGC  
TCTCTCTGGTTACCCAATCTGAGATAGAGATTGGCAAGCCGCTGATGCGCTCTTAAATAACAAGGATCAATCCTGATAGCCTGTCTGCACTCCTGCAAAGCTTCAAGGAGACGGCCGAG  
GCCGATTAGCGCTGCCGCTTTGTTGCTCCAGTAAGAAGCATTCTTCTGGATCAATCACTATCGCTCTATCGTAGAACGCCACGGCCTCCGCATACCTCCCGTTCTTATACTCTCGTTCCCA  
ACTCCTTCAGCTCTTCAGGATCAAGTCTTCTTGAAGCGCCCGGCACATGGACACCGGAATCTCAGCCTCATACTCAGAGCTACTTCTACGCCTCACCTCCGATTCCATCTCTTTTGCCGT  
CTTGGGGAGATAGTCGAGGACATCGCGGTTCCGGAGTGACGGCGCCGGGAGCTCGGAGGTTTTCCAAATTGCTGTAGAGCATGACGTTACCAGAGGAAGCGCGGACAAGGGTATTGCTC  
CCCTTGCGCGTGGTGATCGTAGATCATACTGTGAGATCTGCCGATATGCTGCTGGTGGTTTGTGGCCGCACGCCGCGACCAGCGGATGGCCGATTGGTTTTGATCTGGGGGACACGGC  
GCCGCGCAGGCTTGGGGGAGACTAGGATCTTTGGTGTGACGGCGGCAGGGGATTGGTCGGGGCCAGGACGCCCGCGCTTGGTACTATGGCTGCTTCCACCAGAAAGGGAGGCATTGG  
CGACAATAGGGGAAGGAGAGGGGTGGCGAGGAGAGACGGGGGCTGATCCAGCACGGCGCGGAAGAAGGCGTTGTAGAGAATGAGCAAGCCACAGCTGGAGGAATTTTTGTCTCAT  
TTCCCATTCGTCGCTGTGACGGGATGATTGCCTTGCAGGAGGATTGAAAATTGCGTCTGGGATTTGGTTAATCGGACCTCAAAAAGGAAGATGAAGCATTCACTTCAAATTTGGATTT  
AGAAAACATTGATTTTGGTTAATCTCTGAGAATGGAGGAAGAATAATGATCACCCGGAGGCATTGTAGGTTCAAATGAGTTGTCTCTGATCAGGGAGGCGAACATTGGCTGAAAAAGGA  
AGAGAGAGGAGGAAAGAAGATGACGGT

>comp163418\_c0\_seq33

GTCAAGAAATCTAAGTAAAACAACAAAGTTTATGCACCTTATATTCAAAAATTA AAAACATTTATATTTTAATTGCAAGATAACTGTTTTTAATTA AAAATACTACTCAAGCTCATTCCTTTTCCT  
AAAAAAAATAAGATATTTTATTTGGAACATACGTCCTTTAATTTTGCAGCGTAAATGGTAATTTTTGTACAGTTATGACATTTACTAAATGTGTCCCTTCAACATTCTTTTGATGTCTCAAT  
TTCATAGTTAATACCAAGTAATGGGCTTAGTCAAATCTTAAACAAGGAAAAAAAATTTCTGAGCTTCCAGAAAATTAATTTTGCATTATCTCTTTTTTTTTTCGTCTATGGCTTCAAGCCTT  
TGAAATAAGATGTACAATCCTTTATTTTGATTGCATGGATATTTCAAATTTTAATGCTTCTTTATAGCCTCTCATTTCAACAACGGCTGAAAATTTGGAGAGTCTCTCTAGCTGTTCTATGT  
CAGAACCTGGAACGTCTTCTATGTTGGAGCCATTCTTGATAATTTGAAAATAGGCACTGAACTCACATTCTCTGAACTTACAATGCTAGCTTGTTCCTTCATGTTACCTTGAGAAAAGTC  
ACAGACGTGTGTTGCTTGCAGAGCTGCTCTAGATGATGCAATATTCCTTTTGAATCTTCATCTGATTGGTCATAGAATAGTGCCAGCGACAGTCCTGCCAAACATAGATGCCATGAACTATG  
TATTAAGAACTTAAGTAATTTACAGATTTTAGCAGTTGCATAATAACTTAACATTCTCATTAATAATGTGAATCAAAAACAATAGAGAAAAAGGCTAAAGTGGAATTTGCACAATTTGTATGAT  
ATCACTTTAGTTCCAACGATCTAATGTGTTCAATTTATTCTTTTAACTAATTA AAAATGATCCAAAATAGTCTTACTATTGAATATTTTGGATCAATTTTGGATGTCAATGGGTTATTTTGA  
TCTAGTTTAAAGAGTCGAGGAATTA AATTAGAACATTA AATTGCTTCAAATCAAACTACCTCCTATAAATAGTCTGAATCATTTTGATCTTTTTTTCCTAAACAGTGGATGATATGAAGAGT  
GGTCTCAATGTCATGCCAACCTAACAAATTATCAAATCCATTATATGAAGCAAGAAATTA AAAGAGGGGAATATTATCAAATGCATCATATATCGTCATCATTAGCCTTATACAAATACTACTT  
GGGGTTAGCTACGTGCATAACATTAACATGTAGCACACAAAAATTGCATTTTCTTACATATTACATGGTAGATGGAATGATAATCAGTAAGGCATATGGGCACAGGAAATGTGTCTCTTAT

GCAAGCACGTTTTAAATGTAACAAATCGCCAATCTCCATATGCTTTGGCCAGATGCCACATAGTAATGTAGCATTCCCTAATTTTTTTAAGAATCTCTAATGCTAATGACACGTACCACATGA  
TGTGATAACACTACGAAACTGGTCTTTTGTAGTGATATGAACGGCAGAGTCATCTGCCATCTGTTAAGGCCTTCACTTTGTCTTCGCCTGACATGCGCTTTAGCATCCTGCAAGGCTTTGT  
TTACTGTTTCATCTCCCGGCATTTC AAGAGCCAATACTTCATAATCTTTTATAGAATCTTCCCACCGATCCAACCTTGACATTGACAGTCAGCCCTCCTTAGCCGAGCCTTGCTGTACCTGGGCC  
GCAAATTAAGAACAACATTGCAATCTTCAATGGCCTTTTCCATTGCCAAAGTTTCGACCGGCAAGCAGCTCGGTTGCATAGTAGGATTGTATTATGGGGGTCATGGTTAAGACCACTCCC  
ATAGGCAAGGCATGCCTCTTCAAAATTCGAGGCCTTGAAGAGATCATTACCCATTGAGCGAGCTGATGCCACTGACCGAGCCTTTCGAGCAATAGCAGCAATCTCCCTGCTGCCAGGATC  
AATCCGTGCAGCCATTTGAGCTAATGAAACAGCACTCTCAAATCTTCTGTAGCCATATCAACCTGTGCTCTTATTGAAAGGTGATATGCATTGCTAAGGGCGCCAAAGA ACTGTGTAGCA  
GCATCAGTTTCGAATTTGGGTGCATCAATCATGGTTTCCCTCCGCATCTTCTGTCTGAGGAGCATCAGAAAGGCCTCCGCTTGAATAAATATTTAAAGAAACTGGAGATAAACCTGTGGA  
GCTGAATCAGCACCGGTGGAAATGGCAGACTGACTATCTTTAATACAGCATTCCAGTCCCTCTGTTTCTTGCTTCACTGCACCTTGCCAATGAAA ACTTGACAGCCTTAGCTCTAGAGA  
TGTCTTCATGACTGGCTTCACTCTTTGCTAGCTTATAGTGATTGGCTGCTCTCTCTGGTTCACCCAATCTGAGATAGAGATTGGCAAGCCGCTGATGCGCTCTTAAATAACAAGGATCAATC  
CTGATAGCCTGTCTGCACTCCTGCAAAGCTTCAAGGAGACGGCCGAGGCCGATTAGCGCTGCCGCTTTGTTGCTCCAGTAAGAAGCATTCTTGGATCAATCACTATCGCTCTATCGTAGA  
ACGCCACGGCCTCCGCATACCTCCCGTTCTTATACTCCTCGTTCGCCAACTCCTTCAGCTCTTCAGGATCAAGTCTTCTTGAAGCGCCCGGCACATGGACACCGGAATCTCAGCCTCATA  
CTCAGAGCTACTTCTACGCCTCACCTCCGATTCCATCTCTTTTGCCGTCTTGGGGAGATAGTCGAGGACATCGCGTTTCGGAGTGACGGCGCCGGGAGCTCGGAGGTTTCCCAAATTGCT  
GTAGAGCATGACGTTACCAGAGGAAGCGCGGACAAGGGTATTGCTCCCTTGGCGCGTTGGTGATCGTAGATCATACTGTGAGATCTGCCGATATGCTGCTGGTGGTTTGTGGCCGCAC  
GCCGCGACCAGCGGATGGCCGATTGGTTTGATCTGGGGGACACGCGGCCGCGGCAGGCTTGGGGGAGACTAGGATCTTTGGTGTGACGGCGGCAGGGGATTGGTCGGGGCCAGGACGC  
CGCCGCTTGGTACTATGGCTGCTTCCACCAGAAAGGGAGGCATTGGCGACAATAGGGGAAGGAGAGGGGTGGCGAGGAGAGACGGGGGCTGATCCAGCACGGCGCGGAAGAAGGCG  
TTGTAGAGAATGAGCAAGCCACAGCTGGAGGAATTTTTGTCCTCATTTCCCATTCGCTGCTGACGGGATGATTGCCCTTGGCGAGGGATTGGA AATTGCGTCTGGGATTTGGTTAATCG  
GACCTCAAAAAGGAAGATGAAGCATTCACTTCAAATTTGGATTAGAAAACATTGATTTTGGTTAATCTCTGAGAATGGAGGAAGAATAATGATCACCCGAGGCATTGTAGGTTCAA  
TGAGTTGCTCTGATCAGGGAGGCGAACATTGGCTGAAAAAGGAAGAGAGAGGAGGAAAGAAGATGACGGT

>comp163418\_c0\_seq39

GTCAAGAAATCTAAGTAAAACAACAAAGTTTATGCACTTATATTCAAATTA AAAACATTTATATTTAATTGCAAGATAACTGTTTTTAATTA AAAATACTACTCAAGCTCATTCCTTTCCCT  
AAAAAAAATAAGATATTTTTATTGGAACATACGTCTTTAATTTTGCAGCGTAAATGGTAATTTTTGTACAGTTATGACATTTACTAAATGTGTCCCTTCAACATCTTTTTGATGTCCTCAAT  
TTCATAGTTAATACCAAGTAATGGGCTTAGTCAAATCTTAAACAAGGAAAAAAAAAATCTGAGCTTCCAGAAAATTAATTTTGCATTATCTCTTTTTTTTTTTCGTCTATGGCTTCAAGCCTT  
TGAAATAAGATGTACAATCCTTTATTTTGATTGCATGGATATTTCAAATTTTAATGCTTCTTTATAGCCTCTCATTTC AACAACGGCTGAAAATTTGGAGAGTCCCTCTCTAGCTGTTCTATGT  
CAGAACCTGGAACGTCTTCTATGTTGGAGCCATTCTTGATAATTTGAAAATAGGC ACTGAACTCACATTCTCTGAACTTACAATGCTAGCTTGTTCCTTCATGTTACCTTGAGAAAAGTC  
ACAGACGTGTGTTGCTTGCAGAGCTGCTCTAGATGATGCAATATTCCTTTTGAATCTTCATCTGATTGGTCATAGAATAGTGCCAGCGACAGTCCTGCCAAACATAGATGCCATGAACTATG  
TATTAAGAACTTAAGTAATTTACAGATTTTAGCAGTTGCATAATAACTTAACATTCTCATTAAAATGTGAATCAAAAACAATAGAGAAAAGGCTAAAAGTGGAAATTTGCACAATTTGTATGAT  
ATCACTTTAGTTCCAACGATCTAATGTGTTCAATTTATTCTTTTAACTAATTA AAAATGATCCAAAATAGTCTTACTATTGAATATTTTGGATCAATTTTGGATGTCAATGGGTTATTTGAA  
TCTAGTTTAAAGAGTCGAGGAATTA AATTAGAACATTA AATTGCTTCAAATCAAACTACCTCCTATAAATAGTCTGAATCATTTTGATCTTTTTTTCCTAAACAGTGGATGATATGAAGAGT  
GGTCTCAATGTCATGCCAACCTAAACAATTATCAAATCCATTATATGAAGCAAGAAATTA AAAGAGGGGAATATTATCAAATGCATCATATATCGTCATCATTAGCCTTATACAAATACTACTT  
GGGGTTAGCTACGTGCATAACATTAACATGTAGCACACAAAAATGCATTTTCTTACATATTACATGGTAGATGGAATGATAATCAGTAAGGCATATGGGCACAGGAAATGTGTCTCTTAT  
GCAAGCACGTTTTAAATGTAACAAATCGCCAATCTCCATATGCTTTGGCCAGATGCCACATAGTAATGTAGCATTCCCTAATTTTTTTAAGAATCTCTAATGCTAATGACACGTACCACATGA

TGTGATAACACTACGAAACTGGTCTTTTGTAGTGATATGAACGGCAGAGTCATCTGCCATCTGTTAAGGCCTTCACTTTGTCTTCGCCTGACATGCGCTTTAGCATCCTGCAAGGCTTTGT  
TACTGTTTTCATCTCCCGGCATTTCAAGAGCCAATACTTCATAATCTTTTATAGAATCTTCCCACCGATCCAATAACAAGATTCAAGATGTGACAACCTTTAGCTTCCAGATAAAGAAAT  
TCATCTGACAAAAGGATAAAAGGTTCTGCTCACCTTGACATTGCAGTCAGCCCTCCTTAGCCGAGCCTTGCTGTACCTGGGCCGCAAATTAAGAACAACATTGCAATCTTCAATGGCCTTTT  
CCCATTGCCCAAGTTTCGACCGGCAAGCAGCTCGGTTGCATAGTAGGATTGTATTATGGGGTTCATGGTTAAGACCACTCCCATAGGCAAGGCATGCCTCTTCAAATTCGAGGCCTTGAA  
GAGATCATTACCCATTGAGCGAGCTGATGCCACTGACCGAGCCTTTCGAGCAATAGCAGCAATCTCCCTGCTGCCAGGATCAATCCGTGCAGCCATTGAGCTAATGAAACAGCACTCTC  
AAATCTTCTGTAGCCATATCAACCTGTGCTCTTATTGAAAGGTGATATGCATTGCTAAGGGCGCCAAAGAAGTGTGTAGCAGCATCAGTTTCGAATTTGGGTGCATCAATCATGGTTTCT  
CCGCATCTTCTGTCTGAGGAGCATCAGAAAGGCCTCCGCTTGGTAGGCAAATACCTGTGGAGCTGAATCAGCACCGGTGGAAATGGCAGACTGACTATCTTTAATACAGCATTCCAGT  
CCCTCTGTTTCTTGGCTTCACTGCACCTTGCCAATGAAAACCTTGACAGCCTTAGCTCTAGAGATGTCTTCATGACTGGCTTCACTCTTTGCTAGCTTATAGTGATTGGCTGCTCTCTGGT  
TCACCCAATCTGAGATAGAGATTGGCAAGCCGCTGATGCGCTCTTAAATAACAAGGATCAATCCTGATAGCCTGTCTGCACTCCTGCAAAGCTTCAAGGAGACGGCCGAGGCCGATTAGC  
GCTGCCGCTTTGTTGCTCCAGTAAGAAGCATTTTCTGGATCAATCACTATCGCTCTATCGTAGAACGCCACGGCCTCCGCATACCTCCCGTTCTTATACTCCTCGTTCCCAACTCCTTCAG  
CTCTTCAGGATCAAGTCTTCTTGAAGCGCCCGGCACATGGACACCGGAATCTCAGCCTCATACTCAGAGCTACTTCTACGCCTCACCTCCGATTCCATCTCTTTTGCCGTCTTGGGGAGA  
TAGTCGAGGACATCGCGTTTCGGAGTGACGGCGCCGGGAGCTCGGAGGTTTCCCAAATTGCTGTAGAGCATGACGTTACCAGAGGAAGCGCGGACAAGGGTATTGCTCCCTTGGCGC  
GTTGGTGATCGTAGATCATACTGTGAGATCTGCCGATATGCTGCTGGTGGTTTGTGGCCGCACGCCGCGACCAGCGGATGGCCGATTGGTTTGTATCTGGGGGACACGGCGCCGCGGCAG  
GCTTGGGGGAGACTAGGATCTTTGGTGTGACGGCGGCAGGGGATTGGTTCGGGGCCAGGACGCCGCCGCTTGGTACTATGGCTGCTTCCACCAGAAAGGGAGGCATTGGCGACAATAGG  
GGAAGGAGAGGGGTGGCGAGGAGAGACGGGGGCTGATCCAGCACGGCGCGGAAGAAGGCGTTGTAGAGAATGAGCAAGCCACAGCTGGAGGAATTTTGTCCCTCATTTCACATTCG  
TCGCTGTGACGGGATGATTGCCTTGGCGAGGGATTGGAATTTGCGTCTGGGATTTGGTTAATCGGACCTCAAAAAGGAAGATGAAGCATTCACTTCAAATTTGGATTTAGAAAACATT  
GATTTTGGTTAATCTCTGAGAATGGAGGAAGAATAATGATCACCCGGAGGCATTGTAGGTTCAAATGAGTTGTCTCTGATCAGGGAGGCGAACATTGGCTGAAAAAGGAAGAGAGAGGA  
GGAAAGAAGATGACGGT

>comp163423\_c1\_seq10

CCGTGTTAACTACTCATAAAATAAAATGTTAAAAGGAAGCAGGGTCATTACATAAACCATTAGAGTAATCAGAAACAGAATTCCTTCCAGTGAAAATTTTGTAGTGAATTTACACCAATCA  
GTGGTTCAAATCAGTAAATTACCATAATATTACACATGAATACTTCTTTAGCCTCTTCTAATTGAATTTCTTTCCCATCTGTACATTCATGAAGTCCATTTCTATCTTAAACCACTTAAT  
CATTAAATGCGCATGAAGAATATAGAATATAAACTACAAGCTTTAGTAAACCTTTCCCAAGCCATATAAAATTATCATCTCTTGGGTAGAACGATCAGGCAATCAGAAATCACTTCTAGAA  
GCAGTCCCAAACAGTCATTCATTGTCGTCGTCGATAGATGTCCCTGATGACTCAAAGTGACCTCTATTATGAGGGAACATGGAGAAGCATTGTTGCTGGAATTCGGGAGGTGAGCTTGGTT  
CAAATACATGGTGGCCGAGCTTCAAGTTCACCTCGACGATGCCGCAATGTCTCCACCATTGCAGCATTGCCTCCTGAATAACCGGTCATGTCTGAAGCTCTCAGAATCTACAGGTGGGAT  
ACCCTTGAAGAGATTGCAAGCATCCCTATGTAGAGAATCACAGATTGCTGCAGGGGTTGAAGGGTCAGTTTTCTCTGAGTTTGGATAGAAATCAGTGGAGGATAAAGGTGTTGGGGAGTT  
TATTCTTGGTGTCTCAGCAAGGACTCCAGTTAGGCGTTGCTGCTCCTCAATGATTTTCTCAGATACTTTCCCTGGGCATCTATCCTCAGCTTCACTGCTTGTACCTGAGGTAAGTCTTA  
AAAGTTTGGTTCATTGAAGAGCTATACAAGTAGAATTTGTATAGTGTGCGTAGAATGAGTTTTTCAGGATTGAGACCATAGCTTTTTTAATTAGTAAATTCGGCCTTTATTCAATTACGACC  
ACTATCCAGAAATGTCAAACAACAGCAATGAGACTGAGGTTTCATTTGGGGCAGCTTTCTTACCCTTTTAAAGCAACTTTTGTAGTAATTTTG

>comp163426\_c4\_seq1

TTTGCATGACGTATCAAGAATAAATTATAAACTCAACACTAGGGGAAAACATGAGCTGAGGGTCCTTTATTTTACATATTTGGAATCCACAAGGAGAACTATAAAAGCATGGAATAAGAAA  
ATGTATGACTCTCCCACTTGATTATCTTCATTTACCAACACGTTTGTGTTTGTATCGATGAAGATGCACAAGATCCCCTAAAGTGGGAATTTTATTGGGTGCGAACACCAGACGGAGAGAA

CCATCCAATTTTCTCTGTCTATAGTAAAGATACAGTCAAAATGCAGCTGCTACAGTAATTGTGCTTTTACTGTAGACAGAGAAAAATTCAG

>comp163446\_c0\_seq4

AGAGAATCATCCGAATTTCTCTCTATTTATAGTAAAGTGCAGTGATTGTAGCAGCTGCGCTTTGACTGCACTTTTAATGTAGTCAAAAAAATCCAGATGATTCTCTCTATCAGATGTCCG  
AACCTAATAACTTCTCGCGTAAACGGCATCAAATTGTGCGGTGCGTGACCGCTGTCCCTATTTGTGTTGTTAAACGAGACGGAGACGAAGCCGTTTCGCTTTTCTCACACTCAAATCCAG  
CTAGCCAAGTCCATTTCCCTGTGCCGACTCTGCCTGATCTTGTGTCATCGGTTGAAGCAAGCTAGAGTCTGAAACATATAGCCTGTCACTTTACCTAGCCTTCAGCCAATCAAGCCGATTTACC  
TCCTTTAACCTCTCCACTTCTCACGTGAAAACCCAGTTTAAGCCCACTCAAATAACACACTCCATTAACCTTTATCAGACAAGGAGCAGAAAATAGAATCCTCCAGTGA CTGACCT  
CAATGAGATCACCTTCTCCAGGCATAAGCTCTCGCGCTGATACTAGAGAAATATTCTCTATTAGAAGCAAAAAGAACAAGAGATTGAGAATAGTATAACAAGAGGCCAGAAGAGAATAAG  
TTGCCATGAGAATAGAGCTTCGAATATCTGCTAGATCGGAAGAGCACAC

>comp163446\_c0\_seq6

AGAGAATCATCCGAATTTCTCTCTATTTATAGTAAAGTGCAGTGATTGTAGCAGCTGCGCTTTGACTGCACTTTTAATGTAGTCAAAAAAATCCAGATGATTCTCTCTATCAGATGTCCG  
AACCTAATAACTTCTCGCGTAAACGGCATCAAATTGTGCGGTGCGTGACCGCTGTCCCTATTTGTGTTGTTAAACGAGACGGAGACGAAGCCGTTTCGCTTTTCTCACACTCAAATCCAG  
CTAGCCAAGTCCATTTCCCTGTGCCGACTCTGCCTGATCTTGTGTCATCGGTTGAAGCCGCTAGATCCACACCGACGCAAGCTAGAGTCTGAAACATATAGCCTGTCACTTTACCTAGCCTTC  
AGCCAATCAAGCCGATTTACCTCCTTTAACCTCTCCACTTCTCACGTGAAAACCCAGTTTAAGCCCACTCAAATAACACACTCCATTAACCTTACAAAAGCTCATTTCAAAACAGCAAA  
AAAAAGTAAATCTCCTTTTACTGTGTCCATGATTATTCGCATTAGCTATTATTGTTAGATAATATATTTAGCATTATTAGTTTTTTTTTAGCTAATTATGCACATTATTATTGGTGAGAGTAAAC  
AACAGAAAAAAGAAAGTGAGAAAAAGATAT

>comp163446\_c0\_seq9

ATTTGATTATAAGCATGCCATATTGGGATATTATTCATTATCCAAATAAAGCTTTAACCTTCCAAATGTGGTCTGGGCCCCCGATTGGACCCATTGGGCTTGGGTTGGACCAATTCGG  
TGTGTTTCGGTTTCGTCCTTTGAGATGTTGATTTGATTGTAAGTCTCCTTTATCAGGAACGGAGCAGAAAATAGAATCCTCCAGTGA CTGACCTCAATGAGATCACCTTCTCCAGGCAT  
AAGCTCTCGCGCTGATACTAGAGAAATATTCTCTATTAGAAGCAAAAAGAACAAGAGATTGAGAATAGTATAACAAGAGGCCAGAAGAGAATAAGTTGCCATGAGAATAGAGCTTCGAAT  
ATCTGCTAGATCGGAAGAGCACAC

>comp163465\_c1\_seq2

AATTAAGAAGTTAGATGTTTGAACCCAAATGGCTTGATTTTCTTTTAAACATCACTTGCAGGATGCTTTTGGGACAAAACCTCACAAGAAATATCCAGTTTTGTTGAGGACTGTTGTTTAA  
ACTTTGGTAATGATTAGCAGTATTTACATATGCTCAATATGTTTAAAGCAAAACGGGTTCTTGATCAGTCCCAATGTGATGAGGGTTGAAATTATGAATGAACCTTGTGCGGCGCCCTGACAT  
TCCTGCATCTGAACTACATTACATTCACTACCCAGAACCGACCACGTATAACAGCTTAATTGGCAGAGATGAGTGTGCATGTACCCCACTTCGGTATTTTGTATATTATCAATGCAAAGGT  
CTGGTAGTGGTTGGTTTGGAGACATTGTTAAATAGCCACATCAATATCAGCTCAAATGGTGAGATATTTCTGTAAAAGAAAGGCGAAGCAACATTTCTACTATCACAGCCACCTTAGATAA  
GGTATACAACTTGGATTGGTATAGCAGTTCCTCTAAGAATGAATGCAGTGGTGCTGTTGGCTTGAAATGGATGCTTAATCAGGGTCTGATGAGGAACCATGAGGGCATAGTTGAATATTTCC  
AAAATAGAGGTGTTTCTGCTATATTCCTTCTTAGAAGAAATCTTCTTCGTCGGTGGGTCTCAATTCTAGCAAATTCATGACCGAGAAGCAAAGCAATTGAACGGAACTCATAAAGCTCA  
TGTGCATTCACGACACGAGGCTGACATTCTGCAAGATATAAGCCCTTGATTGATGTGAATAAGTTTATTGTAGATTTCAAACAACTAGTAAATGGTGTGCAGATGCTTCTCACTATTTCA  
ATGGCACCAGGCACATTATCTTATACTATGAGGATCTCATTCTTAATCGAACAAAATAGTGGACGTTCTTGACTTCCTAAGAATGCCACAAAAGAGAGCTTAAAAGCCGCCATGTCAAGAT  
CCATAAAGACCATATCAGATCAGATTGAGA ACTGGGATGTGCTTTCCAATCACTGAAAGAACTGAGTATGAAAGTTTCTTTCGATTCCGACCATGGAAAATAGAGTGGCTAACACAA  
TCTTGCTGCTGTAAATATTGTTGACAGCATTGGTTCTTTTGTGATACTAGCGGATTCATTCAGACTCCTTTTCTGAAAGAAGCAGGAAAAATTTGGCTACTTCAAAGGGTCTTTGACTG

CTAACAGAAAGGTTCTTTTAGAGTTTTCTTTAGGCTTTTCTCATCCTTGTAAGGTTTTATATTTAGAAGTCTTTTACAACCTAGCAAATAGCAAGGTTGCTATTCTGTTATCCATGTGCTA  
AGCATCTTTTATTTAATAAAAAAATGATTACTTGTCTCTCGAATTTGTAGTGGTTCTAATCAAATGTAAGTACAAATTATAAACAAATTACAAATACTC

>comp163479\_c1\_seq2

GGTAGTTGCAAAATGAAGTATATAATTTTTAAAATTTATTTCTCCATAGTACAGTCTAAAAGCTTACATAATCCTTTTCTCACAAACATAATAAAACAAATCAAGCAAAATACTTTTTATCT  
TATTAATCTCACCATAAAGTTGAACTAAAAAGTCATATCTGAGACAACACATTCATCATATATTGATGTGGCCTGCACAGAGCTTCAAGATGCTTAGCTCTCGGCATTGTAAGTCTGACCC  
TTCCGTCATGTCCACCTCTTCTGCTCCAATCCTCTTCCACTCAAAGCATTGGATTAGAATCCCCAACACTAATCCAATCTCCTTCAATGCAAGCCCTTCTCCCGGACATCTCCTCCTCCCAT  
CCCAAATGGCATCATCGTCATCTTCGACCCTTCTTCTCCTTCGCATTTTGAAATCTTTCGGGGAGAAATTTGGTCCGGTTCAGACCAAATCGCAGGATCTCTATGGATTTTATGAACATTTAC  
TAAGAGCAGAGTTCTCGGTCCACGGCGTAGCCTCCGATCTCGCAGTCTCTCTTGCTACGTGAGGGATGAGGAGAGGGGCGACGGGATACAGACGGAAGGTTTCGTTGATGATGCAGT  
GGAGGTATGGAAGTTTGTGAGATCTGATTCTTCGAGGAGGCGATCATGTCCGATTTGGTCATCGATCTTGCCTCGCCTTCTCTAATTTGTCGGGATTGTTTAGTAAGAGAGACATCGAC  
CATTCTATTGTGTTTGTGAAAGTGTCTGTGCCCGCTGCGATTAAGCTATTAATAAGCGATTTAATGAAGACATCAGTGTACTGCTCCGGCTGGTTCGTCCTGCAAAGAGAGCAGAGCATCAA  
TCATGGTTTTATGAATCTTCTGCTTCTGCTTCAATCCCCCTTCTTTTTCTTCTTCTCCTCTGCCCCTTCTTCTCTTGTGCTCTTCTATAAGTGACTGAACAATTTTCATCCCTGTACTTG  
TGATACCTCGCCAGCTTCTTATCCACTTCTCGACGTGCAAACCACCCGATCGCCGCCGGCAAAAAGTCTCCGACGTTGTTTCGCGCCGGTAAGCGAGAAGATCTTCTCTATCACGTCCTTG  
AAATTATGCGCCTCCTCCTTTTACCTTCTCCCCATAATACCTTCTCCCTGTACACATTTGATAATCGATCAACGAAAATTGATAACGAATTCGAGTTAAAAGTTTTCAGAACCTGTATAA  
TCCTCATCATGACATTCATTGCAAGCCCGAACAAGCTTGAAGTATCTCCACTTTCCTCCGAGGAATGGAAGAGGCTTCGGGCCAGGGATCGAGCCTCGTCCGCCCGAATATCGGAGAAG  
AAGGCGAGGCGGGGGCCGAAAGAGCTTCGACGGTGGCGATTTCGGCGCATTTCGCGCCAGTGGGGTCCGTATGCGGCGAAGGGGAGGCTGGTGTGGTTGTAGGTTATGACGGCCATGG  
AAGGGAAATGAGGGCGGTCTGCGAGTGCATGTGCTTGGTGGTGAAGCATTCAATGGCGATGGAGGCGGAGGAGACGATGAGGGCGGGATGGTTTCCGAAGCGGAGGAGGAGGATCG  
GGCCGTGCTGGGTGGAGAGACTTGCAAGAGATTGGTGGAGGGGTTTCTGGAGAAGGTGGAGGTGGCCGAGGATGGGAAACGAATTAGGAGGGCTTGGAGGGGCTTCTTCTTCTCCT  
CTTCTTGTCTTGTGGTTATGAAGAGTTTGTATTACGAGGAGGAAGGAGAGGAAGAGAGCTAAGCTGGTGAGGATCTTCATGGCGTCCATGGCGGGAGGAGGAAGAAGGGGTTCTGTAT  
GGGAATCGGTGGCTTTAGCTTGTAAATTTATAGGCAAAATCTTAAACAGAACGTATTAATAATTTAATTTAAAATTAAGGGAAAAAAGTATATTATAATATATATTTTTTAAATATATTTG  
ATTTGATGTGCCTTTAATAGTGAATTATATGACTGAAATAAATTTACTTATGTTAACAAAATATGAAGAACAAGAATTTGGCTGGATTTATGTGAATAACTAGATAAGAATCATGTGAATGT  
GAATCTACTTTAATTTTTGTCTTAATGTGATCAATGGTGCAGGCGTTAAGAAAAGGAGCCACTA

>comp163500\_c0\_seq2

AAAGATAAAAAGTATATTGAATTTTAAATAATAAATATACTCAACACCAATCTACTTGGATCTTGAGTTGACTGGCATTGCAAGTAAATTTATGGATCTAAATAGTTAGTGCATAGGGTAAAAA  
AAATAAATATGCTAGAAATAGAAGTAGTAAAGAGATAATAATATTTGTTATCATCAAATTATAAGCTCAAATTTCCAAATTAACACATAAAATATAAAAAATATAGATTCTCATGATTATAGA  
TCTCATGAATCCTTCGTGAATTGAGCTCATACTTTTACCTTTGCCCTAGAAATTGGAACACTTACCATGTGCTACATCAGCTTACCTCAAAGTGTGTACATAAACGTCAATCTAAATCATA  
GCCAAAAATCATTACTGTTCAAATAAGTTAAAAAATAAAGCTACGGGAAAACACTCCACGCCCTCCCAAATTTGGTACAAAAAACCTTCAATGGAAGAAGATCTCCAAATTTCTTTTT  
GTCGATTCTGCATCCAGATGGAAACAATCTGCAACAGTATTCGTCAAATGATGTCATATCAAGGATATTAATTGCTACAATGGGGATGGTTAAGAAATGTAAGAGAAAAATCATTTACC  
AGTAAAGACGAAAAGCCATCAAGCTCATCTGAATTCATCAGATGATTAGGTCAAAGCAATAGGCCTGCATAAGGCTTCCCACAAATAAGACATGTTTCTATTTGATTTTGTGCAGACATT  
TTGTTAAACATTTACAAGGTAATCTTCAATCTTTATGGATAAATCGAAATACCATACTTCATTGTTTCTTCTTCTTGCAGTGAATAATGGAGTCACATCTCAGCTTGTGGTAGCCTCC  
TGCAATTCAGCTAACTCCTGCTGATCCGGTACAATCTTCTCCTCTTTCCGTCTCCTTCTTATAAGCTCGCGAAAAGTAGACAAAAGATTTCGAGTACCTTTGCTGCTTCAATTTTCATCCCTT  
TTATCTGAATTTCCAATCTCAACCTTCTTGACAAATGCATTAAGACTATCCACATGTTTCGCTAGCCTGCTTTAGAACACTCTGCATATCTGTCCGTCTCTCCATGGTTCGAATCCTCCAGCACC



TGCATCTCATTACAGCCCTCTGGTTCTCCTCTCGCTCCACCATGCGCTCATGAGCGTTACGGCCGAACATCTGAACAGCTTCCATGACTTTCAGCTGAGCCCATAGCTTCGTGCTTTAAC  
ATGGTCTTCCAGCTTACGGATCCGGCGAATAAGGTCCATGATCATCTCCGTCTTCTGGTCTGAAGCTCCTTATCTTACGCTTCTCATCCTCAATTCTCATAGCCTCCAGTCTTTTGAGCAC  
CAACTGCACCACGTCTCTGCCTCTTCTCCACTTCTGCTGCCTTTGCCTGCCCTGCATCTTTAGCTCAGAGAAACAATTATTAGTTATGTTCTGTTTCGGAAAAAAATTAAGTGACGAC  
GGTGAATCAAACGTTCCATGCTTCTAATGGATGGGCTGCAGCACCATAGACAGAAGCTGGTTCAGAATCTCCACTCACCAGCAAAGGCAAAGCGGCACCAGGCGTGAATGCGCCCCG  
AGTACTAGCTGCTTGGAGATTACCAGGAGGCGAACGGGAAGGGAATTAATGGAGCTTGCACGGCGAATGCGGAGGCGGCTAATGAGGAGGCACCATATGGCTCACCAGCGGAGAGG  
TTTGCCTGATCTGCTGCAGAAGGCAAACCATGGCAGCGAGAGAATACTCCTCGAGGTGGCGGAGGTCAGAGCAGGCGCCGGCAAGAGCGTTCAGTCATCGGGAGTGTGGCAGCTG  
CCGTGTTACAGAACTCGAGTGCCTTCTGCATGATATTAGATAGTGGGTCCACGCCGCCGTAGTAATGGCCCTTGCAAAGAACGGCCCGAAGCGCCATGGCAGCGTTCGTATCCGAAGGAG  
ACCAAACGGGAGATAACCTCCTTGTAGACGCGATCGAGGTAATTGATAAGAATCTCCTCGAGCTGCTCCTCGGAGAAGTTGCCGCACCCATTTTCATCAAATCCGTAATTGTAAAGACTAG  
GGCCAGGGTTAAACCAGGGGCTCGATTGTGTTTGTATGCTAGGGTTCGCAACACGGGTAGGATCAGACAAGGGAACGGCAGTAGGAGAAGCACCAGGGGGGGTGTGGAGACTCCGG  
AGTCTGAAGGGTTCATCGGGACCGCCGCCGGGGGGGCTTGGCGCTTCCCGTCAATGGCACCAGCACTGAGGGGCTTCTTACTACCTTTCGGGCCCATGGTAGTTCGATCTGCAGCAA  
TTGCAGGTTACAGGGACGGTGGTTGATAAACCTTACGCATTTTCATGCTTTTTGGTTGACAACCCCTCCCTCCAGATCCTAACTTGGCGCAATTGAAAAGCTCCATGGATCTCTCCGAATC  
TCTTGGTCAGCTCCTACATATAAGAAAGCAAGATTTACTACAGATTGTTAGAATAACTCTAACTTGTAAAGATA

>comp163500\_c0\_seq3

AAAGATAAAAAGTATATTGAATTTTAAATAATAAATATACTCAACACCAATCTACTTGGATCTTGGAGTTGACTGGCATTGCAAGTAAATTTATGGATCTAAATAGTTAGTGCATAGGGTAAAAA  
AAATAAATATGCTAGAATAGAAGTAGTAAAGAGATAATAATATTGTTATCATCAAATTATAAGCTCAAATTCCAAATTAACACATAAAATATAAAAATATAGATTCTCATGATTATAGA  
TCTCATGAATCCTTCGTGAATTGAGCTCATACATTTTACCTTTGCCCTAGAAATTGGAACACTTACCATGTGCTACATCAGCTTACCTCAAAGTGTGTACATAAACGTCAATCTAAATCATA  
GCCAAAATCATTACTGTTCAAATAAGTTAAAAAATAAAAGCTACGGGAAAACACTCCACGCCCTCCCAAATTTGGTACAAAAAACCTTCAATTGGAAGAAGATCTCCAAATCTTTTT  
GTCGATTCTGCATCCAGATGGAAAACAATTCTGCAACAGTATTCGTCAAATGATGTCATATCAAGGATATTAATTGCTACAATGGGGATGGTTAAGAAATGTAAGAGAAAAATCATTTCACC  
AGTAAAGACGAAAAGCCATCAAGCTCATCTGAATTCATCAGATGATTAGGTCAAAGCAATAGGCCTGCATAAGGCTTCCCACAAATAAGACATGTTTCTATTTGATTTTGTGCAGACATT  
TTGTTAAACATTTACAAGGTAATCTTCAATCTTTATGGATAAATCGAAATACCATACTTCAATGTTTCGTTTTCTCTTTGCAAGTAAATGGAGTCACATCTCAGCTTGTGGTAGCCTCC  
TGCAATTCAGCTAACTCCTGCTGATCCGGTACAATCTTCTCCTCTTTCCGCTCCTTCTTTATAAGCTCGCGAAAAGTAGACAAAAGATTGAGTACCTTTGCTGCTTCAATTTTCATCCCTT  
TTATCTGAATCCCAATCTCAACCTTCTTGACAAATGCATTAAGACTATCCACATGTTTCGCTAGCCTGCTTTAGAACACTCTGCATATCTGTCCGTCTCTCCATGGTTCGAATCCTCCAGCACC  
TGCATCTCATTACAGCCCTCTGGTTCTCCTCTCGCTCCACCATGCGCTCATGAGCGTTACGGCCGAACATCTGAACAGCTTCCATGACTTTCAGCTGAGCCCATAGCTTCGTGCTTTAAC  
ATGGTCTTCCAGCTTACGGATCCGGCGAATAAGGTCCATGATCATCTCCGTCTTCTGGTCTGAAGCTCCTTATCTTACGCTTCTCATCCTCAATTCTCATAGCCTCCAGTCTTTTGAGCAC  
CAACTGCACCACGTCTCTGCCTCTTCTCCACTTCTGCTGCCTTTGCCTGCCCTGCATCGAAAAGGCAAAGCGGCACCAGGCGTGAATGCGCCCGCAGTACTAGCTGCTTGGAGATT  
ACCAGGAGGCGAACGGGAAGGGAATTAATGGAGCTTGCACGGCGAATGCGGAGGCGGCTAATGAGGAGGCACCATATGGCCTCACCAGCGGAGAGGTTTGCCTGATCTGCTGCAGA  
AGGCAAACCATGGCAGCGAGAGAATACTCCTCGAGGTGGCGGAGGTCAGAGCAGGCGCCGGCAAGAGCGTTCAGTCATCGGGAGTGTGGCAGCTGCCGTGTTACAGAACTCGAGT  
GCGTCTGCATGATATTAGATAGTGGGTCCACGCCGCCGTAGTAATGGCCCTTGCAAAGAACGGCCCGAAGCGCCATGGCAGCGTTCGTATCCGAAGGAGACCAAACGGGAGATAACCTC  
CTTGTAGACGCGATCGAGGTAATTGATAAGAATCTCCTCGAGCTGCTCCTCGGAGAAGTTGCCGCACCCATTTTCATCAAATCCGTAATTGTAAAGACTAGGGCCAGGGTTAAACCAGGG  
GCCTCGATTGTGTTTGTATGCTAGGGTTCGCAACACGGGTAGGATCAGACAAGGGAACGGCAGTAGGAGAAGCACCAGGGGGGGTGTGGAGACTCCGGAGTCTGAAGGGTTCATCGGG  
ACCGCCGCCCGGGGGGGCTTGGCGCTTCCCGTCAATGGCACCAGCACTGAGGGGCTTCTTACTACCTTTGCGGCCCATGGTAGTTCGATCTGCAGCAATTGCAGGTTACAGGGGACGGT

GGTTGATAAACCTTACGCATTTTCATGTCTTTTTGGTTGACAACCCCTCCCTCCAGATCCTAACTTGGCGCAATTGAAAAGCTCCATGGATCTCTCCGAATCTCTTGGTCAGCTCCTACATAT  
AAGAAAGCAAGATTTACTACAGATTGTTAGAATAACTCTAACTTGTTAAAGATA

>comp163512\_c1\_seq2

GAAGGGCTACGCTGGGCAGGGGTCCCTCGTTCTTTAGCTATTGCGAATTCGAAGAAGCGAAGCGATTAATGGCGTTGGGGAGAAGAATAGCTCACCGATTCTCGATGGGGCGAAGGGC  
TACGCTGGGCAGATTAGATCCGGCGCCGGCGATGTTGGGAAGGCAGCGCGAGGCTCTGTTTTCCGTGGGGTTTGTCTGACTCCGGCGACCGTTGGATAACAGTGTGCGGCCCGTTTTCCAG  
GCGGCGGTACCGCCTGACAGGATATCGATGCCTTTTGGTTTGAATCTTTTTGATCGGATATGGGGCAGAATGGTGATTGTATGAGGCGGGAGATGGTGGCTTCACCGCCGCTGGTGTGCG  
CGACTGCTGGTGAGGAGGAAGAGGAGAAACGGGCTGCAATGGGAATGACGGTGAAGGAGGTAAGGAAAAGTGCTTAAGGCGTCGCAGATGGAGGTGGTGAAGTTCGAGGTTGAGGGCG  
ATTCCGAAGAGCTTTGTGGCTACATCGGAGTTCTTTCGAATCTGTTGCGAGGTTTCGGGGGAGGAAAAGGGACCGGAGCTTGC GCGGTCTCTGGATGAGTCCGCGGCGGTAATTGTTATC  
GGAAACGTCGTTTTTGTGTCAGGCCCGATCAGGTAGCAAAAAGCAATCGAGCGCACAAATCCCCCTTGCTCTCTCCCCTCTAACTGACCGAATGAAGGAGGAGCTAAGAAAGCTGGAACAGC  
AGAAGGCTACGATCGACAAGCTCGCAGAGGCCAAAGCAAGAAGGGAATTATGGTTTGGCCTAGCTTTCCTGGCCGCTCAAACCGCCGGGTTTCATGAGGCTAACGTTCTGGGAGCTTTCA  
TGGGACGTCATGGAACCCATCTGCTTCTACGTCACCTCCATGTACTTTCATGGCCGGCTACGTTCTTCTCTGAGGACTTCCACAGAACCTTCCCTCGAAGGTTTCTTCAAGAGTGCCTTTG  
CCACGAAGCAGAAGCGGCTCATGAAGGCTCGCAATTTTGTATCTCGGCAGGTTAATGAACTCAAGGAAGCCTGTCGTTCAAGCGAGGCGCCTTCAGAAATGGAGCTGGTGGCTTCTTCT  
TCCTGTAAGTAATTACCCTTCTCTTCTGCAAAGAAGGGAAGCCGAGTATTCTTTTTGATCTGCGGATTGTTTTCTGTTACCGGAGTTCAATCAATTAGGCCTGCATTGGCTGAAATAGGAG  
GAGCAATTTTTTGTATTGATCATCTTATTATCTACCATTAGA ACTATAGAGTATGAAGTGGGGGAAATTTGAGGGAACGATGTAGTAGATATAGGCATTTTTTTTCTTAAAGAAACACTGTTA  
TTGCGGCGATTATCACTGTTATATTATGATGTTTTTTTTTTTTTGTTC AACCATTATAGTGAATTTATTAGTGGATATTTTCAATTATTGTATCAGTTCTTTTTTGTGCAATCAAAAAGAGCAATCT  
TCCTTTTTCTTGAATTGTAAATCTTGAAGTGTCAAAATTTGACGCAACTTGAAGT

>comp163512\_c1\_seq5

GAAGGGCTACGCTGGGCAGGGGTCCCTCGTTCTTTAGCTATTGCGAATTCGAAGAAGCGAAGCGATTAATGGCGTTGGGGAGAAGAATAGCTCACCGATTCTCGATGGGGCGAAGGGC  
TACGCTGGGCAGATTAGATCCGGCGCCGGCGATGTTGGGAAGGCAGCGCGAGGCTCTGTTTTCCGTGGGGTTTGTCTGACTCCGGCGACCGTTGGATAACAGTGTGCGGCCCGTTTTCCAG  
GCGGCGGTACCGCCTGACAGGATATCGATGCCTTTTGGTTTGAATCTTTTTGATCGGATATGGGGCAGAATGGTGATTGTATGAGGCGGGAGATGGTGGCTTCACCGCCGCTGGTGTGCG  
CGACTGCTGGTGAGGAGGAAGAGGAGAAACGGGCTGCAATGGGAATGACGGTGAAGGAGGTAAGGAAAAGTGCTTAAGGCGTCGCAGATGGAGGTGGTGAAGTTCGAGGTTGAGGGCG  
ATTCCGAAGAGCTTTGTGGCTACATCGGAGTTCTTTCGAATCTGTTGCGAGGTTTCGGGGGAGGAAAAGGGACCGGAGCTTGC GCGGTCTCTGGATGAGTCCGCGGCGGTAATTGTTATC  
GGAAACGTCGTTTTTGTGTCAGGCCCGATCAGGAATTAAGTTAAGGGTCCGTGTTTGA AAAATGATAGCCAAGGATGAAGAGACCTCAGACCAGTAGCAAAAAGCAATCGAGCGCACAAATC  
CCCCTTGCTCTCTCCCCTCTAACTGACCGAATGAAGGAGGAGCTAAGAAAGCTGGAACAGCAGAAGGCTACGATCGACAAGCTCGCAGAGGCCAAAGCAAGAAGGGAATTATGGTTT  
GCCTAGCTTTCCTGGCCGCTCAAACCGCCGGGTTTCATGAGGCTAACGTTCTGGGAGCTTTCATGGGACGTCATGGAACCCATCTGCTTCTACGTCACCTCCATGTACTTTCATGGCCGGCTA  
CGTCTTCTTCTGAGGACTTCCACAGAACCTTCCCTTCGAAGGTTTCTTCAAGAGTCGCTTTGCCACGAAGCAGAAGCGGCTCATGAAGGCTCGCAATTTTGTATCTCGGCAGGTTAATGA  
ACTCAAGGAAGCCTGTCGTTCAAGCGAGGCGCCTTCAGAAATGGAGCTGGTGGCTTCTTCTCTGTAAGTAATTACCCTTCTCTTCTGCAAAGAAGGGAAGCCGAGTATTCTTTTTGA  
TCTGCGGATTGTTTTCTGTTACCGGAGTTCAATCAATTAGGCCTGCATTGGCTGAAATAGGAGGAGCAATTTTTTGTATTGATCATCTTATTATCTACCATTAGA ACTATAGAGTATGAAGT  
GGGAAAATTTGAGGGAACGATGTAGTAGATATAGGCATTTTTTTTCTTAAAGAAACACTGTTATTGCGGCGATTACTGTTATATTATGATGTTTTTTTTTTTTTGTTC AACCATTATAGTGA  
ATTTATTAGTGGATATTTTCAATTATTGTATCAGTTCTTTTTTGTGCAATCAAAAAGAGCAATCTTCTTTTTCTTGAAGTGTCAAAATTTGACGCAACTTGAAGT

>comp163540\_c1\_seq4

ATCAGGTGATCTTGGGATGAAACGAAGAAAATGATAGTGATGGGTCAAGAAGAGTATGCATCACATATTCAGGTATTATTTTAAGCACATAAAATTAATTTATATGTTGGGGTTAACAACCTT  
ATTTTGTATTTCCTTACAGGCTTTTCCCAAGGATGCTGCTTATTTAAATATTGCAATTGCAAATTATGTTGAATTGGAGATAGTATGTGGTATTGGACATGCAACTGGAGAGTGGGCGAAATCT  
GGAAATTCTAAAACCTCCACTTGGAACGCAACAATTACATTTAAGCGATGATGAATCCCCAAAATTTATGGATGTTGGTACAGATGGACCAATGGATATTGAGTGCTCTGATATGCAAGAGA  
AAGAGAATAATACCGGAACAACAAGAAACCTCAACCTTCATCTGCTATAGGAGGCGGCGTGAAAAAGAAGTCTAAAAAATCAACTGTGCATCACGACATTCGTGAGTATATTTGTTTGA  
TGGCAGAAAAGTGTGAATGAAGTTGCTAACGCAATGAAGAGCTCAACAACATCTCCAAAACAAATTCAGAATTCGAAGGCTAGATGGATGCGT

>comp163541\_c0\_seq2

ATTGTATAACTTTCTATTTTCTGCTAGAATTGTCTGATAGTTTTCAGCAGCATCTAACAACACTTTTAGTCTAAACCCCATGCTGTTCAATTCTTCTGTCCATTGCCTTTGAGAATTATTGACT  
TCTACTTTGATGGACTCTGATGATGTCTCAAGCCCTTTAGTGATTGTAGTTGAAAAGAAATGAAATTATGGAACACATTCTCCTTTTTAGTCCAATTATGGAACCTTAAACTCAGAAAATGC  
CTTAAGTTCATTCATCTCTTACTCGACTCTGCTAGCAAGAATTCAGCCTCTTTTGTCTTTCTTGTAACTGGCTTCATTTTGCTTTGCCTTGGCATCTAATTGCTGGTAATGATCTTCGTAA  
GTGCTATTTATTGCTTCCAAATCCTTTTTAAATCTAAAATCATTCTATCATTATTTTCTTCTTTCATCAACTTCAATGTTTGCTGTTCCCTGTTTCTTACTCTCCTCGATTGCAGTTTTT  
TTTACTTGTGCTTCTTCATTTGTTCCAGATGCCAGTGTCTCAAGCACTCTGATTCTTGATTGATACTTCTCTTCGCGTGCTTTAATCAGATCATTTTGATTACGAATATGCTCTGTCTGGGTTG  
ATATCCGGCGCTCAATCTCTTGCACAACCTTTTCTCAGTAAACTCGCTACACGCAGAGGCATCTCTCCATTCTCCTATCGATGCTTTCATCCAGAATTCTGTTAATGACACTTAGAAGTGATT  
GGGTTGGAGCATTATCTAAACCAATTTGATTTAATGATTTTCAGAAAATCTGGCTGCAGGAATATCTGAATAACGTCCATGCTTTAGCTGGAACACCTCATGAAACTTATGGCCCCATGACGC  
AGTGAGGCGGTTTGCTCTGGCACAGCAGAATGCCAAACGCGATGAAATATTGATTCTGAATACTTATTTTTGTTCTCCTCTTCTCCAGTTGGAGAATTTTTCCCACTTCGGACAAGATT  
TCCTTCGCAACATCCATAGCACCTCTATCATCTTTTGTGTTGAACCACTTCTTTCTTGTCTTGTTCACAAATGGCTGTCCATGAATGTCACCTTCTCCTAGTTTGAATGAAGTGATC  
CCTAAGGGACAAAAGACAATCAAGCACTGCAGAAATGGAGCCATTTTCCAAATCATCTACAGTAAAAACGTGGCAGGCCATTCCTCTACAGCTGAAAGAAATCTCCTGACTTTTCTCCCG  
CCGCTGCTCGAATGAAATATAAGCACCTCGCTGATTCTCCAAGGCACTAGGATCCTGCCGCTTCTCAACGCCGCATAAAAACGGTCCATCAAAAAGCAGAGCCCTTAGTTCCTCATCGGAT  
GCCTCAAGGGAATGTTGAGACTCGGAAACAAATATTTAGCCATCTACAACCTCTCCGCTCTTGCTGATGCATCTGCAGCACTCATGCTTCCAATGCCGTCCGATTCACAATCCTCTCC  
TTCCAGATTTAAGTTAGCTTCTTCTCGAATTTGACATTTACCGTATTCTCTCCCTTAAGCTGCAAATCCGCCAACTCACAGCGACGTTCAAAGTACCAACAAATATAAATCTCCCAGGA  
GCTTCAGCAGCATTCTCAAGCAACCGCAGATTTGGCAATGCAACCCAAATTAATTAAGTGTGCTGCTGCGTAGAATAAGAACCACAAGACGAAACCAAGAAGCTGGATCGCCGAAACCC  
TAGCTATTGACCAGCGTGGGATCGGTAATGTTGGTTCCG

>comp163542\_c0\_seq3

TTTTTTATTTTTTTAAAGTCAACTCTTTTTTTTTTTAATTAATATTTTGTCTACACAATCGATGTTTGAAATATTTTTTCTTTTTCTTGAACATCCAAACCCGAGAAAAATTTTTCATGTGA  
AGTCCGGACGGTAAGACTGTCCGGATGTGAGTGCACATAGTATTTGTACACACTTTATAAAAAAATTAATTTATGTATAAATTTATACTTA

>comp163570\_c1\_seq5

ATTTTTTTTTTTTTTTTTTAAATTCATTTCACTACAACCTGAACCCAAACAAAAAGAGGAAAATCATACAATTAGTACACAAAAACAAAACCAAATAAAACAAATCAAGTCGTGGATCCA  
GAGAAAGGGAAAGCAGGTGACTAGCGGTTCAACAAAATAAAATCAAATTTTGGAGCAAAAACACAGAATCAAATGCTAAAATTAAGGAATGCATCTGAAAGATGGAAAACCATATAAAA  
CAAATCAAACACAACCCTTTCTATCATCTTCTCCGTCTTCAGCGAACAATACCGGGATTTGTTCCATGGCAACTGGCCACAGGGACAGATTTTTAAAAAAGAAAGGGAAAGCCAGTGA  
AGAGTGCTTTTCGGGCATGAGCTGGAGGTTGAAAAACAAAATAGGTAAGAAAAATTTAAGACGAACCTTCTTCAAGCTATGAAGAGCAGCTTGTGCGACAGTTTCTGCTGACCTGC  
TCCGCGTAGCTCCGAATGCGAGATTTTATAGGGCAAGGAAGTATCTGGGGCAAGAGCGGGAGGCGAAAATCATGTTAAGCTTTTTTTTTTCTCGGGTTTGGGGGACAGTGCCTCCGCA  
AGCCCCCTAAATCTGCCGTTGCTGCCAACAGATCAAGATGAATGGAACCTGGTACATGTAATATTCTTAAATTTGTAATTTAATTCACTCAAATAATTAGATAAAAAATGTCATCAAACG

TGATTTTTAAAGCAAAACATGAATTTTATATAGGCTATAATTAATTTATTTGGGACATATTAATACTACGTACAAGCTAGAAAGAGAAACATGCATGAAAATGATACAACCCACCTGCTAC  
ACAAATTACTTACCCGCCACCGCCTCACCCGCATCCACCGCTGCCACCGCCGGCAACAATTGCAGCTAAGATAGGACCAGTACTGGAATAACGACTACCACCGTTGTTTTACCAGCTGC  
TTTCAGCCGGCTGTTGCGACCTCCAACCTCCGCCCGCCATAGTAAACGACGTTCTGACTCTGCTTCGGCTTCTTTCTAAATCCTGCGCAGGCGAAGACTATGAAGGCTATAATTGCTGCC  
GCGATGCAAAGCATGAAAAGAGCTCCGGATATTGTAGAGCCGCACCACTCTTTGCTTGCCTGGCGAATTCCTTCAATATTCGTGCCATGTTGTTGGTTGCAATAAACTGGAAGCAGGC  
GATTTTATAGGCTTTTCATTACAGTTTCAGAAAATTTACAGAAAGTTCTTCGAGGAGTTTAATA

>comp163619\_c0\_seq13

AAATTC AATCATTGAGCAAATCCTTCTAATTTACACACACACAAAAAAGGATTAACATCCCTTCAAAAACTAACCCTATTGATCATAACAAGCCAAATAAGATTAAACAAAGCTGGTAA  
TTAACCTGAATTATCCATCCTTTTGCTAATTCCTCATTATTAGCTTATCCTTCTCAAATGTACTTAGCAAAAAGGATTCACAAAGCTGGTAATTAGCCATGAATTATTCATCTTTCTACGT  
GATTCGTCCATCATTACCTTATCCAGTTTCTCAAAGTTTTAGCTTTGAGGGGCACCCATCCATGAATTGCCTCACCAGCTACGGCTGTGAGCCATCTCGGCCATCCC GCGGCGGCTTGTTC  
CCCTTCGATGTGCTTGTGAAGTTCTCCACTCTGACGACAACCGCTT TAGGGCTTTCCACGACCGCTTTCACCGTTACCTTCGGCTCCTCGATCTTCTTTATCTCCGCTCATCTCCT  
TTGGCCTCTCCCTCGACGATATCTCCGAAACTGCCTCCGATCTTCGGTTATCCCTGAGAATGCCTGACGAATCCAGCACGGGCGTACCGACACGACATTCTTCGACGACGAGCAGCCCA  
TCGCCGCCGATCGCCGGCCGGGATTGGCAGCACCGGATTATCCAACGAGTTGGGGATTGGGAGGAACCGAGAGGGGATAAAGGCGGAGAAGACAGCAAGATGTCCGCGGTGGAAC  
ACGGGGACAAATCCCAAAAAAGCAAAGAAAGGCGAGA ACTTTATATCCTATTCTAGGCTTTTGATGGTATCGAAATCTTCGCGAAATTAATGGGAGATGAACGGAGCAGAAGCTTTTAG  
GAGTAATGCCGCTTCTGCGAGATTCTCGCGGAAGGCCCTCGAGGAATCTCTTTTCATTTCCCTGATGGGGAAACAAAATATAGCCGTTGTG

>comp163619\_c0\_seq2

TCAAAAAAAAAAAAAAAAAAGAAGAGAGAGCGGGAACAAATAAAAAGAAAAGAAAAGAAAATAGAAAATCAAAGCTATGCATAAGTAGCAGTCGCTGTTTTCCATCCTTCTCTAATATGAAAA  
CTGGAACATCTGTGAGAAAAATGGAAACATATTTAGCCTCGTTCCTATCAATGTAACAGTCTTTACCAAAGTGTTTTGTGCGGGCAATTTATAACAGATAGGATCCGTTGCAATGTACAGCA  
GGAGCTTCTAAGTATAAGCAACAGCTTTGATTCACTGAACTTGATTTCTTCCAGCCACTGTATTTAAAGACAATTTTGAGTGTAGATCTCGTTGGAACCATGATTTTCGAACGGCTTTCCG  
GATTTGGCGATCATGTTTTCTAACAGTTCATCAACCTTTTGGGCTTTAGACAACAATGGCCCTGAAA ACTCCACCCTGCCTCCATCATGGTATCCCAGCATACTGCGCTTTGATTGCATTG  
TGCCATTTCTTGAGAAATCGTGTGAATGAAATCTGGAAGAATCGAATGAATCTGGGTGTCCAGTTGTGCCAATTTTTCATCGCTGCTTCTTTGCCAATTTATACTGCTCATTGCGCCTG  
TGATGATCAAGTGGATAATGTGCAGTATTTCCATTAGCTTTGGCCATCAAACCAGAACTA ACTCTGGCTCTGATAGCAGCTGGCAGCTCCGGTGCACCATTTATGTTTCTTGAGGTAGT  
TTAATATGAGTTTTAGCAAATGGACGATCTCCCGCAGTTTCTTATCCCATGCAAGGCCATTAGAATGATTAACATGCAAAGGACCTGAGAAAGGAATGCTCCCTTGAGAAATATCTTAA  
TATGTCGACCTCGATCAGAAGGATTTAGTGCTGCCATTGGCTGAAGATCTACAAAGAGTCTAGAACCACCATTA ACTCTGGGACAAGGTA ACTTGTGCGCCACTGCTATCAGTTCTATGGTT  
AATTTTTCGATGCTCTGCCTCTTGGTGGTTTGATAAFTACTCAAGCCGCTAAGTTCTTGTGTATCCCTATGAACCCCTAATGGTCTCCTCGTCACTTCTGTGACACGTGCTCTACCGTTGCC  
CTTTGGAATCCTCCTGTTAGCATCTCTTGGATTTTGCATCAATTTCTTTGGTAGGTGGGTATTTGGCAA ACTTGATGGTTCACACGAAAGAGGCATTGCTGAGAAATACTGTGGAAATG  
ACAAGAAATAAAGTATTAAGTCTAACAGTAAGTACAAAAGAAAATGAAATGACAGTAGCAGTTAAGGGAGTTGATATATGAAGATTCTTGAAA AATTATAGCTGACATTATACATGGACGA  
AAGGCCAAA ACTGATTCATACCTCAGATGCCAGAGCAGACTCA

>comp163619\_c0\_seq5

TCAAAAAAAAAAAAAAAAAAGAAGAGAGAGCGGGAACAAATAAAAAGAAAAGAAAAGAAAATAGAAAATCAAAGCTATGCATAAGTAGCAGTCGCTGTTTTCCATCCTTCTCTAATATGAAAA  
CTGGAACATCTGTTTGGTTAACATCTCAGAATCAGCAAAAAAATATGACAAATGAATGAAATTTTTTATATTTTTTCATCCTTAACATATTTAAGGCTGCTAAACTCACTTGTGAGAAAAA  
TGGAACATATTTAGCCTCGTTCCTATCAATGTAACAGTCTTTACCAAAGTGTTTTGTGCGGGCAATTTATAACAGATAGGATCCGTTGCAATGTACAGCAGGAGCTTCTTAAGTATAAGCAA

CAGCTTTGATTCACTGAACTTGATTTCTCCAGCCACTCGTTGGAACCATGATTTTCGAACGGCTTCCGGATTGGCGATCATGTTTTCTAACAGTTCATCAACCTTTGGGCTTTAGAC  
AACAATGGCCCTGAAAACCTCCACCCTGCCTCCATCATGGTATCCCAGCATACTGCGCTTTGATTGCATTGTGCCATTTCTTGAGAAATCGTGTGAATGAAATCTGGAAGAATCGAATGAAT  
CTGGGTGTTCCAGTTGTGCCCAATTTTTCATCGCTGCTTTCTTTGCCAATTTATACTGCTCATTGCGCCTGTGATGATCAAGTGGATAATGTGCAGTATTTCCATTAGCTTGGCCATCAAAAC  
CAGAACTAACTCTGGCTCTGATAGCAGCTGGCAGCTCCGGTGCACCATTATATGGTTCCCTTGAGGTAGTTTTAATATGAGTTTTAGCAAATGGACGATCTTCCCGCAGTTTCTTATCCCAT  
GCAAGGCCATTAGAATGATTAACATGCAAAGGACCTGAGAAAGGAATGCTCCCTTGAGAAATATTCTTAATATGTCGACCTCGATCAGAAGGATTTAGTGCTGCCATTGGCTGAAGATCTA  
CAAAGAGTCTAGAACCACCATTAACCTCTGGGACAAGGTAACCTTGTGCGCCACTGCTATCAGTTCTATGGTTAATTTTCGATGCTCTGCCTCTTGGTGGTTTGATAATCTACTCAAGCCGCTA  
AGTCTTGTGTATCCCTATGAACCTTAATGGTCTCCTCGTCACTTCTGTGACACGTGCTCTACCGTTGCCCTTTGGAATCCTCCTGTTAGCATCCTCTTGGATTTTTGCATCAATTTCTTTGG  
TAGGTGGGTATTTTGGCAAACCTTGATGGTTCACACGAAAGAGGCATTGCTGAGAAATACTCAGATGCCAGAGCAGACTCAGCACTTCCACGCCTTCGAGGTTCTATAGATAGAAATCTTT  
CTAATAATTTGTAGACAGATTGTGGCAAATTTCTGAAAGTCTCATGCAGGTGACCCTCATAAGGACGATGGGGCTTGAAAATATTTTCATGAGGTAACCTGGAATTTCTCCAGTATTCATCT  
GATGGGGAACCACATAGTTTAAAGATTTGTGCAGTTGCTCAACCTCAGTTCTTCCTTGCAAATGGGCTTCTTGAAGAACATCTCTGCAAATACACAACCAACACTCCACATGTCTACTG  
ATGCTCCATAATCGACGGAGCCCAACAGAAGCTCAGGTGGACGGTACCATAGTGTACAAACACGACTAGTTAGCGGTTGCTTATTTTCAGGTGGCATGAAGTTTGGCAGACCAAAATCAG  
CAATTTTAAAGATTCCATCATTGTTAACTAAGAGGTTTGCACCCTTAATATCTCGATGGATGATTCCCTCGCGAATGACAATGTTCAAGGCCAGATAGCAATTGTTTCATATAACACTTCACCT  
GCACGCACAAATTGCCATTTTTCATTGAAAAGTT

>comp163619\_c0\_seq9

TCAAAAAAAAAAAAAAAAAAGAAGAGAGAGCGGGAACAAATAAAAGAAAAGAAAAGAAAATAGAAAATCAAAGCTATGCATAAGTAGCAGTCGCTGTTTTCCATCCTTCTCTAATATGAAAA  
CTGGAACATCCTGTTTGGTTAACATCTCAGAATCAGCAAAAAAATATGACAAATGAATGAAATTTTTTATAATTTTTTTCATCCTTAACATATTTAAGGCTGCTAAACTCACTTGTGAGAAAA  
TGGAACATATTTAGCCTCGTTCCCTATCAATGTAACAGTCTTTACCAAAGTGTTTTGTGCGGCAATTTATAACAGATAGGATCCGTTGCAATGTACAGCAGGAGCTTCTTAAGTATAAGCAA  
CAGCTTTGATTCACTGAACTTGATTTCTCCAGCCACTGTATTTAAAGACAATTTGAGTGTAGATCTCGTTGGAACCATGATTTTCGAACGGCTTCCGGATTGGCGATCATGTTTTCTA  
ACAGTTCATCAACCTTTTGGGCTTTAGACAACAATGGCCCTGAAAACCTCCACCCTGCCTCCATCATGGTATCCCAGCATACTGCGCTTTGATTGCATTGTGCCATTTCTTGAGAAATCGTGT  
GAATGAAATCTGGAAGAATCGAATGAATCTGGGTGTTCCAGTTGTGCCAATTTTTCATCGCTGCTTTCTTTGCCAATTTATACTGCTCATTGCGCCTGTGATGATCAAGTGGATAATGTGC  
AGTATTTCCATTAGCTTGGCCATCAAAACCAGAACTAACTCTGGCTCTGATAGCAGCTGGCAGCTCCGGTGCACCATTATTATGGTTCCTTGAGGTAGTTTTAATATGAGTTTTAGCAAATG  
GACGATCTTCCCGCAGTTTCTTATCCCATGCAAGGCCATTAGAATGATTAACATGCAAAGGACCTGAGAAAGGAATGCTCCCTTGAGAAATATTCTTAATATGTCGACCTCGATCAGAAGG  
ATTTAGTGCTGCCATTGGCTGAAGATCTACAAAGAGTCTAGAACCACCATTAACCTCTGGGACAAGGTAACCTTGTGCGCCACTGCTATCAGTTCTATGGTTAATTTTTCGATGCTCTGCCTCTT  
GGTGGTTTGATAATCTACTCAAGCCGCTAAGTTCTTGTGTATCCCTATGAACCTTAATGGTCTCCTCGTCACTTCTGTGACACGTGCTCTACCGTTGCCCTTTGGAATCCTCCTGTTAGCAT  
CCTCTTGGATTTTTGCATCAATTTCTTTGGTAGGTGGGTATTTTGGCAAACCTTGATGGTTCACACGAAAGAGGCATTGCTGAGAAATACTCAGATGCCAGAGCAGACTCAGCACTTCCACG  
CCTTCGAGGTTCTATAGATAGAAATCTTTCTAATAATTTGTAGACAGATTGTGGCAAATTTCTGAAAGTCTCATGCAGGTGACCCTCATAAGGACGATGGGGCTTGAAAATATTTTCATGAG  
GTAACCTGGAATTTCTCCAGTATTCATCTGATGGGGAACCACATAGTTTAAAGATTTTGTGCAGTTGCTCAACCTCAGTTCTTCCTTGCAAATGGGCTTCTTGAAGAACATCTCTGCAAAT  
ACACAACCAACACTCCACATGTCTACTGATGCTCCATAATCGACGGAGCCCAACAGAAGCTCAGGTGGACGGTACCATAGTGTACAAACACGACTAGTTAGCGGTTGCTTATTTTCAGGT  
GGCATGAAGTTTGGCAGACCAAAATCAGCAATTTTAAAGATTCCATCATTGTTAACTAAGAGGTTTGCACCCTTAATATCTCGATGGATGATTCCCTCGCGAATGACAATGTTCAAGGCCAGA  
TAGCAATGTTTCATATAACACTTCACCTGTGATTCCGTGAATTTACATCTGGTGTGATGATAATCCAGAAAGATCATGTTCCATATATTCAAACACCAGATATAAGCTACAAGATAACCG  
AGAGGTGATCAAACCTTCCAGTTTCATAACATTTGGATGGTCGAGTCGACGAAGTATCTCTATTTCTCGTGCCATGAACTTGACACTTTCTGGCTCAAATTTGTCAAATCTCACCTTCTCA

GGGCAACAAC TTTTCCAT TTTCAAGATCCCTTGCTCTAAACACACTGCTGTAAGTGCCTTGCCCTTATCCAGTTTCTCAAAGTTTT CAGCTTTGAGGGGCACCCATCCATGAATTGCCTCA  
CCAGCTACGGCTGTGAGCCATCTCGGCCATCCCGCGGGCTTGTCCCTTCGATGTGCTTGTGAAGGTTCTCCACTCTGACGACAACCGCTTTAGGGCTTTCCACGACCGCTTTCACC  
GTTACCTTCGGCTCCTCGATCTTCTCTTTATCCTCCGCCTCATCCTCCTTTGGCCTCTCCCTCGACGATATCTCCGAAACTGCCTCCGATCTTCGGTTATCCCTGAGAATGCCTGACGAATCC  
AGCACGGGCGTCACCGACACGACATTCTTCGACGACGAGCAGCCATCGCCGCCGGATCGCCGGCCGGGATTGGCAGCACCGGATTATCCAACGAGTTGGGGATTGGGAGGAACCGA  
GAGGGGATAAAGGCGGAGAAGACAGCAAGATGTCCGCGGTGGAACACGGGGACAAATCCCAAAAAAAGCAAAGAAAGGCGAGAAC TTTATATCCTATTCTAGGCTTTTGATGGTATCG  
AAATCTTCGCGAAATTAATGGGAGATGAACGGAGCAGAAGCTTTTAGGAGTAATGCCGCTTCTGCGAGATTCTCGCGGGAAGGCCCTCGAGGAATCTCTCTTTTCATTTCCCTGATGGGGA  
AACAAAATATAGCCGTTGTG

>comp163696\_c0\_seq1

AATTTTATGAGTTGAAAAATAGATATTCTCACCATTTATATAACTCAAAACTCATTAATTTTCATAGCTGTGAAC TTTCTTTCTTGAAGTCCTTCTACCACTCACACTCCAGTGCACCATAAC  
AATGACACATCAATAATCTCAGAAGCTCATATGAACCAAATTTTTATTTTCTCACACAATGAAGCTTCTAATGACATTCCATTTGGAATATGCAAGCTTTTTATTACCTTCATATAAACCTTT  
TATATACTTTCCAATTTCCAAAATACAATGCAAAACACCAAATCCAAAGAACAATAACAAGTTGCTAACAGTACATCTTAACATAACAAAGCCTTGATTTTGTCAATCCCAGATGCAGAAGTA  
AAATGCAGTCTTCTTATTTCCCTTCAACGAAGGAGACTAAAGCATCCCTGTAAACACCATGAGTGAATTTTTTTAGAACATCTTCGAGTTTAGTTCCATGTCTCTTCAGATACTCTTCTTG  
ATTTCTCTATATCAACATCAGACCTCGACAAAATCACTCGACTGAGAGCTTCTTTGAGTCATTATCTGCTCCATCTTTTAAAGCCTTGTTTATCAACTGAAAACCAAAGTGATAAAGGTG  
AAAAGCAATGAATTTGGAAGTGAATAAGATTATTTATTTTCATGAATATTAGATTGTTTACTGTAAACCGGTCCAGCCATTCGCATAGAACCGGACGGCGGTCCAAACGCCCAAGCGGA  
GCATTTTAGGAAGGATTTTGAAGGATTTGGGAGGGAAATTTGAATATAGGGACTGTTTAGGGATTTCCCTT

>comp163696\_c0\_seq11

AATTTTATGAGTTGAAAAATAGATATTCTCACCATTTATATAACTCAAAACTCATTAATTTTCATAGCTGTGAAC TTTCTTTCTTGAAGTCCTTCTACCACTCACACTCCAGTGCACCATAAC  
AATGACACATCAATAATCTCAGAAGCTCATATGAACCAAATTTTTATTTTCTCACACAATGAAGCTTCTAATGACATTCCATTTGGAATATGCAAGCTTTTTATTACCTTCATATAAACCTTT  
TATATACTTTCCAATTTCCAAAATACAATGCAAAACACCAAATCCAAAGAACAATAACAAGTTGCTAACAGTACATCTTAACATAACAAAGCCTTGATTTTGTCAATCCCAGATGCAGAAGTA  
AAATGCAGTCTTCTTATTTCCCTTCAACGAAGGAGACTAAAGCATCCCTGTAAACACCATGAGTGAATTTTTTTAGAACATCTTCGAGTTTAGTTCCATGTCTCTTCAGATACTCTTCTTG  
ATTTCTCTATATCAACATCAGACCTCGACAAAATCACTCGACTGAGAGCTTCTTTGAGTCATTATCTGCTCCATCTTTTAAAGCCTTGTTTATCAACTTGCTGAAATATACAGGAGCTGAA  
TTGATGCTCTCAACTGTATCTATTATGTATGGCTCATCTCCAAGATCCTGCTCATTGCATGTAGAAATCAGTATATTTAAATGTTCAAATTACAAATATGCAAAAACAATAAAAAATTTGACT  
GCTTCAAGCAAAAAGTAGGGACTAATGTCATCCACATGTAAGATATCTTAAACTTAAGCGAGGAGAAAACAAGACACCTCTTCTATGGACTTTCCAAAAGTTCCCTGTAGAATTTGAAGG  
TFACTCTTAGTTGCGACTTGCTCCTCGTAGTAAGGATCCTCACTACATCCTCATTCACTATGAGGTTCTCTGGTGTTTTTTTTCTGAATGGCATTATGGAGAGCTTTGGCCTCTGATTTTGCTAT  
CTCCTCGTGACATGAGGGCCTTCATATCTGTAGGAGCTCACAAGCCTGACCAGAAACTATATCCATGAAATCATAGATAAAAGCTTGGTTAGAACTAATGTTTTCGCCATTGCATAAGTT  
TCTGTAACATTTTGAAAATTGCATGAAGCCATTAATCCCAAGAGGAACCATACCTCTAAAACATCGCGAACAATGGGTGGATCAAACATCGGGGAGCTAGGGGCACATGCACCTACTAGC  
TCTAGTCGACCCCACTTAGTTACCTAATTGAGTAGGGTTGTCAATTTTTGACACGACCCACCAACCCGACCCGAAAAATCTGGGTAGAGTCGACCCGTTTAAACAAATGGGTCTGGGTTCG  
GATTTCAATTTTTGACCCATTTAAAAACAAGTAGGGTCTGGGTCAACCCAGAACCCGAAATTGACCCGAGAATACCCGGATAACAATCAAATGTGACCCAAGATTGCTCCGCCATTTTAA  
TTTTTCCCGCTGGGAGGGAACCGAGGTAATCCACCCTTCTAAACCTACTCCTGAATAAATGCCAGCTCATTACAAAGTTGACTATGTGTAGATCATGATTACATTCCCTAAATTAGGTAA  
GCTAATACTTTTTTCTCCTTGAGGGGTACAGATAAATTACTTCAGTCCTTTTTAGGGGATGTTATTGGTTCAGTCCATACAACAAAAAAGGGAAATTTACAACCGTAACCAAATTAG  
GCAATCCACAAGCAAACATAAATAAATAACAGAAATTTCAACATTTTCAAGGTCATTGACCTCACTGCAATATGAAATATGAGGCATTGTGGAGCATTACTTACATTAACATGGCTTCCA

GAGATGCTATAGGCAACTTCTTCTCAAGGGAATGATGAAATAAGGCATGATATGCCTTCCCTTGCCCCATAAAGCTCGGCTGCTGATCGAGTGCAAGCAATTTCAACAAGAATTGTAGGG  
GAATGACCTTTGTGGATTACTTGGTGAGCCCAACGAGCATCCCTTTCCCATGGATGCATTGCCATTGAAAAGTCAAGTTCTTAAACCTCGCATATTCGAACTCGAGAAAATGAATGTAAT  
CAAGGTCTACTCGTGCAAAGCTTCCATTATCAGCCTTAAATAGACCACCAAAGTTTTTTCTGAACTGGGCCAGTGTCTTGGCCGGCGGCCATCTCCCCATTGCCGCCACCACAGACTT  
CTCTTCCACTCCAAGCCCTCCAATCCTGCGAGGGCCTTGGTGAGTTCCTTGCAATCCTCAGCTAAGATATGAGCCATGGTTGGTTTCTTCTCCTTTTCTTCTTCAACTCCGCAAATCG  
>comp163696\_c0\_seq24

AATTTTTATGAGTTGAAAAATAGATATTCTACCATTTATATAACTCAAACTCATTAATTTTCATAGCTGTGAACTTTCTTTCTTGAAGTCCTTCTACCACTCACACTCCAGTGCACCATAAC  
AATGACACATCAATAATCTCAGAAGCTCACATGAACCAAATTTTTATTTCTCACACAATGAAGCTTCTAATGACATTCCATTTGGAATATGCAAGCTTTTTATTACCTTCATATAAACCTTT  
TATATACTTTCCAATTTCCAAAATACAATGCAAAACCAAATCCAAAGAACAATAACAAGTTGCTAACAGTACATCTTAACATAACAAAGCCTTGATTTTGTCAATCCAGATGCAGAAGTA  
AAATGCAGTCTTCTTATTTCCCTTCAACGAAGGAGACTAAAGCATCCCTGTAAACACCATGAGTGAATTTTTTTAGAACATCTTCGAGTTTAGTTCATGTCTCTTCAGATACTCTTCTTG  
ATTTCTCTATATCAACATCAGACCTCGACAAAATCACTCGACTGAGAGCTTCTTTGAGTCATTATCTGCTCCATCTTTAAAGCCTTGTTTATCAACTTGCTGAAATATACAGGAGCTGAA  
TTGATGCTCTCAACTGTATCTATTATGTATGGCTCATCTCCAAGATCCTTCTATGGACTTCCCAAACAGTTCCTTGTAGAATTTGAATGTTACTCTTAGTTGCGACTTGCTCCTCGTAGTAA  
GGATCCTCACTACATCCTCATTCACTATGAGGTTCTCTGGTGTTTTTTTCTGAATGGCATTATGGAGAGCTTTGGCCTCTGATTTTGCTATCTCCTCGTGCACATGAGGGCCTTCATATCTGTA  
GGAGCTCACAAGCCTGACCAGAACTATATCCATGAAATCATAGATAAAAAGCTTGGTTAGAAACTAATGTTTTTCGCCATTGCATAAGTTTCTGTAACATTTTGAAAATTGCATGAAGCCATT  
AATCCCAAGAGGAACCATACTCTAAAACATCGCGAACAATGGGTGGATCAAACATCGGGGAGCTAGGGGCACATGCACCTACTAGCTCTAGTCGACCCCACTTAGTTACCTAATTGAGT  
AGGGTTGTCAATTTTTGACACGACCCACCAACCCGACCCGAAAAATCTGGGTTAGAGTCGACCCGTTTAAACAATGGGTTCGGGTTTCGGATTTCAATTTTTGACCCATTTAAAAACAAGT  
AGGGTCTGGGTCAACCCAGAACCCGAAATTTGACCCGAGAATACCCGGATACAATCAAATGTGACCCAAGATTGCTCCGCCATTTTAAATTTTTCCCGCGTGGGAGGGAAACCGAGGTAATC  
CACCTTTCTAAACCTACTCCTGAATAAATGCCAGCTCATTACAAAGTTGACTATGTGTAGATCATGATTACATTCCCTAAATTAGGTAAGCTAATACTTTTTTCTCCTTGAGGGGTACAGAT  
AAATTACTTCAGTCTTTTTAGGGGATGTTATTGGTTCAGTCCCATAACAACAAAAAAGGGAAATTTACAACAGTAACCAAATTAGGCAATCCACAAGCAAACATAAATAAATAACA  
GAAATTTCAACATTTTCAAGGTCATTGACCTCACTGCAATATGAAATATGAGGCATTGTGGAGCATTACTTACATTAACATGGCTTCCAGAGATGCTATAGGCAACTTCTTCTCAAGGGAA  
TGATGAAATAAGGCATGATATGCCTTCCCTTGCCCCATAAAGCTCGGCTGCTGATCGAGTGCAAGCAATTTCAACAAGAATTGTAGGGGAATGACCTTTGTGGATTACTTGGTGAGCCCAAC  
GAGCATCCCTTTCCCATGGATGCATTGCCATTGAAAAGTCAAGTTCTTAAACCTCGCATATTCGAACTCGAGAAAATGAATGTAATCAAGGTCTACTCGTGCAAAGCTTCCATTATCAGC  
CTTAAATAGACCACCAAAGTTTTTTCTGAACTGGGCCAGTGTCTTGGCCGGCGGCCATCTCCCCATTGCCGCCACCACAGACTTCTCTTCCACTCCAAGCCCTCCAATCCTGCGAG  
GGCCTTGGTGAGTTCCTTGCAATCCTCAGCTAAGATATGAGCCATGGTTGGTTTCTTCTCCTTTTCTTCTTCAACTCCGCAAATCG  
>comp163696\_c0\_seq28

AATTTTTATGAGTTGAAAAATAGATATTCTACCATTTATATAACTCAAACTCATTAATTTTCATAGCTGTGAACTTTCTTTCTTGAAGTCCTTCTACCACTCACACTCCAGTGCACCATAAC  
AATGACACATCAATAATCTCAGAAGCTCACATGAACCAAATTTTTATTTCTCACACAATGAAGCTTCTAATGACATTCCATTTGGAATATGCAAGCTTTTTATTACCTTCATATAAACCTTT  
TATATACTTTCCAATTTCCAAAATACAATGCAAAACCAAATCCAAAGAACAATAACAAGTTGCTAACAGTACATCTTAACATAACAAAGCCTTGATTTTGTCAATCCAGATGCAGAAGTA  
AAATGCAGTCTTCTTATTTCCCTTCAACGAAGGAGACTAAAGCATCCCTGTAAACACCATGAGTGAATTTTTTTAGAACATCTTCGAGTTTAGTTCATGTCTCTTCAGATACTCTTCTTG  
ATTTCTCTATATCAACATCAGACCTCGACAAAATCACTCGACTGAGAGCTTCTTTGAGTCATTATCTGCTCCATCTTTAAAGCCTTGTTTATCAACTTGCTGAAATATACAGGAGCTGAA  
TTGATGCTCTCAACTGTATCTATTATGTATGGCTCATCTCCAAGATCCTGCTCATTGCATGTAGAAATCAGTATATTTAAATTGTTCAAATTAACAATATGCAAAACAAATAAAAAATTTTGACT  
GCTTCAAGCAAAGTAGGGACTAATGTCATCCACATGTAAGATATCTTAAACTTAAGCGAGGAGAAAACAAGACACCTCTTCTATGGACTTCCAAAAGTTCCTTGTAGAATTTGAAGG

TTACTCTTAGTTGCGACTTGCTCCTCGTAGTAAGGATCCTCACTACATCCTCATTCACTATGAGGTTCTCTGGTGTTTTTTCTGAATGGCATTATGGAGAGCTTTGGCCTCTGATTTTGCTAT  
CTCCTCGTGACATGAGGGCCTTCATATCTGTAGGAGCTCACAAGCCTGACCAGAAAATTAACATGGCTTCCAGAGATGCTATAGGCAACTTCTTCTCAAGGGAATGATGAAATAAGGC  
ATGATATGCCTTCCTTGCCCTAAAAGCTCGGCTGCTGATCGAGTGCAAGCAATTTCAACAAGAATTGTAGGGGAATGACCTTTGTGGATTACTTGGTGAGCCCAACGAGCATCCCTTTCC  
CATGGATGCATTGCCATTGAAAAGTCAAGTTCTTAAACCTCGCATATTCGAACTCGAGAAAATGAATGTAATCAAGGTCTACTCGTGCAAAGCTTCCATTATCAGCCTTAAATAGACCAC  
CAAAGTTTTTTCTGAACTGGGCCAGTGTTCTGCGCCGGCGGCCATCTCCCCATTGCCGCCACCACAGACTTCTCTTCCACTCCAAGCCCTCCAATCCTGCGAGGGCCTTGGTGAGTT  
CCTTGCAATCCTCAGCTAAGATATGAGCCATGGTTGGTTTCTTCTCCTTTTCTTCTCAACTCCGCAAATCG

>comp163696\_c0\_seq4

CCTATCATTACCTTGCTGAAATATACAGGAGCTGAATTGATGCTCTCAACTGCATCTATTATGTATGGCTCATCTCCAAGATCCTGCTCATTGCATGTACAAATCATAATTAAGTGAAGCTCA  
AATTACAAATATGCAAAACAAATAAATTTTTGACCGCTTCAAGCAAACTAGGGACTAATGTCATCAACATGTAAGATATCTTAACTTAAGCGAGGAGAAAAACAAACACCTCTTCTAT  
GGACTTCCCAAACAGTTCCTTGTAAGATTGAATGTTACTCTTAGTTGCGACTTGCTCCTCGTAGTAAGGATCCTCACTACATCCTCATTCACTATGAGGTTCTCTGGTGTTTTTTCTGAAT  
GGCATTATGGAGAGCTTTGGCCTCTGATTTTGCTATCTCCTCGTGACATGAGGGCCTTCATATCTGTAGGAGCTCACAAGCCTGACCAGAAAATTAACATGGCTTCCAGAGATGCTATAG  
GCAACTTCTTCTCAAGGGAATGATGAAATAAGGCATGATATGCCTTCTTGGCCCTAAAAGCTCGGCTGCTGATCGAGTGCAAGCAATTTCAACAAGAATTGTAGGGGAATGACCTTTG  
TGGATTACTTGGTGAGCCCAACGAGCATCCCTTTCCCATGGATGCATTGCCATTGAAAAGTCAAGTTCTGTAAAGAGGTGCTTAAATAAGCACTTATAGAAATCTGAGTTCATGTAGTTT  
CTCAACATTTTGAACGTTAAAGAAGAACCTCCTCTCATGGGGGAATTATTGGGTTCCGACACCAGACACAGCTTACC GTTCCGGTATTTACAGTACCAAATAATACTGAGCTCGGTACTT  
CACAGTACCGACTTGGCACTGCTCAGTACCGAGTAGGGGGTGATG

>comp163696\_c0\_seq7

AATTTTTATGAGTTGAAAATAGATATTCTACCAATTTATATAACTCAAACCTCATTAAATTCATAGCTGTGAACCTTTCTTTCTGAAGTCCTTCTACCACTCACACTCCAGTGCACCATAAC  
AATGACACATCAATAATCTCAGAAGCTCACATGAACCAAATTTTTATTTCTCACACAATGAAGCTTCTAATGACATTCCATTTGGAATATGCAAGCTTTTTATTACCTTCATATAAACCTTT  
TATATACTTTCCAATTTCCAAAATACAATGCAAAACACCAAATCCAAAGAACAATAACAAGTTGCTAACAGTACATCTTAACATAACAAAGCCTTGATTTTGTCAATCCCAGATGCAGAAGTA  
AAATGCAGTCTTCTTATTTCCCTTCAACGAAGGAGACTAAAGCATCCCTGTAAACACCATGAGTGAATTTTTTAGAACATCTTCGAGTTTAGTCCATGTCTCTTCAGATACTCTTCTTG  
ATTTCTCTATATCAACATCAGACCTCGACAAAATCACTCGACTGAGAGCTTCTTTGAGTCATTATCTGCTCCATCTTTAAAGCCTTGTTTATCAACTTGCTGAAATATACAGGAGCTGAA  
TTGATGCTCTCAACTGTATCTATTATGTATGGCTCATCTCCAAGATCCTTCTATGGACTTCCCAAACAGTTCCTTGTAAGATTGAAATGTTACTCTTAGTTGCGACTTGCTCCTCGTAGTAA  
GGATCCTCACTACATCCTCATTCACTATGAGGTTCTCTGGTGTTTTTTCTGAATGGCATTATGGAGAGCTTTGGCCTCTGATTTTGCTATCTCCTCGTGACATGAGGGCCTTCATATCTGTA  
GGAGCTCACAAGCCTGACCAGAAAATTAACATGGCTTCCAGAGATGCTATAGGCAACTTCTTCTCAAGGGAATGATGAAATAAGGCATGATATGCCTTCTTGGCCCTAAAAGCTCGGC  
TGCTGATCGAGTGCAAGCAATTTCAACAAGAATTGTAGGGGAATGACCTTTGTGGATTACTTGGTGAGCCCAACGAGCATCCCTTTCCCATGGATGCATTGCCATTGAAAAGTCAAGTT  
CTTAAACCTCGCATATTCGAACTCGAGAAAATGAATGTAATCAAGGTCTACTCGTGCAAAGCTTCCATTATCAGCCTTAAATAGACCACCAAAGTTTTTTCTGAACTGGGCCAGTGTTTCT  
GGCCGGCGGCCATCTCCCCATTGCCGCCACCACAGACTTCTCTTCCACTCCAAGCCCTCCAATCCTGCGAGGGCCTTGGTGAGTTCCTTGCAATCCTCAGCTAAGATATGAGCCATGG  
TTGGTTTCTTCTCCTTTTCTTCTTCAACTCCGCAAATCG

>comp163702\_c1\_seq7

CACGCTCTGTAGCGTGGTGGGGGCAACCTTAAGTACCACGTTCCGACATCGCCGACAGAGTCTCGACCTCGACATATGCACCGCCGATATTGCTACGTAAGGTATAAAAATCCAAATCC  
CATTTTTAGTGTTTGGCGCGGACCGGAGAACCCTTATACACGCTCTCGTAGCACGGTAGAAGGGACCTCGGTGCGAGGCATAACAACGAGATGGGTAAGCCCTATACACGCTCTTGTAGC



GTGGTGGGGAAAAGCCACTCGTGTTTTTCATATCTATACTTTGGAGCCCCAATACACTCTCTTGTAACGTGGTGGGATGAAAAGATGTACGGCCCCGGTGT

>comp163727\_c0\_seq2

TCTTTTTGCTTGTATATTGTTCTAATACCATTTGTCATAGCATTGATGCTTATCCATTGAAGTTTTATCCATTTTGGTCTATACAACCTCATGATTTTGTTCCTAGGACGATCATCTATCCTAGGA  
TTGATCTAGCATGAGCATAACATTACCTTAGAATCTTATGAAATCACCAACCATTACATCAAAGGCACTTGAAGGGTTAAAAGTCAATTCAACTATTCTTAATAGAGAGGTTCAAACCTCTC  
AACCTCAAGATTTTACTTAGCTTTGAGATTTGCTCACTCTCGCTAACCAATTGCTTCATTACTGATAGGAATCTGATCTCCACAGCCAAAAACAATAACGAAGAGATAACACAACAAA  
AATCAGCAAGAAAGAATGAGATTATGGACTAATTTAATGATATCGACACAATAAACCAAGATTATTACTCCATTTGGTCAAATTCGAGAAATCTAATGCAGAAAAATACCATGCTGCCTT  
TTCTGGATCATATCAAATTAATTTAAATTCATGAGAAATTTTTTCAGGCTGAATATGTTCTTATATGACGGTCTCTGATTTTTAACAGGCCTTGGAGGCGCTTAATCAGCAGGAAGAGAC  
TAAGAAGTTATGCTTGAGGAGGACACAAACAGGTCCCTGGTAGAAGTAAC

>comp163731\_c2\_seq11

AAAGATGTCGGCGCCGGCTCCGGCCAGACGGTCAAATTCGCACGCCGTACATCCAGCGGCCGTACATTAGCCTCTCTCGTGACGATATCGAACTTTCCGGCGACCTCTCCGGCGATTAC  
ATGAACTACAGTGTTACATTCGCCAACTCCCGATAACCAGCCCATGGATGAGCCCGTGGAGGCGCAGTCCGTCGCCGTGAAAGCAGAGGAGCAATACGTGTCTAACTCGCTTTTCAC  
CGGTGGATTTAATAGCGAGACAAGGGCCACCTCATGGACAAGGTGATCGACTCTGTGGTTACCCACCCTCAAATGGCTGGCTCCAAAGGATCCTCCCCATGCGCCATGCCACATGCGA  
CGGCAAGCTCATTACGGACGAACGCGGCAACGATATTGACCCATGCGATTGCCACTTCAAATTTGCCGCGATTGCTACCTCGACGCTCGAAAGGACACCGGGAATTGCCCTGGCTGCA  
AAGAACCCTACTCCGCCACCGGTGACAATGACGATGAAGCCCCTGTCGACTTCCCCGCCTCTTCCACGGCCCCTGCCGCACCGGCATTACCATCTCCAACGTCAAAGCCCAGCCACCAC  
AGCTTCTTAGAGCCAACCAAATCATTGTTGGCGCGCGGCCAAGCAGGGCCTCTGACTTTGACCATAACAGATGGCTTTTTGAGACGCAGGGGACATACGGGTACGGAAATGCATTCTG  
GCCAAAAGGCGGTGGCAATGGCGGCGGAGGCTATGATGAGGATGGGGAGGATGATGATGATGAAAAGGAAATGGGCGATGGGATGCCGGAGATGTCGGAGAAGCCATGGAAGCCGTTG  
ACGAGGGTTGTTCCGATGCCGACGGGGATTATCAGCCGTATAGTTGTTGATGCTGGTGAGATTCTGGCTTTGTTTTTCTTCTTGGGGTGGAGGATACAGCATCAAATGAGGAGGCAC  
TTTGGCTGTGGGGCATGTCGGTGGTATGCGAGGTTTGGTTTGTCTTCTCATGGATTTTGGATCAGGTTCTAAATTCATCCGATTAATCGCGTCACGGATCTAAAGGTAATAAAGAAAA  
GTTTCGAGACGCCATCGCCGGCTAATCCCACCGGTCGCTCCGACCTCCCTGCCACCGACTTTTTTCGTCTCAACCGCCGATCCCGACAAAGAGCCACCGCTCGTCACCGCCAACACCATCCT  
CTCCATCCTAGCCGTGGACTACCCGATCGAAAAGATCGCCTGTACATCTCCGACGACGGAGGCGCTCTCCTCACCTTCAAGACTATGGCTGAGGCGGCGAGCTTACGAACATATGGGT  
ATCGTTCTGCCGAAACACAACAACAACAGAGAAATCCGGATAACAAAGAATCTGAGTTGTTTTTCTTTTTTTTTTTAATGAATCCCTGCCAACAACGCTATGTCTAGATTTATCGAA  
CGATAAATTTCTTCTTCAATCTCTTAATTCATAGTATAAATATGTTCTCCAACAATGGAATTTTGATTTGCAAAGGCTATCTCTCCGTCATATCTTCTGGTAAGTATGATTAGTGTTCG

>comp163769\_c0\_seq4

CTTTAGGAGTTCTATTTGAAAATAATAAATAAGTTGGGCTATATAAAGGACGGCTTCAAGCCTTGCAAAGCATAAACACAGTTAGTTTGTATCTCATTAGATTGAGGTGGGAGGAGGA  
AGTGGCTTTACGATAAGCTCCCAAACAGCCAACCATGGCTGATCAAGGCCAGGTGAGGCTGTTGCCATGCCTATTACTGGCATTGGTGGTTAGCTTGACCGCCATGACTGTAGAGGCAGA  
CTCTAATAAATATATCTACTCATCTCCGCCGCCACCATATCACTATAAATCTCCTCCACCGCCATCTCCCTCTCCGCCTCTCCCA

>comp163822\_c2\_seq9

AAAGGAGTCAAACCTAGAAGCTAAACCATTTCAAATTCATATTTAGTTTCTTACATAAAACATAGAATTATCAACAGCATATGGAACGCAAATTATAACTAAGAGACAAAGAAATGCCAGC  
GTATATATTTCCCTTATCAACTGATTAATGCGCTGTCTTATTGGTTAAGATCATGTTCTATAGAATCATAGTTTCCAAAACATAAACGTACGTAAGGCTTGAGCAGCGGTCTTTTTCTCTACC  
TGGTTCTGCCCGAAGAACTTAACCACGCGCTGAAGCCCCGAGCGACTTCCGATCTACAAGCGGAGAAGAAGGCGAAGGAGTAGTAGAAGAAGGCGAAGATTCTTCTTTCATGGGAA  
GCCCTAGAGACTTCCGATCTGACATGAGAAGAAGAAGCCGAAGAAGCTCCCAAATAAATTGAAGGAGAGGAATTCGAAAAGGCGTAAAATCAGACGGTGCGGATTAAACAAAAACAA

CGACAAGATCGCTTATGGCAGAAACAAAACACAACATATAAAATTTTCGGCGGAATTCAGCTTAAATTTTCGGCGGGCGGGTTTTGGACGGAATTTAAATGTTGATGAAAATAAATAATT  
TTAAAAGTAATATTATTAATAATTTATTTTATAGATAACGTTGTTAAATAAATAATTTTAACATTGTTAAATTA

>comp163885\_c0\_seq2

AATTGAAATCGTGAAGAAGAGCAAAAACCTGAAAATTAGAAGAGAAGCGAGCAGTTAGGAAAGGAGCAAGCGATGAGCAGCGGCCGATCCGTCGACGACAAAATCTCCAAAGAACTC  
AAATCGCTTTTCGCTCCGTGGCCCCGCCGGAGGCAGCGGCAGAGGGCGGAGGGATTTTGCTGGATGAGGAGGATGTGGCAATCCGGTTTGCTAACGTGAGGAAGAAGGGCTTCAAGCTCT  
GGGAGAGGGTGAAAGGACGAATGATCAACATACTGGACGGTCTAGAACTCCACACCGGCGTATTCTCTGCCGCCGAGCAGCAGAGGATCGTCGATTGCGTCTATGATTTCCAGGAAAAG  
GGCGTAAGGGGAAGCTTAGAGAGCGCACATATTTAGAGCCTAGAAAAGTGGATGCGAGGTAAAGGACGTGTCACGATAACAATTTGGTTGTTGTTACAATTATGCATTGGACAGGAATGGG  
AATCCCCCTGGCATAATCCGTGATGAGGTAGTCGATCCTATCCCACCATTTGAAAACAAATGATCAAGAGAATGGTTGCTTGGCATGTTCTCCCACCATCATGCATCCCCAACAGCTGCAT  
TGTC AACATTTATGACAAGGATGTCTGCATTTCTCCTCACATTGATCACCATGATTTTGTTCGGCCATTTGCACTGTCTCTTTCTTGAGTGAATGCAATATCGTTTTTGAACGCAATTCAA  
GACAAATGGACCAGGAGATTTCTCAGG

>comp163926\_c0\_seq3

GCAAAATACAAAACCACAAACATAAGTAGGATTAGGATTACCTACCATGTATAGAACATTTTTTCAAACATAAATGATAGAAAATTTGTTCTTTAATTTCTACAATTTAACAGTATCAATAA  
TATAAATAAAAACCTCAAAAATAAAGATAAAGAAGCAATCCTCCATCAAAATGAATCAATGTTGAACCGACACAATGGACATAAGCCAGATATTTGGAACCCACTACTAATAAATAAGAT  
GAAATCTGTGAATGCAACAAGGCGTGCAAGCCACTTCTCCCCACCTCATCTCATGCAACAAATAGAGCAAGCATCATTCTCCTTCTCCGCCATTGCCACATTCTTATAAACATTCTTC  
GCCAACAAATTCATCCTTCTATCGCGAAGCAACTCCGGATCCACATCATCTAATTTCTCAATATAAACATACTCTCCTCCTCTATATTGATCTCGACTAGGACAACCACTTGCAACATCTTC  
AACCTTCAGCTCCAGCACAAATCGCACACCAACCTAGTGATGGTGCTTGAGATCCTGTCTCTTAATATTTAGCATCCTCTTGATCAACCAATGTATCCAATGGAATAGGCTCCTTCTCTTC  
GATCAAGTCTTAAGAGATGATGGATTGCAGTCGAGAATTTATGCCTTGACCTTGCAACAATATCATCATCGCCATTCTCTCCCCGTTGATATTGTAGACGAGGCTGAGGAGGAGATATG  
GTTCTCCAGCATTATCGTCAATGTCAGAAATGTTAAAATTTCTATTGTAGAAGATATGGATGTTGTCGTTGATATGGATTATTGAAACCATTGCTATAAATATGTTATATGTTAAAGAACTCCT  
CGATCTGGTTTTGATTGTACCA

>comp163937\_c0\_seq3

GAAACGGTCTAATGATCTCCCTTCTCTTTGGTTATGGGATAAAAAGTGGCATTGTTATCAAAACAAACAGCGTATTGGATGATAAATGATATTCAAAACCCTTTTGGCGCAGGATTGTCTTCAT  
TCTCTATATTTGCATTTAATGTGGAGGAGGAGAAAGGACAAATCATAACCAAGCCTAATACTACATTCATAACCTCCAACAATCGTTGTGAGTGGAAGATGATTCCTTATGAGGAGTGGTTG  
TGTTTGGTGACATAAGTGGAAATAATATCAATGTTTGGATGCTGATGGTGACAACATGTGATGAGAATATCAACAATGGAAGTGGAAAGGGGTCATACTCTGCAGAATATATTAATAATC  
GTAATTTGCTTTTGGAGATGGCATTCCAATGAGAAAAGTTGTGTTTTTGGAAACACTTTATAGAGAATTATGGTTTTATCTTCACGAACGAGTATTGGGAGCAAAATATATGATCCTCTG  
ACATTAATTTCAAGATGTATATGGACGGAAATTTTAAACGCTACTTA

>comp163961\_c0\_seq3

TAATTTTCAAATAATTTTCTGTTTAGCAAATCGTTTAAATAGATAGAGCGAAATGTCAGAAAAGCAAAGCAATTGCTGAAATAATCTGAATCAACAATCCAATATCAGATTCTTAGATAAA  
AATCGATATTTCTTTTGACAAATTTATGATTTTTATACCTTTAGCAGAACAACCTGAAGAACAGATGTCCAGATTTTTGACTCTCCGGCGAGCTCGACTCACGGACGACCTCCGCCTGCA  
AATCACAGGCAGCGGCTTCATTCGTTTCCAATGTGAAACTCAGCTTAGCCCTCGGCTCGTACACATTGTTTCCAACATCTTCCATAGAAATGGGAAGCCAATCTGATATCATGCAAGAATA  
ACAGCAGCTTATCGCGTAGGAAAAATCGCTGGCATAAACTGTAACAGAAAGGCACCGATCCCTCCTCCATTTTGGCTTCTTCTCTATGACAGCCTCATCGCTCTCCCTTGCCCGCTTC  
CTGGACTCCCCCTCGCCGGAGCTCAACCCAGAGAAAAGCTCTAGCCTGACATCCACACCATCATCTTCCACCACCGGTGGCGATTCCATCGACGTGGGGCCGGCGCACTCCTCTCTAAT

AGTCCCATCAAATCCAACCTCCATTCTGTGCGATCTCTCTCCCTACCAAATCAAAAACCAGTTTTTTTTTCTCTGATACTTAAACGATGGACGGAAAAAATCTTCTTTTATGTGGCGCCACCTCT  
CCTCAGAACCCTCAAGACGTGGTAGGATTATATTAATATTAAGCTGCATATTTATAAATAGCACCCATGATCTCCCGCGGACAGCTCATTGGTAGAGGCCAAGAAATCTTCCCCTCATAT  
CGAATCACCTAACATTTCCAAAAAATAAATCTTAAACGGTGGGTGTTACTTCACTCTGTGAGCTAATCCCCAAAAAGGATCTAAAGCTGGAATGGCAATATCTTGGCTAGGATATA  
TGAAGAGGTCCGAGTCCAAATGTCCAATGTATTTGCGCTTTCCATGTAACTTTTTTTTTTCTTTTTTGTATTTTAGCTTATAAATTTACTATATTTGCATTCAATGTTGCCATCACTGATTGCA  
AGAATTTGAAGGCCAGAAACCGAACCCAGAAGCGTTGACAGTGGTGCTTGAACCTTTATATCAGAAGAATCAAAGGATTATCTTATTATCTAGTTAACTAATAGATTATAGAATATCTTGTT  
ATAAGTTCGGTAAGTTCGATCTTTATTAACCTTTATAT

>comp163961\_c0\_seq6

GAATGCACCACATCACGTAGTACACAACGGTACCGAGCACCAAGCAAAAAAATAACGTGGCGCGTTTTGATTGTTCTCCAAACCGTCCAATGTCAGCACATAAATTTGTTAATTAATA  
GCCAAAACCTTTTACGAAAATCACTCTCGCCCTCAAATAAAATGGCCAAATGCTCATCGGTGCTATGTTAGGGGCTTCGAATGTGAGCCATCGACAAAATTAGTGCTATTTAAAATTATGCA  
GCTTAATAATAACATAACCTACCTCGTGTGACAGCTCTGAGGAGAGGTGGCGCCATATAAAGAAGATCTTTCCGTCTATCATTTAAGCATTAGCGCAAAAAAATGGTTTTTGATTG  
GTAGGGAGAGCGATCGACAGATGGAGTTGGATTTGATGGGACTATTAGAGAGGAGTGCGCCGGCCCGGACGTGATGGAATCGCCACCGGTGGTGGAAAGATGATGGTGTGGATGTCAGG  
CTAGAGCTTTCTCTGGGGTTGAGCTCCGGCGAAGGGGAGTCCAGGAAGCGGGCAAGGGAGAGCGATGAGGCTGTCATAGAGAAGAAGCCAAAAATGGAGGAGGGATCGGTGCCTTCT  
GTTTTACAGTTTATGCCAGCGATTTTCCCTACGCCGATAAGCTGCTGTTATTCTTGCATGATATCAGATTGGCTTCCCATTTCTATGGAAGATGTTGGAAACAATGTGTACGAGCCGAGGGCT  
AAGCTGAGTTTACATTGGAACGAATGAAGCCGCTGCCTGTGATTTGCAGGCGGAGGTGCTCCGTGAGTCGAGCTCGCCGGAGAGTCAAAAAATCTGGGACATCTGTTCTTCAGTTGTT  
CTGCTAAAGGTATAAAAAATCATAAATTTGTCAAAGGAAATATCGATTTTATCTAAGAATCTGATATTGGATTGTTGATTGAGAATTTTTCAGCAATTGCTTTGCTTTCTGACATTTTCGCTC  
TATCTATTTAAACGATTTGCTAAACAGAAAATTTTGTAAAATTAACCTAAGTGATTTCTTCTTAAGGTGGGCTTAGCAATGTTGTTAGAGTAATGATTCATTTGTGTTTTCAAGATATTA  
AAAAA

>comp163963\_c0\_seq1

GCAATATAAATACATAGTTTTTTTTTTAATTTATCTTGAATTATATATTAATCTGTTAAAATATATTGGAAAAGTAATTAATAATTAATAATAAATAGCTTTATGCGGCGCGGATGGGGGCGAA  
CAAGCTGTGCCCGCTGCTAGAGGCAAATCTCGTACGGGTCCCAGAAAGATTTCTGCGGCCACGTCAGCTGTCTCATTCTATGGTCTTTTTCGCGAGTCTCTCCAACATATTCTCCGAAGTC  
CATATTGACAACCTCAGCGAACGTTTGAGGCTAATGGCCTTGTGCTAATTTTTTTGTAGTTGAATGGCATACTTTGACTGCTATAACGTCTTCGTGCATTTAACCTCCGGTAAAAAATAAATA  
AACTAATAAAGAAGCCGCGGACGGGTGAAGAAATCCGGACAGCAGCGCTGTAAAATCTTTCTCTCTCCGCTAATTGTTGACGATTCTCGCTCTCTGCAACTACCCGCTCTCATAAGACAA  
GATCGAAGAGGAAGAAAAGGATGAGAGGACTGGAGGAATTTCTTCAATGGTAGGAAGAAGAGAAGAGTATCAGTTCGATATTGGATCTCTTCGACCTCTGCACCATTGGTGATAAATA  
ATACGTTGGCTGCTGCTTTCTAGAACGCTTACTTGATTTTGTAAATTAATGAAGACTAGAAGTTGGGTTATTTCTTTTCATTAGCTGTGAACATTTCTTTCTGAAATATACATTGGCATCCTCT  
AGAATCATGATACCAAATTCGGCAAATCTTTAACGATGAACTCGGATGAAATGACGGATTTCCACAAAATGAAAAATAATTTCTCGGGTGATGAGTTCTCCTGGCCTGATTTCCGACC  
TGGGAAGTATACAAAATGATGCTGATTAGGCGATTTGACATCTGTATCACGTCAAAGAATAAATAGTTGCCAATTTCTCCCACTTCATTTTTTGAAGGAGAAAACAACTGGAAAGTG  
GTGCTTTTCATGGGACGAAGACTCTTCTACTGCAGCTTAAAGATGGTTTATCTTCTGAAACTGAAGTCATTTATGTTGGGAGTCTGAAAGTTGATGTTGATGTTAGCGAGCAGGAAGAA  
ATTGCTCAAAAGCTTTTGGATGATTACAAGTGCCTCCCAACGTTCCCTTCCAATTGACCTTCAAAGAATTTCTATCATGGTTTCTGTAAGCAACAGTTGTGGCCACTTTTCCATTACATGCT  
TCCCATCTGTCTCAACAAGGGTGACCTCTTTGATCGGTCTCTTTTTCAAGCTTATGTTTCAGTCAATAGAATATTTGCTGACAAGGTGATGGAAGTGATTAATTCAGATGATGACTATGTATG  
GGTTCATGATTATCACCTAATGCTTCTTCCACATTTCTTGAGGAAGAGACTAAACCGAATCAAGCTTGGGTTCTTCTCCACACCCCGTTTCTTCTCAGAAAATTTATCGGACTCTACCTG  
TCAGAGATGACATTTAGAGGATTGCTTAATTCTGATCTAATTGGATTCCATACATTTGATTATGCCCGGCATTTCTTTTCATGCTGTAGTCGGATGCTAGGGCTGAACTATGAGTCTAAGC

GCGGTCACATTGGAATTGAGTATGGTGGTCGTACCGTTGGCATTAAAATTCTTCTGTTGGTGTTCACATTGGACGGCTTCAATCTCTATTAAGTCTTCTTCTACGATTGGCAAGATTCAA  
GAAATTGAGCAGAAGTTCAAGGGGCAAAAGTTGCTAGTAGGTGTAGATGATATGGACATCTTCAAAGGCATCAGCTTGAAGTTGCTGGCATTGAGTTGCTACTCGATAGGAATCCTGAT  
CTACGAGGAAAAGTGGTACTTGTTCAAATTGTAAATCTGGCAAGGAGCTCTGGTAATGATGTGAAGGATGCAAGAGCAGAAACAATGTCATTGGCAGAAAAGAATCAACCTTCGGTATGG  
CAACCAAATCTACAATCCTGTGGTACTTATTGATTACGCTATCCCCTTTCATGAAAAGATTGCTTTCTATGTTGCTGCTGAGTGTCTGCATTGTAAATGCCTTAAGGGATGGAATGAATTTGGT  
TCCATATGAATATGTAGTTTGTGCGACAAGGAAGTGGAGATGGATAAATTAAGAGATATTGGCAGAGGTTCTCCACGAACAGTACACTTATTGTTTCTGAATTTGTGGGATGTTCTCCAT  
CCTTGAGTGGAGCTTTCAGGGTAAACCTTGGAGCCTTGAGGATGTGGCTGATGCTTTGTATCAGGCCATTGACATGAACGAGTCTGAAAGACAGCTCCGGCATGAAAAGCATTACCGCT  
ATGTGAGCTCTCATCATGTGTCGATTGGGCGCGCAGCTTACACAGGATCTTGAGAGAGCATGCAAAGATCACTACAACCAAAGGTGCTGGGGTGTGGTCTTGGTTTAGGTTTCAGGG  
TTATTGCCCTTCTCCTGGTTTCAGGAACTATCTGTTGGCCATGTTGTCTCGTCCACCGCAGATCCAATAGGAGAGCAATCTTCTTAGATTATGATGGAACACTAATGCCAGAAACATCT  
ATAGTAAAAGATCCAAGCAGTGATATTATTTCTATGCTAAAGACTCTGTGCAGTGACCCTAGAAATAATGTGTTTATTGTTAGTGGAAGAGGGCGGGCTCCTCTTGCCAACTGGTTTTTCATC  
ATGTGAAGCACTTGGAAATGCTGCTGAACATGGCTATTTTCATCAGGTGGAATGCGTCTTCTAATTGGGAATCTAGTCCAGTTGTGGTTCGATCCAGATTGGATGAACATAGCAGAACCTGTC  
ATGACTTTGTATACAGAGGCAACTGATGGATCCTACATAGAAGTGAAGGAGAGTGCTTTGGTCTGGCATCATCAATATGCTGATCCTGTCTTTGGCTCATGCCAAGCAAAGGAATTGTTGG  
ACCATCTTGAGAAATGTTCTTGCTAATGACCCGGTGGTTGTTAAACGTGGGAATCTTATTGTGGAAGTTAAACCTCAAGGAGTCGGTAAAGGACTGGTTGTGGAGAAGCTGCTTAAGACGC  
TTATAAATGATGGAAAACCACCAGATTTTTTGATGTGCATTTGGTGTGATCGATCTGACGAGGACATGTTTGAAAGCATTATTTCTACAGCCTCTAGTTCACTTTTTCTCTGTAGTTCTCTGAA  
GTGTTTGCCTGTACTGTTGGCCAGAAGCCAAGTAAAGCCAAGTATTTTGTCAATGATACCATGGAAGTGATCAACCTGCTGGAAGCCATTGCAGATTCTTCTTCTCAAAGAAGCAAGGAT  
TTAAAAAATTTGGTTTCGTTTGAAGGGTCAATGGAGTACAAGATCTGCCTATTGTTTCTGCATGAGAAGATTATTGGTTCTCTTGTACATTCATTACTCTTTTCTGTGGCTCATAGATTCTG  
TGACTCTGACTCTAACTATTGTGAAGGACAACCTGAAGAGATACAAATAGAAGCAGAGGATTAATTAACCTTTCGCTGACTCTACTATGCCTTTTGTAGTGGTTTTTTTTTTCTTTTTTTTTGT  
TTGTAAAGGTGACAGTATGATTGACATGATTGTTTCATTGACATTAAGGAATATTTAATAT

>comp163977\_c0\_seq10

AGTATCGATCCAAGGCAAGACAAATATAACCAGAAGTACAGATATTTGATCTTTACATACAGGAAATCACTTCATCATACTTTATGACTGAATCTTTTCTGAAAATCTGCCACAATTCTCAG  
ATGAGAAGGAAAAAATATTATGACCACTATATCTCTATTAGAACAGTACTATATGCGTTTACTGTTAAGCACTTGAATTTATGTATCCTTTAGAAGCAAGGAGGAGGAAATACGTGTCCTA  
TGGCTTTTGAATTTCAACGTTTCGTGCATGCGGTCAAGGGGACGGTAGGGGCGAGGCCTGGGCTGGGTGGAAGAGGCTTCAGGTTAATGTTCTCGAGTGTATGTGGTTCGCAAGGCACA  
AAGGAGCTGCAGACGAGGTTGATGGCGACATCAGTAGCTGAAGTTCCCCTTATGTTTTGGAACCTCACGTTGTGATCTTTACTCTGGAAGCTGGCTTTTCTTCATCGCAAGAATTGGGA  
CAATACTCCTGGTCAATAATAATCGGATTGCTAACCTCCTTCATCACAATATCCGAAAACAATATATTCGTAGCAGATATCCGAGGCGAATCTCTCCACGTCTTAATCCTCACCCCGTTCGTT  
GTTCCAGCAAGCGTGAATTCAGAACTCTTATTGCATTCCTCCCTTATCTTCACTGTTCTTTCCCAAGCTCCCAACACTGATGCCATGGCCGGGCCCACACCTGACTTTGCTGACCGTTAT  
GTTTGAACCTCCAGGTCCGATGGAGACACAGTCGTCACCGGAGGAGATTCTGGACTTTGAGATTCGGATATCGGATGAATATGCGATGTGGATTCCGTCGGTGTGGGGCTGTTCCGGG  
AGCGGTGATGTGAACGCCGAGGACGGTGACGTACTGCGATTGGCCTATAACCATGTGGAAGAACTTGGAGTCGACAAGAGTGATGGCACGAATCTTGGCGTTGATCACGTGAAGAACT  
TTAAAGTCGGTGAAGGCTATTTCCATGCTTATGCGGCCATATTGCACGACCCTGACCATCAAATGTGCCTAATCCAGTGACCAACAGGTTGCTCACATGCCGAAAGGCAATCCATTCCTT  
GTGCTTGAAGTCCCTAGATTAATCGGAGCCCGAACCCAGGCCCTCACCTGAACCACCATAGGACTCTTGCAGGGTCCCCTGAAGGACACTGGCCCTACCAAGAAGGTACCCTCCGGAA  
TCAGAACCCTACACCTAACCTAAAGCTACCATAACCATCCACAATCTGTTCCACAGGCTTCAATCCATGCCTTAGAAAAAGCTTGGGCTCCATCGCTTTTACCCTTAGGGGAGGCTCCGTA  
GCGAAGAACGTTAAATATTTGTCTGTAAAGACGACTCCATCACAATGTTGAGATGTGCTACTGCGCAGAGAAGGATGAACAGCAAACCTGCATGATTTTCATGGTTTCACTGTTGCTGCT  
GTTCTTGCCTTGTCTCTTCTCCCTTTGATCTCTCCCTTTTTAATTTTTTTTTTATTTTTTTTTTCTTTTTTTTTTTCAGCAACCAGGGCTTAATGTTCTCACAGAAGTTATAATGGATACATA

TATCCTGGAAGGCCACTTGCTAACGTTGCATTCAAGACATATGGCTATATTAGCATGACTCAAGCAATCACCTTCCTTGCAGATTTCAAGCTAGGCCATTACATGAAGATTCCACCAAAGTC  
CATGTTTTTGGTTTCAGGTAATGCATAGATCTGTATTTTATTGTACAAGATCTGTAAATCTCTCTATTTATAGGATTTAAAAGATGTAAGAATTTCTCCCTCACATAATCTTAAATTTTAAAA  
TAAATAATCAAATAATTTATCTGACTTTTCAGAAAATTTTATGGTTGTCATACAAAAATAAATTTTCAGATTTTGAACCTCTCTCAAAAATTTACTAAACCTGATTTTACAGATTTTACTAATCCCAT  
TGAGTTAAATACTAATCGTAGCCAAACGGCCCAAAGCCATCAAAATCAGAATTTTCACGATGAGAACAAAATCAAAATCAAAATCGAAACCGAGTAAAAAACTTGATTGCATGTTTGC  
AGAATAACATCATCATCAGGGAAAGTAATCATAAATTACCTCTGTGGATTTTCAGCTGGTAGGCACCATCGTGGCCTCCTCCGTCTACTTCGGCACCAGCCTGGTGGCTTCTTGAAACAATC  
GAAAACATCTGCGACCCATCAAAGCTCCCCGAAGGCAGCCCCTGGACTTGCCCCGGCGATACCGTCTTCTTCAACGCTTCCATCATCTGGGGCGTCGTCGCCCCCTCGCCGCATGTTCCGGC  
AATCTCGGCCTCTACACCAAATGAACTACTTCTTCTCATCGGCATCATTGCCCCCTTCCCATCTGGCTCCTCTACCGCTTATACCCCAACAAGAAATGGCTCAGGCTCATCAACATGCC  
CATCATCCTCGGGCCACAAGCGCAATGCCGCCGGCCAGGGCGGTTAATTACATCATGTGGGGGACGGTGGGAATCTTCTTTCAGCTTTGTGGTTTACAGGAGGTATAAAGGGTGGTGGGC  
GAGGCATAACTATGTTTTATCGGCGGGATTGGATGCTGGAGTGGCGTTCATGGCGACTCTGACTTATTTTTCTCTGCAAATTAAGAATATTGATGGGGTGAATTGGTGGGGGTTGCCGTTGA  
ACGATCATTGCCCTTTGGCGAGTTGTCCGACCGCTCCGGGGGTGAAGGTTCCGAATGTCTGTGCATTAGGATTAAGGCATTCGTCGAACAGTTGGCGGGCGAGTATACAGGAATGTG  
TTTACACCAGTTCATTGTGTTTTATTTTTGTTGCTCTTGATTTTGAATATATTGACACACTCGAATGCTGAAAGTCCGTAATTTTTTTTTGCAATGATGTTTTTGGAGGATTTACATAAATACC  
ACTTTATTTTATGCTATTTACAAGTTTAACTTAAACATTAATATTACATGCGTATCACCCATATACAATTTTAATATCAAATATATCACTCCT

>comp163977\_c0\_seq7

AATAATAATGAAATATTTAAAATTGAAAGAGAGTGATATAAGATGTTTTGCTTGTAATTAATCTCTATAAATAAAAATAAATGTGAATTCAATATATATCATTTACGGTGATTTTCAGTGAAGAGA  
ACGAGCACCCGATTGAAGAAGTTTCGGCTTACAGTCGACCCCGCCGACAACCCTAACCTCCCAGTCCCTGACCTTCCGAACATGGCTTCTCGGATCAATCTCCTGCGTAATGCTCGCTTTTG  
CCAACAAATCTTCGGCTACAGAACGAATCAGCTTACCATTGGTCCAGTCTGCGTTCAAATCGTCTCGCTGCCATTGGCAGATTCCTCGCGGCTTCTTTGCCGAAGAAGAACATCAAGG  
TTCCTTTACCAAATGGACTTTCTCCCTCAATCCTGGGCCATTCAATATGAAGGAGCATTGTCTCATCACCATTTTTGCCAACTCTGGTGCCGGCGGCTCTATTCCATACACATTGTCACCA  
TTGTTAGGGCTTTCTATCGCAGAAATATCAATCCTGTGTGCTTCTTGTGTCACAAACCACTCAGGTGCTAGGTTATGGTTGGGCTGGAATTTTCAGAAAAGTATCTGGTGAATCTCCA  
TATATGTGGTGGCCTGCAAATCTTGTTCAAGTTTCCCTCTTCAAGTAGTGAATCTTCATCATTAAGTTAATTCAATTTTCATAATCCTCTTGCTTTTATGCTAAAATAAATAATCAAATCTTTTT  
CTTTTGTTTTTTTAAGAACACTGCATCAAAAAGAGAAGAGAAGAAAGGGCAGCCTGACAAAATTTCAATCTTCGTAGTAATCTTTGTATTTCAGCTTTGCATACTATGCCATTTCCCGGCTAT  
CTCTTCCCAGCCATCTCCACAGTCTCTGTCTCTGCTTGATTTAAGGAGTCGATCACCATGCAACAAATTGGATCAGGGATGAAAGGGCTTGGCATTGGCTCCTTCGGTCTTGATTGGT  
CAACAGTTGCTGGTTTTCTTGGTAGCCCATTTGGGAACACCTGCAAGTGCAATCTTTAACATAATGGTAGGCTACTTCATTGCCATCTATATAATGCTTCCATTTGCCTATTGGACCAACATAT  
ACAGGGCAAAGAATTTCCAATGATCTCGTCCCATGTCTTCGACTCTTCTGCGCAACCGTACAACACGACACGAATTATTAATAGCAAGACTTTACCTTGAATGTTGAAGAACAGGAGA  
GTTACAGCAAGATAAACATGAGTATTATGTTTGCTTTGACATATGGCTTAGGATTTGCAACCTTGACATCATCGGTTCATGCATGTTGCTCTCCACAATGGAAAGGATATTTGGCAGTCATGG  
AGACAAGCCAGAGATTCTCTAAGGAGAAGAAATTAGATGTTTCATGCTAGATTGATGAAGAATTATGATGCTATACCTCAATGGTGGTTCATGTTCTCTTGATTTTGGATGATTCTACTCTCA  
ATTTTCACTTGTGTGGGATTTGGTGGAGCTTTGCAACTTCCATGGTGGGGAAATATTATTGGGTTGTGCTATGGCTTTCTTCTTACATTACCTATTGGAGTCATTACAGCAACTACAAACCAG  
TCACCAGGGCTCAATATCATCACAGAGTACATCATTGGTCTAATTCTACCTGGAAAGCCCTAGCAAATGTGACATTCAAGACATATGGCTATATTAGCATGACTCAAGCACTCACATTTCT  
CAGTGATTTCAACCTTGGACACTATATGAAGATTCCCCCAGATCTATGTTTCATCTCACAGTTGACAGGGACCGTGATCGCAGCGACGGTCAACTTTGGAAGTGCATGGTTTCTTTTAGAT  
TCAGTTGAGAACATATGTGACACTGATAAACTACCAGCTGACAGTCCATGGACATGCCAGGGGACGATGATTTCAATGCATCCATCATATGGGGACTTGTGGCCCTATGCCAATGTT  
CGGAAAACCTCGGTCTCTACTCTGCTTTGAACTACTTCTTCTTCTGCTGGATTCTTGCTACCCATTCCTTTCTGGTGGATTTCTAAGGTCTTCCCTAACTGCAAATGGCTCAAATACATCCATTT  
ACCTCTCATTATTGGAGGTGCTGGTGGTATCCCTCCTGCACACACAGTGAACATATCACCTGGGGTGTGTTGGCATCTTCTTCAACTACTACATTTACAACAAATATAAGGAATGGTGGG

CAAGGCACACCTACGTAATGTCGGCCGCCCTCGATGCCGGAGTCGCTTTCATGGGAGTTCTCATCTTCTTTGCCTTACAATACAATGATATTGGTGGAATTAGTTGGGTGGGAGGCGATGC  
AAGTGACTTCTGTCCCCCTTGCAAATTGCCCTACAGCTCCTGGAGTGGTCGCCAAAGGATGCCAGTGATAGCCTGAGATATGATTACTATGTTTCATTAAGCACTTACTAGTTGGTGATAAG  
CTTGCATGACTTGTGTTCTAGTACTCCCAAGTCATTGTACATATAATCGTTCATTTTTTATTTTTTCTTTGTTTCTGAAAACCTATATTCAAGCCAATGTTCTTTGTATGTTCTGTGGAATTT  
GTTATTTATAGCATTGAAGTCTATGTGAATATATTCTACGTATGTATGGTCTCTATAGTTTCTCATTAGAGTCCAACATTCCTTAGCTATTTATGATCATGATATAACAATTTGGATGCC

>comp163984\_c1\_seq2

TTGCTAAGAGCCTAAGAAGAGAAGAAAATAGAGAGCTTATATTCTTATTGAAGGAATGGCTTCCATTCTTCCATTAGATTGCTTCATTTTCTTCTTCTTCTTCTTAGCTACTTCTCCATCGC  
CATTAACATCAGAGACTATGGGGCGGTTCCCTGATGGCTCAAAGGACAGCACCAAGAATATGGTATTCAGTTTTGTGAGCAATGCAAACATAAGCCGCATATCATCAATTAACAGCAAATAC  
TTTCACATGCTCGTTTTTCGGCAGCAACAACATAACATTGCACTCCATAACTATCTCTGCCCTGGCGACAGCCCCAACACCGACGGCATCCACATTGCCGTCTCCAGAACATTATCGTTC  
AAAACTCGGTTATTGGCACCGGCGATGATTGTGTTCCGTTGGTGATAAGACTCATAATCTCACCATCTCGGGGGTCCGATGTGGGCCGGGCCATGGTATTAGCGTCGGCAGTCTTGAAG  
GAACCGCAATGAAGAAGATGTTGTTGGGCTCACTATAAGAAATTGTAGCTTTATAGACACTCAAATGGGGTGAGGATTAAGACATGGCAGAATGGATTGAACAAAACCTTCATGTTAGAGA  
TCTTGTGTTTGAAGATATTATGATGGAGGATGTGGAGAATCCTATTGTTATTGACCAGAAGTATTGCCCTTCAAGGACTTGTCTGACAATTTGAGGCCGTGAGTGTGAAGATAAGAAAT  
GTGAAGTTCAACAATATTGTGGGCACATCGACGAGCCAAACGGCGATCAACTTGGTGTGTAGTGCATCCAATCCTTGCAGGGGGTTGAGCTGAACCACATTGATCTCGAGTTCAATGGT  
GTTGGTGAGGCCAAAGCTACTTGTATCAACGTGAAGGCACCTAAGGTCATCGGCCTCGTCAAACCGGATAATTGTGCTTAGTTAATTATTGTTGCAACATTTCTATATTTGCATGCTGTGAA  
GTGTGAGAGAGAACTTTTGCATTGTCTCTATTTTTATGTATTATCCATTATATGTATGCTTATTGTGCCAAATAATATTAAGAAGAAGAGGATTGTTCAAAAAAGAAAAAA

>comp163984\_c3\_seq2

AAAAAAAAAAAAACACATAAATTTGAACAATCCTCTTCTTCTTAATATTATTTGGCACAATAAGCATAACATATAATGGGATAATACATAAAAATAGAGACAATGCAAAGTTCTCTCTCAC  
ACTTCACAGCATGCAAATATAGAAATGTTGCAACAATAATTAACCTAAGCACAATTATCCGGTTTGACGAGGCCGATGACCTTAGGTGCCTTCACGTTGATACAAGTAGCTTTGGCCTCAC  
AACACCATTGAACTCGAGATCTATGTGATTAGCTCAACCCCTCGCAAGGATTGGATGCACTACACACCAAGTTGATCGCCGTTTGGCTCGTATGTGCCACAAATATTGTTGAACTTC  
ACATTTCTTATCTTCACACTCGACGGCCTCAACATAGGAAAAGCCTGCAAAGAGATTTGTGATTCTGGCGGCACCTGTTCTTCGTCCAGGCATCAGCACCCCTGACCATCGACCTTACCTG  
GGCCGAAGAGAATGAGCCCATGATATACTGAAATTCATCCAGTTGGGCTTATACAAAGCTAGATTTTTCTTTGCAATCAAAGTTCCGATCAGGTGAATGGTTACCGGGCTCTTACATGG  
GCCCTGAACATTAACGGCCCAATTAAGTATCTTCCATTGGGATCTCAATACTTGCAATTGCTCTCAGCTGCGCATGCAATATCCAAGCCTTTTGTAGTGCCTTGGTGCTGTCCTTTGAGCC  
ATCAGGAACCGCCCATAGTCTCTGATGTTAATGGCGATGGAGGAAGTAGCTAAGAAGAAGAAGAAAGAAAATGAAGCAATCTAATGGAAGAATGGAAGCCATTCTTCAATAAGAATATA  
AGCTCTCTATTTTCTTCTTCTTAGGCTCTTAGCAAAG

>comp163984\_c3\_seq3

AAAAAAAAAAAAACACATAAATTTGAACAATCCTCTTCTTCTTAATATTATTTGGCACAATAAGCATAACATATAATGGGATAATACATAAAAATAGAGACAATGCAAAGTTCTCTCTCAC  
ACTTCACAGCATGCAAATATAGAAATGTTGCAACAATAATTAACCTAAGCACAATTATCCGGTTTGACGAGGCCGATGACCTTAGGTGCCTTCACGTTGATACAAGTAGCTTTGGCCTCAC  
AACACCATTGAACTCGAGATCTATGTGATTAGCTCAACCCCTCGCAAGGATTGGATGCACTACACACCAAGTTGATCGCCGTTTGGCTCGTATGTGCCACAAATATTGTTGAACTTC  
ACATTTCTTATCTTCACACTCGACGGCCTCAAATTGTCAGGACAAGTCTTGAAGGGCAATACTTCTGGTCAATAACAATAGGATTCTCCACATCCTCCATCATAATATCTTCAAACACAAG  
ATCTCTAACATGAAGTTTGTTCATCCATTCTGCCATGTCTTAATCCTCACCCATTCTGAGTGTCTCTAAAGCTGCAATTTCTTATAGTGAGCCCAACAACATCTTCTTATTGAGGTTCT  
TCCAAGACTGCCAATGCTAATACCATGGCCTGGCCACATCGAACTCCCGAGATGGTGAGATTATGAGTCTTATACCAACGGAAACACAATCATCGCCGGTGCCAATAACCGAGTTTTG  
AACGATAATGTTCTGGGAGACGGCAATGTGGATGCCGTCCGGTGTGGGGCTGTGCCAGGGGCAGAGATAGTTATGGAGTCGAATGTTATGTTGTTGCTGCCGAAAACGAGCATGTGAA

AGTATTTGCTGTAAATTGATGATATGCGGCTTATGTTTGCATTGCTCACAAAACATAATACCATATTCATAGGGAAAGGCCTGCAAAGAGATTTGTGATTCTGGCGGCACTTGTCTTCGTCC  
AGGCATCAGCACCCCTGACCATCGACCTTACCTGGGCCGAAGAGAATGAGCCCATTGATATACTGAAATTCAATCCAGTTGGGCTTATACAAAGCTAGATTTTTCTTTGCAATCAAAGTTCC  
GATCAGGTGAATGGTTACCGGGCTTTACATGGGCCCTGAACATTAACGGCCCAATTAAGTATCTTCCATTGGGATCTCAATACTTGCATTGCTCTCAGCTGCGCATGCATTATCCAAG  
CCTTTTGTAGTGCCTTGGTGTCTCTTTGAGCCATCAGGAACCGCCCATAGTCTCTGATGTTAATGGCGATGGAGGAAGTAGCTAAGAAGAAGAAGAAGAAAATGAAGCAATCTAATG  
GAAGAATGGAAGCCATTCCTTCAATAAGAATATAAGCTCTCTATTTTCTTCTTCTTCTTAGGCTCTTAGCAAAG

>comp163991\_c0\_seq5

GAATACAAAAACAAATGATATAAAAAGGAAGAATGAAATTCTATTTCATTTAGCTTTATAAACAACGAATTAAGAACCATAAATAAATAAATGATTTGTTTGCTAAAAAAAACACTACT  
AGTATACAAAGAAATATCTCATACTGATAAACATCTTATATTCATGTGCCATTTGCAAAGATCGCTACAAAATCTTCTTTTCACTTGTACCTCATGTGACCATAGATTATCTCCTTCCAAAGC  
TTTAGTTCCACATGAAAAATTTTACGAGTAAATGTCAATGAAGGTAATTTTGGCCATATCATATTCCTAAAGATCTGTGAAGCAAGTTTTCGACACTGATGTGTAGTATTTGATATCTCGTT  
CAAAGATCAATAGCATGCAAGCGAGTTGATTCATCATGAAACAACAATATTCCTCTAATATATTTAGAAAAGATATGTCCTTGACTTGCAGCTAATTGAAGATGATGCAAACCAATATCAA  
ATCTTCTTAGATTGAACATTTCTCCAATCCAAGCAAGAAGAGAGCATTGACATTTTCACTCTCAGCACAACTATGAAGAAATCGTAGATAGCTTTGTTTATCTTGCCAATACATGATCCAG  
TCTTCTACATTCATATATTTTCTACTCTTTTGTGAACTTGTTCATGAAAATCCTTGCATATTTGTCTGAAATATCGAATGTCTCTGCTAGGTGTTGGAGAGTCTGCAAGAGCTTCTAGCA  
AAATTTCTCTAATAAGATCAGGTGGTAGGGAAAAATGCTAGACTCTCTTCTACTTTCTTTCATGATCTTTTGTCTTTCATGTTTGTCTCCTTGAAGCTTGCAGATTGAATGCTTCAACAAT  
GGCTGTTAAGACTATAGAAGAGTTGAAGAACGGATGATGAGAAAAGAGTTGAGAAATCTTAAAGATTTACTAAAAATTAATGAATATAATTATGTT

>comp164043\_c0\_seq8

CCGAAGAAGCTTCCCCCTTACTGAACTTAACAAAAGTCTCTTCTAATAGCAGCAGTGCGGTAAAGAGTTTCTCCTTCGATCCTGCCTTGATTTTCTCATCCTCATTCCACATCAACACCTG  
AATCTGAGTAATGAACGTGTCTGTCGATGTAGGTGGCCAGAAGTGAGAGGTGACGCGTCTGATGGCGTCCGAGGAAGGATGGGAAAGCCTGAAGAGGACCAGACTTGATCGATGTAT  
TCAATAATCAAAAAGGAGTGGCAGATGGGCTTGGCGCCATGGATGAGTACAGGGAACCTCTTATAGACAGGGTTAGATTTAAGAAGAAGCTCACTCTTCTTGGTGGGATCTTCTTCGAGA  
AACTCGTACTTGATCACCTTCAGATTTAGAGCGATTCTTGCTCTCGCGACCAAGGGGCTCTCCACGTCCCGATGAGCTTTACATCTTCTGCTGCCATTATTTATTTCTTGAATTTTCAGAT  
CTGAAACTTGATAAATGAAGAGAGAGAGCCGAATGAGCGATTAGGAATGTTGCTTACTGGTATTTAAAGCTCGAAATCAGGAGAATTTATACGGTACAAGTGGACGACGAAGCATAGATG  
TAAGAAAATTTTCAGTCT

>comp164106\_c0\_seq1

GAAATGATCCCCACATATTTACTGGCAAATATAATAACACATTTTGCAAAAAGCCTTGCCATGTTAGGAAAAGCGTAACAGTTACTATCAACATTTTTAGTTTTGCAGCACCTGTAAGCCTA  
ACGGTGTGAGAAACACCATAGCTGCTGATGAAATAAACCAACGGTCAAATACTACGACTCTACATCACAGCAAAAAAATCAACTTCTGCAACAGACTCTTGCTTCCACTGTTTAGTAC  
AAGTCCAGAACTTGTGAGCATAGTAGTGTCTATCTGCACTACTAATTTGATAATAACATGAAGCTTGATCAATAATTTCACTAATAAATTTGAAAATTTCTGGTTAGAGCAATCTTGAGAA  
CCTATCTATAATCAGCACTGTGTACATGGCTAACTAGAAGCAGGGAGAATGTAATAGAAGAGAGCTAAATGATACAGCATTACTAGGTATAAAGAAAAAAGAATGGATGCAAATATTAT  
AAACATACAGGCAGGGCAGGGCCAATTTGCACAAAATGCATCTTTAAAATCTACCTAATAACCTAACAAAACCTGCTGCTTCATTTGCGCACTGGAATCTGATTTCAAATAGGAGATTTT  
GCAAGTGCAAGAGTATGCCACCACCACAAGAAACATTCATGATGCGGAGGTTCTCGATTGGGACCTCAGAGGGTATGTTCCGGTCAATAGAATCACCAAGGCCAAGCTGGCCATATTG  
TTCCATCCCCAGCAAAAACTCTGCTATCCTCTGTAACCTATGGCACTGTGGCGAGCACACAGGAAACAATTTTCGCATTCATACTCTCTAATGATGGGGCATCCAATAGTTTGGGAAGTG  
TCTCTGCTTGATCTAGACCGGTTCTAGCTGTCCAAACTGATTTCCGCCAAATGCATAGACACCACCTCAACTGAAATACACAGTGTGTGCCATAAACCAGCAGCAACTCCGAGCAAAC  
TGACGCCAAAAGAGAAGAAACACATTTTGGACTGAGTTCATCATCTGTAGATCCATTCGGCACTGTCCATAAAGTCCCCAACCAATGTAAGTACTGCACCCTATCAGTCACTACTG

CACTATGACGACCTCCACATGCAATAGCCTTCACACAGCTTCCAATAACCTTGTAAGCATGCCCTTCCGAACTTGTAATTCCTTTACTGGAAGCTGATGCTCTATCTTTAACATAAGAAGCT  
GATTCAATGCATGGTACAAGATGGGGGAAGAAACCATGCGTGTTCGAGAACCCAAACCCAGTTGGCCTTACC GCCATATCCCCAACCCACACCTGACCAACATCTGACAATGCAAG  
TGATGTGCGACCACCAGCAGATACTGCTGTAATCTTCACTCCCACGCCAAGTGTTACAAGACAGGGAAGTGCTGAAAGAGTTTCATCACTTGGTGATGAGCTCTCAGGACCTTGTTTAGC  
TGAAGATAACCTTCTGCGTTTTGCGATATCCTCACTGCCTTTGCCATCATAATTA ACTATTGTTCCACTAATTGATCTGGAGCCGTGTAATGTGGAGCTCACTTGCTCATTGCGAAAAGCGC  
TTTGTCTTTCATCCTTCTCTAAACTTCTATAGCAGGTTGTTCTCCAATCACCTTCCCAGTTGGAACGCACTTTTCCAGCCCCATGTGTACACCTCCCCACATGCTGTAATTGCAACACAG  
TGAGCCCATCCTGCAGCTGCTTTC ACTATCTCTGCTTCAGCAGGAAGAGGAAATGCCTCTGGAATTCCTCGTGCTTTCCAGACGTAAGGTA ACTCTGGCCCATATCATCCGTAGATCCCC  
ATGTGATGAGCTTGGCCGATTCTGAAATAGCCATAGCGAAGCCGCATCCACCCCGGAGACGTCCCTCCACGCTTCGCCGGTGGCAGATTCTGGTCGGCGAACTGGAACCGGATGCAGTA  
GCGGGCATCTATCCGGAGAGACTCCAGGAAGATAGCCCCACATCAGTACCACCTTTTTTCTTCTCTTTCTCCTCCACCTTACCCAGCTTCGGCTTGTCTCTCCATCTCCTCTGCTCCC  
CCGCTACCATTCACTTCCACCTCCCTTCTCTTTATCAACTACGTATCCACC ACTTCTCCAAGAAGAAAAGCTCTGTCTTCTCCTTTCTTTCTTTAGCTTGTGCAACTTGGTTCGCCTCAGCA  
CGAGCTCTCGCATATGGAAGAGAAAAGACAATACGAGAAAAGCGAAATCAAGCAAAAATGAAAAATAAAAAGAGCAGTCGACGAGCCCTAATTCGTTTCGAATCATTGCTTGGAGAACGTA  
AGAGCCACGTAGGATATCAGTCTGGTGGTCCCGTACA

>comp164106\_c0\_seq11

GAAATGATCCCCACATATTTACTGGCAAATATAATAACACATTTTGCAAAAAGCCTTGCCATGTTAGGAAAAGCGTAACAGTTACTATCAACATTTTTAGTTTTGCAGCACCTGTAAGCCTA  
ACGGTGTGAGAAAACACCATAGCTGCTGATGAAATAAACCAACGGTCAAATACTACGACTCTACATCACAGCAAAAAAATCAACTTCTGCAACAGACTCTTGCTTCCACTGTTTAGTAC  
AAGTCCAGAAACTTGTGAGCATAGTAGTGTCTATCTGCACTACTAATTTGATAATAACATGAAGCTTGATCAATAATTTCACTAATAAATTTGAAAATTTCTGGTTAGAGCAATCTTGAGAA  
CCTATCTATAATCAGCACTGTGTACATGGCTAACTAGAAGCAGGGAGAATGTAATAGAAGAGAGCTAAATGATACAGCATTACTAGGTATAACAAGAAAAAAGAATGGATGCAAATATTAT  
AAACATACAGGCAGGGCAGGGCCAACCTTTGCACAAAATGCATCTTTAAAATCTACCTAATAACCTAACAAA ACTGCTGCTTCATTTGCGCACTGGAATCTGATTTCAAATAGGAGATTTT  
GCAAGTGCAAGAGTATGCCACCACCCACAAGAAACATTCATGATGCGGAGGTTCTCGATTGGGACCTCAGAGGGTATGTTCCGGTCAATAGAATCACCAAGGCCAAGCTGGCCATATTTG  
TTCCATCCCCAGCAAAAAACTCTGCTATCCTCTGTA ACTATGGCACTGTGGCGAGCACACAGGAAACAATTTTCGCATTCATACTCTCTAATGATGGGGCATCCAATAGTTTGGGAAGTG  
TCTCTGCTTGATCTAGACCGGTTCTAGCTGTCCAAACTGATTTCCGCCAAATGCATAGACACCACCATCAACTGAAATACACAGTGTGTGCCATAAACCAGCAGCAACTCCGAGCAAAC  
TGACGCCCAAAAGAGAAGAAACACATTTTGGACTGAGTTCATCATCTGTAGATCCATTCCCGCACTGTCCATAAAGTCCCCAACCAATGTAAGTACTGCACC ACTATCAGTCACTACTG  
CACTATGACGACCTCCACATGCAATAGCCTTCACACAGCTTCCAGTAAAGGAAATACAAGTTCGGAAGGGCATGCTTACAAGGTTATTGGAAGCTGTGTGAAGGCTATTGCATGTGGAGG  
TCGTCATAGTGCAGTAGTGACTGATAGTGGTGCAGTACTTACATTTGGTTGGGGACTTTATGGACAGTGCGGGAATGGATCTACAGATGATGAACTCAGTCCAAAATGTGTTTCTTCTCTTT  
TGGGCGTCAGTTTGTCTCGGAGTTGCTGCTGGTTTATGGCACACACTGTGTATTTTCA GTTGATGGTGGTGTCTATGCATTTGGCGGAAATCAGTTTGGACAGCTAGGAACCGGTCTAGATCA  
AGCAGAGACACTTCCAAACTATTGGATGCCCCATCATTAGAGAGTATGAATGCGAAAATGTTTCTGTGGTGTCTGCCACAGTGCCATAGTTACAGAGGATAGCAGAGTTTTTTGCTGG  
GGATGGAACAAATATGGCCAGCTTGGCCTTGGTGATTCTATTGACCGGAACATAACCTCTGAGGTCCCAATCGAGAACCTCCGCATCATGAATGTTTCTTGTGGGTGGTGGCATACTCTTG  
CACTTGCAAAATCTCTATTTGAAATCAGATTCCAGTGCGCAAATGAAGCAGCAGTTTTGTTAGGTTATTAGGTAGATTTTAAAAGATGCATTTTGTGCAAAAGTTGGCCCTGCCCTGCCTGT  
ATGTTTATAATATTTGCATCCATCTTTTTTTCTTGTATACCTAGTAATGCTGTATCATTTAGCTCTCTTCTATTACATTCTCCCTGCTTCTAGTTAGCAATGTACACAGTGTGATTATAGATAG  
GTTCTCAAGATTGCTCTAACCCAGAAATTTTCAAATTTATTAGTGAAATTAATTGATCAAGCTTCATGTCAATTATCAAATTAGTAGTGCAGATAGACACTACTATGCTCACAAGTTTCTGGACTT  
GTACTAAACACTGGCAAGAGTCTGTTGCAGGAAGTTTCTTCTTTTGTCTGTATGTAGAGTCGGAGTATTGACCGTTGGTTTATTTTCATCAGCAGCTATGGTGTCTTCTCGACACCGTTAGG  
CTTACAGGTGCTGCAAAACTAAAAATGTTGATAGTAACTGTTACGCTTTTCTTAACATGGCAAGGCTTTTTGCAAAATGTGTTATTATATTTGCCAGTAAATATGTGGGGATCATTTCACTCT



GAATTCCTTCATTATTCGAATTTATTGATGCCTAATAATCTTAATTTTTTCGCAGGTGTTTTTA

>comp164106\_c0\_seq18

GAAATGATCCCCACATATTTACTGGCAAATATAATAACACATTTTGCAAAAAGCCTTGCCATGTTAGGAAAAGCGTAACAGTTACTATCAACATTTTTAGTTTTGCAGCACCTGTAAGCCTA  
ACGGTGTGAGAAACACCATAGCTGCTGATGAAATAAACCAACGGTCAAATACTACGACTCTACATCACAGCAAAAAAATCAACTTCCTGCAACAGACTCTTGCTTCCACTGTTTAGTAC  
AAGTCCAGAACTTGTGAGCATAGTAGTGTCTATCTGCACTACTAATTTGATAATAACATGAAGCTTGATCAATAATTTCACTAATAAATTTGAAAATTTCTGGTTAGAGCAATCTTGAGAA  
CCTATCTATAATCAGCACTGTGTACATGGCTAACTAGAAGCAGGGAGAATGTAATAGAAGAGAGCTAAATGATACAGCATTACTAGGTATACAAGAAAAAAGAATGGATGCAAATATTAT  
AAACATACAGGCAGGGCAGGGCCAACCTTTGCACAAAATGCATCTTTTAAAATCTACCTAATAACCTAACAAAACCTGCTGCTTCATTTGCGCACTGGAATCTGATTTCAAATAGGAGATTTT  
GCAAGTGCAAGAGTATGCCACCACCCACAAGAAACATTCATGATGCGGAGGTTCTCGATTGGGACCTCAGAGGGTATGTTCCGGTCAATAGAATCACCAAGGCCAAGCTGGCCATATTTG  
TTCCATCCCCAGCAAAAACTCTGCTATCCTCTGTAACCTATGGCACTGTGGCGAGCACCACAGGAAACAATTTTCGCATTCATACTCTCTAATGATGGGGCATCCAATAGTTTGGGAAGTG  
TCTCTGCTTGATCTAGACCGGTTCCCTAGCTGTCCAACTGATTTCCGCCAAATGCATAGACACCACCATCAACTGAAATACACAGTGTGTGCCATAAACCAGCAGCAACTCCGAGCAAAC  
TGACGCCCAAAAGAGAAGAAACACATTTTGGACTGAGTTCATCATCTGTAGATCCATTCGCGCACTGGATATTGAGCACACAGGTAAAAATTACAAAAGAGCAAACTGAATGATTAGTCA  
TTCCATGTGACCTCAAGATTTAAGAGAAAATTATGAAGGATTAAGGCAATATCTCCATGATACAAGGAACCTCATCTTCAACAATATACTTGCTTTATCTCCATCCTTTCTACTATACCTAC  
ATATTAATCCTGTCCATAAAGTCCCCAACCAATGTAAGTACTGCACCACTATCAGTCACTACTGCACTATGACGACCTCCACATGCAATAGCCTTCACACAGCTTCCAGTAAAGGAAATA  
CAAGTTCGGAAGGGCATGCTTACAAGGTTATTGGAAGCTGTGTGAAGGCTATTGCATGTGGAGGTGCTCATAGTGCAGTAGTACTGATAGTGGTGCAGTACTTACATTTGGTTGGGGAC  
TTTATGGACAGGTATAGTAGAAAGGATGGAGATAAAGCAAGTATATTGTTGAAGATGAGGTTCCCTTGATCATGGAGATATTGACTTTTAATCCTTCATAATTTTCTCTTAAATCTTGAGGTC  
ACATGGAATGACTAATCATTAGTTTGTCTTTTGTAAATTTTACCTGTGTGCTCAATATCCAGTGCAGGAAATGGATCTACAGATGATGAACTCAGTCCAAAATGTGTTTCTTCTTTTGGG  
CGTCAGTTTGTCTGGAGTTGCTGCTGGTTTATGGCACACACTGTGATTTTCAAGTTGATGGTGGTGTCTATGCATTTGGCGGAAATCAGTTTGGACAGCTAGGAACCGGTCTAGATCAAGCA  
GAGACACTTCCCAAATATTGGATGCCCATCATTAGAGAGTATGAATGCGAAAATTGTTTCCCTGTGGTGTGCGCACAGTGCCATAGTTACAGAGGATAGCAGAGTTTTTTGCTGGGGAT  
GGAACAAATATGGCCAGCTTGGCCTTGGTGATTCTATTGACCGGAACATACCCTCTGAGGTCCCAATCGAGAACCTCCGCATCATGAATGTTTCTTGTGGGTGGTGGCATACTCTTGCACT  
TGCAAAATCTCTATTTGAAATCAGATTCCAGTGCAGCAATGAAGCAGCAGTTTTGTTAGGTTATTAGGTAGATTTTAAAAGATGCATTTTGTGCAAAGTTGGCCCTGCCCTGCCTGTATGT  
TTATAATATTTGCATCCATTCTTTTTTTCTTGTATACCTAGTAATGCTGTATCATTTAGCTCTCTTCTATTACATTCTCCCTGCTTCTAGTTAGCAATGTACACAGTGTGATTATAGATAGGTTT  
TCAAGATTGCTCTAACCCAGAAATTTCAAATTTATTAGTGAAATTATTGATCAAGCTTCATGTCAATTATCAAATTAGTAGTGCAGATAGACACTACTATGCTCACAAGTTTCTGGACTTGTAC  
TAAACACTGGCAAGAGTCTGTTGCAGGAAGTTTCTTCTTTTGTGCTGTGATGTAGAGTCGGAGTATTGACCGTTGGTTTATTTCATCAGCAGCTATGGTGTCTCGACACCGTTAGGCTTAC  
AGGTGCTGCAAACTAAAAATGTTGATAGTAACTGTTACGCTTTTCTAACATGGCAAGGCTTTTTGCAAAAATGTGTTATTATATTTGCCAGTAAATATGTGGGGATCATTTCAGTCTGAATT  
CTTTCATTATTCGAATTTATTGATGCCTAATAATCTTAATTTTTTCGCAGGTGTTTTTA

>comp164106\_c0\_seq28

ATTTAGCCAAATTCAGATGCCAGAACCCAGGAATACTTGAATGGTCTTGTATCTAGACAATGATACATTCCTAACGTCATTTGCTCCCCTTAAGTTGGAATTCATTTTTGGGTTAATC  
ATGAATTCGTTTTCTAATGTTATTTGCTTACTCCCTTCTTGAATTTGCAGATAGTGGTGCAGTACTTACATTTGGTTGGGGACTTTATGGACAGGTATAGTAGAAAGGATGGAGATAAAGCA  
AGTATATTGTTGAAGATGAGGTTCCCTTGTATCATGGAGATATTGACTTTTAAATCCTTCATAATTTTCTTAAATCTTGAGGTCACATGGAATGACTAATCATTTCAGTTTGTCTTTTGTAAATTT  
TTACCTGTGTGCTCAATATCC

>comp164106\_c0\_seq3

GAAATGATCCCCACATATTTACTGGCAAATATAATAACACATTTTGCAAAAAGCCTTGCCATGTTAGGAAAAGCGTAACAGTACTATCAACATTTTTAGTTTTGCAGCACCTGTAAGCCTA  
ACGGTGTGAGAAACACCATAGCTGCTGATGAAATAAACCAACGGTCAAATACTACGACTCTACATCACAGCAAAAAAATCAACTTCCTGCAACAGACTCTTGCTTCCACTGTTTAGTAC  
AAGTCCAGAAACTTGTGAGCATAAGTAGTGTCTATCTGCACTACTAATTTGATAATAACATGAAGCTTGATCAATAATTTCACTAATAAAATTTGAAAATTTCTGGTTAGAGCAATCTTGAGAA  
CCTATCTATAATCAGCACTGTGTACATGGCTAACTAGAAGCAGGGAGAATGTAATAGAAGAGAGCTAAATGATACAGCATTACTAGGTATACAAGAAAAAAGAATGGATGCAAATATTAT  
AAACATACAGGCAGGGCAGGGCCAACTTTGACAAAAATGCATCTTTTAAAATCTACCTAATAACCTAACAAAACTGCTGCTTCATTTGCGCACTGGAATCTGATTTCAAATAGGAGATTTT  
GCAAGTGCAAGAGTATGCCACCACCCACAAGAAACATTCATGATGCGGAGGTTCTCGATTGGGACCTCAGAGGGTATGTTCCGGTCAATAGAATCACCAAGGCCAAGCTGGCCATATTTG  
TTCCATCCCCAGCAAAAAACTCTGCTATCCTCTGTAACTATGGCACTGTGGCGAGCACCACAGGAAACAATTTTCGCATTCATACTCTCTAATGATGGGGCATCCAATAGTTTGGGAAGTG  
TCTCTGCTTGATCTAGACCGGTTCTAGCTGTCCAAACTGATTTCCGCCAAATGCATAGACACCACCATCAACTGAAATACACAGTGTGTGCCATAAACCAGCAGCAACTCCGAGCAAAC  
TGACGCCAAAAGAGAAGAAACACATTTTGGACTGAGTTCATCATCTGTAGATCCATCCCGCACTGTCCATAAAGTCCCCAACCAATGTAAGTACTGCACCCTATCAGTCACTACTG  
CACTATGACGACCTCCACATGCAATAGCCTTTCACACAGCTTCCAGTAAAGGAAATACAAGTTCGGAAGGGCATGCTTACAAGGTTATTGGAAGCTGTGTGAAGGCTATTGCATGTGGAGG  
TCGTCATAGTGCAGTAGTGACTGATAGTGGTGCAGTACTTACATTTGGTTGGGGACTTTATGGACAGGTATAGTAGAAAGGATGGAGATAAAGCAAGTATATTGTTGAAGATGAGTGCAGG  
AATGGATCTACAGATGATGAACTCAGTCCAAAATGTGTTTCTTCTTTTTGGGCGTCAGTTTGCTCGGAGTTGCTGCTGGTTTATGGCACACACTGTGTATTTCAAGTTGATGGTGGTGTCTA  
TGCATTTGGCGGAAATCAGTTTGGACAGCTAGGAACCGGTCTAGATCAAGCAGAGACACTTCCCAAATATTGGATGCCCCATCATTAGAGAGTATGAATGCGAAAATGTTTCCCTGTGG  
TGCTCGCCACAGTGCCATAGTTACAGAGGATAGCAGAGTTTTTTGCTGGGGATGGAACAAATATGGCCAGCTTGGCCTTGGTGATTCTATTGACCGGAACATACCCTCTGAGGTCCCAATC  
GAGAACCTCCGCATCATGAATGTTTCTTGTGGGTGGTGGCATACTCTTGCACTTGCAAAATCTCCTATTTGAAATCAGATTCAGTGCGCAAATGAAGCAGCAGTTTTGTTAGGTTATTAG  
GTAGATTTTAAAAGATGCATTTTGTGCAAAGTTGGCCCTGCCCTGCCTGTATGTTATAATATTTGCATCCATTTCTTTTTTCTGTATACCTAGTAATGCTGTATCATTAGCTCTCTTCTATTA  
CATTCTCCCTGCTTCTAGTTAGCAATGTACACAGTGTGATTATAGATAGGTTCTCAAGATTGCTCTAACCAGAAATTTTCAAATTTATTAGTGAAATATTGATCAAGCTTCATGTCATTATC  
AAATTAGTAGTGCAGATAGACACTACTATGCTCACAAAGTTTCTGGACTTGTACTAAACACTGGCAAGAGTCTGTTGCAGGAAGTTTCTTCTTTTGGCTGTGATGTAGAGTCGGAGTATTTGA  
CCGTTGGTTTATTTTCATCAGCAGCTATGGTGTCTCTCGACACCGTTAGGCTTACAGGTGCTGCAAACTAAAAATGTTGATAGTAACTGTTACGCTTTTCTTAACATGGCAAGGCTTTTTGC  
AAAATGTGTTATTATATTTGCCAGTAAATATGTGGGGATCATTTCAGTCTGAATTTCTTCATTTTGAATTTATTGATGCCTAATAATCTTAATTTTTTCGCAGGTGTTTTTA

>comp164106\_c0\_seq41

GAAATGATCCCCACATATTTACTGGCAAATATAATAACACATTTTGCAAAAAGCCTTGCCATGTTAGGAAAAGCGTAACAGTACTATCAACATTTTTAGTTTTGCAGCACCTGTAAGCCTA  
ACGGTGTGAGAAACACCATAGCTGCTGATGAAATAAACCAACGGTCAAATACTACGACTCTACATCACAGCAAAAAAATCAACTTCCTGCAACAGACTCTTGCTTCCACTGTTTAGTAC  
AAGTCCAGAAACTTGTGAGCATAAGTAGTGTCTATCTGCACTACTAATTTGATAATAACATGAAGCTTGATCAATAATTTCACTAATAAAATTTGAAAATTTCTGGTTAGAGCAATCTTGAGAA  
CCTATCTATAATCAGCACTGTGTACATGGCTAACTAGAAGCAGGGAGAATGTAATAGAAGAGAGCTAAATGATACAGCATTACTAGGTATACAAGAAAAAAGAATGGATGCAAATATTAT  
AAACATACAGGCAGGGCAGGGCCAACTTTGACAAAAATGCATCTTTTAAAATCTACCTAATAACCTAACAAAACTGCTGCTTCATTTGCGCACTGGAATCTGATTTCAAATAGGAGATTTT  
GCAAGTGCAAGAGTATGCCACCACCCACAAGAAACATTCATGATGCGGAGGTTCTCGATTGGGACCTCAGAGGGTATGTTCCGGTCAATAGAATCACCAAGGCCAAGCTGGCCATATTTG  
TTCCATCCCCAGCAAAAAACTCTGCTATCCTCTGTAACTATGGCACTGTGGCGAGCACCACAGGAAACAATTTTCGCATTCATACTCTCTAATGATGGGGCATCCAATAGTTTGGGAAGTG  
TCTCTGCTTGATCTAGACCGGTTCTAGCTGTCCAAACTGATTTCCGCCAAATGCATAGACACCACCATCAACTGAAATACACAGTGTGTGCCATAAACCAGCAGCAACTCCGAGCAAAC  
TGACGCCAAAAGAGAAGAAACACATTTTGGACTGAGTTCATCATCTGTAGATCCATCCCGCACTGGATATTGAGCACACAGGTAAAAATTACAAAAGAGCAAACTGAATGATTAGTCA  
TTCCATGTGACCTCAAGATTTAAGAGAAAATTATGAAGGATTAAGTCAATATCTCCATGATACAAGGAACCTCATCTCAACAATATACTTGCTTTATCTCCATCCTTTCTACTATACCTAC

ATATTAATCCTGTCCATAAAGTCCCAACCAAATGTAAGTACTGCACCACTATCAGTCACTACTGCACTATGACGACCTCCACATGCAATAGCCTTCACACAGCTTCCAATAACCTTGTAAG  
CATGCCCTTCCGAACTTGTATTTCCTTTACTGGAAGCTGATGCTCTATCTTTAACATAAGAAGCTGATTCAATGCATGGTACAAGATGGGGGGAAGAAACCATGCGTGTTCGAGAACCCAA  
ACCCAGTTGGCCTTCACCGCCATATCCCAACCCACACCTGACCAACATCTGACAATGCAAGTGTATGTGACCACCAGCAGATACTGCTGTAATCTTCACTCCCACGCCAAGTGTTACA  
AGACAGGGAAGTGTGAAAGAGTTTCATCACTTGGTGTAGAGCTCTCAGGACCTTGTTAGCTGAAGATAACCTTCTGCGTTTTGCAGTATCCTCACTGCCTTTGCCATCATAATTA  
TTGTTCCACTAATTGATCTGGAGCCGTGTAATGTGGAGCTCACTTGCTCATTCGGAAAAGCGCTTTGTCTTTCATCCTTCTCTAAACTTCTATAGCAGGTTGTTCTCCAATCACCTTCCCA  
GTTGGAACGCACTCTTCCAGCCCCATGTGTACACCTCCCCACATGCTGTAATTGCAACACAGTGAGCCCATCCTGCAGCTGCTTCACTATCTCTGCTTCAGCAGGAAGAGGAAATGCC  
TCTGGAATTTCTCGTGCTTTCCAGACGTAAGGTAACCTCTGGCCCATATCATCCGTAGATCCCCATGTGTAGAGCTTGCCCGATTCTGAAATAGCCATAGCGAAGCCGCATCCACCCCGG  
AGACGTCCCTCCACGCTTCGCCGGTGGCAGATTCTGGTCGGCGAACTGGAACCGGATGCAGTAGCGGCGATCTATCCGGAGAGACTCCAGGAAGATAGCCCCACATCAGTACCACCTCT  
TTTTCTTCTCTTCTCCTCCACCTTACCCAGCTTCCGCTTGTCTCCTCCATCTCCTCTGCTCCCCGCTACCATTCACTTCTCCACCTCCCTTCTCTTTATCAACTACGTATCCACCACTTCT  
CCAAGAAGAAAAGCTCTGTCTTCTCCTTTCTTTCTTTAGCTTGTGCAACTTGGTTCGCTCAGCACGAGCTCTCGCATATGGAAGAGAAAGACAATACGAGAAAGCGAAATCAAGCAA  
AATGAAAAATAAAAGAGCAGTCGACGAGCCCTAATTCGTTGCAATCATTTGCTTGGAGAACGTAAGAGCCACGTAGGATATCAGTCTGGTGGTCCCGTACA

>comp164106\_c0\_seq50

GAAATGATCCCCACATATTTACTGGCAAATATAATAACACATTTTGCAAAAAGCCTTGCCATGTTAGGAAAAGCGTAACAGTTACTATCAACATTTTTAGTTTTGCAGCACCTGTAAGCCTA  
ACGGTGTGAGAAACACCATAGCTGCTGATGAAATAAACCAACGGTCAAATACTACGACTCTACATCACAGCAAAAAAATCAACTTCTGCAACAGACTCTTGCTTCCACTGTTTAGTAC  
AAGTCCAGAACTTGTGAGCATAGTAGTGTCTATCTGCACTACTAATTTGATAATAACATGAAGCTTGATCAATAATTTCACTAATAAATTTGAAAATTTCTGGTTAGAGCAATCTTGAGAA  
CCTATCTATAATCAGCACTGTGTACATGGCTAACTAGAAGCAGGGAGAATGTAATAGAAGAGAGCTAAATGATACAGCATTACTAGGTATAACAAGAAAAAAGAATGGATGCAAATATTAT  
AAACATACAGGCAGGGCAGGGCCAACCTTTGCACAAAATGCATCTTTAAAATCTACCTAATAACCTAACAAAACCTGCTGCTTCATTTGCGCACTGGAATCTGATTTCAAATAGGAGATTTT  
GCAAGTGAAGAGTATGCCACCACCCACAAGAAACATTCATGATGCGGAGGTTCTCGATTGGGACCTCAGAGGGTATGTTCCGGTCAATAGAATCACCAAGGCCAAGCTGGCCATATTTG  
TTCCATCCCCAGCAAAAAACTCTGCTATCCTCTGTAACCTATGGCACTGTGGCGAGCACCACAGGAAACAATTTTCGCATTCATACTCTCTAATGATGGGGCATCCAATAGTTTGGGAAGTG  
TCTCTGCTTGATCTAGACCGGTTCTAGCTGTCCAACTGATTTCCGCCAAATGCATAGACACCACCATCAACTGAAATACACAGTGTGTGCCATAAACCAGCAGCAACTCCGAGCAAAC  
TGACGCCCAAAAGAGAAGAAACACATTTTGGACTGAGTTCATCATCTGTAGATCCATTCCCGCACTCATCTTCAACAATATACTTGCTTTATCTCCATCCTTTTACTATACCTGTCCATAAA  
GTCCCAACCAAATGTAAGTACTGCACCACTATCAGTCACTACTGCACTATGACGACCTCCACATGCAATAGCCTTCACACAGCTTCCAATAACCTTGTAAGCATGCCCTTCCGAACTTGT  
ATTTCTTTACTGGAAGCTGATGCTCTATCTTTAACATAAGAAGCTGATTCAATGCATGGTACAAGATGGGGGGAAGAAACCATGCGTGTTCGAGAACCCAAACCCAGTTGGCCTTACC  
GCCATATCCCAACCCACACCTGACCAACATCTGACAATGCAAGTGTATGTGACCACCAGCAGATACTGCTGTAATCTTCACTCCCACGCCAAGTGTACAAGACAGGGAAGTGTGCTGA  
AAGAGTTTCATCACTTGGTGTAGAGCTCTCAGGACCTTGTTAGCTGAAGATAACCTTCTGCGTTTTGCAGTATCCTCACTGCCTTTGCCATCATAATTAACCTATTGTTCCACTAATTGATCT  
GGAGCCGTGTAATGTGGAGCTCACTTGCTCATTCGGAAAAGCGCTTTGTCTTTCATCCTTCTCTAAACTTCTATAGCAGGTTGTTCTCCAATCACCTTCCCAGTTGGAACGCACTCTTCC  
AGCCCCATGTGTACACCTCCCCACATGCTTATGCATAAGAACCTTTGATAAATTAATCTTTTCCAGGTTATATTTAAAAGCATTTATACAAAATCTAAACAAAATTTGTTACCACACCTCCTTA  
CATGATCCTATTCTAATAATAGGTAAAATCTGAGCACTCCAATTAATATTGAATCTTGAATTTACAGTAAGTAGAAAAAAAACCTGTAATTGCAACACAGTGAGCCCATCCTGCAGCTG  
CTTTCATATCTCTGCTTCAGCAGGAAGAGGAAATGCCTCTGGAATTTCTCGTGCTTTCCAGACGTAAGGTAACCTCTGGCCCATATCATCCGTAGATCCCCATGTGTAGAGCTTGCCCGAT  
TCTGAAATAGCCATAGCGAAGCCGCATCCACCCCGGAGACGTCCCTCCACGCTTCGCCGGTGGCAGATTCTGGTCGGCGAACTGGAACCGGATGCAGTAGCGGCGATCTATCCGGAGA  
GACTCCAGGAAGATAGCCCCACATCAGTACCACCTCTTTTCTTCTCTTCTCCTCCACCTTACCCAGCTTCCGCTTGTCTCCTCCTCCATCTCCTCTGCTCCCCCGCTACCATTCACTTCTCA

CCTCCCTTCTCTTTATCAACTACGTATCCACCACTTCTCCAAGAAGAAAAGCTCTGTCTTCTCCTTTCTTTCTTTAGCTTGTGCGAACTGGTTTCGCCTCAGCACGAGCTCTCGCATATGGAA  
GAGAAAGACAATACGAGAAAAGCGAAATCAAGCAAAAATGAAAAATAAAAAGAGCAGTCGACGAGCCCTAATTCGTTTCAATCATTTGCTTGGAGAACGTAAGAGCCACGTAGGATATCA  
GTCTGGTGGTCCCGTACA

>comp164106\_c0\_seq8

GAAATGATCCCCACATATTTACTGGCAAATATAATAACACATTTTGCAAAAAGCCTTGCCATGTTAGGAAAAGCGTAACAGTTACTATCAACATTTTTAGTTTTGCAGCACCTGTAAGCCTA  
ACGGTGTGAGAAAACACCATAGCTGCTGATGAAATAAACCAACGGTCAAATACTACGACTCTACATCACAGCAAAAAAATCAACTTCCTGCAACAGACTCTTGCTTCCACTGTTTAGTAC  
AAGTCCAGAAAACCTTGTGAGCATAGTAGTGTCTATCTGCACTACTAATTTGATAATAACATGAAGCTTGATCAATAATTTCACTAATAAATTTGAAAATTTCTGGTTAGAGCAATCTTGAGAA  
CCTATCTATAATCAGCACTGTGTACATGGCTAACTAGAAGCAGGGAGAATGTAATAGAAGAGAGCTAAATGATACAGCATTACTAGGTATAACAAGAAAAAAGAATGGATGCAAATATTAT  
AAACATACAGGCAGGGCAGGGCCAACTTTGCACAAAATGCATCTTTTAAAATCTACCTAATAACCTAACAAAACCTGCTGCTTCATTTGCGCACTGGAATCTGATTTCAAATAGGAGATTTT  
GCAAGTGCAAGAGTATGCCACCACCCACAAGAAACATTCATGATGCGGAGGTTCTCGATTGGGACCTCAGAGGGTATGTTCCGGTCAATAGAATCACCAAGGCCAAGCTGGCCATATTTG  
TTCCATCCCCAGCAAAAAACTCTGCTATCCTCTGTAACCTATGGCACTGTGGCGAGCACACAGGAAACAATTTTCGCATTCATACTCTCTAATGATGGGGCATCCAATAGTTTGGGAAGTG  
TCTCTGCTTGATCTAGACCGGTTCTAGCTGTCCAACTGATTTCCGCCAAATGCATAGACACCACCATCAACTGAAATACACAGTGTGTGCCATAAACCAGCAGCAACTCCGAGCAAAC  
TGACGCCAAAAGAGAAGAAACACATTTTGGACTGAGTTCATCATCTGTAGATCCATTCCCGCACTGGATATTGAGCACACAGGTAAAAATTACAAAAGAGCAAACTGAATGATTAGTCA  
TTCCATGTGACCTCAAGATTTAAGAGAAAATATGAAGGATTTAAAAGTCAATATCTCCATGATACAAGGAACCTCATCTTCAACAATATACTTTGCTTTATCTCCATCCTTTCTACTATACCTAC  
ATATTAATCCTGGAAAGCAGTTAATATTAAGGTGGAGTAGGACACAACATAAGGTAGTAATCAATGATTCAAAGGGTTGTACATCAAATTATTTTGTCTATTCTTATAGTCAATGTCAATC  
TAGAAGTAATATTCAAGATGACAAAATAGCTAAAGGTTTACAATATGCTCTGCAGTCATAAAGCAGAAAATCAACCCATCATACTAAATTTGATCGGAAGTAAATTGACAAAAGCAAAAAGA  
AGTTAAGTAGTTTACGACACAGAGCTACTGTGCTATCCAAAATATATTCTCCTGAAAGGAGAAGAAAATGACCGTCAGCAAATTATCTACTGTACAAAAGCAAGGTTGGACTCAGATTTAC  
CACAGCAAATTAATCAATCGGCTACCGAAATGTATATGTTGGGATTACTCCAAAACCTTTAATGATCTTAATCCTTATTATATTTTCATATGAGAGAACAATTTGGAGAATGTTTTAAAATCAA  
GTGCTCGGCAGGACAGGTTAGAAAAGGTGTCAAAAATAAATATTACCGATCATCAAAAATTAAGTACAAAAGTTA

>comp164106\_c0\_seq9

GAAATGATCCCCACATATTTACTGGCAAATATAATAACACATTTTGCAAAAAGCCTTGCCATGTTAGGAAAAGCGTAACAGTTACTATCAACATTTTTAGTTTTGCAGCACCTGTAAGCCTA  
ACGGTGTGAGAAAACACCATAGCTGCTGATGAAATAAACCAACGGTCAAATACTACGACTCTACATCACAGCAAAAAAATCAACTTCCTGCAACAGACTCTTGCTTCCACTGTTTAGTAC  
AAGTCCAGAAAACCTTGTGAGCATAGTAGTGTCTATCTGCACTACTAATTTGATAATAACATGAAGCTTGATCAATAATTTCACTAATAAATTTGAAAATTTCTGGTTAGAGCAATCTTGAGAA  
CCTATCTATAATCAGCACTGTGTACATGGCTAACTAGAAGCAGGGAGAATGTAATAGAAGAGAGCTAAATGATACAGCATTACTAGGTATAACAAGAAAAAAGAATGGATGCAAATATTAT  
AAACATACAGGCAGGGCAGGGCCAACTTTGCACAAAATGCATCTTTTAAAATCTACCTAATAACCTAACAAAACCTGCTGCTTCATTTGCGCACTGGAATCTGATTTCAAATAGGAGATTTT  
GCAAGTGCAAGAGTATGCCACCACCCACAAGAAACATTCATGATGCGGAGGTTCTCGATTGGGACCTCAGAGGGTATGTTCCGGTCAATAGAATCACCAAGGCCAAGCTGGCCATATTTG  
TTCCATCCCCAGCAAAAAACTCTGCTATCCTCTGTAACCTATGGCACTGTGGCGAGCACACAGGAAACAATTTTCGCATTCATACTCTCTAATGATGGGGCATCCAATAGTTTGGGAAGTG  
TCTCTGCTTGATCTAGACCGGTTCTAGCTGTCCAACTGATTTCCGCCAAATGCATAGACACCACCATCAACTGAAATACACAGTGTGTGCCATAAACCAGCAGCAACTCCGAGCAAAC  
TGACGCCAAAAGAGAAGAAACACATTTTGGACTGAGTTCATCATCTGTAGATCCATTCCCGCACTGTCCATAAAGTCCCCAACCAATGTAAGTACTGCACCACTATCAGTCACTACTG  
CACTATGACGACCTCCACATGCAATAGCCTTACACAGCTTCCAATAACCTTGTAAGCATGCCCTTCCGAACCTTGATTTCTTTACTGGAAGCTGATGCTCTATCTTTAACATAAGAAGCT  
GATTCAATGCATGGTACAAGATGGGGGGAAGAAACCATGCGTGTTCGAGAACCCAAACCCAGTTGGCCTTACCAGCCATATCCCCAACCCACACCTGACCAACATCTGACAATGCAAG

TGTATGTCGACCACCAGCAGATACTGCTGTAATCTTCACTCCCACGCCAAGTGTTACAAGACAGGGAAGTGCTGAAAGAGTTTCATCACTTGGTGATGAGCTCTCAGGACCTTGTTTAGC  
TGAAGATAACCTTCTGCGTTTTGCAAGTATCCTCACTGCCTTTGCCATCATAATTAATACTATTGTTCCACTAATTGATCTGGAGCCGTGTAATGTGGAGCTCACTTGCTCATTGCGAAAAGCGC  
TTTGTCTTTTCATCCTTCTCTAACTTCTATAGCAGGTTGTTCTCCAATCACCTTCCCAGTTGGAACGCACCTTTCCAGCCCCATGTGTACACCTCCCCACATGCTTATGCATAAGAAGCTTT  
GATAAATTAATCTTTTCCAGGTTATATTTAAAAGCATTATACAAAATCTAAACAAAATTGTTACCACACCTCCTTACATGATCCTATTCTAATAATAGGTAATAATCTGAGCACTCCAATTA  
ATATTGAATCTTGAATTTACAGTAAGTAGAAAAAACCCTGTAATTGCAACACAGTGAGCCCATCCTGCAGCTGCTTCACTATCTCTGCTTACAGCAGGAAGAGGAAATGCCTCTGGA  
ATTTCCCTCGTGCTTTCCAGACGTAAGGTAACCTCTGGCCCATATCATCCGTAGATCCCCATGTGATGAGCTTGCCCGATTCTGAAATAGCCATAGCGAAGCCGCATCCACCCCGGAGACGT  
CCCTCCACGCTTCGCCGGTGGCAGATTCTGGTCGGCGAACTGGAACCGGATGCAGTAGCGGCGATCTATCCGGAGAGACTCCAGGAAGATAGCCCCACATCAGTACCACCTCTTTTCTCT  
TCTCTTTCTCTCCACCTTACCCAGCTTCCGCTTGCTCCTCCATCTCCTCTGCTCCCCGCTACCATTCATTCTCCACCTCCCTTCTCTTTATCAACTACGTATCCACCCTTCTCCAAGAA  
GAAAAGCTCTGTCTTCTCTTTCTTTCTTTAGCTTGTGCAACTTGGTTCGCCTCAGCACGAGCTCTCGCATATGGAAGAGAAAAGACAATACGAGAAAAGCGAAATCAAGCAAAAATGAAA  
AATAAAAGAGCAGTCGACGAGCCCTAATTGCTTGAATCATTGCTTGGAGAACGTAAGAGCCACGTAGGATATCAGTCTGGTGGTCCCGTACA

>comp164139\_c0\_seq2

TTGCTATTTATCTTCTAATTGGAAACCCTGAAATTTAAACCAATTTGAGAAATATAGCGCAAATAACCAAAACATCGCTTCATAGAAGCTCAAATTCTGAGAACAACCTCAAGCTTTCTAA  
ATTAGGAAGATAAATAGCAACAACTCAGTCAAGTGTCCATCCCTCACCTCTCAATTTTCCAGCTCTCTTTATCCAAAATAGAAAAGCAAAGGCAACCACACATACCTAACAAATTTCCCT  
TTATATAAACAGCATCCATGTCTTTCTCCATCTCAGAAGGGGAAGATAAATCAATCAAATAAAGAGAAAAGAGAAAATAGAAAAGCCGATCATGACGATGACAAAAGTTGAACTCA  
TTGGCACCCCTCGCCTCATTCTTCTATGCTCTAGTCTCCTCCAGTGACACCTTCTCCATTCAAGGCCGTGTCTATTGTGATACTTGTCTGTTGGCTTCGAAACTAACATCACCGAATACA  
TCTCAGGTGCTAAAGTTAAGGTGCGAGTGCACGCATTTACTACAAATAAGGTTGAACATCATAACGAAGGTGTAACAGATTCCACCGGCTCCTACAAGATTAATGTGGTAGATGGTCACG  
AAGATGAGATTTGTGAGGTGCTGCTCGTCAAAGCTCCCTCGAAAATTGCAAGGAGATCGAGATTGGCAGAGATAGGGCGCAAGTATTGCTCGCAATGATGGTGGCATAAGTGGCAAG  
GCAAGGCATGCAAACTCACTTGGCTTCTCAGGAATGAGCCTTCTCCTTCTGTGCAAAGCTTCTTAAAGAGTACTATGGCCTGGGAGAGGAAGAGTAGTTAAAGCAAGTTATAATTAAG  
AATTTTGGGCTAATGCGTTCTCATTTCTATTTACAACATCTCTTCTAAGCCATTTGTGCTCGTTTCTACACTTTTTCTATTCTTCATGAGACTAACGTTTGCAGCAAATAGTTGATATAATTAAT  
TTGCTTTGACATATAATGGAACAAAGCATTAAAATGTATTAGAAGTTACAGATCCTTATAACTTATTGAGCAAACAAAATTCTTGTGACATGCTATTTGAATCAAATTCATGCTTTGTATTG  
ATTATGATTGAAATAGGTTAAGAGAGCGCATGTTCTTATGATCCTATTAATTGATGGATGAAATAAATGTGAAATTGAGTAGTTGTTG

>comp164139\_c1\_seq1

AATCAATACAAAGCATAAATTTGATTCAAATAGCATGTCAACAAAAATTTTGGTTGCTCAATAAGTTATAAGGATCTGTAACCTTCTAATACATTTTAATGCTTTGTTCCATTATATGTCAAAGC  
AAATTAATTATATCAACTATTTGCTGCAACGTTAGTCTCATGAAGAATAGAAAAAGTGTAGAAAACGAGCACAAATGACTTAGAAGAGATGTTGTAATAGAAATGAGAACGCATTAGCC  
CAAAATCTTAATTATAACTTGCTTTAACTACTCTTCTCTCCCAGGCCATAGTACTCTTTAAGAAGCTTTGCACAGGAAGGAAGAGGCTCATTCTGAGGAAGCCAAGTGAGTTTGCATG  
CCTTGCTTGGCACTTATGCCACCATCATTCGCGAGCAATACTTGGCGCCCTATCTTGCCAATCTCGATCTCCTTGCAATTTTCGAGGGAGCTATCGACGAGCACGACCTCACAAATCTCAT  
CTTCGTGACCATCTACCACATTAATCTTGTAGGAGCCGGTGGAAATCTGTTACACCTTCGTTATGATGTTCAACCTTATTTGTAGTAAAATGCGTGCACCTCGACCTTAACTTTAGCACCTGCCA  
TCATAAACACCACAGATCTATAATGCTCAATTACTTATTACTCAATTGATCAATTGATCTGTCTTTTCAAGTTGATTATATAAATGTGAGTACCTGAGATGTATTCCGGTGATGTTAGTTTCAAGC  
CAACACGACAAGTATCACAATAGACACGGCCTTGAATGGAGAAGGTGTCACTGGAGGAGACTAGAGCAATAGAAGAAATGAGGCAGAGGGTGCCAATGAGTTTCAACTTTTGTATCGT  
CATGATCGGCTTTTCTGTCTCTTCTCTCTTTATTTTGAATGATTTATCTTCCCCTTCTGAGATGGAGAAAGGACATGGATGCTGGTTTATATAAAGGGAAATTTGTTAGGTATGTGTGGTTG  
CCTTTGCTTTCTATTTTGGATAAAGAGAGCTGGAAAATTGAGAGGTGAGGGATGGACACTTGACCTAGTTTGTGCTATTTATCTTCCCTAATTTAGAAACCTTGAGTGGTTCTCATAATTT

GAGCTTCTATGAAGAGATATTTTGGTTAATTTTGAGCTATAATTCTCAAATTGATATAAATTTTCAGGGTTTCCAATTATAGCCATATTGTCATTGTTAAAATGGAATCAACTATTCTTTGATCAT  
TTGTAGATATATACAAAATAAGCTTATTTAAATGATGATAAAATGATGAAATTTA

>comp164179\_c0\_seq7

CTAATTCCCACATGATGAAAAAAAAAGTAAAAAGTCTCCAGAAGAAAATAATCCTATTTGACCTCTATACATTTCTAACATCAAGAAATAGAAGAATCTCAGATCTCGAAATGAGATATATT  
TTGTGCGATCCATCAACAAAAACCTGGATCGACAAGGCAAATTCATCGCCATTCGGGACTAAAAAGCCGGAGGTGGACGAAATGCAAGGAAACCATAAAGCAGCGGAGCAATAAGCAAA  
GAAAAAGAATGCTTCCCTGAGATTGTTGGTGGCTAAGAGGCCAACAGCGCCACGGAGACCAAAAAAAAAAAGCAATCCACTGAAACGCGCCGGAGAGACGGCAAGGGCAAAGACCT  
AGCGGAGCGGGCGAAGCGTCAGGAGGTGGCGTTGTCGCAAGAGTTCACTTGAAATTTGGCATTTCGGTTTTGGC

>comp164205\_c0\_seq3

ACAATGGAGAAAAAGGATTCATGCAGCCGGCCACGTAAGATAACGGCTTGATGTTGTAATTGGTGTAAATCAACTATGTAATATTGAGGGATAATTGCACTTACATTGCACCATAAT  
AGAAGATTTTCATTGTTATGCTTGCAAGGAGAGCTTTCCTTGGGACAGATTGTCCCTTATACGGGAAATAGATGGCATAAAGACCAACAACAGAAGAGATTAACACTGATATAGCTGATAA  
AGCCCCATAGCGACACTGGGATCCTTTGGAAATATACAAATTACACCATCTTTTCTGGTATTGGCGTTCAGCTGCAGGCTTCTTCAATTCTGCTACTATTCCAAGAACAAAAGATAAAC  
AACCGAAGAAAAAATTGTGGCAGCGAACTGTGTGGTCTGATTTAATGCCATTTCTCTCTCTTTTGATCCTCAAAG

>comp164205\_c1\_seq3

TCTTTACATAAAAGCCAATCGCCTTCTTCCTTTCACCAAGGCTTTTCTCCTGCATGTGAGGTCCATTTCGACAATCTTCAAAGCTCTTTTGAGGATCAAAAACAGAGAGAAATGGCATTAAAT  
CAGACCACACAGTTCGCTGCCACAATTTTTTCTTCGGTTGTTTATCTTTTGTCTTTGGAATAGTAGCAGAATTGAAGAAGCCTGCAGCTGGAACGCCAATACCAGGAAAAGATGGTGTAA  
TTTGTATATTTCCAAAGGATCCCAGTGTGGCTTTGGGGGCTTTATCAGCTATATCAGTGTTAATCTCTTCTGCTGTTGGTCTTTATGCCATTTATTTCCCCTATAAGGGACAATCTGTCCCAAG  
GAAAGCTCTCCTTGCAAGCATAACAATGAAAATCTTCTATTATGGTGAATAGTCCTAACATAACAGGAGTTGGAGCTACCCTCTTCAACACAATCAATGAAGGGCTTATTCATGCAAGA  
AATGTGCATGAAGATCTGGAATATCTTTGCCCAACTGCAAAAACCGGTCTCTTCGGTGGCGCATCCTTCTTAAACCTTGACGCTAGTCTCTTCTGGCTCGTATGTCAGATGCTTGTAGAAA  
TGCTCGAGAGGATTACTTCGATTACGAGGAAGAAGGAGAAATAAAGGATGATTACATTCAGATTAGTAACAATTGATGACGAGAAGGAGGAGACAAGCATGATTTAAAGTCCCATGAGG  
GTGACAATGAGACCATCAATGTACATATATAACTAATTTCTTATTTATTCATTCTCTTTTTTCTTATTATGTCTAAACATTTTATTTCGAAGTTGTTATGTAATGATGTTGATTTAACTAAGTT  
GTGGATTCTTAATTATAAATAGTTAGTGTCTTAATGTATGCTTGGGGGATGGAATGATG

>comp164237\_c3\_seq12

TATTGGTTTLAGAAAGAGAGGTATGGGGGACGAGAGAAACTGAACCCAAGTTGCATCTCTCTCTCTCTCTCTATCGTATCTCTCCCTCTCCTGAATCTTCTTTTTTACATCATGTCTCAAT  
AGTTTTCTCGATCTACCTCCCTCTCTCTATTTTTAAGTCCACAACAAACCCATGAACTAAATTCAACTCTGCTATTCTTAAGTCCGCAGCAAACCCAAGAACTAAACTCAATTATGCTATCA  
ACCTGATTTTGCCGGCAATGGCTGTAAGTTCTCGGCGCAACAGCCATTTTCATGAGCTCGCTAAAATGGCAATCATGGAACAAAAAGAAAAATTCAATGGCAAGGTGAAGCATGTTAAAC  
CATCTCCAACCGAACTCCATATCACCGTATGCCGTCCGCTATTTGTTCCATTTCGAA

>comp164244\_c1\_seq28

AAAGGCGGGCCTCAAGGCGAGCCTTATATTGCGCAATTTTAAACCTTGCTTTATCACTTTGACTGAGTTTCACATCTCCCCTGTTTCATGTTGGCAATAAACTGATAATTAATATCATCGACAA  
TCTATTTTTTCTCTCTTCTGCTAGGGCATTGTTAGGCTATGCTTGGCTGCTTACCAGCCTGGATGGGCTAGCCGAGATCATCTTTCCATATGGTTATGCAGTATCAGAACATTTTATTTATA  
AATGTCAAGTGATGCATAAGATATTTGTGCACTTGGCCTCAATCCGTGCGATAATGTAATAGTCTGACATGTAATAAGTATTTAAGACTTTAGATACAACAGGTGGCGAAAATAATG  
TTGATATTATCGTAAGTCATACAAATGTTGTTTGAATAAGTTCCTTACTGCTGCAGGTTATTAACCTGTTTGTATTTCAGTACCATTAAATGATCTTCATGAAGCAGGTAGATTGGGTTCTTT

ACAATTGCCAACAGGGCCATGGATATGAATGGGTGGTTTGAAGCATATGTTATTATCTGCAGTGCCTGCACCAGACTCCAATGACTTGTGAAAAAGTAGGTAGGCTACAGAACGTTCTATT  
GCATTTGTGCTAATCGATACACCGTAGATTTTCAGGAGGCCTCTTTGAATCTTTGGCACCCCTGAAGTCCTATCATAGAGCTACTTCCAATGCTGACATCTTTTGCAGTGGCCATAGTAATGGCTT  
TTTTCAGCACTTCTTGCCAAACGATACAAACTGTCCCTTATGCACAGCTTAGTTCTAACACCCGATCTGTAATCATCTGAAGCTGCTGAAAATTGGCTGCTTTTAGAGACACGTCATCAGG  
AAAAGTACTCGTCATGCAAGAATTGTTTTGAAAAGTTGAAGATTCTATATCAACCCGCTTGTAGATTTTGCCTTATATAGGCTGGTTTTTATCACCGTCAACTTCAACGTTAAATTTATATTTT  
CTTTGAACTGAAGATTCACCTTGCTGCAGCATGTTGTTCTGAAGGTCTATTCAATACCAATGGAGAAGCAAACTTCCGACATGCATATAATTTTTTCGTTTTTCTCTATTGGCATTGACGGCATG  
GAAAAGGTCCCAGGTGAAATTCCTACGGACTGCGTGGCGTGTCTTGACAGATCGTTTGAGGACACATAACCAGGTAAAACACTGGATGTAAGTGTGTCTGTCTGGTAGAACGTGTTG  
AAGTTAAGGATGTCGCTCATCTGTGCTTGAGGATTGTAGGAATGTAAGCACTTGAAGAATAAGATTCTGAGAAAAGGTTTTGCGTTGAAATAACTTGAAGAGAACAAGGCTGCGGAG  
CTGACACCACAGAAGAAATAAGTTCCTGAACTTGGACATTCTGTATCAAGCTACAGCCACTTAATGAACTTGCACGGATCCTAAAGTTGGATTGATTTTCTTCGTTGTGGTTTCACAAAG  
GTCCTTAAGAGTCATATTAATCATGTCAGGATATCTGCATGCATTCCCATAGCCAACCTGTTCAAGTGTGAACTTTTTACCAATCCCAGCATGAAGATACGCCAGTTCAGATAGTGCCG  
ATTTACCCTTCCTTCAGCATCAGAATACATTGGAAAAGAACTACAGCGGGTATCAGAGGGAGCCTCAGTGTTAATGGCCGATGGTTCAATTCCAGGCAAAATATCGTCGCACAAACCATG  
AGAAGATATATTTTTAAAAGCACTAAACTCTGAACTGAAGATAGTACGACTGATTGTAAGTATCTCCATACCATGAAAGCCATGTGAACTAGATGAGAACCATGAGATATCATCTTCG  
TGACAGTGTCTCCCTTGTACAAATGTGGAACCAAGGTTTCTGAGCATTCCGTCAAATCCTCAAGATCTTCAACATTAGGACAATCATAAAATAGAGGATCATTCTCTCCTCCCTTCGTTCC  
ATTGTGCGGTACACTAACGTTGGCAGAGGAAATATTACCAGTTTTTTTTGTGATGTATAGAACCATTTTTCCAAGGAAAAGGATAATCTGAGCATAATGTGGTGTTCCTATGCCATTTTACCC  
TCTCCAAAAGAACTAACGGAGATTTACAGCCCTTGGCAATCTAAAAGGGTGTTCCTGTAGTGCACCTTGTAAAGCCTAATGCTTGAGCCTTTTTTTTCAGATATAAGAGACCGTGAAAGTT  
TTGGAATATTGGAACCTTCCTCTTTCAAAGCAGAGGAAAAAGTCTTCCATCTTGTCTGGAAAGAGAAGGCACATTTGCTGTACCTCACGATCTATATTTGTTTTGACATCACTTGCTGC  
CTCATATCGTGGCTTCTTACGTGAATCACTTAAAGTTACAGATTCAAGAGCATGTTTCATCTTGAAGGAAGAAATTTATTAACACCACCATCTACATCGTCGAAAATATCCCGAACCTCGT  
ATCCGTTCCAATGTGACATCACTCTCCCTCTCTATCCTGGCCGAAGCTGTACCAATCAACCGATCCAATCTCATATTTGAGTCCAGAAGCTTCAGCCGGAGGCAGTATCAAATCTAG  
AACGCTCCTCCCGGCGCTTCTCTTTCTCTCTCCCTTCCCTTCTCTCTCTCTCCCTCCCTTCTCTCTATCTTTATATTATATTATGATTTTGAGTTGAATAAGCTAAA  
CCATAAATTGCATTTAGATTAAGCCAATTGATTTAGCATATTTGAAATCCGCCAAAATATTTGGCGATTTTGTCTGTTTTAAATATTTTTTTAGTATGCTTCTTAAGC

>comp164244\_c1\_seq42

AAAGGCGGGCCTCAAGGCGAGCCTTATATTGCGCAATTTTAAACCTTGCTTTATCACTTTGACTGAGTTTACATCTCCCCTGTTTCATGTTGGCAATAAACTGATAATTAATATCATCGACAA  
TCTATTTTTTCTCTTTCCTGCTAGGGCATTGTTAGGCTATGCTTGGCTGCTTACCAGCCTGGATGGGCTAGCCGAGATCATCTTCCATATGGTTATGCAGTATCAGAACATTTTATTTATA  
AATGTCAAGTGATGCATAAGATATTTGTGCACTTGGCCTCAATCCGTGCGATACATGTAAATTAGTCTGACATGTAAATAAGTATTTAAGACTTTAGATACAACAGGTGGCGAAAATAATG  
TTGATATTATCGTAAGTCATACAAATGTTGTTGAATAAGTTCCTTACTGCTGCAGGTTATTAACCTGTTTGTATTTCCAGTACCATTAAATGATCTTCATGAAGCAGGTAGATTGGGTTCTTT  
ACAATTGCCAACAGGGCCATGGATATGAATGGGTGGTTTGAAGCATATGTTATTATCTGCAGTGCCTGCACCAGACTCCAATGACTTGTGAAAAAGTAGGTAGGCTACAGAACGTTCTATT  
GCATTTGTGCTAATCGATACACCGTAGATTTTCAGGAGGCCTCTTTGAATCTTTGGCACCCCTGAAGTCCTATCATAGAGCTACTTCCAATGCTGACATCTTTTGCAGTGGCCATAGTAATGGCTT  
TTTTCAGCACTTCTTGCCAAACGATACAAACTGTCCCTTATGCACAGCTTAGTTCTAACACCCGATCTGTAATCATCTGAAGCTGCTGAAAATTGGCTGCTTTTAGAGACACGTCATCAGG  
AAAAGTACTCGTCATGCAAGAATTGTTTTGAAAAGTTGAAGATTCTATATCAACCCGCTTGTAGATTTTGCCTTATATAGGCTGGTTTTTATCACCGTCAACTTCAACGTTAAATTTATATTTT  
CTTTGAACTGAAGATTCACCTTGCTGCAGCATGTTGTTCTGAAGGTCTATTCAATACCAATGGAGAAGCAAACTTCCGACATGCATATAATTTTTTCGTTTTTCTCTATTGGCATTGACGGCATG  
GAAAAGGTCCCAGGTGAAATTCCTACGGACTGCGTGGCGTGTCTTGACAGATCGTTTGAGGACACATAACCAGGTAAAACACTGGATGTAAGTGTGTCTGTCTGGTAGAACGTGTTG  
AAGTTAAGGATGTCGCTCATCTGTGCTTGAGGATTGTAGGAATGTAAGCACTTGAAGAATAAGATTCTGAGAAAAGGTTTTGCGTTGAAATAACTTGAAGAGAACAAGGCTGCGGAG

CTGACACCACAGAAGAAATAAGTTCCTGAACTTGGACATTCTGTATCAAGCTACAGCCACTTAATGAACTTTGCACGGATCCTAAAGTTGGATTGATTTCTTCGTTGTGGTTTCACAAAG  
GTCCTTAAGAGTCATATTAATCATGTCAGGATATCTGCATGCATTCCCATAGCCAACCTTGTTCAAGTGTGAACCTTTTTCACCAATCCCAGCATGAAGATACGCCAGTTCAGATAGTGCCG  
ATTTACCCTTCCCTTCAGCATCAGAATACATTGGAAGAAGACTACAGCGGGTATCAGAGGGAGCCTCAGTGTAATGGCCGATGGTTCAATTCCAGGCAAAATATCGTCGCACAAACCATG  
AGAAGATATATTTTTAAAGCACTAAACTCTGAAACTGAAGATAGTACGACTGATTGTAAAGTATCTCCATACCATGAAAGCCATGTGAACTAGATGAGAACCATGAGATATCATCTTCGC  
TGACAGTGCTCCCTTGTAACAAATGTGGAACCAAGGTTTCTCCAAAGACAAATATTAAGTTAAAGTAGAGAGCATGCAACCTAATAAAGCTAATGACATTGTAAATTATAAGTCGTTGCAAA  
GTTACCTGAGCATTCCGTCAAAATCCTCAAGATCTTCAACATTAGGACAATCATAAATAGAGGATCATTCTCTCCTTCCCTTCGTTCCATTGTCCGGTACACTAACGTTGGCAGAGGAAATA  
TTACCAGTTTTTTGTGATGTATAGAACCATTTTTCCAAGGAAAAGGATAATCTGAGCATAATGTGGTGTTCCTATGCCATTTTCACCTCTCCAAAAGAACTAACGGAGATTTTCAGCCCC  
TTGGCAATCTAAAAGGGTGTTCCTGTAGTGCACCTTTGTAAAGCCTAATGCTTGAGCCTTTTTTTCAGATATAAGAGACCGTGAAAGTTTTGGAATATTGGAACCTTCCCTTTCAAAGCA  
GAGGGAAAAAGTCTTCCATCTGTCTGGAAGAGAAGGCACATTTGCTGTACCTTACGATCTATATTTGTTTTGACATCACTTGCTGCCTCATATCGTGGCTTCTTACGTGAATCACTTAA  
AGTTACAGATTCAAGAGCATGTTTCATCTTGAAGAAGAAATTTATTAACACCACCATCTACATCGTCGAAAATATCCCGAACCTCGTATCCGTTCCAATGTGACATCACTCTCCCTCTCT  
CTATCCTGGCCCGAAGCTGTACCAATCAACCGGATCCAATCTCATATTTGAGTCCAGAAGCTTCAGCCGGAGGCAGTATCAAAATCTAGAACGCTCTCCCGGCGCTTCTCTTTCTCTC  
TCCCCCTTCCCCACTCTTCTCTCTCTCCTCCCTCCCTTTCTCTCTATCTTTATATTATATGTATTTTGAGTTGAATAAGCTAAACCATAAATTGCATTTAGATTAAGCCAATTGATT  
TAGCATATTTGAAATCCGCCAAAATATTTGGCGATTTTGTCTGTTTTAAATATTTTTTTAGTATGCTTCTTAAAGC

>comp164261\_c0\_seq12

CTAGCAAACCATCTAAAGTGTGTGTAGAAAGTCTGTGGCAGGGGTAGGTCTAAGGTGAGTGATTAGTTAAAGTTGTCTAAATTCTAAGTTTGTAAAGGCTTAAGGGGAATTTATGTTA  
GAATTTAAATATTAATATACTAAGAATTTTATTTAAATATATTTAAAGGGTAAATTGATTACTATCTTTGTTTCACACCGAGGCCGTGAAGTTTATTTACCTTCTTTGGGACTAAGTTAATAGC  
CTCGTAGGTCTGGGTACCTAATAACAATCGGGGTTAATTAAGTTATTTAAAGTTAGTTAAAATTAAGGGAATAGATTAATATTAAGGGGAGTTGCTTATTTATTTAAAGGATTGATTAATAA  
TTTTATTAACCTATTAAGAAAATCTGGAGTTTGGGGGAATTAATAGATTTTGAAGTTATCCAATATGTCGACTAAGGGGTCATAACTTGACTTTTGAAATTAGGGAGAAAATTGAACAT  
TTCAGATTTTAAATAAATAGTAAACCTTATTTGAGTTGCTAGACAGATGACACACTCAATTTAGAGTTTTCTATGAAAAGTTATGATTTTTAGAAAGTTTTAACCCGGTTTTGACCTAAGGTT  
GACCAAAATGTTGACTTTTTTACTTTGACCAGGTTTTGGTGGTTTTAAATTTTTTGAAAATACTAGATTTAATTAGAG

>comp164261\_c0\_seq15

ATCCTCCTTGGGGCTAACTTAATAACCTCGTAGGCCTGGGTTACCCAGTAGCAATCGGGGTTGATTAAGTTATTTAAATTGGTTGGAGTTAAAGGAGTGGATTGATTTAAAGGGAGTTGGT  
TACTGATTTTAAATGGGTTGGTTGAGATTTTATTATCCTATTAATAAAATCTGGAATTTGGGAGAGTTAATGAATTTTTGAAGTTATCCAGATATGCTAACTAAGGGGTCAAAACTTGACTT  
TTAAAATTAGAGTTAATCTTAAGGGTTTCAGATTTTAAATAAATACTAGACCTAATTATGAGTTGTTATACATGTGGCACACTCAATTTGGAGTTTCTATGAAAAGTTATGATTTTTAGAAGT  
TTAAACCCGATTTTGACTTAGAGTTGACCAAAATGTTGACCTTTTGACTTTGACCAGATTTTGAGGGTTTTAAATTTTTTGAAAATACTAGCTTTTAATTAGAGTCATTAGCCACTGAGTTT  
GATTGATTTAGAATTTTTTACAATTAGTTATGAATTTCTAAGTTCAGGTAATTAAGGGAATTTCTAAATTTTCGTAATAAATGGGTTGTTTTAAAGTTTTAATCCAAACCAGCTCCAAATTGA  
TTGGAATCACTTCCAAGGTTAGGTATGACCTAAGAAAGTGATCCCAAGTGTGGAGAAAATTTGAATTTTTAATAATTTTTTATTATTTAATTTTTTTTTCTTTTTATATATTTTTTCTT  
TTATGTTTTATTATTATTATTCACTTTTTATTTTTTTTTATTAT

>comp164268\_c0\_seq9

ATGATCACCCATCTGGGTCACTGACGGGTATATTAATAAAAGAGGTTACAAAGAACAATAAACTTTATAAAGTAAATTGAAAGTTATAACAAAATATATTTAAAAGACAACAAAACAA  
ACTAAAAAAATGTGAGGCGGTCCCAATCGGCCTCAGGTGTGGCTCGAACTGACAACCTGCAGGCAAGAGTAAGTCATAGCAAGAAAAGCTCAGGGGCCCGAAGGAAGCCACAGGAA



ACGCCACCGGTTGCCGTCGGACCAGAGAACAGTCAGCAGGGTGCGGGATGATGTCAGGCTAATTGCGTGACTGCAATCTAGCAGTACGATGAGGCCGCCAGGGGGTAAGGCAACGAG  
CGATCGGTGTAATGATGAACATTACGAGATGAAGCACAAAGGGAAGGAGTAATGAAGCATTTCAAAATTTTCTGTGAGGGAACCTTTCCCAAAGAAGGAATAGTTCATGCTCCATTA  
TCTTTATCCTCATCATGTGAAAGAAACAACGTGAGAAGAAGCTTGAGTTTTTGTCTGCTAGGGTTTTGCATGGTGCCCTAGTTTTGTGCGTTTTCCACCATCCCGCCGGGGGCCATCCCCCA  
TGGCTGAGTTCCCGCCAGAATTTGCCGAAGTAGCCCCTT

>comp164342\_c0\_seq6

ACATTGTTCTCAGTTTCTTGTAGGGAAATTTCAATTGCTTTTACTTGCAGGTAAAAGAGCCACCGAGTCGACATTAATATTGTTCTCAGTTTCTTGTCCGGAAATTTAGAGCTTTTACTTTC  
AAGTAAAAGAACCCCCGAGTCGACATTGTTATTGTTCTCAGTTTCAATAATCTCCGTGAACTGTAGCAGAGCTTTCTCGTCTTCTCAACTTGTGCTCGAATATTCTGCTCTGAAACTCTAG  
GAAGAATCTCCTTCTCTAAAGATTCTTGCTTCCACCAGGTGGTGAGTGAGCCTCTGAAGCAACGTTGATGGACCCAATTTCCCTTACCTAATGATGATCCAGCATGCTGCTTCCAGTCTTC  
TGTAAGAATGAACTGCGGAGAAGATATAGCTCTTTGATGTTTGAACAAGGGAGTCAAATATCAGTTTTTACAGAGTTATCAGATATCCCAACTTCATTTGGTTGAATATTTAGCTCCAAGG  
CTTTGGTTGATCAGAAGGCTTCATCTTTATCACCTTTTTTTTCGTTTTATGGATGGCAGGTTGACCTCTCACAAGATCTCCACAGTTTCTAAAGCAAATCTATTTGCCATGAACCTTCTGA  
AAGTGAGACGTTTTTTCATCACGTTTCAGGCTCATGCTTCCCCCATACTTGCATAAATTATGACATGAATCCGTCGGTTCTCTGAGATACCGAGAGCGGACATAGCCAAAACCTATTTGAACG  
GGACATTGCATGACTACATTTTGTCTTTGCCCATCTTTGAGGCGCTTATTTCTTTTCCACGAATGCTTTTTCCATTGGAGAAAGAATAGGCTTAGAACTTCATTAGTAGGGGTGAAGGA  
TTCCAACAGAAAGATAACTTGAGCCCTTTCCTAACCATTGAATAAAGCACAAACCACATGTCGAGATCCACGCAATGAAATCCTTAACTCACACCGATTCCAGAAAAGGCAAAAAGGGA  
TAAATAATAGTCAAGGTGACGCTTTTCGGACGATTCCCTTAAACGAGAAAAGTGAAGAAATGGGTGTTCAATTTGAGGACTTCAACCAGTGTACAAGACAAGGCTCAGCCTCCTCCACCATCT  
CCACCTTCTTCTTCCCCCTCTTTCGAGAACGTGCAAGCAACGAAGGAGCCCTTTATTTCTTGGAAATGGCCGAATTTGTGCCAGAGTTTTGAGAAAGGAGGCTAACCGGAGAGCGCGAG  
AAATGGAGGGGAAAGTAAACGGTTTCGACTTCATAAGATCCATGAAATGGTTAGGACTTCGGTTGGTTAGCTGCCAATGATTTTGATCCGCCAACGCTTCTTGCCCGAACTTTGTCTCTGTT  
CGTCCAAAATTAACACGTTGTTCTCATCTCCTTCTCATGGCGTGTATGGTTTGGACACCGTTTTAAGACCCAGCTTTAGAACCTTACGGATGGAGAGGAGGTGGAGGGTGTGTTGTG  
GGGAAACTTTTATATGGCGAAGGGGTTGGAATGATGGAAGCACGGAATTAAGAGGACTTTTTGGTTGGCAGGTTATCATTAGCTTAATTTAGTAGTAATTACGAATGTTTTTTG

>comp164342\_c0\_seq7

ACATTGTTCTCAGTTTCTTGTAGGGAAATTTCAATTGCTTTTACTTGCAGGTAAAAGAGCCACCGAGTCGACATTAATATTGTTCTCAGTTTCTTGTCCGGAAATTTAGAGCTTTTACTTTC  
AAGTAAAAGAACCCCCGAGTCGACATTGTTATTGTTCTCAGTTTCAATAATCTCCGTGAACTGTAGCAGAGCTTTCTCGTCTTCTCAACTTGTGCTCGAATATTCTGCTCTGAAACTCTAG  
GAAGAATCTCCTTCTCTAAAGATTCTTGCTTCCACCAGGTGGTGAGTGAGCCTCTGAAGCAACGTTGATGGACCCAATTTCCCTTACCTAATGATGATCCAGCATGCTGCTTCCAGTCTTC  
TGTAAGAATGAACTGCGGAGAAGATATAGCTCTTTGATGTTTGAACAAGGGAGTCAAATATCAGTTTTTACAGAGTTATCAGATATCCCAACTTCATTTGGTTGAATATTTAGCTCCAAGG  
CTTTGGTTGATCAGAAGGCTTCATCTTTATCACCTTTTTTTTCGTTTTATGGATGGCAGGTTGACCTCTCACAAGATCTCCACAGTTTCTAAAGCAAATCTATTTGCCATGAACCTTCTGA  
AAGTGAGACGTTTTTTCATCACGTTTCAGGCTCATGCTTCCCCCATACTTGCATAAATTATGACATGAATCCGTCGGTTCTCTGAGATACCGAGAGCGGACATAGCCAAAACCTATTTGAACG  
GGACATTGCATGACTACATTTTGTCTTTGCCCATCTTTGAGGCGCTTATTTCTTTTCCACGAATGCTTTTTCCATTGGAGAAAGAATAGGCTTAGAACTTCATTAGTAGGGGTGAAGGA  
TTCCAACAGAAAGATAACTTGAGCCCTGCAATGCCAAAGAAAGCACACCTGTAAGATTAGCAGAATGGGAGCATATTGTAATAGTATATGACTATCATTGAACTAAAAGAAGAGGCAA  
GAAGACAATGGAAACCTAACAGGACATTCTCCATTAATAATGGTTTAGATCAAAACAAGGAGATATTCAAGGGGGAAAAACAGTTCTGTCATGTAGAGTTCTCATCTGCTTTTCAATTTGAT  
TAGAGTAAAGCTGAAGTTAACATTACATGAAGTACTCCAGAGATTGAAGGAAGAAGAATTCAATAAGCCAGCCGAAAATAGATGGGACAAAGCTAATAATGATGATCAACTTTCACTG  
GACGGATTAAGCCTATAAGATCTATAACAAGCAAATTAGCAAAATATGTCAA

>comp164344\_c1\_seq4

TTTTCTCTACAATTCTCTGAATTTAATATGGTATTAGAGAAAGGCATTTCAGTTCTTCAAAAACAAGAGCGTGAGAGAGGGAGAGCTGTTTCTTGCGTTCTGTTCTTTCTCGCGTGCGTCCA  
GGGCAGCCAAACAAGTGGAGGGCTTCCCCTTTGCGGTCTTCTACATGCGTCTCTCGTGTGTGCCTACCTAGGGGGCAAATAAGTGAAGAAGAGGATCAAGAGGAGCGAGCAGGAATTG  
AGGAATACAGGTTCCCACAACCAGCCTTCATTAAGAAATTATGAGGAATATAGGTTCCCACCACTGACATTTCATGCCCCAAATTCAGAGAAATACTAGTCCTTCCACCAACCTTTATTGCC  
GAAATTTAAGGAATATTGGTCCCTTCTGGTCCCTTCGTGCGTCCAAGACCGAGGATAGATCGAGCGGGAGGGCTCCTGTTGCATGCAAAGTCCAATGTCAACTGAGCATAATCAAGAGAA  
GTCGAGCACAAAACCTCTTGAGTATGTATGGAAAGAGTTGAGAGTTCCTTCTCGTGAGGAACTAGGGCCAGGACAAGCAAAGTGGCAGACCAGCATCCTTCTGCAATCAGACCAGA  
GGGATCAAAGGCCTTGCGCGCGCCTGTACAGGGTCGATCGAACGGGAGTGTTCGGGTGGAGTCAGATGATTGATTTGCATTGGGCTGATGGCTGGCTCGATCAGCAGGAGGAGATTGTC  
GTGGCATGTGCTAAGCCGCTTGATACGTGTTTTTCTGCTGCGGTCCCTGAAGCTTGCACAACCTTAAAAACATATTTTTCTACTGTGCATGCCTTCGTTGTGCGCCTTCCCCTCGTGGTTGC  
TATCTTATCTATAACCAATTTAGCCTTCGTTGCTACCCTTTGCCACCGTAATGTTTGAAGCTAATTTCTCCCAAAGTTTTGACCAAATAGAGGACTCCGTGGTGACTAATTACCAAGCTGAG  
AATGACATATATGTATTCCTCAATTTAAGAGGAGTGTAAAAATCTCAACCATCCCTTGGCCCTTGATCCCTTAGCCAGCATGAAGAT

>comp164354\_c0\_seq14

TATTTTGGCATATCATTTAGTTTGTATCTACATTGTTTTAAGCATTTCCATGTTAATTGGCTGAATATTGGTTTTCTTGTAAATTTCTTAGAAGCTGATGACTATCAAATGCAACGCTTTTTGTTA  
TGTAACCATTTCTCTCACATAAAAAACGAGATCTCACTACTGTTATGCAAATATATATTACATCTATTATCAATTTTCATGATGCCATTAGGACTGGCTGTAAGCAAAGGATTCAACAAAGT  
TATGTAGTGATTATAATTTCTTGAGGTTATTGCTAGGAAGTACATGAAGATTTCAAGTAAACCCTAATATAAAAAACAGCGAGAAAACTCCACAAATTCAATGGAAAAGTCAAAGAAAAACAAT  
AGTTTTATTGTAAGAATCAAATAACAGAAGAAAAAATTGTAAGATAACAATTGATCCTCAATTCAGAGGAGGATCTCTCTCCAATCCCTAGACGCCACTAGAGTCCAAGATACCAAAC  
TCCAAGAACAAGAACAACCTAAATAATTTGCATAACCCTAATCCTCCCTCCCTATTTAAAGCAAATAAACCCACCTCCTTAGCCCCCCTCCTATTTAAATAGCTAGTGACCCACACTC  
CTTGGGTGGCAAACAAGGGGGGGCGGACTGCTTGGTTACCTCCTATAAAATTTGACCAGCCCTTTATCCAAGGCCGGGCTAGACTGGTCTAACAATTGCTTGGCTTGGCTGTTGCTGTC  
TTTAGTATCATCTTCTCATTAATTTCTATTACCAACCCATAATTTTTAACAAAGTTTTAGTTTTTAATTATTTTCTATTTTCAATGTAATAAATATGTATTTAAAATTGATAGCATGTTTTCCCGG  
AGTTTGTATGCTTGTGTAATGAGTAGGTCGTATATTGTTGGAGACCTAATATTAGAACTCTAAACCTTTGAACTTCGTCTTCGCATTCATAGATAACCCCTTGTGGACTCTTCAGTGTCT  
CAAACCTCAACTTCTTTAATAGTATAAGAATTTTCAAATAAAAAATCTAAGAATTAGCTTAATGGGCATTTATGTCCATCTAGCTTATCGACTTTTCCATTTTTCTAGTTTGGACTGTTTTGTTT  
TTTCTTGTTCACAATTTTCCCTAACAGGTAGATAGAGTGTATTTGAGCACGCTGGAAAGATAGCCATCATCGACCATGAGAAGAAAAGAACCCTTGTCTGAGGAAGGAAGGCCTTCC  
TGATGCAGCTCTTTGGAACCCATGGGATAAGAAGGCTAAGGCTCTCCCCGATTTTGGCGATGAGGATTTCCAGGTCATGCTATGCTTGGATTCTGCAGCTGTGAGAATCCCATCACTCTC  
AAACCATCAGAAGAATGGATGGGCCGCCAAGAACTCTCCACCGTGCTGTCAAGCTACTTCAGTGGACAGCTCGACCCTCGCCAAGTTCTCGCTGGAAAATAATCATCATCGCATCTATT  
TTGCTTGGACAATCATAAAGAACCTCAACCTTAGTCAAGCTGCTTCAGTGGACAACCTCAAACGTTTACAAAGTTCTTGTGGCTTCTAACAGGTCATTGCATTCTGTTTTAGTATTTAG  
CATGCAGAGGTTTCATGAAATTGTGCATAGTTTCATATAATTCATACTTTTTGTTTATCTGCTGGTATGTTTTCTGTTATGGTGTCAATTGGACTTATGATAGAATATTTAGATCAGTCAGTAGAG  
AATACCTTTCTCAGTTGCATCATTATTCATTTGTTTAGGAAAATTTGAGCTTTTGTATTTTTCTACAATGAGTGTCTCATATTCATTATGATCATTACTAACGCTTCATTTGTGACAAA

>comp164359\_c2\_seq5

AAAAAATGCAGATTTTTATGCGTTTTTATGTTCCAAACTTTTATGGGAATCGAGTAGATGCTTTTCTTTTTTTTATTATTTTTGTTTCATGTCCCAAACCTGTTTTAAGAATGAGATATTGGCATC  
CAAACTTGTATGCGCTTTGATTTGGAAAAGAGCAATGGTACTATTTCATGAGCCTTTTATAAAGTAATATTTAGGGATGTGTTAGAGAACTTTTCATGAGTTTTAAAGTTGGGTTTGCTTG  
CTTGATGATTTCAGATGCTATTTTATGACAATTTCAATTGTTGAAAACGAATGTTTGAATACGAGATGGTTTTGATTCATATTGAAAGGTTTCTTAATCTTATTTTGAATGGTTTGTGACATGC  
TTAAGAGTATTTCATATGCTTTTTCTCTTAATGATGGGTATTCTTAGTCATCTTGTAATAATGCTTTGAGAGTGTATTGAATGGTTTTATGGTGCAAAAGCTTTCTTTTGAAGCCGATTTGTGT  
CTAGTGGTTTTGTTTTAAAGGCTTTTATACGACGTTTTTTTTTATGAAAGCTTTACAACGAGGGTTGTATACAACCTTTCTTGTGGAAAGGTTTTGGGTTTTTCATATCCCACTCCAAATGAAA

GGAGGTGCTTGATTATGGGTTGTCTGGGTAGAGTTTTGTGTGCGAAACAAAATGAAAAGAAAGGTGATTTTGGGTAGAGGGCTTTTGGAGAGTTTTGTGTAGTAATTCTCTTAAGAGTTCTT  
GTGAGCTATTTTGG

>comp164459\_c0\_seq1

GCGGAGGACGAAGTCCACCGACCCCGATATGCTTTCCCTGCCATAATAATAATAACAGATTATTATAATATTCTAGCATATATTTTACGGGAAGAAAAGAGGCTAACATCAACTCTCTCACTT  
TGCAAACACGAAAGCTCATGCGATCAACCCCTCATCCTGTCCTCTAATCCTTCTACCTTCTCAAGTCTCTCCATCCTTGTCTTCTATCTTTTAAATCTCGCGATATCGAAACCTTAATCTTAGG  
AATGGCAATGTTAACGAACGGGACTAAGTCGGCGTCCGATTTCCGCGAGGGTGACGGTGCCAGTTTACGTAGGGGACCTGCACCCTGACGTTACCAATGAGAACCTCATGGAGCTCTTCT  
CTACCATCGGGGAAGTTGATTCCGTTCCGAGTTTGCAGATTTTACACCCGGCTGCTCTCGGGGATACGGTTACGTCAATTACATCTCTCTGTCAGGATGCAATAAATGCTATTGAGAAATG  
AACCATACTGTGTTGTGTGAAAGCCAATTAGGGTTATGAAAGTCACATCATGATCCAGATTTAAGAAACAGTGGGATTGAAATGATTTTGTGAAGAACCTAAGTAGATCAATTGACTCTG  
TCAAGCTTAAGGAGATGTTTTGAAATTTGGGACTATCTCGTCCTGTAAAGTGGCTACTGAAGATGGAAAGAGCAAAGGATTTGGATTTGTCCAGTTTGATTCTCAAGTTTCTGCAAATAT  
GGCCATTGAAAATCTTAATGGTATAATAGTTGATGGAAAGAAAATCTATGTGGGTAAATTCATCAAAAAGAATGATAGAAAATTACCAAATCCGGAACCTGAAGTTCACTAACTTGTACATG  
AAGAATCTGGACAAAGTCATGACAAAAGAACTTATTGAACTGAAGTTTTCTGAGTTTGGAAAGGTTTTAATGTGGCAATTGAAAAGGATGAAGAAGGAAACCCAAAAGTTTTGGGTT  
TGTCAACTTTGCAAATCCTGAGAGTGCCAAGAAGGCGGTGGAAGCAATGAATGGACTTCAACTAGGATCCAAGAAGCTGTATGTTGCAAGGGCTCAAAAAAGGCAGAGCGGAAAACA  
TTTCTGTGTCATACGTTTCAGGACAAACGCAATGAACAAATTAATAAATTCGGCTTCAAATCTATATGTTAAGAACATTGCTGATAATATAGACGATAGTATATTGTGGGAGCATTTTCAG  
TCAATTCGGTACTATTACTTCAGCTAAAGTTATGCACGATGATAAAGGAAACAGTAAAGTTTTGGATTTGTTTGTTCAGCACTCAGGAGGAAGCTTCCAAAGCTTTGAACACTCTTCAT  
GGACACTTGTTTTATGGTAAACCTCTTTATGTTGCAATTGCCCAAAGGAAAGAGGAAAGACAAGCACAATTGTTGCGTCAATATTCTCAGCGAATGGCTGGAGTGACAGGCTTAGATGCT  
GATGTTGTCCCTACTAGCTATCCTCAAGTTTACTATAGCCCTTCTAAGGTTATGAAATGTTTTCTTCTCAACAATATCTCATGTATAAATCATTTGGGTTGAGATCGGGATGTCAGCCAAGT  
GGATTTGTTTCGTCATCTAGACCAGTGCTTCAACGGAATTCGTCTTCTATTTTTTCAAGTACTTGGCAGCAAAGACCAAACCTGGGCTGAAATGAATGCAGATTTGCTGCCTCAATCTGGGA  
AATCTATTCTATCCTTTTCTCACTTGCTCCAACCTAACCATTCTTCAATTCTAATGGACAACAGACAAATAATGTACTACGAAAGACAGGAAGATATGAATGATTTAAAACGGACTCTT  
CCTGCTTCTTCCAACACCGAAAGGATGGAGATGCTCAATAGTATGCTCGCTACCACTCCACCCAGCAACAGAAACAAATGCTTGGTCAACACCTCTTCCCGTTGGTTCAGAACTCAAG  
GCGGAGTTGGCGGCTAAAATTACTGGAATGTTGCTACAGATAGATAACTCGGAATTAAGTCTGTTGCTGGAATCACCTGAAGCGCTTGCAGCAAAGGTGGAAGAGGCTGCTGGAATTTG  
GAGCTCTCCAAGACCAAATGAGCAGCCAGGGTGCTATTAGTTCTAACAATTTTTCATCTGCTGAGATTGCGGTCAATTAATTGATAATAATTCTTAATAAAAAGATTCGATGACACGATTA  
ATAATAGATAATAAATTATGTGAAAATATTCTGATATTAATCAGAATGCACTAAAAAATTATTAACCTTTATATTAATAAATTAGCATTATTTATAAATATT

>comp164459\_c0\_seq2

CCGGGAGAGTTTTGTGGCCCATCAGAGCTCCGTCGTGACTGAGCCTGTGGCGAGAGAGAGAGTCTGCTGATACATTAATATATTAGACAAAATAGAGAGAGAAGATAACCGCGGGTGAGG  
TGACGAGGTCGCATCGGCCCGTCTTCTTTTCCACCCCTCCATATATTAATAATCTCTTCCAGAGAAGAAAGAACTCCCAGGCTCATGCAATCGGTTCCCTCATCACTTCTCTTCTGTT  
CTTGATTCTCTCTTCTTCTTTCGACTCTGAATCGATCGTCCGAGAGAAACCCCTAAGTCTACTTGTAAATGGCAACGGATACAACGCGGACTGCGGTGGCGGTTTCGCGGTTCCCGCACT  
GTACATCGGGGACCTACACCAGGATGTAAGTATCCGAACCTTTTCGAGCTTTTCTCAACCATTGGCGATATCGCTTCTGTTTCGCGTCTGCCGGGATTCCGTTCTCCGGGTGCTCGCTTGGCT  
ACGGTTATGTCAATTATATGCTGAGCAGGATGCTGAAAATGCTATCGAGAAATTAAGTACAGTGTGTTTGTGCGGGAAGCCATTAGGATTATGTGGTACACAAGGATCCAGTTGCTAG  
GAACAGCGGGGTTGAAATATATTTGTGAAGAACCTAAGTGGATCCATTGACAATTTGAACTTCAAGCTATGTTGGGAAATTCGGGACTATCTTGTCCAGCAAAGTGGCTTTGCAGGA  
TGAAAGAGCAAAGTTATGGCTTTGTCCAGTTTGATTGCAAGATTCTGCAAACGCTGCCATAGAAAATCTGAACGGTACAACAGTTGATGGCAAGAACTCTTTGTGAATAAGTTTCAT  
AAAAAGAGTGAGCGAATTCCTGCAATCTTGAAGCCAAGTATACGAACCTGTACATGAAAACTTGGATCAGGATATAACAGAAGAACTTATTGAACTAAAGTTTTTCAGAGTATGGAAA

AATCTTTAATGTGAAGATTGCAAAGGATGAAGCAGGAACTCAAGAGGATTTGGGTTTGTAACTTTGAAAACCTGAGGATGCTAAAAAGGCAGTGGAGGCAATGAATGGACTTCGGC  
TGGGATCAAAGAACTATATGTTGCAAGGGCCAAAAGAAGGATGAGCGACTACAAATTTGCAAGCATACTGTTGAGGAAAAACGGAATGAACAGATTAGAAAATAATATGGCTTCAAAT  
CTGTATATTAAGAACATTGATGATTGTGTTGATGACAATGCTCTGTGGGAGTATTTCAAGTCAATGCGGTACTGTTGCCTCGGCAAAAAGTTATGCACGATGAGAAAAGGAAACAGTAAAGGTT  
TCGGGTTTGTGTTATACTACTCCAGAGGAGGCTTCAAATGCAGTGAATACTCTTCATGGAAGCATGTTCCATGGAAAACCTTTATATGTTGCAATTGCCAAAAGGAAAGAGGAAAGAG  
CAGAACAGTTGCGTCTTCAGTATGCCCAAAGAATGAATGGTTTGGCTGGTTCAGCAACCGCTGTAGTCCCTACTGTTTATCCACACTTTACTACAGCCCTCCGGGAGTTATGCCACAAAT  
TTCTGCCCGACAAGGTATTGTATATCAACCTTTTGGGCTGAGACCAGGATGGCGGCCAAGTGGATTTGTTCCCCATCTAGGCCAACTTTTCAGCCAATGCCGCTTCCAATTATTCCTAATA  
CTCCTAGACAACAAAGGCAAAACAGGGGTTCGGATGAATGGACATTTTCTGCCTCAATCTGGGCAATCTATGCCATACATGGCTCCGTTGCAACAGCCTAACCAATTCTCTGAATTATTTGAA  
AGATAATAATAGCCAAGAGTTTGTACAAAATGGAAGGCGGTGGGGCATGAATAATTTGCCTCTTGGTCTTTCTGCTTCATCTAATCCACAAGGGATGGAGCAGCTCAGTAGCAGGCTCGCT  
GCAGCTCCACTACAGCAACAGAAACAGATGCTCGGCGAACGCCTATTTCCATTGGTCCAGAACTCAAGGCAGATCTGGCTGCTAAAATAACGGGGATGTTGTTGGAGATGGATAACTC  
CGAATTGCTATTGCTGTTGGAGTCGCTGATGCCCTCGCTGCAAAGGTGGAAGAAGCTGTTCAAGTATTGAAACTCTCCAAAACCCAGGTGAGTGGTCGCGTGCCTCTTCACCCTAACAA  
TTTCTTGCTTTCAGAGGTTTCCGTAAATTGAGAGGGATTTCGTGATTCTGAAAATTACCATTCTTTACTAAGTTTCTTTGTTAGTCTTATGATTTTTGGGCGAGAGAGTTCTCTCCATATGGA  
TATAGACATATAGTTTTAGAATTTCCCTTTGGATTTTCTCTGATCAAATTTCTTTCTGGACCTTTTTTTTTTTTGGTGGACCAATTATTTAGCGTTTTTCCAAGTACCGTTGTAATTTGAGTT  
CGCTCTACACATATTTTCCCTTAAATTGGAAGTTTAAATTTCTTCTTCTCAGCAGGCCGTATTAATTCTAACATTGCATTGCTTCT

>comp164459\_c0\_seq6

GCCTGCTGAAGAAGAAGAAATTAAGGAAAATATGTGTAGAGCGAACTCAAATTACAACGGTACTTGGAAAAACGCTAAATAATTGGTCCAACAAAAAAGG  
TCCAGAAAAGAAATTTGATCAGGAAAATCCAAAGGGAAAATTCTAAAACTATATGTCTATATCCATATGGAGGAGAACTCTCTCGCCCAAAAATCATAAGACTAACAAAGAACTTCGT  
AAAGAATGGTAATTTTTCAGAAACGAATCCCTCTCAATTTACGGAAACCTCTGAAGGCAAGAAATTGTTAGGGTGAAGAGGCACGCGACCACTCACCTGGGTTTTGGAGAGTTTCAAT  
ACTTGAACAGCTTCTCCACCTTTGCAAGGAGGCGATCAGGCGACTCCAACAGCAATAGCAATTCGGAGTTATCCATCTCCAACAACATCCCCGTTATTTTAGCAGCCATATCTGCCTTGA  
GTTTTCTGGACCAATGGGAATAGGCGTTCGCCGAGCATCTGTTTTCTGTTGCTGTAGTGGAGCTGCAGCGAGCCTGCTACTGAGCTGCTCCATCCCTTGTGGATTAGATGAAGCAGAAAGAC  
CAAGAGGCAAATTTATTCATGCCCCACCGCTTCCATTTTGTACAACTCTTGGCTATTATTATCTTTCAAATAATTCAGAGAATGGTTAGGCTGTTGCAACGGAGCCATGTATGGCATAGATT  
GCCAGATTGAGGCAGAAAATGTCCATTCATCCGACCCCTGTTTTGCCTTTGTTGTCTAGGAGTATTAGGAATAATTGGAAGCGGCATTGGCTGAAAAGTTGGCTAGATGGGGGAACAA  
ATCCACTTGGCCGCCATCCTGGTCTCAGCCAAAAGGTTGATATACAATACCTTGTCCGGCAGAAATTTGTGGCATAACTCCCGAGGGCTGTAGTAAAGTGTGGGATAAACAGTAGGGA  
CTACAGCGGTTGCTGAACCAGCCAAACCATTCAATCTTTGGGCATACTGAAGACGCAACTGTTCTGCTCTTTCCCTTTTCCCTTTGGGCAATTGCAACATAAAGAGGTTTACCATAAAACAA  
GTGTCCATGAAGAGTGTCAAAGCTTTGGAAGCTTCCCTCTGAGTGTGAAACAAAACAAATCCAAAACCTTTACTGTTTCCCTTATCATCGTGCATAACTTTAGCTGAAGTAATAGTACCG  
AATTGACTGAAATGCTCCACAATATACTATCGTCTATATTATCAGCAATGTTCTTAACATATAGATTTGAAGCCGAATTTTTTTAATTTGTTTCATTGCGTTTGTCTGAAACGTATGACACA  
GAAATGTTTTCCGCTCTGCCTTTTTTTGAGCCCTTGAACATACAGCTTCTTGGATCCTAGTTGAAAGTCCATTCAATTGCTTCCACCGCCTTCTTGGCACTCTCAGGATTTGCAAAGTTGACA  
AACCCAAAACCTTTTGGGTTTCCCTTCTCATCTTTTCAATTGCCACATTAATAAACCTTTCCAAACTCAGAAAACCTCAGTTCAATAAGTCTTTTGTATGACTTTGTCCAGATTCTTCAT  
GTACAAGTTAGTGAACCTCAGTTCGGATTGGTAATTTCTATCATCTTTTTGATGAATTTACCCACATAGATTTTCTTCCATCAACTATTATACCATTAAGATTTTCAATGGCCATATTTG  
CAGAATCTTGAGAATCAAACCTGGACAAATCCAAATCCTTTGCTCTTTCCATCTTTCAGTAGCCACTTTACAGGACGAGATAGTCCAAAATTTCAAAAACATCTCCTTAAGCTTGACAGAGTC  
AATTGATCTACTTAGGTTCTTCAAAATACATTTCCAATCCCCTGTTTCTTAAATCTGGATCATGATGTGACTTCATAACCTAATTGGCTTTCCACACAACACAGTATGGTCCAGATTTAA  
GAAACAGTGGGATTGGAAATGATTTGTGAAGAACCTAAGTAGATCAATTGACTCTGTCAAGCTTAAGGAGATGTTTTTGAATTTGGGACTATCTCGTCTGTAAAGTGGCTACTGAAGA

TGGAAAGAGCAAAGGATTTGGATTTGTCCAGTTTGATTCTCAAGTTTCTGCAAATATGGCCATTGAAAATCTTAATGGTATAATAGTTGATGGAAAGAAAATCTATGTGGGTAAATTCATCA  
AAAAGAATGATAGAAAATTACCAAATCCGGAACCTGAAGTTCACTAAGTTGACATGAAGAATCTGGACAAAGTCATGACAAAAGAAGTTATTGAACTGAAGTTTCTGAGTTTGAAAAG  
GTTTTTAATGTGGCAATTGAAAAGGATGAAGAAGGAAACCCAAAAGTTTTGGGTTTTGTCAACTTTGCAAATCCTGAGAGTGCCAAGAAGGCGGTGGAAGCAATGAATGGACTTCAACT  
AGGATCCAAGAAGCTGTATGTTGCAAGGGCTCAAAAAAAGGCAGAGCGGAAAACATTTCTGTGTCATACGTTTCAGGACAAACGCAATGAACAAATTAAAAAAATTCGGCTTCAAATC  
TATATGTTAAGAACATTGCTGATAATATAGACGATAGTATATTGTGGGAGCATTCAGTCAATTCGGTACTATTACTTCAGCTAAAGTTATGCACGATGATAAAGGAAACAGTAAAGTTTTG  
GATTTGTTTGTTCAGCACTCAGGAGGAAGCTTCCAAAGCTTTGAACACTCTTCATGGACACTTGTTTTATGGTAAACCTCTTTATGTTGCAATTGCCCAAAGGAAAGAGGAAAGACAAG  
CACAATTGTTGCGTCAATATTCTCAGCGAATGGCTGGAGTGACAGGCTTAGATGCTGATGTTGTCCCTACTAGCTATCCTCAAGTTTACTATAGCCCTTCTAAGGTTATGAAATGTTTTCTT  
CTCAACAATATCTCATGTATAAATCATTTGGGTTGAGATCGGGATGTCAGCCAAGTGGATTTGTTGCTCCATCTAGACCAGTGCTTCAACGGAATTCGTTCTTCTATTTTTTCAAGTACTTGGC  
AGCAAAGACCAAACCTGGGCTGAAATGAATGCAGATTTGCTGCCTCAATCTGGGAAATCTATTCTATCCTTTTTCTCACTTGCTCCAACCTTAACCATTCTTTCAATTCTAATGGACAACAGAC  
AAATAATGTACTACTACGAAAGACAGGAAGATATGAATGATTTAAAACGGACTCTTCTGCTTCTTCCAACACCGAAAGGATGGAGATGCTCAATAGTATGCTCGCTACCACTCCACCCCA  
GCAACAGAAACAAATGCTTGGTCAACACCTCTTCCCCTGGTTTCAGAACTCAAGGCGGAGTTGGCGGCTAAAATTACTGGAATGTTGCTACAGATAGATAACTCGGAATTACTGCTGTT  
GCTGGAATCACCTGAAGCGCTTGCAGCAAAGGTGGAAGAGGCTGCTGGAATTTGGAGCTCTCCAAGACCAAATGAGCAGCCAGGGTGTATTAGTTCTAACAATTTTTCATCTGCTG  
AGATTTGCGGTCAATTAATTGATAATAATTCTTAATAAAAGATTTGATGACACGATTAATAATAGATAATAAATATGTTGAAAATATTCTGATATTAATCAGAATGCACTAAAAAATTATTA  
TTATATTAATAATTAGCATTATTTATAAAATATT

>comp164473\_c1\_seq2

TACCAAAAGATGTGATCTTTGCCCATGCAAATGTAACATAATGACATTCTATCAATCAAAAATATAGAATTTCTTTCTCCTCCTTTTATTCTTCTGATTTTTTACCATATTGTGTTTAGAATTCT  
ACAGCACAATTGCAAAGACAAAAGCAACAACACTACAACCAAATATAGCTTAGATGAGCGCATTTTCCAATTACACACCTGGAAATCAACATTTCTAGCTGAAGTGGGCAAAGCAGTTG  
CAAATACTGAAGCTCGGTAAGCACTCCAAAGCCAAAATCCATCAAGGTTAGTTTTCAAAGTTCAGGAGAGCTGGCATCTGGGTCTGTTGGAGGAAACAACACAGCTATGTGCAAGAA  
ATACTGACAGTTTAGAAAACAATAGAAACAACAAAATAAGATTACTGCTGTTGACCTCGATTTTGGCTCGAATATGCTCGACGACCTTCGATTGATTCAATTAGACC

>comp164513\_c0\_seq2

ATATTTCTTAAAAAACAGAATGGCGAAAAGAGAAAAATAACATATTTATGCAAAAAATGCTACTAAATATTACCAAAAAAATGCATATCCAATATTTAAAAAACTTATAATTCAAAAAT  
ATTCTTGTTACATGCTTCTTAAAATATTAACATATCCAATTTATTAAGTGATGGTGTGAACCATATTGAAGGGGGCCAGTTAGGCTGTGAATTAGAATCAAGGAAATATTGGAAGCAATCAT  
TATGAAGATCATAAAGTCCAGCATCACGAGTAGCATCATCTTGTGTCATGATGTCCGCATGATCGGCAAAGTATATGCAGTTTGGTCTAATTCCAAGAGCTACTGTGTGATGTAATGAAATT  
GTTTGGTTGTAACCTATAAACAAAGAGAAATCCCCAAGTCTGTCATGGAGATCCATTGAGAGGAAGAACAAGAAGAAGCATTAAATAGCCGGCACAACTTAAAGACAGAGATTTGGT  
TGCTTCTTTGTATATCTTTCATCAACCTCCATACCACTGATCTCCCTCTTAATTTTTAGAAGAGTTCCTGATAAAAATGCAATGTAGTTCCTGCAATAAGAGTCAGTGGAGTACGGATCTTG  
TATTGCTTGGCAAACAAATTTAACATTTTTCTTCATGGTCAAATGCCAATACTGCTGAGAAAATGTGTGATTGCATAGAACATTTGCTCTTCTCATGAAAGTAAACATCTTCAAACCTCTC  
AAATTTGGTCAACGTGGTAAGGAGGCAGTTGTGGCCCCGAGAACCCAAGCATGGTCAACAGGCTTGGCAAAGCTAGTAATTTATAAAGCCGTAAATAACAACAATGGTACCGAATGGGT  
CGCTAGAGGAAATGGCAATCTTCTGAAATATAGATCACGAAACTTTCTGCATCAATGACATATGATGGATGCTTTTCATCATAATAATACTTGATATGACCATCGAGGTCTGATTTCGGGTT  
TGATCCTTTGCCGTTGATCTTCGGGGATGGTGAAGAGGGATGGAAGTGATTTTTAGCTTTTGTAGAGGATTGAAGAGGCAAGGTTGCAAATAAGTTAGGTCAAGGGTACAGGCCATC  
CATCCTTGGAGCCATAGCAGCGACGGCCAGAGATGTGGTTACCAATGGAGGAGAAGCGACGATTGCAGCCGATGCCGCTTCTTCTTTTTTGGTGGTAAGATCGCAGAAAGTAAGTGTG  
TCAGAGGCCTCTCCGGCATTGTTGGGAAGAAGCAACCATGGGGATGGAGTACGTTGAATTCTAAAGAGATCATTCTTGGCAAGAGCGAAATTCACGATGTGCATGTGGCAGCGAATCG

GAGGAAGTCTACAATGGGAAAGTGCGATGAGAGGCAATGGAGGAGATCTATGGGGAGATCAGACCATGCCATATTATATGTTATGAAATGGAAAGGGAAGAAAGAAGAGGCCAGCCTCC  
TTGCACTGCATTGCTTAAACAAAAATAAATAGAGTTGGAATTAATGTCCAATCTCTGGAGATATATAGCCTGGC

>comp164513\_c0\_seq5

AAACCAGATTGAAGGGGGCCAATTACGCTGCGAATCGGAGTCAAGGAAAACTGGAAGCAATCATTATGGAGATCAAAAAGTCCAACATCATGAGTAATGTCATCTTGCGTCGTGTTCTC  
CGCATGGTCTGTAAAAGTATATGCAATTTGGTTTAATTCCAGGAGCTACTGTGTGATGCAATGAAAAGGTTTGGTTATAACCTATAAACAAAAGAGCAACCCCCCAAGTCCCTGATAGAGATC  
CATTTTGAGGAAGAACAAGACGAAGCATCAACAGCCGGCACAACTTAAAAATCGAGATATTGGTTGTCTTATATGTAACTTTTCATTGGCCTCCAAACAAGTACAATCGATCTCCCTAG  
TAATTTTGTAGAAGAGTTCCCGACAAAAATGCAATGTAGTTCCTTTGCTCTTCTTCATGAAAGTAAACATCTTCAAACCTTCAAATTTGGTCAACGTGGTAAGGAGGCAGTTGTGGCCCGAG  
AACCAAGCATGGTACCAGGCCTTGCCAAAGCTAGTAATTTATAAAGCCGTAAATAACAACAATGGTACCGAATGGGTCGCTAGAGGAAATGGCAATCTTCTGGAAATATAGATCACG  
GAAACTTTCTGCATCAATGACATATGATGGATGCTTTTCATCATAATAATACTTGATATGACCATCGAGGTCGTATTTCGGGTTTGATCCTTTGCCGTTGATCTTCGGGGATGGTGAAGAGGGA  
TGGAAGTGATTTTTAGCTTTTGTAGAGGATTGAAGAGGCAAGGTTGCAAATAAGTTAGGTCAAGGGTCACGAGCCATCCATCCTTGGAGCCATAGCAGCGACGGCCAGAGATGTGGTT  
ACCAATGGAGGAGAAGCGACGATTGCAGCCGATGCCGCTTCTTCTTTTTTGGTGGTAAGATCGCAGAAAGTAAGTGTGTGAGAGGCCTCTCCGGCATTGTTGGGAAGAAGCAACCATG  
GGGATGGAGTACGTTGAATTCTAAAGAGATCATCTTGGCAAGAGCGAAATCCACGATGTGCATGTGGCAGCGAATCGGAGGAAGTCTACAATGGGAAAGTGCATGAGAGGCAATGG  
AGGAGATCTATGGGGAGATCAGACCATGCCATATTATATGTTATGAAATGGAAAGGGAAGAAAGAAGAGGCCAGCCTCCTTGCATGCAATTGCTTAAACAAAAATAAATAGAGTTGGAAT  
TAAATGTCCAATCTCTGGAGATATATAGCCTGGC

>comp164565\_c0\_seq17

TTAATTTCAACATAAATAATCTATTAGAGACAACCTATGACTCATAACATGGGCAGAACAAACAACAAAAAAGCAATAAAAAATAAACATGGCACTGTAAGCTTAATAATATAAGATTTG  
TCACAAAGTTAACAATCTCTTATGCTTAATATATAGCAGAAAGGATAAGTATAAAACCCCGCAGAAAACACCAGATAATATAAGCACCCAGTTGAAGTTGGAGGGACTGTCAAACACAGA  
ATTCTGAAAAGTTCATCCCAAATACACCTGTAACTGCAAAAATGGTTACAACAAAAGTGGCTCCGGTGAGCAGCAACTCAAATTGAATCAACTGATTTTCGACATTGTCCAGTTTGAT  
GTTGATAAAATCCTCAGTATCATCTATATACTTTTCAGAGATGATAATTTGCTTAGTGTATTATCTGTGACAACAAAATATGCTTCCAAAAGCATCTCCAATTCTTCAACATGACTCCCATTA  
TTGAATGAACTCCTGGAGCTGTCTCTTGTCTGGGCTGATAATACTAGTGGAAAATGTTGGTGAAGTGGAGCAGACCTTGAGAAACCAGTGTTCAGAAATCAAGACTGCTCGAATAT  
CGGAGAGTGGATTGAAATGCTTCGATTCCATCCTCCTTCTGGGTAAGATACATCTCAGCCATGTCACCATCATCATCCATGAGATGTTCTATTTCATCGCGAATCTGAAATGTTGATCTAAAG  
TTTTCAATCCAAAAACAAGAATAAGATTACTAATTACTGCATACCTTCTGAACTCTGTAGGTTAAAGCAAGAAGATGGCTTTTTAGCCTGCGAACATGCTCTAGATTTATGGTGCTAATTGT  
GGTTGCTAGCTCATCAAGCACAGGATATATCTCAATTTCCAGTTCAGTGGCCTGAGATTCAGTGTGATGCTGAAGCCAACCTCAAGAGCAAGTCCAAAGCCTTGAATTCAAAAGGAAGATC  
ATCTGCACATCAAATGTAGCTAGCTAATTTCTTAAGAATTTTATGAAGTGATGAAAGCCAACAAAAAGATAACTTTGTTACCATTTTGATCTTTGCTTGCTGAAGTCTTTGGCCCAATTC  
TGATTCATAGTACAGAACACTGCTATCCAAAGAATTCATGAGTAAACCTCATCCGCCATGATTATGCATCTAATTTGCTCCAGGCTGACTACAATTGCTTTCTCTCGACCAAGAATCGTTG  
AGGGGTAGACAAACAAGGGATCTAAGAGCCTGAGATCTCGAGCTGGAAGCTGGCAGCGCCTCATCAGTGTGAATTTATCAAATGCCAAAGTTTGAGATTTCCACTACGGTCTATCTGTA  
TCCATGAACGGCTGTTGAAACCTCTTTTCTTCATAGCTGAAGCTCCAAATCCCTGAAGAAAATGGTTCCAGCTCCATCTGGCTTTGGTATTTTCGTCATAAGAAGCCGTTTCTGGAATGCC  
TGATTTCTCCGAGCTTAGAGTACGACTTCACCATTGGAAAAATGCTTTCTCAATTTATTAGATAAAGATCAAATCCAGCTTAAACCATTATATTTCCACAAAGAAGGGAGAACAAAA  
AGAAAATTGCAAGTCCAGCTAAAATGCATTTCCATCTTTGATTTATCCACAAAGGGATCCATACTTCCATTAACAAAAAACGAAGAAAAG

>comp164611\_c0\_seq14

TTAATTAGGTTACGAGTTCTGCTGAATTAAGTGAAGAAAGATGCTTAACCAGTCACTGTTTGTGGTGTGGCACCATCAAGATTCACAACTTTGAAAGGAGTTAACTCTTTTATATATTTT

CATATAAATAGAATATTATTCTTCTTTTCTTTTCTTATATATAGATCATGAGCATTGTCGTGGGCCAATTTATTATAATATATATAGTCCTAGCTACTCCTTAAGGATTGAGAATCTTGATGATG  
CTGCTTCGGCAATAAATGACTTTAATATCAATCGCGCGCATAITCTATATGATCTTTTCTCCTTTCTTCCATCTGATCTAATGAACAGGTAACCACTCTCAACATTTTTGTTCTGTCTTTTATTT  
TTGTTCTTGGAACCTTGTTTATTTAACGAGTTATGAGTTATATGCAATAGGATTTTCTGATCAGTTCTTGCGTGTACAATACTGTACATTCAACTAATTAACATTTTCTTTAAAAA  
AATCAAATCCTTACCTACTCCCTACCGTCCCACGTGCGCACGATCCAGCGCCGCTCGTTCGCACGTGCAAAACCATAACCGAGCGTCACGTCTCGCACGTGCTCACATGACTCGTTTCGAGTAG  
TTAAAAAGCCGATGGTACGAGGCCTTTGGCCTCTTCTCTCTTCTGCTCTCGCCACACTCCCCTCTTTTCTTTGACCCCTTCGTGGCTTGTTTCGACCTCGCTTGTCTCGACGACGTACCCTT  
CCTGTTAGATCGGAAGTCACGACATTTTGAGCGGAGGCAAGAACAGGAGTCGCTCGCTGTGAAGGAACTTTCTACCTTTCGTGCGCTTCTTCTCCACCTCCCAGCGCCGTCCTTTCCG  
TTTGGATCGGAAGTTAGACATTTG

>comp164612\_c0\_seq3

CTGATACATTTTGTGTTGAATTTGCCAATGTAGAAAAGTAAATTGAACTCATTCTATAAAAAGAATAAAAATGATAAAAAGAACAATTAGCAACAACCTCAAGAAGAAACAACAAAAGAAAC  
AAAAAATATCACTAAACCTACTTGCTAGCTTCAATTCTCTACACACAGAAGTGTGCCCTAAACAAAACCTTGTTACTTTCCAGATCCTGAAGGGAGCAAAACTCTACTGATTTACTGTGATC  
ACCTACATAGTAAGAAGGAACCATAGGCGAGAAAATGGAAGAAAATGATTGGTCTTAAAGCATGGATGCTTCTAGAAGCAGAAAATATATAGAACTTAAATAATAATAATAAAAAATA  
ATAAATTACCAGTTAAGTTGTTGCAACTGATGGTTTCTTCAAGAATTTCTGGCACATGGTAGTACCATGAAATGTAAGAAGTGGGTGTTCTAAGAACTCTAATCTATCAGAAGATGTAATTT  
CTGTGAAACCAAAAGCGGACGTCCACATGTTTCAAGATTCAGGAATAGCAGGTAGCATTAGCCTTTCCACTCCTAATGAACAAAAGCAACTTCTGCAATTCATTATTAGATGCGACACA  
TTCTTGTGCGGCGAAATTTACACGGGTGCCGATAAATGGCATTCTGCAAGCCTTTACCATGTATTCTTAAAGTAGCCACACTTATAAGCTCATCTCCATCCATTAACATCATGGTATAAA  
ACCCCAAAAGTTCAATCTATTCAACTCAGAAATGCTATTGAAAATGATATCCGTAGCAAGGTCACTCTGAGTACGTGCCTCAAACAAGGCTCAAACATTCATGCAAGACATCAAGTG  
CAATATGGAGCATTCTGAATTTCAACTACAGATTCATCATCAAGTTTGCCAAAATCTTCTATATTTGATCTCCAAATAGTCCAATACAATCCTTTACATGACTAGGATTCGGGTTCCTCA  
GAAGTGATTGAAGATGAGAAATAATCTTCAACATGCTTTACTGCAAGTCCAAGTCCCAGTTGGGCACTCTTTTAGCTCCAACCTTGTTTTGTAAGCAACCGACATGATATTGTTGTTT  
ACATTGATCACAATAAATCCCTGAATTATGGTTGAAATTTCTGTCATCAAAAATAAATTTGCTAAGACCACAAATTCACATTGACATGATGGGCAAAACCATTTACCTTCAGGCACATCCT  
CTAGACCAATACAAGTTGGATGAAACGCTGATGGACAAAGATCACATAACATTATCAGACCACCATCTCGACAGACAGTGCATATATCATCAGCTTCATGATTGGAAAAGTCTCTTCTTAAT  
CTTGAATGTTGGAATTTATTTGGCTTCAAAGCACTTAGAATCTGCTTTTGGCAATCTAACAACGACCTACCATCTTGAATATGATATTGGTAGAAGGTCTTGAAGTTCTGCTTCCAGCATG  
AGCTCCAAACTTGGAAGAGGAAACACCTTTAGGCAACACCTACATTTAATTCATCGTGAGTTATCCAACCTCTTTTCAATACGTGGCCATCTGCTTTTCTCACAAAGGCTACCTTCTGC  
CTTGGCAACACAACATCTTTATCAATCAACCAGGACATAACTGTTTTAGCAACTTGATCTTTAGAAGATAGAAACATGGCCAAGCGAGATCTTTTGCCTGAACGTAGCACAGACGATGTG  
AACCTCCGCTAGATGGGTTTTGACTGCTAGAAGCACCGAAAGCATCCATCTTCATAGCATGTTTTTGGTAACAATAAATCTCCTCTTCTTTAGCTCTCTCTTTTGTCTAAATGCTCCTTA  
GAATTAACCTCATTAGAATCAGATAAATTAGAGGAAGAGAAAAGTTTTTTTTCTAATATCTCTTTTTTGATAACATGAGATTTCTGACACTCTATTTTTCTCTTTTAGCTCACACTTTTCTT  
CTAAATGCACCTTATAATCAAATTGACCAGAATCACACAAATTGGAGGAAGATGAAGATCTTGTACCCTTTCTCTTTTTGCTTCATAAGAGATTTTTTATGCTCAAATTTCTCTTTTA  
GCTTCTCTTTTTTCCAAAATACTCAGAATTAATTCATCAACAGCAACCAATTAAGGAAGATAAAGATCCTTGCCCGAATCTCTTTTTGATCACAAGAGATTTTGGATTATGGGG  
GTTATTAACCTGAATAACATGGCAGTTTCATGAGCTTCTCCTTGCTAGGAGTAATACTAGACATATTATTTGATGCACCAATGAAACATTTTTCATCATTAAATACATTCAAATGACATTTCT  
GGGTGTTTTACGATGTACTTCTTCTAGGTATCCCTTACAGGCAGAATAAAGAGATATATAGGTCTTCCCATTCCGAGAGGTGTAGCGTAATTCCTGCCTCACCTTCTGTTAGTTGCCAA  
AATTTCCAACCAATTTCAAGAGATAATCCTTAGTTTTGACCTCAGTTCTTTACATTAGTAGATGAAAGCTTTGACTTGTCTTTTAGCATTTAATATAGTCAATGTATGCTTTTATAACAC  
CTGATAAATGTAGTGTTTTTGCATTTCTATATATGTCATTTTCATTTGAATCCAGAGTTTCAGTATTCATCCCAAATAATTACCGGAAGCTTGTGCCTTTTCTCCAATATATCAGGTGACTTC  
AACTGAATAACCTTACAGTTAGTCAAACCAGAAGAATCTGATTCACCATAGAGCAACTCTGCAGTTTGCTTGTTTTTCAGAAATGACTAGCATCAATGGGATGCATTATCTGGTCTTGTTTTAG

AGAGATGAAATCTGCTTTTGTAGGAGAAGTATCCAGCAAATGATTGCCCGAGTCAATGTCCTTTGAGTTGCCTTTATCTCTAGCTTTACCACTCATCTTTTCGTTCTCCTTCAACAAATACTT  
GAGAACCTTTATAAGAGAGTAATAGATATTTTGTTCAGGTGAAATATATCGAAATCTTAATATAGTGTCTCTTTTACATTCTATCCTCCAACCAATAGACACAAGATGTTTCCTCAATTTTACC  
GTTTGAATTCGAGGATATCCCAGCTTACCTTTTTTCATGGAGTGCTTACTGAATTTCTGTATGAGAAGAAACGGACAGTTGCAGTAAATCATGGCAGAATTCACCTTCAAGTTTCACAGGTT  
TCCATGCCCTTGATGTTATGCTTTTCTTATCGTCATGGGTTTCAAGTGAAATTTAATGTCACAAACACTAGATGCCACAATTTACTATCCCCTTCATTATTCTAAACTTTTCATCTTCCTGA  
TGTTTCATCCACCACCTTTATTTCTTACCAGATATAAAATTTCTGCACCTGAATCCAAAATGCGAGGCTCTAGATGTTTCTGTTTTTGAATATCCTGAATTTTATTTGAAAGTTGTTATACAGCATT  
TGCCAGCATGACTAGTTGATGCCAGAGAAAATTTCCCACATTAGTAGATCTTCCCCTCTTTCATGTGCCAAACACTCACTGAAATTTTGTACAGAGGAAGAAGAGTGAGTATCAGGTA  
AGCTACTACTAGCAATTGATTTTGTGCTCGCTCGAATCACATCTAATACCAACTCTTTCCATACGAGCTTTGATCCAGAATACCAAACCTTAATCTTCTCACGAAAGTATTTGTAGCTTTCAGGC  
GAGGCCATATCTCCTTGATTTCTGATAGCACAATATCTTTTTGCCTAATTTTTTTCATGATCTGAAGGAACAACCACAGACCTCGATGTCTCCATTGCCAGAAACACAATCCACTCTTGG  
GTCAATCGAATCTCAGAGGCAAAAATGAACTTTGATCACTCATGTCTGGAAAGAAAACCAACAATTTACTAGAATCAACAGTTGACCAATCAAAAATCCTTCCCTCCAGGAATCTTTG  
ATGGAACATCAACACACTGCCAAAATTTTTCAGATTTTTTAATGTCATGGATAGGAGGCAAAGGCCTTATCATTCTATTGTAGCTTTCCTCCACCGCAATACAGTTTCTGATGCAGC  
TTCTATTCTAGAGATTGGTTGAATAATTCTAGAATAATCGCCATTATCCATCATATGATTTAATTTAACTATGCGGCAGCAACTCTGACAATCTGTGATCACACCGGTAAACCAACATGCATG  
AGACTCTTCAAAAAACGAAGTACCTCTACTTTCTCTCCTACTAGAAGCTTGTTCCTTCGTCGCCATTGTTGACTGCATCTCCAAGTATTCACCTCGTTGGAGATGAACGCCATTATCA  
GAATCGGGAGATCAGACAGGGTTT

>comp164612\_c0\_seq5

CTGATACATTTTGTGTTGAATTTGCCAATGTAGAAAGTAAATTGAACTCATTCTATAAAAGAATAAAATAAAATGATAAAAGAACAATTAGCAACAACCTCAAGAAGAAACAACAAAAGAAAC  
AAAAAATATCACTAAACCTACTTGTAGCTTCAATTCTCTACACACAGAAGTGTGCCCTAAACAAAACCTTGTTACTTTCCAGATCCTGAAGGGAGCAAAACTCTACTGATTTACTGTGATC  
ACCTACATAGTAAGAAGGAACCATAGGCGAGAAAATGGAAGAAAATGATTGGTCTTAAAGCATGGATGCTTCTAGAAGCAGAAAATATATAGAACTTAAATAATAATAAAAAATAATA  
ATAAATTACCAGTTAAGTTGTTGCAACTGATGGTTTCTTCAAGAATTTCTGGCACATGGTAGTACCATGAAATGTAAGAAGTGGGTGTTCTAAGAACTCTAATCTATCAGAAGATGTAATTT  
CTGTGAAACCAAAAGCGGACGTCCACATGTTTCAAGTTTCAAGGAATAGCAGGTAGCATTAGCCTTTCCACTCCTAATGAACAAAAGCAACTTCTGCAATTCATTATTAGAAATGCGACACA  
TTCTTGTGCGGCGAAATTTACACGGGTGCCGATAAATGGCATTCTGCAAGCCTTTACCATGTATTCTTAAAGTAGCCACACTTATAAGCTCATCTCCATCCATTAACATCATGGTATAAA  
ACCCCAAAAAGTTCAATCTATTCAACTCAGAAATGCTATTGAAAATGATATCCGTAGCAAGGTCACTCTGAGTACGTGCCTCAAAACAAAGGCTCAAAACATTCATGCAAGACATCAAGTG  
CAATATGGAGCATTCTGAATTTCAACTACAGATTCATCATCAAGTTTGCCAAAATCTTCTATATTTGATCTCCAAATAGTCCAATACAATCCTTTCACATGACTAGGATTCGGGTTCCCAA  
GAAGTGATTGAAGATGAGAAATAATCTTGAACATGCTTTACTGCAAGTCCAAGTCCCAGTTGGGCACTCTTTTAGCTCCAACCCTGTTTTTGTAAAGCAACCGACATGATATTGTTGTTT  
ACATTGATCACAATAAATCCCTGAATTATGGTTGAAATTTCTTTAGGCACATCCTCTAGACCAATACAAGTTGGATGAAACGCTGATGGACAAAGATCACATAACATTATCAGACCACCAT  
CTCGACAGACAGTGCATATATCATCAGCTTCTGATTGAAAAGTCTCTTCTTAACTTTGAATGTTGGAATTTATTTGGCTTCAAAGCACTTAGAATCTGCTTTTGGCAATCTAACAACGAC  
CTACCATCTTGAATATGATATTGGTAGAAGGTCTTGAAGTTCTGCTTCCAGCATGAGCTCCAAACTTGGAAAGAGGAAACACCTTTAGGCAACACCTACATTTAATTCCATCGTGAGTTAT  
CCAACCCTCTTTCATTACGTGGCCATCTGCTTTTCTCACAAGGCTACCTTCTGCCTTGGCAACACAACATCTTTATCAATCAACCAGGACATAACTGTTTTAGCAACTTGATCTTTAGAAG  
ATAGAAACATGGCCAAGCGAGATCTTTTGCCTGAACGTAGCACAGACGATGTGAACCTTCCGCTAGATGGGTTTTGACTGCTAGAAGCACCGAAAGCATCCATCTTCATAGCATGTTTTTG  
GTAACAATAAATTTCTCCTCTTCTTTAGCTCTCTTTTTGTCTAAATGCTCCTTAGAATTTAACTCATTAGAATCAGATAAATTAGAGGAAGAGAAAAGTTTTTTTTCTAATATTCCTTTTTGC  
ATAACATGAGATTTCTGACACTCTATTTTTCTCTTTTAGCTCACACTTTTCTTCTAAATGCACCTTATAATCAAATGACCAGAATCACACAAATTGGAGGAAGATGAAGATCTTGTACC  
CTTTCTTTTTGCTTCATAAGAGATTTTTTATGCTCAAATTTCTCTTTTAGCTTCTTTTTTCCAAAATACTCAGAATTAATTCATCAACAGCAACCAAAATTAAGGAAGATAAA



GATCCTTGCCCGAATCTCTCTTTTTGCATCACAAGAGATTTTTGATTATTGGGGTTATTA AACCTGAATAACATGGCAGTTCATGAGCTTCCTCCTTGCTAGGAGTAATACTAGACATATTA  
TTTGATGCACCAATGAAACATTTTTCATCATTAATACATTCAAATGACATTTTTCTGGGTGTTTTACGATGACTTCTTCTAGGTATCCCTTACAGGCAGAATAAAGAGATATATAGGCTTCC  
CATTCGGAGAGGTGTAGCGTAATTCCTGCCTCACCTTCTGTAGTTTGCCAAAATTTCCAACCCATTTCAAGAGATAATCCTTAGTTTTTGACCTCAGTTCCTTTACATTAGTAGATGAA  
AGCTTTGACTTGTCTTTTAGCATTTAATATAGTCAATGTATGCTTTTATAACACCTGATAAATGTAGTGTTTTTGCATTCTCATATATGTCATTTTCATTTGAATCCAGAGTTTCAGTATTCATC  
CCCAAATAATTACCGGAAGCTTGTGCCTTTTTCTCCAATATAATTCAGGTGACTTCAACTGAATAACCTTACAGTTAGTCAAACCAGAAGAATCTGATTCACCATAGAGCAACTCTGCAGTTT  
GCTTGTTTTTCAGAATGACTAGCATCAATGGGATGCATTATCTGGTCTTGTTTTTAGAGAGATGAAATCTGCTTTTTGTAGGAGAAGTATCCAGCAAATGATTGCCCGAGTCAATGTCTTTGAG  
TTGCCTTTTATCTCTAGCTTTACCACTCATCTTTTCGTTCTCCTTCAACAAATACTTGAGAACCTTTATAAGAGAGTAATAGATATTTGTTCAGGTGAAATATATCGAAATCTTAATATAGTGT  
CTCTTTTACATTCTATCTCCAACCAATAGACACAAGATGTTTCTCAATTTTACCGTTTGAATTCGAGGATATCCAGCTTCACCTTTTTTCATGGAGTGCTTACTGAATTCGTATGAGAAG  
AAACGGACAGTTGCAGTAAATCATGGCAGAATTCACCTTCAAGTTTCACAGGTTCCATGCCCTTGATGTTATGCTTTTTCTTATCGTCATGGGTTTCAAGTGTAATTTAATGTCACAAACA  
CTAGATGCCACAATTTTACTATCCCCTCATTATTCCTAAACTTTTCATCTTCTGATGTTTCATCCACCACCTTTATTTCTTACCAGATATAAATTTCTGCACTGAATCCAAAATGCGAGGCT  
CTAGATGTTTCTGTTTTTGAATATCTGAATTTTATTTGAAGTTGTTATACAGCATTTGCCAGCATGACTAGTTGATGCCAGAGAAAATTTCCCACATTAGTAGATCTTCCCCTCTTTTCATG  
TGCCAAACTCACTGAAATTTGTACAGAGGAAGAAGAGTGAGTATCAGGTAAGCTACTACTAGCAATTGATTTGTGCTCGAATCACATCTAATACCAACTCTTCCATACGAGCTTT  
GATCCAGAATACCAAACCTTAATCTTCTCACGGAAAGTATTTGTAGCTTTCAGGCGAGGCCATATCTCCTTGATTTCTGATAGCACAAATATCTTTTTGCCTAATTTTTTTCATGATCTGAAGG  
AACAAACCACAGACCTCGATGTCTCCATTGCCAGAAACACAATTCCTACTCTTGGGTCAATCGAATCTCAGAGGCCAAAATGAAACTTTGATCACTCATGTCTGGAAAGAAAACCAACAA  
TTTACTAGAATCAACAGTTTCGACCAATCAAACTCCTTCCCTCCAGGAATCTTTGATGGAAACATCAACACACTGCCCAAAAATTTTTCAGATTTTTTAATGTCATGGATAGGAGGAAA  
GGCCTTATCATTCTATTGTAGCTTTTCTCCACCGCAATACAGTTTTCTGATGCAGCTTCTATTCTAGAGATTGGTTGAATAATTCTAGAATAATCGCCATTATCCATCATATGATTTAATTTAAC  
TATGCGGCAGCAACTCTGACAATCTGTGATCACACCGGTAAACCAACATGCATGAGACTCTTCAAAAAACGAAGTACCTCTACTTTCTCTCCTACTAGAAGCTTGTGCTTCTGTCGCCA  
TTGTTTACTGATCCTCCAAGTATTCACCTCGTTGGAGATGAACGCCATTATCAGAATCGGGAGATCAGACAGGGTTT

>comp164646\_c0\_seq1

GAAGGTGAGGGATTTATCGAGGGAGTGAATGTGAGAATGAAGGTAGTGGAGAGTGTAAATTCGGATATACAGCCGCTTCGTTCCCTCGGCTCGTCGACGGCCGTGGGTGGTGAATTTCTCC  
CGCCGGAGTTCCCGCAGCCGGGCTACACCGCCGACCACGGCCTGTCCGTTGTCCATTCCAGCTGTGCACGGCTTCGCTTTTCTTCCACAGCTTCGTTAATTTTCGAGTCTGATTGCATCGC  
GTTAATGGCGGCAACAACGGCACGTAGCTCTGCCGATTCCCGCATGAAGCAACGAAGGTGGCATACTCCTTGAAGATCGCTTCAAGCCCCTCGGCCAAATCGTGCACCATTTCATCTCTC  
GCCGTATCGGAATCTGGAAGAATTCATCGACGGTACCTTCGCCAATTTTATCAGATCCACCGCCGACAGTGTGAATGGCTCGCTCTTCGATTTCCGGCATCCAGTTCTCTGTTTCTTTGGC  
TCGTTTAAACTCTCCCTCCCAATCCGAAGCCTCTCATCCACCCAAGTCTTCAAGAGTCCAACAGCAATGGTGTGATCTCGTACGGAACCATCTCTCTAAGAAGATTATTCTTGTTCAT  
CATCGTTATCTGCAGCGTCTTACCAGCATCTGAATTAGCAGCTTTTCAAGCCTGCTGGCGCAATGGAGAACGCGCACAAAGTTGTTGGTGAGGCTATTACCTTAGCAAGATATTGCTT  
CAGTACAACCTCGAAGCAATTATGCAACGTCACCAACGCTATTCCGGTGGCCGCCGGGACCAATTGTGCGCAGCACAGGACTGAACTTCTCTCTCTCCGTCGCGGGGAGTGCCTCCGTGTC  
TTTTGCCAACTCGATCAAGATATCGCTGGGATCCTCGTCCACCTCCACGATCATGCTATCGACATGATCATGCCCTGTCTCGAACACCTTCGTAAAGGCATTGCGCAGAGATCTTTGAATAT  
AGAATTCACCCGGCTGGAACAGAGCCAGATGAGGTTTCTCTCTTACCAGTCCCAGGCGTGTACCTGCCAACCCGGGAGGTCTTCGACGATGATCTTTGTTGTTGATAGCGCAAGCG  
AAAGAATTTTCTCCATGTTTTCCAGTGTCCCTTGTGCAAAATCTCGTGGTAGTCCAGTAGCCTTTTCTCTGTCCACCCCTGCATCGAAACCAGAACGCCGGAGAGAACCTTGATATAACT  
CGGTTCCCGATCTACCCTCTCTTACGTCGGTTGCCACTTCAACAACATGTTCAACGTCGCCTTGATCAAGTCCGGTTGATCTGCCCGGTGACGACGTAAGTCTGGAACAAAATCCA  
GGTGAAGCAAAGATTGTGGATACTTCGGTTGATTCCCTAAAGTAGGCCATGTTTTCTTAATTAGCTCTAGAAGTTCGTCGACCTCATCGAGCACTACGGTTTCTTCGCGCATGTCGAATATGG

ATTTAAGCAGGGCGAGGTAAAGATGAACGTTGACGGGGAATCCGTCGGCCAGTGGATGCTTCCGGCGCTGGATGTTTTGGAGCTGCGCCAGGCAAGAGCAGTCACGGCGCTTGTAAG  
ATTTTCGATTGCTTCCGAGTTTTTGCTTGATCGATGGCTTTACCTCGCTATCCATTAGAACTTGGCGGAATCGGAGAGCGGCGGCATTGAGTCGGTC

>comp164646\_c0\_seq2

GAAGGTGAGGGATTTATCGAGGGAGTGAATGTGAGAATGAAGGTAGTGGAGAGTGTAAATTCGATATACAGCCGCTTCGTTCCCTCGGCTCGTCGACGGCCGTGGGTGGTGAGTTTCTCC  
CGCCGGAGTTCGCCGAGCCGGGCTACACCGCCGACCACGGCCGTGCCGTTGTCATTCCAGCTGTGCACGGCTTCGCTTTTCTCCACAGCTTCGTTAATTCGAGTCCTGATTGCATCGC  
GTTAATGGCGGCAACAACGGCACGTAGCTCTGCCGATTCCCGCATGAAGCAACGAAGGTGGCATACTCCTTGAAGATCGCTTCAAGCCCCTCGGCCAAATCGTGCACCATTTTCATCTCTC  
GCCGTCATCGAAATCTGGAAGAATTCATCGACGGTCACCTTCGCCAATTTTATCAGATCCACCGCCGACAGTGTGAATGGCTCGCTCTTCGATTTCCGGCATCCAGTTCTCTGTTTCTTTGGC  
TCGTTTAAACTCTCCCTCCCAATCCGAAGCCTCTCATCCACCCAAGTCTTCAAGAGTCCAACAGCAATGGTGTGATCTCGTACGGAACCATCTCTAAGAAGATTATTCTGTTTCCAT  
CATCGTTATCTGCAGCGTCTTACCGACCATCTGAATTAGCAGCTTTTCAAGCCTGCTGGCGCAATGGAGAACGCGCACAAGGTTGTTGGTGAGGCTATCACCTTAGCAAGATATTGCTT  
CAGTACAACCTCGAAGCAATTATGCAACGTCACCAACGCTATTCCGGTGGCCGCCGGGACCATTGTGCGACGACAGGACTGAACTTCTCTCTCCGTCGCGGGCAGTGCCCTCCGTGTC  
TTTTGCCAACTCGATCAAGATATCGCTGGGATCCTCGTCCACCTCCACGATCATGCTATCGACATGATCATGCCCTGTCTCTAACACCTTGGTAAAGACAGCATTTTAGTTGTCCCTGTAGC  
CTTTCCTGCTTCTTTTCATTGGTCTATGTTCTTTTCATTGGTCTCTGTTCTTATAAAAAGACTCTTTTGTAAATAATGAGAGAGATTGAAAAGTGACCTTTTCTTCATTGGTTTGCCTGTGTTG  
GTGTTTTGTCTGTATCCTGAATCCTCTTGATTCAAGTGGTGGTTCCTGTTTCATCTCTCTACAGAGAGTTATTCTGTTATCTCATCCCGTTCAAAGAATTTCTGTTTTACCGAGGAATACTTT  
GTTCTCTTCTTGGCGGGGTCAGTGGATCTAATAAAAAGTGGCGAAAGTGACCTTCAATGAATCTTCCAGATTCCGATGACGGCGAGAGATGAAATGGTGCACGATTTGGCCGAGGGGCT  
TGAAGCGATCTTCAAGGAGTATACCACCTTCGTTGCTTCATGCGGGAATCGGCAGAGCTACGTGCCGTTGTTGCCGCCATTAACGCGATGCAATCAGGACTCGAAATTAACGAAGCTGTG  
GAAGAAAGCGAAGCCGTGCACAGCTGGAATGGACAACGGACAGGCCGTGGTCCGGCGGTGTAGGCCGGCTGCGGGAACCTCCGGCGGGAGAAAACCCACCACCCACGGCCGTCGACGA  
GCCGAGGAACGAAGCGGCTGTATATCCGAATTAACACTCTCCACTACCTTCATTCTCACATTCCTCCCTCGATAAATCCCTCACCTTC

>comp164646\_c0\_seq4

TCGGAGTTTTTGTCTGATCGATGGGCTTTACCTCGCTATCCATTAGAACTTGGCGGAATCGGAGAGCGGCGGCATTGAGTCGGTCAAGGGGAAGAGATGGGTGGAGCAGAAGCCCGAC  
TTCGAGGATCTTGAGTTGCCCTCCTTTGCCATTGATGATACTTTGGCTATCATTGAATTCCGATGGTTTTCAGATGGCGGAGGAGCTCAAGCGGGAGGATGATGGTCTCCGCTCTTCTCCCAT  
TCTGACCGACGAAGCTTCTCATGAGGATTTTTCTCAGCCTGTTATCGCTCTGCTCCGTAACGCGCATCTGCCGCCGATGATCTCGGCGGAGGTCATCGGCCGCTTGATCCTTCCGGGAGA  
GCTGGGAACAAAGTTTCTTCCCGGGGAATTTGGACTGGCGGCATGAAGATTTGCAACCGATCTCAGCGCCATGGAATTCATCGCGCGCATTGGAGGCGGCCGTCGGGCTTTCAGCCCGA  
GCGTGCTCTTACCCGACTGGTCAACCATCATCCCCGTGCCGCCCTTGGGGCCGACTACCGCCGGCTGCTGCGTATAGGGGGCTCCACCACATACCCAGCTTCCAACGTAGGCGA  
TGGCTCCCTGTTTCCGAAGCCAGGGGACGAGCGGCAGGACATGAAGAAAATCTCGTAGGCGGTTTCGCGGAGGTCGAGCGGCGGAGTGTGCCGAGGCGGGCGCCGAAGGGCCAGT  
TGATTTTCGCTGTCCCGGACGATATGGAGGCGAGGGATTCAATTGTTGGGGGAGATGGAGGAGCGGGGGACGCGGGTGGAGCCATGAACTAGCTAGTAAGGGGCGGCCAGCTGCGGCG  
ACGGCCGCGTTAGCTGAGGAACATGGCCACCATCGCATGGATCTGTTCCGGCCCTGGCCGCCCTAAATTGAAAAATGGTGAGCATGAG

>comp164670\_c0\_seq1

TTTTCCACAATAATCTATACTACAATAAGTTTTCTATTTTTCTAAGTTCAAATATGGTCATGTTTGGAGCATCCCTTTCGTTTGTGTTTTGCTTCCAAATTGTTACTGACCATTTTCATGATTC  
TGATGGAAAATGCAGCCCAATCTTACCCCACTTGGCTGGAAGGACCTCAGTTTGGAAAGGCCATATCGCCGGAGGTGCTTCAGGCTTCAATCAACACCTCGCCGAAAATGGAGCAGCTCTTC  
AGGTCTAAGAGGAGCTCTGAGGAGATCTTCTCGCTCCTCCCAACTAAAAACAAGAAAGATATGCCTATGAGCTTTATATGCCGCACCTTTTACTGGTTTTTCTTCTGCAAGTAATGA  
ACTGGTTATTTGTTCTGTTATCCACTAGTTACCCCTTCTGGTGGACTGTAACCTAATGACTATTGTGTTTTTATTTTCATATTATTCATGAATATTTCTGTTTTGCTGCAGCAGTTGAGAGA

GCTGATTAGTCTCATACAAA

>comp164672\_c0\_seq14

TTGTATCTTTTAATTTAGATTCTAGGACATTACATATCATCCCAGTTGTCATAGGGATTTGTATAGTCTATAAAGTACTTTATAGTTCATGTGATGCTATTGATGTATTTGAATTTTGAACATTTT  
GTTTTGGTTATTAACCTTTCTTATTATCACTAGAAATGTTTGGCTGTTTATCTGCAAAAATCAAAAATAGTGATTTACCTCTTGTGGAATGTTTTCTCCCTGTGCTGCTTCTGCTCTTAAGACC  
TTAATGGCAACTGGTGTATGATCCAGATATGCCTTGACACAGGTCCATAGCCACCTCACCAATCTTATTTTCTGCAGTGAAGTCATTAGTTGCTGCTTAATCTCATCAATGGTGTATCTC  
CTGTAGCGGGTGTGAGTTAGTGCATCCAATGCTTTCTTTCTTTCTTACGCCTCATGCCTAGCTTTTCTTTCTGCATTTTGTCTCTTATGTGCTTCGAGCTCAGCAATCTTTCGTGCA  
GTTTCAGCTGCTTCAACGGCAGCTCTACATTTTACTTTCTCCATTTACGCCATAGCAAGAGCTGCTTCTTCTGCATGTCTTAATTCCTCAAACCTTTGGGCTTCTTCAATTTTCCATTGTTGA  
AGCTCCATTGCCTTCTGTTAGCTGTTACAGCTTCTTTGCAGGCATTGCTATAATCTCCATTGTTTGCCTTAGCTCAAGTTTCAGCCTTCTCATTTCAGCCTCAAGTTCTCGATTACACCA  
GTAAGTGAAGTGCCTTGTAGGACTATCAACAGAGGCTGAAGAAAATTCAAGAGAATTTCCAATGTTTCATTGATTGGAAGCTGTGTCCTTGTATGTCAATGTCATCTGAAAATGAGC  
TTCCATAATCAACAGAACTTCCAGACAGGTTAGCAAAATCGAGCTTCTCCATGAACAGATTGTTGGGTGGCGGTGCTGAACGAGCTATGGAAAGTGGCCTATCTTTCGAGAAGTATTCA  
GATAATCAGGCATAAGATCTATTGATCTTCGTTCTGTCTTTTCATGCAAGGGGGTGGTGGACCTGAAACTCTCCAGCTCCTCCTTGAATATGATGATCTACTGCTTGAATCTTCCCTGGTCA  
GGTAGGACTAGTGAAGTTGCTGTGATGCTCAATTGCCTTGGTGAATAACGTTAGGAGTTGAGTTTCTTGTGCTCGGATGCTAGTTGTTTTCCCTTTGGAAAGGACATACACAGCACAG  
AAGTCTGGTGTGCTGATTTTCATCAGGCTACTTGGGACATCAAACTTCTGAGTTTTTTCATGATGCTCCTATTTGAAGCCCCAACGACTATGTTTTGGATGGAGCTGGCATTGATGTAATCAAC  
TATGGCCTTAGAAATATCAGCACCTCCAGGACTACCTCCTTTAGCTGCATCTGCAAATTCAAAAACAACATCTACAAAATGAAAGAGGAAGGGTACCTACTAGAGGATTTGCTCCGG  
ACATGAATGAGAACAACAATCCTTGTTTAATGAGATGATCAACGGCCCATTTACGGCATGCTGGCTGTTCTTGTCTTGTGATGGCCACCGCAGTTGGGCAGATTTCTGATACAGGGC  
TTCGGTGCCTTCAGCTCCGACCACAAGAGACTGAGCTGCAAAGGTACGCTTATCGACCACAGGCCACCTGTAATGACTTTCGTTTCGCTTGTCTTTATGCCTGCATTGTAGGAGATGAAT  
GATGGTATGAAGGAGAACAAGAGGAGAAGAAGATAAGATCTGTCTTTTTTCTCTCTCTCTCTTCTTCTTACCCTGCTTCCCTCTTTTTTGGGAACAAAATGTAGCTTCC  
TGGAAATCACGGAATTGTATAGCTTAACTTTGCCAACTGCTAACGGCTGAGGACCAAGAAGGGCCAGCCGTTGAGTCTGGCCACATATTTAAGGCAGAGAATAGGTTGGTTGGAGGAG  
CTAAGGACATTTTCTATTTTGTATTTAATCTATTGATATTTTGAAAAAAATATTCTGAAAATAAATTGAATAGGAGGAAGATTG

>comp164672\_c0\_seq19

GATAAATTCTATAATAAATTCATAAATTACAAATACATGAGAAAAGAAGGAGCACATAACGAAACAAATAGGTGCAACATTTTTAGAAGTTTTTTGCAATGCGGCAAATTAAGCTTTAAG  
CCCAAGCCATGATAAAGTCTTATGGTCAGCCACATTTTCAGATATTTGATACCTTTATATTTGTATTACAAAGGTTTTGGGGAGTAAGGCAATAGGAAGATCTGGCTTATCCAATCCATTTAGGC  
TGAAAAATATAAAAACCTCAACATGAATGATTTTCATTTCCACAGTCAATTGAAAACCATCAAATTACATTGAACTTCACACTAAACCGAAAAGCATTAAACATAAAAACCAATTCATTAT  
ATAATTCAAATTTACTCATCTGAACATCACCATCAGATGCTGATTTTCGACCTTGTACAACGCCTGAATTGCTTGAACCTTTTCTTCTGCATAAGCAACCTTGTCTCGTGTCTGTGGATTG  
TTGTAGCTATGTGGTCTTGGTGGAAAGTTGGACCTTGTCTACTATGGTGGTGGCTAGTTTTATATTCATTTCCAATGTTTCTTAGTCTGTTAAGCTCTGGCAAGACTTCTGCTCCAAGATCG  
GGCCTATCTTTCTCCTTAATTCAGCACATTTAATGCAAGTTTTGCAAAAATCAAGAGTTTCATCCATAGGCCAATCAGTGATTGATGGATCAAGCAACTGTTCAAATGTTCTTTTCAATT  
GCTCTCTCAACATGATGAGTGAGACCCATTGGTGGCTTTGCTGTGATAAGTTGAAGAAGCATTACTCCAAGGGAGTAAACATCGGACTTAGCTCCAAGCATTCCAGTTTGTGGTATTTCAG  
GATCAATGTAGCAGAATGTTCTGCTGCTGAAGTCATGTGGTATTGTGTGACGCTATCAGCTATAGATGGTGGGACAAGTCTGGCTAGACCAACATCACTGATCTTGCTAACATAATTCGA  
TCTAATAGGATATTAGCTGGCTTGGATCTCGATGAACAAGTGGTTCTGGTTTGGTCTGGTGAAGAATAATAGTGTGTGGCTATCTCTGCGGCTATTTTAAATCGAACATTCATGGAATT  
GGTGGGGTGTTCGTCGTTGGAAGAGCCTATCCTTAAGCTCCATTGTCCATGAACTCATATACTAGGCATCCATATTCTGGGCAAGCGCCGAGCAATAGTACCATGTTGGGATGTGCAAT  
GCAACTTAAAACCTCAACCTCTGTTGAAATGTTTCTTCTTGTGTTGCATCAGGTTTCAAATCTTAATGGCAACAGGTGTATGATCCAAATAACCTTGTAGACAGGTCCATAGCCAC

CTTACCAATCTTATTTTCAACAGCAAAGTTATTACTAGCAGCTTCAATCTCATCAATTGTGTATTTCTGTATCGTATATCATTATAAGCAAGCTCTTCCAAGGCTTTCTTCTCTCCATTGCC  
TCACGTGCGCGCTTAAATCTCAGCATTCTTTCTCTCTGTGATTCAAGCTCTGCAATCCTTTGTGCAGCTTTCAGCAGCTTCAATGGCGGCTTTGCATTTTGCCTTCTCCATTTAGCTATTGCA  
AGGGCTGTTTCTTCAGCATGCCTTAAATTCCTCAAATTTCTTGATTCTTCCAATTTCCATTGTTGAAGCTCCATAGCCTTCTGCTTAGCTGTAATTGCTTCTTTGCAAGCAGTGCTGTACATC  
TCCATTGTTTGCCTTAACTCAAGTTTCAACTTTCTCATCTCATTTTCAAGCTCTCGATTTTACTAGCAATGGGAGAGCGACTACTCCTTGGGCTATCTATGGAAGCTGATGAATGTTGAAA  
GGAGTCTCCGAAATCCATAGAATTGAAGCTAACGCCACCGGTAAATCAATTTTCACTGAAAACGTGTCAATAACAATCAGTAGACCTTTCGAGGCCAATTTGAGGAATCGAGATTGTCCATG  
AATTGATTATTGGGGCTTGAAGTAGCCATGGAAAGAGGAACATCCTTTAAAGTTGTCTTATATAATCAGGTAATCTATCAAGTGATATTCTTTCTGTACTTTTATGTAGAGGAGTTGCTGGA  
GCTGAACTTTTCCAGCTTCCCCTTGCAGGTGTCTTAGCTGAATCTTTCATGGTCCGGTGAAAATTTTGGAGATGCTAGGAGGGGCAATTCCTAGGAGGAAAGGTAGTAGAAGGAGGTGG  
ACTTTTTGTGATCGAACTGTGGTTGGCTTACCCTTTGAAATGACATAAACAGTACAGAAGTCTGGTGCAGATTTAATAAGGCAGCTTGAACATCAGGATGTCTAAATTTTTTTCATGAGC  
AAACTCTTATTAGAGATGCCAACACAATGTTTTGAATATGATTAGCTTTGATGTAATCAATTATGGCCTTCGAAATATCAACGCCTTCAAGTACTATCTCCTTCAACTGCATCCCTTTGCAA  
GCACAAAATCCCCTGTAAGGAAGAAACAATTGATTTATCTCTGCATCTGCTTATCTCTGGTACTTCAGTGCTAACTTCTGTCTATGGAGGATTTGTTCCCTGACATGGATGATGTTGATGAT  
CGGTGAGCGGACGAGATTGTTGATGGCCATTTTCATGGCATAATTTACTATTTTTGTCTTTTGTCTGATGGCCACGGCGGTGAGCTCGAACCCGACAAGCTCGTGCCGCTCTCCATGATCTCTA  
CAGGTTTACTTCAGATCATCTCATTAGATTATTTTCTGCTTGCCTTTTAACTAGAAATTATCATTGAAGAAATGAAAATTTTTTTGATAGAAATTAAGGAAAAGAGGAAGAGGAAGATCTT  
TCTCTCTCTTTTTTTTTTTTTTAAACAAAATACCTGAATTTTTCTGGCAACAATAT

>comp164672\_c0\_seq26

TTGTATCTTTTAAATTTAGATTCTAGGACATTACATATCATCCCAGTTGTCATAGGGATTTGTATAGTCTATAAAGTACTTTATAGTTCATGTGATGCTATTGATGATTTGAATTTTGAACATTTT  
GTTTTGGTTATTAATTTTCTTATTACTACTAGAAATGTTGCTGTTTATCTGCAAAAATCAAAATAGTGATTTACCTCTTGTGGAAATGTTTTCTTCCCTGTGCTGCTTCTGCTCTTAAGACC  
TTAATGGCAACTGGTGTATGATCCAGATATGCCTTGTACACAGGTCCATAGCCACCTTACCAATCTTATTTTCTGCAGTGAAGTCATTAGTTGCTGCTTAAATCTCATCAATGGTGTATCTC  
CTGTAGCGGGTGTGAGTTGAGTTAGTGCATCCAATGCTTTCTTCTTTCTTACGCCATGCTTAGCTTTTCTTCTGATTTTGTCTTATGTGCTTCGAGCTCAGCAATCTTTCGTGCA  
GTTTCAGCTGCTTCAACGGCAGCTCTACATTTTACTTTCTCCATTTAGCCATAGCAAGAGCTGCTTCTTCTGCATGTCTTAAATCCTCAAACCTTTTGGGCTTCTTCAATTTTCCATTGTTGA  
AGCTCCATTGCCTTCTGTTTAGCTGTTACAGCTTCTTTCAGGCATTGCTATACATCTCCATTGTTTGTCTTAGCTCAAGTTTCAGCCTTCTCATTTCAGCCTCAAGTTCTCGATTACACCA  
GTAAGTGAAGTGCCTTGTGTTAGGACTATCAACAGAGGCTGAAGAAAATTCAGAGAAATTTCCAATGTTTATTGATTGGAAGCTGTGCTTGTATGTCAATGTCATCTGAAAATGAGC  
TTCCATAATCAACAGAACTTCCAGACAGGTTAGCAAAATCGAGCTTCTCCATGAACAGATTGTTGGGTGGCGGTGCTGAACGAGCTATGGAAAGTGGCCTATCTTCTGAGAAAGTATTCA  
GATAATCAGGCATAAGATCTATTGATCTTCGTTCTGTCTTTTTCATGCAAGGGGGTGGTGGACCTGAAACTCTCCAGCTCCTCCTTGAATATGATGATCTACTGCTTGAATCTTCTGGTCA  
GGTAGGACTAGTGAAGTTGCTGTGATGCTCAATTGCCCTTGGTGGAAATAACGTTAGGAGTTGAGTTTCTTGTGCTCGGATGCTAGTTGTTTTCCCTTTGGAAAGGACATACACAGCACAG  
AAGTCTGGTGTGATTTTATCAGGCTACTTGGGACATCAAACTTCTGAGTTTTTTCATGATGCTCCTATTTGAAGCCCCAACGACTATGTTTTGGATGGAGCTGGCATTGATGTAATCAAC  
TATGGCCTTAGAAAATATCAGCACCTCCAGGACTACCTCCTTTAGCTGCATCTGCAAAATCCAAAAACAACATGTGCATTGCAACCATCAAATTAATTAATAATATATCACTTGTGATTG  
TTTTAGCTACAAAATGAAAGAGGAAGGGTACCTACTAGAGGATTTGCTCCGGACATGAATGAGAACAACAATCCTTGTTTTTAATGAGATGATCAACGGCCCATTTCACGGCATGCTGGC  
TGTTCTTGTCTTGTGATGGCCACCGCAGTTGGGCAGATTTCTGATACAGGGCTTCGGTGCCTCATCAGCTCCGACCACAAGAGACTGAGCTGCAAAGGTACGCTTATCGACCACAGGC  
CACCTGTAATGACTTCGTTGCTTGTCTTTATGCTTGCATTGTAGGAGATGAATGATGGTATGAAGGGAGAACAAGAGGAGAAGAAGATAAGATCTGCTTTTTTTTTCTCTCTTCTCT  
TTCTTCTTACCCTCATGCTTTCCCTCTTTTTTGGGAACAAAATGTAGCTTCTGGAATCACGGAATTGTATAGCTTAACTTTGCCAACTGCTAACGGCTGAGGACCAAAGAAGGGCC  
AGCCGTTGAGTCTGGCCACATATTAAGGCAGAGAATAGGTTGGTGGAGGAGCTAAGGACATTTTCTATTTTTGTATTTAATCTATTGATATTTTTGAAAAAATATTCTGAAAATAAATTG

AATAGGAGGAAGATTG

>comp164690\_c0\_seq2

ACTCCACCCCATAGTTAAATTCCTGTTTAAACAGATAAGCCAAAAAGTAATTAGAAGAAGGGCACATGATGCGTGATGCTGATGGGATCAAGATTACTTTTTGAAATCCAATCCGAAGGAA  
ATTAGTATACATGAAAAGCAGGCATGGTTACATAAAAAGAGCATGATGAATCCTGCAGCAAACAAAGGTTAGAGCAAAGAACAGAGAAGTGAGCAATCAGTTCTTCATTATCTTCCTTGC  
CATGATCAAGCTACAGTATATGCTTAAATAAACTAGCCAGTTAGTTACAAACCAACGGCTGTGATTAACAGCAGAAAAATAAACGATTGAGATTGCTCAGAGCAGGTGTAGTGAGGAAGTG  
GCGCAGTCATAGCACATGGAGAGGTAAGCCACCAGCTCTATATATGAGAAAGCTTATCACATGTGCTTATCTTATCATCCCCCTCAAGCTAGCAGTGGGAGGCCCAATGGTAAGCTTGG  
ACGAAGAG

>comp164701\_c1\_seq2

TTTTATTTTTATTTTTTATTAATATATTAATTTATGCAATAGTAGCAATAGAGCATCAATGGCTGATGGAGGAGAGATTATTCTATGCGGTATCTAAATACATCCATATATCAATCTGGACGT  
GCCACATCATTCAATGCACTGTGCATTGGGTGACATAGCGCGTCCGAATTGACCTCCGGACTCGTATGAACACCGCAGGTAATAATTTTTCTGATGGAGAGGTAATATCAACGGTTAGTT  
GTTTTTGATTATTTAGGTAGGAATAATTTTGAGAAAAGTTCTTCGGCTCTCAAAAAGAAGTTGTTCTAATTTTAATAATATTTTCAAAACTATAAGGAAATAGTAATTAATAAATAAATAGT  
TTTGGTTGACTTCATTTGATTCTTCCAACCTCTTATAGGCTAACTAATCTTCTAGCTATTACTATCATTCAAGTAATACTTACTATTTTCGAGCAAATAATATAGGCAGAGCAAAAAGAAA  
AGAACGAAGAGCTCAGAACGGAGATGAAGAAAATCTTATAAATGCTACAGATCCATTAATAACTTGAAGTGAATTCAATCAACGGCTTGGAGTGGCATATCATTGAGAAAGG  
AAATCAACGACATATTACGTAGAGTTTATAAGATCAACATCATTGATGATGATCTATATGTAGTTGCACCTCGTTTTTCGACTATTACGACAGCAAAGATATAACATAAGTTCTGATGTATTCAA  
TAGGTTTTTGGATGATAAAGGAGATTTTATGGCTTGCTTATGCAACAATGTGAAAGCTTTACTAAGCTTATATGAATCTGCTTATCTTGGATTTCTGATGAAGAAATACTAGAGAAAGCTA  
AAATTTTTTCAAGTTTTCACTTGAAGTCATTGATCTGCAAGATGGAGCCATCTTTTGCTTTGATGGTGACAAGTGCTTTGGAATTGCCATTGGTCAGAACACCTGATCGGCTCAAGGCTAG  
AAATTACATAGAAATTTATGACAAGTACAAATTTGTGCAATCAAAAACCTTACTTGAATTTGCAAAATTTGATTTCAATATATTGCAAGCTACTTATCAAGAGGAGCTTCGAATCATATCTGAGTG  
GTGGAAGAGTTAGGCTTGTTCAAAGACTTACCATTTATACGTGATCAAAATAGTAGAATCCTACTTCTGGATGCTTACAACCTACTGTGAACACTGCTATTACATGCTAGAGTTATTATGA  
CAAAGCTGATGGCCCTTGCTGTGACAACAGATGATATTTATGATATTTATGGGACACTAGAAGAGCTCGAGTTATCCCAATGCAATAGAAAGCTGGAATCTTGAAAAAGTTAGAACGTT  
GCCAGAATATATGCAACGATGCTTCCCTTGCATTACAATACCTTCAAGGATATCGAGGATGAGTTAGCTCCTGAGCACAAATCTTTTCGAGTTCATTACCTTAGAGATGAGTTGAAGCGAA  
TGGCTCATGCGTACCTTCAAGAAACCAAATGGGCGAGCGAGTGCTATATTCCTAAGCTTGAGGAATATGTTAAAGTAACATTTATTACTTCTGGGTGCATATTTATCACGTGTGCTTCATATG  
TTGGAATGAAGGAATTTATCTCAAAGGATATTTTTGACTGGGTATCAGCCCTTCTGAGATTATCAAATCTTTTTGTGCAATGGGAGGCTTATGAATGATATTGGTTCATATCAAATGAAC  
AAAAAAGGAATCATCTTGCTTCATCAGTTCAATGTTATATCAAAGAGTATGGTTGCTCTGAAGTGAAGCTTGCAAGAAGCTTAAGGAGATGGTGAAGAACATTGCATGATTATAAATAG  
AGAATTTGTGTCAACAAAGAACATCCCATTTGCCATTAATTAGGCCAATCTTAAACTTGTACAGTATCTATGATTTTTACTACAAGGACACACGTGACATATATACCGACTCCTCAGAGTTCAT  
GAAGAAAAGTATCATTGAAGTGCTCGTTGATCCGATTTTGATTTATAGGAACGATTGAAACTTTTCTTACATAATGGGAAATCTGTGTGACTACCTACAAATAATTTCAAGTGCATTGTTG  
GAATCGTGCGTGTCTCTTAAACTGCTTGAATGCTTTTTTGTATTAGTCTTTTACTTCATCATTGTCAAATTAATGTGATTTTTAAGTTTAATAAAGAATATGTATGGTTTCTGAGGATAATT  
TGAGCTAAAACCTCCTCAAAGCATATTTTAATTA

>comp164701\_c3\_seq1

GAAATCTTGCAAGTTTTATATGTTGTCTTCTAAACCTTTAATTAATAATATGCTTTTTGAGGAAGTTTTAGCTCAAATTATCCTCAGAAACCATAACATATCTTTATTAATAAATCAACAT  
TTAATTTGACAATGATGAAGTAAAAGACTAATACAAAAAAGCATTCAAGCAGTTTAGAGAGACACGCACGATTCCAACAATGCATTGAAATATTATTTGTAGGTAGTCACACAGATTCC  
CATTATGTAAGAAAAGTTTCAATCGTTCCTATAAATCAAAATCGGATCAACGAGCACTTCAATGATACTTTTCTTCATGAACTCTGAGGAGTCGGTATATATGTCACGTGTGCTTGTAGTA

AAAATCATAGATACGTGACAAGTTTAAGATTGGCCTAATTAATGGCAATGGGATGTTCTTTGTTGACACAAATTCTCTATTTATAATCATGCAATGTTCTTCCACCATCTCCTTAAGCTTCTTG  
CAAGCTTCCACTTCAGAGCAACCATACTCTTTGATATAACATTGAACTGATGAAGCAAGATGATTCCTTTTTTGTTTCATTTTGATATGAACCAATATCATTATAAGCCTCCCAATTGCACAA  
AAAGATTTGATAATCTCAGAAGGGCTGATAACCCAGTCAAAAATATCCTTTGAGATAAATTCCTTCATTCCAACATATGAAGCACACGTGATAAATATGCACCCAGAAGTAATAAATGTTAC  
TTTAACATATTCCTCAAGCTTAGGAATATAGCACTCGCTCGCCATTTGGTTTCTTGAAGGTACGCATGAGCCATTGCTTCAACTCATCTCTAAGGTAATGAACTCGAAAAGAATTGTGCT  
CAGGAGCTAACTCATCTCGATATCCTTGAAGGTATTGTAAATCGCAAGGAAGCATCGTTGCATATATTCTGGCAACGTTCTAACTTTTTCAAGATTCCAGCTGTAATTATTTATTAATCAAT  
ATTTTTAGCTTAGAAATGTGGCAAATTAATTAAGATTATAATGTTGGTTTGTTTTTTAATTTCTTTTTTACCTTTCTATTGCATTGGTGAATAACTCGAGCTCTTCTAGTGTCCATAAATATC  
ATAAATATCATCTGTTGTCACAGCAAGGGCCATCAGCTTTGTCATAATAACTCTAGCATGTGAATAGCAGTGTTCACAGTAGGTTGTAAGCATCCAGAAGTAGGATTCTACTATTTGATCAC  
GTATAAATGGTAAGTCTTTGAACAAGCCTAACTCTTTCCACCCTCAGATATGATTGCAAGCTCCTCTTGATAAGTAGCTTGCAATATATTGAAATCAAATTTTGCAAAATCAAGTAGTTTTT  
GATTGCACAATTTGTACTTGTACATAAATTTCTATGTAATTTCTAGCCTTGAGCCGATCAGGTGTTCTGACCAATGGCAATTCCAAGCACTTGTACCATCAAAGCAAAAGATGGCTCCATC  
TTGCAGATCAATGACTTCAAGTGAAACCTTGAAAAAATTTAGCTTCTCTAGTATTTCTTCATCAGGAAATCCAAGATAAGCAGATTATATAAGCTTAGTAAAGCTTTTACATTGTTGCAT  
AAGCAAGCCATGAAATCTCCTTTATCATCCAAAAACCTATTGAATACATCAGAACTTATGTTATATCTTTGCTGTCGTAATAGTCGAAAACGAAGTGCAACTACATATAGATCATCATCAATG  
ATGTTGATCTTATGAACTCTACGTAATATGTCGTTGATTTCCTTCTCAAAATGATATGCCACTCCAAGACGTTGAATTGAATCAATCAGCTCAAGTGATTTAATGGATCAATAGCATTATAA  
GAATTTTCTTCATCTCTACTCTGAGCTCTTCATTCTTCTTTTTGCTCTGCCAGATTGGTATTTGATTGTAATGGTGAATAGTTGATGAAATAATCTCCCAAAACAGTTGGGTGAAAATCTG  
CAGATTGGCGAGAAGTTGTCAGAGGTACAGGAAGAGCCTCCATTAAGTCACTCTACTTAGAAAGGTAGAGATGCTTAGAGAAGCTAATTTTTATGGCTAAATGTATTGATGGTGTGAAC  
AATTTATAATAGCAAGGGCGAGATGGAGCGATGGAAAGGCCAAAATTTAAGAAATAAAAGGACAGATATTTTCATTAATGCAGACCAAATTTATTGTTTATTCTCCACGACAATAATGAT  
GGTAGATCCAAGCAATAAACACGAAATAAACATGAAGTATTATCCTATTAATAAAGATAGTTTTATGACTTTAGCTCTCATCAATATTTTTTAATGACCTTCCAATGCCACAACGTAGGAA  
AATTTGACTCTTAGGCTTGCTC

>comp164701\_c3\_seq2

GAAATCTTGCAAGTTTTATATGTTGTCTTCTAAACCTTTAATTAATAATATGCTTTTGGAGGAAGTTTTAGCTCAAATTATCCTCAGAAAACCATACATATTCTTTATTAATAACTTAAAAATCACAT  
TTAATTTGACAATGATGAAGTAAAAGACTAATACAAAAAAGCATTCAAGCAGTTTAGAGAGACACGCACGATTCCAACAATGCACTTGAAATATTATTTGTAGGTAGTCACACAGATTTC  
CATTATGTAAGAAAAGTTTCAATCGTTCCTATAAATCAAAATCGGATCAACGAGCACTTCAATGATACTTTTTCTTCATGAACTCTGAGGAGTCGGTATATATGTCACGTGTGCTTGTAGTA  
AAAATCATAGATACGTGACAAGTTTAAGATTGGCCTAATTAATGGCAATGGGATGTTCTTTGTTGACACAAATTCTCTATTTATAATCATGCAATGTTCTTCCACCATCTCCTTAAGCTTCTTG  
CAAGCTTCCACTTCAGAGCAACCATACTCTTTGATATAACATTGAACTGATGAAGCAAGATGATTCCTTTTTTGTTTCATTTTGATATGAACCAATATCATTATAAGCCTCCCAATTGCACAA  
AAAGATTTGATAATCTCAGAAGGGCTGATAACCCAGTCAAAAATATCCTTTGAGATAAATTCCTTCATTCCAACATATGAAGCACACGTGATAAATATGCACCCAGAAGTAATAAATGTTAC  
TTTAACATATTCCTCAAGCTTAGGAATATAGCACTCGCTCGCCATTTGGTTTCTTGAAGGTACGCATGAGCCATTGCTTCAACTCATCTCTAAGGTAATGAACTCGAAAAGAATTGTGCT  
CAGGAGCTAACTCATCTCGATATCCTTGAAGGTATTGTAAATCGCAAGGAAGCATCGTTGCATATATTCTGGCAACGTTCTAACTTTTTCAAGATTCCAGCTTTCTATTGCATTGGTGAATA  
ACTCGAGCTCTTCTAGTGTCCATAAATATCATAAATATCATCTGTTGTCACAGCAAGGGCCATCAGCTTTGTCATAATAACTCTAGCATGTGAATAGCAGTGTTCACAGTAGGTTGTAAGC  
ATCCAGAAGTAGGATTCTACTATTTGATCACGTATAAATGGTAAGTCTTTGAACAAGCCTAACTCTTTCCACCCTCAGATATGATTGCAAGCTCCTCTTGATAAGTAGCTTGCAATATATTG  
AAATCAAATTTTGCAAAATCAAGTAGTTTTTGTATTGCACAATTTGTACTTGTACATAAATTTCTATGTAATTTCTAGCCTTGAGCCGATCAGGTGTTCTGACCAATGGCAATTCCAAGCACTT  
GTCACCATCAAAGCAAAAGATGGCTCCATCTTGCAGATCAATGACTTCAAGTGAACCTTGAAAAAATTTAGCTTTCTCTAGTATTTCTTCATCAGGAAATCCAAGATAAGCAGATTAT  
ATAAGCTTAGTAAAGCTTTTACATTGTTGCATAAGCAAGCCATGAAATCTCCTTTATCATCCAAAAACCTATTGAATACATCAGAACTTATGTTATATCTTTGCTGTCGTAATAGTCGAAAAC

GAAGTGCAACTACATATAGATCATCATCAATGATGTTGATCTTATGAACTCTACGTAATATGTCGTTGATTTCTTCTCAAATGATATGCCACTCCAAGACGTTGAATTGAATCAATCAGCT  
CAAGTGATTTTAATGGATCAATAGCATTATAAGAATTTTCTTCATCTCTACTCTGAGCTCTTCATTCTTCTTTTTGCTCTGCCAGATTGGTATTTGATTGTAATGGTGAATAGTTGATGAAA  
TAATCTCCCCAAACAGTTGGGTGAAAATCTGCAGATTGGCGAGAAGTTGTGAGAGGTACAGGAAGAGCCTCCATTAAGTCACTCTACTTAGAAAAGGTAGAGATGCTTAGAGAAGCTAA  
TTTTTATGGCTAAATGTATTGATGGTGTGAACAATTTATAATAGCAAGGGCGAGATGGAGCGATGAAAGGCCAAAATTTAAGAAATAAAAGGACAGATATTTTCATTAATGCAGACCAA  
ATTATTTGTTTATTCTCCACGACAATAATTGATGGTAGATCCAAGCAATAAACACGAAATAAACATGAAGTATTATCCTATTAATAAGATAGTTTTTATGACTTTAGCTCTCATCAATATTTT  
TTAATGACCTTCCAATGCCACAACGTAGGAAAATTTGACTCTTAGGCTTGCTC

>comp164701\_c3\_seq6

TTTTTGTTTCATTCTGAAAGATCAAATACAATAAAATTAAGTATGAAATCAATATATGATCAACATGAAAATTTAATGAATTTTTTGAATTTTTTTTTGACAAAATTCCTTTTAGCTATACATTTTTT  
AAAATATCACAAATGGTATCAATCAATATGTCTCATAAGTTTATCATTTTTTCAAACAAAATTTCCAACATAAAAAGATAAAAATATATCCTTAATATCAAATCCATAAAACTTACTTGATATGA  
ACCAATATCATTACATAAGCCTCCCAATTGCACAAAAAGATTTGATAATCTCAGAAGGGCTGATAACCCAGTCAAAAATATCCTTTGAGATAAATTCCTTCATTCCAACATATGAAGCACACG  
TGATAAATATGCACCCAGAAGTAATAAATGTTACTTTAACATATTCCTCAAGCTTAGGAATATAGCACTCGCTCGCCCATTTGGTTTCTTGAAGGTACGCATGAGCCATTTCGCTTCAACTGG  
AATTCAAATGAATAATCAAAACAAGGCAACAAGATATAGATTAGTGAATAATGATGTTAATCTTATTGGTTTAATTATATGATCAAAC TAGAAACAAAAC TATTTTTAAAATATTAATATTA  
ATACATATCTACTTTCAATAATATATGCATATATAACCACAATTAATTTATTACCTCATCTCTAAGGTA

>comp164708\_c0\_seq10

TACATCCGATAACCGCACCTAATAATATTTCCCGATCAAATGGCAGGCAACAACCTTCAAATTTGTACCAAGGCTCAAATAAAAAAGCTAAGGCTACTGCATATGGGAATCAAAACAAACAT  
AACAGGTTTCTTCAATAGCGCAGATACTCAAAGCTTAAAACAGTAAGCACAGGTTAGGTAGTTAAATAAATTTATGAAATAAAAAATATTGACCATTTGTTCTGAGACAATGGCATCAACA  
AAGTCAATCTCAATGACAGATAATTAGTACCCAGATTAGATTTCTGCTCTATTACAGATAGGAAGTATTGCAGATGTTTATATAAAGCCGTCCAGAAATTACATAATAAATAAAGCAAA  
CGATATGAAAACTAATAGTTCCAACCTGAATGAGTTTCTCAAGCACAGTTCTAAGCTTTTCGTCATCTGGCCGACCTGAGTATTCATATAATTCATGCCTTCAGTAAAAGAGCCTTGCTGAAG  
CATCTTCATATCCCCTTGATGCTTGAACCAGATAGGTTTCCACCTTGAAGACCACCTGCATCTCTTTACCAGAGCTCTCTGCTCCCTTAGCAGAACCCTTGCCATCTCCCTCTATCTGCCA  
TGCGCTCGCATCCATTCCACAGAACCACCAGATAAACAAAAAAGCCAACAAAATCGCAATCAGATTAACGATTACAAAAGGGCAAAAGAAGAAGTACCTATCACCCCGCCAAC  
CACCAATTCCGATCTATCATCTGAAAAGAAGTAAAAGCTCACATAAATGGTCACAGAGTAATCACCTCTTTATACTTCTGCGAATACAACCTATGCGGTTTAATGTAGTCTTCAAACCGGT  
CTAGTGTGTCATTGCACACAGTACATCGTCCTCAGTAATTTCTTCCTCTTTTCCCTCAGGCACTTATCTCTAGCCTCGCTGGTGATGAAACTGATGAACTCGAAAACGCACTCCTGCATG  
GTCTCCTTCGCGTCTTGGCAATCTTCTTTGGGACGGAGCGCTTCTTCATGATGCGGCTGATGAAGGCGATGGGAAGGAGCCTATCCAGCTCACGGACATTGGATCTCGGGCTCTGG  
TCGCCACTCTCGTGGCTTCCGCCGAAGGCTTGGTGGCACCTTGCCGCCATAGGCGGTACCCTAGATCCGCGACGGCACGAGAACGAATCATAAACGTGAACGCTCGTCTGCGTAGC  
GGAACCCTAGACAATCGATCGCTTAGTTCAAAAATCGTACCTCGCAAAACAATAGAGCGCGCAACGAGGCTGAG

>comp164708\_c0\_seq11

TACATCCGATAACCGCACCTAATAATATTTCCCGATCAAATGGCAGGCAACAACCTTCAAATTTGTACCAAGGCTCAAATAAAAAAGCTAAGGCTACTGCATATGGGAATCAAAACAAACAT  
AACAGGTTTCTTCAATAGCGCAGATACTCAAAGCTTAAAACAGTAAGCACAGGTTAGGTAGTTAAATAAATTTATGAAATAAAAAATATTGACCATTTGTTCTGAGACAATGGCATCAACA  
AAGTCAATCTCAATGACAGATAATTAGTACCCAGATTAGATTTCTGCTCTATTACAGATAGGAAGTATTGCAGATGTTTATATAAAGCCGTCCAGAAATTACATAATAAATAAAGCAAA  
CGATATGAAAACTAATAGTTCCAACCTGAATGAGTTTCTCAAGCACAGTTCTAAGCTTTTCGTCATCTGGCCGACCTGAGTATTCATATAATTCATGCCTTCAGTAAAAGAGCCTTGCTGAAG  
CATCTTCATATCCCCTTGATGCTTGAACCAGATAGGTTTCCACCTTGAAGACCACCTGCATCTCTTTACCAGAGCTCTCTGCTCCCTTAGCAGAACCCTTGCCATCTCCCTCTATCTCTTT

ATACTTCTGCGAATACAACCTATGCGGTTTAATGTAGTCTTCAAACCGGTCTAGTGTGTCATTGCACACAGTACATCGTCTCAGTAATTTTCTCCTCTTTTCCCTCAGGCACTTATCTCT  
AGCCTCGCTGGTGATGAACTGATGAACTCGAAAACGCACTCCTGCATGGTCTCCTTCGCGTCTTGGCAATCTTCCCTTTGGGACGGAGCGCCTTCTTCATGATGCGGCTGATGAAGGC  
GATGGGAAGGAGCCTATCCAGCTCACGGACATTGGATCTCGGGCTCTGGTCGCCACTCTCGTGGCTTCCGCCGCAAGGGCTTGTCTGGCACCTCTGCCGCCATAGGCGGTACCCTAGATCC  
GCGACGGCAGGAGAACGAATCATAAACGTGAACGCTCGTCTGCGTAGCGGAACCCTAGACAATCGATCGCTTAGTTCAAAAATCGTACCTCGCAAAACAATAGAGCGCGCAACGAGG  
CTGAGGGGGAGTTCTAAAACCTCGTGATCTTCCCTTTTTTCGG

>comp164708\_c0\_seq12

TACATCCGATAACCGCACCTAATAATATTCCCGATCAAATGGCAGGCAACAACCTTCAAATTTGTACCAAGGCTCAAATAAAAAAGCTAAGGCTACTGCATATGGGAATCAAAACAAACAT  
AACAGGTTTTCTTCAATAGCGCAGATACTCAAAGCTTAAAACAGTAAGCACAGGTTAGGTAGTTAAATAAATTTATGAAATAAAAAATATTGACCATTTGTTCTGAGACAATGGCATCAACA  
AAGTCAATCTCCAATGACAGATAATTAGTACCCAGATTAGATTTCTGCTCTATTACAGATAGGAAGTATTGCAGATGTTTATATAAAGCCGTCCAGAAATTACATAATAAATAAAGCAAA  
CGATATGAAAACTAATAGTTCCAACCTGAATGAGTTTTCTCAAGCACAGTTCTAAGCTTTTCGTCATCTGGCCGACCTGAGTATTCATATAATTCATGCCTTCAGTAAAAGAGCCTTGCTGAAG  
CATCTTCATATCCCCTTGCATGCTTGAACCAGATAGGTTTTCCACCTTGAAGACCACCTGCATCTCTTTACCAGAGCTCTCTGCTCCCTTAGCAGAACCCTTGCCATCTCCCTGCCAAAATT  
AGAGCAAAATTAGTACTGGAGAAGTCAAGAATGAGCATCTTAAACGTTAAACGTTTGTTCATCGGGCTATCTTTAAACAATAAGGCAGCATGTATGTAGTGCTTAAATTTTAAATTGGCCA  
TGTAATAATACATAAAAATTGATGCGCCTTTTCGACATGTAAGCAGTACATTACTTTTACATTAACATGTAAGCAACCACATCTAGAAATGCACAATGACCAATAAAATCATAAACTAT  
AGCATTAAATTCTACTTTAATAGAACACTGCCAGGGCCCGGATTATATACCATAATTTTCCCTTTCGGTGGAAACCCATAAATATTAACCTTAAACACGCAAATGGGAGACAGTATAGTGCCAT  
AAGGCATCACAGTATAAATAATAGAACTGCTATTGAAGAAAATAAAAAAACCGATTACAGAGGGGAGAGATTAGTTTGATTACCTCTATCTGCCATGGCGTCGCATCCATTCCACAGAAC  
CACCAGATAAACAAAAAAGCCAACAAAAATCGCAATCAGATTAACGATTACAAAAGGGCAAAAGAAGAAGATGACCTATCACCCCGCAACCACCAATTCGGATCTATCATTCTGAA  
AAGAAGTAAAAGCTCACATAAATGGTCACAGAGTAATCACCTCTTTATACTTCTGCGAATACAACCTATGCGGTTAATGTAGTCTTCAAACCGGTCTAGTGTGTCATTGCACACAGTACA  
TCGTCCTCAGTAATTTTCTCCTCTTTTCCCTCAGGCACTTATCTCTAGCCTCGCTGGTGATGAACTGATGAACTCGAAAACGCACTCCTGCATGGTCTCCTTCGCGTCCTTGCCAATCTT  
TCCTTTGGGACGGAGCGCCTTCTTCATGATGCGGCTGATGAAGGCGATGGGAAGGAGCCTATCCAGCTCACGGACATTGGATCTCGGGCTCTGGTCGCCACTCTCGTGGCTTCCGCCGCA  
AGGGCTTGCTGGCACCTCTGCCGCCATAGGCGGTACCCTAGATCCGCGACGGCACGAGAACGAATCATAAACGTGAACGCTCGTCTGCGTAGCGGAACCCTAGACAATCGATCGCTTAG  
TTCAAAAATCGTACCTCGCAAAACAATAGAGCGCGCAACGAGGCTGAGGGGGAGTTCTAAAACCTCGTGATCTTCCCTTTTTTCGG

>comp164708\_c0\_seq13

TACATCCGATAACCGCACCTAATAATATTCCCGATCAAATGGCAGGCAACAACCTTCAAATTTGTACCAAGGCTCAAATAAAAAAGCTAAGGCTACTGCATATGGGAATCAAAACAAACAT  
AACAGGTTTTCTTCAATAGCGCAGATACTCAAAGCTTAAAACAGTAAGCACAGGTTAGGTAGTTAAATAAATTTATGAAATAAAAAATATTGACCATTTGTTCTGAGACAATGGCATCAACA  
AAGTCAATCTCCAATGACAGATAATTAGTACCCAGATTAGATTTCTGCTCTATTACAGATAGGAAGTATTGCAGATGTTTATATAAAGCCGTCCAGAAATTACATAATAAATAAAGCAAA  
CGATATGAAAACTAATAGTTCCAACCTGAATGAGTTTTCTCAAGCACAGTTCTAAGCTTTTCGTCATCTGGCCGACCTGAGTATTCATATAATTCATGCCTTCAGTAAAAGAGCCTTGCTGAAG  
CATCTTCATATCCCCTTGCATGCTTGAACCAGATAGGTTTTCCACCTTGAAGACCACCTGCATCTCTTTACCAGAGCTCTCTGCTCCCTTAGCAGAACCCTTGCCATCTCCCTGCCAAAATT  
AGAGCAAAATTAGTACTGGAGAAGTCAAGAATGAGCATCTTAAACGTTAAACGTTTGTTCATCGGGCTATCTTTAAACAATAAGGCAGCATGTATGTAGTGCTTAAATTTTAAATTGGCCA  
TGTAATAATACATAAAAATTGATGCGCCTTTTCGACATGTAAGCAGTACATTACTTTTACATTAACATGTAAGCAACCACATCTAGAAATGCACAATGACCAATAAAATCATAAACTAT  
AGCATTAAATTCTACTTTAATAGAACACTGCCAGGGCCCGGATTATATACCATAATTTTCCCTTTCGGTGGAAACCCATAAATATTAACCTTAAACACGCAAATGGGAGACAGTATAGTGCCAT  
AAGGCATCACAGTATAAATAATTGAACCGTTCTCGAAGAAAATAAACAAACCGATTACAGGGGGAGTGGTTAGATTGATTACCTCTGAAAAGAATAAAAGCTCACAGAAATGGTCACA



GAGTAATCACCTCCCTATACTTCTTCAAATACAACCTTAAGCGGTTCAATGTAGTCGTCAAACCCTAGTGTACCATTGCCAACAGTATATCGTCCCCATTAATTGTCTTCTCCTCTCCCTCA  
GGCACTTTTCGCTAGCCTCGCTGGTGTATGAAAGCGATGAACTCGGAAACGCACCTCTGCACGCTATCCTTCGCGTACTTGGCAACCTTTCCATTGTGAGGGACAGCCTTCCTCATGATGC  
GGCTGATGTTGGCCATGGGAAGGAGCCTATCCTGCTCACGGGCAAAGGATCTCGGACTCTCGTGTCACTCTCGTGGGTTCCGCCGAATGGCTTGCTGGCATCTCCTCCGCCATAGGCG  
GTACCCTCGCAAACAATAGAGCGCGGAACGAGGCTGAGTGGGAGTTCTATAACTCGGGATCTCCCTTTTCGGTTGCTTCGCGTTGGGGAGAGCAGGTGGGCGATCGGACGCTGGA  
GGCTGGAGAATCGAGGAAGGAGGAGACGACTGGG

>comp164708\_c0\_seq15

TCAAAGCTTAAAACAGTAAGCACAGGTTAGGTAGTTAAATAAATTTATGAAATAAAAAATATTGACCAATGGCCTCATCAAAGTCACTCTTCAAAGACAAGATAATTCGTACCCAGATTAGA  
TTTCTGCTCTATTCACAGATAGGAAGTATTGCAGATGTTTATATAAATCCGTCCAGAAATTACATATTAATAAATAAGCAAACGAAATAAAAACTAATAGTTCCAAGTGAATGAGTTTCTC  
AAGCACAGTTCTAAGCTTTCGTCCTCTTGTGACCTGAACCAGAAGCATCTACTAAAAGATGCAGAAGGCCCATTTAGCTGGAGAGGTCTCCAGGATGATACTGAGTATTCATATAATTCA  
TGCCTTCAGTAAAAGAGCCTTGCTGAAGCATCTTCATATCCCCTTGCATGCTTGAACCAGATAGGTTTCCACCTTGAAGACCACCTGCATCTCTTACCAGAGCTCTCTGCTCCCTTAGC  
AGAACCCTTGCCATCTCCCTCTATCTGCCATGGCGTCGCATCCATTCCACAGAACCACCAGATAAACAATAAAGCCAAACAAAATCGCAATCAGATTAACGATTACAAAAGGGCAAAA  
GAAGAAGAATGACCTATCACCCCGCAACCACCAATTCCGATCTATCATTCTGAAAAGAAGTAAAAGCTCACATAAATGGTCACAGAGTAATCACCTCTTATACTTCTGCGAATACAACC  
TATGCGGTTTAAATGTAGTCTTCAAACCGGTCTAGTGTGTCATTGCACACAGTACATCGTCCCTCAGTAATTTTCTTCCCTCTTTTCCCTCAGGCACTTATCTCTAGCCTCGCTGGTGTATGAAAC  
TGATGAACTCGAAAACGCACCTCTGCATGGTCTCCTTCGCGTCTTGGCAATCTTTCCTTTGGGACGGAGCGCCTTCTTCATGATGCGGCTGATGAAGGCGATGGGAAGGAGCCTATCCA  
GCTCACGGACATTGGATCTCGGGCTCTGGTCCGACTCTCGTGGCTTCCGCCGCAAGGGCTTGTGGCACCTCTGCCGCCATAGGCGGTACCCTAGATCCGCGACGGCACGAGAACGAA  
TCATAACGTGAACGCTCGTCTGCGTAGCGGAACCCTAGACAATCGATCGCTTAGTTCAAAAATCGTACCTCGCAAAACAATAGAGCGCGGAACGAGGCTGAGGGGGAGTTCTAAAAC  
TCGTGATCTTCCCTTTTTTCGG

>comp164708\_c0\_seq16

TCAAAGCTTAAAACAGTAAGCACAGGTTAGGTAGTTAAATAAATTTATGAAATAAAAAATATTGACCAATGGCCTCATCAAAGTCACTCTTCAAAGACAAGATAATTCGTACCCAGATTAGA  
TTTCTGCTCTATTCACAGATAGGAAGTATTGCAGATGTTTATATAAATCCGTCCAGAAATTACATATTAATAAATAAGCAAACGAAATAAAAACTAATAGTTCCAAGTGAATGAGTTTCTC  
AAGCACAGTTCTAAGCTTTCGTCCTCTTGTGACCTGAACCAGAAGCATCTACTAAAAGATGCAGAAGGCCCATTTAGCTGGAGAGGTCTCCAGGATGATACTGAGTATTCATATAATTCA  
TGCCTTCAGTAAAAGAGCCTTGCTGAAGCATCTTCATATCCCCTTGCATGCTTGAACCAGATAGGTTTCCACCTTGAAGACCACCTGCATCTCTTACCAGAGCTCTCTGCTCCCTTAGC  
AGAACCCTTGCCATCTCCCTGCCAAAATTAGAGCAAAATTAGTACTGGAGAAGTGAAGAATGAGCATCTTAAACGTTAAACGTTTGTTCATCGGGCTATCTTAAACAATAAGGCAGCAT  
GTATGTAGTGCTTAAATTTAAATTTGGCCATGTAATAATACATAAAATTTGATGCGCCTTTTCGACATGTAAGCAGTACATTACTTTTACATTAACATGTAAGCAACCACATCTAGAAAT  
GCACAATGACCAATAAAATCATAAACTATAGCATTAAATCTACTTTAATAGAACACTGCCAGGGCCCGGATTATATAACCATAATTTTCTTTTCGGTGGAAACCCATAAATATTAACCTCTTA  
ACACGCAAATGGGAGACAGTATAGTGCCATAAGGCATCACAGTATAAATAATAGAAGTGCATTTGAAAGAAAATAAAAAAACCGATTACAGAGGGGAGAGATTAGTTTGATTACCTCTATC  
TGCCATGGCGTCGCATCCATTCCACAGAACCACCAGATAAACAATAAAGCCAAACAAAATCGCAATCAGATTAACGATTACAAAAGGGCAAAAAGAAGAATGACCTATCACCCCG  
CCAACCACCAATTCCGATCTATCATTCTGAAAAGAAGTAAAAGCTCACATAAATGGTCACAGAGTAATCACCTCTTATACTTCTGCGAATACAACCTATGCGGTTTAAATGTAGTCTTCAA  
CCGGTCTAGTGTGTCATTGCACACAGTACATCGTCCCTCAGTAATTTTCTTCCCTCTTTTCCCTCAGGCACTTATCTCTAGCCTCGCTGGTGTATGAACTGATGAACTCGAAAACGCACCTCT  
GCATGGTCTCCTTCGCGTCTTGGCAATCTTTCCTTTGGGACGGAGCGCCTTCTTCATGATGCGGCTGATGAAGGCGATGGGAAGGAGCCTATCCAGCTCACGGACATTGGATCTCGGGC  
TCTGGTCCGCACTCTCGTGGCTTCCGCCGCAAGGGCTTGTGGCACCTCTGCCGCCATAGGCGGTACCCTAGATCCGCGACGGCACGAGAACGAATCATAAACGTGAACGCTCGTCTGC

GTAGCGGAACCCCTAGACAATCGATCGCTTAGTTCAAAAATCGTACCTCGCAAAACAATAGAGCGCGGAACGAGGCTGAGGGGGAGTTCTAAAACCTCGTGATCTTCCCTTTTTTCGG

>comp164708\_c0\_seq2

TCAAAGCTTAAACAGTAAGCACAGGTTAGGTAGTTAAATAAATTTATGAAATAAAAAATATTGACCAATGGCCTCATCAAAGTCACTCTTCAAAGACAAGATAATTCGTACCCAGATTAGA  
TTTCTGCTCTATTCACAGATAGGAAGTATTGCAGATGTTTATATAAATCCGTCCAGAAATTACATATTAATAAATAAGCAAACGAAATAAAAACTAATAGTTCCAAGTGAATGAGTTTCTC  
AAGCACAGTTCTAAGCTTTCGTCCCTCTTGTTGACCTGAACCAGAAGCATCTACTAAAAGATGCAGAAGGCCATTTAGCTGGAGAGGTCTCCAGGATGATACTGAGTATTCATATAAATCA  
TGCCTTCAGTAAAAGAGCCTTGCTGAAGCATCTTCATATCCCCTTGTCATGCTTGAACCAGATAGGTTTCCACCTTGAAGACCACCTGCATCTCTCTTACCAGAGCTCTCTGCTCCCTTAGC  
AGAACCCTTGCCATCTCCCTCTATCTCTTTATACTTCTGCGAATAACAACCTATGCGGTTTAAATGTAGTCTTCAAACCGGTCTAGTGTGTCATTGCACACAGTACATCGTCCTCAGTAATTTT  
CTTCTCTTTTTCCCTCAGGCACTTATCTCTAGCCTCGCTGGTGATGAAACTGATGAACTCGAAAACGCACTCCTGCATGGTCTCCTTCGCGTCCTTGGCAATCTTTCCTTTGGGACGGAGC  
GCCTTCTTCATGATGCGGCTGATGAAGGCGATGGGAAGGAGCCTATCCAGCTCACGGACATTGGATCTCGGGCTCTGGTCGCCACTCTCGTGGCTTCCGCCGCAAGGGCTTGCTGGCACC  
TCTGCCGCCATAGGCGGTACCCTAGATCCGCGACGGCACGAGAACGAATCATAAACGTGAACGCTCGTCTGCGTAGCGGAACCCCTAGACAATCGATCGCTTAGTTCAAAAATCGTACCTC  
GCAAAACAATAGAGCGCGGAACGAGGCTGAGGGGGAGTTCTAAAACCTCGTGATCTTCCCTTTTTTCGG

>comp164722\_c0\_seq10

GGGCTTGCTTTTGTGGTGGTTTGTGCTATATTAATCTAAATGATGCGTAATATTAGAGCATAAACATCTAATAAACTCAAAGTCTGTGATTGAAATCAGCTCAATCAATTAGTTTATAGAAG  
TATGATCAGCTTCTACATATTTATTTCAATTTGCAGGAAGGTTCTCTTAAGGCACCACCCCAACAACACTACTACAAAGTTATCTTACCAATAATAGAAAAGAATCAAAGGATCAAGTCTATCA  
CCATGCGGGGTTTCATGATTTATTAAGCTTTAAAGTTTATTCCAAATCCAAATGCCAATATGAAACTATGCTAACCCAGACAGCTTTTTCTCATAGACAAGCTCTCTTTCCACTGCTTTCCCT  
CTTGGCCTGTGTTATTCCTCTCCTCGGTTTCCACCAAGTGCCTGTTGAATGTTGCAACTTCTGATCCATTGTTGATGCTACTTCGTGCATTTTCCCTGGAAATGTTGCAAGTAGATGATGGA  
GTGAATACCTTCTGTTGAGGTGCATCTGCAGTCCAGGAGCTTCTCATTTCCTGAATTTGTGGTCCAGTTGCCATCAAATGCAGTGGGGAGAAACAGTGCGGCAGCAACTGCCGATAA  
AATAGCTCTTCAAAGCAATCGAGTCTGACAATTGTGTAGAATAAATAAATAAGAGCACAAATCACTTGCAAGCATGTAAGTGAATCACAATTTTAGTTTTATTAGATGACAACCTGTTTG  
AGACCTTCAGTACTAGATTTGCTAATCCCCGGAGTATCCCCAACTCCTGAATAATGGACGGGCCTTGTTACCTTGTTCAATTGATTCCTTTGGCTTCTTCTTGTCAAAGCTGCATCTTTC  
TCTACTTCACTACTGGGCGATGTGTTAGAATCACAGGAGGACGGATCATGTTTCTTTTTGCCTGGAACATGATCAACATCATGGATTCCACAAATTGCTGTTTCTGCGCACTTGGTAGATTT  
TGGAGACCTTGCAGATTTTGTGCTTTGGCAGGTATCTGGTGATGAAGAGATCTCTAATAATGCAGAGGAAGGTTGTATCGCTATGTTTGTCTCCTGCTGTTTCGATTTGTTGAAATTTCCGCT  
TATGAGTTTGGCTAAAATTTCTTTAGAGTCACTGTTATCTTCAGGAACTTGGGCCACTCTGTGGCTTGCACCATTACTTGGGTAAATGCGTGGTTTGGCAGAGAAGGAGATTGCAATAG  
CCCATGAACCTCCACCAAGCAGCTGCAGCGGCAATTGTGGCTGTTACAATAGCCGATATGCCAGAAGATGCGCTAGATTGTTTCTCTGGAGCTTCGCCAACTAACTTGCTATTTGATTGC  
ATAGAAAAATCCACATAGGCAGGTGGCAGTGAAGCAGCTGCAATGCTAGCTGCTTGATGAACTGCTGGATTTTGTGACAAGGCAGATACAAGGAGACTTGGAAAGTAGTTGGTTAAGTT  
TATAAGTGCCTAAATGGATTGTCATCATTACTGAACGGGTTATGAAGTGAGATGGATGGAACCGCCTGATGGATGGATGAAATTGAGTTTTTGTCCGATGTATTGTTGTTCTGTAGAAT  
CAAGTGACAGGTTAAGATCTGCATTTGCTTCTAGTTGAGTTGACACTGATTTTGTAGATATCTTCATCAGAATATTTGTACCTACAAATTGAGCAGGAATATTTTCATGGTTTTTACCACCTT  
GTAGATTGCTCTTCCATAATGAAATGGCATCTCCATATGGCCTAGTACTTGCCATTTCTTTCAGTAGTGAAACCAACCGAGAATCTGTACTCATTCCAAAATTTGTAAATCAGAATCAT  
TTTTTCTCAGTTCTTTTGTATTCTACTTCTAGTTTCTTTCAACTCTTCCAATGTTGGCATCTGTTCTAAAGGTTCTGAAGTGCTATTAAGATGAAAATAGATAGAAGCGGATGAAGTGCCTT  
CTCCAAATGCCTGCTTTGTATTTGTCAATTTGCAACTTTCACTGGTTCTTAAATCTTAGTATCCATTGCCACTTCATCAGTTCTTAGCGAAAACAAAAGCCTGTGACAAATTTTTCTTTTTA  
CTTCCACAAATGGACTTTGTGAGGCTGCACCGTCTTCCGAGGATATGAACTACATGGTTTTTCGTTTAGGCCTTGGGGGAGGAATTTCTATGTCATGAGGATGTCCAGGTGACATGCCTCC  
AGTCCCATTCTCAAATTTAAAAAAAACCTTCTGCGCATGACTTCTTATCTGAACAGCAGTCTTTGTACCGATATGCTCTTGAATACGCTGCCATGCCCTGCCATGCAGCTGAGCGCTTCCA

AGAACCTGTTATGCTCCTCGTCTGTCCACTTCTCTCGCTGCTTCGTAATCGTGTAAGGTTTTCTCATCTTAGCCAGCTCCCTCACTGGGCTCATTCCCATTACTGATTCCGAAATGTAATGA  
ACCACGGATGAGACAAACGGTTTTCAAATCAACCCTAACCTCATATAAGTAAGAAACGGTTAAATTCCTCATGCATGTTCCCAACTGAAATGTCGGGCACCTAATGCATTCACTGATATGCAG  
GGAGTAACAGGACAACAAACAGCCAAAAGAAAAAGAAAGGAAAAACGCCAAGAAGAGGCAGCGGTCACTCACCAAAGAAACCTTAGAAACAGGAAAGAAACTCCGGCGGTTCGC  
AGCCTCATGTCTATCTCTATTCCTCTCCTCCCTTGATCTCCTTCGCCTCACATTAGCACCCAGTGCAATCCTATCTACAATCGCCATCTTGCCATCGTGGGTTTATGTACAAGTAGAAACA  
TGGAGGCTGTTATGGCCGGCGAAGGGAGCTGTGATTGGCATGCCTAACTCCAGAACCCTCGCTCTCTCTCCCTCTCTCCTCGCAGCTCCACCCTAACTCTCTCTACAGTAAGGTCGCA  
AACCATAAGAGTAGGCCAGGACAGGAGGAATCTGAGCCACAACCTTTTTGGCATGGAGATTCGGGCGAATGGTGAGCGAACTGGCGAAGCAGAGCGAGATTTCGATGATCAATTCT

>comp164722\_c0\_seq5

GGGCTTGCTTTTGTGGTGGTTTGTGCTATATTAATCTAAATGATGCGTAATATTAGAGCATAAACATCTAATAAACTCAAACCTGCTGTGATTGAAATCAGCTCAATCAATTAGTTTATAGAAG  
TATGATCAGCTTCTACATATTTATTTCAATTTGCAGGAAGGTTCTCTTAAGGCACCACCCCAAACAACCTACTACAAAGTTATCTTACCAATAATAGAAAAGAATCAAAGGATCAAGTCTATCA  
CCATGCGGGGTTTCATGATTTATTAAGCTTTAAAGTTTTATTCCAATTCCAAATGCCAATATGAAACTATGCTAACCCAGACAGCTTTTTCCTCATAGACAAGCTCTCTTTCCACTGCTTTCCCT  
CCTCGGTTTTCCACCAAGTGCCTGTTGAATGTTGCAACTTCTGATCCATTGTTGATGCTACTTCGTGCATTTTTCCCTGGAAATGTTGCAAGTAGATGATGGAGTGAATACCTTCCTGTTGAGG  
TCGATCTGCAGTCCAGGAGCTTCCTCAATTCCTGAATTTGTGGTCCAGTTGCCATCCAAATGCAGTGGGGAGAAACAGTGCGGCAGCAACTGCCGATAAAATAGCTCTTCAAAGCAATC  
GAGTCCCTGTTTGAGACCTTCAGTACTAGATTTGCTAATCCCGGAGTATCCCAAACCTCCTGAATAATGGACGGGCCTTGTTACCTTGTTCAATGATTTCCTTTGGCTTCTCCTTGTTCAA  
AGCTGCATCTTTCTACTTCACTACTGGGCGATGTGTTAGAATCACAGGAGGACGGATCATGTTTCTTTTTGCCTGGAACATGATCAACATCATGGATTCCACAAATGCTGTTTCTGCGC  
ACTTGGTAGATTTTGGAGACCTTGCAGATTTTGTGCTTTGGCAGGTATCTGGTGATGAAGAGATCTCTAATAATGCAGAGGAAGGTTGTATCGCTATGTTTGTCTCCTGCTGTTGATTGTT  
TGAAATTTCCGCTTATGAGTTTGGCTAAAATTTCTTTAGAGTCACTGTTATCTTCAGGAACTTGGGCCGACTCTGTGGCTTGCACCATTACTTGGGTAATGCGTGGTTTGGCAGAGAAG  
GAGATTGCAATAGCCATGAACCTCCACCAAGCAGCTGCAGCGCAATTGTGGCTGTTACAATAGCCGATATGCCAGAAGATGCGCTAGATTGTTTCTCTGGAGCTTCGCCAACTAACTT  
GCTATTTGATTGCATAGAAAATCCACATAGGCAGGTGGCAGTGAAGCAGCTGCAATGCTAGCTGCTTGATGAACTGCTGGATTTTGTGACAAGGCAGATACAAGGAGACTTGGAAAGTA  
GTTGGTTAAGTTTATAAGTGCCTAAATGGATTGTCATCATTACTGAACGGGTTATGAAGTGAGATGGATGGAACCGCCTGATGGATGGATGAAATTGAGTTTTTTGTCCGATGTATTGTTG  
TTCTTGTAGAATCAAGTGACAGGTTAAGATCTGCATTTGCTTCTAGTTGAGTTGACTGATTTTGTAGATACTTTCATCAGAATATTTGTACCTACAAATTGAGCAGGAATATTTTCATGGT  
TTTACCACCTTGAGATTGTCTTCCATAATGTAATGGCATCTCCATATGGCCTAGTACTTGCCATTTCTCTTTCAGTAGTGAAACCAAACCGAGAATCTGTACTCATTCCAAAAATTTGTA  
AATCAGAATCATTTTTTCTCAGTTCTTTTGTATTCTACTTCTAGTTTCTTTCAACTCTTCCAATGTTGGCATCTGTTCTAAAGGTTCTGAAGTGCTATTAAGATGAAAATAGATAGAAGCGG  
ATGAAGTGCCCTTCCAAATGCCTGCTTTGTATTTGTTCAAATTGCAACTTTCCTACTGGTTCCTTAATCTTAGTATCCATTGCCACTTCATCAGTTCCTAGCGAAACAAAAGCCTGTGACAAA  
TTTTTCTCTTTTACTTCCACAAATGGACTTTGTGAGGCTGCACCGGTCTTCCGAGGATATGAACTACATGGTTTTTCGTTTAGGCCTTGGGGGAGGAATTTCTATGTCATGAGGATGTCCAGG  
TGACATGCCTCCAGTCCCAATCTCCAACCTTAAAAAAACTTCTGCGCATGACTTCTTATCTGAACAGCAGTCTTTGTACCGATATGCTCTTGAATACGCTGCCATGCCCTGCCATGCAGCC  
TGAGCGCTTCCAAGAACCTGTTATGCTCCTCGTCTGTCCACTTCTCTCGCTGCTTCGTAATCGTGTAAGGTTTTCTCATCTTAGCCAGCTCCCTCACTGGGCTCATTCCCATTACTGATTCCG  
AAATGTAATGAACCACGGATGAGACAAACGGTTTTCAAATCAACCCAAAGAAACCTTAGAAACAGGAAAGAAACTCCGGCGGTTCGCAGCCTCATGTCTATCTCTATTCCTCTCCTCCC  
TTGATCTCCTTCGCCTCACATTAGCACCCAGTGCAATCCTATCTACAATCGCCATCTTGCCATCGTGGGTTTATGTACAAGTAGAAACATGGAGGCTGTTATGGCCGGCGAAGGGAGCTG  
TCGATTGGCATGCCTAACTCCAGAACCCTCGCTCTCTCTCCCTCTCTCCTCGCAGCTCCACCCTAACTCTCTCTACAGTAAGGTCGAAACCATAAGAGTAGGCCAGGACAGGAGGAAT  
CTGAGCCACAACCTTTTTGGCATGGAGATTCGGGCGAATGGTGAGCGAACTGGCGAAGCAGAGCGAGATTTCGATGATCAATTCT

>comp164734\_c1\_seq6

GGGAGCTCGCTGGCTGTGAAGACAGGCATGGGCGAACTAGCGATCGTAGCACAGAAGATGTAAGTGAATTAAGGAACTGGGTGAGGACATGCGAGCTAGAAAGAAGAAAAGATTA  
CGAAAAGATCTTATCAGTTCGACAGATTGGCGTGGTATCTGCTACTTCTGTGCGGGTTCCACCCACATGGATCCGGCTAACCTCCGCCAAATCCTCTCTAAGTTTGGAGATTTACAGAGGA  
TATACCTCGTTCCCAAGGAGATACACGAAAAAGAATGAGGTACAGTTTGAATGTC

>comp164741\_c0\_seq11

CTCAAAGATGAGCATCTTTAGCTTCCCTCACCTTCGGGTCACCCCGTTGCCACTGAATCCTCCATATCCTCTCGTTTCGCGAAGAGGAGGTGCTCCCCAGTTGTCATGATCTTCCCTCCGA  
CGATCATAACCAAGCCCTTCTCAGATTCCCCTTACTCCTTTCATCTTCAGCACCCCGGCGTAAAATTCATCTTTCTCCCCAAAATTCAGCACCCCTTCATAGCCCATGCTCATCTCTT  
CTCTAGAAAGTGGTTCTAGCGGATGCATCCATCATTCCCCTCAAGGATCTCCACTTCCGGATTCTCCCTCCCCCTAAATGGGTTCCGGATTCCCGCATCTCCATTGTCGCCGGTGGTTTCC  
CTTGCTTCCGATGTCATCGGATTTTGTGTTGCCCTCAAGCATCTTCTTCATCATATCTTTCAAGGCGGTGAACCTCTCATCCATCTTTTCATGGATGGAAGTAAATTGGTTTTGAAAATCAGCG  
GTTCTTTCCTCAAAATCGGTCTTCAGTTGGCCTATTTCTCCCTC

>comp164753\_c0\_seq3

AAAGCGATTGTCTCACCTTGAGGCTACGCTCATTTGTCTACTTCTAGGGTTGTGCGAAGAAGAAGAACACACAAGAGATGAAACCACTCCGAGGGAGACGGAGCCGGCGATCCGTAG  
TGATGAAGAGGACGGCGTAGGATGTGGAGGTGGCGTGGAGTTCCAACCGTCAATGGTCCACTCGTAGTCCGGTCGTTGTCTATCGATGACTTGGATGAGGGTCCGGTAGGATCCGATCCA  
AATAAGCTCCAACAGTGTGTCGTCGGAGTCAAATCCCACGTCGAAGAAGGGCGATTGTAGAAGCTTCAGATTACCGTGGGCATCAAACACAAGTCCCCATTCTAGCTCGGGATCCGCC  
ATGCGACATGTAGGTGAAGATGGGTTGTGCGCACAAGAAGCTCTCCAATGGGGAAGATGAGGAGGTCCGGCGGGTTGTAGAGAGGAGGGGGAAGCCGGCGGTAGAGCTAGGGTGAGAG  
GAGGGATTAGTTTGTAGAAAAGTAAATTAATTTAGTTTAAAGGGAATTGGGAGGAAAATTTGAGATTTGATTTTCCAATTAAGAGGCAATTAAGGCATTAAGAAATTT

>comp164756\_c1\_seq4

TGCTCAAAGCAATATATAAAATTATTTAAAATTTGATTACATCAAATAAAAACATGTA AAAACA ACTCCATGCATTAATAGTTGCCTTCCCCAACATGAGAAAAGAAAATCTACAAAAAAA  
CTAGGCACTTCTTACCCTCTAGAAGAGAACCCTCCAGAGATATGGAATCAGTTCCTCCCTCTATTACAGTTTGAATCAGCAAGAGAATATTATTATATATGATCCATCTCAACATGAAATCA  
TTAGGACATAGCTGAATTTAACTTTAGTCCCCAACCAATACTAACACAAGAAGATCATCAAATAGAAGACAATGGTGGTGAAAAGCCAAGAACTTGCTTTCTATCTTTTCATTGATCCT  
CTATTTTCAGATAAAATTTTAAAGTGCCTTAGCTGAGGCAAAAACAAATTATATGACCTTTTAACTCTTATGTTAACATATGCATATTAGCTCAGATAAAGTTAGATAGACTGTGGAATTCT  
GAAGAGATGTTCCCTACCCTTACCTCATCAACTTTTCGTCACCCATGCACTCTTGCTCCTCGACCGCCTCCTCGAAGCTCCTCTTACCTTCCTTCCTGCGGTA AACCCCTTCGAATCCTTCA  
TGACGAATTCGGCACTCTCCCTATCATTGTCACCTCCATTCCTTCCCTATAGGATGCTTTGAAGACCTCACAGCACTTTTATCCTGTAAAGACCTCCATTCCTCCCAAGCCTGATTTTT  
CACCTAGCAAGTTATTGGCAACCACAACAGACTTGGCAGGATTCATATCAAGCAGTTTGTAGCAAGCCTGTGTAGGATTCAGACTTGCAGTCCACTACAGAGAAGTCGACATTTCTCGCACT  
CGGGCAATAGCTTATAGGGATCTCCTACTTTGAACTCGACGATGTCGGTGAGGCCGGAATCCTCGATGACCTGTTTTGATTCAACCAGAGACTCTGACTGTGGGAGAATGCAAACAAGCC  
GGCCGCCGTTTGGCGAGCAGCTACAGCAAGTGCAACTGTTGATTGAGATGCTTGTGGAGATACTTCAACAATGTGTTGAGCACTCATGCCCGCAGCCAAAGCTGATAGGAACTGAGTG  
CTTTCTGGTTCAATTGGGCTGTTAGACTCCTTACATCTTTACACAGCTTAAACCGTGTCAAGGTAGGCATTGGCGGCAAATTGAGGAGACCAAACCATGATAGCGAGCCAGATCAAAAACA  
ATCACACTCTCTTCTCAATATCTTCTTATAAAGCACTTTAAAGGGAGAGAAAAGAAGGAAGGAGAAGGTTGTAGAGACAATGGGAAGAGGCGAAAAGGGAGAAAAGGGGTTTTAG  
TTGGATTTTTCTTTGTTTCTCGCTAATAACTCAGCGAAGGCGAGGGATGCAACGAACAATTAATACCTAACGGAAAATTCAAGACATGGCGGCGAAAAGAACAGCTTCGACCCCAAAGTA  
TCTCCGGCCAGCGGCGGCCGAGGTCTCGGTAGAGAGCATGAAAGGGAAAACGTTTTGGTTGTTTTGCCTTTGCGGTGCGGATTCCTTTCACATCGTTTTTTGTTAACGGTACTTTT

>comp164770\_c0\_seq1

TTTTCTCTCCCAATTAATTCCAATCTCCACCAAATCAGCCCCTAATCCTCTCCTAATTGCCGCCCTAGCCATTAATTGATTAATTTGAATTTTCAAATTAATTTCCCTCCAAATCCACTTA

AATCTGAATTTAATTTTCAGATTTTAGGTTGGATTTGGATGGGGAGAGATTTAAAATTTCAAATTTCAAATTTCAAACAAAGAGGAATAAAGGAGGGAAGAGGTAATTAATATCCTCTAATCT  
AGGGCTTAATTAGAGAACGAAATAAATTAGAGAAGGGGAGGGAAGGGGGCCGGCTAAATGAGGGAAAAGGGGAGCGTCCACATTCAATGTATGTGGTTCTTTGCATTGATTGTTGATT  
GAGAAATTCAAATATGAATAAATTTTCAGATTTGCATCAATTGGGGGGCTTCTTAAAAAATAGTTTTACTAATTAGGAAAAGTATTTGAAATTCAAA

>comp164786\_c2\_seq11

TTTCAAAAAAAAAAAAAAAAAAATCTAATGATTTTTATTTTTCTCTTAAAAATGTAATAGTGAAATAAACTTCGACTAGTTAATGGATTTCCGTGCGGAGTTTATAATCATTATGCTATTTA  
GCCAGAGTAGAGGATGATAATAATATATATTAGTCTAATGAACTGAGTTGGCTGTTGTGGCAACTCGTTTCTGTATCCTTAGACGACGAACTGTGTGAATTGGTTCTTCTTGTGTTGGTTTCTT  
CGGAGTTATGGTTATTTGTTGTGGCGAGATTCCTTGAATGAGCTTTTCATTACGTGGAGGAGGAGGATGGTGAGAAGAAGTACTGGACCTTGTAGAGGCAGGGCCTTGCCTGCTGTTTGG  
ATAAGGCCGAGGAAGGAGAGATTGAGCTGCTGTCAGTCTTACCTTCTCTGGTTTCTTGATTAAAACGGGGTTGGTTTGTTCAGTCTTCTGCTGCTGGGAAGCTAATGGTTGCTCTGTTTC  
GTTAGCTGGTGCTGTAGATGCATGATCAGCGGGTCTTGGTTCTCAACAGGGTGTACTGTAATGGATGATGGTTGCGAGACAACATATTGCAAGATCGTCAAAAACCATGACCGTCCATTA  
CTCAAACATTTTGCCAATAATGGGCAGCTAAATCGTTAGCTCGTGTCTCAACTCCAGTAGAGTACGATCAATCTTATTTTCATGTTTAGACATATAAGGCTGGAAGAAGGTGCTGTAAAT  
ATATGTCGTCCCCTTTGTTTTAGGATGCCAAAGATATACAAAAGAAAACCAATTTAAATTCGCCATACAGAGGCAACCATGAAATGAGAGCATCTCCAACCTCTCTCAAAAACAGCCAGAAC  
AGCAACTAAAATCCAGTACTGGCACCAAAACAGCAGCTGCTCAATTTCCGGCCTATTCAATTCCACAGTCTTGTAGCATTATGCGGATAGGCATATCCAAGAATCATGATAGAACT  
CTGGTGAGAAAAGCCTCCCATCATTGCGACCAATTTAACATTTTCTCCCCTGAAGCAACTACTATATGGCTTCTCTAAAGCCCGGATCTTTTCAACAAAGACGGAGATGCAGCAGAGGA  
GGTATGGCCGGCCAAAGACCGAACCCGAAAAGATTTCGATGACTTGCATCGGCTTATCGCGCCCTTCTTGGCCTTACCAGGGGTTCTCTCTTTATGGCCGGCCATGTGGACATATATAGCG  
AGGCGGCAGGCCTCGAATGGCGAATCGCCGCGCCTATTTTTCGGAGAGGAGAGAGAGAGAG

>comp164786\_c2\_seq14

ATCATGATTTCTGGATATGCCTATCCGGCATATGAATGCTACAAGACTGTGGAATTGAATAGGCCGAAATTGAGCAGCTGCTGTTTTGGTGCCAGTACTGGATTTTAGTTGCTGTTCTGGC  
TGTTTTTGAGAGAGTTGGAGATGCTCTCATTTTCATGGTTGCCTCTGTATGGCGAATTTAAATTTGGTTTTCTTTGTATATCTTTGGCATCCTAAAACAAAGGGGACGACATATATTACAGCAC  
CTTCTTCCAGCCTTATATGTCTAAACATGAAAATAAGATTGATTGTACTCTACTGGAGTTGAGAACACGAGCTAACGATTTAGCTTCCCAGTATTGGCAAAATGTTTTGAGCAATGGACGGT  
CATGGTTTTTGACGATCTTGCAGTATGTTGTCTCGCAACCATCATCAACTACGGAACCAAGACACGCTGATCATGCATCTACAGCACCAGCTAACGAAACAGAGCAACCATTAGCTTCCCA  
GCAGCAGAAGACTGAACAAACCAACCCCGTTTTAATCAAGAAACCAGAGAAGGTGAAGACTGACAGCAGCTCAATCTCTCCTTCTCGGCCTTATCCAAACCAGCGCAAGGCCCTGCC  
TCTACAAGGTCCAGTACTTCTTCTCACCATCTCCTCCTCCACGTAATGAAAAGCTCATTCAAGAGAATCTCGCCACAACAATAACCATAACTCCGAAGAAACCAACAAGAAGAACCA  
ATTCACACAGTTTCGTCTGCTAAGGATCAGGAAACGAGTTGCCACAACAGCCAACTCAGTTCATTAGACTAATATATATTAGTCTAATGAACTGAGTTGGCTGTTGTGGCAACTCGTTTCT  
GATCCTTAGACGACGAACTGTGTGAATTGGTTCTTCTTGTGTTGGTTTCTTCGGAGTTATGGTTATTTGTTGTGGCGAGATTCTCTTGAATGAGCTTTTCATTACGTGGAGGAGGAGGATGGT  
GAGAAGAAGTACTGGACCTTGTAGAGGCAGGGCCTTGCCTGGTTTGGATAAGGCCGAGGAAGGAGAGATTGAGCTGCTGTCAGTCTTACCTTCTCTGGTTTCTTGATTAAAACGGGG  
TTGGTTTTGTTTTCAGTCTTCTGCTGCTGGGAAGCTAATGGTTGCTCTGTTTCGTTAGCTGGTGCTGTAGATGCATGATCAGCGGGTCTTGGTTCCCTCAACAGGGTGTACTGTAATGGATGATGG  
TTGCGAGACAACATATTGCAAGATCGTCAAAAACCATGACCGTCCATTACTCAAACATTTTGCCAATAATGGGCAGCTAAATCGTTAGCTCGTGTCTCAACTCCAGTAGAGTACGATCA  
ATCTTATTTTCATGTTTAGACATATAAGGCTGGAAGAAGGTGCTGTAAATATATGTCGTCCCCTTTGTTTTAGGATGCCAAAGATATACAAAGAAAACCAATTTAAATTCGCCATACAGAGG  
CAACCATGAAATGAGAGCATCTCCAACCTCTCAAAAACAGCCAGAACAGCAACTAAAATCCAGTACTGGCACCAAAACAGCAGCTGCTCAATTTCCGGCCTATTCAATTCCACAGTCTT  
GTAGCATTATGCGGATAGGCATATCCAAGAATCATGATAGAACTCTGGTGAGAAAAGCCTCCCATCATTGTGAGTGATTTAGCATTCTCCTCCATTGTAGCAATTACTTTATAACTTCT  
CTAAAAATCTAAAAATTTGAAAAAAAAGCATTATCAGAATGAAAGGAATCAGGAAATAAGGAAAAAAAATGAATCACTCAAGCTTTTTCAAAATCACAAATATCGTAGAAGAATATAA

TCATATATCAATTGAAATCACAACCTGACCAATGCTTAGAAAGCGAAGAAATCTGATCAAAGAATACAAATATATAATTATATTCTTCTACGATATTGTGATTTTGAAAAAGCTTGAGTGATTC  
ATTTTTTTTTTCTTATTTCCCTGATTCCTTTCATTCTGATAATGCTTTTTTTTTTTTCAAATATTTTAGATTTTTAGAGAAGTTATAAAGTAATTGCTACAATGGGAGGAAATGCTAAATCACTCACA  
ATGATGGGAGGCTTTCTCACCAGAGTTTCTGTGTAAGTGATTTTGAGTTGAATGGTTTATGATGAGGTTGTTGTAGCCTGTTGTAACCTTCTGTTTGACATATCACCATTGTTATTTTACTCAT  
ACAACATGTTTTTGTGCCAATTTTGGTTGGTGTGTTGTGCTTTGTATTCTTTCTCTCACTCGATGTGTCTACAAACACAAAGTACATTAATAATTTCTCTGTTTCTTGGTTCTCAGGCTTTTATT  
TGTTGTAATGTGAGTTTATGAGAGGGTTGGAGATGCCCTCATTTTCATTGTAATAAGCATATCCATTTAGTCAGTTATGTATTGTATGATGAATAGCTGGCGTAGGAAAATGGAAAACGAATTT  
GGGTTAGGATATTATGATAAGGATCAATCAAAGTGCACATATAAGGG

>comp164786\_c2\_seq8

TTTTCAAAAAAAAAAAAAAAAAATCTAATGATTTTTATTTTTTCTCTTAAAATGTAATAGTGGAATAAACTTCGACTAGTTAATGGATTTTCCGTGCGGAGTTTATAATCATTTATGCTATTTA  
GCCAGAGTAGAGGATGATAATAATATATATAGTCTAATGAACTGAGTTGGCTGTTGTGGCAACTCGTTTCTGATCCTTAGACGACGAACTGTGTGAATTGGTTCTTCTTGTGTTGGTTTCTT  
CGGAGTTATGGTTATTTGTTGTGGCGAGATTCTCTTGAATGAGCTTTTCATTACGTGGAGGAGGAGGATGGTGAGAAGAAGTACTGGACCTTGAGAGGCAGGGCCTTGCCTGGTTTGG  
ATAAGGCCGAGGAAGGAGAGATTGAGCTGCTGTCAGTCTTACCTTCTCTGGTTTCTTGATTAAAACGGGGTTGGTTTGTTCAGTCTTCTGCTGCTGGGAAGCTAATGGTTGCTCTGTTTC  
GTTAGCTGGTGCTGTAGATGCATGATCAGCGGGTCTTGGTTCTCAACAGGGTGTACTGTAATGGATGATGGTTGCGAGACAACATATTGCAAGATCGTCAAAAACCATGACCGTCCATTA  
CTCAAAACATTTTGCCAATAATGGGCAGCTAAATCGTTAGCTCGTGTCTCAACTCCAGTAGAGTACGATCAATCTTATTTTCATGTTTAGACATATAAGGCTGGAAGAAGGTGCTGTAAT  
ATATGTCGTCCCCTTTGTTTTAGGATGCCAAAGATATACAAAGAAAACCAATTTAAATTCGCCATACAGAGGCAACCATGAAATGAGAGCATCTCCAACCTCTCTCAAAAACAGCCAGAAC  
AGCAACTAAAATCCAGTACTGGCACAAAACAGCAGCTGCTCAATTTCCGGCCTATTCAATTCACAGTCTTGTAGCATTCATATGCCGGATAGGCATATCCAAGAATCATGATAGAACT  
CTGGTGAGAAAAGCCTCCCATCATTGTGAGTGATTTAGCATTTCCCTCCCATGTAGCAATTACTTTATAACTTCTCTAAAAATCTAAAATATTTGAAAAAAAAAGCATTATCAGAATGAAAGG  
AATCAGGAAATAAGGAAAAAAAAAATGAATCACTCAAGCTTTTTCAAATCACAAATATCGTAGAAGAATATAATCATATATCAATTGAAATCACAACCTGACCAATGCTTAGAAAGCGAAGA  
AATCTGATCAAAGAATACAAATATATAAAAATATGTCTAGAAATTCGAACTATAAATGATCATTACAGTTTAGTAAAACCTTTCATTTACAAAAGCGAAGGAGGAAATTTAAGCAAAAT  
GATGTAGAGAATAAGCGAAGTGTGGGTCTCCGAAAGGATTCTG

>comp164815\_c0\_seq1

AAGGCTGGATCCAGACTTTCAATTCTGTTTGTGGCAAGAATTACTTTAACATCACCCCTTGGGTCAAAAACCATCTAATTGATTCACAATTTCCAACATAGTGCCTGTATCTCAAGTTCTCC  
TTCTGAATAAGCATCATATCTTTTAGTTCCAATTGCATCGATCTCATCAATAAACTACTATTGATGGAGAAAGATCATCAGCAAATCTAAAGAGTTCCCTTACTAATTTTGGACCATCACCCAA  
GTACCTCTGGATCAATTCACCTCCGACAACACGCAAGAATGTGGCAGAAGTTGTTTTGGCCACGGCTTTGGCAAGCAAAGTTTTCCAGTTCCGGGCTCTCCATAGAGTATGAC

>comp164882\_c1\_seq1

AAAAAAAAAAAAAAAAAATTCAAAGCTTTGTCTCTCAGATGAAAGAATAGAAAACAATTAGACCACTCGAATGGTGCCTGGAGACAATGTTGATAAGTTGCTTTGAGATTGAGGCGGCG  
CTATACTGAGCTCCAAATCATTAGTGGCAGTACTCGTTGTTGCAGGATTAACCAAAGTTTGGAGGTGTGGCTGAAGATGCAGATAGTTTGGAGTAACTGGCAGGTTGTGGTTGATCCTGAGT  
AACAATTGTTGAAATGAAGGTAAAGGTGGGGTGGCCACATCCTCGCTTCCCTTCTGCCCCTTCTCTCCTTCTCGATGACTTCGACAACCCACCATCTGATAGAAACCCGTCATCGCCGGC  
TCCATGATACCCCGATGAGTTCGAGCCGCACGCCCCAGGTTTCATCATGCTTTGCTCTTCAACAAACCTTTTCGTCATCGTCTGTTCCATCGCTTCCCTCTTCAAATCCCTCGTCTCCATCT  
CTTGCTCCCCCTTCCACCTCTCTCCATCCACGATCCTTACTCCAAAAGCTTCAATCCCTTCTCCTCCTCCATAGCGCCCTAATCTCCCTCGCTCGCTCTCGAGAGCGCGGCTCTCTCTC  
TTCTTATCGTCTCTTCTTCTCGGAGAGAGGAAATAAATCAGAGGAGAGCCGCACTAGTGCTCGCTTTCGGATCTGGTTTTTATACTGATATCCAAATCCGCAAATAGAACTGCCAACGA  
TGTTCCGCGAAAGTGC

>comp164895\_c0\_seq1

GGCTTATAGCATTTCATTTCTTAAACTGCACTGTATACATTCATCACTTCTAAAAGAACTTTCAGGACATGCTGCTAAAAAATAATTAATCAAGAACAATAATCATCAATTCAAT  
ATAAATCTTCTGGAAAAAATAAAAAAGAAAGTGTGCGCAATGATTCTTCTGCAACTTTTGTAAAATCATTACTTGTCTACTGCCTTCATTCATACTTTCTTAAGTTTCTTTACCTTT  
GCCATCAATGCCTTGAGTACTATCGAGCATTCAAGGAACATAGGTGAAGGAAATGTATTCAATTACATTATTATGTAAGTTGATATATTTCTGTAGTAGTTTCTGTTCCAGAAGAAATTT  
ACAGATAAGAGCTGTTCTACTTTTTCTGGAAAGTACTTACCTCCTCTTTACAGCAATCATGCTTGGTAGATGCTTCAACAGGTTCAATTTGCTGAGGTAGAACAGCTCTCCGTT  
TGTTTCATAAAGGTTTCTCCTTCTATAGAACATGAAACTATGACTTTCTCTGAAGATGTGATTTAGCTTTTAAGAGAGCTTTTGCCACTTCCTCATCTGCTGGAAATCCCTCGTCAAAATCT  
GATAATCTTGTGCTGATGCCTCCCACTTCTCAAGCTTAGCAAAGCAATCAGCTCTTCAAGTCTAGCCTTAGCATAGGAAGGTTTCAAATTAAGAACCGTATTGCAATCTTCAATTGCTTTC  
TCCCATTGTCCAAGTTTGAATGACAGGCAGCTCGGTTGCAGAGAAGAATGGCATTCAAGGGATCATGATGAAGCCCTTCTCCATAAGCAGTGCATGCTTCTGAATACTTTGAAAACCTG  
AAGAACTCATTGCCTTTGTTTCGAGCTGATGCGACGGCTTTTACTCTCCTAACTACAGCACTGATTTCTCTGTTGTTCTGGTGTATCAGCCCTTCCACTAATGCAACCGCTTCATTGAA  
CCTTCTGAAGCTAAATTAACCTCTGCTTGAATCATGAGGATGTATCCATTCAGTCTGAACCAAGAAATTTATGATTGCATCAGTGTCAAACCTGGGTGCATTCTTAAGAACTGAGTCA  
GCCTCTTCATGCCTGCCAAGTCTTAGAAGCGCTTCTGCTTGAATGCAAATACTTTTGGAGCTGAATCTGCACCACTAGAAATGGCAGATTGGGATTCTTTAAGCATGCTCTGCCACTCCTT  
CAGTTTTCGAGCCTCGCTGCATCTTAGAATATGCATTTGGAGATTTGTTGCTCTAGTGATATCATCAGTATCAGCCACTTTTCGAGATTGGTTGTAGTGATGAACTGCCTTTTCGGCTTCCCC  
TAACTGAGATATAAAGTCGCTAACCGATAATGAGCTCTCGAATATGAAGGATCAATCCTTACTGCCTCCTTACACTCTTTGATAGCTTCAATGAGCCTACCCATTCCAGCAAGTGCTGCCG  
CCTTATTGTTCCAATAAGAAGCCTTCTCAGGATCAAGCATGATCGCCTTGTATAGAGAGCTAATGCCTCACTGAGCCTCCAGCATTGAACTCCTCATTGCCATCTCCTTCAACTTCTCA  
GGATCCGTTCTCTTTGACAAAAGCCCTGCACAACACCGGTGGTTTTGAGGCCTTCTGTTCTGCTTTGCTCCTCAAATGTTGCCATTCCCCATTGATGCCACTATTCTTTCCCAGATGTT  
GCCTAATTGGCCATACACCATTCATTGCTAGAGAAGCTCGCACCAATTTGCTGTTACCCTTTGCCTTCTGATAGTCATAGATCATCATGCAAGCTCCCCTGAGAGGCCATTACCAGGCG  
TGGTAACCTGCTTTCGCTTCTCCGGAGCTGCTGCTGGCTTCGACTTGTGTACCACAAATTGGGAGGCATTTAGATGACTCCTTCGTTGAGGATGGCTGGAGCTCGGTGGTCGAGTCTTCG  
CTGGGGAAGATGGTGTGAGGCTTGCAGGCTTGCAGGTTGGGAATTGATTTCTCGATGAAGACCGATTATGGCGGCCAAAGAGCAAGCTTAGCAAGTTGCAGCCTTTGATCTTCTTCTGGTCACTGC  
TAACTCGGTCTTCATCTCCTCCTTCAGTGGTTCTAAGGAGATAGATGGATCCAGAAGGAATTGGCTGCAAAGCTTGGAGCTTTATTGAGGATTTGGAATGCCTCGGCAAAAAGGAGGCG  
AGAAGAAAGGATTACATTGATCGGGATGGGAAAAATAAGAGAACGTCGTGCGTTTATGAAAAAGGGAAAAAGAAAAACCTAAACAAAAAAACCAAAAAAAGATCGTTGAAAG  
AGTAAAACAGCCGATGTATCTTACCAGAAATACCATTGTGAGGGGGAGTCTCAAACAAGCCTCCTTTC

>comp164907\_c0\_seq16

ATAATAATAATAATATGACTTTTCATTAGACATTCTTCACAAATTCCTGGATATGATACTAGTTTTGCTTTTGTTCCTTATTCTTACTTCTAAATACATGAAAGATCAAATGTTTCCCTTGA  
AATTCTATAAAATCCTCCACATTATGCATGTGACTTCTGCTAGAAAAATGAAAAAGATGGCCGGAGGCTGTAAGTGCCTGAGGAAAAATAAAATAAAATATCCAAACAAACC  
ATTCATGGATGGACTGCAATGTGCAAAAATAATATAAAATCTCTGACATTGGTTGATTTTAGGCTTATGAAAAAGCCTATGACCAATCTTTTCTTATCTCGAAGTAATAGCTCATTTC  
ATAACATTTACCATCATCATCCACAACTTTGTTTTAGCAGAATAGGATCCCCCTTGCAAAATATGCCAGAAGGGGTGGTATCCTCTTCTAGCTCATAGGTGTATGGCTCCTTCTGAGGGCTGA  
AAGTTCCCAGCATCACCTTTGTGTTCTCAACTCTCACTCCAGTCTTCCACACAGTGTTCGTGTACCGGAGTCTGATACAATGTTATTTGAGACAGTGAAGGAGAATTTGAGTCGGTAGCG  
ACTGCTGTCTTAAGAGTAAATGCATAGCCCTTCGCATTTGGGACGAAAGGATAGGTAGAACCAGGTCTGGTCTATCAGGAGTGTGATTGTGAGACTCTGGATCTTCACTTCTGGATCT  
GGATTCTCTCAAATTCAGACAAATCAACGCCGGCAAGCAGCTGCTTTTCCATTTCCCTCAGGCTTTCATCATCTTGTCCATCTCAAGCTGTTCCCTTGAGAGCCAATTGAGGGCCGAGCG  
CCACATGTGCGTCTTTCCGATCATTGTCGTCTCCTCGGCATCTTCGTCTGCTCCTCGCCACCGTTCGGTGGAGTAAAAAGAAGCACTGCTCATCTTCTTTTGTGTTTATCCGAATCG  
CCCGGCTCCTCCCCCTCCTTCAAGCTCAATGTACATCTTCTGATGCCGGCGTCGACATTTCTATCTTTTTCTCTCCTTCCATGCTTAAAAAACTGGTTCCTTTGCTTCTCGTTTCAGGGAA

AGACGAGGCAGGGGACGATGGGAGAGGGAAAGATCTTAAGAATAGAAGAAGATAGTAAGGGCTTCTGTTTCTCTATTTTTATAGAAAAGCTGTTATGCGTCTCATAGGATCTGCAAAAAT  
GGCGGAGAGACAACCAATGAGGGGGAAGAGTTCTCTGCCTATGTGGCTTCCGACATTTAAGATCTGTG

>comp164907\_c0\_seq18

CTCTCTCTCTCTCTCTTCTTTTCTTACCTCCCTCTCTCCCTTTCTCTACTCTTTGAATCCTCAACAAGATATTTTTATTATAAAAATGAAGTTTTGGGCCTAGTGTTTTGGCACTCAATT  
CCTCAGCTCCGCTATGCTCCGAGAGAATCTTCATATGTGCCTCAGCACTGAGGTGAAGAACACATTGTATTCTCCATTTCTCCATTTTCTTTAGAGCTCAAAAATTGGGGCCTCGACAACGT  
TGATGTTGTGGTGCCCAAAAGCAACTTCTGAGCTGGGATTCTAGAAGTCGGAGAAACATGCTAACAATGGAAGGGAAATTACCCTAAACATCTGCAACTTCCATTCTTTATATCAGAGG  
AATGCAAAAAGAGAGAAATGCTTACATATATATATTTATACACTTACAGCTCTCTGCAGAGATTAACAGATATTTTCTACAGTTCTAAATGTACGTGAAATGAGATGTTGTTAGTTTGCCCAAT  
CTTATGCCCTATCGATCACAATGACGAACCTAACCTTGGATATTTATTTCCCAAAGTCTTAGCATATTTGGAAAGCATTTTTTTGTGACCACCTAATTATTTGGCAAGGTTACTATTTAGAA  
AACTTTTTCTCCAAGCTGTGGAAACAGAAGATTTTCATGAAAGCAATCAACCTAACGTGCTGTCATGTCGTACAAATGGCTTAGATGCTAATGAATCATGATCCACTTGTTTTATTTGGC  
ATGCAATAGGGTAAAATCACATGTCTAAAGGACTAAATTAATCACCTAAAATAATTAATATGCTTTATATAAGTTCAAGCAAAGCATGTAATAATGCCTTTTACAAGATTTTAACTAACCT  
TCTCAACATCAATGGCTAAGAAAATTGAGGAAACACTTGCTCAAGAATATTTTTTTTTCTAAGTTTAATTGGGGATAAGATTAGAAAGAGTTGCCTTAGATGGCTTGAATACATAAAAATGTT  
AGCCTTCCGATTATCCAG

>comp164907\_c0\_seq19

TTCTGTCGGGATCAAGCTAATTTTTTACGGGTATCAGAAAATTTGACGGCATAAATAATCCGTCAGCTGAACCTAGCGAGCTCACCTTCCGTCTTTGGGCCACACTTGCTTTGCCCTA  
CTGAAAAAATGAGTTTGTAAATAGGGGGATTCAAATTCGGAATGGGGATTCTTAATCAAGCTAATCAACTAACCCATAAATCTCTGTGGGTAAATTACATAAATTTCAATTTGAGTTTATGA  
AAATAAAAAACAGTATATTTGCTCAAAAAGCTGCGTTACGATGAACCAGCACGTCTAAATTGTAAAGCATAAGCGAAAGCCTGTACCCGTCTAGACTTTTCTGGAGGGATTAAAAAGAT  
ATTATTCCTCGTGGCTAACTGGTTCAGCGGACTACAACAATAGTTTCCATGCAAGCTTGCCTTTCTTAAGAAGCGTTCAAGATCGTTACACGTTCCCTAGAGCTATATATAATGAACCTT  
GATCAATTTCTATGACGTTAAACATCAATATATGCAATAATTAACATCGTTAATTAAGCCTAATGAAGACAAGGTACTTGTATTCTTCTTTATAAAGACCTCACCAACAACCTTCTGCCGT  
CCTCACACCCCCCTCTCTCTTTCCACACACTCTTTCTCTCTCATATCATAACCATACTACAAACCTAACCTTTCTCTCTTTCCGCCGACTCTGCCATGGTGGAAGAATCGAGCAACATGG  
ATAAGAGGATAAACGGAACCAGGAGGCTGAGGTGAGGAAGGGGCCATGGACTATGGAAGAGGACCTCATCTCATAAATCTATAGCCAACCATGGAGAGGGAGTATGGAATAATCTT  
GCCAGATCTGCAGGTGATTGAGATGCAAATATTTCTTGAAGGATTTTTATTTTTTGTAGTTTGAAGATGATTTGATTGATTAAGGTGATATATATATTGGTGGGTTTTATGAGAAGGTTTGAAG  
AGAACAGGGAAGAGCTGCCGGCTTCGATGGCTGAACTATCTGAGGCCAGACGTGAGGAGGGGGAACATAACGCCGGAGGAGCAGCTGCTGATCATGGAGCTGCATGCCAGATGGGGA  
AACAGGTGAGCTTCTTCTTACATGCATGCCCTGCATCCTCTTAAAGCTGAGCTGGGATTCTAGAAGTCGGAGAAACATGCTAACAATGGAAGGGAAATTACCCTAAACATAGCTCTCTGCA  
GAGATTAACAGATATTTTCTACAGTTCTAAATGTACGTGAAATGAGATGTTGTTAGTTTGGCCAATCTTATGCCCTATCGATCACAATGACGAACCTAACCTTGGATATTTATTTCCCAAAGT  
CTTAGCATATTTGAAAGCATTTTTTTGTGACCACCTAATTTTGGCAAGGTTACTATTTAGAAAAACTTTTCTCCAAGCTGTGGGAAACAGAAGATTTTCATGAAAGCAATCAACCTA  
ACGTGCTGTCATGTCGTACAAATGGCTTAGATGCTAATGAATCATGATCCACTTGTTTTATTTGGCATGCAATAGGGTAAAATCACATGTCTAAAGGACTAAATTAATCACCTAAAATAATT  
AATATGCTTTATATAAGTTCAAGCAAAGCATGTAATAATGCCTTTTACAAGATTTTAACTAACCTTCAACATCAATGGCTAAGAAAATTGAGGAAACACTTGCTCAAGAATATTTTTTTT  
TCTAAGTTAATTGGGGATAAGATTAGAAAGAGTTGCCTTAGATGGCTTGAATACATAAAAATGTTAGCCTTCCGATTATCCAG

>comp164907\_c0\_seq21

TTCTGTCGGGATCAAGCTAATTTTTTACGGGTATCAGAAAATTTGACGGCATAAATAATCCGTCAGCTGAACCTAGCGAGCTCACCTTCCGTCTTTGGGCCACACTTGCTTTGCCCTA  
CTGAAAAAATGAGTTTGTAAATAGGGGGATTCAAATTCGGAATGGGGATTCTTAATCAAGCTAATCAACTAACCCATAAATCTCTGTGGGTAAATTACATAAATTTCAATTTGAGTTTATGA



AAATAAAAAACAGTATATTTGCCTCAAAAAGCTGCGTTACGATGAACCAGCACGTCTAAATTGTAAAGCATAGACGGAAAGCCTGTCACCGTCTAGACTTTTCTGGAGGGATTA AAAAGAT  
ATTATTCCTCGTGGCTAACTGGTTCCAGCGGACTACAACAATAGTTTCCATGCAAGCTTGCGTTTCTTAAGAAGCGTTCAAGATCGTTACACGTTCCCCTAGAGCTATATATAATGAACCTT  
GATCAATTTCTATGACGTTAAACATCAATATATGCAATAATTAACATCGTTAATTAAGCCTAATGAAGACAAGGTACTTGTATTCTTCTTTATAAAGACCTCACCAACA ACTTCCTGCCGT  
CCTCACACCCCCCTCTCTCTTCCACACACTCTTCCCTCTCTCATATCATACCATACTACAAACCTA ACTTTCTCTCTTCCGCCGACTCTGCCATGGTGGAAAGAATCGAGCAACATGG  
ATAAGAGGATAAACGGAAACCAGGAGGCTGAGGTGAGGAAGGGGCCATGGACTATGGAAGAGGACCTCATCCTCATAAACTATATAGCCAACCATGGAGAGGGAGTATGGAATAATCTT  
GCCAGATCTGCAGGTTTGAAGAGAACAGGGAAGAGCTGCCGGCTTCGATGGCTGAACTATCTGAGGCCAGACGTGAGGAGGGGGAACATAACGCCGGAGGAGCAGCTGCTGATCATG  
GAGCTGCATGCCAGATGGGGAACAGGTGAGCTTCTTCTTACATGCATGCCCTGCATCCTCTTTAAGCTGAGCTGGGATTCTAGAAGTCGGAGAAACATGCTAACAATGGAAGGGAAAATT  
ACCCTAAACATAGCTCTCTGCAGAGATTAACAGATATTTTCTACAGTTCTAAATGTACGTGAAATGAGATGTTGTTAGTTTGCCAATCTTATGCCCTATCGATCACAATGACGAACTAAC  
CTTGATATTTATTTCCCAAAGTCTTAGCATATTTGGAAAGCATTTTTTTTGTGACCACCTAATTATTTGGCAAGGTTACTATTTCAAGAAAACCTTTCCCTCCAAGCTGTGGGAAACAGAAGA  
TTTTCATGAAAGCAATCAACCTAACGTGCTGTCATGTCGTACAAATGGCTTAGATGCTAATGAATCATGATCCACTTGTTTTATTTGGCATGCAATAGGGTAAAATCACATGTCTAAAGGAC  
TAAATTAATCACCTAAAAATAATTAATATGCTTTATATAAGTTCAAGCAAAGCATGTACTTAAATGCCTTTTACAAGATTTTAACTAACCTCTCAACATCAATGGCTAAGAAAATTGAGGAAA  
CACTTGCTCAAGAATATTTTTTTTTCTAAGTTAATTGGGGATAAGATTAGAAAAGAGTTGCCCTTAGATGGCTTGAATACATAAAATGTTAGCCTTCCGATTATCCAG

>comp164907\_c0\_seq22

ATAATAATAATAATATGACTTTCATTAGACATTCTTCACAAATTCCTGGATATGATACTAGTTTTGCTTTTTGTTTTCCCTATTCTTACTTCTAAATACATGAAAGATCAAAATGTTCCCTTGA  
AATTCTATAAAAATCCTCCACATTATGCATGTGACTTCTGCTAGAAAAATGAAAAAAGATGGCCGGAGGCTGTAAGTGCCCTGAGGAAAAATAAAAATAAAAATATCCAAACAAACC  
ATTCATGGATGGACTGCAATGTGCAAAAACTAATATAAAATCTCTGACATGGTTGATTTTTAGGCTTATGAAAAAGCCTATGACCAATCTTTTCTTATCTCGAAGTAATAGCTCATTTCCAA  
ATAACATTTACCATCATCATCCACAACTTTGTTTTAGCAGAATAGGATCCCCTTGCAATATGCCAGAAGGGGTGGTATCCTCTTCTAGCTCATAGGTGTATGGCTCCTTCTGAGGGCTGA  
AAGTTCCCAGCATCACCTTTGTGTTCTCAACTCCAACCTCAGACAAATCAACGCCGGCAAGCAGCTGCTCTTTCCATTTCCCTCAGGCTTTCATCATCCTTGTCCATCTCAAGCTGTTCCCT  
GAGAGCCAATTGAGGGCCGAGCGCCACATGTGCGTCTTTCCGATCATTGTCGTCTCCTCGGCATCTTCGTCTCCTCCTCGCCACCGTCGGTGGAGTAAAAAGAAGCACTGCTCATCTT  
CCTTTTGAGTTCGTTATCCGAATCGCCCGGCTCCTCCCCCTCCTCAAGCTCAATGTCACATCTTCTGATGCCGGCGTCGACATTTCTATCTTTTTCTCTCCTTCCATGCTTAAAAAACTGGT  
TCCTTTGCTTCTCGTTTCAGGGAAAAGACGAGGCAGGGGACGATGGGAGAGGGAAAGATCTTAAGAATAGAAGAAGATAGTAAGGGCTTCTGTTTCTCTATTTTTATAGAAAAGCTGTTAT  
GCGTCTCATAGGATCTGCAAAAATGGCGGAGAGACAACCAAATGAGGGGGAAGAGTTCTCTGCCTATGTGGCTTCCGACATTTAAGATCTGTG

>comp164907\_c0\_seq5

TTCGTGCCCAGTCAAGCTAATTTTTTGACGGGTATCAGAAAGTATTTGACGGCATAAATAATCCGTCAGCTGAACCTAGCGAGCTCACCTTCCGTCTTTGGGCCACACTTGCTTTGCCCTA  
CTGAAAAAATGAGTTTGTAAATAGGGGATTCAAATTCGGAATGGGGATTCTTAATCAAGCTAATCAACTAACCCATAAATCTCTGTGGGTAAATTACATAAATTTCAATTTGAGTTTATGA  
AAATAAAAAACAGTATATTTGCCTCAAAAAGCTGCGTTACGATGAACCAGCACGTCTAAATTGTAAAGCATAGACGGAAAGCCTGTCACCGTCTAGACTTTTCTGGAGGGATTA AAAAGAT  
ATTATTCCTCGTGGCTAACTGGTTCCAGCGGACTACAACAATAGTTTCCATGCAAGCTTGCGTTTCTTAAGAAGCGTTCAAGATCGTTACACGTTCCCCTAGAGCTATATATAATGAACCTT  
GATCAATTTCTATGACGTTAAACATCAATATATGCAATAATTAACATCGTTAATTAAGCCTAATGAAGACAAGGTACTTGTATTCTTCTTTATAAAGACCTCACCAACA ACTTCCTGCCGT  
CCTCACACCCCCCTCTCTCTTCCACACACTCTTCCCTCTCTCATATCATACCATACTACAAACCTA ACTTTCTCTCTTCCGCCGACTCTGCCATGGTGGAAAGAATCGAGCAACATGG  
ATAAGAGGATAAACGGAAACCAGGAGGCTGAGGTGAGGAAGGGGCCATGGACTATGGAAGAGGACCTCATCCTCATAAACTATATAGCCAACCATGGAGAGGGAGTATGGAATAATCTT  
GCCAGATCTGCAGGTTTGAAGAGAACAGGGAAGAGCTGCCGGCTTCGATGGCTGAACTATCTGAGGCCAGACGTGAGGAGGGGGAACATAACGCCGGAGGAGCAGCTGCTGATCATG

GAGCTGCATGCCAGATGGGGAAACAGGTGAGCTTCTTCTTACATGCATGCCCTGCATCCTCTTTAAGCTGAGCTGGGATTCTAGAAGTCGGAGAAACATGCTAACAATGGAAGGGAAATT  
ACCCTAAACATCTGCAACTTCCATTCTTTATATCAGAGGAATGCAAAAGAGAGAAATGCTTACATATATATATTTATACTTACAGCTCTCTGCAGAGATTAACAGATATTTTCTACAGTTCT  
AAATGTACGTGAAATGAGATGTTGTTAGTTTGGCCAACTTATGCCCTATCGATCACAATGACGAACTAACCCCTGGATATTTATTTCCCAAAGTCTTAGCATATTTGGAAAGCATTTTTTTG  
TGACCACCTAATTATTTGGCAAGGTTACTATTCAGAAAACTTTTCCTCCAAGCTGTGGGAAACAGAAAGATTTTCATGAAAGCAATCAACCTAACGTGCTGTATGTCGTACAAATGGCT  
TAGATGCTAATGAATCATGATCCACTTGTTTTATTTGGCATGCAATAGGGTAAAATCACATGTCTAAAGGACTAAATTAATCACCTAAAAATAATTAATATGCTTTATATAAGTTCAAGCAAA  
GCATGTACTTAAATGCCTTTTACAAGATTTAACTAACCTCTCAACATCAATGGCTAAGAAAATTGAGGAAACACTTGCTCAAGAATATTTTTTTTTCTAAGTTAATTGGGGATAAGATTA  
GAAAGAGTTGCCTTAGATGGCTGAATACATAAAAATGTTAGCCTTCCGATTATCCAG

>comp164919\_c0\_seq3

TGAAGCTGGGAGCTTAGATGTTTTAGTTCATAGAAATCAGTCAGTGAGTCAGCACAGTAGTTGAAATCGGATGGGACTACAGGTGGCAATGGCGTTCGGCTGGAGCAGTGAGGAGGATG  
CGGCTACCGCAAGAGCTCAACTGGAGGTGTCTTCGGGCTAGGGTCGGGAGCAGGCGTCGGGTCAAGGAGTTGCAGTTGGACTCGAAGGGAAGGGCAGATCTTGCCTGGATTTCCGGTT  
TGAAGAGATGGAGAGGCAGCGGCTGGAGCTTGAGTTAAGAGCAGGTTCGGTTCGTGGAGTTCTTCAAGCAGCAAGAGATCGGGCAACAGCCGAGATATCTGGGTGAGGATCGAAAAGTC  
GGGCGTGGTCTTGAGGTTCGGGTATGGCTGCTGGAGGAAGATTGGGTTTGGCGAACTCGACAGCACCTCGGAATAAAGGAGGGAGACGGAGCTTGGTGTGGTAGGTGAGGAGGAACT  
GCGGCTCTGGAGTATTAAGGGCTGGAGGGAGAGTGGATCAAAATATGGAGGATGAAATCGATTGGAGAGGATGGAGGTCCGGCTTGGGTCTAGAGCGAAAATCGGGGCTGCTGGAGGT  
CGGAAGAGGCTTCGGAAGGCTACAGGAATCGGAAGCAGGGAGAAAGTCGGAGGTTTGGAGACTCGTTAGGCCTGGTTTGGAGACAGCTTAATTTTATTTTTCAGTTTGGAAATGGCATAATTT  
CTTTTTTTGACTCTTTGAATGCTTTTTTTGACTGTTTGAATGCTTTTTTGAATAATCAATTTATTTATTTGTTTTTAAAAACGTTATGGTATTAGTTTCTACCTTTAAAACCTACATTTCTTGAT  
GTTTTTGAAAAAATTTAATAAAAAAATGGAGGTTTTAAACGGAGAAGCTAATACCATAACACTTCTCAAAACAATAAAGAAATGGAGTTTCCATAAAAGCATGCATCACATTCAAACA  
GCGGAAAAAAAATTTATGACGTTTTGAAATTGGAGAAGGGAAAAATTAAGCTGTTTCAAACGAGGCCTTAATAGCGAGGCAGATCGCAGGATTTAGGCAGGATTTCTGATCGAGACTCAA  
AGGGCGCCGAATGTACAGTCTTGCAGATATTCAAATGCTCGTGTATCATGGATGTTCTTGTGAAATGCTAAATGCTTTAGATCCGAGAAATAAAGAGGATGTCAAGCAGGAGGTGATC  
GTTGAACTTGTGAAAAGTGTCTCTATATAGGCAAAAGGGTGGTTCATCTTGTAACTCTACTTCGAACGAGAAATTAATTCGTGAAGGGCTTGCTTTAAATGATGATCTACAAAATGTTCT  
ATCAAAATATGATGCTATTGTTATTGAAGTTTCTAAAAAACCAAAGAAGCAGAACTCTCTCCATGATTTGGTAGATCTTCATGATAAAAATCAGGATGCTGACAATGAATCACATCGAAGGT  
CAAATGCTCCTCTTCAACAGCTCTTGCTACCTGCTCCTCCTGGACCAAATGATATAACCAATTAATCTCTCAAAAATCATGTCCTCAATTAGATCTTCTTAGCGGCGAGGAGTTCAATACA  
TCAACAGATAACTCATTAGCTCTTGTGCCAGCAAATGAAACAACCTGCTCCTTCGGCAAATGACCAAATATGCTAGTTCTAACAGGCATTTATTTCTCAAGGAACTGTGGAAATAACTGTA  
CTGCCAATATAGCTTTTCAAGCTGAACAAGATTATACTGTTGCATCTCTGTTTTCAGCAGCAACAGCAGTCTATATCTTACTTAGATGGGAGTGCCATGAACCATGGACAATCTATACATGAG  
CACGCTTCATTTGTTCAAAAAGCTCAGCCAAGTCATGGGATCTTTCATGGAATAATCATAATGTGGATACACAGCAACAAGCACGTATCGGAGAAGTCGATCAAGGTGGAGCTCTCCCC  
CCACCTCCTTGGGAGATTGGACTGGCTGAAAGTAGCCAGCCGTTGACCATAACAACAGCAGCATTTCAAAATGAGCAGACACAAGAAATTATTACATATTCTACAGGAATTCAGCGAAAC  
CAACCATGGGAATGTTTCTCCTCATGATCAAGCTTACCATCTCTCAAATGCATATTCTCAGTCCATGCAGGGTTATAATTCAGGCCAACAGTCAGAATCTCACTTACTCAAACACCAG  
AGAGCTCTCTATAAATTGAACGGGCTTGGCTTGCAAGATAGTTACATGAATGCAGGTCATTACTACCAAATGCCTTCTACTTCATCTTCTTCTTACTTGCAACAGCGATTCAAGGAGGATG  
ACAATTTGTTTGGTGATCTTGTGAGCATTGCAAAGTCAAAGACGAATAGACCTGCTAAGTGATTGAAGACATTTAGCGACTGTGAATTTGGATTTCTTTAATTTAACTAATTCTTTCCAT  
TTTGCTGTCCAATGTATCTGCATATTAATTTTATTACATTAACCTCAATTGTTT

>comp165001\_c0\_seq9

CGCTGGCATGCATGTCCTCCTCTATGAAGGATGATGGCAATATTTTGCTTGGGCTTTTTGCATTGACAACGAGAGAGAGCACGCTGGCTGGTTCGGCGCCATGAACGCGGTCTGTACCG

TTTATTTGCTCGCTCCCTCTTGCTGTCATCCACTTCGCCCTGTAAAATGGCTGCCAGGAAATTCGGAGCCGTGGCTCTCTTACCAGGAGATTTCTACTGTATGAAAGGTAAGCCTAATAAA  
TTTTATAAAATTTCTTGATATTTATATATCTA

>comp165048\_c1\_seq1

GCCCTTCCATGTTTAGCCGCCATCGGTGCCCCGAAGTGGGGCCTCCATAACCTCAATGGTAACTTCGCCGCAGACCCTGTTGAGATCCGCGAGGTATGGGACTCCAACCTGGAGGAGGAA  
CTCTCTCTCATCCGCTCTATTGTGCGCGACTACCCCTTCGTCTCCATGGACACCGAATTCGCCGGCGTTGCAATTCTCCCGTCGTCACTTCTCCGAATTCATAACCAAATTC AATTACCA  
GACTCTCCAACCTCAACGTCAACATCCTCAAACCTCATCCAACCTCGGCCTCACCTTCTTTGACTCTGCAGGCCACCTCCCTTCCTTCGGCTCTCCCCCTCGCCCTTGCATTTGGCAGTTCAAT  
TTCCGCGAGTTCGACGCAGCAAGAGACATCTTTGACCGCAGCTCAATCGAGCTTCTCCGCTGCAGCGGCATTGACTTAGAAAAGAATCATTGCCTAGGCGTCACTGCTAATCGCTTTTCC  
AAACTCATCATCTCTTCCGGCGTCGTGCAAAAATGATTCCGTTTCGATGGATCACTTTCAATGGTCGCTTTGACTTAGGATTTCTTCTCAAACGTTAACTTGCCATGATCTACCGGACTCTCA  
GGAGGATTTCTACCGTTCTCTACGGTTGTATTTTCTAAAGTCTATGACATCAAGAATATTATGTGGTTCCGCAACAACCTCCCTGACGGGCTGAAAAAGGTCGCAGAGGAGCTTGGGGTG  
AAGAGAGCGGGAACCTGCCATCAGACTGGATCGGATAGTTTGGCTCGCCGCAGCCGTCTTCAAGAGGTTGAAAGATCATTTATTGTTGGATCTCTTGAGAGATATGTTGGAGTTTACGTG  
GTCTTAGCTCGGATTGAACATGATCCATTATTTGCAATAATAAAATTTTTGTAATGAAAATAAAATTTGGGCCATCTCTATTATTTCTTTGGGAATTTTTTTGGTGGCCTATTGAATATTGGGT  
TTTCTATATTTTTTTAATAAAAATTTATTACTT

>comp165048\_c1\_seq6

GCCCTTCCATGTTTAGCCGCCATCGGTGCCCCGAAGTGGGGCCTCCATAACCTCAATGGTAACTTCGCCGCAGACCCTGTTGAGATCCGCGAGGTATGGGACTCCAACCTGGAGGAGGAA  
CTCTCTCTCATCCGCTCTATTGTGCGCGACTACCCCTTCGTCTCCATGGACACCGAATTCGCCGGCGTTGCAATTCTCCCGTCGTCACTTCTCCGAATTCATAACCAAATTC AATTACCA  
GACTCTCCAACCTCAACGTCAACATCCTCAAACCTCATCCAACCTCGGCCTCACCTTCTTTGACTCTGCAGGCCACCTCCCTTCCTTCGGCTCTCCCCCTCGCCCTTGCATTTGGCAGTTTAAT  
TCCGTGAGTTCGACGCAGCAAGCGACATTTGCGACCCGAGCTCGATCGAGCTTCTCCGCCGCAGCGCATGGACTTAGAAAAGAATCACCACATCGGCATCACCCTGATCGCTTTTCC  
GAACTCATCATCTCTTACGGCATCGTGCAAAATCCGTCCAATGGGTCACTTTCCACAGTTGCTTCGACTTAGGATTTCTTCTCAAACATTAACCTTGCCGCAATCTACCGAACTATCATGC  
GGATTTCTACCGTTTGTAGAGTTGTATTTTCTAAATTTCTATGACATCAAGTTTTTGTATGATGTTCTGCAACAACCTCCATGGCGGGCTCAACGATGTGCGAGAGGATCTTGGTATGAATAT  
AGTCGAAACTCGCCACCAATCTGGATTGGATAGTTTGGCTCGCTGCTGCCGTCTCAGGAAGTTGAAAGTTAGTTTTTTTCATGGATCTGTGCGAGAGATACGCTGGAGTTTATATGACCTTC  
AGACGTGATTGAACATGATCTATTATTAGCAATAATAAAATTTAAAGAAAAAATTAACCTAATAGTTAATTTTTTTTTTAAAGGAAAATAAAATTTGGGCCATCCCCAAGTAATTGAATATTGGTTT  
TTCTATGTTTTTTAAATAAAAATGTATTGCTT

>comp165048\_c1\_seq8

TTTATTTTATGTGTAACGATTA AAAACATTATATATATAGACTAATGAGCAAATTCGGTGAAGGCATGGACAAGAGCATTTGGTGAAGAGGAATTTGTTAGTGATTTTTGGATTTTAATTACAT  
CCGCCAAAATGGTGGAATTGCAGGAATTACGGGTCAACAGAGGAGAATAACTATTTATAGGATTTAAAGTTTTCTTTTTAAACCCTATTGCTAAACAATCCTTCAAAAAACAATTCCTT  
CTCCCTTCACAACTATTTGAACATGACTTCGGCGCCTCAGATGCTTTATGGTACTATGCCGCTGCCGTGCGATGCCGTGACTCTGTTGAGATTCGCGAGGTATGGAATTTTAATCTGGAGG  
AGGAATTTCTTCTCATCAGCTCTATTGTGCGCGACTACCCCTTCGTGCGCCATAGACAGCGAGTTCCCTGGCGTCCCCTTCGCCCGTGATTAGTTCTCCGACTTCATTCACCGAGTTCAAT  
TACCAAACCTCTGAAAATCAACGTCAATTTCTCAAACCTCATCCAAGTCGGCCTGACCTTCTTCGACTCTTCAGGCCGCCTCCCTCTCGTTCGGCTCTCCCCCTCGCCCTTGCATTTGGCAGT  
TCAACTTTTCGCGAATTC AATGCTGCAAGCGACTTCTTCGCCCTGACTCCATCGAGCTTCTCCGCCGTAGTGGAAATAAACTTCGAAAAGAATCACTGCCTCGGCGTCGCTGCCAATCGCT  
TTGCCGAACTCATGATCGCTTCTGGCGTCGTGCTGAATGACACCGTCCAATGGATCACTTTCCATGGCTGCTATGACTTCGGTTATCTTCTCAAATGTTAACTTGCCGCAATCTGCCGGAC  
TCTCAGGAGGATTTCTTCCATTCTCTGCGGCTGTATTTTCAAACATCTATGACATCAAGCATTGACGAAGATCTGCTCTAACTTCTATGGCGGGCTGAACAAGCTCGCAGGGCTACTTGG

GGTGAAGAGGATGGGAACCTGTCACCAGGCTGGATCAGATAGTTTGGCTCACTGCTGCCACGTTACAAAAGTTGAAATCTTGTTTAGCAAATGGATCTGTACAGAGATGTGCTGGAGTTTT  
ATATGGTCTCGGTGTTGATTGAACCATGCATATGCCATGTCTAGTATAAGTAAAGTAAAGAAAAAATCATTAGTATTTAAATTTTTTGTAATAATAATAAATTTGGGATCAAATGAAT  
TTTCATTTTTGTTATTTGTAACATTGTGAAATGTTACAAATAATAGAATACATGAATTTAAATTTTATATCAGATGCAATAGCTCTTATAACTATTTAGATGA

>comp165055\_c1\_seq10

GCAAAGAGCTATTGAGGGCTACTAGCTGAGGAGTTTTCTGATAGACTTTCATAAGCCATCGATAATTATAAACTGGCATCCAAACATTGTATATCATGATCATAAATGGCTAAGGAATGTTG  
GACTCTAATGAGGAACTATAGAGACCATACATACGTAGAATATATTCACATAGACTTCAAATGCTATAAATAACAAATTCACAGAACATACAAAGAACATTGGCTTGAATATAAGTTTTCA  
GGAAACAAAGAAAAAATAAAAAATGAACGATTATATGTACAATGACTTGGGAGTACTAGAACAACAAGTCATGCAAGCTTATCACCAACTAGTAAGTGCTTAATGAAACATAGTAATCAT  
ATCTCAGGCTATCACTGGGCATCCTTTGGCGACCACTCCAGGAGCTGTAGGGCAATTTGCAAGGGGACAGAAGTCACTTGCATCGCCTCCCACCAACTAATTCCACCAATATCATTGTAT  
TGTAAGGCAAAGAAGATGAGAACTCCCATGAAAGCGACTCCGGCATCGAGGGCAGCCGACATTACGTAGGTGTGCCTTGCCACCATTCCCTTATATTTGTTGTAATGTAGTAGTTGAAG  
AAGATGCCAACAGCACCCAGGTGATATAGTTCACTGTGTGTGCAGGAGGGATACCACCAGCACCTCCAATAATGAGAGGTAAATGGATGATTTGAGCCATTTGCAGTTAGGGAAGACC  
TTAGAAATCCACCAGAAAGGAATGGGTAGCAAGAATCCAGCAAGGAAGAAGTAGTTCAAAGCAGAGTAGAGACCGAGTTTTCCGAACATTCGCATAGGGCCAACAAGTCCCATATGAT  
GGATGCATTGTAGAATACATCGTCCCCTGGGCATGTCCATGGACTGTCAGCTGGTAGTTTATCAGTGTACATATGTTCTCAACTGAATCTAAAAGAAACCATGCAGTTCCAAAGTTGACC  
GTCGCTGCGATCACGGTCCCTGTCAACTGTGAGATGAACATAGATCTGGGGGGAATCTTCATATAGTGTCCAAGGTTGAAATCACTGAGAAATGTGAGTGCTTGAGTCAATGCTAATATAGC  
CATATGTCTTGAATGTCACATTTGCTAGGGGCTTTCCAGGTAGAATTAGACCAATGATGTACTCTGTGATGATATTGAGCCCTGGTGACTGGTTTTGTAGTTGCTGTAATGACTCCAATAGGTA  
ATGTGAAGAAGAAAGCCATAGCACAAACCAATAATATCCCACCATGGAAGTTGCAAAGCTCCACCAATCCCACACAAGTGAAAATTGAGAGTAGAATCATCAAATCAAGAGAACA  
TGGAACCACCATGAGGTATAGCATCATAATCTTCATCAATCTAGCATGAACATCTAATTTCTTCTCCTTAGAGGAATCTCTGGCTTGTCTCCATGACTGCCAAATATCCTTTCCATTGTGG  
AGAGCAACATGCATGACCGATGATGTCAAGGTTGCAAATCCTAAGCCATATGTCAAAGCAAACATAATACTCATGTTTATCTTGCTGTAACCTCTCTGTTCTTCAACATTCAAGGTGAAAG  
TCTTGCTATTAATAATTCGTGTCGTGTTGTACGGTTGCGCAGAAGAGTCAAGACATGGGACGAGATCATTGGAATAATCTTTGCCCCTGTATATGTTGGTCCAATAGGCAAATGGAAGCATT  
ATATAGATGGCAATGAAGTAGCCTACCATTATGTTAAAGATTGCACTTGCAGGTGTTCCCAATGGGCTACCAAGAAAACCAGCAACTGTTGACCAATCAAGACCGAAGGAGCCAATGCCA  
AGCCCTTTCATCCCTGATCCAATTTGTTGCATGGTATCGACTCCTTAAATATCAAGCAGAGGACAGAGACTGTGGAGATGGCTGGGAAGAGATAGCCGGGAATGGCATAGTATGCAAAG  
CTGAATACAAAGATTACTACGAAGAATTGAAATTTTGTACAGGCTGCCCTTTCTTCTCTCTTTTTGATGCAGTGTTTTGAAGAGGGAACTTGAACAAGATTTGCAGGCCACCACATAT  
ATGGAGATTCCACCAGATACTTTCTGAAAATTCAGCCCAACCATAACCTAGCACCTGAGTGGTTTTGTGACAACAAGAAGGCAACAACAGGATTGATATTTCTGCGATAGAAAGCCCTAA  
CAATGGTGACAATGTGTATGGAATAGACGCCGCCGGCACCAGAGTTGGCAAAAATGGTGTATGAGACAATGCTCCTTCATATTGAATGGCCAGGATTGAGGGAGAAAGTCCATTTGGTGA  
AAGGAACCTTGATGTTCTTCTCGGCAAAGAAGCCGCGAGGAATCTGCCAATGGGCAGCGAGACGATTTGAACGCAGACTGGACCAATGGTAAGCTGATTGTTCTGTAGCCGAAGAAT  
TTGTTGGCAAAGCGAGCATTACGCAGGAGATTGATCCGAGAAGCCATGTTCCGAAGGTCAGGACTGGGAGGTTAGGGTTGTCGGCGGGGTCGACTGTAAGCCGAACCTTCTCAATCGG  
GTGCTCGTTCTTCCACTATCCACCCTTCGGCAAAGCTCGAGCTTTGGCTGATGAGAGAGACCGACGATACAGTCGCCCATCGTTTTGTCTTCTCCTTCTCCTTCTCGGATTCT  
CTTCTTTATTTAAATACAAAGCGTTGCGTATTTTTATACTCGATACGGTTTTTTGTCAATGCTTTTTTTAGACGCTTACGGTTATAACTCGGCGAACGATATTTGCCTCGTAGCATTACGCT  
CGTCCGTGGTGATCTGTTTCGTTAACTAGAACGGTTT

>comp165062\_c1\_seq1

TTTTTGTCAACAACCACCATTTTCTATAAAAGGGTTACAGTGTGGCAAAGATTAGCACGTAAATAATAATAAGCCATTGAATGCTTGATCATTATCATGTAATAAGGTATTAATCCAATTATT  
GTTGAATCATGTAATCTCTTAAATTTAGAAAGCTAATAATCACAATTTTTTACTTCTTAAATTCGCTATAATTGTATATATTTTTTGTGACTTATTTTTTAACATGGATGGATGAAAATTATATC

CACAATCTCCTGATTCGACTTAAAAATATTGAAAGAGGCACATGAATAAAATTAATAAAGCTTTACATAAAAACTTGATAAAGAAACAAAGGATAGTGAGAAAGAGCTTGGTCCTGTAG  
AAGAAAAAAGAACGTACCATAATGGTAAGAGGGGAGGGCGTACATGCAAGTGCCGAAGATGACACAGAGGATGCCGACAATCATCGACCTTCTCTCGTACTATGACCCACCGTGAGCA  
CAACTGACACAACCACCGCCATGAAAGCCAATTCCTACTAAGATCTTCAAAACCTTCAACCTCAGATCCTTAGGGGCGTAAATGAAGAAGATCGTAAGATAAGCTCCCTCAAGCACAA  
TACCAATGCCATTTATGGTAACTACGAGCATTGAATTGGGGTGGACGATGGGTAAGCCATAGAAAACCCAGAGCATGCAGTTGAGCAGAGTCGCAACATACGGGATTGGTGAGAACTGCT  
CTACTGCATTCTTCTCCATATTTTTATGAAAGTCGGTAAAGGCGAAAAGAAATAGTCTAAATGATACTACATTTCCCTATCCCGATCCCATTTTCCCAATACAATTTTTAAGAAATCGGAAAGG  
AAAAGTGAAATTAATCAAAGGAAAATTGTTATGCCGCGCCGAAGTTACCGATGATCCCCACGATGTTACGGACAGCATCGGTGCTCAC

>comp165062\_c1\_seq10

AAAAATAATAATAATAAATTGATTAGAAAATAAATTTTTGAATTAATATTCTGACCTTTGAATTCGATAAAAAATTCCAATATTATCAAATTCCCAAAATGATTACCTTCCCTACGACAAC  
AATAGAGCTTGAAAGAAATCAAGATTTAAAACAGTGAATGCGCGGCTAATAGAAAGAGCTATCCATTAATCTATCGCTTGATTATCTTAAAAGTGGATATTACAAAAAAATGCAACTCTT  
GGACCTCCTTTTCTTTGGGAGCTTGAAGCCATTAGTCTTCTTTTCAGGCCATTTCAACCTCCTGTCTTTTCTGTCTCATTCTGTTGCTCAACGATCGGGGTACTTCGGCAATAACATCC  
GTACAACACTAGCTGGAGGAATCCGAGCAGCGCTCCGAGCCCGTTCGGTAGCTGCACGAGGGTCCACACATCAGTCTTCAACAAATTTTAAACAGCAGAAGATTAAGAAAGAAAAATA  
GTATAGTTGTCAGGAAAGAAATGTGTTACCGTAATGAAAATGTCGAACTTCAAAGTGCATAGGCGGTCCAGCATAACGCAATCAGAAAGCTAACTAAGGAAAGCCAGAACGGCATGTA  
CTTCACGCTTTTTGTACGACCACATTTTATAACGGTAAGAGGGGAGGCATACATGCAAGTGCCGAAGATGACACAGAGGATGCCGACAATCATCGACCTTCTCTCGTACTATGACC  
CACCGTGAGCACAACACTGACACAACCACCGCCATGAAAGCCAATTCCTCCATTAAGATCTTCAAACCTTCAACCTCAGATCCTTAGGGGCGTAAATGAAGAAGATCGTAAGATAAGCTCC  
CTCAAGCACAATACCAATGCCATTTATGGTAACTACGAGCATTGAATTGGGGTGGACGATGGGTAAGCCATAGAAAACCCAGAGCATGCAGTTGAGCAGAGTCGCAACATACGGGATTGG  
TGAGAAGTGTCTACTGCATTCTTCTCCATATTTTTATGAAAGTGGGTAAACGGTGAAAGAAACAGTCCGAATGATATCACATTCCCGATTATCCCAATGACGTTACGGACAACGTCTGTGC  
TCACCATCTTTGTTGGAATATTGAGAAAACAGATGGACGCAGAAAAGAGATGAGTTGTGGGGAAGAAGAGGAGCAGAGGTT

>comp165062\_c1\_seq13

AAAAATAATAATAATAAATTGATTAGAAAATAAATTTTTGAATTAATATTCTGACCTTTGAATTCGATAAAAAATTCCAATATTATCAAATTCCCAAAATGATTACCTACCTACGACAAC  
AACAGAGCTTAAAGAAATCAAGATTTAAAGCAATGAATGAGCGGCTAATAGATAGAGCTATCCATTAGCAATCGCTTGATCCATCTTGAACGTGGATATTACACAAGCAAGAGAGAAGC  
TAGCTAGTGCATCTACTCCACCCAACATCAAAGAGAAAAAAATCAGTACTCTTGGATTTCTTTTCTTTGGGAGCTTGAAGCCATTAGTCTTCACTTCAGGCCATTTCAACCTCC  
TGCCTTTTCTTCTTCTCCTCATTCTGTTGCTCAAAGGTCGGGGTACTTCGGCAATAACATCCGTACAGCACCAGCTGGAGGAATCCGAGTAGCGCTCCGAGCCCGTTCGGTAGCTGCACG  
AGGGTACCACATCAGTCTTCAACAAATTTTAAACAGCAGAAGATTAAGAAAGAAAAAATAGTATAAGTTGTCAGGAAAGAAATGTGTTACCGTAATGAAAATGTCGAACTTCAAAGTGC  
ATAGGCGGTCCAGCATAACGCAATCAGAAAGCTAACTAAGGAAAGCCAGAACGGCATGTACTTACGCTTTTTGTCACGACCACATTTTATAACGGTAAGAGGGGAGGCATACATGCA  
AGTGCCGAAGATGACACAGAGGATGCCGACAATCATCGACCTTCTCTCGTACTATGACCCACCGTGAGCACAACACTGACACAACCACCGCCATGAAAGCCAATTCCTCCATTAAGATCTT  
CAAACCTTCAACCTCAGATCCTTAGGGGCGTAAATGAAGAAGATCGTAAGATAAGCTCCCTCAAGCACAATACCAATGCCATTTATGGTAACTACGAGCATTGAATTGGGGTGGACGAT  
GGGTAAGCCATAGAAAACCCAGAGCATGCAGTTGAGCAGAGTCGCAACATACGGGATTGGTGAGAACTGCTCTACTGCATTCTTCTCCATATTTTTATGAAAGTCGGTAAAGGCGAAAG  
AAATAGTCTAAATGATACTACATTTCCCTATCCCGATCCCATTTTCCCAATACAATTTTTAAGAAATCGGAAAGGAAAAGTGAATTAATCAAAGGAAAATTGTTATGCCGCGCCGAAGTTAC  
CGATGATCCCCACGATGTTACGGACAGCATCGGTGCTCAC

>comp165062\_c1\_seq14

AAAAATAATAATAATAAATTGATTAGAAAATAAATTTTTGAATTAATATTCTGACCTTTGAATTCGATAAAAAATTCCAATATTATCAAATTCCCAAAATGATTACCTACCTACGACAAC

AACAGAGCTTAAAAGAAATCAAGATTTAAAGCAATGAATGAGCGGCTAATAGATAGAGCTATCCATTAGCAATCGCTTGATCCATCTTGAACGTGGATATTACACAAGCAAGAGAGAAGC  
TAGCTAGTGC ACTATCCACTCCACCCAACATCAAAGAGAAAAAAATCAGCTACTCTTGGATTTCTTTTCTTTGGGAGCTTGAAGCCATTAGTCTTCACTTCAGGCCATTTCAACCTCC  
TGCTTTTCTTCTTCTCCTCATTCTGTTGCTCAAAGGTCGGGGTACTTCGGCAATAACATCCGTACAGCACCAGCTGGAGGAATCCGAGTAGCGCTCCGAGCCCGTTCGGTAGCGTAATGA  
AAATGTCGAACTTCAAAGTGCATAGGCGGTCCAACATACGCCATTGAGAAAGCTAACTAAAGAAAGCCAGAACGGCATGTACTTCACGCTTTTGTGCACAACCACCATTTTCATAACGG  
TAAGGGGGGAGGGCTACATGCAAGTGCCAAAGATGACACAGAGGATGCCGACCATCATCGTCTCTTCTCATGAGTATGACCCACCGTGAGCACAACGGACACCACCACCGCCATGAAA  
GCCAGTCCCCTGCTAGGAACTTCAAACCTTCAACCTCAAATCCTTAGGGGCATAAAGAAAGAAGATTGTAAGATAAGCACCCCTCAAGCACAATACCAGTGCCATTTATGGTAACAACG  
AGTATTGAATTTGGGTGGACGATGGGTAAGCCATAGAAAACCCAGAGCATGCAGTTGAGCAGAGTCGCAACATACGGGATTGGTGAGAAGTGTCTACTGCATTCTTTCTCCATATTTTA  
TGAAAGTCGGTAATGGAGAAAGAAACAGTCCGAATGATATCACATTCCCGATTATCCCAACGACGTTACGGACAGTGTCTGTGCTCACCATCTTTGTTGGAATATTGAGAAAACAGATGG  
ACGCAGAAAAAGAGATGAGTTGTGGGGAAGAAGAGGAGCAGAGGTT

>comp165062\_c1\_seq5

CTGATAAAGGGTTACAGTGTGCTCGTAAATAATAATAAGCCATCGAATGCTTGATCGTTATCATCTACTTAAACGTATTAATTCAACTATTATTGAATCATATAATATCTTAAATTTAGAAAGC  
TAATAGTCATGTTTTTTTACTTTCTTAATCACCTATAATTGTATATATTTTTTGTGACTTATTTTTTAACATGGATGGATGAAAATTATATCCACAATCTCCCGATTCTGCTTAAAAATATTGAA  
AGAGGCACAGGAATAAAATTAACAAGCTTTACATAAAAACCTTGACAAAAGAAACAAAGGATAATGAGAAAGAGCTTGGTCTTGTAGAAGAAAATAAGAAGCTTACCATAACGGTAAGG  
GGGAGGCGTACATGCAAGTGCCAAAGATGACACAGAGGATGCCGACCATCATCGTCTCTTCTCATGAGTATGACCCACCGTGAGCACAACGGACACCACCACCGCCATGAAAGCCA  
GTTCCCCTGCTAGGAACTTCAAACCTTCAACCTCAAATCCTTAGGGGCATAAAGAAAGAAGATTGTAAGATAAGCACCCCTCAAGCACAATACCAGTGCCATTTATGGTAACAACGAGTA  
TTGAATTTGGGTGGACGATGGGTAAGCCATAGAAAACCCAGAGCATGCAGTTGAGCAGAGTCGCAACATACGGGATTGGTGAGAAGTGTCTACTGCATTCTTTCTCCATATTTTATGAA  
AGTCGGTAATGGAGAAAGAAACAGTCCGAATGATATCACATTCCCGATTATCCCAACGACGTTACGGACAGTGTCTGTGCTCACCATCTTTGTTGGAATATTGAGAAAACAGATGGACGC  
AGAAAAAGAGATGAGTTGTGGGGAAGAAGAGGAGCAGAGGTT

>comp165062\_c1\_seq8

AAAAATAATAATAATAATAATTGATTAGAAATAATAATTTTGAATTAATATTCTGACCTTTGAATTCGATAAAAATTCCTCAACTATTATCAAATTCCTCAAAATGATTACCTTCCCTACGACAAC  
AATAGAGCTTGAAAGAAATCAAGATTTAAAACAGTGAATGCGCGGCTAATAGAAAGAGCTATCCATTAAGTATCGCTTGATTATCTTAAAAGTGGATATTACAAAAAAATGCAACTCTT  
GGACCTCCTTTTCTTTGGGAGCTTGAAGCCATTAGTCTTCTTTCAGGCCATTTCAACCTCCTGTCTTTTCTGTCTCATTCTGTTGCTCAACGATCGGGGTACTTCGGCAATAACATCC  
GTACAACACTAGCTGGAGGAATCCGAGCAGCGCTCCGAGCCCGTTCGGTAGCGTAATGAAAATGTCGAACTTCAAAGTGCATAGGCGGTCCAGCATAACGCCATTAGAAAAGCTAACTA  
AGGAAAGCCAGAACGGCATGTACTTCACGCTTTTTTGTGCACGACCACCATTTTCATAACGGTAAGAGGGGAGGCATACATGCAAGTGCCGAAGATGACACAGAGGATGCCGACAATCATC  
GACCTCTTCTCGTGACTATGACCCACCGTGAGCACAACCTGACACAACCACCGCCATGAAAGCCAATTCCTCCATTAAGATCTTCAAACCTTCAACCTCAGATCCTTAGGGGCGTAAATG  
AAGAAGATCGTAAGATAAGCTCCCTCAAGCACAATACCAATGCCATTTATGGTAACTACGAGCATTGAATTGGGGTGGACGATGGGTAAGCCATAGAAAACCCAGAGCATGCAGTTGAGC  
AGAGTCGCAACATACGGGATTGGTGAGAAGTGTCTACTGCATTCTTTCTCCATATTTTATGAAAGTCGGTAAAGGGCGAAAGAAATAGTCTAAATGATACTACATTTCTATCCCGATCCC  
ATTTTCCCAATACAATTTTAAAGAAATCGGAAAGGAAAAGTGAAATTAATCAAAGGAAAATGTTATGCCGCGCCGAAGTTACCGATGATCCCCACGATGTTACGGACAGCATCGGTGCTC  
AC

>comp165086\_c2\_seq6

CCTTCTTCGGGCTTGAACACCGGCTTGGTTGATCGCACTTTTGGAACTTTTACTTTTGAAGTATACTTTATATCTTTCCAATATTTATCTCGAGGCATGGCAAGGGGATATAGAAGGGGG

AGAAAAAGAGAGAGAGGGCTTACTTTTCAATAATTCATCCAAAACACTATCGATCTCTATCACAAACAATTTTTATTTTTATTTTTTTGCTTTCCAACAAATACTCAAAGCAACTCATTCTCC  
AACAAATCCTACTTTTTCATCTCTTTTTCTGAAAATTTACATAGTTTCACTTTCAAAAACATACACTTCTACATTTAAAACATACAATCTCCACTTCTTACTTTTCATACACCTCAAGTTCCATTT  
TTAAAACACATATTTTTTCACAAAAATCATACTTCATCTCTAACACAAGACACTTTACCTTTAAACTTCCACAAGCATCTCCCTTCAAACCTTACATTTT

>comp165090\_c1\_seq4

AAATTCCTTTTTTAATATTTTTTAGTCTCATTAGCATGAAAATAATTAAGGAATGATAAATAAAAAGAAACGTGACTTAATTAGAAAGGAAACAAGACTAACTAGAAATTTTGGAGTTTTTCT  
CTTAATTTCCCATTCATTTTCATATACATACTCATTCTAATTACAACCACCAGCCCCAAAGCCAATTCTCAAGTTTTTTATATCATGCACTATATTGAATGTGCGTAACTGCACATTACCAATAA  
TCACCTTATCACTAGCATATTTATTGGCAGCGAAGGCTAAGCATTGTTTAGATTTAGTGGTCCCAGAAAGTATCCCTGAGATATCTAATTTAATAATAACCCCGCCATCAAATTCAAACGTAA  
TCTGCGGCACCTTCACGTTACGTTTGGGTAGTTAGTAAAGTTATAGCATGTGTCAAGTATGCCCCATGACGGCGCCCTCGGGTAATTGGCCATGTATTTACGGAAAGTGCTGCGGATGCC  
ATGGTAGGTAATGGGCGCAGTCGGCTAATCACTGTGCCAGAGTCCAACATGGCTTTTTTGCCGGAGGCCAACATGGTTCTAGGGGATTTGAACACTGTAGGTGAATGGGCAGACAAATC  
ACCCCAACAGTAATAGAAATTAGCTTGACGAAGTAGAAGGATGGCATCATTTGCTGGTTATCATCGGTGTATATTGCACATGAATGGCATCAATCCCTACATCACTCCCTAGTGAAAGAT  
ATCCAATTATGCCTGGCTTTGATGGTAGACAATATGAGAATACCAAGTCATATGATTGAGCTGTCTGGGAAATAATTGAAAGAGGACCCCGGCCGAAGCCTAATATCCCATCTACCTTCGGT  
ACGCTGAAGCTGTTGTTTTGTCCGCAGCCATAACGAAAATTCTTTATAATATCATAGGAGAATTGTAAGGTGTCTTGAACGAGGTAGCCTTTAGTGTAAGAACCATCGCGGTATTGTACCTC  
ATAGAGACAATTGTCGGTCCAGGAGCAATCATATGATTTAGTTGGCTACAATAGTCGGAGTGGCAGCGGATGGATGCATAGGTGGAGGACTCGAAAGGGTTATATTTGGGTCTTTTTGG  
GGATAACACTTCTCGCAGGGTATACATTGCATCCAAGTGACATCGCTGCCGGTGTCAAAAACAAGTGAGTATGGGGAGGGAGGGCTGCCTAGGTATATGGTGACGATAAATTTGTGGGTA  
CCAAAAAACGCCTTCTTCTATTGGAAGTGTGCTGAAACAGAGCTGCCAAGTGGGTTGAGATGGTATTCTCCGGTAAGCCATCGCACTGATACTAGAGAATTCTTCTCTATTAGATCTA  
TTAGAAGAAAAAGAAGAAG

>comp165090\_c1\_seq8

AAATTCCTTTTTTAATATTTTTTAGTCTCATTAGCATGAAAATAATTAAGGAATGATAAATAAAAAGAAACGTGACTTAATTAGAAAGGAAACAAGACTAACTAGAAATTTTGGAGTTTTTCT  
CTTAATTTCCCATTCATTTTCATATACATACTCATTCTAATTACAACCACCAGCCCCAAAGCCAATTCTCAAGTTTTTTATATCATGCACTATATTGAATGTGCGTAACTGCACATTACCAATAA  
TCACCTTATCACTAGCATATTTATTGGCAGCGAAGGCTAAGCATTGTTTAGATTTAGTGGTCCCAGAAAGTATCCCTGAGATATCTAATTTAATAATAACCCCGCCATCAAATTCAAACGTAA  
TCTGCGGCACCTTCACGTTACGTTTGGGTAGTTAGTAAAGTTATAGCATGCGTTCGAGTATGATCCATGACAACGCTCTCAGGTAATTGATCATGCCTTTTTTCGAAAAATGCTGTGGATGCC  
GGAGAAGATAATTTAAAATGGATTTTCTGCAAGAGGCCAAGATGGTTCTAGGGGCGCTGAACACACTAGGTGAAAAGGCAAGCCATTCACGCCAAATAGAAATTAGATTGACGTAGTAG  
AAAGATGGCCTCCTTTGGTTGGTTATCATCGGTGTATATAGCACAAAGAGTGAGATATTTCTTAGTACAAGATATCCAATTATGCCTGACTTTGATGGTAGACAATATAAGAATACCAAGTCA  
TATGATTGAGCTGTCTGGGAAATAATTGAAA

>comp165090\_c1\_seq9

AAATTCCTTTTTTAATATTTTTTAGTCTCATTAGCATGAAAATAATTAAGGAATGATAAATAAAAAGAAACGTGACTTAATTAGAAAGGAAACAAGACTAACTAGAAATTTTGGAGTTTTTCT  
CTTAATTTCCCATTCATTTTCATATACATACTCATTCTAATTACAACCACCAGCCCCAAAGCCAATTCTCAAGTTTTTTATATCATGCACTATATTGAATGTGCGTAACTGCACATTACCAATAA  
TCACCTTATCACTAGCATATTTATTGGCAGCGAAGGCTAAGCATTGTTTAGATTTAGTGGTCCCAGAAAGTATCCCTGAGATATCTAATTTAATAATAACCCCGCCATCAAATTCAAACGTAA  
TCTGCGGCACCTTCACGTTACGTTTGGGTAGTTAGTAAAGTTATAGCATGTGTCAAGTATGCCCCATGACGGCGCCCTCGGGTAATTGGCCATGTATTTACGGAAAGTGCTGCGGATGCC  
ATGGTAGGTAATGGGCGCAGTCGGCTAATCATTCTGCTAGAGTCCAACATGGCTTTTTCTGCCAGGGGCCAACATGGTTCTAGGGGAGTTTTTCGACCAATCACCCCAACAGAAATAGA  
AATTAGCTTGACGAAGTAGAAGGATGGCATCATTTGCTGGTTATCATCGGTGTATATTGCACATGAATGGCATCATCACTCCCTAGTGTAAGATATCCAATTATGCCTGACTTTGATGGTAG

ACAATATGAGAATACCAAGTCATATGATTGAGCTGTCTGGGAAATAATTGAAACTGGCCCCGGCCGAAGCCTAATATCCCATCTACCTTCGGTACGCTGAGGCTATTGTTTTGTCCGCAGC  
CATAACGGAAATTCCTTTATAATATCATAGGAGAATTGTAAGGTGTCTTTAACGAGGTAGCCTTTAGTGAAAGAACCATCGCGGTATTGTACCTCGTAGAGACAATTGTCGGTCTGGAGCAA  
TCATATGTATTTAGTTGGCTACAATAGTCGTTGTAGCAGCGGATGGATGCATAGGTAGAGGACTCGAAAGGGTTATATATTGGGTCATTTTGGGGATAACACTTATCGCAGGGTATACATTGG  
ATCCAAGTGACATCGCTGCCGGTGTCAAAAACAAGTGAGTATGGCAAGGGAGGGGTGCCTAGGTATATGGTGACGATAAAATTTGTGGGTACCAAAAAAATGCCTTCTTCTATTGGA  
GTTGCTGAAAGAGAGCTGCCAAGTGGGTTGATGCCAGCGGAGTTGTTTGGCAGCAATGACTCAACATCAATGAGATGGTATTCTCTGGCACGCCATCGCACTGATACTAGAGAATTCTTC  
TCTATTAGATCTATTAGAAGAAAAAGAAGAAG

>comp165091\_c1\_seq5

CAAACAAAATATAAATAACATAACAACATAATATGTATGTTTAAACAATGCAGTATGATGATAGCATTTCGTACTTTTTTACTCTATGTACGCATTAATACAATATTAATCAAACAAAAGAC  
GATCATGTCTATGCAATTAGCATTCAAATCATATGATAATGACAGATTAATATTTGATTGTTGCGTCCTGAAGTATTCATGGCAATAGAGAAATATAAAGTTTAAACGTCTCAGCTTTGTACG  
AAGACCCGACATGCATGCAAATAAATAGAGACCGGGTGGAGTTTTCCGGTGTCACTTGGTGATCGGGTGGAGTTTTCCGCATCACTTGAAAGTCGGGCAGAATTCTAGCATCATTGGAAGT  
CGGGCGGAACTCCGGCGGTGGTTGAGGAGGAGTTTTTTTCTCTCTATTCCTCTCTTATATTCCTCTCTTCTTCTTACTTGGGTCCCCTCTCAAATAAATGAGGTGCTATTTATAGTTTTCT  
GAGAGTGGTATGACCCGTAAATAGGAGGAGGATCAAGGGCAAATGTAGA

>comp165104\_c1\_seq1

TGTTTTGAGAATCCAATGCTTTATTTCCAACCAATTTATTCACATTTGACAACCTTAAACAAGTAGATTGTGCATGCCTTGGTGATATCTTATTGTTTCATCAATATAAAATTTACATCTGATATTA  
CACAAATATGTTACAATGACTCTGATTCTGGGATGACAAATAATACAACAACCTTAAATGTATAAAAGCGTACCTTCTTCAATGCGAGTGAATGCAGGAGCTCCATAGTATGGTCAAAGAAC  
AACTTAAGATTTTGTATGGGACGGTTTTTTTTAATGCTTCTTAAAGTAACTTTTTAATGCAAAAGTTTTAATTTTTGTACTGAAAAGTTGCTTTAAGAAGAAATAAAAAATCGTCCCAAACG  
AAAC

>comp165108\_c0\_seq5

AAACTGAAAATCTACACAAATGCTGATGATGATGAAATAATGCATATATAAAAGAGAGCTGATTTTATAAATATAAAATTTACAGGTTACATCCCAGGGTCTGCAGTAAAGTAAAGGTGGC  
CAGGCCCCACAGACAACAAGCCTGGGTTCTAAGCCTATAAGAGAGTAGAATTAATATAACTCTGCTTATGGTCTTTCAGGCTCCAAGTCTTCTATGGAATTCAAAAAGGAACATCCTCCT  
GATGAAGGGTATTACTTTTTGGAGCCCCATTTGTATATATAAGCAGTTATTTTAAATTCCTTTACAGATTCAAGACACTTTACAGACTCAATCTATATAACAATAGATCTAAGAAAATAAAGC  
TTTACATTTCTCTTTATAAGTACATCAGTCCCTATGAACATTCTACTTTTGCAGGAATATAAAAGACAGGAAAGTAAAAGCAGGTATGTAATTATGCATGTTATGAGTGCATTGTGAACAGTT  
ATATATGCAGGAAAGTAAAGACAGAAAAGTAAAGTACACGGCCCTCACTTATTCCTCCGCTCTCTGGTGCCTGACAGAAAAATAAATATGCATATTATGAGGTACAGGAAAGTAAAGCA  
AACACACATGGGTGCCCTCTAGGCAAGACACCCGCAAAACAACCACAACAACCACCGCCTAGCCTAGGCTAAAAGTTGGTTGTCTAGTAAGCATCTATGTGTGTGAAAGAGGTGCGTG  
TGGCTTGGATAGGTCTTATAAGAATTTATGTTTGAATTGTGTGTATTATTAAGGTTATTTATTAAGGCCAAAAGAAAATTTAATTAATGTTGAAGTAGTGTGTATTCTATTTTTAAAATTATT  
CCAATTTTAGAAGTTAAAGTTACTTGATTTAGTTTTAAAGAACTTATAGATTGGTAACTTCTAAGTGTAGGAGATTATCAATTTATAAGTTCTAGGACTTTCAGAATGAACACCCATCTTATA  
TGGAAGACAGACATTCATTTGAGAGTCCCTAAATTTTTATTAGAGAGAGAGAAAGGGACCTTACAAATGCAATGTGACATACCTTCCAAAAGGAGTCGAGTATGCCACATAAGGTGCGGTG  
TATTATCAAAAATTTGAAGATCTCAAATCAAATGTATTGTGCCTTCTAAAAGGAGCCGTGCACAATACATGGAATATCTTTTGGTTATTTTGTATGATTAAGGGTCTTTTGAATCAAAA  
TGTCTAAAGCCCTCCAAAAGAATAAAGCTTTAGGCATAAAAGACCTTAATCCATTTAGTCTAAATTAATAATCAAATTTGATTGA

>comp165152\_c0\_seq5

TTGTTAGAGGAGGATGAAGCCAAGTAGACATTGTTATCAAAGACTTGAAAAACACTGGGGGGAGCGCAAACAACTTCAATGTGGATGGTGCAAAGGTGGTAAGGAGACGATGGAGAA



GCAAAAGACATAAGAATTTTCCACATATTCAAAGGCAAAGCCAAGTAAATTATTGCGAGCAAGACGGAGGCAATATCAACAATATATTACGATACACCCCTGAGTACCTTTTCGTTAACAA  
AGGAGGACGATCTAAAGGAGGTGTATGCTCTTTAAGGTGAATTATTGATTGCAAAAGAATCAGGTGAATAAATGACAAGATAAAATAGAAATTGTGGAGAACGATAAGATTAACCTACAT  
AAGCGACTACATTAATAACTGTATGACCTACAAGGGTAGAGGTTGGAGCATATAGAAGAAATGTTATGTTCTATAGCCCTAAAATAGCTTGCTCACTAAAGCAAGCTACAAGTGAAATCC  
ATGCAGTCAACGTCTTTACAATCACATGAGGTCTTGAGAAGGAAATCGTGAATTTTAAAGAGTAAATCTTTCTATAAAAATATGATTAGAAAAAGT

>comp165211\_c2\_seq15

CTAAAAGATTGAATAAATATATAAAAACATATTATCAGTCATGATCACATTGCCACACAAGGCCAACTAGAGAATATCATCAGGAACTCTCTCAACAATGTTTCTATATATTTGGAAAG  
ACTTCTCAATTTGAGAGTTAGTGATAACAACCTTGATTAATAAAAACAAATAGAATCTGAAAAGCTGATGTAATGGACCAATGGTCTCCACAAAAGTGCCCTAGACTCATCTCAAATGTCC  
ATTATGGGCCATGAAGCTTTGAAAAAAGTTAATTTGGAAGCAAATAGACAATCAGTTTTTTTTTCTGAATGGAGTAGCATGAAAACATAAACTCTTAAGAATATTTGAAATAAGACTTAG  
GATGGAGTTTAGTGTGTTTTCAAAGAAAATTTAGGTATATGACTGCTCTTCTTTGTAGTTTTGGGTGCTCTTCATTTTCATGATAAGTATTAATGTCAATATTATCATATTCATTATCTAAA  
CTGTTTGGGATCATCTTTCAAATCATCTTTCATCCCTTACATTATGTGATATAAAAAGTGGTTAACTTAGAATACTTACTACATCATAGCCCCGTGTCCAGTGATATCCGACCGTAACACC  
TTAATTTGGAAGAAATAGTGGCGATTGAACTCCTTAAGCTTTAGCATCCATTTTATCTTCCATTGTTACTCGCAAACCACATAAGCAGAAAAATATAAACAGAAAGAAGAATATTCTAAAGG  
CTTTGACCATAACGTTGTCTCTTTCC

>comp165211\_c2\_seq16

TCTACTTGTTTTTTAAAACTCTTGTTCCAACATAAAATTTAAATGTGCTTTATCATTTTTCAAAAAATACTAAGTTTTTACATCGCTAACATCTTGATGGCAATTCATGTAATTTGGGGAAT  
CATAAATATCAGTATATCCATATAAATCTCCAACACCTTCAGGCATTGCTATCACAACTTCTTCTAGTAGAATGAGATTAATTATCTTAAGAGAACTAACTACATTGACATATTAATAGCAT  
GTAATAAAACAATGGCACGACAAATCGGACAATTGTTATTTCTGCAGAGCCACAAGTAAATACAATCTGTATGAAATAAATGTCGGCATGATGGCAATTTGGCTAACCTCCTCCTTCATCA  
AATGGTGACAAACAATCATGACTCTAGTGCAGCTTCTCTTCTCCTTAAACCCCACTTCATTCTTGTGATATATGAACGTTGGAATCCAACACCCGATTTCTAAAGCATTTCGGCCC  
ATGGTCGAGTAAGCCGCACACTGAGAGGAGTGGGCGTCGAAGCCAAGTGCAGCAACCCATTGTGATAGCACTGATAACGAGGAGTGAGATGGAGACAAGTGCAAGGCTAAAGAGCAA  
GTAGTCGTAGTTGAGTTTGTATTGGATGGAGGAGAGCAAAATGGTGCCATTTTGATAGTTGCTACATAAGTAACATCAACTTTTAGAAATTAGGAAATTTATTCTCTTTGCTACTCATCCTT  
CCTTAGAGGTCACCATAAATAACACCTATAAGAAAATAATTTCTCCTTAAAAAATTTACAAAATAAATTTAAATTAATAATTTCTTCTCTTTTTAAACCATTCTAAGTTCGCTCTTTCCCTT  
CTCTCTC

>comp165211\_c2\_seq22

TTTTAAACGCTATTGTAATTATAAGAAAACTCTATGAATGTTATGAGAAGTTTAATAAAATTACATGTAATAAAATAAGAAAATATACTCTTCTTATTTGAGAGTTAGTGATAAAATGCTAC  
GACAAATTGGACAGTTGCTATGTGAGTTGAGCCAAAAGTCAATACAAGCTGCATGAAACAAGTGTTTCATGATGTCAATTTGGCTAATCTCCTCTCCTTCATCAAATGGTGACAAACAAA  
TCATGACTCTAGTGCAGCTTCTCTTCTCCTTAAACCCCACTTCATTCTTGTGATATATGAACGTTGGAATCCAACACCCGATTTCTAAAGCATTTCGGCCCATGGTCGAGTAAGCCG  
CACACTGAGAGGAGTGGGCGTCGAAGCCAAGTGCAGCAACCCATTGTGATAGCACTGATAACGAGGAGTGAGATGGAGACAAGTGCAAGGCTAAAGAGCAAGTAGTCGTAGTTGAGTT  
TGTCATTGGATGGAGGAGAGCAAAATGGTGCCATTTTGATAGTTGCTACATAAGTAACATCAACTTTCTTAGCCTTCACTTAGTCTATTCTATATTTTCATCAAGCTTTGGCCGCCAAATCT  
GCCGCCGAGCCTCTCCTATCGGCTCCCGTACTTCCGCCCTCTCCCCTTCAAGTTTGGCAGATCAA

>comp165215\_c2\_seq21

AAAGCTGCTTTAAGAAACAATAAAAAAGCTGTCCCAACAATTATTAGTGAATCAATGGAAGTATGATACAAATAATTGGCAAGCTTATCATCACCGCCATTGTCATCATTATCATAATCA  
TTAGCCTTATCGCGACTATTCTTGACTTGAAACTCGAGATTTGATCAAGTTTGCTACATGATGTGCAACCCAGATGGAACCGGCCTCGGAGCACGAAAAGGAATGAGTATGTCCTTCCCTT

TCTATTGACAATGGAGCACCAGGCACCTGTCTTCAAACAATGACAATGGACCCCAGTGATCATCAACGCCGAACAAAAATGCAATTTGTTTCTTTTTCTTTTCATGAAGC  
TCCAATCTGGCTCCTCTGAAAAGCTTCTCAAACCTCTGTCTTTGCCATGAATAAGACATTGCGCATTGTGTGGTACTTCATGAGGCAAGTGCAAGCAGCATCAACTGCTGTTATAGAACATGA  
TGGACCAAGAAGTCTACTTACGAGAGCTCCCGAAATTCTCGTGGGAAAAAACCCCAACAAGGCCACAAGAAAGCTGAAGGTTGCACTCAAAAGGGAAAGACCTTGCAAGCACCCCAAT  
CATGTACTGTGTTGACGAACTTGTGTTAAAGCCAAAAATGGGTACAGAAAAATGGAAAATATCTCCTGTTCCGGGAATCTCTTGAGAACTTCAATGCATACATACGAACCAATAGAATGT  
CCAATCAATATTATTGGAAGATGTTTATTCTGGAGTTCTTTGATGAAACCCACCTTGTGATTTATTTGCTCTTGTAATGAGAACATCCTTCCATATGCCATGTCTGTCTTGAATGGGATATAT  
GCCCAATTGCTGTAATAGATGCGCAACCCCAAGTTGTTTCGTAGAGAGCTTCAACAAAGTCCTTGTA AAAAGAAGCGACGCCTGGATTCCCTGGTATAACGACAACATTCAAAGAGGCC  
TCTTCAGACTCTACTTTCGAGCAGTTCAGTCGAGAATCCAGAGACGAGACAATTTCTGTCAGTGGCCCTCTTTCTGTAAAGAGATGGCAATTCCTCATCATCCATTGAGCAACTTTTGTACC  
CTGCAGCAGATTTATCCTAGAAAAGCAACAGCGTTCTTTGATGTTAAATTTCTACGGCCGAGAAGGCAGACCAAAAGGCAAAAAGACTTCTCTTCAATTGAGGAAGAATAGGGCAGG  
AAAGGCGAAAAGTTGCAGCGAATAGAGGAGAGAGTTATGGGCGAAATCGATGGTGGCATGTGAAGCAGGCTAGCAGCTGCTGGCTTTATACTGCATTCTGTCCTCTCCAACCTCCCTTCAA  
AAGTCCAGCGTTGCTCGGAGAAAAATGTAATAGAGGAGTGAGTTGAGTTTGGTATGCTCAAGTGATTGATTGAGTTGAGTTTGGATTGTTTGGATTAATTATGGGACAAA

>comp165215\_c2\_seq3

TATATTCTCCAATTTATACTATTGTGAAGCATATAAAGTCAAATTTCTCTAATATTACATGGTTATTTGGCCAGTAAATAAGTAATCCCACATTAAGTTTATAATATACAGATTGGTCTCCCTAA  
TTAAACATTTTGAAGCTTAAAAGGTACATTA AAAACCATACTAGTTTAGCAATTAATGGATATTTGTATAAAAAGGAAGGAAATAAAGGCAGTATTCACCTCTTCAAACAATGACAATGGAC  
CCCAGTGATCATCAACGCCGAACAAAAATGCAATTTGTTTCTTTTTTCTTTTCATGAAGCTCCAATCTGGCTCCTCTGAAAGCTTCTCAAACCTCTGTCTTTGCCATGAATAAGACATTGCGC  
ATTGTGTGGTACTTCATGAGGCAAGTGCAAGCAGCATCAACTGCTGTTATAGAACATGATGGACCAAGAAGTCTACTTACGAGAGCTCCCGAAATTCCTGTTGGGAAAAAACCCCAACAA  
GGCCACAAGAAAGCTGAAGGTTGCACTCAAAAGGGAAGACCTTGAAGCACCCCAATCATGTAAGTGTGTTGACGAACTTGTGTTTAAAGCCAAAAATGGGTACAGAAAAATGGAAAAT  
ATCTCCTGTTCCGGGAATCTCTTGAGAACTTCAATGCATACATACGAACCAATAGAATGTCCAATCAATATTATTGGAAGATGTTTATTCTGGAGTTCTTTGATGAAACCCACCTTGTGATTT  
ATTTGCTCTTGTAATGAGAACATCCTTCCATATGCCATGTCCAGGGGAAAAAAAATTGAGCCTGCGTAGCAACACGCGGGCAAGTGAACAGCAGATGAGCTCTTATAGATCTATTTCCAG  
TCATTTCTCTTCTCCTTCTCCACTCCTCTGTTTCAGATTCACATTCACCTCAGATATAAGCATCAACTGAGATAACCACAAACGCCTTCTTATCATTTTCTATCTGTTCTTCAAGAAAATGATC  
TCTTGGTTAATTTCTTCCATGTTGCTTCTGTCTCTTGAATGGGATATATGCCCAATTGCTGTAATAGATGCGCAACCCCAAGTTGTTTCGTAGAGAGCTTCAACAAAGTCCTTGTA  
AAGAAGCGACGCCTGGATTCCCTGGTATAACGACAACATTCAAAGAGGCCTCTTCAGACTCTACTTCGAGCAGTTTCAAGTCCAGAGACGAGACAATTTCTTGCAGTGGCCCTC  
TTTCTGTAAAGAGATGGCAATTCCTCATCATCCATTGAGCAACTTTTGTACCCTGCAGCAGATTTATCCTAGAAAAGCAACAGCGTTCTTTGATGTTAAATTTTCTTCTTCAATTGAGGA  
AGAATAGGGCAGGAAAGGCGAAAGTTGCAGCGAATAGAGGAGAGAGTTATGGGCGAAATCGATGGTGGCATGTGAAGCAGGCTAGCAGCTGCTGGCTTTATACTGCATTCTGTCCTCTC  
CAACTCCCTTCAAAGTCCAGCGTTGCTCGGAGAAAAATGTAATAGAGGAGTGAGTTGAGTTTGGTATGCTCAAGTGATTGATTGAGTTGAGTTTGGATTGTTTGGATTAATTATGGGACA  
AA

>comp165215\_c2\_seq7

TATATTCTCCAATTTATACTATTGTGAAGCATATAAAGTCAAATTTCTCTAATATTACATGGTTATTTGGCCAGTAAATAAGTAATCCCACATTAAGTTTATAATATACAGATTGGTCTCCCTAA  
TTAAACATTTTGAAGCTTAAAAGGTACATTA AAAACCATACTAGTTTAGCAATTAATGGATATTTGTATAAAAAGGAAGGAAATAAAGGCAGTATTCACCTCTTCAAACAATGACAATGGAC  
CCCAGTGATCATCAACGCCGAACAAAAATGCAATTTGTTTCTTTTTTCTTTTCATGAAGCTCCAATCTGGCTCCTCTGAAAGCTTCTCAAACCTCTGTCTTTGCCATGAATAAGACATTGCGC  
ATTGTGTGGTACTTCATGAGGCAAGTGCAAGCAGCATCAACTGCTGTTATAGAACATGATGGACCAAGAAGTCTACTTACGAGAGCTCCCGAAATTCCTGTTGGGAAAAAACCCCAACAA  
GGCCACAAGAAAGCTGAAGGTTGCACTCAAAAGGGAAGACCTTGAAGCACCCCAATCATGTAAGTGTGTTGACGAACTTGTGTTTAAAGCCAAAAATGGGTACAGAAAAATGGAAAAT

ATCTCCTGTTCCGGGAATCTCTTGAGAACTTCAATGCATACATACGAACCAATAGAATGTCCAATCAATATTATTGGAAGATGTTTATTCTGGAGTTCTTTGATGAAACCCACCTTGTGATTT  
ATTTGCTCTTGTAATGAGAACATCCTTCCATATGCCATGTCTGGTAGAAAAAGTAACCCATATATCATGGTATTTTCATAAATGAAGAGTATTCTTCAATAAGAAATTATATGAAATATAAAAA  
TCCAACAGCAACTCTTTGTATGATAAAAAGCTTATAGTGTGCATTCTACATAGAATTACAGCAATAGTGTATTATTAGCTAAATTTAAGAAGAATGACAAGTAGAAAAGCTCTGTCCAGCG  
CATCATTCCAATATTGATGCATTTTTGTACATGTAATATCTTGAAAACTTCTCTTATTGCTCATTTTATAAGGAAAAAGTTAGATCGGGTGTCTCAACAGCAAATTAAGCCCAGCACCTAA  
TCTGTTTTCCATGAACAAATAGCCAAATGCAAAGAAGTGATTAGTTGGAAAAGCCAAACCAGGGGAAAAAAAATTGAGCCTGCGTAGCAACACGCGGGCAAGTGAACAGCAGATGAGCT  
CTTATAGATCTATTTCCAGTCATTTCTCTTCTCCTTCTCCACTCCTCTGTTTCTGATTACATTCACCTCAGATATAAGCATCAACTGAGATACCACAAACGCCTTCTTATCATTTTCTATCT  
GTTCTTCAAGAAAATGATCTCTTGGTTAATTTTCTTCCATGTTGCTTCTGTCTGTCTTGAATGGGATATATGCCCAATTGCTGTAATAGATGCGCAACCCCAAGTTGTTTCGTAGAGAGCTT  
CAACAAAGTCCTTGTA AAAAGAAGCGACGCCTGGATTCCCTGGTATAACGACAACATTCAAAGAGGGCCTTTCAGACTCTACTTCGAGCAGTTCAGTCGAGAATCCAGAGACGAGACAA  
TTTCTTGCAGTGGCCCTCTTTCTGTAAAGAGATGGCAATTCCTCATCATCCATTGAGCAACTTTTGTACCCTGCAGCAGATTTATCCTAGAAAAGCAACAGCGTTCTTTGATGTTAAATTTT  
CTTCTCTTCAATTGAGGAAGAATAGGGCAGGAAAGGGCGAAAAGTTGCAGCGAATAGAGGAGAGAGTTATGGGCGAAAATCGATGGTGGCATGTGAAGCAGGCTAGCAGCTGCTGGCTTTAT  
ACTGCATTCTGTCTCTCCAACCTCCCTTCAAAGTCCAGCGTTGCTCGGAGAAAAATGTAATAGAGGAGTGAGTTGAGTTTGGTATGCTCAAGTGATTGATTGAGTTGAGTTTGGATTTGTT  
TTGATTAATTATGGGACAAA

>comp165268\_c0\_seq6

TTCATTTTTAAGTTGAATTACACGGGACCGATTGTTGGCTGCAGGCGATTCTCTAGGGTTATCCAAACCTCATGAGCAGTAGATAAAGAGAGAACATAAGGTAGCACAGATGCAGAAATA  
GTGGACAACAAGGCAGAACTAAGTTTTGGTCAACTAGTTTCCACAGTCGGAATTCCTGAGAATCTGCTTCTGTCTGCGAGGCGGCAAAATGCTACCAGTCAAGTAACCTTCAAACCAT  
AGCTGAGAACAGTTTGAACACTTGCAAACGCCAAATAGGGTAGTTTTCAATTGGTCAAGTAGAAACAATATTCTTCAAGTTGTTTCATCAGAACTTCAAGGAAGATGGAATGGAGA  
GCTCTGTCAATTGAAGTAGTGAGAGAAGCTGCTGGTATGCAGCCGAGGAAGCCGAAATCTGTTTCAAGCCATTCAGAGAAAAAAAAGCTGATAGTGAAGCAGGATGAAGCCCTCAGA  
GCTCTGATACCATGAAATCAACCTGCAATAAAGAAGGCATAGAAGAACAGAGAAGGAAATGGCTTTAAAAATTGTATTTGCTTTCTTACTTCAGTACACAGTAAAGGCTTCAATATAAAG  
AAGCCAAAGGGGACAGAGGCTGCACAAGCCGCCTGGACTGGTACAACCCAGTCTGAGCGAAACAGAGAAGGTGCAACCTTAACTAATCATGATTGGTGGAGTAGCATAACTAAAGTGC  
TCTTGCAATATATTCTAACAGTCCCCTTCAAACCTTATCATTGAGGAGCAAATGGTAAGTTTGTCTCTTAAAAGAGAAAATCTGAGAGGTGGTAATGGTTAGTTAGTAATATCAGCCAACCTG  
ATCCTGGGAGTGGACATGTAGAATAGAGATAGCTCCTTGTGTAATGTGCTGACTGATAAAGTGAATCTATCTCAATATGCTTCGTGCGAGCATGAAAAACAGGATTATGAGCTAAGGCA  
ATCGCCGAAGTGTATCACAATAGACTCTTGTAGGAGATGTTTGTGGCAAGGATATATCGTCTAGTAAGCGACGTAACCATAGAATGTCGGATGTAGCAGAGGAGAGTGCTCGATATTCCG  
CCTCGGTGCAAGACTTGGCAACAGTGACTTGTCTTTTAAACACACCAAGAGATAAGTGTGGACCAAGATAAGAACAGAAGCCAGTAACCGATTTG

>comp165283\_c0\_seq1

ATTCCTCTTTTGGAGTGAATTCCTGTA AAAAGTTAAGGAAAAAAGA ACTACGATAAAACAATTCCAAGTGGTCTATATCTGGTTCAAATAACACAAAGTATTTCCAACCTACATATTA  
CTAAATTTACAGTGTGTAGATAAATCAGCACCTCAAATCTGGATCATTGTA AAAATTATAACTAAACAATACAGATAAAAAAAAACAATGCGCCGGATTTTCTATATCGTAATTCCTAGTT  
TATGGCATGCTATTTTGGTATTTTCATAATGCAAATCAGTGTGATGGAACAGCTGAGCCTGTGTACCCCACTAGTATGGGCAAAAAAAGATTAATTTCTCCCTTTAGTTGCTTATCATAGAAAA  
TCAAATTTGTGAGGGAATTAGGAAAGTTTATTTATGGAATGGGGCTGATTTGAATTCAAATTTGGAAGGGAATTAGGAAGGTTATTTAGAGAAACAGTGCTGATTTGAATTCAGATTTT  
GGAGGAAATTAGAAAAGTTTATGTAAGGAAAGATGCCGATTTAATTCAGATTTGTGCGGGATTTAGGAAGATGTAATTTAGGATTAATTTGGTTATTTAACTTTTATTATGTAATTTGTTTGT  
TGTAGTTTTCTTTGGAGTTGTTTCATAGAGGCGCTTAGGGTTTGTGGAGAGTCGGTCCATCTCTCGAATAGTATATCAACTTGATTTTGGTTTGTATGCCGATATCTCATTATTTCTCGCTGA  
TTTCTGTTTTTGGGCTGAAGCGATAAACACAACCTTATTATGTGTTAAATAAGGTGAATGTTAGAGTCAAACCTAGATAAGACACCCTATGGATCCTTAAGGGTAAGACACCCAATCTTTCC

ACCTCTATTTCTTTGGTTGTAAGGTTTTCAATTTATAATAACGGGAAGTCACAATTAGGGAAATTTGACCAAAATTTGATGAAGGTGTTCTTAGGATATTCAAGTATTGGTAAATTTCTTTAAGG  
TGTTTAATAAAAAGGACATTTGTGGTGGAGGAGATTACTCATATAGTGTGGATGAATCTGATCCTAAGGAGTTTAGAATTGAGGATGAAGATGGTGTATAGAGATTTCCAATGGAGCTAAA  
AATTTGGAGAAGAGGGTAAAGTCCTAAATCACTGAAGAAGTAGGTTGGATTATGTAAAGAGTATAAAATTCAAATCTAGAGGAAAGGGTTGATCATAACACACTTTGCATAGGGATTGG  
AGATATTCTTTGAGTCATCCTAAAGAATAATCTTAGGAGACCCTTCTGAAGGTGTTAGGACTAGGCATGGACTTAGGAAGGAAGTGAACCACTCTGCCTTTATCT

>comp165311\_c1\_seq15

TTCTTCTATTAATCAAATTCAGAAAATTTGAATTATAAGTAAATGAGATATCTATTTATACATAATGCAAAGTGAAAAAAGAAGGTGCAATACAATAATTTCTTCCATTGCTAGAAAT  
ATGCATGCTTCTATAGCTTAGCATTTTCTTTAGGTTGGTAACATTGTGATATCCTCTATTCAAAGAAGATTTGATAAAGTTGGAAGAAGACAAGATCAACTGAAGCCTATAAATGCAACGCAA  
GCCTTCTTCTTTAGTTGGTTCTGTGCAAAATCTTTGTTCGGCTAGCTTTCTCACAGCCATTAGTTTTTCTTTTTGTTTTAGGTAAGTGTGACCACATGCACCTTCTCTCTGCTATTACAGTAC  
TTCAACCAATCTTCCCTTCGCTTTTTGCTTTCATAATTGTGGCTTCTTCTTGGTACTCTGAGTTGTATATAGCACAGCATGCAGAAGTAATCTTTGTTGCCTTCTCTGGAGGGACAGAACA  
TTCATAGAGTTTCCACCATTGGGAGTTACAAAAAATTGTATAAATATATGGTGTAAATTCACCTGGAAGAAGATTATATCAGGGTAGTGCTTCTGAATTAGTTGGCCAATGACTTTCATCCGC  
CTAATCACCTCTACATCTTCACGGGACCAGACATTATAAATCATTACCTTGTATCAATCTGGAAGCGGTGTCATGATAACCCTCATCACCTTTATGACCTTGTACTTCAAATCCAGATCTGTCC  
AGAACCCCATCCTTTCGGGATTTGTTCTCAGATGAATCAGAAGATGAGAGGCTCCATACACCAAACGCAAGGAGAGCAGTTCCTGCTATAACTGCACCAACTTTGAGTGCTGAGATTGGT  
GTAGAAGTTTGAGAGGATCTACTCTTAGAATTACCCATTAATTAATCCTTTCTTATTTCCTCCTCACTCATCCTCTCCTTCTCTGCAATCACACATGGCTGAGAGTGTCTTGTAAATGTAA  
GGTAAAGTTGGAAAGCATATTTGATGTGATGACTATTCCTAGTCC

>comp165311\_c1\_seq19

TTCTTCTATTAATCAAATTCAGAAAATTTGAATTATAAGTAAATGAGATATCTATTTATACATAATGCAAAGTGAAAAAAGAAGGTGCAATACAATAATTTCTTCCATTGCTAGAAAT  
ATGCATGCTTCTATAGCTTAGCATTTTCTTTAGGTTGGTAACATTGTGATATCCTCTATTCAAAGAAGATTTGATAAAGTTGGAAGAAGACAAGATCAACTGAAGCCTATAAATGCAACGCAA  
GCCTTCTTCTTTAGTTGGTTCTGTGCAAAATCTTTGTTCGGCTAGCTTTCTCACAGCCATTAGTTTTTCTTTTTGTTTTAGGTAAGTGTGACCACATGCACCTTCTCTCTGCTATTACAGTAC  
TTCAACCAATCTTCCCTTCGCTTTTTGCTTTCATAATTGTGGCTTCTTCTTGGTACTCTGAGTTGTATATAGCACAGCATGCAGAAGTAATCTTTGTTGCCTTCTCTGGAGGGACAGAACA  
TTCATAGAGTTTCCACCATTGGGAGTTACAAAAAATTGTATAAATATATGGTGTAAATTCCTGAAAGACAATCAAGTTAAATTCGATCATAACTATCCTTGATTAGTATGAGGTATCTATCTTC  
AAGGCTCAAACGAACCTTACACCTGGAAGAAGATTATATCAGGGTAGTGCTTCTGAATTAGTTGGCCAATGACTTTCATCCGCTAATCACCTCTACATCTTCACGGGACCAGACATTATAA  
CTCATTACCTTGTATCAATCTGGAAGCGGTGTCATGATAACCCTCATCACCTTTATGACCTTGTACTTCAAATCCAGATCTGTCCAGAACCCCATCCTTTCGGGATTTGTTCTCAGATGAATCA  
GAAGATGAGAGGCTCCATACACCAAACGCAAGGAGAGCAGTTCCTGCTATAACTGCACCAACTTTGAGTGCTGAGATTGGTGTAGAAGTTTGAGAGGATCTACTCTTAGAATTACCCATT  
AATTAATCCTTTCTTATTTCCTCCTCACTCATCCTCTCCTTCTCTGCAATCACACATGGCTGAGAGTGTCTTGTAAATGTAAAGGTAAAGTTGGAAAGCATATTTGATGTGATGACTATTCCT  
AGTCC

>comp165315\_c1\_seq14

CCCAAACACCCCGATGATGGCCGTGTTGAATGCAGATCTCAACCGGAGGGTTCCCAAATACTTTCAATTGTCTCCCAAAGTCCATTCCAAATACTTTCAAACCTTACCTAAGATATCCA  
CCAAAATGCCAAAATGCACAAAAATCCCAAACCTCCACAAAAATCCCAAATAATTCAGAAAAATCTCAAACCTCCAAAATCCCAAATAATTTAAAATTGAAATAAATCCATCAACG  
CAGTTAAAGCAAATCCATTGCCCCCTCCGCAACAGTTTGTGCGAG

>comp165329\_c0\_seq8

GCATCATAACGATTCCATCCCCAAGCAGGAGGCGATGCATAAGGAGATTGGGGATGGAATCTTCTCTGAAAAGAAGAATGATTGTGAATGCAACACCATATCTCCTGCTCACAAAAGATA

GAGTTTATATTCTATGGTTTGTCTTTTTGGGGGTGCTATATGGTCACATATCAAGCGATTGGGAATGCCAACGGCGCAACCGTTGTGAGTCCACATTTACCAGTATCCACCATGCAAGAGA  
GTTCAAAAAGCACGGCGGTGACCTCAGAGAAAATGCTAGGGCAATAAATAGGGCTTATTTTCGAGGGCGATGCAATCAGAGGTGAAATGTTCAACATTGACATTGTTGTGCGGGCAGATTT  
TGAGTTGGGCGATGTCCTAAGATCCATTTCTTCTTGGTCACCATCAAGAGATCGTTGCATGTAGCGTATGAAGCTGGGGTCTCTAAGCTTGTGGCCATGGTGATTGGTGACAAGGAAAAC  
ATTCATGAACCAAACACTATCGGCTGAAATGGTGGCTTTGGAGATGATGAGGTCAAGATCGCTCAAGGCTTGAACATTTGTAAGAGAATGCCATGCCATTCTCACCTTCCACCCTGAGA  
AGAGTACAATCCTCGAATGTTTCATTGTCAACGCACACACAGAGAGGAGGTATGCATTCAGAGTCAAAGTTGGAACAACCTTCAGCCATCACTATCTCTGAAGCTCACTTAGTAGATAGG  
AAAGTAGTGGGCGGAGGAAGAAGAAGACGAAGGAGAAGCCTGTCCGGGAACTGAGAAGAAGAAATAATTAAGAAGATTAATGGTATTTGGTAGGAGAAGCAGAAGCTCTAATCAATCT  
GCTATTTATAATTAATCTCTCTGAACTTCAGCTATTTGTTAGGACGAAAATCCGTTGATTAGGACTCCTAATAAGCCTCACTATCCCCCTCTATTTCTCCTCATTTCCTGATTTCCGTTGCCG  
GAAGAAGTCCCACGCCACCATCTATTTCTCCTCATTTT

>comp165378\_c0\_seq2

ATTATCAAACCTACACAGAACTACTTGGCTTAATACATATCAATATGGCTTTGTATTTTCGCCCTCCCATGCTTTTCGTACAGTAAGAAGCAGCCAGTGCTCTTTAGCTTTTCTTCCACGCCAA  
CATTTCTAATCTTCAAGGAAGTATTACAAGATTCCATCCATAAGCTGCCTCTCAACAGCTAATACAAAAAATTCTCCTGCTCGTCGCACAGCAAATTTTCAGCCAACCATTTGGGATGAT  
AACTACATCCAATCGCTTCCAGTTCATTTTCATGGAGGAGAAGTATAAACACCAAAGAGATAAATTGAAGGAGGAAGTCAGGTGTTTGATTGGCCAACAACATGAACTTGTAAACAGCTT  
GAACTTGTGGATGCCCTACGACAGTTAGGAATTGATTATCATTTTAATTCAGATATCAGAAATTTGTTGAGTAATATTAGTTCATCAACGGAAAATATATATAACTTGATAAAGAATAACAATC  
TTTATGGCTCTGCATTGCTCTTTAGGCTTCTAAGGGAGCATGGCATCAATAATGCTGCAATACTAAGGTATGTACCAACATGTGCATGCATATAAAAATTTCAATTAAGGGTTATTTAGTTTCAG  
TGTAATATAATTATAAAAATTTAGGTTCAAGCAATATTCTCCCTAATTTCTTGGGTATAATAGAGTCATAAATTCATTTCCATCTTTTACTTCTTTAAAAGAAAATCTATATTTTATCTCCAT  
GTGATATTTTATTTATGGCTAGTCTTATTTCTTGTTTTTTTTCCAATGGACTTATGCCCTTGGATCTATAAATAATATTGTTCTCTACTTCTAAGTAAATAATATTTATGATATGTTTCCATCCTTAA  
AAAAATCCGATATAAATCTAAATAAAATGTTACCTAAACAACAATATTGAGATACTATATCATAAAGACACTCTATGTCATTAATTTCTATTGCAATCTTATCTAGAATGCCAATAGGGATA  
ATGATGTATCATTTTTTTCTTATTGTAACATAATTTAGCTATTAGTTAGCAAGACTAATATTAGCAATTCATTAATTTTATGTACATCAAGATGCTTTCGGAATAGGACTAAAATGCTAATGAAT  
AAAATAATTTACCTTATTGAACGTCAAATATGATATTAATTTCTATTGCATTTTATAATAAGTATGCTTAATAAAAATCCTTTTTTAATTTTCGTAGAGTTGATACTCTGATAAGCTGCTTCAAAAA  
AGTGAGAGAAAGCTTCAATCCCAATCATCAATATGATGTTAAAGAAATGCTCAGTTTGTATGAGGCTTCCCTACCTTGCTATGGAAGGAGAGGAAGAAGTGGATGAGGCAGGAAAGTTTGC  
TATGGAGCACTTAAGACGTCTTGATAGATCTTTACTAAGTCCACAACCTTATTGAAGAAATAGATCATGCCTTGGAGCTACCCCTTGCAT

>comp165378\_c0\_seq5

ATTATCAAACCTACACAGAACTACTTGGCTTAATACATATCAATATGGCTTTGTATTTTCGCCCTCCCATGCTTTTCGTACAGTAAGAAGCAGCCAGTGCTCTTTAGCTTTTCTTCCACGCCAA  
CATTTCTAATCTTCAAGGAAGTATTACAAGATTCCATCCATAAGCTGCCTCTCAACAGCTAATACAAAAAATTCTCCTGCTCGTCGCACAGCAAATTTTCAGCCAACCATTTGGGATGAT  
AACTACATCCAATCGCTTCCAGTTCATTTTCATGGAGGAGAAGTATAAACACCAAAGAGATAAATTGAAGGAGGAAGTCAGGTGTTTGATTGGCCAACAACATGAACTTGTAAACAGCTT  
GAACTTGTGGATGCCCTACGACAGTTAGGAATTGATTATCATTTTAATTCAGATATCAGAAATTTGTTGAGTAATATTAGTTCATCAACGGAAAATATATATAACTTGATAAAGAATAACAATC  
TTTATGGCTCTGCATTGCTCTTTAGGCTTCTAAGGGAGCATGGCATCAATAATGCTGCAATACTAAGTTGATACTCTGATAAGCTGCTTCAAAAAAGTGAGAGAAAGCTTCAAGCCCAATC  
ATCAATATGATGTTAAGGAAATGATCAGTTTGTATGAGGCTTCCCTACCTTGCTATGGAAGGAGAGGAAGAAGTGGATGAGGCAGGAAAGTTTGTCTATGGAGCACTTAAGACGTCTTGATA  
GATCTTTACTAAGTCCACAACCTTATTGAAGAAATAGATCATGCCTTGGAGCTACCCCTTGCAT

>comp165378\_c1\_seq1

CAAAATAATATTAAGATCATTACATTCTAGAAAGCTATTTTAAAGAAGCAGTTAGAAAGCCGTCTCAAACGAAGCCTTAGTTTAAAAGAAAAATCATTTTGATTTTTTTTTTTTTTCAAATTTG

GTATCCATACCTTCATATCAAAGTACAAGAATTTATACTTGAATATAGATTAATTATGATTGAATAAAAAAAAAAATTATGTGCATATCATCTAATAACATTGCTGATAATAATAATTAGCATATGC  
CAATTTTAAGAGTAGATGTAATATAAAATCTCTTCATAATTACTCAAATAATTTAAATCATAAGCCATCACCATGAAATGAACTGGAAGCGATTGGATGTAGTTATCATCCCAAATGGTTGGC  
TGAAAATTTGCTGTGCGACGAGCAGGAGAAGTTTTTGTATTAGCTGGTGAGAGGCAGCTTATGGGATGGAATCTTGAATACTTCCTTGAAGAATTAGAAAATGTTGGCGTGGAAGAAAAG  
CTAAAGAGCACTGGCTGCTTCTTACTGTACGAAAGCATGGGAGGGCGAAAATACAAAGCCATATTGATATGTATTAAGCCAAGTAGTTCTGTGTAGGTTTGATAATAGATGGGAACCCCT  
ATGCCTATTTAT

>comp165383\_c0\_seq8

ACCCTTCAAAAACACACACAAGTTACTTCCCACAAACACATACTCTTTTCATCTTCAAACTCGCACAAAGTTATACTTTTTTAAAATTCATGTATTTTACTATTTCAAAGTTCACACACTTTA  
TCTTACTCTTACATTTCAAACCTTAAACACTAAACTCGTTTCACTTTTACCTTTTCAAAAATCACAAAATTCACTTCTTAAACTTTACACCCATTTTCACTTTTTAACATATAAACACTTTACTTT  
CCATACCTTTTATACACTTTCTTTGCAATTTTCCATACATTTTACCTTCCAACACATGAGCACACGATTACCTTTCAAGATATAAACTTTTACCTTTCTAAATCACACAATTTTCCACTTTT  
CCAAAATTCACTCAAACCTTTGCCTTTTGAAACTTTTACTTTTGAAGTACACTTTGTAACTTCTAACATGTATCTCGAGGTGTGGGAAAAGGGGAAGAAGAAGAAAAGTGAGAGAGAGGT  
AGAGAGAAAGAGAGCTTTTGATTTTCAACACTTTTCTTCTACACATTTTAAAACATCATTTTGATATAACCAGACTTTATTTCTCACAATCCAACCCTTTCTTTTCATTTTTACACATTTTATC  
TTTTAAGGTAAACATACACCTTACTTCTCACATGAACAATTCCACCTTTCTAAAACACAATCACAAGCCCCATTTATTATTTCTCACACATATCATCTTACTCCTCACACTGGCACACTTCAT  
CATTCAAAGATCACATACTATACTTTTATATTTTCTAAAAGTTACACAATTCACCTTTTCAGGACATACACTTTTTTACATAAAACACTTCTCAATATGAATACATTTTACCTT

>comp165431\_c1\_seq3

CATATTATAGAACATAAATAACGAATTTTAACTACACATATAAGTTCAAGGACGATGAAGAGAGGTAGAGTCATATAAAAATGTAGGCGATAATTTTTTTTTCAGCTTTTTTAAAATAATTTTATAGT  
ACAAATATTAATAATTTTTGTAATAAAAAATTTTAAAGAAGCAATAAGAAAAGTCATCTCAAACGAAGTCTTAGTCCATTCTAGATCGGATAAAGCATTGTCTTCTTTTTCTTTTTATATAAT  
TATTTTTCACTCTGCAAGAAGAAGAGCGAGCCCAATCTCCACCCAGATTCCTAATTTGCGAGATTCACCATTGGATAAAGTAGGATTTTGTGGTAATACCCATTTGTCCCAGTCACGGCGTT  
TTCTGATTTTATCACCTGCACCTCCACATTGCCCGAGAATTCCATGCTGTCTGATATGAATTGTTTCATCGCTGGTCAACGGTGCATGTAATCTAGCATAAACTGTACGATCTTAAATAAT  
TATATACGAGATTTGCTTCTTCAATTAAGTCTCAACTCTCCTAAACCCAGCAATCAAACCTTATTGGAACCCAACCGTTTCGCATCCATCTGTCTCTTCCAGAAATATATCTGTTTCCAAATTT  
CCGAAGTGAAGTAGTACTCAATCTGCTTCCCTCAACCTAGTTCGCATATTATACAACCAACTGAAAATTTTTGATTGTTGTGCTGCATTAATGTCTTGGAGAGGAATAAAATATCCAACATGT  
GGGTGGGTTGGATGGTAATACGCACAATGAGGAGCATATGGGAAGACATTATTGAGGCCTTGAGCTGAAGAGCTGGTGGTGGGCTCGGGGTTGTCAAAGAAAGGCACTGGGAAAGTTG  
GCGGAGGGACCGTACCATATGCATGCAGGTTAGGTTGTCCGAAATCTATATGAGGAGCCATAACATTTGGTGTGATAAGGATTCGTTTCATTGAAAGTTCCACGATTGTTATTTAATCTC  
CCAATATTTCTATTAGGAGGTCGCACCTCATTTGGAAGGTATTCTTCTCCATGCCACCCGCTCAGTAGGGGCATTGTAATTTCTGCGGACTGAGGATGATGCTGAATGGTTCCCTCTTGCAA  
GTTGACCGGTCTGCTGACGATCGATGGGTCAGCCTCAACCTCTTCAATGAAAGGCTCTTCCCAACGCCGCAATTTGGTTTCTTTGGCAAATCGCATTGTGCTGCTATGGCGGAAGAAGA  
GGAGGTTGAATGGTTCTCACTAGACATAGCCAATCTTTAGAGGGGATACTTCTGGCTCTTAGATTGATGACTGAGATTATTGGTTGGTGAATGAATCGAAGGAGGAATAAGTATCGTAGA  
GAAGAATTACGTTATTGATTGATGATTTGTTCTGTGATGGTTGGCTTCTT

>comp165431\_c1\_seq4

TCCCAGTCACGGCGTTTTCTGATTTTATCACCTGCACCTCCACATCGTCCGAGAATCTTAAGCTATCTGATATGAATTGTTTCATTGCTAGTCAACCGTGCATATGATCTGGCATTAAATTTA  
ACGATCTTAAATAATTATATACGAGATTTGCTTCTTCAATTAAGTCTCAACCTGCAAAATAGCATTGCAAATACAACATTTGTAAGGATAAACTTGAGATAAAGTGCATGAAATAATA  
AAGTTAAGATAAATATACTC

>comp165431\_c1\_seq8

ATGTGGGTGGGTTGGATAGTAATTATACGGAGGACAGTAAGAAGCATCTGAAAATCATATAACAACATTAACATAAACTTACATCAAGTTGGTAGAAAATGATGTGCAATTCAATAAAAAG  
ACTACAGCACAAATGTATGTCTTACATGGGAAGACATTGAGACTTTGAAATGAAGAGCTGGTGGAGGGCTCGGGGTTGTCAAAGAAAGGCACTGGGAAAAGTTGGCGGAGGGACCGTACC  
ATATGCATGCAGGTTAGGTTGTCCGAAATCTATATGAGGAGCCGTAATAATTTGGTGTCTCGATAAGGACTCGTTTCAATATTGAAAAGTTCCATGATTGTTATTTAACCTCCCAATATTTCTATTA  
GGAGGTCGCACTTCATTGGAAGGTATTCTTCTCCATGCCACCCGCTCAGTAGGGGCATTGTAATTTCTGCGGACTGAGGATGATGCTGAATGGTTCCTCTTGGCAAGTTGACCGGTCTGC  
TGACGATCGATGGGTCAGCCTCAACCTCTCATTGAAGGCTCTCCCAACGCCGCAATGGTTCCTTTGGCAATCGCATTGTCGTTGCTATGGCGGAAGAAGAGGAGGTTGAATGGT  
TCTCACTAGACATAGCCAATCTTTAGAGGGGATACTTCTGGCTCTTAGATTGATGACTGAGATTATTGGTTGGTGAATGAATCGAAGGAGGAATAAGTATCGTAGAGAAGAATTACGTTAT  
TGATTGATGATTTGTTCTGTGATGGTTGGCTTCTTC

>comp165462\_c0\_seq5

CCAAATAACTTCATTGATACAAGCGTACTGAAAAGTGTTAATAATATTTCTATGAAATGCATGCTTAAAATTAAGAAATAATATCTCTATGAAACGTGTTCTACTCTGACCAGATCATT  
GGTAAACAATAATAAATATTACTCGAGTAAAAAAGGTAATAAATGTTGGTACAGTTTTCATCCACATGAGAACTCAAATGGGCAGTAAACATTGGAAAAGTTATTACGTCCGGATAAAAA  
ACCGAAAATCCGAACGAATACCGAGCGATACCGAGTGTGTATCGAGCATGGTACCAAGCACCCAAGTGATGTAGCGCTTTGTTATTGGTTTCTGGACGCATTAGGTGTCCGAACACAAT  
AATTACTCTTGCAGAAGTGATGTACCATTTATGTTTGCTGTGTTGATTCTTAAAGACTGGTGCAGTATCTCCTGTTATTCAGAATTCAAGTTATAGTTAGTCATCATCAATTTATTAGGTTT  
CCTTTGTTTTTTTTTATTGTTAATGAAAGCTTACCTTACATGGACAATGGAGAGGATATTTGAGGAGCATTTTTATGAGAAATATTTATTAATAAGCCCTTTTTGTACATTGTGGAATTATTC  
GAGAGAATGTTTCATGTAATTTGGCAAAAACATAAAGAAGCCTGTTTTTGAAGTTCTTGAAAATGGAGAGGATTTGCAAGTTCTTGAAAAGCTGATATTTGCTTCTACCATTTACCTCAGTAG  
AAAAGCTGTAATAGAATTATGTATACCATATGGTATATGATATTTGCCCTAAATGAG

>comp165473\_c1\_seq3

CAAATAAGGCTTAATCAAATTAGATTAATTTCTTAGAATAAGTACTTGCTTTAACTAGCAAAGTTAACAAGACTGCTACAACTGACCAGTTTTTAAAGAGAAATTCATTCCTCAAAG  
GCCATCCTAAGGCTTACTTACACAACCTTAAATTAAGTACTGCTTTCTGCTACTTCACTCTATCAACCACTTGCTTTGAATACCTCACAGCTCTTTGTCATAAATTGGAACACCAAAGAGCTTA  
ACAGTACAGTCATGGCCCTCCTCTTCTCCCCCTAATGGTTACTGAGCACTGAGGCTGTCTGTGGTAGCCATCTCTATGAGCATTCCATGCCTGTATGTGTGCAGTGGGCTTACATGTTG  
CTGTAGGTAGTGAATGATATCATCATAGAGCTTCTTTAAATGATTGAGCTCTGATAAGAGGAGAGAGTTCCTCCTTCTCAGCCTTAGGTTGTCTCCTCGGAGAGGGCCAAGAGGAAGCTGGT  
GTCGTCGAGGGTGGACGAAAAGCCGCGGTGGCGGCTCGACGATGACTTCTGTGTAACACTGGAAGATGGCTGCGAGTAATGAAAGCAATGTTGTTGTTGATGATGGTGTGATGAATAT  
GATGATTCTTCTTCTGTGAATTTCTAAGAGAAGATGCTTCTCTCTTTTTTGAAGAACTCATTAGCAAACCTCCACCTTTCTGCAACTATCTTTCTGAATCCATAGGTGTTGAGCTGCCTAA  
CAAAGCTAGAGAAGTTGTTGTGTTTGAAGTATTGGGAAGGAGATCTTTGCAAATCTGGAGTTCTCCATACTATAAATGTGTTGTTATCTTCTCCCAAGAGACAATGTGATCAGTACAT  
GGATCATCAACAAGATGGTAGGTTTTGGTGAGGAATGGAGCTGGAATTGGCTTGTGAGAGTTCACAGGAACTACCATGTCATCATGATTTTTCTACCAAGAAAGCCATGGAGAGGAA  
GAAGAGAATGGAAGCTAGCAGCTCTCTGGCTACTACATCTAGCTATCCTGCTTTGAGTATATATGCATTTGATTTGTAGCGCTCATCTCTCTCTCTCTCATCTCTCTCTCTCTCTGA  
CATTTTGTTTTTGGGATTTATACATACCTAAC

>comp165498\_c1\_seq6

CGAAAATTTCCAAACAAGTGCAAGTCCAACATCAGGATTGTTTTAACTCCAACAGATCAAGTATATCAAGAGTCATAGAATTCAGACCCGATTGTCTTAAGAGCTTTAAACCTTAAAA  
AACTATATTCAAACAATATAATCAAACCAAAGCAGCCATAAAATACAGATTCAGCGTAGAAAAGGAAAAAAAATCTTACAGCGCAACACTTCGCGAATCTCAAGCGGCTCGAGTACTAG  
CTCTTTCAGCTGGCAGACTTCGAGTTCATGGTTCTGATGACTTGACCTAGGTTAACGATCAGAATAGATGGCAGAAATATATATGGACGCGAGACCGACTAGGTAATCAGGGTTTTGGG  
CGCAGGCGGAGCTAAAAGTAGCTCGGAGTGAAGAGGAGGAGACCTTTTCGACCTTCGCTATCGTGGAGCACTAACCTGGTATTACATGTCCTCTTGGCGTGACGGTATTGTGCTGAAAA

GCAAAAAAAGCCTGTAATTGACTGCTCGGCCGACCAGGGTGGCGATGAATTTCTGGCGGACTCACGAACGTCTTCGAAGAAGTGTAGCAACAGGAGTTCTCTGTTTATATAGCGAAC  
GTGAGAAGAGAGATAATGGTGGAGAAAAGGGACTAAAATGGAGGTGGCCGTAATGAGGGAAATGGTGGGGAAGAAGGTGGTGGTGGTAAAATGGAAAGAAAAGAGAGAAATATG  
GAGGGAAGTGGTGAATAAAGAGGGTGAAAAATGAATGAAAATGGAGGCGGGGTGCAAGAGAAGAAGATGATGCAAAAATAAAATGGTGGGTGTCTGGGAAGAGAAGAAAAAGAATA  
AGAAGAAGAAGAAGAAAAGAGATAGAGAGAGAGAGAGAGAGGAAGAACTGATTGAATACTAGTTGGAAGCACAGGTTGTGTATTAAGAACTTTTATTTGGTCTGGTCACAGGACGTA  
ACTCGGTATAACTCGGTATTGCTCGGTATTGGTCT

>comp165531\_c5\_seq7

ACTCAAACCCGAAGTTCCTACTCGGCTTGCAAGTGAGAACGGGTGATCGCCGCAAGAGGATCTCCAATGGGAGGGAGAGAGGGGCGGCGCTTGGAGAGGGGAGAGGATTTGAGCCGT  
GGGTTTAAAGGAGATGTGGGATCTCGGTTGGGAGGGAGAGAAGAGAGAAGTGGTGGCTGTTTTGTGTGAAGAGAAAAACTGAATTCTCAATTCAGTTTTGAATAGGAGGAAAATAAC  
GGATTTGAATTTCAAGTTCAGGTTTTGAAATCCAAATTCGGTTTAGAGGGAGAGTGAATAAAAGAAATATCAGGAGATGATTAGGTGGCAATTAGAGAGAGAATTAAGGGACAAGGGT  
GGCCGGCCATATAGTAAGGAGATAAGGCTTTGGAATTTAGAAAAGTGGGGCCACGTTTGGATAAATAATTCTCTCAATCAAATCTAAAATTATAATTTAGATTGATTATTTAAGTAACT  
CCCAAATGAGTTATTAAGGAGGAATAGAATTTGAATTTCAAAGAAGCATTATCCCCTTAAATGCTTTTCTTAATTGGATGAAGACCAATTAGGAAATTAAGTTAATTAAGGGTAATTTG  
AAATTCAAACACGTTTGGGTCCAAGGGGAAGATCCGGCGGCAGGAGTTTTGCTGGACGGTGGGCTAGGGGTCACGGTGGGCGCTGGACGGGAAGTGGGGTCGGCAGACGGGCTA  
GCAGCGACGGGATTAATTTGGCTGGCGGCCAATTCTCTGGCCAAGCCACAGGGCCGGCGGCAAGGAAAATTGAAGAGGGAGTTCTAGGGCTTGGAAAGCAGTAATATTTATTTAGAGAA  
AATTCAGAAATTTGACTCACTCACCTCTTCTCAAACCTCTCAATGGGAAGTAATAAGAATTCGGAACTCACACAGAGATCCACGAAATTTCCATCAAGAACTCGCGGAGAGAAGT  
GGGAATGGAGAAGTCAAAAGAGATCAA

>comp165552\_c1\_seq1

TGCCAATTTGAGGACAACAGTCTGCAAAAAATGTGCAATCGAGAATGTCAAATGAGATTTGCTAGTTTGAACAATATAGACAAATTTCTTTCTATATATAATAAATTAGATTGAGGTTAT  
TAAGCATAGAGGAAGTTAAGGTACATATAGGCTAGGCTAGACTTTACTAAAGATTGTACCGAACTGTGTTTTTCAATAAAAACTTTGTTTTCTTTCCCTTCATATGGTATCAGAGCAAGAAT  
AACCCATTTGGACCATCTCTTCTTCTTCCATCATCTTCGTTCTCTCTTAGGTTTCGGCTGAGATAATCTAGTATTAGGCTTTCTCTAGTCGAACATCAAACATGTGCATGGCGTCGT  
TCGGTCGTTCCAGTCGAATGCCAAAATTTTCGCTATTTGCTTGCTGGTGAACAGTGCACGCTGTATTTGGAGTGAAAATTGAG

>comp165554\_c0\_seq15

GGGATATTCGATGCAACTAAGTTAAAGATTAGTGTACAATTGTTAGCATCTTTCTTTTTTGGGAAAAAAGTTAGCATGTTTCGGCTTACATTAAGCTTTTAAAATGCGTAGAATCTCTATC  
TCCATATATATATCTCTCTCTTCTTCTTATCTCTCTTTGAAAGAAAATAAGAGTCATTGAGGCCCCGACGTTGGTGGCGTTGGAAGCCATGAGTTCCTCCATGAAATCTGTCCCGAATG  
CAACAATCTACTCTACCCAAAAGAAGATAAGAAGCGCAAGATCCTACTCAGTGCCTGCCGACCTGTAGTTACACGGTTCCGTATCACAGAAAATTCTGACTTGTGATCAGAAATATATAT  
ATCTATATATTCGTATTGAATAAATGAATTGATAAATAAATTACAGGAGGTGGCGGAAAGTAACTGCGTGTACAGAAATGTGATAAATCATGATTCAGATTATGAGCGACCTCAAGATATGCG  
AGATGCTTATGCAGATCCACACTTCTCGAGAAAAGGGCGTCAAATGTCTGCTGCAACCATCCAAAAGTTGCATTCTCTTGGTTTGCCTTCTTCAATTCATTAATTTAAATTTGATTCT  
TGCTCATGCATGCCATTAATGCCCTTAATTCGTTGATGCCTTAAGAAATAGGTAATAAGACACGCTAGACTGCTAAAATTTAATTTATTTTTTTGAATGAGTGTATAAATTTATGTTGATT  
TAATTTGGTAAGTTATTATACCATTATTTACTTAATATATACAGCATTATTAATTTATTAGGAGCATAGTTTTATATTTTAATAATAAATGTATCATATATTGATGTATTATTATGTGTGTGCCCC  
ACATTTATTATGTGTTATATTATAG

>comp165554\_c0\_seq19

GATTATTCTCTAATTTAATATACGCTATAATATAACACATAATAAATGTGGGGGCACACACATAATAATACATCAATATATGATACATTTATTATTAATAATAAATAAATAAATAAATTT



AATAATGCTGTATATATTAAGTAAATAATGGTATAATAACTTACCAAATTAATACACATGAAATTTATACACTCATTCAAAAAAATAAATTAATTTTAGCAGTCTAGCGTGTCTTTAGTAC  
CTATTTCTTAAGGCATCAACGAATTAAGGGCATTAAATGGCATGCATGAGCAAGAATCAATTTAAATTAATGAATGAAGAAGAGCAAACCAAGGAGAATGCAACTTTTGGATGGTTGCAGG  
CAGGACATTTGACGCCCTTTTCTCGAGGAAGTGTGGGATCTGCATAAGCATCTCGCATATCTTGAGGTGCGTCATAATCTGAATCATGATTTATCACATTTCTGTACACGCAGTTACTTTCCG  
CCACCTCCGTGTAACACAGGTGCGACAGGCACTGAGTAGGATCTTGCCTTCTTATCTTTTGGGTAGAGTAGATTGTTGCATTCGGGACAAAATTTTCATAGAAACACTCATGGCTTC  
CAAAGCCATCAACTTCAAGCCCGAATGCCAATTATTTTTTTTTTTCACAGAGAGAGAGATGAAGAGGGAAAGAAAAGCGACACAATTAGAGATAGAGATTATGTGCCGTTTGAAAGGCTT  
A

>comp165554\_c0\_seq24

TTCAAACGGCACATAATCTCTATCTCTAATTGTGTGCGTTTTCTTTCCCTCTTCATCTCTCTCTGTGAAAAAAAAAATAATTGGCATTTCGGGCTTGAAGTTGATGGCTTTGGAAGCCATG  
AGTGTTTCTATGAAATTTGTCCCGAATGGTAGAATGCATTACCTCTCCTCCCTCTGCATTGTCTTATATGGCGCTTTCTCATTTCATTGTTCTGCATGTTTTAATTACGCTTAACAGAAATTAT  
ATAAACTTCTATGAATCTTTATCTGTCTAATTAATGCAGCAACAATCTACTCTACCCAAAAGAAGATAAGAAGCGCAAGATCCTACTCAGTGCCTGCCGCACCTGTAGTTACACGGAGGT  
GGCGGAAAGTAACTGCGTGTACAGAAATGTGATAAATCATGATTCAGATTATGAGCGACCTCAAGATATGCGAGATGCTTATGCAGATCCCACACTTCCTCGAGAAAAGGGCGTCAAATG  
TCCTGCCTGCAACCATCCAAAAGTTGCATTCTCCTTGATTAACCCGAGGAAAAGCCTAGCACGGATGAATGCTTGCTGCAACCCGAGCTGCCGTCATAACTGGAGGGATGATGATGAAAG  
CATTGCTTAATGATTGATTGCAGTTTAATAATTATATTTACAAATAATAGAGAATTAATAAATAAATAAGATTCCGATGGGCTATCTATCATTTTAATCGTTCCCCATAAGAAGCTTGATCTAAG  
GAATTTGTTTTAGTGAGTAACAGGAGACCATTACAATTTGTTTGATTGTTTTGGCATGGTGTGTCAATTTTTATTAAGAAAATATTTCAAGAAATCCTACATATAATCATTTTCAAGAAAATG  
AAAAAAAAAAGTAATAATAATAATAAAATTACCTCCATTGAAGTCTTCGTGTTCTGTATGATCAAGCTAATATATAATTTAAACTTTCCATGTATGTTTAAATATATATATTAGCTTGATCAT  
ACAGAACACGAAGACTTCAATGGAGGTAATTTTATTATTATTACTTTTTTTTTTTTCATTTCTTGAAAATGATTATATGTAGGATTTCTTGAAATATTTTGTAAATAAAAATTGACACATGT  
ATCATGCCAAAACAATCAAACAAATTGTAATGGTCTCCTGTTACTCACTAAAACAAATTCCTTAGATCAAGTTCCTATGGGGAACGATTAATAATGATAGATAGCCCATCCGAATCTTATTTTA  
TTTTTTAATTCTCTATTATTTGTAAATATAATTATTAACCGCAATCAATCATTAAGCAATGCTTTTCATCATCATCCCTCCAGTTATGACGGCAGCTCGGGTTGCAGCAAGCATTATCCGTGC  
TAGGCTTTTCTCGGGTTAATCAAGGAGAATGCAACTTTTGGATGGTTGCAGGCAGGACATTTGACGCCCTTTTCTCGAGGAAGTGTGGGATCTGCATAAGCATCTCGCATATCTTGAGGT  
CGTCATAATCTGAATCATGATTTATCACATTTCTGTACACGCAGTTACTTCCGCCACCTCCTGTAATTTATTTATCAATTCATTTATCAATACGAATATATAGATATATATATTTCTGATCACA  
AGTCAGAATTTTCTGTGATACGGAACCGTGTAACCTACAGGTGCGACAGGCACTGAGTAGGATCTTGCCTTCTTATCTTTTGGGTAGAGTAGATTGTTGCTGCATTTAATTAGACAGAT  
AAAGATTCATAGAAGTTTATATAATTTCTGTAAAGCGTAATTAACATGCAGAACAATGAAATGAGAAAGCGCCATATAGGACAATGCAGAGGGAGGAGAGGTAATGCATTCTACCATTC  
GGGACAAAATTTTCATAGAAACACTCATGGCTTCCAAAGCCATCAACTTCAAGCCCGAATGCCAATTATTTTTTTTTTTCACAGAGAGAGAGATGAAGAGGGAAAGAAAAGCGACACAATT  
AGAGATAGAGATTATGTGCCGTTTGAAAGGCTTA

>comp165554\_c0\_seq27

TTCAAACGGCACATAATCTCTATCTCTAATTGTGTGCGTTTTCTTTCCCTCTTCATCTCTCTCTGTGAAAAAAAAAATAATTGGCATTTCGGGCTTGAAGTTGATGGCTTTGGAAGCCATG  
AGTGTTTCTATGAAATTTGTCCCGAATGGTAGAATGCATTACCTCTCCTCCCTCTGCATTGTCTTATATGGCGCTTTCTCATTTCATTGTTCTGCATGTTTTAATTACGCTTAACAGAAATTAT  
ATAAACTTCTATGAATCTTTATCTGTCTAATTAATGCAGCAACAATCTACTCTACCCAAAAGAAGATAAGAAGCGCAAGATCCTACTCAGTGCCTGCCGCACCTGTAGTTACACGGTTCC  
GTATCACAGAAAATTTCTGACTTGTGATCAGAAAATATATATATCTATATATTCGATTGAATAAATGAATTGATAAATAAATTACAGGAGGTGGCGGAAAGTAACTGCGTGTACAGAAATGTGA  
TAAATCATGATTCAGATTATGAGCGACCTCAAGATATGCGAGATGCTTATGCAGATCCCACACTTCCTCGAGAAAAGGGCGTCAAATGTCCTGCCTGCAACCATCCAAAAGTTGCATTCTC  
CTTGATTAACCCGAGGAAAAGCCTAGCACGGATGAATGCTTGCTGCAACCCGAGCTGCCGTCATAACTGGAGGGATGATGATGAAAGCATTGCTTAATGATTGATTGCAGTTAATAATTA

TATTTACAAATAATAGAGAATTA AAAAATAAAAATAAGATTCCGGATGGGCTATCTATCATTTTAATCGTTCCCCATAAGA ACTTGATCTAAGGAATTTGTTTTAGTGAGTAACAGGAGACCATT  
ACAATTTGTTTGATTGTTTTGGCATGGTGTGTCAATTTTATTAAGAAAATATTTCAAGAAATCCTACATATAATCATTTTCAAGAAAATGAAAAAAAAAAGTAATAATAATAAAAATTA  
CCTCCATTGAAGTCTTCGTGTTCTGTATGATCAAGCTAATATATAATTTAAACTTTCCATGTATGTTTAAAATTATATATTAGCTTGATCATA CAGAACACGAAGACTTCAATGGAGGTAATT  
TTATTATTATTACTTTTTTTTTTTCATTTCTTGAAAATGATTATATGTAGGATTTCTTGAAATATTTTGTTAATAAAAATGACACATGTATCATGCCAAAACAATCAAACA AATGTAATG  
GTCTCCTGTTACTCACTAAAACAAATTCCTTAGATCAAGTTCCTATGGGGAACGATTA AAAATGATAGATAGCCCATCCGAATCTTATTTTATTTTAAATCTCTATTATTGTAAATATAATTAT  
TAAACCGCAATCAATCATTAAAGCAATGCTTTTCATCATCATCCCTCCAGTTATGACGGCAGCTCGGGTTCAGCAAGCATTTCATCCGTGCTAGGCTTTTCTCGGGTTAATCAAGGAGAATGC  
AACTTTTGATGGTTGCAGGCAGGACATTTGACGCCCTTTCTCGAGGAAGTGTGGGATCTGCATAAGCATCTCGCATATCTTGAGGTCGCTCATAATCTGAATCATGATTTATCACATTTTC  
TGACACGCAGTTACTTTCCGCCACCTCCTGTAATTTATTTATCAATTCATTTATTCAATACGAATATATAGATATATATATTTCTGATCACAAGTCAGAATTTTCTGTGATACGGAACCGTGTA  
ACTACAGGTGCGACAGGCACTGAGTAGGATCTTGCCTTCTTATCTTCTTTGGGTAGAGTAGATTGTTGCTGCATTTAATTAGACAGATAAAGATTCATAGAAGTTTATATAATTTCTGTTA  
AGCGTAATTA AAAACATGCAGAACAATGAAATGAGAAAGCGCCATATAGGACAATGCAGAGGGAGGAGAGGTAATGCATTCTACCATTCCGGGACAAAATTCATAGAAACACTCATGGCTT  
CCAAAGCCATCAACTTCAAGCCGAATGCCAATTA

>comp165554\_c0\_seq44

TTCAAACGGCACATAATCTCTATCTCTAATTGTGTGCGCTTTTCTTTCCCTCTTCATCTCTCTCTGTGAAAAAAAAATAATTGGCATTCCGGGCTTGAAGTTGATGGCTTTGGAAGCCATG  
AGTGTCTCTATGAAATTTGTCCCGAATGGTAGAATGCATTACCTCTCCTCCTCTGCATTGTCTATATGGCGCTTTCTCATTTCATTGTTCTGCATGTTTTAATTACGCTTAACAGAAATTAT  
ATAAACTTCTATGAATCTTTATCTGTCTAATTAATGCAGCAACAATCTACTCTACCCAAAAGAAGATAAGAAGCGCAAGATCCTACTCAGTGCCTGCCGCACCTGTAGTTACAGGAGGT  
GGCGGAAAGTAACTGCGTGTACAGAAATGTGATAAATCATGATTCAGATTATGAGCGACCTCAAGATATGCGAGATGCTTATGCAGATCCCACACTTCCTCGAGAAAAGGGCGTCAAATG  
TCCTGCCTGCAACCATCCAAAAGTTGCATTCTCCTTGATTAACCCGAGGAAAAGCCTAGCACGGATGAATGCTTGCTGCAACCCGAGCTGCCGTCATAACTGGAGGGATGATGATGAAAG  
CATTGCTTAATGATTGATTGCAGTTTAATAATTATATTTACAAATAATAGAGAATTA AAAAATAAAAATAAGATTCCGGATGGGCTATCTATCATTTTAATCGTTCCCCATAAGA ACTTGATCTAAG  
GAATTTGTTTTAGTGAGTAACAGGAGACCATTACAATTTGTTTGATTGTTTTGGCATGGTGTGTCAATTTTATTAAGAAAATATTTCAAGAAATCCTACATATAATCATTTTCAAGAAAATG  
AAAAAAAAAAGTAATAATAATAATAAAAATTACCTCCATTGAAGTCTTCGTGTTCTGTATGATCAAGCTAATATATAATTTAAACTTTCCATGTATGTTTAAAATTATATATTAGCTTGATCAT  
ACAGAACACGAAGACTTCAATGGAGGTAATTTATTATTATTACTTTTTTTTTTTTCATTTTCTTGAAAATGATTATATGTAGGATTTCTTGAAATATTTTGTTAATAAAAATGACACATGT  
ATCATGCCAAAACAATCAAACA AATTGTAATGGTCTCCTGTTACTCACTAAAACAAATTCCTTAGATCAAGTTCCTTATGGGGAACGATTA AAAATGATAGATAGCCCATCCGAATCTTATTTTA  
TTTTTTAATTCTCTATTATTTGTAAATATAATTATTA AACCGCAATCAATCATTAAAGCAATGCTTTTCATCATCATCCCTCCAGTTATGACGGCAGCTCGGGTTCAGCAAGCATTTCATCCGTGC  
TAGGCTTTTCTCGGGTTAATCAAGGAGAATGCAACTTTTGGATGGTTGCAGGCAGGACATTTGACGCCCTTTTCTCGAGGAAGTGTGGGATCTGCATAAGCATCTCGCATATCTTGAGGT  
CGCTCATAATCTGAATCATGATTTATCACATTTCTGTACACGCAGTTACTTTCCGCCACCTCCGTGTA ACTACAGGTGCGACAGGCACTGAGTAGGATCTTGCCTTCTTATCTTCTTTGGG  
TAGAGTAGATTGTTGCTGCATTTAATTAGACAGATAAAGATTCATAGAAGTTTATATAATTTCTGTAAAGCGTAATTA AAAACATGCAGAACAATGAAATGAGAAAGCGCCATATAGGACAAT  
GCAGAGGGAGGAGAGGTAATGCATTCTACCATTCCGGGACAAAATTCATAGAAACACTCATGGCTTCCAAAGCCATCAACTTCAAGCCGAATGCCAATTATTTTTTTTTTTCACAGAGAG  
AGAGATGAAGAGGGAAAGAAAAGCGACACAATTAGAGATAGAGATTATGTGCCGTTTGAAAGGCTTA

>comp165587\_c0\_seq2

TCCTTGATAGCTCATGGTCATCAGCTAATACATTACAACAAAACAGACTCACTAAAATATATCTTAACTTTTTCGCTGAACTTTTATGGTACATAGATCATCCGAGTTCCTTTTGGCAATCAT  
TGTATACATCAGTAATGCCTTTTAGCTAGTTTACTGTATAATTCACATCAAATTTATTTACTACGAGAAATACTTGAATCATATACATCTTTAGGCCTCATGCGAACAACAAAATTCCAATGTG

TTTTTAGGATCTTGAATGTAGTAGATTGGTTCAACCTTTCCTTGTCTGTTGTAATTGT

>comp165589\_c1\_seq1

CAACTTATCGAAATAAGTTGCTAATCCAAGTTTCGTTAGGACAACCTCTTATTTTTTTCTAAAACAATTTTTTTAGTAAAAAAATTATTTTCATGAAATTGTTGTTACTAAAAAACCGTAAAAA  
TACTATCATAAATAAAACCTAGTATAAGAAGTTGCAAACCTACTGAGGTATGACATTGACTATTTGTTGGTGGTTATTTGAACAACGTATACTAGCTCTCAAGAACCCTAAACTTATACTGGC  
TTAATCAATTTGAACCAATGAAACTGAGTTAAGGGACCCAAATCACTGGTTCAATCGCATGAAACGTTCAAGCTGGCTCACATATTTTCTGCAAGGTTTGAAGCATTCAAAACGAACA  
TGGAECTATAATAACCTTCTCGCTTTTTTCTCCCAAATCATAAAGCAAACCGAGTATTTAACACTGACACCTCCACGTGCACTACAACCCACTTAATCCCTTCCATTAATTATATTTCTTTT  
CTTGAGTTTCATACATAATAATAATAAATAAAAATCGCATAAAGTGCACATAGTACATAGCCACAGACATCAACGACACCCAATCCCAAGCGAACGGCCAAGATTTCCCAACCGTTGCAAAT  
TGATCACTGGCAGGCCTGTAACGGCCAGCCACAGAGACAGTCATTATTGGAGAACGACGCCGCTTCGAGGTGATCGAACGGCGAACCCGTGGGAATCCGACCGCACAGATGGTTATGAC  
TTAGATCAAGGTGGCCAACGAACGCCGCCGTTAGCAAAGTCTTTGGCACATCTCCGGTGAGTTTATTGTACGAGAGATCCATCGCCGTAAAGTACGATCTCGATGTGAACGCATCAGGAA  
TCGAACCCCTCAAGGCCGTTTCTGCTTAGATTCAGAATACCCAATCCCTTGCTCCCCAAAACCTCCGCCGGAATCCCGCCGGTGAGGAGGTTGCTGTGAGGTAGAGCGAGGAGAGACC  
GGCATCGATCCGAAAGATGCTGGGATTGACCCCGAGATATTGTTATCGGAGAGGTCGAGGTCGGCGAGGCGGTTTCATGTAAGTATTGAGGTCGGAATCACGCCAGAGAGCTGGTTCCG  
GCCGAGGAGAGCCCTGCTAAGCATTTCAAATTGCCGAAGTCGGAAGGGATCGAACCGGTTAAGAGGTTATTGCCGAGGTTAAGGTGCATTAATCCTGTAATCTGGGTTAGGGATTTGGG  
GATTGAGCCAGAAATCTGGTTGTCGGCGACGTTGAGGACAGTGAGTTGGGAGAATTTGCCAATGTCGGCAGGTAAGGGGCCGATAGGCGGTTACCGACGAGATCTAGAATGCGTAGGG  
AGGTCAGAGTGGTTATGCAAGGGGGAATGGGGCCAGAGATCTGCTTCCAGTCAGCAATGATGAGAGATGAGAGGCTTTTGAGGCGGCAGATGGCTGGCGAGATGTGGCCGGTCATGAG  
GCCGGATCGTCCGGCGCGTGTAAATGATTGGGTCTTCGGATTCCCCGCGGAGAATAAGATCGGGCAGCGGCCGGTCGACGGTTTCGACGACACCCCGTACCATTGAGAGCAGCAGTCGC  
TGCCGGTCCAGGAGGAGAAAAACCGATGTAGGGTTCGGAGAGGGCTGATCGGAACTCGAGAAGCGCAGCTCGGTGACGGCCGAGCAAGAAGCGGCGGTGGCAGTGCTAACAGCG  
AAAGCAAGTAGAAGGTAGAAGAAGAGGAAGTGGTAGTAGTGGGAAGAAGAAGAACAGGCATCCATTATCGCTTCCGCTCGG

>comp165672\_c0\_seq1

GATATTTGCATAAACTCTTCATGTGAATTGGGATACACTGTAGTCTTATTATAAAAATCCTATTATTAATAGTAATTTATATAACCAAGAGTTTCATAAATCATAACAACTCAAGCATTAATAT  
CGGAAATTTAACGTATTATCCTTTTCAAACAAAATAAAATTAGAAAACGGAGTTTTTTACAAGTTTCCATAGTTCTGCTGAAAGATATATGCATGCACTGATACAGAAGAAAACCTTCATGGC  
TTCTCAAGTGCAAAGAAATTTATTTTTATGCACCAAACTAAGTTTTTTTCCCTATAAAAAGAAAAAAAACAAAAAAATCAATCCTTCAAGCGACCAATGCTTTCTCTACTTCAGTTAT  
AAGTGCAGAAAGTGAAATTTAAGGTGGATTATCTTACATATGGGCTGTGAAGAATTTGAAATCATGGTGATGATGAACTCTTAGCTGCTTAAAGCCATGAGTCTGCTGCACTGTAAAGG  
GTCATAAGCTTTTCGTGATCCGAATTTTACAGAGTTTAGCCAGATATTTCCCGCATCTATAGGTTGCAAGGCCAAATGGAGGAAGGCTAATAGTGTTTTTGGTATCCTTGGAACTCCCATC  
TTTTCGTGTAGAAATTTTCGACTTGTCTTCTTACAGAGTCGATGAATGTGTCATCTGCAATTTAAATGCAAAAAATGAATGAATATGTAGAAAAACAAGGAGCCTGAATTGATTATGTAGGAG  
GATTGGTCTCTGAATCATATAAATCTGTGTTCTATGATGTTATGTTTTGATTATCTTTTTCTTTTTTTATTCTACGGTAATCGTGTGGCAGACCCTCTTACGTAGACATCCTTGCCTTGAT  
CTTATTGTTAAAAGTAGCATAATAGGCCCTAAATCTACACGATCAATATGCCATAGCTGCCACCTTTGTTGCCAATGGTGTAATATTTTGTCTATTTACGTATGATTGATTTCTTTTTCAAT  
GAGGTTACTTGTTCAGCAAACCTCAACTATGTATGTTCAATACCTCTATCATAGACCTATGTACTGGGTGTTAATCGCACATATTGAGTGTGATAAGACACTAACAGTAATGTTTTTGAAT  
ATATAGCAAAACGTCACAATTTCTATGACTCTAAGGGAGTTACTAAAAACATGGGATTATATACTAAGCTTCAATTCGTCACAAGATTTAGGAAGATCTTAACCTTGATTTTGTGTTGGCCTT  
GCCAAAGATGAACAACGACGTTGATGTTAGGGAATCGGCTTAGTCAGCTAGCCGTACTATACTTTCTTGGTTTTAGCTATGTATTAGACCTCTATATAATTGGGGTTATCTGATGTATCTGCTG  
GATAATAATAATATACACTTTTCTCCTTCTTCCCTCTTTGTTCCGTCGCTCTTCCGGTCCCTCTGGTTCAGTTCGGTCCAAGAACCTTACCTGGTATCAGAGCTCAAACGCTCCACAGTGT  
TTCCTGATCCCATGGCAAAAAGAGGACTCAGCCAGCTCTCGTTGGACAACATCAAATGTCTCTAATCAAGAAACCGAGATGGTCATCCCTTATCATCTCAAATTCCTAATCTCAAATGTCAA





GATGGTGAACAGCCAAAGGGAGGCATTCGGGCTGCCGACTTGATGAAGTCGGCGGCGGAGGTGCTCGGAAATGGAACGTTGGGCTCAGCTTACAAGGCCATTATGGCCGGCGGCCAC  
GCGGTTGCAGTGAAGAGGATGAGGGAGCTGAGCCGACTAAACAAGGAGTTGTTTATGATGGAGAGATGAGGCGTTTCGGACGGCTTAACCATCCCAACGTTCTAACCCCGCTCGCTACCA  
TTTCCGAAAGAGGAGAAGCTTATAGTATATGACTACGTTCCAAAGGGAAGCCTCCTTTATATACTCCATGGCGATCGAGGAGCGGATCACGCTGCCTTAGACTGGCCAACTCGTCTAAAA  
ATCGTCTCCGGCATCGCGCGAGGAATGGCGTATCTCCACGCCGAATTGGTCTCCTACGAAGTCCCACACGGCAATCTCAAGACTGCTAACGTCCATCTCCCGACTTTTGACCCCTCTAA  
TCGCCGATTACGGCTCATCGCCCTCGTCAACCCCGACGTGCGCCCGACCGTCTCTCTTTCAAATCCCCGAAGCCCAACATCTCCGCCACGTGTCTCCGAAATCCGACGTCTTCTG  
CTTTGGCGTCGTTCTCCTCGAAATTCTGACGGGTAAGTTTCCGTCTCAGTACTTGAATAACACCAAGGGTGGTACGGATGTCGTGCAGTGGACGGCGTCTGCGATCTCCGATCATCGGGA  
GGCTGAGCTTATAGATCCGGTGATTACGGCGAAGGCGGCGCCGACGATGGAGATGGTGAGGTTACTTCCGGTTGGTGCGGCGTGTACACAGGTTAGTCCGGATGAGAGACCGGAGATGA  
AGGAGGCGGCGGAGCTTGTGAGGAAATTGCGGTTGCTGTGGCGGGCGCGTGGTGGGGGCTGGGGGATCGAGCCGGGAGGAGGCGGCGGGTTCGGTGGGAACCGATGGCTCGTTGC  
ATGCCGTTTCATCATCGTGAGTTATCATAGTCTTTTGATTCTGATCATGCGGTGTATATTCGTTCAATTTTTTAATTTTATATGAGGATCTTGGTTTGACTTTTATTTATTTCCATTAATGCTC  
GACTCACAAACAGACATAATAGGTTGTCTCAATTTTCGTGCCTGGTTTTGTTAAAAAATTTGATTTTGTAAACAAATTGACTATAACCACCC

>comp165708\_c0\_seq3

AAATGTTTTATTTGTTTAGCGGAAATGCTCAAATTTATTA AAAACTTATTAATTTAAATATTGAAAAGAATATTACTTGAATAAGCCTTAATTTAGACTTTTTCTTTGATTGCAAGTGTGAT  
ACGTTGGCCTCCGAGGAGTTTGACCTCCAACCTTGAATGTTGTAATTGCATTAAGGAAAGAAGCTAAAGTATTGCTCCATTTGTCTTCATCACCCCGAATCACTCCACACATATGTAGG  
AAAGCTTTGTCTTCAGGCATTATAAAATCCTCTTGCAAATCTACTTCACAAATCTATTCCACACAAATCCATTTTCATCAGAGAGTGAGGAGATAGAGAGGAGAAGAAGTGAAGATGTTGT  
AGGAAGATTAGGTGGGGTGTAGGAGTATAGGAATAGGGGTGTCAATATATGCACGACTCAAAAACCCGACGCGTTTGAAGCCGCATCCTTCCCCGATTAGCTCTCATAATCGCCCTCAC  
GACCTCACCTTGCTGCCCCTGCGACCTTTCCCTTGCTTGCCCTCAAGACCTTGCCCTCACCTTCACCTCTCCCTCGCCATACTTATGTCCTAGTCTAGCCCTCGAGGCCCTTTCCCTC  
ACTCTCACCCATGAGGCCTTATCCTTGCCCGCACGTGCTCGCATAGTCGCCCTCACCCCTCAATGCCTCGCCACACAGTTGCACTCGCCCTAGCTACCTCGCCCACTCCAGCTCTATCTC  
ACACTCGCCCTCTCATGCTTGACAAAAACACTTATCGCCGCCCTCTCTCGCCCTCGTGTTCATGCTCGCGCTCAGCCTCTCCCTTACAATCGCCCTTACCCTTGCCCTCTTAGCATGCT  
CACACTTGCCCATGCACTCAACTATCTCCACCAAAAAACATCTTTTGACACCCCTAAGTAGGTGTAGAGGTATGTGTTAGCAGGGTAGGGTTAGAGGTCAGTATAGGTAGTAGGGTAGG  
AGTAGAGGTGTGGGTAGGTAGTATGCACTACAGGAAAAATGACAATTTCCGGCGACCATTTCCGTGCGGAAAAATGGCTAAAAATCCG

>comp165727\_c0\_seq6

AAAACATTTAATATACATATAAATTTATTATATTTATCACAAAATCATTAAAAAACTATAAATTAACACCTAAAGTAACATTGTAAGGAAATTCATAAATTTCAAAGCTATTTTACAATTT  
AGACTAAAATCTACCCTAAAAAATATAATAATAATGAAATAAAATTTAACCAAAATCATGCCTTAAACTAGCAGTCTGATGTACCCGAAATGAAACCTCTGCGTCTCTTGTAGTCACTGATGC  
TGAGTGTGAATCCTTTACTTTTTCCATACTCGTCAGGAACTGCATGCCAAATGGTTGCTTCTATCTTCCGCTTCCCTCCATGAAGCAACGTTGAACACCCTCAGCTCCTTGAAATTTGTTT  
AGAGCAGCCAACGAAATCGGCAAGTCAAAATTATGCAGAGCCATTAGTTCTTACCATGATCAACCGGAGGTCTGGTGTCAATCAGTTTCCCTTCATCTTTAGCCTCCTCCATGGCTGTCA  
CAAGGGCTGCTTCGCCAGCTTCTTCAGGCTTGTAGTATCATGATCAACATTTGTGGTTTCTTCATTACTATAAATCACACACTGAAGAAGAGGGCTTAGTCCATTTTCTGGCGGAAGGATCA  
TAACCTTCTTACCAAACTTTAAGTTTGTATAAACTGGCTTCATTTCTGATGCTTTTTTATAATTTCTCAGCTCTATTTTTGCGATTTCATCTCCAATAACCTGAAAGATCTTGATCAGCTGGCT  
TAATCTGTCTAGACAAATCCTCAACTCCTTCAGCTTCGCACGCAACCTATCTGCCTCACTTTCTTTCCAGCACTCTCTGCAGTTTCAATGGAAGCCTTCAAACGGATCTTTTCTGACTGCA  
ACATTTGATTGGCCTTGAAGAAGATGATTTATTTACCTCTATCATCTTCTTACAGTTCTCGGTGAATATACAAAAGTGTTCGCTTTTTGAAATTTCTTCTTCTTCATCAACTTCTTGCAGGC  
AAGGAATGTGCCTTCCATTACGTTCCATTTCTCTCAGCCATTCCTTGAATTTCTTCTGTTGGTGGAGAGTTAGAAACCTTAATCATTGCCATCTAGCTGCTGAAGCTTCGCTGCCCCATA  
TACAGTTCAGCCATTTGCAAGTGGTTTCGACCTTCGAATTCATACAGTCGATTTTGGTTTGTGTCATCGACATTATTGACTACACAAAGCCTGTATTTTGGACCGTTGCGAGTCATCCCAATA

CCAACCTAACAAAACATCCAGCAACTATTTTCTCAAAGAAAGGTTCCATATGCCATTTAGCCAGCTTTGATCTACGAATGGTTATTTCTTTTACATCTTCATACCTGATTGGTCTCGACTTA  
GATGCCATTAATCATCTGAGTTATCATCAATGTCGTTATCTTCAGATAATTTGTCTTCTTTTCCATCATCACTATTGTCACCTGAATCAAATTTAGGAACAGTGATTGCAAGTGAATACTTGC  
GGTAAGAATTTGGTTCTTGCTGCCTCATCCTCTTAGCTCGTAGCTCATTAAATGCGTGCATCTTTGCAGCTGGTTTCTCTGTTCTGACAGAAGATTGGCAATGAGAAGGAAAAGTTGGAGG  
GAACTCTTTTTCATAATTCTCCACCTTAGTTGATGAGTCTCTTCTTCTTTTCTTCAAGCGATAATCATCTATTTTTCTACTCCTGGTTGCAAGAATCAACTCTCGATTAGCTCTGAAAGCTTA  
CTCATCTCTTCTTATCTGCTTCATCTTTGTACAAATCACTTCCAATAGATAGTGCATCATCAGATTATCACCATTAAACCTTCTATCTTTGTCAATTCTCCAGTTTCTCATATTGCCTTTCTC  
TGGAGGGTCTCCAACACTCTTCTTCAGAGAGAATCTTGATCCAGAGTGTTCACCTTATTGAACTTTGAGTTATCAGAATCATTTTCATTGGATCCACTACCAGAAGCTTCTCCTCGCCTTC  
TTGAATGAGCATTGCTTTGGTTCTTCTTTGTTGGTGAGCTAGTTCGACCGGCAGCCTCAAGCAGCAAATATCCAAATCTGCCATGACTTCAAAAAGCTTCTCTTTGAAGATCGGCGATCA  
GTGGCGGCGGAGGCGAGAAGACGTCGTAAGGGATTATCGGAAGCCAAAAGCGCAAATTCAGGACTTGCAAGACTGTGTAATGTAGCCTTCAAGAATCGTCAGTATACGCATAAGGTCA  
CCGCAGAAGCGTTGAAAACAGCCGTTGAGCTCATCGGAGGGCGGCACCGGCGACAGGGAGAAGAGACAAATCCTGATGAATGGATTTGAGGATGCTCTGTAACTATTTATAGAGGTTTT  
TTTTTTTTGGACGATCAGTAGTTGGAATCGGTCTGATGGGAGAGCAGTTTTGTGTAACAGAATTCTGTTTATAGTGGAAAAAATCCGGATTCAACTAGTGAATGGGTTAATTTACTAAT  
TTAGTGTCACTTATATTGATTAA

>comp165731\_c0\_seq1

CAAAAAGTAGACTTCCATACCAAGATGTATTTCAAATAAATTTGAAGAAATATGGATTATCTTTAAAACGACATTCTCTTTCTTATAACATCATCTTTCAGAAGAAGTTTCATTGCCACC  
ATTTGTGAGCTTCTTGAGGTTGATGCTGCATTCGAATTTCTTGCATGAATGCCTCATCTCAGTACGTAATGAGTTGACCTCCTCTTTGAGATTTACTATTTGACTTAAATGCTTCCAACA  
CTACTCCATACTGAACACCCTTTCGTTAGCCTCCATATTCGCATCCTCTGGTGTAAGTCCATCCTTAGCCAAAAGCTCACAAGCTTGTATCCATCTCTGATTAGCATCTTCAGATGACCAGGT  
GCCATCTTTACGCAATCTGTTAACTCTCCATAATAAATCTATCCTTGATAGCCATCTCTTGTGCCTTCGAACAGAATCACACGGCCCATAAATGTGAGGACAAGTCTGTTTCTTTGCATT  
TGCAGCATTATAGCGGCCCTCTCTGTTACATATGAATCTAACTCTATGTTGATTTGTTATGAAATTTTAAATTAATATAATGATGTTACTAACCTTGTCTTTTAGTTGTGACCACTTGGTGA  
CTAGATGACACCACTATGCAGCATCAACACTATCTGGAATAGACTCCGTAATTTCTCGATAGGACGACAATCCCAATGCTCAGCTTTTAAATTAGTCTTATAGTTACGCCACTTAACTCCA  
AGGGATTGAAGAATCTAGTGACGTATATGTCCAGGAAATG

>comp165792\_c0\_seq1

CCAATGCAGGGTAGGGCTATATATATCCAAAGATTGCACATTTGATTCCAACCTTCTCTTTCAATTTATTTATGCATTTCTAGTGCTAGAAGGCTTCACAACCTCTTTCATCGCTTCCCATCACATT  
GAATATAGTATTATGGCATGGTCTGATCTTCCCATAGATCTCCTCTATTGCATCTCATCACACTTGCTCGTTGTAGACTTCCTCCGATTCTCCGCTGTCTGCACCTCATGGAATTTCCGGTCTAG  
CTAATAATGCACTCTTTAGAATAAAAATGTTGCCCTCGCCATGGTTGTGCCTTCCCAGCAATGTCGGAGAGGACTCTGACACACTCACATTCTATGATCTTACCATGAAAAAAGAAGGAAA  
CGTCGACAACCTTCTTCACTTATCTTCCCTCGGTAGCCACATCTTTGGTCGTCGTTGCTTTGGCTCCAAGGATGGATGGCTGGTGACCCTTGACAAAACCTGATATGCAACCTTGCCTATTCA  
ACCCTCTAACAAAAGCTGAAATATCCCTCCCATCCCTCTTGACCATCCCCGAAGATCAATGGCATAGGATCAAGCCCCAATACGCCCTTGACGGTCATGTGCAATTTTATTATGATGAAAAG  
CATCCAATCTTTTCCGCAGATGTGGAATTTTTCGTGATCTTATTTCCAGAAGATTGTCCTTTCCTCTAACGACCGATTGGTACTGCTGTTGTTGTTTATGGCCATTCAAAAACAGTTAGCT  
TTGGCAAAGCCATGCGACCATGCTTGGGTTCTCGGCCACAACGGCCTCCTTACCATATCGACCAATTTGAAGAGTTTGAAGATGTTTACTTTTCATGAAGAAGAGCAAATGTTCTATGCAA  
TCACACATTTCTCAATGGTTCTGGCCTTCGACCTCAAAGGACAAAATATTGAAGTGATATGCCACCGATACAAGACCCGTTAACAACAAATTTATGATTGCAAGAAGACTATATTTCTTTTTA  
TTGGGCAGCCTTTTAAAAATCGAGAGAGAGACATCAGAATTTAGTATACGAAATCATAGATGTTATATCTGGATCTGGGTGAACATTTTACTATGAAAAGATAGCTAGGATCGCGGTTTTTC  
AAGTTAGGGCCATATTTACTTCTTCTTCTGGCTCATTCTCTCAATGGATCCATGTCGACGATTTGGATGGTTTTTTCATATTTATAGGTTGTAACCATACATTTCGATTGCATCACAAGGTTG  
CTCCTGGAATTAGACCGAATTGTGTATACTTTAATGATCAATGGGATGCAATGTCACCAAAGAAAGTTGCTCGTGATTTTGGTCTTTATGATCTTCAAATCATTGCTTCGAATATTTGTTT

ACCCTGATTCACAACCTAAATTGTCTCCTTCAATATGGTTTATGCCATCATTTTCATAAATGAAAAATCTTAGTATTTTTAAGAAGCATGTACCGTGAGTATCTTTGAATTATGAAATTATTTTC  
ATTATTTGTAAGCCATTTTTCAGCTAATA

>comp165792\_c0\_seq2

CCAATGCAGGGTAGGGCTATATATATCCAAAGATTGCACATTTGATTCCAACCTCTCTTTTCATTTATTTATGCATTCTAGTGCTAGAAGGCTTCACAACCTCCTTTCATCGCTTCCCATCACATT  
GAATATAGTATTATGGCATGGTCTGATCTTCCCATAGATCTCCTCTATTGCATCTCATCACACTTGCTCGTTGTAGACTTCCCTCCGATTCTCCGCTGTCTGCACCTCATGGAATTCGGTCTAG  
CTAATAATGCACTCTTTAGAATAAAATGTTGCCCTCGCCATGGTTGTGCCTTCCCAGCAATGTCGGAGAGGACTCTGACACACTCACATTCTATGATCTTACCATGAAAAAGAAGGAAA  
CGTCGACAACCTCCTTCACTTATCTTCCCTCGGTAGCCACATCTTTGGTCGTCGTTGCTTTGGCTCCAAGGATGGATGGCTGGTGACCCTTGACAAAACCTGATATGCAACCTTGCCTATTC  
ACCCTCTAACAAAAGCTGAAATATCCCTCCCATCCCTCTTGACCATCCCCGAAGATCAATGGCATAGGATCAAGCCCCAATACGCCCTTGACGGTCATGTGCAATTTTATTATGATGAAAAAG  
CATCCAATCTTTTCCGCAGATGTGGAAATTTTCGTGATCTTTATTTCCAGAAGATTGTCCTTTCCTCTAACGACCGATTGGTACTGCTGTTGTTGTTTATGGCCATTCAAAACAGTTAGCT  
TTGGCAAAGCCATGCGACCATGCTTGGGTTCTCGGCCACAACGGCCTCCTTACCATATCGACCAATTTGAAGAGTTGAAGATGTTACTTTTCATGAAGAAGAGCAAAGGTTCTACGCG  
ATCACACATTTCTCGGCAGTAATTGCATTTGATCTCGATGGAAATAATGTTAAAATAGTTTGCCAAGCAATAGAAGACCCCATGACACAACTCTTCTTGTAGGAACACTACATTGCATTTTT  
GTCGGAACTCTTCTAAAAATTACTAGGGAGATCGATTGTACTTGTGGAGGCCAATGAAAAGTTTACATATAAGACAACCAATATCTCGATTTTTAAGTTTGTGCCGGCTGTTGATGCTT  
CGTCTTGTCTTCTCCTCAAAATGGATCTCTATCAGGGACTTGGGGGGTTGCTCTTTGTTTATAGGTTATAACCAAACCTTTTCATTGCATCACACAGTAGCTCCTGGAATTAACCAAATTC  
ATATACTTTACAGACCATGCGGAGAACACGACGCAAGATGACATTACTCATGATGTTGGACTTTTTGATCTCCATAATGATTGCTTCCAGTTTTTTCCTTGACTCCGATTTCGCAGCGTAATTG  
GCCCCCTTCAATCTGGTTT

>comp165792\_c3\_seq2

CGAGTCTATTTTTTATGATGCTTTCATAATATAAAAAATAAAAAATTTAGGATCAAATCATAATGTAAGAAGCAATTTTTTTTTAAATAAAATCTATATTTTTAAATTTTAAATAAATTTTACACAC  
GAATTCATGACTGTGCTGGATGTGCTGGCTTTGGAATTTAAGAAGCTTTATGATCTTAAGCAAGAAGAAAACATTGTTATGAATTTGTTCTGTATTTCAGACAAACATGGCAGCGATTATTTGG  
ATAGGACTCTTTTTCTTTGGCTATAAATAGTAAATACTATATAAGAAGAATTTTTATAGCATAAGAACATACATCATTTCCCAAAAAAGAATATCATAACAATAATTTATCCTATAATCCTATTC  
TTGCTCACGTCCAGTCAAATCCAAGGAAAAATGTCATTTGTTTCTTCTACAACAGATTTAGAAAAGTTCAAAACCTCTATCTCTCTAAACTAGGTCACGCTCCTCTTTTTCTCTATATAAAA  
GGCTAGAGAGCATCATAGCTAACAAAAACAACAATATGACTTGGTCCGATCTCCCGATAGATCTCCTCCATTGCATCTCCTCACATTTGCGTATCGTTGACATCCTCCGCTTTTTCTGGTG  
TATGCACCTCATGGAATTTAGTTATTTCTAATAATGCACTCCTAGGCATTCATTATCGTCCCTCCCCGTGGCTGCTTCTTCTAGTGATGTCGGAGAGACCTCTGACACACTCACCTTTCACG  
ATCTTACCATCGAAGAAGAAGAAGAAGATGGCGTCAACATCCATTATCGCTTCTCCTCCCTCACGGGCAACATCTTCGGCCGTCGTTGCATTGGCTCTAAAGATGGATGGCTTGTGACACT  
TGATAAGAAAGATCTACGGCCTCGTATCTTCAACCCTCTCACAAAAGCTGAAATATCCTTCCCATCGCTCTTACCATCCCTGATGATAAATATCATAACGATCAAGCCCGAATATGCTTCAG  
ACGGCTCTATCGAGTTATCTTATAAAGAAATTTGTCGAGGCCTTTGCACATACACAAAATATTTCTGCAATGTATATTTCAAAGATTGTCATCTCCTCTAATGATCCACATGGAAGTGC  
TTGTAATCTATGGTTATGATAAATGTTGGCTTTAGCAAGGCCTGGTGATCGAGCTTGGGTTCTTGGCCCACAGCTGCTTCTTACAACACCAATGATCATGATGAATTTGAAGATGTGTGC  
TATCACGAAGAAGAACAAGGTTCTACGCCATAACACGTTTCTCGAGGGTGTAGCCTTCCACCATAATGGACAAAATGTTGAAATGATATGCCAGCCAATACAGGATGAACGCCCCATA  
CAAGAATATTGCATGAACTATATTTCTTTTTAATGGGAACTCTTCTAAAAATAGAGAGAGAGATCAATATTTTTACTCGGCCTGTTGATGAAAGGTACGCTGGGAAGACAATTAGAATCTC  
AGTTTTGAAGTTAGTCCAGGATGTTGTTGCAACTTCTTCTTCAATCTCTCAATGGACCACATCAAAGACTTGGGGGGGTTTTCTTATTTGTTGGGTTGTAACCAGACATTCTCATTGCATC  
ATACGACTGTTCTGAAATTAACCAAACCTGATATACTTCTGTGATCATTTGGATGAATCGTCACAAGATGATGTTTATCATGATGCTGGGTTTTTTGATCTTCAAGATGATTGCTTTCAC  
TTTTTTTACTATGATTCACAACCTAACTGGCCTC



>comp165807\_c1\_seq10

GATTTTAAAAGCCTTGCTATCAAATGTCAATTTGTTAACCCAAGTGATTTTGGACATTCCCAAAGCTAAATACGCGAACTAAGCCTATTTTTTTGGGAAAAAATACGGGAACTAATCCGATC  
CGCAACAAAACAATCCTCCTCATATCATTGCCGTACAAAATCATAGAAAGGCATTATGATCAACGGTCAGAAATAATTACAGCAATTAATCCGCACATAAAACAAAGCCAGCCAATTAGCGC  
TCACCTCGTCTCACCTATTTATAACCTTTTCGCTACCCACCGTTTCGCTATTCGCCGCTCTATTCGCTCTCGGATTTGTTTTCGATTAGCGATTCCAATGGCTCCAAAGGCCGGAGAAGAAGCTCG  
CTGAGAAGAAGCCCCTCGCCGAGAAGTCGGTGGAGGAGAAGGAGAAGAAGGTAGAGGTGTCCGAGAAGGCCGACAAAAACGCCGGCGGGAAAGAAAACCGAGGGCGGGAAAGAGCCT  
TCCTGCAACAAAAGAAGGCGTCGCTCCTGGCGATAAGAAGAAGAAGAAGGCCAAGAAGTCCTCCGAGACTTACAAGATTTATATCTTTAAGGTTTTGAAGCAGGTTACCCAGACATCG  
GGATCTCTAGCAAGGCGATGAGCATCATGAACCTCCTTACATAACGACATCTTCGAGAAACTTGCTCAGGAGTCTTCGCGACTCGCCCGATAACAATAAGAAGCCGACTATCACATCTCGGG  
AGATCCAGACTTCGGTTCGCCTCGTTCTACCCGGTGAGCTCGCTAAGCACGCGGTTTCTGAGGGCACCAAGGCTGTTACCAAGTTCACCAGTTCCTTGATCTGGTTTTGTTAATTCTACGGTC  
TTGATGTGTAATTTCTTGTTTTTCTGGGAATGCTTCTTTAACTTTCTGGTCCTAAGATTCTGTAATTAGTAGTAGAACATGTTTCGCATGTCTACGTTTTAATTTGTTTTGGTTATACTTT  
CGCAGCGGAAACATTTTCTATGAAAAGTCTTTTCTGGTAGCTGCTTGATTATTTCTGTTATTGAATATTTTCGATCCTCGTAATTGTTTATGCTAATTCTTTTTATGTTTTAAGTATGGATT

>comp165807\_c1\_seq5

GCACCAGAGAAACCCGGATCCAACGCTAGCTTTCTTCTTTCCAATCGTCTTCTCGATCAACCGAATTCGTTTTCCCTTTCTCTTTATCTTATTCCATGGCGCCAAAGGCCGAGAAGAAGC  
CGGCGGAGAAGAAAACCCGGCACCAGAGAAGCCCGCGCCGAAGAAAAACCAGCGGAGAAGAAGCCGGCCGAGAAGAAACCGAAGGCCGAGAAGCGGTTGCCTGCGAAAGATGGAG  
GCGACAAGAAGAAGAAGAAGAAGGCCAAGAAGTCCTCCGAGACTTACAAGATTTATATCTTTAAGGTTTTGAAGCAGGTTACCCAGACATCGGGATCTCTAGCAAGGCGATGAGCATC  
ATGAACTCCTTACATAACGACATCTTCGAGAAACTTGCTCAGGAGTCTTCGCGACTCGCCCGATAACAATAAGAAGCCGACTATCACATCTCGGGAGATCCAGACTTCGGTTCGCCTCGTTC  
TACCCGGTGAGCTCGCTAAGCACGCGGTTTCTGAGGGCACCAAGGCTGTTACCAAGTTCACCAGTTCCTTGATCTGGTTTTGTTAATTCTACGGTCTTGATGTGTAATTTCTTGTTTTTCTGG  
GAATGCTTCTTTAACTTTCTGGTCCTAAGATTCTGTAATTAGTAGTAGAACATGTTTCGCATGTCTACGTTTTAATTTGTTTTGGTTATACTTTTCGAGCGGAAACATTTTCTATGAAAAG  
TCTTTTCTGGTAGCTGCTTGATTATTTCTGTTATTGAATATTTTCGATCCTCGTAATTGTTTATGCTAATTCTTTTTATGTTTTAAGTATGGATT

>comp165808\_c1\_seq4

GTGGATGAGGTAGACGCCGATGCTTGAGTCGCCATGCGAGAAGCCCCGGATCAACTGTCTACTGATACCATGAAGAAACCCAATGAGGGTTCAAGAAGCTCGAAGATGAACAGGAAAG  
AAATGTAAATTGTTATTCAAACATTAGTTTGATTACAGAAGCTGAGAAATATAAATAGAGAGAAGGAGAAGTAATCCACGGCTAGTACACGTGTCAAACCTCCTATTCGAGATACAAACTA  
TTTATTTATTTATTACATTCTTCTAACACCAACAAGCTTTGGCTCATTGAAGTTTTTTTTTTCTTTGAACAACCTTATCTCGTAGTTTCATTCAAATTCGTTCCCTCAACCAATAATTTACTTG  
TAAAAAGCTCGTGAAATATATCATTAGAAAAGAACTAATTATTTGATACAATCATTACTGCAGCAGCAACACACAATCAACGGAAAATTAAGTCTTAATTAGGCAATAGCATCGC  
AGGAGCCAATGCCTTTTTATTCAAATATATACTAACAACTTCAATTCATCTTCACTGTATTAATGTTACTCGTTGTTCAAGGATACAGCTCCTTACCTTGTCTGTGCAGCGCCGGATGTC  
GCCGCTGTGCCGTTGCTATGCGGGATGACGAAAACATCAGCATTGCCAACGTTAGTTCCAGTCGCCAAATAGCGTTGTTAGCGTTATCGTATATGACGACGTTGCGATCTCTCTGGAGGA  
TGAGATAAATAACCGTCTTGGCGATTGGTGTGCTCGCCAGATAGCATCGCCGTTACTATATATTACGAGATTGCCATCGGTTTGCATGGTGAGAACACATTCCGAGGCCTGTCCGTTG  
GTCCCGAGGCCAGACGGCTCCGCCGTTATCGTAGAGAACGAGGTTACAATCTTGTGTCATGATGAATAAGTAGGTGCCTTCTGCGAGTGATTGTCCAGGGTTAAGGGATTGGCCGGCG  
TTCAGGCGGTCGTCGGCGGAGACAGGAGTGGTTAGGAGGCTAAATAAGGTGGCGACGAAGAGGAG

>comp165826\_c0\_seq17

GATTGTGGAGCTAATTAAGAGAAGAGTCGCTGGTCTTCATCAAATACTGCAGTCGGGTCTTTAGACATAACTGATACATGGGAGCCATTAGAAGAAGGCTTACTTCCACTTGAAACGAC  
AAGGCATGTATCAATGATCAGCATAACCCTCTCTAAAATGGAGCTGGATAAGTTATCTGCTGGATATCAATCTCCTTTACCGGCAGATCAGGTGAAACCATCTGCTGAATATGATTATGAGG

GAGAGGTTTCTCCTGCTGGTCGAGGAAGAGGCCGTGTTGGTCATGGTAGAGGAAGGGGAAGAGAAAATGGACCTATGATGGTAGATTATGGTGAACGGAATTGGGACAATAGAGAGCG  
TGGATTTGGCAGGGGAGGTTGGGGACGTGGTAGAGGCCGTGGTTTCAGAGGTTGGGGCAGAGGAGGAGGCTACGGTGGTTCGAATTATCAGCAAGACAATGCTGTCTACATTGAG  
GATGCTACTCATGCTCCCGTTCAGGGCCGAGGTCGAGGAGGTGGCCGACGGCAAATTCGTC AAGGAAGGGGCCGCGATGCGAGGTCAAATGGTCCCATCAATGCAGTTGCTGGCGAAG  
CTTAGTAAATCATTGGTTGCATGCAAGATTTCTTCTTTATAAAGCCTTGGATGCCTGCTCAGTCCAGAGTGTCTTTCTTACTTTAGTTTTCAATTTTTTAGATAAAAAACTCACAGGTAA  
CCATAGTCGGTTTTAAGTTGTGAGGATAAAACCTGGTAATGAGTTCTTATGACTCTATAAGGATTAGTTAGATGTCATCTCATGCTTTTCTTTAATGTTTGATTGTAGCATTCAACCTGTAGAG  
CAGCACATTCTTTTATTATTATTATTATGCTTAAACTTTCTGGCTTGAGTAATCATTATGTTTAGTTAATGAA

>comp165830\_c0\_seq1

TGCCTTTATCTTTGATTAAATCTCTACCGCTACTTTTTAAACAACATGACATTTATGTAAATTCCTTTTCTACTACTTCATCTAGTATAAATGTATCTACTGTATCCAGTATTAACCCCAATTTTC  
TAGTTGGCTTCTTCTTAACAAGAATCTAGCAGTTGCTCTCTTCTCCACAATCTCCTCATCCTTGTGGCCCTTCATTATTAACCTGGATTCTTCCATTTCATCTGGACAATTCTTGAATGCCGA  
CTATTCTCTACAAATCGTTCAGAGTTATATAACTCAAGAATGAACTTCACTCCCTCACTATGCAAATCAGACCATGATTGATTATCTCTCCACTGTAAAAACATTTACTTCACTCCCTCACTA  
TGCGAAATCAGTCCATGATTGATTCTCTCCACTATAAAACATTTGGTGGACACATTGCAACTGCTGGTGGTACCATCGACACGAAGATATTATCCAATATATCTTAAATGGGTGACCTACTAA  
TTATCAAGCCTTCAAAGCGACCATCCGAACAAAGCTCACACCCATTTCTTTGGATGATTTATGTGCTCTTCTCTGTAGTGA

>comp165849\_c0\_seq4

TTTCTTTCTATCTTTAGCTATTGTATATCTCATTATCTTCTTCTTCCATACAAACCCGATTCTAATTTTCTTTTGTTCAGCACTATAAATAGTATTAAAAAAATCTATATTCATAAACCAAT  
AAGAAAAAGCCTCAAGATCTATCCTCCCATCAAATATTAACATTTGAACTTTTAGTTGTCATCATCAAATCATAAATATGAAAAAGTCTAGTAGTAGCTGTTGACCCTCATACTAGTGTC  
GGGTTCGAGTCGACCGCGCAGGTGGGTTTTAAAGA

>comp165866\_c2\_seq1

TTGTGTTACAAATAAATCTCTAATTACCGATGAATAGCTGTCAATTCTAAATAGATGGCTTCTCTACCTATAAAAACTCCACGCAAGAGAAGAAGCCAACCATCACAGAACAATACAT  
CAATCAATAACGTAATTCTTCTCTACGATACTTATTCTCCTTCGATTCATTCCACCAACCAATAATCTCAGTCATCAATCTAAGAGCCAGAAGTATCCCCTCTAAAGATTGGCTATGTCTAGT  
GAGAACCATTCAACCTCCTTCTTCCGCCATAGGCAACGACAATGCGATTGCCAAAGGAAACCAATTGGCGGCGTTGGGAAGAGCCTTCAATGAAGAGGTTGAGGCTGACCCATCGAT  
CGTCAGCAGATCGGTCAACTTGCCAAGAGGGAAACCATTCAGCATCATCCTCAGTCCGCAGAAATTACAATGCCCTACTGAGCGGGTGGCATGGAGAAGAATACCTTCCAATGAAGTGC  
GACCTCCTAATAGAAATATTGGGAGGTTAAACAACAATCGTGGAACCTTCAATGAAACGAGTCCCTTATCAAACACGAAATGTTATGACCCCTCATATGGAGTTCGGACAACCTAACATGCA  
GGCATATGGTGCAGTCCCTCTGCCAATTTCCCTGTGCCATTTCATTGGCAACTCCGAGCCCTCCACCAGCTCTTTCAGCTCAAGGCCTCAATAATGTCTTCCCATATGCTCCTCATTGTGCGT  
ATTACCATCCAACCCACCCACATGTTGGATATTTTATTCTCTCCAAGACATTAATGCAGCACAACAATCAAAAAATTTTCAGTTGGTTGTATAATATGCGAACTAGGTTGCGAAAGCAGATT  
GAGTACTACTTCAGTCCGGAAATTTGGAAACAGATATTTTCTGAAGAGACAGATGGATGCTAACGGTTGGGTTCCAATAACTTTAATTGCTTGGTTTAGGAGAGTTCAGACTTTAATGA  
AGGAAGCACATCTCGTATATAATTATTTAAGATGGTTAAATTTTATGCCAGATCATATCGCACGGTTGACTAGCAATGAACAATTCATATCAGATAGCTTAAGATTCTCGGACGATGTGGAAG  
TGCAGGGTGATAAAATCAGAAAACGCCATGAATGGGAGAAATGGGTATCACCTAAAAATCCTACTTAATCCAATGCTGAATCTGCCGACCAGACTCAAATGACTCAAATTAGGAATATCT  
GTGGAGGATTATGCTCGCTCCTCTTCTTCTTCTACAGAACTAAACTTGAAGAATATCAGTTTTCTTGATGACTATTTTGTTCGATATATAAAACAAAGCACAAAAAAGCATTAAACAATGT  
CTTATCCGATCTATATGGCGTGGAGTGGATCACATCTTTCTTCTTAGTGTTTATGATAAGTAATATTGGCTATTGGTAAAGGTGAGTGCAGGGTAAGAAAAAATAAAGCCAAATAAGAACAAA  
TAATTCGGCCAAAGAAACTTTCAGACCGAATGGAGCTACGCATTTACGCCCTTGGTTTTTAAAGTTATTTCTGTTTAGAATATATTACTTGTCTTATGTAATAAATAATATTGTTTGTCTTG  
ATGTGACTTTGGGAGGACAAAAGAGTTGGGACTAAATTTCTCATAAATCTTGATGCCTCTGCCTGCCTTCATTGTGCTCAAACCTTATGTGTGTTGTTAAATCCTTTATTGATGTTCTATAA

AGGATTTTAAACAACACACATAAGTTTGAGCACAATGAAGGCAGGCAGAGGCATACAAGATTTATGAGAAATTTAGTCCCAACTCTTTTGTCTCCCAAAGTCACATCAAGACAAACAATA  
TTATTTATTACATAAGACAAGTAATAATATATTCTAAACAAGAAATAACATAAAAAACCAAGGCTGAAATGGGCAGCTCCAGTCGGTCTGAAAGTTTCTTTGGCCGAATTATTTGTTCTTATT  
TGGCTTTATTTTTTCTTACCCTGCACTCACCTTACCAATAGCCAATATTACTTATCATAAAACACTAAGAAGAAAGATGTGATCCACTCCACGCCATATAGATCGGATAAGACATTGTTTAATG  
CTTTTTGTGCTTTGTTTTATATATCGAACAAAATAGTCATCAAGAAAAGTATTTCTTCAAGTTTAGTTTCTGTAGAAGAAGAAGAGGAGCGAGCATAATCTCCACAGATATTCCTAATT  
TTGAGTCATTTGAGGTTGGTCGGCAGATTCAGCATTGGATTAAGTAGGATTTTTAGGTGATACCCATTCTCCCAATTCATGGCGTTTTCTGATTTTATCACCCCT

>comp165866\_c2\_seq2

TTGTGTTACAAATAAATCTCTAATTACCGATGAATAGCTGTCAATTCTAAAATAGATGGCTTCTCTACCTATAAAAACTCCACGCAAGAGAAGAAGCCAACCATCACAGAACAAATACAT  
CAATCAATAACGTAATTCTTCTCTACGATACTTATTCTCCTTCGATTCATTCCACCAACCAATAATCTAAAAAGCTCAATCCTTCTCCATTCAGTCATCAATCTAAGAGCTAGACATATCCC  
CTCTAAAGATTGACTATGCCTAGTGAGGACCATTACGCTCCTCCTCTTCCGCCGTAGGCAACAACAATGTGTCTGCCAAAGGAAACCAATATGCGGTGTTGGGAAGACCCTTCAATGAA  
GCGGTTGAGGCTGACCCATCGATCGTCAGCAGATCGGTCAACTTGCCAAGAGGGAACCATTCACATCACCCCTCAGTCCGGGAAAATTGCAATGCACCTGTTGAGCGAGTGGCATGGAG  
AAGAATACCTTCCAATGAAGTGCAGCTCCTAATAGAAAATTTGGGAGATTAATAACAATCGTGGAACCTTTCAATGAAACGAGTCTTATCAAACACGAAATGTTATGACCCCTCATATG  
GAGTTCCGACAACCTAACATGCAGGCATATGGTGCAGTCCCTCTGCCAATTTCCCTGTGCCATTATTGGCAACTCCGAGCCCTCCACCAGCTCTTCAGCTCAAGGCCTCAATAATGTCT  
TCCCATATGCTCCTCATTGTGCGTATTACCATCCAACCCACCCACATGTTGGATATTTATTCTCTCCAAGACATTAATGCAGCACAACAATCAAAAAATTTTCAGTTGGTTGTATAATATGCG  
AACTAGGTTGAGGAAGCAGATTGAGTACTACTTCAGTTCGGGAAATTTGGAAACAGATATATTTCTGAAGAGACAGATGGATGCGAACGGTTGGGTTCCAATAAGTTTGATTGCTGGGTT  
TAGGAGAGTTGAGACTTTAATGAAGGAAGCAAATCTCGTATATAATTATTTAAGATCGTACAGTTTATGCTAGATTACATCGCACCGTTGACCAGCGATGAACAATTCATATCAGACAGCA  
TGGAATTCTCGGGCAATGTGGAAGTGCAGGGTGATAAAATCAGAAAACGCCGTGACTGGGACAAATGGGTATTACCACAAAATCCTACTTTATCCAATGGTGAATCTGCAAATTAGGAAT  
CTGGGTGGAGGATTGGGCTCGCTCTTCTTCTTGCAGAGAGCGTAAATTGAAAAATAATTATATAAAAAGAAAAAGGAAGACAATGCTTTATCCGATCTAGAATGGACTAAGACTTCGTTTG  
AGATGACTTTCTTATT

>comp165886\_c0\_seq5

TTTGATTGGATAGCTCTCAAATGGCTTTGCAAGCAACAGCTTTTTCTTTTTCCCTTCATTAATTTGTATCTTTTCTAACGGTCGATCAAACACAAATTAAAAAACAGAAATCAAACCCCTC  
CCAAACGAATTAACAGCAAAATCAAACGCTACAGCTTTGCAATTCCTTCAGTTATACAAGCCATAACGCACAGGAATGGTGACTCCCCCTCTCTCATTATTTATCCACTCAGTGCCCTGTA  
TGAAGTCCGCCACCGTGAACCTCGCCGCCGACCTCTTCAGTTTCTCACGCCCTTCCACTTCACCCTCCCATCAAACCTCGCCCCTGGCCCTGTGTTGTTATACTCCCCGTAAAATAGAGT  
ATTGAGCGCGAAATCCCCCTCCCATGGCAAATACCCATCGGGATGTATAACATCGCTGATCTCCGTCTCCATGATCACATGCCGCGCTACTCCTTCCACGGCTGCCGAGGTAGCTCCTGA  
TCTTGTCTTTGAAAGGCAACAGCTTTGTCGTCGCCGATGATCTTGCATTTGTGGAGGACAAAGCCGGTGGTTTTCTGTGGCGGTGACGCGGCCGTGGGCGAGGACGATGTTCTGTTGGTTG  
TCGAGGGGGCGACGGATGACCATGAGGCAGTTTTGGAAGACAGAGGCGGAGTCGCCGAAGATGAAATCGACGGTGCCGGCGATGACGCAGCTACGGTAGAATTGTGCTTTGGCTTGGG  
CGTAGAGCGTGTCTTGGTAGCCTTCGAAGCGGCATTCGAAGAAGATGGAACGATCGGATTGGACCCGGATTGCCACGGCTTGGTGCTTGATGGCTCCGGCGGTGTTGCCGACGCCAAAG  
CCAATGCCATGAAGTTGTGCGCCGAGACCACAAACGTAGCAGTCATGAAAGTTCTGACGCCATCGACGAAATCTTCTCTCCAGTGATGATCGTCTTCGCACTTCCATCGCCGTAAACG  
GTCAAGTTCGGCATTCTTCTCGTGACATTTACTGTCTCCTCGTACACTCCCTCTTTAACATAGATCACATACCTTAATCATCATTTTAATACGCTCCTCAGTATTAATAAATAATTTTACCTCT  
TAATTCATTAATAATTAAGAAATTTAACCTTCCAGTGTACTCGTTCCGAATCTTCGCCAACGCCATTGAAATCGTGTGTAATCGCCGGTCCCATCCTTAGCCACCGTAACATTTGGCTTTAG  
ATTCGATTGACCTGCCTGAGAACCCTTCTCTCATCTCATGAACCCACGAAGGAATGCCCTCATCGTCAAATGGTGCAGTTCTTCTTTCTCAGCGAGCAGCTTCTTCCACTAACGGTC  
AATCCCGAACCTCCAGCATTTCAGAAAGCTCGATAGCTCCTTAACAATTGCAAGAGAGTTGCTCGTTAGCTCCCTTGCTGTCTTCAACGCTTTTTTCAGCTTACCTTAAGCTCACCGT

CAGGGAAACCGTCAATGCAGGTTTGTGATACGACATGACAGAGCTCAGCCATGTTCTGATGTCGCGGACTTCCTGGGGATATGTTCAATGCCGGTGGAGACGATGTCGTCGAGCGAAC  
GTTTGATCTCGTCCTTGGAGTCTCGAACAGCTGCCGGCAGTCTTCGACGGCGCCACGAACTCTCGGGTCTTGTGCGCTAGGAGGCGGGTGGCGGGAAGGCCGTGCTGATCTCGTCG  
AGAACAACGGCGACGGCGGCCTTGACGAGTCTTTGGGGTCCGGTGGTGTCTTCTTACGACTTTGTTGAGGCTGGAGACGCAGGTTTGTGTAATCGGTGGATTTCGCACATTACCTGA  
ATGGACTTGGCGGTGGAATGCAGTTGCGTGGCGGGGGAACCGGCAGTGGCGGATGTGACGATGTGGGAGGAAGGAGTGTCTTCTCTGGGCTGTAGAGCGTGCAGGCGGTGCCGACGA  
CGGCGAGGAGGAGAATGAGAGAAGCGATGGAGCCGGCGATCCGCTGTAGCGGCGCTCCGCTGTTCTTCGTCGGAGAAGGCTGCCATGGCGGGAGAGATGGTAATGGAAGTTTTTAT  
GGAAAGACACGCACGTAGTTTTATTATTATCTTCTCTTCTCCCGCCTAGCTAGTCTTTCTCCGAGCTTTTT

>comp165886\_c0\_seq6

TTTGATTGGATAGCTCTCAAATGGCTTTGCAAGCAACAGCTTTTTCTTTTTTCCCTTCATTAATTTGTATCTTTTTCTAACGGTCGATCAAACACAAATTAACAAAACAGAAATCAAACCCCTC  
CCAAACGAATTAACAGCAAAATCAAACGCTACAGCTTTGCAATCCCTTCAGTTATACAAGCCATAACGCACAGGAATGGTGACTCCCCCTCTCTCATTATTTATCCACTCAGTGCCCTGTA  
TGAAGTCCGCCACCGTGAACCTCGCCGCCGACCTCTTACGTTTCCCTACGCCCTTCCACTTACCCTCCCATCAAACCTCGCCCCGGCCCTGTGTTGTATACTCCCCGTAATAAGAGT  
ATTGAGCGCGAAATCCCCCTCCCATGGCAAATACCATCGGGATGTATAACATCGCTGATCTCCGTCTCCATGATCACATGCCGCGGTACTCCTTCCACGGCTGCCGAGGTAGCTGGGG  
AAGGAACCCTTGGCCGCCTCCAGGTCGTCGGTGGCGGTGATGCGGCAGGATTGGAGGACGATGCCCGTGGGTTCTGTTCCGGTCCGAGCGGCCTTGGGCCGTCACCATGTTCTTCTGGTT  
CAAGCCGGGTCGCCGGGCCTGGATATCGCAGTCTTGAAGACGGCGGCCGCGTTGCCGAAGATGAAATCGACGGTGCCTTGGATGAGACAGGAGCGGAAGAAGTGCAGAAAGGAGTG  
GACGTAGAGGGTGTCTTGGTGGGCGATGATGACGCAGTTGTAGAAGGCGGAGAGGTCCGACCCGACCCGGAGTGCCACGGCTTGGTGCTTTGATGGGCCGGCTGTGTTCTCGATGCGG  
AGATCGCGGGCCAGGAAACCCGAGCCACTGCGGCTAAGGTGGCGGAACGGAAGGTGGTCCAGCCGTCGACGACATTCCGGCTTCCGGTGATCACCGTCTTCGTCTCCATCCCCAA  
CAAACATTATATTCGTCTTATTCTTCGGCACCTTACGTTCTCCGCGTAAACCCCGGCCTTATTTTTATGACAAATCTTCGCTTGCTCTTACCAGGCGCCGCCGCCACCGCTTCCGTAATGG  
TTCTAAAATTCCCCTCCCGTCCACCGCCACCGTCAAATCTGCCGTGCTGTCCGCTGACTGAAGCTGCTGCCTGTCCCTCGCCGTATCCATTCCGGAAATCCATCATGACGGCTCGCTAA  
CTTCCGCCCTCTGTGCGCCGCCGCCGCCATGTGCGCCGTCCGTCATATTCTTATCATGGCGAGAGCGTTTTTCGCACATGCGCTCGATGTAGGTAAGCCCTCGAAGGATCCCCAACCGA  
AGCCGGCGGTCATCGCTGGCGTGTGAGAAGCCGTCGGCGCAGGACTCCTGGTTGGTAATGGCACCGCTGATCATGATCTTCAGGTCGGCGGCATGGCGGGAGAGTGATTTGGAGCTTGC  
AAAGCCCGGCGAGTAAGATCGGAGATCGGCGTCCGGCGGACGGAGCTCGTCGAGCGTTTTCGTCGAACATCTCGAGACAGTCTTGAACGGCGGCGGCTTCGCGGGAGGTGAGACTTGGT  
CGGGCGGAGATGATTTGGCTCCGGCGATTGAGCGGCGGACGGCGGCGAGGGTGGAGTTAGGGAGGCGTGATTACGTCTTATAGAGGAGGAGATGGAATGGAGAAGCGAGGCGGAGG  
CGGCGATGGAGGAGATGCAGAGCTCAGGATGGCGGGCGGAGACGCAGGAGGAACGGAGGAATGTGTGGGAAGGTGTGACGGCTGCGGCGGCGGCGATTGAGATGATGGCGGCGAGT  
AGGAGTATGGTAGCATTGGGAATAAAAGGTCTCATTTTTCAGATAGAGCTTAAGGGAAGGGATAGGGAATTTGCGTGAGGACTGAAGAGATTATAAAGGTGATGGTGATGACGGGGAGGG  
AATGTGGGTAGGCTTGGAGGATTTTTTTAGGATTGAAAAGATTTG

>comp165906\_c0\_seq6

TTTTTCTGACTCTTTCTCCCTTGGCGTCTCCTTCTTCTTCTGCTGCTCCACGCCTTCTCTTTCCTCCATCATTCTATTATCCGTCTCGCAGATATCTTCTTTGCTCCGATTTCATGGCGGAT  
AAGAACATATTGGTGACGGGAGGGGCGGGCTACATAGGGAGCCACACGGTGTGACGCTCCTCCAGGAAGGGTTCCGCGTCTGGCTGTGACAACCTCTACAATTCTTCCGAGGTGCG  
CATCAAGAGGGTTGCAGAGCTTGTGGTACGCGAAGAAGAATCTCGCGTTTGAACGGGTTGATCTTCGAGATAGAGAAGCATTGGACACTGTTTTGCTTCTACAAAATTCGATGCTGT  
TATTCATTTTGCTGGCTTGAAGGCTGTAGGCGAAAGTGTCCATAAGCCTTTGCTTTATTATAACAACAATCTTATTGGTACAATAACTCTTATAGAAAGTATGGCTGCTCATGACTGCAAAA  
ATCTCATTTTTTTCATCATCTGCAACTGTTTATGGATGGCCAAAGCAAGTCCCTGCACGGAAGAGTCTCTCCTAGCGCGGCAAACGTTTATGGACGAACCAAGCTTATCATTGAAGATATT  
TGCCGTGACTTACAAAATCAGACTCTGATTGGAGGATAATATTGCTTAGATATTTAATCCTGTTGGTGCTCATCCCAGTGGAGATATTGGTGAAGATCCTCGTGAATACCTAACAACCT

CATGCCTTTTATACAACAAGTTGCTGTTGGGAGGAGACCTGCACTTAGTGTTTATGGAAACGATTATAATACCAGTGATGGAACCTGGGGTTCGTGACTATATTCATGTTGTGGATCTAGCGG  
ATGGACATATTGCAGCTCTCCAGAAGCTTTTCCAGGACCCAAACATAGTTGTGAGGTGTACAACCTTGGGACTGGCAAGGGAACCTTCTGTGTTGGAAATGGTTGCAGCTTTTGGAGAAG  
GCCTATGGAAAAGATGTTTCATTTCTTGTGCAGAAAATCCCTTTAGTAATGGCTGCAAGGAGGTCCGGTGATGCAGAAATTGTTTATGCCTCAACTAAGAAGGCAGAGAGGGGAGTTGAATTG  
GAGAGCCAAGTATGGAATTGATGAGATGTGCCGTGATCAGTGGAACTGGGCAAGAAAAATCCCTTGGGGTTATGGATCGCCTGAATCTGAGAGTTGAGGATGCTTTATGGCACTCGTTTT  
TACATAACTTTTATCTATTTGCAGCCTGTGTTAATAAAAAGAAATGCTAATTTCTGGTCTTTTTTGTGTAATGTTTTCAAAGAGGCATAAAGGAGTCCAGCCCAGTGCTTTGCTGATTGGCTG  
CACTATTGTAAGGGCATCCAGCTGATGTAAGTCCAGGTACAGGCCATTGAAAAATCCTATTAAGCTTAAAATAATAATTCAGATATTCTGACCATTCTTCGTGCTATCAGAGCAAAAAGAT  
AAACAAGCAGAGAAATTATTTTTTT

>comp165912\_c1\_seq3

CTTATATCTAACTTTGGAGAATCATCATTAGTAAAGAGATTTTTGAATCTTGAAATTTCTACACTTGTTTGATTTTATATGGCAACCACGTATATAATTATGTTGAAAACTGTCGGAACATTT  
TTATATTTTCATATAAAGCCTTGCCTTGATTCAATATAATGTTTGTCTATGTGCGAGTAGTTGGAATGTTTTCTTAAAATTTATATTTCAAAGAAGCTCTCACAAAGCTCCAATACCTACCCCAT  
TGCATAGCCCGGTAAGATAGAATTTCCAATATTTGAAATCCCGCACCAGCGTCTCGAGAAGGGCTCCTTAGAAAACAGTCATATCTCCAAGTTCAATGATGTCACATAGGATTACATTATGCT  
ATTACAATTGTTTAAAATATGAGCAACACTTCTCACATCACCATTAGTAATATAAGCTTTTATTATTGTAGTTCACTCCACAATATTCATTCAGGTAAATCCTCAAACATCTCATATACTATC  
CCTGCATCTAATTTACTTACGTACATATTGATTAGGACAGTTTGAACAAAATAAGTTTGGTCTACATTTCTCATTTATTTTACAATTGAAGGTGCTTCTTCGTTAATGCCATTACCAAGGC  
TCCTAATGGTGTGGTAATTTGTATCTGCATGGCTTTCACATAGAGCTATTGTGATTAAGTTGAAGAAACCAAACTTGTTCCAATATCCAACATTGTAGCAGAATGGATGGATGGTTTATGC  
AAATATTGCCTTCCGATCTTGTCTGTTTCTATTGTTCCAGACATTTATTACAGCAAGATCATGAGATGGAAGTTT

>comp165969\_c0\_seq3

ACCTGTTGCACATTCATCATAAAACACATAAAAAAATGTTTTGCAGCTTTATTTAATCAATGCCTAGAGCGGGTTAAAATTTGAATCTGATTCAAAGATTACACATCCATAGAGCTGCATA  
GAGAGAAAAAAAATACTCACCATATCTCAGTGGTAAAATTTGGATGAAAAACAAGTAAAGAAATTAAGCAAAAATGGCAACTTAATACACACACAGATATGATACGAACCCTGAGCATA  
ACGATAAACAGAAATTCATGTCGCCCTTGCTTTCCCGTTATTACATGCGTGCTAGAGTTTCCACTTGATGTTACAGAGCCGCCAAGCTCCTCTACAATCTTTGTAAGCTTTGATTTCTTAT  
CATCATCAGCAATATTCATGAACATGATTCTTGGGCAGTTTCCCTTAAATATCACGCCTAGTACTTTCTGTGCTAACCTTTCCCTTGAGAATGAGTTGTCAAATTAGAATGGGTGACCAAAT  
TAGGAATTTCTTTGGACAACCTGAGGACATCCCAAAGCTGCCAAAGATTGCTCACTGAAACAATCATAATTTCCCTTCATCATGAAGAGAGCCACAATTTTGATCGGAAAACGAAGAATCAT  
CAGGCACATGACTTCCTTAACTCTCTTAGACTTCAAAGAGGAAACAGAAGCTTCCATACTAGCCTCTTTCCCTTAGCCGAGAAGAGAAGAATCTTTCATCAGCAACATCTTTTGCATT  
TATCATATCTTTCAAAGAAAAATCTTCCTGATCAGTTTCCCTTGACAGATGAAGTGTGTTGAATTAGAAAATTGCGCCAAGTCTAGAAGGTTCACTAAATCTGCATCTTATCATGTTGGATTG  
AAGATAATTTTTTTTCAACATGTTGAGAGGACTCCATGAAAGTAACAATATCCTTCTTAAGATGTGCAACCATAAGTGTAGCATCTCCAGGAAAGCACAATGCCCTCCTAATATCAGCTTTT  
ACTGGCAGTTTTCGAGCTTTTCTTTGCCATCTACCACTCCTACCGTTATGAAACCCTGTTTATGCCAAAATTGCTCAGATTCCATATCAGCCCAACAAAATAATGTTGAAACCCCAACTCT  
TCTAAGTCTTTCTTTCAAAGGAAGGGCATCGGTTGCATGATGATGAAGAGTTGAAAGAAAGACTTAGAAGAGTTGGGGTTTCAAACATATTTTGTGGGCTGATATGGAATCTGAGCAAT  
TTTGGCATAAACAGGGTTTCATAACGGTAGGAGTGGTAGATGGCAAAGGAAAAGCTCGCAAACCTGCCAGTAAAAGCTGATATTAGGAGGGCATTGTGCTTTCCTGGAGATGCTACACTTA  
TGGTTGCACATCTTAAGAAGGATATTGTTACTTTCATGGAGTCTCTCAACATGTTGAAAAAAAATATCTTCCAAATCCAACATGATAAGATGCAGATTTAGTGAACCTTCTAGACTTGGC  
GCAATTTCTAATTCAAACACTTCATCTGTCAAGGAAACTGATCAGGAAGATTTTTCTTTGAAAGATATGATAAATGCAAAAGATGTTGCTGATGAAAGATTCTTCTTCTTCGGCTAAGAG  
GAAAGAGGCTAGTATGGGAAGCTTCTGTTTCTCTTTGAAAGTCTAAGAGAGTTAAAGGAAGTCATGTGCTGATGATTCCTCGTTTTCCGATCAAAAATTGTGGCTCTTTCATGATGAAGG  
AAATTATGATTGTTTTCAGTGAGCAATCTTTGGCAGCTTTGGGATGTCCTCAGTTGTCCAAAGAAATTCCTAATTTGGTCACCCATTCTAATTTGACAACCTCATTCTCAAGGGGAAAGGTTAG

CACAGGAAAGTACTAGGCGTGATATTAAGGAAACTGCCCAAGAATCATGTTTCATGAATATTGCTGATGATGATAAGAAATCAAAGCTTACAAAGATTGTAGAGGAGCTTGGCGGCTCTG  
TAACATCAAGTGGAAACTCTAGCACGCATGTAATAACGGGGAAAGCAAGGCGGACATTGAATTTCTGTTTATCGTTATGCTCAGGGTGATCCGTGATCTGCAATGTATGATCGAGCCATCA  
AAGACCATATTTCTTACTTGTGAAGAAGACATGGAGCAGGCTCTTCTTGCAGCAAAAATGGGGGTCTAACTTTTAGTAGTACTGGCTTATGAACTGTGTAATGAGACAGGAACCTTGAG  
CTGGCTGCTCATCAGTTTGCAGAGTCACTCTAGAAATCAAATTTAGTATAAATTTTTTGTATCTTAGTATATTTTGTGCCCTGATATAAGAGGCTTGAATAGAGGCCAGTATAGCTGTGAT  
ATATTATGATAGAAACGCAAAAATCTCTTTATTCTGTATTAGTTGGATTATAGTCAAGCAAAAATCATTAGTATGGCTTTTTCAAAGTAGATTCAAGCTTCGTTTTG

>comp165969\_c0\_seq4

CAAATGAAGCTTGAATCTACTTCGAAAAAAATTCTAATGAGTTTTGTTTTATTATAATCCAATAACAGCATAAAGAGATTTTTGCGTTTCTATCATAATATATCACAGCTATACTGGCCT  
CTATTGCATGCCTCTTATATCAGGGCACAAAATATACTAAGATCAAAAAAATTTATACTAAATTTTGATTTCTAGAGTACTCTGCAAACTGATGAGCAGCCAGCTCAAGTTCCTGTCTCATT  
ACACAGTTCATAAGCCAGTCACTACTAAAAGTTAGGACCCCATTTTTGCTGCAAGAAGAGCCTGCTCCATGTCTTCTTACAAGTAAGAAATATGGTCTTTGATGGCTCGATCATAACATT  
GCAGATCACGGATCACACTGCCACCAGCAGATGATATGATGGATGAAAGGTCAATTGACGGATGGTTGGATATGCTTAGAAAGGCAGACTTGATATCCTCTGAGTAATGAATGAGGATTTGC  
TCTTGCTCTAATAACCGCATCACTTAGTTTACATTTATACTTAAACATGATAGTCTCATCTTCTAATATATGCTGAGATTCATCTAAGAAGCTTGCCTTCTCGGAAGCTAGATTTCAACCAATTG  
GCAGAAACTATCCAAGTCCCTGAGCATAACGATAAACAGAAATCAATGTCCGCCCTTGCTTTCCCGTTATTACATGCGTGCTAGAGTTCCACTTGATGTTACAGAGCCGCCAAGCTCCT  
CTACAATCTTTGTAAGCTTTGATTTCTTATCATCATCAGCAATATTCATGAACATGATTCTTGGGCAGTTTCTTTAATATCACGCCTAGTACTTTCCTGTGCTAACCTTTCCCTTGAGAATG  
AGTTGTCAAATTAGAATGGGTGACCAAATTAGGAATTTCTTTGGACAACCTGAGGACATCCCAAAGCTGCCAAAGATTGCTCACTGAAACAATCATAATTTCTTTCATCATGAAGAGAGCC  
ACAATTTTGATCGGAAAACGAAGAATCATCAGGCACATGACTTCCTTAACTCTCTTAGACTTCAAAGAGGAAACAGAAGCTTCCATACTAGCCTCTTTCCTCTTAGCCGAGAAGAGAA  
GAATCTTTCATCAGCAACATCTTTTGCATTTATCATATCTTCAAAGAAAAATCTTCTGATCAGTTTCTTGGACAGATGAAGTGTTGAATTAGAAATTGCGCCAAGTCTAGAAGGTTTAC  
TAAATCTGCATCTTATCATGTTGGATTTGGAAGATATTTTTTTTTCAACATGTTGAGAGGACTCCATGAAAGTAACAATATCTTCTTAAAGATGTGCAACCATAAGTGTAGCATCTCCAGGAA  
AGCACAATGCCCTCCTAATATCAGCTTTTACTGGCAGTTTGGCAGCTTTTCTTGGCCATCTACCACTCCTACCGTTATGAAACCCTGTTTATGCCAAAATGCTCAGATTCCATATCAGCCC  
AACAAAATAATGTTGAAACCCCAACTCTTCTAAGTCTTTCTTTCAAAGGAAGGGCATCGGTTGCATGATGTATGAAGAGTTGAAAGAAAGACTTAGAAGAGTTGGGGTTTCAACATTATT  
TTGTTGGGCTGATATGGAATCTGAGCAATTTTGGCATAAACAGGGTTTTCATAACGGTAGGAGTGGTAGATGGCAAAGGAAAAGCTCGCAAAGTCCAGTAAAAGCTGATATTAGGAGGGC  
ATTGTGCTTTCTGGAGATGCTACACTTATGGTTGCACATCTTAAAGAAGGATATTGTTACTTTTCATGGAGTCTCTCAACATGTTGAAAAAAAATATCTTCCAAATCCAACATGATAAGAT  
GCAGATTTAGTGAACCTTCTAGACTTGGCGCAATTTCTAATTCAAACACTTCATCTGTCAAGGAAACTGATCAGGAAGATTTTTCTTTGAAAGATATGATAAATGCAAAGATGTTGCTGA  
TGAAAGATTCTTCTTCTCGGCTAAGAGGAAAGAGGCTAGTATGGGAAGCTTCTGTTTCTTCTTGAAGTCTAAGAGAGTTAAAGGAAGTCATGTGCCTGATGATTCTTCGTTTTCCGAT  
CAAAATTGTGGCTCTCTTCATGATGAAGGAAATTATGATTGTTTCAAGTGAAGCAATCTTTGGCAGCTTTGGGATGTCCTCAGTTGTCCAAAGAAATTCCTAATTTGGTCACCCATTCTAATTT  
GACAACTCATTCTCAAGGGGAAAGGTTAGCACAGGAAAGTACTAGGCGTGATATTAAGGAAACTGCCCAAGAATCATGTTTCATGAATATTGCTGATGATGATAAGAAATCAAAGCTTAC  
AAAGATTGTAGAGGAGCTTGGCGGCTCTGTAACATCAAGTGGAAACTCTAGCACGCATGTAATAACGGGGAAAGCAAGGCGGACATTGAATTTCTGTTTATCGTTATGCTCAGGGACTTG  
GATAGTTTCTGCCAATTGGTTGAAATCTAGCTTCCGAGAAGGCAAGTTCTTAGATGAATCTCAGCATATATTAGAAGATGAGGACTATCATGTTAAGTATAAATGTAAACTAAGTATGCGG  
TTATTAGAGCAAGAGCAAATCCTCATTACTCAGAGGATATCAAGTCTGCCTTTCTAAGCATATCCAACCATCCGTCAATGACCTTTCATCCATCATATCATCTGCTGGTGGCAGTGTGA  
TCCGTGATCTGCAATGTATGATCGAGCCATCAAAGACCATATTTCTTACTTGTGAAGAAGACATGGAGCAGGCTCTTCTTGCAGCAAAAATGGGGTCTAACTTTTAGTAGTACTGGCT  
TATGAACTGTGTAATGAGACAGGAACTTGGAGCTGGCTGCTCATCAGTTTGCAGAGTCACTCTAGAAATCAAATTTAGTATAAATTTTTTGTATCTTAGTATATTTTGTGCCCTGATATAAGA  
GGCTTGCAATAGAGGCCAGTATAGCTGTGATATATTATGATAGAAACGCAAAAATCTCTTTATTCTGTATTAGTTGGATTATAGTCAAGCAAAAATCATTAGTATGGCTTTTTCAAAGTAGAT

TCAAGCTTCGTTTG

>comp165985\_c1\_seq2

TTGTCCCATAATTAATCAAAACAAATCAAACCTCAACTCAATCAATCACTTGAGCATAACCAAACCTCAACTCACTCCTCTATTACATTTTTCTCCGAGCAACGCTGGACTTTTGAAGGGAGTT  
GGAGAGGACAGAATGCAGTATAAAGCCAGCAGCTGCTAGCCTGCTTCACATGCCACCATCGATTTTCGCCATAACTCTCTCCTCTATTTCGCTGCAACTTTTCGCCTTTCCTGCCCTATTCTTC  
CTCAATTGAAGAGAAGTGTCTTTTGGCTTTTGGTCTGCCTTCTCGGCCGTAGAAAATTTAACATCAAAGAACGCTGTTGCTTTCTAGGATGAAATCTGCTGCAGGGTACAAAAGTTGGCTC  
AATGGATGATGAGGAATTGCCATCTCTTTACAGAAAGAGGGCCACTGCAAGAAATTGTCTCGTCTCTGGGTATCATTTTCCGTTTTTTTTTTTTCCCTTCTTACTGATAAGTAGTGTTTTTGTT  
ATGCTAAAGCTGGTTTTTAGATATATGATGCGAAAGCCGATGAAAGGTATTTTTTTTTTTTTTTTTTTGTGGGAAGCAGATTCTCGACTGAACTGCTCGAAGTAGAGTCTGAAGAGGCCTCT  
TTGAATGTTGTCGTTATAACCAGGGAATCCAGGCGTCGCTTCTTTTTACAAGGACTTTGTTGAAGCTCTCTACGAACAACCTGGGGGTTGCGCATCTATTACAGCAATTGGGCATATATCCCA  
TTCAAGACAGGACATGGCATATGGAAGGATGTTCTCATTACAAGAGCAAATAAATCACAAGGTGGGTTTCATCAAAGAACCTCCAGAATAAACATCTTCCAATAATATTGATTGGACATTCT  
ATTGGTTCGTATGTATGCATTGAAGTTCCTCAAGAGATTCCCGGAACAGGAGATATTTCCATTTTTCTGTACCCATTTTGGACTTTAAACACAAGTTCGTCAACACAGTACATGATTGGGGT  
GCTTGCAAGGTCTTCCCTTTTGGAGTGAACCTTCAGCTTTCTTGTGGCCTTGTGGGGTTTTTTCCACGAGAATTCGGGAGCTCTCGTAAGTAGACTTCTTGGTCCATCATGTTCTATAA  
CAGCAGTTGATGCTGCTTGCACTTGCCTCATGAAGTACCACACAATGCGCAATGTCTTATTTCATGGCAAAGACAGAGTTTGAGAAGCTTTCAGAGGAGCCAGATTGGAGCTTCATGAAAG  
AAAAAAGAAAACAAATTGCTTTTTTGTTCGGCGTTGATGATCACTGGGGTCCATTGTCATTGTTTGAAGAGATTTCAAGACAGGTGCCTGGTGTCTCCATTGTCAATAGAAAGGGAAGGAC  
ATACTCATTCTTTTCGTGCTCCGAGGCCGGTCCATCTGGGTTGCACATCATGTAGCAAACCTTGATCAAATCTCGAGTTTCAAGTCAAGAATAGTCGCGATAAGGCTAATGATTATGATAA  
TGATGACAATGGCGGTGATGATAAGCTTGCCAATTATTTGTATCATACTTCCATTGATTCCACTAATAATTGTTTTGGACAGCTTTTTTATTG

>comp165985\_c1\_seq20

TTGTCCCATAATTAATCAAAACAAATCAAACCTCAACTCAATCAATCACTTGAGCATAACCAAACCTCAACTCACTCCTCTATTACATTTTTCTCCGAGCAACGCTGGACTTTTGAAGGGAGTT  
GGAGAGGACAGAATGCAGTATAAAGCCAGCAGCTGCTAGCCTGCTTCACATGCCACCATCGATTTTCGCCATAACTCTCTCCTCTATTTCGCTGCAACTTTTCGCCTTTCCTGCCCTATTCTTC  
CTCAATTGAAGAGAAGGATGAAATCTGCTGCAGGGTACAAAAGTTGCTCAATGGATGATGAGGAATTGCCATCTCTTTACAGAAAGAGGGCCACTGCAAGAAATTGTCTCGTCTCTGGGT  
ATCATTTTCCGTTTTTTTTTTTTCCCTTCTTACTGATAAGTAGTGTTTTTGTTATGCTAAAGCTGGTTTTTAGATATATTGATGCGAAAGCCGATGAAAGGTATTTTTTTTTTTTTTTTTTTGTGGG  
AAGCAGATTCTCGACTGAACTGCTCGAAGTAGAGTCTGAAGAGGCCCTCTTTGAATGTTGTCGTTATAACCAGGGAATCCAGGCGTCGCTTCTTTTTACAAGGACTTTGTTGAAGCTCTCTA  
CGAACAACCTGGGGGTTGCGCATCTATTACAGCAATTGGGCATATATCCATTCAAGACAGGACATGGCATATGGAAGGATGTTCTCATTACAAGAGCAAATAAATCACAAGGTGGGTTTC  
ATCAAAGAACCTCCAGAATAAACATCTTCCAATAATATTGATTGGACATTCTATTGGTTCGTATGTATGCATTGAAGTTCCTCAAGAGATTCCCGGAACAGGTCTTCCCTTTTGGAGTGAACCT  
TCAGCTTTCTTGTGGCCTTGTGGGGTTTTTTCCACGAGAATTCGGGAGCTCTCGTAAGTAGACTTCTTGGTCCATCATGTTCTATAACAGCAGTTGATGCTGCTTGCCTCATG  
AAGTACCACACAATGCGCAATGTCTTATTTCATGGCAAAGACAGAGTTTGAGAAGCTTTCAGAGGAGCCAGATTGGAGCTTCATGAAAGAAAAAAGAAACAAATTGCTTTTTTGTTCGG  
CGTTGATGATCACTGGGGTCCATTGTCATTGTTTGAAGAGATTTCAAGACAGGTGCCTGGTGTCTCCATTGTCAATAGAAAGGGAAGGACATACTCATTCTTTTTCGTGTCTCCGAGGCCGGT  
TCCATCTGGGTTGCACATCATGTAGCAAACCTTGATCAAATCTCGAGTTTCAAGTCAAGAATAGTCGCGATAAGGCTAATGATTATGATAATGATGACAATGGCGGTGATGATAAGCTTGCCA  
ATTATTTGTATCATACTTCCATTGATTCCACTAATAATTGTTTTGGACAGCTTTTTTATTG

>comp165985\_c1\_seq25

TTGTCCCATAATTAATCAAAACAAATCAAACCTCAACTCAATCAATCACTTGAGCATAACCAAACCTCAACTCACTCCTCTATTACATTTTTCTCCGAGCAACGCTGGACTTTTGAAGGGAGTT  
GGAGAGGACAGAATGCAGTATAAAGCCAGCAGCTGCTAGCCTGCTTCACATGCCACCATCGATTTTCGCCATAACTCTCTCCTCTATTTCGCTGCAACTTTTCGCCTTTCCTGCCCTATTCTTC

CTCAATTGAAGAGAAGGATGAAATCTGCTGCAGGGTACAAAAGTTGCTCAATGGATGATGAGGAATTGCCATCTCTTTACAGAAAGAGGGCCACTGCAAGAAATTGTCTCGTCTCTGGGT  
ATCATTTCCTGTTTTTTTTTCCCTTCTACTGATAAGTAGTGTTTTTGTTATGCTAAAGCTGGTTTTTAGATATATTGATGCGAAAGCCGATGAAAGGTATTTTTTTTTTTTTTTTGTGGG  
AAGCAGATTCTCGACTGAAGTCTCGAAGTAGAGTCTGAAGAGGCCCTCTTTGAATGTTGTCGTTATACCAGGGAATCCAGGCGTCGCTTCTTTTTACAAGGACTTTGTTGAAGCTCTCTA  
CGAACAACTTGGGGGTTGCGCATCTATTACAGCAATTGGGCATATATCCCATCAAGACAGGACATGGCATATGGAAGGATGTTCTCATTACAAGAGCAAATAAATCACAAAGGTGGGTTTC  
ATCAAAGAACTCCAGAATAAACATCTTCCAATAATATTGATTGGACATCTATTGGTTCGTATGTATGCATTGAAGTTCTCAAGAGATTCCCGGAACAGGAGATATTTCCATTTTTCTGTAC  
CCATTTTTGACTTTAAACACAAGTTCGTCAACACAGTACATGATTGGGGTGCTTGCAAGGTCTTCCCTTTTGAGTGCAACCTTCAGCTTTCTTGTGGCCTTGTGGGGTTTTTTCCACGA  
GAATTCGGGAGCTCTCGTAAGTAGACTTCTTGGTCCATCATGTTCTATAACAGCAGTTGATGCTGCTTGCCTCATGAAGTACCACACAATGCGCAATGTCTTATTCATGGCAAAG  
ACAGAGTTTGAGAAGCTTTCAGAGGAGCCAGATTGGAGCTTCATGAAAAGAAAAAAGAAACAAATTGCTTTTTTTGTTGCGCGTTGATGATCACTGGGGTCCATTGTCATTGTTTGAAGA  
GGTGAATACTGCCTTTATTTCCCTTCTTTATACAAATATCCATTTAATTGCTAAACTAGTATGGTTTTAATGTACCTTTTAAGCTTCAAATGTTTAATTAGGGAGACCAATCTGTATATTATA  
AACTTTAATGTGGGATTACTTATTTACTGGCCAAATAACCATGTAATATTAGAGAAATTTGACTTTATATGCTTCATAATAGTATAAATTGGAGAATCTA

>comp165985\_c1\_seq3

TTGTCCCATAATTAATCAAAACAAATCAAACACTCAACTCAATCAATCACTTGAGCATACCAAACACTCAACTCACTCCTCTATTACATTTTTCTCCGAGCAACGCTGGACTTTTGAAGGGAGTT  
GGAGAGGACAGAATGCAGTATAAAGCCAGCAGCTGCTAGCCTGCTTCACATGCCACCATCGATTTCCGCCATAACTCTCTCCTCTATTTCGCTGCAACTTTTCGCCTTTCCTGCCCTATTCTTC  
CTCAATTGAAGAGAAGGATGAAATCTGCTGCAGGGTACAAAAGTTGCTCAATGGATGATGAGGAATTGCCATCTCTTTACAGAAAGAGGGCCACTGCAAGAAATTGTCTCGTCTCTGGAT  
TCTCGACTGAAGTCTCGAAGTAGAGTCTGAAGAGGCCCTCTTTGAATGTTGTCGTTATACCAGGGAATCCAGGCGTCGCTTCTTTTTACAAGGACTTTGTTGAAGCTCTCTACGAACAAC  
TTGGGGGTTGCGCATCTATTACAGCAATTGGGCATATATCCCATCAAGACAGGACAGAAGCAACATGGAAGAAAATTAACCAAGAGATCATTTTCTTGAAGAACAGATAGAAAATGATA  
AGAAGGCGTTTGTGGTATCTCAGTTGATGCTTATATCTGAGGTGAATGTGAATCTGAACAGAGGAGTGGGAGAAGGAAGAAGAGAAATGACTGGGAAATAGATCTATAAGAGCTCATCT  
GCTGTTCACTTGCCCGCGTGTGCTACGCAGGCTCAATTTTTTTTTCCCTGGTTTGGCTTTTCCAATACTCACTTCTTTGCATTTGGCTATTTGTTTCATGGAAAACAGATTAGGTGCTGGGCT  
TAATTTGCTGTTGGAGCACCCGATCTAAACTTTTTCCCTTATAAAATGAGCAATAAGAGAAGTTTTTCAAGATATTACATGTACAAAATGCATCAATATTGGAATGATGCGCTGGACAGAGC  
TTTTCTACTTGTCACTTCTTCTTAAATTTAGCTAATAATAGCACTATTGCTGTAATCTATGTAGAATGCACACTATAAGCTTTTTATCATACAAAGAGTTGCTGTTGGATTTTTATATTCATATA  
ATTTCTTATTGAAGAATACTCTTCATTTATGAAATACCATGATATATGGGTTACTTTTTCTACCAGGACATGGCATATGGAAGGATGTTCTCATTACAAGAGCAAATAAATCACAAAGGTGGGT  
TTCATCAAAGAACTCCAGAATAAACATCTTCCAATAATATTGATTGGACATTCTATTGGTTCGTATGTATGCATTGAAGTTCTCAAGAGATTCCCGGAACAGGTCTTCCCTTTTGAGTGCAA  
CCTTCAGCTTTCTTGTGGCCTTGTGGGGTTTTTTCCACGAGAATTTCCGGGAGCTCTCGTAAGTAGACTTCTTGGTCCATCATGTTCTATAACAGCAGTTGATGCTGCTTGCATTGCCTC  
ATGAAGTACCACACAATGCGCAATGTCTTATTTCATGGCAAAGACAGAGTTTGAGAAGCTTTCAGAGGAGCCAGATTGGAGCTTCATGAAAAGAAAAAAGAAACAAATTGCTTTTTTTGTT  
CGGCGTTGATGATCACTGGGGTCCATTGTCATTGTTTGAAGAGATTTCAAGACAGGTGCCTGGTGTCTCCATTGTCAATAGAAAGGGAAGGACATACTCATTCTTTTCGTGCTCCGAGGCC  
GGTCCATCTGGGTTGCACATCATGTAGCAAACTTGATCAAAATCTCGAGTTTCAAGTCAAGAATAGTCGCGATAAGGCTAATGATTATGATAATGATGACAATGGCGGTGATGATAAGCTTG  
CCAATTTATTGTATCATACTTCCATTGATTCCACTAATAATTGTTTTGGACAGCTTTTTTTATTG

>comp166029\_c0\_seq1

GAAGAGTAATATAAAATGTAACAATCAACAAGAAAAATTCATTAATTTTTCAGAATTATTACATATCAACAAGGTTCTACATTGAGAACCTTTATAAATGGATATGTTCCGTAAAAAAAAT  
GTCATCATAGGACATATCATCATATCATCAATTGTTAAGTCCAAAAATAAGCCCTTCATAGGCGATTTTCCCTCTCCTTTCCGTTATACCAAGGCTGAAATAAATCGTCTTCATCCTCAGA  
AACACCTGGCAAGTCAGCAAACTATCAGATCCCGCCTGATGTGCTTTCCCCACCGCACGCTTCACATTTAGCTTCTCCGCCACCTTCTCCAGTCCCCCGTAAAGCCCATCACATCTTCTTAT



CAAGCACTTCACATCATATATGCGGCCACCAAAAAACCATTTTGTGTCAGCGCCATGAACTCCTCCATGGTCTCTGGCAGCATCACCCGCATGTTTCGTCTCAGCTGAAATAGAGCTTTGAAC  
AAGATTACGAAATCGTAGCATCCGTGGAAAGCTACCCATGTCGCTTTGGAGAAGTCACCGACGAGGCCCGCATCAAGCAGAAGGCGGGCGAGCCAGGCGGAGGGGATGCCAACCTGTC  
GATTCAGGTAAGATTTATCCCAGACGACTCGAGAAGGGAGATTGTGCCGGGAGCGTGAGGGTGGCTGCGGAGGTCTGAAGTCTTGGAGTTTGAAGTCCAGGTGGCGGAGGAGGTGCC  
GCCGTCGCTGATAGTTATGCCGACTTGAGTGGGGCGGATGACGTTGGCATTACGTTTAAAGACAGAGTAGCGCTCGGTAGGGGAGAGCTGCGTGTGATGCTTAGAGTGTCTGAAAATGC  
AGCCGAGTGTGAACTCAGTGTGCAAGAAGACGAAGGGGAGCGGCAACGGCGAGAAAATTGGATGAAGGAGGCCGATTTCGATGTAGAAGTTTCGAATATCGACGTGATGAAGAGCAG  
CCATGAGAGCTTTATTGCGGAATTTTTGGAAGCAGTACAAATGTGCAATG

>comp166083\_c0\_seq3

CCTTTTGAAAGCAAAGGAATATTCACCATAGCTTTTCAGGAGTTGTTCTGCAGGTCCAAGGAAAACCGAGTCATCGTTAAATAGCCTAAGCTTCAGCTCCTCGTCCGAGGTGGTGGCCAT  
TCTCAACAATGTTTGTAGTAGCTCTATTGGAAGCTCGTTTCCCTCCATTAATTCATCACAAACTTCTTCTATTTTACATTATGTGCCTTTAAAGAGATGGCCAAATTCTGCGATTTCTTCTGC  
TCAAGAATCTGTATGCGTTGACCAGAAGAATCATTTCCAAAATCCCTTTTAGAATCATTCCTGCTTATCAGCAGCATTGTACCCAAAACAAAGTTTCTATCATCTCCTCATAAACTGGAAT  
GATCCAGCTTTAAGCTGATGCCAGACCATGGATTGATCAGGGTTGGCCATGACCTTATCCCAGAAGAATGGCTTCAGCTTGGTCTTGGCACTGTCAGTATCAGCATTTCCTTTTGAAGAAT  
CATTTTGCATGGGATAAGAATTTGCATAAGAACTTGAATTTTCTTGTGGAAGACAGGAAGAGCCTTTTGGCGGCAGTGGCGGCCCTCCTTTGCGAGGGGGAGGAGCAGGCTTTGGTTTAG  
GACGCGGAGGAGGTGGGGCCGGAGGAGGCGCAGAAGTTCTTCCAGGAGGTGGCTTGAGAGGTGGTGGAGGGCGCACTCCTGCCGAGAAGGATTGAGAGGTGCATTTGTAAGCTCAC  
TTGAACTTGAAGCTACAGAATGCCATCAGATAAGGTAGCATTTTGGTTCCGGTCCAGCTTTAAAAGATGAACCAAACCTTATCTTTGTACAAAACAAAAGAATTCTGCGATGAACCAGAGA  
AGTCACTAAGGCTTAAGGACAAAATTGGTCTCTCATCTTTTGCCATTGACAGTCTGATACTTGCTTCCAGCATATCTATTACAGCAACAAAAGCAGAATGCAGCAAGTGAAAAGTAGC  
TGCTGCAGTTACTACCACTGCAATAATAATTGTTTGAAACTGTTGCTTGCAGCAGAAAGATGAGGTATTGGATGAACCTGGGGCTCAAGGAAGTGATCTGATGATGGAGTTTGAAGAAA  
ATCCCCATGATCATCTTCAGGCAAGGGGGTTCATTGGGAGGTAATGACAGAACAGGAGCAAGCCGTTTAAATCCGATAGCGGGGGTGGGGCTGGAGGTAGAGCTACGACTGGAGCCA  
GAGCTGAGCTTCGAGTTTGGATTTCGATGACTTGGACTTAGAGTTGGAGCTGGAGATGGGTGAGAGGCCCTTTTGAAGAGAATCTTGCTCGAGCATTCTTGAAGAAATGAGTAGCAGGCC  
TGTGCATTAGGCTGATATCTGGGAAAACAGGAAGGATATTTGCTTGATCAGACAGTCAATAAGAGAGCGCTTCATGTCAGGGGTAAGGTGAGTGAGGGTCTCTTGCATGTCTTTCCATAC  
ATGTTTCAGTGGAGAATCCAGAATGCTATGTATTATTAGCAAATCTGAAGCAATCATGACTGATTTTGTTCCTCAACAAATCAAGCATGCAATTTGACCATACATGTTCCATCTGCATTTCAAT  
TCTTCTCCCGTACCTGACAAATCCGTTACCATCGTATCCTCGGATCCAAAAGAACAATCCATCGCCCGCTCGCCTTCTCTCGAACCCCTCGGTACGGCAAATACTAGGAAAAAAACCGCGC  
ACGCGGCTAAAAGAACATCACTTCTCATAGCCATCATAATCGGAACGAGCTCTCAGAGAGGATCAGCCTTTATCAACTCATCAATAGCTGCAATATGTTCTTCCGATCAAAATCCTATGCA  
ATCCAATCTCGGAAAGACCCCGAATAACCTTTCTCTATAATGGAAAAAATGGCTGATTCCGAATGCAGAAGCCACTGCGCGAAATGCGAAGAAAAGGGTGAATATCAGAGGAGGAAA  
TGAACGAAGCCTTTGATCTCTTCCGGCGAGTTCGTCGGGAAATGGCCTTCCGACGTGGTAGGAAATCAAGACGTGCCCGAGATCTAGGTTTCGACGTTTCGTGCGGACGACGAGCTG  
GTGATAAATAGCGCATTTTGAATCTCTTCTATAGGTTT

>comp166110\_c0\_seq5

TTTATGGATGATATAATTTAATACTTTTCTCAAGGAGTGCCAAATTGAGATTCAGTACTTCATGACAAAACAAAGGTGCATATGCTCTTTATTTTGTAAAGACAAAACATCAGGAATCTGTT  
AATAATTTAACATGCTCTTTCTATAGTAATACAAATCAAGTAAACCAGTGCCTGTAACCAATCCTTCAGTCTGCATAGCCACTAATATACATATAAGAGCCCAGGGTTCAAATCCTAATTTAA  
GCTGGAACATCAAACAATAAATAGTTTCCCTATTCTAACTAGCCAGTTTGAATATGTTTATGATAGAGCTCTTATTGTTGGTATGTTGTTGTTTATCAACTGCAGCAACCATCTGATTTTGTG  
CATCATTTGTGGTCCATAAGTGCAAATGTTTCATCACCTGAGGAGGCATTTGCATCTGAGGAAAGCCAAAGTAGCTTGAATATTGTTTCAGGGATATGAAAGTTATGCATATGGGTAGCAAAA  
TTAATAGAATTTGGGCCTTGAAGAGGGCAAACATGTGGTTGGTTTATATAGAAGTTCCAAGTGTAGTAGACTGAATATCAGATGATACTTTTGGTGGTTGAACTGGATTGGTATTGATGT

CATTGAATGATGATTCATTGCATTGCCCATGCATGACATCAATACCAAATCCAGTTCAACCACCAAAAAGTATCATCTGATATTCAGTCTACTACACTTGGAACCTTCTATATCAAACCAACCAC  
ATGTTTGGCCTCTTCAAGGCCCAAATTCTATTAATTTTGTACCCATATGCATAACTTTCATATCCCTGAACAATATTCAAGCTACTTTGGCTTTCCTCAGATGCAAATGCCTCCTCAGGTGAT  
GAACATTTGCATTTATGGACCACAAATGATGCAGCAAAATCAGATGGTTGCTGCAGTTGATAAAACAACAACATAACCAACAATAAGAGCTCTATCTAAACATATTCAAACCTGGCTAGTTAGA  
ATAGGGAAACTATTTATTGTTTGGTGTTCAGCTTTAATTAGGATTTGAACCCTGGGCTCTTATATGTATATTAGTGGCTATGCAGACTGAAGGATTGGTTACAGGCACTGGTTTACTTGATT  
TGTATTACTATAGAAAGAGCATGTTAAATTATTAACAGATTCCTGATGTTTTGGTCTTACAAAATAAAGAGCATATGCACCTTTGTTTTTGTTCATGAAAAAAAAA

>comp166155\_c0\_seq3

TTTTTATAACAGCACTTATTAGTGTGAAAAAATAAATTTAAATGATTTAACTGATCAGTTTACAAATGTTAAACAAAGCATTACAAGTTTGTTCCTCAAGGACAAGGATGCAAACCTCCCAT  
GCCGGGCCAAATATAAAGAAGACAAAAATAGGCTACCTTCTACAATTATAAGCTACAGATCTTCTCATCAGTTAAATTGATTAGAGTGGGCTAACCATAGTAACGGCTAAAATATTTAAAT  
ACAAGCAACAAAGGTCAGCACTTACGTAACAATAAGGAGATTGTTTTTGAAGCCATTATTGTTGGTAATAGGACGTAAGAGATCGATTGCCCAAACACCATCAACAATGAATTTGATCTCA  
TAGCGTCCAGGATAGAGCTTCAAGCACAAAGAAAAACACCCAGTATTGTTCTTTTCCATCCTCCACTGACTTGTCATCCATCGAAGGACCCAGTAAGAAGAACTTCTGAGGCAGAGTTA  
GGCCAGACTATGCATACAGAGCGCAAAATACTCAGGGACATTTACAGCAGCAGCAAGCCTCAGTTGTTTAACTTCAATAACTTTTTGAAATTCAATGACCTCAAGTGAATCTTGCCTTCCA  
TAACAGCCAGCTTAGCTCTTGTGTAACGTAATATATCTCTGGCATTCTTTATTTCACTCTGCTGGAATCCAAAGCATCAGAAAGAGAATGCAGCTGCTCAAGTAAACTTTCTTGGTCTTGA  
TCCGTGTTGCATGCAATTTAAACTTCTTTCCATCCACAACCTGGTGAATATAAGAGATGCATGAATTGGATGCATCCTTTTTCATCATAAGTCAGCATAACAGATAAAGGCGCAGGAGATTGAA  
AAACTGCCACCTCACGTTCCAGTTTGGATCCACCGAAACCTGTGCCAATTAAGGTTAGAATTTGAAAAATGCTCCATGAATTTCTCCTCAACCTGCCAAGATCCATGCCCATGCTTCTA  
CCTCAAAGCCAAAGCACCAACTGCACTCCTTGATTTCTGCCTCTGAGCCAGTAAGACCACCAACGGCTCCTGCCTAATTCCATCGCCTCACCGCCGCATCATGGATCCGTGGGATCCTTG  
CTAATTCGGAGAATGATTGAACTTATTTTTATTCTTATTTCAAATGCTTCTTATTAGAAATTTCTCCTGGGATTATATAAATTATGTACATGCTGGAATGAGATGCAATCAATCCTCTAATTCT  
TAGCATGGTATCAAAGCTTACCGATTTTTCTTCTTCTGTTTCCCAAAGTTGTCGCCTTCATTTCTGATTGTCATAATCTTGTAGCCTTTATCACTGCATTCTCTTCTTCTTCTGATTCTT  
CATATAGTTTGTAGCTTTTATCACTATAGTCTTTTATGCCCTTTTTGTTGCAAATAACTACTACCACAAGTTTCCCTCCTCCATGTCCCTTCATCATGGGTTCTTTGGAAATGAAGATGACT  
ATTCAAGTTCAACAGGAGGATTGCAAAATATCCATTCAATATATCAATTGAATGGAAAGAACAATCTCCAGTGCTCACAATTGGTTCACACATCCTTAAAGAGATAATAAAATGTGAGTCAT  
TTACATAGCATCTGATCTGAGCAAAAGGCTATCCCACGTTTAAATTTTTGGGATGAACATGGCTTTATGGTGATATCCTGATTGAAGAACTCAATAGTTCCTAAGATATGTGACATAAGCATAT  
TCCTTCATTCAACAAAAAATATGGATACACTAAATCAAATGTATTATAAAATCTATGATCTGTACAAATTTATGAAATGAAGAACAAAATCTCAT

>comp166155\_c0\_seq6

TTTTTATAACAGCACTTATTAGTGTGAAAAAATAAATTTAAATGATTTAACTGATCAGTTTACAAATGTTAAACAAAGCATTACAAGTTTGTTCCTCAAGGACAAGGATGCAAACCTCCCAT  
GCCGGGCCAAATATAAAGAAGACAAAAATAGGCTACCTTCTACAATTATAAGCTACAGATCTTCTCATCAGTTAAATTGATTAGAGTGGGCTAACCATAGTAACGGCTAAAATATTTAAAT  
ACAAGCAACAAAGGTCAGCACTTACGTAACAATAAGGAGATTGTTTTTGAAGCCATTATTGTTGGTAATAGGACGTAAGAGATCGATTGCCCAAACACCATCAACAATGAATTTGATCTCA  
TAGCGTCCAGGATAGAGCTTCAAGCACAAAGAAAAACACCCAGTATTGTTCTTTTCCATCCTCCACTGACTTGTCATCCATCGAAGGACCCAGTAAGAAGAACTTCTGAGGCAGAGTTA  
GGCCAGACTATGCATACAGAGCGCAAAATACTCAGGGACATTTACAGCAGCAGCAAGCCTCAGTTGTTTAACTTCAATAACTTTTTGAAATTCAATGACCTCAAGTGAATCTTGCCTTCCA  
TAACAGCCAGCTTAGCTCTTGTGTAACGTAATATATCTCTGGCATTCTTTATTTCACTCTGCTGGAATCCAAAGCATCAGAAAGAGAATGCAGCTGCTCAAGTAAACTTTCTTGGTCTTGA  
TCCGTGTTGCATGCAATTTAAACTTCTTTCCATCCACAACCTGGTGAATATAAGAGATGCATGAATTGGATGCATCCTTTTTCATCATAAGTCAGCATAACAGATAAAGGCGCAGGAGATTGAA  
AAACTGCCACCTCACGTTCCAGTTTGGATCCACCGAAACCTGAGGCAATCAGGAATAATTGCCATTCAGTTTCCAGTAGCATTTTATAATTATCAAATATTTAGGTTAATTTGAGATTAATT  
AAGATTTAATTACATCATTATTATTTCAATAGGAATGACCTGTGCCAATTAAGGTTAGAATTTGAAAAATGCTCCATGAATTTCTCCTCAACCTGCCAAGATCCATGCCCATGCTTCTACCT

CAAAGCCAAAGCACCAACTGCACTCCTTGATTTCTGCCTCTGAGCCAGTAAGACCACCAACGGCTCCTGCCTAATTCCATCGCCTCACCGCCGCATCATGGATCCGTGGGATCCTTGCTAA  
TTCGGAGAATGATTGAACTTATTTTTATCTCTTATTTCAAATGCTTCCTATTAGAAAATTCTCCTGGGATTATATAAATTATGTACATGCTGGAATGAGATGCAATCAATCCTCTAATCCTTAGC  
ATGGTATCAAAGCTTACCGATTTTTCTTTCTGGTTTTCCCAAAGTTGTCGCCTTCATTTTCGTATTGTCATAATCTTGTAGCCTTTATCACTGCATTCTCTTCTTTCTTTGTATTCTTCATAT  
AGTTTGTAGCTTTTATCACTATAGTCTTTTTATGCCCTTTTTGTTGCAAACATAACTACCACAAGTTTCCCTCTCCATGTCCCTTCATCATGGGTTCCCTTTGGAAATGAAGATGACTATTCA  
AGTTCAACAGGAGGATTGCAAATATCCATTCAATATATCAATTGAATGGAAAGAACAATCTCCAGTGCTCACAATTGGTTACACATCCTTAAAGAGATAATAAAATGTGAGTCATTTACA  
TAGCATCTGATCTGAGCAAAAAGGCTATCCCACGTTTAATTTTTGGGATGAACATGGCTTTATGGTGATATCCTGATTGAAGAACTCAATAGTTCCTAAGATATGTGACATAAGCATATTCCTT  
CATTCAACAAAAAATATGGATACACTAAATCAAATGTATTATAAAAATCTATGATCTGTACAAATTTATGAAATGAAGAACAAAATCTCAT

>comp166177\_c3\_seq3

AAAAAAAAAAAAAAAAATCATAATAATAAGGCATGGTTGGTATGAATAATTACACTTGCGGGACAAGGCAACAAGTAATACTTTACAGACAATTATTTTTATAACAAATAATACTTTCAAGC  
TAGAACCCAAAATATTAGCAACTTTGAAATCTTATGATTGAAATATTATGTCTGTTTTATTTGAAGTATTGGCAAAATGTGAGGATTATTAATAAAAAGATTTTTAAAAAATATTTCAATTC  
TCAGCTGCTCTGGTTTCTG

>comp166194\_c0\_seq2

TATCTTTCATAAACTTGCCTCTCCATCTCTTCAACATCCTCTTGATCCTCCGGCATCATAATTCAATGGACGATGTGCTCTTCTACCACGACTTTCATCAGGCAAGTCAGTTCAGCATCATTA  
TAAAATCGTCTTCCGGCTCCTCATCTTCTCTTCCATCGTCACTATCGACCTGGGCTCAAGGTCGAAGAAGTTCAGAACCCCTCTCCGATATTTCTGGCCGCGGCCACCGTATAGCTCC  
TCATTCTCGTCTTCTTCATCTTTGTATTCTTGTGTCATGATCGTCCCTATGGCTGCATCGTCAATGAAATCGGACCGAACCCGCTTCCCTCCACCTGTCTCTCTCTGTAGTCTTCGTTCTCTT  
CTTCTCTATCTTTCATCATCTCTCTCTCTTATAATCGTCTTCTCGGCGACGAGACATCCCGTACTCCCTCCGCTTTAAGATTTGACGTGATTTGCGAAATCCTGAGTGGTTGGATCAA  
CAACAGCGAATCCTTCTTTCGAATTGTTGGGAAAGATTATATAAATTTGCTAGCAAAAATAAGCTTTAAGTTTGTTCAGCAAAACCGCCAAAGCGGGAGAGGCGGAGGGGGAAAGC  
GGGAGAGGCGGAGGGGTTGAAACCGAAAGCGGG

>comp166210\_c1\_seq1

GGGTGTGCTTGACTAACTTGACCGCACCTTATTGTCAAATTGGCTCTTTTCAAACGGAGCAAACCAGAATCTGAGCAATGTGAGCTGACTGAATATGCCATAAAATTACCAATTCCTCTT  
ATATTTTTTAGACGTGATTAGTGCTTTTTGATATTACTTTTGAACCTCTTTTACCATCATTTTTTTGGGGGGGAGTTTCTCGTGATACTACATGGAGAAATGAGAAATTGATGTAGACTTATACA  
TTCTTTGCAATATAAGCCAAAGATAAACATAACTTATTAATATACTGTGTAAATATATGCAAAAACCATAGCCAGTTTTGTTTTCAAGCAGCAAATAAACAGTAGAAAAAAAAAAAAAAAA  
CGTTTGAACAAGATGCCATTAGTAAAGATCATCCAAGGTTAAGTTCTCCATGGATCCCAACTTAGGTGTAGATTAGCTGAGTAATTTCCAGTTTCTCATCAGGAACAGTCATTAACAA  
GTCCGCAGAGAAGGCACAATTGAGACCAATGCCATATTCAATCCATCTCTAACGGTAAATACAGATCAGAATATCTTGCTCTAGCCACCACTATATCAGTAACAATGGAATCAAAGATTC  
CATCTTCTATTCCAGGAAGTGAAGCAAGAAGTGGCTCTTGCAATCCAGCCTTCTTAGCTCGAATGACATATCTATCTTCTCATTATCCTTGTAAGCATGATGAAATCTCCTGATATAAGTC  
CATGGCTCCTTACAACTCACCGATTTCTCCAATATGTACATTCTGCTCTTGTGTTAGGCCAAAACCTTCATTAGAAATACAGAGGAATCACTTTTAGTTTTGGCTATTTCTGTTTCTGAA  
ATATGAATTCAAACCTGAACTTAAAATTCAAACTCGAGCTGTGTCCAAATCGATCATTGGCAATGAGATGCCTTCTCTTACAGTGAGGATTGGAAGATTGGCTTCTGTCTCTTCTTAGGA  
AGAACAACCTTCCGAGCGAGCCGACATCACTGTTCTGAGTTCCTTCTGGAGAAGGAATCTCAAACCATTCATGGCTAGGGGTTCTGGTGGAGTGGTACTGAGCGAGGTAGTATAGG  
CGGTGAGGAAAAGCCGGCGGCGGTGGCGGCGCGGGTGTCCGGTGA

>comp166210\_c1\_seq2

GGGTGTGCTTGACTAACTTGACCGCACCTTATTGTCAAATTGGCTCTTTTCAAACGGAGCAAACCAGAATCTGAGCAATGTGAGCTGACTGAATATGCCATAAAATTACCAATTCCTCTT

ATATTTTTAGACGTGATTAGTGCTTTTGATATTACTTTTGAACCTCTTTTACCATCATTTTTTTGGGGGGAGTTTCTCGTGATACTACATGGAGAAATGAGAAATTGATGTAGACTTATACA  
TTCTTTGCAATATAAGCCAAAGATAAACATAACTTATTAATATACTGTGTAAATATATGCAAAAACCATAGCCAGTTTTGTTTTCAAGCAGCAAATAAACAGTAGAAAAA  
CGTTTTGAAACAAGATGCCATTAGTAAAGATCATCCAAGGTTAAGTTCTCCATGGATCCCAACTTAGGTGTAGATTACAGCTGAGTAATTTCCAGTTTCTCATCAGGAACAGTCATTAACAA  
GTCCGCAGAGAAGGCACAATTGAGACCAAATGCCATATTCATTCCATCTCCTAACGGTAAATACAGATCAGAATATCTTGCTCTAGCCACCCTATATCAGTAACAATGGAATCAAAGATTC  
CATCTTCTATTCCAGGAAGTGAAGCAAGAAGTGGCTCTTGCAATCCAGCCTTCTTAGCTCGAATGACATATCTATCTTTCTCATTATCCTTGTAAGCATGATGAAATCTCCTGATATAAGTC  
CATGGCTCCTTACAACTCACCAAGTATTCTCCAATATGTACATTCTGCTCTTGTTGTTAGGCCAAAACCTGAACTTAAAATTCCAACTCGAGCTGTGTCCAAATCGATCATTGGCAATGAG  
ATGCCCTTCTTACAGTGAGGATTGGAAGATTGGCTTCTGTCTCTTTCTTAGGAAGAACAACCTTCCGAGCGAGCCGACATCACTGTTCTCTGAGTTCCTTCTGGAGAAGGAATCTCAA  
CCATTCATGGCTAGGGGTTCTGGTGGAGTGGTGACTGAGCGAGGTAGTATAGGCGGTGAGGAAAAGCCGGCGGGCGGTGGCGGCGGGCGGTGTCCGGTGGGA

>comp166247\_c1\_seq1

CTGATTCAATTGTCAACAGATAAATAACAAAGAGAGAAGAACCTGAGCTTTAATGCTGAACTTGAATGCTTTCATCAAAAGCTTAAAAATGTAGCCTAGCTAGTACAGGTAAGAAAGAT  
TAATAAATGATCATAGCTCACAGCCTCGTAATTCTATCTTTTCTAGACACATGCTTTTAATTTGTACTACTTTATACTCTTTTGATATGAATGATTTGCATCGCAATAACAATTCAACACATAAT  
GAGTTACACTTTCTACTAATTTCTCCAACTCTGGATTTAACTTACAAATCCTTTCTTGGTGTAAATGAAAACGAATAAAAAACAATGAAACCCTGCTCTCCATCTTTACAGTTCTCCC  
TCTTCACTATTTCTAATTACTTAAAATGAAAACAAAATAAAGAGCAATAAAAGTACATCATAACAAAAAATCAACTAATCGAAAAGGGGAAAAAACTCACAACTCTAGTCGCAAT  
CGACCTTAAGATCTGACGGTGAAGAAAAGAATCCATCGCAAGGCCATGCAGATTGAAATCGGCCTCTCAATCGTCCAACACTCTCCAACCGGCGCTTATGATTAATCGATCCCTCAC  
CGTATCTGAACAGAGTGACGACGGTTCGGCCATTGTGAGCGATATTGATGCCATCAATGTAGCGATAATCGTCAATGATGGATTCCATAAAAGTTTCCAGAATATGGAAGAATCATTGTTG  
ATGCTTTTGCAGCTGATCTGGGTGGAGGCGGAGATGCGACTGCAGCCAGATTTACATACGGAGGAGATGAGAGTCTTCCAGCTGCATAAGGAGACCAGTGCCTGGCTAAAGTAGCCCCA  
AACGGTGTGGCGGATAATGTCGAAGCTGGATGCGCTGCGGGATTTGAGGACATTGGGGCTGACTTCGAGCTTTAGAATGAAGCATTCTTCGCCGTTTATGATTTTTTCGCCGATGCAGACT  
GCGTCGACGAAGAGATTTGCCGTTGAGCGCGGGTCTAGGCCCTGTAGAGATCTCCGGAGAGGACGCGGGGCCACGCGAAGCGTGCAGTTGCTCCGAGCAGGACTGGCGCCAGGCG  
AGCTTGCCATTACAGCCCGCTCATCTTACAGCCGGCCATAATGAGCTCAAAGAACCAGAGCTCGGGATTTTTCTGCCATAACACGAAGCCTCCGATCTCGCTTTTGCCATTCTTGTAT  
GGACGGAGGAACGGCGACAGCGGGCGGAGGAGTTATCGTTGCCATGTGGAACCTCCGACGAGCTCATCCGCACCTTCCAACACATACATACTCTGCACCGACGTTAGCGCCGCTGCC  
CGCCGGTCGCCGCTATGATTGTTGTAGTATGTACTTGGCCGTTGAGGCTTGAATGGAGGATTCACAGACGGAGCGGTTACTGAATGCGGTGTGAAACGGCACGGGCATAGGGATGAGCG  
GCGAGCCGATGACGCTGAGGAGGAGCTGCAGCTCGGCGGTCCGGCCTGAAAGCATCAGCGCGGGCTGTCAGTGGCTTTGTTGAAAGCTTGCAGCTTGCAGCAAGCGTAGTGATTGTC  
TTGGTCGGTTCGATGACGACGACGATCCTCCCTCCGGTTGGGAAACATCTCCTCCGGTAAAGGAACCTCGAGGACGGTGTCAAGGGCATCTTCTCGCTCTAGATTTGGGCAAAGCTTCCCT  
CATATGTAGAGAGGAAATAGATTGATCCATCGTTAAATATATCGATCGATGGATCGTCCGAGAGGATGGTATAAATATAGGGATAAATGTTTTGGAAGATGAAGGAAACTTGCTTTTTTTGC  
GCCTTGGCTACCAAATCGTTGT

>comp166269\_c1\_seq1

TATTTCTCCAATCTTCCCCTATTCAATTTATTTTTCAGAATATTTTTTCAAAAATATCAATAGATTAATAACAAAAATAGAAAATGTCTTAGCTCCTCCAACCAACCTATTCTCTGCCTTAAA  
TATGTGGCCAGACTCAACGGCTGGCCCTTCTTTGGTCTCAGCCGTTAGCAGTTTGGCAAAGTTAAGCTATACAATTCCGTGATTCCAGGAAGCTACAATTTTGTCCAAAAAAGAGGG  
GAAAGCAATGACGGTAAGAAGAAAAGAGGAAAGAGAGGAAAAAAGACAGATCTTATCTTCTCCTCTTTGTTCTCCCTTCATACCATCATTATCTCTACAATGCAGGCATAAAGAA  
CAAGCGAACGAAGTCATTACAGGTGGCCTGTGGTTCGATAAGCGTACCTTTGCAGCTCAGTCTCTTGTGGTTCGGAGCTGATGGGCGACCGAAGCCCTGTATCAGAAATCTGCCAACTGC  
GGTGGCCATCGACAAGGACAAGAACAGCCAGCATGCCGTGAAATGGGCCGTTGATCATCTCATTAACAAGGATTGTTGTTCTCATTATGTCCGGAGCAAATCCTCTAAGACGGAAAG

CTGGGCCGAAACCACAAGAGATCAAGCAGATGAAGAAGTAAATCAGCTGTTTCTCCCTTATAGGGGGTTTACTGCTCGCAAAGGGATGCAGCTAAAGGAGGTAGTCCTGGAGGGTGCT  
GATATTTCTAAGGCCATAGTTGATTACATCAATGCCAGCTCCATCCAAAACATAGTCGTTGGGGCTTCAAATAGGAGCATCATGAAGTCTATCCAACACACCCGCACATCATTTTATCTTCAA  
CGCAATATTGAGCCTTTCAAACCTTACTAACATCAGTTCTTCTAATATGCAGAAAACCTCAGAAGTTTTGATGTCCCAAGTAGCCTGATGAAATCAGCACCAGACTTCTGTGCTGTGTATGTC  
CTTTCCAAAGGAAAACAACCTAGCATCCGAGCAGCAAGAACTCAACTCCTAACGTTATCCACCAAGGCAATTGAGCATCACAGCAACTTCACTAGTCCTACAAAGCATTTTAGGTTTT  
ATAACAGGATAAGACCTCACTTCCCGTTTTCTGCATCATACAGTAGATCATCATATTCAAGGAGGAGCTGGAGAGTTTTCAGGTCCACCAACCCCTTGCATGAAAGGACAGAACGAAGATC  
AATAGATCTTATGCCTGATTATCTGAATACTTCTGCAAGAGATAGGCCACTTTCCATAGCTCGTTCAGCACCGCCACCCAACAATCTGTTTCATGGAGAAGCTCGATTTTGCTAACCTGTCTG  
GAAGTCTGTGATTATGGAAGCTCATTTCAGATGACATTGACATACAAGGACACAGCTTCCAATCAATGAACATTGGAATTCTCTTGAATTTCTTCAGCCTCTGTTGATAGTCCTACA  
AGCAAACGACACTCAGTTACTGGTGAAGTGAAGAAAATGATTGAAGTCATATTTGTAATGTGACGTTCATTTTAGGCATCGTCTAATCTGTTTTTTTGAATCTTAG

>comp166269\_c1\_seq20

TATTTCTCCAATCTTCCCCATTCAATTTATTTTCAGAATATTTTTTCAAATAATCAATAGATTAAATACAAAAATAGAAAATGTCCTTAGCTCCTCCAACCAACCTATTCTCTGCCTTAAA  
TATGTGGCCAGACTCAACGGCTGGCCCTTCTTTGGTCTCAGCCGTTAGCAGTTTGGCAAAGTTAAGCTATACAATTCCGTGATTCCAGGAAGCTACAATTTTGTTCCTCAAAAAGAGGG  
GAAAGCAATGACGGTAAGAAGAAAGAGGAAGAGAGGAAAAAAAAGACAGATCTTATCTTCTCTCTTTGTTCTCCCTTCATACCATCATTATCTCTACAATGCAGGCATAAAGAA  
CAAGCGAACGAAGTCATTACAGGTGGCCTGTGGTCGATAAGCGTACCTTTGCAGCTCAGTCTTGTGGTTCGGAGCTGATGGGCGACCGAAGCCCTGTATCAGAAATCTGCCCAACTGC  
GGTGGCCATCGACAAGGACAAGAACAGCCAGCATGCCGTGAAATGGGCCGTTGATCATCTCATAAAAACAAGGATTGTTGTTCTCATTATGTCGGGAGCAAATCCTCTAGTAGGTACCC  
TTCTCTTTTCAATTTGTAGATGTTGTTTTTGGAAATTTGCAGATGCAGCTAAAGGAGGTAGTCCTGGAGGGTGCTGATATTTCTAAGGCCATAGTTGATTACATCAATGCCAGCTCCATCCAA  
AACATAGTCGTTGGGGCTTCAAATAGGAGCATCATGAAGTCTATCCAACACACCCGCACATCATTTTATCTTCAACGCAATATTGAGCCTTTCAAACCTTACTAACATCAGTTCTTCTAATATG  
CAGAAAACCTCAGAAGTTTTGATGTCCCAAGTAGCCTGATGAAATCAGCACCAGACTTCTGTGCTGTGTATGTCCTTTCCAAAGGGAAAACAACCTAGCATCCGAGCAGCAAGAACTCAA  
CTCCTAACGTTATTCACCAAGGCAATTGAGCATCACAGCAACTTCACTAGTCCTACAAAGCATTTTAGGTTTTATAACAGGATAAGACCTCACTTCCCGTTTTCTGCATCATACAGTAGATC  
ATCATATTCAAGGAGGAGCTGGAGAGTTTCAGGTCCACCAACCCCTTGCATGAAAGGACAGAACGAAGATCAATAGATCTTATGCCTGATTATCTGAATACTTCTGCAAGAGATAGGCC  
ACTTTCCATAGCTCGTTCAGCACCGCCACCCAACAATCTGTTTCATGGAGAAGCTCGATTTTGCTAACCTGTCTGGAAGTTCTGTTGATTATGGAAGCTCATTTCAGATGACATTGACATAC  
AAGGACACAGCTTCCAATCAATGAACATTGGAAATTTCTTGAATTTTCTTCAGCCTCTGTTGATAGTCCTACAAGCAAACGACACTCAGTTACTGGTGTGAATCGAGAATTTGAGGCTG  
AAATGAGAAGGCTGAAACTTGAGCTAAAGCAAACAATGGAGATGTATAGCAATGCCTGCAAAGAAGCTGTAACAGCTAAACAGAAGGCAATGGAGCTTCAACAATGGAAAATTGAAGA  
AGCCAAAAGTTTGAGGAATTAAGACATGCAGAAGAAGCAGCTCTTGCTATGGCTGAAATGGAGAAAAGTAAATGTAGAGCTGCCGTTGAAGCAGCTGAAACTGCACGAAAGATTGCT  
GAGCTCGAAGCACATAAGAGACAAAATGCAGAAAGAAAAGCTAGGCATGAGGCTGAAGAAAAGAAGAAAAGCATTGGATGCACTAACTCAAACCTGACACCCGCTACAGGAGATACACC  
ATTGATGAGATTAAGCAGCAACTAATGACTTCACTGCAGAAAATAAGATTGGTGAAGGTGGCTATGGACCTGTGTACAAGGCATATCTGGATCATAACCAGTTGCCATTAAGGTCTTAA  
GAGCAGAAGCAGCACAGGGAAGAAAACAATTTCCAACAAGAGGTTGAAGTCTTGAGCTGCATCCGTCATCCTAACATGGTCTTACTACTTGGCGCCTGCCCTGAGAATGGATGCTTAGTG  
TACGAGTTCATGGACAATGGGAGCTTAGATGACAGGCTCTTCCGAAAAGGAAAACACCCACCAATTCCATGGAGCACAAGATTCAAATTTGCAGCTGAAATAGCTACTGCACCTTGTTC  
CTCCATCAGGCAAAACCTGAGCCGCTGGTCCACCGTATCTAAAGCCAGCAAATATCCTTCTAGACCGAAACTATGTCAGCAAGATCAGCGATGTCGGTCTAGCAAGGCTTGTGCCACCA  
TGTGTGGCTGACACTGTAACACAGTACCACATGACATCAACTGCAGGAACATTCTGCTATATCGACCCTGAGTACCAACAAACTGGGATGCTCGGCGTCAAGTCTGATATTTACTCTCTAG  
GAATAATGCTGCTTCAAGATGATAACGGCTAAGCCTCCAATGGGCCCTCACCCACCATGTGGAGAGGGCAATTGAGAAAAGGAACATTTGCAAGGCTTCTTGATCCAGCAATAACTGATTGGC  
CAGTAGAAGATGCACTTTCCTATGCTAAGCTTGCCTTGAATGTGCTGAACTGAGGAGAAAGGACCGGCTGATCTTGCAACAGTAGTCTTGCCAGAGCTGAACAAACTAAGAAAACCT

GGACGCGACCATGAAGCTAACAGACGACATAAAGGAAAAAGCTGCAGGACTGGCAGCAATTCAGCACTCCACCAAGGCCACACAGCAACAACAATTCACAGCCACGGACAGGGCCA  
CTCATGCAGCAGGAACAGGTTGCAAGCAACGCTGGTGTACAGCAAAGTCGACATCCCAAGTGATGATGATGTCAAAGCTGGATAAAAGCACAGGATTCAAAACAAAAGAAGGTTTG  
CATAAGCTAAACGTTTTGGATGGATGTTACAGGCTTAGGATGGATATTAAGGTGAAGAAAATTATAATTTATGGCTGATTATAGTGTAGGGCATGTCAGCTGTAAGTTATTCATATTTAATT  
TTTTTTCCTTCTCCAATTAATAGAATCTGTATTAATAAAATTATGGAAGAATCATTGGTTAATCTTAATTCACAATTGCCTGAAGTTTGCTAAGTTGCTAAGTTGCTTCCATGGAAGACCTCAGATGAAAC  
AAAACCTGAAGACTGTCAGTTCATTCAAATCAATAAATGAAGAGAAAATTGCTATAACGGAATTCAGCAAGGCCGACATGTTGAAATCAGGGATTTGTAAAATTAGAAAATTGGCTT  
GGATAAATTTGTCCCAGGTGCCATATATCACAATGAAATATCAAAGTAACATGCGTATGGTATGATACTGCTCCAGCGGATCCTAAGAACTTTTAGGAAATTTGTTAAGTCAGAATGAT  
TCTAACAAAATGTAGGGTTAGGCCATGCCTGAAGATGTGAGATTCAAATATTGCTGCCAAAATGGCTTTTGAAGAGGAATTGAGTGATGCATTCTCCAATAAAACTATCCCCAAGCTTTG  
GTTTGATCAAGCATGTGAGTGTGAAAGGGATTTATTTGAATCATTGCTTATATTTATAATTTTTATTCGTTTCTACAATTTAGAAAAGTAGATGCTATTTTCTATGAGGTTGTACTATTTCAA  
TAGAGTAGTTTCTAGATTTTGGACAATTGATGCTGCTTTAAATTAGTAAAATTTAATTTTATGATTGACTTAGGGTTCGTTTGGGACAACGGTTGCTTTTTATAAAGTGATAGCAAAGCTGTT  
GTTTAGAAAAAAACTTTTTAAAAATTGCTAGAAATCAACTTCTAATACAAAAATTTATTGAAAGTAGTCAAAGTAGTGACCAATAAAAAATTGTTATTGATGTCTAAAAATAAAACA  
GTAATAAAATGCCCCAAATAAGCCTTAGAATTTAATGTTTCTATATCAGACTATTACTTTTTTTAAATGAGAACCTATTTGAATCATTATACTAATAAGGGTTGAATGAAATACCC  
CCACCCCGACCACCCTCTAGTCGGAAGTCTCCACCTGTTTAAATCCGAGTTTCGAACATCCAGTAGCGGTTCTCCACCTCCTATGGCTATAGGTCCTTCTGTGTCGAATCTTACCACCAA  
TCTCCACATTCTAGCTACTATTTCTCTCCATTGCAAGATATATTGTCCCATTCTCAAATTTTCATGGAAACAATGGAATTTACCCCTATTTTATAGGAAAATTGATAAAGAATTAGAGGAAAT  
GGCAAATATATCATTTAGAGTGTCACTCT

>comp166269\_c1\_seq25

TATTTCTCCAATCTTCCCCTATTCAATTTATTTTCAGAAATTTTTTTTCAAAAATATCAATAGATTAATACAAAAATAGAAAATGTCCTTAGCTCCTCCAACCAACCTATTCTCTGCCTTAAA  
TATGTGGCCAGACTCAACGGCTGGCCCTTCTTTGGTCCTCAGCCGTTAGCAGTTTGGCAAAGTTAAGCTATACAATTCCGTGATTCCAGGAAGCTACAATTTTGTCCCAAAAAAGAGGG  
GAAAGCAATGACGGTAAGAAGAAAGAGGAAGAGAGGAAAAAAAGACAGATCTTATCTTCTCTCTCTTTGTTCTCCCTCATAACCATCATTATCTCTACAATGCAGGCATAAAGAA  
CAAGCGAACGAAGTCATTACAGGTGGCCTGTGGTCGATAAGCGTACCTTTGCAGCTCAGTCTCTTGTGGTCGGAGCTGATGGGCGACCGAAGCCCTGTATCAGAAATCTGCCAACTGC  
GGTGGCCATCGACAAGGACAAGAACAGCCAGCATGCCGTGAAATGGGCCGTTGATCATCTCATTAAACAAGGATTGTTGTTCTCATTATGTCGGAGCAAATCCTCTAGTAGGTACCC  
TTCCTCTTTCAATTTGTAGATGTTGTTTTTTGGAATTTGCAGATGCAGCTAAAGGAGGTAGTCTGGAGGGTGCTGATAATTTCTAAGGCCATAGTTGATTACATCAATGCCAGCTCCATCCAA  
AACATAGTCGTTGGGGCTTCAAATAGGAGCATCATGAAAAAATCAGAAGTTTTGATGTCCCAAGTAGCCTGATGAAATCAGCACCAGACTTCTGTGCTGTGTATGTCTTTCCAAAGGG  
AAAACAACCTAGCATCCGAGCAGCAAGAACTCAACTCCTAACGTTATTCCACCAAGGCAATTGAGCATCACAGCAACTTCACTAGTCCCTACTTCCCGTTTCTGCATCATAAGTA  
GATCATCATATTCAAGGAGGAGCTGGAGAGTTTCAGGTCCACCAACCCCTTGCATGAAAGGACAGAACGAAGATCAATAGATCTTATGCCTGATTATCTGAATACTTCTGCAAGAGATAG  
GCCACTTTCCATAGCTCGTTACAGCACCGCCACCCAACAATCTGTTTCATGGAGAAGCTCGATTTTGCTAACCTGTCTGGAAGTTCTGTTGATTATGGAAGCTCATTTTCAGATGACATTGACA  
TACAAGGACACAGCTTCCAATCAATGAACATTGGAATTTCTCTGAAATTTCTTACAGCCTCTGTTGATAGTCTACAAGCAAACGCACTCAGTTACTGGTGTGAATCGAGAACTTGAGG  
CTGAAATGAGAAGGCTGAAACTTGAGCTAAAGCAAACAATGGAGATGTATAGCAATGCCTGCAAAGAAGCTGTAACAGCTAAACAGAAGGTGAGAAAACTCTCCCGCTATTCCATTA  
AATAAGATATTTGTAACCTTAAGCGCCAAGATTAAGTTTGTAAAATCTTGTAAATGTTTGGATGCAGGCAATGGAGCTTCAACAATGAAAATGAAGAAGCCCAAAAGTTTGAGGAATTA  
AGACATGCAGAAGAAGCAGCTCTTGCTATGGCTGAAATGGAGAAAATGTAAGTGTAGAGCTGCCGTTGAAGCAGCTGAAACTGCACGAAAGATTGCTGAGCTCGAAGCACATAAGAGAC  
AAAATGCAGAAAGAAAAGCTAGGCATGAGGCTGAAGAAAAGAAAAGCATTGGATGCACTAACTCAAACCTGACACCCGCTACAGGAGATACACCATTGATGAGATTAAGCAGCAAC  
TAATGACTTCACTGCAGAAAATAAGATTGGTGAAGGTGGCTATGGACCTGTGTACAAGGCATATCTGGATCATAACACCAGTTGCCATTAAGGTCTTAAGAGCAGAAGCAGCACAGGGAAG

AAAACAATTCCAACAAGAGGTAAATCACTATTTTGATTTTTGCAGATAAACAGCAAACATTCTAGTGATAATAAG

>comp166269\_c1\_seq64

TATTTCTCCAATCTTCCCCTATTCAATTTATTTTCAGAATATTTTTTCAAAAATATCAATAGATTAATACAAAAATAGAAAATGTCCTTAGCTCCTCCAACCAACCTATTCTCTGCCTTAAA  
TATGTGGCCAGACTCAACGGCTGGCCCTTCTTTGGTCCTCAGCCGTTAGCAGTTTGGCAAAGTTAAGCTATACAATTCCGTGATTCCAGGAAGCTACAATTTTGTCCCAAAAAAGAGGG  
GAAAGCAATGACGGTAAGAAGAAAAGAGGAAGAGAGGAAAAAAAAGACAGATCTTATCTTCTCTCTCTTTGTTCTCCCTTCATACCATCATTATCTCTACAATGCAGGCATAAAGAA  
CAAGCGAACGAAGTCATTACAGGTGGCCTGTGGTCGATAAGCGTACCTTTGCAGCTCAGTCTCTTGTGGTCGGAGCTGATGGGCGACCGAAGCCCTGTATCAGAAATCTGCCAACTGC  
GGTGGCCATCGACAAGGACAAGAACAGCCAGCATGCCGTGAAATGGGCCGTTGATCATCTCATTAAAAACAAGGATTGTTGTTCTCATTATGTCCGGAGCAAATCCTCTAAGACGGAAG  
CTGGGCCGAAACCACAAGAGATCAAGCAGATGAAGAAGTAAATCAGCTGTTTCTCCCTTATAGGGGGTTACTGCTCGCAAAGGGATGCAGCTAAAGGAGGTAGTCTGGAGGGTGCT  
GATATTTCTAAGGCCATAGTTGATTACATCAATGCCAGCTCCATCCAAAACATAGTCGTTGGGGCTTCAAATAGGAGCATCATGAAAAAATCAGAAGTTTTGATGTCCCAAGTAGCCTGA  
TGAAATCAGCACCAGACTTCTGTGCTGTGTATGTCCTTTCCAAAGGGAAAAACAAGTAGCATCCGAGCAGCAAAGAACTCAACTCCTAACGTTATTCCACCAAGGCAATTGAGCATCACA  
GCAACTTCACTAGTCTTACAAAGCATTTTAGGTTTTATAACAGGATAAGACCTCACTTCCCCTTTCTGCATCATAACAGTAGATCATCATATTCAAGGAGGAGCTGGAGAGTTTCAGGTCCA  
CCAACCCCTTGCATGAAAGGACAGAACGAAGATCAATAGATCTTATGCCTGATTATCTGAATACTTCTGCAAGAGATAGGCCACTTTCCATAGCTCGTTCAGCACCGCCACCCAACAATC  
TGTTTCATGGAGAAGCTCGATTTTGCTAACCTGTCTGGAAGTTCTGTTGATTATGGAAGCTCATTTTCAGATGACATTGACATAAAGGACACAGCTTCCAATCAATGAACATTGGAATTC  
TCTTGAATTTTCTTACAGCTCTGTTGATAGTCTTACAAGCAAACGACACTCAGTTACTGGTGTGAATCGAGAAGCTTGAGGCTGAAATGAGAAGGCTGAAACTTGAGCTAAAGCAAACA  
TGGAGATGTATAGCAATGCCTGCAAAGAAGCTGTAACAGCTAAACAGA

>comp166298\_c0\_seq3

TTAAAAAATAAAAAAAAAAACCCTTCAAAACATTATTTTACAGAAAATTATATAAAAATTGGGAACAGCGAACAACTCAACAGTTTAAATATCAAGTTCTTTGGCCGTCAACAGC  
AGTAAATGCAATTCCAGCAGCTGCAAAGAGAGGGGAAATTGGAGGCAGACCCAAAACCTCCAGCTTATGAAATGAAAAACCCAGTGGATGAAAAAGGGTGGGGGAAACCTTAATC  
AGATTGATTCAGTAGAGACTCAGAAGAAATTGCAGAATTTGATTGAGGGTCCCTATACTCATCATTATCAGGAGGAGGAGCTTCGTCCCTCACCTCAGATTTTCATGATTTTAGGAGCTTCC  
AACGACGTTAATGTCGCTTGCAGGTTCCCTCTGGTTAGGAAATAAAGGAAAATGATCCGGTATAGACATTTCTGGTAATGAGTAGTTATAATAGCTTATCCAGGGATGATCAAATCTGCAAGC  
TGAGCCATAGCTGCAGGTTCCATACATGCTGTAGAATGAGCAAACCGCATGGCCAGGTCTCATAGGGAGGCCAAAGGGTCCAAGAGTGTGGTAGCTGATGAGAATCTCTCTCTCGGGTG  
ATGGTATTTGCAAGTTGAACCATATTTACAGCTTCCAGTTTTCAAGTAATACTGGCATTCCGGTTGATCGGGTTCGCTCCGGGAAATTTTCGACGAAGCTGGGACTTGGATGGGCGTTGTTT  
TTGTACTTTGGTGTCTGAGTGTGCCAACTATATCAGGAGATGGAACCTGACTCACATTACCCGTGTAATTGGTCCATCCCTGCTGCCAGGAATGGTCCCTGAGGTTCGGAGGAATAATAA  
CAGGCATGTAAGCTGGCAGGCATTGCATGCGAGGATTGGACATATAGGGTGGCCCGTTAGATAATGGCCAAGCTGCAATTCACCAGCAAAGGCATGCTAGGTGCTGGGCCACAGATG  
ATAATGGAGACCCATAAGCGGAGGACCCATTTAGAGCCAGAGGAAATATGGCGCCTGATGCAGGCTGGGGATGGTCAAACCTGCAAGCAACTCCAATTTGCAGGTTCCAGTTCTCATGT  
AATATGAGCAGGATTTCTCATCTGACGCATTGGAAGCCTAAAATGTTAAATCCTAATGCCCGTGCATCTTGTCTGTACAGTGGATGATGATATTTGCATGTTGCACCGAAGCTTGCACATC  
CCTGTTCTTAGAAAGTACTGACAATCAGGCTGACCAACTCTTTCTGGAAGTTCACCTTTTGCCCGAGTCCCTGCCAACGTAAGTTGGGTGATTATAGCGGCAGCTGCTTCCATATCCAC  
ACGATCCTGTCTTCATGTAGTGCATGCAATCAGGCTCTCCAGGGCGATCGGGATATGGATTTGCATACGCATCAACTTCATCATAATTATCCTCAACTTTTAACCGCCGCATAGATTCATCTAT  
ATTATGATTCACGGGGGAGGCATTGCAATACGTCGGAAGTGCATTGTTCTGAAACTCCCGTGTATCCGGCATCGGTAACGCGATCAAAGCTCGACTTCTCTTTCAAAGGACACAAACAA  
CTTCTTCCACCACCAAACCGTCCACAAAAGCAAAAAACTATGGAATCCCCAGATCAAATCAGCACTATCCCTGTCTGGAAATCTCGATCTCTTCAAGCCCCAAATCCACTCGTCTATT  
ACCTCGGATCATCGGATGCTTCTCACTCTTGCATTACGCCATCAAACATCCAAGTCGGCGAGGATCGACAAGGAATCTAACGCTCTCCTGCTCAGATGCTTCCGCCTAAAAAGCATCGAA

TTCGAAGATCACCCAGACATGTCTGCAAATCTCGATGGTTCTCCCCCTCTCTCTCTCTCTCTCCCTCTTCCCCATTCTCGCACCTTTCTCCCCCTCGCCAGAACTCCAGTCGCCGGCGTTT  
CCTTCTCCCCTACAATGAGGCTGCTTCGCAAGCAACATCACCAGATTCCGTCCACTTCGTCCCCAAAGCCCTCGAAGCCCCCGTCGCGATCTTCTCCGTGCTCGATCAGCGGCCTCTTA  
CCTCTCCGCGAGCAGCGCTCGTCTTCTAATCCTCGGCATCCTCATCGCCTCCTCCTTCTTCTCTCCAAGCACTCCTCTTCTCCAGGCCCTCCAAAACCTCCCTCGCCACATCTCGC  
CTCCCCAGTCTCTTCTCACTTCTCCTCCGCCGTTGTAGCGAGGCCTATGATACCGATTGGGCTGAGGAAACCATCATTGCGGGTCTGGTAACGGGGCGGGTCCGGTTTTTGTGGCAGCCA  
TTTGGTGGACCGATTGATCGATAGGGGGGATAGCGTGATCGTCATCGACAATTTCTATACGGGGAGAAAAGGGGAATGCCGTCCATCATATTGGCAATCCAAGGTACGAGTTGATAAGACAC  
GATGTCGTCGAGCCAATCCTCGTTGAAAGTCGACCAGATTTACCATTTGGCTTTCCCGGCGTCTCCCGTTCATTACAAGCGTAATCCGATCAAGACAATCAAGACAAATGTGATCGGAACCT  
TGAACATGTTGGGCTTGGCAAAGAGAACTGGAGCTCGGTTTTTATTGACAAGCACTAGTGAGGTTTACGGAGACGCACCTTGAGTACCCGCAGAAGGAGAATTATTGGGGAAATGCAAAT  
CCTATTGGTGTAGAGGCTGTTATGAAGAAGGAAACGAGTTGCTGAAACTTTAGCCATGGACTACCATCGTAGCGTGGTGTGCAGGTACGCATTGCACGTATTTCAATACATATGGGC  
CTCGTATGAGCATTGATGATGGACGTGTAATCAGCAACTTTGTTGCCAGGCACTCCGAAGAGAACCCTGACTATCTATGGTGTGAAATCAAACACGAAGTTTCCAGTATGTTTCTGA  
CTTGATTGCTGGATTAATCAAGCTGATGGATGGTGAATGTTGGACCTTTAATCTTGAAACCCGGGAGAATTTACTATGTTAGATCTGGTTGAGGTTATCAAGGAAACAATTGATCCA  
AGTGCAGACAGTAGTTTTCAAACCCAAAACGGCTGATGATCCCCATAGAAGAAAGCTGATATACCAAGGCCAAGCAGCTACTGAACTGGGAACCAAAGTTCCACTCAGAGAAGGTC  
TCTCAATAATGGCCAAAGACTTCCGCAGAAGGATTCAAACGAGTAAACTGAGCCAAAGACATCGAAGTACAACAACCTTGCATCATGAGAGAAGACAAGGGCTGACTATCTAATTT  
TATTTTCATTTTACTTTCTTTTCAATCTATTCTTTATCTTGAAATATAAGGGGCCCTTTGTGATCACTTTATGGTTTTGTCTTATTTATATTTAATATAAAAAAAATAGTATAAA

>comp166298\_c0\_seq8

GATTGCTCTGATTATAGTCAATGCATTTGACTTGGTTCACTTGTGATTAATAAGAATTTGAAAGTAAAATTGAGACTAAAGGCTTCAGTTGGTAATTTGCCGTCTTTTTTGGCACCCAGCCA  
TATCCCTGCAAATAGATCCTGTATTTACTGTTTCATGGATTCATGAGCATGGATTTATGCACTTGTGCGAGTAGGTTGTGCTCTGCTGATGCTAGCTTAGTTTTTTGATGCATTTGCTATCTACCT  
TTTTTTTTCTTGAAAGCAAAGATGCTCTTCTTCTACGTATGGTATTTTTTTTTTAAAGGTTGCAAGCATCAATAAAAGTCAGACACAAAATAATTACAATAAATAGGCATGAGATCCATTA  
CAAATAAGAATGGAACGAGGCACCAAATTTATGTAGGAGCTAATGAATATTTAATTTAAAAATGTCACGACCCACACTCAAACCTTAAAGACCTCTACAAGAATAAGGAGCACACTGCTT  
GAGCTTCTTTTTGGTTTTGTGTTTGATAGGATGAGTACTGGTAAATGCTTAAATGAAGCTTAAATTTGACAGGTGCAAGTAAACATTTCTACTGAATCATCATCTTATTCATCCTTATCCTATTTT  
CATTTATGTAGGCTTTGTAATATTAGGCTTTGTAATATCCTTCTTATTAATATTTTATTCTAGTTTTGTGAGCTTAGTTAGCTTTATCTATTTTGGACAAAGCATATTAGTTTAACTGAACGTG  
TGAGGGGAAGTGGAGAGTAGTTTTTTTTCAGTATAGTCATTGTTGTCTGCCTCATAAGAACCCTTAAAGGCTGTTTCGTATCTTCCCTTATAAGAACTTAAATAGAAGATTGTAGAAGTTTTGC  
CACGAAATACTATGGGTCTTGAATATGCTATTCGGCATAAGTATTTAGTAGATCTGTAAACCTACTTTGAATTGTCAAATGCACTGGTGAGAGATTTTTAAATAAATAAATTTTGTCTTGC  
AGCATGCTATATGTCAAGCATGTTAAAGCTTAAAGCAAAAGAGTCTAGGAAGCTTCGAGAAAATGTAACCTTAAATGATGTGCACTATGCATGCTAACGGTATCCCTGTCATGAGAGTTTAG  
GGATTTGACATGCTGGTATTCTATATTTTTGACTAAACCCAGTGACCGGAAATACTACTTTTGGCATTTGAAAATTTAAAGCATCATACCGTTACTT

>comp166301\_c1\_seq15

ATTA AAAAGGATAAAATTAAGAATGATCATGTTTCGCGGAAATATTACAGTGAAATCTATTAAGATTAGGTGGTTGAAAATAAGCTTAGGTGATTTGAACATATGCAATCAAGGGTAGAAA  
GTATGCCTAGTAGGCAAGTTGATAAAATAGTGTCAAAGACTAATGAAAAAGAAGGATAAGTAAGATTTATGGATAGAAGATGTTCTTAAAGATTTGCAAAAAGTGTGCTTGAATAATATG  
AAAATCATGCATGTTTTTATTTGGTCAAGTTGTCTTATAATATTTGTTTTTCTTGTATTTGATGCATAGGTTACTATAAACAGAGTGGCTGGAGCGAAGTGGGGTCCCTGCAGTGGCC  
AAGCATGCATAGCAATTTGATTATTTGCTCGTGGAAGAGCAATTCGCCCGCTTTTGGTTGATTTACTCAAGGCAAAGATCAAGAAAACGTACAAAAGATCCTGAAAACCTGCAAGGATTG  
TTCACAAGCAACATTTTCAAAGACTGAGCAACTTTCTCAACGACTCGGCAGTTGCTGCCTCTGTTGTGTATGGTGGTTCCCTTCAATGCTGAAAGCCTGTTAATCGAGCCCACCATTCTTCT  
AAATCCTCCTTTAGACTCTGAGATCATGAGAGAGGAGATTTTTGGACCTTGCTTCTGTAAATCACAGTAAGATATGAAGCTAAGTGTTATTTGAAAAGAAATATAAATCTTCTATCATTCAT



GTTGTCTAAATGCCATTATTTTTGGATATTAGCATTATTTGGATTGTAGTTTTGTTGGTCAAATGTTCTGTGTTTGATTACGGTTTATGTCCATAATAATAGTAGCGTTATCTAGATATTTGAC  
TTATTTGGATGTTATCTCTATCTAAATTACTCTGACAATCATACTTCAATGCAGAAGATAATGTCATACTAAACACATTTTCATTTTTAGAAAAGCAAACACAGCATTACATACAGAAATATTA  
AACCAAACAGCCACTGAAAATCATTAAAGCTTCACACAGCTGCTCATCTCATTACAGCTAAAGAAGATTGAAGATAGCATTGAGTTTCTGAAGGTAAGGCCGAAGCCTCTCGTCATTTA  
CGCCTTACCGTCGATGAGAAGTTGAAGAGGAGAGTCATCGAAGAAACATCATCAGGAAGCATTACTTTTAATGATGCAATGTTACAATTTGCAGTAGATTCAATGCCATTTGGTGGAACT  
GGTGAAGCGGTTTCGGAAAAGTACCACGGAAAAGTTCTCCTTCGACCAGTTCAGCCATGGAAAAGCCATATTGAGAAGAAGCTTTCTCATAGAACTCTCATGCAGATAACCCCTCTGGAA  
CGAGTGAAGCTCCAGTTCATCAGGTATATTTACAGGTTTTACTACATTGGGATTATACTAATGTTACTTGGACTCAAGAGATGAGATAATCGACTAAAAAATTCATGTATGGTAGCTTTTTTA  
TGTAGCCAAGTCTGGGAATTCTGTGGGTGAACCGTTAAGTCTTATGTATTTGTTATTTTCTATAACTTTGTTGGTGGTTTGTATTATAAGCAAGTCTGGATTTCTGT

>comp166301\_c1\_seq17

ATTA AAAAAGGATAAATTAAGAATGATCATGTTTCGCGGAAATATTACAGTGAAATCTATTAAGATTAGGTGGTTGAAAATAAGCTTAGGTGATTTGAACATATGCAATCAAGGGTAGAAA  
GTATGCCTAGTAGGCAAGTTGATAAAATAGTGTCAAAGACTAATGAAAAAGAAGGATAAGTAAGATTTATGGATAGAAGATGTTCTTAAAGATTTGCAAAAAGTGTGCTTGAATAATATG  
AAAATCATGCATGTTTTTATTTTGGTCAAGTTGTCTTATAATATTTTGTTCCTTGTATATTTGATGCATAGGTTACTATAAACAGAGTGGCTGGAGCGAAGTGGGGTCTTGCAGTGGCC  
AAGCATGCATAGCAATTGATTATTTGCTCGTGGAAGAGCAATTCGCCCCGCTTTTGGTTGATTTACTCAAGGCAAAGATCAAGAAAACGTACAAAGATCCTGAAAACCTGCAAGGATTG  
TTCACAAGCAACATTTTCAAAGACTGAGCAACTTTCTCAACGACTCGGCAGTTGCTGCCTCTGTTGTGTATGGTGGTTCCTTCAATGCTGAAAGCCTGTTAATCGAGCCCACCATTCTTCT  
AAATCCTCCTTTAGACTCTGAGATCATGAGAGAGGAGATTTTTGGACCTTGCTTCTGTAATCACACTAAAGAAGATTGAAGATAGCATTGAGTTTCTGAAGGTAAGGCCGAAGCCTCT  
CGTCATTTACGCCTTACCCTCGATGAGAAGTTGAAGAGGAGAGTCATCGAAGAAACATCATCAGGAAGCATTACTTTAATGATGCAATGTTACAATTTGCAGTAGATTCAATGCCATTT  
GGTGGAACTGGTGAAGCGGTTTCGGAAAAGTACCACGGAAAAGTTCTCCTTCGACCAGTTCAGCCATGGAAAAGCCATATTGAGAAGAAGCTTTCTCATAGAACTCTCATGCAGATAACCC  
TCCTTGGAACGAGTGAAGCTCCAGTTCATCAGGTATATTTACAGGTTTTACTACATTGGGATTATACTAATGTTACTTGGACTCAAGAGATGAGATAATCGACTAAAAAATTCATGTATGGT  
AGCTTTTTATGTAGCCAAGTCTGGGAATTCTGTGGGTGAACCGTTAAGTCTTATGTATTTGTTATTTTCTATAACTTTGTTGGTGGTTTGTATTATAAGCAAGTCTGGATTTCTGT

>comp166301\_c1\_seq19

ATTA AAAAAGGATAAATTAAGAATGATCATGTTTCGCGGAAATATTACAGTGAAATCTATTAAGATTAGGTGGTTGAAAATAAGCTTAGGTGATTTGAACATATGCAATCAAGGGTAGAAA  
GTATGCCTAGTAGGCAAGTTGATAAAATAGTGTCAAAGACTAATGAAAAAGAAGGATAAGTAAGATTTATGGATAGAAGATGTTCTTAAAGATTTGCAAAAAGTGTGCTTGAATAATATG  
AAAATCATGCATGTTTTTATTTTGGTCAAGTTGTCTTATAATATTTTGTTCCTTGTATATTTGATGCATAGGTTACTATAAACAGAGTGGCTGGAGCGAAGTGGGGTCTTGCAGTGGCC  
AAGCATGCATAGCAATTGATTATTTGCTCGTGGAAGAGCAATTCGCCCCGCTTTTGGTTGATTTACTCAAGGCAAAGATCAAGAAAACGTACAAAGATCCTGAAAACCTGCAAGGATTG  
TTCACAAGCAACATTTTCAAAGACTGAGCAACTTTCTCAACGACTCGGCAGTTGCTGCCTCTGTTGTGTATGGTGGTTCCTTCAATGCTGAAAGCCTGTTAATCGAGCCCACCATTCTTCT  
AAATCCTCCTTTAGACTCTGAGATCATGAGAGAGGAGATTTTTGGACCTTGCTTCTGTAATCACACTAAAGAAGATTGAAGATAGCATTGAGTTTCTGAAGGTAAGGCCGAAGCCTCT  
CGTCATTTACGCCTTACCCTCGATGAGAAGTTGAAGAGGAGAGTCATCGAAGAAACATCATCAGGAAGCATTACTTTAATGATGCAATGTTACAAGTATTCTTCTTTTTTCTTCTCTAA  
CTTTCTTAATTTTAGAAGCAGTAAATGCTTAACCATTTGAGAAAAAAGTTGTTGCACAGTTTGCAGTAGATTCAATGCCATTTGGTGGAACTGGTGAAGCGGTTTCGGAAAAGTACCAG  
GAAAGTTCTCCTTCGACCAGTTCAGCCATGGAAAAGCCATATTGAGAAGAAGCTTTCTCATAGAACTCTCATGCAGATAACCCCTTGGAACGAGTGAAGCTCCAGTTCATCAGGTATAT  
TTACAGGTTTTACTACATTGGGATTATACTAATGTTACTTGGACTCAAGAGATGAGATAATCGACTAAAAAATTCATGTATGGTAGCTTTTTATGTAGCCAAGTCTGGGAATTCTGTGGGTGA  
ACCGTTAAGTCTTATGTATTTGTTATTTTCTATAACTTTGTTGGTGGTTTGTATTATAAGCAAGTCTGGATTTCTGT

>comp166301\_c1\_seq2

ATTA AAAAGGATAAAATTAAGAATGATCATGTTTCGCGGAAATATTACAGTGAAATCTATTAAGATTAGGTGGTTGAAAATAAGCTTAGGTGATTTGAACATATGCAATCAAGGGTAGAAA  
GTATGCCTAGTAGGCAAGTTGATAAAAATTAGTGTCAAAGACTAATGAAAAAGAAGGATAAGTAAGATTTATGGATAGAAGATGTTCTTAAAGATTTGCAAAAAGTGTGCTTGAATAATATG  
AAAATCATGCATGTTTTTATTTTGGTCAAGTTGTCTTATAATATTTTGTTCCTTGTATATTTGATGCATAGGTTACTATAAACAGAGTGGCTGGAGCGAAGTGGGGTCCCTTGCAGTGGCC  
AAGCATGCATAGCAATTGATTATTTGCTCGTGGAAAGAGCAATTCGCCCCGCTTTTGGTTGATTTACTCAAGGCAAAGATCAAGAAAACGTACAAAGATCCTGAAAACCTCTGCAAGGATTG  
TTCACAAGCAACATTTTCAAAGACTGAGCAACTTTCTCAACGACTCGGCAGTTGCTGCCTCTGTTGTGTATGGTGGTTCCTTCAATGCTGAAAGCCTGTTAATCGAGCCCACCATTCTTCT  
AAATCCTCCTTTAGACTCTGAGATCATGAGAGAGGAGATTTTTGGACCCTTGCTTCTGTAATCACAGTAAGATATGAAGCTAAGTGTTATTTGAAAAGAAATATAAATCTTCTATCATT  
GTTGTCTAAATGCCATTATTTTGGATATTAGCATTATTTGGATTGTAGTTTTGTTGGTCAAATGTTCTGTGTTGATTTACGGTTTATGTCCATAATAATAGTAGCGTTATCTAGATATTTGAC  
TTATTTGGATGTTATCTCTATCTAAATTAAGTCTGACAATCATACTTCAATGCAGAAAGATAATGTCATACTAAACACATTTTCATTTTTAGAAAACAAAACACAGCATTACATACAGAAATATAA  
AACCAAACAGCCACTGAAAATCATTAAAGCTTCACACAGCTGCTCATCTCATTACAGCTAAAGAAGATTGAAGATAGCATTGAGTTTCTGAAGGTAAGGCCGAAGCCTCTCGTCATTTA  
CGCCTTCACCGTCGATGAGAAGTTGAAGAGGAGAGTCATCGAAGAAACATCATCAGGAAGCATTACTTTAATGATGCAATGTTACAAGTATTCTCTTTTTCTTCTTAACTTTCTTAA  
TTTTAGAAGCAGTAAATGCTTAAACATTTGAGAAAAAAGCTTGTTCACAGTTTGCAGTAGATTCATTGCCATTTGGTGGAACTGGTGAAAGCGGTTTCGGAAAGTACCACGGAAAGTTCT  
CCTTCGACCAGTTCAGCCATGAAAAGCCATATTGAGAAGAAGCTTTCTCATAGAAGCTTCATGCAGATACCCTCCTTGGAACGAGTGGAAGCTCCAGTTCATCAGGTATATTTACAGGTT  
TACTACATTGGGATTATACTAATGTTACTTGGACTCAAGAGATGAGATAATCGACTAAAAAATTCATGTATGGTAGCTTTTTATGTAGCT

>comp166301\_c1\_seq7

ATTA AAAAGGATAAAATTAAGAATGATCATGTTTCGCGGAAATATTACAGTGAAATCTATTAAGATTAGGTGGTTGAAAATAAGCTTAGGTGATTTGAACATATGCAATCAAGGGTAGAAA  
GTATGCCTAGTAGGCAAGTTGATAAAAATTAGTGTCAAAGACTAATGAAAAAGAAGGATAAGTAAGATTTATGGATAGAAGATGTTCTTAAAGATTTGCAAAAAGTGTGCTTGAATAATATG  
AAAATCATGCATGTTTTTATTTTGGTCAAGTTGTCTTATAATATTTTGTTCCTTGTATATTTGATGCATAGGTTACTATAAACAGAGTGGCTGGAGCGAAGTGGGGTCCCTTGCAGTGGCC  
AAGCATGCATAGCAATTGATTATTTGCTCGTGGAAAGAGCAATTCGCCCCGCTTTTATAACCCTTCTGTATGCGAAAAGCCATACTACATTAACAAAAAATTCATATTATCTAAATTA  
GCATTCAATTTATGATTATCTAATCATTACCCATTCACATTTCAAATGTATGCTTGAATTGATAGGTATCTTGATCAATCTTAAGTCAAACCTTACAGTCGGTTATCAGTCCAAATATTGTAAGA  
GTTATTATCATTGCAATTATTTACATAGCAGATATGTGCTTAGAAAACCTTATTAACAATTCTCATCATCTCAGATATCTTACAGTTTCCATCACTCCACCTCACATGAAAGGTTTTTAAG  
AACATTAAGGGCTCATTGGTTCCACGTAATTCCTCCGTTTTTTGGTTTGAACGGAAAACTCAGTTGACGGAACATGTTTGGATGTGA

>comp166313\_c4\_seq1

TTGCTCTGTGTCAAAAACCTATAGAGGAACAACCTAAATCTTCTTGGTTTCGAAAATATTAGAAATATCTTTCTTTTATTAGATTAGAAATTGAATTTAATTGTTAATAGGACACAATAGAAATGA  
CATTTCTTTATCAGATTTAGATGATAATTTGACTCTTAATAAAAATACAATAGAGAAAAAAGATTGATGTAAGTACGCCCCACAATGGGATAAATATTTGTTGTTGTTGTTAGACCGAAGA  
CAATAACATCTGCTTATTAAGTTTTGAACACAGTACATGAAGTTCCCGCCAAAGTAAGGTGTGGAGAACGATTAATATATGCAACATTATTGCTGTCTTATTTTCATGACTCACAGTGTG  
ATTAATGTCAACTAACTACTAATAATGTTGAACTTGTGAATGCCATGTCAATCTCCGTAAACCCAAAATTTGGATACAAGTAGACATTTGGTGTGGAACCTAAGCTTCGTTTGGGACA  
TCTTTGTTACTTCTTAGAGCAACTTTTTATTACAAAAATTTAAAATTTTATAC

>comp166341\_c0\_seq3

CCAAGCTTCCTTGCATCACCAACATTGACATACATATCAACTATATATGTTTCTCTATAATACACAAATAAAAATTAGATCTTATATCATTAACTGAATCTAGACAAAACAGAAAGGATCATCG  
ACCAAATCATAATGATCCACAAGTCTCATTAAATAGATGTCACACGATCTCGCTGGATCTGTAAAACCTCAAGATCATCACAGCGCCGTACATAGATTCCCATCTTCCATACTTTCCCAA  
GCAATCAAAAGAAAGAGGTAGCCGATTGGATGCATGGTTTGTAGATCTGGTGTGACAGGTTCTTCTCAAAGCTGGAGGATAAAGCTTCGACCTGTACGCTCATTACAAGTAGATAAGCGGTT

GCATGCATGGTTTGTATCTTGCTTGTCTTGTGGTTAATCGTGTGTTGTCTTCTTGATGGACATTTGCATGTTTAGTTCCAGTATTAAGAAACAGAAAGAGGACGCGGTT  
ACTGATGGAGAAAACCATCTCAATTTATTGAAAAGATCAACGGGCTGTGATAATGCGGTTTAAAGTTCTACGATTAGGATGAATCCACGCTAATGTTTGTCTGCTGTAACAGGCATCTAATTA  
AAAAGGTGGTGTGTCAGGACCGCCTTCCACGTGGCTTAATGTTCTCTAGTTCACCACGTGGAAAACAAATTGGGCGGGTTACAGTGGTTTAAAGTTTAGATATGGTGGGATGTTGCT

>comp166344\_c0\_seq1

ATCGAGAGAGGTAACCTGGCATATATTTAGAGCTTTATTTTTGACTTTTCGAAAATATATCTTCTATATTTTCATTAGTTTTCTTAGGTGACGAGCTCTCGATTTACAATATCATATATTTGGCACA  
ATAGTGTGTTTACGAGTTTAAAGTTTGGCCTCTTCTAAGACTCTTGATGGCATATAATATGAAGAAGAAAAGTTTATTGGAGAATATGCATTTGTTTGTCTAGATTCAAAATTATGTTGTTATC  
TTTCTACAAGGAATTGGTGAATCTTGAGGTGCTGTTCTGCTTATTGAACTCCCTCCTTCTTATTGCTCAAACCTGCATGTGAAAGTGGTGTAGCAAGTGGTTGGAGAGCAATTATTGGG  
CTTCATAAGTGGAAGTGTAGTTGTTGGAGTGTCTTTGGCATAACGTGTAGGAAATTTACGAAAGCTTTGTGAATTGTTTTGTCTTGAGAAGTTTACTATATGTTTTGCGAATGTTTTA  
TAATAGAGA

>comp166351\_c1\_seq1

TTTTTGTGCTAGAAAGCCGCTTTACGAAGCAGAAAGAAAGCCGTACCAATGAAGCCTAAGTCTAAAATATCTTCAAATCCATCCCCACCCATTTTAATGAGAATATTGTAAAGATCAAA  
CAACTTCACATAAATTTAACCAACAGAGAAATGTCATTTATTGTCATACAATATGTACAACACAAGTGCTGCTATCAAACAGCTCAATTGTTAACACATTTAAAGGAATATAGTTCAGC  
AATCTGTTAGATCTTCATTGTAAGATTTCAAATTTAAATGAAGGTGTCATAATTATTAGGTTGTTATTACCCAATAATGAGGACGTAGAAGGGAAAGGTTGGCCAATAAATATAAGAAGACT  
AACTTTTGATTCTAAGTAAAATGAATAGGATAGAGAGATTGATGGCCTCAATGAGCAGCTGGAGGAAGATGCTAAATGCCTTGAACGTCTCCAGCTACAGTTGCTTGATGAGCGAAGCA  
AGAGAGCTGATGTTGAGAGGGAGAATAGTATGTTGCAGAATCAGATTACCATGCTCATGACCTTGCTTGAAGAAAACCAAGCAATGGAAGATGAAGCAGCAGAAGGGATGAAGCTTCC  
CTTCCCTGAAATTCATGGATGTTCTTTAATTTTATGATAAGGCAGCAGCTCCAGAGACTCATTTGTTACCTGTTTAAATAGATTTACAGCAAAGTGTATTTGTTATTGCAATCTAGAAGAATA  
AGAGATGGGTATCAATATACTTATTTGTTCTTTTTATTACTTAAAATGTGCAGTGTACAGTTACATGCATATGATTTATTGTAAGCAGTTCAGAATATTTATAATATTCATTTGATGTATGA  
AAGTGGTGGAAACATATATTTTTCATATTTCTTTTGATGTGGATTGACCATTGTGCATATTTTGTAAGCCGCACTTAAGCGCGGTATAACTTAGATCATCTTCAACCGAACTGCATAATATACG  
ATGGTATGCCATCCGCTATTCGCTCCATTTCGAACGCTAGATTGC

>comp166356\_c0\_seq2

GACCGTTTGGAAATTGGGAATGGTCGGGTTTTGATAAATAAGTGATTGAGATCTAATATTGAAGGTCGAGATAGAATGATCATGGAGGAATGGATTGTTTCATGGCTTTGGAACCTCTTGACG  
AGAATAAATGAATAGCGGAGATGGGCTTTGAGTGTCTTTGATGGAGGAGGAGGTGTATGTACGTGTTTGGGGTTGAGGTGAGCACTTAAGGGGTTAAGGCTTCTAAGGTTTTGGAAGAGG  
TGAGAGGTGGTTCGACTTCGGTGGAGGAAGGAGGCCATGGCGGATTGGGGCTGCGTTGGAGGAGGAATACAAATAAAAAAT

>comp166361\_c1\_seq2

TTGATCCATAGAAAACCTCATCTTATGGCAAAAAGAATATAAATCTAAATCTTATTCTAAAATTAACAAAAAGAAAAAGTAGAATCTACATCTTTGATTTCTCCTAAAGAGGAGAATCAA  
AATATATTTCTTCTATTAATTCCTTGTACCTTTATTTCAGGCAAATCGCAATGTGCAACTGAAAAGTTGCAGGTGGTATCGGTTAGGACTTGCCTTGGGTGAGCAGATCGGAGAGGGAGTTGC  
GAACTACAGGTCTGGAATGCGAGCTTAGAAGCGACGGGCAGAGGATTCGCCAATCAGAGTGAGGAAGTCCGTGAGAATGAGAAGGAGAGCAGGTTTTTTTTGAATGGGACCTGGGGT  
TCGTATGAACTGGGAAGAGAGGGAGGTTTCTGTCTGATGAACTGCAGTAGGGAGAAGGAGAAGAGGGTAGTTTCGGGTTGGAGGCCTGCGGCAAAGGCTCTCAGTCCGTATGAATGGAG  
AGGAGAAGGCTTTATTTGTGTGGGTAGAGAGCGTGAGAGTAGTTAGCGAATGCCAGGAAAAGGCCTTGGCTTC

>comp166386\_c0\_seq14

AACGAAATAAATAGAAGAAAATATTTTACAACATTTACAACAGGCTTATTTCTTATGCAATCGTATGCAACAAAACCAAACAAACATTGGACATCCTTGAGGTTAACAATTGAATAATATAAA

ATTAATTAGAGGAAAAAAGTATATATGTGGCAGTATTCCTTCACCCATTCTCCAATTATGTTGTGAAAAGCAAGTAAACGAGACCCTTCAGGTATTCAACTATTTCCGGATCCTCCTAGTTTC  
GAAGTTCCATAAACTCTGTCCACAAATGTTATCGGAACCTTTATCTCAAATATTTATGATAAACTTTCTTATCCTCAGTTTCTCCGGTTATCCATATCTAGGTGAAAAGAAATTTGAAGCCTAATGA  
TTGGTGAGATTATTCTGTGTTGACACCGAATACAGCTCTACATCAGGATACCAACCAGAAAGAGCCACGTCAGTGATACCGAGCTGCAGGTTTAGGTATCCGGACGGGGATCAGCTTCCG  
CGCAGAATAATTTTTCCCAAACGAAGCCTAAATCTTTATACATTTTGCATCGTGATACGTAGCACATTATCTCTATGAACTTCAATTTA

>comp166388\_c0\_seq3

AGAATTGAGGGCTTATCCATTTTCATTAATAAATGAAATAAATTACATGTGTAGCTTATAAAAAGAACCAAAAAAGGTGCAAAAGCACCAGGCAAAAAAGGCTACAAAACCTACAAGGA  
GTTGAGGAAAAACAGCTATAACTCCAACAAAATTATACCACCACAAAAATAACCTCAGAAAAACAACCATAAAAAACCAGAAATACATTCAGATAGATACTTCCCCATCACGGGCTT  
AGGAATTGCTGGTGTCTAACTTGTGTTGACAGTAGCCCCAGTATTTCCATCCAAAGGGAGAAAAGAAGGCAATTCTATCATCCTTGCTCATATAAACAACTCATCCATATCGATGAAACCAT  
CGCAACTTTGAAGCAGTAGTAAGAAGAGATTTCGTAGTAGGGACGTTTACTGACAGAGTATCCAACCAGAGAAAGGTTCCATTCCGCGGCTGTTGCATCTGTAAAATCCTTGTTAAAAGGA  
ACAATTTCTTTCCGGAGTTTCGATGAGAGAAATCGGGATAAAGGGCTTAGATATTTCTGGAGTAGAAAATAATGTTTGACCAGAGTCGGTCCAGGACGAGAGGTGCAACGGGAGGTGGAGG  
TGCCAAGCGGGCGGAAGTGGAGAGGGGAGGAGGGATCCATGTGGAGAGGAGCGCGTGGTACCACCGGCAAGGGCAAGCCAAAAATTGGCGGCTAGGGCAAAATGAAG

>comp166401\_c0\_seq8

ATATGACGTGGCGGCTGCCATGAATGATTCTTGGGAGGACATGGAGATTTGGAECTATTACCAGAGCTTGACATGGAAGGCTAGAGATTTTCGATTTTCATGTCCAAGAATTATGTGAAGTAT  
ACAATGAAAACAAGTAAAATGATTCATTTGCAGCAAAGATCTGTTGTGCAAGATTGACTCAGAGGGAAAGGCAAAAAGTCATATGGTGCTCGTGTGTTGCTGTTAAGGATTATGGAGAG  
GAGGATTCATACTATTATGAATATGAAGATTATATAATGTGAGATATATGAGTTTAGAACTTACAGTGTTATATATATCTTCTCCTCTACCAATTTTTGAGTATTGTAGTTGTGCAAGATTAAGT  
AACAAATTAACATTATATGAAGATTCAAAGAGAGAATTTATGAATATAATGTAATTTTGATGGTACACTTTTTTATTATATTTTATCATTTTTGTATAACAAGTGAACAAACAAAAAATTTAAA  
ACCGCCGATGCCGGTCCCAAATTCAGGTGAAAAATATTGTGTTTTTTTTAGTATTGATAATTTGTGCCCCACACCAAAAAAACCTAGCTCCACCCTGGGTGGAAGGGATCAAGATGGATT  
CATCACAGTGCAGCATCAAAGTTTTCAATGGAAAAAGATGACCAGGGAGTTGACAAGAAAGAGAGAGGATACTCCTCTTCATTCAGATGTCAGGGTAGGGTATCTAGCTTCTGTAA  
GAAGATGGTTTTCAAGGAAAGCAAAAAAAGCTCTGATTGATTTGTTGTTAAGCAGAATCTTCTAGGATAAACGCTAGATGATTCTTTTAGGGATTATGATAAATTTTGGAGCTGCTATAGCT  
GATCTTGTGAAG

>comp166419\_c0\_seq4

CCAGTTGAAGCTGGCAACAAGGAACTGCATTACGTGAATGTGCTTCCCTCAATTGGTTTAAATTTCTACAGCATCCTTCAGCACGACACTTGTGATGACAAGAAATGCAGTTGACAAGAT  
TGTTACTCGTATGCACACACCCATTAATCGTTGACAGAAATGTTGAAGCCATATGGTTAGAAAAGTGAATCGAAAATTCTTTAGAGATATTGGTGAGTGACAAGGCACACATATATGTTGC  
ATGCAAGATTCTTATTCAATATCTTCTCAATAACTTTCAAGATCTTTCTTAACCAAGCTACTTAGCACCAATATTTTTTATTTTATTTTGGTGTACAATGTAATAGATTGGACTCTATATGTGGT  
ACTGATCTTGAAGAAGATTTTCATCCGTTTTTTAATATTATTTTACCTTCAAATAGTGGCAGACCCCACTTTAGAAGCAAGAAAATTTTTTTGTAGCTGAAACTCCTACTCTTGGTGATAAA  
TGTTAAAGAAATGGTGTGTTTCCACTTTTCTCATTTCCACAGATGCTTTCTGTAATATGTGTT

>comp166425\_c0\_seq2

AAGCTGCTTCAAAAAGCAACTAAAAAGCCGCTCCAAACGAAGCCTTAATAACAATAAAAAACACCCAAATGAAGCCAAAATCTACAATGCAACCACACATCTTCAGATTAAGAATAA  
TAATAAAAAAAGACAACGATGAATCATCAAGTTAGGTGATTTTCAGATTATCACAATTTACAACAGTAAGGGTGAGAACACTGTGAAATAAATAACATGCCTATTTGATATTAACACTTAATT  
AAGATTCCTCATCATCATCAGAGCTGAAATCCTCCAAGCGCCGGTCTTTGATTGCAGGAAATATCGACTGCCGGGCCGACATTGATTTTCATTATGTATTATCCTTGCTTCTTGATGTACTCG  
TCACTTTCCTCTGTGCTTCTCTGACTTCTTTCAGGCCTTATCCAAAACCTCAAGGAAATCCCTCACTGTGACAAACAATCTCAACCCCTCGTCTTCTCCAGCATTCCCATGGAAATAGTC

AGTGTGCTGCAGCTTTCTTGACATTCTCAAGTTCATAGCTGAGGCTTGAAACAGCCCTGAGACCAAGGTGACGGTACTGATCTTCAGATTCTTCAGGAATTCGTCGCTGAAGTCGACAG  
AGTTAAAGCTAGAAAATTGTAATGCTGGAGTTACTCCTACTATCTCTTGCTATTTGCACAGCACGCCCTGCCCTCGGAGCGGATGATCTCTTGAACAACAAAATGTAGTAGTGTGGTCTTTCCA  
TCGGCGCCTTTAACGTCTGAAAGTTTCAAAGTGTGTCAAGCTTGAATGCCTCTGCTCCTCCACGGTATGTACCATCATTTCATGCGGTTCCCAAGTTTTGAGAACAGCTTCCAACAATTTA  
AAAATAAACGACTGTTTTGGAGATCATTGCAGGCTTCTCCACAGTAGCAAGTATTCTTCATACTTGAGGATTCTCTTCGAATGAAGTCATGAAAAGCAATGCATCGATCCTTTTGAA  
AGCAAAAGGAATA

>comp166439\_c1\_seq3

TCCTTAAAGTTTTACCAAAAGTCAAATAACATAAAGCTCAATAATATAAAATAAAATTATAATAAAAAATTACATAAATCTCAATAATGAAAAATCGAATGATATAATAAAAAAAGATCATCA  
TATGGACAAAGCCAAGGGCACCTCTTTTCATGCGACCCCAGGGAAGAATCGCTCGCTGCGCCCTCCGCCGTCCATTACCCGCATCGCCGACATCCTGTGTTCCGATCACCGTTGTCTC  
GCCGAACCTCACCCGCCTCCCTTCTCCTGGTGAACACACCTGCGACTCCACCGGAGCCGCCACCGCTTCCGTGCGCGGTGACTTGTAGCAGGGCATGATGGTGCAGGTACAAGCAGGTCA  
AGATCCAAAAGATCCAGGGAATGGCGATTAGGGCCATTCCGACGATGGGAAACCAGCCGGTCTCGTCCGGTCTCCGGCTGGGTATATAGAGGACAAGGAAGATGCCACCGGAGAGGATT  
AACAGAAAGAAAAAGCAGGTAATGAACCAGATGCAAAGATCCTCTGCCTTTCCCTCCGGTGGCGGCATTTCTTAGGGATCGGCCCGCGCCACCGTCACCACGGCGCGTCTTTATCTTG  
CTTGGCTTATCAGATCTTAGTTATTAAGTCACTAATATAACTGTATTGCTTATTTCTCCATGGTGTTCATCTTCTTACTCGATGTGCTTTGATTTGCGAAGGAACGAGGAGAGGGCTTCGTCG  
CCGGTAGGTGAGATCGAGATGGGGAAGGATGAGAGAGCTGAAATATTCAAATGGTATGATGCCATGGGAGGAGGGATTGAAGGACAGAGAAGAGCGGAGAAACGTCGGGGAGTTAAC  
AACAGCCTTTTGTTCGATCTGTTTCTGCCTTGCTATTATGAGAAATGGTTTTTTTTATAAATAAAATAAAGTTTAAAGGTTAGATTTGCAAATAAATAAATATTATTTTATATGTCTGTAAAGCA  
TAAATTTGTTTTTTGAAGAAGCTTTTACTAAAA

>comp166457\_c0\_seq4

GTGACCACACCTCAAGGCCAGAAAATATAGACTGCAGTGTATCTGGATCTCGCTAAATAATAATGAACAGCTCAAGGCCACAAGTTTAATAATATGAATCATCCTTTATAATAATCGCAATT  
CATTCACTTAGTTGGCAAATCATTATGTACAACAGTGCTAGCAAGTTCAGGAGATACCAGACCTTTCAAAGACTGGAGATATTTACAGCAAAAATTTAGGAAGATGATAGTCGTATGTACA  
ATGATATTTACATAAGAATTGCCCATATATATAGGCCATATATACAGGTTTTATAGAATCATAAAAAAGAAGTAAAAAGAGGAACCAGAGCTTCGCAGGAGGTCTCTGATTATAGTTCCTTAATT  
ACTCAGCATTTTGTGTCTTGCAGCGAAGTATTTGATTATCAACACCAGGATGGATGATCCTTGGTCAATCCAATGCACTCCAATATTAGTTCCAAACATGGCTTGCTTATCTTTTTTCTT  
TTTTGTATTTTGTAAAGTAAGTCTTTATATGATATCATGGAAGTTCGATAAGATGACAGGGGAAGCATCTCAAAGGACAAGCCCAGGATGAGTTGAGGACAATCAAATGCCTAATCTGAAG  
AAAGCCACCTTTGAATGTACTCAATCCCCTCTGACATAAGAAAAATGCAAAAAACAGATTAGCAACCAATGCCATTCCACAATAACAAACCAAGAAAAATAACAAGTAGATGAAGCA  
TATTAGCAGCACAGACTTCTTCTAAAGAGAAAACCTGTAAGTACCATATATTCAATAATAATTACTACAACCTTTAAAAGAAAATCAACAATATTCCAATAGCACATCTCATAACTTTTGAAGA  
AATGTTATTCAAGGATTTGAACGAAAAGTAGATAATGCCATAATCATAAGCAACTAAAATAAGCTTTTGGGAATTGAATATAATCGCTAAGATCATGTCCAACCGAAAACTAATTTTCT  
ACTCCAAAACGCAATAACACTTCAAATGAAGTAATTCATCAATAATTGAACTCTATTTCTTAACCCAAAAAAGAAATATTCCAT

>comp166464\_c1\_seq4

AACTAACTTTAAAAATGAAAGTCAGATCAGCCAAAATCAGTTCATTTCAGAAACAAAAAATTGGAATTATCATAACATAAGAAACAATGTGCAAGTTCAATTCAATTTAAGTTAAATTA  
ATCCATAATAGATGTTTGAACACTAGCAGTAGAAAATGGAGAGAATTTGTTGTTATTGCAACGGTTTCTCCAATTGGATCGGTTGCAAAGAAGATGAAGAAGCAGGGTGGTATTATGAGA  
AGTTGAAGCAGTTAGATTGTGAGAGATTTATAGATCGTATAAAGAAGATTTGATGTTTGATTGAAGATCACGTTGTGGATAAAGCCTTTATGTTTGTAAAGATTTGCCACTTTTGACGGAG  
TTATTGTCGGCTGTAGTTTTATTTTTTCATTTTTCCCTAAAATAAAACTCTTGTTAAAGATTATTAAGTTGATGAGAAATTCGTTTTAGTAAACATAAGAAATTTACAGATTTAGAAAAGTGC  
AGCAA



AGACGGAAAAAGGAGATGCATCAAGCCTAATAGCAGAATTTTATTCTTCAGAAGGTTGAAATCCAGAGACGAACCTAATGGTTTCCTAGCTTCTGACCTTCATGAAAGAAAAAATCACCC  
TTTCTTTCAAAAAGAAAGTTTCTTATAAAACTGAAACTCCAAATCTTCCTCGATAAATGTAATACCACACCCCCACCCCTCAAACCAGATAAGAAACCCGGCGGGGATTGACGGAAGAC  
GATCAAAATCTCAATTTGGCACGGGGGTTCCAGAAAATGGACCCCCGGCCGATGTTTCTGGAGCCCTCTTTTGATCTATCAGGTATTCCAGATCAAAGAACCCGGCCGGCGTTTCTGCAG  
CTCTCTTTTGATCTATCAGCTTCCCAAAGGCCTATGTTTCATCCTTTCTTCCCATCTCTCTCTCTCCGCGTATCTTCTTACAATCCCAATTCTGGCAATGAAAGGAGGAAAAATCGCTAT  
GTTGT

>comp166472\_c0\_seq29

CACAACCATGATTACAGGATGACAGGGATAGTCCTTCATTACAGAAAATACCAACAAATGAGCTTTCAAATTATGAGAAAAGAGAGTATATTACTGAGCAAGTGCTTTAAATAAAGCTTGA  
TAAATCATATTGAAGGAATAACACAAAAGTTAATTAATAAACTTTGAAAAACAATATGATGCAGTAAATGAAAGCACTTGATAGCCACTCAACTCACTTTGCTTTGAAGGGCAGAAGATGC  
AGTTCCTCGATCCTCTGGTTGAATTGCAAGAAGAGTATCAAGAAGAGCCAAAGTTGACGGAGGGCAATCCCTGAATGTCTCTTCAATTCGGCGAGGGTATTGACGCTGAGGTTTGAAAAT  
AGTAGCATGGGGCAACTTTGGTTTTCTCCAATAGTCTTCTGGAGGAGATCCACAGAGTTGAAAATTTATGCAATTGTTCTACCTCAGTCTTCTCTGGCATGATTGGCTTTCCAACAAGTA  
ATTCTGCAAGGATACAACCACTACTCCATAAATCAACAGCAACACCATATTCAGTGGCACCCAACAAGAGCTCAGGAGGCCGATACCATAGAGTCAACAACACGGCTTGTTAAGGACTGAT  
TCTGGCCAGGTTTGAAAATGTTGCCAGGCCAAAATCCGCTATTTAAGGATGCCATCATTGTCAATCAGAAGATTAGAGCCCTTGATATCTCGATGTAAAATTCATGGCTATGGCAGTAT  
TCAAGCCCACGAAATAGTTGTTGCATGTAGCACTTAATCTGTGGCTCGGTGAACTTGATGCCGGGTGTTGAAGCAAGTCCGGCAAGATCATGATCCATATATTCAAATACAAGATATAAGT  
TGCATGACATTTCTTGATGTAACTATTCCGACGAGCTTTACAATATTAGGATGATCGAGTTTACGCAAAATATGAATTTCTCTTGCCATGAAACGAACACTTTCGGGATCCATATTAACAAAAC  
GCACTTTCTTGAGAGCAACCATTTTCCAGTTTGAAGTTCGCGAGCTTTATACACAGTGCTATAAGTTCCCTGTCCAATCTTATTTAATTTCTCAAATGAATCTGCCCTTCGAGGCAGCCAA  
CCATTCACTGCTTCTGGTGCAACTGATGAGCCACGCCGGCCAACCAATAGCCACATGCTCACCGGAAAAACCATTTGGCACATCAAAGATCCCTGAGTTGACCCACCATTGCCCTTC  
GTAGTCAATATATTGATTGAAGATTTTACCATTCACTCTGACATCAACAGTCTGTTTCTCTGGTGCCCGACAGACATCCCTGTTCTATCTGAAGAGACAACCACACTATTCTTCTCACC  
TCCATTAGATTGTCTAGGAAAAGGGGGCATCAAATCTCTAGTAGCTTAACTGCAGGTCTCGTGCTGGCCCAATGCTTCTAGTAGCAGCAGCTTCAGCTTCAATGAACAAAGCAGCATCC  
TTCTGTGAATGAGTAACAAGCTGTTTTAAGGATTTTCTTGACCCCTTGTTTTAAGTCTCAGCAATTTCTTCTGTTTCAATTCCTTTTCGAGCAAATGCAGCCCATAAGGAAGAAGCAGAAAAG  
TGCCACGCTTTTCCCCCAATTATAAAACCAGGCTAATGGTTTCCTAGCTTCTGACCTTCATGAAAGAAAAAATCACCCCTTCTTCAAAAAGAAAGTTTTCTTATAAACTGAAACTCCAA  
ATCTTCCTCGATAAATGTAATACCACACCCCCACCCCTCAAACCAGATAAGAAACCCGGCGGGGATTGACGGAAGACGATCAAAATCTCAATTTGGCACGGGGGTTTCCAGAAAATGGA  
CCCCGGCCGATGTTTCTGGAGCCCTCTTTTGATCTATCAGGTATTCCAGATCAAAGAACCCGGCCGGCGTTTCTGCAGCTCTCTTTTGATCTATCAGCTTCCCAAAGGCCTATGTTTCATCCT  
TTCTTCCCATCTCTCTCTCTCCGCGTATCTTCTTACAATCCCAATTCTGGCAATGAAAGGAGGAAAAATCGCTATGTTGT

>comp166472\_c0\_seq3

TTTTCTTTGTTTTTACCTTGCTAAACGAGCTTTGCGCACAGCCTGCTGGATTGCCTCTCATGCTCTTTAAGCAGTTCTTCTATGTTACCACCTGGGGGCATTAATGGCCCTGAGTAGTGAA  
TTCTTTTGTTTTTTCCACCGTAACTCATGACAGCTTCCCTTGCTCCAACCTTGTCATCTCCCTTATAGGTAGAAGAAGGTCTATCTAGTACATGCTGCTTCTCAGATGACTCAGCAACATCA  
AGCCTATTATACGTGGAGCTCATATTGCTCTTTGAATTGGCAAAGTCCATGCCACCACTATTCTGAGGCATATATGATCTCTGAGATCGTAATCGTGGAACGTTGGGTGCCACATAGTACTA  
GATGCTTGGTTAGGAATCGTCCTGATATCATCGTCTTCCCAAATGCACTGGGGTGCAATGTAGTGTGGAATGAGACAAGCCATGTGGAGCTCCTCTGGGAGGATCAATGGGGAACCCCT  
GAACCAACTTCTTCAAAGGACTGTACTTCTCACTCGTACTTTTGGTATTTGATTGCTCACGCCACTTCTTTGGGTCTCCGTTGGCTTCTTGCCCGGTCATAGGTTTATTATCCAATGGGCCT  
TTCCCTCCAGAATCAAATGGCTTGCCTTTAAGAGCTGCAGCTTTTTGCTTCCCTGTGCAGAGCCAAAGATGCTGTTCCCTCGATCCTCTGGTTGAATTGCGAGAAGGGTATCAAGAAGAGA  
CAATGTTGAAGGAGGAAACTCCCTGAATGTCTCTGCAATACGCCGAGGGTAGGGGTGATGAGGTTTAAAAATAGTAGACTGCGACAACCTAGATTTTTTCCAGAAGTCTTCTGGTGGGGA

TCCACAAAGTTTGAAGATTTTATGTAGTTGTTCAACCTCTGTTCTTCCTGGCAGGATAGGTTTCCCAGCAAGCAATTCTGCAAGGATGCAACCAGCACTCCATAAATCAACAGCAACACCA  
TATTACAGTAGCACCAAGCAAAAGCTCAGGAGGCCGGTACCATAGAGTCACCACACGACTTGTAAAGGACTGGTTCTGATCAGGATCGAAAATCGTAGCCAGGCCAAAGTCTGCTATTCTG  
AGGATTCCATTGCTGTCAACCAGAAGGTTAGATCCCTTGATGTCGCGATGTAATAATTTGCGTTTATGGCAATGTTGAGGCCACGAAGTAATTGTTGCATAAAGCACTTAACCTGCGGCT  
CGGTGAACCTGATTCCAGGTGTTGCAACAAGTCTGCAAGATCATGATCCATATATTCAAATACAAGATACAAATTGCATGACAATCTTGATGTAACCTATTGCTTCAAGCTTCAACAATTTT  
GATGATTGAGTCTCCGCAGAAATTTGAATTTCCCTTGCCATGAAACGGACACTTTTCAAGATCCATGTTAACAACCTCACTTTCTTGAGTGCAACAATTTTACCAGTTTCAAGGTCACGGGC  
TTTGTACACGCTGCTGTATGTTCCCTTGTTCCAATCTTGTTCTAATTTCTCAAACGACTCAGCTCTGCGAGGGAGCCAGCCATTCACTGCTTCTGGTGCAACATTCGTAAGCCATGCAGGCCAA  
CCTGCAGCCACATGCTCACCAGAGAACCCATCGGGCACACTAAAATTTTCCATAGCCAATCCAAAGTCACCCATCTTCGGATCAGTATCTGCCCCATGCACCCTAAAATCCACTGTAGCCC  
TCCTATGGTGCCCGGCCAAGTTCTGATTCCCTATCAACAGGAGCCAAAAGAACCCCTATCTCCTTCATCTGTCTGCACAGGAATGGGAGCAACCACATTCTCTTGATTTTTGTTGCAGGCCT  
TTTACCCTCCCGCAGCTTCTAGTGGCAGCATCAGCATCAAACAATATAGCTGAAACATCCTTCTCAAAGGAGTAACTAGCCGTGAGAGGGATCTGCTTGAGCACTTCTTTATACCTTCA  
ACAATCTCATCTGTTTCAATCCCTCTAGAACAATGCAGCCCATATGAACTAGAAAGCCCCACCTTCTCTCAATGTAATAAATCAAAATTGCTAATTGAATATGTAGATTATCAAGCCTT  
CTTACGGAAGACCATTCTTCTGAACCTTATAAAACCTCTAATTCCTAGAACTTCAATCAGAGATCGCCCCCTTTCGAATATGTGTCTCAAATCCTGAAGCAAGAATTAATGACTTATGAAT  
CAATATGCAGACGACCTAAAACAGAATCTAAACAGAAGGCCAAGCAGATACAATTACTCAAAAAATCAACAGCAGAACCCTCAGCTTCAAATCCAAGCCAGAAACCAATCGAGGAT  
CGTCGGAATCTGATCAAAAATCCACCTTGCGCCGAAATTTTCAGAATGAGGGTTTGTTCCTGTTTCTAGCTCAATACTGGCTTATCCCTTCTCCCTGTTGGGATCCCTTATCATCATCTC  
TCTCTTCTTCTCTCTCGTTTCTGAAAATGAAATGAGAAAATGTAGGAGGTTGGTAACGAGAAGGACATAAACTTATACAAAATTAGCAAAAAGCAGCAAAAAGCTTTTATCGAAGACGG  
TGAGGAGAAGAAATAATTGAAGATGAAAGGG

>comp166504\_c0\_seq3

CTTAGGCGTATGTGAATCTCCCTCACCTCAGGTGCGCTAGATTGAGTTATTTGGACTTCCGAGACTTTTGTGGATATCTTCAATTTATGTGCGTGTGACCTCCCTGCATGAGTGGATAGTCC  
CACCTTGAATAGATATTCCTCGTCTAAGCATCTACTAAGAGAGTGCATCTCATAACGAAGAGCTTCAATATCAGGCAGCTTCAACATACTCAACAAGTCCTTTTCTCCGTGCGGTATAAATAC  
GCCCCATCCGAGATAAGCATTCTACAGACAACACCGCTCCATGTTCTCTGAAAAAT

>comp166504\_c1\_seq8

GTGACAGTGTACGAGTTTAGTTTGCTAGCGGGTTGCGATTTCGCGCTGCCTGAACTGCTTGATATCCTGACGGCTTGTGGAATGAGTTTGTCTCAATTCTACTATCGGGCTATGTGGT  
CATAGTGGGTCTGATCGCATTCTCAGAAACCATGGAGCGGTATTGTCTGTAGAATGCTTATCCTGGATGGGGCGTATCTATACCGACCCACAGGGTCGAATTTCTTTAGATCCAACCTGGT  
TGGAAGTTCGTACTCGGGATCCATCCAAAGATTGTATTAGCGATTTTTTCTTTGTGCAGAATGATTGGCGCTCCAAGAAAGATGGGGAAAGTTGAAGGAGCTACCTATTCCCCTTCAAT  
GGAGCAGAAGACTTGTGAATATGTTAAAGCTTCTGATATCATTGTTGGCTTTTGTACCTTAGGAGCCTTCTTGAACCCTTGAACACGCAGTAGGACGATCTTCCACAACGGAAACA  
TCTTTGGTAGAAGTGTGATCACCCATTTTGATTGCCTCACGAGAATCCACTAGAATGAAAAATTCGTAACCTCCTGCACGAGAGGGGGCGCTAATTCGAGCATGGAAAATTTCCAAT  
CGCAAATAGCGGAAGCCTCAACCTCCAGTAAGCCGGAGGGGGAGGAAGA

>comp166504\_c1\_seq9

ATCACCAAGTCATTAGGAAAATGATACTTTTTTCTAAAAGAGATGAAGGAGTCTTCGGTAATGGTAGAAACCACATCGTCGGCTTTTTTTCGCCTTAGAAGCCTTCTTTCGAACCCTCTGGA  
CGCGCAATAGGACGATCTCCACGACGGAACATCTTTGGTAGAAGTGCATCACCCATTTTGATTACCTCACGAGAATCCACCTGGAAGAAAATCCCGTAACCTTACACGCGAGGAG  
GGGCGCTAATTCG

>comp166516\_c0\_seq15



GCCACATAGATGCAAATGAATGCTACCACCAACCCGGCGTAGCTTCTTGACAACACCGTGTGTGCTCCGGTCACTCCGAACTTAATTCCGATGAGCAATCCCACAATTACCTGGCTGATAA  
ACATTTGAACGCCGCTTCTAAAAGCAGAGCACGTCGCCCAACTTGTCTACTGATACAATCGACACAGATGTGGCAACCAAGTTCACCAAGCCGGTGATAACAGAAGATATGAGGGAA  
GCCTGGTCGCCGAAGCCTATGGTTTTGAAGAGCACAGGAGCATAGAACATGATCGCGTTTTATGCCTGTGATCTGTTGAAAAAAGGGATAAGTATTGCCATTGTTAGTTGTGGTCGATACC  
TACGCTCTGTGATCTTTTTCCATGGATGCTTACCCGCTTGGAGTCGTTACTGGCGATTACAAGATCATGGAATTCCTCATGTATTTGATCAGTGCCACGCACTTTGGCGGAGCATGGCCTTG  
GCCGCTCCTCATGCCCCGTTCAATTAGAGAGTTGGGGTCTCAGGGAGAGCCAATGCGCCAATCGCGATAATGGCGCCGGGCACGGAAGCAAGCGCAAGGCTCACGCGCCAGCTCCA  
TCCCCCTTTGATCTGGGCCATCCAGAAGTTGATGAGATTTGCGGGCAGGATACCAATTGTGATCATCATCTGGAAGCCAATATTGAGCATGCCGCGGAGCCTAGCTGGAGCCATCTCCGAA  
AGGTAGACAGGCACTGATTGGTTGGCGAAACCGACGCCGATGCCGAGGAGGATGCGGCCGAGGATTAGCATCAGCAAGTTCCTGCGCGCCGTTGAGGGTTGCGCCGATAAGGAAGA  
TGAGGCCGCCGCGCAACATGGACATTTGCGACCGAACCCCTTGTAAACAGTCGCGGCGAAGAAGGAGGCGATAAGTGCCGCCAGATACAAAGACGACGTGAATAGCGTGAGGAGCTC  
GCTATTGAATTTACAGTATTCATTAGTCGAGACATCCTCCTTTTTCCATATGGTATAACCGATGGGAAGAATCGGATAAGAAAAGAATCCATTGATGTAATCCACCGGAGATTCCAAGATCATA  
CCCAAATATGAGGCCGCCGGTGGCGGGCAGGAAACACGCCAGGAATACAAAACTGTCAACTTGGCGGGTAATCCTTCCGGTTCGGCCATTATTGATATGGACAGATGGGACTTTAATTT  
TGTTTAGGAAATCAATATATCGCTAACCGAAACAGAATTGAAGAATTATAGTAGAGGAACGAGAGGAGTAACAAAGTAATTGATTTCCGGGAGCTAAAGATCGATCAATGGAGGAGGAA  
AGTTTTGGATTGCATGATCTCTCTTCTCGTCCA

>comp166547\_c0\_seq1

TAAATCCTCTAAAAGAATTCAACATAAGATTTCTATTCCCCCTAGAAAACGAGAAACAATAATTATTAATCTAGAAAAAAAAAAGCAAATACACAGATCGAAGATAGACTTGAAAAGG  
CGATGAAGAAACCATATTGAATACTAGTTTCGGTTTCTCATTATTGTCATTGGCTTACAAAAACATCAAAAAGCTTCTGTTGTAAACTAGTTTAATTAGGGTTTCCTCATGATTCTGTAAGAGG  
CTTTCGAGCCAAGAAGAAGTAAATGGCGGTGAAGATCTCCTTCCACCAGCTGCGAGACCATCCGAGCTTTCTCTAACAATGACGAAACTCTCAAACTTCTGCAGGAGCAAGGC  
GCACAAATCCAGCACCCGAACCTACTCTTGTACATAAAACGTCCAATAGCTGTGAGGGGAAGCTACTCAAGGAGAAATGGCTCGTATCCATAGGCAAATACCATGGCAAAGGTGAAT  
CAGTAGCAAATCCTTCTCCCAAATGACCTCAAATCCAGCTTTTTGTAAGGCATCAAGGCATTGATGTGTTGATCTTATGTCAGGAAGCCCATTACCAATCTCAATCTCAGCCTTTAT

>comp166547\_c0\_seq10

TAAATCCTCTAAAAGAATTCAACATAAGATTTCTATTCCCCCTAGAAAACGAGAAACAATAATTATTAATCTAGAAAAAAAAAAGCAAATACACAGATCGAAGATAGACTTGAAAAGG  
CGATGAAGAAACCATATTGAATACTAGTTTCGGTTTCTCATTATTGTCATTGGCTTACAAAAACATCAAAAAGCTTCTGTTGTAAACTAGTTTAATTAGGGTTTCCTCATGATTCTGTAAGAGG  
CTTTCGAGCCAAGAAGAAGTAAATGGCGGTGAAGATCTCCTTCCGGACAAATAAGCACACACCTTCCACCAGCTGCGAGACCATCCGAGCTTTCTCTAACAATGACGAAACTCTCAA  
ACTTCCCTGCAGGAGCAAGGCGCACAAATCCAGCACCCGAACCTACTCTTGTACATAAAACGTCCAATAGCTGTGAGGGGAAGCTACTCAAGGAGAAATGGCTCGTATCCATAGGCA  
AATACCATGGCAAAGGTGAATCAGTAGCAAATCCTTCTCCCAAATGACCTCAAATCCAGCTTTTTGTAAGGCATCAAGGCATTGATGTGTTGATCTTATGTCAGGAAGCCCATTACCAAT  
CTCAATCTCAGCCTTTAT

>comp166547\_c1\_seq1

CTTACAAAAAGCTGGATTTGAGGTCATTTGGGAGAAGGATTTTGCTACTGATTCGCCTTTGCCATGGTATTTGCCTATGGATACGAGCCATTTCTCCTTGAGTAGCTTCCCCTCGACAGCTA  
TTGGACGTTTTATGACAAGAGTAATGGTTCGGGTGCTGGAATTTGTGCGCCTTGTCTCTGCAGGAAGTATGAGAGTTTCGTCATTGTTAGAGAAAGCTGCGGATGGTCTCGCAGCTGGTG  
GAAGGAAGGAGATCTTACCCGCCATTTACTTCTTGGCTCGAAAGCCTTACAGAATCATGAGGAAACCCTAATTAACACTAGTTTACAACAGAAGCTTTTGATGTTTTTTGTAAGCCAA  
TGACAATAATGAGAAACCGAAACTAGTATTCAATATGGTTTTCTTCATCGCCTTTTCAAGTCTATCTTCGATCTGTGTATTTGCTTTTTTTTTCTAGATTAATAATTAGTTGTTTCTCGTTTTCT  
AGTGGGGAATAGAAATCTTATGTTGAATCTTTTAGAGGATTTAATTATATATATATTGTCATTTGCTTAAATTGTTCTTATATGTTATCTATTTTTGGAAAAGTTATTATGCGCGGTGATTGGAC

CAT

>comp166555\_c0\_seq5

CAGCAAAAAATTATCCCAAAAGAAACATTTGTCAAAAGACCAAAACAATCATGTAATGAGAGAAACACCATTTACCTTCCCATGCTATGATGTCTTTACCAAAGAGATGCAGAAAAAAC  
TATTAGCTGCAGCACAAAACTGAGAGATAGTTGGATATGACCGCTAATTGATTTAACAATATAACAACCTCTTTCATGTGAAAAATGAATGGTTGAGAAGGCTCTGGCAAGCAAAAC  
AGAGATCAGTGAAGACAACCAGTAGCATCATTCTTCAGCTTCGTTTTGTGGTATGGAGTTCATTGTCTCCAGGTCTCTCTTGAACCTGTCTTTTAGTTTTCTATCTCGATGAGGCGTGATT  
GAGCTTGCACAATTCACACAGAAGAGAATCCTCAGTACAACGGAGAAGTGATGTCCAATGTTGCAATAGATCAGATTCTGTAGCTTTTGCTTTCTTGTGTGCGAGATTTAGAGGTTTCACC  
AGTTTTCTCATGTCTGAGAATTTCCCTTCTAGTATTCTAGCATGTCTTCTGCTAGACTTCAGTGCTAAAAGAAAAAAAAAAAAACATTTAAACAAAGCGAGAATACACAGTAAAACCGTAAA  
CAAGAAAAGAAAGCTATCCAAATAGAGAGTAAAAATGATACTAATTTTAATGGATACAAGCTTTCTGCTCAAGAAAAAAAAATAAACAGATTTACCACTCAATCGCCCTCTAGTATCCTGGT  
ACATAAGATCTGACCACATATAAGCAG

>comp166555\_c1\_seq4

TTGGAGAGAGATTAGCTCATGAAAAGTTCCAAAATGTAAGCCTGTGTGGTAGTTGTCCATGCTCTTCGTGTATCAAAGGTGAACCACACATTCGGTCACTTGTTCCTTATTTATACAATA  
ATAGTGA CTCTATTAATCTAATGGTTTCTTTCTGCTAATTATTCAAACACTTTGCCCTTTTGTAAATTTACCATTTACAGGTGTATTTTGCAATTTGTGCCTAACTTTAACCTATTTTTATATTAT  
CAGCTGCTTATATGTGGTCAGATCTTATGTACCAGGATACTAGAGGGCGATTGAGTGCCTGAAGTCTAGCAGAAGACATGCTAGAATACTAGAAGGGAAAATTTCTCAGACATGAGAAAA  
CTGGTGAAACCTCTAAATCTCGACACAAGAAAGCAAAAGCTACAGAATCTGATCTATTGCAACATTGGACATCACTTCTCCGTTGTACTGAGGATTCTCTTCTGTGTGAAATTTGTGCAAGC  
TCAATCACGCCCTCATCGAGATAGAAAACTAAAAGACAAGTTCAAGAGAGACCTGGAGACAATGAACTCCATACCACAAAACGAAGCTGAAGAATGATGCTACTGGTTGTCTTCACTGA  
TCTCTGTTTTGCTTGCCAGAGCCTTCTCAACCATTCATTTTTACATGAAAGAAGTTGTTAAATTTGTTAAAATCAATTAGCGGTCAATCCAACTATCTCTCAGTTTTTTGTGCTGCAGCTAA  
TAGTTTTTTTCTGCATCTCTTTGGTAAAGACATCATAGCATGGGAAGGTAAATGGTGTCTCTCATTAATAA

>comp166570\_c2\_seq8

CAAACAGCTGATATACTTACAAAGCCATTATCAACCACTAGATTCAAACCTGTTACGGGACAAGCTCACTGTTTTAGCCGAACCATTGGCTTGAGGGGGGATATTAGAGACATTACAAATAC  
CGCATATATTTAGTTAATTGTAATTTGCTTTAATATACATTTTACAAGTTTGCCATGTATCTAACTGCTTATATTATAAATACAATCACCGCTGCTCCGTAAGGAGCATCCTGTTTTCTCCTTCCT  
CTTCTGTGTTAATCTGTTCTCTGTTCTCCTGTTCTTGAATATTCACATAAAAAGCATCAATGGTTCGTTTTCCCTTTACTCATCTCCCGTGACTCACGAGCCACGCTCTCGAGAATGGCTTT  
CGTTAGGCCTCCCCTGAACAAAATTTCTGGCTCCGACACTGGCTCTAGTTGCTTTGAAGGAATTGAAGAAGGGGAAAAGAAGAGAATAACATTGTAAGAAAATTGAATTGAAATGGCTT  
TCATTCACATATTTGGTTCATAATAAATTAAGTAGAACTAGTATCAAGAAGAAAAAAAAAAGCAAAAACAAAAT

>comp166573\_c0\_seq1

CATCATATAGACTTTGTTTATTAATAACTAAGCAAAGTCCATATAAGAAAGATGAGCTCATCCAAGCCCTCTTGCATGTTCAAAACCAAAGTTGTAAGATAAATTTCTCACCTCTTATAGCTATG  
ATCTCGATCAATTGCTATACAAAAAGGTATTAATAAATACTAAACATCCCCTATAGCCATAACCAAGTACTCATCCTTTGAGAACTTCTCTCATATACATAAAGCATTCCATACAGTAAA  
CATCTTAATAGTAAAGCCCACAGCAACAAAACATAACCCATCCCTCCAGATTCCATGAAATGATGTTACCATCTAGGCCATGAAGTCACGTATACACGATAAATTTATTGTGTGGAGATCGA  
ATGCAGAATGCTGTCCGTAATCAATCAGAATGTGCCACATCAGCAGTACATAGCAGCGATATCGATCGGTACCGAACAGTACCGACCCACGGTACTGAGCGAAAGGGTGATGTGGCGCA  
TTCTGATTGTTCTTCGGACGTCGTTTCGATGTCCACAGAGAATAATTAATCATGTTTTATAGCATTATTGCAACTAATACTAAGCATCTCCATTGATCGAAACCTGGAAAATAAGCTTGAATTT  
CAGGTTGCTGGTTTTTATCCAACCTCCTTAAACAAATTTTAGATATTAAGTACTAGTGAATGAAAGACCATTGATGCCCTATTTTCTAAATTAGCCTTGTGAAAGTTTGTTTCATCTACTGAAG  
AATTCATAAAGTCTTTTTAGATCTTTGCTCAGGATGCTTTGGGTTCCAGGAGACTTCACTGGTACCTACCTTGTTTTTGTCTATTTTTGAGTCTATTGATGAATAATTAAGAGGCTTTTTATG

TAAGCTTGGTAATGACTTGTGCCTGTGTTAAGAAAAGCTATGTGAAGTTGTAAAGAATTATTTTCATGTGATTTAGGTTTCGTTTG

>comp166609\_c0\_seq1

TTTTAAGTGGGAGATGAATAAATGCTATATTTGGCAAATCATCGCTATCAAATTGAGCTTGTGAAAGAAATGAGAATTTTGAAATAGATTAGGCGCAATTAGAAAAGAATAGATAAAGAAAT  
AACTATATGAGAAGAATGATGAATCTTAAAATGTATTAATAAATATACAACAACATCAAGCTTTTGTCTCACTACGTGGGGCCGGTGCGGCGGCTCCTGCACACTTATCGTTGTATCTAGGTC  
ATACAGCGTGTGCTTCCA

>comp166627\_c3\_seq20

GTTGCTTCTTTTCTCATTAGAAAAGAGCCTCAAATCAAACCATGTCAGCACCCTTCTGCTTCTGTTCCAAAACCAATCTCAGAATTTGCTGTGAAGAAAACCTTGCTTTCAGTTCCAGCG  
AAGAAGATTAGTATTCTATGGTTTGATTGGTGTGGGATGGGTTTATCGGCATCTTCTGATGAAGCTAGTGC GGCTAAGAGGCGGCCGCCGCCGCCGCCGCCCAACCTTTCTTTGC  
TATTTTTAGGTGCCTTGCTTGTGCTGGGAAATGCAGCCTGGCATAGAGGGGCTTCGGCGCCCTCGTAACTCGATCAAATCCTCTTACACAAAACAAAACCTCTCCAAAAGCACTGCTGTATCC  
TTCTGTTGTGAGACCTCTGAATATTGTTGGTATTGAAGTTCCAAAACAAACAGTTCTTCTAGGTAGGTTCCATATCCAGTCTCTTGGAAATGTCAATTGGGTTACGGCTCGTATGGTGATCAG  
CAAATACCTCATTAAC

>comp166629\_c0\_seq4

ATTACAAAACCCAAAACACTAAAGCAAAATTTCCATAGATAAGAAAAGTATAACAATAATTTCAATGAAAAAAGGACTAAAATGCTCATGAAAAGTAAATCAAGCATAGAAAACACTACATA  
GGCTTACATGTCTAACAACAGCTCAGTAAAGCATTAACTTGAATAAACTCCGGTGCTGAACGCTGAAGGAAGGAATCCACAGTCAAGTAATACAGATGGCTAAAATATTATCCTCTGC  
AAGTTTCTTCTCAATTTTCATCTTGATCCTTTCTTGTGAAGCCACTAGCTGCGAGTTCTTGTTCAGAAACCAGCAGACTTCTCTATGGACAAAATGACGGCCTACCATTCTCTCAAGAT  
TAGAATCAGAAACAGCCACCTTACACACTTTCTCATCCAAATATCCACGACAGCAGACTTAAACGGGACAACCAACTCCTCAGAATTTAAAGACTGACCAACCAAAAACAGAAGGGGCA  
GACCTCACAGACACCAAAGGAGCCTCACGAGGAAGGCCCTCAACGCTATTACAAACACGAATGGAAGTCAAATTCATCCACAAGGAGTAAAAGGTTGAGCGTCTAGGAATAAAATAG  
CAGCAAACCTCAACACGATTAGCATCTCCACCCACCTCAGTTTCCACAGCAATTTCCACAACCTCTAAACCAACCAAAAACAGGGGAATCACAAACAGGCACAGGGCTCACCACTGATTA  
GAGCAGAAAGGAGAAAGAGGAGCACAAACAATACCACCTAAACTATCAATATCA

>comp166633\_c2\_seq1

CCCAAACCCGAATTTTTTTGGGTCAGATTCGGGTCAGCTTTTTCGGGTCAGGTCCAATATTGACACCCATAATGCTTGATTTGAGGTAAAGTGAGTATAAAATATTCTATATGTAAGAGTTTTT  
AAAATATTGATGGTTGGTTTGAAGAAAAATGAATGTAAAGTAAAATAAATATAATGTAAATCATTTTTGACCTAAACTAGCTCGATTTTGAGCGACAACCTATTTACTGCAAGTAAGCTCG  
CTTGAACACCGTCTTCACATGCCAACCAACTGTTAGTTCGGCGCCACCAACCGCCGGCCATCACCTGCCTCCAACCTGCCTTTACTTGCCGCTGGCCATCCCACCACCGGCCATCACAGT  
CACCAGCCACCACCACAAGCCCTCCACCCGAGTCATTCGTCAGTCTCCGACATCATCTTTGGACTTTATACTTCATTCATTTTACTTCAAACAAAACAAAAAATAATAATCT  
CGTGTATTTCTTTTACTCATCCAAACAATTCCAAAATATTTATTTTACTGCAATTCCTTTTTACATTTTATTCTTTTTTTAGGCAACCAACAACCCCTAAATGTTAGAGATGAAAAGGTA  
AAAGCAGAATTATCTGAGAGTAGGGAACTATGCCACTGGTGATAAAATGTTTAGTAAAATATATCATCATAGTTTTATGAAAAATCTATAATATCTTTGCTTACCGATGATACTTCTCATATTA  
AATCATCATTAGATTGAAGATGATGCTGTTAGGCGTCTATAGGCTTTGGATGCTAGACCATTGGATCTCCCGTTTAAATATATATCATGGTGTGGATAGATTTGAATTTTTGATAAGTTTGT  
CTTTATAGTTAAATTCAAATTAATAATTATGATAAGAATTATCATTAGTTTAACTTATTTCTATTTGTTAAAATGGATAGGGACGGGTTATTACCTCA

>comp166651\_c1\_seq17

AATGATATATTTTCTCATTGAGACCTCGCTTCTAGTTGTAAGAACAGTCTCTTTGAAGACATAAATGTTTCTGTACTTTTACAGGGTCCCATCAGATAGCATGGGTGTTACCACTGTGATT  
TCTTTAATAATCATGAATATTTTATATGATGATTGTTGTTCTCAGTGGCAAGTGTGTTCCCTTGTCACTTCTATTACTGTTCCCTTAATGTGAGTTTTTTTTT

>comp166657\_c0\_seq2

GAGAGGGGAGAGGGAGAGGAAGAGGAAGTGGAAAGAGGAGGGAGAAGATCGTTGTTGGGCTTCTAGTATAAGTGGGTGGGTAGGCTATGGTTTGGAGAGTGAGGAAGTTGTAAGGGAAG  
GAGAAGAGTGAAGTAGTGTGAATGTTTTTAAGAGAGTGGAGGGCTGCTTTTTGTGTATTTTGCCTTTATAAGAGGGGAGGCTGATGAGTTGTGTCTTTTCTTGCATGGGAGGTAAATC  
GATGGTCCAAAGTGGATTTTCTTGCAGTAAAAAGTGGAAATGCATGTGCTGACAAGTAGCATCAAAGGACCCGCAGCTTTGTTTAGCTCCTTCTTCATTCATTTTCATATGACCAAATTTCTA  
TGCACTGACTCATATGACCAGATCATGTAAAATATAATTTATTAGTCCATTTTTTATTTTTTTTTGGGAGTTTAAATATGTTAGAAAATGGATGATTTGCTATATTAATAAATCACTTTTTAGATAA  
ATAAAATACAAATGCAATATAAATTTTCATGCATTTATGGTGCATCACTTTCTCTCTCTAAAATGCCAATCAAATCTTATCACTACAGGAAATTTAATGAATAACTGTGGAACCTCCGATGCC  
GGAATTAGGCCAGTGGTTAAACCATCGGTCTGATCTCCGCTATTTACTGACAGTCTGACCACTGATAAAAAAGACCAAATTGCCGAAACTTCTCGGGGGTCAAATGATAGTCGGAAGTTC  
CGCCGGTATTATGTTTTTCATGATGATTTATAGGCGGCTTAGCCATCTTTTTAAAGTGAAAAATTGATGTATACCGTCAGAAACTCGCCGATTTTTTCAAACAGCCGAAAAATCGACATAT  
ACCACATGTAATGAATGATTTTCTATAATGTATATAATTTCAATCAAATAAAGAGAACATTTGACTCAAATCTCTCATTCTCTTAAAAGTAGTCCAACATAGATGACAATTATAAATCCAA  
AAGTGACAAATCTTCAATAGAAATCAAGTTATGCAAAGGAAAGATTATGATTAAGTAACAAACCTTAACTAGCCAAACCATATTTTACATGATTAATAATCACATGTCCCTATAGAAGCAGC  
CTATGTGTCATATGCATATAGCTTCTTCAAGCACTTAACATCCTATTCTTACAGTATCCAAAAGAAAAAACAATAGA

>comp166709\_c3\_seq7

AAGGTTGCGAACCCTAACGTGGTGATTGCTTGAGCCCGTAGAGAGCCTTCTTGAGGCGACAGACATAGTCCGGATGAGTTTGGTTCGATGAATCCAACGGGTTGCTTCATATAGACGGTG  
TGGCTAAGTGTTCATGGAGAAACGCATTGGAGACGTGAGCTGATGAATTTGCCATTGATGATGGAGGGCAATCACAAGAAGAATCCGAACAGTTGGTATTTTGGCGACGGGACTGAA  
AGTTTCGGCATAATCAACGCCCTTGTCTTGGTTGAAGCCTTGCGCAACTAGTCTAGCTTTGTATCGAGCAATCGTTCCGTCAGCAAGATATTTGGTACGAAAAG

>comp166713\_c0\_seq6

CGCCGGAAGAAATTAAGCATCCCTGATGGAGTCTGAGAAGGGGAAGGGCGTTGCTACAAATGACTCTGTGGACAACGAGGGCCGCCTCTGGAACCTCTTATGGAGAAGCACTTGC  
GATCTCTTACCCAAACTCTCCATGAGAAGGAGCTCGTTGATCTCTCGTCAAGCTCGGTATGTCATTCCCTCAGATTGCCAAAGAAATTAGAATTACAGCGAGACAATACCTTGTAGGTCA  
AAGACTTGTGTTTATGGTTTGCATGAGGAAACTACTACAGAACTTTGTGTGATGCCTTTTCTCATATGGCGAAATTGC

>comp166713\_c0\_seq8

AGGAACGCACTTGCTGCCCTGCCTTGCCTTTTATTGCAAAAACCATCCCAATCTTGTGTTGCTTCTCTTCTTAAAGCATCCCTGATGGAGTCTGATCAGAAGGGGAAGGGCGCTGCTACAAA  
GGACGACTCTGTGGACAACGAGCTAGTCCCCGGCCGAACTCCTTGATGGAGAGACACTTGCATCTCTTACCGAAACTCTCCATGAGAAGGAGCTCGTTGATCTCTCGTCAAGCTCG  
GCATGACATTCCCTCAGGCTGCTGAAGAAATTAGAGATTGAGCTAGACTATACTTGCAAATCAAAGACTTGCAGTTTATGGTTTGCCTGAGAAAATACTTTCAGAACTTTGTGTGATGC  
CTTTTCTCATATGGCGAAATTGCGGAAGGACATGTTATGCTTGACAGTGCAACTGGAAAGTCTCGTCTGTTTTGGCTTACATTCAAAGAAAATTTCTTCAAAGAACTGGA  
AAAAGAAAACACATTAGTTGATAGCGGTCAAGCTTTCCACCATCTCCAAATGAAAGATTCGACGGTGCAATTGCGACTGCCGATGTAGAATTCAGAAGACTGTTGTTGGAATATTCC  
TATGAATATACCAACTAAAAAGTTGCTCGGTTTCTTTGCAAAGTATGGGGAAATAGAAGAAGGTTCTGTTATATATGATCATGAAACGGGAGAATCAAAGGATATGGGTTTGTGACATTC  
AAGACGTATGAGGATGCAACGAACGCCATCAATGATCCAGATAAACTCCTTGAACGAACCAACTCTTTGTGAAGCGTGCACATAAATACGAGCCGAAGAATCTGTAGCCTAAGCTCCTT  
ACGCCGGCGATTGCCGGCCTGAAGCATAGCTTACATATACGTAATTTTGTCTAACGGTAACCATTTTATTGGAGTTAGAAACCTGAAGCTGTTAACCTCTTGTACTAATAGAGTTTCGAT  
GATGTTGTAGAATAATGGTCAGCTACTAAAGATTAATGGAGA

>comp166729\_c1\_seq1

CAATACTGAACTATATATATATATAATTTGGTTATATTTAATAAAAAAATTATTATCCAATTATTATGCCTTGGCTATAACAATTAAGATCAATCCATCACTCCTTTATATTGCAATTAGTTA

GATAAATTTTCATAATAGAGAAATAACACATTTTATTAACCTTGAGGTAACAATAATAAAAAGCATATATCACTAGTAAAAAATAAGCTTTTCACTGTATTTGCGTTCGCTACAAAGACTTTAT  
GTTACAGAAAACGTGGGATTGTGAAAGTCATTCAAATAGATGGAATCAAGATCCTTAAAGAGCCTATTTCAAGGAGTATCATAACGACCATCACAAAGGTCAAGTCCCCCGATAAAAGC  
AGTAATCTTTTCGATTATTTCCAAAAGCTTGTGTATCAACCAACACACATTTCTGATGATGAGTGAAAAGTGTCCCCACAACCGCTAGCCTCAAACAAAAGCTAAGGAAGCAACTGCCACC  
GCACAGACACACAAAAGCATCAAAGTGTAGCTTCCCACGCCACTCTTATCACTCAAAGCTCGGCACTTTCTTATGACAAAATCCTTTTCTACCGTTTCACATTGAAATTTATCTTCTTT  
GCTTCCATCAGAGCAAGAAGGCAGAAAAAGCAATGCAAACAGAAGTAGTAGATAATTTAGAGAAAACAAGACCATTTCATCCAACAAATATTGTATATGCCTCTCGCAGGAAGAGAGTTAA  
GTTGAAATAATCTAGTCTAATAGATGATAATGCAGCTGCGCAGATAACAATTGCATCAGGGAGAGAAAAGTTGGTTTACCTGAAACAAGGCAATATCAACATAATCGCAAAAAATCCTTAT  
TATAGTCAAATTTCTTTACCTACTTTTCATTAATAAATGCAAGGAGAGAATAAACACTATATCCAGCTGCAGGTTGTCATTCTTCTTTATCAAGTTGTGCCTATTCTTTGAGGCATAATACAAA  
CACCTGATGTGCATAAACCTACTCTCATGAGGTCATTAATGGCTGTACCAAGAAAATTTCCACACCTGCAAGCTTAAATTTTTCTGAGTCAAAAAAATTGCACAACCAAATCCAATCATT  
GGTCTCTCAGTAAGCTCTTTGTAAGGTTTCTTTCTTGCTAACACTCCACCACCAAGCTTTTTATAATCTATATAGGCCTTCGAGCGAAAATCTCCTACTCATCGTGTGCATCACACAATCC

>comp166775\_c1\_seq3

CCACAATGCAATCCTGCGACAGCGATCGGCAATGTCCATTCCCCTCTTCTTCTCGCACTGGTGATACATGACCGCCGAGTTGATGCCGGCCGCTGTGTGCGGCGTGACCTTCATCATTCTT  
ATTCGTTGCCTTGGCGTTTTTCGTTTACTTCAATCTCTTTCTTTTACACTTTTTTCTTTTTGATTCTCAATCTTTTGCTTGAATCTCTTTCAATCAGACTTTAGTTAAAAGCAAAGTATGGAT  
ATAGGTAGAATGAACTGGAGTCCCAGTCTCTTAATAAAAAGGTTAAAATTTCAATCCAAATCTGACTCAATCAAACCTGTAGGATGTAACATGAAAAACACTTGATTCGTCTAGCACAATA  
CCATCACATAAAAAGTTTGTACCGAAGACTCATCAAAAAGAAATCCAATGCAGTGCAGCTTCAACAAATTATTAATAAAAAAAGAACAAGCCTAACCGGTGCAATGTCAAACCTCAAATCTT  
AATATCGAATTTTTGTTTTACCTCCTTCTGTATCTATTTAAGGCTTAGCTTCTTTTGTATCTCTGCGCTTCTTCAATCTTGTGAAAGCCTTTTTCTCCCTGTTTTATAAGCTTCAAATACT  
GAAGGAATGATAATTTTCATGGGTTTATAATTAATAATGGTTTCAATGGGCTTAAATTTGGGTAGCTTCTTGATCCTTGCTTATCTAACAGCGATTGTGAGGTTGGTACCTTTTGCTTCTTGTCTC  
GATGGGTCCTTTGGTTCAAGATGTGTTTCGTTCTATGATCACTGATCAGTTTAAAGTTAG

>comp166781\_c0\_seq10

TTATTATTGGAAAATCACTTTAAAAACACAGAAATTTGTATCATTAAAGATCCTTATGAACTAAACAAAAAATTACATAACAAAAAGTACAATTAGGACTTTTACGGCAATCTCAAAGCATT  
TAGAAATAAATCCAACACAATAATTTCTATGACAGAATACGAAATGAGTAATGCCAAATTTGATTCAGAGTATCGTCGCAACAAACAATAATTAATTTCAAATTACAATTAGCAGACAATAT  
CCCCCACACGAACAAAAATTCAGAAGTATCAAACCAGATGAGAACATAAGAACCCTATCCCTTTTTATTCTGGCTTCGAGAAGAAATCGTTGACAGATGGCATGATCTGAGGCTCTTTATT  
GCGCACATAATTTCTAAGGCCGTGTTCTCTATATCTCTCCCTTCGGCGAGATTGTCGAGCACTCCGGCTGTTCTTTTTCTTGCACACCCTGACATCAGGATTGGTCGTTATGTTCTCAC  
TAATTGCATCACACAAATACCAACAACAGTTCCAACCGCTGCAAACAGCGGATAGACCTAACCATTCAATTAGAAAAAATTAGATTAATAAGATTTAAATTTCTGTTGAGACTATTTCTTA  
CTGCTTATTAAGATACTTTTTTAACTAAAAAAGTATCTTTAATAACAGTAAGAAAGCAGTCTCAAATAGGAGATATTATTCTGTG

>comp166781\_c0\_seq20

AAAAAAAAAAAAAAAAAAAAAACAATTATCCTAATTTCTAAATACGTAATTCATTTCACTAAAGTAAACAAGATTACCAAAACACAAATACATCACATTCAAATTTGAGCTCTCAAACCTAAACAGA  
AAAAAATTACATAACAAAAAATAACAATCAGGATTTTTATGGCAATCTCAAAGCATTAGACATAAATCCAGCACATAAAGTTCTTATGATACAATACGAAAAGAGTAATGTCAGT  
TTTGATTCAGAGTACCGTCGCAACAACTACAATTATGTCCAAATTACAATAAACAGACGATATCCCCACACGAACCTAAAATTCAGAAGTATCAAACCAGATGAGAACATAAGAACCCT  
CTCCCTTTTATTCTGGCTTCGAGAAGAAATCGTTGACAGATGGCATGATCTGAGGCTCTTTATTGCGCACATAATTTCTAAGGCCGTGTTCTGCATATTTCTCCCTTCGGCGTGATTGTCGA  
GCACTCCAGCTGCTCGATTTTCTTGAGCACCTGACATCAGGATTCGTCGTTATGTTCCCTATTAATTGCATCACACAAATACCTACAGCAGTTCCAAGTCTGCAAACAGCGGATAGAC  
CTCAGGCCTCAACCATCTTTGACTGTGATGAAGCCATTGGGGCACGCAAGAGAAGCGAATATCAGAAGAGAAGAGGGGAATAGAAGAAGAGAGAAATATATGAAGCAAAAACTTGC

AAAAGACGAGAAATAAATATTGCAAGATTGCATTTAAGGGAGAGAAAGAGGTCAATTTTAGTATGAGAGCCGTTTCGGGTTTGGGCTGGCTTCGCCTGAACCACTAGCTGTACACGTTTT  
CTTTGTTATTCTCCTCTTACGGGGACCGGAAATCGGAGTAGAAAATAAGGACTTGATCTGAATTTGTGGTCGGGGTGTGGTAATTAGGGATGGGTGAGGTTGGGTGGCTTTGAAAATATG  
GAAGGAAAGCTTGACTTGCTTTTTGGGGTTTTTTTATTGTTAATGCAGATACAAGGCCACAAAATCTACGGATTGAAATTTCTAGAACCCGTGGAGTTTGACTTCTGTTTCAATTTCTAGG  
AAAAAGAAGTTATTGAAGATGACTAATTTAACATTAATAATTTAAAATATACTGGAGTTATATTGGCTCGTAAGTTGGCTAAATTTTATAGTTGATGAGTCAATTTTGTGTCAGCGTTGAGGTG  
CGAGCAGGCGAGCACGCAGGTGCGGCCGTGCAGGGTGAGTGTGTGCCACGCTTGCGTGAGTGTGGGGTAGCACATCGTGTGCGAGTGCTGAGGGAGACATGGCGGGATCATGTGAAG  
CAAGATTGGACTAGATTGACCCGGATCAAACCAATTTTCAAACGGATTGAAAAACGAAACTCGAAGTTAGCACATTTGTTAAGGTCGACCCAACTAGAATTTTCTAGGTTAGATTCCG  
ATCGGGTTACCGAGTCGGGTCAATAATTGACATCCATATAGTAGGATAAAGACTTGATTTTATTGTTATAGGTTATAAAATCCAATTTTCATGATGAGTCAAACCTTACATTAACTTTTGTAAATA  
AGAGAACATGATGATATAATATTAGGATTGATCCTAAAAAGTTTAGAAAAGAAATTGGGGCCCTACTAAAAAGTTTTGGCTAGAAATAGAGATTTAATGAAGAATTACCTTCACCATACTTGTA  
CATTTGTTAATTCTCTTATTGATATTTTTTTTCAAAAAAATAAGAATCAATATTACCCTACTTCATTTCAATTAGTGTGAGCTGGATGTGCGCATGGATCCTTTTCTATGTCTTCCAAGTGCT  
AAGAGATCAATTAATTTTACATTATTTTCTACTAGTGCTACATATGAATTGATTGTTTCGACAAATTAATTGTAACCTAGCTAGATTATAGCTAGTTCACTAGTGCTACATTTTTTAAGATTGG  
CTTGAATCTTTATTTGGTTATTTTTACATAA

>comp166781\_c0\_seq22

AAAAAAAAAAAAAAAAAACAATTATCCTAATTTCTAAATACGTAATTCATTTCACTAAAGTAAACAAGATTACCAAAACACAAATACATCACATTCAAATTTGAGCTCTCAAACCTAAACAGA  
AAAAAATTACATAACAAAAAAAAAAAAATACAATCAGGATTTTTATGGCAATCTCAAAGCATTAGACATAAATCCAGCACATAAGTTCTTATGATACAATACGAAAAGAGTAATGTCAGT  
TTTGATTAGAGTACCGTCGCAACAACTACAATTATGTCCAAATTACAATAAACAGACGATATCCCCACACGAACTAAAATTCAGAACTATCAAACCAGATGAGAACATAAGAACCCAT  
CTCCCTTTTATCTGGCTTCGAGAAGAAATCGTTGACAGATGGCATGATCTGAGGCTCTTTATTGCGCACATATTTCTAAGGCCGTGTTCTCTATATCTCTCCCCTTCGGCGAGATTGTGCA  
GCACTCCGGCTGTTCTTTTTCTTGCACACCCTGACATCAGGATTGGTCGTTATGTTCTCTACTAATTGCATCACACAAATACCAACAACAGTTCCAACCGCTGCAAACAGCGGATAGAC  
CTAACCATTTAATTAGAAAAATAGATCAATAAGACTAAAAATTTCTTCCCAAAGATTAGAAATACAAAAAAAAAACCCATCATAATCTAATCAAATATTCATAACATAAAATAAAGA  
GACAAATCGAAATAATAGCTGGATACCTCAGGCCTCAACCATCTTTTACTGTGCGATGAAGCCATTGGGGCACGCAAGAGAAGCGAATATCAGAAGAGAAGAGGGGAATAGAAGAAGA  
GAGAAATATATGAAGCAAAAACCTTGCAAAAGACGAGAAATAAATATTGCAAGATTGCATTTAAGGGAGAGAAAGAGGTCAATTTTAGTATGAGAGCCGTTTCGGGTTTGGGCTGGCTTCG  
CCTGAACCACTAGCTGTACACGTTTTCTTTGTTATTCTCCTCTTACGGGGACCGGAAATCGGAGTAGAAAATAAGGACTTGATCTGAATTTGTGGTCGGGGTGTGGTAATTAGGGATGGG  
TGAGGTTGGGTGGCTTTGAAAATATGGAAGGAAAGCTTGACTTGCTTTTTGGGGTTTTTTTATTGTTAATGCAGATACAAGGCCACAAAATCTACGGATTGAAATTTCTAGAACCCGTGGA  
GTTTGACTTCTGTTTCAATTTCTAGGAAAAAGAAGTTATTGAAGATGACTAATTTAACATTAATAATTTAAAATATACTGGAGTTATATTGGCTCGTAAGTTGGCTAAATTTTATAGTTGATGA  
GTCAATTTTGTGTCAGCGTTGAGGTGCGAGCAGGCGAGCACGCAGGTGCGGCCGTGCAGGGTGAGTGTGTGCCACGCTTGCGTGAGTGTGGGGTAGCACATCGTGTGCGAGTGCTGAG  
GGAGACATGGCGGGATCATGTGAAGCAAGATTGGACTAGATTGACCCGGATCAAACCAATTTTCAAACGGATTGAAAAACGAAACTCGAAGTTAGCACATTTGTTAAGGTCGACCCAA  
ACTAGAATTTTCTAGGTTAGATTCCGGATCGGGTTACCGAGTCGGGTCAATAATTGACATCCATATAGTAGGATAAAGACTTGATTTTATTGTTATAGGTTATAAAATCCAATTTTCATGATGAGT  
CAAACCTTACATTAACTTTTGTAAATAAGAGAACATGATGATATAATATTAGGATTGATCCTAAAAGTTTAGAAAAGAAATTGGGGCCCTACTAAAAAGTTTTGGCTAGAAATAGAGATTTAAT  
GAAGAATTACCTTCACCATACTTGTACATTTGTTAATTCTCTTATTGATATTTTTTTTCAAAAAAATAAGAATCAATATTACCCTACTTCATTTCAATTAGTGTGAGCTGGATGTGCGCATG  
GATCCTTTTCTATGTCTTCCAAGTGCTAAGAGATCAATTAATTTTACATTATTTTCTACTAGTGCTACATATGAATTGATTGTTTCGACAAATTAATTGTAACCTAGCTAGATTATAGCTAGTT  
CACTAGTGCTACATTTTTTAAGATTGGCTGAATCTTTATTTGGTTATTTTTACATAA

>comp166806\_c1\_seq1

AAAAATCGCCTCAAACCAAGCCTAAAATCATAAACCCAATTCAAGCAACTAACAAAACCTTCTCCATAACATGCCCTTGTGCCATAAAAGAAGAACTTTTACGTCACCATCACTTAGCT  
GTTAATATCTTGACAGCTGAAGCATTACAAATACGGTGTAAATGCCACAATAGAATCACCAGACTTGCAGAGTCCGGTTGCCCTTCGCATGCCGAAGAGCAAAGTCAAGCGCTTCCCTGTGT  
GCTTCAGTATGAGAAGGCTTTGCTGATCCTTCACTTAATACTGGAATCACTCCTCTATAAAACAAGGCTGTGCCCTTGCCGGAGCTTCGTCGCTGCAGTACCAGTCGAAAGAATCACTATTTAT  
CTTTATCTCAGGAACACCACAGACAAAATGGGCACTTTTGGCCTGTACTTAGCCACCAGTCTTGAAGCAGTCCCTCCTCTCGTCAGAACAAGAATAAGAGCAGCTCTGACAGACTTTG  
CAAGTCGAACGGCAGACGAAGCAAGGCTCTCCAATGGAGTACTTGGCGACTTTGTTACAGTCGTGAGTGCTTTAAACACAGCGTCATAATCCATAAATGATTCTGCTTCCCTCGCGTATCCT  
CGCCATGATCTCAACAGCAAGAACAGGGTAAGCACCCGCTGCTGTCTCGCCGCTGAGCATGACACAATTAAGTCCATCAAGAACAGCATTGGCGACATCTGTAGCTTCTGCTCTGGTGG  
GACGAGGAGACCTGATCATAGATTCCAGCATTGGGTGTCAGTACCCTGGCTTCCCTTGAACGTTGCATTTGTGGATCATTAGCTTCTGCGCAAGGAAGATTTTCTCAATTGGTATCTC  
CATGCCAGGTCTCCTCTGGCCACCATGAAAGCATCAGAATTTTCAAGTATATCATAAAATTCGCCACCCCTTCTTGGTTTTCAACCTTCGACATCAGCATGACAGACTTTGCATGATCAC  
CCAGAAGCTCTCTAACTGCAACCATGTCAGAACCTTTTGAACAAAGGAGAGGGCGATAATGTCGATTTTGTTCGGGATGCCCCATTTGAAGATATCTTCTTTGTCTTTCTCAGTTAAGGT  
GGGAAGATCAACAACAACCTCCTGGAAGATTTACGTTCTTTCTCTCACCGAGAACAGCAGCATTTCGCAGCGGCAGTGAACAAGACCTTGCTCCTTATCGCAGCTTATCACATTAAGTGA  
AATTGTGCCATCAGAACAGAGGATGATACTTCCAGTTTTACATCCTCCGCCATTTTCTTGTAGCTCATTGATATCATGGTTTTGGTCACCCCTATACTATAATCTGTTGTTATGGTGATCTCT  
TGATTTTTCTCAAGCTTTATGGGCTTTCCATCTTTCAAGAATCCTGTTCCGATCTCAGGACCCTTTGTATCGAGCATTACAGCGCAGAGTATTCCTGTTCTTTCCATGGCAACCCCTGAGATTA  
TCTAGGGTTTTCTGATGGTACTCATGGGATCCATGGGAGAAATGAATCGCGCGACGCTCATTCCGGCCCTAAGCAATTTCTCGATCATCTCAATCGATCGCGATGCAGGGCCGAGCGTAC  
AAACGATCTTCGCTTTCGGCCTTCTCATCACTTGATCTTCCGCAACGGGGCTGAAAATCTTCGACGTCTCCATTGTTGATGATCTCAAAGAACAATAGAGGAGAAAGTTGAGAACTTTA  
AGGGGAAGCTTAATATATATAGGGAGAGGGTTAGTTATTTTTGTTAAGAGAAACAAAATTTGCTAAATTTGAAAAGTTCCGCGTACAATAGAAAATAGAAAACACAATTCTTCTTGGCCT  
ATT

>comp166839\_c2\_seq1

CGACCAATCATTTTCTTTTGCAATGGTGGTTTTTATTTTGAATTCCTCGTCTCGATTGGTTGTGGCATTCTATAAATGGGTAGCAGGAGGGAATGGAGGGACAGCCGCACTTTCGGCG  
CGTAGCCTGTAAGGAGATTCCGTTGCCGTTGCCGCCTCTCCTTTCTTCTTCAATCTCCTCTTCTACCTTACCTTGTCTTAGCTCTTCTATCCGGTGCTTCTCGTTCTTCTACTGCGCCG  
CGGAAGACAGGGAGGCCACTGTGCTTCTTGCCTCAGCGTGTGCGGAGGAGGGAGAGGGACGTTGGGTGATGGCGATGATGGTGGAGGTTCGGAGAGGATGGGGCTCGGAACGATG  
AGAAGAGGCCGGCTGTTGAGGTGTCGGATGAAACTGCGCACCCAGATTAGCACAGATCCTTGGTATCAAGTTGGGTTTGTCTCAACCGGGATCAACAGCTCTTACGTATTGGGGTATT  
CAGGATCAATCATGGTTCCTTTGGGATGGATAGGTGGTGTAGTTGGTTTACTTTTAGCCGCTGCAATATCCTTGAATGCCAATGTTCTTATTGCTCGTCTTCATAATGTCGGAGGTAAGGC  
AAATCAGATACAGAGATCTTGCTGGTACATATATGGAAGGAAAATGTATTGTCTTACATGGGCCCTCCAATATGTGAATCTTTTCATGATCAACACCGGTTATATCATTTTGGCCGGGCAAG  
CACTCAAGGCTATTTATGTTCTGTACCGGGATGATGGTGTCTTGAAGCTCCCATACTGTATAGCAATTGCTGGAGTTGTTGTGCTCTTTTTGCCTTTGGAATACCTCATCTATCTGCTTTGA  
GGATATGGCTTGGATTCTCTACGTTCTCAGTTTTGTATATATTGTCATAGCGTTTGTGCTCTCACTTCGGGATGGATTGAACAGTCAGAAAAGGATTACAGCATTCTGATCACACTGG  
GACAGGATATTCAGTACCATTTGGTGAATGCTAATCTTGTTTTTGCGTACAATACTGGGATGCTGCCTGAAATACAGGCAACAATAAAAGAACCTGCCATTAATAATGGAGAAAGCCC  
TATGGTTTTCAATTTACAGTTGGTGGTTTTGCCCTTATATGCTGTCACTTTTATGGGTTATTGGGCGTATGGTTCCTCAACTTCGAGCTATCTCCTCAACAGCGTTCATGGACCAGTTTGGGTCA  
AGACAGTAGCCAACGTTGCATCCTTTCTCCAGACAGTAATTGCTTTACATATTTTTGCCAGTCCCATGTATGAGTACCTGGACACAAAGTATGGGAGAGGAGGGAGCCCTTCGCTCTAAA  
GAATATTTTATTTCCGATCATCGTTAGAGGTGGGTACCTCACCAATAACACTCCTCTCAGCTCTTCTTCCATTCTCGGAGACTTCATGAGCCTGACTGGGGCTTTGAGCACATTTCCAC  
TCACCTTTGTTCTCGAAACCACATGTATCTAATGGCAAATATGAAGAACTCTCAGTTCCTCGAAAGGCTTGGCATTGGCTGAATGTTTTAGGCTTCAGCTTCTTGGCTCTCATTGCTGCT  
ATTTCTGCAGTGAGGCTAGTAACGGTCGATTCGAAAACCTTATCATCTCTTCGCTGATATTTGAAAATATATTTTTGTTTGTACGATTTGTTTTTTCGGCATTGAGAAATTTCTTCTTTTGA

AGTACAATATTTTCGATCATTATCGCCGATCTGTTTCAAACCTATTATCCATAAAATTGATGTATTCTATCAACACTTCAGTGGCAATCAAAGCTCACAACCCACAATCTAATGAGAGATTATTAC  
GTGCGGATGTTGAACGGGTTTCAGTGGAAAATGAGGAGGCGACACGTCATGTAATGCACTGTGCATTGGACGATATGACATCTTCTCATTGCTCCGAACATGTTTCGACATCACGTAATAA  
TTTTTTCAAGCCAAGAGACGTTGGGTCGGTCAGAAGCATTGAGGTTTTTTTTGTTGTTGTTAGCTTGTACTATGAATTTTTTTTTGTCCTAAAGCAATCTAATGCAAAAAGTTTCAATGCAATTA  
CTAATTTGTAGCCTATATGATTGTAACCTCTGCTTTTTCGAAGAATGATATTAAGAAATTCCTTAAA

>comp166894\_c0\_seq10

AGAGATGACCGGATCTGGGGAGCCGTTTGC CGAACTGGATCTGTTGTGCGGCGAGAGTAGATGTCTCGGATTGAGCCATTGAACAGGATAGGATCAGCGACCTGCTCTGATACCATGTAGA  
AACTCTTAGGACAGAGCTTCTTGATTAAAGAAATAGAGAATACAGAAGGGAAATAGAAAAGTGCAAAGCAGAGAAAAGAAGAATTTATTATTATACAGATAACCGAGTACAGCCTGTTTAAA  
TAGAGAAAATAGGTAACATATAAAGCCATATAAATGGCTATACAATTATTTAGATAGATTGCTCTAATATCCCCCACAAAACAGATGATTGTTCTACAATTGTAAGTTTGTCTCGTAGTAGTTG  
AAAACGAGGAGTCGATAGAGCTTTTGTGAAAATATCTGCCGTTTGATCAATAGTGCTAATAGGTATAATCCGAATCGTGTTTTGACGAATGTGATCTCTAAGAAATCTATGATCAATCTCGA  
TGTGTTTTGTGCGAGCATGAAACACCGGATTGTTGGCAATTGCTATAGCTGAAGTATTGTGCGCATCTAATGTCCGGTCCGGTATGTTGAGGAACGCCAAAGTCGGTAAGAAGACGCCTAA  
GCCAAATGATGTCCGATGCAAGTGC GGCGAGGGCTCGGTA CTGATTCTGTGGAGGAACGGGCAACGGTTGTTTGTCTTTTACTGTCCAAGAAATGAGCGTGTTCCTAAGAACGAA  
CAGTAGCCTGAGGTAGACTTGCGTGAAACTGGATCACCTGCCAATCCGCATCTTCTCTGTAAAGAATTGGATATATTCGATGACCTCCAGCAAAAATGATGCTTTATCTCTTTTCTGATCG  
CTATTTGGCAAGAGTCTATAAGCATTGAAATCTGTCAAAAACAGGTTGAGTGTTCAATTTAGCTACACATTCAGAAAGCAATCTGCTTAAATGAAAGCATAATTATGCAACTTATCTGGTT  
GAGATAAAATTGTAGTCTCACGAAAAGCAGTGCTAATTAGTTCCTTTGACGTCCATTTACCCTTGAAAAATGCATATTGCATGAGCATGTCATCAGGTTATCAGCAAACTGTGATCTAGGA  
GGCTCTTCCATTAGAGGCTAATCCTAGGTTTAGCTATCATTTATTTACTTCTACGTCTTTGTTCTATGGCAGAATGCTTCAATCGTGGGGTGCTTGCCCTCTGCTCGTTGCTTTTCCCATCAA  
GTTTCAAGGTCAGCTCTTTTTTAGAAGAGCCTTCTCCCTTCCGAACTCCTCTTCATCTTCGTCGCTCTTCAAACCCCATGTTGAATCTCGAGAAAAGACTCCATGAATCGATTCTTCTTC  
TAGAATCAGCTGTTCTTAAGTTTCTTATGCTCTCAAGACTGCTAGAGAGGTAGAATCGTGGAGAGGAAAAAATTGCTAGTAGAAACCCTAGAAAGCGAATGCAGGAGGTACTGGCGAGT  
AGGTTGATGCGAGTACTCGAAGTCTCGAAGCTTTGGAGCTTCCAGCGGAAAGTGTAATAGCCGCGGCCT

>comp166902\_c1\_seq5

AATGACTCTTGAGCGATTGGTTGGTTGAAGCCTCTTTTCCAAAGTGTCCAGATTTTCGTGTGTAGTTTGCAGCGTCAATACATAAGAAAGGATATTCGGTGAGATAGTGGAGAACAATGCC  
GCAGCAAGATTTTGATCAGTGAGTTGCCATAGTTAATAGTTTGGATTCAAACCTAATGGTTCCAGATGAATCGGAAATGTGTTTTACTGGACAAACATCAGATCCGGTGAGAAAACCATCAA  
AACCGTTGGCGGAAAAGATTTTAAAAACCTGGAGCTTCCAAATGGCGTGTGTTGTCGCTGTTTTCAGCTGGATGTTGATGATATGCTTGATATTTGAGATTATGAACTTCAGAGACACGGGAAT  
GATGATATCTGTTGCGGCTGTAACCTGTAGAAGCGGCTTGAGGAGCCGAAGAGCTTTGGCTGTCTACCATAGAGGAATCTCAGTCACACTATTGAGCCTGGAGCTCTGATACCATGAAATGA  
TCTGCAAAAATAGATGTTAGAAAAACAGAGGAAGAAGAAGAGGTTTGGTTGAAGGTTTCATATATCCCTTAGTCAACAATTCCTGTATACATTGGTATATATTAAGAAGAAGGGAACAGGT  
TGTTAGAGTTTCAGAAGGAGCAGGTGCCAGACGCGCGATGGCAGAAAACCATTTTTTGTAAATGATTGCTGAGGAGGAAGTGGAGCAGTAGCCGAATATAAGCAGGTGTGCTTGTAT  
AAGTTGAATGGCGTATATGATCTGTTAACAGCCCCCGCAAACTTACGGTTACAGGTGGTTGAATGGTAAAGTTTGTCTCTGAGCATTGTAAGCGAGCGAGAGCTAATGGTTTGGTGAGTAT  
GTCGGCAGGTTGATCCACTGAGTTTATGTGATGTACAGTGATCTCGTTGGATAGAATACGCTCTCTGATGAAATGGTAGTCAATTTCAATGTGCTTCGTTCTGGCATGAAAAACAGGGTTG  
TTTGAAGTGCCAGGGCTGATGTATTGTTGCAGGAGAGAGCTGTAAGAGTTGATGATGAAGCTTCAAATCAGTGAGCAAGCGACGAAGCCATATGACATCTGATGTTGCAGAAGCAAG  
AGCTCTATATTCGGCTTCAGTGGACGATTTAGCAACCGTAGGTTGTTTCTTTACACACCAAGAGACTAAGGTGTGCCCCAAGTAAAGTACAGAATCCGGAGATGGATTTTCTGTCAATTAGAA  
TCGGATGCCAGTCAGAGTCAGAGAAAAGAAGTGAGTTGGAGATTTCTCTTGTAAATTGGCAATCCGAAATGATGGTTCCCCGAATATAACGCAGCAGCCTCTTAAGAGCGGTAAAGTCTT  
GCTCAGTCGGATTGTGCATATGTTGGCAAATCATGTTAGTAGCATATGCAATATCCGGCCTCGTGATGGTTAAATACTGCAATGATCCAGCTAATTGCCTGTATAGTTTGGCATCTGAGTTGA



GGAAATTGTTGCTGTTGGATGAGGGCTTAAGAGCAATAGGTGTTTGAGAGGATTGACAATCCTTCAAACCTGCTGATTGTAAGATGTCTTGGGCGTATTGTGCTTGATGCAATAAGTATCC  
GGTAGGTTGGCGTAGTACCTGAATTCCCAAGAAGAAGGAGATGGGGCCGAGTTCCTTTAAGGAGAACTGAAGTTGTAGCTTGGTGATGAGTGCAGAAATACTGTCTTTGTTGTTGCCGG  
AGATTAAGAGGGTCACCCACATACATAAGTATGTAGAGATGAGTGCTGCCTTGCTTGTAGACTAGTAGAGAGGGGTCGGACTTGCTGAAGCTGAATCCGAGGGATTGAAGGAAACCGGTA  
AATGTATGAAACCATTGTCTAGGTGCTTGTTTAAGCCCGTAGATGGTTTTGTTTCAGCTTGCATACATAATCGGGACGATGACTGTCTATGTAGCCTTGAGGTTGCTTCATATATA

>comp166944\_c0\_seq9

TTTTTGGGGGACATCATATATAATCCTAAATTTTTATTAATATATATAAAAAAACATTTATATTATATTTTACTGAAGGATAATATAGATCTGCACACACAACCTTAAATGTACAACAGA  
GAATTATATATTGAAAAAAGATAGGGATTTTTATATACATAACACCTAAAACCTATTGAAAATACATATCTAACACTCAAACATTAATATTTATTTATTTACCCTATGTTACACATACTGTCAC  
ATTCTGTCACTCTCAACAACCACCTTCATTGTAGTTACCTCCAGCGGCGGCATCCAGCTCAATAGCGGCCACATGGACCATCTACATCCAGCCAGGACCACCGGCGACCGCGTGTGGGCT  
CGCACTGGTTGTTCCCTTCGACGCCTCTTGAAACAACAATTGTGAAATCGGCGACTACTGCAACACACTCTCTGCACCGCCTACAGCTCGCCGCCGAGCACCTTGCCCGAGTTCACCCCTC  
AACTAGTTCTCCAATCTCGACTTCTTCGACATCTCCAACGTCGACGGGTTTAAACGTGGGGCTTGATTTACAGCCCGGAGACGCCGAGCGGGTCTTGCCACGGAATCCAATGCGGGGCGGAT  
ATCGTCGGGCAGTGCCCGGCGGCGCTGCAGGCTCCCGGAGGATGTAATAATCCGTGCACGGTGTTTAAGACAGATGAGTATTGCTGCAACTCCGGCAGCTGTCAGGCGACCGACTACTC  
GAGGTTCTTCAAGAACCTTTGCCCGGACGCCTACAGCTATCCCAAGGACGATCAGACGAGCACCTTCACTTGCCCCGCCGCACCAACTACAGAGTCACCTTCTGCCCTAAGGCCTCG  
CACGCAAATCTTCTCCATTCAAAAACATAAGCAATATATATAAGCAATGGTGCCATGTTTGATTTGTTGGCTATCATTGTCTACTATGATAGCTTAAACATTCATACTTTATTTTATGTAATAA  
GGACACTTTGAATATTTCTATTTTAAATATTTTAAAAAGCATGAACTAAAGAGTTTATAATTAGTTTATAATTTATATAAGCCTTAAAGTTATAAATAAAGTATTTTATAATGGTTAATGAGAAG  
AGAAGGAAAACCTTTTTAGAAAAA

>comp166954\_c0\_seq10

CGTCCCTCCCAAATATCAGCTAATCCAATCCGCTGGACGCCATATGGACAGCCATTCTGTGCCGGCCAAGAGAATCATCTCTTTCACGCCCGATGTCAACAGGTGGACGAGTTCCTTCCTA  
CTTAGCCAGTGCTCCTCCTTCAACCTGTGCTTTTTGACATTCGTGCTCTTTGTCCTCTTCGTCGATTGTCTCCTCCTCCATCGTCTAGTCTGGAACATCTTCGCTCTCATTCTTTAAGGA  
GGATCTGTTTTTAACCAATCGATGGAAACGAGAGAAGCGAGTAAATGCAAAAGCCAAGGGGAATCGGCGTAGCAGAGAGGAGGGTTTCATCGAAATGGATCTTTTTATTTTGCCTTGC  
GAGCTTCGGGCTCGGAATGCTGTTACGGATAGGCTCTGGCCGATTCCAGATTGCAACAGGATGTTCTTACGCAGCGGAGGCAGGAGCAGGAGCTTACGCCGTCTCCGAAGATTGTT  
CAACTAAAACGAAACTTGGGCACGATAATGATATAATGGGAGAGGTAACGAAGACCCATGAAGCCATACGATCTTTGGATAAGGCAATATCATACTTGAAATGGAGTTGGCTGCGACGA  
GGAGCTCTCATGAGCTGATGGGTCTGGATGGTTCTCCTACCATTGCAGGATCCCATCGGCAAAGGAAAAAGGCTTTCGTTGTTATTGGGATCAATACTGCATTTAGCAGTAGGAAGAGGC  
GTGATTCTGTGACAGAGACTTGGATGCCTCAAGGGGAGAAGCTTCGACGATTAGAACGTGAAAATGGAATTGTGATCCGCTTTATGATTGGTCACAGTGCTATATCAGGCAGCATTCTAGA  
TAGGGCAATCAATTCAGAAGAAGAACAACATAATGACTTCTTAGGCTGGATCATGTAGAAGGATATCATGAATTATCCGCGAAGACAAAGATATTCTTTTCTACAGCTGTTGCTAAATGG  
GATGCTGAATTTTATGTTAAGGTGGATGATG

>comp166954\_c0\_seq4

TATAATGGGAGAGGTAACGAAGACCCATGAAGCCATACGGTGAGTTGAAATTTCCCAGCAATTTGTTTTGATTTATATTTATATTTGTGTTAATTTGAGGCTTGTTGGTTGTTTGATATCTCG  
GAAGTTTATTGATGTCAGATCTTTGGATAAGGCAATATCATCACTTGAATGGAGTTGGCTGCGACGAGGAGCTCTCATGAGCTGATGGGTCTGGATGGTTCTCCTACCATTGCAGGATCC  
CATCGGCAAAGGAAAAAGGCTTTTCGTTGTTATTGGGATCAATACTGCATTTAGCAGTAGGAAGAGGCGTGATTCTGTGACAGAGACTTGGATGCCTCAAGGGGAGAAGCTTCGACGATT  
AGAACGTGAAAATGGAATTGTGATCCGCTTTATGATTGGTCACAGTGCTATATCAGGCAGCATTCTAGATAGGGCAATCAATTCAGAAGAAGAACAACATAATGACTTCTTAGGCTGGAT  
CATGTAGAAGGATATCATGAATTATCCGCGAAGACAAAGATATTCTTTTCTACAGCTGTTGCTAAATGGGATGCTGAATTTTATGTTAAGGTGGATGATG

>comp166955\_c1\_seq1

TTTCCCATATATAATTGGTTGTTTTACTGTCCGAAAAAGAAAGTTTTTGTGAGTAATAATTTGTGAAATGTAAAACCTACGGGTTTTCTCTAGCTTATGAGCCAACAACCTCCTTTTCCATTCTCTAT  
TATTTTCATCTCGGTTTTCTATCTCTTCTATFCCACGGTTTTTCGCCCTATCTGTATCTTTCTTGTCAAAAATTTTGTAAAGTTGAATGGTTTAGTTGCGTCCGACGTGTCATGTTAATGTTTATTTA  
TAAGAAGTGTCTTTAAGTTGTGATATTGAGTTTATATTTATGTTTTAAGAAAGGAAGTTATGATCTTCGCAATCTTTAAATTTTGGTTGCATCAATTTGGTATCAGAGCCTTAAATTTTTAC  
GAATTTTCTTTTTTTTTTTCATTTTTTTTTCAAAAAGGACATTCATCAACAAGCCGAGGTCCCAAATCAAGATGAAATAGAATCTGTAGTTGATGAAAATCAGCCAATACTAGAAGAGA  
CAATTCCAACAATCATATGGGTTTCACCACAAGAAAGTTATACTAATCCAATCCAGAACGAACTATACAAAGTTTCAGGAAAAATAAATTTGTGTGCAAAAAAATATGCGAAGAAAAA  
AGTATACTTCAAGCCCAATTTAATCAAGAAAAAGAAATGATCCAAAGAAGGTATGCTGCATTAATACATGAATTAGATATGGCTCAATCAGCTCAAATGGAAGTTCTGAAGCTATCTTGTG  
AGGGGGATGAGATCTCTCCACAAGAAGAGAATTGATGTAGGCAAAAATTTGGGGCCCCCTGACCATCATTTGATGCTTCAGATCTCCCCCTGTTCACTTTGGTCCGCCCCCCCCCTTTG  
GCCGTCGTGTGACGCTTCAGTTTCCCCCTTTTGGTTGATGCCCTTTTGTATCCATGTATTCTATTTCTTTAAGGAGTTCTTATTGGCTAAATGCATAGTACTCTAATTTTCATGCATTAATTACTCT  
TCTCCTTTATTTTCCATATATAGTGGCTATTTTCTGCTGGAAAAAGAAAGTTTTGAGTGATAATTTATGGAATG

>comp166961\_c1\_seq12

AAAGGACAAAATATCATTGAATGTATCACCGGATCGCATCTCAGCCTTCATATTCATCACCCCTCGTCTTCACCACATCCACCGGATTCGAAACCGCTGCCGCAACCAACCCCGCCGCAAAG  
CTCGCCGCCACATGCGTCAGTAACCCGTCCTGTATCCACCCCTTCCCAATATCGCCTCCTTTGCTGATCATATGTTGCCAATTGCGAAACCGTCACCATCATCGCCCTGTTACCCGTCAA  
AGCCGATCTCGCCACAACGACCCACCCCTCCCTCCTCACCATCTGCATGATGGCATCACCGACCCCTTGTAGTTCCGCCGCTCCGCGCCGGAAGCCTCCCGTCCGCTGCATCCG  
TACCATCGCCAGGTCAGCCGATTTCCAACCTGCCGCCCTACC CGCGCCGGAATCAACCCTGCGGTGATCTTCTTGTACAAGGAAGCGAAACTGTCGCCGTTTTCGGCTGATTTCCCTC  
GCCGTCGCGGCGATGGAGTGGGATGACCATTTGATTTAAGAATGTCGTAGAGGCCATACGTGTCGTTGAGTATAGGGTTTGCCGAGTACGGTGGCGGACACGCCGGAAGAGAG  
CGAGGGGGCCCTCAGCGCGGAAGATCTGCACGCCGACGGAATGGGACCAGGGCGCGCGCGGTGGGAGGAGTTTGTAGGAATGGCGAGGCCAGATCCGGGGAAGGTTAGGGCAGAG  
CGAAAGGTGGGCACGGACGCGGCTGATTCGCCCTGAAGCTGCATCCGGACCTTGATGAGATCGAGCGGATGGGTGGAGCAACCGGCCACGATGGATGCGATCCCGCCCTCCACAAATC  
CCCTGAGACTCATCTCAATTGCAGCAAGGGGTTTCGTGCGATATCTGAGGGCTACGAAATTGGGGGAAATTATGGAAGGAAGTTAATATCAATACATATGATTCTACCAGTCGGAGCTGGGA  
TTCATCTCACTGGAACACGAGATGGGAATGGAGGCCGAAGGCTACGGAAGAAAAGTGAGGAACGCGTGTCTGCTGAGACATGTAATGCTTTCTATATTGGTTGATCTGTAGCTGGCT  
GA

>comp166961\_c1\_seq13

TTAAGATTATTAATGGTCACCATTGACGATACTATATTTTTATTATAAAAATATGTGACTTGAATTTATTATTTTAGAGAAAATAATAAATTC AAGTCACATATTTTATTATAAAAATATAGTATCGTC  
AATGGTGATGATCCATTAATAATCTTAAAAGAAAAAATTTAAATTATATAAATTACCATTTACGAAAAGAAGCGAGCAAGTAAATCACACGTGCCGAAACAAGAATAGAAATCACATCAGAA  
GTTCTTGAGCAGGGAGCGAACCTGCTCAAGCGTAACGAACAGAACAACAGTAAAGGGTCCCTGGCGGAAACGGTAGGAATAAATCCCTTATACAGAGCCATTGGCCCTCCGCCCTC  
ACCGTCTTCAAGGCGCAATCCACCGCACCGACGTAAGGCGGAGCCACCCCATCTCCACTTTTCATGTTTCATCACCCCTCGTCTTCACCACATCCACCGGATTCGAAACCGCTGCCGCAACC  
AACCCCGCCGCAAAGCTCGCCGCCACATGCGTCAGTAACCCGTCCTGTATCCACCCCTTCCCAATATCGCCTCCTTTGCTGATCATATGTTGCCAATTGCGAAACCGTCACCATCATCGC  
CCTGTTACCGTCAAAGCCGATCCTCGCCACAACGACCCACCCCTCCCTCCTCACCATCTGCATGATGGCATCACCGACCCCTTGTAGTTCCGCCGCTCCGCGCCGGAAGCCTCCC  
GTCCGCTGCATCCGTACCATCGCCAGGTCAGCCGGATTTCCAACCTGCCGCCCTACC CGCGCCGGAATCAACCCTGCGGTGATCTTCTTGTACAAGGGAAGCGAAACTGTGCCGGTTT  
CGGCTGATTTCCCTCGCCGCTGCGGCGATGGAGTGGGATGACCATTTGATTTAAGAATGTCGTAGAGGCCATACGTGTCGTTGAGTATAGGGTTTGGCCGAGTACGGTGGCGGACAC  
GCCGGAGAAGAGAGCGGAGGGGCCCTCAGCGCGGAAGATCTGCACGCCGACGGAATGGGACCAGGGCGCGCGCGGTGGGAGGAGTTTGTAGGAATGGCGAGGCCAGATCCGGGGA

AGGTTAGGGCAGAGCGAAAGGTGGGCACGGACGCGGCTGATTCGCCCTGAAGCTGCATCCGGACCTTGATGAGATCGAGCGGATGGGTGGAGCAGCCAGCGACGATGGAAGCGATGC  
CTCCCTCCACGAATCCCTTCAGACCCATTACTTCAGATCCGAACGAAACTGGTTACCAAAAATTTTCAGTAACGAGAAAGATCTAAAGAGAGAGGATATTGGGGCAGCGAAGATGGGGGT  
GTGTTCTACCAATCAGAGCTAGGGTTCATCTCACTGGAGACGTGGAGATGGGAATGAAGGCCGAAAGCTATACAAGAGAAATGGGGAACGGCCGTTCTCTGAGACATGAAAGGCTTTTCG  
ATCTAATGGTTGATTTTCGAGATGGGGAAGAAGAGGCACAACGTAAGCTATTTATAGCAGAGGGGTGTT

>comp166972\_c0\_seq19

AGTATTAAGTTAATGCTCACATCCAACCTCATTATTAGAGCCTCTCATTTCGCATCACAACCACCAAAACCAACGTATATCAATCAATTACTGTACATATAAAACTGTACATTATGTATTATTACAC  
TACCCAGATCGACAACCTTTGGTGCAATATGTTTTTATTGTCTCAGCTCTTCCTATACTTTCGTTTCAGCTTATGTTATCTGAAGCTTCACCGACCAACATTGCTAAAGCTGACCATTTCTT  
GCTTTTAACTCTGCACCTCCTCTTGTGAACATGCAAGCCTCATATGCAGTTCCTCCTTCTGTAGCAGTCTTTCTCTCTTTCATGCGCGGCTCCAACAATGACTTTTCAGGTGCTGT  
AGTAGGTGAAGGTAAGAGGCTCCGTCAACTGAGCGGTTAGCTGATGGATCACCGGTGCTTATCTGCTTCATGATGCTAAGAATATGATCCCTTTGAACAATATTACTCTGCAATATAAGCT  
GCAACTGTTGAAAGAATGAGTTCGCATAGCTTGGAGAAGAATCAGCCATCGGTGAAAGGCTTTGCGGTTGAAGTTGAGAAATCACCTGAATGCTATGACTCTTTTGTAGACCAATGGAA  
GAAGGCTTATCAAAATCAATGCTTTTCAGAGGTCACCTTGAAACGCCCTTTTGTGTTGAACAACAGGAGGCTTTGACTTGTGCATCAATGTCATCACCATTTGGAGCCATTGGTTTAGACCTT  
TTGGCACAATCTCAGCAGGTGATTCATTTGATGTCTGGGAAACCTCTCCATTGGAATTCATGTTGTTTTGCTGCTGATTTTGTGCTTCAGGCTTGCTCCTCTGGATAATGAAGGAACATCG  
ATTGGGCAATTCGTAAGTCCCTTGGCTCCTCGGGACTATAAGTAGGAGAAACATTCACATTTTTTTCATCAATTTCTGAAGCGATTGAAATCCCTCTTTTACCCTCAGAGAAAACAGACC  
GTCCATTTAAACCTTTTTTACAATTTTTAGTAAGATTATCCATCTCAGTCTTTTGGAGCTGCATTACAACCTGTTGATCGCTTGCCCCATATTCTTCAGCTCGTTATCAGATCCATCAGATCG  
GTTTCTTTGAGAACATGATGTTTCATCTGGCGGTAAAACAGTACATGATTTGTCTGCAACCCATCGCTTGAATGTCTGTATGTTCCCTGAATGAACAATTTCTGGAATAGGGCCTATCTG  
ACATTTCTATCTTGCAAATGTGCACACTCAAAAAGGAATTTGAGACTCCTTGATCTTTTCTGTCATCTTCATTACATGTGATCAATGATGCTTGGGCCTTCAAATCCCTCGATATCGAAGTTCC  
ACCCACTGATTCCTCTTTTATATTCACTCTGCGAGATCTCCTCTTCTTCCATCAGGCATTTTCTTTTGTGCAAGCAAGCTCTCTCCTTCTCCTTTAGCGCTTGGTATCGATCGCCAAGTGC  
AGCCAAACCCTCCAAAATTTTCGTGCAAAATAATCCTGTGATCGAGCTTGCTTGAAGAATGCATGTTTTAACAACCTTATGAGCAGTAGGCCTCTTTGAAGGATCTTTAACCAAGCAGGAT  
GCAATCATATGCTTGAAGTTCCTTGAAACTTCTTGTCACTTTCATAGTCAAGGCCCGGGGGTGCATTTTGCAAAGTCATCAATAGAACCTTCATTGGAGGGTATTTTGAGAAAGGAGCAT  
GACCATGAGCAAGTTCCAAAGCAGTTATTCCAAAAGACCATATGTCTGCCTTGAATCATAGCCATGCAATTGTTCCATCACCTCAGGTGCCATCCAGCAAGGTGTCCCAACAAATGTATT  
TCTTGAACGTTGCCTATCACCTGAATCAAAAAGGCAAGCAGAAACCCCAAAATCTCCGAGTTTAAATCCACCTTTAGCATCAACTAGGATGTTGCCAGCTTTCACATCACGATGGATATGG  
CCATGATGATGAAGATAATCCAATCCTTTCAGCGCCTCCTTCAAATCGTGGCAATAATCGATTCCCTCGAAACCATCTGGAAATGCTGACTTCATGATATGGAGGCAGGACCCTCCTGCCAT  
GTACGGCATGACTACCCACAAGGTGTGGTCTTCACGAAGGAGCAGTGCAGGTTTCAGGACATTGGGGTGGTCTATCAAAATCATTGTCTGTGCCTCCCAGGAGATGTTGCTCAGATCGCT  
TCCGTGGCGCTCAAAGTCAAGAATCTTGATAGCCACGATCTCGTTGAGAGGAACACATAAGGCCCGCTGCACGACGGCGCTTGCCCCCTGTCCAACCATCTCGTAAAGCTCGTACTCCTC  
CGCGCGGATCGGATACTTCTTCCGCTCCATGGCTGCTTTGGCTAACTCGTCAGTCAGATAAACCTTAGAAGCAGATGAAAAAGAAGGAGAAGAAGAAGACGAAGAGGAATTGTAG  
GAGGGAATACGAATCGGGATAGAAATGGGACTATGGGAGGCATTAATGGAAGAAGCGAGGATGACGAGGAGAAAGCAGGTCTCTCCACCTTTTCTCGTGAGGAGAGAGGGGGAAGGCG  
AGAGAGCGACCGCAGCTTGCAGGGCGAGTTCTATGGCCAGAGCTGGCATTGTATCCGAAAAGCGCGCTATATGGAAAGCACGAAGCGAGCCAGGAAGCAGCTCTCACCGCGCGCGG  
CGCGCGACGGCAA

>comp166972\_c0\_seq4

AGTATTAAGTTAATGCTCACATCCAACCTCATTATTAGAGCCTCTCATTTCGCATCACAACCACCAAAACCAACGTATATCAATCAATTACTGTACATATAAAACTGTACATTATGTATTATTACAC  
TACCCAGATCGACAACCTTTGGTGCAATATGTTTTTATTGTCTCAGCTCTTCCTATACTTTCGTTTCAGCTTATGTTATCTGAAGCTTCACCGACCAACATTGCTAAAGCTGACCATTTCTT

GCTTTTAACTCTGCACCTCCTCTTGTGAACATGCAAGCCTCATATGCAGTTCACCTACTTCTTGTAGCAGTCTTTCTCTCTTTCATGCGCGGCCTCCAACAATGACTTTTCAGGTGCTGT  
AGTAGGTGAAGGTAAAGAGGCTCCGTCAACTGAGCGGTAGCTGCATTCGGGAAATACTTATTGAATATATTCAAATGAAGAAGGACATGAAAAATCCATACCTGATGGATCACCGGTG  
CTTATCTGCTTCATGATGCTAAGAATATGATCCCTTTGAACAATATTACTCTGCAATATAAGCTGCAACTGTTGAAAAGAATGAGTTCGCATAGCTTGGAGAAGAATCAGCCATCGGTGAAAG  
GCTTTCGGGTTGAAGTTGAGAAATCACCTGAATGCTATGACTCTTTTGTAGACCAATGGAAGAAGGCTTATCAAATCAATGCTTTCAGAGGTCACCTTGAAACGCCCTTTTGTGTAAC  
AACAGGAGGCTTTGACTTGTATCAATGTCATCACCATTGGAGCCATTGGTTAGACCCTTTTGGCACAATCTCAGCAGGTGATTCAATTTGATGTCTGGGAAACCTCTCCATTGGAATTCA  
TGTTGTTTTGCTGCTGATTTTGTGCTTCAGGCTTGCTCCTCTGGATAATGAAGGAACATCGATTGGGCAATTCGTA AAAAGTCCTTGGCTCCTCGGGACTATAAGTAGGAGAAACATTAC  
ATTTTTTTCATCAATTTCTGAAGCGATTGAAATCCTCTTTTACCCTCAGAGAAAACAGACCGTCCATTTAACCTTTTTCACAATTTTGTAGTAAGATTATCCATCTCAGTCTTTTGGAGCTG  
CATTACAACCTTGTGATCGCTTGCCCCATATTCTTCAGCTCGTTATCAGATCCATCAGATCGGTTTCTTTGAGAACATGATGTTTCATCTGGCGGTA AAAACAGTACATGATTTGTCCTGCAA  
CCCATCGCTTTGAATGTCTGTATGTTCTTGAATGAACAATTTCTGGAATAGGGCCTATCTGACATTCTATCTTGCAAATGTCACACTCAAAAAGGAATTTGAGACTCCTTGATCTTTTCC  
TGCATCTTACATTACATGTGATCAATGATGCTTGGGCCCTCAAATCCTCGATATCGAAGTTCACCCACTGATTCCTCTTTTATATTATTCTGCGAGATCTCCTCTTTCTTTCCATCAGGCATT  
TTCTTTTGTGCAAGCAAGCTCTCTTCTCTCTTTAGCGCTTGGTATCGATCGCAAAGTGCAGCCAAACCCTCCAAAATTTTTCGTGCAAAAATAATCCTGTGATCGAGCTTGTGTTGAAGA  
ATGCATGTTTTAACAACTTATGAGCAGTAGGCCTCTTTGAAGGATCTTTAACCAAGCAGGATGCAATCATATGCTTGAAGTTCCTTGAAAACCTTGTCACTTTCATAGTCAAGGCCCGG  
GGGTGCATTTTGC AAAGTCATCAATAGAACCTTCATTGGAGGGTATTTTGAAGAAAGGAGCATGACCATGAGCAAGTTC AAAGCAGTTATTCCAAAAGACCATATGTCTGCCTTGAATC  
ATAGCCATGCAATTTCCATCACCTCAGGTGCCATCCAGCAAGGTGTCCCAACAATGATTTCTTGAACGTTGCCTATCACCTGAATCAAAAAGGCAAGCAGAAACCCCAAAATCTCC  
GAGTTTAATTCCACCTTTAGCATCAACTAGGATGTTGCCAGCTTTCACATCACGATGGATATGGCCATGATGATGAAGATAATCCAATCCTTTCAGCGCCTCCTTCAAATCGTGGCAATAA  
TCGATTCCTCGAAACCATCTGAAATGCTGACTTCATGATATGGAGGCAGGACCCTCCTGCCATGTACGGCATGACTACCCACAAGGTGTGGTCTTTCACGAAGGAGCAGTGCAGGTTCA  
GGACATTGGGGTGGTCTATCAAATCATTGTCTGTGCCTCCCGCGAGATGTTGCTATAATGGATCGATTCAACTTTTTCAACCGAATCGAAGGGGAGAAACGAAAGAGAAAGGAA  
AAGTAGAGTCAACGACGCGAGAACCAGATCGCTTCCGTGGCGCTCAAAGTCAAGAATCTTGATAGCCACGATCTCGTTGAGAGGAACACATAAGGCCCGCTGCACGACGGCGCTTGC  
CCCCTGTCCAACCATCTCGTAAAGCTCGTACTCCTCCCGCGGATCGGATACTTCTCCGCTCCATGGCTGCTTTGGCTAACTCGTCAGTCAGATAAACCCCTAGAAGCAGATGAAAAAGA  
AGGAGAAGAAGAAGACGAAGAGGAATTGTAGGAGGAATACGAATCGGGATAGAAATGGGACTATGGGAGGCATTAATGGAAGAAGCGAGGATGACGAGGAGAAAGCAGGTCTC  
TCCACCTTTTCTCGTGAGGAGAGAGGGGAAGGCGAGAGAGCGACCCGAGCTTGGCGGGCGAGTTCTATGGCCAGAGCTGGCATTGTATCCGAAAAGCGCGCTATATGGAAAGCACGA  
AGCGAGCCAGGAAGCAGCTCTCACCGCGCGCGCGCGCGACGGCAA

>comp166980\_c0\_seq7

GACCCAACCTCCCTGCATTTTACTTATGCTCGGCTTTCCACTGCTTTGATTGGCATTCTTGAGACCTGTGCGAGAGGAGATTGATCGGAGTGTCTTCTCGTTGAAGACGGATGTTGGTG  
AACAGGAGGCTGGACCTTAGCCTGCTGTAGGGCTCTGGAAGTTGGTATGCCTTCGGAGTGAGAAAGGAGGTCCGCGACAGAGATCCGGCTTCTCTCTGGGTTGTGCGAACAAGGAGAG  
AGATGGGAGGGAAGAGATCTTCCGCCGA

>comp167025\_c0\_seq14

GGAGGTGAAGGTGTTTATCCACCACGCTTTCCCGTACTTTGGTTTTGGAATAGTTTGGGAGTGTACTAAGCATTACATAATCTATATAATATATAATTTGTTATTATAACGATAACAATTA  
ATAACTAAAAAATCTATACCGAGAGGTTCGGTCTGGTGCGTCTTGCGAAGTGGACAGGGAGATCGGGCAATTTCTCGGTACAGGTCTGAGAGGGAACCTCGGGAGGTTGAGTTGGCTTG  
CGGCACAGTAGAGGTCTTAGCTAGGGTTGTGTCGGCTTGCGGCACTGAGAGGTGGAAGAGGCGTTGGATCAGAGGCTGGAGGGAATCGTCCGGAGAAACAGAGGCGTTTGC GCGAGG  
AAGCTTGC GGCAGATGTTTAGGGTTGTGGGGTGAAGAGATCTCGGCTAGGGAAATCGGAAGGCTGAACGTTTGTCTCGAGTTCCGGTAATGCAAGGTGGAATCGGCGGCTAAGCTCGG

ATACGAGTCGGACAGGGCTTTGGATTTCGTCGGCCTTGGCTTGAGGAGGTTTTGGCTCTGACGTTTGTGCGTGGGAGGAGAAGAAGAGGCAGAGTTGCGGCTTTTTTTGGGGTTTTTCATG  
AGCCTGGGAGAAGAAGAGAAGAAAGTTCCGTCTCCTCTCTGTTTTTAAAAGCAAGCGTAGGCATGCATGGTATGACTGCAAACGGCGCCAAGTCGCAGAGCATAGGAACTGTAGCAAG  
CGCGGGGATGCGACTGTAGTAGAATTTTGGATTTGCAAGATTAGCAACATCTGGAAGTGGCGGGTCGACCACATCTACAGGCCTGAGAGGAGGTGCTGGTGATTGAGCCGGAGGTAGG  
GCCTCAGGTGCAGCCAGCCCAGCTAGACCTCCAGCCTCTGCTGGGTATTTCAGTGATTAGACCATCCACACCAATTCCACCAACAAAAGTAGCAATTTCAACAATTGGATCTGAGAAGAAA  
TCGTAAGCTATCGTTGTAAATTCATTTTTGAGCACCGATACATAAACAGATATATTTGATTATGCATCTCCGTTGTAACGTCGGTGTAATGAGAAATGAAAGCACCATCATAAGCCATTAGG  
GACGATCTTATAACATTAATAGCATTAGCAAATTGCTTGATCTCATCAATAGTTGGCTTTGGTGCATCGCCAACCTGCTCTGGAATCAAGAGAACATATTCATAGAAGGTGTTCTTCTTTA  
AATGCTGAAAGAACTGAAGAGTCGTCAGATTGGATTA AAACTCTCTTTGTTTTGTCTTTGTGCATAGCTCGCATTAGCCAATGCAGTTGAAACGGCATCGACTATACTTAGACCCTTCTTTGA  
TGCTAGATAGGGAGCATTCTTAATATTGATCAGGACACCTGGAACACTACTGTTTTTGGCAAAGGATAGGAATTCAGACAATGTCAGGATTTTGCCCATGTTCTTAGCAACTGGATTTCTTA  
CCAACCCAAGTGATGAGTAGGGGCTAACCAAATTAGCTGAAAAAGGAAATGAGATGTTTGAGACATTTTCATCTTTCTGCTTGAACATATAAAAACAAAGAAAAAAGAAGAACAACCTC  
TTACGTTTCAAGCTTTGGATTTCAATCCAAGTGAGATCGAATGTGAAGATTCCAGTGTTGTTTTGGATCTCAGGTATTGTTGTAGACTTCGCATGAATTTAGGCATTGCGGTTGTGCTTCC  
TGAAAGATCTGCTGAGTCTAAACAAAATAAAAATGGCATCTTTTGACATTTGAACGGAACAATCAATGATATCTGCACCATCATCTACTGCTTGTATAAGCAATATCAGTGCTTCCAGGAT  
AGATTCCACTTGCACCGTTGTGAGTTATAACCAATGGTTGACCTTCTCCAGAGAGAGCTTTGTTCTTGTATGGGCAAAGCAAGCAATAGCCTCTGATGCAGTGGAAGGGAAGTCAGTGA  
CAACTCCATCAACAGAGAATTTGAATTGTCAATAAACTGAAGATACTCATCAACTGGATCAAAGTTGTTACTGTAGCTTCCCTGGAGCATCATTAGCAAATCCTGAAGCATAAACTTCTAG  
TCCAACTCTATGAGCATGTGTTACAAGGCCAGTGCTAGGTGCTAAATAGCCATTATGATCAACAGGCCATATATACTCTTTTTGAACTAAAATTCCTGATGCAAATGTCTTGATATTTACCAA  
GTCTCAAGAAGATCTCCATATGTCTTGTTCGAGGCCGGCTCGACTGAACCAGCATCAAGGAACCTAAAATGAGCTTTGGTTTTGTTTTCATGGAGCTCACATCAACATTTCTTCAGGAA  
GTCTATTTCTGGTGATGAGATGAAATTGAACTGTATATCTTGAGAGGCTAGCTTTATAAAATTTAATGCATCTAGTTTATGTTCTTTGTAGAATGTGCTGTACTGCACATTCAGCCAAAGTTG  
AGGAGGTTTAAGGCCTGAACATCATCAATAGTTGAGATTGGCATGACACCATCAAATATGCTTGGCCTTGAATAAATGTTCTGAACCAATGTGACATTATGAATAACTCTTCTGCTGTAA  
AGTCTATAGAGAACCATCCTCGAATAGGCTGCCATTTACTTTGTAAGTGTTCCCTCTCTTTGGAAAAATACTAGCAATATTAGTAGAGTTATCAAGCCTCAGATCAGCCTTGCATATGCCAA  
TACTATCTTTTGTAACTGAAGGTGCGCAGAATAGCACAAACATTTCTTAAACTGCTCGGTGATACTGCAAACCTGATAAGCATATTGGCTTGATTCTGGAAAAGATGCCTGAGAATCCACCTCG  
AGCAATCACTAGAGGAGGATAACCATTTAAGGTTTGCCATTTTTGGAGGGGAGGATTGTCAGGCTGAGCCAATACTCCATAAATGATGAAGAGAATAGGAAAGAGATAGGCCAACATTTT  
CGAAATATTCATCAAAACATCATCTAAAATAAAAATCATAACATGAAGAAAAAAGCGGCTTCCTCACAAAATTCATAATTTTATTTAATGTCTAATATTTAATGAGTCAAATCATAACA  
TCAAAAACCTGCAGGCTGAGCAGCATCTCCTTGAAATGATGAAGAGAAGAGGAAAGAGATAAGCCACCGTTCTTTGAAAAATTCAGCCAAACAGAAAAATGAAGGAATAAAAATGGCTT  
CCTTTCAACTCGAGGTGATGGAGAGAGAAGGTGTTTGAAGATGTTTGTCAATAATATAA

>comp167025\_c0\_seq17

TTTGTCTTCTGTTTTGGAGGTTAAACAAGTAGCAACTTTGTAAGACAAAGTTATGGTTTCCCTCATCCATATTAATTACTGCAACTGAACAATTATTGTATGTATGCTGGGAATAGGTAATTT  
AGCACTTGAATCAACTCTGTTTCTCAAAAACATCAAAAGCAGTTAAGGTAATAAAAGATGGAACAAGAAAGTTTTCTTTTCACTATGGTAAAAAACAATTAGACCCTCTTGTCAATTA  
AAATAATTTAAATTCACTCTTCATTTACTTTAATTAATCTAATCACCTGAACTTAATTATGATACTTCAATAATTGGTTCAATTCAATAAAAGGGAGCATTACATCCAGCTAATACATCGAC  
AAAATGATATACATAACCAAATTTGCAATTGCAATCATTTGGTGCCTTAAACAAAAAAGCTGAGCATCATTATAAGGATGCAGAGATGAGTGTTAAAAGCTGTATTTGAAAGCTGACCGCT  
TTCTTTGGCTCCGAACCTGGTGTCTGTGCCTGAGCAGGATTTGTAAGATTAGCAACATCTGGAAGTGGCGGGTCGACCACATCTACAGGCCTGAGAGGAGGTGCTGGTGATTGAGCCG  
GAGGTAGGGCCTCAGGTGCAGCCAGCCCAGCTAGACCTCCAGCCTCTGCTGGGTATTTCAGTGATTAGACCATCCACACCAATTCCACCAACAAAAGTAGCAATTTCAACAATTGGATCTG  
AGAAGAAATCGACACCTGGAACACTACTGTTTTTGGCAAAGGATAGGAATTCAGACAATGTCAGGATTTTGCCCATGTTCTTAGCAACTGGATTTCTTACCAACCCAAGTGATGAGTAGG

GGCTAACCAAATTAGGTTTCAAGCTTTGGATCTCAATCCAAGTGAGATCGAATGTGAAGATTCCAGTGTGTTTTGGATCTCAGGTATTGTTGTAGACTTGGACATGAATTTTGGCATTGCT  
GTTGTGCTTCTGAAAGATCTGCTGAGTCTAAACAAAATAAAATGGCATCTTTTGACATTTGAACGGAACAATCAATGATATCTGCACCATCATCTACTGCTTGTTTATAAGCAATATCAGT  
GCTTCCAGGATAGATTCCACTTGCACCGTTGTGAGTTATAACCAATGGTTGACCT

>comp167025\_c0\_seq18

GGAGGTGAAGGTGTTTATCCACCACGCTTTCCCGGTACTTTGGTTTTGGAATAGTTTTGGGAGTGTTTACTAAGCATTACATAATCTATATAATATATAAATTGTTATTATAACGATAACAATTA  
ATAACTAAAAAATCTATACCGAGAGGTCGGGTCTGGTGCCTTTCGGAAGTGGACAGGGAGATCGGGCAATTTCTCGGTACAGGTCTGAGAGGGAACCTCGGGAGGTTGAGTTGGCTTG  
CGGCACAGTAGAGGTCTTAGCTAGGGTTGTGTCGGCTTGCGGCACTGAGAGGTGGAAGAGGCGTTGGATCAGAGGCTGGAGGGAATCGTCCGGAGAAACAGAGGCGTTTGC GCGAGG  
AAGCTTGC GG CAGATGTTTAGGGTTGTGGGGTGAAGAGATCTCGGCTAGGGAAATCGGAAGGCTGAACGTTTTGCTCGAGTTCCGGTAATGCAAGGTGGAATCGGCGGCTAAGCTCGG  
ATACGAGTCGGACAGGGCTTTGGATTCGTCGGCCTTGGCTTGAGGAGGTTTTGGCTCTGACGTTTGTGCGTGGGAGGAGAAGAAGAGGCAGAGTTGCGGCTTTTTTTGGGGTTTTTCATG  
AGCCTGGGAGAAGAAGAGAAGAAAGTTCCGTCTCCTCTCTGTTTTTAAAAAGCAAGCGTAGGCATGCATGGTATGACTGCAAACGGCGCCAAGTCGCAGAGCATAGGAACGTGAGCAAG  
CGGCGGGGATGCGACTGTAGTAGAATTTGGATTTGCAAGATTAGCAACATCTGGAAGTGGCGGGTCGACCACATCTACAGGCCTGAGAGGAGGTGCTGGTGATTGAGCCGGAGGTAGG  
GCCTCAGGTGCAGCCAGCCCGGCTAGACCTCCAGCCTCTGCTGGTAAGATTGTGTAGGAAAGCTTCGCATTGAGGTTTGAGCATGGAGTCCTCAAGTATGCTCTTGCTGTTGCAGGGTAT  
TCAGTGATTAGACCATCCACACCAATTCACCAACAAAAGTAGCAATTTCAACAATTGGATCTGAGAAGAAATCGACACCTGGAACACTACTGTTTTTGGCAAAGGATAGGAATTCAGAC  
AATGTCAGGATTTTGCCCATGTTCTTAGCAACTGGATTTCTTACCAACCCAAGTGATGAGTAGGGGCTAACCAAAATTAGGTTTTCAAGCTTTGGATCTCAATCCAAGTGAGATCGAATGTGA  
AGATTCCAGTGTGTTTTGGATCTCAGGTATTGTTGTAGACTTGGACATGAATTTTGGCATTGCTGTTGTGCTTCTGAAAGATCTGCTGAGTCTAAACAAAATAAAATGGCATCTTTTGAC  
ATTTGAACGGAACAATCAATGATATCTGCACCATCATCTACTGCTTGTTTATAAGCAATATCAGTGCTTCCAGGATAGATTCCACTTGCACCGTTGTGAGTTATAACCAATGGTTGACCT

>comp167025\_c0\_seq21

TTTGTCTTCTGTTTTGGAGGTTAAACAAGTAGCAACTTTGTAAGACAAAAGTTATGGTTTTCCCTCATCCATATTAATTACTGCAACTGAACAATTATTGTATGTATGCTGGGAATAGGTAATTT  
AGCACTTGAATCAACTCTGTTTTCTAAAAACATCAAAAGCAGTTAAGGTAATAAAAGATGGAACAAGAAAGTTTTCTTTTCACTATGGTAAAAAACAATTAGACCCTCTTGT CATT A  
AAATAATTTAAAATTCACTCTTCATTTACTTTAATTAATCTAATCACCTGAACCTAATTATGATACTTCAATAATTGGTTCAATTCAATAAAAGGGAGCATTACATCCAGCTAATACATCGAC  
AAAATGATATAACATAACCAAAATTTGCAATTGCAATCATTGGTGCCTTAAACAAAAAAGCTGAGCATCATTATAAGGATGCAGAGATGAGTGTTAAAAGCTGTATTTGAAAGCTGACCGCT  
TTCTTTGGCTCCGAACCTGGTGTCTGTGCCTGAGCAGGATTTGTAAGATTAGCAACATCTGGAAGTGGCGGGTCGACCACATCTACAGGCCTGAGAGGAGGTGCTGGTGATTGAGCCG  
GAGGTAGGGCCTCAGGTGCAGCCAGCCCGGCTAGACCTCCAGCCTCTGCTGGTAAGATTGTGTAGGAAAGCTTCGCATTGAGGTTTGAGCATGGAGTCCTCAAGTATGCTCTTGCTGTTG  
CAGGGTATTAGTGATTAGACCATCCACACCAATTCACCAACAAAAGTAGCAATTTCAACAATTGGATCTGAGAAGAAATCGTAAGCTATCGTTGTAAATTCATTTTTGAGCACC GATA C  
ATAAACAGATATATTTGATTTATGCATCTCCGTTGTAACGTCGGTGTAATGAGAAATGAAAGCACCATCATAAGCCATTAGGGACGATCTTATAACATTAATAGCATTAGCAAATTGCTTGAT  
CTCATCAATAGTTGGCTTTGGTGCATCGCCAATTTGCTCTGGAATCAAGAGAACATATTCATAGAAGGTGTTCTTCTTCTTAAATGCTGAAAGA ACT GAAGAGTCGT CAGATTGGATTAAA  
ACTCTCTTTGTTTTGTCTTTGTCATAGCTCGCATTAGCCAATGCAGTTGAAACGGCATCGACTATACTTAGACCCTTCTTTGATGCTAGATAGGGAGCATTCTATAGATTAAGAGTAACCAT  
TAGAACATTGATATTTGATAAGTTATCTAAAAAGTGTCTGCTTTGATACCTTAATATTGATCAGGACACCTGGAACACTACTGTTTTTGGCAAAGGATAGGAATTCAGACAATGTCAGGAT  
TTTGGCCATGTTCTTAGCAACTGGATTTCTTACCAACCCAAGTGATGAGTAGGGGCTAACCAAAATTAGGTTTTCAAGCTTTGGATCTCAATCCAAGTGAGATCGAATGTGAAGATTCCAGTG  
TTGTTTTGGATCTCAGGTATTGTTGTAGACTTGGACATGAATTTTGGCATTGCTGTTGTGCTTCTGAAAGATCTGCTGAGTCTAAACAAAATAAAATGGCATCTTTTGACATTTGAACGGA  
ACAATCAATGATATCTGCACCATCATCTACTGCTTGTTTATAAGCAATATCAGTGCTTCCAGGATAGATTCCACTTGCACCGTTGTGAGTTATAACCAATGGTTGACCT

>comp167025\_c0\_seq27

GGAGGTGAAGGTGTTTATCCACCACGCTTCCCGGTACTTTGGTTTTGGAATAGTTTTGGGAGTGTACTAAGCATTACATAATCTATATAATATATATAATTGTTATTATAACGATAACAATTA  
ATAACTAAAAAATCTATACCGAGAGGTCGGGTCTGGTGCGTCTTGCGAAGTGGACAGGGAGATCGGGCAATCTTCGGTACAGGTCTGAGAGGGAACCTCGGGAGGTTGAGTTGGCTTG  
CGGCACAGTAGAGGTCTTAGCTAGGGTTGTGTCGGCTTGCGGCACTGAGAGGTGGAAGAGGCGTTGGATCAGAGGCTGGAGGGAATCGTCCGGAGAAACAGAGGCGTTTGC GCGAGG  
AAGCTTGC GG CAGATGTTTAGGGTTGTGGGGTGAAGAGATCTCGGCTAGGGAAATCGGAAGGCTGAACGTTTGCTCGAGTTCCGGTAATGCAAGGTGGAATCGGCGGCTAAGCTCGG  
ATACGAGTCGGACAGGGCTTTGGATTCGTCGGCCTTGGCTTGAGGAGGTTTTGGCTCTGACGTTTGTGCGTGGGAGGAGAAGAAGAGGCAGAGTTGCGGCTTTTTTTGGGGTTTTTCATG  
AGCCTGGGAGAAGAAGAGAAGAAAGTTCCGTCTCCTCTCTGTTTTTAAAAGCAAGCGTAGGCATGCATGGTATGACTGCAAACGGCGCCAAGTCGCAGAGCATAGGAACTGTAGCAAG  
CGGCGGGGATGCGACTGTAGTAGAATTTGGATTTGCAAGATTAGCAACATCTGGAAGTGGCGGGTCGACCACATCTACAGGCTGAGAGGAGGTGCTGGTGATTGAGCCGGAGGTAGG  
GCCTCAGGTGCAGCCAGCCCGGCTAGACCTCCAGCCTCTGCTGGGTATTCAAGTATTAGACCATCCACACCAATTCCACCAACAAAAGTAGCAATTTCAACAATTGGATCTGAGAAGAAA  
TCGTAAAGCTATCGTTGTAAATTCATTTTTGAGCACCGATACATAAACAGATATATTTGATTTATGCATCTCCGTTGTAACGTCGGTGTAATGAGAAATGAAAGCACCATCATAAGCCATTAGG  
GACGATCTTATAACATTAATAGCATTAGCAAATTTGCTTGATCTCATCAATAGTTGGCTTTGGTGCATCGCCAACTTGCTCTGGAATCAAGAGAACATATTCATAGAAGGTGTTCTTCTTTA  
AATGCTGAAAGAACTGAAGAGTCGTCAGATTGGATTA AAACTCTCTTTGTTTTGTCTTTGTCATAGCTCGCATTAGCCAATGCAGTTGAAACGGCATCGACTATACTTAGACCCTTCTTTGA  
TGCTAGATAGGGAGCATTCTTAATATTGATCAGGACACCTGGAACACTACTGTTTTGGCAAAGGATAGGAATTCAGACAATGTCAGGATTTTGCCCATGTTCTTAGCAACTGGATTTCTTA  
CCAACCCAAGTGATGAGTAGGGGCTAACCAAATTAGGTTTTCAAGCTTTGGATTTCAATCCAAGTGAGATCGAATGTGAAGATTCCAGTGTGTTTTGGATCTCAGGTATTGTTGTAGACTT  
CGACATGAATTTAGGCATTGCGGTTGTGCTTCTGAAAGATCTGCTGAGTCTAAACAAAATAAAAATGGCATCTTTTGACATTTGAACGGAACAATCAATGATATCTGCACCATCATCTACTG  
CTTGTTTTATAAGCAATATCAGTGCTTCCAGGATAGATTCCACTTGCACCGTTGTGAGTTATAACCAATGGTTGACCTTCTCCAGAGAGAGCTTTGTTCTTGTTATGGGCAAAGCAAGCAATA  
GCCTCTGATGCAGTGGAAGGGAAGTCAGTGACAACCTCCATCAACAGAGAATTTGAATGTCAATAAACTGAAGATACTCATCAACTGGATCAAAGTTGTTACTGTAGCTTCTGGAGCA  
TCATTAGCAAATCCTGAAGCATAAACTTCTAGTCCA ACTCTATGAGCATGTGTTACAAGGCCAGTGCTAGGTGCTAAATAGCCATTATGATCAACAGGCCATATATACTCTTTTTGAACTAA  
AATTCCTGATGCAAATGTCTTGATATTTACCAAGTCCTCAAGAAGATCTCCATATGTCTTGTTTCGAGGCCGGCTCGACTGAACCAGCATCAAGGAACCTAAAAATGAGCTTTGGTTTTGTT  
TTCATGGAGCTCACATCAACATTCCTCAGGAAGTCTATTTCTGGTGATGAGATGAAATTGAACTGTATATCTTGAGAGGCTAGCTTTATAAAAATTTAATGCATCTAGTTTATGTTCTTTGTAG  
AATGTGCTGTA CTGCACATTCAGCCAAAGTTGAGGAGGTTTAAGGCCTTGAACATCATCAATAGTTGAGATTGGCATGACACCATCAAATATGCTTGGCCTTGAATAAATGTTCTGAACCA  
ATGTGACATTATTGAATAACTCTTCTGCTGTAAAGTCTATAGAGAACCATCCTCGAATAGGCTGCCATTTACTTTGTAAGTGTTCCTCTCTTTGGAAAAATACTAGCAATATTAGTAGAGT  
TATCAAGCCTCAGATCAGCCTTGCAATATGCCAATACTATCTTTTTGTTAACTGAAGGTGCGAGAATAGCACAACATTCCTTAAACTGCTCGGTGATACTGCAAACCTGATAAGCATATTGGCTT  
GATTCTGAAAGATGCCTGAGAATCCACCTCGAGCAATCACTAGAGGAGGATAACCAATTAAGGTTTGCCATTTTTGGAGGGGAGGATTTGCAGGCTGAGCCAATACTCCATAAATGATG  
AAGAGAATAGGAAAGAGATAGGCCAACATTTTCGAAATATTCATCAAAACATCATCTAAAAATAAAATCATAACATGAAGAAAAAAGCGGCTTCTCACAAAATTTTATAATTTATTTT  
AATGTCTAATATTTAATGAGTCAAATCATAACATCAAAAACTTGCAGGCTGAGCAGCATCTCCTTGAATGATGAAGAGAAGAGGAAAGAGATAAGCCACCGTTCTTTGAAAAATTCAG  
CCAAACAGAAAAATGAAGGAATAAAATGGCTTCTTTCAACTCGAGGTGATGGAGAGAGAAGGTGTTTGAAGATGTTTGTCAATAATATAA

>comp167025\_c0\_seq28

GGAGGTGAAGGTGTTTATCCACCACGCTTCCCGGTACTTTGGTTTTGGAATAGTTTTGGGAGTGTACTAAGCATTACATAATCTATATAATATATATAATTGTTATTATAACGATAACAATTA  
ATAACTAAAAAATCTATACCGAGAGGTCGGGTCTGGTGCGTCTTGCGAAGTGGACAGGGAGATCGGGCAATCTTCGGTACAGGTCTGAGAGGGAACCTCGGGAGGTTGAGTTGGCTTG  
CGGCACAGTAGAGGTCTTAGCTAGGGTTGTGTCGGCTTGCGGCACTGAGAGGTGGAAGAGGCGTTGGATCAGAGGCTGGAGGGAATCGTCCGGAGAAACAGAGGCGTTTGC GCGAGG

AAGCTTGCGGCAGATGTTTAGGGTTGTGGGGTGAAGAGATCTCGGCTAGGGAAATCGGAAGGCTGAACGTTTGTCTCGAGTTCGGGTAATGCAAGGTGGAATCGGCGGCTAAGCTCGG  
ATACGAGTCGGACAGGGCTTTGGATTTCGTTCGGCCTTGGCTTGAGGAGGTTTTGGCTCTGACGTTTGTGCGTGGGAGGAGAAGAAGAGGCAGAGTTGCGGCTTTTTTTGGGGTTTTTCATG  
AGCCTGGGAGAAGAAGAGAAGAAAGTTCCGTCTCCTCTCTGTTTTTAAAGCAAGCGTAGGCATGCATGGTATGACTGCAAACGGCGCCAAGTCGCAGAGCATAGGAACTGTAGCAAG  
CGGCGGGGATGCGACTGTAGTAGAATTTGGATTGCAAGATTAGCAACATCTGGAAGTGGCGGGTCGACCACATCTACAGGCCTGAGAGGAGGTGCTGGTATTGAGCCGGAGGTAGG  
GCCTCAGGTGCAGCCAGCCCGGCTAGACCTCCAGCCTCTGCTGGGTATTAGTGATTAGACCATCCACACCAATTCCACCAACAAAAGTAGCAATTTCAACAATTGGATCTGAGAAGAAA  
TCGTAAGCTATCGTTGTAAATTCATTTTTGAGCACCGATACATAAACAGATATATTTGATTTATGCATCTCCGTTGTAACGTCGGTGTAAATGAGAAATGAAAGCACCATCATAAGCCATTAGG  
GACGATCTTATAACATTAATAGCATTAGCAAATTCGTTGATCTCATCAATAGTTGGCTTTGGTGCATCGCCAACCTGCTCTGGAATCAAGAGAACATATTCATAGAAGGTGTTCTTCTTTA  
AATGCTGAAAGAAGTGAAGAGTCGTCAGATTGGATTAATAACTCTCTTTGTTTTGTCTTTGTCATAGCTCGCATTAGCCAATGCAGTTGAAACGGCATCGACTATACTTAGACCCTTCTTTGA  
TGCTAGATAGGGAGCATTCTATAGATTAAGAGTAACCATTAGAACATTGATATTTGATAAGTTATCTAAAAAGTGTCTGCTTTGATACCTTAATATTGATCAGGACACCTGGAACACTACT  
GTTTTTGGCAAAGGATAGGAATTCAGACAATGTCAGGATTTGCCCATGTTCTTAGCAACTGGATTTCTTACCAACCCAAGTGATGAGTAGGGGCTAACCAATTAGCTGAAAAAGGGAA  
ATGAGATGTTTGAGACATTTTCATCTTTCTGCTTGAACATATAAAAAAGAAAAAAGAAGAACAACCTTACGTTTCAAGCTTTGGATTTCAATCCAAGTGAGATCGAATGTGAAGATT  
CCAGTGTGTTTTGGATCTCAGGTATTGTTGTAGACTTCGACATGAATTTAGGCATTGCGGTTGTGCTTCCTGAAAGATCTGCTGAGTCTAAACAAAATAAAATGGCATCTTTTGACATTTG  
AACGGAACAATCAATGATATCTGCACCATCATCTACTGCTTGTATAAGCAATATCAGTGCTTCCAGGATAGATTCCACTTGCACCGTTGTGAGTTATAACCAATGGTTGACCTTCTCCAG  
AGAGAGCTTTGTTCTTGTATGGGCAAAGCAAGCAATAGCCTCTGATGCAGTGAAGGGAAAGTCAGTGACAACCTCCATCAACAGAGAATTTGAATTGTCAATAAACTGAAGATACTCAT  
CAACTGGATCAAAGTTGTTACTGTAGCTTCTGGAGCATCATTAGCAAATCCTGAAGCATAAACTTCTAGTCCAACCTCTATGAGCATGTGTTACAAGGCCAGTGCTAGGTGCTAAATAGCC  
ATTATGATCAACAGGCCATATATACTCTTTTTGAACTAAAATTCCTGATGCAAATGTCTTGATATTTACCAAGTCCTCAAGAAGATCTCCATATGTCTTGTTCGAGGCCGGCTCGACTGAACC  
AGCATCAAGGAACCTAAAATGAGCTTTGGTTTTGTTTTCATGGAGCTCACATCAACATTTCTCAGGAAGTCTATTTCTGGTGATGAGATGAAATTGAACTGTATATCTTGAGAGGCTAGC  
TTTATAAAATTTAATGCATCTAGTTTATGTTCTTTGTAGAAATGTGCTGTAAGTGCACATTCAGCCAAAAGTTGAGGAGGTTTAAAGGCCTTGAACATCATCAATAGTTGAGATTGGCATGACACCA  
TCAAATATGCTTGGCCTTGAATAAATGTTCTGAACCAATGTGACATTATTGAATAACTCTTCTGCTGTAAAGTCTATAGAGAACCATCCTCGAATAGGCTGCCCATTTACTTTGTAAGTGTTT  
CCTCTCTTTGGAAAATACTAGCAATATTAGTAGAGTTATCAAGCCTCAGATCAGCCTTGCATATGCCAATACTATCTTTTGTAACTGAAGGTCGCAGAATAGCACAACATTTTAAACT  
GCTCGGTGATACTGCAAACGATAAGCATAATTGGCTTGATTCTGGAAAGATGCCTGAGAATCCACCTCGAGCAATCACTAGAGGAGGATAACCATTTAAGGTTTGGCATTTTTTGGAGGGGA  
GGATTTGCAGGCTGAGCCAATACTCCATAAATGATGAAGAGAATAGGAAAGAGATAGGCCAACATTTTCGAAATATTCATCAAAACATCATCTAAAAATAAAATCATAACATGAAGAAAA  
AAAGCGGCTTCCACAAAATTTCAATTTTTATTTAATGTCTAATATTTAATGAGTCAAATCATAACATCAAAAACTTGCAGGCTGAGCAGCATCTCCTTGAATGATGAAGAGAAGAG  
GAAAGAGATAAGCCACCGTTCTTTGAAAAATTCAGCCAAACAGAAAAATGAAGGAATAAAATGGCTTCTTTCAACTCGAGGTGATGGAGAGAGAAGGTGTTTGAAGATGTTTGTCAAT  
AATATAA

>comp167025\_c0\_seq31

GGAGGTGAAGGTGTTTATCCACCACGCTTTCCCGTACTTTGGTTTTGGAATAGTTTGGGAGTGTTTACTAAGCATTACATAATCTATATAATATATAATTTGTTATTATAACGATAACAATTA  
ATAACTAAAAAATCTATACCAGAGGTCGGGTCTGGTGCCTTTCGGAAGTGGACAGGGAGATCGGGCAATTTCTTCGGTACAGGTCTGAGAGGGAACCTCGGGAGGTTGAGTTGGCTTG  
CGGCACAGTAGAGGTCTTAGCTAGGGTTGTGTCGGCTTGCGGCACTGAGAGGTGGAAGAGGCGTTGGATCAGAGGCTGGAGGGAATCGTCCGGAGAAACAGAGGCGTTTGCGCGAGG  
AAGCTTGCGGCAGATGTTTAGGGTTGTGGGGTGAAGAGATCTCGGCTAGGGAAATCGGAAGGCTGAACGTTTGTCTCGAGTTCGGGTAATGCAAGGTGGAATCGGCGGCTAAGCTCGG  
ATACGAGTCGGACAGGGCTTTGGATTTCGTTCGGCCTTGGCTTGAGGAGGTTTTGGCTCTGACGTTTGTGCGTGGGAGGAGAAGAAGAGGCAGAGTTGCGGCTTTTTTTGGGGTTTTTCATG



AGCCTGGGAGAAGAAGAGAAGAAAGTTCCGTCTCCTCTCTGTTTTTAAAAGCAAGCGTAGGCATGCATGGTATGACTGCAAACGGCGCCAAGTCGCAGAGCATAGGAACTGTAGCAAG  
CGGCGGGGATGCGACTGTAGTAGAATTTGGATTTGCAAGATTAGCAACATCTGGAAGTGGCGGGTTCGACCACATCTACAGGCCTGAGAGGAGGTGCTGGTGATTGAGCCGGAGGTAGG  
GCCTCAGGTGCAGCCAGCCCGGCTAGACCTCCAGCCTCTGCTGGTAAGATTGTGTAGGAAAGCTTCGCATTGAGGTTTGTAGCATGGAGTCCTCAAGTATGCTCTTGCTGTTGCAGGGTAT  
TCAGTGATTAGACCATCCACACCAATTCCACCAACAAAAGTAGCAATTTCAACAATTGGATCTGAGAAGAAATCGTAAGCTATCGTTGTAAATTCATTTTTGAGCACCGATAATAAACAG  
ATATATTTGATTTATGCATCTCCGTTGTAACGTCGGTGTAATGAGAAATGAAAGCACCATCATAAGCCATTAGGGACGATCTTATAACATTAATAGCATTAGCAAATTGCTTGATCTCATCAAT  
AGTTGGCTTTGGTGCATCGCCAACTTGCTCTGGAATCAAGAGAACATATTCATAGAAGGTGTTCTTTCTTAAATGCTGAAAGAACTGAAGAGTCGTCAGATTGGATTAATACTCTCTTT  
GTTTTGTCTTTGTCATAGCTCGCATTAGCCAATGCAGTTGAAACGGCATCGACTATACTTAGACCCTTCTTTGATGCTAGATAGGGAGCATTCTTAATATTGATCAGGACACCTGGAACACT  
ACTGTTTTTTGGCAAAGGATAGGAATTCAGACAATGCAGGATTTTGGCCATGTTCTTAGCAACTGGATTTCTTACCAACCCAAGTGATGAGTAGGGGCTAACCAAATTAGGTTTCAAGCTT  
TGGATTTCAATCCAAGTGAGATCGAATGTGAAGATTCCAGTGTGTTTTGGATCTCAGGTATTGTTGTAGACTTCGACATGAATTTAGGCATTGCGGTTGTGCTTCCTGAAAGATCTGCTGA  
GTCTAAACAAAATAAAATGGCATCTTTTGACATTTGAACGGAACAATCAATGATATCTGCACCATCATCTACTGCTTGTTTATAAGCAATATCAGTGCTTCCAGGATAGATTCCACTTGCACC  
GTTGTGAGTTATAACCAATGGTTGACCTTCTCCAGAGAGAGCTTTGTTCTTGTTATGGGCAAAGCAAGCAATAGCCTCTGATGCAGTGGAAGGGAAGTCAGTGACAACCTCCATCAACAG  
AGAATTTGAATTGTCAATAAACTGAAGATACTCATCAACTGGATCAAAGTTGTTACTGTAGCTTCTTGAGCATCATTAGCAAATCCTGAAGCATAAACTTCTAGTCCAACCTCTATGAGCA  
TGTGTTACAAGGCCAGTGCTAGGTGCTAAATAGCCATTATGATCAACAGGCCATATACTCTTTTTGAACTAAAATTCCTGATGCAAATGTCTTGATATTTACCAAGTCTCAAGAAGATCT  
CCATATGTCTTGTTCGAGGCCGGCTCGACTGAACCAGCATCAAGGAACCTAAAATGAGCTTTGGTTTTGTTTTCATGGAGCTCACATCAACATTCCTCAGGAAGTCTATTTCTGGTGATG  
AGATGAAATTGAACTGTATATCTTGAGAGGCTAGCTTTATAAAATTAATGCATCTAGTTTATGTTCTTTGTAGAATGTGCTGTACTGCACATTCAGCCAAAGTTGAGGAGGTTTAAGGCCT  
TGAACATCATCAATAGTTGAGATTGGCATGACACCATCAAATATGCTTGGCCTTGAATAAATGTTCTGAACCAATGTGACATTATTGAATAACTCTTCTGCTGTAAAGTCTATAGAGAACCA  
TCCTCGAATAGGCTGCCCATTTACTTTGTAAGTGTTCCTCTCTTTGGAAAAATACTAGCAATATTAGTAGAGTTATCAAGCCTCAGATCAGCCTTGCCATATGCAATACTATCTTTTGTTAAC  
TGAAGGTGCGAGAATAGCACAACATTCCTTAAACTGCTCGGTGATACTGCAAACCTGATAAGCATAATTGGCTTGATTCTGAAAGATGCCTGAGAATCCACCTCGAGCAATCACTAGAGGA  
GGATAACCATTTAAGGTTTGGCATTTTTGGAGGGGAGGATTTGCAGGCTGAGCCAATACTCCATAAATGATGAAGAGAATAGGAAAGAGATAGGCCAACATTTTCGAAATATTCATCAAAA  
CATCATCTAAAAATAAAATCATAACATGAAGAAAAAAGCGGCTTCCTCACAAAATTCATAATTTATTTAATGTCTAATATTTAATGAGTCAAATCATAACATCAAAAACCTTGCAGGCT  
GAGCAGCATCTCCTTGAAATGATGAAGAGAAGAGGAAAGAGATAAGCCACCGTTCTTTGAAAAATTCAGCCAAACAGAAAAATGAAGGAATAAAATGGCTTCCTTTCAACTCGAGGTG  
ATGGAGAGAGAAGGTGTTTGAAGATGTTTGTCAATAATATAA

>comp167025\_c0\_seq38

GGAGGTGAAGGTGTTTATCCACCACGCTTTCCCGGTACTTTGGTTTTGGAATAGTTTGGGAGTGTTTACTAAGCATTACATAATCTATATAATATATAAATTGTTATTATAACGATAACAATTA  
ATAACTAAAAAATCTATACCGAGAGGTTCGGTCTGGTGCCTTTCGGAAGTGGACAGGGAGATCGGGCAATTCCTCGGTACAGGTCTGAGAGGGAACCTCGGGAGGTTGAGTTGGCTTG  
CGGCACAGTAGAGGTCTTAGCTAGGGTTGTGTCCGGCTTGCAGGACTGAGAGGTGGAAGAGGCGTTGGATCAGAGGCTGGAGGGAATCGTCCGGAGAAACAGAGGCGTTTGCAGGAGG  
AAGCTTGCAGGATGTTTAGGGTTGTGGGGTGAAGAGATCTCGGCTAGGGAAATCGGAAGGCTGAACGTTTGTCTGAGTTCCGGTAATGCAAGGTGGAATCGGCGGCTAAGCTCGG  
ATACGAGTCGACAGGGCTTTGGATTCGTCGGCCTTGGCTTGAGGAGGTTTTGGCTCTGACGTTTGTGCGTGGGAGGAGAAGAAGAGGCAGAGTTGCGGCTTTTTTTGGGGTTTTCATG  
AGCCTGGGAGAAGAAGAGAAGAAAGTTCCGTCTCCTCTCTGTTTTTAAAAGCAAGCGTAGGCATGCATGGTATGACTGCAAACGGCGCCAAGTCGCAGAGCATAGGAACTGTAGCAAG  
CGGCGGGGATGCGACTGTAGTAGAATTTGGATTTGCAAGATTAGCAACATCTGGAAGTGGCGGGTTCGACCACATCTACAGGCCTGAGAGGAGGTGCTGGTGATTGAGCCGGAGGTAGG  
GCCTCAGGTGCAGCCAGCCCGGCTAGACCTCCAGCCTCTGCTGGTAAGATTGTGTAGGAAAGCTTCGCATTGAGGTTTGTAGCATGGAGTCCTCAAGTATGCTCTTGCTGTTGCAGGGTAT

TCAGTGATTAGACCATCCACACCAATTCCACCAACAAAAGTAGCAATTTCAACAATTGGATCTGAGAAGAAATCGTAAGCTATCGTTGTAAATTCATTTTTGAGCACCGATACATAAACAG  
ATATATTTGATTATGCATCTCCGTTGTAACGTCGGTGTAATGAGAAATGAAAGCACCATCATAAGCCATTAGGGACGATCTTATAACATTAATAGCATTAGCAAATTGCTTGATCTCATCAAT  
AGTTGGCTTTTGGTGCATCGCCAACTTGCTCTGGAATCAAGAGAACATATTCATAGAAGGTGTTCTTCTTCTTAAATGCTGAAAGAAGTGAAGAGTCGTCAGATTGGATTAACAACTCTCTTT  
GTTTTGTCTTTGTGCATAGCTCGCATTAGCCAATGCAGTTGAAACGGCATCGACTATACTTAGACCCTTCTTTGATGCTAGATAGGGAGCATTCTATAGATTAAGAGTAACCATTAGAACATT  
GATATTTGATAAGTTATCTAAAAAAGTGTCTGCTTTGATACCTTAATATTGATCAGGACACCTGGAACACTACTGTTTTGGCAAAGGATAGGAATTCAGACAATGTCAGGATTTTGCCCAT  
GTTCTTAGCAACTGGATTTCTTACCAACCCAAGTGATGAGTAGGGGCTAACCAATTAGCTGAAAAAGGGAAATGAGATGTTTGAGACATTTTCATCTTTCTGCTTGAACATATAAAACAA  
AGAAAAAAGAAGAACAACCTTACGTTTCAAGCTTTGGATTTCAATCCAAGTGAGATCGAATGTGAAGATTCCAGTGTGTTTTGGATCTCAGGTATTGTTGTAGACTTCGACATGAATT  
TAGGCATTGCGGTTGTGCTTCTGAAAAGATCTGCTGAGTCTAAACAAAATAAAATGGCATCTTTTGACATTTGAACGGAAACAATCAATGATATCTGCACCATCATCTACTGCTTGTTTATAA  
GCAATATCAGTGCTTCCAGGATAGATTCCACTTGCACCGTTGTGAGTTATAACCAATGGTTGACCTTCTCCAGAGAGAGCTTTGTTCTTGTATGGGCAAAGCAAGCAATAGCCTCTGATG  
CAGTGGAAGGGAAAGTCAGTGACAACCTCCATCAACAGAGAATTTGAATTGTCAATAAACTGAAGATACTCATCAACTGGATCAAAGTTGTTACTGTAGCTTCTGGAGCATCATTAGCAA  
ATCCTGAAGCATAAACTTCTAGTCCAACCTCTATGAGCATGTGTTACAAGGCCAGTGCTAGGTGCTAAATAGCCATTATGATCAACAGGCCATATATACTCTTTTTGAACTAAAATTCCTGATG  
CAAATGTCTTGATATTTACCAAGTCTCAAGAAGATCTCCATATGTCTTGTTCGAGGCCGGCTCGACTGAACCAGCATCAAGGAACCTAAAAATGAGCTTTGGTTTTGTTTTCATGGAGCT  
CACATCAACATTCTTCAGGAAGTCTATTTCTGGTGATGAGATGAAATTGAACTGTATATCTTGAGAGGGCTAGCTTTATAAAAATTTAATGCATCTAGTTTATGTTCTTTGTAGAATGTGCTGTA  
CTGCACATTCAGCCAAAGTTGAGGAGGTTTAAAGGCCTTGAACATCATCAATAGTTGAGATTGGCATGACACCATCAAATATGCTTGGCCTTGAATAAATGTTCTGAACCAATGTGACATTA  
TTGAATAACTCTTCTGCTGTAAAGTCTATAGAGAACCATCCTCGAATAGGCTGCCATTTACTTTGTAAGTGTTCCTCTCTTTGGAAAAATACTAGCAATATTAGTAGAGTTATCAAGCCTC  
AGATCAGCCTTGCCATATGCCAATACTATCTTTTGTAACTGAAGGTCGCAGAATAGCACAACTCTTTAAACTGCTCGGTGATACTGCAAACTGATAAGCATATTGGCTTGATTCTGGAAA  
GATGCCTGAGAATCCACCTCGAGCAATCACTAGAGGAGGATAACCATTTAAGGTTTGCCATTTTGGAGGGGAGGATTTGCAGGCTGAGCCAATACTCCATAAATGATGAAGAGAATAGG  
AAAGAGATAGGCCAACATTTTCGAAATATTCATCAAAACATCATCTAAAAATAAAATCATAACATGAAGAAAAAAGCGGCTTCCTCACAAAATTCATAATTTTATTTAATGTCTAATATT  
TTAATGAGTCAAATCATAACATCAAAAACCTTGCAGGCTGAGCAGCATCTCCTTGAAATGATGAAGAGAAGAGGAAAAGAGATAAGCCACCGTTCTTTGAAAAATTCAGCCAAACAGAAAA  
ATGAAGGAATAAAATGGCTTCTTTCAACTCGAGGTGATGGAGAGAGAAGGTGTTTGAAGATGTTTGTCAATAATATAA

>comp167025\_c0\_seq4

TTTGTCTTCTGTTTTGGAGGTTAAACAAGTAGCAACTTTGTAAGACAAAAGTTATGGTTTCCCTCATCCATATTAATTACTGCAACTGAACAATTATTGTATGTATGCTGGGAATAGGTAATTT  
AGCACTTGAATCAACTCTGTTTCTCAAAAACATCAAAAGCAGTTAAGGTAATAAAAGATGGAACAAGAAAGTTTTCTTTTCACTATGGTAAAAAACAATTAGACCCTCTTGTTCATTA  
AAATAATTTAAATTCCTCTTCACTTTAATTAATCTAATCACCTGAACTTAATTATGATACTTCAATAATTGGTTCAATTCAATAAAAGGGAGCATTACATCCAGCTAATACATCGAC  
AAAATGATATACATAACCAAAATTTGCAATTGCAATCATTTGGTGCCTTAAACAAAAAAGCTGAGCATCATTATAAGGATGCAGAGATGAGTGTTAAAAGCTGTATTTGAAAGCTGACCGCT  
TTCTTTGGCTCCGAACCTGGTGTCTGTGCTGAGCAGGATTTGTAAGATTAGCAACATCTGGAAGTGGCGGGTCGACCACATCTACAGGCCTGAGAGGAGGTGCTGGTGATTGAGCCG  
GAGGTAGGGCCTCAGGTGCAGCCAGCCCGGCTAGACCTCCAGCCTCTGCTGGGTATTCAGTGATTAGACCATCCACACCAATTCCACCAACAAAAGTAGCAATTTCAACAATTGGATCTG  
AGAAGAAATCGTAAGCTATCGTTGTAAATTCATTTTTGAGCACCGATACATAAACAGATATATTTGATTTATGCATCTCCGTTGTAACGTCGGTGTAATGAGAAATGAAAGCACCATCATAA  
GCCATTAGGGACGATCTTATAACATTAATAGCATTAGCAAATTGCTTGATCTCATCAATAGTTGGCTTTGGTGCATCGCCAACTTGCTCTGGAATCAAGAGAACATATTCATAGAAGGTGTTT  
TTCTTCTTAAATGCTGAAAGAAGTGAAGAGTCGTCAGATTGGATTAACAACTCTTTTGTGTTTTGTCTTTGTGCATAGCTCGCATTAGCCAATGCAGTTGAAACGGCATCGACTATACTTAGACC  
CTTCTTTGATGCTAGATAGGGAGCATTCTTAATATTGATCAGGACACCTGGAACACTACTGTTTTTGGCAAAGGATAGGAATTCAGACAATGTCAGGATTTTGCCCATGTTCTTAGCAACTG

GATTTCTTACCAACCCAAGTGATGAGTAGGGGCTAACCAAATTAGCTGAAAAAGGGAAATGAGATGTTTGAGACATTTTCATCTTTCTGCTTGAACATATAAAAACAAAGAAAAAAGAAG  
AACAACTCTTACGTTTCAAGCTTTGGATTTCAATCCAAGTGAGATCGAATGTGAAGATTCCAGTGTGTTTTGGATCTCAGGTATTGTTGTAGACTTCGACATGAATTTAGGCATTGCGGTT  
GTGCTTCCTGAAAAGATCTGCTGAGTCTAAACAAAATAAAATGGCATCTTTTGACATTTGAACGGAAACAATCAATGATATCTGCACCATCATCTACTGCTTGTATAAGCAATATCAGTGCT  
TCCAGGATAGATTCCACTTGCACCGTTGTGAGTTATAACCAATGGTTGACCTGTAAACGATGTACATTTTTTTTCAGCCTAAGTTACGAGCATTACATTAAGATATGATTATGAATAAGAAAG  
AGAATTCC

>comp167025\_c0\_seq5

TTTGTCTTCTGTTTTGGAGGTTAAACAAGTAGCAACTTTGTAAGACAAAGTTATGGTTTTCCCTCATCCATATTAATTACTGCAACTGAACAATTATTGTATGTATGCTGGGAATAGGTAATTT  
AGCACTTGAATCAACTCTGTTTTCTCAAAAACATCAAAAAGCAGTTAAGGTAATAAAAGATGGAACAAGAAAGTTTTCTTTTCACTATGGTAAAAAACAATTAGACCCTCTTGTCATTA  
AAATAATTTAAAATTCACTCTTCATTTACTTTAATTAATCTAATCACCTGAACTTAATTATGATACTTCAATAATTGGTTCAATTCAATAAAAGGGAGCATTACATCCAGCTAATACATCGAC  
AAAATGATATACATAACCAATTTGCAATTGCAATCATTGGTGCCCTAAACAAAAAAGCTGAGCATCATTATAAGGATGCAGAGATGAGTGTAAAAGCTGTATTTGAAAGCTGACCGCT  
TTCCTTTGGCTCCGAACCTGGTGTCTGTGCTGAGCAGGATTTGTAAGATTAGCAACATCTGGAAGTGGCGGGTCGACCACATCTACAGGCCTGAGAGGAGGTGCTGGTGATTGAGCCG  
GAGGTAGGGCCTCAGGTGCAGCCAGCCCGGCTAGACCTCCAGCCTCTGCTGGTAAGATTGTGTAGGAAAGCTTCGCATTGAGGTTTGTAGCATGGAGTCCCAAGTATGCTCTTGCTGTG  
CAGGGTATTCAAGTATTAGACCATCCACACCAATTCACCAACAAAAGTAGCAATTTCAACAATTGGATCTGAGAAGAAATCGTAAGCTATCGTTGTAAATTCATTTTTGAGCACCGATAC  
ATAACAGATATATTTGATTATGCATCTCCGTTGTAACGTCCGTGTAATGAGAAATGAAAGCACCATCATAAGCCATTAGGGACGATCTTATAACATTAATAGCATTAGCAAATTGCTTGAT  
CTCATCAATAGTTGGCTTTGGTGCATCGCCAACCTTGCTCTGGAATCAAGAGAACATATTCATAGAAGGTGTTCTTCTTAAATGCTGAAAGAAGTGAAGAGTCGTCAGATTGGATTA  
ACTCTCTTTGTTTTGTCTTTGTATAGCTCGCATTAGCCAATGCAGTTGAAAACGGCATCGACTATACTTAGACCCTTCTTTGATGCTAGATAGGGAGCATTCTTAATATTGATCAGGACACCT  
GGAACACTACTGTTTTTGGCAAAGGATAGGAATTCAGACAATGTCAGGATTTGCCATGTTCTTAGCAACTGGATTTCTTACCAACCAAGTGTAGTGTAGGGGCTAACCAATTAGGTT  
TCAAGCTTTGGATTTCAATCCAAGTGAGATCGAATGTGAAGATTCCAGTGTGTTTTGGATCTCAGGTATTGTTGTAGACTTCGACATGAATTTAGGCATTGCGGTTGTGCTTCTGAAAAG  
TCTGCTGAGTCTAAACAAAATAAAATGGCATCTTTTGACATTTGAACGGAAACAATCAATGATATCTGCACCATCATCTACTGCTTGTATAAGCAATATCAGTGCTTCCAGGATAGATTCCA  
CTTGCACCGTTGTGAGTTATAACCAATGGTTGACCTGTAAACGATGTACATTTTTTTTCAGCCTAAGTTACGAGCATTACATTAAGATATGATTATGAATAAGAAAGAGAATTCC

>comp167033\_c0\_seq28

ATTTAAATTAATTATCAATTAATTGAAGTAATTAATAATTTATTACTGTTGACCCTGCCCTGTGTGACAAAACAAAACAAAAAATACTAGCTCACCATCTCTCTGCCATTCCACGTCGTCGC  
ACGTCACGCACAAGTGATGTCGTGTCTCCCACCACCGGCTCATGCCGTTAAAAAGGAGGAGGAAATGAGGCTTTCGGCCTCTACTTGGCTCCTCTAAAAAGGCTCTCGCTCCCTCTTCC  
TTCTCTCATCTGCCGAACCGAAGCTCCGACGTTTTGATCGGAAGAGACGACGTGAGCTCGCCCGCAGTGAAGATCCCTTTCTCCCTATCATGTGCGGCTCGGCCTTCTTCTCCGACG  
GCCTCCTCATCCTGTCCGACCGAAGCTATGAACTTTGATCGGGACAAGAGCAGGAGCAGCTCACTGCAGTAGTCTCCGTGGCTGAGCGACTTCGCCCCCTTCTCCGATACCTTTGTG  
GCTGTTTCGACTTGGCTACGGCGATGACATTTCTTCTTGTGGATGGAAGCCACGAACGGGAGCTCGCTGGAAATAAAGGTAGCTGCCCCACTCACGCGATTCTCGGCCAAATCC

>comp167037\_c3\_seq4

CAAATAAAGCTAAAGTGCAGAAATCTCTGTACACAATGTCCACTTAAAACTGTAATTTCTGCCACAAAAAATGCAGATTTTTCAATGCAAATTCATCCGAAAGTAACCGAGCAACA  
TAAATCTCAATGATGTAGGATAAGAATGTTATCAACCTTTGTCATATAATAACAAAAGGTAAACAAAAGACAGGCAATAGTGATCTCATTGCTCCAAAGGGCTACTATAAGATGCTATATCA  
TTCAGAAATGGTTTGTAGAACTTGGATGTAGAATGAACAGGGATTTTCAGACTCAGGCTTTGTTGGGGCAGCTTTTTTTGTTGCTTTCTAAAATAACTTTCCAGTTAAAAAAGTTCTTGA  
ATTAATAATTTTTATACTAGAAAATTGCTTTAAGAAGCAGAAACAAAAGCTGCTCCAAATGAAGCCTAAGTGCATTTAGCACCGATTTTAG

>comp167055\_c2\_seq1

AAGATCTTTCTTTGTCTGGTTCAGTGTGATGATTTTGATCTATTTCCTCTGCATGCTCCAAACGCATCTTGTCTGTTTTGGGTTTTCTTTTCCCTTCTTTCCACGTTCGGTTTTAAACTCAAT  
GAAAATTGGAAGATGACTCTCAAATCACCTGTTTGTACCCATAGTTGCACCCACTTTAATCAAAAAGGAAAATGACCCCTAAGATGCTAGGTAGGGTTCGGGGTTCGGCAACACGATGCTG  
GCGGCAGGCTCGTTTCTTGTCTACAAGTCAAAGAAATGGAATCTAAGAAGAAAACAATTTTTATGTATTATGACATTATGCTCTCCAAATGGGGTTCGGAGGCATTTTCAAGAATGTGT  
GTCCCAATTTAAATTAAGTTTCTATCTAGAGTAGTCTGCAATTGACCGATCATTTCTTTAATATCTCTTCTCATCTTAAATTTATTTGTTGACCCTAAAAACATTCAATGAGGTTTCAGGG  
CTTTCTCCAACAAGGTGGAGAGAATGGTTCGCCACCCTACGTTCTATAAGTTCGACGTTCTTATCGCCGTCAAGTGGAGGAGGTGCTATTGCATATGTTGATGCAAGATCCAACCCATGTTT  
TGAATATGCTCATGAAGGTCCCAAGAAGAAATGGTTGTTCTTGGAACTGGCTGGGCTGGCACAAGCTTCTGAAAAATTTGGACACTTCTTGTATGATGTT

>comp167080\_c4\_seq12

AGGTTCTAATAACTGCATTATGCGAGATATAAAGCACGCCTATTAAGTCCCACCTGCTTTTGGTCTCCAAAGCAGAGATTCGAAGCTCTATTCTCATGGCAACTTATTCTTCTTGGCCT  
CTTGTTATACTATTCTCAATCTCTTGTCTTTTTGCTTCTAATAGAGAATTTCTCTAGTATCAGCGGAGAGCTTATGCTTGAGAGGATGATCTCATTGAGGTTCGAGTCACTGGAGGATT  
CTATTTTCTGCTCCTTGTCTGATAAAGTTTGTAGCAATTTCTTAATGCCATGTTTTTGTACATTTTTTCTCAACGGGACCAAGACCGCATCATCTACATCCGAAGCCAGTTTGGCGAACCTC  
GGCCTCAACCCACTCTGCGGCTCATTAACTATGGTTGCAACCATTAATATTTATTTGGGGTTCGAATGGGATAAGCGTGATATTGCTAACGGCTCAATTTCTTCTCATGTCTGTTGCTTGTATT  
GATTCAGATTCATCTGAATACTTTTGTGTTGCTCCCTTTGCTGTTCTGACATATTCTCTATCTATCTAGACTTGCTATTATTGCTTTTTAATAATAAAAT

>comp167116\_c1\_seq1

AAATTTAATTCAAAACAATCAAATTTATACATAAAGAAAAAGATTAATCCAAATTAATCTGAAACTAAAATAAAAACCACAATTTTACATATGAATGATTGAATTCATTTAAATTCAGATGTA  
GAAAGAGAAACAGCATATAAAATCATTTAGGATAAATTATTAATAAAAAAATCTCAAACCTTCTCCCACCTCCTCTGCTTCGCCTGAAATCTCTTCCAGCGACCTCCCTTCGATTCCGGC  
ACCATAAAAAGTACACAAAAGCCGATCACATTACATCCAGCAAGAATAAACAACGAATTCCTCACTCCAATACCCGCCGATATCCATGATCAGCCAACCTTCGGATTTCGGATTCTGTGCGA  
GATACAAAACCCAAACGACCCGATTATCGCCCCAGTTTCCCTGCCGCCGCGATATTCCGTGGCATGTGACCTCAACCTTGCTGGAAATATCTCCGCCGGCACAATAAAGGTCGTACT  
GTTTCGGCCAAAGTTCGCGAAGAAGAAGGTGAATGCGTACATCACAAACAACCCAATGTGATTCCCAGGCGTCTCCAATGACTGTAAGGAATCGCAAGTCCGAGCATAAATACAGTCA  
TCATCAAGAACCCAAGCAACTGAATCCCAAACCGGCCGATCACATCAATAAGTGCACGGTGAACCAGTACCCAGGAACCGTTCCGCACAGCGCGATCAGAGTCTGAGCTCTGGCGATC  
TTGAACACCTCTTCAAGCGCGTTCATCGTGAAGCCTTTCGGAATCCATCCTATCGCGCTAAAGATGTCTTTTTGGAAAAGGTTTTGGCTGTAGAAAGCGATGTGAGGAGGAACCAAGTG  
GTGGTGGTTCCGAGGAGATGGAGGCCATGGCGGCGAAGGAAGTGTGGAGAAGAGGCCAAAGGTGTGATTTTTATCGGCGGCGAAACGTTTCGATTTTGGCCTGTTCTGCTTGGATTC  
GACTTGGAGGACTTTGGACATGTGCGAAGCTGCTTGTGTTTTGCGTTTTTGGCGACCAGGGCGGTGTAGCGAGCGGTTTTCTGGCATCTTCATCCGCCAGTAGTATGTAAGAGCGGCTGGGAG  
AGCGCCGACCATGAGAATTATTCGCCAGACATAGTCGGCTTCAGGGACGGTGAACCGGCCGGATCGACCGCGTATGCCGGAGCGGGGAATCGGCTCTTGAATACGGCGGAGATGATGA  
TGGCGACCATGCCGCCGGCCAGAATGCCAAAGCCCTGCATCGCAAACACGGCTGCAATAAAGCGCCGCGAGTCTTCTTATTCGCGTACTCCGACATGATGGTGGCGAAAGAGGGTAA  
TCGCCCGGATTCCAAGCCAAGCCAGAACCGGAAGAAACAGAGAGTCGCAATCACAGAACTCGACTTATGACCAAACGACAATCCAGATCCAATCGAACAATAACCATAAGCAACA  
GAGTCATCCATATACTTTCTTCCGGCCAAGCCTATCTCTAGCCAACCAAAGAACAGTTGGCCGGAGAGAGTCCCACAGAAGGCAACGCCGTTGACGGAGGCAGAGATGTGCGGAGG  
AAGAGAGCCGGGGTAAGGATCCATCGACGTGGTAATAGATGCGGCCGAGGAGTTTGGTTACGAGGGATATGCAGAATAGGTCATAGGCGTCGGTGAAGAAGCCCATGCCGGCGACG  
ACGATGGCGGTGAAATGGTACCATTGTGTTTTGGCCGCGTCGAGGGCGGAGAGAACCTGGAGATGTTCCTTCGCCATTGGTTTTATCTTCTCTTTCCCTTCTCTGACCTGATTCGCG  
CGGAAGGATCAGAGAGCCAGAAAAGGTTTGTCTTTTCAATTCCTCTGCTCGGAAATGAAGAAGCTTTGATTTACATTTTTGTGGGAGATCAGAAGGTTAAATAGGGC

>comp167151\_c0\_seq3

GTTATATATAAGTAATACATATATATCATGAAAGCTCACCAAGTCGCACATTATTTTCATCGAACTGTTACAAATATAACCACGACACAATATTGACCTTTTCTGGGTCTTATTCTTCGGTAGCTTT  
AGGTAGGAGGCTATGACATGAAACTTTTATTAATGAGGAAGGACAATAGCTGAAAGCAGCCACTTCCATAGCCCTCTACTATGGACTAAACCATCACCACAAGGATGGTGGCCGCAGCAA  
CCTCTGCTTCTACGAAGCCATTAACGGCGGCCACCTCCGTCGCCACCGCCGCCACCATCTCCACCACCACCCTGCCATCTCCACCGCCACTGCCGCCATCGCCACTGCTTCCACCATC  
ACCATCACCGCCACCGCTGCTGCCACCTCCATCGCCAGTACCATCACACCCTTGCCATCGCCGTTACCGCCACTATCGCCGTTACCGCCGCCACCTTCGCCCCACCGTCCCCTCCGTCA  
CCATCATCAGCTACATGGTAGCCAGAACTTGATTTTGGCTTGCTAGCCTGCTTCAAGGACCTTGCGAAGGAAAGGCAGAAGCTAATGCTAAGCAGAACTAAACAATGCAAGAGCCGTGAG  
CTTATTGCTTGTAGCCATTGTTTGTATGGAATGGTGGATCCG

>comp167216\_c0\_seq5

CCTGCACCAACCTCGCGACCAGCGAGGCGAAGCTGAGGGCTTCCTCATCATTGTCCACAAAACCTGTAAAAAACACCACTAAAGAGCAAATAGGAAAGAGCTAGAGCCTATTTCTTTTTA  
CCTTTATTCTTACGTTTATTACCACCATTAGTACGAATAAGATCCCCAATCTTAAACAGGTGCAACCTCCTCAAAAAATAACATTTATAAACGTTTCAGCAAAGTTTTCCCATCAAATGACATAA  
AAATCATGCATGCATGAAAATAAATTAATATAGTTAATGCATCTTCTACATATCGAGAAGCTGTGCCAGCACAAATAAATATAATGTTCCATAATTAATAACTTGTAACATCTTAAAAACA  
ATGGCTCACAAATCAGGATAACAGAGCCTTATTATTAATAGTAAATFATGCCGCAATAACACGTACGGCCTGCGGAGTCTCGTCAGGGATGAACCTTGCCCCAGAACCAATGCTTCTTCCAAA  
CAATCACCATCTCTTCGATCGGCACATTCTTCGTCTCCGAAAGAAGAAGAAGATGAACGTGTCATTATGACAACAAAACCACCAAAAAAGTAAAAGAGTCCGAACCTCAAGTGGCAG  
AGCATGTTGAGGAACACCTGAGCAAGTATGAAAGTGCATAACATGTTTCATCGACACATTGATGCTCTGCCAGCCGACCTGATCTCTAATGGGAAGATCTCTGATGGCACAAGCCACCCG  
AGAGGCCCCCATGACCACGCAATGCCGACACATAAATGCAAATGAATGCCACCACCAACCCGGCGTAGCTCTTTGAAAATTCTGTTTGTGCGCCTGTCACTCCGAACCTTAACGCCGATG  
AGCGTGCCACAATAATTTGGCATATGATCATTGAAATCCCGCCTTCTAAAAATAGAGTGCCTCGCCCCAGCTTATCTACAGATGCAATTGATACGAATGTGGCCAACATGTTCACTGTGCC  
AGTAATGACAGCGGACATGAGAGAAGCCTGGTCGCCGAAGCCAATAGTTTTGAATAGAACAGGTGCGTAGAACGTGATGATGTTGATGCCAGTAAATTGCTGGAAAAAGGGGATGAGTA  
TTGCCATGGTGAGTTGTGGTCTATATCGGCGTTGGATGATATTTTTCCATGGGTGCTTCACGGCCTTAGATTCATTGCTAGCGATACTAGATCTTCGTATCTCTGTCACCGGATGAGTTC  
CTCGCACCTTATGGAGCATCGCCTTGGCGGCCGCATCATGCCCCGCTCAAGTAGTGAGTTGGGGGTTTCGGGGAGTACAAAAGCACCAACGGCGATGATGGCACCAGGCACAGCAGC  
GAGGCCAAGGCTCACACGCCAACCCACCCCTTTGATCAGTGCTGTCCAATAGTTGATGAGATTTGCGATCAAGATGCCGATTGTGATCATCATCTGGAAGCCGATGTTGAGCATGCC  
ACGGAGTTTAGGGGAGCCATCTCGGAGAGGTAGACGGGCACCGATTGGTTGGCGAAGCCGATGCCGATTCCTAGGAGAAAACGACCAAGGATTAGCATAAAAACATTTACCGCAGCG  
CCGTTGACGATCGCGCCACTAAGAAGGTGATGCCGCCGCAAAACATGGACCATTTGCGACCGAACGCTCTTGTACAGTCGAGGCGAAGAAGGATGCGACAAGGGCCGCCAGATATA  
GGGACGACGTGAAAAGGGTAAGGAGATTGCTATTGAATTTGCAATACTCATTAGTAGATAATCTTTCCTTCTGTTGGCGGTACACTGATGGGAAGAATCGAATAAGGAAAGAGTCCATTGA  
TGTGACTCCGCCGGATATGCCGATGTCATAACCAAATATGAGACCACCGGTGGCGGCGACTAAACATGCTAGGAATACGAAAGCTGTCATCTTGCCGGGGTATTCCTTTCCGTTTGTAGGA  
TTCCCTACTTCTCCGACTGCCATGATTGATCTCTATGTAGTAGTTTTAAAACAGAATTAAGAAATTATATCGAAGGGGTGAGAGGAAGGAGCTTAGAAATTAATTCTTTGAGAACTAATGAT  
CAATGGAGGAAGAAAGCTTTGATATCCCTCCTTCCAATCCAAGCTATTTATAAGCTCATCTATTCTATCCATTGATCGAAGAAAAAGCCTTGTCTTTATCCTTTTTCTATTTAAGGGAGGA  
TCATCGGTTTTTTTTGCCGTTTATGATGTTCTCTATCTCTTTCTTGGTCAAGAAATAATGAAATAT

>comp167224\_c0\_seq19

TTGCTAATGAATAAAAAGCTTACCAGATGCTGACCAGCAACTGCAGAACAACCGGAACAAAGGGATAAAAATGTGGCAAGGAAAAAAGACCTTCTTAGGAATTTCAACAAACACCTAG  
TATTCAACTTAAAGATACAAGAATGCTACGCATGCCTTGGTTTTTGTGATGATACACCATCTACAACTAACTACAGATTTTCAAGATGTATATATACATGTTTAGAAAGAAAAACAAGCCAC  
CGAAATGGCTACACAAGAACTCAAGAACAAAAAAAATGCTAAAAAAGATCAATATACAACAAGAGAATCAAATAAAAAAAGGATCACTAATTTAACAAGTTTCATGACTCTAACAAG  
GTCAAATGCTACATGCTTCATCAATAGGATAAATCTAGTGAGATTATTTAGTGAAGAAGGATGCAGCTTCATCTCTACACCAGCATGTTTTCTTTCTTTTTGTTTTAGTTTTATTTAAA

TTCTACACTTGATCTGTTCTGTAAACAACAACTAAGCTTTCCTTTCCATATCTTTTACTGATGGATTTTATTCTCTAATTGAATCTGAAGATAGGGCAAGGCACTTACAGCAGTGTGTTAGAGC  
AAGGGATCTTGAAAATGGAAAAGTTGTTGCCCTGAAGAAGGTGAGATTTGACAATTTTGAGCCAGAAAGTGTCAAGTTCATGGCACGAGAAATAGAGATACTTCGTGCGACTCGACCATC  
CAAATGTTATGAAACTGGAAGGTTTGATCACCTCTCGGTTATCTTGTAGCTTATATCTGGTGTGTTGAATATATGGAACATGATCTTTCTGGATTATCATCATCACCAGATGTGAAATTCACCG  
AATCACAGGTGAAGTGTATATGAAACAATTGCTATCTGGCCTTGAACATTGTCATTCGCGAGGAATCATCCATCGAGATATTAAGGGTGCAAACCTCTTAGTTAACAATGATGGAATCTTA  
AAAATTGCTGATTTTGGTCTGGCAAACCTCATGCCACCTGAAAATAAGCAACCGCTAACTAGTCGTGTTGTAACACTATGGTACCGTCCACCTGAGCTTCTGTTGGGCTCCGTGATTATG  
GAGCATCAGTAGACATGTGGAGTGTGGTTGTGTATTTGCAGAGATGTTCTTCAAGAAGCCCATTTTGCAAGGAAGAAGTGAAGTTGAGCAACTGCACAAAATCTTTAAACTATGTGGTT  
CCCCATCAGATGAATACTGGAAGAATTCCAAGTTACCTCATGAAAATAATTTTCAAGCCCCATCGTCCTTATGAGGGTCACCTGCATGAGACTTTCAGAAATTTGCCACAATCTGTCTACAAA  
TTATTAGAAAGATTTCTATCTATAGAACCTCGAAGGCGTGGAAAGTGTGAGTCTGCTCTGGCATCTGAGTATTTCTCAGCAATGCCTCTTTTCGTGTGAACCATCAAGTTTGGCCAAAATACCC  
ACCTACCAAAGAAATTGATGCAAAAATCCAAGAGGATGCTAACAGGAGGATTCCAAAGGGCAACGGTAGAGCACGTGTACAGAAGTGACGAGGAGACCATTAAGGGTTCATAGGGAT  
ACACAAGAACTTAGCGGCTTGAGTAGATTATCAAACCACCAAGAGGCAGAGCATCGAAAATTAACCATAGAAGTATAGCAGTGGCGACAAGTTACCTTGTCCCAGAGTTAATGGTGG  
TTCTAGACTCTTTGTAGATCTTCAGCCAATGGCAGCACTAAATCCTTCTGATCGAGGTCGACATATTAAGAATATTTCTCAAGGGAGCATTCTTTCTCAGGTCCTTTGCATGTTAATCATT  
TAATGGCCTTGCATGGGATAAGAACTGCGGGAAGATCGTCCATTTGCTAAAACCTCATATTAATAACTACCTCAAGGAACCATAATAATGGTGCACCGGAGCTGCCAGCTGCTATCAGAGCC  
AGAGTTAGTTCTGGTTTTGATGGCCAAGCTAATGGAAATACTGCACATTATCCACTTGATCATCACAGGCGCAATGAGCAGTATAAATTTGGCAAAGAAAGCAGCGATGAAAAATTTGGGCA  
CAACTGGAACACCCAGATTCATTGATTTCTCCAGATTTCAATCACACGATTTCTCAAGAAATGGCACAATGCAATCAAAGCGCAGTATGCTGGGATAACCATGATGGAGGCAGGGTGGAG  
TTTTCAGGGCCATTGTTGTCTAAAGCCAAAAGGTTGATGAACTGTTAGAAAAACATGATCGCCAAATCCGGAAAGCCGTTTCGAAAATCATGGTTCCAACGAGATCTACACTCAAAAATTG  
TCTTTAAATACAGTGGCTGGAAGAAATCAAGTTCAGTGAATCAAAGCTGTTGCTTATACTTAAAGAAAGCTCCTGCTGTACATTGCAACGGATCCTATCTGTTATAAATTTGCCCGACAAAACA  
CTTTGGTAAAGACTGTTACATTGATAGGAACGAGGCTAAATATGTTTCCATTTTCTCACAAAGTGAAGTTAGCAGCCTTAAATATGTTAAGGATGAAAAAATATAAAAAATTTCAATTCATT  
GTCATATTTTTTTGCTGATTCTGAGATGTTAACCAACAGGATGTTCCAGTTT

>comp167224\_c0\_seq38

TTGCTAATGAATAAAAGCTTACCAGATGCTGACCAGCAACTGCAGAACAACCGGAACAAAGGGATAAAATGTGGCAAGGAAAAAAGACCTTCTTAGGAATTTCAACAAACACCTAG  
TATTCAACTTAAAGATACAAGAATGCTACGCATGCCTTGGTTTTTGTGATGATACACCATCTACAACTAACTACAGATTTTCAAGATGTATATATACATGTTTAGAAAGAAAAACAAGCCAC  
CGAAATGGCTACACAAGAACTCAAGAACAAAAAATGCTAAAAAAGATCAATATAACAAGAGAATCAAATAAAAAAAGGATCACTAATTTAACAAGTTTCATGACTCTAACAAG  
GTCAAATGCTACATGCTTCATCAATAGGATAAATCTAGTGAGATTTTATAGTGAAGAAGGATGCAGCTTCATCTCTACACCAGCATGTTTTCTTTCTTCTTTTGTGTTTTTAGTTTATTTAAA  
TTCTACACTTGATCTGTTCTGTAAACAACAACTAAGCTTTCCTTTCCATATCTTTTACTGATGGATTTTATTCTCTAATTGAATCTGAAGATAGGGCAAGGCACTTACAGCAGTGTGTTAGAGC  
AAGGGATCTTGAAAATGGAAAAGTTGTTGCCCTGAAGAAGGTGAGATTTGACAATTTTGAGCCAGAAAGTGTCAAGTTCATGGCACGAGAAATAGAGATACTTCGTGCGACTCGACCATC  
CAAATGTTATGAAACTGGAAGGTTTGATCACCTCTCGGTTATCTTGTAGCTTATATCTGGTGTGTTGAATATATGGAACATGATCTTTCTGGATTATCATCATCACCAGATGTGAAATTCACCG  
AATCACAGGTTAGTAGTATCATGAAATGTCAAATATTTTGAAGTACTGGTGTATAGAACTTTCAATGAAAAATGGCAATTTGTGCGTGCAGGTGAAGTGTATATGAAACAATT  
GCTATCTGGCCTTGAACATTGTCATTCGCGAGGAATCATCCATCGAGATATTAAGGGTGCAAACCTCTTAGTTAACAATGATGGAATCTTAAAAATTGCTGATTTTGGTCTGGCAAACCTCA  
TGCCACCTGAAAATAAGCAACCGCTAACTAGTCGTGTTGTAACACTATGGTACCGTCCACCTGAGCTTCTGTTGGGCTCCGTCGATTATGGAGCATCAGTAGACATGTGGAGTGTGGTTG  
TGATTTTGCAGAGATGTTCTTCAAGAAGCCCATTTTGCAAGGAAGAAGTGAAGTTGAGCAACTGCACAAAATCTTTAAACTATGTGGTTCCCCATCAGATGAATACTGGAAGAATTCCAA  
GTTACCTCATGAAAATAATTTTCAAGCCCCATCGTCCTTATGAGGGTCACCTGCATGAGACTTTCAGAAATTTGCCACAATCTGTCTACAAATTATTAGAAAGATTTCTATCTATAGAACCTCG

AAGGCGTGGAAGTGCTGAGTCTGCTCTGGCATCTGAGTATTTCTCAGCAATGCCTCTTTTCGTGTGAACCATCAAGTTTGCCAAAATACCCACCTACCAAAGAAATTGATGCAAAAATCCA  
AGAGGATGCTAACAGGAGGATTCCAAAGGGCAACGGTAGAGCACGTGTACAGAAGTGACGAGGAGACCATTAAGGGTTCATAGGGATACACAAGAAGTTAGCGGCTTGAGTAGATTA  
TCAAACCACCAAGAGGCAGAGCATCGAAAAATTAACCATAGAACTGATAGCAGTGGCGACAAGTTACCTTGTCCCAGAGTTAATGGTGGTCTAGACTCTTTGTAGATCTTCAGCCAATG  
GCAGCACTAAATCCTTCTGATCGAGGTCGACATATTAAGAATATTTCTCAAGGGAGCATTCTTTCTCAGGTCCTTTGCATGTTAATCATTCTAATGGCCTTGCATGGGATAAGAACTGCG  
GGAAGATCGTCCATTTGCTAAAACTCATATTAATAACTACCTCAAGGAACCATAATAATGGTGCACCGGAGCTGCCAGCTGCTATCAGAGCCAGAGTTAGTTCTGGTTTTGATGGCCAAGCT  
AATGGAAATACTGCACATTATCCACTTGATCATCACAGGCGCAATGAGCAGTATAAATTGGCAAAGAAAGCAGCGATGAAAAATTGGGCACAACCTGGAACACCCAGATTCATTGATTCT  
TCCAGATTTCAATTCACACGATTTCTCAAGAAATGGCACAATGCAATCAAAGCGCAGTATGCTGGGATACCATGATGGAGGCAGGGTGGAGTTTTTCAGGGCCATTGTTGTCTAAAGCCCAA  
AAGGTTGATGAACTGTTAGAAAAACATGATCGCCAAATCCGGAAAGCCGTTGCAAAAATCATGGTTCCAACGAGATCTACACTCAAAAATTGTCTTTAAATACAGTGGCTGGAAGAAATCAA  
GTTCAAGTGAATCAAAGCTGTTGCTTATACTTAAGAAGCTCCTGCTGTACATTGCAACGGATCCTATCTGTTATAAATTGCCCGACAAAACACTTTGGTAAAGACTGTTACATTGATAGGAAC  
GAGGCTAAATATGTTTCCATTTTTCTCACAAGTGAGTTTAGCAGCCTTAAATATGTTAAGGATGAAAAAATATAAAAAATTTTCATTCAATTTGTCATATTTTTTTGCTGATTCTGAGATGTTA  
ACCAAACAG

>comp167260\_c1\_seq6

CATAATTGATCTCATTTTATAAGATATTTACTGCAGATATTAATTTCTTTCAAGGTATATGAAATATTTAAGAAGAAGAGTTTAAGCTAAATAAATTTAAACTATATAAATTTAATAAAACAAT  
AGCAAATTTTTGTTAAGAAATACTCCATCCCAAACCTTAGAAAAATACATTAGCACGCTTAATATAGTATACGTCTGTCCACCCAGCATGCAGGCTTCTTAGAGCCATACTTTTCAGGCAAAA  
GAATTTCCATATCACAAATCAACCATGTTGTGGGTGAACACATTAAGTGAAGATCATCTCACTTTCCCTTCTAAAATAAGCAATTTTTCGATAAGTAGGATGTGTACGCTCTCCCGGTTGC  
CCTCCCCACCAACCAATGCTTTCAAACAAGTACACATATTTCTTTACCTCCCTTCAAGTAGAATGAACATGGATGACTCAAAAACCAACTGGTATTCATCAACTCAACATTATTAATCTC  
AAGCCAATCCATCATCTGCCAGTCAAGCTTATAAAATTTAAGAAGTCGCAGCTCATACTAGGGCAACTAACACACATAACTTCATTATCCTGCTCAAAGAAGTAACATTCTGAATAATTG  
GAAACTTCTCCGTTTAGATAGAAAAAGTCCAACCTGCAATTAGCCAAGTCAAACATGATAATTTGCACCTTTACTGTCAATGCACATAATCTGATTCCCAATCACTAACGTATAAGAGATT  
ATAATATGCTGATTATGAGAATTACCAAGCTCATGCACCTCCCATGCACTATCATAGGGATGAATTAAGTCAATGACAACACTTCTAGTGGGGATCTTGTAGCTAGCATGGATAATATGACGT  
GGGTTCCCAGAATTAGTAAGATTGAAAGCAAATGACCCTTTCAAATGGTCTGGCAAGTGCATTCTGCTCCCCTACGAGGGTTGAGAAGAAATAGTGAGTTCTGATATTGTTTTGAA  
CATATTTCTTTCATGACACATCAACAACCACTCTCCTTTGTTGTACAAAACATAAAGCATCTCGAAGGTGTGGGCTACTTATACTGTGGAAAACTTTAGTAGAAAACATCGAGGATGCAAC  
GATCTGGGCTGGAAGGTCGGGAATGCTAAACACAAGAGGTTTGTTTTCATTGGCAGGAGGGATGTCATGTGAACTAATTGAGTAACCAGCCATCTCCTCTTCATATTTCTTTGTAGCCTC  
TTCACGATTCCTTCTAAGTTCCCTCCCTAATCTTTCTGCTTTCTCCGCTCTACTTCGTCTAAAAAACCGATTGTATACATGAAATGAGTAATCCATCTCTTTGTGCGACAGAATAAGCTGCA  
GCACTTCGACGTGAATCTATCCCGCACCAAGATCACACAATAAGAGGCGGATCTGGTTGCAACTAATGTTGGAGAGGTCAGTGATCAATCCTCATAGGCTCCAATGAAATCCTTCAAGCA  
AATGCCTACCGTCCGCTCTCACAATAATCACAAAGCAGCTATGGCTGCTTCGCAATGTGACGACGACGGTCTCCACCAACCTCCTTGGGAATGGCTCTCAGATCTCCGTCGC

>comp167260\_c1\_seq7

CATAATTGATCTCATTTTATAAGATATTTACTGCAGATATTAATTTCTTTCAAGGTATATGAAATATTTAAGAAGAAGAGTTTAAGCTAAATAAAGTTAAACTATATAAATTTAATAAAACAAT  
AGCAAACCTTTGTTAAGAAATACTCCATGCTAAACTCAAAAAGAATACATTAGCATGCTTTATATAGTATACGTTTGTCCACCCAACATGCAGGCTTCTTAGAGCTAAACTCTTTAGGCAAAA  
GAATTTTTAAGTACCTTCAACCATGTTGTGGATGAACACATTCACCGGAAGATCATCTCACCAACCGTTCTCAGTAAAAAGAATTGTTTGATAATCAGGATGTTACGCTCTCCCGGTTG  
TCTCCCCACCAATATTTGTTTTCAAAGAGTACACATATTTCTTTACCTCCCTTCATGTAGAATGAACATGGATGACTCAGAAACCAACTAGTATTCATCAACTCAACATTATTAATCTC  
AATCCAATCCATCATCTGCCAATCAAGCTTATAAAATTTAAAAAAGTCGCAGCTCCTACCAGGGCAACTGACACACATAACTTCATTATCCTGCTCAAAGAAGTAACATTCTGAATGATTG

GAAACTTCTTCCGTTTCAGATAGAAAAGTCCAAGTCAATTAGACAAGTCAAGCATGATAATCTTGCACCTTTACTGTCAATGCAAATAACCCGATTCCCAATCACTAATGCCGAAGAGAT  
TATAATATCCTGATGAGAATTATCAAGCTCATGCACCTCCCAGGCACTATCATAGGGATGAATTACTCGAATGACAACACTTCTAGTGGGGATCTTGTAGCTAGCATGGATAACATGGCGTG  
GGTCCCACCACAAGTAAGATTGAAAGTAAATGACCCTTTTCAAATGGTCTTGGCAAGTCGATTCTACTCTCACTTTGAGGGTTGAGAAGAAATAATGAGTCCTGATATTGTTTCGAGTA  
TACTTCTTCTTCATGACACATCAGCAACCCTCTCCTTTGTTGTACAAACATAAAGCATCTCGAAGGTGTGGGCTACTTATAGTGTGGAAAATCTTAGTAGAAAACATCGAGGATGCAACGA  
TCTGGGCTGGAAAGGTCGGGAATGCTAAACACAAGAGGTTTGTTTTCATTGGCAGGAGGGATGTCATGTGAACTAATTGAGTAACCCATCTCTTGTGCGCATAGAATAAGCTGCAACAC  
TTCGACGTGAATCTATCCCGCACCAAGATCACACAATAAGAGGCGGATCTGGTTGCAACTAATGTTGGAGAGGTCAGTGATCAATCCTCATAGGCTCCAATGAAATCCTTCAAGCAAATG  
CCTACCGTCCGCTCTCAACAATAATCACAAAGCAGCTATGGCTGCTTCGCAATGTGCGACGACGACGGTCTCCACCAACCTCCTTGGGAATGGCTCTCAGATCTCCGTCGC

>comp167265\_c0\_seq16

AAGATATTCATTACAATGCTTGCAAGCTGTATACCGCTTGTCTGGCTAATTATGAATTCAGTTCACAGAAAAGAGCACTAAATACTTCACCATCCACATCTATAGAAGCTAAATATCCACTT  
TAAATCCATCTCTTGTCCAACCTTCCATGGCTTCTCCGGCCAACGTTCTCAGATGGTCCCAAGTCCAAGTCCATCTCGTCCACAAAACCTATCCGGCGGGCTCCCCCTTCCATTACAGCG  
GCATGTTTTCTTCGCCTGTCCCTCTGCTCAATCGCCGCCGGGGTGAACATCCGGCGAGAGTGGCAGCCTTTGTGCGCCGGAAGCGGACGCCGTGTTCTTACATGGGAGAAGTTATGGG  
TTTTCGTTTTCGGGTCATAAAGGAGAGCGCGTGCCGGTGTCTTTCGGGCCCTTACCGGGCTGGCCCAGCCAGGAGAGGTGCTTGCAATTATGGGCCCATCGGGATGCGGCAAGTCAACGCTT  
CTGGACTCGCTTGCTGGAAGATTGGCACC GAATCTTAGCCAGAGTGGAGATATCCTCATCAATGGCAGCAAACAAGTCTCGCCTACGGCACCTCAGCTATGTGACCCAAGATGACGTCT  
TGATGACGAGCTTAACAGTAAGAGAAGCCATACAGTACGCCGCCGAGCTACAACCTCCCTTCTTACTGAGCCGCTCAGCTAAGCGCGAGCGAGCGGAGGAGGCGATCAGGGAGATGGG  
GCTGGCGGCCGTCGCCGACGTACGGATTGGCGGCCGAGTCACGAAAGGGATAAGTGGGGGGCAGAGGAGAAGAGTAAGTATATGCATGGAGATTATAAAGCGGCCGAAGCTTTTATTTT  
TCGACGAGCCGACGAGTGGGCTCGATAGTGCGCCGCCCTTCCACGTCATCAACCGGATCGAAAAGATGGCCGCGAGTGGGGACCACATGACCGTCGTAGCCGCCGTGCACCAGCCTGG  
GCCGAGGTCTTTGACTTGTTAAGATCAGTTGTATTCTGGCTAATGGGCGGACCGTCTTCTTTGGCCCCGCCGATGTCGCACCAGAATTCTTCGCTTCAATGGCTTCCCCATCCATCCC  
TAAAAATCCCTCAGACCACTACTTAAAACTATCAACAAGGATTTTGACCGGGACATTGAAGAAGGACCTGAAGCTGAGCTCACTACCACAGAAGAAGCCATTGTGATACTCGTCCAG  
TCGTATAGCTCATCAATGGCTTCAAAACAAGCAATAACACAGATTGCTAAGATTCTGTAAATGGGAGGAAAAGCTGTGAGAAAAGAGGAGGCAGGCTAGCTTCTGAAGCAGTGCTCAGT  
CCTTACAAGAAGATCATTGTAAATATGTACAGAGATTGGGTTATTATTGGCTGCGATTTGCTATCTATGTTGCTCTTTGTTTGTGTGTTGGCACACTTATTATCATGTGGGCCATAGTTTGT  
GTTCTATTACGGCTAGAGGCTCTATGCTTATGTTTATAGCTGCATTCCTTACATTCATGGCAATTGGTGGCTTCCCATCCTTTGTAGAGGACATGAAGATCTTCAAAAGAGAGAGATTAAATG  
GACATTACGGTGTACTTCCCTTACAATAGCCAACACAGTCTCTGCAACTCCTTACCTAGCTTTAATCTCAGTTATCCCAGGGGCCATAGCCTACTACTTAGTAGGACTACAACATAGTATT  
GATCATTTTATATATTTTGTGCTTGTGTTATTTTCATGCATGATGCTTGTGCAAGGTCTGATGATGATAGTTGCTGGTATTGTTCTGATTTTTTGTATGGGCATCATACCCGGTGTGGGATTCA  
AGGGGTGATGATGCTTAATGGAGGCTTTTTTAGATTACCAGATGATATGCCGAAGCCGTTGTGGCGTTACCCAATGTATTATGTTGCTTTTTACAAATATGCAAATCAAGGATTATACAAAA  
ACGAGTTTATAGGATTAACATTTCTAAAAAATCAGGCAGGGGGGCCTTCTACAATCAATGGAGAGGAAATATTAAGGGACACATGGCAAGTGAAGTAGGATACTCAAAGTGGGTGAT  
TTGGGAATTTTGTGGGATGGTGTCTTGTATAGATTCTCTTCTTGGTGATTTTGGAGATGCGGGGAGAAGGCAAGTCTATGCTAAAGAGGTTGATGGTTAGGGCTCCAAGAGAGTCTA  
CATCAATAAATGACAATTCCTCTTAATTAAGTTTGCAAAATCCCAAGCTATTTGATAAAGCTTTTAAAATGCTTATATTCAAAGAATATTGTAATGGCTACCATTGCAATATTCTTTGAATAT  
AAGCATTTTAAAAGCTTTATCAAAATAGCTTGGGGATTTTGCAAACTTAATTAAGAGGAATTGTCATTTATTGATGTAGACTCTCTGGAGCCCTAACCATCAACCTCTTTAGCATAGGACT  
TGCTTCTCCCAGCATCTCAAAATCACCAAGAAGAGAAATCTATACAAGAGCACCATCCCAAGCAAAATTCCAAATCAACCCACTTTGAGTATCCTACTTCCACTTGCCATGTGTCCCTT  
AATATTTCTCTCCATTGATTGTAGAAGGCCCCCTGCCTGATTTTTTAGGAAATGTTAATCCTATAAACTCGTTTTTGTATAATCCTTGATTTGCATATTTGTGAAAAGCAACATAATACATT  
GGGTAACGCCACAACGGCTTCGGCATATCATCTGGTAATCTAAAAAGCCTCCATTAAGCATCATCACCCCTTGAATCCCAGCACCGGTGATGATGCCCATCAAAAAATCAGGAACAATAC



CAGCAACTATCATCATCAGACCTTCGACAAGCATCATGCATGAAAATAACACAAGCACAAAATATATAAAATGATCAATACTATGTTGTAGTCCTACTAAGTAGTAGGCTATGGCCCCTGGG  
ATAACTGAGATTAAAGCTAGGTAAGGAGTTGCAGAGACTGTGTTGGCTATTGTGAAGGAAGTAACACCGTAATGTCCATTTAATCTCTCTCTTTTTGAAGATCTTCATGTCCTCTACAAA  
GGATGGGAAGCCACCAATTGCCATGAATGTAAGGAATGCAGCTATAAACATAAGCATAGAGCCTCTAGCCTGAATAGAACCAAACTATGGCCCACATGATAATAAAGTGTGCCAACACA  
CAAACAAAGAGCAACATAGATAGCAAATCGCAGCCAATAATAACCCAAATCTCTGTACATATTAACAAATGATCTTCTGTGAAGGACTGAGCACTGCTTCAGGAAGCTAGCCTGCCTCCTC  
TTTCTCACAGCTTTTTCTCCCATTTACGAATCTTAGCAATCTGTGTTATTGCTTGTTTTGAAGCCATTGATGAGCTATAACGACTGGACGAGTATCACAAATGGCTTCTTCTGTGGTAGTGAGC  
TCAGCTTCAGGTCCTTCTTCAATGTCCCGGTCAAATCCTTGTGATAGTTTTTAAGTAGTGGTCTGAGGGATTTTTAAGGGATGGAATGGGGAAGCCATTCGAAGCGAAGAATTCTGGTG  
CGACATCGGGCGGGCCAAAGAAGACGGTCCGCCATTAGCCAGAATACAACTGATCTTAACAAGTCAAAGACCTCCGGCCAGGCTGGTGCACGGCGGCTACGACGGTCATGTGGTC  
CCCCTCGCGGCCATCTTTGCGATCCGGTTGATGACGTGGAAGGCGGGCAGTATCGAGCCACTCGTCGGCTCGTCGAGAAATAAAAGCTTCGGCCGCTTTATAATCTCCATGCATATA  
CTTACTCTTCTCTCTGCCCCCACTTATCCCTTTCTGTGACTTGGCCGCAATCCGTACGTGCGGACGGCCGAGCCCATCTCCCTGATCGCTCCTCCGCTCGCTCGCGCTTAGCTGA  
GCGGCTCAGTGAAGAAGGGAGTTGTAGCTCGGCGGCGTACTGTATGGCTTCTTACTGTAAAGCTCGTCATCAAGACGTCATCTTGGGTCACATAAGCCTGATTAAGTAATTAATCACC  
AAATATAATCATTAACATAAAGCTTTACGATGAAGGGTTGTAATTAAGGACGTTTTTGTAGTAAGGTTACTGAGGTGCCGTAGGCGAGGACTTGTGTTGCTGCCATTGATGAGGATATCTC  
CACTCTGGCTAAGATTCGGTGCCAATCTTCCAGCAAGCGAGTCCAGAAGCGTTGACTTGCCGCATCCCGATGGGCCATAATTGCAAGCACCTCTCCTGGCTGGGCCAGCCCGGTAAGGC  
CCGAAAGCACCGGCACGCGCTCTCCTTTATGACCCGAAACGAAAACCCATAACTTCTCCCATGTAAGGAACACGGCGTCCGCTTCCGGCGACAAAGGCGTGCCACTCTCGCCGGATGTT  
TCACCCCGGCGGCGATTGAGCAGAGGGACAGGCGAAGAAAACATGCCGCTGAATGAAAAGGGGAGCCGCCGAATAGTTTTGTGGACGAGATGGACTTGGACTTGGGGACCATCTG  
AGAACGTTGGCCGAGAAGCCATGGAAGGTTGGACAAGAGAGATGGATTTAAAGTGGATATTTAGCTTCTATAGATGTGGATGGTGAAGTATTTAGTGCTCTTCTGTGGAATTGAATTCA  
TAAATATACAGAACAAGCGGTATACAGCTTGCAAGCATTGTAATGAATATCTTTTCATTGAAGAATA

>comp167265\_c0\_seq18

AAGATATTCATTACAATGCTTGCAAGCTGTATACCGCTTGTCTGGCTAATTATGAATTCAGTTCACAGAAAGAGCACTAAATACTTACCATCCACATCTATAGAAGCTAAATATCCACTT  
TAAATCCATCTCTCTTGTCCAACCTTCCATGGCTTCTCCGGCCAACGTTCTCAGATGGTCCCAAGTCCAAGTCCATCTCGTCCACAAAATACTTCCGGCGGCTCCCCCTTCCATTACGCG  
GCATGTTTTCTTCCGCTGTCCCTCTGCTCAATCGCCGCCGGGTGAAACATCCGGCGAGAGTGGCACGCCTTTGTGCGCCGGAAGCGGACGCCGTGTTCCCTTACATGGGAGAAGTTATGGG  
TTTTCGTTTTCGGGTCATAAAGGAGAGCGCGTGCCGGTGCTTTCGGGCCCTTACCGGGCTGGCCAGCCAGGAGAGGTGCTTGCAATTATGGGCCATCGGGATGCGGCAAGTCAACGCTT  
CTGGACTCGCTTGCTGGAAGATTGGCACCGAATCTTAGCCAGAGTGGAGATATCCTCATCAATGGCAGCAAACAAGTCTCGCTACGGCACCTCAGCTATGTGACCCAAGATGACGTCT  
TGATGACGAGCTTAACAGTAAGAGAAGCCATACAGTACGCCGCCGAGCTACAACCTCCCTTCTTACTGAGCCGCTCAGCTAAGCGCGAGCGAGCGGAGGAGGCGATCAGGGAGATGGG  
GCTGGCGGCCGCTCGCCGACGTACGGATTGGCGGCCGAGTCACGAAAGGGATAAGTGGGGGGCAGAGGAGAAGAGTAAGTATATGCATGGAGATTATAAAGCGGCCGAAGCTTTTTATTTC  
TCGACGAGCCGACGAGTGGGCTCGATAGTCCGCCGCTTCCACGTCATCAACCGGATCGCAAAGATGGCCGCGAGTGGGGACCACATGACCGTCGTAGCCGCCGTGCACCAGCCTGG  
GCCGGAGGTCTTTGACTTGTTAAGATCAGTTTGTATTCTGGCTAATGGGCGGACCGTCTTCTTTGGCCCGCCCGATGTGCGACCCAGAATTCTTCGCTTCAATGGCTTCCCCATTCCATCCC  
TTAAAAATCCCTCAGACCACTACTTAAAAACTATCAACAAGGATTTTACCAGGACATTGAAGAAGGACCTGAAGCTGAGCTCACTACCACAGAAGAAGCCATTGTGATACTCGTCCAG  
TCGTATAGCTCATCAATGGCTTCAAACAAGCAATAACACAGATTGCTAAGATTCTGTAATGGGAGGAAAAGCTGTGAGAAAAGAGGAGGCAGGCTAGCTTCTGAAGCAGTGCTCAGT  
CCTTACAAGAAGATCATTGTAAATATGTACAGAGATTTGGGTTATTATTGGCTGCGATTTGCTATCTATGTTGCTCTTTGTTTGTGTGTTGGCACACTTTATTATCATGTGGGCCATAGTTTTG  
GTTCTATTACGGCTAGAGGCTCTATGCTTATGTTTATAGCTGCATTCCTTACATTCATGGCAATTGGTGGCTTCCCATCCTTTGTAGAGGACATGAAGATCTTCAAAGAGAGAGATTAAATG  
GACATTACGGTGTACTTCCCTTACAATAGCCAACACAGTCTCTGCAACTCCTTACCTAGCTTTAATCTCAGTTATCCAGGGGCCATAGCCTACTACTTAGTAGGACTACAACATAGTATT

GATCATTTATATATTTTGTGCTTGTGTTATTTTCATGCATGATGCTTGTGCGAAGGTCTGATGATGATAGTTGCTGGTATTGTTCTGATTTTTTGGATGGGCATCATCACCGGTGCTGGGATTCA  
AGGGGTGATGATGCTTAATGGAGGCTTTTTAGATTACCAGATGATATGCCGAAGCCGTTGTGGCGTTACCCAATGTATTATGTTGCTTTTACAAATATGCAAATCAAGGATTATACAAAA  
ACGAGTTTATAGGATTAACATTTCTAAAAATCAGGCAGGGGGGCTTCTACAATCAATGGAGAGGAAATATTAAGGGACACATGGCAAGTGGAAGTAGGATACTCAAAGTGGGTTGAT  
TTGGGAATTTGCTTGGGATGGTGTCTTGTATAGATTTCTCTTCTTGGTGATTTTGGAGATGCGGGGAGAAGGCAAGTCCTATGCTAAAGAGGTTGATGGTTAGGGCTCCAAGAGAGTCTA  
CATCAATAAATGACAATTCCTCTTAATTAAGTTTGCAAAAATCCCAAGCTATTTTGATAAAGCTTTTAAAATGCTTATATTCAAAGAATATTGTAATGGCTACCATTGCAATATTCTTTGAATAT  
AAGCATTTTAAAAGCTTTATCAAAATAGCTTGGGGATTTTGCAAATTAATTAAGAGGAATTGTCATTTATTGATGTAGACTCTCTGGAGCCCTAACCATCAACCTCTTTAGCATAGGACT  
TGCCTTCTCCCGCATCTCCAAAATCACCAAGAAGAGAAATCTATACAAGAGCACCATCCCAAGCAAAAATCCCAAATCAACCCACTTTGAGTATCCTACTTCCACTTGCCATGTGTCCCTT  
AATATTTCTCTCCATTGATTGTAGAAGGCCCCCTGCCTGATTTTTTAGGAAATGTTAATCCTATAAACTCGTTTTTGTATAATCCTTGATTTGCATATTTGTGAAAAGCAACATAATACATT  
GGGTAACGCCACAACGGCTTCGGCATATCATCTGGTAATCTAAAAAGCCTCCATTAAGCATCATCACCCCTTGAATCCCAGCACCGGTGATGATGCCATCAAAAAATCAGGAACAATAC  
CAGCAACTATCATCATCAGACCTTCGACAAGCATCATGCATGAAAATAACACAAGCACAAAATATATAAAATGATCAATACTATGTTGTAGTCTACTAAGTAGTAGGCTATGGCCCTGGG  
ATAACTGAGATTAAGCTAGGTAAGGAGTTGCAGAGACTGTGTTGGCTATTGTGAAGGAAGTAACACCGTAATGTCCATTTAATCTCTCTCTTTTTGAAGATCTTCATGTCTCTACAAA  
GGATGGGAAGCCACCAATTGCCATGAATGTAAGGAATGCAGCTATAAACATAAGCATAGAGCCTCTAGCCTGAAAATAATGGTGA AAAACTCATAAAATTAGCTTTCTAGCTATAATCATT  
AAGATTATTAACCTTTTATAATCAAATTAACATAATTAGCATAATTAATATCAAATTTGGGAAAAAAAATATTAATCACTCAACCTGAATAGAACCAAAAATATGGCCACATGATAATAAA  
GTGTGCCAACACACAAAACAAAGAGCAACATAGATAGCAAATCGCAGCCAATAATAACCCAAATCTCTGTACATATTAACAAATGATCTTCTTGTAAAGGACTGAGCACTGCTTCAGGAAGC  
TAGCCTGCCTCCTCTTTCTCACAGCTTTTCTCCCATTTACGAATCTTAGCAATCTGTGTTATTGCTTGTTTTGAAGCCATTGATGAGCTATACGACTGGACGAGTATCACAAATGGCTTCTT  
CTGTGGTAGTGAGCTCAGCTTCAGGTCCTTCTTAATGTCCCGGTCAAAAATCCTTGTGATAGTTTTTAAGTAGTGGTCTGAGGGATTTTTAAGGGATGGAATGGGGAAGCCATTGGAAGC  
GAAGAATCTGGTGCAGACATCGGGCGGGCCAAAGAAGACGGTCCGCCATTAGCCAGAATACAAACTGATCTTAACAAGTCAAAGACCTCCGGCCAGGCTGGTGCACGGCGGCTACG  
ACGGTCAATGTTGCCCACTCGCGGCCATCTTTCGATCCGGTTGATGACGTGGAAGGCGGGCACTATCGAGCCACTCGTCGGCTCGTCGAGAAAATAAAAGCTTCGGCCGCTTTATA  
ATCTCCATGCATATACTTACTCTTCTCTCTGCCCCCACTTATCCCTTTTCGTGACTTTGGCCGCAATCCGTACGTCCGGCGACGGCCGCCAGCCCCATCTCCCTGATCGCCTCCTCCGCTCGC  
TCGCGCTTAGCTGAGCGGCTCAGTGAAGAAGGGAGTTGTAGCTCGGCGGCGTACTGTATGGCTTCTCTTACTGTTAAGCTCGTCATCAAGACGTCATCTTGGGTCACATAAGCCTGATTAA  
AGTAATTAATCACCAATATAAATCATAACTAATTAAGCTTTACGATGAAGGGTTGTAATTAAGGACGTTTTTAGTAAGGTTACTGAGGTGCCGTAGGGCAGGACTTGTGTTGCTGCCATT  
GATGAGGATATCTCCACTCTGGCTAAGATTCCGTGCCAATCTTCCAGCAAGCGAGTCCAGAAGCGTTGACTTGCCGCATCCCGATGGGCCATAATTGCAAGCACCTCTCTGGCTGGGC  
CAGCCCGGTAAGGCCGAAAGCACCGGCACGCGCTCTCTTTATGACCCGAAACGAAAACCCATAACTTCTCCCATGTAAGGAACACGGCGTCCGCTTCCGGCGACAAAAGCGTGCCA  
CTCTCGCCGGATGTTTACCCCGCGGCGATTGAGCAGAGGGACAGGCGAAGAAAACATGCCGCTGAATGGAAAGGGGAGCCGCGGAATAGTTTTGTGGACGAGATGGACTTGGAC  
TTGGGACCATCTGAGAACGTTGGCCGAGAAAGCCATGGAAGGTTGACAAGAGAGATGGATTTAAAGTGGATATTTAGCTTCTATAGATGTGGATGGTGAAGTATTTAGTGCTCTTCTG  
TGGAATTGAATTCATAAATATACAGAACAAGCGGTATACAGCTTGCAAGCATTGTAATGAATATCTTTTCATTGAAGAATA

>comp167272\_c3\_seq3

ATGATTGTGATTTCTAATGCTAATTGTTGCTGCCAATGGTGGTTGTGCGGACAACTGTTGCTGGTCATCCATATGTGGCGATGGCTGAAAAATGTAAGAGTACTCTCTATTATTCTT  
GTCTCCCTCATGTGAAGAATGAGGGCATAATTTATAGATTTTTGGGAGTGACAAACGACATAAATATGAAGAAGGTCTAGAGCAAATTTCTGAGTGCTCCATGAGATGGTTTGCATTAACCTC  
ATTGATCATAGAGCATTTTCCAAGCATTCAAGTGTCTTAATGATGTTAGAATTAAGTGAAGATTGAGCTCGTTGGATTTCGTCTCTTTGAGCTACATTTTTTTTATGGCAATATTTTTTTTTAA  
CAAAGCAAATATATTAAGCAAAAATCAAGACGGTTACAACAACAATGAACACAAAATAAAAAAAGTGAAGATAAAAAACTACCAAAAATGGGCTCAGTAAAAAGGCCGATGCTCCAA

GCATCCCAGAAGCCCCGCACGGACCATCCAAAAGGAGTCAGCATCGCCCAAAGTCCACCAATAAGAACTGTACCAATGGGTTCCACGAGAAAGGCTAAAGGGATACGAGCCACAGCCA  
CATCATTGCCTTATCAACCAGCGGCCACCAAAACGCAAAAACCAACCCGTAGAAAACAGCGGATAAATACATTATACAGAAAGGTTATCTTCTCCTTCGTCCCCTCCCACGGAATCTCCCA  
TGAGAAGCAACTGAGATAACAGGCCTATCACGAACCAAAAGTAAAATCATTTCAGG

>comp167280\_c0\_seq13

CAGAAAGTAAGAACAACTAAGTCAGAATAACTTATAAACAATTGAGGTTAATGTAATAAAATTAATATGCAGATACATTGGACAGCAAAAATGGAAAAGAATTAGTTAAAATTAAGAAAT  
CCAAATTCACAGTCGCTAAATGTCTTCAATCACTTAGCAGGTCTATTCGTCTTTGACTTTGCAATGCTCACAAGATCACCAAACAAATTGTCATCCTCCTTGAATCGCTGTTGCAAGTAAG  
AAGAAGATGAAGTAGAAGGCATTTGGTAGTAATGACCTGCATTCATGTAACATCTTGAAGCCAAGCCCGTTCAATTTATGAGAGAGCTCTCTGGTGTGTTGAGTAAGAGTGAGATTCTGA  
CTGTTGGCCGTAATTATAACCCTGCATGGACTGAGAATATGCATTTGAGAGATGGTAAGCTTGATCATGAGGAGGAAACATCCCATGGGTTGGTTTCGCTGAATTCCTGTAGAATATGTAA  
TAATTTCTTGTGTCTGCTCATTTTGGAAATGCTGCTGTTGTATGGTCAACGGCTGGCTACTTTCAGCCAGTCCAATCTCCCAAGGAGGTGGGGGGAGAGCTCCACCTTGATCGACTTCTCC  
GATACGTGCTTGTGCTGTGTATCCACATTATGATTATCCATGAAAGATCCCCATGACTTGGCTGAGCTTTTGAACAAATGAAGCGTGCTCATGTATAGATTGTCCATGGTTCATGGCACT  
CCCATCTAAGTAAGATATAGACTGCTGTTGCTGCTGAAACAGAGATGCAACAGTATAATCTTGTTCAGCTTGAAAAGCTATATTGGCAGTACAGTTATTTCCACAGTTCCTTGGAGAATAAA  
TGCCTGTTAGAACTAGCATATTTTGGTCAATTTGCCGAAGGAGCAGTTGTTTCATTTGCTGGCACAAGAGCTAATGAGTTATCTGTTGAAGTTGTATTGAACTCCTCGCCGCTAAGAAGATCT  
AATTGAGGACATGATTTTGGAGAAGTAATTTGGTATATCATTTGGTCCAGGAGGAGCAGGTAGCAAGAGCTGTTGAAGAGGAGCATTTGACCTTCGATGTGATTCAATGTCAGCATCCTGAT  
TTTTATCATGAAGATCTACCAAATCATGGAGAGAGTTCTGCTTCTTTGGTTTTTTAGAAACTTCAATAACAATAGCATCATATTTTGATAGAACATTTTGTAGATCATCATTTAAAGCAAGCC  
CTTCACGAAGTAATTTCTCGTTTGAAGTAGAGTTAACAAGATGAACCACCCTTTGCCTATATAGACGACACTTTTCAACAAGTTCAACGATCACCTCCTGCTTGATATCCTCTTTATTTCTC  
GGATCTAAAGCATTTAGCATTTCAACAAGAACATCCATGATAACACGAGCATTTTGAATATCTGCAAGACTTAGAAAATGAATCTCAGAATCGCTTGAAGCTTCTAGTTTTTCTGTTTTCTT  
GTCATGTTTTCTCATAGAATAAGGATATGATGTTGCAGACCTAAATATGGGTGTGGACTTCACAGGTCGCTTAGGAAATACTACTCCAGCACGCAATAATTCATGATATGCCATGAAGAATT  
GTGGATATCTTCCCTGTGGACCACCAAATGCTTCTTGCCAAGTGTCTATTAGTACCAATATTTTCTCCTTGACATGAAAATCAGGCTTTTTTTTAGCAATCTTACCATTTTCATGTGGGATATC  
TTTGTCTACTATTTGCATGTGGACCATATCGCTACAACCTTTTACCACCGTCTCCAGCAACGTAAGAGCCAGTAGCTGTACTTTTTGAGTTCTTACTTTTAATACGCTTTTTAAGACCTTTTCA  
AAAATCTCTGATTTGCCCTGGATCATGATTAAGAACGTCGCAGATCTCCAGGTTTCATTGCCCAATCGGGTCCAATGAGCATATCGCTCGTTGCCGATCAACCAATGAATTCGGCATTCTCA  
AAGTGCTGAATATAATTAATAATGAATGAGAGAAATCTGGGACGATGGGAGTTTGCCTGCGTTGTGGATTTGACGAATCTCATTGGAGAGCTCTTCCCTCTCCGGGAAGGAGATGGAGGT  
TTACAACGAAATCTTGGAGATAGAATGAATGGTGAAAAGGAAGGGTAGTAATTATTGTTTATTTATTTATAGCAAAAATTT

>comp167280\_c0\_seq15

ACAAACCATATAAAATGCCTTGTAATCATAACCAGGCCAGGGCATGAAAATAGTGCATCCAACACTACATCATGGGCGTGGGCCAGTTGTATAAAAAGCTGGCCCATTTAATGGGCTGGGTT  
GGCTCGATTTGGCCTGGCCCACCTGGCATGATCCAATCCCAAACATGCAGGTGCAAATAGGCAGTAATGAAGTTGCAATAATAAGTATGAAAATAAGAATCTTACGAAGTAGAGTTAAC  
AAGATGAACCACCCTTTGCCTATATAGACGACACTTTTCAACAAGTTCAACGATCACCTCCTGCTTGATATCCTCTTATTTCTCGGATCTAAAGCATTTAGCATTTCAACAAGAACATCCAT  
GATAACACGAGCATTTTGAATATCTGCAAGACTTAGAAAATGAATCTCAGAATCGCTTGAAGCTTCTAGTTTTTCTGTTTTCTTGTGATGTTTTCTCATAGAATAAGGATATGATGTTGCAGA  
CCTAAATATGGGTGTGGACTTCACAGGTCGCTTAGGAAATACTACTCCAGCACGCAATAATTCATGATATGCCATGAAGAATTGTGGATATCTTCCCTGTGGACCACCAAATGCTTCTTGCC  
AAGTGCTATTAGTACCAATATTTTCTCCTTGACATGAAAATCAGGCTTTTTTTTAGCAATCTTACCATTTTCATGTGGGATATCTTTGTCTACTATTTGCATGTGGACCATATCGCTACAAC  
TTTACCACCGTCTCCAGCAACGTAAGAGCCAGTAGCTGTACTTTTGTAGTTCTTACTTTTAATACGCTTTTTAAGACCTTTTCAAAAATCTCTGATTTGCCCTGGATCATGATTAAGAAGCT  
CGCAGATCTCCAGGTTTCATTGCCCAATCGGGTCCAATGAGCATATCGCTCGTTGCCGATCAACCAATGAATTCGGCATTCTCAAAGTGCTGAATATAATTAATAATGAATGAGAGAAATC

TGGGACGATGGGAGTTTGCCTGCGTTGTGGATTTGACGAATCTCATTGGAGAGCTCTCCTCTCCGGGAAGGAGATGGAGGTTTACAACGGAAATTCTTGGAGATAGAATGAATGGTGGA  
AAAGGAAGGGTAGTAATTATTGTTTATTTATTTATAGCAAAAATTT

>comp167280\_c0\_seq5

ATCAAAAAGTAAAGCGGTGCAATTGTGGTCGTAGATCGACGGCCATGCCTCCGGTAGAATCTCCAAGGTGGGATGTCCTCATCACATAGCCTGCTTGATAAAATGTTGGGAATATGATCGAT  
ACGTGCTTGTGTGTATCCACATTATGATTATTCCATGAAAGATCCCCATGACTTGGCTGAGCTTTTTGAACAAATGAAGCGTGCTCATGTATAGATTGTCCATGGTTCATGGCACTCCC  
ATCTAAGTAAGATATAGACTGCTGTTGCTGCTGAAACAGAGATGCAACAGTATAATCTTGTTTCAGCTTGAAAAGCTATATTGGCAGTACAGTTATTTCCACAGTTCCTTGGAGAATAAATGC  
CTGTTAGAACTAGCATATTTTGGTCATTTGCCGAAGGAGCAGTTGTTTCATTTGCTGGCACAAGAGCTAATGAGTTATCTGTTGAAGTTGTATTGAACTCCTCGCCGCTAAGAAGATCTAAT  
TGAGGACATGATTTTGGAGAAGTAATTGGTATATCATTTGGTCCAGGAGGAGCAGGTAGCAAGAGCTGTTGAAGAGGAGCATTTGACCTTCGATGTGATTCATTGTCAGCATCCTGATTTT  
TATCATGAAGATCTACCAAATCATGGAGAGAGTTCTGCTTCTTTGGTTTTTTAGAACTTCAATAACAATAGCATCATATTTGATAGAACATTTTGTAGATCATCATTTAAAGCAAGCCCTT  
CACGAAGTAATTTCTCGTTCGAAGTAGAGTTAACAAGATGAACCACCCTTTGCCTATATAGACGACACTTTTCAACAAGTTCAACGATCACCTCCTGCTTGATATCCTCTTATTTCTCGGA  
TCTAAAGCATTTAGCATTTCAACAAGAACATCCATGATAACACGAGCATTTTGAATATCTGCAAGACTTAGAAAATGAATCTCAGAATCGCTTGAAGCTTCTAGTTTTTCTGTTTTCTGTG  
ATGTTTTCTCATAGAATAAGGATATGATGTTGCAGACCTAAATATGGGTGTGGACTTCACAGGTCGCTTAGGAAATACTACTCCAGCACGCAATAATTCATGATATGCCATGAAGAATTGTG  
GATATCTTCCCTGTGGACCACCAAATGCTTCTTGCCAAGTGTCTATTAGTACCAATATTTCTCCTTGACATGAAAATCAGGCTTTTTTTAGCAATCTTACCATTTTCATGTGGGATATCTTT  
GTCTACTATTTGCATGTGGACCATATCGCTACAACCTTTTACCACCGTCTCCAGCAACCTGGATCATGATTAAGAACGTCGCAGATCTCCAGGTTTCATTGCCCAATCGGGTCCAATGAGCAT  
ATCGCTCGTTGCCGATCAACCAATGAATTCGGCATTCTCAAAGTGTGAAATATAATTTAAATATGAATGAGAGAAATCTGGGACGATGGGAGTTTGCCTGCGTTGTGGATTTGACGAATC  
TCATTGGAGAGCTCTCCTCTCCGGGAAGGAGATGGAGGTTTACAACGGAAATTCTTGGAGATAGAATGAATGGTGGAAAAGGAAGGGTAGTAATTATTGTTTATTTATTTATAGCAAAAAT  
TT

>comp167280\_c0\_seq9

ACAAACCATATAAAATGCCTTGTAATCATACCAGGCCAGGGCATGTAAAATTAGTGCATCCAACACTACATCATGGGCGTGGGCCAGTTGTATAAAAAGCTGGCCCATTTAATGGGCTGGGTT  
GGCTCGATTTGGCCTGGCCACCTGGCATGATCCAATCCCAAACATGCAGGTGCAAATAGGCAGTAATGAAGTTGCAATAATAAGTATGAAAATAAAGAATCTTACGAAGTAGAGTTAAC  
AAGATGAACCACCCTTTGCCTATATAGACGACACTTTTCAACAAGTTCAACGATCACCTCCTGCTTGATATCCTCTTATTTCTCGGATCTAAAGCATTTAGCATTTCAACAAGAACATCCAT  
GATAACACGAGCATTTTGAATATCTGCAAGACTTAGAAAATGAATCTCAGAATCGCTTGAAGCTTCTAGTTTTTCTGTTTTCTTGTGATGTTTTCTCATAGAATAAGGATATGATGTTGCAGA  
CCTAAATATGGGTGTGGACTTCACAGGTCGCTTAGGAAATACTACTCCAGCACGCAATAATTCATGATATGCCATGAAGAATTGTGGATATCTTCCCTGTGGACCACCAAATGCTTCTTGCC  
AAGTGTCTATTAGTACCAATATTTTCTCCTTGACATGAAAATCAGGCTTTTTTTTAGCAATCTTACCATTTCATGTGGGATATCTTTGTCTACTATTTGCATGTGGACCATATCGCTACAAC  
TTTACCACCGTCTCCAGCAACCTGGATCATGATTAAGAACGTCGCAGATCTCCAGGTTTCATTGCCCAATCGGGTCCAATGAGCATATCGCTCGTTGCCGATCAACCAATGAATTCGGCA  
TTCTCAAAGTGCTGAATATAATTTAAATATGAATGAGAGAAATCTGGGACGATGGGAGTTTGCCTGCGTTGTGGATTTGACGAATCTCATTGGAGAGCTCTTCCCTCTCCGGGAAGGAGATG  
GAGGTTTACAACGGAAATTCTTGGAGATAGAATGAATGGTGGAAAAGGAAGGGTAGTAATTATTGTTTATTTATTTATAGCAAAAATTT

>comp167290\_c1\_seq1

CAAAATAATTTTTTTGTATGAGACTAATCAGCTCTCTCAACTGCTGCAGCAAAAGCAGAAATATTCATGAATAATATGAAATAAAAAACAATAGTCATTAAGTTACAGTCCACCAGAAG  
GGGTGAAGTAGTGAATAACAGAACAAATAACCAGTTCATTACTTGCAGGAAGGAAAACCAGTAAAAGGTGCGGCATATAAAGCTCATAGGCATATCTTCTTGTTTTTTAGTTGGGAG  
GAGCGAAGAAGATCTCCTCAGAGCTCCTCTTAGACCTGAAGAGCTGCTCCATTTCCGGCGAGGTGTTGAATGAAGCCTGAAGCACCTCCGGCGATATGGCCTTCCAACTGAGGTCTT

CCAGCCAAGTGGGTGAAGATTGGGTGGGTGTGCTGATGATGGAGAACCACTCCATGCCTTCGGCATCGGCAATCTTCGACACAACGAAGAACCTGGGCACGATGAAGAGGTAGCCAG  
CTTCAACGCGGGTCTCCAGCACGCGCTTGCCATCAATGCCGACAACCTCCGCACGACCGCTGCCCTAACACATAGGTGACTTGATATGCAGAGTACATGAGAATCCCGGAGAGCAC  
ATGGAGTGGCCGTAGATCCTCACAAGATCGGCGCCGAGACCAACCTCGCCGACTAGGGGGAGGTTCTGGGTGTTTTCAGAACGACGACACAACCGCCGCCCTTAATGTCGACATCAAGGG  
GAGCCTCAAGGCAGTTGAGAACCAGCCCCTTGCGGTTCGGCTCGGAGGGCTGAGGAATGGACTGGTTGTGACAGAGATTTTGACGATGATAGAACCCTTCTGGCTGCTAACGAGCTTCTCA  
GCATCATCAGTGGAGAGGCCCATGCACGGACGACGAACTCGGTGGAGAAGCCGGTGAAAATGCCTTGGGCACCTGTGATTTGGAAGTTTGTGAATTCGCCGGCGAGGTGGCCCTTAG  
AGGTGTCGCCGAGGAAGAGTATGATGAGTTGGGTGGAGCTAGGGTTAAACCACCATGTCACCACGCCGAAGGGGAGAGCAATAGCGTCACCCTCTTTGATGGGAAGTACCTTCTCCTTT  
GGCGTTTCAGGAAGAGCAATTCCACAAGTGCCGCTCCCTTGAGAAACATAAGCAACCTTGGCGGAATCGGAATAAGCAGGCAGAGCGAGACCACGCTCGGCTAGCTCAAGCTTGGCGG  
CGCCGATGTTGCCGGCGCAAGCATTGGGAGATCATCAGGAGACCAAGACAAATACGAGCCTCCATCTCCGCTGTAGGCTGTCTTAGGATTCTTTGGGGACAAATCGAGCTCCATTGCTG  
CTACGAGAGGAAGAAACGCAGAAAACAGGCGGTGATCGAGGGAGAGAAAGGAGAAGAGATGACCGATAAATTAATGGAGGAAAGGCTCGTAATTTATAGCGGGCGGATAAGGAGAGA  
AGCATAACGATTTGGCTAGCCTAAAAAGTAGGAACTGTAGCTTTAAATTAGAGAATTTTTGTTCTTAAGAGTAAAGGGAAGCGGAATTCTACAGGTGCGAAAGGAGCGACCTTTCCGGA  
TCTTCATGCGAATGGTTCGGTGTCTGTCAATGGATTGTATTAAGGGGCGGTTTGGTTCGATATATTGAAATGACCAAAAAAAGGGTAAAATAA

>comp167315\_c0\_seq1

ACCAACCTTTACTTGTGCTTTTTTATCTCTGAGGGAAATGAGGATCACATCCAACATATTCCTTAAAAGAAAAGAATCGACAACATCATCAACTAGCTATGGAAACCGAAAATACTCATG  
GCATCATCTTCGCACTTCATGCAACTTCTTTGGCCGCTATGCCTATTTTCCCCTACCACAATATTTCCCAATGATGCTGCCTCCAACCTTTGACAACATTTGCACCAATTCTCTACCAATG  
CCCCTCACTTTCCCGACATCACAATCCTCGATTCTGTCTCCTCTAATATCCTCTACCAAACCTACAACCTCCTTCCCCTATGTCTTTTCATGTCTATAACCTGATCAATCGAAGCTACTTTGCCTT  
CTCCTTCCATAACCACCTCACCTTTGTCACTGCCGCCATCCTTATATGTGGCTGCTCCCACTTCAAAGTTCTTGTGCTGTGCATAAATGAGCACCCAAACCCATTATTTACTGAACAAGGAG  
GTAATAGGAATAAGCCCCTCGTCTTCTACATCTACACATCTGAGAGCGAGAATTGGTCACTTGTCCCATCGATTATGATCTCACCTCTAATCGTCTCCTTCAAATAGAAGAAATCCAGCT  
CACGCTGGTGAGAACACCATATACCTCGATTAAACCAATCGTTTCCCTCGTCACCTATGCCTATTGGGAAGAAAAGATTGAACCAATACCAAAGTTTGTGTCAATATGGGAGAAAGAATCAA  
TGTATATCGACAAAGACACGAGGTACTTTTCAGAGTAGTGGATATCTACATTGTGTAAAGTTTAATCCTATACAAATGCGATTTGAGGTATACATATGGATGGAACCGCCAAAAGGAAAAGTG  
GAGGCTAGTGGCCAAAGGAGAAAAAGAAGCACATGGGAGAAGGTTGTAGGGATCACCTGATGATGTGGGTATTTTGTCTGAGATCAATCGAAAAAGATGACATTTGTTAGTTAA  
TATCCGAAGGAATTACTCACATATAATCATTGATGAAAAGAGGACCTATTTGCAGCTCACAGTGTTTTGTAAATGGGATGAATGACGTGTTGGAAGATGCAATTTCAAAGGCGTGCAAAGT  
TTAAGTTGTAGTGTTTTGCATCTCATGAGAACATTGAAGGGCCAGAAGGAGAGGTTTTTATTATTTACGTTCTGGATCACAACCTGGTTCTTCTCCACAAAATATATTTAAAATTATTG  
GAGTTATTTGTTTGAAGATGTTATTAATAAATTTTATCGTGTGTTAATATTTATCACATGAATCTATAGTATTTGTTAAGCATTTTTTACGGTCTGGATCTCAACT

>comp167325\_c0\_seq3

ATGCCATCTCCAAAAGCAAATTTACGATTTTTAATATATTCTGCAGAGTATGACCCCTTCCACTTCCATTGTTGAATATTCTCATCACATGTTGTCACCATCAGCATCCAAACATTGATATTAT  
TTCCACTTATGTGCACCAAAACACAACCACTCCTCATAAGGAATCATTTCCACTCACAACGATTGTTGGAGGTTATGAATGTAGTATTAGGCTTGGTTATGATTTGTCCTTTCTCCTCCTCCA  
CATTAATGCAAATATAGAGAATGAAGACAATCCTGCGCCAAAAGGGTTTTGAATATCATTATCATCAATACGCTGTTTGTGTTGATAACAATGCCACTTTTATCCATAACCAAAGAGAA  
GGGAGATCATTAGACCGTTTCCACTTTTGGGCTCTAGAGTCAAAGATCTCGCAGTAATTGATACTTGGTACCTTAGTTATCCCCACATTGGCACTGATATTCTAATAATCTTGAATTCATTA  
GAGGTTTCGCTTAATATCGTTGGTGTCTATAAATAATGGCGACACCACAAGTGTCAAAGCCGGTCTCCGGATTGGGGATGGGGAGACTGTATGGAGTAGTACCCAGCCGTATGATGGAGTAG  
ATGGGGTTGATATCATTGTTGCTATTGTATTTAGGTATGATACTGCAAAATAGAAGGCCTTGAATTGGAGCAGTAGCTTCGATGTAAAGAGTTTGGAGTCTACCAGGGAGAAGGGGTAGAG  
AAAATGTGCCATGCATGGACACAAAAGTGTGGTGATTTTCATTGTTCATGGGTGTTTTGTAGGATGAAGCCTGATGTTTTTGTAGTACAAAAGTGAATGGGCTTACCGAAGTATGGCTGATA

TGCAATGCGACGCCAAGTCTTAGAAACACTGATACATGAAGGCAGACTCACAAGGGCAACTCTGGTTAGTATTTTCATATAAGTTGTCCTCTGAAAGTACACAACCATCATCTTGGATCTCC  
ATTATCACAAAAAAATCTTAATTTAGCTGTGATGACGGCTTGGATGCTCGAACAAACTTTTAGAAATATCAAAGAGGTTTTGTTGGGTTTCAGAGTATATGAACAAATCACAACAATTTG  
ATTAAAGATATAACAGTTGC

>comp167325\_c0\_seq8

ATGCCATCTCCAAAAGCAAATTTACGATTTTTAATATATTCTGCAGAGTATGACCCCTTCCACTTCCATTGTTGAATATTCTCATCACATGTTGTCACCATCAGCATCCAAACATTGATATTAT  
TTCCACTTATGTGCACCAAACACAACCACTCCTCATAAGGAATCATCTTCCACTCACAACGATTGTTGGAGGTTATGAATGTAGTATTAGGCTTGGTTATGATTTGTCCTTTCTCCTCTCCA  
CATTAATGCAAATATAGAGAATGAAGACAATCCTTAATTTAGCTGTGATGACGGCTTGGATGCTCGAACAAACTTTTAGAAATATCAAAGAGGTTTTGTTGGGTTTCAGAGTATATGAAC  
AAATCACAACAATTTGATTAAGATATAACAGTTGC

>comp167347\_c0\_seq2

TTTTTTTTTACCCAAAATTTACTGCTATATATTTTCATTCAAAGAAAATAACTTGTTACACTGATCGGTAACCTGAAATCTATGAATCTCGTTTTTTTTTTCTTTACACTAAACATATCATATA  
TCGTAATAATTACATTAAGAAGCTCTAATATCATCTGTGGCTTAAAAAATGGTTGAACGATCATCAATGTTCTCTCAGCCATATCCGAGCAGAGCAGGAGCAAGCTGCAACAAAGGCTGC  
AAAGAGCTGGGAGCAAATTTCTCGCAAAGAGAACACAGAGAGAAGAATGCTGGCCATTGTACATACAATCCCAGCCACTAAGAAGCTTCTTCTTCATGAATCCTCAGTGATATCATCT  
TTGCCAAAAGTTGCAGGGTGAGCTCCACCTCTTGACCAATCCACAAAGGTAAGACTACTATTTGCTATCAGATCTGATTTTTCAATGTGGAGCATGGTTGGGAAGTAATGCTCATCAACAT  
AGCAAGGTGGCTTGAGAATTCCTTGAACCTGGAGTAGTACTTGGTGTCTTGAAGTATGTAAATTGCAAGCTTCTATCAACTTCAAACCACTGAGATCCTTTTCGCCATTGATCGATGGT  
AATCAATGGAGCCATGTTGGGATTATAGCGGCCTCTGCCATGAGGGCCTTTGTCATCGAAAACGCCCATGAAGCTGAAGTGAGATCTCTGAAAATATTTGTAGATTATGCTGAAGTTGTAG  
AGAGGTATGCATGACTCAGAAAGAAGAACAACCACTCGTTGGAGAGATCGAGGAGCGCGTTTTGCAAGGAGACGTTTTTCTGCATCACACATGCTCATTCTTCCCCATTCTGCTACCTGT  
GGGATGGGAAAAGGAAAGGGGTGCGAACAAAAGGAGGATTAATTTAACTAAATACACCAATTATTAATCTTTTACATCCAAAAGTAAAGCATATATGAGTGAAATCCAGCCCCCT  
AATATTTCCACACCAATATACTTTTAAACCATCCAATTTAAAACCTAAATTCATACTAACTCAGATGAAAATACATCCAGCAAATTTAAACCTTATAGTATCTTCTCAATCATGACACAG  
ACTGTACTTCAATTAATCATTATTCTTTAGATCCAAAATGAATTGCTTTAAAAGAGGACAACATCATTAAAGAGGCTATACTACCAAAAATTCAGAGGATGGGGAAGAGCCAGGACTATT  
TACTTGGTTGAGTTGCCCAAGCTTGAGTCCCTGTGCTTGACGAGAAATTATTTGTGCGGATACCGGACACAGCTTACCGTCCAGAGGAATATCAGGTTACAGCCACGTCATCCAGTACCG  
AGTAGTATCGAGCTCAGTACTGAACAGTACCGAGCCGAATACTGAGTTGGGGTGATGTGGCGTTTTTTTCAATTCGGCTCTGGATGGCGTTTCGATGTACGCACCTAATAATTTACGCCGGT  
TACAATTTTAAACAATCCAAAGGATATTGCTATGTACCATAAAAGCTTTAGAGCATTTACGATATGCAATTATTCTGAGAATTGTATCAATATGCAAATCTTGTTTCAAATTTATTATGGTGC  
ACTTTTTCTTATAGGTA

>comp167347\_c0\_seq5

TTTTTTTTTACCCAAAATTTACTGCTATATATTTTCATTCAAAGAAAATAACTTGTTACACTGATCGGTAACCTGAAATCTATGAATCTCGTTTTTTTTTTCTTTACACTAAACATATCATATA  
TCGTAATAATTACATTAAGAAGCTCTAATATCATCTGTGGCTTAAAAAATGGTTGAACGATCATCAATGTTCTCTCAGCCATATCCGAGCAGAGCAGGAGCAAGCTGCAACAAAGGCTGC  
AAAGAGCTGGGAGCAAATTTCTCGCAAAGAGAACACAGAGAGAAGAATGCTGGCCATTGTACATACAATCCCAGCCACTAAGAAGCTTCTTCTTCATGAATCCTCAGTGATATCATCT  
TTGCCAAAAGTTGCAGGGTGAGCTCCACCTCTTGACCAATCCACAAAGGTAAGACTACTATTTGCTATCAGATCTGATTTTTCAATGTGGAGCATGGTTGGGAAGTAATGCTCATCAACAT  
AGCAAGGTGGCTTGAGAATTCCTTGAACCTGGAGTAGTACTTGGTGTCTTGAAGTATGTAAATTGCAAGCTTCTATCAACTTCAAACCACTGAGATCCTTTTCGCCATTGATCGATGGT  
AATCAATGGAGCCATGTTGGGATTATAGCGGCCTCTGCCATGAGGGCCTTTGTCATCGAAAACGCCCATGAAGCTGAAGTGAGATCTCTGAAAATATTTGTAGATTATGCTGAAGTTGTAG  
AGAGGTATGCATGACTCAGAAAGAAGAACAACCACTCGTTGGAGAGATCGAGGAGCGCGTTTTGCAAGGAGACGTTTTTCTGCATCACACATGCTCATTCTTCCCCATTCTGCTACCTGG

CTAGGAATCTGCCTCTTATAGAACACGGAGTCCCTTCGGATAGCTGGCTTTATAACCGGGCAAAGAATGAATAAAGATAGAATAAAGGCCCTCATTTCCCTTGAAGAACTTCTCCCACAGTG  
GAGAGAGAGGGCAAAGGTCCCCTCGTTAGGAACATGAACGCAACCTTCGGCAATCTCTTGAACGGATAGTTTTTAACTTCTGGGGCAAAGCTCGCAAGCCAGAAGAGCTCATGATCACTC  
ATGTTATGCAACAAAAGAAGAAGGAGGTTTATGATCCAACGATTAATACCGCTCGGCTCCACAGTTATACAGGGCAAAAAACCAGACTTTGGCGACTGCAATTTTAAAATTCGAGTATCGAAG  
AACCGAGCACCAAAGATGAAAAACCAGCAGCCAGGAGCAAGAAAGGGCCAAAGTACTTGGACGATGCTAAACAAATAACCCCTGGGTTGAATCCTCTGCGCCAAATCCTTGCCATCTT  
CAGCATGAAAAACCCTAGGTAGCATCTCAGCCCGATGAACAACGGCACCAAAAGATAATTTTCAATGTTTTTCGATCAAAAAGATCTTTTAAAGAGGAGGAAGAAGATAATTTCTATCAA  
AATCGCGTCTTTTAAAGAGCTAATAAGCTGAAAAGGAAGGACTTCCGCACCGCAAAAAACTCCAACTAGCACCTCCTGAGGAGTAAATTGCGTTTATACAAACGGAAATTTTCTGGAAA  
CAGGTAGATGGGGTCGGCTGCGAAGGCCGAGCAGACGTTATGGAAATCCACGAAGAGGGAGGTAGAAGCTCTTCGCGGTTTGGTGGGGCCCTCGCTGCAGAGAAGGTCTGATTCCATG

>comp167422\_c0\_seq1

AAAATGAAATATGTATTTTATCTCAAAGAAAATTTAAAATTTATATGCCAATCAATTAATAATTTTAAAAATTAATAAAAAATAATTTAATAAATAATGTATTTTATATATAATTATAACAT  
GCATTTAATACTTGAGCAATTAAACTAGTCTTTAAAAAATATTATAATGAAAAGAAAAACAGCATGACTTTATGTCAGAATATAAAAATGAAAATTTTCAATAACAAACACAATATCATCATA  
AAAACCCTCTGAATCTTTATTTGTTTGAATAAACTTCATAACATAAACCTTTTTGTTTGCCAATGTACATGATATGTGAGGAGGGAACAATGACATATCTAGATTTCTTTTGTCTTTTCTTCAA  
AAATAAGTGTATGAATATCCAATAGTCAGGGCGGATCCAATCTTAATTTTACGAGGGTGGGTGGGGGGCAACTTCTCGACCCCTATTTGTTTATTGTTGTACGGTTCGTAGATATGTTGG  
GGTCCAAGGAGGTTACCTCTGGGCGGGCTTCCAATCCGCCATGCCAATAGTCTTATCTTGTCTTAGCTAAAGCTAATTAGTCTGATGTAGAACAACATGAATCACTTTATGCTTTTCTGA  
AGTATCATCCTGAGTCTATCCAAAGCAGCTTTTGCAGCCCGATTTTGGAGCGATCTCCTTCTTCTGACCGTAAGTACCCTTCCATATAAGTTCCCTCAATGAAAACCTTTGACCGTTTACCC  
AAAAAAAACCTTTGACCGTCATGCTCTTCGTCCATGTATCTTTATCGAAATTCACATTCATTTTGTCTTTTACATAGTTCATAAAGCTCGCTCACAGGGTGTTTTCCCTAGTGTATCGAGGC  
TGATCAGTGGATCTGCTAATCTTTGAATGTCTTCCAGACAATCTCTAAAGAATAATGCTGTGATGAAAATGGCTCCAATGACAGATTCAACGATGTTTGAAGGGCTTTTGGTGGATC  
AAGGAGACCATTTGAATGTATAGGATATTGATTTATGCCCTCCATGAATTCCTTAATCTGCCATTCAAGCTGAGGAGCATTATGACGTAGAAATCGATGAAAATTAGATTTAATGGCTATTG  
AGCTAGCCTCTCAGTATCAACATTAGCAGCCCTTAGAAGTGTAAGTTGTCCCGGAGGCAAATCTTCATAAGAAGAAAATACCTCTCTAGCCATTAAGAGGCCAAGCACCGAATCACCCAT  
GAACTCCAATCGTTCATAAGATTTCCAGCCCTTTTGAAGGGTGTAAAAGATGACTGGGTGAATGCCTGAGCAAGAAGCATTATTTCTTAAATCTATACTGCAAGATCATCTCAATCT  
CCTCTATTACATCTTCTCCATAGGTTGAAGATCTGGAACCTCTTGCATATTCCTCCTCAACTATTTCTTCTTCTCCATCTCCTTCTTACT

>comp167422\_c0\_seq3

AAAATGAAATATGTATTTTATCTCAAAGAAAATTTAAAATTTATATGCCAATCAATTAATAATTTTAAAAATTAATAAAAAATAATTTAATAAATAATGTATTTTATATATAATTATAACAT  
GCATTTAATACTTGAGCAATTAAACTAGTCTTTAAAAAATATTATAATGAAAAGAAAAACAGCATGACTTTATGTCAGAATATAAAAATGAAAATTTTCAATAACAAACACAATATCATCATA  
AAAACCCTCTGAATCTTTATTTGTTTGAATAAACTTCATAACATAAACCTTTTTGTTTGCCAATGTACATGATATGTGAGGAGGGAACAATGACATATCTAGATTTCTTTTGTCTTTTCTTCAA  
AAATAAGTGTATGAATATCCAATAGTCAGGGCGGATCCAATCTTAATTTTACGAGGGTGGGTGGGGGGCAACTTCTCGACCCCTATTTGTTTATTGTTGTACGGTTCGTAGATATGTTGG  
GGTCCAAGGAGGTTACCTCTGGGCGGGCTTCCAATCCGCCATGCCAATAGTCTTATCTTGTCTTAGCTAAAGCTAATTAGTCTGATGTAGAACAACATGAATCACTTTATGCTTTTCTGA  
AGTATCATCCTGAGTCTATCCAAAGCAGCTTTTGCAGCCCGATTTTGGAGCGATCTCCTTCTTCTGACCGTAAGTACCCTTCCATATAAGTTCCGTTGATAAAAACCTTTGACCGTCATGCT  
CTTCGTCCATGTATCTTTCTCGAAATTTACATTCATTTTGTCTTCTGACATAGTTCATAAAGCTCGCTCACAGGGTGTTTTCCCTAGCGTATCGAGGCTGATCAATGGATCTGCTAACTTCTTG  
AATGTCTTCCAGACAATCTCTAAAGAATAATGCTGTGATGAAAATGGCTCCAATGACAGATTCAACGATGTTTGAAGGGCTTTTGGTGGATCAAGGAGACCATTTGAATGTATAGGAT  
ATTGATTTATGCCCTCCATGAATTCCTTAATCTGCCATTCAAGCTGAGGAGCATTATGACGTAGAAATCGATGAAAATTAGATTTAATGGCTATTGAGCTAGCCTCTCAGTATCAACATTAG  
CAGCCCTTAGAAGTGTAAGTTGTCCCGGAGGCAAATCTTCATAAGAAGAAAATACCTCTCTAGCCATTAAGAGGCCAAGCACCGAATCACCCATGAACTCCAATCGTTCATAAGATTTCC

CAGCCTTTTTGAAAGGGTTGTTAAAAGATGACTGGGTGAATGCCTGAGCAAGAAGCATTATTCCTAAATCTATACTGCAAGATCATCTCAATCTCCTCTATTACATCTTCCTCCATAGGTT  
GAAGATCTGGAACCTCTTGCGCATAATTCCTCCTCAACTATTTCTTCTTCTCCATCTCCTTCTTACT

>comp167426\_c0\_seq13

GTGGGAACATTAAGGGCATTGTTGATGTTGCTTTAGGATACACTTGTCTTTAAAGAAGTGTGTCCAAAACAACAATGCCTACATTCCTTTTATTCTGATTTTCATTTTTTTTCTACTGTT  
TTGCTATAGATTCTTAAGTCTAGTGATACATGTACGAGAGTCCTAAGGATTAGAAAACAACACCCTCTTAGTCCCATAACTTTAGTGACATCTAAGGAC

>comp167433\_c1\_seq2

TCGACTCCGTGAGTGGGTGTCTCGAGAACTTCTCGTGCATCTGGGTTGATCTGATGTAACATCATCGCGCTCTGAGATCGTATCATCTGACTCTGGTTTACCTCTTCACCTTATCAAATATCT  
TCTTCGCTCACCTCTTTTGTGGAAATAATGTCATCACGTAGAATATTGTCAATCTTCTGCTATAGGTATTTTATGAATATTTTTGGGAGTGGAGGTAGGCTTTAGGGTTCTCACAAAGATG  
GGGTCACAAAAGGCTTAAATTCAAGTGGATTTGGGGTTTAACTCTGGACCCTCATAGGCTACTAAATCTGTTATGTTAAAGGAGGGATTAACGTTGAAATCAACAGATAGACCTACCACA  
TAAGCATTGTCATTGATTTTCTTGATTATTTTAAAGGGTTTGCACCTTTGAGCATGTAACCTTAAACGGTCCCTATAGGAATCGTTTCGGATGAATCCACACCATCACTGAGTCACCAAAC  
TCAAGTTTTAATTCGTGCTTTTGAATCAACATGAAGTTTATAATTATTATTGTTTCAGTTCAATTAAGCGTGCAATTTTCAGGGGATGCGATGCAAAATGTGGCATGTTTTATGCGATGTCATGTGT  
CCAAAATTTGATACTCAATAAGATAAACAATACGGTAAAAATGATGCAAGAACTTGATATGCATGATGAGTGAATTGAAGATTTAGACACGAAGAAAATTTGTGGAAGACAACAGACTA  
TAAACACATGCACACATACTAACTCACAAAGCACACATATATAGGAATAAAGTTGGTTTCAGTCACAAAATGAGAGAACATAAAGTTTCCATGTGTAATGGAACGGTGTAGGAGGAGAAA  
TGAAGACATCCTTAGCTACAAGGTTATTTCTATAGGAAATTTCCGGCTAGGGTCGCAAGTAGTCTCCTAGGGGCAACAGGGTAATTTAGCAAATTTATCCAACCTAGGAGAGAGATGGTCTTT  
AACAGGGA

>comp167435\_c1\_seq11

ACGCTCTCCGATCTTAAAGAGATTATTTTGGAGATAATCTGTAAGGCAATGAACTAAACCTTAGATCAATAGGTAGCTACAAAGGAGGTGAAGGGCAGTAGGCAGGGTAGAGGAAGAGT  
AGGGAAGAACAAAAAATTAATAATAAGATGGCATTTTAACAGTGATTTGTTTGTCTTTTAAAAATTCATAATGACATAGTACTTGTGAATAAATATATATAGAATAATAAATGAGTTTTCA  
CATACTCTGTTGAGGAAAAGGTTCTCTCCAGTTGGGGTCATAAATAAAGCCATTTGAAGTTCTT

>comp167435\_c1\_seq19

TACTAGAAAACCTGCTTTAGGAAGCAGAAGAAAAGCTGTCCCAAACGAAGCTAAGTGTTGATTGGCTCCTAAAGAAATTTTTTTTTGGGCAGCTCACTTCTGAAGTTCCGCAACTGGTTCA  
GCTAATCTGGGCCACCATGAGATCATTAGGTTTTACAAGGCATCAACTTCAATGTTGAAGACAGAGCTTGGGAATACTTTACTCAGGTTCTGCAAATGAGGAAGAGTCATATTCTTCAAAA  
GTGTTGGGTGCCGAAAAACAAAATTTTTCCACTCATCTTGATCAATTCTGCCATCCCTGTTAACATCAGCATCTTCAAATGCCTTATCAATTATGACTTCAAGAAGTTCATCTGGAAGTGCC  
ATCTCAGATTCAACCAAAATGGCAACCAACATCTGCTTAACTTCTTCTCGCTCAATGAAGCCTGTTTCATTCAAGTCATATAATCTGAATGTAAAGTTTATTTTTATCCTCTAGAGGAGCATAA  
GGATGAAAACACTTAGTGATGAACGAACCTCCTCAAATTCATAACACCATCTTCTTCTCATCAAAAAGATAAAAAACCTGTAAGATCATTAACAAACAGTTCTTACAAATTCATTTTGC  
AAAATCCAATCTTTTTTTTTTTTGAAGAAGAAATTGTGATCCAAAATCTAGCATTCCAAAATAGTATTATGAAATGTGAATTTCTTTTTATGATATGAGGAAAAAATTGCTGTTTCTTTTGATTA  
AGATG

>comp167461\_c1\_seq2

TTTACAGAGAAAACCTTCACTTTTACAGATGTCATTATAGATAAGTAAATATATTTTACTCTTTCTAAGCCAAATATCTTTAAAATTTGATCAGTCTGAATCCAAGAGCATCATATCACTTGATAGAT  
AATAGAGAAAGGCAGATAGCAAACCTCACAAAAGACAAAACCTGTACCCATTATACATCATTTCCCTCAATTACAGAACTCTAAAGTTACTATGCAAATGTAAAACAAGATAATTAAGTCC  
TTGTTGGTCCCTAACGTCAGAGTAGTTAAATCATCTTCATTAGCTGCAATTCAGCTTCATCATTCTCTGAATGACCAGTTGCTAAGGCTCTGTGGTTATGATCACCTTCGTATGATATATCTAT



GTTGTTTGGTTCATTTGGTGGCCAATCCACCTTCTTCCTCGCCTTACAGTTCCTTGTTAACACATTTGAAATAACTTCTATTCTTCTGTATACCTCTAATATACTTTGGTCCATATTTTCGTCCATT  
CGTAATCATCTTCTGGGATAACAACCCTATTTTGCTCCTGGACTTGTCTTCATTTATGATGTGGTTGTGATCTCCTTCATACGATATAATTTTTGTTGTTTGGATCATTGGTGGCCAATCCACC  
CTCTTCTCGCCTTGCAGTTCCTGTTCTACATCTTAAATAAGTTCTAAACATTTTAATCTTGTGAACATACTTTTCTCGACCATACTTTTTCCAATTGTAAACATCTTCTTGAATAGCCATCAT  
TCGATCGTTCCTTTCTTCAGCTATAATTTTTCTCCTTTGCTTCTTCTTCTTATCAATGATGGGGGGTGTAGAAGAAGAGGCCATTGATAATACAAGAGTAAGAGATTAATTTGCAGGAGAATT  
ATTTTCAAATTTTCTTCTTTTTTTTTTTTTTTGGTTGCTGCTTTCTTTTAGGAAGAAGCTTCTGCAGAGGGGAAACAATTCACGACATTTATGTTTCTTAGGTTTTACAGATTTTCTCTTGAA  
AGTAAACCCCTTTAACCATCACTATATGATATGTACAATTAATCTTGATTCTATCGATCATTTTTTCTTATGATATTGTGTACTGTTTC

>comp167465\_c0\_seq1

TTGGAAGAATTTTTAACTCCATAAGTTAAATAAAAATTTCCCAACATAAGAATGTACATAACTTGGTTAACTCTTTAATAAAAATAGAATTTACATAACTTGTAGGGGAAGATAAAAATTTCAA  
AAATACAAATAACTATGCTCATATTCTGAAAATCTGTAAATGTTGCGTGACTTGGCCCTCCTTTTCTGCTTCTGCCGAGAAGATCGTAATCTTATTTGTATCGATATAAATTTTGTGGTGGAGA  
CATTCAAAACTAGAAATGAAGAATTGTCTCATTCTGATGTGACTTCCGACAGCAAAAGGCCAGGGAATAGAGCGTCGAGCTGCTTTTGAAGGCTTTTGGTCTCTTTTAGGTTTTCTATCC  
GGCTTTCTCCCGTTAATAATGATGTCTCTTCGATCTCCTTTGAGACAAAGAAATAGAAAACCTTCTTCGTCGGTCTTTTTGTGCGACCGTTTTCTTGATAACTGCTTTACCTGGATC  
GTCCTTTCCAATTGTGACTTAGACGGCGTTGAGGAACAATGATGTTTCTTTCTTCTATCATGGCATCAGAGGAAGGCCCTTCTTTTCTAAGATTCCATGGAATAGTCGTCTCAGCAG  
GAGCCTCCTCAGAAGCAACAGAAGAAACATTCTTCGGCTCTTCCCTTTCCATCAACCTACTAATCTGAGATGACATGGGAAGAGAATTACCTAGAGAATATAAAGCATTTTTCTTGTG  
GGGCTCTATTTGGTATTAGGATTCAATGATTGAGGGGCTGAGCTATCGATCCCTGATACAGACTTACACATCGGAGAATTCGTTGACAACCCCAACTCTTTGTAGGAAAATAAAAGTTG  
TGCAAACGGGACTTGGCCATAGGGGAGCGTTGGGTTGCCATAGCAGAGCCACCAAGCTCTTCCAACCTCTCATGGGTCACTTCTTATCTTTGGAATCTCCATTTGGAATTTATTCGGC  
TCCAAGAAAAAATTACTTGTGTAAGCAATCAATAAA

>comp167465\_c1\_seq1

AACAATTAAGTATTTCTGCTTCTCATTCATTGTCTCTTAATCTTCTTCTCACCCAAGCTTCTCTCTAACCCTCATCTCTAATTGACTTCAAATCGCTTAAGAAGCTTTTATTGATTGCT  
TACACAAGTAATTTTTTTTTTGTCTTGGAGCCGAATAAATTTCCAAATGGAGAATTCCAAAGATAAGGAAGTGACCCATGAGAGGTTGGAAGAGCTTGGTGGCTCTGCTATGGCAACCCA  
ACGCTCCCTATGGGCAAGTCCCGTTTGCACAACTTTTATTTTCTTACAAAGAGTTGGGGTTGTCAACGAATTCTCCGATGTGTGAAGTCTGTATCAGGGATCGATAGCTCAGCCCCTCAA  
TCATTGAATCCTAATACCAAATAGAGCCCCAACAAAGAGAAAAATGCTTTATATTCTTAGGTAATTCTTCTTCCATGTCATCTCAGATTAGTAGGTTGATGGAAAGGGAAGAGCCGAAGA  
ATGTTTCTTCTGTTGCTTCTGAGGAGGCTCCTGCTGAGACGACTATTCCATGGAATCTTAGAAAAAGAAGGCCCTTCTCTGATGCCATGATAGAGAAAGGAAAGAAACATCATTGTTCTC  
AACGCCGTCTAAGTCACAATTGGGAAAGGACGATCCAGGTAAGCAGTTATGCAAGAAAAACGGTGCACAAAAACGACCGACGAAGGAAGTTTTCTATTTCTTTGTCTCGAAAGGAG  
ATTGAAGAGGACATCATTATATTAACGGGGAGAAAAGCCGGATAGAAAACCTAAAAAGAGACCAAAAGCCTTGCAAAAGCAGCTCGACGCTCTATTCCCTGGCCTTTTGTGTCGGAAGT  
CACATCAGATATGTAAGTGAATGAGACAATTCTTCTTACTTTTGGATGTTTCCACCACAAAAGTTTATATCGATACAAATAAGATTACGATCTTCTCGGCAGAAGAAGCAAAGGAGGGCA  
TGTCATGCAACGTTTATAGAATTTCCGGAATATGAGCATAGTTATTTATATTTTTGAAATTT

>comp167541\_c0\_seq10

AAAATTCATCATAATAAAATGAAAATAGCACGAATCCAAGAAATTTTCTAATTTTTGGAGAGAAATTATCTGAAAAAAATAAGGTGATGGAAAAAAATCAGGGGTGATAAATTACAAAT  
AAACTCATAAATTAAGAGCTTTATTTATTTTTAGCAGGACACAGTTCTGCCGAGAAATCTTCCCTCGCTCTCAATAATCATTTTCCCGCAATTTCAATCTAAATTTTCTTTCGACACCCAGA  
TTCCGTAAAAATGTAATCATGAAAGTAAGAATTCATTGGATGAAGGAACCGCAGCAGCACCCTAGCGGCCTTAAATTTTTCCGGTACTCCACCAGCTTTTCAACTTCTGGAAGCGCC  
TTCTCCGCGCCTCGACGGAGCAGAAGCATTCCGCCACTCAACCAACCGCGGAGTCTTCGTCTTATCTAGAAAGTTTTTTCCCGTCATAATTTGACTGCTTTTAGCCAATTAATGTAGG



TAAGTGAATGTGCTCTTAATGAAGCCGAGGGCAAGGGCAGGAGAGGGCGGAGGCAAGGCTGGTCCATGTGGTCTGAGTATTCCATGCTCGCTTCACTGTTTCATGGAATGGGGAGGAGG  
TGCATGCCAAGCCACTCCTTGAGAAATTGGCATATTGATGGCAGCATTGGTCTCTCTTTATGCCATTTTCGGAAGAGGGCCCTGCTCCACTGCTGTAGTAATCACTTCCCTTAAACATCAGAAT  
CTGAGTAGTAGTGCATTGCGTTATGATTCCCTCTTCTTTCTTTCTTTCCACAACAGAAACATGCTGTAATGCCAATAATCAGAATAAATAGAGCAATGCCAGCAGCAACTCCAGCCACCAG  
AGGCAAATTGAAATCAGATCCACCTGATGATTTTCTTGAATTAGCATTATTTATCATCAGATGTAGGGGTTGGAGTAGAAGGCGAGGGCTTCGCCGGCCGTTTGGCGGGGGAGGTGGGGC  
GGAATTGCCGGAAGAAGGCGGCGACTTGGACGATGATGGCGGCGTTGGAGGGGGTTGTGACGGTGGAGGCACGGGAGGTGAGGGTGGAGAAGATCTGCCTGGTGTGATGGAGGTGG  
TGCTGAGGTGGTGGGCGGGCTTAGGGATGGAGGGGCTGGTGGTGGTGGTGGAGGATGATGGCGGTGGTGCCGAGGCGGCCGGAGGGGTTGGAGATGGTGGTGTGATTGGTTTGTGTG  
TTATTTGAAGATGAGGAGTTGGTATGTGATGGTGGTGCGGTCTGAGGGGAAGAGGCCATCTCTGAAAATTATGAATTAGTGTTAGATGGAGCTCCACTCTTCTCAAACCTGCTCTACGGG  
CAAGCTTTACTGTTAGAGGTCTCTGGTACTTCTGTGTTTGATAGAGAGAGGGGTGAATAAGAGGGCTAAGGATGCAGAAGCATTAAAGTGTATGCTTTGCCCTCCGCCCGCCGAGCACCA  
CCGCTCCGCTCTCTTCTTCAACTAATATTTAATGAAGCCATGGATTTTGTTCACAGGGAGATTTGGAGGAGAGCGACAGATTAATTTGAGGAATAAAAAAGCGAATCGACGAG

>comp167549\_c0\_seq17

TTTTTGTTCCTAAATTCATTTCAAGGGTAAAGCCATGCCATGATTATGACTCTTATATGAATGAGATGTGTTATCTAATATTTTGTATAATTAGTTTATTATTGTAAGCTTTCAACTCAACTCA  
TTGAATTCTAAGTCAGCACATCTAGAATTCAGATTCATTCAAATTGTTGTGATGAGAAGATTTGAAGGATACATGTTGTTGTATGCTATTATGTCTTTCTTGTTCCTATTAGTATGTCGACCT  
TGCTACTCGTTGGTTCATTCACACTAGTTTGCCTACTTTCATGCCGTTGATTTGATTCCACGTCAATTAATTTCTTAGGACATGCTAGTCATGTTGTTCCACATCTATTACCCATTAGTTATAT  
TATTGTTGATTTTCACTTGCATTTCCCTCTAAATTTTACCTCTATTACTATTTTCTTTGATTGTCATATTTGTATCCTGCGAAAAGATTTTTCGCTCTAGTGGGCTCTGTTAATGTGGTAATGG  
GAGAATTGGATTTTACAAATCAAGAGCTAGATTTTATATGGAAGATTTTCATGCTTTATTGGAATTCATGAAGGATGTATTGAAAGTTGTTATATTTGACTATATCTTTATAGACTTTAAGAAGC  
TTTTTTTTGGTCTTTTGTGGGTATAAATAGAACGCCCATGGCATGTAACAGCATGAAACATTGAAAATTGAGTATTGTAGTAAAAAAAAGTCACATCAATGACCATCCTATATCATCT  
AGATGGATATACCCCTGTCATAGAAACATGTTCTTCATGATCACTGAAATTACTCCAAGAATGTCAGGAAAACCAACCTTTATTCCATTCGGTCTAAGAATCACATCCTACAACATTAGAA  
GGCTAAATATGAATTGAAACAGAAGTGATAATTTCAAAACAACGGACAACCTTGCCTTGCTACAAACAACAATATTCATCCAGGAATCATAGAAGCCTGAAGCCAGTCTTACTCCAAT  
AGTTAGGATATACTGATAAGAACACCAACACCAAGACTCAATCGTCAATCTATTTCACTACTCTATCCACCCAAAAAAAACCTTCACATTGAAAGAATTGAATCTGTTATAAATTATATA  
AGTTTTTATTGTATAAGAATCAGTCAAAATCTAAACCATGATCTTGATTATTTTCTTTTGTCTTATTTCCTACTGCTTTGGACCACCTTTGTTAGAACGAGGTCTGACTGACTTCACCTCGCCA  
GAACTGCTTGATGTTGAATTGTTAACCCCATAGTCACTGGTTCGTACGCTGTACTCTTGACTGATTTCACTTCCAAATGCAACCTTTCTGTAACGACTGATGTTAGAGGCATAGGAGCC  
CGAGTCATGGTCTGAACTCGAACTGAAGAGCATACTTTGTCCTGGCTTGACCCCTCATTCAGTCATCCAGGGATGAATCACCTTCCAGTGCTCGAGCAATCTGCAGGTACGAATGAAT  
AATTTACCAGACTTTTGCCTGTATACATTTTATAGTTATTTTCTACGCCAATATGCATTTTCTTGGAAAGGCATTAGCAAGTAGCAACTAAGACGTTTAGCAAATGTCATTCATTATATTTTCT  
AATATCATAGACTGATGGAATGTTCAAAGAATACCTCAATTACTCAAAGTGAATGAGGAGTCGGCTAATTTAAATGTTGTTGCATAAAAAATCCCATTCCAAAACTACATAATCGTAGAAA  
TATATCTATTGTGGATGGATTA AAAAGGGGATTAGTTTGTGGGATAAGGCTAATACTGCTGATGACAATTACGATACTGGTAACAATAATGCTGAACTTAGTACGGTTATCTGACGATAA  
AGAGGGAAATTGGTTGTGATTATACTCATGAAGGTAGGAAATAACTCTTTACCTGGCTCATCTGGGGCGTCTTTTCGCCGAGTGCCGAACACTAGCAGCAGCACATGCTACCATCCGTGT  
CATCTCCAGATTGCTAAAATTTCTTCCAATCTTGGATCAGTAGTTCATCATAGTTCTCCTCAGATAATGTTTCTGCTAATAAAGGCCTTGCCAGTCAACCAAGTATCCTCCATTGCATC  
ACTGTCTACTGGTTTCTTTCCAGTAATCAGCTCCAGAAGCATTACACCAACGAGAAAACATCCGATTTCTCCGTAAGCTTGCCACTGGATGCATATTCAGGAGCCAGATATCCAAATGTG  
CCCATGACTCGAGTAGAGACATGGGTGTAGTTGTCCGAAGTTAACTTGGCCAGTCCAAAGTCTGCAACCATAGCTTCGAATTTATCATCCAGAAGAATGTTTGCAGCTTTGATGTCGCGAT  
GAATAATGCGAGGATGACAATCTCATGCAAGTAGGCAAGGCCTTTCGCTGATCTAAAGCAATCTTCACTTCTGGTAGGCCAGTTCATTGTTGGCTGGTTCTTTCCATGCAGGTGGAACCT  
AAGAGTCTTGTAGGAACAAAGTCATAAACAAGCAATCGTTGAGAGCCAGCAATGCAGTAACCAACAAGAGAGACCAGATGGCGATGGTGAACCTCTGCTAATAATCTCAACCTCTGCAT

GGAACTCCCTCTCTCCTTGCCCGCTACCTGCCTTGAGCTGTTTTACAGCAACTTCTTTCCCGTTTGGCAAAACTCCCTTGTACACATAGCCAAAGCCACCTTGTCTATTAGATTTTCATGA  
GAGAATCCATTTGTTGCTGATGCCAATTGTTTATAACTGAATGTGCTCTTAATGAAGCCGAGGGCAAGGGCAGGAGAGGGGCGGAGGCAAGGCTGGTCCATGTGGTCCCTGAGTATTCATG  
CTCGCTTCACTGTTTATGGAATGGGGAGGAGGTGCATGCCAAGCCACTCCTTGAGAAATTGGCATATTGATGGCAGCATTGGTCCCTCTTTATGCCATTTCCGAAGAGGGGCTGCTCCAC  
TGCTGTAGTAATCACTTCTTTAACATCAGAATCTGAGTAGTAGTGCATTGCGTTATGATTCTCTTCTTTTCTTCCCACAACAGAAACATGCTGTAATGCCAATAATCAGAATAAATA  
GAGCAATGCCAGCAGCAACTCCAGCCACCAGAGGGCAAATTGAAATCAGATCCACCTGATGATTTTTCTTGAATTAGCATTTTTATCATCAGATGTAGGGGTTGGAGTAGAAGGCGAGGGCT  
TCGCCGCGCGTTTTGGCGGGGGAGGTGGGGCGGAATTGCCGGAAGAAGGCGGGGACTTGGACGATGATGGCGGCGTTGGAGGGGGTTGTGACGGTGGAGGCACGGGAGGTGAGGGTG  
GAGAAGATCTGCCTGGTGTGATGATGGAGGTGGTGTGAGGTGGTGGGCGGGCTTAGGGATGGAGGGGCTGGTGGTGGTGGTGGAGGATGATGGCGGTGGTGGCAGGCGGCGGAGGGG  
TTGGAGATGGTGGTGTGATTGGTTTTGTGTGTTATTTGAAGATGAGGAGTTGGTATGTGATGGTGGTGGCGGTCTGAGGGGAAGAGGCCATCTCTGAAAATTATGAATTAGTGTAGATGG  
AGCTCCACTCTTCTCAAACCTGCTCCTACGGGCAAGCTTTACTGTTAGAGGTCTCTGGTACTTCTGTGTTTGATAGAGAGAGGGGTGAATAAGAGGGCTAAGGATGCAGAAGCATTAAAG  
TGATGCTTTGCCCTCCGCCCGGAGCACCACCGCTCCGCTCTCCTTCTTCAACTAATATTTAATGAAGCCATGGATTTTTGTTTACAGGGAGATTTGGAGGAGAGCGACAGATTAATT  
TGAGGAATAAAAAAGCGAATCGACGAG

>comp167549\_c0\_seq20

TTCCGCAATACTTTGGATTTTGTGTTGAAGAAGAGGATAGTGCCGAGGCATTTGCATCTCAAGCAGAGGAATATTAGGCCTTCATTGAAATGGATGTTGATGCCGGGGGACAAAAGTTCTATG  
GCAAGTGGAAATAGAGCTATTGGAGCAACTGGGACATTTTACTTCAATGGTTGGGTTGTAGTGACATCTTCGGAACCTCACCGGAGTCGCATACTTCCATCAGCCCTTTCATTGAACGTG  
AGGCTAACTGGGCCCTTGCTCACACGTGCAGTGTGCGGACCAATAAAAATGGTCAAAGCCTATTTGGCCGTGCAGATCATACTGCCCAGCACAAAGGAAAGGAACTGCTTGATGTTGAA  
TTGTTAACCCCATAGTCACTGGTTTCGTACGCTGTACTCTTGACTGATTTCACTTCCAAATGCAACCTTTCTGTAACGACTGATGTTAGAGGCATAGGAGCCCGAGTCATGGTCTGAACT  
CGAACTGAAGAGCATACTTTGTCCTGGCTTGACCCCTCATCAAGTCATCCAGGGATGAATCACCTTCCAGTGTCTGAGCAATCTGGTCTATCTTGGGGCGTCTTTTCGCCGAGTGCCG  
AACACTAGCAGCAGCATGCTACCATCCGTGTCATCTCCAGATTGCTAAAATTTCTTCCAATCTTGGATCAGCTAGTTCATCATAGTTCTCCTCAGATAATGTTTCTGCTAATAAAGGCCT  
TGCCCAGTCAACCAAGCTATCCTCCATTGCATCACTGTCTACTGGTTTCTTTCCAGTAATCAGCTCCAGAAGCATTACACCAAACGAGAAAAACATCCGATTTCTCCGTAAGCTTGCCACTG  
GATGCATATTCAAGGAGCCAGATATCCAAATGTGCCATGACTCGAGTAGAGACATGGGTGTAGTTGTCCGAAGTTAACTTGGCCAGTCCAAAGTCTGCAACCATAGCTTCCAATTTATCAT  
CCAGAAGAATGTTTGCAGCTTTGATGTCGCGATGAATAATGCGAGGATGACAATCTTCATGCAAGTAGGCAAGGCCTTTTCGCTGATCCTAAAGCAATCTTCATTCTGGTAGGCCAGTTTCAT  
TGTTGGCTGGTTCTTTCCATGCAGGTGGAACCTCAAGAGTCTTGTAGGAACAAAGTCATAAACAAGCAATCGTTGAGAGCCAGCAATGCAGTAACCAACAAGAGAGACCAGATGGCGAT  
GGTGAACCTGCTAATAATCTCAACCTCTGCATGGAACCTCCCTCTCTCCTTGCCCGCTACCTGCCTTGAGCTGTTTACAGCAACTTCTTTCCCGTTTGGCAAAACTCCCTTGTACACATAG  
CCAAAGCCACCTTGTCTATTAGATTTTCATGAGAGAATCCATTTGTTGCTGATGCCAATTGTTTATAACTGAATGTGCTCTTAATGAAGCCGAGGGCAAGGGCAGGAGAGGGGCGGAGGC  
AAGGCTGGTCCATGTGGTCTGAGTATCCATGCTCGCTTCACTGTTTATGGAATGGGGAGGAGGTGCATGCCAAGCCACTCCTTGAGAAATTGGCATATTGATGGCAGCATTGGTCCCTC  
CTTTATGCCATTTCCGAAGAGGGGCTGCTCCACTGCTGTAGTAATCACTTCCCTGCAATATTTGACCCCTTTTTGTATTTACTATGTCTGGTTAAAAAATCAATCAAACATCAGACCGGACGT  
TGAACGTTGTCCGGAGACTAATCAGAATGGGACATGTCACCCCTTCGCTTGGTACCGGTATTGTGGCTCGCATGCTAATTGGTCTCCAGACAGCCTTCTGTGTCCGGCCTCTGCACATAAT  
AATTTCTTCTCCAAGGGAGCACATGCGTATGCAGTCCACCGACAGCTTTAACCAAATTTCCAATTCACATGGTAATGTAACAAAGTTAATAGTGTGATGCCATTG

>comp167549\_c0\_seq27

GGAATATGATGTATGTGCATTTGGTGGAGCTTCCCCTCTCCCTTTTAAACATAAAACATAAATTCTCATCATCATAATAGTTCAATAAGAGCTCATAATAACCATTAAATTTAAGGAAAATGA  
GAGACTTCTCTTAAACAATAATTTGATCATGAAAAATTCTAAATATGAACTTGATGGCAACTAAGAGAATATCAGAAGTCTCCAGTCTTTTTGAATCACAAAAGCCATTCCTGCTCAGAATA

TATATAAAGTATAGCAGAGAAACCAAGTCCCTACCCCTCCAACAGAACACCAGTAGATAGATTAAGTGATTTTTGTTTGCTGTTATATTATGTTTTCACTTCTCTAGTCCAGTCTGTGCGGAT  
CTTTTTCAGAAGTCTGCTTGATGATGAGGGATTGCGGCCATAGTCACTAGTCTGTCCACTGTACTCTTGGCTCAAATCATTGCTGTTAAATACAGCCTTTCTGAAACGCCTCATCTTAGAGGCGT  
AGGAGCCTGATTCATGCTCTGAACTAGAAGTAAACTGCATGCTTTGCCCAGGCCTCACGCCCTCAGTTAAGTCCTCAAGAGATGAGTACCTTCCAGTGCTCTTACAATCTGGCTCATCTT  
TGGACGCATTTTACGAGAATGGCGAACACTAGTAGCAGCGCATGTTACCATCCGCGCCATCTCCATTTTGTCTGTAATTTCCCTCCAGTCTTGGATCAACCAGCACCTCCAGCTCCTCATAGT  
TTTCATCAGTTAATGCCTGTGTCAATAGAGGCCTTGCCCAATCAACCAAGCTATCCTCCATAGGATTGCTGTGAACTGGCCTCTTTCTGTTATAAGCTCCAGAAGCATCACACCGAATGAG  
AAGACATCAGACTTCTCAGAAAGCTTGCCACTTGATGCATATTCAGGAGCTAGATACCCAAACGTTCCTCATGACACGAGTGGAGATGTGGGTGTAGTTGTCTGAAGATAGCTTAGCCAGT  
CCGAAGTCCGCAACCTTCGCCTCAAATCTATAATCCAGTAAAAATTTGAAGCTTTGATGTCTCGATGGATGATGCGAGGATGACAATCTTCATGCAAGTAGGCAAGGCCTTTAGCTGATC  
CTAAAAGCAATTTCTATTCTGGTAGGCCAATCCATTGTTGGTTGGTCTTTCTGCAACAACAACATGGAGGTGGAAGTCAAGAGTCTTGTAGGAACAAAGTCATAAAACAAGCAATCGTT  
GAGAGCCAGCAATGCAGTAACCAACAAGAGAGACCAGATGGCGATGGTGAAGTCTGCTAATAATCTCAACCTCTGCATGGAAGTCCCTCTCTCCTTGCCTGCTACCTGCCTTGAGCTGTT  
TCACAGCAACTTCTTTCCCGTTTGGAACAACTCCCTTGATACACATAGCCAAAGCCACCTTGCTTATTAGATTTTCATGAGAGAATCCATTGTGCTGATGCCAATTGTTTCATAACTGAAT  
GTGCTCTTAATGAAGCCGAGGGCAAGGGCAGGAGAGGGCGGAGGCAAGGCTGGTCCATGTGGTCTGAGTATCCATGCTCGCTTCACTGTTTCATGGAATGGGGGAGGAGGTGCATGCCA  
AGCCACTCCTTGAGAAATTGGCATAATTGATGGCAGCATTTGGTCTCCTTTATGCCATTTCCGAAGAGGGCCTGCTCCACTGCTGTAGTAATCACTTCTTTAACATCAGAATCTGAGTAGT  
AGTGCATTGCGTTATGATTCCTTCTTCTTTTCTTTCCACAACAGAAAATGCTGTAATGCCAATAATCAGAATAAATAGAGCAATGCCAGCAGCAACTCCAGCCACCAGAGGCAAATT  
GAAATCAGATCCACCTGATGATTTTCTTGAATTAGCATTTTTATCATCAGATGTAGGGGTTGGAGTAGAAGGCGAGGGCTTCGCCGGCCGTTTTGGCGGGGGAGGTGGGGCGGAATTGCC  
GGAAGAAGGCGGCGACTTGGACGATGATGGCGGGCTGGAGGGGGTGTGACGGTGGAGGCACGGGAGGTGAGGTGAGGAGATCTGCCTGGTGATGATGGAGGTGGTGTGAGGT  
GGTGGGCGGGCTTAGGGATGGAGGGGCTGGTGGTGGTGGTGGAGGATGATGGCGGTGGTGCCGAGGCGGCCGAGGGGGTGGAGATGGTGGTGGTGGATTGGTTTTGTGTGTTATTTGAA  
GATGAGGAGTTGGTATGTGATGGTGGTGCAGTCTGAGGGGAAGAGGCCATCTCTGAAAATTATGAATTAGTGTTAGATGGAGCTCCACTTCTCTCAAACCTGCTCCTACGGGCAAGCTTT  
ACTGTTAGAGGTTCTGTTACTTCTGTGTTGATAGAGAGAGGGGTTGAATAAGAGGGCTAAGGATGCAGAAAGCATTAAAGTGTATGCTTTGCCCTCCGCCCCGCCAGCACCACCGCCTCC  
GCTCTCCTTCTTCAACTAATATTTTAATGAAGCCATGGATTTTGTTCACAGGGAGATTTGGAGGAGAGCGACAGATTAATTTGAGGAATAAAAAAGCGAATCGACGAG

>comp167549\_c0\_seq3

TTTTTGTTCCTAAATTCATTTCAAGGGTAAAGCCATGCCCATGATTATGACTCTTATATGAATGAGATGTGTTATCTAATATTTTGTTATAATTAGTTTATTATTGTAAAGCTTTCAACTCAACTCA  
TTGAAATCTAAGTCAGCACATCTAGAATTCAGATTCATCAAATTGTTGTGATGAGAAGATTTGAAGGATACATGTTGTTGTATGCTATTATGCTTTTCTTGTTCATTAGTATGTCGACCT  
TGCTACTCGTTGGTTCCATTCACTAGTTCACTATTCATGCCGTTGATTTGATTCCACGTCAATTTATTCTTAGGACATGCTAGTCATGTTGTTCCACATCTATTACCCATTAGTTATAT  
TATTGTTGATTTTCACTTGCATTCCCTCTAAATTTACCTCTAATTTCTTTGATTGTCATATTTGTATCCTGCGAAAAGATTTTTCGCTCTAGTGGGCCTCTGTTAATGTGGTAATGG  
GAGAATTGGATTTTACAAATCAAGAGCTAGATTTTATATGGAAGATTTTCATGCTTTATTGGAATTCATGAAGGATGTATTGAAAGTTGTTATTTGACTATATCTTTATAGACTTTAAGAAGC  
TTTTTTTTGGTCTTTTGTGGGTTATAAATAGAACGCCCATGGCATGAAAACAGCATGAAAATTGAAAATTGAGTATTGTAGTAAAAAAAAGTCAATCAATGACCATCCTATATCATCT  
AGATGGATATACCCTGTCATAGAAACATGTTCTTCATGATCACTGAAATTAATCCAAAGATGTCAGGAAAACCAACCTTTATCCCATCCGTCTAAGAATCACATCCTACAACATTAGAA  
GGCTAAATATGAATTGAAACAGAAGTGATAATTTCAAAACAACGGACAACCTTGCCCTTGCTACAAACAACAATATTCAATCCCAGGAATCATAGAAGCCTGAAGCCAGTCTTACTCCAAT  
AGTTAGGATATACTGATAAGAACCACCAACACCAAGACTCAATCGTCAATCTATTTCACTTCTATCCACCCAAAAAAAACCTTACACTGAAAAGAAATGAATCTGTTATAAATTATATA  
AGTTTTTATTGTATAAGAATCAGTCAAATCTAAACCATGATCTTGATTATTTTTCTTTTGTCTATTTTCACTGCTTTGGACCACCTTTGTGTAACGAGGTCTGACTGACTTCACTTCCGCA  
GAACTGCTTGATGTTGAATTGTTAAACCCATAGTCACTGGTTTCGTACGCTGTACTTCTGACTGATTTCATTACTTCCAAATGCAACCTTTCTGTAACGACTGATGTTAGAGGCATAGGAGCC

CGAGTCATGGTCTGAACTCGAACTGAAGAGCATACTTTGTCCTGGCTTGACCCCTCATTCAAGTCATCCAGGGATGAATCACCTTCCAGTGCTCGAGCAATCTGGCTCATCTTGGGGCG  
TCTTTTCGCCGAGTGCCGAACACTAGCAGCAGCACATGCTACCATCCGTGTCATCTCCAGATTGCTAAAATTTCTTCCAATCTTGGATCAGCTAGTTCATCATAGTTCTCCTCAGATAATG  
TTTCTGCTAATAAAGGCCTTGCCCAGTCAACCAAGCTATCCTCCATTGCATCACTGTCTACTGGTTTCTTTCCAGTAATCAGCTCCAGAAGCATTACACCAAACGAGAAAACATCCGATTT  
CTCCGTAAGCTTGCCACTGGATGCATATTCAGGAGCCAGATATCCAAATGTGCCCATGACTCGAGTAGAGACATGGGTGTAGTTGTCCGAAGTTAACTTGGCCAGTCCAAAGTCTGCAAC  
CATAGCTTCGAATTTATCATCCAGAAGAATGTTTGCAGCTTTGATGTCGCGATGAATAATGCGAGGATGACCTTCAATTTAATGAAATAGTTGGAGAAATTAGGTGAATGGAGGGTTTAGA  
AAAATCATGAAAGGAGTACAGTAAGTATCAGTACTGACAATCTTCATGCAAGTAGGCAAGGCCTTTCGCTGATCCTAAAGCAATCTTCATTCTGGTAGGCCAGTTCATTGTTGGCTGGTTC  
TTCCATGCAGGTGGAACCTCAAGAGTCTTGTAGGAACAAAGTCATAAACAAGCAATCGTTGAGAGCCAGCAATGCAGTAACCAACAAGAGAGACCAGATGGCGATGGTGAACCTCTGC  
TAATAATCTCAACCTCTGCATGGAACCTCCTCTCCTTGCCCGCTACCTGCCTTGAGCTGTTTACAGCAACTTCTTTCCCGTTTGGCAAACTCCCTTGTACACATAGCCAAAGCCACCT  
TGTCTATTAGATTTTCATGAGAGAATCCATTTGTTGCTGATGCCAATTGTTCACTAATGAATGTGCTCTTAATGAAGCCGAGGGCAAGGGCAGGAGAGGGCGGAGGCAAGGCTGGTCCA  
TGTGGTCTGAGTATTCATGCTCGCTTACTGTTTCATGGAATGGGGAGGAGGTGCATGCCAAGCCACTCCTTGAGAAATTGGCATAATTGATGGCAGCATTGGTCTCCTTTATGCCATTT  
CGGAAGAGGGCCTGCTCCACTGCTGTAGTAATCACTTCCCTTAAACATCAGAATCTGAGTAGTAGTGCATTGCGTTATGATTCCTCTTCTTTCTTTTCTTCCACAACAGAAACATGCTGTAA  
TGCCAATAATCAGAATAAATAGAGCAATGCCAGCAGCAACTCCAGCCACCAGAGGCAAATTGAAATCAGATCCACCTGATGATTTTCTTGAATTAGCATTTTATCATCAGATGTAGGGGT  
TGGAGTAGAAGGCGAGGGCTTCGCCGGCCGTTTGGCGGGGGAGGTGGGGCGGAATTGCCGGAAGAAGGCGGGGACTTGGACGATGATGGCGGCGTTGGAGGGGGTTGTGACGGTGG  
AGGCACGGGAGGTGAGGGTGGAGAAGATCTGCCTGGTGTGATGAGGAGGTGGTGTGAGGTGGTGGCGGGCTTAGGGATGGAGGGGCTGGTGGTGGTGGTGGATGATGGCGGTGG  
TGCCGAGGCGGCCGGAGGGGTTGGAGATGGTGGTGTGATGGATTGGTTTGTGTTATTTGAAGATGAGGAGTTGGTATGTGATGGTGGTGGTGGTGGTGGTGGTGGTGGTGGTGGTGGTGG  
ATTATGAATTAGTGTAGATGGAGCTCCACTTCTCCTCAAACCTGCTCCTACGGGCAAGCTTTACTGTTAGAGGTCTCTGGTACTTCTCTGTGTTTGTATAGAGAGAGGGGGTGAATAAGAGGGC  
TAAGGATGCAGAAGCATTAAAGTGTATGCTTTGCCCTCCGCCCGCCGAGCACCACCGCTCCGCTCTCCTTCTTCAACTAATATTTAATGAAGCCATGGATTTTGTTCACAGGGAGATTG  
GAGGAGAGCGACAGATTAATTTGAGGAATAAAAAAGCGAATCGACGAG

>comp167549\_c0\_seq34

TTTTTGTTCCTAAATTCATTTCAAGGGTAAAGCCATGCCATGATTATGACTCTTATATGAATGAGATGTGTTATCTAATATTTGTTATAATTAGTTTATTATTGTAAGCTTCAACTCAACTCA  
TTGAATTCTAAGTCAGCACATCTAGAATTCAGATTCATTCAAATGTTGTGATGAGAAGATTTGAAGGATACATGTTGTTGTATGCTATTATGTCTTTCTTGTTCATTAGTATGTCGACCT  
TGCTACTCGTTGGTTCCATTCACACTAGTTTGCCTATTCATGCCGTTGATTTGATTCCACGTCATTTATTTCTCTAGGACATGCTAGTCATGTTGTTCCACATCTATTACCCATTAGTTATAT  
TATTGTTGATTTTCACTTGCATTCCTCTAAATTTTACCTCTATTACTATTTTCTTTGATTGTCATATTTGTATCCTGCGAAAGATTTTTCGCTCTAGTGGGCCTCTGTTAATGTGGTAATGG  
GAGAATTGGATTTTACAATCAAGAGCTAGATTTTATATGGAAGATTTTCATGCTTTATTGGAATTCATGAAGGATGTATTGAAAGTTGTTATATTTGACTATATCTTTATAGACTTTAAGAAGC  
TTTTTTTTGGTCTTTTGTGGTTATAAATAGAACGCCCATGGCATGTAAACAGCATGAAACATTGAAAATTGAGTATTGTAGTAAAAAAAAGTCACATCAATGACCATCCTATATCATCT  
AGATGGATATAACCCCTGTCATAGAAACATGTTCTTCATGATCACTGAAATTACTCCAAGAATGTCAGGAAAACCAACCTTTATCCCATTCGGTCTAAGAATCACATCCTACAACATTAGAA  
GGCTAAATATGAATTGAAACAGAAGTGATAATTTCAAACAACGGACAACCTTGCCCTTGCTACAAACAACAATATTCATCCAGGAATCATAGAAGCCTGAAGCCAGTCTTACTCCAAT  
AGTTAGGATATACTGATAAGAACACCAACACCAAGACTCAATCGTCAATCTATTTCACTACTCTATCCACCCAAAAAAAACCTTACATTGAAAGAATTGAATCTGTTATAAATTATATA  
AGTTTTTATTGTATAAGAATCAGTCAAAATCTAAACCATGATCTTGATTATTTTCTTTTGGCTATTTTCACTGCTTTGGACCACCTTTGTTAGAACGAGGTCTGACTGACTTCACTTCGCCA  
GAACTGCTTGATGTTGAATTGTTAACCCCATAGTCACTGGTTCGTACGCTGTACTCTTGACTGATTTCACTTCCAAATGCAACCTTTCTGTAACGACTGATGTTAGAGGCATAGGAGCC  
CGAGTCATGGTCTGAACTCGAACTGAAGAGCATACTTTGTCCTGGCTTGACCCCTCATTCAAGTCATCCAGGGATGAATCACCTTCCAGTGCTCGAGCAATCTGGCTCATCTTGGGGCG



GCCCCTACCTGCCTTGAGCTGTTTCACAGCAACTTCTTTCCCGTTTGGCAAAACTCCCTTGTACACATAGCCAAAGCCACCTTGTCTATTAGATTTTCATGAGAGAATCCATTTGTTGCT  
GATGCCAATTGTTTCATAACTGAATGTGCTCTTAATGAAGCCGAGGGCAAGGGCAGGAGAGGGCGGAGGCAAGGCTGGTCCATGTGGTCTTGAGTATCCATGCTCGCTTCACTGTTTCATG  
GAATGGGGAGGAGGTGCATGCCAAGCCACTCCTTGAGAAATTGGCATATTGATGGCAGCATTGGTCCCTCTTTATGCCATTTGGAAGAGGGCCTGCTCCACTGCTGTAGTAATCACTTC  
CTGCAATATTTGACCCTTTTGTATTACTATGTCTGGTTAAAAAATCAATCAAACATCAGACGCGGACGTTGAACGTTGTCCGGAGACTAATCAGAATGGGACATGTCACCCCTTCGCTTG  
GTACCGGTATTGTGGCTCGCATGCTAATTGGTCTCCAGACAGCCTTCTGTGTCCGGCCTCTGCACATAATAATTTCTTCTCCAAGGGAGCACATGCGTATGCAGTCCACCGACAGCTTTAAC  
CAAATCCAATTCACATGGTAATGTAACAAAGTTAATAGTGTGATGCCATTG

>comp167568\_c0\_seq2

AGTTCAACCTAATGTGAAGAACTATTCTTCTTGTGAGAGCTGGGGATGCCAAGTTGGCTGCAAAGCGCATGCAAATGAGCTTATGTAGCCGGTGTAAAGGAAGGTATAATATCAAAG  
AAGCCATTCATATCGGTGAAGCACTGAATAAGGATTTGTATTTAGACATCGAAGGAGAGCTAAGGCTTGTAAAGATAGAAAGAAAGAACTCCA

>comp167584\_c1\_seq1

CTCCTTAGGACACTTAGCCCCGAGCCCGGAGTAGTCCATCCAATAAACTTCACTTCTGGAGTGGTTGTTATGTATTAGGAGATTTGTTAATTGATTTTAAAAGATTACTCTAAGTTTGATCT  
TTAAGAGTATTTAATCCTAATGAATTCATTTATAATTTAATCTCCTAAGGATATCTACATCTTTTAGGTTTTAAATTAGTTGGGAGTTAATTATTGGATTAGTCAAACCTGATTTAGATGTATG  
TTTTAGATTTAGAATTAATAATTATAAATTAATTATAAGTTGATTAAAGATTAAGTATTTTTAATAAATTTAAGAATTAGATTAAGATTGGTTGGTTGATTATTAGTGGATTAAGAAAATA  
GAACCTAGGAAGACATGCTACTAAGTTTTGTTTTGATGTCTCTATCCTATAAGGAGCATGCATCCTAAGTCTATATTTTCTAAGACT

>comp167604\_c0\_seq2

GAACCTTCTCTACGTCCAGTGAATGTACCAAATAAAAGTTTCGCTTTAAAAGGACCATCTACATAGAAGAAAGTGTACATAGTTGCAGCGTCTCTTGGAGTTGATAACTTGGTGAGCTTAA  
TGGCTTCAAGACCAGGATTGCTCACAGAGTGGCCATGGCATAGGCTCGGCAACTTCAAGTATTTGGTTATAGTCCGTGGGTGATACAAAGTTTCTACTTACTTGCAACAAAGGAGATGA  
AGGATGTCTCCATACCTTATCTCTGATTTTCCCTTCCATGCTGCTGAGGATGCTCCACAATCAGATATGGATAAGCATTCTCGCTGGCAAAGTCCACCGGATACTTGAC  
AAAAGTATAGAGTTTGAGCAGGTTGATCGTGAGAGGAACTGGGATGACCAGATACTCTTTAATGGAATTCTCCTCTATATGGGATTTCCCTGATCCCTTCTACTTTTCAAATGTGCGATGTG  
GCGAACTAACGGTGTGATTCTAAACATTTATTACATGCTGGACCAGTTGAGTTCCTTACTATTGGTTTCATCGAGCATTGCACCATCATTTTCTTACTCGCGCTACCATTCTCACCATCA  
TGCCTCTATTGTCACAGAACCAATCACATCTGTTACTCATCCATTTGCGGAGCATATTGTCTACTCTATGTTGTTTCGCTGTCCCATTTGTTGACTACAGCCTATAACAGAAACAGCCTCGACGAT  
ACAATTTGTCGGATATGTTTTCTACATTTGACTTCATGAACAATATGGGGCACTGCAACTTTGAATTGGTTCCAAAGTGGTTGTTTTCTATCTTTCCACCATTGAAATACCTCATATACACTTC  
CTCGTTTTCACTCTTTCATCACACGCAATTTCCGACAAACTATTCCCTATTTCATGCCATTCTATGACTATTTGTACAACACGAGGGATAAGTTAACTGATGAAGTCTATGAAATCTCATTGAA  
AGGAAAGAAAGAGACTATAGATGTTGTTACCTTACACATCCAACCACCTTGCAATCAATATATCATCTGCGACTTGGAAATGCATCTTTGGCCTCTAAACCATACAAATATTCTAAGTGGT  
ATGATCGGATGATGTTGCCATTATCATGGATGTCGATGTTGCTCACATGGTTTTATAGTTCTTCTTTCATTGTTGAGAGAAATAAGTTGAAGAATCAAAATGCAAACATGGGTCATGCCA  
ATATACAATTTCCAAGTATAAAAGTCATTGAAAGATTTCAATTTCTTTGATAATTCTAAATAACTCAATCATTTGTTTTATGTGCAGTATGGCTTATCATGGGAGAAGGAGAAAATCAATA  
ATTTGATTGAAAAGTCTATTCTACAGGCTGAAACCAAAGGAATTAAGTTCTAAGTTTAGGGCTCTTCAATCAGGTGAAAGAACTCAATAGAAGTGGTGAGTTTTACCTTCAAAGGTATC  
CAAAGTTAAAATTAAGGATTGTGGATGGAAGTAGCTTGGCAGTTGCTGTGATTCTTAACAACATTTCCCAAAGGCACAAAACAAATTTTACTGAAAGGTAACATTTCAAAGGTTGCTTGCA  
CAGTGATTACAGAGCCTATGCAACAAAGGTATAAAGGTTGTAATAACAAACACGCATGACTACTGTATGTTGGAGCCATTAATGTTTCGGAAGTACACAGGGTTCATTTATACTTTCAAATAAT  
TATATGCCTAAGGTTTGGTTAGTTCGGAGATGGTATAGATGATGTAGAGCAATGGAAGGCGCAAATGGAACAATTTCAATCCATATTCTATTTTCTCCCAAAAAGTTAGAAAGGATTG  
TCTCTATTACAGTACTGCAGCCATGAAGATTCCAAATGAATTACAAAACATACACGCATGTGAGAATTGGTTGCCAAGAAAGGTAATGAGTGCATGGCGCATTGCTGGAATAATTCATGCT



TTAGAGGGATGGGATGAACATGAATGTGGTGATAACAATACTTCAAGTGGACAAAATTTGGATGGCCGCACTACGACATGGGTTCCCTTCCACTACTTAATGAGTAATAGATTTTCATGGATTG  
AGAATGTGTTATAAGATACATGTAGTAATCATTAGTATTCAAGTTTTTAAGGAGTAATGAGAAATATATGTCATCAAAAATGGAAAGGAAGATAACTTGAATTTATGATAAGAAATTA  
GATTAGGAATGTGTATTAATGATGCATGTATAGGATGCCTCATTGCATCCTGAAGTTTTATCTTAGATCCATGTTAGTGAGAACCTCATGTAGCGATTAATTTCTTATTATTAACATATTAGTT  
GATATTGAGGAAAACATTTCAATTCTATGAAGTGGTAGAACATTAAGAGCATCTACAAGAAGGAAAGTCATAAACTTCGCTATGTTTCTGTGGAATTAAGTGTATTCTTCATGTATCAAG  
GAAATAAGAGCAATGGTTTAAACATTGGAATAAAAAGTGCCTATTGAAAAAGG

>comp167604\_c0\_seq28

GAACCTTCCTCTACGTCCAGTGAATGTACCAAATAAAAAGTTCGCTTTAAAAGGACCATCTACATAGAAGAAAGTGTACATAGTTGCAGCGTCTCTTGGAGTTGATAACTTGGTGAGCTTAA  
TGGCTTCAAGACCAGGATTGCTCACAGAGTGGCCATGGCATAGGCTCGGCAACTTCAAGTATTTGGTTATAGTCCGTGGGTGATACAAAGTTTCTACTTACTTGCAACAAAGGAGATGA  
AGGATGTCTCCATACCTTATCTTCTGATTTTCCCTTCCATGCTGCTGAGGATGCTCCACAATCAGATATGGATAAGCATTCTCGCTGGCAAAGTCCAGGATCCTCACCGGATACTTGAC  
AAAAGTATAGAGTTTGAGCAGGTTGATCGTGAGAGGAACTGCTGTTACTCATCCATTGCGGAGCATATTGCTACTCTATGTTGTTTCGCTGTCCCATTGTTGACTACAGCCTATACAGAAA  
CAGCCTCGACGATAACAATTTGTCGGATATGTTTTCTACATTGACTTTCATGAACAATATGGGGCACTGCAACTTTGAATTGGTTCCAAAGTGGTTGTTTTCTATCTTTCCACCATTGAAATACC  
TCATATACACTTCCTCGTTTCATTCTCTTCATCACACGCAATTTCCGACAAACTATTCCCTTATTCATGCCATTCTATGACTATTTGTACAACACGAGGGATAAGTTAACTGATGAAGTCTATGA  
AATCTCATTGAAAAGGAAAGAAAGAGACTATAGATGTTGTTACCTTACACATCCAACCACCTTGCAATCAATATATCATCTGCGACTTGGAAATTGCATCTTTGGCCTCTAAACCATACAAAT  
ATTCTAAGTGGTATGATCGGATGATGTTGCCATTATCATGGATGTCGATGTTGCTCACATGGTTTTATAGTTCTTCCCTTCATTGTTGAGAGAAATAAGTTGAAGAACATCAAATGCAAACAT  
GGGTCATGCCAATATAACAATTTCCAATATGGCTTATCATGGGAGAAGGAGAAAATCAATAATTTGATTGAAAAGTCTATTCTACAGGCTGAAACCAAAGGAATTAAGTTCTAAGTTTAGG  
GCTCTTCAATCAGGTGAAAGAAGTCAATAGAAGTGGTGAGTTTTACCTTCAAAGTATCCAAAGTTAAAATTAAGGATTGTGGATGGAAGTAGCTTGGCAGCTGCTGTCAATATCAATAGC  
ATTCTAAAGGTAATCAACAGTTTTTACTAAAAGGTAACATATCAAAGGTTGGTTCGATCAGTATCCAGGGCCTATGCAATAATGGTGTGAAGGTAAATCCAATCATATAAACGTATATTAT  
TGCAAATTAAGCTCAATTTTACTCTTATAACATTTTCTGCTAATTACACTTAAGCAAATATGTGCTAATAATGCTAGATGCACAGGTTGTAATGACTAACAACATGACTATTATATGCTGGAG  
CCATTCATGCTAGATAACAATGGGAGAAAAGCTTCTGCTTTCAAACACTTGTATGCCTCAGGTAATGAGTTTCTTTTAACTATAGGGGGGAGAATGGTTCTTATAAAATAATTGCTAATAACTA  
GCCAAAATCCATTAGCATCATAAACTTCATAACATTCACAATGAGAATTCAAAACCTAAGAGTTCGATACAAACAATTCAACGAGATGAGGCAACCAATATTCTTATATTCTTACAATCGCAA  
ATATATGGATAAAAATCAATTGCGAAAACAAGAATATAAAATAAATGGAAAATATGTTGATAAAAATAATTTGTAATCATATTG

>comp167604\_c0\_seq29

TGACCTGGATGTAAACGGGTTGACACTAATCCAATCATTTTTTTTTAAATGGATCAGGTTTGTCAACCCGGACACGACCCGTGTGGGTTACTGGGTTGACCCAATCTGACCCGCGACTTGT  
TTGCAAAAATATGAACCCGAAAGCATGCGAGGCGGACGTGAAAATGCAGCTGCAGGCATGTAGGGCCAGGGCTAGAAAAGTGTGCGCGACAAGGCCAACGCGCGGGTGCAACTGCGGC  
CTGTGGATGAGCCGGTGAGAACCGTCAGGACCTGCTCGAGTCACCGCGGTCTGTGCATGAGGGCCAGCTACAACAAGGCAAGGGCGAGACCAACATGGCCAGGCTTACGCGGTGCGCA  
AATGCCGGTTTGAGAACCAGCCAGCAGTTTTCTGTTGACGACGTGCGGGGCGAGACGAGGTGCAAGGGGATATGATTTTATGTTGAACGATATTTAATGAATGGTTTCAAGATGTTGAAGCAGG  
AAAACAAGTGTCACTTACTTTCAAACCAACTTGTATTGTAAAAAATGTCTGAACATCTTCAATTTTTTGGTAATTACAAATTAAGTATAGCAACACCCAAACCAAAAGTTAATCTCTCTTCAA  
CATCCAAACCAGAGGCAACTTCAAAGTTTTCAGAGTGCAAAAATATCCTACCTTACATTTGTGTTTAAACATAGGTAAGTCACTCATTGAAGCACCCCTTACAAAAATACCGGTGTTTCAA  
AAGACTCTGCGGCATTATAGAATATAATAAGTATAATTAACGTTTCAATTCATCAACAACAGGGATGACCAGATACTTTAATGGAATTCCTCTATATGGGATTCCTTCTGATCCCTTCTAC  
TTTTCAAATGTCGATGTGGCGAACTAACGGTGTGATTCTAAACATTCTATTACATGCTGGACCAGTTGAGTTCTCTACTATTGGTTTCATCGAGCATTGCACCATCATTTTCTCTACTCGCG  
CTACCATTCTCACCATCATGCCTCTATTGTCACAGAACCAATCACATCTGTTACTCATCCATTGCGGAGCATATTGCTACTCTATGTTGTTTCGCTGTCCCATTGTTGACTACAGCCTATACA

GAAACAGCCTCGACGATACAATTTGTCGGATATGTTTTCTACATTGACTTCATGAACAATATGGGGCACTGCAACTTTGAATTGGTTCCAAAGTGGTTGTTTTCTATCTTTCCACCATTGAA  
ATACCTCATATACACTTCCTCGTTTCATTCTCTTCATCACACGCAATTTCCGGACAAACTATTCCTTATTCATGCCATTCTATGACTATTTGTACAACACGAGGGATAAGTTAACTGATGAAGTC  
TATGAAATCTCATTGAAAGGAAAAGAGACTATAGATGTTGTTACCTTACACATCCAACCACCTTGCAATCAATATATCATCTGCGACTTGGAATTGCATCTTTGGCCTCTAAACCATA  
CAAATATTCTAAGTGGTATGATCGGATGATGTTGCCATTATCATGGATGTCGATGTTGCTCACATGGTTTTATAGTTCTTCCTTCATTGTTGAGAGAAATAAGTTGAAGAACATCAAATGCA  
AACATGGGTCATGCCAATATAACAATTTCCAATATGGCTTATCATGGGAGAAGGAGAAAATCAATAATTTGATTGAAAAGTCTATTCTACAGGCTGAAACCAAAGGAATTAAGTTCTAAGT  
TTAGGGCTCTTCAATCAGGTGAAAGA ACTCAATAGAAGTGGTGAGTTTTACCTTCAAAGTATCCAAAGTTAAAATTAAGGATTGTGGATGGAAGTAGCTTGGCAGTTGCTGTGATTCTTA  
ACAACATTCCCAAAGGCACAAAACAAATTTTACTGAAAGGTAACATTTCAAAGGTTGCTTGCACAGTGATTGAGAGCCTATGCAACAAAGGTATAAAGGTTGTAATAACAAACACGCATG  
ACTACTGTATGTTGGAGCCATTAATGTTCCGAACTACACAGGGTCATCTTATACTTTCAAATAATTATATGCCTAAGGTTTGGTTAGTCGGAGATGGTATAGATGATGTAGAGCAATGGAAGG  
CGCAAATGGAACAATATTCATTCCATATTCTTATTTTCTCCCAAAAAAGTTAGAAAGGATTGTCTCTATTACAGTACTGCAGCCATGAAGATTCCAAATGAATTACAAAACATACACGCA  
TGTGAGAATTGGTTGCCAAGAAAGGTAATGAGTGCATGGCGCATTGCTGGAATAATTCATGCTTTAGAGGGATGGGATGAACATGAATGTGGTGATACAATACTTCAAGTGGACAAAATTT  
GGATGGCCGCACTACGACATGGGTTCCCTTCCACTACTTAATGAGTAATAGATTTTCATGGATTGAGAATGTGTTATAAGATACATGTAGTAATCATTAGTATTCAAGTTTTTAAGGAGTAATGA  
GAAATATATGTCATCAAATGGAAAGGAAGATAATCACTTGAATTTATGATAAGAAATTACTTGATTAGGAATGTGTATTAATGATGCATGTATAGGATGCCTCATTGCATCCTGAAGTTTTA  
TCTTAGATCCATGTTAGTGAGAACCTCATGTAGCGATTAATTTCTTATTATTAACATATTAGTTGATATTGAGGAAAACATTTTCATTCTATGAACTGGTAGAACATTAAGAGCATCTACAAGA  
AGGAAAGTCATAAACTTCGCTATGTTTCTTGTGGAATTA ACTGTTATTCTTCATGTATCAAGGAAATAAGAGCAATGGTTTAAACATTGGAATAAAAGTGCCTATTGAAAAAGG

>comp167604\_c0\_seq3

GAACCTTCTCTACGTCCAGTGAATGTACCAAATAAAAGTTCGCTTTAAAAGGACCATCTACATAGAAGAAAGTGTACATAGTTGCAGCGTCTCTTGGAGTTGATAACTTGGTGAGCTTAA  
TGGCTTCAAGACCAGGATTGCTCACAGAGTGGCCATGGCATAGGCTCGGCAACTTCAAGTATTTGGTTATAGCTCCGTGGGTGATACAAAGTTTCTACTTACTTGCAACAAAGGAGATGA  
AGGATGTCTCCATACCTTATCTTCTGATTTTCCCTTCCATGCTGCTGAGGATGCTCCACAATCAGATATGGATAAGCATTCTCGCTGGCAAAGTCCAGGATCCTCACCAGGATCCTGAC  
AAAAGTATAGAGTTTGAGCAGGTTGATCGTGAGAGGAACTGCTGTTACTCATCCATTTGCGGAGCATATTGTCTACTCTATGTTGTTTCGCTGTCCCATTTGTTGACTACAGCCTATACAGAAA  
CAGCCTCGACGATACAATTTGTCGGATATGTTTTCTACATTGACTTCATGAACAATATGGGGCACTGCAACTTTGAATTGGTTCCAAAGTGGTTGTTTTCTATCTTTCCACCATTGAAATACC  
TCATATACACTTCCTCGTTTCATTCTCTTCATCACACGCAATTTCCGGACAAACTATTCCTTATTCATGCCATTCTATGACTATTTGTACAACACGAGGGATAAGTTAACTGATGAAGTCTATGA  
AATCTCATTGAAAGGAAAGAAAGAGACTATAGATGTTGTTACCTTACACATCCAACCACCTTGCAATCAATATATCATCTGCGACTTGGAATTGCATCTTTGGCCTCTAAACCATACAAAT  
ATTCTAAGTGGTATGATCGGATGATGTTGCCATTATCATGGATGTCGATGTTGCTCACATGGTTTTATAGTTCTTCCTTCATTGTTGAGAGAAATAAGTTGAAGAACATCAAATGCAAACAT  
GGGTCATGCCAATATAACAATTTCCAATATGGCTTATCATGGGAGAAGGAGAAAATCAATAATTTGATTGAAAAGTCTATTCTACAGGCTGAAACCAAAGGAATTAAGTTCTAAGTTTAGG  
GCTCTTCAATCAGGTGAAAGA ACTCAATAGAAGTGGTGAGTTTTACCTTCAAAGTATCCAAAGTTAAAATTAAGGATTGTGGATGGAAGTAGCTTGGCAGTTGCTGTGATTCTTAACAA  
CATTCCCAAAGGCACAAAACAAATTTTACTGAAAGGTAACATTTCAAAGGTTGCTTGCACAGTGATTGAGAGCCTATGCAACAAAGGTATAAAGGTTGTAATAACAAACACGCATGACTA  
CTGTATGTTGGAGCCATTAATGTTCCGAACTACACAGGGTCATCTTATACTTTCAAATAATTATATGCCTAAGGTAATGAGTTCCCTTTAGTTTATGACGGGAGAATGGTTCAACTAATATAATT  
TTAATGATTGAGAAAAGTCTATAAGTATTATTA ACTTTTTAGGATTCATCATAAACATTTAAAAAATAGCTAGGAGTTTGATGCAATCAATAGCACAAAAATAATTCAACATTATGATTCAAT  
TATCATTCTTAGGCACTCATGCAACCAACATAAAACAAATCAAGGAAACAATGAAATCACTTGGGCACATTATAAATATATTACAAATATATTGATGCCTAATTTATTTTTTATCTAAACATTCG  
TGATAAAAGTTTTGCATTGTTAAGCATTATAATTGGTTTTTCATCCCTTATATCAGTGAACATCCTTTATAGTTGTGATAGTATAATACATGAAAATGACTTCAAAAATTTGTCTTTCAGGTT  
TGGTTAGTCGGAGATGGTATAGATGATGTAGAGCAATGGAAGGCGCAAATGGAACAATATTCATTCCATATTCTT

>comp167604\_c0\_seq34

GAACCTTCCTCTACGTCCAGTGAATGTACCAAATAAAAAGTTCGCTTTAAAAGGACCATCTACATAGAAGAAAGTGTACATAGTTGCAGCGTCTCTTGGAGTTGATAACTTGGTGAGCTTAA  
TGGCTTCAAGACCAGGATTGCTCACAGAGTGGCCATGGCATAGGCTCGGCAACTTCAAGTATTTGGTTATAGCTCCGTGGGTGATACAAAGTTTCTACTTACTTGCAACAAAGGAGATGA  
AGGATGTCTCCATACCTTATCTTCTGATTTTCCCTTCCATGCTGCTGAGGATGCTCCACAATCAGATATGGATAAGCATTCTCGCTGGCAAAGTCCCTACCGGATACTTGAC  
AAAAGTATAGAGTTTGAGCAGGTTGATCGTGAGAGGAACTGGGATGACCAGATACTCTTTAATGGAATTCTCCTCTATATGGGATTCCCCCTGATCCCTTCTACTTTTCAAATGTCGATGTG  
GCGAACTAACGGTGTGATTCTAAACATTCTATTACATGCTGGACCAGTTGAGTTCCTCTACTATTGGTTTCATCGAGCATTGCACCATCATTTTCTCTACTCGCGCTACCATTCTCACCATCA  
TGCCTCTATTGTACAGAACCAATCACATCTGTTACTCATCCATTTGCGGAGCATATTGTCTACTCTATGTTGTTTCGCTGTCCCATTTGTTGACTACAGCCTATACAGAAACAGCCTCGACGAT  
ACAATTTGTGCGATATGTTTTCTACATTGACTTCATGAACAATATGGGGCACTGCAACTTTGAATTGGTTCCAAAGTGGTTGTTTTCTATCTTTCCACCATTGAAATACCTCATATACACTTC  
CTCGTTTCATTCTTTCATCACACGCAATTTGCGACAAACTATTCCCTTATTTCATGCCATTCTATGACTATTTGTACAACACGAGGGATAAGTTAACTGATGAAGTCTATGAAATCTCATTGAA  
AGGAAAGAAAGAGACTATAGATGTTGTTACCTTACACATCCAACCACCTTGCAATCAATATATCATCTGCGACTTGGAATTGCATCTTTGGCCTCTAAACCATACAAATATTCTAAGTGGT  
ATGATCGGATGATGTTGCCATTATCATGGATGTCGATGTTGCTCACATGGTTTTATAGTTCTTCTTTCATTGTTGAGAGAAATAAGTTGAAGAACATCAAATGCAAACATGGGTCATGCCA  
ATATACAATTTCCAAGTATAAAAGTCATTGAAAGATTTCAATTTCTTTCTTTGATAATTCTAAATAACTCAATCATTGTTTTATGTGCAGTATGGCTTATCATGGGAGAAGGAGAAAATCAATA  
ATTTGATTGAAAAGTCTATTCTACAGGCTGAAACCAAAGGAATTAAGTTCTAAGTTTAGGGCTCTTCAATCAGGTGAAAGAACTCAATAGAAGTGGTGAGTTTTACCTTCAAAGTATC  
CAAAGTTAAAATTAAGGATTGTGGATGGAAGTAGCTTGGCAGCTGCTGTCATTATCAATAGCATTCTAAAGGTAACAGGTTTTACTAAAAGGTAACATATCAAAGGTTGGTTCGTAC  
AGTGATCCAGGGCCTATGCAATAATGGTGTGAAGGTAATCCAATCATATAAACGTATATTATTGCAAATTAAGCTCAATTTACTCTTATACATTTTCTGCTAATTACACTTAAGCAAATATG  
TGCTAACTAATGCTAGATGCACAGGTTGTAATGACTAACAACATGACTATTATATGCTGGAGCCATTCATGCTAGATACAATGGGAGAAAAGCTTCTGCTTTCAAACACTTGTATGCCTCA  
GGTAATGAGTTTCTTTAATCTATAGGGGAGAATGGTTCCTATAAAAATAATTGCTAATAACTAGCCAAAATCCATTAGCATCATAAACTTCATAACATTCACAATGAGAATTCAAAACCTAAG  
AGTTCGATACAAACAATCAACGAGATGAGGCAACCAATATTCTTATATTCTTACAATCGCAAATATATGGATAAAATCAATTGCGAAACAAGAATATAAAATAAATGGAAAATATGTTGAT  
AAAATAATTTGTAATCATATTG

>comp167604\_c0\_seq43

GAACCTTCCTCTACGTCCAGTGAATGTACCAAATAAAAAGTTCGCTTTAAAAGGACCATCTACATAGAAGAAAGTGTACATAGTTGCAGCGTCTCTTGGAGTTGATAACTTGGTGAGCTTAA  
TGGCTTCAAGACCAGGATTGCTCACAGAGTGGCCATGGCATAGGCTCGGCAACTTCAAGTATTTGGTTATAGCTCCGTGGGTGATACAAAGTTTCTACTTACTTGCAACAAAGGAGATGA  
AGGATGTCTCCATACCTTATCTTCTGATTTTCCCTTCCATGCTGCTGAGGATGCTCCACAATCAGATATGGATAAGCATTCTCGCTGGCAAAGTCCCTACCGGATACTTGAC  
AAAAGTATAGAGTTTGAGCAGGTTGATCGTGAGAGGAACTGGGATGACCAGATACTCTTTAATGGAATTCTCCTCTATATGGGATTCCCCCTGATCCCTTCTACTTTTCAAATGTCGATGTG  
GCGAACTAACGGTGTGATTCTAAACATTCTATTACATGCTGGACCAGTTGAGTTCCTCTACTATTGGTTTCATCGAGCATTGCACCATCATTTTCTCTACTCGCGCTACCATTCTCACCATCA  
TGCCTCTATTGTACAGAACCAATCACATCTGTTACTCATCCATTTGCGGAGCATATTGTCTACTCTATGTTGTTTCGCTGTCCCATTTGTTGACTACAGCCTATACAGAAACAGCCTCGACGAT  
ACAATTTGTGCGATATGTTTTCTACATTGACTTCATGAACAATATGGGGCACTGCAACTTTGAATTGGTTCCAAAGTGGTTGTTTTCTATCTTTCCACCATTGAAATACCTCATATACACTTC  
CTCGTTTCATTCTTTCATCACACGCAATTTGCGACAAACTATTCCCTTATTTCATGCCATTCTATGACTATTTGTACAACACGAGGGATAAGTTAACTGATGAAGTCTATGAAATCTCATTGAA  
AGGAAAGAAAGAGACTATAGATGTTGTTACCTTACACATCCAACCACCTTGCAATCAATATATCATCTGCGACTTGGAATTGCATCTTTGGCCTCTAAACCATACAAATATTCTAAGTGGT  
ATGATCGGATGATGTTGCCATTATCATGGATGTCGATGTTGCTCACATGGTTTTATAGTTCTTCTTTCATTGTTGAGAGAAATAAGTTGAAGAACATCAAATGCAAACATGGGTCATGCCA  
ATATACAATTTCCAATATGGCTTATCATGGGAGAAGGAGAAAATCAATAATTTGATTGAAAAGTCTATTCTACAGGCTGAAACCAAAGGAATTAAGTTCTAAGTTTAGGGCTCTTCAATCA

GGTGAAAGA ACTCAATAGAAGTGGTGAGTTTTACCTTCAAAGTATCCAAAGTTAAAATTAAGGATTGTGGATGGAAGTAGCTTGGCAGCTGCTGTCATTATCAATAGCATTCTAAAGGT  
ACTCAACAGGTTTTACTAAAAGGTAACATATCAAAGGTTGGTCGTACAGTGATCCAGGGCCTATGCAATAATGGTGTGAAGGTAAATCCAATCATATAAACGTATATTATTGCAAATTAAGC  
TCAATTTTACTCTTATAACATTTTCTGCTAATTACACTTAAGCAAATATGTGCTAACTAATGCTAGATGCACAGGTTGTAATGACTAACAAACATGACTATTATATGCTGGAGCCATTCATGCTA  
GATACAATGGGAGAAAAGCTTCTGCTTCAAACACTTGTATGCCTCAGGTAATGAGTTTCTTTTAATCTATAGGGGAGAATGGTTCTTATAAAATAATTGCTAATAACTAGCCAAAATCCA  
TTAGCATATAA ACTTCATAACATTCACAATGAGAATTCAAACACTAAGAGTTTCGATACAAACAATTCAACGAGATGAGGCAACCAATATTCTTATATTCTACAATCGCAAATATATGGATAA  
AATCAATTGCGAAACAAGAATATAAAATAAATGGAAAATATGTTGATAAAATAATTTGTAATCATATTG

>comp167607\_c0\_seq4

TCACTTTTCATATTTTGGATTTTATCTCAATTTGATTATAAATTTAGTAAAATCAGAGCTAGAGTTGAACTTTAATTTGTATTGAGATGTATCTTATCAAGTTTGGATTTTTTGTGCACATAAGAA  
AAGTACAAATAAAAATTTATCGAAATCCTGGGTCCACGTACACTTAACATTGCATCAAATACTTTGTGCACGGTGCCTGAAGAGGACAATCCCTCTACACTCGGGCATTGATCAACCACCA  
GCGCACTTAAATTTAAACGCCTTCATCTTCTCCCTTGGAACGCCACCCCTTTGTTTCTTTAGTAGCTTTCATCATGGCTTTGATCGGTCGTGCATGGCGAATCAAATCTTCTTTTCTTC  
CAAATCTACCTGTCCAAAAAGCCTGCCTCCACCGAACCAGAACGGCGCCACCAGAGGCACCAAAGCAGCACAAACGAACCAACGTACCCGAGAGTGAGCTGTATGGGCCAGATCAA  
GCGCTGCAA ACTACCTCCACCGCTTCCGCTGCCGAATCCACCACCGCTCCGACATGGCTTTTCTTTTTTCCGGTTTCAGCTTCTTCTCCTCCGCCTCCAGTTGCTGCTCTCCGGCGACC  
GGTAAGTCGAAGAAACAGATGACTGAGGCCAGAGGCTTGAGAGTGAGGAGATGGACCCGCCTTCCGGTGGAGAAAAGGAAGGAGAAGCCGTATTACGTCGAGAGCTTGTGGAGG  
AGAAGGTGCCGAGATAGGGATGAGCTCACACAGCTGGAGCTTTGCCAGCCGGTGGAGGCTGCCGGCGGCTGCTATGGCGTCGTAGATTGAGATTCGTGGGCTTTTTTTGTCTGTTATATT  
ATAGTTTAATGTGGGGATTTTATTTTATTTGTCTTGTCTTTTTTTTTTAAATATAGAGGTGAGCTAACATCAA ACTTGTCCAGAGACCAAAAATAAAGCACCACATCATTTGGGCGCTCGG  
TACCGCACTCGGTACACTCAATATGCTCAGTATTCTATCCAGACGTAATAATTTTTCTAGCTAAAAAGCCATAGCTCGATCTACTCCATGTACTTGTCTTGTATATTATAGCTCATGGATGGC  
CAACTATGGCTTTTTTTT

>comp167644\_c1\_seq1

TAATTAACATATAATATAAAGGGTTCCTCCATTGTTATTGAATAGTGATCATTGCGACAAATTAGAATGCGTCACATCATCGAATACATAACACCGATATGACGTGGCCCATATTGATTAC  
CTTTAGGCTTCATCGAATGACTGCATGGAATAATTTCTAAGAACTAAGTGGATACATATCTTGAATAACA ACTCACATTCTTTTCATCCCAGTAGCCAGCGCGCTCCTTCTCACCTTCTCCA  
GCTCATA CGCTAACCATGCGCTCCTATGACAATTCCC GTTCTTCTTCTCGTCGTCATCCGAAATGAGGCGCATGATCCGCTCTTCAATCTCCCTGTAGAAACTTTC

>comp167644\_c1\_seq2

AAGGGGTGCGATGTGGATGAAACGACCAGTAAAACATTTTTCCAGGTAATTAATTAACGACGAATTTGCGACGAAGGCAGAGGAGCAATTGGAAAGGAAGATGAGATGAACCTTCGTG  
GATGGGAATATGGAGACCTTCAGGTTTGCAGGAGAGAAAGGATTAAGGGACTATTATATAAGCCGAACGAATAGAACTTTTCTCCTTCGGGATTCAATAATTACCATCAGTTAAGTCGGTC  
TAGGCGATGGAGAAGAATGACAGGATTTAGGAGCCATGGGACTCTTGGAAAGACCGGATCTTTGTGGCTCTCCATTCATATTTCTTAGTGCCC

>comp167644\_c1\_seq3

TAATTAACATATAATATAAAGGGTTCCTCCATTGTTATTGAATAGTGATCATTGCGACAAATTAGAATGCGTCACATCATCGAATACATAACACCGATATGACGTGGCCCATATTGATTAC  
CTTTAGGCTTCATCGAATGACTGCATGGAATAATTTCTAAGAACTAAGTGGATACATATCTTGAATAACA ACTCACATTCTTTTCATCCCAGTAGCCAGCGCGCTCCTTCTCACCTTCTCCA  
GCTCATGCGCTAACCATGCGCGCCTCTGACAATTTCAAAAACAAAGGGTGTTCGCAATGCTCATCCCCGATCAAACGTTCCATAACGGCTCGCATCAACAAATGAACCAAACATTGG  
AATAAACTGTGGTCTTTCTCCATTAATGGAGAGCGGAGGAGCTCCGTTTTTCTCTTTTGTCTTCTTCTCCTCGTCGTCATCCGAAATGAGTGAATGATCCGCTCTTCAATCTCCCTGTAGA  
AATTTTCTGTTGTCTTTTTCACTTACGTTTCTCTCCATGCTGGAAAACGGATTGAGGGGAGAGAATGATTAAGGGAGTATTATATAAGCCGAATGCAGAGAACTTTTATCTTTTCGAAATTCAT

TATCTATCATTAGTTAAGTCGGTCCAGGCAATGGAGGAGAATGAGGGGATTTAGGAGCCATGGGAGTTTAGAAGACCGGGCCTTTGCTTCTCTCCATTCATATTTCTTTGCGCAAAAATTT  
ACGGCCCAAATCTGAGGCGTTCCCTGTCTTTGCTATTATTATATATTTGAATGGT

>comp167644\_c1\_seq7

TCAATTAATTGTTTTGAAATTTTGGCAAAAATTTATCAAAATGATATTCTTACAAAATTATAGATATACTACAGACATGTAGGAGAGAGCATAGATATCTAAGAAAATCTAGATTTTACCCAAC  
ATTTAATGTGGGCGATCATTGTAAACAAGTGCCATAACCATTTGTCCGACTTGTGGCATCAACAGAAAAAGCATACAATCAAATAAATTTGTTAGCATATGCCAAAAATAAAAAAAGATAAA  
AATACTGCCACTTTCTTTTTCAAGTGTCTTAAATTCCTCCAATCAAATAAATTCAAAACACACATAAAAAATCATGTTCTTTCTCTCAGTAGCCAGCACCTCCTCACCTTTTCCAGCT  
CATACGCTAACCATGCGCTCCTCTGATAATCCCACAAACAAAGGGTGTCTTGTATTGCCTCATCCCCCTTATCAAACGTTCCATACAGCTTGCATCAACAAATGAATCAGACATTGAAAA  
GGCTGTGGTCTTTCTCCATTAATGGAGAGTGGAGGAGCTCCGTTTTCCCTATTTAGTTCTTCTTCTCCTCGTCATCCGAAATGAGGCGCATGATCCGCTCTTCAATCTCCCTGTAGAACT  
TTCGTTGTCTTCTTCACTTACGTTTCTCTCCATGACAGGAAAATGGATTGAAGGCAGATAGTACTGGATAGGATAACAACACGGGCCAAACTCGACTATTATGGGAGCAAAACGGAGCAG  
CAATGGTATATAATGTTGGGGACTCTGAAAGGGTGGAGGGGTGCGATGTGGATGAAACGACCAGTAAACATTTTTCAAAGCAATTAATTAACGACAAATGTGTGACGAAGGCAAG  
AGGAGCAATTGGAAAGGAAGATAAGATGCTTCGTGGATGGAGACCTTCAGGAATTATGGGGAGAGAATGATTAAGGAAGTACTATATATGCCGAATGCAGAGAAGCTTTTCTCCTTCGGAA  
TTCATTTTGATCATTAGTTAAGTCGGTCCAGGCAATGGAGGAGAATGAGGGGATTTAGGAGCCATGGGAGTTTAGAAGACCGGGCCTTTGCTTCTCTCCATTCATATTTCTTTGCGCAA  
AATTTACGG

>comp167649\_c1\_seq5

GGGACTTCTTTATCAAGGATCTCATACCCTATAACTCTAATGGAGATTCCATCACAAAGTGCAGAACATAAATTTGACTATAATCAGGTAGAAATAATTTGTCCCAATCAAAGCTAAA  
ATAAACTCACCTAAATATAACTTAAAATGTCTGAAATTAGAACAACTCACCTTACATCAATAATCTGCTAAGTGAAAGTAAAATGGATTGCATTTAAGCAGATCTCAGGCTTGAGCCATG  
ATCTGGAAACGTACTGGGCCAACATCAAGTGCCCAAGCAACAATGGAAGATCCAATGGCAATACAAGTGGAAGGATACGGAGTCTGCTCTGGCTTGTCCCAACCAGACTACTTCAA  
ACAGGTCTGGATCTCCTGCAAAGGCAGACATAGCCTTTCACCTCGTCAAGAAAGGTACCTAATCCTCATTTACCCGAAGTACTAGTAGTAAGGGCTATCTCCAACCCAAAATCTTATTTT  
CACTTCAAATCAAATGCTGTGATTCATTTCCAATCGAACTCCATTGTGATTCTTCTTTTGCACGTTTAGAATAG

>comp167655\_c1\_seq3

AAGTTCGCTAAACCATTATCTATTATCTGAAATGAAAGATCTTTTATAATTAGTTTATTTATTTTCATTAATTTATCTATAAAAATTTATTTTATTTGTATTTGCTTTGTGTTATTTGTGTTT  
ATTGTTTTTTTTTTTTGGTCTATTTTTTTTTATCTATTGGTATTTGATGTTGAGGCCCTTCTTTGTGTTTATATTAATCTCCCAAAGCTTTCTTATTTTATAATTTACCTGAAAATAATTCATTTAAA  
TTGGATTGAGAACATATTGGTTTTGGTCCCGTTTTGGTTAATCCTATAAGAAATTTGTGTTATATATAGAGTTTTTATATTTTATAGATTTATCTATAGTTGGTTTTGATTACTACCAAGCAT  
AGGCTCGATGGTGGTCATCATGATGGGAAGTGGAGGAAAGTGGTGGAAAGTTGGTATTCAAGTTTTTTTTAAAATTAAGGTTTTAATGATAAGTTGAGATTTTTTGAATCCAACCTTTGGTGT  
CTGCCTACAATGTTTTTCACTCTACTCGATTTCAAGTTTCAAACATTTGATTTGAAAACAGGCGTTACTTGTTCATAATTGTTGTTTTCTTGTGTAATCATATATGTCCATTTAAATATCTT  
TTAGGTATGCTTACAATGTTGTTAACTAAAATAATTCATTTAAATTTATAACAGCTCCTCATTATCCCATATCCACCTAAAGTTTTAAAATGAAAAGAGTTTTCATTTTTCTCACCAGGGA  
AGGGCAATCAAAGCCATCATATTTAGCCATCTCTGACTTCTCTCATGAATGTATGCAACTGTCTTAACATCTCCAATAGTTTCTCCTTAAATCTACACAACCTATATTTTTTTCTTTAACTGTT  
ATTGTAAGAAGAAGCATTTTTTAAATAATGATAGCTATTTACCTCATGAGTTAGTAAGGCTCTTGGTATAATTCATTTATACAAATAAATGAAAATATT

>comp167684\_c0\_seq20

ATAATGTCTGGAGAGACAGATAAGACAGGAATGACCTCATAGTTTAAACAACATTCAAAGGTGCAGCAGATGACCCTTGAAGACAACCTTAAAGTAAGCACGATAGATAAAAATATAAACAAA  
TAAAAAAAAGGAAAGAAAGAAATCGTAATTCAGAAATACATAATCACATTGATATGAAGAGCACAGTACTGATGCCACTTTAGCATTGAAAACGCCAATCTGACGCAACTTTTTGGGA

TTACTCCATCACAACAATGTGCAAAAAGAGAAGACTAATTGTCCAAAGGTCAAAGCTGAACAATGATTTTCATCATCAATCACCATAGAATTCAATCTGCATAACTTTCTGCCAAAATTCCAT  
CATTAAACGCTGAAAGTTGCGGAGACCTTGTAAGCTTCATGTAGAAGCTTTAGACCACTATCATAGATAACAAAACCACTGGACCAGAATTCATGATAGTCAATGGGCACAATTTTCGATTT  
ACAGCTGGCTTTACTTTAGCTTGTTAAAGGAATGACAAACCTCAGCGAGTGCAAAGTAATCAGCACCTCTTCTCAAGTTACAAGCTAAAGCTGCTGTATTTTACTAAATATTTTTTGAAGGA  
ATGGTCAATCATATTTCTTAGCAGGGAGAAAAATGAACAGGGTATAGAAGTATAAAATATACATGAGAAATGTTAATAATACATAGAACTTAGATAACAAGTCATGTTGCCCTCTCCTTAGG  
CTGGTTAGTTGAAGACTTTGTCACCCATTAGGAGATCTAAGGTTCAAAGATAGGTATAAGCGTGTGCGTGTGTGATTTATGCCTTCGCTCTTTATGGTGCTTGAATGGAAGCATAAAGAAG  
GTGGTTAATACAGTTACATTCTCTTCCACTGTAGGAGTCAGATCTCTAATATGATGTAGGGCACAGGGATAGCTGTCAGATCAGATTCAAACACCTTCAAGTTTGGCATCTTCATAAGCATT  
ACTGACCAATAAAAAAGAATGAGAAGTTCAGCTTTCTTTGGGGCCAGCCTCCAAAAGAATGTAGAAGTAATCAAGAAAATAGATGTTTATATTTGCTGAACGAGGGGCAAAATCAGCCACCT  
TTATGCATTTAGTTCAGACATGACCACATGTGCACA ACTATAGTTAAGCTGTCAAGACTGATGTACCGATCATCAATCATAAGGCCAAAAAAGTGGCAACTAAAGGTTTGTCTGCATATCGT  
ACATCCCGTTGTATATCTTTTTAAAAATATACTCTGAGATGCCCTGCAACAAAGAGCAAATTATAACTTAGCTAAAACAGTTGATGGATGATAAATACATATTGCATAATACTTTTACCATATC  
TAAACTCTTTTATCTAATTTAGGCGATCCCATGAAAACA ACTGTACTCGATTATACATGTGTAGTTATTCTCATTTAATCAATCATAA

>comp167684\_c0\_seq21

ATAATGTCTGGAGAGACAGATAAGACAGGAATGACCTCATAGTTTAAACAACATTCAAAGGTGCAGCAGATGACCCTTGAAGACA ACTTAAAGTAAGCAGATAGATAAAATATAAACA  
TAAAAAAAAGGAAAGAAAGAAATCGTAATTCAGAAATACATAATCACATTGATATGAAGAGCACAGTACTGATGCCACTTTAGCATTTGAAAACGCCAATCTGACGCAACTTTTTGGGA  
TTACTCCATCACAACAATGTGCAAAAAGAGAAGACTAATTGTCCAAAGGTCAAAGCTGAACAATGATTTTCATCATCAATCACCATAGAATTCAATCTGCATAACTTTCTGCCAAAATTCCAT  
CATTAAACGCTGAAAGTTGCGGAGACCTTGTAAGCTTCATGTAGAAGCTTTAGACCACTATCATAGATAACAAAACCACTGGACCAGAATTCATGATAGTCAATGGGCACAATTTTCGATTT  
ACAGCTGGCTTTACTTTAGCTTGTTAAAGGAATGACAAACCTCAGCGAGTGCAAAGTAATCAGCACCTCTTCTCAAGTTACAAGCTAAAGCTGCTGTATTTTACTAAATATTTTTTGAAGGA  
ATGGTCAATCATATTTCTTAGCAGGGAGAAAAATGAACAGGGTATAGAAGTATAAAATATACATGAGAAATGTTAATAATACATAGAACTTAGATAACAAGTCATGTTGCCCTCTCCTTAGG  
CTGGTTAGTTGAAGACTTTGTCACCCATTAGGAGATCTAAGGTTCAAAGATAGGTATAAGCGTGTGCGTGTGTGATTTATGCCTTCGCTCTTTATGGTGCTTGAATGGAAGCATAAAGAAG  
GTGGTTAATACAGTTACATTCTCTTCCACTGTAGGAGTCAGATCTCTAATATGATGTAGGGCACAGGGATAGCTGTCAGATCAGATTCAAACACCTTCAAGTTTGGCATCTTCATAAGCATT  
ACTTTATGCATTTAGTTCAGACATGACCACATGTGCACA ACTATAGTTAAGCTGTCAAGACTGATGTACCGATCATCAATCATAAGGCCAAAAAAGTGGCAACTAAAGGTTTGTCTGCATAT  
CGTACATCCCGTTGTATATCTTTTTAAAAATATACTCTGAGATGCCAGCTCATTCAGATTTCTCACTCATAATGGCGCAAAACGATTCCAGAAAAATCCTCCGCTCTTCTGGCCGTCTCTTCC  
AATCTTTTACCCCGCTTCCCCATCACATCCTAAGGAAACACACAAAA

>comp167691\_c0\_seq5

CGCACGAGCATTCGACATGGATGGTGAGCGATTAAGGGATTTTTTTTTTTTTCTGTATGTGATATGGGTTTTGATTTTCTTTGCTGCTTAATGGGTTTATGGTAATGAACGCAGTTGAGCCAC  
CCGTCGCGCTGAGCATGTTTCGATGAGATCACAAAAGCGTTGATTGGGAAGCAGGTTGTGATGTTTCTCGACTATGACGGCACGCTCTCACCCATCGTTGATGACCCCGACCGCGCCTTT  
ATGTCCGACGCGATGAGAGATGCGGTTAGAGATGTGGCGCGATATTTCCCAACGGCAATTTGTGAGTGGCCGTTGCCGGAACAAGGTCTACAGTTTTGTGAGATTGGCAGAGCTGTACTAT  
GCTGGTAGCCATGGCATGGACATCAAAGTTCAGCTAAGGGACCCAGTTTGAAGAAACCTAATGGCAAAGCCGTTCTGTTTCAACCAGCTAGTAAGTTCTCCCGATGATAGATAAGGTT  
TATAGAACCTTGCTGGAAGCGACCAAATCTACTCTGGGGCCAAGGTGGAGAACAACAAGTTCTGTGTGTCGGTCCACTTTAGATGTGTGGATGAAAAGAGATGGAGAGCTTTAGCCGA  
TCGAGTTAAATCGGTGTTGAAAGAGTACCCAAAGCTACGGCTA ACTCCAGGAAGAAAGGTGCTAGAGATTCGCCCATTAATAAATGGGACAAAAGGGAGGGCCATGGAGTTCTGTAA  
AGTCTCTTGTAAGTTGTAGGACAGGTTT TAGACATATTACATCAAGTCGTTTTTCATAGTTTTGTTTCTTTTTGTCCCAGTTTT

>comp167709\_c0\_seq2

AGAGAGAGGTGGTGAATCTTGGGAGTTTGAAGAAGGCGAACCCCTTCTGTTCTCCTTTATCTAGTTCTTCTTCTTCGAGAAAGACAATCGCAAGGGATTGTTAGTTGGAAGCAAGTTTT  
AGGCTGTAAGCTCTTTCATTCAAGTTCTTTGAGTTGGGAATGAGAGCAAGAAAGGGCTAAATCTTTATTAACAGTTTCTTTGAGCTTGTGGAAGAAAGAAAATATGGAGAGGTGAAATCT  
TGGGATTCAGTGTGTGTGAAGAAGGTGAACCTTTCTGTTCTCCTCTAGCTTGTTCCTCATCTCTAAGAAAATAATATATTGTGATTGTCGGTTGGAAGCCTGTTGGTACCCTAAGATCTT  
GTTCCCTAGCTGAATGCTGGAAGTGCATGATTTTTCTCCTGTATATTAGGAGATTTTTTTTTGTTAATACATGTTGCTACTCTCGGTTTTGGGGTTACATCCCCTGATTCACCCAATTTATTA  
TTTCTGCTACTCCTGATTTAAAGATCTAGTTAGATATTAAGAAATGCACTTGTGGTTCTTTGATTATAAAATCTGGACCAAGGTGGAGATTGTGAGGTGTT

>comp167721\_c0\_seq1

CATTATTTGATTGACTACCACCACCAATTCTGTACAGCTAGAGAAACCCACTTCTCCTTCCAATAAACTTGCTTTGTTATCATCCAAAGAAAAAATTATTAGGTGCGGAGTACGTACCGT  
CCGCATAAATACTGGTACCTAGCGGTACCGAGTGCAGGGGACTACTAGGTACCAAATGATTGTGCGGACGGTTCATCCCGTCCGCACTCCGAGCCTAATAATCTCTCCTTTTTTAGGCTTCAT  
TTGGAACGCTTTTTTTAAAAAATTATTTTTTAAAGCAGCTTTTTAAGTATAAAATATTAATAAAATTGCTTCAGAAAATAGTAAAAAATCGTCTAAACGAAGCCTTAGTGTGGATGTTATGT  
AGTTATTTGGCTTACTCAATGTATGATGTAATTTTTTATTGGTTTCGTTTTTCATATGATAATTATTTTTTCCAA

>comp167727\_c0\_seq3

TCTCAATAGCAGACAAAAGTAACAAAAAATCTGATAGAATTCATACCGAGGAAATGAAAATTTATTGAGATGAACTGACAAAATTTGTACAAAAACATAAATACATAATGTGAGTGCAT  
TCAGACTTTCAAGAACTGGACAGTAATTAATTGGGATTGAAACAAAACATTAACCTAGGTTTATTTTTCTCCTCTGTAGCCCCAATTAGGATTCATCCAGAGTATGAGGAATTTACAGTC  
CTCAGAACCCTCAAACAGCAGCAGATCATTGAAAAAAGCATTCCAATTTCAATCTTTGTTCCAGGTTCTACCAATGAAAACACCAAAAAACAAAAGGGGGCCCCAAAATATCATGA  
AAAAAAGT

>comp167727\_c0\_seq9

AAGATAATGTGTATGATACAAGTACTTTCTCCTGGAATTAGTTCTAGTATTTATGTTTAGGATAACTCATAACAACAAAACAACATCAAGCCTTAATTCCAATACGTAGGCTCAAGATATG  
ATAGGACTAGAAAATAAAATTTCTTTATGAAAAGGACTAATAAGTATTTTCAAATAACATGACCAACAATAAATATAGTTAAACTCTAGAATCTTAAGGAAATTCATCCTTAATAAAA  
AAAATACTACCATGTGTTTAGTTTTACTGGGTTTATAAATTTCCCTATTTTTTTTTTTCCCATTTCTCGTGAAGTTTGAATATCAATCCGCCTAAAGTCTGGCAATGTTCTTTTTTCGTTAT  
TTTTTCTTGCAGCTCTTGAAGGTGTGACTTGTGAGTTGTAGTTCAAGGAAAATACAAGAAAAGTGTAGAAAAGTGGTGTATATACCCTCCAAACCCGGCTCTCATGTCCATAACATTACGAA  
TGTTCATTTTCTTCCAGTGGAAAATACGGATATAGCCTTCAACGATATCATTCCAGAATCTTGTTCGCCCATAAAAAGTTCATTTTTTGAATATAAGCATCCATCTGTACACCTTGAAGTC  
TCAATGGTGGCTCATGCAAGCGAGCAGGCCATGCTGTAATATTGGCTCCAGAGGCATCCTCAAGGAGTTGGCTGATACATGCTTTGAGATTAACATAACCAGACACTATTTGAATCATCTTCT  
GGACCACAAAGTGGAGTTGGACTTCAGGACTGCGATTAAGATAGCATGTGTTGTTCAAAGGCTTCCTCCATATAGCAAGATACCCCTTTTTCTTACCAGCTCCCAACAAATACGAGAA  
GTAAGGTTCTCCATCTCTTTCCATGTTTCTTGCTGAGCTTCTTCATGTTTATAAACAGGTTGTGCTGCCATGCAAAGTATCCTCCAGCTCTAAGCATTGCGTTTCGTTCAAGAAGCAAAT  
TCCATCATCACGAGTCCAATTTATTCGGCATCTTGAGCAATGGAGTAGATCAAAGGCTTGGCTTGGATACAGTAAGCGTCGAGTTGCAAAAAGCTGCCACCATCGCAGGCACACCACGTTT  
AAGAGCAAACCTGAATTTGATTCTCATGTAAGTCTTTTGGAGCTATTGACATGGTAATGACATCTCGTGAAAGCAAGAAAGCACCAAACTTGCTACCCACACCCAACATCCAAGACAAC  
TCTTGTACGATTTCCAAATGCAATGCCTGGAACCATCTCAGATATCTGGTCTAAATAACTGTCTGCTCCATGTATAAATTGGGTGCCACCTCCAGGAAATTTGAATTTTTCTTGTCCCTTTT  
TATCCAATTTGCCCTCCTTTGTCCTCAACTAAGCGCGTGTGTGGCACATTACTAAACCACACCTCGTCTCTGCTTATGGGCCAAGGGATCGGCTCCCTGTAGCCCTTCGGTGCCGGAAC  
AGGCAATTCAAACTCTGCTCCTTCGCTGGGCAGTGCCGCTCAAATCTCTCCCTCTCTCCGTAGAATTCAGTTTCTTGATCTCCTCCTCGTTATCAAGACAAGGAATGTACTCCCTCATCT  
CTCCGGGCAAAGCCCAAACCTTCTGGATTCTAACCTAGTCTCATCCTTCTTCTCTATCTCATTATTCGTCTCGTTACCCGCCAAGATGGCGGTTCCCTCCTCCTCCACCAGATCGGAATCGA  
ATGATCCGGCATCAAAGTCCCTCCCGCATTGCCCCGTTCTCGTCCACGATCCCAACGTTCTTCGGAACCACCGGCGCGGGAGCTCTGGAAGCGCATCAAGCAGCGGATCGGCCGCA

TTGAGAGAGGACTCGTTGGAAACTGGGGTGGTAATATCGCTGGTGCCTTTGAGGTTGGGAGAGAGGGTAACAGATAGGTTTCGCATTGCCGTAGCCGGCGGTAGGATTGACGTTACTGTA  
AAAGATAAGTTGGGGATACATAGAGCCATCGTTCCAGTTACGGCCGAGGTAGAAGGAGGCGATGCACGCTAGGAACAAGAAGGAGATCTTGGTGAAGGAGGAGACTTGAAGGGATCG  
CCAAGCTCGCCTTTCATTGTTTGGAAAGTGCCACTGCTCAAAACGAACCTTAATAGAGGCCTTCGCGCGGAGACCTGAAGGTTCGGTGGCCAGCCTGTTTTATAAAGGAAATAGC

>comp167738\_c0\_seq5

CCTCCTAATTTTTAAATAAAACAAAATTTGAATGTTTATTGAAGGGGGAAAAAAAACCTTTATTATTGTCCAAACAATCAATAAGCAAATAAATTATAAATAAACATCTAAGATCACCACAAT  
ATTCCATGTAGAATTCCATGGCAAAGCATGATAATGCTCATAAGGCTGGTTCCTAACAAATACAGTAATTGCTCAATGTGGTGGTGCTGATAAGGAAGGAGCATTAGCCAATCTGGATCTCA  
ATTCCTTTCTCAATATCTTCCCTGAAGGTGATTTTGGGATGGCATGAACAAAAGTACACTTTATGCAATCTTTTGTAGAGCACCACCTGTTTGGCTATGAACCTTTTACAGTTTCTTCAGTGA  
TTTCAGTGTCTTTGGATCGAACAAATGAAAACAACAGGAACCTTACCAGCTACTTCATCATTTTTGCGGGACAACAGCAGCATCAGCAATGAATGGATGGCTTAGTAGAAGGGCTTCGAGTT  
CTGCTGGAGGCACCTGAAAGCCTTTAAATTTGATTAGCTCTTTAACCCGATCAACAATATAAATCTCATCATCATCGTCCACGTAGCCTACGTGCGCTGTGTGTAGCCAACCCTCCACGTCT  
ATTGCTGCTAACGTGGCTTCCGGGTCATTTAGATAACCTTTCATGATTTGAGCACCTCGGATGCAAATCTCGCCAGACTTGTTCCTTCCAAGGGAGAATCCAGTTTCAGTGTCTATCACTTT  
GAGCTTAGCGTTGCGAACTACAGTGCCGAGGAGCCGACTTCGCTCCGTCGGGTGCTTGGCGAAGGCCGGGCACATCGATATCACCGGCCCGCCTCAGTCATCCATAGCCCTGGC  
CGAAGACGGCGTGCGGAAGCCGGCGACATAGGGCGGTCTGGAGGTCTTCCCGAGCGGCGCCGCCCGATATTACAATTCTTATAGAATTCAAATCAAAGCTCTCCAGCAGGTGACTTT  
TCGCCAAAGCTAACACTAACGGCGGCACCACCGCCGTCGCCGTCACCTTATACTTCTGTATCAATCTCAGCATTGCTTTAATCTCAAACCTTCGGCATTGTCACAACCGCCGCACCCGATCT  
CAGCGAACAAAGCAAAGTAAAATTGAGAGAAAATATATGAAACAGGGGAAGAACACAGAGCACAACGTCATCACTTTTCAGAAAAAGGTTTCGGATTTTCTCCATCTACTTGTTCGCGGA  
TGCTCGTTATCATGCTCCGGTGAGTTAACATCACCCCTTTCGGCAGACCCGTCGTTCCGGACGAGAAAGGAAGCGCCACCGTGTGTCGCGGGGATATAGAATTTAGTTCAGCAAGTTCAG  
ACTCGTTGGCGTCAGAGAGAACGGTGAATGGAAGGCAGGATTTTTCCGGCGGTGGGTTCATCGACGGTGATCACCGTTGTTCCAGTTTGGAGCTTATCGACGAAGATGGAGTGGGTGATG  
ATGAGTTTAGCCCCGGAGGTTTTGAATTGCTTGTGAATTTCCGCTGGAGTGCAGAATGGATTGGCCGCGGTGGCGGGCGGCGGAGGAAAGAGGTGCCCATGAAGGCGAAGGCGAATTC  
AGGGCAGTTTTGGAGGAGGAGGATTACATCACCTTGTTTAAATGCCGAGGGAGGAGAGGCGGCGGCTGTGCGGCGGGAGAGAAGGTGGGTTTTGGCGAAGGTATATACTCGGCCG  
GAGGTGCCCCGAAATGAGACAGGGGTTGTGCGCGAAGTCTGAGAGTTTTTCGAAGCAGTAGGTGTGCAGCGGTAGGTGGTTGGAGATGGGAATGTCGGGTAGTCTTGACCGGAATATGA  
CGTCTCCGGCGGTGATGACGGCGGGGCTGACGGGAAATTATCATGCTGAGGGGAGGAGACGCTGATCATGGCTTCTCTGTTTTTTTTTCTCTCTTTAATTAGGCTTAGGCGTTGTGACGG  
AGCTCTGATTAAGCTCTCTGATCCGCTAAGCCACATTTTATGGGCATCTACGAGCGTATGCCGTTTCCGCCATTTAATTGAAGCAAAAAAGTACGACGACGACAATATTAGCGTGCACGCC  
ATTTTTTACCTTCTTAAAAATATCTAAAATGGAGTTCCCAACCGAGCAGCACTACACCAAAATAGAATTTT

>comp167775\_c1\_seq2

CTGCAAAACAACACAACCGATGATCAGTGAATGTTAAAGGATCTAGTTCCTTTTAGGGCATAGGGCATCTTCAACCGAACTACAAACGCTTAAATGGCGTGCCTCGTGAGCTCCAGCTGAA  
CGATAAGAAATTACGCTATTTGATTGTGGGTGAACAGTGGGACGTCATTATTGGCGTTGCACTGTTTCATCTTTGTTATTTTTTTTTTATCTATTCTAAACGTGCAAAAGAAGAG  
AATCACAATGGAGTTCGATTGGAAAATGAATCACAGCATTTTGATTTGAAGTGAAAAATAAGATTTTGGGTTGGAGATAGCCCTTACTAGCTAGTTCGGGTGAAATGAGGATTAGGTACCTT  
TCTTGACGAGGTGAAAGGCT

>comp167784\_c1\_seq12

ATATTATTATTGGCAAAGTAATACATGCTGATTTTATTGTTTTGGGGCTTCCAAAGCGTGTTTTGGCTCTCTAAGTCGTTTTGGAGTAAATAGTGACCTTGATATTGAATCGTGTATGGTTGTTT  
CTCTTCATTGGCACTTTGAACGACAAGCATTGGGGTAAACTATGAATGGTGTTAATTGTATCATGGTGCACCGATTTTCATAAGCATGTGGATGAGTAAAAATTATTGGAGGTCTCTCTCTC  
TAAATTCATGTTGCGTTAAACGTTCTTATGTATTGTTTCATAAAGCAACAAGGTGGAAGGTATTTAGAGTAATTTATCTATTTAGGTGTATAGTTTGCTACTTGGATTATGTATATAACGCTACG



TTGATCTTTGCCTTTTTTTTAGTCTTTATATATGCCATCTTTTAAGACTTTTGTAGAAAGAATTGATATTCATTTTGATATGTGAGGTGCATAATTTCTTGCATTAATGGGGTAATATTAGAAT  
GTGCTCGAGACGAGTTTTCTCTTTGTTGAATTTCTACGATCTTTGTTAAATTTCTAGTTTCTTTGCAATGCTAATAGAATGATAAAGGTTAATGTCAATTGCATGCAATCTCTTTTTTTTATG  
TGAGCGAGGCCTAATGTTGGAGGCTAGTTTATGTCATAAAGTGAATTTTCTCCGTTAGCATATAAGGTAGCATGCATTCGTGGATTTCAATGGTTTTCTGTCCGATTTGTGTTAGAAGGG  
CCGAATAGTGGTTTTCTTTTCTTTGCTTATGACGCTTTGTTAGGAGAGTGAAGTGAAGTGGAAATGTTTTATGGAATGTGTTGCATTAAGAGATTTTATGAATGGGTCCATCATTGGAGGA  
TTTTGTGAGTCGTTTTGTGTCGCTAATTTGAGAAGTTGCTTTTGATTGAAAGAAGTCTTGATTGCTTTGTTTATAATAATTTGTTAGCGGTTTTGGATTTAATCTGAAAGCTTTTTATACGACG  
TTTTTTTTATGAAAGCTCTACAATGAGGGGTTATGTACAACCTCCTTGTGGAGAGCTTCGTGTTTTTCATACCCCACTCCAAATGAGAGGAGGGGCACTTGATTAGTGGGTCTTTGGGTA  
GGATTTTGTGTCAAAATATGAAGTCTTGGTAAAAGATTTTGTAGAATTTTGTGTCAAAACAACAAAATGAAAGAGAAAGAGATTTTAGTAGATAACTTTTGGGGGTTTTGTAGGAGTTC  
ATGTAACGGTTCCTATAAATCATTGAGGCTATAATTTGTAAGTTAAGCTTATGTAGCAAGATCCCTTAGTGTCTTTCAAGAATAACTAGTGCTGTCTTATTAGAATTAGAGTTTGTCTTAA  
TATTTCTCCTAAAAGAATGAGTTTAGGAGATTTGAAATTTGGGAAATTTATGTTGATAAATGTTTAGTGTCTTTAATAGCTTCTTTGATTAGTCTCTACTTGCTTAGATTTTCTCCTCTTT  
AGTATTTATCCTATAAAAAAATGTTGGGTAAACTTAAGCGTATAAGATTTCTAGATTTTAGGTTGAGCTTAGAGGTTGGTTTTCCCTTAGTTGTTGCAAGCTTGGTTTAGAAAAGTCTTTG  
TGGGTAGAAGTGTCAAAATATCAAGCGCCTCATTGGAGTGGGAACAGTA

>comp167788\_c0\_seq4

CACACACGAAAGAAAAAATTATAGGAAATATAAGTCCATTAATAGTATTCTTTATATCAACTGATAATCTTCAAAACGTTTTCCATCGTTAAAACCTTGACATTAGGCTATTGAGATGAAAATA  
GATGAAAAGATAATTAATCCATTGGCAAAGCAGTGTAGAGAAGAATTAGGTAAGATAACATATTGAAACCCACAATATAAAAAGGAATAAAGTAAAAAAGAAAAAGTAAAAGTGGT  
AGGACTGTCTGCGTTTGAATACATTAGGTGAGATAACAACGTTTCATCTCAATTGGTGTGATGATTTTATCTGCTGACATGTTTTCTACCTTGAAAAAGAGATTTGCATAGGACTGACTG  
GTTTTGGAATCTTTTTCTCATTCTTAGAATCATTCTCTTTGATGAGGGGTTCTTAGCCATGGGGAATGTGAGTGGTCTGCTTGACTTTCATGCCTTTCATTTCCCTAATTTTTTTTCATTC  
ATTTTTGTTTTCAGGTGGTGCATTGTTCTTATCTTGGTGGGCTCTCATTGCAATATAAGAAATTGAAAGAGAATAAATGATAAAGGAATTGAATTAAGCTTAAACCCACTTATTGGCTGA  
GAAGTTGAGTGAAGAAGTAATGTACCCATGAGATAAACAAAGTAACCTTTCTGCTTTATCCCCAAAACCGACCAAAGCCTAGTCTGCTAAGATTTCAATTTGTCCTTGATCAACAATATG  
TAAGAATTGAAAATTCATAATGCAGAATAAGGTAATGTTTAAATTTCAAAGCTCCATGCGAGTAAAAACCCAAAAGTAAACTACAATTCTCAAACCAAAAAGAAAATTTTCGGTTAAACATA  
AAAGAATTGATCACTTTGAAAAAGGAAATTACACAACGATAAGAACCCAATAAAGAAGAAATTTTATACTGGCACTCATTGGACATGTAATCCTGAAGAATACTCTGCTAAAATGAAGC  
ATTAAGAAAGATTCTTCTAAGGTTTCTGTTTCTTTAGTTCTTTAAGACAATTTTGTAAATCAATGAGTCAAAATTTACAATTTGTAATGAAAATAGCTGTTGATTCCAAAGCATCATATTT  
TTAGCTATTTTATTGGCACGATCCAACAAAAAATACTGTTAGTCAAATCTATGAAAACTGACCAAGATTGCATTACGGCAGGAATAAATAAAAAAATCCTACCTGAGAAAACTTTTATA  
GCTTCTAATCTAATTAAGCTTTATCTCAAATTAAGCCCTTCTAGTGTACTAATTTGATTTTTCTTATGATCAAATGCAAATGCTGCCCACTTCTTCTTTAAGAAGCTATGGATATGAAGGC  
TGGCTTGGCAATGACCACTGACACTTGGTGGACCACAATGATAATAACGAGTAATATGAAACTTAGTGGTTATCCACTTAGCATTACCCTTTTTAAATTTCTTCTTCTTCCCCGGTCAG  
CTTGTGCATAACAATGATAACATAACAATCTCTATTTGAACGGTTTCTAAGAAAGTTCAAAAAGTAAAGAAAATTGTGAAATAGCTTGTATAACAAGGAATTACATCGAGGAAGAAA  
AGGTAAAGAAATTTATCACCTCTATTATACAAACAAGATTTGATAAACAGAAAGTTCATTGCAATGCACAGAAGAAGAGGTCGATTACAGCAAAACCATAAAAAATCCTGAGGGTATATTTGC  
TATGAAGATTTATACATGATTAAGGTTAGATTAATGCCGAATTCAA

>comp167802\_c0\_seq4

TACTCTTCCAAATCTTAAAGTAAATATTATGTCATCTATTGCAATTATATATTACCAAGCAAAGATACAGAATTAATCTCCAAATCATGCACCCTCTATGATTAAGTTTTTTTATCTATTTCAATTT  
TATCCCTAACATCTCCCTTTAAGATGTAGCTATGAGTAACAAACTAGAATTAACAATCCTGTGCTTACTACATACACATTTTCACTGTTCAAATTAGAAAATCTTGATAAATAAAATACCA  
CAAATATTTGACTTGGTTCATATAAAAAACATACATAGTGATTCAACAAATAAAATAGACTTTACTACAAACAAACATAGCAATATGAAATCCAAAATTAATAAGCAAATTTCAAACAAACA

CAAAGATAAAAGTCTTCAAGCATCCATGCGGATGATACAGCGGAGACCTTCCCCCTGAAGCATATAGTCGAAGGCCTTGTTAATCTCAGAAAAAGGTACTTCATGAGTTATGAACTTCTCC  
AGCTCCAGCTCCTTGTTTCATGTACTTCTCAACGACCGAAGGGAGATCAGAGCGAGGCTTGTAGTTTCCAAAGAAAGTTCCTTGAGATTCTTTTCGTTGAGGAGTTTCAAGGGGTGGGT  
CTGGAAGACGGCATCTTTGTTAGGCACGCCAACCAAAACAGCAACACCCCATCCATCATGAACACATTCAAATGCAGATATCATGGCACCAATATCCCAGTGCACCTCAATGCTTCGATCA  
ACTCTCCACCAGTCATCTCAGCAAGCACCTTGTACTGGTCTATCATAGTCTTTTGGATTGACAAATTCATTGACACCAAATTTCTTTGCTTCATTGAACCTCTTAGGATTACATCAAC  
GCCAATAATTTGAGGCTCCCGCAATCTAGCTCCCTCTGCAGCAGCAAGACCTACGGCTCCCAAGCCAAACACAGCAACAGTTGAACCCCTTTGGTGGTTTTGCAACATTCAATGTAGC  
ACCAAGGCCAGTTGAGATGCCACAATAAGAACACAAACTTTATCAAGTGGTGCCTCAGGATTGATCTTAGCAACGCAACCAGAATGAACTACAGTGTACTACTGAAAGTTGAGGTTT  
CAAGAAAATGATAGACAGGCTTTCATTAATCGAGAACCTTGATTACCATCATTAAATCATAACGCCCTCTCTGTGTGATTCTCAGTAGGGAGCACAAATGCTCTCTCAGACTTGCAA  
TGTTACACTCTTTGCAATTCAGTAAGGACTGATCTCCAGGAGCAAGATCCGTCACGCCCTCGCCAATGCTCTCAACAATTCCTCCCGCTTACATGACCGAAGATCCCT  
GGAAAGACCGGCTCTGGCCCTTGGCTTCCCAGAAAGTAAACATCAGTGTGGCAAAGAGAAGTGAAAAGGATCTTCAAGCGAACCTCCATTGCCTGAGGAGGCGCTACCTCCACCTCCT  
CAATCACAAGCGGCTTCCCTGCCTCCCATGCCACGGCAGCTCTGCATTTGATAACTTGGCCAGCTTTGCTCGCCATACCTCCCAACTTCTTCTTATCTTCTTCTTCTTCTTCTTCTT  
CTACAAATGATGTGCATAGCTCGGATCTTGAGCTATGTATTTA

>comp167814\_c0\_seq1

AAAAACGATAAAAAAAGGATATTAAGGAAAATAATTAAGCAGAAATTTTGTGGAGATGGATGATATTGAGTTAGGATTTTGTGTCATAAAAAGATGAGCACAAAACCTGGCCATTGAA  
ACAACCTTGCAGCTTGCCCTTGCTTAATGATAATTCAGATATAAGCCTATGGATCTTAATAAAATTGGGAATAATGAAATTATAATTTTTTTTTTAAATCAATTGAGGATAAAATGGGAATG  
TAACTCGTTTTAAATTACACGAGCCTAGTTTCGAGCTCTAGATTTGGCTCGCGAGTCGAGCTCGAGTCAAGCTTGCATTGAGTTCAACTCGACTCATTACACCCCTACCGCCATATAAATAA  
AACTCCATTGGTTGGGGCTATTATTAAGACAAGCCAATCAATTAATTTTCATTACAGAAACAAGCGATATCGTCTCTCGACCACTCTTCAATAAATAACCTTCTCCGCCTTCCCTTCCAT  
CAACCACCTCTCCCTCTCCTTTAGTTTCTCTTCTTCTTCTTCTTCCAAACCTCCATAATCAATTAATCAATGGCGGTCTCAAAAACCTCACCTTTTACTCATCCCTTACCCTCTTCAAG  
GCCACATCATCCCCGCCGTCCACCTCTCCCTCAAACCTCGCCGTGCTGGCTTCTCCATAACCTTCGTAAACACCGAAAACCGTTCACCACCGTCTCCTAACTAATGGGACCGCTCGCGGCG  
ATATCTTCGCCGGCGCTAGGGCCGCGGCTTTGATATACGTTACAAGTTGGTCAGCGACGGTCTTCCGGTCAGCTTCGACCGCTCGTTATATCACGATGAGTTTATGGAAAACTGCTTCAT  
GGTTCACCGGAACGTGGAGGTGCTCGCCCGGCTTTGCCGTGCTGACCGGTCTGATTGCAGATACTTTCTTTGTTTGGCCTGCCACGCTCGCCCGATCTCTTGAATACCGTACGTCT  
CTTCTGACGGAACCTGCCCTTGTGTTTTCTCTGTATTATCACATGGATCTTCTCCGGGAAAATGGCCATTTTGCCTGCGGATGATAATCGAAAAGATACGATCACCTATTTACCGGGGGT  
ACGGCAATCGAACCGGTGATCTAATGTCTACCTTCAAGACACCGACACCTCGACCGTGGTTCACCAATCATCTACAAAGCCTTCGACGAAGCTCACCGAGCCGATTTTCGTGCTCTGC  
AACACGGTCCAAGAGCTCGAACCAACACAATCTCCGCCATCCAGAAGAAAAAACCGTTCACGCCGTGGCCCAATTTCCCGACCGCGTGGCCGCACCACCGTCTGTGCCGACGA  
GCCTCTGGACCGAGTCGGACTGTTCCAATGGCTGAACGCTCGACCGCTGGCTCAGTTCTCTACATCTCCTTCGGAAGCTACGCGCACGTGGAGAGGAAGGAGCTGGAGGAGATCGC  
GCACGGGTGGCGTTAAGCGAGGTGAGCTTCGTCTGGGTGCTTCGACCGGATGTGGTGAAGGAGCGGATCCGTTGCCGGTGGGGTTACGGGAGGAGACGGCCGGAAGAGG  
GATTGTGGTTCAATGGTGCTGTCAGACGGAGGTTTTGGGGAATCCGGCGGTGGGAGGGTTTCTGACGCATTGTGGATGGAATTCGGTGTGGAGAGTGTGTGGAATGGAGTTCCGATGAT  
CTGTTACCTTTGCTGACGGATCAGTTTACGAATAGGAAGTTGGTGGTGGGGATTGGAAGGTTGGGGAGGGTTTTAATGGCGGAAGGGGAGGTGTGAGGAGGGAGGAGGTGGGGAAG  
AAGATTGAGGGGTGATGAAGGGGAAGGAAGGGGAGAGGATGAGGAGGAATTGAAGAAGGTGAGGGGAGTTTTACGGGCGGCGGCGGCGGGTGTCTCGGGGCGGAATTTGA  
GCGATTACGAGGATCTGAAGGGTTGGGGACGAAGGTCTGAGGACACGTGGATCAGATGTGTGGTGGGATTGGATCGGGTTGTTGCGTGGGTGTGCGAGAGAATGAGAGGGCTT  
TTCTTGCAAGGCCATAAAATAATTTTTTTGTGCGGAAAATGTTTGGCAGGGATGACGTGGCAAATCTGGGCCGAGGATAAGAGGTTACGATTGCAATCAAATACTGTTTCGCTGT  
CATCTTTGATTGATAGTTTTTATTAGCAATTAAGAAATTTGGATTTAAGACTTTGATATTTAATTGATCTAAATATTCAAAA

>comp167820\_c0\_seq2

GCGTTCGGTTGGAGATGACCTAAGTCTTTGCCATGTCAAAAATGGAAAATAAATCGATAGTGTATTACAAGAGAAAAAAGTGAAAAAGAGGAAATGATGAGAAATTGAAATATATAGGAA  
GAAAACGCAAGTTGCTGTCCAACAACCTATCATCTCAATGCTGTCAACCATTTCCATATCCATTAACCTATACTATTACACCATGAAAGATGAGAGAAAACAAAGAAAGGGAAAGATCTGATT  
ATATTTCTTAGTGAATCATTTCAGTCATTGAAATAGTTAAATAATAGCACCGCCATACAAGATGACTATCGTTCAGTCTTCACCGTTCTGCGAACGGGATCGCAATAGCATCCAAATCGA  
GAAAGTCCCAACACAAACTATAAACGGGTAATGCTAATCCATGCACTAGATGGAAATGGGGTAGAATAGTTCTTAGGGCTGCGATTTCCATAGACAAAATAAAAACTTTATGAAGATGAAA  
TTCCACAGTAATCCAGGTTCGGTACAGATCCTAACCTAGAAAACAATTTTGATCAAGGATTTGAGACACAGATCCTCGGAATCCATGAAAAAGGAAAAT

>comp167820\_c2\_seq1

TGGCTGTGGAAACAAACATTCTGCATGCAATAGGATTAACAAAAGAAACCATATGAAATTCAGCAAATTTGTAGATTGTTTATGAACAACAAATTCAAATTTAACATCTTAAAGGAAAAAG  
CTTGTGCAAGTTTATTTCTAAGATTTCTGAACAAAATCAGATCACAATGGGTTTTAGAATCATGGAATTTACTTTGAGATGAGTGTAGTATATGATTAACCTTGCCTCATCTCAAAGCAAAT  
CGATCAAATTTGGGTCATACTAGTGCAAAATTTGAAGGCATTTGGATGGTACTAGAACCTCAATATAAATAATATTTCATGTTATGAGACAAAACAAACCATAAATCATAAAATTTATCAACATT  
GTATAGAACTGATATCTTTATGTCTAAACAAGGTTTTCTTATTCAAGTGAATCTCAATCAGTCAATGCAAATAAGAAGGAAATAGTGTTCTCATCAACTTGTTCAAAAAATATCAAATTA  
ATAGCTTATGTTTTTTTCATGAAGTGAGTATAGCATAT

>comp167893\_c1\_seq11

CCAATGCATTCTACATGGACCCCTTAACGAGACAGTCTACATGAAGCAACCAGTCGGCTTCACTGATTTACAATTTCCCAATCATATCTGCCTTTTGAAAAGACTATTTATGGCCTTAAGC  
AAGCTCCTAGACAGTGGTTCTCCACTTTTTTCATCATATCTGCATCAACATGGCTTTCGGACCAGCACTGCCGATTCGTCCTTATTGCTGTTTCAGCACAACTCTGTTCAAATATACATCTTAG  
TGTTCAAATATACATCTTAGTGTATGTAGATGATATTTGATTATAGGAAATTC AACGTCTGAAATTTGACAAACTACTAGCTGCTTTACATGTCAAATTTCCATGCGCAACCTTGGCCGATT  
GCATCACTTTCTGGGCTTACAAGTAAGCTATAACAACCTCACGGCATTCACTTGGCTCATTCTAAATATGCCACAAATTTGCTTCATCGGGCTGCAATGGACAATTGCATGCAAACCTTTGCTT  
ACACCAACCAATTTTGCTGCTATCTCCTCAGATGATACTCCATATGATAACCCAGAGCATTACTGACAACTCACATAAGTTCTACAATACCTGATTATTATACGTCCCGATCTCTCATATACAG  
TCAATTTTCTATGCCAACATATGCACACCCCTCTTCAAATACACTATAAGCTCTTAAAACAGGTAAGGCAATGTCAAAGGCACTATCTCTCTTTGGCTACCCATTACTTCATCAACACTTG  
TTCTTCAAGGTTTTGCAGATTGAGATTGGGCCACTGATCCCATCACTCGTCGCTCGGTTACTGGCTACTGTGCCTTTTATAGGCACTAATCTAATCTCTTGACTGTAAAAAAACAAACGTCT  
GTAGCAGGTTCCATCCACGAAAGCTAAATATAGAGCTCTTTCCACTGCTGCGTGTGATCTAATTTGGCTAAGACGTCTTCTCTCTGAATTCCAAATTCAGCCGATTGAGCCTACCAACCTTTA  
TTCTGATAATGTTTATGCTCTTGCTTTAGCTAATAACCAATTTTTCATGCCCGAACGAAATATATAGAGATTGATTTTCACTTTATACTGGACTGCATTTGGGATCGTCATATACAAGTTCTAC  
ATATCAGCTCACGATATCAGCCAGCTGATCTTTTACCAAGGCTTTGAGTGTCTCAAAGGCATCTTTATCTATGTGACAAGCTAACACTACAGCCCTCTACTGTTAGCTTGAGGAGAGCTGAT  
AAAGAGATTTGATAAAGCCCTCTTTCTTATACATAAGTCGGCTTACCTATCCATTTGCCTGCTCCACTTCTCTGTTATTCGGCTGTGCTTGTTTCATCTTACCCTTCATTTCTGCACTTT  
GATCTCTGCCGTTAGTTGCTAGATAACTGGCTCTTTATATTGAACAGATGTATTGCCTGCTAATGTTATGGAAGATGAACAGTAACCTTACTCTGTGCTTT

>comp167898\_c1\_seq11

TTTTACTGCTTTCTAAAACAATTTTCTAGTGCAAAAATTTCTTGAACCTTGAAATTTTTATGCTTAAAAATATTAAGAAAACCGACCCAAACAAATCCTTTAAGCTTTCATGTCCCATAGCCCA  
TGGAGAGGAGATGAGCCACAGGATCTCGTTCCAAGTGTGAGGCACACCAGGAAGACACCAGTGGCTACAATCCTGTATTGCATCGACGGCTCTTGTGGGCTGCTCCATGTACTTGAA  
GGATGGCCGTCCGATCTTTGCTCGGTGAGATAAGTTATGTTCAAGAATCTCACCTTCTATTTTCCCTTCTTCTTATCACCTCAGTTATAACTCCATTGCTCCATGGCTCTGACCTTAGC  
TTTTTCTCTTCCGTGCTGGGGATGGTTTCATTGTCGAGCTGCCGCTGTGTCCCAGGTGCCATTGCTTTTTCAGGGTCTTATCGTCATTCCACCAATGTCCAGCATTAAAGACAACAACATC  
GGCGCCGACCCACTTCTTAGATTCCCAATGAGGCATATCAACATGAATAGCTTTGTGGACAATGGTAGGAGAGTTTGGTGGAGGTCTACCAATAGCCACAAGGAAAGGAGCCCTATAGTA

CTCAATGGTTAGGTTATAGTCCTTGAAGAAGATGATAAGGCTTCCTTTGTGCTTTGAGATTGGGTTCCCATATTTCTCATAAACTCTACTTTGATTTGCAATGCCTATCCATAACATGCAAAG  
TAGAGATTCCCATTGATTTCTCCCTATTGAATCCCCACAAATAAAAATCCTCTTATTTTGTCTTTTTCAAGCATCAAGGTAGCATTGAACCTTGGCAAATTGCATCTATGAGGCTTCCATCG  
CCATTGAAGATAGTTTATATCTTTCTTCCATTGAAGCGACAGAGAAAACCAGGATCAATGAACGGGCATTCTTCTGAATAATACTGATCAGAGCCTTCATTA AAAACCCATTTTCCATCTG  
AATAATCACAGTCGTCCGAGCGGCCATTAGAGAGCTTAGGGAAGGTGAAGGGAAAGGAGAGGAGAGAGAATGTATGGTTGATGGTGAAGAGAGAGAGAAGAAGGAAGAGAGAG  
>comp167898\_c1\_seq9

TTTTACTGCTTTCTAAAACAATTTTCTAGTGCAAAAATTTCTTGAACCTGAAATTTTTATGCTTAAAAATATTAAGAAAACCGACCCAAACAAATCCTTTAAGCTTTCATGTCCCATAGCCCA  
TGGAGAGGAGATGAGCCCACAGGATCTCGTTCCAAGTGTGTCAGGCACACCAGGAAGACACCAGTGGCTACAATCCTGTATTGCATCGACGGCTCTTGTGGGCTGCTCCATGTACTTGAA  
GGATGGCCGTCGGATCTTTGCTCGGTGAGATAAGTTATGTTCAAGAATCTCACCTTCTTATTTTCCCTTCCCTTCTTCATCACCTCAGTTATAACTCCATTGCTCCATGGCTCTGACCTTAGC  
TTTTTCTCTTCGGTGTGGGGATGGTTTCATTGTCGCAGCTGCCGCCTGTGTCCCAGGTGCCATTGCTGTAGTGAGCTTGAGAGAAGCTTCTGAAGAAGACGAAGCTCTTTCTGTGAAGG  
AGATTCTGATCTGCCATTGCTTTATGTTTCGAATAGCTTTACGATAAGCTTCCTTAACGTCCATTGTAACATTTATTTTGTCCCAATTTGAAAATAATTTCCACTTTTCAGGGTCTTATCGTC  
ATTCCACCAATGTCCAGCATTAAAGACAACAACATCGGCGCCGACCCACTTCTTAGATTCCCAATGAGGCATATCAACATGAATAGCTTTGTGGACAATGGTAGGAGAGTTTGGTGGAGG  
TCTACCAATAGCCACAAGGAAAGGAGCCCTATAGTACTCAATGGTTAGGTTATAGTCCTTGAAGAAGATGATAAGGCTTCCTTTGTGCTTTGAGATTGGGTTCCCATATTTCTCATAAACTC  
TACTTTGATTTGCAATGCCTATCCATAACATGCAAAAGTAGAGATTCCCATTGATTTCTCCCTATTGAATCCCCACAAATAAAAATCCTCTTATTTTGTCTTTTTCAAGCATCAAGGTAGCATT  
GAACCTTGGCAAATTGCATCTATGAGGCTTCCATCGCCATTGAAGATAGTTTATATCTTTCTTCCATTGAAGCGACAGAGAAAACCAGGATCAATGAACGGGCATTCTTCTGAATAATACT  
GATCAGAGCCTTCATTA AAAACCCATTTTCCATCTGAATAATCACAGTCGTCCGAGCGGCCATTAGAGAGCTTAGGGAAGGTGAAGGGAAAGGAGAGGAGAGAGAATGTATGGTTGATG  
GTGAAGAGAGAGAGAAGAAGGAAGAGAGAGAG  
>comp167920\_c1\_seq10

TAAGAAAGTTATCCCAAACAAAATATTTTACTAGAAACTACAAAATAGGGCAATGGAGATCTACCAAACAGTTAAACAAGGCTATGATATTGAAACATGAATGCACGATTAATCAAATCC  
ACAGTATATCATAAGTAGAAGAAAATGCAGTTCATGCAAAGCTAAGATCATGAGACTCATAAACTATTTTCTGCTTATTTGGCTGACTGTGCTGCTGATTTGCCATTGAGATGGTGTGCTGTCG  
TAGACGCCGCTAAGATCTTCTGCAACAAAACCTGCACCGTTGATTCTCATCTCGAATTCGTGCTGTGATAATGTCATTCAGCAGAAAAATTCATTCTCTTGTATGTCATATTAATTGAGAA  
CTGCAAGAAGAGCATTAACTAACCAGTTCATGCAGTAGGGCTGTATATATTTCCCTGGTGTCTTGAGCTGTAAAGAACATGATTGATTTGGTGAACATGTAATAGGAATTGATGACTTGC  
AAGCTTCATATAGAAATAAGTCATGATTTCAATTCAATTAACATATAGAAATATTTAGAAGGAACACAAGTTAAAAATACTATTAGGCATGAAGGTCAACAAAGCGCTCCATTGTTTTATT  
CAACTAATATTGATCTTATTTGCATAGGCGGATGCACGGTCAAGTGAGGGGGTGAGCATTAGGTGGGCAAATGCTCGCACTGAAAAAAAAAAAAAAAAAAGTTCATTAGAGAGGGGCTTT  
TTGCCCTAAATTTATTAATCAAGCGTCAGTTTGGCCATCCCGCCTCCCATCATTTCGAGAAAGCACAGTAGAAGGCTCGAAGCCCTCTCGTTCCATCATTTCGCAACTCGCAAGCCCAGGTT  
GCTTTTACAATCGCAAGAGGTCATCGACCTGAACAAATCGCAAGAGTTTGTCCACCCTAAAAAGTGGTCTGGATCCGCTCCTGTTTATTTGACTACAATAAAGGCACCATAACAGAAG  
CAAACCAAGAGAGCAAATAGAAGAATTATATTTCCAAATGATAACTGTATAATTGCATTGGTGTATCCAAAACATCCTAAGAGGTTATCACTACTCATACAATGCCAAATAGATGACATGG  
AGAAAATCCTCAAACCTTATTATCCTCTTCAAGAAAACTAAATCGCCTTACAAATATGCACATATAATCCCTAAAGCAGGACAACAACAAAAGGTAGTCTGTTATATTGCACATCTTTA  
ATTCAAGAAGATAAATTAAGGCTTCATTTGGGATAGCTTTCTGACTGCTTTCTAAGATAGCTTTTTAGTACAAAAATTGTTTTAGAAAATAGTATGAAAGCTGTCCCAAACAAAGCCTAAAT  
CACGACGAAATATGCTCTATTTTCATTGTTTCATTCTTTGATAATTAAGTGGAATTATGTTTACAGAGCAGAATCTAGCCTCTAACAACATAGACAATTATGAAGACCAAACAGCTTTATAAT  
TTCAAAGAGAGAAGATGATTTGTAGAGAAGAAATCCACTACTTATTGATACCTTTTTCTTGTAAAGTGTCCGTTTGGCTAGCGATCACATGATACTTTCTCTCTCGAACAATCTTAATCGAC  
TCTTCCAAATTTTGTCAAGACCGCGCAGCTCATTAACTGCAACCCCTCCAGATTCTCCCCCTTCTCTGCCTTATCTCCTTCTGAAGGTTATCATTAATCTCTTTGAGATTCTCAGAGTA



TGATGGGAGGCGGGATGGGCAAAACTGACGCTTGATTAATAAATTTAGGGCAAAAAGCCCTCTCTAATGAACTTTTTTTTTTTTTTTCAGTGCGAGCATTGCCCCACCTAAATGCTCACCC  
CCTCACTTGACCGTGCATCCGCCATGCAAATAAGATCAATATTAGTTGAATAAAACAATGGAGTGCTTTGTTGACCTTCATGCCTAATAGTATTTTAACTTGTGTTCCCTTCTAAATATTTCT  
ATATGTTTAAATTGAATTGAAATCATGACTTATTTCTATATGAAGCTTGCAAGTCATCAATTCCTATTACATGTTTACCAAATCAATCATGTTCTTTACAGCTCAGAAACACCAGGGAAATATAT  
ACAGCCCTACTGCATGAACTGCACGAATTCGAGGATGAGAATCAACGGTGCAGTTTTGTTGCAGAAGATCTTAGCGGCGTCTACGACAGCACCATCTCAATGGCAAATCAGCAGCACAG  
TCAGCCAAATAAGCAGAAAATAGTTTATGAGTCTCATGATCTTAGCTTTGCATGAACTGCATTTTCTTCTACTTATGATATACTGTGGATTTGATTAACCGTGCATTCATGTTTCAATATCATA  
GCCTTGTTTAACTGTTTGGTAGATCTCCATTGCCCTATTTTGGTAGTTTCTAGTAAAATATTTTGGTTGGGATAACTTCTTACTATTTCTTAAAATAAATTTGTAATACAATAATTTTAAATTTT

>comp167926\_c1\_seq16

ATACTTTATTTTTTATGAAATAAACTTACTACATCAAATCTCCATTATCAAGAAATCATTTACCAGCTAAATAGTCAATCCATATGCAAAAATTTCTTAATGTTTATTTACAAATCGATAATAAAAA  
AAGACCAGAATCCCCACCATTACTACCTTGCCCAAGAGTACATAAATCCTAATCTTTTGCAGTTCTCACTGTGCACAAAATATGGGGGTGAAAACTAATAAACATAAAAATTTGAGGTTT  
CCACGGAAAATTTGGTTTCCAGCTAAAAGAATCAATATGTTAAATGGATTTTTAACATATCTTACACAATTGCCCAAGATATCAGGTGCTGCTCCACCTCTTCCCAATTATGAACCTTAGT  
GACTAGGCTGTAAGAATCTACAGAGTCATCCTTGCACCATGGATAGGAGTTGTGGTAATCAAAGAGGAGGACTCTAATGCCAGCCTCAGCACATTCCACAGCATATCTTGGGTTATCATCT  
ATCAGTACCTTAGCACCAATGGATCTGCAAATCTCAGATTTGGCCTTGATTTCCCATCCAACGCAAAATGATTTCCAAAGTGGATCTCCTTAAACAGGCCAGGAAAATGCCGCTCAATCC  
AATCGCATGTCTGATCTTTAATTACATTTTGGCGAGATGTCACAACTGATAAGTTGCAGAAAGCTGACAGATTACAAAGAGCAGTATGAGCACCAGGAATGGGATGAATACCAGACGTAA  
AATACTGGGTTTGGAAAAAATCGTGGACCCGATTTTACGCTAAAAGAATCGTAGATATAATAGTCTGAAACAGTGTGATATGATGAGTACCGATCTGCAACAAATTTATTAAGCGCCGGG  
ATAAAGCTGCCAAGAACTCGGAGCAATGAGGCATCATCTCATCCAAGCCGCCGATTTGATCAGGTCAGCCCCATCTAGGCCACCAGCTATCTGAATCAAAGCAAAGGCCGGTGAATGGG  
GGGAATTTGATAGGATGGTCAGGCCCTTGCCTGCGGCTAAAGGAGACGAAGCTTTGGCCCTTCTCATGCGGAACAAAGAGACGGGGCATTAGCACTTCTCGTTTGAATGAGGGAGACGG  
GGTGGTGGCCCTTCTCGTGTGATCTTCTGTGCAAAGTTGAACAATGGCGATGGAGCTGAATCCTCATGCCAAGCAACGAAGTCAAACGACAATGGAGATATAGAGAGGATGAAAAGA  
AAACCCTGGTATAGAGCTGTGCCTCACGCAAAGCAGGAGGAAGAAACGAATAAGTATTATCGTGCAACTCTCTCTCTCTCTCTCTGTTGAAATCCGTTTTGCTCCATTTGAGCAGATTT  
ACTTTACCCGCAAAATGAACT

>comp167926\_c1\_seq23

ATACTTTATTTTTTATGAAATAAACTTACTACATCAAATCTCCATTATCAAGAAATCATTTACCAGCTAAATAGTCAATCCATATGCAAAAATTTCTTAATGTTTATTTACAAATCGATAATAAAAA  
AAGACCAGAATCCCCACCATTACTACCTTGCCCAAGAGTACATAAATCCTAATCTTTTGCAGTTCTCACTGTGCACAAAATATGGGGGTGAAAACTAATAAACATAAAAATTTGAGGTTT  
CCACGGAAAATTTGGTTTCCAGCTAAAAGAATCAATATGTTAAATGGATTTTTAACATATCTTACACAATTGCCCAAGATATCAGGTGCTGCTCCACCTCTTCCCAATTATGAACCTTAGT  
GACTAGGCTGTAAGAATCTACAGAGTCATCCTTGCACCATGGATAGGAGTTGTGGTAATCAAAGAGGAGGACTCTAATGCCAGCCTCAGCACATTCCACAGCATATCTTGGGTTATCATCT  
ATCAGTACCTTAGCACCAATGGATCTGCAAATCTCAGATTTGGCCTTGATTTCCCATCCAACGCAAAATGATTTCCAAAGTGGATCTCCTTAAACAGGCCAGGAAAATGCCGCTCAATCC  
AATCGCATGTCTGATCTTTAATTACATTTTGGCGAGATGTCACAACTGATAAGTTGCAGAAAGCTGACAGATTACAAAGAGCAGTATGAGCACCAGGAATGGGATGAATACCAGACGTAA  
AATACTGGGTTTGGAAAAAATCGTGGACCCGATTTTACGCTTACGACGAGTGAATCCATATCCTAAAAGAATCGTAGATATAATAGTCTGAAACAGTGTGATATGATGAGTACCGATCT  
GCAACAAATTTATTAAGCGCCGGGATAAAGCTGCCAAGAACTCGGAGCAATGAGGCATCATCTCATCCAAGCCGCCGATTTGATCAGGTCAGCCCCATCTAGGCCACCAGCTATCTGAAT  
CAAAGCAAAGGCCGGTGAATGGGGGGGAATTTGATAGGATGGTCAGGCCCTTGCCTGCGGCTAAAGGAGACGAAGCTTTGGCCCTTCTCATGCGGAACAAAGAGACGGGGCATTAGCACT  
TCTCGTTTGAATGAGGGAGACGGGGTGGTGGCCCTTCTCGTGTGATCTTCTGTGCAAAGTTGAACAATGGCGATGGAGCTGAATCCTCATGCCAAGCAACGAAGTCAAACGACAATG  
GAGATATAGAGAGGATGAAAAGAAAACCCTGGTATAGAGCTGTGCCTCACGCAAAGCAGGAGGAAGAAACGAATAAGTATTATCGTGCAACTCTCTCTCTCTCTCTCTCTGTTGAAATCCG

TTTTTGCTCCATTTGAGCAGATTTACTTTACCCGCAAAATGAACT

>comp167926\_c1\_seq25

ATACTTTATTTTTATGAAATAAACTTACTACATCAAATCTCCATTATCAAGAAATCATTACCAGCTAAATAGTCAATCCATATGCAAAATTTCTTAATGTTTATTTACAAATCGATAATAAAAA  
AAGACCAGAATCCCCACCATTACTACCTTGCCCAAGAGTACATAAATCCTAATCTTTTGCAGTTCTCACTGTGCACAAAATATGGGGGTTGAAAACTAATAAACATAAAATTTGAGGTTT  
CCACGGAAAATTTGGTTTCCAGCTAAAAAGAATCAATATGTTAAATGGATTTTTAACATATTCTTACACAATTGCCCAAGATATCAGGTGCTGCTCCACCTCTTCCCAATTATGAACCTTAGT  
GACTAGGCTGTAAGAATCTACAGAGTCATCCTTGCACCATGGATAGGAGTTGTGGTAATCAAAGAGGAGGACTCTAATGCCAGCCTCAGCACATTCCACAGCATATCTTGGGTTATCATCT  
ATCAGTACCTTAGCACCAATGGATCTGCAATCTCAGATTTTGGCCTTGATTTCCCATCCAACGCAAAATGATTTCCAAGTGGATCTCCTTAAACAGGCCAGGAAAATGCCGCTCAATCC  
AATCGCATGTCTGATCTTTAATTACATTTTGGCGAGATGTCACAACTGATAAGTTGCAGAAAGCTGACAGATTACAAAGAGCAGTATGAGCACCAGGAATGGGATGAATACCAGACGTAA  
AATACTGGGTTTGGAAAAATCGTGGACCCGTATTTAGCTTCAGCAGAGTGCAATCCATATCTGTTTCAAGGAGACAAAATAAATAGCAATAATGACTTTAAATAAGGAAAAGGT  
AAGCCATACTAGAAATATACTAGAAAAAGTTTGCACAGTTAAGCGCCAAAAACACAAATCTGAGGTCTTGGGGCAATACCCTAAAGAACTCGTAGATATAATAGTCTGAAACAGTGTGA  
TATGATGAGTACCGATCTGCAACAAATTTATTAAGCGCCGGGATAAAGCTGCCAAGAACTCGGAGCAATACAGCATCATCTCATCCAAGCCGCGATTTGATCAGGTGAGCCCATCTAGG  
CCACCAGCTATCTGAATCAAAGCAAAGGCGGGTGAATGGGGGGGAATTGTAGGATGGTCAGGCCCTTGCCTGCGGCTAAAGGAGACGAAGCTTTGGCCCTTCTCATGCGGAACAAAGA  
GACGGGGCATTAGCACTTCTCGTTTGAATGAGGGAGACGGGGTGGTGGCCCTTCTCGTGTGATCTTCTGTGCAAAGTTGAACAATGGCGATGGAGCTGAATCCTCATGCCAAGCAAC  
GAAGTCAAACGACAATGGAGATATAGAGAGGATGAAAAGAAAACCCCTGGTATAGAGCTGTGCCTCACGCAAAGCAGGAGGAAGAAAACGAATAAGTATTATCGTGCAACTCTCTCTCT  
CTCTCCTGTTGAAATCCGTTTTTGTCTCCATTTGAGCAGATTTACTTTACCCGCAAAATGAACT

>comp167985\_c1\_seq8

TAGATGCAGCCAAACAACCTCATAGTCAATTTCTTCCCAATGCTTCATAACTTCATTATTCTACAACAATTTGAGGATAGTAATCACTACATTTGTATCCACATTTTGTATGCAATGATTTAGT  
TCTCACATTTCAATTTGACAAGCTTGAAATGTGATAAATACCATAAATAGAGTTACTTATAGGGAGTTCAACCCCTGCAATTTGTTTCAAAAACAGGAAGATCTTCTTCAAAGTATGGTGA  
GCTCTCAGTATAGGGTTTTTATCAAAGAAATTAACAGGCTTAAGATCAAAGCTAGATGATACTGTGGGCATTAAGGGATAGTCTCTTGTACAAGGTATATGGTGAATCCTAATGTGTACCA  
AGTACAATGTCTTGTCTCGATTGGCCGGTTCCTCTCAGACCATACTGCAAGAGTATCATCTCCTTACTTTGATATGCAAAAAGGCCACCCGCCATTCCTCACTTTGGTTATATGGT  
TTATCCAGATCTGGTTATTTGTGAAACCACTTCTCAGCTGTGGAGGATCTGAGAGATCAAGCAAGCTCGCAGCAGTTGCAGCAGGAACAATCTTATATCCAGAAGGATTTCCAACCTTAG  
ACAACCTTGCAGGGTTCATATATGAAATTTCTGAGGGATCATAGAGGTTTAGTTTTATCCGTCCATCTTTCTCAGTCTTGGCCACTTCTCTATTGAATTTAAGAATGCTTTTCTCGGAGATT  
CTTCAGGTGAAATCTCCTGCTTTGTGATGTGAACCTTTACAAAGGAGTTGTTTCGGGCCATCGATATCCATGTCCAGGTAAAAGGTGATGAAGTGTATGTTTATCCTATCAGATTCTCT  
GTCATAATGTTCCATGGAGGTGATGTTTCTTGGGAACCTTGGCTCATGTTCTGGTATACTGTTTCTTTTACCATTAGCATGCCACTAAGACTTACCTTAATTTTTATGAGACCATCCTGTGTA  
AATTTCCCAATCAAATATATAGTCATAGTTGCCGACCGACGCCACCATCCTTACCACCAACGTCACCTTTGGCCTTGACTCGTGTATAGCTTCATCTGAAAAGAGCTCCGAGTGCCGCCACG  
CCACATCGCCGGTATATCTCTCAAACAAACAAATAACATCGGGCTCACAAACGGCCGCCCGTCTCCCGGGCAAACACCCGATCCATATAATAAGCATTCCGTGGGCAATCATTAAAGCCT  
CACGAGCGGCATCGCGCAACTCCCCAACCCATACTACCCGCATCCATATACCCCCTAAAGTACCACCTTCACTCCCTTCCATATACGGCACAAATAACTCCGATGCAAATCCCTTATACA  
TCACACTCCTCCACTCTTCTCCTTCCACTGAGCTCACCTTCGCTGTAGACACCACAATCCCCGCCCTCTCATCCGCCTTACATGCAGTTCCAATTTCCCAATTTACCATATGCCCTCCC  
TCCACCTCGAACCTGTCCCTCCTCCCGCCCTTTCCATCATAACTCCTTGTGCGCGCCGCGCCGCTGTGTAGCGGTAGTCAGTGCCCTTCCATTCGGCACTGGAATTCGCGGCCCTCAT  
CACGAACCCACACGACCGCTCCGACATCCAAGTCAACCAAAACTATTAGTCTTCAATCGGACTCATGTAGAAGTTAGATGTTGTGTTGTGGAAAAGCGCGAAGCATTGGACTTTAGCTA  
GTCTTCGGTTTTTCTTCTTGTGGACCGAACCAGCCTGGGGAGAGAGGGAGGCAGTTGATGCGGGAGGGGTCAAGACCGCGTTTTTGGATGGCGCGGATGACGCGGGGATCGGAGAGGGT

GGTTGAGGAGACGCGGGAGATGTCGGAGGAGGTGAGGCGGGGGAAGGCGGAGGGGTGGGGGATGGTGGAGTGAGAGAGGATGAGACGGGAGGGGATGTCGATGGAGAGGAGGTGC  
GTGAGGTTGGGAGAGTAGGCGGTGACAGTGGCGCGACGAGGGAGGGGAGGGGAGGAAGGGAACCAGGAGAGGATAGATGTTTTGGGGGTTTCGAGAAGGGAAAGAGAGGTGATTG  
AAGGGAAGGAGTTGGGGTGGGAGAAGGGAGGGTGGGAGGAGAGGATGGAGCGGATGGTGGAAATTCGGTGAAGGTTAGGGGATCGAGTGGGTGGGGGAACGAAGATGCGAGCGAG  
CTGAGGAGGATGAGGGCGGCGAGTGATTCCATGTTGAGAACTTAGTAGCTACAGAGGTGCTGGGGAATTGAGTTGGCGTAATTAATAAAAAA

>comp167989\_c0\_seq3

AAGGGGAAGGATGCGATGCTGGTTGGGGCTAAAGGGGTGGAGTACCAGCAATCACAGTGGTGTGTGTTGAAACCGGAGGCGAAGAAGCTTGGGTTTGCTCGCCGAAACATGGATTACG  
CCTGTAGCTTAGCTGATTGCACGCCATTAGCGTATGGAGGATCCTGTAATCACTTGGGGGATTGGATGGGAAATGCGTCGTATGCTTTTAACATTTATTTTCAGATGCAGGATCAGGATGTG  
AGGGCTTGTGATTTCCAGGGTTTGGCGATGATCACGACGAAGAATCCTTCGAGGAACGGATGTTTGTTCCTGTGGAAATTGTTAGCGCAGGGGAGAGAACGGCGGTGGGCTTCGTAGT  
GGCGGCGGCGACGGTTGTGGTGGCGGTGAGCTTGATGAGATTGTGAAGGAGAAGAAGACAAAGATATGTTTGTACATGACAATTTTTTAGAAAGTCTGATTTTTTTATGTAAGAAACGC  
TTCAATAGAAAAGAGGAGAGATTTTCTTCTTAAACTATCATTATTTTTTGATATTATTGATTTTCTCTATTAAATTGTTATATTATAATCATCAATGCAATACTAAAATTCTTTATTTA  
TAGGAGAAATTTTTCGGTCAATGGATGTCGTTCCGAGGTGAATCAGGATGCTCCACATCAGTACAGCGGGTGACATGGCGCGACATGATTTTCCTTCTGACGGTCAAATGACTGCA  
CATAATAATTTCTCTATTTTATATATTTTTCTTTCATATCTTTATTAATAACTTGATTAGTGAAATATTAATTTATTTTTTTGTAATAAAGGGGATATCTGCATTTTTAAAGATTTTTTTTT  
ACTATTTGGGGCATT

>comp168003\_c2\_seq1

TGAACTAGATAACACCATTCTTTATAAATCAGAAAATTTCTGCAATGCTAATCAGAACCGCATCAGCAGAGATGGCGCACGGAAATACAACTCTTATTTATTAATCACGTTTCATTCACCA  
TTTATATATCTTAAATGGCAAGGAGAATTTTACAAGCCATTATTACAAAGCAGGATCATGACCAAAGAGCAAGATTAACATAGATGGACAATAATAGCAGGACTAAGATTTTCATTTGGGA  
TGGCTTTTGTACTGCTTTTTAAAGCAGTTTTTTAGAACAAAAGTAGAAAATTTTTGTACTTGAAAGTTGTTTTAGAAAACAAGAAGAAAGCTGTCTCAAACGAAGCCTAAGATTTTGTGTTG  
GGACGGTTATCTTACTGCTTCTTA

>comp168021\_c0\_seq4

TTTGAATGCATTCTGTTTTGTGCATATTCGTAAATTTAGAACTGTGATATTCTGAACTATTATGGCTGTTTATAAGAATTCAATAGCAATTTAATATGCCAAATGCGTCTAGTTTTTAGTCTTAG  
AGCTGACCAAGAGCCATTAAGTGTATGTTGAATCTGTGCCATCTGAACACTTAATTTGGTTTTGCTCTACCATGGAAGTTTCGGTATTGATAGTTTTGATTTTTCTGATATGTAGCTTCGATTA  
AGGTTTAAGCTAG

>comp168045\_c0\_seq4

ATCTTCCATGGATTCTCTCCTCAATAGTTGACAGTAAAACAAAGGCAAAGCCAGTGAATCTTTTTGTGCTTGATGTGCTCAAGACTCAGAAGAGAAATTTCTATAAGCAACCAGGCTCTCA  
TGCTTGATTGAGATGGCACAATACTGCATTGTTTATTTGCTTTTCAGTAGCAAGGATAGCAAATAGTAGAATGAGAAAAGAAAATGAGAATAGGGTAGATGAGATGTTCAATGTAATAT  
AGTTTAAATTTTACATACAATTTGCTTAAAAGGTGGAACAAATGTGCATATGATTATTAATGAATTTCTACACAAAGTGAGCAATTTTAAACATGTTTACAAGAATGAAGAATATAATTGCT  
TTGTTAGGGTATCTCCAAGCGAAAA

>comp168056\_c1\_seq4

GCCATATAGATCTTCCACTTGTGCTTCAAGAGCCTCCAAAGAGTTGCATTGCTTGAGACAAAACCCAACAGAATGAATTTTCGCAGAGCTAACAAAAATTGTCCTTGAACGAATACAAATT  
ATTGAACAAGACAATTTTCAGAAAATTTGTAGGATTTATTTGTTTAAATGAGCCAAGTGAATTTGAGATGTTACAGCTAGCCTTTTGCTCTGAAAATGCATTACTCTTCAGAATTTGATGAAGT  
CAAAAATGCTTAGAAAATTTATACCCAAAGAATGTTTCAGGTTCTTCTGAACGCCAATTTGGTTTCAATTTCTGCAGGGTTCACGCTCATTCTCATTCCCTTCTGTATTTAATATCCCTGCGGAA



TATTGGGATCAGCGGATTTCTTCTGATAAGTTCCTTATGTTATTTAATTTGGATGAGAATTTCTGTTCCCAAGATGCTTCATTGGATGGAAGCAGTCCCTTAAGAACAAGTAAGAGATCTCC  
AAGTCTTCCTGAATTTCTCTGAAGCCATGTCATTACTACTACAAGGGATATTGCAAACACGGAGAGAAGTGTGATATTTTCATGGGGGGCCGTCTTCCCTGATGGTCATTTACAAGCTT  
TCGTTCCAAGTTTTAAATGACTTGCAAAGTGAGGACCATGGCTTTTTCTCTGCTTCTTTGAGAAGCTGGAAATAGAGATCATTGAACTCTTGAGAGCTCAGAGAGGACTGCCTGTTTCAA  
TTGCCCTCATTACCAATACTGTATTATGAGAAGTATGGCAAGTATCTTCAAGCCGAAGGGTATTTAACTGAGAGCCAAAGGCACGGGAAGGCTGGATTCAGCTTGACAAAACACTTGTGCGC  
GTTTGAAGAACAAAATCAGACTGATAGATAGGCCTCATGGACAGCATTAGTATCTTGTGAGCCTGTACCAAATATTTGGACTGCAGGAATGAGAGGAACGAACTACGATCTACCG  
CGTCGAGTTCGCATCAGATATACTAACGTTTCCAGCAGAAAGCACATTCACAGAGGATGATGTTTCCGATTACTTCAAGCAGTTTGGACCAGTCAAGGATGTCAGAATTCCTTGCCAAG  
AAAAGAGAATGTTTGGGTTTCGTCAGCTTTGTCTATCCTGAAACAGTGAGTAAATTTTGATGAAACGAGTTTCTCATTATATTTGTGATTCTCGCGTTCTCGTCAAGCCATACAGGGAGAA  
ACTAAGGATGGTTGACAGGATTCATACTGAACAGATTAAGTCTCCAATCTGTTATCCTTTGCACTGTGTTGATTTTGATTTCGGAACCTCGAGCACTGCCAAGGGAATTCGAAAGCTCCAGT  
GCACTTAAAATGCACTTTGAGGAGCAAGATAAGCTGCTAGAACTTGAGAGAATGCGCCTATCGGAGTTCAACTTCAACTATGGTGTGACAACCTGAAACTCCCAGGTCCAGATGAATTT  
ACACTGGAAGACCATTTCAACTATACCTTGAAGCTCTAAACATTGACTTTTCTACTGACGACAAAACCTAGAAATACAAGCACCAGTTGCAGTAATCTGGAGAGGGGTTCAGATTTTGCTC  
CCCGAGAACCCATTTGCATCACCACAACCTGCTAGCAACCAGTATTTCAACAGCCACATAGAGATCAGAGAAGAAAACATGAGAAGACAGAGATCTCCAGAAAACCTGAAAGAAAAAAA  
GAAAAAAATACATCCATTACATTCTGATCTAAGCATCAATAATTATCCTTCACAAATAACCCTCCACTCCACTGATTACTTGTCTAAACCAATTACCTTCATACTAAGCAATGACTGATAG  
TAGTAAACATAAATGGGATACTTCAATAATTATAGCTATATAAATGAATGTTTATATATTCTCTAGAGTAGATGACAATAACAAGAAGCAGATGAGTTATGCCATTTGGAAGACTTCTCAGATT  
AGTCGCAATAAAACAAGTCTCTATATCTACAAGAGAAGAGAGAGCTTCTTTACAGGTAAGAGGTTTCAGAAAAGTAGTTTGTAAAGTATGATACTTTACTTTTTTACTGTCAATTACTTTGA  
CAAAGGTCCAGTGATTGTCAGTTTCCCTTAAACTTTCCCTTCTTTGTCACTTAAACACCATCGTCCATCCATTATCATTCTGAGTATCTACTCTTCTTGAATTTATGGTTGCTGATTGTAGTTGAT  
GGGATTTTATACGGCATTTTGTTCCCTGAAACTTGCATTTATGTCAACATCTTGTCAAATAAGTTCTAGAGAAGATATTGTTAATAGAAAAGACAAATAAAGGCAAATCAAACCTGCTTTT  
GCTTGGTACATCTATTCAACTTCTACTCTATAAATCTGGAGGTAAAACCTTCACAACTTCAGATGCTAATGCAGCAATCAACCTTGTCTCTTGTGTTGATTTTTTAGAAAACCTTCAGCATAAAT  
GGATTGTTTAAATAGTATATGAGATATTGCTTTATTTTGGTCACATCTATAACAGTTCCTTTTTTTATCCTCCTGTGAATCTGGTTTG

>comp168095\_c0\_seq7

GTTGGGTGCCACTGGGTACCGCTAGGTACCAATATTTGTGCAGACGGTGCTGACTCCGCACCTAATAATTTTTAGTTATTACGAACTCCACACGGAACAATCTCTCTCATGTCAGAGGA  
CTCTCAACAAAAAAAAAAAAAAAAAGATTTTCGGGGAACCAAAGTCTCACCTTGTTCATCCACCGCCTGTTGCGGCCAACGGCGGGGACGTTGGTGGGCGATGTTAGCGCCGGCACTGT  
CGCCGGAGAGAAAAGCAGGAGGAAAAGTCAACCAGATCGCCGGCGACTGCGTCGATTCCACCAGAATCGACGAATCTGAGGACATCGATGCCGTCTTCGTAGTGGGCGGGGTAGCGGTG  
TTCAGGGGCAAGTTCGATAGTTAACAGAGGCGATGATGGCTGGGATCTTGCGGGCGATGCGGCGCAAGCTAGGTCATAGCCGCGGGTGTGCGGAGAGAAAATAGACGAATCCGCCGCCGT  
GGAAGAAGACGATAAGGGGAGACGCTGAGGACGACCGTCGCCGGGAGAAAGAGGCGGAACCAAAGTTTACGTGCGGGGTCGACCGTGAGGTCGATTGTACGGACGCCGTGGACC  
GTGGTAGGGTTGGGAGGGACGCGGAGGTTTCAGGAAGGAGAGGAGGCGGCGGTTGATTGTTCCGTCCGCGCGGGGTTGGCGTCTTTATGGCGGAGAGGAGGGAGATGGAGAGCCGA  
ACCTTAAATGGTAGTTTGGGTTTCCGGTACGTGCGGGCCGCCGGTGTACTGGACCCATCGGTTCAT

>comp168095\_c0\_seq9

TTAATAATTTAATTATAATAAAACATAACATTGTTTTGTGGAAATAAAAAATAATATATGACATACATCATAATTTTCATTGTAGTAGTCCGTCTATCAATGGAGAGATTATTATATGCGGAATTT  
GAACCAAGATTTAATTTTGTATTTGTGAACAGTAAATCAAACGGTTCAAGGAAACAAAATCGGACGGTTATGTCAGTCCGATCTACTCATGTAATAATCTCTCCTTATAAACATGGCTCCTT  
ACGAAGCTCCCCATCTCTCGATCATCCTATCGCCGTGCGGATGTCAGGGAAAACGTAGAAGGCATGGATGGCCTCCGGAACTCCACGAGCCACACCTCCCTGCCCTCGCCTTCAAC  
CCCTCACAGTAGCTACGCTGCCAATCCTGAAGCGGGTTCGTACCCGCCGACCACCACCATCCCCGGCGGGAACCTTCTTCGAGTTCCCCCGTCTCGCTCTCGGCCAAAAACATTCGCCGCC

TCATGGTCCCGATCAGCTCCCGGCGCAAGAACGCCCGCCACAGCCAATCAGTCTTCTTTGTTGATACTAGCAGTGCTCCGCTGAGGCGGATCTCCGATTCCGTCCTCTCTTCTCCACCAA  
AAAAGGGCTGGATCAGGACGATGCCTGATAGGTTACCTTGTTCATCCACCGCCTGTTGCGGCCAACCGGCGGGCAGCTGGTGGGCGATGTTAGCGCCGGCACTGTGCGCCGGAGAG  
AAAGCAGGAGGAAAAGTCAACCAGATCGCCGGCGACTGCGTCGATTCCACCAGAATCGACGAATCTGAGGACATCGATGCCGTCTTCGTAGTGGGCGGGGTAGCGGTGTTTCAGGGGCA  
AGTCGATAGTTAACAGAGGCGATGATGGCTGGGATCTTGC GGCGATGCGGCGGCAAGCTAGGTCATAGCCGCGGGTGTGCGGAGAGAAATAGACGAATCCGCCGCCGTGGAAGAAGA  
CGATAAGGGGGAGACGCTGAGGACGACCGTCGCCGGGGAGAAAAGGGCGGAACCAAAGTTTACGTGCGGGGTGACCGTGAGGTGATTTACGGACGCCGTGGACCGTGGTAGGGT  
TGGGAGGGACGCGGAGGTTTCAGGAAGGAGAGGAGGCGGCGGTTGATTGTTCCGTCCGCGCGGCGGGTGGCGTCTTTATGGCGGAGAGGAGGGAGATGGAGAGCCGAACCTTTAATG  
GTAGTTTGGGTTTCCGGTACGTGCGCGCCCGGTTGATCTGGACCCATCGGTCAT

>comp168111\_c0\_seq2

AACATCTTTAAGGTGTCCTGTTTCTTTCTGCAGGCACAAGAATTATGACGCTTCAATATAAATAATAATAATAAGTGCTCAATACATATTATGATATGTAAAGAGCTACAAAAGAAGTTA  
AAACATATAGTGTAATAAAATATTGACTGACCAGCCATGATGCCATCGTTTCCACTTTTTTCAGAGCAATGAGGGCTATTTAAACTGTGAAGAATCCCTCCTCTCCTACCAACTCACCT  
CCCTTTGCCCTCTCTCGCTTCTGCCCCTTAGCTTTCTTTCTCCATCAAATGCTTCTCAATACAAGAAACATAATTACATCAAATATTGCCGAAAGCAGAAGAAAGACATGGCTGGATTC  
AGCTTGAAAGGCTTTGTGGCAATCCTTCTCCTCATTCTCCTCTGCTCTGCTACAACCTTGAGGCTGCGAGGCAAGAAGAGGCAAGCATTGGAAGCAGAGGAGGCCTCCCGCTTCTCT  
CTAGCCAAGAAAAAAGGAAAGGGGAAATCTGGGGGCGGCAGTCACAATAACCACCACGGCGGCGGGGACGAAACCAGCTCCTCCTGTGCCGAGCCCGAGCCCGAGCCCGCGCCC  
GAGCAACAATTCCATGTACAACGTGCTTGTATTTGGGGCGAAAGGCGACGGGGTACTGATGACACTAAGGTGGACAAAATACTACTACTTACTCCATATATCTTTGGCATTCTTCAAT  
AATTTTTTGTTTACATTACACAGGCACCATATCTTCCCTTATTTGTTTGCACAATCTTGCATTATTTTTTATTCTGTTGGATCTGTTTGTATCTTCGCAGACTGGAAATTTGTTTGCATGCA  
TGTGAAGCTGAGAAAGTGATGGTGAAGCATAGAACGTTAACATTATTATTTTGGATAACCAATTGAAGAGTTCGATGCTCCATAGCTTTTAGAAGGAAAGTTAGTACTCATTGCAGTGT  
AAATAACTTACGCAGGATGTTTTTATGATAAGGGGGTAAAAAGCATCTTTTGTGTACTTAAACCATTGCTTCTCTTTGTCTCATGTGACTCTTCACAAAAGGGGAAAAAATAAAAAAAT  
GTGACTATGAACATTGTCCGTATGCCAGTAAAACTCTGGTTCGATCTAGCCTGCAACCCACACCAATTTACACGGACCAATACTTACGGTTTTCACTACTTGCCAAGGGATTTGAAATAGA  
TATGATCTCACGAAAAAAAAACTCTTAGGACATCTAAGAGGGGGTTTTTTTTTCCATCATAAATTCAGGCTTCATTTCAAAAAGTTGATAATATATGTTTTTTTTTAAAAAAAAGCTAAA  
CAAGAATTGAAAAGTCAGATCACTAATTGCATAATTACCATCAAATTGTGATGTCCAACCCCTGTCTTAAACCCTATTTGTTTACATTTGGCCAAATTTTTGTTCTCAATATTAATGTTAAA  
GTACCATCGAATAATACTAAACTTATTGGTCAAACCTGGCAAATATTTTCATGAAGTATTAGCAACTCTTCTTGAATAAAAATCAGGGCAGAGCTTTCAAGCATTTAATTCCCCCTTAGTATAA  
ATAAGTTCTTAAAGATCTCTTTTTTGGGGATCAGCATATTTTATAAAGGGAATTTCTGAAGCTAAGTATAATAGCAGTAGAGAGAGCTACCATGTTGTTCACTGGAAAATTACAATGCAGGC  
ATTTGAAGATGCTTGGATGGCAGCCTGCCAGGTGCGAGGCATCAACGGTGAAGGTTCCATCGGATTACGCATTCCTCGTCCGTCGGTCCGATCTCCTTCTCGGGTCCCTACTGCCAGCCTAACATC  
ATATTCCAGGTATGCTACTGCTGCTAAAAACATAGCTTAAAAAGAGAACAGCAGGTTTATCTCAGTTTAAACAAAGGGAGGAGGACATAGCACAAAAGCTCATCCTTCAGATCAAAGAAA  
TGGCAAATTCAGATAAACCAACGCATGCCATGTGGATACCTTTAATTTTCATCCGTTTTCGGCTTTCGCTTTGATTGCTTCGGCACAAAATAAAAAACGATCTCT

>comp168121\_c0\_seq5

GATATCTAATTATGATAATTCATTAGATGAAGCATTAAAAGAAAATGAACATATATAATCAAAGAATCCATTATCTCTTAGAAGAGATAGTCCAAATAAATTTATGCAGTGGTAAAGTGTTA  
CCACCATCAGTATCTACAGCCAGTAAAGGAAAGTAAGTGGCTGATAATCTAGAAACCTCATAACCAATTCAATAAGATTTAGATGTAGCTAATTAATGCATTCCCTTAATTCTTACAAAACA  
CAGATGATGAAACATGTCATTGGTTCTAACTTAATTTGTTAGATTTCTTGCAGCTTGATCACGCACAAAAGGATGATCCATTAATTGAGCAGCTGTTGGTCCGGTTAGAAGGATCACGTTGT  
AAACATGACATTACAAAACCTTAGCTTCAGAAGAAAGGTGACCTGGGATATCTGGAATATCTTTGCCAAACACAATTTTCATGCTTTGCATCCATCCATTCAAATCTACTCCACGGTGGTTT  
AGAAGTTGCCATCTCAAGTACCGCGCATCCAAGGCTCAAATATCTACTGATAGGTTGTGTTTCGTTTCTGTTTCATGATGACCTCAGGAGCCATCCAATAAGGGCTTCTCTAAGAGATCGA

ATGAATGCACCATAAGATATATGTTTAGCAATGCCAAAATCAACAAGTTTGACCTCTCCATAAGAATTAGCAAGTATGTTTGTTCCTTTGATATCCCTGTGCACTATGTTTTTCCCATGCAAAT  
AAACAAGTCCAGAAAGAATCTGTGCAGTATAGATCTTGATAAGAGGTTCCCCAAATGAGCCAAATTCCTGAAGTAACATATAAATTGATGCTCCTGAGACATATTCAAGATAAACTGAAAG  
TGTGTCATCAACCTGATTTAGTTGCTTGAGAGATTCTTTGGAATGGGGATCATCAGATATGACCGGGACCTCTTTAATAACAAATCTTTGCCATTTTCAGTGTTAAATCCTTGATAAACAG  
GTCCGAAAGTTCCTCTGCCAACAGCATTCCCTTCTTCCATGATAACTGAGAAGGCCCTGATGCATTGAATCCATTTACGTAAATTTATTTCTCTGAGATTTGGAGGACGACGAAGACTT  
GCTCGACTCTGAATTTCCCTGCCTATCCGGCATCGCATCCATTGATTCTAGCTCGAGATCGCGAGAGAAAGGTGTGCAAGTCCGGACATAGCTCTCCGGACGCAATATATACGCGAGG  
ATTAACCGCCTGGAATAGTTATGCATGGATTGTCCGTGTGGAATAGTTACGCGTGAAGGACTTTG

>comp168121\_c0\_seq7

GATATCTAATTATGATAATTCATTAGATGAAGCATTAAAAGAAAATGAACATATATAATCAAAAAGAAATCCATTATCTCTTAGAAGAGATAGTCCAAATAAATTTATGCAGTGGTAAAGTGTTA  
CCACCATCAGTATCTACAGCCAGTAAAGGAAAGTAAGTGGCTGATAATCTAGAAACCTCATAACCAATTCAATAAGATTTAGATGTAGCTAATTAATGCATTCCCTTAATTCTTACAAAACA  
CAGATGATGAAACATGTCATTGGTTCTAACTTAATTTGTTAGATTTCTTGCAGCTTGATCACGCACAAAAGGATGATCCATTAATTGAGCAGCTGTTGGTCCGTTAGAAGGATCACGTTGT  
AAACATGACATTACAAAACCTTAGCTTCAGAAGAAAGGTGACCTGGGATATCTGGAATATCTTTGCCAAACACAATTTTCATGCTTTGCATCCATCCATTCAAATCTACTCCACGGTGGTTT  
AGAAGTTGCCATCTCAAGTACCGCGCATCCAAGGCTCCAAATATCTACTGATAGGTTGTGTTCTGTTTCATGATGACCTCAGGAGCCATCCAATAAGGGCTTCCTCTAAGAGATCGA  
ATGAATGCACCATAAGATATATGTTTAGCAATGCCAAAATCAACAAGTTTGACCTCTCCATAAGAATTAGCAAGTATGTTTGTTCCTTTGATATCCCTGTGCACTATGTTTTTCCCATGCAAAT  
AAACAAGTCCAGAAAGAATCTGTGCAGTATAGATCTTGATAAGAGGTTCCCCAAATGAGCCAAATTCCTGAAGTAACATATAAATTGATGCTCCTGAGACATATTCAAGATAAACTGAAAG  
TGTGTCATCAACCAGCTCACTGCCATAGTATTGCACAATGTTTGCATGAGAGAGCTGACCAAGCAATTTTATTTCTGATTTAGTTGCTTGAGAGATTCTTTGGAATGGGGATCATCAGATA  
TGACCGGGACCTCTTTAATAACAAATCTTTGCCATTTTCAGTGTTAAATCCTTGATAAACAGGTCCGAAAGTTCTCTGCCAACAGCATTCCCTTCTTCCATGATAACTGAGAAGGCCCT  
GATGCATTGAATCCATTTACGTAAATTTATTTCTCTGAGATTTGGAGGACGACGAAGACTTGCTCGACTCTGAATTTCCCTGCCTATCCGGCATCGCATCCATTGATTCTTAGCTCGAGA  
TCGCGAGAGAAAGGTGTGCAAGTCCGGACATAGCTCTCCGGACGCAATATATACGCGAGGATTAACCGCCTGGAATAGTTATGCATGGATTGTCCGTGTGGAATAGTTACGCGTGAAGG  
ACTTTG

>comp168207\_c2\_seq8

CTACGGTTTGCAATTCCTCTTCTGCATTTGTTCTGTTGCTGTTCTGTTTCTCGTGAAATCGAGTTCTGAAAGAGCCCAGGCTTCTGCGCCCCCTGCTCCTACATTGTTCTTGTTCGGATTTGA  
AGTTGCGCCGGTAGCTCACCGGAAGCGATCGAAGGAGTAGAAATTTGCCCAAACCTGACAGATCTGATTGAGATGGGTATTCTTTCTGATGTGGTGGGCGGCGTTAGGCCAAGCAAGA  
GATCAACTTTCATGGTGGCAGCTTCTCCCAATGAGCCTAGGGTTATAGATAGCAAGACATCCCCAACCAAGATGCAGTTCAAAGAGGTCTCAAATGGCCATTATTGCAGGCTCGGTAG  
TTGCAGTTCCCACGCTGGTTGGTTGTCGAGTCATTCCCTGGGCGAAAGCAAATTTGAATTACTGCACAAGCTCTAAGCATATCAACAGCTGCAATTTCTGCTTTCTTCATCACTGCTGAT  
AAAACCATCCTGAAACATGCAAGGGGAAACACAATGGGAAAGTATGACAAGAGCTCTTGACATGAAGCAGCACCAACTCAAAGATGAAACTCTTGGAGCACGAATTTTGATGTTTAAATG  
GTTTCAGCCCTTGCGAGTTTATTTCCATTTGTTTTGTTCTAAATTTGCTTGTGAATCAAGTTAGAAATGAAATACCAGCAGAAGCAGAAATATAGAGTAATTGAAGCTGATTGGCTGCAT  
ATAAATCAAATGTATTAATTTTTTTTTTATTTGTTATTGTAAATTTTCATATTATCTCCTGACTCTCTCTCTCGTGCAC

>comp168213\_c0\_seq1

AAGTTCCATAACCTCATCTCCTCATCGTCCCCACATCTCATATTTTTGTCTACGTCCATTTGCTTTTCTCAAGATTTTCGTCATGATGGTGAGCACCGATGCTGTCCGTAACATCGTGGGGAT  
CATCGGTAACCTTCGGCGCGCATAACAATTTCTTTGATTAATTTCACTTTTCTTTCCGATTTCTAAAAATGTATTGGGAAATGGGATCGGGATAGGAAATGTAGTATCATTTAGACTAT  
TTCTTTGCCTTTACCGACTTTCATAAAAATATGGAGAAAGAAGGCAGTAGAACAGTTCTCACCAATCCCATATGTTGCGACTCTGCTCAATTGCATGCTCTGGGTCTTCTATGGCTTACCC

ATTGTCCACCCCAATTCAATGCTCGTGGTTACCATAAATGGCATTGGTATTGTGCTTGAGGGAGCTTATCTTACGGTCTTCTTCATTTACGCCCTAAGGATCTGAGGTTGAAGGTTTTGAA  
GATCTTAATGGGGGAATTGGCTTTCATGGCGGTGGTTGTGTCTGTTGTGCTCACGGTGGGTCATAGTCATGAGAAGAGGTCGATGATTGTTCGGCATCCTCTGTGTCATCTTCGGCACTTGC  
ATGTATGCCTCCCCTCTTACC GTTATGAAAATGGTGGTCGTGACAAAAAGCGTGAAGTACATGCCGTTCTGGCTTTCCTTAGTTAGCTTTCTGAATGGCGTATGCTGGACCGCTATGCACT  
TTTGAAGTTCGACATTTTCATTACGCTACCGAACGGGCTCGGAGCGCTGCTCGGATTCCTCCAGCTAGTGTGTACGGATGTTATTGCCGAAGTACCCCGGTGCTTGAGCAACAGAATGA  
GGAGAGGAAGAAAACACAGGAGGTTGAAATGGCCTGAAGGGAAGACTAATGGCTTCGAGCTCTCAAAGGAAAAGGAGGTCCAAGAGTTGCATTTTTTTTTCTTTGATGCTGGGTGGT  
GGATAATGCACTAGCTAGCTTCTCCCTTGTTTTTGTAATATCCACTTTTAAGATGGATCAAGCGATTGTTAATGGATAGCTCTTTCTATTAGCCGCTCATTCACTGTTTTAAATATTGATTTCTT  
TCAAGCTCTGTTGTTGTCTGATAGGTTAGGTAATCATTGTTGGGAATTTGATAAT

>comp168213\_c0\_seq12

GTTACCATAAATGGCATTGGTATTGTGCTTGAGGGAGCTTATCTTACGGTCTTCTTCATTTACGCCCTAAGGATCTGAGGGTGC GTTGAATCGATTCTCGGTTGATTAAATTTTAGTATTTAT  
TGGCTGATTGGACGATCCATGTTTTTATTGATTGATGGTTTTGGGATTTTTGGATATGTTCTTGCAGTTGAAGGTTTTGAAGTTCCTAGCAGGGGAACTGGCTTTCATGGCGGTGGTGGTGTCCG  
TTGTGCTCACGGTGGGTCATACTCATGAGAAGAGGACGATGATGGTCGGCATCCTCTGTGTCATCTTTGGCACTTGCATGTACGCCTCCCCCTTACC GTTATGAAAATGGTGGTTGTGAC  
AAAAAGCGTGAAGTACATGCCGTTCTGGCTTCTTTAGTTAGCTTTCTCAATGGCGTATGTTGGACCGCCTATGCACTTTTGAAGTTCGACATTTTCATTACGCTACCGAACGGGCTCGGA  
GCGCTGCTCGGATTCCTCCAGCTAGTGTGTACGGATGTTATTGCCGAAGTACCCCGGTGCTTGAGCAACAGAATGAGGAGAGGAAGAAAACACAGGAGGTTGAAATGGCCTGAAGGG  
AAGACTAATGGCTTCGAGCTCTCAAAGGAAAAGGAGGTCCAAGAGTTGCATTTTTTTTTCTTTGATGCTGGGTGGTGGATAATGCACTAGCTAGCTTCTCCCTTGTTTTTGTAATATCCAC  
TTTTAAGATGGATCAAGCGATTGTTAATGGATAGCTCTTTCTATTAGCCGCTCATTCACTGTTTTAAATATTGATTTCTTTCAAGCTCTGTTGTTGTCTGATAGGTTAGGTAATCATTGTTGGGAAT  
TTGATAAT

>comp168230\_c0\_seq3

AAAAAAAAAAAAAAAAAATCTATACCTAAACAAATTTTATAGACTTCAACACTTTAATAAAGCTCAAATACAAAGACAATTACATTAAGACTCATGCCTCATCTATGATTTCTGTAAGGTCCT  
GAGAAACATTACATTGAGGCAGATAATTAGTGATTA AAACTTCGTTCCGGGACGGCTTTTTTATTGCTTTCTAAAACAAATTTTCAGTAAAAAATTTTTTAAAGTAGAAATTTTGTATTAGG  
AAGCCGCTTTAAAAGCATTATGAAAGCCACCCAAAAAAGCTTAGAGTCCTAAACATTTGCATATGCTAGCCAAAACAATTGAAGGCATGCATCTTCTCAACTATGCCATCTTGTCCAT  
ATTCAGAGAGAAAAGTTAATTGAAAAATGGCCTTTGAGGATGATTACACAAAGCTTGCATTTGTCTAACATTGATCAGAATCAGATTAAGTTGCCATCTTACCCAAAGTTCAAATACCAAT  
CCTGGATTTGAACGCATGTAATCCTTCTTCTTATCAAGCTTTCTCTTTCAACATTCCTAGATGGCTCAAGTGAAGAAGACATGTTGACATATTAGAGTCGACAGAGGCAGA ACTCTCAA  
CACTTGATTGCATCGAATCCTCCTCGAAAAACATTTTTTGTCTAGCTTAACTCTCTGAGCATGTGCACTAGATAGCTCAAATGAAGAAGACTACCCCTAAAATACCATTTTTATCTTAAGTTT  
TCTCTCTAAAGACCTCCACCACATTTTTTTTCACTGAAACCTTTCTCAAAGATTTGTGGGCTACTTTGTTGTGAAGGCTGAGGTTTCTATAGCCTTCTGGAAATACAAATGAAGGGAGT  
TGCTTTCTTAGAACATGGGAAATAAAAAAGTCCATAACCAGGTCTCCACGACCTAAACACGTTACCCGATCTTTAAATCTTCTATAGTTTCTTGTAGGTCAAATGTTGTTCTTCTTCAAC  
CTTGAAACCTTCTTTTCTCCGTAATCCAGGAAAAAAATCTATGTGGACGCTGCTTAGAAGAATCAATATACTCAGTAGGATCTGGGTGGCATTGCAACATCCCATTGTATCCC ACTCAA  
TCAGAAGAGTCAAAGCCTCAAACGAGATTCCACCCAGCCCTCAAATAACGCAGATCATCAGCATCGTTGGCAACTATGGAAACCTTAAGAAAATCTTGTATGAATCAAAAAATTGGT  
AAGGTTCAAATAATTCCTCAACTAGCCTTGTCTGATCAATCTCCTCACAAATTTGTTGCCAACTGGA ACTGCTCATTCAACTCTGAGGGTACTTTTTGATACATTATACTAGAAT  
TCACGCTTGGATATGCTGGTGAATGATTGGCATTGATGAGTTCTATCATTGTGATCTTGCATGGATTCCAAAACAAGAAAGCCTAGTTTATCATCCACTATTGAACACAACATGACAGGAT  
TTGGCCAACGCCATTGTGAATAGACTTTGAAGAAATGAGTGACCAACATACTAGGTGAAGCATTGGAACAATTGGCAGACATGAGCTACAAGTAAAGCCCAGCTAATACCCCAAGA  
AATCCGATAACATTTGAGTATACACAGCGAGTCTTAGCCCAAAGCTTTATGCATCTTAGAGTTATTCGAAAATTCTCAACATTAGGAACAAGTTCAAGTATCTGATCAGCATCCCTACAAGC

ATTAAGGCTTCGAACAGTACATCCATCAACATTATATAACGACATCGAAACATTGGATATATCCAAATCTTCTGGAACATAAGTACTGATATACTTGCATATAGAAGGTCAACAGATATCCC  
ATTAAACTTAAATTTATAACTGGAACATGAGCTTTAGGAATAGCTTGAAGCTCACTGACTTCTTCTCTTTAGCCAGAATGTCATGTAAAATGACGAAAAAGTCCTCTCTATTGACAT  
ATGAAGGGCCAACACATAATGTGTCAATATCAGCTCCAGGTCCATTAACCCCTAATCGCTGAGAACCAATTGTAAAATGATGGCATTGCTTGTTCACCAATTTGATTATTGTATCCTCGTT  
GATCTGTTAATTGCTTCACCCAATTTTAAACAATTTGATCCAACCTGTCTTGGAACTTCTCTCTTCTCATTGTTCTTCTTCCATAAACCCAGCCTTGGCCAAGAAGTTCATCAAGA  
AGGCCAAATCAGAAGGCGCATTAGATCATGAACAAACAGATAAGCAAAGAATAAAGATAAAGAAGAATAAGATCACTTTATTTAATTCAACGTCTCTCTGAAGATCATCTCGATTTCGGCC  
CTGCATTGGAAATTTGGCTTTGCCATAACCATACTGATTTGAGCTTTGTGACACAAAGCTTCCATCAACCAAACATTCCATCCTTAAGTTGCAAAAATGACCCAAACTTGACGAGAGACAAAT  
GCCACCAATGCGAAGAGCTTAAATATACGAAGGGAATCTGAATAGATATTAGCAGGCCAAAGAACAGATGGATGAGAGAAAAAGAAGGGAGAAAGGGAGGTGGAGGTAGCCGTTAAGG  
AGGTAGTTTTAGGAGAAGAAATATTCTAACCATAAATTTAAATTTCTACCTTCTAAGTTAAGCTAATACTTAAATTTAGAAAATCATAGAAAT

>comp168247\_c1\_seq7

AAATAGAAGCGACAGAGATTTAAGTCACAAATTTCTTGCAAATAAATGACAAATGATTACTTCAAATCAACAATTTGGATAAAAATAAAGAGTAAAGCTTTTATTTTGCTTGGCTGGTGGCC  
CAAACCATATTTCTCCAAGCAAAAATTATATTTGCATTCCCCTCTGTTCCATTGGGCCACCCAAACAAAGTAAACAAAATTTGATTTTTTTTTTTTTTTTTTAAATTCATGTAACATAATTG  
GAAAGTGATTTTGGCAGGCTAATTTTCGTAGGCACCTGCAACCAGAAAAAGAGTCTCAATCCTTATCTTATTTACCAAATGGAGAAAGATCACTAGATTTGTGGCCGATTCCATATTGA  
ATGTGGAGGCCAGGAACCATTTGAGGCTATCTTCTCGTCAATTTGCTGGTGGATTGCTGCTGCTTGGGAGGCCTGACTAAAATTTCCCAATCTTCTGGCAAGCAAAAATATCAACGAAAATTA  
CTTATGTTAATTTGAGACCGATTCCATATTGAATGTGAAGGCCAGGAACCATTTTAGGCTATCTTCTCATCAATTTGCTGATGGTTTGGCGCTGCTTGGGAGGTAATTGGAGAAAATATTCTC  
TCTATAACAACTTTTTTTCAAACTTTTATGTTGTTTTCTCATTGACCATTAAACGATGTATTTCTTATGCCTGACCAAACCTTCCCAATCTTCA

>comp168247\_c2\_seq1

TTTTTAAACGAAGCCAAAAACTTTCATTGAAAATGGGTTGAGTAGTCATAGCTTTTGAACATTTGCCATATGATTATAAAAACCAAACAACAATCATGAGCACCACCCTACAAGAGAAG  
TAACTTGGAGAACTACACAAAAGAGAAAAAATCATATGCATGCTTACCAAATTAACATAAGTAATTTTCGTTGATATTTGCTTGCCTGAAGATTGGGAAGTTTGGTCAGGCATAAGAA  
ATACATCGTTTAAATGGTCAATGAGAAAACAACATAAAAGTTTGAAAAAAGTTGTTATAGAGAGAATATTTTCTCCAATTACCTCCCAAGCAGCGGCAAAACCATCAGCAATTGATGAGGA  
AGATAGCCTAAAATGGTTTCTTGGCCTTACATTCAATATGGAATCGGTCT

>comp168270\_c4\_seq1

CACAACTACCACCCAGCCATTATAAGACACCAGCAAGCTCACAGATTCAACAGAGAGCTTTAATTTTTATTTTAGATTACGAAATGGTCAAGAGAAAAATAATACATTTCTTCTTCATTC  
CAAGCATTAGTCAAATGCCAACATTACAAAGCCTTCTGCTATTGCTATTTTCAAGAACAAAGAGAAAAATGGAAATACACTCTCAAGGGATGAAACCATTAACATCAAATTTCAAGCTCCA  
AGAGTTTGATCTTTGAGTTGGTGCTGCTTCATGTCAAGAGCTCTTGTCACTTTCCCATTTGTTTCCCCTTGCATGTTTTCAGGATGGTTTTATCAGCAGTGATGAAGAAAGCAGAAATTG  
CAGCTGTTGATATGCTTAGAGCTTGTGCAGTATAATTCAAATTTGCTTTGCCCCAGGGAATGACTCGACAACCAACCAGCGTGGGAACTGCAACTACCGAGCCTGCAATAATGGCCATTT  
GAGACCTCTTTGAACTGCATCTTGGGTTGGGGATGACTTGCTATCTATAACCCTAGGCTCATTTGGGAGAAGCTGCCACCATGAAAATTTGATCTTCTTGGCTTGGCCTAACGCCGCCACCACA  
TCAGAAGGAATACCCATCTCAATCAGATCTGTGCGAGTTTGGGGCAAATTTCTACTCCTTCGATCGCTTCGCGGTGAGCTACCGGCGCAACTTCAAATCCGACAAGGAACAATGTAGGAG  
CAGGAGGCGCAGAAGCCTGGGCTCTTTCAGAACTCGATTTACGAGAAACAGAACAGCAACGAACAAATGCAGAAGAGGAAAAGTAAACCCTAGAAAGGCAATGGAAATTTGCTCGC  
TTGAAGCTTTACCTAACCGAACGAAGAGTGCCGCTTAGGCAGTCAAGTCCGACTACAAAGC

>comp168270\_c4\_seq10

ACAACACAAAAAATTTCTCCATTTCCAAACGAAAAAGGCAAAAAAATCTCAAACAAACAAACCTAAATCTCGAAAAATGGATTCTCTAAAAAAGCTACGATACCAAACAAT

TGAAGGTTATGCTGATGCTGAGTGCTGACTATAAGGGATTACCAAGTTCATAGGAGATTCACTTCATAATATTATAACAATTATAGGAAAAATCCTATAATATGAAGGAGCAAGAAGAAATAA  
CATTTTTTCAAGATCCAATGGGAATCTAAATTCAGAGTAATTGCTAAAGGTATTTCAAACCTTTATAGATTAAAATCAATTTAGGCGATTATGATGGGGGAAATAAACCTGGAACATATCA  
GGAACATAAGAACTATGAACAAACAAATGCACATCATCACGGCATTGAAATACAAGTGAAAAACAAGCATTCAATTATTTAAAGAAACATTGAAAGTGTTTGTAAATTGCAAACCAAACC  
GCTGGAATTAATAAGAACTCCAATCTCGTGTTAAGAAAATAAAGATACTCAATTCCTGATCAGGCAAGGCACATCAAAGCTACCATTACTTCTGTGAAATTAATGGAGCATTCAAATAAA  
TTAAAATATGTTACCTGTTGATATGCCTAGAGCTTGTGCAGTATAATTCAAATTTGCTTTCGCCCAGGGAATGACTCGACAACCAACCAGCGTGGGAACTGCAACTACCGAGCCTGCAATA  
ATGGCCATTTTGAGACCTCTTTGAACTGCATCTTGGGTTGGGGATGACTTGCTATCTATAACCCTAGGCTCATTGGGAGAAGCTGCCACCATGAAAGTTGATCTCTTGCTTGGCCTAACGC  
CGCCCACCACATCAGAAGGAATACCCATCTCAATCAGATCTGTCCGAGTTTGGGGCAAATTTCTACTCCTTCGATCGCTTCGCGGTGAGCTACCGGCGCAACTTCAAATCCGACAAGGAA  
CAATGTAGGAGCAGGAGGCGCAGAAGCCTGGGCTCTTTCAGAATCGATTTACGAGAAACAGAACAGCAACGAACAAATGCAGAAGAGGAAAAGTAAACCCTAGAAAGGCAATGGA  
AATTTGCTCGCTTGAAGCTTTACCTAACGCGAACGAAGAGTGCCGCCTTAGGCAGTCAAGTCCGACTACAAAAGC

>comp168270\_c4\_seq15

CACAACTACCACCCAGCCATTATAAGACACCAGCAAGCTCACAGATTCAACAGAGAGCTTTAATTTTTATTTTAGATTACGAAATGGTCAAGAGAAAAATAATACATTTCTTCTTCATTC  
CAAGCATTAGTCAAATGCCAACATTACAAAGCCTTCCTGCTATTGCTATTTCAAGAACAAAGAGAAAAATGGAAATACACTCTCAAGGGATGAAACCATTAAACATCAAATTCAGCTCCA  
AGAGTTTGATCTTTGAGTTGGTGCTGCTTCATGTCAAGAGCTCTTGTCCATACTTTCCATTGTGTTCCTTGCATGTTTCAGGATGGTTTTATCAGCAGTGATGAAGAAAGCAGAAATTG  
CAGCTGTTGATATGCTTAGAGCTTGTGCAGTATAATTCAAATTTGCTTTCGCCCAGGGAATGACTCGACAACCAACCAGCGTGGGAACTGCAACTACCGAGCCTGCAATAATGGCCATTTT  
GAGACCTCTTTGAACTGCATCTTGGGTTGGGGATGACTTGCTATCTATAACCCTAGGCTCATTGGGAGAAGCTGCCACCATGAAAGATGATATCTTGCTTGGCCTAAGGCCACCACATCA  
GAATGAATACCCATATCAATCAAATCTGTCCGAGTTTGGGGCAAATTTCTCTGCTCCTTGGATCGCTGTAGATGTCTGTGGAAAAGTAAGAGTTGGATTGATTTAACGTATTCTTGGCACCAG  
AAAAAAAATTCGGCCGAACAAGCATGGGAGATCTTTCGTTATCTTAGCGGCAAGCTCCCGGTGCGACTTGCAATCCGACAGGAAACGTAGGAGGAAGCGGAGAAGCTTAGAACGCT  
AAGCAGAACAGCAACGAAAAAATGCAGAAGAGAATGGGAAAAGCAAATCGTAGACAGGCAAACGCCATTGAATGGCTCGAAGCTCCGTTTATGCGTTACATAAATAAAGAAAAGCAAA  
CCTAAATAAGGAAAAGCAAACCTAACACCTCACCGGCGCAAGAAAAATTATTCTAAAATCGTAAACCGTCCGTCATTCCGACTACAAAACC

>comp168270\_c4\_seq5

ACAACACAAAAAAAAAATTCCTCCATTTCCAAACGAAAAAGGCAAAAAAATCTCAAACAAACAAAACCTAAATCTCGAAAAATGGATTCTCTAAAAAAGCTACGATACCAAACAACCT  
TGAAGGTTATGCTGATGCTGAGTGCTGACTATAAGGGATTACCAAGTTCATAGGAGATTCACTTCATAATATTATAACAATTATAGGAAAAATCCTATAATATGAAGGAGCAAGAAGAAATAA  
CATTTTTTCAAGATCCAATGGGAATCTAAATTCAGAGTAATTGCTAAAGGTATTTCAAACCTTTATAGATTAAAATCAATTTAGGCGATTATGATGGGGGAAATAAACCTGGAACATATCA  
GGAACATAAGAACTATGAACAAACAAATGCACATCATCACGGCATTGAAATACAAGTGAAAAACAAGCATTCAATTATTTAAAGAAACATTGAAAGTGTTTGTAAATTGCAAACCAAACC  
GCTGGAATTAATAAGAACTCCAATCTCGTGTTAAGAAAATAAAGATACTCAATTCCTGATCAGGCAAGGCACATCAAAGCTACCATTACTTCTGTGAAATTAATGGAGCATTCAAATAAA  
TTAAAATATGTTACCTGTTGATATGCCTAGAGCTTGTGCAGTATAATTCAAATTTGCTTTCGCCCAGGGAATGACTCGACAACCAACCAGCGTGGGAACTGCAACTACCGAGCCTGCAATA  
ATGGCCATTTTGAGACCTCTTTGAACTGCATCTTGGGTTGGGGATGACTTGCTATCTATAACCCTAGGCTCATTGGGAGAAGCTGCCACCATGAAAGATGATATCTTGCTTGGCCTAAGGCC  
CACCACATCAGAAATGAATACCCATATCAATCAAATCTGTCCGAGTTTGGGGCAAATTTCTCTGCTCCTTGGATCGCTGTAGATGTCTGTGGAAAAGTAAGAGTTGGATTGATTTAACGTATTC  
TTGGCACCAGAAAAAAAATTCGGCCGAACAAGCATGGGAGATCTTTCGTTATCTTAGCGGCAAGCTCCCGGTGCGACTTGCAATCCGACAGGAAACGTAGGAGGAAGCGGAGAAGC  
TTAGAACGTAAGCAGAACAGCAACGAAAAAATGCAGAAGAGAATGGGAAAAGCAAATCGTAGACAGGCAAACGCCATTGAATGGCTCGAAGCTCCGTTTATGCGTTACATAAATAA  
GAAAAGCAAACCTAAATAAGGAAAAGCAAACCTAACACCTCACCGGCGCAAGAAAAATTATTCTAAAATCGTAAACCGTCCGTCATTCCGACTACAAAACC

>comp168272\_c0\_seq3

AAAACAAGGTGCAACTTGGCGCCGTTTGGCGGCATAAACGATAGAAGGCTCCGGACGGCCGATCGTAACCCTAGCGGAACGTAGTTCGTTATGACATCGGCCAATCAAACATCTGCATTAT  
AGGAAACTGATGGAATAAGAAGAAAGATCACACCTCTTGTTTTGTAGCAGCAAAATATAAGAATTTTTGCAATGAATCCAAAAAGCAGCATTCTTGCTGATGGAGGACTGAGCGCAATGA  
ATAATGGTAATGCAATTGCAAATGGGAATGACCCGAGTCACACAATCAGAAGAGATTATTTACTCGAGAGGTCTAGAGAGTTGTCACAGTTGAGAAAAGGAGTTCAAAGCTCTCTGCAAT  
TGAAGAAATCTGTACATAGACGGAGGAGATCTTGGTGGTCAATTCTTTTCACTATTCTCACAAGGATTGTAAGTTTATAGCAGCTTTGTTGTATCTTGGACAATTTATTACAAGGTGTTCTA  
CTTTGGCTGGAAGGGATACCAAGTCTTCCTTTGCTTTGTTGGATTATGAAGATCGGGTGTGAGAAGTTGAAAACTCTTTGAAGATAACATCAAAAATGTTGCAGGTTCAAGTGGAAAGTTAT  
AGACAAGAAGATAGGAAATGAGATTGGCATTGTA AAAAGGGAGCTTCAAAAACAATTTCAAGAAAAAAAATCATTATTGAGATGGAGCTGAATCAGCTTGAATCTAGA ACTGATGAAT  
TGAGCAAGTCATTGGCAGATTTGGAAGACAGGGACCTTTTAAACAAAGGGAGAGCTTGAGAAGTTTTGGAATGAGCTAAAGAGCAAGGGGAATGTAGATGATATTAGCAAAGATGTTGAT  
TTGGATGAGATCATGGCAATGACAAAGGAAATTGTTGAGAAAGAAATTGACAAACATTCTGCTGATGGTCTAGGAAGAGTGGATTATGCTTTGGCTTCTGGTGGGGCCAAGGTGGTTAGT  
CATT CAGAGCCATATGTTTATGGA AAAAGGTAGCAGCTGGTTAGCCGTTGCTAAAGGTATAAGTAGAGTTCATTCTAATGCACAGAAGATGTTAGAACCAAGTTTTGGTGAGCTGGTCACT  
GTTTTCCCTTGCAAGGAAGCAGTGGGTTTTGTTGAGATTAGATTAAGAACAGGCATAATTCCTGAGGCTATCACACTTGAGCATGTCTCAAAGAGTGTGGCTTATGACAGGTCTAGTGCTCC  
CAAGGACTGTCGAGTTTCTGGATGGTTTGAAGAACCTGAAGATGACCCATCCGCCAGAATTGATAAGATGTTTGTGCTGACAGATTTCTCCTACGACCTTGAAGAAAGTAATGCACAGAC  
CTTCGCTGTCCCCGTCAATTGATTCGGTATCATCAACATGGTTAGGCTCGACTTCACCTCCAACCATGGCAACTCTGCACTCACCTGCATTTACCGCTTCAGGGTGCATGGCTACGAGCCC  
AGCTCACCTGCAGCTATCACACACATGCTTGAGTTGCCTAGGAGAGATAGAAGGTACCAAGATTTGTTCTTTTTGTCTTGTTCATGTATTTATGTTGATATGATAGCTTTCTACAAGCCC  
AAGTTTTTTACTATGTTATAAAAATCTATT CAGCTTTATCTCCTATTCTTTTCGAGATCTACTTATGCTCTATTAGGATCAGGAATTTCTTGCATCATTTGTACTTTTGTGCAAATTGGACACA  
ACAAAACAATCAATAATTTATGTATATTCTTTTGTGATCTCATATCTTAATGTTATATG

>comp168321\_c0\_seq6

AAAACCTGCTCATAGAAGTCCCCTCTATCAGTTTGAAAATATTCTAATAAAAAATCTTTGAATGCTCTCCAACCTCTGTATTGGTCTCCTTGGGTCCCTTTACTGGAATTACGATAATGCCTTCC  
CTTACAAGCATAGGCCTGCTGCTATTAGTTTCTCATCATCTGTCAACCCATTGACGACGAAGTACCTCTCTACCTTGTAATCCATCCATAAGTGTATCCCTTTCAAAAATTGGTATCTTCA  
GCTTCCTCACCTTTGTTTCTCCTTATTCCTCCATATTTTCCCTCTCTCAAGTGTTTTGCTCTCCCCACGTCTCTCGATCTTCCCTTACATATTCATATTGAAACCCCTCTTTACTTTCTTCTCT  
ATTTCTCAAAAATCAGCACCCCTCCTTCCATAGTTTTCCCTTCTCTCTCCCAACCAGCCCCCTTTACTCCTTGATCCCTATTTCCCCGTCTTTTACATACCTTCGCCCCCTTTCTCCTCAATAT  
TTTCTACATCATTTTCTCCTACGAAATCAAAAATTTGTAGTTCTTCTGTTGGTCTCTTTACCTCCGATGCCTCCGTTTGGATTTGATTTCCAATGACTTCTCACCATCAAATGAAGATCG  
AAAACCTTGTCTTCCACGGAGGAAATCTTGTCTTCTACAGAGGAGATTCAATCTTCCACTGTGGCATTATTTGGCTCATCTCTCCTTTTAAACATTCTTCTGATGCATTTACCTTCTTAGCC  
GCCATAAAAAAATCTGATTTTTGCTCCAAAATCAGCAAGGGTTTTTCTCCTCAAATGGAATTTACCGCTGAAATTTAAAAAAAATCAGCCCCCGATGGTCCCATGACTTGCTCTGAT  
ACCAATTTG

>comp168363\_c1\_seq3

ATGCATAAGCAGAATACAACGAATAGATAATAGAGCCACCCCAATAATTCGATAGGTGAGCCAAAAGAGCAGTCGGAATGATGAAAGAAGGAAGCAACAAAGAGAAAGCCAACGTC  
CAATGGCCATTTGGCAAAGATGCCTGATATAAATTCTGAAATGCAATTGACAGTTTAAAATAATATCGAATGTTGCTTCAACAAAAACATTAACAACACTAGGTCTTTGTCTACTACATG  
GAGTCAGTTACATGAATTTCTTTTCTTCAATCTGTTCTATTGTGAGTCAAATCTCCATTAATGCTCTGTTACCAACCAAAAATGCCAATGCCATCTCCAATCTATGGCTTCTAATTTTC

>comp168368\_c0\_seq6

TTATGACATTCTACAAAAGGAGGTGGTTTGTCTTAAGAAATGCTTGTGATGAGAAGGACCAGTACTTGAAAGACAAGGATAATTCTATAGAGTCTCTGTCAAAGAAAGTTGATACACTGCA

CAAGGCAATGGAGGTAGAAACAAGGAAATTACGCAGGGAAAAAACTGCTATGGAGAAAGAGGTTGCCTCTATGCGGATTGAAATAGAGCAAGAGAAAAAGGCTAGGCGCTTGAAGGG  
AATGGTTGCTAATCTTCAGATCTAAAGAAGTTTACGTGCAAGGATACAGTCTTTTTGCTTATAGAATGACAGCAATCATCAGAATCACAGTGACAAACATATGAAGAAGAAGATTATTTTTTT  
GCGACAAAATTAGTCGGTCTAATAATCAGCTAAATGAAATGGTACAATATGTTCTACAATCAGATTGGACCACATCATTGGCTGGTCTTCTCAGACTGCTAATTTCTGTATATCTAATATCTT  
CCATGCAGAAAAAAGCCCTTTTCTATTTTCTGATGCAGTCTTAAAGTTTAAACTCTTGCATGTACACTTTGGTACACCTTGCAGGAACCTGCCATTGATGTCAAATACTACATCTT  
GTGAGGAAAACGATTTGCTTTCCAGCGTTTGTACCTTTGATCTGAAAAGCAGAACAAGCCTAGTTTTCAACCGGTTCTTTGAAGCTTTTGGATTGCTAGAGCCATTCTTAATGAAGTACAGT  
GGTTGTAAATAAATATTAATTTACGCATCTGAAGTAATATTTCAATCTTTAAATTATAATATCGAGCTTTGTAACGATGTGATTAATTCATATATAAGTTTCAGAATGCAAGGTTGCAAGAGAA  
TGTTTCATTAATCTTTTCCAGGAAGGAGCAATAATCTCTCAGATTCTCCATGCCAACACCAGCTTTACAGAGCACTTCCTTTTTTCTGCACTTTATTTTGTGCCTTCCATCATTAGTCCCAAGT  
GCAATGATTTCTATATAATTTATTTGAAGAATCTGAATTCATAG

>comp168374\_c0\_seq15

CCGTGATCTCCGGCATCTCCTGATGGTACATGTGTGCGCAATCTCTGACGATGTCCCCATCAAAAAGTCTATTCAAATCCTGCCTTATTCTTCTAAATGAAAAGTCTAGTTGTAACCACAGAAA  
TCAATTTACACAAAACCCTTCCAACACAAATTTCTGTGATGATAATCAATTCACAGTTCAGTAAGAAATATAATGATTTTTGTGAATGTCTGTGCATTGAAGATGAACTTCTAGGAGGGTTG  
ATATACTCGCGAAGTCCGCCGCAAATTAATAAACTATTAACATAATATGGAGCCTTGTCCAATTCCTAAATATGCACAAAAATGCAGAAAGCATGAAGATATAATTATGTTGTACCTGTTG  
CAACATAGCATGAAGTCATCGAGCCAACCACATTCATTGTCCCAAGAGCAACCATCTCTTTGTTTTCCATCCAAGTATGATGCTTCCATGCAATGTTCTTCCAATCGCCACAGCTTCC  
GTTAGTGCAATCATGCCAGCAATGATGCCAATTTTACTCCTTTCCCTAGAAAGGGTCCCGAAAAATATATTAGCTCCAAAGAGGAGGGATTGATTCCCTTTTTTATGTGTTTCACTATTTGT  
ACTCCGTATCTTTACGCATGAAAAATATAGACAAAAAATGTGCGCTAAAAACAACAGAGATAAGCGGCGCAATTGCTGGCAGCCAAAATAACTTTCTGTTCTTCTTCCATATATTTAGCAA  
CAAGAAGGAATACCAAGAATATCGTTCCAATGAGAATTGTTGGCCAGTTCCACCCGTGAGGAAATGGATGAAAAACCGATTTTATTACAGAAATGATGTCTGTTTGCTTTGTAAATTTCTC  
TATGCCAAGGAAACCTTTGAGTTGCTGAAGGCCAATAGTAATGGCTGCCCCAGCCATAAATCCAATTTGCAGCGTGTGAAAGGAAGTCTATAAGAAATCCTAGTCTTAAAAATCCTAGC  
AATGCTTGAGTAATACCAGCAAAGAAGGTAGCTGTGAATGCAAGCCTTAGGTATTCTCTTTGTTATTTATGGGATCAAGCTCATCTTGAAGAAGGGACCCTAACAAAAGAGAACTACT  
GCTACAGGTCCAATAGCAATGTCTTTTGAACCTTCCCATGAATGCATAAATAAGTGGTGGAAACAAAGCTAGAATAAAGACCATGCTGTGGTTCTAGATTTGCAAGCTTTGCATACCCAATATC  
TTGAGGTATGCAGAGGCTTGCAATGGTTAAACCAGCAATGACATCTCTTTAAGTTTAAATCAAATTATAATTTCTTCCCATTCAAAGATTGGAAACAAAACTGCAACCCAAGCATGAAC  
TTCTTTGATTTAGGTTGGTCTTATAAGGCTTCAAGGGATCATCAGCGAAGAATGTTTCCCTTAAATCCATCAGCGAATTCTTTAAGGAACCTTTTCTTGGAGGAACCTTTTCTTGGAGGG  
CATCCAACCGTGTAAGTTGATGGAGATTTCTTCATTTGTTGCTCTGATTCATGTTGACCGATATCATCCGCTTCATAGTTCTTGACTTCGTTTGCAGTAACAGGATGACCCATCTCTGTATATA  
CAAAATTGACTGGGGCACTTTGCAATGAGAGGTTTTACCTAGACAGAGAAATGACATTTGTAACGGAAGATCGCCAATGCTTGGGTGTTGGCAACCGTTCATTGTGAAGGAAAAGTTGAT  
AGAAATCGGAAATAACTATTTTTTTAAGTTG

>comp168387\_c2\_seq11

TTGTTTGGGCTCTAGCCGCGGCTAGAGATTTTGGAGAATCGTATCTTCCCTCTCCAATTGAATATCAAATTGTATCTCAAATCAAATCAACTTAGTTATGAAAATAATTAATTACCTGATCAAT  
TACAATAATGAGCCATTAATAACTTTTCAAATCAAACTAATTTAGATTTTCGAAATCTTTCAAATCAACAAAGACTCTTTTTTTATTATATTAAGAAACAAAGATGATTATATAATAAATCA  
TGAGATTTTTTTTAAAAAAATATAATTATGAACCATAAGGAATCACCAACTTTACCGACAAGTAATCATCTCTTTAAATCAACGGTCAAGTTGTCTTACATGCAAAATAGATTAACCAC  
ACACGCTTAACGCCCTATTCTTAAATACCAATCTGCAATCCAAATCATCAATCCTCTTTCCCTAAATTTACGCCACCGCCTATAAACTCCCTTCTTCTTCAAATCGAAATCCCAAC  
GCTTGATTTCTAACAACAAATTCCTTCTGCAATTCCTTCTCTGACGCCATGGACAAGCTTCTTCTAATGTGATCCTAAGCTTCGGCAATTCAGCGACATTCTGGATCGAACCGCCGAGT  
AAGTGGAGGAGCCTCGACGTAAAGAAACCGGAGATTAGGAAGGAAGACCGCAAGGAGAAGTCTGCTGACGTGAAGAGGAAAAGAGGCCAGCGGCGAAGACGCCGGGCAGGAAGAGCG



GATCGAGCCCCTCGTTCGCGCCGACGTTTCGACGGCCTCCATATCTTCGAGACGTTTCGTCCTCCACTGAAGAATCAAACGCGGTTTTTCGTCCTCTTTTTCTCTCTTTTTTTTTCTCTTAGGAC  
ATCTAATTGTTTCATTGATATTTGATCTGTGCATTGGTTTTCTTTCCCTTTTTTTCACAGTAATTGCTGTGAGATAATTGAAGGAAGGATTTTTTTTTTTGGGAATCTTTGCTTTGTTGGACGGTTA  
GTTTGGTGCAAA

>comp168388\_c0\_seq13

AAAAAAAAAAAAATTTTTTTTTTTAAAAAAAAGGAAAAAGGTTTGTGTTTTCTAACAAGCTACTGGTTTTGAGAGTGCACACTGTTCTTTAGCATGCTACATTTATATATAAATCT  
ACAAATTTTGCCAATATCATTAACCATACAGCTATCAGTATTTACTATCAAAACACTTACAAACCCTCACACATGCACATTTTGATTCTTTATCTCGGACTACTTCATTTTTCTTTGTTT  
CATCTGTTGTACCTGACATACTCTGCTCATAGATGAACTGAGCAAGTAAACCAACAATATCAACAACAATGCCCAACTTTCCGCCACTCAACCTCCGGGCTAGCAAAAACAGCATTAC  
CAACTGCAAGAATAAGCAATAAAATAGTGCAAGGTAAATATTTCTCCGTGTCCTTGATCTGTGAGTCTTCTTTGCTAGCTGTCTAAAATTCTGTGCCTCCTCCTTAGCCTCAGCTTTCTTC  
GGAGGTGTGTTCTCCCTCAGGTTCTTAAAGAAGAGGCCTTCATTTTTGTCCCTAACAATCTGTTTCTGAAACTCCTCCAAAATTTCTCGTTACTTTCTATCTCCTGCCTATTCATCTCCGCT  
GTTTCTCAAAAAGCCTCAAGCCGGCTCTCCAGCTTCTCCATTATCTGTTTTATCAAAAGCCAGAAACATGTGCAAAAACCTTAGCTAGGCTTCTCCTATGTATGGGTGCAGGGCATACTAAG  
TTATTGACGTACCCTGGTGCCGGCATCATCAAGCTCTTTGAGTGCCTTCTTCCAATAGCATCAAACCTCAGCATTGGCATCTTCTGCAAACTGTGCCAGATTGATGAACGCTCATCTAGG  
AAGTTTGTGAGCCGAACCTTCTGTGTCTGGAGCATTGCAATCTGTGCGAGCAAGTCTTGCTTTTCGCTTGTCTCCGTCTGGAATGGAAGTGTGGAGTCGGAGCCATCAGAATTAGAGAAG  
CAGATGTTTGATCTGCGCCTATTGTTGGATTTGCATGGTTGAGTATGAGTTGGCTTTGTAAGTGGGAAGCAGTATTGAATGGCTTTGAGGGTGTTCATCTCTCGACCCACCAAGCTGATCA  
AGAAAGTCTCTGGTGTACCATTTTGAATCAGAAGATACACCAGAAAGTTCACAAGGCTAAGAATGGCCAGGAGCCAGTAGAAGTAATCCAGGTGACCTCTGTTGAGATTATCTGCTATC  
CATCCAAGCTGCCATTTCTTGTGTGATATTAGTGACAACGGTCACCAGAAATGTGCTGAGGTAGTTTCCAATGCGACGGTGGTCAGTGAGAGCGCAGAGCACAAGCTCCTCATTGCA  
TCTGGTGCCTGATCGTAGAAGAAATCTAATTGACCAATGAATGTAAAGACCTCAGCCGCACCAACGAGAAAGTACTGAGGCACCTGCCAGAATATTGTCATCGGCAAGTAGCCTTCGTGA  
TCATAAAGATTGAGTCTTGCTACCATTTGAAGCCTGATGACCTCCAAAATGCCTGCAGCCACCATGGAAAAGATGGAATGATGAGGCCAATGCCCATGCGCGTGAGCTGTGTGAAGCCA  
CGCTCGTTTCTGTGATTCTTCGAGCAACTGGGACGATGACGCGGTCTGATGTTGGTACCCAAATGATAACACTAATGGTGTCAAAGACGGACAGGGAAAGCTGCAGGGATTTAAAGTTG  
GGACCTATATGGGGTCCATGGTGTCTCCTTGAAGGACAAACATAGTGCTCATCTGGCCATACACAGTTGAGAAGATGATGCCGCTTGCCAGATAGGGAGAAGACGTACAAGGCTCTTC  
AGTTCCTCTACTTGAGTGACAGTGCAGAGCTTCCATGAATTAACAGTGTATCTATATTGTCATATTGAGTTTGACAGCTGCTTTATCAAAGAACTTGAATTGCTCAGTGTGCTCTAGCTT  
GCGGCTTCTTCTATGGCAGATTCTTTGTCTGACACTTCATATAATAGAGATTTGTCATCAGGTACTTTCTCTCCAGATTTCTTAAACGAAGCAACAAAAACCTGAGCTATTCTTGTGAATG  
GACTGCCTCCAGGTTTTTGATGCCTATATAATGGTGTGCCAAGAAGAAGCTCACAACGGCAATGGCCATCGCTACTGCGGGAATGCCAAAACCAAGCCCCACCTAATTTGGTCTGTAT  
CCAAACCAGGACCGATGCTGCAATCATGGCGCCGATATTGATCGAAAAGTAGAACCAATTAAGAAAGAGGTCTTGCTCTTCTTCTGATTATCTGAATCGTCAAACCTGGTCAGCACC  
AAATGAAGAGACACATGGCTTAATTCCTCCAGTTCCAAGGGCAATGAGGTACAATGCTACAAATACAACCTGTAGATTGTGCTGATGTAGGGTTGCAGACTCCATTATGGCAAACAGGTTCT  
AGTCTTTCACTGATGCAGCCATTGTAAGCAGTACTAGACCAATAATGTAAATTATCATGAAAGTGGCAATTGTGCAGTATCTTCAAAGTATGCATCAGCTAAAAATGCACCCAAAAGAG  
GTGTGGCATAAGCAGGTTCCAGACCAGTTAGTGACATTGTTGACTGCTACAGCGTTTGCTTGGTTGAGTCTATCCTTCATGAAGTTCACAATATTGCTGCTCATTCCATAGTATGCCAACCTT  
TCACAGCATTCAATTTGCAAGAATGTATGGGCATGCTTTCCAAGTGCCAGTTTCTTCTTTATGGCTGGGTTCCCTTTGAGATCTGTAGTCCCATCTTTTGTATGCTTATCTCAACCACCTCC  
ATGAATGTTTGAAGAGGGAGGATAAGACCACCTAGTCACTTATATAAATGTTGCCTATGAGTTCTTCCAGACAATCTCTAAAGAAC

>comp168388\_c0\_seq18

ATTGTAAGGGACTTACAATAATGTAAATTGCCACTCTCATGATAATTTACATTATTGTAAGTCCCTTACAATAGACTTTGGTTCTCAGTTTTATATATTCAACAATATATCTCAAGAAAATGAA  
ATGCTTGTCTGATCACTTACAGGGTCTAGTACTGCTTACAATGGCTGCATCAGTGAAAGGACTAGAACCCTGTTTGGCATAATGGAGTCTGCAACCCTACATCAGCACAATCTACAGTTGT

ATTTGTAGCATTGTACCTCATTGCCCTTGAACTGGAGGAATTAAGCCATGTGTCTCTTCATTTGGTGCTGACCAGTTTGACGATTCAGATGAATCAGAGAAGAAGAGCAAGACCTCTTTC  
TTTAATTGGTTCTACTTTTCGATCAATATCGGCGCCATGATTGCAGCATCGGTCCTGGTTTGGATACAGACCAAATTAGGGTGGGGCTTGGGTTTTGGCATTCCCGCAGTAGCGATGGCCAT  
TGCCGTTGTGAGCTTCTTCTTGGGCACACCATTATATAGGCATCAAAAACCTGGAGGCAGTCCATTACAAGAATAGCTCAGGTTTTTGTGTTCTCGTTAAGGAAATCTGGAGAGAAAGT  
ACCTGATGACAAATCTTATTATATGAAGTGTGAGACAAAGAATCTGCCATAGAAGGAAGCCGCAAGCTAGAGCACACTGAGCAATTCAAGTAAGTTCAATGTAAAACCTAAAAGATCTTC  
ACTCAGCACTGTCCATAAATGAAAATTAATATGTAAGAAAAGCAAATTAATTAACCTTCGTTTTCTTCTTGAAGTTTGAATTGATGATCATCCGGGGTGTCTTAACCTTAAATGCCTAAGGTA  
AAACAATATGAACGGTTACACGAAGTGTGATGATAATAACATTATTCTAAATATTCTACTATGAATAGAACTCTCAGCATATAGTATACTTAAATCTAAAAGTTTTTTTTTAGTTTTGTTAATAT  
GAAAAATATGGGAAGAGCTGTTTTACGATCTATACTTGAATCGATATCAATATGACAATAAAAACGAGCTTGAACATGATAACCTACACGCTTGATTTAAGTTCAAGTAGCGTATGTTGCTA  
TTAGCAATCCGACAAATGAAAATGATATATCCGTCCAGGTTCTTTGATAAAGCAGCTGTGCAAACCTCAATATGACAATATAGATAGCACTGTTAATTCATGGAAGCTCTGCACTGTCACTCA  
AGTAGAGGAACTGAAGAGCCTTGTACGTCTTCTCCCTATCTGGGCAAGCGGCATCATCTTCTCAACTGTGTATGGCCAGATGAGCACTATGTTTGTCTTCAAGGAGACACCATGGACCC  
CCATATAGGTCCCAACTTTAAAATCCCTGCAGCTTCCCTGTCCGTCTTTGACACCATTAGTGTATCATTTGGGTACCAATCTACGACCGCGTCATCGTCCCAGTTGCTCGAAGAATCACAG  
GAAACGAGCGTGGCTTACACAGCTCACGCGCATGGGCATTGGCCTCATCTTCCATCTTTTTCCATGGTGGCTGCAGGCATTTTGGAGGTCATCAGGCTTCAAATGGTAGCAAGACTCA  
ATCTTTATGATCACGAAGGCTACTTGCCGATGACAATATTCTGGCAGGTGCCTCAGTACTTTCTCGTTGGTGCGGCTGAGGTCTTTACATTCATTGGTCAATTAGAATTCTTCTACGATCAGG  
CACCAGATGCAATGAGGAGCTTGTGCTCTGCGCTCTCACTGACCACCGTCGATTTGGGAAACTACCTCAGCACATTTCTGGTGACCGTTGTACTAATATCACACAAGAAATGGGCAGC  
TTGGATGGATAGCAGATAATCTCAACAGAGGTCACCTGGATTACTTCTACTGGCTCCTGGCCATTCTTAGCCTTGTGAACTTTCTGGTGTATCTTCTGATTGCAAAATGGTACACCAGAGAC  
TTTCTTGATCAGCTTGGTGGGTCGAGAGATGAACACCCTCAAAGCCATTCAATACTGCTTCCCCTTACAAAGCCAACTCATACTCAACCATGCAAAATCCAACAATAGGCGCAGATCAA  
CATCTGCTTCTCTAATCTGATGGCTCCGACTCCAGCACTTCCATTCCAGACGGAGACAAGCGAAAAGCAAGACTTGCTCGCACAGATTGCAATGCTCCAGACACAGAAAAGTTCCGGCTCA  
CAAACCTCCTAGATGAGCGTTCATCGAATCTGGCACAGTTTGCAGAAGATGCCAATGCTGAGTTTGTGATGCTATTGGAGAGAACGCACTCAAAGAGCTTGTATGATGCCGGCACCAGGGTAC  
GTCAATAACTTAGTATGCCCTCAGGTATAGAATGATCATTCTGCTGTGCATTTCCAGCCTTCTTACACGGAATCACAGCATGCCTTGAAAGGAAAACATCGCTGAAGCATGTTTAGACA  
CCGCTGCTCAATACTGCCCTAACTAGTATGTTCCAAGTAATGGAAGTTGGGACAATGCCACAGTACACAGCATCATCCAAAACCTTGAGTGCCTCCATCGTCTGTTTATGCAAACAAAGCC  
CTTTAAACACTATATTGTAAGATATGATATCTGGTTGCAACCCAGCCTCAAAAATCTCATTCCACAAATCAGTTGCCTTTTTGCAGTCGCCAACTTCATAAAGTCCATCCATAATAGTGT  
ATGTCACGAGATTTGGAGAGCAGTTCTTATGTTTCATCTCTGAACAAAGATGCAAAGCTTTTTCCACCTTTCCCATGCTGCAGAGGCCGCGGATGAGAACATTGTGCAGGACAACATCAG  
CTTCAAATCCCATGGAAAAAACTTGGTTCCAAATTTCA

>comp168388\_c0\_seq35

AAAAAAAAAAAAATTTTTTTTTTAAAAAAAAAGGAAAAAGGTTTGTGTTTTCTAACAAGCTACTGGTTTGGAGAGTGCACACTGTTCTTTAGCATGCTACATTTATATATAAATCT  
ACAAATTTGCCAATATCATTAAACCATACAGCTATCAGTATTTACTATCAAAACACTTACAAACCCTCACACATGCACATTTTGATTCTTTATCTCGGACTACTTCATTTTTCTTGTGTTT  
CATCTGTTGTACCTGACATACTCTGCTCATAGATGAACTGAGCAAGTAAACCAACAATATCAACAACAATGCCCAACTTTCCGCCACTCAACCTCCGGGCTAGCAAAAACAGCATTAC  
CAACTGCAAGAATAAGCAATAAAATAGTGAAGGTAATATTTCTCCGTGTCTTGTATCTGTGCTGCTTCTTTGCTAGCTGTCTAAACTTCTGTGCTCCTCCTTAGCCTCAGCTTCTTC  
GGAGGTGTGTTCTCCCTCAGGTTCTTAAAGAAGAGGCCTTCATTTTTGTCCCTAACAATCTGTTCTGAAACTCCTCCAAAATTTCTCGTTACTTTCTATCTCCTGCCTATTCATCTCCGCT  
GTTTCTCAAAAAGCCTCAAGCCGGCTCTCCAGCTTCTCCATTATCCTGGTGCCGGCATCATCAAGCTCTTTGAGTGCCTTCTTCCAATAGCATCAAACCTCAGCATGGGCATCTTCTGCAA  
ACTGTGCCAGATTCGATGAACGCTCATCTAGGAAGTTTGTGAGCCGAACCTTCTGTGTCTGGAGCATTGCAATCTGTGCGAGCAAGTCTTGCTTTGCTTCCGTCTGGAATGGAAG  
TGCTGGAGTCGGAGCCATCAGAATTAGAGAAGCAGATGTTTGTGATCTGCGCCTATTGTTGGATTTGCATGGTTGAGTATGAGTTGGCTTTGTAAGTGGGAAGCAGTATTGAATGGCTTTGAG

GGTGTTTCATCTCTCGACCCACCAAGCTGATCAAGAAAGTCTCTGGTGTACCATTTTGCAATCAGAAGATACACCAGAAAGTTCACAAGGCTAAGAATGGCCAGGAGCCAGTAGAAGTAA  
TCCAGGTGACCTCTGTTGAGATTATCTGCTATCCATCCAAGCTGCCATTTCTTGTGTGATATTAGTGACAACGGTCACCAGAAATGTGCTGAGGTAGTTTCCCAATGCGACGGTGGTCA  
GTGAGAGCGCAGAGCACAAGCTCCTCATTGCATCTGGTGCCTGATCGTAGAAGAATTCTAATTGACCAATGAATGTAAAGACCTCAGCCGCACCAACGAGAAAGTACTGAGGCACCTGC  
CAGAATATTGTCATCGGCAAGTAGCCTTCGTGATCATAAAGATTGAGTCTTGCTACCATTGAAGCCTGATGACCTCCAAAATGCCTGCAGCCACCATGGAAAAGATGGAAATGATGAGG  
CCAATGCCCATGCGCGTGAGCTGTGTGAAGCCACGCTCGTTTCTGTGATTCTTCGAGCAACTGGGACGATGACGCGGTGCTAGATTGGTACCCAAATGATAACACTAATGGTGTCAAAG  
ACGGACAGGGAAGCTGCAGGGATTTAAAGTTGGGACCTATATGGGGGTCCATGGTGTCTCCTTGAAGGACAAACATAAGTGTCTATCTGGCCATACACAGTTGAGAAGATGATGCCGCTT  
GCCAGATAGGGAAGACGTACAAGGCTCTTCAGTTCTCTACTTGAGTGACAGTGCAGAGCTTCCATGAATTAACAGTGTCTATCTATATTGTCATATTGAGTTTGCACAGCTGCTTTATC  
AAAGAACTTGAATTGCTCAGTGTGCTCTAGCTTGCAGGCTTCTTCTATGGCAGATTCTTTGTCTGACACTTCATATAATAGAGATTTGTCATCAGGTACTTTCTCTCCAGATTTCTTAAACGA  
AGCAACAAAAACCTGAGCTATTCTTGTGAATGGACTGCCTCCAGGTTTTTGTATGCCTATATAATGGTGTGCCAAGAAGAAGCTCACACGGCAATGGCCATCGCTACTGCGGGAATGCC  
AAAACCCAAGCCCCACCCTAATTTGGTCTGTATCCAAACCAGGACCGATGCTGCAATCATGGCGCCGATATTGATCGAAAAGTAGAACCAATTAAGAAAGAGGTCTTGCTCTTCTTCTC  
TGATTCATCTGAATCGTCAAACCTGGTCAGCACCAAATGAAGAGACACATGGCTTAATTCCTCCAGTTCCAAGGGCAATGAGGTACAATGCTACAAATACAACCTGTAGATTGTGCTGATGTA  
GGTTCAGACTCCATTATGGCAAACAGGTTCTAGTCCTTTCACTGATGCAGCCATTGTAAGCAGTACTAGACCAATAATGTAAATTATCATGAAAGTGGCAATTGTGCAGTATCTTCCAAA  
GTATGCATCAGCTAAAAATGCACCCAAAAGAGGTGTGGCATAGCAGGTTCCAGACCAGTTAGTGACATTGTTGACTGCTACAGCGTTTTGCTTGGTTGAGTCTATCCTTCATGAAGTTCAC  
AATATTGCTGCTCATTCCATAGTATGCCAACCTTTCACAGCATTCAATTTGCAAGAATGTATGGGCATGCTTTCGAAGTGCAGTTTCTTCTTATGGCTGGGTTCCCTTTGAGATCTGTAGT  
CCCATCTTTTGTATGCTTATCCTCAACCACCTCCATGAATGTTTGTAGAGGGAGGATAAGACCACCTAGTCACTTATATAAATGTTGCCTATGAGTCTTCCAGACAATCTCTAAAGAAC

>comp168388\_c0\_seq8

TTGATTAACAACATTATCACTTTCTAATAAGGGGACTCGATTATTCTTCAGATGCTCAAGTGTTTAACCATTCAAGTTTATGTTTTTTTTTTCTGATATCAGAACTTATAGGCAACATTTATAT  
AAGTGACTAGGTGGTCTTATCCTCCCTCTCAAACATTCATGGAGGTGGTTGAGGATAAGCATACAAAAGATGGGACTACAGATCTCAAAGGGAACCCAGCCATAAAGAAGGAAACTGGC  
ACTTGAAAGCATGCCCATACATTCTTGCAAATGAATGCTGTGAAAGGTTGGCATACTATGGAATGAGCAGCAATATTGTGAACTTCATGAAGGATAGACTCAACCAAGCAAACGCTGTA  
GCAGTCAACAATGCTACTAAGTGGTCTGGAACCTGCTATGCCACACCTCTTTGGGTGCATTTTGTAGCTGATGCATACTTGGAAAGATACTGCACAATTGCCACTTTCATGATAATTTACATT  
ATTGGTCTAGTACTGCTTACAATGGCTGCATCAGTGAAGGACTAGAACCTGTTTGCATAATGGAGTCTGCAACCCTACATCAGCACAATCTACAGTTGTATTTGTAGCATTGTACCTCAT  
TGCCCTTGGAAGTGGAGGAATTAAGCCATGTGTCTCTTCATTTGGTGCTGACCAGTTTGACGATTCAGATGAATCAGAGAAGAAGAGCAAGACCTCTTCTTTAATTGGTTCTACTTTTCG  
ATCAATATCGGCGCCATGATTGCAGCATCGGTCCCTGGTTTGGATACAGACCAAATTAGGGTGGGGCTTGGGTTTTGGCATTCCCGCAGTAGCGATGGCCATTGCCGTTGTGAGCTTCTTCT  
TGGGCACACCATTATATAGGCATCAAAAACCTGGAGGCAGTCCATTACAAGAATAGCTCAGGTTTTTGTGCTTCGTTAAGGAAATCTGGAGAGAAAGTACCTGATGACAAATCTCTATT  
ATATGAAGTGTGAGACAAAGAATCTGCCATAGAAGGAAGCCGCAAGCTAGAGCACACTGAGCAATTCAAGTAAGTTCAATGTAAAACCTAAAAGATCTTCACTCAGCACTGTCCATAAAT  
GAAAATTAATATGTAAGAAAAGCAAATTAATTAACCTCGTTTTCTTCTTGAAAGTTGATTGATGATCATTCCGGGGTGTCTTAACCTTAAATGCCTAAGGTAACAATATGAACGGTTAC  
ACGAAGTGTGATGATAATAACATTATTCTAAATATTCTACTATGAATAGAACTCTCAGCATATAGTATACTTAAATCTAAAAAGTTTTTTTTTAGTTTTGTTAATATGAAAAATATGGGAAGAGC  
TGTTTTACGATCTATACTTGAATCGATATCAATATGACAATAAACGAGCTTGAACATGATAACCTACACGCTTGATTTAAGTTCAAGTAGCGTATGTTGCTATTAGCAATCCGACAAATGA  
AAATGATATATCCGTCCAGGTTCTTTGATAAAGCAGCTGTGCAAACCTCAATATGACAATATAGATAGCACTGTAAATTCATGGAAGCTCTGCACTGTCACTCAAGTAGAGGAACTGAAGAG  
CCTTGTACGTCTTCTCCCTATCTGGGCAAGCGGCATCATCTTCTCAACTGTGTATGGCCAGATGAGCACTATGTTTGTCTTCAAGGAGACACCATGGACCCCATATAGGTCCCAACTTTA  
AAATCCCTGCAGCTTCCCTGTCCGTCTTTGACACCATTAGTGTTATCATTTGGGTACCAATCTACGACCGCGTCATCGTCCAGTTGCTCGAAGAATCACAGGAAACGAGCGTGGCTTAC

ACAGCTCACGCGCATGGGCATTGGCCTCATCATTTCCATCTTTTCCATGGTGGCTGCAGGCATTTTGGAGGTCATCAGGCTTCAAATGGTAGCAAGACTCAATCTTTATGATCACGAAGGC  
TACTTGGCCGATGACAATATTCTGGCAGGTGCCTCAGTACTTTCTCGTTGGTGGCGCTGAGGTCTTTACATTCATTGGTCAATTAGAATTCTTCTACGATCAGGCACCAGATGCAATGAGGAG  
CTTGTGCTCTGCGCTCTCACTGACCACCGTCGCATTGGGAACTACCTCAGCACATTTCTGGTGACCGTTGTCCTAATATCACAACAAGAAATGGGCAGCTTGGATGGATAGCAGATAAT  
CTCAACAGAGGTCACCTGGATTACTTCTACTGGCTCCTGGCCATTCTTAGCCTTGTGAACTTTCTGGTGTATCTTCTGATTGCAAAATGGTACACCAGAGACTTTCTTGATCAGCTTGGTGG  
GTCGAGAGATGAACACCCTCAAAGCCATTCAATACTGCTTCCCACTTACAAAGCCAACCTACTCAACCATGCAAATCCAACAATAGGCGCAGATCAAACATCTGCTTCTCTAATTCTGA  
TGGCTCCGACTCCAGCACTTCCATTCCAGACGGAGACAAGCGAAAGCAAGACTTGCTCGCACAGATTGCAATGCTCCAGACACAGAAAGTTCGGCTCACAACTTCTTAGATGAGCGTT  
CATCGAATCTGGCACAGTTTGCAGAAGATGCCAATGCTGAGTTTGTATGCTATTGGAGAGAACGCACTCAAAGAGCTTGATGATGCCGGCACCAGGATAATGGAGAAGCTGGAGAGCCGG  
CTTGAGGCTTTTGGAGGAAACAGCGGAGATGAATAGGCAGGAGATAGAAAGTAACGAGAAAATTTTGGAGGAGTTTCAGGAACAGATTGTTAGGGACAAAAATGAAGGCCTCTTCTTTA  
AGAACCTGAGGGAGAACACACCTCCGAAGAAAGCTGAGGCTAAGGAGGAGGCACAGAAGTTTAGACAGCTAGCAAAGAAGACTGACAGATCAAGGACACGGAGAAATATTTACCTTG  
CACTAATTTTATTGCTTATTCTTGCAAGTGGTAATGCTGTTTTGCTAGCCGGAGGTTGAGTGGCGGAAAGTTGGGGCATTGTTGTTGATATTGTTTGGTTTACTTGCTCAGTTCATCTATG  
AGCAGAGTATGTCAGGTACAACAGATGAAACAAAACAGGAAAAATGAAGTAGTCCGAGATAAAGAATCAAATGTGCATGTGTGAGGGTTTTGTAAGTGTTTTGATAGTAAAATACTGAT  
AGCTGTATGGTTAATGATATTGGCAAATTTGTAGATTTTAATATAAATGTAGCATGCTAAAGAACAGTGTGACAGTGCCTCTCAAACCAGTAGCTTGTAGAAAACAACAACTTTTTC  
CTTTTTTTTTAAAAAAAATTCAGTCAAGAACAAACATTTCCATTGATACCTTCAGGTATAGAATGATCATTCTGCTGTGCATTTCCAGCCTTCTTACACGGAATCACAGCATGCCTTGAAA  
GGAAACATCGCTGAAGCATGTTTAGACAACCTCCGCTGCTCAATACTGCCCTAACTAGTATGTTCCAAGTAATGGAAGTTGGGACAATGCCACAGTACACAGCATCATCCAAAACCTTGAG  
TGCCTCCATCGTCTGTTTATGCAAACAAGCCCTTTAAACACTATATTGTAAGATATGATATCTGGTTGCAACCCAGCCTCAAAAATCTCATTCCACAAATCAGTTGCCTTTTTGCAGTCGC  
CAACTTCATAAAGTCCATCCATAATAGTGTAAATGTCACGAGATTTGGAGAGCAGTTCTTATGTTTCATCTCTGAACAAAGATGCAAAGCTTTTTCCACCTTTCCCATGCTGCAGAGGCCG  
CGATGAGAACATTGTGCAGGACAACATCAGCTTCAAATCCCATGGAAAAAATTTGGTTCCAAATTTCA

>comp168433\_c1\_seq1

GCTTTACAAACAATAAATTGACAGAGCCAAACAGCTGCAAAAACAAAACAAGCAAATGAAAAAATCCATGGCCAACCACTACGAAACCAAACAGCACCAAATCCCCGGCCACA  
AAAGCAGTGGGAAAGCCATTACATAAAGCTCATCTTGCACCTAAATGAAGAAGAGAACCTCACCCAAATCAGCAGAGGCTCTCCTGGAAGAACAGCAAAGGCAAAAAAGTACTTAT  
TATTATGTGCAAGGGAGAAAGACCAGACTATTTATGGGGAGAGAGAGAAGAAGAAATCCTATATATTTATTTGTTTTTACTGATTCAAGCTGTGGCCAATTGCTAGGTGTACAGCTAGTGC  
AGCATCATCTTACCATTTGTCTGCTTTCCATAAATCATTTTTTTTTGGCTGTT

>comp168447\_c0\_seq1

ATTAGACTCGCTTGCACCTCCTCACGTTAGAGTAAACAATCTTTTTACTGCGACATGTCTGTCTTCTTCTCAATCTGCCTTTTTTTTTTTTGGCGAGCTCGAGTGTTTTTCCCTTGATCCTTCAG  
TTCGTAACAGATACATACAAAATTTAAAGCAGGGACACATAGTCAATGATATTATGAAGGATCTATTAGGGAATGGAATTTTACAGTGGACGGCGACATGTGGCGCCATCAGAGGAAAG  
TATCAAGCTTAGAGTTTTCAACAAAAGTTTTGAGAGATTACAGCAGCCATGCTTTTGAAGCAACGCGATCAAACCTTCTGTGCTAATTTCCGAGGCGGCAAATCAAGCAAAATAATAG  
ATATCCAAGTAAAGTAAATACTCATAAGGATTCGAGTTGACTTTTTCAAGCAGGATTAAGTGTAAAGGTTGTATTAATCCTTAGAACCTATTTATGAGGTCAACAATGGATTCCATCTTCAA  
AGTGGGTTTTGGGGTTGAGCTTGACACTCTTGAGGATCGAACAAGGAAGGGAGTATCTTTGCCAAGGCCTTTGATGATTCAAGCAGCCAAACACTTAGACGATTCTTTGATGTTTTCTG  
GAAAATTAGCAGGGCATTGAACATTAGTTTGAAGCTCAGTTGAGAAAGAATATAAAGCTGATTGACGAATTTGTATATAAGGTGATAAATGAGAAGATTGAGCAGCTATCGCAGAAGAA  
AGATGATGCTCTGCTGAAAGAAGACATACTGTCCAGGCTTCTAATGAAAGGGAAAGGGATCCGGAGACCATAAGTTACCAGTATTTAAGAGATATTGTGTTGAATTTTCTACTTGCTGGC  
AGGGATACAACCTGCAGGTACACTTTCATGGTTTTTTTTACATGCTCTGCAAGAATCCTAATGTTCAAGAGAAAGTTGCACAAGAAGTGAGAGATGCGATAATGGAAAAAGAGACTTTGTCCG

ATGAATGAATTTTCATTTGTTTTGACGGAGGAAGTTCTCAATGGAATGCATTACCTTCACGCTGCATTGACCGAGACACTAAGACTGTATCCTGCAGTCCCATTGGACGTGAAGTATTGTTT  
CTCAGATGATACATTACCAGATGGTTTTGACTTGAATGAAGGTGATTTGGTGACCTACCAACCTTTCTCCATGGGCAGAATGAAGTTCCTATGGGGTGAAGATGCCGAGGTATTCCGTCCG  
GATAGGTGGCTAAATAATGATGGTCTATTTGTGGCTGAAAGCCCTTTCAAATTTCTGCATTCCAGGCTGGACCTCGTATCTGTTTGGGAAAAGATTTTGCTTATAGGCAAATGAAGATTTT  
TGCTGCAACTCTCCTGTACTACTTCAAATTTGAGATTTACAGCCGACCAAATTTGAAATTACAGGCCCATGTTAACCTCCAAATGATGGAGAGCTTCGTCTTCGTGCTTTATGCAGGTAGT  
GCAGTTTACAAACTGAAGTGCTGATAAATATTATACGTGGAGATTTGTTCTTCTGCCATAAACTTGGATTATATCGTTTGTAAATTATAAAACATATTCAGAGAAATGTTGCATTACTTTAAAA  
AAAATCCTGTAAACATTTGTATGTCTACATC

>comp168447\_c0\_seq4

ATTAGACTCGCTTGCACCTCCTCACGTTAGAGTAAACAATCTTTTTACTGCGACATGTCTGTCTTCTTCTCAATCTGCCTTTTTTTTTTTTGGCAGCTCGAGTGTTTTTCCCTTGATCCTCAG  
TTCGTAACAGATACATACACAAATTTAAAGCAGGGACACATAGTCAATGATATTATGAAGGATCTATTAGGGAATGGAATTTTACAGTGGACGGCGACATGTGGCGCCATCAGAGGAAAG  
TATCAAGCTTAGAGTTTTCAACAAAAGTTTTGAGAGATTACAGCAGCCATGTCTTTGAAAGCAACGCGATCAAACCTTCTGTGCTAATTTCCGAGGCGGCAAATCAAGCAAATAATAG  
ATATCCAAAACCTATTTATGAGGTCAACAATGGATTCCATCTTCAAAGTGGGTTTTGGGGTTGAGCTTGACACTCTTGGAGGATCGAACAAGGAAGGGAGTATCTTTGCCAAGGCCTTTTGA  
TGATTCAAGCAGCCAAACACTTAGACGATTCTTTGATGTTTTCTGGAAAATTAGCAGGGCATTGAACATTAGTTTGGAAAGCTCAGTTGAGAAAGAATATAAAGCTGATTGACGAATTTGTA  
TATAAGGTGATAAATGAGAAGATTGAGCAGCTATCGCAGAAGAAAGATGATGCTCTGCTGAAAGAAGACATACTGTCCAGGCTTCTAATGGAAAGGGAAAGGGATCCGGAGACCATAAG  
TTACCAGTATTTAAGAGATATTGTGTTGAATTTCTACTTGCTGGCAGGGATACAACTGCAGGTACACTTTCATGGTTTTTTTACATGCTCTGCAAGAATCCTAATGTTCAAGAGAAAGTTG  
CACAAGAAGTGAGAGATGCGATAATGGAAAAAGAGACTTTGTGATGAATGAATTTCAATTTGTTTTGACGGAGGAAGTTCTCAATGGAATGCATTACCTTCACGCTGCATTGACCGAGA  
CACTAAGACTGTATCCTGCAGTCCCATTGGACGTGAAGTATTGTTTCTCAGATGATACATTACCAGATGGTTTTGACTTGAATGAAGGTGATTTGGTGACCTACCAACCTTTCTCCATGGGC  
AGAATGAAGTTCCTATGGGGTGAAGATGCCGAGGTATCCGTCCGGATAGGTGGCTAAATAATGATGGTCTATTTGTGGCTGAAAGCCCTTTCAAATTTCTGCATTCCAGGCTGGACCTC  
GTATCTGTTTGGGAAAAGATTTTGCTTATAGGCAAATGAAGATTTTGTGCAACTCTCCTGTACTACTTCAAATTTGAGATTTACAGCCGACCAAATTTGAAATTACAGGCCCATGTTAACC  
CTCCAAATTTGATGGAGAGCTTCGTCTTCGTGCTTTATGCAGGTAGTGCAGTTTACAAACTGAAGTGCTGATAAATATTATACGTGGAGATTTGTTCTTCTGCCATAAACTTGGATTATATCG  
TTTGTAAATTATAAAACATATTCAGAGAAATGTTGCATTACTTTAAAAAAAATCCTGTAAACATTTGTATGTCTACATC

>comp168465\_c0\_seq5

TACATAAAATTTTACATAATTGATTTACAAAAGCATATATTTTTGCGGAATACGACATATAAAATTTTTAAGAATACATTCTAAGTGAATGTGCCTGAAACATCACAACAAATATATAAACCAT  
TGTTGCACAGTTTATAAATTACTCATTGAAATATTTGAGCTTGTTTTGAGAACTTGATATGCCATGAAAGTAAATACAATTTTATTATATCTGTCTATACGACAGATTTCTCTATTGAAAACTA  
AGCTCTGTAAAAATGTATATTGACTTATAATATACATTTAAAAGAAATTTAAGTAAGTAAAAGACACCTTACTCTCAAGTTTTTTCTTCTTTTCCAATAGCTATGCAGAGAATGCGAAGTCC  
TCCAAACCCATCTCCATATTCATTGCCTATTTGTTTTTTTTTTTTTTTCTCAACAGACAACAAAAGTTTTTTGTTCTGCAAAATTCCTAATATTTGAGAGCATTATAGACCTCTTTTTTAA  
AAACATAAAAAATGAGTGGGTGTGCGCAATTTAAAATTTTCAAAGCTGGGTAGGTGGGATGTTAGGTCTTGAGAAATTCACGTGTATTAATTTAATTAGAGTATGGACGTGCGAGCTAC  
ATCTGGAGTAGGATATATATAGTTATCTTGATCGGCCACGAACCTCGATGCAAAATCAAGTTCAAACCTTTTCGAAATTAATAATTTGGGACCATCTGAACTCCGATTTACCAGTCCCTTGCTT  
ATGACTCCATCAAGTTCTCAAAGTATAGCTTCGAAATCTATTATCATGGCAACTTCTTCTTCTTTGCTCTCCTGCTATACTCTTCTCAATATCTTCTTTTTTCTTCTAATAGAAAAGAAATC  
TCTAGCATCAGCGGGAGGGCTTGTCGAAGAATACAATCTCATTGACATGGAGTCAATTGCTGCCGAGCAAAGATCCATGTCTGATAAAGGTTTGGCAACAATATCTTAATGCCCTGTTTGA  
ACTAATTTTTTTTAAATAAATTAATTGAAATAATAACAATTTTGCATTACTTATGTTTCATTGATAGATACACAAGCTTAAACGAAATGCAAAAGCAAAGATTCTTCAACCACAAATTTCTT  
AATTCATAAATACGTACATTA

>comp168465\_c0\_seq6

TACATAAAATTTTACATAATTGATTTACAAAAGCATATATTTTTGCGGAATACGACATATAAATTTTTTAAGAATACATTCTAAGTGAATGTGCCTGAAACATCACAAACAAATATATAAACCAT  
TGTTGCACAGTTTATAAATTACTCATTGAAATATTTGAGCTTGTTTTGAGAACTTGATATGCCATGAAAGTAAATACAATTTTATTATATCTGTCTATACGACAGATTTCTCTATTGAAAACTA  
AGCTCTGTAAAATGTATATTGACTTATAATATACATTTAAAAGAAATTATTAAGTAAGTAAAAGACACCTTACTCTCAAGTTTTTTCTTCTTTTCCAATAGCTATGCAGAGAATGCGAAGTCC  
TCCAAACCCATCTCCATATTCATTGCCTATTTTGTTTTTTTTTTTTTTTTCTCAACAGACAACAAAAGTTTTTTGTTCTGCAAATTCCTAATATTTGAGAGCATTATAGACCTCTTTTTTAA  
AAACATAAAAAATGAGTGGGTTGTCGCAATTTTAAAATTTTCAAAGCTGGGTTAGGTCGGGATGTTAGGCTTGAGAAATCACGTGTATTAATTTAATTAGAGTATGGACGTCGAGCTAC  
ATCTGAAGTCTGCACAAAATAATTTTTTATAAAATTGAAAGCTATAGTAAATTAGAACCATGACAAGCAACTGAACCTGAAGATAACTCTAGCTAATTGGAATAAATTTGAATGATGCCAC  
TTACAGGACATATATATAGTTATCTTGATCGGTACGAATCTCGATGCAAATCAAGCCGGAACCTTCAAAAATTAATCCAAAGTACCTGAATTCCGATTTTCAGCGAACTTACAATCAAAC  
TGAGCATCTCAGAAATACGAACTCAACGACACTAGATTCGACTTAATTCGAGCCCAAATCAAGGACCCGAAG

>comp168470\_c0\_seq4

CCCCTCGTAATTAGCACAAACACTACTCTCTTCAACTTTCTGCACCAGCCATGCTTTCCTCACCATTTACAATTTGATATATAAGACCCTTAATAATGATTGCATTGGACTAGAGTATAAGA  
TATCTTTGATGCCCAAAAATATTATATTCTCACCCACCATCTATTCATTGACTTGGACTAAAATATTCAAGATCTCTTAAGGATATTTGACCTCAAATAAACTTGATCCTAACATAATTG  
ACACGCACACAAAATATTGAAGAATTTGGGCAATCCTTCAACATGCAACTTAGAGATACAAAACACATTAGTGATAACAAAATGAGCTAGAGTTGAACGAAGAAGCCAAATAAAA  
TTGAATATACTTTAATTATCTAAGGCTTAGAAGATCTTCGAGGTTAAATAGAAATAAGAAAAACATAAACCCCATTTGCATTGACTGTAAACATTGCAGTTCTATGGTGTGCTCCGCATATTT  
CAAGAGGGGGTTCATAGAGCGTCAAGGTTATGCAATGCAGCAGGGTTGCACACGGCATCACTTTATCTCAAATGTACTTGCACCACAACAAATGTAATGGCATGTATGTGTTGGCTTCACTT  
TCCACAGCCCTTTTAAAGATAAGCCACATAGTAAAATAGTAATAAAATTTTAAATTAACCTCAGAAAATAATAATTTCCAGACTTTTTCTCTCATGAATAATTAGTTTTTAAACAGTTACTCC  
ATTAGTAAATAAAATTTTATACTAGCAATATGAACCTTTATAAAGTTTCAAAGCCTTGACAACGTAGTGGTCAGCCAAAGAAGAAATGTTGAGTTTTGATCTTAAACTCATCAAATGAAGC  
AATTTCTTCCATATAGCCTCGATTTATTTTAGACCGAATTAGCTAAGTCATGACTATATATAACAGCAGGGTAGGCAAAATGAATACCGTATAATGAGAAAGTCCTTTGCCCAAGTGTCCAG  
CTGACAAAGCCCGCTTGTTGATATTGATCCACTAATCAGAGTAGTGTGTTCCATAATCATGACTATTGAGTGTATCAGCTATAACACTCCTAGATTCATTACATAGTACTTCTGCGTTTTTTCC  
TCTTAAAGGTTTATGTATTACAACCTTCACTGATCCTGAATTTAAAATACATTCCATTCCTGCAGGCATCAGCTTCTAGTTCCCAAAAGGGTAATGGGCACAACAGGTGCTTCAAGTTTTGA  
CAGCAACAGCGAAGGCTCCTTTCTTAAATGCACCTAGTTTGCCATCCTTACTCCGAGTACCCTCAGGAAAGAAAAACACAGATGCTCCTTTTCTCACACAATCCATACAGCGTTTAAAGAC  
ATTCCAGTTGACTCCTGCTGTCCATACGCCGAAGAGGAATGAGACCCATAAGGAACATTGCCATCCTATTATTGGAATAACAAAATACTCGTCTTGCTAATGAACTTAAAGCTCCTTCC  
AAGCGTAAGAAGGGTGTATGTATCCAAGAAGCTCTGGTGATTGGAAACATAAACGGCAGGAGCATCACCGGGAGGTAAATTATCTAAACCCCTCGAACTCGAACCTATAGAAAGGAGAGA  
TAGTAAAGATCGCCCAATCTTCGCAATCAAGTGATGAAAGTCTTCTTGTGCCGATCCAAGATCATTACAAATGGGTGTACCAGCAACATTACCGCAAAGAGAGGGATCGCGGTATCG  
CAGTGACGGCGTAAAGCAAATCCCACGGACCCCTCGAACCCAAATGAACACCTTCCAGAGAGGGCCTGCCATCACTAGAAGAGCTTGCCGTTGCGATTTGCGACCTAACGATAAACTC  
CTTTGAGTCTTCTCAAGGCTTTTAAAGTGAATGAGCGGCTCCGACCACGAAGTTCAAGCTTATGTGCGAATCGGTATCATCGAAGAAGCGGTAATTTCTTTGAGAGTTGAGGGGATGG  
AGTGATTGCATTTGACGTGCACAACAGGGAAAGGACTGTGCAATTTAAACAGCGAGAAGGTATCCATTTCTCTCCTAGAAAAGAAGACGACGGAAATGGATAGCTTGAAGCCTTGAACG  
ACTACTACAGAAAGGGCAATCCGCCGCCGACGAGGATATTGCGCCTTGATTTTCAGTTGGTATTGCAGCAATAGGTTATTAATTTAAGCACATCCGAAAAGAAAAATATAATTATCTTAGA  
GAAAGCCTAAAAGTCTGTGCGGTATTAATGAAAGCCTAACAGTCTGTCTGTTTATAAGTCGCTTAACTCCATCTTCAACTTATAGAAAGAGCCATAGAAGTCAGGCTATAACAGGTCAAGA  
G

>comp168470\_c1\_seq2

ATGGAGTTAAGCGACTTATGAACAGACAGACTGTTAGGCTTTCATTAATACCGACAGACTTTTAGGCTTCTCTAAGATAATTATATTTTTCTTTTCGGATGTGCTTAAATTAATAACCTATTG  
CTGCAATAACCAACTGAAAATCAAGGCGCAATATCCTCGTCGGGCGGCGGATTGCCCTTCTGTAGTAGTCGTTCAAGGCTTCAAGCTATCCATTTCCGTCGTCTTCTTTTCTAGGAGGAGA  
ATGGATACCTTCTCGCTGTTTAAATTCGACAGTCCTTTCCCTGTTGTGCACGTCAAATGCAATCACTCCATCCCCTCAACTCTGCAAAGAAATTACCGCTTCTTCGATGGGTTTTCAAGATA  
CCGATTCGCACATAAGCTTGAACCTCGTGGTCCGAGCCGCTCATTCACTTTAAAAGCCTTGAGAAGACTCAAAGGAGTGTATCGTTAGGTCGCAAATCGCAACGGCAAGCTCTTCTAG  
TGATGAAAGGCCCTCTCTGGAAGGTTCTCCCTCAATTTCTCAAATGAATCTTTAAAAGATCTCATCAGATCTTTTTACCTTTTTCTTCCCCCCCCACCCCCCTTCTTGTTTTCTTGTTT  
TCTCAGGTGTTCAATTTGGGTTTCGAGGGTCCGTGGGATTTGCTTTTACGCCGTCACTGCGATGACCGCGATCCCCTCTCTTTGCGGTAATGTTGCTGGTACACCCATTTGTAATGATCTTGGAT  
CGGCACAAGAGAAGACTTCATCACTTGATTGCGAAGATTTGGGCGATCTTACTATCTCTCCTTTCTATAGGTTTCGAGTTCGAGGGTTTAGATAATTTACCTCCCAGGTGATGCTCCTGCCGT  
TTATGTTTCCAATCACCAGAGCTTCTGGATACATACCCCTTCTTACGCTTGGAAGGAGCTTTAAGTTCATTAGCAAGACGAGTATTTTTGTTATTCCAATAATAGGATGGGCAATGTTCT  
TATGGGTCTCATTCTCTTCGGCGTATGGACAGCAGGAGTCAACTGGAATGTCTTAAACGCTGTATGGATTGTGTGAGAAAAGGAGCATCTGTGTTTTCTTCTGAGGGTACTCGGAGT  
AAGGATGGCAAACCTAGGTGCATTTAAGAAAGGAGCCTTCGCTGTTGCTGTCAAACTGAAACACCTGTTGTGCCATTACCTTTTTGGGAACTAGAAAAGCTGATGCCTGCAGGAATGGA  
ATGATTTTTAAATTCAGGATCAGTGAAGTTGTAATACATAAACCTTTAAGAGGAAAAACGCAGAACTACTATGTAATGAATCTAGGAGTGTATAGCTGATACTCAATAGTCATGATT  
ATGGAACACACTACTCTGATTAGTGGATCAATATCAACAAGCGGGCTTTGTCAGCTGGAACACTTGGGCAAAGGACTTTCTCATTATACGGTATTCATTTGCCTACCCTGCTGTTATATATA  
GTCATGACTTAGCTAATTCGGTCTAAAATAAATCGAGGCTATATGGAAGAAATTGCTTCATTTGATGAGTTTAAAGATCAAACTCAACATTTCTTCTTTGGCTGACCACTACGTTGTCAAGG  
CTTTTGAACCTTTATAAAGTTCATATTGCTAGTATAAAATTTTATTTACTAATGGAGTAACTGTTAAAACTAATTATTCATGAGAGAAAAAGTCTGGAAATTTATTTTTCTGAGGTTTAAAT  
TAAAATTTTATTACTATTTTACTATGTGGCTTATCTTTAAAAGGGCTGTGGAAAGTGAAGCCAACACATACATGCCATTACATTTGTTGTGGTGAAGTACATTTGAGATAAAGTATGATGCCGT  
GTGCAACCCCTGCTGCATTGCATAACCTTGACGCTCTATGACCCCTCTTGAAATGTGCGGAGCACACCATAGAACTGCAATGTTTACAGTCAATGCAAATGGGGTTTATGTTTTCTTATTT  
CTATTTAACCTCGAAGATCTTCTAAGCCTTAGATAATTAAGTATATTCAATTTTATTTGGCCTCTTCGTTCAACTCTAGCTCATTTTTTGTTATCACTAATGTGTTTTTGTATCTCTAAGTTGCA  
TGTTGAAGGATGCCCCAATTTCTTCAATATTTTTGTGTGCGTGTCAATTATGTTAAGGATCAAGTTTTATTTGAGGTCAAATATCCTTAAAGAGATCTTGAAATATTTTAGTCCAAGTCAATGA  
ATAGATGGTGGGTGAAGAATATAAATATTTTTGGGCATCAAAGATATCTTATACTCTAGTCCAATGCAATCATTATTAAGGGTCTTATATATCAAATTTGTGAAATGGTGAGGAAAGCATGGCT  
GGTGCAGAAAGTTGAAGAGAGTAGTGTTTGTGCTAATTACGAGGGGTATTGTCATTTGAGATACTTTACCATCATAATTCAAGTATTATATGTTCTCTTTAGTAAAACCTTTTCAGCTTTAGG  
GGTATTTCCAAGTTGAACAATTTTATCCTATTTTTCCACATGATTAATTCATATCTATGATTCACTTATTTATCTTTCTGTAAAATAAACTATAACATTACCATTTCTTTGTGGATGGAGTGTT  
GAGAAGTAAAACCTTCATTTAGGGGACATGTTAATACTTAGGTGATTTGTAGCAAAGATTAATAATGATACCTCAAGAAATGATTATATGTGAAATACGAGCTGCACCTATTGGAAATAATTAG  
TGGAATATAGTTTTGGGTGTTTTGGGCATGCATAGCGGAGGAGGACAGTATTATTTACTAAGTGGATATATGGAATGTAATAAAATTATACCAAGGAAAATGCTTTGACCCAACCTCCA  
AAGTCAACTTGACTAGCTTTTATGAAAAACAGACTTGAATTAGCTAGAGTTTACATATTATCTAATA

>comp168479\_c0\_seq2

CAGCCCAAACCGCTGATATATATTAGTAATGTTAATTTGATGCCCTAAAAAATACTGGCTCGTTATATTTAGAGCTCAAATCAAATTAATTAACCAATCCGATTCTCAATATTCAAGT  
GAAATCCAAAAGCCTAATTTCAAGCCCCTAAATTTAATCAAGTAACCGATTGATAAAGCAATAAGAGATTAAGGCTTCAGCTCCAGTAAGTCAGTAGAAGTGCATGCAACTTCATTTACA  
AAAAGCAAATCAAACACTAGTAACAATTCAGCATCATCTGTAATGGTTGACTAAAGGAGGCCTCATCATATTCTACTGCAAGCATGCAACATTGGAAGCAAATTCACATACCCTAGA  
TCCGAAAACGACCGTAATTTGATGTTAAGCATGGTCCTTCAAGGCCTCACTGATTTCTGCAACATGATCCCGAAGTATCTTCCACTGATCCAAGGGAAGAGTTATACCTTTTCTTTTCGGG  
AGCTCCTTCCCGTCCCTTACGAAGAACTCCCTGATATCAACCACAGGTTTTCCCTGCCAGCTCCGAACTGTAACCCCTCCGCCTCTTTGAGAGCTCGCAGACCAGATTCGCCGCTTCGAT  
CGTCGGAGTCCGTTTTGGCGAGCTTCGCCGGCGGCCCGAGTCGCTATCTCCAGAATCATCTTTCCGCTTCTTCCCTTCTTCCACATTTCTTCGCCGGGACCCTTCCACTTAGTAACGGA

AGTTAAGTCAAGGTTTCCTCGAGCTGCCGGCTATTTGAGGCGAGGGCGGGTAGCAAAGCGGCGGAGAGA

>comp168515\_c0\_seq3

TTCAGCATTTTAGCAATTCTCCGTTTTGCTTTCCTCCAGTTTTGTTTGATGCAGCTGTGGTTCAGATGAGGTCTTCATTCTTTGTTTGGAAATTGATGGCTCTACAATAACAACAACAACA  
ACAACAACAATACGGCAACTATTTCTTCTGCGGTGCGCAAGAGCCTTATCAAACATTAATTCTAATGAAAACACCAATAATATGCTGGCCAATGAAGCTGAATTTGATTTGAGCATGAAT  
TTGCTTGGGAATGATATGTTGGAGATGGACATGATTGGTTCCAGACTGGATTTTGGGCAAGAGGAGGATGTTAAGCCTCTTGATGATACATTTGCCATGCGAAATACATTTGTAAAAAATG  
AGGACTCTTTGGATGTCAGTGTGGTTCATCCATCACAGCCGTTCAATGCAGCTCCAATACTGAACAGAAAGATGATCAGAGCCCCGTAGAACAACATGCAGAAACATGAGCTGAAGTGT  
GCTGCTTCATACTTACATTACAAAATTGCAATATCTCAGTTGTATAATTTTTAGTGATTTTTTTTGAATAATGATAGCCTTTTCCTTGATTCTGATGAACCTGAATTGAACCTTGCTGTCATCT  
TTTCTAGCAAAAAGTTTCTTTTTATCTTTCTGCTTTTGATGTTTATGATCTCTAAGTTAGAGTTTCAGGTTGTAGTCATGAATGGAGTGACAAAACAAATAATTAGAATTTTGTGTTATCA  
CCTGAACATAATGTAATCTTTGATTTGGTTATTTGTACTGCTCCATTCTTGAAGAAATAGTTATTTGGCCAAAATCTTCATGGAAATAATGTAAATTGGTTGTTGGATAGAAGTTTTC  
ATAAATTTTATGGTCATATACATTACATCATATAGAAAA

>comp168537\_c3\_seq1

ATTATGATAGTTTTATATAACCAAAATAAAATCAAATTTTATTAAGAAAATTAATGATTCCAACATTATAATGCAAAGCCTCTGTTTTTTTTTTTAGCAAACCATCTTGTAATTTATATAG  
AAAAGAAAATCTTTTAATATTTATATATACAATAATGCCACATTATCTAAGAACTATCACATTTCTATGATCAGCTCCCCTGCTGGCTTTTTCTTCTTGTAATGCTCGAAGCTGTAATGTTGTAC  
ATAGACAAAATTTAAATTTAGGATTCACACTAAATTAAGTAAACAAATCAATTTCTCTCATCTAAACAAATTATAACAATAATGCTAAAGAAAGAATTAAGAATAGTGGGATTAGCTTTGTAC  
AAAGGTGAGAGGGTATGCAAGGCTGGAACAAATAGAATGGATCAGTGGATCATTCAAAGATTTCAAAAATACCCAAATCTTATATGTTGATGTTGGTGTGATGTTCAAGTCTGAAAGTATG  
CCAAAAATGGTGAAAAGTGGTTTTTTTTGGGCAAGAAGTGAAGTACCTACACTTCAATTTATTTGAAGTTTGTATTTGTTGGACTCGTGTGTTTTTTTCTTCTCAAGTTTCGGCCTGCTTGC  
AATTTTCTTCATGTGCTCGTCGGAACATCCGAACAAAGTTTATAAGAGTGGTGTGACTTGTTCAAAGGAGCAGCGAGCAGGGTCTTCGCCAAAATAAAGAACAAGACCATCTGCATTTT  
GACCCACTGCATTATAAAGTGTGTTAGTGACCGAACTTCAGCTCCAGCAACCACAGTAAATCCTTCAAAGTCTTACGAAAAGTCTCAGATATTACCCCATCGCTTTCTGAAGCGATCAG  
CTCCATCTCAACCTTCTCTAATCCTTTGACCACAGCTTGTGTTCTTCAGCTAAAAGTCTTCAATTGTATCTTAGATGCCGCTTCTAGGCTGATAAAATCCTCATGGAAATCCAGCAGATGTGG  
TGACCTTGAAAGCGAGGACCTTACAAAGATAATGCATGAGAGTCATCCTGTTGTTGTCGTAGCAGCATATCTGATAGTTTGAGGAGGCTATCTAAACGGAAACCAACAGCAGCACCTCTTGC  
AGTTCCTGATTAAGTGTATTTCTTAGATATAGAATTTTCTTCATGATTTCTTTAGCTTGTGTTGAGTTACGAATCTTTCACACGAAGCGTCAACAGCATACAAACCTTTTCTTATATCGGCT  
GTCTGTGCATTAAACTGGATTTTAAAACAAAAGACCCTTAACTTGGCCTCTACACGAGGAACCTTCATCAATTCAAGGAAGAAGTCTCACATTTTCCAAGATTTCCCGGTCTCCAGTAT  
AGTTCCTAAGGAGCTCCATCTCTTTTAGTTGGGCAAAATTTAATAAGATTTTCAACTTGATCACCATCTAGGAGAGAATCATCCAATGTTAGAGCAGCATTTCATCATATCGGGTAGCGGC  
ATTTTGATTTTTGTCAGCATGATTTTCAAGTGTATTAGCCCCGTTTTAAATCAATCAAGTGAACCTTTATCAGATTTAGTAGCAGATTTGCCGCGTCTTGTAGATTTAGTAACAGCTGCTGAGAAA  
AGTGTCTCAAGCTCGGAAACATCAAATCTGGCGTGTGTAGACATCAACATGCTTTTGTAAATCTGCCACAGACTTCCTTGCATAGCTCTTGATACTTTCACCCAATGCAATGGCTTTAA  
TGATGACTTCTTTACTGCTGCAGGACTAGCCGAACCTGCAAGTCCATGCTTTTTCCCTCTGCCATTGAATGTAATGCTGGTGGTCCCTTAAACCAGAGCCTGGAGGTGGCGGAGGAGC  
ACCTGGAGTCCCTGGAAGCAATGGAGGCAATGGTACACTTCTCCAGAGGGAGGCTGTGGTAATCGAGTTTACCACCACGTGCAGCAGGTGGAGGTGGAGGAGGAGGAGCTCCACTA  
TGCTCTCCAATAATTTGCAATGTTGAAGAAGCTCCCCTAGATCCACCAGGTAAAGGTGGGGGTGGTGGAGGAGTTCATGTTTTCTGGCAAAGGAGGTGGTGGTGGAGCCCTTCCAGG  
TCTCTGGGAGTGGATGTGGTGGCAGTGTCCCTTAGGAGCTCCAAGCACTGGAGGTGATGTCAATGTTCCCTTAGGAGCTCCAATAAGTGTATGTTGGTGTAGCTTCAATAATAATTGGA  
GGAGGGGTGGGGTGGTGGAACTCCCCTAGTAGCTGGAGGAGGGGTGGTGGTGGTGGTGGAGCTCCACTAATAGTTGAAAATGGGGGTGGTAACGGAGCACCGCTAATGGATGTAG  
GGGGCAGTGATGGCAGCAATGGTGAAAATCCGCTAGTAGTTAGAGAATGACGTGGAGCACCAATTGTAGTGGGAGGAGGTGGTGGTGGAGCAACATTAGTAGCTAAAGGAGGTGGTGG



CGGAGGAGGAGCTTTTGTAGTAGTTAGAGGAGGGGGTGGTGGTGGCGGTGGACATCTACTAGTAGTTGGAGGAGGTGGTGGTGGTGGAGCCACACTATAATTCAGTGGAGAGAGTTGTA  
GGGGCGATCCTGTAAGTCTGCCTGTTAGAGGTAGAGGTATAAGAGGTGGTGTCTCGAACTCCAAAAATTGGAGGGGCTGGAGGCGGTGGTGGTGGTGGTGGAGACTTTATATGAGAAGTT  
TGACATTTATCTTCTGCAAAGCCCCAAGATGAAGTTTGTGGCGAATTGGAAGGTCTTCTGCACCCCTTCAAGGAAAGGTAAATATGTCTCTCAAGGAGAGGGGGTGGTGGTGAAGTTAAT  
GGTGGATTTGCTCCATGGGAAGGGCATGGAGTTGCAGATCCTGGAGACGTAGGAGGAAGAGGAGTTGCCAGGACTGTTGGTGCAACTGAAGCTTTCATGGAGTTGGGGTTAGTTTTAG  
AGCCATTCCATTAGGCAGAGGTGGATATGGTGGTGGAGTTGGAGAATTTGCTGGAGGTAGAGCACTTGAAGGAGCTGTAAACTCTGGTGGAGGAACTGAATTTACGGGTAGAGATTCTC  
CAACAGGAGGGGTAATGGGTTTGAATGGAGATGAAGCATGTCTTTGAGGAGGAGGTGGAGGAGGAGGAG

>comp168537\_c3\_seq16

ATTATGATAGTTTTATATAACCAAAATAAAATCAAATTTTATTAAGAAAATTAATGATTCCAACATTATAATGCAAAAGCCTCTGTTTTTTTTTTTGGACAAACCATCTTGTAAATTTATATAG  
AAAAGAAAATCTTTTAATATTTATATATAACAATAATGCCACATTATCTAAGAACTATCACATTTCTATGATCAGCTCCCCTGCTGGCTTTTTCTTCTGTAATGCTCGAAGCTGTAATGTTGTAC  
ATAGACAAATTTAAATTTAGGATTCACACTAAATTAAGTAAACAAATCAATTTCTCTCATCTAAACAAATTATAACAATAATGCTAAAGAAAGAAATTAAGAATAGTGGGATTAGCTTTGTAC  
AAAGGTGAGAGGGTATGCAAGGCTGGAACAAATAGAATGGATCAGTGGATCATCCAAAGATTTCAAAAATACCCAATTTCTTATATGTTGATGTTGGTGTGATGTTCAAGTCTGAAAGTATG  
CCAAAATGGTGAAAAGTGGTTTTTTTTGGGCAAGAAGTGAAGTACCTACACTTCAATTTATTTGAAGTTTGTATTTGTTGGACTCGTGTGTTTTTTCTTCTCAAGTTCGGCCTGCTTGC  
AATTTTCTTCATGTGCTCGTCGGAACATCCGAACAAAAGTTCATAAGAGTGGTGATGACTTGTTCAAAAGGAGCAGCGAGCAGGGTCTTCGCCAAAATAAAGAACAAGACCATCTGCATTTT  
GACCCACTGCATTATAAAGTGCTGTTAGTGACCGAACTTCAGTCCAGCAACCACAGTAAATCCTTCAAAGTCTTACGAAAAGTCTCAGATATTACCCCATCGCTTTCTGAAGCGATCAG  
CTCCATCTCAACCTTCTCTAATCCTTTGACCACAGCTTGTGTTCTTCAGCTAAAGTCTTCAATTTGATCTTACAAAGATAATGCATGAGAGTCACTCTGTTGTTTCGTAGCACGCATATCTGA  
TAGTTTGAGGAGGCTATCTAAACGGAAACCAACAGCAGCACCTCTTGCAGTTCCTGATTAAGTGTATTTTCTTAGATATAGAATTTTCTTCATGATTTCTTTAGCTTGTGTTGAGTTACGAAT  
CTCTTCACACGAAGCGTCAACAGCATACAAACCTTTTCTTATATCGGCTGTCTGTGCATTAACCTGGATTTTAAACAAAAGACCCTTAACTTGGCCTCTACACGAGGAACCTTCATCAAT  
TCAAGGAAGAACTGCTCACATTTTCCAAGATTTCCCCGGTCTCCAGTATAGTTCTTAAGGAGCTCCATCTCTTCTTAGTTGGGCAAAATTTAATAAGATTTTCAACTTGATCACCATCTAG  
GAGAGAATCATCCAATGTTAGAGCAGCATTATCATATCGGGTAGCGGCATTTTGATTTTTGTCAGCATGATTTCAAGTGTATTAGCCCGTTTTAAATCAATCAAGTGAACCTTTATCAGATTT  
AGTAGCAGATTTGCCGCGTCTTGAGATTTAGTAACAGCTGCTGAGAAAAGTGTCTCAAGCTCGGAAACATCAAATTTGCGGTGCTGTAGACATCAACATGCTTTTGTAAATCTGCCAC  
AGACTTCCCTGCATAGCTCTTGATACTTTCACCCAATGCAATGGCTTTAATGATGACTTCTTACTGCTGCAGGACTAGCCGAACCTGCAAGTCCATGTCTTTTCCCTCTGCCATGAAATGT  
AATGCTGGTGGTCTCTTAAACCAGAGCCTGGAGGTGGCGGAGGAGCACCTGGAGTCTTGAAGCAATGGAGGCAATGGTACACTTCTCCAGAGGGAGGCTGTGGTAATCGAGTTT  
CACCACCAGTGCAGCAGGTGGAGGTGGAGGAGGAGGAGCTCCACTATGTCCTCCAATAATTTGCAATGTTGAAGAAGCTCCCCTAGATCCACCAGGTAAAGGTGGGGGTGGTGGAGG  
AGTTCCATGTTTTCTGGCAAAGGAGGTGGTGGTGGAGCCCTTCCAGGTCTCTGGGAGTGGATGTGGTGGCAGTGTCCCCTAGGAGCTCCAAGCACTGGAGGTGATGTCAATGTTT  
CCCTAGGAGCTCCAATAAGTATGATGGTGTAGCTTCATTAATAATTGGAGGAGGGGGTGGGGTGGTGGAACTCCCCTAGTAGCTGGAGGAGGGGGTGGTGGTGGTGGTGGAGCTCCA  
CTAATAGTTGGAATGGGGTGGTAACGGAGCACCGCTAATGGATGTAGGGGGCAGTGATGGCAGCAATGGTGAACCTCCGCTAGTAGTTAGAGAATGACGTGGAGCACCAATTGTAGT  
GGGAGGAGGTGGTGGTGGAGCAACATTAGTAGCTAAAGGAGGTGGTGGCGGAGGAGGAGCTTTTGTAGTAGTTAGAGGAGGGGGTGGTGGTGGCGGTGGACATCTACTAGTAGTTGGA  
GGAGGTGGTGGTGGTGGAGCCACACTATAATTCAGTGGAGAGAGTTGTAGGGCGATCCTGTAAGTCTGCCTGTTAGAGGTAGAGGTATAAGAGGTGGTGTCTCGAACTCCAAAAATTGG  
AGGGGCTGGAGGCGGTGGTGGTGGTGGTGGAGACTTTATATGAGAAGTTTGCATTTATCTTCTGCAAAGCCCCAAGATGAAGTTTGTGGCGAATTGGAAGGTCTTCTGCACCCCTTCAAG  
GAAAGGTAAATATGTCTCTCAAGGAGAGGGGGTGGTGGTGAAGTTAATGGTGGATTTGCTCCATGGGAAGGGCATGGAGTTGCAGATCCTGGAGACGTAGGAGGAAGAGGAGTTGCC  
AGGACTGTTGGTGCAACTGAAGCTTTCATGGAGTTGGGGTTAGTTTTAGAGCCATTCCATTAGGCAGAGGTGGATATGGTGGTGGAGTTGGAGAATTTGCTGGAGGTAGAGCACTTGA

AGGAGCTGTAAACTCTGGTGGAGGAACTGAATTTACGGGTAGAGATTCTCCAACAGGAGGGGTAATGGGTTTGAATGGAGATGAAGCATGTCTTTGAGGAGGAGGTGGAGGAGGAGGA  
G

>comp168537\_c3\_seq25

ATTATGATAGTTTTATATAACCAAATAAAATCAAATTTTATTAAGAAAATTAATGATTCCAACATTATAATGCAAAGCCTCTGTTTTTTTTTTAGCAAACCATCTTGTAATTTATATAG  
AAAAGAAAATCTTTAATATTTATATATAACAATAATGCCACATTATCTAAGAACTATCACATTTCTATGATCAGCTCCCTGCTGGCTTTTTCTTCTTGTAATGCTCGAAGAAAGGTGAGAGG  
GTATGCAAGGCTGGAACAAATAGAATGGATCAGTGGATCATCCAAAGATTTCAAAAATACCCAATTCTTATATGTTGATGTTGGTGTGCATGTTCAAGTCTGAAAGTATGCCAAAAATGGTG  
AAAAGTGGTTTTTTTTGGGCAAGAAGTGAAGTACCTACACTTCAATTTATTTGAAGTTTGTATTTTGTGGACTCGTGTGTTTTTTCTTCTCAAGTTCGGCCTGCTTGCAATTTCTTCATG  
TGCTCGTCGGAACATCCGAACAAAGTTCATAAGAGTGGTGTGACTTGTTCAAAGGAGCAGCGAGCAGGGTCTTCGCCAAAATAAAGAACAAGACCATCTGCATTTTGACCCACTGCAT  
TATAAAGTGCTGTTAGTGACCGAACTTCAGCTCCAGCAACCACAGTAAAATCCTTCAAAGTCTTACGAAAAGTCTCAGATATTACCCCATCGCTTTCTGAAGCGATCAGCTCCATCTCAAC  
CTTCTCTAATCCTTTGACCACAGCTTGTGTTCTTCAGCTAAAGTCTTCAATTTGATCTTACAAAGATAATGCATGAGAGTCATCCTGTTGTTGCGTAGCACGCATATCTGATAGTTTGAGGAG  
GCTATCTAAACGGAAACCAACAGCAGCACCTCTTGCAGTTCCTGATTAAGTGTATTTCTTAGATATAGAATTTCTTCATGATTTCTTTAGCTTGTGTTGAGTTACGAATCTCTTCACACGA  
AGCGTCAACAGCATACAAACCTTTCTTATATCGGCTGTCTGTGCATTAACCTGGATTTAAACAAAAGACCCTTAACTTGGCCTCTACACGAGGAACCTTCATCAACTCCAGAAAGAA  
CCGTCCGATCCACGAATCTGGCTGAAATCGGCGCCGTTTCGCATCATGTCTCCGCAAATCCAGCGCAAATTTGCGATGTGCGCTCGATCGAACGATCACAAGCGTCTGTTAAATAGAGGCC  
GAACGCCTCACTGTTGGCAGCAATCTCCTCCACGCGAAACCACACTCGCTCTCTACTTCTCCTCCCGACATCCCAACCTCCTGCTCTCTCTCCGATCCCGACCACAAACCACGATCGC  
CTCCTCTCACACAAACACCTAACCCGAGCTCTTCCTCCTCTCTTCCCTGTCCGACGC

>comp168537\_c3\_seq9

ATTATGATAGTTTTATATAACCAAATAAAATCAAATTTTATTAAGAAAATTAATGATTCCAACATTATAATGCAAAGCCTCTGTTTTTTTTTTAGCAAACCATCTTGTAATTTATATAG  
AAAAGAAAATCTTTAATATTTATATATAACAATAATGCCACATTATCTAAGAACTATCACATTTCTATGATCAGCTCCCTGCTGGCTTTTTCTTCTTGTAATGCTCGAAGCTGTAATGTTGTAC  
ATAGACAAATTTAAATTTAGGATTCACACTAAATTAAGTAAACAAATCAATTTCTCTCATCTAAACAAATTATAACAATAATGCTAAAGAAAGAATTAAGAATAGTGGGATTAGCTTTGTAC  
AAAGGTGAGAGGGTATGCAAGGCTGGAACAAATAGAATGGATCAGTGGATCATCCAAAGATTTCAAAAATACCCAATTCTTATATGTTGATGTTGGTGTGCATGTTCAAGTCTGAAAGTATG  
CCAAAATGGTGAAAAGTGGTTTTTTTTGGGCAAGAAGTGAAGTACCTACACTTCAATTTATTTGAAGTTTGTATTTTGTGGACTCGTGTGTTTTTTCTTCTCAAGTTCGGCCTGCTTGC  
AATTTCTTCATGTGCTCGTCGGAACATCCGAACAAAGTTCATAAGAGTGGTGTGACTTGTTCAAAGGAGCAGCGAGCAGGGTCTTCGCCAAAATAAAGAACAAGACCATCTGCATTTT  
GACCCACTGCATTATAAAGTGCTGTTAGTGACCGAACTTCAGCTCCAGCAACCACAGTAAAATCCTTCAAAGTCTTACGAAAAGTCTCAGATATTACCCCATCGCTTTCTGAAGCGATCAG  
CTCCATCTCAACCTTCTCTAATCCTTTGACCACAGCTTGTGTTCTTCAGCTAAAGTCTTCAATTTGATCTTACAAAGATAATGCATGAGAGTCATCCTGTTGTTGCGTAGCACGCATATCTGA  
TAGTTTGAGGAGGCTATCTAAACGGAAACCAACAGCAGCACCTCTTGCAGTTCCTGATTAAGTGTATTTCTTAGATATAGAATTTCTTCATGATTTCTTTAGCTTGTGTTGAGTTACGAAT  
CTCTTCACACGAAGCGTCAACAGCATACAAACCTTTCTTATATCGGCTGTCTGTGCATTAACCTGGATTTAAACAAAAGACCCTTAACTTGGCCTCTACACGAGGAACCTTCATCAAC  
TCCAGAAAGAACCGTCCGATCCACGAATCTGGCTGAAATCGGCGCCGTTTCGCATCATGTCTCCGCAAATCCAGCGCAAATTTGCGATGTGCGCTCGATCGAACGATCACAAGCGTCTGTT  
AAATAGAGGCCGAACGCCTCACTGTTGGCAGCAATCTCCTCCACGCGAAACCACACTCGCTCTCTACTTCTCCTCCCGACATCCCAACCTCCTGCTCTCTCTCCGATCCCGACCACAA  
ACCACGACTCAAAGCTACCTCTCCCGACCTCCGTCCAGACCCTGCCGCCTCAAACCTCTTTATTCTACCGGAAAGACCCTCTCCGATCCTCTCACCTGACCCCATCTCCTCTACCCGT  
CGTACCTCTTGCACCTTCGACCCCAAGCCGAGAGAGAGAGAGAGAAAGATTGAGAGGAAGAAAGAAGTCTCATACCTCCTCTCCAGCCGAACCTCCAGCCGATCTCCATCC  
CTCTCCTCTATCCCGTTCACGCGCTTCTTTGGCCCATCCTTGGCCGAACCAGAGAGTGAGAGAGAGGTTTATTTATTTTGTGTTTTTATTTTAAATTGTGAGTTTTTTTTATTTTGGTTTTTG

TTTTGAAAGTTTTTCAATTTAGACATTTGTCATTTTTGAAATGCTGGTTGAATTTGACAAAATTTCTAGATTACATTTCTAAGTATTTTATTCATATTGTATAATATTATTTCTTATTGTATAA  
ATTCTTTAGCATGTCAATCGTTGTTTTGGAGTTG

>comp168554\_c3\_seq1

GAGATCGGCATAGTTCCGACAGCTTCAAACTTTCCACAAAAAATTAGTTTCCCACTCCCTCAACAAACCCATGGCAATGGAGTCAATATCTCCGTCTCCCGACTCCATCAAGCCATGGCT  
AAGCCTAAAAGGCCAAAGTTGTTCTTATCACC GGAGCTTCCCTCCGGTATTGGTTCGCGAGGTTTGTCTTGATCTCGCCAAAAGCAGGGTGCCTCGTTATTGCCGCCGCACGAAGAGTTGACCG  
CCTCAAATCTCTCTGCGACGAGATCAACGGATGGGGATCCTCGGCCTCCGTTTCTCACCGTCGATCAGAGCCGTGGCCGTGGAGCTGGATGTGAGCGGAAAGGGGGCGGAGATTGAGG  
CGGGTGTGCAGAGGGCGTGAATGCGTTTGAAGGATTGATGCGCTGCTGAATAACGCTGGGGTTAGAGGTAGTGTCAATTCCTCACTAGATTGGACTGAAGATGAATGGC ATAGCAATT  
TGTCCTACTAATTTAACGGCTCATGGCTAGTTTCTAAATATGTCTGCAAACTTATGCGAGATGCTAAAGTTAAGGGATGTGTGATCAATATGTCGTCCATTACTGGACTTGATCGTGGACAAT  
TACCTGGAGGCTTGGGTTATGTTGCTTCGAAAACCTGGTCTTAATGCCATTACCAAGGTGATGGCATTGGAATTGGGGGTGTTTGGTATACGAGTGAATTCATATCACCTGGGTTGTTAAA  
TCTGAGATAACTGCAGGACTCTTACAAAAGACTGGCTCGTGAACGTAACGAAGAGGACAATACCTTTGAAAACCTCTGGAACGGTAGATCCTGCTACTAACATCGCTTGTGCGATATTG  
ATCCATGACTCCTCAGAGTATGTGACTGGCAACATCTTCATAGTTGATGCGGGTGCCACCCTCCCAGGCTGTCCCATCTTCTCCTCTCTGAGCATCTCTTATGTATAATTTGTGATTTGTTT  
TCTGATATGGAAC TGAAGTTTTCTCTAGTTGAGTCCATTAGTTTTAAGATTTGTAGTTTGAATATAGGAAGTGGATGTAATTCAGCAAAATCAAAGAACGGCACAATAAATTTAGGAAGA  
GAACACTTTTTATTGAAAGAAATTATGAAGAAAAATACAAGATACAGTTGGATCTAGAGGAATATCCAGTTCTCCCAAATCCTTAGCCATTGGCTAAAATCTTCAACCTAAGCAAACTA  
ATTTTAGCAAAATCCACCATAAAAAATGAACCATAGGATAAAACCCTACATAAAGCATAACAATAACAAGGCAAAATCCCCAAAACAGCACATTCATTTGAATTTTCCCTTCATAGCCGCC  
CCATTTCCCTTTGAATTATCCCCCTGGGTCCCACCCTAGGCAGGATCTTATGTAGGTAGAAGTTCCACATGATGTA AACCATGGCCAGTCTAGGAGGTATCGATCCATCAATGCCCCCTCC  
CAAAGAACAACCTTATCCTCAAGATGGAAAGACAAAATTTGATGTTTCATTCTCTCGCACGACTCCCATGTGGCGTCATAGTGATGAGGATATCCGTAGGTGATTTACAGCACTCTTACCAT  
CAGAGGAGTTGTCGAGCAACAGCTATGCTTCATAGTCTCTATTTCTGATGTTTTATTTTATTCATGTTATTTATATTTTATGTTTTTCCATTTGTACCCCTATGAGGAAGTTATTGCATGTTGTA  
GCCCAAGGACAATTCATCTTTATGGTTTTTTTTTATTTTTTCGGATGGCCTATATATA

>comp168565\_c4\_seq3

TTGATCTTCTCGTCTTCATTTAGAGAAAAAGAAATCTTTTGCAGACAAAGATACGGAGGAGAAAAACTCCGCGCTTACCTAATTTTATCTGCTTCGATACGCGGAAGAGATGAATCGT  
GATTCAAATATCTTTGATGAAGAAAATGTGAATCCATTCGCGGATCCCAAGAAAAAGGAAAAAGAGAGCAAATAGGGAAACGGATCTGAAGAAGAGAGAACAGGATATAAAGCGGA  
GGGAGGATGCTTTGACAAGAGCTGGAGTAACCATCGAAGAGAAAAACTGGCCGCCATTTTTTCTATTATTCACCATGATATCACTAAAGAAATTCCTGTCCATGCACAAAAGTTGCAGTA  
TCTGGCTTTTGAAGTTGGCTAGGTATAGTTCTTTGTCTTGTGTACAATGTTGTTGCTGTGACTGTCTGCTGGATCAGAGGAGGAGGTGTCATAATATTCTTGCTTGCAAACATATATGCGTT  
GCTTGGGATTCTCTATCATATTTGCTTTGGTATAGGCCTCTGTATCGTGCAATGAGGACTGATAGTGCCTCAAGTTTGGCTTTTTTTTTCTCCTTTACCTGATTCACATTGGCTTTTGTATC  
GTTGCTGCTGTTGCTCCTCCGATTGTGTTGCTGGGAAGTCATTGACGGGATTCTAGCAGCAATTGATACCCTCTCAGATGAACTTTTGGTGGGGTCTTTTACTTTATTGGTTTTGGCTT  
GTTTTGCTTGGAGGCGCTTCTAAGCCTTTGGGTTCTTCAGAAAATCTACTTGTACTTCAGAGGGCACAAATGAGCTTGGTGCTGGAAATAATATCTTTTATGGGTGATCTTGTCTTTTGT  
GAGCTGCAGTGCTACATGATAATATTTGGTCATCTTAGTTTACAACAATTTAGTTATATTTGGTATGCTTTAGAATTGCCTGATAATCATAATCTTCAGACTTTATTTTCTGTATATTTGGTACTA  
ATGTGCACGTTTATTGTGTTGTGATAAGATTCTAAAAAATCCCTATGATTCTTTGTTCTTCATTGAAAAACAAGTTTGTGTTTTGCAATTAAGTGCATCATAGAATTCAGTTCTTCATC  
CTAAGCGATTTCCAGTCCATATGTAAGCAGGTGCAATTTAGTCAATTTGATTTGCTTTGAGAGCTGTGTAATACAGACTAAGTAATCAAAAATCTTATATCGCACTCTTCTTTAAACAAATCT  
AAAGCAGGTGTTTGGATGCAGGATTTAAGCAGCAGTTGAGATAAAATCTACCAAAC

>comp168569\_c0\_seq11

TTTATGTAGATAATAATTTGCCAATTGTATTGGCAATCTATTGCATCATGAAATAAGCAAATATTTTGATATTTATTTTACTACATAAGAGACCCATTCAAGCTAAAAGAAAATTCAAATATTA  
TGTACAAATTTTATAACATTAGTTACCAAGTTTAGCTCAATTTCAATTTATAAACCAATAACCAATACAATTGACCATTAATCATCCTCTTTCAATGTAATGGGTTCAAGAAAAAGAGAGGTG  
ACATTGTCTTTTCATTTTCTCTAAGTTAAGCTCACCAACATTCTCATCATTTGATTGTCGATAAAAAAGATGAGCAACTCGTGGCAAATTTATCACAACCATTTTCAACATTTCTTCATATTC  
AAGGCTTTTATCCATTCTTTATTCAATTCTTTCCAGCATTGTGTTATGATAGTCCTTATACACTTTTGTGCCTCTGATTTCAGAAACATGCTTCTCTTTCATATAGCATTGGATGGATTTTGAAC  
ATCTCCCCTTCCAAACTCACCTTTGATGTTCTAAATCATTGTAAAGCCGAAAAAGAATAGATGATTGGCAGATGATGCTTGGATAGAAGTCAAAGCGTTTCGAGTGAAAAATTTGTAAAG  
TTCTCACTCAGACAAAGTGCCATAATCGAGATTAAGGGGCTGCAACTGAAATCCATGCATTAGCTAAATATTCTTCAAATGTAGGGCAATATCTTGTGTAATACCATCTTGCCTCCACCATA  
TATGCTTTGCATAAATCTAACCATGCTCTTTTAAGATATGGGAGAATATCCAACCCCTTATCTTTCATGATTTTGCATGCTAAGCTATTCACTGTGTTGAATAATTCTGAAAGGCATATCTTCAT  
GTATTGAGGAAGTGATTGCTTGTAGCAAAGTCCCACCTCTCAACAGCATCGGTAAAGTGTGTTAGCTCGTCCAATGAGCCGTAGATGTCATAGATATCATCTATAACATTTATGAAGCATA  
TTGCTTTAGCAAATCTTTTCTACATGTTGAAAAATAAGGTTCTATTGCTAAACCTACGGCTAAGAAGTAGCTCTCCAAAGGCCATTCCCTTGCAAAACTCAATTCACCACCAGCTAGATTA  
CTATTTTGGCCACCACCTTGTAATTCCTTGAGCTCTCTATTGTAGATGCTTTGGGTATGTTGAAGTCCAATTGAGCAAATTCAAACAAGATTGGGTCCACATCAAGCTCTTTCATGTTG  
CGAGCATGCTCGATGAACATTGGAGCTTGAAGCTTCTGAATTCATGGTGCAAAGGAAGCTCCAAGGCTAGGGCTATGTGTTTTGCAAGCACTGTATTTGTTGTAGAATTTGATCTCATGC  
AATCATTTAGATGTTTTAGAGCAAATTCCTTTGCTTCATCTATTTTCATCTTCTCCATCCATCGAAAGAAATGAAGCTTCATAGAGACTTAAAAGTCCTTTGATATCATGAAAAACATATGGCT  
TGAAGCACCCCTTCTCATCTTTATAGCTTTTAAACCAATAAATCTTTGGAGACCTCAAAGCCATGCTCCCTTGAAAGCTATAAAGATGAGAAGGGGTGCTTCAAGCCATATGTTTTTCATGAT  
ATCAAAGGACTTTTAAAGTCTCTATGAAGCTTCATTTCTTTTCGATGGATGGAGAAGATGAAATAGATGAAGCAAAGGAATTTGCTCTAAAACATCTAAATGATTGCATGAGATCAAATTCTAC  
AACAAATACAGTGCTTGCAAAACACATAGCCCTAGCCTTGGAGCTTCCCTTGCACCATAGAATTCATAAGCTTCAAGCTCCAATGTTTCATCGAGCATGCTCGCAACATGAAAGAGCTTGAT  
GTGGACCCAATCTTGTTTGAATTTGCTCAATTGGACTTCAACATGACCCAAAGCATCTACAATAGAGAGCTCAAGGAAATTACAAGGTACATATTGTTAGAAATTTTAAAAACATTACATTT  
TTATCTGACTGAATGAGGATTAATAATTAACAAGCATATATTTATATACTGTTATAATGTTTTAGGTGGTGGGCAAAAATAAGTAATCTAGCTGGTGGTGAATTGAGTTTTGCAAGGGAATGG  
CCTTTGGAGAGCTACTTCTTAGCCGTAGGTTTAGCAATAGAACCTTATTTTTCAACATGTAGAAAAGAATTTGCTAAAGCAATATGCTTCATAAATGTTATAGATGATATCTATGACATCTAC  
GGCTCATTGGACGAGCTACAACACTTTACCGATGCTGTTGAGAGGTGGGACTTTGCTACAAGCAAATCACTTCCCTCAATACATGAAGATATGCCTTTTCAAGATTATTCAACACAGTGAATA  
GCTTAGCATGCAAAATCATGAAAGATAAGGGGTGGATATTCTCCCATATCTTAAAAGAGCAGTAAAGTTGTTAAAACCTCTTAAAAATTTTCAAAGTCTTTTCTTGTGAGAATGTTTTCT  
AAGTGCTTGAAATTTATTTATTTTATTTTCAGTGGTTAGATTTATGCAAAGCATATATGGTGGAGGCAAGATGGTATTACACAAGATATTGCCCTACATTTGAAGAATATTTAGCTAATGCATGGA  
TTTCAGTTGCAGCCCTTTAATCTCGATTATGGCACTTTGTCTGAGTGAGAACTTAACAAATTTTCACTCGAACGCTTTGACTTCTATCCAAGCATCATCTGCCAATCATCTATTCTTTTTTC  
GGCTTTACAATGATTTAGGAACATCAAAGGGTGAGTTTGGAAAGGGGAGATGTTTTCAAATCCATCCAATGCTATATGAAAGAGAAGCATGTTTCTGAATCAGAGGCACAAAAGTGTATAA  
GGACTATCATAACAAATGCTGGAAAGAATTGAATAAAGAATGGATAAAAGCCTTGAAATATGAAGAAATGTTGAAAATGGTTGTGATAAATTTGCCACGAGTTGCTCATCTTTTTTATCG  
ACAATCAAATGATGAGAATGTTGGTGAGCTTAACTTAGAGAAAATGAAAGACAATGTCACCTCTCTTTTTCTTGAACCCATTACATTGAAAGAGGATGATTAATGGTCAATTGTATTGGTTA  
TTGGTTTATAAATTGAAATTGAGCTAAACTTGGTAACTAATGTTATAAAATTTGTACATAATATTTGAATTTTCTTTTAGCTTGAATGGGTCTCT

>comp168569\_c0\_seq30

TTTATGTAGATAATAATTTGCCAATTGTATTGGCAATCTATTGCATCATGAAATAAGCAAATATTTTGATATTTATTTTACTACATAAGAGACCCATTCAAGCTAAAAGAAAATTCAAATATTA  
TGTACAAATTTTATAACATTAGTTACCAAGTTTAGCTCAATTTCAATTTATAAACCAATAACCAATACAATTGACCATTAATCATCCTCTTTCAATGTAATGGGTTCAAGAAAAAGAGAGGTG  
ACATTGTCTTTTCATTTTCTCTAAGTTAAGCTCACCAACATTCTCATCATTTGATTGTCGATAAAAAAGATGAGCAACTCGTGGCAAATTTATCACAACCATTTTCAACATTTCTTCATATTC  
AAGGCTTTTATCCATTCTTTATTCAATTCTTTCCAGCATTGTGTTATGATAGTCCTTATACACTTTTGTGCCTCTGATTTCAGAAACATGCTTCTCTTTCATATAGCATTGGATGGATTTTGAAC

ATCTCCCCTTCCAAACTCACCTTTTGATGTTCCATAATCATTGTAAAGCCGAAAAAGAATAGATGATTGGCAGATGATGCTTGGATAGAAGTCAAAGCGTTCGAGTGAAAAATTTGTTAAG  
TTCTCACTCAGACAAAGTGCCATAATCGAGATTAAGGGGCTGCAACTGAAATCCATGCATTAGCTAAATATTCTTCAAATGTAGGGCAATATCTTGTGTAATACCATCTTGCCTCCACCATA  
TATGCTTTGCATAAATCTAACCATGCTCTTTTAAAGATATGGGAGAATATCCAACCCCTTATCTTTTCATGATTTTGCATGCTAAGCTATTCCTGTGTTGAATAATTCTGAAAGGCATATCTTCAT  
GTATTGAGGAAGTGATTGCTTGTAGCAAAGTCCCACCTCTCAACAGCATCGGTAAAGTGTGTAGCTCGTCCAATGAGCCGTAGATGTCATAGATATCATCTATAACATTTATGAAGCATA  
TTGCTTTAGCAAATCTTTTCTACATGTTGAAAAATAAGGTTCTATTGCTAAACCTACGGCTAAGAAGTAGCTCTCCAAGGCCATTCCCTTGCAAAACCTCAATTCACCACCAGCTAGATTA  
CTTATTTTTGCCACCACCTTGTAAATTCCTTGAGCTCTCTATTGTAGATGCTTTGGGTCATGTTGAAGTCCAATTGAGCAAATTCAAACAAGATTGGGTCCACATCAAGCTCTTTCATGTTG  
CGAGCATGCTCGATGAACATTGGAGCTTGAAGCTTCTGAATCTATGGTGCAAAGGAAGCTCCAAGGCTAGGGCTATGTGTTTTGCAAGCACTGTATTTGTTGTAGAATTTGATCTCATGC  
AATCATTTAGATGTTTTAGAGCAAATTCCTTTGCTTCATCTATTTTCATCTTCTCCATCCATCGAAAGAAATGAAGCTTCATAGAGACTTAAAAAGTCCCTTTGATATCATGAAAAACATATGGCT  
TGAAGCACCCCTTCTCATCTTTATAGCTTTTAAACCAATAAATCTTTGGAGACCTCAAAGCCATGCTCCCTTGAAAGCTATAAAGATGAGAAGGGGTGCTTCAAGCCATATGTTTTTCATGAT  
ATCAAAGGACTTTTAAAGTCTCTATGAAGCTTCATTTCTTTTCGATGGATGGAGAAGATGAAATAGATGAAGCAAAGGAATTTGCTCTAAAAACATCTAAATGATTGCATGAGATCAAATCTAC  
AACAAATACAGTGCTTGCAAAACACATAGCCCTAGCCTTGGAGCTTCCCTTGCACCATAGAATTCATAAGCTTCAAGCTCCAATGTTTCATCGAGCATGCTCGCAACATGAAAGAGCTTGAT  
GTGGACCAATCTGTTTGAATTTGCTCAATTGGACTTCAACATGACCCAAAGCATCTACAATAGAGAGCTCAAGGAAATTACAAGGTACATATTGTTAGAAATTTTAAAAACATTACATTT  
TTATCTGACTGAATGAGGATTAATAATTAACAAGCATATATTTATATACTGTTATAATGTTTTAGGTGGTGGGCAAAAATAAGTAATCTAGCTGGTGGTGAATTTGAGTTTTGCAAGGGAATGG  
CCTTTGGAGAGCTACTTCTTAGCCGTAGGTTTAGCAATAGAACCTTATTTTTCAACATGTAGAAAAGAATTTGCTAAAGCAATATGCTTCATAAATGTTATAGATGATATCTATGACATCTAC  
GGCTCATTGGACGAGCTACAACACTTTACCGATGCTGTTGAGAGGTGGGACTTTGCTACAAGCAAATCACTTCCCTCAATACATGAAGATATGCCTTTTCAGAATTATTCAACACAGTGAATA  
GCTTAGCATGCAAAATCATGAAAAGATAAGGGGTTGGATATTCTCCCATATCTTAAAAGAGCATGGTTAGATTTATGCAAAAGCATATATGGTGGAGGCAAGATGGTATTACACAAGATATTGC  
CCTACATTTGAAGAATATTTAGCTAATGCATGGATTTCAAGTTGCAGCCCTTTAATCTCGATTATGGCACTTTGTCTGAGTGAGAACTTAACAAATTTTCACTCGAACGCTTTGACTTCTAT  
CCAAGCATCATCTGCCAATCATCTATCTTTTTTCGGCTTTACAATGATTTAGGAACATCAAAGGGTGAAGTTTGAAGGGGAGATGTTTCAAATCCATCCAATGCTATATGAAAGAGAAGCA  
TGTTTCTGAATCAGAGGCACAAAAGTGTATAAGGACTATCATAAACAAATGCTGGAAAGAATTGAATAAAGAATGGATAAAAGCCTTGAAATATGAAGAAATGTTGAAAATGGTTGTGAT  
AAATTTGCCACGAGTTGCTCATCTTTTTTATCGACAATCAAATGATGAGAATGTTGGTGAGCTTAACTTAGAGAAAATGAAAGACAATGTCACCTCTCTTTTTCTTGAACCCATTACATTGA  
AAGAGGATGATTAATGGTCAATTGTATTGGTTATTGGTTTATAAATTGAAATTGAGCTAAACTTGGTAACTAATGTTATAAAAATTTGTACATAATATTTGAATTTTCTTTTAGCTTGAATGGGT  
CTCT

>comp168569\_c0\_seq41

TTTATGTAGATAATAATTTGCCAATTGTATTGGCAATCTATTGCATCATGAAATAAGCAAATATTTTGATATTTATTTTTACTACATAAGAGACCCATTCAAGCTAAAAGAAAATTCAAATATTA  
TGTAACAATTTATAACATTAGTTACCAAGTTTAGCTCAATTTCAATTTATAAACCAATAACCAATACAATTGACCATTAATCATCTCTTTCAATGTAATGGGTTCAAGAAAAAGAGAGGTG  
ACATTGTCTTTTCAATTTCTTAAGTTAAGCTCACCAACATTCTCATCATTTGATTGTCGATAAAAAAGATGAGCAACTCGTGGCAAATTTATCACAACCATTTTCAACATTTCTTCATATTT  
AAGGCTTTTATCCATTCTTTATTCATTTCTTTCCAGCATTTGTTTATGATAGTCTTATAACTTTTGTGCTCTGATTTCAGAAACATGCTTCTCTTTTCATATAGCATTGGATGGATTTTGAAC  
ATCTCCCCTTCCAAACTCACCTACATTTCATGCAAAAATATGTTTATTTTTTCATCATCATTAGATAAATATTTAATTGGAAAAAATATTCTATTACAATATACTAATACATTATGTATTAGAATGA  
TACTAATTTCAATTACATGTGGCATTGATTTCA

>comp168569\_c0\_seq43

TTTATGTAGATAATAATTTGCCAATTGTATTGGCAATCTATTGCATCATGAAATAAGCAAATATTTTGATATTTATTTTTACTACATAAGAGACCCATTCAAGCTAAAAGAAAATTCAAATATTA

TGTACAAATTTTATAACATTAGTTACCAAGTTTAGCTCAATTTCAATTTATAAACCAATAACCAATACAATTGACCATTAATCATCCTCTTTCAATGTAATGGGTTCAAGAAAAAGAGAGGTG  
ACATTGTCTTTTCATTTTCTCTAAGTTAAGCTCACCAACATTTCTCATCATTTGATTGTGCGATAAAAAAGATGAGCAAACTCGTGGCAAATTTATCACAACCATTTTCAACATTTCTTCATATTT  
AAGGCTTTTATCCATTCTTTATTCAATTTCTTTCCAGCATTTGTTTATGATAGTCCTTATACACTTTTGTGCTCTGATTGAGAAACATGCTTCTCTTTTCATATAGCATTGGATGGATTTTGAAC  
ATCTCCCCTTCCAAACTCACCTTTGATGTTCCATAATCATGTAAAGCCGAAAAAGAATAGATGATTGGCAGATGATGCTTGGATAGAAGTCAAAGCGTTCGAGTGAAAAATTTGTTAAG  
TTCTCACTCAGACAAAGTGCCATAATCGAGATTAAGGGGCTGCAACTGAAATCCATGCATTAGCTAAATATTCTTCAAATGTAGGGCAATATCTTGTGTAATACCATTTGCCTCCACCATA  
TATGCTTTGCATAAATCTAACCCTGAAATAAAATAATAAATTTCAAGCACTTAGGAAAACATTTCTCACAAGAAAAGAACTTTGAAAATTTTAAAGATTTTAAACAACCTTACTGCTCTTT  
AAGATATGGGAGAATATCCAACCCCTTATCTTTCATGATTTTGCATGCTAAGCTATTCCTGTGTTGAATAATTCTGAAAGGCATATCTTCATGTATTGAGGAAGTATTGCTTGTAGCAA  
GTCCCACCTCTCAACAGCATCGGTAAAGTGTGTAGCTCGTCCAATGAGCCGTAGATGTCATAGATATCATCTATAACATTTATGAAGCATATTGCTTTAGCAAATTTCTTTTCTACATGTTGA  
AAAATAAGGTTCTATTGCTAAACCTACGGCTAAGAAGTAGCTCTCAAAGGCCATTCCTTTGCAAACTCAATTCACCACCAGCTAGATTACTTATTTTGGCCACCACCTTGTAATTTCT  
TGAGCTCTTATTGTAGATGCTTTGGGTGATGTTGAAGTCCAATTGAGCAAATTCAAACAAGATTGGGTCCACATCAAGCTCTTTTCATGTTGCGAGCATGCTCGATGAACATTGGAGCTTG  
AAGCTTCTGAATTTCTATGGTGCAAAGGAAGCTCCAAGGCTAGGGCTATGTGTTTTGCAAGCACTGTATTTGTTGTAGAATTTGATCTCATGCAATCATTTAGATGTTTTAGAGCAAATTCCT  
TTGCTTCATCTATTTTCATCTTCTCCATCCATCGAAAGAAATGAAGCTTCATAGAGACTTAAAAGTCCTTTGATATCATGAAAAACATATGGCTTGAAGCACCCCTTCTCATCTTTATAGCTTTT  
AACCAATAAATCTTTGGAGACCTCAAAGCCATGCTCCCTTGAAAGCTATAAAGATGAGAAGGGGTGCTTCAAGCCATATGTTTTTCATGATATCAAAGGACTTTTAAAGTCTCTATGAAGCT  
TCATTTCTTTTCGATGGATGGAGAAGATGAAATAGATGAAGCAAAGGAATTTGCTCTAAAACATCTAAATGATTGCATGAGATCAAATTTCTACAACAATAACAGTGCTTGCAAAACACATAG  
CCTAGCCTTGGAGCTTCCTTTGCACCATAGAATTCATAAGCTTCAAGCTCCAATGTTTCATCGAGCATGCTCGCAACATGAAAGAGCTTGTATGTTGACCCAATCTTGTGTTGAATTTGCTCAA  
TTGGACTTCAACATGACCCAAAGCATCTACAATAGAGAGCTCAAGGAAATTACAAGGTACATATTGTTAGAAATTTTAAAAACATTACATTTTTATCTGACTGAATGAGGATTAATAATTA  
CAAGCATATATTTATATACTGTTATAATGTTTTAGGTGGTGGGCAAAAATAAGTAATCTAGCTGGTGGTGAATGAGTTTTGCAAGGGAATGGCCTTTGGAGAGCTACTTCTTAGCCGTAGG  
TTTAGCAATAGAACCTTATTTTTCAACATGTAGAAAAGAATTTGCTAAAGCAATATGCTTCATAAATGTTATAGATGATATCTATGACATCTACGGCTCATTGGACGAGCTACAACACTTTAC  
CGATGCTGTTGAGAGGTGGGACTTTGCTACAAGCAAATCACTTCCTCAATACATGAAGATATGCCTTTTCAAGATTATTCAACACAGTGAATAGCTTAGCATGCAAAATCATGAAAGATAAG  
GGGTTGGATATTCTCCCATATCTTAAAAGAGCATGGTTAGATTTATGCAAAGCATATATGGTGGAGGCAAGATGGTATTACACAAGATATTGCCCTACATTTGAAGAATATTTAGCTAATGCA  
TGGATTTTCAGTTGAGCCCTTTAATCTCGATTATGGCACTTTGTCTGAGTGAGAACTTAACAAATTTTTCACTCGAACGCTTTGACTTCTATCCAAGCATCATCTGCCAATCATCTATTCTT  
TTTCGGCTTTACAATGATTTAGGAACATCAAAGGGTGAGTTTGAAGGGGAGATGTTTCAAATCCATCCAATGCTATATGAAAGAGAAGCATGTTTCTGAATCAGAGGCACAAAAGTGT  
ATAAGGACTATCATAAACAATGCTGGAAAGAATTGAATAAAGAATGGATAAAAGCCTTGAATATGAAGAAATGTTGAAAATGGTTGTGATAAATTTGCCACGAGTTGCTCATCTTTTTT  
ATCGACAATCAAATGATGAGAATGTTGGTGAGCTTAACTTAGAGAAAATGAAAGACAATGTCACCTCTTTTTTCTTGAACCCATTACATTGAAAGAGGATGATTAATGGTCAATTGTATT  
GGTTATTGGTTT

>comp168569\_c0\_seq48

AGGGCAATTTCTATTTGAATTCCTTCTTGATTTCCCCCTCTTTATTCTTTAATAAGACGAATGAACTGCCTCCCTACTTCAAATCTTTATCTTTCTACTGATTTTGTACATAATTATGGCTTCT  
TCCTGCAATTAACACAGCACAGCGCTCAGTCTTCTCATCAACTCCATACCTTCGCCTTTGCAAGAAGTGTACTCTGTTGCTTCGAACTCTTCCACTCCCTTCGAAGAACAACAAA  
TTATCAGCCGAGCTTATGGGATGACAGTCAAATACAGTCTCTGAATACTACTTCTTCACTGGAGATGTGCATGAAAAGAGAAGAGAGAAGCTGAAGGAGGATGTCAAGCGTCTTATTA  
GGAGAAGAGTTTTGCTGATCAGCTGGAGCTTTTTGATTCATTGCAAAAGCTTGGGGTGGCTTATCATTTTGAAGAGGAAATCAAATATTTGTTAAATTTGATGAAATGTTTCAAGAGAAG  
TTAAGAATGGAATTCCTGAGGATGTTTCATGTCATGGCCTTGTATTTAGGCTTTCAAGGGAGCATGGCTTTGAGGTCTCAAAGATTTATTGGTTAAAAGCTATAAAGATGAGAAGGGGT

GCTTCAAGCCATATGTTTTTCATGATATCAAAGGACTTTTAAGTCTCTATGAAGCTTCATTTCTTTTCGATGGATGGAGAAGATGAAATAGATGAAGCAAAGGAATTTGCTCTAAAACATCTA  
AATGATTGCATGAGATCAAATTCTACAACAAATACAGTGCTTGCAAAACACATAGCCCTAGCCTTGGAGCTTCCTTTGCACCATAGAATTCATAAGCTTCAAGCTCCAATGTTTCATCGAGC  
ATGCTCGCAACATGAAAGAGCTTGATGTGGACCCAATCTTGTGTTGAATTTGCTCAATTGGACTTCAACATGACCCAAAGCATCTACAATAGAGAGCTCAAGGAAATTACAAGGTACATATT  
GTTAGAAATTTAAAAACATTACATTTTATCTGACTGAATGAGGATTAATAATTAACAAGCATATATTTATATACTGTTATAATGTTTTAGGTGGTGGGCAAAAATAAGTAATCTAGCTGGTG  
GTGAATTGAGTTTTGCAAGGGAATGGCCTTTGGAGAGCTACTTCTTAGCCGTAGGTTAGCAATAGAACCCTTATTTTTCAACATGTAGAAAAGAATTTGCTAAAGCAATATGCTTCATAAAT  
GTTATAGATGATATCTATGACATCTACGGCTCATTGGACGAGCTACAACACTTTACCGATGCTGTTGAG

>comp168569\_c0\_seq71

GTCTTCTAGTGAGTTGGGTTATTGCTTCTTTTAAAGTTTTTCAATTTTTCTTTGTTCTCTTCTATATTGTTATTATCCAGTTTTGTAGGGTCATTTCTTTTGTAAGGTGATAGTGCTATCAAGCTAT  
TTTGTAGGTTCTTCTTTTTGTAGGTTGATCATGCATCAAATTTAGATAATAACATTACATAATATGAACAAAGAAAAATTTACAAGGAGTTAGTAAATGGACAAAATATAAGTATGATATTAT  
CTGATCATATTCATGTACAAGCCACCTACCAATTCAATTGACCATTAATCACCTTCGTTGAATGTAATGGGTTCAAGGAGAAGTGAGATGACATTATCCTTCATTTGTCTATGTTAAGCTCA  
CCAATATTCTCACCATTTGATTGTAGATAAAAAAGGTGAGCAGCTCGTGGCAAGTTTTATTGCAACCATTTTGAATGTTTCTTCGTAGCTTAAGCCTTTTATCCATTCTCTATTCAATTTCTTCC  
AATATTTATTATAATATTCCTTATAAACTCTTGTGCCTCCAATTCTGAAACATGTTTCTTTCATGTAACATTGGATGGATTTTGAACATCTCCCCTTTGCAGCTCACCTTTGATGTTCT  
AAATCATTGTAAGCCGAAAAATAATAGACGATTGACGGATGATGCTTGGATAGAAGTCGAAGCTTTTCGAGTGAAAAATTTGTTAAGTTCTCACTCAGACAAAAGTGCCATAATCGAGATT  
AAAGGGGCTGCAACTGAAATCCATGCATTAGCTAAATATTCTTCAAATGTAGGGCAATATCTTGTGTAATACCATCTTGCCTCCACCATATATGCTTTGCATAAATCTAACCCTGAAATAAA  
ATAATAAATTTCAAGCACTTAGGAAAACATTCTCACAAGAAAAGAACTTTGAAAATTTTAAAGAGTTTTAACAACTTTACTGCTCTTTTAAAGATATGGGAGAATATCCAACCCCTTATCTTT  
CATGATTTTGCATGCTAAGCTATTCACTGTGTTGAATAATTCTGAAAGGCATATCTTCATGTATTGAGGAAGTGATTGCTTGTAGCAAAGTCCCACCTCTCAACAGCATCGGTAAAGTGTT  
GTAGCTCGTCCAATGAGCCGTAGATGTCATAGATATCATCTATAACATTTATGAAGCATATTGCTTTAGCAAATTTCTTTTCTACATGTTGAAAAATAAGGTTCTATTGCTAAACCTACGGCTAA  
GAAGTAGCTCTCCAAAGGCCATTCCCTTGCAAAACTCAATTCACCACCAGCTAGATTACTTATTTTTGCCCACCACCTTGTAATTTCCCTTGAGCTCTCTATTGTAGATGCTTTGGGTGATGTT  
GAAGTCCAATTGAGCAAATTCAAACAAGATTGGGTCCACATCAAGCTCTTTCATGTTGCGAGCATGCTCGATGAACATTGGAGCTTGAAGCTTCTGAATTCATGGTGCAAAGGAAGCTC  
CAAGGCTAGGGCTATGTGTTTTGCAAGCACTGTATTTGTTGTAGAATTTGATCTCATGCAATCATTAGATGTTTTAGAGCAAATTCCTTTGCTTCATCTATTTTCATCTTCTCCATCCATCGAA  
AGAAATGAAGCTTCATAGAGACTTAAAAGTCTTTGATATCATGAAAAACATATGGCTTGAAGCACCCCTTCTCATCTTTATAGCTTTTAAACCAATAAATCTTTGGAGACCTCAAAGCCATG  
CTCCCTTGAAAGCCTAAAATACAAGGCCATGACATGAACATCCTCAGTGAATTCCATTCTTAACCTTCTTCTGAAACATTTTCATCAAATTTAACAATAATTTGATTTCTCTTCAAATGATA  
AGCCACCCCAAGCTTTTGCAATGAATCAAAAAGCTCCAGCTGATCAGCAAAACTCTTCTCCTTAATAAGACGCTTGACATCCTCCTCAGCTTCTCTCTTCTTCTTTCATGCACATCTCCA  
GTGAAAGAAGTAGTATTCAGAGACTGTATTTGACTGTGATCCATAAGCTCGGCTGATAATTTGTTGTTCTTCGAAGGGAAGTGGAAGAGTTTGAAGCAACAGAGTAACACTTCTTGCAA  
AGGCGAAGGTATGGAGTTGATGAGAAAGACTGAGCGCTGTGCTGTGTTTTAATTGCAGGAAGAAGCCATAATTATGTACAAAATCAGTAGAAAGATAAAGATTTGAAGTAGGGAGGCA  
GTTCAATTCGTCTTATTAAGAATAAAGAGGGGGGAAATCAAGAAGGAATTCAAATGAAAGCTGGATGAAGGCCTATTGAAGCTATCTCATAATTTATAACACTGTTGCTTGTACGAAGGG  
ACAATATTTTTTTTTTTTTTCTTAAAAAATTTGCGAAAAAAG

>comp168569\_c0\_seq73

GTCTTCTAGTGAGTTGGGTTATTGCTTCTTTTAAAGTTTTTCAATTTTTCTTTGTTCTCTTCTATATTGTTATTATCCAGTTTTGTAGGGTCATTTCTTTTGTAAGGTGATAGTGCTATCAAGCTAT  
TTTGTAGGTTCTTCTTTTTGTAGGTTGATCATGCATCAAATTTAGATAATAACATTACATAATATGAACAAAGAAAAATTTACAAGGAGTTAGTAAATGGACAAAATATAAGTATGATATTAT  
CTGATCATATTCATGTACAAGCCACCTACCAATTCAATTGACCATTAATCACCTTCGTTGAATGTAATGGGTTCAAGGAGAAGTGAGATGACATTATCCTTCATTTGTCTATGTTAAGCTCA

CCAATATTCTCACCATTTGATTGTAGATAAAAAAGGTGAGCAGCTCGTGGCAAGTTTATTGCAACCATTTTGAATGTTTCTTCGTAGCTTAAGCCTTTTATCCATTCTCTATTCAATTCTTTCC  
AATATTTATTATAATATTCCCTTATAAACTCTTGTGCCTCCAATTCTGAAACATGTTTCTTTCATGTAACATTGGATGGATTTTGAACATCTCCCCTTTGCAGCTCACCCCTTTGATGTTCCCT  
AAATCATTGTAAAGCCGAAAAATAAGACGATTGACGGATGATGCTTGGATAGAAGTCGAAGCTTTCGAGTGAAAAATTTGTAAAGTTCTCACTCAGACAAAAGTGCCATAATCGAGATT  
AAAGGGGCTGCAACTGAAATCCATGCATTAGCTAAATATTCTTCAAATGTAGGGCAATATCTTGTGTAATACCATCTTGCCTCCACCATATATGCTTTGCATAAATCTAACCATGCTCTTTTAA  
GATATGGGAGAATATCCAACCCCTTATCTTTCATGATTTTGCATGCTAAGCTATTCAGTGTGTTGAATAATTCTGAAAGGCATATCTTCATGTATTGAGGAAGTGATTGCTTGTAGCAAAGT  
CCCACCTCTCAACAGCATCGGTAAAGTGTTGTAGCTCGTCCAATGAGCCGTAGATGTCATAGATATCATCTATAACATTTATGAAGCATATTGCTTTAGCAAATCTTTTCTACATGTTGAAA  
AATAAGGTTCTATTGCTAAACCTACGGCTAAGAAGTAGCTCTCAAAGGCCATTCCCTTGCAAAACCTCAATTCACCACCAGCTAGATTACTTATTTTGGCCACCACCTTGTAATTTCCCTTG  
AGCTCTCTATTGTAGATGCTTTGGGTTCATGTTGAAGTCCAATTGAGCAAATTCAAACAAGATTGGGTCCACATCAAGCTCTTTCATGTTGCGAGCATGCTCGATGAACATTGGAGCTTGAA  
GCTTCTGAATTCTATGGTGCAAAGGAAGCTCCAAGGCTAGGGCTATGTGTTTTGCAAGCACTGTATTTGTTGTAGAATTTGATCTCATGCAATCATTTAGATGTTTTAGAGCAAATTCCTTT  
GCTTCATCTATTTTCATCTTCTCCATCCATCGAAAGAAATGAAGCTTCATAGAGACTTAAAAGTCCCTTTGATATCATGAAAAACATATGGCTTGAAGCACCCCTTCTCATCTTTATAGCTTTTA  
ACCAATAAATCTTTGGAGACCTCAAAGCCATGCTCCCTTGAAAGCCTAAAATACAAGGCCATGACATGAACATCCTCAGTGAATTCCATTCTTAACTTCTCTTCTGAACATTTTCATCAAATT  
TAACAAATATTTGATTTCCCTCTTCAAATGATAAGCCACCCCAAGCTTTTGAATGAATCAAAAAGCTCCAGCTGATCAGCAAAACTCTTCTCCTTAATAAGACGCTTGACATCCTCCTTCA  
GCTTCTCTTCTCTTTTCATGCACATCTCCAGTGAAAGAAGTAGTATTCAGAGACTGTATTTGACTGTCATCCATAAGCTCGGCTGATAATTTGTTGTTCTTCGAAGGGAAGTGGAAGAG  
TTCGAAGCAACAGAGTAACACTTCTTGCAAAGGCGAAGGTATGGAGTTGATGAGAAAGACTGAGCGCTGTGCTGTGTTTTTAATGCAGGAAGAAGCCATAATTATGTACAAAATCAGTA  
GAAAGATAAAGATTTGAAGTAGGGAGGCAGTTCATTCGTCTTATTAAGAATAAAGAGGGGGGAAATCAAGAAGGAATTCAAATGAAAGCTGGATGAAGGCCTATTGAAGCTATCTCATA  
ATTTATAACACTGTTGCTTGTACGAAGGGACAATATTTTTTTTTTTTTCTTAAAAAATTTGCGAAAAAAG

>comp168569\_c0\_seq76

TTTATGTAGATAATAATTTGCCAATTGTATTGGCAATCTATTGCATCATGAAATAAGCAAATATTTTGATATTTATTTTACTACATAAGAGACCCATTCAAGCTAAAAGAAAATTCAAATATTA  
TGTAACAAATTTATAACATTAGTTACCAAGTTTAGCTCAATTTCAATTTATAAACCAATAACCAATACAATTGACCATTAATCATCCTCTTTCAATGTAATGGGTTCAAGAAAAAGAGAGGTG  
ACATTGTCTTTTCATTTCTCTAAGTTAAGCTCACCAACATTCATCATTTGATTGTGCGATAAAAAAGATGAGCAACTCGTGGCAAATTTATCACAACCATTTTCAACATTTCTTCATATTT  
AAGGCTTTTATCCATTTCTTATTCAATTTCTTCCAGCATTTGTTTATGATAGTCTTATAACACTTTTGTGCCTCTGATTCAGAAACATGCTTCTCTTTCATATAGCATTGGATGGATTTTGAAC  
ATCTCCCCTTCCAAACTCACCCCTTTGATGTTCCATAATCATGTAAAGCCGAAAAAGAATAGATGATTGGCAGATGATGCTTGGATAGAAGTCAAAGCGTTCGAGTGAAAAATTTGTTAAG  
TTCTCACTCAGACAAAGTGCCATAATCGAGATTAAGGGGCTGCAACTGAAATCCATGCATTAGCTAAATATTCTTCAAATGTAGGGCAATATCTTGTGTAATACCATCTTGCCTCCACCATA  
TATGCTTTGCATAAATCTAACCATGCTCTTTTAAAGATATGGGAGAATATCCAACCCCTTATCTTTCATGATTTTGCATGCTAAGCTATTCAGTGTGTTGAATAATTCTGAAAGGCATATCTTCAT  
GTATTGAGGAAGTGATTGCTTGTAGCAAAGTCCCACCTCTCAACAGCATCGGTAAAGTGTTGTAGCTCGTCCAATGAGCCGTAGATGTCATAGATATCATCTATAACATTTATGAAGCATA  
TTGCTTTAGCAAATCTTTTCTACATGTTGAAAAATAAGGTTCTATTGCTAAACCTACGGCTAAGAAGTAGCTCTCAAAGGCCATTCCCTTGCAAAACCTCAATTCACCACCAGCTAGATTA  
CTTATTTTGGCCACCACCTTGTAATTTCCCTTGAGCTCTCTATTGTAGATGCTTTGGGTTCATGTTGAAGTCCAATTGAGCAAATTCAAACAAGATTGGGTCCACATCAAGCTCTTTCATGTTG  
CGAGCATGCTCGATGAACATTGGAGCTTGAAGCTTCTGAATCTATGGTGCAAAGGAAGCTCCAAGGCTAGGGCTATGTGTTTTGCAAGCACTGTATTTGTTGTAGAATTTGATCTCATGC  
AATCATTTAGATGTTTTAGAGCAAATTCCTTTGCTTCATCTATTTTCATCTTCTCCATCCATCGAAAGAAATGAAGCTTCATAGAGACTTAAAAGTCCCTTTGATATCATGAAAAACATATGGCT  
TGAAGCACCCCTTCTCATCTTTATAGCTTTTAAACCAATAAATCTTTGGAGACCTCAAAGCCATGCTCCCTTGAAAGCTATAAAGATGAGAAGGGGTGCTTCAAGCCATATGTTTTTCATGAT  
ATCAAAGGACTTTTAAAGTCTCTATGAAGCTTCATTTCTTTCGATGGATGGAGAAGATGAAATAGATGAAGCAAAGGAATTTGCTCTAAAAACATCTAAATGATTGCATGAGATCAAATCTAC



AACAAATACAGTGCTTGCAAAACACATAGCCCTAGCCTTGGAGCTTCCTTTGCACCATAGAATTCATAAGCTTCAAGCTCCAATGTTTCATCGAGCATGCTCGCAACATGAAAGAGCTTGAT  
GTGGACCCAATCTTGTGTTGAATTTGCTCAATTGGACTTCAACATGACCCAAAGCATCTACAATAGAGAGCTCAAGGAAATTACAAGGTGGTGGGCAAAAATAAGTAATCTAGCTGGTGGT  
GAATTGAGTTTTGCAAGGGAATGGCCTTTGGAGAGCTACTTCTTAGCCGTAGGTTTAGCAATAGAACCTTATTTTTCAACATGTAGAAAAGAATTTGCTAAAGCAATATGCTTCATAAATGT  
TATAGATGATATCTATGACATCTACGGCTCATTGGACGAGCTACAACACTTTACCGATGCTGTTGAGAGGTGGGACTTTGCTACAAGCAAATCACTTCCTCAATACATGAAGATATGCCTTT  
CAGAATTATTCAACACAGTGAATAGCTTAGCATGCAAAAATCATGAAAAGATAAGGGGTTGGATATTCTCCCATATCTTAAAAGAGCATGGTTAGATTTATGCAAAAGCATATATGGTGGAGGCA  
AGATGGTATTACACAAGATATTGCCCTACATTTGAAGAATATTTAGCTAATGCATGGATTTCAAGTTGCAGCCCCTTAATCTCGATTATGGCACTTTGTCTGAGTGAGAACTTAACAAATTTT  
TCACTCGAACGCTTTGACTTCTATCCAAGCATCATCTGCCAATCATCTATTCTTTTTCGGCTTTACAATGATTTAGGAACATCAAAGGGTGAGTTTGAAGGGGAGATGTTTCAAAATCCAT  
CCAATGCTATATGAAAGAGAAAGCATGTTTCTGAATCAGAGGCACAAAAGTGTATAAGGACTATCATAAACAAATGCTGGAAAGAATTGAATAAAGAATGGATAAAAGCCTTGAAATATGA  
AGAAATGTTGAAAATGGTTGTGATAAATTTGCCACGAGTTGCTCATCTTTTTTATCGACAATCAAATGATGAGAATGTTGGTGAGCTTAACTTAGAGAAAATGAAAGACAATGTCACCTCT  
CTTTTTCTTGAACCCATTACATTGAAAGAGGATGATTAATGGTCAATTGTATTGGTTATTGGTTTATAAATTGAAATTGAGCTAAACTTGGTAACTAATGTTATAAAATTTGTACATAATATT  
GAATTTTCTTTTAGCTTGAATGGGTCTCT

>comp168574\_c4\_seq1

CCCATTTTACCACAACCTCCAGCATCAAATATTGCAGCAATGGTCTTCTCCTTTTTTACAGTAGCATTCTCTCTGTTTTTCATGTCTGCAATCCTACAACAAAAATATGGGCCTCTCTACCCAA  
GCCAAGGGGTAAGAGCCAGCACTCAATACTAGCTTTTCGATCCTTACAAATCAACATATTACAAGGTGGTTTGCCTTTTATCAGACGCAAGCACAAAGGAGTTCAGCTTGAAGTCTTCTCATCA  
GAGACCGGCCAATGGGTGCAACACAACCTGAATTGGGGAGTTGATACCAACA

>comp168604\_c2\_seq2

ACAACCGCCCACATTATCGCCTGTTGTTGCCAAAAACGTCGGCGCACACCATCCCCTATAAGGCTGATGCTCACAGTTGATATGAACCGGATGCCCACTGACTTTGTTCGCATGTCTCCCA  
CCAAGGTGCATGCATGCTGTTGACACAAATACTGAAGTCCTTTGGACCAGGGGAGGAACCATCCTTAATTTTTAGATGGGGGAGGGAACTTATAAGTTATAAGTAACTGTTGGTGTTCCT  
CGAATTTGGCTTGACCCTTCACTACTAGAAAATGGGTCTAAAAAAAAAAAAAAAAAGAAAACAAATTACATAACCCGATTATAGAAACATCTTCATGACTTAATGTTTCGTACAACAAAAGATCTA  
AACAGCAAATAATTTATCAAAATTTCTTTACTCCAGATTTCCAAAATTTGCAAAATCCCCTTAAACCCTATTAGGTGCTCCATTCACGCAACATTCCTCATTAAAGATTCATCAAACCTTCTC  
CACAAAAAATGGGGACTCGCAACACTATAGAAACTACCCCGCCATCAATGGATGCTGAATCATGCAAGAACGAGTTGCTGGTGATTAAGCCGTCGTACCTTGGCGAGATTAACGTAGAAG  
AAGAGTGGCTTCTTCGTATTGAAACCTGAATGCGATACTTCTTACGCGGATTGTTTATGCTAAGGCCATTCACAGCGTTGGTAACCCCTTCCATTTTCCCGTAAACCCTAAACGGGAGGA  
GGAAACCCTGAAACCTTAAATAGCAGAATCAACGAAGAGAGAGAACTCCCAAACGACAACCTTAGTCCTAACCGATTAATCGAGAAGAAGGGAATCCACTATAATTTATGCTAAATTTG  
GGGGGAACAAAGCGATATGACTATTTATAGCCGAACAGTTAAGAAACCAGCCTTTGTT

>comp168604\_c2\_seq3

AAAAAAAAAACATCGGATACCGGATTCATTTCGACTGCAGCATTTCATACCCCAAAAAAAAAATATCTGGCAAAACAACTTCAACAAAGATAGATTATATACGGCTCCAAGCCAAATTAAT  
AAGCATTTGAATTATAGGTGCGCAAATCGGAGCATCATTACTGTTTCAGATCTCACAAATAAATAACACCGTAAATGTGTGCATACAAATAAAAAGATGAAAAATGAACAGTAGTTATATAAT  
CATTTAGTTCTGTTTCATCCCCTTGAGCACCACCGCTCGCTTCTGCAGCAGCAGCAGCCATCAACTCATCGAACTCTTCAGTCTTGCCAGTAATATTGAAATCTTTGCTTTCTGCAATGGTC  
GGACCCTGTAGTCATCTTTGATATCCACAGTAGATGTCAATATCTGCTTACAGTAGCAAATCCACTGTTCTTCAGAATCTCCGCAACGGAAACAGTAGTTGCAATGGCCATTCCAAGAGC  
AGAAAGCTCGATTTCAATGTGCACTTGCATGTGCTCTTTGGCGAGATTAACGTAGAAGAAGAGTGGCTTCTTCGTATTGAAACCTGAATGCGATACTTCTTACGCGGATTGTTTATGCTAA  
GGCCATTCACAGCGTTGGTAACCCCTTCCATTTTCCCGTAAACCCTAAACGGGAGGAGGAAACCCTGAAACCTTAAATAGCAGAATCAACGAAGAGAGAGAACTCCCAAACGACAACC

TTAGTCCTAACCGATTAATCGAGAAGAAGGGAATCCACTATAATTTATGCTAAATTTGGGGGAACAAAGCGATATGACTATTTATAGCCGAACAGTTAAGAAACCAGCCTTTGTT

>comp168617\_c0\_seq3

TAATTCAGTGTAAATACCAGTCATGCAAAATAAACCATCTACTTCTCGAATTGTCCAAGAGGACCTGTACCGCGGACAATCGTTGGGTAGTGGGATCTTCATCCAATTCTCAGCCTCAATA  
TCAAACCTCAGAATTACAACATAATCTTTTTTCGAACATATACATTCCACCGGCGACAAAATACATGGAATTGGATCAAAAATATTAATAGGAGGTTTCATCAACCTCCCTCCATTGGTAATC  
AGAGCCAAGGGTAAACACCTCACAACCACCCCCCTGCAATATTCTGCAACACGTACAACCTTGTACTCTTGGGTGCGATTGCGACTCGTCCAAGCCCCACGCATTTAAGCCAAAAATCTTC  
TTGGTCAGAATCTTTGGCAATGTCATGAACTCATCGGTGAGGGATTGTGAAGGCAGAGGAATTCGCTAAGATTATCATAGAGTAGGACGAGTTTTAAGAAGGAAGAAGACACAATTTCC  
TGTGTTGCTTTTTAACTCTCTTTTGTTCAGAGGTGCGAGATTTAAATTTCCCAAGCCTTCATTGTTAATATTGTTCAAAGTATATAGGTGGAGGTGTGCTTTACCTTTTTTAGCAATGTCGGT  
AATACATGGGTATAATAGTCGCTGCAAGTGAGAAAGTCGGATGGGACAACAAGACTGCTTGTAATTTGATGTAGATTGCACCTCCAATCGCAACTGCCGACGATATTGGAGGAATTTGGG  
GTTGGAGATGAGTGCTTGCCAACACTTGCATATACATCTACATTTCAATTATATCCTTGAAGCTAAGTCGACAGAGAATTTCCACGACGAGGTCTACTGGGAGGTTGTCCATTGCCGATTGAT  
TTTGAGATTCATCAAAGATGGAGCTTTTCATGCAATTTTATAGATGCAACCATAACCATTGTTTTTTTTGTTGGAGGCCACCGGTTGTTCTATGTTTCCTTAATTAGTAATTAGTTAGGGAATACC  
AACCACCCTATCTCAACAGGCACTAATTTA

>comp168617\_c0\_seq4

GCATCAAAGATATCATATATTTAATAAACAAAATGGTCATACAAATAATATTAAGTAGTATTATCATCTAAAATATGTAAACTAAACAATTATGATGGTGATAAAAAAAAAAATTCATAACAAGG  
ACTCAAACCTTTCAATAAAGAATGTAGCTGCAATGATAGAAGCAGAATACGGATTTGGTAGTTCCTCAACATGTAGCGTTATGGGATCATAGGAGAGTAATTTCAATTATATATGGTTCAGCG  
CACATGAGCAGCATCTTGTTCATCCCCATAATCAAAGACAAAGGATATATAATGTCTCTCCTTGAACATCACCATTTAAATTTTTCTAAAATTATAATCAATGTTGATTCTCTCTCTAGA  
GCCCATACTCCTTTTTCATAGTCTTTCAAACCCACATACTAATATTTTCAGAGTTAATACCAGTCATGCAAACCTAAACCATCTACTTCTCGAATTGTCCAATAGGAAATGTACTCCAGATAA  
TCATCGGGTGGTGGGATCTTCATCCAATTCTCAGCCTCAATATCAAACCTTACAATTCCAAATCTTGATCAAACATATACATTCATTGAGGACATAAATACTTGAAATTGAAGAGATATGA  
ATAGGAGGATCAGCAACCTCCCTCCATTGGTAATCAGAGCCAAGGGTAAACACCTCACAACCACCCCCCTGCAATATTCTACAACACGTATAACCTTGACTCTTGGGTTGATTGCGACTCG  
TCCGAGTCCCACGCATAAAATCCAAAAATCTTTTTGGTCAT

>comp168617\_c1\_seq1

AAATCAATCGGCAATGGACAACCTCCCAGTAGACCTCGTCGTGGAAATTCTCCGTCGACTTAGCTTCAAGGATATAATGAAATGTAGATGTATATGCAAGTGTGGCAAGCACTCATCTCC  
AACCCCAAATTCCTCCAATATCGTCGGCAGTTGCGATTGGAGGTGCAATCTACATCAAATTACAAGCAGTCTTGTGTGCCATCCGACTTCTCACTTGCAGCGACTATTATGACCCATGTAT  
TACCGACATTGCTAAAAAAGGTAAAGCACACCTCCACCTATATACTTTGAAACAATATTAACAATGAAGGCTTGGGAAATTTAAATCTCGCACCTCTGAACAAAAGAGAGTTAAAAAGCAA  
CACAGAAATTGTGCTTCTTCTTCTTAAACTCGTCCTACTCTATGATAATCTTAGCGAATTCCTCTGCCTTACAATCCCTCGACTGATGAGTTCATGACATTGCCAAAAGAATTCTGACC  
AAGAAGTTTTTTGGCTTAAATGCGTGGGGCTTGGACGAGTCGAATCGACCCAAGAGTACAAGGTTGTACGTGTTGCAGAATATTGCAGGGGGTGGTTTGTGAGGTGTTTACCCTTGGCT  
CTGATTACCAATGGAGGGAGGTTGATGAACCTCCTATTAATATTTTGGATCCAATTCATGTATTTTGTGCGCGGTGGAATGTATATGTTGAAAAAGATTATGTTGTAATTCTGAGGTTTGA  
TATTGAGGCTGAGAATTGGATGAAGATCCCACTACCAACGATTGTCCGCGGTACAGGTCTCTTGGACAATTCGAGAAGTAGATGGTTTATTTTGCATGACTGGTATTAACACTGGAATTA  
TTAGTATGTGGTTTTGAAAGACTATGAAAAAGGAGTATGGGCTCTAGAGAAGAGAATCATCATTGATTATAATTTTAGAGAATTTTAAATGATGATGTTGAAGGAGAGACATTAATATAT  
CCTTTGTCTTTTGAATTATGGGGATGGCAAGACGCTGCTCATGTGCGCTTATTCAAAATAAGACAAAATTGCTCTCCTATGATCCATAACTCTACATGTTGAGCAACTACCAATCCGCGTTCT  
AATTCTGACACCAGAATTACATTTCTCACTGAAAGTTTTGAGTCGTTGTTATGAATCTTTTTTTATCACCATCAGAATTGTTAATTTATATATTTTAGATGACAATATACTTAATATTTTGT  
ATGTTCAATTTATTTATCAAATATATGATATCTTTAATGCAATATTGTTATCTAAAATATATAAATTAACAAT

>comp168634\_c0\_seq3

AAATATTACACGGATCTTTACGATAAACATTTTTTTAACAATTAGCCCATCAGAAAGGGTACTTTTCGGCAATTCGTATAAAATTCAGCTCTATAAATAAGAAATCGTCGGTATTTACGCGCCC  
TAGAAGATTGCTGTCTACAGCTCTTGATAGGTGCAGATATTGCGCGGCTTCCCCTTTCTCTATCGCTCAGTAACCATCTTCTCTCCGACCAAAAAGAGATCCTTCTTCAGGAAGACAAGCA  
GTTAAGTCATGGCTTTGGTTCTGCATTCTGGCATGCCAAACAAAATGCTTTCAAGGCCCTCATTGCTGCAGAATACAGCGGTGTAAAGATTGAAGTTGTTAAGGATTTTGAAATGGGTGT  
CTCAAATAAAAACCCCTGAATTTCTCAAATGAACCCGCTAGGAAAGGTTCCAGTGTGGAGACGCTGAGGGATCTGTTTTTGAGAGCAATACAATTGCTCGATATGTTACTCGATTAAAG  
GCTGAAAATCCTCTCTATGGTTCTTCACTGATAGAATATGCTAAAATTGAGCAATGGATTGACTTCTCAACGACTGAGATTGATTCAAATATTGCACGATGGTTTTATCCAAGACTGGGGTT  
TGTGCCTTATGAAGCGCAGTCTGAGGAACGTGCTATTGCTTCCCTGAAGAGGGCATTAGGTGCTTTGAATACTGAACTTGTCTACGAAAACCTTCTTGGTTGGCCATGCAATTACATTAGCT  
GATATCATCATGGCCTGCAACTTGGGTTATGGATTTCTTTGGTCATGACGAAGAAATTTACATCAGAATTTCCCTCATGTTGAAAGATATTTTTGGACGCTGGTTAATCAGCCTAATTTCTAC  
AAAGTTATGGGCGAAATAAAGCAGGTAGAATCAATCCCCCTATCCAATCAAAAAACCTTCTGCTCAACCAAGGAACCTGCGAAGGCAAAGGAGGCAAAGAAGGAAGTTAAGAAAG  
AAGTACCAAAGCCTAAAGTAGAAGAAAGTGTGAAGAGGAGGAGGCACCCAAGCCCAAGCCTAAAAATCCGTTGGACCTATTACCTCCAAGTAAGATGATACTAGATGAGTGGAAAAG  
GTTGTACTCCAATACAAAGACTAATTTCCGTGAAGTTGCCATTAAGGTTTTCTGGGAAATGTATGACCCAGAAGGCTACTCCCTGTGGTTTTGCAACTACAAATACAATGATGAGAACACA  
GTCTCCTTCGTGACCCTGAACAAGGTGAGTGGTTTTCTGCAACGAATGGACCTCGCTCGCAAATACGCCTTTGGTAAGATGCTTGTGATAGGATCTGAGCCTCCATATAAAGTGAAAGGG  
CTGTGGCTCTTCAGAGGGAAGGAGCTTCCCTCAGTTTGTTATTGATGAATGCTATGACATGGAACCTCTATGACTGGACTAAAGTAGACATAGCTGATGAAGCTCAGAAGGAGAGAGTCAAT  
GCAATGATTGAAGACCAGGAGCCATTTGAAGGGGAGGCCCTTTTGGATGCTAAGTGCTTCAAGTAGATCATCTTCAAGATTTGAACTTCTAATACAAATTTCTTCAGTCAATTAGATTTTGA  
CTTGTCCAGTTTTGCAGAGATTGAATAAGTTTTTCTCATTCTTCCCATGTTGTTCTGCCTGGAAAGTATGTTACTAGACCCATTGATTTGTAAGTGTGTTTTAAATGTTAAATGCTTTGTACG  
CATTGATATTCGTATATTTAAGCTTATTTTGGAAATTATATTGCGTGTTTTTGAAAGCTGTTTATGCGG

>comp168688\_c0\_seq10

CCATGTGGCATAACATGAAGCTGAACATGATCAACACTCAACCTCATTCTAAGGTCTCTTCCAAGGCATGATAATCTAATAAACTCTAAAAAATATGAATCATGACGCTAAATCTTAGGATGA  
CTGACTAACTGACTGAGAAAAATTATTTTTAAGGGATTTCAAGGAATGAAGAGAGAAAATCTTGCCTTTCTTTGAAGCTCAGCAAGTGAATCAAGGAGCAGTTGATTCTTCTTTACAAAG  
AATGGTTATATTGAATGATATTAGCTACAATACAAGTAGTGCGGTCAAATTTGAAGTATTTTGATTTAATTATTTACCATTGGGACCTTATATGGTTCAGCGCAGTTTCAAGTTGCAGTTTTA  
GTTGTTGAAGCTCTGTCAGGCTCAAGGTGTCTAGATTATTCTCACCCATGACATGCCTCAAATACACTTAGGACGAGCTCACATCAGCAATTTTTCTCTCCATATTCTGTCAAAAATAAGA  
AATATTTATTTCCCTTCGGCTCCTCTGCAAGGTATCAACCTTTGCTTAAGCTCTTCATATTCATGGCACAAATCTTCTGCGACTCTGGTTCTTTTATAGGAAACACTTTTTCAACATAACTGT  
GTCGCATGTAACGTTCAAGAATCTGCTCCATGCTATGCAACATGGAAAACATTAGTAGCATTTCACAGATACATAATAAATTTACAAATATATCTATATATCCATAGCTTTCAAATACCTAAA  
CAATTCGATGTCTCTTGGTATTTCAACTACTCATTATATTTAGCAAGTAGGTGTTGGAATCTTATAACATATAAGCTTGAAAACATGAAAAATTTCTTACCTTGGCGGAAGTGTATAAGTTC  
AGTGAAAATATTGCATAGATTAATTTAAACACATGGAGAGCTATGTGCGTTTGACCCGTATATTATTGTGTAGTGTCAAATAGTCGTATCCTACCCTTAGGAGCGAAGGGTCACACTTTCCA  
CTTTTGCTTTTGAGGGGAGAAGAACTAGAAAGATGGTGGCAAAGACAGATATAAGACAAATTTGGCAATGAATCTAGCAGCACGAAGTTTATGATTTTTTAAATGTGGTAGATCAAAGATA  
AATTCATCAAACATAATGCAGGGAGTCAATCCATAATTTAATATGAAGTGAATTCATTACACTCTTGGAGTATGAACCATAACTCGATTCAATTTGGGAGTCAATGATTATACAATTTTGATAG  
TAAGAACTAGACGGTTAGAGATTAATATGCAAGATATAAAGAGAGCTAGAAATTTCAAAAACCAAAGAGGTATTAAGGGTCAAGGACTATGCAAGTCCCTCAATATCAAATTCACATTA  
GAAGAAACCAAACCAATAGCAATGAAAGCAGTAATCAATATTAATAAATTTGAAAAATGCGATAAAACATACAGAGAATAATTTCTTTCAAGAACAAGGACCTTCTTTTGGTACCATC  
ACCTTGGACATATGGAATAATTTGTTCCCACTCAGACAAAGCCTTTAAGAAGTATTGCACCATCTCAAAGATATTTTGTCAAACAAAGTGTATGAGGACATCCGACCATGAAGAGTCTAT  
CAGAGAAGGGGCCGACGATCTACGGCCGCGATCGCACCACTTTATTTTTAAGTTATCATTGTCTTAGGTTTATCATTATATGTGTGTTGATTTATTATCGCTGTTTTTTTCGTTTTTACCCTC

ACTTGAAGGAATAATTGTTTACCCTTAGAGGCACTTTTGTCTTGTATGTTGCTATTGTATTTGGCTACTTAAAGCCCCCTCCTCTTCCTTTGGGGGAATGATGAATATTATTAAGAAAA  
TTTTCTGCAATTGTGTTTGTAGAGCTTAGAGAGTTCTTTTGTAGAGATTGAAGTTCTAGGGGAGGACAATGTATTACCCATCAGCCGTATGAAGCGTCCGAACGCATGGTCCATCTCCTCC  
ACCATCATCCCTCCTTTATCTTAGCCGCCGGCCACCCTCCTTCCTCCTAACCCTCGGCAGAAAGCCTTCCCCTGGCTCCTAATCGCTGACCTCCACCTCTCCTCCCTTCCAGC

>comp168716\_c0\_seq10

TGTCGCCACAGAATAATTTTTCGTATATGGATAGGGCTATTGCATAATAACTGCAGTTAAGCATGTTAGTTCTTCTCAITTTAAACTCAGTTAATAATAAATGAGTACTAATTTTACATTATTG  
AACGAAGAAGCTCATTACAAAAATACAATCATGCTGTTTAGGCATTCTAATTGTTGAACTTTGCTGTATCTGACTATCCAGACAAGAATTCTACAAGCATTTTCCCTACACGAATAATTCT  
AAAGCATAAGCTTTCAGACATTTAATTCCTTGAGACAGTGACCATACAAAAAAGGCAATGCAGCGAGAAAGCATGCCATATAAAATGAGAACAATTATACAAAGGGCCCAATCATTGAT  
ATCATAATCACTTTGCATCATAAGAACACACCTAGTTATCAGCCATACTCCAGAATACCTTTTTCAGCATTGACAACAACAATGCTTCCAATGCCCACTTTGTGTAGCATATGTTAGCCAGGG  
ATTTTGAAGTTGTCTCCTCAGTTGCTATTAGCGTTAAAACAACCGGCATAAGTGCAGACCACAACCTGGGCTGTTTCTGGCTGGAAGAAGATGGCAAAGAAGTAACCAATACCAGTTACAC  
AGTAAACAAGAGCAACCAGTATGATGTAATTATCTACAAATGAGGACCTAGGATTGTTGAAAAATAGAACATTGACAGATAAACTATTGGTTTGTGATTGAAATGATCAATGGT  
GTCCCTTGCAAGGAAATAAGCAAGTGAGCTCATGCCAGAAGTCTTTCCCTCCAGTAATGCAACTTCTCAAGTGAATAATGATCTGAGAGCTCCAATCTTACATAATAGAGAAACAGCTAT  
AACTGTGTATGTGTAACCCAACGAGCCAAATGTTTCATCACTCATTTTTGAAGCGTCCCTAGGCAGACTCCAGCAAGACACAGAATAAGAAAATCCACTCCTTGTATTCTGGCTTCACG  
AAGACGTTGTTTACCTACCCTTCCCAAGAAATACTTGTATTGCGTCATAACACCAGGAGTGCTCCGATTTGATAAATCTATAGAATGTAAGAAAGTGGTACTTAAAATCATTTTTCGCTGCC  
CTAAAATATCCTTGACATGGTTCCATACTTCTCCTGCAATAGATGGTGTTCGACCTTAACAGTAGTATTTTCACTATCCCTGCTAGATACATCTCCAGTAGCATCATATTAAGCATATCAGG  
AGGCACATCATATTTATTATGTAACATCCATCGAAGAGGAAGTTGCTTGCAAGTTATTCTGAAGTTGTGTTTGGTTTAAATTATGCCCTCTAAAATGTCAATATAATAGTCTGGAGGATTAAC  
ACGTTACAGGAACATGATAACCAGGCCTGAAAAGTATCTTCAACCTTCTTACAGATCCATGATACTGTTATACTCCTTTTGTAGAAAGTATCAAATCATCAAACATCCTGTACAGGG  
TATAACTAGGTTGGTGAACCAACATGCATATATTTACCCCTTCCAGTGCTTCGCGACGTAGGGCTTTAAGAAGTAAAGATGATGAAGCACTATCCAAACCAGAGGTTGGCTCATCTAAAATT  
AATAAAGAAGGTTCCATGACCATTCAAGTCCAACATTAACCTCGCTTTCTTTGCCACCAGATATCCACGCTTCTCAACAGTACCAACTAAGGATTCACGTATTGTCTGCAATCCTAAGGA  
CTCGATAATCTTTCAACAACAAGAACCTTGTACAGCTTTGACAAGTCTGCTGAAAGTCTGCATCTTGGCTAAACCAAAGGTTCTCTTCCACTGTCAAGTTTCCATGAACAATGTCATCC  
TGTGGTACAAAACCTATAATCTTCTTATAAAACCGGATTGGTTCTACTTTTTTATTATAAAGAACCAGGCCTGTAATCTCGCACCCCGTTGTCTTCCAGCCAAAGCAGTTAGGAATGTAGT  
CTTGCCTGCCCCAGAAGGACCCATCACTGCTGCCACACGGCCAGGAATGAGTTTGCCTGTACACTTCTTAGAAGCTTTTTTCTTACTCCCTCTCAAAGTTAGTGTAGGTCCTTAAAAGC  
AATCTCAATTCTCGGCCTGGTTCTTAAATCCGTATCAGTAGCCATAGAAATAACTCCAGAGAATGTCAAGTTCTTATATTGTTGTTCCAGTGCCTTTTCTTTCTCAATTTGACCATAAGCATA  
CTTGAAGATTTGGCTGCGAGTATGCATTTGTTTCCCTTTTGGCACATTTTCTTTTATGTTCTTATCTCCAATTTGTAGATTAAAACCTTGGTCACTTTCAGGATTTCTTTCTAGTGACTGAATA  
ACTTTTGTAAAGTTTACTAGATTCTTTTTTCTTAGGAGGAAGGCCTGCATTTTGAAGTATGATGCGTCAGATGATTGAGATTGCCCGAACCTTTAGACGTTTTGCGTGAGAATGTTCT  
TGATAGTTGTGCTGAAAGTCCCACAGCATGTTTCTTGGCAACATCTTTAGCTGATTTCCACCTTTCACGAGCTTGACAGTTTCTCTAGCACTCCTTGCAGCAGCTTCTCTGATTTAGCTT  
GCCTCCTCTCACGATTACTAAGGATTTGGCCAGAGAAGTTGTATATTATTAAGAGCAACAACACAGAGCAACCATAACTAGAGCTCCAAATATAGTAATATCTTGATTTGAGGAATTTGGC  
TTACAAGAACCTTTGCTTAAAACACCTTGTTCAGATGTAGAACCCTTCTGCAAGTAACTTCTGTATAGTCTCGGACAATAGTATCCAGGCGGGCAAAAACA  
CTTGTCTAGTAGATAAAAACATCAGCCACATATCAGCACCACCACAAGTATGATTTGGTTGACCAGGAGGTAATTGGTAATTATATGGATCACAACACCAGTGGTCTTATTAAGTTTAGCA  
AGTGGGCAGTAGGCACCCAAAGGACAAGGTATCATGCAAGTAATACCACGGGGGCAGAAGAATCCTGGACAACAAGGATGACACTTATAAGTCTTGCAGGCATTTGTTTGGAAATCATT  
AAGCTTAACATCTGATTTGGATTGATGTTGCATGCCATCTGGCTCACATCCAGGTACCCATGAAGTCAAGTTGCAATTTTTGTTTGGTTAAGTATATTGATTTTTGCTGCGTTTTCTCC  
AGTGTGTCATAAAAGCTATTGAAGTAAAATTTTATTTCTGCGGCATTACACAAGCGTGATGTGAGGTCCCCTTTCTGCTTGATGCAATTAACCAAGAATCTCAAATCCGCCGAAAAATTA

ACGCCTGATTCCAATCTTTATCTGAATCCTTGATGCAATATTTGAGCTGGTTGCCAACTCTTTAGTGAACGCTCCGGTAAGGCTCATTAGACGGTCATAGACAATGTTGGCGAAGAGCGG  
GACATCTGCTGAGTTTCCTCCGCCATCGTCGTCATCGCCATCGCTGTCGTCATAATCATCGTCGTCGCTCTGGCATTGCCCTAGCTTCCC GGCGGCGAGGAGGGCGACAAACAACAACAG  
GGCAGCTATAGCCCGTCGCCGGTGACGAACGCGGCACAAAGCGTGCATATCTCTCGGTAAGGTTTCGTAAGCAACGAAATAAAGATCTATTAGTTTCAAGGAAAAATGATTTATGGCGGGG  
GGAAAGGAGTGATGCCGGACGGAAAAAAGAAAAATGTAGGGAGAAGTTGGGTGGT

>comp168716\_c0\_seq5

TGTCCGCACAGAATAATTTTTCGTATATGGATAGGGCTATTGCATAATAACTGCAGTTAAGCATGTTAGTTCTTCTCATTAAACTCAGTTAATAAATAAATGAGTACTAATTTTACATTATTTG  
AACGAAGAAGCTCATTACAAAAATACAATCATGCTGTTTAGGCATTCTAATTGTTGAACTTTGCTGTATCTGACTATCCAGACAAGAATTCTACAAGCATTTTCCCTACACGAATAATTCT  
AAAGCATAAGCTTTCAGACATTTAATTCCTTGAGACAGTGACCATACAAAAAAAGGCAATGCAGCGAGAAAGCATGCCATATAAAATGAGAACAATTATACAAAGGGCCCAATCATTGAT  
ATCATAATCACTTTGCATCATAGAACCACACCTAGTTATCAGCCATACTCCAGAATACCTTTCAGCATTGACAACAACAATGCTTCCAATGCCCACTTTGTGTAGCATATGTTAGCCAGGG  
ATTTTGAAGTTGTCTCCTCAGTTGCTATTAGCGTAAAACAACCGGCATAAGTGCAGACCACAACCTGGGCTGTTCCCTGGCTGGAAGAAGATGGCAAAGAAGTAACCAATACCAGTTACAC  
AGTAAACAAGAGCAACCAGTATGATGTAATTATCTACAAATGAGGACCTAGGATTGTTGAAAAAATAGAACATTGACAGATAAACTATTGGTTTGATGATTGTATTGAAATGATCAATGGT  
GTCCCTTGCAAGGAAATAAGCAAGTGAGCTCATGCCAGAAGTCCTTCCCTCCAGTAATGCAACTTCTCAAGTGAAAATGATCTGAGAGCTCCAATCTTACATAATAGAGAAACAGCTAT  
AACTGTGTATGTGTAACCAACGAGCCAAATGTTTCATCACTCATTTTGCAAGCGTCCCTAGGCAGACTCCAGCAAGACACAGAATAAGAAAATCCACTCCTTGTATTCTGGCTTCACG  
AAGACGTTGTTTACCTACCCTTCCCAAGAAATACTTGTATTGCGTCATAACACCAGGAGTGCTCCGATTTGATAAATCTATAGAATGTAAAAAGTGGTACTTAAAATCATCTTTTCGCTGCC  
CTAAAATATCCTTGACATGGTTCCATACTTCTCCTGCAATAGATGGTGTTCGACCTTAACAGTAGTATTTTCACTATCCCTGCTAGATACATCTCCAGTAGCATCATCATTAAGCATATCACG  
AGGCACATCATAATTTATGTAACATCCATCGAAGAGGAAGTTGCTTGCAAGTTATTCTGAAAGTTGTGTTGGTTTAAATTATGCCCTCTAAAATGTCAATATAATAGTCTGGAGGATTAAC  
ACGTTACAGGAACATTGATACCCAGGCCTGAAAAGTATTCTTCAACCTTCTTACAGATCCATGATACACTGTTATACCTCTTTTGGCTAGAAAGTATCAAATCATCAAACATCCTGTACAGGG  
TATAACTAGGTTGGTGAACCACCATGCATATATTACCCCTTCCAGTGCTTCGCGACGTAGGGCTTTAAGAAGTAAAGATGATGAAGCACTATCCAAACCAGAGGTTGGCTCATCTAAAATT  
AATAAAGAAGGTTCCATGACCATTTCAAGTCCAACATTAACCTCGCTTTCTTTGCCACCAGATATTCCACGCTTCTCAACAGTACCAACTAAGGATTCACGTATTGTCTGCAATCCTAAGGA  
CTCGATAATTCTTTCAACAACAAGAACCTTGTACAGCTTTGACAAGTCTGCTGAAAGTCTGCATCTTGCCTAAACCAAAGGTTCTCTTCCACTGTCAAGTTTCCATGAACAATGTCATCC  
TGTGGTACAAAACCTATAATCTTCTTATAAAAACCGGATTGGTTCTACTTTTTTCAATTAATAAGAACCAGCCATAGCAGTTAGGAATGTAGTCTTGCCTGCCCCAGAAGGACCCATCACTGCTG  
CCACACGGCCAGGAATGAGTTTGCCTGTCACACTTCTTAGAAGCTTTTTCTTACTCCCTCTCAAAGTTAGTGTTAGGTCCTTAAAAGCAATCTCAATTCTCGGCCTGGTTCTTAAATCCGTA  
TCAGTAGCCATAGAAATAACTCCAGAGAATGTCAAGTTCTTATATTGTTGTTCCAGTGCCTTTTCTTTCTCAATTTGACCATAAGCATACTTGAAGATTGGCTGCGAGTATGCATTTGTTTC  
CCTTTTGGCACATTTTCTTTATGTTCTTATCTCCAATTTGTAGATTA AAAACCTTGGTCACTTTCAGGATTCTCTTCTAGTGACTGAATAACTTTTGTAAAGTTTACTAGATTCTTTTTTCTTAGG  
AGGAAGGCCTGCATTTTGAAGTACTAGATGCGTCAGATGATTCATGAGATTGCCCCGAACCTTTAGACGTTTTCGCTGAGAATGTTCTTGATAGTTGTGCCTGAAGTCCCACAGCATGTTTC  
TTGGCAACATCTTTAGCTGATTTCCACCTTTCACGAGCTTGACAGTTTCTCTAGCACTCTTGCAGCAGCTTCTCTGATTTAGCTTGCCTCCTCTCACGATTACTAAGGATTTGGCCAGA  
GAAGTTGTATATTATAAGAGCAACAACACAGAGCAACCATAACTAGAGCTCCAAATATAGTAATATCTTGATTTGAGGAATTTGGCTTACAAGA ACTTTGCTTAAAACACCTTGTTCAG  
ATGTAGAACCCTTCTGCAAGTAAATGCCCACTACTGCAAGAAATCTTCTGTATAGTGCTCGGACAATAGTATCCAGGCGGGCAAAACACTTGTCTAGTAGATAAAACATCAGCCCACATATC  
AGCACCACCACAAGTATGATTTGGTTGACCAGGAGGTAATTGGTAATTATATGGATCACAACACCAGTGGTCTTATTAAGTTTAGCAAGTGGGCAGTAGGCACCCAAAGGACAAGGTAT  
CATGCAAGTAATACCACGGGGCAGAAGAATCCTGGACAACAAGGATGACACTTATAAGTCTTGCAGGCATTTGTTTGAATCATTAAAGCTTAACATTCTGATTTGGATTGATGTTGCAT  
GCCCATCCTGGCTCACATCCAGGTACCCATGAAGTCAAGTTGCAATTTTTGTTGGTTTAAAGTATATTGATTTTTGCTGCGTTTTCTCCAGTGTTGTCATAAAAAGCTATTGAAGTAAAAATTT

ATTTCTGCGGCATTACACAAGCGTGATGTGAGGTCCCCTTTCTGCTTGATGCAATTAACCAAGAATCTCAAATCCGCCGAAAAATTAACGCCTGATTCCAATCTTTATCTGAATCCTTGAT  
GCAATATTTGAGCTGGTTGCCAACTCTTTAGTGAACGCTCCGGTAAGGCTCATTAGACGGTCATAGACAATGTTGGCGAAGAGCGGGACATCTGCTGAGTTTCCTCCGCCATCGTCGTCA  
TCGCCATCGCTGTCGTCATAATCATCGTCGTCGTCCTGGCATTGCCCTAGCTTCCC GGCGGCGAGGAGGGGCGACAAACAACAGGGCAGCTATAGCCCGTCGCCGGTGACGAACGCG  
GCACAAAGCGTGCATATCTCTCGGTAAGGTTCTGTAAGCAACGAAATAAAGATCTATTAGTTTCAAGGAAAAATGATTTATGGCGGGGGGAAAGGAGTGATGCCGGACGGAAAAAAGAAA  
AATGTAGGGAGAAGTTGGGTGGT

>comp168744\_c0\_seq1

ATAAGTTAAGATGTGCGCCCTAAGTAAAACCTGCAAGTTAACCCGGTTGGTAAAAAACAGATAATGCTTTTATTTCAACCACAAAATGAGCTCTCTAATTATAGCTTATGGAATATTTTCATTATT  
TCTTACCAAGAAAAGAGAGAGAGAACATCATAAACGGCAAAAAAACCGATGATCCTCCCTTAAATAGGAAAAAGGATAAAGACAAGGCTTTTTCTTCGATCAATGGATAGAATAGATG  
AGCTTATAAATAGCTTGGATTGGAAGGAGGGATATCAAAGCTTTCTTCTCCATTGATCATTAGTTCTCAAAGAATTAATTTCTAAGCTCCTTCCTCTCACCCCTTCGATATAATTTCTTAATT  
CTGTTTTAAAACTACTACATAGAGATCAATCATGGCAGTCGGAGAAGTAGGGAATCCTACAAACGGAAAGGAATACCCCGGCAAGATGACAGCTTTCGATTCCTAGCATGTTTAGTCGCC  
GCCACCGGAGGTCTCATATTTGGTTATGACATCGGCATCTCCGGCGGAGTCACATCGATGGACTCTTTCCTTATTCGATTCTTCCCATCAGTGTACCGCCAACAGAAGGAAAGATTATCTAC  
TAATGAGTATTGCAAATTCATAGCAATCTCCTTACCCTTTTCACGTCGTCCCTATATCTGGCGGCCCTTGTCGCATCCTTCTTCGCCTCGACTGTGACAAGAGCGTTCGGTCGCAAATGGT  
CCATGTTTCGGCGGCGGCCCTCATCTTCTTATCGGCGCAACCCTCAACGGCGCGGCAGTGAACCTTGCTGATGCTAATCCTCGGCCGCATCCTCCTCGGCATCGGCGTTCGGTTTCGCCAACC  
AATCAGTGCCTGTCTACCTTTTCGGAGATGGCTCCAGCTAGGCTCCGCGGCATGCTCAATATTGGCTTCCAGATGATGATCACAATTGGTATCCTCGCCGCAAATCTCATCAACTTCTGGATG  
GCCCAGATCAAAGGGGGATGGAGCTGGCGCGTGAGCCTTGCGCTTGCTTCCGTGCCCGGCGCCATTATCGCGATTGGCGCATTGGCTCTCCCTGAGACCCCAAACTCTCTAATTGAACGC  
GGGCATGAGGAGGCGGCCAAGGCCATGCTCCGCAAAGTGCCTGGCACTGATCAAATACATGAGGAATCCATGATCTTGTAATCGCCAGTAACGACTCCAAGGCGGTGAAGCATCCATG  
GAAAAAGATCACAGAGCGTAGGTATCGACCACAATAACAATGGCAATACTTATCCCTTTTTTTTCAACAGATCACAGGCATAAACGCGATCATGTTCTATGCTCCTGTGCTCTTCAAACCC  
ATAGGCTTCGGCGACCAGGCTTCCCTCATATCTTCTGTTATCACCGGCTTGGTGAACCTTGGTTGCCACATCTGTGTCGATTGTATCAGTAGACAAGTTGGGGCGACGTGCTCTGCTTTTAGA  
AGGCGGCGTTCAAATGTTTATCAGCCAGGTAATTGTGGGATTGCTCATCGGAATTAAGTTCCGAGTGACCGGAGCACACACGGAGTTGTCAAGAAGCTACGCCGGGTTGGTGGTAGCATT  
CATTTGCATCTATGTGGCCGCTTTTGCTTGGTCTTGGGGGCCGCTCGGGTGGCTTGTGCCGTCCGAGATCTTCCCCTTGGAGATTAGGTCGGCGGGCCAGAGCATCAACGTATCAATGAAC  
ATGTTTTTTCACATTCATCATCGCTCAGTTGTTCTCAAGATGCTCTGTCTGATGAAATTCGAACTTTTTTTTCTTCTTTGCTGGCTGGGTTATGATAATGACAATATTTGTGCGGTTTTTTCTTGC  
CGGAGACGAAGAACGTTCCGATTGAGGAGATGGAATTTGTGTGGAAGAAGCATTGGTTTTTGGGGCAAGTTCATCCAGCTGACAAAGCCTTGCACGTTGGAAGGGGGGACGTCGCCGC  
CTAATTAAGCATATACAACATCCAATCTTTATTTTATGGTTGTCCAAAAGTTTTTTTTTTTTCTTTTATTTTGTGGTTGTTTTAAACAATCACACAGTCTAATCTTTTATTCTCTCTCACAAT  
AATTCCATCAAACACAAATGCATTTTGTTTTATCAGTATTTTGTTTTTATGAA

>comp168750\_c1\_seq1

TTTAGAAAAAAGAAAACCTTGTAACATCAAGCAAAATAAGAAACACGAAGAGTTGGGCAATATACCTCTAGTCACCACATGACAGTGGCCAAACCAAAACTGACTAGCAAATAACTCAA  
AAACACAGTATGCAAGTAGAACTATAGACTACTACTATTAAGGGTTACAAAGCGAGGTAAGTTAACAATATAATATAACAATAGTAAAAATGGTGTACAGGGCTTCCCAAGGTGGCCAGCTC  
TATTGCTGAGCACATTGCACTCTCTGAGCGCCACCGTGCATTTCTCATCTTCGTCGTAGGCCTCCTGAGCTTGTGAGCTTGCTTCCTCTTCATCTCCTCGTCCATGTTACATCATAAAG  
GTCGTCTCTTCGCACTCATCAAGCTCCATG

>comp168765\_c0\_seq2

TGGTTTTTCCCCTTTTTAGGGGTTTTTCGACATAAAAACCTCTGGTGTCTCTTATGAATGCTACACCCTCTCACTTATCTGCTTGTGTGCTGGATCTTCGTACAATGCTAAGACGTTAAACTAT

ACATTCGAATACTCCAGGACGCAACAAAGGTGAAACAAAGAACCCTTATTATGAGCGTTGTCACGTACACACTTCAGATTTCCCAATGAAACTTCATTGGTTAAATCAAAGCACCCCTCA  
TCTTCTCTTTGGGTGGAAACCTAAGCTCAAAAAGCAACAATTTGCCGTTTCATAGCCAACCTCAGGTTTTGATTGGGACGCCTTTTTTACTATTTAAAACAACCTTCAGTATAAAAATTA

>comp168783\_c0\_seq3

CACCCACCCACCCCTCGATCGAGTTCAGCTTGAAGAAATTGAAGATCCATTGCTGAAATCGCCGTCCTTGCCTTCTTTGATGAACCCGTATATGACGTGTATGAGGATGACATGATCAG  
CGAAGTGCTTGGTGTGATAAGCCTGTGAATAATGATGATAAGAGCAAACCAATGTCCAACCGAATCTATCACTCATAATGTTTCAAACAAGAAAACCTATTATGCTCACCATCATTGATA  
AAAAAATTACATGTAAAGATCTCTCAATGGTTTTGGATCGTGAATCTCTTATCTTCTCTTAGATGGCTGAAAGAAACACATTTGGTCTTAGATGCTTTCACAATCACAATTATCCATCC  
GCTTATGCTACTCTTGAGATATTGAAGATTCGTAGGCAAATCGATACCTGATGGATCTATCCAGACCTGTTTAGCCAACCAAACCCACCTTTTTATGGTGGCCAATCAGGCATTTTCCTATGA  
GCCTAAAGTTCCCTCTACCCCGGTAGTATGACGCCGAGCTGAGCCATTAGTTGTGTTAACTTCAGGATAATTCAATCCATTTGGTAGCTTATCTGGCTACATAGATTTAGTGCTTTTCAATTTG  
TTTTGTGTAGCCTAGTATGTTCTTCTTTTGGGCTATAAATAGGTAGCCAATGTCATGTAATAGATAGATTTTTGATATGAATATGATTTGAGTTTAGTCTCATGTGTTTCTATATCCTAAGAG  
TGATTTCTTAGGTGGTGGATCTTTCCTCCAAGAAGTTCTTGGAGCGGTGTCCGGCAACCGTCACCGGATCGTCGACGTGGATTCGTCGAGCCCCTCTGGTTCAGTGTCATTTGGTATCAGA  
GACGGCAAGATGGCGGAGAGAATTTGCCCTTTTTTTTTTGGAGAGAGAGATTTCTCTCTTCTGTATCTTGAATTTATTCAAGTGGTGGTTTTCTTGGTTTTACGTCTCTACCCAATAGGTCA  
AGAAAGGGAGGAGCTTCCGTTGTTACAAACATGTTTTTT

>comp168819\_c3\_seq1

TCGTCTTCTTCGTGCTCGAGGAGACTCCTTATTTATTTATTTATTTAATCGCAGAGAAAGGAAAGAGTATTTTCGGAATATCAGAAGACGAAAAATAAATTTGGAAGGAAATAAATTCTC  
GCGGAGGAAAGAATTTTTCTGATTTTTCGGCGGTTTCGGAATCCTTTAAAAAGCAAGTTTGCTGTCTCTACAGTCTCTCTCTCTCTCTTGCCTTCTTCTATCTCTCTCTT  
TCCCCATCCGCCGCTCCATCTCTTGCTTACCTTCTGCTTCATCTGAATCCCTCTTGTCTGGTCTTGTTTGCGACCGAGGAGAAGTGGGGGCAGAGATTTCAAAGAAACTGAAGTCTGCGC  
GGATCTCTTCTATCTCCAGGTGTCTATTCGCTTTCATTTTTGCGTTTATATGTTTTCTATCTCCTCCACCATCTTCTCTGGTCAAATCTTACAGTTTTGCTCATAAAAAACCAAATTTCTT  
TTGCAGAGATGAGGAAACCACATTAGTTTCAGGAACAGAGCGAGAAATGGAAAGAAACGACGTACATGCAATCAAGCACACTGATCGAGTCAGAGTATCTTCAAATTCATTGGAAAA  
AAATCCGTCGGAGGTTCCGGCGAGATCCTCTGCCGCATCCCCCGCACGCTCCGTATATTCTGTGACGACCCCGATGCCACGGATTCTTCCGACGACGAAGCCTGCTTCAACCGCCGGCTC  
ATAAACGGTACATAGAAGAAATCAGATTTGAAGAACGGCCGCTTTCAAAGACGATTGGAAAGAAGAAAAAGAAAAAGAATTCGCCGGAGATGTTCCAGTCGCCAGACGAGATTCCGA  
GATACCGCGCGTACGGCGAAGGCCGTGGGGGAAATTTCCGGCGGAGATACGTGATCCAGCGCGCCGTGTCCGGATATGGCTCGGCACCTTACAGCACTGCCATTGAAGCAGCCATGGTC  
TACGATAATGCTGCAATTC AATTACGCGGCCCTCACGCCGTACCAACTTTCAAACCGCGCTTCTCTGACCGCTGCCTCGGCGTCGCCGAACCTTACAGTTTCGCATGGGTATGAATCCA  
GCGAGGACTCCCATAATGTTTCAACCTCGTCCCCACCACCGTTCTCCATGGATTCTTCTCTGATGCCGTCAAGGGTTCTACGGAGAAGGTTTCTCTCGTCCGTCGGGAATGGATTGTCACC  
GGAGCTTAAGATCGACTTCAACGTGTTTCGATGAAATGCTCCAATATAATGAGTTTTACGATAACGGGTTTACGGCTGGGGGGACCCGCCGTCGGACCTAACTGATGACTTCTGGTGT  
GATAAAATGCCTGACACATACGAGCCGGCAATATTCGAAAAAGTCGCCGCCGGCGACCGATCGATTGACGCCGGCGAGAGAATCGGAACCGAAATTTGTGGAGAAGGCGAGGATTTATT  
TGCGGGTATTAGTGATCTGTTTCCGCTCGATTCACTCCTCTAAATGGAAAGCAGCGATTTTGTGCTCCGGACGCCGATTTTATTGGCCGATTTTACTTTGCGGAGAAGAGAAATTCGTCAAA  
TCGTGTCAGTTTTA

>comp168851\_c2\_seq8

TAAATTTCTTAATGCTTAATGGTTAAACAAACAAATTTTGTGTTGTCCAAGAATACATAAAATCGATCGATTGGGTCTGGAGAGCTTTCCCAATCCCATGTGTTTCTTCTCTCCTTCAGCC  
TTCGCTCATGAGCCTAAAAGCGGCCATTGTTAAAGAGAAGAGCTTTTGTTTTCTTGGTCTTTTACGAGCAAAGGTGGGACCCTTTCTTCTTCGCCATCCTCAGTTGAAGACATGGCTGCT  
GTCTTTTGACAGCATCTATGGATTCCGGAAACGAAGGATAGAGAGAGAGAGAGAGAGGAGCTTCTTTTTTCTTTTCTTTTTTGAAACAAAAAAGCTATCCTTCTTTTTCCGGACCTTTTAC

GTGCGACGTTTTCCATCCTCTTCATATCAACACCACTCTTTTTTTTCTTCTTCTTCTCCTCCTCCTCCTCGCAGCTTTCATGAGAGAAAAAGCTGCGTTTTGGTGCCTTACGCCTTGTA CTATC  
TGTGAGAGAACA ACTAATGAAAGAAAATGTCATTTCGAAATGCTTTCTTCTCATTTCATTGTTTATGACACCATCTCGGCCACACCAGAGCCTCATCACCAACAACCACTAAGTTTCCTTTTT  
GATGCCGGCGGGCGGATGCCTAAGCCCTGAGTCAGCGATGCTCGGCAGCCTCCCGCCACCGGCAGGGCCGAGCCGGCTCCACTTCCTTCTGTGCCGGAGCACAGGGGAAGCGAAAGC  
GGCGGGCCGGCCGAGGAGTTGTAAGAACAAGAAGAAGCCGAGACTCAGCGCATGACCCACATTGCCGTCGAGCGCAACCGCCGGCGACAGATGAACGAGCACCTCGCGATGCTCC  
GCTCCCTAATGCCGAATCCTACATCCAAAGGGGAGACCAGGCCTCAATTGTGGGAGGGGCCATTGACTTCGTTAAGGAACTGGAGCATCTCCTCCAATCCCTCGAAGCTCAAAAAGAGA  
ACAATTGAGCAA ACTCAGAGGGCCAATGCAAGCATTAATGATTCTGGAGGCGGGCTAATGAGGACCGATGATGAAACAGAGCAGCCTCCTTTCGCTCAGTTTTTTGCCTATCCACAGTAC  
AATTGGTGCATCCTCGCCATGAGTACCCGTCCTCCGGCGCCGAGATCCGGTCGCCGGCGGTGGCCGACATCGAGGTGACTCTCATCGAGACTCACGCCAGCCTTCGAATCCTGTGCGCCG  
ACAAGGCCGCGGCAACTAATACAGTTGGTGACCGCCTCCAAGCTCTCAGGCTTTCCATTCTTCATCTCAATGTTACTACATTGGACTCCATGGTTCTTACTCCCTCAGTGTC AAGGTTG  
AGGAAGGATGCAGCCTATCCACAGTGGATGAAATTGCGGCCGCGGTGCACCGCATGCTATCGCTCATTGAAGCAGATTCAATTCAGCCGTTTCATCAAGTTTTCTAGACGAACTGTCAA  
GCAGTCCAAACCCGCCCTGTGCTTCTAAAAATCTACGAGAATGCCACCCCTTCATTTTCTTACCCATGCTTCTCAAGCTAAAGTTCTGGGGCCAAGTGACTATATTTCCCTCCCTCC  
TCTCTCATATATTTCTTTTTATCTATGTAAGCAAATCTGCAAGTTCTCTTCCCTTAATTTAGTTTTCTGCGCAGAAATGGGAGGCCAAATAAACTTTCACGGCCTTCAAGCTTTTTATTC  
AATGGTCTAAACTGGCAGATTTTGGTATGTAGTTAGGGTAAAATGTTTGCATAAGACATTCACCAAATAAATATTATGGCCTTCTTAATATACGTTAAAGAATGCATGAGAAATTGAAAG  
>comp168880\_c1\_seq16

TAAATCTAAAATTACATGATTTTTCCA ACTTCAAAAAATAAATTGCTACTTCAAGCTTAAATATACAATTATACATAATCAATCTATTATAATAATTTATGCCAATCTTATATTCCTATTCATGG  
TCATCGCCAACATTGCTTTTACAACA AAGATATTTAGTAACATCTCTCTTTTCAAATTCTAGTAGATGAAGAAGCTTTAGATGAATCCTCTGTGCGAGCATCAGATAAGGAATATATCGATTA  
ATGAGGAGCTGATGCCACCGTTGATCCTGCCAAAGAATGCACATATCCATTGTTAAAAAAA ACTAGCTTCCATCGATCTATTGCTCAATAATAACAATAATAAAAACTACCTTTACATATAT  
GATCTATTAATTAATTAAGACAAAAATCATTCCTACAGGCCTTATATCGGCCTCCACATGCATGGTTTTTTTGAATGCTAGTTATCTAATTAGAAAAGTAAGCACCACAGCCCTAAAGCATGA  
AGTTCTGTTGGTGATTGAATCCTTCAACA AATTCTGGAAGACATCTAGTCCAAAATACTGCAGTGAAATGCTGCTCTTTTGTAGGACATTAAGAAAAGCAGAATCACATCATCATTCTGC  
AAACATAATGAAATAATATATTCAAAGGAAACCATGATTGAGATAACACAGCTACTCTACATTCAATCAAAAAGAACAATTTGTCAAGCATCAAAAAGACAAAAAACCTTTATTACTACAT  
TGGCATTCATATCAAATTTCCAATCAACAAGCATATCAAGAAGAGCATTCAGAAGTTGTTTCGCTTGGTTGCCACTCGAAAAATCAAGTAAGAGACTCTGCAAAGTTTGATAACCCACAC  
CAACCAACGCTCTAAATTCAGCCTTCACTTTTGAATTAGACAACAATGTACACATGGCACGAGTACTGCAACAATCAAGCAAATCATGCGAAAAATAGGATTATGCTCCACTTCAAATGTT  
TCTCTTTGGTTGCAAGATGATGTAGTGT CAGTCGGCAGTCGGTAGTGGGCAGTCGGCACATATCACTCAAGAAAAAGAAATTTATGAATCTACAGTAGAGAAGATGAAATGTGATTCGTG  
GAGAGGCACGACACA ACTTTACCAATTGCTAAAGAAATAAGAAATCCGAGAAGGAGTTTGCAATCTGCGATAGAGACCCGAGGGAGAAACCGACAGAGAGGGCAGTTTGCGGGGTTG  
CCGAAAAATTTGAGGGAGGGAAAAATATCAGCGCGCGGAAGTAGAGATGTCGAGTCGTGGCAGCGGTGCGAGCGCGGTTGGAGCCTGGAGGTTGTCGCTAAAGAGCGAAA ACTAGG  
GCAAGTAGAAATG

>comp168880\_c1\_seq18

TAAATCTAAAATTACATGATTTTTCCA ACTTCAAAAAATAAATTGCTACTTCAAGCTTAAATATACAATTATACATAATCAATCTATTATAATAATTTATGCCAATCTTATATTCCTATTCATGG  
TCATCGCCAACATTGCTTTTACAACA AAGATATTTAGTAACATCTCTCTTTTCAAATTCTAGTAGATGAAGAAGCTTTAGATGAATCCTCTGTGCGAGCATCAGATAAGGAATATATCGATTA  
ATGAGGAGCTGATGCCACCGTTGATCCTGCCAAAGAATGCACATATCCATTGTTAAAAAAA ACTAGCTTCCATCGATCTATTGCTCAATAATAACAATAATAAAAACTACCTTTACATATAT  
GATCTATTAATTAATTAAGACAAAAATCATTCCTACAGGCCTTATATCGGCCTCCACATGCATGGTTTTTTTGAATGCTAGTTATCTAATTAGAAAAGTAAGCACCACAGCCCTAAAGCATGA  
AGTTCTGTTGGTGATTGAATCCTTCAACA AATTCTGGAAGACATCTAGTCCAAAATACTGCAGTGAAATGCTGCTCTGCCACCCAGAACATATGAATGTTTAAAAACAAGGAGGCTCAAT





TATCAAGAAGAGCATTTCAGAAGTTGTTTCGCTTGGTTGCCACTCGCAAAAATCAAGTAAGAGACTCTGCAAAGTTTGATAACCCACACCAACCAACGCTCTAAATTCAGCCTTCACTTTTG  
AATTAGACAACAATGTACACATGGCACGAGTACTGCAACAATCAAGCAAATCATGCGAAAAATAGGATTATGCTCCACTTCAAATGTTTCTCTTTGGTTGCAAGATGATGTAGTGTCAAGT  
GGCAGTCGGTAGTGGGCAGTCGGCACATATCACTCAAGAAAAAGAAATTTATGAATCTACAGTAGAGAAGATGAAATGTGATTTCGTGGAGAGGCACGACACAACCTTTACCAATTGCTAA  
AGAAATAAGAAATCCGAGAAGGAGTTTGCAATCTGCGATAGAGACCCGAGGGAGAAACCGACAGAGAGGGCAGTTTTCGGGGTTGCCGAAAAATTCGAGGGAGGGAAAAATATCAGC  
GCGCGCAAGTAGAGATGTGAGTCGTGGCAGCGGTTCGAGCGCGCTTGGAGCCTGGAGTTTGTCTGCTAAAGAGCGAAAACTAGGGCAAGTAGAAATG

>comp168899\_c0\_seq2

GCTCCAGATGATTTACCAGTAGCTGTAAAGTTTCATATAGCAACAGCCAAATGAGTTTTGTATGCACAACTTAATGTGGGGAAGAACCATTAAGTAAAGGCTAACGGCTACTTAATCAT  
GTAAAGCAGGTCAAAGCTTCTTTTATGAAGAATGTTAATAGATAGAAAATTTCAAGAAGAGGGAGCACAGGAAAAAAAAGAAGTTTAGCATAAGGGCATATCTATTGCATGAGGTTAC  
CGTTAATGGGGTATCTTCATGATTCAAATCGCAACCTCAAAGTACCTATCCTTCAAATAATTTCTTAAATATAACAAAGTTCACCATTATTATAGGCTTCATTTGGGACGTCTTTCTTGCT  
GCTTCTTAAAGTAGCTTTCTGGTAGAAAAATTTAATTTTCTAGCAGAAAGCTGCTTAAAGAAGCAGCATGAAAGCCGTCCCAAACAAAGCCAGAGTTTCTTCGCAATAAGAATCTTTT  
AGCAGCCTGTGACAGCAGTTCATGTTTCGAAAACCCATAAAGCATTTAGGCTTTGCATCCTAGCATAATCATAAGCAACATCAAGATATTTAAAATAAAAATTATTCTTAGATTAGTCAAGT  
AGACTTAAAAAGGTTGCACAAGAAAAAGTAGACGGCGTTCAAATACCAGAAAAGCTCTAAAGCATAACATATATGTGGGCATACATCATAACATCGTTTATTTTAGCTTGAATCTGACCA  
ATTTGAGTGAATCATTAAGAGGAGTAAATCAGCTCGATTCCAATTAATTTTGAATTATTAAGCAAGATTTGCAGACATAATTATCAGCCTAAGTTCTGATCATGTTTCTTCGACG  
GTTTATAATGGAGTATTTATAGATGCATAAAGGATAGAAAATAATTGCATGCCATTAATAAATAAAGCGACTTTTGATGTCTTTATTCAAATGCAAATATAACAAACAACCTTCATAACCCATTT  
ATGATAGAGAAATAATAGCTTTTTTCCAAATTTGTGCAATTATTAAGCAAGATTCGAGACATAATTATCAGCTCTAAGCTCTGATCATGTTTCTACCACAGCTAATAAAGACTTAAAATAA  
TACTTAATAAGTGCATAAAGGAGAGAAAGATCAAATGGTCCCTCAGCTTTTTGTGAGGGACCAAATGATCCCTCAACTATTTAAAATGGGCCTTTTTAGTTCTAACATTAATTTTGGG  
ATTAATGGTGTAAATCATGATGTA

>comp168909\_c0\_seq1

TAGAGAATACAGTCCCGAAAACCCGGCTCGGCTATTTCCCTTTATAAAACAGGCTGGCCACCGACCTTCAGGTCTCGCGCGGAAGGCCTCTATTAAGTTCGTTTTGAGCAGTGGGCACTT  
CCAAACAATGAAAGGCGAGCTTGGCGATCCCTTCAAGCTCTCCTCCTTACCAAGATCTCCTTCTGTTCCTAGCGTGCATCGCTCCTTCTACCTCGGCCGTAAGTGAACGATGGCTCT  
ATGTATCCCAACTTATCTTTTACAGTAAACGTCAATCTACC GCCGCTACGGCAATGCGAACCTATCTGTTACCCTCTCTCCTGACCTCAAACGCACCAGCGATATTACCACCCCAAGTATC  
CAACGAGTCTCTTTCAATGCGGCCGATCCGGTGTGATGCGCTTTCCAGAGCTCCCGCGCCGCGGTGGTTCCGAAGAACGTTGGGATCGTGGACGAGAACGGGGCAATGCGGGAG  
GACTTTGATGCCGGATCATTCCGATTCGGTGGAGGAGGAGGAACCGCCATCTTGGGCGGGTAACGAGACGAATAATGAGATAGAGAAGAAGGATGAGACTAGGGTTAGAATCCA  
GAAGTTTGGGCTTTGCCCGGAGAGAATGAGGGAGTACATTCCTTGTCTTGATAACGAGGAGGAGATCAAGAACTGAATTCTACGGAGAGAGGGGAGAGATTTGAGCGGCACTGCCCA  
GCGAAGGAGCAGAGTTTGAATTGCCTAGTTCGGCACCGAAGGGCTACAGGGAGCCGATCCCTTGGCCCATAAGCAGAGACGAGGTGTGGTTTAGTAATGTGCCACACACGCGCTTAGT  
TGAGGACAAAGGAGGGCAAAATTTGGATAAAAAGGGACAAGGAAAAATTCAAATTTCTGGAGGTGGCACCCAATTTATACATGGAGCAGACAGTTATTTAGACCAGATATCTGAGATGG  
TTCCAGGCATTGCATTTGGGAATCGTACAAGAGTTGTCTTGGATGTTGGGTGTGGGTAGCAAGTTTGGTGTCTTTCTTGTCTTACGAGATGTCATTACCATGTCAATAGCTCCAAAAGA  
CTTACATGAGAATCAAATTCAGTTTGTCTTGAACGTGGTGTGCCTGCGATGGTGGCAGCTTTTGCAACTCGACGCTTACTGTATCCAAGCCAAGCCTTTGATCTACTCCATTGCTCAAGA  
TGCCGAATAAATTTGACTCGTGATGATGGAATTTTGTCTTGAAGCGAACCGAATGCTTAGAGCTGGAGGATACTTTGCATGGGCAGCACAACTGTTTATAAACATGAAGAAGCTCAG  
CAAGAAACATGGAAGAGATGGAGAACCTTACTTCTCGTATTTGTTGGGAGCTGGTGAAGAAAAAGGGGTATCTTGCTATATGGAGGAAGCCTTTGAACAACACATGCTATCTTAATCGC  
AGTCCCTGAAGTCCAACCTCCACTTTGTGGTCCAGAAGATGATTCAAATAGTGTCTGGTATGTTAATCTCAAAGCATGTATCAGCCAACCTCCTTGGAGATGCCTCTGGAGCCAATATTACAG

CATGGCCTGCTCGCTTGCATGAGCCACCAATTGAGACTTCAAGGTGTACAGATGGATGCTTATATTGCAAAAAATGAACTTTTTAGGGCAGAAACAAGATTCTGGAATGATATCGTTGAAGG  
CTATATCCGTATTTTCCACTGGAAGAAAATGAACATTCGTAATGTTATGGACATGAGAGCCGGGTTTGGAGGGTTTGCATCAGCATTAAATTGATCAGAAGATGAATAGCTGGGTGATGAATG  
TTGTCCCTATAAGTGGACCCAACACATTGCCTGTCATCTATGATCGTGGACTTATAGGAGTGGCCCATGACTGGTGTGAGCCATTTGATACTTACCCAAGAACTTATGACTTGTTCATGCT  
TTTGGTCTCTTCTCTATAGAGCATAAAAGGTGCAATTTGTCTGTTATTTTACTGGAAATGGATCGCATTCTAAGACCGGGTGGACGAGCATAACATACGGGATTCCAAATTTATTACCGAAGA  
GATTAAGGAAATCACTGAAGCTATGGGATGGAAGACTGAACTGCGTGATACAGCTGAAGGACCATACGCAAGCAGGAAGGTATTGATAGGCCACAAGGAGGCCAGGCATTCTTAGCATT  
GTTTTGACAAGGTAATATAGAATCTGATTCCCTGTAAGAATTGCTCTTTGTTGATCCATAATGGAGATTCAACGAGGACGTGAAATTTGGGTCTGGTTGCTTACAAATGGATGCAACGGTAA  
GATGATTTTAACTTCATTTTATATTTTTTAGCTATTCTGTTTTGTCTTACAATGGTGGGTGGTTTTTGGTTTTTTGTTTTTACCCTTTTTTTGTATCATTAAACCACAACAGAACAGATTAATTGTA  
TATTTTATATCTATTCTGTTGCTTACAGTGTGGGTTGGTTTTTGGGTTTTGTTTTCCGTTTTTGTGTTGTTTTAAACCCACCATAGAACAAATTAATTGTTATGAGAGTACAGGCATGAAT  
AAAGCATGTTTCATTGAATAAACTATTGCATGGCGTATGCATTATTGACTACTTTGCTGCCCTTTGTGAA

>comp168909\_c0\_seq3

TAGAGAATACAGTCCCGAAAACCCGGCTCGGCTATTTCCCTTTATAAAACAGGCTGGCCACCGACCTTCAGGTCTCGCGCGCGAAGGCCTCTATTAAGTTCGTTTTGAGCAGTGGGCACTT  
CCAAACAATGAAAGGCGAGCTTGGCGATCCCTTCAAGCTCTCCTCCTTACCAAGATCTCCTTCTTGTTCCTAGCGTGCATCGCCTCCTTCTACCTCGGCCGTAACCTGGAACGATGGCTCT  
ATGATCCCAACTTATCTTTTACAGTAACGTCAATCCTACCGCCGGCTACGGCAATGCGAACCTATCTGTTACCCTCTCTCCTGACCTCAAACGCACCAGCGATATTACCACCCCAAGTATC  
CAACGAGTCTCTTTCAATGCGGCCGATCCGGTGTGATGCGCTTTCCAGAGCTCCCGCGCCCGCGTGGTTCCGAAGAACGTTGGGATCGTGGACGAGAACGGGGCAATGCGGGAG  
GACTTTGATGCCGGATCATTTCGATTCCGATCTGGTGGAGGAGGAGGAACCGCCATCTTGGGCGGGTAACGAGACGAATAATGAGATAGAGAAGAAGGATGAGACTAGGGTTAGAATCCA  
GAAGTTTGGGCTTTGCCCGGAGAGAATGAGGGAGTACATTCCTTGTCTTGATAACGAGGAGGAGATCAAGAACTGAATTCTACGGAGAGAGGGGAGAGATTTGAGCGGCACTGCCCA  
GCGAAGGAGCAGAGTTGAATTGCCTAGTTCGGGCACCGAAGGGCTACAGGGAGCCGATCCCTTGGCCATAAGCAGAGACGAGGTACTTTTTTTTCATGATATTTGGGGCCCCCTTTT  
GTTTTTGGTGTTTTCATTGGTAGAACCTGGAACAAAGATTGAAATTGGAATGCTTTTTTTTCATGAATGATCTGCTGCTGTTTGAAGGTTCTGAGGACTGTAAATTCCTCATACTCTGGATGA  
ATCCTAATTGGGGGCTACAGAGGAGAAAAATAAACCTAGGTTAATGTTTTGTTTTCAATCCCAATTAATTACTGTCCAGTTCCTTGAAAGTCTGAATGCACTCACATTATGTATTTATGTTTTT  
GTACAAAATTTTGTACAGTTCATCTCAATAAATTTTCATTTCCCTCGGTAAAAA

>comp168924\_c3\_seq5

TCAAGCACCATTAACCTGCATTGATGTTTGTAGTAAAATTTACCAAACCTTGTTCGATCTTTATAACATGTGATCAATATTCGGCTAATCACTTAATTAATTGCTTCTTTGAAGAACAATCCACTG  
GCTTGCAATACACACCATACACAACCTATCTTCCCGGCCAACACAGGCTGTGCTTATTACCTTATTAGCAATCCTTATAAACAATTTTCTAATTAATTAACAAGCAACACATACATACATGCAT  
ACATAATTACAACAAAACAATATATATATGGGTACACATGGACATGCACATCTATTACACAAAGTACTTCGAGACACTTCAAGCTAAGCCTTCGTTTGGGACGACTTTCTTACTGCTTCTTA  
AAATAAATTTTAAATAAAAAATTAATAATTTTATATTAATAAAGTTGCTTTAAGAAACAATAAGAAAGCCGTCCCAAACGA

>comp168948\_c1\_seq1

CATCTATATTTATTTGATAAATCTATCTTCTATAACAAGTTGCCAAATAATTTTAAAATAATGCAACAATAATAAATACCTCATCATAATCAATTTGGATATTTGATTATATCTTTTATCTTGAA  
TATCACCTTTTATTGTCTCCTTTAGAATTCATCATAGTTTTGCATGCTCATTAGATAGTTCATCTTCTCAGGGCTGTTGGAATGCAATTCACATTGAACCTTAAATAACCATAGAAAATTATCAT  
ACTACGCTTTTATTACATCTTAAATAAAAAACAGGACATGAACTCTTGATAAAAGCTGCATTTACTGATTAAGATAAGTAGGGATTGATGACTGCATTGCCATCATATCAGACAATAATTCTATG  
AATTGCGTCATGAAATAAGATGATATTTTGCCTGACATTAACAACCTTCATTCCTCTTTGTTGATGATCTTATGAGATATTTTTCGCCATAGTCCCTCCATTGACATAATCTCTTGACTGTG  
AGACGCCAGGCCAGGTATGAAGAGTCCCGAAGCACGATACATGAGGGACACAAAGCCCTCATCAAATCGTTTTGAAGATAGGCCAACAAAGAAAGCTTTCGTTAAGTCTCCCACTGCGT

TCAAGTACATGGAGAACACGAAAAATGGATGAAAATAGTTCGGGTTTCGGCGATTCTCCACCACCTGCCATTAATTCAAGATAAAGTCGATGACATGCTAATCAACATAACAATGAAAGT  
CTGCTTTGTAACCTTCTTTAAGACAGCATAGAATGAGTAAGCTAAACGATGGAAGTAGAAGCTAGCAAACGCACCTTGCCCTCATACCAACTTGTGAAGTAAATGCAGGTTCCAAAGTGCT  
TGAACAGAGCAACGGGGGGCTTGTCAAATGGAACCCGAGGGACTATATCGTACCTGTAAACCATCTATGATACTTGGATTTCAAACAGCTTGCACGTTGTTTCAAACACCCGCATCTC  
CAACCCTCGGCTGGCCATAAGTCATCACGCCATGGATTCTGTCTATGATGTCCTGCCGCTCGTGCATGGCTAGCAGTGTGGAAACAGAATCGCTAGAGCTCCACCGAGGCTGTGACCCG  
TTATGATGATCTTGGCTCGTTTGTGCTTCTCCAGCAATTGATTCAGCTCCTCCCGAATGGCGTAGTAAGCCAGCAATTTGCCCTTCGTTATGCCCTCGTGCTCACGGGGGAAGCCTATCTCA  
ACATCTTTCTCGTCTTGGAGCCCGAGTGCTCTCATGAAACCAAGATGGGCTTTGCCAAATTTTCCATGGAAAGCCAGGAGAGATCGACGTCCGTAATCCAGTCGTAAGCGTTGAAGGGC  
TCAGTCCCGCGGAAGGCCAATACAATGACATTGGCGTCCCTCTTGTGCGCAGCAGATGAAGGCTTGGGTTCCCTCTGTTCTTCAAGTATTTGTTCCAACAATTGAAGAATCTGACAAAG  
TGCATCTTCCAGTATTTATTAACCTTGGTTTTTGTAGAAAGCACCGTTCTCGTAGGGCAGCTTCGAAGCCATCATAGAGAGACTGAAGGGATTGACGTCCAGGCCTGGAAGTGGTTCTATTG  
AAGAAAAATCTGTAATAAAAATGCTCCTGAATAGCTCATATCGACCATCTATGTGACAGATGATGGATCTAAAATCGGCCGATTTTCGTCTTGAATCACCAGAGACACTGTGAGGCAACC  
CCAAAAGATGCCGAAGAAGCCACCGTTGAGGGAGTGTAGGTTGAGGAAAACTCGACAATGTGGCCGAGACACAGAAGCGGGAAGCTAATAACTGAAAGCAGCTTCTGAATGAGCAG  
AGTGAGCGCGGTTACCCAATCGATCCTGGCTTCGTCTAGCGAAGCGCTTACGCCAGACTTGTGCTCCTCGTACTTGTCCCCCTCAGCCGCCGGTGTAGCACTAGATGGCCGGCGATGTC  
GCGATACCTCGCCTTATCGTGGCGAAGGATCATATGCTCATCCTTGGCCGCCATTGTTTAAAGAGAGAATGAAGGAGAAACGGAGATTGAGGGACAGAGAATTTGAGAGTAGGTGCGTCG  
AGTATTTATGAAAG

>comp168948\_c1\_seq11

CATCTATATTTATTTGATAAATCTATCTTCTATAACAAGTTGCCAAATAATTTAAAATAATGCAACAATAATAATACCTCATCATAATCAATTTGGATATTTGATTATATCTTTTATCTTGTA  
TATCACCTTTTATTGCTCTCTTTAGAATTCATCATAGTTTTGCATGCTCATTAGATAGTTCATCTTCTCAGGGCTGTTGGAATGCAATTCACATTGAACCTTAAATAACCATAGAAAATTATCAT  
ACTACGCTTTTATTACATCTTAAATAAAAACAGGACATGAACTCTTGATAAAAGCTGCATTTACTGATTAAGATAAGTAGGGATTGATGACTGCATTGCCATCATATCAGACAATAATTCTATG  
AATTGCGTCATGAAATAAGATGATATTTTGCCTGACATTAACAACCTTCATCCTCTTTGTTGATGATCTTATGAGATATTATTTTCGCCATAGTCCCTCCATTGACATAATCTCTTGGACTGTG  
AGACGCCAGGCCAGGTATGAAGAGTCCCGAAGCACGATACATGAGGGACACAAAGCCCTCATCAAAATCGTTTTGAAGATAGGCCAACAAGAAAGCTTTCGTTAAGTCTCCCACTGCGT  
TCAAGTACATGGAGAACACGAAAAATGGATGAAAATAGTTCGGGTTTCGGCGATTCTCCACCACCTTGCCCTCATACCAACTTGTGAAGTAAATGCAGGTTCCAAAGTGCTTGAACAGA  
GCAACGGGGGGCTTGTCAAATGGAACCCGAGGGACTATATCGTACCTGTAAACCATCTATGATACTTGGATTTCAAACAGCTTGCACGTTGTTTCAAACACCCGCATCTCAAACCCTCG  
GCTGGCCATAAGTCATCACGCCATGGATTCTGTCTATGATGTCCTGCCGCTCGTGCATGGCTAGCAGTGTGGAAACAGAATCGCTAGAGCTCCACCGAGGCTGTGACCGGTTATGATGAT  
CTTGGCTCGTTTGTGCTTCTCCAGCAATTGATTCAGCTCCTCCCGAATGGCGTAGTAAGCCAGCAATTTGCCTTCGTTATGCCCTCGTGCTCACGGGGGAAGCCTATCTCAACATCTTCT  
CGTCTTGGAGCCCGAGTGCTCTCATGAAACCAAGATGGGCTTTGCCAAATTTTCCATGGAAAGCCAGGAGAGATCGACGTCCGTAATCCAGTCGTAAGCGTTGAAGGGCTCAGTCCCG  
CGGAAGGCCAATAACAATGACATTGGCGTCCCTCTTGTGCGCAGCAGATGAAGGCTTGGGTTCCCTCTGTTCTTCAAGTATTTGTTCCAACAATTGAAGAATCTGACAAAGTGATCTTCC  
AGTATTTATTAACCTTGGTTTTTGTAGAAAGCACCGTTCTCGTAGGGCAGCTTCGAAGCCATCATAGAGAGACTGAAGGGATTGACGTCCAGGCCTGGAAGTGGTTCTATTGAAGAAAAAT  
CTGTAATAAAAATGCTCCTGAATAGCTCATATCGACCATCTATGTGACAGATGATGGATCTAAAATCGGCCGATTTTCGTCTTGAATCACCAGAGACACTGTGAGGCAACCCCAAAAGAT  
GCCGAAGAAGCCACCGTTGAGGGAGTGTAGGTTGAGGAAAACTCGACAATGTGGCCGAGACACAGAAGCGGGAAGCTAATAACTGAAAGCAGCTTCTGAATGAGCAGAGTGAGCGC  
GGTTACCCAATCGATCCTGGCTTCGTCTAGCGAAGCGCTTACGCCAGACTTGTGCTCCTCGTACTTGTCCCCCTCAGCCGCCGGTGTAGCACTAGATGGCCGGCGATGTCGCGATACCTC  
GCCTTATCGTGGCGAAGGATCATATGCTCATCCTTGGCCGCCATTGTTTAAAGAGAGAATGAAGGAGAAACGGAGATTGAGGGACAGAGAATTTGAGAGTAGGTGCGTCGAGTATTTATGA  
AAG

>comp168948\_c1\_seq13

AAATTATGATTACCGATCTGAAAATTTAAAACAACAAAAAATCTCAAAGAAGCTTAAGACTAATTTATCGAAAAACAAAAATATATGCGATCAAGGGCATAAGAGAAAACAAA  
AAAAGGTGATCGTTATTAGATCCAGACCTGTAAGGAAGCGGCGAAGGATGCCGAAGAAGCCGCCGTTGAGGGAGTGTAGGTTGAGGAAAACTCGACAATGTGGCCGAGACACAGAA  
GCGGGAAGCTAATAACTGAAAGCAGCTTCTGAATGAGCAGAGTGAGCGCGGTTACCCAATCGATCTGGCTTCGTCTAGCGAAGCGCTTACGCCAGACTTGTGCTCCTCGTACTTGCTCC  
CCCTCAGCCGCCGGTGTAGCACTAGATGGCCGGCGATGTCGCGATACCTCGCCTTATCGTGGCGAAGGATCATATGCTCATCCTTGGCCGCCATTGTTTAAAGAGAGAATGAAGGAGAAAC  
GGAGATTGAGGGACAGAGAATTTGAGAGTAGGTGCGTCGAGTATTTATGAAAG

>comp168948\_c1\_seq6

GGAATTGTATCCCTTTTGGTTAAACAAAAAAGACCTTGGCCATATAATAAACAGGTCATAACAATGGACCCAAACCGGACTTGAAAACCAATTTTAATAATATTTTTTATA  
ACATGTTAGCTATGAATTTTAGGTAACCTAATCATAAAATAAATATATATACTAACAATAAAAGAATTTTAGGAAAAAATAAACATGTCACCTTTAGATAAAAATTGAGTTTGCAGTTA  
CCCTAAATCCCACCCAGTTAAACAAGCGAGTCAATATGTTGGATCCAAATCCAATTCGCTAATTAATTACGTCAACCCAAAATTAATTTTTTTGAATTAGATCTAATAGATACAGTCATGTTT  
TGGAGAGATTATTATATGTGAAGTTCAGACATAGGACTACGTCCAGACTCTCTGTACACATACTGAGTACATTGTGTAAATGTGTGTACACATGCTATATACAGAGTTGTACACAATGCATT  
AAATGAACTTAATAGATGAGTTTGAATTTCTCAAATTTCAATCATTATTTTGTTCATCCAACGAAATGCCTACAAATTTAGAACTCCTATTTTTATAATTTTAAACAGACCCTTAATTA  
CTATCCCCATATTTCAATCACCTTTAAAATTTTACCTCACACAGCCCAGTTTGGCATGTTGGTTAAGATATTAACCTACCCTAAGAGTTTTTAAATTTAAGTCTTTGTGTATGAGATGT  
GTGTATGAATTTATCTTAATTGATCTAAATGTAAAAAATTCGCCTCAAACGTACGACTTTAATGCTCTAAAGATTATGCGACCAAT

>comp168960\_c0\_seq12

CTTATCTACAAACCATCTTCCTTCTAAAATTTACCTCGGAACTTAAATCAATTAAACTCCTCCGAAAAGAAAAGGAAAGCGAGCAGAGGCTGGGGCAGAATTTTTGGAGCCCACAGT  
TTAATACATTTAAATCATATGTAAACCAAGCTTTTTCTCAAACATAAGAGCCAGATTTGACCGAATGATTTATATGGGAACATAAAGCTTATTATTTCTCAATATAAGCAACAATACTA  
GGTAATATATTAATTGAAGCACTGTATAAAGGATACCACAAGAACACCAAACTTCAATTTATTATAATTATTCGCTAGAAGCCGAGGCGAAGGCCATCGTTTTGAGCTTTTAAAGTAGGGAC  
AAGAACTTATCTGTCATTATTTTATTATGGAAATTACATTTATCTTTCAAGTGGTTGAACTTTGTGTTAGGGATGTTGCTCAAGAAGTCATCTAGTTTTCAAACCTTCTGTATCCAAGTAGTT  
AGTCCTTGCACAAGCGGAGGTCCACTTTTAAAGCTGGAGCAGATGCCTACACTCAATCTTAAACTCAGATGAGGAATTGGAGCTTACATAGGAGACAACAACGAGGGATTGCAATACGTC  
GCCCCAT

>comp168960\_c0\_seq18

CGTCCTTCGCTACACGTGGTCAACGACTCTCACTAAGCCGCTTCTCCCTCAGTTTTTTCTGCGATCGCTAACTCGTGGTCAACAACCTGTTACTAGAGCCACTTCTTCCTAAGTCGGACT  
TTTTCTGCGAAATAGGGATCGCGTGCAAGATAGAACGAGAGCAATCAAGATGGAGTATCTCTTAGTCCGATCAGCTGTAGCCCTGCTGCTCTCATCGGTGATCTCCGCGGGAGCGCTCAG  
GCGGAAGTCGCTCGATCTATCAGGGGCTTTATCAGGGTTCTTAGTGATGGCGATCCACATCACGTGCAGTTACAGGTTGCGAAACACCCATCTTCTGCTGGCTTCCTTTTCTCGAATCGA  
CTTGTGCTGGCGCTTCTGATTCTTTGGTCTGTCTATCTGAAGGTTTGGGGCTCTCCCTCCTAGTTTTCTTCTTCACTTCATCCAAGCTCACCAGGCTCGGAGAGAAGAAGAAGAGGAGC  
GTCGACGAGGAGTTCAAGGAAGGAGGGCAGCGGAACTGGTTGCAGTTTTGGCTAATAGCGCCCTTGCAGCCATTTTGGTTATGCTAGTTGCTATGATTACTGGGGGCCAGGACAGGTG  
CTTGGACACAAAAGATTCAACCCTTTTAACTGGCCTAATTGGTGGCGTTATTGGACTACGCTTGTGCAATGGAGACACCTGGTCTTCAGAAATTGGGATGCTTAGTAATGCCAACCT  
AGACTAATAACTACCTTCAAGAAAGTTGAAAGGGCACCAATGGCGCAGTTTCTGTAGAAGGCCCTTAGCAGCTGCCGAGCTGGCTTAGTTATAGGATCGACTTTTGTAAATGGTCGGT  
TGGCTCTCAGTTTCATGTGGTACTCATGTTGTGCGGAGAGAGTTTCTTGCAGTTTCTATTGCTGCAATTGCTGGGCTTTCGCGAAGCCTAATTGATTCTATATTGGGTGCAACGCTCCAATT  
TAGTGGATTTTGCACCTTTGCGGAAGAAAGTAATTATACCATTTTCAATCTATCCTTTTTAACAGTATTATTCTATTTTGTGAATTTGAGATTTTCCATCAATCAACGAACTAGTTCATCAATTA

AGCAAAGGAAAGAAATTAAGAAAGTTTTTGAAGACAGCATTTTAAAGTGATGACCCATCTTCTAGGCTGAATCGGTTGTGTTAGGTTGCTTGAAAGAAAGTGATTGCTATGCTTGCAAAG  
AAAAGCGGTAATAAAAGCTCTTTTATATTCTCATTGTGATAGCTGAAACTTGTTCCTTGTCTTTGAAGGTGGTTGGAAGAAAAACACCTACTGTAATCAGAATTCAGGAATGGAAGTT  
CTTGACAACAATGCGGTGAATGCTGTGTCTGTTTTAATAACAACACTTCTTACAGGTCTCGCATGTATTTACATTTTTTGATTACGCTGGGTAGGTCTTCATTCTTCTCCTATTTTTCTCGA  
ACACACCCAAAAGCGACAAGCAAGCTCAGCGATGCTTTATTTATCTGTCCCTCTCTTTCCCTACTGTGTTTGAAGGCATATCTAACAAAAGAATACTATTTTTTTTTGCATCCCAAATTTT  
CATGATGTAAATCCAAACCAATGCACGATTTTTGCCCCTACAAAATTAGGACCTAATGTACCGACAAGATCCTGTAATGCAGGCTGAGCAGAATAACATATTGTGATACTACACAGTTGAAC  
TGTTTTCCATTATCTGATGCAATATGCAAATATATATGTTGGTGTATTCCATTTTTGGATATTGTTCTCTGAGTTATCTTACATGTAATACAATCTTTTAAAGTGATGCTACTTTACACATCA  
AATGAAATTCATTCTGAATCCTTCTCCTACTGCATGCAGGGAAGGAGACATCTCAGTCAAAAAGAATACAGAATGCATTAGTCCATAATGAAAGAGACTCAAAAGTGACCAAATCAA  
GATGCATGTACGAAAATATATTAGGGATGTTGCTCAAGTAATCATCTGGTTTTCAAACCTTTTGTACCCAAGTTGTTAGTCCCTCCACAAGAGCAGGCCCACTTTTGAGCTGGAGCAGATG  
CCTACACACAATTTAAATTCAGATGAGGAATTGGAGCTTACAGAGGAGACAGCAGCGAGGGATTGCAATACATCGCCCATCTTACACTCCTTCTAAACTCAAGGACCATGCTGGACAT  
CGCATGAGTCTCCAGATAGAAATTGGAATGGCCCTCAAAAATCCACAGAATGTACTTGACATTGTTTACATGCATATTAACATCTAAATCGGCCCAATTAGGCTGTCAAACAAATGAAGG  
TTATAAATAATATAGAGAAAGAATGTTAAGAGAGAAAAAGATATACTAAATGAGAAATTTAAATCAAACATATTTAGCCAATCTAGAACTTACAGTTAAGCCATCTATGATGTAATCTGCA  
TTCTCATCATTAACTTTAGGGAACCTTCTGTTGTCCTCATTCAAAATAAAAGTAGTATCATTACAGTGGAGATCTAATTCAACTTTTTTTTCATCAGGTATCTTTGAAAGTTTACGTGTTGTTT  
TGTCATAAGTGCCCAAATACTCGTAGCTCGAATCATACTTTGACCTGTTTTGTGATTGCATAGATGCCAATCACGAGCCATACTCAATTTGTTATGATGTCTTAACCATGTATTAACCTCAA  
GAGCATCACCCATGAAGGATAATGTTCCACTTGAACATGCATTTTTAGTATGACAAATATATCGTTTTCCGCCATGTATCTTTGGGTATGAACGAATAGAATCATCAAAAACCCAAAGAATTT  
TGAAATGGTTGACATTTGTTTCTGTAAAAGGTTTATTATTGCCTCAAGCGATGCTTTTCCAGTAGCATCAATCTCATATACTTTGATAGAGTTTCTCTGCATGTAATATTATCAATTATCTG  
TTCATGACTAAATGAATCATCGAACAGGTCAGGCCCTCCTAGGCTTCCAATTCAGAACGTTTTCTTTGTTTCTTATTGCTACTTTTTATTTTCATTAGAGTCGCAAGGAGCCACCTCCAATAAA  
GGAAGTTGTGAACATCCTTTCGTGATTGAGAAGGTACATCCTCCTCAACATTTGCTAACTCACTCTTAAAGCTAAAAGTAACAGTATTGGCCTTTTTGACATATCCTTTGATTTGAAAAGCC  
TTAGCAGAACATGCAAATTAGCTTTCTGTCCACTATTAAGCAATGAATCATCAAACGAACCAGTCAAAGAGGATGAAATTTGTTGTGAG

>comp168960\_c0\_seq19

CGTCTTCGCTACACGTGGTCAACGACTCTCACTAAGCCGCTTCTCCCTCAGTTTTTTCTGCGATCGCTAACTCGTGGTCAACAACCTGTTACTAGAGCCACTTCTTCCTAAGTCGGACT  
TTTTCTGCGAAATAGGGATCGCGTGCAAGATAGAACGAGAGCAATCAAGATGGAGTATCTCTTAGTCCGATCAGCTGTAGCCCTGCTGCTCTCATCGGTGATCTCCGCGGGAGCGCTCAG  
GCGGAAGTCGCTCGATCTATCAGGGGCTTTATCAGGGTTCTTAGTGATGGCGATCCACATCACGTGCAGTTACAGGTTGCGAAACACCCATCTTCTGCTGGCTTCCTTTTCTCGAATCGA  
CTTGCTGCTGGCGCTTCTGATTCTTTGGTCTGTCTATCTGAAGGTTTGGGGCTCTCCTCCTAGTTTTCTTCTTCACTTCATCCAAGCTCACCAGGCTCGGAGAGAAGAAGAAGAGGAGC  
GTCGACGAGGAGTTCAAGGAAGGAGGGCAGCGGAACTGGTTGCAGTTTTGGCTAATAGCGCCCTTGGGACCATTTTTGGTTATGCTAGTTGCTATGATTACTGGGGGCCAGGACAGGTG  
CTTGACACAAAAGATTCAACCCTTTTAACTGGCCTAATTGGTGGCGTTATTGGACTACGCTTGTGCAATGGAGACACCTGGTCTTCAGAAATGGGATGCTTAGTAATGCCAACCT  
AGACTAATAACTACCTTCAAGAAAGTTCGAAAGGGCACCAATGGCGCAGTTTCTGTAGAAGGCCCTTAGCAGCTGCCGCAGCTGGCTTAGTTATAGGATCGACTTTTGTAATGGTCGGT  
TGGCTCTCAGTTTCATGTGGTACTCATGTTGTGCGGAGAGAGTTTTCTGCAATTCTATTGCTGCAATTGCTGGGCTTTGCGGAAGCCTAATTGATTCTATATTGGGTGCAACGCTCCAATT  
TAGTGGATTTTGCATTTGCGGAAGAAAGTAATTATACCATTTTCAATCTATCCTTTTTAACAGTATTATTCTATTTTTGTGAATTTGAGATTTCCATCAATCAACGAACTAGTTCATCAATTA  
AGCAAAGGAAAGAAATTAAGAAAGTTTTTGAAGACAGCATTTTAAAGTGATGACCCATCTTCTAGGCTGAATCGGTTGTGTTAGGTTGCTTGAAAGAAAGTGATTGCTATGCTTGCAAAG  
AAAAGCGGTAATAAAAGCTCTTTTATATTCTCATTGTGATAGCTGAAACTTGTTCCTTGTCTTTGAAGGTGGTTGGAAGAAAAACACCTACTGTAATCAGAATTCAGGAATGGAAGTT  
CTTGACAACAATGCGGTGAATGCTGTGTCTGTTTTAATAACAACACTTCTTACAGGTCTCGCATGTATTTACATTTTTTGATTACGCTGGGTAGGTCTTCATTCTTCTCCTATTTTTCTCGA

ACACACCCAAAAGCGACAAGCAAGCTCAGCGATGCTTTATTTATCTGTCCCTCTCTTTCCCTACTGTGTTTGAAGGCATATCTAACAAAAGAATACTATTTTTTTTTGTCATCCCAAAATTTT  
CATGATGTAAATCCAAACCAATGCACGATTTTTGCCCTACAAAATTAGGACCTAATGTACCGACAAGATCCTGTAATGCAGGCTGAGCAGAATAACATATTGTGATACTACACAGTTGAAC  
TGTTTTCCATTATTCTGATGCAATATGCAAATATATATGTTGGTGTATTCCATTTTTGGATATTGTTCTCTGAGTTATCTTACATGTAATACAATCTTTTAAAGTGTGATCTACTTTACACATCA  
AATGAAATTCATTCTGAATCCTTCTTCTACTGCATGCAGGGAAGGAGACATCTCAGTCAAAAAGAATACAGAATGCATTAGTCCATAATGAAAGAGACTCAAAAGTGACCAAAATCAA  
GATGCATGTACGAAAATATATTAGGGATGTTGCTCAAGTAATCATCTGGTTTTCAAACCTTTTGTACCCAAGTTGTTAGTCCCTCCACAAGAGCAGGCCCACTTTTGAGCTGGAGCAGATG  
CCTACACACAATTTTAAATTCAGATGAGGAATTGGAGCTTACAGAGGAGACAGCAGCGAGGGATTGCAATACATCGCCCATCTTACACTCCTTCTAAACTCAAGGACCATGCTGGACAT  
CGCATGAGTCTCCAGATAGAAAATTGGAATGGCCTCAAAAATCCACAGAATGTACTTGACATTGTTTACATGCATATTAACATCTAAATCGGCCCAATTAGGAGTTAAGCCATCTATGATGT  
AATCTGCATTCTCATTAACTTTAGGGAACTTTCTGTTGCTCATTCAAATAAAAAGTAGTATCATTACAGTGGAGATCTAATTCAACTTTTTTTTTCATCAGGTATCTTTGAAAGTTTACG  
TGTTGTTTTGTCCATAAGTGCCCAAATACTCGTAGCTCGAATCATACTTTGACCTGTTTTGTGATTGCATAGATGCCAATCACGAGCCATACTCAATTTGTTATGATGTCTTAACCATGTATTA  
ACTTCAAGAGCATCACCCCATGAAGGATAATGTTCCACTTGAACATGCATTTTTAGTATGACAAATATATCGTTCCGCCATGTATCTTTGGGTATGAACGAATAGAATCATCAAAAAACC  
AAGAATTTTGAATGGTTGACATTTGTTTCTGTAAAAGGTTTATTATTGCCCTCAAGCGATGCTTTTTCCAGTAGCATCAATCTCATATACTTTGATAGAGTTTTCTCTGCATGTAAATATTATCA  
ATTATCTGTTTCATGACTAAATGAATCATCGAACAGGTCAGGCCTCCTAGGCTTCCAATTCAGAACGTTTCTTTGTTTCTCTATTGCTACTTTTATTTTCATTAGAGTCGCAAGGAGCCACCTC  
CAATAAAGGAAGTTGTGAACATCCTTTTCGTGATTGAGAAGGTACATCCTCCTCAACATTTGCTAACTCACTCTTAAAGCTAAAAGTAACAGTATTGGCCTTTTTGACATATCCTTTGATTTG  
AAAAGCCTTAAGAGAACATGGAAATTTAGCTTTCCTACTCCACTGGTAAAAGCAAATGAAACATCAAACGAACCAGTCCAAGAGGATGAAATTTGGGTGTGACGATGATAGAATTGAGAAGA  
TGTTTGAGAAAGCAGTTGAAGCAGTCATGATTGTGCTACTTTCACACCTCAAAGAAGCTATAACCAGGTGTTAGTATAGTAGTGAATTATAACGAGCTATGTTAATAGAAAAGAAATTTCA  
AAAAGCAGTTTGAGTGTAATAATAAAATTAGCTCCATTCTAATAAAATTTATGACGATTTAAAAAATAAAACTTTTATATCTCAAGTAGGACATGTCTATCAATTAAGTGTATTCTCTAAGA  
ACAAATGTAGCTTCTTATATTAGTCCGGAATATTGTAATTGAATTCATCCGAGGGCTCACCTGGTTGGTTGTACAAGAAAAATAGAATTTAGAAAAGTGATGATTTTGCTTTCGCTCAGTTT  
GAGTGTGAAATTAAGATCCACGCTTATGAGAAATTTTAAAAGGGTTTGTGGAGTTTAAACTCCATATTAGTTTTAATTGTATCCACTCAAATAATGGAATCTAAAAAATCATATTTTTCAA  
AATATTAATTATCACTTAAAAAGAATTTTAAATGA

>comp168960\_c0\_seq21

CGTCTTCGCTACACGTGGTCAACGACTCTCACTAAGCCGCTTCTTCCCTCAGTTTTTTTTCTGCGATCGCTAACTCGTGGTCAACAAGTGTACTAGAGCCACTTCTTCCCTAAGTCGGACT  
TTTTCTGCGAAATAGGGATCGCGTGCAAGATAGAACGAGAGCAATCAAGATGGAGTATCTCTTAGTCCGATCAGCTGTAGCCCTGCTGCTCTCATCGGTGATCTCCGCGGGAGCGCTCAG  
GCGGAAGTCGCTCGATCTATCAGGGGCTTTATCAGGGTCTTAGTGATGGCGATCCACATCACGTGCAGTTACAGGTTTGGGGCTCTCCTCCTAGTTTTCTTCTTCACTTCATCCAAGCTCA  
CCAGGCTCGGAGAGAAGAAGAAGAGGAGCGTTCGACGAGGAGTTCAAGGAAGGAGGGCAGCGGAAGTGGTTGCAGGTTTGGGCTAATAGCGCCCTTGCACCATTTTGGTTATGCTAGT  
TGCTATGATTACTGGGGGCCAGGACAGGTGCTTGGACACAAAAGATTCAACCCTTTTAACTGGCCTAATTGGTGGCGTTATTGGACACTACGCTTGTGCAATGGAGACACCTGGTCTTC  
AGAAATTTGGGATGCTTAGTAATGCCAACCTAGACTAATAACTACCTTCAAGAAAAGTTTCGAAAGGGCACCAATGGCGCAGTTTCTGTAGAAGGCCTTCTAGCAGCTGCCGAGCTGGCTT  
AGTTATAGGATCGACTTTTGTAAATGGTTCGGTTGGCTCTCAGTTTCATGTGGTACTCATGTTGTGCGGAGAGAGTTTCTTGCAGTTCCATTGCTGCAATTGCTGGGCTTTGCGGAAGCCTAA  
TTGATTCTATATTGGGTGCAACGCTCCAATTTAGTGGATTTTGCATTTGCGGAAGAAAGTAATTATACCATTTTCAATCTATCCTTTTTAACAGTATTATTCTATTTTTGTGAATTTGAGATTT  
TCCATCAATCAACGAACTAGTTTTCATCAATTAAGCAAAGGAAAGAAATTAAGAAAAGTTTTTGAAGACAGCATTTTAAAGTGATGACCCATCTTCTAGGCTGAATCGGTTGTGTTAGGTTGCT  
TGAAAGAAAAGTGATTGCTATGCTTGCAAAGAAAAGCGGTAATAAAAAGCTCTTTTATATTCTCATTTGTGATAGCTGAAACTTGTCTTGTCTTTGAAGGTGGTTGGAAGAAAAACACCT  
ACTGTAATCAGAATTTCAAGGAATGGAAGTCTTGACAACAATGCGGTGAATGCTGTGTCTGTTTTAATAACAACACTTCTTACAGGTCTCGCATGTATTACATTTTTTTGATTACGCTGGGT

AGGCTTCATTCTCTCCTATTTTTCTCGAACACACCCAAAAGCGACAAGCAAGCTCAGCGATGCTTTATTTATCTGTCCCTCTTCTTTCCCTACTGTGTTTGAAGGCATATCTAACAAA  
AGAATACTATTTTTTTTTGTCATCCCAAAATTTTCATGATGTAAATCCAAACCAATGCACGATTTTTGCCCTACAAAATTAGGACCTAATGTACCGACAAGATCCTGTAATGCAGGCTGAGCA  
GAATAACATATTGTGATACTACACAGTTGAACTGTTTTCCATTATTCTGATGCAATATGCAAATATATATGTTGGTGTATTCCATTTTTGGATATTGTTCTCTGAGTTATCTTACATGTAATACA  
ATCTTTTAAAGTGTGATCTACTTTACACATCAAATGAAATTCATTCTGAATCCTTCTCCTACTGCATGCAGGGAAGGAGACATCTCAGTCAAAAAGAATACAGAATGCATTAGTCCATAA  
TGAAAGAGACTCAAAAGTGACCAAAATCAAGATGCATGTACGAAAATATATTAGGGATGTTGCTCAAGTAATCATCTGGTTTTCAAACCTTTTGTACCCAAGTTGTTAGTCCTTCCACAAG  
AGCAGGCCCACTTTTGTAGCTGGAGCAGATGCCTACACACAATTTTAAATTCAGATGAGGAATTGGAGCTTACAGAGGAGACAGCAGCGAGGGATTGCAATACATCGCCCATCTTACACTC  
CTTCTAAACTCAAGGACCATGCTGGACATCGCATGAGTCTCCAGATAGAAATTTGGAATGGCCTCAAAAATCCACAGAATGTACTTGACATTGTTTACATGCATATTAACATCTAAATCG  
GCCCAATTAGGAGTTAAGCCATCTATGATGTAATCTGCATTCTCATTAACCTTTAGGGAACCTTTCTGTTGTCCTCATTCAAAAATAAAAGTAGTATCATTACAGTGGAGATCTAATTCAACT  
TTTTTTCATCAGGTATCTTTGAAAGTTTACGTGTTGTTTTGTCCATAAGTGCCAAATACTCGTAGCTCGAATCATACTTTGACCTGTTTTGTGATTGCATAGATGCCAATCACGAGCCATA  
CTCAATTTGTTATGATGTCTTAACCATGTATTAACCTCAAGAGCATCACCCCATGAAGGATAATGTTCCACTTGAACATGCATTTTTAGTATGACAAAATATATCGTTCCGCCATGTATCTTTG  
GGTATGAACGAATAGAATCATCAAAAACCCAAGAATTTTGAATGGTTGACATTTGTTTCTGTAAAAGGTTTATTATTGCCTCAAGCGATGCTTTTCCAGTAGCATCAATCTCATATACT  
TTGATAGAGTTTCTCTGCATGTAAATATTATCAATTATCTGTTTCATGACTAAATGAATCATCGAACAGGTCAGGCCTCCTAGGCTCCTCAACATTTGCTAAGTCACTCTTAAAGCTAAAAGTA  
ACAGTATTGGCCTTTTTGACATATCCTTTGATTTGAAAAGCCTTAAGAGAACATGGAAATTTAGCTTTCACTCCACTGGTAAAAGCAAATGAAACATCAAACGAACCAGTCCAAGAGGAT  
GAAATTTGGGTGTGACGATGATAGAATTGAGAAGATGGTTGAGAAAGCAGTTGAAAGCAGTCATGATTGTGCTACTTTCACACCTCAAAGAAGCTATAACCAGGTGTTAGTATAGTAGTGAA  
TTATAACGAGCTATGTTAATAGAAAAGAAATTTCAAAAAGCAGTTTGTAGTGAAAATATAAAATTAGCTCCATTCTAATAAAATTATGACGATTTAAAAAATAAAACTTTATATCTCAAGT  
AGGACATGTCTATCAATTAAGTGTATTCTCTAAGAACAAATTTGTAGCTTCTTATATTAGTCCGGAATATTGTAATTTGAATTCATCCGAGGGCTCACCTGGTTGGTTGTACAAGAAAAATAG  
AATTTAGAAAGTGATGATTTTGTCTTCGCTCAGTTTGTAGTGTGAAATTAAGATCCACGCTTATGAGAAATTTTAAAAGGGTTTGTGGAGTTAAACTCCATATTAGTTTAAATTGTATCCACT  
CAAATAATGGAATCTAAAAAACTCATCATTTTTTCAAATATTAATTATCACTTAAAAAGAATTTTAAATGA

>comp168960\_c0\_seq42

CGTCTTCGCTACACGTGGTCAACGACTCTACTAAGCCGCTTCTTCCCTCAGTTTTTTTTCTGCGATCGCTAACTCGTGGTCAACAACCTGTTACTAGAGCCACTTCTTCCCTAAGTCGGACT  
TTTTCTGCGAAATAGGGATCGCGTGCAAGATAGAACGAGAGCAATCAAGATGGAGTATCTCTTAGTCCGATCAGCTGTAGCCCTGCTGCTCTCATCGGTGATCTCCGCGGGAGCGCTCAG  
GCGGAAGTCGCTCGATCTATCAGGGGCTTTATCAGGGTTCTTAGTGATGGCGATCCACATCACGTGCAGTTACAGGTTGCGAAACACCCATCTTCTGCTGGCTTCCTTTTCTCGAATCGA  
CTTGTGCTGGCGCTTCTGATTCTCTTTGGTGTGTCTATCTGAAGGTTTGGGGCTCTCCTCCTAGTTTTCTTCTTCACTTCATCCAAGCTCACAGGCTCGGAGAGAAGAAGAAGAGGAGC  
GTCGACGAGGAGTTCAAGGAAGGAGGGCAGCGGAACTGGTTGCAGTTTTGGCTAATAGCGCCCTTGGGACCATTTTTGGTTATGCTAGTTGCTATGATTACTGGGGGCCAGGACAGGTG  
CTTGGACACAAAAGATTCAACCCTTTTAACTGGCCTAATTTGGTGGCGTTATTGGACACTACGCTTGTGCAATGGAGACACCTGGTCTTCAGAAATTGGGATGCTTAGTAATGCCAACCT  
AGACTAATAACTACCTTCAAGAAAGTTGAAAGGGCACCAATGGCGCAGTTTCTGTAGAAGGCCCTTAGCAGCTGCCGCAGCTGGCTTAGTTATAGGATCGACTTTTGTAAATGGTCGGT  
TGGCTCTCAGTTTCATGTGGTACTCATGTTGTGCGGAGAGAGTTTTCTGCAATTCTATTGCTGCAATTGCTGGGCTTTGCGGAAGCCTAATTGATTCTATATTGGGTGCAACGCTCCAATT  
TAGTGGATTTTGCATTTGCGGAAGAAAGTGGTTGGAAGAAAAACCTACTGTAATCAGAATTTCAAGGAATGGAAGTTCTTGACAACAATGCGGTGAATGCTGTGTCTGTTTTAATAAC  
AACACTTCTTACAGGTTCTGCATGATTTACATTTTTTGAATTACGCTGGGTAGGTCTTCATTTCTTCTCTCTATTTTTTCTCGAACACACCCAAAAGCGACAAGCAAGCTCAGCGATGCTTTAT  
TTATCTGTCCCTCTTCTTCCCTACTGTGTTTGAAGGCATATCTAACAAAAGAATACTATTTTTTTTTGTCATCCCAAAATTTTCATGATGTAAATCCAAACCAATGCACGATTTTTGCCCTACA  
AAATTAGGACCTAATGTACCGACAAGATCCTGTAATGCAGGCTGAGCAGAATAACATATTGTGATACTACACAGTTGAACTGTTTTCCATTATTCTGATGCAATATGCAAATATATATGTTGG



TGTTATTCCATTTTTGGATATTGTTCTCTGAGTTATCTTACATGTAATACAATCTTTTAAAGTGTGATCTACTTTACACATCAAATGAAATTTTCATTCTGAATCCTTCTTCCTACTGCATGCAGG  
GAAGGAGACATCTCAGTCAAAAAGAATACAGAATGCATTAGTCCATAATGAAAGAGACTCAAAAAGTGACCAAATCAAGATGCATGTACGAAAATATATTAGGGATGTTGCTCAAGTAAT  
CATCTGGTTTTTCAAACCTTTTTGTACCCAAGTTGTTAGTCCTTCCACAAGAGCAGGCCACTTTTGGAGCTGGAGCAGATGCCTACACACAATTTTAAATTCAGATGAGGAATGGAGCTTAC  
AGAGGAGACAGCAGCGAGGGATTGCAATACATCGCCATCTTACACTCCTTCCCTAAACTCAAGGACCATGCTGGACATCGCATGAGTCTCCAGATAGAAATTGGAATGGCCTCAAAAAT  
CCACAGAATGTACTTGACATTGTTTACATGCATATTAACATCTAAATCGGCCAATTAGGAGTTAAGCCATCTATGATGTAATCTGCATTCTCATCATTAACCTTAGGAACTTTCTGTTGTCC  
TCATTCAAAATAAAAGTAGTATCATTACAGTGGAGATCTAATTCAACTTTTTTTTCATCAGGTATCTTTGAAAGTTTACGTGTTGTTTTGTCCATAAGTGCCCAAATACTCGTAGCTCGAATC  
ATACTTTGACCTGTTTTGTGATTGCATAGATGCCAATCAGAGCCATACTCAATTTGTTATGATGTCTTAACCATGTATTAACCTCAAGAGCATCACCCCATGAAGGATAATGTTCCACTTGA  
ACATGCATTTTTAGTATGACAAATATATCGTTTCCGCCATGTATCTTTGGGTATGAACGAATAGAATCATCCAAAAACCAAGAATTTGAAATGGTTGACATTTGTTTCTGTAAAAGGTTT  
ATTATTGCCTCAAGCGATGCTTTTCCAGTAGCATCAATCTCATATACTTTGATAGAGTTTCTCTGCATGTAAATATTATCAATTATCTGTTTCATGACTAAATGAATCATCGAACAGGTCAGGCC  
TCCTAGGCTCCTCAACATTTGCTAAGTCACTCTTAAAGCTAAAAGTAACAGTATTGGCCTTTTTGACATATCCTTTGATTTGAAAAGCCTTAAGAGAACATGGAAATTTAGCTTTCACTCCA  
CTGGTAAAAGCAAATGAAACATCAAACGAACCAGTCCAAGAGGATGAAATTTGGGTGTGACGATGATAGAATTGAGAAGATGGTTGAGAAAGCAGTTGAAGCAGTCATGATTGTGCTACT  
TTCACACCTCAAAGAAGCTATAACCAGGTGTTAGTATAGTAGTGAATTATAACGAGCTATGTTAATAGAAAAGAAATTTCAAAAAGCAGTTTGAAGTGTAAAATATAAAATTAGCTCCATTCT  
AATAAAATTATGACGATTTAAAAAAAACCTTTATATCTCAAGTAGGACATGTCTATCAATTAAGTGTATCTCTAAGAACAATTTGTAGCTTCTTATATTAGTCCGGAATATTGTAAATT  
GAATTCATCCGAGGGCTCACCTGGTTGGTTGTACAAGAAAATAGAATTTAGAAAAGTATGATTTTTGCTTTTCGCTCAGTTTGAAGTGTGAAATTAAGATCCACGCTTATGAGAAATTTAAA  
AGGGTTTGTGGAGTTTAAACTCCATATTAGTTTTAATTGTATCCACTCAAATAATGGAATCTAAAAAATCATCATTTTTCAAATATTAATTATCACTTAAAAAGAATTTTAAATGA

>comp168960\_c0\_seq65

CGTCTTCGCTACACGTGGTCAACGACTCTCACTAAGCCGCTTCTCCCTCAGTTTTTTCTGCGATCGCTAACCTCGTGGTCAACAACCTGTTACTAGAGCCACTTCTTCCTAAGTCGGACT  
TTTTCTGCGAAATAGGGATCGCGTGCAAGATAGAACGAGAGCAATCAAGATGGAGTATCTCTTAGTCCGATCAGCTGTAGCCCTGCTGCTCATCGGTGATCTCCGCGGGAGCGCTCAG  
GCGGAAGTCGCTCGATCTATCAGGGGCTTTATCAGGGTTCTTAGTGATGGCGATCCACATCACGTGCAGTTACAGGTTTGGGGCTCTCCTCCTAGTTTTCTTCTTCACTTCATCCAAGCTCA  
CCAGGCTCGGAGAGAAGAAGAAGAGGAGCGTTCGACGAGGAGTTCAAGGAAGGAGGGCAGCGGAACCTGGTTGCAGGTTTTGGCTAATAGCGCCCTTGCACCATTTTGGTTATGCTAGT  
TGCTATGATTACTGGGGGCCAGGACAGGTGCTTGACACAAAAGATTCAACCCTTTTAACTGGCCTAATTGGTGGCGTTATTGGACTACGCTTGTGCAATGGAGACACCTGGTCTTC  
AGAAATTGGGATGCTTAGTAATGCCAACCTAGACTAATAACTACCTTCAAGAAAGTTCGAAAGGGCACCAATGGCGCAGTTTCTGTAGAAGGCCTTCTAGCAGCTGCCGCAGCTGGCTT  
AGTTATAGGATCGACTTTTGTAAATGGTCGGTTGGCTCTCAGTTTCATGTGGTACTCATGTTGTGCGGAGAGAGTTTCTTGCAGTTCCATTGCTGCAATTGCTGGGCTTTGCGGAAGCCTAA  
TTGATTCTATATTGGGTGCAACGCTCCAATTTAGTGGATTTTGCACCTTTGCGGAAGAAAGTAATTATACCATTTTCAATCTATCCTTTTTAACAGTATTATTCTATTTTTGTGAATTTGAGATTT  
TCCATCAATCAACGAAGCTAGTTTCATCAATTAAGCAAAGGAAAGAAATTAAGAAAGTTTTTGAAGACAGCATTTTAAAGTATGATGACCCATCTTCTAGGCTGAATCGGTTGTGTTAGGTTGCT  
TGAAAGAAAGTGAATTGCTATGCTTGCAAAGAAAAGCGGTAATAAAAGCTCTTTTATATTCTCATTTGTGATAGCTGAAACTTGTTCCTTGTTCCTTTGAAGGTGGTTGGAAGAAAACACCT  
ACTGTAATCAGAAATTCAGGAATGGAAGTTCTTGACAACAATGCGGTGAATGCTGTGTCTGTTTTAATAACAACACTTCTTACAGGTCTCGCATGATTTACATTTTTTTGATTACGCTGGGT  
AGGTCTTCATTTCTCTCCTATTTTTCTCGAACACACCCAAAAGCGACAAGCAAGCTCAGCGATGCTTTATTTATCTGTCCCTCTTCTTTCCCTACTGTGTTTGAAGGCATATCTAACAAA  
AGAATACTATTTTTTTTTTGACATCCAAAATTTTCATGATGTAATCCAAACCAATGCACGATTTTGGCCCTACAAAATTAGGACCTAATGTACCGACAAGATCCTGTAATGCAGGCTGAGCA  
GAATAACATATTGTGATACTACACAGTTGAACTGTTTTCCATATTCTGATGCAATATGCAAATATATATGTTGGTGTATTCCATTTTTGGATATTGTTCTCTGAGTTATCTTACATGTAATACA  
ATCTTTTAAAGTGTGATCTACTTTACACATCAAATGAAATTTTCATTCTGAATCCTTCTTCCTACTGCATGCAGGGAAGGAGACATCTCAGTCAAAAAGAATACAGAATGCATTAGTCCATAA

TGAAAGAGACTCAAAAGTGACCAAAATCAAGATGCATGTACGAAAATATATTAGGGATGTTGCTCAAGTAATCATCTGGTTTTCAAACCTTTTGTACCCAAGTTGTTAGTCCTTCCACAAG  
AGCAGGCCCACTTTTGAGCTGGAGCAGATGCCTACACACAATTTTAAATTCAGATGAGGAATTGGAGCTTACAGAGGAGACAGCAGCGAGGGATTGCAATACATCGCCCATCTTACACTC  
CTTCCTAAACTCAAGGACCATGCTGGACATCGCATGAGTCTCCAGATAGAAAATTGGAATGGCCTCAAAAATCCACAGAATGTACTTGACATTGTTACATGCATATTAACATCTAAATCG  
GCCAATTAGGCTGTCAAACAAATTGAAGGTTATAAAATAATATAGAGAAAAGAAATGTTAAGAGAGAAAAGATATAACTAAATGAGAAATTAATAACATATTTAGCCAATCTAGA  
TACAGTTAAGCCATCTATGATGTAATCTGCATTCTCATTAACCTTAGGGAACCTTCTGTTGTCTCATTCAAAAATAAAAAGTAGTATCATTACAGTGGAGATCTAATTCAACTTTTTTTTCA  
TCAGGTATCTTTGAAAGTTTACGTGTTGTTTTGTCCATAAGTGCCAAATACTCGTAGCTCGAATCATACTTTGACCTGTTTTGTGATTGCATAGATGCCAATCACGAGCCATACTCAATTTG  
TTATGATGCTTAACCATGTATTAACCTCAAGAGCATCACCCATGAAGGATAATGTTCCACTTGAACATGCATTTTTAGTATGACAAAATATATCGTTTTCCGCCATGTATCTTTGGGTATGAAC  
GAATAGAATCATCAAAAACCAAGAATTTGAAATGGTTGACATTTGTTTCTGTAAAAGGTTCAATTATGCTCAAGCGATGCTTTTCCAGTAGCATCAATCTCATATACTTTGATAGAGT  
TTCTCTGCATGTAATATTATCAATTATCTGTTTCATGACTAAATGAATCATCGAACAGGTCAGGCCTCCTAGGCTCCTCAACATTTGCTAAGTCACTCTTAAAGCTAAAAGTAACAGTATTGG  
CCTTTTTGACATATCCTTTGATTTGAAAAGCCTAAGAGAACATGGAAATTTAGCTTTCCTCACTCCACTGGTAAAAGCAAATGAAACATCAAACGAACCAGTCCAAGAGGATGAAATGGGT  
GTGACGATGATAGAATTGAGAAGATGGTTGAGAAAGCAGTTGAAGCAGTCATGATTGTGCTACTTTCACACCTCAAAGAAGCTATAACCAGGTGTTAGTATAGTAGTGAATTATAACGAG  
CTATGTTAATAGAAAAGAAATTTCAAAAAGCAGTTTGAGTGTAATATAAAATTAGCTCCATTCTAATAAAATTATGACGATTTAAAAAATAAACTTTATATCTCAAGTAGGACATGTC  
TATCAATTAAGTGTATCTCTAAGAACAAATTTGAGCTTCTTATATTAGTCCGGAATATTGTAATTTGAATTCATCCGAGGGCTCACCTGGTTGGTTGTACAAGAAAAATAGAATTTAGAAA  
GTGATGATTTTGTCTTCGCTCAGTTTGAGTGTGAAATTAAGATCCACGCTTATGAGAAATTTAAAAGGGTTTGTGGAGTTAAACTCCATATTAGTTTTAATTGTATCCACTCAAATAATGG  
AATCTAAAAACTCATCTTTTTCAAATATTAATTATCACTTAAAAAGAATTTTAAATGA

>comp168960\_c0\_seq72

CGTCTTCGCTACACGTGGTCAACGACTCTCACTAAGCCGCTTCTCCCTCAGTTTTTTCTGCGATCGCTAACTCGTGGTCAACAACCTGTTACTAGAGCCACTTCTTCCTAAGTCGGACT  
TTTTCTGCGAAATAGGGATCGCGTGCAAGATAGAACGAGAGCAATCAAGATGGAGTATCTCTTAGTCCGATCAGCTGTAGCCCTGCTGCTCATCGGTGATCTCCGCGGGAGCGCTCAG  
GCGGAAGTCGCTCGATCTATCAGGGGCTTTATCAGGGTTCTTAGTGATGGCGATCCACATCACGTGCAGTTACAGGTTTGGGGCTCTCCTCCTAGTTTTCTTCTTCACTTCATCCAAGCTCA  
CCAGGCTCGGAGAGAAGAAGAAGAGGAGCGTTCGACGAGGAGTTCAAGGAAGGAGGGCAGCGGAACCTGGTTGCAGGTTTGGCTAATAGCGCCCTTGCAGCATTGTTGGTTATGCTAGT  
TGCTATGATTACTGGGGCCAGGACAGGTGCTTGGACACAAAAGATTCAACCCTTTTAACTGGCCTAATTGGTGGCGTTATTGGACACTACGCTTGTGCAATGGAGACACCTGGTCTTC  
AGAAATTGGGATGCTTAGTAATGCCAACCTAGACTAATAACTACCTTCAAGAAAAGTTGAAAGGGCACCAATGGCGCAGTTTCTGTAGAAGGCCTTCTAGCAGCTGCCGCAGCTGGCTT  
AGTTATAGGATCGACTTTTGTAAATGGTTCGGTTGGCTCTCAGTTTCATGTGGTACTCATGTTGTGCGGAGAGAGTTTCTTGCAGTTCCATTGCTGCAATTGCTGGGCTTTGCGGAAGCCTAA  
TTGATTCTATATTGGGTGCAACGCTCCAATTTAGTGGATTTTGCATTTGCGGAAGAAAGTAATTATACCATTTTCAATCTATCCTTTTTAACAGTATTATTCTATTTTTGTGAATTTGAGATTT  
TCCATCAATCAACGAACCTAGTTTCATCAATTAAGCAAAGGAAAGAAATTAAGAAAGTTTTTGAAGACAGCATTTTAAAGTGATGACCCATCTTCTAGGCTGAATCGGTTGTGTTAGGTTGCT  
TGAAAGAAAAGTGATTGCTATGCTTGCAAAGAAAAGCGGTAATAAAAGCTCTTTTATATTCTCATTTGTGATAGCTGAAACTTGTTCCTTGTGTTCTTTGAAGGTGGTTGGAAGAAAAACCT  
ACTGTAATCAGAAATTCAGGAATGGAAGTTCTTGACAACAATGCGGTGAATGCTGTGTCTGTTTTAATAACAACACTTCTTACAGGTCTCGCATGATTTACATTTTTTGAATACGCTGGGT  
AGGTCTTCATTCTTCTCCTATTTTTCTCGAACACACCCAAAAGCGACAAGCAAGCTCAGCGATGCTTTATTTATCTGTCCCTCTTCTTCCCTACTGTGTTTGAAGGCATATCTAACAAA  
AGAATACTATTTTTTTTTGTCATCCAAAATTTTCATGATGTAATCCAAACCAATGCACGATTTTGGCCCTACAAAATTAGGACCTAATGTACCGACAAGATCCTGTAATGCAGGCTGAGCA  
GAATAACATATTGTGATACTACACAGTTGAACTGTTTTCCATATTCTGATGCAATATGCAAATATATATGTTGGTGTATTCCATTTTTGGATATTGTTCTCTGAGTTATCTTACATGTAATACA  
ATCTTTTAAAGTGTGATCTACTTTACACATCAAATGAAATTTCAATTCTGAATCCTTCTCCTACTGCATGCAGGGAAGGAGACATCTCAGTCAAAAAGAATACAGAATGCATTAGTCCATAA

TGAAAGAGACTCAAAAGTGACCAAAATCAAGATGCATGTACGAAAATATATTAGGGATGTTGCTCAAGTAATCATCTGGTTTTCAAACCTTTTGTACCCAAGTTGTTAGTCCTTCCACAAG  
AGCAGGCCCACTTTTGAGCTGGAGCAGATGCCTACACACAATTTTAAATTCAGATGAGGAATTGGAGCTTACAGAGGAGACAGCAGCGAGGGATTGCAATACATCGCCCATCTTACACTC  
CTTCCTAAACTCAAGGACCATGCTGGACATCGCATGAGTCTCCAGATAGAAAATTGGAATGGCCTCAAAAATCCACAGAATGTACTTGACATTGTTACATGCATATTAACATCTAAATCG  
GCCAATTAGGAGTTAAGCCATCTATGATGTAATCTGCATTCTCATTAACCTTTAGGGAACCTTCTGTTGTCCTCATTCAAAAATAAAAGTAGTATCATTACAGTGGAGATCTAATTCAACT  
TTTTTTTCATCAGGTATCTTTGAAAGTTTACGTGTTGTTTTGTCCATAAGTGCCAAATACTAAAGAAAACCATAATTAGCATAATCACATTAATAAAATTGATATATTTCAATTTGGCATGTAGTGG  
AAAGTTCTGACACACGTGAACGGCTAACCTCGTAGCTCGAATCATACTTTGACCTGTTTTGTGATTGCATAGATGCCAATCACGAGCCATACTCAATTTGTTATGATGTCTTAACCATGTATT  
AACTTCAAGAGCATCACCCCATGAAGGATAATGTTCCACTTGAACATGCATTTTTAGTATGACAAATATATCGTTTTCCGCCATGTATCTTTGGGTATGAACGAATAGAATCATCCAAAACC  
CAAGAATTTTGAAATGGTTGACATTTGTTTCTGTAAAAGGTTCAATTATGCCTCAAGCGATGCTTTTCCAGTAGCATCAATCTCATATACTTTGATAGAGTTTCTCTGCATGTAAATATTATC  
AATTATCTGTTTCATGACTAAATGAATCATCGAACAGGTCAGGCCTCCTAGGCTTCCAATTCAGAACGTTTCTTTGTTTCTCTATTGCTACTTTTTATTTTCATTAGAGTCGCAAGGAGCCACCT  
CCAATAAAGGAAGTTGTGAACATCCTTTCGTGATTCAGAAGGTACATCCTCCTCAACATTTGCTAACTCACTCTTAAAGCTAAAAGTAACAGTATTGGCCTTTTGTACATATCCTTTGATTT  
GAAAAGCCTTAAGAGAACATGGAATTTAGCTTTCACTCCACTGGTAAAAGCAAATGAAACATCAAACGAACCAGTCCAAGAGGATGAAATTGGGTGTGACGATGATAGAATTGAGAA  
GATGGTTGAGAAAGCAGTTGAAGCAGTCATGATTGTGCTACTTTCACACCTCAAAGAAGCTATAACCAGGTGTTAGTATAGTAGTGAATTATAACGAGCTATGTTAATAGAAAAGAAATTT  
CAAAAAGCAGTTTGAGTGAAAATATAAAATTAGCTCCATTCTAATAAAATTATGACGATTTAAAAAATAAAACTTTTATATCTCAAGTAGGACATGTCTATCAATTAAGTGTATCTCTAA  
GAACAAATTGTAGCTTCTTATATTAGTCCGGAATATTGTAATTGAATTCATCCGAGGGCTCACCTGGTTGGTTGTACAAGAAAAATAGAATTTAGAAAAGTGATGATTTTGTCTTCGCTCAG  
TTTGAGTGTGAAATTAAGATCCACGCTTATGAGAAATTTAAAAGGGTTTGTGGAGTTTAAACTCCATATTAGTTTAAATTGTATCCACTCAAATAATGGAATCTAAAAAACTCATCATTTTT  
CAAAATATTAATTATCACTTAAAAAGAATTTTAAATGA

>comp168960\_c0\_seq74

CGTCTTCGCTACACGTGGTCAACGACTCTCACTAAGCCGCTTCTTCCCTCAGTTTTTTCTGCGATCGCTAACTCGTGGTCAACAAGTCTTACTAGAGCCACTTCTTCTAAGTCGGACT  
TTTTCTGCGAAATAGGGATCGCGTGCAAGATAGAACGAGAGCAATCAAGATGGAGTATCTCTTAGTCCGATCAGCTGTAGCCCTGCTGCTCTCATCGGTGATCTCCGCGGGAGCGCTCAG  
GCGGAAGTCGCTCGATCTATCAGGGGCTTATCAGGGTCTTAGTGATGGCGATCCACATCACGTGCAGTTACAGGTTTGGGGCTCTCCTCCTAGTTTTCTTCTTCACTTCATCCAAGCTCA  
CCAGGCTCGGAGAGAAGAAGAAGAGGAGCGTACGAGGAGTTCAAGGAAGGAGGGCAGCGGAAGTGGTTGCAGGTTTTGGCTAATAGCGCCCTTGCACCATTTTGGTTATGCTAGT  
TGCTATGATTACTGGGGCCAGGACAGGTGCTTGGACACAAAAGATTCAACCCTTTTAACTGGCCTAATTGGTGGCGTTATTGGACACTACGCTTGTGCAATGGAGACACCTGGTCTTC  
AGAAATTGGGATGCTTAGTAATGCCAACCTAGACTAATAACTACCTTCAAGAAAAGTTTCGAAAGGGCACCAATGGCGCAGTTTCTGTAGAAGGCCTTCTAGCAGCTGCCGAGCTGGCTT  
AGTTATAGGATCGACTTTTGTAAATGGTCGGTTGGCTCTCAGTTTCATGTGGTACTCATGTTGTGCGGAGAGAGTTTCTTGCAGTTTCTATTGCTGCAATTGCTGGGCTTTGCGGAAGCCTAA  
TTGATTCTATATTGGGTGCAACGCTCCAATTTAGTGGATTTTGCATTTTGCAGGAAAGTAATTATAACCATTTTCAATCTATCCTTTTTAACAGTATTATTCTATTTTTGTGAATTTGAGATTT  
TCCATCAATCAACGAACTAGTTTCATCAATTAAGCAAAGGAAAGAAATTAAGAAAAGTTTTTGAAGACAGCATTTTAAAGTGATGACCCATCTTCTAGGCTGAATCGGTTGTGTTAGGTTGCT  
TGAAAGAAAGTGATTGCTATGCTTGCAGAAAAGCGGTAATAAAAGCTCTTTTATATTCTCATTTGTGATAGCTGAAACTTGTCTTGTCTTTGAAGGTGGTTGGAAGAAAAACACCT  
ACTGTAATCAGAAATTCAGGAATGGAAGTTCTTGACAACAATGCGGTGAATGCTGTGTCTGTTTTAATAACAACACTTCTTACAGGTCTCGCATGTATTACATTTTTTGTATTACGCTGGGG  
AAGGAGACATCTCAGTCAAAAAGAATACAGAATGCATTAGTCCATAATGAAAGAGACTCAAAAAGTGACCAAAATCAAGATGCATGTACGAAAATATATTAGGGATGTTGCTCAAGTAATC  
ATCTGGTTTTCAAACCTTTTGTACCCAAGTTGTTAGTCTTCCACAAGAGCAGGCCCACTTTTGTAGCTGGAGCAGATGCCTACACACAATTTAAATTCAGATGAGGAATTGGAGCTTACA  
GAGGAGACAGCAGCGAGGGATTGCAATACATCGCCCATCTTACACTCCTTCCATAAAGTCAAGGACCATGCTGGACATCGCATGAGTCTCCAGATAGAAAATTGGAATGGCCTCAAAAATC

CACAGAATGTACTTGACATTGTTACATGCATATTAACATCTAAATCGGCCCAATTAGGAGTTAAGCCATCTATGATGTAATCTGCATTCTCATCATTAACTTTAGGGAACTTTCTGTTGCCT  
CATTCAAAAATAAAAGTAGTATCATTACAGTGGAGATCTAATTCAACTTTTTTTTCATCAGGTATCTTTGAAAGTTTACGTGTTGTTTTGTCCATAAGTGCCCAAATACTCGTAGCTCGAATCA  
TACTTTGACCTGTTTTGTGATTGCATAGATGCCAATCACGAGCCATACTCAATTTGTTATGATGTCTTAACCATGTATTAACTTCAAGAGCATCACCCCATGAAGGATAATGTTCCACTTGAA  
CATGCATTTTTAGTATGACAAATATATCGTTTTCCGCCATGTATCTTTGGGTATGAACGAATAGAATCATCCAAAAACCCAAGAATTTGAAATGGTTGACATTTGTTTCTGTAAAAGGTTCA  
TTATTGCCTCAAGCGATGCTTTTTCCAGTAGCATCAATCTCATATACTTTGATAGAGTTTCTCTGCATGTAAATATTATCAATTATCTGTTTCATGACTAAATGAATCATCGAACAGGTCAGGCCT  
CCTAGGCTTCCAATTCAGAACGTTTTCTTTGTTTCTCTATTGCTACTTTTATTTTCATTAGAGTCGCAAGGAGCCACCTCCAATAAAGGAAGTTGTGAACATCCTTTCGTGATTCAGAAGGTA  
CATCCTCCTCAACATTTGCTAACTCACTCTTAAAGCTAAAAGTAACAGTATTGGCCTTTTTGACATATCCTTTGATTTGAAAAGCCTTAGCAGAACATGCAAATTTAGCTTTCTGTCCACTAT  
TAAAAGCAAATGAATCATCAAACGAACCAGTCAAAGAGGATGAAATTTGTTGTGAG

>comp168960\_c0\_seq95

CGTCC TTCGCTACACGTGGTCAACGACTCTCACTAAGCCGCTTCTCCCTCAGTTTTTTCTGCGATCGCTAACTCGTGGTCAACAACCTGTTACTAGAGCCACTTCTCCTAAGTCGGACT  
TTTTCTGCGAAATAGGGATCGCGTGCAAGATAGAACGAGAGCAATCAAGATGGAGTATCTCTTAGTCCGATCAGCTGTAGCCCTGCTGCTCTCATCGGTGATCTCCGCGGGAGCGCTCAG  
GCGGAAGTCGCTCGATCTATCAGGGGCTTTATCAGGGTTCTTAGTGATGGCGATCCACATCACGTGCAGTTACAGGTTGCGAAACACCCATCTTCTGCTGGCTTCCTTTTCTCGAATCGA  
CTTGTGCTGGCGCTTCTGATTCTTTGGTTCGTGTCTATCTGAAAGTTTGGGGCTCTCCTCCTAGTTTTCTTCTTCACTTCATCCAAGCTCACCAGGCTCGGAGAGAAGAAGAAGAGGAGC  
GTCGACGAGGAGTTCAAGGAAGGAGGGCAGCGGAACTGGTTGCAGGTTTTGGCTAATAGCGCCCTTGCAGCCATTTTGGTTATGCTAGTTGCTATGATTACTGGGGGCCAGGACAGGTG  
CTTGACACAAAAGATTCAACCCTTTAACTGGCCTAATTGGTGGCGTTATTGGACACTACGCTTGTGCAATGGAGACACCTGGTCTTCAGAAATTGGGATGCTTAGTAATGCCAACCT  
AGACTAATAACTACCTTCAAGAAAGTTCGAAAGGGCACCAATGGCGCAGTTTTCTGTAGAAGGCCCTTAGCAGCTGCCGCAGCTGGCTTAGTTATAGGATCGACTTTTGTAAATGGTCGGT  
TGGCTCTCAGTTTCATGTGGTACTCATGTTGTGCGGAGAGAGTTTTCTGCAATTGCTGGGCTTTCGGAAGCCTAATTGATTCTATATTGGGTGCAACGCTCCAATT  
TAGTGGATTTTGCATTTGCGGAAGAAAGTAATTATACCATTTTCAATCTATCCTTTTTAACAGTATTATTCTATTTTTGTGAATTTGAGATTTCCATCAATCAACGAACTAGTTCATCAATTA  
AGCAAAGGAAAGAAATTAAGAAAGTTTTTGAAGACAGCATTTTAAAGTGATGACCCATCTTCTAGGCTGAATCGGTTGTGTTAGGTTGCTTGAAAGAAAGTGATTGCTATGCTTGCAAAG  
AAAAGCGGTAATAAAAGCTCTTTTATATTCTCATTGTGATAGCTGAAACTTGTTCCTTGTCTTTGAAGGTGGTTGGAAGAAAACACCTACTGTAATCAGAATTCAGGAATGGAAGTT  
CTTGACAACAATGCGGTGAATGCTGTGTCTGTTTTAATAACAACACTTCTTACAGGTCTCGCATGTATTTACATTTTTTGATTACGCTGGGTAGGTCTTCATTCTTCTCCTATTTTTCTCGA  
ACACACCCAAAAGCGACAAGCAAGCTCAGCGATGCTTTATTTATCTGTCCCTCTTCTTTCCCTACTGTGTTTGAAGGCATATCTAACAAAAGAATACTATTTTTTTTTGCATCCAAAATTTT  
CATGATGTAAATCCAAACCAATGCACGATTTTTGCCCCTACAAAATTAGGACCTAATGTACCGACAAGATCCTGTAATGCAGGCTGAGCAGAATAACATATTGTGATACTACACAGTTGAAC  
TGTTTTCCATTATTCTGATGCAATATGCAAATATATATGTTGGTGTATTCCATTTTTGGATATTGTTCTCTGAGTTATCTTACATGTAATACAATCTTTTAAAGTGATGACTTTTACACATCA  
AATGAAATTTCACTTGAATCCTTCTCCTACTGCATGCAGGGAAGGAGACATCTCAGTCAAAAAGAATACAGAATGCATTAGTCCATAATGAAAGAGACTCAAAAGTGACCAAATCAA  
GATGCATGTACGAAAATATATTAGGGATGTTGCTCAAGTAATCATCTGGTTTTCAAACCTTTTGTACCCAAGTTGTTAGTCCCTCCACAAGAGCAGGCCCACTTTTGTAGCTGGAGCAGATG  
CCTACACACAATTTAAATTCAGATGAGGAATTGGAGCTTACAGAGGAGACAGCAGCGAGGGATTGCAATACATCGCCCATCTTACACTCCTTCTAAAACCTCAAGGACCATGCTGGACAT  
CGCATGAGTCTCCAGATAGAAATTGGAATGGCCTCAAAAATCCACAGAATGTACTTGACATTTGTTTACATGCATATTAACATCTAAATCGGCCCAATTAGGAGTTAAGCCATCTATGATGT  
AATCTGCATTCTCATCATTAACTTTAGGGAACTTCTGTTGTCTCATTCAAAAATAAAAGTAGTATCATTACAGTGGAGATCTAATTTCAACTTTTTTTTCATCAGGTATCTTTGAAAGTTTACG  
TGTGTTTTGTCCATAAGTGCCCAAATACTAAAGAAACCATAATTAGCATAATCACATTAATAAATTGATATATTTCAATTTGGCATGTAGTGGAAAGTTCTGACACACGTGAACGGCTAACCT  
CGTAGCTCGAATCATACTTTGACCTGTTTTGTGATTGCATAGATGCCAATCACGAGCCATACTCAATTTGTTATGATGTCTTAACCATGTATTAACCTCAAGAGCATCACCCCATGAAGGATA

ATGTTCCACTTGAACATGCATTTTTAGTATGACAAATATATCGTTTCCGCCATGTATCTTTGGGTATGAACGAATAGAATCATCCAAAAACCAAGAATTTTGAAATGGTTGACATTTGTTTC  
CTGTAAAAGGTTTCATTATTGCCTCAAGCGATGCTTTTCCAGTAGCATCAATCTCATATACTTTGATAGAGTTTCTCTGCATGTAAATATTATCAATTATCTGTTTCATGACTAAATGAATCATCG  
AACAGGTCAGGCCTCCTAGGCTCCTCAACATTTGCTAAGTCACTCTTAAAGCTAAAAGTAACAGTATTGGCCTTTTTGACATATCCTTTGATTTGAAAAGCCTTAAGAGAACATGGAAATT  
TAGCTTTCACTCCACTGGTAAAAGCAAATGAAACATCAAACGAACCAGTCCAAGAGGATGAAATTGGGTGTGACGATGATAGAATTGAGAAGATGGTTGAGAAAGCAGTTGAAAGCAGT  
CATGATTGTGCTACTTTACACCTCAAAGAAGCTATAACCAGGTGTTAGTATAGTAGTGAATTATAACGAGCTATGTTAATAGAAAAAGAAATTTCAAAAAGCAGTTTGAGTGTAAAATATAA  
AATTAGCTCCATTCTAATAAAATTATGACGATTTAAAAAATAAACTTTATATCTCAAGTAGGACATGTCTATCAATTAAGTGTATCTCTAAGAACAATTTGAGCTTCTTATATTAGTCC  
GGAATATTGTAAATTGAATTCATCCGAGGGCTCACCTGGTTGGTTGTACAAGAAAAATAGAATTTAGAAAAGTGATGATTTTGCTTTTCGCTCAGTTTGAGTGTGAAATTAAGATCCACGCTTA  
TGAGAAATTTTAAAAGGGTTTGTGGAGTTTAAACTCCATATTAGTTTTAATTGTATCCACTCAAATAATGGAATCTAAAAAATCATCATTTTTTCAAAATATTAATTATCACTTAAAAAGAAT  
TTTAAATGA

>comp168966\_c0\_seq10

TTTTTTCAAGATTGAGGAACTATTATCAGAAATAAAAGCTTAAGAGCTAAATAGAGGTTAATAACGTTAAATACAATACTTGATACATTGCAATCTTTTAAATCTTACTGTACATTAAGTAT  
TGTTGCGGGCTAGAAAATACGCGGCGATAGAGGTTAATTCTGCGTCTTAGCGTTGAACGGATAACTAGCTCACACACAGAGAACACAAGATTTTAACTGGAAAACCCCTTGAAAAGG  
GAAAAAACCACGGGGCCTAGCCCAATTGAAAATGATTCCACTATAACTTTGAGTCGGTTACAAATGGTTGAATCACCTTCAGGGGTGTTGAGATTACAACCTGGTTACTATCAAAAAGGAG  
TCAGGTGTTAGACCCAGTATCACTTGGAAAGATTGGATGTCGATAGTCCGGACGTGAGCTGAGCGTGGGGTCTGAATGTCGGGCCTTGAGTGACGTGCGGTCTTTGGCAGAACATCGGGC  
CTTAAGCAGGACG

>comp168966\_c0\_seq12

TTTAAGGGGCTATTTGGTTGCAGCATTAGGACATGATATTAGAGGCTATAATAGTGTTACGTTTTGAACAGGTTAATGCTAAATTTAAATCAAATCCTGCCAAGCAGTTTTTGCTGGGTTTT  
TACTTAAATTGCAGGTTTCTTAAATTCAGGGGAAGATCGGATTTAATCGATTAGGGGTTGTTTGGTAGCAGCATTTCATGATTTAAGAAGGATTAATATAAACTGTGATCATTTTAAAGG  
AGATTTACATGCTTCTCAAAACAATACAAAAACGGAGTTTTTAAAAAAGTCTGCTACACATCCAAACATCTTCCACGTCTACATTTTCCAGTTTCAAACGAAAAAAAAAAGAAGAGAA  
AAACGGAGAAATACCATGGAAAAAACGAGCCCTAACTCTACATGCTGCGGCGGCGTTGAAACTTTTCCAAAATAAGGAACAGTTCGTAAATTATCCCTGTGATTAATTTAAGCATCT  
AATTATGTGCCTTATGACCATCGGCAACTCTTACTGTCTACATATCTTGTGGTCCCCCTCTGTGGATCAATATCCAATTGCCCGTGTGAAACTGATTATACTCCGCATTAGCCAATCAAAAC  
GATCTGAACTCAGTTCCATGACCCCACTTGACCTTCATGGGCCACCGAATTAATGATAATAATGATTAAGCAAATAATCATAAACCTTTAACATTAATGAATTTTTTAGATTATTTACAAAAT  
TACATACTTTTTTTAAAATGGGTATCTACCCGCTGCCATTCTAGATTAAGAAAGTGTTGCGGGCTAGAAAATATGCGGCGATAGAGGTTAATTCTGCGTCTTAGCGTTGAACGGATAACT  
AGCTCACACACAGAGAACACAAGATTTTTAACGTGGAAAACCCCTTGAAAAGGGAAAAAACACGGGGCCTAGCCCAATTGAAAATGATTCCACTATAACTTTGAGTCGGTTACAAATGG  
TTGAATCACCTTCAGGGGTGTTGAGATTACAACCTGGTTACTATCAAAAAGGAGTCAGGTGTTAGACCCAGTATCACTTGGAAAGATTGGATGTCGATAGTCCGGACGTGAGCTGAGCGTGG  
GGTCTGAATGTCGGGCCTTGAGTGACGTGCGGTCTTTGGCAGAACATCGGGCCTTAAGCAGGACG

>comp168968\_c1\_seq8

TTTTTGCACGAAACCCGTCAGCTTAAGGCTTCTCTGTTCTATATATATGGAGGCAAGAGCAATCAAATGCAGCACAGAACAGACCTTACTTTTCATCACGCCATGGCTGAGATAAGTATA  
AAACTTCTAATTAATAAAGAGCAAAAGCAGGTTGTATTTGCCGAAGCTGGGAGTGATTTCAATTGATGTCTTGTTTAGCTTCCTTACTCTGCCGCTAGGAAGCATTTGCCAGCTTTTGGGCA  
AGCAGTCGGGCTTGGGATCTCTTGACAGCCTTTATAAGAGCGTTGAACAGCTTGATGTCAAGCACCTACAGAGCGAGGCATGTAAGGAAATGCTTCTCAATCCTCGGAGTGAGGCTGCA  
AGAATATGTGTAGATGGTTGCTTTACTCAATCAACATGTTACTGTTCTATGTAACCTAAGGCTCGATGCAGCCGTTGTGGCAAACTGATGGATAAGGCTTTGAGCTGGCCAAAAAGTACAG

TGGAAAATAAAGGGATCTTTGTTAATGACGGAGCTAGTTTTATTACTGATGATTTACGGATGATGCCAATTTCTTATATAAATGTTCTCTCCGTGCTTGAGGAGCTGCGAATTAATGATAC  
AAGCATCTTAGAGGAAAGGGTTATAAATGTTGGCAATAAAGAGGGCTTTAAGCTTACTGAGGAGGTCATTAGAATCCAAACACGCATTGACGGAGGTTTTCTTCCCGGATTCATGTGTAGA  
ACCAAGTGGGAAGTGCTTCTCAATGATTAAAGAGGAGATTGAAGACACCAAAGCAGGACAAAAATTTAATTTGAAGATCATATTAACAAGAAAAACAACAGTGTTTTATCTGCCGAAG  
TTGGGGGAGACTTCCTCAATCAGTTGTTGAGTTTTCTCCATTTCTTTAGGCTCTGTGATCGAACTACTCCGGGATCACATATCATCAGATTGGTGCATCAGCAATTTGTATTCCTCGGCA  
GAGAGCTTGGGCTTAGAATGGTTCAAGTCAAAGAATGTAAAAACATGTTGGTGTTCACAACCTGCCTCTACTATGGATGCGAAAAGCAAATGCTAAAATTGGTTGAAATGCCATCA  
GCTAAGTGGACCTGTTTCGGCGAGCTGCATAAAGTGCTATGCGGATGGGTGGTATTGTTTTAAACCTACTCCGTGCAAGCATGGATTAAGGAAGGCAGAACTCATAGAACAAAATCCCAAG  
TTGCAAAACGGAGGGAGTGATTCTGGTGGAAAGTTTTGTGGAAGACTCAAAAAGGTTTTATGATTGCTGATAACCTTCACATATCTCCCATATCATCCATTTCCCTCATAATAACTAAAGGAAT  
AGACTTTCTCATTTCCGATTTTATTGAGAAGGAAATAATCGTTGATAAGGCTAAGGTTTTGTCTTTGCTGGGTGTGATGCTGACATCGAATACTGTTTTAACTGATGTTTTCGTTCCTAAGCA  
GAAGAAGCGGAGCAGAAGCCACTATATGTAGAATCATTCTGCAGCTTGCCAATACATTTTATTCTCCTGTAACCTAATAATTTCTTAGTGCTTTATGTAAACGTTTCACTGAAACAGCTA  
TTGCTAAGGAAATTCATTTTGCCTGCACTGTATCTTCTTCTATTGTTTTCTCTGCTTACAGATTACTTCAGTTGCCACCCTTTTTTTTAAATAAAGAAAAAGCACATACATCTC

>comp168972\_c1\_seq3

AATAGGAGAATAAACCAAAAACCTATACCTCCCAAAAGTGCTAGAAAGAAAATAACAGAAAAAAGATAAATGGACATCAACAGCATGAAGACAAAAATGGAGAGAATGTTTTTTGA  
GCTCCCAAAAATGGACTCAGACTGCTAATCGTAGATATTTCCGGTTCATCCAACGGTCGAGGATCTCCTGGTTGCCAAGAGGGCCCTCCAAGGAGATGATTAGCAGCTACATCATCGTCTC  
CCATAGAAAATGCAACCCATCCAGCCGCTGCTTAGAGAAGTTAACAGAGAATCCATCCAAAAGACATCTACAAGAAAAGATGTCCATCCAAAGCAATAGAAAGGGGAATTGCAGAAGCA  
GAGAATCCAACATCCCGGGTAATCCAACACCCAGCAAATGACCACAGAGAATAAATGAGAGTTCATGCTTAAGCCGGCCAAGCAATTCGCAAATTATCTTTATGTTTCCAGGTCGAAGC  
CTTCTCCTCAACAGCTCGTTAATGATATAGCATAAAGTAGATATGCTTCTAAATTTGAAGTTGAATCTCCTCTCATTTCTTTCCCTCCATAAGAAATACATGGCACAGCAAACCGAAAAGTAA  
AACAAATCCCTTTGGTTTTTAAACATATAGCTTCTCTCACCCAAAAAATGAAGCACTTGTAACAGCCTGGGCCTAAGTAGGAACTCGCCAACAGCAGGAACCAGATTTTTCAAACCTC  
AAAACCATAATCGCATTCAAAAACATGTGAGCATTAGACTCATTATGCCTAGAGCATAGTAGACAAGTAGGCTGCACAGAAATATTCTTTTAAATGAGTTCATCAGCCGTTTTAAGCCCG  
CCATTAAGAGCAATCCAAGTATAAGAGGAATATTTCAATGCATGAAGTTTATGCCACACTAACCAATGCCATTCAGTAATAGATTCATCCCGGAAATAAAAAATTTTTAAAAGAAGAAAAGTA  
GGCTTCTTCTTATCAATCCAACCCATCTTGCAAGTAGAATCATTAGTCAAAGTAATTTGGCCAAAAAATGGGTATAAAACGTCATGAACAGAGCTCGGAAAACACCAATCTCCCTCTAACC  
AAAATTCAGAAATCCTGGCATTAGTCGGTATATAAGCTTGAAGATTGCAATTGGGTAAAACAGTTTGAAGAGACCTGCCCTGCAACCAAGGATCCACAGCAAAGCAATTTTGCTATCAG  
CGTTGATCTCAAAATGGATACTAGAGCAAGCAATACTAGCCACCTTACAATTTCCCTCCAGAGAATAGATTTTTTCGCAGTTGAAGGTGTCCACGGGGTACCGTATTTAGTGTTTCAGATA  
GGAGAAGAGAAGCGAATTGGAGTTATAAAATCTGAATAACAAGGAGCAGTGATTAGCAAATGAAAAGCTTGAAGATCCATATTGCCCAACCCACCAAACCTTTTTTGCTTACAAGCTCT  
CTTCCAAGCAATGAGTTGCATTTTCTTAGCCTCCACATCTCCAAAGAAAAGAAATCTGGAACATAATCTACTCAAGTTCTTAATACAAGCTTTAGGAAAAATTGCACCCCTAATCCAGTAG  
GCAATAGTGTGCAAACCGTATATTTCAAAAATTGTAACGCCCTGCAAAAAGAGAGCAATCTAGCTTTCCAACCTGCCAAGTGTTTAGAGATAGTTTGCAAAGGGGTTGAAAATCAGCT  
ATGCCAAGTTTTTTAACAGATATAGGTATGCCAAGTAATTCATCTTGTTAAGAGAAGTAGGAATATGGAGAGCTTCACAAACAACAGAGGGGTATCAATGAAATTGGAGATAACAAGCT  
TACTCTTGTCTATGATTAACCCAAAGACCAGAGATTTTGGCAAAATTCATCAAGGGTTTTTAAAGAGAATTTGACAGTTAACTGTTGTGGCTTCTCCAAAGATTAGGAGATCATCAGCATAAAG  
CAAGTGAGTGAGTTGCATATCCTTCTTTTTGATGCCTATAAATCTCTCTGATCCTGTAGTCTTGTCAATCATAACGTAATGCATCCATGGCAATGCAAAAACAGGTAAGGGCTAAGGGGGC  
ACCTTGCCTGATCCAGAAGAAGAAAAGAAAGTGCCCTCCAAAGCACCATCAATGGAATAGAAAAATGAACATTAGAAATACATGCTTTGATCCAATGGATAAAAAACAAGAGGAAAT  
CCTTTTTGCCGCAATCTATCAAGAATGAAATCTCTGGAGACTGAATCAAAAGCCTTACGAATGTCCAGTTTGGCACAAAACAACCTTGCTTTTTCGCAGTTTTTTTTAAAT

>comp168976\_c0\_seq12

TTTGGTTGTCCAAGATTAATTATATATATATATATTTTTTTTCAAAAATCTCAACCCTCGAAGTAGAGTGGATTGCATTGTTGAGATTGGGTAATTATATTGTGCACTTACCATGGTGATTGGAGAA  
GATTTTTATCCTTCTATAATGAACAGAAAAAGATGCTATCATCTTTATCATCTTTGTCTGTAAAGCTGACAACCTTCAAGGACTCATAAACATGCTAACATAAGTTGCTTCTTAACAGAGGG  
CATGTGGTATTTGTACAATTATAATAATTACCAGTCATGTAAGTGGAGAAACATTAAGTCAAACGAATTGGATATTGGAAGCCCATGGACGAGATCACAATTTTTCAAGATGCTGCCA  
CTGTTGGCGGTAAAATAACACTGGAATTTACGTTGGCTTAGAACCTTTGGAAATAGAAGTGGTTGGAAGATGCAAGAGTACCATAGAGACCAGAAGTCGTACCCTGAATCTAATTTTTTC  
ACAGGACTACCAGTTAATGTGTAGAGTGTCTTGCAAAAATGACAAAACCTTCAAAAATTTGTGATTTAAAGTTACCCGATGAGGAGCAGCTCAACCCTTCTAGTTCATGTGATGATGATGAT  
GTTCTGCACGTAGAAAGCTTGTGATGAGATTTGTAGAAGATGAAGATAGCAATTTATCAACTAATGCCAAAATAGATCTCAGCCTTTTACTGGTAGTGACGAGATTGTGCAAGCTGCTG  
CTGATAGCAACGAGGTTGCTGCACTCGAGGATCAGAACAGTTTTTCTTCATCAGACTCCCATGCATATTTCCGATTCCCAGTGGACGATTATCTGGAGCTAAATGACCTTTATGATCCAGAC  
TCAGCCTCAGCCAGTTCAAACAATTCCAGCATCATATCTTTCCACTCAAACGAGTATTTCAATTCTGAAGAGCTATTGCGATACCTTGGGAGTGCAAGTAGCCAGAACATGCAAGAAGAG  
CACAAGGATTACAATGTTGCGTCTCCACATCTGCAAAGCCAGTGAATGTGGTTGTCAATCCTTCACAGCCATCTGATAGTGTATTCTCAAGGAAATACACAAAACATTGTGTCCGA  
>comp168985\_c0\_seq6

TACAGCCATGGTTGTGCGCCGTGCCGGAGAAGCGGAAAACCTACCCTGGAACCTCCGATGACATATCTGTGGAGCAGCTCTTCGATTGCAAGGAGGTTCCGACATGGGGGAGAACAGCTCA  
CTTTTCGGGCATTTTTCGTCAGCTTCATCGTCGGAATCTTCCTCTGCTTCATTGTAATGAAGCTGAATCTCACCACAGGGATTATCCCTTCACTTAATGTCTCAGCAGGCTTGTGGGTTTCT  
TTTTGGTGAAGACATGGACCAAAGTTCTGGACAAGTTTGGATTTCTGAAGAAGCCGTTTACTCGGCAGGAGAATACTGTTATACAGACATGTGTTGTGGCTTGTCTGGCATTGCTTTCA  
GTGGTGGCTTTGGAAGCTACATATTGGGCATGTCCAAACAAGTTTCTGCCGAATTTATCGAAGCAAACGATGACTTGAACACCAAAGATCCCCACTTGGGCTGGTTTATTCTCCGTTGTTT  
CTCTTCGTAAGGTCTGTATCATTTGAAACTCTGAAACTTCTTTTCATCGCAAAAATTTCTGAAACAAATGAATATAGCATTCTACATCCTTCTGTTATGAACATTCTTCCATGTTTGATTGA  
TTGTCAGATAATGATTCTTGGTCACAAGCTCACTTACCCAAGTGGAAACAGCCACAGCGCACCTGATCAACAGCTTCCACACACCTCAGGGAGCCAAGCTCGCCAGTAAACAGGTCTCTG  
TTCTTTTCAAATCTCTGGCCAGTAGCTTCATCTGGTCTTTCTTTTCAGTGGTTCTACAGCGGTGGCAGCGACTGCGGCTTCAACAGTTTTCCTACATTTGGCCTCCAAGCTACAAGAACAG  
GTGCACAGCTCACCAAACAAAAGCCTCAATCTTTCTTCTTCTTAGGATCAAACAAAATGAAATTTTTTTTATCTGGCTACTCCACAGATTCTACTTTGACTTCTCCGCCACCTACGTGGGCG  
TCGGAATGCTATGCCATACCTGATCAACATCTCCCTCCTCCTAGGCTCCATCATCTCATGGGGGATCCTCTGGCCTTACATCTCCACCAAGAAAGGCCAATGGTACGACTCCAATCTGGAA  
GAAAGCAGCCTGCTTGGCCTCAACGGCTACAAAGTTTTTCATCTCCATCGCCATGATCCTTGGCGACGGCCTTTCCAATTCATCTTCTCCTGTTCCGCTGCTCTAACGACATCTACACGAA  
ACTCCACAACCCTCCCAAGTCCCAAGCAACAAATCCCCCCTTCTCTGACCAACCGCTTACGAATCCACCGCCATGACCTTCGACGACCGCCGCCACCAACGTCTTCTCCTCAAAGAC  
GAAATCCCAAGCTTCATCTTTCCGGCGGCTACATTCTCCTCGCCATATCTTCAATCTTACCGTCCCCAACATATCCCCCAACTCAAACCACACCACATCCTCGCCGCTTATCTCATCGCC  
CCTCTCCTCGCCTTCTGCAACGCCTATGGCTGCGGCTTAAACGGACTGGTCCCTCGCCTCCAGCTACGGAAAAATGGCAATTTTCATCTTCGGACTATCGGTAGGAAAAGACTACGGCGGA  
GTTCTCGCTGGCCTCGCCGCTGCGGAATCATGATGAGCATCGTCTCCACAGCTTCAGATCTCATGCAGGATTTCAAACAGGGTATCTAACTCTAGCATCTCCACGATCCATGTTTCATCAG  
TCAGGCAATAGGCACGGCGATGGGCTGCGTTATAGCTCCAACGGTCTTCTGGTTATTCTACAAGGCTTTTCTTTAGGCGTCGAGAATTCAGAGTACCAGCTCCTTACGCCAAAGTATAT  
CGTGGAATAGCTTTACTTGGAGTAAATGGGATATCTTCTCTTCCAAAGAACTGTCTTAGCTTCTGCTTCGGATTCTTTCTCTTCGCGATGGTCATCAATGGCGTTAGGGAAATGGCGAGATA  
TAAGAAGTGGTGGTTCTGTGAATATGTGCCGAGCGCGATGGGAATGGCGGTGCCGTTCTATTTGGGGTCTATTTTACGATTGATATGTGCGTGGGGAGTGTGCGTATTGCTTGTGGGAG  
AGAAGGGATAAGCGGCATGCGGATGCGTTTGCGCCGGCGGTGGCGGCGGGGATGATATGTGAGACGGGATGTGGTTCGTTGCCGGCGTGCCTGTTGGCGATTGCGGAGAATTAATCCGCC  
GATGTGTATGAGGTTTTTGTGCGAGGAGCGATAATTTAAAGCTGGAGGCTTTGATTACTCGTCAAGGACTTCCGAACCTGAATTTTTTTTTTTTTTTGGAAAAATTTTTTTTGGAAATTTTTGTTT  
TTTGGTGGG

>comp169014\_c2\_seq12

GAAGAAAAAAGGATGAGGAATCATAAAGCAGGTTCAAACCTAATTGCATTAAGAATAATTTAAAAGGATGAAAAAGAGCTTCAGATTATAATGATTTAAGTTAGGTTCAAAGTGGTTGC  
AATTTTACATCCAAATTCTAACTGGAAGAAGGGCTAATTTTATTTCGAATAACTACAAGAACGATTACCACAACAGGTACCAGATTTTTTGAAACAATAATGAGCAGCAGCAACTGCAGC  
GGCAGCAGCTGAAGCAGCAACAACAACGACGATCAACAAAAGATGGAAATCATCGCACTACTAACCTCTGTGAATCAGCCACCATCCCCAAATTCACAGTATTCCTCTGTCTTAGCAAA  
ACCCTAAGCTGAGATTTCTGACACTCCAAATCTTGTGCGATCTGCTCCTTCTGTTTACCGATCCCGGCGACCGAACCTTGCCCGCCATCCTCGGAGAGTCCGCAAACCCCTTAACGCCCT  
TCTTGATGTGAGATTCTCCCTCCCTTGGCTCCCTTTGCAATCGATCGCGCTAGATCTGGGCACACCAAGCTTCGCTATCTCCCTTATCTTCTCCTCGAGGACAATCGCGGCCTCGGTGAGC  
TTCATCTGCACCCGCTCCTCACGCCACGCGTCCGCGTATTTAAGCATCCGGCGCTCTTCTTCGGCTTCTAGCGCAGCGCGGCCGGCAGCTTCCCGGCAGCGAGCGGCATCAGCCTCGGCC  
TCGGCTCGGAGGCGGCGCTCCTCTGCGAGCTCAAGGGAGAGAGATCTTGTGAGAGATTCCGAATCTCGGCGAAGGCGGCGCTCGAGTTCAGATCGGAGCGGAGGTCGTCTATCTCGG  
CGTTGGGGATTATGGGATGCGGAGGAGTTTCGATACTTTGAAAGGGGAGGAGGCGACGGGGGAATTCATGGAGGGATTAGAGGAGAAATGCGGGTTTTTCGTAGAGCTTCCAGTGAAG  
AGAGGAAAGAGTGTCCATGGCCGTGCTGATGAGCTCTACGAAAACCCGCATTTCT

>comp169016\_c0\_seq2

AGCAGATCTAATAGCAGAGTACAGAGGACAATATATAGAAAAGAGCTTAATGGCTCAGTATGTAAATACAATGAAAATAAGTATAACGGTCGTTTACAGCCTCCCTCAAATTAACCATTCCG  
TGAACGAATGGTTAATTTGTGACGAAGATTTTAAAACGAGCGATAGAAAAGGATTTTGTAAAATGTCAGCTATCTGTGCGTCGGATGAGATATGAGTGTGAAATCGCTCCGTTCTTG  
AGGTGCTGACGAATAAACTGATAGTCTATCTCGATATGTTTCGTCCGCGCATGAAAGACGGGATTTCCGGCGATTGCGATTGCCGATGTGTTGTGCGCAGTAGATTGGTGTAGGAGATGATT  
GTGGAAGATCGAGTTCTCAACAAGCCGACGCAACCATATGACTTCGGATGTGGCGGCAAAAAGAGATCGGTATTCGGCTCGGTAGATGATTTGGCGACCGTTACTTGCTTCTTAACGG  
TCCAAGAGACGAGGTTTGACCCAAAAATGTGCAGAAGCCTGAGATTGATTTTCGGTCGGAGGAGTCGGAGGCCCAATCCGCATCGGTGTAGGTCCGAAGAGTGAGATCACCTGTAGT  
GATGGGGAGACCATAGGATACGGTACCTTTTATGTACCGGAGTAGGCGTTTGTAGTGTGGAAATCTTGAGTGGTCGGTTGATGCATGTGCTGACAAGCTTGATTTGTAGCGAATGCGATG  
TCGGGCTGGTGATTGAAAGGTATTGTAGAGATCCGGCTAGGCGGCGGTAAAGAGACGGATCCGGAAATGGTGAGCTGGGTGTGTTGTTGCCTTTGGACTTGGGTGACAGAGGTGTCTC  
CGTGCCCTGACAGTCAGCCAGCCGAATTCCTTGAGTAATTTCTCGGCATAGTGTGTTGTGTTAGAAAACAGTCTGTTGGTTGCCGAATGATCTGAATGCCAAGAAAGAGAGATAGTTG  
GCTGAGTTGTTTGTAGAGCGAAATGTTTCGTGACGTTTGGAGAGGAGTTCCGGTCAGAGCAGCATGATCATTCCCTGTAATTAATAATGTCGTCGACATATATTAAGAGAAAAATTTGTATTGTA  
TTGCGACGAAAGGTTAAGAGAGAGGGGTCAGAACGAGTGAACCTGAAGCCTTGATTTTGGAGAAATGTCGTAAGTTTCTCGAACCATTTGCTGCGGTGCCTGTTTGTAGATCGTATAGCGA  
TTTATTTAATTTGCAGACTGCAGATGGCGAAGTGGTATCAACGAAGCCTGGAGGTTGACGCATGTAGACTGTTTCGGATAAATCACCGTGAAGGAAAGCGTTTCGAGACATCTAGCTGACG  
AATTTCCAATTTTCGGTTTAGTGCTAGCGTGAGAAGAATGCGAATAGTTGTCATTTTGGCAACGGGGCTAAATGTCTCCGTGTAGTTGACACCATATTGTTGATCATAGCCTTGCCTACGA  
GCCTGGCTTTGTATCTTTCCACTTGCCATTGGGAAGAAGTTTTGTCTTGAAAGTCCATTTACACCCGAGAATTGGTGTGTTGAGCTGGAGCTGGGACAAGTGTCCAGGTTGACTGTTTCTG  
TAGAGCATGAAACTCCTCGGACATGGCTTGACGCCAGTGCAGGATGTTAATGGCTTGGGCGTACGTTTTGGGCGTGGAGTCAGTAGGAGCAGATGTAAGAGAGACAGGATATGTTTGG  
GTTAATGATGCCGATTTGAGCCTGGTTTGCATGTGATGTGAGGGAGGATTAGGAATTGGTTGAGCTGATACCGGGGAAGCAAGGAAGAGTTCGAAGAATTTCTAGTGGAGGCGGGA  
GATTGTTGGGTAGTTGGAGTAACAGGATGAGTAATCTGAGTGGTAGTGTGGACAGTTGAAGGAATGGGATTAATAGCCAGAGACGGAGGAATGAGAACCAGCGGGGAGTGTAACTGG  
AAGGGGTATTGATGGATTTAGGGAGACTAGTTTTAAAAGGAAAAATGGTCTCATTAAACGTGACGTGCCGAGAAATGAAAATTTTGTGGAGTAAGAGTTGAGACACTTGTACCCTTTGT  
GGACGGGTGAATACCCGATGAACGTACACTCTTGGGATCTAGGCAATAGTTTGTTCGCAGTGTAGGGTCTGAGCCAAGGAAAGCATTGACACCCAAAGGTGCGAAGGTGAGTGTAGTTC  
GGGTGATGACCATATAAACGATAGAAGGGAGTTTGGTTAAGAACAGCGGAAGATGGAAGTCGATTTACGAGGTAGTTTGTCTGTTGCAATCGCTTCGGCCCAGAGATTAATCGGAAGATTG  
GCAGCGTGCATCATAGTCCGGCAAGATCAAGGAGGTGACGGTGTTCGGTCTGCGAGTCCATTTTGTTCGGGCGTATGAGGACAGCTGAGTTGTCTCTGTATGCCGTGGGACTGAAGG  
TAAGTATTGAATTCATGACTCGTAAATTCACCTCCGCCGTCCGATCTAAAAACTTTTGGAGTGTGTTAACTGAGTTTGAATAAGTTGATGAAATAATCGGAATTTAAATATTGTTTCTGT



TTTGATGTCATAAGATCCAACCATGAAAAACGCGTGAAATCATCGACGAAAATTACATAATACCGAAAGCCATCCAAAGAGTTTACCGGGGCGGGACTCCAAACATCGGAGTGTATAAGA  
TCAAAAGCAGCATGTGAAACGGAATTATTCTTATTAAATGGGGATTTATGACATTTGACATAGTACAAGAAGCACAAGAAAATTTGTTTGAAATGTGATTAATGTCAGGTAAAAAAGGAA  
GTAAATGTTTAAAGTAGCCCATGATGAGGATGCCCCGAGACGTGCGTGCCAAATGGTTTCTTGATTGCGTCGTAGCATGAAGTGCCGTGCGTTTTGGGATAATTGGACGCTGAAGATGGTAGA  
GTCCGTCACGAAGAGGCCACGAAGAAGTAGACGGTGGTCCTTGCATCCTTAATTTGAAAACCGTTAGCATCAAAGCTTATAGAAATCGGATTGTCAGTGGTTAGTTGTGAGACAGATA  
AAAGATTATGAGACAAATGAGGAACGTGAAGAAGTTTGCGTAGGTAGATCTTACGGGGAGTGTGCGGTAAGGGAAGAAGACCTTGCCCCGAATGAACAACCTGGAAGTTGCGAACCATT  
AGCTATTGAGACGCTGTCTGTACCTTGGTAGTTCGCTGGATAGTGCAGATTGCTGAGATATGGTGTGAGATGATTGGAAGCACCCGAATCTAGTATCTAATCTTGAGAAGAATTCTGGTTTT  
ATTGAGCAAGAAGGGCGTTCATGGATCGAGAATTGGTCCGAGCAAATCGCGGATTTGATCGATGCCAGCAGTTTAAAGGCGATGTGCCCAATTTTATTGCATATTTGGCAAGTTGGCCGAG  
CCATGTTTGCTGAAGCCGAATTTGGTGTGACTGGTGGATTGTTGATTGCGGCAAGGTTTGCCCAACAGGAGGATTGCGAGTCTTGCCGAACCTTACGTGGAGGTCTATTTCTGCTTTGATT  
TATGGACGTGGCATAAGAGAGCGGTGGCGCTGACCGCTGTGGAGCTTTCTTTGGAGATTTCTTGATTGACAATAATCTCTTCGCTGCAAAGAAGAGAGTAGAGATTGTCAAGTGACATCGG  
AAGAGGCGACGTGCGGATAGCGGCTTTGAAGGGATTGTAGGCTGCCGGTAGTCCGTTGAGGATGTGAATATGACGTCTTCCGCATCTACATTAGATCCGGCAGCTGCTATGTTGTCCACG  
ATGACCTTGACGTGATTAAGGTAAGTACTGTTGCATCGTCAAATCTGCATTTGCACATGATGGAGCTCATTCTTGAGCTGTATGACGCGTTTTCGGCAAGTTGGCTGTAGGCGTCGTTCAAGAA  
CAAGCCAGGCCTCATGAGTAGAGGTGCAAGAAATGATGTAAGGGAGGAGAGAGGGGAAATTGTGGAGAAAAGGGCAGACAGAAGGTTGTTGTCGGTTAATTGCCAACGTTGAAAAT  
CTTGAGAGGTGACATCCGTTGGACATGGAGAAGTGCTGTTGAGATGCCCGCATAGCCATTGGCGGTGAACTGTTGAAGCAGTTGAAGGCGCCATATGGCGTAGTTGTCGGTAGTGAGA  
GCATTGGGAACGAGATTCTTGATGTTGGAGATGAGAAAAC

>comp169016\_c0\_seq3

AGCAGATCTAATAGCAGAGTACAGAGGACAATATATAGAAAAGAGCTTAATGGCTCAGTATGTAATACAATGAAAATAAGTATAACGGTCGTTTACAGCCTCCCTCAAATTAACCATTTCGG  
TGAACGAATGGTTAATTTGTGACGAAGATTTTGAACGAGCGATAGAAAAGGATTTTGTAAAATGTCAGCTATCTGTGCGTCGGATGAGATATGAGTGTGAAATCGTCCGTTCTTG  
AGGTGCTGACGAATAAACTGATAGTCTATCTCGATATGTTTCGTCCGCGCATGAAAGACGGGATTTCCGGCGATTGCGATTGCCGATGTGTTGTCGCAGTAGATTGGTGTAGGAGATGATT  
GTGGAAGATCGAGTTCTTCAACAAGCCGACGCAACCATATGACTTCGGATGTGGCGGCAAAAAGAGATCGGTATTCGGCCTCGGTAGATGATTTGGCGACCGTTACTTGCTTCTTAACGG  
TCCAAGAGACGAGGTTTGGACCCAAAAATGTGCAGAAGCCTGAGATTGATTTTCGGTCCGAGGAGTCCGAGGCCAATCCGCATCGGTGTAGGTCCGAAGAGTGAGATCACCTGTAGT  
GATGGGGAGACCATAGGATACGGTACCTTTTATGTACCGGAGTAGGCGTTTTGAGTGCTTGGAAATCTTGAGTGGTCCGGTTGATGCATGTGCTGACAAGCTTGATTTGTAGCGAATGCGATG  
TCGGGCCTGGTGATTGAAAGGTATTGTAGAGATCCGGCTAGGCGGCGGTAAGAGACGGATCCGGAAATGGTGAGCTGGGTGTGTTGTTGCCTTTGGACTTGGGTGACAGAGGTGTCTC  
CGTGCCTTGACAGTCAGCCAGCCGAATTCCTTGAGTAATTTCTCGGCATAGTGTGTTGTGTTAGAAAACAGTCTCTGTTGGTTGCCGAATGATCTGAATGCCAAGAAAAGAGAGATAGTTG  
GCTGAGTTGTTTGTAGAGCGAAATGTTGTCGAGTTTGGAGAGGAGTTCCGGTCAGAGCAGCATGATCATTCCCTGTAATAAAATGTCGTCGACATATAATTAAGAGAAAAATTTGTATTGTA  
TTGCGACGAAAGGTTAAGAGAGAGGGGTCAGAACGAGTGAACCTGAAGCCTTGATTTTGGAGAAATGTCGTAAGTTTCTCGAACCATTTGCTGCGGTGCCTGTTTGTAGATCGTATAGCGA  
TTTATTTAATTTGCAGACTGCAGATGGCGAAGTGGTATCAACGAAGCCTGGAGGTTGACGCATGTAGACTGTTTCCGATAAATCACCGTGAAGGAAAGCGTTCCGAGACATCTAGCTGACG  
AATTTCCAATTTCCGTTTGTAGTGTAGCGTGAAGAATGCGAATAGTTGTCATTTTGGCAACGGGGCTAAATGTCTCCGTGTAGTTGACACCATATTGTTGATCATAGCCTTGCCTACGA  
GCCTGGCTTTGTATCTTTCCACTTGCCATTGGGAAGAAGTTTTGTCTTGAAGTCCATTTACACCCGAGAATTGGTGTGTTGAGCTGGAGCTGGGACAAGTGTCCAGGTTGACTGTTTCTG  
TAGAGCATGAAACTCCTCGGACATGGCTTGACGCCAGTGCAGGATGTTAATGGCTTGGGCGTACGTTTTGGGCGTGGAGTCAGTAGGAGCAGATGTAAGAGAGACAGGATATGTTTGG  
GTTAATGATGCCGATTTGAGCCTGGTTTGCATGTGATGTGAGGGAGGATTAGGAATTGGTTGAGCTGATACCGGGGAAGCAAGGAAGAGTTGGAAGAATTTCTAGTGGAGGCGGGA  
GATTGTTGGGTAGTTGGAGTAACAGGATGAGTAATCTGAGTGGTAGTGTGGACAGTTGAAGGAATGGGATTAATAGCCAGAGACGGAGGAATGAGAACCAGCGGGGAGTGTAACCTGG

AAGGGGTATTGATGGATTTAGGGAGACTAGTTTTAAAAGGAAAAATGGTCTCATTAAACGTGACGTGCCGAGAAATGAAAATTTTGTGGAGTAAGAGTTGAGACACTTGTACCCTTTGT  
GGACGGGTGAATACCCGATGAACGTACACTCTTGGGATCTAGGCAATAGTTTGTTCGCAGTGTAGGGTCTGAGCCAAGGAAAGCATTGACACCCAAAGGTGCGAAGGTGAGTGTAGTTC  
GGGTGATGACCATATAAACGATAGAAGGGAGTTTGGTTAAGAACAGCGGAAGATGGAAGTCGATTTACGAGGTAGTTTGTCTGTTGCAATCGCTTCGGCCCAGAGATTAATCGGAAGATTG  
GCAGCGTGCATCATACTCTGGCAAGATCAAGGAGGTGACGGTGTTCCTGTTCTGCGAGTCCATTTTGTTCGGGCGTATGAGGACAGCTGAGTTGTCTCTGTATGCCGTGGGACTGAAGG  
TAAGTATTGAATTCATGACTCGTAAATTCACCTCCGCCGTCCGATCTAAAAACTTTTGGAGTGTATGTTAAACTGAGTTTGAATAAGTTGATGAAATAATCGGAATTTAAATATTGTTTCTGT  
TTTGTATGTCATAAGATCCAACCATGAAAAACGCGTGAAATCATCGACGAAAATTACATAATACCGAAAGCCATCCAAAGAGTTTACCGGGCGGGACTCCAAACATCGGAGTGTATAAGA  
TCAAAAGCAGCATGTGAAACGGAATTATTCTTATTAATGGGGATTTATGACATTCGACATAGTACAAGAAGCACAAGAAAATTTGTTTGAATGTGATTAATGTCAGGTAAAAAAGGAA  
GTAAATGTTTAAAGTAGCCCATGATGAGGATGCCCGAGACGTGCGTGCCAAATGGTTTCTTGATTGCTGCTAGCATGAAGTGCCGTGCGTTTTTGGGATAATTGGACGCTGAAGATGGTAGA  
GTCCGTCACGAAGAGGCCACGAAGAAGTAGACGGTGGTCTTGCATCGGGGAGTGTGCGGTAAGGGAAGAAGACCTTGCCCCGAATGAACAACCTGGAAGTTGCGAACCATTAGCTA  
TTGAGACGCTGTCTGTACCTTGGTAGTTGCTGGATAGTGCAGATTGCTGAGATATGGTGTGAGATGATTGGAAGCACCCGAATCTAGTATCTAATCTTGAGAAGAATTCTGGTTTTATTGA  
GCAAGAAGGGCGTTCATGGATCGAGAATTGGTCGGAGCAAATCGCGGATTTGATCGATGCCAGCAGTTTAAAGGCGATGTGCCAATTTTATTGCATATTTGGCAAGTTGGCCGAGCCATGT  
TTGCTGAAGCCGAATTTGGTGTGACTGGTGGATTGTTGATTGCGGCAAGTTTGCCTAACAGGAGGATTGCGAGTCTTGCCGAACCTTACGTGGAGGTCTATTTCTGCTTTGATTTATGGA  
CGTGGCATAAGAGCGGTGGCGCTGACCGCTGTGGAGCTTTCTTTGGAGATTTCTTGATTGACAATAATCTCTTCCGTGCAAGAAGAGAGTAGAGATTGTCAAGTGACATCGGAAGAG  
GCGACGTGCGGATAGCGGCTTTGAAGGGATTGTAGGCTGCCGGTAGTCCGTTGAGGATGTGTAATATGACGTCTTCCGCATCTACATTAGATCCGGCAGCTGCTATGTTGTCCACGATGAC  
CTTGACGTGATTAAGGTACTGTTGCATCGTCAAATTCTGCATTTGCACATGATGGAGCTCATTCTTGAGCTGTATGACGCGTTTTCGGCAAGTTGGCTGTAGGCGTCGTTCAAGAACAAGC  
CAGGCCTCATGAGTAGAGGTGCAAGAAATGATGTAAGGGAGGAGAGGGGGAAATTTGTGGAGAAAAGGGCAGACAGAAGGTTGTTGTGCGGTTAATTGCCAACGTTGAAAATCTTGA  
GAGGTGACATCCGTTGGACATGGAGAAGTGCTGTTGAGATGCCCGCATAGCCATTGGCGGTGAACTGTTGAAGCAGTTGAAGGCGCCATATGGCGTAGTTGTGCGGTAGTGAGAGCATT  
GGGAACGAGATTCTTGATGTTGGAGATGAGAAAC

>comp169077\_c0\_seq14

CTTGTGGAAGATTCGTTCCTAGGGTGGTTTTGATGGATCTGGAGCCTAGAACAATGGGCAACGTGAGGACGGGACCATGTGGTTTGTATCATCCGCCCTGTCATCTTCATATTTAGGCAATT  
CTGGTGCATGGAAGAGCGGAACGTAGTATTCTGGCAAGGACGTTGGCATCGAAGGATCGGAGTGAAAGGGACATCGAAAACATAGTGGTAGTGGGGATGGATTTGAGATCTTGAACTCC  
TCCCGATTTGATCACGTTCCAATTACGGTCATGATGATTTGAGCTTTTCTCACCAAGGTGACGTGGAAGCCTCGGAACCTGCAAGAGAAAAGAACAAGAACACAAGGAAAAAACTGGA  
TAAACCAAAGAGCAGAGCTCCAATGACGATAGTATTGATAGTATCTCTGTATGCCTTCTCTCCAGCTAATAACAAAATATACCTCCTAAAAGTGTGTATGACTAAAAACGGAAAAAC  
CAGAAAAAAGGAAAAACAACCTGTACTATGGCCTTTAGTTAGTTAAAACCTGCTGCAGCAATGGAGAAGTGGGAGTATAACCAAACCATGTGGGTAGTAAAGTGATCTTGCAGCAACAAAA  
AGGCCACAGCAATTGTGAGCCACATCAGTTCCCTCCTCCTCTAAAGAACTCCGCTTCCGTGGAGTGTCCGTGAGCTCAGTAGTAGCTTCATCTGATGGAAGTAGGGGAAGACATCTT  
CGACATTGAAAGTAGAGGGCGTGAGAATGTCAGGTGGTAGATCAATGACATAGGCATTGTCGTTGATCCGCTGCTTGATAGCAAATGGTCCAATTTTTCGTGGACTAAGCTTCGAATAAGT  
TCCCGCAGGAAATCTTTCTTTCGTAACCGTACCATTACAAGTTCTCCAGGCTCAAATATCTTTCCGGCGCCGGTGTGATCAGCATTCAACTTGTAATTTTCAGTGGACAGTTGTAATCTGC  
GGCAACATCATCAAGCATGAATTTAAAATCCTCAGCTAGTTTACCTGCAGCGGAGTTATGACATTGAGGGAGAATGGCCAGGTCCACAGTATGATTCGGCATCTTGGTATAGACTATGCT  
GAATGGACACATTCCAGTTGATCTATTTCGGCATGGAATTATAAGCAAATTCGGCTTACTTAAAGACCTCGTCCCATTGTTTCGGATGATCTTGAACCAAACACCTCAGCATGCCGCCGAGA  
GTCCTATTAACCACCTCCGTCTGGCCGTGCGTT

>comp169106\_c2\_seq2

CGAAAATTAATTTTCGTCTGGACGAAAAGGACTTAGAAAATTTTCGAGCAAATTTCTATTCGTTCCATATGCTCTATAGGAGATAACTGTCTGATCGTCCAGTACGAACGAAAATCGTCCTG  
TACGATCAACACAAATTTAATATGATCTCCTTATTTGTGTGTGCATGTTTTTATTCACTCAAGTTACAATCACTCCCTTTCAATTTGATTTCTAAGCAAAGTGCAAGCTTCAAAAATTTCAAG  
GTATCTCATGCTGATTTTAATTTGAAGCCTTGTAGTCTGGAGTTCTTTCCCTGAAATGTTAGTATACACAAGAGCAAATACAATTCTTCCAAAATTGTTAGGAGATAACTACACATTTGAAC  
AATAATGTTTGAATCATCAAAACTTTATAAGTTGCCAAAAATGTAATGCATGCAAATAGCAACTATCTTAACAATTACGAGTTAGAACTATCAGGTAGTATAGAGATAGAGATTTAACTTC  
CTAACTTTATGTGAATATCCAAAAAAAATACATAGATAATAGATGAGGGCACAAATCAAAGGTTTCATCATATTTTCTTATGTGTA AAAACAAAAACAAAAAGAAAAAATCATGGGGC  
TTGGCCCATTTGAAATGATTTTATTTGGTATTTATAATTGATTACAAATAATGCCCTTCCCTAAGATAAGATATTGAATCAATGCAAAAAAAAAGGTTAAAGTTGGAGGAGCCCATTTGTAAGA  
AATTATCATAAATGAAGTTGGGAGTTAGAGTTGTTGTTATAGATGTGCATCAATCCTTTAGGTGATGGTGTATATTGGAATTATTAGTGATGCTAGATTTGATGCTGAAAAATGTTGGAGTAA  
CTAGGTGGTAATAACCAAAGAGTATAGGTTCTAGGATTAATGTTGGCAAGCAAAAAGAGGTTAAAGAATAAAGTCAATGGACGAAGAAGGATAGAGGAGCACAGTCAACAAGAAATAGA  
AGTAGTAAGGACTATAGTTGGGTGACAATGGTTAAAATATTATAGATGAAAAATGGTGAAGTTCAGAGGACTATTGTTGGTAGGTTATAAATATTGGAGGATTTAGGAGAATAAGAGATGG  
AGGTCAAAATTAACCTAATCAATTAATGGTGGTCAGAGGATTCTTATTGTGCAATAGTGGTCAAGGACCATAATTGGGCAATAACTCTGAGGAATGTTGTCAAGTGATGGTTATTTGAGG  
ATCATAATAAGAAAATAATGGTCTAAGTGCTAAATCTAAAAGTGCCTGATGTTAGAAGGATCATATTTCAAGCAATGGTGGTTGAAAGATTAAGTTGCATAATGGTGATCTAAGGCAAAA  
GTTATATGAGGTTTGTAGTCAATGGGTGATGAAGGATAGGAGGACTATAGTCACCAAGTTAGAAAGGTA AAAAGGACTATTGTTAGGTGATGCTAGTTGGATAACTATAGAGGCTAGAAGA  
TTATAGCCAATATGAGATAGTGGTATAATTTATCATAGTAAAGCAATGGTGATCGAGAGATTGAAGTTGGGTAATGGTCATATGGAATACCATGTGATATGCTAAAAATTTTATGTTAATTTCT  
TATGATTTTATGATTTAGTGCTTATAA ACTTTGTGTTTTGTATAGAAAAGTATAAGGCAAATAGGGAAATTA AACAGCACCCTACCACCACAAGTTCAGCACTATATCACCATAACCCATTT  
CAATATCGTATTGCCATACCTTAAGCACCAAATGGAAGCTTACACAAATTTGGTTAGACAGTTTAGCTCTAAAATACTACAACTATGTATAGTAAAGCTAGATAGGAGTACTATAGGTTTA  
AATATCCACTGCTGAAAAATGGTTCAATACCGGCGAGTTTTTTATAAGATTGTTTGCCAGACAAATCCGTTGGCATCTGCCCAATAGAATGGTCTAGTGGATAATCCATTTAAAATACTAGC  
GGTAAATTTCTACTGGAATTTCCCGTAGAAAAAATACCATAACTCATAACATGTAAAAGATG

>comp169130\_c1\_seq10

ATTCGTCCAACCTCTTTATTGAAATGTGTGGTTGGTTCGGTTGCCAAGTTCAATCTCCCTTAGACATAAATCACAGAATATAATCTTTACATCTTTCTCCCATGTTGCGGATGGTCCACCATC  
TTTTGGCTTACCCATTTTAAATCTTACTTGTGTTGATTATAAATTGACTGAAGAAGGATTGTAATGGATTGCATATGAGTACCTAAAATAATTTAGAAGGAAATTGCAATTTACTTTGAGATATA  
AAAAAAGGTAATAAATTAGGAGAAAACATACATAAAGTTATCTGATACAATATAGACCTTAAAGTTCAATTTTATAGGTTCTTAGATAGTTGTACACAACAGAACAGTCCATGAACTAATACA  
ATTAACCACCTAAAGCCTAAATCACAATGACCAATCTCTCTAGGCTCTGGTTGGAGTTCTGTTTAAATGTCAAAAATTTATGTGATATAATCAAGGTTTGGAGATGATTAATAAATTCGTTCTT  
GATATAGATTCAAAGGCCATGATAATAGAATAAAGAAACCCACTCCTTCCCATGTTGGTCAA

>comp169130\_c1\_seq2

TAATACTTACATCGTTTGCATAAATTGAGAGCATAATTTCAATTAATGGCATGCAGAAGAAGCTCCGTTAATGAACCTAATGATAATGATATGTGATAAGCAAATTACAATTAATAATGTTATAGG  
TCCAAAAGACCATGACAGAGTACAGAATAAAGCATACTAAAATTTGCCTTCATCTCTCTCCTTTTACCAGGAAATAGACACGCAAGCAAGAGAACTTTCTTCTCGTCTCTCGCTCTCTC  
TACCTTACATCCAGAGTGAATAAAAAAAGTAAAAAAACTCAAATCTCTCTTCTTCCCAAATGTTACGAAAGACTAAAAAGGAAGAAGATGAAAAA AACTCAAACCTTTATTTGC  
TTCCAGCCAAAGACTAACGGGAAAAAATCCCTCCCGTCGCTCTCATTTCGGGCCGCTTTAACGAAAGGCAGCAGGGGAAATGGGGGCTTGAATTTGAACAGAAGATCGTAGAAAAAGT  
CGACGCCTTGA AAACAATTAACGCTGGGTATAACAGAAGATCGTAGAAAAAGCAATGGGTGCTGACTTGAAGTGCTCGTTAAGAAAATGAAAAAATGCTCCACATTCTCCATCGTTCCG  
GAGACAGATCGAGGAATGGGGATTTGCGAATAGGGGAGGCGGGAAGTGCTGGCTTGAAGTGTTGCTGATAGGAGGGAAGAAGAGTCCGCAAAATGCAAAAAA AATAGTAGATGAG  
CGAAATAAAGGAGGTAAGAATGACGAATCTCATACCGGCTGAACTGACGAGCGACCTCCTACCGAATGGAGTTCGAGGATGCAGCCCGCTGGAGACGATCGCGTATGAGGATTGCGAAGA

TGACTAACCTTTTCAGATAATCGGCTGTGAGGAAGATTTGCACCATCAAAATGTCTGAAGATATATATGCTAACGGAGACGAGGCCATGTATATGGCGGAATGATCGGCAACTTCCACAC  
TAATTGGGGCAGTAGCGTCATTTTTAGGCTTCGAAACAGCGGAAAGCAGCCGACCGCGGGAGATAAGGTTTCGGTTCGTGAGAAGCAGCGAGCGGCAGCAAAAATTTTCGTAACGGGCTC  
TGCCGCGATCGTCCCAAACAATTGTTTTACTGCTTTTTAAATAGTAAAGCAG

>comp169145\_c0\_seq15

ATGCTCAGGCCCTGCATATGCTGTAAATGGCTAGAAAGCAAATATGGTGTTTTTTAAGCAGACTCAATTTTTCTTAAGATTTTTATTTTGTGGCAATGATTCAGTCGCATCAACTATACGACAC  
AAAAAAGTTTGTACATGTTTTTAAGCAATCGGTTTCAGATCTCAATTACTCGGTACATAAGCACAATATTGCTCAAAGGTGAAATCACGTGAAGAATCTAGTTTGATATTAAGTTGTAACAGA  
TGGTTTCTTTTCAAACGAATGATAATCAATACAAAGCATGGCTTGTAGATGTGGTGAAGGGGACCACAATATTTGGACAACAAGACCTCTAAAAATCTTACAACCAATCAAATAGCTGC  
CGTAATTGTGAGTATATGGAGTAGTGAATGATATATTCAAGCAGCTTAAAAAGTAGAAAAGCAAAGGCACAGTTGATGATCGTGATACGTACTTTTTAAGCTGCTTGAATATATCATTCCAC  
TACTCCATATACTCACAATTACGGCAGCTATTTGATTGGTTGTAAGAATTTTTAGAGGTCTTGTGTCCAAATATTGTGGTCCCTTCACCACATCTACAAGCCATGCTTTGTATTGAATTATC  
ATTCGTTTGAAGAAACCATCTGTACAACCTTAATATCAAACCTAGATTCTTCACGTGATTCACCTTTGAGCAATATTGTGCTTATGTACCGAGTAATTGAGATCTGAACCGATTGCTTAAA  
AACATGTACAACTTTTTTGTGTCGTATAGTTGATGCGACTGAATCATTGCCAACAAAATAAAAATCTTAAGAAAAATTGAGTCTGCTTAAAAAACACCATATTTGCTTCTAGCCATTTACA  
GCATATGCAGGCCCTGAGCAT

>comp169145\_c0\_seq25

AGATCTCAATTACTCGGTACATAAGCACAATATTGCTCAAAGGTGAAATCACGTGAAGAATCTAGTTTGATATTAAGTGAAGTACTGCATCGTTGAGCTTTTCAAATAATTAATTCAGTT  
TCTCTCGCAACTTGTATTTTTGTTGCAAAATTTCTTTCAAACAAATATGAACTGGATGTCTGGAACAATTTTGAATATATGATCAAGACGTTTCATGATCCTCAGCATTCTTATCATCATGA  
GATTATAAGACATAGTTTCATTTGTTAGAAATAGTTTCATCATGAGATTATAAAAGCATTTGTTGGATCTCTATTTGGTGATAAAGCTAATATAAAGTTTTTTGTTAGAATAGGTATTTCTCGTAT  
CATGATTTTCATTTGAAAAAACATTTGTTATCTAATGGCACTTATTCTCGTATCATGATTTCTCTTGTATACTTTTGGTGGCATCATGGTTGTTGATGGTTTGTGGCTTTGAAAGCAAAGTT  
GTTTACTCGGAAGTTATGGAAGAGTGGGTGTTAACAGTGTAAACAGATGGTTTCTTTCAAACGAATGATAATTCAATACAAAGCATGGCTTGTAGATGTGGTGAAGGGGACCAAAATATT  
TGGACAACAAGAACCTCTGAAAATTCTGACAATCAATCAAGTAGCTGTCGTAATTGTGAGATCTTGAAGAGTGGGCCTCTGTTAATATCATCTAAAGGAATTGGATGGACATCTTTGAAA  
AAACGGTGGTTTGTCTTTCTCGTAAATCCTTGATGTTTTATAGGGTCGACCCTAACGCGCTACCTCAGAAAGGAAGTGAAGCCCCAACCCACACTTGGTGGCATTGAACTCAACAAC  
TCAGGGAGCGTGGTTGTGAAAACAGACAAAAAACTACTCACTGTCTTTTTCTGATGGTTCGGGATGGGAGAGCTTTTACTCTGAAGACAGAAACCTTAGAAGAATAAATGAGTGGA  
AAGCTGTATTAGAAGGTGCTTTGGCGCAAGCACCTAGTGCAAACCAAGTAATGGGGCCCAGTGAATATTTCTTAATGAAGTAGCTGACTCAATTGAAGCTTCAGTTGATCTATGCAAGG  
ATAAGCCTCCTACTACATCTTCAATCATTTGGGAGGCCAGTTTACTTGGCTCTACAAGAGATTGATGGCTCTCCTTCTTTCTTGGAGAAGGCCCTTAGGTTTCATTGAGGAACATGGAATTTAAA  
GTTGAAGGCATCTTACGGCAATCTGCTGATGTTGAAGAGGTAATGCACAGGGTTCAGGAATATGAGCAAGGAAAAACTGAGTTTGGTCTGATGAAGATGCTCATGTTATTGGTGATTGC  
ATTAAGCATGTGCTCCGGGAAATGCCATCATCACCTGTTCCAGTATCATGCTGTATGACTCTGGTTGATGCATATAGAACCCTATCGTGGATCCAGAGTCAAGAACATGCGTGATGCAATATAT  
GGGACCTTCCCTGAGCCTAACCGTCGTTTGCTACAAAGGACTCTCCAGATGATACTAACTGTGGCTGCTCACAAAGCTGAGAACAGGATGAGCCCTCTGCTTTGGCTGCTTGTATGGCA  
CCTTTACTTCTTCGCCCACTTCTGGCTGGTGAATGTGAACTCAGTAATAGTTTTCAAATGGATAGTGATGAATCTTTTCAACTTTTGAAGCTGCTGCAGCTGCAAACCATGCTCAAGCTAT  
AGTGCTAATTTCTTGGAGGAGTACAAAAATATATTTGATGTAAATTTCTGTCAAACCTTGTCTTGTGGCCGTTAGATTGCTGCCATACAAAGATAATTTTACATGTTGAACATTTTATTTTCA  
AGGAGCTAATCGTCATATGTCTATGACACTACCTTCAGGATAACTTTTTCTTCAGAGCTTTTACACTGAGTCAGAAGATGATGATATTGAGGATGATGAATCAACTGATAATGATATCTCCC  
AAGTGGATGGATATCGTGATGCAGAGAATGACAAAAAACAGATGCAGAGGGTGATATGGATCATTCTTATAGTGAACCTCCAGTGAAGTGAACAATGATGTTGGTAGTGAAGATGATA  
GTGATTTGGGTAGTGATGTTGACAGCGAAGTTGGCGGTAATGTTGGCAGTCACATAGGCAATGATGTTGGCAGTAATGTAAGAAGCGATGCTCATTTGTGATGTTGACAGCAATGGTGTTA

GTGTTGTCAGGAGTGATGCAGGCAGTGATATGGGGAGTAATTTGTCAAGAGACCAGGACATTAAGACATTAGTGCTCATTCTATAGCTGCTAGAAAATTTGGAGGTTGTTGAAAACACTG  
CGATAAGTTCAAAAAAAGTCTCCGCATTTCTCCATGATGATATTTACCTCAAACATCTGCATCTGCCATGACCAATCGTCAGCATATATCCATCCTTTGGCAATGCTGACATACAGCATG  
ATGATGACTTGCCAATTGAAAATACTAACTCAACCATAACCACTTTATCAAGAGTCTCATGAGCCCACTGTCCGGTTTTTTGTCTACAATTGTAACGAATAATTTAGTTAATCTCAAACCTTCTG  
CCCCAGCATAATAAAATTTGCAGAACAATCAAAGGAAGCAAAACCTGCTATGCGAAATAAATTTGGGGCGTACCTCTGCAAGGAAAAACCTTTCAGTGGACTCAATTGAAGACATCAGT  
GATGATGAGTCTGCTATTAGAGGCTTGAGAATGCCAGATAGATCTTCTAACTAAAATTTCAGAAGAGATAAAAAGGAATGCAGTTTTGCAAGCAAGTTTGGACAGGGCGAAAGGAAGA  
TTTGCCAGAACGTCGTTTGGCTCTAGAGAAAGAAGTGGTAAGGTTGAAAGCAATATTGCAGAAAGAGAGAGATTTAAGGTCACACTTGGAGTCTGGTTTGTGAACCTACAGTCCGACA  
ATTTAACCACCTTAGCTTGTTTAGATCGCAAGATTATTGCCGATCTTGAAGAAAATTGCTCTTTTCAGTAAGTGATATCAATAATTTGAAGCACAAATATCACTGATCTCACTGAACAGCTACACC  
ATGGATGTAATACTTTATGTCAATCTGCGGTCAACCTATTTATAGAAGAGATGAAAGACAGGAAAAAGCAGATGATATTCCTAATGAACATAAAAAAGATAACCCGTTGAAACATGACAA  
TACGAAAGATGAGGCCAAAAGTTCAACTTCTTTGAAGGAAAGACAAAACATACCAAAAAGCTATTACCAAGAGTTTCAAATCAGAGTGTGCAAGATATTCTGAAGCTTCATTATCTGAAGA  
TCGAAATAGAGCATCAAAGAAGCTTGCAAGGTGGGAAGGTACAAAAAAGGATGCTTTAGAGTCTCCAACCTAGGAGAATGTCTTCCAGAAAGCAAAAACCTAGTATTTTCATCGGTAAACA  
GTGAGACATATGAAGAAACAATAACACAGTATTTTCAGAAGAACAATAACACTTCTTCGCAACAATGCAACAAGAAGACAGGCTCACAAGATTGAGGAGGGATTCTCATCAGCATCT  
ACACTGACAAAGCTAACAAATCGACTCAACTTTCTCAAGGAAAGGCGCTCCAACCTCGCTAATGAGCTACAAAATTTGGATTCCGGTTCGAGCCGCTGGCT

>comp169145\_c0\_seq41

CCAATTCAACCGCTCCATTATAACAATATTGCTCCAAAATTATCTCTCGTGTAGAAATTGTGATACAAAATTGATTTCAATTTAATCCCTTAGCTATACAAAATTATCCCAATTTAGTTTCCGAA  
GAAGTATTTTGAATCAATTTTGCATAGTCATCAAATAAATTGAAGAAATATGATACACTGGGATTAATTTGACCTTATATGAATGTTGGGGGATAATTTTACAATTAACCACCATTAGGA  
GTACAATAATGAATGCTTACGAGGCATTACATTAGATTTTAAAAGCACACAATTTATCTTACCTCAATCTTGTGAGCCTGTCTTCTTGTGATTGTTGCGAAGAAGTGTATTTGTTCTT  
CTGAAAATACTGTGTTATTTGTTTCTTCATATGTCTCACTGTTTACCGATGAAATACTAGGTTTTTGTCTTCTGGGAAGACATCTCCTAGTTGGAGACTCTAAAGCATCCTTTTTTGTACCTTC  
CCACCTTGCAAGCTTCTTTGATGCTCTATTTGATCTTCAGATAATGAAGCTTCAGAATATCTTGAACACTCTGATTTGAAACTCTTGGTAATAGCTTTTGGTATGTTGTCTTTCCTTCAA  
AGAAGTTGAACTTTTGGCCTCATCTTTGATTTGTCATGTTTCAACGGGTTATCTTTTTTATGTTTCATTAGGAATATCATCTGCTTTTTCTGTCTTTCATCTTTCCTTCCCTCTCCGCATCCCA  
TACAAGATGCGTCTGAT

>comp169145\_c0\_seq69

CAGTTAGTTTCCATGTTGAAAACCTTACAATAAAATATTTACAGTGGTTAGTTTTCAAATAGAAAATTTTACAAGAATATATAAGGAATCTTTGAGGAAAAGAAAACAAGTGCTAGCATACT  
CCACAAATGAGTCTTCAGTCTCTCGTGGATAATCGGAACTTAAATATCCTGATAGACCTGATGAGAGCAACAAATGTTGTTATAAGCTTAACATTATAATAAATCATCAAATGCTAAGCAT  
TTGAATCCCTACAAAACCATTTGATCTGGTAAGAGCACAGCTTTTTTGTGAATCAGTTGTTATTCGTTTTTCGAAAGGAGCTTCGGAGCCAGCGGCTCGACCCGAATCCAAATTTGTAGCTC  
ATTAGCGAGTTGGACGCGCTTTCCTTGAGAAAGTTGAGTCGATTTGTTAGCTTTGTCAGTGTAGATGCTGATGAGAATCCCTCGTCATGTTTCAACGGGTTATCTTTTTTATGTTTCATTAG  
GAATATCATCTGCTTTTTCTGTCTTTCATCTTTCCTTCCCTCTCCGCATCCCATACAAGATGCGTCTGAT

>comp169145\_c0\_seq70

AGATCTCAATTACTCGGTACATAAGCACAAATATTGCTCAAAGGTGAAATCACGTGAAGAATCTAGTTTGATATTAAGTGTAAGTACTGCATCGTTGAGCTTTTCAAATAATTAATTCAGTT  
TCTCTCGCAACTTGTATTTTGTGCAAAATTTCTTTCAAACAAATTTATGAACTGGATGTCTGGAACAATTTGAAATATATGATCAAGACGTTTCATGATCCTCAGCATTCTTATCATCATGA  
GATTATAAGACATAGTTCATTGTTGTTAGAAATAGTTCATCATGAGATTATAAAAGCATTTGTTGGATCTCTATTTGGTGATAAAGCTAATATAAAGTTTTTTGTTAGAATAGGTATTCTCGTAT  
CATGATTTCAATTTGAAAAAACATTTGTTATCTAATGGCACTTATTCTCGTATCATGATTTCTTGTATACTTTTGTGGCATCATGGTTGTTGATGGTTGTTTGGCTTTGAAAGCAAAAGTT

GTTTACTCGGAAGTTATGGAAGAGTGGGTGTTAACAGTGTAACAGATGGTTTCTTTTCAAACGAATGATAATCAATACAAAGCATGGCTTGTAGATGTGGTGAAGGGGACCAAAATATT  
TGGACAACAAGAACCTCTGAAAATTCTGACAATCAATCAAGTAGCTGTCGTAATTGTGAGATCTTGAAGAGTGGGCCTCTGTTAATATCATCTAAAGGAATTGGATGGACATCTTGGAAA  
AAACGGTGGTTTGTCTTTCTCGTAAATCCTTGATGTTTTATAGGGTGCACCCTAACGCGCTACCTCAGAAAGGAAGTGAAGCCCCAAACCCACACTTGGTGGCATTGAACCTCAACAAC  
TCAGGGAGCGTGGTTGTGAAAACAGACAAAAAACTACTACTGTCCTTTTTCTGATGGTTCGGGATGGGAGAGCTTTTACTCTGAAGACAGAAACCTTAGAAGAATAAATGAGTGGAA  
AAGCTGTATTAGAAGGTGCTTTGGCGCAAGCACCTAGTGCAAACCAAGTAATGGGGCCAGTGGAAATATTTCTTAATGAAGTAGCTGACTCAATTGAAGCTTCAGTTGATCTATGCAAGG  
ATAAGCCTCCTACTACATCTTCAATCATTGGGAGGCCAGTTTTACTTGTCTTACAAGAGATTGATGGCTCTCCTTCTTTCTTGGAGAAGGCCCTTAGGTTTATTGAGGAACATGGAATTTAAA  
GTTGAAGGCATCTTACGGCAATCTGCTGATGTTGAAGAGGTAATGCACAGGGTTCAGGAATATGAGCAAGGAAAACTGAGTTTGGTCTGATGAAGATGCTCATGTTATTGGTGAATTGC  
ATTAAGCATGTGCTCCGGGAAATGCCATCATCCTGTTCCAGTATCATGCTGTATGACTCTGGTTGATGCATATAGAACCTATCGTGGATCCAGAGTCAAGAACATGCGTGATGCAATATAT  
GGGACCTTCCCTGAGCCTAACCGTCGTTTGCTACAAAGGACTCTCCAGATGATACTAACTGTGGCTGCTCACAAAGCTGAGAACAGGATGAGCCTCTCTGCTTTGGCTGCTTGTATGGCA  
CCTTTACTTCTTCGCCCACTTCTGGCTGGTGAATGTGAACTCAGTAATAGTTTTCAAATGGATAAGTGAATCTTTTTCAACTTTTGCAAGCTGCTGCAGCTGCAAACCATGCTCAAGCTAT  
AGTGCTAATTTCTTCTGGAGGAGTACAAAAATATATTTGATGATAACTCTTTTTCTTTCAGAGCTTTTACACTGAGTCAGAAGATGATGATATTGAGGATGATGAATCAACTGATAATGATATCTC  
CCAAGTGGATGGATATCGTGATGCAGAGAATGACAAAAACCAGATGCAGAGGGTGATATGGATCATTCTTATAGTGAAACCTCCAGTGGAAAGTGAATGATGTTGGTAGTGAAGATGA  
TAGTGATTTGGGTAGTGATGTTGACAGCGAAGTTGGCGGTAATGTTGGCAGTCACATAGGCAATGATGTTGGCAGTAATGTAAGAAGCGATGCTCATTGTGATGTTGACAGCAATGGTGTT  
AGTGTGTCAGGAGTGATGCAGGCAGTGATATGGGGAGTAATTTGTCAAGAGACCAGGACATTAAGACATTAAGTGCTCATTCTATAGCTGCTAGAAAATTTGGAGGTTGTTGAAAACACT  
GCGATAAGTTCAAAAAAGTCTCCGCATTTCTCCATGATGATATTTACCTCAAACATCTGCATCTGCCATGACCAATCGTCAGCATATATCCATCCTTTGGCAATGCTGCATACAGCAT  
GATGATGACTTGCCAATTGAAAATACTAACTCAACCATACTTTTATCAAGAGTCTCATGAGCCACTGTCGGTTTTTTGTCTACAATTGTAACGAATAATTTAGTTAATCTCAAACCTTCT  
GCCCCAGCATAATAAAATTTGCAGAACAAATCAAAGGAAGCAAAACCTGCTATGCGAAATAAATTTGGGGCGTACCTCTGCAAGGAAAAACCTTTTCAAGTGGACTCAATTGAAGACATCAG  
TGATGATGAGTCTGCTATTAGAGGCTTGAGAATGCCAGATAGATCTTCTAACTAAAATTTTCAAGAGATAAAAGGGAATGCAGTTTTGCAAGCAAGTTTGGACAGGCGAAAAGGAAG  
ATTTGCCAGAACGTCGTTTGGCTCTAGAGAAAGAAGTGGTAAGGTTGAAAGCAATATTGCAGAAAGAGAGAGATTTAAGGTCACACTTGGAGTCTGGTTTGTGAACTACAGTCCGAC  
AATTTAACACCTTAGCTTGTTTAGATCGCAAGATTATGCCGATCTTGAAGAAATGCTCTTTTCAAGTAAGTGAATCAATAATTTGAAGCACAATATCACTGATCTCACTGAACAGCTACAC  
CATGGATGTACTACTTTATGTCAATCCTGCGGTCAACCTATTTATAGAAGAGATGAAAAGACAGGAAAAAGCAGATGATATTCCTAATGAACATAAAAAAGATAACCCGTTGAAACATGACA  
ATACGAAAGATGAGGCCAAAAGTTCAACTTCTTTGAAGGAAAGACAAACATACCAAAGCTATTACCAAGAGTTTCAAATCAGAGTGTGCAAGATATTCTGAAGCTTCATTATCTGAAG  
ATCGAAATAGAGCATCAAAGAAGCTTGAAGGTGGGAAGGTACAAAAAGGATGCTTTAGAGTCTCCAAGTGGAGAAATGTCTTCCAGAAAGCAAAAACCTAGTATTTTCAATCGGTAAC  
AGTGAGACATATGAAGAAACAATAACACAGTATTTTCAAGAAACAATAACACTTCTTTCGCAACAATGCAACAAGAAGACAGGCTCACAAGATTGAGGAGGATTCTCATCAGCATC  
TAACTGACAAAGCTAACAAATCGACTCAACTTTCTCAAGGAAAGGCGCGTCCAACCTCGCTAATGAGCTACAAAATTTGGATTTCGGGTTCGAGCCGCTGGCT

>comp169145\_c0\_seq9

CTCACAATTACGGCAGCTATTTGATTGGTTGTAAGAATTTTTAGAGGTCTTGTGTCCAAATATTGTGGTCCCCTTACCACATACTTAATATCAAACCTAGATTCTTTCACGTGATTTACCTTT  
GAGCAATATTGTGCTTATGTACCGAGTAATTGAGATCTGAACCGATTGCTTAAAAACATGTACAAACTTTTTGTGTCTGATAGTTGATGCGACTGAATCATTGCCAACAAAATAAAAATCT  
TAAGAAAAATTGAGTCTGCTTAAAAAACCATATTTGCTTCTAGCCATTTACAGCATATGCAGGCCTGAGCAT

>comp169153\_c1\_seq1

AAAATAAACTATATATATATAGCTGAAACTTAACTTTATATATATATCATTCAATGAAGACATCAATACATAATATTCATTTAAGCAGCTCTTCTTTATTGAGCTACAGTTAAGGAAACAAAACA

TGCATGAAAAGCAATGTAAAAAACACAAACTGAAAGTTTTTTTATACAGGACATTTTCAAGATAAGAAGAACAGAAATGCTACTCAGCCAAAAAATTTGAAGTGTGAGCACTTCATTGA  
ATAAAAAAGTTTTGGCCTGAGCAGCATTGTCAAAGAAAGAAAGGCAATTCTTAAAGGAATATGCAAGTGTTAAAAACACAGGGCAGCCATCGACAATCACTCCTTTCGCGGTGGGGCAAG  
TTGCAAGATCACAGTGCTCACCTCTAGTGCCCCACCAGTCCAGACTGTAGTTCTCCATGCTTAAACTGAAGTACAGCAGGACCCCATGAACGCAACTCCTGCATCCAGTGCTGCAGAA  
AGGATGTAATTGTATCTTACCCACCATTTTTCTGTACCTGAAGACGAAGAAGTTGAAGATTGTTCCAACAATGACCCAAACGTTATAGTTGAGTGGAGTAGCTGGAGGCATGTTGGCTG  
TAGCTCCAAGAAGAACTGGAAGTTTTATGAGTGGGATCCATGATTGATGAGGGAATGCTCTGTGGAAGAGCCAGACTATGATTGGGCCAACTGCACCGACCAGAAAACACCAGTTCAAAA  
GCACCGTAGTTGCCGAGCGAACC GAAGATCCGTCTCGGGCCTACCAAGCCCCAAATTACGGATGCGTCGAAGAAGACACGGTCACCGGGGCAAGTCCAGGGGCTGTTTGGCGGTAGGA  
GCTCGTCTGGC ATATGTTCTTAATTGAGCCCAGAAGCCACCATGCAACACCGAGGTTGATTGTTCCAGCAACAATGGTGCCAGCAA ACTGAACAAGGAACATGGATTTTGGAGGGATT  
TCATGTAATGACCAAGCTTGAAATCTGAGAGGAAAGCAACTGCTTGGGACATGCTCATGTATCCATAAACTTTGAAGCAGACATTTGCGATTGGTTTTCCAGGTAGGATAAGTCCCATTAC  
GTATTCTGTGATGATATTCAGCCCTGGAGTCTGGTTTTGTAGTTGCGGTTATGATGCTGATGGGTAAAGTAAACAAGAAGGCCATGGCACAGGCAAAGAAGAGCCCCACCATGGAAGTTG  
AACTTGGTCTTTCAGGACTGTGCATAGGATCAAAGAAATTGCAACAGTGAATCCTAGTAATAAGTGAACCACCATTCTGGTATGTCCTCATAGTTCTTCATCAGCTTTGTATGATGTCCT  
CCTTTTCTTTATATGAAGCACGGAACGATCATAGATCTCCCTTCCATAGAAGAAGGCCACATGTGTAAGCGTAGCAGCAATAGTGGCAAAGCCAAATCCATATGTCAAGGCAAAGAACAT  
ACTCAGGTTAATCCTTCCCTGCTCCTGATAAGCATT CATGTCAATCTCAA ACTTGTGTTACAATAGCACTAATGTTGTAGGGCTGCCCTTCTCTTGTGAAGAGATGGGAGGAAAATATTG  
GAAAGGTCTTGGCATTGTAACGTTTCATGCCCAATAAGCGATTGGCATTGTTATGTAGACAACGAGAAAATATCCAACAAAAACATTGGCAATGGCAAAGAATGGGCAGACGAGAGGG  
CTGAAGAGGAAGGAGGAGACGGCGGACCAGTCCAGTGTAATGGCCCCAAGGCCAAGGCCTCTCATGCCGAGCCGATTTGCTGAGCAGTGACAGACCTGGAGAATGCCAGCAGACC  
CAGGAGATACTAGTCAGGGTAGGGAATAAGTAGCCAGGGACTGCATACCAAGCAAAGCTGCAGATCAATGCGATTACGAAGA ACTTGGCTCGGGAGAAGCGGTGGTCTTCTTCTCATG  
CAATGCCCGGAAAAGCGACACCTGAACCAGCGTGCTCGGCCACCACATATGCGCCGGCTCCACCACGTACTTCTCATCAGCCCCGCCATCCGTACCCCAGCACCTGCGTAGTGATGAT  
AAGAATCCAGCTAGCCAGGAACGAGATGTTCCGCTTATAGAACGCCTTGATAATGTTAACGATCCCAATAGCATATGCGTTTCCGTTTCCAAAAGCATAACCAGCGTTCGCAAAGATCGAG  
ATCAGGACATGCTCCTTCATGTTAAACGGCCCCGATTGAGGGAGA ACTCCCGATCGCCGAATCCAGGAAGCCGGA ACTTCGCTCGGGCAGGGTACGAGCGAGGAAATGCCAGCCG  
GAAGAGAGGCCACCTGAACGGTGATCTGCGTGATGACAAGAGGCTCCGTTCCGTTAGGCGAAGAACTGGTTCAGGAAGGACATTAGGGCACAGGATAGAAGCCCTAGGAACCACATCCG  
GAACGTCCATACCGAAGATTGGGGTCGTCGGTTGTCGATACGGTCAGCCGGACTTGTTCAATCGGAGATGATTCCTCTTCGTCGGCCTTGTGCGGGCGGCGCTGCCGTTTTCCGGCTG  
CTTGGATCCTCGGTATTGCTCTTCTGATCCGGCGTCTTTGCCATCTGTTACTACAGTTGCTGCTGCATGGTCATTAAGTAGGATCTTCTTATAGAAAAATACTTTGTTATTTTTATCCTTT  
GTTAAATTGCACCCAATTTGCTACCGTCGTATAATTG

>comp169153\_c1\_seq3

AAAATAAACTATATATATAGCTGAAACTTAACTTTATATATATATCATTCAATGAAGACATCAATACATAATATTCATTTAAGCAGCTCTTCTTTATTGAGCTACAGTTAAGGAAACAAACA  
TGCATGAAAAGCAATGTAAAAAACACAAACTGAAAGTTTTTTTATACAGGACATTTTCAAGATAAGAAGAACAGAAATGCTACTCAGCCAAAAAATTTGAAGTGTGAGCACTTCATTGA  
ATAAAAAAGTTTTGGCCTGAGCAGCATTGTCAAAGAAAGAAAGGCAATTCTTAAAGGAATATGCAAGTGTTAAAAACACAGGGCAGCCATCGACAATCACTCCTTTCGCGGTGGGGCAAG  
TTGCAAGATCACAGTGCTCACCTCTAGTGCCCCACCAGTCCAGACTGTAGTTCTCCATGCTTAAACTGAAGTACAGCAGGACCCCATGAACGCAACTCCTGCATCCAGTGCTGCAGAA  
AGGATGTAATTGTATCTTACCCACCATTTTTCTGTACCTGAAGACGAAGAAGTTGAAGATTGTTCCAACAATGACCCAAACGTTATAGTTGAGTGGAGTAGCTGGAGGCATGTTGGCTG  
TAGCTCCAAGAAGAACTGGAAGTTTTATGAGTGGGATCCATGATTGATGAGGGAATGCTCTGTGGAAGAGCCAGACTATGATTGGGCCAACTGCACCGACCAGAAAACACCAGTTCAAAA  
GCACCGTAGTTGCCGAGCGAACC GAAGATCCGTCTCGGGCCTACCAAGCCCCAAATTACGGATGCGTCGAAGAAGACACGGTCACCGGGGCAAGTCCAGGGGCTGTTTGGCGGTAGGA  
GCTCGTCTGGC ATATGTTCTTAATTGAGCCCAGAAGCCACCATGCAACACCGAGGTTGATTGTTCCAGCAACAATGGTGCCAGCAA ACTGAACAAGGAACATGGATTTTGGAGGGATT

TCATGTAATGACCAAGCTTGAAATCTGAGAGGAAAGCAACTGCTTGGGACATGCTCATGTATCCATAAACTTTGAAGCAGACATTTGCGATTGGTTTCCCAGGTAGGATAAGTCCCATTAC  
GTATTCTGTGATGATATTCAGCCCTGGAGTCTGGTTTGTAGTTGCGGTTATGATGCTGATGGGTAAGTAAACAAGAAGGCCATGGCACAGGCAAAGAAGAGCCCCACCATGGAAGTTG  
AACTTGGTCTTTCAGGACTGTGCATAGGATCAAAGAAATTGCAACAGTGAATCCTAGTAATAAGTAAAACCACCTTCTGGTATGTCCTCATAGTTCTTCATCAGCTTTGTATGTATGTCCT  
CCTTTTCTTTATATGAAGCACGGAACGATCATAGATCTCCCGAAAAGCGACACCTGAACCAGCGTGCTCGGCCACCACATATGCGCCGGCTCCACCACGTACTTCCTCATCAGCCCCG  
CCCATCCGTACCCAGCACCTGCGTAGTGATGATAAGAATCCAGCTAGCCAGGAACGAGATGTTCCGCTTATAGAACGCCTTGATAATGTTAACGATCCCAATAGCATATGCGTTTCCGTTT  
CCAAAAGCATAACCAGCGTTCGCAAAGATCGAGATCAGGACATGCTCCTTCATGTTAAACGGCCCCGGATTGAGGGAGAACTCCCGATCGCCGAATCCAGGAAGCCGGAACCTTCGCCTG  
CGGCAGGGTACGAGCGAGGAAATGCCAGCCGGAAGAGAGGCCACCTGAACGGTGATCTGCGTGATGACAAGAGGCTCCGTTCCGGTAGGCGAAGAAGTGGTTCAGGAAGGACATTAG  
GGCACAGGATAGAAGCCCTAGGAACCACATCCGGAACGTCATACCCGGAAGATTGGGGTCGTCGGTTGTCGATACGGTCAGCCGGACTTGTTCATCGGAGATGATTCCTCTTCGTCGGC  
CTTGTGTCGGCGGCGCTGCCGTTTCCGGCTGCTTGGATCCTCGGTATTGCTCTTCCTGATCCGGCGTCTTTGCCATCTGTTACTACAGTTGCTGCTGCATGGTCATTAAGTAGGATCTT  
CTTATAGAAAAATACTTTGTTATTTTATCCTTTGTTAAATTGCACCCAATTTGCTACCGTCGTATAATTG

>comp169175\_c0\_seq4

CTAACGCGGCGACATAACGGACGAGTTCATCGGTTTCTTTTCGTTTCCCTTCCCTCTTTTTCTTCAACCCTTATAACACATTACATCTTCCCTCTCTGTCTCTCTCGCTCGCTCGCTGATCT  
CCGGGATTTGAAGGAGCTTTATCGTCGATCATGTCAGAGGATGGGAACAGGACAAGGGACAGCCATTGCCCAAATTTGGTGAGTGGGATGTGAACAATCCTGCATCAGCTGAAGGATTC  
ACTGTTATTTTTAACAAGCTCGGGATGAGAGGAAGGAAATGCTAATCCAGGTGCAGTGCCAGCGCCACCAAGGAACAATATAGGAGGCTACAACTTGAAGACGACAATGATCTCCC  
AAGGAAGAATAGTAAATGGTTTTGCTGTGCTTAAGACATGGATGTATGGCCTTGAAGATTTGGTGATTCTGTATCCACAGGGTTAATGGGATTATAAAAGATGTTACTGTATTAAAGCTG  
TCCAAGTTGTGCTTTACCCATATCCCATGATGTGTTATATAAATTATGTAGAGAAATGATGAGATGAATGGAAGTTTTCTTCTTTTGAATTTGCTTATGTGTTGTTGGTGGTGAAGCGACCA  
TAATTATTTAAGTGTATTAACCTTATTATGATTGACTATTGAGAGAGAGAGAGAGATGGCTGCTACGCGTTAAGCGTAAATGTTAGGGTTAGAGAAGGTGTGGTGTCTTGGTATGCCGT  
GAGTATGCGGATAGAGATTAAGACCACCTTTTGTCC

>comp169186\_c0\_seq3

CTCTCTTCCCTCTCCCACCGTCTCCCGTCTTCCCTCCTCCTCTCTCTCGATCTCCGAGCTCTCGCCCTTTTCGTTTCTTACTCTGGTTAATTTCTGCTGCTCTCGTACCGCAACTGAAGGTTG  
AAGGAAGCTTGAGGCTCCTCTGAGTTTGAGTAAAGGTACATCTACTGTCTTGATATACAAGGAAGTCTTGGAATGGTTGACTTGAAACTAAGGATGATATCAATTTTTGCTCTTTGCTT  
GGTCATTGTTGTTGCGATAACATTTCTTCAGGATACACATGTGAAGAAGATGTCTATGCTATTAGTAGCTTGCATGCGGCACTTGGGTATCCCCCTTCTCCTGGATGGACCCTTTTCGGAG  
GGGATCCTTGCCTTCAAGGATGGCAAGGCGTCCAATGTGTTGGGCCAAATATAACTGCAATAGTTATCAATGATGCAAACTTGGAGGAGAATTAGGTGATATGCTTGGAAATTTACTTCT  
ATTATTACATTAGATTTTAGCAATAACCATATTGGTGGAAAGCATTCCAACAAATTTGCCAGTTACTCTAAGGCAATTTTTCTGTATCCAACCAACTCACGGGAAGGATCCAAGTCTTTG  
GCAGATTTAACTCTCCTTTCTGACATGTCACTCAATGAAAACCTTCTTAAATGGAGAAGTGCCTGATGCTTTCCAGTCCCTTACTGGTCTAGTGAATTTGGATGTTTCTTCTAACAATTTGAG  
TGGTCCCTTTGCCACCCTCAATCACCAGCTTATCATCGCTGACTACCTTACATATACAGGATAATCATATATCTGGAACCCCTTGATGTTTTGCAAGATCTACCCCTGATGGATTTGGACATTGA  
GAATAATCTGTTTTCTGGACCTGTTCCAGAGAAGCTCTGGAATATTCCAATTTCAAATCGAACGGAAATCCGTTAATACAACAGTTGCTCCAGAACCAGCACCAATTCAGGCATTTCT  
TCCTTAGTTGCACCTGTTCCCTTCCCCTTATTCTGATGCACCCGTTTCGCCATGGTGCACCTACTCACCATGGTGGAAACAAGCTCGACTGTTAGAAAAAATTCAACCATGAGGGTCATTGCTTA  
TGTGTTGCTGTGGTACTAGTTATAATTGCAGTTCTCCTTGTCTATTTTGTACATTGAAGTTGCAAGAACGACACCTCAAGCGGAGCTCATTCCAATTTGCATAAAAAAATGGCACCTA  
AAATGACCAAGCACCTTCAAGCACTACTGATTTGGCTGCATCAAATTACAAGAAAGAAGATTTTTATGGGAACACTCTCCGGAACAAAAGGAACATGAAGCTCATATGATTGAAACTT  
CTGCAGGGCTGAGGCCATTATGGCTGAAAAAGTTGCTGCAAAACCCATTGCCCCCTTGTACAAAGAAAAAGATTATATTTCTTTTGACAAAGCAATGCCTCTAAAAAGAAATTGTACTC



TCCAGCTTCTGTGACATCCTTTTCTGTTGCTTCGCTTCAGCAGTATAACCAATTATTTTGGAGAAGAAAATCTGATCAGAAGCTCTTATTTGGGCAAGGTATATGTGGCAGAGCTGTCTGAG  
GGCAAGCTATTAACAGTCCCTGTCGCTCAATAATCTGACTTCAAACATCAATAGTGACGACTTTCATGAGTTAGTGTGCGCATCTCAGAACTTCAACATCAGAACATCATTAAGCTTGAGG  
GCTATTGTTCTGAATTTGGACAGCGGCTGCTTATCTATAAAATACTTCAGCAGAACTACACTTAATGACTTGCTTTATGATTTTAGTAAGAAGAGATTATCATGGAATGCTCGAATTCAAATTG  
CACTTGCTGCTGCCAGAGCCATAGAGTTTGTCTTTGAGCTTTTTCTCGGTA AAACTATATCCATCCTAAAATTTATGACCATGTCGTGAATGCATTCTCTCTTTTTTTGAAGGTACCTACAT  
GAGTCCGCAAGCCTCCCGTCATACTCAGAAACCTAGAAGCCTCCAGTATTCTACTTGATGATGAGCTTGCAGTATGCATTTCTGAATGTGGCCTGGCTTCAGTTGTATTATCCAACCTCTTT  
AACCCAATTTTCAGGTGATTCAAGAACACCTTTTGGTTATGAGGCCCCAGAAATTAGTGAGTCAGGATCTTCTTATACAGATCGAAGTGATGTTTACAGTTTCGGCGTAGTTATGTTAGTGC  
TTCTTACCGGACGCCAACCATATGAACGTTTCACAGTCTCGTGCAGAGCAGCACTTAGTCAGATGGGCCAGTCCACAGCTTTATGACATCAATGCATTATCAAGAATTGTGGATCCTTCTATT  
GATGGTGTGGTTTCTCTAAAGTCATTATCTCGCTTTGCAGATATCATCAGTCGTTGTATTCAGCAAGCTCCAGAATTCAGGCCATCAATGTCTCAGATTGTGCAAGATTTAAGCCTGGTGT  
AAAAGATGCAACGATGTGAATCCTTAATGCATTTTCATAGTGGAAATACTAATTGAAGGAGACTTTGTAATTTGCAAAAACAAACCTTAGCCTTCTAATTATTTGCAAATAAAAACCTCTTTT  
TTGTGTTTTTGGATAGCCAGCCAGCCCTTATCAGCAAAAATATGTATAATAATCACCATCTGCCAACTCCAGTATTACTCTCCTGTCCATGCGTTCCTGTAGCTTTGTTAAAAGCCAGTTT  
GATAAACAGATTGTTTTGAATTTTGAATATTTGATTTATTTTATATATATAGTTTTTTTTCCCGTTCCATTTATTGAAACTGAGACTAATCTTTTTTTTTTTATAAGTACTTTTTTCATGCCTGA  
ATTACTCTTTCAGCCATCCATTTATTTTGA

>comp169186\_c0\_seq5

CTCTCTTCTCTCCCACCGTCTCCCGTCTTTCCTCTCCCTCTCTCTCGATCTCCGAGCTCTCGCCCTTTTCGTTTCTTACTCTGGTTAATTTCTGCTGCTCTCGTACCGCAACTGAAGGTTG  
AAGGAAGCTTGAGGCTCCTCTGAGTTTGAAGTACATCTACTGTCTTGATATAAAGGAAGTCTTGAAAATGGTTGACTTGAAACTAAGGATGATATCAATTTTTGCTCTTTGCTT  
GGTCATTGTTGTTGCGATACCATTTCCCTCAGGATACACATGTGAAGAAGATGTCTATGCTATTAGTAGCTTGCATGCGGCACTTGGGTATCCCCTTCTCCTGGATGGACCCTTTTCGGAG  
GGGATCCTTGCCTTCAAGGATGGCAAGGCGTCCAATGTGTTGGGCCAAATATAACTGCAATAGTTATCAATGATGCAAATCTTGGAGGAGAATTAGGTGATATGCTTGGAAATTTACTTCT  
ATTATTACATTAGATTTTAGCAATAACCATATTGGTGGAAAGCATTCCAACAAATTTGCCAGTTACTCTAAGGCAATTTTTTCTGTCTATCCAACCAACTCACGGGAAGGATTCCAAGTTCTTTG  
GCAGATTTAACTCTCCTTTCTGACATGTCCTCAATGAAAACCTTCTTAAATGGAGAACTGCCTGATGCTTTCCAGTCCCTTACTGGTCTAGTGAATTTGGATGTTTCTTCTAACAATTTGAG  
TGGTCTTTGCCACCCTCAATCACCAGCTTATCATCGCTGACTACCTTACATATACAGGATAATCATATATCTGGAACCCCTTGATGTTTTGCAAGATCTACCCCTGATGGATTGGACATTGA  
GAATAATCTGTTTTCTGGACCTGTTCCAGAGAAGCTCTGGAATATTCCAATTTCAAATCGAACGGAATCCGTTAATAACAACAGTTGCTCCAGAACCAGCACCAATTCAGGCATTTCCCT  
TCCTTAGTTGCACCTGTTCCCTTCCCCTTATCTGATGCACCCGTTCCGCTGCTGACCTACTCACCATGGTGGAAACAAGCTCGACTGTTAGAAAAAATTCAACCATGAGGGTCATTGCTTA  
TGTTGTTGCTGTGGTACTAGTTATAATTGCAGTTCTCCTTGTCTATTTTGTACATTGAAGTTGCAAGAACGACACCTCAAGCGGAGCTCATTCCAATTGTCATAAAAAAATGGCACCTA  
AAATGACCAAGCACCTTCAAGCACTACTGATTTGGCTGCATCAAATTACAAGAAAGAAGATTTTTATGGGAACACTCTCCGGAAACAAAAGGAACATGAAGCTCATATGATGAAACTT  
CTGCAGGGCTGAGGCCATTATGGCTGAAAAAGTTGCTGCAAAACCCATTGCCCCCTGTACAAAGAAAAAGATTATATTTCTTTGACAAAGCAATGCCTCTAAAAGAAATTGTACTC  
TCCAGCTTCTGTGACATCCTTTTCTGTTGCTTCGCTTCAGCAGTATAACCAATTATTTTGGAGAAGAAAATCTGATCAGAAGCTCTTATTTGGGCAAGGTATATGTGGCAGAGCTGTCTGAG  
GGCAAGCTATTAACAGTCCCTGTCGCTCAATAATCTGACTTCAAACATCAATAGTGACGACTTTCATGAGTTAGTGTGCGCATCTCAGAACTTCAACATCAGAACATCATTAAGCTTGAGG  
GCTATTGTTCTGAATTTGGACAGCGGCTGCTTATCTATAAAATACTTCAGCAGAACTACACTTAATGACTTGCTTTATGATTTTAGTAAGAAGAGATTATCATGGAATGCTCGAATTCAAATTG  
CACTTGCTGCTGCCAGAGCCATAGAGTACCTACATGAGTCCGCAAACCTCCCGTCATACTCAGAAACCTAGAAGCCTCCAGTATTCTACTTGATGATGAGCTTGCAGTATGCATTTCTGA  
ATGTGGCCTGGCTTCAGTTGTATTATCCAACCTTTAACCCAATTTTCAGGTGATTCAAGAACACCTTTTGGTTATGAGGCCCCAGAAATTAGTGAGTCAGGATCTTCTTATACAGATCGAA  
GTGATGTTTACAGTTTCGGCGTAGTTATGTTAGTGCTTCTTACCGGACGCCAACCATATGAACGTTTCACAGTCTCGTGCAGAGCAGCACTTAGTCAGATGGGCCAGTCCACAGCTTTATGA

CATCAATGCATTATCAAGAATTGTGGATCCTTCTATTGATGGTGTGGTTTCTCTAAAGTCATTATCTCGCTTTCAGATATCATCAGTCGTTGTATTAGCAAGCTCCAGAATTCAGGCCATC  
AATGTCTCAGATTGTGCAAGATTTAAGCCTGGTGTTAAAAAGATGCAACGATGTGAATCCTTAATGCATTTTCATAGTGGAAATACTAATTGAAGGAGACTTTGTAATTTGCAAAACAAACC  
TTAGCCTTCTAATTATTTGCAAATAAAACCCTCTTTTTTTGTGTTTTTGGATAGCCAGCCAGCCCTTATCAGCAAATATGTATAATAATCACCATCTGCCAACTCCAGTATTACTCTCCTGTCA  
CATGGCGTTTCTGTAGCTTTGTTAAAAGCCAGTTTGGATAAACAGATTGTTTTGAATTTTGTAAATTTTATATATTATAGTTTTTTTTCCCGTTCCATTTATGAAACTGAGACTA  
ATCTTTTTTTTTTTTATAAGTACTTTTTTCATGCCTGTAATTACTCTTTCAGCCATCCATTTTATTTTGA

>comp169212\_c1\_seq10

ACCTAAGATAACTATCTCCCCTTATTCAGGGTTCCTATCGTAAAAAATGAACTTTGCACTCGGAATCTTCTTACTGAAAGGAGCCACCTCTACAAGCAAGGATTGACAGATAATAGACATC  
AGAAAAACAACACCTGTCCACTATGAATTTGAGCTTTGCAACTCAAACACTACAAAGCTTTGGCATTGGGATAACAGAAATTCAGCACGAATAGAGCAGTATTTGAGTTAAACCTTGCCAAAC  
GCCAAAAACGGCTGCTCAAATCTCACGGTACGTTAATTACATTTGAAATATCGGAGGCAGGTAATTTGACTGCGAATGTTGCTGCGGTGCTCAAATGGCCCTTGTGATAATGAAAATG  
TTCTTAGGCCTCACACACCCCTTTGTAATTTGCAGGAATGATTGCCAGTAAGTCTGTTGATCAACATCTATGAACGGAGATGAGAGGTTGGCGTACTGAGCGGCTTTGGCACGGAGA  
CAAAAGGGAGATCGACTACTCTGGGTGATTCTCTGTTCGAATCGGACAGAACAAGGGGGGCACGACTTGTCCGTTTGATCCCGAACAGACAAAAGGTTAGGGCAATGGGAGGTCGCG  
ACCTGGGCTGCTTCAGACGAGGGCTAGGCGTCGGCTCACTGGGGTACACGAACAAGAGAGATGGGAGCCGAAAAGGGAGAGGAGTTTCGCCCATGAGCTTCAAATAGAGAAAATT  
GAGAGGGAGAGCCGGCAGCTAGGACTAGACGACGTCCAAGGAGAAGCTTCGGCCCTTTGGGCTGGACGGCGTCGGAGGGAATCAACATCCACGCGAAAGAGAGGGGCTTTGGCTCGA  
CGGAAGCAAGGAGCCAGCCTTGTCCGACCCAAAGGAGACAAAGGGGCTGGCGTCGGTACAGTTCCGCGAAGGGGTTGACCCCTACCTGGGGTCCGACAGGCTTCGCCCTTGCTCGGA  
GCTCGTGAAGTGGAGCGAGAGCAAGGAGCTCGGGTTTGGTCTTCCCTGGCTCACGCGAGAGAGAGAGGGGGAGAAGAGACGAACCTGAAGGCGAGAGGGAGGAAGAAGTGGTCCGG  
ATTTGCCTAGGGCTTCTTTTGGACGAGAGTCCGAGAGAGAGAGCGAGAGAGAGATCCCGCCCGTTTTACTCAATGCCCGATCTCTTACGCTACGGCCTTACACAAGCTATCTGTG  
AGCCGATGCCAAAGACGGAAGCCCGCCATCAGTCGCCCGAGCT

>comp169215\_c1\_seq1

AAACCACGGGGCCTCGCCCAGTTGAAAAAGTTCCACTAGTGTTTAATTGAGATACAATATACTGATTCGTCCGCAAAAAGTTAGGACGATCAGATTACAATGAATCACTTTTTGTATTGAAAT  
CCAGTTACAAGGCCGGGCAAAGTTCGGCGTACTTGGAAATCCGACGTGCTTTGGGCAGAAATTCGGCGTCGGATAGAATTCGATGTCAGTTGGGCGTCGAGCAGGATTTTGGCTTCA  
CTTGGGCAGAAATCCGGTTTCGGGTAGAAATTCGGTATCACTTGGTGTCTGACAGAACTCCGGCATCACTTGGGCATCTGATAGAACTCCGGCGTCACTTGGGCGTCGGACAGAACTCC  
GGCGGTGGTCGAGGAGGAGCTTCTTCTTCTCCTACTTCTCTCTTCTTCTTCTTCTTCTTCACTTATTAATTCTTTTTTGAACAGTTCCTTAAGGTGAACAAAATCTTGATGACTGGAAC  
GATGAGTTCGTGAAGGTCAAATACCTTCAGGGAGAATATAAGAAGAAATACGACGGCAGAGTGAAAGAGGTGGAGATGGTGGAAAGTCAACTCGATCAATGTAGAGCAGAATTGGCGA  
ACAAGATCGCTTCAGCTTCTTCCAGAATGAGCGGTTGGATCGTTTGCATATACAGTTAGTGGAGGCAGAGGCAACAACAACCAACAACCTGAAAAATATGCGGATCCTAGAGGCTGAA  
AATAAGAAGCTCTTGAACAAATTGTCGGAGAAGGTAGCTCAACTGTCACCATCTGCAGCCATATATGAGTTCAAAAATCTTACTTTTAAGATTTTATCGAGGATCAAGTCCAGGAAG  
CTTGCAATTATTTTATGACGTTAAAGGTGAAGTCTTGAAGTAGAGCTTATGCAGGATGGCTTATTAAAGGCTTCATGAAGGGCGTTCGTGACAGTGAACGCGAGAACGGAGGGGAGA  
TTGAGGGGTTGACTCCGAGCCAGGCTTATGGTGATCATTCTCTAGATTATGGCGGCGAAGAATTAGAGAGTGATTTGCAAAAAGATCTTCGCGTTAGAAGAGGACGACGATGATGATCTTG  
AGATTCTGTAGTGGTCGATATGCTCGTACGGGTCGGACGTTCCGTCGTAAGACTCGATGCTGGGTAGCTTAAATCTAGCCGGAATGGGATGTTGTAGTATGACCTCAGTTAAAGGTGATGA  
TTCTTCAAAGTCTCTCTCTCGGAGAGTTTGTCTCGCATCCCCTTGGGGGAATCTTCCCTTACCAATTTTCGCAAGTTCGTGACGCAGGGCGTTCGTGAGGGAGCTCCACTCCATGTGGTTGA  
GCAAAGTCTTCAGGGAGATCTGGGAGGATGCAAGGCTGTGCAATTGAAGGTGGAGGATGTGTAGAATTTGCCGATCGACAAGTTCATTATCTGTCGAGACTGAGGAATCTTCTAAGT  
GGGGGGAGATGAACTTCTGCTTGAAGATGTTCAAATGGACATCCTCAACTCGTGGTGGATTCTAGGGGAGAAAAACTTCTCTCTGTTGTGCTAATGCCGGCTGCCGATTCTCTCGCAGG

AGTTGAAGAATCTCGTTCTGAGATTCTTCCATTTTCTGAATCTTTCTTCCAAAGAAGGTCCCGAGGTCTTTCTCCGGCAGCATTCTGCCCCCTAGGATGCAAAGATGCTGACATTGGTC  
ATCGATGATTAATAGACGGATTTCTGGACTGACGAGAGTTGGAGCGAGAAGCTCTAACTAAACGACTGTTGCGCCTATTCACCATCGTAGCAGTACTCGAAGTAGTGGGATAGTGTTC  
ACAGACGACAGATTCTCGACTGCTCCGACTTTCTGACGGTTAAGGCTTCCGCTATTTGCGAGTGAGAAATTTTCTGCTCGAATTAGTTCCCCTCATCGCGTGTAGAGGCTTACGAGATT  
TTTCTTCTTTCCCCACGGCTTTCTGCCGGTTGAGGCTTCCGCTATTTGCG

>comp169228\_c0\_seq3

TATATTTGAAGGATCGTGGATTTCGCTTCATAAATCCCATTGCTCCAACAAGAAGTTATTGTCTGGAACCTATAAAAAACGGAAACCGTCACGAAAACCTCCGGCCATCATCAGGAGGCCAA  
CATTAAGATCGATGATGGAAGCCAAGATATTCATATGAAGACGAGAATTCTGACCCCGGTTGTCTGGTAGCAAGGTGTGGAAGGAGTCCAGTAATGAATTCCAAAAGGAAGTGAATCCTAA  
CAATGGTAGGAACGATGTTGGGGGAAGTGGAGGAGAGGACTCGGACTTTTCTTTCCAGAGCCAGAGCCCCAGGAGATCAACCAAGACCCTCCATCTCGGCCAATTAGACTGTTTATGA  
AGAAACAAAAGAAATCTGGTGCCGAGATGACCCTCGATATGAATCTTGAGATGGAGGGGCTCAAGAAACCGATGGAGGATGTCAGACAGTCGAAGGAGTTACGTATTGCCTATCAAGAT  
GATTCGGATAAAGCACCTTCCCCACTCTCCCTGTCCGAGTCCGAGGAGTACGACTCT

>comp169244\_c0\_seq3

CTCGAAGCTGGAGAGAGTTCAAGGACTGTCTACTAGAACATTTCTGAACCAGTATGGGAGGAGACTTGTACGAGCGGTTCTTTGCCCTAACACAAGAGGGGACAATGACAGAGTACCGT  
GACCGGTGAGTATCTAGTGAGCATGCTGGATCGTCTTTCTGAAATCGTGTGGAGGGGAATTGTTTGAAGGGCTCAAATCGGAGATCATAGTAGCCATTAGAGTGATGAGACCGCGCGA  
CTTGGGGAAGGCCATGGAGTTAGTGCAGCTGGTAGAGGACCAGAAGCATATGGAGAGGGGATTTCGAGGCAGTAGCTCCGGGGATCCTATAGGATGACTACTACTTTTCTAGTCCCA  
AAGGAGCTGCACTGGGAGATTCACGCAAAGCACCAAAGGAGAGGACTAAAGGAAGGGGGCTTGAAGGAAATTTTAAGAAGCTGACTGAGAAAGAGATCCATGAGAAGCGGGCTAAG  
GGGTTGTGTTTCAGGTGCGATGAGAAGTACATGCCAGGGCAT

>comp169257\_c0\_seq12

AAAAAAAAAAAAAAAAAAAAAAAAAATCCATCTCTAATTTATAACATGTGAACACTAGTAACTAGTGTCTTCAAGAAATGTTAATGGATGTTCCAATGAAATTGAAACCAATAATAAAGAAT  
GCAGATGATTGTAGGAAGAGGTAAAAGAAGTATCCTTTTTTGGTGCAGGTAATATCATAGAATCCTGCTATAAACATGAAGACACCCATCCATAGCTCGGCCAAATGAAATCTTTGCCATGT  
CCTAGCTTGAGGCTTCTTATAATCACCAAGCAACGGGTCTATCACTTTAGCATCTCTTAAATCTTTTGCATTCTTAACTATCACTTCCATAGATGGCTTTGTCTTGCTACCATCACCCAACTTT  
GTTGTAACATCCATTCATTAACCCGGCCAACGTCTAAAAAACCTGTAGTAGCTGCCTTAATTCGATGCAAGGACATTACATTTTCAAAGAGCACCCAAGGGATTACAAGGTGGAAAAGAG  
CTGTTTCATCAAATAGAAGAGATTTCTTGCATTTAAATCATTAATATCAAATATATTATGAATACTCCAATGCAAGAATAATTATAAAATGTTTTTTTATTTTATGCTATTACCTTGGAGTTCCTA  
CTGATTTAAGAAGTGTAATAATTGTTGGGATGTATGCGACTCCCCATAAGGGAATCTCGGCCTCAGGAATTAGAACAGATAGTGAATCACAATGCAATAGAATATATAGGTTGATGTATGA  
GCTACAATCTTTCCAACAAAGAAGAAGTTATAGATTAGGTGGATTTTTTTCCATGTTGAAACCTTCTGCAAAAGTCATTCATACAGAACATAACAAAATTTAATTGGAATGACCATAACAA  
CACCTAAATATAAAGTAACTTTTTACTAATATTGTATATGTAATAACATAATATCATATATGTGCTCTATTGGAGCCTTGCCTTTGACAATCACTTTATATAATTTGAGAATGAAGTATATACG  
TACCTTGTTAGCTATTATCTCTAATATCATTTTCTTGAAAAGATTTGCAAGTCCACAAGACCATCGATGTTGCTGATACCGAAAGGCCTTAAAAGTACTTGGTAATTCACATTTTACCTTGAC  
ATCACCAACATACACAACTTCCAACCATCAAGACTTGAACGAACAGCCAAATCCATGTCTTCAACCGTCGTCTATCCTTCCATCCTCCAGCATCAGCAATGGTTGATATGCGCCAAATG  
CCAGCAGTTCATTAACCCGAAGAAGGAAAATGCAGATGACCCAGCTTCTTGTCAATCTTGAAGTGATAATCTAATGACATCTCTTGCATTCTTGTATCATGCACTCATTAGCATTAC  
AAATTTCCATCGAGTTTGAACAAGAGCAATCTCCGAATTATGAATGAGAAAAGGAACTGTTGTTTCAAGAAATCAGATTCTGGTTGGAAATCAGCATCAAATATGGCAACATATTCACAA  
TCTTTTACAGAATAATGAAGCATTCCATCTTCAAAGCACCAGCTTTGTACCCTTTCTGTTGTTTCTGACCTCGTGATTTATGTTCAACCTTCTACTCTTCCATATTCACATTCCAATCCCA  
CCAAATCCTTCACAACCTGGATCAGTGGAGTCATCCAGTACTTGAATAATCATCCTGTCCGATGGCCAATCCAAATTGCATACTGCCCTTATTGAAAGCTTGTACACCTCTTTCTATTGTAC

ATTGGGATCTGTATAAGCACCATTGGATAAGATAGAACGCCAATCTCTAGATCTGATGTCTCGGGTCTCATTGGCTCCCATCTATAACGCTTCTCAGGCTTCAATTTAAACACCTTTACAACA  
AGACAAATAAATCCCACAAACACCTTCTCCACAAAATCATCACAATCATTATCAAGCAAATCAACACAGCAACTCTCAACAATGGCGCCACTATATCACTCTTATTTGCTTCCATTTTCGT  
AAGTAACACCTCTTCAATACCTTCCAAATCGATAAACTCTAACATTTCTTTCTTTTTCAGAATTATAGCTTCTCGTAGCGAAGAGGAGCTCTCTCATGGCCACTTCAGGGCGAGAGGTGTAC  
AAAATAAGGCAACGGTTTGTGGTGAATGGTACAACATTAGGGGTGAGGCGACGGAGGTTTCATGGCGGTGGTCGGCAAAAAAGGTTCAATGACGGATTAAGAGAGGGGAGTAGAATAA  
ATAAAATTAAGCTTTATGGTGGCATGAGCAGCTCGCTTCATTCAAAAATCTCACCGCATGAGTTAAGGATGTCTAAGAGTTAGAAGCTTCTATTCATAAGCACTTTTTGAACGT

>comp169257\_c0\_seq13

AAAAAAAAAAAAAAAAAAAAAAAAATCCATCTCTAATTTATAACATGTGAACACTAGTAACTAGTGTCTTCAAGAAATGTTAATGGATGTTCCAATGAAATTGAAACCAATAATAAAGAAT  
GCAGATGATTGTAGGAAGAGGTAAGAAGATCCTTTTTTGGTGCAGGTAATATCATAGAATCCTGCTATAAACATGAAGACACCCATCCATAGCTCGGCCAAATGAAATCTTTGCCATGT  
CCTAGCTTGAGGCTTCTTATAATCACCAAGCAACGGGTCTATCACTTTAGCATCTCTTAAATCTTTTGCATTCTTAACTATCACTTCCATAGATGGCTTTGTCTTGCTACCATCACCCAACTTT  
GTTGTAACATCCATTCATTAACCCGGCCAACGTCTAAAAACCTGTAGTAGCTGCCTTAATTCGATGCAAGGACATTACATTTTCAAAGAGCACCCAAGGGATTACAAGGTGGAAAAG  
CTTGAGTTCTACTGATTTAAGAAGTGAATAATTGTTGGGATGTATGCGACTCCCCATAAGGGAATCTCGGCCTCAGGAATTAGAACAGATAGTGAATCACAATGCAATAGAATATATA  
GGTTGATGTATGAGCTACAATCTTTCCAACAAAGAAGAAGTTATAGATTAGGTGGATTTTTTCCATGTTGAAACCTTCTTGTAGCTATTATCTCTAATATCATTCTTTGAAAAGATTGCA  
GGTCCACAAGACCATCGATGTTGCTGATAACGAAAGGCCTTAAAGTACTTGGTAATTCACATTTTACCTAGTATAAATGCTGATGATCAAAATGAGTGGAGATTAAACACTTTACAACCTG  
AATGCTAATTTATATGCTAAGTACATATTAATATGCATTTAAGTTGGCTTGAGTAAATCATCATGAGAGCTTAATCAAATTAATAAAGCATTATTGAGAATACTTAGAACCTTCTATAACTT  
GAAAATCACAAGTCAGATGTTTCTTAATCCTCAAGCCACCAAGAGCTGGATAATTGAAGTTCACCATAAGCCCAACCTTACTTGGCCATCAAATAAAGTTACCTAACTCGCCTAAGGATC  
CTTAACTACCCAGTTGGCAAACCTCGCCTTTCTAAAGGGTGATCACCTCAATCTACAATTTGTATAAGCTTTCTACCTAACAAACGTAAACCTATAAGTCAAACCTTGCTAGGTACATAACTA  
GTTACACCTAGTCCAAGTCATGATTTTCTATAAATGTGATCAAAATATATAGTCAATTTTTAATGTTAGTTTATCCCTCAACTATAAATAAATATGACATGTGCGACACATGTATGATATA  
ATCTTGATACATTAGAAAAAAAATCCTCTTACTTAAATTTCTCTAATTGTCTTACATACTTTCCCTAAATTTCTCTCGTGATCTCTCATTCTATTTGATCTTTGGGCACATGTTATATATGTAATAA  
GATCTAGTTATCTTTCATGGGCAACATCAAGTCAAACAACAAATATATAACTTACAACAAATTTATAATATATATAACTAGGGTAGAAGATAAAGGAAAAGATATGCATGTATACCTTGACAT  
CACCAACATACACAACTTACAACCATCAAGGCTTGAACGAACAGCCAAATCCATGTCTTCAACCGTCGTCCTATCCTTCCATCCTCCAGCATCAGCAATGGTTGATATGCGCCAAATGCC  
AGCAGTCCATTAACCGAAGAAGGAAAATGCAGATGACCCAGCTTCTTGCTCAATCTTGAAGTGATAATCTAATGACATCTCTTGCAATCTTGTGATCATGCACTCATTAGCATTACAAA  
ATTTCCATCGAGTTTGAACAAGAGCAATCTCCGAATTATGAATGAGAAAAGGAAGTTCGTTTCAAGAAATCAGATTCTGGTTGGAATCAGCATCAAATATGGCAACATATTCACAATC  
TTTTACAGAATAATGAAGCATTCCATCTTCAAAGCACCAGCTTTGTACCCTTTCCCTGTTGTTTCTGACCTCGTGATTTATGTTCAACCCTTACTCTTCCATATTTACATTTCCAATCCCACC  
AAATCCTTACAACTGGATCAGTGGAGTCATCCAGTACTTGAATAATCATCCTGTGCGGATGGCCAATCCAAATGACATACTGCCCTTATTGAAAAGCTTGTACACCTCTTTCTCATTGTACATT  
GGGATCTGTATAAGCACCATTGGATAAGATAGAACGCCAATCTCTAGATCTGATGTCTCGGGTCTCATTGGCTCCCATCTATAACGCTTCTCAGGCTTCAATTTAAACACCTTTACAACAAG  
ACAAATAAATCCCACAAACACCTTCTCCACAAAATCATCACAATCATTATCAAGCAAATCAACACAGCAACTCTCAACAATGGCGCCACTATATCACTCTTATTTGCTTCCATTTTCGTAA  
GTAACACCTCTTCAATACCTTCCAAATCGATAAACTCTAACATTTCTTTCTTTTTCAGAATTATAGCTTCTCGTAGCGAAGAGGAGCTCTCTCATGGCCACTTCAGGGCGAGAGGTGTACAA  
AATAAGGCAACGGTTTGTGGTGAATGGTACAACATTAGGGGTGAGGCGACGGAGGTTTCATGGCGGTGGTCGGCAAAAAAGGTTCAATGACGGATTAAGAGAGGGGAGTAGAATAAATA  
AAATTAAGCTTTATGGTGGCATGAGCAGCTCGCTTCATTCAAAAATCTCACCGCATGAGTTAAGGATGTCTAAGAGTTAGAAGCTTCTATTCATAAGCACTTTTTGAACGT

>comp169257\_c0\_seq20

AGAGAGAGAGAGAGAGAGAATTTGCAGTATATAGAGAATGCATAAATATATTTGTCATTGATTCTTATTTCTCTAATTATATGATTAATATGTTGTGTGACACCTAGTGATTAATTTCTCTCTAT

ATAGGAAGGAATGCATAAGAAAATGCTTGAATAATTTTTTAAAAGCATAATAATGGAAAGGTGTGGTCAAGAGCTGTTAATGAGTGAGAAAAATCATAAAAAGCAATAGTATCAACTTAT  
TTTCTCAATCATATACTAGCACTTCTTTTAACTTTGCTTTACATGATGCGTGATAGAATTATATGTTTATGCACCTTTAAAATTGTAACAAGCACAAGAATCTTTCAACTACCTAATGATCATCT  
GACCATCATAAGCTAATGATTAATAATTA AAAACATTA AATTAAGGTTTAATACCTTTGCCATGTCCTAGCTTGAGGCTTCTTATAATCACCAAGCAACGGGTCTATCACTTTAGCATCTCTT  
AAATCTTTTGCATTCTTAACTATCACTTCCATAGATGGCTTTGTCTTGCTACCATCACCCAACCTTTGTTGTAACCTATCCATTCATTAACCCGGCCAACGTCTAAAAAACCTGTAGTAGCTGCC  
TTAATTTCGATGCAAGGACATTACATTTTCAAAGAGCACCCAAGGGATTACAAGGTGGAAAGAGCTGTTTCATCAAATAGAAGAGATTTCTTGCAITTTAAATCATTAATATCAAATATATTATG  
AATACTCCAATGCAAGAATAATTATAAAATGTTTTTTTATTTTTATGCTATTACCTTGGAGTTCCTACTGATTTAAGAAGTGTAATAATTAGTGGGACATATGCAACCCCCCACAATGGAAGCT  
CAACCTCAGGAATCAGAACAGAGAGGGGAATCATAACACAGTAGAATATATAGGTGGATGCATGAGCAACAACCTTTCCAACGAAGAAGAAGTTATAAATTAGGTGGATCTTTTCCCATG  
TTGAAACCTTCTTGTTAGCTATTATCTCCAATATCATCTTCTTGAAAAGATTTGCAGGCCACAAGACCATCGATGTTGTTGATACCTGTAGGCCTTGAAAGTACTTGGCAATTCACATTTTA  
CCTTGACATCACCAACATACACAAACTTCCAACCAGCAAGACCTGAACGAACAGCTAAATCCATGTCTTCAACCGTTGTTCTATCCTTCCATCCTCCAGCATCAGCAATGGTCGATATGCG  
CCAAACCCCA

>comp169257\_c0\_seq6

AAAAAAAAAAAAAAAAAAAAAAAAATCCATCTCTAATTTATAACATGTGAACACTAGTAACTAGTGTCTTCAAGAAATGTTAATGGATGTTCCAATGAAATTGAAACCAATAATAAAGAAT  
GCAGATGATTGTAGGAAGAGGTA AAAAGAAGTATCCTTTTTTGGTGCAGGTAATATCATAGAATCCTGCTATAAACATGAAGACACCCATCCATAGCTCGGCCAAATGAAATCTTTGCCATGT  
CCTAGCTTGAGGCTTCTTATAATCACCAAGCAACGGGTCTATCACTTTAGCATCTCTTAAATCTTTTGCATTCTTAACTATCACTTCCATAGATGGCTTTGTCTTGCTACCATCACCCAACCTT  
GTTGTAACCTATCCATTCATTAACCCGGCCAACGTCTAAAAAACCTGTAGTAGCTGCCTTAATTCGATGCAAGGACATTACATTTTCAAAGAGCACCCAAGGGATTACAAGGTGGAAAGAG  
CTTGGAGTTCCTACTGATTTAAGAAGTGTAATAATTGTTGGGATGTATGCGACTCCCCATAAGGGAATCTCGGCCTCAGGAATTAGAACAGATAGTGAATCACAATGCAATAGAATATATA  
GGTTGATGTATGAGCTACAATCTTTCCAACAAAGAAGAAGTTATAGATTAGGTGGATTTTTTCCATGTTGAAACCTTCTGCAAAAGTCATTCATACAGAACATAACAAAATTTAATTGGAA  
TGACCATAACAACACCTAAATATAAAGTAACTTTTTACTAATATTGTATATGTAATAACATAATATCATATATGTGCTCTATTGGAGCCTTGCCCTTGACAATCAACTTTATATAATATTGAGAAT  
GAAGTATATACGTACCTTGTTAGCTATTATCTCTAATATCATTTTCTTGAAAAGATTTGCAGGTCCACAAGACCATCGATGTTGCTGATACCGAAAGGCCTTAAAAGTACTTGGTAATTCACA  
TTTTACCTTGACATCACCAACATACACAAACTTCCAACCATCAAGACTTGAACGAACAGCCAAATCCATGTCTTCAACCGTCGCTATCCTTCCATCCTCCAGCATCAGCAATGGTTGATA  
TGCGCCAAATGCCAGCAGTTCCATTA AAAACCGAAGAAGGAAAATGCAGATGACCCAGCTTCTTGCTCAATCTTGAAGTGATAATCTAATGACATCTCTTGCAITTTTGTGCATCATGCACTC  
ATTAGCATTACAAAATTTCCATCGAGTTTGAACAAGAGCAATCTCCGAATTATGAATGAGAAAAGGAACTGTTTCGTTTCAAGAAATCAGATTCTGGTTGGAAATCAGCATCAAATATGGCA  
ACATATTCACAATCTTTTACAGAATAATGAAGCATTCCATCTTTCAAAGCACCAGCTTTGTACCCTTTCTGTTGTTTCTGACCTCGTGATTTATGTTCAACCCCTCTACTCTTCCATATTTTAC  
ATTCCAATCCCACCAATCCTTACAACTGGATCAGTGGAGTCATCCAGTACTTGAATAATCATCCTGTGCGGATGGCCAATCCAAATTGCATACTGCCCTTATTGAAAGCTTGTACACCTCT  
TTCTCATTGTACATTGGGATCTGTATAAGCACCAATTGGATAAGATAGAACGCCAATCTCTAGATCTGATGTCTCGGGTCTCATTGGCTCCCATCTATAACGCTTCTCAGGCTTCAATTTAAC  
ACCTTTACAACAAGACAAATAAATCCCACAAACACCTTCTCCACAAAATCATCACAATCATTATCAAGCAAATCAACACAGCAACTCTCAACAATGGCGCCACTATATCACTCTTATTT  
GCTTCCATTTTCGTAAGTAACACCTCTTCAATACCTTCAAATCGATAAACTCTAACATTTCTTTCTTTTCTTTTCTTTTCTTTTCTTTTCTTTTCTTTTCTTTTCTTTTCTTTTCTTTTCTTTT  
CGAGAGGTGTACAAAATAAGGCAACGGTTTGTGGTGAATGGTACAACATTAGGGGTGAGGCGACGGAGGTTTCATGGCGGTGGTCGGCAAAAAGGTTCAATGACGGATTAAAAGAG  
GGAGTAGAATAAATAAATAAAGCTTTATGGTGGCATGAGCAGCTCGCTTCATTCAAAAATCTCACCGCATGAGTTTAAGGATGTCTAAGAGTTAGAAGCTTCTATTCATAAGCACTTTTTG  
AACGT

>comp169272\_c0\_seq1

AAAATTTTATATTCATGTGAAATTTTACGTAATAAAAATTGAAGCATATATAGTTTTTTTTACTTTTTTTTACCACAAAATTGGCCTTCGTAAGCTAGCCATCCATCTGCCACCTTCAAAGCGAA  
GGGAAATTATTAGGCATAAAAATTGGGCACTGCCAAATATTGAGTCCATCATCACAGAGAGGGCAAGAACAGAGCAACTCACTGAGAAACCAATCATGGAAACCCTCCACTCCTTTAAGG  
GCTACGGCAAGATGGATCCC GCCGACGACCACGCATTCCGGCATAAGACCAGGCGCCGATAATCCTCATCGGCGTCTCCGCTTTTCTCCTCCTCGTCATCATCACCACCGTCGCTACCGT  
TCTCGTCATCAACAAACGAAATAACACAGACGAGCCCTCTTCCAACCAATCTCCCATCTCCACCTCTTCTTCCATCAAAGCCATCTGCAGCGTCACTCTCTATCCCGATTCTGCTACGCCT  
CCCTCTCCGCGCTTTTCGTCAACTCCTCCGCCATCGACACCGACCCGGCGACCCTCTTCAACCTTTCCCTCTCCGTCGCCTCCCGCGCCCTCTCCAAGATCTCCTTGTTCCTCTCCAAACT  
CGACATTCCGGCCGCGGACAAGCGGCTCCGAGCTGCCGTTCTCGACTGCAGAGAGCTTATCGACGACGCCGTCGATCGATTAAATGAATCTGCCGCCGTTCTCGCGGGAACGAAACCAG  
GCGAGAAGATTTTGTCCGAGAGCAAGATTGGGGATCTGAAGACATGGCTCAGTTCAACGATCGCTGATCAGGAAACTTGCCTCGACGGCTTCGAGGGGACGACTGGAGGTTTCAGGGA  
GAAGCTGAAGGCGGCGATGGCGAACTCGACGCAGCTCGCGAGCAACAGCCTGGCTATCGTTTCCAGTATTATAGCAAAGCTACATTTTTTCGATTAATCGTAAACTACTGTCCATCGACGG  
AGCCAGCCAAAAATTTCTGCCGGAATGGGCGACGGAGGGGCAGAGGAGGATTCTGGCCGCCGTCAATACTTCGGCGAACGTGACGGTTGCGCAGGATGGAACGGGGAGTGTGAAGAC  
CGTTCAGGCGGCGGTGGATCTGGTGCCGAAGGGGAATTTGAGCCCTTTGTGATCTACATTAAGCAGGGGAGTACAATGAGGCGGTGGTCATTGATAAGAACAAGTGAACATAGTGA  
TCGTCCGCGACGGCATGGACAAGACGATCATTACCAGCAACAAGAACTTCATCGACGGAACGCCAACCTTCTCGACGGCAACCTTCGCTGTCACTGGACGAAACTTCATCGCAAAGGA  
CATCGGATTCAAAAACACCGCCGGCGCCGAGAAGCACCAAGCCGTCGCCCTCCGCTCAGGCTCCGACCGCTCCATCTTCTACCGCTGCTCCTTCGACGCTTTCAGGACACTCTCTACGC  
CCACTCCAACCGCCAGTTCTACCGCGACTGCCAAGTACCGGTACCGTTCGACTTCATCTTCGGCGACGCCGTCGTCGATTTCCAGAACTGTAAGATCCTTCGCGCCAACCCCTTCCCAA  
CCAAGCCAACACCATCACCGCACAAGGGAAGAAGGACCCCAACGAGAACACTGGCATTTCATCCAGGGATGCACAATCGGGCCATACGATGCCGTGACCCGCCCAACGTTTCTTGGC  
CGCCCGTGGAAGAATTACTCCACGACGGTTATCATGAAGTCGGAGATCGGGTTCGGTGGTTCGACCCGGCGGGATGGCTGGCATGGTTGCCGGGGGTGGTGCCCGCCGACACTATTAATTAT  
GCTGAGTACGAGAACACGGGTCCGGGCGCCGGCGTTGCCGGGCGGGTTCAGGTGGGTTGGGTACAGGCCTGCGATTGGGGTGGATGAGGCGAGTAAGTACAGCGTGGCTTCGTTTTTGG  
ATGGGGAAGAGTGGATAACCAGAGGCGGGTGTAGAGTATGAGCCGAATTTGTGAGCCGAATTTGGGAGCGGTTTTTTTTATATAAAATTTGATTACGATTATTATTAATTATTATTGTTTACAA  
AATGTTATTATTTAGTCGCGTGCCATTGCCTTTTCGAAACTTATTTTCCATTATTAACAGAGCACTATCACAAATTTTTAGTAAA

>comp169311\_c1\_seq1

AAACTGCAACTTGAAACTGCGCTGAACCATATAAGGTCCCAAATGGTAAATAATTAATCAAATACTTCAATTTTGACCGCACTACTTGTATTGTAGCTAATATCATTCAATATAACCATTC  
TTTTGTAAGAAGAATCAACTGCTCCTTGATTCACTTGCTGAGCTTCAAAGAAAGGCAAGATTTTCTCTTTCATTCCCTTAAATAATTTTTCTCAGTCAGTTAGTCAGTCA  
TCCTAAGATTTAGCGTCATGATTCATATTTTTTAGAGTTTATTAGATTATCATGCCTTGGAAGAGACCTTAGAATGAGGTTGAGTGTGATCATGTTGAGCTTCATGTATGCCACATGGTTGAT  
GTGACATGAATCAATTTTTCAAATGGATGCTTTTGGTAAATATAAACTTGATAGTTATCCAAATATGGAATTATCAAATGATGGCTTATCTGGATTGAGCATTTTATTGTTTTGATGACA  
TTTTTTCTGTTTCATGTATTTTAAACGATCCCCTTGCAGAATAGATTTAGGACACATTGTTTCTAAACTATCTCCCTAGAAAAAACTAGTAAGACTGAGGACATCCTTAACTAGGCTGTC  
AAGTGGGCTACTCAATTTTATTTAAGTTCATTTAACTAAGCTCTCCAAAAAGAATTATATTGAGATAACAATTATTATAGTTATTTTGTGAGTATAATTTATAATCCCATGTGATGTGATCAAAG  
ATTTTGAATAATTG

>comp169319\_c0\_seq5

GCTGCTCAGCTCTGAAGTTGCCATTTCCACGTTTCATGCAAAAGACAAGCTCATTACTCTTTTTCTGTCTGATGTTTTCGTCTATTTCAATTCACCTGCTTGATGTTTTGCCTCTGAAGGAT  
TGCTTCACATTTTGTGTTGTTGTTGTTGTTGATGCCAGTGATTCAATTTTCTTCATGTTTATTAACAGCTTTCCTAATTTTTATACAACTAAACCGCTTTAAAAAACTAAAAAAATCAT  
ACCAAATTAAGCCTAAGTTTACAAATAAATACATCGCCCAAAGGCATTTCAGAGCGTGACGCATTCTCATTTCGCTACGGACAATCCAGCGTCCGCACATAATAATAATGTCTTGTAAATGAA  
GCTTCCATGAGTTTCAACCCCGAATGTCCACTCACTGTTTTTATATAAGACCTTCTTCATAGGACATTAATTAATTTCTGTAACCTCCATAATTTCCATCTTCTTGTTCCTCCATGTTTCT

G TTCAGCTGTTCTTTATGCTTCATAATCGACATCGTAGTAGGGGAATCATCAATATTTTAACT

>comp169341\_c0\_seq1

AATTTCTCCACGAAATGAAACTAATTAATCAATCAAAAAGGTTAAATCAAATTCATGAAAATGCCACATTCCTTCCACTGATAAAAAAGTAGAGATGAAAATGCATTTCTTCATTTCAATTTCT  
TTTTTTTTTAAATGCATTTTCATCTTATTTTGTGTGTACTACTAAGATGAATCCATTGTACATACAAATGGAAAAAAAACAAGAGAAGTGCAGAGACAGCCATGTGAAGCTTTTAAAAATGA  
ACGTGGCTGTACGACGATAGCCTAAACGAGGACCGGGCGTGGTAGAAAAACCGGTGAACTGCTGGTACGTACAGCCGGTTGCTTACCGGTAATCATGTATCAATTAATAATTTTCTAATCA  
ATTCATCAAATCATTAGCACGTTTCATCAATAGAATCACTACAGCTACACTTAAAAACCAGATTGAGAACGGTCACTGGAGAAGAAGCTCTGTAACCACTTGCAGTTGGCAATATCTCCGGAA  
GGGTGCATTCCTCGCCGTTGAAGAACACTGAGGCCGGAAAACCATCGCCGGCGCGGATGTTGATGCCCGGAGTTAACTTCTTCTTAAAGGAGATGACCGATTGTGCTTTCCAGGTACCC  
TTGGATCTGAAAGGGTCTTCCCGTCCACTTCCGGCATCAGGTAATTGAGACCTGGCAGCCCCTGCATGAAAATGGTGTGCGCCGAGGTCGGGCCACACAGTGTGTTTCAGCTTGGTGCCAT  
TGAAGGAGTAGACATTTTCGTAGCCAGAAACAATGTTCTTCTTCATCTGTATTGCCAAGAACCAGTTCCTGAAAGTATAATCCTCCCAATTGAAAATAGTGATCCTGGCCGTCCATCCGTTT  
TTATAATCAGAAAATAAGTGCCAGTTGATGCTTACGCCACAGTTGTGCGCCACAGGAAACCCGTCGAGGTAAAGGCCAGTGCTTGATGTGAGCCCAAGCCCTAGCCTTTATTGTCCGGTTC  
TCGAATGGCACTAGCAGGGCCTCTGGTGGCAACAGCATTGCAACTGCATTGGTGTGCGACGTAGCATCCTCTGGGCATCCACAGGCACACGTGCTACAAGGGATCACAGAGTCATTATAA  
TAAGCAGAGTAGGAGACGCAGCACTTGGCCGCTCTAGCTTTTGGCCTAGTCATGTTGCAAACCACCTGCCAACTGGCGAGTGCATGGATTCTGACATGAGCCCAGATGGGTCAGGGAA  
CTCGGCGGGACTAACTCGAATCGGTGCACCCGCATACATAATGCGGGTTAAGAACACCCTTATCTCCCACTTATGAGGCGGGTAAAGCGCGGTTCTATTCAATCAGGGGGCATCTTATAC  
ACTTGGAGTTGAAACACAGCCTTAGAGAGTGAAGGGTCCATAGTAGGTGAAGTAGAGCTCCATTTTACAACAGTAAGGTATATTTCCAAGCTCGTTGTCTTTCTCGCGCTCAGGTGGG  
AGATCAATAAGGATAGGGCGCTTCTGACAACTCAAACCTTTGGAAAAGTCGATATTTGATAGTAGTTAGAAGCTTGCCCATAGATGCAGTCAGTGGAGTCTTTGATGAGGGTGTAAAGCA  
CCTCTGGTGGAGTAGATGAACTCACCGCGCATCCATTCCAGGTTAAGTTCCAGTTGTGCGAGGCGGCTAAGAGGGTGGTGATTCTCCATGGTGACTTGAGCCAGATAATTGGTTGGGTAG  
GCTTGGAGGATGTCGTAGGAGATGGTGAAGTCAACCGTGTGCGGAGGGAGGAATTTGATATGGCTTCTTTTATCTTCCATTTTGGGTCTGGATGCAACACACATAACATTAGGTTCCCTTT  
ATGTTTTGGAGTTGGACAATTGATCCCATCATTAACCAATTAATAGTTTTAGGCATTGGCACGCTAGGGGGCTTCACTCCAATTGTGTTCCAACCATGTTAATCTCCACCTAATCTTCGT  
CAAATCTCCCGCCGTGTCGATTGAATTTTGTAGATCCGACTGTGGAAATCCCACAAAGTTTTGTGCCATTTTCGACATTCACGGGGAAATCAGTACCATCCGCCACGACCGCCCCATCAGTC  
GACACAAAATCTCATTATTTGAAAACCAACAAGAGCTTCCATTGCTTGAGATCATGATCCATGGTGTTCGTCACAGTCGCCATTGCCTTGAAGGCATAGGCTTGTGCTGATGCGTTTT  
TGAGGTGAGGGAATTCTTTGGTTCGTGAAATAAATGTATATGTCAAGAAGGCGCCATTACAATTCTTCTTTCGGGAGGCATTGCTGGGGTAGATGACGAGTCGTCATCGTAGTCTTGTGC  
GAGGGTGAAGGAGATGGAGGTAAGGAAGAGGATGACAATGAGAGGCGACGAAGAACAAGACATATCCAGCGGAATTTGGTCTTTTGTTTTAAATTATAACAATAAAGGGTGGATATA  
GAATGCTCAATTGGAGATTAATTAGGAGGGTAAATGATTTGTAAGTGAAGGGGAATTGGAGTTCCAAAAAGAGGACGAAGGAGGACGAAGGAGGAGAGATTATTTTTAGGGTTC  
TGTATTGG

>comp169349\_c0\_seq14

TTGAGTTCGCAAGTAATCCTATTGAAAATATTTGAGTTCACAAGCAACCCTAGTAATAATTGATAAAAACAGCTAGAATAATGCAATAATCTCGATGAAATCAATCCAAAATCATAGATTGT  
AATAGTGGATTA AAAAGCAAAGCAAACACAAAACAAGATACAATTGATCATCAATTC AAGATGAGGATCATTCTCACTCAATCTCTAGACGATGAATCTAGAGATCAAAGCCACAAAGAG  
AATTCATTAGTAAACAATAATCATGAATGCCCTAACCTAACATCTCGTCCCTTTTAAATACACATATTCCTAATAAGAAGCCAATAAAAAGCTTCTTAAATAAACCAAATTCAAAATAGC  
TTCCCTATGCTTTAGCCGCCCTTCCCTCTCCCTATTTTCCACCCTAGGGGGGCCACATTGCTTGGGCGGCTTCCCTAAGAAGGCGGCTTAGCCTGCCTCTATAAATCTAAATCGGCCCA  
GATTGGGCCGTTTGGTCAAGTTCAGGAAGAACCATAACACATGAGTTACTTAGTGAGCCAAACATGAACTATTTGCAAACATCAAGTTAGATAAACGCCCTACCAGTTGTTTTTTGTTTT  
GTGCTCTTAGATGACCTTGGATCACATCTTCAACCATCTCCAATCACCTGAGGGTACCCAAGGCCAACTGGTAGCGACATCCACCTAATTTTGGGTGGAGATTGGAGACAGAATAGAGA

TCAACAGCTTCCAGCAGCAGGGGACAGCACCTCCTTGCCATCCACAGCAAACACAGCGACCAAACACCATCTTCCAGACAGAGATCCACTCTTTTGGGGAGATCTTTGTTGTTGGAAA  
ACCTATAGA AACTTGGAAAACTGATCAGTTTCTTTATAGATATAAATCTTTGAATGTTAGTTAGATTGCAATCTTTGTTAGTTTGCATATCTGATAATGATTACATGATTCTAACCTAGGAA  
GCTCTACTCTAAAAAAGGTTTCAGGGACCACCTGCTACCTATAGCCAATGTGAGATAGAGTTTCAACAAATATTGAGGGGTTGCTTGGTAGCAGGATTTA

>comp169356\_c0\_seq2

CACTGATATCTTCAAATTATAATGCCATGAATGATAATGCTTCCATTTTGATGACATTTAGATGTTACATAATTTGATTGCTTGAATGTAATACAATAAAAAAGAACCATAATTATCTTTGATCT  
TTCTGAATAACTTCGCATTTCTTAAAGCAAAAATAACATAAAATAGCTATATTATTTATAGAAAACATCGCTATCTACCTAGAAAACAGAGGAATGGATCCACTTTGCTTTGTGCCCTTTCCCT  
CTTCAAACCTCAAAGTTACCATGCCAAAGTTGAAAGTAGACATAGTTGTAGGATCACCTTCCTTGGGTTCTGGTTTTGTTTCCATCGTCCAGCTAATGAGACATTCGGCACGCTCTGTCCAC  
TATTTTCAGGGATCGGGTCTTTATCATCATAGTTTTTTCATCTTTAAATGCTTCAGATTTGGAAATCCTCTATGTTGCAGGGAAGACAGTAGCAGCTTATCGTCCACATTCATAATGAGATTTTCA  
ACTGATGAGAAAAGTGGGGCAAAGCTTTCAGCTTTGGGCAGTCCAGCAGAATTAGTGTGTGAAGGCGAGGGAGAAATTTCTCTCCTGCTGCACTGCACCATTCTCCAAATCTGTCAA  
GCAGTTTAGTTCCAGCTCCTGCAACGAAGAAAATGCATTGGCGCCACCATAGAAATCAGAACCTAGATGCTTGACTAGAGGAAGTTCTACGAGGTTAAGAACTTGGAGGGCGGGTAGCA  
GCCCAAGTGTGGGATTTTTTACAAGCGCAACAAGTTAGTGTGAGACGGACAAGATTTGAAAGTGATAAGTTCATCCAAGAAGGGAAAGCTCTTCCAACATATCCTTCTATTTTTAACT  
CTTCTAAGCTTTTGTGGTTGGAGGCTTTCAAGTACATCTTCTGCAAGCAGAATTTCCACAATGGTGTGCATATTCATCGAAGGCTTCCACTGAATTTATGTAAGAATTGCACAACCAAGAT  
AACTTCAGTGACCTGATATTATGCTTTTCACTCAATTGCGCGGCCCTTGGCTTCTTCAACGCACCTCACATTCTGAAGATTTTTTCAGCTGCAATATACCTTCAAGTTTCAAACCTACCCAGCTC  
TTTGAGGGTGCAGTTGTTCTTCCCTCCAGGAATGAAAATTTGGAAGTGTTCGAAGTTGCTTCAGTTTCTTATAGATGCCTGAGTTTCTTGAAGGTATGTGGCAGAGCTTTTAAAGGATAACTT  
TGTAAGTGCAAAGCTCTTAGAAGATTAATGTCAGATGATATAACATGAAGAAGTTCCTGGACGCTCTGTTCTGTCTCTGTGCAACATTTCTTCTGTAATCCAAATATAACGTTTCGCAGTTT  
CTTTGCATCACGTAGCAATTTAAAGTTGCAGATAGTGGCTTTTGATTGCAAATGAAAGAAACATAGCGTGAATTTTGTGAAGGATATCTTTTAGTGAGATCATCCACGATTGAACATTTCAA  
TACCTGCAACAGATTGAGCGAGATCATGTAATAATCATGCATTTTTACCTGTGTTATGACGCTCCTTGGCTCTATCATGTTCACTTGAAGAGTGACCTTGCCTGCAGCTCTTCCACACAT  
TGCAAACCAATTTGCTCCCAGTGAATATGCCCTGCAGATGGCTCAAGGAAGCCTTCAGCACCCATAACTTAACCAATGTGGTAGTATTTATATTTAAATCTTTGGGGAATATTGAGCAATA  
AGCGAAGCACTGTTTCAAACACGAAGATAGATGATCATAGCTCAACTTCAGAGCAGGTAAAACTCATAGTTTTTCATCAGAAGCAAGTTTCCATAGCTCATTATCCTTGATAGCTAGCCAC  
TCACTCTCAGTTCTTTTGAATCTCAATAGGCCACCCAACGCTTTTGCAGCCAAAGGAACACCCCCACACTTTTTCACAATCTCCTTTCCGATCGCAACGAAATCTGGATTCTCTCAACCT  
CATTGCCAAAAGCTTCTCTCAAACAGCAACCAACAATCATCGAACGACAAATTCGATAACCGGTGAGGAGAAATTGTGCCATTATGGATGCAACATGCTCATTCCTTGTGGTTACTAT  
GACTTTACTTCCCTTTGCACCAACTGTAAGCAAAGCCCTGAGACTATCCATTTTTTCATGACTTTCACTCCACACATCATCTAAAAGTAAAGTAAATCTTCTCTCCTGGAGTTGATTTATAA  
GGGATCTCTGCATTGCATCCATGTTTCATTGGAGAAAATTCACTTCCCTGTTGCTGATTCTATAATCAATCTAACAAGCCTTTTAAAGTTCAAACCTCCTCAGATACACAAACCCACATCCTCTCT  
GGAAATGCCACAAACCTTTTCATCATTGTAGACTAATCCTGCAAGTGTGTTGCTTGGCAAGCCCTCCTAAGCCAACAATACCTATTACGCCAATATCATCTCCAACGGAAGTATTCATGAGA  
AATTTACTATTTTCTTTATCTACTTCCCTTCCATAAACTTCTGATTCCTTTATAAAGGAACCTGTTTCTTCCCTTGTGATGCTTCTTTCTAGCTTAAAGCTTCCAACCTACTCCTTCCCTGAG  
ATGGAACCTAGATCTTACTTCTGCAATCTCATCAATCTCTCATTGATCTCCTTACCCTCAGTGAATCTTACGCTGGAAAGCAATGTTCTTAGGGAGGTAAAGTAAAGTTGCGTACCTTCT  
CCTTCATGTTGGCTTTCTTCAATTTTGGCGCTTTGAAGGCAAAGTCATCGAGCACATCATCGGCATCATAAGCCAACCTTTGAGCTGACTTAGCCAGCTCCTAAGAGCTTTCTCCTTACC  
TGCCTAGCCTCGGCATCTTCAAGCACATCTTGTATGGTTGAAAGAGTCCCTTCAAGCTTTTGAAGTCTTTGTCGATGCCGGTCTGCATTGCAAACCTCTGCAATAGCTTTTGTATGCCAGTTT  
TTCAGAGATAAACCTGAGGAGGCTGGTGGCTACTATTTCTGTCATTTTCTCGATCTTTCGAAGTAAATGATCGTAGAAAGATAGACCAGCTTTGCTTGTGATCTCTTATAGAATTGGAAGG  
TCACTGGTGAGGGAGATTTAAAGGAGAAACGCGGCTTCTTAGGATTGAAGGAGATGACTCTGATCGCACTCTGTAGTCTTCTCCTTGAAGGAAATTAGGAAA

>comp169356\_c0\_seq3



CACTGATATCTTCAAATTATAATGCCATGAATGATAATGCTTCCATTTTGATGACATTTAGATGTTACATAATTTGATTGCTTGAATGTAATACAATAAAAAAGAACCATAATTATCTTTGATCT  
TTCTGAATAACTTCGCATTTCTTAAAGCAAAAATAACATAAAATAGCTATATTATTTATAGAAAACATCGCTATCTACCTAGAAAACAGAGGAATGGATCCACTTTGCTTTGTGCCCTTTCCCT  
CTTCAAACCTCAAAGTTACCATGCCAAAGTTGAAAGTAGACATAGTTGTAGGATCACCTTCCCTGGGTTCTGGTTTTGTTTTCCATCGTCCAGCTAATGAGACATTCGGCACGCTCTGTAC  
TATTTTCAGGGATCGGGTCTTTATCATCATAGTTTTTCATCTTTAAATGCTTCAGATTTGGAAATCCTCTATGTTGCAGGGAAGACAGTAGCAGCTTATCGTCCACATTACATAATGAGATTTCA  
ACTGATGAGAAAACCTGAGGGCAAAGCTTTTCAGCTTTGGGCAGTCCAGCAGAATTAGTGTGTGAAGGCGAGGGAGAAAATTTCTCTCCTGCTGCACTGCACCATTCCTCCAAATCTGTCAA  
GCAGTTTAGTTCCAGCTCCTGCAACGAAGAAAATGCATTGGCGCCACCATAGAAAATCAGAACCTAGATGCTTGACTAGAGGAAGTTCTACGAGGTTAAGAACTTGGAGGCGGGGTAGCA  
GCCAAGTGTGGGATTTTTTACAAGCGCAACAAGTTAGTGTGAGACGGACAAGATTTGAAAGTGATAAGTTCATCCAAGAAGGGAAAGCTCTTCCAACATATCCTTCTATTTTTAACT  
CTTCTAAGCTTTTGTGGTTGGAGGCTTTCAAGTACATCTTCTGCAAGCAGAATTTCCACAATGGTGTCAATTCATCGAAGGCTTCCACTGAATTTATGTAAGAATTGCACAACCAAGAT  
AACTTCAGTGACCTGATATTATGCTTTTCACTCAATTGCGCGGCCTTGGCTTCTTCAACGCACCTCACATTTCTGAAGATTTTTTCAGCTGCAATATACCTTCAAGTTTCAAACCTACCCAGCTC  
TTTGAGGGTGCAGTTGTTCTTCCCTCCAGGAATGAAAATGGAAAGTGTTCGAAGTTGCTTCAGTTTCCCTGAGATTCATAGGCATGCAAGTTAAATTAATGCATCCATGTATGTTGAGGTTG  
ACAAGGCTTTTTCATATTGCTCAAGTTCTGTGGAAGCTCATGGATGAAAAACAATCTTCAAGCCCCAGAGTATGAAGGTTGGAGAGAGTACAAAACCTGATTCAGGAAGTGAGTTTATTTTG  
GTGCGAGAGCAGTCTAATTCACGTAAGCAGTTGAGTCGGCCAATGGAACCAGGCAATGATGTAAGATTAAGCAATGGCTAATTTTCAAGGTACAGAGGTTGTGAAGGTCACCGATTGA  
GTCTTAGATGCCTGAGTTTCTTGAAGGTATGTGGCAGAGCTTTTAAAGGATAACTTTGTAAGTGCAAAAGCTCTTAGAAGATTAATGTCAGATGATATAACATGAAGAACTTCCCTGGACGCT  
CTGTTCTGTCTCTGTCAACATTTCTTCTGTAATCCAAATATAACGTTTCGCAGTTTCTTTGCATCACGTAGCAATTTCTAAAGTTGCAGATAGTGGCTTTTGTATTGCAAATGAAAGAAAACATA  
GCGTGAATTTTGTGAAGGATATCTTTTAGTGAGATCATCCACGATTGAACATTCATAACCTGCAACAGATTGAGCGAGATCATGTACTAAATCATGCATTTTTTACCTGTGTTATGACGCCTCC  
TTGCTCTATCATGTTCACTTGAAGAGTGACCTTGCCTGCAGCTTTCACACATTTGCAAACCAATTTGCTCCCAGTGAATATGCCCTGCAGATGGCTCAAGGAAGCCTTTCAGCACCCCAT  
AACTTAACCAATGTGGTAGTATTTATATTAATAATCTTTGGGGAATATTGAGCAATAAGCGAAGCACTGTTTCAAACACGAAGATAGATGATCATAGCTCAACTTCAGAGCAGGTAAAACCT  
CATAGTTTTTCATCAGAAGCAAGTTTCCATAGCTCATTATCCTTGATAGCTAGCCACTCACTCTCAGTTCTTTTGAATCTCAATAGGCCACCCAACGCTTTTGCAGCCAAAGGAACACCCCA  
CACTTTTTTACAATCTCCTTTCCGATCGCAACGAAATCTGGATTCTCTCAACCTCATTGCCAAAAGCTCTTCTCTCAAACAGCAACCAACAATCATCGAACGACAAATTCGATAACCGGT  
GAGGAGAAATTGTGCCATTATGGATGCAACATGCTCATTCTTGTGGTTACTATGACTTTACTTCCCTTTGCACCAACTGTAAGCAAAGCCCTGAGACTATCCATTTTTTCATGACTTTCA  
CTCCACACATCATCTAAAACCTAGTAAAAATCTTCTCTCCTGGAGTTGATTTATAAGGGATCTCTGCATTGCATCCATGTTTCATTGGAGAAAATTCACTTCCCTGTTGCTGATTCTATAATCAAT  
CTAACAAGCCTTTTAAAGTTCAAACCTCTCAGATACACAAACCCACATCCTCTTCTGGAAATGCCACAAACCCTTTCATCATTGTAGACTAATCCTGCAAGTGTGCTTGTGCAAGCCCTC  
CTAAGCCAACAATACCTATTACGCCAATATCATCTCCAACGGAAGTATTCATGAGAAAATTCCTACTATTTTTCTTCTTATCTACTTCCCTTCCATAAACTTCTGATTCTTTTATAAAGGAACCTGT  
TTCTTCCCTTGTATGCTTCTTTCTAGCTTAAAGCTTCCAACCTACTCCTTCTTGGAGATGGAACCTTAGATCTTACTTCTGCAATCTCATCCAATCTCTCATTGATCTCCTTACCCTCAGTGCA  
ATCTTACGCTGGAAAGCAATGTTCTTAGGGAGGTAAAGTAAGTTGCGTACCTTCTCCTTCATGTTGGCTTTCTTCAATTTGCCGCTTTGAAGGCAAAGTCATCGAGCACATCATCGGCAT  
CATAAGCCAACCTTTGAGCTGACTTAGCCAGCTCCTAAGAGCTTTCTCCTTACCTGCCTAGCCTCGGCATCTTCAAGCACATCTTGTATGGTTGAAAGAGTCCTTTCAAGCTTTTGAAG  
TTCTTTGTGCGATGCCGCTGCAATTGCAAACCTCTGCAATAGCTTTTGTATGCCAGTTTTTCAGAGATAAACCTGAGGAGGCTGGTGGCTACTATTTCTGTCAATTTCTCGATCTTGAAGTAA  
TTGATCGTAGAAAGATAGACCAGCTTTGCTTGTCTTATAGAATTGGAAGGTCCTGGTGGAGGAGATTAAAAGGAGAAACGCGGCTTCTAGGATTGAAGGAGATGACTCTGA  
TCGCACTCTGTAGTCTTCTCCTTGAAGGAAATAGGAAA

>comp169362\_c3\_seq5

TTTTTTGGAAGTGGGTGATTCATCAAAAACCTTGACAAATTCACCAATTCCTTCAACTATCATATCTTATCGATTTCGAACCTAATTACATGCAAAAATTCGCAAAAATTAATATAAAGGCAA

AGCATTAGTAACAGTCTACAAGATCAAACCTTTTTTCAAAACCAGAAATTGATTTGATAAACTTTAGATAATCAATAATCAAGCACTAAAAGATAATCAATAATCAAGCACTGAAATTACATA  
AAAATTCTCTCAACGCTTTGTCAATATTAECTATGCTTTGTAATATCGCAATATGGTGCACATAGTATTAATATTTGTGAGAGCCAGGAGAAGCAAACCTCCGTATGGTGAGATGAAGACCC  
AAAGACTCTCAAGATATGTCTCAACAAAATTTGTTCTTCTCCAGTGCATCATCTTCTATAATAGGTATTGAACTTACTGTTACACCCGATTATGTCTCCATCAAACCCGCAAGTGTCTGCTT  
CCTTGGAATCTTACTAAATATTTTGAAAATATTTTCATCACTATGCACCAAGCCCTTAATAATCTCCTCATTTCTCAGTAGAGCTACATCATCAACAGTTTTTGATGAGGCCATCCATAAAGAA  
GACATAAGCTGTCACTTCGTTACCTGCAGTCTCATGTAAGCGCTCGAAGGCCATGAGATTGAGCAACGATGACTCAGTGGTGTCACTCAACTTCTAGTTGGGGAAGAGATAGAATGTCTGCC  
ATTGAAACTAATGTCTCTAAGGGAATTAGTTTTGCTCTTACAAAATAATACTCCAGCATTTTTGAGCTTTGTGGCTGACTGTATATCTTCTTATAGCTCGGCAAGTACTCTCCCTCAGATGTT  
AATATTTTTCTGTACAGATCTAAGATATGAAAGCATTCGTCTGCTTATCTGATCTTTTGGTGAAGCCGAAGAGAGGTTGTAGAAAATCTTTGATTAGAGTTTTCACATCTCCAATCTAATTTGGT  
AAAATTAAGAGAAATAGTAGATTATTCTGATAAAAATAAATATTAATTAGGCCAATTAATTAGAATATTACCTCTG

>comp169368\_c0\_seq15

TCGATTTACGATGCCTCCTGTGACAGATGCGCCAAATCTTCGACTGATGTCCGCATCAGTGGTGAGGCTTCGGCTAGGTAGGGGAAGAAGAAGATGGGTGTAGGGGAAAAGGAAAAAT  
TTAGAGAGCTACAAACATCAAGTACCACATCCTCAAGAACTTACAAAGAGATCTTGAGAATCTCACGAACTCACAAAGAGATCAACAATAAGAAAATTTTCATTCATCAACAACACTACCAA  
AATACAATGACTAGGCCTCCATATATAGGCCTTCCAAAACAAAACAACAAGACGAAATTGCACTCGAGCTACAACATACAACGACTCCCTCATAGGGGTACAAATGGAAAAACATAAAA  
TATAAATAACATGAATAAAAATAAAACATCAGAAATAGAGACTATGAAGCATAGCTGTTGCTCGACAACCTCCTCTGATGGTAAGAGTGCTGAAATCACCTACGGATATCCTCATCACTATGAC  
GCCACATGGGAGTCTGCGAGAGAATGAAACATCAAATTTTGTCTTTCCATCTTGAGGATAAGGTTGTTCTTTGGGAGGGGGCATTGATGGATCGATACCTCCTAGACTGGCCATGGTTTA  
CATCATGTGGAACCTTACCTACATAAAGATCCTGCCTAGGGTGGGACCCAGGGGGATAATTCAAAGGGAAATGGGGGCGGCTATGAAGGGAAAATTCAAATGAATGTGCTGTTTTGGGG  
ATTTGCCTTGTTATTTGATGCTTTATGTAGGTGGTTTATCCTATGGTTTCAATTTTTATGGTGGATTTTGCTAAAATTAGTTTTGCTTAGGTTGTGAAGATTTTAGCCAATGGCTAAGGATTTGGG  
AGAAGTGGATATCCTCTAGATCCAAGTGTATCTTGATTTTTCTTCATAATCTTTCAATAAAAAGTGTCTCTTCTTAAATTTATTGTGCCGTTCTTTGATTTTGTGAAATTACATCCACTT  
CCTATATTCAAACACTACAAATCTTAAAACATAATGGACTCAACTAGAGAAAACCTTCAGTTCCATATCAGAAAACAAATACACAAATATACATAAGAGATGCTCAGAGAGAGGAGAAGATGGG  
ACAGCCTGGGAGGGTGGCACCCGCATCAACTATGAAGATGTTGCCAGTACATACTCTGAGGAGTCATGGATCAAATATCGCACAAGCGATGTTAGTGCAGGATCTACCGTTCCAGAGTT  
TTTCAAAGGTATTGTCCTCTTCGTTACGTTACAGAGCCAGTCTTTTTGTAAGAGTCTGCAGTTATCTCAGATTTAAACAACCCAGGTGATATAGAATTCCTCGTATACCAAACACCCCA  
ATTCCAATGCCATCACCTTGGAATGGCATTAAAGACCAGTTTTTCGAAGCAACATAACCCAAGCCTCCAGGTAATTGTCCACGATCAAGTCCAGTAATGGACGACATATTGATCACACATCC  
CTTAACTTTAGCATCTCGCATAAGTTTGCAGACATATTTAGAAACTAGCCATGAGCCGGTTAAATTAGTGGACAAATTGCTATGCCATTCATCTTCAGTCCAATCTAATGGAGAATTGACACT  
ACCTGAGACAAGGAAAAGAATGGTAGTAACACACTTAAAGAAAAGTAGCAAGCAATTGTTCTATTCCAAAGTATAGGCGCCAACACTAGCTTAGTCAATAAAGATCTTAAAGTTGTTTTGAAC  
TTTTCTAAGATCGAATCCCGCTGATATCAAATTTATATTTTAGCTGTTAACTTCCAAAAAAAAGAAGTTTTACACATTCATATCATAACAATCCATTAATCATGCCAAAGGATATTA AAAACT  
AGAAAGGAATCTAGCATGACTTTGATAGCCAATATGCCATATGCAGGCTATCTTGAGAAAAGTACTGAAAGGCTGAAAGCTAGCGATTAAATTAGAAAATTAGAACTATAAATCTTTA  
AGCACTAAGAAAATTAGAAATCTTTTCAAGCCCTTAATAACAAGGTACAAAGAAACCAGCAACAATTCGGGAAAAGAACAGAGCCAAATCAAACAGCCCAGGTTAAATGGTAACGATT  
TTGGTGGAAATAGTACAGCTAAGTCTGGAGGACCAGGACATAATGGGCAGCAAATTTTAATAAAGATAATGAAGAATGACCGGTATTTAAGTGTGGCCCTAGAGAAATGGCTAGTTGCC  
TCCATTGTTGAATTAATCCAGTAATTCAAATCATAGAAATAGAATCTTTACAATAGGGTCAAGTTGTATAAATCAACCTGATCCTGGATCTTGCATGCATTGACATAAGCCTAATCACTCGG  
TGTGCTTTTTTTTTAATAATATTTACAACACTACTCTTAAAACCTACTATGAAGACTATAGCTCTATCAAATGAGCTTTAAATGCAACGCAAAATGCCTTAGATGAATGAAAGATTAATGGC  
CATTGTGATGAAAGCCCAAACCCATAATGGTGTCTCACACACTCACATTATGATGGGTGTTAAAATTTAGAGAAAAATAAATAAATTTATTTTTCATTTGGCAGTTCAAAATGAGGACAT  
AAAAAATGATAGAATTTCTCCATGATGAAGTTTTTGTAAAATGACCCAAAAGAGAGAAATGAATAAGCAAACCTTTTTGTAATACCCAAACTACCCTTGCTTTTCATTA AAAAAGATTAG

AGATTTACCTATCTGTCATAAAATTATGATATCTACAACAACAACAACAAGCCTT

>comp169368\_c0\_seq8

TCGATTTACGATGCCTCCTGTGACAGATGCGCCAAATCTTCGACTGATGTCCGCATCAGTGGTGAGGCTTCGGCTAGGTAGGGGAAGAAGAAGATGGGTGTAGGGGAAAGGGAAAAAT  
TTAGAGAGCTACAAACATCAAGTACCACATCCTCAAGAACTTACAAAGAGATCTTGAGAATCTCACGAACTCACAAAGAGATCAACAATAAGAAAATTCATTCATCAACAACACTACCAA  
AATAACAATGACTAGGCCTCCATATATAGGCCTTCCAAAACAAAACAACAAGACGAAATTGCACTCGAGCTACAACATAACAACGACTCCCTCATAGGGGTACAAATGGAAAAACATAAAA  
TATAAATAACATGAATAAAATAAAACATCAGAAATAGAGACTATGAAGCATAGCTGTTGCTCGACAACCTCTCTGATGGTAAGAGTGCTGAAATCACCTACGGATATCCTCATCACTATGAC  
GCCACATGGGAGTTCGTGCGAGAGAATGAAACATCAAATTTTGTCTTTCCATCTTGAGGATAAGGTTGTTCTTTGGGAGGGGGCATTGATGGATCGATACCTCCTAGACTGGCCATGGTTTA  
CATCATGTGGAACCTTCTACCTACATAAAGATCCTGCCTAGGGTGGGACCCAGGGGGATAATTCAAAGGGAAATGGGGGCGGCTATGAAGGGAAAATTCAAATGAATGTGCTGTTTTGGGG  
ATTTGCCTTGTTATTGTATGCTTTATGTAGGTGGTTTATCCTATGGTTCATTTTTTATGGTGGATTTTGCTAAAATTAGTTTTGCTTAGGTTGTGAAGATTTTAGCCAATGGCTAAGGATTTGGG  
AGAACTGGATATTCCTCTAGATCCAACCTGTATCTTGTATTTTTCTTCATAATCTTTCAATAAAAAGTGTCTCTTCTAAATTTATTGTGCCGTTCTTTGATTTGCTGAAATTACATCCACTT  
CCTATATTCAAACTACAAATCTTAAACTAATGGACTCAACTAGAGAAAACCTTCAGTTCCATATCAGAAAACAAATACACAAATATACATAAGAGATGCTCAGAGAGAGGAGAAGATGGG  
ACAGCCTGGGAGGGTGGCACCCGCATCAACTATGAAGATGTTGCCAGTCACATACTCTGAGGAGTCATGGATCAAATATCGCACAAAGCGATGTTAGTGCAGGATCTACCGTTCAGAGTT  
TTTTCAAAGGTATTGTCTCTTCGTTACGTTACAGGACCTTTTTGTAAAGAGTCTGCAGTTATCTCAGATTTAAAACAACCCAGGTGATATAGAATTCCTCGTATACCAAACACCCCA  
ATTCCAATGCCATCACCTGCAATTAAGACAGGGAAGACTATTAATCAGTAAATCACATTATTGCAAATGGCATAACTAGGACTTGAGATATAAAGATGAAGATACTACAGAATTATTACT  
TGTTTTGAAGAATCAACAACAACCTGCTTCTTAGCACCATATAATAACAATAAAACAGTGAAGAAAAAACGAACTCTCTCTGCTTTAATATGTATCTTTAACCTCAGAAAAATGGAAAAT  
TGATGCCAAATCACAGACATCAACTACATCAACTACCTTGTGTTTTTTCATGTAGGCAAATAAAAACAGTCAAGAAGGATCTCAAGGCTCATTGGTTGCTAATACAATAGAAAATATGC  
CTTTTAAACGATGATCACATTTTCACCTCTTTTCTATGTGAAAAAGTAAATCATTATACTAGAAAAGCTAACTTGTGCAGGATAAGACATTATGAGGCCTAACTTCAAGCAACCAATGAA  
GCCTTGTGTTAGGATACGACATAATTTTAGTCATATCCAACATTACCAAACGACGATCT

>comp169380\_c0\_seq2

AGTTCCAAGTTGCGTCAAATTTGACACTTCCAAGATTTACAATTCCAAGAAAAAGGAAGATTGCTCTTTTTGATTGCACAAAAAAGAAGTACTGATAACAATAATTGAAAATATCCGCTAATAA  
ATTCATAATGGTTGAACCAAAAAAAAAAAAAACATCATAATATAACAGTGATAATCGCCGCAATAATACTTTTAATTTAAAAAAAAAAAAAGTACTGTAACAGTGTCTTTTAAAGGAAAATG  
CCTATATCTACTACATCGTTCCTCAAATTTCCCCACTTCATACTCTATAGTTCTAATGGTAGATAATAAGATGATCAATACAAAAAATTGCTCCTCCTATTTAGCCAATGCAGGCCTAATT  
GATTGAACTCCGGTAACAGAAAACAATCCGAGATCAAAAAAGAACTCGGCTTCCCTTCTTTGAGAAAGAGAAACGGTAATTACTTACAGGAAGAAGAAGCCACCAGCTCCATTTCTG  
AAGGCGCTCGCTTGAACGACAGGCTTCCCTGAGTTCATTAACCTGCCGAGATCAAATTTGCGTGCCTTCATGAGCCGCTTCTGCTTGGTGGCAAAGCGACTCTTGAAGAAACCTTCG  
AAGGAAGGTTCTGTGGAAGTCTCAGGAAGAAGACGTAGCCGGCCATGAAGTACATGGAAGTGACGTAGAAGCAGATGGGTTCCATGACGTCCCATGAAAGCTCCAGAACGTTAGCC  
TCATGAACCCGCCGGTTGAGCGGCCAGGAAAGCTAGGCCAAACCATAATTCCTTCTTGCTTTGGCCTCTGCGAGCTTGTGATCGTAGCCTTCTGCTGTTCCAGCTTTCTTAGCTCCTC  
CTTCATTCGGTTCAGTTAGAGGGGAGAGAGCAAGGGGGATTGTGCGCTCGATTGCTTTTGTACCTGTAGGATAGGAAGACTAAGCAGAGGAAAAAGAGATTGGGTGTCTCAAATTTGCTG  
AATACATGAGAGTGTTCAGAAGAACCAAAAAAGAGAGAAAAGTTGGAGAAGTGCCTTTTAATCAAATCAACAGAGAAAGTGATTAGGAAATACTTGAGTTCGCAATCAAACCTAATCAA  
TAATTAGTAAAAACAGAGAGAAAACGAAAAGATCGTGGTGGGAAGAACAAACAAACGATAGCAAATCTTATAACAATCAAAGAGAAACAAGAACAGAGCAGAGATATA

>comp169398\_c0\_seq7

ACTTGCACTCTCACATTAATGCTGTAGATGTGCTGCTGTCATCTCCAAAATAAGCTCATCATATTGATTAATTTATTTTGTACGGACATTGGACATCGTCCGGAGTCAAATCAGAGCACGCC

ACATCATCTCCTTGCTGTGTACTGCAGCTGTATATCTGTTGTGTACTGAGTGTGTGATGCGCTTTGATGCGTCTTCAAACACAAAGCTACGTCCAGTACCTACGCAGAATAATTTCTCCAT  
CCTATTCTACTGAAGGCACATTTTAGCATTTCTCTGCCAGACCTCTCCAAAATTGGTGGGCTTGGGCCAGCGAATTGGGCCCTTCGGCCCTATGTGGATTTGATAGGGTCTCAGACGATTC  
AGGCTAGCAGAAGAAGCAGTTGGGCCCCACGATGAAAATATCCAAGCCACGTCAGCGCGCGGGCCACAGCCTTCAAATTGTCCGACAGTTGGGTGGGCAGGAGATATTATGCCTTGGC  
GTCGCGATATTCGAGATGTGGGACCCGCGGCCGGCCCATCCACACAGTATCGCGCTGCACCGAGTTATTCTTGGCCACTGACATCATGCCACGTGTCAATAAATATCCACCTATACCG  
CTCTCGCTGGATATACACCCCGAATCCCTAAAAAATCTTTTCCAAAGAAATTGTGGCTCAGGTTTCTCGTGGCGTACGATTGGATCTCTGCGTGGTCTGTGTGCATTTGAGAGAGAGAGC  
CAGAGACAGAATGGAGTTTGGCGTGCCAACCCAAAAGCTCGTTTCGCCGCTATTACCCCTTCGATGAATCTCCTTGTCTATAAACCAATGGCGAACATTGAAGTAACCATCGTGAAAGT  
TGTTATTGTCAACGACGCGGTCTGTGAAAGAGTGAGCGAGCCGCGGAATAGAGTCAATGAGATGGCGGCTCTGGCTGCCCTGGCTTGCTCCGTCTCCAATGGTTTCATTTCCCTGAGGACTA  
ATGCATGGATAGATATTTCCAACAGAGAAGCGATGGAGACGACCCCTTCGAAAGACCCGGCGAAGGTGCAGGCAAGGAAACCTTATACGATCTCGAAACAGCGAGAGAGGTGGAATGA  
TGAGGAGCATAACAAGTTCTTGGCAGCTCTTGGGCTTTATGGAAGGGAATGGCAGCGGATAACAAGACACGTTGGTACCAAGACTACTGTTTCAGATAAGAAGTCATGCACAGAAGTTCT  
TCTTAAAGAAAGGGATTGGTGTCTGTCTTGGACATCCTCATGGCATAGAGATCCCTCCCCAAGACATAAAAAGGAAAGCATCCCATCTGACGAGGAAAAGGTGAACAACCTGTT  
CAATAAGTTTGGCTTGGCCGAGCACCGATAAAGTCGCAATGGATGCTAAGAAACCAATGGAGCACGCAACTGTTGAAAGCATGAATCAGGCATTTGGAAAATGCAACTCATCTGCTTCTG  
TTTATTGTGGAACAACAATGCTTACTCTTCTCAGAGCCTTTACCAATGACCGATGAGTCAGTAAAGATGACTGGAAAATTTTGCATTTGTTTGAATGAATGGGAACTTCACAAATCC  
TCAGATGAATTTCACTCCAGTAGAAGAAAGGTATGAAATACTAAAAGAAGATGGATGAACCATTCACATCACAAAACACACTTTACAAGGTGAGGAAAGGTACCAAAACATAGTTTCAC  
CTCAAATTAATGGTGCAAAATGTTCTGGTGAAGGAATATCTGCATCATTTATTGAACACCGAGATGAAGATGTAGATCTTAACTGTTCTTAATCCTACAAGATCAGTAAAATGCATGTCA  
AAAGATCCAGCAATTTCTTCCACCCATCAGGCAGTTCCATCAACTTCATTTTATGATGAAAATGCTTCTACTGCATTGAGCTGCTTAACCACCAACTCATTTCCCAAGTCTCATGCAGAAGC  
AAGCATTGCTGCTTCATTAAGTGGCGCATCCTGTTGTGGATTCCTCCATGATTTTCAGATACAAATATCGATGTTGGAGGAGCTCAAGAGAAACATGGCAATATAACTCCAAGCATATCAGCTA  
TTATTGCAGCCACAGTTGAAGCAGCTGCTGCTTGGTGGAGATTTAATGGGCTATTGCCGTCCTTTTTCAGTCAAGCATTCTTTCAGCAACACAAACAATGATGCAGAATCTTAAAAAGGC  
ATCCAAAGATCTTGAAGGTTATAGTGACACCAAAGGAAACACAAAATTGCAATCTTGTACCACATTATTAGAACCATCATTATCTCCAAAACAGTTCAAGAACTGAGAGTTGAAAGGAC  
TGAAAAACTTCCCAACCAATATGTGCTCTCGTCAATAGTTAAAGGAATTAATGAAGTTAATCAGGTTCCAAGAAAAAAGGATGATCTTTCGTCATGTGATTGGAACACATCTCCATTT  
ACTGAAGCAGTTAACATCAGACAGCTTAGGAATGCTGGAAGATTAACAAGCCATACAATGCGCGTCTTAAACAGGTTGTCAGCTATCAATCAAACCTAACAAATTTGATACAGGATCCGGT  
TATTAATACTCATCTGTTGAACAATTTAATTAATTGTCTCATTTTTGTGAGGGTCCACTTGCCCTTGAAGCTCTTTTCTCTCAAAGGTTGCTGCCCCAGAGCTTTGGAGCTCCGCACATGGAT  
TATGATAAATTGGACTTGAATCTGAAGAAAGAAGCAGCTCTTGGATTGCAGATTGACCTTAACAGAAAAATATCACTGAAAATGATTGTAACCTCTGCCGAGGAGGAAGAAGCTTCAAGC  
TTAATCTTGAGACCAGAGGAACGAATGGAGTAAACATTGATCTACCAGCAGAGTTTGTCTTGAACAAGTTATATCCATCCAGTGAAGAGGTTGCTACAGCAAAATATTTCTCTTTTACAG  
GATCAGAAGTTGCCTGATGGAACAGCATACTCATGACATATTCACGAATTTAGTCTCAAACCTTAATAAATCATGGAATTTCCATGCTTAAAAACTACATATATTTATCTCTCGCTGTAA  
TTTGAAGTTGTTGATTTTCGCTTTAGAAAGAAAAATAACATACTACAAAACTGTTTGAAGCCTGAAGGGCTATATCGGCTGCATGCTTTTATAATTTCCAAATTTACAGTATCATTGCAA  
GTAGATTACAGATGTTAAAAACCAAAAAGAATTTACTGACAAAAAATTGAAGAATACACGACGCGTCATCAAAAACAAGAAACCGGCATCAGAATGGAGGATGTCGGACTCAGA  
AGAAACCGAATAGGACAGAAAACCCGAGAATGATGAGCCAAACAATGTGGATGAGAAAGAAGGCTTGGCCGGATACGAGGCCGTTTCCGCCATTGCCGACCTCGCAAGGACCGTTCTT  
GGCCACTCGCACCCCTGCACAAGCCGCATCCGGGCAGCCGCACCCAGTACGTCACGCCGTTCTCGCCGACAGCGGGTTCGGATCGGAAGCATTTCACGGGCAGAACTTGTGCGCCGTCGT  
GTGGGACCACGCATGGGCTGTGCTTTCCATGTCCGGTTGAATCTAGCATCTCTGATCCAGCGGAGGAGATAAAGGAATACAGTGAGGAGGAAGAGGAAGAAGAGAGAGAGAGA  
TGCGGCCGGGACATGGAACAGAAGGATCGTAGCGGCTTTGACTCTGCGGAGAGGTGATCGGAAGACTGACCAACTATTTAAGGACCCGCTTATTTTTGTTTAGAGAGAAG

>comp169398\_c0\_seq8

ACTTGCACTCTCACATTAATGCTGTAGATGTGCTGCTGTCATCTCCAAAATAAGCTCATCATATTGATTAATTATTTTGTACGGACATTGGACATCGTCCGGAGTCAAATCAGAGCACGCC  
ACATCATCTCCTTGCTGTGTACTGCAGCTGTATACTGTTGTGTACTGAGTGTGTGATGCGCTTTGATGCGTCTTCAAACACAAAGCTACGTCCAGTACCTACGCAGAATAATTTCTCCAT  
CCTATTCCTACTGAAGGCACATTTTAGCATTTCTCTGCCAGACCTCTCCAAAATTGGTGGGCTTGGGCCAGCGAATTGGGCCCTTCGGCCCTATGTGGATTTGATAGGGTCTCAGACGATTC  
AGGCTAGCAGAAGAAGCAGTTGGGCCCCACGATGAAAATATCCAAGCCACGTCAGCGCGCGGGCCACAGCCTTCAAATTGTCCGACAGTTGGGTGGGCAGGAGATATTATGCCTTGGC  
GTCGCGATATTCGAGATGTGGGACCCGCGGGCCGGCCCATCCACACAGTATCGCGCTGCACCGAGTTATTCTTGCGCCACTGACATCATGCCACGTGTCAATAAATATCCACCTATACCG  
CTCTCGCTGGATATACACCCCGAATCCCTAAAAAATCTTTTCCAAAGAAATTGTGGCTCAGGTTTCTCGTGGCGTACGATTGGATCTCTGCGTGGTCTGTGTGCATTTGAGAGAGAGAGC  
CAGAGACAGAATGGAGTTTGGCGTGCCAACCCAAAAGCTCGTTTCGCCGCTATTACCCCTTCGATGAATCTCCTTGTCTATAAACCAATGGCGAACATTGAAGTAACCATCGTGAAAGT  
TGTTATTGTCAACGACGCGGTCTGTGAAAGAGTGAGCGAGCCGCGGAATAGAGTCATGAGATGGCGGCTCTGGCTGCCCTGGCTTGCTCCGTCTCCAATGGTTTTCAATTCCTGAGGACTA  
ATGCATGGATAGATATTTCCAACAGAGAAGCGATGGAGACGACCCCTTCGAAAGACCCGGCGAAGGTGCAGGCAAGGAAACCTTATACGATCTCGAAACAGCGAGAGAGGTGGAATGA  
TGAGGAGCATAACAAGTTCTTGGCAGCTCTTGGGCTTTATGGAAGGGAATGGCAGCGGATACAAGAGCACGTTGGTACCAAGACTACTGTTTCAGATAAGAAGTCATGCACAGAAGTTCT  
TCTTAAAGAAAGGGATTGGTGTCTGTCTTGGACATCCTCATGGCATAGAGATCCCTCCCCAAGACATAAAAGGAAAGCATCCCATCCATCTGACGAGGAAAAGGTGAACAACCTGTT  
CAATAAGTTTGGCTTGGCCGAGCACCGATAAAGTCGCAATGGATGCTAAGATTTAATGGAATGTTGGCAAGTTTATAGAAACCAATGGAGCACGCAACTGTTGAAAGCATGAATCAGG  
CATTTGGAAAATGCAACTCATCTGCTTCTGTTTATTGTGGAAACAACAATGCTTACTCTTCTCAGAGCCTTACCAATGACCGATGAGTCAGTAAAGATGACTGGAAAATTTTGCATTTG  
TTTGAATGAATGGGAACTTCACAAATCCTCAGATGAATTTCACTCCAGTAGAAGAAAGGTATGAAATACTAAAGAAGATGGATGAACCATTACATCACCAAACACACTTTACAAGGT  
GAGGAAAGGTACCAAACATAGTTTACCTCAAATTAATGGTGCAAAATGTTCTGGTGAAGGAATATCTGCATCATTTATTGAACACCGAGATGAAGATGTAGATCTTAACCTGTTCTTA  
ATCCTACAAGATCAGTAAAATGCATGTCAAAAAGATCCAGCAATTTCTTCCACCCATCAGGCAGTTCCATCAACTTCATTTTATGATGAAAATGCTTCTACTGCATTGAGCTGCTTAACCACC  
AACTCATTTCCCAAGTCTCATGCAGAAGCAAGCATTGCTGCTTCACTACTGGCGCATCCTGTTGTGGATTCCCTCCATGATTTTCAGATACAAATATCGATGTTGGAGGAGCTCAAGAGAAAC  
ATGGCAATATAACTCCAAGCATATCAGCTATTATTGCAGCCACAGTTGAAGCAGCTGCTGCTTGGTGGAGATTTAATGGGCTATTGCCGCTCTCTTTTTCAGTCAAGCATTCTTCAGCAACA  
CAAACAATGATGCAGAATCTTAAAAAGGCATCCAAAGATCTTGAAGGTTATAGTGACACCAAAGGAAACACAAAATTGCAATCTTGTACCACATTATTAGAACCATCATTATCTCCAAAAA  
CAGTTCAAGAACTGAGAGTTGAAAGGACTGAAAAACTTCCCAACCAATATGTGCTCTCGTCAATAGTTAAAGGAATTAATGAAGTTAATCAGGTTCCAAGAAAAAAAAGGATGATCTT  
TCGTCATGTGATTGAAACACATCTCCATTTACTGAAGCAGTTAACATCAGACAGCTTAGGAATGCTGGAAGATTAACAAGCCATAAATGCGCGTCTTAAACAGGTTGTCAGCTATCAAT  
CAAACATAAATTTGATACAGGATCCGGTTATTAATACTCATCTGTTGAACAATTAATTAATTGTCTCATTTTTGTGAGGGTCCACTTGCCTTTGAAGCTCTTTTCTCTCAAAGGTGCTGC  
CCCAGAGCTTTGGAGCTCCGCACATGGATTATGATAAATTGGACTTGAATCTGAAGAAAGAAGCAGCTCTTGGATTGCAGATTGACCTAACAGAAAAATATTCACTGAAAATGATTGTA  
ACTCTGCCGAGGAGGAAGAAGCTTCAAGCTTAATCTTGAGACCAGAGGAACGAATGGAGTAAACATTGATCTACCAGCAGAGTTTGTCTTGAACAAGTTATATCCATCCAGTGAAGAGG  
TTGCTACAGCAAAATATTCTCCTTTTACAGGATCAGAAGTTGCCTGATGGAACAGCATACTCATGACATATCCACGAATTTAGTCTCAAACTTAATAAATCATGGAATTCTCCATGCTTA  
AAAACATACATATTTATTCCTTTCGCTGTAATTTGAAAGTTGTTGATTTGCTTTAGAAAAGAAAAATAAACAATACTACAAAAACTGTTTGAAGCCTGAAGGGCTATATCGGCTGCATGCTTTT  
ATAATTTCCAAATTTACAGTATCATTGCAAGTAGATTACAGATGTTAAAAACCAAAAAGAATTTACTGACAAAAAATTGAAGAATACACGACGCGTCATCAAAAACAACAAAGAAACCGG  
CATCAGAATGGAGGATGTCGACTCAGAAGAAACCGAATAGGACAGAAAACCCGAGAATGATGAGCCAAACAATGTGGATGAGAAAGAAGGCTTGGCCGATACGAGGCCGTTTCCGC  
CATTGCCGACCTCGCAAGGACCGTTCTTGGCCACTCGCACCCCTGCACAAGCCGATCCGGGCAGCCGCACCAGTACGTCACGCCGTTCTCGCCGCAGACGGGGTTCGGATCGGAAGCAT  
TTCACGGGCAGAATTTGTCGCCGCTGTGTGGGACCACGCATGGGCTGTGCTTTCATGTCCGGTTGAATCTAGCATCTCTGATCCAGCGGAGGAGATAAAGGAATACAGTGAGGAGG  
AAGAGGAAGAAGAGAGGAGAGAGATGCGGCCGGCGACATGGAACAGAAGGATCGTAGCGGCTTTGACTCTGCGGAGAGGTGATCGGAAGACTGACCAACTATTTAAGGACCGCCT

TATTTTTGTTTAGAGAGAAG

>comp169490\_c0\_seq21

CCAGGGGGTGTTCGAGTCGAGCCTGACAATCAAAACCCGAGCTCGAGCTCGAGCTCGAACTCGAGTCGAGCTCAAACAACAAGCTCAAACCTCGGCTCATTGTGAAAATGGAAGTCTCG  
CGAGCAGCTTGGGAGGTTGTGCACAGCTTCATTGCAGGAGACGGCATCCCTTGCACCGGAGAAGAAGGTCGCGGGACTAGCATCTGCCAAAGAAGACAGTTGCAACTGAAAAGAGAG  
ATTAGAATTTGCTTTTTAATCTTGGTAAAAGCACAGGACAATTAATCTTCTTTTTACCTTTCAAAAAAAAGTTAGCTGCTATTAACAGCATTGGACAACAAAGACAGCGGGCCAATTTTTT  
TTTAGTTTTTATCTTTTTCTTTTTTCATGTTGACTGTTGCTTTTATTAAGATAAAAAAGACTTAAATCTATTTTAAAAAATAATATTTTTATGATGACCTGGCTTGCAGGCTCATGAGCCGA  
GCCTTATCAAATTTAACAAGCTCGTGGCTTATTATTAAGCTTGACTCACGAGCTCGTTATTGAGTTGAGTGTGCATGAATGGCAACAATGACGTGGCGAAAAAGTCGTGGCAGATCAATT  
TTAAAAGAAAAAACTTACATC

>comp169524\_c1\_seq1

AAAAGGCAAGTGAAAGTTGCAATCTCTTCTTGTCTCTCAAATCCTTGAAGCTGAAAAGAGCCCAACCCTTCTCTCGATTTATGTTGATGGGCTACTATACAGAACTTTGCTACAACA  
CCCAATCTCCTTGTATTGTAGCCGAATACCTCTCTTCTCTCACTTTTCCATTGATAGTTGCTTTGGTGTGGGATGATTCAAGGGGGGTTCTAGAGTAGCTTATTTATGGCTGTGATGTTA  
AATTAGGAAATAAAATAAGAGCCCTTGCAAATCATGTAGGATATCTCAAATCTCTCATATCGATACATGGTTCTCCCATATTGTTTTCATACCCCTTAAATAACTAACATACCTCAATCTAGAT  
AAACAATAATGAGAGGATCACATGACAAATCAAGAAGACATTATGTCTCCATAAAATTAACATGATACCACTAAATATCAGTATATTTAACTTCAAAACTCAAGTCCTATAA

>comp169529\_c0\_seq8

TTTTTCGAAAAATCATGATTTATTTGATAAAATACTTTTTCTTACAAACGATTTATTAGCAAAAAATAACTAAAAATAGAATATAATTTGATTAATTTGGTTTTCAAGGTAGTGCAGAAGTTAA  
GGATTTTGTAACGCTCTCCACAAGTCTTAATCCTTCTTACAGAGGATTTACTTTCTCCTAATAGCTTGACAATGGCACTGCCACAATCACACCATTTGCTCCCATATTGATAGCTGCTTTAC  
ATGTTCTGGTTTTGATATCCAAATCCAACGCTATGGGTTTTGAGGTTTTCTTTTTAAGTTCCTTCCAATCGAAATGTACTTGTGAATTCAAATTTGAACGAGCACCTGTAACTCCAGTTGT  
GCTAACAAAGGTAGAGAAAACCATCACTAGCATCAACAATGGCTTTCAGTCGATAATTTGAAGTAGTTGGTGCAGCTAATAGGACCAAATCAATATTCTTCTTATTAGCCCTCTCTTTAAAC  
TCCAATGTCTCTAAAAGGAAGGTCTGGCACAATAAGTCCTTGAATGCCTCCATAATTCAAAGCAGACATGAACTTTCTTGATTAATTTTCATTATCTGATTATAATAGGAAAACAAAATG  
ATTGGACATGATAGTTTCAAGAACTACCTGCATAGGAGATTAATAAAAAAACTTATTAGTAACGGGGTATCTACCCGCTGTCATCTCTTAGGAGGTGCATAGCGGTGTAACATACTTTTCGGT  
GAGCCTATCAGCAATCAACCCCTTTGCTAGCATTGAAATAATGGCCTGAAAATTGACCCCATTTGGTCAATGCCCGAATTGTAGAAGCCTGAATCACCGGACCATCTAAGATGGGATCAGGGT  
AAGGCAAGCCCACTTCAATGAGATCTGCACCGCAGGAGCTCAACAATCTCAATGCTTTCTCTGTCTACATAAATCCGGATCTCCAGCAGTGATGTAAGGTATGAATCCAACCTTTCTTTG  
TTTCTTCAACCTGGAGAAGGTCTCTGAGATGGTCAGAGGAGACTTAGGAGAGATAGTGAAGGAATGATTGATGGAGGTCTTAGATCCTTTGAGCAGTGCTGGAAGAAGGAGCGAGTGAT  
TCGTAGGAAGAGCCATTTTTTGATCTTTTTGTGCAAACTGAAACCGTAGAGGGTCTTTAAATAGAGAGATTATTATGACAGAGTCAGGAGTTTTGTGATTATTGTGAATAGTAAAAGTGCA  
GCAATGAACTATAAAAAATGTTTTACTATTTCGTAATCACAAAACCGATCAAATCTTTCCGCATGTAATAATCTCTCCTTT

>comp169546\_c0\_seq7

TGAATTTATACACCATCAATCATCGTAGCCACCCCGTTGAAAACCTAAGGCGCCAAAAAATTTCTATCAAGCAACATATCTAGAAAATGCAACTTGAGAAATCTTCATCCTTGGGAAGA  
ATTGCACTGTTTTAGATGACTGGTGGTACAAAAATGTATGAAAAATGCATCATTTTTTCATAAACATATAGGCGGTAGCAACACAAATTAAGTAACTAGGAATCATAGTAGTGCCTAAGTATGGGG  
GAGCAGAATTTGACGAGAAATAGAAGGTTTTCTAAGATAAAATGTTCGAGCTGTTTTTTGTTGGATAGCGGTGCTAACCAAAACCAAAAAAGAAACGGTTTCAATCCGACAAAAGTTTA  
GATGGTTCAGTCACCAGTTATAATGCTATCTAATTTGCACCATAACTTAAGCATTATTTTACAGACATTTAGTAACCTTTCCGATATATTGGTTTAGTAGAGAAAACATCAGTTAACACAGTCT  
TGGAGCTCAGTGTGGCACCCAGCAGCGATAGAACCTTGGCTTTATCAACGCTAACTTCCTTCTCAACAAGGTCTGAAATTAGAAAAGTCTATTCCTTTAGTTATGACAGAAAATGGAGAAA

TCGGAGAAATTTGAAGGTTGTCAGCAACCATAAACTTTCTTTCATCTTCCACAAAACCTCCACCATAATCACTCCCTCCTTTTTGCAACTTGGGATTTTGTCTATGAGTTCTGCCTTCCTT  
AATCCATGCTTGCACGGAGTAGGTTTAAAACAATACCACCCATCCGCATAGCACTTTATGCAGCTCGCCGAACAAGTCCACTTAGCTGATGGCATTTC AACCAATTTTAGCATTGCTTTTC  
GCATCCATAGTAGGAGGCAAGTTGTGGAAACACCAACATGTTTTTACATTTCTTTTGACTTGAACCATTCTAAGCCCAAGCTCTCTGCCGAGGAATACAAATTGCTGATGCACCAATCTGAT  
GATATGTGATCCCGGAGTAGTTTCGATCACAGAGCCTAAAGGAAATGGGAGAAAACCTCAACAACCTGATTGAGGAAAGTCTCCCCAACCTCGGCAGATAAAACACTGTTGTTTTCTTGTTT  
AATATCATCTTCACATTAATTTATGTTCTGCTTCGTTGTCGTCATAATCTTCTTTAATCACTGGGAAGCACTTCATACTTTGTTCAACGCATGCATCGGGGAAGAAAAACTCCGTCAATGCA  
CGTTTGGATTCTAATGACCTCCTCAGTAAGTTTAAAGCCTCTTCATTGCCAACATTTATAACCTTTTCTCTAACATGCTTGCATCATTAAATTTGCAACTTCTCAAGCACGGAGAAACCAGT  
CATCACAGAAATGGCATCACCCATAAATTATCAGTAATAATAAAACCAGCTCTGTCATTAACAAAAGACCCCACTCTTTTCTACTGTATCTTTTGGCCATCTCAAAGCCTTATCCATCAGTTT  
GCCACAACGGCTGCATTGAGCTTTAGTTACATAGGTACAATAACATGTTGATTGAGTTGAGCAATCACCTTCATTGCAAATGTATGAAGTTCTTGGGTTGGCCTCATGAATATTTTTAATTTT  
CAAATCCTCGCATATTTTGCAGCAGCACTTCGAGGTTTGAGAAGCATTTCCTTGCATGCCTTGGTTTGCATGTGCTTGACGTCAAGCTGCTCAACGCTCTTATAAAGGCTGTCAAGAGAT  
CCCAAGCCCGACTGCTTGCCAAAAGCTGGACAATGCTTCTAGCGGCAGAGTAAGGAAGCTAAACAAGACATCAATGAAATCACTCCCAGCTTCGGCAAATACAACCTGCTTTTGCTC  
TTTATTAATTAGAAGTTTATACTTATCTCAGCCATGGCGTGATGAAAAGTAAGGTCTGTTCTGTGCTGCATTTTGATTGCTCTTGCCTCCATATATATAGAACAGAGAAGCCTTAAGCTGAC  
GGTTCGTGCAAAAAGATTGGAATGCCAAAGTTGGGAATCCTAATAATAGGATGGGTCATAAATAGAAATGCATTAACCTCCATTCAAAAACTCCTCGACAATCAAAAACCTATTTAG  
GAGCTGTTTGGTAT

>comp169563\_c1\_seq1

TGCTGACGATGTCCATCAATTTGATCTCATTCGGTGTGCATTTTTTTAAAATCTTTTTACCGATTTAAAAGTCTGACCAATATAGGTGTCAATTCTAGTTGTTTCAGTTGTTTTGAACGCCT  
CGACAATATTTGCTTTGAAAATGGATGCCATTCGGGCAATTTTGGTTGACACGTTTCAAATAAGTTTGATAACAACATCACTCTGTTCACTCATCATTTCTCCTTGAATTTGATGCACTGGAATA  
ATTTATCGAGGTCAACAAGAGGATGGACCAAATGTGGAGGAAATAGGAAAAAAAGTGTAGACATGAGATAATACGGTTAAAAGTTGTGAAAGAATGTACAAAA

>comp169568\_c1\_seq5

TTTTTTGTTTTTTAATCCAAGCATATAACCATTTTCATTGTTTCCAACTTCATAACAAAAGTTCTTAAATTTAAATCTCCTACCAATTAATCAAGGAAAAAGTATATCCTTACGCATAAAAAAC  
TTAACATAATATCCACAAATCTTAGTCGTACAATTGAATAATATCCACAAATCTAACGCCTATGTAATAGAATTACAATCTCTGAGTAGGAGTAGTTTTCTGCACCCATCATTGGAGGAACAT  
CCTTATAGTTCTTCGGACCCAGTAGGCTAACAACTACATTTCTCACATGCTCGTACATTATATCGTCATTGACAGTGGGAAGGTAGAATTGTTAATTCTCAAAGAAGTATATTGAAGCAGAG  
CATTTATATACTAATGCATTACAATGACCAATTGTAAAGCCTTTATACTCTATAAGCGAGTCCCTCGGATCTTGTATGGCTCTATTCTCGAATTCATGGTATAAGACATGCCAGAACACCCT  
CCTTGTTTGACTCCAATTCTCAAGCACAGATCTTCATTCTTATCAACTCTCATCTTATTAAGATGGTTGAATGCCTTGTGACACAATGAAATGGCTGGTGAATGCTGCCAGATGTGGGAGT  
TGCTTCTCTCTACCCGAGTTGCTTTTAAATCTGTCTTATAAACCAAACCTAAAATACAATACTCAATCCAATTCATTGGCAAGCCTCAATCAATTTCTAAGCTCTAACCAAACCTGAAACA  
ACAGAACGCACAAATTGATCAAGTAAAACTAAATAAAAAGACAACGGGCAGTATATATCATCCATTACCTCTTTAGCAGAAGATGAGTAATACTTCCCTGCAACAAAGGCAGCCGGGCC  
AACCTCTTGATGGCTCGCCTCAACATCTACAAGTACAAAAGGAGAAAAGAGTAAAATTTTCAATATAAAAAATATAATAATATAGAAACCACATGAACAACACAGAATTTTTTTTTTTGA  
CTGAAAATCCCACGGTTCTGCATCCAGCCTCTGCCTAAGGAGGCCAACATCGTTCTTGCGAACCAAAGACTTGAACAGGGAATGACAGCATAACCAGATCAGATAGACAAAAGGAAG  
GGCACCTACCGGCCGACGGGCTGCGCGAGAGCGACTTAGTCGTTGAAATCGGAGAGGAAGAAGGAAATTTGACCTTATTGTATCTACCCTCTATGACGAAAATATCAAACGACCTACTT  
TAAATAATGCGCATAAATCTCAGAGAGACTGGATGCTCATTTGTTTCACTCCAAATCTCACCCCTAACACTTGCAACTCTCTCTCTCGTTTTAGCTGAAGATGATCTCGCAGCTCCTCGC  
CCATG

>comp169586\_c1\_seq6

TTCAACTTCAAAGAGCTCAAGAATTAATAATTACGATATTAGATTTACTTCAATTATTTTTTTAATATAAATATTTTCATTTCTAGCCATCTAATCTAAAGTAAAAAGTTATAATCCATCTACATC  
TAACATATTATCTGTCAATAGTAAGTCTAACACATGAGCAAGCACTCAGTAAAAATAATCAAATGATTAGGATGAAGCTAACGATGATGATGAAACAAGAGGAAGTGTCCAGAATTTTGCA  
GACTTTGTGAAGGTTTTAAATTATGATGCTGAAAGTTCATCAAATCCTATAAAAAATCATACAAAAAATGTATTAGAAATAATTGCTCCTTTCTTTTGCTTGTGCCTGATTCATTCATAGAGAG  
AAAAA

>comp169623\_c1\_seq8

TTAATCTGCACAACCTCTGGAAGGCGTCTGTAATACATATAAAAAACAAAGGGGCTCCTAATTACATTTTAATGGAAAATAAATTTCTGAAATCAACATTTCTAATCAGAGAAATAAAAAATT  
CTGATTAAGCGGAAAATCAACAGAATTTATTATTTAATTAACATTCATCAATATTCGATCTTGCATTTACGAACCTTCAATATGTAAAGAAAGCATAACCATTGAGCTAACACGACCAG  
AACAAGTACAAAATAGCTTTAACGGTACTGTACAGAAAAATAAAATTTTAACTGCATATCAGGATCTGTATATGATTATACTAATGGGACTGAAACGGCATATAATGTTGCGCAGTCAAAG  
CGGATTAATTCGTCGTGGCCGGAGCCACCGGCGTGTG

>comp169679\_c0\_seq3

TGAACCATGAAGCACTTATTGTTTGTGTGTGACCAACATTAATCAATTATTATTAGGCTCAACATAACGAGTTTGGCACCGATAGATGATGGCAAAGCATCAGTTTATAGATTTGTGAAG  
CTAACTTTACTGAAATACTAAAATGTTTTCTATTAATATAACAGCCAAAATAAATAAAGAGCGTTCAAAAAGTCATCTTCCCTAACTATAAAAGACCTGTAGATGTAAAAATACTTACAGAGG  
AGGTTACAGGGCAAATTTACATGTGGTGTTCGGACCGTCCGGAGGGCAATCCAGAAGTGCCATGTCACCCGGATGCAACGGGGTTGGGGTGACGTGGCGAGTCCGGATTCGCCTCCG  
GACACCACACGTAATAATTTTCCAACCTTTTGATTGAGTGTGTTTTAACAGTTGGGTAAAAATACATGATTCAAACAAAAGCTACTACTCCCACGGGCAATAAAGTTGTGAGATTCCACCA  
TTAAGCAGAAATCAAGTGCAGGCATTAAGACTAAGGGCTCGTTTGGTTCCACATAATTCCTTCGTTTTTCGGTTACTAACAGAAAATCAATTGACGGAAACATGTTTGGATGTGAGGCATA  
CTTTTTAAGAACTCAATTTCTCTACTGTTTTGAGAAGCGTTATGTATTAGCTTCTCCGTTTTAAAAAATTCATTTCTCCTATTGACGTTTTTAAACCGAAACGACAAAGAAACCAAACGA  
AGCCTAAGTATTATACCAAGAGCCAATACAATCATGTGAAGTTGTTGTGGGAGTTACTCTTTCTTAAACCTTGATCAACATGATGGAATACTAAAGACCCATGAGACCCAAAAACCC  
AATGAACTTCTCAATTCTAGTCAAATCATTGGATATGATATCACTTGTAAATAGTGTGGTATAAGTTAGGATTGACACACCAATGATCAAAGTCATTTTTAGCCAAAAAGTTAAGTGCAG  
GAGGGGTAAAGGCCAATCTTTTGATATTTGTTTCAATTAATATATCTAATATGAGATTAACCCGGCACTTCCAAATACTTTAATAGTACATTGCTGCATCCTGTAGGTTGATTTACTCAAGGCA  
AAGAT

>comp169679\_c1\_seq3

ATCTTTGCCTTGAGTAAATCAACCTACAGGATGCAGCAATGTACTATTAAGTATTTGGAAGTGCCGGGTTAATCTCATATTAGATATATTTAATGAACAAATATCAAAGATTGGCCTTTA  
CCCCTCCTGCACTTAAACTTTTGGGCTAAAAATGACTTTGATCATTGGTGTGTCAATCCTAACTTATAACCACACTATTTAACAAGTGATATCATATCCAATGATTTGACTAGAATTGAGAAGT  
TCATTTGGGTTTTTGGGTCTCATGGGTCTTTAGTATTTCCATCATGTTGATCAAGGTTAAGAAAGAGTAACTCCCACAACAACCTTCACATGATTGTATTGGCTCTTGGTGTATAATACTTAG  
GCTTCGTTTGGTTTCTTTGTCTGTTTCGGTTTTAAAAACGTCAATAGGAGAAATGGAATTTTTTAAACGGAGAAGCTAATACATAACGCTTCTCAAACAGTAGAGAAATTGAGTTTCTTAA  
AAAGTATGCCTCACATCCAAACATGTTCCGTCAACTGAGTTTTCCGTTTTCAAACCAAAAAACGGAGGAATTACGTGGAACCAATGAGCCCTTAATGTTCTTAAAAACCTTTTCATGTGAG  
GTGGAGTGATGGAACCTGTGAAGATATCTGAGATGATGAGAATTGTTTTAATAAGGTTTTCTAAGCACATATCTGCTATGTAAATAATGCTAATAACTCTTACAATATTTGGACTGATAACCG  
ACTGTAAAGTTGACTTAAGATTGATCAAGATACCTATCAATCAAGCATACTTTGAAATGTGAATGGGTAATGATTAGATAATCATAAATTGAATGCTTTTTAATTTAGAATAATATGAATTT  
TTTGTTTAATGTAGTATGGCTTTTCGCATACAGAAGGGTTACCAAAGCGGGGCGAATTGCTCT

>comp169703\_c0\_seq5

TTCCCTTCACCTTTAATGAATGCAACAAGTTCTGAAAAAGAATACGGTATGTATGGCCATAAATTTCTCCAATTATGATTTTTATGTGAAAGTCAGATATTTGCTATTTATTTATTTCTC



ACCGGTTAAAAACATAATATTTATAAACAATTTAATTTTCTCTTGTCTCCCTAAACAGAATTTTAGAAATACTTACCTTATAAATATATGAATGTAAATAGAAAAAAATTAGGAGAAGTTGA  
ACTTACAACATAAGATGGCCTTGACATGGTCTATATTGCTCAAAAAACCTCCATGAAGGACTGCAGCTTTATGGAGCCTCAGCAAAACATGCACCAAATCCTTCTCCTCCTCACCTCTTATC  
TCTTCTTCTTTTTCTCTCATTTTAAGATGCTCATAAATAACTCTATCAAAAAATGTATTTCATCTCCTCAAAATCTTTTTCCATCCTTCCATGAAATCCTCTTAATCGATCAATCCATTCCATCCC  
AGGAAAGAAATCTGCTACACAGAAACCACCAACAAGCTTTGAGTCTCTGAAAGTAGCTGATGAAGCCATACTCCTCCTTTTCTAAAAGAACCGCCGAGTGCCGCTCGGCAGACCACAT  
TATTTACGAATGAAAGCGTCAACTCGCTCAAGTTAGCTATGGAGAGATCTTTGATAGTGGCTACGAGGTTCTCCACTTCTCCCTTCGCACAGCTTCAAAGACCGAACGCGACGAGAGC  
TGAGAAGCTCGAGCATGGCGATCTTGGCAGCTTGGCGCCAGAGATCGCCGTAAGGAGCGAAGGAGATGCTGGAGCTGTTGTATGAAAGCTTGTTTGGTGCAGTGAGGAGAGGGCGGCT  
GGAGAAGGTGAGGTCGTGATTAGTGAAGATCTCCTTGGCTATGTCGCGAGAGGAAACAACGAGGGTGGGGATGGAGCCGAGGTGGAGGAGGATGAGAGGGCCGTGTTTATTTGAGAGG  
CTGATGAGGGAGCGGAGAGGCTTATTGGGATTGAGAAGAAAGAGGTTACCGACGATGGGGAGACGCCATGGACCTGGAGGGACCTCTCTGTTTGTGATTTATTAGTTTTTTGTGATGATG  
TTGAGTACGAGGAAGGAGAATAAGAGGAAGAGGGAGAGATAGAGGAGGTAGGAGAAGCCCAATTGT

>comp169809\_c0\_seq3

AAAGTCATCCCAAACGAAGTCTAAGTCTTACTAAATTCCTAACACAACATTTTCAGTCTGATTTGGAAAAACATCTTTACTGCTTATGAATTTGAACCGAACAATCGATCAATTTAAAGGAA  
AACAATATTATCTAATAAAAATTGAAAGTAAACACAGAATGCTGAAGACATTATCATGCTTATGTTGCATCAAATTTAAGTTACAGAACAATAAAACAGTAAAAGAAAAGCAATAATACTAGT  
TCAAATATACAGAAAAAAAACATTTAGGGAGTATTTTTCAAACCTAATAACAAATTCATTTTTCAATGAGCTCAGATGATTTATATGGTTGTAAAGAATTTTAAATAATTGTCTAAATTA  
ATGTTCTATGAACTTCAGCTGACAAATTAATTTTCATGATTGGCAGAGCATTAAAAAAGAACGTTGGCATAAATTGTAGTGAACGCAATAGGAGCAGGAAAGAAATAGACGTCAGTTTACAT  
AAAGAGAACACAAAAAGGAAAAAAAAGATTCTTGTCTGAGCAGTGTTAGCAGCATTGCGAGTAAATAGAAAGATCCATACGCATTCAAACAGAAAATTAATAAAGATAAAGAAC  
GGATTCAAACCTGAAAAGTGCTATCTCTATTTTTTATATGTTTGCGAAGTTAAAGAACATGATTTAATCAACAAGAACTAAGAGTCTCCAATGATATTTAGATCTCTGATTGAATCATGTCA  
TCAAAAAGCCTAACATGGGGAGAAGGAAGTACTATGTAGCCAAAGACAACCTGCCACTTACTCCTCTAAATTTCTTCTAAAGATGGTAAGTGAGATTAAGTCTAAGAACAATTTCTAT  
GTCGGGGTTCGGCAAGTCATCCTTGGCTGCACCATACTTCCCTGAGCCTCCATGTAAAGCCATAGATGAGAAAAAAAACACCTCAAAAATTTACCCTATCTTTAAAATATTTATTCCTATCCG  
C

>comp169848\_c0\_seq1

AAAATCCCACATTTTTAGTTCTCCCCGCCAAAGAATTCCAGAATGGCCGATGCGTCGAGATCAGCGGCGACCGCGAAGTACCGGAAACCCAACTACCATTAAAGGTTTCGGCTCTCCGT  
CTCCCTCATCTCCGCCATAACGGACGCCATCTGCCGCTCCGACGGAAACAATCAACCGCCGCTCATCTCCTTCCCTCAACCTGCGCGCCCCTCCCAACCCTACCACGGTTTCGCGGCGTCCGT  
ACAATCGATCTCACGGTCGACCCCTCACGCAAACCTTTGGTTCCGCTCTTTCTCCCCGTCGACGGTCGTCCCTCAACGTCACCCCTTATCGTCTTCTTCCACGGCGGCGGATTTCGCTATCT  
CTCCCCGACACCCGCGCCTATGACCTAGCTTGGCCGCGCATGCCCCGTAAGATCCCAGCCGTCGTCGCTCTGTAACTATCGGCTTGACCTGAACACCGCTACCCCGCCCCCTACGAA  
GACGGCATCGATGTCCTCAGATTCGTTCGATTCTGGTGAATCGACGCAGTTGCCGGCTATCTGGTTGACACTTCTCCTGCTTTCTCGCCGGCGACAGCGCGGGCGCTAACATCGCCAC  
CACGTCGCCCCGCGTTGGGCCGAGCAGGCGGTGGATGGAGCAAGGTGATACTTTGGATTCCCCAAAATCTTTTTTTGTTGAGAGTCTCTGTTCATGAGCTGATATCAAATCCCATGAG  
AAGTTCAGATCATTGAGTTTAAATTATATCTTGATTACATTTCTATATTTATTACATTAAGCTACTAAGGCCATCTCTCACCTAACGCCATCAACACGAATGTTGACTTTGTACTTTTCAC  
AAAAGTTTTTTTTTTGTGAAATCATGAAATAGATGAGGAAGAAGATGAATTCGCCTACCTGATGGAGCATTCAACAGAGAGAACTATCTACAATAGAGAGGCAGCAATTCTGCTAGAAAT  
TGGGCATAGGAGATCGGAAGAGC

>comp169848\_c0\_seq3

GACGGCGATAGGATGATCGAGGAGATGGGGAGCTTCGTAAGGAGCCATGTTTATAAGGAGAGATTATTACATGAGTAGATCGGACTGACATAACCGTCCGATTTTGTTCCTTGAACCGTT

TGATTTACTGTTCCACAAATACAAAATTAATCTTTGGTTCAAATTCGCATATAATAATCTCTCCATTGATAGACGGACTACTACAATGAAAATTATGATGTATGTCATATATTATTTTTATTTTC  
ACAAAACAATGTTATGTTTTATTATAATTAATTATTAATAATATTATTAACCTATTTGATATAATTAATAATTAGATTTTTATAATTTTTTATTAATTGATTTATTTAAGGTTTATTTATAAA

>comp169851\_c0\_seq1

TAAGGCTTATATAAAATTATAAACTAATTATAAACTCTTTAGTTCATGCTTTTTAAAATATTTAAAATAGAAAATATTCAAAGTGTCTTATTACATAAAAATAAAGTATGAATGTTAAGCTATCAT  
AGTAGACAATGATAGCCAACAAATCAAACATGGACACCATTGCTTATATATATTGCTTATGTTTTGAATGGAGAAGATTTGCGTGCAGCTCGAGGCCTTAGGGGCAGAAGGTGACTCTG  
TAGTTGGTGCCGGCGGGGCAAGTGAAGGTGCTCGTCTGATCGTCCTGGGATAGCTGTAGGCGTCCGGGCAAAGGTTCTTGAAGAACCTCGAGTAGTCGGTCGCCTGACAGCTGCCGGA  
GTTGCAGCAATACTCATCTGTCTTAAACACCGTGCACGGATTATTGCATCCTCCGGGAGCCTGCAGCGCCGCCGGGCACTGTCCAACGATATCCGCCGCGCATTTGATTCCGTGGCAAGAC  
CCACTTGGCGTCTCTGGGCTGAAATCAAGCCCCACGTTAAACCCGTCGACGTTGGAGATATCGAAGAAGTCAAGATTGGAGAAGTGGTTGAGGGCGAACTCGGCCAGGGTGTTCGGCG  
GCGTGCCGTAGGCGGTGCAGGCGAGTTTGCCGCCGAGTCGCCGTTTGGCAATGACCGTTACCGGAGGCGTCGAAGGAGCAGCCGGTGCGGGCCACACGCGGCCCCCGGTGGTCCC  
GGCTGGGACGTGCATGGTCCATGTTGGCCGTTGTGCGAGCTGGATGCCACCGCCGGCGGGGACCGCGGCTGCCAGACAGTGTACGAGCATTGGTTCACGATGGTGAAGGTGGCGGCTT  
TGAGAGGGGTTAGGAGGGTGAGGAAGGCGAGGGGAGGAGGACGAAGGAAATTGCTACGGTGGTGGTGGCCGCATATTTGTTTGATTAATGAATTAC

>comp169912\_c1\_seq10

ACATTACAGTACAAATTAACGAGCATAACCTTTCTTCAATGCAATAGATTCTAGCCATTTAATACAATCTTCAAAGCTTAGAAATAAAGGAATTCCAAACCCCCATTGGTTTAGATGATGAATA  
ACCTCTTTTAACTTCAAGCAGTTGCACACAATATGCTCCACATCTTCAATATCATTGCATCCTTCTCCACCAAAACACTTCCACCCGAGCATTCAACTTAGCTTTTTTGATCCACTTCCAATG  
CTGAGACT

>comp169912\_c1\_seq5

TTCACCTTCAATTATGATACCTGTATTTGAGCATCCAATCCTTGATCACCTCCTTCAAAGAATGAATTGCTAGAAAGCTCCAATTATGCTATATCCCATTGAACGCAAGGTCTACCGAAAGCCA  
ATAGTTGCCCTTTGCAATCCCTTAATACTCCAGCAATACCTGTTGTATAAGAAGAAAAGTAGAGATTCATCAACATTAACCTTTAGCTATTCGGGTGGAGGAGGATGCCAAGTATTTGACAGTC  
TGATCGACTGGTTAACATCCTAGTGGCCCAAATAGAAATGGCTAAAACCTATGAGAAACCGATGTATAACATATGGCATTGGAAGCAATAAAAGCAGGGATGTCTTCCACTCCTTCATGAAT  
ACTTTTGTTCCTAGCTTTCCATGATAAAAAGACTGCATTACACTACAAATTAACGAGCATAACCTTCTTCAATGCAATAGATTCTAGCCATTTAATACAATCTTCAAAGCTTAGAAATAAAGG  
AATTCCAAACCCCCATTGGTTTAGATGATGAATAACCTCTTTTAACTTCAAGCAGTTGCACACAATATGCTCCACATCTTCAATATCATTGCATCCTCTAAGACAATTGGCACTATCCATCAG  
TCTTCTGTACCATAAGAATTTGAATGAAGGGATTGCATTTTTACTTACTCTCCACCAAAACACTTCCACCCGAGCATTCAACTTAGCTTTTTTGATCCACTTCCAATGCTGAGACTCACAGC  
TCTCTTGACCAAAGCATTAAACAACAATCCAGTAATTGAGATTCCATATTTTTGCTGAAGCAGCTCCATTTCGATCCCCCTCCCCATCTTGTACAATTTTCACCTGCAAGATGAGATTGACC  
AACTCTCTACCAAACGTATCCAGCAGCAATGGTACATTCCAGCATCCATCAAGAATAAATTCTCTGACTAATACCCTTCATCCTCCTCTGGAACTACAAATGTAGGCCATAAATTGATACA  
TTTATCCAATATCCAGTTGTCTTTGAATGCATCTACTAATTCTCCATCAACCAATGACCATCTAACAATTAGTTTCAGCATTTTACATCCATCATTCAATAATTTCCAAGAGGAAGAGCATTTT  
CCTCTAATATTTTCCATATCAAGCCTTTCTCCATATTTAGCAGCCATAACCACATGTAAGAGAGTCTTTTTTTCATGAATGAATCTCCATGCCAACTTGGCTATTAAGCAAACGTTTTTGAGAC  
TCTTGAATAAAAACATCGTCCACCTTTACTTACCGGTTTACACATATCATCCAACTGACATAGTGAATCCATTGATCCATTAGACTTGTTCAAATGAAACTCCTGCAGAGTTTATCTAA  
TTCTTCCAATATTTATTTTTGGGACAAGTGAATGTGTAGCATGAAAGGTTGGAAAAGACAACATTACAGATTTTACCAAATAATTGCCGCTAATGATAAAAATTTGCTACCCCATATGTT  
GAGCATCAGGCCACGAAAGAGAGAAAATGATTACCGTCGAAATGAACGAGCTCCTTTTCGATCCAACAGAAGAAAGACCCCTCAAGCAAAGCACAAGTGACATAGACATGCTAGAAA  
AGAAGAAAAGCAAACCTAGGCCTAAGACTAATGAGAAAAGACTCATACTGTTATAGGATTTAATTATTTTAAATCAACTAATTTAATAAATAATTAATAATAAATAA  
TATTAATAATATAAAATTAGTAATTAATAAATAA

>comp169932\_c1\_seq13

GAGGAGGAGTCTCTCCCTCCTATTCTTCTGTTCTCCGCTTCTTCTCCTTTCTTCTTGTGGCTCTCCCTTCTTATGAGAAATGAGGGGTCTATTTGTAGATTTCTGGAGTGGCATA  
GCTTGTAATAGGTGTGAGATCAGGGGGCAAATATAGAGTGGTTCGAACGGACGGTTGATATTGAATCCTTTGATTAAGCACCGTTCTTCAGACATTTGAAGTTTTTAATGATGTCGAAATTTG  
GCG

>comp169932\_c1\_seq6

AGCCCGTAAATAGGCGTGAGATCAGGGGGCAATAGGGAGTGGTCAAATGGACGGCCGATATTGAATCCTACGATCGTGCACCGTTCGTTGGACATTTGGAGGCCTTAATGATGTCGGAAT  
TCAGCAATCTTGGGCTCGTTGGATTCTGCTTATCGAGCTGCTCGATTTGACTATAAGCTTGTATGTTTGGAAACCGTTTGGAAATCCAAATTATGGTTTGAACCTTCCAACGGCGCTTCGG  
GTCCTTGATTTGGACTCATTGGGCTCGGATTGAGTCGATTTGGTGTGCTTGGGTTTGTGTTCCGAGACGCTCAATTCGACTATAAGTTTGGTGAAATCGGAATTTAGATGGTCTCCAAT  
TTAATTTTTGAAGCTTACAACCTCAATTTTTCTTTGAGATTCGTGCCTGATCAAGATAATTTTTACTGATATATCACTACAGTTTCTGAATTAATATCCAATTTTGTCCAACCTGCTAAGAT  
GTAGTGAGAAATCGGAAAAACACAAATCGAAGGGGCTCAATGGAATAAAATATCAAATAATAAAAAAATCAATGGAATAAAAAATGAAGGTTTGATCCGGATTGATAGGACAATTGAAT  
GATACCTGCGGAAACTAAAAGCTCTGTTCCCAAACGCTGTTGTCTTGGCCAATTACAACCGC

>comp169982\_c1\_seq16

TGCTACTAAAAGGAATGCTATCCAGAAGGTCTTCATTTTCTTGGATCAGCTCACTAGAAGGATTCAACAGGCTTAGCTCTGGTTCCTCATTTAACATAAAAAATGTGATAGCAAACGAATA  
AGAAATATTTAAGTTTCTACTTAAATAATGACGTAGCAATTTCTAAGAAATATAAAGTTTCCACTGTCATGAAAACAAGTATACTTTCATCAAACACCCAAAAAGATGCTTCATTTAGGTG  
ATGGAATTTACCTGCTATTTACATACCTTCAGTTGACGACGATGAATTGGGCTTTAGTTGAAGACAAAGGTTCTACACGTTGTGGAGAAGACTTCCAATAAACTATCTTAGATCATCAACTT  
TTCTTCTTTAACATCTACATTTCTAATCTAAAATAAGCTAAGATAAAATAACTGTAAAATCCAAACTCAAACACCATATTACTTTCAAACATTGAATTAAAAACAACAGAACTTCTGCGCAA  
CAAAA

>comp170023\_c1\_seq1

AGAGAGAGAGAGAGAGAGAGGGGAGAACATTCTGAAATCAATGGCGCATGCAAGTACAAGCAATTAAGATGCATGAACATTTAAGAAATTGCTCCGAGAGTGTGTGCTGGTGATCGTCC  
CCTACAGCCAGACTCGGCCTCCCAAACGACCCAACCATCTCCGCTGCATAGCCTCGCATCATCATCTTTTGATGTTGCTGCTGCTTCTGCTGCAGTTGCGACTGGCATTTCACGAGTT  
CAGATTGAGCGGTGAAGAGATCGATCTGGAGCTGACGGAGTTTGGGTTGGAGCAACGAGATGATGCCACGCAGCCCTTAATGGGGTACGCAGGGCGCATCTCCGCTCGAAAAAGAG  
CGAGTTCACGGCTGCCTCCCGCTCGAACGGGCTCAGCTCGTTGAGGATCTTGGAGACGTTGCTGGCCCCGAAGACGCGGTGCACGTTACAAAATTTCTGAGGTTGGTCCGGCGGAAAAT  
AGGGCTTAAAGATGCAATCTTGCTGGCATTTCGCGGGAGAAAATTTGCAGCCAGCGCATGGCGTGTTCGCCAGCACCGCTTGCCCGCCGGCAGCCATGCTGCTGATTGGTTTTCAATACTG  
CAGATTCATGTCTGACAGATCCACTCGAAAACAAAGGCGGTTACCACATCGAAGAAGGAGACGATGGCTTCTTCAACCAGGATTGGCTCTCGTCTCTGCCTAAAGAACAGGCTTTCTT  
AGCCCTAGGAAACGGAAAGATGAAGCGTGAGATAAGAAGAATAGGGAGAAAATATACAGATATAGGAAGAGAGAGAGAGAGAATAAGGCTTTCCGGTGATTTGATGTGAGATAAAAG  
ACGAGAACGAAGGCGATTTTGCCAAATATAGCAAAGAAATTTCACTTGTATTGAGCCGTTGGATTTTTGTTTTT

>comp170064\_c0\_seq10

GCGGTTGTAATTGGCCAAGACAACCTCGTTTGGGAAAAGAGCTTTTAGTTTCCGAGGGTTCGAACAATATTGCGGGTTAAATCTTGCTCCAATCCTGCTAGCAAACAACAAATTTGGGTG  
GACTTTCAATTATCGTATTTTTCTCCGCTAATCGTTTTCTATATTATCTGCTCTGTTCCGGTGTATGGACTACGAGAACGATCCATACATTGATGAGGATGGAGAGGCTCTTATGGATC

>comp170081\_c0\_seq2

TTTTCTTACTATATTTTCATCCACATGTCCCTAGATTTTTCTCCATTTAAATTTGTTTATGATCGATCGCCACCCATTATTATGCCATGACTATAGATGAGCTGAGAGAGAAAAAATTACAGTAG

TTACAAACTAATTACAAACAAACTCAAATAGGACATCCCACGCGGAGCTGTTCTTCGTCCCCGCCGAGATGGCCTCAACGCACTTTATCACACTTCGCTCCTCAGCTCCTCCCTGCATC  
CCCACCCCTCTCTAAATCATCACTTGTAAATCATTACTGTATAACCTGCCACAAAACCATATAGTTTCCAACCAAAAATATTTCTTCTTTGGAAAACGAAGCACAGTACGCCAACGATTCCGTTT  
ATCTACATAAATCCAAAAATAGCAAACGTTTCCTTTCTATCGTTTCGCTCCTCCATCTCCCATCGTAGAGCCTTCAATCTTTTAAACAATTTCTTTCTCTCTGCCAAAAATAGCAAAGATGCG  
ATTTTTATCTACCGCTGTCTCGTCATCCTTACAAAATTCCTTCATTTTCTCAGATTTCTTCTCCCGGAAAATCCGCCCTCGGCCAGCTCCTATCCATGGCCTCCTCCGTGGCTCGAATGC  
CCTCTGACGAATGGCGCCACCACCAGCTTCCCGCCTTACGTCCGCACCCACAAACCTATCTCCAAGATCTAACCCGTATCTCCACCTCCATTAACACCACAGCCGCCGCCGCCGAG  
CCGCGGCTTCAGCAATCGTCTCATCGGAGGAGGCAGCGAGCCACTATCGCCGGCGACGAAACCAAAACGCCGACAATCCCAAATACTTGACC GTTGGGCCGCCGACAGGCACGCGA  
CATGATTACGACTATAGAAAGACAGGCCCATGAGGCAGAATTGTCGGCGCTCTCCACGACGACTCAGCCCCGTCTCCGCCGAGCTGCCTCGCTCCTCCGCGAGACCTCTCCGGACACCT  
CCGTTGCTGCCGCCGTAGCAGATGTCGTTGGCAGCGCGCGGTGCGGTGGCCGCGGACATCCAGCCCACCGTGC GCGCTTCATCGCTGATACAGATGTGGAGGGAGCTGGAAGCTGA  
GGCAGGGGTCTGCCCCACGCCTCGCGCCAGCATGGCGGCTCCACCGCCAGCCGCCGAGGCGGAGGAGGCCCTCGGCGGGTTCGGACACAAGTAACGAGGCGGACGCGTTCTGCGACTT  
GGAGAAAGCAGCTCCATCATCGCCTCCGACTTCGTCCGCGGTGGAGATGGAGAGCGAGGTCACCGAAAGGAGAAAAGGTCTGGGATATCATAAAGATGCTGAGCCTACAGGTCTCGTCCT  
CCCCGGCCTCCTCCGGCAATAAGCCAGA ACTGTCCGCGAAGGAGATTACGGGTAATACGCCAGCGGCCACCCTTTTGCCTTCGTCCGCACCGTTGCCAATGCCGGACACCAGCAAAAA  
GCGTTGCGTGTAAGGGGAAGACTGGTGATGGAAAATTTTCATTTGAAGCTGGAGAAAGAGCGCAGACTAGAGGTCCCGCGCTTGAGAAGCGCCACCCTGTTTCTCGATTCCCCTTCCG  
GGGCCGATTCAAGTATTGATTAGGTTGAGATCCCTGCGACAAGAAGTAGCGACAATCAACATCAACAATGGTCTCAAAAATTAGAAGCAAAGAGATTTGAGACTGGATCAAATACATT  
TTTCTCAAGGGAAAAACCTGCAGATAGAAGTGA ACTTGATATCATTGAAGTTCAGCTGAAGAAAGTCTGAATGTCATGGAAGTTCAGCCATCAGATCCTCATGTTTGCCTCTTTGCAATT  
CCCATTAATCATTCTAATGGTGAAAATAACCTCTTCCCAGAATTAGCATCCACAGGAGAAACGGAAAAGCTCGCCACTAGACTTCTACTCGCCATTGTCCCAACACGAGGATCTGCAAGAA  
AGCAGAAGCTCTAAAGTTTCATGGGATGAGAAAAGCTTATGGGGGAGCAGCCTTGATTGGCAAAGGCTTTCAAATTTCTACTCGCTGCAAACCTTGGCATGGTGAGATTGCATCCGAGGG  
GACAGAAACATCTTCTCAAGAGCAACAAATCGAATCTCCCCAATGTAAATTGTTATTACAACCATGGGTGATAAGAAGAACTTTCTATAATGACTTACTAAATACGAGCTTACCAAAAAT  
GGAGAGATTCAAGA ACTGCTGGAGATGAAAACAGTTTCAACTTCTCTTGCGAGCGAATTCTCTGCCAAAATGAACCAAATGATTGAGTCATTTTTACACAGACAAGGACAACAAAATGC  
TGATGTAATTGAAAGAGAGCAGTACGAAGAACAAGGCATCTGGAGACAGAATTATGAAAGCAGTTCTGATCAAGAGGTGGCTGCAACATCACTGT CACAATTATCCTCTGCAACTTTAA  
GTGACCAGGAAATTTGGAAAATACTTCATTATCGTCATCCTCTCAAATATTGCAAACCAGGATCATTGGCAAAGATTTTCATTACCGTTGCAAAAAAGCTGGCAAAGTTCTTCGTCCAC  
ACAAAATTCATCACCTAGTTTTTCAAGAAGGGGAAGATATGCACGAACTGAAGAACAGTGTGCTCAGATACATCACGAAATTTCTGAGCTAAGGAAATTAGTTGAGAGTTGCCTGGACTG  
GCAGAAAAAGTTAGATCATTCAATAAAGCAGGAAGCTTTTTGTGCTGTCAATCAGTTGGCTGGAAGAGGAAGTCTATTGCATAATTCAAAGTGCATGCAAGGAAGGAAAGACAATTGTT  
GCATCTGCTGTGAAGCACAAGTTGACACACTTTTATACAGGTGTGGCCACATGTGTGCTTGTTACAAGTGTGCTAAAGAGTTACAATGGAGCTGTGGTAGGTGCCCAATTTGCCGCTCTC  
TGATCGCCGATGTTGTTGAGCGTATCCAAACTCTTAAGTACTGATTCAGCTTATTTAATCCACTGATCAGTTTCTGATAGTTTGGATGAAGCAAATCTCCTTGAGCTCCTGTTTAGAAGAA  
CATCCATCCTAACTGGCCAACTTCTTATACATTGCACTGCAAAGCTTGCCATTTTGGCAGTTGCAGTGAGAGTAATAACAGTCTTAGGTGTCTTTTTTTTATTCTTTTATGTTTATGGAGAGT  
GAATATCTCTTTCTCCAGTTTGTATCTTTGGTGGAGCTATAAATGCTCTGTCTATATGTACCAATACAAGAAGGTTATTTTGAAAAATACATTTTTTCATCTACTTTTTTGCTTACGGTT  
GGAATTCACAAAAGATGAAAGAATTCTGCTTGTTCATTTTTGAAATTAGAATGCTCAGAAAAGAATAGAAAAGT CAGAATAAGTTGCAATTGGACTTTCAAGTATGTGAAATGATA  
GCTTCCAAAGAAACTAGA

>comp170090\_c0\_seq13

TCAATACAAAACCTCCGCAAAAAATTCATTCGCAAGAGATGAGATCATAATAGTATCATAACCAATAAGAATTCTTGAAATAAAACAAACTCTAATTTGTGAAAATCTAAAAAACATGAT  
CTCTCAATGCAACCAATAACAAAAGAGGAAGGGATAGGCAGAAGAGTAGATGGAGTAAAGAATGAGAAAAGAACGATAAAACAAACAAGAATTAATCAACATGATAGTAGCAATTGC

ACAATCTCTTCATCAAACCTTTGCACTTTAAAGACAAAGCAATCTTCACCTCCATCGAAGAAAGTCCATTCTTGAATAATCTCTTCTACAATTTCAATAATCCTCTTCACACAGATAAATGTAT  
AAGCTAAAAAAGAAGTTTTACATATGATCCCTTAATCAAGAAAGATGAATAAAAAACCTCAATCTCAAAAAACTTTCAAGCTGCAAAATAATATCTTTATTCTAGAACCATCCTAACAAGGA  
TATCTATTCCATAAATTAAGCATCAAATCTATGCCTATATCCACGCTCAAATCAGTCCAAATCTTCCATGATATAGTATATGATCAGTTCCCTATTCTACGCCAACAAACAGAAGTTAGCCAG  
GTTCAATTTGCCATACTAAATCTAACCAACATGCAGAAAACATGAAGTGCAAACCAGAGAATTCTGACAACATTAGATTGCCAAATTCAAATTTGGTCGGCCAATTTGACCTAAAGCGGATT  
GAAAGGATCAAAGAGATTTAGTCACATTTGGTTGGGTATAGTCAAATTTGATCGGCAATATGACCCATGGCAGATAGAAAGTGCTCAAGTCTCCTAAAAAGAAAAAAAAAACTGGTGTAACA  
CAACAATATTGAATTTTTTTGAAGTACTATAAACCTAACAGCAACCTTCAATTTTGCACAACCTGTAAACGTAGTCAGTATCATATAGAGCAATTGGAGTGATAAGGTGAAAGAAAGTTTGA  
AACTTTGAGCACAAAGGTTATATATGGAATCAAGAGGAGTCATGCTCATTTTTCACATCCAAATTAGCAGCTAAGAGGTAATGCGTCAACAATTCATTTTTCTGTGAAAAACACCGCCTTC  
ATTAGCCATATCATAAATCATGGTATCAGAGTTCTTGGCATTCTGTAAATGCTAATGAAGCCATGTTACAGAAAAAGAATATAAATATTTACCTTATGCAATCAAAGACATAAATCGA  
ATTCTCAAGAACCTGTGCTAGAATTGCTGTACTCGAAGGTTGCCTGAGCTGTTGTTGAGCAAGAAGTTGCTGATGCTGCGGCATTTGCATCATTTTCTGTGTTGCTGCTGCTGCTGCTGC  
TGCTAATTGTTTCGTTCTTATCCAAAGCCTTGTGGACGGCCTTATTGAAGTCATTTGTGGCAGCAATAGGATCAGGATTATAGGCCGCATGTGCTTCATCACGAGCGGCTTCTGCGCGTTTC  
TTCCAATACTCATCGAATTCGCCAATGTCAGGACGAACAACATCGAAAAACAAAAGAGGAAGAAGAAAAGAAGAAAAGAAAGGCGAGAGCCAACAATTAGATTCTCCATTTCTTCTCT  
TCTCCTTTTTCTTCTAATTCACATGAATTTAAAAAGAAAAAATAAATAAGAGGTGGGAATTAAGGTTTTGGTCAAGGTGGAAATTAATGGCCGGAGACCACACGACCGAACCTCA  
AATTCAAAAAGGCGATTGAGCGAGAGCCATTTATACATTTGCCAATTCGGTCTTTTTCTGTTGGTCTTGGCGAATGAGGGCGACGAGGCTTTAGGGTTATTTATGTGGCTAAGGAAA  
AAGACGACAGGTAGAAAACACAAGAGGTTAGAGGCGAGAAGTGAGGACCGCCATTGATGGCTCGGGAAGGTTTCTCTCTCTT

>comp170090\_c0\_seq19

AACCTTCCCAGCCATCAATGGCGGTCCTCACTTCTCGCCTCTAACCTCTTGTGTTTTCTACCTGTCGTATTTTTCTTAGCCACATAAATAACCCTAAAGCCTCGTCGCCCTCATTGCCAA  
GACCAACAGAAAAAGACCGAATTGGGCAAATGTATAAATGGCTCTCGCTCAATCGCCTTTTTGAATTTGAGGTTTCGGTCTGTTGGTCTCCGGCCATTTAATTTCCACCTTGACCAA  
ACCTTTAATCCCACCTCTTATTTATTTTTTCTTTTTAAATTCATGTGAATTAGAAGAAAAGGAGAAGGAAGAAATGGAGAATCTAATTGTTGGCTCTCGCCTTCTTTCTTCTTTCT  
TCTTCTCTTTTTGTTTTTCGATGTTGTTGCTCCTGACATTGGCGAATTCGATGAGTATTGGAAGAAACGCGCAGAAGCCGCTCGTGATGAAGCACATGCGGCCTATAATCCTGATCCTATT  
GCTGCCACAAATGACTTCAATAAGGCCGTCACAAGTAACTTGTATTGTCATGCAATCCGATTGTCCTAATGGTTGATGATTTTGTATTATTAAGGAGGAAATATTATTACGTGTAGAGT  
TTGGTGATTCAATTATTGACGAAAAATTATTACGAAAAAATGACAGTTTTATGATTAATTTCTGCCTTTAAAGCTCACAACATGAAATGCAGGGCTTTGGATAAGAACGAAACAATTAG  
CAGCAGCAGCAGCAGCAACGACAGAAAATGATGCAAATGCCGACGATCAGCAACTTCTTGTCAACAACAGCTCAGGCAACCTTCGAGTACAGCAATTCTAGCACAGGGTACCA  
TGACTCAGTTACATGATTTACAGGGGCAAGGTCAGCAGAAGTTTCAACCGGTACCTGGACAACATCAAATGCAATATTCTCAACCTTGTCCCAACAGTTTCAAACAGGCAACTACAAT  
CTGCACATATTAGCACAACATAGCACAAGCCAGATAACCCAAGGTGGCCAACTAAGAAACCAGTTGAGCCAATTTACTGGATCTGCAAATAGTGCTTGTTCATGCTGCACAGACAT  
CTCCAAATCTCAAATGATCACAATATGTCAGCGGCAATGCAGCCACAATCTATTTGACACGAATGCAGTTTGGTTTATCTGGTGGACATCCTCAAAGAAATCTTCAATCACAATCTA  
AATGATCAGATGTTCCGGCATGGGTGGCTCAAATACAGCTAGTATGGTGGGAATGCAGCCTCAGCAGCACGGCGCACAGGGTGGATTGGTAACATTCCTTCAAATTCACAGAACATGCAA  
CAAATATGACTGGCCTTCCAAATAACCTAACTTTCAGCAACAAAGGCAGCAAAACCAACAGTAAACGAAGATCTGAAGATTGGTGCAGAAATTTGGTCTTCTTCTTCTGGAGAAAAAGT  
GCAGGAGAGTAGCAATTTGAAGTTCAATTGTAAGTGCAGCTCGGTGTGAATAATTTTCAGTGGCGATATCTTAAACTATTGAAGCCTTATTACGAAGATGCCTCCTGATAACCTTAATGTAT  
TCATTAATGTTAAACGTAGTTACAATCTTGTATGATCTTTTGGAGGCTCAAATCATTAAAGCTTCAATTCGGTGATTTTTTACATAAATTTTGTGTAATTTATTTTATTTTGGAAATTTATTT  
GAATGTTTCTTGAGAATAAAGTTCAGTTTTGTAAAA

>comp170090\_c0\_seq23

AACCTTCCCGAGCCATCAATGGCGGTCCTCACTTCTCGCCTCTAACCTCTTGTGTTTTCTACCTGTCGTATTTTTCTTAGCCACATAAATAACCCTAAAGCCTCGTCGCCCTCATTGCCAA  
GACCAACAGAAAAAAGACCGAATGGGGCAAATGTATAAATGGCTCTCACTCAATCGCCTTTCTGAATTTTGAGAAGAAAAAGGAGAAGGAAATGGAGAATCTAATTGTTGGCTCT  
CGCCTTTCTTTTCTTCTTTTCTTCTTCTTCTTCTTTGTTTTTCGATGTTGTTGTCCTGACATTGGCGAATTCGATGAGTATTGGAAGAAACGCGCAGAAAGCCGCTCGTGATGAAGCACATGC  
GGCCTATAATCCTGATCCTATTGCTGCCACAAATGACTTCAATAAGGCCGTCCACAAGTAAACTTGTTATTGTCATGCAATCCGATTGTCCTAATGGTTGATGATTTTGTTATTATTAAGGAG  
GAAATATTATTACGTGTAGAGTTTGGTGATCAATTATTGACGAAAAATTATTACGAAAAAATGACAGTTTTATGATTAATTTCTGCTTTAAAGCTCACAACATGAAATGCAGGGCTTT  
GGATAAGAACGAAACAATTAGCAGCAGCAGCAGCAGCAGCAACGACAGAAAATGATGCAAATGCCGCAGCATCAGCAACTTCTTGCTCAACAACAGCTCAGGCAACCTTCGAGTACAG  
CAATTCTAGCACAGGGTACCATGACTCAGTTACATGATTTACAGGGGCAAGGTCAGCAGAAGTTTCAACCGGTACCTGGACAACATCAAATGCAATATTCTCAACCTTTGTCCCAACAGT  
TTCAAAACAGGCAACTACAATCTGCACATATTCAGCACAACATAGCACAAAGCCAGATAACCCAAGGTGGCCAACTAAGAAACCAGTTGAGCCAATTTACTGGATCTGCAAATAGTGCCT  
TGTTCAATGCTGCACAGACATCTCAAATTTCTCAAATGATCACAAATATGTCAGCGGCAATGCAGCCACAATCTATTTGACACGAATGCAGTTTGGTTTATCTGGTGGACATCCTCAAAG  
AAATCTTCAATCACAAATTTCTAAATGATCAGAGTAAGTAATAGTTCCATTGACTTACACAATTTTCTGCTCATTTTGATTTTGTTTATATTGCTAAAGCTGTAGATAGTTCAAAGGTTAGAATT  
ATCTCAAGCATCGAAAAGGCAAGTATTCTACGGCATTGCAATTTGGTTGGATTTTGATCAGCATTCAATTATGTTCCATGCGTTCAATTGGCTTCATTGCTATTTAATTTTTGGGAATTTCTTACC  
AAAAGA

>comp170090\_c0\_seq3

TCAATACAAAACTCCGCAAAAAATTCATTCGCAAGAGATGAGATCATAATAGTATCATAACCAATAAGAATTCTTGAAATAAAACAAACTCTAATTTGTGAAAATCTAAAAAACATGAT  
CTCTCAATGCAACCAATAACAAAAGAGGAAGGGATAGGCAGAAGAGTAGATGGAGTAAAGAATGAGAAAAGAACGATAAAAACAAACAAGAATTAATCAACATGATAGTAGCAATTGC  
ACAATCTCTTCATCAAACTTTGCACTTTAAAGACAAAGCAATCTTACCTCCATCGAAGAAAAGTCCATTCTTGAAATAATCTCTTCTACAATTTCAATAATCCTCTTCACACAGATAAATGAT  
AAGCTAAAAAAGAAGTTTTACATATGATCCTTAATCAAGAAAGATGAATAAAAACCTCAATCTCAAAAACTTTCAAGCTGCAAATAATATCTTTATTCTAGAACCATCCTAACAAGGA  
TATCTATTCCATAAATTAAGAATCATCAATCTATGCCTATATCCACGCTCAAATCAGTCCAAATCTTCCATGATATAGTATATGATCAGTTCCTATTCTACGCCAACAAACAGAAGTTAGCCAG  
GTTCAATTTGCCATACTAAATCTAACCAACATGCAGAAAACATGAAGTGCAAACCAGAGAATTCTGACAACATTAGATTGCCAAATTCAAATTTGGTCGGCCAATTTGACCTAAAGCGGATT  
GAAAGGATCAAAGAGATTTAGTCACATTGGTTGGGTATAGTCAAATTTGATCGGCAATATGACCCATGGCAGATAGAAAAGTGCTCAAGTCTCTAAAAGAAAAAATAAACTGGTGTAACA  
CAACAATATTGAATTTTTTGAAGTACTATAAACCTAACAGCAACCTTCAATTTTGACAACTGTAAACGTAGTCAGTATCATATAGAGCAATTTGGAGTGATAAGGTGAAAGAAAGTTTGA  
AACTTTGAGCACAAAGGTTATATATGGAATCAAGAGGAGTCATGCTCATTTTTCACATCCAAATTAGCAGCTAAGAGGTAATGCGTCAACAATTCATTTTTCTGTGAAAAACACCGCCTTC  
ATTAGCCATATCATAAACTCATGGTATCAGAGTTCTTGCCATTCTGTAAATGCTAATGAAGCCATGTTACAGAAAAAGAATATAAATATTACCTTATGCAATCAAAGACATAAAATCGA  
ATTCTCAAGAACCTGTGCTAGAATTGCTGTAAGGTTGCCTGAGCTGTTGTTGAGCAAGAAGTTGCTGATGCTGCGGCATTTGCATCATTTTCTGTGCTGGTGGTGGTGGTGGTGGT  
TGCTAATTTGTTCTTATCCAAAGCCCTGCATTTTCATGTTTGTGAGCTTTAAAGGCAGAAATTAATCATAAACTGTCAATTTTTCTGTAATAATTTTCTGTCATAATTTGAATCACCAA  
CTCTACACGTAATAATATTCTCTTAATAATAACAAATCATCAACCATTAGGACAATCGGATTGCATGACAATAACAAGTTTACTTGTGGACGGCCTTATTGAAGTCATTTGTGGCAGCA  
ATAGGATCAGGATTATAGGCCGATGTGCTTCATCAGGAGCGGCTTCTGCGGTTTTCTTCCAATACTCATCGAATTCGCCAATGTCAGGACGAACAACATCGAAAAACAAAAGAGGAAG  
AAGAAAAGAAGAAAAGAAAGGGCAGAGCCAACAATTAGATTCTCCATTTCTCCTTCTCCTTTTTCTTCTAATTCACATGAATTTAAAAGAAAAAATAAATAAGAGGTGGGAATTAA  
AGGTTTTGGTCAAGGTGAAAATTAATGGCCGGAGACCACACGACCGAACCTCAAATTTCAAAGGCGATTGAGCGAGAGCCATTTATACATTTTGCCCAATTCGGTCTTTTTTTCTGT  
TGGTCTTGCGCAATGAGGGCGACGAGGCTTTAGGGTTATTTATGTGGCTAAGGAAAAAGACGACAGGTAGAAAACACAAGAGGTTAGAGGCGAGAAGTGAGGACCGCCATTGATGGCT  
CGGGAAGGTTTCTCTCTCTT

>comp170090\_c0\_seq6

AACCTTCCCGAGCCATCAATGGCGGTCTCACTTCTCGCCTCTAACCTCTTGTGTTTTCTACCTGTGTAATTTTTCCTTAGCCACATAAATAACCCTAAAGCCTCGTCGCCCTCATTCGCCAA  
GACCAACAGAAAAAGACCGAATTGGGCAAAATGTATAAATGGCTCTCACTCAATCGCCTTTCTGAATTTGAGAAGAAAAAGGAGAAGGAAGAAATGGAGAATCTAATTGTTGGCTCT  
CGCCTTCTTTTTCTTCTTTTCTTCTTCTCTCTTCTTTTTGTTTTTCGATGTTGTTCTGCCTGACATTGGCGAATTCGATGAGTATTGGAAGAAACGCGCAGAAGCCGCTCGTGATGAAGCACATGC  
GGCCTATAATCCTGATCCTATTGCTGCCACAAATGACTTCAATAAGGCCGTCCACAAGGCTTTGGATAAGAACGAAACAATTAGCAGCAGCAGCAGCAGCAGCAACGACAGAAAATGAT  
GCAAATGCCGCAGCATCAGCAACTTCTTGTCAACAACAGCTCAGGCAACCTTCGAGTACAGCAATTCTAGCACAGGGTACCATGACTCAGTTACATGATTTACAGGGGCAAGGTCAGC  
AGAAGTTTCAACCGGTACCTGGACAACATCAAATGCAATATTCTCAACCTTGTCCCAACAGTTTCAAACAGGCAACTACAATCTGCACATATTAGCACAACATAGCACAACAGCCAGA  
TAACCCAAGGTGGCCAACCTAAGAAACCAGTTGAGCCAAATTTACTGGATCTGCAAATAGTGCCTTGTTCATGCTGCACAGACATCTCCAAATCTCAAATGATCACAATATGTCAGCGG  
CAATGCAGCCACAATCTATTTTGTGACACGAATGCAGTTTGGTTTATCTGGTGGACATCCTCAAAGAAATCTTCAATCACAATTTCTAAATGATCAGAGTAAGTAATAGTTCCATTGACTTACA  
CAATTTCTGCTCATTTTGATTTTGTATATTGCTAAAGCTGTAGATAGTTCAAAGGTTAGAATTATCTCAAGCATCGAAAAGGCAAGTATTCTACGGCATTGCAATTGGTTGGATTTGAT  
CAGCATTCAATTATGTTCCATGCGTCAATTGGCTTCATTGCTATTTAATTTTTGGGAATTTCTTACCAAAGA

>comp170118\_c1\_seq3

TTAGGTCAAATTAAGATAAATTCATACACACATCTCATAACAAAGACTTAAATTTAAAAACTCTTAGTGGTAGTTAATATCTTAACCAACATGCCAAACTGGGCTGTGTGAGGTGAAAAAT  
TTAAAGGGTGATTGAAAATATGGGGATAGTAATTAAGGATCATCTGGTGTAAATATTTATAAAAAATAGGAGTTCTAAATTTGTAGGCATTTCTGTTGGATGAAAACAAAAATAATGATTGA  
AATTTTGAGAAATTCTAAACTCATCTATTAAGTTCATTTTGGATAAATTCTAAATTTTATTGATTTGAGCTTTTGAATGCATTTGTGTACAACCTCTGTATATAGCATGTGTACACACATTACACA  
ATGTAAGTACTAGTATGTGTACAAGAGAGTCTGGACGTAGTCTATGTCTGAACCTTACATATAATAATCTCTCCAAACATGACTGTATCTATTAGATCTAATTCAAAAAAATTAATTTTGGGT  
TGACGTAAATTAATTAGCGAATTGGATTTGGATCCAACATATTGACTCGCTTGTAACTGGGTGGGATTTAGGGTAACTCGCAAACTCAATTTTTATCTAAAAGTGACATGTTTATTTTTCC  
TAAAATCTTTTATTGTAGTATAATATAATTTATTTATGATTAAGTTACCTAAATTCATAGCTAACATGTTATAAAAAATATTATAAAAATTGGTTTTCAAGTCCGTTTTGGGTCCATTGTTAT  
GACCTGTTTTATTATATGGGCAAGGTCCTTTTTTTTTTTTTTTTGTTTAACCAAAAAGGGATACAATTCCATTAATAAAAAGAAAGAAACAATAAGACTAACAAGGACAAAGCAAAAATTA  
CAATAGACTGATTGAGCTTGTAAAAAGAAAAAGAAAAGCAACCACCAATTTTTTGGCCACTTAACTAATGCCCATCGCCATCATTATAATCGGTGCTGCTATCAATTGTTGTTGCC  
GATATGACTATCCACATTGCCGTATCATCAATTTGCTATTGATTGGCTTTATATTAATAATTTAATTTATTCAAATCAAACACCTCAGAAATAAGAATATACTGCATTCAATTTATACTCAATTAA  
TAATTTTAAATTAATTCAAATACATTATATATTTATTTATTTGTAACATTTTGTAGTAAATCAAACAGCCCAATTTGTTTGTGAGAGTTCCCATGACCTAATAATGCTATACTCATATCAAATAATC  
AATAGTGTGAACCAAAAGCTGCTTAGATTAATTTGGCCAATCCACCGCGCCTAGTAGTAATTTAACTTAAATGTGTAAGATTTTCCCTTTTTCAGAATACTTGAAGAACAGAGGAACCC  
AAGCCTTTCATCTGCTGCGACAAAGAGGAGGACGCAATGTCATTGTATTGGCCTTCCGCGGGACTGAGCCCTTCAACGCTTACGACTGGATTACGGACGTGATCTCTCCTGGCTTTCCA  
TGGGAAAATTTGGCAAAGC

>comp170118\_c1\_seq5

ATTAAGTGTGAACCAAAAGCTGCTTAGATTAATTTGGCCAATCCACCGCGCCTAGTAGTAATTTAACTTAAATGTGTAAGATTTTCCCTTTTTCAGAATACTTGAAGAACAGAGGAACCC  
AAGAGGAGGACGCAATGTCATTGTATTGGCCTTCCGCGGGACTGAGCCCTTCAACGCTTACGACTGGATTACGGACGTGATCTCTCCTGGCTTTCCATGGGAAAATTTGGCAAAGC

>comp170173\_c2\_seq1

CAATGGGCTTCTCCTACCTCCTCTATCTCTCCCTCTTCTCTTATTCTCCTTCTCGTACTCAACATCATCACAAAACTAATAAATCAACAAACAGAGAGGTCCCTCCAGGTCCATGGCG  
TCTCCCCATCGTCGGTAACTCTTTCTTCTCAATCCCAATAAGCCTCTCCGCTCCCTCATCAGCCTCTCAAATAAACACGGCCCTCTCATCTCCTCCACCTCGGCTCCATCCCCACCATCAT

CATCTCTCCCATGACATAGCCGAGGAGATCTTCACCAAACATGATATCGCATTCTCCGGCCGCCCTCTCCTTACCGGGCCTCAAAGCTCTTCTACAATTGTTCCAGCGTCACCTTCGCTC  
CATATGGTGAGCACTGGCGCCAAGCTCGCAAGATCGCCACGCTCGAGCTTCTTAGCTCTCGTCGTGTTTCGATCCTTTGAAGTCGTGCGAAGGGAAGAAGTGGAGAAGCTCGTAGCCACT  
ATAAGAGATCTCTCAATAGCTAACTTGAGCGAGTTAACGCTTTCATTTCGCAATAATGTGGTTTGTGCGAGCGGCGCTTGGTGATGAGTTTGGAGATGGAGGGTATGGTGGAAAAGGAGGA  
GTATGGCTTCATCAGCTACTTTCAGAGACTCAAAGCTTGTGGTGGTTCCTGTGTAGCAGATTTCTTTCCTGGGATGGAATGGATTGATCGATTAAGAGGCTTTCATGCAAGGATGGAAA  
AGAATTTTGAAGAGATGAATACATTTTTTTGATAGAGTTATTTATGAGCATGATCTTAAAATTAGAGAAAAAGAAGAATAAGAGGTGAGGAGGAGAAGGATTTGGTGCATGTTTTGC  
TGAGGCTCCATAAAGCTGCAGTCCTTCATGGAGGTTTTTTGAGCAATATAGACCATGTCAAGGCCATCTTAGTTGAAGTATTCATAGCTGGAACGGATACATCATCAGCTACAATAACATGG  
ACAATGACAGAGCTGATAAGAAATCCAAGAGTATTGAAGAAATTACAGGAAGAACTTCAACAAGCCACCAATGGAAACTCGCACAGACTCATCCAAGAAAGCGAACTTGAAAAGCTTG  
AATACCTCAAAACAAGTTATAAAGGAATCACTAAGACTAAAACCTCCTGTTCCACTTTTTGGTTCCACGTGAAACCATCCAGGAATGTGAAATCCAAGGATACACGATCCCTGCTTATACAG  
AGTTATCTTCAACGCCGCTGCTATTTCCACAGACCCAAATATTTGGGAGAAGCCCCTCGAGTTTTGGCCTGAAAGATTTGAAGGAAGGGATGTTGATTTCAAGGGACATGATTTAAGATG  
TTTCTTTTGGCTTTGGGAGGAGAAAGTGCCAGGGATCAACTTCGCGATGGTGATTGTTGAACTTGCCTTGGCCAATCTCCTCCATTGTTTTGATTGGTCAATACCAAATGGAATGAAGG  
CTGAAGATATCAATATGGAGGAGGCTATTGGAGTTACCACACACAAGAAAGAGGGCGCTTTGCTTGGTTGCTAAACCTAAGTGGTGAGGAAGAAGCATAACCTAATTATATATTTATGTATG  
TTCTATATTTTTCCATGATATCCAAGCTTGAAATTAAGCTATCATATTGTCATATCAAGCTGAATTTATTGTTTCTAAATATAACTTAGAAACAATAAATTCAGCTTGA

>comp170173\_c2\_seq5

AAAAAAAAAAAAAAAAAAGTCTTATATATATTCTATGTAATATGAAAGTCTATGTAATTTGATTATTTATATATAGCCAAATCTCAAGAACATATCATGCGTCCAGATTCTGAATATGAT  
TATGGAACAGCAAGCTTTCCTCTACCTCTTCGTCTTCCTCTTCCTCTTCCTCCCTTTTGTCTAAAATCCTGCTAAACGCTAATAAATCAAATGGAAAGAAGCTCCTTCCATGTCCATGGC  
GCCTCCCCATCCTCGGCAATCTTCACCTTCTCAATCCCAACAACTTCACCACTCCCTCCTCAGTCTCTCAAACAAGCACGGCCCTCTCATACTCCTCCACCTCGGCTCCATCCCCACCCT  
CGTTGTTTCTCTCGCGACATAGCCAAGGAGATCTTACTAATCACGACCTCACCTTCTCCAGCCGCCCTCTCCTCACTGCACCAAACAAGCTTTCATACAACAGCTCCAGCATCTCCTTC  
GCTCCTTACGGCGATCTCTGGCGCCAAGCTCGCAAGATCGCC

>comp170177\_c0\_seq1

GTGTAATCCGACTTAAATCCCAGATATATCCGATACCAAACAGCCCCTTAGAGATGCTCCACTAATATTAACCATGTTCTTAAACGCACCAATTACAGTATCATCTTAGCGATTACATCAA  
AATACATCTCCATCAATCCTTCTATTAAGCTCTTTTTTCACTTTTTTATGAAATTTTCATCTCCATCAATTCCTCTTCAGACCAGCTTTCCCTCTTAAAATAATCGACAGCAAGCTAATTGGCAA  
GACAATCCGTTACATCATTTCTTTTTACAACAAATATACAGGCGAAGAAAATAAAAAATTAATAATATGTTACAGCTCGTCAGAGTTCCAAGAACTCTAAAATCTCTTCTAAACAATAGA  
ACAGAGAAAAAAGGGGTGGCCATGGCCATCGGTGGAGAGCAATTAAGCTTCAGAGCACTCATCTGAGGTGTACCCACTGGTGCGCCGGCGTCAGCATCGTCGAGCTAGCTTCTGGTGT  
CGCCGCTCCCTTCTTTGATTGTTTGAAGAGCTGGCGATGATTGAACGAACTAAGCTTCCAAAGATCCTGGCTTTCACTTGGCCTCTCCTTGGTAGAGGGTTCCCTTTCTTCTCAAATGGCT  
GCTTTTGGTACTCCATTCCTTGAAGCAAATAGAGCTCAAAGCCTTTCTGCTGATGTTGAGACAGTGATGGTGCAGGCTTATTTATAATTGGATTTATAGAGTGTGAGTTACTCGTGTTCCT  
GGACTGCAAGATTTCCGTAATAAGAGTTGGGAGGAGCTTTTGAACGTTCAAAGGAAGCTAAAAAGTGATGGTAGTAGAATGGGTCAAATTAGGCAAGCCATGTGAAGCCATTGATAT  
TCTCTGCTTTCATTGATTAATGTTAAAAAAGGAGATGCTTTCACATTAATGATTTGAAAGGAGAATCTGAGAAAAAATCAAGGAATTTAGTTTTTTTTGGGGGGTCTAAGTGATATTCCT  
CTTGGTAACTGAAGTGAGATCAGAGGAACTTCAAAGGATCGTGTTAACGTGTAATTAAGCAAAAAATGTGATTATTAATAGTTGAAAAAAGTCATTAATTTGATTTTATAGAGAGTAG  
TATCTTAATAAAAGGTGAGGAGGATGAGTAACTCAATATGTAACCTCAATATGTGGCCATTGAACTAGTATCTCCAGGGACGGTTGTGATGCAATCCGGCTGTATCTTTTTTCAGGCGGTTG  
AGACGTTTTCCATTGCTGTGATGCAAGTTGCAGTGATATGGAGAGCTGCCTATCATCATGAGTGGTCCCCTTTGGCTTATATGCACTGACAGTCCCCCTCAAATTAATTCGAGTTGG  
AAGAGTTAATTTGGTCTTAAGATGCTGAAATCGAGTAATGAGATGGAAGGCGAGGGCTTTCTGCTTGCCTGCGTGCGAAGGGCGCAGTTTGCACGCTAGAAGGGGAGCAGGAGAGGTC



GGCCATGAGAATATGCCTGGACCTGTTTACATGAAAACCTAGACCGAATGGTTCAGGTTATAACATTTTCATCTTCATCAATTCTTCTTCCACAACAGTATCTGTATGATAATTTTCATCCTGTAG  
TAATCATTTCCTCAAGCTTCAATAAATATATTAGCCTTAAATAACCGAAAAAACACCTAATGCCAAGAACACGTCATTTCTTATAACAACAATATACAAGCGAATAACTCTAAAATATCTTCC

>comp170185\_c2\_seq3

TAATATTTTCTAACAAAATATTTTAGATCCGTCTCTATTTTCTTAACAAATGTCATATGCAATGCATCTACTTCTTAAAGAATTTTTTTTTTTTTGTATAAAAAATAATTTGTATTAAAAATATG  
CTTTAAGAAGCAAAAAAGAAAGACACCCGAAACTAAGATTAATTATATGTGCGGATGTCGAATGCAGTTTGGATATCAATCAGAATATGTCACTTCAACCCCTTCGCTCGATACCACGGCTC  
AGTACTGCCCCGCATTGCAGCTAGGTAAGTACTGCCCCGCACAGCAACTCGATACCGCTGATGTGACGCATTCTGATTGACCTCGGAATATTTTTCTGAGTCCAATCGACGGACAAAAACAAA  
AAAAATCAAACAAATTCCTCTCAAAGAATTTTCTCATAATTTTGTAAATCAAATATCTTTTTATATAATTTTTTATAGTTTAGGTAATAAATATACACTATAAATTACTTTTATATTCTTTTG  
AGGCTCGCTACCGGAAGCGGTCCGGTACACCGCGCTCAATCAAAAAACGACAAGCACGCTCTCGAGTGCAGCGGGCAGAGCACAAGAGTTGGAAATCATGCGGCGAGGTGGCAG  
ACCACTTCGCCGTAACGAGCAAGCGTCGCCAAGCGTGAAAAGGCAAGAAAAAAGAATCCAAAAGAAAATCTAGAGAGAGAAAGAAATCAAGAAATTAATCATTTTTTTACTCTCAC  
TGGTAGAAGGCGGCGGGTTCGGGTACACACTCGGTTGGCTAAACACACCGGAGAAATTTCTCCGGCCGGCGGTGGCCCTGCGGATAGACGCCCTTGCAGCGGAGAGTTCCGCCTCGA  
GCTCGTTCTCAGGACCGGGATTCCGCCAGCCGTTTCATAGGGGTGGTGGCGGAGGAGGCGAGTGTGTGGATTCCGGCGAGCGGGCGGAGTGGGAGGAGGCGGAAGGCTGCGGAGGAGA  
GAGTTACCGGTGATGGAGAGATTGGGGGTAGGGTAAGGAGGAGTGCAGGTGGGAATCAGGAGGAGGAGGGGGATGAGAAAAAGGGTTTGAACCATGAAGAACAGAAATATCCCAT

>comp170185\_c2\_seq6

TCATGTTGGCAGCACGTGCAGTGGGGCTCACGAGCGGACGTTGGCAGTGGGGCCTGTAAGCAGGCAGGGCTGGCGGGCGTGGGCAGCTCATGCCAGCGGGGCAGGGGGCGCATAGC  
GGGCCGCTTGGGCAGGGCTGGCGGGCGGGCAGCTTGGCCGCGCCACAAGCAGGTGGGGCGTAGTAGGTGGGCCGCTGCGGGTGGGCGCGGACAAACGGATTTTTTTTTCTTTT  
GCTTTTTTTTTATGGAAAATTTTTGTAGGAATTTTTCTTTGCACTGCTTTTATCGGCCAAAAATTTTCATGAAAAATCTACCAAAATCACTTTTTCCGGAATTATATATATTTAAGATACT  
ATAATTTTTCATAAACTTCTACACTTAACTACTTTACGCAAATTAATTTCTAGTTCTACTCCATCGAAGGGTTGCGTGCCAAAGCTCTCATCAATAAACTTTGCCCCATCACTTCCAAA  
AAGGCAGAGAATGACAATTCCTTATACTGATGATGATCCTTCAATGTTTGGATTGCGATTGAGTTGATAGGCAACATCTTACTTCTTAATAACAGTATCAAATATCTGTTTGAATGGACGAA  
CTAAGACTTTTCTTGACTAATGCCTCAAATTTCTTCCACTGTGTAGATATAACATTTCAAATCTATAAATTTAATAAAAAATATTAGGAGATAAGATTCTATTAGTGGTGTCAATTAATGAC  
ACAATACGAAAATCCGATCCAAAAATTTAGATTTAGATTGACCCATTTAACAAATGGGTTCATGTTAGGGTTCTAATTCCTAACATGTTTGAATAATCAGATTATGTTTCGAGTCAATCCGCTA  
ACCCAAAAATAGACCGCATCCCACTTGCCTTTCTCGCCAGTAGTCCACACTACAATTTGTGATTGGGCTCGCAATCTTGACCTACACACAAGCTCCAAGCCTTGCAGTGCCTCATG  
CAGTCTGCATCGCACGGTTCTGCTCCCGCCCTCAATTTGTGTTGTCCACATATATCGCTGCCCGTTCTTAAAGCTTACTTGTGTTGGTTAGTGCAGGTCTAGTTGATTCAACCTAGTAACCC  
AACGGGTTCGGGTTTAGAATTGAATTTTTGCCCTATTTGTCAAATCTGATCGGGTTCAGATTGGATCATTGGAATGAAGATTAGTTTCAAATTTGACCCAAACCTACTAAAAACTCATTTTAA  
AACCCCTAGATAGTATACCAAACTCCATATTAATAAATTTTTGTAATATACCAATTAATCATTATGTCCTATGTTTATAACAAGCCATGCACGCCATTAATCTAAAAATCGTATGACA  
TAAATTAAGATAAATCATTCTAGAAAGATCCAATTTGGTGCGTACCCAGTCATGGCAGGACAGCATGAAGTGGTCGCGGGCGGCAGTGCAGTTCCAATAAGGGTGTCTAGATGCGACCAC  
GTTGACATAGTCGGAGACGAAGCGGGGATGGGGACATGGTTCGTAAGTGTAGGGCGGTAACCGTACCTCACGAGCTGAGCCACGCTGAAGGGAAGGAAGAAGGCGTGGGCTCGCCG  
GGGATCTCCGTTCTCAGCATCTCGACGACGCGCCGCCCGGGAATATTCTCCGGACGCATCATCTTAGCTCAGATATGAAGCGGCCCTCTGTCTGTAGATGTTCTTGCACGGC  
CCAGCGTGTACCAGCGGCCTCCCTTCTGAGTACACGTACACTCTGAACCGCTTCTCCATCTCCTGATAGCTCTGGTAGAAGGCGGCGGGGTTGCGGTACACACTCGGTTGGCTAAAC  
ACGCCGGAGAAATTTCTCCGGCTGCGGTGGCCCTGCGGATAGACGCCCTTGCAGCGGAGAGTTCCGCCTCGAGCTCGTTCTCAGGACCGGGATTCCGCCAGCCGTTTCATAGGGGTGGT  
GGCGGAGGAGGCGAGTGTGTGGATTCCGGCGAGCGGGGAGTGGGAGGAGGCGGAAGGCTGCGGAGGAGAGAGTTACCGGTGATGGAGAGATTGGGGGTAGGGTAAGGAGGAGTG  
CGGTGGGAATCAGGAGGAGGAGGGGGATGAGAAAAAGGGTTTGAACCATGAAGAACAGAAATATCCCAT

>comp170185\_c2\_seq7

TCATGTTGGCAGCACGTGCAGTGGGGCTCACGAGCGGACGTTGGCAGTGGGGCCTGTAAGCAGGCAGGGCTGGCGGGCGTGGGCAGCTCATGCCAGCGGGCAGGGGGCGCATAGC  
GGGCCCGCTTGGGCAGGGCTGGCGGGCGGGCAGCTTGGCCGCGCCACAAGCAGGTGGGGCGTAGTAGGTGGGCCGCTGCGGGTGGGCAGGACAAACGGATTTTTTTTTCTTTT  
GCTTTTTTTTTATGAAAATTTTTGTAGGAATTTTTCTTTGCACTGCTTTTATCGGCCAAAAATTTCCATGAAAAATCTACCAAAATCACTTTTTCCGGAATTATATATATTTAAGATACT  
ATAATTTTTCATAAACTCTTCATACTTAACTACTTTACGCAAACCTAATTTTCTAGTTCTACTCCATCGAAGGGTTGCGTGCCAAAGCTCTCATCAATAAACTTTGCCCCCATCACTTCCAAA  
AAGGCAGAGAATGACAATTCCTTATATTGATTGCGATTGAGTTGATAGGCAACATCTTACTTCTTAATAACAGTATCAAATATCTGTTTGAATGGACGAACCTAAGACTTTTTCTTGACTAATGC  
CTCAAAATCTTCTCCACTGTGTAGATATAACATTTCAAATCTATAAATTTAATAAAAAATATTAGGAGATAAGATTCTATTAGTGGTGTCAATTAATGACACAATACGAAAATCCGATCCAA  
AAAATTTAGATTTAGATTGACCCATTTAACAATGGGTCAATGTTAGGGTTCTAATTCCTAACATGTTTGAAAATCAGATTATGTTGAGTCAATCCGCTAACCCAAAAATAGACCGCATCCC  
ACTTGCCTTTCTCGCCAGTAGTCCCACACTACAACCTTTGTGATTGGGCTCGCAATCTTGCACCTACACACAAGCTCCAAGCCTTGCCTGCGTTTCATGCAGTCCCTGCATCGCACGGTTCT  
GCTCCCGCCCTCAATTGTGTTGTCCACATATATCGCTGCCCGTTCTTAAAGCTTACTTGTGGTTAGTGCAGGTCTAGTTGATTCAACCTAGTAACCCAACGGGTTCGGGTTTAGAATTGA  
ATTTTTGCCCTATTTGTCAAATCTGATCGGGTTTCAGATTGGATCATTGGAATGAAGATTAGTTTCAAATTTGACCCAAACCTACTAAAAACTCATTTTAAAACCCCTAGATAGTATCACAAA  
ACTCCATATTAATAAATTTTGTAAATATAACCAATTAATCATTCATATGTCCTATGTTTATAACAAGCCATGCACGCCATTAATCTAAAAATCGTATGACATAAATTAAGATAAATCATTCTAG  
AAAGATCCAACCTTGGTGCCTACCCAGTCAATGGCAGGACAGCATGAAGTGGTGGCGGGCGGCAGTGCAGGTTCCAATAAGGGTGTAGATGCGACCACGTTGACATAGTGGGAGACGAA  
GCGGGCGATGGGGACATGGTCGTAAGTGTAGGGCGGTAAACGTACCTCACGAGCTGAGCCACGCTGAAGGGAAGGAAGAAGGCGTGGGCTCGCCGGGGATCCTCCGTTCTCAGCATC  
CTCGACGACGCGCCGCGCCGCGGAATATTCTCCGGACGCATCATCTCTAGCTCAGATATGAAGCGGCCCTCTGTCGTGTAGATGTTCTTGACGCGCCAGCGTGTACCAGCGGCGCC  
TCCCCTTCTGAGTACACGTACTCTGAACCGCTTCTCCATCTCTGATAGCTCTGGTAGAAGGCGGGGGTTGCGGTACACACTCGGTTGGCTAAACACGCGGAGAAATTTCTCCGG  
CCTGCGGTGGCCCTGCGGATAGACGCCCTTGCAGGGGAGAGTTCCGCTCGAGCTCGTTCTCAGGACCGGGATTCCGACCGGTTTCATAGGGGTGGTGGCGGAGGAGGCGAGTGCTG  
TGGATTCCGGCGAGCGGGAGTGGGAGGAGCGGAAGGCTGCGGAGGAGAGATTACCGGTGATGGAGAGATTGGGGTAGGGTAAGGAGGAGTGGGTGGGAATCAGGAGGAGG  
AGGGGGATGAGAAAAAGGGTTTGAACCATGAAGAACAGAAATATCCCAT

>comp170185\_c3\_seq1

TCATTCATGGATAAGTTCAAGCAACTTTACAAAGAACCAACCCCAAAAAAAGCACTGTAACCTATATTGAAAGGAAAAAAAACATTCTTAATACTGAAATCCAAAGCTTGTAGCAGA  
AACAAAATAACAACCTTGTAAATTTACGATGACTCAGTCATCAGCAGCTCGGAAAAGAGTAAGAAGAGCTAAAAACAAGTTGATAATGTGAGGTATAGAGCGACTGCAGCCCATATGTA  
CTCATCATAGGAGTAGCGTTTAAATCAAATTATCTGTGTCATAGATGATATAGCCGCTGAAGATTAGAGCAGCCAAGCCGCTATAGATCATATGTGAGATTCTACCCATTGGGAAAAAGATCT  
GGATGAAGGCAAAAAACAATCAAGACAATGAGTGAGGAAAATAATATCGGGCCGAGAAAGCTGAAATCATGGCCTCTCTTTGCTGCCAGAAAGGTGTAAGAGTAAGGCTGAAGACAAC  
CACTGCGGTGAGAATGGCTGCCTCAAGAATAACCTTCCCTTTGGTGAATGCGCATGACAATCCACCGCAAGCTGATGGATACAGTGAAGGGCGAGGAGAAACAGATTTAATGGAT  
GGCGCTGGTGGTAGAAATATAGAGGGATCAACACTGAAATGTGGCAAATTAACCAAGTCTTATCTTCTTAAACATAGAATTCTCTACTCCTTAATATCGAATGGACAGAAAAATGATAA  
TGCTTCTAATGCTAGCAATATGAGTGATTGTCAAATATGTAATAATATGTAATAATATGAGTGATACGTA

>comp170187\_c3\_seq5

TTACTTTTAAAATTTTTTTTACTTATAAAATTATAATTCTGACGGATTTAAGCCATTTTTCCGGCGGAAATGGTGCAGGAAATTTGTCATTTTTCTGAAGTGCCTACTACCTACCTCACCTC  
TACTCCTACCCCTACTACTATACTGACCTCTAACCCCTACCCCTCTAACACCGACCTCTTCTTCTAGGACCTACATCAACCTCTACCTCCACCCCTAACACTTCGCTAAAACCTAACTTCATC  
CCTAACCTAACCCCTTATACTTACACTTACCATAACCCCTAGATCTTACCCTTATCCCTACTCCAACCTCTACACACCAATACCTACATATACCTCTACACCTACTTAGGGGTGTCAAAAAG

AGGGCAAGGGTAAGGGCGATTGTGAGGGAGAGGCTGAGCACGAGCATGAAACGACGAGGGCGAGAGAGGGCGGCGGTAAGTGTTTTTATGCAAGCATGAGAGGGAGATTGTGAGATA  
GAGCTGGAGTGGGCGAGGTAGCTAGGGCGAGTGCAACTGTGTGGGCGAGGCATTGAGGGGTGAGGGCGACTATGCGAGCACGTGCGGGCAAGGATAAGGCCTCATGGGTGAGAGTGA  
GGAAAGGCCTCGAGGGCTAGGACTAGGACATAAGTATGGGCGAGGGAGAGGGTGAAGGTGAGGACAAGGTCTTGAGGGCAAGCAAGGGAAAGGTCGCACGGGCAGGGCAGGGTGA  
GGTCGTGAGGGCGATTATGAGAGCTAATGCGGGGAAGGATGCGGCTTCGAACGCGTCGGGTTTTTGTAGTCGTGCATATATTGACACCCCTATTCTATACTCTACACCCACCTAATCTTC  
CTACAACATCTTCACTTCTTCTCCTCTCTATCTTCTCACTCTCTGATGAAATGGATTTGTGTGGAATATAATTTGTGAAGTAGATTTGCAAGAGGATTTTATAATGCCTGAAGACAAAGCTTT  
CCCTACATATGTGTGGAGTGATTCGGGGTGATGAAGACAAATGGAACAATACTTTAGCTTCT

>comp170215\_c0\_seq1

TTACAAAGTGTCTTGTGCATAGCTTAAATAGAAGAGTTAAATCGAGCTCATTAATGCAAGTTGCAGACATTATCGTCCAGGACGATAGGCATATCGTCCTGGCCGATTAGTTCAAATATGAG  
GAAAATCGTCCTGAATATCGCCCTGAAATGAAGCTGGACGATGTCTAATCGTCCCGGACGATCTTGCATCGGCCTGGACGAAATCCCATTAATTGCTTTCCAAAACCTGCCTGAGAAAT  
TTGAAAAAATTGACCTGGATCGGCCAGGACGATATTTATAGTCCAGGCCGATATACCAGGACGATATCCAAAATAAGATTTTCTAAGTAGATATGGCGGCAGATTCTTGCTGAATTGAG  
CCGATCGTCCTGGCCGATACAAAATCGTCCAGGACGATGTGTTTTGCATAAAGACGGCTGCTTTAAAGAGGATGCCCTAATTAGGGTTTTCTGTTTCCAACCTGATCGTCTAGGCCGATGTTT  
GAATCGTCCCGGACGATGTGAGCAAAAACAGATAACTCTAAAACAGAAATAAGTGAGCAAGGTTACAAGCAAGCAAAACACATTTACAAACCAAAAATACATTAATGAAAATTACAATAA  
AAAAATAAAAAAATTAATAAAAAAAAAAACTTTTACATTCTCATAATAATAACGTATACAGAGATCATTTCCGCGACTGAATAAACTAGCTTGAAGCACTTACAAAACATTGATTTGTA  
CAGAAGCTACTGCTTATATGCTCCCACCGCCATGACAACCTTCATCAGCACCAATCTTCAGAAAAGAACAAAATAGCTTAAAACCTTCTGAACTAAACGCCTTCTATTTACCAAACAATAAT  
AATTTGAACGACAAGTACAGTTTCTATGCCCTCTGCACTGTCCAGCGCCGGCAGAAATCAAACTAAGGCTTCTTTTGGGCGGCTTCTGTTGCTTCTTAAAACAGCTTTTCTGCACAA  
AAAATTTAATTTTTATAACAAAAGTCGTTTTGAGAAACAGTAAAAAAGCCGTCCCA

>comp170235\_c0\_seq9

ACTTAAAAATTTGAGCTCTCCATGTTGGATAATTATCTGGTAGAAGTTGTATATGAACCACATTCTTGATATTTGACACAAGAACTTTAGGGCTTGAGGAATAGGAGTTTCGGCAGGGATG  
GACGGAGGAATGGGAGACTGCGGTGGAGTTGAAGGAGATACAGACGAGTCGCCATTTGAGTGGAGGCAAATCAGCGATTTATCCTGGAAGCTCTGATACCATGTTGAGGGCGATGGCT  
TGAGCAACCTGCATACAAGTTAGCGAACAAGCAGACAGAGACGGAGCCAGAGAAGTTCTCCGGTGTTTTTTTTTCATTCTATATTGGTGAACAGTAAATTACACTTTGTATATAAAGAAAC  
TTAAGGAAGCTGCTAGACGTATAAAGACCGGAGTGCCCTTAGTTGGTTACGGTGGCAGATAAGTGGCGCAGTGGAAAGTGGCTGAAAACGGAACCTGCAGCAGTAAGCAATTATGCTAAT  
GTTGGGTTTATATTTTGTAGTATCATCATTAGCCCCCGCAAGCTGATAGTAGGAAGGACTAGAAGCTTGGTTCTAAGCATGGTGAACCGTTGAACGGAGAGGGACTTGGTAAAAATGTCA  
GCAAGCTGATCGACTGAAGAAACATGTTGAACAGTAATTTGTTGATTTTGAACACAGTCCCGGATAAAGTGGTGGTCAATTTCAATATGTTTGGTCTCGCGTGGAAAGATGGGATTGGAG  
GCAATGGACATTGCTGATATGTTGTACAGAAGAGAGCGGTGGATGAACTTGAGATAGAGAAGTCTTGACAAAAGACGTTGTGTCCAAATAATGTCCACGGCAGCGGCAGCAAGAGAAC  
GGTATTCGGCTTCAGTGAAGACCGAGCGACCGTCTTTGTTTTTTGACAGACCATGAAATAAGGGCTTTGCCAAGAAATAAGCAGAAACCTGATGTAGATTTACGATCCGCAGCATCGC  
CAGCCCAATCTGAATCGGCATAAGCGGAGAGAGTAAGCTCGGTTCTTGGTAGAAAAAGTCCAGTAGACTTGGTCCCTTGAAGATAGCGAAGGACTCTCTAAGCTGTAAGTAATGACTTT  
GTAACGGTTGGTGCATGTTTTGACAAAAGCTTATTGACAGCAAAGGCAATGTCTGGTCTAGTGTAGTCAGGTATTGAAGAGAACCTGCTAAATGCCAAAATGCTCTGGTTGAGGATACG  
GAAGTTGAAGAGCGGGATCAATGGTCCATTTTGTGGTAATGGTGTGCCAACGGCTTGAAGAGTTCATGGCAGCTGCTGTAAGTAAATCTTCAATATAAGCGGACTGAGACATGTGAT  
ATCCATCAGGTTCTCGGTGAAAATCAATACCAAGGAACCGTTTGAGCTCACCAAGTTGCCAATTTGAAAGTGTGTTGAAGATCGTGAAGAAGAGTTGATATAAAATCTGAATTGCTTT  
CCGAACCAACACAGATTCG

>comp170256\_c0\_seq1

AATGAGTTCACTGTCATACTTGATCATATTCCTTCGAAAAGGTAAATTTATTTCTAATGTTTCATCTTACTAATTGTGTGTTTTCCCATGTCATGCCTTTTGCATTTAAATAGAACGATATGCTT  
CTCCTGTCTATTTTTCTGTCAACATATGATTGTACAGAAATGACAATCGTGGTGGAAATGATAGTCCTGCTGAAGGTGAGCGTAAGCGTGCTAGGCGCTCCTATAATGCAAAGACTATCAA  
AGTTGTGCTGAGCTTTGCGACTAAAATCCCAATGCAACGCATTGCGCTGGCCAAGAGACTGAAAAACCGTAGGAAGCATTGCGAGTGCTTGATATTATTTTGGCGACAATATGCTGCCAAG  
CAGGGTTGCCTACTTATACGCCAAGTTGAAGTCTTTGCATCCGAAATATGTATTGCTGTGGATATGGAGCTGGATCTCACATTGCAACAATACTAGATATTGATTGGCGTTAGCATGGTTAA  
AGATTCATGTTGTGCATTTGCATTTGATAAAGATGATATGAGAGAAATTAATAATTTTGTAAATTTTATATTT

>comp170275\_c0\_seq11

AAATTTGGCTAAAATTTGAGATCTCCTTCCCTAGATTTATGTTTTTTTTGGCTCTAGCAGCATCTAGAGATTGGCAGAGATCGATCCTCCTCTCGAATAGTGGATCAAGTGTATCTTGCTATTTT  
CCATTTCCCTTTTCATCATATAATACAAATTTTCTACTATTTTTTGTGGATTTGTGTGGATTTTGATAGAGAAAGCTCGCTATTTTTATGACGATTGATAGGCAACTTGAGATCTACAAGTACTTC  
CTATCATTTACCTTGCTGAAATATACAGGAGCTGA

>comp170281\_c0\_seq6

CTCAAAGAAAGATAAAAATATCCTTTTCAAGATATGGATCATTAAAAAATCTATATTAATGCATGATTAGTCCATCAGAAGGATCTGCAAATAATAAAACAAAATGCACTTAGGTATAG  
GTGTTAGCTTTTGTAGTTGGAAGCTCAATTAACAGAACTTTTGTAAATTTAACCATATTCAACTTTCCAAGCCTCAGAACAATGTCGTGATAACACATCTCATTGAACGAGTAGATAGT  
GCTATCCTTAGCTAGGCAGTTGACGCAGTTAGATGCTTGATTTCAATTAAGACACAGACATGAGGAGAACGTTTTATGTCCATCTTCACAGTGAATTTATGACTTTGGATAAAAAAATTTAAAG  
AATTTCAACAAGATTAATAAGAAATAGAATAGAAGAATAACAAAAGCAATTTTTTTCCATAATAAGTTAACCTTTTTAAAAGCAAACAAGCAGAAGGAGATGAAGGAATAGGCCGCAAC  
AAATTAATCTAAAATGAGTAATAATTTTTGTCTAAAACATGTTATAATAATCGTGCTTAAATCATGTGTAATGTTACTATCAAACAGCATCTCAATCAATGAAATCCAATCGTTCACTGAAAAT  
AATAATTAATCGATTCATTAATAATCCCAACAAAAACAGCTTGGAAGATTTTATATAAATTTAGATTTTATACCTGCTCAAAAAGCTACGACCAATAACAATTTCAAGCATGCCATAAAGAT  
GCAACCAAGTAGGCCCTTATACTAACAAGTTAGAAATATGATTTATTTGGGTTAAGTATGAGTACAGCACTCACGTATTTATGCTGAGCAGTGGACAACCTGTTTCAGAGAAGATAAGCA  
AAGAAATAAGGAGTTAGGGGCTCACATTTATCCTTGTAATTTGAAAATATATTGCTCCACTTAAGATCGAATGTGCTCCTCTAGTTTATTTTCATGATACAAATTCCTTACAAATT  
ATCTCTTTCCCTAGAGCTTAAATGGTATTGAAATCCAATCCGTGCCAGAAGTTATATCAAAGAAACCTGGTCATTCAATAAGAACTGAAGGAAGATTCTGTCTCCCTTTATCTGACAAAAT  
AATTTTTTTTTTCTCTCCGCAGATTCTTAAGCAAGAGCAAACAAGTTGCACATGTGTAAGCAATATTGAGGACTCGTTAGTTTAGGAACCTTCAGATTCTCTCTCCAATAAATGTTTCATG  
GTCCCGGTGGCTGAGCTATATTAATATGACCCTCAACCTTTCTCATTGGGCTTGGGACCGGCAATGGCGGTTTTAAAAAATTTTTTTTATAATATTACTTTTACAAAAAATTTGAATAGTTCTT  
ACAACGCAGAAAAAATTAATGACATAAGAAGAATCAAATTAGAGGGAAGTTAAAATTTTTAACGTATTAAGAAATAAATTGAAAAATATGAAGTATAAATGAG

>comp170295\_c0\_seq1

TTTTCAGGGGAGTCACCGACACATTTGCTCTTCCAACCATAAAACAAAATCTTCTTCATAATCAGATAACATTATAATACTAAATATTAAGCAAATCTGATAATTGAATAATTATTATAACTCTG  
ACAAGATGATTCTACTGTGAGCCTGTAATCCGTCATATGTTGCAGAAGCTCAAATATATTAAGGCTGAAAAATACTAAGTAAAGCCAGATTGGAGACAGGAAAGTCCTCCATTTATGA  
AAAGCAAAAATAAATGCTTCAGTGTCTGTTGGTCAAAAGTGAAAGGAGAAATAGGACTAAGAGGAAATAAAATTTCTGGTAAGGATCAGAAAAATAGAGAAAGATTGTGGCAGCAAAG  
AGCTCTATCAGAAATCACTTTTGTGCAAGTTTGTAGATAGAAGAAAAATACTTATTTGAAGCTCTGCCAGAATCTGATTCATGGCCTCGTAAGCTTCTTGGAGAGGGGGCTCATTGCTGG  
ATCCAACGGACTTCCTGAATTTTTCTAAGATGACGTTACGAATCAGAAGTTGAGGTTGATTTGTTGCTTTTCGCTTTCTTCTTCTGATAGCTTGCTGGCCTTCATATCCAGCTTCCCAGATA  
ACTTCTTAAGAATTTCTGGTTGAGATTGCGACCTTGGTAGAGCACCAGAGTTAGGGAAAGCCTTCCCCTGAACCATCATTTGCAGTCCAATCTCATCTCCACAAAACAGATGTTTGGTCACT  
TTCTGAATCTAAGCACCTCTCCGTTTGGTTCATACTGGTCTTATCCCTCTCCCTCTCCAAAATCTGTAACAAAACATCTGGAATGGGATCTCTGAAACCTTTGATGCTTCTACAGTCGTCC  
ACACCTGAATTTATTTAATAGGCACATTTGATATCGAGGTAATCGGCAGGGGGACTTGGCAAGTCTGGCTGGTTGTGATCTGGGTGCATGATGAGGAACCTTTTTGTGTAACGAAGCAC

ACGACATATGGATGAAAAGCTTGGTCGCTGCGATGGATCGGCATGCCAGCATTCTTGGTTAGATTGGTGAGGTACTTTGAAGATTGAGAAGGGAACAATGGCCTCTCTCCTGCTCTTATG  
TTCCTGCTCATCTATCCCCTTGCAAGGTGATCATCTCAAATGGGATTTTTCCGGCTAGCAGCTCAAAACAAATCATTGCAAAGCTGTAAACATCAGCCTTCTCTGTGAACTTTGCAGATTG  
CGAGCGCGGCGACCGTTCTTGTCTCCCAGTACCTCAGGTGCATACCAAATGCAATGATACTTATCTGTTTGGTTTGTATGATTGCTTCCAGCTTTTAGTGCCTGATTGCCCGAATCCAGTAA  
TTTTAACATGCAAGTAGCCATCTGATGAGTGGCTTCTTGACCTCACCAGAATATTTGACGGGTTTAGATCTCCATGATACAGCTTCTTTGAATGCAAATACTCCATTCCTCTTGCAATTTGAA  
TCATAATGTCTACTGCAACAAGTAGAGGGAAGGGAAGCTTCTTCTTGCAGAGCTAATTCCTTTATGTATCTACCCAGGTCCTTGTTCATGAGCTCCATAAGAACAATAATGCTCCTTCCTC  
TCATCATCTGAGAAAACATACATATAGTTCAAACATTGGGGTGCATGACTGATGTAAGAAGAGAGATCTCAGCAGACATGGAATTGGAATCACAAAAGCAGTGACGAAGAGCGAATGA  
TTCACCCATCCATTGCACCTCCTTATACTGCCCCCATCGCTAATCTTCTCCTCACTTGGAAAGTCCTTTGATCCCGCAAGTACCGAGGTGGAATGCAACTCATCTCTTGGAGCCAATACAA  
GCTCAGCAAGCTGGCTTTCATGCTTTGTTAATGTCAATTGAGATCTTCTTCTCAGATATTAGCTCAGTGAGTAACCACCTGTCTTCCCTTCAAACACTGCTAAATGAATTGCACATCTCCTGA  
GAAAGTAAGTAATGCTCCGCGAAGCGATGAAAGAAGAGCTTTCGTTCCATCCACGCATGCTCGTACTTCTTTAAGAGTACAATCTTTTCAGCTGAATGGTTTCAAGGTCTTGGCCGCTAA  
TTTCTCCTGCATTCTCAATGGCTTCAAGAACAACAGTGAAAGCACCACAACAAGTTGTGCAGGTGGAATTCAACACAGTCTGTATTCAAGTTAAGGCTAATGGCCTTTGCCACCAGTCTT  
TAGGTTCTAAGCATTGCTTAAACATAGTACTCACCCTCTTTGATCACCTTGTGGAGTTTCTTTCATTGGGTTTTCAAGTGCATGCCATTTTGTGTTGATTTTCATCAAATCTCAGGTGCTGCCTTA  
GCTCTTGGGTAATGACATCGAAGGCAAGGCTGAAAGCATCAAAGAGCAAGCAGCACTGCCTTCGGTTAATCTGTATCTTCTCAGAACGCCATGAAAGCTTTAGACTTCTATGGCTT  
CCCCAATTTGTCGTAGTTTTTCCATTGCTGATATGTGGAACAGAGAATCCTTTTGTGAGACGGCTCGTTTGGTATGGCTTAAAAATTTCTGCTTTTTCTATCAGAACATTTTAAAGCCTGCTT  
TTCGAGCAAAGTTTCTATTCTAATTTCTCAAAAAACAGCTCTTTTAAATCAAATTTTGAGAAAATGAAGAAGAAAGCTATGAAGTTGTTTCATCCAAACAACCTTTTTAAAAAATGCTTTG  
TTGGCTGCTTTTTTATCATTTAACCAGATTGAAAGAAGACACCAAATTGAAGCCGAAGTCTACAAGATTCTCCAGTAATAATCCGAACATATATGAATCCCGAAGCAGAACCTTGATTC  
TTCTTGGCGGAAGAGAAGGCAGAGTTAGGGTTGGAAAATGAAATGGAGAGCTGCTTTGAGGAGAAGGAAAAATATACGTGGCGAGAAATTCGAGCTCCAAGCCTGCTTCTTCGCCATC  
TTTCGGAGTGCTGTGCTGCTTCGCCATTGGCTTGGACAAATGGGAAGAAAAC

>comp170303\_c0\_seq4

CTATGAAAATGAGAGAAATTGTAAGGATCTCTATTCTCTCTCTCTCCACTTGTCTCCCTTCTCTTATCTTTTTCAATTTGCACACATAATAGACAAAGGAACACTTTACAATTTAACAAAAAAC  
ACAACCCTTCAAATGAAATAAGAGAAAGAGGGATAAAAAATGCTCAACCCGAATAGCAACAATGTGATCATGCTGGGGTTTGGAGTGTGCAGCGCTTCACTCTGTGCCTCTAGCCCG  
AGTCACTATGCCAGCTCTAAAAGTATCGGACTCTATGCTTTCTGCCTCCAAGTCAAGCTCTCTAATGTTTAGTGTGGTGCCTGCATCTACGATGATGTAGCTCTTTAATGAATAGCACC  
ACGCTGTTGTACGGTAAAACATTTTCCAGCAGGCCTCCAAACCTCAAGTAGAGGGGAGTGCTGCCCCCTCGAACCCCTCATCGAGCTGGACCGACACCTGGCAGAATTGACGTTTAA  
GTTAACAGTACAACCGAATTGATCGACACAATCATATTTACACAAAACTAATAAACTAATGATGAAAGTAAAGAACTAATGCTCACGATAGTGAATTCACCCTTGGACAAATTGAGTTA  
TAGTTTCTGCTCACATAATACATGAAATAAACTGATTATCAGATATTCAAGGTGCTAAAAAATGTTAAATGCTAAAACATCATCAAATATAACCATTGGGTGCCCCAAGAAGGATTTG  
AGTATCTCATTACACCACAAATAAAGCTTCCATTCATAGAGGCCTGCACAACTTCAAATGACATTTAACATTCGTCTCCAAGGCAAAAGTGAATTTGATGGTACCCACAAAACATACCC  
AACTTAGACAATATGTCAGCACTCTCTAAGTAATAAGACATATTTGTTGGAGAAGATGAGGAGTAATCACCATAATGACTAAACAAGCAAGAAAGTAAATGTAGCGAAAA

>comp170307\_c1\_seq4

TTATATTTATATATCCTCTCTATTTTACCTTCCATACAATACTAAATCTCTTTCCCATCCATATAGAAATCACGCTCTCATATCCTCCTACTATAATGGTTTCGGCTGATCAAATACGCACC  
GCCGTAGGGATCATTGGCAATGCCATCTCTTTTATCCTCTTCCATCACCCATGCCAACATTTTTTTCGAATATGTAAGAACAATCTGTGGAGCATTCTTCTGTAGTCCCTTATTTTGGCAGC  
CTGCTCAACTGTATGCTTTGGGTATTATATGGTTTGGCCTTTGTGAAACCTAATAGCACATTAATAATAACCATTAATGGAGCTGGCACTGTGATAGAGCTCATCTATATTTTATCTATCTCT  
CTACTCGGACGGGTCGAGACGGATCAAAGCCCTTGTACTTCTCTTACAGACATCACCTTCATCGTTATCGTTGCTGCTATCGTCCTTTCCATTTTCAAATCCCATGAGCGACGAACACTTA

TTGTTGGTATTCTATGTATCATTCTGTCATCATGATGTATGCCTCACCTCTCTCAATTATGAAAAGGGTGATAAGAACAAAGAGCACGGAGTACATGCCTCTCTATCTCTCGATTGCTTACTT  
CTTTAATGGGCTTTTGGTGGACTACTTACTCACTCATCCATCTTGACGTGAACCTCACGATTCCAAATGCAATTGGGCTATTATTTGCTATAGCTCAATTGCTCCTACATGCAATTTACAATAAA  
TCAACAAAGCAGCAGCCAAATGAAGTGAAGAGCGAAGTGGCACTTTTCAGAGGTGAACATTACCCATTGAAATGTCTATAGTCCAAAAGAAACAACAAGTGTGAGTCTTTTCTTTGGCT

>comp170326\_c1\_seq10

AAAAGCGAGCAATTGAAAAAAATTACTCCCACTGACATAAAGCAAGCCTCAGGCAACCGCAATATACACTTCATGGAAATATATGTTTTTTTATCTGAATCAGTCTCTATTTCCTCACCA  
AAATACGGGTTTTTTCTACAGTTGAGGATAGAAAAAGTATTACAGGTAGATTTGCCGATTTAAGGAACCGAAAAAAAATAAAACAAGCTGTTAGTAGCTGATTTACAGTTCTGCCTTTTC  
AGGATGATATTTTTTTGACTTTATGAGATAAAGGGCAGATATTTAAATCAGCTTTTCAGCCAGTTCAACAAAGAGGAGATTGTCTCTCTTGTATTTCATTAACCTAAGATAATATTTCAA  
GCAGATTTTCAGTGACGCGTCGCCGTCGTGGCTTTCTCAGCGAAACACAGGCCTGCGAGCCCGCGGAGGGCGGCAGCAGACGGTGAGGGGTCCATCGTATTCTGGCGCGTACGGTCTCC  
GGCGTGGGAGTATGGGGGGTGGAGGCTGGCGGCCGGGGCATTGAGGCTGGAGAAGAAGGGGTCACGGAGGAGCTCGGAGGCAGAAGGGCGGGCGTGGGGCTTGCCCAGGCAGCGCT  
CGATGAAGGCGTGAAATCCGGGTTCGCGGATGCGGCTGAGGGCGGGCGGTGGGACGCCCGCTGACCTTGCGGTAATCTTGCGGACGGAATCGCACTCGCTGTAGGGGATTTCGAG  
GGTAACCATCTCTAAGACGCACATACCGAAGGAGTAGATATCTACTTGTTCGGTGTAGTTCTCTTCGTAGAGTTCCGGGAGCCATGAACTCCGGGGTCCGAGAATTGAGTGCGCCGCATG  
GCTTTTGCCAACGATGGCCGCGAGTCCGAGATCACCATCTTAAGCGTGCCAGAATTTCCGTTTCATGAAGACATTGCTGCAATTAAGATCGCGATGAATGATGCAGGGGTCATGTTGTGA  
AGATAGTCGAGGCCGGCAAGTATCTGGCGGCTCCACTTCTTTAAAGCGTTGAACGAAACATGGCGATGCTTCTTGCGATACTCGCGGAGGTTCCAGAAGTACAGACCTCGGTGATAAAA  
TTTAGTGTGCCAGCCTCGGTGTCTGTCCACACGCTGTAGAGAGCGATGATGTTCTCATGACGCAGAGAACGAAGAAGCCGCACCTCCGAGAACAGGCGGTGAGCATCTGCGGATCCTC  
GTTGAAGCTCCGCAATCTCACCTGATTCCAAGCCACCTCAATCCCTCCTCCTGATCAAACCTCTGTAAACCTTCTTTGTGCGACCAGTACCAGCAGATCCCCGTATCGTCCATATCTCC  
CCGTCCGATCCACCTCCTCGAATGGCTCTGCATCCTTGTCCGCCGATCAGGCCTAACGCACGGCATCCTCGCTGGATCTACACCGCCTATCGCAATCAAATCCAAAACCTTAGACATTT  
AAACACCAAGATCATATATCAATCTGATTCCATTTAGAATACAAAATCTATTTCTCGATCTGTAATAATCAGGTCCAATCCCTACCTAAATCGTAGATATATCCCTTAAATGAAAAGAGTCGA  
AAATACCTTCTATCGATCAAATGAAGACGGAGGAAGCACAAATAACTAGAAAATAGGAAGTCTTGATTCTCTCAGGTGCTGGTTCCATCAGCCATCCTATTGCAGAAGATGCCGGGGCT  
ATCCTCTGCTACGATTCCGAGGAAGATGAACAAGCAGCGGCAGAATCTTCGTAATGAAGCTTGTGAAGAAGGCGATGGAGAGAGGACAGCGTTATGCGGAGGCCATATTTATAGCTAAA  
CAACTAACCTCGTTGATGTACAACCTAACCGAGTTAACTCTATGCCACCTTCGTTTCCCTTTGTTCTTTTACTTTTTTTATGTTGTGTGGGTCTGTGCGCCCGCATGCGATCTTCTTCT  
TGGCACCGTTTCGATCTGCTATTGACGGTCAAGTTCATATTCGTATACGGTATTCAAGTTGAGGAAAAGTGGAAGTAAATGCGATGCTGTTCCATCTAATTCTCTATTTCTTGGAGCGCAA  
GTAAAGGAAA

>comp170393\_c1\_seq7

AATTTGATATTCAGAACTTAAACCCGATCTTGAATATTATGATTTTACTGGAAAAAGCTGGTTTGCCTTTTATCCGCAATGGTTGATGACTTCTATTTTCTGGTGTTTTGTCTCCCATCCGGCTA  
TTTTTTGTCTGCTTGTCTTGGTCTTTGTCTCTGGTTGATGTTGAATGTCTTTTTTATGGCCTGGTTAATGTTCCTAGTTGGTGTTTTTTCACTAGTACCTCTTTGTTTCTGGCATGTCTGTGCT  
GGTTGCTGGAGATCAGGGTATTTTATTTTGTATTGCTAGAGTTGTTTTCTATGAGCTTGGATAATCAGGTGGTTGTATGGCCCTGGATTATACTCCTTTCTGGTATGTGGTTGGCCTGCC  
GCCCTATTCTAATGCTATTTCCCATGGTGTGGTTTTTACGGGTTAATCTCTTTGTGAGATTTCTGAACATTTTTACTATTGCTGAGTTAGTATGTTCTGTGAGAATTGTGATGTTTGTCTA  
GTCAATTTTGGTTAATGGTACATTCTGGTTTGTCTTATTAGCCTTCTAACTTTTGGGCCTAGAGCTTTTTCTATGATATCATGAATATGAGGGAGCATGTTATTCAAGTGTATTCTGCAATG  
GTTGGAGTATTAGCTATAGTTATCAGGTCCGCAGGTATGCTGGGGCTATTTATGTTCTTAGTAACTGTCTTCCCAACAGGCATATCATTGTGATTTTTACTGTGTTATTTACTATCGTTCTAA  
TATTCTTTTTTGGAGAGTATCTTGCAGGAAAATCTTTCTTTTCGATTAGGGAGCTTCAATGATCGCAAGGTACTCTTGGTTTGTATCTTTTATTGCCATTTCAATTTTCATCAATATTTTTTGC  
AAGAAGAATGTGCTGAACGGGATTAATCTGCTCTTCTTTTTTAATTGTTGTCTACTCACAGCCTGAGTCTTTTTTTTTATGACTTTTATGATATTATTAGGAAAAGGAACCATCGGCTCTTAG

GTTTTATTTCTTTTTATCTTGTAGCTCTTATGAGCAGTAGCGAGCTGGAGGATCATTTTAAGGACTTTATAACCAAATTTTTTATATTAACGCGTAGGCC

>comp170393\_c1\_seq9

ACGCGTTAATATAAAAAATTTGGTTATAAAGTCCTTAAAATGATCCTCCAGCTCGCTACTGCTCATAAGAGCTACAAGATAAAAAGAAATAAACCTAAGAGCCGATGGTTCCTTTTCCTAA  
TAATACATAAAAGTCATAAAAAAAGACTCAGGCTGTGAGTAGACAACAGTTAAAAAAGGAAGAGCAGATTAATCCCCTCAGCACATTCTTCTTGCAAAAAATATTGATGAAAATTGAA  
ATGGCAGAGGAATTACAAACCAAGAGTACCTTACGATCATTGAAGCTCCCTAATTGAAAAGACCAATTAACCCTGCAAAATACTCTCAAAAAAGACATATTAGAACGATAATAAATAACA  
CAGTAAGAATACCCAGTAAAAATATGCCTGAAGTAATGACAGTTACTAAGAGCATCCAAAAATCCAGCATAACGCTGCAAGACCATATAACCATCTCTAAAACTCCAATCGATCAGAAAC  
AAAGACTGAATAACATGCTCCCTCATAATCATGCTATCATAAAACAAGAACCAGGCCAGAAAAAAGAGCTAATAATAGCACACCAAAT

>comp170406\_c2\_seq3

GAGAGAGAGAGAGAGAGAGAGCATGGGATATTTCTGTTCTTCATGGTTCCAAACCCTTTTTCTCATCCCCCTCCTCCTCCTGATTCCCACCGCACTCCTCCTTACCCTACCCCAATCTCTC  
CATCACCGGTAACCTCTCCTCTGCAGCCTTCCGCCTCCTCCACTCCGCCGCTCGCCGGAATCCACAGCACTCGCCTCCTCCGCCACCACCCCTATGAAAACGGCTGGCGAATCCCGGTC  
CTGAGAACGAGCTCGAGGCGGAACCTCCCGCGCAAGGGCGTCTATCCGCAGGGCCACCGCAGGCCGGAGAAATTTCTCCGGCGTGTGTTAGCCAACCGAGTGTGTACCGCAACCCCGC  
CGCCTTCTACCAGAGCTATCAGGAGATGGAGAAGCGGTTACAGAGTGACGTGACTCAGAAGGGGAGGCGCCGCTGGTACACGCTGGGCCGTGCAAGAACATCTACACGACAGAGGGC  
CGCTTCATATCTGAGCTAGAGATGATGCGTCCGGGAGAATATTCCGGCGGGCGGCGCGCTCGTTCGAGGATGCTGAGAACGGAGGATCCCCGGCGAGCCACGCCTTCTCCTTCCCTTC  
AGCGTGGCTCAGCTCGTGAGGTACGTTTACCGCCCTAACACTTACGACCATGTCCCCATCCGCCGCTTCGTCTCCGACTATGTCAACGTGGTTCGCATCTAAGCACCCCTTATTGGAACCGCA  
CTGCCCGCCGCCGACCCTTCATGCTGTCTGCCATGACTGGGGCCCCACGCTTCACGTGCGAACCATTACTGTACAAAAACGCCATTTCGAGCGCTCTGCAACGCCAACACGTCCGGAG  
GGATTCCGGCCCGGAAGGACGTGAGCATCCCGGAGATAAACCTCGTCTCCGGTGACATGCCCCGGAATTTCTCTCTCCGTCCCGCCGGAATCCTCTCCACGCCGACTTCTCGCCTTC  
TTCGCCGGAGGGTCCACGGCCCCGTGACCCGATCCTCCTCAGCCACTGGAAGGGCCGTGACCCGGATCTCGAGGTTACAGAGTACCTTCCCCCGGCCGCGATGCCTACTACTCCTAT  
ATGCGGCGATCTCGCTTCTGCCTCTGCCCCAGCGGATATGAGGTACAGCATTTAAATTTGGGAAATTTTTATGTTATTATATCTTATTGTTTAGATATCTTTACAATTTTAGGTAGCGAGCCCT  
CGGGTGGTAGAGGCCATCTACGCTGGTTGTATACCTGTGATCATCTCAAATGGGTACGTATTGCCATTTCAGTGATGTGTTGAAGTGGAAGGAATTTTCTGTGATGGTGGCGGTGGAAGATA  
TACCGGATTGAAAGAGGTGTTAATGGCGGTGGGGGAGGAGGAGGTGATGCGGTTGATGGCCGGAGTTAGGGCGGTGCGCCACCATTTTGTACTAAACCACCCGCCTAAGCGATTTCGAT  
GCATTTACATGATATTGCACTCCGTGTGGTTGCGTTCGCTCAATATAAAGGTTGCTTAAGTTTGGGATTTTTTAGATGGTTTTTTCTTTTTGTTTCATAGGAATAAAACAAGAAGTTACACAA  
GAAATAAAAAAGATTTGCAACAAGGTTTGAGTTAGGTTTTCTTTTTTTGTTTCGGTGTGTTGGCTGCTTTTGATCAAATGAAGCCAACCTTCTATCAACATAAACATATCTGTGAGAATA  
GTCTTTTTTATTTTT

>comp170406\_c2\_seq4

GAGAGAGAGAGAGAGAGAGAGCATGGGATATTTCTGTTCTTCATGGTTCCAAACCCTTTTTCTCATCCCCCTCCTCCTCCTGATTCCCACCGCACTCCTCCTTACCCTACCCCAATCTCTC  
CATCACCGGTAACCTCTCCTCTGCAGCCTTCCGCCTCCTCCACTCCGCCGCTCGCCGGAATCCACAGCACTCGCCTCCTCCGCCACCACCCCTATGAAAACGGCTGGCGAATCCCGGTC  
CTGAGAACGAGCTCGAGGCGGAACCTCCCGCGCAAGGGCGTCTATCCGCAGGGCCACCGCAGGCCGGAGAAATTTCTCCGGCGTGTGTTAGCCAACCGAGTGTGTACCGCAACCCCGC  
CGCCTTCTACCAGAGCTATCAGGAGATGGAGAAGCGGTTACAGAGTGACGTGACTCAGAAGGGGAGGCGCCGCTGGTACACGCTGGGCCGTGCAAGAACATCTACACGACAGAGGGC  
CGCTTCATATCTGAGCTAGAGATGATGCGTCCGGGAGAATATTCCGGCGGGCGGCGCGCTCGTTCGAGGATGCTGAGAACGGAGGATCCCCGGCGAGCCACGCCTTCTCCTTCCCTTC  
AGCGTGGCTCAGCTCGTGAGGTACGTTTACCGCCCTAACACTTACGACCATGTCCCCATCCGCCGCTTCGTCTCCGACTATGTCAACGTGGTTCGCATCTAAGCACCCCTTATTGGAACCGCA  
CTGCCCGCCGCCGACCCTTCATGCTGTCTGCCATGACTGGGGCCCCACGCTTCACGTGCGAACCATTACTGTACAAAAACGCCATTTCGAGCGCTCTGCAACGCCAACACGTCCGGAG

GGATTCCGGCCGCGGAAGGACGTGAGCATCCCGGAGATAAACCTCGTCTCCGGTGACATGCCCCGGAATTTCTCTCTCCGTCCCCGCGGAATCCTCTCCACGCCGACTTCTCGCCTTC  
TTCGCCGGAGGGGTCCACGGCCCCGTGACACCGATCCTCCTCAGCCACTGGAAGGGCCGTGACCCGGATCTCGAGGTTACACGAGTACCTTCCCCCGGCGCGATGCCTACTACTCCTAT  
ATGCGGCGATCTCGCTTCTGCCTCTGCCCCAGCGGATATGAGGTAGCGAGCCCTCGGGTGGTAGAGGCCATCTACGCTGGTTGTATACCTGTGATCATCTCAAATGGGTACGTATTGCCATT  
CAGTGATGTGTTGAAGTGAAGGAATTTTCTGTGATGGTGGCGGTGGAAGATATACCGCGATTGAAAGAGGTGTTAATGGCGGTGGGGGAGGAGGAGGTGATGCGGTTGATGGCCGGAG  
TTAGGGCGGTGCGCCACCATTTTGTACTAAACCACCCGCCTAAGCGATTGATGCATTTACATGATATTGCACTCCGTGTGGTTGCGTCGCCTCAATATAAAGGTTGCTTAAAGTTGGGAT  
TTTTTAGATGGTTTTTTCTTTTTGTTTCATAGGAATAAAACAAGAAGTTACACAAGAAATAAAAAAGATTTGCAACAAGGTTTGAGTTAGGTTTTCTTTTTTTTTGTTTCGGTGTTGTTGGCTG  
CTTTTGATCAAATGAAGCCAACCTTTCTATCAACATAAACATATCTGTGAGAATAGTTCTTTTTATTTTT

>comp170419\_c0\_seq2

AAAATTAACCTCTCAATTGTTTTATGCTTGGTTATATGCCTTGTAACAAAACAGAGACAAATCACAATTGAATTTGTAACAAAACAGGGACACAGAATTTGGTTGAACAAGAATGTAAA  
TCAAGTGTATCAGCTAAGAATTTTGTACAATTTAGCCAACCGGTAATCTTTATGAACCAAAAATCATGACAGGCTTACAAGCTAGCCTGAGCCATGAAGAGTACTAACCAAGATAAAA  
CGCGTTTGTAGGCATCTTGTGATCAGTCTTGATCTCCAATAATCTCTCAATAGATTCATAGTTGCTTACCCAGTTTCAGATTCAAATGCTGCTTCTCTTGATCTATTTGTTTGTCTTCTC  
CATCTCTCTGTTGGTTGTCCTGAGAATCTTCTGCTTTGTGTTTCTTCTTCTGACTCTCCTTTCTTTCTTATGTAGAAGCTTGACAAGACCACGTAAGGCGATATCAACATCATCACTTCTTA  
ACAACCTCTGACACTTCAGCTGGAGTTACTTCCACCTCTTTCAACAACCTCGTCAATCTCCTCGAATATGGGGTGATCATCAATACAATGGTAGTTGGAAGCCAGCACTCTGAAGCCATC  
TGGACCACAGTGACCCATATGGATGTGCATGTCCATTCGACCTGGTTCGACGAATGCCGGGTCGAGCCGATCCTGTAGTTTGTGCTGAACACGATGATCCTCTCCTCCCCGCTCGTCGAC  
CACAGCCCATCTACGCAATTTAGAATTCCTGAGAGTGTACCTCATCATCTTTAGATTTTGTCTTTCTTCTTCTCATCTCTATTTGTTAAATCAATGGAGCAATCAATGTCCTCAATCACAAGCA  
TTGATTTGTTTGGCATTCCAACCAGCAATGTCTTCAGTTCAGAATTCGAGCAAATCTCCTTCAGATCGAGGTCGTAGATGTCAAACCTGAGGTAGTTGGCTATGGCGGCAATCAGGCTTGA  
TTTGCCAGTTCCCGGAGGACCGAAGAGCAGATATCCACGCTTCCAGGCCTTCCCAATCCTTTTATAGTACTCCTTTCTCTTCACAAATCTTGCCAAGTCTCCTCATGATTATCCGTTAAGCT  
CGGCGTCCATAGCCAACGTCTCGAATGTTGCAGGGTGGTTCAGCTCTATGGAATAATGCCATTCATCATATTTATTCGTTATGATCTTCAGCAGCCGGTCTGCCGCCTTGATTTCTTTGATC  
GCTCTAGAATGTGAGGAAAATAGTTGTCCAGCATCACGTCCTTGACTTGTGTGGAATTTGAGCTCGAACCAGCGGATTTGGATGCTCTTTTCTCCGTTGCGGGAATTAGAGGTCTCTTC  
TTGGCTGATGAGCATCCACTTGTATTCTGTGCCTTGAAAGATGTCTATTATCTCCTCGCCGACATCAAAGGTGATGACGACCTTGTCTTGTCTCCTCGCTCTTGTCTGCCCTTAGCCGCTTCAT  
CGTTGGAGAGATCTTGGTGCGAAGTAGATGCTGGCTGCATCGTAGAGCTCATTGGGATTGAGCCCTTCGGTTTGTGGGATGATTATGGTGTGCTCCGCAGAGAATCGACCGAAGAGTTT  
GTGAATCCCGTGGAGGCCAAGCTTCGCAACTCGCTGGGGAGGAATTCGTTGATGACGGTGC GCGGAGCATCGCCGAGGCGGCAACGGAGGCAGCTGTGGTGAGATAATTCTT

>comp170424\_c2\_seq2

ACAGAGAACATAAGATTTTTTACGCGGAAATTAGATGTCAGTTGGCGGCTAGTGGAAAGTCCGGCGTCAGTCAGTGGTAGGACTTATTTGGGCTTCGGGTCTCGTCGAGCCGCTCGATTCCG  
ACTATAAGCATGCCATATTTGAAACTGTTTGGTAATCCAAATTGTGGATTGAACCTTCCAAATGTGTTTCGGGTCTTTGATTTGGGCTAGTTTGGGCTCGGAGTGAGTTGAATTTGGTATC  
GTTGGCGCAACTTATAAGTAAAAGTGTAGAAATTTTGC GGATATGTCCGATGTCCAAGGGGGTAGAACCTAATGATAACACTTCTACACAATGTAGCAGAGGGGGAATTGCCTAAAAAAA  
ATAGACACCAGTCCACAAAATATCTAAAAATCATTAGAATATCATTTAAAAGTTTATGTTTGAATTATCATGCACATGAGTTGACTATTTAAAAAAATGTTCAATTTCTTAACAATTCTACAATT  
ATTTTCATAAAAAAATTATACTCCAATCACATGCTTCTTCAACTATAAGCCTCCACATCAACAAAAATCTTAAACATAATATCATCAAATTTTATTGATTAATGATTTACAATCCATGAAGTA  
CTTCACTTAATCCACTTATCAATTTTACATCACCTCATTGAAAATTC AAGGTGAAAAGAGGAGAAAAAACTCTCTAAATAAAATAGCACACCCTCACTAATTAGAAAAAAATATTACATT  
TATTATAAATGTATAATAAATGTGTATAAATATATATAAATATATAAAGATGCATATGAATATGTATAGGGAGCATATATGTACACATACTATAACATACATACATAGTGAAGGTGTGTACAC  
ATGATGTTTGTATGCATCATGTAGAAATCATTGATGTATGTAAATTATATGTGCATATATGTATGGTCTCCTACACAATTATAGATCTATATAGATATAATATTCATCTATATACATCTACTAAGCA



TGTAATTATTTCTCCCATGCATGAGGGGAGCACCAACTTTGTCTTGCTTGCATTACCTAATTTACTATTATAACCCTCATCTTCTACCTCTTTGCATCTCTTAAATTAACCTCAGCAGGAAGAGAC  
AAGCCTAAGCTTCGTCTTCATCTCTTCCCTTTCCTGATCAAAAGCTTCAGGTAAAAGCTTCTCAAATCTTCCAAGAATAACTTCCATTGTTCTTCGCTTTTACTCTTGAAAGATATCATCTT  
GCTTCTTTGCACTCTTTCGCCATCCGAGAAGCTCAGACTCTTCATCATCATTCCTTTTTCCACGC

>comp170433\_c0\_seq11

AAAAAATCATCCCAAACAAAACATAATAGATTATTTACATGAAATTCATACAATCATGAATGTAAGCTTGCTACTACTAATAACAACAAGAAAAAATAAATTAACCTCTTAAGCC  
AAATCATTCTGAGGCCAATCCATCACCATTCAAAAAGTTGCAAGACAAAAGCAAAAAAACAAGGAATAAATAAACTGAAAAACAATCACCTGTGCTATCTCTCAACTCAAATTTGATC  
TTCTTTCTCCAGACAAACCAGAATTGGTCTTGGTGGAACCTCATAATATCCAGACTGAATCATATTGGGATCACTCAGCACATCTGCAAGAAAACCTGACTGTTTCAGAGGCGAGCTATT  
CGCGCTCCTCAGCATCACACAGTTGTGCATATTATCTTCCCAAGCGATCTCAACCTCTCCAGCTCGGGAAGCAGCAGTCCCGAGATCCGGCCGATCTTCCCTCTCAACTCCGAGCAT  
TTCAAAGCCATTTCTGCAAACTTCACCGTCTCCTCCACCGGCAATCCGCGATGCTCGGATCCAAGAGCTCCTCGAAAGTCCCCTTCTCCAAGGCTCGGCTGACATGATGGGTGAGTCCC  
ATGGCGGGTTTGGCGGTGATGATCTGAAGAAGCATGATTCCGAGGGAGTAGATGTGGATTGACGCCGAGCATTCCGGTTTGTGGTATTCCGGGATCGATGTAGCAGAAGGTGCCGGCG  
GTGGAAGTCATTCCGGTATTGGGTGACGGTGTGGCGACGGAAGGGGGGACTAAGCGGGCGAGGCCGACGTCGCTGATTTTGCTTACGAAGTTGCGATCGAGGAGGATGTTGCCGGGTTT  
TAGGTCACGGTGGACGAGGGGTTCCGGTTTGGTTTGGTGGAGGAAGAGGAGGCCGGTGGCGATCTCGCGGCGATGCGGAATCGGTGTTGCCAGGGGATTGGTTTAGTGTTCCTCTTC  
TAAATAGGCGATCATCAAACCTACCAATTTTCATGTACTCATAAACTAGACATCCATACTCTGGACAAGCACCTAGTAGTAAGACAATGTGTGGATGCCGATGCAGCTCAGCACTTCTACC  
TCTTGCTGAAACTGTATTATTCCTCGTGTGCATCTGGTCTGACACCTTAACTGCAATTGGCGTGTGATCTAGATAACATCTGTATAACGGACCATAGCCACCCTCACCATTTTAAGGCTT  
TCAGAAAAGTGTGTTGTAGCCACCTCGATCTCCTCTATTGTGTACCTACGATACCTGACAGTTGGAACAAAGGTATCCAGTGCATTCTTCCCTCTCCTCTGCCTCTTTGAAAGCCTCCATCTC  
TATTTTCTTCTCTTCTGTGCTTCTAACTCTGCTATCTTCTGCTGTGCATGAGCAGTCTCCATGGCTGCTTTACATTTTGCCTTTTCCCTCTCTACGAGGGCCAGAGCTGACTCCTCTGCCAA  
GCGAGCTTCTTCCAGTTTGTGCTCCTCTTCTATCTTCCATCGGTGAGATCATGGGCTGTGATCAGGATTGGTTAGGAGATTGAATGCTAAATTGAAGTTAGATTTTAGAACACACTTACT  
TTCTGCTTTGCCATGAGTGCTTCTTTCAGGCAGTGTGTACATTTCCATGGTTTGGCTTAAAGCTCCAGCCTTAGTCTCTTCAATTCAGCCTCTACATCATCCTAAACAGCGAAACGGGAGGA  
AGAGCTCCTTCATATGAGGTTCCACGGCTCCTTTGTAGCCATTGGACGGGTCATATTGCTGAGAACCTGATTCATGGGTGTTAACATGTAATAACGTTAGAGTTTGGCCCTTAGTAATAAGA  
TTGTGATAGTCCATTTCAATGCATTCTGGCTGCTTTTATCCTTGCTAATGGCTACAGCCACCAATGGAATCTACCATCTTTTCCATTGTTACCTTCTCAATCTCCTCTATGCTTTTCGGT  
CTATCAAACGCTTTTTTCTCTGCAGTTTCTTCGCTTTTTATTCTATAAAATATGTGATTTTTTGTCTGTCTTCTCATTCTGATCTGCATTTCGCTATTTTCCCGTGTACAGAAAGTGAGGAGGA  
AGGGGAAGCTGAAATTGGCAAGGTAATTTTTCTTCTCCATTGTTTTAAGGTTTCTGTGCGAGGCTACCCACTCTTATCGGGTAGCCATTTCTTAAATTGGCTGACCTTCTATTTCCATAATAA  
GCTTGAGGCTGGGAGTTTTGGGAAGTTCCTGTGGCTATTATGTAGCGCTTCAAAATTTGGTATAGGATATTTGAGGCAATTTGCATGAAAATGGAGTATTTTTTACCATGTATTTTTAA  
AA

>comp170433\_c0\_seq18

GCTAACAGCTTAAGTTGGTTCGAGAGCCACCAGTTTTTGAAGCTCTAAAATCATTACAGCTGAAACGACCCAATCATGCCGGTAACGCTTTTGGCTTAGGCTCCGCCAGGTGCTTCTCCT  
TTTGGTTTCCAGCCGCTCTACATCAAGCTGAGATGGAATAGCCGTGAGTCCGACTATCAGCTCCCTCTCTCCGTCGTCGTTTTTCTTCTCCGCGGGCTATCAAGTTACGGCGTGTAAAGT  
TTCTTCGAGTCCAAGCAATTTGTGCCAGAAGAAACAGCGAAACGGGAGGAAGAGCTCCTTCATATGAGGTTCCACGGCTCCTTTGTAGCCATTGGACGGGTCATATTGCTGAGAACCTGA  
TTCATGGGTGTTAACATGTAATAACGTTAGAGTTTGGCCCTTAGTAATAAGATTGTCGATAGTCCATTTCAATGCATTCTGGCTGCTTTTATCCTTGCTAATGGCTACAGCCACCAATGGAAA  
TCTACCATCTTTTTCCATTGTTACCTTCTCAATCTCCTCTATGCTTTTTCGGTCTATCAAACGCTTTTTTCTCTGCAGTTTCTTCGCTTTTTATTCTATAAAATATGTGATTTTTTGTCTGTCTTC  
CTCATTCTGATCTGCATTTCGCTATTTTCCCGTGTACA

>comp170433\_c0\_seq21

AAAAAATCATCCCAAACAAAACATAATAGATTATTTACATGAAATTCATACAATCATGAATGTAAAAGCTTGCTACTACTAATATAACAAACAAGAAAAAAAAAAATTAAGCTCTTAAGCC  
AAATCATTCTGAGGCCAATCCATCACCATTCAAAAAGTTGCAAGACAAAAGCAAAAAAAAAACAAAGGAATAAATAAACTGAAAAACAATCACCTGTGCGTATCTCTCAACTCAAATTTGATC  
TTCTTTCTCCAGACAAACCAGAATTGGTCTTGGTGGAACCTCATAATATCCAGACTGAATCATATTGGGATCACTCAGCACATCTGCAAGAAAACCTGACTGTTTCAGAGGCGAGCTATT  
CGCGCTCCTCAGCATCACACAGTTGTGCATATTATCTTCCCAAGCGATCTCAACCTCTCCAGCTCGGGAAGCACGACAGTCCCGAGATCCGGCCGATCCTTCTCTCAACTCCGAGCAT  
TTCAAAGCCATTTCTGCAAACCTCACCGTCTCTCCACCGGCCAATCCGCGATGCTCGGATCCAAGAGCTCCTCGAAAGTCCCCTTCTCCAAGGCTCGGCTGACATGATGGGTGAGTCCC  
ATGGCGGGTTTGGCGGTGATGATCTGAAGAAGCATGATTCCGAGGGAGTAGATGTCGGATTTGACGCCGAGCATTCCGGTTTGTCTGGTATTCTGGGATCGATGTAGCAGAAGGTGCCGGCG  
GTGGAAGTCATTCCGGTATTGGGTGACGGTGTGGCGACGGAAGGGGGGACTAAGCGGGCGAGGCCGACGTCGCTGATTTTGTCTACGAAGTTGCGATCGAGGAGGATGTTGCCGGGTTT  
TAGGTCACGGTGGACGAGGGGTTCCGGTTTGGTTTGGTGGAGGAAGAGGAGGCCGGTGGCGATCTCGGCGCGATGCGGAATCGGTGTTGCCAGGGGATTGGTTTAGTGTTTCTTCTTC  
TAAATAGGCGATCATCCAACTACCATTTTTCATGTACTCATAAACTAGACATCCATACTCTGGACAAGCACCTAGTAGTAAGACAATGTGTGGATGCCGATGCAGCTCAGCACTTCTACC  
TCTTGCTGAAACTGTATTATTCCTCGTGCTGCATCTGGTCTGAGCACCTTAACTGCAATTGGCGTGTGATCTAGATAACATCTGTATAACCGGACCATAGCCACCCTCACCAATTTTAAGGCTT  
TCAGAAAAGTGTTTTGTAGCCACCTCGATCTCTCTATTGTGTACCTACGATACCTGACAGTTGGAACAAAGGTATCCAGTGCATTCTTCTCTCTCTGCTCTTTGAAAGCCTCCATCTC  
TATTTTCTTCTTCTGTGCTTCTAACTCTGCTATCTTCTGCTGTGCATGAGCAGTCTCCATGGCTGCTTTACATTTTGCCTTTTCCCTCTCTACGAGGGCCAGAGCTGACTCCTCTGCCAA  
GCGAGCTTCTCCAGTTTGTGCTCCTCTTCTATCTTCCATCGGTGAGATCATGGGCTTTCTGCTTTGCCATGAGTGCTTCTTTCAGGCAGTGTTGTACATTTCCATGGTTTGTCTTAAGCTC  
CAGCCTTAGTCTCTTTCATTTACGCTCTACATCATCCTAAACAGCGAAACGGGAGGAAGAGCTCCTTCATATGAGGTTCCACGGCTCCTTTGTAGCCATTGGACGGGTGATATTGCTGAGA  
ACCTGATTCATGGGTGTTAACATGTACTAACGTTAGAGTTTGGCCCTTAGTAATAAGATTGTCGATAGTCCATTTCAATGCATTCTGGCTGCTTTTATCCTTGCTAATGGCTACAGCCACCAA  
TGAAATCTACCATCTTTTTCCATTGTTACCTTCTCAATCTCTCTATGCTTTTCCGGTCTATCAAACGCTTTTCTCTGCAAGTTTCTTCGCTTTTATCTATAAAATATGTGATTTTTGCTCT  
GTCTTCTCATTCTGATCTGCATTCGCTATTTTCCCGTGTACAGAAAGTGAGGAGGAAGGGGAAGCTGAAATTGGCAAGGTAATTTTCTTCTCCATTGTTTAAAGGTTTCTGTGCGGAGGCT  
ACCCACTCTTATCGGGTAGCCATTTCTTTAATTGGCTGACCTTCTATTTCCATAATAAGCTTGAGGCTGGGAGTTTTGGGAAGTTCCTGTGGCTATTTATGTAGCGCTTCACAATTTGGTATA  
GGATATTTTGGAGCATTGTCATGAAAATGGAGTATTTTTTACCATGTATTTTTAAAAA

>comp170433\_c0\_seq4

AAAAAATCATCCCAAACAAAACATAATAGATTATTTACATGAAATTCATACAATCATGAATGTAAAAGCTTGCTACTACTAATATAACAAACAAGAAAAAAAAAAATTAAGCTCTTAAGCC  
AAATCATTCTGAGGCCAATCCATCACCATTCAAAAAGTTGCAAGACAAAAGCAAAAAAAAAACAAAGGAATAAATAAACTGAAAAACAATCACCTGTGCGTATCTCTCAACTCAAATTTGATC  
TTCTTTCTCCAGACAAACCAGAATTGGTCTTGGTGGAACCTCATAATATCCAGACTGAATCATATTGGGATCACTCAGCACATCTGCAAGAAAACCTGACTGTTTCAGAGGCGAGCTATT  
CGCGCTCCTCAGCATCACACAGTTGTGCATATTATCTTCCCAAGCGATCTCAACCTCTCCAGCTCGGGAAGCACGACAGTCCCGAGATCCGGCCGATCCTTCTCTCAACTCCGAGCAT  
TTCAAAGCCATTTCTGCAAACCTCACCGTCTCTCCACCGGCCAATCCGCGATGCTCGGATCCAAGAGCTCCTCGAAAGTCCCCTTCTCCAAGGCTCGGCTGACATGATGGGTGAGTCCC  
ATGGCGGGTTTGGCGGTGATGATCTGAAGAAGCATGATTCCGAGGGAGTAGATGTCGGATTTGACGCCGAGCATTCCGGTTTGTCTGGTATTCTGGGATCGATGTAGCAGAAGGTGCCGGCG  
GTGGAAGTCATTCCGGTATTGGGTGACGGTGTGGCGACGGAAGGGGGGACTAAGCGGGCGAGGCCGACGTCGCTGATTTTGTCTACGAAGTTGCGATCGAGGAGGATGTTGCCGGGTTT  
TAGGTCACGGTGGACGAGGGGTTCCGGTTTGGTTTGGTGGAGGAAGAGGAGGCCGGTGGCGATCTCGGCGCGATGCGGAATCGGTGTTGCCAGGGGATTGGTTTAGTGTTTCTTCTTC  
TAAATAGGCGATCATCCAACTACCATTTTTCATGTACTCATAAACTAGACATCCATACTCTGGACAAGCACCTAGTAGTAAGACAATGTGTGGATGCCGATGCAGCTCAGCACTTCTACC  
TCTTGCTGAAACTGTATTATTCCTCGTGCTGCATCTGGTCTGAGCACCTTAACTGCAATTGGCGTGTGATCTAGATAACATCTGTATAACCGGACCATAGCCACCCTCACCAATTTTAAGGCTT

TCAGAAAAGTGTGTTTGTAGCCACCTCGATCTCCTCTATTGTGTACCTACGATACCTGACAGTTGGAACAAAGGTATCCAGTGCATTCTCCTCTCCTCTGCCTCTTTGAAAGCCTCCATCTC  
TATTTTTCTTCTCTTCTGTGCTTCTAACTCTGCTATCTTCTGCTGTGCATGAGCAGTCTCCATGGCTGCTTTACATTTTGCCTTTTCCCTCTCTACGAGGGCCAGAGCTGACTCCTCTGCCAA  
GCGAGCTTCTCCAGTTTGTGCTCCTCTTCTATCTTCCATCGGTCGAGATCATGGGCTTTCTGCTTTGCCATGAGTGCTTCTTTGCAGGCAGTGTTGTACATTTCCATGGTTTGTCTTAAGCTC  
CAGCCTTAGTCTCTTCAATTCAGCCTCTACATCATCCATGTTTTGAGATGACCATGATGTAGTGCTTCCAGCCCCGAGTTGGAAGAGAATTCATTTCCAAAGTAGTATGAATCCACAGAGC  
GCACTGGAAGTCAAAAGCTGTGGTCATGGTCATTTGAATAATTGGTAAGCCTTGGTAGAAATGCTCTGTACAGTGCTTGGCCTCCCTAAGCTGACAACGGATATGTCTGTCTCAGTTTG  
TGAGTGATCTGCATATGACTTCCCATGGAATCCTCTTGTAATGGTGATTTGATTGATTCATCTTGTGTAGGCATTGAGCATTGGGTGTCATGTTACCTTTGACTCCTGATTCATGTTGATGA  
TGATCTATAGGATCTGGCTTGATAATTAGCCTGGTTCTGTATTTGAGCTCTGAGTGGTGAAAGTATAGGAGCTGGCCTAACTGAACTCCGCACTGACTGTATCTTTCCCTTCGAGATAACATA  
AACCGTACAGAAATCTGGCGCCCCCTTGGAAATGTTGGTGGTGATATCCGAGCCTCTAAGTCTCATTAGTCCATTGCGGGATGGAGCTCCGAGAACAAGCTTCTCAATTGCTGCATAGGA  
CACGAACTCTACAATTGCCTTTGCTACATCATGGTCTTCAACGACCACATCCTTGCAGTTTATATCTTTTCTTGTGCAGAAACAGCGAAACGGGAGGAAGAGCTCCTTCATATGAGGTTCC  
ACGGCTCCTTTGTAGCCATTGGACGGGTCATATTGCTGAGAACCTGATTCATGGGTGTTAACATGTACTAACGTTAGAGTTTGGCCCTTAGTAATAAGATTGTGCATAGTCCATTTCAATGCA  
TTCTGGCTGCTTTTATCCTTGCTAATGGCTACAGCCACCAATGGAAATCTACCATCTTTTTCCATTGTTACCTTCTCAATCTCCTCTATGCTTTTTCGGTCTATCAAACGCTTTTTTCTCTGCAG  
TTTCTTCGCTTTTTATCTATAAAATATGTGATTTTTGCTCTGTCTTCCCTCATCTGATCTGCATTGCTATTTTCCCGTGTACAGAAAGTGAGGAGGAAGGGGAAGCTGAAATTGGCAAGG  
TAATTTTTCTTCCATTGTTTTAAGGTTTCTGTGCGGAGGCTACCCACTTATCGGGTAGCCATTTCTTTAATTGGCTGACCTTCTATTTCCATAATAAGCTTGAGGCTGGGAGTTTTGGGA  
AGTTCCTGTGGCTATTTATGTAGCGCTCACAAATTTGGTATAGGATATTTGAGGCATTTTGCATGAAAATGGAGTTATTTTTTACCATGTATTTTTAAAAA

>comp170436\_c1\_seq2

TTTATTAATATTCTACATTAAGATATCTATATATATAATTTGAATCTGCTAAGCATGCTTAATACATTAGCATTCTCCTCTTGTTTTTTTTACAAATTAAGCTTAATAAGTTAGCATTCTT  
CATTTTTTCTCACAAATTAATATAGGCTTTAGTTTGAAGATTTGAGAGTAAACTAAGGTTTTGTTGGGACAGTTTTCTTACTACTTTTCTAAAGTATCTTTCTATTACAATAATCAGAAC  
ATCTTCATGAGGTTTACTACATAGTCAAACCTCCCTCTATATTCTTGATCTTCACTACTGTATTTCCCTGCAATGTATGCCAACTTTGAGCTCAGCAATCTTCAATATATAACTTCATCTCAAAT  
CACATTGAATCATCCTACCATTGTAATTTGTTTGAAGAAAATGCTAATCATGCAAAGGCACTTCAGTGAGGTTTCATAGAGTTTGGTGACTGAATTAAGCAAGCTGCAGCACATTCTGTTGG  
CAAAGTTTCGCAGGGTTCTTCAAGATGCCAATCTTCGCATTTGTTTGGCTGGACAATATCACCCAAGCAATGATAAATGATTCTCCTTCTCTATGGCACACTGCCACTCATTTTTCGAAGT  
AGGGAACCAGTTTTTGGATGCAGAAATGGTACTTTTGACCTCTACATATAACGTTTCAGACTTTTTTCATAATGATCAAGTCGTAAGGTAATCCCATCTCAAATCTCTATTGACCCATTGAA  
CTGCTTCTTCACTTAGCTTCTCAGTGAAGTATCTGTAAGCTATAATCTCTCCTAATCTGCCAGTTTTAGAAGATTGACCTTCCACAGTTTTCAAACACATAATGTCTTTATTCTTATCTGACCT  
CGCTGATTCCAAGGCTGTTTGAACAAACCCATCGATTGGAAGTGGAAACATCGTCAAAGTGAATGAATCCAGGAACTGGAATTTTCTTAGGAAAAATATCTGAAGCAGAGGGTAGATCTTC  
TGAGGCCTTCAAATTTACTGGAGGCCAGCACAAATTTGAAAACCTGGTTTCTTGCTAATTTCTGTATATTGTTGCTTAGCTTTCAATTGTGATGTGTCTCCGGCATAGTTAAAGTCAGCTAAGA  
CACAAAAGCCCATAGAGGCTCCCCTCAGGAAGGACGGGCACCTGATAGCTACCAACAATAAAAGATTCAATTTGCGCCTCGGTGTAGCCTAACTCAGCCTTAGTAGTGATGATATGAA  
GGAAATTTGCAATATGTAGATTACGAAGTCCATGAAAGAAAAGTCGGGAGAGCTCCAAAAACAATTCATGAGAATCCGTATTGCGGTGTTATGTAAAAGATATTTCCCAACAACCCTTTGT  
CTTCAGCTAGCTCTAACTTACAACTCCTTTTTCTCCTTCGCACGCCTCTGGCACTGTCGATGCCTTCTCCAGAGATCCGTGCGCATCTTTATAGTCTCGCGAGTTTCTAGAAATTTGGGG  
CTGTTATTGAGTTCTGGGAATTTGGGCAGGGGATCTGGAGAGAAATACCAAGCCTTCTCT

>comp170436\_c1\_seq6

TTAATAGAAAGCCGTCCATAATGCCCTACATAATAGGGGTTTACTCTGAACCACAAGCAATCTGGAAGTTGAAGTACACCTTTTTGTGTTGAATATTCCATGTATATAACATTTTTTGT  
GTGAATTATGCATGCAGAATGAAAAGTAAAATATAGGATATGGAAAAATGTACATTAATTTACAACTAAAAAAGGTTACAAGTCGGCAACTGATATTTACATTAATCTAAGGTTTTGTTT

GGACAGTTTTCTACTACTTTTCTAAAGTATCTTTCTATTACAATAATCAGAACATCTTCATGAGGTTTACTACATAGTCAAACCTCCCCTCTATATTCTTGATTCTTCATTACTGTATTTCTGC  
AATGTATGCCAACTTTGAGCTCAGCAATCTTCAATATATAACTTCATCTCAAATCACATTGAATCATCCTACCATTGTAATTTGTTTGAGAAAATGCTAATCATGCAAAGGCCACTTCAGTGAG  
GTTTCATAGAGTTTGGTGACTGAATTAAGCAAGCTGCAGCACATTCTGTTGGCAAAGTTTCGCAGGGTCTTCAAGATGCCAATCTTCGCATTTGTTGGCTGGACAATATCACCCAAGCA  
ATGATAAATGATTCTTCCTTCTCTATGGCACACTGCCACTCATTTCGAAGTAGGGAAACCAGTTTTTGGATGCAGAAATGGTACTTTTGACCTCTACATATAACCGTTTCAGACTTTTTTCAT  
AATGATCAAGTCGTAAGGTAATCCCATCTCAAAATCTCTATTGACCCATTGAACTGCTTCTTCACTTAGCTTCTCAGTGAAGTATCTGTAAGCTATAATCTCTCCTAATCTGCCAGTTTTAGA  
AGATTGACCTTCCACAGTTTTCAAACACATAATGTCTTTATTCTTATCTGACCTCGCTGATTCCAAGGCTGTTTGAACAAACCCATCGATTGGAACCTGGAACATCGTCAAAGTGAATGAAT  
CCAGGAACCTGGAATTTTCTTAGGAAAAATATCTGAAGCAGAGGGTAGATCTTCTGAGGCCCTCAAATTTACTGGAGGCCAGCACAAATTTGAAAACCTGGTTTCTTGCTAATTCTGTATATT  
GTTGCTTAGCTTTCAATTGTGATGTGTCTCCGGCATAAGTAAAGTCAGCTAAGACACAAAAAGCCATAGAGGCTCCCCTTCAGGAAGGACGGGCACCTGATAGCTACCAACAATAAAAG  
ATTCAATTTGCGCCTCGGTGTAGCCTAACTCAGCCTTAGTAGTGATGATGAAGGAAATTTGCAATATGTAGATTACGAAGTCCATGAAAGAAAAGTCGGGAGAGCTCCAAAAACAATTC  
ATGAGAATCCGTATTCCGGTGTATGTAAAAGATATTTCCCTGTAAATTAAGTTAGGAGAACTGTTCTCAAAACAAAACCCATGAAATAATTCTCTTTTAAAGTAATCATTCAAACATAA  
AAAGCAGGAAGTTTTATTGATCAAGTGAAGGATTTTTTTTTTTTTTAATTGCTTCCTTGCATTTCCCAGCAACAACTTTCCATGTTCAACAATGCTATTACTGTTTTTTTTATCAGACGAGACA  
ATGATATTGGTTGCCAATCTTAGATTATTAATAAAACCAAACCTTCACCTTGATTAGCCTCGAACTCCTGTAAACAAGTCTTTTGAACAAAAAAGCTTTAATAATACTAGATTTAACCTAAA  
AACTGCCAAAAAAGCAAAAAATAACAACCTTCAAATCCCGTTTCTCCATTGTTTCACGTTAATCTCTACGAAGCCGAAGCAGCAACGAAGATTGGCGATGAGGATAAAGCAAACCCCTAGAC  
AGGCCTAAGGC

>comp170445\_c0\_seq4

TTTTAGGGCTACGTTTGCTTTCATCCATCAAATTAATGCCTCACAAGCCATTGGTAATTCTACGTCCCTGCAATACGTGATAACGACATGCTCCAAACTGTACAGCAAACAGCTCAAGTAT  
AGGAAGTCTAGAAGTTGTTTTGCATAATATGGTTTTGTGACTTCAGGCAGGATCCGGAGGATGCTGCGGTCAACTCTGGTCAATTGTATGGAAGATACTGTGACTCCACCAATGCAAATTGAT  
AGTGATGGTGGTAACAGTCTCCTTAGAGTTAAACGCTCCCTGAGGAGGAGGAATGGAGTTGATTATTGTGTGTTTGTAGTATAGCTCTGAGGAGGAATTAGATAATGCAAAGCCAATGAAG  
GCTCGCCAATCAAAATATTCTCAACAAGTCAATGATATTCGAGGAAGTACAGTTAGTTCTGACTCTCAGGAGGTAACGGCTAGGTGGTGTCCCAAAGAATCTTGTAGGCCTATTATGGATG  
AAGCTCCCGTGTCTATCCTAGTGAGGAGGAGTTTAGAGATACACTTGGTTACATTGCTAGTATAAGCTCTAAAGCTGGAAAATATGGCATTGCGCATAGTTCCACCACCTTCTTGAA  
GCCACCTTGCCCACTTAGAGATAAGAATATTTGGGAGCAGTCGGAGTTTTCAACTAGGATTCAACAAGTTGATAAGCTTCAAAATAGGGAACCAATGAGGAAAAGATATAGGAATCGTTA  
CCAAAGGAAAAGGAAGAGAAGAAAGCGCTTAAGATTTGGAATGACCCGTAGACGTAACAACCTGCACCATTGCCGAAACCAATGATTACTCTTCAGACACAGAAGAAAAATTTGGCTTT  
CAATCTGGTTCCGATTTTACACTTCAGACCTTCCAGGTGTATGCTGAGGATTTAAGGAACAATATTTGGTATGAGATATGCAAAGGACAGTAAATCATGTGGTAAGGATGAAACTGGTG  
AGAGATGGCAACCTTCTGTGGAGGAAATTGAGGGGAATATTGGCGGATTGTTGAGAGTCTGATGATGAAGTTGAGGTAATATGTTGCTGATTTAGAAACTGGGAAGTTTGGCAGTG  
GGTTTCCAAAAGCAAACCTGCAACGTCTAAGGACTTAGATCCACATGTCTACTCTGGATGGAACCTAAACAATTTCCCAGGCTACCTGGGTCAGTTCTTTCTTTTGAAGTGGGGATAT  
TTCTGGGGTACTAGTGCCTTGGCTATATAATTGGGATGTGCTTTTCATCATTTTGTGTCATGTTGAAGACCACCACCTGTATTCACTGAACTATATGCATTGGGGTGATCCAAAAATTTGGTA  
TGGAGTTCCTGGAATGCTGCTGTGAAATTGGAAGAGGCCATGAGGAAGCATTACCAGAACTATTTGAGGAACAACCTGATTTGCTGCATGAATTGGTTACACAGTTGTCTCCTTCAGT  
TCTAAAGTCTGAGGGTGTCCAGTTTACCGTGCTATCCAGAAAGCAGGGGAGTTTGTCTCACCTCCCTAGGGCTTACCATTCCGGCTTCAATTGTGGATTCAACTGTGCAGAAGCAGT  
GAATGTTGCTCCCATGGACTGGTTATCTCATGGTCAAGTGTGCGGTTGAGCTTTATAGCGAACAGCGCCGCAAGACATCCATTTCCCATGACAAGTTATTAATGGGTGCTGCAAGAGAAGCT  
GTCAGAGCTCTCTGGGAGATTTTCTGTTAGGATCTGACAAACCCAGTAACTTAAATGGCAGCGTGTTCGCGAAAGGAAGGGACATTGACGAAGGCTATACTGGAAAGAATAGAAAT  
GGAACAGGAACGAAGAGATTCTCATTGTGATCCTACAAAAGCAAGGAAAATGGATAGTATCTTTGATTTGTCAAAGGAGAGAGAATGTTTTTTCTGTTTTTATGATCTTCACCTATCTGCT

GCTGGCTGTGAATGCTCATTGGATCGTTATGCCTGCTTAAACCATGCAGAGCTTCTTTGTTCTTGTGAACCCAACCAAAAATTTTTCTTTTTTCGCTACACTATGGATCAGTTGAACACTCT  
AGTTCAAGCTTTAGAAGGGTATGCAAGTGCAGTGCAAGATTGGGGTTCATATGATCTGGGATTGGTTTCACCTAATATTGTAATGAATGAAGATTGAGAAAGCTTAAAAGTATAGGTGAA  
TCTGATTCCGAGGTACCATTGCAGAGAAGTACATCCACTTCAATGAAAGGATTGGTAGATATCAACGTTGCTAGTGTGAGATCTTTAGTCTGAAGAGTGGAGGGCATTGATGTGGAGCTA  
CTGATCGTCTAGTGAGATCAATAGTATGGCATGCTCACAACATATGGAAGCAGTTTTTGATATTAGTAGGCCGAGCTTGCCACAAAATAACTGTGATATAGAAGCCAATGCAAGTTTGCAG  
AAGCCAGAAACATCTTGCAAACTCGTGTA AAAACAGAATTGGAAAAGTGATAACTTGAATAGAGGCACCTCCCATAATTAATCTTGACTTAGCAACTCCACAATATACTGAAAATATGCGCC  
ACGGTATTGCTTTCAAGGAAAATAAAAATCTTTTCTGATGATGATAATGTATGGGAAGAGGAGCCAAAGTGGTTTTTGGACCTCAGCAAGAAAACTTAACCAAAGATTATAAGAATGAAA  
TTCAAGGCTGGCCTTATAGAAATGGCGAGACAATTAAGCATTAAAGGAGGAAGATTGTACTTCGACTGCAGTAGAACAGGATATGGAGCATGATTCCATAGCAACATCCAGTACACCAT  
TGAGGTCAAGCCCTGGAGGTGGATCTTCAGTCCCTTGGCAATCTTTTGGAGTTTTTCTCTCCTCTCCTTTTCAAAGCAAATGGAGGCATGAAGCTTCTCCTTCTAAAGGTAGTCAGTC  
TTCGGCAAAGTTGTTTGGCATTGAACTTCAGCCACATGAACCACATCTTCTATTAATTCAAATCTGAAGGCAACCGGCCTTTCAACAGCAGCTCAACCAATCCACTGGGTTGAGTTCA  
TCTAATGCTGAAAAGGAGAAGCATTAAACCAAATCCAAGTACTTTGTTGAGGCACCTCATCTTGGAAGTGTAAATGTTTGGAAAGACACTGGTGTAAATGCAAAAAGCCATCTTCCAAAAGGA  
TTCCGAAGTCGTGCAGGTACTTCAGTGTGCTTGATCCAACAACAACCTGCAATTACATATCCGAAGTACTAGATGCTGGACTTATAGGCCCTTTATTTAAGGTTACCTTGGAAAGATAATCC  
AGAAGATACTTTTATTCTTCTCCTCGCAATGCTGGGATTTGATTAGAGAGAGACTAAACCAAGAGATCATAAAGCAGTGCAGCTTAATGAACCAAGAAGTCCCTCCCTTCAACCT  
CCTGGGAGCATCGATGGGCTCGAAATGTTTGGTTTTCTGTCCCCATCAATATATCAGTTTATTGAATGCCTCGATCCTCATCGTCGCTCGGAGTACTGGGCATCCAAGTCGAGTTCATC  
AACAAAAATTGAAGCCAATATGAACTCTACCCTGAAATCTATGAAGAAAAAACCAAGTGGATTTGGATTTGGATCAACAAATTACTCTTGCAACCAAATGCTTCAGCAGAAACACAAG  
GAAAGTTTTTTGGCATTGACATTTGCACATTAGAACCCTGATTCAATTCAGACGATAAGATCCAGCATGTCCTGAGGTCAATCTTTCGTAGATTAAACCCAGAAGAACTTCAGGTGAT  
GCAAATGGTTTTTCAGAAGCGGTTGAGAAAGTATTCTGGAGAGCAGCTTACCGAGCTCTTCTATATGAGATTGAGATGAATGTAGATAATTAATTGTTCTTCTTAGAATAAAATTCATTT  
CTAAAGGATGATTAGCTACAGATGAGACATCATTGCCAACAGAGCCACCATTCTTTCTTCAACAGCTAACAAAACTACATAGTTTTCTCATAACAATCTCTTGAGGATTGCAATTCTGTTT  
TTCTTTCTGTGCTACAATGGAGTCTAAGGGAAGCCTGTGTTTGAAGATGGTTCTTCTTACATTTGAATATCTGTCAATTTTGTAAATGAATGATTAGCATTGGCTCTGTTGGATATTTTTGGA  
GCTTTAATCATGCCTCTTTGGCAATGAGATTATTAATGTTTTAGTGTAGGTAAAATACATATTGTTTCTTGGAGCTTCATAAATATTTGAATATAAGATTATTTGAACAACCTGAGTTGGTAC  
AAAAA

>comp170454\_c0\_seq12

ACTATCTATCATCCATAGAGCCCTCCGATACAAGGTTCAAATCTGATTGGAACCTTGTTTATAGTCACATTTATGAATGATTAGCTAATTAATCACACCTAAAAGTTAGTTAAGTATGCTTT  
TCCTTTATATTATAATAGTATGAATTTAGAAGCTGCAATGCAACTGTGGCCACTATATTTTATGATCTGGAACTAAAAGAACAATAAAAAGATTCTCTAGATTAGAACGGGAAAACAATAGCT  
AAAGTCCATTAGACAAGAAGGTATATTGTGATAGAAATCTATATGCCAGTATCTAAATAGTTGTATCATCATAAGTTCTTTTTTACCAATCACTGAGTTTCAGGCTTCTGACGCTTCAGGTT  
TGAAGAATAGGCTCTTTGATCATGCTTGTTTTACGAGATCTTTTATCTTGTGTTGAACGGCTACCTTCAGCTCCAGAAGGGCGGAAGATCTTGCTTCTAAAACCTCCACTCTCTAAAGAAG  
AAATCGGCGGGCTCTGTGCTTTCCCACTATATGTCTGCCACTGTGAACTGATTGCTTTTATGTGCTTTCAGATTGTCTCGGGTGCAGTGTGAGATCTGATCCAATGGAGTGGAGGCCGCC  
ATAGGTGGAGCCATCTTCATGTTGTGATCTAAGATATTAATCACATCAGAATTTGAGGATAAATGAAATCAGAATAGCAGTAAAAAAAACAAAAAATAAGAAACCATTGTGCTGTAGAT  
CTTTGGCGTTGAATTCAAATGCTTGGTTGGGGATTTCAATTTCTGCATCAAATGGGGTTTTGTGAGCTAAGACTGGAAACGAATGCATCAACTTGTTAACCAGACAGCAAATGTAAC  
GCAGTAACTGAGCTTTACCATCGATTTCCATCTAGTAATCTTTGACCTCAGCAAGCTTCTTGTGCTGGCTTCAGATTGAACTACAAGCTTGCCCTGCAAGAAATTTACTTAAACAGTTGC  
TGTAGAGGAATAAATCTCATATTTCTCTAGAAATTTACTATAGGATAATGGTTTGATAACTAATGCAATTGAAAACATTCTTGAACACGTTACGGCGTTATGAACTTC

>comp170454\_c0\_seq8

ACTATCTATCATCCATAGAGCCCTCCGATACAAGGTTCAAATCTGATTGAACTTGTATATAGTCACATTTATGAATGATTAGCTAATTAATCACACCTAAAAGTTAGTTAAGTATGCTTT  
TCCTTTATATTATAATAGTATGAATTTAGAAGCTGCAATGCAACTGTGGCCACTATATTTTGATCTGGAACTAAAAGAACAATAAAAAGATTCTCTAGATTAGAACGGGAAAACAATAGCT  
AAAGTCCATTAGACAAGAAGGTATATTGTGATAGAAATTTCTATATGCCAGTATCTAAATAGTTGTATCATCATAAGTTCTTTTTTACCAATCACTGAGTTTCAGGCTTCTGACGCTTCAGGTT  
TGAAGAATAGGCTCTTTGATCTGTGAAAATCTTCTCATTAATCTCCAATTAATAGGATTTGACATGCTTCATGCTTGAAGGGAACATAACCATGCTTGTTTTACGAGATCTTTTATCTTGTGT  
TGAACGGCTACCTTCAGCTCCAGAAGGGCGGAAGATCTTGCTTCTAAACTCCACTCTCTAAAGAAGAAATCGGCGGCTCTTGTGCTTTCCACTATATGTCTGCCACTGTGAACTGA  
TTCGCTTTTATGTGCTTCAGATTGCCTCGGGTGCAGTGAGATCTGATCCAATGGAGTGGAGGCCGCCATAGGTGGAGCCATCCTTCATGTTGTGATCTAAGATATTAATCACATCAGAA  
TTTGAGGATAAATGAAATCAGAATAGCAGTAAAAAAAACAAAAAATAAGAAACCATTGTGCTGTAGATCTTTGGCGTTGAATTCAAATGCTTGGTTGGGGATTCAATTCCTGCATCAAA  
TGGGGTTTTGTGAGCTAAGACTGGAAACGAATGCATCAACTTGTTAACCCAGACAGCAAATTTGAACTGCAGTAACTGAGCTTTACCATCGATTTTCCATCTAGTAATTTCTTTGACCTCAG  
CAAGCTTCTTGTGCTGGCTTCAGATTGAACTACAAGCTTGCCCTGCAAGAAATTGTACTTAAACAGTTGCTGTAGAGGAATAAATTTCTCATATTTCTCTAGAAATTTACTATAGGATAATGGTT  
TGATAACTAATGCAATTGAAAACATTCTTGAACACGTTACGGCGTTATGAACTTC

>comp170457\_c1\_seq4

TCGCACATTAATACACTTCTCAATAACATCTTCAATCCTCCGGCGACCGGAGAAGGAGCTGAGCCTGCCAGAAGGAGAGAACATGATGAGCGCTATATCTATATCACAGAGAACGGAGAG  
CTCGTAAAGCCTTCTTGATGAGGCCATTGCGTCGCTTCGAAAACGTCACTTGCCATTTGTATTGTTCTCAATTTTCTTTATTTCCAACCTCACCCATCCATTCTTATACGCTTTTCTAAGAAA  
AGAAAATCGCGTTTCGAAATCGCTTTTTGAGAAGCGCTGCCAAGAATAGAAAAATATCTATAAAAGAAAAGAGAAAAATAGCGAAGATTGAAGAGTGTGAGAACTAGATCAATGAGAA  
AGGAGTTTTGAAATTTATAGGAGGGAGGATAGTCAGAGAATGAAAGAGATGTTGTTGGAGAGGTTTAAAGCCAATGGTCAAATATTAATAAGGCCTCTAAATTTATATCTATAGTTC

>comp170483\_c0\_seq3

CGTACCGACCACCGACCTACCGCTGCTAACGACCTGCTGCTGCTCGGAATTGTCGTGTCTGCGGGTTCGGGTTTCATGTCTGAAAAATCAGCTTGTGTTGCAAAAATAAGCCAGGTTTGGATT  
GATCTGAATAGTGTGAGATCAATTCCAGATTTGATCCGAACCTGACTTGAGACCCGAAATTTGACACCCTAGGGCACTCCAACCTGTATAAAAAGCAAATTTTTTAAGAGTTTAAATATTCGAC  
CAATTACCTGAAGTTGAGCGAAGCCTTCAGCCCGACGTTGCACACGCGGAAGCGGTAGACCTTCCCAGCCTCCAGAAAGAACATGGGAGCATCACCGAGCTTGGCCGACGCGGCGCCG  
TTGATAAGCACGCGCGTGCAGCTGTGAGGTGGCGGCCGGAGTCGAGCAACACAGCGAGGGCCTTATGGCCGATTCCGTACCAGTCGGAGATCAGCACGTCGAACTCATCCGCCGGGG  
GATCAAATGGAACGGGGATGAGAAGGCGACTATGCACGCGGATTGGGCCGTACCCACCGGCGGCCTTCTGCATGCCAATGCTGGGGTAGTAATAGAAGCTGCCGATCTGGTCCCTTCGCTT  
GCCAGTGATAGGTGAAGTTTTGGCCCGCGGGATTGGGCAGTTGGTGCCCGGCATTCCGTCTGCCACGAGTTCTTGCCTGCTGGATGCCGTTCCATGAGAGGAGGAAAGGCTCGTCC  
AGTTGGTTGAAGACGTTGACGACGATATTGTTGTTGCTGGTGCAGTTGATGACGGGGCCGGGAACTGGTTATTAATCATGATGACCTGTTGGGGGACCCGAAGGGGAAGATGGTGCC  
GTAGCTGACCGTCCATGTGAAGTACAGATACGGGTCTCAGCGCCGGCGGAGATGAAGGCGATGAATAGAACAACGGCGAGTGTTACGCCAGATTTATCCATCGACGACATTGCTGCTTG  
GTGTTGTTGAGTTTCTGCTGTTGTTATTGAGAAGAGAGATTAGGGAGACATGAATGGAAGGTCCCGAGGCTAGCCTTTGCAGGATCGAAGTTGCGAGCTAGCCTGGGAAAATTGAGCGC  
TCCTTCGATGTGACAGAGGCA

>comp170483\_c0\_seq5

AATTCCTCGGATAATTATGGATTCAATGGAATTCATATATATTGAAACATTTTTTTTATTTTTCCATACCTCCACTTAAAAAAAATAAAAAATAAAAAATAAAACCATAGCTTCACGTGATAA  
TTCAATGCAGACAAAATCAATAAAAAAATCGCTATAATCCTGTGGCCGACAACAAATTTATTTTTAATATAATGACCAAAAAATCTGTCCAAGCAATAAATAAATAATATATCCTGCAG  
GGCATGCAGCTGATTTTCATTTTTAATAAATAAAATTTAAGAAAATTGACTATAGCACATCGAAAATAGTTTACACTTTATAGACTCGCCATATATTTAAGGTAAAGCTTTCTAAATACTATGT  
TGAACACTTTCAGAAGCTTAGGAGTAAGGCGGTGGCAGTGGAAGATCTGTAATAGCACCAACGGAGAGCATTCTCAGGCAAGTTGTATTCATCCCTGAGAGACCGCTCCGGCGACAG

AACGCTGATGTAAAGCTGCTGTCCAAGATAACGGCGGTCCCAAATCTCCGACCTCAGGTTCCACATTCCGGCATTGTCGAAGGTCAACATGATCGCCGTCCATGAACGAGGATACACCTG  
GATGGTGTGCCCTGCTCACAGCATCAAGTAAGTTGTACGTTTTCTGTTCTCCGGGGTCCAGCAGCCAGGCCCATTCGGGTAGGGAAGAAGGAATAACCATTTAGATGATAGGACTGCAC  
GCTCTTCTCCGGGTTCTCAAGTATGATCTCAATAAACGTCCCTGAACTCCGCCGTGATCACGTTCCGGAGCTATGGTCACAGGCGTGTGGTAGCCGGAGGCTCGTCGGTTATCAAGTTGTAC  
TTGAAAACAGTACCATTGATCCCGAAATACTCAGCGAGCTTAAGCGGCACGGTGGGGTCCGGTGTGAGACACGCCGTTGAGCGCAAAGCGAAGCTTTCCGTCGACGGCGGATGTGGAGC  
TGCGGAGCTTGATGGTGC GG GTGATGTTGATCTGTCCGTAGTGGTATGAGCCCTGTGGGTTGGGCCGGGCCGCGCTGGCGGTGAGATTCCAACGGAAAGAGCGCCATTGGTTGAGCGAC  
CAAGCCCAGGTGGTCCGGTCCGGAGGGAGGTCGGGGGTTGCCGGGACGCTGCTTCCACTGTAGCGGATGATAGCAGTTGCCGTCTGCACGGTTTTTTGAAACCGGGTGGAGGCGACGA  
GGAAGTAGTCGCGCGGCGATTGATCAGCTGTGACGAGGACGGAGTAGCATTGGCCGGCGTGGACGTCCAACGAGTCGTAAACATTTTTGCATAGTGTGGCTGCCGTGATCTCTACTAGCT  
TTAGCGTGTGCCCTGAATCTGAAGTTGAGCGAAGCCTTAAGCCCCACGTTGCACGCGCGGAAGCGGTAGACCTTCCCAGCCTCCAGAAAGAACATAGGAGCATCACCGGGCTTGGC  
CGATCCGGCGCCGTTGATAAGCACGCCGCGTGC GCGTGTGAGGTGGCGGCCGGAGTCGAGCAACACAGCGAGGGCCTTATGGCCGATTCCGTACCAGTCGGAGATCAGCACGTCGAAC  
TCATCCGCCGGGGATCAAATGGAACGGGGATGAGAAGGCGACTATGCACGCGGATTGGGGCCGTACCCACCGGCGGCCTTCTGCATGCCAATGCTGGGGTAGTAATAGAAGCTGCCGAT  
CTGGTCTTCGCTTGCCAGTGATAGGTGAAGTTTTGGCCCGCGGGATTGGGCAGTTGGTGGCCGGCATTCCGTCCTGCCACGAGTTCTTGGCGCTGCTGGATGCCGTTCCATGAGAGGAG  
GAAAGGCTCGTCCAGTTGGTTGAAGACGTTGACGACGATATTGTTGTTGCTGGTGCAGTTGATGACGGGGCCGGGAAGTGGTTATTAATCATGATGACCTGTTGGGGGACCCCGAAGG  
GGAAGATGGTGCCGTAGCTGACCGTCCATGTGAAGTACAGATACGGGTCCTCAGCGCCGGCGGAGATGAAGGCGATGAATAGAACAACGGCGAGTGTTACGCCAGATTTATCCATCGAC  
GACATTGCTGCTTGGTGTGTTGAGTTTGTCTGTTGTTATTGAGAAGAGAGATTAGGGAGACATGAATGGAAGTCCCGAGGCTAGCCTTTCAGGATCGAAGTTGCGAGCTAGCCTGG  
GAAAATTGAGCGCTCCTTCGATGTGCAGAGGCA

>comp170496\_c2\_seq14

CGTACGCAGACGAGCGTTCACGTTTATGATTTCGTTCTCGTGCCGTCGCCGATCTAGGTTACCACCTATGGCGGCGGAGGAGCCAGCAAGCCCTTGCGGCGGAACCCACGAGCGTGGCG  
ACCAGAGCCCCGAGATCCAATGTCCGTGAGCAGGATAGGTTCCCTTCCAATCGCCAACATGCAAGCGGAGGTTTCGGCTGCGCAGAGGAGCGTTCACGAGAGTGGCGAACAAGCCTGAG  
ATCCAATGTCCGTGAGCAGGGTGATTTGCTTCCCATCACCAACATCATCCGCGTCATGAGGAAGCATATCCCTTCCGATATAAAGATTGCCAAGTACGGGAAGGACAGGATGCAGGAGTG  
CGTTACCGAGTTCATCAGTTTCATCACCAGCGAGGCTAGAGATAAGTGCCTGAGGGAAGAGGAAGAAAATTACTGAGGACGATGTACTGTGTGCAATGACAACACTAGACCGGTTTG  
AAGACTACATTAACCGCATAGGTTGTATTGCGAGAAGTATAAAGAGATAGAGGGAGATGGCAAGGGTTCTGCTAAGGGAGCAGAGAGCTCTGGTAAGAGAGATGCAGGTGGTCTTCAA  
GGTGAAACCTATCTGGTTCAAGCATGCAAGGGGATATGAAGATGCTTCAGCAAGGCTCTTTTACTGAAGGCATGAATTATATGAATACTCAGTATCATCCTGGAGACCTCTCCAGCTAAA  
TGGGCCTTCTGCATCTTTTAGTAGATGCTTCTGGTTCAGGTCAACAAGAGGACGAAAGCTTAGAACTGTGCTTGAGAACTCATTAGTTGGAAGTATTAGTTTTTTATTTTCGTTTGCTTAT  
TTTTTAATATGTAATTTCTGGACGGATTTATATAAACATCTGCAATACTTCCTATCTGTGAATAGAGCAGAAATCTAATCTGGGTACGAATTATCTTGTCTTTGAAGAGTGACTTTGATGAGGC  
CATTGGTCATTATTTTATTTTATAAATTTAATACTAGCTAACCTGTGCTTACTGTTTTAAGCTTTCGCTATCTGCGCTATTGAAGGAGACCTGTTATGTTTGTTTAATCCCATATGCAGTA  
GCTTTAGCTTTTTTATTTGAGCCTTGGTGCAAATTTGAAGTTGTTGTCTGCCATTTGATCGGAAAATTATTAGGTGTGGAGATCGGTTGTAGAGATACATCCGGATATCCACTTAAAATTTG  
ACACGTATAGTGCACCTTTGGTTGCGCATTTTTGTGTGTTTTACCTGT

>comp170496\_c2\_seq20

CGTACGCAGACGAGCGTTCACGTTTATGATTTCGTTCTCGTGCCGTCGCCGATCTAGGTTACCACCTATGGCGGCGGAGGAGCCAGCAAGCCCTTGCGGCGGAACCCACGAGCGTGGCG  
ACCAGAGCCCCGAGATCCAATGTCCGTGAGCAGGATAGGTTCCCTTCCAATCGCCAACATGCAAGCGGAGGTTTCGGCTGCGCAGAGGAGCGTTCACGAGAGTGGCGAACAAGCCTGAG  
ATCCAATGTCCGTGAGCAGGGTGATTTGCTTCCCATCACCAACATCATCCGCGTCATGAGGAAGCATATCCCTTCCGATATAAAGATTGCCAAGTACGGGAAGGACAGGATGCAGGAGTG

CGTTACCGAGTTCATCAGTTTCATCACCAGCGAGGCTAGAGATAAGTGCCTGAGGGAAAAGAGGAAGAAAATTACTGAGGACGATGTACTGTGTGCAATGACAACACTAGACCGGTTTG  
AAGACTACATTA AACCGCATAGGTTGTATTTCGAGAAGTATAAAGAGATAGAGGGAGATGGCAAGGGTTCTGCTAAGGGAGCAGAGAGCTCTGGTAAGAGAGATGCAGGTGGTCTTCAA  
GGTGGAAACCTATCTGGTTCAAGCATGCAAGGGGATATGAAGATGCTTCAGCAAGGCTCTTTTACTGAAGGCATGAATTATATGAATACTCAGGTGCGCCAGATGACGAAAGCTTAGAAC  
TGTGCTTGAGAACTCATTAGTTGGAAC TATTAGTTTTTCATATCGTTTGCTTATTATTATTATGTAATTTCTGGACGGCTTTATATAAACATCTGCAATACTTCCTATCTGTGAATAGAGCA  
GAAATCTAATCTGGGTACGAATTATCTTGTCTTTGAAGAGTGACTTTGATGAGGCCATTGGTCATTATTTTTATTTCATAAATTTATTTAACTAGCTAACCTGTGCTTACTGTTTTAAGCTTGC  
GTATCTGCGCTATTGAAGGAGACCTGTTATGTTTGTTTAATCCCCATATGCAGTAGCTTTAGCTTTTTTTATTTGAGCCTTGGTGCAAATTTTGAAGTTGTTGTCTGCCATTTGATCGGAAAA  
TTATTAGGTGTGGAGATCGGTTGTAGAGATACATCCGGATATCCACTTAAAATTTGACACGTATAGTGCAC TTTGGTTGCGCATT TTTGTGTGTTTTACCTGT

>comp170496\_c2\_seq21

CGCTACGCAGACGAGCGTTCACGTTTATGATTTCGTTCTCGTGCCGTCGCCGATCTAGGTTACCACCTATGGCGGCGGAGGAGCCAGCAAGCCCTTGC GGCGGAACCCACGAGCGTGGCG  
ACCAGAGCCCAGATCCAATGTCCGTGAGCAGGATAGGTTCCCTTCCAATCGCCAACATGCAAGCGGAGGTTTCGGCTGCGCAGAGGAGCGTTCACGAGAGTGGCGAACAAGCCTGAG  
ATCCAATGTCCGTGAGCAGGGTGATTTGCTTCCCATCACCAACATCATCCGCGTCATGAGGAAGCATATCCCTTCCGATATAAAGATTGCCAAGTACGGGAAGGACAGGATGCAGGAGTG  
CGTTACCGAGTTCATCAGTTTCATCACCAGCGAGGCTAGAGATAAGTGCCTGAGGGAAAAGAGGAAGAAAATTACTGAGGACGATGTACTGTGTGCAATGACAACACTAGACCGGTTTG  
AAGACTACATTA AACCGCATAGGTTGTATTTCGAGAAGTATAAAGAGGTGATTACTCTGTGACCA TTTATGTGAGCTTTTACTTCTTTTTCAGAATGATAGATCGGAATTGGTGGTTGGCGGG  
GTGATAGGTCATTCTTCTTTTGCCTTTTGTAAATCGTTAATCTGATTGCGATTTTGTGCTTTTTTTGTTTATCTGGTGGTTCTGTGGAATGGATGCGACGCCATGGCAGATAGAGGTA  
ATCAAAC TAACCTCTCCCTCTGTAATCGGTTTTTTTTTATTTTCTTCAATAGCAGTTCTATTATTTATACTGTGATGCCTTATGGCACTATACTGTCTCCCATTGCGTGTTAAGGAGTTAATAT  
TTATGGGTTTCCACCGAAAGGAAAATTATGGTATATAATCCGGGCCCTGACAGTGTCTATTAAGTAGAATTAATGCTATAGTTTTATGATTTTATTGGTCATTGTGCATTTCTAGATGTGGT  
TGCTTACATGTTAATGTAAAAGTAATGTACTGCTTACATGTCGAAAAGGCGCATCAATTTTATGTGATTTTTACATGGCCAATTTAAAATTTAAGCACTACATACATGCTGCCTTAGTTGT  
TAAAGATAGCCCGATGACAAACGTTTAAACGTTTAAAGATGCTCATTCTTGCA GTTCTCCAGTACTAATTTTGTCTAATTTTGGCAGGG

>comp170509\_c0\_seq4

TACAGGAATCTCAAAGTTAAAGGTGAGAAAAGATCAGAAATTACGATCTGCTTTGCCTAATCATACTTTTATGTTCAAATCTTTTGTACTAAAAC TTCATTATTGCCATTTTACAATAGATC  
CTTCAGAAGAAGATGTTTTAGGAACATCTTGTACTTACATGTTGAGATTAACGAGCCTACAGAATTA ACTGAGATTGCCCTGACAAGGGAATCTGCTAGAATCCATGAAGACCTGAAGC  
AGCGTCTGTCCCAAGTTCTCTCTCCTAGGTGGCTTCAATCTCCTTGGAAATGATATCATTCATGGTGCCCGAAAGGATAATGAGTGCAAATTATCTCATACTTTAAGCTTTAATGGATTGCCAA  
GTATTAATAAGAAGCCTGAGGCTGAGTTATCATGTTT CAGAGTTTGCAGATGGAAGTTTTGTTAGTGAAATTGAACGAGAGGTTTCAGTTGAACGTTTAAAAAACAGATTA AAAATAGACC  
AGCAATCCCTGAGTATTCTATAACAAGGAACTAGAGGAGGAAAGAAATGCTTCAGCTGTAGCAGCAAATCAAGCTATGGCCATGATCAATAAGTTGCAGGAGGAAAAGGCAGCGATGCAA  
TTGGAGATAATGCAATACCTAAGGATGATGGAGGAACAACTCAATATGAACAGGAAGCACATCGAAATCTAAATGACCAACTCACAGAAAGGGAGAAGGAGATACAGGATCTTGAGAC  
ACAAC TTTCAAAGCTGTAGGAAGCTACCCGGGGATGAATCAATGGCTGAAAAAGCTTTACAACCATTTATTTGATTCTGAGGAAAGTGAATATAGTACCACCAGTACACCTCATGTCGTTAG  
AACTAGGAGAAGGAGCAAGCACC ACTTGCCAAGTGAATGTTTGAAGATTGCGCGTGGCCTCCATCAAGCCCAATAAAGAGAATTTGTTGGATTTTGAAGATGAGAGGGAGTATATCTT  
AGGATGCCTGAGAAGGTTGGAGAAAAATCTTCGTCTGTTCTCCAGTGCGGATGCATCTAGACGTAATGAAGAGGATGATGAGTTCAATGATGAAGTTTATGCAGGTGATACTGAAAGTGA  
AAACCACAAAATCAATGCTTAAATGAAGATAAAGATCTAGAAACTGTTTGTGTTCTCTGAAACAAAATGATGAGGATTGTCGACTCGACAATTTAATCGATTAGAAGAAAAAATTTCA  
TATGTA AAAAATCTACCAGTATCTGTTGAAAGCCTCTCTCTTGAGGAACGGGATTCTGAGATCAATTC AAATGAAGAAGAGAATATGCTAAGTTCTTCTTCAAGAAAAAGAACCCCA  
AAGACAAGTACAAGACATAATTTAGTAGCTCTTGGTGATGAAGTTGAACACTTGCATGCAAGGTTGGAGGCACTTGTAGCTGATCGAGATTTCTTGAGCGTACTATTA ACTCACTTAAAA



ATGGGAAAGATGGGCTACAGTTTGTTCAGGAAATAGCTACCCACTTGCGAGAAATTAGAAAAATTGCTTCCACGCAAAGAGAGCAAGTAAAAGCTTGAACCTTCTTACATTCTTTTTAAAG  
CTCATGGAAAGGTATAGTGAAATCCAGCTTGCTTCTTCAGAGGACGCTTCTGTGGTAATCATATTCTTCTGTCTTGGATTCCCAAAAACAAAACCTTATGATGAGGATACACAAATGTCACCTC  
AATAAGCCGGCGCTTTGAAGTTAGTCTCTTTTGCTTCATGAATTTTGTATTTGAGTGAATTTTTAATTTTTTTTCATTTCAATTTGAAGAGTTTTTCATCTTCTGTTTTTAGAGTTCTTTTTAATT  
GCATGTGTAATTTGTTACCAATGTTAAACTCGGCTTCTTTCTTTCTTTCTTTGGAAAATTAAGGGACTACC

>comp170509\_c0\_seq5

AAAGAATTTCAAAGAAAAAGATACCTCTGTGAATTATATATAAGCTTACCTATTTATAACATTATATACATAAGATGCTGAGCATAAAAACAGGTAAAGAGAAGGCTATGGATGCCAATGACA  
TTGTAAACTTCCAGAGAATTCAAAAGTCCACTGAAACATCAAAAACAAAGAAACGAGATTATCATATAGGGAAAGTAAGCATCCATTTCATGCATATTTGGCTGCATTACATAATACTGATAA  
AACAAATGCACTGCTTTGGCACCATCTTATTGATTACCTTCAAGATTAAGGAAAGCAATTTTAAGAAAATAGACTCTTCTTTGAGTGAGCCCAATTTTTCTTAATTTCTCGAAGGTGAGTAG  
CTATTTCTGAACAAATTGTAGCCCATCTTTCCAGATCTAAGTGAATTAATAGTACGATCCAGAAAATCTCGATCTGCTTCAAGTGCCTCCAACCTTGCATTCAAGTGTTCATCTCATCAC  
TCAGGGCTATTCCGCCATTTCTTCTACCTGCTTTGGCTTCATTTTCTTAGTACAAGAAGAGTTTAAACTATTATAGTTTTTCATGTTCTCCAACGGTGCAGTTTTCTTCAGTAGAAAGGCTTT  
TTATATGTGGAGATTGATGCTTTTCAGATGCAATCATTTCTTTCAATTTGATTAATTTCTGGAGTCCCAGAATTCCTTCAATTATATTCTGAGAATACAAATTATGTTTATTTCTTTCATCTTCA  
GCTACGCCTTCTTGTAGTTCAAGGTTTGGCCACTTGGTATTATCTGCATCAATATCATCGTCAAACCTCGTCACTCTTCAACAAGTCGAGATGCATCAGCACAAGAGAACAAACGAACAT  
TTTTCTCAAACCTCTTCAAGCATTCTGCGATATACTCCCTCTCATCTTCAAATCCAACAAATTTCTTTTTATTGGGCTTGATGGAGGCCACGCCAATCTTCAACATTACACTTGGCAAG  
TGGTGCTTGCTCCTTCTCCTAGTTCTAACGACATGAGGTGTACTGGTGGTACTATTTCACTTTCTCAGAATCAAATAATGGTTGTAAAGCTTTTTCAGCCATTGATTTATCCCCGGGTAGC  
TTCTACAGCTTTGAAGTTGTGTCTCAAGATCTGTATCTCCTTCTCCCTTTCTGTGAGTTGGTCAATTTAGATTTTCGATGTGCTTCTGTTCATATTGAGTTTGTTCCTCCATCATCTTAGGT  
ATTGCATTATCTCCAATTGCATCGCTGCCTTTTCTCCTGCAACTTATTGATCATGGCCATAGCTTGATTTGCAGAAATAGCTGAAGCATTCTTTCTTCTCCTCCAGTTCTTTGTATAGATTACT  
CACGAACCTGTGGTCAATTTCAATCTGCCTTTTCAAACCTATCAACTGAACCCTCTCCTTCAACTTCAGAGACAAGGCTTCCATCAGTAGATTCCACAAATGATAAATCAGAATCCAGTCTC  
TTAGTAACACTATGTAACCTATTACAACAAGAAGTATCAGATAATTTGTTTTTCATCATCTTGCCAACACTGAAATTGAAATCAGTCCACGAGGATTCAAGGCTACAAGAAGTTGGGAGTT  
GGAACAGACGTTGCTTCAGATCTTCATGGATCCTACCAGATTCCCTTGACATTGACAGGGTAATCTCAGTAGATGTAGGTATTCGCTGGGCTACTTTATCGCCAAAAGGAAGATTTCCATCA  
AGCTTGCTCAAATGTTTGTGTCAGGTTTGGAACTTGTATCAGTTAAATTCAAAATACTGATGGCTTCAATCTTTGGAGTAGAAGATGTTCTTGAACATCAACTTCTTCAACAATCGAGATTC  
AGTAGGAACATAATTCAGATGTGATTTGAGATGATAGTGGAAGAGTTGGTTTTCACTTCAACATTAATCCAGTTGATTTCTCCAAGCCATGACGAAGGCCATTAATGGATTCCGGAAATGAA  
TTAAGCAAGAACCACCTTCATTAATTTCAATATTAGAAATTGAAGAAACATCAGATATAATAGGATCAAGATGAATTAGCTTCTCTAGGACCATATTGTCTGAAATCACAGATAAATCTTTT  
AGGGCATCAGTGAGACAAGTAGATGACTTCAGATTTTGGCGAACAGATTCTCCTTGACTTCTTCAGTTCCGGGGGACCTTATTGCTGCCATCAGCATCATCACCCGAGTATGCAATTTCTA  
ACTCCGAGTCAGAAGAAAACCTTCAGCTCTCTGTATGAGAAATGAGGATCAAAGCCATAATCTTCTCCAGGATGATAAGCTAACTGCATGGAGAAAATTTTTCTGTCTTGTCTCAATCTATC  
AGGAAAATGTGCTCTAGAATGTAGCCTTGCACCGGATAACTGGATAGCAGGGTGAGCAAGCTCTTTGAAAATTGGCTTGTCTTCAAATGGCCTGTATGCAGATGGTTTTATATTGCACAGT  
TTAGAACAGCATGAGCAAGGCTTTTTGTGTCAGAGAACTACCTTCTTGATCATTTTCTAGCAGAGGAACTTCCACCATCTCATCATCTGGGTTTACACATTGCTTACTCCACAAAAATTTACA  
TATCTCCATACTCGATTTATTTTCGGCAAATGAAGGGAGGCAAGTTTACACATTTCCCTAGCATCAGCAAGCTTTTTGTGTACATGACAAAATGCAAAGGTGGATATCTCAAACCTTATGCA  
CATCACAAGGAAGTCATTATAAAATCCCAGCTTTTCATTTCTTAAAGATAGGTAAACCTTGAGCAAACATAAACATGGAGTCTGCAACTTAGAGTAGCGAAATATCTTTATCAGCAAGTA  
TAAACAAAATGCATCAACGAGCAACAAAAGAATTAGCAGCCATTCTGTGAAAAGCAGAAAGAAAGAGCTGTTGAAAACCGGTGAAGTTCACTTCTCTCTCTGGTGGTACTTCTTGCAGCCA  
TGACACAAGAAGGTCAGATCAACCTCTAGGAAAAAGAATGACTCCAAGCTCCCCCTATCGATAGTTTCAGGCATGAAAGAAACCGAAATTCAAAACCATAACGCCGATCTTCAAGAC  
CTGTGCAGGGAACCCTGCCTATCTTGAATCGAGAAGGGAAGTTTGAACCAAGCAACCAATCCTAGAATTAAGATATAAGATTCGAGTTTGGATCTCGCTTCTTCTTGGCATTGCCTCAAACG

GCCGCGACCACGCAACTCCGCCCCAGAACTTCAAATGGAAACGGCCAAAGGTATAAAATACAGCTTTTTAGGAAATCAAACGGCAAAGAATGGGGAAAAAGGGGGAAAAGATCA  
GAGAATTCGTAGGGTTTTGGTGTCTGTTGTGCTGAAACATCGGAGGAGGGAGCGGAAGAAAAGGTGGCAACACAAAAAATTGAGAAATGAAACAAATGAGGAAAGCAAATTATTA  
ACAAAAACGAGGAGGGATATGGGAACTCATTTTGGCACCCTA

>comp170509\_c0\_seq9

GGTAGTCCCTTAATTTTCCAAAAAAGAAAGAAAGAAGCCGAGTTTAAACATTGGTAACAATTTACACATGCAATTA AAAAGA ACTCTAAAAACAGAAGATGAAA ACTCTTCAAATGAAA  
TGAAAAAATTA AAAATTC ACTCAAAAATACAAAATTCATGAAGCAAAAAGAGACTAACTTCAAAGCGCCGGCTTATTGAGTGACATTTGTGTATCCTCATCATAAGTTTTGTTTTGGGAAT  
CCAAGACAGAAAGAATATGATTACCACAGAAGCGTCCTCTGAAGAAGCAAGCTGGATTCACTATACCTTTCCATGAGCTTTAAAAGAATGTAAGAAGTTCAAGCTTTTACTTGCTCTC  
TTTGGCTGGAAGCAATTTTCTAATTTCTCGCAAGTGGGTAGCTATTTCTGAACAACTGTAGCCCATCTTTCCATTTTAAAGTGAGTTAATAGTACGCTCAAGGAAATCTCGATCAGCT  
ACAAGTGCCTCCAACCTTGCATGCAAGTGTCAACTTCATCACCAAGAGCTACTAAATTATGTCTTGTACTTGTCTTTGGGTGCTTCTTTTTCTTGAAGGAAGA ACTTAGCATATTCTCTTC  
TTCATTTGAATTGATCTCAGAATCCCGTTCCTCAAGAGAGAGGCTTTCAACAGATACTGGTAGATTTTTTACATATGAAATTTTTTCTTCTAATCGATTA AATTGTCGAGTCGGACAATCCTC  
ATCAATTTTGTTCAGAGAACACAAACAGTTTCTAGATCTTTTATCTTCATTTAAGCATTGATTTTGGTGGTTTTCACTTTCAGTATCACCTGCATAAACTTCATCATTGAACTCATCATCCTCT  
TCATTACGTCTAGATGCATCCGCACTGGAGAACAGACGAAGATTTTTCTCCAACCTTCTCAGGCATCCTAAGATATACTCCCTCTCATCTTCAAATCCAACACAGTTTCTTTAATTGAACC  
TGAAAGCAGGAGGCCAAGCAAAATCCTGGAATGTTATACCTGTCAAGTGATGCTTGTCCCTTCCCTGGGTTTTAGGACATGAGGAGTACTAGTAGTACTGAATTCAC TTTTCATCAGAATCA  
TATGATGGCTGTAAATCTTCCCTGCAAATGATTCATCCAGCACCGCTTCTACAGCTTTCAAGTCTGTCTTCAAGATCTTTTATTTCTTCTCCCTTTCTTTGAGCCGATCATTTAGTTTCC  
GCTGCTCACTCAGCTTGTCTTCCATCACCTCAGGACTGCATAGCCTCCA ACTGCATAGCAGCCTTTTCTCTTGA ACTTATTGATCATGGCCATAGCTTGATTTGCAGAAATAGCTG  
AAGCATTTCTTTCTTCCCTCCAGTTCTTTGTATAGATTACTCACGA ACTTGTGGTCAATTTCAATCTGCCTTTTCAA ACTATCAACTGAACCCCTCTCCTTCAA CTTCAGAGACAAGGCTTCCA  
TCAGTAGATTCCACAAATGATAAATCAGAATCCAGTCTCTTAGTAACACTATGTAACCTATTACAACAAGAAGTATCAGATAATTTGTTTTCATCATCCTTGCCAACACTGAAATTGAAATC  
AGTCCACGAGGATTC AAGGCTACAAGAAGTTGGGAGTTGGAACAGACGTTGCTT CAGATCTTCATGGATCCTACCAGATTCCCTTGACATTGACAGGGTAATCTCAGTAGATGTAGGTAT  
TCGCTGGGCTACTTTATCGCCAAAAGGAAGATTTCCATCAAGCTTGTCTCAAATGTTTGT CAGGTTTGGAACTTGTATCAGTTAAATTCAAAATACTGATGGCTTCAATCTTTGGAGTAGAA  
GATGTTCTTGAAACATCAACTTCTTCAACAATCGAGATTT CAGTAGGAACTAATTCAGATGTGATTTGAGATGATAGTGAAGAGTTGGTTTCACTTCAACATTAATCCAGTTGATTTCCCTC  
CAAGCCATGACGAAGGCCATTAATGGATTCCGGAAATGAATTTAAGCAAGAACCACCTTCATTAATTTCA TTATTAGAAATTTGAAGAAACATCAGATATAATAGGATCAAGATGAATTAGCT  
TCTCTAGGACCATATTGTCTGAAATCACAGATAAATCTTTTAGGGCATCAGTGAGACAAGTAGATGACTTCAGATTTTGCGCAACAGATTCTCCTTGACTTCTTCAGTTCGGGGGACCTTA  
TTGCTGCCATCAGCATCATCACCCGAGTATGCAATTTCTAACTCCGAGTCAGAAGAAA ACTTCAGCTCTCTGTATGAGAAATGAGGATCAAAGCCATAATCTTCTCCAGGATGATAAGCTA  
ACTGCATGGAGAAAATTTTCTGTCTTGTCAATCTATCAGGAAAATGTGCTCTAGAATGTAGCCTTG CACCCGGATAACTGGATAGCAGGGTGAGCAAGCTCTTTGAAAATTGGCTTGTCT  
TTCAAATGGCCTGTATGCAGATGGTTTTATATTGCACAGTTT AGAACAGCATGAGCAAGGCTTTTTGTGCAGAGAACTACCTTCTTGATCATTTTCTAGCAGAGGAACTTTCACCATCTCAT  
CATCTGGGTTTACACATTGCTTACTCCACAAAATTTACATATCTCCATACTCGATTTATTTTCGGCAAATGAAGGGAGGCAGGTTTACACATTTCCCTAGCATCAGCAAGCTTTTTGTGTA  
CATGACAAAATGCAAAGGTGGATATCTCAA CTTATGCACATCACAAAGGAAGTCATTATAAAATCCAGCTTTTCATTTCTAAAAGATAGGTAAACCTTGAGCAA ACTTAAACATGGAGT  
CTGCAACTTAGAGTAGCGAAATATCTTTATCAGCAAGTATAAACA AAAATGCATCAACGAGCAACAAAAGAATTAGCAGCCATTCTGTGAAAGCAGAAGAAAGAGCTGTTGAAAACCGGT  
GAAGTTCAC TTTCTCTCTGGTGGTACTTCTTG CAGCCATGACACAAGAAGGTCAGATCAACCTTAGGAAAAAAGAATGACTCCAAGCTCCCCCTATCGATAGTTTCAGGCATGAAAGA  
AACCAGAAATTCAAAACCATAACGCCGATCTTGAAGACCTGTGCAGGGAACCTGCCTATCTTGAATCGAGAAGGGAAGTTTGA AAACGAACCAATCCTAGAATTAAGATATAAGATTCG  
AGTTTGGATCTCGCTTCTTCTTGGCATTGCCTCAAACGGCCGGCGACCACGCAACTCCGCCCCAGAACTTCAAATGGAAACGGCCAAAGGTATAAAATACAGCTTTTTAGGAAATCAA

ACGGCAAAGAATGGGGAAAAAGGGGGGAAAAGATCAGAGAATTCGTAGGGTTTTGGTGCTGTTTGTGCTGAAACATCGGAGGAGGGAGCGGAAGAAAAGGTGGCAACACAAAAAAT  
TGAGAAATGAAACAAATGAGGAAAGCAAATTATTAAAAAACAAAAACGAGGAGGGATATGGGAACTCATTGCGACCGTA

>comp170513\_c0\_seq1

GCTGAAGTGCCGACGCCGGAAGTTGCGTTTTGTGTTTTGGTGGAGGAGCGGTGTTGAGGCTGCCAGGAAGCAATGTGATGTTTGTGATGTCATAGCAAGGTGTCGTGTTTGGCGTTTGGCGT  
GGCGAAAGGAGTGACGATTATTGGGAATTGGCAGCAGAAGACGTTTGATATTGTGTATGATGTGGGCGAGGGGAGGATTGGTTTTCGCCCGCGGTGGCTGTGGATGAGAGGCGGCGGTGA  
TTCCGGCGGTTGAATATGGGGCTTTTGGGTTGGGTTGTTTGTCTGAATAGGAAATGATGATGGGAGATATGACATTGTAATAATTATAGGGAAATTCCTCTTAAATTTCTTAAGAGATGAGT  
AATAATTGTAATTGAAATTGTAATAAGGTGGTTTATGTTATTTGAGAACAAGTCTATCTATATTATTAATAGAAAATTATGCAATCATTGTTATTTGACAATTTAACATTAATGGC

>comp170513\_c0\_seq4

AAGATAAAATATTTAAATCTATAAAAATTTAAAAATTTAAAAATTTAAAAATACTGTTTTTTTTTTTTTCCAATTTTCCTAATTTACGTTTCTCCCCATCCAGGCATCATCAGCCTGCAGCTGCAG  
CACAACTCCTCTGGCATCCGCCTCCCCCTTACCATCCTCATAGCCCCTGCTCCCCGGCTCCCCCTCTCCAGCTACCTTCCCTTCTCCGACATCCTCCACCACGATTCCACCCGCGTCAACTC  
TCTCTCCACCGCGTCAACACCTCCGCCGCTCCGTCCTCTCTTCAAGGGCACAGCCCTGGGCGTCGGCAATTACGTCACCCGCATCAACGTCCGGCACCCACCAACCACTTACACGGT  
TGTCACCGACACCGGAAGCTCCCTTCTTGGCTCCAATGTCCTCCCTGCAAGCGCTACTGTCACCGCAACTCGACCCCATCTTCAACCCGGCCGCTCATCCACCTACCGCACCATCCC  
GTGCTCCGCCTCTTACTGCTCCACCCTCTCTCCGCCACCCTCAACCCCTCCGGCTGCGATAGTTCCGGCACCTGCATCTACGAAGCCAGCTACGGGGACGCCTCTTCTCCATCGGCTAC  
CTATCACAAGACACCCTCTCGCTCTCCCGTAGCGTCGCAGCCATCCCAATTTTCATCTTCGGATGCGGCCAAGACAACGAAGGTCTGTATGGAGAGTCGGCCGGCATCATTGGCCTCGCC  
AAGAACAGCATTCTCTCTCTCAACTAAGCCCCAAATTCGGTAGCTCCTTCTCATACTGCCTTCTTCTCGTCCGCCACCGGCTACCTCTCATTCCGGCAGCTACAATCCTGGCAAATT  
CGTCTTACACCCATGGCAAAGAGTTCGGCTGACGAGAGTCTCTATTCTTTGAACTGTGCGAGTATCGCAGTGGCAAGGCAGAGCATCGCGGTATCCGAAGAATCACCGTCGATCATTGA  
TTCAGGGACGGTGATCACGAGGCTGCCGGAGGAGGTGTATAGTGCGGTCAGAGCAGCGGTGGTGGAGGGCGATCGGGGAAAGGTGGCTCGGGCTCCGGCGTATTGTTATTCGATACGT  
GTTATAAGGGGAG

>comp170526\_c0\_seq10

AGGACTGGCTTAGCTGCCTCAGTCTGTTACGAAGAGCATTTATAAGTGCTGGCCAACTTTATAAGGAGTGTGAGACAATGTGAATTTAGTATTACTTACAGCCTCTATAAGATTGTAATGT  
GGTATTTGTGGGAAGAGATGATGAATCACATGAGTACCAATGTCATGGTGGATGTTGTTGATCCATCCATAGTCACGATCAAGTGTGTCGTAAGCCTCCTCGAAGATAGCTCCATTCCTGCA  
AGCCAAGAACAAATCATTATGGAAGCTTTTCATCATGTCCAATGGCTATAAGAGAATTCATTACCTTCCCACGGTACCAGGGAAGCTTTTCATCATGTCCATGGTGTATGTAATAAGTTAC  
TAAGTCCAG

>comp170557\_c2\_seq16

TATGCATATATCTATATATGCAGGTATGTATGTTTGTAAGTACGTGCATGTACACACACATATAAAGAAAAGAAAGTACCTCAGATAATAGCATTGAGAACAATGCTTCATTTCCCCAAAAAT  
AATGAGCTTTGTGAGAGGATAAAGTTGCCACTAGTATTTAAAAGCCTTTTGATATGCAATGCAGACAAAAAGTTAAACAAGGATAGAAGAAAGCGAGCTTGCATGCCAATCTGCCACGATAA  
CTAGCCATTA AAAAGGCTAAAATAGGCATCTCCAACCGACAAACTTATTTCCACTTCAAAAATACAATAAGAGACACATCAAAATAGTAATCTTCTCCA ACTGAACCCCTTTCTAACAAAA  
AAAAATCTGTGTATATTAATCTTCGACTCTATTTTCTACACACAAAAATTGAGTTCTTGAACAGTGCAGCAATATTGGCGTGGCACCGTTCGTGGCACTGTTACGGACGCAGAATTTT  
GGACTGGAATGCGGTTCCGGGAGGAGCAGGCATGTGACTGCAAACAAGTGTATAGAGTTCGGTTGGAGATGCCACGGGCTCTTTGGATGCAGGGTTTGTGCTAAATCCTGCAAAATCCA  
AAAAATGCAAAGTAAAATATCACGGTAAGTGCTCCACTTCACTGCATTTTGGACATTTTGTCTAAATCCTGGATATGGTAAATCCGATAGGTTCGGCAGATTTATGGGATAAAGCCGAA  
GAGGTGTGCAAAGGGTGAATGATCGTTATCTTCGCAGCGAGCGAGCTCCAGTCTTTACTTCCGAGCTAACGGCGATCAAAAATTTGTGACTTCCGATCCGACGGGAAGAGAAATTTGTC

AAAGGAGGCGAAGCTAGCGACTCGTTGAAAACCTACCTGCCACGCGAAGGAGGCGAAGTCGAAGGCAACGAACAGTGGAGAAGGGGAAAAGCGAACCTAGCAAATA

>comp170577\_c1\_seq6

ATTATTCTCAAGTTTTTTTTTTTTGGTTCCTTTCTTTGATCAATGGTTTTTACAGCATTCAAAGCTAGAAAGGTACGATCATTACCAGCTCCGGTAAGAAGCCATTCAAGGATGGAATTAC  
ATCAGCTTTCATAAAGAGTTAGGCGTGCATCAAGCAAATATAATAAGTCAGGAAATTGGACCACTTCTGGGATCCCACTTGAATATGTACTTCAATCAGTATATTCATTGGAAATCAA AAC  
ATTACAAATCATAAAAAATATATGTATTAACCTTTGAATTAATTTGGAAGCCGTGACTTTCATGTTACAAAGGTATAACCTAACCAATTGCACCATTGCCACCCTTACTATCTATGAGCTATTT  
TTTACTGGAAATATAAGGATCCAATATCAAAGAAAAACCTTATAGCTAACCTTGGACATGGCAAGTCCCGTAACAAAAGCATCTCCATTATCAGATTTCTCAAATAATACTTGTCTGCAAC  
CCCATCTTAAGTGAA

>comp170600\_c0\_seq5

TAAAATTTTGAAGAAAAAGAATTCACCTTGTAGTTTAAATCCACTATATTTAGAATCTTTCAGATTTGGATGATTTTCAAATACATTGCAAATTTACCGCCACCACAAGCCATTGCCGTCCA  
CCGCAAGCCACTGCCATCCTCGACAGCCATCATCCACCCGCCAGACCAACGCCGGCCACAACTTTTTCATCTTACATTGCATTCATTTTCTTCAAAGCAAATAAAAAATTAATCTCACG  
CACTTCTTTTACAATCATTCAAACAACCTCAAATGATTGCTTTCACACTACATTCCTTTTTTCAGACAACCAAAACAGCCCCTATATCATATCTAAAGAGTATTTTAGTCTTCGTTTAAGA ACT  
GTTATAAAATACTACAAAATTGACGAATTTTAGTGGTACCAGTAATCTTCCACTATGTTCTCCCTTCAACTAAAATCTCAAGATATAATCACTTGATAATGCCGCCACAGATACTTATAATTCC  
ATCTGTCAAACCTGAAGCGCAGCTTCTATCTTTATTGTCTACTGCATTTATAATGTTCCCGGAAATTGCCCCATCCACTGCTCCATCAATACAGGATTCAACTACTGATTTTCATAGCATAATT  
TGTCCAAAACCTACATTA AAAACACCATTTCATGTCTCCTGATGCCATACTCGAGCAACCTGCAGACTGTCTTCACGAAGTTCTCTCTCCAGGACATCAAAAACAGCTTATCGTCCAAA  
GGCGAATCAAGTACAACCACATCATTCACTGAGCAGTTGGTGACGTGACGCATTTTCATTGAGCTCCGAACAACATTCGGTATCTGCACGGAATAATTTTTCTCCAGGACCCCTTAG  
AATAATTTTTTTTTTTTGTGTAGCCG

>comp170602\_c1\_seq2

TTTTTTTTTTTCCAAAAATATCTTATTCATCTTCAA AATTCAAACATGCATGCATGATCAATATACAACATCCTCACCAACATATCAATTGAAAAATATTTATCTACTCAAATATAATGGA  
TTTATTGTATATGCATGTAGCTCTACATATCAAATGGGCGCATCAAAGCTGGTCCCATCTTCCACACGGTAAGTGATTTGGCTGTGATAGTTGCGTCTGTAGCATTGTTGAAGAGAAAAAGC  
TTGGCTGCACCGTCGATCGCTGCAGTTGGGTAAACCCTAGAGGTGATGCAGGTTCTTCTCCTTGAGCAAAGCTCTCGACAATGGAGTGATCAACCTGGAACCCACATAGTAATTATTATA  
CTTGTTATTAGATCTATATGATTATCAATAATTATGTAGCATTAATAATTAACAACCTTAAATTAGTTCATAATTTTGGAAACCATCCAGAGGATGGCTTGCATCATGATTGAATATTGCAATAAATA  
GATGCTGAAAAACATATGGGTACTTAAATTTAATGGTTTTT

>comp170619\_c0\_seq6

ATTATTATTATTATTATTTATGTTTAAATGAAAGTCATATGCATGTATATATTTAATAGAATTAGATTTTCGATTGGGACAACCTTTATTATTGCTTTCTAAAGAAGTTTTTTAGTTTTTAATTTTTTTTTTA  
ATTAGAAAGTTTTGTACTAGAAAACCTGCTTTAGAAAACAGTAAGAAAGTCGTTCCAAATAAAGTCTTGGGTTTAGTTTGGGATAGCTTTTTTGTGCTTCTTAAAGCAGCGCTTTCTAGTT  
AAAAAAGGAAAAAATTTATAGTACGTA AAAAGCTGCTTTGAGAAGCAATAAGAAAGTCATCCCA

>comp170653\_c4\_seq14

TGAGAGACTGAACATTATTATAACATTGTGTTTTCTAAGGAATAAAATTTTTGAATAGTTTTCTACTTCATTTGTAGAGATTGGTCCTTTTTATTATTGGAACCTGTCCCATATTTATTTA  
CCCTTCCAATTTGTGATTTTCTTCGTTTTGTTCTGCATACGCAATTTGTAATATTTTTGTAAAATCCCACAAAAAACTTGGTATTTGCTCGGTATTGCTATGTATTATTCATAATAACGAG  
GAATACCGCTCTGTGAAGACCAATATCGAGCTATACCGAGTTTTTTCTAGTCGGTACAACCTT

>comp170654\_c0\_seq3

GACAAACAACGGTGGGTAAAATCACTTATATCAGAAGAGTATAAATTCATTACATGAAGATACACAGTAATAAAACAAATCCGCATAAATATACTGTCAATTATTCCTTTTTGTAAGTTCCTT  
CTCCCCGCTAAAACCCGCAGCAAAGAAGATTTAGAATGTGTTCTTCCGTTCTTCTGAATGAACTGAACTTAACATATAAAAAACCTTTCGAGGAACAGGAAAAACACAGCAAACCTTTC  
ACAGTTTTCTGTTCCAAGGAGCATAACAATTTCAAGTTCAAAGACTGAGCTCTCTTCTGCGCAAGAACATGATTATTCGTGGGAAGAATGATTTTTCTTCTTGGTCTCTCCTCAGTCAC  
AGAAGCATCCACTTCACTGACTGAATAACATCTGTTCCGATTTGGAGTTGAGTTTACACGAAGAGCAATTGAAGCTGGATCTGAGCCGTTTATGTCTCTGCTGTCAAAAGCTCTTCCAG  
TAGTGGCGTACGCTCATAGACTGGCCTTTAGAAGAAGCAGCAGCTTCAITGGCCTTCCCTTCGCTGCTCATTCTCAGTTCTCCATTCTCAGTTCTCTGCTCCATGTTTCCAGTTCCCTTTTATA  
GCCTTCTCAGCCTTTTCAAGTGCATCTCTCAATGCCTCCTTCTCTTTGATCTCCTTATAAGAAGCTTCCAACCTTTCTCTGCTCATTGATTCTGTTTTTTTTGGCATCCTTAATCAGGTCTGA  
CCGCCGCGATCACCATCTCATTGCAAACCTCTCAGCCTCATTAGCTCTCTTGCTAAGGGCATAGTATTTCTTCAAGATGAATGGTCATTACATCTTCGTAGGAAACCTGCTCACTCTCCTGC  
ACAGCTTTGATTGCATCAAGTGACAATTTTTAGAGGACTTGGCAGCTTCAATCTCTTTCAATACTGCTTGAAGCCTGAGCTCCATTGCGCTTGCCTAGCCTTAGCTAGCTCTAGCTCTTC  
CGTGGCTCTGATTAGTTCTTGGCTTGCAGAATTAGCTTTGGATTTGGCCTGATCGGCTTCCCTCAGTTTTGTCTAACAGCTCATATGGTAACTCTCTCATCTCTTCATGGGATGTCTTCTGCTT  
CGCGTGAACCTCCTCTGTTTCACTTTGGTTTCAATTTCCAAGTTGGCTTGAAGAGAAGAAATTGTCATAACTGATATCTTTTCTTTTCTTAAAGGGAAGCCAAGCTGCTAGTTTCTTTTTCCA  
GTTTCAAGCTTGGAGTGAATATGCTGCAATTTCTCAGGCAATTTACTTTCATCCTTCCGCTTCTGAATGCTAGCCTTCACTTCTTCAAGTTTCACTTTTGTGCTGCCGTTAGTACTGCTTCTTCAAGTTT  
CTGGCTGCGCTAACTTTTGTCTCTCTTGAACAATTTCAAGCTTCTGGCTGAGTTTTGTTGCCACATATGCAGCCAGCTCCCATTTCAAGAGTTTCAAGAGTAGATTCCGAATCCAA  
CTTCAAGCTTAAAGATCATTACAACAGAAAGCTTTTCTTCTAGAGACTGCAGCTTCTCCTGTGATTGCTTCAAGCTTCTTCCCAATTTGTGAGTCTCCTGCTCCCTTTTCCATTACTGCATTGA  
GCCTTTGCTCTTCTGCTTTGATATGTGATGCAATTTGCCGACTCGACCGCTCCTTTGCTACTAATGAGCTCAATTGTGAGCTTCTCAACTGTTTTCTCAACCTCTTTTGGAGCCAGTACAGCC  
TCTCAGCTTTCTTAGCAGCGACATCCTTTTCTTGTGATCAACTGATCACATTTCTCTCCTCAATGTACTAAGCACAGCTTCCAAAGATTTCAAGCTCATTATCTGCTTCCAAGTACCTATTTCTT  
GCTACTTGAACCAGTTTCTTGGCTGCCCACTGTCTCATCGCTAATTTCTTGTCAATCTCTTTTACACGGAGTTGGGCAATTCAGAGTCTGTTGTGCTGAGACTCCTCAATCTGAG  
CCTTCTCAAATTCAGTTTCAAGCTTCTTACTTGTCTTACTGATTTCAAGCTTCTGAAGCACCTTGCATCTTCAAGCTTCTTCAACTGTTTTAAGTAAAGAGGCACCTTCTTGC  
TCTGCCTTCTCAAGCTCTAGCTCAAAGTTCTTGTCTCTCTTTAGTAAGAGCACTCTGTGTTTTCCAATCTACATTTCTTCCAAACATATTGACAGCAGCTTTGACAGATTGAAACGGTGC  
TGCTGTGTCGATAAGGGACCTGTTCCGATCAATGAGTTTTGTGGAAGAATCGGGTAATTTCTGGTTCTGATGATTGGCTCCAGTAACCATGCTTGTGTTGATAAATCTTGTGATGAGCAGTAT  
TAAGGCCATGTTGGTGTTTAGAGGGTCGATTGTTGCTCTCACACCATCCAATGCTTCTGAGTTTCCATTGCTTGAATCTAAAGATGCTGAAGGAGAAGGGAAAAATCTATAGAGACATT  
TTCTTGTGATTTTTTGTCTTCTCCATTGATTTGATTTAAATATGCTTTTCCAGGTATAATTTCTTCACTTCTCTCTGCCCCGTTGTTTTCTGCAAGTGAGGAAATGAAGAGGATTATAAGAGA  
GAAGGAAGAGAAAGGGAAGAAGAAGCCGTGGAGAGGAGAGGAGAGGAAATCCGAAATCCTTCACTGTCTAAACATTTCTT

>comp170683\_c0\_seq9

TTTTTTTTTTTTTAAATAATAAATCTTTTCTCATTCTTAATGGCTAGCATTGACAGATCTGAAACTTGTACGAAATTTCTTAGCTGTTTTCTCCTTTTTCAITGATATTATCCGATATTTTATCAGT  
GGGTTACTGCTCCTACTACGGGAAGAACTTGACCCAGAACCTGGCCGTTGCCGGAGACCGATGGCAAGAAATGGCGGTGCTCAAAGACGCGTACCCTGACTCCAAGTACTGTGAG  
CGGCACATGCACCGCGGCCGCAATCGTTCAAGAAAGCATGTGGAAACGCCGCAAGCCCTCTCCAGTCGCAGTCGTCTTGTCTGACGGGTGACTTCCCTAGCTCCCACCTCTCTGGGGAG  
TTCCGGGAGCGGCAGTGAAGCGGCGCTACCGCTCCTTGGCGGAGGTAGTTGCAGCGGGGAGCTTCCACTCCCTTCTTCTTCACTCGATCCCTTCAATGCATCATCAAGTCTCTGG  
CATTGGCGCTGCAACTTCTCTCATCTCAGCATTGACCCATCTTACATCGGAAACGTCATCTCCAAAGATTTCAAGTATGTTTATGGATCAAAAATCTGGGCTAGATGAGCGTGGCTTCTATT  
CTGAAGCTCCTGGAAGTGCAGAGATTCTTGGCATGGACTCTGCATTGGATAGTTTATGGCGCCTGTTGTCATCGCCCCGTTCTTACATTTCTTGTCAAAGGAGAGAGAACTTTTTCT  
CCATGTCAGTTACCCTCAACTTCAAGCTTCTGCAAGAACTTGGTCAAGTACTATCAGTTCTTTGCCAAAGCAGCATCAGCAGCATCAACTCCTTCTTTGGAACCGATTATGGATCGACA  
GAGCCTCCCATCAAGACTGAGCAACCACTACGACCATTTTTCGATGAATGGCCTGGGACAAGAGATTATGGTCCGATCTCGAGGATGAGAGAACCAATCGTAACTTTTCTTACCACA

CAGCTCTCCATGTCCATAACCAATGTCGTCATCTGATTTCTCAACAACAAGTTCTCGATCCCCAAATGATGATTAAGAAGCCTTCTTTGTTTCGTCTGACTTTGAAGCTGGTGC GGCTTGCTTC  
TTGTGTGAAGTTGCTTTAAAGCAAAGTTGCAGTAATTTATCATTCTACCGTCGCTTTGTATGACTGTTATTGAGCTGGATTTCTACTGGTGCTGCCAGACTAACTTATGCTTATCATTAT  
TTACAATTAAGCAACTTTGTTTGCTTTTATGACTGTTAAGCTTGTGATCATCGCCTTTGCAAAATCTGGAGAAATGCTAGTTCTTACTTTCAGGTTCTTTCTACTGTCCACTGGTAGTAATCA  
CGTTTAGAGACAAATATAACAAAGGC

>comp170719\_c1\_seq2

CAAAGTGTGTATTCAAAGTTTGGTTTGAAGAGCAATGCCGATATTCAAGAAGGAGAAGCTGGTAGAGAAGGAGGAAGAGAAGTATCATTGTCGATTCTGCGGTAAGAGATTCAGTAA  
TGGGAGAGCGCTTGGAGGGCATATGCGAGTCCACGGGATGTTCAATAAACCCATCATTACCCGAACAAAAGTCCATCCACCACAGGAGTTGAAGGAGACTCCTCCGACGGCAACTGCC  
TCCCTGCTAGTACATTTGCCAAAATTGCCGAAAAGAATTCTGTTTCGTTGAAATCATTGTCCAAGCACTGTTGTGCGGGTCTCGTTGGTGTGGCAGGGATGATGGCGAGAATGACAAC  
CAAATGACCTTTTTTCGCCTTCACTCTCCAATCCAAAATTCCTACTCAACCTCTTGTGCTTACCGAAGAAGAGCGTGTGCTAATTGTCTTGTTCATGCTCTCCACTGCCTGCGCCAAGCCT  
GTTTTTCGCAATACCGATGAAGCAGAATGCTCTACTTCCAAAAGGAGGGATGTTGATTATGTCTTCTCCTGCCTTCTTTGCCTCAGCCAGAAGGCCCAAACCCCATCTCAACACAA  
ACGCCTCAAATGCGCATAAACTTTTTGAATGCAAGACTTGTCAAAAAGTATTTACCTCACATCAAGCACTCGGCGCCATCGGGCTAGCCATAAGGAAGTTAAGGGCTGTTTTGCAACT  
TGGGTTGAAATCAGGTCACCCAAGAGAATGAAGTTCACAGCAATTGAAGATGAAAGCAACAATAGAAATCATCAAAATAATCAAGCCATATCTTCTCTGAAAATATGACTTTACCAATT  
GTTCCGTTTGTAGGTACCTCATCACAATTGCCACTGCCAAAGAAAAAACCCAAAGTACACGAATGCTCAACTTGTAACGACAGTTTCCATCAGGCCAAGCACTTGGCGGGGCACATGCG  
ATGTCATAGGAGGGCATCAAGTTCCCGTGG

>comp170735\_c0\_seq1

AGAGGGTAGCCATGACGCCTTTAGAGGTATGGCCGAAGGAGAGGCCGGAGAATACGGAGCAGATAACCATGAGCATGAGGGTCATGCCATAAACCTTTTTGCGGCCAACTTATCGCCG  
AGCCAACCGAAGAAGAGTTGGCCGCTGAGAGTGCCGCAGAAGGCGACGCCGTTGACAGCAGCGGAAACTTGGGGAGGGAGGGAGCCAGGGGTCGGGGACCCGTCGACGTGGTAATA  
GATGCGGCCG

>comp170748\_c1\_seq8

TCCAGCCCAAATGCCAAACCAATTACAAGCAAGAATGTCCAAAATAATACTATCCCACCAACACTCGTTGAAGTTTGGTAGCATGTGACGAAAAGTAAGCTCCATCAGTTCAAACCTAT  
TGATAAGACCCACAAAAGAGATTGATTTTCGTATCATTATGGCCTTACCCACCAACCAATATATGTGCAAGAACAACTCATCAATAATGTCTCATAAACATTGTTAAACCTGCTTTTGG  
GATTATCAGGCACATATATACGACAATCCGTTCCATAAGACCTTTCAGGCAGTTCAATTCCAAGGTCAGGGTGAAGAAATTTTCATGAATCTACGAGCATCGTCACGATTCTGAAAAAGCAA  
GAAAGTAAGGGCAACAAGGTAAACAACAGCCATTCCATGGACTAAACGCCAAATAGCAGGATGCGGCCTAGTAAGTACCCTTGGAGGTGCTTGGAGCAAGGAATAAGCTAGAAAGACT  
GCAATCATGGCACAAACCCCTCTTAACCGATGTAACAAGAGCATTGAAAGTCATGCTTTCTGGATCAAAAAGCTCCACTTGACCAACTATCAAATAGGTGGTTCCACAGTTATCACATAA  
TAAGGCTAATAAAGCAGAAATGACATATTAACCTATTGTTAGACAACATCATCATGAAAAATTAGGAATGGGAATTAAGTTGTGAGCCTACCCTGAACCGAAAGCTAACCAAGTTCAA  
AGGTAAATTCAGAAGCTACAAAAGAATAACTTGTGGGTTTGTGTTATGTTGAACATTTTCTATAAAAATTTTCAGAAAAGAACAACCTCAAAAATAAGTTTCATGAAAAGGAATCAAGTAT  
AACTAGACAACAAGAACATGCTTCTTTGTATGTTATGGGGCATGATTGCTTTTAATCACAGCCTATATTGTACGATAAAATGGAACATAAGAGATCGAGAAAAGGATGAACCATATGTAATG  
AAATGTAATAAATAACTTTAGAGCACATCTAGATTCTTTATAATTCATTCAA

>comp170750\_c0\_seq1

GCAGTCTTGGTCCGAGGTGCACATGGGCAGCCAACATCATCTGGATGTCTTGTCTCTTCTGAGAGAGCACCTTGTGCGCCATCTCAGAAAAATTTGAGCTAAGTTAGGGTTAGGGATT  
CGGAGGTGCGAAGGGATTTGGAGGTGCGAGGTGCGAAGGGAAATATTTGAACAGCGGCCAAACTCCAAGGCCTTCTTAAACAGAAATAAATCTCAAATAATATATATTTCCAAGGCTGT

AGTGAGGGTGAAAGGGCTCGAAGAAACCGATGGGAGAGAAGAGGAGTTCGAAAAGAGATGGGGTTACAATAAGAGCGAGAGGAGGAGGAGGCTAATATATATAGAAGCACTGCAAGG  
GTTGGAGCTGG

>comp170779\_c0\_seq3

ATCCGGTTTCGACCCCGTTTCGACCGGTCGAATCTTGAACCTCTTATTCTTCCGGTTCGTTGTCCGGTCCGATTTTTACAGCCTTGTGTTAAAGCATCTAAAATTAATTTGAAAATCTTCAAA  
TTCTAATGCTTGAACCAAATTCGAGCTAATTTGCACAAGAAATCCATCTAAAGCTCATCTTCTTCTTCACATGTACATTCACATGTACATGTCCCCACAATTGCTCGTCATGGGCTTCCA  
CACTAAGCAAAGCCCTAATCCATCTTTAGAAGAAATCGAGGATCCTGCACATAAAAAATTAGAAGAATTGACGTAAAATATTTAGTAACAAATTATAATTGTC

>comp170816\_c0\_seq14

GAATTTGCAACGGTCAACAAGCTCCCCTTAAGCTCTCGTGTCCACTAGCGTGGCATTCTCGTAATTAACCTCGAGATACCTGTCCAATCTTATAAATCCGCCCTCGGACTGGAGCTCCTCTG  
CCCTAGAAAAACCAGAGATAATCCCACAGGCCATCCAAAGTAGAATCGATCCATTTGTTCTTACGTCTCTTAATCCCTCATTAATGGCGACCAAAGCCCCATCTTTGCAATGCCGATTC  
CCCACCACTACAGCGACTACGGCTTCGATCCCGAGATCGACTACTTCCAGGCTCTGGAAGAAGCGCGGAGACATGGAAAGAGAAGCGACGGGTCTCGATCGGCGGACGCGCTGCATTT  
CAAGCTACAGAAGCCGATTTTCGAAGGAGGAGAGAACGAAGTCAAGAAGAGGCGGCAATGGTGAAGAAGCGCGTTTGGGCTTATTTGGAAGAGCGGGAGAAGCGTTGGTAGAAGCGT  
GGGCGGCCGGGTTCCGTCCGGGCCGCTGTACGCGACGAGAGCATGCCGTGCCGGGCGGTTTCGAGCGAATCCGGTCCGCTGAGTGCAGCTGAGTTCATGGAGACCCAGGTGCCGTAC  
TTTAGCCTTAGGGATCTTAATCTTCTGGAGAGTAATGAACTCTCTCCGGCGAAGCGACGATGAGGCCTATCTATCTCGTTACTTGAGTGTTTGAGAAGGTTTTGATATTGAGCTTGATTGC  
TCTGCTTTGTCTTCTTCTTCTTCTTCTGCTGAGAGAGATTCTCAACAGAAGAAGAACCAGGAAATCAGAAAGCTTGGTTAATGGATTCCGGAGCTGCGGTGAGAGGAAGGAAAGGC  
TTTATCTGAGCGGCTTGCAGGAAGATCGAGAATGGAGGGCTGGTTGTATCTAATCAGGTCCAATCGATTCCGGTCTGCAGTCTTCCAGGAAAAGATACTTTGCTCTGAAGGAGAACCTTCT  
CAATTGCTATAAGAACATACCCAAATCAAATAGGGAGGAACCTCTAAAACCCGATGATTGATTCCATATACGGGTGCGTGATAATGGAAGAGAGAGCTTCCATAGAAATGTTTTCTACA  
TTTTTACAGTTTACAATCTTCTGATCACAATGATCAACTAAAGCTGGGTGCTCGAAGCTCAGAAGAAGCAGCTAAGTGGATTCAATCGTTAAAAGAAGCAGCAATGAAGGAAAGCCCA  
AGCAATGGAACCAAACATGTTTCATTGCTCGAAGAGTAGACGTCAATCATTAGGTTAGTCCAAGCTAGAGGTAGAAGCTCGTCTGCATTCCATAGATTGGACAGTTTTCTCAACTGGGCAC  
ACTAAGAGGATGGCCTCTGATGTTATTGCACCATCACCATGGAAAATTTTTGACTGTAAAATGGTAAGAGTGATAACCTTGGTCCTTATTTTCTATCTAGACATGACCCAAGTAGGATTCA  
AAATTATTGCTTCCTTTCAGGCTTGGAGGCTCTTTAAAGAGGCCAAAAATGCACAGTTTCTTAGGATGGTAACTATTGGACTCAAGTAACAGGGCCACTATTTTTTCATATTCTGTAGCAC  
TAATGAATTCTCATTCCTCAGCATTGGGATGATCATCCAGCTATAATGGCTGTAGGTGTGGTTCGATGGACCGTCAGAAGCCATTTTTTCAGACATTGATGTCTTTTGGTCCGTCAAGATCTAG  
AAATTTGTAGGATGGCGATG

>comp170816\_c2\_seq10

GCTAACCCACATTTAGCTAAAACCTTCAGTTAACTTTGATCCTTTCACAATGTCATTTATTACTCCTTTCATCATTTTCAATTTATTGCTTCACTGCTTTCTCCACCTTAGCTTCATTTAATACTACTA  
CTCAGGCAGCTTCATCGCTTGCTCTTTATGTAAAATAGGCTTTTGTGTGGGCTCAAACACTTCTTCTTGAAGTTCAACACTGTAATTAGTAAAAGTCATCCAGTTAAGCTTACAGCAC  
CATAAGAAATTTACTTCCAGAATGCTAAAACCTTTATATAATGTGATTTATCTTTTGGTAGAAAAGAATGCTGCAATAAATAAATTTTGTCCATGCATACATACTATAATATTATGTGGTCAT  
GCCAGAAATAGTATGGCTTGAGAAAACAAATGGAGAAAAGAAGTTGTTGGACAAATATTAATAATATAAATTCAGCATGTAATGTAGCAACCTATGAAAAAAATTATACAACCTTTGGTTCT  
CACTTTCCATATTCAGATATAATTAACCTGTCAACATAAGCGTACGTGGATAGCTTTGGTGGCATCAAGATAGTTCAGTCGACAGGTTCCCAGGAGGAATTCTGGAAGTTCCTCTTGGCTAT  
TTCCCTGTATTAATAAAGCCATTTCTATCACCAGTTTGCTTAGGTAGCTGAGCACAAGGCTTGCAACACCCCTGGCAACAGTAGATGAGCCGACATCCACGCAAAGCTCAAGGTAGTTTC  
GCCAGTAAAATAATTGATTTCCAGAGCTTGACCCAACAAACATGCTTCTTTCCACACTTTGCTTCACTATCCAGGATCCTTTAGATATATATGGTATGAGCTTAAACCTTGAATTCTTGT  
ATGCATCATCGCCCTTGACATAGTTTGTAGTATAGGAACATTCTCCAATGGTGTATCCAGCATGTAATAGAGAGCAAGACTATAAGCAGTCAAACCTGGAACCTGTATGTTTATGATAAAG

AAAAAATTACTGCTTCCTTGATCTGCGTATCTCTGAACTATGCCCCAGCTCGACTAGCTAGATCATCCTCACGCTTATCAGATTCAGCCAATCAGCAGCCACCATTTTCATCAAAGTAGT  
GCTTCCTTTAATCTTCTTATGATCTTTCAAGTAGGATTCACTACGAACTAGAAATGTTGAAGGATCTGCAGTGGTCCAACATAAATTAGTGGTACAGGTTGAGTCGCTTGGAAGAGTAGTC  
CCATAGCTATAAAGTTCTGTACCATTAATCGAAGCTTCTTTCAGATCAAAAATAACCCTTCCTTTGACCTGAAAGATCTTGAACTTTTTTCACTAGAACTGCTGCTGTTGATAACATGGTATGG  
CGTTGGTCTCGGATTCGGCATCCTCTTTGGGAGGCCACACAATCTCTGATTATCACAATCAGATTCATCAGGTAAGTCAAAAAATTCATCAGCAGCATCATTAAGTTGAACAATTGATC  
CACCCATGTTGGCATGTTTGGGAGCAAGGACTTCCAAATCGTCTCAGAATCATCACCTTAATACTATCAGCACCCATCTTGACTTCCTCCTTGATGTATTCTTTTCTTGAGCAGATAAA  
CGTTTCTCTCTTGTCTTTCTCTTGATGAGAAATTGGAGAACAAGTAATTTCCATGTTTTGCTTGGAAAAATCTCTCAAAGCTGCAACTCTTGCAAGCATCTTGATTGTTATATATTTTGAT  
GAAGAGGTCAATGAGTAAGGCTTCCAGATTCTCCAATCAATAGCAAGAATGTGCTTGACAACAGCTTGTTCCTGGATTGATGGAGATATTACATATCCTCCACTTTTAAGGGAGACAC  
GAATATAGCCTCTCTCGGTTGACAGTCTGGATGGTAAACAGAGTGGTATACTATAACATATGTTCCATCATCTTCTCTCCTCCAGTAAACGCTTAGCAGTAGATCCCTTCTTTTCATCCCC  
AGGGCAACCAATCTCCACTTAATTTCTTGTGGATAATATCAGTGTGACCATCAAGATGTTCAACCACGCTGCCATAGGCTAGACAGAAATCCCATTAGATCTTGACGGACAAAAGACAT  
CAATGCTGAAAAATGGCTTCTGACGGTCCATCGACCACACCTACAGCCATTATAGCTGGATGATCATCCCAATGCATCCTAAGAAATGTGCATTTTTTGCTCTTTAAAGAGCCTCAAGC  
CATTTTTACAGTCAAAAATTTCCATGGTGATGGTGAATGACATCAGAGGCCATCCTCTTAGTGTGCCAGTTGAGAAAATGTCCAATCTATGATGATAATGAATTTAATTTAGAACCA  
AAATAGGCACCTTAACTTTGAATGATAGCTTGGACTTCACTCAAAACATAATTGAACCTCTGAATTCTCCCCACTTAATGAGCTAAGAGAGGGAGATAGCTCACAGAACAAGAGTTGT  
GTAGAAGTAAGAGTAGTGTACCTATGGAATGCAGACGAGTTCTACCTTAGCTTGGACTAACCTGAATGATTGACGTCTACTCTTCGAGCAATGAACATGTTTGGTTCCATTGCTTGGGCT  
TTCTTCATTGCTGCTTCTTTAACGATTGAATCCACTTAGCTGCTTCTCTGAGCTTCGAGCACCCAGCTTTAGTTGATCATTGTGATCAGAAGAATTGTAAACTGTAAAAATGTAGAAAA  
CATTTCTATGGAAGCTCTCTCTTCCATTATCAGCGACCCGTATATAGGAATCAATCAATGCGGTTTTTAGAGGTTCCCTCCCTATTTGATTTGGGTATGTTCTTATAGCAATTGAGAAGGTTCTC  
CTTCAGAGCAAAGTATCTTTTCTGGAAGACTGCAGACCGAATCGATTGGACCTGATTAGATACAACCAGCCCTCCATTCTCGATCTTCTGCAAGCCGCTCAGATAAAGCCTTTCTTCC  
TCTCACCGCAGCTCCGAATCCATTAACCAAGCTTTCTGATTTCTGGGTTCTTCTCTGTTGAGAATCTCTCTCAGCAGAAGAAGAAGAAGAAGACAGCGACAATGGATTGATCGGA  
ATCGAAACAATGTCGACCAAAACATGCAATATTGAAAAGGATTC AACACGGATTATCGGAAAGAAAGGGAACGGGCGACCACCTGATCCCAATGGTTGGAATCAGAGGTATCCGAGCT  
ATCCCCCTTCTCCCTTGTCTTGCAGGTGCGCCCTGATGAAAAAGGAAAATAAGAAAAAATAGAAAAAATAGAACCCCAAAATCTCTCTCCCCGATCTTTCTCTCCATCGAATTCGTTT  
>comp170816\_c2\_seq9

AGGATATGAAATATGAAAGAAAGATGCACAGAAAAGCAGAGAAAAGCATATGGATTTTACATGATTCAATGAATTTTAAATACAAAAAGGGTAGGGCAACAAACAGAAAATCTACAAAA  
ATAAGGCAACACTCTTAGTAGAGATCATGCACCACAAACCATCGACAATTTATGCATGGATAACAATTTGATATCAATGGTTGAATTTTAAATAGAATATGCATCTACTATACCTCAAGGTA  
GTTTCGCCCCTAAAATAATTGATTTCCAGAGCTTGACCCAACAAACATGCTTTCTTTCCACACTTTGCTTCACTATCCAGGATCCTTTAGATATATATGGTATGAGCTTAAACCTTGAATT  
CTTGATGCATCATCGCCCTTGACATAGTTTGTAGTATAGGAACATTTCTCCAATGGTGTATCCAGCATGTAATAGAGAGCAAGACTATAAGCAGTCAAACCTGGAACCTGTATGTTTATGAT  
AAAGAAAAAATTACTGCTTCCTTGATCTGCGTATCTCTGAACTATGCCCCAGCTCGACTAGCTAGATCATCCTCACGCTTATCAGATTCAGCCAATCAGCAGCCACCATTTTCATCAAAG  
TAGTGCTTCCTTTAATCTATTAATAAATAATCAGTTTGTAAACAAAAAATATGTTTTTCATATTAGTTCAATAGGCATATAAAACTGCGTAATCTTATCCACCATCTATTCTGTTTTGCTTGT  
TGAGCCACACGTCATATA

>comp170849\_c0\_seq6  
AACAAACAAATCAAGCTTTTCGATTTTGTCAAATAGCTCCAATTAATCTCCCAACTACAAAAACAAAATATTTCAATGTTAGATATCCAAATTTCTACCGAGCAAATGATCCACTTATTACTAAT  
ACAAAACAATAAACAAGCTATATTTAACATTTATCAACTGCCACAAAATAAGGCTTATCCTAAAGGTAATAAATTCACACCATCAGAAAAACCATCAAGCTACAAAAACGTTTTTGAAG  
GAGCCCATACACATTTCTATGTCACATAATTAATTTTTCAGATAAAATATTATAGTTTAAACTGCGTATTCACCGATCTCCACCAGAAGATGTTGGTCCACCGAAGACTGGTCTCATGTA



AGCATTATCGAACTTTCTCCAATAGAAATGAATTGTGTGAATCGGACTTTCCAAAAGAATCGATAAGCTTCTTGTCGCTTTGAGAAGATTCGACTCTGTTGATTCTTCTATGGAAAGTAGAG  
GCGTGGTTGGATCTTCTTTGCTAATGCTAGTTTGTGGCTGATTGTTGCGTTGAGCTTGGTGTATTAGCTTATTTACAAGTGGCTTTGTGAAGATACCGATTGCCAAAGTGGTAAAAAGCACA  
ATTACAATGGTGCTTGTGATCATTGTTGCATGAACAGGGTCCCAAGTAACTCCAGAAAACGGTGAAGTAAAGATTATTTAATAATGCATGTATTTTATTAATTTAAATTTAGGGTTTGAAATG  
ACTGAAATGTAAGCAAATTGTAAATATCAGACCAGGTTAAATGCTAAAGCGATCGAAACAGCTCCTCTCATGAGACCAGCCCACCAAATTATGAAGTGTAAACAATCAATCATATTGAAGT  
TTTAATAGTTTGAAATTAATGAAAAAATAAAACACTTGTATTAAAGTGAAGAAGGAAATGGGATGATATCCCAAATAGGCTTCTGAAACAATGAAATTACAAGGGTTCAAAAAGG  
AATGTAACCTGGTGCTTAAATGTAATTATCAACCTCTCAGGACCAGAAGTGAATTTATTGGATAGAATAGAGAGAGGAAATACAAATGCAGCACGTCCAAGCAACACCAAAAATAAAGAGG  
ATAAAAATTGACACCAAAAAGTTGCCTTGACACCTATTTTCGTCATTTTCCATTTCTCAATATCAAATACATCCATTCCAACATAAAGAAATATGAATGTTTCTGCAATAAAAAGATATGGTTGAA  
AAAATATGCCTTGAGTGACCCCTTGAGCTCTCAGTGGCATTATGCCATGCGTAATGTGACATTACAATCCCGCAGAAGAAAAGTGTGGGTATCCCGCTTAAATTTAATAGCTCAGCAACCA  
CATAAGACAGATAAGCCATCAACATCATTAAAGCTACTTCACGGTCAGTTGAATGCCTGCCAAAATAGAAGGTCTTTAGAGTGTAGGCAGTCGAAAGCCCTACAGCAACCCCCAGCATAG  
TGCTTGTGCGAAAATAAGCATAAGAAGTCCCAAAGAAGGATAAAAAGCTGTCCCACCACCAATTTTAGAAGCATTGATCTTCTGAATCGCATTA AAAAGA ACTATAGATGTAGCACCATTAC  
AACACCTTCCCAAACACTAAGCTGTAGAGGTGTGGGGTCTCCTCTTGACGTA AAAACCTAAATATTGCCAAGTAGTAAGTCTTCAA AACCAATTTTGGAAATAGCCACCAAGTTCCTG  
CCGAGATTATGAAAATGAGATGAAAACACCAATGGCGCCGAACAACATTATCGTGACGAAGTTATGAAAGAACTGCTTCTTCTAACCTGAAATCCTGCATTAATATTATTGGTGGCAG  
AAGATATATAAAAAACAGTTTCTCATCAAACCTGAGAATGTGAGAAGTTTTACCCCTGCTCAGCAAGAGAATCACAATCCAGAAAGGCATCCGATGAAAATGGTAGCGGGCGAACTCGTT  
AGTCCATCGAGAATTGACTAGTACGTGGCCAATCACAATGCAGAAGCAGAGCACCGCTGTAAATATCGAGATGGACACCACGCGAGGATTTAGCGACGTTGGAGAGAAAGAAATCCA  
CCGCCATAGTAACGAAACAATCTCTTTCTTAAATCCCGGGTTCGATCGCAGATAATTTGAAGGGTTCGATCGCAGATATCAAATGAGATATAAAGCTAGGGCTTGGAATCTGGAAGAGA  
CTAGACATTTTGGCGCG

>comp170861\_c0\_seq1

GCTTTTTTACCGATTAAATTTGCACGAGTTTGCACGATTGACGATTACCAGGGATTTTTTTTATAACATCCTCGCCGTGACCCAGTTTGTTCATCATCAATGTTCCGTGTTGGGTCGAG  
TGTGGCCATACTTACACCCCAAATATACGCCAGATTATAACAATCCTTCGTGATTTGTTGAAGATGGTCCGCATTCGGAAGCGCCATAAACACGACACTGAATGGTTGTTTGTATTGTCTG  
CCATGAC

>comp170861\_c0\_seq2

AATTTTTTTTTTTTATATTTTTTTTATTTACAGCATTTTTACCGATTAGATTTGCACGAGTCTGATTACCAGGATTTTTTTGTTATAACATCCTCGCCGTACCCAGTTTGTTCATCATCAATGTT  
CCGTGTTGGGTCGAGTGTGGCCATACTTACACCCCAAATATACGCCAGATTATAACAATCCTTCGTGATTTGTTGAAGATGGTCCGCAGTCTCGAAGCGCCATTACACGACACTGAATGG  
TTGATTGTATTGTCTGCCATGACTGG

>comp170869\_c0\_seq4

TGCTTCTAATATTCACCCGCAAATTGAGGGATCTGGAACGATCGTCAGTTTGTAGTCGAAGAGCTTGAATCGTGGTGTGATAAATTCTTAGTGAATATATCGGCAACTTGATCTATTGTG  
CTGATTGGAAGTAGCCGATGTTGTGGTGTGAATTTGATCACGAATAAAGCGTTGATCTATTTCAATGTGCTTTGTCTGCGTGAAAGACAGGATTGTTTGTCTATTGCGATGACGGAGG  
TATTATCGCAAATAGCTCAGCTGGGCTGTCTTGGGAGATGTTGAAGTCGGTTAGCAGTCGTCTAATCCATATAAGATCCGCTGTTGCGGCTGCAAGTGCTCTATATTCCGATTCGGTGGAT  
GATCTAGCTACCACCGTTTGTCTTGGCAGCCCATGAAACGAGTGTGTGCCGAGAAAAGTGAATGGCCGTTGTAGATTTCTGGTTGATGGGTCACCGGCCAATCAGCGTCAGAG  
AACGATCGCAGCTGGAGGTCCGACTTGTGATTGGAAGACCAAAGTCCAGAGTCCCGCTATGTACCTGAGAAGACGTTTAAAGAGATATCAGTGATTAGGAAGCGGATGATGCATATGT  
TGAGATATAACATTGACTGCAAATGCAATGTCGGGGCGTGTCAAGGTTAAATATTGTAATGATCCTGTAATGCGTCTGAATGTTATAGGATCAGAGAGCAGTTTCGTCCGCTTGAAATTCAGA

CGGTGTTTTTGTACAGGTCGGATTGGCCAGAGCCTTGCAATTAGTCATTCCGGCTTGCTGAAGAATGGAAGCTGCGTAGGTTTTCTGTGAAAGAAAGTAAGAATGATTAGTTTTAGTTATA  
GAAATGCCAGAAATTGATTGCATAACCAAGTTTTTTTTAGATTAAAACGAGCTGCGATTTTATTGTAAACGCGGAGATAGCATGATTGTTGTTTCCGGTAATCAGTATGTCGTCAACGTA  
GATCAACAGGTACATTTGCGTATTGTCTTTGTTGTATGTTAGAAGCGACGGATCTGCTCGACTATGGTTGAAGCCGAGGGATAGAACGTGTTCTGTGAACGTGTTATAACCACTGCTCTGGG  
GCCTGTTAAAGGCCATAGATTGCCTTTTTTAGACAACAAACGTAGTTGGGTTTATGGAATCTTCAAAGCCCTTCGGTT

>comp170938\_c1\_seq4

TTCACTTAAAACGTGTTGCGACGCATCGAAAAATGTTTGAGGTCTAAAATTACATTTCTCGGGTTTTACCGGTAAAAGCTTCACTCAGAATTCCTAGTCCCTACTTGCCCATAGTAGAAA  
AGTTGATGCAACACTAAGACAAAAGGGGATGACAATATATAAATTAAGGTATTATATAAATATTTGGGCCAATATCATGCATAATCTCCATACAAAAGCATGAATGACCCATTATAAAGAAA  
GAAGAACCATTAAACTAACACGACCAGAGGACCAGAACAAGCATGGCCTCAGACTAAAATAGATTATACGAGTACCATACATAAAAAATAAAAATAAAATTTTGAAGTGCATATCAGGATC  
TGCATATAACTAATCATACTAATGCGCAGTCAAAGCGGATTAAACTCGCCGTGGCCGGAGCCACCGGCGTGTGGGGTATCCGGCGAAAGGGCGTCTTCGGCCACCTCTTCTACCAGGGGA  
GTGCTCATCGCAGAGGGATCGTGTGCTGACGAGCAGCGATGCGGCGGTGCGAGTTAGACGCTGCCATGAAACTCCCCACAGGGCCGAGCTCCGGGCAGTCGATCCGGTCAGCGA  
GGGGCATCACCGGCGCCCTCTGCCAACTAGAAAACAGATTGCATCTCCCCACCCCTTGATGACTGATACGATTTCTCCTTCTTTCTTGCCACTTTCTCTTCAAACCTGACCGATCCGTTG  
GTGCTTGCTGCCACCCTCTCCCGCAATCGGGCAATGCATTCATTGTCATTGGACAGCTGGTCTGCGCCATCCGAATGTTAATGAAGGAGGGGCTTCCAGGTGGTTGGACGAAGCAGAGT  
ACAGTGAGGATGATCCGGGGTGTCTAGCCATGCGGAGGCCGTAGGCGAGGGCTTCCGGTCTGCGAACCGCCAAAGAACAGAACGGTGACGGAGTAGGAAACCTCGCTGGCGGAC  
ACCTGGGTGGAGCCGCCAAGGCCTCGGTCAACGAGGATGGCAACGGAGCAAGGGGCGTAGTGGAGGACTCGCTGGTTACAGTGTGGTATTCAATGCCAATGGATTCCATAAAGCCGTC  
AACCAGCAGGGCCTTGTAAGGGGAAGCAGGATTAGAGCCGCACGCTTTTGATGGGCGCTGGTGACCAGTCTCGTGGATGGTGTGGAGGTCAGAAATGGCGGTTCATGGGCCGGACG  
GTGACGTGGCTGAGCTGCTGGTAGGCTTGAACGCGATGACGAGCTGGTCTCCGCCGTTGGTATTGCCGATTGCGCTCTCCTTCTTTTTGTTCCAGAAGGGGAGGCCGTTGCGACGGGCT  
TTGTGGACCATAAAGATTGAGGATGGGCGCTCCGAGAGCTCCATGAGGTGCATGGCGTAGACAGTAACGCCACGGCGGGGTGCCACGGGAGGATTCGATGAGGTTGATGAGGGTCG  
GGATGTTGCGGCTGCCGTGAAAGCAGGCGAGGATCCGCAACTCGCTCTCCGTGTCGGCACGCTCGATTTTTCGATGCTTGTATGGAGTCGCTTCTCGCCGGCTTGTATATCCCATCAC  
AATCGGCGTCGTTATGAACGTCGTGAACAGAGCCATCATTACCATGATCGCAAATGTCTCGTCATTTAAAACCTTGCGATCTTTCCGATGTTTCAGGACGATGAGTTCAACGAGGCCTTTG  
GTGTTTCATGAGGAACCCGAGGGTGAGGGCTCGCGAATGGGGACTTTCATAATGAGGGAAGCGAGGATGGTGCCACCGATCTTGCCAGACAGGCGTTGAAGATAACTAGAACGAGAA  
GCGCCCAGGAGGTGCCGTTGCTTATGGTGGCGACGTTAGTTTTGAGGCCGCTGGAGACGAAGTAGAGGGGTAGAAAGAGGCCAGAGATGAGGTCTTCGACTTTCTCGATAAGGATACCA  
GCGAAAGGACCTTCTTGGGCATTACAATGCCACCACAAAGGCCCGAAGAGGGCATGGATGCCGATGGTGTCCGTAATGAAGCCGGCGGCGAGGACAGTGGTGAGGGTGGCGCATA  
TATAGACTTCTTAACCGGTTTCGCTTCCAGTGAGTGACGAGCCATCCGCGCGAGAAGAGGGCGAAGGATGAAGGCTGCGATTGCGACAAAGGCAGCGGCGGTGAGGAGTACCCAAAG  
GGAGACAAGGGGTGAGCGAGAGCCTGAAAGGGCAATGGCGAGAGCGAGGAGGATCCAGGCGGCGACGTCGTTGACAGCAGCGGCGGACATGGCCATGCGGCCTAGGTCGGTGGTGA  
GAAGCTTGAGCTCGGCAAGGATGCGAGCTAGTACAGGGAAGGCGGTAATGGACAGAGCGACGCCATGAAGACAAGGAAAGGGGCGCCGCAACGCCGTCGGCTATGGTGTGCGGA  
GGACCACAGACGTGCCGATGCCAAGGAGGAAAGGCAGGGAAATGCCAGCGACGGCGATGGACAGTGCATCTTGCCGGTGGCGGAGGGAGTTGAGGTCGATTTTCGAGACCCACTA  
GAAAGAGAAAGAAGAGAAGGCCGAAGTTGGCGAGCGTGTGAGCACTGTCAAGCTCTGTTTGGGGAAAATGACGTTTCAGGAAACGCTTTGTTGCGGCCAGCGCCGACGGCCCTAACA  
GAATGCCACCAATGACTTCAGCGATGACGCGGGGCTGGTGGAGAGGGCGGAGGAGGAAGGCTAGGGTTCGCGTGAGGACGACGACGAGGCAGATCTGGAGGATCGCTAGCGGCAACG  
CGAATTCGACCGGGCTGTCACCTTGGAAAAACCGTTTCGAGGTCGCCTTCATCGGTTGCAGACATGTCGAATTCGCCATCGTCGACGTCGCTCTGAAGATCACAGGAATTAGCGACGAT  
CGATGAATCCAAACAATCTTTAATTACAAGTTTATGGTTGTTTTGGATGAATCATGTGTGGAAGGATAGATTAGTTTCTCTATTTTTTTGTGATTTGTGAATAATTTGGGAAGATATGAAGA  
AATAGATTTCTGGATTCAGTGAAAGAGATTGAAAAAAGGGATTAGAATATTGATAAGCACCTTTTTATGAAGAGAAATTCGGAGCTGAGGTTTTCTGCGATCTCTGTAGCTGTTCTGTT

TGTGAATAAGCCGTTTCAGTTTTTCTTCTTCTATTTAAAGGAGGAGGCACGAGCGCCGCGGTTTTGACTG

>comp170938\_c1\_seq6

TTCACTTAAAACGTGTTGCGACGCATCGAAAAATGTTTGAGGTCTAAAATTACATTTCTCGGGTTTTACCGGTAAAAGCTTCACTCAGAATTCCTAGTCCCTACTTGCCCATAGTAGAAA  
AGTTGATGCAACACTAAGACAAAAGGGGATGACAATATATAAATTAAGGTATTATATAAATTTGGGCCAATATCATGCATAATCTCCATACAAAAGCATGAATGACCCATTATAAAGAAA  
GAAGAACCATTAAACTAACACGACCAGAGGACCAGAACAAGCATGGCCTCAGACTAAAATAGATTATACGAGTACCATAACATAAAAAATAAAAATAAAATTTTGAAGTGCATATCAGGATC  
TGCATATAACTAATCATACTAATGCGCAGTCAAAGCGGATTAACTCGCCGTGGCCGGAGCCACCGCGTGTGGGGTATCCGGCGAAAGGGCGTCTTCGGCCACCTCTTCTACCAGGGGA  
GTCGTCATCGCAGAGGGATCGTGTGCCTGATGACCAGCACGGATGCGGCGGTGCGAGTTAGACGCTGCCATGAAACTCCCCACAGGGCCGAGCTCCGGGCAGTCGATCCGGTCAGCGA  
GGGGCATCACCGGCGCCCTCTGCCAACTAGAAAACAGATTGCATCTCCCCACCCCTTAAATGGCGGACACGATTTCTCTCTCCCCGTCGGTCTCTTCTCAAACCTCACCGATCCGTCTGT  
GCTTTCCCGCAATCGGCCAATGCATTCATCGTCATTGTTGAAGCAAAGTACGGTGAGGACGATTCCAGGGTGCTCGGCCATGCGGAGGCCGTAAGCGAGCGCTTCCCGATCATCCGAACC  
GCCAAAGAACAGGACGACGACGGAGTACGAAACCTCGCTGGCGGAAACCTGAGCAGAGCCGCCAGGCCTCGATCGACGAGGATGGCGACAGAGCAAGGAGCGTAGTGGAGGACTC  
GCTGGTTCACGTGTTGGTATTTCATTGCCAATGGATTCCATAAAGCCGTCAACCAGCAGGGCCTTGTGAAAGGGAAGCAGGATTAGAGCCGCACGCTTTTGATGGGCGCTGGTGACCACGT  
CCTCGTGGATGGTGTGGAGGTCAGAAATGGCGGTCATGGGCCGGACGGTGACGTGGCTGAGCTGCTGGTAGGCTTGAACGCGATGACGAGCTGGTCTCCGCCGTTGGTATTGCCGATT  
GCGCTCTCCTTCTTTTTGTTCCAGAAGGGGAGGCCGTTGCGACGGGCTTTGTGGACCATAAAGATTGAGGATGGGCGCTCCGAGAGCTCCATGAGGTGCATGGCGTAGACAGTAACGCC  
ACGGCGGGGGTCCACGGGAGGATTCGATGAGGTTGATGAGGGTCGGGATGTTGCGGCTGCCGTGAAAGCAGGCGAGGATCCGCAACTCGCTCTCCGTGTCGGCACGCTCGATTTTTTC  
GATGCTTGTATGGAGTCGCTTTCCTCGCCGGCTTGTATATCCCCATCACAAATCGGCGTCGTTATGAACGTCGTGAACAGAGCCATCATTACCATGATCGCAAATGTCTCGTCATTTAAACC  
TTGCGATCTTTTCCGATGTTCAAGGACGATGAGTTCAACGAGGCCTTTGGTGTTCATGAGGAACCCGAGGGTGAGGGCCTCGCGAATGGGGACTTTCATAATGAGGGAAGCGAGGATGGT  
GCCACCGATCTTGCCAGACAGGCGTTGAAGATAACTAGAACGAGAAGCGCCAGGAGGTGCCGTTGCTTATGGTGGCGACGTTAGTTTTGAGGCCGCTGGAGACGAAGTAGAGGGGT  
AGAAAGAGGCCAGAGATGAGGTCTTCGACTTTCTCGATAAGGATAACCAGCGAAAGGACCTTCTTGGGCATTACAATGCCACCACAAAGGCCCCGAAGAGGGCATGGATGCCGATGGT  
GTCGGTAATGAAGCCGGCGGGCAGGACAGTGGTGAGGGTGGCGCATATATAGACTTCTTAACCGGTTCCGCTTCCAGTGAGTGACGAGCCATCCGCGGAGAAGAGGGCGAAGGATG  
AAGGCTGCGATTGCGACAAAGGCAGCGGCGGTGAGGAGTACCCAAAGGGAGACAAGGGGTGAGCGAGAGCCTGAAAGGGCAATGGCGAGAGCGAGGAGGATCCAGGCGGCGACGT  
CGTTGACAGCAGCGGCGGACATGGCCATGCGGCCTAGGTGCGGTGAGAAGCTTGAGCTCGGCAAGGATGCGAGCTAGTACAGGGAAGGCGGTAATGGACAGAGCGACGCCCATGA  
AGACAAGGAAAGGGGCGCCGGAACGCCGTCGGCTATGGTGTGCGGAGGACCACAGACGTGCCGATGCCAAGGAGGAAAGGCAGGGAAATGCCAGCGACGGCGATGGACAGTGCA  
CTCTTGCCGGTGCGGCGGAGGGAGTTGAGGTGATTTCCGAGACCCACTAGAAAAGAGAAAGAAGAGAAGGCCGAAGTTGGCGAGCGTGTGAGCACTGTCAAGCTCTGTTTGGGGAAA  
ATGACGTTTCAGGAACGCTTTGTTGCGGCCAGCGCCGACGGCCCTAACAGAATGCCACCAATGACTTCAGCGATGACGCGGGGCTGGTGGAGAGGGCGGAGGAGGAAGGCTAGGGTTC  
GCGTGAGGACGACGACGAGGCAGATCTGGAGGATCGCTAGCGGCAACCGGAATTCGACCGGGCTGTCACCTTGAAAAACCCGTTTCGAGGTGCGCTTCATCGGTTGCAGACATGTGCA  
ATTCGCCATCGTCGACGTCGCTCTGAAGATCACAGGAATTAGCGACGATCGATGAATCCAAACAATCTTTAATTACAAGTTTATGGTTGTTTTGGATGAATCATGTGTGGAAGGATAGAT  
TAGTTTCTCTATTTTTTTGTGATTTGTGAATAATTTGGGAAGATATGAAGAAATAGATTTCTGGATTCAGTGAAGAGATTGAAAAAAGGGATTAGAATATTGATAAGCACCTTTTTATGAA  
GAGAAATTCGAGCTGAGGTTTTCTGCGATCTCTGTAGCTGTTCTGTTTGTGAATAAGCCGTTTCAGTTTTTCTTCTATTTAAAGGAGGAGGCACGAGCGCCGCGGTTTTGACTG

>comp170946\_c0\_seq1

GATATCGAGGGAGGTGCAGTGCATATGTCCTCTTCCCTTGCCGAATGATTCCAAAGAATAAAAAGAAATCCTAAAAAACTGTTTGTATTCAACAGATACTGAAAATATACCAATAATCTC  
CACAAGAACAAGATCCATCTTTGAAACGGTGGAACTAATCCTGTCCCTAACAATTATTTCCCGCTCATAACCATGGATATGAACTTTGTGGCCTTGTGGCAGTCCAAGCAGACGCGCAA

GTTCTTTACAATCCGAATAGTCCCTCCCTGCTCTTGTATTTCATCAATCCAAATGCAATGGCTAACTTCTCACTGTGTCTTGATAAAGCCGTCTCCTTATCTTCCACATCAACATCGACCAACAC  
TTCTCCTACTTCTGGAACATAACCAGCTTCCCTTTAATTTGCTTCCCATCTCATCCAAAATGAGTAGATCGACTTTGTTTGTGGGTGAGACCTGTCTCCAACCAGAACTGGTGAACATC  
CCATCCACTTCAATGGAGCTGCAGCCCCGGAATCTTCTCTCACCTGCAACCTCAATTTTCTTCCCTCACCTCATTGAATCATTCCATCTACCACATCCCGAGTAAATGTTTCGCTAGTAAGAC  
ATGGCAACCAACATGTTTGGACTCGAACTCCTCGACGAGTTTTCCGATCCTTTGTGCCCTCTCCAGGTCCTTGTGGATGCGGCAGGCGCAAGTAATGAACCCCAAGTTGCAGCATCTGG  
AGCCATGGACATGTTTATGATATGATATCCTCCGCATCTTGCAGAAGCCAGCTCGTCCGAGAAGATCCACCATGCAGCCATAATGCTCAAGCTCAGGCTCAATCGAATACGCGCTCTTCATC  
ATATCGAAGTAGAATTTACCCTTTTCCACAAATCTTCCATGACTGCAAGCAGTTAGCAGAGATACAAATGTTACTTTGTCAGGAAAGACTTTAAATTGATCCATTTTTTCGAAGAGTTGTGT  
TGCTTCGGCAGAGTAACCATGAATGGCAAGACCGGTGAGTATGGCGTTCATGGACGTACAATCTGCTTTGGGCTATCTGCTTTGTTAAACAGGTCGAATGCAAAGTCTATTTTCGCCGCAC  
TTTGCATACATGTCTATTAGACTTGGGAGCAACCTGTCATTCACCTTTGATCCTGGCCTTGTATTGAAAGCATGAATCCATCTTCCCTTGATCCAAAGCCACTAAATTAGCACAGGTTGCAAG  
AATGGTTGACAGGGTGAATTCATTTGGTGCAATGCCAGCGAGCTGCATCTGCTGAAAAGCTGCATGGCTTCCAAGAACCAGCCTGTCTACACATAACTAAAGAATTTTATATGTGAGTTT  
CAAACCAGAAGAAAAACGTAAAGATAATGATACTATTTCAAATAGTGCTATGCATGGCTTTGATATTTTAGGTGCTTGCAAGCTGCTCGCCAGTGATCTCTCATATCTTAGAGGATAAAT  
GTTTGAATAAATTTAGGATCATAAACGTGAGGATCAGTTGCTTGAATCCTCCGCAGTCTTCCCTCCCTCTGCCTGAGTACGCAATACTGGTGCGGTTACTCGGATCATGCCAGAGATGGGT  
GCTGGTCACGGGGTGGCTGGAGGAGCAGAGAGGCGAAGGCGCCATTATGGTTGCCAACGTGTCTATTTTGTCTATGAAACGTATGAAATTAGCACATGAATTATCTAATCGATCAAGTGA  
TGCAATTCGCTTGAGCTGTCCAAAAGGCTTCATGTCTTCGATTGTCAATGATGGCCATCTTCTTTGGCGTCAATGATCGTCGACAACCCATCTTCTTTAGCTTCAATCGTCGTCGTCACCC  
ATCTTCGGTGTGATCGTCGTTGACAACCCATCTTCTTTGACTTCAATCGTCGCCGAGCCATCACTTTTGCAGTCCGACATCTTTTGAAGCTCCAACTCTGATACTAACTGATGTAGT  
TGATTGGTGGAAGAAAGGATTTGCTAGAAGACCAAGAACAACAGGAATAACCCAAATAACTAAACAAGAATGTGCATCTTCTATATCCCTCCTTACAACATTGTTTGTATATATAATG  
ACAATAGAATATTCTAAAACGTAGAAATGAAACTAGACCTATGTTCTATTATAACTATGATATTCTATATCACAGAATATGGAAGACCACAAAAGTGGGTTTTATGCAGCGAATAATCAA  
GAAGTGCATGGTAAAAGAGGGCGCTCCAGAGAGAAGTGAGTACACTTCTCTTCTGAATCCACAACGATTGTGTTGCTCTATCTTCTCTATTGCCAAGTACTGAGAATGAAGTGAGAGAAC  
CCATTCACGCAAAAAAAAAAAAAAAAAAATCTAGACCAGATAACAGTAACAGCATACAAACCTCACTCAGCAAACACTGTAGAAGAGAAATATCTTTATAGATTTTTATGAAAAATAATTGG  
CGTGGAACATCCTCATCAAATCTTGCACATAACAGCCATACTGCGCGCATTTTGTATGCAAATAAGTGATCCTTAGATTTTGCATAGGATGACGTACACTGCAGGTTCTGAACTAGATTTTT  
ATGAAAACGTGTTGATGATCCCATTATATAAATATTTTTTCTGTTTATTAACCAATTTCTTTCGCTTCTCTCCAGCATCATAGCACGATCGTCTTTTCGCTTCTTATGATCCCATTGCT  
CACTTAGTATTAATCGATCAAAAAAGAAATATATATAAAGAGAAACTATATAATCAGCCAAAAGGGGAACTAAGTCATCACCTGGCTGAATTTTCCGGCATATCTCTCCGGCGGACTCGGTTG  
TGGCGGATGAGTTGACGGACTTACTGTTCCCTCGGGGCCGGATGCCCGCTGCTGACCCGTTAAGGCCTAAGAACTCCTTCCACCGCACGAGCCCTTGGACTGCGGGGCGCCCTCGGCC  
CGGAGCTCTTCGCGGAGGGTGGTGACCCTTGCTAACTGCCCAGAACTCAGTGGAAGCATAACGTCCTTGAAGAAGAGCTCGTCGGCGGGCATCATGGGCCGGCCTCCGACTGCGAACT  
CGAAGGTGCGGTGCGGAGTTACGATGTCCCAGGAGGAGTCTGGCGCCCTCTGCGGCGAGGTCGTTGGAGAAGGATATGCGCGGGCTCGCCGGCAGCGGTGCTCCGTACATGGCCGG  
ACGGTCTTTAAGCGTATTGATACAGGAAGCCATGAGAGATCGTGATTGAGACAAGTAGCGAGACAGAGGTGAACTTTTGGTGAGATGAGTGATGATAA

>comp170963\_c0\_seq1

ACAAATTTCAATTTCAATTCATCAAATGTATATACAATGTTTACACTACAATATATGGCTATTTACCATAAAAAAAAAAACTCATAAAATAGACAAGATTGCTCTTGTACAAAATCAGGAAAGT  
ACCTATAAAGACTCAGAAAGATTAGATCCTGGACGCTCAGCTACTCAACTGACTCTTTCACCTTTCCCTGACCTGATTGTGGCGCTTCCACTTAAAAGCTCCAAGCAAGTAAGTCCAGATT  
GTGGCGCGGCCACTTAA

>comp170995\_c0\_seq4

TTTTTGAATAAAAAATTTGTAATATTTAGAAAAGCAACAATAACTATCCTAACTAAATCTTTGTTTAGGACGATTTTTTTCGTCCCTCAGCCTAAGCCTCAGCACGTTCAAGAACAGA

AGAGAGGCACGAGTTTCTCGTGCTCATTGATTATTCGAATTCAGACCTCTTAATAGAGAGATTAACTCCTAAATCAATATAGATTAAGGTGGCTGAACACTCCTCGATCTGCTATA  
AATGGCGCCTAAAACCTCTGCAAGCCACACGACCTCCGCCGAGATCCTTCTCGTTCTATCTCTTTAGCCTATCTTCGCTCCCATTCCCCCGTTCTAGCAAGATGATTATCAGTCACATAGTTA  
AAGATGTTTTGTCTGCCGAAAAAGAAGGTGAAAGCCAGTATTGTTATCATGGACAAGAACGTGCTCTCCCTGAACGACTTCAACGCCTCTATTCTCAACCAAATTCAGGACTTTGTCTG  
GCCAGAGTGTCTGAGCTCCGCCTCATCAGCGCCACCGTCCGGGATCCCAATAAAGGGAACAGAGGAGTGGTAGGGGAGCCGGCGAACCTGGAGAGGCCTCCGCTTTCCTTCATCCCGAA  
ACTCATCGCCGGCGAGACTTTATATGAAGCGCACTTCATCGTTGACGAAAGCTTGGGAATCCCCGGCGCCATCATCGTCAAAAACCGCCACTTGGCCGAGTTTTATCTCAAATCCATCACT  
ATTGATGACTTCCCCGGGAAAGGTCGAATTCACCTTTGACTGCAACTCCTGGGTTATAACGCTAATAAGTATGACTATGACCGCATCTTCTTCGCCAACGACACTTACTTGCCGGAACACA  
CGCCAGGGCCACTCAAGGGGTACAGGGAGGACGAGCTGCGGAATCTTAGAGGAGATAACGTGAACCGAGAGCTGGAGGAATGGGATCGCGTGTATGGCTATGCCTATTACAACGATCTC  
GGCGCCCCGGACCTCAGTCCGAGCTTGGCCCGCCAATACTCGGTGGCAATTCAGTTCCCTTACCCTCGCCGCGAAAGACCGGCCCGCCCGCCGAGAACCGATCGGAATTCGGA  
GAGCAGGCTTTTCGCTCTTGATCTGAACATCTACGTGCCTCGCGATGAGAAATTCGGGCACTTGAAGTTTGC GGATTCTTGGGCTACGGCCTCAAGGCAATCACAAGGACCTGTTGCC  
ACTCGTCCAATCCATTGTGCACTTACGCCCAAGGAATTCGACTCCTTGAAGGAAGTTTTGTATCTCTATGAGGGCGGCTTTCCTCTGCCGGACATTCCGCTGGTTGAAAAGTTTCATTAG  
TCCATGCCCTTTGAGCTCTTCAAGACCTTCATCACTCCGGGCCATAACCAGCGCGGCTACTCAAGTTTTCCGTTGCCGCATATCCTTCAAAGTAAGAATTTTTTCTTTCCCTTTCTTCCGC  
TCACTATGTTTACATATATTAAGATTTAGTTTTAGTTTCTGACAAGAGTTTTGAGATTTATTTTGATCTAATTTTTTCCAGCGATGAATTTGATCCATGGATATTGAAAAATAGTCTAGACAGA  
CAAATATTATTACAGCCATGATGGATCAAACCTTTTATTGTTTAAATTCATTTTTATTTTTTTTCATAATTTTTGTCTACATTAACAGTTGCTCCAGATGGTCTGATTTGAGAATACTACTAATTTCA  
TTCATAATAATTAGTAGTGTTCCTTAACATAAATCGTTATTTTCAGAGGATAAATGGGCATGGAGATCCGACGAAGAATTCGCAAGAGAAACACTGGCCGGCGTCAACCCTATCATGATCC  
AACTACTGAAGGAATTTCCACCAAAGAGCAGTCTTGATCCCTCCCTCTACGGCAACCAGAACAGCACCTTCAAAGAACAAGACATCCAAGACAACCTTGACGGCTACTCTGTTTATGAA  
GTAATTTAACTTAATCTCGACTATTTGCTCTTTCCATGGCTGTCAAAAAGAAACCATTTTGTGATGTTTATCGTGTATTATCGCAGTAATTAATACTCCAAGGATTATGTAATTTAGTCAC  
AGTGTCTTCCATCTTTTCACTTCTCAGGCGCTTCAATTGAAGAACTCCTCATCTGACCACCATGATGCAATCATGCCATATTTGAGACGCATCAACAGCACAGACAACAAAATCTACG  
CCTCCCGTACTCTGTTCTTCTCAA AAAAGGATGGCACTTTGAAGCCACTGGCCATCGAGCTCAGCCTTCCCCATCCAGGCGGCGACAATCTCGGGCGCCGTGAGCACGGTTTACAAAACCG  
GCCAGTGTAGGCGTGGAGAGCACCATCTGGTTACTTGCTAAATCCTACGCCCTTGTC AACGACTCCGGCGTCCACCAACTTATCAGTCACTGGTTGCGTACTCATGCGGTGATCGAGCCTT  
TTGTCATTGCGACCAACCGGCAACTAAGTGCCTGCATCCAATCAACAAGCTCTTGGCGCCTACTACCGGATAACAATGAACATAAACGCTCAGGCTCGCCATACTGATCAGTGCCG  
GTGGTTTTGCTCGAGTTCACCGTCTTCCCCAGCAAGTATGCTCTGGAGATGTCTGCAGTTGTTTACAAAAGCTGGAATTTTCTTGACCAGGCCCTTCCAGCTGATCTTCTCAAGCGTGGAAAT  
GGCCGAAATAGACCGATCATCCCCGCACAACCTCCGCCTTCTTATCCCCGACTACCCCTACGCCGTGACGGCCTCGCCATCTGGTTCGCCATCGAAGGCTGGGTCCGCGATTACACCGCC  
ATTTATTACCCCAACGACTCAGCCGTTCAACAAGACGGTGAACCTCAGTCTGGTGGACGGAGGTCCGGGAAGTCCGACATGGGGACCTCAAAGATCAGCCATGGTGGCCAAGTCTCTA  
CACCTTGGAAGATCTCATAAATCTGCACCACCATCATCTGGATCGCATCCGCCATGCACGCCCGCTCAACTTCGGCCAATACCCTTACGCCGGCTACCTCCCGAACCGCCCCACCGCC  
AGCCGCCGTTTATGCCCCAACCGGCACTGCCGAATACGAGGAACTGGAGAAGAACCCGGAGAAGGCGCTCTTGAAGACCATTACAAACCAGGTGCAGACGATTATCGGCATATCGTT  
GATCGAAGTTCTGTCTAATCACGCGAGCGATGAGCTTATTTGGGTCAAAGGGCGAGTGCAGAGTGGGCCAGCGACAACCGAGTCATTCAAGCATTAAACCGGTTCCGTTTCAAGCTGA  
AGGAGATCGAGAAGAATATCAGTAACTTGAACCATGACCCGAGTTTGAAGAACCGGTGCGGACCGGCTCAGGTTCTTACTATCTGCTGTGCGCTTACAGTGAAGGTGGGATCACGGCA  
AAGGGTATCCGAATAGCATTTCAATCTGAGCCTAAGCTATCTTATATAGGTTGTTATGGAAGTAGAAATAAATGTTGAATAATGTTTTCTCTGTAAGGTGTTGCCTTGGGCAAATTATTGT  
GTCCGTTGTCCGGATTTCGTCGGACACCAA

>comp170995\_c0\_seq9

TTTTTGAATAAAAAATTTGTAATATTTAGAAAAGCAACAATAACTATCCTAAACTAAATCTTTGTTTAGGACGATTTTTTTCGTCCCTCAGCCTAAGCCTCAGCACGTTCAAGAACAGA

AGAGAGGCACGAGTTTCTCGTGCTCATTGATTATTCGAATTCAGACCTCTTAATAGAGAGATTAACTCCTAAATCAATATAGATTAAGGTGGCTGAACACTCCTCGATCTGCTATA  
AATGGCGCCTAAAACCTCTGCAAGCCACACGACCTCCGCCGAGATCCTTCTCGTTCTATCTCTTTAGCCTATCTTCGCTCCCATTCCCCCGTTCTAGCAAGATGATTATCAGTCACATAGTTA  
AAGATGTTTTGTCTGCCGAAAAAGAAGGTGAAAGCCAGTATTGTTATCATGGACAAGAACGTGCTCTCCCTGAACGACTTCAACGCCTCTATTCTCAACCAAATTCAGGACTTTGTCTG  
GCCAGAGTGTCTGAGCTCCGCCTCATCAGCGCCACCGTCCGGGATCCCAATAAAGGGAACAGAGGAGTGGTAGGGGAGCCGGCGAACCTGGAGAGGCCTCCGCTTTCCTTCATCCCGAA  
ACTCATCGCCGGCGAGACTTTATATGAAGCGCACTTCATCGTTGACGAAAGCTTGGGAATCCCCGGCGCCATCATCGTCAAAAACCGCCACTTGGCCGAGTTTTATCTCAAATCCATCACT  
ATTGATGACTTCCCCGGGAAAGGTCGAATTCACCTTTGACTGCAACTCCTGGGTTTATAACGCTAATAAGTATGACTATGACCGCATCTTCTTCGCCAACGACACTTACTTGCCGGAACACA  
CGCCAGGGCCACTCAAGGGGTACAGGGAGGACGAGCTGCGGAATCTTAGAGGAGATAACGTGAACCGAGAGCTGGAGGAATGGGATCGCGTGTATGGCTATGCCTATTACAACGATCTC  
GGCGCCCCGGACCTCAGTCCGAGCTTGGCCCGCCAATACTCGGTGGCAATTCAGTTCCCTTACCCTCGCCGCGGAAAGACCGGCCCGCCCGCCGGAACCGATCGGAATTCGGA  
GAGCAGGCTTTTCGCTCTTGATCTGAACATCTACGTGCCTCGCGATGAGAAATTCGGGCACTTGAAGTTTGC GGATTCTTGGGCTACGGCCTCAAGGCAATCACAAGGACCTGTTGCC  
ACTCGTCCAATCCATTGTGCACTTACGCCCAAGGAATTCGACTCCTTGAAGGAAGTTTTTGATCTCTATGAGGGCGGCTTTCCTCTGCCGGACATTCCGCTGGTTGAAAAGTTTCATTAG  
TCCATGCCCTTTGAGCTCTTCAAGACCTTCATCACTCCGGGCCATAACCAGCGCGGCTACTCAAGTTTTCCGTTGCCGCATATCCTTCAAAGTAAGAATTTTTTCTTTCCCTTTCTTCCGC  
TCACTATGTTTACATATATTAAGATTTAGTTTTAGTTTCTGACAAGAGTTTTGAGATTTATTTTGATCTAATTTTTTCCAGCGATGAATTTGATCCATGGATATTGAAAAATAGTCTAGACAGA  
CAAATATTATTACAGCCATGATGGATCAAACCTTTTATTGTTTAAATTCATTTTTATTTTTTTCATAATTTTTTGCTCTACATTAACAGTTGCTCCAGATGGTCTGATTTGAGAATACTACTAATTTCA  
TTCATAATAATTAGTAGTGTTCCTTAACATAAATCGTTATTTTCAGAGGATAAATGGGCATGGAGATCCGACGAAGAATTCGCAAGAGAAACACTGGCCGGCGTCAACCCTATCATGATCC  
AACTACTGAAGGAATTTCCACCAAAGAGCAGTCTTGATCCCTCCCTCTACGGCAACCAGAACAGCACCTTCAAAGAACAAGACATCCAAGACAACCTTGACGGCTACTCTGTTTATGAA  
GCGCTTCAATTGAAGAACTCCTCATCATTGACCACCATGATGCAATCATGCCATATTTGAGACGCATCAACAGCACAGACAACAAAATCTACGCCTCCCGTACTCTGTTCTTCTCATAAA  
AGGATGGCACTTTGAAGCCACTGGCCATCGAGCTCAGCCTTCCCCATCCAGGCGGCGACAATCTCGGCGCCGTGAGCACGGTTTACAAACCGGCCAGTGTAGGCGTGGAGAGCACCATC  
TGGTACTTGCTAAATCCTACGCCCTTGTC AACGACTCCGGCGTCCACCAACTTATCAGTCACTGGTTGCGTACTCATGCGGTGATCGAGCCTTTTGTCAATTGCGACCAACCGGCAACTAA  
GTGCGCTGCATCCAATCAACAAGCTCTTGGCGCCTCACTACCGGATACAATGAACATAAACGCTCAGGCTCGCCATACTGATCAGTGCCGGTGGTTTGTCTCGAGTTCACCGTCTTCC  
CCAGCAAGTATGCTCTGGAGATGTCTGCAGTTGTTTACAAAAGCTGGAATTTCTTGACCAGGCCCTTCCAGTGTATCTTCTCAAGCGTGGAATGGCCGAAATAGACCGATCATCCCCGC  
ACAACCTCCGCCTTCTTATCCCCGACTACCCCTACGCCGTGACGGCCTCGCCATCTGGTTCGCCATCGAAGGCTGGGTCCGCGATTACACCGCCATTTATTACCCCAACGACTCAGCCGT  
TCAACAAGACGGTGAACCTCAGTCTGTTGGACGGAGGTCCGGGAAGTCGGACATGGGGACCTCAAAGATCAGCCATGGTGGCCAAGTCTCTACACCCTGGAAGATCTCATAAATCCT  
GCACCACCATCATCTGGATCGCATCCGCCATGCACGCCCGCGTCAACTTCGGCCAATACCTTACGCCGGCTACCTCCCGAACCGCCCCACCGCCAGCCGCGGTTTCATGCCCAACCCG  
GCACTGCCGAATACGAGGAAGTGGAGAAGAACCCGGAGAAGGCGCTCTTGAAGACCATTACAAACCATGTGCAGACGATTATCGGCGA

>comp171042\_c2\_seq4

CCCTTCTGTGGATCGGAAGTTAGGACATTTTTGATCGGATGCAACAACCTGGAGCTCGCTGGCTTTGAAGATATGGGGGATAATAGTTGTTCTACTCAACTAATTGATGGAGATGGCGTAT  
ATAACGTCTCTGGAATGGAGAATTTTCATGGAGACTATGAAACTTGGTGAATGTGGTGTCTCATATGCTATAGTCTCCATACTGGGTCTCAGAGTAGTGGGAAGAGCACTCTTCTGAACCG  
TCTTTTCCATAACCAACTTTAGAGAGATGGACGCATTTAGTGGGAGGTCTCAAACACTCAAGGAATTTGGCTAGCAAAGTGTGTGGATATTGAACCTTGTACTATTATCATGGATTTGGAGG  
GTTTTGATGGAAGAGGGGGTGGAGAGGATGAAGCCGCATTTGAGATGCAGAGTGCTCTTTTTGCTTTAGC

>comp171068\_c0\_seq1

AGGAGAAAGATGGTTACCTTCGCAAAAGCGCATAAAAATAGAGTTCGATTGGATATGAATCACGACATTTTTGAGTTTTTGCATTTTGGAGTGAAAATGAGATTTTCGGTTGGAGATACCCT

AATGTGAACTAAGCACAAACAAATAAATGGTACTATTAGTACATAACTTGTGGCCATGATTTCTAACATCATAGGACGTGAAAGTACTGTTTCTCAGATGATACATTACCA

>comp171068\_c1\_seq11

GATTGATATGTATTCAAAGTGTGGGGCTATTGACATGGCGATCCTGGTTTTCCAAGGGATGAAAGAGAGGAACACAGTGTGCATGGAATTCGATGATTCTAGGACTAGCAATGCATGGCCGT  
GCACGTGATGCTTTGCATCTATTTGAAGAAATGCGGCTAAGAGAGGATGATGAGCCCAATGGCATTACCTTTCTTGGTGTCTTTGTGCTTGCAGCCATGGAGGTTTGGTTGAAGAAGGA  
AAAAGATACTTCCATTGCATGAAAAGGGATTATGGAATTGACCCTGCTGTGCAGCACTATGGATGCATGGTAGATCTTCTGGGAGAACTGGGCTGTTAGGAGAGGCCTATGAGCTCATAA  
GAAGCATGCCCAGTGGGGGAATGCTGTGATGTGGAGAACATTGTTGGGGGCTTGCCGAGTTCATGGGGACCTTGAGATGGGGGAGAGTGTAAGGAAGCATCTTATAGAATTGGAGCCT  
GACCATAGCAGTATTTGTACTACTTTCACATATGTATGCAATGGTTGGAAGATGGAATGATGTGCTTAATGTTAGAGAGGATATGTTAGGGGTGGGAGTTCAGAAGCCACAACCAGGAA  
ACAGCTTTATTGATTCTTTCTTGTGCGGAGATGTTGACCCCTACACATGGTATAACATAGAAATAAAGGCACAGATTTTATTTCCAGCGATTTGGAAACATACTGAAGAAGTAACGGTCT  
TTCTCTTCTTTCGCACTTTTCTTCGGCAAATTCGGTAGAGACTGAAAAATAACACAGGTGAACAGTGCAATGCAAATATTGACATCACATTGTTACCCCGCAACCAAATACCGGAAGTTTT  
GCCATTACAGCTGGAGTTCAGTTGGAGAAGGCCTTTTAGACTACAAATGCAAAAAGTTTACCAATGGGACTGCAGGATATAGTCTTAGTGTCTCGGTCAATGCAGCGTGAAGGTAATGCAT  
TCCATTGAGAACTTCCCTCCGTCAAAAACAAATGAAATTCATTGATAGACAAAGTCTCTTTTTCCATGATCGCATCTCTTACTTCTTGTGCAACTTTCTCTTGAACATTAGGATTCTTGCAGA  
GCATGTAAAAAACCATGAAAGTGTACCTGCAGTTGTATCCCTGCCAGCAAGCAGAAAATTCAACACAATATCTCTCAAATACTGGTAACTTATGGTGTCCGGATCCCTTTCTCTTCCATT  
AGAAGCCTCGACAGTATGTCTTCTTTCAGCAAAGCATCATCTTTCTTCTGCGATAGCAGCTCAATCTTCTCATTTATCACTTTGTATACAAATTCGTCAATCATCTTTATATTTTTCTCAACT  
GAGCTTCCAAACCAATGTTCAATGCCCTGCTAATTTTCCAGAAAACATCAAAGAATCGTCTAAGTGTGGCTGCTTGAATCATCAAAGGCCTTGGCAAAGATACTCCCTTCTTGTTCGA  
TCCTCCAAGAGTGTCAAGCTCAACCCCAAACCCACTTTGAAGATGGAATCCATTGTTGACCTCATAAATAGGTTCTAAGGATTAATACAACCTTTAACAGTTAATCCTGCTTGAAAAAGT  
CAACTTGAATCCTGTATGAGTATTTACTTACTTGGATATCTATTATTTTGTGTTGAATTTGCCGCCTCGGAAATTAGCACAGAAAAGTTTGTATCGCGTTGCTTCGAAAGACATGGCTGCTGTAAT  
CTCTCAAAACTTTTGTGAAAACCTAAGCTTGCTACTTTCCTCTGATGGCGCCACATGTGCGCTCCACTGTGAAAATTCCATTCCCTAATAGATCCTTCGTAATATCATGATTATGTGTC  
CCTTTCCAAAATTTGCAAAGTTGGTCTTAAGGATGTATTCAATGTTGATGGGATCGACAGTGTAACGTTAGTTGAAGAAGGGGGTGAGAATCCTGAAGGTTTTATAGCGACGGGAGAGAT  
CGGTCTGGAAATCGAGTAACCGATGGAGGTTTCAAGCTGGTGGAACACAGTGCCTGCGACGGGTGGGTAGTTCTTCTTCTTCTGAATAATAAGTTTACTATTGGCTTGAGGAGATAGACGG  
CGACCAGAAAGCAAGCGACTCCTACCGCCATGGCGAGGAGCTTCGCGTCTGCAACAAGTTCCATTACACAAGGCCAACACGCTCAAGGGGAAGAAAATTTTAGGCTACTTCATGAAA  
GAACGCCGTGCTAAATATTTAGGGGGTGTGGTATAGATTTTATTTTCTAGGATTTATGATAAATCCAACCAACGCAAAAAAACGGCGCTGTA

>comp171068\_c1\_seq16

TTAAGAAGCAGTAAGAAAGCTACCCCAATTGAAGCCTTAATCAGATGTAGACATACAAATGTTTACAGGATTTTTTTTTAAAGTAATGCAACATTTCTCTGAATATGTTTTATAATTACAAAC  
GATATAATCCAAGTTTATGGCAGAAGAACAATCTCCACGTATAATTTATCAGCACTTCAGTTTTGTAACTGCACTACCTGCATAAAGCACGAAGACGAAGCTCTCCATCAATTTGGAG  
GGTTAACATGGGCCTGTAATTTACAATTTGGTTCGGCTGAAATCTCAAATTTGAAGTAGTACAGGAGAGTTGCAGCAAAAATCTTCATTTGCCTATAAGCAAAAATCTTTTCCCAAACAGATA  
CGAGGTCCAGCCTGGAATGCAGAAAATTTGAAAGGGCTTTCAGCCACAAATAGACCATCATTATTTAGCCACCTATCCGGACGGAATACCTCGGCATCTTACCCCATAGGAACTTCATTC  
TGCCCATGGAGAAAGGTTGGTAGGTCACCAAATCACCTTCTTCAAGTCGAAACCATCTGGTAATGTATCATCTGAGAAACAGTACTTCACGTCTATGATGTTAGAAATCATGGAAACAA  
GTTATGCATTAATACTACCATTTCTTTATGCGTGCTGATCAGTTCACATTAAGACTACAAATGCAAAAAGTTTACCAATGGGACTGCAGGATATAGTCTTAGTGTCTCGGTCAATGCAGCG  
TGAAGGTAATGCATTCCATTGAGAACTTCCCTCCGTCAAAAACAAATGAAATTCATTCATCGACAAAAGTCTCTTTTTCCATTATCGCATCTCTCACTTCTTGTGCAACTTTCTCTTGAACATTA  
GGATTCTTGCAGAGCATGTAAAAAACCATGAAAGTGTACCTGCAGTTGTATCCCTGCCAGCAAGCAGAAAATTCAACACAATATCTCTCAAATACTGGTAACTTATGGTGTCCGGATCCC  
TTTCTTTTCCATTAGAAGCCTCGACAGTATGTCTTCTTTCAGCAAAGCATCATCTTTCTTCTGCGATAGCAGCTCAATCTTCTCATTTATCACTTTGTATACAAATTCGTCAATCATCTTTATA

TTTTTCTCAACTGAGCTTCCAAACCAATGTTCAATGCCCTGCTAATTTCCAGAAAACATCAAAGAATCGTCTAAGTGTGGCTGCTGAATCATCAAAGGCCTTGGCAAAGATACTCC  
CTTCCTTGTTTCGATCCTCCAAGAGTGTCAAGCTCAACCCCAAACCCACTTTGAAGATGGAATCCATTGTTGACCTCATAAATAGGTTCTAAGGATTAATACAACCTTTAACAGTTAATCCT  
GCTTGAAAAAGTCAACTTGAATCCTGTATGAGTATTTACTTACTTGGATATCTATTATTTGCTTGAATTTGCCGCCTCGGAAATTAGCACAGAAAGTTTGATCGCGTTGCTTCGAAAGACA  
TGGCTGCTGTAATCTCTCAAAACTTTTGTGAAAACCTCTAAGCTTGTACTTTCCCTCTGATGGCGCCACATGTCGCCGTCCACTGTGAAAATTCCATTCCCTAATAGATCCTTCGTAATATCA  
TTGATTATGTGTCCCTTTCCAAAATTTGCAAAGTTGGTCTTAAGGATGTATTCAATGTTGATGGGATCGACAGTGTAAACGTAGTTGAAGAAGGGGGTGAGAATCCTGAAGTTTTATAGC  
GACGGGAGAGATCGGTCTGGAAATCGAGTAACCGATGGAGGTTTCTAAGCTGGTGGAAACACAGTGCCTGCGACGGGTGGGTAGTTCTTCTTCTGAATAATAAGTTTACTATTGGCTTG  
AGGAGATAGACGGCGACCAGAAAGCAAGCGACTCCTACCGCCATGGCGAGGAGCTTCGCGTCTGCAACAAGTTCCATTACACAAGGCCAACACGCTCAAGGGGAAGAAAATTTAGG  
CTACTTCATGAAAGAACGCCGTGCTAAATATTTAGGGGGTGTGGTATAGATTTTATTTTCTAGGATTTATGATAAATCCAACCAACGCAAAAAAACGGCGCTGTA

>comp171068\_c1\_seq9

TTCAAATATACCTTGAGATTTGTGCCCGATCGAGATTTAATGCCATATCAAACTAAATATTAGTTTCATCAAGTTTTACAAGACCAAAAAGTTTTAACCCACCCTTCTTTAAAGCCGTTTT  
TAAAGCCGTTTGGGCTAAGCAATACTTCTCAACTTTAGTTTTTTTTTAAATTTCTTTTAGGCAAAGGGGTTTCGTATTAATAAAGAGTTCTAACTTCTAAAATCTATTTTGCATATAGGCCGTAA  
TTTTGACTCAGAAAACCTAAACGTCCTTGTATTCAAAAATAAGCACAAAGATCGGATCGTCCACCGTAAAAATCACATTATCTAAATTACAGAACTTTTGGTAATTCTAAGATTTGAACAATT  
AGACCCTTCCCATAAGGTATTCTAACAAGGGAGCCTTTAATTAATAACATAACATCAAAGGAATATATTATTGGAAAAGCATACCTGGAATGCAGAAAATTTGAAAGGGCTTTCAGCCACA  
AATAGACCATCATTATTTAGCCACCTATCCGGACGGAATACCTCGGCATCTTACCCCATAGGAACTTCATTCTGCCCATGGAGAAAGGTTGGTAGGTCACCAAATCACCTTCTTTCAAGTC  
GAAACCATCTGGTAATGTATCATCTGAGAAACAGTACTTCACGTCCTATGATGTTAGAAATCATGAAACAAGTTATGCATTAATACTACCATTCTTTTATGCGTGCTGATCAGTTTACATTA  
AAGACTACAAATGCAAAAAGTTTACCAATGGGACTGCAGGATATAGTCTTAGTGTCTCGGTCAATGCAGCGTGAAGGTAATGCATTCCATTGAGAATTCCTCCGTCAAAAACAAATGAA  
ATTCATTCATCGACAAAGTCTCTTTTCCATTATCGCATCTCTCACTTCTTGTGCAACTTCTCTTGAACATTAGGATTCTTGAGAGCATGTAAAAAACCATGAAAGTGTACCTGCAGTT  
GTATCCCTGCCAGCAAGCAGAAAATCAACACAATATCTCTCAATACTGGTAACTTATGGTGTCCGGATCCCTTTCTCTTCCATTAGAAGCCTCGACAGTATGTCTTCTTTCAGCAAAGC  
ATCATCTTCTTCTGCGATAGCAGCTCAATCTTCTCATTATCACTTTGTATACAAATTCGTCAATCATCTTTATATTTTTTCTCAACTGAGCTTCCAAACCAATGTTCAATGCCCTGCTAATTT  
TCCAGAAAACATCAAAGAATCGTCTAAGTGTGGCTGCTGAATCATCAAAGGCCTTGGCAAAGATACTCCCTTCCTTGTTCGATCCTCCAAGAGTGTCAAGCTCAACCCCAAACCCA  
CTTTGAAGATGGAATCCATTGTTGACCTCATAAATAGGTTTTGGATATCTATTATTTGCTTGAATTTGCCGCCTCGGAAATTAGCACAGAAAGTTTGATCGCGTTGCTTCGAAAGACATGG  
CTGCTGTAATCTCTCAAAACTTTTGTGAAAACCTCTAAGCTTGTACTTTCCCTCTGATGGCGCCACATGTCGCCGTCCACTGTGAAAATTCCATTCCCTAATAGATCCTTCGTAATATCATTG  
ATTATGTGTCCCTTTCCAAAATTTGCAAAGTTGGTCTTAAGGATGTATTCAATGTTGATGGGATCGACAGTGTAAACGTAGTTGAAGAAGGGGGTGAGAATCCTGAAGGTTTTATAGCGAC  
GGGAGAGATCGGTCTGGAAATCGAGTAACCGATGGAGGTTTCTAAGCTGGTGGAAACACAGTGCCTGCGACGGGTGGGTAGTTCTTCTTCTGAATAATAAGTTTACTATTGGCTTGAGG  
AGATAGACGGCGACCAGAAAGCAAGCGACTCCTACCGCCATGGCGAGGAGCTTCGCGTCTGCAACAAGTTCCATTACACAAGGCCAACACGCTCAAGGGGAAGAAAATTTAGGCTA  
CTTCATGAAAGAACGCCGTGCTAAATATTTAGGGGGTGTGGTATAGATTTTATTTTCTAGGATTTATGATAAATCCAACCAACGCAAAAAAACGGCGCTGTA

>comp171077\_c0\_seq1

AAAGCTGGTTGTGCCGAAGTTCGATTCGAGAGTTAGGCCAGCAGAGGAAGAAGGAAGCCCGATTTCTCTCTCGATTGGAGTAATGGCGAGGGCTGGAGTGGCGATGGAGGTCGGA  
AGCGATGGAGTGGCGGTGATTACAATGTGGAATCCTCCTGTCAATGCGCTGGCTCCATCGATTTTTGCTGGATTGAAGGAAAAGTACGTGGAGGCAATGAAGAGGAATGATGTCAAGGCT  
ATCGTCTTAACTGGTGTGTTGAAAAGTTTTCCGGTGGTTTTGACATCAATGTTTTGCTGAAGTTCACAAGACGGGGGATGTGTCTATTTTGGCGGATGACTCGATCAATTTGCTTGCAA  
GCACTATTGAAGATGCCAACAAAGCCTTCTGTTGCAGCCATTCATGGACTTGCTTTAGGAGGTGGTTTTGGAGTTGGCAATGTGTTGTCATGCTCGAATATCCACTCCA



>comp171084\_c0\_seq31

GGAGATAATATCCAACAAACAAAAATTTTACAACCTAGAAATTTTTACTATAAATTATAAAAAAAAAAAAAAAAAACTTTATATGATATTATATCTTCATAATATATGTGCCAACAAAGTTGCAGACGCTAGTCATTTAGGAATAGGCAGTATTAACCTCATGGCCTGCCTACTTTCCCTTCGTTGCCGATTATCTCCCAACAAAAAGCCTGTAGCGCCTGCCTTATTACTCCCAAAGCTCTGCCACCGGTTGAAAAGGAGCAACAGATGTATCTTCTCTCTCTCTCTACACAGAAAGACCTATGCTTCCTTCTTGTCTCTGGTCTTGTCCCATCACTGCTTCCCCGCCTGATCCGATTCCGACCCATCAAGATCCGCATCCGCTATCATCGCCTCCGCTTCGATCCACAGCTGCGCCGCCACCTCGCTGCTCGCCGCCGACTTCGCCGCCGCTGACTCGTTGCAATCCGCATAGTATTTCCCGCTCGCACCAGCCACCGCCGGATGCACCGCCACATAGCACGTGCTGCGCCGCCGCTGATTGATGGTTTTACGAATTTTGACGCAAAGAAGAATCATATCTGCTTCCACGAAGAATCAGACGGTTTGTGGTTTTTTTTTTGAGAAGCTGCGTAAATGAATGGAAAAAGAGGAGGGAGCGTATCATCACCTAACACAAAGCCTTACGGTACGATTGAGTCGCGTACGCGTTATACCAGGATCTACGCTGTTGACTGTTACGTTACGCCCATTTTCTTCCCTCCAGGATTAATAAATAAATTTATCTTTTATAATTTACGGTGAAGAATTTTTTAATTAATAAAAAAAAAAACAAATGGATGGTCTCTACAGAAGAAGACTGCTTTGAAAAGAATAGTTAGGGCAGTGCGGAGGAGGAAGCACTAGCTTTGGAAGCGCCGAAAGTGCAGCGGACATTCTCCACTGAGCAAGCCATTAATGTTCCAGCTTCCCCCGGATTTGCTCACAATGTTCTTCAAGGCAGTCTCTAACTTCGCTCCCAAATTATTACATATATGTGATTTTCTTTCTTTGATCGTATATTTGG

>comp171098\_c2\_seq5

GCACGTGCATTTATACAAGTTTCTCAAAAAGACTTAATAATAACTCTTTCCCTCAAATCAAATGACATAAAGAGAAAAATATATATTGAAATTAATAAAGATTCATACATATTAGTTGAAAAAATGACTTACAAATGCTGAAAATATTTTGATAATTCAAAGATACTCATGTTACATGCTTTTTAAAAATACTAAGATTTTTTCATTTATGGAATGATGGCTTAAACCATATTGAAGGAGGCCAATTAGGTTCTGAATAAGGGTCAACAAAATATTGGAAGCGTTTACTTTGAAGATCATAAAGACCAATATCACGACCAACTTCATCTGGTGACATTACCACTGGATGATCAGTAAAGTATACACAATTCGGTCTAATTCCAGGAGCAACCTTGTGATGCAATGAGAATGTTGGTTACAACCTATAAATATGAAAAACCTTCCAAATCGTCGACAGGGATCCATTGAGAGAATGAACAAGAAGAAGTAGTAACATCTGGCCTTAACTTTAAAACCGAGATCCCAATGTCTCTTTACTGTACCATGGTTACCCGGAGCCGATGCATGCCATCTAAGATTTTCGTAGATTATTAATTGATGTCCTCTCTCGACTTTTAAAAGACTTCCCAATAAAAAGAAAATATAGTTATTGCAGTCAAAATTTGTTGTGAATGGGTCTTGTATCGGTGGGCATATCAATTTCAATTTTTTCCAATGAGGTCAAAGGCTAGCACCATCGAGAAATTTGTGATTACGTAGAACCAGTCTTCTTTATGATAAAAAACATCTTCAAACCTCTCAAGCTCGTTGGTGCCATAACAAGGCACCTGTGGACCGAGTGCCAAAGCTTGGTCATCGGGCTTTGCTAGAGCCAATAATTTCTTACAACCGTAGATACAAACAGCAGTTCCATGCGAGTCATTAGAGGAGATGACAATTTTTTCGTAATAACATTTCAAAAACTTTTCGCATCTGTGCTAAATTTGTGGATGAATTTCAATATAAAAAGGTCTCGATAGAGCCATTCGAAGCAAATTCATGCCTGATCCTTATGCAATGTTCTTCAGGATGGTAAAGAAGGATGGGAGGCATATTTACAGCCTTTGTGAGGGGGTTGAAAATGCGAGGTTGTAGATCTATTTTGTCAAGTGTACGAGCCATCCATCCTTGGAG

>comp171123\_c1\_seq2

TTAGTACAAATTTTTTTAGTTTAAAAAATTTTATTAATAAAGTGCTTTAGAAAAGCAGTAAGAAAGTCATCCATGACGAAGCCTTAGTATTGCTAGTTGTTGCTTAGATGGCGGTTTTTTGTGGATTTTATTCTTAAATTTTACACATATGTTAGTAATATCATCAGAATTTAGAAATTATTAATAATCTTTAATTTTTTTAGGACAAA

>comp171129\_c1\_seq1

AATGAAAATGCGCCACGTCACCCCTACTTGGTTCCGCGGGCTCGGTGATGAGCTTGGTATTGCTCAGTACTGACTGACGTGATTGCACCTTATTGACCTCTGGATGGTAAGCTGTGCCCGGTGTCGCACAAAATAATCTTTGTAACCGACGGGCATTTACTTATGTTGTAATCTTTCCCGCATAATTGCTATCTTTTCCCTCGGCAATAGTTGCTAATGGGTAGTCGAGCGGACACATTGTTGGATACGTAAGCTTCAGATTGTCATATCTCAAAAATACTGTTGTCAGAATATTCATCTTCTCCACAATCATCTCCACACCATCCACTTCACAACGATCTCCACATCGAAGGGATGCATCAAAAATAAAGAAAATGATGGCTTCAAAAAGTCGTTTTTAATGTGTTGCCAAAAGATAAACCAATAATAGAACTTGAGAGCTAAGAAGAAGTAAAAAATGTGTTGTTGCGATGTTCAAAAATAAAGATCCAGAGAGCAAATAGTATTATGAAAACAATAGTGTGTTGCCATATGATGAAGTTGTTTATGCTGTTTTACTATCATTTAATGTCAAAGAAAGGGCTTTGCGATCTCTGAACGCATTGACCTGAAACATAAATATCCAATAAGATTCATATATGGTAATTCAAATATTAATGAGCATGACTTGCTTGACCTATACCACCCAGTTCTTGAGAGTCTCTGCTAACTCTATTATAATCCCCT

GCTCCATTA AAAAGGGCCATCGTCCTTAGAGCTTCATCTTCCCTCATGAATCGCATTACATCCACCAAGTAGATATGCTTGGCACCTTGTTTTGCAACATTGTTGAAGATCTTTTTGCGGCT  
ATGTTTCGCTTCATGCTCACTCCTAATCTGCAAAGTTGACTCGTCTCTCCACTTCTCGTGTATCTGTTTCATCTATTATCGTTAATGTTCCATGCCTTACAATTCTCATTAGTCGCTTCATATT  
CCAAGCTGATATGGTCTTCTGGTTGAGCTTGTGTAGTTGGTCCATGGTAATACCATCCTCATGCTGCAATTGTTTTCTACCAAACCTTGTCTCAAGAGATCACCAGAAAGCTTGATACTCT  
TTCTATATGAGAACACCTCAACCCAGTGGACCCACTATAGATACCCTACTGCCATAAATCACCTTCTGGTTTTGGAAGGTATAGCTGCCGCCAATGGTCAATTAGGAATCGTGGCTCCC  
ACATTTTGAAAATTTTGACCTCTGCGATCATTCGATCATCTCTTCCATTTTGTGTTGTATTTCAATGAGTGGTGGACCTGTGAGTGTCTGAATAACATACTGCTTGAAGAAAGCTTCCCTG  
AATTCGATCAAAGTATGTAATAACGTGGAAGGAGAAAGCTAGGACTTTAAGCGTAAGGGTCTTCATGAGGCGCAAGACAATGGCGACAATTAAGCAAAATAGTATTCTTGTGATATAGGA  
AAGTGCCTTGTCTCCCTCAGAATCTTCTTGTCAAAAAGTGATTGCCAAACAATCAACACTAGGCCAAGCCATATACAATTATGGACGGCATTGCGCACACTGTACACAAAATAAAGCAG  
TCGCTTATAAAGTTTAAAGTTGCGTTCAAGGAACAAGTTGATAATGCTTGTCAACCAACAAGAAAGGAGAAAACCATATTTGAGGACGAGGACGAGAACCAACAACCTTCCATAGGTGAA  
GTCCCAAATGGTCTGGTGTGCTGGATTCTGTAGATGGTGTGACTGCCAATAGTGCAACAATGAGTAGGATAAAGCCGATCAATTGTAGTATAGTCCATTTACACATTTTGTGTGATTGAAC  
TCATCAGGGAGTTCCTCGAAAGGGTCTCTATCATCAACGATTTGCTGAGAGGTCTAGATTTGGGTGGGCTAGAACGCAGCGGGAATTGGCTAGACCACGATGGGAGCTGATCAAATCTA  
TTTTGGCATCCACAACGACTTCTTTTCGTATCCCCGCCACCATTGGTAGTCGGCGAATCTATCTTTCTAGACCTTGTCTTGTCCCTTAGCAGCATATTGCTCTTTTCGGCAAAAATAACGAGTTA  
GAAGAACATTCAGAACTTTGGCACTAGCGTCCCTCACGGCAGGCCTCGCGGTGGCCGAACCTCGCCAAAGTTCGCGCCCCTCGTCATAGGTGTCAGAGTCGTACTCCTCCGACTCCGA  
CAGGGAGAGTGGGGAAGGTGC

>comp171129\_c1\_seq12

AATGAAAATGCGCCACGTCAACCCCTACTTGGTTCCGCGGCTCGGTGATGAGCTTGGTATTGCTCAGTACTGACTGACGTGATTGCACCTTATTGACCTCTGGATGGTAAGCTGTGCCCGGT  
GTCCGCACAAAATAATCTCTTGTAAACCGACGGGCATTTTACTTATGTTGTAATTCCTTTCCCGCATAATTGCTATCTTTTCCCTCGGCAATAGTTGCTAATGGGTAGTCGAGCGAGCACATTGTT  
TGGATACGTAAGCTTCAGATTGTCATATCTCAAAAATACTGTTGTGAGAATATTCATCTTCTCCACAATCATCTCCACACCATCCACTTCAACAACGATCTCCACATCGAAGGGATGCATCA  
CAAATAAGAAAATGATGGCTTCAAAAGTCGTTTTTAATGTGTTGCCAAAAGATAAACCCAATAATAGAACTTGAGAGCTAAGAAGAAGTAAAAAATGTGTTGTTGCGATGTTCAAATAA  
GAATCCAGAGAGCAAATAGTATTATGAAAACAATAGTGTGTTGCCATATGATGAAGTTTGTGTTTACTATCATTTAATGTCAAAGAAAGGGCTTTGCGATCTCTGAACGCATTG  
ACCACCCAGTCTTGAGAGTCTCCTGCTAACTCTATTATAATCCCTTGCCCCATTA AAAAGGGCCATCGTCCTTAGAGCTTCATCTTCCCTCGTGAATCGCATTACGTCCACCAAGTAGAT  
ATGCTTGGCACCTTGTTTTGCAACATTGTTGAAGATCTTTTTTGGCGGCTATGTTTCGCTTCATGCTCACTCCTAATCTGCAAAGTTGACTCGTCTCTCCACTTCTCGTGTATCTGTTTCATCT  
ATTATCGTTAATGTTCCATGCCTTACAATTCTCATTAGTCGCTTCATATTTCCAAGCTGATATGGTCTTCTGGTTGAGCTTGTGTAGTTGGTCCATGGTAATACCATCCTCATGCTGCAATTGTTT  
TCTACCAAACCTTGTCTCAAGAGATCACCAGAAAGCTTGATACTCTTTCTATATGAGAACACCTCAACCCAGTGGACCCACTATAGATACCCTACTGCCATAAATCACCTTCTGGTTT  
TGGAAGGTATAGCTGCCGCCAATGGTCAATTAGGAATCGTGGCTCCCACATTTTGAAAATTTTGCACCTCTGCGATCATTCGATCATCTCTTCCATTTTGTGTTGTATTTCAATGAGTGGTG  
GACCTGTGAGTGTCTGAATAACATACTGCTTGAAGAAAGCTTCTGAATTCGATCAAAGTATGTAATAACGTGGAAGGAGAAAGCTAGGACTTTAAGCGTAAGGGTCTTCATGAGGCGCA  
AGACAATGGCGACAATTAAGCAAAATAGTATTCTTGTGATATAGGAAAGTGCTTGTCTCCCTCAGAATCTTCTTGTCAAAAAGTGATTGCCAAACAATCAACACTAGGCCAAGCCATAT  
ACAATTATGGACGGCATTGCGCACACTGTACACAAAATAAAGCAGTCGCTTATAAAGTTTAAAGTTGCGTTCAAGGAACAAGTTGATAATGCTTGTCAACCAACAAGAAAGGAGAAAAC  
CATATTTGAGGACGAGGACGAGAACCAACAACCTTCCATAGGTGAAGTCCCAAATGGTCTGGTGTGCTGGATTCTGTAGATGGTGTGACTGCCAATAGTGCAACAATGAGTAGGATAAAG  
CCGATCAATTGTAGTATAGTCCATTTACACATTTTGTGTGATTGAACTCATCAGGGAGTTCCTCGAAAGGGTCTCTATCATCAACGATTTGCTGAGAGGTCTAGATTTGGGTGGGCTAGA  
ACGCAGCGGGAATTGGCTAGACCACGATGGGAGCTGATCAAATCTATTTGGCATCCACAACGACTTCTTTTCGTATCCCCGCCACCATTGGTAGTCGGCGAATCTATCTTTCTAGACCTT  
GTCTTGTCCCTTAGCAGCATATTGCTCTTTTCGGCAAAAATAACGAGTTAGAAGAACATTTAGAACTTTGGCACTAGCGTCCCTCACGGCAGGCCTCGCGGTGGCCGAACCTCGCCAAAGT

TCGCGCCCTCGTCATAGGTGTCAGAGTCGACTCCTCCGACTCCGACAGGGAGAGTGGGGAAGGTGC

>comp171129\_c1\_seq3

TTTATTGGAATCATCTTGATAGGCAATACGTAACCTTTCGACTGTCTGACATCCTCCATCGGTTTTCTTGAGCCCCTCCATCTCAAGATTCATATCGAGGGTCATCTCGGCACCAGATTTCTT  
TTGTTTCTTCATAAACAGTCTAATTGGCCGAGATGGAGGGTCTTGTTGATCTCCTGGGGGCTCTGGCTCTGGAAGAAAAGTCCGAGTCCCTCCTCCACTTCCCCAACATCGTTCCTA  
CCATTGTTAGGATCACTTCCTTTTGAATTCATTAATTGACTCCTTCCACACCTTGCTACCGACGACCGGGATCAGAATTCGCTCTTCATATGGATATCTTGCTTCCATCGTTCGATCTTA  
ATGTTGGCCCTCCTGATGATGGCCGGAGTTTTTCGTGACGGTTTTCCGTAGAGAATTGGTCGTTGGTCCTTCCGGTCGCCTTTCGAATGAGTTCAGGACAATAACTTCTTGTTGGAGCAATGGG  
ATTTATGAAGCGAATCCACGATCCTTCAAATATATTATCTATTGGGAACAGGAGAAAGACTTAGATGGAGAAGAACAGATTCATCCCTTTTATAAGAAAAGGATAAAGCTGTTTAATTTTC  
GTTGAAACAACCTTCAAGGTGGACCGCAGAATGAGAACCGAATG

>comp171184\_c1\_seq12

CGAATAAAAGTTCGTATTTTAGAGATTGAAAAGGTCAAAAAACACAGCGTCATTGGAACGATTTTCAACTTAAATTAAATTAAATTATCTTCTCTCTAAACAAAAATAAGGCCTCTT  
AAATAGTTGGTCAGTCTTCCGATCACCTCTCCGACAGATCAAAGCCGCTACGATCCTTCTGTTCCATGTCGCCGGCCGCATCTCTCTCTCTCTCTCTCTCTCTCTCTCTCTCTCTCTCTCTCTCT  
TTTATCTCTCTCTCCGCTGGATCAGAGATGCTAGATTCAACCGGACATGGAACGACAGCCCATGCGTGGTCCCACACGACGGCGACAAGTTCTGCCCGTGAATGCTTCCGATCCGACCC  
CGTCTGCGGCGGAGAACGGCGTGACGTAAGTTGCGGCTGCCCCGGATGCGGCTTGTGCAGGGGTGCGAGTGGCCAAGAACGGTCCCTTGCAGGTCGGCAATGGCGGAAACGGCCCTCGTA  
TCCGGAAGCCCTTCTTCTCATCCACATGTTGGCTCATCATCTCGGGTTTTCTGTCTCTATTCGGTTTTCTTCTGAGTCCGACATCTCCATTCTGATGCCGGTTTTCTTTGTTGTTTTGATG  
ACGCGTCGTGTATTCTTCAATTTTTTGTCTCAGTAAATCTTTTTTGGTTTTAATCTGTAATCTACTTGCAATGATACTGTAAATTTGGAATATAAAAAGCATGCAGCCGATATAGCCCTTC  
AGGCTTCAAACAGTTTTTTGTAGTATGTTTATTTTTCTTTCTAAAGCGAAATCAACAACCTTTCAAATTACAGCGAAGGAATAAATATATGATGTTTTTAAGCATGGAGAATTCCATGATTTATT  
AAGTTTTGAGACTAAATTCGTGGAATATGTCAAGATGATGCTGTTCCATCAGGCAACTTCTGATCTGTAAAAGGAGAATATTTGCTGTAGCAACTCTTCACTGGATGGATATAACTTG  
TTCAAGACAAACTCTGCTGGTAGATCAATGTTACTCCATTCGTTCCCTGCTCAAGATTAAGCTTGAAGCTTCTCTCTCTCGGCAGAGTTACAATCATTTCAGTGAATATTTTTCTGT  
TAAGGTCAATCTGCAATCCAAGAGCTGCTTCTTTCTTCAAGTCCGATTTATCATAATCCATGTGCGGAGCTCCAAAGCTCTGGGGCAGCACCTTTTGGAGAGAATAGAGCTTCAA  
GGCAAGTGGACCCATAAAAAATTGAGATAATTAATTAATTTGTTCAACAGATGAGTATTAATAACCGGATCCTGTATCAAATGTTAGTTTGATTGATAGCTGACAACCTGTTTAGGACGC  
GCATTGTATGGCTGTTAATCTTCCAGCATTCTAAGCTGTCTGATGTAACTGCTTCAAGTAAATGGAGATGTGTTAAATGGAGATGTGTTCAATCACATGACGAAAGATCATCCTTTTTT  
TTTCTTGGAACTGATTAACCTTCATTAATTCCTTTAAGTATTGACGAGAGCACATATTGGTTGGGAAGTTTTTCAAGTCTTCAACTCTCAGTCTTGAAGTGTTTTTGGAGATAATGATGGT  
TCTAATAATGTGGTACAAGATTGCAATTTTGTTTCCCTTTGGTGTCACTATAACCTTCAAGATCTTGGATGCCTTTTAAAGATTCTGCATCATTGTTGTGTTGCTGAAGAAATGCTCGAC  
TGAAAAGGAGACGGCAATAGCCATTAATCTCCACCAAGCAGCAGCTGCTTCAACTGTGGCTGCAATAATAGCTGATATGCTTGGAGTTATATTGCCATGTTTCTCTTGGAGCTCCTCAA  
CATCGATATTGTTGATCTGAAATCATGGAGGAATCCACAACAGGATGCAGTAAAGCAGCAATGCTTCTGCTTCTGCATGAGACTTGGGAAATGAGTTGGTGGTTAAGCAGCTCAATG  
CAGTAGAAGCATTTCATCATAAAATGAAGTTGATGGAAGCTGCCTGATGGGTTGAAGAAATGCTGGATCTTTTACATGCTTGTAGGATTAAAGGAACAGGTTAAGATCT  
ACATCTTCATCTCGGTGTTCAATAAATGATGCAGATATTCCTTACCAGAACATTTTGCACCATTAATTTGAGGTGAAACTATGTTTTGTTACCTTCTTACCTTGTAAAGTGTGTTTTGGT  
GATGTGAATGGTTCATCCATCTTCTTTAGTATTTCATACCTTCTTCTACTGGAGTGAAATTCATCTGAGGATTTGTGAAGTCCCATTCAATTCAAAACAATGCAAAAATTTCCAGTCATC  
TTTACTGACTCATCGGTCAATTGGTAAAGGCTCTGAGAAAAGTAAGCATTGTTGTTTCCACAATAAACAGAAAGCAGATGAGTTGCATTTTCCAAATGCCTGATTCATGCTTTCAACAGTTG  
CGTGTCCATTGGTTTTCTATAAACTTGCCAACATTCCATTAATACTTAGCATCCATTGCGACTTTATCGGTGCTCGCCAAGCCAAACTTATTGAACAGTTGTTACCTTTCTCTGTCAG  
GATGGATGGGATGCTTCTTTTTATGCTTGGGGGAGGGATCTCTATGCCATGAGGATGTCCAAGACACATGACACCAATCCCTTTCTGCAACTTTAAGAAGAACTTCTGTGATGACTTC

TTATCTGAACAGTAGTCTTGGTACCAACGTGCTCTTGTATCCGCTGCCATTCCCTTCCATAAAGCCCAAGAGCTGCCAAGAACTTGTTATGCTCCTCATCATTCCACCTCTCTCGCTGTTTC  
GAGATCGTATAAGGTTTCCTTGCCTGCACCTTCCCGGGTCTTTCGAAGGGTTCGCTCCATCGCTTCTCTGTTGGAAATATCTATCCATGCATTAGTCCCTCAGGAAATGAAACCATTGGAG  
ACGGAGCAAGCCAGGGCAGCCAGAGCCGCCATCTCATGACTCTATTCCGCGGCTCGCTCACTCTTTCACAGACCGCGTTCGTTGACAATAACAACCTTTCACGATGGTTACTTCAATGTTCCG  
CCATTGGTTTATAGACAAGGAGATTTCATCGAAGGGGTAATAGCCGGCGAAACGAGCTTTTGGGTTGGCAGCCAAACTCCATTCTGTCTCTGGCTCTCTCTCAAATGCACACAGACCA  
CGCAGAGATCCAATCGTACGCCACGAGAAACCTGAGCCACAATTTCT

>comp171184\_c1\_seq14

CGAATAAAAGTTCTGATTTTAGAGATTGAAAAGGTCAAAAAACCACAGCGTCATTGGAACGATTTTCAACTTAAATTAATTAATTAATTTATCTTCTCTCTAAACAAAATAAGGCGGTCCCT  
AAATAGTTGGTCACTCTCCGATCACCTCTCCGCAGAGTCAAAGCCGCTACGATCCTTCTGTTCCATGTCGCCGGCCGATCTCTCTCTCCTCTCTTTCTCCTCCTCCTCACTGTATTCC  
TTTATCTCTCCTCCGCTGGATCAGAGATGCTAGATTCAACCGGACATGGAAACGACAGCCCATGCGTGGTCCCACACGACGGCGACAAGTTCTGCCCCTGAAATGCTTCCGATCCGACCC  
CGTCTGCCGCGGAGAACGGCGTGACGACTGGTGC GGCTGCCCCGGATGCCGGCTTGTGCAGGGGTGCGAGTGGCCAAGAACGGTCCCTGCGAGGTGGCAATGGCGGAAACGGCCCTCGTA  
TCCGGCCAAGCCTTCTTCTCATCCACATTGTTGGCTCATCATTCTCGGGTTTTCTGTCTTATCGGGTTTTCTTGAGTCCGACATCTCCATTCTGATGCCGGTTTTCTTTGTGTTTTGATG  
ACGCGTCGTGATTCTTCAATTTTTTTGTCAGTAAATCTTTTTGGTTTTAACATCTGTAATCTACTTGCAATGATACTGTAAATTTGGAAATTATAAAGCATGCAGCCGATATAGCCCTTC  
AGGCTTCAAACAGTTTTTGTAGTATGTTTATTTTTCTTCTAAAGCGAAATCAACAACCTTTCAAATTACAGCGAAGGAATAAATATATGATGTTTTTAAAGCATGGAGAATTCATGATTTATT  
AAGTTTTGAGACTAAATTCGTGGAATATGTCATGAGTATGCTGTTCCATCAGGCAACTTCTGATCCTGTAAAAAGGAGAATATTTGTCTGATGCAACCTTTCACTGGATGGATATAACTTG  
TTCAAGACAACTCTGCTGGTAGATCAATGTTACTCCATTCCGTTCTCTGGTCTCAAGATTAAGCTTGAAGCTTCTTCCTCCTCGGCAGAGTTACAATCATTTTCAGTGAATATTTTTCTGT  
TAAGGTCAATCTGCAATCCAAGAGCTGCTTCTTTCTTCAGATTCAAGTCCGATTTATCATAATCCATGTGCGGAGCTCCAAAGCTCTGGGGCAGCACCTTTTGAGAGAATAGAGCTTCAAA  
GGCAAGTGGACCCTAACAAAATTGAGATAATTAATTAATTTGTTCAACAGATGAGTATTAATAACCGGATCCTGTATCAAATTGTTAGTTTTGATTGATAGCTGACAACCTGTTTAGGACGC  
GCATTGTATGGCTTGTAAATCTCCAGCATTCTAAGCTGTCTGATGTTAACTGCTTCAAGATAATGGAGATGTGTTAAATGGAGATGTGTTCAATCAGATGACGAAAGATCATCCTTTTTT  
TTTTTTGGAACCTGATTAACCTTCATTAATTCCTTTAACTATTGACGAGAGCACATATTGGTTGGGAAGTTTTTTCAGTCTTTTCAACTCTCAGTCTTTGAACCTGTTTTTGGAGATAATGATGGT  
TCTAATAATGTGGTACAAGATTGCAATTTTGTGTTTTCTTTGGTGTCACTATAACCTTCAAGATCTTTGGATGCCTTTTTTAAGATTCTGCATCATTGTTTTGTGTTGCTGAAGAAATGCTCGAC  
TGAAAAGGAGACGGCAATAGCCATTAATCTCCACCAAGCAGCAGCTGCTTCAACTGTGGCTGCAATAAATAGCTGATATGCTTGGAGTTATATTGCCATGTTTCTCTTGAGCTCCTCCAA  
CATCGATATTTGTATCTGAAATCATGGAGGAATCCACAACAGGATGCGCCAGTAATGAAGCAGCAATGCTTGCTTCTGCATGAGACTTGGGAAATGAGTTGGTGGTTAAGCAGCTCAATG  
CAGTAGAAGCATTTTCATCATAAATGAAGTTGATGGAACCTGCCTGATGGGTGGAAGAAATGCTGGATCTTTTGACATGCATTTTACTGATCTTGTAGGATTAAGGAACAGGTTAAGATCT  
ACATCTTCATCTCGGTGTTCAATAAATGATGCAGATAATCCTTACCAGAACATTTTGACCATTAATTTGAGGTGAAACTATGTTTTGTTGTTACCTTTCTCACCTTGTAAGTGTGTTTTGGT  
GATGTGAATGGTTTCATCCATCTTCTTTAGTATTTTACACTTTCTTCTACTGGAGTGAAATTCATCTGAGGATTTGTGAAGTCCCATTCATTTCAAACAATGCAAAAATTTCCAGTCATC  
TTTACTGACTCATCGGTCAATTGGTAAAGGCTCTGAGAAAAGTAAGCATTTGTTTTCCACAATAAACAGAAAGCAGATGAGTTGCATTTTCCAAATGCCTGATTCATGCTTTCAACAGTTG  
CGTGCTCCATTTGGTTTCTATAAACTTGCCAACATTCCATTAATAATCTGAAAACAGAATGTGCATATGAAAACAATATCCAAAAAAGATACGGCCTGGCATTTATACTTACCTTAGCATCC  
ATTGCGACTTTATCGGTGCTCGGCCAAGCCAACTTATTGAACAGTTGTTACCTTTTCTCGTCAGATGGATGGGATGCTTTCCTTTTATGTCTTGGGGGAGGGATCTCTATGCCATGAGG  
ATGTCCAAGACACATGACACCAATCCCTTTCTGCAACTTTAAGAAGAATCTGTGTCATGACTTCTTATCTGAACAGTAGTCTTGGTACCAACGTGCTCTTGTATCCGCTGCCATTCCCTTC  
CATAAAGCCCAAGAGCTGCCAAGAATGTTATGCTCCTCATATCCACCTCTCTCGCTGTTTCGAGATCGTATAAGGTTTTCTTGCTGCACCTTCGCCGGGTCTTTCGAAGGGTTCGT  
CTCCATCGCTTCTCTGTTGGAAATATCTATCCATGCATTAGTCCCTCAGGAAATGAAACCATTGGAGACGGAGCAAGCCAGGGCAGCCAGAGCCGCCATCTCATGACTCTATTCCGCGGCTC

GCTCACTCTTTACAGACCGCGTCGTTGACAATAACAACCTTTCACGATGGTTACTTCAATGTTTCGCCATTGGTTTATAGACAAGGAGATTCATCGAAGGGGTAATAGCCGGCGAAACGAG  
CTTTTGGGTTGGCACGCCAAACTCCATTCTGTCTCTGGCTCTCTCTCTCAAATGCACACAGACCACGCAGAGATCCAATCGTACGCCACGAGAAACCTGAGCCACAATTTCT

>comp171184\_c1\_seq2

CGAATAAAAGTTCTGATTTTGTAGAGATTGAAAAGGTCAAAAAAACCACAGCGTCATTGGAACGATTTTCAACTTAAATTAATTAATATCTTCTCTCTAAACAAAAATAAGGCGGTCTT  
AAATAGTTGGTCAGTCTTCCGATCACCTCTCCGAGAGTCAAAGCCGCTACGATCCTTCTGTTCCATGTGCGCCGGCCGATCTCTCTCTCTCTCTTCTCTCTCTCCTCCTCACTGTATTCC  
TTTATCTCTCCTCCGCTGGATCAGAGATGCTAGATTCAACCGGACATGGAACGACAGCCCATGCGTGGTCCCACACGACGGCGACAAGTTCTGCCCGTGAAATGCTTCCGATCCGACCC  
CGTCTGCGGCGAGAACGGCGTGACGTACTGGTGCGGCTGCCCGGATGCGGCTTGTGCAGGGGTGCGAGTGGCCAAGAACGGTCTTTCGAGGTCGGCAATGGCGGAAACGGCCTCGTA  
TCCGGCCAAGCCTTCTTCTCATCCACATTGTTGGCTCATCATTCTCGGGTTTTCTGTCCTATTGGTTTTCTTGTAGTCCGACATCTCCATTCTGATGCGGGTTTTCTTTGTGTTTTGATG  
ACGCGTCGTGTATTCTTCAATTTTTTGTGTCAGTAAATCTTTTTGGTTTTTAACATCTGTAATCTACTTGCAATGATACTGTAATTTGGAAATATAAAAAGCATGCAGCCGATATAGCCCTT  
AGGCTTCAAACAGTTTTGTAGTATGTTTATTTTTCTTTCTAAAGCGAAATCAACAACCTTCAAATTACAGCGAAGGAATAAATATATGATGTTTTTAAAGCATGGAGAATCCATGATTTATT  
AAGTTTTGAGACTAAATTCGTGGAATATGTCATGAGTATGCTGTTCCATCAGGCAACTTCTGATCCTGTAAAAAGGAGAATATTTTGTGTAGCAACCTCTTCACTGGATGGATATAACTTG  
TTCAAGACAAACTCTGCTGGTAGATCAATGTTTACTCCATTCGTTCTCTGGTCTCAAGATTAAGCTTGAAGCTTCTTCTCCTCGGCAGAGTTACAATCATTTTCAGTGAATATTTTTCTGT  
TAAGGTCAATCTGCAATCCAAGAGCTGCTTCTTTCTTTCAGATTCAAGTCCGATTTATCATAATCCATGTGCGGAGCTCCAAAAGCTCTGGGGCAGCACCTTTTGGAGAGAATAGAGCTTCAA  
GGCAAGTGGACCCTGTTTAGGACGCGCATTGTATGGCTGTTTAAATCTTCCAGCATTCCTAAGCTGTCTGATGTTAACTGCTTCAGTAAATGGAGATGTGTTAAATGGAGATGTGTTTCAAT  
CACATGACGAAAGATCATCTTTTTTTTTCTTGGAACCTGATTAACCTCATTAAATTCCTTTAACTATTGACGAGAGCACATATTGGTTGGGAAGTTTTTCAGTCCTTTCAACTCTCAGTTCTT  
GAACTGTTTTTTGGAGATAATGATGGTTCTAATAATGTGGTACAAGATTGCAATTTTTGTGTTTTCTTTGGTGTCACTATAACCTTCAAGATCTTTGGATGCCTTTTTAAGATTCTGCATCATTGT  
TTGTGTTGCTGAAGAAATGCTCGACTGAAAAGGAGACGGCAATAGCCATTAATCTCCACCAAGCAGCAGCTGCTTCAACTGTGGCTGCAATAATAGCTGATATGCTTGGAGTTATATTG  
CCATGTTTTCTTTGAGCTCCTCCAACATCGATATTTGTATCTGAAATCATGGAGGAATCCACAACAGGATGCGCCAGTAATGAAGCAGCAATGCTTGCTTCTGCATGAGACTTGGGAAATG  
AGTTGGTGGTTAAGCAGCTCAATGCAGTAGAAGCATTTCATCATAAAATGAAGTTGATGGAAGCTGCCTGATGGGTGGAAGAAATTGCTGGATCTTTTGACATGCATTTTACTGATCTTGT  
AGGATTAAGGAACAGGTTAAGATCTACATCTTCATCTCGGTGTTCAATAAATGATGCAGATATTCCTTACCAGAACATTTTGCACCATTAATTTGAGGTGAAACTATGTTTTGGTACCTTTC  
CTCACCTTGAAAAGTGTGTTTTGGTGATGTGAATGGTTTCATCCATCTTCTTTAGTATTTACATACCTTTCTTCTACTGGAGTGAAATTCATCTGAGGATTTGTGAAGTTCCCATTCATTTCAA  
CAAATGCAAAAATTTCCAGTCATCTTACTGACTCATCGGTCATTGGTAAAGGCTCTGAGAAAAGAGTAAGCATTGTTGTTTCCACAATAAACAGAAGCAGATGAGTTGCATTTTCAAAT  
GCCTGATTCATGCTTTCAACAGTTGCGTGCTCCATTGGTTTTCTATAAACTTGCCAACATTCATTAAAATCTGAAAACAGAATGTGCATATGAAAACAATATCCAAAAAAGATACGGCCT  
GGCATTTATACCTTACCTTAGCATCCATTGCGACTTTATCGGTGCTCGGCCAAGCCAACTTATTGAACAGTTGTTTACCTTTTCTCGTCAGATGGATGGGATGCTTTCTTTTATGTCTTG  
GGGAGGGATCTCTATGCCATGAGGATGTCCAAGACACATGACACCAATCCCTTTCTGCAACTTTAAGAAGAATCTGTGTCATGACTTCTTATCTGAACAGTAGTCTTGGTACCAACGTG  
CTCTTGATCCGCTGCCATTCCTTCCATAAAGCCAAAGAGCTGCCAAGAAGCTTGTATGCTCCTCATCATTCCACCTCTCTCGCTGTTTCGAGATCGTATAAGGTTTCTTGCCTGCACCTT  
CGCCGGTCTTTTGAAGGGGTGCTCTCCATCGCTTCTGTTGGAAATATCTATCCATGCATTAGTCTCAGGAAATGAAACCATTGGAGACGGGAGCAAGCCAGGGCAGCCAGAGCCGCC  
ATCTCATGACTCTATTCCGCGGCTCGCTCACTCTTTCACAGACCGCGTCGTTGACAATAACAACCTTTCACGATGGTTACTTCAATGTTTCGCCATTGGTTTATAGACAAGGAGATTCATCGAA  
GGGGTAATAGCCGGCGAAACGAGCTTTTTGGGTTGGCACGCCAAACTCCATTCTGTCTCTGGCTCTCTCTCTCAAATGCACACAGACCACGCAGAGATCCAATCGTACGCCACGAGAAA  
CTGAGCCACAATTTCT

>comp171184\_c1\_seq6

CGAATAAAAGTTCTGATTTTAGAGATTGAAAAGGTCAAAAAAACCACAGCGTCATTGGAACGATTTTCAACTTAAATTAAATTAAATTATCTTCTCTCTAAACAAAATAAGGCGGTCTT  
AAATAGTTGGTCAGTCTTCCGATCACCTCTCCGCAGAGTCAAAGCCGCTACGATCCTTCTGTTCCATGTGCGCCGGCCGCATCTCTCTCTCCTCTCTTCTTCTTCTCCTCCTCACTGTATCC  
TTTATCTCTCCTCCGCTGGATCAGAGATGCTAGATTCAACCGGACATGGAACGACAGCCCATGCGTGGTCCCACACGACGGCGACAAGTTCTGCCCCTGAAATGCTTCCGATCCGACCC  
CGTCTGCGGCGAGAACGGCGTGACGTACTGGTGCGGCTGCCCGATGCGGCTTGTGACAGGGGTGCGAGTGGCCAAGAACGGTCTTTCGAGGTGCGCAATGGCGGAAACGGCCTCGTA  
TCCGGCCAAGCCTTCTTCTCATCCACATTGTTGGCTCATCATTCTCGGGTTTTCTGTCTATTTCGGTTTTCTTCTGAGTCCGACATCTCCATTCTGATGCCGGTTTTCTTGTGTTTTGATG  
ACGCGTCGTGATTTCTTCAATTTTTTTGTCAGTAAATCTTTTTGGTTTTTAACATCTGTAATCTACTTGCAATGATACTGTAAATTTGGAAATTATAAAAGCATGCAGCCGATATAGCCCTTC  
AGGCTTCAAACAGTTTTTGTAGTATGTTTATTTTTCTTTCTAAAGCGAAATCAACAACCTTCAAATTACAGCGAAGGAATAAATATATGTAGTTTTTAAGCATGGAGAATCCATGATTTATT  
AAGTTTTGAGACTAAATTCGTGGAATATGTCATGAGTATGCTGTTCCATCAGGCAACTTCTGATCCTGTAAAAAGGAGAATATTTTGTGTAGCAACCTTCTCACTGGATGGATATAACTTG  
TTCAAGACAAACTCTGCTGGTAGATCAATGTTTACTCCATTCGTTCTCTGGTCTCAAGATTAAGCTTGAAGCTTCTTCCTCCTCGGCAGAGTTACAATCATTTTCAGTGAATATTTTTCTGT  
TAAGTCAATCTGCAATCCAAGAGCTGCTTCTTCTTCAGATTCAAGTCCGATTTATCATAATCCATGTGCGGAGCTCCAAGCTCTGGGGCAGCACCTTTTGAGAGAATAGAGCTTCAA  
GGCAAGTGGACCCTAACAAAAATTGAGATAATTAATTAATTTGTTCAACAGATGAGTATTAATAACCGGATCCTGTATCAAATTGTTAGTTTTGATTGATAGCTGACAACCTGTTTAGGACGC  
GCATTGTATGGCTTGTTAATCTTCCAGCATTCTTAAGCTGTCTGATGTTAACTGCTTCAGTAAATGGAGATGTGTTAAATGGAGATGTGTTTCAATCACATGACGAAAGATCATCCTTTTTT  
TTTTCTTGGAACTGATTAACCTTCAATTAATTCCTTTAACTATTGACGAGAGCACATATTGGTTGGGAAGTTTTTCAGTCTTCAAACCTCTCAGTCTTGAACGTTTTTTGAGATAATGATGGT  
TCTAATAATGTGGTACAAGATTGCAATTTGTGTTTTCTTTGGTGCTACTATAACCTTCAAGATCTTTGGATGCCTTTTTAAGATTCTGCATCATTGTTTGTGTTGCTGAAGAAATGCTCGAC  
TGAAAAGGAGACGGCAATAGCCATTAATCTCCACCAAGCAGCAGCTGCTTCAAACCTGTGGCTGCAATAATAGCTGATATGCTTGGAGTTATATTGCCATGTTTCTTCTGAGCTCCTCAA  
CATCGATATTTGTATCTGAAATCATGGAGGAATCCACAACAGGATGCGCCAGTAATGAAGCAGCAATGCTTGCTTCTGCATGAGACTTGGGAAATGAGTTGGTGGTTAAGCAGCTCAATG  
CAGTAGAAGCATTTCATCATAAAATGAAGTTGATGGAACCTGCCTGATGGGTGGAAGAAATGCTGGATCTTTTACATGCATTTTACTGATCTTGTAGGATTAAGGAACAGGTAAAGATCT  
ACATCTTCATCTCGGTGTTCAATAAATGATGCAGATATTCCTTACCAGAACATTTTGACCATTAATTTGAGGTGAAACTATGTTTGGTACCTTTCCTCACCTTGAAAGTGTGTTTTGGT  
GATGTGAATGGTTCATCCATCTTCTTTAGTATTTTACATCTTCTTACTGGAGTGAAATTCATCTGAGGATTTGTGAAGTTCCCATTCATTTCAAACAAATGCAAAAATTTCCAGTCATC  
TTTACTGACTCATCGGTCATTGGTAAAGGCTCTGAGAAAGAGTAAGCATTGTTGTTTCCACAATAAACAGAAAGCAGATGAGTTGCATTTTCCAAATGCCTGATTCATGCTTTCAACAGTTG  
CGTGCTCCATTGGTTTTCTTAGCATCCATTGCGACTTTATCGGTGCTCGGCCAAGCCAAACTTATTGAACAGTTGTTACCTTTTTCTCGTCAGATGGATGGGATGCTTTCTTTTATGTCTTG  
GGGAGGGATCTCTATGCCATGAGGATGTCCAAGACACATGACACCAATCCCTTTCTGCAACTTTAAGAAGAACTTCTGTGCATGACTTCTTATCTGAACAGTAGTCTTGGTACCAACGTG  
CTCTTGATCCGCTGCCATTCCTTCCATAAAGCCAAAGAGCTGCCAAGAACTTGTTATGCTCCTCATATTCCACCTCTCTCGCTGTTTCGAGATCGTATAAGGTTTCCTTGCCTGCACCTT  
CGCCGGTCTTTTGAAGGGGTGCTCTCCATCGCTTCTGTTGGAAATATCTATCCATGCATTAGTCTCAGGAAATGAAACCATTGGAGACGGAGCAAGCCAGGGCAGCCAGAGCCGCC  
ATCTCATGACTCTATTCCGCGGCTCGCTCACTCTTTCACAGACCGCGTCTGACAATAACAACCTTTCACGATGGTACTTCAATGTTGCCATTGGTTTATAGACAAGGAGATTCATCGAA  
GGGGTAAATAGCCGGCGAAACGAGCTTTTGGGTTGGCACGCCAAACTCCATTCTGTCTCTGGCTCTCTCTCAAATGCACACAGACCACGCAGAGATCCAATCGTACGCCACGAGAAAAC  
CTGAGCCACAATTTCT

>comp171201\_c0\_seq5

ATTATCATGGCAACTTCTTCTCTACTCTCATGTCTACTCTTCTCAATATCTTCTTTTTTGGTTTCTAATAAAGAAGAATTCTCTAGTAACACTGCGAGGGTTTTGCCGGAGAATACCATC  
TCATCAATGTGCGAGTCATTGCGCCGAGCAAATCCTACTCCATGCCTGATAAAGATTTGCTAGCAATATCTTAATGTCATGTTGAAAACCTTTTTTTTATATAAATTAATAAATAAACAAT  
TTGCATAAATTATGCTCATTTAATAGATATCACAAGCTTAAACATAATGCAAAAAAAAAGATTCATTCTTAACCACAAATTTCTAAATTCATAAATACGTACATTAACAAGCTTTACCAAT

TTTGACAGGCATGAGCCTTTGCAAGCTCAAGCTGGTCCACTAATGAGAATCGTGCTACCCCTTGGCGTGCGAGGACAACCTATCCCTTAAAAATAAATATCATCAGATCTTAAACAGG  
ACCAAGCCCGCGTTGACTACATCAACCGCCTTGACACCACCAACTCCATCGGCTTCAACCCTCTGGTGGCTCTCTTCCGCAACAGTTCAAGTAAAGAAGGTGTTTTTTGTTGATAGCT  
ACAACCTTATCGTCAACATATACCTAGGCACCCCTCCCAAGCTTCTCAATTATTTTTGACAATGGTAGCGATCTCACTTGGACCCAATGTGTTTCCTTGGCGAT

>comp171257\_c0\_seq3

GAATCTCTAATCAATTAGACAAAAAGTCTGTCAATTTATTATACTATTATTACAAAACATAATTTTTAGGAGTTTGTGTAATTAATAAAACAAACAGGAAAGAAAAAACTATAAATATAAATAA  
ATCCAGAAATGCCATAATACTTCCTTGGAAAGGGAAAAAAGTTGATACCATGCCGTCAAAAATAGATAAAGGAAAAGCGCCGTCCGCCGCCGGCATGTCTCCCGTCATCGACCGT  
GCTATATGGAAACCCCTCGCCTTCTCATCTCCCAACATCCCTTCCGCCGGCTCCGACGTCTACTACTTCTCCGAAGGCCACGCGGAGCAATGTGGCTCTCGTCTGCCGAAGTACTTATTCC  
CCTCCTTTGCCTTCCCTGCCAACCTCGCCCGTCAATCTCCATTCGGACCCCAACCGAGCAAGTCTTCGCCACATTCTCTCTACCACAGACTTCTCATCTCCGGCGACGACGACTGC  
CAAAACCTTCTCCGGCAGCGGCATCACTTCCGTCTGTTAAAATTCTGTCTCAGAGAGCGAAACCGACTGCAAGAGCAAAAGCTTCGTCTTGAAGCTTCCGCCAAGAGCTCACAGTGTGTCC  
GTAACCTGGAGGATGATGACCTGACCGTCTATGACTTGAATAATCAACGGTGGAGGTTCCGGCCACATGGTCAGAGGAAGTCTCCTATGCATGGGCTGACTAGTGGTTGGCGCCATTTCAT  
TTCAAGCAAGAAGCTTGTCTCGCCGGCGACGCGATGGTCTTCGTACGGGATGGTGACGGGATAATTTTCGTTGGCTGCCGGCGTTATGACGGCGATTTTTGCGATGTCATCGCCATGAATGA  
GGCATCTTCCAGCAGGTTTTTTCTTTTTCTTTTTCTTTTCCCATAAATGGTTCCCGACAGTAGGCTTCCAGTATATGTGGTGAAGAAGGAGGTGGTGGAAACCGCCATGAGGGTTCAGT  
GGAAGCGAGGAATGCGAGTGCTGAAGAAGTGGGAGATGGCTGATGGCTTCAGATGTTGGTTGCATGGTCTGTGAGTGCTCTCTCGCCTGAATCATTAAAACTCCATGGCGTATGCTTG  
AGGTGATTTGGGATAAAACAACCTGCGATGAAACAACCTGGAAGAGGACGATGGAAAATCCATGGGATGTTGAGCCTGTCCAAGCTCTGATTACAGAAATGCCGGAAGAAGAAGAAAT  
CCTGATTTCTGATTAACAGTTAATTAATGCTGTTAAGAATTTTTTAAACATGCACATCAGTGATATGTTATAAAAAAATTATTTTGGTTCGGGCACGAATCTCGAGGTAAAAATCAAGTTGA  
AACTTCAA

>comp171257\_c0\_seq8

GAATCTCTAATCAATTAGACAAAAAGTCTGTCAATTTATTATACTATTATTACAAAACATAATTTTTAGGAGTTTGTGTAATTAATAAAACAAACAGGAAAGAAAAAACTATAAATATAAATAA  
ATCCAGAAATGCCATAATACTTCCTTGGAAAGGGAAAAAAGTTGATACCATGCCGTCAAAAATAGATAAAGGAAAAGCGCCGTCCGCCGCCGGCATGTCTCCCGTCATCGACCGT  
GCTATATGGAAACCCCTCGCCTTCTCATCTCCCAACATCCCTTCCGCCGGCTCCGACGTCTACTACTTCTCCGAAGGCCACGCGGAGCAATGTGGCTCTCGTCTGCCGAAGTACTTATTCC  
CCTCCTTTGCCTTCCGCCGTCAATCTCCACTGTTTGTCTATTGATTTGCTCCTGTGAAGCCCTTGTTAATTTAATCTTTGTCAATTTGTGTTAATCTTATGTTTTAAAGTTTTAACTGAATAAC  
AGTTATTACTTTTAGTTAATTTTTGCATTATAACTGTACCGAAACAGTTATTCAGTTTGTAAGTTTGTCTTGTACCGTAAATTAGCCTCC

>comp171279\_c2\_seq10

CCTCTATTTTTGTTTTCTTTGTTTCAAATTTGTTTACTCCCAGCATTTCTATTCATGCTTCAAGTGTATGATTTGGGGCTCATTTGAGCTTGGATCAGTGTTTTTTTTTGATTGTTGGGT  
TCAATTTTGTGATATGCTCCATTCAGATATAACTTTGTTGATATCAAAGTTTGGATGACCCTAAATTTAAATTTGAACATTTTCATTGCAAACATTCACAAGATTCATGCATGATATGAGAC  
TGGATTTTATTGTGCTTAATGATATGAGAGGGTTAGTTATAAATTTGTCTAGAAAGAGAGGATAATGCACATCTGTACTTAAAAACCAACCCTCTATTTTTCTGTTGCACAGCATAAAAA  
AGCCTCCATGATAATTACAAGAGCATCTCTCCATTCTACCGTAAATATAAATAAAGTTTACAGGAAAAAATACAAAAATCAACATAATTTTACAAATGCATAGTAACTGCCATCTACTTTTT  
TTCATCAGCTTTTTTGTAAAAATCATAATGAGCACATTACAAAGTTTGTCTGGACCAACAAAGCAAAGCAAAGCAAAGATTACTTCAATTTCTTATTATTATGATGAGTACCAACCAATAAC  
GAGGAATTTCTATGGTTACAATGTTAATCACTTTTCAATGAGCTATAAGTAGCTTTACATAAGCTAGGAGCCCTTTTATAGCTTAGACATACAAGGCCAATATGTAATTCACTACTATCTTT  
CAAGGAATTTATATTAGAAGTTAGCATACTTATTAACACTAAAAAATTTATTAGCTCATCAATAGAACAAGAAGTGATACAAGAAGTTAGCTTTGAGATTCAGGCGTTTCATATCCCAGGG  
ATTTTTACTAGCCAGTTCCATTGATCACGGCACATCTCCTCAATTCATACTTAGCTCTCCAATTTAACTCCTGCTTAGCCTTCTCCGTTGATGCGTAGACGATTCGGCATCGCCAGGTCCG

CCTATCAGCCATGATCAAAGGGATTTTCTTTCCAGATGCCTTCTCAAATGCTGCCACCATTTCCAACACAGATGTTCCCTTTCCAGTTCTTAGATTGTAGACTTCACAGCCGATACTTTGGT  
CTTGAAAAGTTTGTAAAGAGCTGCAATATGCCATCAGCCAGATCCACAATATGAATATAGTACGAAACCCAGTTCCATCACTGGTATTATAATCGTTTCCATAAACACTAAGTGCAGGT  
CTCCTCCCAACAGCAACTTGTGTATAAAAGGCATGAGGTTGTTAGGTATTCCACGAGGATCTTACCAATATCTCCACTGGGATGAGCACCAACAGGATTAATAATCTAAGCAATATTAT  
CCTCCAATCAGAGTCTGATTTTTGTAAGTACGGCAAATATCTTCAATGATAAGCTTGGTTCGTCCATAAACGTTTCCGCGCTAGGAGAGAACTCTCCGTGCAGGGAACTTGCTTTGGC  
CATCCATAAACAGTTGCAGATGATGAAAAATGAGATTTTTGCAGTCATGAGCAGCCATCACTTCTAAGAGAGTTATTGTACCAATAAGATTGTTGTTATAATAAAGCAAAGGCTTATGGAC  
ACTTTTCGCTACAGCCTTCAAGCCAGCAAAATGAATAACAGCATCGAATTTTGTAGAAGCAAAAACAGTGTCCAATGCTTCTCTATCTCGAAGATCAACCCGTTCAAACGCGAGATTTTT  
CTTCGCGTCACCAGCAAGCTCTGCAACCCCTTGTATGGCGACCTCGGAAGAATTGTAGAGGTTGTGCAGACCCAGACGCGGAACCCCTTCTGGAGGAGCTGCAACACCCGTGTGGCTC  
CCTATGTAGCCCGCCCTCCCGTACCAATATGTTCTTATCCGCCATGAATCGGAGCAAAGAAGATATCTGCGAGACGGATAATAGAATGATGGAGGAAAGAGAAGGCGTGGAGGCAGAC  
GAAGAGAAGAAGGAGACGCAAAGGGAGAAAGAGTGC

>comp171298\_c0\_seq3

CAACAATGTCGACTCAGGGGTTCTTTTACTTGGAAAGTAAAAGCAATGAAATTTGCCTACAAGAACTGAGAACAATGTCAATGTCGACTCGGGGGTTCTTTTACTTGGTAGAAGTAAAAG  
CAATGAAATTTCTCCACAAGAACTGAGAACAATATCAATGTCGACTCAGGAGCTCTTTTACTTGGAAAGTAAAAGCATTGAAATTTCCCAAGTGAATCTCCAGAACTTCCGGATGA  
TGAAATAATTCATGCGAGATTTTTGAATCGTAGCAAGAACAAGGGAAAGGTAAATAAACCGAATGCTTCATCAATGTTGAAACCCACTCATGTAAAAGCAACATTGTCAAACCTGAAGAA  
CTCGTCAGCTTCCACCGAAGCTGATTCAAGAAGAAACACAAATATCTCTGAGGAGAAGGTTCTGTCAAACCCGAAGGAACCAACTACATCGACAGCACTCGAAGTGATCAAACCAAAG  
AAGATAGTTATTAGGAAACAATCTGCATCTCCTAAGCTTCAAAGTAATAATCAAATGCTTCATTTCTTCCAGAAAGACAAGTGGTTCTGTTACTCCTGCAATATATTTGAATGTGAGGAC  
TCCAATGATGATGTCAATACCTCAATTGAATACTTCTAGAAGCATAAATGGTAGGATGAATCGGGAGGAAAAATGCCTAAAAACTAATGAGATGCCTGAAGATTGGGAGACGAAGTTATTG  
AAGCCTCAAGGGACTTATATTTCTTCTACTATACCTGACCATAGTAGTGTGAGCTTGAAGGCAAGAAAATCCAGAAGGCATGTAATACTGAAGAAATCTGGTAAAACAAAAGATGATAATG  
GTGATTTCAATGAGAAAATATTGAAAGTTGTTGAAACAAAAAATATGGCAAAGGTCTGGAACCTCATGATAAATTAAGCAAGGTACTTGACGGACATGCTTCTAATTCTGCTGTTGGTGA  
AGCTAGTGAACATTCAAAGGACAAAACCTGAGGAAATTTAAACGTATTTCTTCCAAAGAAGAAGACAAGAGACCGGCAAGAAGAACTCCAGCTGTTTCCAGCAATCAGATGGCAGCTCT  
TCCTCTCCTTATAAGTTGAAATTTAAGAGGGGCAAAGTGATTGAACTCCGAACAGCTGACAGTGTGGTCCCTAGAAGGCTTAAATTCAGGAGAGGGAGAGTCCTTGGTGAGAATCCCATT  
GGTGAAGTTGCGAAGAGAAGCTTCAGGAGGAGGAGACATAGGAGACTCCAATGAACATAAGTCAGAAGCTCATGCTGTCATGTTGAAAGAAAGCCAATCTAGAATCTAAAGTTGGCA  
TGTTTAAAGTATGAAGATGCACAGGGAAAGAAGGAGATTCGAGCTCTTTTCAATCATGTAATTGAGGAAACAGCAAGCAAGCTTGTGAAACCAGGAAGAGTAAGGTGAAAGCCTTGGT  
GGGCGCTTTCGAGACCGTCATTTGCTCCAGGAAGCCAAATCAGCATCACTGCTATGACGTGCCATTAGTCGCATTCCTGTGCTAAGCTGCTTGGCGGTACTACTACTTAATGCTAAGCAT  
ACTGTAAAACAGCTCTCATTGTAGCAAATAAGAGTGGAACTGTATAACGCAATGGTCTGGGAAGGCTTGTTCATATTATTTTTATTAATTTGCTTCGAATTTTCATAGAGAACTTGTACAA  
TCCTTCTTGGTTATGAAATGTAATCGTGTGGTATGGTGTAAAGTAAAGTTATCCTTGTTCATTGTGAAATCTGAATTATGAATTATCAGTATGGTGAAGTTTATGCAAGATGCGATAAACAAA  
CCTGCTCTTCTGACGGGCCATTCAAATGTGTTGGGGAAGTAAAACACATAGTGGTGTGGAAACTTGGCAGGAAGAACTCCGCTCGATCGCTGCAACTGAAGACCTGCACAGAAAACCTG  
AAGACAAGGCAATTGAACAGGGAAAAGTAGTGTATATTCTATTGTGTTCTCTCTCTCTTACAGCCTATATGTATATGACTTAAACGTATAAAAGAAAACATTATTAATGATAGCTAACAGA  
AAGTAGTGACC

>comp171322\_c0\_seq1

AGAAAGCTATGCCAAACAAAACCTTATTTACTTCAATTTTCTACTCACACAATCTTAATAATAAGTTTGATGCCTAAACCCCTAAACGAATAAGCCAACCTTAAACATCTTTAGGATATGCCTT  
TGGGGCTAGCCTAGTCATTGGCTTAGCGACTAGAGGCACAGCTCTACGAAGAGTGAGCCATAAGCCTCTTCCATATTGAGCTTCTCGACTATTTGTCCGTGACCAAACCCCAATCGAA



GGCATGAATCAACGTCGCGGTCATGAATTGAACCATTCTCAAACCCAAACTCAATCCTGCACAAATTCTCCGCCAGCACCAAACGGAATGAGCTCAAAATCATTCCCTTTGAGATCGAC  
TCTTTCATGTAGACCGCCATAAGAAAACGCTCAGGTTGAAAAGCTAGTGGCTCGTCGGGCCACATGGATGGGTCCCGTGCAATAGACCAGACATTAACCAAGAGAGTGGAACCTTTAG  
GAATCAAGTAGCCATCGATGTCGCAATCCTTTGGAAGCAATGCGTGGAAGGGAGAGTGGGGTTGAGGGATGGAGGCGGAAGGTCTCTTTGACAACGGCTTTGGAGGAAGGGAAGGTTGG  
GGAGATCAGACTCAGAGACGAGCCGATCGGATCCGACAACCGAGTCGAGCTCAATTTGGGCTTGCTTTAGAAGATTTGGGTGACGGATTAGCTCGGCCAAAGCCCATTCTACTGTGCTC  
GACGTTGTGTCAGTTCGGGCTGTAAAAAGATTTCAGTAGGAGAGCCTTGATGTCTGTATCTGTGAGCTTGATTCTTCTCGACCAGCTTCTCTTTTAGTCCAATGAGTATACTGAGCATATC  
GCTGCGCTTTCCATCAGAATCAGCTTTCTCTTGCTTCTCTATGCTCAGCAATTATTCCATCGAAGAATTCATCAAATCTTCCATGCAACTTCTTCATCTTCTTACCCTCCCTGTAAATCA  
AGCCATGCCAAGCCGGGGACAAAATCCCCAATGTTAAAAACTCCGGCGAGCCTCAAAGCTCCACCACCATCTCTTAAACTCTCCGCCCTTTTCCCAAACACCCGCCGCCAAC  
CGTCGCACGTGCCAGCGCATTGGTCACACACGTGTTACCTCCCCACCAACATCTACAGCCTCTCAAACCTTCTTCGCTAACTCCCGCACGAGCTCATCCACCTCCCCTCGCCGCACGTC  
CCGAAAATCTTCCATCGCTTTTCGCGGAAAATAGATGCAAGGCGCATAGACGCCTCAGCATGCGCCACCGCGCACCATACGGTGCGAATACGAGATCCTGGTAGTTGTATGCGACGTGCTC  
AGCGCCGGAGTTGGGCGGCCGGTTGCTGAAATTTGCGTCTGTGTGCGGAGAAATTGTGAAGCGGCGGGCGGAGGAGGCCACGACTACGTTGACGGAGCCGAAACGGAGGCTGAC  
GATCGGGCCGAATGTTTTGGAAGGGCGTGTAAGGTTTGGTGAGGTTTGGGGCCAGTTGCGGAAGGTTCCCGATGATCGGCCAACCTTTCCGGCCCCGGCGGCAGACGGCGGTGATTGC  
CGGAGAGGAGGCGGAGGAAAGCGAGGATGAAAGTGACGAAGAGGAAGACAAAGATCAGTAAG

>comp171339\_c0\_seq1

TCAAGCATTGCACTGCTTTTACAGCGTTCTCCTCATATTTCAAGTCTCTAGGTTGTCAACATAATTACTCCAAATTTGTCTAGGCCAAAACATGCGGAGACTTGGGTATCTCATTATATCTT  
CCAAGTAATCCCTTATTATATTTGTTTTCTGGAGAAAACAAGCCATTGAATTTGCAAATGAATTGGGAAGTGCATTTTCTAATTTAGAAGCATAAAAAAGTTTAGATAGTCCCAATCCA  
AGACCTGCTACATAATGGCAATATTCATCATAATGTCATCAATTTGTATCCACCTCCTTGCATATAAATTTCCGCATTCCTGCACCCATTCTCATGGTAATATTTTAAATGCCTCTTGGTAGCTTTT  
GTGCAGCTCTGTGAAGGCATCTGAAACAAAGTGGAACTTATCCATCAGGACTTTGTAAGCATTTCATGCCACATGAGAAATGCCAATCACGGTCATTTAAATGCTCATGAAATCCTAACAA  
AATTGGCACCTTAGTGTCAATAGGAATTCTCATATCCTCAATAGTATCAAGGGCTCTAAGAACCAATAGAAGATGCAAACAGCATTCCGGAGCTCGGGTTTGGAGCTGCTTGATTACA  
AGGAAGAAGCTACGAGAGACCTTTTGCAGCATCGAGTACGCGAATCCCCAGTGAGACTCCGCCGGAATCTGCCGTTTTATCTTGTTCGCTCCACCTTCATCTTCATAAGAGGCATCAAA  
TCTCCGGATGCTCCAGAACCGCCTTCACTATCCCCAGTCTCCCACTATCTTCATCATCCCCATGGTTTTCCCTCTCTATCTCCCTCCCTTCTCCTCTTAGAGTTAAAGGGCCGGTGGCTGG  
TGGCTGGTGGCTGGTGCTCAGATCAAGGGAGGCTATTTATTGCGACGCTTCTACAGTTTCTACTCCTCGCAGCACGGTGTGGCTCGCCAAGTGGCATCAAGGGTTTACCGGCAACGCGGTG  
GGAAGCAGCATGATCGCCACATTGTGAGGAAAGCCACACAAATTGAAACGATAGTAGGATCGCATTGAAGCGTGGCCAAACGCTCTCTCCCGCTAGCGGCGTGATTCCGGTTTATAGTTT  
AATATTAATAAATTTGAATTAGTTCGTTTTATATATTTTATAGCAAATGTAATATTGAGTAATCATTTAAATTTTATTTTATATTTTAAACAAAATTAAT

>comp171404\_c2\_seq5

TTGTATGAATTTTGTGTAATTTCTAATTTCTCCACAGCTTTTTCTTCTTATATAATATTTTTGTCAAATTCAGGGACAATACAACCTATGAAAATTTGAAGGAATTTTGGAGATGGAATCTT  
CGCAGTGGATGGTGAATAATGGCATCATCAGAGGAAATGGCGGGCTACGAGTTCTCAACAAGAGCTTTGAGGAACTATAGTACCAGTATTTTTAAACAAATGCAATAAAAATTTGCCGA  
TATCATTTTTGATAAAGCAAATCTGATTTGCCCTTCGATATTCAGGAACTGTTTATGAGTTCAACAATGGACTCAATCTTCAAATTTGGGTTTGGTTTTGACCTAATGAACTTGGATGGGTC  
TGTTGATGGGATTAATTCACAAAAGCTTTTCGATAACGCAAGTGTTCATTACAAGCCGGTATGTTGATGTTTTCTGGAAATTTAAAAGGTTTTTCAACATTGGCTATGAGGCGCAACTCA  
AGAAGGACATCAACGTTATTAATGACTTCATATACGACTTGATTCTGTGCAAAAAAAGAGAATATGACTAATGCCAAAAACAATTTGGAAAAGAAAGAAGACATCATCTCACGATTTATGGT  
TGAAATGGAGCATGATCCAGAAAATATAACTTATGAATATTTGAGAGATATCGCCCTCAACTTTGTTATAGCTGGCAAAGACACCACAGCTGGAACACTGTCTTGGTTCATATATTTGTTGT  
GTAAGCATCCCTACGTGCAAGAAGAAATTTATCAAGAAGTGAAGAAGCTACCCGAGCAGGACAAGATATTTGTATCAATGAATTCGTTGAGAAAATAACTGTAGAGTCTATTGATAAAA

TGAAGTACCTTCATGCTGCATTATCCGAAACCCTCAGGTTGTACCCATCAGTACCATTGAATCAAAGACCTGCTTCTCTGATGACACTTTACCTGATGGGTTTAATGTTAATCGAGGAGAC  
GTTGTGTTCTACATGCCTTATCCCATGGGTAGAATGGAAATATTATGGGGAGATGATGCTGAAAATTTTCAACCAGAGAGATGGCTAGATGATGATGGATCAGTTCGAAATGAAAGTCCTTT  
TAAGTTTACAGCATTCCAGGTAAGTAAAGTAAAAAATTAACCTTGCTGTCAAATGTTGATCAATTTAAGTTTTTTTTTTTTTGAATCTAATGTTTTACATCTTTTATTTAACAAAATGTACTTTA  
TATTAGTTTAAACATTGTGTTTCGTTGAAGCTTAATCAACTTTAATTTGTATTGGACGCTTACCATTCAAACCT

>comp171426\_c2\_seq10

AATTCATGCCCCGATCAAGAATTTTTATTTTATTTTATGATATATAAAACAAATATTTCAAATTGCATTAGAGCTTCTATGGTCTATCTCCTTGGAGAGCCAATTATCATATAAATTGTTTAGGAA  
AGATAACATCACATCAAATGCTAAGCACGTAATATACTAATATAATAATCACGGTATGAATGTGTATAAAGTGTAATCTAACCACAACACGTCAGCTACCAGATACCAATTATGATCGTTGAT  
TGAAATCTCAAGAAAGTGAGAAGCCATGCAGGCGATTCCAGATTTCAAAGCACGTAACCTGTGAAAACCTTCTGGACATCGGCAGCACAAAGAAACATTAAGGTTGATTAGCATTCTG  
CACTGTGTTTTTGAGTGGACATGATCAAGAAAAGAATTTGAGGGTGCAGCAATGACGGATACCAAATTGATCTAGCTTTTGTCTCAACCCTCCAGTAGCAGCGGAAAATTTTTTTGTAT  
AAACGATCAACTTGAATGCACAATTGAGTTGGCATCACAACTGGCAGTATTCTGTTGGTAAGGGCCCTTGCAATCAACCCATCTGTAAGCCAGCCACATTGTAAACCATCACGCCTGATG  
TAAATGAACTCCCTCTGTATATAATCTAAGGAAATCTGCAGCCTACCCCTGAAGTACACTCATCAGCAATGCTTTTTGGTGCTATTCCCACATTTTGTCTCAAGCCAGTAAAGATAGTTGAC  
ATGGAAGAGAGATTTGAGCATGTCTTCTGGTGAAGAGTCTTCTTTAAGTATTACACGGAACTTTTGTTCCTTCTAAAAGTAAATAGCGCTCATCTCTAAACAGATCAAAAAGAGCAAAT  
GCATCTTCTTTCTGCTAATAGCATCGCTAAGCTTAGATCCCAGCTCAAGTCTGCGGCATATATTACCCGCAGCATCTATGGCCCTCAGTGGACAAAAACTTGATGCGGCCTGCAAAGGGA  
AGGGAAAATGGAAGTAAAAATGTTGAGGCACCCAGCATTCCAAAATGAGCTTCAAATATCAAATTACATTTGATCAAATCTGCAGCATGCAAATCTTACCTTGGTGTATTGGAACATCAT  
TTTTTTCTTTACGGCTTAGAAACCAGAGAGCATATGCTTCAAGCATATTTGATTATCAACGAAA

>comp171448\_c1\_seq17

TCCACGCTTCTGTAGCATCCTGGTGGCTGATAACTCATGGCGACAGAAGCTACAATGGGTTCACAAAGTGAACCTTTGATGAACACATTGTCCTCGCCGATCCTGGTCTTAAAGCCGC  
TGCGGCTGCCAGCGACCCTACTGTGCGGTGATTTATATGTCGAAAATTACACCGCTGGTCTCTGTAGTTCCCAACTCGACTACTCTCGGCCGCTTGGGAAGTTCATATCCTTGCCATACGAA  
CGTCGGAGGCAGCCAGCGTAGCCGTCTCCACCTCAATCACTCCATCGGTGACGGGACCTCCTTTCATGTGCTCTTACATGCCTGCACTCGCCGCACCTCTGACCCTGAGTCCCTTCCATC  
CCTTCTTAAAACACGGCGGGCCCCATACCTGTAGCTGCCAGCTTTGGCCCATCATTTTCCTATGCTGGATCTGGAATTTCTTATCTACGTGTGGAATACCCTTGTGTAAGTTATCCTCTT  
TGCTCTCCACCACCATCTATTTGAAGGACTCCAAAATACTGAATATGGGGAAAGAGGGCATCGAATATCGATCTAGGGGATTGTCCACTGCACTCTTTGTCTTGATGACATTATAGCCATAA  
AGAACACCATTGGTTGTACAATAAACGATGTTTTGGTTGGAGCCACTTCTGCCGCTCTATTTTCGTTACCTTAGCAGGAAGTACGGTGGCCTTCTACCCAAACATTTGCTAATAAGAACTAC  
TCTGATCGTCAATATTCGGCGAATATCAGGAATTAATGATTTAGCATATATGATGAAGAAAGGCAGTGAAGCGAAGTGGGGTAATCGGATTGGCTCTTTTTGCTTCGGTTACCTGTAATGA  
AGTGCAGGATCCATTGGACTATGCAAGGAATGTTGCAGCAAACACAGAAAAGAAAAGAAATCATGGACAGCGACACTTTCTTATAAATCCTATGTCTTGATTTCTAAGTGTCTGGGCA  
CTAAGGTACGCTGGATATTATCATCTTTACTGAAGCACACCAATTTTTCTGAAATTTGGCTCAATATGTAACACATATAATCTTAAATTACACAAAATTTCAAATATTTGCCAGATTTTT  
TTTTTTTGCTTTTTGAAAAGAAGCACTCTCGATTCTTATAAACAATTATTTTTTACAAGAGAAGATAGTCTTGATTTAATTTGAAATATGTGTATGTTTTAACTTGGTAAAATAATTTCTATG  
GATTTTACTCAAATCAAAGAGTGAATGCAATATTTAATCCAAGCCAAATTCAACCTTTATATGCCTTTCTTATTCGCTATTTAGTTTGTGCTCAAATGAAACACAAATTAACCAAGCCCTCCC  
AAAGCAAACGACCCTTACTCGGCCTATTTATTTAGAAAAAATCAAAAAAATAAAGAAATAAAGTTCTTTGATCCAAAAATAAATAAATAACTTTTTATATAGATATTTATTTTA  
CATCATTTTTTATAAATAAATAAATTGATTAATAAAAAATAGGTTATTACAGTCTACATAAATAATTTAAATTTAGAACTTTGCCTTGTAACTCTATGATTTCAAATTTTGAATTAATAAAA  
TTAGATTATTTACTACTTTCTTCTGAATTCATAACAGGTTGCGACCGTACTTTTACACAGGATTGCATCTAATGTAACATTATGTTTCTCAAATGTTATTGGGCAATAGAGGAAGTTAGCTTC  
TGTGGCTCACCAATTGATCTATATTGCTCCCAGTGTCTAGTAATTGTGAGCCGTTCTGATCCATGTTCAAAGTTATTTGAACAAGATAAAGGTCGTTGTTCAAGTGGATGAGCAAGCAAT

TCCAGATCCTCACAGGTTTCTGGATGACATAACTCACTCAGTACAAATCATGAAGGATGCAGCTGCCTCCGCAAATTGAATAGTCAAATTGTAATATTTAAATTTTCGTTATTTCCGAAATAC  
TTTTAATTCTGAACTTGTGGATCAGCTAGATTTGTAATACTTATAAAAACCATGCTCTACATGGTGCTGTTAGCGAATGGTAATGTTAATTCTTATAAACTCCGATGTAGTTGTATATTTGCA  
GCTTATTCATCTTCCCCTATCTTCAGAAGGTCCCAATTGTTCTCTCAAATCTTAGAAGGTTCCCTTTTTAATATAGAAATGCTGATTATTTTATT

>comp171448\_c1\_seq4

TCCACGCTTCTGTAGCATCCTGGTGGCTGATAACTCATGGCGACAGAAGCTACAATGGGTTCCAACCAAAGTGAACCTTTGATGAACACATTGTCCTCGCCGATCCTGGTCCTAAAGCCGC  
TGCGGCTGCCAGCGACCCTACTGTCGGTGATTTATATGTCGAAAATTACACCGCTGGTCTCTGTAGTTCCCAACTCGACTACTCTCGGCCGCCTTGGGAAGTTCATATCCTTGCCATACGAA  
CGTCGGAGGCAGCCAGCGTAGCCGTCCTCCACCTCAATCACTCCATCGGTGACGGGACCTCCTTCATGTCGCTCTTACATGCCTGCACTCGCCGCACCTCTGACCCTGAGTCCCTTCCATC  
CCTTCCTAAAACACGGCGGCGCCCCATACCTGTAGCTGCCAGCTTTGGCCCCATCATTTTCCTATGCTGGATCTGGAATTTTCTTATCTACGTGTGGAATACCCTTGTGAAGTTATCCTCTT  
TGCTCCACCACCATCTATTTGAAGGACTCCAAAATACTGAATATGGGGAAAGAGGGCATCGAATATCGATCTAGGCGGATTGTCCACTGCACTCTTTGTCTTGATGACATTATAGCCATAA  
AGAACACCATTTGGTTGTGTAATGCTTTTTAACTCACGTCTCTATGAGTAAACCTTTATGCTTTTCTACAGTGCACGCTAACAGTTTGATTAAATCCCTATAGACAATAAACGATGTTTTGGTT  
GGAGCCACTTCTGCCGCTCTATTTTCGTTACCTTAGCAGGAAGTACGGTGGCCTTCTACCCAAACATTTGCTAATAAGAAGTACTCTGATCGTCAATATTCGGCGAATATCAGGAATTAATGA  
TTTAGCATATATGATGAAGAAAGGCAGTGAAGCGAAGTGGGGTAATCGGATTGGCTCTTTTTTGTCTCGGTTACCTGTAATGAAGTGCAGGATCCATTGGACTATGCAAGGAATGTTGCA  
GCAAACACAGAAAAGAAAAGAAATCATGGACAGCGACACTTTCTTATAAATCCTATGCTTGATTTCTAAGTGTCTGGGCACTAAGGTACGCTGGATATTATTCATCTTTACTGAAGCAC  
ACCATTTTTTCTGAAATTTTGGCTCAATATGTAACACATATAATCTTAAATTACACAAAATTTCAAATATTTTGCAGATTTTTTTTTTTGCTTTTTGAAAAGAAGACACTCTCGATTCTT  
ATAACAATTATTTTTTACAAGAGAAGATAGTCTTGTATTATATTGAAATATGTGTATGTTTTAACTTGGTAAAATAATTTCCCTATGGATTTTACTCAAATCAAAGAGTGAATGCAATATTTAAT  
CCAAGCCAAATCAACCTTTATATGCCTTTCTTATTCGCTATTTAGTTTGTCTGCAAATGAAACACAAATTAACCAAGCCCTCCCAAAGCAAAAACGACCCTTACTCGGCCATTTATTTTAG  
AAAAAATCAAAAAAACAAGAATAAAAGTTCTTTGATCCAAAATAAATAAATTACTTTTTATATAGATATTTTATTTTACATCATTTTTTATTAATAAAATAATTGATTAATAAAAA  
ATAGGTTATTACAGTCTACATAAATATTATTTAAATTTAGAAACTTTGCCTTGTTAACTCTATGATTCAAATTTTGAATTAATAAATTAGATTATTTTACTACTTTCTTCTGAATTCATAACAGGT  
TGCGACCGTACTTTTACACAGGATTGCATCTAATGTAACATTATGTTTTCTCAAATGTTATTTGGGCCAATAGAGGAAGTTAGCTTCTGTGGCTCACCATTGATCTATATTGCTCCCAGTGTTTC  
TAGTAATTGTGAGCCGTTTCTGATCCATGTTCAAAGTTATTTGAACAAGATAAAGGTCGTTGTTCAAAGTGGATGAGCAAGCAATTCAGATCCTCACAGGTTTCTGGATGACATAACTCAC  
TCAGTACAAATCATGAAGGATGCAGCTGCCTCCGCAAATGAATAGTCAAATTTGTAATATTTAAATTTTCGTTATTTCCGAAATACTTTTAAATCTGAACTTGTGGATCAGCTAGATTTGTAAT  
ACTTATAAAAACCATGCTCTACATGGTGTCTGTTAGCGAATGGTAATGTTTAAATCTTATAAACTCCGATGTAGTTGTATATTTGCAGCTTATTCATCTTCCCCTATCTTCAGAAGGTCCCAAT  
TGTTCTCTCAAATCTTAGAAGGTTCCCTTTTTAATATAGAAATGCTGATTATTTTATT

>comp171448\_c1\_seq5

TCCACGCTTCTGTAGCATCCTGGTGGCTGATAACTCATGGCGACAGAAGCTACAATGGGTTCCAACCAAAGTGAACCTTTGATGAACACATTGTCCTCGCCGATCCTGGTCCTAAAGCCGC  
TGCGGCTGCCAGCGACCCTACTGTCGGTGATTTATATGTCGAAAATTACACCGCTGGTCTCTGTAGTTCCCAACTCGACTACTCTCGGCCGCCTTGGGAAGTTCATATCCTTGCCATACGAA  
CGTCGGAGGCAGCCAGCGTAGCCGTCCTCCACCTCAATCACTCCATCGGTGACGGGACCTCCTTCATGTCGCTCTTACATGCCTGCACTCGCCGCACCTCTGACCCTGAGTCCCTTCCATC  
CCTTCCTAAAACACGGCGGCGCCCCATACCTGTAGCTGCCAGCTTTGGCCCCATCATTTTCCTATGCTGGATCTGGAATTTTCTTATCTACGTGTGGAATACCCTTGTGAAGTTATCCTCTT  
TGCTCCACCACCATCTATTTGAAGGACTCCAAAATACTGAATATGGGGAAAGAGGGCATCGAATATCGATCTAGGCGGATTGTCCACTGCACTCTTTGTCTTGATGACATTATAGCCATAA  
AGAACACCATTTGGTTGTGTAATGCTTTTTAACTCACGTCTCTATGAGTAAACCTTTATGCTTTTCTACAGTGCACGCTAACAGTTTGATTAAATCCCTATAGACAATAAACGATGTTTTGGTT  
GGAGCCACTTCTGCCGCTCTATTTTCGTTACCTTAGCAGGAAGTACGGTGGCCTTCTACCCAAACATTTGCTAATAAGAAGTACTCTGATCGTCAATATTCGGCGAATATCAGGAATTAATGT

GAGGGGAGCACAAATTATTTGTTTTATTTTAATTGTTTTATAGAAATAGTTATTATTGTTATTCTGTATATTATGGTGAATTGCGAGCAGGATTTAGCATATATGATGAAGAAAGGCAGTGAA  
GCCAAGTGGGGTAATCGGATTGGCTCTTTTTGCTTCGGTTACCTGTAATGAAGTGCAGGATCCATTGGACTATGCAAGGAATGTTGCAGCAAACACAGAAAAGAAAAAGAAATCATG  
GACAGCGACACTTTCTTATAAATCCTATGTCTTGATTCTAAGTGTCTGGGCACTAAGGTACGCTGGATATTATTCATCTTTACTGAAGCACACCATTTTTCTGAAATTTTGGCTCAATATG  
TAACACATATAATCTTAAATTACACAAAATTTCAAATATTTTGCCAGATTTTTTTTTTTTGGCTTTTTGAAAAGAAGACTCTCGATTCTTATAAACAATTATTTTTTACAAGAGAAGATAGT  
CTTGTATTATATTGAAATATGTGTATGTTTTAACTTGGTAAAATAATTTCCATGGATTTTACTCAAATCAAAGAGTGAATGCAATATTTAATCCAAGCCAAATTCAACCTTTATATGCCTTTCT  
TATTCGTCTATTTAGTTTGTGCAAATGAAACACAAATTAACCAAGCCCTCCCAAAGCAAAACGACCCTTACTCGGCCTATTTATTTTAGAAAAAATCAAAAAAAAAAACAAAGAATAA  
AAGTTCTTTGATCCAAAAATAAATAAATTACTTTTTATATAGATATTTATTTTACATCATTTTTTATTAATAAAATAATTGATTAATAAAAAATAGGTTATTACAGTCTACATAAATATTATTTA  
AATTTAGAACTTTGCCTTGTAACTCTATGATTCAAATTTTGAATTAATAAATTAGATTATTTACACTTTCTTCTGAATTCATAACAGGTTGCGACCGTACTTTTACACAGGATTGCATCT  
AATGTAACATTATGTTTCTCAAATGTTATTGGCCAATAGAGGAAGTTAGCTTCTGTGGCTCACCATTTGATCTATATTGCTCCCAGTGTCTTAGTAATTGTGAGCCGTTCTGATCCATGTTT  
AAAGTTATTTGAACAAGATAAAGGTGCTTGTCAAGTGGATGAGCAAGCAATTCCAGATCCTCACAGGTTTCTGGATGACATAACTCACTCAGTACAAATCATGAAGGATGCAGCTGCCT  
CCGCAAATTGAATAGTCAAATTGTAATATTTAAATTTCTGTTATTTCCGAAATACTTTTAATTCTGAACTTGTGGATCAGCTAGATTTGTAATACTTATAAAAACCATGCTCTACATGGTGTGT  
TA

>comp171453\_c0\_seq6

CCATTA AAAACGTTTCGAGCTCTCCACCTTTCAAATCAAACGGCAGCTCCTCAGGTCTAAAAATAGCATTGGAAGCTCCACATCTTTTGTCTATAAAAACACGCCAATCTCTTGCCTCTGCACA  
TCGAAGGAGCGCTCAATTTTCCAGGCTAGCTCGCAACTTCGATCCTGCAAAGGCTAGCCTCGGGACCTTCCATTCATGTCTCCCTAATCTCTCTTCTCAATAACAACAGAGCAAACCTCAA  
CAACACCAAGCAGCAATGTCGTCGATGGATAAATCTGGCGTAACACTCGCCGTTGTTCTATTTCATCGCCTTCATCTCCGCCGGCGCTGAGGACCCGTATCTGTACTTCACATGGACGGTCA  
GCTACGGCACCATCTTCCCCTTCGGGGTCCCCAACAGGTCATCATGATTAATAACCAGTTCCCCGGCCCCGTCACTGCACTGCAACCAACAATATCGTTCGTCACAGTCTTCAACCA  
ACTGGACGAGCCTTTCTCTCTCATGGAACGGCATCCAGCAGCGCAAGAACTCGTGGCAGGACGGAATGCCGGGCACCAACTGCCCAATCCC GCCGGGCCAAA ACTTCACCTATCACT  
GGCAAGCGAAGGACCAGATCGGCAGCTTCTATTACTACCCAGCATTGGCATGCAGAAGGCCGCCGGTGGGTACGGTCCAATCCGCGTGCACAGTCCGCTTCTCATAACCCGTTCCATTTG  
ATCCACCCGGCTGATGAGTTCGACGTGCTAATCTCCGACTGGTACGGAATCAGCCACAAGACCCTCACTCGTTTGTCTGACTCCGGCCGCCACCTAACACGCGCTCGCGGCGTGTATCA  
ACGGCGCCGCGTCCGCAAGCTCGGTGATGCTCCCATGTTCTTTCTGGAGGCTGGGAAGGTCTACCGCTTCCGCGTGTGCAACGTCGGGCTGAAGGCTTCGCTCAACTTCAGGATTCAG  
GGCACACGCTAAAGCTAGTAGAGATCGACGGCAGCCACACTATGCAAAATGTTTACGACTCGTTGGACGTCCACGCCGGCCAATGCTACTCCGTCCTCGTCACAGCTGATCAATCGCCG  
CGGACTACTTCCCTCGTCGCTCCACCCGGTTTCAAAAAACCGTGCAGACGGCAACTGCTATCATCCGCTACAGTGGAAAGCAGCGTTCCGGCAACCCCGACCTCCCTCCGGCACCGAC  
CACCTGGGCTTGGTCGCTCAACCAATGGCGCTCTTTCCGTTGGAATCTCACCGCCAGCGCGGCCCGGCCAACCCACAGGGCTCATACTACGGACAGATCAACATCACCCGCACCA  
TCAAGCTCGCCAGCTCCACATCCGCCGTCGACGGAAGCTTCGCTTTGCGCTCAACGGCGTGTCTCACACCGACCCACCGTCCGCTTAAGCTCGCTGAGTATTTCCGGATCAATGGTA  
CTGTTTTTAAATACAACCTGATAACCGACGAGCCACCCGGCTACCCGGCGCGCTGTGACCATAGCTCCGAACGTGATCACGGCGGAGTTCAGGACGTTTATTGAGATCATACTTGAGAACC  
CGGAGCAGAGCGTGCAGTCTACCATCTTAATGGCTATCTTTCTTCCCTACTGGAATGGGGCCTGGAACCTGGACCCAGAGAGTAGAAAAACATACAACTTACTTGATGCGGTGAGCA  
GGCACACCATCCAGGTGTATCCTAGTTCGTGGACGGCGATCATGTTGACCTTCGACAATGCTGGTATGTGGAACCTGAGGTTCGGAGATTGGGACCGCCGGTATCTCGGGCAGCAGCTTT  
ATATAAGCGTTCTCTCGCCGAGAGGTCTCTCAGGGATGAGTACAACATGCCTGAGAATGCTCTCCGTTGTGGCGCCGTTACTGATCTTCCCCTCCCACCGCTTACTCTTAAAGCTTACA  
GAGGTATCAGCTTTATTGTGCGTCTTTCGCCGTTTCATCTGTTTTTCTTGAATTCAGAAGGGGAATTTATTTCTTGACGTTTTTATTTTTGGGTTTGATTCTTTGTTACTACGACAGA  
TTCAGGAAATGAACGATTGGATATTTAATAATTTGTCTGTCTTTTGTATGCATTTGGATTTGGGAAGCCATGGATGCTTCTGTGTCATGTTCTGGTAAAAACAGAGACGGTTCGATTTA

TACAATGTTTTTTGGGATATTTTCATTTTTATTTGGAAAAGTATTTATAACAATTTAAAAAAATTGTTGTTGAGATATTCGTACGATCA

>comp171466\_c0\_seq4

AAAATATAATATTTCAAAACTATTATTTAAATAATAAAAAATAAATTGTTAATATTTGTGAACAGACTTTTCAATTGCACATATTAATTAATGAACAAAACATCACAACTACTATGTTCCCC  
CCTATATATGTTGGTTGTCTTATTAGCTCAAATACAACCGTATTATGAAATAAAACGTTCCCTTGCATGCACGCAACGACCATCTATGATCCTTATACATTCAAAGATATAATTAACAAATCTC  
CAATTTTAATTTCTTACTCCCACATAATTCAAATTATTGCAAGGCAAATAAAGCCACACCGATGAACGCACCTATGCCTGTTCCGATCGCCACCCGCCGACGCTTGACTTTATCAT  
CTTCCGCTCCCTTCGGCGGCTCTACCTTCGACGAATCTTTGGCCGGTGCATCAGCTGGAACAGGTTCTGTTGTTGGCGCATCGACGACCGGAGCGATAGGTTTGATCACTGGTGCTTCAG  
CAGCAGGAGGGCGGAGCTTTTGCATCAGCCTTGGTTGGAGCGGGAGGCAATGGTGATGGTGGAGTATTGTTATGGTGGGGGCCATCGATGCCCGGAGGGTTCGATGATCGAGCTGCTATGG  
AGTACAGATATGTTGTAGGGTCGTGCGGCAATTTGTCCACTAATTTGCGACGAGGTGGGCCCCAGAAGCTGCGGAGCCGAAGGCGATCCGCCGTTGGCAAACCTGGTTACATTGAG  
GAAGCCAGTCCGGCCTTCGGCTATGCCAGAAGTCTGGAAGAGGGTGGTGACGATGATTGAATGGCTCTTGAGGTTCTGGAGCTTTTCGCGGTCAAAGTAATCGAGGATGACATGGACGG  
ATAGAATGCGGCGCTGGATTTTAGGGCTAAGACCAATGAGACCGCAATGGAGGCGTTGGATACGGCGAGGACGGTGATGGAGTTGCGATGATTGATCTTTTTGGCGAGGTTGGTGGATG  
AGAGGAGAGAGTTGAAGACGGAGAACTTGGGGTGTTTTGAGAGGATGCGAGTGATGTTGTGGGCTGATGAGGAGGAGAAGAGGACGGTGATGGTGAGGAGGAGGAGGGAGAGG  
GAGGTGAGGGATTTGATTGCCATTGTGAAGTGGTAGAGGGTGAGACGATGAATGTAGGGCTTTGTAAATTAGGTAAATTGGGGGAAAGAGGTTTAAAATGGATGGGATGGAGAAGAGA  
AAGGGAAGGTGAGGCTATGTAGGAGATGATAGTCACTATTTTTGGGCTTTGTATGGAAAGGAAATCTGGTATATGTTTTGTTTTCTTTTGGATGGGAGTTAGATTTGTTCTTGGCCCTAAGA  
TTAAATAGATTAAGGTGCTGATCTCATTCTATTTACACGATCATACAAACAGATTTAGTTTTAAAATAAAAACAAATTAACATTCAATTATAGTTTTTTTTTTTTCTGTTTTTATTTTCTTTTAA  
TTTTTTTTTGGGGTTTTACATACATAATACTTAAACTTTGCTATTTACCTATCTAACACTAAAACCTTTCATATTTACTGTTTAGCCACCCAAAACACTAATAAGTAACCTAAAATGCCACTCC  
CGTTACCTCCGTCAACCCCGATCCTGTCTTTTGTGCGGGAATCATCTCGATCGAGCGACGTCGATCTCTCTACGCCGAGCTCTTCTCCAAACTGCTCGTCTTCTCCAAACCGCTCAGCAT  
TCTCCACGCCGCAACTCCTCTTCTCCACTCCGCTCAGGCTTCTTCCCCGCCGCTGCTCGTCTGTCACACTGCTTCTGTTAACGACTCCAATTTGCAATATCTTGTTCCTTCTAAGAAGA  
AAGGAACTATACCTTCATATTATTAGCACAAACGTTCAACCGAATATCAGAACAAAAAATCTAGTAATAATCTATACCTTCATCTGGCAGATGTGATATTCTTGCAATACATATTCTATATAGCT  
CAAATCAACTTCAGGTAATTCATTAGAGGAAAATAGAAGAGCTGACCGGAAAACAGAGCAGATTCACAATACCTCCTCCATTGGAGGAAAATAGAACAGATTCACAGAGCAGAGAGC  
GCCGTTTATGCGTTCAATAGCAAACCTTGCCGGTTTTCCGATATGCCTAATGGATTTATCGGAAGCTTTTAATGGTTTGAATTTCCCTCATGGTCAAGTTCTAAATGTAAAAGAAAAGGGTATT  
ATCTAACCTAGATAATGAAAAGGAGATTCAACGGCAAACCTAGAGCTGTCCGAGCGCGGAGGAAGTGTCGTCTAAGCTGAATTCCTCCCATTACCACTATCAAACCAAGGCAGGAAGA  
GCTGACCGAGAAGCAGGAGGCAATCGAACAAGCGAAGCAGTCGGTTCGGTTGTGCAGTTAAGGGAGAGTTAGTTTTGAAGAGGGACGGTGTTTTGGGTGGTTGAACAGTAAATATGAAA  
GTTTTAGTGTTAGATAGGTAATAGCAAAGTTTTAAGTGTATGTATGTAAACGTCCCAAGCATTTATTTCTTACACCTACAAGTTGCTGGTCATTAAGCATTTATTTCTTACAGCTGAATG  
TCCCGATTGAGACAAACATTTATTGTTGGTTATTATATGTTCCAATGCAATTGTGTAAATTGTGTTGTAGAGATGTTAACCTTGCAAGTAGCTGGTGTGGATCAATCTTGTGAGGCAAGTT  
CGTGTGGGAGCATAATTCTACTCTGACCCATGTTCCCATCATGGACGCCATTGTTACTCAGATTGCCAGCATGCCATTGATTATTTAATCCCTTAATTGAGTTTTATACTTCATGATATGCTAC  
TCTGTTAACCGAGCAAATCATCATGTATATGTGCAATCTGCAGTCATAATAATATATGCTGTGTAGCCATGGACTTTTATGGTTGTGGCAGGGGGTCTCCTATTAAGCTGTGGTTTGCTTCTT  
CGTTCTATTTACATATTCAGGTATTGAATAGCTCTGGCCTCTGGGTTAAGGTCGGAAGATCCGGATCATTGCTAGACTTCAAAGATATTGGGTTTTTGAATCGTAAATTTTCAGCAGAAGT  
CCATTTTATTTATTTTCTATATTTTTTATATGAGTATTAATAATCCAGGAATTGGTACTGAAGTTTGAAGTTGAACCGTTTTATATTCTGATCATTAGTTTTAGCTTTTGCAGTAGTTTTGTTCAAGC  
TGATATATGCCTTTGGACATAATTAATCATCAAATTAATTTCTTTAGTTTTATTGGGTGTGTGACAGGCATCCTAGAGGAGGTTTTAGGGATAAAAATATGGGATTTTATTTCCATACAACATC  
AATGACTTCCTATTATGACTGAGATCCTGTGATCTACCCCTGTATGTGAACAATAATTTAGGCATATGAGAAAATAGTTATAACCTTTCTACTCCTTGACGTATCCATGTAATATATGTTCT  
ATGAGCATTCAATTAATTGCATTTGCAATGATAAATGTCAATAGGTTCAATGCACTTTCAGATTGATTTTGGGTTATTCTGGGTGACTTGGCTTTAATTTGCTTCAGTCTGCCCCATACCATA

AGCAGTTAATGGGAGTTTTAGGTTTCGTTTGGTTATCCTCCACCTTTTCTAAATGTCAGTTTTAAAAACAATTGTTTGAGAAAACAGAGTTTTAAAACGGAGAAGTAAATACCCTAAAGTTTT  
TAAAAACAGTATAAAAAATACAGTTCTCCAAAAAGTATTTCTGCAAAAAGTGTACAAAACAAACAATAAAAAAAAATTCCTCCATTTTCAAACCTAAAAGGCAAAACAAAACCTT  
AATCCATAACTCCTAACCTATCTTTTATGATTTGATTCCATACTAGCCTAAAATGTGTTGGTTGTTGTTTCAGATAGAACCTGCGATTGAACCTAAAGATGAAGTACTAGTATTAGCATTTAGAC  
TTCATTTG

>comp171482\_c0\_seq19

ATATCTAATTGTGAAAAAATGAATGCTCATCCCTCTCTATTTATAACGCCTATTTGTAACATCATAATCACTTATGTAATCTATTGAACCACTGGAAATTACATCTGTAGCTGTGGCGCCAAGCC  
CATAACCAAATAAACTAGATTCAAGTTCATTCAACCCTGAGTGCCAAGAAAGATCTCCATAAATTGAACCACTTCCATATAAATCCATATAGTTTCTTCTAGCTGTGAAAGAAGCACTA  
AGAGAGCCAATGTCATAACGCCTTGGATAATTATCACTAGAAAAACCAAAGTATCATCCAGATTTCTGATAATATTGTTGTTGAAACCATCAATGCTCCCTATTCCAGAGGCTGTGAAGGA  
ATTTGCACTTACAGGGATAACATTATAGTCACCATTGTCCATAGATTAAGAGCTCTTGAATCAAAAAGATGAACCAGGATTACTACAACCTACACTGTTACTAATAGAGCCAGCAAATCTAG  
TCAAATTTCCCACTATAATATGGGCTCAAGGCTTGTCCATAACCAATATTGCTACTTAAATTTAAGTTTTCTCCATAGCTTGGGCTCACTCCATGCTCAAAAACCTCAACCAATTTTCATAACCAG  
GAGTGAAAGGGGACCCGTTCCGAGCGCCGATCGTGGCCGAAAGCTACCGAGAGAGCTTGGATTGTTCACTTGACCATATAGATTGAGAGAAGTGTGAATCTATTCAAGCCATAGTTAG  
TAGGTCCTTGGCAGATGTCTTTTGGGATAGCTCTTTGACCTCCACCATCTTTCCATTGAGTTCATGAAAGGAATTCTGCAAAACTCTGTCAACAACAGCTTCTGAAGTGAAAGTTATAAA  
ACCAAAGCCTCTTGGCCTCTGAGTGTGTGATCATAATTACAACAGCATCTGTGATGGCACCAAACCTTTCAAAGTAGTTCTTGAAATATGCTTCTGTTATATTGGATGGAAGGCCTCCCA  
CAAATATTTTTTGTATGCGGCTTGGACTAGGTGAACCATGGAGGAGGAGGCTATTGTTGTTTCTGTTAAGTAATATGCGTTGATCGTCCCTTGGAAATAGCTTTCTTAGCTTCAACCATCCTCC  
CATCAATTCGGTGTCTAATCATGACAACCCTCTCGGCAACAGCAGGGTCTGCAAAGGCCACAAATCCAAAACCCCTAGCACGGCCAGTTTTTCGATCCTTCATGATCACCGCCTCTACAA  
CCTCCCCGAATTTCTCGAAATATCCCGAAGGCAATCCTCATTTGTGTCCCACGAAATACCTCCAATGAAAACCTTCCCGAGATCCGATTCCATTCTTCTCCAAATTTGTCTCAGACGATTT  
GGAAAGAAGTGAATAAGAGGAAGCATCAGCATAAATCAATTGATAAATGTCAGATCCTGATCGAATCGAGTAAGTAATGAAAGCCCAAGGAGATCGTATTGGTTCGGCGGTGAAAAGCTC  
ACCGTGCGATTCAAAGTCCGCCGTAGGATAGGAGCACGACGGAATATCCTCCCTTCTCATACTCTATGATCTGCAAGTCGGCATTGGGATTTAACAGAAGCTCCTTCTCGCCATCTTTGCA  
TTCTTCTCCGTGCGATT

>comp171482\_c0\_seq20

CAAGGGAAGCTGAACATTAGAATTAGTATGTAGTACTCGATATCTTTTAAATATGTATGAGAATTTTATCATAATTTTTATGTTAATGTTTATCTTTAAAAAAAATAATTATATCAAAAATATTTT  
AATTTATGAAAAATAATGTGTTTCTAAATTATTATTTCTTAATTATTTATAATAAAAATTTTACACTTAAATATTTAAAATTAATCATAAATTTTTTAAATAAAAAAACTTATATGGCGGATGAACA  
GTGTGATGCAATATTGGCATGGCACTGTTTTCAGATATACAGTAATTAGCATTATAAATTGATTTATCTTGTGATGTTGAGTATCCACTCATAACCCACCCACAAGGCCATATGCATAACCCATACTC  
ACCCATAACCATTTGGGTATTGGTACCCATTTGGTATGGATGAGTATATGGGTGGGTGTGGATATGGGCACCCAATGCAGGGATCTGCTTTCTATCAATTGCTTTAAGCATGTACTTTTCAAAT  
AGGTAGCATTGGTAGTTACCATCCTCCCATCAATTCGGTGTCTAATCATGACAACCCTCTCGGCAACAGCAGGGTCTGCAAAGGCCACAAATCCAAAACCCCTAGCACGGCCAGTTTTTC  
GATCCTTCATGATCACCGCCTCTACAACCTCCCCGAATTTCTCGAAATATTTCCGAAGGCAATCCTCATTTGTGTCCCACGAAATACCTCCAATGAAAACCTTCCCGAGATCCGATTCCATT  
CTTCTCCAAATTTGTCTCAGACGATTTGGAAAGAAGTGAATAAGAGGAAGCATCAGCATAAATCAATTGATAAATGTCAGATCCTGATCGAATCGAGTAAGTAATGAAAGCCCAAGGAGA  
TCGTATTGGTTCGGCGGTGAAAAGCTCACCGTGCGATTCAAAGTCCGCCGTAGGATAGGAGCACGACGGAATATCCTCCCTTCTCATACTCTATGATCTGCAAGTCGGCATTGGGATTTAA  
CAGAAGCTCCTTCTCGCCATCTTTGCATTCTTCTCCGTGCGATT

>comp171497\_c0\_seq2

GGCGCTTCGGTACATGTCCATTCTCATTGGCAGGCGCTTCGGTACATGTCCATTCACATAGATCATTGTGCAGGAAAAATTGGTCTTGTAACCTGCTTTGTTGGCTGCAAATTGTGCGCC

CCATGAGATTTTCAGGATCGCATCCAGTTGCCCGCAAGAAGCAGCTATTAACCTGAAGTATGATATGGAAGAAAATGCCATAAAGTGAGTGATTGTAATGAATTTCGAGATGAAAAATGCA  
AGCGCCAAGCTGCATTGGAGAAAACTATTTTACAATTTTCATGATTTTATGGTAATGTGGACTTGATCAAGAAGAAGCTGAAGCTAACTGGAAGATCAGTGTAGCACAAAACACTGACTT  
CTTTCTTATGTTAGGTGTTAGTAAACTTAAATAATTTATTTTAGGCATTGATTCCAAGGACCCTCTGAAGCAAAAGATGATTTTCATGCAGAACTAAACAATCTTGCTATTGCTATAATGC  
TTTCAACAGTATGTTAGGCCGGTTCAGGTTGAACCAGCCCAACCGACCCTGCATTTTAATAGTGGGCCGTTCTCTGCTATAGGCAACGGACCAAACAGCCCCCTTGGAGGGATTGCCG  
CCCAAGCCTAGTGGGCCCTCTAGGCAAGCCAATGAGGAAAAGAAGTAGGGGGCGGCTAGTAGAGGGAGGGAAAACCTGAATTCAGTATTTGAAATTAGGGAAAGTATTTTTTTTTTACACGA  
ATTTTGAGATAAAAATTTAAAAATTAGGGAAGTATTTTTTTTACATGAATTTTGAAATAAAAATTAATAATTAGGGAAGTATTTTTATTTCTTAAAAAAAACAGAAGTATGTAATAAATAT  
GAAGAGTTGTTTAGGGTTAGAGTTAGGCTTGATTATTGTGTTCTCTTGGGA

>comp171517\_c1\_seq2

CAAATTTTATTTGAATTCATAGTACGTAACACTATAAGCATGAGATATAATGGCCAATATCTGATCTGAAGATCATTTATTCATAATGAATGCTTTCAGACGGTATAACTAAAACTCAGTA  
CAGTAATATTCACTCATTATCTTATTATTTTTCTTTTACAAAGCATTGCAAATCAAGCTCTTAATTTAACTAATGATGTTTCTACTTCCCATTTCCTCCACCATAACCTTCGCCATATCCTTG  
GCCATAGCCTGAACCACTTCCCCTCCCACGCCCTCCTCCATATCCAGATCCCTCGCCCCGATCCACCACCAGCACCAGAGCCAGCTCCAGAACCAGCCACTCGATCCCCTCCGAAACCAGCC  
GGACCCTGCAGAAGATCCAGCCCCAGAACCAGCATATGAGCCTGCTCCAGAACCCGAGCCGGAGCCAGATCCAGAGCCGGAGCCGAGCCAGAACCAGACCCGACCCAGACCCAGA  
CCCGGATCCAGAGGAGCCACCCTGCCACCACCTAAACCAATGCCAACGCCAATAACCAACGCCAAGACCCGCCACCACCACCCAAATTAAGATCAAGGTCTTTCTTGTCTTTGGCCGT  
TGGTAACCATGGCCATGGAATAACAAGCAATGAAAAGCAAAGGCAGTGTCTTTGATGAGGCCATTTGTAGCAGCGATTCCCAAACAAGATACCTTTATATTCAGCAAGGAATTCAAGA  
TAGCTATTGATTTGAGTCTTGGAGGATGCAAGTTTCTGCATATATATAGGAGAAGGTAGGAGGCCACTTCGAAGTGACTTCTTTTTCGGTGGAAGTGGAAGAATAACGTGGTGTTTTGTCTA  
TGAATCGCTCAATTACAATGTTACCTGTTTTACTGTTTTACCTGTGTACTCTCTATTTAAACATCCCTGTACCTAGTTAATATGACGATAATAACAATTTCTCTCTAAGCTTTGTCTGTCTTTC  
TTCCGCCCTCCTGAGGCCCTCCTGCCTCTGGTTTCATGGTATCAGAGCCAATCATGGCTGATCAAGAATCAACCATTCTCTTCCTCCCTCCTCCTCCCTCCTCCACTCCGGCAATCAACCT  
GATGATCTCGTATCCCTGCGCCGCTCAAATTTGATCTCAAACATCAAGAATCTCATCTCCAACACCCTTACCTCCGACAACACTCGCAATATGGCGGATTCAAGTTCTTCAACAATTCAC  
CGCCAACGGGTACGCCGGACATCTCACCGGTTCTCTCCGCCTCCGACTGAGACAAATTCTCCGGACTTCTCTCGCTGGAAACTCGAAGACGCCAACCTTCTCTCTGCATTATTCTCCAC  
AATATCTCCTACTACTC

>comp171521\_c3\_seq1

TTAAAAAATCTATCGAATTGATGGGCAAGGCTCAATACTTAATATACCAATTAATCTTCGAGGAAGGATTCTTCGGTTATTAATAAACAATAAGGACTGGTTCATAAC  
TCAAATTTATTCATGAAAACACAGCTACATGAAGAAGAAAAAGAAAAAAAAAAAAAGACAAGAGGACCTAAACCCAGAAACCAAGCAAGACAATCAGACACCCAAATATATATCAGCA  
ACAAAAGGATGCTATTTATTCAGAAACAGCAACGTCAAAAACACGTAACTAAACAACGATTAGGTAGACCAGATTGTTTTGCGTAAATCACAGCTTCGCCGTTAATCTTCACAACGA  
GAACGTAAACTCCGTCGTCGTACGCCGGCTTGGTCTCCACACGATCCTGTTGTAGTCGTTAACGAGAGCGAGCTGCCCGTGGTGGTTCAGCCTTATAAAGCAATGTTGGTAATCTCTTAA  
CTTCGTCGGGCTTGCCACAGGACGCCACAGAAAGCCTTGGTGAACCTCGAGAACACACTTTTCGCTCACTTCCAAGGTGTAGTCTCTGCTCGCCAGCTTCGACTTCTCGTTCAACACCTC  
GGATGAAAATAACAAATTGGGCGTGTAGATCCCTTATTGATATCCTTCTCTCCACGGTGTGTTGTACGCTGTATCTGCCGATCTGGCGAGTGTCCACAAAGAGGGGCCGTAGATACCA  
ACCTGACCATCGGGTTGGAGGATGGCGGCATTCGCCTCTCTGTTTGGACGCAGGAGTTGACCATACGATGCTGCCTGTGTTGTTTTGATCTGAAGCTCGCCGTAACACTCGGAGATGGTG  
GCGATGCAATTGGGGCCTAAACCACTGGTTCGCGATTGGAACCGGAGCCCTGTTGTAAAGCACGAGGTTGCAGTCGTCCTGGATGACGAAGACAGCGTTCGGGAAGGTCAGTTGGCT  
ATCGGTTTGGAGGACGTCGCCGGTACGATGAGGTTGCCTTGGTGGCGGTTGAATGAGAAGGGAAGTGGAGGAGGAGGAGGAGGAGGTTGGAGAGGAGAAGAGTGGAAAGGATCAGCG  
CCATTGTTAATGTAATATGCTGGCTAATTAACCTTCTTTGATATCTATTAATGCTCAGGTATTGGCTTATTTACTACTATATTGTTTTGTGCTCCTGGTTTTTACGATATTCTGAATGCCAAC

TAGTTGATTTTGTCTATGACGCGTGAGTCTGATGTGGAGACGAAATCAGCGCGGAAACAGGAAACTCCTACAAAA

>comp171522\_c3\_seq1

GATGATCTTGGGCTCATTGGATTCTGCTTGTCTGAGCCGCTCGATTTGACAATAAGCACGTCATGTTTGGAACTGTTTGGTAACCCAAATTGTGGTTCGAACCTTCCAATAGTGCTTCAGG  
TTCTTGATTTGGACTCATTTAGGCTCGGATTGAGTCGAATTTTATGTCTGTTAGCTTTGTAATTCGAGACGTTTAGTTTACTATAAGTTTGTGAAATTGGAGTTCAAATGATCCCAGATTT  
AATTTTTGAAGTTTCCAACCTGATTTTTACCTCGAGATTTCGTGCCCGACCAAATAATTTTTTATAACATATCACTGATGAACATGTTTAAAAAATTCTTAACAGCATTAACTGTTAA  
TCAAGAATCAGGATTTCTTCTTCCGGCATTCTGTAATCAGAGCTTGGACAGGCTCAACATCCCATGGATTTCCATCGTCCTTCCAGGTTGTTTCATCGCAGGTTGTTTTATCCCAA  
ATCACCTCAAGCATAACGCCATGGAGTTTAAATGATTCAGGCGAGAGAGCACTCACAGAACCATGCAACCAACATCTGAAGCCATCAGCCATCTCCCACTTCTTCAGCACTCGCATTCT  
CGCTTCCACTGAACCCATGATGGCGTTTCCACCACCTCTTCTTACCACATATACTGGAAGCCTACTGTGGGGTAATACCTTCCCTTCCACCATCCCTTCGCCATCTTCTACCGCCCAACG  
AATCGCTTCTATGACCATCTCTGGTTCTTCTCTTCTCGTAGTTGATCTGCTGGAAGATGCCTCATTATGGCGATGACATCGCAAAAATCGCCGTCATAACGCCGGCAGCCAACGAAAATTA  
TCCCGTCACCATCCCGTACGAAGACCATCGCGTCGCCGGCGACAAGCTTCTTGCTTGAATGAAATGGCGCAACCACTAGTCAGCCCATGCATAGGAGGACTTCTCTGACCATGTGGC  
CGAACCTCCACCGTTGATTATTCAAGTCATAGACGGTCAGGTCATCATCTCCAAGTTACGGAACACACTGTGAGCTCTTGGCGGAAGCTTCAAGACGAAGCTTTTGTCTTGCAGTCGG  
TTTCGCTCTCTGACAGAATTTAACGACGGAAGTGATGCCGCTGCCGAGAAGGTTTTGGCAGTCGTCGTCGCCGGAGATGAGAAGTCTGTGGTGAGAGAGAATGTGGCGAAGACTTG  
CTCGGTGGTGGGGTCCGAATGGAGATTGACGGCGGGAGTTGGCAGGGGAAGGCAAAGGAGGGGAATAAGTACTTCCGGCAGACGAGAGCCACATTGCTCCGCGTGGCCCTTCGGAGAA  
GTAGTAGACGTCGGAGCCGGCGGAAGGGATGTTGGGAGATGAGAAGGCGAGGGTTTTCCATATAGCACGGTCGATGACGGGAGACATGCCGGCGGGCAGGGCGCTTTTCTTTATCTA  
TTTTTGACGGCATGGTATCAACTTTTTTTTTTCCCTTCCAAGGAAGTATTATGGCATTCTGGATTTATTTATATTTATAGTTTTTCTTCTTCTGTTTGTATTTAATTCTAACAACTCCTAA  
AAATATGTTTTGTATAATCAATGACAGACATTTTGTCTAATTGATTAGAGATTCCACGGGATTATTGGAGCAATTGCAAGTTACTTTTTTCTTTCCAAAAAAAGGTTTTTTTTTCTCTCA  
AAATTA

>comp171544\_c1\_seq16

ACTAGTGAAGTCTCAAATCAATAACCATTAATAAATATTCAAACCATAAATTATTAGGACTTCATTCATTTCAATTTCCCTGGTATTTCTTCAATCGAAGAATATTGTAATTTAAGGAAATACAC  
TTCATATGTTGTTGGGTTAAAAATAATTCCAGCACAAAGTAATTGACGCATATTCACTAAGATATGCATGCACATAAAGGCCTTATCTATGTGTAGAGTTATCATTGTTTTATAATGGACATC  
GCTGCTCTTGGAGCTAAGTTTAAACTTGAAAAGATGGAGGAGAACAGCAGCGAATATCTTCATCTGTGTATATGCGAAGTCCTTTCTAAGCATATACGAGGTCCAGCCTGGAATGCTGTA  
AACTTAAAAGGACTTTCATTTGAACTGATCCATCATCATCCAGCCATCTCTCTGGTTGAAAATTTTTCAGCATCATCTCCCATAATATTTCCATTCTACCCATGGGATAAGGCATGTAGAAC  
ACAACGTCTCCTCGATTAACATTAACCCATCTGGTAAAGTGTCATCAGAGAAGCAGGTCTTTGAATTCAATGGTACTGATGGGTACAACCTGAGGGTTTCGGATAATGCAGCATGAAGGT  
ACTTCATTTTATCAAGAGACTCTACAGTTATTTCTCAACGAATTCATTGATACAAATATCTTGTCTGCTCGGGTAGCTTCTTTCACTTCTTGATAAATTTCTTCTTGCACGGAGGGATGCTT  
ACACAACAAATATATGAACCAAGACAGTGTCCAGCTGTGGTGTCTTTGCCAGCTATAACAAAGTTGAGGGCGATATCTCTCAAATTCATAAGTTATATTTCTGGATCATGCTCCATTTC  
AACCATAAATCGTGAGATGATGTCTTCTTTTCCAAATGTTTTTGGCATTAGTCATATCTTTTTTTGCACGAATCAAGTCGTATATGAAGTCATTAATAACGTTGATGTCCTTCTTG  
AGTTGCGCCTCATAGCCAATGTTGAAAAACCTTTAAATTTCCAGAAAAATCAACATAACCGGCTTGAATGTAAACACTTGCCTTATCGAAAGCTTTTGTGAATTTAATCCATCAACAG  
ACCCATCCAAGTTCATTAGGTCAAACCAAACCAATTTTGAAGATTGAGTCCATTGTTGAACTCATAAACAGTTCCTGAATATCGAAGGCCAAATCAGATTTTGCTTTATCGAAAATGATA  
TCGGCAAGTTTTGTTGATTTATTTTAAAAACTGGTACTATAGTTTCTCAAAGCTCTTGTGAGAACTCGTAGCCCGCAATTTCTCTGATGATGCCATTTTCCACCATCCACTGCGAA  
GATCCATCTCAAATAATCTTCAAATTTTATAGTTGATTGTCCCTTGGCGTAGTTTTTGAAGTTGGTTTTTAATATACTCCACGATTGCAGGGTCTGTGGTGTAGATCAGATTATGA  
AAAGGAGCATACAATCTGAAAGTTTTGTATTTGCGAGAGATATCTATGAAGTAATCTGCAACCTTCTAAAGTTTAGAAACAGATGGAGTATAGTTCCAGCTATCGGATGGTATCTCTTCT



TGCTTTCCTCCACAAAAATCCATGTCTTCCAAAGATTTTGATGGCAACCAAAACCAGCATAAGTATTATTACTGGTTGGAGGTATTAGCCATGAAAGCTAGAGAATTCTCCATCTCTTGAG  
TTTGCTGATTTGGAATTGAAAAGAAAGAGAAGTTGTGCTGCTTGATTTATATAAGGCAATATGAAAACGTGATTTATTAATCAGCAGCATATGCCATTTATTTGTAACCGTTAAAGTATTCT  
CAGCTTCTACTATATAATTAAGTATTATTTATAACCGTTGGATGCTTGATCTGCTTTGGACGCTCTTTTTAGCTTTCATGAAAAATTACATTCC

>comp171544\_c1\_seq9

ACTAGTGAAGTCTCAAATCAATAACCATTAATAAATATTCAAACCATAAATTATTAGGACTTCATTCATTTTCCTGGTATTTCTTCAATCGAAGAATATTGTAATTTAAGGAAATACAC  
TTCATATGTTGTTGGGTTAAAAATAATTTCCAGCACAAGTAATTGACGCATATTCATCTAAGATATGCATGCACATAAAGGCCTTTATCTATGTGTAGAGTTATCATTGTTTTATAATGGACATC  
GCTGCTCTTGAGCTAAGTTTAAACTTGAAAAGATGGAGGAGAACAGCAGCGAATATCTTCATCTGTGTATATGCGAAGTCCTTTCTAAGCATATACGAGGTCCAGCCTGGAATGCTGTA  
AACTTAAAAGGACTTTCATTTGAACTGATCCATCATCCAGCCATCTCTCTGGTTGAAAATTTTCAGCATCATCTCCCATAATATTTCCATTCTACCCATGGGATAAGGCATGTAGAAC  
ACAACGTCTCCTCGATTAACATTAACCCATCTGGTAAAGTGTATCAGAGAAGCAGGTCTTTGAATTCTACATAACATGTAATTTATAAATTTTGAATAGTGCATAAAATTTAAAGATTTT  
TTGACATATTTATAGCGAATTAATGATCATTAAAGAAGCTTACCAATGGTACTGATGGGTACAACCTGAGGGTTTCGGATAATGCAGCATGAAGGTACTTCATTTTATCAAGAGACTCTACA  
GT

>comp171550\_c1\_seq2

ATGAACCTGTTAAAAAAGTGGCAGAAATGCTAAGAACTTAAATAATATTTACCCAGATTTTTTCAGCAGTTTTGCCTCCTTGACACATAATTTCAAATTTTCAATGATTATGTAATATTACAC  
AACTTTATCTTCTTAACAGAAAAAGATGATCCTAAATGCCATGATGATTACAGAGACATTTAAGCACAATTTAAAATGTTAGGTGCTGGAAAGAGAGTTTAAACAGATAAAAAGACAACAA  
CAGTTGCATCAATATAAATTATTCAGCATCAGTGGAACAATAAATCATGGACAGAATCAGAAAATATTGTACATTAAGAACTTTAAAGCAGCTGCACACAAGCCATAATACACAGAATC  
CACTAAAAAAAAGTAGATGGGCTTCAGAAAAATACTTTCCACCTCCTCTGTCAAATCAATCTGTTTACATATAAAGATACTTTACCAAATCCTGCAGCTGGCCTCAGAGTCTTCAGCT  
ACAATAATTGGTACTCCTCTCTGCCTTTGGCTGCAAGTACAAACCAAGGTCAAGTGGCTAAACGACCATAACATTAAGATGACATGGGAAAGAAGCTTTTAAAAGGCCATGAAAGGAAAAT  
AAAATCTTCTCCTTTACCAGATTTGCCGTCAACACAACCTTACTGCGATCCACATGAACCTTTTTTTACAGCAGCAGCAAATGGCATTCCAAGGAACCAATGAAAACAGTTATGAGCCAT  
TGTGTGAATGTCAGTGGTGTGGTATTGGCAAAATCGCCAAGGAATTGAACAATAATGAACTGAAAAATGAAAGTAAAGGAGAGGACACCAACGAAGACATAGTTCTTCAGAATGCCTTC  
AAAAACATTTATCTTCTCCATCTCCCTTGAACCTGATCTCATTAAACAGCTGGCAGAAGACAAATGTATTAAGATGAGAGTATTAGACTGGCATTGAAACAGGACCAATGTTGGAGAAATTGT  
GAACCTTTTCCCTCTGTTTGGAGATACCAAATCACAACAACTGGTAGAAAGCCTGTCTAAGATATTTCTCCACATTACATTGCTAATAAAAATTCCTTTCTCCCAACAGGTGTTCTTT  
TCATCAACTCATCATTAGGAGGTTCAAGTGGCAAGCGCAAGTGTCTCCAGTGTATCCATAATCATGTTGACCCATAGCAATTGAACAGCAGTGAGTGGAGCTTCTCCAGTAAAACAAGCTG  
ATGAGAAGTTAACAATTAGAGCAACAACATTAACAGTCAGCTGAAATTGTACAACTTTTGAATGTTTATGTAAACAGAACGCCCATTTGCCACAGTCACAATTGTGGAGAAATTGT  
CATCAAGAATTATGACATCAGCACTTCTCTTTGCGACCTCAGTTCTGCAATCCCATAGCAAGCCCAATATCTGCCTCATGAAGCGCTGGAGCATCATTGTACCATCACCGGTCACAGCA  
ACTACCTCATTTAACATGGTACGGAGGTGCTTCACTAGTGTATGCTTATCTAACGGTGATGATCTAGCCATAACCTGTATCTTTGGAATCAATCCATCATCTCTTCAAGACTCTTTCCCTAA  
ATTCTGAACCTTCAATAGCTATACCATCATCTGTAAGAATACCGCATTCTCGAGCAATGGCCTTTGCCGATTGATGTTATCTCTGTAAACCATTTACTGTAAATGCCAGCAGACCTGCAAA  
CTGAAACAGATTCCTTGACACCAGGTCGAACAGGATCCTTGATGCCTACAATACCTATACAGTGTAACCATCTACAGGAATTTCTTGCTTGGCTGAAAATCACCTTCAATGTCCATATAA  
CCCAGACAAAGCGTACGTAATGCTTCTTTAGCAAAACCTTCAATCGTATCCTTGAGGTGCTTGGCTACTGCATCATCAATTGGAACAGCTCTGCCTTCAGCATCTAAAACCTTTGCTACAAG  
AAGCCAGAACTATTTAGAGGCACCTTTACAGTGGGCACGATAGCCTCCCTCAGGAAGTTGTATTACCACTGCCATTCTCTTTTGTAGAATTGAAGGGTTCAACTTTAAACAAGCTCAAC  
CGCTGACGCTTTCATGAAAATCACCACTAGAGACAAGCCAAATCCAATATTGCCGTTTCAGTTGGTGTCTCTAAAATTTTCAGTTTTCTTTCTTTGTTGATCACAACCTTCTCCTCCAG  
TGTTGGTGAATATAGACTGTGAAAGAATTTTAATCACATCATTGGAACCTGAGAGCAAATGCTAGATGCATCCACTGGATTGGATAGTACATTGATATTTCCACCGATGCAGGCTTTAACA

ACGGTCATGTGGTTGGTTGTCAAAGTTCCTGTCTTGTCACTGCAAATAGACGTAGCTGATCCCATTGTTTCACAGGCAGCAAGGTGACGGACCAAGGCTTTCTCGTTCATCATTTTCTTCA  
TAGCAAAGGCAAGGCTCAAGGTCACAGCTAGAGGCAGACCTCCGGAAGTCAACAACAACAATAGTAATTGCAATGGCAAAATACTCTAACAATGCAGTGCATCATCTCCTGTCCAA  
CTCAATAGTGTGCCAGCTTTAACCTTATCCCTCATGAGAGATTCTGCCAGCACTGCAAAAAGTTACAACCTGCAAAAGAGTAAGCCAATTTTTCCAATAAGAGTGGCAACTCCATTCAGCTTAA  
CTTGTAATGGGGTTTCATCATATCCTCCTTCACTAAGTGTGGCCATCAACTTACCCATTGAGTTCTCATGCCAACAGTTGTCACCATCATTTTACATGAGCCATCTTGAACCTTTAGTTCAG  
ATAGAAGAAAAGGATTTTCAGCATCAATTGCCACGGGCTCGCTTTCCCTGTCAAAGTTCATCAATCAACAAGGAAAATCCAGATAGGAACAATCCATCTGCAGGGACTTGATCTC  
CAATTGCTAAATGGACAATATCACCAGGAAGAAGATCATAGATTGACATTTTCTGTCTAAACCCATTCGTGTTACTTGTATCAATATTTTCTTCTCCTTATCCAAGTCTTTAAACTTTTG  
GCCATCCTTCTGTGAGCACACCAACAATCAGAGAAATAAAGGCACAAGCACCAAGGATTATAAGCGTCATGTCTTGAAATGCTTCCATAAAAATACCCAGAAACTCCGGATTACGCTCT  
CAGTAAATTTATTTATCCATAAATCTCTTGCCTGCCATCAAGCTTTCTTCGGTAGTGCACAGGCCACTAGCTGTTGAAGTTGATAATTTGTTTGTATACCATCCACTCCACCATGTATTTT  
CAGCTTCTTGATGTCACGTCTTCGACTATGGATCCCAATTCGTTCGGCACAAATCCCAAAGCCAGCTGCCTTGACTTCATCAGGTATGGTATATTCACTTGAACATGTAATAAACTGATAA  
AACAGAGGGCAGCTTTTGAAACTAATACAGCAACCCGAATTTTCTCCTGGTTGGAACGCTTCATTGCCGCGGCCTCCCATCGCTTGAAAGGTTGGCTGTGAAGCGAAACCGCCGCTTC  
GGGTTCTTTACTAAGCCGAGAGATTCCGCCACCGCTGGAGCGCTTCTCCGACGAGTTCTTCGACAGCACACCGCTGAAATTTCTGGTTTCAGGTAACCTCTCCATATCCTCTTGCTTCTTCA  
CCCCTGATCTCCTCCTCTCCAGTCTCAACTCTTAATATACTCCTCGAAAAAAGCTTCTTCTACACGAAGATTCAAGAGATCGAGAAGGAGAAGAAGTTGTGTGGAAGGAGCGGGG  
CATTGGGGCGCGTGACGGAAAATGGAACCGACCAAGGCCGAAAAGGATGATGCGGTAAAATGGGTCCGATAATGTCTCAAAAATGGACGAGTATTCATGGAAGGAGCGATGAAAGGTT  
ACATGGATCCGATAATGTCTCAGAAGGGGACAAGTAGGATTCATGGAAGGAGCGGTGGAAGAATTTCTCGCAATTTTCAGGGGACTGCCCTTCTGAATCCTGAAATTTAGCTGGACGTG  
TGAGAGAACTTCTCCGAAAAACCTTCCGCAGAAAAATATCGAGCGAGACTTCGAAGTCAAAAATTACCGTATTTCTTCTGATTTGCTTCGTCACTACTTCTC

>comp171581\_c0\_seq4

AATCATCACCATCATAAGCCTTATCCCAACTCTTGGGGGTTATCTTTATAAATCCTCACACATGTTATTAATAACTATTCCGCATAATTTAGTTTGAATACTACTTTTTCTCCTAATCATTTGAT  
ACACTTTCATTAACTGTTCTGCTCTCACAATTAATAAACTTCAAAATTCACAATTACATAAACTCCAATATTGTTTCATACACAGGTACATACTACTAAACTCAAACAGAAAAAAT  
CAAAAGAACATTTCTCCTGAGGTCCTCTACGACGATATGTGTACGGTTCGTGTCATCCATCACTTATCTCCTGAAAAATATTTTCAAACGAATAATGAGCCAACGCTCAACAGGTAATTC  
ATAACTCGGTTAATTTACAAGAAGCATAAAAACAAAACCTTTATAATTGAAATCAATTCATATCATTTTGCAAATCATAACATTTGAACTTCCATCTTACTTTTCAATTTTCTTTTAAACG  
TTACATTTCTTTCATTTCTTTTCTTTTACAATTTTCATATGCAAAATCAAATGCAAAATATGCTTATGTTAAATGTATACACCCGTCTCGGAAGTACCAGTGTGTTGTAAGTATCAGATACACAGTCAA  
AATTTTGACCATTTCTTTTACCATTTGGCTTTGAAAAACTCCATTTATCATTTGGCTTTTGCAAGCCCTATTACTATTTGTTTACACTTCCGGATTAACATGCACATGAAAGTGTGTTAATT  
TAAATCTTTTAAATTAATTTTTCATAAGCTTCATATATAATTTATCCTCAAGTATTTTTCATATGCTTTATATGTTTC

>comp171605\_c1\_seq2

CAAAAAAAAAAAAAAAAAACCATCTCCAATTGGAGATTAATATTAAGTAATTGAACATAAAACTACAATATATAAATAATCTGATCAGAAGAATTTCTCTATTACAGAGCCATAGATCCTTA  
CTGGAACATGACAGCAGAATAATTTGTCCAGATAATTAGTTGTCCCTATGAAGCTTTTGGGGTCTGCTCAGCCATGGATTTCTTCTGTGCTTGTCTTGTGCTTTTGTGTAATCTGAACT  
GCTTCATGATGTTTTTCCATTTCTTTTATGTTTCTGGTAGATGAACATTGCTGCCCGGCATCTCAATCAGCGTGACCTCCCAAGCGCGCTTTTGTCCCTTGAACCTTACACCGA  
CCATCTCACAGTCCATAGCCAAAGCTTCCGTTAAGCTGAAGTCTTCGGAGGTGGGCGCAAGGATTGAAGGAGCGGACAGAGGTGCCGCTGGCACGGTGTCCGGGCTCTCCTTACGCTTA  
CCGAGAGCGGAAGTCGCTCGGGTTCCATTTGTCGAGACTTGCCAAGCTTACCAATGGTTTGCAGCTTTCTCCTGAAGACTGGCCAGTTAGGGTTACGAGCTGCCCCGCTTCG  
CCTCCGACCGTTCCATCCCCCGCTTTC

>comp171624\_c1\_seq2

ACTTCCTATTTGGAGTTATGATGTTAATGATAGAGAGATAAGATATCCGAATCTTATCTCTATTTAAACCTCAAGAGCAGATCATTAAAGGTCAAGGTGGTGGGGATTCATTTGTTGGAGAA  
GGTTTCAGAACTGGAAGAAGAAAGAGAAATTATTATGTCACATTGGAGATCACAATAGCATAATAAAGGCTAGACAAAAATGTGAAGATTTGATGAAAAACAAGAACACAGTCT  
TCCTGCTTTATGGTTAAGCAAAGATGATAAGAACAAAAACAATATAAGATCATGTAACTGC

>comp171624\_c2\_seq10

GAGTCCTGGATCTGATGGTAGATTATTAATATCAATTTCTACTCGCTCTTTTCTCTTTAAATAATGCTCCATTATATAACCCAGACTACCAGAGCACTTAGAACGAAGTCCTCTCCAGTCGCC  
TCCACCGATTCAAGCTTCAAGAACAAAAATCAAAAGAGCCGGAGATGCAGCGATCGCGTTCGTTCCGGAGCTGGAGCGGAGCGAGTCGCATTCGTTCCGGAGCGGACAGCCG

>comp171646\_c0\_seq11

CTTGCACTCATGCGGTCTGACTCCAACAAGATTCTGCGTGTAAACCACCCGCGCACCAAGCCCTGCGCCTTCCCACGTGCCGTGCTCATCACATTTCCACGCCCTGCACTGCCCGCTCTGG  
CCAGGGCCCTGCATGTCCTCCACTGGAGTCTTGCACTCCTATGCGATCTCTTCGTGCACCGCAAAACCTCTCACCTCTAAGCGCCCCATACTACCGGCACTGCTCCTCAAGAACAGGCCA  
AATCCACCTCAAAAGATGTGAGCCCATCTTCTGCTACAATCTTGATTACAATTTCTTCCAAACTCCAAGAAACCCCTCCATAGGCTATGGTTCTGCTGTGTCTTCCAAAAATCTGAATGGA  
AGGGTTCCTCTGTTCTGTGCAATTGCTCAAGAACTCCTCTGACTCTGCTCTTCTTGCAATTCGATAGCTCCAGACCGCCGGCAAGCCGAGGTTGATCGCAAGAAACACAAGCCCACATCC  
ACGAACAAGCCACGACTCAATTCCTGCCTCTGATTGTTGCGATCTTTACGCGGGCTTCCGTTTCGTTCAACCCCGAGCAAGCCTCAAGCCAGCATCAACAACCCCTGCCGCTCTGGTAGC  
CGAACTCAGCTAGACATCTCGCTTCCCTACTCTGTCTGACGTCGCTGAAGAGCACAAGACTACACGTCCGCCTCCCTTTCCACCAAGCGGAAGAATCCAGTCTCACCTCCGATCGGATC  
AAACCTCAAAAGCCAGTCCCTTGCACCTGTTGTGCGCTTCTCTCACACGACCAACAGCGACACCTGCGCCGCAAGCCGAAACGCGACACCTGCGCCGCAAGCCTCCAGCCTTCTCG  
CACTTCACGTGCGTAGCTATCCTGCTCCAACCAGTGAGCTCAGCCCAGCTGCCTTGACAACAAAGCCCATATCCATCGCCCTTCTTCGGATCGTTTTCTTTGGAGAAGAAAACCGCCTCTC  
CTTACCTCAAGATCGTCAACCACAGGGCTCTAATATCATATGTGAGATCTTGCTTGAGAGGAAGAAGCACTTTTCTTTCTTGATCTTGGGAGATGAGGAGGGACAGAGGGAAGGGAGAC  
AGAGAGCTGAACTCAAATTTTTATTGCTTGACCATACTCTCTTACAACATAAAGCTCCTATTTTATATACTTAAAATAGTAACATCAAAAGCTACACTAACAATAAGTCATATAAGAA  
ACATCCTGAATCTAGGACCAATATCTAATAAAAAACAATATCAATGAGTTTATAAGATGAACTAGTATATAATACTTGGCTTGTGTTTCAAGAAATAAGACACAAGCTGTGAGGTTGTTTCA  
TCCCTTTTGGGATGAAATCAAGAACTGCTTCTTTGGTTGGAAGTGAGGGAATTGCTCCCTCTCAGTGACTGTGATTGCTCCGCATGCATTGGCGAAGACCAAGGCTTCTTTTAGTTTCTT  
CTCATCCTGATAAATATCTAGATTGGACGCCAAATGAACTAACAGCCCGCTGACAAAAGAATCACCAGCACCAGTAGTATCCACAGCTTTAACTCTAAACCCACCAACTCTCCCATGGAAT  
TTCTACTCTCACAGATCAATAAAATGTATCAGAGTAGTAATATTAATGACCCTTTTCTCCAATTGATGACAAGTGTTATATTGGCATATACCTTGGTGTAGTATCTGCAACCCTTTTCTCCTT  
GGTTACAACAAGGAGTTTGAGATTGTCGTGAAAAAGATTATTATACACAACCTCATCACTATAAGGGTCTTCACCTCCAGTCAAAAATGAGATTTCTGCTCACTCACCTTGATGACATCT  
GCGTATTTCCAGATGCTTTTAAATGCCCTCACGAGCAGCATCTGCTGAAGGCCAAAGTGGAAGTCTCAGATTAGGATCATAGGAAAGAAGGAGACCTTCTTCTTGGCAAACCTTAAGAGCA  
GCAAGATGAGTTGATCTGCACGGCTCCTCGATCAAGCTAATGGAGCCATAATGAAATATGGAACCCCTTCTTGATGAGATGAAAATCAAGCTCGGATTCTTTTCAGGAGCATATCGGCGCTTG  
GATTTCCGGTAGAACATGAACTCCCGTTCGCCGTCGGCCCTAAGAGTCAAAAGGCTAGTGCAGTTCTAGCGCCGGTGTGGAAGCAGACACCGGAGTAATCCACATTGTTGATCTTCAAAA  
TGTTGGACAGCATATGCCCCGAATTCGTCTGTCGCCAACCTTTCCGATGAAAGCAGAGGAACCAAGCCTGGCAATGCCGACGGCGACATTCGCCGGGGCGCCGCCGGCGCCTTCTTG  
AATGCCGTAGCCTCCGCAAGAGAAACACCGGAGACAGTCGGGACGAAGTCGATGAGCATCTCGCCGAAGCAAATAATGAACGGGCTTTTCTCCAATTACCAGAATCGTTCTTAGCCAT  
TCTTACACTTCCACGTTGAGAAACAAGAGAAGATAGAGAAAACAACAATAAGATCAAGCAGATAAAGCACCGTGAATGTTTATGGAACAGATTCAAGCGAGACATTTGCGATGTAGATA  
ATATAGGCGAAGGGGGAAAATGAACGGAACGGAATGCCCTTTCTGTGCTGGCAGCGCTTCTAGAGCGAATCTTCGCTATTTTCAGCTGAGAAGATTGGTTTGTGTTGGCAAATTTGCATGC  
CAACTGTTTCGATCAAAGGTCGCAAAGAGGGTTTTCCACATAACCCTGAATTTCTGTTTTGCTTTTTGGGTTGAGAGTAGCTGGAAGAGTAAGGAAAGGATTTGTGATCTATTTTCGATA  
AAAAAAGGACGATAACCGGTGGTTGTGAGGTGGCGATTTTCTGACGCGGCGACATTTCAATTGGGCGATAACGTGCGGTTTCATGCTAATCTTGAGATAAGCCTGGTGACGCTTACTA

ATCATGTGTTTGT

>comp171646\_c0\_seq7

CTTGCACCTCATGCGGTCTGACTCCAACAAGATTCTGCGTGTAACCAACCCGCGCACCAAGCCCTGCGCCTTCCCACGTGCCGTGCTCATCACATTCCCACGCCCTGCACTGCCGCGTCTGG  
CCAGGGCCCTGCATGTCCTCCACTGGAGTCTTGCACCTCCTATGCGATCTCTTCGTGCACCGCAAAACCTCTCACCTCTAAGCGCCCCATACTACCGGCCTGCTCCTCAAGAACAGGCCA  
AATCCACCTCAAAAGATGTGAGCCCATCTTCTGCTACAATCTTGATTACAATTTCTTCCAAACTCCAAGAAACCTCCATAGGCTATGGTTCTGCTGTGCTCTTCCAAAAATCTGAATGGA  
AGGGTTCCTCTGTTCTGTGCAATTGCTCAAGAACTCCTCTGACTCTGCTCTTCTTGCATTTCGATAGCTCCAGACCGCCGGCAAGCCGAGGTTGATCGCAAGAAACACAAGCCCACATCC  
ACGAACAAGCCACGACTCAATTCCTGCCTCTGATTGTTGCGATCTTTACGCGGGCTTCCGTTTCGTTCAACCCCCGAGCAAGCCTCAAGCCAGCATCAACAACCCCTGCCGCTCTGGTAGC  
CGAACTCAGCTAGACATCTCGCTCCCTACTCTGTGCTACGTCGCCTGAAGAGCACAAGACTACACGTCCGCCTCCCTTTCCACCAAGCGGAAGAATCCAGTCTCACCTCCGATCGGATC  
AAACCTCCAAAAGCCAGTCCCTTGCACCTGTTGTCGGCTTCTCTCACACGACCAAAACAGCGACACCTGCGCCGCAAGCCGAAACGCGACACCTGCGCCGCAAGCCTCCAGCCTTCTCG  
CACTTCACGTGCGTAGCTATCCTGCTCCAACCAGTGAGCTCAGCCCAGCTGCCTTGACAACAAAGCCCATATCCATCGCCCTTCTTCGGATCGTTTTCTTTGGAGAAGAAAACCGCCTCTC  
CTCTACCTCAAGATCGTCAACCACAGGGCTCTAATATCATATGTGAGATCTTGCTTGAGAGGAAGAAGCACTTTTCTTTTCTTGATCTTGGGAGATGAGGAGGGACAGAGGGAAGGGAGAC  
AGAGAGCTGAACTCAAATTTTTATTGCTTGACCATACTCTCTTACAACATAAAGCTCCTATTTTATATACTTAAAATAGTAACATCAAAAGCTACACTAACAATAAGTCATATAAGAA  
ACATCCTGAATCTAGGACCAATATCTAATAAAAAACAATATCAATGAGTTTATAAGATGAACTAGTATATAATACTTGGCTTGTGTTTCAAGAAATAAGACACAAGCTGTGAGGTTGTTTCA  
TCCCTTTTGGGATGAAATCAAGAACTGCTTCTTTGGTTGGAAGTGAGGGAATTGCTCCCTCTCAGTGACTGTGATTGCTCCGCATGCATTGGCGAAGACCAAGGCTTCTTTTAGTTTCTT  
CTCATCCTGATAAATATCTAGATTGGACGCCAAATGAACTAACAGCCCGCTGACAAAAGAATCACCAGCACCAGTAGTATCCACAGCTTTAACTCTAAACCCACCAACTCTCCCATGGAAT  
TTCTTGGTGTAGTATCTGCAACCCTTTCTCCTTCGGTTACAACAAGGAGTTTGTGATGTCGTGAAAAAGATTATTATACACAACCTCATCTATAAGGGTCTTACCTCCAGTCAAAAA  
TGAGATTTCTGCTCACTCACCTTGATGACATCTGCGTATCCCAGATGCTTTTAATGCCCTCACGAGCAGCATCTGCTGAAGGCCAAAGTGGAAAGTCTCAGATTAGGATCATAGGAAAGA  
AGGAGACCTTCTTCTTGGCAAACCTTAAGAGCAGCAAGATGAGTTGATCTGCACGGCTCCTCGATCAAGCTAATGGAGCCATAATGAAATATGGAACCCCTTCTTGTGAGATGAAAATCA  
AGCTCGGATTCTTTCAGGAGCATATCGGGCCTTGGATTTGGTAGAACATGAACTCCCGTTCGCCGTCGGCCCTAAGAGTCACAAAGGCTAGTGCAGTTCTAGCGCCGGTGTGCAAGCAG  
ACACCGGAGTAATCCACATTGTTGATCTTCAAAATGTTGGACAGCATATGCCCGAATTGCTCGTCGCCAACCTTTCCGATGAAAGCAGAGGAACCACCAAGCCTGGCAATGCCGACGGC  
GACATTGCGCGGGGCGCCGCCGGCGGCTTCTTGAATGCCGTAGCCTCCGCAAGAGAAACACCGGAGACAGTCGGGACGAAGTCGATGAGCATCTCGCCGAAGCAAATAATGAACGGG  
CTTTTCTCCCAATTACCAGAATCGTTCTTAGCCATTCTTACACTTCCACGTTGAGAAACAAGAGAAGATAGAGAAAAACAATAAGATCAAGCAGATAAAGCACCGTGAATGTTTATGG  
AACAGATTC AAGCGAGACATTTGCGATGTAGATAATATAGGCGAAGGGGGAAAATGAACGGAACGGAATGCCCCCTTTCGTGCTGGCAGCGCTTCTAGAGCGAATCTTCGCTATTTTCAGC  
TGAGAAGATTGGTTTGGTGGCAAATTTGCATGCCAACTGTTTCGATCAAAGGTCGCAAAGAGGGTTTTCCACATAACCCCTGAATTTCTGTTTTGCCTTTTTGGGTTGCAGAGTAGCTGGAA  
GAGTAAGGAAAGGATTTGTGATCTATTTTCGATAAAAAAAGGACGATAACCGGTGGTTGTGAGGTGGCGATTTTCTGACGCGGCGACATTTCAATTGGGCGATAACGTGCGGTTTCATG  
CTAATTTGAGATAAGCCTGGTGACGCTTACTAATCATGTGTTTGT

>comp171667\_c3\_seq13

ATTACTCACACACACAACGCATACACAAAGACTCGAACCCAAGACCTCTTAGTTGGAAGCATAAGCTCTTCGGAGACTTCCGATAAAATTAGTAATGTTTTACTTCACTACTATAGTTTTG  
CCGCGTACCAAATGCCGAAAAATTGAAAAGCCATGTATTCCGATTGTAGTGCACACTAATTACCGCAAAACCAATAGCCCCTAAGGATGTCAAAAAAGCACGTTTGAATAATTTTCGAAC  
AAATGAACTAAATGGCATTAAAAATTAATATGAATTGAATCATAAAATATGATATCGCTTTGAAAAAATGGAATTTCTTAAAGAAAATTACAATAAAATAAATATTAGGGAAATACAAATT  
AATATTTTGAACGAGTTGAGACGCT

>comp171675\_c0\_seq9

GTATCAAATCATTACAGTCCGAACGGTTATTTCTGTCCGAACCTCCGCGCAGAATAATTTATCATCACCCCTAGGACATGCATAAAAATACAAGCTTAAAGGGTGGGTCATTGGGCCAATCGA  
ACTGAATTTGAATGATTATTTAGCCTATTTAGATCAATTCGAAGCCCAATCACACTTGAGTTTCGAAGTTTTTAACATCGTTGGAATAAGCAAAGGTAATTCCTATGCAAAGTAATGATATAT  
TCCACTGCTCACACCACTACAGACAAAAGAAGAAATGGTTGAGGAGAAAGCTACCATCTTGCTTTATTTCATTGATGATGATCACAACGAGCATCAGCTCTATCATAAGATACAGAATTCAA  
AACCAACAGTATTATATCAAACCTTCACAGTAGCTTGATCTGCTGCAAGAAGGGAGAGGGCTTACCAGCACTAGCTCCAGGGGAGAGCCTAAGTTTTCTGTACTCCTTGAACAAGAAA  
GTCTGATATAGCCGTGGGTGCTCGAAATCGATGAAGTCTTGTGCGGCTCGACCATGTCATCTTCGGTGCAGCATGAACAGTGCAATAGAGATCCTTGGCAAGGCTTCCTTGCATTGCA  
CCCTATGCTTTATATTGTGCAATCTACCATTGCTCCACACCTTCATATAGCACATCATGCAGCTTATGAAAGCTTACACAACAAAATTGTAGTTTCAGAGAGACGCAAATAGTATTGATTGTC  
ATTGGTATAGAATAAAAGCAAGAGGCTGGAAGGTTACAATACACCTTGACACACCAACAACCTCACTATAAGAGCTGGCCATACTAGTCATTAATTTAGGCTTCGTTTGGGAATACTTT

>comp171709\_c0\_seq1

CTGATTAATTTATTAAGCATAGTACAAAAGCAAACAATATGATCTAAGAAGAAGAAGGAAAAAAAAAATCGCTTTATTAACCTAATGTAACGTAGGAACATAAGAAATCACAAA  
TCTGACTACAACGTTATTTTCCAAAGCCAATTTGCTTACGGTGACCGTTTAGGGTTTTCTCTTTTCGTTGCTAATTCCTAAGCGGGTCTTCCGTTAACTATTTTCTATACGATTCCATGGCTA  
AAAAAGTGATTTGCACTTGCCAATTCGTTTCTAATGCATTTGCTGCTGCGCCAGCCTTTGTTATGGGAAGGAATTAGTTCTCAACAGAGCCCTCGTTGATTTCTCCCGCTCAGCGACCG  
GGATCACATTTTCCACAAGCTGTTGAAACCTCCAGTTTGAAGATCTTCCCGTTCCCTTGAGAAGGATAGCATTCTCCTCCTCCAGCTTGAACACTGTCTGCTCCAGTTGATTTCGTGTATTGC  
TGCTTTCTTTCCCTAGACCTCGCCGCCGACTCCCTGTTCTTAATCATCCTCTTCTGCCTCTGCAATGCCGCTCTATCCACCGAATCTACGGCCGACCTCTCTCCCTCCCTCTCTCCGCT  
CCTCCACCCGCAATCCCCACCATCTGATTCCCCGTTTCTCCAACCTCCTTGCCCAATTCGATCACTCGCAGCCGCCGCTGTCTCAAATCCTCTGTTTCTACTACTCTAGCTTTAGTCAA  
GTAATCCTCCAAAGTCACCTCCCTGAAACGCGATTTCATCCCCACCAGAAACCTCCGTACAATTTCCGGCGGCCCTCTCCTTCGCACAGATTTGGAAGAAGATGTTCTTCTACGCCCCCGAT  
CGAACCCTGTTGTTCCGCCGAGATCGGCGGCTGCATTGAGGAAGTAAATCGAGGGTTTCAAACCTGTGTTCCATATTGGCCGAAGAGGGAAACGACGAAGACATGAACTGTGGCCACG  
CCATCACCCAGTTCAGGGCAAAAATCTCTTGAAGATGAAAGTGGGGATCGGAGGCTTGAAGCAGAGAACAGTGCGAGGCTGCCAAGTGGTTGCTGTTCTTATTTATGCAAGGTCCGAG  
GACGGGCGGCGCATTTGGTGTCCGCCGGCTTTCCGTTTGACCTGGTTTTTTTTTTTTTAACTATCCGGCTTGCCCGTTGACGCGAGGCCCGGTGGCTGAGATCGATTTTTAAATAATATTT  
AAATTTCTGCAATGCCCTGGCTGAGTTGGAGATCGAGAAAGGCACCTGAAAGCGA

>comp171731\_c0\_seq2

AATAATAGAAGAGTGAATTGTGTCATATAGTGGTGCAGAAATAGATAGCAGTAAATATGATGAGAACAGGATGCGTAACATATCAAACATATTATAAAGGAAAAAAAAATCTGCACAAAAT  
CTCTAATTGAATAAGCACAACAGCAAAGGTTTTGTCTTGTTGGCTGCCATACATTTAGGGAAGTACATGAATGGAAGAGAGAATAAATTTTGGTATATTGGTGTGGTCAAGCACTTATTAT  
TTCACCTTCATATATTTTAATTAATCTATGTGGTATTATATTTTCATGTGTCCCTCTTAACCTTAGGTTAATGTTATGGTGGTGCACAACACTTAGTATGCCACAAATGATCATAGACTTTAAAG  
AGTCACATAAAATATAAATTTAAATTAAGTTAAAATTATGGCATTTTAACTAACTCGAATTCCTAAGCTCATGATTGGGAGTTAATCACTTACATTTCTAATATGATTAAGCCTGCTAGTGA  
TGAAAAATCATTGGGAAGTAATGTCCAAAAATTTGAGAAAGCAGCAGAAAAAATTTGAAGAAATAAGTGATAAGGACTCATAAAGGTTTGAAGGATGTGTTTTTTGTTGTTGAGAG  
CCAGAAAAAGGCCTTATTTCAATGATGTAGCTCATGAGCTTGGCAAAGAACTAGTAAGAAATAAGAAAACCTTACTAAATTTAGCTTCATTGCTCTTACGATCTATTCTATGCAATTTG  
ATATTTATTAATAAAATGTCATTTTGTCTTTAGGTTTATATGAAGGTAATATGATTTATGGTGGGGGAAGTATAGGTCTCATGGGTTTGATTTCTCAAACCTGTCTTGGTGGTGGTTGTCATAT  
CTTAGGGTGTAACTTTTACCATGTCTTATCTTTGTTAATTATATTTATTTTCATGTTTCATCAAACTAACCAATATTTTCATTTATTTGTATAAAGAATTATACCAAGAGCCTTACTACCTCACGT  
GGTAAAGAGCTATCACGATTTTAAAAAAGCTTCTTCTTACACAAAGAGTTA

>comp171731\_c0\_seq5

GAAATAATAAGTACTGACCACACCAATAGACTGAATTTTGTCTCTTCCATTCATATACTTCCCTAAATATATGTTAGGAAAACAAGCAAAAACCTTTGCTTTAGTGCATATCCAATCAGTG  
CTTCTGTGCTGATTTTTTATCCATTATAATATGTTCTGATATGTTCTTCATCATGTGCCACTATATGACACAATTCCATCTTTTATTCTTGCCAACCTTTTGTGGAGCCCATTGCAAACCTTTATC  
TGCATATATAATTTGGATAGCTGATTTATCTTTTTTTTTCTCATTTTTGTAAATTTCTTTGATCGGGATAATAATGATAAGTCTGATTAATTTTTTATTTAATCTTCTAAACATTGACTACGATTAGAT  
TCTTTGTAATTGATTTACTGGAACATTTCTTGACAAAGTAAGTATAGATATTTCTTATTAATAATTTTGACCTAGCGAACTCTTAATATTTTTTTTTTTTGAACCTCATATACTTCTGCAGTTTT  
ATTTCTCAAAAAGTAGTTCTAGCAAATAAATTATAAAGAATCAAATCATATTAATAAGTTAAAAAATTAATGAGAAAATAATCAGACTTATCATCATTATTCCGATCAAATAAATAACTAAAA  
ATGAGAAAAAATAAGTCAACCATCCAAAAAACCAATATAGAATCATATAGCAGTAAATTTGGGAAGGTCCCAATACCAATAACAACAACGCTTAGGCTGAGAGGTATCAAAAGCATAAC  
ATGGTATATGTACAGATAAACTATGCAATGGGTCCAAAGAAAAGTTTGGCAATAATAGAAGAGTGAATTGTGTCATATAGTTGTGCAGTAATAGATAGCATTAGATATGCTGAGAACAGGAT  
GCGTAACATATAAAAAACATATTATAAAG

>comp171732\_c0\_seq8

AATAAAAAACAATTTTATAATAATACCAACATCATCATTAAAAAAATCTATTTTTTAGTAGCAACCCCAACTATTTTTTACAAATAGCTACAGCCACCCCAACTAGATGCAGCATCCACAAC  
TGCAAAAAGAAGTAAAGAACAACAGCAGACAGCAAAATTTAAATCAGCTTATAAACTCTGTATCAGTTTGACGATTTAGTACAAAACAAAATTTATGAACCTTTCTACAAATGAATCAGAA  
CAAAAAAAAATGACAATAAAATAGAAGGACAAAACCATAATTAGTTATAAAGAACAATACAATGGAGCCTGATTGATCATATTTTTGCTCACCTGAAAGAAGATATCTGCTTCCAGCTGG  
AAGATCTACGATGAGTCTTATGTGGTGTGAAGCTGAGTCCAAACATCTCCTTGAGAGCCTGCTCTGGTTCAAGGAGACCAATAAGCTTTGCCACAAGTACAGCACTTTCTCTTATCTGTTT  
CATGTCCATTGTATTGGTCCATAGCAGCCGAGCCAGCTGCATTCTACGCTGCTTAGAGGCCAATTTGATGCCCATTTGCGGTAAAGAGCCTCCCTTTCTCCTTTGAGAGCTTTTTTCAGCA  
TCCTCTTATGGAGCATATCTCTCAGTTCGAAGATTTCTTATGCTTGAAGAAAGAGTGTCAATTTCCACTGTCCTGAGATATCATCTTTTTGATAAAAAGACAGCCTCCTACGCTCCACTTCCA  
TGTAATAGAAATCAGCAGGTTACCTTTAAAGAGTAGGAAGAAATAAGTCTGTGGATCAGGGAGACAATACATGCATCCCAGAGTTCAATAATTTCTCTCTGTAGTTTTTCAAACCTCCAA  
AGGCCACTGAGAGGGGAGATTCTGTGCAACGTATCAATAGGTCTGTACTGGAATCTCTTGCAGTTTTCTCAAACATATAGTTGTCAAAGGAGGTATCATGCATCTCCCGTTTTCTTTGACAATT  
GTTTCTGACATTGAACCTGAGCCATTTCTTTCATCCCTTCAACAAAGTTTGAATGCTTGGAAATGTCCACTTCAAGAGGAGTCTTACAATGCTTTGCTCTAAGCTTATCTTCGCAATTTCTA  
GTATGCTGAAGTTTGGGTAACCTTCTCAGGAACCTTGAAATCTTTAAATTTGACCTCCTCATCCGAAAAAATTTCTGATTTCTTAAACATTCGAAAAGGTGCTTCAGTTTCTGAGCCACAAC  
TTAGAGAAGAATTTCCAGTTGAGGCATCTTCAGGCCTTATCAAAAAGCTTCTTAGCCGAGCTGTAAGGTGCATTTGTTGTTTTCTCAGATTCTGGTGGCCAAAATAATTTGCACAGGCTCT  
AAAGCTAGGAAAATCTCCCAAAAAGCCATAGAATTGGTTCATCCATATCTGGTTTTGACAAGATTTTTGCAAGCTCGTCTCACTCCCACTTGATGTTTCAGAATTTGAGCCGCTTTTGCTT  
TAGCAACAAAGGATGTGGGCATCAGATTGTCACAGTCTTCATCTAACAATAGACTAAACTCGTCTTGTTTACATTCAAATCATTATTTCAATACACTGAACCTCCTTACAGTGTTCTTCA  
GAAGTTTCAGAAGCAATCTCAGGAGCTTGAGAAGCAATTTGAGCAATGTGTCTTTCTATGCCACTGAGGTTTCAGACAACCTTGTTATCGCCGACGACTGTAGATTGGCTTCATAGTAAT  
TGTTTCGAATGCGGTATCCGGCACTTTGAAATTTCAAATTTCTGGACTCTGGTAACAAATTTCCCGAGGCCTCGGATGTCAATGATTATCTTCTGAAGTACCGGCACGATAAACAGACAGTTG  
GCTGGATTCATCCAGTGTCTTGAAGAATGAACATCATCAAAAAGGATTGCGTATATGTCGCATTGATAATCCTCTGGTTTTCTCCAATCGTCTCGACGCTTGATCATCCCAATGGATCTAA  
GCAAATTTGCAAGTTGAGCCTGACCAAGATCTCTCTGCTGAATTAGCAGCTTTATCTTTTTCCCATCTTTACTATCTGTTTATCTTTTACCTTCAGTTTCTGTATTAGTTGTTTTGTGGAT  
CGAGCCGACATATCTCAGTTTATCTTCTAATCTTGAAGTTCTCTCTGTAAATGTTTTACGAGCGCCTTGTCTGACATGACAACATTGACACGTGCGCTGGTAGCTACTTCTTTGCACAGC  
TTGCAACAAAAGTGTGTTTTCTGTTTTGCTCAATATGGCTCCTTGCAGGGCTCATTGTGCAAATGATGGCAGTTCTTGCATTACCCCTAGTGAATTTCTGTAATATTCGTGTCAGCTTTGAA  
TCTCGATAAGGAACATGAGCATTCTTCCATTGCTAAGCTTTGCAATGACAGTTCCAGAGTAAGCAAACTCTATTAATGTGACTACCTTCTTTTACGCTTTGTCCAGCAGACAATGTCTG  
AGAAGCTCGTTCACTACCAGCCAAATCAACGAAGTTCACAGTGGCTGCAAGAGAGCTAGCACGAAATTTCTTAGCCGAGCTTTCTATTGTGCTGAGTATCTGGTGAGATCTGGAGCT  
TGCTTCATTTAATGTGGTCTCGCCTATCTGTCTTTGAGCTTCAAAAATAGCAAGAAGCTCCTTAAGATGGCTTTTCAATCCCTTAAATGTTTCTCGGTGAGCTTTTCAACAATAGTTCTCTCTC

TGGATCATCAAGAAGCCTAAGATGGCTATTGTCAGAACTGAGAAGATCTCTAACTGCTTCGTTATATATCTCCATAGCTGAAAATTTTCAGTAGGAATTCCTCTCCTCATGCTTCTCCATGTA  
ATCATAAATATCTTCCACAAAGTACTCTGCTATTCCATTCAATTGTGTAAAGTCTTTCCACTGCTGGTTTGTCCATAAGCAAAAATGCTTGAGTTGATGCCACTGAGTACAGAAAGAGCAATCT  
CCTTTGCTCCCTCCTCGTAAACTTTTCTCGTGTACAAATTATAATCAAAGACTCTATCATATGTATAAGCGCTGGGAGACATAGACCTATCTGGGAGATTGTTCTTAAATATGATAGTGGTGT  
ATTGATGACCTCCCAATCTGATGGATCTTTTCTCTCAATTTCTTGGAACTGAGAGGTCTAACCTCACCGAAACATAAATCTCTCCTCCTTTCCGCCGCCGGCACCCGCCATTTCTGCAT  
CATCTCCATTGCTTGACCCATTCCGAGCGTAGAACTCTCCGGCGCCGGCGAACTGGTCCGCGTTCCGAGCCGGCGTTAGATAAGGAAACGAGAACGAGGTTTCTTCATTCCGCAAGAG  
GAAATGAAGTGGGAAAAGGCAAAAGGTTTGTGGAGAGAAAAATCTCTATAAGAGATCTCTCCTCATCAAC

>comp171744\_c0\_seq15

GAACTTTTACAGGGAAGCCCGGAACATCTCAAATCCCATCTCTTTCCTATGATTCTTCAATCAAAAAGCCAAAAACAAACAAACAGACAATCACCACAAAAAATCGCACCTTCCATT  
CCCCAACCTTCATTAATGGCGAAGAACAACCTGAAGAAGAATCCGACGCCGAAATCTAACCAAATAATGTACAAGGATAGCAACAACCAACGCGTAAAGGCGTGGGAGTCGACAGT  
CCGGCGAGCCCAATTCTTAAACCAGCAGCAATTCGGCCGCCGCCGCCGCGGCTTCTCTTCTCCCCATGTCCGTCGCCCTGACGACGACGAATCCTCTGACCCCAACAACACCTCCCC  
CTCCACCTCCACCAACACCCCGAATCCTCCTCCTCTTCTTTCAGACCTCATTGGCGACCTCTACTACGCCGAGCGCCTGCTCCCAAATGGCGATTTTTACACCGGCCAGTGGTCTCTC  
GCCGAATCCCTCACGGCATCGTAAGTATCTCTGGACCGACGGATGCATGTACGAAGGCGAGTGGCAACGAGGCGTCACGACTGGTCAAGGCAAGTTCTTGGCCTTCTGGTTCGAC  
TTATGAAGGCGAGTTCAAAGCCGGTTTCATGGATGGTTATGGCACTTACACAGGTTCACTTGGAGATACTTATAAGGGAGCTTGGTTCGATGAACCATCGCCATGGATATGGGACCAAATCT  
TACTCCAATGGCGATTACTATGACGGGGAATGGCGTTCTGGTTTGCCCGACGGCCACGGCCGGTATATTTGGACAAACGGGAACGAATATTCAGGGCAATGGCAAGACGGAGTTATTAAT  
GGAAAAGGTTCTGTTTACTTGGGCCGGCGGAAACAGGTTTCGACGGCGGGTGGGAAGATAGTCGACCCGTCGGCTCGGGTAGGTTCCGGTGGGCGGACGGCAGCCTTTACATTGGATTGT  
GGAATAAGGATTCGGAGGAAGAGCAGGAAGGTTTATATTCTTACATACTGCGGCTGCTTCATCTCAGCGCAACCCAAAGGAGTTCTTTTTAACCGCGTTAAGAGAATGCAAGATCT  
CCCCTCCGAAACCGTATCTATTCTCCATCGCAGAAATGCTCAACTTCTCCGACGGGAAGCTTCCGCCGCCGGCGTGGCGTCCGGTTCTGCGGATTCGGCGGCAGCAGAACGGCAGA  
AAAGGGCGAACGGGAGGAAGCATACTGTGATTGGGATTAATGGCAATGGGAAGATATGGGACTCAGATGAGGGTGGAGAGGAGGGGGTAGGCGAGGGAAGGAGGTCATCTTCATCATC  
ATCATCGAAGAATCAATTGCCGGTATGTTGTGCGCCGAAGCCGGCGAGGAAACAGGGGGTGACAATATCGAAGTGGCATAAGAATTATGAGCTCATGCTTAATCTGCAGCTTGGAAATCG  
ACATGCCGTAGGAAGACAACCAGGACAACCAACAACGCTTGATTGAAATCTTCGGCCTTTGATCCCAAAGAGAAAGTCTGGACAAAGTTCCCTCCTGAAGGCACAAAGCATAACCT  
CCACACCAGTCTTGTGATTTTCAGATGGAAGGATTAAGTCCCGTTGGTTTTTCAGAACACTGAGAAAACTTTTCAAGGTTGATGCAGCTGATTATATGATTTCAATATGCGGAAACGATGCTC  
TTCGAGAGCTTTCATCACAGGAAAGAGCGGAAGCTTCTTTTATCTGACCAACGATGATCGTTACATGATTAAGACCATCAAGAAATCTGAAGCTAAAGTGCTCATTGCAATGCTTCCAGC  
CTACTACAACCATGTCCGATCATTTCGAGGATACTCTAGTGACGAAATTTTTGGTCTGCATTGTGTGAAATTGACCGGTGCTGCGCAGAAGAAGGTGAGGTTTGTTCATCATTGGTAATCTAT  
TCTGCTCTGAATACGCCATTACAGGCGTTTTGATCTTAAAGGATCTTCCCACGGTTCGCATAACTGATAAACCTGAATCCGAGATTGATGGTACCACGACATTAAGGACCTCGATTTAAAT  
TTCATATTCAGATTGCAAAAACCATGGTCACGTGAATTCGGGAGACAAATAGACAGGGATTGTGAATCCTAGAACAGGAGAGGATCATGGATTACAGTCTACTGGTGGGTGTTCAATTCA  
GAGATGCAGCATTTCGACATGGGATGTTCAAGTCTTCCATATTAGACTCCAATCTTACTGTTGCAGAGCGATTAGGTGTCAATCAGCAAGCAAGAGTTGAGCTGACGATAAGAAGGAACG  
ACTATGAAACACAGTTGATCGGCGAACCGACCGGCCAGTGCTATGATGTTATATTGTTCTTTGGTATAATAGACATTCTTCAGGACTACGATATCAGTAAGAACTAGAGCACGCTTACAAG  
TCCATTCATCTTGATCCAACCTCAATATCTTTCAGTCGATCCCAAGCAATATGCAAAAACGTTTCAGAGATTTTCATATTAGAGCTTTCATAGAAGACACATGAAGCATTGTGTACATATAAAC  
ATATAACATCTGTGGCAAGCGCTCCTGCAATCTGTTTCATGCTGAGGCTTCGTTTGGTTCCCCAACATTTTTTTTCGTTCTTAAACGGATGTATTACAACGGAGAATCAGAATTTTTTTTGTG  
TCAGATCCACGAAAATACATAGGTGTAGCAAAAAGGTGTTTTGAA

>comp171747\_c0\_seq2

ATTCTCACCTGAGGAAATAGATTGGACAATACCCGCTTGCTGTTTGTAAAGTGTGATTTGCTGCTTCTAGTTTGTCCCGTACACTTTGTAGCATTTTAATGTAAGCTTCGGTAGTAATGGTTG  
CTACCATGCTCATGCATTGTGGCAAACGGCAACATCCACTAAGTGATTAGGACACTTAGTAGATAAAAATGTTGAATGGCATTGCCAGTGGACCGGTTTGTTCATAGCATTATATGTGAAGTT  
AGCATGGCCGAGGTCCATCGAGGAGCGTGAGAGAGCATAAGCAATCCTCCTGGGTCTGAAGATTCTGCGTCTTTTAAACCAATCCGCAAGCTTGTTCATCAGCCGATTGAATTCTTTTGGAA  
TTCCACAAATTTGCAAGCCTCCATTAGTAGAAATAACAACATAGTTGGCACTTGGAAATTGTTTTTTATCCCATCTAAAATTGCATAATAAGCTCCAGACTCCAGCAAATAATTGTTCCAA  
CTCATAGTATCCTTAGTATGCATTTTCATCGAACAGTTTCTGTGCATCCTTAATCTCCCATGTTCTTAAAATTTCTCAACAATAGAGTTCCACGAAATCACATCAGTCTTAGAGAAAATTTCT  
TCAGCTTCCTTCCAAAAGTCATAATTGCACATTCTTCACTATTTCGGCTCAAAATTGAACTCCTTAAACTGTAAGTACCTTTTTAAATTAAGCAACGTCTCCTCGCTCCTAGAGTTTGGGAG  
CTGTATCAAATGGAGAGCCATGGCAATTGAAACGAACACAGCTCCATTATCATCAAGGACATCCAGAACTCTCCCTTCAAAGCTTAAAATCTTCTCATGATCATCAGTACCAAGGGAGTCC  
AGATTTTGTCCAACCTTTAAGCAAGGAAGACCAAGTGATCTGGCCAGAGAGGGCGGATGATCGAGAGGGTGATTCGGTTGAGCTGAGACGAGACCTAGGATTTGCATATTC AACGACAGA  
AACATTGGCCCGTAGCTGGTGGCACCCGATCATGGTTGGGAGATGTTGCTGGAGTGGGGCCTGTGCGCGGACTGAATCATGCAGATAAAAATTGGAATCGTGCCAGATCGGGTCGAAAC  
GATTTGCGCCGTAGAACTCTGCGGGTGCGGGCGTTCCAACCTAAAAGTTTCGTTTCAGGCGTCTGCTCATTTCATCCTGCTGAGGTGGTAGCAGACTGCGAATCTAGCATTGGGAGAA  
GCTTATCGTAAACCGAGAGTGCCTTGAAGAGGATAACAACACGGTTCCCAACTGTACCAAGAGTTCGTCTTGTGCAAGAAGCCAGCGACAGGTCCAACGAGCAAGCCGTCGTGAG  
GGCTGTGGTCGGCTTGTGGATAGCGAAAAGGGCCACTGCACGCCAGAGTCGTGCTGGAGTCGCGCAGATGCTGAAGCTGTGCGGGTGAGCGCGTAGGACGCGATGGCGAGTCTGATA  
ACGGCTTTGCACAAGCTGCAAGCGAACGTCCGGGTGGCCGAAGGATACGACAGTGGCGCAAGCGCTCTGTGCGAATCGCAGTGGGCGTGCATTAGGGTCTCCGGGACATACTTGCCCC  
CAAATCTCCCAAACCGGCCGAAAGAATCTGGCCTCTGCGCGGGGAGCCCCACCGCACCGTTCCTGATTTCCTCTATCGCCATAGCGGTGGCTGATACCTCCCGCCTGGCCACTGTTGCAA  
GCAGATGCGAGCCCGTCCAGACCTTGCTTGCAGGAAGCTGCACGGGTTGGAGAAGAGGAATACGAGGACTTCGAGGAGGAGAAAAGAGGGTTTATGCAAGGTTCTCTGATGGTCTG  
GTTTGTGGTAGAGGTGGCGACTGCGGCCATGACAGCATAGATAAATCGAGTGTCTATGGCGTGATTTGCGGATTCCGCTGAAGGTTGGAGCCAATGTGATTGCTTCGCGTGGGTAAGAGG  
CGAAAGCTGCTTAAAGCAGGAGAGCCTCTTAGATGCCGACAGGTGATGGCTTGAAGAGTCTTCTTGCGGTGAGAAGAAAGAAAATAACCAATGGCGAAAGCTCAAAAATGAGATCAGT  
CCTAGGTGGACTTGAGGAGGTGCCAGAGTGGTATTGCGGGAGCTGAGCGGGGGTTCAGGCGGGAGCGGAAGAAATCTGGCGTTGGCGGGTTTGGTTTGGTAATCGAGCTTCTCGGCGT  
CTTCGCTGTATGCTTCCGAGTCGGGGCTGAAATCACGCTGTTCAACGGAGTCGGAGCAGGCAACAACACTGGAATAGGGTCGTGATAGCTCGAGCTCAATACCTGGAGCAACATCGTGA  
TAGCAGAGTGAGTCTCTGTCTGCTGCTGCCAGAGTGGAGTGTGCAGCAACGGGGGAATGGTGTGCTGGACGCCAACGGAGAAATAGTATCGGCATCGAGCTGTGGATCTACTCGGGC  
TGTGGTTACGAGCTGGAGCGACGGAGGTCCGACAAGTGCGGAATCGACCTTTGATGTAAGATCAGGAGGAGAGAGCGAGTAAATGTCGGATGATAGCTTGATTGTCGTCGTGCGTATTC  
GTTCTAAGGAACGATTGAAATTAGCAAATGATGCATCCATTCTGTCAAGAATTGCATTCACTTGAGCTGCTCGAAGGGTTTCACGGCGTCGATCTTCGTGCAAGGTCCTTCTTTGGCG  
CCGTTCTTTGTGAGGATAGTGGGGCGGGGATCCACCATTGTGGTGGAGGATAGTCGTCTTCTTCGT

>comp171748\_c3\_seq1

GTCGTCAAAGACATGGCGCCATTGAGGAACTCAAAGCCTCTGTTATCCTCACAAAGATCGGGGCGAAAAATCCAATGAAGGACTTACCAGACACAACGGATAGGGGGCGGATCTTTG  
CCTGGAGAATTGTCTCAAGGTGCAAATGCTTGTGTCAGGAAACTGTTCTCTATATGTTTGGTTTTTGCATAAGTTCCCTCCACTCAAAGGAACCTTCACGAATGAGACTGTCTAACTGAGACTT  
GACGGGCATTATATTCTGATTAGATTGGAACAGTCAGCTATAACAGCAACTAGTGTGTGCATGCACTCTGACCAGCGGCTCTTTCCTCCTCTGGTCTATGGATGCAAAAAGACCTGA  
GTGGAGAGCTTCATCAGTCCACAACGGCTAATGATTTCTTTTGAATCCCAACTGCCAACAGCAAAATTGTCATCTCCAAAATCTGATATTGATGAATGATGAGCAGACCCATCATCATCAG  
ACTTCTTTCCAGATAAAGATTTCATCAGAAGAAGTAAGCAGACGACGGTCATAGTCAATGTCATCCCCCTCCCTCTTCTCCATAAGCTTTCTTCAACAAAGGTTACCTTTGCTTTAGGAGA  
TCTAAAACCTATACTTTCTCTTTTCCAGGGAAGGATGCTT

>comp171755\_c1\_seq10



AACTCGGCTGGGCAAAGCCCAAGTCCCTGGTTTCGAATCCCATGGGGCGGTGGTGACAGTTTTAAGCGTTGGCCTGGGTAAATGGTGTGGGTTGTCTGTTAGGTTGATCGGGGTTTACTCG  
CCGCAAAGTGGAGGGGTTCTCTGTCACCAAAAATAAAAAATAAAATTCCACGCGGTCATTGGACGGCGTCCAGAGACGAATTAGTATGTGCCACGTAATTTCTTACTGTGTACCGGTGCGG  
TGTACCGCTATGTAICTCGTTGACGTTGTGCATTTTGATTCACCGCTAATGATCGCTATTCAATAATAATAGAGGAGCTGTTATTAATATATTTTAATTATTATTTATTGTTTGTTTTTTTTTTAGC  
CTTTGTGTGAATATTTTGTAAATCAAGAATGGCTAGTTGT

>comp171755\_c1\_seq2

AATATATAATAATAGCAAAGACAGGAACGCCTCAGATTTGGGCCCTAAATTTTTGCGCAAAGAAAATATGAATGGAGAGAAGCAAAGGCCCGGTCTTACAAACTCCTATGGCTCCTAAATC  
CACTCATTCTCCTCCATTGCCTGAACCGACTTAACTAATGATAGATAATGAATTTTCGAAGGAGAAAAGTTCTCTGCATTTCGCTTATATAATACTCCCTTAATCATTCTCTCCCTCAATCCGT  
TTTCCAGCATGGAGAGAAAACGTAAGTGAAAAAGACAACGAAAATTTCTACAGGGAGATTGAAGAGCGGATCATTGACTCATTTCGGATGACGACGAGGAAGAAGAACAAAAGAGGA  
AAAACGGAGCTCCTCCGCTCTCCATTAATGGAGAAAAGACCACAGCCTTTTTCAATGTCTGATTCAATTTGTTGATGCAAGCTGTATGGAACGTTTGATAAGGGGATGAGGCAATGACAAGC  
ACCTTTGTTTGTGGGAATTATCAGAGGAGCGCATGGTTAGTGCATGAGCTGGAGAAGGTGAGGAGGGTGCTGGCTACTGAGAGGAAAGGAACATGATTTTTTATTCCGAGATATGTATC  
CAGTTAGTTCTAAAAATTTATTCCATGCGGTGAGTGGATGTTGTCCCGAGGCAAATCAGTATGCGCCACGTCGTGCTTGTGATGTGTACCATTGTGATTTTGATGAAGTTGCGCATTTTGAT  
TTGTTGCAAATGATCGCTATTCAATAATAATGGAGGAGCTAAGTAATATTAGATTTAATTATTGTTTATTGTTTGAATTTTTTTTTTAGCCTTTGTGTGTTAATATTTTGAATTGAACAGTGGTT  
GCTTGTGTGATGTGATTACCTTTAAGGCATGAGGAAACCAGTGGGTTACTGTGTTTTTGTGTTAAGCATTGTGATTTGAAAAATGGAAATAGAAAATAAAAAAGAAAAAAAACGTTGA  
GGAATTTTAAATTTTCATACTTTATGAGTGTTTTGAATTTATTTGATTGC

>comp171755\_c1\_seq7

AGAGTATAACTTCCGAACATAAAATAGTAATTTAAGCCATTAATAAATCATTAATAATAATTTGTCAGCTTTTAAATTCAAATATATAATAATAGTAAAGACAGGAAAGCCTCAGATTTGGGTC  
GTAATTTTGGCGCTAAGAAAATATGAATGGCTCCTAAATCCCCTCATTCTCCTCCATTGCCTGGACCGACTTAACTAATGATCGATAATGAATCCGAAGGAGAAAAGTTCTCTGCATTTCG  
GCATATATAGTAGTTCCTTAATCATTCTCTCCCCATAATTCCTGAAGGTCTCCATCCACGAAGCATCTTATCTTCCTTTCCAATTGCTCCTCTTGCCTTCGTACACATTTGTCGTTAATTAAT  
GCTTTGAAAAATGTTTTACTGGTCGTTTCATCCACATCGCACCCCTTCTCACCTTTTCAGAGTCCCCAACAAATTATATAACCATTGCTGCTCCGTTTTGCTCCCATAAATAGTCGAGTTTGGCCC  
GTGTTGTTATCCTATCCAGTACTATCTGCCTTCAATCCATTTTCTGTTCATGGAGAGAAACGTAAGTGAAGAAGACAACGAAAGTTTCTACAGGGAGATTGAAGAGCGGATCATTGACTC  
ATTTCCGGATGACGACGAGGAAGAAGAACAAGAGGAAAAACGGAGCTCCTCCGCTCTCCATTAATGGAGAAAAGACCACAGCCTTTTTCAATGTCTGATTCAATTTGTTGATGCAAGCTG  
TATGGAACGTTTGATAAGGGGATGAGGCAATGACAAGCACCTTTGTTTGTGGGAATTATCAGAGGAGCGCATGGTTAGTGCATGAGCTGGAGAAGGTGAGGAGGGTGCTGGCTACTGA  
GAGGAAAGGAACATGATTTTTTATTCCGAGATATGTATCCAGTTAGTTCTAAAAATTTATTCCATGCGGTGAGTGGATGTTGTCCCGAGGCAAATCAGTATGCGCCACGTCGTGCTTGTGAT  
GTGTACCATTGTGATTTGATGAAGTTGCGCATTTTGATTTGTTGCAAATGATCGCTATTCAATAATAATGGAGGAGCTAAGTAATATTAGATTTAATTATTGTTTATTGTTTGAATTTTTTTTA  
GCCTTTGTGTGTTAATATTTTGAATTGAACAGTGGTTGCTTGTGTGATGTGTATTACCTTTAAGGCATGAGGAAACCAGTGGGTTACTGTGTTTTTGTGTTAAGCATTGTGATTTGAAAA  
ATGGAATAGAAAATAAAAAAGAAAAAAAACGTTGAGGAATTTTAAATTTTCATACTTTATGAGTGTTTTGAATTTATTTGATTGC

>comp171755\_c1\_seq8

AGAGTATAACTTCCGAACATAAAATAGTAATTTAAGCCATTAATAAATCATTAATAATAATTTGTCAGCTTTTAAATTCAAATATATAATAATAGTAAAGACAGGAAAGCCTCAGATTTGGGTC  
GTAATTTTGGCGCTAAGAAAATATGAATGGCTCCTAAATCCCCTCATTCTCCTCCATTGCCTGGACCGACTTAACTAATGATCGATAATGAATCCGAAGGAGAAAAGTTCTCTGCATTTCG  
GCATATATAGTAGTTCCTTAATCATTCTCTCCCCATAATTCCTGAAGGTCTCCATCCACGAAGCATCTTATCTTCCTTTCCAATTGCTCCTCTTGCCTTCGTACACATTTGTCGTTAATTAAT  
GCTTTGAAAAATGTTTTACTGGTCGTTTCATCCACATCGCACCCCTTCTCACCTTTTCAGAGTCCCCAACAAATTATATAACCATTGCTGCTCCGTTTTGCTCCCATAAATAGTCGAGTTTGGCCC

GTGTTGTTATCCTATCCAGTACTATCTGCCTTCAATCCATTTTCTGTTCATGGAGAGAAACGTAAGTGAAGAAGACAACGAAAGTTTCTACAGGGAGATTGAAGAGCGGATCATTGACTC  
ATTTCCGGATGACGACGAGGAAGAAGAACGGGAATTGTCATAGGAGCGCATGGTTAGCGTATGAGCTGGAGAAGGTGAGAAGGAGCGCGCTGGCTACTGGGAGGAAAGGAACAGGAGT  
TTTTATTCCGAGATATGTATCAACTTAGTTCTAAAAAATTATCCACCCACCATGGCTTAGCTCATGTGGGGGAACTCGGCTGGGCAAGCCCAAGCCCTTGGTTTGAATTCCATGGGGC  
GGTCATGATAGATTTAAGCATTGGCCAGGGTAGATGGTGTGGGTTGCC

>comp171756\_c0\_seq2

AGCTCAAAGTGATAGACACTGAAACTGGATTCTCCCTTGAAGAAACAAGTCTGGCGAGATTTGCATCCGAGGTGCTCAAATCATGAAAGGTTATCTAAATGACCCGGAAGCCACGTTA  
GCAGCAATAGACGTGGAGGGTTGGCTACACACAGGCGACGTAGGCTACGTGGACGATGATGATGAGATTTATATTGTTGATCGGGTTAAAGAGCTAATCAAATTTAAAGGCTTTCAGGTG  
GTGTTCTACAAAAGATTGCATAAAAGTTTACTTTGTTTCATGCCATCCCCAAATCACCTTCAGGGAAGATATTGAGAAAGGAATTGAGATCCAGATTGGCTAATGCTTCTTCCCTTATCAGACC  
ACCACATTGAGCAATTACTGTATTTATATTTGTTAGGAACCAGCCTTATTATGAGCATTATATTATCATGGAATTTCTAAATGGAATATTATTTTGGTGATCTTAGATGTTTATTATAATTTATTG  
CTTATTGATTGTTTGGACAATAATAAAGTTTTTTTTTCCCCCTTCAATAAACATTCAAATTTTGTTTATTTTAAAAATTAG

>comp171757\_c0\_seq2

TAGTTATAATTAAGACAAACTAAAACGAAACATTTTTTACTTATGACAACTTAATTGATATGTCAATCTTCAAAAACCTTAAATCATTTCCTCAATTCTTTACGCATCCAACGAGCCTTGAAT  
CTGTAGGTTTTGAAAAGGAAAGATGGTATCAGTGTGGATTTTTTGATAAATTATCATATAACGTATCAACTTCTTCTTCTGAGAAGCCAGGAATATTGTTAACTCAAACAGCAGTTCAGTAT  
ACATTTCTCGAATTTGCTTTGGAGAAGTTATTGAGCTCTTGATAGCGTTAGCAACTTCATTCACACTATCAACCATCAAAGAAATACACTCAAGGATATTTTGATCAATAGCAGATGCTTTA  
GACTTCTTTTTTACGCCGCCTCTATACCAAATGAATTTAGCGGTTTCTTTGTTGTTCCAGTAGAATTTTTTATAACTTGCATATCAGACCCTTAGTAAGAATTGATCCATCTGCACCAACAT  
CCATAAATGGTGAGGGTTCATCATTGCTTGAATGTATTTGTTGAGTTACAAGTGGAGTTTCATAAAGTTTCAGCAACATCTTCGAATGGCTCAACCATCTTTGTAAGTAACTCAACTGG  
TGCAGAGGAGGGCGGACAGGTCACAAAGGAAGCAAGAGGAGTCGGCAACGGGTCCGGTTCGGTGTGCGGACGGCGAAGGGATGAACAGGTCTCTGGCTGCGGCAAATGGATGCG  
GCGAAACAAGGGTTCTCCTCCTGCAGCGAATCAGAGCTTCTGTTGAGGAGTAGAGAGCCAGAGAGAGAATGGGAAGAATGGAGAAGAAGAGAGAACTTATAAGTTCTGCTTCCGAGAAA  
TGATCGGGCAAGGCTGATTTGTCGCGGGAGAATTTCTAACCCGCTCAATTTG

>comp171761\_c0\_seq6

CTATCTCTCACTTACATAACACAAAGATAGGATCGACGAATTTTCCCAAGAAATTTTGCTCCAATTGAAACCTACTGTGCCCAAAGAAGATAAGAAACGGAAGATACTTTCATTGCCTG  
CAGAACCTGCCCTTACCAGATGGCTTCAGGTGATGATCGTCATAGTGGATTAAGAAAGAATATATTTGGTAGGCACGCCACAGTACTACTCACCAGACCCACACTTTCCTTTCATTGGACA  
TCGTGCAAAGTACTCCTCTCTACCGCTCTTATCGGCTACCCTTACCTTCTCATGTTGGGCACATAATGATTGAACCTAACGGTGATACGTTCTATCCGTCAAAGAAACCAATACATAAAATA  
CGAGACATAATACAGAGCATGTATGATGCTCCTTATATTTCTTGAAGAAAGTCCGAAAGAAGTACGAGATATGTGGTTTATGAGAGTGGGAAAGATTTTATTGGCTGCCACAACACA  
CTGAAGAAATTAGAAAGAATTTGAGAAGTATGGGTCGACACACATGCGAGACATGTTTAAAGAAATTAAGAAAGTTCAGGCGAGCGGCCACTTTGGATTAGTGAGAGTGGTGGCGGAG  
TTGAATAGTGCTTGGGGTAGCCTAAAGTATAATTGGATAAGGGAGCAAAATAGACATAATAGAGCTTCTGTTGTTGGTGGCTTGGGAAGTTCCTTTATACCGGGGGCTCAATCCAAATA  
CTAACACATAAGACATTTGAAAGAGGTGCTAGGTAGAGAATCAACTCCTGTTAAATTGCATAATCATACCCATAAGCGGCAAGAGGACCAACAATGGATTGATGAGCGAGCTCGGAAAG  
CATATCATCGAGAGATTCAGGTTGAAGAAAGTGAAGGTTCTTCTGGTGGATCGGCAGAATATTCTGAGTACGACACTTGGTCGCAAGAAGTAGGAAGAACTCAGCAAGGCAGAATATAC  
AGTTTAGGCTCACAAAGCCTATGCATATGAGGGGCAGAAATCTGGTGGCTCTAGTTTCTTACCAATACCCAAGAGTCTTTATATAACCAACAGATAGCTGCCCTTACAGCCGAGGTAGAGC  
AGGTAAGGAAAGCACAAACTGACTTGCATATACAGATAACAACAACAGATGGAGATGCAGCAGCAGATGCATATAACAACAAGAGGAGATGCAGCAACAGATGCATAGGCTTCAAACCT  
CAAATATTAGAGGAAATACGAAAGATGAGGGATGAGATGAGTGAGAGGAGTACAACATAAGAAGAGGAGGAGACTAAATAAGAATAGTCGTTATTTTAAATGATGCGGACAACTATA

ATTGTGTATTTGTGGACATGTTTACTTGATTATTTTATGGACATATGAACTTGTTT

>comp171775\_c0\_seq1

TATTAGCATAATCCCATAATCGTCATCAACTTTACACCCGGACATCAAAAATGTTGTTTTGAGATCCTTGTGCGCATATATATGGCATTGTTGTTTGAATCGGTATAAGTATTGTTGTAGTATCTCTAAACATTCCCTAAGAAATTCTTGAGACTAGGTAGCTACCTTCCATTGACTTCTTCTATTACATAATTTCTGCAAACATTTCAAGAGAAAATGCTTGGCTTCTGATGAAAGGTGCTCTGGAATGGATGTGACTTTGTAGACCCAATGTGAAATAAAGCTCTTGATATTGCTAACTCCATGGAGGTTTTTCCAGTAGCCATCTCAATAACAGTACAACCTAGCACTCCATATGTCAGCAAA GCTAAGATTTATTTTAGCAAACATTTAAATATTTAGAGGTTAGCATCAAATAAATTTATCATGTGAATTGAAAATTTGGAAAATATCTACAGTGTTAAATATTTCAATGACGAGTAATCA ACCATAAAAATAGCCTAAATTTGAATTTTATTTTCATGTGAAGAATATAAAGGTGTGAAGCTTAAACACCTATCATAAATCACCTGGCAATTATATCTAACCCTATATTTGGCATGCATTCAT CGTATCAATACTCTAAATGGTGAACCTATTCATTGACTCCATCTATTTAATCACTCCTAGTATATAATACTTATATTAAGTAAAACATGCATGCTATGCAAATCCTTATACAAATTTTCATCCTCAAACGCATATCAATTAAGGCAGATTTCAATTTATGAACATTGAATTAGCATAATTTCTCTACAATGTCAAAGAAAATTTCAATGGAGAAAAAGGAT

>comp171786\_c0\_seq8

CACTAAGATATTTTGTGACAATTTATAAATTAGTAAAGATTAACAATGAAGTGTTAACAATAATAACATGTTAAAAACCATTGGTCTCTATGACATACAAGTATTATTTTTTTTGTAAATT AGGGATAAGGGATGGTTTTAAATGTGCTCCCATGTTAATGGGTGTTTTGACAAATAATATTTGATAAATATGTTATTATGACTAATAAAAAATATAACAAATCAAATGTTTTGATTTATT CACTGTTGCTTTTTTAATACAATGACGATAGCTTTTATAACAAATGTTTGCTTTCATCAATAAAGTTTCATGGGTCATGTTGTGATCTCTATTAATAAGCTTTCTTCTCGTTGTCAGGTTACT CAATTAGTTCACATGACATCTCTCCTGCCAATGAAAACAAACCTCTTGTGTTTAGCATCCCGACCTTCCAGCCCAGATCGTTGCATCCTCGATGTTTCTACTAAGATTTTCCACACTATAA GTAGCCACACCTTCGAGATGCTTTATGTTTGTACAACAAAGGAGAGTGGTTGCTGATGTGCATGAAGAAGAAGTATGCTCGAAACAATATCATGACTCATTATTTCTTCTCAACCATCAT AGTGAGAGCAGAATCGACTTGCCAGGACCATTTGAAAAAGGTCATTTTGTCTTCAATCTTACTTGTGGTGGGAACCCACGTCATGTTATCCATGCTAGCTACAAGATCCCCACTAGAAAGTG TTGTCATTTCGAGTAATTCATCCCTATGATAGTGCATGGGAGGTGCATGAGCTTGGTAATCTCATAATCAGCATATTATAATCTCTTATACGTTAGTGATTGGGAATCAGATTATGTGCATTGA CAGTAAAGGTGCAAATATTATCATGTTTACTTGGCTAATTGCAGTTGGACTTTTCTATCTAAACGGAAGAAGTTCCAAATTAATCAGAATGTTACTTCTTTGAGCAGGATAATGAAGTTAT GTGTGTTAGTTGCCCTAGTATGAGCTGCGACTTCTTTAAATTTATAAGCTTACTGCGCAGATGATGGATTGGCTTGAGATTAATAATGTTGAGTTGATGAATACCAGTTGGTTTTTTGAGTCA TCCATGTTTACTTACTTGAAGGGAGGTAAAGGAAAATATGTGTACTTGTGAAAGCATTGGTTGGTGGGGAGGGCAACCGGGAGAGCGTACACATCCTACTTATCGAAAAATTGCTTAT TTTAGAAGGGAAAAGTGAGGATGATCTTCCAGTTAATGTGTTCAACCACAACATGGTTGATTGTGATATGGAAATCTTTTGCCTGAAAAGTATGGCTCTAAGAAGCCTGCATGCTGGGTGG ACAGACGTATACTATATTAAGCGTGCTAATGTATTTTCTAAGTTTGGGATGGAGTATTTCTTAACAAAAATTTGCTATTGTTTTATTAATAATTTATATAGTTTAAATTTATTTAACTTACTCT TCTTCTTAGATATTTTAAATACCTTGAATTAAG

>comp171798\_c0\_seq11

GTAAGATTCATGAAACCTTTGGGGGATGATTTAAAGTCCATATATTTGTTTGATATTTGTGATAAATTTATGGTTTTGGCTACCGTTTTTTTTGTTTTTCTTTTTTTTGTGGGAATTTGC AGGTTTTTGGTGGCGGCTAATGGGATATTAGCTGGGTATAACTTGTGTCAGTTGGTGCAGGCTTTGTGGGGATTATGAAGGGGGTGTGTTTTGTTGGAAAGAGCTTTGCTTTTGTGTTGTT TTTCTGTGATCAGATAATGGCTTATGTGACATTATCGGCAATGGCAGCAGCAGCTCAGGCTGCTTTTCTAGCACTATTTGGCCAGCAGGAGCTTCACTGGATGAATATATGCAACGTCTAC AGTAGGTTTTGTAGACAGGCAGGGGAGGGAATAGCCTGTGCTTTTATAGCTTGGCCATGATAATCATTTCCTGCATCTCTGCTTTCAACTTCTTCAGGCTCTATGGAAGTAATAAAGG CTGTAAGAACAGCTATGGAAGCTGGTAGTTCTTCTGTCAGTTTCTGAGCTGAAAAGTATCATTTTATAGCCTTTTCATGTTGATCTTACTTATATTAATTTCTGTTTATTTATGGTAAAATGAAC CTGATGCTTGTCTTAATATCACGCTGAATTGTAATCTAGTGAGAGATGAATATGCTATATTTGTGATGGAAGCAAAGATGAAAGCTGGTTTACAATCTACATTAGGCTTTATTTGGCACAAC TTTTGTACTGTTTTTAAAGCAGTTTTTTAGTTAAAAAAATTTATTTTTTATGAAAACTACTTTAAAAAGAGGTGAGAAAGCTGTTCTAAACGAAACCTAAAGCTGCATGCATCAACCCT

TTATTCAAATCTATGAATGAATGAAATTCTCATCATGCTCTGTTAGGATGCAGTTGTTTCCTGTTTTCTTCTCTCTTAGATTAAACATTTTGATCGTTCAAATACATGCAGTCGATTTGCTTT  
GAGATTTGTGTAACCTTTTATCATTCTTTCTTGTGATCACATGTAAGAATTTCAAATAGAATTCAGTTTCCTTTAAAACTCCATTTATTATAATCAA

>comp171798\_c0\_seq17

GTAAGATTCATGAAACCTTTGGGGGATGATTTAAAGTCCATATATTGTTTGATATTTGTGATAAATTTATGGTTTTGGCTACCGTTTTTTTTGTTTTTCTTTTTTTGTGGGGAATTTGC  
AGGTTTTTGGTGGCGGCTAATGGGATATTAGCTGGGTATAACTTGTTCAGTTGGTGCAGTGTCTTTGTGGGGATTATGAAGGGGGTGTTTTTGTTTGGAAAGAGCTTTGCTTTTGTGTGT  
TTTCTGTGATCAGATAATGGCTTATGTGACATTATCGGCAATGGCAGCAGCAGCTCAGGCTGCTTTTCTAGCACTATTTGGCCAGCAGGAGCTTCACTGGATGAATATATGCAACGTCTAC  
AGTAGGTTTTGTAGACAGGCAGGGGAGGGAATAGCCTGTGCTTTTATAGCTTGTGGCCATGATAATCATTTCCTGCATCTCTGCTTCAACTTCTTCAGGCTTATATCCCGAAAAAAA  
ACTTCTTCAGGCTTTATGGGGTAATAAAGGACGTAAGAACAGCCATGGGAGGTGATAGTTCTTTCTGTCAGTTTCTGAGCTGAAAGTCTCATTTTATAGCCTTTTTTATTTGTCTTACTTTT  
AATAAATTCCTGTTTTTTATGGTAAAATAAACCTGATGTAATCTAGTTAGAGATGAAAAATGTTATATTGTGTATGAAAACAAAGATGAAAAGCTGGTTTGAATCTACGTTACGGTTTTGT  
TGGGACGTCTTCTT

>comp171805\_c0\_seq6

CACAAATCATCTAATATGTACGCCAATAATTAGTCGCACAAATCGATATCAATAATAATGTCTGAAAACCTACAGCTGCCATCCTTAGCCATAAGCTTCTTCCCCATTATTTCTCCCCATATCT  
TCTATAAATACTCCATTCCCCATTCCATCATTCTCACAGTAGCTTCTGCTTTCCTCTCTTACCCAATTCATGGCCTCCTCTGTGTCTCCTCTCTCCCCTTATTCTTCTCCCTTCTTTATACT  
AATATCTACCTCCTTCGCCGCCGCCGGCAACTTCAACAATGACGTTGATATCATATGGGGCGACGGCCGTGGAAAGATAGTCAATAACGGCCAGCTCCTCACTCTGTCTCTTGATAAGTCC  
TCTGGCTCCGGCTTCCAGTCTAAGAACCAGTTTCTCTTCGGCAGAATAGATATGCAGATCAAGCTAGTTTCAGGGAATTCGGCAGGCAGTGTACAGCCTACTATTTATCGTCGCAAGGAG  
CAGCGCATGATGAGATAGATTTTGAGTTTCTCGGAAACCTCACCGGCGATCCTTATATAGTGCACACCAACGTTTACACGCAGGGGAAGGGGAACAGAGAGATGCAGTTCTACCTCTGGT  
TTGATCCCAACAAAGACTTCCACACCTATTCCATCCTTTGGAATCCCAGCCACATTGTGTAAGAAAAACAGAGCTTGCAATTTGAAATGATTTCTCAATCTCTGAAAAAGTTAAGTTTT  
TGATATCAAATCCACTGCAGATTCTACGTGGATGGAACCTCCATTAGAGAATTCAGAATCTCGCGGCGACCAAAGGGGTTTCCTTACCCGAACAATCAGGCCATGAGACTGTACTCAAGT  
CTCTGGGATGCGGAGGACTGGGCAACAAGAGGAGGGCTAGTGAAGACTGATTGGAGTAAAGCTCCGTTTCATGGCAGGATTCAGGAACTTGAACGCCGACGGCTGCGTTCAAGGTCTC  
TCGCTTCTTCTTCTTTCGGGCTCAAAGGCATGGATGAATCAAGCACTGGATGCAGAGAGCTTGAAGAAGATGAAATGGGTGCAGAGCAATTATATGGTTTATAACTATTGCAGTGATGTGAA  
GAGGTTTCCGCAGGGACTTCTCCTGAGTGCTCTGCAAAGTAGATGGAGAAGAAATATAGTTTATATGGTGTGATTGGAGTTTGTGAATAGTAAAGGTTATTGTTTTGATGGGAAGTCAA  
TAAGCTTCTGTGTTTAGTTTGTAAATGAAGAATTGCTCGTTTGTGACTCGAAGCTTCTTCTTGGTACTTCGAAAAGTTAAAAGGTGGCCTCATCTTTATCCTAATCAAATTTGAAAAATTCTA  
TCAACAGAAAACACAACAACCACTGCTACAGTGGCTTCTTCTCCACCTCCGGCAACTGCTCTGCTCTGTATTTGCTTTGATATTTGCAGGTTGCATAATGAAGTTCTTCAAATTCGAATA  
GAATTTGCAATTATGGCTTCGTTTGTTCGGTTTATGCTTACATAAAAAGGAGTTTTAGAAAAGGAGTTGAGAAAAGCCGTTCAATAAATGGAGTTTCAATAATGAGATATGTTTACT  
AATATTTTTAAAAGTGCTTATTAATACTTGAAGTAATTTAAATTGTTTGTAGGAGTTCTGCTTTTGTGAGATTTTATTATAAAAAGACATTTTGTGACCGAACTCCGTTTTGTGACCGAAG  
AAGCAGATACGAAAAGAATTTTGTAAACCGCCGAAAAACGATGTTTATTAATAAGGAATATTGTTAAGCTTTGATTCCAAACAGTAAATACTAATTGATTTCCGGCGTATTCAAACGGAAA  
CGGAGAAAAAAAAGCCTTATCAAACGAGGCCTAAATTTAGTTGGCATGGTTGGC

>comp171820\_c0\_seq4

CTTCTTCTTCTTCTTCTTCAATGATAGAGAATTTCTTTCATGAATCTAAAGGTTTTAATTAACCTGTGATCATCGTTCCATCTATGTCATCAAATGTGCAGTTTAAATTGTACCACTAATATGT  
TATATCTAACACAGTAAACCCTTAAGATCTTACCGTTTTCGTCGATGACTCCATCTTGAATAAGCTTGGGGATACTAAGTAAGGTGACAAGGACTCCAGCTGCAGCAGGCCAAACGACAG  
CCGTCCGAAGCCCCACGTTCTTGGCGATAGTGAGAGCCCAAGCCATATTGAAATCTGCAATAAAGCAAGTGAACCTCACAGCTTTATTTCTGATCAATTCTTCTAAAAAACTTGGCATCAC

TGTGGTCAAGGATGTTGTAAGCCTCCCAAAGTTGTGGCGATCCTCTTCTGGTTCAAGGCCATCTGGGATTGTCACAAAATGAATTCCATCAATAAATTTAGCTTCATCAAGCATTGAACCA  
GCAAAAATACGTTTCATGATTGAACTCTGTGTTGATAAAAAGTTATGCGGAAGCCACGTTTCGATGAGGCAGTAAGAGAGCTCCTGAGAGGAATGACATGGCCCTGTGCAGGATAAGGGAGT  
ATGAGTGCATGAGGGGAGCTCATGGCTGCTGTTGAGTAACAAGAAAAACCTTAAGATGAAGCTTATTGAAATGTCAATGGAAGGTATGCTTGAAGGCCTAATATATGTTTCAGAGGAAAAA  
AAAAAAATTTGTGAGGGATGGACAAAAATAATTAAGATTAATAAAATTTAGGACAACAAAATTTTTTTAGAGGGGGCAAACACCCAAAATATTCAAAATATACCTT

>comp171851\_c0\_seq10

ATATTCGTTAAAGAGATTTTCATAGAAATTAATAAAATTTGTA AAAACCCTAATTTTTGTA AACTCAACAAAATTTGGGGGAAATTA AAAATTTTCATGATTAGAAATCATTATTCAACATTCCCTAA  
CATTACCTTCCATAATTTCAAGTTTTAGAAAAACCCTA ACTTTTTTACTTCAAGAAATCCTTAGATGTCGTTATGAATGAGAGAAAATGAAAAAGATTCTTGTGTTACTCATTAGAAGAT  
TGGCATAATTTGTGTTTTACTAGTTCACATATATCATAATAAAAATTTTTCAATATCGATTTGTTTTAAATGATGAAGGAAATATGATTTTGAGAATAATAAATGATGGGTGGTTGTCAAGGAATAG  
GCGTTGAAGCTAATTTTTATCTTTATTTGAATTAAGGGTTTATAAGATTAGAGATAATATTGAATGTTGGGTTCTCTTGATCATTGGATTCCCTTTAGGTGGTAGAAACCCTTAATTTCTTTAGT  
GAGCCCATCGTCCGCCTTTTGCTTTGTTTTCTGAAGATACAATATGAAAGCTAAAACAAAATGTTGCTCTTGACATCTTCAATTC ACTTTAAAATGGATAACAGGTTGGTAATAGTTTAGGT  
GCATGAAGGATAATGAGAGAGTGAGGGATTTGTTTTATAACAATTTTTTATGATTGTTTCATGATTGTTAAGTATCCATCGGCTATAGTTATTTTTTTACTTCTATAACAACATAATATGAAATA  
AATTTATGAGATGAATTATATGATATGCAGCCTTTGAATCCATGATCCAAGAGTTTGAATAGGGATCTCTGTGACTTTAAAGGCTTGTGTAGAGGATATAATACTTAAGAATACTAGAGTAG  
AAATTCCTTTTATAAATGTTTTTTTCGGTCTCTTATCAAGGCTTTTTGTTTTTTATGCCTAATAAATGATCCAATTTTTTTGTGTTTTCTTTGTAAGCGGTACTAATTGGGAACACATTTGCTAG  
ATCTTTTTTATCAATTGATATATTGAATGGATATTTTGAATCCTCCTGTTGAACTTGAATAGTCATCTTCAATTTCCAAAGGAACCCATGATGAAGGGACATGGAGAGGGAAA ACTTGTGGTAG  
TAATTAGTTTGCAACAAAAGGGCATAAAAAGACTATAGTGATAAAAAGCTACAACTATATGAAGAATACAAGGAAAGGAAGAGAATGCAGTGATAAAGGCTACAAGATTATGACAATAC  
GAAATGAAGGCGACA ACTTTGGGAAAACCAGGAAAGGAAAAATCGGTAAGCTTTGATACCATGCTAAGAATTAGAGGATTGATTGCATCTCATTCCAGCATGTACATAATTTATATAATC  
CTAGGAGAATTTCTAATAGGAAGCATTGAAATAAGAGAATAAAAATAAGTTCAATCATTCTCCGAATTAGCAAGGATCCCACGGATCCATGATGCGGCGGTGAGGCGATGGAATTAGGCA  
GGAGCCGTTGGTGGTCTTACTGGCTCAGAGGCAGAAATCAAGGAGTGCAGTTGGTGCTTTGGCTTTGAGGTAGAAGCATGGGGCATGGATCTTGGCAGGTTGAGGAGGAAATTCATGGA  
GCATTTTTCAAATCTAACCTTAATTGGCACAGGTCATTCCTAATGAAATAATAATGATGTAATTA AAAATCTTAATTAATCTCAAATTAACCTAAATAATTTGATAATTATAAAATGCTACTGGA  
AACTGAATGGCAATTATTCTGATTGCCTCAGGTTTCGGTGGATCCAACTGGAACGTGAGGTGGCAGTTTTTCAATCTCCTGCGCCTTTATGCTGTATGCTGACTTATGATGAAAAGGAT  
GCATCCAATTCATGCATCTCTTATATTCACCAGTTGTGGATGGAAAAGAAGTTTTAATTGCATGCAACACGGTGGATATCTCCATTTTGTATTCTGATCGTTGATCAAGACCAAGAAAAGTTTA  
CTTGAGCAGCTGCATCTCTTTCTGATGCTTTGGAATTCAGCAGAATGAAATAAAGAATGCCAGAGATATATTACGTTCAACAAGAGCTAAGCTGGCTGTTATGGAAGGCAAGATTGCAC  
TTGAGGTCATTGAATTTCAAAAAGTTATTGAAGTTAAACA ACTGAGGCTTGCTGCTGCTGAAATGTCCCTGAGTATTTTGCCTCTGTATGCATAGTCTGGCCTAACTCTGCCTCAGAAGT  
TCTTCTTACTGGGTCTTCGATGGATGGACAAGTCAAGTGGAGGATGGAAAAGAACAATACTGGGGTGTCTTTCTTTGTGCTTGAAGCTCTATCTGGACGCTATGAGATCAAATTCATTGTT  
GATGGTGTGGGCAATCGATCTCTTACGTCCTATTACCAACAATAATGGCTTCAAAAACAATCTCCTTATTGTTACGTAAGTGTGACCTTTGTTGCTTGTAAATTA AATATTTTAGCCGTTA  
CTATGGTTAGCCCTCTCTAATCAATTTAACTGATGAGAAGATCTGTAGCTTATAATTGTAGAAGGTAGCCTATTTTTGTCTTTTATATTTGGCCCGCATGGGAGTTTGCATCCTTTGTCCTT  
GGGAAACAAA ACTTGTAATGCTTTGTTTTAACATTTGTAACTGATCAGTTAAATCATTAAATTTATTTTTTCACACTAATAAGTGCTGTTATAAAAA

>comp171851\_c0\_seq5

GGGCATGGATCTTGGCAGGTTGAGGAGGAAATTCATGGAGCATTTTCAAATTTAACTTAAATTGGCACAGGTTTCGGTGGATCCAACTGGAACGTGAGGTGGCAGTTTTTCAATCTC  
CTGCGCCTTTATGCTGTATGCTGACTTATGATGAAAAGGATGCATCCAATTCATGCATCTCTTATATTCACCAGTTGTGGATGGAAAAGAAGTTTTAATTGCATGCAACACGGTGGATATCTCC  
ATTTTGTATTCTGATCGTTGTAATTTCTTATTTGTTTATTTGCTAGCATTTAATTCATTTCTTGTGCATAAAATTTGATGATTCCAATTTATTTCTCTCCTAAAATTTAGAAGCCTTATTGT

AT

>comp171886\_c1\_seq1

GAGCTTATTTACATTTACAGGTCATGAGCGGTTTCCTTACTATTTGTACTCCTAGTTTCAGGCTTGGCCTCCTTGGCAATACGAGGCAGCGATTCCATTATCATAAGGAAGATCATCTGAACA  
AAAAGAAGTACTCAAGGTGATCGATCGCTTCCGTGACGCGCTTTTGGCCGAGGAAACGGAGCAATGGAGAACCAGGAAGCCAAAGGTTGTGTCTTTAGAATCCAGAAGTGTGCTTTCGA  
TCTCCTATCAATGGAGGATGATTTGACTAATGAAGAAGATGATGATATATGGTGGGAGCTAATCAGAAGAGAAATCTGTCTGAAATCAACTTTCTTGTATTGTGATCTCAACCGTGCATCT  
CAAGTTCTGCCGATGAACTAAAGAGGACTCTTACTGACCTTGCTAACAGTTTGTTC AATACTTGG AAGAGCTGGACGACGCAATTAAGAGCAGGAGCATAACCTTTGGCACAGATTTGTT  
ACAGTGATGCAGCTCTTGTGCTCCAGGAAATCATGGCAGCCCTTATTCCTGGCTATTAGTTTTATTTAAAGGCATGTTCAAAACCTCAAAAATGCATATAGTTGAATAGGATTCTTCTTTAAA  
AAAAGAAATGCAATAGAGATCTCTTCTGTTTCTTTTGATGTACAGACCCATTGTGCATCAAAAGAAACAGAAGAGATCTCTATTGCATTTCTTTTTTTAAAGAAGAATCCTATTCAACTATA  
TGCATTTTTGAGGTTTTGAACATGCCTTTAAATAAACTAATAGCCAGGAATAAGGGCTGCCATGATTCCTGGAGCACAAGAGCTGCATCACTGTAACAAATCTGTGCCAAAGGTATGCT  
CCTGCTCTTAATTGCGTCGTCCAGCTCTTCCAAGTATTGGAACAACTGTTAGCAAGGTCAGTAAGAGTCCCTTTAGTTTCATCGGCAGAACTTGAGATGACACGGTTGAGATCACAAATAC  
AAGAAAGTTGATTCAGACAGATTTCTTCTTGATTAGCTCCCACCATATATCATCATCTTCTTCATTAGTCAAATCATCCTCCATTGATAGGAGATCGAAAGCACACTTCTGGATTCTAAAG  
ACACAACCTTTGGCTTCCCTGGTTCTCCATTGCTCCGTTTCTCGGCCAAAAGCGCGTACAGGAAGCGATCGATCACCTTGAGTACTTCTTTTTGTTTCAGATGATCTTCTTATGATAATGGA  
ATCGCTGCCTCGTATTGCCAAGGAGCGCAAGCCTGAAACTAGGAGTACAAATAGTAAGGAAACCGCTCATGACCTGTAAATGTAAATAAGCTC

>comp171886\_c1\_seq3

AAAATATAAGTATATATATGAGAATCTTGTACTGGTTATTTCAATCTCATTGGTTTAGAGTGCTTGTTTTTATTTTATAATGTGTTTTTGGCAGCTGGACGACGCAATTAAGAGCAGGAGCATA  
CTTTGGCACAGATTTGTTACAGTGATGCAGCTCTTGTGCTCCAGGAAATCATGGCAGCCCTTATTCCTGGCTATTAGTTTTATTTAAAGGCATGTTCAAAACCTCAAAAATGCATATAGTTG  
AATAGGATTTCTTTTAAAAAAGAAATGCAATAGAGATCTCTTCTGTTTCTTTTGATGTACAGACCCATTGTGCATCAAAAGAAACAGAAGAGATCTCTATTGCATTTCTTTTTTTAAAGA  
AGAATCCTATTCAACTATATGCATTTTTGAGGTTTTGAACATGCCTTTAAATAAACTAATAGCCAGGAATAAGGGCTGCCATGATTCCTGGAGCACAAGAGCTGCATCACTGTAACAAAT  
CTGTGCCAAAGGTATGCTCCTGCTCTTAATTGCGTCGTCCAGCAGGTAATCGCAATAGCTTCATGGTCATAACTTATAGAAAACAGCTTCATCAACAATGGCTTTCTACCATAACCTTTCCAAC  
GGCAACTGCCTTACCAGATAAAGCCTCAGGCATTCAGACCATTGTGAGTTTTTGACAAACAAGACATGTATCTCCCCTCAACTACTATAATT

>comp171917\_c1\_seq4

CTTAGTCATCATATGTATTTTTGATTAATAAATAAATAAATAGGTACCTTTTACTAAAATTGAAATTCCTACTCCATTTTCTGCGTTGATTGAATCTAGGGGAAGCAATTAAGAAGAGAC  
ATCTGAAAGCTATAAAAAGGAGAGGTAGACAGGGAGAGAAAGAGAGATGAAGGCAAAGATGGCGAGGAGGAGCTTCTGTTAAATCCCAATGTGCGACTTGACAGATCATAGAGGTATGAGA  
AGGGAGGATATCCGTCGTGCTCCTATCCTACGGCGGACTTTGAATCGCACGGAGGAAGAATGGAATCGGATCTCGGGAAGGTTTTTCATTGGAGGGATTCGTGGGACACAAATGAAGAT  
TGCCTTTGGGAATATTCGAGAAATTTGGGGAGGTTGTAGAGGCGGTGATCATGAAGGATCGAAGAACTGGCCGTGCTAGGGGTTTTGGATTTGTGGCCTTTGCAGACCCTGCTGTTGCC  
GAGAGGGTTGTATGATTAACACCGAATTTGATGGGAGGATGGTAACTACCAATGCTACCTATTTGAAAAGTACATGCTTAAAGCAATTGATAGAAAAGCAGATCCCTGCATTGGGTGCCCA  
TATCCACACCCACCCATATACTCATCCATACCAAATGGGTACCAATACCAATGGGTATGGGTGAGTATGGGTATGCATATGGCCTTGTGGGTGGGTATGAGTGGATACTCAACATCAAGAG  
ATAAATCAATTTATAATGCTAATTACTGTATATCTGAACAGTGCCATGCCAATATTGCATCACACTGTTTCATCCGCCATATAAGTTTTTTTTATTTAAAAAATTTATGATTAATTTAAATTTAA  
GTGTAATAATTTTATAAATAATTAAGAAATAATAATTTAGAAAACACATTTATTTTTCATAAATTTAAATAATTTTGGATATAATTTTTTTTTAAAGATAAACATTAACATAAAAATTTATGATAA  
AATTCTCATACATATTTAAAAGATATCGAGTACTACATACTAATTCTAATGTTTCAGCTTCCCTTGCT

>comp171922\_c0\_seq12

TATCAAACACGAATATCTTCGTACTCTGCGAACAAACCGTAAGACCTATTGTTTAAATCTGGCTTGATCTACATCTTATTGGATAAATATATAAAAATATTATTTATATGTATATTTCTAAACTTA  
AAAGGTGCTTAAAAAAGTGTGTTTTGGCCTAGCGATATTCATCACCGCAGTCTCCGATCGCTTTCAAAGATCTCTCCCGTTCATTGACACCTCTGTGATACTTCTCATATCTTCTCATCCA  
GATCAAGGGACAATATGGCACATGTGTCTTTTATATGCTCAGATAGACCTAGCCTAACTCCAACCATTGATCCTGCAACTGATGCTGATTCAAAAACATATCTAACGGCTACGGAAGGAATA  
GAAACCCCGTGTCTTGATGCAATGTTCTTCAGTGTGTTGAAGCAAACTTGAAAGAGGCTCCAACCTCCCAAGCATCAACCATCCTTTTATACTTCTTCAGAGATGGGGTATTTAAAGTAG  
GGCCTGAAAAAGGGATTGATAAATTGACATCTAGGAACTTCTCAGACAGGAGGCCACCCATAACAGTTCCATAACCAGTGGAAGTGAAGCATGTCCAATGAAGAAACATCCATCCTTTTAA  
GTGACGTTTTGATGCTCTCCCTCACATAATTGCTTGTTCATCTTAACAGGAGATGGCACCCATTTTGTAAGGCCTTTGATCTTTTCAAGGAACTCTCGAGGTCGTTCCCGACGAACTCTGTTG  
ATGAAAAAGCCATACAAGTCTTCTGCAGGACCGTAGTGATTGGACATGTGCAAGCTGGTGAGTCTGCGTCAGCGTGGCTTAGCATAGCCTGGACGGCAGCGCTGCTGTCAATGGTGCC  
CCATCCGCCGCTGGTCTGCCACATCCCATTAATAATTCGGCATATCACCAGCGAATCATTTCCGTTCTTCAGAGTCAACACCCGTGCGTCTTCTCCTCCGTCGTACTIONCACGCACCTGGCTG  
ACCGCAACGCCCAATGACACCTTAACCACCCGGTGGCCGGCGAAGACGAAGACAATAGCTTGCGGCAGAAGAAGAGGCAAGAAGACATCACTGCTGCTGCTGCGAAGGAGTCCAGT  
AAACTGAGAAAGTTCAAGAAGGGGAAATTGGTGTGAAGTCGAAG

>comp171927\_c0\_seq13

TTTTTTTTCAAATTCACCGCAAATTTCTTTCTCTATTTCACTCCCTGGTTTCTCAATTTCTTCCCACCATTAAGAACCATTAAAGGCCCCACCTTTTTGATCCATTCCATCTTCTCCCC  
AGTTTCGAGGTGGATTTCTATTCAAATCCTCTTATTATAGCAGAAAACAGCTCCTGTTTCATCAAAAATGAGAAGGATGAGAAAAACCCCTTCGGGTTCTCAGAGCAAAAATTTGTCGCCT  
TAGGGCATCTGATGGTTCGATTTCTGAAGAGGAGACAGAGCTTGCAGAAGCCCTCGGAAGAGAAGAAAATGTTTGAATTTTAGATAGGGAGACTCGAAGCATGATTATTGAGAATGAG  
AAAAAAGCAAAAATGGGGCAGAGAATTGAAAGCCCACTTGTGGGTGGGTTTTGATCGATCTGAGAACCTGATTCCCATTTCTAGGTTTGGAAAGGAGAGCGCTTGCACACGCTGCGG  
CACTGGCCTGAATGGGCAGCACTCAGATATGGAGCAGATGAAGGAGAAGCTCGCGAAGCTGCTTCTGGGTGAAGATATGTCAGGATGTGGCAAAGGGTTTTATCAGCTCTAGCTTTGT  
CCAATACCATCACTAACCTTGCACTTCTGTATTTGGTGAGCAACAAAATTGGAGCCTATGTCTACTGAACTAAGTGCAGATGGAGGAAAGAAATTAATTGGTTCTTGTCTGTCACTGA  
TCACATTGTAGAATTTGTTCCCTTCTCAGCAAATAGGAAAGGATGGACCAACATGGAGATTATGAAAACCTCAGCAGCGCAAAGATCTTCTTATGAACATTCCCTGCATTGCGCAAGCTGGAT  
GCTATGCTTATTGGTTATCTCGATAACTTCAAAGACCACATTGAATTTCTGGTATGTTGATGGAGATGCTGATGAATTGCAGAAACGAAATGTGCAGAGAACAGATGAAAAGTGGTGGCTTC  
CCACTGTGAAGGTCCCTCCAAATGGGCTATCCGAGGTTCCAGAAAATGGCTACAATTCAGAAAAGAATCAGTTAATCAAGTTCTCAAGGCAGCCATGGCAATCAATGCTCAGGTTCTTA  
TGGAATGGAGATCCCTGAAACTTATATTGATTCCCTTCCAAAGAATGGAAGGGCATGCCTCGGAGATACGATATAACCGCAGCATAACTGTTGACCACTTCGATCCAGAGTACTTCTCAGC  
ATCACTTGATTTGTCGACCGAACACAATGTCCTTGACCTCAAGAACCGCATTGAGTCCTCAGTCGTCATTTGGAAGCGGAAGATGCATAATAAGGACCTTAAGTCCTGGGGCTCAGCTGT  
CAGCTTGGAGAAGAGGGAAACAATTTGAAGAAAGAGCTGAAACCATCCTTCAACTCCTCAAACACAGATTCCCTGGTACCCCTCAGTCAGGCCTTGACATAAGCAAAAATTC AACACAAC  
AAGGATGTGGGACAATCTGTTCTTGAGAGTTACTCAAGGATCCTTGAACATTTGGCCTATACTGTAATGTCAAAGATTGAGGAAGTTCTCTATGCCGACGAACTTGCACAGGATCCCAGT  
AAGAAGAGCTCAAACAGGAAGCTTTCTTTGTCAGATTGAGATCTATTGTCACTGAAGAATTTGATCCAAAGGAAGAGATGGAGAAGCTGGCCTCCATGGAGTCGCAGACCTCATTAC  
GCTGTCCGACTATATGGGTTGGGCTGTAGACCTGAACTCAGAGGGCGAGAAGAAGGAACAAGGTAGTCCCGAGGAAATCTTAGGCTCAGAAGAATCGAAGTTGAGGAAGCCTCCTGTG  
TGTGCGACTCATAAGAAATTTCTTATATAGAGAAGCTTGAGAACTTCGGAGGCTTGAGAAGTCTTAGAGCGCGCCATTAAGGCAACTACAGAGTAAAAAGGAGGAAGAAGAGCAGG  
ACAAATTGAGAGGAGCGGTTTGGTGAAGTGATTAAACGAACTCTAACTCCAATGTATATGGCTCAGAGGCAAACAAGAGCCTTTTGGCTTAGATTTGAGGGTGAATGCTTCTCTTA  
TCTTTCTTTTTCTCTCTATTAGATAAAAGTCTGATTTTGATGTGTTTGAGCGATTCTTTTTATTGAATAACCTTTTCATATCTTGATGATCGTCTGATGATCATGTGTGATCTTCATTTCTAGT  
TCTAAATTTGTTTTGTACTGAGCTCAAAAAGGCACCGTGAATTCCTTGTGTTTTAAGTTCTTGCCATTTCAAATACTTTCTAGCTGTGGTCATGAAATTAATTTCTGTATGCAAATA

>comp171927\_c0\_seq15

TTTACTCTGTGGTTGCCTTTAATGGCGGGCTCTAGGACTTCCCAAGCCTCCGAAGTTCTCAAACCTTCTCTATATAAGAAAATTTCTTATGAGTCGCACAGACAGGAGGCTTCCTCAACTTC  
GATTCTTCTGAGCCTAAGATTTCCCTCGGGACTACCTTGTTCCCTTCTCTCGCCCTCTGAGTTCAGGTCTACAGCCCAACCCATATAGTCCGACAGCGTGAATGAGGTCTGCGACTCCATGG  
AGGCCAGCTTCTCCATCTCTTCCCTTTGGATCAAAATCTTTCAGTGACAATAGATCTGAATCTGACAAAAGAAAGCTTCCCTGTTTGAGCTCTTCTTACTGGGATCCTGTGCAAGTTCGTCCGGC  
ATAGAGAACTTCTCAATCTTTGACATTACAGTATAGGCCAATGTTTCAAGGATCCTTGAGTAACTCTCAAGAACAGATTGTCCCACATCCTTACGAATGAAATAATGTTAAGTACACAAG  
AAACAAGTTAACATGTTATATCCTCTGGTGAGTTTTTCAGGAACTTCATTACCTTGTTGTGTTGAATTTTGCTTATGTCAAGGCCTGACTGAGGGGTACCAGGGAATCTGTGTTTGAGGA  
GTTGAAGGATGGTTTCAGCTCTTTCTTCAAATTGTTCCCTCTTCTCCAAGCTGACAGCTGAGCCCCAGGACTTAAGGTCCTTATTATGCATCTTCCGCTTCCAAATGACGACTGAGGACTC  
AATGCGGTTCTTGAGGTCAAGGACATTGTGTTCGGTCGACAAATCAAGTGATGCGAGGAAGTACTCTGGATCGAAGTGGTCAACAGTTATGCTGCGGTATATCGTATCTCCGAGGCATGC  
CCTTCCATTCTTTGGAAGGGAATCAATATAAGTTTCAGGGATCTCCATTTCCATAAGAACCTGAGCATTGATTGCCATGGCTGCCTTGAGAACTTGATTAAGTATTCTTTCTGGAATTGTA  
GCCATTTCTGGAAACCTCGGATAGCCCATTTGGAGGGACCTTCACAGTGGGAAGCCACCACTTTTCATCTGTTCTCTGCACATTTGTTTTCTGCAATTCATCAGCATCTCCATCAACATAC  
CAGAATTCATGTGCAGAGAACAGATGAAAAGTGGTGGCTTCCCACTGTGAAGGTCCTCCAAATGGGCTATCCGAGGTTCCAGAAAATGGCTACAATCCAGAAAAGAAATCAGTTAAT  
CAAGTCTCAAGGCAGCCATGGCAATCAATGCTCAGGTTCTTATGAAAATGGAGATCCCTGAAACTTATATTGATTCCCTTCCAAAGAATGGAAGGGCATGCCTCGGAGATACGATATACC  
GCAGCATAACTGTTGACCACTTCGATCCAGAGTACTTCTCGCATCACTTGATTTGTCGACCGAACACAATGTCCTTGACCTCAAGAACCGCATTGAGTCCTCAGTCGTCATTTGGAAGC  
GGAAGATGCATAATAAGGACCTTAAGTCCCTGGGGCTCAGCTGTCAGCTTGAGAGAAGAGGGAACAATTTGAAGAAAGAGCTGAAACCATCCTTCAACTCCTCAAAACACAGATTCCCTGGT  
ACCCCTCAGTCAGGCCTTGACATAAGCAAATTC AACACAACAAGGTAATGAAGTTTCTGAAAAACTCACCAGAGGATATAACATGTTAACTTGTTCCTGTGTACTTAACATTATTTCA  
TTCGTAAGGATGTGGGACAATCTGTTCTTGAGAGTACTCAAGGATCCTTGAAACATTGGCCTATACTGTAATGTCAAAGATTGAGGAAGTTCTCTATGCCGACGAACTTGACAGGATCC  
CAGTAAGAAGAGCTCAAACAGGAAGCTTTCTTTGTCAGATTAGATCTATTGTCACTGAAGAATTTTGATCCAAAGGAAGAGATGGAGAAGCTGGCCTCCATGGAGTCGCAGACCTCAT  
TCACGCTGTCGACTATATGGGTTGGGCTGTAGACCTGAACTCAGAGGGCGAGAAGAAGGAACAAGGTAGTCCCGAGGAAATCTTAGGCTCAGAAGAATCGAAGTTGAGGAAGCCTCC  
TGCTGTGCGACTCATAAGAAATTTTCTTATATAGAGAAGCTTGAGAACTTCGGAGGCTTGAGAACTCCTAGAGCGCGCCATTAAAGGCAACTACAGAGTAAAAAGGAGGAAGAAGAGC  
AGGACAAATTGAGAGGAGCGGTTTGGTGGAAGTGATTAAACGAAACTCTAAACTCCAATGTATATGGCTCAGAGGCAAACAAGAGCCTTTTGGCTTAGATTTGAGGGTGAAATGCTTCT  
CTTATCTTCTTTTCTCTCTCTATTAGATAAAAGTCTGATTTTGATGTGTTTGAGCGATTCTTTTATTGAATACCCTTTCATATCTTGATGATCGTCTGATGATCATGTGTGATCTTCATTT  
TAGTTCTAAATTTGTTTTGTACTGAGCTCAAAAAGGCACCGTGAATTCCTTGTGTTTTAAGTTCCTTGCCATTTCAAATACTTTCTAGCTGTGGTCATGAAATTATTTCTGTATGCAA  
ATA

>comp171927\_c0\_seq16

TTTTTTTTCAAATTCACCGCAAATTTCTTTTCTCTATTTCACTCCCTGGTTTCTCAATTTCTTCCCACCATTAAGAACCATTAAAGGCCCCACCTTTTTTGATCCATTCCATCTTCTCCCC  
AGTTTCGAGGTGGATTCTATTCAAATCCTCTTATTATAGCAGAAACCAGCTCCTGTTCCATCAAATGAGAAGGATGAGAAAAACCCCTTCGGGTTCTCAGAGCAAATTTGTGCCT  
TAGGGCATCTGATGGTTCGATTTCTGAAGAGGAGACAGAGCTTGAGAAAGCCCTCGGAAGAGAAGAAAATGTTTGAAATTTAGATAGGGAGACTCGAAGCATGATTATTGAGAATGAG  
AAAAAAGCAAAAATGGGGCAGAGAATTGAAAGCCCCTGTTGGGTGGGTTTTGATCGATCTGAGAACCTGATTCCTAGGTTTGGAAAGGAGAGCGCTTGACACGCTGCGG  
CACTGGCCTGAATGGGCAGCACTCAGATATGGAGCAGATGAAGGAGAAGCTCGCGAAGCTGCTTCTGGGTGAAGATATGTCAGGATGTGGCAAAGGGGTTTCATCAGCTCTAGCTTTGT  
CCAACGCCATCACCACCATGCTGCTTCTGTGTTTGGTGAACAAGCACAATTGGAACCCATGTCTGCTGATAGGAAAGCGAGATGGAGGAGAGAAATTGATTGGCTTTTGTCTGTACAG  
ATCACATTGTAGAATTAGTCCCTTCTCAACAAGTTGGAATGATGGAACCAAAATGGAGATTATGACAACGCAACAACGAAGAGATCTCTTAATAAACATTCCAGCATTACGCAAACCTCG  
ATGCAATGCTTATTAGCTATCTTGATGATTTCAAGGATCAGAATGAGTTCTGGTATGTCCAAATAGACGAAGAAAACCTCGGAAATAGGGAACACAGACAGAAAAGATGATAAGTGGTGGC



TCCCCACAGTAAAGGTTCCCTCCAAATGGTCTCTCTGATATATCCAGAAAATGGCTGCAATTCCAGAAAAGAATCTGTAAACCAAGTTCTAAAGGCAGCCATGGCCATTAATGCCCAAGTACT  
AATGGAAATGGATATCCCTGAAGCTTACATTGATTCGCTCCCAAAGAATGGAAAGGCAAGCCTGGGAGATTATCTATATCGCAGCATAACAGCTGAATACTTTGATCCCGAGCAATTTCTTG  
CATCAGTCGATTTGTGACCGAGCACAAAGTCCTCGACCTCAAGAACCGCATCGAAGCCTCAGTTGTGATTTGGAAGAGGAAGATGCATAACAAGGATGGCAAGACTTGGAGCTCAGTT  
GTTAGCTTGGAGAAGAGGGGAGCAATTTGAAGAAAAGAGCTGAGACCATCCTACACCTCCTCAAGCATCGATTTCCAGGCACCCCTCAGTCAGCTCTAGACGCTTGAAGATTCAATTCAA  
CAAGGATGTTGGCCAATCTGTTCTTGAGAGCTACTCGAGAGTCTGGAGAGCTTGGCTTATACGGTGATGTCGAGGATTGAAGATGTACTATATGCAGATCAGGTTGTGCAGGATCCAATC  
AAGAAAATATACAGCAGGAGCTCATCAGAGCTTAAAGAGGAGATGGAGAACCAGGACTCTTCGGAGGGACGAGTCTCATTGACATTATCAGATTTTATGGGTTGGCCTTTTGAACAGGAT  
AAGGGGAATGAGAAGTTGCCAGGTAACCTTTGATAGTCTCTTGTGCTCTGAAGAATCAGAGCTGAAGAACTTCCTAGGATTGTAACCTCAAAGAAAAGTTTCTTATATAGAGAAGGTGGA  
GAACTTTGGGAGGCTTGAGAAGCCCGACTTCGCGCCATTAATGAGAACCACAGAAGTGAAGGAGGAAGACTGTTACAACTTGAAGCGAGTGGGAGTGAGGAAGTGCTAGTAAAAAG  
AAGCTTTTATTCAAATGTATATATTTGGAACAAATAAGAATTTCTCCTCTTTTCTTCTATCTCTCTGGCTTCGTTTGAACAGTTTTCTTATTGCTTTCTATGATAGCTTTCTAGCATAAAAATT  
TATTGAAAGCATCGAAAAAGCAGTGGCCAAAAGCTATTCCAACTCGGAGCAGCTTTCTTACTATTTTGTGAAGTTGTTGTAGAGAAAACAGCTCCTAATATAATTTTTTTTCAAATCAT  
CAAAAACCCAGTGGCCAAATAAAAAGTATAACTATGATCTGAGAAGTAAAATAATAAGTAACCTGTCTCAAACGAAGCCTTAATCT

>comp171927\_c0\_seq21

TTTACTCTGTGGTTGCCTTTAATGGCGGGCTCTAGGACTTCCCAAGCCTCCGAAGTTCTCAAACCTTCTCTATATAAGAAAATTTCTTATGAGTCGCACAGACAGGAGGCTTCCCTCAACTTC  
GATTCTTCTGAGCCTAAGATTTCCCTCGGGACTACCTTGTTCCTTCTTCTCGCCCTCTGAGTTCAGGTCTACAGCCCAACCCATATAGTCCGACAGCGTGAATGAGGTCTGCGACTCCATGG  
AGGCCAGCTTCTCCATCTCTTCTTTGGATCAAATTTCTCAGTGACAATAGATCTGAATCTGACAAAGAAAGCTTCCCTGTTTGAAGTCTTCTTACTGGGATCCTGTGCAAGTTCGTGCGC  
ATAGAGAATTCCTCAATCTTTGACATTACAGTATAGGCCAATGTTTCAAGGATCCTTGAGTAACTCTCAAGAACAGATTGTCCACATCCTTACGAATGAAATAATGTTAAGTACACAAG  
AAACAAGTTAACATGTTATATCCTCTGGTGAGTTTTTCAGGAACTTCATTACCTTGTGTGTTGAATTTGCTTATGTCAAGGCCTGACTGAGGGGTACCAGGGAATCTGTGTTTGAGGA  
GTTGAAGGATGGTTTCAGCTCTTCTTCAAATGTTCCCTCTTCTCCAAGCTGACAGCTGAGCCCCAGGACTTAAAGTCCCTTATTATGCATCTTCCGCTTCAAATGACGACTGAGGACTC  
AATGCGGTTCTTGAGGTCAAGGACATTGTGTTTCGGTTCGACAAATCAAGTGATGCGAGGAAGTACTCTGGATCGAAGTGGTCAACAGTTATGCTGCGGTATATCGTATCTCCGAGGCATGC  
CCTTCCATTCTTTGGAAGGGAATCAATATAAGTTTCAGGGATCTCCATTTCCATAAGAACCTGAGCATTGATTGCCATGGCTGCCTTGAGAACTTGATTAAGTATTCTTTCTGGAATTGTA  
GCCATTTTCTGAAAACCTCGGATAGCCATTTGGAGGGACCTTCACAGTGGGAAGCCACCACTTTTCATCTGTTCTCTGCACATTTTCGTTTCTGCAATTCATCAGCATCTCCATCAACATAC  
CAGAATTCATGTGCAGAGAACAGATGAAAAGTGGTGGCTTCCCCTGTGAAGTCCCTCCAAATGGGCTATCCGAGGTTTCCAGAAAATGGCTACAATTCCAGAAAAGAATCAGTTAAT  
CAAGTTCCTCAAGGCAGCCATGGCAATCAATGCTCAGGTTCTTATGGAAAATGGAGATCCCTGAAACTTATATTGATTCCCTTCCAAAGAATGGAAGGGCATGCCTCGGAGATACGATATACC  
GCAGCATAACTGTTGACCACTTCGATCCAGAGTACTTCTCGCATCACTTGATTTGTGACCGAACAACAATGTCCTTGACCTCAAGAACCGCATTGAGTCTCAGTCGTCATTTGGAAGC  
GGAAGATGCATAATAAGGACCTTAAGTCTTGGGGCTCAGCTGTCAGCTTGGAGAAGAGGGAACAATTTGAAGAAAAGAGCTGAAACCATCCTTCAACTCCTCAAACACAGATTCCCTGGT  
ACCCCTCAGTCAGGCCTTGACATAAGCAAATTCACACAACAAGGATGTGGGACAATCTGTTCTTGAGAGTTACTCAAGGATCCTTGAAACATTGGCCTATACTGTAATGTCAAAGATT  
GAGGAAGTTCTCTATGCCGACGAACCTGCACAGGATCCCAGTAAGAAGAGCTCAAACAGGAAGCTTTCTTTGTGAGATTGAGATCTATTGTCACTGAAGAATTTTGATCCAAAGGAAGA  
GATGGAGAAGCTGGCCTCCATGGAGTCGCAGACCTCATTACGCTGTCGGACTATATGGGTTGGGCTGTAGACCTGAACTCAGAGGGCGAGAAGAAGGAACAAGGTAGTCCCAGGAA  
ATCTTAGGCTCAGAAGAATCGAAGTTGAGGAAGCCTCCTGTCTGTGCGACTCATAAGAAAATTTCTTATATAGAGAAGCTTGAGAACTTCGGAGGCTTGAGAAGTCCCTAGAGCGCGCCAT  
TAAAGGCAACTACAGAGTAAAAAGGAGGAAGAAGAGCAGGACAAATGAGAGGAGCGGTTTGGTGGAAAGTGAATAAACGAAACTCTAAACTCCAATGTATATGGCTCAGAGGCAAAC  
AAGAGCCTTTTGGCTTAGATTTGAGGGTGAATGCTTCTTATCTTTCTTTTCTCTCCTATTAGATAAAAAGTCTGATTTTGTGTTTGGAGCGATTCTTTTATTGAATACCCTTTCATAT

TCTTGATGATCGTCTGATGATCATGTGTGATCTTCATTTCTAGTTCTAAATTTGTTTTTGTACTGAGCTCAAAAAGGCACCGTGAATCCCTTGTTTGTTTTAAGTTCCTTGCCATTTCAAAT  
ACTTTCTAGCTGTGGTCATGAAATTATTTCTGTATGCAAATA

>comp171927\_c0\_seq6

TTTTTTTTCAAATTCACCGCAAATTTCTTTTCTCTATTTCACTCCCTGGTTTCTCAATTTCTTCCCACCATTAAGAACCATTAAAGGCCCCACCTTTTTGATCCATTCCATCTTCTCCCC  
AGTTTCGAGGTGGATTTCTATTCAAATCCTCTTATTATAGCAGAAAACCAGCTCCTGTTTCATCAAAAATGAGAAGGATGAGAAAAAACCCCTTCGGGTTCTCAGAGCAAAAATTTGTCGCCT  
TAGGGCATCTGATGGTTCGATTTCTGAAGAGGAGACAGAGCTTGCAGAAGCCCTCGGAAGAGAAGAAAATGTTTGAAATTTTAGATAGGGAGACTCGAAGCATGATTATTGAGAATGAG  
AAAAAAGCAAAAATGGGGCAGAGAATTGAAAGCCCACCTTGTGGGTGGGTTTTGATCGATCTGAGAACCTGATTCCCATTTCTAGGTTTGGAAAGGAGAGCGCTTGCACACGCTGCGG  
CACTGGCCTGAATGGGCAGCACTCAGATATGGAGCAGATGAAGGAGAAGCTCGCGAAGCTGCTTCTGGGTGAAGATATGTCAGGATGTGGCAAAGGGTTTTCATCAGCTCTAGCTTTGT  
CCAATACCATCACTAACCTTGCAGCTTCTGTATTTGGTGAGCAACAAAAATTGGAGCCTATGTCTACTGAAACTAAGTGCAGATGGAGGAAAGAAATTAATTGGTTCTTGTCTGTCACTGA  
TCACATTGTAGAATTTGTTCCCTTCTCAGCAAATAGGAAAGGATGGACCAACATGGAGATTATGAAAATCAGCAGCGCAAAGATCTTCTTATGAACATTCCCTGCATTGCGCAAGCTGGAT  
GCTATGCTTATTGGTTATCTCGATAACTTCAAAGACCACATTGAATTTCTGGTATGTTGATGGAGATGCTGATGAATTGCAGAAACGAAATGTGCAGAGAACAGATGAAAAGTGGTGGCTTC  
CCACTGTGAAGGTCCCTCCAAATGGGCTATCCGAGGTTTCCAGAAAATGGCTACAATTCCAGAAAAGAATCAGTTAATCAAGTTCTCAAGGCAGCCATGGCAATCAATGCTCAGGTTCTTA  
TGGAAATGGAGATCCCTGAAACTTATATTGATTCCTTCCAAAGAATGGAAGGGCATGCCTCGGAGATACGATATAACCGCAGCATAACTGTTGACCACTTCGATCCAGAGTACTTCCCTCGC  
ATCACTTGATTTGTCGACCGAACACAATGTCCTTGACCTCAAGAACCGCATTGAGTCCTCAGTCGTCATTTGGAAGCGGAAGATGCATAATAAGGACCTTAAGTCCTGGGGCTCAGCTGT  
CAGCTTGGAGAAGAGGGAACAATTTGAAGAAAGAGCTGAAACCATCCTTCAACTCCTCAAACACAGATTCCCTGGTACCCCTCAGTCAGGCCTTGACATAAGCAAAAATTCAACACAAC  
AAGGTAATGAAGTTTCCCTGAAAACTCACCAGAGGATATAACATGTTAACTTGTCTTGTGTACTTAAATTTTCAATTCGTAAGGATGTGGGACAATCTGTTCTTGAGAGTTACTCAAG  
GATCCTTGAAACATTGGCCTATACTGTAATGTCAAAGATTGAGGAAGTTCTCTATGCCGACGAACTTGCACAGGATCCCAGTAAGAAGAGCTCAAACAGGAAGCTTTCTTTGTCAGATTC  
AGATCTATTGTCACTGAAGAATTTTGATCCAAAGGAAGAGATGGAGAAGCTGGCCTCCATGGAGTCGACAGCCTCATTACGCTGTCGGACTATATGGGTTGGGCTGTAGACCTGAACTC  
AGAGGGCGAGAAGAAGGAACAAGGTAGTCCCGAGGAAATCTTAGGCTCAGAAGAATCGAAGTTGAGGAAGCCTCCTGTCTGTGCGACTCATAAGAAATTTTCTTATATAGAGAAGCTTG  
AGAACTTCGGAGGCTTGAGAAGTCCTAGAGCGCGCCATTAAGGCAACTACAGAGTAAAAAGGAGGAAGAAGAGCAGGACAAATGAGAGGAGCGGTTTGGTGGAAAGTGATTAACG  
AAACTCTAACTCCAATGTATATGGCTCAGAGGCAACAAGAGCCTTTTGGCTTAGATTTGAGGGTGAAATGCTTCTCTTATCTTTCTTTTTTCTCCTATTAGATAAAAAGTCTGATTTTGA  
TGTGTTTGAGCGATTCTTTTTATTGAATACCCTTTCATATTCTTGATGATCGTCTGATGATCATGTGTGATCTTCATTTCTAGTTCTAAATTTGTTTTTGTACTGAGCTCAAAAAGGCACCGTG  
AATCCCTTGTTTGTTTTAAGTTCCTTGCCATTTCAAATACTTTCTAGCTGTGGTCATGAAATTATTTCTGTATGCAAATA

>comp171950\_c0\_seq1

TTCTCTGTCAATCTTCTTCTTGAATCTCTACAATTTTGGCGATGATGACATTTTATTATGACATATTCATAAACATATTAGCAACACATGCTATTTTTCAGGATTGCTACTAAAAGATT  
AAGTATTGATAACTGTTACAATAAATGTGATAGTTACCTTTACAAGTCATGATTATAGGACATGCCTTTGTGCGATGCAATAATATCATCCAAAATCTAAGATTTGTTTCGAGAACAAGCTAT  
ATATTATCTGGGTCCTGAAAGATGGGAGTTATTTATCTCACTAGAAAATAGCTATGTAATATGATCATTAGCATTAGTGTAGCAGAGGTGAATAAGTTGTAGTCAAGATCAGTCTCCATGCT  
CAAGTTTCCCTCTAAAACCTTAACCACCGTTGACATAGATGGCCTTTTACAGATGTTAGTCTGCAAACACCACATTGCAAGCCTCATCATCTCAACAGCTTTTTCTCCATGCAGCTGCATAT  
CAATTTGTTTTCTATCAACCATGTCTAAGAGCCGATCAATCTTCACTTTTCTCCTGCAAAAAGATAAATCAAGCGTGCGCCATCTTCAGGCTGAGAATGATCGAAATCTTCCCTTCCACACACA  
ATTTCCATGACCACAATTCAAAGCTGAACACATCAACCTTTTCCGGTGAATTGTAGATGTCAACCATTGAGGAGCTAAATACCCAATCGTTTCTCCTCATTCTTGTATTTAATTCATGTTGATCA  
CGATCAATCAGCTTTGCAAGGCCGAAATCCACAACCTTTGCGTTGAAATTTTATCGATAAGGATGTTCTGAGGCTTGATGTCTAAATGAGCAATTCTCTGCCTGCACTTTCGTGGAGATA

TGAGAGGCCT

>comp171971\_c0\_seq1

GCAGGTTGATTAATTTAATCGTTTCTACCATTGTATATCTTTTAATTAATATATATTTTGTTCAAAATTAACCATTTATAGTTATTTTGTTTAAGGGTACATTTAATAATTAAGAACAACATAAA  
CAACACAAACATGACAGCCACGTTAATTAGCTGCTGTCCATTAATTTCTCTCCCTCCTCAGTAGATAAACGGAACATTAATATCTAGATCTAGAAAACAATATGTATGAAGAGTGCTTAAT  
CAACAAAAATTATATATAATAAAAATAAAAAATATTCATTCTTGATTTTCAGTAATCATCATGAATCCTGTTTCATGTTGATGATGGCAAGACAATTGTCAGTCATGCTCTGCAATGTCTCGGAC  
CAATCCTCCAAAGGGGATTTGATGCTGAACTCTGCGAACCCATCCTCGCAAGTGCCGAAATTGCTGATCATGGCGCTCAACATCGAGTCTCGCGTGCCGATATCTCCAACCCTGATAGCTT  
CTTTGGCGGCTTCGAGATTGTTCGAGAGCATCGTCGTAGACGTGATGCAATCGTGCAGCAGTTTCGCGAGTCTTGCCGTCAAATGGGGATCGGCGGAGAGGTTTTGTGCAAAGGAGCGG  
GCGTCGTGGGTCTTGACGTCGACCGCTTTCATGAGGGCGGCGAGAACGGTGGAGTTGGTGGGTGATTTGAGGACGGCGGAAGAATTTTTGAGGGATTGGAGACAGAGGTCTGAGAAGT  
CGGTGTGGTTGCAGAAGAATTCGATGAGGTGGGACGCGTAATTGGGAAGGGAAGGATCAGTGGGAGGGGAGGGGTGGCCGGGTAGATGAGAAGGATGAGGGGTACTGGAAGTGGCGG  
GAGGGGGAGGAGGAGGGGCTGCTGGTGGAGCCGCGGGGGAGGCAGATGGAGGCGGAGGGGTGGAGGACGGAGAGGATGAAGAGGAGGAGGAGGAGGAGAATATGGACGTTGAGCTG  
AGAAAGTTTTCTCCACTGGTGACCCCGACAAGATGGCCAAAATGCAGGAAATTTTATCTCAATTTTGTGAGGAGCAAATGAGTCGATATGAATCTTTCAGAAGGTCTGGTTTTCCAGAAA  
TCCGTTCATGCGGAGGTTATTAGCGGCTATCACTGGATCTCAAAGATTTCTGTGCCTATGACAATAGTGGTATCTGGTATTGCAAAGATGTTTGTGGGGAGCTGGTGGAGACAGGTAGAA  
TAGTTATGAGAGAAAAGGAAGGAAAAGTGGACCCATTAGGCCTTGCCACATTAGAGAGGCGTGCAGAAGACTTAAGCTCGAAGGAAAAGTACCAAGAAGATCAGTTAGAAGGCTCTTCCG  
TTGAAAAAATGATTTACTTTTTGTTATCATGTAGCTTTTGCCTACTAATTTCTAGTACTACGTAAATTTCTTTCACATATACAGATTTTAAATTTTCTTTTTTGTGTTTTTCTGGTTTATCAAATC  
AATCGAAGTGATTAGAAAGAGGTTGAACCTACAATACCAAAGTTACCTGAACCGGATCAAAGAATGATGGATTGGATTAGGTTTTTATTTTCAGTTTTAATGGTGCATTAATAATTTGAGATA  
TGGCTTTTATTTAATCATATCCTTTGAGCTAGTTCTACATGTCTTTCTTAATGTGCTAGAAAAGACAGCAATGCCTAAAAA

>comp171983\_c0\_seq13

TGTCATTACTCAATGTATAGCTTTATATTATGATAATTATATTGCAAGCTATATTGTCAGTGATCTTACTTTTTTCATGAATGAACTAAAACATATTGATATAGATAATCACTTCATATGGAAATACTT  
TCCAAGAAAATTACACTCCTATCTTCGGTTCCAAACAAACGAAGGATATCTTCAATAAGGCTCTATGGCATCTTCCTTTTTGCTTGTTTTTACAATAAGTTGGAGCTTACAGATATATATGCTC  
TAACTTGGGAGAGTTGACTTCTGATTTCTTATTTGAAGTATCATCTTAACCAGCAACAGAATTCGGGAATGTCCAATTTGTTGGAAGTGAACAGCCATGGGTACTCCTGTTTCATATTCT  
TCTTTTCTGTGAGACCTGGTGAACCTGATTGCCAATCTTTGCAAAAACAGGGGATTGAAAATTTGGTTTTAGCCTGCAGGTTAATCATCCAATAGAAAATATAACTCCTGCGTCACACTG  
TGAGTTGAGCCTCGAGGGTCTTCCCCTACGCCCGTAAGCTATGCCGCTCACTTCGTATAACGAAGGACTTTGTTTATGATCTTCTTAAATTTACATTTGATGACTGGATATTAACATCAG  
CTTTTTGCATATCTTGAGAAGTTCATACAGGCTCTTCCAGAAGGGAATTTAATCAACTCTTTTTGCAGGGTTCGACCTCTGTGCGTTTTTTATGGCCGTTATGGTACTGCGGATATGGCTCG  
ACTTGCAAATTTGATCATCCAATAGCTGCACCCAATGTTCTGTGTTGTCGACAACCATTAGAGTCATCATCTGGGCCTGCCACGTTAACATTGTCAGCTGAAAGCTCTTCTATAGCCAGCCC  
TGAAAATTAACGCCTCCCCTCGTCCAAACGACAGAAAATGAATTTCTGACAATGAGAAGGTATAATCTGAATGATGATGGAACCAACCAATCACTTGACGGGATTTTCTTATTTATTT  
CCTTATGAGTTAAAAGCATTTTACCGGCTAAGTCGAGTCATTCTAGCCAGAGGTGTCTATTCTTTTTGAAGAGTGGGCGCTGTTTCATCTAAATAAAGACTACTTTCACTTGATAAATGT  
ACTGGCCACCTCTTACTTTACTGCAACGATGTTCTTCTTACCCTGTTTGTACTTGGTCATGATGTTCCATCTATGTTAATTTATTTCTCATTTAAGATCAACTGACAGTCCAAGAAGATGT  
GAAAATTTTCGCTCTCTCTCCACCAATTTTTCTTGATTCAATTAATCTTTTGATCATTCCATAAAGTCTTCAATTGTGTCTGTCCATTCAAGCTGTAGATTTTCACTAAACAGTCATCT  
TCACTGAAGCTCAGTTTGTGAAGCCACTTCTATGAAACCTGTTGATTGTCGAAAAACAATTTGCTTCTCCAGAGCAAGGTTGTTTTGATCTTTCATACAGTAGAAATCTCCTGGTAAGAG  
AGCCACGGCTCCGAAATTTCTGGCAGCCATTTACAGGGCGAAGTGGATGACAGCAAGAGGGAGCGAGCAAATAAACGGTACGACCGGTTTCATGGCCGCCGACCAGCCAGCGTGC  
TCTCTCTCGTTGTCACTGCAACAAGCTCAAACAAAATCTTGCCATCATCTTTCATCTACAAGACCAAAAATACATTGCATCAGCAGTTACCTGCTCAAAGTTCAAAAAAAAAAAAAAGAAT

AAGAAATACGAAGGTAAGATTATTGTGATACCCTAATGCAAAAAACGGCCTAATTGGCAAATGAAAGATCAAAGTTAAAGAAGATGGAAAATAACTTAGATTTCATGCAAGAATCAAAC  
ATAGAGGAGGACATGCCAGCGAGATCGAGAGAAGCATAAAAACAAATCCGTATTTGGCGTCGAACTCCAGAATATGACCGGGATCGAACAGTATAATAGCCAAATATTGATATCGTTTAG  
ATCGAGTAGTTAAATCTCCAGGAAAAAGGATTCTTCTTTACCGAACTGGCACTCATCTGAATAACAAAAGATCGAAGCAAAAAACAAGACAGGATGCTCATCATCTTCTGATCAGAAGCC  
GAGTGACTAGAAGGGAAACCGCTAGATTAGATCAACGCTTAGAAGAGAAAAATAGCTCTGCTCTTGCAGATCTGAGCTCCGAGATCTACTGCCCTTGCTCTCCGCAGATGCAGATGCA  
GATGCAAAAGACAGTATAAAATGATAAGCGAGACATCGCTGTC

>comp171983\_c0\_seq16

TGTCATTACTCAATGTATAGCTTTATATTATGATAATTATATTGCAAGCTATATTGTCAGTGATCTTACTTTTTTCATGAATGAACTAAACATATTGATATAGATAATCACTTCATATGGAAATACTT  
TCCAAGAAAATTACACTCCTATCTTCGGTTCCAAACAAAACGAAGGATATCTTCAATAAGGCTCTATGGCATCTTCCTTTTGCTTGTTTTTACAATAAGTTGGAGCTTACAGATATATATGCTC  
TAACTTGGGAGAGTTGACTTCTGATTTCTTATTTGAAGTATCATCTTAACCAGCAACAGAATTCTGGGAATGTCCAATTTGTTGGAAGTGAACAGCCATGGGTACTCCTGTTTCATATTCT  
TCTTTTCTGTGAGACCTGGTGAACCTGATTGCCATTCTTTGCAAAAACAGGGGATTGTAATTTGGTTTAGCCTGCAGGTTAATCATCCAATAGAAAATATAACTCCTGCGTCACACTG  
TGAGTTGAGCCTCGAGGGTCTTCCCCTACGCCCGTAAGCTATGCCGCTCACTTCGTATAACGAAGGACTTTGTTTATGATCTTTCTTAAATTTACATTTGATGACTGGATATTAACATCAG  
CTTTTGCATATCTTGAGAAGTTCATACAGGCTCTTCCAGAAGGGAATTTAATCAACTCTTTTGCAGGGTCGACCTCTGTGCGTTTTTATGGCCGTTATGGTTACTGCGGATATGGCTCG  
ACTTGCAAATTTGATCATCCAATAGCTGCACCCAATGTTCTGTGTTTCGACAACCATTAGAGTCATCATCTGGGCCTGCCACGTTAACATTGTCAGCTGAAAGCTCTTCTATAGCCAGCCC  
TGGAATTAACGCCTCCCCTCGTCCAAACGACAGAAAATGAATTTGACAATGAGAAGGTATAATCTGAATGATGATGGAACCAACCAATCACTTGACGGGATTTTCTCTATTTATTT  
CCTTTATGAGTTAAAAGCATTTTACCGCCTAAGTCGAGTCATTCTAGCCAGAGGTGTCTATTCTTTTTGAAGAGTGGGCGCTGTTTCACTAAATAAAGACTACTTTCACTTGATAAATGT  
ACTGGCCACCTCTTACTTTACTGCAACGATGTTCTTCTTACCCTTGTGTTTACTTGGTCAATGATGTTCCATCTATGTTAATTTATTTCTATTAAAGATCAACTGACAGTCCAAGAATCATGT  
GGAAATTTTGTCTTCTCACTCCCACCAATTTTCTTGTGTTAAGGAATTTCTTGGATTCAATGATCTTTAATCATTCAATAAAGTCTTTCAATTGTGTCTGTCCATTCAAGCTGTAGATA  
TTCATAAACGGTCATCATCTTCACTGAACTCAGTTTGTGAAGCCACTTCTATGAAACCTGTTGATTGTGCAAAAAAATTTGCTTCTCCGGAGCACGGTTGTTTTGACCTTCTCAGA  
ACAACATATAGTCAGAGTTCAGAAAAGAAGTGCTGCTGCTTACAGGATGGCTTTTTAACCCTTTATAGCTCCGTTTTGACTCGACTTTCTGCATTGATAGATTTGGTTGCAAGGATAAACGT  
TGATGGGTGGGGTTGAGTTGATTCAGAATCTTCTCTAATGCATTCCTTCCGGAATATCAGTTGTATTGGGATGCAATATGCCAGGTACCTCTTATACAGTAGAAATCTCCCGGTAAATAGAA  
GCCACGGCTCCGAAATTTCTTGGCAGCCATTTTAGAGGGCGAAGTGGATGACAACAAGGGGGAGCGCGCAAGTAAAACGGTCAAGACCGCGTCCATGGCCGCAACCAAGCGTGTCTTTC  
TCCCTCTCGTTGTCAATGCAAGAAGCCCAAGCAAAATATTGCTATCATCCTTCATAGGAGGAGGACATGCATGCCAGCGAGATCGAGAGAAGCGCACAAAACATGGTAGGTTTTGACGAT  
TATAAATAAGGAGCGGTAGAGATCGGGTGACAAAATCAATGGTGGGAAGAAGAGATATTGACCGACGGTTAGGAC

>comp171983\_c0\_seq17

TGTCATTACTCAATGTATAGCTTTATATTATGATAATTATATTGCAAGCTATATTGTCAGTGATCTTACTTTTTTCATGAATGAACTAAACATATTGATATAGATAATCACTTCATATGGAAATACTT  
TCCAAGAAAATTACACTCCTATCTTCGGTTCCAAACAAAACGAAGGATATCTTCAATAAGGCTCTATGGCATCTTCCTTTTGCTTGTTTTTACAATAAGTTGGAGCTTACAGATATATATGCTC  
TAACTTGGGAGAGTTGACTTCTGATTTCTTATTTGAAGTATCATCTTAACCAGCAACAGAATTCTGGGAATGTCCAATTTGTTGGAAGTGAACAGCCATGGGTACTCCTGTTTCATATTCT  
TCTTTTCTGTGAGACCTGGTGAACCTGATTGCCATTCTTTGCAAAAACAGGGGATTGTAATTTGGTTTAGCCTGCAGGTTAATCATCCAATAGAAAATATAACTCCTGCGTCACACTG  
TGAGTTGAGCCTCGAGGGTCTTCCCCTACGCCCGTAAGCTATGCCGCTCACTTCGTATAACGAAGGACTTTGTTTATGATCTTTCTTAAATTTACATTTGATGACTGGATATTAACATCAG  
CTTTTGCATATCTTGAGAAGTTCATACAGGCTCTTCCAGAAGGGAATTTAATCAACTCTTTTGCAGGGTCGACCTCTGTGCGTTTTTATGGCCGTTATGGTTACTGCGGATATGGCTCG  
ACTTGCAAATTTGATCATCCAATAGCTGCACCCAATGTTCTGTGTTTCGACAACCATTAGAGTCATCATCTGGGCCTGCCACGTTAACATTGTCAGCTGAAAGCTCTTCTATAGCCAGCCC

TGGAAAATTAACGCCTCCCCTCGTCCAAACGACAGAAAATGAATTCTGACAATGAGAAGGTATAATCTGAATGATGATGGAACCAATCACTTGACGGGATTTTCTCTATTTATTT  
CCTTTATGAGTTAAAAGCATTTTACCGGCCTAAGTCGAGTCATTCTAGCCAGAGGTGTCTATTCTTTTTTTGAAGAGTGGGCGCTGTTCATCTAAATAAAGACTACTTTCACTTGATAAATGT  
ACTGGCCACCTCTTTACTTTACTGCAACGATGTTCTTCTTTACCCTTGTGTTACTTGGTTCATGATGTTCCATCTATGTTAATTTATTCTCATTAAAGATCAACTGACAGTCCAAGAATCATGT  
GGAAATTTTTGCTTTCTCACTCCCACCAATTTTTCTTGTGTTAAGGAAATTCCTTGATTCAATTGATTCTTTTAATCATTCAATAAAGTCTTTCAATTGTGTCTGTCCATTCAAGCTGTAGATA  
TTCACTAAACGGTCATCATCTTCACTGAAACTCAGTTTGTGAAGCCACTTCTATGAAACCTGTTGATTGTGCAAAAAACAATTTGCTTCTCCGGAGCACGGTTGTTTTTGGACCTTCTCAGA  
ACAACATATAGTCAGAGTTCAGAAAAGAAGTGCTGCTGCTTACAGGATGGTTTTTAAAACCTTTATAGATTGTAGTCGAGGCGTATAATTGGTTGTGACTTTGTTCCCTGTACTAGTGAGGT  
GTAAGGTAGAACTAGTAGTTTATTTGTGAAATAATTTGCGTATTGTTGTTTGTGACTTTTTTCCCTGTGTGATTTCATGATTGCAGCTTAAAATGGTAGGAAAAGCATTTTGTTAAATTAATT  
GTGTACACTTATAATTAATTGGGTTAGGTTAATCAAATAGAATGTGGCGTTGAATTCATCTCATGCTTGAGGTGCTTAGACTTTGAAGTAGCCTTAGATTTGAAGTCATCTAAAGATCTAAAC  
TTGTCTTAGACTTCATGAAGTCTTAGAGCTTAAGCCCTTTTCAGGCTTGAATTTGTCAAAGACTTGACTCACCATAGGATTTATGTCTTATGAGAGTTTGAAGTCATCTTATATCTGAAGATG  
TTAGAAACTTTGTACTTGTCTTGAGCTTGAAGTTGTGCAAGAATCTGAACTCATCTCAAGCTATAAGAGAATTTGAAGTCGTCCTAGATTTGAAGTCATCAAAGAGTCTAATCTCATCTCA  
AACGAAGTCATCAGGGGGCTTTGAATTCGTCTCATGTTTGAAGTTATTAGAGAGCAAACAACCAAACTCGATATAATCCACAAACATAACAAAAATACCATGTCAGATGATGACAGGAA  
CAGATCACCAGATCTAATTTGGTTCTCTCAGGCTATTTCTTTTTGTTGAGCCTATTGGTAAAGTTGTGCGGATTGAGTAAACTACATTTATCATATCTTTATTTTTAATATTATAGATTTAAT  
GAGGTTTTGAATTTTTAATTATATAAATGATACAAAAG

>comp171983\_c0\_seq18

TGTCATTACTCAATGTATAGCTTTATATTATGATAATTATATTGCAAGCTATATTGTCAGTGATCTTACTTTTTTCATGAATGAACTAAACATATTGATATAGATAATCACTTCATATGGAAATACTT  
TCCAAGAAAATTACACTCCTATCTTCGGTTCCAAACAAACGAAGGATATCTTCAATAAGGCTCTATGGCATCTTCCTTTTGCTTGTTTTTACAATAAGTTGGAGCTTACAGATATATATGCTC  
TAACTTGGGAGAGTTGACTTCTGATTTCTTATTTGAAGTATCATCTTAACCAGCAACAGAATCTGGGAATGTCCAATTTGTTGGAAGTGAACAGCCATGGGTACTCCTGTTTCATATTCT  
TCTTTTCCCTGTGAGACCTGGTGAACCTGATTGCCATTCTTTGCAAAAACAGGGGATTGTAATTTGGTTTAGCCTGCAGGTTAATCATCCAATAGAAAATATAACTCCTGCGTCACACTG  
TGAGTTGAGCCTCGAGGGTCTTCCCCTACGCCCCGGTTCGACCTCTGTGCGTTTTTTATGGCCGTTATGGTTACTGCGGATATGGCTCGACTTGCAAATTTGATCATCCAATAGCTGCACCCA  
ATGTTCCCTGTTGTTTCGACAACCATTAGAGTCATCATCTGGGCCTGCCACGTTAACATTGTCAGCTGAAAGCTCTTCTATAGCCAGCCCTGAAAATTAACGCCTCCCCTCGTCCAAACG  
ACAGAAAATGAATTTCTGACAATGAGAAGGTATAATCTGAATGATGATGGAACCAATCACTTGACGGGATTTTCTCTATTTATTTCTTTTATGAGTTAAAAGCATTTTACCGGCCTAAG  
TCGAGTCATTCTAGCCAGAGGTGTCTATTCTTTTTTGAAGAGTGGGCGCTGTTTCATCTAAATAAAGACTACTTTCACTTGATAAATGTACTGGCCACCTCTTTACTTTACTGCAACGATGTT  
CTTCTTTACCCTTGTGTTTACTTGGTTCATGATGTTCCATCTATGTTAATTTATTCTCATTAAAGATCAACTGACAGTCCAAGAACATGTGGAAATTTTTGCTTCTCACTCCCACCAATTTTT  
CCTTGTTTAAGGAATTTCTTGATTCAATTGATTCTTTTAATCATTCAATAAAGTCTTTCAATTGTGTCTGTCCATTCAAGCTGTAGATTTCACTAAACGGTCATCATCTTCACTGAAACTCA  
GTTTGTGAAGCCACTTCTATGAAACCTGTTGATTGTGCAAAAAACAATTTGCTTCTCCGGAGCACGGTTGTTTTTGGACCTTCTTCAAGAACATATAGTCAGAGTTCAGAAAAGAAGTGC  
TGCTGCTTACAGGATGGCTTTTTAAACCCTTTATAGCTCCGTTTTGACTCGACTTTCTGCATTGATAGATTTGGTTGCAAGGATAAACGTTGATGGGTGGGGTTGAGTTGATTGAGAATCTTT  
CTCTAATGCATTCTTCCGGAATATCAGTTGTATTGGGATGCAATATGCCAGGTACCTCTTATACAGTAGAAATCTCCCGTAAATAGAAGCCACGGCTCCGAAATTTCTGGCAGCCATTTT  
AGAGGGCGAAGTGGATGACAACAAGGGGGAGCGCGCAAGTAAAACGGTCACGACCGCGTCCATGGCCGCCAACAGCGTGCTTTCTCCCTCTCGTTGTCAATGCAAGAAGCCCAAGC  
AAAATATTGCTATCATCTTCATAGGAGGAGGACATGCATGCCAGCGAGATCGAGAGAAGCGCACAAAACATGGTAGGTTTTGACGATTATAAATAAGGAGCGGTAGAGATCGGGTGACA  
AAATCAATGGTGGGAAGAAGAGATATTGACCGACGGTTAGGAC

>comp171983\_c0\_seq2

GAGAATAATGGGAACAAAAGATCTCAAACAAGAAAGCCTTCATATCCACAATAGTTCCAAATGAATAAAATGCAAGCTGAGATGGATGAGTTATATATGAACAGAATGCTGTACACATAC  
ATGGATAGCTACATATCAATATGCATAACAGAGAATAAGATTTTGTGTTGGGACGACTTCTTTCTGCTACTTAAAGCAGCTTCTAGTACAAATATTTAATTTTTGAACTCGAAAGCTGTT  
TTAAGAAGCGTCCCAAACAAAACCTTAATGTCTTCTAAAACAGCTTTTTAATATAA

>comp171983\_c0\_seq24

TGTCATTACTCAATGTATAGCTTTATATTATGATAATTATATTGCAAGCTATATTGTCAGTGATCTTACTTTTTTCATGAATGAACTAAACATATTGATATAGATAATCACTTCATATGGAAATACTT  
TCCAAGAAAATTACACTCCTATCTTCGGTTCCAAACAACGAAGGATATCTTCAATAAGGCTCTATGGCATCTTCCTTTTGCTTGTTTTTACAATAAGTTGGAGCTTACAGATATATATGCTC  
TAACTTGGGAGAGTTGACTTCTGATTTCTTATTTGAAGTATCATCTTAACCAGCAACAGAATCTGGGAATGTCCAATTTGTTGGAAGTGAACAGCCATGGGTACTCCTGTTTCATATTCT  
TCTTTTCTGTGAGACCTGGTGAACCTGATTGCCATTCTTTGCAAAAACAGGGGATTGTAATTTGGTTTAGCCTGCAGGTTAATCATCCAATAGAAAATATAACTCCTGCGTCACACTG  
TGAGTTGAGCCTCGAGGGTCTTCCCCTACGCCCAGGTCGACCTCTGTGCGTTTTTTATGGCCGTTATGGTTACTGCGGATATGGCTCGACTTGCAAATTTGATCATCCAATAGCTGCACCCA  
ATGTTCTGTTGTTTCGACAACCATAGAGTCATCATCTGGGCCTGCCACGTTAACATTGTCAGCTGAAAGCTCTTCTATAGCCAGCCCTGGAAAATAAAACGCCTCCCCTCGTCCAAACG  
ACAGAAAATGAATCTGACAATGAGAAGGTATAATCTGAATGATGATGGAACCAATCACTTGACGGGATTTTCTTATTTATTTCTTTATGAGTTAAAAGCATTTTACCGGCCTAAG  
TCGAGTCATTCTAGCCAGAGGTGTCTATTCTTTTTGAAGAGTGGGCGCTGTTTCATCTAAATAAAGACTACTTTCCTTGATAAATGTACTGGCCACCTCTTTACTTTACTGCAACGATGTT  
CTTCTTTACCCTTGTTTGTTACTTGGTCATGATGTTCCATCTATGTTAATTTATTTCTATTAAAGATCAACTGACAGTCCAAGAACATGTGGAAATTTTTGCTTTCTCACTCCCACCAATTTTT  
CCTTGTTAAGGAATTTCTTGATTCAATTGATTCTTTAATCATTCAATAAAGTCTTTCAATTGTGTCTGTCCATTCAAGCTGTAGATATTCATAAACGGTCATCATCTTCACTGAAACTCA  
GTTTGTGAAGCCACTTCTATGAAACCTGTTGATTGTGCAAAAACAATTTGCTTCTCCGGAGCACGGTTGTTTTTGACCTTCTTCAGAACAACATATAGTCAGAGTTTCAGAAAAGAAGTGC  
TGCTGCTTACAGGATGGTTTTTAAAACCTTTATAGATTGTAGTCGAGGCGTATAATTGGTTGTGACTTTGTTCCCTGTACTAGTGAGGTGTAAGGTAGAAGTACTAGTTTATTTGTGAAATAAT  
TTGCGTATTGTTGTTGTGACTTTTTTCCCTGTGTGATTTTCATGATTGCAGCTTAAAATGGTAGGAAAAGCATTGTTGTTAAATTAATTGTGTACACTTATAATTAATTGGGTTAGGTTAATCAA  
ATAGAATGTGGCGTTGAATTCATCTCATGCTTGAGGTCGTTAGACTTTGAAGTAGCCTTAGATTGAAAGTCATCTAAAAGATCTAAAAGTCTTAGACTTCATGAAGTCTTAGAGCTTAAGC  
CCTTTTCAGGCTTGAATTTGTCAAAGACTTGACTCACCATAGGATTTATGTCTTATGAGAGTTTGAACATCATCTTATATCTGAAGATGTTAGAAAACCTTTGTACTTGTCTTGAGCTTGAAGTTG  
TCGAAGAATCTGAACTCATCTCAAGCTATAAGAGAATTTGAACTCGTCCTAGATTTGAAGTCATCAAAGAGTCTAATCTCATCTCAAACGAAGTCATCAGGGGGCTTTGAATTCGTCTCAT  
GTTTGAAGTTATTAGAGAGCAAACAACCAAACTCGATATAATCCACAACATAACAAAAAATACCATGTCAGATGATGACAGGAACAGATCACCAAGATCTAATTTGGTTCTTTCAGGCT  
ATTTTCTTTTGTGAGCCTATTGGTAAAGTTGTGCGGATTGAGTAAACTACATTTATCATATCTTATTTTTAATATTATAGATTTAATGAGGTTTTGAATTTTTAATTATATAAATGATACAAA  
AG

>comp171983\_c0\_seq9

TGTCATTACTCAATGTATAGCTTTATATTATGATAATTATATTGCAAGCTATATTGTCAGTGATCTTACTTTTTTCATGAATGAACTAAACATATTGATATAGATAATCACTTCATATGGAAATACTT  
TCCAAGAAAATTACACTCCTATCTTCGGTTCCAAACAACGAAGGATATCTTCAATAAGGCTCTATGGCATCTTCCTTTTGCTTGTTTTTACAATAAGTTGGAGCTTACAGATATATATGCTC  
TAACTTGGGAGAGTTGACTTCTGATTTCTTATTTGAAGTATCATCTTAACCAGCAACAGAATCTGGGAATGTCCAATTTGTTGGAAGTGAACAGCCATGGGTACTCCTGTTTCATATTCT  
TCTTTTCTGTGAGACCTGGTGAACCTGATTGCCATTCTTTGCAAAAACAGGGGATTGTAATTTGGTTTAGCCTGCAGGTTAATCATCCAATAGAAAATATAACTCCTGCGTCACACTG  
TGAGTTGAGCCTCGAGGGTCTTCCCCTACGCCCAGGTAAGCTATGCCGCTCACTTCGTATAACGAAGGACTTTGTTTATGATCTTCTTAAATTTACATTTGATGACTGGATATTAACATCAG  
CTTTTTGCATATCTTGAGAAGTTCATACAGGCTCTTCCAGAAGGGAATTTAATCAACTCTTTTTGCAGGGTCGACCTCTGTGCGTTTTTTATGGCCGTTATGGTTACTGCGGATATGGCTCG  
ACTTGCAAATTTGATCATCCAATAGCTGCACCAATGTTCTGTTGTTTCGACAACCATAGAGTCATCATCTGGGCCTGCCACGTTAACATTGTCAGCTGAAAGCTCTTCTATAGCCAGCCC

TGGAAAATTAACGCCTCCCCTCGTCCAAACGACAGAAAATGAATTCTGACAATGAGAAGGTATAATCTGAATGATGATGGAACCAATCACTTGACGGGATTTTCTCTATTTATTT  
CCTTTATGAGTTAAAAGCATTTTACCGGCCTAAGTCGAGTCATTCTAGCCAGAGGTGTCTATTCTTTTTTTGAAGAGTGGGCGCTGTTCATCTAAATAAAGACTACTTTCACTTGATAAATGT  
ACTGGCCACCTCTTTACTTTACTGCAACGATGTTCTTCTTTACCCTTGTGTTACTTGGTTCATGATGTTCCATCTATGTTAATTTATTTCTCATTTAAGATCAACTGACAGTCCAAGAATCATGT  
GGAAATTTTTGCTTTCTCACTCCCACCAATTTTTCTTGTGTTAAGGAAATTCCTTGATTCAATTGATTCTTTTAATCATTCAATAAAGTCTTTCAATTGTGTCTGTCCATTCAAGCTGTAGATA  
TTCACTAAACGGTCATCATCTTCACTGAAACTCAGTTTGTGAAGCCACTTCTATGAAACCTGTTGATTGTGCAAAAAACAATTTGCTTCTCCGGAGCACGGTTGTTTTTGGACCTTCTCAGA  
ACAACATATAGTCAGAGTTCAGAAAAGAAGTGCTGCTGCTTACAGGATGGTTTTTAAAACCTTTATAGATTGTAGTCGAGGCGTATAATTGGTTGTGACTTTGTTCCCTGTACTAGTGAGGT  
GTAAGGTAGAACTAGTAGTTTATTTGTGAAATAATTTGCGTATTGTTGTTTGTGACTTTTTTCCCTATGTGATTTTCATGTTAAATTAATTGTGTACACTTATAATTAATTGGGTTAGGTTAATCAA  
ATAGAATGTGGCGTTGAATTCATCTCATGCTTGAAGTTCGTTAGACTTTGAAGTAGCCTTAGATTTGAAGTCATCTAAAGATCTAAACTTGTCTTAGACTTTCATGAAGTCTTAGAGCTTAAGC  
CCTTTTCAGGCTTGAATTTGTCAAAGACTTGACTCACCATAGGATTTATGTCTTATGAGAGTTTGAACATCTTATATCTGAAGATGTTAGAACTTTGTACTTGTCTTGAAGTTG  
TCGAAGAATCTGAACTCATCTCAAGCTATAAGAGAATTTGAACTCGTCCTAGATTTGAAGTCATCAAAGAGTCTAATCTCATCTCAAACGAAGTCATCAGGGGGCTTTGAATTCGTCTCAT  
GTTTGAAGTTATTAGAGAGCAAACAACCAAACTCGATATAATCCACAACATAACAAAAATACCATGTCAGATGATGACAGGAACAGATCACCAAGATCTAATTTGGTTCTCTTCAGGCT  
ATTTTCTTTTTGTTGAGCCTATTGGTAAAGTTGTGCGGATTGAGTAAACTACATTTATCATATCTTTATTTTTAATATTATAGATTTAATGAGGTTTTGAATTTTTAATTATATAAATGATACAAA  
AG

>comp171983\_c2\_seq2

AGTATAAAAATTTAATTTTTAAATTAAGAAGCTGTGTTAAGAAACAATAAAAAAGCCGTCACAAACGAAACCTAAAAAGATCATATGCAAGGTCCTTTATTATACGAAGTGAGCAGGAT  
AGCTTACCGGGCGTAGCGGAAGACCAATGGGGCTCAACTCACACTCTGAAGTAAGAGTTATCTTTTCTATGGGAGGATGATTAACCTGCAGCGAGAACCAAATTTACAACCCCTGTTT  
TGGCAAAGAATGGGCAATCAGGTTTCATCAGGCCTCACAGGAAAAGAAGATATGAAACAGGAGTACCCATGGCTGTTCCACTTCCAACAAATTGGACATTCCCAGAATTCGTTGCTGG  
TTAAGATGATACTTCAAATAAGAAATCAGAAGTCAACTCTCCCAAGTTAGAGCATATATCTGTAAAGCTCCAACTTATTGTAAAAACAAGCAAAGGAAGATGCCATAGAGCCTTATTGA  
AGATATCCTTCGTTTGTGTTGGAACCGAAGATAGGAGTGTAATTTTCTTGGAAAGTATTTCCATATGAAGTGATTATCTATATCAATATGTTTAGTTCATTCATGAAAAAGTAAGATCACTGAC  
AATATAGCTT

>comp172025\_c0\_seq4

GCGTTCGTCACCTTCTCTGCGGCATCCTCTGCGTCTCCTCCTTCTCCATGCTAGCCAGAACCCTCGCCGATATCAAACCTGATCGCTTCTGATATTGGGCGGCTCGTTCTCTCATCAGCGAT  
GATAACGAACGGGTTGGCTTGGGTGCTTATGGTGTGTTTCCACCGCGCTGGCCCAGAGCAAAGGAAAAGCGCTTTCAGCTATATGGTCGGTGATCTCTGGCGGGGTGTTTAGCGTCGTGGT  
TTACATGGCTGTGAGGCGGGCTGCGAGGTGGGTGCAGAAGAGAACGCCGGAGGGGGAGGAGGTGGCGGAGCTTCACGTGTGCGTGATACTGGTTGGGGTGATGGTGGCGGCATTGCC  
GCGGATGCCATTGGGACTCACGCCATCTTTGGGGCGTTTGTGTATGGGTTGGCTGTGCCTAATGGACCGCTAGGCGAGCTGCTTATTGAGAAAATTGGGGATTTCAATTGAAGGATTGCTCC  
TTCCACTTTTCTTTGCGGTTAGTGGATTGAGGACTAACCTTTACAGCATTTGTGGACGCCGGCGCGGTGTTTTTGTGCTAATAGTTGTGATCGGAGCGGCTATCACGAAGGTCACCGGTT  
CGTGCTCGCAGCGTTTTATATGGAGATGCCGTTTACGACGGAATCTCGCTGGGATTGCTTATGAACACGAAAGGATTGTTGAACTCATATTGCTCAATATTGGCTGGGACAAAATGGTA  
AGTAATACTTTATCTAGAAAAATTTTTGATGAGGTATACTGTGAAATTTTTAAAATTTAATATGGGTATATTATATAAATAGTTAATGTAATATTATTTAAAATAGCTCTAAGAATTT  
AAGATTTATCTTAATT

>comp172029\_c0\_seq2

TTATGCTTCCGAAACGTTTAAAAATGTGAATCCATATGAATAAGTAAATATATATCCTTCTTTATTTCACTAGATAATAAAAAATAAATTCAAAAGTCTTAATGTCAATCACATGACTGCAAAAT

AAACTAAACAACAATAAAAATCAGAATTGGCATATGATCAGTTAAGGTTGATCAGCTTTAGTCTCCTGCTTAGATATGGATTCAAACCCAATCTGCAACCATGTAGAACCACCCTCTCTCTCA  
TTTATATCAATGAGATGACTAAGATCATTCAATCTCACTTCCCTACTCTCAGCCTCCTCTATATTTACATTCAACACATTCTCTAATTGTAGCTCAGTGGCAACAACGCTCGCTGACTCAACG  
GTGACACCACGGGAACCTTGATGCCCTCCTATGACATCGCATGTGCCCGCCAAGTGCTTGGCCTGATGGAAACTGTCGTTTACAAACTGAGCATTATGTACTTTGGGATTTTTCTTTGGCA  
ATGACAACCTGCGATGAGGTACCTCAAATGGAACAATTGCTAATGCCATACTTTTCGGAGGAAGCCCCAGCTTGATTATTTTGTAGGGAAAACCTCATCTTGATTATTTTGTAGTAATTATATAT  
TGCTTTCTTCTTTGATTGATGTGTACTTCATCATCTTGGGTGACTTGATTTCAGCCGAGTGGCAAAAACAACCCCTAACTTTCTTATGGCTAGCTCGATGGCCGCTAGTGCTTGATGTGAG  
GTAAATACATTTTGGCAAGTCTTGCATTCAAAAATTTTATGCGCATTTGGAGGGGTTTGTGTTGAGACGTGGGGTTCTGGGTTTTTTGGCTGAGGCGAAGGAGGCAGGAGGACAACATAA  
TCAGTTCCTCCTTTCTGAAGTAGAGCATTCTCAGCACCTGTGATGTGGAGAACATAAGAAGAGCATTCCGATGCATCTATGTTGCGGAGAACCAGGTTGGCACGGGCAGTGGAGAG  
CCATAAAGAAAATTAGCGACATGCTCTTCTTCGGTAAGCAGAAGAGGCGGAGTGGGAGTTCTGGATCGGGGTAGTGAAGGAGAAAAAAGGCCATTTGACTTGTCAATTCTCGCCATCAT  
CCTCACAGCACCAACGAGACCGGGACAACAATGCTTGGACAATGATTTCAACGAACAGAATTCTTTACCACAGTTCTGACAAATGTGACTAGTAAGGAGACGGTTGCCGTCGGAGGAC  
TCCCTTCAACTCCTGTGGTGGATGGACCTTCGTTTCGGGTGGAGGATGGGTTCAATGTTGAACATCCCATGGACCCTCATATGCCCGCCCAACGCTCTCCCACTACTGAATCTCTTATCGCA  
TAATCGACAATGGTACTTCTCTTCTCCTGCTCTTGTAGCTTCTGCTTCTTGATTATCGGCATTGTTCTTGCAAATCAAACCTTGAAAACAAGACTCAAACAAGCAAATTTATAGAGAAAA  
GTTCAAGCTAATTTGTGGGTGTGATTCTTTTTTT

>comp172029\_c0\_seq7

CGCATTTTGTAGGCGTTTGTGTTGAGATGTGGGGTTTTGGGCCTTCTGGCTGAGGCAAAGAAGGCAGGAGGAAGACATAATCAACATCCCTCCTTTTTGGAAGTAGAGCATTCTGCTTCATC  
GGTATTGCGAAAAACAGGCTTGGCGCAGGCAGTGGAGAGCATGACAAGACAATTAGCGACACGCTCTTCTTCGGTAAGCACAAGAGGCAGAGTAGGAGTTCTGGATCGAGGTAGTGAA  
GGAGAAAAAAGCCATTTGAGTTGTCAATTCTCGCCATCATCCTCACAGCACCAACAAGATCGGGACAACAATGCTTGGACAATGATTTCAACGAACAGAATTCTTTACCACAGTTCTGA  
CAAATGTGACTAGTAAGGAGACGGTTGCCGTCGGAGGACTCCCTTCAACTCCTGTGGTGGATGGACCTTCGTTTCGGGTGGAGGATGGGTTCAATGTTGAACATCCCGTGAACCGCATA  
TGCCCGCCCAACGCTCTCCCACTACTGAATCTCTTATCGCATAATCGACAATGGTACTTCTTCTCCTGCTCTTGTAGCTTCTGCTTCTTGATTATCGGCATTGTTCTTGCAAATCAAAC  
TGAAAACAAGACTCAAACAAGCAAATTTATAGAGAAAAGTTCAAGCTAATTTGTGGGTGTGATTCTTTTTTT

>comp172088\_c3\_seq2

AAGAAAAGCTGCAAAAAAGACATGACTACTAAAAAATTTCTTGAAATTAAGTGATGAATCTAAAGACATAAATTACAATAATATGAGATACCTAAGAAAATTTGTGAAATGTTACTCTCAG  
AGCACGAAAAAAAATAAAAACTTAATCCAAATTAAGAATAAACCAAGCAACATACCACTACTCTGAGGACCCAGTATGGAGACTATAGCATATGAGACACCACATTCACCAAGTTTCA  
TAGTCTCCATGAAATTTCCATTCCAGAGACATTGTATACACCATCTCGATCAATTAGTTGGGTAGGACAACCTACTATCCCCCATATCGTCGCAGCGAGCGAGCTCCCGCGTCATCGAAGGA  
GGCGATGAATGTCGTCAAAGGAGGCGAAGGAAGAACGTTATATATCTGTTATGACTTTCGATCCGATGAGAAGGAAACGTTGTTAAAGGAGGCGAAGAAGCTTTCAATATGAAGAAAAC  
TCTACCTCAAAT

>comp172110\_c0\_seq9

CTGAAAGTGACCAAATACACGCGATGCTTGATCGGTTGGCATTAGATATGAGGTCATCAGTTGACAAACATGATAGCTCTGACCTTATGATGCACTATGTTGTGCCTGCGGCACAACACAT  
CCGGGAATAACGGCCAGATACGCTCCACTATCGTTTTTTTTTACCTTTTCGCCTCTCTGCTTCATTAGTTGGCTTTATGTTATTTTGTCTTTTTATAGCATTTCAGTTATTTAGAAAAGATAG  
AATTATACTTATAGGAGAAGAGAAGGGCTG

>comp172150\_c1\_seq2

AATCCCTACATTCAATTCCTCCTAAACTTCCTCAAAAAACCTTCAAACAAGCTCCCTTAGCTCCTGCGGTGGGATCGGCGGAATTACAGGCGGAAGGTTCCGCCTCTATGTTGCACGG



ACCGTCCCCTGGACCAGTCCAATGGACCAGTCTAACAATAATATATTGATTCTAATGCATTTTTAGGATCAACATATTGAATATAAAACAGACACTTGACATACTACAAAAACCTTACCAT  
AAGCTAATCCAATTTGAGTTTTGTTTTGAATCCAGCAGTCACCGCAATGCAGAGAACCATGAGGACCCAATTAATAGACGGAATGTATATCTGACCAAAAAACTTCTTTGATGTATGAAC  
AATCTTACTCTAGGAAAAACAACCAAGTGCAACTGCCTGCTTGATGATAGAAAATGTTGCTGATATGGTGGCTTGACTAGCAATTATAGCTGCTGCTGTTGCAACAATAAAC

>comp172157\_c0\_seq4

AACTTCTTTTCAGTAGAGGTTCTTACTTCACTTCTCTACCCTGTAAAAATGCCTCAAGATGCTTCAGGAAACAACATTAGAGACACTAGAGGCCTTTCAGGTGGAGAGCGTTCTTTCTCTA  
CACTTTGTTTTGCACTAGCTCTTCATGATATGACTGAGGCCCTTTTCGAGCTATGGATGAATTTGATGTCTTTATGGATGCAGTTAGCAGAAAAATCAGCTTAGATGCTCTGTTAGAATTTG  
CTATAAACCAAGGTTACAATGGATATTTATTACCCCGCATGACATCAGTATGGTGAAGGGTGGGGACAGAGTCAGAAAGCAGCAGATGCCAGCACCTCTTCCCTCGTGATTTGTGCTCAT  
CACTTGTGTTGCAATGAAGGTGCAATTAATTTGTCAACTTTTCGTTTGATCACAATTTGTGATATTTTGTATTTGTAAAAAGTGGCTGTTTGAATTCAAAAAA

>comp172163\_c0\_seq11

GACTTTTCTCAAATCAAGTGATATCTATAAAACCCTGTAAATTTGTGGAACAAGGAAGAGAACACTCATGCGTTTAAAAGTCTCTCTCCTTACCATCTTCTCATAAAATACACAAAGCAGG  
ACTGACTTCTCATAATTCCTCGTGCGTGAGAGAGAGAGAGCCGATGGGTTCCGCTTCATCAGAGAAAGCACACGCAGTCTGTGTCCCTTTTCCAGCCCAAGGGCATATGAACCCCATGCT  
GAAGTTGCCAAGCTTCTCCACAGCCACGGCTTCCACATCACCTTTGTCTCACTGAGTTCAATCACCGCCGCTTGGTTCTCTCCTCCGGCCCGAGGGCCGTCAGGGGGCTTCCCGACTT  
CCACTTCCGAACCATTTCCCGACGGTCTTCTTTCTCCGAAGAAGACGCTACGCAGGACATCCAACGCTCTGCGATTCCACATCCATGAACGTCTCCCACACTTTCCCGCTCTCCTGGCA  
GAACTCAATGAAGAAAGCATCAACAACAACAGCCGACCACCTGTCTCCTGCATCGTCTCCGATGGAGCCATGTCCTTACCCTGGACGTTGCTCGTGAGCTCGGCATTCTGAGGTTCTC  
TTCTGGACAACCAGCGCTGCGGCTACCTCGCGTACAACTACTATCGCCACCTTATCGACCGTGGCCTTATTCTCTCAAAGGTAACCATTTTGAAGTAGGGGTGTGAATGATTAGAGTT  
GAGCAGAGTATTTATCTAATAGAGGCGTGAAACGAGTC

>comp172182\_c0\_seq1

CTCTCTCTCTCTCTCTCATAAAGCATGGTGCCTAACCTATTAACCTGTTGAGCATTTTTTTTTGTTACGTAGATATTAGATTTTTTATGGAGAATCAAATATGTTATTTACTGATTTAGAGA  
AATCATATGATAAATTTCAAGAGAAATGATCTGGAGAGTTCTAGAAAAGAAAGGTGTTATAATGCTTATATTCAAGTCATGAAGGATATATATGCAAGTGTGTTCTTGTGATCTAAGGTG  
ACTCTCTAATCACATATATGCTCATTTCATATATTGTCTCTAAAAGAGGTTACAAAGTGATGCAAGTGATGCAACGATACTTTCCTAAAGAAATTAATAAAAAAAGAAAAAATAATGTTT  
CATCTCAAGTTCTTAAACCATCACTATCAAGTTTTATCAACCATACATTCTGATCTCGTGAGTCTGCAAACTTAAAAACTAGCAAGATCGCCACAGAACGCACATGTTGTTAGCAAATAGCAT  
ACGAAAACAACAATATTCTAATTCCGTTGCAACAATTACAAAAACAGAGATTGAAAACAATAGCAATGGAAGCATAAGTACTAATAAGAGGAACTGAACCCCTGGCAAGAATTCATAATCAG  
ATCAGTCCCTCAATAAGTATAGGTCCGTCCTTATGCTCATCATCGTCCAAATCTCCATGGGCATGCCCGGTCTCCACTCCTGGAAGCGGTCTTCCATCACCGGTGCAGCCTCCCTTGGC  
TCCAAAGTCTGATTTCCCGCTTCTCCCCCATATCCTGCTCCACCCACAACCACAACCCTGTCTGTCCATCTCCCCACCTCCGGCGCCAATAACGACCACCTCATCCGTAGCGCTTCG  
ATCTCCGCCACCTTCCCCATTGCCACACCAATTGTCCGGTATCTGGCCGTTGCTGGGGCCGGGATCCTGAACGCATCCACCGCCTTCTCCGTCAACGTAGTCTGCTGCAGAGCCGGAG  
AAAGACGCGGGACGCGAGATTTGAGGGAGGCGGCAGCTCGAGAGAAGGCTTCCATTATGGACTTTGGCGGGAGGGCGCAGTACTCCAGGCCGGGCTCCTCCAACCTCGGTGGCCGGA  
TCGCACCGATGAATCCCTTCACTACGCTCCTTCCGCTTCGATTCCCTCCATTCTCTCCACTCGTACGATACCCACATACGCGCTGTGCCTATCTCGATCGATCGGAACAAACAACACTTAA  
ATAGTTTTTATTCCCAAAAAAAAAAAAAAGGAACAGTGGACTGCGACTGCTAGAGATTGCCGCGATTGGAGTTAGGCGATCAGAAACAGCTGAGTCTGGCTGATCCCCTGCGGTTATT  
GCTATAAATTTGGGGAGAAACATGTTGAATTTTCGTTGTTACGTTGGGGTATTGAATTTTATCTAGGAGGAAAGATTGATTTGATAAGAAAGCAGTATACAAAGTCGTCAGTTTCAATGCA  
GAGCTTTTCTGTAGTTCCAGGCCATAAACACATTTTCAGAATTTCTCAGTAGTCTTCAGAATCTCAAATTAGTCTCCGGTGAGAAAAAAGTTCTGATCTTCTCAAGATCACAGTATGTTT  
GAGTAAGAACTGCAGGAAGTCTATCTCATGCGCTCTTCC

>comp172227\_c1\_seq6

TCATTTTCGTCAATTATTTCAACAAGCTGATCTCACCCATACCGTCATCAGTTTGTCCCGGGGGTGTAGCATGTAAAAACAAAAACAAGAAAGGACAATGTACGGATGACCGTGGATTAAGT  
CTTGTCTAAAGTTTTATTATTACATTACAGGTTATAAATATGGATTTACATTCTACAGTTCAAAAATAATAAAGATTTTACTTTCTCTGTCTCCTTTTCGGGTCTCCTTCTTCACCGAAGGTTTTT  
GCTTTTCATCAGCATTTCATGTTGAGAGACAAGAGAGAATGATACATTGGTGTGGTCTGTGGAATTGATGGCACAAAAAGATCTTCATCGCCACCAGGAGGTCCGGTCTGGTTTTCTTCC  
TTCTTTTAAAGCTTTTCGTATGTCTGCAGCTTTCCAAACTGCATA

>comp172231\_c2\_seq19

ACGTTTATAGCATCTTGGACATAAATAGCATAAAAAACCATGCTAAGCCTTTAAGGAAAGAAAAAAAAGTCCCAGTAACAATCACAACATAAAAGATCATGCATGCTTACAGGAAATGTA  
TTCCAGCTTGGAACTTGAGCTAATCCTTGAGGAAGAATTACTTGCGCATAGCTTGAAGGAACTTGCCAATGAGGGCTCGCATTGAAAGAAGTCAGTTCCCCAGGACATAATGTTTGGCTT  
GGCGTTGTCCGTGAAAGCCACCAGGGCATTGAATTAGATGGCTCAGGATGGTTAAATGTACAGGTTTTGTTGAACTTGCACCATCCATTTGTTAAATAAAATTTGCAATCCATCACATTCA  
AACGAAGAGGATAGCCTAGGGTATTTAATTTTCTGATTCCGGGATTATAACTAGGGCGATGAAATTTCCATGCAGGTCCAAAATTGCATTTTCCAGTCTCCAGATAGTGTCCCTGGGAGGA  
TGATTAATCCGCAATACATTCCCAATTTACAATAGCCACTGTTGAGGTAATAAGGGCAATCTGGCTCTCCAGGACGTTCCGGGATAAGATTCAGAGTCCATGTTGTTGCCCGCCCTGGAAC  
TAATTTGCTGCATCGACTCTTC

>comp172231\_c2\_seq20

CCTGCAAAAAGAGTTGATTAATCCCTTCTGGAAAGAGCCTGTATGAACTTCTCAAGATATGCAAAAAGCTGATGTTAATATCCAGTCATCAAATGTAAATTTAAGAAAGATCATAAAC  
AAAGTCCTTCGTTATACGAAGTGAGCGGCATAGCTTACCGGGCGTAGGGGAAGACCCTCGAGGCTCAACTCACAGTGTGACGCAGGAGTTATATTTTCTATTGGATGATTAACCTGCAG  
GCTAAACCAAATTTACAATCCCTGTTTTTGCAAAGAATGGGCAATCAGGTTCCACAGGCTCACAGGAAAAGAAGATATGAAGCCGGAGGATCCATGGCTGCTCCACTTCCAACAAAT  
TGGTCATTCCATAATACTGTTGCTGGTTAAGATAATACTGGCATTGAGGTTGCCCTATTCTTTGAGGATGCACGGCCTCTAGACCCAGCACCCCTGCCTGGAGGATGATTAATCTGCAAAA  
CATTCCAATTTACAATAGCCACATTTGAGGTAATATGGACAATCTGGCTCTCCAGGACGCTTGGGATAAGATTTAGAGTCCA

>comp172231\_c2\_seq24

AGTTTCTAACATCTTCAGATATAAGATGAGTTCAAACCTCTCATAAGACATAAATCCTATGGTGAGTCAAGTCTTTGACAAATTCAAGCCTGAAAAGGGCTTAAGCTCTAAGACTTCATGAA  
GTCTAAGACAAGTTTAGATCTTTAGATGACTTCAAATCTAAGGCTACTTCAAAGTCTAACGACCTCAAGCATGAGATGAATTCAACGCCACATTCTATTTGATTAACCTAACCCAATTAATT  
ATAAGTGACACAATTAATTTAACAAAATGCTTTTCCTACCATTTTAAGCTGCAATCATGAAATCACACAGGGAAAAAAGTCACAAACAACAATACGCAAATTTTTCACAAATAAACTAC  
TAGTTCTACCTTACACCTCACTAGTACAGGAACAAAGTCACAACCAATTATACGCCTCGACTACAATCTATAAAGGTTTTAAAAACCATCCTGTAAGCAGCAGCACTTCTTTTCTGAACTC  
TGAATATATGTTGTTCTGAAGAAGATCAAAAACAACCTTGCTCTGGAGAAGCAAATGTTTTTCGACAATCAACAGGTTTCATAGAAGTGGCTTCACAACTGAGCTTCAGTGAAGATGA  
CTGTTTAGTGAAAATCTACAGCTTGAATGGACAGACACAATTGAAAGACTTTATGGAATGATCAAAAAGAATTAATTGAATCAAGGAAATCCTTCAACAAGGAAAAAAGAGAAAATAAAA  
AAGGGTAAATAAAACAACGTTGAGTAAAGAGGTGGCCAGCACAAATTAAGTGAAGTAGTCGTTATTTAGATGAACTCTTCAAAAAGAATAGACACCTCTGGCTAGAATGACTCG  
ACTTAGGCCGGTGAATGCTTTAACTCATAAAGGAAATAAATATAGAAAATCCCGTCAAGTGATATGGTGGTTCCATCATCATTGAGATTATACCTTCTCATCATCAGAATTCATTTTCTGTC  
GTTTGGATGAGGGGAGGCATTTTAATTTTCCAGGGCTGGCTACAGAAGAGCTTTCAGCTGACAATGTTAACGTGGCAGGCCAGATGATGACTCTAATGGTTGTGCAACAACAGGAACAT  
TGGGTGCAGCTATTGGATGATCAAATTTGCAAGTGGAGCCATATCCGAGTAACCATGACGGCCATAAAAACTGCACTTAGGTTTACCCGGGCGTAACGGAAGACCCATGGGGCTCAACT  
CACAGTTTGAAGTGAGAGTTATCTGTCTATGGGATGATTAACCTGCAGCGTGAACCAAATTTACAGCTCCCTGTTTTTGCAAAGAATGGGCAATCAGGTTCCACAGGCTCTCACAGGAA  
AAGAAGAATATGAAGCCGGAGGATCCATGGCTGCTCCACTTCCAACAAATTTGGTCATTCCATAATACTGTTGCTGGTTAAGATAATAAGGAAATGTATTCCAGCTTGGAACTTGAAGAAA

TCCTTGAGGATAAACTACTTGCACATAGCTTGAAGGAACTTGCCAATGAGGGCTCGCATTGAAAGAAGTCAGTTCCCCAGGAAATAATGTTTGTCCAGGCGTTGTCCGTGAAAGCCACC  
AATGCATTGAATTAGATGGCTCAGGATGATTAAATTTACAGGTTTTGCCGTA CTTGACCATCCAGTGCTTAAATAAAAATTTGCAATCCACCTCATACTGACGAAGAGGATAGCCTAGGGCA  
TTAAATTGAACAGGTTTTGATGATTCCGGGAATATCTTTAGGGTGATGAAATTTGCAAGCAGGTCCAAAATTTGCATTTTCCGGTCTCTAGATAGTGCTGGCATT CAGGTTGCCCTATTCTTTG  
AGGATGCACGGCCTCTAGACCCAGCACCTGCCTGGAGGATGATTAAATCTGCAAAACATTCCAAATTTACAATAGCCACATTTGAGGTAATATGGACAATCTGGCTCTCCAGGACGCTTG  
GGATAAGATTTAGAGTCCATGTTCTCGCCCGCTTGGAACCTTATTTGCTGCATCGACTCTTGGCCGAGAGGTAGCTCGCGAAGTGACGATGCAGACGCTTCAGCAATGTTTAATTCAGTCC  
GCGTTGTAGGTTCAACATTGTTCTTTATATTTCCGCCGCCGTTGAGCTCCATTAGCCAACGCCTCCGTACACGACGTCGCACCAGCGACTTCCCACCGGCGGGCGGCCTACTGGACGACA  
AGTAATCTCCTTCGAGAAGAGAGTGAGAGCAAGCCAAAGGAGAGCGCGAGATAGAAAGGGTAAAAGAAAAAGGAGGGGAGAGGGGTAT

>comp172231\_c2\_seq30

AGTTTCTAACATCTTCAGATATAAGATGAGTTCAAACCTCTCATAAGACATAAATCCTATGGTGAGTCAAGTCTTTGACAAAATTCAGCCTGAAAAGGGCTTAAGCTCTAAGACTTCATGAA  
GTCTAAGACAAGTTTAGATCTTTAGATGACTTCAAATCTAAGGCTACTTCAAAGTCTAACGACCTCAAGCATGAGATGAATTCAACGCCACATTCTATTTGATTAACTAACCCAATTAATT  
ATAAGTGACACAATTAATTTAACAAAATGCTTTTCCCTACCATTTTAAGCTGCAATCATGAAATCACACAGGGAAAAAAGTCACAAACAACAATACGCAAATTTATTCACAAATAAACTAC  
TAGTTCTACCTTACACCTCACTAGTACAGGAACAAAGTCACAACCAATTATACGCCTCGACTACAATCTATAAAGGTTTTAAAAACCATCTGTAAAGCAGCAGCACTTCTTTTCTGAACTC  
TGACTATATGTTGTTCTGAAGAAGATCAAAAAACAACCTTGCTCTGGAGAAGCAAATGTTTTTTCGACAATCAACAGGTTTCATAGAAGTGGCTTCACAAACTGAGCTTCAGTGAAGATGA  
CTGTTTAGTGAAAATCTACAGCTTGAATGGACAGACACAATTGAAAGACTTTATGGAATGATCAAAAGAATTAATGAATCAAGGAAATCCTTCAACAAGGAAAAAAGAGAAAAATAAAA  
AAGGGTAAATAAAACAACGTTGAGTAAAGAGGTGGCCAGCACAATTATTAAGTGAAAGTAGTCGTTATTTAGATGAACTCTTCAAAAAAGAATAGACACCTCTGGCTAGAATGACTCG  
ACTTAGGCCGGTGAAATGCTTTAACTCATAAAGGAAATAAATATAGAAAATCCCGTCAAGTGATATGGTGGTTCCATCATCATT CAGATTATACCTTCTCATCATCAGAATTCATTTTCTGTC  
GTTTGGATGAGGGGAGGCATTTTAATTTCCAGGGCTGGCTACAGAAGAGCTTTCAGCTGACAATGTTAACGTGGCAGGCCAGATGATGACTCTAATGGTTGTGCAACAACAGGAACAT  
TGGGTGCAGCTATTGGATGATCAAATTTGCAAGTGAGCCATATCCGAGTAACCATGACGGCCATAAAAACTGCACTTAGGTTACCCCGGGCGTAACGGAAGACCCATGGGGCTCAACT  
CACAGTTTGAAGTGAGAGTTATCTGTCCTATGGGATGATTAAACCTGCAGCGTGAAACCAATTTACAGCTCCCTGTTTTTGGCAAAGAATGGGCAATCAGGTTACCAGGTCTCACAGGAA  
AAGAAGAATATGAAGCCGGAGGATCCATGGCTGCTCCACTTCCAACAAATTGGTCATTCCATAATACTGTTGCTGGTTAAGATAATACTGGCATT CAGGTTGCCCTATTCTTTGAGGATGC  
ACGGCCTCTAGACCCAGCACCTGCCTGGAGGATGATTAAATCTGCAAAACATTTCAAATTTACAATAGCCACATTTGAGGTAATATGGACAATCTGGCTCTCCAGGACGCTTGGGATAAG  
ATTTAGAGTCCATGTTCTCGCCCGCCTTGGAACCTTATTTGCTGCATCGACTCTTGGCCGAGAGGTAGCTCGCGAAGTGACGATGCAGACGCTTCAGCAATGTTTAATTCAGTCCGCGTTGT  
AGGTTCAACATGTTCTTTATATTTCCGCCGCCGTTGAGCTCCATTAGCCAACGCCTCCGTACACGACGTCGCACCAGCGACTTCCCACCGGCGGGCGGCCTACTGGACGACAAGTAATC  
TCCTTCGAGAAGAGAGTGAGAGCAAGCCAAAGGAGAGCGCGAGATAGAAAGGGTAAAAGAAAAAGGAGGGGAGAGGGGTAT

>comp172231\_c3\_seq7

CTCGCGCTCTCCTTTGGCTTGCTCTCACTCTCTTCTCGAAGGAGATTACTTGTCTGTCAGTAGGCCGCGCCGGTGGGAAGTCGCTGGTGCGACGTCGTGTGACGGAGGCGTTGGCTAAT  
GGAGCTCAACGGCGGGCAAATATAAAGAACAATGTTGAACCTACAACGCGGACTGAATTAACATTGCTGAAGCGTCTGCATTGTCACTTCGCGAGCTACCTCTCGGCGAAGAGT CGA  
TGCAGCAAATTAGTTCCAGGGCGGGCAACAACATGGACTCTGAATCTTATCCCGAACGTCCTGGAGAGCCAGATTGCCCTTATTACCTCAACAGTGGCTATTGTAAATTGGGAATGTATTG  
CGGATTTAATCATCTCCAGGGAGCACTATCTGGAGACTGGAAAATGCAATTTTGGACCTGCATGGAAATTTTCATCGCCCTAGTTATAATCCCGGAATCAGAAAATTAATACCTTAGGCT  
ATCCTCTTCGTTTGAATGTGATGGATTGCAAATTTTATTTAACAAATGGATGGTGAAGTTCAACAAAACCTGTACATTTAACCATCTGAGCCATCTAATTC AATGCCCTGGTGGCTTTCA  
CGGACAACGCCAAGCCAAACATTATGTCCTGGGGAACCTGACTTCTTTCAATGCGAGCCCTCATTGGCAAGTTCCTTCAAGCTATGCGCAAGTAATCTTCCTCAAGGATTAGCTCAAGTTC

CAAGCTGGAATACATTTCTGTAAAGCCTGCATAATCTTTTAGTTGTGATTGTTACTGGGA

>comp172234\_c0\_seq1

ATAAATACTCATTAGCATAAAAAATGATCGCTAATATGAACAATTTTAGCGACCAATTTAAACCACTGGTCACTAATTTAACAGCCAGAAAAATGTGTGGTCGCTATTTGCTTTAGCATCC  
AATTTGCTATTTTAGCTACCATTTTTCTTGGTCGCTAATGACCTATTTATTTATAGAGTAAAATGGCTAATCTCGACCTTACATTTCTAACTAACTTGCTTTCTAATTATCGTTCGTATATATATA  
GTTACATATCCAGATTAGCAGGACCATAAATAGATTTGGCAATCCCTATTTAAAGAAAAGAGGCAATCAAAATTGTGTGGACCAGCTAGAGTTTCATCCGGTTGAACCTAAATGTTTTGTAGC  
AAAATGAAGGTTGAGTCACTCCACCGCGATGAGGGCCAAGCAAAGTCTCATCCAATGGCTGGAGCGACCAACGACGGTGACACCGGAGGCCATCAGCCACCACCGTGCAGCGGGC  
ACCGGCGGGCTTTGTGAACAGGGCATCTCCTGTACGCTGAATACGGAGGTGGGGATGATGCTCGCCGTGATTTCGCCAGCCTCCAGATCCCACCATCAGCCCCACCCTTCATGGAGCTCCTG  
AAACCGACTCATATAACTCCCATCATGTCCAGTCCCTTCTTTCTCTGCGCTCCATCATCTTCCACCCCTTCGTGGAAGCTGGCACTCCCTCGACCCGATGGTCTACCTCTCCCCCTCCTC  
GACATTATACAGAGCGAAGATGTCACGGCGGCCTCCACTAGCGCCGCCCTTACGCAGTGCTAAAGATCATGCGCCTCGACATCTTTAGCGAGATCACCCCGGTGCTCGCGAGGCAATC  
CACGCGGTGGTCTTGCCATTACCAATTGCCGTCTAGAGCTCACTGATCCTGCATCAGAGGACTCCATCCTCATGCATATCCATCAGGTGCTCACCGCGGTGATGCACTCCAATGCCTCGG  
TCTACTGACAGATCACGCAATCTGCACCATCGTCAGTCTCTGCTTTTCAGATTGTTTCAGCAGTCCGCCGATCGCAGTGATCTCCTACAACGCAGCGCTCGTCAATGCACGACCTTAT  
CGAGGGCATATATTTCCCGTCTCAGCAATATGCGATACTCCGACGGTGGCCCCGTAGACTCCGGCTCTGAAGCGGAGAAAAATGCCCTTCACGTGAGCTACACGGCGCAGTGATGATTGAT  
ATCTTCTCTTCTCTGCTCTCTCGTCAATGTTGAAGAGCCCGTGCACCCCTGAAACTGCCGACGCCAGCTCTGACGAGGAGTTCCAGCTCTTCGTCTCTTACTCATTAACACCGTGGTAG  
AGCTCGGCGGGCAGCAGCATCAACCATCACCCCGGCCTTCTCCACATAATTCAGGATGATCTTTTCCACCATCTCATCCATTATGGTACCCGATCTGGACAACGCATCTCTCCATCACCCCA  
TGAGTAGTCCAATATCGTCGATGCAGCTCCAGGCCCTTCGAAGCCTTAATCAGCATAATTCACAACATCGCCGATGGTATTAATAATTCACCATGCCCTTAGTCGAGATGCATACGCGATCGAT  
GACTCCACGTTTAAGCCCTTCTGGCTCGAGCGCTGTGACATGCACAAGGATCCCGATTCCTGGGTGCAATTTGTAAGGATGAGAAAGCTAAAGAAGAAGAAGATCATGATGGCCGCCAA  
TCATTACAACAGGAATGAGAAGAAGGGAATGGCTTTTCTCAACATTTGTGCGGCTGGTGCCAAGCCCCGCCAGACGCTAAAAGCATTGCCTACTTCTTTGCTACACGCCGAGGCTCGACA  
AGAATAAGATTGGCGATTACTTGGGCGAGTCCAACGACTTCAATATTAAGGTCCTTAATGAGTTTCGCACAAACATTTGAATTTCGATGGGGTATCCTTGACACTGCCCTCCGAACCTTTCT  
CGAGACTTTTTCGACTCCCCGGTGAATCTCAAAAGATCCACCGCATTCTTGAGGCATTCTCAGAGAGGTTCTATGACCAGCAGACATCTGGGATTTTTGCGAGCAAAGATGCCGTCTTCATT  
CTCTGTTACTCCCTCATTATGCTCAACACAGACCAGCATAATCCGCAGGTGAAGAAAAAGATGACAGAGGATGAATTTATAAGGAACAACAGAGCTATTAATGGAGGAGTGGATCTTCCC  
CGAGAGTATCTATCGGAGTTGTTCTCTCCATTTCCACAAATGCAATCACCCCTTTCGATTTCATCAAGTGCCGTCAATTTCTGAGATGAACTCCCACCTTTGGGCGAACCTCATGAAACAAA  
CGCGTACAGTGGAGCCCTACATATTGTGCGACTATAAGCACAAAGCTTTGTGCGGAAGTTTTCAACACCATCTCTGGCTTATCGGTTGCCACCATCTGTGTCATCTTCGAGCAAACCTGACGA  
CGAGAATGTGCTGCAAGAGTGCATCGAAGGGCTATTCTCCATCGCCCGATTGCTAGATACAGTTTGGAGGACATCCTTGATGAACTATTGTTTTCTTTGTGCAAGTACACCACGCTACTC  
AATCCATATGCCACCGCAGAGGAGATCGTCTTCAGCTTCTCAAATGAGGTGAAGCCGAGGATGGCGACGCTGGCCATTTTACAATCGCTAACAAGTTCGGCGAGTCAATCAGGGGGGC  
TTGGAGAACTTGGTAGACTGTCTTCTAAAGCTTAACAGGTAAAGCTATTGCCGCCTACACTTCTCGAGACCTGTCGTAGTGCAACAGAGGCTGACATAGACAACGATGGAGGCCGTCA  
TTCAAAGTCAGAGTCTGGATCTGGCGTGATCTACCCACCATCTACCTGGGCAGCGACAGACGAAACATTTCTGGGCTGGTTCGGTAGGTTACAGAGCTCCTCTCGCTCGAATCCGGTGC  
CGACTCGATGTTGAATGCTGCGAGCGACATGGAACAAACCTCAAGATAATACAACAATGCAGAATCGATAGCATATTTAAGGATAGCGCGGGGTTGCCTCAAGAGTCATTGCAGCACCT  
TATACGAGCCCTCGTCTTTGCTGCGGCTGGTAAGGGGCAAAGTTTCAGCACGTGCGTGGAGGAAGAGGAAACAGTTGGATTCTGTTGGGACCTCATCTTCATCATAACAGCCAACCT  
TCATCGCTTGAGCGCATTTTGGATGCAGTTTAAATGAATGCCTGGCATTGGTGTCAAGTTCTCAATTCACCATGCCCGTTTGTGAGAAGGCAATGGTTGCCTTGTACGGGTGGTG  
ATTTTGATACTTCTTCGGAGCCACCAAGGTTGCAGGATCGACAGTTCGGAGGAGATGGTTTTCAAGTCAATCAATTTGACATGGAAGCTGGACAAGGATATCTTAGATGCGTGTAATGAC  
AGTGTGACTGAGGCGACGATGAAGATCTTGAGCAAATATGCAAGAAATGTGCAGACGACACTTGGGTGGAAGACGCTATTCCACCTGCTGTGAGTACGGGGCGGCACCCAGAGAACT

TTGATCGGGGGGTAGAGACCCTAATAGGCCTGATGACAGAGGCCGACCACATCACTAGGAGTAACTACGCCTATTGCATTGAGGCTGCCTTTGGGTTTGTCTGCACTGAAGATCAGCCCGG  
TGGAGAAGAGCTCCCAAATTCTGAATCTAATGGCTGGTTCCGTCAAGTGGATCATAAGTGGCAAAGTCAAGTTTTTATGAGACAGGGAACTCCAACATGCACAACAGCAGCTCGTCC  
ACGGAGGAAGGAATTAATAAGGCATCCAGTGTTTCAGGGAAATAGTTTCGCGGGCAGCAACCTATTTCATGAAGCTGGCGGAGGCATTGCGGAAGACGAGCTTAGTGAGGAGAGAGGAGA  
TAAGGAACCAAGCGGTGGAGGCGCTGGGATGGTGCTTCTTGGAGGTGGCGGACGAACCTGGAGTGGACGGCGGGGAGCTATGCGTCGAGCTTCAACCTGGTGATTTTTGCGATGGTGG  
CGATCTTCATGAAAAGATGGTGGAGTATTCAAGACGGGAGGGAATGGAACGGGAGATGCGGAGCATGGAGGGGACGTTGAAGATGGCATTGGAGCAGATGGTGGAAAGTTTACCTATGTT  
TTATGGTTCCGGCTGGCAGCTGGACCAGGCTTTAGAACCTTTTGGCTTGGACTGCTGCGAAGGATGGACACTTGTATGAAGGCCAGCCTTGGAGAGGAGGGTCTGCCGTCGCCGGTGATG  
CAGGAGCTCGTGCCGAAGCTACTCAAGAGGATGATATTAGAGATGAAAGAGAAGCAGGTGCTTGTGGAGAGTGATGAGAGTGATCTCTGGGAAGTACCAATATACAGATCCAATGGAT  
AGCGCCATCAGTCAAGGAGGAGCTATTCCCGGATGATTAATCACTTAATGTTAGTTTCAAGTTAGGTGATTTTTTAATGTAAAAAAAATTTAAGGTAAAGAACATATAAGTTTTTTAGAAATT  
GAGAAATTATTTTCATTAAGATAAAAATTTTGGATGAATTTAAAAGGATGTTTTAATCTCTAACACTATATACTCAATGTTGGTAAAGCAATGATAGAGTAA

>comp172256\_c0\_seq3

TTAAACGCTCTGCTCTTCATTATAACTCCATCATTGCTAAAAATGTCTTTAAATGTCCGAAGCATTGATCTTTCTTCTAGCTTCTTCTCATTATCCGGTTTCAGACTGCAATACGCCTTCTTT  
CTCGTCCCTTCATTTCTTCTCATTTTTTCACTGGAAGAAAGAATCCCATCAAAGTTGAAATCGTTCTTTTCTTTCTATTCTCTTTTCGATCCCTGCTTCCACATCCTTCACACCGGAAAGATGT  
TCGATCAATTCGCTGACTCGGACGGAGAAATAGGGTCCGAGATGCTAAACTCTAGCCAGAGCTCAAGTAGCAACAGCTGCGAACGTTGCAGCAGCTTCTCCTCTCGCCTATCCTTCGACG  
CCTCCGGTCCAGTCCGCCACCGCCGGACTTACGCTCCAAACCTCACCGATCCTCTGACCGGGCATGGACTGCGATCCGCTCGCGGGCCGGCAACGAAATAGGCCCTCGCGATTTCCGC  
CTTCTCCGCCAAATCGGAAGCGGCGATATCAGCACTGTCTACCTCTGCCGCTTCGAGATGATCATTCCGCTTCTCTTTGTACGCTATGAAGTTGTTGATAGGCTGTCCCTTTCGAGGA  
AGAAGAAGCTTGGACGGGCGCACGGAGCGGCAATTTCTCGGGAGTTAGATCACCTTTTTTGGCGATCTTGTACGCCGACTTTGATGCTTCCCCACACTATTCGTGCGTGGTTATGG  
AGTACTGTGGTGGCGGCAATCTCCACTCTCTCTGACCCGCATGCCCGGCGGCCGCTTCTCCGCTCCGCCGAGGTTTTACGCGGCGGAGGTTCTCCTGGCGCTGGAATACCTCCACA  
TGCTCGGCATCATCTACCGGACCTCAAGCCGGAGAATCCTCATCAAATCCGACGGCCACATCATGCTCTCCGACTTCGACCTCTCCCTCCACTCCTCCGCCTCCCCCGCCCTCGAGAC  
CGTCAAGCCGACCTCATGCTTCTCGGCCGCTCCTCCGGTCCAAGAAAACGGCGCCCGGCCGACTCTTCGTTGCGGAACCGCTCGGTGCTCGATCCAACCTCATTTCGTGGGACCCACG  
AATACGTCTCGCCGGAAGTCGCTGCCGGTCCGGGCCACGGAAGCGCCGTCGACTGGTATGCCTTCGGCATTTTTCTATATGAGCTGTCTACGGCCGTACGCCCTTTGTGGGGCCAACTAA  
TGAGGCGACTCTCCGTAATATTCTCAACAAGCCGCTCGCATTCCCGCGGCCGGCGGGTGAAGCCGACGGCGCCGACGAGGCGGCAGCGAAAGACCTTATTGCCGGGTTACTCGTTA  
GGGATCCGGCCAGCCGGCTCGGGACACGCCGCGGGCGGCCGAGATAAAGGTCTGCCGTTTCTTTAAGGGGGTTAATTTTGGGTTGATTTCGGTTCGTGTCGGCCGCCGGTGTGCCGGTG  
TTTCGGCGCGCCGCTTCGTGTCGGGAGGCATCGAAGCTGGATCGGTTTCGAGGGCTTTTGGAGACCGGCTGTCCGGTTTATCCGGTGTACGTGGGTTCCACACTGTAATGGATGAACAATTA  
TTAGGTCCGGACATCGAACGTAGCTCTATATTCCGATGCCAATAACATGTCTCCACGTGCTCTTAATTTTTATCGCGTGGCCCGACAACCCGACCCGACCCGGAACACGGTATTGCTATGTT  
CGGGTATTG

>comp172258\_c1\_seq5

AAGATTTGAAGCCAAATTCATTTATTCCACATTTTGTACATAATTCATCTTATAATCTAAGTACAAATCCAACCTCTGCCATTTTCAACCAAATGACACAAAAATGCAAAGCAAACCATCA  
ATCTCTTTGCAACAGCTCCTAACACCACAACACCTCCTTCTACTACAGAAAAATGTAAGGTTTGTATCCTCCTGATTGTGATGCTTATAAGCCACTTGACTACATCTTGATCTTGCTGAAG  
ACCAGGACAAGCACAAGCTCTCTATTGCTTCAGTCGAGAATCCATTCCTGCTTAGATCAAGCAATTGAAGCTGCTTTGCTGCATCTATCCCAACCGATAGCTCCTGAATCAGAGGAAAGCA  
TATCGAAGGATTTTGGCTTGCAGCACCATCCTTTGAAGCCTCGTCGCTTTCGCTGTCGGCAACTTCAAGCTCTCTGTTAGTATTGCAGACGGTCTTTGATGTTGCAGGTGTGCTGTCTTAG  
GTTGGTACTCTAAAGCTCTCTCAATGGCAATATCGACGTTTTTCGACAAGATGGAGTTCTTCCAAAGATTCATTTCTGTAAATTACGATTAAGGAAGCGTTAAAAGATAAGATTTGAATGAT

TTTGAATTTGGAAGAAACCTGTATTTTCTTTGTTTACGACCCAAATCTTGTTATTTCTTAAGGTGTATGCGTTGGACTAGGAAAGAAAAGCAGCGACGGCCGATGCATTTCTGCTTCGACT  
GATTTTAAATTCAACAATGGGAAAACCAAAGCAGATTGAAAAAAAATTTATTCGGATCTTCTCCAAACGAGGGAAAAACATAATTT

>comp172262\_c0\_seq17

AAGCTCATTTTTAGGTTCCCTTGATGCTGGTTCAGTCGAGCCGGCCTCGAACAAGACATATGGAGATCTTCTTGAGGACTTGGTAAATATCAAGACATTTGCATCAGGAATTTTAGTTCAAA  
AAGAGTATATATGGCCTGTTGATCATAATGGCTATTTAGCACCTAGCACTGGCCTTGTAACACATGCTCATAGAGTTGGACTAGAAGTTTATGCTTCAGGATTTGCTAATGATGCTCCAGGA  
AGCTACAGTAACAACCTTTGATCCAGTTGATGAGTATCTTCAGTTTATTGACAATTCAAAATTCTCTGTTGATGGAGTTGTCACCTGACTTCCCTTCCACTGCATCAGAGGCTATTGCTTGCTT  
TGCCATAACAAGAACAAGCTCTCTCTGGAGAAGGTCAACCATTGGTTATAACTCACAACGGTGCAAGTGGAAATCTATCCTGGAAGCACTGATATTGCTTATAAACAAGCAGTAGATGA  
TGGTGCAGATATCATTGATTGTTCCGTTCAAATGTCAAAGATGCCATTTTATTTTGTGTTAGACTCAGCAGATCTTTCAGGAAGCACAACCGCAATGCCTAAATTCATGTCGAAGTCTACAA  
CAATACCTGAGATCCAAAACAACACTGGAATCTTCACATTCGATCTCACTTGGATTGAAATCCAAAGCTTGAAACCTAATTTGGTTAGCCCCTACTCATCACTTGGGTTGGTAAGAAATCC  
AGTTGCTAAGAACATGGGCAAATCCTGACATTGTCTGAATTCCTATCCTTTGCCAAAAACAGTAGTGTCCAGGTGTCGATTTCTTCTCAGATCCAATTGTTGAAATTGCTACTTTTTGTTG  
GTGGAATTGGTGTGGATGGTCTAATCACTGAATACCCTGCAACAGCAAGAGCATACTTGAGGACTCCATGCTCAAACCTCAATGCGAAGCTTTCCTACACAATCTTACCAGCAGAGGCTG  
GAGGTCTAGCCGGGCTGGCTGCACCTGAGGCCCTACCTCCGGCTCAATCACCAGCACCTCCTCTCAGGCCTGTAGATGTGGTCGACCCGCCACTTCCAGATGTTGCTAATCTTACAAATC  
CTGCTCAGGCACAGACACCAGGTTCCGAGCCAAAGGAAAGCGGTCAGCTTTCAAATACAGCTTTTAACTCATCTCTGCATCCTTATAATGATGCTCAGCTTTTTTTGTTAAGGCACCA  
ATGATTGCAATTGCAAATTTGGTTATGTATATCATTTTGTGATGTATTAGCTGGATGTGAATGCTCCCTTTTATTGAATTGAACCAATTATTGAAGTATCATAATTAAGTTCAGGTGATTAGAT  
TAATTAAGTAAATGAAGAGTGAATTTTAAATTATTTAATGACAAGAGGGT

>comp172262\_c0\_seq21

AAGCTCATTTTTAGGTTCCCTTGATGCTGGTTCAGTCGAGCCGGCCTCGAACAAGACATATGGAGATCTTCTTGAGGACTTGGTAAATATCAAGACATTTGCATCAGGAATTTTAGTTCAAA  
AAGAGTATATATGGCCTGTTGATCATAATGGCTATTTAGCACCTAGCACTGGCCTTGTAACACATGCTCATAGAGTTGGACTAGAAGTTTATGCTTCAGGATTTGCTAATGATGCTCCAGGA  
AGCTACAGTAACAACCTTTGATCCAGTTGATGAGTATCTTCAGTTTATTGACAATTCAAAATTCTCTGTTGATGGAGTTGTCACCTGACTTCCCTTCCACTGCATCAGAGGCTATTGCTTGCTT  
TGCCATAACAAGAACAAGCTCTCTCTGGAGAAGGTCAACCATTGGTTATAACTCACAACGGTGCAAGTGGAAATCTATCCTGGAAGCACTGATATTGCTTATAAACAAGCAGTAGATGA  
TGGTGCAGATATCATTGATTGTTCCGTTCAAATGTCAAAGATGCCATTTTATTTTGTGTTAGACTCAGCAGATCTTTCAGGAAGCACAACCGCAATGCCTAAATTCATGTCGAAGTCTACAA  
CAATACCTGAGATCCAAAACAACACTGGAATCTTCACATTCGATCTCACTTGGATTGAAATCCAAAGCTTGAAACGTAAGAGTTGTTCTTCTTTTTTTCTTTGTTTTATATGTTCAAGCAGA  
AAGATGAAAATGTCTCAAACATCTCATTTCCCTTTTTTCAGCTAATTTGGTTAGCCCCTACTCATCACTTGGGTTGGTAAGAAATCCAGTTGCTAAGAACATGGGCAAATCCTGACATGTGTC  
TGAATTCCTATCCTTTGCCAAAAACAGTAGTGTCCAGGTGTCCTGATCAATATTAAGAATGCTCCCTATCTAGCATCAAAGAAGGGTCTAAGTATAGTCGATGCCGTTTCAACTGCATTGG  
CTAATGCGAGCTATGACAAAGACAAAACAAGAGAGTTTAAATCCAATCTGACGACTCTTCAGTTCTTTCAGCATTAAAGAAGAAGAACACCTTCTATGAATATGTTCTCTTGATTCCAGA  
GCAAGTTGGCGATGCACCAAAGCCAATATTGATGAGATCAAGCAATTTGCTAATGCTATTAATGTTATAAGATCGTCCCTAATGGCTTATGATGGTGCTTTCATTTCTCATTACCCGACGT  
TACAACGGAGATGCATAAATCAAATATATCTGTTTATGATCGGTGCTCAAAAATGAATTTACAACGATAGCTTACGATTTCTTCTCAGATCCAATTGTTGAAATTGCTACTTTTTGTTGGTGG  
AATTGGTGTGGATGGTCTAATCACTGAATACCCTGCAACAGCAAGAGCATACTTGAGGACTCCATGCTCAAACCTCAATGCGAAGCTTTCCTACACAATCTTACCAGCAGAGGCTGGAGG  
TCTAGCCGGGCTGGCTGCACCTGAGGCCCTACCTCCGGCTCAATCACCAGCACCTCCTCTCAGGCCTGTAGATGTGGTCGACCCGCCACTTCCAGATGTTGCTAATCTTACAAATCCTGCT  
CAGGCACAGACACCAGGTTCCGAGCCAAAGGAAAGCGGTCAGCTTTCAAATACAGCTTTTAACTCATCTCTGCATCCTTATAATGATGCTCAGCTTTTTTTGTTAAGGCACCAATGAT  
TGCAATTGCAAATTTGGTTATGTATATCATTTTGTGATGTATTAGCTGGATGTGAATGCTCCCTTTTATTGAATTGAACCAATTATTGAAGTATCATAATTAAGTTCAGGTGATTAGATTAAT

AAAGTAAATGAAGAGTGAATTTTAAATTATTTTAATGACAAGAGGGT

>comp172262\_c0\_seq34

AAGCTCATTTTTAGGTTCCCTTGATGCTGGTTCAGTCGAGCCGGCCTCGAACAAGACATATGGAGATCTTCTTGAGGACTTGGTAAATATCAAGACATTTGCATCAGGAATTTTAGTTCAAA  
AAGAGTATATATGGCCTGTTGATCATAATGGCTATTTAGCACCTAGCACTGGCCTTGTAACACATGCTCATAGAGTTGGACTAGAAGTTTATGCTTCAGGATTTGCTAATGATGCTCCAGGA  
AGCTACAGTAACAACCTTTGATCCAGTTGATGAGTATCTTCAGTTTATTGACAATTCAAAATTCTCTGTTGATGGAGTTGTCACTGACTTCCCTTCCACTGCATCAGAGGCTATTGCTTGCTT  
TGCCATAACAAGAACAAGCTCTCTCTGGAGAAGGTCAACCATTGGTTATAACTCACAACGGTGCAAGTGAATCTATCCTGGAAGCACTGATATTGCTTATAAACAAGCAGTAGATGA  
TGTTGCAGATATCATTGATTGTTCCGTTCAAATGTCAAAGATGCCATTTTATTTTGTTTAGACTCAGCAGATCTTTCAGGAAGCACAACCGCAATGCCTAAATTCATGTCGAAGTCTACAA  
CAATACCTGAGATCCAAAACAACACTGGAATCTTCACATTCGATCTCACTTGGATTGAAATCCAAAGCTTGAAACCTAATTTGGTTAGCCCCTACTCATCACTTGGGTTGGTAAGAAATCC  
AGTTGCTAAGAACATGGGCAAAATCCTGACATTGTCTGAATTCCTATCCTTTGCCAAAAACAGTAGTGTCCAGGTGTCGATTTCTTCTCAGATCCAATTGTTGAAATTGCTACTTTTGTG  
GTGGAATTGGTGTGGATGGTCTAATCACTGAATACCCAGCAGAGGGCTGGAGGTCTAGCCGGGCTGGCTGCACCTGAGGCCCTACCTCCGGCTCAATCACCAGCACCTCCTCTCAGGCCCT  
GTAGATGTGGTTCGACCCGCCACTTCCAGATGTTGCTAATCTTACAAATCCTGCTCAGGCACAGACACCAGGTTCCGGAGCCAAAGGAAAGCGGTCAGCTTTCAAATACAGCTTTTAACT  
CATCTCTGCATCCTTATAATGATGCTCAGCTTTTTTTGTTAAGGCACCAATGATTGCAATTGCAAATTTGGTTATGTATATCATTTTGTGATGTATTAGCTGGATGTGAATGCTCCCTTTAT  
TGAATTGAACCAATTATTGAAGTATCATAATTAAGTTCAGGTGATTAGATTAATTAAGTAAATGAAGAGTGAATTTTAAATTATTTTAATGACAAGAGGGT

>comp172314\_c1\_seq20

TTACACCGAACCAATAAAAGTTCATCTCTTCCATTTCTTTTGTGGCTCATGGAAAAGGTGATAGCAGGTGTACAAGCTTCAATAAGGGCAGTATGCAATTTGGATTGGCCATCCG  
ACAGGATGATTATTCAAGTACTGGATGACTCCACTGATCCAGTTGTAAAGGATTTGGTGGAGAAAAGAAATGTAAAATATGGAAGAGCAAAGGCTTGAACATAAGGTATGAGGTCAGAAATA  
ATAGGAAAGGGTACAAAGCCGGTGTCTGAAAGAAGGAATGACGCATTATATGTGAAAGATTGTGACTATGTTGCAATGTTGATGCTGATTTTCAACCAGAATCCGATTTCTTGAACG  
AACAGTCCGTTTCTCATTATAATCCGCAGATTGCTCTTGTTCAACTCGATGGACATTTGTGAATGCTGATGAATGCTTATGACAAGAATGCAAGAGATGTCATTAGATTACTTCA  
AGATTGAGCAAGAAGCTGGGTCATCTGCATTTGCCTTCTTCGGTTTTAATGGAAGTCTGGCATTGGCGCATATCAACCATTGCTGATGCTGGAGGATGGAAGGATAGGACGACGGTTG  
AAGACATGGATTTGGCTGTTCGTTCAAGCCTTGATGGTTGTAAGTTTGTGTATGTTGGTGTATGTAAGGTAAAATGTGAATTACCAAGTACTTTAAGGCCTTTCGGTATCAGCAACATCGA  
TGGTCTTGTGGACCTGCAAATCTTTTCAAGAAAATGATATTAGAGATAATAGCTAACAAGGTACGTATATACTTCAATTCTCAATATTATATAAAGTTGATTGTCAAAGGCAAGGCTCCAATAG  
AGCACATATATGATATTATGTTATTACATATACAATATTAGTAAAAAGTTACTTTATATTTAGGTGTTGTTATGGTCAATCCAATTAATTTTGTATGTTCTGTATGAATGACTTTTGCAGAAGG  
TTTCAACATGGAAAAAATCCACCTAATCTATAACTTCTTCTTTGTTGGAAAAGATTGTAGCTCATAATCAACCTATATAATTCTATTGCATTGTGATTCCACTATCTGTTCTAATCCTGAGGC  
CGAGATTCCCTTATGGGGAGTCGCATACATCCCAACAATTATTACACTTCTTAAATCAGTAGGAACTCCAAGCTCTTCCACCTTGTAATCCCTTGGGTGCTCTTTGAAAATGTAATGTCCTT  
GCATCGAATTAAGGCAGCTACTATTGGTCTTTTAGAGGTTGGTCGAGTTAATGAATGGATTGTTACAACAAAGTTGGGTGATGCTAGCAAGACAAAGCCAAATATGGAAGTGGTAGTTAA  
CAATGCAAAAGATTTAGGAGAAGCCAAAGTGGTAGAGCCGCTGCTTGGTGTATACAAGAAGCCTCAAGTTAGGATTTGGCAAAGGTAACCTTAATTTAAACATTTAAATTTTAAAT  
AAAAACCAAGATGAAAGTGTGAAAATAAATTTTAGTTATTCTCCATATATCAGTCTCTCTCTTCAATCTCTCTCTCTCTCCATACACACACATGTTATTGGCCGATTCTTGTCTATCTATCA  
TTTTGTTTACATATAGCATGCATTAAGGAAGCAAATGGAAGTGGTGTGACCTTGAAAATTTGAGAATCAGTGTGACATATGATTTTCTATTAATATATTTGAACAATATATGGAGTTAAT  
TTTGATGATTTCTATTGTTTGTGCAATTAGATTTTCATATGGCT

>comp172314\_c1\_seq26

TCTCTTCAATGAGTTGATTAATGACGTTCAAAAAGTGCTTATGAATAGAAGCTTCTAACTCTTAGACATCCTTAAACTCATGCGGTGAGATTTTGAATGAAGCGAGCTGCTCATGCCACCA

TAAAGCTTAATTTTATTTATTCTACTCCCTCTTTTAATCCGTCATTGAACCTTTTTTGCCGACCACCGCCATGAAACCTCCGTCGCCTCACCCCTAATGTTGTACCATTACCAACAAACCGT  
TGCCTTATTTTGTAACACCTCTCGCCTGAAGTGGCCATGAGAGAGCTCCTCTTCGCTACGAGAAGCTATAATTCTGAAAGAAGAAAGAAATGTTAGAGTTTATCGATTTGGAAGGTATTGA  
AGAGGTGTTACTTACGAAATGGAAGCAAATAAGAGTGAATATAGTGGCGCCATTGTTGAGAGTTGCAGTGTGGATTTGCTTGATAATGACTCTGATGATTTTTGTGGAGAAGGTGTTGTG  
GGATTGATTTGTCTTGTGTCAAGGTGTTAAATTGAAGCCTGAGAAGCGTTATAGATGGGAGCCAATGAGACCCGAGACATCAGATCTAGAGATTGGCGTCTATCTTATCCAATGGTGC  
TTGTACAGATCCCAATGTACAATGAGAAAAGAGGTGTACAAGCTTTCAATAGGGGAGCATGCAATTTGGATTGGCCAGCTGACAGAATGATCATTCAAGTGTGGATGACTCCACTGATC  
CAGTTGTAAAGGATTTGGTGGAGAAAAGAAATGTAAAATATGGAAGAGCAAAGGCTTGAACATAAGGTATGAGGTCAGAAAATAAGGAAAGGGTACAAAGCCGGTGTCTGTGAAAGAAGG  
AATGACGCATTATTATGTGAAAGATTGTGACTATGTTGCAATGTTTGATGCTGATTTTCAACCAGAATCCGATTTCTTGAAACGAACAGTTCCGTTTCTCATTATAATCCGCAGATTGCTCT  
TGTTCAAACCTCGATGGACATTTGTGAATGCTGATGAATGCTTGATGACAAGAATGCAAGAGATGTCATTAGATTACTTCAAGATTGAGCAAGAAGCTGGGTCATCTGCATTTGCCTTC  
TTCGGTTTTAATGGAACCTGCTGGGGTTTTGGCGCATATCGACCATTGCTGATGCTGGAGGATGGAAGGATAGAACAACGGTTGAAGACATGGATTTAGCTGTTTCGTTTCAGGTCTTGCTGGTT  
GGAAGTTTGTGTATGTTGGTGTATGCAAGGTATACATGCATATCTTTCCCTTTATCTTCTACCCCTAGTTATATATATTATAAATTTGTTGTAAGTTATATAATTTGTTGTTTACTTGTATGTTGCC  
ATGAAAGATAACTAGATCTTATTACATATATAACATGTGCCCAAAGATCAAATAGAATGAGAGATCACGAGAAGAATTTAGGAAAGTATGTAAGACAATTAGAGAAATTTAAGTAAGAGGA  
TTTTTTTTTCTAATGTACAAGATTATATCATAATGTGCTCGACATGTCATATTTTATTTATAGTTGAGGGATAAACTAACATTAATAAATTGACTATATATTTGATCACATTTATAGAAAAT  
ACATGACTTGGACTAGGTGTAACCTAGTTATGTACCTAGCAAGTTTACTTATAGTTTACGTTTGTAGGTAGAAAAGCTTATACAAATTGTAGATTGAGGGTATCACCCCTTTAGAAAAGGCG  
AGTTTGCCTGACTGGGTAGTTAAGGATCCTTAGGCGAGTTAGGTAACCTTATTTTGTAGTGGCAAGTAAGGTTGGGCTTATGGTGAACCTCAATTATCCAGCTCTTGGTGGCTTGAGGATTAA  
GAAACATCTGACTTGTGATTTTCAAGTTATAGAAGTTCTAAGTAGTTCTCAATAAATGCTTTATTTAATTTGATTAAGCTCTCATGATGATTTACTCAAGCCAACCTAAATGCATATTAATAT  
GTACTTAGCATATAAATTAGCATTCAAGTTGTAAGTGTTTAATCTCCACTCATTGATCATCAGCATTATACTAGGTAATAATGTGAATTACCAAGTACTTTTAAGGCCTTTCCGGTATCAGCA  
ACATCGATGGTCTTGTGGACCTGCAAATCTTTTCAAGAAAATGATATTAGAGATAATAGCTAACAAGGTACGTATATACTTCAATCTCAATATTATATAAAGTTGATTGTCAAAGGCAAGGCT  
CCAATAGAGCACATATATGATATTATGTTATTACATATACAATATTAGTAAAAAGTTACTTTATATTTAGGTGTTGTTATGGTCATTCCAATTAATTTTGTATGTTCTGTATGAATGACTTTTG  
CAGAAGGTTTCAACATGGAAAAAATCCACCTAATCTATAACTTCTTCTTTGTTGGAAAAGATTGTAGCTCATAATCAACCTATATATTCTATTGCATTGTGATTCCACTATCTGTTCTAATTC  
CTGAGGCCGAGATCCCTTATGGGAGTCGCATACATCCCAACAATTATTACACTTCTTAAATCAGTAGGAACTCCAAGCTCTTCCACCTTGTAATCCCTTGGGTGCTCTTTGAAAATGTA  
ATGTCCTTGCATCGAATTAAGGCAGCTACTATTGGTCTTTTLAGAGGTTGGTCGAGTTAATGAATGGATTGTTACAACAAGTTGGGTGATGCTAGCAAGACAAAGCCAAATATGGAAGTGG  
TAGTTAACAATGCAAAAAGATTTAGGAGAAGCCAAAGTGGTAGAGCCGCTGCTTGGTGTATAACAAGAAGCCTCAAGTTAGGATTTGGCAAAGGTACTAAACCTTAATTTAACATTTAAAAT  
TTTTAAATAAAAACCAAGATGAAAGTGTGAAAATAAATTTAGTTATTCTCCATATATCAGTCTCTCTCTTCAATCTCTCTCTCTCCATACACACACATGTTATTGGCCGATTCCTTGCT  
ATCTATCATTTTGTTTACATATAGCATGCATTAAGGAAGCAAATGGAAGTGGTGTGACCTTGAAAATTTGAGAATCAGTGATGACATATGATTTCTATTAATATAATTTGAACAATATATGG  
AGTTAATTTTGTGATTTCTTATTGTTTGTTCATTAGATTTATATGGCTGAGCTATGGATGGGTGCTTTCATGTTTTCGGCTGGATTCTATGATGTCGCCTACACTAAAAAAGGATACTTC  
ATTTACCTCTTTATGCAATCATGTACATTTTATTATTGGTTTTGATTTCAATTGGCTCATCTATTAATAAATTTATTGAAGACAGATGTTAATTTAGTTGTTTGCATGCTCTAAATTTTCTCAA  
TCAGGGTGGAAATTTAT

>comp172314\_c1\_seq3

TCTCTTCAATGAGTTGATTAATGACGTTCAAAAAGTGCTTATGAATAGAAGCTTCTAACTCTTAGACATCCTTAAACTCATGCGGTGAGATTTTTGAATGAAGCGAGCTGCTCATGCCACCA  
TAAAGCTTAATTTTATTTATTCTACTCCCTCTTTTAATCCGTCATTGAACCTTTTTTGCCGACCACCGCCATGAAACCTCCGTCGCCTCACCCCTAATGTTGTACCATTACCAACAAACCGT  
TGCCTTATTTTGTAACACCTCTCGCCTGAAGTGGCCATGAGAGAGCTCCTCTTCGCTACGAGAAGCTATAATTCTGAAAGAAGAAAGAAATGTTAGAGTTTATCGATTTGGAAGGTATTGA



AGAGGTGTTACTTACGAAATGGAAGCAAATAAGAGTGAATATAGTGGCGCCATTGTTGAGAGTTGCAGTGTGATTTGCTTGATAATGACTCTGATGATTTTTGTGGAGAAGGTGTTTGTG  
GGATTGATTTGTCTTGTGTCAAGGTGTTTAAATTGAAGCCTGAGAAGCGTTATAGATGGGAGCCAATGAGACCCGAGACATCAGATCTAGAGATTGGCGTTCATCTTATCCAATGGTGC  
TTGTACAGATCCCAATGTACAATGAGAAAAGAGGTGTACAAGCTTTCAATAGGGGCAGCATGCAATTTGGATTGGCCAGCTGACAGAATGATCATTCAAGTGCTGGATGACTCCACTGATC  
CAGTTGTAAAGGATTTGGTGGAGAAAAGAATGTAAAATATGGAAGAGCAAAGGCTTGAACATAAGGTATGAGGTCAGAAAATAATAGGAAAGGGTACAAAGCCGGTGCTCTGAAAAGAAGG  
AATGACGCATTATTATGTGAAAGATTGTGACTATGTTGCAATGTTTGATGCTGATTTTCAACCAGAATCCGATTTCTTGAAACGAACAGTTCCGTTTCTCATTCATAATCCGCAGATTGCTCT  
TGTTCAAACCTCGATGGACATTTGTGAATGCTGATGAATGCTTGATGACAAGAATGCAAGAGATGTCATTAGATTATCACTTCAAGATTGAGCAAGAAGCTGGGTCACTCTGCATTTGCCTTC  
TTCGGTTTTAATGGAAGTCTGGGGTTTTGGCGCATATCGACCATTGCTGATGCTGGAGGATGGAAGGATAGAACAACGGTTGAAGACATGGATTTAGCTGTTCGTTTCAGGTCTTGCTGGTT  
GGAAGTTTGTGTATGTTGGTGTGCAAGGTAATAATGTGAATTGCCAAGTACTTTCAAGGCCTACAGGTATCAACAACATCGATGGTCTTGTGGGCTGCAAATCTTTTCAAGAAGATGAT  
ATTGGAGATAATAGCTAACAAGAAGGTTTCAACATGGGAAAAGATCCACCTAATTTATAACTTCTTCTTCGTTGGAAAGGTTGTTGCTCATGCATCCACCTATATATTCTACTGTGTTATGAT  
TCCCTCTCTGTTCTGATTCCTGAGGTTGAGCTTCCATTGTGGGGGGTGCATATGCCCCACTAATTATTACACTTCTTAAATCAGTAGGAACTCCAAGCTCTTACACCTCATAATCCCTTG  
GGTGCTCTTTGAAAATGTAATGTCCTTGCATCGAATTAAGGCAGCTACTATTGGTCTTTTLAGAGGTTGGTCGAGTTAATGAATGGATTGTTACAACAAAGTTGGGTGATGCTAGCAAGACA  
AAGCCAAATATGGAAGTGGTAGTTAACAATGCAAAAAGATTTAGGAGAAGCCAAAGTGGTAGAGCCGCTGCTTGGTGTATACAAGAAGCCTCAAGTTAGGATTTGGCAAAGGTAATAAC  
CTTAATTTAACATTTAAAATTTTTAAATAAAAAACCAAGATGAAAGTGTGAAAATAAATTTAGTTAATCTCCATATATCAGTCTCTCTTCAATCTCTCTCTCTCCATACACACACATG  
TTATTGGCCGATTCCTTGCTATCTATCATTTTGTTCATATAGCATGCATTAAGGAAGCAAATGGAAGTGGTGTGACCTTGAAAATTTTGAAGAATCAGTGATGACATATGTATTTCTATTA  
TATATTTGAACAATATATGGAGTTAATTTTGTGATGATTTCTTATTGTTTGTGATGATTAGATTTTCAATGCTGAGCTATGGATGGGTGTCTTCATGTTTTCGGCTGGATTCTATGATGTCGCCTAC  
ACTAAAAAAGGATACTTCATTTACCTCTTTATGCAATCATGTACATTTTATTATTGGTTTTGATTTCAATTGGCTCATCTATTAATAACTTATTGAAGACAGATGTTAATTAAGTTGTTTGCATG  
CTCTAAATTATTTTCTCAATCAGGGTGGAAATTTAT

>comp172319\_c0\_seq8

GAAATGTGATTTTTTATTTTATAGATAAAGAAGACGAGAGAGAGAGAGAGATGGCCGGATCGGCCGATGAAGAAAACCTCTCTATGAAGATGGATTCCGAGTGGAACGAAGAGGCCGAG  
GAGGAGCTTCGGGCCATTGAGTCTGCCTACGCCGTTGCAAAGCGGAAAAATCCGATTTTCGACCTCGAGGAATCCTCATCGCAGCGCCGCCCTACCCGGCTGGGCCAACGCGGCTTC  
ACCATATGGAAGAAAGACGCACGATCTATGCGATGGAATGGCCATCACATTAGCAAGATTGATGGGTCTCCTTTCCCTTGCCCTAAGAATGGATTTTGTACTTTCTCTCCGACACCTTGCC  
AAGCTTCTGAACAAGCACAAGATTAACCTTCTCTCCTTTCCAGTCGAACACATTGAATGCCAATGCAGGTCCTCTGTCAAATTTTACTCGTGGCCCGTAAATCTTTACCAAAGAATAACCA  
GCTTATTTAACACCAAGGCATCCAGTATTTACTTTTGGTGGACGCACTGTCTACAGCAAAAACCTCTGCTGAGGTGGAGCAAACAACAAAAGAGATTTTGGATAAAATTGAACAGTTGAAA  
CATGATGCAAAATGAAATCTCTCTTGGATTTGATTTAGAGTGGAAACCTATTTTCTCAAAAGGGACAGCACCTCGAAAAACTGCTGTATTGCAAATATGCATGGATTCTTCTGATTGTTATGT  
TATGCACATTATTCATCTGGTATAACCCCTATATTGAAATCACTCTTGGAGGATTTTCATCTTTCAAGGTTGGAATAGGAATAGCCAATGATGCAACAAGATCTCAAGGGACTACAATGT  
TTGTTTAAACATCGTTAGTAGATTTGTCAAGATATGCAAATTTCAAGCTTGGTGGAGCTCCCAAGAATTGGGGACTTTGTTCTTTAATAGAGATGCTTACATGCAAACAGTTATTGAAGTCCA  
ATAAAAATAAGAATGGGGGATTGGGAAGCCAGTGAGCTATCAAAAAGACCAACTTACTACGCTGCTACAGATGCTTTTGCTTCTTGGTACTTGTATCAGATTCTGAAAACCTTTCCAGATCC  
AAAACCTAAAACCTTAGGTTGGGAGAAACCCAATATTTTGCAAATATCAGCTCTCAATGCAGGAAGTGAATTTTCAAGTTAGTCAGCACAGCATAATTGCCATATATCTGTATGGTTCCAAAC  
TCAAGGTAAAGTTGGAAGAAATTCTGACAATTGTTAGCATTAGGGCTTACCAAGTGTGCTATAGCGAGTGCTCATAAGAACAAGTTGTACCTGACAAGAACTTCTGGGAACAGAAATCCT  
ATGGACAAAGCTCTTAAATTAATTATTGCAGTGAAGGAAGTAAAGATTGCCCCCTGCTCACTTAAATTTGGTAAGATATTGATACTTGAATAGCAATTCTGCAGTTATTCTATCAATTATA  
ATTCAAAAATAATTGCAGATTATGTCTCATGGCTTATCTGAAAATTTTGGGAAAATCTGAGGACATCAGTTGGGGTAATTAGAGAAATTCCTCAAGGTCAGATTTAACGA

>comp172341\_c3\_seq11

TAAACTCAAATATACTTAATTCACAAAACCACTCTACATAGATAACACAGCTATGCTACATCTCTGAATACAACACCAACATGGTTCGAACATGGCTTCTCTGCTCCAAATCGTCCAAATTGGAC  
GTTGTTTTTCTATGTCATTGTGTAAACCAATTAATCCTACTCTTTTCATTTGCATTGTTTCGCTGATTTCGTGCGAATCATCAGATGCAACAACAGTTGCTTTGTTGGCTGGAAAATCAAA  
CCTACTCCGTGTTTCATCGCAATCAGAAGGAACGCCCAAATCCTCTTCTAATCTGATATATGAATCCACATCCTATTCATTTTCTTCAAATCCTGCCACAAATTGAGATCAACATCATCTAGGT  
GGCCTCGATCGGAGCCTCGGATGAACAATCGAAGGCGTCTAATGAAGAAGACGAGCAACTGCATGGTAAAGTAGACTTGTGTGCAATGAGTTGCATATTAGCAGTGATGTTTCGTCTCAA  
AATGATGTTATTAACAAAGAAGCAGTTTTGCCAATCGATTAAAATTTATTTAATTTTCCATTTTCTTCCGTTGTAAGACGAATACACCTTAGAAACGCCCAACCAATCAAGCCTAAGTGTT  
AGGCGATTAGCATGATCCTTTTCATAAAAAATGAATGATGTTAGGATACACACTTTAATTATTCTCACGATGTTTTTTTTGCAATAAGTAATTATCTTGTTCATTACAGTAATTATGTGGATGAATT  
TCTTTTCATGACTTGTATGTCATTTTAAAAATTAATAATTAACATATTTGTTAGAATTATTGTTGTAATTTATTTGTATTATGATATTCTATATCGTGGCGGTTATTGATGTGTTA

>comp172369\_c0\_seq4

GAGCCATCCAATTATGCAAGTAATTTCTAATTTCTATCTCCCCTAAAATACTAACACAATTTAATTCAGTATTTTAGAAAAATCTTCCCTGTCATTTCAGTTAAAAATTGCCTAAAAACTCCAT  
TTTATTACCAATTTTCCACAACTCTTTATATAATTCCTCATGAGGCGCAAAAGGCATTTGGCATTTCATAGCAGCAGAGAGACATGTCAAGGGCCCAAGAGATGGTGGCCAACCTTTGAAG  
GTGAGGCCAATGGGGCTCTCATTACTTCTCCACAGTACTTGC GGCGGCGGGCGGCGCAGCTTCAGAGAATAGGGATGCAACAGCACCGTCGAGCAAGAAATGGTCTCGAAATCGTCTTC  
GAAGAAGACCCAAATCTGAATTCAGAGGTTGAAGATGAGTGCTTAGTTCCAACATCAAGAATGTGTTCTTATTTGAGCTTTATGGACCAGCTGAAGAGTGGTTTTAGGCATCAAATACAGA  
AGAATGTCCCAATTTATCTTGTTCCCTTACTCTTTGGTGTTTTTTTATTTTTTATTTTTTATTTTCTAAACAAAGAAAAGAAGACTCAACAAACTTAAACTCGCTTGATAACAAGAC  
TCACACAACAAGTCTATATCTCACCAAGACTCACTCGACAAACCGGATTTGCTAACCCTGTGATATCAAATTGATGCAAGCAAAAAATTAGGAAAACCCCTAATTTTTGCAAGCA  
AAAGATACTCTTCCTATGATAATAAAAAGTAACATGAAATACTCAAACATAAAATAAATAAATAAATAAATAAATAAATAAATAAATAAATAAATAAATAAATAAATAAATAAATAAATAA  
ACACCAAAGAAGCTTTGCCGATCGTCGAGAAGAAATATATTGATGGGGTGGATACTTGCGGGAAGAAGAATGAGATTAGAAGTTCAAGACGAAGATAGGAGAAGCTCGCAAGCCTTCC  
CA

>comp172373\_c0\_seq1

TGGAATGCGAACATATCCATAGATTGTCGCATCCATATTTTTAGAATTTTTCAACAGGGATCACAGGTTGTTGGGTAGCATTAGGGCTGTAAATGAGCCGAGCCAAGCCGATTATTAGACTG  
AAACCTGTAAACAAATTTTCATTTTCAATGAGAGACAACTATTAAGTGATTTTTACAAGTTTCCCTTAAAATTATTAATCTGAGTCTTCATTCCCAAACCTTAGTACTTTATTTTAGCAACAA  
GAGGATCATGCAGCTCTTAGTTTCTTTACAATCAATCACTATATATACAGGAGAGAGCTAGCAAAGCTAATCTTATTTTCATGTAAGCATTTTCACTCAACCATAATGCCTCTTATATGGAG  
GGCATCCAACCTTTTTGGGTCTTTTGTTAGTTCTTCAGCAAGAGAGACCACAAGACAACACTAACAGAAGAGGCTGCCATGGCAGCTCCAGCAATCCATGGCGGAAGGCGGAACCTTGTGTG  
ATGGAAGAGTGTCTCAGCAGCAATAGGAATGCCAATGATGTTGTAACCAATGCCAGATGTAGTTTCATTCGAATCCGAGAGAAGGTTTTCTTGGAGAGATCTATGGCAGTTATAACATC  
ATCTAAGTTGCTCTTCATAAGAACAATGTCGGCGGCTTCGATGGCGATATCAGTGCCGGCACCTATAGCCATTCCACATCAGCAGAGATTAGTGCTGGTGAATCATTGATTCCATCACCAA  
CCATGGCCACTGTTAACCCAGACATCTGCAGTTCCTTTACTTTTACTGCCTTCTTCCGGGAGTTGCTTCAGCAACAATGGTGTCTATCCCGACCTCTTTGGCAATTGCTTTTGCAGTGCCC  
CAGTTGTCCCTGTTACCATAATGCTCCTGACATTCATGGACTTGAGAATGGATATGACATCCTGCGCCGAGGTTTCAGAGGATCGGATATTGCAATTAATCCGAGAATGTCATGGTTGAT  
GGCTACAAGAATTCCTGTTTGCGCCATTTCTCAGCTTCCATAAGGAGCTCGAGAGCTTGATCTGGGATTTGAATGCCAGAGTCTAGCATCAAGCTCTTGTGCCCCTACTAGACTCTTTG  
TTTTCTATCATGGCTTTGACACCATGACCTGTTATTGAAACGAAGTCTCGTGCCCTCAGGCCAAGTATAGTTTTCTTCTCTTTGAAATTTCTTGGCATGCTCCACAATGGCCTTAGCCAAGGG  
ATGCTCGCTGTTACCTCAGCAGCTGCAACACATTCGTAGAATTCATGTAGTGCAATATTCTTCAAAGCCCTTGTGCTGACGACAACCGGCTTCCCTGTTGTAAGTGTTCTGTCTTATCAA  
AGACAATGCAATTCACCTTATGAGCACTCTCAAGTGCTTTACCCCTTTAATTAGCACACCCTGAGAAGCACCAACTCCGGTGGCCACCATAACAGCAGTAGGAGTTGCCAAGCCGAGCG

CACAGGGACATGCTATGACCATTACAGATATACCAAATTGAAGAGCAAGCTGAAAGCTATCCATCGAAGATGGAATCCAAGATTTTGGATAGCCATTATATTTACCCGATAGAAAACCAGAC  
TAGCCAAGTTAAGAGGGACAGAGTAATGACAAGTGGCACAAAATACTGGGAAATTCGATCAGCAGACTTTTGGACGGGAGCTTTCGCCATTTGAGCCGATTCAACAAGGCGAACAACTCT  
GCGATAAAGCACTTTCAGATCCTACATGTGTTGCCCTGACATGCAACACACCATTCTCATTACAGTACCACCTATCACACTATCCCCCTCCTCTTTGCAACAGGTCTTGCTTCTCCAGTT  
ACCATACTCTCATTGACATAGCTCTGACCCGCATATTACAAAGCCATCACAAAGCTACCTTTGCACCAGGCATCACTTTGATCACGTCATTATGTTGTATCAATCGACTGTCAATTTCCCTTTCA  
CTAACTATATTTCCATCTTCGTTATGAATGATGAGGACTGCAGTTTCTGGTGCCAAGTCCATGAGTTTAGCAATGGCCTCTGATGTTTTGCCTTTTGCTAGGATTTCAAGATACTTTCCTAGA  
AGAATAAAAGAGATGAGCATAGAGCTAGTTTCAAAGAAATCAGTCGACTCAAAAATTTGGTGAAGTTGCTGCTCTAACCACAGAGTAGAGTGAATAAAAATAGGCTGTGTTGGTTCCCAG  
AGCTATCAACACATCCATGTTAGCAGAACCATGTGCTAAAGCTTTGTAAGAACCAATATAAAAACCTTCGGCCAATTATAAATTGGACTGGAGTTGATAATATCCATCTCAAAAAGCTCTCCAA  
TAGTTAACATATTAATACTTTAGTATCTAGAGCATGATTTACTCCGGGGATGTACATAAACACCATTGAAGTAAGAAATACTGGGATAGTGAACAACAAGCTCCATAGAAAAGATTGGTAG  
TATTGCCTAATCTCTTCACGTTTGTGAGATTCCCTCCCCCTCCTTCAGGGTATATTGTTGCCAAGAAACGACCAGATCCTGTTGATTGTATCACTTCAATGAAGTTGCGAGGGCCTGTTTG  
ATCTGGCTTGTAGGACACCGAAACTTTATAAAGAAATGGGATCTATGTCAACTTCTTCTATAACCAGGGAGTGCCTGGAGTGAGCTTTCAACAATTCTCATGGATCTTTCAGTGCGAACCCT  
TCTATCTTGAGCTGTATTTTGTTCCTATCAACCCAGTTGTAATGAGAATAGCTTCAAAGCCAGTCTCATCGACTTCTTTTCATTAGTTGGTCAGCACTTACAAGCTTAGGGTCATAACGAATT  
TCTGCCTCTTCTGTTGCTAAGGCTACAATAGCTTCCGAACCCCAAGAACAGATTGCAAAGCTGATTCCACAGTATTGGAGCAAGTAGTGCAGGTCATACCTTTAATATGCAGCCGACATG  
TCAGGGTTGATGGTTCTTTGGAATCTTCTGAATCAGTGCAGCTTCAAATCCAACATCTTCAATTGTTTCTCGGATTTGGTCCTCAGAAAACAAAATTAGGGTAAAAGATAAATTGAGCACG  
GTTATTGAGCACATCTACGGCTGCGTTTTGAATTCCCGGTAATCGCTTGATCGCTTTCTCCACCGACCCGGCGCAAGCCGAGCACGTCAATCCAATCACAGAGAACATCGCCGTCCTCCGA  
TCCTCCGGCGGCGCTTCGACGTCATTTCCGCAGCCAATCGCCGCCACCGCAGCTACACCCTTAGGGTATCTCGGCATCGATGGGTAACGGGGCCTTGGAGAAAGGTCACGAGAAGATCC  
CTCACCTTAAGGCACGACATCAGGAATGCTCTGCTCGCCATTTATGCTCTGTTATTGATCTCTTTCGTCGCACCTCCTTTTTCAAGAAATTCTGCGAATCCCCCTCTTGGCCACATGGTAC  
AG

>comp172381\_c2\_seq10

GATAATGGAAGTGCAAGTGCTCTAAAGTGATGAACTGGAAGAGTGCAAAAAGACAAAGCTCTTCCTTTTATGGGACTAAAATTAGGATAGAATGATTGAACGAGCCATGTGAAAAGTCCC  
CTTATGAGATAATTTCTTTTGTCCCATCGATCTAATGATAGAATTTCAAGCCTATTCATGTTTGTGGATATGTGAGTTTCTATTACTAATCTTGTAGGAAGAGTTGTGTTGTTTATACA  
TACTCCATGCTAAGAAAAAATGTTGAACATTATATAAGGTGCATATTTATTAGTTCCCATTTTCATGCAATTATATTTTGGAGGATTAAGTTTTACTAAAATAGAACTTGTATTGTAATTA  
ATTAACTCGACTCTAAGCAAGAAATTTTCATCTCTTTTATAACTATTTCTTTTTCTTATGTGGGGGATTTAGTAAATTTAATATATCTCACACTTATACATGTACATTTCAATTTGGGACAATTTTT  
CTCTGATTTCTCATCATTTACGAGAAATTTTTGTATTAATAAATCACTCCTTAGACCACAAACTCATGACCTCCTAGTGAGAATGGAAATTCTCAATAATTAGGCTAAAACCTATGACTCATT  
GATTAAGGAGAAGGTTTTTTCTACAAAGTCATTGTTGGAGACATATTGTGATTTATAGCTCACCGATTTAGGATTAATTTGGGATGGTTTTCTTACTGCTTGACAAAGTGTTTTTTTAATAC  
AAAAGCTTCTTAAACAATATTTTTGCATCGATTGTTAGGATAAGTTTTAAAACCGCTACCAAAACCTTCTTTACATTGGTTATAATCGGCACAAATTACATGATAATTGCACAAAATTT  
AAGTTACCAAATGAATCTTTATTCTTAACAGTAACTTGGAAATTCATTTTTCAATTAATATGGATAAGAGTTGGATTACAAAAGCCAAGTGGAGTCGTGATTATGTAACGGTGTAAACAAT  
TTCTTAGAGTTTGAAGTCGAAGTCAGAATTTATCTGGGAAAATTTATGTCCGTGCAAGTCATGCATTAATAGGTACTTTTCATTCTATGAAAGATGTGAAAGACCATTTAATTTCCAAAGG  
TTTTTTTCTGGACATGTTATATGGAATTAACATGGGGAAGAGCATTGTCCTATATATGAATATGCAATGCATGAAGCATTGGTTCCACAATAAAGTTAAAGGAAGGGGAAGCTCCTTTTG  
AGAATATAAGAATAGATGATATATATGCATTATTAAGAGCCATATTATGTCAAAATGATCCATTTTAAAATCCAACAATGGAGCAGAACGAGTTCAATACTAATGAACAAAATAATCATGGTG  
AGAAATTTGCTAATTTAATGTATGATACAGAAATAGAGCTATACCCTGGATGTAACCTTCTCAAAGCTTCTTTTTATATTGATGTTTTGTTTGAAGTGTGTCATTCTTGGATGGCGAGCC  
CCTTTGATATGGTACTTGAGTTACTGGTTCGATGCCTTTCCTAAAGGGTCTTGTTCCTAAAAGTATATATAAATGAAGAAGATAATGAAAGAATTTGATCTTGGATATACGAAGATAGGTG

CATGTCCTAATGATTGTAAGTTATTCTAGAAAAGATTGATTTGATCAGAATATATGTCACATATGTTGAGCATCAAGATGGTCAGCTATGATAAAGAATACTTCTGAAGGAAAAAGAACTCGTA  
TGAAGTCAGCTAAAATTGTCAGATATTTCCATTAATTCCAAGACTTCAAAGATTTTTTAAAATAAAGAAATTTGCTAAAGAGATGATTTGGCTTGCTAGACATAGAAATGTAGATGGATTA  
TTACAACATCCAGCTAATGGAGAAGCGTGGAAAGCTTTTGACTCTCAATACCCCTATTTTGCTTTGGATCCACATAATGTTTCGCCTTGGTTTGGATAGTGATGGGTTTAAATCCATTCAAGATA  
ATGAGTAGTACATATAGAAATTGGCCAGTACTTCTTGTTCATAAAAATATGCCACCTTGGGTTTGGATAAAACATGATTCTTTTATCAAATCATTTATAACATGGGGAAAAAATCCAGGA  
AATGCTATTGATATTTTCCCTTCAACCTTTGATTCAAAGTTATGTGAATTATGGCATGGAGTTAATGTTATGATGCAGCAAGTGGACAAACTTTCAACATGCGAGCTGCATTACTATGGACC  
ATTAATGATTTCCCAGCATATGGCATGTTTGTGGGGGAGCACAAAAGGGATATTAGCTTGCCTTATTGTACGCAAAATATAGAATCTTTGTGGTTATACAAAGGAAAGAAATTCTCTTAC  
ATGGGACATCATCGTTGGCTTCCAAATAATCATATTTATGTTGCCAAAAAATTACTTTGATAACATAGAGGAAGTCCGAAGAGAACCTCGAAGGAGAATTGGCACTGAAGTTCTATCAC  
AGTTACATAATATAGAATTTACATTGCCTCCTTAAGTGAAGCTGGTCTAAAAAGAGGACGAGTTGTATAATGGATTGAAGGATGGAAGAAAAAATCAATTTTCTTTGACCTACCTTACTG  
GGAGTATT

>comp172381\_c2\_seq8

TAAATGTTAAATTTTTTATTTAATCAATCATCTTGCACCTTCTATCAATGATGTATTAAGTACCTTTGGAATGATGTAATGCTACACCTTCAACGTTACATCATTGAGCTCTCTAGACATTCCAT  
CAAACCTAAGCATCATAATACTGCTTCTATATAGCATCACAATACACTATCAAAAAATAGTATTTTTCATGTCACATGTTAGAAGAGGTTTTGAAACCGCTATCAAAACATAAATTTTGCATC  
GATTAATAATGGTGCAAAATATGGTGCTATTTGCACGAATTTAAACCGGTGCAATGTATACCTGTTCAAACCCGGACATTGCCTCTTAAATTGATGCCCTAATTTGATCTTATTCTAACCCG  
ATTTGAAACTCAACCTCTTCCCCTCTTCTTCATCCGTAGGAACACACCGTCGCGTCACAATTTAAGCTAGATCAACCCCTCTCCCCTCTCTTTCTTTCATCTGTGGGAGCACAAACATCG  
AGTGTGCGAAGAGAAGACTATCCCCTGTCGACCCTTTCACACTGTACGTGAGTCTCTTACCTTCTACTTTTATTATCTTCTTCTTCTTCTTTTCAAACACTTCTCCATCTTCTTCTTA  
TTTTCTTAAATTCATCCCCTGGATGTAACCTTCTCAAAGCTTTCTTTTATATTGATGTTTTGTTTGAAGTGTGTTGCATTCTTGGATGGCGAGCCCTTTGATATGGTACTTGAGTTACTGGT  
CGATGCCCTTCTAAAGGGTCTTGTGCTAAAGTATATATAAACTGAAGAAGATAATGAAAGAATTTGATCTTGGATATACGAAGATAGGTGCATGTCTAATGATTGTAAGTTATCTAG  
AAAGATTGATTTGATCAGAATATATGTCACATATGTTGAGCATCAAGATGGTCAGCTATGATAAAGAATACTTCTGAAGGAAAAAGAACTCGTATGAAGTCAGCTAAAATTGTCAGATATTT  
TCCATTAATCCAAGACTTCAAAGATTTTTTAAAATAAAGAAATTTGCTAAAGAGATGATTTGGCTTGCTAGACATAGAAATGTAGATGGATTATTACAACATCCAGCTAATGGAGAAGCGT  
GGAAAGCTTTTGACTCTCAATACCCCTATTTTGCTTTGGATCCACATAATGTTTCGCCTTGGTTTGGATAGTGATGGGTTTAAATCCATTCAAGATAATGAGTAGTACATATAGAAATTGGCCAG  
TACTTCTTGTTCATAAAAATATGCCACCTTGGGTTTGGATAAAACATGATTCTTTTATCAAATCATTTATAATACATGGGGAAAAAATCCAGGAAATGCTATTGATATTTTCTTCAACCTTT  
GATTCAAAAGTTATGTGAATTATGGCATGGAGTTAATGTTATGATGCAGCAAGTGGACAAACTTTCAACATGCGAGCTGCATTACTATGGACCATTAATGATTTCCCAGCATATGGCATGTT  
TGTTTGGGGGAGCACAAAAGGGATATTAGCTTGCCTTATTGTACGCAAAATATAGAATCTTTGTGGTTATACAAAGGAAAGAAATTCTTCTTACATGGGACATCATCGTTGGCTTCCAAATA  
ATCATATTTTATGTTGCCAAAAAATTACTTTGATAACATAGAGGAAGTCCGAAGAGAACCTCGAAGGAGAATTGGCACTGAAGTTCTATCACAGTTACATAATATAGAATTTACATTGCC  
TCCTTAAGTGAAGCTGGTCTAAAAAGAGGACGAGTTGTATAATGGATTGAAGGATGGAAGAAAAAATCAATTTTCTTTGACCTACCTTACTGGGAGTATT

>comp172388\_c0\_seq1

TTACTCAAATCAATAATAACAGTAATATTTAACTCAAATCAAGCTCGCCAATAATTAACCTTTTCTTACTTAAAGGTTCCATCAACAAAATCAAATAATCAAATCCCTTAAAATTCATTATATA  
AATCCACATAAGAAATTAACCTCAACAACCTCAGCATTTTTTAAACACAAATATTACACATTTTCATAGCACATTCTTATATTTCAAGTATAGCTGGTTGGATTTCTCCTGAAAAAAAAGTATGG  
AAGGTTGTTGAAGCTGCTAGAAGCTTCTAGAAGCAGCTGGGAGGAATAACGAGGCCGAGCTTCTTCCATTAGCATTCTTACAGAATGACTGCGCTGCCATTTTCTTCTGCCCATAGGTC  
AGATCTATGTTATCCAATCCGATTCCGCTGCATGGATTGCTTTCCGCTGCAGTCCAATTTCACTGCTATCTTTGTCGCTGATGTTCCATTATGTTCTTGAAGGACACCCCGATTATCTTTATCC  
CTGAGCTCTGCTTAGGGCAACCCTTCTTCTGTGGGCAATAGTTCTGGTCAACGATAATCGGATTACTCACACCGTTCATCACCACGTCTCAAATCTCACCTTTTACCACCCCGCCATTA

TTCTCCTTCGCCCACGTCTTTATTCTCACCCCGTTTTGCGTTCCGGTGAACGTAACCGACCTAACTGTCACATTCCGTACGCCGCCCTTGCAGTGGTCCCGCCCCAAGCTGCCGACGC  
TGATGCCGTGGCCGGGCCACACTCCACGTGCTCGATGTCGACGTCCGCATCGCCGTCTTTGAGGGAGATGCAGTCGTCGCCGTACGGATGACGGCGCCGGAGACGGCCACGGCTGA  
GGAGAGTTGGATGTGGATGCCGTCCGTGTTGGGACTGTACCCGGCGGCGGAGATGGTGATGGAGCGGAGGGTGACGGCGGTGCTCCGGTAGATGTTGAAGTGAAGAGCTGGCTGTTG  
AGGGAGGTGACGCCGGAGAGGAGGATTTGCTTGGAGTCCATAATGGTTATTGACGGTGCACCCGTGGGACAGTTTCCGCCGGCCATCTTACAAGCCCAGAGAGGCTTTCCTCGGCCGTC  
GAATTTCCCTCCGTAAATGGAGAGGCCCTTTGACCTGCCGAAAAGTAATCCAGGTGGCGGGCGCTGCCGTAGTCGGAGGAAGCGACGACGGTGGCTCCATAGGCAAATATTTCGCATTC  
CGACGCTCTTGCATGGACCGGAGAATTCCGCTCGGCTGAGGAAAAAGGTGCCGGAAGGGATGAAAATGGAGGCTGGTTTTGTGGAGGAGCAGGCTTTGGACCATGCCGGCAGAAAACG  
GCTTGGCCGAATCGGTCAGGCCGTCCGGCTTTGCGCCGAAGTCGGTGATGTTGTAGGAAGGCATTGAAGCTGATTTTGTGTTGGAGAGAATGAGGAAGAAGAAAAGTCACGAATCTCATG  
ATGAGCTTTTTGGCCATTAAGAAGAGAGA

>comp172451\_c1\_seq11

TTTTTTTTTGAAATAAAGTACATCTGCAGAGCTTCAGGTTTAGTAGGAAATGTTAGCCTCCGCAACTGAGGTGATTTAGTTGTAAACTACAGTTTCAGCTCCCAATATCCAGCAATATGAAA  
CCATAATTACAGGCCTTGGACAAAAGTAACAATATACAGAAACGTAAGAAGTCTCAGCCTTTCAGTTCTCAGTATCCGTACAGGAGTTCAAATGCATAAATACAAGAGATTTTAATGACATG  
TACGTAAATTTCCCTGATGGGATTTATAGAATTTAAACCCACAGCATTTCAAATTTTTATTATTTCTTAAGCCGACGATACCTCGGCACTAACTTCGAAGCAGACAGGAGCCTCACTCTTCA  
ACTTATGAAAGAGTTCAGGAATTAGGCATTTCGCTACGAGGAGCTTCTCTTAAAGTTTTGCAACTCGAGCCTTGAATGATTTGGACCTGCGAATAGATGGATCAATATCCAAAGCAGTGGCA  
TAAGCCTTCTCAGCAGCATTCAAGTCTCCATTGCCAGTAAAGCATCACCTTGGCAAGTGTAAGCCTACACCATTGATAGTTGTCAGCATCTTCTAGTCCATCTGAGGAAAATAAGGTGCT  
ATCTTACATACTTCCTTAGCATCTTCAAGAGCACCATCATTGTCTCCATTCCCTAATTTAGCAGCTGATCTGGCTTTGTAGATGAACTGCAAACCTCCGGAAGGATTAAGCTCAATAGCCTG  
GTATAAGGCACCCACCAAAAAATAAATATCTAGTCTATTACTTGTCTAGGGTTTTGTTAGTAAGAATACTTTGTTGGGAGTAAATAAAGAACAACAAGAAAACAACGACGGA  
GAAAGAATACCATAATTTAAAGTGGA AAAACCTAAAAATGGAAAAAATCACATAGCCATATAAA

>comp172451\_c1\_seq2

TTTTTTTTTGAAATAAAGTACATCTGCAGAGCTTCAGGTTTAGTAGGAAATGTTAGCCTCCGCAACTGAGGTGATTTAGTTGTAAACTACAGTTTCAGCTCCCAATATCCAGCAATATGAAA  
CCATAATTACAGGCCTTGGACAAAAGTAACAATATACAGAAACGTAAGAAGTCTCAGCCTTTCAGTTCTCAGTATCCGTACAGGAGTTCAAATGCATAAATACAAGAGATTTTAATGACATG  
TACGTAAATTTCCCTGATGGGATTTATAGAATTTAAACCCACAGCATTTCAAATTTTTATTATTTCTTAAGCCGACGATACCTCGGCACTAACTTCGAAGCAGACAGGAGCCTCACTCTTCA  
ACTTATGAAAGAGTTCAGGAATTAGGCATTTCGCTACGAGGAGCTTCTCTTAAAGTTTTGCAACTCGAGCCTTGAATGATTTGGACCTGCGAATAGATGGATCAATATCCAAAGCAGTGGCA  
TAAGCCTTCTCAGCAGCATTCAAGTCTCCATTGCCAGTAAAGCATCACCTTGGCAAGTGTAAGCCTGAGGAAAATAAGGTGCTATCTTACATACTTCCTTAGCATCTTCAAGAGCACCAT  
CATTGTCTCCATTCCCTAATTTAGCAGCTGATCTGGCTTTGTAGATGAACTGCAAACCTCCGGAAGGATTAAGCTCAATAGCCTGGTATAAGGCACCCACCAAAAAATAAATATCTAGTCT  
ATTACTTGTCTAGGGTTTTGTTAGTAAGAATACTTTGTTGGGAGTAAATAAAGAACAACAAGAAAACAACGACGGAGAAAGAATACCATAATTTAAAGTGGA AAAACCTAAA  
AATGGAAAAAATCACATAGCCATATAAA

>comp172461\_c1\_seq8

CCAAAAAAAATATTTCTTTAAAACTAATCTTTGTTGATGCTATGTCTCTCCACAAAATACTGGCGCTAAAGGATCTTCAATGGACATAGAATAGCTATTGAGCATGACAAGCACTCTTG  
TCATTGTAGGTCTTTGAGATGGGTCTTGTGTCACGCATAAAAAGTCCAATTTGAAAGCATCGCATGACTTCATTTCTTGAAAAAGATTTGCTAAAGCTGGGTCCACAATTTGTAAGACCGT  
TCCCTTTTGCCAATTCGTCCATACATAATTTAAAAGTTCTCTGAAAGATCATAATTGAAGAAAATATTACTCTTTCTGTCATAATCTCTAAAACCTAGTACTCCAAAACCTAAAGGCATC  
AGACTTGACTGAGAAATGTCCATGCATTCATATTCTGGAGCCATATATCCACTGCAAGAAGCTTGTGACTTCATGATGTCGTTCTAGTAAAAATAGTGAAATTAGTAAGACTTTTGAAGAT

TTATTAAGCTTACTATGTTCCAACAACACGACTTGTCATCCCTTGAGTCTCGTCTCCTCCAAAAAGCCTAGCCATGCCAAAATCTGAAATTTTTGGGTTCATTTCTGCATCTAACAATATATT  
GCTAGCTTTAAGATCCCTGTGAATGATCTTCAGTTGGGAGTCTTCATGCAGGTAAAGTAGGCCACGAGCAACCCCTCCGATTATCTTATATCTTTTTACCCAACATAGTAGCTTACTTTTTGT  
CGGATCGAAAAGAATGGTATCTAAGCTTTTTGTTGGGCACATATTCATAAATGAGCAATTTTTCTTCATCTTCCAGGCAAAACACCATGTACTCTTACAAGATTTCTATGCTGGAGATTAGCTAT  
TAAAACCAATTCATTTTTTAGCTCTTCAAGGCCTTGCCCAGATCCTGT

>comp172485\_c0\_seq16

CTCCATCCGGAAGACTCCCACCTCAGCTTTACTTTCGCCTGCTACAGGTCAATCCCAGATCCATTTCCATGCCGACGGCGACAACCGCAAAAACAAATTGTTGCTCATCTGTTCAAGCA  
TTCCTAACCCCGTCTGAGCACTGTTCGGCCTAGCCTATTTCCCTTCTCCTCGGTACTGTGGCATACTCTGTAGCTTGCTTCCCTCAATAAGTTCTTTGTTCCCATTAGGTTGCTTCTGGAACCAG  
TTAATATTCAAGACCTTGATATCGGCAGTGGGGGAGGGAACATTCAAGTTGTTGCAGAGCGCAGATGACCGCTAGAATCGTAAGTGCAGATCGTTACGATTACATTCGTGCGGAAGCTGAA  
GGAATGCATTCCTGTTCTGCGTCTCTCTCTCTCTTTGGCTCGCCTGCAAGCCCGCTTTCCACGCTGTTTGAAAAAGATTTAATTTAGGGGCTTTGGTACCCAGAATTAGGGGGTAAA  
GTAATCTAAATAAGTGCATTTCTTAAATTAGGGTGTGTTGGTTATTTACAGCGGAACATAAGGAATTCGTTCAAAGAATTAGGGGTGTATTACGGGACCCCGATCGTTCCGGCTTCCAAAACC  
GCTCAAATGAGCGGGTTAGAAATTTCCCGCGACAAATCAGCCTTGCCCCGATCATTCTCGGAAGCAGAACTTATAAGTTCTCTCTTCTTCTCCATTCTTCCATTCTCTCTCTGGCTCTC  
TACTCCGAACAGAAGCTCTGATTGCTGCAGGAGGAGAACCCTTGTTTCGCCGCATCCATTTGCCGCAGCCAGGAGACCTGTTTCATCCCTTCGCCGTCCGCACACCGGAACCGGACCCG  
TTGCCGACTCCTCTTGCTTCTTTGTGACCTGTCCGCCCTCCTCTGCACCAGAATTTTTCCCTGGATTGCGTAATCCAAAAGATTAGAGATGCGAGGCCACTGATACGCTTTAGAAAATTTTT  
CCTGGATTGTTCTTGTGTATTTGCGGGAAGATGAAGTTTTCCCTTACCAGATCCGTGATATGAGTCACTTAAAACGTGTTCACTCTCTATACTTTGTCCTCCAAATGTGTTGTTAGAACAATT  
TATGAGTTCAAGTTCTTCAGTTGCGACTGCAGAATCGTTGGGTTCTCAGGCGGTGATGGGAGATTCTTCGTCAGTGAGTTATTTTCCCTCCGTTTTATTACGCGCGGGGCAGCATCGGACA  
ATGGGGAATGGTTACGTCGCCGGCTCCGCCGGAGTGGACCGGTTCCGGCAGCTATCCACCGTCTCCTTCGTGATGAAGCGGAGAGGTTTTACCTGTAGCAGTTTCATGTTAACCATTTTTTT  
TTTCTGAAATTTGTGGTTAGCCAGTCAGTGCTTTTCACTATTGAAATCATTCTTGATTGATAGAAGGAAACGTGAGGGAGCCTTTTTTTCTCGATAGTTCTGAGTCAAGCTCATAAAGG  
CAAGAATATTTGTTTTAGATTGGTTGTAGTTGCAGTTGGCATTAACTTGCCATATATTTACTGTTTTAGATGTATGTTAAATTCTTTTTATTACTCTAGCACACAATCCTCTTTCATGAATT  
ATTGCTCATGGATCTTTTTTTTTCTTGAAGTTGAATTTCTAGTTACAAAGATGGTTGAGCCATT

>comp172485\_c0\_seq60

CTCCATCCGGAAGACTCCCACCTCAGCTTTACTTTCGCCTGCTACAGGTCAATCCCAGATCCATTTCCATGCCGACGGCGACAACCGCAAAAACAAATTGTTGCTCATCTGTTCAAGCA  
TTCCTAACCCCGTCTGAGCACTGTTCGGCCTAGCCTATTTCCCTTCTCCTCGGTACTGTGGCATACTCTGTAGCTTGCTTCCCTCAATAAGTTCTTTGTTCCCATTAGGTTGCTTCTGGAACCAG  
TTAATATTCAAGACCTTGATATCGGCAGTGGGGGAGGGAACATTCAAGTTGTTGCAGAGCGCAGATGACCGCTAGAATCGTAAGTGCAGATCGTTACGATTACATTCGTGCGGAAGCTGAA  
GGAATGCATTCCTGTTCTGCGTCTCTCTCTCTCTTTGGCTCGCCTGCAAGCCCGCTTTCCACGAGCGGAACATAAGGAATTCGTTCAAAGAATTAGGGGTGTATTACGGGACCCCGA  
TCGTTCCGGCTTCCAAAACCGCTCAAATTGAGCGGGTTAGAAATTTCCCGCGACAAATCAGCCTTGCCCCGATCATTCTCGGAAGCAGAACTTATAAGTTCTCTTCTTCTCCATTCTTCC  
CATTCTCTCTGGCTCTTACTCCGAACAGAAGCTCTGATTGCTGCAGGAGGAGAACCCTTGTTTCGCCGCATCCATTTGCCGCAGCCAGGAGACCTGTTTCATCCCTTCGCCGTCCGCA  
CACCGGAACCGGACCCGTTGCCGACTCCTCTTGCTTCCCTTTGTGACCTGTCCGCCCTCCTCTGCACCAGGTATTTAATTCATTTCAACTCAAGGGGATTGAAGCTTATATTTACCTAATTG  
GTCCTCTATCCGCTTGAATGATTCGCTGAATTGAAGCAGTTTTGAGTTATCTTATTAATTTTCATCTATAGAATTTTTCTGGATTGCGTAATCCAAAGGATTAGAGATGCGAGGCCTACTGAT  
ACGCTTTAGAAAATTTTTCTGGATTGTTCTTGTGTATTTGCGGGAAGATGAAGTTTTCCCTTACCAGATCCGTGATATGAGTCACTTAAAACGTGTTCACTCTCTATACTTTGTCTCCAAAT  
GTGTTGTTAGAACAATTTATGAGTTCAAGTTCTTCAGTTGCGACTGCAGAATCGTTGGGTTCTCAGGCGGTGATGGGAGATTCTTCGTCAGTGAGTTATTTTCCCTCCGTTTTATTACGCGGC  
GGGGCAGCATCGGACAATGGGGAATGGTTTACGTCGCCGGCTCCGCCGGAGTGGACCGGTTCCGGCAGCTATCCACCGTCTCCTTCGTGATGAAGCGGAGAGGTTTTACCTGTAGCAGT

TCATGTAAACCATTTTTTTTCTGAAATTTGTGGTTTAGCCAGTCAGTGCTTTTCACTATTGAAATCATTTCTTGATTGATAGAAGGAAACGTGAGGGAGCCTTTTTTCTCGATAGTTCTG  
AGTCAAGCTCATAAAGGCAAGAATATTTGTTTTAGATTGGTTGTAGTTGCAGTTGGCATTAACTTGCCATATATTTTACTGTTTTAGATGTATGTTTAAATCTTTTTATTTACTCTAGCACAC  
AATCCTCTTTCATGAATTTATTGCTCATGGATCTTTTTTTTCTTGAAGTTGAATTTTCTAGTTACAAAGATGGTTGAGCCATT

>comp172494\_c1\_seq6

GCAATAAAGCCGTCCCAAATGAAGTTTTAGTATATGTCGATGTTTTCAATATTTCCAAGTTGTTTTGGGAATAGCACGGGGGGGGTCTTTTTGTTGATATTTAAGATATTACGAGCATAAAA  
GCTTCAGGTTTGAAACTATAATAAAATCTATGGTGATGGGATTAGAACATAGCGATTAATTGGGTGGCCCTATGTAATAATTATTGTTGTGTTTTCTGTGAACTGTTCTTCTTCTATCATATGA  
GAGGTCTTTAGAGAACTCCATATAATTTGATCTTATTGTGAACAAAAATAATAATAGCTCTAAGATTCTCAAACAAAAGAAAATGATGCGGTGCATCACTATTATAGTTGCGCTGAGGAGCA  
TTTTATCTTACTAGCACTTTCTTTTGTATACCGTTATCAGCATGTGGCCACTAGTTAGTTAGACAGTACAACCTTTCTACTTTTTGTTTTAGTCCCCGTTTGGGAATGCCGAAAGGGGGAAG  
GGAAGATAGGTATATTAGCAAACCTGTAGAAGAAGAGGCCGGCAGTTTTTAATTTACAATATAGAATCACTGTTCTATCTTGTGTTGTCTTGTATTACTTCTTGCAGGTTTTGATCCTCAT  
CAGAAAATAGTTCATCCTATCTTGTAATAAAAGATAAAGGCTTACTGTTTCTTAAAGCAGCTTCTTAGG

>comp172502\_c1\_seq1

GACAGAATAATTAATCTTAATTATGAGGCGACAAACAACAAAGAAAATATCGATATCAGCAGCTCAATATCCTATACACACAGAAAAGTGTTTCAGATCCTGCAGAGTTATTATGATAAACAT  
TAAAAAATGCAGCAGTTGATTGAATCAACCAATCCTATTTACTTGTAAAATGTTTAAAAACTACAGCAAAAAGACAACGAAAGAAAAGTTAGGAACCCCACTCCAGTTTTAATAACCTC  
ATGGGCATCCGAAGGTTGTTAGTAAAGGCTGAGTAAATCCCCGCTCCACGGCTCCTGCGCCGCTCGACTGATCTCTCCGACCGGGGCTGTGCGCGGACCCGCGCAAGCTGCCCTCCC  
GCCACGGTTGCGTGGGTACGATCGGACTGATAGATTTCGATTCCACCGCTCCTCCGCGGCGATCTCCTCGACCATCTCCGCCCTCCTTCATCCCGGGACGCTCCTCCGGCCCCGACCTT  
CGTGCACGCCACGCCACCCGACGATTCGGATCATCTCTGGCCCGGCGGCGGAGACCCATGATCTGGGGGTCGATGAGATCGGCCCTCCCGCTCTCCGCAACGGCGGATGCCCCC  
AGTGGACGACGTCGATCCCGCCTTGGTGTGTTGAGGTATTGGGAAGGGAATTTGCCTGTGATTATCTCGAGGATCACGACGCCGAAGCAGTACACGTCGGATTTGGGGGAGACGTGT  
GGGGCTCCGGGGATTTGAAGGCGAAGAGAACGTTGGGGCCGCGGCGGGGTTGACGAGTGCGATGAGACCGTAATCGGCGAGGATGGGTTGAAATCCGGGCGGAGGAGGACGTTG  
CCTGTCTTCAGGTTTCCGTGGGGGAGATCGTAGGAGTCGAGCTCCGCGTGAAGGTACGACATTGCGCGCGGATTCCTCGGATGATTTTCAACCGCGTCGGCCAATCCAGCGCCGCGTGT  
TCTTCTCCTCGGTCGCCATGTAGAATATACAGTAGGCTCCCCTTTGCAATATACTCAGACACAACCAGCTTCTCCTCCTTCCGAAAATGGTAAGCGAGCGGCGGAACAAATTTGGATGCT  
GCAACCTTCCCAGTCTCCTCATCTCCCTATCAAATCCCTCCTTGTTTAATCGGTTTCAGCTCCCTCATCCTTCTCACTGCAACGGAACCCCAATTGTCCATCGCCGCTTATAGACAGAACCA  
AGCCCTCCGTTTCCAAGCACCTCCGCCGACGCCCTCATCAAGTCCGGCAACCCAAAAACTCCCTTTTCATCATTACCATCACCAGCTCCGAGCCGCCACCCCGGTTTGAACCGCCGCGG  
CTTCTCTGTTTGAACCGCTGCGCTTCTTGTGCGGCGGCGGGAAGTGAAGCTGAGGGTAATTGCACCGGTGAGGCGGCGGCTGCTGCTTCCATGGCTTCTGAAACGGATACGGCGTC  
ATGGTGGTCTATGAAGGAATCGGCGAATTGGTCTTGACGGCGGGATTTGACGGCGGCGTAGCCGATGACGAGGGCAAGGAAGACGAGGAGAATGCCGAGGACGATGAGCACGAGTTTG  
CCGAGTGGGAGTCGCCTTCCCTCTGCTCGACTGCTTTTAAATAGGTTGTTGGGATGGGGCAAGCCGGGCCGGGAGTGGTGGCCCGCAGAGATTTGGATTGCCGGCGAAAGCAGCAG  
CTCCGAAGTGGACCAACGAGGTCGGAATAGGCCCTGCAGATCATTATTGGAGACGTTGAAGTAGCGGAGAGAAGGAAGCTGCAGCGCTGGTATGTGCGCGGTGAAATTATTCCCTTCC  
AAACGTAGGTCGATGAGCATGGAACCTTGGAGAGAGACGACGGAATCCTCCCAGAAAGCAGATTTCCATCCAGCCATAGCTTCTCAGGTGATCCATCGATAAGAAAAGCGAATCATT  
GATAGAACCGCGAACCAGGTTATTCGAAAGATAGATCGATTTTAGGGCATCGAGGCGGCCGATATTCGGGAGAGGTCCAGACAAGTTGTTATTGTTGAAGCTGATGGAGCGGAGGGAGC  
GGAAGTGGGAGAGAGCATCGATATTGATGGTGCCTTGGAGGCCGAGACCGGAGAGACGGAGACCGGTGACGAATCCGCGCAAGCAGAGGACGCCGATCCAGGAGGCGGTGCAGGGG  
GAGGTGGGGGATTCATCGTGGGAGGTGGCCGGGTGGAGGGGTGGACCACGAGGAGAGGGCGGGGTTGGGGTTGAGGAAGGAAGATTTGAGGAGCAGGAGGGCGCCGGAGTCGGA  
GAGGGAGGAGGAGAGGGGTTGGTGGAGGAAGAAGAGAAGGAAGAGGAGAGGAACAGGGGCCATGGATGCAGGGGAGGGGAGGGTGGCGGGATGTTCTGTGAGGGCGTGTATTCTGT

TTCTCTCGTTTTGTTTGAAGAGAGGGTGATTTGACCGGGTCAAAGGTGAGGAGAGTGATGATTGGGGAGCGGTAGGAATTGAGGCTTTGTGAGAATTTGTAAATAAAGCT

>comp172512\_c0\_seq2

TAAATATAGCTATATAAGATGACATGAGTTTATTTTAAATTTTATGAAATTATTTTTATTTTATAAAATTTTATGGTGCATTTATAGTTTTATACTAGTAATTGAAAAAGGCCAAAAAGCTTCTTAC  
TAAAAATCTGCATTTCGCTTTTAAATTCACCACCTAACTAGCAGAGCCAATCACAACTCTCCCTTGCCTTGGTGTTCCTCGTACGCTGCGCTACTTCCCTGACCCCGCCGGC  
GGCAACACCACCGCGCTCCGCTCATCTCTATTTTCTCTGATCCTTCCCTATACTTCCCCGCTGCAGCACCAGCACCAGCCTCGACCCGAAATCCGGCGATGCCAGCAAATCCCCAA  
TCGGCCCAAGTTCCTCACACTCACTCCACTCCGTCAGCCCCGCCGTCAGCGGCGACGCCATCCCTTCTCCAATCCCAACAATATATAAATCATAACGCCCTTCCATCTCCCTCAGCATCGC  
CACAGTCTCTCCGATTTCCACCATCTCTCCACATACTCCGCCTCTCCACCACCTTCGCTGAAACTGCGCCAAACACTCGTCGTCGTTCTCCCCGCCACATCCACCCTCTATCCT  
GCCGTCGTCGTGATCCGCCGGCGCAATACAGGGGAGGAAGCGCACGACGGTGAGGGCCACGCCGGGATGGGTGCCAGACGGTCCGGCGTATGCAAGCGCCTCGCGGTCGTCTGCACT  
GCCGAAGAACAGGAGTGCTACAGCGTAGCGCTGCGCGGGGCTCCTGTTCCGGCGAGGCTACGGTCGATGAGGATGCCAACAGAGCACGACGCGCCGGCGAGGACGTTCTTGTTAAGG  
CAGCGGATAGCTGGGTGGGTACCTCCATAGTGCCGTCGATGGTCTGGTGCTTGTGGAAAGGGAGGATAATGAGGGCGCAGTGCTTGTCTCGGAGAGGGAGATGACGCTCTCGTGCAT  
AGAGGGGTATTGGGAGAAAGCAGTGAGGGATTGAACAGAGACACCACCGCGTGTGTTTCGTAGGATTGCAAGGCGTGGGAGATGTGTTCCGATTCCGGTTTGGTGGCGGATGAAGCCG  
CCTCCCGCTTGGGAGCTCCGCGGTGGGATTTCGAGGGAGGAGGAGGAGGAGTTGGTGTTGACGACGAAAAGGGTGGAGGCGCGCCAGTGAGCTCGACGAGGTAGAGGGCGTAGAC  
GAAGAAAGGAGAGCGTTTGGTGGGGTGGGAGATGTCGAGGAGGGAGATGAGGGAGGGGACTTCGCGGGAGGAGTGGGCGCAGATTAGCATTCCGAGTTCGGATTCTGGATTCCACCA  
CCGGATAGTGCGGCCTTGTAGGCGACGTAGCGGGCGGAAGGCTTCGCGGCCACGTTTATGAGAGGAGTGATCAAGGTGGTGCTTATTACGGAGATTATCACCAAGATCGTGAATGTTG  
ATCTCGCAGCACCATTTTGTCCCAACCAATATTGAGCAATATGAGTTCAACAATCCCTTTCGTGTTTATAAGTAATCCAGCGAGATTCCGTCGTGGAATGGCATCTCCATATAAACGCAG  
CGAGCACGGAGCCGGCGACCTTCGTGATAGCCGCTCCGACCACAACTATTAGTAGCAAAAAACCCGCGCCGGCGTCCACAATGCTGTAAAGGTTAGTCTGAATCCACTAACCGCAAAG  
AAAAGTGAAGGAGCAATCCTTCAATGAAATCCCCAATCTTCTCAATAAGCAGCTCGCCTAGCGGTCCATTAGGCACAGCCAACCCATACACAAACGCCCCAAAGATGGCGTGAGTCCC  
AATCGCATCCGCCCAAACGCCGCCACCATCACCCCAACCAGAATCACGCACACGTGCAGCTCTGCCACCTCTCTCCCTCCGGCGTTCTTCTGACCCACCTCGCAGCTCTCTCAC  
AGCCATGTAAACCACGACGCTAAACACCCCGCCAGAGATCACCGACCATATAGCTGAAAGGGCTTTCCCTTTGCTCTGTGCCAGCGCGGTGGAAAACACCATAAGCACCCAAGCCAACC  
CGTTCGTTATCATCGCTGATGAGAGCACGAGCCGCCAATATCGGAAGCGATCAGTTTGATATCGGCGAGGGTTCGCTGCTAGCATGGAGAAGGAGGAGACGCAGAGGATGCCGCAGAGG  
AAAGTGACGAACGCGCCTCGCTGGGTCCCGTCTTGGATGCGGCTGTGGAGTATGATGCCGGCGAGCACGCCGATGAGGACAGGGCCGATGAGGCATACAATGGTGAGGAGGGTGGAAAC  
GGCGGCCGACGCGGCGCACGACGTCTGGATCGATCTCAACGCCGACGATGAACATAAAGAAGACGAGGCCGATGGAGGCCATGGAATCGATGACTAACAGGCTGCGCAATGGAAAGAA  
GGTCAGGGCGAAGGCTGGCACCTTCCCATCAATGTGGGGCCGAGGATGAAGCCACCCAGAATCTCGGAGATATAGCGAGGCTGGCGAAGCGGTTTGAAGTGAAGGCCGTGAGGCGA  
CTGGTGAGGAGTATGATGATAAGCTGGAAGAGGAAGAGAGGAAAGGTGTAGTCAAGAGGATTCTCATTCTGAAGCATTCCATTTGAGGACAACATGGTTGCGGCGTAGCAGACGAGG  
GGCATCGGAAGAATTTATGGATGCCAAATCTTTGAGGAATTGGACGGGAGAGGAATCCATTAATCTGCTTTCGTTAGGAAAAAGAAGGAAACTCTGGTGCTGGGTGAATGGGAGATGT  
GATGGACGAGGACGATGAACCATTTGCTTTGGCTATCTGAAAGGGAATTTAATATGGTTTCGTCGTTTTTGTACCGAGGAAATGGAGGTTGGTAATAGAGAGA

>comp172525\_c0\_seq2

ATAGTCTTTAAAGGAAACTCGTCAATATCTGAATTTAAATCATTTTATTGAATGACATACCCCTATTAACGTTAGGGATCTAAACCTTAAGAATCTTTTCAATAGATTTATTTGAAGTAATGCC  
CTAAAAATTTAGGCAATCGGCAACACTAAGTAGAAATAATCAACTAATGCAATTTACAATCTTCAAAAGAAGCCTTTTATCTTAGAATTTAAACAATTGAAATACAATATACAAGAAAATT  
GGAGGTATAACAAATAAGTAAAAGAGAATATCATGCCAACAAAGAGCTTAGTGCTGTAATAGTGAAGAATTTACAAACATGGAAAGGTGAAGATAATTCCAATTTACAATAATGAAA  
TGCATCAAACTAGCAAACCTGTAGCTTGATTATTCAATAGTGTCTTAGCCGTTTTCGTTTTTCGATTCTTTTCTTAGAACTATCTTTCTTTTACTATTTCTGGATATAGGAGGAAGAGCA



AGAGTACCTTCTCCAGGCTTACCAACAAATGTTCTTCTCTTCTACCAACCCACTTTAAGGGCAAGTTGTTAGTCACAGTCGCAATATTACTAGAAAGTTGTAAGTTCCACGAGTCTCTGAA  
TCTTCTGATGCATTTGTGTTACCCAAGCAAGAGATTGGTCGAGTTCAATTGAGTCGTCCACGGTTTTCTCCAAATATCAACAAGAAGTTGCTGAAATGCTTGGTGTGATAATGATGGAGG  
ATAATCCTCTTTACTTTTCGCAAAGCATGTTGACCTTTATCACATGCTTGCAAAGATTCCCTTGCATAGACCACGAACAATCACAAAAGGCAAATTCTGAGCCCGGATTCCACACCATGCGT  
GTGAGATTGTTATCCTTCTGACTAACAACCTTTGCAAAGAGGCGATCTTTATCATCGAATATAACAGAATCATCAGGAATCTGCAATGCCCTGTGCCATGATGTGGAAGAGATATACTCTTC  
TTTTACAGCAGGGAAAGATCCGCTTTCATCTGCATAAAACATCAAGCCAGTAACCAGAATGTATCTCCATTGTAAGCTTGTGTACTAACCAGTCCACACGTTCAAGAGCATCGAGTTGTGAA  
TCCTCATATATTTTGAGCTTCAGTTTGACATGATAACCCTCAATGGCTCCACATGATTCCAGGCTGCCAGTGGAAGACTCTTCATAGCCATAAGCCACATCTCTAGTAAGAAAAGTAATGA  
ATGAGTTCCGCATGGATGAAAAAGATGGAGCCTAACTTCTGCCCAAAAAAGCATCCCGGAGAAAGTTATCTAATATTTGCAATTATATCATTAAAGGATGTTTTGATAATTTTATATACTTC  
AGCTGTCCATAATTTTTTCTAAAGGATGGGCCGATGGGGGTGATGTTTTTTTTTTTGCATCTAAAAAATTAGGCTGTAGTTCTCCTCAATTAATAGTAAAAATCTGTAGCGGTGGAAACAAGA  
CGTAGTCAATAGTTGAGTGAAGCCACATAATGTGTTTTTATGGATGATTTTCTTTTCTATTTGCTGTCTGTTTTGTTCTGAGTTTACATAGAATTCACCTTTCTCCCAATTTTCCACATAGAT  
GTAGAAGACAAAAATAATTA AAAACTGATAAAGGTAATGGATTATTACC

>comp172530\_c0\_seq12

CGTCACTCCTGTCCAAAATATCCTGGCTATTTATTTCAATTTAATAATTTAAAAAATATATTA AATTACCCGCCGGTAGCTTAACTGCGAAATATCCTACGCAATTTCCATCGTTGAATCACC  
AGCGCATATTCGCCGGATATTCGCCAGTATTTAAAGATTTTCAACGCATTTTTCCGCCGGTAGTAATTAATTGATAGAGTTACCCGGCGAATATTGCGCCGACCTACTTAAACTCCTGTCCAA  
AATTGATAATCACTCACTTTTTCTGGCTTATGCTCCATCTAAGACATCTACATACATACATA CAACCACAATATATAAGATGAATAAAAATTCATGGAAGAATTAAGAATAC

>comp172540\_c0\_seq1

CAGAGGCTTTGAGTTCCTCCATGGAGCCATGTCCTTCGACAGCATTGGGAAGAGATCAGTCAGGTCAGGCTGATTGCGTCTTCATTGTTAGTTGGAATGATCACTTCTTTGTA CTTAAG  
GTTGAGCGAGATGCCTATTACATCATAGACACACTTGGAGAGAGGCTCTATGAGGGTTGCGAGCAGGCTTACATATTGAAGTTTGATAAGAGCACAACCATTACATAAATTACCAAGCAAA  
AAGGAAATCAGTGCAAATGGGAAGGAGGGGAGTTCTTGTGGAGAAGAAAGTGAATGTGACAGACCTGAGGAGGAGCAGCAGCTTGTGTTGTAATGAAAAGAATCATGTAAGGAATACA  
TAAAGAGCTTCCTGGCTGCAATTCCTATCAGGGAGCTCCAGGCTGATGCGAAGAAGGGATTAATGGCCTCTACTCCACTTCACCAACGCCTTCAGATTGAGTTCCACTACACTGAGCCAT  
CAAAGGATTTATCGAACTTCGTTGCTTTTTCCACCATTACAGTCGACAGGATCAAATTCAGTATCTCTTGGCCTGCATATCCATCACCATCTACAGAACAACCCCTCACTGTATAGAACCCA  
ACTGATGTGATTATTAGCTGTTGAAGTCTCTTTTTAGCTTTTTCTTTGCATAGATGAAGTCCTAACTGCTACTGACTAAGGTGAGCCATGCGGCAACCTTCTTAATAGGGGGACTGTATGGGT  
AAAAGCTAAAGAGAGCGGCCATATCTTAGTTTCCAACCTACCTGATGCTAACTGTAACACTTTTTTTTTCTTACAAAGCTGCAACTCTCTCTTTTCTCTTTGATTTTGTAGTCAAAGCTGT  
CTTTAGTTTACTTCATCAGTTCTCGGCTGGAAGAATAACTACTGATCTAATCACTGTCTAATGTATCTTTTGGACTTTCTCAAAGTTATAAAAACAACCATTTCTTTTGCTACCAAAAAAAA  
TGGTTGTTTTATAACTTTGAG

>comp172550\_c0\_seq21

TGAAATCAGGTCCCAATTCATGCAAACCTCGGATAGCTGCTCTGTTTTCTTTGTCAAGCCGTCATCTCGATCACAGCTAGCCTCGATCAAACCCTCGTCTCGTCGCTAAATCAAACTGAA  
ACGAGTTCGTTCCCTCAATCCCGTTTTCCCTCCGCTTCGTCTTTACACGTTTCGTGAGCTTCCGTCCTCTTCTTCTTTGTTCTTCGCAAACAAAATCTGCACTCGAGCTCTAGCTACCTCGC  
AAACTCTTTTTCTTCCACGCGAATCCCTTCCGCCTCTTTACACAAGCAAGCAGCCGCAATCCCTCTCCCGTCTGTCCTGACTGGTCTTCTCACGACCCTCACTCCGTTCCCAAGCTTAA  
GCTCCCGTCTGTCAAACCCGCTGCCCTAATCGTGCCAACCACGAATCAAGCTGCAACCGACCTCTTCTTTCTTGTCTACCATCACTCATTCCATCTGCCTCCTAGCTACTGAAACC  
AGACCCGACGCTCCAGGCCGAACAGTCCCCAGCCGCGTGCCTTCATGTGCCGAAACCGACCACCTGCTTTCACGTGGATCTCCTCCCTCCGCTCCAACAGATACTCGCGTTTTTCGG  
AGGAGCCCTCACGCGAATATTCAGAACTTCAAACGCTTGCTTCTCCTGATACTTGAAGAGGTAGTGATTAATCAATTTCAAATCAAGACTCTAGAAATATAATCTTAGAAATATATTTCTA

TATGATGGTACAACGTAGTAGTGCTTCTTAATTGATATCTTCGTACAACCTGACTAGTACCCAGCAATATTTAACCATGAAGACATCCATATAGCCTCCAAATAAGCACCAGTAAAAAAAAA  
AACACTAGTAAACAACCTTCTTTGCATCACCTTGGAGATACGGGAGCCATATAAATTATTTACCTCATGGGTACAACCATGCCAATAGGCATAGATGCCCTCTTGTAATACCATGTAGTTGT  
ATTCTCTGGGACATGGTGTGAATTGAAGGGGGTTGGAAGCATCACAACCACACATTATATACATCAAGTTTCTCAATAAGCACTTTCAACAGATGTCATGATCAGAGAGGATGCGGTTGCT  
TGTTGGCTTTCCATTTTGCAGGCAGAAAATCGGAGGGACGGTTGGTGTATACAGTTCCCAAAAGCGTGCCAGCAGAATGGATCATAATGATAATGCTCTTGCATGGGTTGGAGCTCT  
ATTTCAAGTCAAGCTGATCTCTGAGCAAGGAGTGTTATCACTGCACGCTAGGTGCACAGGCTTGACAGTATATGTTCCCTTGATACTCTCATATGCGATGCTTGATAACGCTACTGCGTTTGT  
CTGATTCTTGCAGGAACTTCGGTCACAGTAGAACTGATCAATCACTATGGGAGTTTGCACCTCTGAACTTTGATATTTGAGAACCTTATGTTTTGGACTGAACCTGAACCACCCTGCCAG  
GTCTTGATTCTGACACCTGTCATGGTTCCATACATGTTGACATCCTGCACTGTAATATTGGAGACGCAGGCTTTGGTGTGTCTCTTCCAAGCCCTCCGATGCTGATCCCATGGCCAGGTCC  
ACAGTTTACATTATGATTTTAAACACCATTCATCCTGTCTGAATTGATATGCAATCATCACCTGCAGCAGGAAAATTTTATGAATATTTCTTAAACCACAAATACGACGTCATGATACGCAC  
CAGGAACATACATCAGGAGATCTTATTAATTACAAGAATACATGTTATGCTTATTTATTGGAGTGGTGGGAAGGTTGGTAGATGCACAGTAAAGCAAAAATGATAACCACCGAGCATAATG  
CATTGAAAGTTAGACATCCCATGACTGTCCAGGAAGGCTATGGGATTACCCGACGACAAATTGCAGTGGTGGATTGCAACTTCTTTGGAGTTCTGAAGATGGATTCCGTCCTGTTGAG  
GCTGTGCGCCAGGGGATGCGACCGACATATTGAAGACATGGACAGCTTCAAAATTGTCAAACCTTGAGGTGACACTGAGGACTGTTTTGGATGGTTATGCCCGTCACTGTTACATTGTAGCT  
ACCATAAAACCTTAATGCCTGAAGAAGAATATATCTAAGTCATGCTCTTGATTAAGGTTTAGAAAAAATAAAGAGTTTGGTTTGTATGGCTTACAGTTGGTTTTATGCTTGGCATCTT  
CATGTCAAGGTCCCTCATTTATCTGCAACAGGCATCGTTAAAAATTTGTAAATGGAATTCAGAGGAGCTATCTAGCACAAACCAAAAGGCGATTGTAGGGTGCTTCAGGCTTACAGGTTCA  
TTGTTGGGTTCTGATTGGCTCCACCAGATACTTCCCCTGCCTTCAATGGTGCCATGACCTTGAATCGTGATTCCCTTTCAGCTTTGTAAACTCTATCCACCAAAGCAGTCTGAGCTCCAGAT  
TTTTGAATTTGTAGGCGCAACAATCGTCCCATCCAGCTGCAACAAATAAAAGACCCAATCATCAGGTATAATTGTTTATTTATTTATTCATTTTTATGCCAGGTGGGTAATAACTACTTTTAC  
ATCGGGAAAGATTATGTTTTTCTTATAACCTCATGTAAGGCATCTTTGCCAGCTACTATTCCTTACTCACATTTCTATTGTCTCACATGCTGACAGCAACTGTAGCCACTCATTTTGAATCATT  
CTACATCAGAAATCAGTTAGCCGTTGGCAGTCACATGTTAACGGGTGGGCTTTCCCTAATAAAAAAACTCCAAATAAACTGCTATTGTTTTCCCTTTTCCCTTGACAGATAGAATCTTCAA  
CAGCTTTGATTCTAACCAAGAATTTTGAACCTTAATCATGTCTTTTATTACGTTGCTGCTTTTGAATCCTTTTCCAATCCACCATACATCTTAGTTTGCAATTTTTTTTTCTTTGGATTTTTG  
CTCGTGTATTACATGAAGCAATGAGATGGTTGGAACATGGTCCGGGTTATTAATGCGCACATCTTTTTGTACGTCTCTTTCATTGTATGCCATCTTTACCTTTTTCTTTTTCATGGCTATTT  
CTTGTCATTTTTGAGTTTCTTCAAATGTGCATTCATAAACCGCTCTACGTCTGGAACATCTGCGAATTCCTACTTCTTATTACAAAACTTTTCAACGTCCCCCTCATGGCATCCAAGTTAAA  
AGAGATAAATTGAACAAGTATG

>comp172550\_c0\_seq36

TGAAATCAGGTCCCAATCCATGCAAACCTCGGATAGCTGCTCTGTTTCTTTGTCAAGCCGTCATCTCGATCACAGCTAGCCTCGATCAAACCCTCGTCTCGTCGCTAAATCAAACTGAA  
ACGAGTTCGTTCCCTTCAATCCCGTTTTCCCTCCGCTTCGTCTTTCACACGTTTCGTGAGCTTCCGTCCTCTTCTTCCCTGTTCTTCGCAAACAAAATCTGCACTCGAGCTCTAGCTACCTCGC  
AAACTCTTTTTCTTCCACGCGAATCCCTTCCGCCTCTTTACACAAGCAAGCAGCCGCAATCCCTCTCCCGTCTGTCTGACTGGTCTTCTCACGACCCTCACTCCGTTCCCAAGCTTAA  
GCTCCCGTCTGTCAAAACCCGCTGCCCTAATCGTGCCAACCACACGAATCAAGCTGCAACCGACCTCTTCTTTCTTGCTTACCATCACTCATTCCATCTGCCTCCTAGCTACTGAAACC  
AGACCCGACGCTCCAGGCCGAACAGTCCCCAGCCGCGTGCCTTCATGTGCCGAAACCGACCACCTGCTTTCAGTGGATCTCCTCCCTCCGCTCCAACCAGATACTCGCGTTTTCGG  
AGGAGCCCTCACGCGAATATTCAGAACTTCAAACGCTTGCTTTCTCCTGATACTTGAAGAGGTAGTGATTAATCAATTTCAAATCAAGACTCTAGAAATATAATCTTAGAAATATATTTCTA  
TATGATGGTACAACGTAGTAGTGCTTCTTAATTGATATCTTCGTACAACCTGACTAGTACCCAGCAATATTTAACCATGAAGACATCCATATAGCCTCCAAATAAGCACCAGTAAAAAAAAA  
AACACTAGTAAACAACCTTCTTTGCATCACCTTGGAGATACGGGAGCCATATAAATTATTTACCTCATGGGTACAACCATGCCAATAGGCATAGATGCCCTCTTGTAATACCATGTAGTTGT  
ATTCTCTGGGACATGGTGTGAATTGAAGGGGGTTGGAAGCATCACAACCACACATTATATACATCAAGTTTCTCAATAAGCACTTTCAACAGATGTCATGATCAGAGAGGATGCGGTTGCT

TGTTGGCTTTCCATTTTGCAGGCAGAAAATCGGAGGGACGGTTGGTGTATACAGTTCGCCAAAAGCGTGCCAGCAGAATGGATCATAACATATGATAATGCTCTTGCATGGGTTGGAGCTCT  
ATTTCAAGTCAAGCTGATCTCTGAGCAAGGAGTGTATCACTGCACGCTAGGAACTTCGGTCCAGTAGAACTGATCAATCACTATGGGAGTTTGCACCTCTGAAACTTTGATATTTGAGAA  
CCTTATGTTTTGGACTGAACCTGAACCACCTGCCAGGTCTTGATTCTGACACCTGTCATGGTTCCATACATGTTGACATCCTGCACTGTAATATTGGAGACGCAGGCTTTGGTGTGTCTC  
TTCCAAGCCCTCCGATGCTGATCCCATGGCCAGGTCCACAGTTTACATTATGTATTTAAACACCATTGCATCCTGTCTGAATTGATATGCAATCATCACCGCAGGACAAATTGCAGTGGTGG  
ATTGCAACTTCTTTGGAGTTCTGAAGATGGATTCCGTCCGTGTTGAGGCTGTGCCAGGGGATGCGACCGACATATTGAAGACATGGACAGCTTACAATTGTCAAACCTTGAGGTGACAC  
TGAGGACTGTTTTGGATGGTTATGCCCCTCACTGTTACATTGTAGCTACCATAAAACCTTAATGCCTGAAGAAGAATATATCTAAGTCATGCTCTTGATTAAAGGTTTAGAAAAAATAAA  
GAGTTTGGTTTGTATGGCTTACAGTTGGTTTTATGCTTGGCATCTTCATGTCAAGGTCTCATTATCTGCAACAGGCATCGTTAAAAATTTGTAAATGGAATTCAGAGGAGCTATCTAGC  
ACAAACCAAAGGGGATTGTAGGGTGCTTACAGGCTTACAGGTTTCAATTGTTGGGTTCTGATTGGCTCCACCAGATACTTCCCCTGCCTTCAATGGTGCATGACCTTGAATCGTGATTCCCTT  
TCAGCTTTGTAAACTCTATCCACCAAAGCAGTCCCTGAGCTCCAGATTTTTGAATTTGTAGGCGCAACAATCGTCCCATCCAGCTGCAACAAATAAAAGACCCAATCATCAGGTATAATTGT  
TTATTTATTATTATTTTTATTGCCAGGTGGGTAATAACTACTTTTTACATCGGGAAAGATTATGTTTTTCTTATAACCTCATGTAAGGCATCTTTGCCAGCTACTATTCTTACTCACATTCTAT  
TGTCTCATATGCTGACAGCAACTGTAGCCACTCATTTTTGAAATCATTCTACATCAGAAATCAGTTAGCCGTTGGCAGTCACATGTTTAAACGGGTGGGCTTTCCTAATAAAAAAACTCCAAA  
TAAACTGCTATTGTTTTCCTTTTCCCTTGACAGATAGAATCTTCAAACAGCTTTGATTCTAACCAAGAATTTTGAACCTTAATCATGTCTTTTATTACGTTGCTGCTTTTGAATCCTTTTCC  
AATCCACCATAACATCTTAGTTTGCAATTTTTTTTTCTTTGGATTTTTGCTCGTGTATTACATGAAGCAATGAGATGGTTGGAACATGGTCCGGGTTATTAATGCGCACATCTTTTTGTAC  
GTCTCTTTTCAATGTATGCCATCTTTACCTTTTTCTTTTTCATGGCTATTTCTTGTCAATTTTGTAGTTTCTTCAAATGTGCATTCATAAACCCTCTACGCTCTGGAACATCTGCGAATTCCTACTT  
CTTATTACAAAACCTTTTCAACGTCCCCCTCATGGCATCCAAGTTAAAAGAGATAAATTGAACAAGTATG

>comp172550\_c0\_seq47

TGAAATCAGGTCCCAATCCATGCAAACCTCGGATAGCTGCTCTGTTTCTTTGTCAAGCCGTCATCTCGATCACAGCTAGCCTCGATCAAACCCTCGTCTCGTCTGCTAAATCAAACCTGAA  
ACGAGTTCGTTCCCTTCAATCCCGTTTTCCCTCCGCTTCGTCTTTCACACGTTTCGTGAGCTTCCGTCCTCTTCTTCTTGTCTTTCGCAAACAAAATCTGCACTCGAGCTCTAGCTACCTCGC  
AAACTCTTTTTCTTCCACGCGAATCCCTTCCGCTCTTTACACAAGCAAGCAGCCGCAATCCCTCTCCCGTCTGTCTGACTGGTCTTCTCACGACCCTCACTCCGTTCCCAAGCTTAA  
GCTCCCGTCTGTCAAACCCGCTGCCCTAATCGTGCCAACCACACGAATCAAGCTGCAACCGACCTCTTCTTTCTTGTCTTACCATCACTCATTCCATCTGCCTCCTAGCTACTGAAACC  
AGACCCGACGCTCCAGGCCGAACCAGTCCCCAGCCGCGTGCCTTCATGTGCCGAAACCGACCACCTGCTTTCACGTGGATCTCCTCCCTTCCGCTCCAACCAGATACTCGCGTTTTTCGG  
AGGAGCCCTCACGCGAATATTCAGAACTTTCAAACGCTTGCTTTCTCCTGATACTTGAAGAGGTAGTGATTAATCAATTTCAAATCAAGACTCTAGAAATATAATCTTAGAAATATATTTCTA  
TATGATGGTACAACGTAGTAGTGCTTCTTAATTGATATCTTCGTACAACCTGACTAGTACCCAGCAATATTTAACCATGAAGACATCCATATAGCCTCCAAATAAGCACCAGTAAAAAATAAA  
AACACTAGTAAACAACCTTCTTTGCATCACCTTGGAGATACGGGAGCCATATAAATTATTTACCTCATGGGTACAACCATGCCAATAGGCATAGATGCCCTCTTGTAATACCATGTAGTTGT  
ATTCTCTGGGACATGGTGTGAATTGAAGGGGGTTGGAAGCATCACAAACCACACATTATATACATCAAGTTTCTCAATAAGCACTTTCAACAGATGTCATGATCAGAGAGGATGCGGTTGCT  
TGTTGGCTTTCCATTTTGCAGGCAGAAAATCGGAGGGACGGTTGGTGTATACAGTTCGCCAAAAGCGTGCCAGCAGAATGGATCATAACATATGATAATGCTCTTGCATGGGTTGGAGCTCT  
ATTTCAAGTCAAGCTGATCTCTGAGCAAGGAGTGTATCACTGCACGCTAGGAACTTCGGTCCAGTAGAACTGATCAATCACTATGGGAGTTTGCACCTCTGAAACTTTGATATTTGAGAA  
CCTTATGTTTTGGACTGAACCTGAACCACCTGCCAGGTCTTGATTCTGACACCTGTCATGGTTCCATACATGTTGACATCCTGCACTGTAATATTGGAGACGCAGGCTTTGGTGTGTCTC  
TTCCAAGCCCTCCGATGCTGATCCCATGGCCAGGTCCACAGTTTACATTATGTATTTAAACACCATTGCATCCTGTCTGAATTGATATGCAATCATCACCTGCAGCAGGAAAATTTATGAAT  
ATTTCTTAAACCACAAATACGACGTATGATACGCACCAGGAACATACATCAGGAGATCTTATTAATTACAAGAATACATGTTATGCTTATTTATTGGAGTGGTGGGAAGGTTGGTAGATGC  
ACAGTAAAGCAAAAATGATAACCACCGAGCATAATGCATTGAAAGTTTAGACATCCCATGACTGTCCAGGAAGGCTATGGGATTACCGCAGGACAAATTGCAGTGGTGGATTGCAACTTC

TTTGGAGTTCTGAAGATGGATTCCGTCCTGTTGAGGCTGTCGCCAGGGGATGCGACCGACATATTGAAGACATGGACAGCTTCACAATTGTCAAACCTTGAGGTGACACTGAGGACTGT  
TTTGGATGGTTATGCCCGTCACTGTTACATTGTAGCTACCATAAAACCTTAATGCCTGAAGAAGAATATATCTAAGTCATGCTCTTGATTAAAGGTTTAGAAAAAATAAAGAGTTTGGTT  
TGTTATGGCTTACAGTTGGTTTTATGCTTGGCATCTTCATGTCAAGGTCTCATTATCTGCAACAGGCATCGTTAAAAATTTGTAAATGGAATTCAGAGGAGCTATCTAGCACAAACCAA  
AAGGCGATTGTAGGGTGCTTCAGGCTTACAGGTTCAATGTTGGGTTCTGATTGGCTCCACCAGATACTTCCCCTGCCTTCAATGGTGCCATGACCTTGAATCGTGATTCTTTCAGCTTTGT  
AAACTCTATCCACCAAAGCAGTCCAGCTCCAGATTTTTGAATTTGTAGGCGCAACAATCGTCCATCCAGCTGCAACAAATAAAAGACCCAATCATCAGGTATAATTGTTTATTTATTTA  
TTCATTTTTATTGCCAGGTGGGTAATAACTACTTTTACATCGGGAAAGATTATGTTTTTCTTATAACCTCATGTAAGGCATCTTTGCCAGCTACTATTCCTTACTCACATTCTATTGTCTCACAT  
GCTGACAGCAACTGTAGCCACTCATTGAAATCATTCTACATCAGAAATCAGTTAGCCGTTGGCAGTCACATGTTTAAACGGGTGGGCTTTCCTAATAAAAAAACTCCAAATAAACTGCTA  
TTGTTTTCTTTTTCCCTTGACAGATAGAATCTTCAAACAGCTTTGATTCTAACCAAGAATTTTGAAACTTAATCATGTCTTTTATTACGTTGCTGCTTTTGAAATCCTTTTCCAATCCACCAT  
ACATCTTAGTTTGCAATTTTTTTTTCTTTGGATTTTGTCTGTTTATTACATGAAGCAATGAGATGGTTGGAACATGGTCCGGGTTATTAATGCGCACATCTTTTTGTACGTCTCTTTCA  
TTGATGCCATCTTACCTTTCTTTTTCATGGCTATTTCTGTCAATTTGAGTTTCTCAAATGTGCATTCATAAACCGCTCTACGTCTGGAACATCTGCGAATTCCTACTTCTTATTACAA  
AACTTTTCAACGTCCCCCTCATGGCATCCAAGTTAAAAGAGATAAAATTGAACAAGTATG

>comp172550\_c0\_seq54

TGAAATCAGGTCCCAATTCATGCAAACCTCGGATAGCTGCTCTGTTTCTTTGTCAAGCCGTCATCTCGATCACAGCTAGCCTCGATCAAACCCCTCGTCTCGTCGCTAAATCAAACCTGAA  
ACGAGTTCGTTCCCTCAATCCCGTTTTCCCTCCGCTTCGTCTTTCACACGTTTCGTGAGCTTCCGTCCTCTTCTTCTTGTCTTCGCAAACAAAATCTGCACTCGAGCTCTAGCTACCTCGC  
AAACTCTTTTTCTTCCACGCGAATCCCTTCCGCTCTTTACACAAGCAAGCAGCCGCAATCCCTCTCCCGTCTGTCCTGACTGGTCTTCCCTCACGACCCTCACTCCGTTCCCAAGCTTAA  
GCTCCCGTCTGTCAAACCCGCTGCCCTAATCGTGCCAACCACGAATCAAGCTGCAACCGACCTCTTCTTCTTGTCTTACCATCACTCATTCCATCTGCCTCCTAGCTACTGAAACC  
AGACCCGACGCTCCAGGCCGAACCAGTCCCCAGCCGCTGCTTTCATGTGCCGAAACCGACCACCTGCTTTCAGTGGATCTCCTCCCTCCGCTCCAACCAGATACTCGCGTTTTCCG  
AGGAGCCCTCACGCGAATATCAGAACTTCAAACGCTTGCTTCTCCTGATACTTGAAGAGGTAGTGATTAATCAATTTCAAATCAAGACTCTAGAAATATAATCTTAGAAATATATTTCTA  
TATGATGGTACAACGTAGTAGTGCTTCTTAATTGATATCTTCGTACAACCTGACTAGTACCCAGCAATATTTAACCATGAAGACATCCATATAGCCTCCAAATAAGCACCAGTAAAAAAAAA  
AACACTAGTAAACAACCTTCTTTGCATCACCTTGGAGATACGGGAGCCATATAAATTATTACCTCATGGGTACAACCATGCCAATAGGCATAGATGCCCTCTTGTAATACCATGTAGTTGT  
ATTCTCTGGGACATGGTGTGAATTGAAGGGGGTTGGAAGCATCACAACCACACATTATATACATCAAGTTTTCTCAATAAGCACTTTCAACAGATGTCATGATCAGAGAGGATGCGGTTGCT  
TGTTGGCTTTCCATTTTGCAGGCAGAAAATCGGAGGGACGGTTGGTGTATACAGTTCCCCAAAAGCGTGCCAGCAGAATGGATCATAATGATAATGCTCTTGCATGGGTTGGAGCTCT  
ATTTACAGTCAAGCTGATCTCTGAGCAAGGAGTGTATCACTGCACGCTAGGAACTTCGGTCACAGTAGAACTGATCAATCACTATGGGAGTTTGACCTCTGAAACTTTGATATTTGAGAA  
CCTTATGTTTTGGACTGAACCTGAACCACCTGCCAGGTCTTGATTCTGACACCTGTCATGGTTCCATACATGTTGACATCTGCACTGTAATATTGGAGACGCAGGCTTTGGTGTGTCTC  
TTCCAAGCCCTCCGATGCTGATCCCATGGCCAGGTTGGTAGATGCACAGTAAAGCAAAAATGATAACCACCGAGCATAATGCATTGAAAGTTTAGACATCCCATGACTGTCCAGGAAGGC  
TATGGGATTACCGCAGGACAAATTGCAGTGGTGGATTGCAACTCTTTGGAGTTCTGAAGATGGATTCCGTCCTGTTGAGGCTGTGCCAGGGGATGCGACCGACATATTGAAGACATG  
GACAGCTTACAATTGTCAAACCTTGAGGTGACACTGAGGACTGTTTTGGATGGTTATGCCCGTCACTGTTACATTGTAGCTACCATAAAACCTTAATGCCTGAAGAAGAATATATCTAAGT  
CATGCTCTTGATTAAGGTTTAGAAAAAATAAAGAGTTTGGTTTGTATGGCTTACAGTTGGTTTTATGCTTGGCATCTTCATGTCAAGGTCCTCATTATCTGCAACAGGCATCGTTAA  
AAATTTTGTAAATGGAATTCAGAGGAGCTATCTAGCACAAACCAAAGGCGATTGTAGGGTGCTTACAGGTTACAGGTTCAATGTTGGGTTCTGATTGGCTCCACCAGATACTTCCCCTGC  
CTTCAATGGTGCCATGACCTTGAATCGTGATTCTTTCAGCTTTGTAAACTCTATCCACCAAAGCAGTCCCTGAGCTCCAGATTTTTGAATTTGTAGGCGCAACAATCGTCCCATCCAG

>comp172550\_c0\_seq59

TGAAATCAGGTCCCAATTCATGCAAACCTCGGATAGCTGCTCTGTTTCTTTGTCAAGCCGTCATCTCGATCACAGCTAGCCTCGATCAAACCCTCGTCTCGTCGCTAAATCAAACTGAA  
ACGAGTTCGTTCCCTTCAATCCCGTTTTCCCTCCGCTTCGTCTTTCACACGTTTCGTGAGCTTCCGTCCTCTTCTTCTTGTCTTCGCAAACAAAATCTGCACTCGAGCTCTAGCTACCTCGC  
AAACTCTTTTTCTTCCACGCGAATCCCTTCCGCTCTTTACACAAGCAAGCAGCCGCAATCCCTCTCCCGTCTGTCTGACTGGTCTTCTCACGACCCTCACTCCGTTCCCAAGCTTAA  
GCTCCCGTCTGTCAAACCCGCCTGCCCTAATCGTGCCAACCACACGAATCAAGCTGCAACCGACCTCTTCTTCTTGTCTTACCATCACTCATTCCATCTGCCTCCTAGCTACTGAAACC  
AGACCCGACGCTCCAGGCCGAACCAGTCCCCAGCCGCGTGCCTTCATGTGCCGAAACCGACCACCTGCTTTCACGTGGATCTCCTCCCTTCCGCTCCAACCAGATACTCGCGTTTTTCGG  
AGGAGCCCTCACGCGAATATTCAGAACTTCAAACGCTTGCTTCTCCTGATACTTGAAGAGGTAGTGATTAATCAATTTCAAATCAAGACTCTAGAAATATAATCTTAGAAATATATTTCTA  
TATGATGGTACAACGTAGTAGTGCTTCTTAATTGATATCTTCGTACAACCTGACTAGTACCCAGCAATATTTAACCATGAAGACATCCATATAGCCTCCAATAAAGCACCAGTAAAAA  
AACACTAGTAAACAACCTTCTTTGCATCACCTTGGAGATACGGGAGCCATATAAATTATTTACCTCATGGGTACAACCATGCCAATAGGCATAGATGCCCTCTTGTAATACCATGTAGTTGT  
ATTCTCTGGGACATGGTGTGAATTGAAGGGGGTTGGAAGCATCACAAACCACATTATATACATCAAGTTTCTCAATAAGCACTTTCAACAGATGTCATGATCAGAGAGGATGCGGTTGCT  
TGTTGGCTTTCCATTTTGCAGGCAGAAAATCGGAGGGACGGTTGGTGTATACAGTTCGCCAAAAGCGTGCCAGCAGAATGGATCATACATATGATAATGCTCTTGCATGGGTTGGAGCTCT  
ATTTCACTCAAGCTGATCTCTGAGCAAGGAGTGTTACTGCACGCTAGGAACTTCGGTCACAGTAGAACTGATCAATCACTATGGGAGTTTGCACCTCTGAAACTTTGATATTTGAGAA  
CCTTATGTTTTGGACTGAACCTGAACCACCTGCATTGAATATTTTACAAGTGGTATTAGTTACCAGGTTATGTCAGTGGTCAGTGAGTAACACGGCATGTTAACATAACCTGCCAGGTCT  
TGATTCTGACACCTGTCATGGTTCCATACATGTTGACATCCTGCACTGTAATATTGGAGACGCAGGCTTTGGTGTGTCTCTTCCAAGCCCTCCGATGCTGATCCCATGGCCAGGTCCACAG  
TTTACATTATGATTTTAAACACCATTGCATCCTGTCTGAATTGATATGCAATCATCACCTGCAGCAGGAAAATTTTATGAATATTTCTTAAACCACAAATACGACGTCATGATACGCACCAGG  
AACATACATCAGGAGATCTTATTAATTACAAGAATACATGTTATGCTTATTTATTGGAGTGGTGGGAAGGTTGGTAGATGCACAGTAAAGCAAAAATGATAACCACCGAGCATAATGCATTG  
AAAGTTTAGACATCCCATGACTGTCCAGGAAGGCTATGGGATTACCGCAGGACAAATTGCAGTGGTGGATTGCAACTTCTTTGGAGTTCTGAAGATGGATTCCGTCGGTGTGAGGCTGT  
CGCCAGGGGATGCGACCGACATATTGAAGACATGGACAGCTTACAATTGTCAAACCTTGAAGGTGACACTGAGGACTGTTTTGGATGGTTATGCCCGTCACTGTTACATTGTAGCTACCATA  
AAACCTTAATGCCTGAAGAAGAATATATCTAAGTCATGCTCTTGATTAAAGTTTGAAAAAAATAAAGAGTTTGGTTTGTATGGCTTACAGTTGGTTTTATGCTTGGCATCTTCATGTC  
AAGGTCCTCATTTATCTGCAACAGGCATCGTTAAAAATTTTGTAAATGGAATTCAGAGGAGCTATCTAGCACAAACCAAAAAGGCGATTGTAGGGTGCTTCAGGCTTACAGGTTTATTGTTG  
GGTCTGATTGGCTCCACCAGATACTTCCCTGCCTTCAATGGTGCCATGACCTTGAATCGTGATTCTTTCAGCTTTGTAAACTCTATCCACCAAAGCAGTCTTGAGCTCCAGATTTTGA  
ATTTGTAGGCGCAACAATCGTCCCATCCAGCTGCAACAAATAAAAAGACCCAATCATCAGTAGCATACTGGAATATGATGTTAGGCTGGCAGTAGGGACCCGAGAAGGAGATCGGACCGA  
CGAGGAATGCGTAATCCGATGGAACCTTACCGTTGATGCCTCGACCTGGCAGGCTGCCATCCAAGCATCTTCAAATGCCTGCATTTTAATTTCCAGTGAACAACATGGTAGCTCTCTCT  
ACTGCTATTATACTTAGCTTCAGAAATCCCTCTATGAAAAGATGCTGATCCCCAAAAAAGAGATCTGTAAGAACTTATTTATACTAAGGGGGAATTAATGCTTGAAAGCTCTGCCCTGATT  
TTATTGCAAGAAGAGTTGCTAATACTTCATGAAATATTTTGCCAGTTTGACCAATAAGTTTAGTATTATTCGATGGTACTATAACTAATATTGAGAACAAAATATGGCCAAATGTGAAAC  
AAATAGGGTTAAGACAGGGGTTGGACATGACAATTTTGTATGGTAATTATGCAATTAAGTATGATCTGACTTTTCAAT

>comp172550\_c0\_seq67

TGAAATCAGGTCCCAATTCATGCAAACCTCGGATAGCTGCTCTGTTTCTTTGTCAAGCCGTCATCTCGATCACAGCTAGCCTCGATCAAACCCTCGTCTCGTCGCTAAATCAAACTGAA  
ACGAGTTCGTTCCCTTCAATCCCGTTTTCCCTCCGCTTCGTCTTTCACACGTTTCGTGAGCTTCCGTCCTCTTCTTCTTGTCTTCGCAAACAAAATCTGCACTCGAGCTCTAGCTACCTCGC  
AAACTCTTTTTCTTCCACGCGAATCCCTTCCGCTCTTTACACAAGCAAGCAGCCGCAATCCCTCTCCCGTCTGTCTGACTGGTCTTCTCACGACCCTCACTCCGTTCCCAAGCTTAA  
GCTCCCGTCTGTCAAACCCGCCTGCCCTAATCGTGCCAACCACACGAATCAAGCTGCAACCGACCTCTTCTTCTTGTCTTACCATCACTCATTCCATCTGCCTCCTAGCTACTGAAACC  
AGACCCGACGCTCCAGGCCGAACCAGTCCCCAGCCGCGTGCCTTCATGTGCCGAAACCGACCACCTGCTTTCACGTGGATCTCCTCCCTTCCGCTCCAACCAGATACTCGCGTTTTTCGG

AGGAGCCCTCACGCGAATATTCAGAACTTCAAACGCTTGCTTCTCCTGATACTTGAAGAGGTAGTGATTAATCAATTTCAAATCAAGACTCTAGAAATATAATCTTAGAAATATATTTCTA  
TATGATGGTACAACGTAGTAGTGCTTCTTAATTGATATCTTCGTACAACCTGACTAGTACCCAGCAATATTTAACCATGAAGACATCCATATAGCCTCCAAATAAGCACCAGTAAAAA  
AACACTAGTAAACAACCTTCTTTGCATCACCTTGGAGATACGGGAGCCATATAAATTATTTACCTCATGGGTACAACCATGCCAATAGGCATAGATGCCCTCTTGTAATACCATGTAGTTGT  
ATTCTCTGGGACATGGTGTGAATTGAAGGGGGTTGGAAGCATCACAACCACACATTATATACATCAAGTTTCTCAATAAGCACTTTCAACAGATGTCATGATCAGAGAGGATGCGGTTGCT  
TGTTGGCTTTCCATTTTGCAGGCAGAAAATCGGAGGGACGGTTGGTGTATACAGTTCGCCAAAAGCGTGCCAGCAGAATGGATCATAACATGATAATGCTCTTGCATGGGTTGGAGCTCT  
ATTTCAAGTCAAGCTGATCTCTGAGCAAGGAGTGTATCACTGCACGCTAGGTGCACAGGCTTGACAGTATATGTTCCCTTGATACTCTCATATGCGATGCTTGATAACGCTACTGCGTTTGT  
CTGATTCTTGCAGGAACCTCGGTCACAGTAGAACTGATCAATCACTATGGGAGTTTGCACCTCTGAAACTTTGATATTTGAGAACCTTATGTTTGGACTGAACCTGAACCACCCTGCATT  
GAATATTTTTACAAGTGGTATTAGTTACCAGGTTATGTCAGTGGTCAGTGAGTAACACGGCATGTTAACATAACCTGCCAGGCTTGATTCTGACACCTGTCATGGTTCCATACATGTTGAC  
ATCCTGCACTGTAATATTGGAGACGCAGGCTTTGGTGTGTCTCTTCCAAGCCCTCCGATGCTGATCCCATGGCCAGGTCCACAGTTTACATTATGATTTTTAACACCATTGCATCCTGTCTG  
AATTGATATGCAATCATCACCCGAGGACAAAATTGCAGTGGTGGATTGCAACTTCTTTGGAGTTCTGAAGATGGATTCCGTCCGTGTTGAGGCTGTGCGCCAGGGGATGCGACCCGACATATTG  
AAGACATGGACAGCTTACAATTGTCAAACCTTGAGGTGACACTGAGGACTGTTTTGGATGGTTATGCCCGTCACTGTTACATTGTAGCTACCATAAAACCTTAATGCCTGAAGAAGAATAT  
ATCTAAGTCATGCTCTTGATTAAGGTTTAGAAAAAATAAAGAGTTTGGTTTGTATGGCTTACAGTTGGTTTTATGCTTGGCATCTTCATGTCAAGGTCCTCATTATCTGCAACAGGC  
ATCGTTAAAAATTTTGTAATGGAATTCAGAGGAGCTATCTAGCACAACCAAAAAGGCGATTGTAGGGTGCTCAGGCTTACAGGTTCAATTGTTGGGTTCTGATTGGCTCCACCAGATACT  
TCCCTGCTTCAATGGTGCCATGACCTTGAATCGTGATTCCCTTTCAGCTTTGTAACTCTATCCACCAAAAGCAGTCCCTGAGCTCCAGATTTTTGAATTTGTAGGCGCAACAATCGTCCCAT  
CCAGCTGCAACAAATAAAAGACCCAATCATCAGGTATAATTGTTTATTTATTTATTTTATTGCCAGGTGGGTAATAACTACTTTTACATCGGGAAAGATTATGTTTTTCTTATAACCTC  
ATGTAAGGCATCTTTGCCAGCTACTATTCCTTACTCACATTCTATTGTCTCACATGCTGACAGCAACTGTAGCCACTCATTTTGAATCATTCTACATCAGAAATCAGTTAGCCGTTGGCAGT  
CACATGTTTAAACGGGTGGGCTTTCCTAATAAAAAAACTCCAAATAAACTGCTATTGTTTTCTTTTTCCCTTGACAGATAGAATCTTCAAACAGCTTTGATTCTAACCAAGAATTTGAAAC  
TTAATCATGTCTTTTATTACGTTGCTGCTTTTGAATCCTTTTCCAATCCACCATAACATCTTAGTTGCAATTTTTTTTTCTTTGGATTTTTGCTCGTGTATTACATGAAGCAATGAGATG  
GTTGGAACATGGTCCGGGTTATTAATGCGCACATCTTTTTGTACGTCTCTTTCAATTGTATGCCATCTTTACCTTTTCTTTTTCATGGCTATTTCTTGTCAATTTTGAATTTCTTCAAATGTGCA  
TTCATAAACCCTCTACGTCTGGAACATCTGCGAATTCCTACTTCTTATTACAAAACCTTTTCAACGTCCCCCTCATGGCATCCAAGTTAAAAGAGATAAATTGAACAAGTATG

>comp172550\_c0\_seq86

TGAAATCAGGTCCCAATCCATGCAAACCTCGGATAGCTGCTCTGTTTCTTTGTCAAGCCGTCATCTCGATCACAGCTAGCCTCGATCAAACCCTCGTCTCGTCGCTAAATCAAACCTGAA  
ACGAGTTCGTTCCCTCAATCCCGTTTTCCCTCCGCTTCGTCTTTCACACGTTTCGTGAGCTTCCGTCCTCTTCTTCTTGTCTTCGCAAACAAAATCTGCACTCGAGCTCTAGCTACCTCGC  
AAACTCTTTTTCTTCCACGCGAATCCCTTCCGCTCTTTACACAAGCAAGCAGCCGCAATCCCTCTCCCGTCTGTCTGACTGGTCTTCTCACGACCCTCACTCCGTTCCCAAGCTTAA  
GCTCCCGTCTGTCAAACCCGCTGCCCTAATCGTGCCAACCACGAATCAAGCTGCAACCGACCTCTTCTTTCTTGTCTTACCATCACTCATTCCATCTGCCTCCTAGCTACTGAAACC  
AGACCCGACGCTCCAGGCCGAACCAAGTCCCCAGCCGCGTGCCTTCATGTGCCGAAACCGACCACCTGCTTTCACGTGGATCTCTCCCTTCCGCTCCAACCAGATACTCGCGTTTTCCG  
AGGAGCCCTCACGCGAATATTCAGAACTTCAAACGCTTGCTTCTCCTGATACTTGAAGAGGTAGTGATTAATCAATTTCAAATCAAGACTCTAGAAATATAATCTTAGAAATATATTTCTA  
TATGATGGTACAACGTAGTAGTGCTTCTTAATTGATATCTTCGTACAACCTGACTAGTACCCAGCAATATTTAACCATGAAGACATCCATATAGCCTCCAAATAAGCACCAGTAAAAA  
AACACTAGTAAACAACCTTCTTTGCATCACCTTGGAGATACGGGAGCCATATAAATTATTTACCTCATGGGTACAACCATGCCAATAGGCATAGATGCCCTCTTGTAATACCATGTAGTTGT  
ATTCTCTGGGACATGGTGTGAATTGAAGGGGGTTGGAAGCATCACAACCACACATTATATACATCAAGTTTCTCAATAAGCACTTTCAACAGATGTCATGATCAGAGAGGATGCGGTTGCT  
TGTTGGCTTTCCATTTTGCAGGCAGAAAATCGGAGGGACGGTTGGTGTATACAGTTCGCCAAAAGCGTGCCAGCAGAATGGATCATAACATGATAATGCTCTTGCATGGGTTGGAGCTCT



ACATGACAATCTTCCGAAAATATACATCACGGAACATTTCCACATCTGTGGCGAAACATTGATCTATTTTCATCATAAAAAAACCCAGAAGATTCATCTAGCTTAATCCTCTGATATTTATCTT  
CTGGGATGGTGAATAGGGATGGGAGAGATATTTACAGCCTTTGTGAGAGGGTTGAATATGCGAGGGCTGCAAATCCATTTTGTCAAGTGTACAAGCCACCCATCTTTAGAGCCAATGCAAC  
GACGGCCGAAGATGTTGCCCGTGAGGGAGGAGAAGCGATAATGGATGTTGACGCCATCTTCTTCTTCTTTGATGGTAAAGATCGTGAAAGGTGAGTGTGTGAGAGGCCTCTCCGACAT  
CACTAGGAAGAAGCAGCCACGGGGAGGGACGATAATGAATGCCTAGGAGTGCATTATTAGAAACAATAAATCCATGAGGTGCATACACCAGAAAAGCGGAGGAAGTCAACGATACG  
CAAATGTGATGAGATGCAATGGAGGAGATCTATCGGGAGATCGGACCAAGTCATATTGTGTTGTTTTTGTAGCTATGATGCTCTCTAGCCTTTATATAGAGAGAAAAGAGGAAGAGCATGG  
CCTAGTTTAGAGGGATAGAGGTTTTGAACTTTCTAAATCTGTTGTAGAAGAAAACAAATGACAATTTTTCTCAGATTTGACTGGACGTGAGCAAGAATAGGATTATAGGATGAAATTATTGT  
ATGATATCTTTTTTGGGAAATGATGATGTTCTTATGCTATAAAAAATCTTCTTATATAGTATTTACTATTTATAGCCAAAGAAAAAGAGTCCATCCAAATAATCGCTGCCATGTTTGTCTGA  
ATACAGAACAAAATTCATAACAATGTTTCTTCTTGCTTAAGATCATATAAGTTCTAAAATTCACGCCAGCACATCCAGCACAGTTATGAATTCGTGTGTAATAATTTATTTAAAAATTTAAAA  
ATATAAAATTTATTAATAAAAAATAATGCTTCTTATTTTATGATTCGATCCTAAATTTTTTATTTTTATATTATGAAGACATCATAAA

>comp172608\_c0\_seq1

GGTGTGATGACATACACCATAAGAGTCCAATCCATACTTCATTCTTAGTTAAAATAAACTTCACATGAACACAACCTTGTATCAACTAACTCATCCATAAGATCTTAGATTAACATTTGAA  
GAAATGCTGGAAACCAAGGTAAAGGAAGAAGACTAAGAGGGAGAAAAGGAAGACAAGTGAAGAAGAAACAGACTAAGAAAAAGAAGGAGGAGGAGAAGAAGAAAACAACCGAC  
GAAGAAGAGAGAAGGAAGAAATACTCACATAGATGATTCCGGTCAGTCCAAGTGTCCGGTCTTGAGCACGAATAGCGACGGGAGTAGAGGCTCAGATATAGGCCGATTGTGAGCAGGG  
GAGTCGGGGACGTTGGCTGCCGTCGGGTTTCAGACCTGGCGCGCGGACGAGCTTCGGGCGTGCGAAGCTAAGAGCGAGGGGGAAGCTCGGCAGCTACTAGGTCTCCGTGAACGAGGGA  
GACGCGAGAGCGGCGTCCGGTCAAGGCTCATGAACGGAGTGAGGCCGAGAGGGAGATCTGCTCGGCTCTTCTGGACTTGTGCGAAATCCAAAGAGAGAGGGAGCGGGGGCCGAGAGG  
GAGTTGGGCGAGTGGCTACCGTCCGGATCGGTCTCCCTAGCTCACGCGAGGGAGGGAGAGAGCGACCGGAGCTGGTTTCATCTAGGGCTTCTCCAGCCAGCCCCCGTGAGACTCA  
GAGAGCGAGAGAGAGCGAATCGGGTCTCACGCCACTGAATACTGCGCAACGGTCGACTTTTGATTTGAAAAAACTGAGCCGTTGAATTTGATTACCGGATTTAGGAATTGATTCAAATG  
AAAGCAAAAGTCAATTGGAATTTATTTGAATTAATTTGAGCTGATTTGAATCAGATTTGGGCTCA

>comp172676\_c0\_seq1

AAAAGCTACTTCTTAAAAGTAAAAAATATGATTATAAAGGAAGCCTAAAATAAAACCAAACACGGAAGCAAATCTAATGCACGTTAATAAGTAAATCAATTAACCTTACTGAGTTTAAAG  
AAAAAAGAGGAACAGTTGTCAACTTCAACTGCATGATGAGAAGGAAAGTAATGGAGAGAGGGAAAAAATGCTCCAGGTAAACAAAAAGATGCCTAGAAAACATGGCAGCTGTTCC  
GGAAATCCCTGTAAAACAGAAAAGAGATTATCTTCGACCTATCAAGGTTGCAGGAATGCAAGTAATCCATCTATTCATGCTGGAAAGAAGAAAAGTTCCATCGTTTAGGGTTTAGGAGG  
ATGCACTGCAGCTAGGTTTTCTTCCGGTATCCTGTACTATCTTGAATGGCTGTAGAGTTTTTAAACATCCTGTACTATTTATTGATTGAATGACCACACAGAAGGTGCATCTGGTCTCTCGA  
GAAAAGGCTTCCAACATTTGCACCTTCTAGAATTGAGGTTTACAGCTTCTGAGGACCGTATGAAGCCAGTTTCGCTTTTGGACCACTACTAGCTTGATGTGTTTCAAAGCATGCACAGC  
AGTAGATTTGTTTGGACTACTATAGGTAGCTTCACTCAGAGTAATAGCATCCATAAGATTAGAAGGTAGCAAACGATCATCCCATCAACAAGTAAAGGAGAACGAAAGGGTGAATTCTG  
CCGCCACATGCCACTTCCATTCAAACATATGACCAAGAGGACTATATGTCCCACAAGTCGGTTGGTGATTACTAGTATGAACACGCTGAGTAGTGTGATTCTTTGAGATTGGTGGCATTATAG  
GCTTGTGGGGCAAAGAATGCAAGACATCCTGAAGGTGAGAATTGTTATGTACAACGGGTGAAAACAAATTGGCAGGACAACCTTTACACCCAGCCCTTCTGAGCCATGGACTGCC  
CACATTTGCCATGTGCTTTGTTTCATGCATATTAGTCGATACATCTGACCTAGGAATACAAAATAGTTGGTCAGATTTGGTATGAATTTGTTTCAGGAACATGTAACATTGACAAGGGAGATTCA  
TTAGGGGAAGGCTTGTTCGCTGCTGCAGAAGCATAAACTCCTCAGAAGTGGGGATTGTTTACGCTTTGGTCTTTGTACTAAATTTAGCTTCCAAATCCAAATGGAAAATTATCAAGTGAAT  
CTGACACAGGCCCTAACAATGAGATCGGAGCTGGAACATAGCATGAGTTTTCAAATGACTCTGCATCTTCTGACACTGAACCCTGTAATGGTTCTTTAACCGGAGAAAATGTTGTTTCAG  
GCACGTTATGAGAAATTGGATTGCTACTAAATAGAGTACTTGTGGGAGAATAGGCCATGAATGGTGACGCTTGCCCAACTTGAACCTGGTTATGAGTTGTGCCGTAACCTGGGTAGAAAAT



TTGTTGTGATTTTTGATCGCCGGGACCTAATAATCTTTCAGGTTTGTCCACATGAGTAGTAGAATTTGAATCAGGATGTGGGAAAACCGCTGAAGAACGAGTAAACAATTGTTTCCATGAC  
GTTTTGAAACCAGTTTTTTGTTGAACATTTGTGGCTGCAGGTTGACTCAAGTTGGCATTATGAGCTTTTTCAAAGGCGCTAGACATAGATTTACCAGCAACATAAGCCACAGGGTGAGCAT  
CTCTTCTTTTTACTGTATTTTGAGCATGGTCTATGAACCCAGCGGAAGGCTTAACTGACTTGGCAACAGCAGCAGATTTTTGTGTGTTTCTTCCAAAGAAAGATGACCCACCAAAGCCTCT  
AGAAGAAGATAACAAAGAACCTTTCATGCCATCAAATATCTGGGCTTATCTCCCAGGCTTACTTCCATGAAAAGCATATGATTTATAATTCCCCCCCATACTCTTCTGCAAATCAAAT  
TTCATTCTACCCTTCTTCATAGTCTCTGCTTCTTTCACCTTCCCACTTGTCTCTTTTCAAGCTCTTCATCCACTGAATTGCTCCTACAAGATGCTCTGTCTTTGTCTTCTCTCGTCCC  
CTCCTCTATCAATTTCTTTCGACCATCTCCATCCCCATCAAGAATGGAGCCCTTTGAACCTTCTCAACAACCATTTTCTCATCACGGAGTTTCTTCTCTCTCTACCAGCCTTGCAACC  
TCTTCTTCTGCTTCTCTCTCTTCCATCATTTCTTCTTCAATCTAGCCTGTCTGCTTCTCCTCTGCCTTCTTCTAGCCTTCTCTCTCTGCTCTCTGGAAATTACCAGAAATCTCCC  
CTTTCTTGTGATGACCCTTTATGATCGGAATCAGAAGATATATCTTCTTTGAGGAACCAAACCTGAAAAACTTACCAAGAAGCCACCTCATACTCGAAGAAAAAAGGACAGCAGCTTGC  
AGGAAAACACCATCACCCAGAATAAGATATATCTGTTGAACACCGATGATCACTTCCAGCCCAGTACGTTGGAACGGTGCCGAATAAATTGCAATTTCCATCAGCATCACATAACCAACC  
ATGCTTCCCAACAAGATCAGTAATCAGTCCAGGACCTGCTGTTGAAACAGGAAGGTCAAGAACCGGTTTTTTGGAGATGTGGCCACAGTATGAGCACAAGAAACGGCCACCACAGGGG  
GTCTGGTTACGGTAAGGCGTGTGGCAATTCGGCAATGACGAGTGGCAGTTTTACGGAGTTTTCTGAAGCTCAAGAGCCTCAGCGCGGCGTCTCTCACGGAGGCGGGCAGCACGGCGAG  
CCCGCCAACTGGAAAGTTGGGGCATTAAAGATTTCCATACCAGAATAGAGTGGCGAGGAGTACTGCCACACAGGCAAGCCGTGGTGAGGTTATCTCAAACGCAGAGCCGGCGGTAGGAG  
CTGTGAGAGACCCAGAGAACGATAAACGGGATCACAGCCAAGGTAACATGGTGCAGACCCGCCGAGACCCTCTGTATCGCGCAGAGTATACACATTATCCGGAAACTCGATGAAT  
TGAAGCAATCAACGAAAGAAACCTATAGGTAGCGCAGCGTGAACACGTCTGTTAAAATATAAATATTCAGCGCCTTAACCTCTTTCCAAAATCGTAACTTCTCGGTTCTTCCAACGTAA  
AAAAAGGGGATCGCAATATCGCCAACACCAATCAAACAACAAAAGACCTATCCTTCGACTGCTTGGAGAAGGAACGGGTGCGATTAGGGTTTCTTCAGTCTACGAAGAATTTAATCCTGC  
GGCGCGAAAATCGTGGCCGGATGGAGAGGACGGACAGGAGCAGGCGAAGAGGTATTTGTGTCTTACGTATTCAACTTCGTCTTAGATATA

>comp172694\_c0\_seq4

GATAATCAAAGCTTCCAATCCACACACACGAAGATGAGTTGCATGAATTAATGAGATACTAAAAAGAAATAATAAAATTTAGATATACTTTGAGTGCATATATAAATCTCCTAAATTCTTTTAT  
GACTACACAAACCATTAGAAAAATGAAAAATTATTACGCGCGGTCAGCGGACCAGCCGGATGTCAATCAGAACGTGCCACATCACTCGATACACAACAATACATAATAAATTAATGATGT  
GGCACATCCCAATTAACCTTCGTACAATATCCCACATAATAATTTCCCCAGAAAAAATGAAAAACATCAGCTTCAATGCACATTTATAAAATTTGTCCCTCTCTTTTTTTGTTGGTTCCATGGC  
CAAAGTGGCAGGCAGCTTCATATCATTGTCACTATCGATGGTGGCCACATGAGGGAGTCCAGATCTTCTCGTACATGCCTATGGTGAGGTTACCGGGCTCGAGAAAACTGTTGCGGATGC  
GGTAAGCCTGGAGCCTAGGCATATCCGGTAGCTTGTGACGAACATCTCCAGATGGGTGACGTTTGCAGACCAACGCCGCCGGCGAGGGCTCCGGTAATGGTCCATGAGAGGAGGAGG  
AGGAGGAGGACTTTTTCCATGGTACTCTTCTCAGTTTCTTCTTTTGGAGAAGCTGGAAAGAGGAAAGGGATAAATAGCAGTGGTTTTGTTGGCGTGGAGAATTAGAACGAATCAGCGG  
CAAAGTTTTATGTTAGGACCGTGCTCTCTTAGCCCAGCCCCGTGCTGAGCGTGCCTGAGTGCCTGCTAGGCAAGTGG

>comp172728\_c0\_seq13

TTAAGAAGTAGTAAGAAGCCATCCCAAATGAAGCCTAAGCTTGATATCAAATCTCTAATGAAGCCTCTCTTATTTCAACTATTTTTTTTTTTGTTCTTTCTATGAAGCCAATGTTGTTGGTGAG  
CAGCTATCATGAACACAAGCCAAAACATCTTTATACTCCCTTGAGATAGTAAAAGAATCATATACTCTACCATCACTGCTCTTCTTATATTCAAATAGAAGAGAAGAATGATTGAATGCAGT  
GAGCTTAACAAAGCCATGATCATAATCTTTGTACAAGCTCCAAGCAGTCTGAACATTGCTGAATTCTGAAAGATGACTTCTCCACCTCCTACAACCACATGAATTGTCCCATTCAATTGTG  
CCAACATAATTCGATTCTTCATTATTAACACATTGACTCTGGTAAACTGGGCATGTTCTTTTATAATTGTGAACATGGCCAAATAATGCAATGTCCACTCGATATTTCTGCCATAGAAGTTCC  
AGGCTTTCCCTTCCCATAGGTTCTGCAAATGTTCTTCTTTTGCCTACCAGGAATCGGATGAGTAGCCGAGGACTCGGTGTGCTAAGAAGATCAGCCATGGCTGTTTCTGCCGGTCAGCCG  
TTGACAAGCAATGTTCAATGAACTGTACTGTTTCAAGTGCCTTTCTCCAGTCATGCTCTGTATCTGCTATGCAGAATCTGAACATAACCGAAATCTGTTGAATACCAAACTTAGCTCTATTAT

CAGCTGGAACATAGAACATTGTTTCAGCCAATACACCACACTCTCCCCAGAATCCATAGTATTATAAAAAGAACCTGTATTTGGCCAATCACGTTTCATGATTACCACTGCAATTACACATA  
CTAAGATCACCATTAATCTACTTTATAATCTCTAAAATCATCAAACAAAACAAGAAGCAAACCTTGCAATCATATAAGGAACTGCAGATGCTATGGGCTCTATTTGTGCTGTAAATTGATCC  
CACTGAGACAAATATCCATTTGCATATGTTATGTCTCCAATGTGGAAGACAACATCAATGTTATCCAAATCCTTGATTAGCTGATCTGTTGTGTTTCAGTGAGCCTGGTTGGTAGTTGCTGAA  
CTCATTGCAACCATCTCGCTCTGCCTTTCCCATATCGCCGAAAATGATGACACGTTGTAACGAATCTTGCCCTGGATAAGGAGATGCTCGAAACGAATAAGCCTTGCTCCATACATAACTTC  
CATTGAAGAGTTGATGACCAAGCTTGTAECTATAACATTGTGTTTGGCCATAATTCTTTAAGGAACTAGTGTGGATATAACCTGGATGTCTCCATCCAAATGTTCTTGCTGGAGAACCGCAC  
ATGTCATTACGACTGAATGTTAATGTGCCAGCCGGAGATCTTGTCTGATGGCCATCATTGGACCCCATCTACAAAAGGGTAATGCTTCATCTATATTATACCCACTTGTCCATGTTATAGTCA  
TCTCATTCCACAGTTTTCCCTTGAGCCAGCCTTGATAGAGAGGAGCCTCTGGATTTGCAAAGGAGACAGTATTTGAAACTGCAATGAGCTTTGGATTTGCAAGGCCACCTCTAAACAGTG  
CAAATGAAAAGTCTGAACGCTGATTGATCATTGGAATCTCAAAGTTGCCCTCCAGTCTTGATGTAICTAGCATTTGAATAATTTGCAAATTTGGTACTTTATTGGCGATGAACAAATCAAG  
GGTCTTGTCTCTGCTATTGCCGACCTCTGTTGGACAAGTAGAGGCATTGAAATTTGCTGGGGAGAACTCCAACCCAATCATCAGAGCTGGGTTTTGGACTATGAAGCTCTACTTTTA  
CCCATTACAGTATCATCTTCTGGAGACCAAGCAGATTAGGCGAAAACCTTGATGGAGGCTGACCTGTCAAGCTCCAGCGACGCCATGTGGATCGCGATCATGGCCAGCGGCTGAACTCCGG  
CGAGCCCAGCCGAACTCCCACGCTGGTGTGCCACCAGCGAAGGCCACCGCCGCCGCGCAGTACTTTACGAGGAGGGGAAGAAGCTGCCTTGCAGGATCCTTCATCTTCAG  
CCTTTTCTCCCTTAAGAAAATCTGCATAATGAACAGCAGCCCGCCGGAGATTTCCGTCACCGATCATGAACCTAACCGTCCGCCGTCGCCGGTACCAAACGCGGAGAATGGCGAAGACCT  
AGATTTTTCAGGCTACAAATCAAGAAGCAGAGAGCGATGATAAGAAAGGATAAGGAGATGGACGAGGAATCGTTTTACACTCCTCGTCTGACTCGAACTCCGATTCTGAATCCGATTTCTT  
CCAGATCAATCCGCTGAGCTCGCTACCCGCAGCCGACGCCACCACCTTAGCGAGATCAATGCGGAAGGCATCGAGAAAATCTGTAGCCCTCGTAATAGAGAGAAGCCTTCCGGGC  
TCGGAATCGAGCGACGATCACCTGTGATTCAATCGATGGTAAGGGATCCGAACCGAATCCCATCTTCGATATTGCGCGGAGCCCCGATGACGCCGATGGAATGGAGCGTAGCTTCCAATG  
AGTCGTTGTTTCAGCATTACATGGGGAACTCGAGCTTACGAGGGATCAGATGTTTTGACGGGAAGATCTGGGGATCTGAGGGGTTTTGCGAGCGGGACGATGGATTACCCATCGCCGT  
GGATTTGCGAGGATTCGAGATTGCCGCGGCCGCGGGCGGGTGGGTGGAGAGAAAGGAGATGGGGGATTTGGTGACGGAGATAGATGAGGCGGGCGGCCAGCGCGAACGCGG  
AGGCGATGAGAGAAGTGATGAGGGCGGCCGGAGGGGAAGGAGAGCGAGAAGAAGCTGATGCTGGGAAGGAGCATTCCAGGCATTCTGATGGAAGCGCCACCAGCTTCGCCCTTCC  
CAATATTGACAGGCGATGGTAGAGTTGGATCAATAAAAAGTAAATTTTGAACCTCAAAAAGATCATCAGGTAAATTTCTCAAGGCAAGCGGTCGAAACTCTTCGCTGGTAAAGGATCGACAG  
CTAGGATGAGCTCCCATCGCTCAGCCCAGAGCAGAGCCTCAGCTTCAGCTCATAGCCACTGGTTTCCATGTTTCTTCACTTGTAATTTTTGTTGCTGCTGTGAGTACTAATGAAAACATATA  
AGCTTCTGTTTGATACACTTTTCAACTACCAACCCTAAATTTATTTGATTTTTGATTTCTAATCAATTTTTTTCATCTCTTTAAAAAATTTT

>comp172728\_c0\_seq3

TTAAGAAGTAGTAAGAAGCCATCCCAAATGAAGCCTAAGCTTGATATCAAATCTCTAATGAAGCCTCTCTTATTTCAACTATTTTTTTTTTGTTCCTTCTATGAAGCCAATGTTGTTGGTGAG  
CAGCTATCATGAACACAAGCCAAAACATCTTTATACTCCCTTGAGATAGTAAAAGAATCATATACTCTACCATCACTGCTCTTCTTATATTCAAATAGAAGAGAAGAATGATTGAATGCAGT  
GAGCTTAACAAAGCCATGATCATAATCTTTGTACAAGCTCCAAGCAGTCTGAACATTGCTGAATTCTGAAAGATGACTTCTCCACCTCCTACAACCACATGAATTGTCCATTCAATTGTG  
CCAACATAATTCGATTCTTCATTATTAACACATTGACTCTGGTAAACTGGGCATGTTCTTTTATAATTGTGAACATGGCCAAATAATGCAATGTCCACTCGATATTTCTGCCATAGAAGTTCC  
AGGCTTTCCCTTCCCATAGGTTCTGCAAATGTTCTTCTTTTGGCTACCAGGAATCGGATGAGTAGCCGAGGACTCGGTGTGCTAAGAAGATCAGCCATGGCTGTTTCTGCCGGTCAGCCG  
TTGACAAGCAATGTTCAATGAACTTGTACTGTTTCAGTGCCTTCTCCAGTCATGCTCTGTATCTGCTATGCAGAACTGAAACATACCGAAATCTGTTGAATACCAAACTTAGCTCTATTAT  
CAGCTGGAACATAGAACATGTTTCAGCCAATACACCACACTCTCCCCAGAATCCATAGTATTATAAAAAGAACCTGTATTTGGCCAATCACGTTTCATGATTACCACTTGAATCATATAA  
GGAECTGCAGATGCTATGGGCTCTATTTGTGCTGTAAATTGATCCACTGAGACAAATATCCATTTGCATATGTTATGTCTCCAATGTGGAAGACAACATCAATGTTATCCAAATCCTTGATT  
AGCTGATCTGTTGTGTTTCAGTGAGCCTGGTTGGTAGTTGCTGAACTCATTGCAACCATCTCGCTCTGCCTTTCCCATATCGCCGAAAATGATGACACGTTGTAACGAATCTTGCCCTGGATA

AGGAGATGCTCGAAACGAATAAGCCTTGCTCCATACATAACTTCCATTGAAGAGTTGATGACCAAGCTTGTAACATAACATTGTGTTTGGCCATAATTCTTTAAGGAACTAGTGTGGATAT  
AACCTGGATGTCTCCATCCAAATGTTCTTGCTGGAGAACCGCACATGTCATTACGACTGAATGTTAATGTGCCAGCCGAGATCTTGTCTGATGGCCATCATTGGACCCCATCTACAAA  
GGGTAATGCTTCATCTATAATTATACCCACTTGTCCATGTTATAGTCATCTCATTCCACAGTTTTCTTGGAGCCAGCCTTGGATAGAGAGGAGCCTCTGGATTTGCAAAGGAGACAGTATTTGA  
AACTGCAATGAGCTTTGGATTTGCAAGGCCACCTCTAAACAGTGCAAATGAAAAGTCTGAACGCTGATTGATCATTGGAAATCTCAAAGTTGCCTTCCCAGTCTTGATGTACTCAGCATT  
GAATAATTTGCAAATGGTACTTTATTGGCGATGAACAAATCAAGGGTTCTTGTCTCTGCTATTGCCGACCTCTGTTGGACAAGTAGAGGCATTGAAATTTGCTGGGGAGAACAACCTCAA  
CCCAATCATCAGAGCTGGGTTTTGGACTATGAAGCTCTACTTTTACCCATTGAGTATCATCTTTCTGGAGACCAAGCAGATTAGGCGAAACCTTGATGGAGGCTGACCTGTCAAGCTCCAG  
CGACGCCATGTGGATCGCGATCATGGCCAGCGGCTGAACTCCGGCGAGCCAGCCGGAACCTCCACGCTGGTGTGCCACCAGCGAAGGCCACCGCCGCCGCCGCGTCACTACTTTC  
ACGAGGAGGGGAAGAAGCTGCCTTGCAGGATCCTTCATCTTCAGCCTTTTTCTCCCTTAAGAAAATCTGCATAATGAACAGCAGCCCGCCGGAGATTTCCGTCACCGATCATGAACCTAAC  
CGTCCGCCGTCGCCGTTACCAAACGCGGAGAATGGCGAAGACCTAGATTTTCAGGCTACAAATCAAGAAGCAGAGAGCGATGATAAGAAGGATAAGGAGATGGACGAGGAATCGTTTT  
CATACTCCTCGTCTACTCGAACTCCGATTCTGAATCCGATTTCTTCCAGATCAATCCGCCTGAGCTCGCCTACCCGACGCCAGCCACCACCTTAGCGAGATCAATGCGGAAGGCAT  
CGAGAAAATCTGTAGCCCTCGTAATAGAGAGAAGCCTTCCGGGCTCGGAATCGAGCGACGATCACCTGTGATTCAATCGATGGTAAGGGATCCGAACCGAATCCATCTTCGATATTCGC  
GCGGAGCCCGATGACGCCGATGGAATGGAGCGTAGCTTCCAATGAGTCGTTGTTTACGATTACATGGGGAACCTCGAGCTTTACGAGGGATCAGATGTTTTTACGGGAAGATCTGGGG  
ATCTGAGGGGTTTTGCGAGCGGGACGATGGATTACCCATCGCCGTTGGATTTGCGCAGGATTCGAGATTGCCGGCGCCGCGGGCGGGTGGGGTGGAGAGAAAAGGAGATGGGGGATTT  
GGTGACGGAGATAGATGAGGCGGCGGCCAGCGGAACGCGGAGGCGATGAGAGAAGTGATGAGGGCGGCGGAGGGGAAGGAGAGCGAGAAGAAGCTGATGCTGGGAAGG  
AGCATTTCCAGGCATTCTGATGGAAGCGCCACCAGCTTCGCCTTCCCAATATTGACAGGCGATGGTAGAGTTGGATCAATAAAAAGTAAATTTTGAACCTCAAAAAGATCATCAGGTAAAT  
CTCAAGGCAAGCGGTGCAAACTCTTCGCTGGTAAAGGATCGACAGCTAGGATGAGCTCCCATCGCTCAGCCCAGAGCAGAGCCTCAGCTTTCAGCTCATAGCCACTGGTTTCCATGTTTCT  
TCACTTGTAATTTTGTGCTGCTGTGAGTACTAATGAAAACATATAAGCTTCTGTTTGATACACTTTTCAACTACCAACCCTAAATTTATTTGATTTTTGATTTCTAATCATTTTTTTCATCTC  
TTTAAAAAATTTT

>comp172728\_c0\_seq9

CAACTCTACCATCGCCTGTCAATCTGTTTGATCAAAGAATGATTCAGTTTGTAAAGGAAAAAAAAAATGGAATTTTTAGAAATAATGGAGAAGAAGATAGAGAGCATAACATTGGGAAGGCG  
AAGCTGGTGGCGCTTCCATCAGAATGCCTGGAAATGCTCCTTCCCAGCATCAGCTTCTTCTCGCTCTCCTTCCCCTCCGCCGCCGCCCTCATCACTTCTCTCATCGCCTCCGCGTTCGCGCT  
GGCCGCCGCCGCTCATCTATCTCCGTCACCAAATCCCCATCTCCTTTCTCTCCACCCACCCGCCGCCGCGCCGCCGCAATCTCGAATCCTGCGAAATCCACGGCGATGGGTAATCC  
ATCGTCCCCTCGCAAAACCCCTCAGATCCCAGATCTTCCCGTCAAAAACATCTGATCCCTCGTAAAGCTCGAGTTCCCCATGTGAATGCTGAACAACGACTCATTGGAAGCTACGCTC  
CATTCCATCGGCGTCATCGGGCTCCGCGGAATATCGAAGATGGGATTCGGTTCGGATCCCTTACCATCGATTGAATCACAGGTGATCGTCGCTCGATTCCGAGCCCGGAAGGCTTCTCTC  
TATTACGAGGGCTACAGATTTTCTCGATGCCTTCCGATTGATCTCGCTAGAGGTGGTGGCGTCGGCTGCGGGTAGGCGAGCTCAGGCGGATTGATCTGGAAGAAATCGGATTCAGAAT  
CGGAGTTCGAGTACGACGACGAGTATGAAAACGATTCTCATCCATCTCCTTATCCTTCTTATATCGCTCTCTGCTTCTTGATTGTAGTGTGAAAATCCAGGTCTTCGCCATTCTCCGCGT  
TTGGTACCGGCGACGGCGGACGGTTAGGTTTATGATCGGTGACGGAAATCTCCGGCGGGCTGCTGTTTATTATGCAGGTAGGTCCCTCAGAATCCTATTAATTTGATTTTTCTTTGCCCTTC  
TGTGGGACCCTGCAATGATTTCAATTCAGAATTTTACAAAATTTATTAACAAAACGAAGAAATCTTCTGAAAGAGGAATAGTGAATGGATGGAATCAGCGGGAAGAGGGGAAAGGGAAA  
GCACC

>comp172729\_c0\_seq3

CCATTCCCCGCCGCTCAGACTTCCACCTCATCGACTGTTATTTGCAGTGATCGCCACCGCAAATCCACATCGAGAGATAGAGAGAGGGCGGCGATCGGCCGTTAGAGAGGGAGAGCAAAC

TTCCACCACCACCAACTATAACTAATCGTCCGGTGGCCTTCTCCTCCCGCTGTTCTATTATTAACAATGGCAGCGTCATCTCTCCCATCTGCAACCATCAAGTCCCGTCCTTTATATATTC  
TCCTAAGAACTCTCCAGCTTTTCTCATCGATCACCCCTTTCCCTTTCCTCGATAACGAGTAGCAGAGCGACGAAGAAGCAGGGATTCTCAATGCTCGAATCGTCTTCAGAGAATGAGGAG  
GAGGAGGGAATTGTTCCGAAGCAGCCGCAGCCGGAGCTGAATTGGGGCGGCGTTGGGGGGGAGAAGAAGGTTTTGAGGAAGCAGATTTTCGATGAGGGATACGATGAGGGAATTGAAA  
TGGGAGAAGAAGAAGAAGCTGATGCATTTGCGGAGTCTCGGAGGGAAAATCGATGGGGTGGAGGTTTACGGATGAGGACTTGGATGAACTGAAGGGATCATTAGAGCTGGGTTTCG  
GCTTCAATGAGGAGAACGGCGGGCGTGAACATGCAAGACTTTACCGCGCTGGAACGTATTTTTCGCGTTAATCGTCAGTTTTCTGACCCGAACATGCGGATGTCGACGCCGAGCCCCG  
GCGTCGACGCCGACGGCGACGGCGACTTCATCGGCCACCTCGTCGGCGTCGACGCTATACGGTACGCCGAGCCCTAGAAGTCCGTATGGGCAGCCGAACCAGGAGCCGGGGCCGATG  
GTTGGAAGCTCATTAACCCCGGTAAGAAATACCGTATCAGAAAATGGCGTGTTCCTTTACGAGCCTTCGTTAAAAAAATCTATCGATAACAAAAATATTAATTAATATATGTTTATTATT  
ATAATTAATGAGTTTTAATTAATATAAGATATCGTTTTTTCGAGTAAAACTTTGAAAAAACTTTTTTCAACATGGCCTAAACTTTTTACATATTTGTCTCTATTTGAACTAAGATT

>comp172760\_c0\_seq14

GGGATGAAATTAATTCTGGCAAATGCTGTTTTATTGAACTGGAATTTGAATCTGATAACGGCTAATTAGTAACTCTCTCAAAAGCACCACCAACCTGCATATGAAGCCATTCTGTTGTAGAT  
CCTTGCTCATGCTCATATTTCTTTGTTGGCTGAGAGGGAAATCCTGAACTGGACGGAGTATGGTATGTCTGAGCTCCAAAATCTTTAGAAGGGAAGCCCTCCATGCCACCATTAATCCGAG  
AATTAACAGCTTCAAGCTTCATTGATAGGAGCTCAACCTGGCGCTGCAGTGCCTGGATGTAGTTTATGATCTCATCAAGCACGGATGCTTTA

>comp172761\_c0\_seq6

TAAGAGAAAAACAAAGAAGCAAGAGGTGAGTAGTCAGAAATTGTACAAGAAGAAAGCCAAGAGAGTCAGTTCAACATGAGCCAAGGTGTAGCAAATGCAGAGAAAATTCACCATGGC  
CCTCACTGGAATGGGGAACACAATGAAGAATTCTTCAAATGGATAAGAAAGAAATTCATATCTCCTCAAGAGCCATGAGAATCACATGGGGGAACGATTGCAGATTCTGGCAGTGGACT  
AATTTATCAAAAGATGAATCATGGTACATTTGTTTTTTATAATTACTTGTATTGCTGCAATGCATTGGACTAACAAAATTTACAATCATCCAAGCTTTGGCTTAGGAGCAGAGCTAATTCAG  
GTAATTGGATAGAGGTGGTCAGCTTGCTTGACTTGCAAAAATTCGCCTAGATCCTATGAAGAACTATGAAGTGATCTACATAGTAAAGTTCAAGTTGATGCATTTGGCTGGCATTCTTG  
CCCTATTATATTTGAAGTCTCAACCCCGGATGGGAAGAAGAGAAGAAGG

>comp172800\_c1\_seq2

TTTTTTTGAATAGAAAACGTTAATATAATTTTTTTAATTTTCGATAAATTATATTACCTGGCAAGCCTATTTTGATCAAGCTTAACTAATCTAAAAGGAGGTCCGGCCTTAGATCGTCCTTTT  
CTTCGACCGCTCTGTCTTCTCAGAACGATTGAGCGCGCGCAAGAGAAGGAAGCCAGAAAGGAGAAGTCAAGGATAGAAAAGTTACGTTCTTGATCGCCCTCATCATCTTGATTTCT  
TTCATTGCATTCTTCTCGTGATCTTTGGTCCAATCTGTTAAGACGAGCAGCGTATTGCAATGTTTCGTGCGAGTGCATTTCTCACCGAACGTTCTGCTTGATACCCGATTGAGATTGAGATG  
AATAACGACGAGATGGACATGAACTTCCCTCTCCTCTGTTTGAGCCACCCCATGTCTTCTTCTGGTCCAATGAAGGCAATGTGAACCGAAGGAAGAGGGGAAGAGAGGAGCAGCCGTA  
TGCGGCGGTGGCGGCGCCACCGCAGCAAGATCAGCAGCTTTACGTTTTCCTTGCAAGTTGCCGCGATGTTGGAACCCTTTCCGCTCCAATCGGAGACGCCCTCTCCGATTGTCTCCACGGG  
CCTTACCTCGCCTTAGCCGACCAAGGGAACAATAAGATCAAGAGAGGACAGCCGATTGAGTACATACCGGCTTACTTCTCGGAAGAGCTTGCCGCCAGATTAACACGGAGAAAAACG  
AAATCGATCAGTACCTCATTGCTCAGGGGGAGCAGCTGCGGCGACAAGTGGCGGACAGGCATCGACGGAACATATCGCACTTTACTCGAATCTGTGGGAAATAAGCTACAGGAAAAGGAT  
GCGGAGATCGAGAGAGCTAGCCGCTGCATTTCCGAGCTCGAAGACCGGCTCACACGCCTCGAACTGAGTTGATGGAATGGAAGAGGAGAGCCATGACGGAACAGGTGCGCAGCAGCG  
TCTCTCCACGCTCAGCTCCAGAGAGCCACTGTCGAGGCGGCGGCCGCGGAAGCGCGGGCGGCGGCGGTTGCTAATGAGAACTTCGGCGAGTCGCCGGCGGAGGATGCGGAGTCGGCC  
AACGTTGACCACAACGGGATTGAGATAATTGATAATTCTTGCCGCGCCTGTTTTGCCAGCCGGCTACGGTCGTTCTACTTCCCTGCTGTATCTCTGCATCTGTGCTTCTTGCGATTTCTGT  
CAGCACCATCGGCGACGCCTGCCCCGGCTGCGGCTGCTTGCGGACCGGAAGCGTTCACGTTTCCCTTGCCATAATATCAAAAATAAAATCTAAAAAAATTAAAAAAAGAAAAAAAAG  
AAAGAGTTTATTGTTAGTACATAGTTGAATTCAGTGCACAGCTGATACGTAGCTGTTTACTTCGTATACAATGAGTACATAACTATCTATTACGTTATTTCGCCTATAGAGCTATTTATATTTTT

CGCACCTAATAATTTCTCAAGAGAAGAGGCATATAATGGCTGGAATGTTTCAGGTGGAGAAGAATGAGAGGG

>comp172800\_c1\_seq3

TTTTTTTGAATAGAAAACGTTAATATAATTTTTTTTAATTTTCGATAAATTATATTACCTGGCAAGCCTATTTTGATCAAGCTTAACTAATCTAAAAGGAGGTTCGGGCCTTAGATCGTCCTTTT  
CTTCGACCGGTCTGTCTTCCTCAGAACGATTGAGCGCGCGCAAGAGAAGGAAGCCAGAAAGGAGAAGTCAAGGATAGAAAAGTTACGTTCTTGATCGCCCTCATCATCTTGATTCT  
TTCATTGCATTCTTCTCGTGATCTCTGGTCCAATCTGTAAAGACGAGCAGCGTATTGCAATGTTCTGTCGAGTGCATTTCTACCGAACGTTCTGCTTGATACCCGATTGAGATTGAGATG  
AATAACGACGAGATGGACATGAACCTCCCTCTTCCTCTGTTTGTAGCCACCCCATGTCTTCTTCTGGTCCAATGAAGGCAATGTGAACCGAAGGAAGAGGGGAAGAGAGGAGCAGCCGTA  
TGCGGCGGTGGCGGGCGCCACCGCAGCAAGATCAGCAGCTTACGTTTCCTTGCAGTTGCCGCGATGTTGGAACCTTTCCGCTCCAATCGGAGACGCCCTCTCCGATTGTCTCCACGGG  
CCTTCACCTCGCCTTAGCCGACCAAGGGAACAATAAGATCAAGAGAGGACAGCCCGATTACAGTCATAACCGGCTTACTTCTCGGAAGAGCTTGCCGCCAGATTAACACGGAGAAAAACG  
AAATCGATCAGTACCTCATTGCTCAGGTAATTTGACCTCCTTTTTTTCCCGTTACTAGAAGAAATACATGGATTCTGATTCTATTTCGCTAATTCTCTTGCTAACCAGGGGGAGCAGCTG  
CGGCGACAAGTGGCGGACAGGCATCGACGGAACCTATCGCACTTACTCGAATCTGTGGAAATAAGCTACAGGAAAAGGATGCGGAGATCGAGAGAGCTAGCCGCTGCATTTCGGAGC  
TCGAAGACCGGCTCACACGCCTCGAACTGAGTTGATGGAATGGAAGAGGAGGCCATGACGGAACAGGTCGCAGCAGCGTCTCTCCACGCTCAGCTCCAGAGAGCCACTGTGCGAGG  
CGGCGGCCGCGGAAGCGCGGGCGGCGGCGGTTGCTAATGAGAACTTCGGCGAGTCGCCGCGGAGGATGCGGAGTCGGCAACGTTGACCACAACGGGATTGAGATATTTGATAATTC  
TTGCCGCGCCTGTTTTGCCAGCCGGCTACGGTCGTTCTACTTCCCTGCTGTCTCTGCATCTGTGCTTCTTGCGATTTGCTCAGCACCATCGGCGACGCCTGCCCCGGCTGCGGGCTGC  
TTGCGGACCGGAAGCGTTACGTTTCCCTTGCCTAATATCAAAAATAAAATCTAAAAAAATTAAAAAAAGAAAAAAGAAAGAGTTTATTGTTAGTACATAGTTGAATTCAGTGCA  
CAGCTGATACGTAGCTGTTTACTTTCGTATACAATGAGTACATAACTATCTATTACGTTATTTCGCTATAGAGCTATTTATATTTTTCGCACCTAATAATTTCTCAAGAGAAGAGGCATATAATG  
GCTGGAATGTTTCAGGTGGAGAAGAATGAGAGGG

>comp172823\_c0\_seq8

TCATTGTTGTTTATTATTATTGTCAAATGATATTTGTAACCTGTGCGCCGACTATTGTAGACAGAGTATGATCTCCTAATGATCATCACTTTGACTATGATCTATAAATCACAGTCACCTG  
ATTACCATCACTTGACTACAAAATGCTATCCAACCTCATCCCCTTTTGTCAACAATAAATTTGAAGCACACCATTGCTATTAAGATCGATACACGATGTGACAAAAACAATGCTTATAAG  
GTCAATACACACCATCAACACATGTTATCACTTATAAGGTTTGAAGCATGCTATTAACATGAGGGTTGACAATCATTGAATTTATTGCTTGACGCTAACATCGATTAGTAAATTTGTAGACGG  
CTTTGAAATAAATTTGTAATTCAAAAAGATCTCAAATGATGAAGACTTCTTTTTGATTAAACTGATTTATTTATGCATCAAATGAGTGCTAAGGAATTGCGGACATCAATTAGTGATGGCCG  
CTCAATGATGATGACGCGCCACATCACCTGCTGTGCCGCAAAAAGCAAAAACATGACGTGGAGCATCTTGATTACCTCAGAACGACATCCGATGACCGCAAAAATAATTTCTCATAAA  
AAAATCAGACTTTCTAAAAAATGTCATGTAACAAACATATCTTTGTCTTCTTCTCCTTCAAAATCTCATCAAGCTCACCGCCACCACAACCGCCGCCGACTACGAAGCCCACCGCCGT  
TCTCTCCCCTGCGCTAACAATTTCCACAGGAAACAACATCCGTTCTCGAAGGATTCTTCGTCGTGATCATCGCCAAACCCTGGAAATCACAAAGCCCTCACATCCTGATCCTGCATCTGA  
AAATAAATGTTAAAAGCATAACGACGCATTTCCCATCCAATCCCCAAGTGATTACAGGATCCTCCATACGCTAATGGCGTGCAATCAGCTAAGCTACAGGCGTAATCCATGTTTCCGGCGA  
GCAAACCCAAGTTCTTCGCTCCGGTTCAACACACACCACTGTGATTGCTGGTACTCCACCCCTTAGCCCTACCAGCATCGCATCCTTCCCCTTGCCGCTGAAATCCATGGCGAATTT  
AGGCTTGCCATCGTATGTAACAGGCCCAATGCCTCTCGAAGTTCCCCGAACTATGCTTTTCATGTTCTCGTCGATGAGGCTAAAGAGGTAGACTTCCAATGGCCCCGGTGCATCGGT  
GTCCCCTTGTGCTTGCCATCCTCTTCAAGAATCCGTCGTAGAACCCTCTTCGCGTTAGCAGCGTCGGCGCTCTTCGCACCGTCGGTCGGCCACCCGACTCCCCGACGATGATCTTCATGT  
CGTTGATGCCGATTCTCTTGAGCGCAAAAGACGAGCGTGTGCAAAATTGGCATCAAACACGTTGGTGTACTGCCTCCCCCGTCGGTAATGGGTTTTCCACCGCCGTCGAAGAAGGCGAAG  
TTGATCGGAAAATGGCTGTTTTTCATTGAGGCTGAGGAAAGGGTAAATATTGACTACGAACGGCGCGTCTGGGATTGAAGGAAGAGAGCGATTTGTGTCATTAGATTGCGGATATCAGCG  
CGGAAGGCGCCGCGGAGGGCGCGCCGCTTGCAGAGTCATATACATCGGCGTTGTGCGGGACGACGGCTTTGATACGATCTCCGACGCCGGCCTCGTCGAGCGCCTTTTGGATGTTCTTG

AGCGCAGGGAAGGTGGAATTCAAGAATCCCTTCGTAGCTCGTTAAAAATGGCTCATTTCCGACAACAACATAGCTGATTTTCAGACCGCGATCATGGAGGTAATGGGTGATGTTCTGC  
TTGACCCAATTCTTCGCGATCTCATAATCTTTGCCCATTTGTGGAAAGCTGGTCATTCGGAATGCCGATCATTACGTCAATGCCGGTGTTCGTGAGGGAGGAGAGAGTCCATGGATCGGCGT  
CGAAGAGCTTCACCTTGGAGATACCGTTATCTTTCAATAACTTGACTGCTATGTTCCGATTCAAAGGGTGAGAGGTTTGGCTGCCCAATTCACCCCTATTCGGGCCCGCTTGGCGCAA  
AATGGCCACCAAGATGGTGGAGAAGCAGAGGAAGATGGACCGGCGAGGCATGGCGGCCGCAAGGAGGCGGTGATTATGCTATGGTTTAGAGAAGAATGAGGTGAAGGTTTTAGTTTG  
GCTGTGCAAGATCTATTTTGGGACGGGAAATGTGTGGGAAGGAAGGAATGTGATGTGGCGGAAACCGTTTTCTGTTGTTTTGAGTGTACAGAGTTAGGCAAAGAACAACGGATAAAAC  
AGTTCCAAACGAAATCTAAATCCTACAAAATGATAAATCTCTTTACAACTTTGCTTCTCTGTTTTTGCTTGAATTCAAAATTTATAAAATCCAAAAGTCCAGCCGATTTACAGTATTTAGG  
AGAAGAAGTGCACCAAAACAGAAAGATTGTTACCTTCCCTCAACCTTTCTATTTCGACATCGTTGGAGAAGGTGAAGAAGACAAGTTCACAAGGAAAAGCAAACCCCTAGCCAGGACAA  
AGGCTCTGGGAAAATCATAGAGAAAATTAAGATGATAAAATTTAGAAAACATAAAGGTAATACCTTTTTCCGATGAACAATTGCTTCAGCCTTCGGACTTCAGAATCTATAAAACCTC  
ATAGTTATAGGCTTATAGAACCGAACAGGGGCACATCTCACCTCAGAAAGCCGAGCTGCAAATGAGTGCAACGAAACTGTGAAGGTAGCTTTCTCTGTTTCGTGCGCTCAGAGGCGTCTA  
GGTTTCGCTTTTTTATCTTCTTTTTTCGTCGTTGTTCTTCGGCTTCGCTCCACGGAGAACATTCCCTTCGAATCAGATCGGAAGTTAC

>comp172840\_c0\_seq10

CAAAGCTCATGAAGAGCTGCATTTCTGTTCTCTGGTGGTGTATTGTATCGTTTGTCAATCCCTCGATTTACGAGAAACGGAGGAGCTTTCGTGACAGATCAAAGCTCATGAACCAAATC  
AGCCGACGCCCGCTCTCGAGACTTCTCCTCATAGATGAATCGGAGCGATCACTGCGAGTAAGACCAATAATGTCTAAAATTTATCATGATAAAATAACAAAAGTGAAACTGATGTGCCA  
TAGATGGAGGCACGTTTTCAATGCATCTTTACCGGACTTGAATATTTGCACTGGATCAGTGGTGAAGCTTGTGATGTTGAGTTAGAAAATTAACACTGCCCAACAATTTTACAGGCCA  
ATTCGGCCATCTGATCTGCAAGTTCTTGAGCTGATCCATGCTTCTTTATTTCCCGTAAGGTATGACATAGACTTCTTCTCAATGTTGTCAATGGGCTAGGCATTGTCTCTTGGGGTGTGTT  
GACGTTAGCCGGTCTGATGGTCACATTTGACGAGCTTATTGGATTTGTAACACTACGCATCAACGCAGTAAAAGAAAATTCAGAATTTACTAAGATATGACTACTAGGAACGATCAAAT  
TTAGTCTATATCTTGACACTTGGTGTGGTAGAACAATACAGGAACCTTGGCATAGCTTCTTCACTTGTTCGGGAGGTTATAAAATATGCTTCAAGCATTCTAGCTGCAGAGCAGTCTATTT  
GCATGTTATTGCTTACAATCTACCAGCCATCCATTTCTACCAGAAGATGCTATTTAAGCTTGTAAAGAGGTTGTCAAAGTTCTACTATATTAATGGATATCATTACGACGCATTCTGTTTGTG  
TACTATGTTAATGGTGGCCAGTCTCCTTGCTCAATGCCGTAAGGAAATCATTTTGGTATCTAAGTTGCATAATGTTAGCGTATTTTGCCTCTCATATGCATCTCAATTCATTTTATCATTGGA  
ACAAGGGAAGGAATATGAAATCACATCTGCACAGTGCATTGTGGAGAAGTTATTTTGTGCGGAGGTCGAACGCAGAATGCCATCCGGAGATTAACCAGAATGCGCCACATAAGCAGCAC  
CGAGCAGTACAGAGCCGAGTACCAGCAAAGAGATAACGTGACACATTTGCACTGGACTCCGGAAGACGTTTGGCGTCGGCACAGAATAATTAATCTGCATTGTGAGGGTCAAATTTT  
CTTCTTAGGATGCTTGTCTATATATACACGCGTGCTTATGTTTTCTATTATTGGAGAAATTTATACCTGCGAATTCGACACATAACAGACAACCAATTAAGAGTTTGTACACAGCTATGCACAAT  
TATTCACGCCAAAGTTCTAATTGTCTGTTACATATATCCGCACCTTCTTATCTGCAATGAAATTTATCTCCATTACCGAGTGTATATTACAGCTTCTGTCTTGCAGGGAAAGTTTTAGCAGCAG  
TTGCTGCATACTTGAGGGGACTACTGAGCATCTGGCTGGAAAGATTTGGAACGGTGATTGCAAGAAAAGGTCAAGATGGTCCAGGTGTAAAGAAAACCACAGCCTTGGACTTACACA  
GAACAAGAGAATCCTCAATGCTGAGAATGATATCTGCCAAAATGTTTAAATTTAAAATCGTCCTGAAGTTGCTCTGTCTTGAATTTCAATTCATGGACTACTTCCCAGCAAAGGTTG  
AGGATCATGATTTTAAATTTCTAACTGAGCACTTGAAGATAAGAAAGCTATTGTGCTTACCAAATGGCGACAGCATGTTATATCATTGCTTTTCAGCACACACTTGATAAGTGAATTTGTTG  
CAACTTGCAAGTTTTTCTTGTATTTTCAAATTTCTTGGTTGCTCTCTTACAATGCTATTAATCTATTTTCATCTGCAGATAAGATGAATTTTTCCACAACCTTGAACCTATAAATATCCAT  
GGATGGATATTTAGTCTCGAAGATGTTCTGTTATCAGAGCGATGTATCGAACTGAATTTTACCATATCGGATTGCGTTGAGCTGTTGAAAGCCCTTCTTTCAGTACAAAAGCTGTAGT  
GGACTTGATTGGGGCACCAAATTTACAACTGGTTATGAAAATTAGTTTTCTTGGAAAAGGATACAGCACCTGGTGGATAAGAAGTGCATATAATGGTTCCAACACCACCATCTCCCT  
CCTCCACTTCTACCTTAAGTATTACATGAGGAATCAAGTCCATAACAACCTTAGCGAGTCGAATAGTGCCATAGACCTCCACAGATCATCAGCTGGTACATCAGCCTCGAGCTCATGATAA  
AGAAATCCCTTGATCATGCTTGTGATTATCCTTTCAAGCCAACTCTCAGATAGCTAATTTACTTGGAGAGGAATGTAGATGCATAGGTCTTGTAGGTTATGTGTTTATATAGCCTATCTCTGA

ACTATGTGTGGGTGTTATAGGTTGAAGGTGAAGCAGGCAAAATGCTTAAGGCCACAAGAAGCCCATGTATTAATGACTCTTCAGATAACAGAAAAAGGAAAAGAAAAAATCTGT  
GCAGAATTAATTGCATGCTTGTCCGGTCTTTGGAAAGTTGCTTGTGTTGATTTGGGAAATTAATCCTTTACACATGT

>comp172840\_c0\_seq16

CAAAGCTCATGAAGAGCTGCATTTTCGTTTCTCTGGTGGTGTATTGTATCGTTTGTTCATCCCTCGATTTACGAGAAACGGAGGAGCTCTTCGTGACAGATCAAAGCTCATGAACCAAATC  
AGCCGACGCCCGCTCTCGAGACTTCTCCTCATAGATGAATCGGAGCGATCATACTGCGAGTAAGACCAATAATGTCTAAACTTATCATGATAAAATAACAAAAGTGAAACTGATGTGCCA  
TAGATGGAGGCACGCTTTTCAATGCATCTTTACCGGACTTGAATATTTGCACTGGATCAGTGGTGAAGCTTGTTCATGTTTGTAGTTAGAAAATTAACACTGCCCAACAATTATTTACAGGCCA  
ATTCGGCCATCTGATCTGCAAGTTCTTGAGCTGATCCATGCTTCTTTATTTCCCGTAAGGTATGACATAGACTTCTTCCTCAATGTTGTCAATGGGCTAGGCATTGTCTCTTGGGGTGTCTGTT  
GACGTTAGCCGGTCTGATGGTCACATTGACGAGCTTATTGGATTTGTAACACTACGCGATCAACGCAGTAAAAGAAAGTGAGGTAGCTAACTTACGTAAGGTTTTTTAGAGAAGTTGAAC  
GTTATAAAAACATTCAAGTCTTTCTGTACAGATTCAGAATTTACTAAGATATGACACTACTAGGAACGATCAAACCTTTAGTCTATATCTTGACACTTGGTGTGGTAGAACAATACAGGAAC  
CTTGGCATACTTCTTCACTTGTTCGGGAGGTTATAAAATATGCTTCAAGCATTCTAGCTGCAGAGCAGTCTATTTGCATGTTATTGCTTACAATCTACCAGCCATCCATTTCTACCAGAAG  
ATGCTATTTAAGCTTGTGAAGAAGGTTGTCAAAGTTCTACTATATTAATGGATATCATTACGACGCATTCTGTTTGTGTACTATGTTAATGGTGGCCAGTCTCCTTGTCTCAATGCGGGAAGTT  
TTAGCAGCAGTTGCTGCATACTTGAGGGGACTACTGAGCATCCTGGCTGGAAAGATTTGGAACGGTGATTGCAAGAAAAGGTCAAGATGGTCCAGGTGTAAAGAAAACACAGCCTTG  
GACTTACACAGAACAAGAGAATCCTCAATGCTGAGAATGATATCTGCCAAAATGTTTAAATTTTAAAATCGTCCTGAAGTTGCTCTGTCTTGAAAATTCAATTCATGGACTACTTTCCAG  
CAAAGGTTGAGGATCATGTATTTAATTTCTAACTGAGCACTTGAAGATAAGAAAGCTATTGTGCTTACCAAATGGCGACAGCATGTTATATCATTTGCTTTTCAGCACACACTTGATAAG  
TGAAATTGTTGCAACTTGCAAGTTTTTCCTTGTATTTTCAAACCTTCTTGGTTGCTCTCTTCCACAATGCTATTAATCTATTTTCATCTGCAGATAAGATGAATTTTTCCACAACCTTGAACCTA  
TAAATATCCATGGATGGATATTTAGTCTCGAAGATGTTCTGTATCAGAGCGATGTATCGAACTGAATCTTACCATATCGGATTGCGTTTGAGCTGTTGAAAGCCCTTTCTTTCAGTACAAA  
AAGCTGTAGTGGACTTGATTGGGGCACCAAACCTAGTAAGTTTCATTGAAATTGAATTGAAATCTCTTAAACTTAAACCAATCAATTTCAATGTATAATTTGATGGCCACTCTTGAATATGTT  
TCCAGTGTGTTTAAAAGTAAGGTCATAAAGCTACACTTATGATGTTTACATCTCCAAAATAAATAAATAATTTTGTGAGACAAATTAAGTTTTCTCCAAACAGAAAATAATAGCATTAA  
GTCTACTAAAATAATAACAACAAGTGGTCCATTTGCTGCCTTATTTACTATAAACATGGTTACTTATCATAATCAATCATCCTTGAGGATCCTTAACTTAGCTTTTCGCCTAACACACCTTCAG  
TAATAAGCTGATTACTGCATACACGGCTTAATTACACACACAACATCATATAGATGCCTTCTCCAAAGTATTAATGAGGTCGACATATTGATCAACAAAACACCATATACATAATCAATCACA  
ATACAAGCCACATATAGTTATAATGGCAACCTAAACCCTAAATAACTAATTAATCAAATCTTGCTCTCCTTAATATGCTTGATAACAGTGTGGCGACGTGCACTGAGGGAACAATGGAAGC  
AAGAGAAATAGCATCGATATGGTCATCTTTAAGCTCATAGAGTATACTAGATTTAATGATGGAAATAGACTTCTCTTTCTCTATGATCTCAAATGAATAAGATAAGAGCTGAAACCCAGTTC  
AATTAGTCTCCTTCTATCACTTGTATTTCTTTTACATGCTTTTCGTTGTCTACCTTCACAAATTTCTGCTTGTCTGACTTAGGACCTGATGATTCTGGTGGATAAGAAGTGCGTATAATGGTT  
CCAACACCACCATCTCCCTCTCCTTCTACCTTAAAGTATTACATGAGGAATCAAGTCCATAACAACCTTAGCGAGTCAATAGTGCCATAGACCTCCACAGATCATCAGCTGGTACATC  
AGCCTCGAGCTCATGATAAAGAAATCCCTTGATCATGCTTGTGATTATCCTTTCAAGCCAACTCTCAGATAGCTAATTTACTTGAGAGGAATGTAGATGCATAGGTCTTGTAGGTTATGTG  
TTTATATAGCCTATCTCTGAACTATGTGTGGGTGTTATAGGTTGAAGGTGAAGCAGGCAAAATGCTTAAGGCCACAAGAAGCCCATGTATTAATGACTCTTCAGATAACAGAAAAAGGAA  
AAGAAAAAATCTGTGCAGAAATTAATGCATGCTTGTCCGGTCTTTGGAAAGTTGCTTGTGTTGATTTGGGAAATTAATCCTTTACACATGT

>comp172840\_c0\_seq18

CAAAGCTCATGAAGAGCTGCATTTTCGTTTCTCTGGTGGTGTATTGTATCGTTTGTTCATCCCTCGATTTACGAGAAACGGAGGAGCTCTTCGTGACAGATCAAAGCTCATGAACCAAATC  
AGCCGACGCCCGCTCTCGAGACTTCTCCTCATAGATGAATCGGAGCGATCATACTGCGAGTAAGACCAATAATGTCTAAACTTATCATGATAAAATAACAAAAGTGAAACTGATGTGCCA  
TAGATGGAGGCACGCTTTTCAATGCATCTTTACCGGACTTGAATATTTGCACTGGATCAGTGGTGAAGCTTGTTCATGTTTGTAGTTAGAAAATTAACACTGCCCAACAATTATTTACAGGCCA

ATTCGGCCATCTGATCTGCAAGTTCTTGAGCTGATCCATGCTTCTTTATTTCCCGTAAGGTATGACATAGACTTCTTCCTCAATGTTGTCAATGGGCTAGGCATTGTCTCTTGGGGTGCTGTT  
GACGTTAGCCGGTCTGATGGTCACATTGACGAGCTTATTGGATTTGTAACACTACACGCATCAACGCAGTAAAAGAAAGTGAGGTAGCTAACTTACGTA AAAAGTTTTTTAGAGAAGTTGAAC  
GTTATAAAAACATTCAAGTCTTTCTTGTACAGATTCAGAATTTACTAAGATATGACACTACTAGGAACGATCAAACTTTAGTCTATATCTTGACACTTGGTGTGGTAGAACAATACAGGAAC  
CTTGGCATAGCTTCTTCACTTGTTCGGGAGGTTATAAAATATGCTTCAAGCATTCTAGCTGCAGAGCAGTCTATTTGCATGTTATTGCTTACAATCTACCAGCCATCCATTTCTACCAGAAG  
ATGCTATTTAAGCTTGTAAAGAAGTTGTCAAAGTTCTACTATATTAATGGATATCATTACGACGCATTCCTGTTTGTGTACTATGTTAATGGTGGCCAGTCTCCTTGCTCAATGCGGAATATGA  
AATCACATCTGCACAGTGCATTGTGGAGAAGTTATTTTGTGCGGAGGTCGAACGCAGAATGCCATCCGGAGATTAACCAGAATGCGCCACATAAGCAGCACCGAGCAGTACAGAGCCGC  
AGTACCGAGCAAAGAGATAACGTGACACATTTGCACTGGACTCCGGAAGACGTTTGGCGTCCGGCACAGAATAATTAATCTGCATTGTCAGGGTCAAATTTTCTTCTTAGGATGCTTGCTTA  
TATATACACGCGTGCTTATGTTTTCTATTATTGGAGAAATTATTACCTGCGAATTCGCGACATACAGACAACCAATTAAGAGTTTTGTACACAGCTATGCACAATTATTCACGCCAAAGTTCTA  
ATTGTCTGTTACATATATCCGCACCTTCTTATCTGCATGAAATTTATCTCCCATTACCGAGTGTTATATTCAGCTTCTGTCTTGCAGGGAAGTTTTAGCAGCAGTTGCTGCATACTTGAGGG  
GACTACTGAGCATCCTGGCTGGAAAGATTTGGAACGGTGATTGCAAGAAAAGGTCAAGATGGTCCAGGTGTAAAGAAAACACAGCCTTGACTTACACAGAACAAGAGAATCCTCAA  
TGCTGAGAATGATATCTGCCAAAATGTTTAAATTTTAAAATCGTCCTGAAGTTGCTCTGTCTTGAAAATTC AATTCATGGACTACTTTCCAGCAAAAAGGTTGAGGATCATGATTTTAAATTT  
CTAACTGAGCACTTGAAGATAAGAAAGCTATTGTGCTTACCAAATGGCGACAGCATGTTATATCATTGCTTTTCAGCACACACTTGATAAGTGAAATTGTTGCAACTTGAAGTTTTCTCT  
TGATTTTTCAAACCTTTCTTGGTTGCTCTCTTACAAATGCTATTAATCTATTTTCATCTGCAGATAAGATGAATTTTCCACAACCTTGAACTTATAAATATCCATGGATGGATATTTAGTCTCG  
AAGATGTTCTGTTATCAGAGCGATGTATCGAACTGAATCTTACCATATCGGATTGCGTTTGAGCTGTTGAAAGCCCTTTCTTCAGTACAAAAAGCTGTAGTGGACTTGATTGGGGCACCA  
AACTAGTAAGTTTCATTGAAATTGAATTGAAATCTCTTAAACTTAAACCAATCAATTTCAATGTATAATTTGATGGCCACTCTTGAATATGTTTCCAGTGTGTTTAAAAGTAAGGTCATAAAG  
CTACACTTATGATGTTTACATCTCCAAAATAAATAAATAATTTGCTGAGACAAATTAAGTTTTCTCCCAAACAGAAATAAATAGCATTAAAGTCTACTAAAAATAATACAACAAGTGGTCCA  
TTTGCTGCCTTATTTACTATAAACATGGTTACTTATCATAATCAATCATCCTTGAGGATCCTTAACTTAGCTTTTCGCCTAACACACCTTCAGTAATAAGCTGATTACTGCATACACGGCTTAA  
TTACACACACAACATCATATAGATGCCTTCTCCAAAGTATTAATGAGGTCGACATATTGATCAACAAAACACCATATACATAATCAATCACAATACAAGCCACATATAAGTTATAATGGCAACC  
TAAACCCTAAATAACTAATTAATCAAATCTTGCTCTCCTTAATATGCTTGATAACAGTGTTGGCGACGTGCACTGAGGGAACAATGGAAGCAAGAGAAATAGCATCGATATGGTCATCTTTA  
AGTCCATAGAGTATACTAGATTTAATGATGGAATAGACTTCTCTTCTCTATGATCTCAAATGAATAAGATAAGAGCTGAAACCCAGTTCAATTAGTCCCTCTTCTATCACTTGTATTCTT  
TTACATGCTTTTTCGTTGTCTACCTTCACAAATTTCTGCTTGCTGTACTTAGGACCTGATGATTCTGGTGGATAAGAAGTGCGTATAATGGTTCCAACACCACCATCTCCCTCTCCACTTCTA  
CCTTAAGTATTACATGAGGAATCAAGTCCATAACAACCTTAGCGAGTCGAATAGTGCCATAGACCTCCCACAGATCATCAGCTGGTACATCAGCCTCGAGCTCATGATAAAGAAATCCCTT  
GATCATGCTTGTGATTATCCTTTCAAGCCAACTCTCAGATAGCTAATTTACTTGAGAGGAATGTAGATGCATAGGTCTTGTTAGGTTATGTGTTTATATAGCCTATCTCTGAACTATGTGTGG  
GTGTTATAGGTTGAAGGTGAAGCAGGCAAATGCTTAAAGGCCACAAGAAGCCCATGATTAATGACTCTTCAGATAACAGAAAAAGGAAAAAGAAAAAATCTGTGCAGAATTAAT  
TGATGCTTGTGCGTCTTTGGAAAGTTGCTTGTGTTGATTTGGGAAATTAATCCTTTACACATGT

>comp172840\_c0\_seq19

CAAAGCTCATGAAGAGCTGCATTTTCGTTTCTCTGGTGGTGTATTGTATCGTTTGTTC AATCCCTCGATTTACGAGAAACGGAGGAGCTTTCGTGACAGATCAAAGCTCATGAACCAAATC  
AGCCGACGCCCGCTCTCGAGACTTCTCCTCATAGATGAATCGGAGCGATCACTGCGAGTAAGACCAATAATGTCTAAACTTATCATGATAAATAACAAAAGTGAACTGATGTGCCA  
TAGATGGAGGCACGTTTTCAATGCATCTTACCAGACTTGAATATTTGCACTGGATCAGTGGTGAAGCTTGTGATGTTGAGTTAGAAATTAACACTGCCAACAAATTTTACAGGCCA  
ATTCGGCCATCTGATCTGCAAGTTCTTGAGCTGATCCATGCTTCTTTATTTCCCGTAAGGTATGACATAGACTTCTTCCTCAATGTTGTCAATGGGCTAGGCATTGTCTCTTGGGGTGCTGTT  
GACGTTAGCCGGTCTGATGGTCACATTGACGAGCTTATTGGATTTGTAACACTACACGCATCAACGCAGTAAAAGAAAGTGAGGTAGCTAACTTACGTA AAAAGTTTTTTAGAGAAGTTGAAC



GTTATAAAAACATTCAAGTCTTTCTTGTACAGATTCAGAATTTACTAAGATATGACTACTAGGAACGATCAAACCTTTAGTCTATATCTTGACTTGGTGTGGTAGAACAATACAGGAAC  
CTTGGCATAAGCTTCTTCACTTGTTCGGGAGGTTATAAAATATGCTTCAAGCATTCTAGCTGCAGAGCAGTCTATTTGCATGTTATTGCTTACAATCTACCAGCCATCCATTTCTACCAGAAG  
ATGCTATTTAAGCTTGTAAAGAAGGTTGTCAAAGTTCTACTATATTAATGGATATCATTACGACGCATTCTCTGTTTGTGTACTATGTTAATGGTGGCCAGTCTCCTTGCTCAATGCGGTAAGGA  
AATCATTTTGGTATCTAAGTTGCATAATGTTAGCGTATTTTGGCCCTCTCATATGCATCTCAATTCATTTTATCATTGGAACAAGGGAAGGAATATGAAATCACATCTGCACAGTGCATTGTGG  
AGAAGTTATTTTGTGCGGAGGTCGAACGCAGAATGCCATCCGGAGATTAACCAGAATGCGCCACATAAGCAGCACCGAGCAGTACAGAGCCGAGTACCAGCAAAGAGATAACGTGA  
CACATTTGACTGGACTCCGGAAGACGTTTGGCGTCCGGCACAGAATAATTAATCTGCATTGTCAGGGTCAAATTTCTTCTTAGGATGCTTGTCTATATATACACGCGTGCTTATGTTTTCTA  
TTATTGGAGAAATTATTACCTGCGAATTCGCACATACAGACAACCAATTAAGAGTTTGTACACAGCTATGCACAATTATTCACGCCAAAGTTCTAATTGTCTGTTACATATATCCGCACCT  
TCTTATCTGCATGAAATTTATCTCCATTACCGAGTGTTATATTCAGCTTCTGTCTTGCAGGGAAGTTTATAGCAGCAGTTGCTGCATACTTGAGGGGACTACTGAGCATCCTGGCTGGAAAG  
ATTTGGAACGGTGATTGCAAGAAAAGGTCAAGATGGTCCAGGTGTAAGAAAACCACAGCCTTGGACTTACACAGAACAAGAGAATCCTCAATGCTGAGAATGATATCTGCCAAAATGT  
TAAATTTTAAAATCGTCTGAAGTTGCTCTGTCTTGAATTCATTCATGGACTACTTTCCAGCAAAGGTTGAGGATCATGATTTTAAATTTCTAACTGAGCACTTGAAGATAAGAAA  
GCTATTGTGCTTACCAAATGGCGACAGCATGTTATATCATTTGCTTTTCAGCACACACTTGATAAGTGAAATTGTTGCAACTTGCAAGTTTTCTTGTATTTTCAAATTTCTTGGTTGCTC  
TCTTACAATGCTATTAATCTATTTTCATCTGCAGATAAGATGAATTTTCCACAACCTTGAACCTATAAATATCCATGGATGGATATTTAGTCCTCGAAGATGTTCTGTTATCAGAGCGATGT  
ATCGAACTGAATTTCTTACCATATCGGATTGCGTTGAGCTGTTGAAAGCCCTTTCTTTCAGTACAAAAAGCTGTAGTGGACTTGATTGGGGCACCAAACTAGTAAGTTTCATTGAAATTGAA  
TTGAAATCTCTTAAACTTAAACCAATCAATTTCAATGTATAATTTGATGGCCACTCTTGAATATGTTTCCAGTGTGTTTAAAGTAAGGTCATAAAGCTACACTTATGATGTTTACATCTCCA  
AAATAAATAAATAATTTGCTGAGACAAATTAAGTTTTCTCCAAACAGAAATAAATAGCATTAAAGTCTACTAAAAATAATACAACAAGTGGTCCATTTGCTGCCTTATTTACTATAAACAT  
GGTTACTTATCATAATCAATCATCTTGGAGGATCCTTAACTTAGCTTTCCGCTAACACACCTTTCAGTAATAAGCTGATTACTGCATACACGGCTTAAATTACACACACAACATCATATAGATG  
CCTTCTCCAAAGTATTAATGAGGTGCAGATATTGATCAACAAAACACCATATACATAATCAATCACAAATACAAGCCACATATAGTTATAATGGCAACCTAAACCCTAAATAACTAATTAATCA  
AATCTTGCTCTCCTTAATATGCTTGATAACAGTGTGGCGACGTGCACCTGAGGGAACAATGGAAGCAAGAGAAATAGCATCGATATGGTCATCTTTAAGCTCATAGAGTATACTAGATTTAA  
TGATGGAAATAGACTTCTCTTTCTCTATGATCTCAAAATGAATAAGATAAGAGCTGAAACCCAGTTCAATTAGTCCTCCTTCTATCACTTGTATTTCTTTTACATGCTTTTCGTTGTCTACCTT  
CACAAATTTCTGCTTGTGTAAGTCTTAGGACCTGATGATTCTGGTGGATAAGAAGTGCATATAATGGTTCACACACCACCTCTCCCTCCTCACTTCTACCTTAAAGTATTACATGAGGAATCA  
AGTCCATAACAACCTTAGCGAGTCGAATAGTGCCATAGACCTCCACAGATCATCAGCTGGTACATCAGCCTCGAGCTCATGATAAAGAAATCCCTTGATCATGCTTGTGATTATCCTTTTC  
AAGCCAACCTCAGATAGCTAATTTACTTGAGAGGAATGTAGATGCATAGGTCTTGTAGGTTATGTGTTTATATAGCCTATCTCTGAACTATGTGTGGGTGTTATAGGTTGAAGGTGAAGC  
AGGCAAAATGCTTAAAGGCCACAAGAAGCCCATGTATTAATGACTCTTCAGATAACAGAAAAAGGAAAAGAAAAAATCTGTGCAGAAATTAATTGCATGCTTGTGCGGTCTTTGGAA  
AGTTGCTTGTGTTGATTTGGGAAATTAATCCTTTACACATGT

>comp172840\_c0\_seq22

GAGAGCAAAGAATGCGATCCAACCTGTTACCAATCCAACGAAGGATCAGCGATCGCCGCGGGAAGGATCTCTCGAGAGATCTCTTCTCGTTTAAATCCAGGGATCTGGCGGAGAGTAGGG  
CCTGGAAAGTATAAAGTTTGTATGATGGCATAATCAGGGGAGTTAATGTGGCATAGATGGCATGCTTATGCATGCATCTTTACCATAGTTACTTTTTTCCCGTGATTAGTGGCGAGGCTTGT  
CATGTTTGACTCAGAAATTAGACTGTCCAACAATTTTACAGGCCAATTCGGCCAGCTGATCTTCAAGTCTTGTGAGCAGATTCATGCTTCTTATTTCCAATCAGGTATGAGAGGGAAT  
TCTTCTCAAAGTTGTCAATGGCCAAGGTATTGTTTCTTGGGGTGTGTTGACATAAGCAGGCCTGATGGCCATGTTGATGAGCTTATCGGATTCGTCACAACACGCACCATTCAGTAAA  
AGAAAGTGAGATTACTGATTTAATAGGATTTGACACATTAAGGAAGGATCAAACCTTTAGTGTATATATGACTTGGTGTGTGAGAACAATACAGGAACCTTGGGACAGCTTCTTCACTT  
GTTCCGGGAGGTGATAAAATATGCTTCAAGCGTTACTAGTTGCAGAGCAGTGTATTTGCATGTTATCGCTTACAATCAGCCAGCCATCCATTTCTACCAAAGATGCAATTTAGGCTTGTAAAG

AAGATTGTCAAATTTCTACTACATTAATGAACAGCACTACGACTCATTCCTGTTTATGTACTACGTAATGGTGGTCGATCTCCATGCTCGCCATTGGATGTTCTAGCAGCATTGCGGCATA  
CTTCATGAGCCTCCTAAGAATGCTTATTGCAAAGCTGTGGAAGGGTGGTGACAATAGGAACTCAAGATGGTCCAGGTGTAAGAAAACACAGCCTTGGACTTACACAGAACAAGAGAA  
TCCTCAATGCTGAGAATGATATCTGCCAAAATGTTAAATTTAAAAATCGTCCTGAAGTTGCTCTGTCTTGAAAATTCAATTCATGGACTACTTTCCCAGCAAAAAGGTTGAGGATCATGTAT  
TTTAATTTCTAACTGAGCACTTGAAGATAAGAAAGCTATTGTGCTTACCAAATGGCGACAGCATGTTATATCATTGCTTTTCAGCACACACTTGATAAGTGAATTTGTTGCAACTTGCAAG  
TTTTTCCTTGATTTTCAAACCTTCTTGGTTGCTCTCTTACAATGCTATTAATCTATTTTCATCTGCAGATAAGATGAATTTTTCCACAACCTTGAACCTTATAAATATCCATGGATGGATATTT  
AGTCCTCGAAGATGTTCTGTTATCAGAGCGATGTATCGAACTGAATTCTTACCATATCGGATTGCGTTTGAGCTGTTGAAAGCCCTTCTTTCAGTACAAAAAGCTGTAGTGGACTTGATTG  
GGGCACCAAACCTAGTAAGTTTCATTGAAATTGAATTGAAATCTCTTAAACTTAAACCAATCAATTTCAATGTATAATTTGATGGCCACTCTTGAATATGTTCCAGTGTGTTTAAAAGTAAG  
GTCATAAAGCTACACTTATGATGTTTACATCTCCAAAATAAATAAATAATTTTGCTGAGACAAATTAAGTTTTCTCCCAAACAGAAATAAATAGCATTTAAGTCTACTAAAAATAATACAACA  
AGTGGTCCATTTGCTGCCTTATTTACTATAAACATGGTTACTTATCATAATCAATCATCCTTGAGGATCCTTAACTTAGCTTTTCGCCTAACACACCTTCAGTAATAAGCTGATTACTGCATAC  
ACGGCTTAATTACACACACAACATCATATAGATGCCTTCTCCAAAGTATTAATGAGGTGACATATTGATCAACAAAACCCATATACATAATCAATCACAATACAAGCCACATATAGTTATA  
ATGGCAACCTAAACCCTAAATAACTAATTAATCAAATCTTGCTCTCCTTAATATGCTTGATAACAGTGTGGCGACGTGCACTGAGGGAACAATGGAAGCAAGAGAAATAGCATCGATATG  
GTCATCTTTAAGCTCATAGAGTATACTAGATTTAATGATGGAAATAGACTTCTCTTTCTCTATGATCTCAAAATGAATAAGATAAGAGCTGAAACCCAGTTCAATTAGTCCCTCCTTCTATCAC  
TTGATTTCTTTTACATGCTTTTCGTTGTCTACCTTCACAAATTTCTGCTTGCTGTACTTAGGACCTGATGATTCTGGTGGATAAGAAGTGGTATAATGGTTCCAACACCACCTCTCCCTC  
CTCCACTTCTACCTTAAAGTATTACATGAGGAATCAAGTCCATAACAACCTTAGCGAGTCAATAGTGCCATAGACCTCCACAGATCATCAGCTGGTACATCAGCCTCGAGCTCATGATAA  
AGAAATCCCTTGATCATGCTTGTTGATTATCCTTTCAAGCCAACTCTCAGATAGCTAATTTACTTGAGAGGAATGTAGATGCATAGGTCTTGTTAGGTTATGTGTTTATATAGCCTATCTCTGA  
ACTATGTGTGGGTGTTATAGGTTGAAGGTGAAGCAGGCAAAATGCTTAAGGCCACAAGAAGCCCATGTATTAATGACTCTTCAGATAACAGAAAAAGGAAAAGAAAAAAAATCTGT  
GCAGAATTAATGCATGCTTGTGGTCTTTGGAAAGTTGCTTGTGTTGATTTGGGAAATTAATCCTTTACACATGT

>comp172840\_c0\_seq8

CAAAGCTCATGAAGAGCTGCATTTTCGTTTCTCTGGTGGTGTATTGTATCGTTTGTTCATCCCTCGATTTACGAGAAACGGAGGAGCTCTTCGTGACAGATCAAAGCTCATGAACCAAATC  
AGCCGACGCCGCCGTCTCGAGACTTCTCCTCATAGATGAATCGGAGCGATCACTGCGAGTAAGACCAATAATGTCTAAACTTATCATGATAAATAACAAAAGTGAAGCTGATGTGCCA  
TAGATGGAGGCACGCTTTTCAATGCATCTTTACCGGACTTGAATATTTGCACTGGATCAGTGGTGAAGCTTGTGATGTTGAGTTAGAAAATTAAACACTGCCCAACAATTATTTACAGGCCA  
ATTCGGCCATCTGATCTGCAAGTTCTTGAGCTGATCCATGCTTCTTTATTTCCCGTAAGGTATGACATAGACTTCTTCTCAATGTTGTCAATGGGCTAGGCATTGTCTCTTGGGGTGTGTT  
GACGTTAGCCGGTCTGATGGTACATTGACGAGCTTATTGGATTTGTAACCTACACGCATCAACGCAGTAAAAGAAAGTGAAGGTAGCTAACTTACGTAAGGTTTTTTAGAGAAGTTGAAC  
GTTATAAAAACATTCAAGTCTTTCTTGTACAGATTCAGAAATTTACTAAGATATGACTACTAGGAACGATCAAACTTTAGTCTATATCTTGACACTTGGTGTGGTAGAACAATACAGGAAC  
CTTGGCATAAGCTTCTTCACTTGTTCGGGAGGTTATAAAATATGCTTCAAGCATTCTAGCTGCAGAGCAGTCTATTTGCATGTTATTGCTTACAATCTACCAGCCATCCATTTCTACCAGAAG  
ATGCTATTTAAGCTTGTAAAGGTTGTCAAAGTTCTACTATATTAATGGATATCATTACGACGCATTCCTGTTTGTGTACTATGTTAATGGTGGCCAGTCTCCTTGCTCAATGCGGGAAAGTT  
TTAGCAGCAGTTGCTGCATACTTGAGGGGACTACTGAGCATCCTGGCTGGAAGATTTGGAACGGTGAATGCAAGAAAAGGTCAAGATGGTCCAGGTGTAAGAAAACACAGCCTTG  
GACTTACACAGAACAAGAGAATCCTCAATGCTGAGAATGATATCTGCCAAAATGTTAAATTTTAAAATCGTCCTGAAGTTGCTCTGTCTTGAAAATTCAATTCATGGACTACTTTCCCAG  
CAAAGGTTGAGGATCATGTATTTAAATTTCTAACTGAGCACTTGAAGATAAGAAAGCTATTGTGCTTACCAAATGGCGACAGCATGTTATATCATTGCTTTTCAGCACACACTTGATAAG  
TGAAATGTTGCAACTTGCAAGTTTTCTTGTATTTTCAAACCTTCTTGGTTGCTCTCTTACAATGCTATTAATCTATTTTCATCTGCAGATAAGATGAATTTTTCCACAACCTTGAACCTA  
TAAATATCCATGGATGGATATTTAGTCCCTCGAAGATGTTCTGTTATCAGAGCGATGTATCGAACTGAATTCTTACCATATCGGATTGCGTTTGAGCTGTTGAAAGCCCTTCTTTCAGTACAAA

AAGCTGTAGTGGACTTGATTGGGGCACCAAACCTATTACAAACTGGTTATGAAAATTAGTTTTCTTGGAAAAGGGATACAGCACCTGGTGGATAAGAAGTGCGTATAATGGTTCCAACACC  
ACCATCTCCCTCCTCCACTTCTACCTTAAGTATTACATGAGGAATCAAGTCCATAACAACCTTAGCGAGTGAATAGTGCCATAGACCTCCCACAGATCATCAGCTGGTACATCAGCCTCGA  
GCTCATGATAAAGAAATCCCTTGATCATGCTTGTGATTATCCTTTCAAGCCAACTCTCAGATAGCTAATTTACTTGAGAGGAATGTAGATGCATAGGTCTTGTAGGTTATGTGTTTATATAG  
CCTATCTCTGAACTATGTGTGGGTGTTATAGGTTGAAGGTGAAGCAGGCCAAAATGCTTAAGGCCACAAGAAGCCCATGTATTAATGACTCTTCAGATAACAGAAAAAGGAAAAGAAAA  
AAAAAATCTGTGCAGAATTAATTGCATGCTTGTGCGGTCTTTGGAAAAGTTGCTTGTGTTGATTGGGAAATTAATCCTTTACACATGT

>comp172869\_c0\_seq5

AAAAAAAAAAAAAAAAAAAACTATCTTGGCATTTCATATCTTATCTTCCATACCATGAGAAGAACAATAATCAAATCGGAGAATAAAACAAATGAAGGGCAGCTCATATGAAATCTTTTTT  
TTTTTTTGACATGCCTATTTAAATAACGCTCAACCTCATAACAACAATCATAGTAAATGATGTATAGTACTAAATCTCAAATACAACAATCATATAAAGTGAACAGCGAAATCAATCTTTAC  
AAACATGACTGTATATGCGGTGATCAGTTTTAGACATAATGAAGATAAATATAACCTTAATAAATGAGCTTGAATAAAATCTTTAGACTTGGTCAAGGAACTGCTAAGCAATGGAACCTTAGA  
GTTGGGGAGTTTTATACCTGTAGCTGGGTAGTTTGTGTAGCAAAAATAAAGAAAATCACCCACTAGCCTATGAGATAAGCGACCCATGGTCTGCCGGTCTGGAAAGTGGCAGCGAGTAG  
CTCGGGTTCGAGACCGGCGTTCGGAGAGGGGCTCGGCGTTCGAGTAGAAGAGCTTGGTTCGAAGGTGCCTTGGCTGGCAACGTGAAGAGAATAGCTGGTGGTCAAATGACCAGCAGCGTAT  
GAATGGCCGGCGAGAGGTTGGGGCAACGCCGTGAGTCGGTCAGCTGGTCGGCATTAAACGAAGGACCCCATGTCGTGGCCAAGAGAATGGCGGAAGAGTTGGAAGGAGGAATGGCT  
CGAGAGAACTGTCGGCGGGCGGCGAGTGAGGCGGCTGGGGTGCACGACAAGAAGTGGACACCAACGATAGTGGACCATGAGCTCGGAGGTCGACATCGGGGTTGCCGGCGTGCAGGTCG  
AGATGGTAAGAGAACATTTCTTTGCCTCTTAGTGTGAGAAATCGTGTCTTGTTCATGAGGGCCGAGGAGCTCTCCCTGTTGCTTGTGCTTATGAGAGCCATCTCAGAGGAAGGAAAGGCTTG  
GGGATGAGGAGCTAGGGCCGGCTGAAGTCCTCGGAAGACCAAGAGATTTCTCTGTCCATGTCCCCGATCCTCATTCCCTCCAAGAGTTCATGTATGAGGAGCTCTCTCCATTAGACGG  
CTGAGATCTAATTGAGCAATTTCTTTCTCTGAAAAGCAAAAGTGAACCATTGTCCTCTTGATATCTTTCTCGAAAAGCATTAAGATATATCTTTTTGTTGCATACATCTTGACCATTGG  
ATCTAAATATATGCTTCATTTGGAGATATGTGAAAAGTTGAATTAAGAAATTTGGAGACAACTCAATTTAAACTATTTGAATGTGATATTATATTATACTATTTAATTATTTTTTTAAT  
ATGATTTTTTTTTTTGTTTTATGTGTTTCAACAATCATAGATTTAGATTATCTCATACTGTCAAATGTAACACATAGTATATGGAACATTTACCATATTTATGAGTTACTCATAGTATGAGAAAATC  
CTCCAATGATTGGA

>comp172869\_c1\_seq1

GTCGTCAATGCCGACCAGCTGACCGACTCACCGGCGTTGCCCAACCTCTCGCCGGCCATTTCATACGCTGCTGGTCAATTTGACCACCAGCTATTCTCTTCACGTTGCCAGCCAAGGCAC  
CTTCGACCAAGCTCTTCTACTCGACGCCGAGCCCCTCTCCGACGCCGGTCTCGACCCGAGCTACTCGCTGCCACCTCCAGACCGGCAGACCATGGGTGCTTATCTCATAGGCTAGTGG  
GTGATTTTCTTTATTTTTGCTACAACAACCTACCCAGCTACAGGTATAAACTCCCAACTCTAAGTTCATTGCTTAGCAGTTCCTTGACCAAGTCTAAAGATTTTATCAAGCTCATTTAT  
TAAGGTTATATTTATCTTCAATGATGCTAAAACCTGATCACCGCATATACAGTCATGTTTGTAAGATTGATTCGCTGTTCACTTTATATGATTGTTGTGTATGAGGTTGAGCGTTATTTAATA  
GGCATGTCAAAAAAAAAAAGATTTTCATATGAGCTGCCCTCATTGTTTTATTCTCCGATTTGATTTTTGTTCTTCTCATGGTATGGAAGATAAGATATGAATGCCAAGATAGTTTTTTTTT  
TTTTGGGCGTTTTCTGTTCTTTCACAAAACCTGAAGAGTCGAGAATAAAGCATGCTTGTTAGCAGACCTTTTTTATTTAATGGCAAAGTGTATGGTGTAAAGCGTGCTTGGTAGTCTTT  
GATGTTTATGACTATTATTGATTGATGAGCTCTGAATAGATTGTGTCATGAGAATCTTAATCAAAAATATGTGGA

>comp172872\_c1\_seq6

AATGTCGTAACCTCCGATCCGACAAGAAGGGAAAGTCGTCTAAGGAGGGAAGTCGAACAGCCACGAAGGAACCGAAGTAGCGACGCGCAATCTGTACACCTCCTGCGAATCAACGA  
AGCCGAACAGCAACGACGCAAAGAGGCAAACCTTGACCGCAGCTTCGTATCTCCATTGACGATCATCCACACCAAATCAGCCCGCCTCGATGCCAAGCCACCGATGATCATCCAAG  
CCGAATCAGCCAGCCTCGATGCCGAAGGCACCCATCCCGTCCCGACGAATCTTGGGTGCTGGCAGTGAGGGGGAGGTAAGCTAGATCGGCAGCAGGTGGTTTTATTCAAGATTTGGTT

TTGCTGCGCTTACGGACGATGATGATCGAGACTATTCTGATGTTGCCCTTGGACGGCCTTCGGGGCAACCAGGCATGTTCTCCTGCACTGTTTCTACTCCGGCTGCTGGCACTGAGAGGG  
CTGTTATGGTGCTTTCTGGCAACCGGTTCCACAGCCTGGGTTCCTTGCATCTCCATGATGTTTCGGGATGATCTTTTGTCTCTTCTTTTCTGAGTCCTTTATGTTTTGCCAGCACCTGTTTTT  
TTGCTTATTGTTGTCTTTGTGTATATTTTCACTTGTAACTTAACTTTATCTTTTAATTCATGGGTCTTGGACCCCGGGTTACCCAAAAAAATATTGGTAGTTTGATGAATCTATTAAC  
ATTTAAAGATTATTCTTCTATTGACCTGACATCTCATCCTCGTAATGATCTCTTTTTGGGCTTAACAGAAGATTGAAGCCCTTACTGCCAGATTATTTTTCTGAAAGTAAGGCTTAAACCTT  
GGAGCATTCCTATTCTCAAGGTTTCTTTTGAATAGCGTTAATAGGGTTCATTTGAAGTTGCTATTTAATAAAAAGATTGCTAAATTTCCAGTTTTAATTTTGTGCGATCTAACCCTGATTTA

>comp172895\_c1\_seq5

ATTTGAAAACCTTCTTCAAAGATGCTTTAGAAGTTTTTATTTTTTAAATTTAAATTCCTTACTTCTAAATAATCTGAGTCCTTGTGGTAAAACCTAGTTTTAGAAAATAGAGGTGCAGGTTCTG  
GTAGGAAAAACTAGTCAAGATGACATATCATTATGTATCTTCAACAAATATATGCTTTTCATGGTATGCAAGATTAATTTTTGTAATGCTGCTTACGATTTAAAAAGTGAGCTAAACGTGCCAA  
ATTTTGTATCATGGCCTTCTAAAAAACCCCTTATGCTAAAAATATTGGAACTCTCATTACATTCATATACTTTTAACTTCATACACTTGCTTACATCCTCAAACCTTTTTCTTCCACA  
ACAAACCAATAATTTTACAGGGGGGGCTATGCAAGGCCGCAAGATCTTTCATACCTTGAAAAAGAAAACAAGGCATTTTGTACCAGTGCCTTTGCTGCCATTGCATATAACGACATGTATT  
GACTTACTAGCAAGGAACAACGACATGTTCTTGATGGAAGCAAGTGGAGCAGTGGCTCTCGGTCAAGGCAAAGAAGCATGAAGATCTGTGCAAGGTGTAGGCGCAACCACCAGGAA  
GTGACCGGTGGGATGGAGAGCAAGGTGTTTTTGTCTGGTCAAGACAATACGATAGCATTCAAGATTTCTCTTTCAATTTTTTTTTTCAATGTAATACTGGATCAAGATCGAGATTGTTAG  
GATTGATCCAAATTTAGGTTAAGTCATTCATATATAGATGCTATAGGTTGATTTATAATTTGAGGAAAATGAAATAAAGTTTTCTCCTAAAATCTTTTCTCTTCTT

>comp172930\_c0\_seq5

TTGAATGCATCTTTGGTATGCAAATAGAGCATTTGCTCATAGTCTGAAGGAAGAAAATGTTTCATTCTCATTGAGTGGAAAGTTTCTTCATGCAATGAATTCTTGTGATGAATGATTTGTTGG  
CGAGGTGTTTGGCTGGAATTGGCCGTGGATCTGATACAAATATGTTATAAACCAAAACAAACGAGAAGAAAGAAGAGCTGAATAATTCGGTTCGAGTTTTTTTCAAGTATTGCAAATAG  
CTGTTCCACCAACTGTATTTGAGAACTGGATGATAGACTACCGTCAAATCATTGTGTATAACATTGCAGAACTAAAAGCTTTATTATTACTTTCAATGCCTCTATACTACTACCAAACAA  
GAAATTTCAAAGATGTTTTGTAGTTTGAAGAAACATTCGAACTATTTATACAAAATCTCTGATGAAGTTATCACGTACAGGTTTTCGGAATACAAGCAGTCAGATATCAGCATCCTTCTCT  
TCAGACGGAAAATACATCATCTGTGCGAGCGAGGACTCCAATGTGTACATATGGAAGCGTGGCACAGCACATAGGGCCGGTGGTGTGCGGTGGTGGAGCGAAAAGTAAGGGTTGGGTTAC  
CACTCGATCACATGAGTACTTCTACTGCAAGGATGTCTCAGTTGCAATCCCATGGCCAAACAATGGAAGCAACCATGATAAACCAACTTTGCCATTGCCATCCTCAGGAACTTGGGGCC  
TTCAAACAGATCACAGCAATCAAGCCACAGCCTACATGACTCCTTCCCAAAGAAGGGCTTGCTGGAACAAATACTCCCTACAAGCCCCGACAAAGTGCAACCATCACCATCTCATGCAG  
CATCTGGCCTGAGCAACTCATCTTTTGCCTCACTACGGTCTTCCATTAATCTTTCGTGTCATTTGCATCTTGGGGATGGGTTGGTGGAAAGCAGGAAGGTGGTTACAAACAGTTTGA  
GAGTTCAAATGCTTGGGGTTTGTGTTGTTACTGCAGACCTGGGAGGTAATATCAGGATATACCAAACCTTTGGCTTGCTGTGAGGCTTAGCAGGCAGAACAACCTGTTCTAGGAGGA  
TGATAAGATTGTGCTATTTTTTTCATTTAAGAGGTGAAAGCCTGAAGATTATATGCACTGTAATCCTGTATCCATACCTTTGGGTCTCTGTCATCTTCTTGTGCTCAGTATGCTTC  
ATGGTTCTGTAAATCTTCATTTTCATGTGGATCAGAGAGTTAGTGGAGCAATCCTTTGACATCATCTCTGATGTTAACAAGGTGTCATATGGAATTTGATTATAACGTTTATTTTTGGATT  
TAAAGAACATTAACAGCTCTGACAAACAAGCGAAGAAGCAAGCTTCTTCAAAGAGTGTGACAGAGCAGATCTATTTGACTTGTGCAAGGATTGTGAATAGATTTTCTTAAAGTTAAAAA  
TTGATTATGTTGCAATTATAGCAAATATCTTGTTTTTGTGCTAGATATTTCTGCACTTTTGTATGAGAAACATCTGATCCATTTTTTTTTCATTTGTTGGCTGTTATAACTTGAAC  
AACTCGAGCAAATCTGAAATG

>comp172975\_c0\_seq13

TCAAGCAGAAACTAAAGAATTAGTCCCTCTGGATGTCAATGCAGCTTTCATTCATCTGAGACCAGTTTTGCTGAAGAAAAGCAAGAAATTTCAAAGCCTATAAACTTAAATGCTTTTGA  
CATCATTTCTCTTTCAGCTGGATTGATCTGTCCGGCTTGTGTTGAGGAGAACGACTGCAAGAGGGAGGCAAGATTGCGATCCAATAAGCCACTTCTATAATTATCTCAAACCTGAGGAG

GTTGCCAAGCGATTGAAGTTAAAGATAAAAAAGAAGGATGGAGGGATTTTGAAAATGGAAGGATCAAAGAAGGCCGGAAGGGAGTATTAGCCATTGATGCAGAGATTTATGAGGTAAT  
CCCTTCACTCCATCTCGTGGAGATCAGAAAGACAAATGGAGATACGATGGAGTATCAGAAGCTGTGGAAGCAGGATATGAGACCAGCCCTTAAGGACATTGAGTGGGCTTGCCAAGGTG  
ATCTGCCATCATCTCAACCACCGCAGCAGCTGCTACTGGCTAGGAGTGGTAGCATCTAGTGGCAAGAGCTGAAAATTGTCTGATTCACTTCTAAATATTCCGGTATTTATCTCTTCTTTTAA  
GTTTTTTTTTTTTTTTTTTTCCCTTGAACAAATTATATCTCTCGTTCCCTATTTACATGCAGATAGATTCAATCAAATTCGTTACTCAACCCAATAATTTAACAGCAAAAAGCTCGTGAAATATA  
TAATTTAGATAAGAACTAATTATTTGATACAGTCTTTTCATACCGCAGCAACACACAATCACTGCAAAAATTAACCTTGTTTAGGCCGGCAATAGCATCGCAGGAGCCAAT

>comp172977\_c1\_seq13

CTATCATCAGTTTTAAAAAGAAATTTCTCATCCACAACCTCATCTAGTTCCTAGTTGAGCTGTGTAGGAAGGTGTCCTAAGATTAATTCTATACTTTCATCATATGAAAGATGGCCATAGCTAA  
AAGCATAAAAAAAAAAGTCTAAAAGCTTCCATTTAGAGTAGAAAATTATTCTATAAGCAGACGACAAGAAATAGATGAGTGTAAAGACAAACCAACGAAATCAAATTCAGATTCAATGTATT  
GGCGAGAAATTCCTCGTTCAAGTGTATAGATTTTATGCTGAGAGTACTTCATCACAGCCCAATTAGTTGAATGTACCAAAGCTTGAGATTCTGAATGTAAAAGAATAAGAAGGAGAG  
AAAAACGTTTTTGAAAATAAAAATGATTAGTTATGTAGAAGGCCACTCAGTGATGGCGATAATAATAATTGGTTCGATTCTGCCAGCAAGAGTCTCAATAACATCTCAGAAGAGGGA  
GCTTCTTTATCATCATAGTGGCCTTCGCACAAATGAAATTTAGAATAACTGATTGGAAGAAGCGTTAAAGCAGCGATGAAAAACAACCCTAATCTAAAAATACGAAAGAAATTCAAAAG  
GAGAAAGCTCAATTCGTTGAGTAGTCGACATACAGATCTCTCAAAGAGAGACTTGAATACGGTCTGTTGAGCTTGAAATTTTTGAATCATCACAGCAATCCCTTTCAAACGAGCTCA  
GGTAAATTTAAATTAAGCAATACGAATGAGAAACAATTATATTCATGAAAAGGTTGGAAATGCTCCAGACTCCAGTGATGTTGTTGTTGTACGCTTAGGAATAAAATTTAAATGAAAGCAGA  
AACAGAAAAAGAAAACAGGCTTTCCTACTAATTCAATAATGGGACATCAAATGCAAGAATAAAAAACCTAAGGGCATTAGCTCCAATAACTGTGAGGTCCAATAATGTTAGTTATCTACC  
ACTTTTCCCAAGGATGTCCTATCAAGAGAAATTATTCTGTGCATAATCCTGACAGGAAAAACAGTCCGGATTTACTACATATTTGTGAGTATTTATTGTATATTTCAAATATGCAGTAAAT  
ACTCACAAAATACAAAGTTGTGGGTATTAGTGAATTTGCAGAAATTTTGTAATTTTGTACATATTTTCGCTAAATATTTCCAAAATACAGAACAACCAGAACGATTCTTCTGTCCGA  
ACTAAGCACAGAATAGTTTCTCTACCAACAGGACAAAAAATGACACATGATAAAACCTTTTT

>comp172996\_c1\_seq11

CGAAGCCAAATTGCATGACAAACAGATGAAGTTGCAGCAATATACTCAGCTTCAACAAGTAGAAAAGGGCCACGATTGGTTGCTTCTTTGACATCCAAGTGAAAATAGTGTCTCCCATGTAG  
AACACGAAACCCGATGTCTTTTTTCGCTCATCTAAGTCTCCGGCCAGTCGCTATCACTATATCCGACAAGCTTGAAATCATTGTATGATGAATAGAATAGGCCAAAATCAATCGTACCTTT  
GATATATCGAAGAATCCTCTTGGCGGCCTTTAAGTGAGTAGTCGTTGGTATCTCCATATAACGACTAACTATTCCAACAGCATAAAGGATGTCCGGCCTAGTGCAAGTCAAGTAGCGCAAG  
CTACCCACCAAGCTCTTGAAAATGTTGGATTAACAATTTCAATTATCCTCTTTTTTGATAACTTGCCTCCGCATTCCATCGGAGTGCCTATGGGCTTGCAATCATTATGAATTTCTTTA  
GTATTTCTTTTCCATAGCTTTCTTGAGAGATAAAGATGCCCTTCATCCTTTTGCTTAACCTCAATAACCGAGGTAGTATGCCATTTGTCCAATATCCGTCATCTCGAACTCTTTAGTCATTACTTT  
CTTGAAATCTTTAAACATACTTGGATTACTTCCAGTGAATAATTAATCATCCACATATAAGCACACTATCAAATATCTCCATCCTTGACTTTGATGTAGAGGGCATGCTCGTAAGGACATTT  
GCTGAAGTTATTTCAAGGAAATACTTGTGATGCGGTTGTTCCATGCCCTAGGAGCTTGTTTAACCATAGAGGGCTTCTTCAGCTTTAAACCTTGTCTTCTTGCCTTTGACTTTGT  
AGCCCAGTGGTTGTTGAATGTAGACTTCTCTTCAAGAACTCCATTTAGAAAAGGGCGACTTAACATCCATTTGATGTATTTCCACCTATTTGAGCTGCCAAAGAAATGATTAGTCTTATA  
GTTTCAAGTCGAGCAACAGGAGCAAAATCCTCATCATAGTCGATGCCAGCTATTTGGCTGTAACCTTTTCGCCACTAATCTTGCTTTTACTTCTCGACTTCTCCTTTAGCATTTCTTTTGGCT  
TTGTACACCCACTTTACACCAATCGCCTTGTGTCCTTTTGAAGTGTAGCTATCTCCATGTATTGTTCTTTTCGATTGCCCTTGATTTCTTCGTCCATTGCATCCTTCCAATTCTAATTTGCA  
CGGCTTCTTGAATAATTTACAGGTTCAAAATCCGCAAGAGGGCAAAAGAGAGTGAGGTTGTCTTGATTCTCAGTACCTCGTAGATTTCTGTAAAGCTTCTAAAATGTGGTGCTTTTTTCGCT  
TGAGCCTTCACTTGAAGATGATAGTTCCTCTTGTAGTACTTGCATTTGGTGTGGTGGTGGTGTATGGGCTCATCTCTTTCTGATTTATCTTGGCTGCTCCACTTCTTCATCCTTAAAGAA  
GTTGTATTGATCTTCATGTGGGTCCCAAACCCATTCTCCTTCTTCAATTGAAGATAACATCACGACTGATGATTGTCTTCATAGTGTGGATTGTATAACTGTAGCCTTTTGAGCTAGAGTC

ATAACCGATGAAAATGTACTTTTCACTCTTGTCATCTAGCTTGCTTCGTTGCTCATCGGGTACGTGCACATGGGCTATGCTTCCAAACACTCTTAGATGAGAGATGCCGGGCTTCCTTCCAC  
TCCATGCTTCCTGCGGTGTCATTCCCCACACACTTCTTGTTGGAGATCGATTGGATAAGTAAACAGCGCATGCAACAGCTTCAGCCCAAAAATTCCTTAGGTAGTCTCTTACTCTTAAGCATA  
CTTCGAGCTATATCAAGGATAGTTCGATTCCTTCTCTCTGCTACACCATTTTGTGAGGAGATCTGGGACGGTCAACGGTCGACGTATTCATTTGCTTCACAAAATTCCTTGAAATTCCTTT  
GAAGTAAACTCTCCTCCTCGATCAGATCGCATAGCTTTGATCTCGAGGCCGCTTTCTTCTCCACCAAGGCTTTAAACTTTTGAATACTTCAAATACCTCCGATTTTTGCTTTAAAAAATAT  
ACCCATGATTTTCTTGAAAAATCATCTATGAAGAGAAGGAAATAATTACTCTTACCGAGAGAGGTTGGCTTGATTGGACCGCATACATCTGTATGTATGAGTTCAAGTGGCTTTTGTGCTCT  
CGAATTTGACTCCTTTGGAAAGCTTTCCTGAATTGCTTCCCGAGTAGGCAACCTTCACATAGCTGATCAGGGTGTGTTGATGCAGGGCAGACCTCTCACCATTTTCTTCTTTGATAATAGCT  
CCAATCCTCCAAAATTAAGATGCCCAAATCGAAGATGCCAGAGCCAAGATGGGTCTTTGTAGCAAGCTTTGAGACACTTGGAATATCATTGAAATATTGAGCAAGAACATCTATTCT  
TGACATCGGTATATTTGCAATTAGGTTGCTCATATTGTCTCTTATAGAAAGGTTTTATCTTTCAAATGAATATCATAACCTTTCTCTAAGAGTTGACCCAACTTAAGATATTACTCTTCATAT  
TTGGCACATAAAAGACGTTAGAGATGAATTGGTGCTTTCCATTCTTCAATCGGATAAGAATATTACCTTTTCCCTTCACGGCAACCTTGACTCATCTCCGAAGGATACATTGCCGTTACC  
GATTCATCAAGTTCACGAACATGCTTTTTCTTCCACACATATGGTTGCTTGACCCGGTGTCTAGATAACCATGTGTTATCTCCACCTTTTTCATTCTCCTTATATGCCAATAGCAAAGTGCCAT  
CTTGTGACTTCTCTCTTCCACATAATTAGCATTCTCTTCAACTTTATTATTATTAGGAGTTCTACATTCTGCAGCATAATGACCAAATTTT

>comp172996\_c1\_seq16

GGAGCTCGGTCTCAGGGAAAGGAGATCGGGAAGAGGCTGGAGTCCGCGAATGGAAGAACCTCTGTGAAGCCCTCTTTGTTCTCCTTTTAATGACAAGCAGGATCATTCTGCGAGGTAGA  
TGACGAGATTTAGGCAGGATTTCCGATCGAGACATGAGAGGCGCCGTGCTACAGTGGTTCAGCGATATTTCAATGGATTTCTAGATTTGGTAGAGGACTCAACGGGAGATGTTGTATAAC  
AACAAATGGAGAATAATATGTAGTATGTGCATCGTCAGTAACAAGGAGAATACACCCACCGTGGAACAAATTAGCG

>comp173008\_c0\_seq1

TAGGCTTACATCCACTACTCATTAGAAGAAAAAAGGAGAAATTTTTTTACTAAAATAAGAAAAAATTTATTAGAAATCTCCAAAATTATGAGACACATCAACCAAACAGTAGATTATAAAG  
CAATTATCTTTGAGAGCAATAGAGAACCATGACAAGTGGCTCTCCGGAGAAAAAATTATTATGTGTGGACACCAGACTTTGACCGGAGAGACGAATTAGAATACGCCACGTCACTTTTT  
GCTATGTATTGTAGTTGTATACTCGTTCTGTACTAAGTGACTTGGCGTGCTATGATTCACCTCTTTACAGTCCAGTGTCCACACAGAATAATTTCTCCTTCTGGAGGCCATAGAATCATCATG  
ATGTGGTGTCCAATCAGTACTATTGATGTGAATTCAAGATGAAACATAAAATATAAAATTTAGGTATCACTCCATTTAAAGAGATTGAATATCTCTTCTTCTTTTTTTGACATTGAGCGTTTG  
AACTCAGAACCAAACCTTCCAGTGCATAAGCTGGTAATCACCCAACCATTTGGCCAGCTTCTTCGGCGATTACGCTAGGGTTGGAGCTTGTAGTCCTCACCTTCACAATCTAATCGAAGTTA  
ACAACACAGTGGACAGCATCTCGAACAAATCAAAGGGTCTCCTCCTATCTGATCTGAAAAGAAATAAGGTTTATATATATTTTCAGAAAAACCATCTCATCACTTACTTTAACAACACTACAT  
ATGAGAAAAAATACCCTTTTTATTATGATATTTAAAAACAATGACTACTTTAAAATAAAATGCAGTTGCTGCATATGAGAAAAACAACATTTTACGCTATCTGTAGCAAATTTAAGCTAT  
AAACTAAAAGTGTGACTAAAATTA

>comp173008\_c0\_seq6

TAGGCTTACATCCACTACTCATTAGAAGAAAAAAGGAGAAATTTTTTTACTAAAATAAGAAAAAATTTATTAGAAATCTCCAAAATTATGAGACACATCAACCAAACAGTAGATTATAAAG  
CAATTATCTTTGAGAGCAATAGAGAACCATGACAAGTGGCTCTCCGGAGAAAAAATTATTATGTGTGGACACCAGACTTTGACCGGAGAGACGAATTAGAATACGCCACGTCACTTTTT  
GCTATGTATTGTAGTTGTATACTCGTTCTGTACTAAGTGACTTGGCGTGCTATGATTCACCTCTTTACAGTCCAGTGTCCACACAGAATAATTTCTCCTTCTGGAGGCCATAGAATCATCATG  
ATGTGGTGTCCAATCAGTACTATTGATGTGAATTCAAGATGAAACATAAAATATAAAATTTAGGTATCACTCCATTTAAAGAGATTGAATATCTCTTCTTCTTTTTTTGACATTGAGCGTTTG  
AACTCAGAACCAAACCTTCCAGTGCATAAGCTGGTAATCACCCAACCATTTGGCCAGCTTCTTCGGCGATTACGCTAGGGTTGGAGCTTGTAGTCCTCACCTTCACAATCTAATCGAAGTTA  
ACAACACAGTGGACAGCATCTCGAACAAATCAAAGGGTCTCCTCCTATCTGATCTTGGAGCTTACCTGCAAGCTTGAGCGAAACAGCTTGGCATAGCAGCTTAATCAAAAATCTGAAATTT

CGGCTCAAAAAA ACTTCCAGAAATCAAGGAGATCTTCATTTTCTTACAAAAAGAAAA CAAAAGGAGCAAACAGAAAGCTTGCAGCTTTGAAATGCGACAGAACAAAATAATAGTTTAA  
AATGAGAAAAA AATTTAAAAA AATTTAAAA CAATGATAAAAAAATAGTTATAAAGGCGCTTTAATTGAAAGGTATGTGACTAATAATATAACATTTTAATCACAGAATTTAAGATAAA  
ACACTTCAACAAAAGAAAATTAACAAATTTGATAACAAGCGAAA ACTGTAGATGAAGATAGAGAGTAACATAGCATAGGCAAAGAGAGAAGGGAGCTCCCTTCAGTCCAAGCAAAGATA  
GCATAGGATCCGACTTTATCTCCCGCATCATTCAATTCATCTACTAAGCCAATACCATTTCTTCTGCTAATTCTTCTCACTTAGCATTTGAATGAATGAGTCGGCAGCTAAACAAATCCTATCCC  
CATCCATGAGTGGACTGAAGGAAGCTCTCTTTATTTTACTTCCCATGCTAAGCCTTCCATGATTAAGTCACTCTTAAAGTAAAATCACAATACAAAAATGAAATAACAACAAAAAATA  
AAAGCATAGTAGCCATTTGAGGTAAAGGAAATGTCGAATGCATTGAACATGGTAGAAGAGTACTGAGAAACAAGCTAAGTGTAGGATTTTAGTAAGTTAGAAGGAAGAAGAGAGATTGA  
CATCCTTAGAGCAGGAAGA

>comp173008\_c0\_seq7

AAAAAAAAAAAAAATCTAAGATAAACAAATTATTA AAAAGTTAGTTTTTGAATAAATTTAAATTGAATAAATTTTAAAATAATTCACCCAAATATATACACTCAACAGATTATAAACATATC  
AGTTTAAATTTTTTATTCAAAAACATTTTGCTTACTTGATTAGTGGTGTTCAGACATCGTCAAATTTACAAGATTTCTCTCAAATAAACTTGGAGGATAGGTATATGTTTCATTAACATGATA  
TACACATAGAATATTTTAAATGTTTTATACGTAATTTCAAAGAAAATAAATATTTGGCTGATATTTGTAACCTGGAAACTATTTATTTGCAAATGCATTTGCTTTCATAACGCTGAGATGTTT  
ACCTTGGAGCTTACCTGCAAGCTTGAGCGAAACAGCTTGGCATAGCAGCTTAATCAAATCTGAAATTTCCGGCTCAAAAAA ACTTCCAGAAATCAAGGAGATCTTCATTTTCTTACAAA  
AGAAAACAAAAGGAGCAAACAGAAAGCTTGCAGCTTTGAAATGCGACAGAACAAAATAATAGTTTAAAATGAGAAAAA AATTTAAAAAATTTAAAACAATGATAAAAAAATAGT  
TATAAAGGCGCTTTAATTGAAAGGTATGTGACTAATAATATAACATTTTAATCACAGAATTTAAGATAAAACACTTCAACAAAAGAAAATTAACAAATTTGATAACAAGCGAAA ACTGTAGAT  
GAAGATAGAGAGTAACATAGCATAGGCAAAGAGAGAAGGGAGCTCCCTTCAGTCCAAGCAAAGATAGCATAGGATCCGACTTTATCTCCCGCATCATTCAATTCATCTACTAAGCCAATACC  
ATTTCTTCTGCTAATTCTTCTCACTTAGCATTTGAATGAATGAGTCGGCAGCTAAACAAATCCTATCCCATCCATGAGTGGACTGAAGGAAGCTCTCTTTATTTTACTTCCCATGCTAAGC  
CTTCCATGATTAAGTCACTCTTAAAGTAAAATCACAATACAAAAATGAAATAACAACAAAAA AATAAAAGCATAGTAGCCATTTGAGGTAAAGGAAATGTCGAATGCATTGAACATGGT  
AGAAGAGTACTGAGAAACAAGCTAAGTGTAGGATTTTAGTAAGTTAGAAGGAAGAAGAGAGATTGACATCCTTAGAGCAGGAAGA

>comp173015\_c2\_seq2

TTTTTTTCGCTTAGTAAACATATAAAACATAATCTATAAATAAAAATTTTATGACCTTGACTGTAAATACAAATGGACTGATAAATAGTTCAAGTTGCATACATTAATGGCACTGATACCCAAC  
ACAATGAACCACAAACCCCTTATTGGTCCACACAAGTTCAAATTTATACATCACAGAAACCAGACTTAGGTTGCATTTGGGACTACTTTCTTACTGCTTTATGAAGAAATTTTTTAGTACAAA  
AAATTTTTGATTTACTAATTTTTGCACTAGAAAGCTGCTTCGTAAAGAAATAAAAAAGCTGTCCCAAACGATGATTTGTACTTCATTTGGGACATCTTTTTTACTACTTTCTAAAACA ACTTT  
CTACTATGAAAATTTCTAGTTCATGAAACTTTTATACTAGAAA

>comp173030\_c0\_seq24

CTGCTTAAAGAAAATTGTTAGCATAAAAAATTAATTTTTAACAAAAA ACTTCATTAAGAATCAATAAGAAAGTTATCTCAAACGAGGCCTCAATAAGTCCTTTTAAATTTTTATCTTCTAA  
TATTGGAAAAGAGTGGTTGTTGTTAATCACACTGAGAAAAAGAAGCATGAATTTGTTGATTGAAGAGAAATTGAGAAGATTATTTATTTTATTTTACTTGGATATTTTAGCGCTA  
GGTAGTCAACTACCTTGATATTTTCTGAAATATATATATTCATCTATTGTATCTTATAAGCACCCGATCTTCTTCAATGCGGCCCTTGCTGTAAGGACTGGCAAAGCTGAAACCAACCACCTT  
AGCTTGGTTTATGATAATTTTAGATTGTATGGTATGGATCATTGATACATCCGGTCTGAGTGGAAAGTGAGGAAAGGTTCTAAATCCCATCTTAACTTTCCCTACCAAGAACATGCAGA  
ATGAAAACCAATTTAGCTGCAAAGAGCCACCGGCCAGGTTCTGTTAGACCTGGTCAAGTTTCGATAATATTTGTTCCAACCCAAAGTTTATCACCAATCTGCGTTCACACCTATAATACGT  
TAGATGTATTTATGAAGTTTACTGCACATGTGAGTGGCAATTTGCGTCTTAACTTTCAAATTTTAAACAGTTTGTGTTTGAATCATTCAATATCTTAAAATTTAGTTTAAAGCCAGCTTTATT  
TTTGCACACCTTCTAATTGTGGAAGCTTCTGAATCTTATTTTGTAGAGGAGCTATTTGTCATCTATTATGAAAAAGCCACCTTGATGAGGAGGAATAGCTGGAAATTAAGTAAAAGAAA

ATTAACCAACCTGGAGAGTATCTCCAACATTGATGAATACTGCAGTTGGGTCTGGTGGGACTGCAACCCATGCCATTCTACTGCCCAAGACTCCTGAGGCAGGTGCGAGTATTTGGAGAC  
CTTCAATACCGTTTGATCTCAGCAAAGTCAGGATCTGAGGGTCTGTATGCTCGCCAAACCAATCCTACTACTCTTCCTGCCCTTCTTTTGGCTCCACGTTTTGCTCTTGATGTCATGTCTT  
TTTTTCTATTGTTACTGTTGCTATTTCTGTTGCAGTTTGAGGGGTAGTGGTTTAGCCTTAAGAGAGAATCACTCCCCTTTCCCGTATAAGCTTGCAAAGTTCCCCACTGCCCCAAGCCCT  
AATCCTTCTTCTATCAGCTCCAGAATCTCGTTTGCTAGTTCCTTGATTGCCTCCACATAATCTTTCCTGACAGCTGAATTTGTTTGGATCCTTTCTGCAAATGATCCTTGCTCTATTGAAA  
TACTAGATGAATCAGCTGGTAGTAGGAGATACTCAACGTCACCAATGTGCCATTAAGACCAATGCTTCGACAGCCATAGCCGAGGGGATTTGGAGGTCCAGCCCGCTGCTTCTCTGCTG  
CTGGCAAATTAAGAATTCTACCCCGCAGCCTCCAACCTGTGCTGAAACACTGGGCTCTACTCTATGGTTGATTACCTTAAAGAATCCAAATTCTTCGCAGGTCTTCACGATGAGCTGAGA  
GATGAGAGACCGATCAAGGGAGAGGTGATGACCGGGATGCCCGGCAGCACCCGACCACGACTGTTTGAGCCTGGAGCCATGGATGCCACTACCATGTTCCAGAAATTGAATTAGTAGG  
AATGAAAGGCTTGGGTTGGTGTAGAGTAACTTTTAAAAGGAGCTGAAATCTGAAGAGATTGCAAAAATAGTATCGGTGGGAGTATTCTGTCAAATTTCTTTGGTGGGGGACCGTGAAGT  
TGACCACTTTGGATGTCTATTTTTTTTTGGGCTATTATTTTATAAATACTGTTGGTGTGATCTACTGTGACTTTAAAGAGTATAAGGT

>comp173030\_c0\_seq25

TCTTCCGATCTTTTCTACATTTATATCTCTCAAGGGCCGACAGCGGCTTCCACCTGAAACCCCTCCGTGGGCTTAAAACCCCATATTCGCCATCTCGCCGGAGCTTTACCACCATGCGCCGG  
GCTCCTCATATGTCTTCTATTTTATTTCTCACTTGTGTTGATGACTCTTCTGGGGAAGCCACAGCCAGCCATTGGACTTTGGACCTTGCGAAGCTGGTAGCCTGAGATGAGGTTTCTGTGA  
AGATCTACACCGAGAACGCTCCGATGGAGCCTTGAAACAGGAAAGCAGTTGGCTACGACGAGGAAATGCCGCTGCATTTTGATCAGATATGTTGAGCAAGGTAAGTGTGTTGGAATCAA  
ATTCCAACATCCGACTCTTCTCAGGTTAAGGATATCTCCTGGCTAAGATGGCTGTCAAGAGAAAGAGAGGGCTTAGCTTGTCAAAGACCTTGATTCAAGGTGACAATTTTTGACCAAGTC  
TTAATTATTAACCTAAGCCCATCGTTTTACTATTGTTGCCTATTGTATTTCTTTTGTGTCCCAAGTATTTCCATGTTGCTTTTAGCTATTGACATTTTCTTGGCTCTTTTTTTTTTCTTTTTAG  
CTGCAGGTTGGGCTCTAGGTAGTTGGAGGCTGTGAGAAGGTCCTAGCTTCCCTTCTCCTTGGGGTTTGAAGCTTGAGCCATAAGGGATGGGGTGAGGGTGGTGAGAACATAGATAGTTT  
TTCTTCTCACTATAAATTGAAAGAGTGGTAGATCAGGAAGGCAGCTTCTATCCGGATTAGATTCTTTGTGATAATCGAATCTACAATCGGGATTCTACTCTCATTTTCTTTCATTCTGTGTT  
CGATTCTCTGGAGGGCGGTAGATGTGCTGTTCATTTCTTGTGCTTGGGCTGAAATTGAAAAGCTTGGTGGCTAGAGGATCTGTGATCAGAGTGGTAAAAGGGCTTGTTATTCTTGTAATCA  
GATGGACATTACATCAATAAATCTAAGTCCCAATTTGTCACCGTGGATGTAGGCATCCGCGTGTGAAACCACGTGATTGCTCTTCAAGTTCTTGCTTGTTTTTTTATTCTTGCATTAGCATT  
TACTTTCTGTTTTTCTTAAACTCTTTTTCTAGCAATTAGTGAATGGATTATTTGCATGATATCTTGTGGTGTGTTCTTATTGCGGCTAAGGTTTCATGCTGTGTCAGTGTCTCGGTTCCCTAGGG  
TTGAACAATGATTTTGTGCAGTTTGTGTTGAAGTGGATTAGTCACTAAAATCTATAATCAGTTTATGCTTGTATAAAAAATCCTTTTTCATTGTCTTATTTAATTTGAGAAGTTTAGTTACTTTT  
TCACATTGGAAAGCTCCTTTCATACAAAATGTGTGTTTCTTGAAGCTTGAGGCGTTATGGAAATAATAAATAATGTAAAGAAAGGATTGCACTAGCTGGCTAGGATGAACCTTATTAGTGGT  
CGACTGGTTGCTAATCTGCAATTCAGACATGCCATTTACTGTAGTAAACCATGAGTGTGACACATTCATATTCATGGGCGGAGTACTGAAATGATGTAGCAAAAACAATTTTTGTATGATAAAT  
GCTGGCTTTTTATTAATGCTTGAGTTAACTACCCACACATTTTGAGAATTTCTTTTTCTGGACACATTTTCTTGACATTTGAAAATAACGTGGGAATTTTGTCCTTTTTCAAGTTATGATA  
ACGGTATGAAAATCACTCAAAAACATAATTTGCTGCATTCTTAACTTAAAAGTTAATTTCTTACATTAAGCTGTTTCAGCACCAGCACTACATTACCCACTCCCAAACCTAGAACAACCTCG  
GGGTGCTTCATTCAGGTAATAATATAACCTTGCACTTTTATTTCATGATTTCTTCTAAACTGTTTGTATTCTGACTTGAGCCGCGCCTTCTTTTGTATCGATTTTAAAGTGGTCAAGACGAT  
TCTGCCAAAGCTTCAGTGAATACATGGCCGCTTGTACTCAGCCCAGGTAAATGATTTGTAGCGTTGAGGATTGTCTGCTGTGATCATTCTGGAAGAGGAGTTATCCATGCGTGGAGATC  
TGGTGTGCAAAAATAGATCATGGACATCCTTGACTTGTAGTAATTGGTCAATGCTCTGTGTCTCACGCTCACCAACCTTCCATTCGTCATGGCCTGGAGAGTATCTCCAACATTGATGAATA  
CTGCAGTTGGGCTGGTGGGACTGCAACCCATGCCATTCCTACTGCCAAAGACTCCTGAGGCAGGTGCGAGTATTTGGAGACCTTCAATACCGTTTGATCTCAGCAAAGTCAGGATCTGAG  
GGTCTGTATGCTCGCCAAACCAATCCTACTACTCTTCTGCCCTTCTTTTTGCTCCACGTTTTGCTCTTGATGTCATTGTCTTTTTTCTATTGTTACTGTTGCTATTTCTGTTGCAGTTTGA  
GGGGTAGTGGTTTAGCCTTAAGAGAGAATCACTCCCCTTTCCCGTATAAGCTTGCAAAGTTCCCCACTGCCCCAAGCCCTAATCCTTCTTCTATCAGCTCCAGAATCTCGTTTGCTAGTT



CCTTGATTGCCTCCACATAATCTTTCACTGCACAGCTGAGCTCGTCAACAGAAATGTTGGGAAAAGTTAGTTTGCAGGATAAAAGATCAAGAAAAGTTTGATTTGATTTGTCAGACACAG  
CGAAAGCTCCACCCTACTAGTACTCCACAGTTAAAGGAATCTCTACTTTTACTAAACCTATTTTTTGGCCATAAATAGCTCGTCCTGCATGCCATCAGATCATTGTTTGGCTTTTTATGGATA  
AAAAAGTTGGGCATCATTGATTCAGGTATACTGTGCTTGTGGGTCTCACTCTCACTTTTCTTTGATTTATATCCATTAGGCGTATGTGGATTTCTGGTCAAAAATGGATTGCTCTTGGGTTGC  
TTGTTTTCTAAAGTGGGTTCAATTGGGCTAGTGGTTGAGATTTGGCAGAATCCTGAACATCTCTACGTGATGGGGCTTGTGCTATGGTGTATGGTTGGGTCATTAGGTTCAAGATTTCTC  
TAATCATTAATGTTAACTGAAGTGATATGTTTGTATTAGTATTTGGTCATTATCTATGGTGATTATAGTGGTTAATGTTATTTCAGGATGCAGTTTATAATTTTAGATAAAATTGTA  
TGATCTACTCACCATATATGATTTTATTGTTGAAGAAGATAAATTGATGGAAATTGATGATTCCTATTA  
AAAAACAGGATGGA

>comp173042\_c0\_seq12

TTTTTGAACAAATGGGTAAATCAATTGCTTCAATGAAATAATTCACAGTTTACCTCATTAAGAACAAGGAATAAAGCATATACCCAAAAAACTTCAGAAATACTATAAAAAACCCACTTG  
ATTCGACTGACATAATACACAATAAGAGCTGCAATTTACCTGCTTGTGTTCTGTGAATCCATCAAGATATGCCAGTTTGCATTATCAAACAGAACCCGAATATGTAAGATAGAAAAG  
AAAAACCAGATGTCAAAGTCCTTTGGCTGAGCATTATAGTTTTCATTGGCCAGCTAAAAACCTTCATGTGAAGGTAACCTTTTAGCTTGTCTACAGATGAGAGATCATCAGCCACTTTCT  
TTTTTGGTGTTTTAGCTACATCTAATATGTCACTCCTTTTAAACCAAGCCAACACCATTCTCAACTCTTTTTGAGCCATTCAAAAAAGTGTGGCATTGGCTCTTCCATTAACCAATCCAATTT  
CCTGAGTGATAGCAAACCTGGTTTTCAATTAATCCTTCGTTGACACCATTTGCTAGCCCGACCATTAGTACCAAGTTTACCAGATTCTTGTGCCCCAACCTCAGCCCTCAAAAAGTTGGTC  
ATATGAAGGAACTTAGATGACAGTGCCTCACCCTTAAATGGTTGAAGATTGGAAAATAAACGAGAGAACTCAGATCCTGTGATGTCCGAACATGTCCTGAAGGGTTCAAGTAGCTATAG  
TAGACGCCTTGAGAAACCATGACCATAGCCATCAAAGAATATATCCTAAGATAAAAAGCAAGACTGATTTGAATCAATTATCAAAGAGGGCTGAAAAACAATTAATAAATTAATTTAT  
AAAACAAAAAAACATGCCTAATACA

>comp173173\_c0\_seq2

TCTCTCTCTCTCTCTCTCTTATTTTTTCTTCTGAAAGCAAAAATCAGAATAAAATTACTGTATAAGAAACGCATACAAAAGCAGATTCCAAGTATCAGGCAAGCCAGCAAGGCACCAATG  
GCTACAGTCATTTCTGGTTCTGATTCCACTGTATTTGGAAGGATGAGCATCCTTCTCAGCTCTGAGAGAAATGTGATGTGCGAGCAATGTGACTATTTCTCTCGGGATTATTTCTTTCACTAT  
GGCTTCTTGTGGTGATTGCTGATATCTGTATTTTGTATCCATCCAACGGCTCTGATTCTCCCGAGCAACTCTTCGAGAAGGATTTACCCCAATCACTACCATGGTAATGGGAAGGAGAGACTC  
CTTGATAGAAAACCTTCTTAGCATAGGGGTCAATGGTGGCTCTAACCCAATTAGCCCAAGTAGTTAGAGCTTTAGAGAACGCTAATGTCCGGTCCATGTCCTTCACTATTAGGTCTCCATCT  
TGAATGTAATCCACCTACAACCAAAAATATAATGAGCTTTCTTTATATAATTAGGGGTGCAAATGAGTCAAGTTGGCTCATGAGCTTACTCTAGCTTGACTTGATAACGAGCACAAGTCGAG  
CTTATTGAGCTTTGAGCTTG

>comp173190\_c0\_seq10

CAACGTGAAAGAGAGCTTAAAGTTCTGAACTCGTCAGCCAAAAATACACAATTTTCGTCAGCCGCTTTTCTAATTACAAAATTCATAAAATGTGAATTTATTTTCGTTAAGAATCAGCAAAATT  
GTTTGGAGGATAAAAATGCCTAAAAAAATTTAACAATTTTCGGTTCCAGTTCCAAAATTTTCAGATATACAAATGCTTCACTGCAGCTGTTTATAGCTATAAGTGGTTTTTCTGTGATGAAGG  
CTTTGTTTTCAGAGAAATCTGTGCGCTCTCCACTGGCCGATCCGTTGCAACTTCAACTGGATTGGAGCCAAGTTACAGTAATCGGTAGGAAAAAAGAATCATGTTTGGTAACAAAATTAAT  
GAGAAAATGATCAAATGATACCTTGACTCTTTAAAAAAAATCAAATAGTCCCCAGCTATATTAAGAATCATTCTGACCCTTCAACTCATTAAGAAGAAGCAAAAATGGTCCCATCATG  
AAATAATTTTATTCTTTTTTTAAGATTTGAAGGATCAAATAATCTTTTATGTAGTTGGAGATCATTGATCTTTCATAAAGAATTAAGAACCATTTTATGATCCTTTTACCAAAAATTAATA  
GTAGGAAATAGCTGAATGTTTATGTTATCAAAGATTTCAAAAATCAGATATGATTATGATGCCACAAAGGTGACAGCACCAGCAGGAGCAGATTTTATCAAAGATGGGTAGATTCCCTT  
GTAGAGCCAGCAAATCCCTCCGTTTCGCAAAAATTTGCCGAAGAGCATCGTTCATGTTCTGTATGTGCCATTCTCTACTCTTGCGCCAAACTTAAGATCTCTCTGTAATCCCTCAATCTGAA  
ATCTCTTTTTTACAACATCAAGAGGATGACAAACAGCTTTTTCGCTTGTTCAGCTGCAAATCCGCAAAAGAAAGAGTTGAAAACCTTGAGAGAGAGTCGCCTTGGTTGGCCGAGCTAGCA

TTGAAAAGCCTGAACCTGTTCCAAGTCATCATCCAGCGTTTAAATGTATCATAAGTACCAAACCTGTAAGCCAGCATATGGAATGATCTCAACAAGAGTTGGGGATAATCCAGCATAACAATC  
CTCGAATACCTCGTGTGTTGTACGATATGTA AAAATGCAGATCTCATATTAGGATATATCTTTGGCTCACCCCTGTGATGCCAAAATTGTTCTTAGAAGATCAAAGGGATATGATCCTACTGTTG  
CAGCACATCCTGCTAGAGAGCCACTCACATAGGACAAGTAAGGACTCAGCCGCAAATGATCATCTGTCTTGGATGAACCAGATGCAAGTGTTTTTCAGCTTATGTA AAACAGTGAAGTGT  
TGGCAGTATAAGGCATATACATTAGCAAAGCTGGAACATTTCTCTCCAAAACCCGGTAAACCTTCCTCTCGAAAAATGTCTTTGCTAGCTTGCATGATTCCAGTATATTTTGCAGGCTTA  
GACATCTCCCGTCGGAGTAAAACCCATGAAGTAGGCTCCAACCTGTACCTGAAACCTGATTTTGATGACGTCAAGAGGGCAAGTTAGCGTTTCGCGAGATTGCCCGGAAATGGCCCCAGC  
CGCAGCATCTATCATCGCGCGCTTAAGCTGCCCCGTCTCCTCCATCAAATTCGTACCAATCCGGCCCCGACACGATATATAATTATATTTCTTGTCAAAAACTAAAGCAAGGGGACAGATT  
TTGAGAGATAGTAAAGGAAACAATGGCTGAAGCCGGGATTTCTTCCAAAAGAGATATATTAGGTATTTCCCGAGCCGGGATTTCCGCCGACGAGAGAGGAATTCTGTGCTATAAAGAAAA  
TATATCAAAAAGGAAAGATGATGAGCGAAGAATTTTTGAAAGATGAGAAGAATAGATACGCCGTGATCGAGAAAAGGAATCAATTGTTGCCAATCTAACCCGTGTCGCGCTTTCTCCCACT  
CTCCCCGATTCTTATACCATTGGTAATAGCCTCCTAATCGTAACGGTTGAGATTTCTGCACCGGTGTTCTAGAACAGAAAATAACAAATCTTTCAGCGAGGGCGACCGCTCAAGCGCTGC  
AACGAACGGGCCCGCCTCGCTGAAAAGATTTGTTATTTCTGTTCTAGAACACCGGTGCAGAAATCTCAACCGTTACGATTAGGAGGCTATTACCAATGGTATAAGAATCGGGGGAGAGTGG  
GAGAAAGCGCGACAGGGTTAGATTGGCAACAATTGATTCCCTTTCTCGATCACGGCGTATCTATTCTTCTCATCTTTCAAAAATCTTCGCTCATCATCTTCCCTTTTTGATATATTTCTTTA  
TAGCACAGAATTCCTCTCTCGTCGGCGAAATCCCGGCTCGGAAATACCTAATTTATCTCTTTTGAAGAAATCCCGGCTTCAGCCATTGTTTCTTTATTATCTCTCAAATCTGTCCCTT  
GCTTTAGTTTTTTGACAAGAATATAATTATATATCGTGTGCGGGCCGGATTGGTGACGAAATTTGATGGAGGAGACGGGGCAGCTTAAGCGCGCGATGATAGATGCTGCGGCTGGGGCCATT  
TCCGGGGCAATCTCGGAACGCTAACTTCGCCTCTTGACGTCATCAAATCAGGTTTACGGTACAGTTGGAGCCTACTTCATGGGTTTTACTCCGACGGGAGATGTCTAAGCCTGCAAAA  
TATACTGGAATCATGCAAGCTAGCAAAGACATTTTTCGAGAGGAAGGTTTACCGGGTTTTTGGAGAGGAAATGTTCCAGCTTTGCTAATGTATATGCCTTATACTGCCATACAGTTCACTGT  
TTTACATAAGCTGAAAACACTTGCATCTGGTTCATCCAAGACAGATGATCAATTTGCGGCTGAGTCCTTACTTGTCTATGTGAGTGGCTCTCTAGCAGGATGTGCTGCAACAGTAGGATCAT  
ATCCCTTTGATCTTCTAAGAACAATTTTGGCATCACAGGGTGAGCCAAAGATATATCCTAATATGAGATCTGCATTTTTACATATCGTACAAACACGAGGTATTTCGAGGATTGTATGCTGGAT  
TATCCCCAACTCTTGTGAGATCATTCCATATGCTGGCTTACAG

>comp173190\_c0\_seq7

CAACGTGAAAGAGAGCTTAAGTTCTGAACTCGTCAGCCAAAATACACAATTTTCGTACGCCGCTTTTCTAATTACAAAATTCATAAAATGTGAATTTATTTTCGTTAAGAATCAGCAAAATT  
GTTTGGAGGATAAAAATGCCTAAAAAAATTTAACAATTTTCGGTTCCAGTTCCAAAATTTTCAGATATACAAATTGCTTCACTGCAGCTGTTTATAGCTATAAGTGGTTTTCTGTGATGAAGG  
CTTTGTTTCAGAGAAATCTGTGCGCTCTCCACTGGCCGATCCGTTGCAACTTCAACTGGATTGGAGCCAAGTTACAGTAATCGGTAGGAAAAAAGAATCATGTTTTGGTAACAAAATTAAT  
GAGAAAATGATCAAAATGATACCTTGACTCTTTAAAAAAAATCAAATAGTCCCCAGCTATATTAAAGAATCATTCTGACCCTTCAACTCATTAAAGAAGAAGCAAAAATGGTCCCATCATG  
AAATAATTTTGATTCTTTTTTTAAGATTTGAAGGATCAAAAATAATCTTTTATGTAGTTGGAGATCATTTTGATCTTTCATAAAGAATTAAGAACCATTTTGATCTTTTCACCAAAAATTAATA  
GTAGGAAATAGCTGAATGTTTTATGTTATCAAAGATTCTAAAAAATCAGATATGTATTCATATGCCACAAAGGTGACAGCACCAGCAGGAGCAGATTTTATCAAAGATGGGTAGATTCCCTT  
GTAGAGCCCAGCAAATCCCTCCGTTTCGCAAAATTTGCCGAAGAGCATCGTTTCATGTTCCCTGTATGTGCCATTCTCTACTCTTGCGCCAAACTTAAGATCTCTCTGTAATCCCTCAATCTGAA  
ATCTCTTTTTTACAACATCAAGAGGATGACAAACAGCTTTTTCGCTTGTTCAGCTGCAAATCCGCAAGAAAGAGTTGAAAACCTTGAGAGAGAGTCGCCTTGGTTGGCCGAGCTAGCA  
TTGAAAAGCCTGAACCTGTTCCAAGTCATCATCCAGCGTTTAAATGTATCATAAGTACCAAACCTGTAAGCCAGCATATGGAATGATCTCAACAAGAGTTGGGGATAATCCAGCATAACAATC  
CTCGAATACCTCGTGTGTTGTACGATATGTA AAAATGCAGATCTCATATTAGGATATATCTTTGGCTCACCCCTGTGATGCCAAAATTGTTCTTAGAAGATCAAAGGGATATGATCCTACTGTTG  
CAGCACATCCTGCTAGAGAGCCACTCACATAGGACAAGTAAGGACTCAGCCGCAAATGATCATCTGTCTTGGATGAACCAGATGCAAGTGTTTTTCAGCTTATGTA AAACAGTGAAGTGT  
TGGCAGTATAAGGCATATACATTAGCAAAGCTGGAACATTTCTCTCCAAAACCCGGTAAACCTTCCTCTCGAAAAATGTCTTTGCTAGCTTGCATGATTCCAGTATATTTTGCAGGCTTA

GACATCTCCCGTCGGAGTAAAACCCATGAAGTAGGCTCCAACGTACCTGAAACCTGATTTTGATGACGTCAAGAGGCGAAGTTAGCGTTCGCGAGATTGCCCGGAAATGGCCCCAGC  
CGCAGCATCTATCATCGCGCGCTTAAGCTGCCCCGTCTCCTCCATCAAATTCGTACCAATCCGGCCCCGACACGATATATAATTATATTCTTGTCAAAAACTAAAGCAAGGGGACAGATT  
TTGAGAGATAGTAAAGGAAACAATGGCTGAAGCCGGGATTTCTTCCAAAAGAGATATATTAGGTATTTCCCGAGCCGGGATTTCCGCGACGAGAGAGGAATTCTGTGCTATAAAGAAAA  
TATATCAAAAAGGAAAGATGATGAGCGAAGAATTTTTGAAAGATGAGAAGAATAGATACGCCGTGATCGAGAAAGGGAATCAATGTTGCCAATCTAACCTGTGCGCTTTCTCCACT  
CTCCCCGATTCTTATACCATTGGTAATAGCCTCCTAATCGTAACGGTTGAGATTTCTGCACCGGTGTTCTAGAACAGAAAATAACAAATCTTTCAGCGAGGGCGACCGCTCAAGCGCTGC  
AACGAACGGGCCGCTCGCTGAAAGATTTGTTATTTTCTGTTCTAGAACACCGGTGCAGAAATCTCAACCGTTACGATTAGGAGGCTATTACCAATGGTATAAGAATCGGGGGAGAGTGG  
GAGAAAGCGCGACAGGAATTCCTCTCTCGTCGGCGAAATCCCGGCTCGGGAAATACCTAATTTATCTCTTTTGAAGAAATCCCGGCTTCAGCCATTGTTTCTTTATTATCTCTCAAAAT  
CTGTCCCTTGCTTTAGTTTTTTGACAAGAATATAATTATATATCGTGTGCGGCCGGATTGGTGACGAAATTTGATGGAGGAGACGGGGCAGCTTAAGCGCGCGATGATAGATGCTGCGGCT  
GGGGCCATTTCCGGGGCAATCTCGCGAACGCTAACTTCGCCTCTTGACGTCATCAAAATCAGGTTTCAGGTACAGTTGGAGCCTACTTCATGGGTTTTACTCCGACGGGAGATGTCTAAG  
CCTGCAAAATATACTGGAATCATGCAAGCTAGCAAAGACATTTTTCGAGAGGAAGGTTTACCGGGTTTTGGAGAGGAAATGTTCCAGCTTTGCTAATGTATATGCCTTATACTGCCATACA  
GTTCACTGTTTTACATAAGCTGAAAACACTTGCATCTGGTTCATCCAAGACAGATGATCATTTCGGGCTGAGTCCTTACTTGTCTATGTGAGTGGCTCTCTAGCAGGATGTGCTGCAACA  
GTAGGATCATATCCCTTTGATCTTCTAAGAACAATTTGGCATCACAGGGTGAGCCAAAGATATATCCTAATATGAGATCTGCATTTTACATATCGTACAAACACGAGGTATTTCGAGGATTG  
TATGCTGGATTATCCCCAACTCTTGTGAGATCATTCCATATGCTGGCTTACAG

>comp173196\_c0\_seq8

AAGGATTGCCTCCAGGTTTGGTACTCCGTTATGGATTGATGCGCAGACCCGGCAGCTAGGGTCGACGCGAATATGCTCGGGTTTGTGTAAGGGTGAATTTGGCCAATAAGCTGCTTGGGG  
AGCTTGGGTCAATGGTTGGAAAGGAAAATTCTACCAACCGGTAGAGTATGAGGGATCGGCCTTTTGTGCTATGGATGTGGCAAAGTGGGCCATCGGAGGGAACAATGCCCTTGAAGC  
CTAACTTTACGGGAGTGGCGGGCTGAGCAGTTCAGGGGACAAGGCGTCAATGCGATTTCAAGCTGGGATGAGTACTGTTCTCCCCCCCCCACCCTGCGCCCTTGACCGCT

>comp173249\_c0\_seq1

TCTCTAAGCACAGAGTCAAAAGGCTGGCGGAGCGAAGACGTAGCTTCCATGAATTTACCGTGTGGTCATCAGAATGAATAAATGCTATATTCTCACACCCGTTGGGGAGGCCGAATTCG  
ACAGAGGGAAAATGGATGACATGGAGATGAATAGAGTCATCGATATTGGGATGGATAATGGTGGCGTTAATGGGAGTAGTGAGAAGGGTGACGCAGGCACCACGAGCGGCGAAGATCTT  
GGCCATATCGACCATAGGGAGCATGTGGCCTTGAGACATGAAAGGGAAGAAAAGCATGTGGAGACGATCTGCTTTAGAACCCATAGTTGGGCAATGGCTCGAGAGCAAGATTCTGTGGA  
CCTGTGATGGTGGGAGGCTCATTGTAGCGAATGTGATTCCATAGCCAAATTACTTCAATTTACGAAGTTA

>comp173266\_c0\_seq4

AAAAAAAACATTTTACAGTACAATAATTCGATCTAAGGGAAGCGAGCCGGTCCAATTCCTGAGCCGATCGATTTTCTCTGTTTCCCCCAAATATTTTTCTTCAAGTCGCCTTCTTCATCT  
TCTCACTTCACTCTGTACAGATTTCTCTCCTTCTACCTCTATGAATTTTCGACCGTTACTTTCTACAGCCCCAGCAGGATATAGTATAACCAGCGTTATAGGCAGAGCAATTAGCATCCCAA  
TATAACCCCTGTGCTGAGGATAGAAGGATGAACACCGTACTCCTTGCGGAAGACGAAGGGGACGATCCCTTGTGGAAGGGCCGCTGTCAATTAATGGCTTCGTTAGAGACACAGTTTTGC  
GTCAACGGATGATGAGAAATAGGAGAACGAAGAGACAGAGAGGGAGAGAGAATGACCTGAACAATGGCGACCTGTAAGAGAACGCCACGCAGGGGCGGAACCAGCCTTTCATC

>comp173275\_c0\_seq11

ATTGATTGACATTTCTTCCAAGTTTGATCTTGGGGCATCACAGTTGGTATCAGAGCAGTGTATTGGAAGAATGGATTGTTACCAGAGTTGTAGGATTGGATTGAGCATTGGGTAGATTGGG  
TAGCTTTAAGAGCTTCATTGGCATAACATCATTGCATGTGTGATTATCTGTTTTGAATTTGTGCAGGTGAAAAGCTATGGATCATCCAGCAGAATCCAGTGTACCAAATAAGCAACACAGCGC  
AGCCCCAGTACCTTCAGAGAGTATGATGCAGTTGGCTACTGCGATTGCACATGTTATGGGGGATGCTCAGAGCAAATGAGTGGTAGCAAAGAGGAAGAAGTGGATAGACATATGCAGAT

GTTTCATAAGCTGAGGCCTCCGTTGTTCAAGGGAGGTGTGGGACCCAGGCTGCTGAGGATTGGATCCTAAGGATAGAAAAGATTTTTGACAGCATGCAGTGTCCGGGAATCGAAAAG  
TACCATTGGCTGTATTTCTGTTTGGGGTGAAGCGGAGAGATGGTGGATTGGACAGCAGAGAGAGAAAATTCCAGGGGAAGACCAATGCTGAGATCACATGGGATGAGTTCACTGCAGTG  
TTCAGAAATGTGGTTTTGTACCACCGTCTGCTCAGCGACAGATGCAGGAAGCTTTCATGAGATTGGAACAAGGCCACAAGTCAGTGATGCAGTACGAGGCCGAGTTTACTGCACTTGCAG  
GTACGCTGCTCATCTGATTCTACTCCCGAGGAAAAATGCTATAGATTTCTGCAAGGATTGAACAGAGAGCTGAGGCATCCACTAGTACCCTTCCGGATACATGAGTTCTCTGAGCTAGTG  
GAGCGGGCCCCGATTGATAGAGATTGACTTGGCGACACCGGTATCGAGGTACGAGGATACCAGGAGGAGGAGAGATGAGGTACGACGAGATGATTCTGGTAGAGACAGAGATAGAGAGA  
AGAAAAGCAGATACGATAGTTCGAGAGGATCTGCATCGGGATCTGTATCGCGCTCAGCATCGATAGTATCGTCTGGTAGTTCTGGAGCGTGTATTCACTGTGGTAAACGACACGCAGGTC  
GGTGTACCTGTTGACGGGGCAGTGCCTTCACTGTGGACAGCGAGGGCACAGAGCAGCAGATTGTCCTCAGAAAAGACTGGATGGACGGACTGATTCTGGCACGGGTACAGGACAGCA  
GAGGACTGTTGGCTCGAGGATTTACAGTGAGAGATCAGGGAACCAGATGGATGATAGGACTGTCAGAGATCAGAGAGAGACAGTTGCGCCACGACCTCCTGCACTTCCCTCCAGTGGTG  
CCACGTGTTTACAGTCTACAGCATCATTTAGATCAACAGCGACCAGAAAAGTTCTACTGGTAAGATTGATTTGACTAACCGATTGATTGATTGACATTTGATCATGCATATTGATA

>comp173289\_c0\_seq13

AGACAAATGTCGACGATGAATCCATAAAGGCCATTTCAAGTCAATTTGGCGCGGGTTCGGGTTCTTCCCACCACCGCGTCATTCCAGCTATTCAGACCATGCCTGCATGCTATTTATTTGCG  
ACGATTGCAGCACAGGTAGCATCACGTGTGGGCAGTCGTCCCAAACAATCCTTCACCTCATCATCTCTCTACGCATAAATTTTTGATAAGATGCAGGTTCCATTTAAGCTCCTCCTTC  
AGGGCTGCAGCCTGCCTTCAATCAAAAATGAAGATGGGAGAGTCGGAGAGACCGAGAGAATATGCGAGCGAATGCGACGATTGCTGCCTTGCTGGCTGCCCCGCTGCCGGCTGGACG  
AACTTTTAGAGAACTGCTGCGTCGCCGTGCGAAAATCGCGCTGGAGCCGAAGCCGAAGTGCGAACGAACCTTCTTCTCCCCTTCATATCAACGCGAGAATGAGAGATATCGTGGTTGTT  
GCTAAACCCGTCGATTTGCAGTTGGCGCAGTTTGAGGTCGTGCTGCTAAAGAGGGCTCTAGGGCTGCGTGCGTGAGACTGAGATCGCGAGAGTTGTTTTGGTATAATGTATATTTTTTTA  
AATAAGTAATTGATAAAATTTAAATAATATATAATGTAATTTATTTCAATTAGTAAATTATTAGATTTA

>comp173306\_c0\_seq1

ATTAAACCAGGCCCTCCGCCGATCGGCTTTGAACGATCCATCCATTCACGAGGAAACCTCGCCGTCGGTTCCCGCAAAACTTATCTCTTTCTCGATCAGCACCGTCAATCATTCCCCCGTC  
TAATCCACGCCCTACGTTTCCATCAAGAACCAGTCCCACGCGCCATCTCCGCTATTACGAATTGGCCTTCGCAATGTGATCCTTTATATCCTGCCAGCCACAATGTTCAAAATAAACTAT  
AAAGAAAGCTCCGCTTCTCTTTTTCTCGCCAAGTCCCTCTCCCAACAGCATCTCTGAGGAGGCTCCTACTGGAATTCGTGAGATTGATCGGTGATTTTGAAGGA

>comp173320\_c0\_seq4

CAAAAGTTATTACAATCTCTCTATATATATAATAATTATACTTTTGAATAAAAATGAGCTTAAGAAACAAGATAACCTAAAAGTGGACAAAATCACAATAATCTCTACTTGAGTCTAGATTT  
TACAAAATAAGAAATTTTTTAAAAATAATTGTTGTCCACAAAGAATAGCCTTGTGCGATCTCCCCTCCAATCAATTTTCATGCTTATGCTCCATCATTTCTCGTTGGAAATCCCATGCTCGAC  
TGCATACAAGAATCCCATACGAGTCCACCTGTAGCCCTTATGCACACCTATGCACGATATAGCCAATCCAATGCCTGACCCTGAGGATCCACCTGCTTCTCATTGCAACCCCAAAACCTC  
TCGCCAACCTCAACCAGGCTCCGCCTGTTCCCACATAGCACCTGCGATTTCGTACATCCATCTTCTGCTTGCACGAGCCTTAACCCAACACCCAAGCCCCTTTCTCTTGTTCGTTAGA  
ATATGCATTTATAAGGTGTTCCAATTGAATAGCCAAAACACTACCACACAGCTTTCGCACATGACCCGTACGCCTCATTTGCGTGACTCAATCCCACGCGAGCATTAGCAAGCTAGCCCCATT  
CAGGTTCCGCGTCAATGCAGTCCATCCACGATCTGACCAGCCCTCTGACTTGCACACCTGATTCCCTTACGTATAGCCCGTCCACGCCCCGCACGTGCCCCCGCACAGTATAACAAATGC  
TCCTGTGCCTCGTGTCTCATCTTCTTCTCTCCATTTTTCTTCTACTCTAGAGGTTTTTCGATATATTTGTAGGTGATTTTTCTACTCAAATTTGCGTCCCTCTTTAGTACAGAAGTTGG  
AGACTTCTCATGTTTCTTCTTCTTCTCCCCATTTTTCTTCTACTATAGAGGTTTTTTGCTATCTTTAGTATGTGATTTTTCTACTCAGATTTGCACCCCTCTTTAGTATAGAAGTTGGAAT  
GGGTGATCACGCTCCACAAAATCCTCCACCAAAGAAGATCGTCTTAAACGACCAATCTGAGGGCGCTAAGAAGATCCACAAGGCATTGAAGATTGATGATGTTATCTCCACCATCAC  
TGATGATTCTTTCATTTCTTTTAGGGAAAAATTCATTTTCTAGCGATTTGGTGTGAAGGTGCCGGCGAGA

>comp173320\_c2\_seq1

CCGGTGGTGTCTCGAAGCCGTCGAGGCAGGTCTCTTGATACGTGGCGGCGGAGTCGAGCCAGAGCTTGAGCTCGTCGACGGCTTTCGCGGGTTTCGGACGTGTTGAAGCCGCCGAGTT  
TTTTGAAGGAGGTCTTGATGTCTTCGATGGCGTATTCCATTAGCTCGCGGCAGGTGTTGAGGGCGTCCTTGGTGCGGGGATCCCGCGCTGCCGTTGAGAGGAGCTTTCGAATGCTGGAAGG  
CTTGTCTGAAGGTGGTCCGTGGCGACCTGGAAGGAGAGCTTGATGAGCTCCTTGGGGTCGGTGGTGTCTTTGGCTACTTTGGAAAGAGCCGACTCGCAAATATCAGGATAGTCTGTGGGC  
TCGCATATGGCTTGAAGTATCTTGAGGTGCTTTGAAGGTTGGTGCTACCTGAAGGTGCTGCAGATTTGGTTGCGAAGCGATTGTGGGTGACGACTACACTGACAGCGGCGACGACGGC  
AACAAGAAGGATCACAGAGCCTCTATAAGAGCCCCCTTTTTGTTTACGGCCATATTGGCTAAGGCGAGTTTGATCGTTTGAAGTGCAAAAGGAGGTGATGAAGATCTTCCCCTACCAAG  
CAAGGGGAGATTGCATGGAGGGGGTTGGGTGGATTTAGAAGGAGGAGTTGAAACTCAGAGGTGTGGCGGGATTGGCCGTAAACAAAAAGGGGGCTCTTATAGGAGGCTCTGTGATCCT  
TCTTGTGGCATCGTCGCCGCTGTACGTGTAGTCGTACCCACAATCGCTTCGCAACCAAACTGCAGCACCTTCAGGTAGCACCAACCTTCAAAGCACCTCAAGATCAGTTCAAGCCAT  
ATGCGAGCCACAGACTATCCTGATATTTGCGAGTCGGCTCTTTCCAAAGTAGCCAAAAACACCACCGACCCCAAGGAGCTCATCAAGCTCTCCTTCCAGGTCGCCACGGACCACCTTCG  
ACAAGCCTTCCAGCATTCGAAGCTCCTCTCAACGGCAGCGCGGGATCCCCGCACCAAGGACGCCCTCAACACCTGCCCGAGCTAATGGAATACGCCATCGAAGACATCAAGACCTCCT  
TCAAAAACTCGGCGGCTTCAACACGTCCGAACCCGCGAAAGCCGTCGACGAGCTCAAGCTCTGGCTCGACTCCGCCGCCACGTATCAAGAGACCTGCCTCGACGGCTTCGAGAACAC  
CACCGGAGACGCCGACCCGGCATGCGGAAGGCCCTCAATTCTCCATGGCGCTCACCGACAACGCGCTAGCGATCGTCGGCCACCTCGCGAAGTTCGTGACGGGTTGAAGCTTCCTG  
ACGTGCTGGGCCGGCGGGGTTGCTGTGCGACGAGGAGGTGGATGCTGTAAAGCAGAAGGATTTTCCGGCTTGGGTTAGTGCTGATCGGAGGAAATTGCTTTCGATTCCGCCGCTGCGG  
ATTAAGCCGGATGTGGTGGTCGCGCTGGATGGGAGTGGTGATTTCTCGAGCATTAAATTCAGCGCTGGGCGTGGCGCCAATTAAGAGTTTGACGCCGTTTGTATATACGTGAAGACCGGA  
GTGTATAAGGAGAAGGTGACGGTGTACAGGAACCAGACTAACATAATCATTGTAGGCGATGGCGCAACGCAGACTAGGGTTACGGGAAGCCTCAACTTCATTGATGGGGTCGGCACTTT  
CAAGACCGCCAGTTTCGTGGTAATGGGCGAGGGATTTCATCGCACGGGACATGGGCTTCGAGAACACCGCTGGTCCAGCCAAACACCAAGCCGTCGCCCTCCGCTGCGGGCGCCGACCTC  
TCCGCTTCTACCGCTGCAGCTTCGTTGCGTATCAAGACACTCTCTACGTTCACTCACTCCGTCAATTCTACCGCGACTGCGATATATACGGCACCATCGATTTCATCTTCGGAACGCAGC  
CGTCGCTTTCAGAACTGCAATCTGTACGCCGAAAGCCCGATCCAAATCAAAAGAACATTTTACCAGCCAGGGTCGGGAAGATCCTAATCAGAACACAGGAATTCGATCCAGAACT  
GTAAGGTCTCCGCCGCCGCGGATCTTCTTCCCGTTCTGTCCCAATTCAAAACCTACCTTGGCCGGCCATGGAAAAAATATTCGAGAACGGTCTACCTGCAGTCTTTTCTGGATAGCTTGAT  
TGATCCGGCTGGATGGTTGGAATGGAACGGGACGTTTGCCTGGATACTTTGTATTATGGGGAGTACAAGAACAGTGGGCCGGGGGCGAATACGACGCGGAGGGTCCAATGGCCGGGGCT  
ACAGAGTCATTAATAGTTTCGACGGAGGCTAATCAGTTCACGGTTTCGAATTTTATTGAAGGAGATCAGTGGTTGGGGTCTTATGATGTGCCCTTTAGTCCTGGCTTGAATTAATTCGATCCG  
ATCCGATCCGATCCTTCAACTCTTCTCATCCAAATCCCAAATAAATTTAACAAGTTTCAGGAGACATTTCTGTTCTGTTTTCCGGTTAATTAATTTGATTTAAGGATAGCGACTCTTTGGC  
TGCTTATAGCTAATTTGAGATACTCTGCATCGCGCGTGTACTGCCTGCCTGCACCCATATGCAGAATTTTATTGGTGCAGTGTCTAATGTAGCAAAATGATGTCATATGCTCTTACTCTT  
TATCGTGTGGCCCGACGACCCGACCCGACCTGACCCTGA

>comp173320\_c2\_seq3

GATGAAGGTGCCGGCGAGATCTGATCGCACTTGCTTTCCCTCCCCGGGATATGTGACAGTGTACGAATTTAGTTTGTGAGCGGGGTTGCGATTTCCACCACCTCCTGAATTGATTGACATT  
CTAACGATCTGTGGAGTGAGTTTATATCAATTTCTATAGGGCCATGTGCATCGTAATGGGCTGATTGTGCTTTTATAGAGACTGCGGAGTGGTGTGCTTTCAGATTGTCTTTCTCGGATG  
GGCGTCTCTTTAGCGATACGTAGGGTCGTATCTCCTCAGATCCAAGTGGTTGATATTCGCACCCAGGATCCATCGAAAGACTGGATTAACGACTTCTTTTTTGTGCAAAATGATTTGAAC  
CTTCAAGAAAAATGGGAAAAGTTGAAAGAGTTTACATCCCCCTTACATTTGGAGCGAAAAGATTTATTGAAGATTCTGAAGCTTCTGACATTGACGCCCTCCGTTATGAGATGCATTATT  
TGAACAGATACATAGACGAAGAATACTTATTTTAGGTGGGATTATCTACTCAAGCAGGGAGATCACACACAAAATATTGAAGAAATCTGTGAACGTTCCAGAGACCCGAAAAGGTCAAT  
CTAAGCGACTAGAGAGTGAGGGACTTTTTCTTCTTTGACGCCTGCAAATCTCTCACTCTTTGGTCATTTGGATTGACCTTTTTGGGTCTCTAGAACTTTCACAGATTTCTTCAATATCTG

TGCGTGCGATCTCCCTGCTTGAGTAGGTAATCCCACCTTTGAATAAGTATTCTTCGTCTATGTATCTACTCAAATAAAGCACCACATAACGAAGCGTCAATGTCAGGAAGCTTCAGAATCCTC  
AATAAATCTTCCTCTCCAATGTGAAGGGGGATGGGCAACTCCATCAACTTTCTCCATTTTTTTAAGGTTATAATCATTTTGAATAAAAAAGAAGTTGCTAATCCAGTCTTTTCGACGGGTCTC  
GGGTGCGAATATCCAACCCTTGGATCTGAAGGAGATACGACCTTTCGTATCGGTAAAGATACGCCCCATCCAAGCAAGAAAATCTGAAGACAACCACTCCGCGGTCCCTAAAAAGC  
ACAATCAGGCCACTACGACCGACATGGCCCTGTAGGAAAATTGAGACAACTCACTCCATAGATCGTCAGAATGTCAATCAATTCAGGAGGTGGTGGAAATCGCAACCCCGCTCACAA  
ACTAAATTCGTACTGTACATATCCCGGGGAGGAAAAGCAAGTGCATCAGATCTCGCCGGCACCTTCATCACCAAATCGCTAGGAAAATGGAATTTTTCCCTAAAAGAAATGAAAGA  
ATCATCAGTGATGGTGGAGATAACATCATCAATCTTCAATGCCTTGTGGATCTTCTTAGCGCCCTCAGATTGGTCGTTAAGACGATCTTCTTTGGTGGGAGGATTTTTTGTGGACGCGTGAT  
CACCCATTCCAACCTTCTATACTAAAGAGGGGTGCAAATCTGAGTAGGAAAAATCACATACTAAAGATAGCAAAAAACCTCTATAGTAGGAAGAAAAATGGGGGAGAAAGAAAGAGGAA  
CATGAGAAGTCTCCAACCTTCTGTACTAAAGAGGGGCGCAAATCTGAGTAGGAAAAATCACTAACGAAAGATAGCGAAAAACTTCGAGAGTAGGAAGAAAAATGGGAGAGAAATGAAG  
AAAACAAGAAGAAATCTCCAACCTCTGTACAAGATGAGGGGCGCTAAGTCCAGCAAGGAAAATCACCTACTCAAAAATAACAAAAAGCCTCAACTGTTAGAGAGCCAAAGGGAGAAG  
AAGAGAACTATAGGCCTTGGGGGCCTATTTATAGTCTTTATAGGAGAAGAAG

>comp173320\_c2\_seq4

CTTTTCTGTCTGTATCATGGATTGGTTCAAGGCTGGTAAAGGACTTTCATTTAAATTACTCTTATTTATCATAACCCCAAACAACAATGAATAGCTATTGGATTTTAGTGTAACCCTTTTACA  
GGCATCGGAACACCGAAGGAAAAAAAATGAAATTTTTAAGACAAAACAACGTATGCATCATAAAGATACTAACTTTCATCTCTTTTATGGAAGACAAGGATATGTTTATATGAAGACAAC  
AAGAAGAAATCTCTCATCAGTGAATCCTTTCAGGCAACGACTGCGGCAACAATACCGGAATATATGGCACCTGGGTGCAAGGGAGCCAGTCATTTCCACAGAAAACGCTCAACTGTA  
AACTTCTGCGCATGCGCATAGCTAATATTCTTACCCCTTCCACTTAACCCTGAGGCTCTTATCCGCCCCCGTCCCCTGTTCTCCACCTCTGTATAAAAGCACGTCCCTAGCCCAAATC  
CCCGAGCCATGGCAGCCACCCATTAGGATGCACGAGCGTATCGAGAAAGGACTGGATGACAAACGTTCTTGAAAACCTTCCACGGCCGGCCGAGGTAGGTAGGGTTCTTGGCGTGGA  
AGGCGGGGGGAAAGAGGGGTGCGCGGTGATGGTGCAGTTGTGGAGGATGATTGCGGTGGCGGATTGACGGGACTTGCGGCCTTGTGCGGTGACGATGTTTTGCTGGTTTTCGAGCGG  
TTTGCGAACGAAGATTTGGCAGTTTTGGAAGATGGCTTTGGCGTCGCCGAAGATGAAATCTATGGTGCCGGAGATGGTGCAGTCGCGGTAGAATTGGCGGAGGGTGTGGACGTAGAGGG  
TGCTTTGGTAAGCATCCATCTGGCAGCGGTAGAAGACTGAGCGGTGCGCCTGAACGAGGAGGGCGACGGCTTGGTGTGGCTGGACCAGCGGTGTTCTCGAAGCCCATGTCCCGTGC  
GATGAATCCCTCGCCATTACCACGAAACTGGCGGTCTTGAAAGTGCCGACCCCATCAATGAAGTTGAGGCTTCCCGTAACCCTAGTCTGCGTTGCGCCATCGCCTACAATGATTATGTTA  
GTCTGGTTTCTGTACACCGTCACCTTCTCCTTATACTCCGGTCTTACGTATATGACAAAACGGCGTCAAACCTTAAATTGGCGCTACGCCAGCGCTGAATTAATGCTCGAGAAATCACC  
ACTCCCATCCAGCGGACCACCACATCCGGCTTAATCCAGACGGCGGAATCGAAAGCAATTTCTCCGATCAGCACTAACCCAAGCCGAAAATCCTTCTGCTTTACAGCCTCCACCTC  
CTCGTCCGACAGCAACCGCCCGGCCAGCACGTCAGGTAGCTTCAACCCGTGACGAACTTCGCGAGGTGGCCGACGATCGCTAGCGGTTGTGCGGTGAGCGCCATGGAAGAATTG  
AGGGCCTTCCGCATGCCGGTGCGGCGTCTCCGGTGGTGTCTCGAAGCCGTGAGGCAGGTCTTTGATACGTGGCGGCGGAGTCGAGCCAGAGCTTGAGCTCGTCGACGGCTTTTCG  
GGTTCGACGTGTTGAAGCCGCCGAGTTTTTTGAAGGAGGTCTTGATGTCTTCGATGGCGTATTCCATTAGCTCGCGGCAGGTGTTGAGGGCGTCCTGGTGCGGGGATCCCGCGCTGC  
CGTTGAGAGGAGCTTCAATGCTGGAAGGCTTGTGCAAGGTGGTCCGTGGCGACCTGGAAGGAGAGCTTGATGAGCTCCTTGGGGTCCGTGGTGGTGTTTTTGGCTACTTTGGAAAAGAGCC  
GACTCGAAATATCAGGATAGTCTGTGGGCTCGCATATGGCTTGAAGTATCTTGAGGTGCTTTGAAGGTTGGTGCTACCTGAAGGTGCTGCAGATTTGGTTGCGAAGCGATTGTGGGTG  
ACGACTACACTGACAGCGCGACGACGGCAACAAGAAGGATCACAGAGCCTCTATAAGAGCCCCCTTTTTGTTTACGGCCATATTGGCTAAGGCGAGTTTGATCGTTTGAAGTGC  
AGGAGGTGATGAAGATCTTCCCCTACCAAGCAAGGGGAGATTGCATGGAGGGGGTGGGTGGATTTAGAAGGAGGAGTTGAAAACCTCAGAGGTGTGGCGGGAT

>comp173320\_c2\_seq6

TTTAAATTTACTGTCAAAAATAGATGTAGTGGGAATTTTATCCGTTAAATTCTATCATCGTACTCAATTTTAAATCAGCTATCCTGAGCGAATATTTTCTACAAATTCTTGTGTGTACAA

GCCTAAGGGAAGGTATGGGGTATTCTTGTCTCTATTTAGGCTATATTTTTATTTGAGATGAAGAAATAAACATACGAGCACCTTCCTGCACCTGTATACAATTTTATTAATATTTGTAATTTGA  
TCAAAAAGTGTAATTTTTATCATTATATTTTTTAATTAATTATAATCTTTAGCTGCGGTTTTAATACCTGCTAATTAATTCTCCTTGCTTGAGTACATAATCCTACATTGAATAAGTATCTTCG  
TCTATGTATATGCACAAATAACGCACCTCATAACGGAGGGCGTCAATATCGGGAGGTTTCAGTATCCTCAATAAATCTTCTGCTTCATTGTGAAGAGGGGTGGGTAACCTCTCAACTCTCC  
CCATTTTTCTTGGAGGCCCAATCATTTTGCACAAAAAGAAGTCATTGATCTAGTCTTTCGATGGGTCCCAGGTGCGAATATCCAACCACTTGGATCTGAAGGAGATACGACCTTGCCTA  
TCGGTAAAGATACGCCCATCCAAGCAAGAAAATCTGAAGACAACACCACTCCGCGGTCCCTAAAAAGCACAATCAGGCCCACTACGACCGACATGGCCCTGTAGGAAAATTGAGACA  
AACTCACTCCATAGATCGTCAGAATGTCAATCAATTCAGGAGGTGGTGGAAATCGCAACCCCGCTCACAACTAAATTCGTACACTGTCACATATCCCGGGGGAGGAAAGCAAGTGCAT  
CAGATCTCGCCGGCACCTTCATCACAAATCGCTAGGAAAATGGAATTTTTCCCTAAAAAGAAATGAAAGAATCATCAGTGATGGTGGAGATAACATCATCAATCTTCAATGCCTTGTGGAT  
CTTCTTAGCGCCCTCAGATTGGTCGTTAAGACGATCTTCTTTGGTGGGAGGATTTTTTGTGGACGCGTGATCACCCATTCCAACTTCTATACTAAAGAGGGGTGCAAATCTGAGTAGGAAA  
AATCACATACTAAAGATAGCAAAAAACCTCTATAGTAGGAAGAAAAATGGGGGAGAAAGAAAGAGGAACATGAGAAGTCTCCAACCTTCTGTACTAAAGAGGGGCGCAAATCTGAGTAG  
GGAAAATCACTAACGAAAGATAGCGAAAAACTTCGAGAGTAGGAAGAAAAATGGGAGAGAAATGAAGAAAAACAAGAAGAAATCTCCAACCTCTGTACAAGATGAGGGGCGCTAAGTC  
CAGCAAGGAAAATCACCTACTCAAAAATAACAAAAAGCCTCAACTGTTAGAGAGCCAAAGGGGAGAAGAAGAGAACTATAGGCCTTGGGGGCGCTATTTATAGTCTTTATAGGAGAAGAAG

>comp173381\_c0\_seq11

TGACGTTTGTGAGTACTGAAGTATCTCTGTAGTCATTGGGACTTGTAGCCACTGGCAATTGAAGTATACTTGTGGGTTCGATCCTGCTTAATTCAAGCTTACCTTATACCAAACAAGAGC  
TGTGTTGCCACAGGTTGAGTCCATTGAACTTTAGAAGAACCTTCCTGGCTATAAATTTGGAGCTTCTCTCCAAAAGACCAACCTGATGTCCCATCCATTGCTAGTGAGATCCAGGGTT  
CCAGTGTTAAGACCTTGGATGGCCACAGAGTGAATTCAGCCATTCTATGTTCCAGATAAGGCCCGCTATCAGGAAAACCAACTGTCAAGGCAAGAATAGCGATGTGGTTGATTCCAGAA  
TGCAGCTTCATGGGCTTTTTGGAAAACAAGCTTTTCTCAATTTTGTACCATGTGCATTTCCGATGTACTTCCCATTGACAAATGCATGCACAACATGGCCAAGGCTTGGCACTTGGAGCA  
CAGGACGAATGTCATGTCTTCTGGGCAAGTCTTCTTCAATGTGGAAGCTTGTGGTATACCACAGATAATCAGTGGTATCCTTGGTTCATGTTTCATGAGCTCCAATGGCTCCGGGCTATGA  
ACAATTCCTTTGTATGATATCTGGGGATATGATCCTGGTACATCTCCCATCTTTTTTTCTTCTCCTCCTCCACAAATCGAATGAAGGTCTTGTGCTGGGCATTAATCCTCTGAGTAT  
TGAAGACTTCAGTCTTGCAGTCTGGAAGAATGCTAATAGAATGGCGTGGCAAGAAGTAGTTGACGCCATGGAAGCTCACTGTGTAATCTCGGTCAGCCTTCTTGTGTTGTGAGGAAAAGCA  
GCACACACTTTCTTACTAGGAAGGTCATAGACTCTAGCCTCAACATCTTTCCCAAGTTTTCTGAAACTGTAAGAACCCCAAAGTAGGGGTTTCTTGCTAAGTTTCAGAGCATGGTGGAGG  
TCCTTCAGGTGTCCCAATTTGGCTGTTTCTGTAAACCATATTCATCAAGAGGTGCTTCATCATAGTACCGTGTGCGGACAAAAGCAGAACCAGTTCTTCCAAAGTTTGTTCCTCCATGATA  
CATGTAATAGTTTGAAGAGTCCCATCTTAGAGAAGAAACGAGCAACAGAGAATGCAAGATCTTCAGCTGACCTTTGAGACGGCGGGTCGCCGAAAACCTCGGTACTGAGCAGTCCAGT  
TTTCAGCCCAGATAAGAGGCTTAGTTGGATGGTTAGGTCCCTTCCAGGTATCACCACAGTTTCTTCCATTGCAAGAATTGATTATTGGTCCAGGAGCATCCTGTTGCTTGACATCATCCAT  
GGAACTCCAGCCCCGAGCTCAAGGCCAAGTTAGAAGCCACCAGTATGTACTTCTTGCCTCCTTCCCTTGAACGCATCTTGCACCATGTTGTACTCATTTTCAATTTGAGCTAAGATGATGG  
GCCC GCCCTGTGAGGCAAATAGCTTTTCTTCTTTCATCATATCAACAATCTTCTCACAAATTCGCCATGTAGTACTTGAAGGGAGGGTTGTTAGTCCGGAAGGTAATGTTCTCAATGTCC  
CTTAGCCAGACTGGTAGTCCACCATGATTCCATTCCGGCTTGAATGAAGGGTCCAATCCTGAGTGTTACATACATTCTCATTTGCTGGACCAATTTAATGAACTTCACCAAATCATATCTTCCC  
TCAAAGTTATACTGCCCTTGAATGGGTTTCATGTCCATTCCAGAAAACATAAGTTTGAATCACATTAAGCCCACCAGCCTTAGCGTTGGCAATAATATTTGGCCACATCTCCGGAGTACTTCG  
GGGGTAATGAATGGAGCCAGAGAAGAGAAGCTCTCTTCCCCTTAATAATGAAAGAACGCGCATCATATACCACTCCTTTTACATTATCGCTACGAGTGGAGATCACCGAAGCGGCGTA  
GAGCGAAAAGAGGGCGAATGTGAGTCCGATGCGCCGGGCGGCCGAGTCCATCGTGGGAATGCCAAGGAAGAGGAAGAAGGGGTGGCTCGACGGAATAGGAGGGCGCCGCGTCCGAG  
TTCCCCTTTGCTTTTAGGTGCTTCAGGTTGTGAGAAGGGGATGGC

>comp173384\_c3\_seq11

TAAATAAGAGCCCAAATAGCTAAATAAAAAACCAGGTTTAAACAGCAGAAGGGATATCCACACAGTCAACCACAAAATTTAAATTTGCTACAAGTTAGGCAATGTCTATAAATATTCAACAAC  
CAAGATTCTTAGTATATGTGCATGTGGCAAAAAAAAAAATGAGATGGGAAAACCTCCGCATACTTCTTTCAAATTTTCAAAGAGAAAAGGAAGTACTTATACAATCGTCAATCCCTCTTT  
TATACCACATACATGAGCAAGAGTAAAACTTCAAAATATATGACATGTGAATATTATTAACCCAGAATCGGGATTTAAAGTAAGCATAAAAAAGTATCTCAAAACCTGTCAATTCTTATATAA  
ACAAAAAAAAAAAAAATCCCAATCAAAATCATTTAACTATGAAGCCCAATAATTGCTCTCCAACCACCTTGCTAACACCACCTTTCACATGCAGTTTGAGCAAATAAAGAAGGAAGGGAGT  
TCAATAAGCAGAACAGCACCTCAAGATTCACCAATTCCTTGTAAGAAAGATAACAACATAATTTTGAATCTAGCAAACAAATGCATATTCTCCAATAAACTTTTCTTCTTCATATTATATGCCA  
TCAAGAGTCTTAGAAGAGGGCTCAAACCTTAAACTCGTGAACACACTATTGTGCCAAATATATGATATTGTAAATCGAGAGCTCGTCACCTAAGAAAACTAATGAAATATAGAAGAGATATTT  
TTGAAAGTCAAATATAAAGCTCTAAATATATGCCAAGTTACCTCTCTCGAT

>comp173429\_c0\_seq4

TATGACGCACGCTTAAAGTTGAAGAGGAAGAAAAGTAGAGGGTCCTTCGACCTCGACGGCGGTGGCTGCGACTTGTGGCCACCGGAGTCCGGGCACGCCTATCTACTTTGTTGCCGCCTC  
CATTCCCTCTTCCAGCGAAAAGCGATGGCTTCATGTGTTCCCTCCGAAATCCGACCGTTTAAAGCGTTTACGCACCCGGCGAGACCTTCGTTCCAGGATGTGACGCACACATAAAGGTCTCAA  
TCTGGCAAATTATTATGTCCGGTCCGAATCTTTTCGGACAGGCACATCACGTTGGTCCCAAAATGCAGCGGGTCCGATCTATTTGGGTGACGTGGT

>comp173440\_c2\_seq5

CAAAAAAAAAAAAAAAAAAATCACCCAAACTAAGCAAAAATCGATGCAGTAACCAGTCGAAACAAGAAAGACTACTAAAAACAAGCCTTTTCTCCTGAATATTAATCTCTACAGTAT  
TTCTTTTTAGCAAAGTGAAGAAACAGCAAAGAAGAGGCTTACTTTTTGTTTCTCCACTTGTGCTTCTAGTGGTCTCCTTCTTTGAAACCGAGGAGGAAGATGCCTGGTGTACCTCTTTGGA  
CCCACATTCCACGGCAAGAACACTCCGGTGCCGCGCGTCCACCTCTCCTCCCTTGGTTCATGACCATTTGGCCTCGTCGCCGTCGGCGCTAACATGAACACAGGAGCTCGAAGAGAAAG  
CCCCCATGGTGGCACCATGGCTTGTGGTCCATAAGCAATAGGCCCTGTTTCAGGCACTTCGACTGGTTGTGGGGGTTGCCATAGAGTAATGGCTTTAGATTGCTGGGAGGCGGGAGATGG  
TAGTTCGATTTGGTTGTAGCAGATCGGACTTTCAGGAAGGTAACGCTTACCCTTTTGTAGGAGACGGACATATGACATGCCTTGCCATGTCTGCACGTGTACCACGCATCACCAGGAGT  
GACCCTTCGGAGAGTGCAGGTGAAGGGAGCCTTTATAATCTCCATTTTGATCACTGGAGAGCACCCGGCCAAAAGCTATGGTTGTCTCAGAAAGAAAAAGTGTAGAGATGGGATTTTCT  
AAATGCGGAGGTTTGAAGTACGGTTGCGAGTGCTCATCCTCATCGAAGAAATGTATAAGACAACCTATTAGGCCCTTTTAATTTCTGGTATTAAGTGCCACTGCGTCAGATGATCTATGACTGA  
TAGCAGAATTTGAGGAATAGGTTCAATGCTGCTTGCTGTCTCTTCATTTGTTGGTTGAAATAATGGAACGCCAAGTTGAATAATCTCTCTCTTGTTCCTTTTCATCTGCTTATTGAAGAAAAT  
AAATGTTTCACCTGAAACATACACAGACAAGGAAATATTTTACAGATTATAATGATAATCTTAAATGTCAAAAACCAAGCTGCTTACCTAAAAATCCTATCATTACATTTTTCTTTGAGAACT  
TAAGTGTCTTTTATGTAGCCAGACTTCTTTTTTTTTTAATAACATAGCAGTTGGAGCATGGCAAGCTTATGGTGCGGGAAACAAAACAAATCAGAATCTAAAATATCGTACGAGTTCGGTTT  
TAACTAGAAGAAATTAATGGAAGAATCATCCCTACCATTATTAAGTAAATTTTGCAAGCGTTTCCCTTGCTGCCTTTATTTATACATCAGTAAGGAAATATTTAGAACGTTTATAAGATAATA  
TACACATTTGAACCTTAAAGAAAATCAAGGTAATATTTAAGGCAAGAAATCAATCTTCAGAG

>comp173441\_c2\_seq50

TCAACTGCATATCTCATGTTGCAACCTATTCAATTTTGTGACAAATTTTACATTCATGTCCATAAAAAAAAAAGCAGCACCTACTAAAACCATCAATAATAAAAAATAGACCAAAGAGTAATTG  
ATCAAAGACAAAATCATCAAGTCAAACAACATAAAGCCTCACAACCTGATCGATCTTGGCAGCAGAAAAGTGGAAAGTCCCTTTCTTCTCTTTTCATCTTTTTTAGCCAAGACATGCATCCA  
TCCATATGACTACATGGAATGCAGGCAACATCCACTTGCTTCTCTAAGATCCACTTTTCTAGTCACCATTTTCTTGTCTTAGATGAAGAAGCGCTGCGACACCTTCTCTAATTTATTTTTAG  
CTTCAGATCAAGATATATAGCCAGCTTAAACTTCCCTGGATTATGAGATTACGAGAATCACAGGGTACAGCAACAGCCCAAATTTTCTTTGACTCCCATTGAGAAGCAAAGCTTCCAAA  
ATGCTTAGCCCATGAATCTCCCTTAGCTAACCAACAATAAATAGATACA

>comp173443\_c0\_seq7



TCCGTCCTCTCCATCCGGCCACGATTTCCGCGCCGAGGATTAATTCCTCGTAGGACTGAAGAAACCCTAATCGACCCGTTCTTCTCCAAGCAGTCGAAGGATAGGTCTTTTTGTTTT  
GATTGGTGTGGCGATATTGCGATCCCCTTTTTTACGTTGGAAGAACCAGGAAGTTACGATTTTGAAAGAGGTTAAGGCGCTGAATATTTATATTTAAACAGACGTGTTACGCTGCG  
CTACCTATAGGGTTTCTTTCGTTGATTGCTTCAATTCATCGAGTTTCCGGATAATGTGTATACTCTGCGGATAACAGAGGTGGTCTCGGCGGGTTCGCGACCATGTTACCTTGGCTTGTGATCC  
CGTTTATCGTTCTCTGGGGTCTCTCACAGCTCCTACCGCCGGCTCTGCGTTTTGAGATAACCTCACCACGGCTTGCCCTGTGTGGCAGTACTCCTCGCCACTCTATTCTGGTATGAAATCTTA  
ATGCCCAACTTTCCAGTTGGCGGGCTCGCCGTGCTGCCCGCCTCCGTGAGAGACGCCGCTGAGGCTCTTGAGCTTCAGAAACTCCGTAAAACCTGCCACTCGTCAATTGCCGAAATTG  
CCACACGCCTTACCGTAACCAGACCCCCTGTGGTGGCCGTTTCTTGTGCTCATACTGTGGCCACATCTCCAAAAACCCTGTTCTTGACCTTCTGTTTCAACAGCAGGTCCTGGACTGATT  
ACTGATCTTGTGGGAAGCATGGTTGGTTATGTGATGCTGATGGAAATTGCAATTTATTCGGCACCGTTCCAACGTACTGGGCTGGAAGTGATCATCGGTGTTCAACAGATATATCTTATTC  
TGGGGTGATGGTGTTCCTGCAAGCTGCTGTCCTTTTTTCTTCGAGTATGAGGTGGCTTCTTGGTAAGTTTTTCAGGTTTGGTTCTCAAAGGAAGATATATCTTCTGATTCCGATCATAA  
AGGGTCATCAAGGAAAGGGGAGATTTCTGGTAATTTCCAGGAGAGCAGAGAGGAGAAGGCTAGAAGGAAGGCAGAGGAGAAGCGACAGGCTAGATTGAAGAAGGAAATGATGGAAG  
AGGAAGAGAGGAAGCAGAAGGAAGAGGTTGCAAGGCTGGTAGAGGAGAGAAGGAAACTCCGTGATGAGAAAATGGTTGTTGAGAAGGGTTCAAAGGGCTCCATCTTGATGGGGATG  
GAGATGGTCGAAAGGAAATTGATAGGAGGAGGGGACGAAGGAAGGACAAAGACAGAGCATCTTGTAGGAGCAATTCAGTGGATGAAGAGCTTGAAAAGAGGACAAGTGGGGAAAGT  
GAAAGGAAGCAGGAGACTATGAAGAAGGGTGAGAATGAAAATTTGATTTGCAGAAGAGTATGGGGGGAAATTATAAATCATATGCTTTTCATGGAAGTAAAGCCTGGGAGAATAAGCC  
CAGATATTTTGATGGCATGAAAGGTTCTTTGTTATCTTCTTAGAGGCTTTGGTGGGTCATTTTCTTGGAAAGAAACACAAAAATCTGCTGCTGTTGCCAAGTCAGTTAAGCCTTCC  
GCTGGGTTCATAGACCATGCTCAAAAATACAGTAAAAAGAAGAGATGCTCACCTGTGGCTTATGTTGCTGGCAGCCACAAATGTTCAACAAAAAACTGGTTTCAAAACGTCATGGAAC  
AATTGTTTACTCGTTCTTCAGCGTTTTCCACATCCTGATTCAAATTTACTACTCATGTGGACAAACCTGAAAGATTATTAGGTCCCGCGATCAAAAATCACAACAAAATTTTCTACCC  
AGTTACGGCACAACTCATAACCAAGTTCAAGTTGGGCAAGCGTCACCATTGATGGCCTATTCTCCCAAGTACTCTATTTAGTAGCAATCCAATTTCTCATAACGTGCTGAAACAACAT  
TTTCTCCGGTTAAAGAACCATTACAGGGTTCAGTGTGAGAAGATGCAGAGTCATTTGAAAACCTCATGCTATGTTCCAGCTCCGATCTCATTGTTAGGGCCTGTGTCAGATTCACTTGATAAT  
TTTCCATTGGATTTGGAAGCTAAATTTAGTACAAAGACCAAGGCTGAACAATCCCCACTTCTGAGGAGTGTATTGCTTCTGCAGCAGCGAACAAGCCTTCCCCTAATGAATCTCCCTTGT  
CAATGTTACATGTTCTGAACAAATTCATACCAATCTGACCAACTATTTTGTATTCTAGGTGAGATGTATCGACTAATATGCATGAACAAAGCACATGGCAAATGTGGGGCAGTCCATGG  
GCTCAGGAAGGGCTGGGTGTGAAAGGTTGTCCTGCCAATTTGTTTTACCCGTTGTACATAACAATCTCACCTTCAGGATGTCTTGCATTCTTTGCCCCACAAGCCTATAATGCCACCAA  
TCTCAAAGAATCACACTACTCAGCGTGTTCATACTAGTAATCACCAACCGACTTGTGGGACATATAGTCTTCTGGTCATAGTTTGAATGGAAGTGGCATGTGGCGGCAGAATTCACCCTT  
TCGTTCTCCTTTACTTGTGATGGGGATCGTTTGCTACCTTCTAATCTTATGGATGCTATTACTCTGAGTGAAGCTACCTAT

>comp173449\_c2\_seq5

AAGAATTTCTCTAGAGCTCTCTCCCTTGAATCCCTCTCTAACCACGTTACCTTCTCTGTAATCTTACTGAAAAAGGACTTGATTGACATCTAAAACGGGCTCCAAAAATCTCTGATTT  
AAAAGTATGATGCAACATCGTAAAGTACGATATATATAACAGACGTCGTCCTGGTATGAAGATGTACGAACAGTTCAAAAACAATTCGATTTGTACGATATAATATCATATGGTACGATCCA  
CAAATACTATTACATACAGGACGATGGTCTGGACGATCGGATGTCGTCTTATTCATCGTATGGTACGATTACTATCGTACAGTACGATGTGACAAAAACCAAGAGATCGTCCAGG

>comp173456\_c1\_seq14

CTTTGTTTGGGACAGCTTTCTTAATGATTTATAAAACAATTTTTAGAACAAAAATTGTATGAACTATAAATTTTTTAACTAAAAAACTGCTTTAAAAACAGTACAAAAGTTGTGCCAATAA  
AGCCTAATGTAGATTGTAAACCAGCTTTCATCTTGGCTTCCATACACAATATAGCATATTCATCTCTCACTAGATTACAATTCAGCGGATAATTAAGCAAGCATCAGGTTCATTTTACCATA  
ATAAACAGGAATTTAATATAAGTAAGATCAACATGAAAGGCTATAAAATGATACTTTCAGCTCAGAAACTGACAGAAAGAACTACCAGCTTCCATAGCTGTTCTTACAGCCTTTTACTTTC  
CATAGAGCCTGAAGAAGTTGAAAGCAGAGATGCAGGAAATGATTATCATGGCCAAGCAAGCTATAAAAGCACAGGCCACTCCCTCCCCTGCCTGTGTACAAAACCTACTGTAGAGGTTG

CATATCTTTATCCATTGAAGCTCCGGCTGGCCGAATAGTCCTAGCACCGCAGACTGAGCTGCTGCTGCAATTGCCGATAATGTCACATAAGCCAGTATCTGATCACAGGAAAACACAACAA  
AAGCAAAGCTCTTTCCAAACAAAACACCCCCCTTCATAATCCCCACAAAGCACCGCACCAACTGCAACAAGTTATACCCAGCTAATATCCATTAGCCGCCACCAAAAACCTGCAAATTC  
CCCACAAAAAAAAGGAAAAAACAAAAAACCGGTAGCCAAAAACCATAAATTTATCACAAATATCAAACAAAGATACGAACTTTAAATCATCCCCAAAGGTTTCATGAATCTTACAC  
GAAGACCTTCATGCTGTAAACTTAGCCCTTTTCTCCAAAGAAAAGAATCCTCACTTCTCTATCGCTTCCAACAAGAGCTGAAGCTGTCACCGCAAACCAAAACGCAGCCAGTCTAAT  
CGCCAACTCGCTCACTCTTAGCCTCCTCTCCATTCCCTTCATCTCCCTTTTCTTGAAGAAAACAGGGAAGACTGCGTCTATAGCGAGGTTAGACGGAAGGTTCCGGTTCCTTTTTCTCG  
AAGTGGCAGGGTATTTAAATGAGATGGCCTATTGGTTTCTTTTTTTTTGCGCAGCGTTCCCTTAAACTCACTTTCAAATAAGCAACCGTTTATTTCTCCATTTTCCCCCCCCGGGTCCATTG  
>comp173456\_c1\_seq5

CTTTGTTTGGGACAGCTTTCTTAATGATTTATAAAAAAATTTTTAGAACAAAAATTGTATGAACTATAAATTTTTTAACTAAAAAACTGCTTTAAAAACAGTACAAAAGTTGTGCCAAATAA  
AGCCTAATGTAGATTGTAAACCAGCTTTCATCTTTGCTTCCATACACAATATAGCATATTCATCTCTCACTAGATTACAATTCAGCGCGATAATTAAGCAAGCATCAGGTTTCAATTTACCATA  
ATAAACAGGAATTTAATATAAGTAAGATCAACATGAAAGGCTATAAATGATACTTTCAGCTCAGAACTGACAGAAAAGAACTACCAGCTTCCATAGCTGTTTCTTACAGCCTTTATTACTTC  
CATAGAGCCTGAAGAAGTTGAAAGCAGAGATGCAGGAAATGATTATCATGGCCAAGCAAGCTATAAAGCACAGGCCACTCCCTCCCCTGCCTGTGTACAAAACCTACTGTAGAGGTTG  
CATATCTTTATCCATTGAAGCTCCGGCTGGCCGAATAGTCCTAGCACCGCAGACTGAGCTGCTGCTGCAATTGCCGATAATGTCACATAAGCCAGTATACGAAGACCTTCATGTCTGTAAAC  
TTAGCCCTTTTCTCCAAAGAAAAGAATCCTCACTTCTCTATCGCTTCCAACAAGAGCTGAAGCTGTCACCGCAAACCAAAACGCAGCCAGTCTAATCGCCAACTCGCTCACTCTTAGC  
CTCCTCTCCATTCCCTTCATCTCCCTTTTCTTGAAGAAAACAGGGAAGACTGCGTCTATAGCGAGGTTAGACGGAAGGTTCCGGTTCCTTTTTCTCGAAGTGGCAGGGTATTTAAATGA  
GATAGCCTATTGGTTTACGACGTTGGAGCTGAGTTTGTGTGGGACAACATCTGAACTTCATCTCATATTCTCAGACTTATTCTCTCACTCTCTTTTTTTTTTTGCGCAG

>comp173456\_c2\_seq1

AACTAATTGAACTCCAAATGATCATACTTTCAACTTGTCAAATGAAGAAGCCACGAAAGCTGCAAAAAGCCGGCTAATAGAATAAAAAGCCATTTGCCATAAAAATTTAGACTTTGGCT  
TTGTTTGTGATAATTTTTTTGCTGCTTTCTAAAACATCTTTTAGTATAAAAAATTTTGTGAATTAGAAATCTTTGTATTAGAAAGCCGATTTAGAAAGCAGCAAAAAAGGTGCCCAAATGA

>comp173493\_c1\_seq13

ACATCCTTGTTATATTGAATCTTGCTTGTGTCCAGGGCTGACTGTGGGATTCCAGGAAACCTGTGCTCAGGAGGTGTAGTATGGTCTCAGCTCTTCTTCAAATTGCTCCCTCTTCTCCAA  
GCTAAACAACCTGAGCTCCAAGTCTTGCCATCCTTGTATGCATCTTCTCTTCCAAATCACAACCTGAGGCTTCGATGCGGTTCTTGAGGTCAAGGACTTTGTGCTCGGTTCGACAAAATCGACT  
GATGCAAGAAATTGCTCGGGATCAAAGTATTCAGCTGTTATGCTGCGATATAGATAATCTCCAGGCTTGCCCTTCCATTCTTTGGGAGCGAATCAATGTAAGCTTCAGGGATATCCATTTC  
ATTAGTACTTGGGCATTAATGGCCATGGCTGCCTTTAGAACTTGGTTTACAGATTCTTTCTGGAATTGCAGCCATTTTCTGGATATATCAGAGAGACCATTGGAGGAACCTTTACTGTGGG  
GAGCCACCCTTATCATCTTTTCTGTCTGTGTTCCCTATTTCCGAGTTTCTTCGTCTATTTGGACATAACCAGAACTCATTCTGATCCTTGAATCATCAAGATAGCTAATAAGCATTGCATCG  
AGTTTGCCTAATGCTGGAATGTTTATTAAGAGATCTTTCGTTGTTGCGTTGTCATAATCTCCATTTTGGTTCCATCATTTCCAACTTGTGAGAAGGGACTAATTCTACAATGTGATCTGTG  
ACAGACAAAAGCCAATCAATTTCTCTCCATCTCGCTTTCTATCAGCAGACATGGGTTCCAATTGTGCTTGTTCACCAAACACAGAAGCAGCATGGTTGGTGATGGCGTTGGACAAA  
GCTAGAGCTGATGAAACTCCTTTCCACCTCCTGACATGCTTTCACCAAGAAGCAGTTTCGCGAACCTCTCCTTCATTTGCTCGACATCTGAAGACTGCCACGCAGGGCTGTGCCGCAG  
CTAGGGCAAGAACCCTCGCCAGGCCTAAATTTGGGCGTTCTGTTCTCTGTTTCGGTCAAAAACAGATCGAATCTGTTGGCTTTCAATTGCTTTCTGACTCCTAAACATCTTATCTTCCCTATT  
GGTTCTTCCATGCTCAACAGTCAAGCTTGGAGCTTGCCTTCCCGTCATGTCGAACATGCTCTTATCTTGCGAAGGTTTCTCCAAGCTATGCTTTCTTTCATGAATCGAATCATTACATAAC  
CAAGAGCTATGAATTTGGCCGTAAATTCAGATGGAGGCTAGCTCACTCCTCTAACCGGAATCCAGTTTTTTTTCTGAAATATTTGGTTTTGCGTAGGATTGCCACCTCGAAAAGTTAGG  
GAAAATATAAAAAAGATGGTAGCGTGGTTCGGTTTCTGGCTGTGAGAGGAGAAACCTACTTCTCCAATGAGACAGGAGAGACGAAAAGACATGAACTTTTTGGAGAATGGAGAAGAAGAT

CATGTGAAAACCCGAGAGAGAGAGAGAGATGCTTGG

>comp173493\_c1\_seq8

ACATCCTTGTATATTGAATCTTGCTTGTGTCCAGGGCTGACTGTGGGATTCCAGGAAACCTGTGCTTCAGGAGGTGTAGTATGGTCTCAGCTCTTTCTTCAAATTGCTCCCTCTTCTCAA  
GCTAACAACTGAGCTCCAAGTCTTGCCATCCTTGTATGCATCTTCCCTTCCAAATCACAACCTGAGGCTTCGATGCGGTTCTTGAGGTCAAGGACTTTGTGCTCGGTGACAAATCGACT  
GATGCAAGAAATTGCTCGGGATCAAAGTATTCAGCTGTTATGCTGCGATATAGATAATCTCCAGGCTTGCCTTTCCATTCTTTGGGAGCGAATCAATGTAAGCTTCAGGGATATCCATTCC  
ATTAGTACTTGGGCATTAATGGCCATGGCTGCCTTTAGAACTTGGTTTACAGATCTTTCTGGAATTGCAGCCATTTTCTGGATATATCAGAGAGACCATTTGGAGGAACCTTTACTGTGGG  
GAGCCACCCTTATCATCTTTTCTGTCTGTGTTCCCTATTTCCGAGTTTTCTTCGTCTATTTGGACATACCAGAACTCATTCTGATCAATAAGCATTGCATCGAGTTTGCCTAATGCTGGAAT  
GTTTATTAAGAGATCTCTTCGTTGTTGCGTTGTCATAATCTCCATTTTGGTCCATCATTTCCAACCTTGTGAGAAAGGACTAATTCTACAATGTGATCTGTGACAGACAAAAGCCAATCAAT  
TTCTCTCCTCCATCTCGCTTTCCTATCAGCAGACATGGGTTCCAATTGTGCTTGTTCACCAAACACAGAAGCAGCATGGTTGGTGATGGCGTTGGACAAAAGCTAGAGCTGATGAACTCC  
TTTCCACCTCCTGACATGTCTTACCAAGAAGCAGTTTCGCGAACCTCTCCTTCATTTGCTCGACATCTGAAGACTGCCACGCAGGGCTGTGCCGCAGCTAGGGCAAGAACCCTCGCC  
AGGCCTAAATTTGGCGTTCTGTTCTGTTCGGTCAAAAACAGATCGAATCTGTTGGCTTTCAATTGCTTTCTGACTCCTAAACATCTTATCTTCCCTCATTGGTCTTCCATGCTCAACAGT  
CAAGCTTGAGCTTGCCTTCCCGTCATGTCGAACATGCTCTTATCTTGCGAAGGTTTCTCCAAGCTATGCTTTCTCTTCATGAATCGAATCATTACATAACCAAGAGCTATGAATTTGGCCC  
GTAATTCAGATGGAGGCTAGCTCACTCCTTAACCGGAATCCAGTTTTTTTCTGAAATTATTTGGTTTTTGCCTAGGATTGCCACCTCGAAAAGTTAGGGAAAATATAAAAAAGATGGTA  
GCGTGGTGGTTTTCTGGCTGTGAGAGGAGAAACCTACTTCTCCAATGAGACAGGAGAGACGAAAGACATGAACTTTTTGGAGAATGGAGAAGAAGATCATGTGAAAACCCGAGAGAG  
AGAGAGAGAGATGCTTGG

>comp173522\_c3\_seq13

GAGATTAAGAGGTTGTTTGGTTGAATGGTAACAGAAAATGTTGGGGATAATGAGGAGTAAACATTACAATGAAGAAAAAACAAGAAAGTAAAAGCAGCGGAAAAGTAAAGTACACTA  
GGATTTAACGTGGAAAACTCAAATAGAAAAAAAACCAAGGAGCCACACCACCAAGAAATCCACTATGAAAACCTGGGAGAACAATATCTTATATCTCACTCTTCTTAAATTT  
TATTCTCTTACACCGTTCTCACACACACAAAAAAGTCTAGTAAATAACACTAAGGGAAGCCACCCTTAAGAAAAACAAGAAAGAAAAGTGTCAAGTCTGCCTCGAAGCGTTGCGG  
CGCTGTAGCACCGAATTTAGAGCACTGCGACGCTAAGCTCTCAGTCGTTTTCTCCAACAACTTTGCAGCACCAGAGTGCTCGAAAACATAGCGCTGGGGCGCTTTGGTACACAGCTTC  
GAGTCACTCGAGTGACAGCGCCGGGTATTATACGAAAAAATTAAGGGGAGGACCCCTGCACTCCAAGCGAGCACGACAAATTGAACAGAGACCTGAGGTAACAGCACAAACCCGA  
TTGATCGAGACAATCAGATTCATACAGATTAATATAAAAGTGGACAAGTTCTAATACATCTAGACTTTAGAGTCTTGAATAAGGCATGTCCAAAGGATGACTTCTCATTGCCTATATTTAAA  
CTTATGCTATATGTAGTGATCACATTCCTGTTCTCCTTCATGGACGACCTTTCAGTTTATAATCAAATTTAAAAAGGGCCTAAAGATGAATAACTTACTAATTTTACATGCCTATAAGTATT  
AACAAATTACAAATATATAAGCTAAATAACTAATTGTATTCAATTTTATATTTTATTGTAGAAGAGGAGTGTAAGGAACGCATATCTAACAATAACGTCATATAACAATGTGTCAACCTCACAC  
AGTAATGAATAAATAAGAATGTTGTTACTGACCTAATGAAGTTCATCGACGCCTCTAAATAAAGTTCACTTTGAAAATCTTGGTTGCCAGTTAAGCTAGCTAGCAGTATGTCATTTATATGG  
CATCAACATCGATCATATCCATCAAGTAAATAATTATAATCATGCAAAAAGAAATCATGAACAATAAGTAAATATCACTATGCATCATTACAATAAAAAAAGTATTTACTTGATGATATTTTAA  
GGTTCCTGTAAATGGGAGACCTGCGAACTGTAGTTGAAGAACTCTACTGCAGGAACTTCTCCAAGGATGAAGCAGTCAAGAACTAATAAATTAGATCAAACTGAGACTTGCTTTGA  
AATCCTTCCCGAACATGGCCTCCTATTACTTTCTTCTATGCACCATTGGTACCCATGAGCTCCATCTCCATGCACTCTAATATTTTCTTTACTTCTATACATTTCAAAGGATTACTGATGTAGA  
ACGGATAGGTGGCTTTCGCTCGGGAGAGGATCTCCTCTCCAAAATCTGAAATTTGCTTGCAAAATCTGAAATAAATCTGGATTTATCTCAGAAATCTGAGAAGAAATCTCAGTTTTGGT  
GTTGAGGGAAGAAGAGCGTGAAGTAGTAGGAAATCAGGAAATCAATCCACTAGAGAACCAATGGTGGAAAGGGAATTTAAGAGAGGGAGCTGGATAGGGAGGGGAGGCGGGATGCTG  
AGGAGAGGGAAAAATAATAGCTTCCGGTTTTCTATTCAAACCTGAGAGATATTTTCATCAGGTAATAACTAGAGGAAGGGAGACCGATGGGAATTTAATCTTAATTCCTGAAATAGGCAT

GAGGGGATTTGAGATGATTTGGTTTTATTGCCTAAATGCCAGATTTTGGACTTAGGAAACAAATCCCAATGTGAATCCAATGGGCTGGCTAGTTGCATGAATCAAGGAGCTATTAACGTGG  
AGGATGGCGGGACACAAGAGAGAAATAGGGAATTTATTTCCATTTCCACTCTCAGCCTAAGGAAGCAATTAAGGTTGGAGAATCAATTGAATGGATATGGCAAAGAAAAAAAAAAAT  
TCGGCCAGCAGAAATTTAGTCTTAAGAGTGAAGAGAAAATCTGTGAGGAGACTTGATTTATTTCCCTAAATGACGTTACCACTTATGTGATTTAAAGCTCCTTTGATTTGAATTTAGGAAATT  
TAAAAAAAAAAACCTGAAATTTAATTCAGTTTTGAT

>comp173522\_c3\_seq14

GAGATTAAGAGGTTGTTTGGTTGAATGGTAACAGAAAATGTTGGGGATAATGAGGAGTAAACATTACAATGAAGAAAAACAAGAAAGTAAAAGCAGCGGAAAAGTAAAGTACACTA  
GGATTTAACGTGGAAAACTCAAATAGAAAAAAAAACCAAGGAGCCACACCACACCAAGAAATCCACTATGAAAACCTGGGAGAACAATATCTCTTATATCTCACTCTCTTCTTAATTT  
TATTCTCTTTACACCGTTCTCACACACACAAAAAAGTCTAGTAAATAACACTAAGGGAAGCCACCCTTAAGAAAAACAAGAAAGAAAAGTGTCAAGTCTGCCTCGAAGCGTTGCGG  
CGCTGTAGCACCGAATTTAGAGCACTGCGACGCTAAGCTCTCAGTCGTTTCTCCCAACAACTTTGCAGCACCAGAGTGCTCGAAAACATAGCGCTGGGGCGCTTTGGTACACAGCTTC  
ATACGAAAAAAAAATTAGGGGAAGGACCCCTGCACTCCAAGTGAGCAGCACAATTGAACAGAGACCTGAGGTAACAGCACAACCCGATTGATCGAGACAATCAGATTCCATACAGATTA  
ATATAAAGTGGACAAGTTCTAATACATCTAGACTTTAGAGTCTTGAATAAGGCATGTCCAAAGGATGACTTCTCATTGCCTATATTTAACTTATGCTATATGTAGTGTATCACATTCAGTGT  
TCTCCTTCATGGACGACCTTTTCAAGTTATAATCAAATTTAAAAAGGGCTAAAGATGAATAACTTACTAATTTTACATGCCTATAAGTATTAACAATTACAAATATATAAGCTAAATAACTAA  
TTGTATTCAATTTATATTTTATTGTAGAAGAGGAGTGTAAGGAACGCATATCTAACAATAACGTCATATAACAATGTGTCAACCTCACACAGTAATGAATAAATAAGAATGTTGTTACTGAC  
CTAATGAAGTTCATCGACGCTCTAAATAAAGTTCACTTTGAAAATCTTGGTTGCCAGTTAAGCTAGCTGCGAACTGTAGTTGAAGAAGTCTACTGCAGGAACTTCTCCCAAGGATGAAG  
CAGTCAAGAACTAATAAATTAGATCAAACTGAGACTTGCTTTGAAATCCTTCCCGAACATGGCCTCCTATTACTTTCTTCTATGCACCATTGGTACCCATGAGCTCCATCTCCATGCACT  
CTAATATTTTCTTTACTTCTATACATTTCAAAGGATTACTGATGTAGAACGGATAGGTGGCTTTGCTCGGGAGAGGATCTCCTCTCCAAAATCTGAAATGTTCCCTTGCAAAAATCTGAAATA  
AATCTGGATTTATCTCAGAAATCTGAGAAGAAATCTCAGTTTTGGTGTGAGGGGAAGAAGAGCGTGAAGTAGTAGGAAATCAGGAAATCAATCCACTAGAGAACCAATGGTGGAAAGGG  
AATTTAAGAGAGGGGAGCTGGATAGGGAGGGGAGGCGGGATGCTGAGGAGAGGGAAAAATAATAGCTTCCGGTTTTCTATTCAAACCTGAGAGATATTCATCAGGTAATAACTAGAGG  
AAGGGAGACCGATGGGAATTTAATCTTAATTCCTGAAATAGGCATGAGGGGATTTGAGATGATTTGGTTTTATTGCCTAAATGCCAGATTTTGGACTTAGGAAACAAATCCCAATGTGAAT  
CCAATGGGCTGGCTAGTTGCATGAATCAAGGAGCTATTAACGTGGAGGATGGCGGGACACAAGAGAGAAATAGGGAATTTATTTCCATTTCCACTCTCAGCCTAAGGAAGCAATTAAGG  
TTGGAGAATCAATTGAATGGATATGGCAAAGAAAAAAAAAAAAATTCGGCCAGCAGAAATTTAGTCTTAAGAGTGAAGAGAAAATCTGTGAGGAGACTTGATTTATTTCCCTAAATGACGTT  
ACCACTTATGTGATTTAAAGCTCCTTTGATTTGAATTTAGGAAATTTAAAAAAAAAAAAACCTGAAATTTAATTTAGTTTTGAT

>comp173522\_c3\_seq2

GAGATTAAGAGGTTGTTTGGTTGAATGGTAACAGAAAATGTTGGGGATAATGAGGAGTAAACATTACAATGAAGAAAAACAAGAAAGTAAAAGCAGCGGAAAAGTAAAGTACACTA  
GGATTTAACGTGGAAAACTCAAATAGAAAAAAAAACCAAGGAGCCACACCACACCAAGAAATCCACTATGAAAACCTGGGAGAACAATATCTCTTATATCTCACTCTCTTCTTAATTT  
TATTCTCTTTACACCGTTCTCACACACACAAAAAAGTCTAGTAAATAACACTAAGGGAAGCCACCCTTAAGAAAAACAAGAAAGAAAAGTGTCAAGTCTGCCTCGAAGCGTTGCGG  
CGCTGTAGCACCGAATTTAGAGCACTGCGACGCTAAGCTCTCAGTCGTTTCTCCCAACAACTTTGCAGCACCAGAGTGCTCGAAAACATAGCGCTGGGGCGCTTTGGTACACAGCTTC  
ATACGAAAAAAAAATTAGGGGAAGGACCCCTGCACTCCAAGTGAGCAGCACAATTGAACAGAGACTTGATGATATTTTAGGTTCTGTAAATGGGAGACCTGCGAACTGTAGTTGAAG  
AACTCTACTGCAGGAACTTCTCCCAAGGATGAAGCAGTCAAGAACTAATAAATTAGATCAAACTGAGACTTGCTTTGAAATCCTTCCCGAACATGGCCTCCTATTACTTTCTTCTATGC  
ACCATGGTACCCATGAGCTCCATCTCCATGCACTCTAATATTTCTTTACTTCTATACATTTCAAAGGATTACTGATGTAGAACGGATAGGTGGCTTTGCTCGGGAGAGGATCTCCTCTCCA  
AAATCTGAAATGTTCCCTTGCAAAAATCTGAAATAAATCTGGATTTATCTCAGAAATCTGAGAAGAAATCTCAGTTTTGGTGTGAGGGGAAGAAGAGCGTGAAGTAGTAGGAAATCAGGA

AATCAATCCACTAGAGAACCAATGGTGGAAAGGGAATTTAAGAGAGGGAGCTGGATAGGGAGGGGAGGCGGGATGCTGAGGAGAGGGAAAAATAATAGCTTCCGGTTTTCTATTCAAA  
ACCTGAGAGATATTTTCATCAGGTAATAACTAGAGGAAGGGAGACCGATGGGAATTTAATTCCTTAATTCCTGAAATAGGCATGAGGGGATTTGAGATGATTTGGTTTTATTGCCTAAATGCCA  
GATTTTGGACTTAGGAAACAAATCCCAATGTGAATCCAATGGGCTGGCTAGTTGCATGAATCAAGGAGCTATTAACGTGGAGGATGGCGGGACACAAGAGAGAAATAGGGAATTTATTTTC  
CATTTCCACTCTCAGCCTAAGGAAGCAATTAAGGTTGGAGAATCAATTGAATGGATATGGCAAAGAAAAAAAAAAAAAATTCGGCCAGCAGAAATTTAGTCTTAAGAGTGAAGAGAAAAT  
CTGTGAGGAGACTTGATTTATTTCTAAATGACGTTACCCTTATGTGATTTAAAGCTCCTTTGATTTGAATTTAGGAAATTTAAAAAAAAAAAAAACCCTGAAATTTAATTTTCAGTTTTGAT

>comp173522\_c3\_seq4

GAGATTAAGAGGTTGTTTTGGTTGAATGGTAACAGAAAATGTTGGGGATAATGAGGAGTAAACATTACAATGAAGAAAAAACAAGAAAGTAAAAGCAGCGGAAAAGTAAAGTACACTA  
GGATTTAACGTGGAAAACTCAAATAGAAAAAAAAACCAAGGAGCCACACCACCCAAGAAATCCACTATGAAAACCTGGGAGAACAAATATCTCTTATATCTCACTCTCTCTTAATTT  
TATTCTCTCTTACACCGTTCTCACACACACAAAAAAGTCTAGTAAATAACACTAAGGGAAGCCACCCTTAAGAAAAACAAGAAAGAAAACCTGTCAAGTCTGCCTCGAAGCGTTGCGG  
CGCTGTAGCACCGAATTTAGAGCACTGCGACGCTAAGCTCTCAGTCGTTTTCTCCAACAACTTTGCAGCACCAGAGTGCTCGAAAACATAGCGCTGGGGCGCTTTGGTACACAGCTTC  
ATACGAAAAAAATTAGGGGAAGGACCCCTGCACTCCAAGTGAGCACGACAAATTGAACAGAGACCTGAGGTAACAGCACAAACCCGATTGATCGAGACAATCAGATTCCATACAGATTA  
ATATAAAGTGGACAAGTTCTAATACATCTAGACTTTAGAGTCTTGAATAAGGCATGTCCAAGGATGACTTCTCATTGCCTATATTTAACTTATGCTATATGTAGTGTATCACATTCAGTGT  
TCTCCTTCATGGACGACCTTTTCAGTTTATAATCAAATTTAAAAAGGGCCTAAAGATGAATAACTTACTAATTTTTCATGCCTATAAGTATTAACAATTAACAATATATAAGCTAAATAACTAA  
TTGTATTCATTTTATATTTTATTGTAGAAGAGGAGTGTAAGGAACGCATATCTAACAATAACGTCATATAACAATGTGTCAACCTCACACAGTAATGAATAAATAAGAATGTTGTTACTGAC  
CTAATGAAGTTCATCGACGCTCTAAATAAAGTTCACTTTGAAAATCTTGGTTGCCAGTTAAGCTAGTTGATGATATTTTGGTTCCCTGTAAATGGGAGACCTGCGAACTGTAGTTGAAG  
AACTCTACTGCAGGAACCTTCCCAAGGATGAAGCAGTCAAGAACTAATAAATTAGATCAAACTGAGACTTGCTTTGAAAATCCTTCCCGAACATGGCCTCCTATTACTTTCTTCTATGC  
ACCATTGGTACCCATGAGCTCCATCTCCATGCCTAATATTTCTTTACTTCTATACATTTCAAAGGATTACTGATGTAGAACGGATAGGTGGCTTTGCTCGGGAGAGGATCTCCTCTCCA  
AAATCTGAAATGTTTCTTGCAAAAATCTGAAATAAATCTGGATTTATCTCAGAAATCTGAGAAGAAATCTCAGTTTTGGTGTGAGGGAAGAAGAGCGTGAAGTAGTAGGAAATCAGGA  
AATCAATCCACTAGAGAACCAATGGTGGAAAGGGAATTTAAGAGAGGGAGCTGGATAGGGAGGGGAGGCGGGATGCTGAGGAGAGGGAAAAATAATAGCTTCCGGTTTTCTATTCAAA  
ACCTGAGAGATATTTTCATCAGGTAATAACTAGAGGAAGGGAGACCGATGGGAATTTAATTCCTTAATTCCTGAAATAGGCATGAGGGGATTTGAGATGATTTGGTTTTATTGCCTAAATGCCA  
GATTTTGGACTTAGGAAACAAATCCCAATGTGAATCCAATGGGCTGGCTAGTTGCATGAATCAAGGAGCTATTAACGTGGAGGATGGCGGGACACAAGAGAGAAATAGGGAATTTATTTTC  
CATTTCCACTCTCAGCCTAAGGAAGCAATTAAGGTTGGAGAATCAATTGAATGGATATGGCAAAGAAAAAAAAAAAAAATTCGGCCAGCAGAAATTTAGTCTTAAGAGTGAAGAGAAAAT  
CTGTGAGGAGACTTGATTTATTTCTAAATGACGTTACCCTTATGTGATTTAAAGCTCCTTTGATTTGAATTTAGGAAATTTAAAAAAAAAAAAAACCCTGAAATTTAATTTTCAGTTTTGAT

>comp173556\_c0\_seq5

GTTGTCAAGTACCATCTCATCTAAAGTCAGCATCTGATAAGATAGTTTGATATGCCTCTCAACTTATTGATAAGCCGGCTCACCTATTGGTATTGGCTGCTCCACTCTTGTGTACGGTTGTCT  
CCTAACCGTGAGATCTCTGCCATTTAATCACTACCGTTGGCTTGTAACCAACTCTCTGATATATACTGTAGCACGGCAACTTAAGAAATGCAAGAATGAATTAATACAGCAAATACTCTGCT  
TCCTTCTTCTTCTTCTCCGATTTGTTTTCTACTGTTTGCTCTTTGCAGGTGTTAAAAATTTCTCATGGTATCAGAGCTGTAGGTTGTTCTTTTCGTCTGTTACAATGTGCTCAACCTCCTCACCG  
ACGAACAACCTCCGATGCACCACCTGCCTCCGACAATGTTGCAATACCACCTCAACTCAAATTTTTTCATGGCCAATGTCAAGACCATGGTGACGGTGCAACTAAACAAAGATAATCATTG  
ATATGGAAATCCCAACTACTGAAGTTGTTTGCAGCAAACTACGAAGGATACTTAACTGGAGCTACGGAAAAACCGGCGAAGCAGATTCTTGGAACAGACGGATCTGTCCGTGTTAA  
TCCTCTGTTTACCACCTGGATGCTCATAGATCAGCACTTAGCCTCTGCGATTTACTCCACTGTATCTGCTTCTTACTGCCGTATATTCTCAACTTGGAGTCTACGCATGAAATCTGGACTAC  
ACTTGAGCTTCGACTGAAGTCGACGCACCGTTCCAGATTACTTCAACTAAAGAATGAACTGCATCAACTTCAACTTGGAGATAAAACCATGTTTCAGTATCTCACAGAGATTAAGACTAA

GGTTGATGCTATAGCAGCCGAGGATCCTCTATTGATACAGAAGACATTATTCTGTACACACTCAATGGGTTGCCAGGCACATATCAGTCTTTTAAAGTTGTAATTCGCAATCAACTTCAAC  
CCATCTCTCTCGATGATTTTTATGCGCTGCTTTGACGCGAGGAAGTGCACATTACATCAGATCATAGTCGTGAACAATCTTTAACCCCTGCCACAGATTCCAACATGCTCTTACTGCAACT  
AGAGGCACATCTCGTGGACGAGCGTCATTCTATCGAGGACGTCAAATTTATGGTCGCGGTGATGGACGTGCAGACGGACGTGGAGGTCGTTCTGCTCCAGGTCGTTCTAATTCTACCCGT  
GGTGGTCGCGGACCTCGAGCAGCAGTTGAGTGTCAAATCTGTGGCAAACCGGGGCACTCAGCCATTCAGTGTGGTATCGAAATGATTCTTCATATAATGCTCCTCCGCAAGCCTATGTGG  
CTACAGACTCACACAAAATGCTGATTGGTTTTTATGACTCTGGTGCAACTGAACATCTCACAGCTAATCCGACTCAGTTACAAAACATAACAACCATAACAATGGAAATTCACAGGTTCAAG  
TCGGTAATGGACAGCAACTGTCCATAGCTCACACAGGGCAAGGTTTGTCTTACTCCATCCCGTAAGCTTCAGTTATCAAACATTCTCCATGTTCCCTCACTTATCTCATAATTTGCTTTCTA  
TTCATAAACTTACCAATGACAATTCATGTTTTGTCTTACTTGTATGCTAATGGTTTTGCCATCAAGGATTCTCGGACCAACAACTTCTTCTCCACGGACCTCATCATATGGACTCTACCCAA  
TTAAGATCTCCAATCCTTCATCTCCGACAACCTCAACACGGCATTGCTTGTGCTGCATCCACTTCATCTGCTACTTGGCATCAGCGTCTTGGACATCCATCTACTTCAACGTTGCGTCTTTTAT  
CGCCTGTTTTATCTACTAGTATTAGTTCTGTTTCTAGTCAATTGTAATGCTTGTCCAAAGCTAAATGTAAGTACTAGATTACCTTTTCTTTATCTATTACTAGCACAAATCAGTGTCTAGA  
CACTTATA  
CACAGTGATGATGGGGTCCCTCCCTTCTTTATCAATGCAATCATATCGGTTTTATGTGCTTTTTATTGATGATTCAGTCGTTACTCTTGGGTGATCCGTTACATCACAAATCTGATGTTTT  
CTCCAAGTTTATTCACTTTCAAAGAATGGTGGAAAAACAATTTCAAACGTCAATTAATAATTTCTTCGACTGATGGGGGCGGAGAATATGTAATAACCATTTTAAATCTCATTTAACTCACC  
ATGGCATTCAACATCAGATCACCTGCCATATACACCTCAACAGAATGGGGTGGCTGAACGTAAGCATAGGCATTTTCTTGAGACCATGCGTGCTTCTCTTTAATGCTAATTTACCCACA  
TCTCTTTGGGTAGATACTCTTTTACTGCCGTGATCTCATTAATCGCCTACCATCCACATCACCAATAATTACTCACCATAACGAGATTCTCTATAATCGGCCTCCCTCATATCAATCTCTACG  
TGTGTTCCGGTTGCTTGTGCTATCCCTGGTTTTCCACCCAAGTGTCTACAAATTTCTCCCCCGATCCGAACCCTGCATTTTCTTGGCTATGCTGCTCAAACCAAAGGCTACAAATGTCTTG  
CAATCAAATCTAACCGTGTCTACACCTCCAGACACGTTTCAATTTTTCATGAGCATATCTTTCCGTTTTCAACAACAGTCTTCTCTGCTGTTATTCAAACCTCGAAAAATTCTTCATATACTCCTC  
CATCCACGCTGATCCCTGTCTCAGCCATTGCCCCATATACTTCTGCAGCAAGCACAATGTCTGCTGCTTCTGACTCTGTGCAACCCCCACACCTGATCATACTTCTACTTCAACCCAGCTCT  
ACATTACCTTCTACATCTCCGACATCAATGCTCCTCTGTCTCAACTTTACCAAAAACATCCTATGATAACTCGAGCTCAAACGGGACATCTGAAGCCTCGTCAAATACTGGACTTGAATTC  
TCCAGTAATTCCTCTCAGTCCCACTGGCTTTACTCAAGCCAGTCAATATTTGGTTTTGGAGACAAGCAATGAGCTCTGAATTTGAGGCTCTTCAAAAAACAGGGGACATGGATTCTTGTTCCT  
TACACTACCGACATGAATATTCTCGGTTGCAAATGGTTATTTAAAACTAAATTTTCATGCAAATGGTTTCAAGTTCAGTTGCACGCTATAAGGCACGCCTTGTGGCCAAAGGTTTTAAACAACAGTATGG  
TATTGATTATCAAGAGACGTTTCAAGTCCCGTTGCCAAGTTTCTTACCATACGATTTTGGCTTACAGTGGCTGTAACCCGAAACTGGTCAATTTTACAGTTAGATGTTTCAAATGCATTCCTTCA  
TGGACCACTGCAAGAACTGTTTATATGAAGCAACCAACTGGTTTTGTTGATCCACACTTTCCAAATCATGTTTGTATTAAAGAAGGCAATCTATGGTCTTAAACAAGCTCCACGGCAA  
TGGTTCTCTACCTTTTCTCTTATCTTCTGCAGTATGGATTTCAAGCAAGCTCCGCTGATCCTTCATTATTATGTCTACATAGAAATTCATACAATTATATATTCTAGTCTATGTAGATGATATT  
CTACTTACTGGAACTCAACTGAGGAAATGCAAAAAGCTTCTTACAGCTTTACAGTCTACATTTTCCATGCGAAATCTGGGAACTTTACACTCCTTCTTGGACTGCAGGCTACCTATACTAA  
TCACGGTATGCATCTTTCTCAATATGCTTATGCTACTGATTTGCTTCGTAAGCAGCTATGTCGGACTGTAAGCCTGTAAGCACACCTCTTCCAACCAATTTTTCCAGCCTGTTCAACAGG  
ACTGTCCATATGATCGTCCCGATCATTACCGTCAAATTACAGGAGCTTTACAATATCTAACACTGACAAGACCAGATTTATTGTATGCCGTTAATTTCTATGTCAGCATATGCATGCTCCAAT  
GCAATCTAACTACTTGTGCTTAAACGAGTCTTTCGTTATGTCAAAGGTACCTTGACACTCGGTTTACCCATTCATTTCGCTTACACTTACAGCTTACGGGCTATGCTGACTCCGATTGGGCCA  
CCAATCCTTCATATGATTGACTTCATATGCTGTAGAGGACATGAGGCGGCATCTTCCTTTAAAGTGTTAGTTAAGTCATCAAATATATTTGGGAGATTTACATACACGCCATCTTATACTATTCTA  
TTTACATATTTAGCACTTAAAATTTAATATTACATATATGTCACCCATAGTTCATTTTTATATCA

>comp173559\_c3\_seq13

ATTATGGTGAAGTGAAGATGAGGTAATTTCTCAATTTACTGTTCTTTAGTGCAATTTCTTTGCTTTATGGTTTCCATTACCTTTGAACACATTCAAGCAAAAAGAATATATGTTTTGTCACGC  
TTAATACCTTACAGATGTTACCAGCGGTGTTCTTTGATATCCTTTTTAAGTGATTGCGAATATTTTATGCATGCTACTGTGGCTATTCCTTGACTTTTTAATAAGGTTATGCTATTACAGTGGTG

CTTTGGTCAAACATATCAGCTTTATGCTTTTAATGAAATATTTTTAGTTGCTTTTATATTGAAGTTTTTAATCCTTGCGGGTATCAATCTTCTGCTTTGAAGGTATGCATTTATTTTTCTATGTT  
TGAATCACTTTAAACCGGTGTACTAAGAGCATCTCCAACCGAAAATCCCATTTTTCACTCCAAAATGCAGTGAACTAAAAAATGTCGTGACTCATCTCTAATCAAACCTCCATTTTGCCTG  
CTTTTGCTCAGGTAATCGTCTTTTTGCTCTTTTCGTGCGTTTTCTTCCCAAATCCGATTGAGATAGAAAAATCTCGTTCGGTAAACAGTGTACGCCAATATTGGCGTTGCTTTGTTCACTCAC  
CACTGAATGTCGATTATTTTGTGCTTGAATGGAACAAACCATCTACACGCTTTACAGTCAGTTGGAGTTCCGCTGGAGACGCCCTAAGCTTAGCTTTAAGATCAAAGTACTCATATAATAG  
CATTGAAAAGACATTAGAGATATTATTTAAAGGACTAGCTACTTACACACGTTAGTCTTTTGCAAACATAAAAGTGGAGTTCAATCATAATAGACATAAGAAATGACAGAGCATTAGAAT  
AGTTGCTTTTGTGATGATGAAAGAGTTTCCTTAACTAGTAATCTTCCATAATAATTCTTGTGCTCACAAAATATCATTGCCAAGTATGGCAGTAGCTGCGAAATCAATATCTAAGCGTTAGT  
TAAAAGGACTGGTGATAAATGCAGTAGGCGTGTATTATCCATAGAAAAAAAATCTTTGTAGAGCACTGAAACAATTGTGTGCAAGTATATATTCACCTCTCTCTTTTAAGTTCTAAGTGTT  
TGTTCAAGTATATATTTACGACAGGATTAACCTGGATGCTATCTTTAATGGGACCAACATGACCACATCAATAATCCTTTCCACTGCCCTTAGAATGCTTTTGAACATGTAGAATTAGAAG  
CCATAGATGACAGCGATTTAGTTCTTTTTATGGCAGTGGCCAAAAATAAAGCTTTTTTGTTCACATATATAGCTTGTAATCAAATGAACAGAATTTTTTTAAGATTATTTTTTTGCTGTT  
GTCTAAGACTATGTTTGAGATAGCTTTCACATTTGTTTCTAAAAAAGCTTTTTCACACAAAATTTTTATTTCAAAATATTTTTGTACTAAAAAGTTGTT

>comp173562\_c0\_seq7

GACATACTGTAAAGTTCCAAGGGTTTGTAATAATTTCAATTGATAGTAATCAAATGCCTGTGTTTGAAAAACACATTTGCAAAGTGAATAAACTTATATTTAGTGCAAGAAATGTTAT  
GGACACTTTACCCAATAAGTACAAAATTTAGGAGATAAATGGTTAAAATTTACTACACACATTTATTCTGAGATGATAATTAGGCTTTAGTACCTCCTCTTGTGATACCAGCAATTATGCTTTG  
TTGCTATCTTCATCTTTTTGATAGTTAAGCATCTTTATGGAAAATCCAAACAGGAAAGCAAATAATATTGCAAACCAACAACACTACAACACTGCAACTACTCTCAAAAACCTCATGTTTGAACC  
CGAAGTAATGCCTTATAAATCAGCAACAGCCTCACCAACATGCTTATCTTTACATCTCCAAACTGTGAAACAACCAATCCATACAAAGTCCATGCGACAGGACAAGCCCAAGAAT  
ACCATCTCCACCACACAGGCATACTAGGGCGTGAATGACAAATCCCGAGAAGAGATTCCATATTGCATAGAATGCTGATGATACTATGGCGGCTATGTTATAATTTGGAGTCAGCCCTACT  
GCCATCATTCCATAATATGTGTAGTACAGGAATGTGAAAAACATGAAGAACATGTACAAAAGAACTGGTAGCCGTCCATTCAAACCTTATCATTGAGTAAACAATGATTGCATACGTTAT  
AGCCTGGACCAAGATGTATGGAATCTCAATCGCAACCTGCCCAAATGCATATGGTAATGTTGAGTACATTCCTGTTGCTCTTCCCTGTAAAAGACTATTTTTTCAATTGCAACTACTGGTT  
GAACAGTGAAGCATTGAAACCCCAAGGAAAATAACAGAAGAATACATGGATCCCATAGCATTGAATAGATCTTGCTGTTTGTCCATTCTTTTACCAAGATCCCAGAATATTGTACCAAA  
CAACAAAGCAATAATCCATGTGAACAAAACCTGACTGCTGTATAAGAAGTATTCCTCCAATATGAAAGCCATTGTTTCAAAGCAAGCCTTGCACTGTGTAATGAAGGACTGCGAGTA  
TTGTGTGGGAAAGTAAAGGTCACTTGAATTAGGAGGTGGTGGCTAAGCTCTTTGATCAAAGTTTTGTTCCCTTTGAAACAATTCGGAGTTCTTATAGACCTCGCTAAAATCTATCCCAAG  
ATTTCTTCTGAGCAATTGTGGTGACTTCTAACATCCATGTTGCGGGATTATAGCTATCTTTAATCTTTTTTACACCATCAATCCCTCAAAGTAGCTTATTAGATGACAAGAATGGTAACCCA  
GTGGACCTACATATATCTTGGCCACCTCTTTCATGAGGAAAAGCTCATCAAATGCTTCAAAAATATCAATGCTTGGTTGATGAATTGTGCAAACCACTGTTCTGCCAGTGTCAACTGTG

>comp173598\_c2\_seq1

GAGCCCAAATGAGTCCAATAAGGCACCCGAATCGTTGTTGAAAAGTTTAGACCATAATTTGAGTTACCAAAGTGTTCAAAATGTCGTGATTATAGTCGAATTGAGCGGCTCGACGA  
GAGGAATCCAACGAGCCCAAGATCACCGAATTCGACATCACTAAGGCATTCAAATGTCTAACAAATGGTGCATGATCGAAGGGTTCACTATCGGCCGTCCATTCAAACCACTCCCTATTC  
GCCCTTGATCTCACACCTATTTACGGGCCATGCCACTCCAGAAAATCTATAATATAGCCCTCATTCTTACAAGGGGGGGATCCAGGCAAGAGAGAGGAGAAGAGAAGAGAAGAA  
GAGGAGGGAGCTCTTCTCGACGACCGCCGGACCACCGCAGGAGTCTCGCCGGGCCACCGCCGGACCACCGCAGGAACCTCGCCGGACCACCACAAAACCTCGCCGGACCACCACCT  
TAAGGCCCGACGTTTATCCCGGCGTCCGCAAAGACCCGACGTCT

>comp173614\_c0\_seq3

ATTTTGGTATCAGGCATGCAGTTTTCTCCAAAATGCTGTACAATCATTCTAAATGAATGCAGACATGTCCATGAGCGCATAATGCTTCATGAAATTGGATTGTCCCTTGAATAATGGA

ATGGATCAATGATTACAAGGATTTTTCTTCAAAAAGTTCCTGCTCGCATGTCTGAACCACTTGGAACTCAAGGAAGGGGGTCTGAAGAATGGGCCATTCCTGAACTTAGTAATTATCTGCCT  
GATGTCTTTGAAACAATATTGTCTTCAGACGGGGAAGCACAAAAGAATATAGAAACACCACTTCCAATGTCAGGTCTACCGCAAGCAGCAGTTTGTGAAAGTTTTTGCAAGGAATTGAG  
CACTGAGTTGATGTATACTCTACACAGCTCGAAAATAAAGATTTTCAATCCGGGATGCAGCCGCTCTTATTGAACAAATTCGAAGGGAGGAATTTGGTTTGGATCTAGATACTGCAGAT  
ACTGACTTACTAAAGAAGCAACATGCTCGTTTAGGAAGAGCACTCAATTGTCTTTCACAAGAGTTGTATTCACAGGATTCACATTTATCCTAGAGCTGATACAAAATGCTGATGATAATAG  
CTATCCAGAAAACGTGGAGCCTACGCTGGTCTTCATTCTTCAGGAAAATGGAGTTATTGTTTTAAACAATGAGGTGGGGTTTTCTGCTCAGAATATGAGGGCACTTTGTGATGTTGGAAT  
TCAACAAAGAAGGGATCAAGTGGTGGCTACATTGGGCAGAAGGGTATTGGCTTCAAATCAGTTTTCCGGGTAACAGATGCTCCAGAAATTCCTCCAATGGTTTTTCATGTCAAGTTTGAT  
ATTAATGATGGCCAGATTGGTTTTGTCTACCAACTATAATACCCCCATGCGATATTGACTTTTTTAGAAGGCAAGTGATATGTGATTCTGACCAACCACATGCCACCTTCTGGAACAGTTG  
CATTGTGCTTCCATTCAAATCAGAGCTTAAAAGAGGCAAGGGTATGAGTCCGATTCCCTCAATGTTTTTCAGATATTCATCCTCACTTGTACTTTTTCTTCGGCATCTTAAAGTGATCAGATA  
TAAGAATATGATATCCAATGAGTTAGTTGTCTTCAGAAGGGGAAGTGATGAAAATGGCATACTACGGTTTCTATTGAAAGAATAAAATGAATTGGTTGTTGGTTAACCAAAATCTAAAA  
CCAACCTTGATCCGCTCTGAGGTTCAAACACAAAGATCACATTAGCTTTCCCACTTGAAGAGTCAGAAATTCAAAATATAAAGCGCAGCTTGATCAACAACATGTTTTTGCTTTTCTTC  
CTTTAAGAAAATATGGCCTTAAATTCATTCTGCAAGGTGACTTTATATTGCCTTCTCTAGGGAAGAAGTTGATGGAAATAGTGCTTGGAAACCAGTACTTGTATCAAGGATACCAGAACTT  
TTTGTCTCTGCAGAGGAGTCACTTCTGCTCACTTCCTTGTCTTTCAGAAGAATCTGGGGAAAGCAGTTACAACCTTCATGAGTTTTGTTCTTTGATGGGTGAAGTTCATGGTTTTTCTCAGA  
TCTTCCACGAATGATTTCAAAGAAGCTTCGCAAGTCAAATGCTTACTTTTTGGATGGATTTAGTGTGAGTGGGTTTCTCTTGTAGAGTACTTCGAAATGTGATGAGCAGCTTCGAAAC  
TTTTTGTGCAATAGTTTGTCTCAACAGCATTTAGGTCTTAGTTACTTGCATAGGGACATATTCTTGCATGATTCATTGGCTAAAGAATTGGGTATTCAAGAATATGGACCTGAATTTTTAGTT  
GAACTCCAATCCTCTGCATGTCGTTCAAGTGGGACTAGTTTATTGAACATAGAGTGGTTGTCTTGTGGCTTAATGCTCTTGTATTTCCATTCATCTAATGCTTCCAAGAATTTAGCATCA  
GCAAATACTGAAATGGAATTCAGCCTTGTCAAAAAATTAAGGCCTTTCATTTACTACTATCTGATGATTCATACGTCTCAGTAGCAGAAGGGCCAGTTTGGTTGCCCTTTGATGTTTC  
CACTTTGAAACATGAAAGTGGAAATGTTCTAAAGCAACTTCTGGTCTTTATTCCAACCTGAGGATTGTAAATCCCCTCCTATTTTCTACAAAATTTTCAGAGAGTAGCAATTTGAGGAG  
AATGTAGTGAGCAATATTATCCGAATCCTGTTGAAAATCGGTGTGCGGCAATTGTCTTCACATGATGTTATCAGAAATCATATTTGCCATCTATTTCTTATGGAAGAATTCGGGTGTGTCCA  
CAGACTTGATGACTGAGTACCTCTTTTATATAATGACACATCTTCAATCTGCCTGCTCCAGTTGTGATACAGAAAAGAAGAGACATCATCATCTCTGAGCTACAGAGACAGTCAATTATATCA  
ACAAATCATGGTTACATATGCCCTACTGAAAAGCCGATCCATTTACAGCAAAGAATTTGGCAATCCTTGTGACATGAAAGAATTGATAGATGATATCGATATTGAGTGGAAATGAATTAGACAA  
CTGCTACTTGCAACATCCCAGCACCCAGTCAATATCTAATGGTTTGAACAAGTGGAGAGAATTTTTAATGGAATTAGGTATCACTGATTTTTTTGCAAGTAAGACGAGTAGAAAAAAGTTTA  
AAAGAGGTTTTAGACATGGATTCTAAAAGCATGCCAGTTTATGGTGATGCTATTGATGGTGAACAATCATTGAAGATTGGGAGTCACCTGAGTTAATCAATTTACTATCTGCACTTTCAAC  
AAAGAAACATTTGGATAAGTTTAAATATCTGCTGGAAGTTTTTGTAAAATGTGGGATGATTTTTATATCTTGAAATCTACATGTCATAATCCTTTTCAATGTGGAGTGAATGAAGAAGTT  
TGAGTCTCATTCATGAGATGTATACGTAAATTTAAATGGGTAGCTTCTAGCATTGATGATGAACTTCACTGCCCTGAAGATCTTTTCTATAATTGCAAGGCAGTTCAATCTATTCTGGGAAC  
TGCTGCTCCATATGCTGTTCCAAAGGCTTCGAGCAAAAAGATTTGTAAAGGATATTGGATTAAGGTTCAAGTTACACTTGATGATGCTATCAGAGTGCTACAGCTCTGGAGAACCTCCAAG  
ACTTCTTCCAGCATATTTAGATGAATCAAATTTACACTTTTTGTTCAAGAAGAATTGGCTAAATCAAAGGAAAAGATCACCGATGTGAAATCAAATATTGTCATATTCGTTCCATCAGTATGT  
AAATCTGAAAACAAGGATGTTGTGTCTGGTACATTTATGCTTCCAGATAAATTATGCTGGCATGATGCAACTGGTTGTGTGGGAAGATTGAGGGAATTAACCCATTCGCATGACCCAGCAA  
GTGCAACAAAGCTTCCAACATGCTTGACACTGTCCATTCTATATCCAGATCTTTATAATTTTCTGTGACTATCTGTGGTATACCTGAAGCACCTTCGTTCCGTGCTTACCTTACAATACTGC  
GTCATTTATCATATGTTGCATTACCTTCCAGAGTTGCTCATGAAGTTTTTCCGGTATTTCTCAAGTGGGCCGATGATTTGAAATCTGGATTATTAGTTGTGATGAAATAAATGACGTAAT  
ATTTTCTTTTAAAATCAGAAAACACAGTGCTTCCAACGATGCAGGATACATGGGTTTCCCTTAATCCAACATTCGGTACCGTATGTTGGACTGATGATGACGAAAGAATGGAGCAATTTAA  
GGATCTCAATGATGTTTCATATTTACAATTTGGTGAACCTACTACCAATGAGAGGGAAATGCTTTGTGGAAGGTTCCATATTTATGCAAAAACATAGGTATTCGTGCACTTGCAGAGGTCA



TATCTCGTGAAGCCATTTTCATATGGTATTGCAGACAACAATTATGAAGCTTCTTTAATTAATTGGATTCTTCCCTATGCTCAACGGTACCTACATAAGATGCATCCTGACCTATATTTGCACCT  
AAAGGAGCTTGAATTTACAAAACTATCAACCTTCAGGTTTTTGTGTGTCGAGAAATTATATTACAAAAATTCTGTTAAAGGACGTGATAGTTCAAATGCAAAACGGTTTTGAATGTAAGTGT  
CTTCTAGAGGGAAATATCTTTTACATAACACGAATACGGATTCTCATGAATTGTTTTTGGAGCTCTCCAGACTTTTCTTTCATGGACTTCCTAATCTACATATTGCAAATTTCTTCATATCAT  
CACTACTAAGGCTGAGTTAGGCCACACCGAGGAGCAAATTGAATCTTTTATTGTTGGTAGCTATCAGGTGCCCGTCTTCTGAAGGGGAGCCTATATGGGCTTTTTTTGTCTTAGCTGACT  
TCAACTATGCCGAGACACATCACAATTGAAAGCTAAGCAGCAACATACAAAAATTAGCAACAAAACCAGTTTTTCAAAGTTGTGCTGGCCTCCAGTAAATTTGAAGGCCTCAGAAGATCTA  
CCCTCTGCTTCAGATATTTTCCCTAAGAAAATTCCAGTTCCTGAATTCATTCACCTTTGACGATGTTCCAGTTCCTAATCGATGGGTTTGTCAAACAGCCTTGAATCAGCGATGTCATATAA  
GAATAAGACATTCTGTGTTTTGAAAACCTTGAAGGTCAATCTTCTAAAACCTGGCAGATTAGGAGAGAAGATAGCTTACAGATACTCACCGAGAAGCTAAGTGAAGAAGCAGTGCAGT  
GGGTCAATAGAGATTTTGGAGATGGGATTACCCTATGACTTGATCATTAAGAAAAAATCTGAAACGGTATATGTAGGGTCAAAGCACCAC

>comp173677\_c1\_seq6

TTATTCAATGAGAGATATTCAAACCGCCGATTATCCCGCACTGGTTCCCTCCAAAATTAACAACCCCGAAGTCGCCGGAGCTGCTCCTTCCCTCCACCGTCAGCCACCGCAGACAGATCCT  
TCGCTTCGTTGCCAATCCGTTGAACCTTGTGTTGTAATGGATTCAAACGCCAAAACTAATTGCAGTCTATTTCTGAATTCCTTCCACGTATCTCTCTACACCACAAATTCATGGCACC  
CCGAAAATAGAACAATGTTGAGCGGCCAATTACTCATTGAATCACCACCGTATGTTCTTCCGCGGTAGAGCGGACGACCGCTCAAGAATCACGATCATCTAACCACCGTCGGCCGCAGCC  
GCCATGGTCCGCCGCGCTCCCTATCTCCTCCGCCTCCGCTGCATCGGAATCAGAGGCTTCCGTCTCCTCTGGCAACAGCGAGATCGAGTGGCCCTTCGGTGGCCGTCTCGGCACGCTC  
CGCCGACCGAGCTCCGGGAAACGGCCTATGAGATCTTCTTCATGTCCTGCCGCTCTCCCCGGCGGCAGCGGTAGTGGAGGAAGCAGGGGAAGCGTCGCGATCATCGGTAGTGGCGG  
GGAGATGGTGGAGGTCTTGCCGTCTCAACAGCCGGCGGGTGTTCGGACCCAAAGGCGGAACGGGGATGATGGTGGTACGAGCAGGGTAAAGAAAACCCTAGGGCTAAAAGCTCG  
CCGACCGCTCCTATGCGAACGATGAATCCAATGGGGCTGACATCGGTGGCGACTGGACACCCTTCCGCCGTACCCAATCCCCTGGCCGGAACGCTGTACCGAGCTCCCCCAGCAGGAT  
CAAGAGGCCGATGACCTCCGCCGAGGTTATGCGGCGGCAGCTTCGCATTACGGATCAGAGCGAGAGCCGATTAAGAAAAATCTTGATGAGAACTTCATTGGACAGAGTGAAGAAAA  
GCAGAGACCATCATCTACCCCTTGAATACTCCGCCACCTGAAGCCCTCGGAGTTCAGCGACAGCCAAGACTATACCAATGGCAACGACGCCAACTAAAGATTCTGGAACCTCGGCCT  
TCTCTCCACCCCTCTCTCCCCCTCGACCGCCTCAATGCCGCTGCTCTCCGATTGCGGGAAATACTACGACTAAGTGAACCAAGCCCATTGACACCAGCAAGAACTCCGAAGCCATGGC  
CAGCCTTACCAGCGCCGTCACCTGCCCTTGTTCGCGCAGCTCCACCTTCTCTCCACCGAAAGCTGCCATTGGGCCGACGGATTCCCCCTCAACGTCCATCTCTACCTCGCCCTCCTCCAA  
TCCATATTGACCTCCGAGAAGAGACCGTCGTCCTCGATGAAGTCGACGAGCTCCTCGAATTAATGAAGAAAACATGGTCTACCCTCGGCATCGATAGAAGGATTACATACTTATGCTTCA  
CTTGGATTCTATTCCAGCAATACGTCACCACCGGCCAAGCCGAGCCGGACCTGATTAAGCGACGCTCAATATGCTTGTACAGGTGCGCAATGACGCCAAGTTCACAGAGCATGAGCTCA  
GCTATGTCAAAGTCTCTCCGGCGTACTTGCCTCGATGCAAGGGTGGGCGGAGAAGCGGCTGTTAGATTACCATGAGAAATTCGACAAGGGAACAACCTGGAAACATGGAAACCATCCTC  
TGCTCGCGCTCTCCACCACCAAAATCATCGTCGAGGATCTCTCCGGCATGGCCATCGCCACGCCAAGTCTTGTGAGCGGGAACCTCCCGGCAGCTCCGCCGCCACTAGAGTGGAAATTC  
TACATTCATAAATCCCTTCGCAACGCCTTCACCAAGGCGTTCGAGACAGGGCACGGCATGTGGATAGCATGATCGTGAAGTAGATGAGGATCCCGGTGACATTTTAAATCCAGCTGGCT  
AAAGACACGGAGACCCCTTGACGCCACGGAGAAGGAGATATTTAGCCCGGTGCTCCGGCAGTGGTGTCCGGCGGGCGGGGGTTGGCAATACTGACGCTTTATAACTGCTTTGGCGTGGT  
GCTGAAGCAGTATTTGGCTAAGGTGAATAGTCTCAGTAATGGGCTTGTGCGTGTGCTGCACTGCGCGGGGAGGTTGGAGAAGCTGCTCAAGCAGATGGTGGCGGATGATGCCGCTGATA  
GGGACGACGGTGGGAGGAGTTTGGTTGACGAGATGGTGCCTTATGAGGTTGACGCCATTGCTGCTGGACTTCTCAAAGCTTGGATGGACGAGCGGCTGAGAATTGGGAGGGAGTGTCT  
CAACCGTGTAAAGGAAATTGAGAATTGGATGCCAAAGTCCAAGAGAGAGCCAGTCGCACAATCGGCAGTGGATTTGATAAAGCTGGCGAAGGTGACAGTGGACGAATTTTTTGGAGATC  
CCGATGACGACGAGGGATGAAATGGTACAAGACCTAGCGGACGGGTTGGAATCCATCTCCAGGAGTACACATATTTTGTCACTTCTTGTGGGAGTCGACAAAAGCTACCTGCCGCTACTG  
CCGCCATTGACGCGCTGCAACCAAGACTCCCGTTTTGCAAACTATGGAAGAAAAGCCACGCCGTGCACACCCGGCGCAGATATGAAGCTCCTCGGCATGGGCGCCGGAGGCCCGACTC

CGGTTGCAGCTGGCGGTACACCGGCCGGTGAGACGCACCATCCCCGGCCATCAACTAGCCGCGGCACCCAGCGGTATAACATTTCGGATCAACACCCTCCATTACCTCTACTCCCACATCC  
ATTCCCTCGATAAATCCCTCACCTTCTTCTCACGCGGGCGGAACCCCCGCGCATCCCCGCCCTTCCCCGAACCTCCACCACCACCAGAACTACGCCCTAACCGCCGCTCACTCCCGCCG  
CCCCTTCGACCTAATCCGCGCTCAATCCAAGCCGAATACTCCACGTTTCCGAGGTCGCCGCTACCGCCTCGTCTTCTCGACTCCGCCACTCCTACCACAGCCTCTATGTCGGCGG  
TGTGCTGGTTCGAGAAATCCGGCCGTCTTTGAGGATTCTTAAGCGGAATCTGAATATGCTGCTCACGGTGTGACCGACCGGGCGCAGCCGGTGGCGGTGAAGGAGGTGATCGGGCCT  
CATTGAGATGTTCTGATGGTGCTTAGCCGGAGGGACAGAGAGGGTTTTTGTGAGAAGATTACGAGATGGTGGATGATTCAGGAACATGAAGAGGGTTTTCTGTGCTCCG  
GCGAGGGGATGGCGGCGGTCTGGCGGACGAGGTGGTGGATAGGGCGGCGGAGGTTGTAGAAGGGGTGATTGGGCTTATGAGCTTGCCGACGGAACGACTTATTGAAGACTTTACAAT  
TGCCGCTTGTGAATCCGGTGTGCGCCGCGGAATTGCGGAATGGCAGAGGATTTTCGATGCCGCCAACCACCGGAGGTGGAGCCGATCGGATCCGAACACCGTGCTTAGAGTGCTCTGTC  
ATCGGAACGATGACACGGCCAATAATTTCTTGAAGAGGGCTTTCCAGTTGCCTAAGAGGAAATAAGAATTACCTATTTATTTATATATTTATTTTGGATTATGAAGATTAGGCGTTTTGACTT  
TTGACCGTTAAAATATGCACAAGAAACAGAATAATTAATCACTAAATTTAATTAATAATGTTAAGCGTAATGGTTATTTTGATCAAATGTTTCACATTATCGAACCATTGTCATGTTTACATT  
ACTAGAGATCTCATCAAAAATTTGACTTAAGATTAGTTTGGAGAC

>comp173752\_c3\_seq2

CATTTATAATAAAGGGAAAGAAATGAACCAATATGATATATAAATAAAACAAATGTGAGAGAATAAAAAATTTTAGTATACGAATATAAATTGTGCTGAAAGATTTTAACAAAATAGGTA  
TGTTAAGATGATAAATCCAGCAACAAAAAATGGATCAAGGCAAACGATTAAGATAATTATTAGTATGTTTGTTTTATTTAGATGTGGAAGGCCCTTGATTAAGTTTGATAATTATGTTAAGAT  
GAATAAAGTTTTCTTTGCTTGTATGTAATGTCCATGATGAAGTGTCCGGCTTGAAGTCCATCGAGGATTTTATGTTCTTTTTATGGTGTGAGATTACTTCTTCTTAGACGTCTCTTATTTTTT  
ATATTAATACTTTCTATAATCTATTTCCATCTTTCTTCTTGTATCTATCTTATTATGCATGCTTTGTCCATAAAAGGCTGCAAATCTTAATCCATAAATCCTTTAACACTCCTATCCTGCATATA  
TATGCCTTGTGCGTAAATAAGGAAGCCTCAATTAACCTATAGATTTTATTTTCTCTACTAAAATCAACGGAAAGACAAGTAAAAAATAGAAAATATATGGAATGAAGAAAAAATACC  
TTACAGCTTGTCTCGGTGAAGCATTGTGAAGGCTGCTTTTGCCTAGAGAGTGGAGATTACCTCCACTGCAATACTCCATCACTAAGCAGTAGAATTTGTCTGTCTCAAAGTGCAGTAAAG  
CGTTGGCAGAAAGGGATGATCAAGAAGGCTAAGGATCTCTTTTCCGGTCTGTGCTCGGATCATCTTATTTCTACTAATAATGGAAGCCCTGTCCATAACTTTCATTGCAAAAATATGCATCAG  
TATCTTTAAGATGAACAAGATAAACTGCCTATGTCACCATAACCTAAGCGCTTGAGTAATTTGAAGTTACCAAGGCCAAGTGGTAGATCTCTAGAACTTGCAAGATGGATTGCCTCCCA  
ACGGCTATCATGACCTGTGTGTCGCTTGACTTGAGATGTCATGGAAGAGTAACTATCCAAATTGTCTCTCTGTGAGCTACTACAAGTGCCTGACTAGTACTGTTTCCACCATCACTGGTCC  
TTTTGTCAATTGGTTTCAGACATGATATTGTTGTTATTGTAGAGCTTGATATCTTTGAACTAACTAGAGCAAGGGCTCGGGTTCAAACCTTAAGCTTGAAGTCAAATCTTTTATTGAATTTA  
CTTCATCTCTGTTAGCAGAATCTATTTTTCTTTGCATCTGATTCCTTTCCATTTATGGGTTCCATAAGTTTTAGCAGGTTTAAATTTAGAGCATGAACAAGAAACCAGGCTATTACTTGAACG  
TGAACGATTTGCTAAATTTGAACCATCTTTAGTAAAAATATGCAATTTTTTCTTGATGCTCAAACCTTTTCCAGATAATATTTCTAAATTTATGTTGGGTTTATTGCTTGGATGGGGACTAGGG  
CACAGGGTTTTTTGTTGAAAATAAGCTGTTTGTGATGAACTTATGAGGTCTCAAATAAGTTCTTTGAAAGAGTTGGTAGCAATGTCTATTATACTGTTAGTTGCTTCCCTCAAATTCATATTTCCA  
GAGATTGCTTCAATACTTGTAAAGATGTTCAAACCTTGGGCCAGACTTTTTCAAGCCAGGTCCAGATATAAGGACTGGATTACCTATCTCAAGCTCAGTGAGAGTGAAGTGAAGCCTTTTTCT  
TGATCTTGGAGGATCTTTTCTTTTGTAAATAGAATCCATCAGATCTGCGAATGGCTGTACGAGGAGAATTTCTACAAGGTATCGAGTTCTTTCAAGTTTCGATGTCATATGAAAATAAAGG  
ATGTCAAATCTTCCATATAAATGTGCGCAGCGATCCGCTTAGGAGATAAGAATTCAGAAATCGATTATAGGATTTGGAAATTGAGGAGAATGAAATATTCGTGGGGCAGGGAGATGAAAG  
CACAGAGGAGAATGAGGAGAGG

>comp173752\_c3\_seq3

CTTTATTATGCAAAATTTAGTAATGCAATAACAATTATTTGTACATTAATAAACATATAAAAGTCTCACTACCAAATACAAGCTAGAATACTGGAGAAACAAATAAAGGGGTTTATAGATCAA  
GCATGCATTCCATTCTACCAATTTGGATTTAAGCGTAAAACAAAGAATGCTCTCTTCAATTTCTGTATAGATCAGACGATATATAGACCTTTCTATTAATAATACACAACCTAAAAATACT

CAAAATCAACTTGTGAGGTAGGAGGATTTTCAGCCGTAGCCTTCTTCTTTCTACCTGTAATATCTTTGCTCGCAAATTGCCCAAAGTCCACCATTTCTGGAACATGTGGTGGCTGCAAGCT  
TCTCACCAATGCCCAATTTACTCCATCAAAAAAATGATGCTGCTTTATTTCTGTGCGCACCTCTACGGCAAGCTATCCTTCTCTGCGGATCCTTAACAAGAAGGCTTCGGATGAGATCTCGTG  
CACTCCTGCTTATAACTGGTTCCCTCTGGAAACCTCAATGGCTGTCCAATAACATTCAGGAGAGTATCTCGATTCCCCGAACCTTTGAAGGGAGTAGTTCCATAGATCATTTCGTAGATGAAG  
ATGCCGAAGGTCCACCAGTCAACTGCACTACCATGGCCTTCTCCTCGGATGATCTCCGGCGCCAAATACTCGTGTGTTCGGACGAAAGACATCGATCGAGCATTGTGTTGGTCTGCTAACA  
ATTCTGGAAGAAGCCCAGCACCGGGGCCAAAAATCTGATTTTGACTTTTCGATTCCTTTTTCGGGATTATACGCGGAAAGAGTACTGTTGGCTGGATGCAGCCCTGTATGGATCCATCGGCATC  
GAGCAAGCATTCAAGATCTCTAGAGCTTTCTCCATGTAAAGATGAAGACTTGACTAGTGTGGATTTACAGAGCACTGGAAAGAGAGGTGCAAGTCTGATAGCATAATGTGCCCTCCTC  
TCTAACAAGAACATTCTCAGGTTTCAAGTCTCTGTATAACAATTCCTAGCATATGCAGTACTCCAGTGCAAGCAATACTTCTGAAGCATAAAACAGCTTGCTCGGTGAAGCATTGTGAAGG  
CTGCTTTTGGCGTAGAGAGTGGAGATTACCTCCACTGCAATACTCCATCACTAAGCAGTAGAATTTGTCTGTCTCAAAGTGGCAGTAAAGCGTTGGCAGAAAGGGATGATCAAGAAGGCT  
AAGGATCTCTCTTTCCGGTCTGTGCTCGGATCATCTTATTTCTACTAATAATGGAAGCCCTGTCCATAACTTTCATTGCAAAAATATGCATCAGTATCTTTAAGATGAACAAGATAAACTGCC  
TATGTCACCATAACCTAAGCGCTTGAGTAATTTGAAGTTACCAAGGCCAAGTGGTAGATCTCTAGAAGTTGCAAGATGGATTGCCTCCCAACGGCTATCATGACCTGTGTGCTGCTTGACT  
TGAGATGTCATGGAAGAGTAACTATCCAAATTTGCTCTCTGTGAGCTACTACAAGTGGCTGACTAGTACTGTTTCCACCATCACTGGTCCCTTTTGTCAATTTGGTTTCAGACATGATATTGT  
TGTTATTGTAGAGCTTGATATCTTTGAACTAACACTAGAGCAAGGGCTCGGGTTCAAACCTTAAGCTTGAAGTCAAATCTTTTATTGAATTTACTTCATCTCTGTTAGCAGAATCTATTATTTT  
CTTTGCATCTGATTCCCTTTCCATTTATGGGTTTATAAGTTTATAGCAGGTTTAAATTTAGAGCATGAACAAGAAACCAGGCTATTACTTGAACGTGAACGATTTGCTAAATTTGAACCATCTTT  
AGTAAAAATATGCAATTTTTTCTTGATGCTCAAACCTTTTCCAGATAATATTTCTAAATTTATGTTGGGTTTATTGCTTGGATGGGGACTAGGGCACAGGGTTTTTGTGAAAATAAGCTGTT  
TGATGAACTTATGAGGTCCCTCAAATAAGTTCTTTGAAGAGTTGGTAGCAATGTCTATTATACTGTTAGTTGCTTCCCTCAAATTCATATTTCCAGAGATTGCTTCAATACTTGTAAGATGTTT  
AAAACCTGGGCCAGACTTTTTCAAGCCAGGTCCAGATATAAGGACTGGATTACCTATCTCAAGCTCAGTGAGAGTGAAGTGAAGCTTTTTCTTGATCTTTGGAGGATCTTTTCTTTTTTGA  
ATAGAATCCATCAGATCTGCGAATGGCTGTACGAGGAGAATTTCTACAAGGTATCGAGTTCTTTCAAGTTCGATGTCATATGAAAATAAAAGGATGTCAAATCTTCCATATAAATTTGTGCGC  
AGCGATCCGCTTAGGAGATAAGAATTCAGAAATCGATTATAGGATTTGGAAATTGAGGAGAATGAAATATTCGTGGGGCAGGGAGATGAAAGCACAGAGGAGAATGAGGAGAGG

>comp173785\_c0\_seq3

TATCAAAGAGGGCATAGCTCTCAATGTGCGTGATCAAATAATACATAATTGTCCCTTAGAACGAATTCGTTATCCCAAATAGAATCGCATAGTGAGCTCCTGATTCCATCCACAACTCTAGT  
GCCATTTGAGTCAACTGATTATTATTGAGCTCATCAATTAAGGCATTCCAAAAGAAAAGCTTCTTCTCAGCCATTTTCATCAAAACAAGTTGCTGGAACCTTTTGATGTCACCACATGTAGTATG  
CAGGCTCATTAAACCATTAGAAATATAGACAAATGGCTCAAAGTCATTACGAATGGCACCTCCAACGTGCTGAAGAACCCTCATCTCCATAATAATTTCTTGCAAATCCAAGCTTCACGTCT  
GCATTTGTCATCGTGCTCCATGAGACTAGGCTTTGTGTTTCCATTGACTTTGCTGTGTTAGCCCATCCGTTTTGACTTAATATTGAAAATAAAATATGGCCAAAGAGAAGTTCTGATCGCTTT  
GAATTAAGTCCCTCATAATCCTGCCTTTGGACACTAGGAGCCCCAAGCATCACGGTGAGGAGCATTGGCAATAGACGGTCTTCATCTCAGTAACCATGCCGAACAAGGCTCTCAACCTT  
GTGCTCATGGGCTCGTTCTCTGAATCAAGCATCTCATTGAACAACCTCAAAGGCATCGAAACCAAGATCATGCTGGGCATAAGCTGCAATAATAGAATTATATGAACTGAATTTCTGTTCCG  
GCATTTCTCAAAATACTTTGTGCGCATCATTGAGGTTCTCGCACTGGAGTACATTGAGATCAACACGTTGTTGACGGAAACTAGATTTGTGGGAAAAGTCCGGACTTCATTGCTAGAGAGT  
GAAGCCGAAACTTCAATAAAGTCCAACCTGACCCTCCCAATGTCAGAGTCATGCCGAACAAAGTCACGCCGGCCAGTAATGAAGTCCAGCTCCGGCAAATCGCTAATGAAGTCCGAGATG  
TTCCCATCAAGCTGGTTGCGGCCGAGATTCATGAGGGTGAGATTCTTGAGCGTAGTGAGCAATGGAGGGATCTACCAATCTCGGATGGAAACTTGCCGGTGAGGCCACGGTTGGCCAT  
GTCTAGCCGTAATACTTAGTAAGACTCCCGAACTCCGGCGGGATCCACCCTCGTAGCTGCTAAAATACCCAATGCTAGAGAGCTCTGATGGGATGGGGCCAGAGAGTGAATTAACGGC  
GGCTACGACCTTGAGGCGGTTGTGCCGATCGTGTAGAACAAGAATCAGCCATGAGACCG

>comp173828\_c1\_seq1

TTTTCCCTTCAAAAAAAAAAAAAAGTTGCTGTTTGATTAGCATAATCTTTCTCCATGGAATTCTAAGAACTTGCGTACAGATTCTTTCACACTACAGAGATGGATTTCTCTTTCAAAGATT  
ATGTGCCCACTGTTCCACCACTCCTGCTTGTATTTGTTCCATTCAAGGCGATGAATGGAAGATTTTTCATTTGACCTCTTTGAAGACAAAATCATCAAGGCAACGGTTGATCTGACTAGC  
ATTACGCAAAGCTGCAAAGAAAGAAGTAAGATGCAACTTTCTATTTATTTATGGGTATATATTCTCTTGCAAAAAAAAAAGTATGAGTATTGATTTATGGAATGGCAAACAAAACCTGGAGCT  
GCGGATGAAAAGATGCAAGAACATATAGAAGTACTGAGTATCTTGCAGCCCTACTCAGACCCCAAATCATTCTGGTTGTTCTCTTTGGCATATATCTAATCCTCCGCTCTTGCCACCATCATC  
CCCCAGCAGGCACAAAGGCCGGCTCTTGTTTACAGGAGGCGGACA

>comp173930\_c0\_seq7

AATCTTAAGTCAAAAATTTTATGAGATCTCTAGTAATGTAAACATGCAGGTTCCATAATGTGAAACAATTTGATCAAAAATAACCATTACGCTTAACATTATTAATTAATTTAGTGATTAATTA  
TTCTGTTTCTTGTGCATATTTTACCGGTCTAAAGTCAGAACGCCTAATCTTCATAATCCAAAATAAATATATAAATAAATAGGTAATCTTATTTTCTCTTAGGCAACTGGAAAGCCCTCTTCA  
AGAAATTATTGGCCGTGTCATCGTTCCGATGACAGAGCACTCTAAGCACGGTGTTCGGATCCGATCGGCTCCACCTCCCGGTGGTCGGCGGCATCGAAATCCTCTGCCATTCCGCAATTCC  
GCCGGGACACCGGATTCACAAGCGGCAATTGTAAAGTCTTCAATAAGTCGTTCCGTCGGCAAGCTCATAAGCCCAATCACCCCTTCTACAACCTCCGCCGCCCTATCCACCACCTCGTC  
CGCCAGGACCGCCGCCATCCCTCGCCGGAGGCACAGAAAACCCCTCTTCATGTTCTGAAATCATCCATCACCATCTCGTAATCTGTTCTGACAAAAACCCCTCTCTGTCCCTCCGGCTAG  
AAGCACCATCAGGAACATCTCGAATGAGGCCCGCATCACCTCCTCACCGCCACCGGCTGCGCCCGGTCGGTCAACACCGTGAGCAGCATATTCAGATTCCGCTTAAGAATCCTCAAAG  
ACGGCCGGATTCTCGAACCAGCAACACCGCCGACATAGAGGCTGTGGTAGGAGTGGGCGGAGTCGAGGAAGACGAGGCGGTAGGCGGGACCTCGGAAACGTGGAGTATTGCGGCTT  
GGATTGAGGCGCGGATTAGGTCTGAAGTGGGCGGCGGAGTGAGGCGGCGGTTAGGGCGTAGTTTCTGGTGGTGGTGGAGGTTCCGGGAAGGGCCGGGATGCGCGGGGTTGCCGCCG  
GTGAGAAGAAGGTGAGGGATTTATCGAGGGAATGGATGTGGGAGTAGAGGTAATGGAGGGTGTGATCCGAATGTATAGCCGCTGGGTGCCGCGGCTAGTTGATGGCCGGGGATGGTGC  
GTCTCACCGCCGGTGTACCGCCAGCTGCAACCGGAGTCGGGCCCTCCGGCGCCCATGCCGAGGAGCTTCATATCTGCGCCGGGTGTGCACGGCGTGGCTTTCTTCCATAGTTTTGAAAA  
CGGGAGTCTTGGTTGCAGCGCTCAATGGCGGCAGTAGCGGCAGGTAGCTTTGTGACTCCCACAAGAAGTGACAAAATATGTGTACTCCTGGAAGATGGATTCCAACCCGTCGGCTAG  
GTCTTGTAACATTTATCCCTCGTCATCGGGATCTCAAAAAATTCGTCCACTGTACCTTCGCCAGCTTTATCAAATCCACTGCCGATTGTGCGACTGGCTCTCTCTTGACTTTGGCA  
TCCAATTCTGTCAAATACTCTCAATTTCTTAGCACGGTTGAGACACTCCCTCCCAATTCTCAGCCGCTCGTCCATCCAAGCTTTGAGAAGTCCAGCAGCAATGGCGTCAACCTCATAAGG  
CACCATCTCGTCAACCAAACCTCTCCACCGTCGTCCCTATCAGCGGCATCATCCGCCACCATCTGCTTGAGCAGCTTCTCCAACCTCCCCGCGCAGTGCAGCACACGCACAAGCCATT  
ACTGAGACTATTACCTTAGCCAAAATACTGCTTCAGCACGACGCCAAAGCAGTTATAAAGCGTCAGTATTGCCAACCCCGCCGCCGGACACCACTGCCGGAGCACCGGGCTAAATAT  
CTCCTTCTCCGTGGCTGCAAGGGTCTCCGTGTCTTTAGCCAGCTGGATTAAAATGTCACCGGGATCCTCATCTACTTCCACGATCATGCTATCCACATGCCCCGTGCCCTGTCTCGAACGCCT  
TGGTGAAGGCGTTGCGAAGGGATTTATGAATGTAGAATCCACTCTAGTGGCGGCGGAGCTGCCGGGAGGTTCCCGCTCAACAAGACTTGGCGTGGCGCTGGCCATGCCGGAGAGATCC  
TCGACGATGATTTTGGTGGTGGAGAGAGCGAGGCAGAGGATGGTTTCCATGTTTCCAGTTGTTCCCTTGTGCAATTTCTCATGGTAATCTAACAGCCGCTTCTCCGCCACCCTTGCATCG  
ACGCAAGTACGCCGGAGAGGACTTTAACATAGCTGAGCTCATGCTCTGTGAACTTGGCGTCATTGGCGACCTGTACAAGCATATTGAGCGTCGCTTTAATCAGGTCCGGCTCGGCTTGGC  
CGTGGTGTGACGATTTGCTGGAATAGAATCCAAGTGAAGCATAAGTTATGAATCCTTCTATCGATGCCGAGGGTAGACCATGTTTTCTTATTAATTCGAGGAGCTCGTCGACTTCATCGAGG  
ACGACGGTCTCTTCTCGGAGGTCGAATATGGATTGGAGGAGGGCGAGGTAGAGATGGACGTTGAGGGGAATCCGTCGGCCCAATGGCAGCTTTCCGGTGGAGGAAGAGGTGGAGCTGC  
GCCAAGCAAGGGCAGTGACGGCGCTGGTAAGGCTGCGCATGGCTTCGGAGTTCTTGTGGTGTCAATGGGCTTGGTTTACTTAGTCGTAGTATTTCCCGCAATCGGAGAGCAGCGGCA  
TTGAGGCGGTTCGAGGGGGAGAGAGGGGTGGAGGAGAAGGCCGAGTTCCAGAATCTTTAGTTGGCGTCGTTGCCATTGGTGATAGTCTTGGCTGTGCTGAACTCCGAGGGCTTCAGGT  
GGCGGAGTAGTTCAAGGGGTAGGATGATGGTCTCTGCTTTTCTTCCACTCTGCCATGGGATCAAATTTGATGTAATCTGGTGTAAATTAGTTGATTTGAAGCATAAATGTATATACCTGTCCA  
ATGAAGTTTCTCATCAAGATTTTTCTTAATCGGCTCTCGCTCTGATCCGTAATGCGAAGCTGCCGCCGATAACCTCGGCGGAGGTCATTGGCCTCTGATCCTGCTGGGGGAGCTCGGTA

CAGCGTTCGCGCCAGGGGAATTGGGTACGGCGGAAGGGTGTCCAGTCGCCACCGATGTCAGCCCCATTGGATTCATCGTTCGCATAGGAGGCGGTTCGGCGAGCTTTTAGCCCTAGGGTT  
TTCTTTACCCTGCTCGTCAACCACCATCATCCCCGTTCCGCCTTTGGGTCCGACAACCGCCGCCGGCTGTTGAGACGGCAAGACCTCCACCATCTCCCCGCCACTACCGATGATCGCGACG  
CTTCCCCTGCTTCCCTCCACTACCGCTGCCGCCGGGGGAGGAGCGGCAGGACATGAAGAAGATCTCATAGGCCGTTTCCCCGGAGCTCGGTGCGGCGGAGCGTGCCGAGACGGGCACCGA  
AGGGCCACTCGATCTCGCTGTTGCCAGAGGAGACGGAGGCCTCTGATTCCGATGCAGCGGAGGCGGAGGAGATAGGGGAGGCGCGGGCGGACCATGGCGGGCTGCGGCCGCCGGTGGTT  
AGATGATCGTGATTCTTGAGCGGTTCGTCGCCCTCTACCGCGGAAGAACATACGGTGGTGATTCAATGAGTAATTGGCCGCTCAACATTGTTCTATTTTCGGGGTGCCA

>comp173983\_c0\_seq2

GCGCCAAACTGTTGCGTCCTGGAAAATTCGCGCCGGTAGAGAAATATAAAGATTAATGCCTTAGCTTTGTACGAAGATCCAGAACACAAGCAGATGAAAGAGATGAGGGTGTAGCGTTC  
ATAAAAGACACCAGAGTTTTTACGTGGAAACCCCTAAAAAGGGGAAAAAAACCACGGGGCTTGGCCAGTTTGAATGAATCCACTAGTGCTTGTAAATTGATTACAAATGAAGCCCATC  
CTTAGGAGGAAGGCCTTAGCTCGAAGTAACAAATATACATCATATAAAATGCATTGCATGGTGGAAAGTCGGAAGAATCAATGTTGATATGTTTGTGGGGCAGCAAACCATAGTCGACGA  
GCGATGTAGATCGGAAGAACCATATTCCGGCGGGTGACGGAGGTTGGAAGGATCGTAGTCTGCGGGCGACGAAGGTCAGGAGGACCGT

>comp174001\_c1\_seq1

TTGTTTTAATGTCTCTATCATATAGGGAGCATGCATCCTGAGTCTATATTTCTAAGACTCAGTTCCTAATTTTGTCTTAGGTGTCCTAAAGTTGTAGGATTAAGAGGTTTTGTTTTCT  
AACCCCTAAGATTTTCGTACATGTGTCACTAGGCTTAAGGATTTATGCATGAAAAGTATGATGATAAATAGCAAAGCAATAGAAAAGACGAGAAGTGAAAAGAAAGAAGACTAAACACGATA  
AAAAAAGAAGAATGAAAATCAAATATAAAAGGAATATAGGCATTGTTGTTATCGGACACACTTCTTTGAGGTCAAGTGTACCCTAAAGCAACAT

>comp174071\_c1\_seq20

AAGAGTTGTAATGTGTGCATGAGATAATTAATAGAAGAAAAAGTTTGTGTGTTTCTTCTCTCATTTTTTTCTTCTTCTTCTTCCAATTTTTTTCTGTTTATTTACAGGTGACCACCA  
TTAGCGACAGAGAATACCGGGTCTTAGCCATCGACTATGCCAACGTCCACATCGCCGTCGCCGACGCCAGATTTATCGGCAACTCCTGCCCTGTTCTCGCGGATAACACAACCGTTGACCT  
ATCCTTGTAACAACACAGACCTCGATAAAGCTGTACCTTGTTATGAACTGCACATTTTTCAGGTGGCCTTCCGCCGGGGCTTCACAACTTGAGCTGCTATGCGGGGAACTCCTCTTTT  
TATGTGGTTGGCGATGGAAGCTCGAATGGTGCAGGAGGAGAGCTGTGGATCAGTAGTACAAGTTGTGATGCATCAGGCGGTGGTGGATTTGGTGATGAAAGGATGAGGTAGGGCTTGTTAAT  
GCTCTGCAGCAGGATTGACGCTCACCTGGACGGCCGGAGATGGGTGGTGCAGCGGTGCGTGCAGGCGGGGGTGTGTGGGTATAATTCGAGCTTGGTGAGTAAAAACATTTGCAT  
CTGTGCTGGTGGCTCGTGTCTTTCAGCTGGCAAAGATCATGTCACCAGGAAAGTTTTAGAAGCTTTGTCTTGTCTGATGGGAATAAACTCAGCCAATCTACTTCCCTAATTCATGTTATGGA  
TTTATGGAAGAGAACCTTATAGAAGACTCCATAAAGACTCTTGTATGATTTATGATTTTCTTAAATGACTTTCTCAAGGGCTTGAATTGATTAATAAATTAGTCCATTTCTTATCGTTGTTG  
ATGTCTAAAATAGTTTCTGTTGTTAGCTTTGGTCAACTTTAGTGTGGCCATACTTTTCACTTCCCTTTCAATTTAAGATGTAAGTGGAGGCTTTTGGAGTTTTTGTATCTGAATTCATTGAA  
CATGGGCCAAAGAAGTGTGCAATATATGATGATGACTTAAATATGAAAAATATTTGGGGGATCTGTGGTTGTAGTGAATGATTGGATAGGCCCAATCCTTGGAGCTCACCATTGATACG  
AGCGAGACTGCGGGGATGGCAACCTCACTGTATTAACCTTTATTACTTTTACATAGATTTATATTGAAATTAATATTTTATTATTATGTCTCATTTTGCATTTGTTCTTCAACGTAGTGATT  
T

>comp174080\_c0\_seq19

GCCTAGTCTCATCAAAAGGGACGTTCAATCTGTCCCTGAGCCTCTGCAGCCTTTGTTCTGGAGAGGGGTAAGAGGATACCCATTGGTCTTTTCATAATTACCACAACGTTTATGGCCATT  
CGATAAAACAATCCTCCAAACCATGCGCGTGGTCCAACCATATCATTAGTTGTCAATGGCGGAGTCAAGATCCATAGTTGTCAAAAAAATTGATATATGTGAAGTTCATTGAATTAGTAGGT  
TCAATTCACCCCATGCTAGCTGTAATGTACATAAAGCCGTGCTAGCTTGCATCACTGCTAGTAAATCTATTGTCAAAATGCTGGATATAGAACAAAAAAGGAAGAGTTGCTGAAATATG  
AAAATGAAAATCTCTTTTTAATTAAGGAAAACTTATATATAGATGAATTATAGAGGTTGAACGTCTCATAATGTTATAGATATATCACATCAAATATGAAAAGACAAACGATCAAGTGCAA

CACATGATCATACTTACATTAGCAGCTCTTCAATGTTGGAATTATAAAATTTTAAACGTTGTTTTCACTTTCCCTGTTTTTCCAGAAAATGAGCACACACATGGAGAAAAGAAGAGAGAGA  
GAGAGAG

>comp174080\_c0\_seq7

GCCTAGTCTCATCAAAAAGGGACGTTCAATCTGTCCTTGAGCCTCTGCAGCCTTTGTTCTGAGAGGGGTAAGAGGATACCCATTGGTCTTTTCATAATTACCACAACGTTTATGGCCATT  
CGATAAAACAATCCTCCAAACCATGCGCGTGGTCCAACCATATCATTAGTTGTCAATGGCGGAGTCAAGATCCATAGTTGTCAAAAAAATTGATATATGTGAAGTTCATTGAATTAGTAGGT  
TCAATTCACCCCATGCTAGCTGTAATGTACATAAAGGCCGTGCTAGCTGTAAGTTCATTAATGAGTACAGCACATGATCATGCTTACATCAGCAGCTTTTCAATGTTAGAATTATTAATT  
CTAAACGTTGTTTTCACTTTCCCTGTTTTTCCAGAAAATGAGCACACACATGGAGAAAAGAAGAGAGAGAGAGAGAG

>comp174114\_c0\_seq8

ATCCGATACCAAACAGCCCCTAAAGAATTTCTTCTCGTCCTTCGACGTCGGATCGGAAATCACGACGAAAGGCCTTCCCTCCGACTCTTGTGATCACTGCCATCGACACCTTCTTTTTCTC  
CGTCGGGAGTCGCTACTTTGCTCGATGGAGAATAACAACCTGGCGGCCCGCCAGGGAGAGACTCCCTCCATGGAAGTCCCTTCCCTCCGACTGGAGGTCCCAACTCCAACCCGAAGCGA  
GGCAAAGGATCGTTAATAAGATAATGGACACTCTAAGGAGGCATCTTCTGTGGCTGCTCTGAGGGGATGACTGAACTCAAGAAAATTGCAGTACGATTTGAAGAAAAGATTTATGCTG  
CTGCTGTCAATCAGTCAGATTATCTAAGAAAGATTTCAATAAAAATGCTCTCTATGGAGACAATGACCAACAAAACGCTCCAATGAACCCCTCAGCCTGGCGTTAACCAAAATTTACAAA  
CACAGGATCGTAGCCATTCCACCACAAGTGAACAGTCAAGGACAACCACTGCCACAGATTCCTCTAGTGGGTCCACCTTCAGGAAGGCAGCAGCTTTTACCTCAAAGCCTGCAAAAATA  
ACACTCTGCTTCCATGCAAGGTTCTTCTAGTCTTTCTGCAGCACCTTCTATTACGGGGCTTTCTCAGTCAACCATAACAAAATTTGGTCATACATCTAATATGCAAAACATGCCAGGGATC  
TCTCACAGTTCTGTAAATAATTCTTTAGCACAGGGAACAACAGCAGATATTTATGCCAATGCGCCGAGGCATATGCAAGGAAGGCAGCAGCAACAATCACAAAATCCACTTATATAACAAA  
ATTCGCTTCAACCGCAATTAATGAAGAAGATGCACAATAATGCACTTCTGCAATCATCTATGCAGCAGCAACAACAACAATCTTTGTTGCAAAACAAATCAACTGCAAACTTCTCAGC  
AGTCCACAATGCAAATGCCATCTGGTCTAACATCTGGCCAGTCTCTATTACAGCAGCCACCAGCGACATCCATTCAATCTGCTTCCAGCCGGCCCTTCAACAGAATCAGCTGAACGCAAT  
TCAACAATCAGTATCACCTTACTCCCACAACATGTGCAAGCGTTTTCTAGACAATCACAGCAACCACAGTCTTCTTACCAGCAAAACAATTTGCAAACCCAGCAGCAGCAGCAGC  
AGCAACAACAGAAGGGGGTTATGGTCATTAAGAAGGGGGAGAAAAAGAAATATGGCGGACCCTGCCGCGCAACAACCCAATCGACCCTGCTGGCGTTGTGCTCCGATTGGGCTC  
ACCACGGAAACGTCTCGCCACCTGCGCCAAAGGCTTCGGCCCGCGCTGGAGGTGGCCGCAACGGCCGCTTCTACGTCGTCACCGACCCCTCCGACCACGACCTCGTCAATCCCCG  
CCCCGGCACTCTCCGGCACGCCGTATCCAAACCCAACCCCTCTGGATTGTCTTCGCCCCGCGACATGATCATCCGCTCAGCGAAGAATAATCGTCAACAGCTACAAAACCATAGACGG  
CCGCGGGCCAGGATCCACATCGCTTACGGCGCCAAATCACCATCCAATTCGTCCACCACATCATCATCCACAACCTCCACATCCACCATCTCAGCCCTGGCAACGGCGGCATGATCCGC  
GACTCCCCTTACATTATGGCATTTCGCACTCGCAGCGATGGTGATGGCATCTCCATCTACGGTGCCTCCAACATATGGATTGACCACATATCCATGTCCAACCTGTGCTGATGGCCTAATAGA  
CGCCATCATGGGATCCACCGCATCACCAATTTCCAATTGTCACATGACAAATCATGACGATGTAATGCTCTTTGGCGCCAGCGACTCCTTCGCCGGGGATGCCCTTATGCAGGTAACGGTT  
GCCTTCAACCACTTCGGGCGTGGACTCGTGCAACGGATGCCGCGTTGCCGGTGGGGCTTTGTCCATGTCGTCAACAATGACTACACACATTGGCAAATGTACGCCGTCGGGGGAAGCCA  
GCATCCCCTGTTATCAGTCAGGGGAATCGATACATTGCTCCGCCGGATATCAACGCCAAGCAGGTGACGAAAAGGGATTATGCACCGGAGGCTATCTGGAGCCAGTGGACGTGGAAGT  
CGCAGGGTGATCTGATGATAAATGGAGCGTTCTTCGTTGAGTCAGGGCAACGATTTATTAGCAGATACACGAGGCATGATATGATGAGGGCCAAGCCAGGGACGTTCTGTAAGTGGCTCA  
CACGCTACTCTGGGACCCTTAACTGCAAGATCGGATTGCCTTGCTAATCCATGCATCCATCCATTGGCTTTTCTTTAGTTCTATTTCTTTAGCTTTTTGGTTTCTACATTTGAAGATGACCGA  
TTGATTGACGTTTCAGCCGGAAGGCATTTGTT

>comp174165\_c1\_seq10

AATTACAAGTGGATATAATATTATTTTTTCTCTGCCTACTACAATACTTGTATATATATAAATGCAATAGAAGATTCTAGAGAATATTTAAACAACTAATAAACTATTCTTAAGGGCTTATTAG

CTAATGATATTCCACATCATACTCTCCTTACGTCAAAAAGAGCTCGACTCCGTCGAGACTCGTCATCAATAGGGCGGTGCGGTGTAGAAATCATAAGCAATCCTTCTGGATCGAAGATTCTTCG  
TTTTCTATGCATACCCGCAAGCTCGTTCATTAGCCGATGAGTTCCTTTTGGAAATTCCACAAAATTTGCATACCTTCATCGGTAGAAATAACAACACATATTTGACCCTTGAAATGAAATCTTTAT  
CCCAACTAGAAATCGCATAATAAGCTCCATATTTCAATTTTTTGAAGTGTGTGAAAAACCAATTTTCATAGCACTGGGACTTTTTAAAAGCAGCGAAAAAATAGTATTAGCCAAATGGAAAC  
TATGGCTATGATATGAAAAGTAAAGCAGAAAAGAAAGCTATCCCTAATGAAGCCTAACTTTGCAATTGTTTAAAGCACCCCTCAAATCACCATAGGTGGAAAGTTCCATGTGAAGTTAAAA  
AAACTTCCATGACTAAAAACAAGGTAAAATGCTTCAATTCGAAAGTGCTTGGTTGTAAATTGTAATGGGGCGACTGAAGAATGAAAGAAATTAGATTGCCTTGTCTTGATAAGCTAAAG  
GCGGCTGATAACAGATTCTACCTCAGTGGGAGAGTAGAGGTGGTAAAGTCGGAGCAACCTTCGCAATATCAACATTGTTGCGGTGTCACCTTTTCCCTCCATGACTTGCTTCAGGATGGAAAG  
AGCAACTGTTTCAGCTTCTTGAAGAGTCATATCCTTGTATACTGCTTTTGAAGCAGCTGTGCGGCTCCTTCGAGCCAGAACCTATAGCTTTAGCACTGCACTGCCAAAATGTACCTGAA  
GGGTCTGTATGGAATAAACTAGGCCATGCTCATCATGACCAGCAATCAGAAAGTGAGACTCCAAAAGGGCGTGACATAGATTCTTCTTCGCCCTCACCAAATCGAATAGCATGATCACAA  
AGCGCTTGGGTAGTAGACTCAACAGTCATTGGCTCACCATAGGAAAACCTGTGATTCTGTGTTTCAACTCTTGCATGCTCAACGAGTGTGCGGGCATCAGCTATAAACCCTCATAGCACA  
TCCAAATGTGCTCATCGATCTCCATATTTTTCTCTACACTGCTTGGCTCCAGTAGAGGTGATGGCAAGCGCTTCTCAACCGGAGCAGCACTCCTTGCTTCGTCTTTATTCCAATAGCAGTCG  
CACCAAGCTTTATAGCTCTATGGCATACTCAACCTGAAGCAACCTTCCCTCAGGGCAGAAAGGTGTTAACCCCTCGATCATATTCAGTCCTCGTGAGAAACATCTCCAAGATCACCAGAA  
ACCCTGACCTCTCTGGGAAAAGCTCTGTTTAGAGATTTCCGGTACTGTGAGGAGCGAGAAAGAGCAGGGAGGAAGAAAGGTCTGACGAGTAATGGGCGAATACCGCAATGGGCTCAAT  
CAAAATAGTCCAAACCAATGTGAAGAGGACGTCTGTGCTCAATGTTGAGAGGGCGTTGTTGTTGACATTAAGACAACGGCTGACAAAGACGAGCTGTCAAGTTGTAGCGTAGAAAATTG

>comp174165\_c1\_seq5

AAACTAGGCCCATGCTCATCATGACCAGCAATCAGAAGTGAGACTCCAAAAGGGCGTGACATAGATTCTTCTTCGCCCTCACCAAATCGAATAGCATGATCACAAAGCGCTTGGGTAGTA  
GACTCAACAGTCATTGGCTCACCATAGGAAAACCTGTGATTCTAACAAATCAAAAAAAAAAAGAAATACACATACAGAATAAAAAGTTCAGCAATTGGCACATGCTTTTTAAAGGCAAGC  
TGTTGGTGTCAATTTCCATTAATAATCACCTGTGTTTCAACTCTTGCATGCTCAACGAGTGTGCGGGCATCAGCTATAAACCCTCATAGCACATCCAATGTGCTCATCGATCTCCATATTT  
TCTCTACACTGCTTGGCTCCAGTAGAGGTGATGGCAAGCGCTTCTCAACCGGAGCAGCACTCCTTGCTTCGTCTTTATTCCAATAGCAGTCGCACCAAGCTTTATAGCCTCTATGGCATA  
CTCAACCTGAAGCAACCTTCCCTCAGGGCAGAAAGGTGTTAACCCCTCGATCATATTCAGTCCTCGTGAGAAACATCTCCAAGATCACCAGAAAACCTGACCTCTCTGGGAAAAGCTCTG  
TTTAGAGATTTCCGGTACTGTGAGGAGCGAGAAAGAGCAGGGAGGAAGAAAGGTCTGACGAGTAATGGGCGAATACCGCAATGGGCTCAATCAAAATAGTCCAAACCAATGTGAAGAG  
GACGTCTGTGCTCAATGTTGAGAGGGCGTTGTTGTTGACATTAAGACAACGGCTGACAAAGACGAGCTGTCAAGTTGTAGCGTAGAAAATTG

>comp174168\_c0\_seq2

ACCTTGATTTGACAAAATTGGGGATGGACCCCATACATCAGTATGTATTAATCTAAATGTTTCTTGCTACAATTTGAAATACGAGAAAACGGAAGTTTGTGACTCTTTGAGAGTGCACAA  
GATTTACAATGAAAAGTACGACAAAGATGTGCTAAAAATGGAAGATAAATCCGCTTGTGTTGAAGACGACGGATGACCCAAGCGACGATGCCAGAGACTGCTGAGAAGAACAATAGGAG  
AAGAACTGGTCAAGTGGTGAAGTGTGGCTGGACGGTTGTGAAGTTTGAATCTATAGAGGCCTTGACGAGGTGGTCCCTGAAGAAGAATTTGATTGTTCTTCAAATCCTTGATAGCAAAG  
CCGGATTTGTCAAAAAGCAACAGAACAAGGATTATTACGGACTAATTGATGAATTGAAACCAGATTATGTGAAATGGAAGGAACATGAAGTAATGGTTTCAAAGAATCTTACGATTGGGG  
GTCGGTAATATTCTTGGCCAGAATGTGTAATCGGTAGCATGTCTCCATTCCTATCTGCACCTGTTGTGCTCCCATATAATGTTGCGGATGTTGAGTTGAGTGAAATCAGGAGTGAGGTG  
AGACGTCGCTCCAGAATCTAATACCCAATCATTGTCTCAGATGCCGAACCTTGCAACAAATGCCGAAGAAGCTGCGGGTTGATACTGCAAATTAGTTTCGATGCCAACACTTAAAAGAAGA  
ATGTCCTGGCTTACGACAAAATTTGACACTCGACATAGTTGTTGGTTGTCCGTCCAGATGTTGCAACATCTTGCTGTACAGGTTGCGAATTTGACTGTATGAAGCGTCCGCGTCTCTGTTT  
GAGCGAAAACGACCCGACACGAGAAGCTGTCAAAGCAACGTGTGAATCGCTGGACGGAAGTAATTGAGTTTACGAGCCGCTCAGCAGCGAGATTAACCTTCCCTCACTGCATAGTA  
ATGCATAAAAATCATCCAGCTTAATAGATTGAGGACTCGCTCGAATGTAAGTTTTGAACGCTTGATAGCCCGATGGCAATCCATTTAGCGTATACATTATAATATCTTCAGGATCCAACGGCG

TACCCGAAGAAGCAGTGGCATCGCACTTGCTCTTAATGTCCGAAAGATACTGCATCATCATTCTATCTTTCATAGAAAATATGGTGTAATTCATTCTTTAACTGTAGCATTCTAGAACGATTGG  
ATGATTGCAGCCGCCGTTCAATCGTGAGCCAAATATCAGCGCAGGAATCCAAATTTAAAATGTAGGGCAGAAGATTTGCAGAAACAGTCAATACAAAAGCAGCTGATAAATTTTGATCTAT  
AAGGATCCAAGTTTGATAATGAGGATTAGAAGCAATTTACCAGTCTCCTTACGATGTGTTTTCTGGCTTCGGTGTAGTTCCGTCAGATAACCGTTAAAGCCATTGGCGGTGAAAAGC  
TTTAACTTTGGGATTTCCACATAAGATAATTATCTGTGTTTAACTGAGTGTTCACACAGATTTTCATGTTGAGCATCAGAAATTTGAGTTGAGGCGGAATAACTGCTTCGCTCATTTTTAC  
CGGAGTTTTAGAAAGAAACAGAGGAGACGTTGGTTCCAGATTTCGGCTGAGCTCATTTTGAAAACAGACAGAAGAAATCAGCAACTCAGTTCAGCGACCCGAACCTGGGAGCTCTGATAC  
CATGTAGACTTGAATCGGCTGGAGCTTCTCTTGAGCTTTGAACCTGCAGGGAAAGATAAAAACGGGAAGAAGAAGGTAGATAGCAGAAAGTGTTCATTGACCTTGTGCCGAAAACCC  
TGTTACAACATATATCAAACTAACTCAACCTGAGCCGTTTGATTAAGCAGTTGTAAAGTAGAGGTGAGGATTA AAAAGGTACAAGCATAAGTATGACAAGTCAGAGTAGTGGCTGCACA  
AAACGGCTAAAGCAGGATAAGTTCTAAAGCATATCAGTTCTGCTTATCATCCCCCGCAAGATGATACTCGAGTTCGGGAGTGTGAGCTTGTGTGCTAAATCTTGAAACCTTTGAATAGCT  
AAAGGTTTGGTAAATATATCTGCCAGCTGATCAAGTGAAGTGAATGATGAATAGAGATATCTTTAGACTTCACACAATCCCGTATGAAATGATAATCTATCTCGATGTGTTTGGTACGAGCA  
TGGAAAATAGGATTGTTAGCTAATGCGATTGCTGAAAAGATTATCACAAAATAATTGAGTGGCATTGTAGCAGGAATGCCAAACTCAAGAAGAAGACGTCGTAACCAAACGAGATCAGCA  
GCTGCCGTGGCCAACGATCTGTACTCAGCCTCAGTAGAAGAACGAGCAACAGTTTTTTGCTTTTTGACCTGCCAAGAAATGAGATTGTGACCAAGGTAGGCACAATAGCCAGTGGTTGA  
TTTGCGGTCTAGGGGATCTCCAGCCCAATCAGAATCCGAAAAGGCGGAAAGAGATAATTCAGTAGGTTGAATGAGAAGACCAAATCTAATGTGCCTTTAAGATATCGAAGAAGCCGCTT  
GAGTAAGTAGAAATGTCCATTGGAAGGTTGTGCATAAATTGACACAGTTTATTAAGTGTAAAAGATAACGTCGGGTCTCGTGACAGTTAAATATTGCAAGGAGCCAAACAGATGTTTGTAT  
AAATCAGAATTGTGAAATGAAGCATCAGCATCTAGCGGCATAATAGATTTAAGAGCTACTGGTGTAGATAAGGATTTACAATTATCCATACCAGCACGCGATAGAATATTGGTAGCATATGA  
CGTCTGTGATAAAAATAATCCCTGTTGTGCCGATTTTACCTGAATGCCGAGAAAGTGAATGCAGCCAAGATATTTAATGCTGAAATGCTGTTGAAGTGTAGTTAAAAGCCGCTGAATA  
AGATCATCATCACCAGTTAATAATATGTCATCCACATAGATTAGGATGAACAACATTTGGAGTCTTTGCGGTACAGCAAAAAGAGAAGGATCAGCCGAACCTGGGTGAAAACCGAAATT  
GAGCAGATGGGAAGAAAACCTTTGCAAACCACTGCCTTGGCGATTGTTTCAATCCATAGATTGATTTTTTTAAAAGACATACATGATTAGGATATGCCTTATCAATAAACCC

>comp174176\_c0\_seq5

AAAGCACAAAAAAAAAAAAAAAAATCTGAGGTAGGACTAATAATTTAATAACTTGCCTAGCCGATCCTTTCTCCTCTATTTCCGCTGCTTCCGGCTCTCCCCTTTCTGCTCGAATACCTTTG  
TGCTGTCAATCAATCGGTTCTTGTGCTTTGTCCCTAATCTGTGCTTGTCTCACTTGGAGGAAGCGAGGAATCCGTTTTCTTCGGCTTCTCAGCTCTGGTACGTCATCCTCATCCGCTGCTCT  
TTTTTTATTTAGTGTCTCTTGTATTTGGAGAAAAGAAATCATTAAATTTATCAAGTCTTTATTAATAAATACTTGTCTTTGTCTTTCTTAATTGCCACATTC AACAGAAAAGAATTGCTAATCAC  
AATTTCTATCATAATCTAATTCAGTTGCTTACTTGTGTTAGATGAAAAGCATCTTTAACAAAAGGATGATTTCAATTTTCACTCGTTTTGATGGTGAGTATGGAATCATTGGATATGAGGAG  
TTTTTGGAGGTGTTTTATAATTTAAACAAATGCTAATGTCTAATATTGCATCCTTCCAATGATAAAATTTAACAAGTTTCACCATTTTAAAGTATGATTTCTAACTTCAAGCAAGAAATTT  
AACGGAGAAGAGAACTCACACTGATTCTGTGAACATAACCACAGAAAAGCCATCCTAAG

>comp174183\_c0\_seq14

GAATTTCAATTTATTTATCTCATTATCATTATTATTGGAATTTACACAACAGGAAAAATGTACATTTTTTGTGCCTATTTTTTCATCGAAAAATGGCCAAAATTTCTCTGAACTTAGTATTTCCGGT  
GAAAATATTTACGTCGGTAAAACACATCGGAAAAGTGCTACCAACGTAAAACCTATCCGCCAGAAAAAAACCTATGAAATTTCCGAAAAAAATTTCTTCAAAAATATTTCTGGCAAATATA  
AACTCCGTCGAAAAAATAAAAAAATGAAAAAAAATAATCCCGCTAAAGCCCCATCAACCCGCTGAAGCTACCGTGAACCCATGCCACCACCCAATGTGCGAAGCCCATGACCTG  
ATGCCCCGCGACTAGTCTAGCTCAACCCGTGACCCACCCGCATCACTAGCGCCTGGCGGGTTTGAACCCCACTCTTGAGCAAGCCTGCTGTCCACCAAACCATCATGCTACCACTGCA  
AAAAAATATAAAGTTATGAGTTATGAGTTGTTTTTTATTTAAATTATAAATGACAAAATTTGTTATTTAAAATAGGTAATATACTAAAATATTAATAAATAATTAATAAATTTATTTA  
AAATATTTAAAAGCTG



>comp174209\_c0\_seq11

TTTTATACTAAAAAATTACTTTAGAAAATAACATCATAACATCATAACATCATAACATTTCAAATTGCATCATAACCATCTTTTTGCCAATATGTTGTCAACTCATTAGGAGAAAAGAGAGAG  
AGTTTTTCAGAAATCCCTGAGAAGCTATTCTGTCTAGCCATGTAAAGCTTAGGAAGGCTTCTTCCCTTATTCAAATGCTTGCTGCTCCCATATTCTTCATCTTTCTTCTGTTCTGCATTTCCATA  
TGATCCACAAACTGAGCTGAGCCTTCCTCTTCTGCTCTCTCTATGTCTGTTTCCCTTGGCTGAATTAGGAGCTTTCTTCTTGTAGATAAAATAGATTACTAGCTGAGCTGAACCCAAAACAAA  
TCCAATAGTATTTGGGATCAGTATAAAAATGTCTCTGACAAGCACAGAGTAGATGCTCCAAATCCCTGCATTGAGGAAGAGGAAGAAGGAAAAGGAGAAAAGGCATGTATTCTACGCTCTT  
TGTCTTCATCACCATTTTCATTGCATATAATGGTGATGCATACATTCCTATTGTTAGGGCTGCACACAAAGATCCCATCACCAAAAAGCCTCAAGCTTTCATGGAGAGCTAAAAGAGTCACCA  
AAATCACCCTCCAATGACTCCAACATTTAATAATCCAACCATTTTGGCCATATAAATTCTGGTGTCCCTTGAAGTATAGATGAGATAGAGAATCACATAAATGGCCTGAAGAACAGTGCCT  
GCTCCATTGACTGTAAACAAGAAGACCATTTCGTCTTCAACAGCCCGTAGTAAGTCCACAGTGATGTGCTCATCAGCGTTGTAACGTACGGTTGCCATTTGAAGCTCTCTGTGCGATTTCT  
TCTTCACCACCTCCGAAAAGTCCCCTGCCCCTCTCAAAAAATCCAAATCAGTTCATTAATAATAAAAAATTAATGTA AACGATTTATTTACTAATTAATCTATTTCTTTGTCAATTTTAA  
AATAATTATAATTAATTAATCATAGTTTACACGAATTTCAAAGCAAATTCAGTGATCAGAAAACCTACCTTATCCAAATTTGGATTACCATATCCATAATAGATAGAATCCATTACTTCGGGGT  
GATTTTCAAATAATTAAGTATTAAGAAATTTACTAAAGAAGTAATTAATAACTCAATTAATCTTAATTACAAATCGGATTAAGTCTGTAAAAACTCACATGGGCGATGCAAACACCAGAATC  
GATATCACGTTTCCCCTAATCCAATGAAGCTCAAATCCGCCATTAATGAATGCCAGAAGAGAGAGAGAGAGAGAGAAGAGGAGAGAGATTGCGTTTTTG

>comp174209\_c0\_seq5

TTTTATACTAAAAAATTACTTTAGAAAATAACATCATAACATCATAACATCATAACATTTCAAATTGCATCATAACCATCTTTTTGCCAATATGTTGTCAACTCATTAGGAGAAAAGAGAGAG  
AGTTTTTCAGAAATCCCTGAGAAGCTATTCTGTCTAGCCATGTAAAGCTTAGGAAGGCTTCTTCCCTTATTCAAATGCTTGCTGCTCCCATATTCTTCATCTTTCTTCTGTTCTGCATTTCCATA  
TGATCCACAAACTGAGCTGAGCCTTCCTCTTCTGCTCTCTCTATGTCTGTTTCCCTTGGCTGAATTAGGAGCTTTCTTCTTGTAGATAAAATAGATTACTAGCTGAGCTGAACCCAAAACAAA  
TCCAATAGTATTTGGGATCTGCTTATATATAAGATTTCAATCATATAATTCATGTTAGGGCATCTCATTTCCTACTCCAAAATATCGTAACAGTTCAAATGCAGCAACTCATCTCCAGCCGA  
AAAAAAAATCATTGTGAACGGTGCAGCACAATATTGACGACGCGCTGTTCCCGTCGAGAAAATGGTAGAGGTTTTCGCTTTTCGAGCACAGCAACTTGCAGGACGGTAAGCGTTGGT  
TTAGCATTCCGGCTGGAGATGATTAATATAAAAACTGAGTACTTTTTTTTTTATTGATGAGAAAGCATTGTTCTTAGGCCAGTGAAAACCCCGGTCGACCAAGCATGCAACCCAAACCAATTT  
ACACGGATCAACACTTAAGGCTTTCAGTGTTCGCAAGGGATTAACCCCGGACCTAGGTTTTGCCAGCCGGCCCTTACCACCCGGACAAGCAGTGGTGGGTAAAAAACAAAACG  
GAGTACTAACAGTATAAAAAATGTCTCTGACAAGCACAGAGTAGATGCTCCAAATCCCTGCATTGAGGAAGAGGAAGAAGGAAAAGGAGAAAAGGCATGTATTCTACGCTCTTTGTCTTC  
ATCACCATTTTCATTGCATATAATGGTGATGCATACATTCCTATTGTTAGGGCTGCACACAAAGATCCCATCACCAAAAAGCCTCAAGCTTTCATGGAGAGCTAAAAGAGTCACCAAAATCA  
CCTCCAAATGACTCCAACATTTAATAATCCAACCATTTTGGCCATATAAATTCTGGTGTCCCTTGAAGTATAGATGAGATAGAGAATCACATAAATGGCCTGAAGAACAGTGCCTGCTCCA  
TTGACTGTAAACAAGAAGACCATTTCGTCTTCAACAGCCCGTAGTAAGTCCACAGTGATGTGCTCATCAGCGTTGTAACGTACGGTTGCCATTTGAAGCTCTCTGTGCGATTTCTTCTTCA  
CCACCCTCCGAAAAGTCCCCTGCCCCTCTCAAAAAATCCAAATCAGTTCATTAATAATAAAAAATTAATGTA AACGATTTATTTACTAATTAATCTATTTCTTTGTCAATTTTAAATAAT  
TATAATTAATTAATCATAGTTTACACGAATTTCAAAGCAAATTCAGTGATCAGAAAACCTACCTTATCCAAATTTGGATTACCATATCCATAATAGATAGAATCCATTACTTCGGGGTGATTTT  
CAAATAATTAAGTATTAAGAAATTTACTAAAGAAGTAATTAATAACTCAATTAATCTTAATTACAAATCGGATTAAGTCTGTAAAAACTCACATGGGCGATGCAAACACCAGAATCGATATC  
ACGTTTCCCCTAATCCAATGAAGCTCAAATCCGCCATTAATGAATGCCAGAAGAGAGAGAGAGAGAGAGAAGAGGAGAGAGATTGCGTTTTTG

>comp174219\_c0\_seq8

AGCGCTTCTTCGCTCCTCGATCTTCTCCGCAATCTCAGCATTAGTAAAACCCTGTTCCGGCTAAAGCATCCTGAAGTACGAGAAGGCGCAATCCGATCTGACGCTTCCGGTTCGTGCTCAA  
GGATATCTTCACTGGGTTTCCGGACGCCCAACTTCCTCGGGCTGCGCGGATCCGCCGACCGTGTGGTGTCAACCCTAGCGGACTTGGGCTTCACGAAGAACTGTTGCTCTCGATGT

AACCCAGTGAAGATATCTTCACTGGGTTTCC

>comp174305\_c0\_seq8

TTTATATAGCCTAATGACTTGGATCTAGCAAACTTTTTGGCAGTCACATCAAACCTGTCTAACCAAGAAATCCTTAATGACCGTTGCCTAGTTGTAAGATGAGAACTCATCTGGATTGCCTGC  
AACAGTAATGATCCTTCTCGGGATTCTAAAGTTGTGAAATGGAAACAAATTAGACAACAAAATATTATAAATTTATTATAACAAGGGAAAGTGTAGTCGACTGAGTGATATGCATCTCAT  
GTTAAACATTGGTTGAGGATTTTCTGATATTGCCTCACTTTTTAACTTGAATTCAGCTCCTCAGTTTGGCAATCCTATAATCATAGCCACATGATCTGTAGTGAAAGCTAGCTCATGCCCTT  
TGATGATAAAGCATTGCTTTGACATATCCCATGATGATAGCAGCATGTATATGACAGGAATATTCTATTGAAATGCAGGGATCTCCAAGAATTGATATAACTTTATTTTCTTTAATTTCTCTTTA  
AATCTTTGCAAAAAGTTTGTACCATATAATCACAGATAAGTCTGAAGGTTGATGTTTTGCAACGAGAAGTAATCTTTGGAACATACATCTACAAAATAGTCAGCATTACACAGCAACAAA  
ATTTCTCAAATACACATCTCTGAAAAAGCTTAAATACACAGCAATACACAACAAAATCCAGCTAAATAAATAGCAATACACATCAATACACAGCAGTACACAACAATATCCAGCTAAATAC  
ACAGTAAATACACAGCAATACACAACATTATACAGCTAAATATGCA

>comp174354\_c0\_seq1

TGAAAGAAAAATGAGAGGTTTTTTCAGTTACTATTTACCTTTTCATTTCTCCTTTGCTTCTTCTCCTTGTGGAGTAAATGGGCAGGAAGGAGATAAAAGAGAGGTTTTATGTGGTTTTATATGG  
GAGCTATTCAATCACAGGCATCTGATAATACTCTCAAAGAAAATCACCTTCAGCTTCTTCTTCTATACTTCCAAGGGGACAACCTGTTGAGAAGTATCTTCTACGTCGCTACAAACGCAG  
CTTCTCCGGATTCCCGCAAGGCTATCGAAGAACGAGGCTGATGCCATTAGCAAGAAAGCAGGTGTTATCTCAGTCTTTGTAGACCCAATTTATCAGCTACACACAACAAGGTCATGGGA  
CTTCTTGGAAAGAAACATCGGTCGAGACCGACTTGAACCCAACCACTGAAGCTGGCTCATCTCCACCTCTGGTGGGTCGGATACCATCATTGGGCTATTGGACACAGGAATCTGGCCAG  
AATCTGAAAGCTTTGGAGATAGTGGCATGGGTCCTATTCTAGCCGTTGGAAAGGAACTTGCATGAAAGGGGATGACTTCGATTCTTCTAACTGTAACAAGAAGATTATTGGAGCAAGAC  
ATTATGATATTGATGATGATGACTCTTCTTCTGTCAATGTTCTTCCAACCTGATGTAACCTCCCAAGAGATGATCTTGGTCATGGCACCCATACCTCTTCTACTGCAGCAGGAAATCCAATAA  
AGGAAGCTTCCTTCTATGGCTTAGCTGATGGGACTGCAAAAGGTGGATCTATTTCTTCAAGAATTGCCATGTACAAAGTCTGTGGAATAGATGGGTGTCCAGGCTCAGCAATGCTATCCGC  
ATTCGATGATGCAATTGCAGATGGAGTCGATCTTGTGCGATTCGATCGGAGCATCCATATTTCTTCGTCCCGATTTTTCGACTGATCCAATTGCCATTGGAGCCTTTTCATGCTGTTGAAAA  
GGGGATTACAGTTGTGTGTTTCAGCTGGGAATGATGGACCTGACGTTGGATCTATTGTGAATACTGCACCTTGGATTCTCACCGTCGGTGCAGCAACTATTGACCGGTATTTTGAATCTGATG  
TTGTTTTGGGCGGGAATAGTAAGGCAGTAAAGGTATCTTTCTCTCTCTGTCTCCCTCCCCCTCCCCATGAAAAAATATTACGTGCGGTGTTTGGACGTCTCCGGATAGTGCATTAGATGA  
TGTGGTGCATCCGAATTGACCTCCAGACACATTGGAACATCACACAGAATAATCTTTCTCCCATATACGTATATAATCATTGCCATTTAGAGGTTTTGATTTTCGAGAAGTAGAGACAATTTTT  
ATCAAAATGTGATTTCAATCTTGAAGTTGGTCCTTATGTTTCATGGCTCTTAGGCTTTGATTTTCAGGGTGAAGCTATAAACTTTTCTAATCTAACAAAGTCTGCAACTTATCCCCTCATCTATG  
CTGCCCTCAGCAAGATCAAATTCAGCTCTGCTGATGATGCAAGCCACTGTTATCTTGACACACTAAATGGGACAAAGATCAAAGGAAAGATTGTCATTTGTAAGCAATCAGATAATGATTA  
CTCGACCGGTACGAAAGCCGAAGATATAAAAAACAATGGAGCGATAGGCGCTATTTTTGTCAATGATTTGGGAAAATCTGTTCCACATTATATATCGACTTTTCTGTCACTGAGGTTACCA  
CAGAAGCATCTATCCAGATCATGAAGTATATCAATTCCTCAAAAACCCAGTGGCTACAATTCTCCGTCGATCACGGTTCCAAAGTATAAGCCGGCACAGAAAGTGGCCTATTTTTCATC  
AAGAGGGCCTTCTCCTGAAACAAGCAATATTGTCAAGGCAAGAAAGTTTTGAAAGTAGAATTAGATTTCAATTTTCAAGTGATAACTTGCTTTGCTGAGCTCACTTTTAAAGTGTTTTTGAG  
CTGCAGCCTGACATTAGTGCTCCAGGAGTGAACATACTAGCTTCATGGACACAAAATAAAGACAACAATGTGGGGCCATCTGGCCATAAGCCCTCACACTTTAATCTTGTCTTCTGGAACC  
TCCATGGCTTGCCTCATGTTGCAGGGATTGCTGCAATCATCAAATCATGGAATCCAACCTGGAGTCCAGCAGCCATAAGATCAGCAATCATGACAACAGCAATGCAACAAACAACAAT  
AAATCTCCAATAACAATAGATTAGGCTTTGCTGCAACACCATATGATTATGGATCAGGAGTAATAAACCTTCTAGTGTATTGCAGCCTGGTTTTGGTGTATGAAACAGAGAAAAATGACTA  
CCTGCAATTCCTCTGCAACTATGGTTACACAACAGATATAATCAAGAACATGACAGTCATTCCAAATGGATTCAAGTGCTCAAAAAATTCAAGTAAGGATTTGATCTCCAACCTCAATTAC  
CCTTCAATTGCGATTTTCAGATTTCAAGGAAAGAAGAATAGTTAAACGAGTGGTGAAGAATGTTGGAGGTGCAGAAGCTACTACCTATGTTGTTAGCATAAAATCACCACCAGAGTTGAAC

GTGGAGGTTTTACCGGATAAGCTACAGTTCAGCAAAAGTGTAACAACTTGAGCTACCAAGTAAGTTTTCTGCTTCAAGTTCTCTACAGAAAGGTGACTACTTTGGATCCATTACTTGGT  
CAGATGGAACCTATAAGGTTAGAAGCCCTTTTGTGGTGAAAAGCAGTTGAACTAAAGCCTAAAATTTGGGTATTTTTAGTATTTAATAAGTAGGGAATGAAAATTAGAATAAGAAAGATC  
ATTGTAAGAGTTAAATTTGCTCTATGATCAGCAGCGCATCGTGTTTTAAATAAAATATTTGAAGTATAGCTTCTTCTCGGTTAACTACTTTGGATGATTTATGATGTGTTTAAATGAAAGCTACTGCA  
AAATAAATTTATTTGCCCAAAGCAGACATGGGATCCGACATATCAGTTTGATATCATTCCATGCGAGTTAAATTATCAAATTTCTGTGATGGATTAACCTTTTTTATAGAACAACCATCCACTGA  
GTCTTTATCTGTAGTAATTTACAGCAATCACAACCTAACCGACAAAATAGCACAAAGAAATGCTTCTGTAGGTTAAGAACATCAAATTTTAAAACAAGTTCTGTACTTGACATTTGGTCCACAG  
TATTTGCGACTAAAAGATAAAACATCCATATTTACATAAGAAAGTGGTAAAACCTTATAACAAAAAGTACTTCCTTCTTCAAGCCAAGCCATTAGAATCCATCATCATCGTCAACAAAAACA  
AACAGGCAAAAAGAAGAGAGTATGATTTCCATTACTCGGCAAAAGGCCACTGGTCTCTCTCCGCACTTCTTCCCTCTTCCCTCGGGAGTGAAGTCATTCTTGATATTGAAGGTTTTCCGGATC  
TCTTCAGGTGTCTTTCCCTTTATCATGTACAGCACCCTGCTGGCAAGTAAGGTCAAGAAGACCTTTGATGTTAGATAATTTGCAGCCAGGATGAGATCGTAGAGAGTAGCCTGATCAACCT  
TCACGAATTCGGAATCCCAACTCTTGAGCTTCTCTCGGCTGACTTGTCCACAACAACCGGTAGAGGAAGATTTTCGCGACATAATCGACATGCTTCTTGACAGTATTCGATGACCTTGGC  
GAGGATCCTACTGTTGACGTTGGGGAGAGGGATGCCGCTGTCCGCGCATCCGTCCTCGATCATGTGCAAGATCGTCTGCGACTCCTTCGCCACCGCCTCGTCTACGACGAATTCCTCACC  
ATCCGAGCTCTTCAAAGTAATCTTATTTCCCAAAGTTTCGTTTCCATCGCCGATCCGAACGAAATGGATTAATCAATTTGCTAGGGTTTTGGAATTTTATAAGGAGCGGAGGAAAGAGGTTAGG  
CAAGAACTCCTTATGGAAACAATGGGAGGCCGGAATATTGGAACCTTCGACAGCAGCGAGGGAAAAGGTTTTCTCTCTGCGGCGACTCCGTAGGATTTGATGTCC

>comp174354\_c0\_seq4

TGAAAGAAAAATGAGAGGTTTTTCAGTTACTATTTACCTTTTCAATTTCTCCTTTGCTTCTTCTCCTTGTGGAGTAAATGGGCAGGAAGGAGATAAAAGAGAGGTTTATGTGGTTTATATGG  
GAGCTATTCAATCACAGGCATCTGATAATACTCTCAAAGAAAATCACCTTCAGCTTCTTTCTTCTATACTTCCAAGGGGACAACCTGTTGAGAAGTATCTTCTACGTCGCTACAAAACGCGAG  
CTTCTCCGGATTCGCCGAAGGCTATCGAAGAACGAGGCTGATGCCATTAGCAAGAAAGCAGGTGTTATCTCAGTCTTTGTAGACCCAATTTATCAGCTACACACAACAAGGTCATGGGA  
CTTCTTGGAAAGAAACATCGGTGAGACCGACTTGAACCCAACCACTGAAGCTGGCTCATCTCCACCTCTGGTGGGTCGGATACCATCATTGGGCTATTGGACACAGGAATCTGGCCAG  
AATCTGAAAGCTTTGGAGATAGTGGCATGGGTCCTATTCTAGCCGTTGGAAAAGAACTTGCATGAAAGGGGATGACTTCGATTCTTCTAACTGTAACAAGAAGATTATTGGAGCAAGAC  
ATTATGATATTGATGATGATGACTCTTCTTCTGTCAATGTTCTTCCAACCTGATGTAACCTCCCAAGAGATGATCTTGGTCATGGCACCCATACCTCTTCTACTGCAGCAGGAAATCCAATAA  
AGGAAGCTTCCTTCTATGGCTTAGCTGATGGGACTGCAAAAGGTGGATCTATTTCTTCAAGAATTGCCATGTACAAAGTCTGTGGAATAGATGGGTGTCCAGGCTCAGCAATGCTATCCGC  
ATTCGATGATGCAATTGCAGATGGAGTCGATCTTGTGCGATTTGATCGGAGCATCCATATTTCTTCTCGTCCGATTTTTTCGACTGATCCAATTGCCATTGGAGCCTTTTCATGCTGTTGAAAA  
GGGATTACAGTTGTGTGTTTACGCTGGGAATGATGGACCTGACGTTGGATCTATTGTGAATACTGCACCTTGGATTCTCACCGTCGGTGCAGCAACTATTGACCGGATTTTTGAATCTGATG  
TTGTTTTGGGCGGGAATAGTAAGGCAGTAAAGGGTGAAGCTATAAACTTTTCTAATCTAACAAGTCTGCAACTTATCCCTCATCTATGCTGCCTCAGCAAGATCAAATTCAGCTCTGC  
TGATGATGCAAGCCACTGTTATCTTGACACACTAAATGGGACAAAAGATCAAAGGAAAGATTGTCAATTTGTAAGCAATCAGATAATGATTACTCGACCGGTACGAAAGCCGAAGATATAAA  
AAACAATGGAGCGATAGGCGCTATTTTTGTCAATGATTTGGGAAAATCTGTTCCACATTATATATCGACTTTCCTGTCACTGAGGTTACCACAGAAGCATCTATCCAGATCATGAAGTATAT  
CAATTCCTCAAAAAACCCAGTGGCTACAATTTCTCCGTCGATCACGGTTCCAAAAGTATAAGCCGGCACCAGAAAGTGGCCTATTTTTTCATCAAGAGGGCCTTCTCCTGAAACAAGCAATATT  
GTCAAGGCAAGAAAGTTTTGAAAGTAGAATTAGATTTCAATTTTCAAGTGATAACTTGCTTTGCTGAGCTCACTTTTTAAGTGTTTTTGAGCTGCAGCCTGACATTAGTGCTCCAGGAGTGA  
ACATACTAGCTTCATGGACACAAAATAAAGACAACAATGTGGGGCCATCTGGCCATAAGCCCTCACACTTTAATCTTGTCTTCTGGAACCTCCATGGCTTGCCTCATGTTGCAGGGATTGC  
TGCAATCATCAAAATCATGGAATCCAACCTTGGAGTCCAGCAGCCATAAGATCAGCAATCATGACAACAGCAATGCAAAACAACAATAAATCTCCAATAACAATAGATTCAGGTCTTGC  
TGCAACACCATATGATTATGGATCAGGAGTAATAAACCCTTCTAGTGTATTGCAGCCTGGTTTGGTGTATGAAACAGAGAAAAATGACTACCTGCAATTCCTCTGCAACTATGGTTACACA  
ACAGATATAATCAAGAACATGACAGTCATTCCAAATGGATTCAAGTGCTCAAAAAATTCAGTAAGGATTTGATCTCCAACCTCAATTACCCTTCAATTGCGATTTTCAGATTTCAAGGAAA

GAAGAATAGTTAAACGAGTGGTGAAGAATGTTGGAGGTGCAGAAGCTACTACCTATGTTGTTAGCATAAAATCACCACCAGAGTTGAACGTGGAGGTTTTACCGGATAAGCTACAGTTCA  
GCAAAAGTGTAACAAACTTGAGCTACCAAGTAAGTTTTTCTGCTTCAAGTTCTCTACAGAAAGGTGACTACTTTGGATCCATTACTTGGTCAGATGGAACCTATAAGGTTAGAAGCCCTTT  
TGTGGTGAAAAGCAGTTGAACTAAAGCCTAAAATTTGGGTATTTTTAGTATTTAATAAGTAGGGAATGAAAATTAGAATAAGAAAGATCATTGTAAGAGTTAAATTGCTCTATGATCAGCA  
GCGCATCGTGTTTTAAATAAATATTTGAAGTATAGCTTCTTCTCGGTTAACTACTTGGATGATTTATGATGTGTTAATGAAAGCTACTGCAAAATAAATTATTTGCCAAAGCAGACATGGG  
ATCCGACATATCAGTTTGATATCATTCCATGCGAGTTAAATTATCAAATCTGTGTGATGGATTAACTTTTTTATAGAACAACCATCCACTGAGTCTTTATCTGTAGTAATTCAGCAATCACAA  
CTAACCGACAAAATAGCACAAAGAAATGCTTCTGTAGGTTAAGAACATCAAATTTTAAACAAGTTCTGTACTTGACATTGGTCCACAGTATTTGCGACTAAAAGATAAAACATCCATATT  
TACATAAGAAAAGTGGTAAAACCTATAACAAAAAGTACTTCCTTCTTCAAGCCAAGCCATTAGAATCCATCATCATCGTCAACAAAACAAAACAGGCAAAAGAAGAGAGTATGATTCCCAT  
TACTCGGCAAAGGCCACTGGTTCTCTCTCCGCACTTCTTCTTCTCGGGAGTGAAGTCATTCTTGATATTGAAGGTTTTCCGGATCTCTTCAGGTGTCTTTCCCTTTATCATGTCCAGC  
GACCGTCTGGCAAGTAAGGTCAAGAAGACCTTTGATGTTTCAAGATAATTTGCAGCCAGGATGAGATCGTAGAGAGTAGCCTGATCAACCTTCACGAATTCGGAATCCCAACTCTTGAGCTC  
TTCTCGGCTGACTTGTCCACAACAACAACGGTAGAGGAAGATTTCCGCGACATAATCGACATGCTTCTTGCAGTATTCGATGACCTTGGCGAGGATCCTACTGTTGACGTTGGGGAGAGG  
GATGCCGCTGTCCGCGCATCCGTCCTCGATCATGTGCAAGATCGTCTGCGACTCCTTCGCCACCGCTCGTCTACGACGAATTCCTCACCATCCGAGCTCTTCAAAGTAATCTTATTTCCAA  
AGTTCGTTTCCATCGCCGATCCGAACGAAATTGGATTAATCAATTGCTAGGGTTTGAATTTTATAAGGAGCGGAGGAAAGAGGTTAGGCAAGAACTCCTTATGGAAACAATGGGAGGCC  
GGAAATATTGGAACCTTCGACAGACGAGCGAGGGAAAAGGTTTTCTCTCTGCGGCGACTCCGTAGGATTTGATGTCC

>comp174354\_c0\_seq6

TGAAAGAAAATGAGAGGTTTTTCAGTTACTATTTACCTTTTCAATTTCTCCTTTGCCCTTCTTCTCCTTGTGGAGTAAATGGGCAGGAAGGAGATAAAAGAGAGGTTTATGTGGTTTATATGG  
GAGCTATTCAATCACAGGCATCTGATAATACTCTCAAAGAAAATCACCTTCAGCTTCTTCTTCTATACTTCCAAGGGGACAACCTGTTGAGAAGTATCTTCTACGTCGCTACAAACGCAG  
CTTCTCCGGATTCCGCGCAAGGCTATCGAAGAACGAGGCTGATGCCATTAGCAAGAAAGCAGGTGTATCTCAGTCTTTGTAGACCCAATTTATCAGCTACACACAACAAGGTCATGGGA  
CTTCTTGAAAGAAACATCGGTGAGACCGACTTGAACCCAACCACTGAAGCTGGCTCATCTCCCACCTCTGGTGGGTCGGATAACCATCATTGGGCTATTGGACACAGGAATCTGGCCAG  
AATCTGAAAGCTTTGGAGATAGTGGCATGGGTCCTATTCCTAGCCGTTGGAAAAGGAACCTTGCATGAAAGGGGATGACTTCGATTCTTCTAACTGTAACAAGAAGATTATTGGAGCAAGAC  
ATTATGATATTGATGATGATGACTCTTCTTCTGTCAATGTTCTTCCAACCTGATGTAAACTCCCAAGAGATGATCTTGGTCATGGCACCCATACCTCTTCTACTGCAGCAGGAAATCCAATAA  
AGGAAGCTTCCTTCTATGGCTTAGCTGATGGGACTGCAAAAGGTGGATCTATTTCTTCAAGAATTGCCATGTACAAAGTCTGTGGAATAGATGGGTGTCCAGGCTCAGCAATGCTATCCGC  
ATTCGATGATGCAATTGCAGATGGAGTCGATCTCTTGTGATTTGATCGGAGCATCCATATTTCTTCTGTCGATTTTCGACTGATCCAATTGCCATTGGAGCCTTTTCATGCTGTTGAAAA  
GGGATTACAGTTGTGTGTTTACAGCTGGGAATGATGGACCTGACGTTGGATCTATTGTGAATACTGCACCTTGGATTCTCACCGTCGGTGCGACAACCTATTGACCGGTATTTGAATCTGATG  
TTGTTTTGGGCGGAATAGTAAGGCAGTAAAGGTGAAGCTATAAACTTTCTAATCTAACAAAAGTCTGCAACTTATCCCTCATCTATGCTGCCTCAGCAAGATCAAATTCAGCTCTGC  
TGATGATGCAAGCCACTGTTATCTTGACACACTAAATGGGACAAAGATCAAAGGAAAGATTGTCATTTGTAAGCAATCAGATAATGATTACTCGACCGGTACGAAAGCCGAAGATATAAA  
AAACAATGGAGCGATAGGCGCTATTTTGTCAATGATTTGGGAAAATCTGTTCCACATTATATATCGACTTTCCCTGTCACTGAGGTTACCACAGAAGCATCTATCCAGATCATGAAGTATAT  
CAATTCCTCAAAAAACCCAGTGGCTACAATCTTCCGTCGATCACGGTTCCAAAGTATAAGCCGGCACCAGAAGTGGCCTATTTTTCATCAAGAGGGCCTTCTCCTGAAACAAGCAATATT  
GTCAAGCCTGACATTAGTGCTCCAGGAGTGAACATACTAGCTTCATGGACACAAAATAAAGACAACAATGTGGGGCCATCTGGCCATAAGCCCTCACACTTAAATCTTGTCTGGAACC  
TCCATGGCTTGGCCTCATGTTGCAGGGATTGCTGCAATCATCAAATCATGGAATCCAACCTTGGAGTCCAGCAGCCATAAGATCAGCAATCATGACAACAGCAATGCAAAACAACAAT  
AAATCTCCAATAACAATAGATTCAAGTCTTGTGCTGCAACACCATATGATTATGGATCAGGAGTAATAAACCTTCTAGTGTATTGCAGCCTGGTTTGGTGTATGAAACAGAGAAAAATGACTA  
CCTGCAATTCCTCTGCAACTATGGTTACACAACAGATATAATCAAGAACATGACAGTCATTCCAAATGGATTCAAGTGCTCAAAAAATTCAAGTAAGGATTTGATCTCCAACCTCAATTAC

CCTTCAATTGCGATTTTCAGATTTCAAGGAAAGAAGAATAGTTAAACGAGTGGTGAAGAATGTTGGAGGTGCAGAAGCTACTACCTATGTTGTTAGCATAAAATCACCACCAGAGTTGAAC  
GTGGAGGTTTTACCGGATAAGCTACAGTTCAGCAAAGTGTAAACAACTTGAGCTACCAAGTAAGTTTTTCTGCTTCAAGTCTCTACAGAAAGGTGACTACTTTGGATCCATTACTTGGT  
CAGATGGAACTCATAAGGTTAGAAGCCTTTTGTGGTGAAAAGCAGTTGAACTAAAGCCTAAAATTTGGGTATTTTTAGTATTTAATAAGTAGGGAATGAAAATTAGAATAAGAAAGATC  
ATTGTAAGAGTTAAATTGCTCTATGATCAGCAGCGCATCGTGTTTTAAATAAATATTTGAAGTATAGCTTCTTCTCGGTTAACTACTTGGATGATTTATGATGTGTTAATGAAAGCTACTGCA  
AAATAAATTATTTGCCCAAAGCAGACATGGGATCCGACATATCAGTTTGATATCATTCCATGCGAGTTAAATTATCAAATCTGTGATGGATTAACTTTTTATAGAACAACCATCCACTGA  
GTCTTTATCTGTAGTAATTTAGCAATCACAACTAACCGACAAAATAGCACAAAGAAATGCTTCTGTAGGTTAAGAACATCAAATTTTAAAACAAGTTCTGTACTTGACATTGGTCCACAG  
TATTTGCGACTAAAAGATAAAAACATCCATATTTACATAAGAAAGTGGTAAAACCTTATAACAAAAGTACTTCTTCTCAAGCCAAGCCATTAGAATCCATCATCATCGTCAACAAAACAA  
AACAGGCAAAGAAGAGAGTATGATTCCATTACTCGGCAAAGGCCACTGGTTCTCTCTCCGCACTTCTTCTCTCCGCGGAGTGAAGTCATTCTTGATATTGAAGGTTTTCCGGATC  
TCTTCAGGTGTCTTTCCCTTTATCATGTCAGCGACCGTCTGGCAAGTAAGGTCAAGAAGACCTTTGATGTTGAGATAATTTGCAGCCAGGATGAGATCGTAGAGAGTAGCCTGATCAACCT  
TCACGAATTCGGAATCCCAACTCTTGAGCTCTTCTCCGCTGACTTGTCCACAACAACCGGTAGAGGAAGATTTCCGCGACATAATCGACATGCTTCTTGCAGTATTCGATGACCTTGGC  
GAGGATCCTACTGTTGACGTTGGGGAGAGGGATGCCGCTGTCCGCGCATCCGTCTCGATCATGTGCAAGATCGTCTGCGACTCCTTCGCCACCGCCTCGTCTACGACGAATTCCTCACC  
ATCCGAGCTCTTCAAAGTAATCTTATTCCAAAGTTCGTTTCCATCGCCGATCCGAACGAAATTGGATTAATCAATTGCTAGGGTTTGAATTTTATAAGGAGCGGAGGAAAGAGGTTAGG  
CAAGAACTCCTTATGAAACAATGGGAGGCCGAAATATTGAACTTCGCAGACGAGCGAGGGAAAAGGTTTTCTCTCTGCGGCGACTCCGTAGGATTTGATGTCC

>comp174362\_c1\_seq1

TTAATAAAAATGATAACATGAAAGTTATGAATCCATAAAGGTTAGCATGGTCCGAGAGTTCTAGCCACCATTTCATGACTATTGAGACAATCATAATAAAATGAAAGATCTGAAATAGTTAAT  
ACTGTAGGATCAAATTAACAATTTCCGAAAGCATAATCATAAATAATATGCCTCAAACAGCTCTTAAAACAATACATTGCGATCAAATTAAAAGTTTCCCACGTCTTCTTCATCATCGTCTAC  
CATGATAATAATTTCAAGTACATGGTATTGGTATCTCGAGTTCATCGTCATCATCTCTTTCTTCTTCCCTCAAACCATAGTGAGCACGAACCTAATTTGAACCACATATCAAAGCCT  
GAACCGTTTCAATGCCCAATTTAGAACGATATGTATCAACTACTCGCTCACCTCTTTTTTTGAACTTGAATCTTAACTTTCAAGATTATTTCTCCACTTCTCTGAACAAAATGTTATAGATCTT  
GAGCACGGGAGCAAGCCCTCTAAAAGCCAAATCGCTAAATGCTTTTCTGCAGATCTTAGAACTATCTCTACCAATCGTTTGAAGCCTGCTTGAGCACCAGCAGAACGGTAGACAACGAA  
GAAGGTATGGCCTAGCTCGAAGCCTCGAACAGGAGACGCTTCTTACCATGAGAACTGATAGACCGGCTCTTCTCTAAACAGATGTTTATTTACTCCTGTAGGTGATCCCGTCCCATACC  
CGATTCAGTTTTTCGCCGATCCTGCTTTACTCCGCCCTGCGCAAGCGCCAGCCACAACGAAATTCATTTTTCGCAAATATGTTATCCGTCG

>comp174362\_c1\_seq3

TTAATAAAAATGATAACATGAAAGTTATGAATCCATAAAGGTTAGCATGGTCCGAGAGTTCTAGCCACCATTTCATGACTATTGAGACAATCATAATAAAATGAAAGATCTGAAATAGTTAAT  
ACTGTAGGATCAAATTAACAATTTCCGAAAGCATAATCATAAATAATATGCCTCAAACAGCTCTTAAAACAATACATTGCGATCAAATTAAAAGTTTCCCACGTCTTCTTCATCATCGTCTAC  
CATGATAATAATTTCAAGTACATGGTATTGGTATCTCGAGTTCATCGTCATCATCTCTTTCTTCTTCCCTCAAACCATAGTGAGCACGAACCTAATTTGAACCACATATCAAAGCCT  
GAACCGTTTCAATGCCCAATTTAGAACGATATGTATCAACTACTCGCTCACCTCTTTTTTTGAACTTGAATCTTAACTTTCAAGATTATTTCTCCACTTCTCTGAACAAAATGTTATAGATCTT  
GAGCACGGGAGCAAGCCCTCTAAAAGCCAAATCGCTAAATGCTTTTCTGCAATCGTTTGAAGCCTGCTTGAGCACCAGCAGAACGGTAGACAACGAAGAAGGTATGGCCTAGCTCGAA  
GCCTCGAACAGGAGACGCTTCTTACCATGAGAACTGATAGACCGGCTCTTCTCTAAACAGATGTTTATTTACTCCTGTAGGTGATCCCGTCCCATACCCGATTCAGTTTTTCGCCGATCC  
TGCTTTACTCCGCCCTGCGCAAGCGCCAGCCACAACGAAATTCATTTTTCGCAAATATGTTATCCGTCG

>comp174362\_c1\_seq7

TTAATAAAAATGATAACATGAAAGTTATGAATCCATAAAGGTTAGCATGGTCCGAGAGTTCTAGCCACCATTTCATGACTATTGAGACAATCATAATAAAATGAAAGATCTGAAATAGTTAAT

ACTGTAGGATCAAATTACAAATTTCCGAAAGCATAATCATAAATAATATGCCTCAAACAGCTCTTAAAACAATACATTGCGATCAAATTTAAAAGTTTCCCACGTCTTCTTCATCATCGTCTAC  
CATGATAATAATTTTCAAGTACATGGTATTGGTATCTCGAGTTCATCGTCATCATCTCTTTCTTCATTCTTCCCCTCAAACCATAGTGAGCACGAACCTAATTTGAACCACATATCAAAGCCT  
GAACCGTTTCAATGCCCAATTTAGAACGATATGTATCAACTACTCGCTCACCTCTTTTTTTGAACTTGAATCTTAACTTTCAAGATTATTTCTCCACTTCTCCTGAACAAATGTTATAGATCTT  
GAGCACGGGAGCAAGCCCTCTAAAAGCCAAATCGCTAAATGCTTTTCTGCTTGAACACCAGAAGAACTTCATCCCCCAAAAAAAGTGCTGAGAAAAAAAAGAAGAAGAAATCAAAC  
TCCTAACCAGATCTTAGAACTATCTCTACCAATCGTTTGAAGCCTGCTTGAGCACCAGCAGAACGGTAGACAACGAAGAAGGTATGGCCTAGCTCGAAGCCTCGAACAGGAGACGCTTC  
CTACCATGAGAACTGATAGACCGGCTCTTCTCCTAAACAGATGTTTATTTACTCCTGTAGGTGATCCCGTCCCATACCCGATTGATTTTTCGCCCCGATCCTGCTTTACTCCGCCCTGCGCA  
AGCGCCAGCCACAACGAAATTCAATTTTCGCAAATATGTTATCCGTCG

>comp174362\_c2\_seq1

AATTCATAGCAACAAGGAACGCCTAGTCCTATTTTATTTATGAAGTTATGGAAATAATGACTTTCTGAGAATTTCTATAATCTTGATGATCTTGTGTTATCTAAAGTACATAAGATGTCTGTT  
TGCAAGGTTTCTAATGTTCTTCTTATCAATTTTAACTTTGCAGGTAGACGATGATGAAGAAGACGTGGGAAACTTTTAAATTTGATCGCAATGATTGTTTTAAGAGCTGTTTGAGGCATATTA  
TTTATGATTATGCTTTTCGAAATTTGTAATTTGATCCTACAGTATTAACATTTTCAGATCTTTCATTTTATTATGATTGTCTCAATAGTCATGAATGGTGGCTAGAACTCTCGGACCATGCTAAC  
CTTTATG

>comp174384\_c1\_seq1

TAGGATCCAATCCTCAGCAGCCTGGGGTCCCACACCTCCCTTGAACAACGGAGGCCTCAGCTTATGAAACATCTGCATATGTCTATCCACTTCTTCCCTCTTTGCTACCACTCATTTTGCTCT  
GAGCATCCCCATAACATGTGCAATCGCAGTAGCCAACTGCATCATACTCTCTGAAGGTACTGGGGCTGCGCTGTGTTGCTCATTGGTACACTGGATTCTGCTGGATGATCCATAGCTTTT  
CACCTGCACAATTCAAAACAGATAATACACATGCAATGATGTATGCCAATGAAGCTCTTAAAGCTACCCAATCTACCCAATGCTCAATCCAATCCTACAACCTCTGGTAACAATCCATTCT  
TCCAATAACACTGCTCTGATACCAACTGTGATGCCCAAGATCAAACCTTGGAAAGAATGTCAATCAATTACTCAAACAATTTACCAGAGTTATCTAAAACCTTCAATTAACCAGTCTATCA  
AACATCTATAAAATTTAAAACATCAATATAACAAGTCGATTTCATCTCTCAAAAAGTTATGTACAATACTTAGGAACTACACTACAATCACCAGTACTGAAATCTATCCTGAGTACAAAAGAATC  
AAAATCAATCAAAGACAAAAACCTGAAGATCTGGATCAATTCCTATCTTCTGCTCCCTTGCCCTGACCTCTTTACTCTGGAAAATAAGATTGGCATATCAATTTTGGTTGAAATTTTCATC  
CTCCTCTGCTTCCACGTTATATCCATCCTTCATGCACAAGGTTGACATTCTCATCAAATGATTGCTTGTTAATGCTCTTCTGTTGTTCTTTACTCTTCAACATATCACTTGACCCTATTATA  
GTCTTATCTTTCTTTTCCAAGCTGGCATACTAGCAAAATCTTGGTCCCTGCTTGCTCTAACTTTTGGCTCGAAATAATGCACTTGTTTATCTTGATATATGCTTAAATGATTCAACGCTTCC  
CTTAAACTCTCCTTCAAATAGCAAATCTTTCACTTATGATTCCCTCTTATTTATAGGCAAAATAAAGCAATTAATAA

>comp174384\_c1\_seq6

TAGGATCCAATCCTCAGCAGCCTGGGGTCCCACACCTCCCTTGAACAACGGAGGCCTCAGCTTATGAAACATCTGCATATGTCTATCCACTTCTTCCCTCTTTGCTACCACTCATTTTGCTCT  
GAGCATCCCCATAACATGTGCAATCGCAGTAGCCAACTGCATCATACTCTCTGAAGGTACTGGGGCTGCGCTGTGTTGCTCATTGGTACACTGGATTCTGCTGGATGATCCATAGCTTTT  
CACCTGCACAATTCAAAACAGATAATACACATGCAATGATGTATGCCAATGAAGCTCTTAAAGCTACCCAATCTACCCAATGCTCAATCCAATCCTACAACCTCTGGTAACAATCCATTCT  
TCCAATAACACTGCTCTGATACCAACTGTGATGCCCAAGATCAAACCTTGGAAAGAATGTCAATCAATTACTCAAACAATTTACCAGAGTTATCTAAAACCTTCAATTAACCAGTCTATCA  
AACATCTATAAAATTTAAAACATCAATATAACAAGTCGATTTCATCTCTCAAAAAGTTATGTACAATACTTAGGAACTACACTACAATCACCAGTACTGAAATCTATCCTGAGTACAAAAGAATC  
AAAATCAATCAAAGACAAAAACCTGAAGATCTGGATCAATTCCTATCTTCTGCTCCCTTGCCCTGACCAGTAGAACTTTCTGGTCGCTGTTGATCTAAATGATGCTGTAGACTGTAAACA  
CGTGGCACCCTGGAGGAAGTGCAGGAGGTCGTGGCGCAACTGTCTCTCTGATCTTTTCAGTCCTATCATCCATCTGGTTCCCTGATCTCTCACTGTAAATCCTCGAGCCAACAGTCC  
TCTGCTGTCTGTACCCGTGCCAGAATCAGTCCGTCCATCCAGTCTTTTCTGAGGACAATCTGCTGCTCTGTGCCCTCGCTGTCCACAGTGAAAGCACTGCCCCGTC AACAGGTAACACC

GACCTGCGTGTCTGTTTACCACAGTGAATACACGCTCCAGAACTACCAGACGATACTATCGATGCTGAGCGCGATACAGATCCCGATGCAGATCCTCTCGAACTATCGTATCTGCTTTTCTTC  
TCTCTATCTCTGTCTCTACCAGAATCATCTCGTGTACCTCATCTCTCCTCCTCCTGGTATCCTCGTACCTCGATACCGGTGTGCGCAAGTCAATCTCTATCAATCGGGCCCGCTCCACTAGC  
TCAGAGAATCATGTATCCGGAAGGGTACTAGTGGATGCCTCAGCTCTCTGTTCAATCCTTGCAGAAATCTATAGCATTTTTCTCGGGAGTAGGAATCAGATGAGCAGCGTACCTCGCAA  
GTGCAGTAAACTCGGTCTCGTACTGCATCACTGACTTGCAGCCTTGTTCGAATCTCATGAAAGCTTCTGCATCTATCGTGTGAGCAGACGGTGGTACAAACCACATTCTGAACTGCAG  
TGAATCATCCCATGTGATCTCAGCATTGGTCTTCCCCTGGAATTTCTCTCTGCTGTCCAATCCACCATCTCTCCGCTTACCCTCAAACAGAAATACAGCCAATGGTACTTTTCGATT  
CCCGGACACTGCATGCTGTCAAAAATCTTTCTATCCTCAGGATCCAATCCTCAGCAGCCTGTGGTCCCACAGCTCCTTTAAACAACGGAGGCTTCAGCTTGTGGAACATCTGCAAATGT  
CTGTCTACCTCTTCTCCTTGCTTCCACTCATCTTGCTCTGGGCATCCCCATAACATGTGCAATTGCAGTAGCCA

>comp174399\_c0\_seq2

TTCTCACACTAATCTCTACTAGCTAACCCCCGTCAGCCTGCCACGAAGGACTCGTTTCAATTAATCTCGATCTGCCGTCGTACGGGTACGAAAAAGGCTCTTGTGGGCCATCTTTCGT  
CCACTATCGGCCCCACGCCAACACGTCGCGCGGCTGCCGCGGCCACAGGAAAGGCTATACCCCGTGGACGCCGTCCTCGACTTCTGGAATATGATTACCTGCTTTAAGCCTGCAAGGTC  
GGAGCCCCACAATCTCTTGAATTCCTCCCCCAACCGGCATCCCTGCTTCCATCACCGCGGTGATCCTATGCGACGATCTTTCGAGTTTCGCCGGAGTCAGTACCCTCTACGTGCGGAG  
ATGTCTAGGGCATCAAACGGTGATCCCGCGCAACGGAAACAAGGAGAGGGCGAATGAGCTGGAGCTGGGTCTGAGTCTCGGCCGCGGCGTAAGAAGGATCATTACGGCAGAGGATT  
TTCCTTACTGAGGTCGCGGGATTGCCCCATATCTTCAAATTCCTCTGTTTTCATCTTCTCCGGCGGTTTGGGGGATGAAGCGGATCAAGGCGATGGCGGAGGGAGCTATAGGAGAGCAGA  
TGCGATCGGTTATAACGGAGCTCGATCGACTAACTCGCTGAGCCACAATCAAGTTGTGGGATGGCCTCCAATCAGAATATGCAGAAGGAACAATTTAGTTAACACATCTAGAGTTGCCAAT  
TCTGTTGAAAAAGCTACCCTCACAAGGAAATTTCTCAAAGTTGCAGCAGCAATGCTGGCAAGAAAGGCATTGGGGGTAATGATGGTGAAGAGAAAGCCATTCATGTTTCGGAGATCTCT  
CTTTGTTAAGGTGAATATGGATGGAGATCCTATAGGACGGAAGGTGGATCTTACATCCCATGTCTCTTATGAAGCTCTTGCTTTAGCTCTTGAGGCCATGTTTCACAAACCCACTTTCTCAC  
TCAATGCTTCTGCTAATGGAATGTTCTCGAAACTTTTGAATGGTCTTCTGAGTTTCTCTCATATATGAAGATGAGGATGGAGACTGGATGCTAGTTGGAGATGTTCCCTGGGGAATGTT  
TTGCGGACTGCCAAGCGACTTAGAATTATCAAGACGATGGATACCTGTGGCCATGATCAATCAGTCAATCCAGAGCCCTGGCTATCTCGTCCGATAAAGTCCAGTGTTCCTGTTGAAAGCT  
GAGCCGATGGAGAAGATCGCAATTTGCTCGTTTTTTGGCTTCTCTTCCCTTCTTTTTCTTTGTTTAAATTTAGAATTCAGCTGGTCGAGTGTAATTTTTCAAGGTCACACGAATGTTAGA  
AAATGGCAGCTTTATATAAATATATATATATTGAAACTCTTGTTCGAAGTCTAAAGCTTCAATTTGAGACGGCTTTACTGCTACTTCTTAAAACAACCTTTTTATTACAAAATAAAAAATTGGTT  
CAAGAAGCAGTAAGAAAGACATCCCAAATGAAGCCTATTCTTTGAGAAATTTACGTGCAAGAGTACATCAAATGCTGACGGTTATCTGTGTTAGATGCATGAAATGTTACAATTTAAATA  
ATTTAAAATATTATTTGTATGTTGTGCTTATTTACTATGTGGACCATTCTATTGCCTCTTTTGTCTATTTGTACTTAATGAATTAATGTGGAGTTGCAAGTGAACATGTGCAGGATTTCCAACA  
GCTTGCTTTCTTAGCTTTCCATTAAGTTACAATGTCTGTTTGCTAAAGAGGAACTTTATCATAAATGACATTACCAAACCTACTTTTGATGCTATTTTTTAGCAAAAGAACTGACAAGCTTAA  
CAGCTTGTCTTTTCTCGAATAGGCGGAAGGTCGGCAACAAACGGAAAGGGTCGGTATGAGTTTTACGATTATTGAATCCGTTCTGAGGATTGTAATGTAAGAGTGATTAATTAGTTATATCT  
TACTCATCTCAAAGCAAATTTACCATTTTGTCTCGTGGCACTTTCTTGTATTGTCAAGAAGCTACTTTATATGTTGAATGGTTTCTATTTGCTCTTTAAAGCTTCATGAGAGACGAAAAG  
CCAATTCAAATTTGCTATGCAGTGGTTGAAAACTTAGTCCTGAGAAGCTGTT

>comp174399\_c4\_seq2

GGACATGATTACATCATGCAAATACCAAATAATTTTTGGGGAAAATTTGGGCTTCGCCGTATATTGAATCAAAAAGCGGGTTATAGCAGTAGATAAAGCAAAATAACAAAATTGGCTAA  
GAAAAATAAGCCAAGCTACAAAAGCATCAAAAAGTTGAAAACCTATGAAAATACACAAGTGTGATTTCCCAAAAAGCTCCAACCGTATACCAAAAATGCTCCCGTGGCCGATAAACC  
TGGACTCAGGAAATATTA AAAAGAGTAAACAGATCAATCGCAACCCCGTTGCCAATAACGAAGGACCGTCCGAGGGGAAGCGTTGGGGAGCTACATCATTGTCCAGATTGGCACATC  
TGCAAGAAAACGGGGCAACATCGAAGCAGCAGCAGCAGACATAGCAAGATAAGAACAGCTTATAACAACAAGAACAGCTTATAATCTGTCTAAAAAATCCATCGGATTTTTCTAATTCAT

AATCTTCTCAGACAGCGCTCTTTAATGCATAATAGTAGAGAAGTATGGCATTGCAACTTGTCCCAAATATTCTATTGTTCCCTCTCTTTCCATACATAATAGATCACAGATGAGACCGCAA  
TTTGTAGAAATTTAACGTCTCTGAATTTTCATTATACCGCCCAATTAACCACTCATAGACTTGGTGAATATTAGGCCGAAGCAGAAAATCATTCAATCCAGGTATGATGCTAGTCAGAAATG  
AGAATGAGGAGCATTCAAAATATAAATGAGAAACAGATTCATCATGGTTGTGACATAGACAGCATAAGCTTGGAAACCAAGATATTCCTGAGACGAAGAGCCTCTGCAGTTTTGAGGCCCC  
CCCTGATGGCAAGCCAAGCGTACACAGAGTATTTAAGAGCGTTTCTTTTGTGCCAAATCATTTTATGCCAGCTACAACCAGGGATGTCATAGTGAAATTCCTTCATAAAATTTTAAAAAG  
CCCTTTCTCCTTATCATAACCATAGTAAACATGGACCATCACCAGCAGAGACATTAATACCCGCAAGCACTTCCCTCAAACCAGGGGTGAAATCATCAGGAAAATCCCATCCAGAATCAGAT  
AAATATTGTTAAGAAAGATATCAGGAATTTGGTGCAAAATATTACTACTAAATACATCAGAAATTCGTCAGTTATCATACCAATGATCCCATTTCAGGATATAGGAGCATCCTTAGAAATTC  
TAAATTTAAAGCAGTGTTTGGCCATGCTTGCCGAATGGCATATAGATTTCCAAATGTTTGATGCTGCAGTAATAGATGGGTTCCATGGCGATCTATATTTATTCAACAGCCAAGCAGATAATG  
GAGAGGAGCAATTATACATCCGTAAAATCACAGAAAAAATATAAGAAAATTGCATGGCAGGAATAGAATAAATACCCAATCCCCCTTTAGAGAAAGGCAAACATACTTTATTCCAGGCTAT  
CATGTGCAATTTTTTGTGTTGAGTTTACTTCCCCAAAAAATAAAAACCTGGAAGTAGTTTTCTTGAAAAATTTGTGCACAGATTTAGGCAAATGGCACCCCGGATCCAGTAAGCAATAGTA  
TTTTGAATAGTAAATTCATGTATTGTAGCCTACCGGCAAGGGAGAGAAGATTAGCTTTCCACCCACTAAACTTCTTATTCAAGCTGTCCATTAAAGGCATATAGTCTTCAATCTTGAGTCTA  
TGAAAAGATAGCGGAATACCCAGATAAGTAATTTTGTAGTTATGTTATGAATGGAAAGAGCCTGGCATATAGCTTGTGATTGTTGAAATGCTTTGGGAACATAATAGCGCACTTATCATA  
GTTAACATGGAGCCCAGATCCAGTAGCAAAATCATTAAAGGATGGAGACCAGCAGATTACAATTCTCAAGGGTTGCTTCTCCAAAATGAGGACATCATCGGCGTAAAGTAAATTAGAGAT  
GGAGAAATCATTAGAAAAAATACCCCTTGAACCCCTTTCCCTCAAGGAGATTGGATAAGACATCCATCACCAGCAAAATAGATAAGGACTAATGGGGCAACCCTGTCTAAGACCAGCAG  
CAGATGGGAAGTAAACCCTCAAGAGCACCTGAGAGAAGTACAGAGAAATTAACATCACAAATGCAAGCTTTGACCCAACTCACAAAATGACTAGGGAAATCTTTCTGAATGAGCCTAGCA  
ATTAAGAATTCCTAGACACGGAATCAAAGCTTTCTTAATGTCTAATTTAGCACAAAATATGTTTCTTTTACCTCTCTTCCCGAGTGATACAGAATATCAGAGGCTAGCAATATATTGTCC  
GTGGATACTCTCGATTTAAGGAACCCAGCTTGATTATCCTTTACAATGAAATTCATGACCGATTTTAGTCTAACAGTAATAACTTTAGCAATAATTTTATATAACCACATTACACAGAGCAATG  
GGTCTATAATCAGAGATATTGACAGCATTAGAGTGTTTTGAATGATAGCAATAGCTGTAGCTTTAACACCATTAGGCATATAACTCTTAGTGAAAAAAGATTTAATAGCTCTACAAACCAC  
CGGCCAATGATATGCCAACTAGTCTTAAAGAAATAGAAGTTGAACCCGTCTGGCCAGGAGCGGAATTAGAGGAACCCATGAAAACCGCAGCTTTGATTTCCTCATCCAGAACAGGGG  
AGCAAAGAGTCATACGGTAATGTTCCGGCACAGAGACACCAACAGGAAAAGCCTCAACATCCAAAGAGTGAGAATGAGGAGGATTATATAATTCTTGATAATACTGAATGACAGAAGATA  
TAACATCAGTTCTAGAGGTAGAAGGGTTGCAAGAGAGAAGATTTATAACCGATTTTTTGTCTACCCATACGGCTCTTGATTTTAGCATATAAAAATTTTCAGATCATCTTCCCAAATTTGAGC  
CATTTAACCTTAGCTCTCTGAATAATCCAAGAAGCATGCAGTGAGTTGAATTTAGCTAGCTCAGAGTTGCAATTTTTGTAGGCCATGTTTGTGTCAGCATTACAGTGATCTAGTTGCATTTG  
TTCCAGCAATGTACTTTGTTTATTGTGTAAATAAGCAAGGTGTCTTGTACCACTATTAGAAGATGCCCAATATTCCTTTTTGATACCACTCTTCAACATCCTAAGAGAGTGACAGAGATGAG  
AGAGGGGGTTCCCTGAACAAGGCCTAGAGAATACCTCCAATAATATTGACCAGTAAGAATCAATCTTAGTCCAATAATTTTTGAATAGAAATCGGTGAAAAACCTGCGTAGCATTCCAGG  
ATGTAAGATAACAGGGCAGTGGTCCGAACAGGAAGGGCTTTGAATGGAGCAGAAAGAATCAGAGAAGACATTTCCCAACAACATTACAAGAAGTCTATCCAACCTAATGTGAATAG  
GATTGTCTAACTGTTGATTATACCAAGTGAATTTCCCAACAGAGTTAAGGTCCAGCAGCCATTATGAAAATGAAATCATTAAAGTCTTTCATGGCAGAAAGAGTGAGAGGGGATCC  
ACCAAGCTTTTCTGTTGCAAACTGCAACAATTGAAATCACCAATAATGACCAAGGAAAATGTCTCTGGAGCAGCCAGAGAGAGAGAGTTCACAGAGTCTTGCGTTCAGTCAT  
ACTGTTAGAGGCATACACAACAGAAAGCTGAAAGAGAGGATGATTAGAGACAGAAACCAACCAGAGATAAGTTGAGAATTAATGACTGAAGGGATAAAAGACAATTTAGAAGAATTC  
C

>comp174415\_c2\_seq5

CATGGAATCAGACCTTCTCTGCAGCGAGGCCCCACCAAACCGGAAGAGCTTCTACCTCCCTCTTCGTGGATTTCCATAACGTCTGCTCGGCCTTCGCAGCCGACCCCATCTACCTGTTTC  
CAGAAAATTTCCGTTTGTATAAACGCAATTTACTCAGGAGGTGCTAGTTTGGAGTTTTTTGCGGTGCGGAAGTCCTTCCTTTTTCAGCTTATTAGCTCTTAAAAAGACGCGATTTTTGATAAGA



ATTATCTTCTCCTCCTCTTTAAAAGATCTTTTTGATCGAAAACATTGAAAATTATCTTTGGTGCCGTTGTTTCATCGGGCTGAGATGCTACCTAGGGTTTTTCATGCTGAAGATGGCAAGGA  
TTTGGCGCAGAGGATTCAACCCAGGGGTTATTTGTTTAGCATCGTCAAGTACTTTGGCCCTTCTTGCTCCTGGCTGCTGGTTTTTTCATCTTTGGTGCTCGGTTCTTCGATACTCGAATTTT  
AAAATTGCAGTCGCCAAAGTCTGGTTTTTTGCCCTGTATAACTGTGGAGCCGAGCGGTATTAATCGTTGGATCAAACCTCCTTCTTCTTTGTTGCATAACATGAGTGATCATGAGCTCTTCT  
GGCTTGCAGCTTTGCCCCAGAAGTTAAAACTATCCGTTCAAGAGATTGCCGAAGGTTGCGTTCATGTTCCTAACGAGGGGACCTTTGCCTCTCTCTCCACTGTGGGAGAAGTTCTTCA  
AGGGAAATGAGGGCCTTTATCTATCTTTATTCATTCTTTGCCCGGTTATAAAGCCAGCTATCCGAAGGACTCCGTGTTCTATAAGAGGCAGATTCCTAGCCAGGTAGCAGAATGGGGAA  
AATGAGCATGTGTGATGCAGAAAAACGTCTCCTTGCAAACGCGCTCCTCGATCTCTCCAACGAGTGGTTTTGTTCTTCTTTCTGAGTCATGCATACCTCTCTACAACCTCAGCATAATCTAC  
ACTTACCTGAAGGGATCAAACACAGCTTTGTGGAGTCTTTTGACGACCCAGCCCTCATGCAAGAGGGAGATACAATCCAGAAATGGCACCACCTCATTGATATAAGCCAGTGGCGCAA  
AGGTTCTCAGTGGTTCGAAGTGGATCGTACCGTCGCAACTCATATGGTGCAAGACACAATGTACTACTTGGCATTCAAGGTATTCTGCAAGCCACCATGCTATGTGGACGAGCATTACTTC  
CCCACCTTGCTTCATATCAAACGTCAAGTCTGATTGCAAATAGGACCATCACTCTTACAGATTGGTCAAGGGGTGGTTCTCACCTGCCACATTTGGAGAGGCTGACATATCTGAAGAAT  
TCTTCAAGAGAATTCTTGATGGTCAGGATTGTTGTACAACGGTCAGAATTCTTCTATTTGTGTTCTCTTTGCTAGGAAAATTTCTCCTAGCGCATTGCAGCCTTTGCTGCACCTAGCTTCCA  
CTGTACTTGGATTTACTTAATAAAGTTTGAATTCTGAATCAGTTTATTTATCATGAATACATGATTTGTCTTCTGTCATAGCATTGGTTACAGGTACAGCTTGTGACTTGCTAAGGAAAACTGT  
TTTTATTTGCATTTGTTAATGTCAGTGCCAGTGGAGCTTCTGCTCTGCCTTTGTAGGTAATATCATTCAATTGAGTTTATTTCA

>comp174482\_c0\_seq13

AAATATAAAATTACAAAATTATTAATTTCTCTCATATCATCTTTATCAAATGCAAATGCACAACATGAATCTTTAACCATGCTAACGCCAATCAATATCTAGTATTGTTGCAATGTGAGATCCA  
GCTCCATATCCACATCAATACATAATTTCCGGATGCAAAGAACTTCAACTTGGCGTATAAGTAGGCAACCCTGCTTGGCAGCATATTGTCGAAAATAATATCAAGCACTCGCAATGCTTCCCTA  
CGTGTPTTTCAGTCTCTTGGCCAGCGCAATGCGTTGCATTGGGATTTTAGCTGCAAAGCTCAGCACAACTTTGATAGTCTTTGCATTATAGGAGCGCCTAGCACGCTTACGCTCACCTTCAG  
CAGGACTATCATTCCACCACGATTGTCATTTCTCTCGAAGGAATATGATCAAGTATGACAGTGAACCTATTGTTGACCTGGGGAAGAGGGACAATTGTGAACAAAGTCTTTTCGCCATC  
ATAAGCTCTCCAGGGAAAACCTCCATCTCATGATCTTGTGTGAATAAATGTCTGGAACAATAGAAACAGAACAAGATCGGAAGGCAATATTTGCATAAACCATCCATCCATTCTGCTACA  
ATGTTGGATATTGGAACAAGTTTTGGTTTCTTCAAGTTAATCACAATAGCTCTATGTGAAAGCCATGCAGATACAAATTGCCAACACCATTAGGAGCCTTGGTAATGGCATTAAACGAAGAA  
GCACCTGGAGATATGGCCATATTGATTTGCTTGGATGCTGAATAAATTAATGCTTCATTTCTTGTGAGTTGAGAGTATGTATAGAATGCATTGTTATTGCTCTATTAACCTTCTGTTATAATTA  
AAAGCCAAGAAAACAAAATATGAAGACTGCCACCGAATAATTACAAACTTTATCATATTTCCAGTGAGAGTAGTTCTACTTCTCATGGGATTTTACATTGGACACACAAACAGAACTTGGT  
ATACATTTAAAAAGTTGCTATGCTGATATATCGGATTTAATTTTCATGATGCCAAGTAGAGCAGACATAAATTATTCATTCATAAATATTATAATCAGAACGAAATTTATAAATTAGGTCCACCT  
ACAAAGAAATAACAGCTCTATGTGATTTTTGGTTCAAATTGCAAGGAAATACATAATGAAAATGCAAGGAAAATGCAAGAAATTGATGTCTACGAATGAACCCTTTCACCTCTCGATCTTT  
CCTCAATAAAAATTTCTATCAAGTTTTTCTCTTATGAATACATGACTGAATGAACCCTTGTATCAAATGACTTGGGAGAATAGTAAAAAAAACCTTGATTTAGGAAAGCAACGAAAACCT  
TATCTGAGAGGAAGCACTCGAGGGCGGCGGAAGGAATCCGAGATATGAGATTGGATCGATATAGTGTAAGAAAACCTACCTGAGAGGACGAACTCGATGGCGACTCATATTCACGCACG  
ATTGAAGTCGAGGCCGTTAACCAAGGGGGAGTTGCGATTGAAGTTAGGGAGTTGAGGAGAGTCCGTCGCGAAAACCCTAGAGCGTGAATGCGATCTACGACATA

>comp174482\_c0\_seq17

AAATATAAAATTACAAAATTATTAATTTCTCTCATATCATCTTTATCAAATGCAAATGCACAACATGAATCTTTAACCATGCTAACGCCAATCAATATCTAGTATTGTTGCAATGTGAGATCCA  
GCTCCATATCCACATCAATACATAATTTCCGGATGCAAAGAACTTCAACTTGGCGTATAAGTAGGCAACCCTATATAAAAATTTTATAAACAAAATACCAGGTTATTTACAGCAATTTCTGGTTC  
AAGGTAAAAATGTAGGGAACCTGATATACATACTGCTTGGCAGCATATTGTCGAAAATAATATCAAGCACTCGCAATGCTTCTACGTGTTTTAGTCTCTTGGCCAGCGCAATGCATTGC  
ATTGGGATTTAGCTGCAAAGCTCAGCACAACTTTGATAGTCTTTGCATTATAGGAGCGCCTAGCACGCTTACGCTCACCTTCAGCAGGACTATCATTCCACCACGATTGTCATTTCTGTAC

AATCATATGTTGACAGAAAAATAGACAGGAGAAGCATATCGTTCTATTTAAATGCAAAAGGCATGACATGGGAAAACACACAATTAGTAAGATGAAACATTAGAAATAAATTTACCTTTT  
CGAAGGAATATGATCAAGTATGACAGTGAACCTCATTTGTTGACCTGGGGAAGAGGGACAATTGTGAACAAAAGTCTTTTCGCCATCATAAGCTCTCCAGGGCTGTATATAGTAAATGGGTGA  
GTGTGACTATGGGTACCAATGCAGGGCTCTTCTAACAGACTGACTGCAGCTGTCCTTAAAATTGTATAGATCAGGGCGACAATAACTTACAAAACCTTCCATCTCATGATCTTGCTGTGAA  
TAAATGTCTGGAACAATAGAAACAGAACAAGATCGGAAGGCAATATTTGCATAAACCATCCATCCATCTGCTACAATGTTGGATATTGGAACAAGTTTTGGTTTCTTCAAGTTAATCACAA  
TAGCTCTATGTGAAAGCCATGCAGATACAAAATTGCCAACACCATTAGGAGCCTTGGTAATGGCATTAAACGAAGAAGCACCTGGAGATATGGCCATATTGATTTGCTTGGATGCTGAATAAA  
TTAAATGCTTCATTTCTTGTGAGTTGAGAGTATGTATAGAATGCATTGTTATTGCTCTATTAACCTTCTGTTATAATTTAAAAGCCAAGAAACAAAATATGAAGACTGCCACCGAATAATTACA  
AACTTTATCATATTTCCAGTGAGAGTAGTTCTACTTCTCATGGGATTTTACATTGGACACACAAAACAGAAGCTTGGTATACATTTAAAAAGTTGCTATGCTGATATATCGGATTTTAAATTCAT  
GATGCCAAGTAGAGCAGACATAAATATTTCATTCATAAATATTATAATCAGAACGAAATTTATAAATTAGGTCCACCTACAAAGAAATAACAGCTCTATGTGATTTTTGGTTCAAATGCAAG  
GAAATACATAATGAAAATGCAAGGAAAATGCAAGAAATTGATGTCTACGAATGAACCCTTTCCTCTCGATCTTTCCTCAATAAAAATTCTATCAAGTTTTTCTCTTATGAATACATGA  
CTGAATGAACCCTTGTATCAAATGACTTGGGAGAATAGTAAAAAAAACCTTGATTTAGGAAAGCAACGAAAACCTTATCTGAGAGGAAGCACTCGAGGGCGGGCGGAAGGAATCCGAGAT  
ATGAGATTGGATCGATATAGTGTAAGAAAACCTGAGAGGACGAACTCGATGGCGACTCATATTCACGCACGATTGAAGTCGAGGGCCGTTAACCAAGGGGGAGTTGCGATTGAAGTT  
AGGGAGTTGAGGAGAGTCGGTCGCGAAAACCCTAGAGCGTGAAATGCGATCTACGACATA

>comp174482\_c0\_seq2

AAATATAAAATTACAAAATTATTAATTTCTCTCATATCATCTTTATCAAATGCAAATGCACAACATGAATCTTTAACCATGCTAACGCCAATCAATATCTAGTATTGTTGCAATGTGAGATCCA  
GCTCCATATCCACATCAATACATATTTCCGGATGCAAAGAAGCTTCAACTTGGCGTATAAGTAGGCAACCCTGCTTGGCAGCATATTGTGCGAAAATAATATCAAGCACTCGCAATGCTTCCTA  
CGTGTPTTTCAGTCTCTTGGCCAGCGCAATGCGTTGCAATGGGATTTTAGCTGCAAAGCTCAGCACAACTTTGATAGTCTTTGCATTATAGGAGCGCCTAGCACGCTTACGCTCACCTTCAG  
CAGGACTATCATTCCACCACGATTGTCATTTCTCTCGAAGGAATATGATCAAGTATGACAGTGAACCTCATTTGTTGACCTGGGGAAGAGGGACAATTGTGAACAAAAGTCTTTTCGCCATC  
ATAAGCTCTCCAGGGCTGTATATAGTAAATGGGTGAGTGTGACTATGGGTACCAATGCAGGGCTCTTCTAACAGACTGACTGCAGCTGTCCTTAAAATTGTATAGATCAGGGCGACAATAAT  
CACTTACAAAACCTTCCATCTCATGATCTTGCTGTGAATAAATGTCTGGAACAATAGAAACAGAACAAGATCGGAAGGCAATATTTGCATAAACCATCCATCCATCTGCTACAATGTTGGAT  
ATTGGAACAAGTTTTGGTTTCTTCAAGTTAATCACAAATAGCTCTATGTGAAAGCCATGCAGATACAAATTGCCAACACCATTAGGAGCCTTGGTAATGGCATTAAACGAAGAAGCACCTGGA  
GATATGGCCATATTGATTTGCTTGGATGCTGAATAAATTAATGCTTCATTTCTTGTGAGTTGAGAGTATGTATAGAATGCATTGTTATTGCTCTATTAACCTTCTGTTATAATTTAAAAGCCAAG  
AAACAAAATATGAAGACTGCCACCGAATAATTACAAAACCTTATCATATTTCCAGTGAGAGTAGTTCTACTTCTCATGGGATTTTACATTGGACACACAAAACAGAAGCTTGGTATACATTTAA  
AAAGTTGCTATGCTGATATATCGGATTTTAAATTTTCATGATGCCAAGTAGAGCAGACATAAATTATTCATTCATAAATATTATAATCAGAACGAAATTTATAAATTAGGTCCACCTACAAAGAAA  
TAACAGCTCTATGTGATTTTTGGTTCAAATGCAAGGAAATACATAATGAAAATGCAAGGAAAATGCAAGAAATTGATGTCTACGAATGAACCCTTTCCTCTCGATCTTTCCTCAATAAA  
AATTCATCAAGTTTTTCTCTTATGAATACATGACTGAATGAACCCTTGTATCAAATGACTTGGGAGAATAGTAAAAAAAACCTTGATTTAGGAAAGCAACGAAAACCTTATCTGAGAG  
GAAGCACTCGAGGGCGGGCGGAAGGAATCCGAGATATGAGATTGGATCGATATAGTGTAAGAAAACCTGAGAGGACGAACTCGATGGCGACTCATATTCACGCACGATTGAAGTCG  
AGGCCGTTAACCAAGGGGGAGTTGCGATTGAAGTTAGGGAGTTGAGGAGAGTCGGTCGCGAAAACCCTAGAGCGTGAAATGCGATCTACGACATA

>comp174482\_c0\_seq21

AAACATGGAAAACCTTGAGAATCAATCTAACTACAAAACCTAAGAAAAAGGTAGAATATGTCGAGTGAACAAAAAAAAGTAGTACGATGATAAAAATGTTAAAGCACACGAAAGTATTG  
GGTTTAATCGTTCCCAATGAATAACTGAATAAGTAAATATATAAATAACAAGCGGGGCCCATAACTTAAAGTTTTAAGTTGAGAACATGTTTGAAGTTGATGTATCTGGCTCATT  
TTTTGTTCCCTTTGGTCCACACAAATATAGAAAATAGGGATGTTAACTAAGAAATATAGGAATGAAGATTGCTGGATGAGAACCAAAAACATGGCCATAAGCAGATAATGTCGCATTGT

CATTTAATGAGCTCAAGTGCTTCAAAAACTTAAGTAATAAATTATTTAAACAAACACCAACGAAGAGATAAGCAGGCCACTAATATTGTAATGGATTCTGACTCTCTCCAACATTAAAGC  
AACAAACAAATTCCTTCTCAGAAGAGCATAACAAGCGAGAGGGCATCAACATGGAAAAACAATGTTCCGATTCAATGATATTGAAATTGCATAACATTAATTTAAATTATATATATAATTC  
TCACCCAACCTCTCCTTTAGCATAAACTCAAAAAATGATATGTAATATACATTCAAATGAAGTAAAAATAAATATATTTCCATTTAGAATCTGTAAATTATAACATGCATTACAAATTTACC  
TTTTATAATAGTTATTCCACCAAATGAAAAAAAATTTTAAACAAATATCTTCATTATTTTTGTAATATTGCAAAAACAAAATCTAAACATCAAACCTTACACAGAAAATTTATTACAAGAAAAT  
AACATACCACATAACAAAGCAAGATCTTAGCCAATAAGAGGAAAATTTAAAGATGAAATTAGATCTTGACAGCCAGGAAAATGGTTTTTAAATAATAAAGAAAATAAAGCAAAATATC  
AACGGTTACCTAACCTTTATTATAGGCTTCAAGGTTCTGATTTCTATTTAACAAAAATACAAGGTAGAATTACCTTCTAACAGACTGACTGCAGCTGTCTTAAAATTGTATAGATCAGGCG  
ACAATAATCACTTACAAAACCTTCCATCTCATGATCTTGCTGCGAATAAATGTCTGGAACATTAGAAACAGAAGAAGATCATAAGGCAATATTTGCATAAACCCATCCATCCATTCTGCTACAA  
TGTTGGATATTGGAACAAGTTTTGGTTTTCTTCAAGTTAATCACAAT

>comp174482\_c0\_seq29

AAATATAAAATTACAAAATTATTAATTTCTCTCATATCATCTTTATCAAATGCAAATGCACAACATGAATCTTTAACCATGCTAACGCCAATCAATATCTAGTATTGTTGCAATGTGAGATCCA  
GCTCCATATCCACATCAATACATATTTCCGGATGCAAAGAACTTCAACTTGGCGTATAAGTAGGCAACCCCTATATAAAAATTTTATAAACAAAATTACCAGGTTATTTTACGAATTTCTGGTTT  
AAGGTAAAAATGTAGGGAACCTTGATATACATACTGCTTGGCAGCATATTGTCGCAAAAATAATATCAAGCACTCGCAATGCTTCCTACGTGTTTTAGTCTCTTGGCCAGCGCAATGCATTGC  
ATTGGGATTTAGCTGCAAAGCTCAGCACAACCTTGGATAGTCTTTGCATTATAGGAGCGCCTAGCACGCTTACGCTCACCTTCAGCAGGACTATCATTTCCACCACGATTGTCATTTCTCTTC  
GAAGGAATATGATCAAGTATGACAGTGAACCTATTGTTGACCTGGGGAAGAGGGACAATTGTGAACAAAGTCTTTTTCGCCATCATAAGCTCTCCAGGGCTTCTAACAGACTGACTGCAGC  
TGTCCTTAAAATTGTATAGATCAGGCGACAATAATCACTTACAAAACCTTCCATCTCATGATCTTGCTGTGAATAAATGTCTGGAACAATAGAAAACAGAACAAGATCGGAAGGCAATATTTG  
CATAAACCATCCATCCATTCTGCTACAATGTTGGATATTGGAACAAGTTTTGGTTTTCTTCAAGTTAATCACAATAGCTCTATGTGAAAGCCATGCAGATACAAATTGCCAACACCATTAGGA  
GCCTTGTAATGGCATTAAACGAAGAAGCACCTGGAGATATGGCCATATTGATTTGCTTGGATGCTGAATAAATTAATGCTTCATTTCTTGTGAGTTGAGAGTATGTATAGAATGCATTGTTA  
TTGCTCTATTAACCTTCTGTTATAATTTAAAGCCAAGAAACAAAATATGAAGACTGCCACCGAATAATTACAACTTTATCATATTTCCCAGTGAGAGTAGTTCTACTTCTCATGGGATTTTA  
CATTTGGACACACAAACAGAACTTGGTATACATTTAAAAAGTTGCTATGCTGATATATCGGATTTTAATTTTCATGATGCCAAGTAGAGCAGACATAAATTATTCATTCATAAATATTATAATCAG  
AACGAAATTTATAAATTAGGTCCACCTACAAAGAAATAACAGCTCTATGTGATTTTTGGTTCAAATTGCAAGGAAATACATAATGAAAATGCAAGGAAAATGCAAGAAAATTGATGTCTACG  
AATGAACCCCTTCACTCTTCGATCTTCTCAATAAAAATTTCTATCAAGTTTTTTTCTCTTATGAATACATGACTGAATGAACCCCTTGTATCAAATGACTTGGGAGAATAGTAAAAA  
CTTGATTTAGGAAAGCAACGAAAACCTTATCTGAGAGGAAGCACTCGAGGGCGGCGGAAGGAATCCGAGATATGAGATTGGATCGATATAGTGTAAGAAAACCTACCTGAGAGGACGAAC  
TCGATGGCGACTCATATTCACGCACGATTGAAGTCGAGGCCGTTAACCAAGGGGGAGTTGCGATTGAAGTTAGGGAGTTGAGGAGAGTCCGGTCGCGAAAACCTAGAGCGTGAAATGC  
GATCTACGACATA

>comp174482\_c0\_seq31

AAATATAAAATTACAAAATTATTAATTTCTCTCATATCATCTTTATCAAATGCAAATGCACAACATGAATCTTTAACCATGCTAACGCCAATCAATATCTAGTATTGTTGCAATGTGAGATCCA  
GCTCCATATCCACATCAATACATATTTCCGGATGCAAAGAACTTCAACTTGGCGTATAAGTAGGCAACCCCTATATAAAAATTTTATAAACAAAATTACCAGGTTATTTTACGAATTTCTGGTTT  
AAGGTAAAAATGTAGGGAACCTTGATATACATACTGCTTGGCAGCATATTGTCGCAAAAATAATATCAAGCACTCGCAATGCTTCCTACGTGTTTTAGTCTCTTGGCCAGCGCAATGCATTGC  
ATTGGGATTTAGCTGCAAAGCTCAGCACAACCTTGGATAGTCTTTGCATTATAGGAGCGCCTAGCACGCTTACGCTCACCTTCAGCAGGACTATCATTTCCACCACGATTGTCATTTCTCTTC  
GAAGGAATATGATCAAGTATGACAGTGAACCTATTGTTGACCTGGGGAAGAGGGACAATTGTGAACAAAGTCTTTTTCGCCATCATAAGCTCTCCAGGGCTGTATATAGTAAATGGGTGAG  
TGTGACTATGGGTACCAATGCAGGGCTCTGTTAAAAATTTAGCATACTTAACATCACGAAAATATGATTTTAGATGGCGATGATTATCATAAAAATGCAGCAGATGGTCTGTAGTAATAATG

ATATTCAAATTCCTTTGTGAGACGCTACAATATGGCTATTATAGTTGTCATGTGATGTGGATAAGAAAATGTATTAACAATATATGCATCATCATAAATTTAACTCGGATAAAAGTTGATCTAA  
AAAAGACAATAGGGAATATTGATTAAGAATGATACGTCTGATAGGTATCTTGAAGTTGTTAAGCCAGAAGTAAGAATTGGAGAGTAGTGCAATAGGATGAGTTTTTATGGCTGGGAGGAAT  
TAGGCAGCTGCGACTAGAAGAAATCACAAGTCAAGGCCGCAATCAGAAACAATGCGGCTACCTTCCATTTATCCAAAAACATAGAGGATTTGAAGAACGTTGAGTATGATTTTTTCGTAT  
GATGAGACAGGTATTAGGAGGAATAGAGATACAGTACAGGAGAGAGTTCGCATTGATTATAGGGGATAGAGAATATGAGAGGGAATCTTTCATCACTCAATCAAAAAATTATTTACATGACA  
GAACACTACTTATAAAAAATACATATACAGGAATAGATGAATTAGATACAGAACATGACATCTATAATGGACACAAAATTTTTGAACCTTCAGAATAAATAAATAAAAAAACTGGTGCATACTAT  
GAACTACCAAGACAATAATGGCATTAGTATATGTAGAAATAATAGATTGCTATCGAATAGGTCTAAAATGTTATCTTTAGCTAGCTGAGTTGATAATGGGAATTCGCAAATGGTATCATAATAC  
AATGAGCTTCCATTGCTAGGAGGGATCATGTGGCATCAATTACAAAGAAATGCAATTTTAAGTCGCGAATGCAAAAAGATGCGGCTATTGTTGTACTAATAAGATATACAGATGAAATGAAAT  
TTGAGTCTGAGTTTCTTTCGCGAGAGAAGAGGACCAAAAAGGAATATAGATGTAAATGAAAAAGAAGGATCTCATAGGTTAGAGTGGAGAGGAAATCTCTCAAGAATTAATTTATCATTCAAT  
TTTACAATATAGTGCCCTAATTATAAGAAAAATGGGATACAAGATATCATCAAATAATTTAATTTTTAAATATAATTCAAAATTAAGATAACTCTTCATAATGTTATCATCCAATTCAAAATAA  
AAAAAATCATAACAAATAAAAAAAATTAAACTTCAACAAATCTTGAAATTTTCTATAATACTAAAAAAATCTAAACCTATTATCTCCTGTTGCATCAACATGTCTGGAATAATGATTGATT  
CAAACCTGATTCATTGTGAGAGATGAAAGACCATCACTGACTCACGCCAAACTACAATGTCCTTTGAATTAAGTAACTATATACAACCTCCAAGATGGCATGAAT

>comp174482\_c0\_seq32

AAATATAAAAATTACAAAATTATTAATTTCTCTCATATCATCTTTATCAAATGCAAATGCACAACATGAATCTTTAACCATGCTAACGCCAATCAATATCTAGTATTGTTGCAATGTGAGATCCA  
GCTCCATATCCACATCAATACATATTTTCGGATGCAAAGAACTTCAACTTGGCGTATAAGTAGGCAACCCCTATATAAAAATTTTATAAAACAAAATTACCAGGTTATTTTCAGCAATTCTGGTTC  
AAGGTAAAAATGTAGGGAACCTTGATATACATACTGCTTGGCAGCATATTGTCGCAAAATAATATCAAGCACTCGCAATGCTTCCTACGTGTTTTAGTCTCTTGGCCAGCGCAATGCATTGC  
ATTGGGATTTAGCTGCAAAGCTCAGCACAACCTTGATAGTCTTTGCATTATAGGAGCGCCTAGCACGCTTACGCTCACCTTCAGCAGGACTATCATTTCCACCACGATTGTCATTTCTCTTC  
GAAGGAATATGATCAAGTATGACAGTGAACCTATTGTTGACCTGGGGAAGAGGGACAATTGTGAACAAAGTCTTTTCGCCATCATAAGCTCTCCAGGGCTGTATATAGTAAATGGGTGAG  
TGTGACTATGGGTACCAATGCAGGGCTCTTCTAACAGACTGACTGCAGCTGTCCTTAAAATGTATAGATCAGGCGACAATAATCACTTACAAAACCTTCCATCTCATGATCTTGCTGTGAAT  
AAATGTCTGGAACAATAGAAACAGAACAAGATCGGAAGGCAATATTTGCATAAACCATCCATCCATTCTGCTACAATGTTGGATATTGGAACAAGTTTTGGTTTCTTCAAGTTAATCACAAT  
AGCTCTATGTGAAAGCCATGCAGATACAAATGCCAACACCATTAGGAGCCTTGGTAATGGCATTAAACGAAGAAGCACCTGGAGATATGGCCATATTGATTTGCTTGGATGCTGAATAAAT  
TAAATGCTTCATTTCTTGTGAGTTGAGAGTATGTATAGAATGCATTGTTATTGCTCTATTAACCTTCTGAGAGGACGAACTCGATGGC

>comp174482\_c0\_seq35

AAATATAAAAATTACAAAATTATTAATTTCTCTCATATCATCTTTATCAAATGCAAATGCACAACATGAATCTTTAACCATGCTAACGCCAATCAATATCTAGTATTGTTGCAATGTGAGATCCA  
GCTCCATATCCACATCAATACATATTTTCGGATGCAAAGAACTTCAACTTGGCGTATAAGTAGGCAACCCCTATATAAAAATTTTATAAAACAAAATTACCAGGTTATTTTCAGCAATTCTGGTTC  
AAGGTAAAAATGTAGGGAACCTTGATATACATACTGCTTGGCAGCATATTGTCGCAAAATAATATCAAGCACTCGCAATGCTTCCTACGTGTTTTAGTCTCTTGGCCAGCGCAATGCATTGC  
ATTGGGATTTAGCTGCAAAGCTCAGCACAACCTTGATAGTCTTTGCATTATAGGAGCGCCTAGCACGCTTACGCTCACCTTCAGCAGGACTATCATTTCCACCACGATTGTCATTTCTGTAC  
AATCATATGTTGACAGAAAAATAGACAGGAGAAGCATATCGTTCTATTTAAATGCAAAAAGGCATGACATGGGAAAACACACAATTAGTAAGATGAAACATTAGAAATAAATTTACCTTTT  
CGAAGGAATATGATCAAGTATGACAGTGAACCTATTGTTGACCTGGGGAAGAGGGACAATTGTGAACAAAGTCTTTTCGCCATCATAAGCTCTCCAGGGCTGTATATAGTAAATGGGTGA  
GTGTGAGTATGGGTGCCAATGCAGGGCTCTGTTAAAACTTAGCATACTTAACATCACGAAAATATGATTTTAGATGGCGATGTATTATCATAAAAATGCAGCAGATGGTCTGTAGTAATAA  
TGATATTCAAATTCCTTTGTGAGACGCTACAATATGGCTATTATAGTTGTCATGTGATGTGGATAAGAAAATGTATTAACAATATATGCATCATCATAAATTTAACTCGGATAAAAGTTGATCT  
AAAAAAGACAATAGGGAATATTGATTAAGAATGATACGTCTGATAGGTATCTTGAAGTTGTTAAGCCAGAAGTAAGAATTGGAGAGTAGTGCAATAGGATGAGTTTTTATGGCTGGGAGG

AATTAGGCAGCTGCGACTAGAAGAAATCACAAAGTCAAGGCCGCAATCAGAAACAATGCGGCTACCTTCCATTTATCCAAAAACATAGAGGATTTGAAGAACGTTGAGTATGATTTTTCG  
TATGATGAGACAGGTATTAGGAGGAATAGAGATACAGTACAGGAGAGAGTTCGATTGATTATAGGGGATAGAGAATATGAGAGGGAATCTTTCATCACTCAATCAAAAAATTATTTACATG  
ACAGAACACTACTTATAAAAAATACATATACAGGAATAGATGAATTAGATACAGAACATGACATCTATAATGGACACAAATTTTTGAACCTTCAGAATAAATAAAAAACTGGTGCATAC  
TATGAACCTACCAAGACAATAATGGCATTAGTATATGTAGAAATAATAGATTGCTATCGAATAGGTCTAAAATGTTATCTTTAGCTAGCTGAGTTGATAATGGGAATTCGCAAATGGTATCATAA  
TACAATGAGCTTCCATTGCTAGGAGGGATCATGTGGCATCAATTACAAAGAAATGCAATTTAAGTCGCGAATGCAAAAAGATGCGGCTATTGTTGACTAATAAGATATACAGATGAAATGA  
AATTTGAGTCTGAGTTTCTTTCGCGAGAGAAGAGGACCAAAAAGGAATATAGATGTAAATGAAAAAGAAGGATCTCATAGGTTAGAGTGGAGAGGAAATCTCTCAAGAATTAATTTATCATT  
AATTTTACAATATAGTGCCTAATTTATAAGAAAAATGGGATACAAGATATCATCAAACTAATTTAATTTTAAATATAATTCAAAATTAAGATAACTCTTCATAATGTTATCATCCAATTCAAAA  
TAAAAAAAATCATAACAAATAAAAAAAATTAAACTTCAACAAATCTTGAAATTTCTATAATACTAAAAAATCTAAACCTATTATCTCTGTTGCATCAACATGTCTGGAATAATGATT  
GATTCAAACCTGATTCATTGTCAGAGATGAAAGACCATCACTGACTCACGCCAACTACAATGTCCTTTGAATTAAGTAACTATATACAACCTCCAAGATGGCATGAAT

>comp174482\_c0\_seq8

AAATATAAAATTACAAAATTATTAATTTCTCTCATATCATCTTTATCAAATGCAAATGCACAACATGAATCTTTAACCATGCTAACGCCAATCAATATCTAGTATTGTTGCAATGTGAGATCCA  
GCTCCATATCCACATCAATACATATTTCCGGATGCAAAGAACTTCAACTTGGCGTATAAGTAGGCAACCCCTATATAAAAATTTTATAAACAATAATTACCAGGTTATTTACAGCAATTCTGGTTC  
AAGGTAAAAATGTAGGGAACCTTGATATACATACTGCTTGGCAGCATATTGTCGCAAAATAATATCAAGCACTCGCAATGCTTCCCTACGTGTTTTAGTCTCTTGGCCAGCGCAATGCATTGC  
ATTGGGATTTAGCTGCAAAGCTCAGCACAACTTTGATAGTCTTTGCATTATAGGAGCGCCTAGCACGCTTACGCTCACCTTCAGCAGGACTATCATTCCACCACGATTGTCATTTCTGTAC  
AATCATATGTTGACAGAAAAATAGACAGGAGAAGCATATCGTTCTATTTAAATGCAAAAAGGCATGACATGGGAAAACACACAATTAGTAAGATGAAACATTAGAAATAAATTTACCTTTT  
CGAAGGAATATGATCAAGTATGACAGTGAAGTCAATTGTTGACCTGGGGAAGAGGGACAATTGTGAACAAAGTCTTTTCGCCATCATAAGCTCTCCAGGGCTTCTAACAGACTGACTGCAG  
CTGTCTTAAAATTTGATAGATCAGGCGACAATAATCACTTACAAAACCTCCATCTCATGATCTTGGTGTGAATAAATGTCTGGAACAATAGAAACAGAACAAAGATCGGAAGGCAATATTT  
GCATAAACCATCCATCCATTCTGCTACAATGTTGGATATTGGAACAAGTTTTGGTTTCTTCAAGTTAATCACAATAGCTCTATGTGAAAGCCATGCAGATACAAATTGCCAACACCATTAGG  
AGCCTTGGTAATGGCATTAAACGAAGAAGCACCTGGAGATATGGCCATATTGATTTGCTTGGATGCTGAATAAATTAATGCTTCATTTCTTGTGAGTTGAGAGTATGTATAGAATGCATTGTT  
ATTGCTCTATTAACCTTCTGTTATAATTAAGCCAAGAAACAAAATATGAAGACTGCCACCGAATAATTACAACTTTATCATATTTCCAGTGAGAGTAGTTCTACTTCTCATGGGATTTT  
ACATTGGACACACAAACAGAACCTTGGTATACATTTAAAAAGTTGCTATGCTGATATATCGGATTTTAAATTTTCATGATGCCAAGTAGAGCAGACATAAATTTATTCATTATAAATATTATAATCA  
GAACGAAATTTATAAATTAGGTCCACCTACAAAGAAATAACAGCTCTATGTGATTTTTGGTTCAAATTGCAAGGAAATACATAATGAAAATGCAAGGAAAATGCAAGAAATTGATGTCTAC  
GAATGAACCCTTTCATCTTTCGATCTTTCCCTCAATAAAAAATTCTATCAAGTTTTTCCCTCTTATGAATACATGACTGAATGAACCCCTGTTATCAAATGACTTGGGAGAATAGTAAAAAAA  
ACTTGATTTAGGAAAAGCAACGAAAACCTTATCTGAGAGGAAGCACTCGAGGGCGGCGGAAGGAATCCGAGATATGAGATTGGATCGATATAAGTGTAAAGAAAACCTGAGAGGACGA  
ACTCGATGGCGACTCATATTCACGCACGATTGAAGTCGAGGCCGTTAACCAAGGGGGAGTTGCGATTGAAGTTAGGGAGTTGAGGAGAGTTCGGTCGCGAAAACCTAGAGCGTGAAAT  
GCGATCTACGCATA

>comp174482\_c0\_seq9

AAATATAAAATTACAAAATTATTAATTTCTCTCATATCATCTTTATCAAATGCAAATGCACAACATGAATCTTTAACCATGCTAACGCCAATCAATATCTAGTATTGTTGCAATGTGAGATCCA  
GCTCCATATCCACATCAATACATATTTCCGGATGCAAAGAACTTCAACTTGGCGTATAAGTAGGCAACCCCTGCTTGGCAGCATATTGTCGCAAAATAATATCAAGCACTCGCAATGCTTCCCTA  
CGTGTTTTCAGTCTCTTGGCCAGCGCAATGCGTTGCATTGGGATTTTAGCTGCAAAGCTCAGCACAACTTTGATAGTCTTTGCATTATAGGAGCGCCTAGCACGCTTACGCTCACCTTCAG  
CAGGACTATCATTCCACCACGATTGTCATTTCTCTTCAAGGAATATGATCAAGTATGACAGTGAAGTCAATTGTTGACCTGGGGAAGAGGGACAATTGTGAACAAAGTCTTTTCGCCATC

ATAAGCTCTCCAGGGCTTCTAACAGACTGACTGCAGCTGTCCTTAAAATTGTATAGATCAGGCGACAATAATCACTTACAAAACCTCCATCTCATGATCTTGCTGTGAATAAATGTCTGGAA  
CAATAGAAACAGAACAAGATCGGAAGGCAATATTTGCATAAACCATCCATCCATCTGCTACAATGTTGGATATTGGAACAAGTTTTGGTTTCTTCAAGTTAATCACAAATAGCTCTATGTGA  
AAGCCATGCAGATACAAATTGCCAACACCATTAGGAGCCTTGGTAATGGCATTAAACGAAGAAGCACCTGGAGATATGGCCATATTGATTTGCTTGGATGCTGAATAAATTAATGCTTCATT  
TCTTGTCAAGTTGAGAGTATGTATAGAATGCATTGTTATTGCTCTATTAACCTTCTGAGAGGACGAACTCGATGGC

>comp174500\_c0\_seq16

AAATTATATTTATAAATTTGATCAATATCAAGTACAACCTTAAAGTAATTAAGCACAATAAAAACCTTGATTAATATAAAAATAGAGCATTTCATATCAATGTTAGACCAAATTTGTATATCACATTATC  
ACCAATCAATATTACAAAAAGAAGTAATTGGAATTATACAATCCATTA AAAAGTTTCATAATAGTGCATAAGTAAAAAACACAACAAAAGATAGA ACTATTAATCCATGTCTGTTTGATA  
TTCCATATCTTCAAACCTTTTCATCAACTCTCTATAGACCAATTAATATGCTGCAAACCTTGATCCTGTCAATTGAAGCTGCTGTGTTTCGGCACTTTTTTACTAGTGGGCCATCCATGTGA  
AGAAAACTTAGATTTTTTCATATAATCGGTAAGACAATCTCCACCTTTCATCTTCTTCTCCTCCTTAACCCCTCCCTTCAAGCCATAGTGGCAGCGAACCCAGTTGGAACCACAAAAGG  
AGAGCTTGCACAGTGTCAACCCCTAGTTTTGATCGATATGTATCAACCACTTTTCTCCAGCACTGAAAGTGGACTCTGAAGCAACTGTACTAACAGGGATGGATAAAATATCCACTGCCA  
TTCTTGAAAAGTATGCGGTATTTGGCTTGATTGTTTTCCACCATGCTATCACATCAAACCTTCTGCCCTTCACTACAAAGTTCTAAGTCATCTTCAAAGTAGTTGTCTAAATCTGATTTTTATAGG  
CCTGGTGCTTGTGTTTGGATGGCACCATAAATACTATCAAATGGCTTCAATGAAATTTCCACGAGCTGGCGAAGTCTCAACTGCACGAATAATAAAAAAAAAAAGACCTAACCCACAGC  
TTATGCTGGCAGATAGCAAACCTCGGAACTGAAACAAACCAGATGAAAGCAATGTTAAACCGAAGCATATAGCAACTCCAGCACCTTGAGCTTGGAGGGGGTTCGGCGGCTTTGGCATCAGA  
GGGAGTCTGAGATCCGGGGGGGGCAGGGCTTCGGTGTGAGGAGTCGTGAGAGAGGTGAAGGGGGGCAATTTGGCGTGAGATGAGATGGGGAGGAGTTAAGAGGGAGTGAGGGGGTA  
TTTTAGGGTATTTTTGAGTTTTTTTTATTAGAAAAAAACCTTTTTTTATTA AAAAAAAAAACTCTTCTCTCCCTCTCTTTCTATTTTTTTTTAAATTAT

>comp174557\_c2\_seq2

ATTTGCTGATGTAGAGAACCCTAATGATTATTA AAAATTTAAGATCTATTGCAACAGAGATAGTTAAAAAGTTTTTCAGGATCTCTATTGAAAACAAACTTCAA AATTA AAAACAAATATTGTTTC  
TCCTAACACCATTGAAGTTAAAAAGTACTATTCCAAATATATAAAAATTTTCATCTTCTTATAATAATCTATTACGGCATGATAACTAGTCCACATCCAATATTGCATCAAACCTCAGCGAAT  
GAGAATAAAATGAGTATTA AAAATTATATATGTATTTTTTATGTCACAATCATGAACATACTGAGAGTAACTATCATAGATGAAATTGATGGCATAATAATAGAGAAAATGAGATTACAAATGTG  
ATATTGATATGATTGATGCAAATTTATATGAATTGAATGAATGTGATGCCTTAGATTTAAACAAACACTTACTAATTGTTTTAAAAATATAAATGATATATGTCACC ACTTTAGGAGCTTCGTGC  
GCCTCTTGTTGGTTAAAAACAAATACTCAAGATGGAATTGCCTATTATGACTATTATTAAGGCTGAGGTTGTGATGGTTGATATTATAACCATTAGCTATTATTATTTAGATAACATTGAAAGTTG  
GGGTTGCTGGTACTGTAATGTAGGTGGATGCCATTGATATGGCTGACGTGCCAGAACTACTTTTGATTATTGATGAGGCTAAAGATAATATTGTATTGCCTACTATATCCCTTTTTTTTTGTGA  
TATTGACCTCAAATGATTTTAGTTACCCATTTATATGTTGAAGTTTGA AATTATTATTTTCGTGTTACTATCAAATCATATTGCTCTTGAGTCTTGAGAGGACAATCTTAAATTTTGTGATCAGT  
ATATTATAGTTAAAACATTTCCAAAAGTTAAATTCCTTATCTAAAGTGTCTTTTGTGCTTACTCTTTATCTTAAAGACCATGATGATTATTATGCTACTTTTTTGTGAATCACTTGTGTTTGA  
AATGTATGTGCTCTTTCATTTCCCATGTTCCATCTCTTCGCAAACATTAATTTCTATTTCAACATATATAACACTATCCACCATCTCTCTAAATATAATGCATTTTATCATGGATATATGTATCCTA  
ATATCTTCTCTCAATATGCATCCTAATATCTTCTCTCAAACCTGAGAAGGAAGTTATAGAGTTTTTTAAAATTCATGTTGTAATAAACCAAATTTAATCCAGTTAAAAAATTATTGT

>comp174560\_c3\_seq1

CATTTTCACATATATACTCATTTCGCATTCTATCTCTAAGAGTAAAGCCACTTATCCACCTGAACATCATCATATCTACAAAACCTTAACTTAATTGTATGCTTCTCTTTTAAAGGTCAACATTAT  
GCGCCATAAAAATATTACAGGACTCTTACCATCTTATATAGAATTTTCCCTTAAATTTAAAGGATACTTTTCAATCACACAATAGGTCTGACACATTTCTTTACTTTAATCAITCAACTTGAA  
TTCTACTAATAGTACCCCATATATTTACGATCACTTTGGACAATAGCTCTGAGTTATTTAAACGTGTACCCCTAATAATGACTTGATCGTCTAAATTCACAATCTCATATTAGACTATCAA  
AACTAAAATTATACTCCATACATTCGATTTTAGATATACTCAAACGAAAATCTTAGACTCTAAAATTGACATCCATAATTCAAGTTTAGTCTTATCAACAAGAATAATATCATCAACAAAAAG

CATACATCAGCTTCAAATGTCTAGTAAGAATGATCATGACCGAGCAAAACGTTATAGGCTTAAAGCTGATCCTCGTTATAATCCAAGTAAAGGGGAAAAATACTTGGTCCAACCTCCTTAC  
GTT

>comp174583\_c3\_seq4

CGTTTGGGACGGCTTCTTACTGCATGCTTCTTAAAGCAACTTTTTAGTATAAAAATTTAATTTTTAGACTAAAAAGTTGTTTTAAGAAGTAGGAAGAAAGTCATCCCAAATGAAACCTA  
AGACCACCATCCAAAAGGGCAGCGCTTTTTTATCTTCTGGCATCAGGTGGAGGGGTCAGAGTGATTCTTTCGGCATTATTTGCAGCCCATCTACTGAAATCAGGGGAAGAGACTAACTC  
CCTCAAAGCTTTTCTAGTTTCTGCTCTAGTGAATGTTCCCACTCATCCTTATTGAATATTTCTTTCTGGTGTCTGTGGAAGGTAGAGTAGTAGTTGTCTCCTTCTAATGTGATATTGGGT  
CTCCTCATGCCTATATTAGTTGAATTGTTTTGAGCGAAATTGAATTCCTGAAACCATCGTTTGTACTTTGTAGGATTTGGGAATTGAATTGTAGTAAAAATAGTATAAAACAAATTTGAAGATC  
ATCCTGAACAAGCGATTTCGAGAAATTC AATTTCTATGTGTTCTTGACACAGCAGATGTTATAATAGAAATAAC

>comp174583\_c3\_seq5

GGTATATTTCCGTGTACCTGTAATCAGAATGTTACTGTGTCCGATCTCTTGGCCAAATTCAGCTAACGGTGAGCTAAGTAGATGCTGCATAAATATCTTTTGAAATATTCAGCCTTGAACCC  
CACCAGAGAGGGGATCCCCGCTGAACAAGCGATTTCGAGAATTC AACTTCCATGTGTTCTTGACACAGCAGATGTTATAATAGAAATAACGAGCGACTGTGCAGCCAGACTAACATCC  
AAGGAGCTCTGAAGGATCATGATGCCAGCAAAAATTAGGGCTGCCATTTAACAAAATAGGCAACATCGGTGTCTACTAGACCCTCGTCGGTCAGAACCAGCTTGCGAACACCCCAATAT  
CCAAACCATGCCCCAGCTAGAATAAGACAACTAGAAAGATATACCAAGCTGTGGAAGGCGGTAAAAAGTAAGATAGAATTTCCAGTGACTAACAAAAATCATCATTTGCCATAACAG  
TTTCAAAAAATGATAGCATGTATTATAACTAGACGGAGCATCTCAATTTACAGACTGTGGAATGTTGAGCCACAAGATATAGATAAAAACTACTGAAATTGATGAAAAAACTGAGATGGTT  
TAATGCCTCAAGACCTTATGTAATAAAACCTAAACACTTTCAAATAGTATTATACTGTTCTTTGGTGAAAAAATAAACTGTTCTTTGGTGAGTTTGAAACCTAGCAAATACGCTAAATACC  
ATTTTTAACACATATAGCATGGCGCAGTGCCCTATTTTAAACATGGCAGAAATTAGAAAAAATTATAAATAAAAAATACAATTAATAGGAAAGAATATTAGATTGAAAGATAAGTCATCA  
TTGTAGTAAAAAAGATAATTTAAAGTACTCAATGCCTCAACCATTTAAAATTTAAAATTTCTGTTACTTTCCAAGTCTAATATTTAAAAAATAAAACAGTGCTCTCGAGACTCAGCA  
TCATCATAAGTACAAAAATCATTTTCTTCATCAATATTATAATTATCATATAAAGCGTAATCTTCATCGTCACCCTCATTATTTTCATGTTTAATTGCAAGAGAATTACGCCTATATAAAGATTC  
ATTCTCTTTGCCTTTTTATTGCTCTCAAATATTGTAGTCTATTTCATAAACACCACTAGCTTTTGCAACAATACTCCAAGTCCAATCTTTCTTATCAATTACTAATCAATTATCTTCGTCTTACT  
CAACATCCATTTTTAATGTTAAACACTCTTAGCATCATCTATAACACTAAAGAAATAGGGTCACTAATATCACGAAGGTTGTACCTTGAAATTAATGCCCTATTATATTTTCATATAAACCAAT  
ATTTGAGCGACCATGATCCATCTTTTCATCCTTTTTTATGAAACTACAACAAAAAATTATTAATAAATACTAAATTATAAAGTTTCATGATAATAATCAATATACAATTTT

>comp174606\_c2\_seq11

GAACTGTCCCTCGCTAACACCATCCCTGTAAAAATATTATTCGCTCGGGCTTCTCCCTGTAGCTTTTTTAAATGAAATAAGTAAATCCCTGATCATGCCACCAGAAACATTTCCACGCTGTG  
GATCTGATTCAAGCTTATATAAGTCCTCAATCAGCTCCTGACGATGGGCTGAGCACTAACAAGTCCAGCATATTTGGTTATTTCTGGCCAGTCTGAGAAGCAACAACCGCAGCAATTGA  
AGGGCTTGAGTCTTACCAGGCTGAGGATGAGTCACATCTGCACCAATATAATTGTGGGCTTTCACTGACCAAAGGCAATCGCCGTGAGATAGCATC

>comp174606\_c2\_seq14

TTTTTAAATAAAAATGAAAATATTTATTTTCAAAGGTGTTAATATAAAAAATGCATAAAGTATCCATCCAATTTCTGGTAAAAGTTTATTGAAACCCCAAGTCAATCAAATTTGAAAGAA  
ACTTAGAACAAACATTTCCCTGGTCAACTCTTTCAGTTGAAGACTCAATAACAACATGGACGCAGCAGTAAAAAGAACATGAAATGCAGGAACGCAGAAATCAGCAATAGAACATCACT  
TCCTCAACATTATCCTCGCGAGCAGGAAGAGGGCCCTGACAGCACTGCAGAACTCAACAGTAGAACATCACATTTAACATTTCTCCTTGATAGCAGGAAGAGGGCGTGACAGCAGCATC  
TCTATCTTCACTAGTGTGGGTGCCTCATTTCAGCTGCAGCTCTTGGCTGTGAAGCATTTTCAGATGTCATGGGATTC AATAAAAACCTTGCCCTGGAAGCAGCAAGATGAGCGTAGTAT  
GCAGGCGGCACAATTGATACTGATCTTGTGCACCTTGCATATGTGTAGCATAAGTTATATGTAAGTGTTCAGGTCATTAGGAGAGAAATTGTTTTTCATCCACTAAAACATGATAATGTGTT

GGCCGGCTAGTCCCCTTGATTCCAGCATGACTACATAGGTAGAAATCAAACCTCAAATGGATGACAGATATCTGAATCAACCACAGTCCCTGGAAGGATGTTCCGTTCCCATCTACTGACT  
CAATGCCATAAATGGTTGTTTGCAAACAGCCTGGTATGATGCCTTTTCTGAACAATCACAAAGGTAATCTTTGGTTCGATAATCAAGATGGAACGAGGCACAAGCGTTACGAATTGCAATATA  
TTCATGCTCCAAAACCTTGAAAGGAACGTGCCCTCGCTAACACCATCCCTGTAAAATATTATCCGCTCAGGCTTTTTCTTTGTAGCTGTATAAAATGATTGAATTAACCTTGTATCATGCCACC  
AGAACCAATCTGTAAGTTCTCAATCAGCTCCTTACGATGGGCTGAGCAGAAACCCGTGCAGCATATTTGGTTATATTTGGCCAGTTCCTGAGAAGCAACAACAGCAGCAATTGAAGGGCT  
TGAGACATCCCCAGGCTGAGGATGAGTCACATCTGCACCAATATAATTGTGGCCTCATCTCCGACCACAGGCAAGAATTTTGGCAAATTTATACCAAGCTCAGTGTTTCGTTCCCTCCAACC  
TTCACATTAATTTTCAAAGCAACATTGGCAAGGTAAGCTCGGCTTCTCTTAAAAACATATTTGACTAAACAACATTGTGAAACTAACCCAATTTGAGTCTCGCATATACGCTTTAGATTCCC  
ATAAAGAGAACCATTATTTTTCAGGCAATATTGCAATAAGTAAATCAAGCTTTGCGTCACTATAAAGTGCATTCAATGCTTCTTCAACTTGATTAGGTTTTGCATATTTTTCAGTTGAATTACAGG  
CTTCGTATCAAATCCATTCCAGAATTGCGACACGCAGAAGCTAGCTCATAACAAAACCTCGTGAATACCATATTCCTCTGCATCTTTGAGCAAACTGATGCAAGCCCAGTTTTGACCCTCC  
CACCAATTACCATTTGCTGCTGCTTCCATTCACCCATTCCTGGCTCGAAATTCGGCCTCCTACCGTCTTTAAGCATAGGTGGAGGCAGAACGTGTGCTTTAACTGTTGTAAGTGTCTCAGTG  
ATTTGAATTCCAAAACCTCAGTGGCATATGGATCCAAATTGTATTCATTACGACGAACCGTCTCCATAATAGCTCTCTGACGAGCTTCTGGGCACTGGGACGTTGCATTTGAAAATGTCTTTAA  
TTGTTCTAGATTCAACTTCTTAGAATATCTTTGTCTTCAACAATCCGGCAAACCTCCATGGGAAGATAAATTTGGCCTCTGTTGATTGCCAAGTTGAAGACAGGGCCAACCAAGAAGTTGG  
ATAGGAATATTATAAGCGTCTAGAAAATATTGTACCACTGTCTTCATCGTGCCTTCCATAGAAAAAGACAGGACTCTTGTTCCTGTTCCGTTAAAGCAAGTATACGATATTTTCTGCGGTC  
GTTGCCACGATGTGTAACCTCCACTTTTACACCTTTTAAAGATTTATTCACCGTAGCAATTTCTCTATCAGTTAGCTTTGTACGTTGAACATTCCTTCCAAGAAGCCTTCTTACAAATTCAAC  
AACAGGCCTGCCTCAAAGAATGCTTTTGTATGTAATATCGATATTCAGTGATAAGCCCTTCTCTGTAGGTCTCATGCTTTGATAAAATCCTTTATAACTTTTCAAACACCACCAAGACTCG  
TCCTCGGAAGAAAAAGGGGGAGTAGAAGGATCTTCCAGAAGGGTAGTACCGAATGTTTTTTCATTGGGCAGCTGACGCATACAATATCCAGAATTTGCAGTTGTGGAGCATCTCTTTGCT  
TCCTAGTCAAGAACCCTTCCAGCTGATAAAGATCGGTTTTAACAGCAAATGTAATGACAACTTTGAAAATCCTCTCCCGCCTTGCAGCAGCTCCAGCACCATCATCTTCACTAAAGT  
AATTATAAATCTTTCAGATTTAAATGGTAGTTCGCCAGCAGTATAAAGGATCTTCTGCCATCATAAACAGGAAGGCGGTTTCCCAAATCGGAGACTCTATGGATCCTTACAAGTTGTCTGA  
TGACAGATCGGTTAACCGAACGAGAAGAACTTCTGGTGTAAATGGAAACATTATATTGATAAAAAACCTTGTGAGTAGAGAAGGTTGCAAGGAAATGGTTGGCCTTAAGCTCACATTCAT  
AACCAATGCTACAATATTTGCCATTGCGCAGACAAAACATTGTTTTATTCCCCGACGCAGGAGCAACAGCCTTACTACTTTCT

>comp174606\_c2\_seq7

TTTTTAAATAAAATGAAAATATTTATTTATTTCAAAGGTGTTAATATAAAAAATGCATAAAGTATCCATCCAATTTCTGGTAAAAGTTTATTGAAACCCCAAGTCAATCAAATTTGAAAGAA  
ACTTAGAACAAACATTTCCCTGGTCAACTCTTTTTCAGTTGAAGACTCAATAACAACATGGACGCAGCAGTAAAAAGAACATGAAATGCAGGAACGCAGAAATCAGCAATAGAACATCACT  
TCCTCAACATTATCCTCGCGAGCAGGAAGAGGGCCCTGACAGCACTGCAGAACTCAACAGTAGAACATCACATTCCTAACATTCTCCTTGATAGCAGGAAGAGGCGTGACAGCACGATC  
TCTATCTTCACTAGTGTGGGTGCCTCATTTGCAGCTGCAGCTCTTGGCTGTGAAGCATTTTTCAGATGTCATGGGATTCAAAATAAAACCTTGGCCTGGAAGCAGCAAGATGAGCGTAGTAT  
GCAGGCGGCACAATTGATACTGATCTTGTGCACCTTGCATATCTGCAAGGAGAAAAGATAGATATGTAGCAAATTAACATAATAGCATCAAGAAGGAATAACCAAAAAAGGGGAAATA  
AGAAGCGTATCCTATTACGTGTAGCATAAGTTATATGTAAGTGTGTTGCAAGGTCATTAGGAGAGAAATGTTTTTCATCCACTAAAACATGATAATGTGTTGGCCGGCTAGTCCCCTTGATTCCA  
GCATGACTACATAGGTAGAAATCAAACCTCAAATGGATGACAGATATCTGAATCAACCACAGTCCCTGGAAGGATGTTTCCGTTCCCATCTACTGACTCAATGCCTAAATGGTTGTTTGCAA  
ACAGCCTGGTATGATGCCTTTTCTGAACAATCACAAAGGTAATCTTTGGTTCGATAATCAAGATGGAACGAGGCACAAGCGTTACGAATTGCAATATATTTCATGCTCCAAAACCTGAAAGGAA  
CTGTCCCTCGCTAACACCATCCCTGTAAAATATTATCCGCTCAGGCTTTTTCTTTGTAGCTGTATAAAATGATTGAATTAACCTTGTATCATGCCACCAGAACCAATCTGTAAGTTCTCAAT  
CAGCTCCTTACGATGGGCTGAGCAGAAACCCGTGCAGCATATTTGGTTATATTTGGCCAGTTCCTGAGAAGCAACAACAGCAGCAATTGAAGGGCTTGAGACATCCCCAGGCTGAGGAT  
GAGTCACATCTGCACCAATATAATTGTGGCCTCATCTCCGACCACAGGCAAGAATTTTGGCAAATTTATACCAAGCTCAGTGTTTCGTTCCCTCCAACCTTACATTAATTTTCAAAGCAAC



ATTGGCAAGGTAAGCTCGGCTTCTCTTAAAAACATATTTGACTAAACAACATTGTGAAACTAACCCAATTTGAGTCTCGCATATACGCTTTAGATTCCCATAAAGAGAACCATTATTTTCAG  
GCAATATTGCAATAAGTAAATCAAGCTTTGCGTCACTATAAAGTGCATTCAATGCTTCTTCAACTTGATTAGGTTTTGCATATTTAGTTGAATTACAGGCTTCGTATCAAATTCATTCCAG  
AATTGCGACACGCAGAAGCTAGCTCATAACAAAACCTCGTGAATACCATATTCCTCTGCATCTTGAGCAAAAACCTGATGCAAGCCCAGTTTTGACCCTCCCACCAATTACCATTTGCTGCTGC  
TTCCATTACCCATTCTGGCTCGAAATTCGGCCTCCTACCGTCTTTAAGCATAGGTGGAGGCAGAACGTGTGCTTTAACTGTTGTAAGTGTCTCAGTGATTGAATTCCAACTCAGTGG  
CATATGGATCCAAATTGTATTCATTACGACGAACCGTCTCCATAATAGCTCTCTGACGAGCTTCTGGGCACTGGGACGTTGCATTTGAAAATGTCTTTAATTGTTCTAGATTCAACTTCTTAG  
AATATCTTTGTCCTTCAACAATCCGGCAAACCTCCATGGGAAGATAAATTGGCCTCTGTTGATTGCCAECTGAAGACAGGGCCAACCAAGAAGTTGGATAGGAATATTATAAGCGTCTAG  
AAAATATTGTACCACTGTCTTCATCGTGCCTTCCATAGAAAAGACAGGACTCTTGTGCTGTTCCGTTAAAGCAAGTATACGATATTTCTGCGGTCGTTGCCACGATGTGTAACCTCCA  
CTTTCACACCTTTTAAAGATTTATTCACCGTAGCAATTTCTCTATCAGTTAGCTTTGTACGTTGAACATTCCTTCCAAGAAGCCTTCTTACAAATTCAACAACAGGCACTGCCTCAAAGAAT  
GCTTTTGATGTAATATCGATATTCAGTGATAAGCCCTTCTCTGTAGGTCTCATGCTTTGATAAAATCCTTTATAACTTTCGAAACCACCACCAAGACTCGTCTCGGAAGAAAAAGGGGGGA  
GTAGAAGGATCTCCAGAAGGGTAGTACCGAATGCTTTTACAGAACAATAATATTTGAAACGTTAGATATAATATAAGTGTGTGAAAGAAATAATTCATCTTGAGCGCAAAAATAATTAC  
TTTTATTGGGCGCTGACGCATCAATATCCAGAATTTGCAGTTGTGGAGCATCTTTTGTCTCCTAGTCAAGAACCTTTCCAGCTGATAAAGATCGGTTTTAACAGCAAATGTAATGAC  
AACTTTGAAAATCCTCTCCCGCCTTGCAGCAGCTCCAGCACCATCATCTTCATCAACTAAAGTAATTATAAATTCTTCAGATTTAAATGGTAGTTCGCCAGCAGTATAAAGGATCTTCCTGC  
CATATAAACAGGAAGGCGGTTTCCCAAATCGGAGACTCTATGGATCCTTACAAGTTGTCTGATGACAGATCGGTTAACCGAACGAGAAGAACTTCTGGTGAATGGAAACATTATATTG  
ATAAAAAACCTTGTACAGTAGAGAAGGTTGCAAGGAAATGGTTGGCCTTAAGCTCACATTCATAACCAATGCTACAATATTTGCCATTGCGCAGACAAAACATTGTTTTATTCCCCGACGCA  
GGAGCAACAGCCTTACTACTTTCT

>comp174639\_c0\_seq5

ACTCCGCACATAATAATTTTCGTCATCGACCCACAACCATTACACGATGTGCACATGCATAATTATTTAATTTACAACATAATCAAACAACCCTAAAAAATTTTAAAGAAAAAGCTGCCTC  
CTCTCTCCACTGCTAGCTCTCCATCAAGAAATTATTCTGTGCAATCACCGGATGGTTCAGAAGCGAATCAAGATACATCACATCGTCCGGTAAACGGTGGTAGTGAACACATGTACACAGG  
AAAAAAATAACGTGGCGCTTACTGATTAAGTCCGACCACACAGAATAATTTCTCCAGCATCACAAACCATAACATAAATAAAAGCAGCATTATTTTCATCGGCCATTATGGCTCGACCAT  
AACACACCACCTTACAGTAGAAATACAGAAAGCAACATAGTTTCTCACCAGCAACGGCGAATTATTGCATCCGGTCACCTGACATCCGGACAACCAATCCGGATGGGCCACGTCACTCAA  
TACATCGGGGCCGATGTATTTTACTGATGTGACGTGTCTGGATTGGTGTCCGAACGAATCCAAACACCGAACGAATAATTTGCCACCGCAACACCTTACAGAGAAAAACATTATTCAA  
CATTTATTTCTACTTCCATAACAACCTATATAAGATAGCTTAGGCTCAGATTGAAATGCTATTTCGGAATACCCCTTTGCCGTGATCCACCTTCACTGTAAGGCGACAGCAGATAGTAAGGAA  
CCTGAGCCGGTCCGCACCGGTTCTTCAAACCTCGGGTCATGGTTCAAGTTACTGATATTTCTCGATCTCCTTCAGCTTCAACCGAACCGGTTAAATGCTTGAATGACTCGGTTGTGCT  
GGCCACTCTGCACTCGCCCTTTGACCCAAATAGAGCTCATCGCTCGCGTGATTAGACAGAACTTCGATCAACGATATGCCGATAATCGTCTGCACCTGGTTTGAATGGTCTTCAAGAGC  
GCCTTCTCCGGTTCTTCTCCAGTTCTCGTATTGGCAGTGGCGGTTGGGGCATGAACCGGCGGCTGGCGGTGGGGCGGTTCCGGGAGGTAGCCGGCGTAAGGGTATTGGCCGAAGTT  
GACGGCGGCGTGCATGGCGGATGCGATCCAGATGATGGTGGTGCAGGATTGTATGAGATCTTCCAGGGTGGAGAGACTGGGCCACCATGGCTGGTCTTTGAGGTCCCCATGTCCGACTTC  
CCGGACCTCCGTCCACCAGGATTGGAGTTCACCGTCTTGTGTAACGGCTGAGTCTTGGGGTAATAAATGGCGGTGTAATCGCGGACCCAGCCTTCGATGGCGAACAGATGGCGAGGC  
CGTCGACGGCGTAGGGGTAGTCGGGATAAGAAGGCGGAGGTTGTGCGGGGATGATCGGTCTATTTCCGGCCATTCCACGCTTGAGAAGATCAGCTGGAAGGGCCTGGTCAAGAAAATTC  
CAGCTTTTGTAAACAACCTGCAGACATCTCCAGAGCATACTTGTGGGGAAGACGGTGAACCTCGAGCAAACCACCGGCACTGATCAGTGTATGGCGAGCCTGAGCGTTTATGTTCAATTGTA  
TCGCGGTAGTGAGGCGCAAGAGCTTGTGATTGGATGCAGCGCACTTAGTTGCCGGTTGGTTCGCAATGACAAAAGGCTCGATCACCGCATGAGTACGCAACCAGTGACTGATAAGTTG  
GTGGACGCCGGAGTCGTTGACAAGGGCGTAGGATTTAGCAAGTAACCAGATGGTGCTCTCCACGCCTACACTGGCCGGTTTGTAAACCGTGCTCACGGCGCCGAGATTGTGCGCCGCTG

GATGGGGAAGGCTGAGCTCGATGGCCAGTGGCTTCAAAGTGCCATCCTTTTTGAGGAAGAACAGAGTACGGGAGGCGTAGATTTTGTGTCTGTGCTGTTGATGCGTCTCAAATATGGCA  
TGATTGCATCATGGTGGTCAATGATGAGGAGTTTCTTCAATTGAAGCGCCTGAGAAGTGAAAAGATGGAAAGCACTGTGACTAAATTACATAATCCTTTGGAGTATTTAATTACTGCGATA  
AACACGATCAAACATGACAAAATGGTTTCTTTTTGACAGCCATGGAAAGAGCAAATAGTCGAGATTAAGTTAGAATTACTTCATAAACAGAGTAGCCGTCAAGGTTGTCTTGGATGTCTT  
GTTCTTTGAAGGTGCTGTTCTGGTTGCCGTAGAGGGAGGGATCAAGACTGCTCTTTGGTGGAAATTCCTTCAGTAGTTGGATCATGATAGGTTGACGCCGGCCAGTGTCTTCTTGCGA  
ATTCTTCGTCGGATCTCCATGCCATTTATCCTTTTTGAAGGATATGCGGCAACGGAAAATTTGAGTACGCCGCGCTGGTTATGCCCCGGAGTGATGAAGGTCTTGAAGAGCTCAAAGGGCAT  
GGACTGAATGAACTTTCGAACCAGCGGAATGTCCGGCAGAGGAAAGCCGCCCTCATAGAGATCAAAAATTCCTTCAAGGAGTCGAATTCCTTGGGCGTGAAGTCGACAATGGATTGG  
ACGAGTGGCAACAGGTCTTGGTGATTGCCTTGGAGCCGTAGCCCAAGAAATCCGCAAATTCAGTGCCCCGAATTTCTCATCGCGAGGCACGTAGATGTTTCAGATCAAGAGCGAAAAG  
CCTGCTCTCCGAATTCGATCGGTTCTGGCCGGCGGGCGGCCGGTCTTTCCGCGCGGAGGGTAAGGGAATGGGAATTCACCAGTATTGGGCGGGCCAAGCTCGGACTGAGGTCCG  
GGGCGCCGAGATCGTTGTAATAGGCATAGCCATACACGCGATCCCATTCTCCAGCTCTCGGTTACGTTATCTCCTCTAAGATTCGCGAGCTCGTCTCCCTGTACCCCTTGAGTGGCCCT  
GGCGTGTGTTCCGGCAAGTAAGTGTGCTTGGCGAAGAAGATGCGGTCATAGTCATACTTATTAGCGTTATAAACCCAGGAGTTGCAGTCAAAGTGAATTCGACCTTTCCGGGGAAGTCA  
TCAATAGTGATGGATTTGAGATAAACTCGGCCAAGTGGCGGTTTTTTGACGATGATGGCGCCGGGATTCCCAAGCTTTTCGTC AACGATGAAGTGCCTTCATATAAAGTCTCGCCGGCG  
ATGAGTTTCGGGATGAAGGAAAGCGGAGGCCTCTCCAGGTTCCGCGGCTCCCCTACCACTCCTCTGTTCCCTTTATTGGGATCGCCGACGGTGGCGCTGATGAGGCGGAGCTCGACACT  
CTGGCCGACAAAGTCTGAATTTGGTTGAGAATAGAGGCGTTGAAGTGGTTCAGGGAGAGCACGTTCTTGTCCATGATAACAATACTGGCTTTCACCTTCTTTTTTCCGGCAGACAAAAC  
ATCTTTAACTATGTGACTGATAATCATCTTGTAGAACGGGGAAATGGGAGCGAAGATAGGCTAAAGAGATAGAACGAGAAGGATCTCGGCGGAGGTGCTGTGGCTTGCAGAAGTTTTAG  
GCGCCATTTATAGCAGATCGAGGAGTGTTCAGCCACCTTAATCTATATTGATTTAGGAGTTTAATCTCTCTATTAAGAGGTCTGAATTCGAATAAATCAATGAATGAGCACGAGAAACTCGT  
GCCTCTTCTGTTCTTGAACGTGCTGAGGCTTAGGCTGAGGGACGAAAAAATCGTCCTAAACA

>comp174639\_c0\_seq7

ACTCCGCACATAATAATTTTTCGTCATCGACCCACAACCATACACGATGTGCACATGCATAATTATTTAATTTACAACATAAACAACCCTAAAAAATTTAAAGAAAAAGCTGCCTC  
CTCTCTCCACTGCTAGCTCTCCATCAAGAAATTATTCTGTGCAATCACCGGATGGTTCAGAAGCGAATCAAGATACATCACATCGTCCGGTAAACGGTGGTAGTGAACACATGTACACAGG  
AAAAAAATAACGTGGCGTTACTGATTAAGTCCGACCACACAGAATAATTTCTCCAGCATCACAACCATAACATAAATAAAGCAGCATTATTTTCATCGGCCATTATGGCTCGACCAT  
AACACACCACCTTCAGTAGAAATACAGAAAGCAACATAGTTTCTCACCAGCAACGGCGAATTATTGCATCCGGTACCTGACATCCGGACAACCAATCCGGATGGGCCACGTCACTCAAA  
TACATCGGGGCCGATGATTTTACTGATGTGACGTGTCTGGATTGGTGTCCGAACGAATCCAACACCGAACGCAATAATTTGCCACCGCAACACCTTACAGAGAAAAACATTATCAA  
CATTTATTTCTACTTCCATAACAACCTATATAAGATAGCTTAGGCTCAGATTGAAATGCTATTCCGAATACCCTTTGCCGTGATCCACCTTACTGTAAGGCGACAGCAGATAGTAAGGAA  
CCTGAGCCGGTCCGCACCGGTTCTTCAAACCTCGGGTCATGGTTCAAGTTACTGATTTCTTCTCGATCTCCTTCAGCTTCGAACCGAACCAGGTTAAATGCTTGAATGACTCGGTTGTGCT  
GGCCACTCTGCACTCGCCCTTTGACCCAAATAGAGCTCATCGCTCGCGTGATTAGACAGAACTTCGATCAACGATATGCCGATAATCGTCTGCACCTGGTTTGAATGGTCTTCAAGAGC  
GCCTTCTCCGGGTTCTTCTCCAGTTCCTCGTATTCGGCAGTGCCGGGTTGGGGCATGAACCGCGGGTGGCGGTGGGGCGGTTCCGGGAGGTAGCCGGCGTAAGGGTATTGGCCGAAGTT  
GACGGCGGGCGTGCATGGCGGATGCGATCCAGATGATGGTGGTGCAGGATTGTATGAGATCTTCCAGGGTGGAGAGACTGGGCCACCATGGCTGGTCTTTGAGGTCCCCATGTCCGACTTC  
CCGGACCTCCGTCCACCAGGATTGGAGTTCACCGTCTTGTGTAACGGCTGAGTCGTTGGGGTAATAAATGGCGGTGTAATCGCGGACCCAGCCTTCGATGGCGAACAGATGGCGAGGC  
CGTCGACGGCGTAGGGGTAGTCGGGATAAGAAGCGGAGGTTGTGCGGGGATGATCGGTCTATTTCCGGCCATTCCACGCTTGAGAAGATCAGCTGGAAGGGCCTGGTCAAGAAAATTC  
CAGCTTTTGTAAACAACCTGCAGACATCTCCAGAGCATACTTGTCTGGGAAGACGGTGAACCTCGAGCAAACCACCGGCACTGATCAGTGTATGGCGAGCCTGAGCGTTTATGTTCAATGTA  
TCGCGGTAGTGAGGCGCCAAGAGCTTGTGATTGGATGCAGCGCACTTAGTTGCCGGTTGGTTCGCAATGACAAAAGGCTCGATCACCGCATGAGTACGCAACCAGTACTGATAAGTTG

GTGGACGCCGGAGTCGTTGACAAGGGCGTAGGATTTAGCAAGTAACCAGATGGTGCTCTCCACGCCTACACTGGCCGGTTTGTAACCGTGCTCACGGCGCCGAGATTGTCGCCGCTG  
GATGGGGAAGGCTGAGCTCGATGGCCAGTGCCCTTCAAAGTGCCATCCTTTTTGAGGAAGAACAGAGTACGGGAGGCGTAGATTTTGTGTCTGTGCTGTTGATGCGTCTCAAATATGGCA  
TGATTGCATCATGGTGGTCAATGATGAGGAGTTTCTTCAATTGAAGCGCTTCATAAACAGAGTAGCCGTCAAGGTTGTCTTGGATGTCTTGTCTTTGAAGGTGCTGTTCTGGTTGCCGTA  
GAGGGAGGGATCAAGACTGCTCTTTGGTGGAAATTCCTTCAGTAGTTGGATCATGATAGGGTTGACGCCGGCCAGTGTCTCTTGCGAATTCCTCGTCGGATCTCCATGCCCATTTATCCT  
TTTGAAGGATATGCGGCAACGGAAACTTGAGTACGCCGCGCTGGTTATGGCCCGGAGTGATGAAGGTCTTGAAGAGCTCAAAGGGCATGGACTGAATGAACTTTTGAACCCAGCGGAATG  
TCCGGCAGAGGAAAGCCGCCCTCATAGAGATCAAAAACTTCCTTCAAGGAGTCGAATTCCTTGGGCGTGAAGTCGACAATGGATTGGACGAGTGGCAACAGGTCCTTGGTGATTGCCTT  
GAGGCCGTAGCCCAAGAAATCCGCAAACCTTCAAGTGCCCGAATTTCTCATCGCGAGGCACGTAGATGTTTCAGATCAAGAGCGAAAAGCCTGCTCTCCGAATTCGATCGGTTCTGGCCG  
GCGGGCGGCGGTCTTTCCGCGGCGAGGGTAAGGGAACGGGAATTGCCACCGAGTATTGGGCGGGCCAAGCTCGGACTGAGGTCGGGGGCGCCGAGATCGTTGTAATAGGCATAGCC  
ATACACGCGATCCCATTCTCCAGCTCTCGGTTACGTTATCTCCTCTAAGATTCCGCAGCTCGTCCTCCCTGTACCCCTTGAGTGGCCCTGGCGTGTGTTCCGGCAAGTAAGTGTGCTTG  
GCGAAGAAGATGCGGTCATAGTCATACTTATTAGCGTTATAAACCCAGGAGTTGCAGTCAAAGTGAATTCGACCTTTCCCGGGGAAGTCATCAATAGTGATGGATTTGAGATAAACTCGG  
CCAAGTGGCGGTTTTTGTACGATGATGGCGCCGGGATTCCCAAGCTTTTCGTCACGATGAAGTGGCGTTTCATATAAAGTCTCGCCGGCGATGAGTTTCCGGATGAAGGAAAGCGGAGGC  
CTCTCCAGGTTCCCGGCTCCCCTACCACTCCTCTGTTCCCTTTATTGGGATCGCCGACGGTGGCGCTGATGAGGCGGAGCTCGACACTCTGGCCGACAAAGTCCTGAATTTGGTTGAGA  
ATAGAGGCGTTGAAGTCGTTTCAGGGAGAGCACGTTCTTGTCCATGATAACAATACTGGCTTTCACCTTCTTTTTTCCGGCAGACAAAACATCTTTAACTATGTGACTGATAATCATCTTGCT  
AGAACGGGGGAATGGGAGCGAAGATAGGCTAAAGAGATAGAACGAGAAGGATCTCGCGGAGGTCGTGTGGCTTGCAGAAGTTTTAGGCGCCATTTATAGCAGATCGAGGAGTGTTC  
GCCACCTTAATCTATATTGATTTAGGAGTTAATCTCTCTATTAAGAGGTCTGAATTCGAATAAATCAATGAATGAGCACGAGAACTCGTGCCTCTCTTCTGTTCTTGAACGTGCTGAGGC  
TTAGGCTGAGGGACGAAAAAATCGTCCTAAACA

>comp174673\_c0\_seq2

TTCTCAATGGCTCCATTAGCAACAACGATGGATCACTTATGCTAAGATTGCTGAGCATGAGATGGCGATTATTAGTGGTCTCCACTTTTTGCATTTCTCCGAGAGAGATCAGATTGGGGCAA  
TTTAAAATTGTCAAGGTTCTTAGTGCTGCAAGTCTTGCTGTTTCATCAGCCAGAGGAAGAGATGTAATGTTCCGACAGCTACTGAGCTCTAATCTTTCAAGGGGAATAGGATTTGAAT

>comp174677\_c0\_seq3

TCAAATAGAAAAAATAAACTATAAAAACAAGGCAAAAATAAAAAAAAAAATAAAATTCCTAATATATTAACTTTCATTAAAAAAAAAACCCCCTATTCGATTTCGATGTGCAGAAAAACCAC  
AAATACCCTCATAACGACCAAGTAAATAACAACGAAACAACCTAAATTTTCAGCTAAAGCAGAAATTACAAATACAACATTGCGAGGTAATATAACTGAACAGTGATCATGAAAATGGCTTC  
GATTTAGCCAGATTTGCTCTAGGTGAGAAGAACAATAATCATCGCCAAATTCCTACAGCGTTGCGTCCGTTCCGTTGCTTCAATATCAGGCCGAGCTTTGCACTTGCAGTTTGTCCA  
AAGCCTTACACAACGTGAATGAAAGCATGAAGCGCTATTTTTTTTACCTCTAACTTATCTTTTAGCCCTATGATCCCGTGGAAAGCATGCGGAATTCCTTGTGTCAGCCTCACGCACTCGCGA  
ACATTTTCAGGTGAGACAAAGTCAAGAGCAACCTTTATGCAAGACTGTCTTTGTTTCAGTCTTGGCCTCAATCGCA

>comp174680\_c0\_seq2

GCCAACATTGAGTATATAGAGTTAGAGATTAACATCCTTTTTAAATTCATCAAAAATTTATCTTTAATGAAATAATTTCTCAAATTCATAAAAACTTATATGTTCTTTACCTTAAATTTTTTT  
TACATTAATAACACCTAACTGAACATAACATTAAGTGATTAATCATCCGGGAATAGCTCCTCCTTGACTGATGGCGCTATCCATTGGATCTGTATATTGGTGACTTCCCAGAGATCACTCTC  
ATCACTCTCCACAAGCACCTGCTTCTTTTCATCTCTAATATCATCCTTTGAGTAGCTTCGGCACGAGCTCCTGCATCACGGGCGACGGCAGACCCTCCTCTCCAAGGCTGGCCTTCATAC  
AAGTGTCCATCTTCGACGAGTCCAAGCCAAAAGGTTCTAAAGCCTGGTCCAGCTGCCAGCCGAACCATAAAACATAGGTAAACTTCCACCATCTGCTCCAATGCCATCTTCAACGTCC  
CCTCCATGCTCCGCATCTCCCGTTCCATTCCTCCCGTCTTGAATACTCCACCATCTTTTCATGAAGATCGTCCACCATCGCAAAAATCACCAGGTTGAAGCTCGACGCATAGCTCCCCGCC

GTCCACTCCAGTTCGTCCGCCACCTCCAAGAAGCACCATCCCAGCGCCTCCACCGCTTGGTTCCTTATCTCCTCTCTCCTCACTAAGCTCGTCTTCCGCAATGCCTCCGCCAGCTTCATGA  
ATAGGTTTCGTCCGCCGAAACTATTTCCCTGAACACTCGATGCCTTATTAACCTCCTCCTCCGTGGACGAGCTGCTGTTGTGCATGTTGGAGTTCCTGTCTCATAAAAACTTGACTTTTGC  
CAATTTATGATCCACTTGACGGAACCAGCCATTAGATTGAGAATTTGGGAGCTCTTCTCCACCGGGCTGATCTTACAGTGCAGCAAACCCAAAGGCAGCCTCAATGCAATAGGCGTAGTTA  
CTCCTAGTGATGTGGTCCGCCCTCTGTGCATCAGGCCTATTAGGGTCTCTACCCCCGATCAAAGTCTCTGGGTGCCGCCCGCTCACTGACAGCAGGTGGAATAGCGTCTTCCACCCAAGTG  
TCGTCTGCACATTTCTTGCATATTTGCTCAAGATCTTCATCGTCGCCTCAGTCAACTGTATTACACGCATCTAAGATATCCTTGTCCAGCTTCCATGTCAAATGATTGACTTGAAAACCA  
TCTCCTCCGACTGTGCATCCTGCAACCTTGGTGGCTCCGAAGAAAGTATCAAATCACCACCCGTAACAAGGCAACCATTGCCTTCTCAACAAACGGGCATGGTGAGAATTGAGGAACT  
TGTGACACCAATGCCAGGCATTCATTAACCTGCATCCAAAATGCGCTCAAGCGATGAAGGTTGGCTGTTATGATGATGAAGATGAGGTCCCAACAGAATCCAACCTGTTTCTCTCTCCA  
CCGACGTGCTGAACTTTTGCCCCCTTACCAGCGGCAGCAAAGACGAGGGCTCGTATAAGCATTCAACATCGAGTCGGCACCGGATTTCGAGCGAGAGGAGCTCTGTGAACCTACCGACCAG  
CCCAGAAATGTTTCGTCTGTGCCTGCCAAGTAGGATGGTGGGTAGATCACGCCAGATCCAGACTCTGACTTTGAATGACGGCCTCCATCGTTGTCTATGTCAGCCTCTGTTGCACTACGA  
CAGGTCTCGAGAAGTGTAGGCGGCAATAGCTTTAACCTGTTAAGCTTTAGAAGACAGTCTACCAAGTTTCTCCAAGCCCCCTGATTGACTCGCCGAACCTTGTTAGCGATTGTGAAAATG  
GCCAGCGTCGCCATCCTCGGCTCACCTCATTTGAGAAGCTGAAGACGATCTCCTCTGCGGTGGCATATGGATTGAGTAGTGTGGTGTACTTGCACAAAAGAAAACAATAGTTCATCAAGG  
ATGTCCTCCAACTGTATCTAGCAATCCGGGCGATGGAGAATAGCCCTTCGATGCACTCTTGCAGCACATTCTCGTCGTCAGTTTGTCTCGAAGATGACACAGATGGTGGCAACCGATAAG  
CCAGAGATGGTGTGAAAACCTCCCGACAAAGCTTGTGCTTATAGTCGCACAATATGTAGGGCTCCACTGTACGCGTTTGTTCATGAGGTTTCGCCCAAAGGTGGGAGTTCATCTCAGAA  
ATGACGGCACTTGATGAATCGAAGAGGGTGAATGCAATTTGTGGAAATGGAGAGGAACAACCTCCGATAGATACTCTCGGGGAAGATCCACTCCTCCATTAATAGCTCTGTTGTTCTTATAA  
ATTCATCCTCTGTCTATCTTTTCTTACCTGCGGATTATGCTGGTCTGTGTTGAGCATAATGAGGGAGTAACAGAGAATGAAGACGGCATCTTGTCTCGCAAAAATCCCAGATGTCTGCTG  
GTCATAGAACCTCTCTGAGAATGCCTCAAGAATGCGGTGGATCTTTTGAGATTACCGGGGAGTCGAAAAGTCTCGAGAAAAGGTTTCGGAGGGCAGTGTCAAGGATCACCCCATCGAATT  
CAAATGTTTGTGCAAACTCATTAAGGACCTTAATATTGAAGTCGTTGGACTCGCCCAAGTAATCACCAATCTTATTCTGTGCGAGCCTCGGCGTGTAGCGAAAGAAGTAGGCAATGCTTTT  
AGCGTCTGGAGGGCTTGGCACAGCCGACAAATGTTGAGAAAAGCCATCCCTTCTTCTCATTCTGTTGTAATGATTGGCGGCCATCATGATCTTCTTCTTCTTAGCTTTCTCATCCTTA  
CAAATTCGACCCAGGAATCGGGATCCTTGTGCATGTCACAGCGCTCGAGCCAGAAGGGCTTAAACGTGGAGTCATCGATCGCGTATGCATCTCGACTAAGGGCATGGTGAATTTAATAC  
CATCGGCGATGTTGTGAATTATGCTGATTAAGGCTTCGAAGGCCTGGAGCTGCATCGACGATATTGGACTACTCATGGGGTACGCCGTCTTGCAGAGAAGCTTTACAATTTCTCCAACAC  
ATTGTGCCGGATAGGGTCGCAATCATAGTTACATATATTTCCATTATGAAATTTGGGTTGTCTGCAAAAACCTTGTGATACCCTCGACCGCCACTTCTTGGAGCTGAGATCCATAACTCCCCTT  
GGCGATCTTTAACAGCACGTAGATGAAGAATGCCTCTAATTGCAACCTCAAAGACCTACAATATTTAGAAAAGCCAAACAAAATGAAGAAGGGAAATCAAACGAAATGAATGGAAGATGG  
CATGGAGATTAATAAAAAAAAAAAGATTATCATATAACAAAAATATTTATAATTCGAACTCAATAATTTACCCGCGAAGAAAATGATAGAGACTGAAAACAATGTTGCAGGTGATGGAGAG  
GATGCGTTGTCCAGATCGGGTACCATAATGGATGAGATGGTGGAAAAGATCATCTGAATTATGTGGAGAAGGCCGGGGTGTGTTGATGCTGTGCGCCCGGAGCTCTACCACGGTGT  
AATGAGTAAGAGGACGAAGAGCTGGAACCTCTGTCAGAGCTGGCGTCGGCAGTTTACGGGTGCGACGGGCTCTTCAACATTGACGAGAGAGCAGAGGAAAGAGAAGATATCAATCATA  
CACTGCGCCGTGTAGCTCACGTGAAGGGCATTCTTCCGCCCTCAGAGCCGGAGTCTACGGGGCCACCGTCGGAGTATCGCATATTGCTGAGACGGGAATATATGCCCTCGATAAGGTG  
TGCATTGCATGACGAGCGCTGCGCTGTAGGAGATCACTGCGATCGGCGGACTGCTGAACAATCTGAAAGCAGGAGCTGACGATGGTGCAGATTGCGTGTGATCTGTGAGTAGGACCGAGGC  
ATTGGAGTGCATCACGGCGGTGAGCACCTGATGGATATGCATGAGGATGGAGTCTCTGATGCAGGATCAGTGAGCTCTAGACGGCAATTGGTAATGGCAAGGACCACCGCGTGGATTGC  
CTCGCGAGCACCGGGGGTGTCTCGCTAAAGATGTGCGAGGCGCATGATCTTTAGCACTGCGTAAAGGGCGGCGCTAGTGGAGGCCGCCGTGACATCTTCGCTCTGTATAATGTGAGGAA  
GGGGGAGAGGTAGACCATCGGGTCGAGGGAGTGCCAGCTTCCACGAAGGGGGTGAAGATGATGGAGCGCAGAGAAAAGGGGACTGGACATGATGGGAGTTATATGAGTCGGTTTC  
AGGAGCTCCATGAAGGGTGGGGCTGATGGTGGGATCTGGAGGCTGGCGAATCACGGCGAGCATCATCCCCACCTCCGTATTCAGCGTACAGGAGATGCCCTGTTACAAAAGCCCGCGT

GCCCCTGCACGGTGGTGGCTGATGGCCTCCGGTGTGCGCCGCTTTGGTCACTCCAGCCATTGGATGAGCAGTTCGCTTGGCCCTCATCGCGGTGGAGTGACTCGAACCTTCATTTTGCT  
AACAAAACATTTAGGTTCAACCGGATGAACCTTAGCTGGTCCACACAATTTTGATGCCCTCTTTCTTTAAATAGGGATTGCCAAATCTATTTATGGCCCTGCTAATCCGGATATGTAACATG  
TATATACGAACGATAATTAGAAAGCAAGTTAGTTAGAAATGTAAGGTCGAGATTAGCCATTTTACTCTATAAATAAATAGGTCAATTAGCGACCAAGAAAAATGATAGCTAAAAATAGCAAAT  
TGGACGCTAAAGCAAATAGCGACCACACATTTTCTGGCTGTTAAATTAGTGACCAGTGGTAAAATTGGTCGCTAAAATTGTTTCATATTAGCGATCATTTTTTTTATGCTAATGAGTATTTA  
TTCGAAACTATTTATTACTTTTGATTGCTAATCTCGTTTAGTAACTTTTATCTGTAGCCACCAAAAATAAAGCTGGGTGCGTAATCG

>comp174680\_c0\_seq4

GCCAACATTGAGTATATAGAGTTAGAGATTAACATCCTTTTAAATTCATCAAAAATTTATCTTTAATGAAATAATTTCTCAAATTCATAAAAACTTATATGTTCTTTACCTTAAATTTTTTT  
TACATTAATAACACCTAACTGAACATAACATTAAGTGATTAATCATCCGGGAATAGCTCCTCCTTGACTGATGGCGCTATCCATTGGATCTGTATATTGGTGACTTCCAGAGATCACTCTC  
ATCACTCTCCACAAGCACCTGCTTCTCTTTCATCTCTAATATCATCCTCTTGAGTAGCTTCGGCACGAGCTCCTGCATCACCGGCGACGGCAGACCCTCCTCTCCAAGGCTGGCCTTCATAC  
AAGTGTCCATCCTTCGCAGCAGTCCAAGCCAAAAGGTTCTAAAGCCTGGTCCAGCTGCCAGCCGAACCATAAAACATAGGTAAACTTCCACCATCTGCTCCAATGCCATCTTCAACGTCC  
CCTCCATGCTCCGCATCTCCCCTTCCATTCCTCCCGTCTTGAATACTCCACCATCTTTTCATGAAGATCGTCCACCATCGCAAAAATCACCAGGTTGAAGCTCGACGCATAGCTCCCCGCC  
GTCCACTCCAGTTCGTCCGCCACCTCCAAGAAGCACCATCCCAGCGCCTCCACCGCTTGGTTCCTTATCTCCTCTCTCCTACTAAGCTCGTCTTCCGCAATGCCTCCGCCAGCTTCATGA  
ATAGGTTGTCGCGCGAAACTATTTCCCTGAACACTCGATGCCTTATTAATCCTTCCCTCCGTGGACGAGCTGCTGTTGTGCATGTTGGAGTTCCTGTCTCATAAAAACTTGACTTTTTGC  
CAATTTATGATCCACTTGACGGAACAGCCATTAGATTGAGAATTTGGGAGCTCTTCTCCACCGGGCTGATCTTCAGTGCAGCAAACCCAAAGGCAGCCTCAATGCAATAGGCGTAGTTA  
CTCCTAGTGATGTGGTGGCTCTGTGCATCAGGCCTATTAGGGTCTCTACCCCCGATCAAAGTTCCTCTGGGTGCCGCCCGTCACTGACAGCAGGTGGAATAGCGTCTTCCACCCAAGTG  
TCGCTGCACATTTCTTGATATTTGCTCAAGATCTTCATCGTCGCCTCAGTCAACTGTCATTACACGCATCTAAGATATCCTTGTCCAGCTTCCATGTCAAATGATTGACTTGAAAACCA  
TCTCCTCCGACTGTGCATCCTGCAACCTTGGTGGCTCCGAAGAAAGTATCAAAATCACCACCCGTAACAAGGCAACCATTGCCTTCTCAACAAACGGGCATGGTGAGAATTGAGGAACT  
TGTGACACCAATGCCAGGCATTCATTAACCTGCATCCAAAATGCGCTCAAGCGATGAAGGTTGGCTGTTATGATGATGAAGATGAGGTCCCAACAGAATCCAAGTTCCTCTCTCCCA  
CCGACGTGCTGAACTTTTGCCCTTACCAGCGGCAGCAAAGACGAGGGCTCGTATAAGGTGCTGCAATGACTCTTGAGGCAACCCCGCGCTATCCTTAAATATGCTATCGATTCTGCATTG  
TTGATTATCTTGAGGTTGTTTTCCATGTGCTCACAGCATTCAACATCGAGTCGGCACCGGATTCGAGCGAGAGGAGCTCTGTGAACCTACCGACCAGCCAGAAATGTTTCGTCTGTCCG  
CTGCCAAGTAGGATGGTGGGTAGATCACGCCAGATCCAGACTCTGACTTTGAATGACGGCCTCCATCGTTGTCTATGTCAGCCTCTGTTGCACTACGACAGGTCTCGAGAAGTGTAGGC  
GGCAATAGCTTTAACCTGTAAAGCTTTAGAAGACAGTCTACCAAGTTTCTCCAAGCCCCCTGATTGACTCGCCGAACTTGTTAGCGATTGTGAAAATGGCCAGCGTCGCCATCCTCGGCT  
TCACCTCATTTGAGAAGCTGAAGACGATCTCCTCTGCGGTGGCATAATGGATTGAGTAGTGTGGTGTACTTGCACAAAAGAAAACAATAGTTCATCAAGGATGTCCTCCAAACTGTATCTAGC  
AATCCGGGCGATGGAGAATAGCCCTTCGATGCACTCTTGACGACATTTCTCGTCGTCAGTTTGTCTCGAAGATGACACAGATGGTGGCAACCGATAAGCCAGAGATGGTGTGAAAACCTC  
CCGACAAAGCTTGTGCTTATAGTCGCACAATATGTAGGGCTCCACTGTACGCGTTTGTTCATGAGGTTCCGCCAAAGGTGGGAGTTCATCTCAGAAATGACGGCACTTGATGAATCGAA  
GAGGGTGATTGCATTTGTGGAAATGGAGAGGAACAACCTCCGATAGATACTCTCGGGGAAGATCCACTCCTCCATTAATAGCTCTGTTGTTCCTTATAAATTCATCCTCTGTGCATTTTTTCT  
CACCTGCGGATTATGCTGGTCTGTGTTGAGCATAATGAGGGAGTAACAGAGAATGAAGACGGCATCTTTGCTCGCAAAAATCCCAGATGTCTGCTGGTCATAGAACCTCTCTGAGAATGC  
CTCAAGAATGCGGTGGATCTTTGAGATTCACCGGGGAGTCGAAAAGTCTCGAGAAAGGTTCCGAGGGCAGTGTCAAGGATCACCCCATCGAATTCAAATGTTTGTGCAAACTCATTA  
GGACCTTAATATTGAAGTCGTTGGACTCGCCAAAGTAATCACCAATCTTATCTTGTGCGAGCCTCGGCGTGTAGCGAAAGAAAGTAGGCAATGCTTTTAGCGTCTGGAGGGCTTGGACCA  
GCCGACAAATGTTGAGAAAAGCCATTCCCTTCTCTCATTCCTGTTGTAATGATTGGCGGCCATCATGATCTTCTTCTTTAGCTTTCTCATCCTTACAAATTCGACCCAGGAATCGGGAT  
CCTTGTGCATGTCACAGCGCTCGAGCCAGAAGGGCTTAAACGTGGAGTCATCGATCGCGTATGCATCTCGACTAAGGGCATGGTGAATTTAATACCATCGGCGATGTTGTGAATTATGCT

GATTAAGGCTTCGAAGGCCTGGAGCTGCATCGACGATATTGGACTIONACTCATGGGGTACGCCGCTTGCAGAGAAGCTTTACAATTCCTCCAACACATTGTGCCGGATAGGGTCGCAATCA  
TAGTTCACATATATTTCCATTATGAAATTGGGTTGTCTGCAAAAACCTTGTGATACCCTCGACCGCACTTCTTGGAGCTGAGATCCATAACTCCCCTTGGCGATCTTTAACAGCACGTAGAT  
GAAGAATGCCTCTAATTGCAACCTCAAAGACCCGCGAAGAAAATGATAGAGACTGAAAACAATGTTGCAGGTGATGGAGAGGATGCGTTGTCCAGATCGGGTACCATAATGGATGAGAT  
GGTGGAAAAGATCATCCTGAATTATGTGGAGAAGGCCGGGGTGTATGGTTGATGCTGTGCGCCGCGAGCTTACCACGGTGTAAATGAGTAAGAGGACGAAGAGCTGGAACCTCCTCGTCA  
GAGCTGGCGTCGGCAGTTTCAGGGTCGACGGGCTCTTCAACATTGACGAGAGAGCAGAGGAAAAGAGAAGATATCAATCATACTGCGCCGTGTAGCTCACGTGAAGGGCATTTTTCTC  
CGCCTCAGAGCCGGAGTCTACGGGGCCACCGTCGGAGTATCGCATATTGCTGAGACGGGAATATATGCCCTCGATAAGGTCGTGCATTGCATGACGAGCGCTGCGCTGTAGGAGATCACT  
GCGATCGGCGGACTGCTGAACAATCTGAAAGCAGGAGCTGACGATGGTGCAGATTGCGTGATCTGTGAGTAGGACCGAGGCATTGGAGTGCATCACGGCGGTGAGCACCTGATGGATAT  
GCATGAGGATGGAGTCTCTGATGCAGGATCAGTGAGCTCTAGACGGCAATTGGTAATGGCAAGGACCACCGGTGGATTGCCTCGCGAGCACCAGGGGTGATCTCGCTAAAGATGTGCG  
AGGCGCATGATCTTTAGCACTGCGTAAAGGGCGGCGCTAGTGGAGGCCGCCGTGACATCTTCGCTCTGTATAATGTCGAGGAAGGGGGAGAGGTAGACCATCGGGTCGAGGGAGTGCCA  
GCTTCCACGAAGGGGGTGAAGATGATGGAGCGCAGAGAAAAGAAAGGACTGGACATGATGGGAGTTATATGAGTCGGTTTCAGGAGCTCCATGAAGGGTGGGGCTGATGGTGGGATCT  
GGAGGCTGGCGAATCACGGCGAGCATCATCCCCACCTCCGTATTCAGCGTACAGGAGATGCCCTGTTACAAAAGCCGCCGGTGCCTCGTGCACGGTGGTGGCTGATGGCCTCCGGTGTG  
GCCGTCTTTGGTCACTCCAGCCATTGGATGAGCAGTTCGCTTGGCCCTCATCGCGGTGGAGTGACTCGAACCTTCATTTTGCTAACAAAACATTTAGGTTCAACCGGATGAACTCTAGCTG  
GTCCACACAATTTTGATTGCCTCTTTCTTTAAATAGGGATTGCCAAATCTATTTATGGCCCTGCTAATCCGGATATGTAAGTATGTATATACGAACGATAATTAGAAAAGCAAGTTAGTTAGAAA  
TGTAAGGTCGAGATTAGCCATTTACTCTATAAATAAATAGGTCATTAGCGACCAAGAAAATGATAGCTAAAAATAGCAAATTGGACGCTAAAGCAAATAGCGACCACACATTTTCTGG  
CTGTAAATTAGTGACCAGTGGTTAAAATTGGTCGCTAAAATTGTTTCATATTAGCGATCATTTTTTTTATGCTAATGAGTATTTATTCGGAAACTATTTATTACTTTTGATTGCTAATCTCGTTT  
AGTAACTTTTATCTGTAGCCACCAAATAAAGCTGGGTGCGTAATCG

>comp174680\_c0\_seq7

GCCAACATTGAGTATATAGAGTTAGAGATTAAAACATCCTTTTAAATTCATCAAAAATTTATCTTTAATGAAATAATTTCTCAAATTCATAAAAACTTATATGTTCTTTACCTTAAATTTTTTTT  
TACATTAATAACACCTAACTGAACTAACATTAAGTGATTAATCATCCGGGAATAGCTCCTCCTTACTGATGGCGCTATCCATTGGATCTGTATATTGGTGACTTCCCAGAGATCACTCTC  
ATCACTCTCCACAAGCACCTGCTTCTCTTTTCATCTCTAATATCATCCTCTTGAGTAGCTTCGGCAGGAGCTCCTGCATCACGGCGACGGCAGACCCTCCTCTCCAAGGCTGGCCTTCATAC  
AAGTGTCCATCCTTCGCAGCAGTCCAAGCCAAAAGGTTCTAAAGCCTGGTCCAGCTGCCAGCCGAACCATAAAACATAGGTAAACTTCCACCATCTGCTCCAATGCCATCTTCAACGTCC  
CCTCCATGCTCCGCATCTCCCGTTCCATCCCTCCCGTCTTGAATACTCCACCATCTTTTCATGAAGATCGTCCACCATCGCAAAAATCACCAGGTTGAAGCTCGACGCATAGCTCCCCGCC  
GTCCACTCCAGTTCGTCCGCCACCTCCAAGAAGCACCATCCAGCGCCTCCACCGCTTGGTTCCTTATCTCCTCTCTCCTCACTAAGCTCGTCTTCCGCAATGCCTCCGCCAGCTTCATGA  
ATAGGTTGTCGCGCGAAACTATTTCCCTGAACACTCGATGCCTTATTAACCTTCCCTCCGTGGACGAGCTGCTGTTGTGCATGTTGGAGTTCCTGTCTCATAAAAACTTGACTTTTTGC  
CAATTTATGATCCACTTGACGGAACCAGCCATTAGATTGAGAATTTGGGAGCTCTTCTCCACCGGGCTGATCTTCACTGTCAGCAAACCCAAAGGCAGCCTCAATGCAATAGGCGTAGTTA  
CTCCTAGTGATGTGGTCGGCTCTGTGCATCAGGCTATTAGGGTCTTACCCCCGATCAAAGTCTCTGGGTGCCGCCCGTCACTGACAGCAGGTGGAATAGCGTCTTCCACCCAAGTG  
TCGCTGCACATTTCTTGATATTTGCTCAAGATCTTATCGTGCCTCAGTCAACTGTCAATTACACGCATCTAAGATATCCTTGTCCAGCTTCCATGTCAAATGATTGACTTGAAAACCA  
TCTCCTCCGACTGTGATCCTGCAACCTTGGTGGCTCCGAAGAAAGTATCAAATCACCACCCGTAACAAGGCAACCATTGCCTTCTCAACAAACGGGCATGGTGAGAATTGAGGAACT  
TGTGACACCAATGCCAGGCATTCATTAACCTGCATCCAAAATGCGCTCAAGCGATGAAGGTTGGCTGTTATGATGATGAAGATGAGGTCCCAACAGAATCCAAGTCTTCTCTCCCTCCA  
CCGACGTGCTGAACTTTTGCCCTTACCAGCGGCAGCAAAGACGAGGGCTCGTATAAGCATTCAACATCGAGTCGGCACCGGATTCGAGCGAGAGGAGCTCTGTGAACCTACCGACCAG  
CCCAGAAATGTTTCGTCTGTGCTGCCAAGTAGGATGGTGGGTAGATCACGCCAGATCCAGACTCTGACTTTGAATGACGGCCTCCATCGTTGTCTATGTCAGCCTCTGTTGCACTACGA

CAGGTCTCGAGAAGTGTAGGCGGCAATAGCTTTAACCTGTAAAGCTTTAGAAGACAGTCTACCAAGTTTCTCCAAGCCCCCTGATTGACTCGCCGAACTTGTTAGCGATTGTGAAAATG  
GCCAGCGTCGCCATCCTCGGCTCACCTCATTTGAGAAGCTGAAGACGATCTCCTCTGCGGTGGCATATGGATTGAGTAGTGTGGTGTACTTGCACAAAAGAAAACAATAGTTCATCAAGG  
ATGTCCTCCAACTGTATCTAGCAATCCGGGCGATGGAGAATAGCCCTTCGATGCACTCTTGCAGCACATTCTCGTCGTCAGTTTGCTCGAAGATGACACAGATGGTGGCAACCGATAAG  
CCAGAGATGGTGTGAAAACCTCCCGACAAAGCTTGTGCTTATAGTCGCACAATATGTAGGGCTCCACTGTACGCGTTTGTTCATGAGGTTTCGCCCAAAGGTGGGAGTTCATCTCAGAA  
ATGACGGCACTTGATGAATCGAAGAGGGTGATTGCATTTGTGGAAATGGAGAGGAAACAACCTCCGATAGATACTCTCGGGGAAGATCCACTCCTCCATTAATAGCTCTGTTGTTCCTTATAA  
ATTCATCCTCTGTCATCTTTTTCTTACCTGCGGATTATGCTGGTCTGTGTTGAGCATAATGAGGGAGTAACAGAGAATGAAGACGGCATCTTTGCTCGCAAAAATCCCAGATGTCTGCTG  
GTCATAGAACCTCTCTGAGAATGCCTCAAGAATGCGGTGGATCTTTTGAGATTACCCGGGGAGTCGAAAAGTCTCGAGAAAGGTTTCGGAGGGCAGTGTCAAGGATCACCCCATCGAATT  
CAAATGTTTGTGCAAACTCATTAAGGACCTTAATATTGAAGTCGTTGGACTCGCCAAAGTAATCACCAATCTTATTCTTGTGCGACCTCGGCGTGTAGCGAAAGAAGTAGGCAATGCTTTT  
AGCGTCTGGAGGGCTTGGCACCAGCCGACAAATGTTGAGAAAAGCCATCCCTTCTTCTCATTCTGTTGTAATGATTGGCGGCCATCATGATCTTCTTCTTCTTTAGCTTTCTCATCCTTA  
CAAATTCGACCCAGGAATCGGGATCCTTGTGCATGTCACAGCGCTCGAGCCAGAAGGGCTTAAACGTGGAGTCAATCGATCGCGTATGCATCTCGACTAAGGGCATGGTGAATTTAATAC  
CATCGGCGATGTTGTGAATTATGCTGATTAAGGCTTCGAAGGCCTGGAGCTGCATCGACGATATTGGACTACTCATGGGGTACGCCGTCTTGCAGAGAAGCTTTACAATTTCTCCAACAC  
ATTGTGCCGGATAGGGTCGCAATCATAGTTCACATATATTTCCATTATGAAATTGGGTTGTCTGCAAAAACCTTGTGATACCCTCGACCGCCACTTCTTGGAGCTGAGATCCATAACTCCCCTT  
GGCGATCTTTAACAGCACGTAGATGAAGAATGCCTCTAATTGCAACCTCAAAGACCCGCGAAGAAAATGATAGAGACTGAAAACAATGTTGCAGGTGATGGAGAGGATGCGTTGTCCAG  
ATCGGGTACCATAATGGATGAGATGGTGGAAAAGATCATCTGAATTATGTGGAGAAGGCCGGGGTGTGTTGATGCTGTGCGCCCGGAGCTTACCACGGTGTAAATGAGTAAGAGGA  
CGAAGAGCTGGAACCTCGTCAGAGCTGGCGTCGGCAGTTTCAGGGTTCGACGGGCTCTTCAACATTGACGAGAGAGCAGAGGAAAGAGAAGATATCAATCATACACTGCGCCGTGTA  
GCTCACGTGAAGGGCATTCTTCTCCGCCTCAGAGCCGGAGTCTACGGGGCCACCGTCGGAGTATCGCATATTGCTGAGACGGGAATATATGCCCTCGATAAGGTTCGTGCATTGCATGACG  
AGCGCTGCGCTGTAGGAGATCACTGCGATCGGCGGACTGCTGAACAATCTGAAAGCAGGAGCTGACGATGGTGCAGATTGCGTGTATCTGTCAGTAGGACCGAGGCATTGGAGTGCATCA  
CGGCGGTGAGCACCTGATGGATATGCATGAGGATGGAGTCTCTGATGCAGGATCAGTGAGCTCTAGACGGCAATTGGTAATGGCAAGGACCACCGCGTGGATTGCCTCGCGAGCACCG  
GGGTGATCTCGCTAAAGATGTCGAGGCGCATGATCTTTAGCACTGCGTAAAGGGCGGCGCTAGTGGAGGCCGCCGTGACATCTTCGCTCTGTATAATGTCGAGGAAGGGGGAGAGGTA  
GACCATCGGGTTCGAGGGAGTGCCAGCTTCCACGAAGGGGGTGAAGATGATGGAGCGCAGAGAAAAGAAGGGACTGGACATGATGGGAGTTATATGAGTCGGTTTTAGGAGCTCCATGA  
AGGGTGGGGCTGATGGTGGGATCTGGAGGCTGGCGAATCACGGCGAGCATATCCCCACCTCCGTATTTCAGCGTACAGGAGATGCCCTGTTCAAAAAGCCGCGGTGCCCGCTGCACGG  
TGGTGGCTGATGGCCTCCGGTGTGCGCGTCTTTGGTCACTCCAGCCATTGGATGAGCAGTTCGCTTGGCCCTCATCGCGGTGGAGTGACTCGAACCTTCATTTTGCTAACAAAACATTTAG  
GTTCAACCGGATGAACTCTAGCTGGTCCACACAATTTGATTGCCTCTTTCTTTAAATAGGGATTGCCAAATCTATTTATGGCCCTGCTAATCCGGATATGTAACCTATGTATATACGAACGATA  
ATTAGAAAAGCAAGTTAGTTAGAAATGTAAGGTCGAGATTAGCCATTTTACTCTATAAATAAATAGGTCATTAGCGACCAAGAAAATGATAGCTAAAAATAGCAAATTGGACGCTAAAGCA  
AATAGCGACCACACATTTTCTGGCTGTAAATTAGTGACCAGTGGTAAAATTGGTCGCTAAAATTGTTTCATATTAGCGATCATTTTTTTTATGCTAATGAGTATTTATTCGGAACTATTTA  
TTACTTTTGATTGCTAATCTCGTTTAGTAACTTTTATCTGTAGCCACCAAAAATAAAGCTGGGTTCGCTAATCG

>comp174680\_c0\_seq8

GCCAACATTGAGTATATAGAGTTAGAGATTAACATCCTTTTAAATTCATCAAAATTTTATCTTTAATGAAATAATTTCTCAAATCTAAAAAATTATATGTTCTTTACCTTAAATTTTTTT  
TACATTAATAACCTAACTGAACATAACATTAAGTGATTAATCATCCGGGAATAGCTCCTCCTTACTGATGGCGCTATCCATTGGATCTGTATATTGGTACTTCCAGAGATCACTCTC  
ATCACTCTCCACAAGCACCTGCTTCTCTTTCATCTCTAATATCATCCTCTTGGAGTAGCTTCGGCACGAGCTCCTGCATCACCGGCGACGGCAGACCCTCCTCTCCAAGGCTGGCCTTCATAC  
AAGTGTCCATCCTTCGACGAGTCCAAGCCAAAAGGTTCTAAAGCCTGGTCCAGCTGCCAGCCGAACCATAAAAACATAGGTAAACTTCCACCATCTGCTCCAATGCCATCTTCAACGTCC

CCTCCATGCTCCGCATCTCCCGTTCCATCCCTCCCGTCTTGAATACTCCACCATCTTTTCATGAAGATCGTCCACCATCGCAAAAATCACCAGGTTGAAGCTCGACGCATAGCTCCCCGCC  
GTCCACTCCAGTTCGTCCGCCACCTCCAAGAAGCACCATCCCAGCGCCTCCACCCTGGTTCCTTATCTCCTCTCTCTACTAAGCTCGTCTTCCGCAATGCCTCCGCCAGCTTCATGA  
ATAGGTTTCGTCCGCGAAACTATTTCCCTGAACACTCGATGCCTTATTAACCTTCCCTCCGTGGACGAGCTGCTGTTGTGCATGTTGGAGTTCCTGTCTCATAAAAACTTGACTTTTTGC  
CAATTTATGATCCACTTGACGGAACCAGCCATTAGATTGAGAATTTGGGAGCTCTTCTCCACCGGGCTGATCTCAGTGCAGCAAACCCAAAGGCAGCCTCAATGCAATAGGCGTAGTTA  
CTCCTAGTGATGTGGTCGGCTCTGTGCATCAGGCCTATTAGGGTCTCTACCCCCGATCAAAGTTCTCTGGGTGCCGCCCGTCACTGACAGCAGGTGGAATAGCGTCTTCCACCCAAGTG  
TCGTCTGCACATTTCTTGCATATTTGCTCAAGATCTTCATCGTCGCCTCAGTCACACTGTCATTACACGCATCTAAGATATCCTTGTCCAGCTTCCATGTCAAATGATTGACTTGAAAACCA  
TCTCCTCCGACTGTGCATCCTGCAACCTTGGTGGCTCCGAAGAAAAGTATCAAAATCACCACCCGTAACAAGGCAACCATTGCCTTCTCAACAAACGGGCATGGTGAGAATTGAGGAACT  
TGTGACACCAATGCCAGGCATTCATTAACCTGCATCCAAAATGCGCTCAAGCGATGAAGGTTGGCTGTTATGATGATGAAGATGAGGTCCCAACAGAATCCAAGTCTTCTCTCTCCA  
CCGACGTGCTGAACTTTTGGCCCTTACCAGCGGCAGCAAAGACGAGGGCTCGTATAAGGTGCTGCAATGACTCTTGAGGCAACCCCGCGCTATCCTTAAATATGCTATCGATTCTGCATTG  
TTGATTATCTTGAGGTTGTTTTCCATGTGCCTCACAGCATTCAACATCGAGTCGGCACCGGATTTCGAGCGAGAGGAGCTCTGTGAACCTACCGACCAGCCCAGAAATGTTTCGTCTGTCCG  
CTGCCAAGTAGGATGGTGGGTAGATCACGCCAGATCCAGACTCTGACTTTGAATGACGGCCTCCATCGTTGTCTATGTCAGCCTCTGTTGCACTACGACAGGTCTCGAGAAGTGTAGGC  
GGCAATAGCTTTAACCTGTAAAGCTTTAGAAGACAGTCTACCAAGTTTCTCCAAGCCCCCTGATTGACTCGCCGAACTTGTTAGCGATTGTGAAAATGGCCAGCGTCGCCATCCTCGGCT  
TCACCTCATTTGAGAAAGCTGAAGACGATCTCCTCTGCGGTGGCATAATGGATTGAGTAGTGTGGTACTTGCACAAAAGAAAACAATAGTTCATCAAGGATGTCCTCCAAACTGTATCTAGC  
AATCCGGGCGATGGAGAATAGCCCTTCGATGCACTCTTGCAGCACATTCTCGTCGTCAGTTTGTCTGAAGATGACACAGATGGTGGCAACCGATAAGCCAGAGATGGTGTGAAAACCTC  
CCGACAAAGCTTGTGCTTATAGTCGCACAATATGTAGGGCTCCACTGTACGCGTTTGTTCATGAGGTTTCGCCAAAGGTGGGAGTTCATCTCAGAAATGACGGCACTTGATGAATCGAA  
GAGGGTGATTGCATTTGTGGAAATGGAGAGGAACAACCTCCGATAGATACTCTCGGGGAAGATCCACTCCTCCATTAATAGCTCTGTTGTTTCTTATAAATTCATCCTCTGTGCATTTTTTCTT  
CACCTGCGGATTATGCTGGTCTGTGTTGAGCATAATGAGGGAGTAACAGAGAATGAAGACGGCATCTTTGCTCGCAAAAATCCCAGATGTCTGCTGGTCATAGAACCTCTCTGAGAATGC  
CTCAAGAATGCGGTGGATCTTTTGAGATTCACCGGGGAGTCGAAAAGTCTCGAGAAAAGGTTTCGGAGGGCAGTGTCAAGGATCACCCCATCGAATTCAAATGTTTGTGCAAACTCATTA  
GGACCTTAATATTGAAGTCGTTGGACTCGCCCAAGTAATCACCAATCTTATTCTTGTGCGAGCCTCGGCGTGTAGCGAAAAGTAGGCAATGCTTTTAGCGTCTGGAGGGCTTGGCACCA  
GCCGACAAATGTTGAGAAAAGCCATTCCCTTCTCTCATTCCTGTTGTAATGATTGGCGGCCATCATGATCTTCTTCTTTAGCTTTCTCATCCTTACAAATTCGACCCAGGAATCGGGAT  
CCTTGTGCATGTCACAGCGCTCGAGCCAGAAGGGCTTAAACGTGGAGTCATCGATCGCGTATGCATCTCGACTAAGGGCATGGTGAATTTAATACCATCGGCGATGTTGTGAATTATGCT  
GATTAAGGCTTCGAAGGCCTGGAGCTGCATCGACGATATTGGACTACTCATGGGGTACGCCGTCTTGCAGAGAAGCTTTACAATTTCTCCAACACATTGTGCCGGATAGGGTCGCAATCA  
TAGTTCACATATATTTCCATTATGAAATTGGGTTGTCTGCAAAAACCTTGTGATACCCTCGACCGCCACTTCTTGGAGCTGAGATCCATAACTCCCCTTGGCGATCTTAAACAGCACGTAGAT  
GAAGAATGCCTCTAATTGCAACCTCAAAGACCTACAATATTTAGAAAAGCCAAAACAAAATGAAGAAGGGAAATCAAACGAAATGAATGGAAGATGGCATGGAGATTAAAAAAAAAAAAA  
GATTATCATATAACAAAATATTTATAATTCGAACTCAATAATTTACCCGCGAAGAAAATGATAGAGACTGAAAACAATGTTGCAGGTGATGGAGAGGATGCGTTGTCCAGATCGGGTACC  
ATAATGGATGAGATGGTGGAAAAGATCATCTGAATTATGTGGAGAAGGCCGGGGTGTGGTTGATGCTGTGCGCCGCCGAGCTTACCACGGTGTAAATGAGTAAGAGGACGAAGAGCT  
GGAACCTCTCGTCAGAGCTGGCGTCGGCAGTTTCAGGGTCGACGGGCTCTTCAACATTGACGAGAGAGCAGAGGAAAAGAGAAGATATCAATCATACTGCGCCGTGTAGCTCACGTG  
AAGGGCATTCTTCCGCTCAGAGCCGAGTCTACGGGGCCACCGTCGGAGTATCGCATATTGCTGAGACGGGAATATATGCCCTCGATAAGGTCGTGCATTGCATGACGAGCGCTGCG  
CTGTAGGAGATCACTGCGATCGGCGGACTGCTGAACAATCTGAAAGCAGGAGCTGACGATGGTGCAGATTGCGTGATCTGTGACAGGACCGGAGGATTGGAGTGCATCACGGCGGTGA  
GCACCTGATGGATATGCATGAGGATGGAGTCTCTGATGCAGGATCAGTGAGCTCTAGACGGCAATTGGTAATGGCAAGGACCACCGCGTGGATTGCCTCGCGAGCACCGGGGGTGTCT  
CGCTAAAGATGTCGAGGCGCATGATCTTATGACTGCGTAAAGGGCGGCGTAGTGGAGGCCCGTGACATCTTCTGCTCTGTATAATGTCGAGGAAGGGGGAGAGGTAGACCATCGGG



TCGAGGGAGTGCCAGCTTCCACGAAGGGGGTGAAGATGATGGAGCGCAGAGAAAGAAGGGACTGGACATGATGGGAGTTATATGAGTCGGTTTCAGGAGCTCCATGAAGGGTGGGG  
CTGATGGTGGGATCTGGAGGCTGGCGAATCACGGCGAGCATCATCCCCACCTCCGTATTCAGCGTACAGGAGATGCCCTGTTCACAAAGCCGCCGGTGCCCGCTGCACGGTGGTGGCTG  
ATGGCCTCCGGTGTGCGCGTCTTTGGTCACTCCAGCCATTGGATGAGCAGTTTCGCTTGGCCCTCATCGCGGTGGAGTGACTCGAACCTTCATTTTGCTAACAAAACATTTAGGTTCAACCG  
GATGAACTCTAGCTGGTCCACACAATTTGATTGCCTCTTTCTTTAAATAGGGATTGCCAAATCTATTTATGGCCCTGCTAATCCGATATGTAACATATGTATATACGAACGATAATTAGAAAG  
CAAGTTAGTTAGAAATGTAAGGTCGAGATTAGCCATTTTACTCTATAAATAAATAGGTCATTAGCGACCAAGAAAAATGATAGCTAAAAATAGCAAATTTGGACGCTAAAGCAAATAGCGAC  
CACACATTTTTCTGGCTGTAAATTAGTGACCAGTGGTTAAAATTGGTCGCTAAAATTGTTTCATATTAGCGATCATTTTTTTTTATGCTAATGAGTATTTATTCGGAAACTATTTATTACTTTTTGA  
TTGCTAATCTCGTTTAGTAACTTTATCTGTAGCCACCAAAAATAAAGCTGGGTGCGTAATCG

>comp174694\_c0\_seq1

AGAGTTTTATGATATATAATACTCATTAAAAACCATCATAAATTTCAAACCTTCACAAACAAACTCTAAAAAATTAATTACACACATAAAATAAAATAAACATAAAAAATAAATCAGT  
ATTTGCTTAAAGATACTTCCTATCTTCTGAGAAATTATTCTGTGCGGAGTTTAGACGGGAAGCTCACGTCCAAATTATGAGTGACATATTTGTACAATAAGTATAATTTTCGTATATTATT  
GGTTCAAATTATGTACACACTATTTGTACATAGTATGTACACTCATAGTTCAGATGAGAACTTCCCGACTGGACTCCGCACGAAATAATTTACGAAACCAACATACATCAACCATCCATCA  
ATCACATCACATGACACCACATCACATCATCTCCTCATCCTTAACACCATCAAAGCCCTCATGGCCATGAACAGACCTCTCATATGTCTCCCCATCCCCCATACCGCATAGGCATCCTCCCC  
ATGTATGGCATCATCGCCCACCACCAGCTCCTCCTCTCAGCCTCAGCACCACCACCATCCTAATCACCAGACATATCGCCGTGTCACCACCACATTTCCAAGCAGTAACGAACAGTATC  
CCCACCACCTGCATGCCATCTGCCTGAACCCAGCCGAACCCCTCCCATCCTTCAACGCGAAAACCAGCCCGATGAATTTGGGGTCATCCCCAAAAAATAACTTTGGTCAGCTTCGGGTGCG  
GCCAGAAGGCCCGTCAATAGCCCGCCAGTGCGCCCGCGATGCCGTGCGTGTGGAAAATGGCGAGCGTGTGTCGATCTTTTGTAGAAAGCGAATGCGTTTTGTGGAGAACCATCATAGT  
GAGCCAAGGAATGCTGCCAGAGAAGACGCCGATGAGAAGGGCGGAGCTGGACTGGACGAGGCCGGCGGGGGTTATGGAGACGAGGCCGGTGATCATGCCCTGGACGGCGCCGAT  
GACAGAGGGTTTGC CGAAGAAGGAGATGTCGAGGCAGAGCCAGATGAGGAGGCTGGTGGCGGTGCATATGTGGGTGTTTAGGATGGCGACGGAAGCGTCGATGTTGGCGGCGTACGGA  
CGCGCCGCGTTGAAACCGGTCCAGCCGAGCCAGGCATGCCGGCGCCGGCGAGGGTTAGGAGGATGTTGTTTCGGAGGGAAGCGCTCGCGGTCTTGTGTATCCTTGGGCCACCCAAT  
AGGCCGAGTGAGCCCTGCAATTTCCCGACGAAAGATGAATAACATATCCTCCGGCGAAGTCCATCACCCCCGCTTCGACAGAAACCCATTCGGACTCCATAAACTGAAGCATCCAATGC  
TGTAAGAAAAAGTAAGCCACAACGGCACAAATAGCATCCAAGCCTTGAAATTCATCCGGCCGAGCAACGCGCCGGCGATCAAATTAGGGTTATGGCCGCGAACACCGATTGGAAGTAG  
ACAAGTGTTCGGGCCGATAACATGCCGGCGAAGCCTGGGGAGGTGATATAGCTATTAGTGAGTACGGCGAGATCCGGACGGCCCCAGAAGGGGAGAAAGTGGGTGCGCCGAAGGAGAGGC  
GGAAAGCCCAGATTGACCAACAGACGACGACCGCGGCAAAGGCATAGAGAGCCATGAATGCGGAGTTGACGGCCATTTCTTCTTGACGATGCTGCCGTAGATGATGACGAGGCCAGG  
GACGCTTTGGAGGCCGACGAAAGTGGCCGCGCGAGTTGCCATGAGTTGTGCGCCTTTGTTTAGCCAGTCGGGGGAAGACATGTTGGGGGAGAGAGAGTTTAGGGTTTGGAAATGGGGG  
TGGTGGCGATGGGGGTGGAGGCGTGAGAGATTTATTTGTAAAGGCGGAGAAAGGGGAGTTTGTGAGAGATTATGGGGGAGAAAAAATGGAATCTTTTGGAAATTAATGGCTGTGCGCC  
TTTGGGACCAATAAAGGTGGAACATAAAAGAGAAATTTTTGGTCATAAATAGAATTTCTAATTCAAATTTGATTAATAAATTAATAAATTTATTTTTTTTATTT  
TTTTATTGTTTTTGTTTTTTTATTTATTTTTATTTAGCCTCTTGTATTGGAAGAATTTGAATTCAAATTCAAAATAATTTGAATTAAAAAAATTTCTAATTAATCAACACTCATTTAAG  
AAACCCCTCAAATCTCTCAAATCTGAATTTAATTTTAGATTTAATTAATGGGGAGGGAATAGAAT

>comp174707\_c0\_seq2

GAAGCAGTAAAAAATCGTCCCATACGAAGCCTTAATCAAGAGGGCATTGTGATGCGGTGCATTTTAAGCTAGAATTGTTCTCTTTAGGAACACCTTACCTAGTTTCTAGAATACTCTTTTA  
GTTTTATAAATATGAGTGCATTGTATTAGGAAAGGGGATTGAATGATAAAAATCTTTTGAAGTTTTGAGAAAATCTCTTCTTCTCCCTGGATTGG

>comp174712\_c0\_seq3

GTCTCAAATTAATTTGGCTACAACAATTCTTAGTGTTAACTTGTTTAGGCAAAGGAATTACAAGGAGATAACCAAACCTATTTAAGCAAATACAAAGGAAAACATAAAGTTAAAAGCTAG  
TGAATGGAATCCAACGATTAATACGTCGTTGTTACCTTGAAGCCTCTTCTCTCTTTCCTACGAACTAGGTTGAGCGGCGGAAGATCGTCCAAGCTAGTTAGTAGTGAGGTTGTACAGAG  
GAGGGAGGAGCCAAGGTACGTCGTTGTGGAGAAGGAGCGTGGAGGTGGAGGTGTTACGGGATGATGACCTTTAATGATCCACGTGTAGATGGAAAAGTGGTCGTCGATGGAATCCACT  
>comp174720\_c1\_seq5

GGGAGGGATCGGAACGACTGAACCTGAACCCGAATTGTAGCAGAAAATCCGTGAGTTTCTGAAACCATGGCGCGGCGCTTGTGTTGAGCCATATAAGTGATTTTTGAAAGTTTGCAAACAT  
GTGTTGGTCTGTGCTTGTCTATAAACCTGGTGGTTGACGCATATAGATGTTTTCTGTGAGGTCGCCATGCAAGAATGCATTAGATACGTCGAGTTGGAGAGTGGACCAGTTGCGGTGAAG  
GGCAAGGGTAAGAAGCATTCTGATTGTTGTCATTTTCGCTACTGGGCTGAAGGTTTCGTTGTAATTTACACCGTGTGTCTGATTAATCCTTGAGTACCAATCTTGCTTTATAATGATCGAT  
CGATCCGTTTGAAGAGTCTTGATTTTTGAAAAGTCCATTTGCACCCAAGAATTGGATCGTTGGTGGGTGGAGGAACAAGCGTCCACGTTCTTTCTGTGCGAGCGCTTGTATTTCTTCGGTC  
ATGGCAGAGATCCACTATGGTGATTGTGATGCTTATTTGTACGTCGTCGATGTGGCTGCGGTAGCAACAGTTGTAGATAGATCAAAGGTTTGTGTTGTTTATGAATACCTGATTTTGCCCT  
GGTCTGCATTGGATGTATAGGGACGGAAGGAGACTTTGTGATTGAGGGTGGAGGTGGGATTGCGGCTGTTGATCCGCTGGATTGAAGCACCGTGCATCCGGAGAATTGGTTATGGGAG  
GTTGAGTAACACTACCAGATGTTGTTGAATATGCGGGTTGCCGTGTCAGTGATGTAGGCACCAAAAGCAGCGGATTAAGAGAGGTAGAAGTGGTTATAGAGGACTGAGAGGTACTGTTG  
GAGTTCATTAAGTCATTGTAAGGAAATAAGTGTTCGTGAAACTTAACGTGCCGTGAGATACGGATGGTGTGTTGTAAGTGTATCCAGACAGCAATAGCCCTTGTGTTGAGATGAGTAGCCGA  
GAAAGATGCACGATTGCGACCTTGGAGAGAGTTTGTCTTGATAGTACGATCGGAGCCACGGAAAAGCACAGGCAACCGAACGTTTCGTAGATGATCATATGACGGGTTCTTGTATGAAGCA  
GCTGATATGGAATTTCTTGTGCAATGGCTTTGGATGGAAGCCTATTGATGAGGTAATTTGTTGTGGATAACCGCTCCGCCAGAATTTGGAGGGTAGATGAGATGTGTGCAGAAGAGCTCG  
GGTGGTCTCCAATAGATGCCTGTTCTTGCCTCAGCAGTTCCGTTTTGTTCTGGGGTGGGGACAACCTAAGTTGATGAGCAATGCCATGAGTAGAGAGGAAAGTGGTGAATTGAGTACTGT  
TGAATCGCCTCCACCATCAGATCTAAAAATTTTCGGGGTAACATTAATGATTTTTAATAAGTGCACAAAATTGAGAAAATTCGAAAACGTTTCGTTCTTGGAACGCATCAGATATAAC  
CAGGTAAATTTGAAAAATCATCTATGAAAATTACAAAGTAATTGAAACCATTTAAAGATTGTTCTGGGGCGGGA

>comp174721\_c0\_seq4

CTCCAACCTCTCGTCAGTCCAGAACTCGTCTATTAACCATAGACGACCAATCTCAGCATCTTTCACCCCCGGGGGGCAAATGCTGCCGGTGAAAGGACCTCAGGGCCTTCTTTGGAAG  
AAAGGATTTCGGAAGATGGAAGAATCTCAGAACGAGATCCTTCAACTCCTACGAGACGATCGACAGCCGACGTTGGAAGAGATCCTTCGCCCTCGGGATCCACCAAGGGTTGAAGATGTT  
CAATTCGAGCAGCGTCAAGAAGAAATTCACCTTCCACCTAGGGGACATCCTCAATCACAACAGGAAGATGAACTTGCCGATAACAGCGAGTTCAACACATCCTCGCATTTTTTCGGAA  
CTCCCAGAAGGCTCTCCCCAACACACATTGCGGGACTCCCTCACAATGTCTACGTTGCGAACTGCGAAAATTGGTACGGGAAGAGTTCCCCCGAGGAGATGTGAGGCATGCTCTCCG  
ACAGAAGAACTTCGAGAAGTCATCACCTCTAAGTGAAGCTATTCTCAGCACCCCATCCGGCCAGATTCAAAGTGCCAAATGTTGAGTCTACGACGGGACGACCCGACCCATATGAGCA  
TATCGACTACTACAGAACCATCATGCATATCAACGAGCATCAGACGCGCTCCTTGCCAGGTCTTTCGCCACCCTTAAAGGACAGGCCCGAACATGGTTCTACTCGCTTCCACCTGGA  
ACGATCCCCTCTTTTGTCAAATTGGCCAAAGTATTCGTGCAACAATTTGTGGCCAATCGAAGAATTGCAAAGGATCTTCCCACCTCTCCGGGATTCGCCAAAATGAGGGAGAATCGTTG  
AAGGAGTATTTTCAACGATTTTCCACTGAAGCACGACAGATTCAGGAGTAGACCCTGAATTAAGTACTCAGAGGGGTCTTCTTGGAGGTCTTCGTCCTGGCCCTTCTATTTCGGCCCTTATGC  
GAGACACCGTCCATTCGTACGCTGACTTGATCCATCGCGTGGAGGCACAAATCTCTGCGGATGAAGCTATAAATGCTCACAGGAAACAGTTTGGACAAATCAGTGGGAAGCGCAAAGGT  
GCACCTGGGATGGATAATTTCTTCTCACAGCAGAAAAAATATGGGAAGAATAATCTACCTCATAAGTCCCCGTCACCACGACGAGAGCCTCGCCAAGAAAAGGAGTACACACCCTTAAT  
ACATCCCAAGCAAATGTATTAATGGCCATCCGGGATCAGGAGAATGTGAAATGGCCACACCCTTTAAAGCCCAATGTCGGAAACCAGGAGCAATATTGTCACTTCCACCGTAGCCGTGGA  
CACACTACTGAAGCATGTTGGCAGCTCAAGGAAGAAGTTGAGAGACTGATCCGACAGGGATATCTCCGACAATTCATCAAG

>comp174727\_c1\_seq1

AAAAGTTACATACTAAAAATTAATAAATTGGGAGAACACTTTTTATATGTTTGAGAGAGATTAAATTCATCAAACCTCAAATTTATTAATAAAATTAATAATGGAATTCAAGTTACATACTTTG  
AATAAAATAAATCTTTAAACAAAATTGATAAATAAAAATTATCTAAACCCTTTTCTCTCTCCCTCTCTCTTCCTTCTCCCCATACCCTCTCCCTTGCCTTTTTCAACAAGCCTAATGAC  
TAGATGAGAGAGCAGATGAGCAGAGGAGAAAAATTATATATAAATATAATTTATTTCCCTAGCATCATGGCTCTCCTATGACTCAGCACTGCAGTATTGAGGACTGAATCTAGGTTTATTATAG  
AACAAAGCCTTAAACATCAATCTAGCGGCTCTTGGCTCTACTATTCTTTAAACTCCTTGGTGATAATAAGTTATTACACCAAGGATTAAAGAATCCTAGAGCACTACCATTAGATCATCATA  
TACCATCACTATAGGGCCTTACCAGCAACCAGCTAGGTCCCTTTAACCTCCATGCTTGTTAAATATGATTCTATAGCCATCATAGCCTTACTATATCTATTCTTGCCTTTATCATATATTGATTA  
TAGCCATCATAACAAAATCACCTCATACTTCTTCGCACCACCATCACCCAGCTACGATCCTAACACTACCAATACCATACTATAGTCCTTCGACTACCATCACTCAAATATAGTCCTTTTAAT  
AACTATCACCTGATTATGGCCATCTAACCTAATGCTTTGAGAAGGGCGAAAGCGACGTTTGC GCGAGTGC GACATTTTTGGCCGATCAGTGGAGATCGTTGGTCTCCGTCGGCCTGGT  
ATGGCCAACGGAGCACCTTTGTTCCGGTTCGGGCATCTCAATCTTGTTAGAGATGCGATGAAGATGACAATTTTTCTGATAGAGGTTCTTTTTTGAAGTATCAATTTTTGTTGTTCTTCGGA  
ATTGAAATAGTTTTCGATGATTTCTGCTTGCCAATGTATCTCCGTTGGTTTGGTTTGGCTTCCGGTTATGTAGGATGTGTCTATCCTAGTATCAGATTTGACTGATTTTTGTGAAATTTCA  
AATCTGAAGATGGATTTGGAGGAGTTTTGTGTTGTTTTTTGTTTCCACAACATTATTGGAAATGAAGTTTATGCTGGGACTAAATTTCTTCTAACGAATGTTGCTAGATTTCTGGTCTA  
ATTTGGTTTTATGGATTCTTTGATCCATAATTGGTTTTGAATTGATTCTTTGATGAGTGAACAGTTGATGAATATGAAGTTGATGGTGTGTTGGGTGTTTGGATTTTTAAAGGAAGTTCTTGCTAT  
TTTAAAGATCCAGTTTCTTTTGGATTCTTGAAGACTCTTGAATCAAGTCAGTCTGGTGGATGATTTGACTCAGTTATTTGTGGATGAATACAATTCTGGTTTGTGTTGGAGCTGGATATGC  
AGCAATTTGAAAGAGGTTTTGGGTAATACCGATTTACTCATTTGTTCTATAAGGATCATGTTATATTGATGCCGCTCTTTGGCCTATTGATGTTGGAGCTGTTGTTATTGCTTTATCAACA  
TCGTTGGATCGTCTAAAGGGTCTGGCCGTGGATTGTCTATATTGAGGGAATTCTTGTGTTGATGTTTGTAAATAACGAGGTGGTTGTTTGGCCACTTGTTTTTCTATTGTTCTTTGAAGATC  
AAGTCTTATTGGTTAAAGACTTGAATGATTTGAAGTTTTTTTATTTTTCTTGTCAATGTGATGAGAGTGGTGAGGATTATCAATTTGGTTGGATTTTGAATGAGGAGGCAGGTTATTGGC  
TTTTTGTGGTGGTTGTTGGTATTATGACTTTATATTGGAATTTACTGGTGTGTTCTTCCAGTATGATGGGTGTGGTGACGATTTTCAGTTGGTATGACTTTGCTTGTGGAGAGGCTGATTCT  
TGGACTATTGAGGAGGAAGTTGGTGTATGGCTTTGTCTGTCATTGATTGGTTCATTCTTCGTGGCTCCTGTCAGTTGTGTTGATGCTACAACAGCAAATCTACTCTTGTGTTGGAGCTTGT  
GGACCTTTTTTTAGGGGTTCTGGATGTTGTTGGATAGCTGGTTTAGTAGTTGCTTTTATTTTTTTGTAAGTATCCTTTGTTGTTTTGCTGTTAGGATTCTTATACCTTTTTAAAGCC  
ATTATGATGAAATATGGGATTTTTACTAGGTTTTATTTTTCATCCCATGGGAAAGCTAGAATACTAACCAACCTTTTTGGTTGTTTTAATATTTGGTATCCCCATCACCCCAATGGATCTAAAAT  
GGGATCTAGTGGATCACATATCCATTATGGTAGTTTTAAAAGGTTTGCCTTTGCTTTTCTAGGTTGTATTAGGTTTTTTCTTTAATACTTTTTGTAGTTCTTCAAAAAA

>comp174730\_c0\_seq8

TTACTAGAGATTAAATAAACTAGCCCCAATCATATTTGGAGTTGAACATGCTTAACTTCCATTTCTTCTAGACTTTCAAGAGATTCTTCAGCTCTGGGGATTGATCGGGCTTGCCTCAAT  
TGTTTTCTTCAAAACATCATTGCTAGCCTCCGCTATTTCTTAGTGACCACTATATGCTCTAGCTACCTCCTTGAATCACTGGTATCACTCCAAATACGTTTCATAATCATATCCCATGCAGG  
GTGAATCTTCTTCAATTTGGTATTCTAGGAACCTTAAAGTGGGATAACAAGCGTTCGGACAAGAACTTCATCTCCATTTCTTACAAAAGCGCATCAGTTTCACAACAATCTGTTTCTTCTA  
GCAGCACTGCCACTACCTGTTTCCACGCTTATCCTTCTAAGCATTAAAAATAAGTTACTTATTGAAATAGGACGAGGCTGAGCAAGTAACTTTGGGTTTGTTCGGCATTCTGGGCAACAT  
CA

>comp174780\_c0\_seq7

GAAAGATCATGATGCTTTCTTAGGGAATTCTAGTGGGTTTCTCCACTGCGCAATAAATGATGCAAATGAATTGAGGATTTGGGTTTTACAAGGAATGAAATGGGTGTTGAAGAACAGCGTA  
AGTATTTCAAGGATTTTAAATGGAATGGTGACCGCAGAGATATGTCTTATACTGCTGTTGGCTTCACGAGCGGTTAATTTATTAGCTTTTCATCCGAAGGAGGATGTGGTTTTCCCTATGG  
GTTATGGGTAACCTTG

>comp174815\_c1\_seq2

CAATCATTTCATTAACCTCAAAGAATAACACTAGGACTATAGATAGCCTCATACAAAGACTCACAAAAATAAAAGGACAATAATGCCCTTAGGGCTTACATACGACATCCCTTAATAAAAT  
GGTACAACGGGAAAATAATAAAGCAAATAATAAATAAATACAATATGATATCATAATAAAAAATTATATAAAACAACCTCAGAAATACAGTGAATCGTTGTCATAGATTGACGGTCA  
TGCTCTGATAGACTCTCCACGATCTGATGTCCCGATCATTGTGAAAAATGAACGCTCATCCCTCTCTATTTATACGC

>comp174832\_c0\_seq7

ATCTCGTCGGCGGGCGGGCGAGGGGGCTCCTGCTCGGATGGGACGGGAACTGATTCCACCTGAAAGGAAGGAATGTTTGTGCTGTGATATTTGGAATAAAGAATAAAGGAATAT  
AAATCAACGATGAGTTTCAATTTAAATAAATAAAATTAATAAAAAATAAAAAATTTAAAAATCTCTTTTAGATAAAATGAATTTGTAATATATTTTCATATGATATTCATTAATAAAGCACTA  
ACTTTG

>comp174870\_c2\_seq2

AACTCCAGCTTTTAAACATCCATCCACTCTCTAAATTAATAAATAATCTTCTTCCGCCCTACCAATTTCAATATAAAGATAATATGATATAGCATGTATCAATAATTAATTCAGGATTATGGATATAT  
ACGAGTCATTATGTACCTATTGCGTTCTTGAATACGTGCGGTGTTAAAAGTAAGGGATTAGTGGAATTGCTTTATTAATAAAGATCTATGACATACATATAAAAGGGAAGAATGTTGGAGATGC  
CATAACTTTTATGTAAAAAAAATTAATAAAAAAAGAAAAAAAATTAATACTGGTACTCACCAAAACAAAACCAGTAGCCAAGTCAAGGACCCTTTCTCAAGCCATCCCAATCTTTCT  
TATAATGCATCAAGAATTAATAATAAGTTCATAGGTTACATTAACAAACATATTAATTAATTAATTTCCACAAATACATTTTATAATAAATTGACCATGGCACTTGATGGAAATACAATTG  
TGATTAATTTAAATTTAAGATAAATATCTAGGTGTGCTCAACAAATATTACAATCAAAAGCATGCATCAATCATTAAATACTTCTTCTCTCCAACAACCTTAATGCTATATAAGCGGCCTACTCA  
TTTTTCATTATCTACTTAAAGAAAATACTTGATTAACCTGGAATGTGAATGTTAATCAAGTAATCATCCATTCAATGTGCTTGGGATCACAATCAAAACAACCTTCATCTCATATTATCCACC  
ATTGCCTTTCTCAAACCTTTCTAAGTTAGAATCATCAAAGCTTCTTTAAAGAATGTATATGGTGCATAGATATCAGCAAGGTGGACCACATGCTTATATTTCTTCCAATATGTGTTGAACTGC  
TGAGTAAACAATCCAAAAGAGCTAGATTTATCAAGCGCATGCCCTCAAGAGGTAGGCGATAGTGAAGAAGCATGTATCTATAAAAAATTGGCATTGTTCTAATGAAGTGAATTTATTTG  
CTTTGATTTCTTTCCATCACTACGAGTCTGACGGTCTTCAATGATATATGACTTCTGAATGGTGAGTTGAATGTGTTGTTATTGCTAAAATCATGGCATTACCACCATGTCTCCTGGAAT  
CAAATCTGAAACTTCTGGATCTCCTAAAATGAATGAAATATCTCTTTTACATAACCAGTATTGCACTATCAATTAATCCTAACTCCTTCTATCCAACCTGGTAGTGAGTCTTTGTAGACACT  
TGTTATAATGGTTGGGTGCATAATAACAAGCGGCATGTCTCCTCTTAAATGACCTAGAAGCATTCTCCCATGGCCTTTGTAAATACATATGATTTGGCCAGCCATGCATTCTAGCCCTTTGT  
ATTCCCAATTCCTTCATAGCAATTTTTCAGCTTCTACTGTTGAATTTTGATCATGGAGTCTTTCTTTCTATCTTTAGCAAGCCTTAGCTCTTCTTCAATGTCTAAATACATATCCTTATTCAG  
TGCTTACCAAAGTGAAATGGCTTCTCTGATATTATACCTTCTTTTCGTACC

>comp174870\_c2\_seq20

GTTAATGTAACCTATGAACTTATATTTCCACAAATACATTTTATAATAAATTGACCATGGCACTTGATGGAAATACAATTGTGATTAATTTAAATTTAAGATAAATATCTAGGTGTGCTCAACAA  
ATATTACAATCAAAGCATGCATCAATCATTCAATACTTATGCTCTCCAACAACCTTAAGGCTATATAAGCTGCCAATCATTTTTTCAATATTTACTTAAAGAAAATACTTGATTAACCTGGAA  
TGTGAATGTTAATCAAGTAATCATCCATTCAATGTGCTTGGGATCACAATCAAAACAACCTTCATCTCATCATTATTCACCATTGCCTTTCTCAAACCTTTCTAAGTTAGAATCATCAAAGCTTC  
CTTTAAAGAATGTATATGGTGCATAGATATCAGCAAGGTGGACCACATGCTTATATTTCTTCCAATATGTGTTGAACTGCTGAGTAAACAATCCAAAAGAGCTAGATTTATCAAGCGCATG  
CCCTAAATAGGAAGCCACAACACCAAAGAATATTGTGTTAACTAAACACCCTTGAATAATAAGCTCAAGTTAAAATCACATATCAAGAATTGCACACTATATA

>comp174870\_c2\_seq5

AACCAAGCAACAAACAACATGTGTTAGAACTATATCTTTCAACTTTTGTAAAGTGAGCCTAAGGCTTCGTTTGGACCAATTTTCTTATAGCTTCGTAATAAACTTTCTAGTGCAAAAAT  
TTAAAATTTTGTACTAAAAGCAAGTTAAAAGCAATCCCAAATGAAGTTTAAAACAAAATATTATGCGGTTAATGCATGTTAATAATTGAAATGGTTTGTGAGATAATACTTTTGCTAGA  
AAACCAGTGGCACCAGTGACAAAGATGCTCTTATCCTTTAAGTACTCAACTATACTACCTATCTCCATTGTGAGCTAAAAGTGAGTATATAAAACCTATTAACAATAAATAAAGGAATCA

AAG

>comp174870\_c2\_seq7

AACTCCAGCTTTTAAACATCCATCCACTCTCTAAATTAATAATCTTCTTCCGCCCTACCAATTTCAATATAAAGATAATATGATATAGCATGTATCAATAATTAATTCAGGATTATGGATATAT  
ACGAGTCATTATGTACCTATTGCGTTCTTGAATACGTGCGGTGTTAAAAGTAAGGGATTAGTGGAATTGCTTTATTAATAAGATCTATGACATACATATAAAGGGAAGAATGTTGGAGATGC  
CATAACTTTTATGTAAAAAAAATTAATAAAAAAAGAAAAAAAATTAATACTGGTACTACCAAAACAAAACCAGTAGCCAAGTCAAGGACCCTTTCTCAAGCCATCCCAATCTTTCT  
TATAATGCATCAAGAATTAATAATAAGTTCATAGGTTACATTAACAAACATATTAATTAATTAATTTCCACAAATACATTTTATAATAAATTGACCATGGCACTTGATGGAAATACAATTG  
TGATTAATTTAAATTAAGATAAATATCTAGGTGTGCTCAACAAATATTACAATCAAAGCATGCATCAATCATTTAATACTTCTTCTCTCCAACAACCTTAATGCTATATAAGCGGCCTACTCA  
TTTTTCATTATTCTACTTAAAGAAAATACTTGATTAACCTGGAATGTGAATGTTAATCAAGTAATCATCCCATTCATGTGCTTGGGATCACAATCAAACAACCTTCATCTCATATTATTCACC  
ATTGCCTTTCTCAAACCTTTCTAAGTTAGAATCATCAAAGCTGCAGTCAATCACAATAATGAATAAGAATATTATCGATATCTCAAATATAATGAATATAATTATTACTCTTTACTCATAAAC  
TTGAGCTTACCTTCTTTAAAGAATGTATACGGTGCATAGATATCAGCAAAGTGGATCACACGCGTATATTTCTCCAATATTACAAATAATATTTTGTAAACCAATCTCCTTTGAATAATAAG  
CTCAAGTTAAAATCACATATCAAGAATTGCACACTATATA

>comp174878\_c0\_seq13

AATAGCATGGGGGTTAGACTTAAAGGTTTAGCAGATGCTGCTGAAAACCTATCATAACGGTTCTTGCAGAAAATAGAAAAGTTATAACAATGAAGTTCAGGAACTAAAAGGAAACATCAGGGTA  
TATTGTGCGTTGAGGCCTTTTCTACCAAGCCAATTTGCTAAGTCAACTGTGGATTACATTGGCGACAATGGTGAACCTGGTCTAGTGAATCCCTCCAGACAAGGAAAGGATGGCCATCGG  
GTGTTCAAGTTTAAACAAGGTCTTTGGTCAAACCTGCAACTCAAGTTTCAAGTTTTCTTGGATATTCAACCTTGATTGATCTGTTCT

>comp174882\_c1\_seq1

AGACCAATACCGAGCAATACCGAGTTATACCGAGTTACGTCCTGTGACCAGACCAAATAAAAGTTCCTTAATACACAACCTGTGCTTCCAACCTAGTATTCAATCAGTTTCTTCTCTCTC  
TCTCTCTATCTCTTTTCTTCTTCTTCTTATTATTATTATAATAAAATATAATTATTATAAAGTTATTATTGTTCTTATTATTTGAAGAGACCTGCTCTATTTGATTCTATCATTTTTTATCG  
AGCAAGGAATAATTCAGCAATAAGAATCATCATCTACCAATATGCTGTGGGAGGAGACAGCTCTGTAAGGAGTTACAATGGAGATGAAAAAGCTTAAAAAAAAAAGCCATTGCCTTCAA  
TGATGATAAGGAGAGATTCTTCTGTATTTGGGAAAGGGAAGGGCTCATGAAATCTTGAGAGGAAGGTTGCGACTGTTGTGAGGATATAACAGTGGGATCAATGGTGTATATGCTGGT  
TTGCAATAAAAATTGGTTATATTTCTTTCTGTTGAGGACATTTCAAATTTGGTTAAGAAAATATTATTG

>comp174894\_c0\_seq11

ATTAGGTAATAAATAATCAGCATTCTATATTAATAAAGGAACCTTCTAAGAATTTGAGAGAACAATTGGGACCTTCTGAAGATAACAGGAAGATGGAATAAGCTGCAAATATACAACCTAC  
ATCGGAGTTTATAAGAATTAACATTACCATTGCTAACAGCACCATGTAGAGCATGGTTTTTATAAGTATTACAAATCTAGCTGATCCACAAGTTCAGAATTAAGTATTTGCGAAATAAC  
GACATTTAAATATTACAATTTGACTATTCAATTTGCGGAGGCAGCTGCATCCTTCATGATTTGTACTGAGTGAGTTATGTCATCCAGAAACCTGTGAGGATCTGGAATTGCTTGCTCATCCAC  
TTGAACAACGACCTTTATCTTGTTCAAATAACTTTGAACATGGATCAGGAACGGCTCACAACTACTAGAAAACCTGGGAGCAATATAGATCAATGGTGGAGCCACAGAAGCTAACTTCTCT  
ATTGGCCAATAACATTTGAGAAACATAATGTTACATTAGATGCAATCCTGTGTAAGAAGTACGGTCGCAACCTTAGTGCCAGACACTTAGAAATCAAGACATAGGATTTATAAGAAAGTG  
TCGCTGTCCATGATTTCTTTTCTTTCTGTGTTGCTGCAACATTCCTTGCATAGTCCAATGGATCCTCGCACTTCATTACAGGTAACCGAAGCAAAAAGAGCCAATCCGATTACCCAC  
TTGCTTCACTGCCTTTCTTATCATATATGCTAAATCCTGCTCGCAATTCACCATAATATACAGAATAACAATAATAAATAATTTCTATAAAAACAATTAATAAATAAATAAATTTGTGCTC  
CCCTCACATTAATTCCTGATATTCGCCGAATATTGACGATCAGAGTAGTCTTATTAGCAAATGTTTGGGTAGAAGGCCACCGTACTTCTGCTAAGGTAACGAAATAGAGCGGCAGAAGT  
GGCTCCAACCAAAACATCGTTTATTGTACAACCAATGGTGTCTTTATGGCTATAATGTCATCAAGACAAAGAGTGCAGTGGACAATCCGCCTAGATCGATATTCGATGCCCTCTTTCCCA

TATTCAGTATTTTGGAGTCCTTCAAATAGATGGTGGTGGAGACAAAGAGGATAACTTCAACAAGGGTATTCCACACGTAGATAAGAAAATTCCAGATCCAGCATAGGAAAATGATGGGGC  
CAAAGCTGGCAGCTACAGGTATGGGGCGCCCGGTGTTTTAGGAAGGGATGGAAGGGACTCAGGGTCAGAGGTGCGGCGAGTGCAGGCATGTAAGAGCGACATGAAGGAGGTCCCGT  
CACCGATGGAGTGATTGAGGTGGAGGACGGCTACGCTGGCTGCCCTCCGACGTTTCGTATGGCAAGGATATGAACTTCCCAAGGCGGCCGAGAGTAGTCGAGTTGGGAACTACAGAGACC  
AGCGGTGTAATTTTCGACATATAAATCACCGACAGTAGGGTCGCTGGCAGCCGCAGCGGCTTTAGGACCAGGATCGGCGAGGACAATGTGTTTCATCAAAGTTCACCTTTGGTTGGAACCCA  
TTGTAGCTTCTGTCGCCATGAGTTATCAGCCACCAGGATGCTACAGAAGCGTGGATGACGAAGGAGGGTGACCTTGAGACCGGCCCTTATCTCCTCAATGGTTAAGATCTTTCCAAATCCT  
AGTATGTAGATGATGTTGTACTTAAACTGAGGCTGCTGGAAAAGCACCGACCCAGGACTAAGTGGTTCCCCCTCCTCCAACCTGCTGCTGCTACCTCTGCCATCGCCGATGAAGGAGAC  
TTTGGGATTTTCACTGAAAGCCTCATGTTGCATGGCAATGGCGGGATGAGATGGATGACTTATAGGAGTTCGTTTCGTGTGGAAGGAGTTTACACGAAAGCGTTCACATCATTAAATTGTC  
ATGCCATGATGCACCGTAGGACATTTTTTTTTTTTTAAATTAACCTTTGTAATTTAAAATTTTCGTTAAAATAAATTTACAAAAAATCGGTCCAGGACAATATTACTCTATGATAGATACATG  
>comp174894\_c0\_seq16

ATTAGGTAATAAAATAATCAGCATTTCTATATTA AAAAGGAACCTTCTAAGAATTTGAGAGAACAATTGGGACCTTCTGAAGATAACAGGAAGATGGAATAAGCTGCAAATATACA ACTAC  
ATCGGAGTTTATAAGAATTA AACATTACCATTGCTAACAGCACCATGTAGAGCATGGTTTTTATAAGTATTACAAATCTAGCTGATCCACAAGTTCAGAATTA AAAAGTATTTCGGAAATAAC  
GACATTTAAATATTACAATTTGACTATTCAATTTGCGGAGGCAGCTGCATCCTTCATGATTTGTACTGAGTGAGTTATGTCATCCAGAAACCTGTGAGGATCTGGAATTGCTTGCTCATCCAC  
TTGAACAACGACCTTTATCTTGTTCAAATAACTTTGAACATGGATCAGGAACGGCTCACAACTACTAGAAAACACTGGGAGCAATATAGATCAATGGTGAGCCACAGAAGCTAACTTCCTCT  
ATTGGCCCAATAACATTTGAGAAACATAATGTTACATTAGATGCAATCCTGTGTA AAAAGTACGGTCGCAACCTTAGTGCCAGACACTTAGAAATCAAGACATAGGATTTATAAGAAAGTG  
TCGCTGTCCATGATTTCTTTTTCTTTTCTGTGTTGCTGCAACATTCCTTGCATAGTCCAATGGATCCTCGCACTTCATTACAGGTAACCGAAGCAAAAAGAGCCAATCCGATTACCCAC  
TTGCTTCACTGCCTTTCTTCATCATATATGCTAAATCCTGCTCGCAATTCACCATAATATACAGAATAACAATAATAACTATTTCTATAAAAACAATTA AAAATAAAAACAAAATAATTTGTGCTC  
CCCTCACATTAATTCCTGATATTCGCCGAATATTGACGATCAGAGTAGTTCTTATTAGCAAATGTTTGGGTAGAAGGCCACCGTACTTCTGCTAAGGTAACGAAATAGAGCGGCAGAAGT  
GGCTCCAACCAAAAACATCGTTTTATTGTCTATAGGGAATTTAATCAAACCTGTTAGCGTGCCTGTAGAAAGCATAAAGGTTTACTCATAGAGACGTGAGTTAAAAGACATTACACAACCAAT  
GGTGTCTTTTATGGCTATAATGTCATCAAGACAAAGAGTGCAGTGGACAATCCGCCTAGATCGATATTCGATGCCCTCTTTCCCATATTCAGTATTTTGGAGTCCTTCAAATAGATGGTGGT  
GGAGACAAAGAGGATAACTTCAACAAGGGTATTCCACACGTAGATAAGAAAATTCCAGATCCAGCATAGGAAAATGATGGGGCCAAAGCTGGCAGCTACAGGTATGGGGCGCCCGCTG  
TTTTAGGAAGGGATGGAAGGGACTCAGGGTCAGAGGTGCGGCGAGTGCAGGCATGTAAGAGCGACATGAAGGAGGTCCCGTCACCGATGGAGTGATTGAGGTGGAGGACGGCTACGC  
TGGCTGCCCTCCGACGTTTCGTATGGCAAGGATATGAACTTCCCAAGGCGGCCGAGAGTAGTCGAGTTGGGAACTACAGAGACCAGCGGTGTAATTTTCGACATATAAATCACCGACAGTAG  
GGTCGCTGGCAGCCGCAGCGGCTTTAGGACCAGGATCGGCGAGGACAATGTGTTTCATCAAAGTTCACCTTTGGTTGGAACCCATTGTAGCTTCTGTGCCATGAGTTATCAGCCACCAGGA  
TGCTACAGAAGCGTGGATGACGAAGGAGGGTGACCTTGAGACCGGCCCTTATCTCCTCAATGGTTAAGATCTTTCCAAATCCTAGTATGTAGATGATGTTGTACTTAAACTGAGGCTGCTG  
GAAAAGCACCGACCCAGGACTAAGTGGTTCCCCCTCCTCCAACCTGCTGCTGCTACCTCTGCCATCGCCGATGAAGGAGACTTTGGGATTTTCACTGAAAGCCTCATGTTGCATGGCAA  
TGGCGGGGATGAGATGGATGACTTATAGGAGTTCGTTTCGTGTGGAAGGAGTTTTACACGAAAGCGTTCACATCATTAAATTGTCATGCCTAGTATGCACCGTAGGACATTTTTTTTTTTTTAAA  
TTAACTTTGTAATTTAAAATTTTCGTTAAAATAAATTTACAAAAAATCGGTCCAGGACAATATTACTCTATGATAGATACATG

>comp174894\_c0\_seq2  
ATTAGGTAATAAAATAATCAGCATTTCTATATTA AAAAGGAACCTTCTAAGAATTTGAGAGAACAATTGGGACCTTCTGAAGATAACAGGAAGATGGAATAAGCTGCAAATATACA ACTAC  
ATCGGAGTTTATAAGAATTA AACATTACCATTGCTAACAGCACCATGTAGAGCATGGTTTTTATAAGTATTACAAATCTAGCTGATCCACAAGTTCAGAATTA AAAAGTATTTCGGAAATAAC  
GACATTTAAATATTACAATTTGACTATTCAATTTGCGGAGGCAGCTGCATCCTTCATGATTTGTACTGAGTGAGTTATGTCATCCAGAAACCTGTGAGGATCTGGAATTGCTTGCTCATCCAC

TTGAACAACGACCTTTATCTTGTTCAAATAACTTTGAACATGGATCATGAACGGCTGAATGGTTTTCAATAAAAAAATCTTTAATGTGTTTCTTAAATGTAATCAAATGTGCAATTTAGA  
GTGAGATGTAGAGAAATTGATAAATCAATTAACAATGTTGATCAAAATGTAAACTTAGAGAGCTACTCCAATACCAACATTCTATTAGTGCGCTTATTGAATGTAAACTTAAACATTTTATTA  
TGTGTTGAAGCTTACCATTGCACGCTCAAGTATCACTGAGGTCAAAAACAATTAGAATATGCTTTCAGATCAAAGAGAGACGAGGCTAAGAAAACACTCACTACAAGTAGGATTTAATTTT  
AGCAGAATTTAATAAATTGTATAAATTAGGCTTTAGTAAATCCCCTGAAAATCTTTAGGGCCTATTTGACAACAATTGATATAACTTCAGCAGGACTTACTAAATTAATCTTGACATGTTA  
AATTAAGAAAACAGTTTGGTAACATAGTTGTTAAATCCTTGAAATGATTTGACAACGTAATTCAGGATTTAAGGCAATT

>comp174894\_c0\_seq5

ATTAGGTAATAAAATAATCAGCATTCTATATTA AAAAGGAACCTTCTAAGAATTTGAGAGAACAATTGGGACCTTCTGAAGATAACAGGAAGATGGAATAAGCTGCAAATATACA ACTAC  
ATCGGAGTTTATAAGAATTA AACATTACCATTGCTAACAGCACCATGTAGAGCATGGTTTTTATAAGTATTACAAATCTAGCTGATCCACAAGTTCAGAATTA AAAGTATTTGCGGAAATAAC  
GACATTTAAATATTACAATTTGACTATTCAATTTGCGGAGGCAGCTGCATCCTTCATGATTTGTACTGAGTGAGTTATGTCATCCAGAAACCTGTGAGGATCTGGAATTGCTTGCTCATCCAC  
TTGAACAACGACCTTTATCTTGTTCAAATAACTTTGAACATGGATCAGGAACGGCTCACAAATTACTAGAAAACACTGGGAGCAATATAGATCAATGGTGAGCCACAGAAGCTAACTTCCTCT  
ATTGGCCAATAACATTTGAGAAACATAATGTTACATTAGATGCAATCCTGTGTAAAAGTACGGTCGCAACCTTAGTGCCAGACACTTAGAAATCAAGACATAGGATTTATAAGAAAGTG  
TCGCTGTCCATGATTTCTTTTCTTTCTGTGTTGCTGCAACATTCCTTGCATAGTCCAATGGATCCTCGCACTTCATTACAGGTAACCGAAGCAAAAAGAGCCAATCCGATTACCCAC  
TTGCTTCACTGCCTTTCTTCATCATATATGCTAAATCATTAAATCCTGATTTGCGCCGAATATTGACGATCAGAGTAGTTCTTATTAGCAAATGTTTGGGTAGAAAGGCCACCGTACTTCCTGC  
TAAGGTAACGAAATAGAGCGGCAGAAGTGGCTCCAACCAAAACATCGTTTATTGTACAACCAATGGTGTCTTTATGGCTATAATGTCATCAAGACAAAGAGTGCAAGTGGACAATCCGCC  
TAGATCGATATTGATGCCCTTTTCCCATATTCAGTATTTTGAGTCTTCAAATAGATGGTGGTGGAGACAAAGAGGATAACTTCAAACAAGGGTATTCCACACGTAGATAAGAAAATTC  
CAGATCCAGCATAGGAAAATGATGGGGCCAAAGCTGGCAGCTACAGGTATGGGGCGCCCGTGTTTTAGGAAGGGATGGAAGGGACTCAGGGTCAGAGGTGCGGCGAGTGCAGGCAT  
GTAAGAGCGACATGAAGGAGGTCCCGTCACCGATGGAGTGATTGAGGTGGAGGACGGCTACGCTGGCTGCCTCCGACGTTTCGTATGGCAAGGATATGA ACTTCCCAAGGCGGCCGAGA  
GTAGTCGAGTTGGGAACTACAGAGACCAGCGGTGTAATTTTCGACATATAAATCACCGACAGTAGGGTCGCTGGCAGCCGACGCGCTT TAGGACCAGGATCGGCGAGGACAATGTGTT  
CATCAAAGTTCAC TTTGGTTGGAACCCATTGTAGCTTCTGTGCGCCATGAGTTATCAGCCACCAGGATGCTACAGAAGCGTGGATGACGAAGGAGGGTGACCTTGAGACCGGCCTTTATCT  
CCTCAATGGTTAAGATCTTTCCAAATCCTAGTATGTAGATGATGTTGTACTTAAACTGAGGCTGCTGGAAAAGCACCGACCCAGGACTAAGTGGTTCCCCCTCCTCCA ACTCTGCTGCTGC  
TACCTCTGCCATCGCCGATGAAGGAGACTTTGGGATTTTCACTGAAAAGCCTCATGTTGCATGGCAATGGCGGGGATGAGATGGATGACTTATAGGAGTTCGTTCTGTGGAAGGAGTTTT  
ACACGAAAGCGTTCACATCATTAAATGTCATGCCTAGTATGCACCGTAGGACATTTTTTTTTTTTAAATTA ACTTTGTAATTTAAAATTTTCGTTAAAATAAATTTACAAAAAATCGGTCCA  
GGACAATATTACTCTATGATAGATACATG

>comp174894\_c0\_seq6

ATTAGGTAATAAAATAATCAGCATTCTATATTA AAAAGGAACCTTCTAAGAATTTGAGAGAACAATTGGGACCTTCTGAAGATAACAGGAAGATGGAATAAGCTGCAAATATACA ACTAC  
ATCGGAGTTTATAAGAATTA AACATTACCATTGCTAACAGCACCATGTAGAGCATGGTTTTGGTTTATATATATATATATTA AAAAGTATTTGCGGAAATAACGACATTTAAATATTACAATTTGA  
CTATTCAATTTGCGGAGGCAGCTGCATCCTTCATGATTTGTACTGAGTGAGTTATGTCATCCAGAAACCTGTGAGGATCTGGAATTGCTTGCTCATCCACTTGAACAACGACCTTTATCTTG  
TTCAAATAACTTTGAACATGGATCATGAACGGCTGAATGGTTTTCAATAAAAAAATCTTTAATGTGTTTCTTAAATGTAATCAAATGTGCAATTTAGAGTGAGATGTAGAGAAATTGATA  
AATCAATTAACAATGTTGATCAAAATGTAAACTTAGAGAGCTACTCCAATACCAACATTCTATTAGTGCGCTTATTGAATGTAAACTTAAACATTTTATTATGTGTTGAAGCTTACCATTGCA  
CGCTCAAGTATCACTGAGGTCAAAAACAATTAGAATATGCTTTCAGATCAAAGAGAGACGAGGCTAAGAAAACACTCACTACAAGTAGGATTTAATTTTAGCAGAATTTAATAAATGTATA  
AATTAGGCTTTAGTAAATCCCCTGAAAATCTTTAGGGCCTATTTGACAACAATTGATATAACTTCAGCAGGACTTACTAAATTAATCTTGACATGTTAAATTAAGAAAACAGTTTGGTAA

CATAGTTGTTAAATCCTTGAAATGATTTGACAACGTAATTCAGGATTTAAGGCAATT

>comp174905\_c0\_seq2

GTGCAAAGTGTTTTAGGGAATCGACCGAAGGTTGCTAATTTAAATTCATCAGTTGTCGCTAACTGAGAGTGGAAGTCTAAGGAGGCAGAAAAATAAGGGAAAATAGGAAAATTTTAG  
CAAGAATAAGGAAAACTCTCTTGAAGTCTCAACCACTCCAACAAATATAAAAAGCTACTTATTTTGAACCAACAAGAAGAAGAAGAGACGGTGTGTGTGGAGGAAAAGAGAACT  
ACTTTGAGAAAGAGAGAGATACAGAGAGATGGGAAGAGGTAGAGTTGAGCTTAAGCGCATCGAGAACAAGATCAACAGACAGGTAACCTTCTCCAAGCGTAGGAATGGCATCATGAAA  
AAAGCTTACGAGCTCTCTGTTCTCTGCGATATAGATATCGCGCTCATCATGTTCTCCCCTTCTGGTAGGCTCAGCACCTTCTCTGGTCGCCGTAGGATTGAAGATGTGATTGAGAAGTGTAT  
TAATGTGCGAGAGCATGACAAAGGAGGGGCTAAGCTGGACAAAGATTACTTGATGAGGACTCTTACCAAGCTCAAATATGAGAATGACATGGCTGCCGACCAAGCCAACCCGGAGATGC  
TGAGCAAAAACCTCAAAGTGGAGGAACTCCAGCGCGAGCTCAATGCTTGTCAACAACAAGTCAAATGCTTGAATAATACTTAAAGATTTTTGGAGCCCAATCCTGCATCCCTGGACTCT  
TCGATATCTTTGAGCGAGCTCGAATCATATGAGAAATTTTTATAGAATCTCTGGCAAATGTTTCTGAGAAAAAGAATTTATTGCTGGGCAATCATCTTCCTGCCTACGATCCATCCCTGACG  
AGCATACCGATGAACCTACAACCTGAACAAGAAGGAATGACAAACCCGTTGAGCTACAATCACAACCAGAATAGCTTTGGTAGGACCAACCAATCATGGTTCTTCACTCAAATTTCTCTC  
GTGCCCTCAGGAATTACGAGATGTGCGAGTGCATGTCAACTCAAATGGACCAACAAGTGGGAGTCGACACATGGCAACAAGGCTATGTATCTACGGAGCAGCTTATCGGCATTGATCCCT  
CCTGCGCCGTCAATAACCCAGGCTTCGATAGGAATGCCAGAGCTGCCATCAGTTGAGCTACAAGTCGAGAATGACACATGTGCTGGCGAGAATGCGAATGTGGGACGATCTTTGGCCGTT  
TGATTGGATCACCTCCATTAATTTATTTTCTTATTTTATAATAAAAATGGCATACAAAATGTCACCTTTAAACTATGTTTATATTGATTATTGACCTTATGATTACCGATTTTGGATGATAG  
CTATAAGGAGTTAAGGACAATAAATATTGTCAAGAAAAAAGAAGAAGAATACTTCTATTTCTGCCATTTTTGCCCTGAGCTTTTTTATTCGTTTCGCATAGTGATCACTTCTTTTATATATA  
TATATTTGTCTTCAGTCCATTCCTTTTTTAGATATTTCTTTGGCCTTCGACTATAAAAAGAAAAATAAAAGATGATTGTATGACAATCATTGAAAGGACTGAGGAAGAGACATTAGCTAAG  
AGTTTCTTATGGGTAAAAAGCTCCAGCTTTTTCAAAACGCAGATTTTGGACAAAGCAAACATTTCTCTCAAATAGTGCTTACTGTAATATTGATGAAATGTATCAGTTTAGCATCTCATCA  
AGCTTCTGTCTATAGCGAGCCAGGCTCAAAGTATACGCATAAACACCAGCCTCAGAAGGTCCTGCTGGACTTCCTCTCCTGATGAACTTTCCTTCCTTAAATATATATAGCATGGGAATGCC  
AGTAGAAAGCTCCAGATTGATCACCTCGTGAGAAGTCAATTTGTCAAGATACATAATTATTGATCTTAAAGGAATCCCATGAGCTGCAATCATCACATTTTTGCCAGACAAAAGTTGGGGT  
TCGATCATTGGGAGGAGGAATGTCAAAACTGCGGCGCCATTCATGAACGTTTTCTTTCCCAAACCTTTCTGCTGTTTCTGCTTGTGAGACCTTGTAAATCCCCATACATTTCTTTCAATCA  
ATTGCCAAGCTGGTATAACAGGAATAGACTGTTTCCTTGTTCCTCACTATATATCTGGCTGCACTGAATAGCTTGTTCACTCTCGCTGTGCATGACAATTGGAATCTTCTTTCGCGCGATGCT  
GAGTCATGGCAAGCATAGCAGTCATCTGAGCACGAATCAATGCCGATGTATATATCATGTCTACGGGAATATTGCTTATTCGTTTACCCGCTTCAATTGCCTCCTCCACACCCCTTTTCGAGTCA  
ATGGTACATCAACACAACCTGTGAATAGATTTTTCTCATTCCACAATGATTCACCATGACGAATCAATATGAGTGCAGCTTCATCTGCGAAACAACAACAATTTTCAAGAAAATGACAGA  
TTTTACCAGTAGAATGCAGGGGAATAATCTACTACATTCCTCAGTTTACTGTTCATGAAGTAAACCAAAAATCTCTCTTTCAATTATGAAGTAAATATTAATGATTTGGATGAGTAATGCT  
TTCTTGAACCAATCTATTGCATGCAAAATGCAGAATCATAATGCAAACTCATACTAAGCAGATAGATCTGGAGCAAACTTAGTGAATCAAATGCTTACAAGATTTCTTATGAGAG  
TCACTGATTTTGTACCAACTGGTAATCTCAGCGGATCAGCAACAGAAGAATGTGAGGATGATGCATGAATTATGCCTTGGGAGCTATCATGGCAACAAGCTCCCTTCTAAGTAATCTGA  
TTTCTATGCCAAAACCTTTGTAACCCTCTCTCAATGAAGATTTCCAGGCCAGTTTGGCAAATGGAGCAAATCTGATCCTGTGGTTCTGGATGGAGCCCAAGGAAATATAAAATGTGAC  
TGTAGCCATTTCTTTTTAATCAAGGAAACCAAGATGGCGTCGGAGAAGCTGAGGTAGAAGGGTGTGTAGAAGAACAACGCCGAAGTTGGAGACAAACAGTATCGAAAAAGCTTCA  
GTTTTGGAAGGAGAGACAAGAAGGAGAGAGAGAGAGAGAGGATGCTTATAACGAGAAGAGAAAGGTGGATGAAAAATTTAGAGCAGCGGCCAAACCTGCGGAAAGGTTGGTGGGAA  
TCGGAAGAA

>comp174905\_c0\_seq22

GTGCAAAGTGTTTTAGGGAATCGACCGAAGGTTGCTAATTTAAATTCATCAGTTGTCGCTAACTGAGAGTGGAAGTCTAAGGAGGCAGAAAAATAAGGGAAAATAGGAAAATTTTAG



CAAGAATAAGGAAAACTCTCTTGAAGTCTCAACCACTCCAACAAATATAAAAAGCTACTTATTTTGAACCAACAAGAAGAAGAAGAGACGGTGTGTGTGGAGGAAAAGAGAACT  
ACTTTGAGAAAGAGAGAGATACAGAGAGATGGGAAGAGGTAGAGTTGAGCTTAAGCGCATCGAGAACAAGATCAACAGACAGGTAACCTTCTCCAAGCGTAGGAATGGCATCATGAAA  
AAAGCTTACGAGCTCTCTGTTCTCTGCGATATAGATATCGCGCTCATCATGTTCTCCCCTTCTGGTAGGCTCAGCACCTTCTCTGGTCGCCGTAGGATTGAAGATGTGATTGAGAAGTGTAT  
TAATGTGCGAGAGCATGACAAAGGAGGGGCTAAGCTGGACAAAGATTACTTGATGAGGACTCTTACCAAGCTCAAATATGAGAATGACATGGCTGCCGACCAAGCCAACCCGGAGATGC  
TGAGCAAAAACCTCAAAGTGGAGGAACTCCAGCGCGAGCTCAATGCTTGTCAACAACAAGTCAAATGCTTGAAAAATACTTAAGATTTTTGGAGCCAATCCTGCATCCCTGGACTCT  
TCGATATCTTTGAGCGAGCTCGAATCATATGAGAAATTTTTATAGAATCTCTGGCAAATGTTTCTGAGAAAAAGAATTTATTGCTGGGCAATCATCTTCCTGCCTACGATCCATCCCTGACG  
AGCATACCGATGAACCTACAACCTGAACAAGAAGGAATGACAAACCCGTTGAGCTACAATCACAACCAGAATAGCTTTGGTAGGACCAACCAATCATGGTTCCTTCACTTCAAATCTCTC  
GTGCCCTCAGGAATTACGAGATGTGCGAGTGCATGTCAACTCAAATGGACCAACAAGTGGGAGTCGACACATGGCAACAAGGCTATGTATCTACGGAGCACTTATCGGCATTGATCCCT  
CCTGCGCCGTCAATAACCCAGGCTTCGATAGGAATGCCAGAGCTGCCATCAGTTGAGCTACAAGTCGAGAATGACACATGTGCTGGCGAGAATGCGAATGTGGGACGATCTTTGGCCGTT  
TGATTGGATCACCTCCATTAATTTATTTCTTATTTATTTTATAATAAAAATGGCATACAAAATGTCACCTTTAAACTATGTTTATATTGTATTATTGACCTTATGATTACCGATTTTGGATGATAG  
CTATAAGGAGTTAAGGACAATAAATATTGTCAAGAAAAAAGAAGAAGAATACTTCTATTTCTGCCATTTTTGCCCCTGAGCTTTTTTATTCGTTTCGCATAGTGATCACTTCTTTTATATATA  
TATATTTGTCTTCAGTCCATTCCTTTTTTAGATATTTCTTTGGCCTTCGACTATAAAAAGAAAAATAAAAGATGATTGTATGACAATCATTGAAAGGACTGAGGAAGAGACATTAGCTAAG  
AGTTTCTTATGGGTAAAAAGCTCCAGCTTTTTCAAAACGCAGATTTTGGACAAAGCAAACATTTCTCTCAAATAGTGCTTACTGTAAATATTGATGAAATGTATCAGTTTAGCATCTCATCA  
AGCTTCTGTCTATAGCGAGCCAGGCTCAAAGTATACGCATAAACACCAGCCTCAGAAGGTCCTGCTGGACTTCCTCTCCTGATGAACTTTCCTTCCTTAAATATATATAGCATGGGAATGCC  
AGTAGAAAGCTCCAGATTGATCACCTCGTGAGAAGTCAATTTGTCAAGATACATAATTATTGATCTTAAGGAATTCCTATGAGCTGCAATCATCACATTTTTGCCAGACAAAAGTTGGGGT  
TCGATATGATCCATAAAATAAGCAACAACCTCGATTAGCGCACATTTCCAAACTCTCACCATTTGGGAGGAGGAATGTCAAAAAGTGGCGGCCATTCATGAACGTTTTCTTTCCCAAACCTTT  
CTGCTGTTTCTGCTTGTGAGACCTTGTAAATCCCCATACATTTCTTTCAATTGCCAAGCTGGTATAACAGGAATAGACTGTTTCTTGTTCCTCACTATATATCTGGCTGCACTGAAT  
AGCTTGTTCCTCTCGCTGTGCATGACAATTGGAATCTTCTTGGCGCGATGCTGAGTCATGGCAAGCATAGCAGTCATCTGAGCACGAATCAATGCCGATGTATATATCATGTCTACGGGAA  
TATTGCTTATTCGTTTACCCGCTTCAATTGCCTCCTCCACACCCTTTTCGAGTCAATGGTACATCAACACAACCTGTGAATAGATTTTTCTCATTCCACAATGATTCACCATGACGAATCAATA  
TGAGTGCAGCTTCATCTGCGAAACAACAACAATTTTCAAGAAAATGACAGATTTTACCAGTAGAATGCAGGGGAATAATCTACTACATTCCTCAGTTTACTGTGCATGAAGTAAACCAA  
AAATCTCTCTTTTCAATTATGAAGTAAATATTAATGATTTGGATGAGTAATGCTTTCTTGAACCAAATCTATTGCATGCAAAAATGCAGAATCATAAATGCAAAAACCTACATACCTAAGCAGATA  
GATCTGGAGCAAAAACCTTAGTGAATCAAAATGCTTACAAGATTTCTTATGAGAGTCACTGATTTTGTACCAACTGGTAATCTCAGCGGATCAGCAACAGAAGAATGTGAGGATGATGCATG  
AATTATGCCTTGGGAGCTATCATGGCAACAAGCTCCCTTCCTAAGTAATCTGATTTCTATGCCAAAACCTTTGTAACCTCTCTCAATGAAGATTTCCAGGCCAGTTTGCAAATTGGAGC  
AAATCTGATTTCTGTGGTTCTGGATGGAGCCCAAGGAAATATAAATGTGACTGTAGCCATTTCTTTTTAATCAAGGAAACCAAGATGGCGTCGGAGAAGCTGAGGTAGAAGGGTGTG  
TAGAAGAACAACGCCGAAGTTGGAGACAAACAGTATCGAAAAAGCTTCAAGTTTTGGAAGGAGAGACAAGAAGGAGAGAGAGAGAGAGAGGATGCTTATAACGAGAAGAGAAAGGT  
GGATGAAAAATTTAGAGCAGCGCCAAACCTGCGGAAAGGTTGGTGGGAATCGGAAGAA

>comp174905\_c0\_seq27

GTGCAAAGTGTTTTAGGGAATCGACCGAAGGTTGCTAATTTAAATTCATCAGTTGTCGCTAACTGAGAGTGGAACCTTAAGGAGGCAGAAAAATAAGGAAAATAGGAAAATTTAG  
CAAGAATAAGGAAAACTCTCTTGAAGTCTCAACCACTCCAACAAATATAAAAAGCTACTTATTTTGAACCAACAAGAAGAAGAAGAGACGGTGTGTGTGGAGGAAAAGAGAACT  
ACTTTGAGAAAGAGAGAGATACAGAGAGATGGGAAGAGGTAGAGTTGAGCTTAAGCGCATCGAGAACAAGATCAACAGACAGGTAACCTTCTCCAAGCGTAGGAATGGCATCATGAAA  
AAAGCTTACGAGCTCTCTGTTCTCTGCGATATAGATATCGCGCTCATCATGTTCTCCCCTTCTGGTAGGCTCAGCACCTTCTCTGGTCGCCGTAGGATTGAAGATGTGATTGAGAAGTGTAT

TAATGTGCGAGAGCATGACAAAGGAGGGGCTAAGCTGGACAAAGATTACTTGATGAGGACTCTTACCAAGCTCAAATATGAGAATGACATGGCTGCCGACCAAGCCAACCCGGAGATGC  
TGAGCAAAAACCTTCAAAGTGGAGGAACTCCAGCGCGAGCTCAATGCTTGTCAACAACAACCTGCAAATGCTTGAAAAATACTTAAAGATTTTTGGAGCCCAATCCTGCATCCCTGGACTCT  
TCGATATCTTTGAGCGAGCTCGAATCATATGAGAAATTTTTATAGAATCTCTGGCAAATGTTTCTGAGAAAAAGAATTTATTGCTGGGCAATCATCTTCCTGCCTACGATCCATCCCTGACG  
AGCATAACCGATGAACCTACAACCTGAACAAGAAGGAATGACAAACCGTTGAGCTACAATCACAACCAGAATAGCTTTGGTAGGACCAACCAATCATGGTTCCTCACTTCAAATCTCTC  
GTGCCCTCAGGAATTACGAGATGTGCGAGTGCATGTCAACTCAAATGGACCAACAAGTGGGAGTCGACACATGGCAACAAGGCTATGTATCTACGGAGCACTTATCGGCATTGATCCCT  
CCTGCGCCGTCAATAACCCAGGCTTCGATAGGAATGCCAGAGCTGCCATCAGTTGAGCTACAAGTCGAGAATGACACATGTGCTGGCGAGAATGCGAATGTGGGACGATCTTTGGCCGTT  
TGATTGGATCACCTCCATTAATTTATTTTCTTATTTATTTTATAATAAAAATGGCATACAAAAATGTCACTTTTAAACTATGTTTATATTGTATTATTGACCTTATGATTACCGATTTTGGATGATAG  
CTATAAGGAGTTAAGGACAATAAATATTGTCAAGAAAAAAGAAGAAGAATACTTCTATTTCTGCCATTTTTGCCCCTGAGCTTTTTTATTGTTTCGCATAGTGATCACTTCTTTTATATATA  
TATATTTGTCTTCAGTCCATTCCTTTTTTAGATATTTCTTTGGCCTTCGACTATAAAAAGAAAAATAAAGATGATTGTATGACAATCATTGAAAGGACTGAGGAAGAGACATTAGCTAAG  
AGTTTCTTATGGGTAAAAAGCTCCAGCTTTTTCAAAACGCAGATTTTGGACAAAGCAAACATTTCTCTCAAATAGTGCTTACTGTAAATATTGATGAAATGTATCAGTTTAGCATCTCATCA  
AGCTTCTGTCTATAGCGAGCCAGGCTCAAAGTATACGCATAAACACCAGCCTCAGAAGGTCCTGCTGGACTTCCTCTCCTGATGAACTTTCCTTCTTAAATATATATAGCATGGGAATGCC  
AGTAGAAAGCTCCAGATTGATCACTTCATCTGGAAACAAGAGCAAATGTGCCACCTCGTGAGAAGTCAATTTGTCAAGATACATAATTATTGATCTTAAGGAATTCCCATGAGCTGCAATC  
ATCACATTTTTGCCAGACAAAAGTTGGGGTTCGATATGATCCATAAATAAGCAACAACCTCGATTAGCGCACATTTCAAACCTCTCACCATTGGGAGGAGGAATGTCAAACCTGCGGCGC  
CATTCATGAACGTTTTCTTTCCCAAACCTTTCTGCTGTTTCTGCTTGTGAGACCTTGTAAATCCCACATCTTTTCAATTGCCAAGCTGGTATAACAGGAATAGACTGTTTCTTT  
GTTTCTCACTATATATCTGGCTGCACTGAATAGCTTGTTCACTCTCGCTGTGCATGACAATTGGAATCTTCTTGGCGGATGCTGAGTCATGGCAAGCATAGCAGTCATCTGAGCACGAAT  
CAATGCCGATGTATATATCATGTCTACGGGAATATTGCTTATTGTTTTACCCGCTTCAATTGCCTCCTCCACACCCTTTCGAGTCAATGGTACATCAACACAACCTGTGAATAGATTTTTCTCA  
TTCCACAATGATTCACCATGACGAATCAATATGAGTGCAGCTTCATCTGCGAAACAACAACAATTTTCAAGAAAATGACAGATTTTACCAGTAGAATGCAGGGGAATAATCTACTACATT  
CCCTCAGTTTACTGTATGAAGTAAACCAAAAATCTCTCTTTCAATTATGAAGTAAATATTAATGATTTGGATGAGTAATGCTTTCTTGAACCAAATCTATTGCATGCAAAAATGCAGAATC  
ATAAATGCAAACTCATACCTAAGCAGATAGATCTGGAGCAAACTTAGTGAATCAAAATGCTTACAAGATTTCTTATGAGAGTCACTGATTTTGTACCAACTGGTAATCTCAGCGGATC  
AGCAACAGAAGAATGTGAGGATGATGCATGAATTATGCCTTGGGAGCTATCATGGCAACAAGCTCCCTTCTAAGTAATCTGATTTCTATGCCAAAACCTTTGTAACCCTCTCTCAATGAA  
GATTTCCAGGCCAGTTTTGCAAATTGGAGCAAATCTGATTCTTGTGGTTCTGGATGGAGCCCAAGGAAATATAAATGTGACTGTAGCCATTCTTTTTAATCAAGGAAACCAAGATGG  
CGTCGGAGAAGCTGAGGTAGAAGGGTGTGTGAGAAGAACAACGCCGAAGTTGGAGACAAACAGTATCGAAAAAGCTTCAGTTTTGGAAGGAGAGACAAGAAGGAGAGAGAGAGAG  
AGAGGATGCTTATAACGAGAAGAGAAAGGTGGATGAAAAATTTAGAGCAGCGGCCAAACCTGCGGAAAGGTTGGTGGGAATCGGAAGAA

>comp174915\_c0\_seq27

AACCTTCCGCAGGTTTGGCCGCTGCTCTAAATTTTCATCCACCTTTCTCTTCTCGATATAAGCATCCTCTCTCTCTCTCCTTCTGTTTCTCCTTCCAAAACCTGAAGCTTTTTTCGAT  
ACTGTTTGTCTCCAACCTTCGGCGTTGTTCTTCTACAACACCCTTCTACCTCAGCTTCTCCGACGCCATCTGGTTTCTTATTAAAGAGAATGGCTACAGTCACATTTTATATTTCCTTG  
GGCTCCATCCAGAACCACAAGAATCAGATTTGCTCCAATTTGCAAACTGGCCTGGGAAATCTTCATTGAGAGAGGGTTACAAAGGTTTTGGCATAGAAATCAGATTACTTAGGAGGGGA  
GCTTGTGCCATGATAGCTCCCAAGGCATAATTCATGCATCATCCTCACATTCTTCTGTTGCTGATCCGCTGAGATTACCAGTTGGTAACAAAATCAGTGACTCTCATAAGAAATCTTATGA  
AGCTGCACTCATATTGATTCGTATGGTGAATCATTGTGGAATGAGAAAAATCTATTCACAGGTTGTGTTGATGTACCATTGACTCGAAAAGGTTGGAGGAGGCAATTGAAGCGGGTAA  
ACGAATAAGCAATATTTCCGTAGACATGATATATACATCGGCATTGATTCTGCTCAGATGACTGCTATGCTTGCATGACTCAGCATCGCCGAAGAAGATTCCAATTGTCATGCACAGCG  
AGAGTGAACAAGCTATTCAAGTGCAGCCAGATATATAGTGAGGAAACAAGGAAACAGTCTATTCTGTTATACCAGCTTGGCAATTGAATGAAAGAATGTATGGGAATTACAAGGTCTCA

ACAAGCAGGAAACAGCAGAAAGGTTTGGGAAAGAAAACGTTTCATGAATGGCGCCGCAGTTTTGACATTCCTCCTCCCAATGGTGAGAGTTTGGAAATGTGCGCTGATCGAGCTGTTGCT  
TATTTTATGGATCATATCGAACCCCAACTTTTGTCTGGCAAAAATGTGATGATTGCAGCTCATGGGAATTCCTTAAGATCAATAATTATGTATCTTGACAAATTGACTTCTCACGAGGTGGCA  
CATTTGCTCTTGTTTTCCAGATGAAGTGATCAATCTGGAGCTTTCTACTGGCATTCCCATGCTATATATATTTAAGGAAGGAAAGTTTCATCAGGAGAGGAAGTCCAACAGGACCTTCTGAGG  
CTGGTGTTTATGCGTATACTTTGAGCCTGGCTCGCTATAGACAGAAGCTTGATGAGATGCTAAACTGATACATTTTCATCAATATTTACAGTAAGCACTATTTGAAGAGAAATGTTTGTCTTTGT  
CCAAAATCTGCGTTTTGAAAAGCTGGAGCTTTTTACCATAAGAACTCTTAGCTAATGTCTCTTCCCTCAGTCCTTCAATGATTGTGCATACAATCATCTTTTATTTTTCTTTTATAGTCGAA  
GGCCAAAGAAAATATCTAAAAAAGGAATGGACTGAAGACAAATATATATATATAAAAAGAAAGTGATCACTACGCGAACGAATAAAAAAGCTCAGGGCAAAAATGGCAGGAAATAGAAGT  
ATTCTTCTTCTTTTTTTCTTGACAATATTTATTTGTCCTTAACTCCTTATAGCTATCATCTAAAATCGGTAATCATAAGGTCAATAATACAATATAAACATAGTTTAAAAGTGACATTTTGTATGCC  
ATTTTATATAAAAAATAAATAAGAAAATAAATTAATGGAGGTGATCCAATCAAACGGCCAAAGATCGTCCCACATTCGCATTCTCGCCATCACATCTGTCAATCTCGACTTGTAGCTCAACT  
GATGGCAGCTCTGGCATTCCATCGAAGCCTGGGTATTGACGGCGCAGGAGGGATCAATGCCGATAAGTGCTCCGTAGATACATAGCCTTGTGCCATGTGTGACTCCCACTTGTGGT  
CCATTTGAGTTGACATCGACTCGCACATCTCGTAATTCCTGAGGGGCACGAGAGAATTTGAAGTGAAGAACCATGATTGGTTGGTCCCTACCAAAGCTATTCTGGTTGTGATTGTAGCTCAA  
CGGGTTTGTCAATTCCTTCTTGTTCCAGGTTGTAGGTTTCATCGGTATGCTCGTCAGGGATGGATCGTAGGCAGGAAGATGATTGCCAGCAATAAATCTTTTTCTCAGAAAACATTTGCCAGA  
GATTTCTATAAAAAATTTCTCATATGATTGAGCTCGCTCAAAGATATCGAAGAGTCCAGGGATGCAGGATTGGGCTCCAAAATCTTAAGGGTTTTTCAAGCATTGTCAGTTGTTCTTGAC  
AAGCATTGAGCTCGCGCTGGAGTTCCCTCCACTTTGAAGTTTTTGCTCAGCATCTCCGGGTTGGCTTGGTGGGCAGCCATGTCATCCTCATATTTGAGTTTGATAAGAGTCCATCAAGTA  
ATCTTTGTCCATCTTGTCCAGCTTAACCCCTCCATTGTCATGCTCTCGCACATTAATACACTTCTCAATCACATCTTCAATCCTCCGGCGACCAGAGAAGGTGCTAAGCCTACCAGAAGGGG  
AGAACATGATGAGCGCGATATCTATATCGCAGAGAACAGAGAGCTCGTAAGCTTTTTTCATGATGCCATTCCCTACGCTTGGAGAAGGTTACCTGTCTGTTGATCTTGTCTCGATGCGCTTA  
AGCTCAACTCTACCTCTTCCATCTCTGTATCTCTCTTTCTCAAAGTAGTTTCTCTTTTCCCTCCACACAACACCGTCTCTTCTTCTTGTGGTTCCAAAATAAGTAGCTTTTTATAT  
TTGTTGGAGTGGTTGAGACTTCAAGAGAGTTTTTCCCTTATTCTTGCTAAAATTTTCCCTATTTTCCCTTATTTTTTCTGCCTCCTTAGAGTTCCACTCTCAGTTAGCGACAACCTGATGGAATTT  
AAATTAGCAACCTTCGGTCGATTCCCTAAAACACTTTGCACCTTAGAAAATCCTTCTATAAATGGCAAGGCCAGCTTAAAATGCCACCTTTCTCTCTATAGATCCCCCTCTCTATCAG  
GTAATTAAGTAGACTTTGGACCGGATGGACCACAGTTTATTTAAGAGGTTTCTCGTTAGGAGGAGGAGAAGTGCGTATTGCAGCAGGCATAAGATAATTAGAAGTTGGCTGTTGTCTTTG  
TGATTTTTGATTGAGGGCATCCTCAACCCACCCGA

>comp174915\_c0\_seq29

AACCTTTCCGCAGGTTTGGCCGCTGCTCTAAATTTTTTCATCCACCTTTCTCTTCTCGATATAAGCATCCTCTCTCTCTCTCTCCTTCTTGTTCCTTCCAAAACCTGAAGCTTTTTTCGAT  
ACTGTTTGTCTCCAACCTTCGGCGTTGTTCTTCTACAACACCCTTCTACCTCAGCTTCTCCGACGCCATCTGGTTTCCCTTGATTAATAAAGAGAATGGCTACAGTCACATTTTATATTTCCCTTG  
GGCTCCATCCAGAACCACAAGAATCAGATTTGCTCCAATTTGCAAACTGGCCTGGGAAATCTTCATTGAGAGAGGGTTACAAAGGTTTTGGCATAGAAAATCAGATTACTTAGGAGGGGA  
GCTTGTGCCATGATAGCTCCCAAGGCATAATTCATGCATCATCCTCACATTCTTCTGTTGCTGATCCGCTGAGATTACCAGTTGGTAACAAAATCAGTGACTCTCATAAGAAATCTTATGA  
AGCTGCACTCATATTGATTCGTATGTTGAAATCATTGTGGAATGAGAAAAATCTATTCACAGGTTGTGTTGATGTACCATTGACTCGAAAAGGTTGGAGGAGGCAATTGAAGCGGGTAA  
ACGAATAAGCAATATTTCCGTAGACATGATATATACATCGGCATTGATTTCGTGCTCAGATGACTGCTATGCTTGGCATGACTCAGCATCGCCGAAGAAGATTCCAATTGTCATGCACAGCG  
AGAGTGAACAAGCTATTCAGTGCAGCCAGATATATAGTGAGGAAACAAGGAAACAGTCTATTCTGTTATACCAGCTTGGCAATTGAATGAAAGAATGTATGGGGAATTACAAGGTCTCA  
ACAAGCAGGAAACAGCAGAAAGGTTTGGGAAAGAAAACGTTTCATGAATGGCGCCGCAGTTTTGACATTCCTCCTCCCAATGATCGAACCCCAACTTTTGTCTGGCAAAAATGTGATGAT  
TGCAGCTCATGGAAATTCCTTAAGATCAATAATTATGTATCTTGACAAATTGACTTCTCACGAGGTGGCACATTTGCTCTTGTTCAGATGAAGTGATCAATCTGGAGCTTTCTACTGGCA  
TTCCCATGCTATATATATTTAAGGAAGGAAAGTTTCATCAGGAGAGGAAGTCCAACAGGACCTTCTGAGGCTGGTGTATTGCGTATACTTTGAGCCTGGCTCGCTATAGACAGAAGCTTGA

TGAGATGCTAAACTGATACATTTTCATCAATATTTACAGTAAGCACTATTTGAAGAGAAATGTTTGTCTTTGTCCAAAATCTGCGTTTTGAAAAGCTGGAGCTTTTTACCCATAAGAACTCTT  
AGCTAATGTCTCTTCCCTCAGTCCTTTCAATGATTGTCATACAATCATCTTTTATTTTTCTTTTTATAGTCGAAGGCCAAAGAAAATATCTAAAAAAGGAATGGACTGAAGACAAATATATATAT  
ATAAAAAGAAAGTGATCACTACGCGAACGAATAAAAAAGCTCAGGGCAAAAATGGCAGGAAATAGAAGTATTCTTCTCTTTTTTTCTTGACAATATTTATTGTCCTTAACTCCTTATAGCTA  
TCATCTAAAATCGGTAATCATAAGGTCAATAATACAATATAAACATAGTTTAAAAGTGACATTTTGTATGCCATTTTATTATAAAAAATAAATAAGAAAATAAATTAATGGAGGTGATCCAATCA  
AACGGCCAAAGATCGTCCACATTCGCATTCTCGCCATCACATCTGTCAATTCTCGACTTGTAGCTCAACTGATGGCAGCTCTGGCATTCTATCGAAGCCTGGGTTATTGACGGCGCAGGA  
GGGATCAATGCCGATAAGTGCTCCGTAGATACATAGCCTTGTGGCCATGTGTGCGACTCCCACTTGTGGTCCATTTGAGTTGACATCGACTCGCACATCTCGTAATTCCTGAGGGGCACGA  
GAGAATTTGAAGTGAAGAACCATGATTGGTTGGTCCACCAAAGCTATTCTGGTTGTGATTGTAGCTCAACGGGTTTGTCACTTCTTCTTGTTCAGGTTGTAGGTTTCATCGGTATGCTCGTC  
AGGGATGGATCGTAGGCAGGAAGATGATTGCCAGCAATAAATCTTTTTCTCAGAAACATTTGCCAGAGATTCTATAAAAAATTTCTCATATGATTTCGAGCTCGCTCAAAGATATCGAAG  
AGTCCAGGGATGCAGGATTGGGCTCCAAAATCTTAAGGGTTTTCAAGCATTGTCAGTTGTTCTTGACAAGCATTGAGCTCGCGCTGGAGTTCCTCCACTTTGAAGTTTTTGCTCAGCAT  
CTCCGGGTTGGCTTGGTGGGCAGCCATGTCATCCTCATATTTGAGTTTGATAAGAGTCTCATCAAGTAATCTTTGTCCATCTTGTCCAGCTTAAACCCCTCCATTGTCATGCTCTCGCACATT  
AATACACTTCTCAATCACATCTTCAATCCTCCGGCGACCAGAGAAGGTGCTAAGCCTACCAGAAGGGGAGAACATGATGAGCGCGATATCTATATCGCAGAGAACAGAGAGCTCGTAAGC  
TTTTTTCATGATGCCATTCTACGCTTGGAGAAGGTTACCTGTCTGTTGATCTTGTCTCGATGCGCTTAAGCTCAACTCTACCTCTCCCATCTCTCTGTATCTCTCTTTCTCAAAGTAGT  
TTCTCTTTTCCCTCCACACAACACCGTCTCTTCTTCTTGTGGTTCCAAAATAAGTAGCTTTTTATATTTGTTGGAGTGGTTGAGACTTCAAGAGAGTTTTTCCCTTATTCTTGCTAAAATT  
TTCTATTTTCCCTTATTTTTTCTGCCTCCTTAGAGTTCCACTCTCAGTTAGCGACAACCTGATGGAATTTAAATTAGCAACCTTCGGTCGATTCCCTAAAACACTTTGCACCTTAGAAATCCT  
TCTATAAATGGCAAGGCCAGCTTAAAATGCCACCTTTCTCTCTCTATAGATCCCCCTCTCTCTATCAGGTAATTAAGTAGACTTTGGACCGGATGGACCACAGTTTATTTAAGAGGTTTC  
TCGTTAGGAGGAGGAGAAGTGCGTATTGCAGCAGGCATAAGATAATTAGAAGTTGGCTGTTGTCTTTGTGATTTTTGATTGAGGGCATCCTCAACCCACCCGA

>comp174915\_c0\_seq34

AACCTTCCGCAGGTTTGGCCGCTGCTCTAAATTTTTTCATCCACCTTTCTCTTCTCGATATAAGCATCCTCTCTCTCTCTCCTTCTTGTTCCTTCCAAAACCTGAAGCTTTTTTCGAT  
ACTGTTTGTCTCCAACCTTCGGCGTTGTTCTTCTACAACACCCTTCTACCTCAGCTTCTCCGACGCCATCTTGGTTTCCTTGATTA AAAAGAGAATGGCTACAGTCACATTTTATATTTCCCTTG  
GGCTCCATCCAGAACCACAAGAATCAGATTTGCTCCAATTTGCAAACTGGCCTGGGAAATCTTCATTGAGAGAGGGTTACAAAGGTTTTGGCATAGAAATCAGATTACTTAGGAGGGGA  
GCTTGTGGCCATGATAGCTCCCAAGGCATAATTCATGCATCATCCTCACATTCTTCTGTTGCTGATCCGCTGAGATTACCAGTTGGTAACAAAATCAGTGACTCTCATAAGAAATCTTATGA  
AGCTGCACTCATATTGATTCGTCATGGTGAATCATTGTGGAATGAGAAAAATCTATTCACAGGTTGTGTTGATGTACCATTGACTCGAAAGGGTGTGGAGGAGGCAATTGAAGCGGGTAA  
ACGAATAAGCAATATTTCCGTAGACATGATATATACATCGGCATTGATTTCGTGCTCAGATGACTGCTATGCTTGCCATGACTCAGCATCGCCGCAAGAAGATTCCAATTGTCATGCACAGCG  
AGAGTGAACAAGCTATTCAGTGCAGCCAGATATATAGTGAGGAAACAAGGAAACAGTCTATTCTGTTATAACCAGCTTGGCAATTGAATGAAAGAATGTATGGGGAATTACAAGGTCTCA  
ACAAGCAGGAAACAGCAGAAAGGTTTGGGAAAGAAAACGTTTCATGAATGGCGCCGAGTTTTGACATTCCTCCTCCCAATGATCGAACCCCAACTTTTGTCTGGCAAAAATGTGATGAT  
TGCAGCTCATGGGAATTCCTTAAGATCAATAATTATGTATCTTGACAAAATTGACTTCTCACGAGGTGATCAATCTGGAGCTTTCTACTGGCATTCCCATGCTATATATATTTAAGGAAGGAAA  
GTTTCATCAGGAGAGGAAGTCCAACAGGACCTTCTGAGGCTGGTGTATATGCGTATACTTTGAGCCTGGCTCGCTATAGACAGAAGCTTGATGAGATGCTAAACTGATACATTTTCATCAATA  
TTTACAGTAAGCACTATTTGAAGAGAAATGTTTGTCTTTGTCCAAAATCTGCGTTTTGAAAAGCTGGAGCTTTTTACCCATAAGAACTCTTAGCTAATGTCTCTTCCCTCAGTCCTTTCAATG  
ATTGTCATACAATCATCTTTTATTTTTCTTTTTATAGTCGAAGGCCAAAGAAAATATCTAAAAAAGGAATGGACTGAAGACAAAATATATATATAAAAAGAAAGTGATCACTACGCGAACGA  
ATAAAAAGCTCAGGGCAAAAATGGCAGGAAATAGAAGTATTCTTCTTTTTTTTTCTTGACAATATTTATTGTCCTTAACTCCTTATAGCTATCATCTAAAATCGGTAATCATAAGGTCAAT  
AATACAATATAAACATAGTTTAAAAGTGACATTTTGTATGCCATTTTATTATAAAAAATAAATAAGAAAATAAATTAATGGAGGTGATCCAATCAAACGGCCAAAGATCGTCCACATTCGCAT

TCTCGCCATCACATCTGTCATTCTCGACTTGTAGCTCAACTGATGGCAGCTCTGGCATTCTATCGAAGCCTGGGTATTGACGGCGCAGGAGGGATCAATGCCGATAAGTGCTCCGTAGA  
TACATAGCCTTGTTGCCATGTGTCGACTCCCCTGTTGGTCCATTGAGTTGACATCGACTCGCACATCTCGTAATTCCTGAGGGGCACGAGAGAATTTGAAGTGAAGAACCATGATTGG  
TTGGTCTACCAAAGCTATTCTGGTTGTGATTGTAGCTCAACGGGTTGTGATTCTCCTTCTGTTTCAGGTTGTAGGTTTCATCGGTATGCTCGTCAGGGATGGATCGTAGGCAGGAAGATGATT  
GCCAGCAATAAATCTTTTTCTCAGAAACATTTGCCAGAGATTCTATAAAAAATTTCTCATATGATTTCGAGCTCGCTCAAAGATATCGAAGAGTCCAGGGATGCAGGATTGGGCTCCAAA  
AATCTTAAAGGGTTTTTCAAGCATTTGCAGTTGTTCTTGACAAGCATTGAGCTCGCGCTGGAGTTCTCCACTTTGAAGTTTTTGTCTCAGCATCTCCGGGTTGGCTTGGTGGGCAGCCATGT  
CATCTCATATTTGAGTTTGATAAGAGTCTCATCAAGTAATCTTTGTCCATCTTGTCCAGCTTAACCCCTCCATTGTCATGCTCTCGCACATTAATACTTCTCAATCACATCTTCAATCCT  
CCGGCGACCAGAGAAGGTGCTAAGCCTACCAGAAGGGGAGAACATGATGAGCGCGATATCTATATCGCAGAGAACAGAGAGCTCGTAAGCTTTTTTTCATGATGCCATTCTTACGCTTGGA  
GAAGGTTACCTGTCTGTTGATCTGTTCTCGATGCGCTTAAGCTCAACTTACCTCTCCCATCTCTCTGTATCTCTCTTTTCTCAAAGTAGTTTCTTTTTCTCCACACAACACCGTCTC  
TTCTTCTTGTGGTTCCAAAATAAGTAGCTTTTTATATTTGTTGGAGTGGTTGAGACTTCAAGAGAGTTTTTCCTTATTCTTGCTAAAATTTTCTATTTTTCCCTTATTTTTCTGCCTCCT  
TAGAGTCCACTCTCAGTTAGCGACAACCTGATGGAATTTAAATTAGCAACCTTCGGTTCGATTCCCTAAAACACTTTGCACCTTAGAAATCCTTCTATAAATGGCAAGGCCAGCTTAAAATG  
CCACTTTCTCTCTATAGATCCCCCTCTCTCTATCAGGTAATTAAGTAGACTTTGGACCGGATGGACCACAGTTTATTTAAGAGGTTTCTCGTTAGGAGGAGGAGAAGTGCATATTGC  
AGCAGGCATAAGATAATTAGAAGTTGGCTGTTGCTTTGTGATTTTTGATTGAGGGCATCTCAACCCACCCGA

>comp174915\_c0\_seq6

AACCTTTCCGCAGGTTTGCCGCTGCTCTAAATTTTTTCATCCACCTTCTCTTCTCGATATAAGCATCCTCTCTCTCTCCTTCTGTTTCTCCTTCCAAAACCTGAAGCTTTTTTCGAT  
ACTGTTTGCTCCAACCTTCGGCGTGTCTTCTTCTACAACACCCTTCTACCTCAGCTTCTCCGACGCCATCTGGTTCCTTGATTAATAAAGAGAAATGGCTACAGTCAATTTATATTTCCCTG  
GGCTCCATCCAGAACCACAAGAATCAGATTTGCTCCAATTTGCAAACTGGCCTGGGAAATCTTCATGAGAGAGGGTTACAAAGGTTTTGGCATAGAAATCAGATTACTTAGGAGGGGA  
GCTGTTGCCATGATAGCTCCAAGGCATAATTCATGCATCCTCACATCTTCTGTTGCTGATCCGCTGAGATTACCAGTTGGTAACAAAATCAGTGACTCTCATAAGAAATCTTATGA  
AGCTGCACTCATATTGATTTCGTCATGGTGAATCATTGTGGAATGAGAAAAATCTATTCACAGGTTGTGTTGATGTACCATTGACTCGAAAAGGTGTGGAGGAGGCAATTGAAGCGGGTAA  
ACGAATAAGCAATATTTCCGTAGACATGATATATACATCGGCATTGATTTCGTGCTCAGATGACTGCTATGCTTGCCATGACTCAGCATCGCCGCAAGAAGATTCCAATGTCATGCACAGCG  
AGAGTGAACAAGCTATTCAGTGCAGCCAGATATATAGTGAGGAAACAAGGAAACAGTCTATTCTGTTATACCAGCTTGGCAATTGAATGAAAGAATGTATGGGGAATTACAAGGTCTCA  
ACAAGCAGGAAAACAGCAGAAAGGTTTTGGGAAAGAAAACGTTTATGAATGGCGCCGAGTTTGTGACATTCTCTCCCAATGGTGAGAGTTTTGGAAATGTGCGCTGATCGAGCTGTTGCT  
TATTTTATGGATCATATCGAACCCCAACTTTTTGTCTGGCAAAAATGTGATGATTGCAGCTCATGGGAATTCCTTAAAGATCAATAATTATGTATCTTGACAAAATTGACTTCTCACGAGGTGATC  
AATCTGGAGCTTCTACTGGCATTCCCATGCTATATATATTTAAGGAAGGAAAAGTTTCATCAGGAGAGGAAGTCCAACAGGACCTTCTGAGGCTGGTGTTTATGCGTATACTTTGAGCCTGG  
CTCGCTATAGACAGAAGCTTGATGAGATGCTAAACTGATACATTTTCATCAATATTTACAGTAAGCACTATTTGAAGAGAAATGTTTTGCTTGTCCAAAATCTGCGTTTTGAAAAGCTGGAGC  
TTTTTACCCATAAGAACTCTTAGCTAATGTCTTCTCAGTCCTTTCAATGATTGTCATAACAATCATCTTTATTTTTCTTTTTATAGTCGAAGGCCAAAGAAAATATCTAAAAAAGGAATG  
GACTGAAGACAAATATATATATAAAGAAAAGTGATCACTACGCGAACGAATAAAAAAGTCTCAGGGCAAAAATGGCAGGAAATAGAAATATTCTTCTTTTTTTCTTGACAATATTTAT  
TGTCCTTAACTCCTTATAGCTATCATCTAAATCGGTAATCATAAGGTCAATAATAAACAATAGTTTTAAAGTGAATTTGTATGCCATTTTATTATAAAAAATAAAGAAAATAAA  
TTAATGGAGGTGATCCAATCAAACGGCCAAAGATCGTCCCACATTCGCATTCTCGCCATCACATCTGTCAATCTCGACTTGTAGCTCAACTGATGGCAGCTCTGGCATTCTTATCGAAGCCT  
GGGTATTGACGGCGCAGGAGGGATCAATGCCGATAAGTGCTCCGTAGATACATAGCCTTGTTGCCATGTGTGACTCCCACTTGGTTGGTCCATTTGAGTTGACATCGACTCGCACATCTC  
GTAATTCCTGAGGGGACGAGAGAATTTGAAGTGAAGAACCATGATTGGTTGGTCTACCAAAGCTATTCTGGTTGTGATTGTAGCTCAACGGGTTGTGATTCTCCTTCTTGTTCAGGTTGT  
AGGTTTCATCGGTATGCTCGTCAGGGATGGATCGTAGGCAGGAAGATGATTGCCAGCAATAAATCTTTTTCTCAGAAACATTTGCCAGAGATTCTATAAAAAATTTCTCATATGATTTCAG

CTCGCTCAAAGATATCGAAGAGTCCAGGGATGCAGGATTGGGCTCCAAAATCTTAAGGGTTTTTCAAGCATTTGCAGTTGTTCTTGACAAGCATTGAGCTCGCGCTGGAGTTCCTCCAC  
TTTGAAGTTTTTGGCTCAGCATCTCCGGTTGGCTTGGTGGGCAGCCATGTCATCTCATATTTGAGCTTGGTAAGAGTCCTCATCAAGTAATCTTTGTCCAGCTTAGCCCCCTTTTGTTCAT  
GCTCTCGCACATTAATACACTTCTCAATCACATCTTCAATCCTCCGGCGACCAGAGAAGGTGCTAAGCCTACCAGAAGGGGAGAACATGATGAGCGCGATATCTATATCGCAGAGAACAG  
AGAGCTCGTAAGCTTTTTTCATGATGCCATTCTACGCTTGGAGAAGGTTACCTGTCTGTTGATCTTGTCTCGATGCGCTTAAGCTCAACTCTACCTCTTCCCATCTCTCTGTATCTCTCTC  
TTTTCTCAAAGTAGTTTCTCTTTTCTCCACACAACACCGTCTCTTCTTCTTCTTGTGGTTCCAAAATAAGTAGCTTTTTATATTTGTTGGAGTGGTTGAGACTTCAAGAGAGTTTTTCTTAA  
TTCTTGCTAAAATTTTCCCTATTTTCCCTTATTTTTCTGCCTCCTTAGAGTTCCACTCTCAGTTAGCGACAACCTGATGGAATTTAAATTAGCAACCTTCGGTTCGATTCCCTAAAACACTTTGC  
ACCTTAGAAATCCTTCTATAAATGGCAAGGCCAGCTTAAAATGCCACCTTTCTCTCTCTATAGATCCCCCTCTCTCTATCAGGTAATTAAGTAGACTTTGGACCGGATGGACCACAGTTT  
ATTTAAGAGGTTTTCTCGTTAGGAGGAGGAGAAGTGCATTTGCAGCAGGCATAAGATAATTAGAAGTTGGCTGTTGTCTTTGTGATTTTTGATTGAGGGCATCCTCAACCCACCCGA

>comp174926\_c0\_seq33

TCATTTCTTTCTTTTTTTTTCATTTCTGAAGTTAGAAAAACCCAGAATTAAAAAATAAAAATTGCTTCATTTCTTTCTTTTTTTCTTTTTTTAATTTTTTTTAGATTTTATTTTTTGATATTAGG  
CAAGGGAAACGTGAACGCTTCCGGTCCGCAAGCAGCCGCAGCCGGGGCAGGCGTCGCCGATGGTGTGACGAAATCGCAAGAAGCACAGATGCAGAGATGACAGCAGGGAAAGTAGA  
ACGACCGTAGCCGGCTGGGCAAAACAGGCGCGGCAAGAATTATCAAATATCTCAATCCCGTTGTGGTCAACGTTGGCCGACTCCGCATCCTCCGCCGGCGACTCGCCGAAGTTCTCATT  
GCAACCGCCGCCGCCCGCGCTTCCGCGGCCGCCGCTCGACAGTGGCTCTCTGGAGCTGAGCGTGGAGAGACGCTGCTGCGACCTGTTCCGTCATGGCTCTCCTCTTCCATTCCATCAA  
CTCAGTTTCGAGGCGTGTGAGCCGGTCTTCGAGCTCCGAAATGCAGCGGCTAGCTCTCTCGATCTCCGCATCCTTTTCTGTAGCTTATTTCCACAGATTCGAGTAAAGTGCATAGTTC  
CGTCGATGCCTGTCCGCCACTTGTGCGCCGAGCTGCTCCCCCTGGTTAGCAAGAGAATTAGGCGAATAGAATCAGGAATCCATGTATTTCTTCTAGTAACGGGGAAAAAAAGGAGGTCAA  
AATTACCTGAGCAATGAGGTAATGATCGATTTTCGTTTTTCTCCGTGTTAATCTGGGCGGCAAGCTCTTCCGAGAAGTAAGCCGGTATGACTGAATCGGGCTGTCTCTCTTGTATCTTATTGT  
TCCCTTGGTTCGGCTAAGGCGAGGTGAAGGCCCGTGGAGACAATCGAGAGGGCGTCTCCGATTGGAGCGGAAAGGGTTCCAACATCGGCGGCAACTGCAAGGAAACGTAAAGCTGCT  
GATCTTGTGCGGTGGCGCCGCCACCGCCGCATACGGCTGCTCCTCTCTTCCCCTCTTCCCTCGGTTACATTGCCTGCACCATTCGCCTCTTCTCAGCAAACAATCGGAAAAGAGAGAA  
ATCCGAAAGGAGAACAATTAATAACTCATACTTCATTGGACCAGAAGAAGACATGGGGTGGCTCAAACAGAGGAAGAGGGAAAGTTCATGTCCATCTCGTCGTTATTCATCTCAATCTC  
AATCGGGTATCAAGCAGAACGTTCCGGTGAGAAATGCACTCGCACGAACATTGCAATACGCTGCTCGTCTTAACAGATTGGACCAAGAGATCACGAGAAGAATGCAATGAAAGAAATCAA  
GATGATGAGGGCGATCAAGAACGTAACTTTTCTATCCTTCGACTTCTCCTTTCTGGCTTCCCTTCTTGTGCGCGCTCAATCGTTCTGAGGAAGACAGACGCGGTGGAAGAAAAGGACGA  
TCTAAGGCCCGACCTCCTTTTAGATTAGTTAAGCTTGATCAAATAGGCTTGCCAGGTAATATAATTTATCGAAAATTAAAAAAATTATATTAACGTTTTCTATTTAAATATTGTTAATTTTT  
GAATGGTGTAAAAACATTCAACTGGTAAAACAAAAAACTGAAATAAGCTAAAAAAAAGTAAAAAACAGAAATAAGCCTAGTTATATGAGCGGCAGGCCGGGAATCCCGCTTAGCTTCT  
CCAACCGCTTAAGCCCTAAATAAAGCAAAACGAGGCTT

>comp174926\_c0\_seq4

TCATTTCTTTCTTTTTTTTTCATTTCTGAAGTTAGAAAAACCCAGAATTAAAAAATAAAAATTGCTTCATTTCTTTCTTTTTTTCTTTTTTTAATTTTTTTTAGATTTTATTTTTTGATATTAGG  
CAAGGGAAACGTGAACGCTTCCGGTCCGCAAGCAGCCGCAGCCGGGGCAGGCGTCGCCGATGGTGTGACGAAATCGCAAGAAGCACAGATGCAGAGATGACAGCAGGGAAAGTAGA  
ACGACCGTAGCCGGCTGGGCAAAACAGGCGCGGCAAGAATTATCAAATATCTCAATCCCGTTGTGGTCAACGTTGGCCGACTCCGCATCCTCCGCCGGCGACTCGCCGAAGTTCTCATT  
GCAACCGCCGCCGCCCGCGCTTCCGCGGCCGCCGCTCGACAGTGGCTCTCTGGAGCTGAGCGTGGAGAGACGCTGCTGCGACCTGTTCCGTCATGGCTCTCCTCTTCCATTCCATCAA  
CTCAGTTTCGAGGCGTGTGAGCCGGTCTTCGAGCTCCGAAATGCAGCGGCTAGCTCTCTCGATCTCCGCATCCTTTTCTGTAGCTTATTTCCACAGATTCGAGTAAAGTGCATAGTTC  
CGTCGATGCCTGTCCGCCACTTGTGCGCCGAGCTGCTCCCCCTGAGCAATGAGGTAATGATCGATTTTCGTTTTTCTCCGTGTTAATCTGGGCGGCAAGCTCTTCCGAGAAGTAAGCCGGTA

TGACTGAATCGGGCTGCCTCTCTTGATCTTATTGTTCCCTTGGTCGGCTAAGGCGAGGTGAAGGCCCGTGGAGACAATCGGAGAGGGCGTCTCCGATTGGAGCGGAAAGGGTTCCAAC  
ATCGGCGGCAACTGCAAGGAAACGTAAGCTGCTGATCTTGCTGCGGTGGCGCCGCCACCGCCGCATACGGCTGCTCCTCTCTCCCTCTTCCTTCGGTTCACATTGCCTGCACCATT  
GCCTCTTCTCAGCAAAACAATCGGAAAAGAGAGAAATCCGAAAGGAGAACAATTAATAACTCATACTTCATTGGACCAGAAGAAGACATGGGGTGGCTCAAAACAGAGGAAGAGGGA  
AGTTCATGTCCATCTCGTCGTTATTCATCTCAATCTCAATCGGGTATCAAGCAGAACGTTCCGGTGAGAAATGCACTCGCACGAACATTGCAATACGCTGCTCGTCTTAACAGATTGGACCA  
AGAGATCACGAGAAGAATGCAATGAAAAGAAATCAAGATGATGAGGGCGATCAAGAACGTAACCTTTCTATCTTCGACTTCTCCTTTCTGGCTTCCTTCTCTTGCGCGCGCTCAATCGTTC  
TGAGGAAGACAGACGCGGTCGAAGAAAAGGACGATCTAAGGCCGACCTCCTTTTAGATTAGTTAAGCTTGATCAAAATAGGCTTGCCAGGTAATATAATTTATCGAAAATTA  
TTATATTAACGTTTTCTATTTAAATATGTTAATTTTGAATGGTGTAAAAACATTCAACTGGTAAAACAAAAAACTGAAATAAGCTAAAAAAAAGTAAAAAACAGAAATAAGCCTAGTT  
ATATGAGCGGCAGGCCGGGAATCCCGCTTAGCTTCTCAACCGCTTAAGCCCTAAATAAAGCAAAACGAGGCTT

>comp174928\_c0\_seq23

TGACGAAATGTCACTTAAGGTTGGGATCCCAAATTGCACATAACAACAGCCAAAAATAATTCCTGCTGTCTCAGAATTA AAAAGTCGAAATTAAGCCATCTCCTCAAATGAGACTTATG  
GCTGAGGATCGTTTGGCAGCTTTCTTATAAGTTACTATGTCTTGCATTCCATCTAATTAACAGCATATTTCCAAAAGAAAGAACTTAAAGCACAATCAAACACTAAATGCCACTTATAT  
GAAATTACAAGCCAAATGCTCTAAACCGACAAGCCGGCTTCAACCAGACGCTTGAGGTGTTGGATTGATTCACTCACATAGAAGTCATGCAGTTTCTCATCGCCGAACAAATTCCTGCAT  
TCCTTCGCTTTTCCCTCAGCACTTTCCCTTCGTCTTCAACCATTGCGAACCTCAGGCTCTTCGCAATTCATCACCCGTGAACGACCCATCCTCCTTTCTAGGCACCTCGACGCCGAATCC  
CTTCTCCACCAGTTTTCTGGCAATTAGCCCCTGATCGATTATCATCGGCAGCAGTACCATCGCCAGCCAAAACGCCAACCTTCCACGACCGAGCTCCACCCAGCGTGCCTCAAGAAACC  
CCCTATGGAAGGGTGAGCCAAGATACGAATTTGAGGAACCCAGTCCATGCAAAGCAGCCACGGCCATGCTCCTTTATGCTCTCCACGAGCCAGCGGGCACCGACCCAGCCCTCAATG  
CCCAAACGAAATGCAGCCCGCTCAGTTCCAGGCCGACGGCAATCTCCTTACCTCCGCGGCACCTTAGCTTCACTTCACTTCCGAAGGCAACATACACAGTTGAGCCCCGTCCTTGCTTGT  
CTAACCAATTCAAGCGCCGCTGCTGTCTTGTCAATTGAGGGTGGTAGAAGTCTACAGGGACGATCGGCTTCTCAGAAAGGTGGCCGAGAAGCTGCAACCATTGCGGGCTCCA  
TTACAGCTACGGATGAGTACGATTTGGCATCCCTGTATAGATTTCCAGCCCGATACATTTACAGATACACCAGATGCATCTGGAAGTCTGCAATTGAACATCTGGGGAGCATCGAAAGAGC  
GGAAGACGATTGTGGAAGGGAAAGGAATCCACGGAGGCAACTGGGTGAGTTCTCTGCTTTCTTCCGAGCTCCTGCGCCGCCATTAGTGCGGATGGCGGGCCCAAGAAGGAAAAGAA  
TGCGGCGTTAAAAATGCTGAAGAACGCACACGGCACACCAAATTTACAGCAATGTTTGGAAACCAGTGGGCGGCATAGTCGAAGAGGATGCAATCCAGAGACGCTATTTGCTTGT  
GGATGAGATCGGAGAGCTTTTGCTCAAAAGTGTCAAAAGCTTTACTTAGATATGGACGGAGATCCGCGGAAGGGAGGTCTATGGTCGCTCGGCGTTCTCCGGCAGGTGTTCAATTTGAG  
GTAGTGGGATTTGATGAAGTTGATGAAGGGAGTGAGAGGCGGGGGATGGCGGGGAGTCTTGCTACATTTCTTGGGGTGTGAGGAAAGAGATACGGTGGCCCTTTCCGGCGAAGGA  
TTAACGAGCTCAAGAAAAGGAAGAAGATGGCCAAAGGCAAACCATGGTAGCATTAAAGATGTGAAGACTCCACCTTCCATGATCAATTGGAAGAGATGAGGCGCCACAGGGAGGATT  
AATAGGTCGATTTGATCTATATCTGACACGAGTAGGTGGAAGGAAATAATTTCTGGCCACATCTATACAGAGATATATATAATTAACACTAAACAGTGTGTTGCCACTACAGTTGTTACATT  
GCCTTCATGCATGAGTTCCGCCGCTGTCTACAGAATAAAGAAAACCTAAAATGAATTGGGCCATCCCGACAAAGAAAAAAAAGCTCTTATTAACGGAAAATTATTAGGTGTCATCGGACG  
GTTCTCCTGTGCGCAGGTCTTCTATCATGGTATCAGAGCGGTAA

>comp174933\_c0\_seq26

ACTGAATGTTAAGGATCTAGTTCTTTTAGGGCATTTCACATAACTCCAAATGCTTGAATAGCGTCGCTCGTGAGCCCTAGCTGAATGGTATTTACTTGCGGGTGAACAGTGAGACGCCA  
TTATTGACGTTGTGTTATCCTTGCTATTTTCTGTCTCTACCGAAGACCGTTACCTTCGAAAAGGGGTATAATGGTGTGTTGGAGATGGCCTTACTAGCTAGTTCAGGTGAAATGAGGA  
TTAGGTACCTT

>comp174933\_c0\_seq8

TAGGATTTATGTAGTATAATTATAATATTAACAATTGAGGTGTTAAATATATAAAAATAACGATAATATAGTGATATGCATGTATGTAAATCTCCCTTTTTTTTATATTTCAAATGTGACAATGCAA  
TCCGTTTAATGAAGGAGCAATCTTCTGACAGTGTTCGCGCCATAAATTATCATTTTTGACAACATTCCTCAAAAGATTGAGGGGTTCTTTTTGGATAATTTAACACGCGGTTATATTCCTTCA  
AACTTGGAAGAAAAAGAAAACAGTACATTACAAGCCAAAGACTGTCATCAGAACGTGTGTTCTGTGGACAAGTACATTCTTTATTCAAAAAGCAGGCTCTACGACTAATCTCCATTGCTCTT  
CTAGCTCTCATTCTTGTCAATGGGCATTGCAATATTAGAATTAGTCTCAAAGGCTTTTCGTGGTGTCAATTAAGCATCCAGCTCCTGAAGGGGTGGAAGAGTATCTCATCAGAGCAAGTGAA  
CTTAGGCTTTGCGGGGCATTCAATGATCGTCGAGCCATCACTGTGATGCAGATGTGCACCTCAAAACAGCTGGAACCTATTGAATGGACCCCTGCTGCATCTTATTACAGGTTCCAGCTCCG  
ATGCCTTCAGCTATGGCACTCTTTATATCAGCAAGCTTGTACAAGTTGTAATCTGGATGGATTCTTTCTTGACGAGGTGAAAGGCTATGTCTGCCTTTTGCAGGAGATCCAGACCTGTTTT  
GAAGTAGTCTGGTTGGGACAAGCCAGAGCAGACTCCGTATCTTTCCACTTGTATTGCCAGTTGGATCTTCCATTGTTGCTTGGGCACCTTGATGTTGGCCCAGTACGTTTCCAGATCATGG  
CTCAAGCCTGAGATCTGCTTAAATGCAATCCATTTTACTTTCACCTTAGCAGATTATTGATGTAAGGGTGAGTTTGTCTAATTTTCAGACATTTTAAAGTTATATTTAGGTGAGTTTATTTTAGCT  
TTTGATTGGGACAAATATTTCTACCTGATTATAGTCAAAATTTATGTTCTGACACTTTGTGATGGAATCTCCATTAGAGTTATAGGGTATGAGATCCTTGATAAAGAAGTCCCCGGCAGGCT  
CGCCGGTCTGCGGAAGGCAGCAACCAGCATTTGTCTGCTCACAGTAAGCTCCAGGCCACTGCATGTAAGTTCAATTTTCATGCTCCATATAACCATACAGTTTCATGCAAATACAGCAAAA  
AAAGTAAGAAAAATAGCTAAAAGATTTGTCAGAGAAGAGAAGGAAGAGAGAATCTGAAAATGTCTGTAATTTCTCAAGGCTTGGATTGAATGAGAAAAGTTGTGTAAGTGAAGGAATGGAT  
GTGTAATACCATGAGAACTAGGGAGAAGTAGTCAAAGCTCTGGGCTGCGAAGCAAGGAGAGATTATTAGCATCAGTGATAGGAGGAAAGCAGATGATACGCTGAGGCCCATCTTTTTTA  
CTGCTAATGTTTCTCTTCTTCTTCTTCTTAGTAGAGATGATTAGAGAAGAAGAAACCGAGCATGGTATTTATAGGCGGAGGGAAACGCCTTCGACCAGAGGGAAACGGTTTCTCCC  
CTAACGTTATCTTTTTTTTTTAAAGA

>comp174970\_c0\_seq10

TGGAAAATAGATGGGTGCATCTACTCAGACAACCACCATAACCATCATATGCATATGCTTCAGGATATTGTAATGCTTCTGTAAATTGCTGTTCCAGGTAGTCGCCGTAACATAGCTTGATA  
TGTTGGTTGGGAGCTTTGACTATCAACCAAGAGGTTTGGGCTCGAAGCTTGTGAATGTGATGTGTGTGAGTTTACCTTACTTGGGCTCCAAAGTCTTAAAAAAAAGCAATTGGAAT  
TGTTTAGCACAGTATAAGACAGGATAACATTTTCAAAGATAATCAATAAAGTTCACCTATTGAAGGACAAAATAATTTTTTTAAGCGGAAGA

>comp174975\_c0\_seq1

AAAATTTTATCACAAGTGACTTCTGTGGTAATTTCTATTAATATGAACTTTGTTAAAATTTAGATAGATATATTTTATTGGAAGGTTCAACAAATACATTTTTTTAAGTTGACGATTAAT  
GCTAAATTGCACTAACGCTTACATTAAGACATGCAATAACTATGGTTTTGTTGAGACAACCTTTTGACCATTGTCTTTAATTGATTTTTTTGTGCTAAAAATCTGCTTTTGAAAGCAGTA

>comp175009\_c1\_seq12

TTAAGAAGCAGTAAAAAATCGCCTCAAATAAAGCCTAAAGCTCACACCCATAGAATGAGAAAACCTCCGAGAATCAAACAGTCACACTTGCATAACACCCAGCTCATCACATTTTTTAA  
ATGCAAAAATCCAAACCAACCAACTGCCACTGAATCCTAGAGAAACTTTTTTATGTAAGAAATTGGTAAAATTTTACCTTTAGCAAGTCATCTGGTTGCTTCATTCCATGACAAGCATA  
TTTTCTCTCCTGTTATTGGATCAACGACCAAAATTGCAGGCAATGTCATCAACTTGTAACAAACATACTTTTGTCCCTCAATAGTGTCTTTGTCATTAATCTCCAAAATAAAAAATGT  
GATCTCAATAATCTTGGACAGTGACATCTGACCATGTCTCTATTTAGCATATATTCCTCCCTTGTGTTGCACATTCACATAAACCATCTATCAAGATGGGAAGACTCTACTTTTGCTCAT  
GAAAGTGCCCGTGAAAAATGTAATTTGGACGTCCATGCAACATAGAGAGATTTGTTTCGTTATATTCTTCTTCTTTGAAATCATAATCTTCAGATGTCCAGAAGTACTGACTCTAACCTACT  
GTTTGTGGATTGCGACCAAGGATTGTTGATCAGAGAAAAGATTTCTGAAGGTGGAAGAGGAAGAGCAACAGCGAAGGAATCTATGATCGAAGAAGAAGGATACATTGG

>comp175009\_c1\_seq2

GTACAAAATCTACTTTAAAAATTTTTTATACTAAAAATTTGTTTTACAAAGCAGTAAGAAAACCATACCAAACAAAACCTTTAATTACAATAAGCCTCTTAAATCAAAGAATAAAAAAT  
ATATAAAAATTAATAATTTAATGTTGATAACATCAGCTAATCATCTGTTAATCTCCTCTGAAGCTTAGTCTTAAACAGAGTGTGGATAAACAGCCTCCTCAAAGGATGTGTCCGTATCATAA



AATAACATAGGAGAACGAGGAACTATAAAGCAAAAACCTTTGAGATTCTTCTCCTTTCTTCAACAAAGTTGAACAAAAAGACCATAACAACCTTCGTTCGAATCTGTTTTTAGGAAGCTTCTC  
TGCACTCTCTCGCCACTTGGAAAGATATACTCCTACTTTGCAAATGTGCTTCTTTCTGTAGGTTCTTCCGGAAGAGGAGGATAGCTTATTTAGTTGTGGGCTCTGGACTAGTTTCCTTAGG  
TTGTGATTCTCATTGCTACTGTTTTGGTCTGTTGAAGCACTAGCATTTTCTCTTCGTGTGCTTGCTTGAAGGTTCTGCTTTGGACTTCTATCAGAAAATCGCATCAAATCCTCTAGCAAGTC  
CTCTGGTTGCTTCATTCTTACAAGCATAACATTTCTCTCCTGTTATTGGATCAACGACCAAAATTGCAGGCAATGTCATCAACTTGTAACAAACATACTTTTTGTCCCTCAATAGTGTC  
TTTTGTCATTAATCTCCCAAAATAAAAAATGTGATCTCAATAATTCTTGGACAGTGACATCTGACCATGTCTCTATTTAGCATATATTCCTCCCTGTTTTGCACATTCATAATAACCATCTAT  
CAAGATGGGAAGACTCTACTTTTGCCTCATGAAAGTGCCCGTGAAAAATGTAATTTGGACGTCCATGCAACATAGAGAGATTTGTTTCGTTATATTCTTCTTTTTCGAATCATAATCTTCA  
GATGTCCCAAGAACTTGACTCTAACCTATCTGATTCTGAATCATCATCATAAAGCCTCTCATTACTAGGTGGTGAATAATTGGGATATTCAAGGGCTCCATCAACACCATGCTCATGTTCCCTG  
AGATTCCAAAACCTTCAATTTTCATCCGCCGAACCCCAACCCGTGGGTACAATTTCCGGGATCAAAATCCCAATGTTCTTGAGCATCTTACCTTCATTTTCATCCTCTGGGCACCTAGGTTGGA  
TAGTGGCATCAAGGTCAAAATGGTTTTGACCATCATCAACTTCATCTTCATCTTCATCGGCTGAGCCCCAACAGTAGGTACAATAGTGGAATCTGAATACAAAAAGGATTAGATGGTAG  
CACTGCCGATTCTCCATGTGAGCTTCCACCCTCAAAAAACAATGAATAGCAGCCTCAATGTTCCATTCTACATCCTCGAGGATCTTCAAAGCAGAAAACCTGCAATTGCACATTGTGATC  
TCAAGAAAAGTGGAGACAAGTTCTGCTTGTGGCTCCATTGCAAAGAACTACTCGTTTTGTGGATTTGCAGCCAAGGATTGTTGATCAGAGAAAAGATTTCTGAAGGTGGAAGAGGAA  
GAGCAACAGCGAAGGAATCTATGATCGAAGAAGAAGGATACATTGG

>comp175020\_c0\_seq5

ATTAATCAATTGAACAGAGTAATTACAGAATAACAGATATTTAATTACTCTTTATCAGGTTGATTAGTGATTGATTAACCTGAAAAGGAATTAATGAATAAATTAACATAAATTTGAAGC  
CTTATGGTAATGCTCCCATCGCACAAATGTATGACGTTAAGATCTCACCAGTACAGACGAGTCATTTAAGGGAAAACCTGCCGTTTGAAAATCAGAATGGCAGCTTATTTCAATGTTTTCTCA  
ATAATGAATTACATCAAATGACAAGTTACAACCTTACAAGAATTATCTTTCCAATGTTCCGATACCAAATCATCACAACTCTCTCCAAGCATGACCTTGAACATAACATAGGCTTAGCTTCTT  
AAATGTTCCAATGGAATGGTATTAACGCCTAAAGTCTTGCTTGAATGCTTGCAGGGAGTTGAATTTGCCGAGCTCAGTGGTAGGCCATTTGCAGCTCTTCTTCCAAGTACTTGCAAG  
GAGTAAAGAATCTGCCATACGCATCCTCCAACCTTTTTGAGCTTTGAGTAAATATAGCTAGATCCAATTGTATCAGCCCAGAACACCAGACCACCCTATATTTGGGAAAACCCATTCCAAGT  
ATAGAAGCAACATCAATATCAGATGCTCGAACTACAACCTCTTCATCCATTACCCTGCATGCCTCATTTACAACCTGGAAAAGAATATCATCTCCACAATTTCTGGTCAGTAACAGTTATGG

>comp175057\_c0\_seq7

CTCAAGTTTATAGGAGGCAGAACATGTCTGCCTCCCTAGGTCTTGCCCGACCACATGGTGGGCCCCAACTAGCCCAATGGATTTCAAATTGAAAAGGAGGGAGTGGCTAGGTCTTGGGA  
GGGAGATTAGATTAGGAAAGTGTGTTTATTAATAAACAATGAGATGTTTAGAGAAGTATATGTTTTGATTTGTTCTCAATTATGGTTCCCTAGGCAACTTTGGCTTTAGACTCGTCTAGAAATTTG  
GGAGAGACAATCCTCCTCTAGAATTGAGGATCTCTGTATCTTGTTCCTTATTATTTTCGCTTTGATTTTCCTACTACAATATATTGTTTTGGGCTGTTTTACCCCATATTTGCATTATCATCG  
CTAATTTTAACCAATTGGTGATAGGTTTGCTAGCAAACCTCAAGTATTACCCTTAAGGTTACTTGCAGAACTCAAGTATTT

>comp175089\_c0\_seq14

GAGCTCGCTCGCTGCGAAGGTAACGATAGTTCTTCCCTCCTCGCACTTCTTCGGCAAAAATCCGCCAAAGAGCCGGATTTACGAAAACCGGGATTTAGGGCAAAAATTTGAAAATGTTCGT  
GAAGTAGAGCTGAGACGCCGACGTAATAATTTTCGAGACTTACCGCCCTTTAATCTTGTGATCCGACCACTCAGGATTTTGCAAATCACGTCAAATCTTAAAGCGGAGGGAGTAAC  
GGGATGTCTCGCCACCGAGAAGACGATTATGAAGAGGAGGAGGATGATGAAGAGATAGAGGAAGAAGAGGACGAAGACTTCAGGAGGAGGACAGGTGGGAGGAAGCGTGGTTCGGTC  
CGATTTTCATTGACGATGCAGCCATAGAGGACGATGATGACGAGGAATACAAGGATGAAGAGGACGAGGATGAGGAGCTATACGGTGGCCGCGGCCAGAAAATATCGGAAGAGGGGTTCTG  
AGTTCTTCGACCTTGAGGCCAGGTGATAGTGACGATGAGGAAGAGGAAGACGAGGAGCCGAAGACGATTTTATTAATGATGCTGGAACCTGACTTGCCTGATGAGAGTGGTGGTAGA  
AGAGCACATCGTCCATTGAATATGATGCCGGAGGATCAAGAGGATGTTGAAGAGATGGAGAGGCAAGTTTATGAAAAGATACGCAAAGTCAAGCCACATTGAATATGGTGAGGATGCCAC

TGAGGTTGAACAACAAGCTCTACTGCCGTCGGTAAAAGACCCCAAGTTGTGGCTGGTGAAATGTGCTATTGGTCGTGAGCGTGAGACTGCAATGTGCCTCATGCAAAAAGTTTATGGACA  
TGCCCTGGCCTGCAGATTAGATCAGTGGTTGCATTGGACTTTCTTAAAAATTACATATATGTTGAAGCCGATAAAGAAGCCCATGTGAAGGAGGCTTGTAAGGGTTTGCGCACGATATATAGT  
TCAGCCAAGGTCATGCTAGTTCCTATCAAAGAAATGACGGATGTTCTTTCTGTAAAAGCAAACTATTGAGATTTCCAGGGACACATGGGTTAGGATGAAACTTGGAATTTATAAAGGAG  
ACCTTGCCAAGGTTGTTGATGTAGACGATGTGCGACAAAAGGTGACAGTGAAGCTAATTCCAAGAATTGATTTACAACATCTTGCTAATAAGTTGAAAATAGAGATGTGGTTAAAAAGA  
AAGCATTGTTCCCCACCTCGGTTTTTCAACATTGATGAAGCTAGGGAGATGCATATTCGTGTGAAATGCAGGAGAGACAAAGATACTGGGGAATATTTTGAATGGTTGAAAATATGAT  
GTTCAAAGATGGTTTTCTTTATAAAACAATGTCAATGAAATCAATCCGCTCTCAGAATATACAACCAACTTTTGATGAACTTGACAAAATCCGAAAACCTAGGGGCGATGGTGATGCTGAT  
ATGGCTAGTTTATCAACTTTAATTTCAAATAGAAAGAAAGGCCATTTTCATGAAAGGAGATGCAGTTGTAGTTGTACGAGGAGATTTGAAAAATTTAAAGGGATATGTTGAAAAAGTTGAA  
GAAGATATTGTTACGTCAAGCCTGAGATGGCTGGCTTACCAAAAACCTTTGGCTTTCAATGAGAAGGAACTTCGCAAAATATTTTAAATTAGGAGATCATGTGAAAAGTGGTATTGGGAGTG  
CAAGAAGGTGCAACTGGTATGGTTGTGAAGGTTGATGGCCATGTGTTGATAATTGCATCAGATAACCACGAAAGAAGATATCCGTGTTTTTGCAGATAACGTTGTTAAGAGCTCTGAAGTTA  
ATTCTGGAATTACAAAAATGGCTGATTATGAGTTGCAAGATCTTGTCCTTCTGTCAACATGTCATTTGGTGTGATTATACGTGTGGAGAGTGAAGCTTTTCAGGTAAGGGGAGTTTCT  
GATAGACCCGAAGTTGTACTTGTAAAGTTGAGGGAAATAAAGAGTAAACTTGAGAGACGTACCAATGCACAAGATAATAGAAAAATATAGTCTCTGTGAAGGATATTGTTAGAGTCCCTC  
GAGGGACCATGTAAGGGGAAGCAAGGACCCGTTCAACACATTCATAGAGGAATCCTGTTTATTTCATGATCGGCATCACCTTAAGCATGCAGGTTTTATTTGTGTGAAAGCACAATCGTGTA  
TCGTTGTTGGTGGAGACAATGTTAAACATGGTGGTGATAAGTTTGATGCAAGATTTGGTTTTGAGGCCCTTCATCTCCTTACCTTCAATCTCCAAGAAGACCACCTAGAGGACATATGGATCG  
TGGTGAAGGGATAATAGAGGTGGTGGACGAGGAAATGATGCTTTAGTTGGAAGAACTATTAATATTCGTTTCAGGGCCTTTTAAAGGATATCGTGGTCTGTGTTGTGGAGGTCCTGGTTCC  
TTTGTTCGCATCGAATTGGATTTCGCAAATGAAGATAGTTGCAGTTAAAAGAGATGATATCTCGACACACCAGGTTCTGCAACCCCTTTCCGTGAACCTTCTCAATATGATTTTGAAGTG  
AGACACCCATGCATCCATCTCGAACACCCTTACCCATATCAAATCCTATGAGAGATGCTGGAGTAACTCCCATCCATGATGGCATGAGGACACCTATGCGTAACGGAGCATGGGCTCC  
CAGGAGTCCCTCTTCGATGATGATGTTGCACGGTAGTTAATGTGTTTCATTTCTTCGTTTTTTGGGTAATAAGAGAACATATTAGATATTACATCAAAGCTTATTCTGGATGATTTACAAA  
TCTGCAGGGTGATATGATCACCTTGAAAACAAATAAAGTGCTTATGCAAACCTTTGGGAACTAGTACTATAGAGAATGCTCTTAAGCTAGGGTTCCAAGAAGTCAATTACACTCTACGT  
AATGATTTTTTTTTGTTCCCTTGATTCTTTTCGATGATGCTGGCCAAAGTGAGGAAGAAGAAGATAAGTTTTAAAAAAAAAATTTACTGCAACTTTGGATGATGGCAAAGAGAATGGATGTT  
TTAATCTTATATTTGAAGTTAATGTCTGGATAAGGGTTGTTTCGGTTTTGATGTCATATTAAAAAACAGCACTATTTAGGTAACAATGTTATTTCATATTTAAGATTATCTTTATATAGAGTGTG  
CTCAATGTAACATTTATTTGAATAATCAATGATGATTATAACCTTAACTTTTTTTTTCTCATATA

>comp175107\_c1\_seq1

AAAACAGTGATAGCAAAAAGTGTAAGGTAAGACAATTTGTAATAATTTGAAATAAACTTTTAGTTTGGCCACTTGTGTCTAATAATATGTGCAAGAAATATTTTGTGTAGTTTCACCCTGTAG  
GATCTTTATTTGTTCCATGGCAAAGCTGTTGCGCTACGTGTATAATCTCTTCTGGTAGCAGTTGTTGATTGGGGGCATGGATCACTGGGCTTTGTGAGTTAATAAGCCAGGAGGTCCCATCT  
TTGTATGCTTTTTCAATGGCGGAAGGGTCTTCTATATTGGTTCAATGGCGGAAGGTCCCATCTTTGTATTGTTTCATTATGTTCTACCCCTTTAAATCAACGGTGTTCCTTCGACGAG  
TTAATCAGGCTTATGTCATTGGAACCTTACCAACGTTGACATTTCTAAAGCCAAATTTGATGACGGGTACTTTAAGAAAGAAAAGAATTCAATATATAAGTGAATTGC

>comp175115\_c1\_seq2

GTGACCGGACCTAATAATTTCCCTGAGCTTGGGATCAGTTAGGAGAGAATGGGGGAAGTAGTAGGCGTTGAGTAACTACTGGTGGGTGGACACAGTGGTAGCCGGACGAATAAAATCC  
AGATCTTTAAAGCTGAAAATGTACGGGTAGGTCGATCGATGGGGGCTGGGCAGTTAAAAGACGAGGTGGAATGCAGAGAGCAGGGTAGCCTCTTTACCCTTTTTACCCTATCTACTTT  
TGTACATGGAAGAACTAACCTTTGAATGGAAGCGTGGGGGAGCATTGCGGTGACGCGAAAGGGAGTAATTTGACACAGCCGCACCGTTTCAAGAAGGTTTCAGGAGGGGGTAATCTTA  
CCGGCGGAGCACCGTCCGTTCTTCTCCATGGCTCCAGAATCGAATCGCGGTAACGAGACGGCAGAGTCTGGTTTCTTCTCGCTCGATCGAACGATGGGTTCCGTTTCTCTGATGGC

ATTGAAGGACGCCGAGCTGCAGCCCTCCGCTTCGATCTCGACGCTGCCGGCGAGCTAGCCGTTCTCTTTCTTGTGGCGGCAGGCGGCCGCGGTGCATCCGGCGAAGCGTTCATTATATC  
ATCGTCTTTACCTCTCTGGAGACCTGACGGGCAGCTTCCAATAAGAGATCGAGGTATCCTTCGCGTCCCTTCGGCTTCTCCGTTGATGTATTCTTCCGGCTTGCAAGAAGTATTCGTGATTT  
CGGAGATTTCTTTGACTGATCCGAGCATGATCGGCGCGGCTTCAGGAGAGCATTCTCCCTCAGAGCTCGTATCCGCTCCAAGAAGGAGTCGGCGGCCGCGTGGAAACCTTCTTGAGACC  
TTATTGACGGTGGGGGCATCATAAAACAAGTTTGGTTTCGGGCAATCGACGACGCCGCTGTGCGCGGTAGGAATCTCTTCTTCTCCTCCGCCGACTCGCGTGCAGCTCTGATCCTCTC  
GGCATAATCCGACTAGGTCCTAATGTAAGATCCAGATTGATAGCTACCTCAGGGGTCTGGTAGGGATATCGCAAGCATCAGGGCAGGTGGTGGTTCCGATTACAGAATACGTTGGCGTAG  
GTGTTGGAGGTACGGTGACGATGATGGTTAATATTTTGGCGAGGTTTGCCTGCGCCGTCGAGCGACCGGTGCGGCCCTGACTGAAGGCCGAGACGGCAGCGCCGCAGGGAAGAAGACGA  
CATTGGCGACGATCTGC

>comp175177\_c0\_seq5

AATTTTGCTCCTGAAAACTGCCGAAAATGATAGATTTCCATCGGAAAAGGTCGCCGGTAATATATGATTTTGCCTTAGTGTTAAGAGAAGCACAGAAAAGTAGTGATCTTATCTAATATAA  
GTAACAGATATATATTGATTTGATGCATATATGAAACGTTTACACAGCATTATATTCTTACAGGTAGCCCAGTGCATAACCACGATTGCTCTTATTTTTCATTCTTAAGTGTATTAATAAA  
GTAGTCTTGCACCTTAGTTGAGACCTCCAACACCACCCCATATCCGGATCCACCACCAGAACCATAACCAGATCCGGAACCTAAGCCTTCTCCATCTCCACCATCGGAGCCCGCTCGCC  
ACCACCACCATTTCATAGCCACCACCATGGGCCCCACCTGCATCAGAACCTGATCCAGAACCATAGCCAGATCCGGATCCGCTC

>comp175197\_c0\_seq10

TTAGAATATTCATGGCAATAAACAGAATCTTACATCTTAGCATTGCACATGTATCCGCACACAAAACAGAGGAATCTAAAAACATCATAATTTTACATGAAAAACCATAAAAAGGTGAAAA  
AGATCAGAACGCCACGCCATTCAAATGATTCCACTATTGTTTGAACACGTTACAAAGATTGACATATGCTTGAACCTTTAGGACAGTCAAATTACAATAGTACATAAAGTAGATTGAACT  
TTGTGTTAAAATTCAGGAGTTTACCACAATGACAGTTGGGTAGAAGTCAGACGGTGGTAGAGCAGAAAGTTCGACGGTTGTTAGGCAAGAGTCTAATGACGTTTAGTTGCCAGACGAAAG  
TCTGGTAAAAGTCTGACGATGATCGGTGGCCGTGTGGTGGTTCGAGGAAGAGTCTGGTGGTAAGAGAGCTCCAGATTTACATTCGCTATTCTCTTCTTCTTCTTCCATCTTTTTTCTTCA  
TTAATGAGAGGTTTATTTATAGATTTTTTGGAGTGACATGAATAGTAAATAGGGAGAAAATCAATGGCATGTTGGTAGTGCTTTGATTGATGGCTGATATCAATTCCCTTAATTATGAATCGT  
TTATTAAGCATTGAGTGTTTTAATAATGTCAAAGTTTGATAATCTTACGCTCTTTGGAGTCATCTCGTCAAGCCACTTGATTCAATTATATGCATGACATATTTGAATATTTTGGTCATCCA  
ATTTATGCTTTAGGCATCCTGAATATGCTTCGGGCCCTCGTTTTGGGCTCACTTGGTCTTGGATTGGATTGAATTTAGTGTGCTTAAGTTTCGTCTCCTTGCGATGTTCAATTTGACTAGAAGC  
ATGTTGAAATCAGAGCTCGGACGTATCTAAATTTTATTTTGGAAAGTTTCTGATTTATATTTACATTGAGATTTGTGCCCGATCAAGATAATTTTTTTTTATAACATATTAGTTTCCCCATATTTT  
TTTATGTCGAAGTCACATAGCCTGAAAATATGTGTTGGAGCTTTTTAAACTATTCCAATGCAAGACTATAATTTTATGGCAATTACGAGGCGCGACTGCTCTCTGGACGTCAGCATGGATCT  
CCTTTTCAGGGCCATGAACTAGGTAAAAATGTAATAATCTTAGATGTTGTTTGTGTAGGGTAAAGTGCAGCTAGATCTTTTTACACACATTATGATGTATTGCATTATCATGTTTACTTGGAT  
GCTTTGTATTGATTAGTAATTATGAGCACAAGCTATAAAAATACATTGGAATGCATTATTTGATTAAATACTAAGCAAAAAATTAGCACTAATTGCTTGGATAAAAAATTGATCATAAGCTAAAT  
TACAAATAACATGCACCTGGAGAAAGGAATTGTACAATGGATTAGGAATGAGGATGTAAGTGTCTTTTTTAAAGGATATCCTTTTTAAAGTGAATTGGTTCAATCATCATTAAAGAAAATT  
TGATCCTTGGTTTTTACCACCGGGCTCTCCATATCCATCTCCATAGTGATAGAAGCTTTGTGCTGTTTCGTGGAACATCTACTAAAGCTTTTCTGAAAGATTCTATAGATGTTGAAAATGTAATA  
TATTCTCCATTCAATTTTTTCCAATAATTTCTTATTAACATCTTATATAGTCTCGAGCAGCTGAGTCTGAAACATTTTTCTCATTATATAGCATTGAATTTGAAACATCTCCTCTTTG  
GATCTCTGCCGTGCATGTTCCCAAATCATCATAAAGACGAAAAAGCATGCACGAATAACGAACCTATAGGTGGATAGAAGTCCAAGCTTTTAATAGCTTCAAAAAGTCAAATCATCACTTAGG  
CAATATGTTGTAGTTAGTGACAAATTCCTGATATGGTAACCCAAGCATTGTCCAAGTACTCGTCCAATGTAGGAGTATATCCATTATGATAACCACATTGCTTCAATGAAATGTGCTTTGCAT  
AAATCGGCCACATTCGTTTTAGGCATGGAAGAATGTCCAACCTTTTTTCTTTGAAAATGAGGAGGCAATATCATCCATTGTATTAATAAAGTGTGTCAAACATTTCTTCATGTAATCTGG  
AAGTTCTTGCCTTGCAGCTATATCCATCTGGGAGTTCCAATTTATTTTACAATATGTTAGCTGAGGACTATTTAAGTAAATATATTTGATTGCATTTAGTGGTTCGTTTAGTTACTATTGTTAT

CAATTTTTTTTATAATAATAGCTAATTA AAACTACTTTATGCATATCAAATGATTTATTCCACTTCCTTACTCTTCAATAGCATTTGTAAATAGCTTTAATTCATCCAAGGTACCATAGATATCAT  
AAATATCATCAATTGTTGTAATTATAGAAAATAATTTGGTAATCTCCTTCCTACATCTCCAAAATGTGGCTCCAAAGCACATCCCATAGCCCAAAAATAATTCATCAATCTGTCTCTTGC  
AAAATAAACTCATCACCAGCAAGACCAATACTCCTCCACCAACTGGACATCTCCTTAACTTCCTTCTTATAGATGCTTTGCACCATGTTGAAATCTAGTTTAGCAAACTCAAACAAGCTAT  
AATTTGTGTTCTCTTGTCTCTCATAAGTATCAATGAACCACATCGTATGCAACGTTGGCATTCTCCAATGCAAAGGGAGATGTAAGGCATGACTTATTTGTTCCACTAACGAGGGATGGATA  
AGAGAAGGTTCCCTAAGATAATTACTTAAATGTTTAGTTGTGAATCCATTGCTTCATCTAGGTCATCCTCTCCCTCAACACTAAGATAAGAAGCCTCGTAAAGGCTTAGCATTCCCTTTACA  
TCATTACAATATGAACTTTGAAGCTCCCATTCTCATTFTTTGAAGCTCCTAACCCAGGAAATCTTCTCTTGTATTTAGTGCCTTAATGCCATATTCTCTGAGAAGCCTAAAGAGTAAGGCTGA  
GCCATGAAGACTATTTTTAATATATTGCTTAAGCTTTCCATTGATGAAGCTATGAAAGTAAGCACATTTTTTATCTCACTCTCAAATGATATGAAATCCCAAGCTGGCACAAGGATTGACA  
TACTCAAGTAGCTTGATAGTATCATTTTGTCTATTCTGATCAATCAAATGTCTCACCTCCTCTTTCAACTTCTCCATAAATTAACCTGTGTTGCATCCAAAGAGCCATCAGGTAGCGACTGA  
ATATAGTTGTCATCCATAAGCTTGGCTGGTAGTTTGCACCTCTTCGTGAAGCTGGAGTTGAGAATACAGCTCCATCAGCTAAGAGACGCTGCATGGTTTGTCTAGCTAGTAGTAGCGAAG  
ACAAACGCTTACACGGGCGAAGTTCTTCCCTCCATGGTATGGTTGCAGGGAAAGCTTAAAAGGAAGAAGAAGAAGAAATTTATTATGTGATCTTTCTTCAGAAGCATTCAAGAGGTAAT  
GGTCTGATTAATAATCTTCTGTTGCATATCTCAATTTATAGATGTGAAAAATTA AAAAAAAAAAAAAAAAAAGGTTGCTCTATTTCTCGGCATTTTCAGGGCGAAGGACAGGGACTGGTAACATACCT  
TTCTGGTAGAAGGTTGTCCCATGAAACCATAAAGATTTGATCGGTGTTGCTACCTCCGCTTTTGATTCTAGGATCATCATCTTCTTCGTAGCGTTGAGTTCTGTACTCCAAAGCTGTAATCTG  
TTCTAACATCCAGTTATAGACGGTGCCTTTTCGGTACACATAAATTGTACAGTCATCGGCGTCCATGTCTTTCAATTGGTTCGGTATTCCTTCTCGAATTCTTCTCAGGCATGGGGGTTATCGA  
CATAGCTCTGAATCATTGAAAGGACTCACATGAAATAGGTTGGAGACGTCTGTGGGGTCTATGTAGCATTCTAAGGCGCTGAGAAAAGCCTTGTAGGCAATGAGATGGAGCCCCCATATC  
ATCGGAAATGGAAGCCTTGGGCGGGGCGGAAAAAAGCCGGAAACC GCCCGCCGACGAAGGGAACGCGTACTCTTTCCATTTAACATCAGCCGGCGGGCTTCTAGATGGTGATGACG  
GCTGGTTCAGGTTAGTCGATGTCGATGGCTGGGGCACATTTGCGGGGAGATGAATCCAACCGAACACAAGATGGGCTCGAGGTCATCATGGCTCATGATTGGACTGAAGGTCGGCGTG  
TGCCAGAGCGCCAGCTTCTTCGATACCTCTTGTATCTTACACCATACATCGCCGATGATTGTGACGGCCGAAGGAACCAGCTCCGTTCAACCTTAGATATACGTTTTTTCTGTCTTCT  
ATCCAAGCGGCATAATTTATCTCCCCTAACCTTCTCTGGTATCTGATTTTGAATCTTTTTAGGATCGCTGTCCACCATCGAAAAGGCCGCGCATTGAGGGCAAGAGTTTGTGCGAG  
AAGCAATGACGAAATTACCCCTCTAAACGGTTCGGGATCCTT

>comp175197\_c0\_seq16

TGACTCGTGCAGCGTAGTCCCTGCCCCGCTCGCAGTCGGCACTCGCACACCCACACCTGCAAAGCTCACCCGAACACGTGCATCCGCATTTGCACCCATTGTGCGCTTGCATAGTCCCC  
ACATGGCCCTCCAAAATGAAAACAAAATTGATGCACAAAAAATATGCATATTTAAATTTAAGGGGATTACAATACTTGCACAAAAATTAATAAAGAGTAAAATTAATCTTTACTATACTA  
GTGAATTTTTTATATTATCAATTAATACAATAATAATTGAGCACGCACCCATTCTTTTGCAACATTTTTTTGGGGAAATTAAGGCCAAAGCCCAATTTTCATAAATAGAAAAAGACTAGTTA  
CATGTGTAATAAATAAAAAAGGACAAAAAAGAGGTGTTGATCCACTAAAAGGCTAAAAGCTCACCAAAAAGGTGTGCAAAAGATTACACATGTCAA

>comp175197\_c0\_seq17

TTAGAATATTCATGGCAATAAACAGAATCTTACATCTTAGCATTGCACATGTATCCGCACACAAACAGAGGAATCTAAAAACATCATAATTTTTACATGAAAAACCATAAAAAGGTGAAAA  
AGATCAGAACGCCACGCCATTCAAATGATTCCACTATTGTTTGAACACGTTACAAAGATTGACATATGCTTGAACCTTTAGGACAGTCAAATTACAATAGTACATAAAGTAGATTGAACT  
TTGTGTTAAAATTCAGGAGTTTACCACAATGACAGTTGGGTAGAAGTCAGACGGTGGTAGAGCAGAAGTTCGACGGTTGTTAGGCAAGAGTCTAATGACGTTTAGTTGCCAGACGAAAG  
TCTGGTAAAAGTCTGACGATGATCGGTGGCCGTGTGGTGGTTCGAGGAAGAGTCTGGTGGTAAAGAGAGCTCCAGATTTACATTCGCTATTCTTCTTCTTCTTCCATTTTTTTCTTCA  
TTAATGAGAGGTTTATTTATAGATTTTTTGGAGTGACATGAATAGTAAATAGGGAGAAAATCAATGGCATGTTGGTAGTGCTTTGATTGATGGCTGATATCAATCCCTTAATTATGAATCGT  
TTATTAAGCATTGAGTGTTTTAATAATGTCAAAGTTTGATAATCTTACGCTCTTTGGAGTCATCTCGTCAAGCCACTTGATTCAATTATATGCATGACATATTTGAATATTTTGGTCATCCA

ATTTATGCTTTAGGCATCCTGAATATGCTTCGGGCCCTCGTTTTGGGCTCACTTGGTCTTGGATTGGATTGAATTTAGTGTCTGTTAAGTTCGTCTCCTTGCGATGTTCAATTTGACTAGAAGC  
ATGTTGAAATCAGAGCTCGGACGTATCTAAATTTTATTTTGGAAAGTTTCTGATTTATATTTACATTGAGATTTGTGCCCGATCAAGATAATTTTTTTTTATAACATATTAGTTTCCCCATATTTT  
TTTATGTCTGAAGTCACATAGCCTGAAAATATGTGTTGGAGCTTTTAAAACATTTCCAATGCAAGACTATAATTTTATGGCAATTACGAGGCGCGACTGCTCTCTGGACGTGAGCATGGATCT  
CCTTTAGGGCCATGAACTAGGTAAAAATGTAAAATATCTTAGATGTTGTTTGTGTAGGGTAAAGTGCAGCTAGATCTTTTTACACACATTATGATGTATTGCATTATCATGTTTACTTGGAT  
GCTTTGTATTGATTAGTAATTATGAGCACAAGCTATAAAAATACATTGGAATGCATTATTTGATTTAATACTAAGCAAAAAATTAGCACTAATTGCTTGGATAAAAAATTGATCATAAGCTAAAT  
TACAAATAACATGCACTTGGAGAAAGGAATTGTACAATGGATTAGGAATGAGGATGTAAGTGTCTTTTTTAAAGGATATCCTTTTTAAAGTGGAAATTGGTTCAATCATCATTAAAGAAAATT  
TGATCCTTGGTTTTACCACCGGGCTCTCCATATCCATCTCCATAGTGATAGAAGCTTTGTGCTGTTCTGTTGGAACATCTACTAAAGCTTTTCTGAAAGATTCTATAGATGTTGAAAATGTAATA  
TATTCTCCATTCATTTTTTCCAATAATTTCTATTAAACATCTTATATAGTCTCGAGCAGCTGAGTCTGAAACATTTTTCTCATTCATATAGCATTGAATTGATTTTGGAAACATCTCCTCTTTG  
GATCTCTGCCGTGCATGTTCCCAAATCATCATAAAGACGAAAAAGCATGCACGAATAACGAACTATAGGTGGATAGAAGTCCAAGCTTTTAATAGCTTCAAAAAGTCAAATCATCACTTAGG  
CAATATGTTGTAGTTAGTGCACAAATTCCTGATATGGTAACCCAAGCATTGTCCAAGTACTCGTCCAATGTAGGAGTATATCCATTATGATAACCACATTGCTTCAATGAAATGTGCTTTGCAT  
AAATCGGCCACATTCGTTTTAGGCATGGAAGAATGTCCAACCTTTTTTCTTTGAAAATGAGGAGGCAATATCATCCATTGTATTAATAAAGTGTGTCAAACATTTCTTCATGTAATCTGG  
AAGTTCTTGCCTTGCAGCTATATCCATCTGGGAGTTCCAATTTTATTTTACAATATGTTAGCTGAGGACTATTTAAGTAAATATATTTGATTGCATTTAGTGGTCTGTTTAGTTACTATTGTTAT  
CAATTTTTTTTTATAATAATAGCTAATTAATAACTACTTTATGCAATCAAAATGATTTATTTCCACTTCTTACTCTTCAATAGCATTGTAAATAGCTTTAATTCATCCAAGGTACCATAGATATCAT  
AAATATCATCAATTGTTGTAATTATAGAAAATAATTTGGTAATCTCCTTCTCATCTCCAAAATGTGGCTCCAAAGCACATCCCATAGCCCAAAAATAATTTCTCCATCAATCTGTCTCTTGC  
AAAATAACTCATCACAGCAAGACCAATACTCCTCCACCAACTGGACATCTCCTTAACTTCTTCTTATAGATGCTTTGCACCATGTTGAAATCTAGTTTAGCAAACTCAAACAAGCTAT  
AATTTGTGTTCTCTTGTCTCATAAGTATCAATGAACCACATCGTATGCAACGTTGGCATTCTCCAATGCAAAGGGAGATGTAAGGCATGACTTATTTGTTCCACTAACGAGGGATGGATA  
AGAGAAGGTTCTTAAGATAATTACTTAAATGTTTAGTTGTGAATTCATTGCTTCATCTAGGTCATCCTCTCCCTCAACACTAAGATAAGAAGCCTCGTAAAGGCTTAGCATTCCCTTACA  
TCATTACAATATGAACTTTGAAGCTCCCATCTCATTTTTGAAGCTCCTAACCAAGGAAATCTTCTCTACAACATTGAATAACTATTAGTTACACATAAGTTCAAAAAGTTAATGATTATATCA  
ATGATAGAAAATAAACTCTCAATATTAATATTGTTGTTTTATTAATAATGCCATAAAAAGAATGTGTCATCATTAAAACTAATGAACATTAACCGAAAAAGATAAAAGTTCAACTTTTTAAAGTAA  
TATTTATATGCAATTTGATCGAAGGATATACTTGCCTTGTAATTTAGTGCCTTAATGCCATATCTCTGAGAAAGCCTAAAGAGTAAGGCTGAGCCATGAAGACTATTTTTTAATATATTGCTTAA  
GCTTTCCATTGATGAAGCTATGAAAGTAAGCACATTTTTTATCTCACTCTCAAATGATATGAAATCCCAAGCTGGCACAAAGTATTGACATACTCAAGTAGCTTGATAGTATCATTTTTGCTTA  
TTCTGATCAATCAAATGTCTCACCTCCTCTTTCAACTTCTCCATAAATTAACCTTGTGTTGCATCCAAAGAGCCATCAGGTAGCGACTGAATATAGTTGTCATCCCATAAAGCTTGGCTGGTA  
GTTTGCATTTCTTCGTGAAGCTGGAGTTGAGAATACAGCTCCATCAGCTAAGAGACGCTGCATGGTTTGTCTCAGCTAGTAGTAGCGAAGACAAACGCTTACACGGGCGAAGTTCTTCTC  
CATGGTATGGTTGCAGGGAAGCTTAAAAGGAAGAAGAAGAAGAAGGAATTTATTATGTGATCTTTCTTCCAGAAGCATTCAAGAGGTAATGGTCTGATTAATAATCTTCTGTTGCATATCTCA  
ATTTATAGATGTGAAAAATTAATAAAAAAAAAAAGGTTGCTCTATTTCTCGGCATTTTCCAGGCGAAGGACAGGGACTGGTAACATACCTTTCTGGTAGAAGGTTGTCCCATGAAACCATA  
AAGATTTGATCGGTGTTGCTACCTCCGCTTTTGATTCTAGGATCATCATCTTCTTCGTAGCGTTGAGTTCTGTACTCCAAAGCTGTAATCTGTTCTAACATCCAGTTATAGACGGTGCCTTTT  
CGGTACACATAAATTTGACAGTATCGGCGTCCATGTCTTTCATTGGTGGTATTCCTTCTCGAATTTCTCCTCAGGCATGGGGGTTATCGACATAGCTCTGAATCATTGAAAGGACTCACA  
TGAAATAGGTTGGAGACGTCTGTGGGGTCTATGTAGCATTCTAAGGCGCTGAGAAAAGCCTTGTAGGCAATGAGATGGAGCCCCATATCATCGGAAATGGAAGCCTTGGGCGGGGCGG  
AAAAAGCCGGAACCGCCGCCGACGAAGGGAACGCGTACTCTTTCCATTTAACATCAGCCGGCGGGCTTCTAGATGGTATGACGGCTGGTTTCAAGGTTAGTTCGATGTCGATGGCT  
GGGCGACATTTGCGGGGGAGATGAATCCAACCGAACACAAGATGGGCTCGAGGTCATCATGGCTCATGATTGGACTGAAGGTCGGCGTGTGCCAGAGCGCCAGCTTCTTCGATACCTCT  
TGTATCTTACACCATACATCGCCGATGATTGTGCGACGGCCGAAGGAACCAGCTCCGTTCAACCTTAGATATACGTTTTTTCTGTCTTCTATCCAAGCGGCATAATTTATCTCCCCTAAC

CTTTCTCTGGTATCTGATTTTGAATTCTTTTTAGGATCGCTGTCCACCATCGAAAAGGCCGCGCATTGAGGGCAAGAGTTTGTGTGCGAGAAGCAATGACGAAATTACCCCTCTAAACGG  
TTCGGGATCCTT

>comp175197\_c0\_seq19

TTAGAATATTCATGGCAATAAACAGAATCTTACATCTTAGCATTGCACATGTATCCGCACACAAACAGAGGAATCTAAAAACATCATAATTTTTACATGAAAAACCATAAAAAAGGTGAAAA  
AGATCAGAACGCCACGCCCATTCAAAATGATCCACTATTGTTTGAACACGTTACAAAAGATTGACATATGCTTGAACCTTTAGGACAGTCAAATTACAATAGTACATAAAGTAGATTGAACT  
TTGTGTTAAAATTCAGGAGTTTACCACAATGACAGTTGGGTAGAAGTCAGACGGTGGTAGAGCAGAAGTTCGACGGTTGTTAGGCAAGAGTCTAATGACGTTTAGTTGCCAGACGAAAG  
TCTGGTAAAAGTCTGACGATGATCGGTGGCCGTGTGGTGGTTCGAGGAAGAGTCTGGTGGTAAGAGAGCTCCCAGATTCACATTCGCTATTCTCTTCTTCTCTTCCATCTTTTTTCTTCA  
TTAATGAGAGGTTTATTTATAGATTTTTTGGAGTGACATGAATAGTAAATAGGGAGAAAATCAATGGCATGTTGGTAGTGCTTTGATTGATGGCTGATATCAATTCCCTTAATTATGAATCGT  
TTATTAAGCATTGAGTGTTTTAATAATGTCAAAGTTTGATAATCTTACGCTCTTTGGAGTCATCTCGTCAAGCCACTTGATTCAATTATATGCATGACATATTTGAATATTATTTGGTCATCCA  
ATTTATGCTTTAGGCATCCTGAATATGCTTCGGGCCCTCGTTTTGGGCTCACTTGGTCTTGGATTGGATTGAATTTAGTGTGCTTAAAGTTCGCTCTCCTTGGCATGTTCAATTTGACTAGAAGC  
ATGTTGAAATCAGAGCTCGGACGTATCTAAATTTTTATTTTGGAAAGTTTCTGATTTATATTTACATTGAGATTTGTGCCCGATCAAGATAATTTTTTTTTATAACATATTAGTTTCCCCCATATTTT  
TTTATGTGCAAGTCACATAGCCTGAAAATATGTGTTGGAGCTTTTAAACTATTCCAATGCAAGACTATAATTTTATGGCAATTACGAGGCGCGACTGCTCTCTGGACGTCAGCATGGATCT  
CCTTTACAGGCCATGAACTAGGTAAAATGTAAAATATCTTAGATGTTGTTTGTGTAGGGTAAAGTGCAGCTAGATCTTTTTACACACATTATGATGATTGCAATTATCATGTTTACTTGGAT  
GCTTTGTATTGATTAGTAATTATGAGCACAAGCTATAAAATACATTGGAATGCATTATTTGATTTAATACTAAGCAAAAAATTAGCACTAATTGCTTGGATAAAAAATTGATCATAAGCTAAAT  
TACAAATAACATGCACTTGGAGAAAGGAATTGTACAATGGATTAGGAATGAGGATGTAAGTGTCTTTTTTAAAGGATATCCTTTTTAAAGTGGAAATTGGTTCAATCATCATTAAAGAAAATT  
TGATCCTTGGTTTTACCACCGGGCTCTCCATATCCATCTCCATAGTGATAGAAGCTTTGTGCTGTTTCGTGGAACATCTACTAAAGCTTTTCTGAAAGATTCTATAGATGTTGAAAATGTAATA  
TATTCTCCATTCAATTTTTTCCAATAATTTCTTATTAACATCTTATATAGTCTCGAGCAGCTGAGTCTGAAACATTTTTCTCATTATATAGCATTGAATTGATTTTGGAAACATCTCCTCTTTG  
GATCTCTGCCGTGCATGTTCCCAAATCATATAAAGACGAAAAAGCATGCACGAATAACGAACTATAAGTGGATAGAAGTCCAAAGCTTTAATAGCTTCAAAAAGTCAAATCATCACTTAGG  
CAATATGTTGTAGTTAGTGCACAAATCCTGATATGGTAACCCAAGCATTGTCCAAGTACTCGTCCAATGTAGGAGTATATCCATTATGATACCACATTGCTTCAATGAAATGTGCTTTGCAT  
AAATCGGCCACATTCGTTTTAGGCATGGAAGAATGTCCAACCTCTTTTTCTTTGAAAATGAGGAGGCAATATCATCCATTGTATTAATAAAGTGTGTCAAACATTTCTTCATGTAATCTGG  
AAGTTCCTGCGTTGCAGCTATATTCCATCTTCAATAGCATTGTAAATAGCTTTAATTCATCCAAGGTACCATAGATATCATAAATATCATCAATTGTTGTAATTATAGAAAATAAATTTGGTAA  
TCTCCTTCTACATCTCCAAAATGTGGCTCCAAAGCACATCCCATAGCCAAAAATAATTCTCCATCAATCTGTCTCTTGCAAAAATAAATCTCATCACCAGCAAGACCAATACTCCTCCACC  
AACTGGACATCTCCTTAACTTCTTCTTATAGATGCTTTGCACCATGTTGAAATCTAGTTTAGCAAACCTCAAACAAGCTATAATTTGTGTTCTCTTGCTTCTCATAAGTATCAATGAACCACA  
TCGTATGCAACGTTGGCATTCTCCAATGCAAAGGGAGATGTAAGGCATGACTTATTTGTTCCACTAACGAGGGATGGATAAGAGAAGGTTCCCTTAAGATAATTACTTAAATGTTTAGTTGTG  
AATCCATTGCTTCATCTAGGTCATCCTCTCCCTCAACACTAAGATAAGAAGCCTCGTAAAGGCTTAGCATTCCCTTTACATCATTACAATATGAACTTTGAAGCTCCCATTCTCATTTTTG  
AAGCTCCTAACCAGGAAATCTTCTTACAACATTGAATAACTATTAGTTACACATAAGTTCAAAAAGTTAATGATTATATCAATGATAGAAAATAAAACTCTCAATATTAATATTGTTGTTTTAT  
TAAAATGCCATAAAAAGAATGTGTCATCTAAAATAACTAATGAACATTAACCGAAAAAGATAAAGTTCAACTTTTTAAAGTAATATTTATATGCAATTTGATCGAAGGATATACTTGCCTTGATT  
TAGTGCCTTAATGCCATATTCTCTGAGAAGCCTAAAGAGTAAGGCTGAGCCATGAAGACTATTTTTAATATATTGCTTAAGCTTTCCATTGATGAAGCTATGAAAGTAAGCACATTTTTAT  
CTCACTCTCAAATGATATGAAATCCCAAGCTGGCACAAAAGTATTGACATACTCAAGTAGCTTGATAGTATCATTTTGTATTCTGATCAATCAAATGTCTCACCTCCTCTTTCAACTTCTCC  
CATAAATTAACCTGTGTTGCATCCAAAGAGCCATCAGGTAGCGACTGAATATAGTTGTCATCCATAAGCTTGGCTGGTAGTTTGCACCTCTTCGTGAAGCTGGAGTTGAGAATACAGCTC  
CATCAGCTAAGAGACGCTGCATGGTTTGTCTCAGCTAGTAGTAGCGAAGACAAACGCTTACACGGGCGAAGTTCCTCCTCCATGGTATGGTTGCAGGGAAAGCTTAAAAGGAAGAAGAAGA

AGAAGGAATTTATTATGTGATCTTTCTTCAGAAGCATTCAAGAGGTAATGGTCTGATTAATCTTCTGTTGCATATCTCAATTTATAGATGTGAAAAATTAATAAAAAAAAAAAGGTTGCT  
CTATTTCTCGGCATTTTCAGGCGAAGGACAGGGACTGGTAACATACCTTTCTGGTAGAAGGTTGTCCCATGAAACCATAAAGATTTGATCGGTGTTGCTACCTCCGCTTTTGATTCTAGGAT  
CATCATCTTCTTCGTAGCGTTGAGTTCTGTACTCCAAAGCTGTAATCTGTTCTAACATCCAGTTATAGACGGTGCCTTTTCGGTACACATAAATTGTACAGTCATCGGCGTCCATGTCTTTCA  
TTGGTCGGTATTCTTCTCGAATTCTTCTCAGGCATGGGGGTTATCGACATAGCTCTGAATCATTGAAAGGACTCACATGAAATAGGTTGGAGACGTCTGTGGGGTCTATGTAGCATTCTA  
AGGCGCTGAGAAAAGCCTTGTAGGCAATGAGATGGAGCCCCATATCATCGGAAATGGAAGCCTTGGGCGGGGCGGAAAAAGCCGAAACC GCCCGCCGACGAAGGGAACGCGT  
ACTCTTTCCATTTAACATCAGCCGGCGGGCTTCTAGATGGTGATGACGGCTGGTTCAAGTTAGTCGATGTGATGGCTGGGGCACATTTGCGGGGGAGATGAATCCAACCGAACACAAGA  
TGGGCTCGAGGTCATCATGGCTCATGATTGGACTGAAGGTCGGCGTGTGCCAGAGCGCCAGCTTCTTCGATACCTCTTGATCTTTCACACCATAACATCGCCGATGATTGTGACGGCCGAA  
GGAACCAGCTCCGTTCAACCTTAGATATACGTTTTTCTGTCTTCTATCCAAGCGGCATAATTTATCTCCCTAACCTTTCTCTGGTATCTGATTTTGAATCTTTTTTAGGATCGCTGTCC  
ACCATCGAAAAGGCCGCGCATTGAGGGCAAGAGTTTGTGCGAGAAGCAATGACGAAATTACCCCTCTAAACGGTTCGGGATCCTT

>comp175197\_c0\_seq31

TTAGAATATTCATGGCAATAAACAGAATCTTACATCTTAGCATTGCACATGTATCCGCACACAAACAGAGGAATCTAAAAACATCATAATTTTTACATGAAAAACCATAAAAAGGTGAAAA  
AGATCAGAACGCCACGCCATTCAAATGATTCCACTATTGTTTGAACACGTTACAAAGATTGACATATGCTTGAACCTTAGGACAGTCAAATTACAATAGTACATAAAGTAGATTGAACT  
TTGTGTTAAAAATTCAGGAGTTTACCACAATGACAGTTGGGTAGAAAGTCAGACGGTGGTAGAGCAGAAAGTTCGACGGTTGTTAGGCAAGAGTCTAATGACGTTTAGTTGCCAGACGAAAG  
TCTGGTAAAAAGTCTGACGATGATCGGTGGCCGTGTGGTGGTCGAGGAAGAGTCTGGTGGTAAGAGAGCTCCCAGATTTACATTCGCTATTCTCTTCTTTCTCTTCCATCTTTTTTCTTCA  
TTAATGAGAGGTTTATTTATAGATTTTTTGGAGTGACATGAATAGTAAATAGGGAGAAAATCAATGGCATGTTGGTAGTGCTTTGATTGATGGCTGATATCAATCCCTTAATTATGAATCGT  
TTATTAAGCATTGAGTGTTTTAATAATGTCAAAGTTTTGATAATCTTACGCTCTTTGGAGTCACTCGTCAAGCCACTTGATTCAATTATATGCATGACATATTTGAATATTTATTTGGTCATCCA  
ATTTATGCTTTAGGCATCTGAATATGCTTCGGGCCCTCGTTTTGGGCTCACTTGGTCTTGGATTGGATTGAATTTAGTGTGTTAAGTTTCGTCCTTGGCATGTTCAATTTGACTAGAAGC  
ATGTTGAAATCAGAGCTCGGACGTATCTAAATTTTTATTTGGAAGTTTCTGATTTATATTTACATTGAGATTTGTGCCCGATCAAGATAATTTTTTTTTATAACATATTAGTTCCCCCATATTT  
TTTATGTGCAAGTCACATAGCCTGAAAATATGTGTTGGAGCTTTTTAAACTATTCCAATGCAAGACTATAATTTTATGGCAATTACGAGGCGCGACTGCTCTCTGGACGTGAGCATGGATCT  
CCTTTCAGGGCCATGAACTAGGTAAAAATGTAATAATCTTAGATGTTGTTTGTGTAGGGTAAAGTGCAGCTAGATCTTTTTACACACATTATGATGTATTGCATTATCATGTTTACTTGGAT  
GCTTTGTATTGATTAGTAATTATGAGCACAAAGCTATAAAAATACATTGGAATGCATTATTTGATTTAATACTAAGCAAAAAATTAGCACTAATTGCTTGGATAAAAAATTGATCATAAGCTAAAT  
TACAAATAACATGCACCTGGAGAAAGGAATTGTACAATGGATTAGGAATGAGGATGTAAGTGTCTTTTTTAAAGGATATCCTTTTTAAAGTGAATGGTTCAATCATCATTAAAGAAAATT  
TGATCCTTGGTTTTACCACCGGGCTCTCCATATCCATCTCCATAGTGATAGAAGCTTTGTGCTGTTTCGTGGAACATCTACTAAAGCTTTCTGAAAGATTCTATAGATGTTGAAAATGTAATA  
TATTCTCCATTCATTTTTTCCAATAATTTCTATTAAACATCTTATATAGTCTCGAGCAGCTGAGTCTGAAACATTTTTCTCATTCATATAGCATTGAATTTGAAACATCTCCTCTTTG  
GATCTCTGCCGTGCATGTTCCCAAATCATCATAAAGACGAAAAAGCATGCACGAATAACGAACTATAGGTGGATAGAACTCCAAGCTTTTAATAGCTTCAAAGTCAAATCATCACTTAGG  
CAATATGTTGTAGTTAGTGACAAATTCCTGATATGGTAACCCAAGCATTGTCCAAGTACTCGTCCAATGTAGGAGTATATCCATTATGATAACCACATTGCTTCAATGAAATGTGCTTTGCAT  
AAATCGGCCACATTCGTTTTAGGCATGGAAGAATGTCCAACCTTTTTCTTTGAAAATGAGGAGGCAATATCATCCATTGTATTAATAAAGTGTGTCAAACATTTCTTCATGTAATCTGG  
AAGTTCTGCGTTGCAGCTATATCCATTCTCAATAGCATTGTAAATAGCTTTAATTCATCCAAGGTACCATAGATATCATAAATATCATCAATTGTTGTAATTATAGAACTAATTTGGTAA  
TCTCTTCTACATCTCCAAAATGTGGCTCCAAAGCACATCCCATAGCCCCAAAATAATTTCTCCATCAATCTGTCTTTGCAAACTAAACTCATCACCAGCAAGACCAATACTCTCCACC  
AACTGGACATCTCTTAACTTCTTCTTATAGATGCTTTGACCATGTTGAAATCTAGTTTAGCAAACCTCAAACAAGCTATAATTTGTGTTCTCTTGCTTCTCATAAGTATCAATGAACCACA  
TCGTATGCAACGTTGGCATTCTCCAATGCAAAGGGAGATGTAAGGCATGACTTATTTGTTCCACTAACGAGGGATGGATAAGAGAAGGTTCCCTAAGATAATTACTTAAATGTTTAGTTGTG

AATTCCATTGCTTCATCTAGGTCATCCTCTCCCTCAACACTAAGATAAGAAGCCTCGTAAAGGCTTAGCATTCCCTTTACATCATTACACAATATGAACTTTGAAGCTCCCATTCTCATTTTTG  
AAGCTCCTAACCCAGGAAATCTTCTCTTGTATTTAGTGCCTTAATGCCATATTCTCTGAGAAGCCTAAAGAGTAAGGCTGAGCCATGAAGACTATTTTTTAATATATTGCTTAAGCTTTCCATT  
GATGAAGCTATGAAAGTAAGCACATTTTTTATCTCACTCTCAAATGATATGAAATCCCAAGCTGGCACAAAGTATTGACATACTCAAGTAGCTTGATAGTATCATTTTGCTTATTCTGATCAA  
TCAAATGTCTCACCTCCTCTTTCAACTTCTCCATAAATTAACCTTGTGTTGCATCCAAAGAGCCATCAGGTAGCGACTGAATATAGTTGTCATCCCATAAGCTTGGCTGGTAGTTTGCACCT  
CTTCGTGAAGCTGGAGTTGAGAATACAGCTCCATCAGCTAAGAGACGCTGCATGGTTTGTCTAGCTAGTAGTAGCGAAGACAAAAGCTTACACGGGGCGAAGTTCTTCCTCCATGGTATGG  
TTGCAGGGAAGCTTAAAAGGAAGAAGAAGAAGAAGGAATTTATTATGTGATCTTTCTTCAGAAGCATTCAAGAGGTAATGGTCTGATTAATAATCTTCTGTTGCATATCTCAATTTATAGAT  
GTGAAAAATTAATAAAAAAAAAAAAAAGGTTGCTCTATTTCTCGGCATTTTCAGGCGAAGGACAGGGACTGGTAACATACCTTTCTGGTAGAAGGTTGTCCCATGAAACCATAAAGATTTGAT  
CGGTGTTGTACTCTCCGCTTTTGATTCTAGGATCATCATCTTCTTCGTAGCGTTGAGTTCTGTACTCCAAAGCTGTAATCTGTTCTAACATCCAGTTATAGACGGTGCCTTTTCGGTACACAT  
AAATTGTACAGTCATCGGCGTCCATGTCTTTCAATTGGTCGGTATTCCTTCTCGAATTTCTCTCAGGCATGGGGTTATCGACATAGCTCTGAATCATTGAAAGGACTCACATGAAATAGGT  
TGGAGACGTCTGTGGGGTCTATGTAGCATTCTAAGGCGCTGAGAAAAGCCTTGTAGGCAATGAGATGGAGCCCCATATCATCGGAAATGGAAGCCTTGGGCGGGGCGGAAAAAGCCG  
GAAACCGCCGCCGCCGACGAAGGGAACGCGTACTCTTTCCATTTAACATCAGCCGGCGGGCTTCTAGATGGTGATGACGGCTGGTTACAGTTAGTCGATGTGATGGCTGGGGCACATTT  
GCGGGGGAGATGAATCCAACCGAACACAAGATGGGCTCGAGGTCATCATGGCTCATGATTGGACTGAAGTTCGGCGTGTGCCAGAGCGCCAGCTTCTTCGATACCTCTGTATCTTCACA  
CCATACATCGCCGATGATTGTGACGGCCGAAGGAACCAGCTCCGTTAACCTTAGATATACGTTTTTTCTGTCTTCCCTATCCAAGCGGCATAATTTATCTCCCCTAACCCCTTTCTCTGGTA  
TCTGATTTTGAATCTTTTTAGGATCGCTGTCCACCATCGAAAAGGCCGCGCATTTGAGGGCAAGAGTTTTGTTGCGAGAAGCAATGACGAAATTACCCCTCTAAACGGTTCCGGGATCCT  
T

>comp175208\_c0\_seq3

TCTGAACGAAGCACAGCAATGTTGATAGTATTAATATATATTACATTTTGAACCTAAGTGACAAGTGATATTTCTGATTTGTCACTAGCTTGTCTTTGTCTTTATATATACCCGCATATCTGTGT  
AATCTGATTAATGGAATGAAATCTGTTTTGTTCTTCTCCTCCGATCTTCTTTATCTTCTTGCTCCCTCTTCTCAGATAGTTCATATTTCTCTCCACTACAAAGCATAACAAAGAAGCAAAG  
CACTCACCGTTGACCATCCAACATAACTTTGAAGCCTAATTATTTAATTATTAATTTATTTATGTTGTTGATTATATCAGTTAATGATGCAAGACCGTTAATGTAATAATAGCTTTAAGT  
CAG

>comp175244\_c0\_seq1

TATGTGCAGGCGATCATATTTTAACCCACTGTAATGAAAATGTCTCTAAAATAACATGGGTAAAATTTTCATAGCTTCAATCCTTGACAGCATTAAATTATTCTGTGCAGACACCCGACAATTCG  
GAGGCCAATCAGAATGCGCCACGTCACCCAGACCCGTTACCGAGCTAAACATTAACATGACACGTTTTGATTGGCCCCAAATGATGCATGGATAATCATAACAATAACATCAGTTTCTTT  
ATTGGTTCCAATCACAATGTAGTGAAATAAGTACAACATTAATCAGTGATACATAATAAGAAAAGGCTTGTCCCTATAAAGAGAAATTTCTGTGCGGATACCTGACGCAGAACGTCGTC  
CAGAGACCAACCAGAATGTGGCACGTCAGTGGTACAGAGCTGCGGTACCAGCGAATGGGTGATGTGGCGCATTCTGATTGACCTCTAGATAGTTCGACGTCCTGCACAAAATCATAAT  
CGACATACACACATTACTTTATTTGTTTCGAAAAGACAATCAACTCATCAATACATTCAAAACTTTGCCATCACAACCTCAAAAATATTCTGAAAAACTAAAAATATCAGATCTCTAC  
CATAAGGGAGAGTGTGAAAGCCATAAAGAAGGTTTTTGGCAGGTAGAGCCAAACAGGTGCAACAATATTTGCAGGATGAATTAATCATTGAACGCAATCCAATGGATTGGTGAGCAGT  
AAAGATTAATGAAACATTTGGCTTGAAAGGGCATGTTGAAGCTTGTAACCGACTTCACAGTTCACCCAACAGAAATCCAGACTTGCTTAATAACAACCACCAACAAAGTTATAGAAA  
ATAACAAATACATAAGACTTAAACGGTTACCCACAGAATTTCCAGACTTGGCTACATAAAAAGCTACCATACATGAATTTTTTAGTCGATTATCTCATCTCTTGAGTCCAAGTAACATTAGTA  
TAATCCCAATGTAGTAAAACCTGTAAATATACCTGATGAACTGGAGCTTCCACTCGTTCCAAGGAGGGTATCTGCATGAGAGTTCTATGAGAAAGCTTCTTCTCAATATGGCTTTTCCATGG  
CTGAACTGGTCAAGGAGAAGCTTTCCGTGGTACTTTCCGAAACCGCTTTTACCAGTTCACCAAATGGTAATGAATCTACTGCAAACTGTGCAACAAGTTTTTTCTCAAATGGTTAAGCA



TTTACTGCTTCTAAAATTAAGAAAGTTAGAGGAAGAAAAAGAAGAATACTTGTAACATTGCATCATTAAAAGTAATGCTTCCTGATGATGTTTCTTCGATGACTCTCCTCTTCAACTTCTC  
ATCGACGGTGAAGGCGTAAATGACGAGAGGCTTCGGCCTTACCTTCAGAACTCAATGCTATCTTCAATCTTCTTTAGCTGTGAATGAGATGAGCAGCTGTGTGAAGCTTAAATGATTTTC  
AGTGGCTGTTTGGTTTTAATATTTCTGTATGTAATGCTGTGTTTTGCTTTCTAAAAATGAAATGTGTTTAGTATGACATTATCTTCTGCATTGAAGTATGATTGTCAGAGTAATTTAGATAGAG  
ATAACATCCAAATAAGTCAAATATCTAGATAACGCTACTATTATTATGGACATAAACCGTAAATCAAACACAGAACATTTGACCAACAAAACCTACAATCCAAATAATGCTAATATCCAAAA  
ATAATGGCATTAGACAACATGAATGATAGAAGATTTATATTTCTTTTCAAATAACACTTAGCTTCATATCTTACTGTGATTACAGGAAGCAAGGGTCCAAAAATCTCCTCTCTCATGATCTC  
AGAGTCTAAAGGAGGATTTAGAAGAATGGTGGGCTCGATTAACAGGCTTTTCAGCATTGAAGGAACCACCATACACAACAGAGGCAGCAACTGCCGAGTCGTTGAGAAAGTTGCTCAGT  
CTTTGAAAATGTTGCTTGTGAACAATCCTTGCAGAGTTTTTCAGGATCTTTGTACGTTTTCTTGATCTTTGCCTTGAGTAAATCAACCAAAAGCGGGGCGAATTGCTCTTCCACGAGCAAAT  
AATCAATTGCTATGCATGCTTGGCCACTGCAAGGACCCCACTTCGCTCCAGCCACTCTGTTTATAGTAACCTCTATATCTTCTTGCTCTTGAGAGGGTATCTATAATAGCAGGGCATTTCCTC  
CCAGTTCAAGAGTACTGGAGTCAGATGCTTAGCAGCAGCAGTCATAATAATGCGTCCAACCTTCGAGCTCCCAGTGAAGAATATCTTATCCCATTGTGCTCCAAGAGTTGCTCTCCGAT  
GTGAGAAGCTCCTTCCACAACCTTCACAGAATTATCCAAATACTTGGGCAGGTTGGTTGCCAGAAACGCAGAGGAAGCAGGAGCAAGTTCTGAGGGTTTCAAGACTACAGCATTTCAG  
CTGCTATAGCTCCAACCAGAGGCTCAAACGACAACCCTATGGGGAAATTCCATGAAGAGAAAATAAGAACAACACCGAGCGGCTCCGCCACTATTTCTCCCGTGGCTGGAAAGCATACT  
AACGGGACATCAACCTTTTTTGGTGCCATCCATTTTTTAAGATTTTTAAGCGCGTAATCCACTGATTTGATCAGCAACCCTAGCTCATCTCTGTAAGCTTCGATCCGATGCTTGCCAAGGTC  
GAGCTTGAGAGCGTTGAAGATGTGGCCTCCTTCTCGAGGAGAATAGCTTTGAGAGCCCTCAGCTGAGACCTCCTCCAAGAATAACTCCTTGTGACGCCGCTCTCAAACGCTTCTCTTGC  
CTCCTTCAACCCCTCTTACCTCCATCCTTCTGAGCTTGACTGTCGCCGGCGCTGCGCTCCACCTCGGCCCTCCTTCTCCTCCGCTTAAAAAAGGCATTTCCGCTGCACAAATTTAAGGTG  
AGGTAGGAAACAGGGGGAAAGCACGAGGAGCAATAAATGAGACTTTAATGAACAGTTCAAGCAGTTGCGCTTCTTCCCCTTGTGTGTTAGTGAGTTCGGCAACTTTT

>comp175244\_c0\_seq13

TATGTGCAGGCGATCATATTTAACCCTGTAATGAAAATGTCTCTAAAATAACATGGGTAAAATTTTCATAGCTTCAATCCTTGACAGCATTAAATTATTCTGTGCAGACACCCGGACAATTTCG  
GAGGCCAATCAGAATGCGCCACGTACCCAGACCCGTACCCAGACTAACATTAACATGACACGTTTTGATTGGCCCCAAATGATGCATGGATAATCATTAAACAATAACATCAGTTTCTTT  
ATTGGTTCCAATCACAATGTAGTGAATAAGTACAACATTAATCAGTGATACATAATAAGAAAAGGCTTGTCCCTATAAAGAGAAATTAATCTGTGCGGATACCTGACGCAGAACGTCGTC  
CAGAGACCAACCAGAATGTGGCACGTGAGTGGTACAGAGCTGCGGTACCAGCGAATGGGTGATGTGGCGCATTCTGATTGACCTCTAGATAGTGTTCGACGTCCGCACAAAATCATTAAAT  
CGACATACACACATACTTTATTTTGTTCGAAAAGACAATCAACTCATCAATACATTCAAAAACCTTGGCCATCACAACCTCAAAAATATTCTGAAAAAACTAAAAATATCAGATCTCTAC  
CATAAGGGAGAGTGTGAAGCCATAAAAGAAGGTTTTTGGCAGGTAGAGCCAAACAGGTGCAACAATATTTGCAGGATGAATTACTCATTGAACGCAATCCAATGGATTGGTGAGCAGT  
AAAGATTAATGAAAACATTTGGCTTGAAGGGCATGTTGAAGCTTGTAAACCGACTTCACAGTTCACCCAACAGAAATCCAGACTTGCTTAATAACAAACCACCAACAAAGTTATAGAAA  
ATAACAAATACATAAGACTTAAACGGTTACCCACAGAAATCCCAGACTTGGCTACATAAAAAGCTACCATACATGAATTTTTTAGTCGATTATCTCATCTCTTGAGTCCAAGTAACATTAGTA  
TAATCCCAATGTAGTAAAACCTGTAAATATACCTGATGAACTGGAGCTTCCACTCGTTCCAAGGAGGGTATCTGCATGAGAGTTCTATGAGAAAGCTTCTTCTCAATATGGCTTTTCCATGG  
CTGAACTGGTTCGAAGGAGAACTTTCCGTTGGTACTTTCCGAAACCGCTTTTACCAGTTCACCAAAATGGTAATGAATCTACTGCAAACTGTGCAACAAGTTTTTTCTCAAATGGTTAAGCA  
TTTACTGCTTCTAAAATTAAGAAAGTTAGAGGAAGAAAAAGAAGAATACTTGTAACATTGCATCATTAAAAGTAATGCTTCCTGATGATGTTTCTTCGATGACTCTCCTCTTCAACTTCTC  
ATCGACGGTGAAGGCGTAAATGACGAGAGGCTTCGGCCTTACCTTCAGAACTCAATGCTATCTTCAATCTTCTTTAGTGTGATTACAGGAAGCAAGGGTCCAAAAATCTCCTCTCTCATG  
ATCTCAGAGTCTAAAGGAGGATTTAGAAGAATGGTGGGCTCGATTAACAGGCTTTTCAGCATTGAAGGAACCACCATACACAACAGAGGCAGCAACTGCCGAGTCGTTGAGAAAGTTGCT  
CAGTCTTTGAAAATGTTGCTTGTGAACAATCCTTGCAGAGTTTTTCAGGATCTTTGTACGTTTTCTTGATCTTTGCCTTGAGTAAATCAACCAAAAGCGGGGCGAATTGCTCTTCCACGAGC  
AAATAATCAATTGCTATGCATGCTTGGCCACTGCAAGGACCCCACTTCGCTCCAGCCACTCTGTTTATAGTAACCTCTATATCTTCTTGCTCTTGAGAGGGTATCTATAATAGCAGGGCATTTT

CCTCCCAGTTCAAGAGTGACTGGAGTCAGATGCTTAGCAGCAGCAGTCATAATAATGCGTCCAACCTCTCGAGCTCCCAGTGAAGAATATCTTATCCCATTTGTGCTCCAAGAGTTGCTCTC  
CGATGTGAGAAGCTCCTTCCACAACCTTCACAGAATTATCCAAATACTTGGGCAGGTTGGTTGCCAGAAACGCAGAGGAAGCAGGAGCAAGTTCTGAGGGTTTCAAGACTACAGCATTT  
CCAGCTGCTATAGCTCCAACCAGAGGCTCAAACGACAACCCTATGGGGAAATTCCATGAAGAGAAAATAAGAACAACACCGAGCGGCTCCGCCACTATTTCTCCCGTGGCTGGAAAGCA  
TACTAACGGGACATCAACCTTTTTTGGTGCCATCCATTTTTTAAGATTTTTAAGCGCGTAATCCACTGATTTGATCAGCAACCCTAGCTCATCTCTGTAAGCTTCGATCCGATGCTTGCCAAG  
GTCGAGCTTGAGAGCGTTGAAGATGTCGGCCTCCTTCTCGAGGAGAATAGCTTTGAGAGCCCTCAGCTGAGACCTCTCCAAGAATAACTCCTTGTGACGCCGCTCTCAAACGCTTCTCT  
TGCTCCTTCAACAACCTCTTACCTCCATCCTTCTGAGCTTGACTGTCGCCGGCGCTGCGCTCCACCTCGGCCTCCTCTTCTCCGCTTAAAAAAGGCATTTCCGCTGCACAAATTTAAG  
GTGAGGTAGGAAACAGGGGGAAAGCACGAGGAGCAATAAATGAGACTTTAATGAACAGTTCAAGCAGTTGCGCTTCTTCCCCTTGCTGTGTTAGTGAGTTCCGGCAACTTTT

>comp175244\_c0\_seq14

TATGTGCAGGCGATCATATTTAAACCCACTGTAATGAAAATGTCTCTAAAATAACATGGGTAAAATTTTCATAGCTTCAATCCTTGACAGCATTAAATTATTCTGTGCAGACACCGGACAATTCG  
GAGGCCAATCAGAATGCGCCACGTCAACCAGACCCGTACCCGAGCTAAACATTAACATGACACGTTTTGATTGGCCCCAAATGATGCATGGATAATCATTAAACAATAACATCAGTTTTCTTT  
ATTGGTTCCAATCACAATGTAGTGAAATAAGTACAACATTAATCAGTGATACATAATAAGAAAAGGCTTGTCCCTATAAAGAGAAATTATTCTGTGCGGATACCTGACGCAGAACGTCGTC  
CAGAGACCAACCAGAATGTGGCACGTCAGTGGTACAGAGCTGCGGTACCAGCGAATGGGTGATGTGGCGCATTCTGATTGACCTCTAGATAGTGTTCGACGTCCGCACAAAATCATTAAAT  
CGACATACACACATTACTTTATTTTGTTCGAAAAGACAATCAACTCATCAATACATTCAAAACTTTGCCATCACAACCTCAAAAATATTCTGAAAAAATAAAAATATCAGATCTCTAC  
CATAAGGGAGAGTGTTGAAGCCATAAAGAAGTTTTTGGCAGGTAGAGCCAAACAGGTGCAACAATATTTGCAGGATGAATTACTCATTGAACGCAATCCAATGGATTGGTGAGCAGT  
AAAGATTAATGAAAACATTTGGCTTGAAAGGGCATGTTGAAGCTTGTAACCGACTTCACAGTTACCCAACAGAAATCCAGACTTGCTTAATAACAAACCACCAACAAAGTTATAGAAA  
ATAACAAATACATAAGACTTAAACGGTTACCCACAGAATTTCCAGACTTTGGCTACATAAAAAGCTACCATACATGAATTTTTTAGTCGATTATCTCATCTCTTGAGTCCAAGTAACATTAGTA  
TAATCCCAATGTAGTAAAACCTGTAAATATACCTGATGAACTGGAGCTTCCACTCGTTCCAAGGAGGGTATCTGCATGAGAGTTCTATGAGAAAGCTTCTTCTCAATATGGCTTTTCCATGG  
CTGAACTGGTGAAGGAGAACTTTCCGTGGTACTTTCCGAAACCGCTTTACCCAGTTCCACCAAATGGTAATGAATCTACTGCAAATTGTAACATTGCATCATTAAAAAGTAATGCTTCTCTG  
ATGATGTTTCTTCGATGACTCTCCTCTTCAACTTCTCATCGACGGTGAAGGCGTAAATGACGAGAGGCTTCGGCCTTACCTTCAGAACTCAATGCTATCTTCAATCTTCTTTAGCTCTATAT  
CTCTTGCTCTTGAGAGGGTATCTATAATAGCAGGGCATTTCCTCCAGTTCAAGAGTGACTGGAGTCAGATGCTTAGCAGCAGCAGTCATAATAATGCGTCCAACCTCTCGAGCTCCCAGT  
GAAGAATATCTTATCCCATTTGTGCTCCAAGAGTTGCTCTCCGATGTGAGAAGCTCCTTCCACAACCTTCACAGAATTATCCAAATACTTGGGCAGGTTGGTTGCCAGAAACGCAGAGGA  
AGCAGGAGCAAGTTCTGAGGGTTTCAAGACTACAGCATTTCCAGCTGCTATAGCTCCAACCAGAGGCTCAAACGACAACCCTATGGGGAAATTCCATGAAGAGAAAATAAGAACAACA  
CCGAGCGGCTCCGCCACTATTTCTCCCGTGGCTGGAAAGCATACTAACGGGACATCAACCTTTTTTGGTGCCATCCATTTTTTAAGATTTTTAAGCGCGTAATCCACTGATTTGATCAGCAA  
CCCTAGCTCATCTCTGTAAGCTTCGATCCGATGCTTGCCAAGGTGAGCTTGAGAGCGTTGAAGATGTCGGCCTCCTTCTCGAGGAGAATAGCTTTGAGAGCCCTCAGCTGAGACCTCCT  
CCAAGAATAACTCCTTGTGACGCCGCTCTCAAACGCTTCTTGCCTCCTTCAACAACCTCTTACCTCCATCCTTCTGAGCTTGACTGTCGCCGGCGCTGCGCTCCACCTCGGCCTCCTC  
TTCTCCGCTTAAAAAAGGCATTTCCGCTGCACAAATTTAAGGTGAGGTAGGAAACAGGGGGAAAGCACGAGGAGCAATAAATGAGACTTTAATGAACAGTTCAAGCAGTTGCGCTTCT  
TCCCCTTGCTGTGTTAGTGAGTTCCGGCAACTTTT

>comp175244\_c0\_seq15

TATGTGCAGGCGATCATATTTAAACCCACTGTAATGAAAATGTCTCTAAAATAACATGGGTAAAATTTTCATAGCTTCAATCCTTGACAGCATTAAATTATTCTGTGCAGACACCGGACAATTCG  
GAGGCCAATCAGAATGCGCCACGTCAACCAGACCCGTACCCGAGCTAAACATTAACATGACACGTTTTGATTGGCCCCAAATGATGCATGGATAATCATTAAACAATAACATCAGTTTTCTTT  
ATTGGTTCCAATCACAATGTAGTGAAATAAGTACAACATTAATCAGTGATACATAATAAGAAAAGGCTTGTCCCTATAAAGAGAAATTATTCTGTGCGGATACCTGACGCAGAACGTCGTC

CAGAGACCAACCAGAATGTGGCACGTACGTGGTACAGAGCTGCGGTACCAGCGAATGGGTGATGTGGCGCATTCTGATTGACCTCTAGATAGTGTTCGACGTCCGCACAAAATCATTAAAT  
CGACATACACACACATTACTTTATTTTGTTCGAAAAGACAATCAACTCATCAATACATTCAAAAACCTTGCCATCACAACTTCAAAAATATTCTGAAAAAACTAAAAATATCAGATCTCTAC  
CATAAGGGAGAGTGTGAAGCCATAAAGAAGGTTTTTGGCAGGTAGAGCCAAACAGGTGCAACAATATTTGCAGGATGAATTACTCATTGAACGCAATCCAATGGATTGGTGAGCAGT  
AAAGATTAATGAAAACATTTGGCTTGAAAGGGCATGTTGAAGCTTGTAAACCGACTTCACAGTTCACCCAACAGAAATCCAGACTTGCTTAATAACAAACCACCAACAAAGTTATAGAAA  
ATAACAAATACATAAGACTTAACGGTTCACCCACAGAATTTCCAGACTTGGCTACATAAAAAAGCTACCATACATGAATTTTTTAGTCGATTATCTCATCTCTTGAGTCCAAGTAACATTAGTA  
TAATCCCAATGTAGTAAAACCTGTAAATATACCTGATGAACTGGAGCTTCCACTCGTTCCAAGGAGGGTATCTGCATGAGAGTTCTATGAGAAAGCTTCTTCTCAATATGGCTTTTCCATGG  
CTGAACTGGTCTGAAGGAGAACTTTCCGTGGTACTTTCCGAAACCGCTTTTACCAGTTCACCAAAATGGTAATGAATCTACTGCAAATTGTAACATTGCATCATTAAAAGTAATGCTTCCTG  
ATGATGTTTTCTTCGATGACTCTCCTCTTCAACTTCTCATCGACGGTGAAGGCGTAAATGACGAGAGGCTTCGGCCTTACCTTCAGAACTCAATGCTATCTTCAATCTTCTTTAGTGTGATT  
ACAGGAAGCAAGGGTCCAAAAATCTCCTCTCTCATGATCTCAGAGTCTAAAGGAGGATTTAGAAGAATGGTGGGCTCGATTAACAGGCTTTCAGCATTGAAGGAACCACCATACACAAC  
AGAGGCAGCAACTGCCGAGTCGTTGAGAAAGTTGCTCAGTCTTTGAAAATGTTGCTTGTAACAATCCTTGCAGAGTTTTAGGATCTTTGTACGTTTTCTTGATCTTTGCCTTGAGTAAA  
TCAACAAAAGCGGGGCGAATTGCTCTTCCACGAGCAAATAATCAATTGCTATGCATGCTTGGCCACTGCAAGGACCCCACTTCGCTCCAGCCACTCTGTTTATAGTAACTCTATATCTCT  
TGCTCTTGAGAGGGTATCTATAATAGCAGGGCATTTCCTCCCAGTTCAAGAGTGACTGGAGTCAGATGCTTAGCAGCAGCAGTCATAATAATGCGTCCAACCTCTCGAGCTCCCAGTGAAG  
AATATCTTATCCCATTGTGCTCCAAGAGTTGCTCTCCGATGTGAGAAGTCTTCCACAACCTTCACAGAATTATCCAAATACTTGGGCAGGTTGGTTGCCAGAAACGCAGAGGAAGCA  
GGAGCAAGTCTGAGGGTTTTCAAGACTACAGCATTTCAGCTGCTATAGCTCCAACCAGAGGCTCAAACGACAACCCTATGGGGAAATCCATGAAGAGAAAATAAGAACAACACCGA  
GCGGCTCCGCCACTATTTCTCCCGTGGCTGGAAAGCATACTAACGGGACATCAACCTTTTTTGGTGCATCCATTTTTTAAGATTTTTAAGCGCGTAATCCACTGATTTGATCAGCAACCCT  
AGCTCATCTCTGTAAGCTTCGATCCGATGCTTGCCAAGGTGAGCTTGAGAGCGTTGAAGATGTCGGCCTCCTTCTCGAGGAGAATAGCTTTGAGAGCCCTCAGCTGAGACCTCCTCCAA  
GAATAACTCCTTGTGACGCGCTCTCAAACGCTTCTCTTGCCTCCTTACAACCCTTTCACCTCCATCCTTCTGAGCTTGACTGTGCGCCGGCGCTGCGCTCCACCTCGGCCTCCTCTTCC  
TCCGCTTAAAAAAGGCATTTCGCTGCACAAATTTAAGGTGAGGTAGGAAACAGGGGAAAGCACGAGGAGCAATAAATGAGACTTTAATGAACAGTTCAAGCAGTTGCGCTTCTTCCC  
CTTGCTGTGTTAGTGAGTTCGGCAACTTTT

>comp175244\_c0\_seq3

TATGTGCAGGCGATCATATTTTAACCCACTGTAATGAAAATGTCTCTAAAATAACATGGGTAAAATTTTCATAGCTTCAATCCTTGACAGCATTAAATTATTCTGTGCAGACACCGGACAATTTCG  
GAGGCCAATCAGAATGCGCCACGTACCCAGACCGGTACCGAGCTAAACATTAACATGACACGTTTTTGATTGGCCCCAAATGATGCATGGATAATCATTAAACAATAACATCAGTTTCTTT  
ATTGGTTCCAATCACAATGTAGTGAATAAGTACAACATTAATCAGTGATACATAATAAGAAAAGGCTTGTCCCTATAAAGAGAAATTAATTCTGTGCGGATACCTGACGCAGAACGTCGTC  
CAGAGACCAACCAGAATGTGGCACGTACGTGGTACAGAGCTGCGGTACCAGCGAATGGGTGATGTGGCGCATTCTGATTGACCTCTAGATAGTGTTCGACGTCCGCACAAAATCATTAAAT  
CGACATACACACACATTACTTTATTTTGTTCGAAAAGACAATCAACTCATCAATACATTCAAAAACCTTGCCATCACAACTTCAAAAATATTCTGAAAAAACTAAAAATATCAGATCTCTAC  
CATAAGGGAGAGTGTGAAGCCATAAAGAAGGTTTTTGGCAGGTAGAGCCAAACAGGTGCAACAATATTTGCAGGATGAATTACTCATTGAACGCAATCCAATGGATTGGTGAGCAGT  
AAAGATTAATGAAAACATTTGGCTTGAAAGGGCATGTTGAAGCTTGTAAACCGACTTCACAGTTCACCCAACAGAAATCCAGACTTGCTTAATAACAAACCACCAACAAAGTTATAGAAA  
ATAACAAATACATAAGACTTAACGGTTCACCCACAGAATTTCCAGACTTGGCTACATAAAAAAGCTACCATACATGAATTTTTTAGTCGATTATCTCATCTCTTGAGTCCAAGTAACATTAGTA  
TAATCCCAATGTAGTAAAACCTGTAAATATACCTGATGAACTGGAGCTTCCACTCGTTCCAAGGAGGGTATCTGCATGAGAGTTCTATGAGAAAGCTTCTTCTCAATATGGCTTTTCCATGG  
CTGAACTGGTCTGAAGGAGAACTTTCCGTGGTACTTTCCGAAACCGCTTTTACCAGTTCACCAAAATGGTAATGAATCTACTGCAAATTGTAACATTGCATCATTAAAAGTAATGCTTCCTG  
ATGATGTTTTCTTCGATGACTCTCCTCTTCAACTTCTCATCGACGGTGAAGGCGTAAATGACGAGAGGCTTCGGCCTTACCTTCAGAACTCAATGCTATCTTCAATCTTCTTTAGCTGTGAA

TGAGATGAGCAGCTGTGTGAAGCTTAAATGATTTTCAGTGGCTGTTTGGTTTTAATATTTCTGTATGTAATGCTGTGTTTTGCTTTCTAAAAATGAAATGTGTTTAGTATGACATTATCTTCTG  
CATTGAAGTATGATTGTCAGAGTAATTTAGATAGAGATAACATCCAAATAAGTCAAATATCTAGATAACGCTACTATTATTATGGACATAAACCGTAAATCAAACACAGAACATTTGACCAA  
CAAACTACAATCCAAATAATGCTAATATCCAAAAATAATGGCATTTAGACAACATGAATGATAGAAGATTTATATTTCTTTCAAATAACACTTAGCTTCATATCTTACTGTGATTACAGG  
AAGCAAGGGTCCAAAAATCTCCTCTCTCATGATCTCAGAGTCTAAAGGAGGATTTAGAAGAATGGTGGGCTCGATTAACAGGCTTTTCAGCATTGAAGGAACCACCATACACAACAGAGG  
CAGCAACTGCCGAGTCGTTGAGAAAAGTTGCTCAGTCTTTGAAAATGTTGCTTGTGAACAATCCTTGAGAGTTTTTCAGGATCTTTGTACGTTTTCTTGATCTTTGCCTTGAGTAAATCAAC  
CAAAAGCGGGGCGAATTGCTCTTCCACGAGCAAATAATCAATTGCTATGCATGCTTGGCCACTGCAAGGACCCCACTTCGCTCCAGCCACTCTGTTTATAGTAACCTCTATATCTCTTGCTC  
TTGAGAGGGTATCTATAATAGCAGGGCATTTCCTCCCAGTTCAAGAGTGACTGGAGTCAGATGCTTAGCAGCAGCAGTCATAATAATGCGTCCAACCTCTCGAGCTCCCAGTGAAGAATAT  
CTTATCCCATTTGTGCTCCAAGAGTTGCTCTCCGATGTGAGAAGCTCCTTCCACAACCTTCACAGAATTATCCAAATACTTGGGCAGGTTGGTTGCCAGAAAACGCAGAGGAAGCAGGAGC  
AAGTTCTGAGGGTTTCAAGACTACAGCATTTCAGCTGCTATAGCTCCAACCAGAGGCTCAAACGACAACCCATGAGGAAATTCATGAAGAGAAAATAAGAACAACACCGAGCGGCT  
CCGCCACTATTTCTCCCGTGGCTGGAAAAGCATACTAACGGGACATCAACCTTTTTTGGTGCCATCCATTTTTTAAGATTTTTAAGCGCGTAATCCACTGATTTGATCAGCAACCCTAGCTCA  
TCTCTGTAAGCTTCGATCCGATGCTTGCCAAGGTGAGCTTGAGAGCGTTGAAGATGTCGGCCTCCTTCTCGAGGAGAATAGCTTTGAGAGCCCTCAGCTGAGACCTCCTCCAAGAATAA  
CTCCTTGTGACGCGCTCTCAAACGCTTCTCTTGCTCCTTCAACAACCTCTTACCTCCATCCTTCTGAGCTTGACTGTCGCCGGCGCTGCGCTCCACCTCGGCCTCCTCTCCCTCCGCTT  
AAAAAAGGCATTTCCGCTGCACAAATTAAGGTGAGGTAGGAAAACAGGGGAAAGCACGAGGAGCAATAAATGAGACTTTAATGAACAGTTCAAGCAGTTGCGCTTCTTCCCCTTGCT  
GTGTTAGTGAGTTCGGCAACTTTT

>comp175244\_c0\_seq7

TATGTGCAGGCGATCATATTTTAAACCACTGTAATGAAAATGTCTCTAAAAATAACATGGGTAAAAATTCATAGCTTCAATCCTTGACAGCATTAATTATTCTGTGCAGACACCGGACAATTCG  
GAGGCCAATCAGAATGCGCCACGTACCCAGACCGGTACCGAGCTAAACATTAACATGACACGTTTTTGATTGGCCCCAAATGATGCATGGATAATCATTAAACAATAACATCAGTTTCTTT  
ATTGGTTCCAATCACAATGTAGTGAAAATAAGTACAACATTAATCAGTGATACATAATAAGAAAAGGCTTGTCCTATAAAGAGAAATATTCTGTGCGGATACCTGACGCAGAACGTCGTC  
CAGAGACCAACCAGAATGTGGCACGTCAGTGGTACAGAGCTGCGGTACCAGCGAATGGGTGATGTGGCGCATTCTGATTGACCTCTAGATAGTGTTCGACGTCCGCACAAAATCATTAAAT  
CGACATACACACATTACTTTATTTTGTTCGAAAAGACAATCAACTCATCAATACATTCAAAAACTTGGCCATCACAACTTCAAAAATATTCTGAAAAAACTAAAAATATCAGATCTCTAC  
CATAAGGGAGAGTGTGAAGCCATAAAGAAGTTTTTGGCAGGTAGAGCCAAACAGGTGCAACAATATTTGCAGGATGAATTAATCATTGAACGCAATCCAATGGATTGGTGAGCAGT  
AAAGATTAATGAAAACATTTGGCTTGAAAGGGCATGTTGAAGCTTGTAACCGACTTCACAGTTCACCCAACAGAAATCCAGACTTGCTTAATAACAAACCACCAACAAAGTTATAGAAA  
ATAACAAATACATAAGACTTAACGGTTCACCCACAGAATTTCCAGACTTGGCTACATAAAAAAGCTACCATACATGAATTTTTTAGTCGATTATCTCATCTCTTGAGTCCAAGTAACATTAGTA  
TAATCCCAATGTAGTAAACCTGTAAATATACCTGATGAACTGGAGCTTCCACTCGTTCCAAGGAGGGTATCTGCATGAGAGTTCTATGAGAAAGCTTCTTCTCAATATGGCTTTTCCATGG  
CTGAACTGGTGAAGGAGAACTTTCCGTGGTACTTTCCGAAACCGCTTTCACCAGTTCACCAAATGGTAATGAATCTACTGCAAACTGTGCAACAAGTTTTTCTCAAATGGTTAAGCA  
TTTACTGCTTCTAAAATTAAGAAAGTTAGAGGAAGAAAAAGAATACTTGTAACATTGCATCATTAAAAGTAATGCTTCTCTGATGATGTTTCTTCGATGACTCTCCTCTTCAACTTCTC  
ATCGACGGTGAAGGCGTAAATGACGAGAGGCTTCGGCCTTACCTTCAGAACTCAATGCTATCTTCAATCTTCTTAGCTCTATATCTCTTGCTCTTGAGAGGGTATCTATAATAGAGGGC  
ATTTTCTCCCAGTTCAAGAGTGACTGGAGTCAGATGCTTAGCAGCAGCAGTCATAATAATGCGTCCAACCTCTCGAGCTCCCAGTGAAGAATATCTTATCCCATTTGTGCTCCAAGAGTTG  
CTCTCCGATGTGAGAAGCTCCTTCCACAACCTTCACAGAATTATCCAAATACTTGGGCAGGTTGGTTGCCAGAAAACGCAGAGGAAGCAGGAGCAAGTTCTGAGGGTTTCAAGACTACAG  
CATTTCCAGCTGCTATAGCTCCAACCAGAGGCTCAAACGACAACCCATGAGGAAATTCATGAAGAGAAAATAAGAACAACACCGAGCGGCTCCGCCACTATTTCTCCCGTGGCTGGA  
AAGCATACTAACGGGACATCAACCTTTTTTGGTGCCATCCATTTTTTAAGATTTTTAAGCGCGTAATCCACTGATTTGATCAGCAACCCTAGCTCATCTCTGTAAGCTTCGATCCGATGCTTG

CCAAGGTCGAGCTTGAGAGCGTTGAAGATGTCGGCCTCCTTCTCGAGGAGAATAGCTTTGAGAGCCCTCAGCTGAGACCTCCTCCAAGAATAACTCCTTGTGACGCCGCTCTCAAACGC  
TTCTCTTGCCTCCTTACAACCTCTTCACTCCATCCTTCTGAGCTTGACTGTCGCCGGCGCTGCGCTCCACCTCGGCCTCCTTCTCCTCCGCTTAAAAAAGGCATTTCCGCTGCACAAA  
TTTAAGGTGAGGTAGGAAACAGGGGGAAAGCACGAGGAGCAATAAATGAGACTTTAATGAACAGTTCAAGCAGTTGCGCTTCTTCCCCTTGCTGTGTTAGTGAGTTCCGGCAACTTTT

>comp175265\_c0\_seq37

CGGTCCCGCCGCGCTTTCACCGCCGGCTCCCTCTTCTCCCGGATACCCGAACTCTCTCATCGAGCGCGGCCGGAATACCAAGCCAGCACCATACTCCGCCGAATCCGTGGCACCG  
ACGACATACAAAAGGAGTTCGCCGACATAAAGGCAGCCGGTGAGGAGTCAAAGGCTGTGAAAAATCCATGGCGAAGCATCGCCAGCGCCGCTACCGTCCGCAGCTTGTTCATGTCCGT  
TTTCATCCCCTTCTTCCAACAGCTCACTGGGATCAACGTCATTATGTTCTACGCCCCGTTCTCTTCAAACCATCGGCTTTGGAAACGACGCCTCGCTTATATCCGCCGTCATCACTGGTC  
TCGTCAACCTCTTTTCCACTCTCGTCTCCATTGTCACCGTCGACCGCCTTGGCAGACGCAAGCTCTTTTCCAGGGCGGAGTGCAAATGATTCTTTGTCAAATAGTGGTCCGTACGCTTAT  
TGGTGTAAATTTGGGACATCCGGCCAGGGCTCGCTGTCGGGTACTTACGCGTCTTTTGTGGTGGCTTTTATCTGTATCTACGTGCGCCGGTTTCGCGTGGTTCGTGGGGGCCGCTCGGCTGG  
CTCGTTCCGTCGGAGATTTTCCCCTTGGAGATCCGGTTCGGCGGGGCAGAGCATCAATGTTTCAAGTAAACATGCTATTCACTTTTATATCGCGCAGGCCTTCCCTTGCTCTTCTTTCAGGCT  
CAAGTTTGGCCTTTTCTACTTCTTCGGTGGCTGGGTGTTGGTTATGACAACCTTCATCGCACTTTTCTCCCGGAGACGAAGGGAGTTCCCATGAGGAGATGGTGTCTGATGGAGGGG  
ACACTGGTCTGGAGTCGGTTTTTTGACGAGGAAGACGGAGGCGACGCTAGTTCATTAGCTGGTGTGAGATGGCCAAGCCGAGCGTATAGAGCATGATCGCGCTGCTTATGTTCTTGAT  
CCTTTTTTAATTATGAGACTAAGATAGTTAATCGCTATTAATACTACTGTTATTTTGTGATTAATGCGTTTTCTTTTACCTGCACTCCATAAATTTTTTGGTTAAGTGGGCGAGACCTATATAT  
AAATATGACATGATTAGTTCGATTTGATATTGTGACTTTTATTTTTGTTGGGACCTTATTGAGCGTGTGCACTGTAATGCTTGAATTTACCCTTATTTTGTGATGAGCTTTCATTGTAATTAATG  
AGACTTTTTATTAATCAAAAAAG

>comp175299\_c0\_seq2

TAGGAATATTTCCAACGTACAGTCTTCTAAATCTGCATCGGCAGTGGCAACTGCACCGTCGAAGCTTTCACCTTGCAAGATGGTGGAAAGAAAGTTTTCCATCAACTATTGTGCCTTCTCT  
TTCCAGTGCTTTCTGAACAGATTCTAAGCTTCTGAATATAATGAAGCCAAAACGACGAGACTTTCCAGTTGCATCGTCAACCACAACACGTCCTTCTTCGATTTACCATATGATGAAGAG  
AAGGCATCACAGAAAGTTTCTGAAGTAGTTTCTCACCGAAGCCATAAACAAGTTTGGCATGTGCAGGGTCAGGTTTCGCTGCAAATCTAATTTCTTCAGCAGCCTGAGGGAATGTC  
ATGCCGAGCTTGACGAGGAGATCAACGAGCTCCTTCTCATGGAGAGTTTCGGTAAGAGATCGCAAGTGTCTCTCCATCAAGGAGTTCGGGCCGGGACTAGCTCGTTGTCCACAGAGTC  
GTCCTTTGTAGCAGCGCCCTTCCCCTTCTGATCAGACTCCATCAGGGATGCTTTAATTTCTTGCGCCAATAAGGAAGAGAAGCAAAACAAGATTGGGATGGTTTTGCAATAAAAAGGCAAGG  
CAGGGCAGCAAGTGCCTTCTGTAATATGGAGAAGAAGCGCACATAATGCCAGGCATCCTGCTAAGTATCGCATGTTTGTAGACTGGTGGATGTTACTTTGGATCCGACCCGAAAATTT  
CGGGTTTGGGTTGACCAGAACCCGAAGCAGGTCAGGTTTTGGTCTAGAAAACCGACCCGTTTGCAAACCGGGTTCGGGTTTAGGTTTCCCTTGAACCCGGGAATGACCCAGAAAACCC  
GTCTACCTTGGCTGCCACTGCGCCACGTTGCTGCTAGGCTGCCTCGGATACCTCTGCCCCACGTCGAATCGCATCGAGCCGAGGCTCGAAACATCAAGTAGCGTCCGCGTGTGACG  
TTGCTGCCCCGATTCACGTCGCCCCCGCGCAGGCGCGCAGTGTGCGAGTCGCGCGTGTGCGAGCCAGCCCTAGTGCCACGCCACCCGTTGCTTACACTATTGTCACTACCCCGCCAG  
CGTCAGCTGTGCTCTCCCACTGCTGGATAGCCGGAGGGGCTGAATCGCGTGTGGCCTTGCCGAAAATGCCGAAGGATCGAAGTCACTAATTGCCAAAAGAAGCGTTGCTGACCCGAAG  
GGGTCGAGTCGGGTTGACCCGAACCAGAAGTGGGTCCGGTTCAAGTCCGAAAATTTGACCCGTTTGCAAACCGGGTTGAGTTGACCCGAACCCGAAGTGGAAAACAGCTTTGTAA  
ACAAGAAGTGTGGAAAACAGCTTTGTAAACAACACCAGCTTCAATTGAATCTCATCACATAGGAGGAAAAGTGTCACTTGCAGCGAACTGTACTGTTGTGTTGGAGCTCAACGGTAGA  
AAATCATCTTCACTTAGTTGCATATGCTTTGTAGAGCAAGCGATTGTATAATTTTTTGTGCTTGCTGAGCTTTTTGAGCTTGCTCAACTTCTTGTGAAGGCTGAGCATTTTTAGGTGGCTGA  
TCTTGCCGGAGTGGAAGAATGTTGGTTTTGTTGTTCTCGTAATGACAATGGACGGAGATTTGCGAGATCAGGATCATGAATGAAATCATATGGGATCTTGGAGTCATCCATCTCTCTAAA  
TGTAATTGAAATCCTTCGCGTAGGTACAACAGGAACACAATGCTTAGCAACATCAGCACCATTTCCATTCAAAAACAAGAACAGACCCTAAAGGCAAAGGAATGGAGGCAGAGCCTGAGA

AATCTCCTGGTCCATTTATCTTCAACTCCGTTCCAAAAACGATGTTGCATTCACTCAAGAAAGAGACCGTGCAAAAATGGCCGAACAAAGTCATGGTGATCAATGTGAGGAGGAATGCAGT  
CATCCCTGTCAATAATGTTGACAATACAGCTGTTGGGGATGCATGATGGTGGGAGAACATGCCAAGAAACCATTCTCTTGATCATTCTTTCAATAATGGTGGGATAGGATCGACTTCCTCG  
TCGCGGATTATGCCAGGGGGATTCCCATTCCTGTCCAA

>comp175299\_c0\_seq6

CATTCGGATGATGTTGTACATTCTGTGAAAATTTTATGCAAGCATGAAAAAAGGGCTTTGTAGAGTTTGACCTCTTTTTTGCAGTATAAGAAAGCTTGCGAGTAGATATGACAAAGACTG  
AATGGTTTTTACTGAACATGTTAACATGATCATATACTTATACAAACATATTTTTTAATAATCTGAAAATACAATGAAGCATTAAAGATTTGATTTTCAGTAATAAAAATAGTTTATTTATTTATTT  
CTGTAAAAAAGGGATATTTATATTGTAGTGAATGCATTGAGTGTGATTATGAAATCAAGTTGACAAAAAGCAGCTCTGATGACTATAAAAGACCAATACTTCGTTTGTGACGACTTTGTAT  
TTTTCCAGATGGCGCACACAATAATCTCTCTCTTTGGTTTCCAATATACATCATTGTAGCTCAACTCCATCCACCGACCTCAAAACAATAGAATAAGACTTCATTTGGGAATCGCATTTGA  
GCACTATTTTGTGCTGCTTTAGATATATTTTTAAAATAAAGTTGATGTAGAAAACAGTAGGAAAACTATCCCAATTAGACCTGTCAATATTGGACCCAACCCGAAAATTTTCGGGTTTGGGT  
TGACCAGAACCCGAAGCAGGTCAGGTTTTGGTCTAGAAAACCGACCCGTTTGCAAAAACCGGGTTCGGGTTTAGGTTTCCTTGAAACCCGGGAATGACCCAGAAAACCCGCTACCTGG  
CTGCCACTGCGCCACGTTGCCTGCCTAGGCTGCCTCGGATACCCCTGCCCCACGTCGAATCGCATCGAGCCGAGGCTCGAAACATCAAGTAGCGTCCGCGTGTGACGTTGCCTGCCCG  
ATTCACGTCGCCCCCGCGCAGGCGCGCAGTGTGCGAGTCGCGCGTGTGCGAGCCAGCCCTAGTGCCACGCCACCCGTGTTGCCTACACTATTGTCACTACCCCGCCAGCGTCAGCTGT  
CGTCTCCCACTGCTGGATAGCCGGAGGGGCTGAATCGCGTGTGGCCTTGCCGAAAATGCCGAAGGATCGAAGTCATCTAATTGCCAAAAGAAGCGTTGCCTGCACCCGAAGGGGGTTCGAGT  
CGGGTTGACCCGAACCAGAAGTGGGTTCGGGTTCAAGTCCGAAAATTTGACCCGTTTGCAAAAACGGGTTGAGTTGACCCGAACCCGAAGTGGAAAACAGCTTTGTAAACAAGAAGT  
TGAAAACAGCTTTGTAAACAACACCAGCTTCAATTGAATCTCATCACATAGGAGGAAAAGTGTCACTTGCGACGGAAGTGTACTGTTGTGTTGGAGCTCAACGGTAGAAAATCATCTTC  
ACTTAGTTGCATATGTCTTTGTAGAGCAAGCGATTGTATAATTTTTTGTGCTTGCTGAGCTTTTTGAGCTTGCTCAACTTCTTGTGAAGGCTGAGCATTTTTAGGTGGCTGATCTTGCCGGA  
GTGGAAGAATGTTGGTTTGTGTTGTTCTCGTAATGACAATGGACGGAGATTTGCGATCAGGATCATGAATGAAATCATATGGGATCTTGGAGTCATCCATCTTCTAAATGTAATCGAA  
ATCCTTCGTGTAGGTACAACAGGAACACAATGCTTAGCAACATCAGCACCATTTCCATTCAAAAACAAGAACAGACCCTAAAGGCAAAGGAATGGAGGCAGAGCCTGAGAAAATCCTCGG  
TCCATTTATCTTCAACTCCGTTCCAAAAACGATGTTGCATTCACTCAAGAAAGAGACCGTGCAAAAATGGCCGAACAAAGTCATGGTGATCAATGTGAGGAGGAATGCAGTCATCCCTGTC  
ATAAATGTTGACAATACAGCTGTTGGGGATGCATGATGGTGGGAGAACATGCCAAGAAACCATTCTCTTGATCATTCTTTCAATAATGGTGGGATAGGATCGACTTCCTCGTCGCGGATTA  
TGCCAGGGGGATTCCCATTCCTGTCCAA

>comp175316\_c0\_seq1

TTGAAGAAATGCAAATTGCATTAAGAAACCTAATACAACCTAGAAAGCAAAAGCAAAAGCAAAACCTTTTAAACTACCATAATGGATATGTGATCCACTAGATCCCATTTTAGATC  
CATTGGGGTGTATGGGGATACCAAATATTAACAACCAAAAAGGTTGGTTAGTATTCTAGCTTTCCCATGGGATGAAAAATAAAACCTAGTAAAAATCCCATATTTTCATCATAATGGCTTTA  
AAAAGGTATAAGAATCCTAACAGCAAAACAAACAAGGATAACTAGTTACAAAAAATAAAAGCAACTACTAAACCAGCTATCCAAACAACATCCAGAACCCCTAAAAAAGGTCC  
AACAGCTCCAAACAAGAGTAGAATTTGCTGTTGTAGCATCAACACAACCTGACAGGAGCCACGAAGAATGAACCAATCAATGACGACAAAGCCATAACACCAACTTCCTCCTCAATAGT  
CCAAGAATCAGCCTCTCCACAAGCAAAAGTCATACCAACTGAAAATCGTCAACACCCATCATACTGGCAAGAACAACACCAGTAAAATCCAATATAAAGTCATAATACCAACAACCAC  
CACAAAAGCCAATAACCTGCCTCCTCATTGCAAAAAGCCAACCAAAATTGATAATCCTCACCCTCTCATCACATTGACAAGAGATAAATAAAAAACAAGTGGCCAAACAACCACCTCG  
TTATTACAAACATCAACCAACAAGAATTTCTCAACATAGACAATCCACGGCCAGACCCTTTACAGATCCAAACGATGTTGATAAAGCAATAACAACAGCTCCAACATCAATAGGCCAA  
GAGACGGCATCAAATATAACATGATCCTTATAGAACAATGAGTAACATCGGTATTACCCAAAACCTCTTTCCAAATTGCTGCATATCCAGCTCCAAACAACCCAGAATTGTATTATCCAC  
AAATAACTGAGTCAAATCATCCACCAGACTGACTTGATTCAAGAGTCTTCAAGAATCCAAAAGAAAAGTGGATCTTTAAATAGCAAGAAGTTCCTTTAAATCCAAACACCCAAACAC

CATCAACTTCATATTCATCAACTGTTCACTCATCAAGAATCAATTCAAACCAATTATGGGATCAAGAGAATCCATAAACCAAATTAGACCCGAAATCTAGCAAACATTCGTTAGAAAAGAATT  
TAGTCCCAGCATAAACTTCATTTCCAATAATGTTGTAGGAAACAAAAACCAACACAAAACTCCTCCAAATCCATCTTCAGATTTTGAAATTTACAAAAATCAGTCAAGAATCTGATACT  
AGGATAGACACATCCTACATTACCGGAAGCCAAACCAACCAACGGAGATACATTGGCAAGCAGAAATCATCGAAAACATAATTTCAATTCGGAAGAAACAACAAAATTGATAGTTCAAA  
AAAGAACCTCTATCAGAAAAATTGTCATCTTCATCGCATCTCTGAACAAGATTGAGATGCCCGAACCGAACAAAGGTGCTCCGTTGGCCATACCAGGCCGACGGAGAACCAACGATCTC  
CATTGATCGGCCAAAAACATCGCACTCACGCGAACGTCGCTTTTCGCCCTTCTAAAAGCATTAGTGGTTAGATGGCCATAATCAGGTGATAGTTATTAAGGACTATATTTGAGTGATGGTA  
GTCGAAGGACTATAGTATGGTATTGGTAGTGTAGGATCGTAGCTGGGTGATGGTGGTGCGAAGAATGTATGAGGTGATTTTGGTATGATGGCTATAATCAATATATGATAAAGGCAAGAAT  
AGATATAGTAAGGCTATGATGGCTATAGAATCATATTTAACAAGCATGGAGGTTAAAGGGACCTAGCTGGTTGCTGGTGAAGGCCCTATAGTATGGTAGTATGATGATCTAATGGTAGTGC  
TCTAGGATTCTTAAATCCTTGGTGTAACTTATTATCACCAGGAGTTTAAATCATAGTAGAGCCAAGAGCCGCTAGATTGATGTTTAAAGGCTTTGTTCTATAATAAACCTAGATTCAGTC  
CTCAATACTGCAGTGCTGAGTCATAGGAGAGCCATGATGCTAGGAAATAAATTATATTTATATATAATTTTTTCTCCTCTGCTCATCTGCTCTCTCATGTAGTCATTAGGCTTGTGAAAAAG  
GCAAGGAAGAGGGTATGGGGAGAAGGAAGAGAGAGAGGGAGAGAGAAAAGGGTTAGATAATTTTATTTATCAATTTTGTAAAGATTTATTTTATTCAAAGTATGTAACCTGAA  
TTCCATTTTAATTTTTTAATAATTTTTAGTTTGATGAATTAATCTCTGTCAAACATATAAAAAATGTGTTCTCCAATT

>comp175356\_c1\_seq7

AAAACCTCTATTTTCAAACCTATCAACTTCAAAAATCTTAGAAACCTATCTTTTCAGAAGTAATAATTTAAAAATCTTAAATCCAATATTTTTAAATATAATATAAGATTTTCTTCAATTTCTGTA  
GTTTTTAAAATATAATTTAGATACATTTATAAATAGTACTTCCAACGGTTGTTTTTGGAGTCTTAAATCTCTATGAATGGAGTTTGTAAATGCTAAACAGGTGGTGAGAACCATAGAGCCATT  
GGCTTGAAACATCTAAAGAGCGGTGAGGGAAGCCATCAAAGCAAGATTTAACGCTCCGCCAGAGGTTTGTGGTATCGATGGAATTCCTGGAACCCAACTGTTGGCTATCTGTCAAT  
GCCTATCTATGAGTGACCTCTCGCCTATCAAAGCTTGCCAATGCTATTCTAGCTTGAGGGCTAAGCGCGCGGAATAATCTTAAATGAGTTGGAGAATCAATTTGATGGCCCAGCCTATCGGTG  
GATTGAAAGACACCTTACAAGATAAATTAGAATTAATTTCTGTGCGGTCACCTTTCTCCGACTGTGAATTTCCGGTTTGAAGGTGGAATAACAAGCAACTCAACTCTCACAGTTATTCCAG  
CCGTCGGCACATCACTGATCAGTCTAGTGAGCAAAGAGCTGCACCAGCAATCCATAAACAACAACAATCCCCACTATGTCAGGACTAGTTAACTCTTAAATCGGTTGATCCTAAGCTCGCT  
AAAAACCATCCTGTAGACAAAGACAATCTGTTACGGTCTTCTTGAACCGACCAATAAGCCCAACCTGGGCCGATTGATGTTTATAGGAGGCAAGCTAAGCTGCCTCCTTAGAAAGCCA  
CCCAAGCATGTGGGCCCCCTAGG

>comp175418\_c1\_seq7

ACATAAATATTTTCGGTTAAATATTACTTAATCAAGAAAAAATGATCTAACTAACATTATAAATTAATTTATCCAAAGTAATATAAAAAATTGTGTACAGCAACACAAGAATCTTAAAATAA  
GCATTCAGCAGCTTCGTCCTGGTTTAGCCCTCCACATTGAGTTTTGATGCCCAAAGCTGCTTCCTTTTAGCATCTTTCAACAGCCGCAGCTTCCTACTCAATTTTTGACGCTGCTGATTTG  
CACAGCTTGTTAGCCTGAGCTCTTATTTCTTCAGGATCTATTTTTGATTGTGGACGCACAACAAAAACCAAGGGTAATGCTTCTGGCAAAGAAGCATGTTGTCTTGAAGCAGCCTGGAG  
GGATTTTTTCTCTGAGAAAATTCATCAAGATCTTCATCTCTAGATTCCTGTTCCGGTAGTATGTTTACAGGCTTTGGAGCTGGCCTCCTGTAAGGAATCTCTCATCCTCGTAACTCCGCAG  
GTCCTCAAAATCTAGTGCTCTTATTAATATTGGTCGGCTCCACCTATCCACTAACTCTTTTGCAAGCTTCCTATTAGATGTCGCTCTTCATCAGATCTCGACAAAAACATAATAACCTTCCC  
AAGGCCGCTTTTCTTAGCTGTTCTCTTCGATCGTACTGCTTAAATCAATAGGAACTCAGATAGTAACTTCAGTATGGCGGTTTCGAATATTCATATTAGGTAAGCTTCCATCTGGCAAAG  
GTTCTAACCAAGTTCTTTAGAAGCGTAAGTACTCCATGATCTAAAAATCAAGCTGAAGTTTCTTTTTAGAAAGAACATCTATAAGAAACGGTAGCTTCTGGAGTTTATTAATCGCTGGCTTA  
TTTTGCCTATTCATTCGCGATCTTCTTCAGCAGTAACTTCAAGTTCAGCCATAAAATCTTCGATGATCATGGCAAGCTCAGCAGGTGATTTTTCATTTTTCTTTTTACCGCCTTTAAAG  
AGCTTATTCTTCGCTCATTATCCTCCTCTGCCTGTGGAGCATACCCAATAAATCCAGATTCATTGTCATTACCAAAGTGATCAACTTGATCAACCCCAATATCAATTACGAAAGCATCATGA  
TTGTATGCTGTTCTAGCACCTTCTGGATCATCCTCTAAATCATCACAGCAATGGCATCCATAACTCCTGCACCTCATGATCACTTGCATGGTTAGACGAACCAACTCCATAACCACCCGT

TGAACCCGAGGGGATGCTTTTCTAGTAGATTTGCCTGACTTTGGTAACACTTTCTCTTCCTTGCTGCTCGAGTCCTTTCCCAATGACATTTTTTTCCTCACCGGCTCTTCCTCATCCCA  
ATCATCTAAATCCTCCCCATGAAACGCCTGCCATCCGTGCTCCCGCTATGCTCTGGCGAGCTCTGCTTTACGCCCTTCTTGATTAACCTCTTCCTTCGCTTCTAAACTTGGCTTCGTCATA  
TGTTGGTGTAGGGACCGTTCCCTTCGCCATTCGTACCGCTTTTATCGTCAAATTTATGTCTGGTGTAAAGGCAAAGGTTCCCTATAAAGCATCAAGTCACCTGGATCCATAAGAGCCTCTC  
CATCCTCATCAGTGTATGGATCGTTCTCGTTCCCATGGCACCGAACAGAGCAGAT

>comp175421\_c1\_seq11

TTTTTGGACTAAGGGAAAAAGGAAGCATTACTTAATAAGATAACAAATTTAGCAATATCCTAAATTGCACATAACAAACATTTATAGAAAAGAATATCCATTTTTCAAAGTGTATCACCT  
TTAAAGTGAAATTGGCTTTATTATTATACAAATGATTTCGCTCCCTAGTTTCAAGATCTGGCTCTCCATACCCATCTCCATATTGGTAGAAACATTGTGCTGTTCTTGGTATATCAACTAAA  
TTTCTAAAAGACTCCACATATTTGAAGATATTACATGTTCTTTATTCAATTTCTTCCAATAATTTCTTATCAAACATCTAATATAATCTCGAGCAGTTGTTTCTGAAACATTTTTCTTTTATA  
TAGCATTGAATTGATTTAAAACGTCTCCTCTTTGGATCTCTGCCATGTCAGTTCCCAAATCATTGTAGAGTCGGAAAATCATAATGAATGTTGAACGATGGGTGGATAAAAATTTATACTA  
TCAAGAGCTTCAACATTCAGTCATCACTTAGACAATATGATGCTGATAGTCCACAATTTCCGGATATTGTTACCCAAGCATTCTCCAAGTACTCATCCAATGTTGGGGTGTATCTATTATGA  
TACCACCTTGCTTCAATTAAGTATGCTTTGCATAAATCGACCCACACTCTTTAAGGCATGGAAGAATATCCAATTTCTTTTCCCTTTAAAAATGAGTACGCAACATCATTCAATTGATTGAAA  
AGTGCCATCAAGCATATCTTCATACAATTTGGAAGTTGTTGAGCTGCATCCATTTCCAATCTTCAACGGCATTGTAAAGATCTCTAGCTCATCTAGAGTGCCATAAACATCATAAACATCA  
TCAATTGTTGTTACCAAACAATTAATCTTGGTGATTGCTTTCCCTGCTTCTCCAAAATTTAGGTTGAAATGTAAATCCTAAAGCCATAAATGGTTCTCCACTAGCCTGTCTCTTATAAAATCA  
AGCTCATCACAAAGAACACCAAGATTTCTCCACCAATTAGAGATTTCTTAAAGCTCTGTATATAAATGCTCTGTACTATGTTGAAATCTAGTTTGGCCAACCTCAAGCAATATGGGATTAAC  
ATTTTCTTGTTCCTAAGCATCAATGAACCACCTACTATGCAGCCTTGGCATCTCCAATGCAAGGGTAGCTCCAAGGCATGATCTATTTCTTCAATAAGTTGTGGACTTAGTAAAGATCT  
ATCAAGACGCTTAAAGTGTCCATAGCAAACCTTTCCTGCCTCATCCAGTTCTTCCCTCTCCTTCCATAGCAAGGTAGGAAGCCTCATACAAACCTGATCATTTCCTTAAACATCATATTGATGATT  
GGGCTTGAAGCTTCTCTCACTTTTTTGAAGCAGCTTATCAGAGTATCAACTCTTAGTATTGCAGCATTATTGATGCCATGCTCCCTTAGAAGCCTAAAGAGCAATGCAGAGCCATAAAGAT  
TGTTATTCTTTATCAAGTTATATATATTTCCGTTGATGAACTAATTAATCAACAAATTTGTGATATCTGAATTTAAATGATAATCAATTCCTAACTGTCGTAGGGCATCCACAAGTTCAAGC  
TGTTTAAACAAGTTCATGTTGTTGGCCAATCAAACACCTGACTTCTCCTTCAATTTATCTCTTTGGTATATATACTTCTCCTCCTGTGCATACGTAATTTTTTCACTCAACTTCAATGATGTAC  
TACTCTTAAGAAAAATAAGCAATATTATCCTTGGCATTAAATCATTAAAGGATATAGGTTCAATAATGTGCCAATATATCTTGAGTAATAACATTAATAAATGATTGCTAGAAAATTGAGTTG  
GGTTGAGTTCGAATCGAGATGAAACTGAACGATTCAAACCTCAACATATATGTTAGTTCAAGCCAAATCTCTTACGCTTTGTTTGGGATGACTTTCTTACTGTTTCTTAAAGCAGATTTCTAA  
TACAAAAAAGTTATTTTTGTATTAAAACCTCTATTT

>comp175421\_c1\_seq12

TTTTTGGACTAAGGGAAAAAGGAAGCATTACTTAATAAGATAACAAATTTAGCAATATCCTAAATTGCACATAACAAACATTTATAGAAAAGAATATCCATTTTTCAAAGTGTATCACCT  
TTAAAGTGAAATTGGCTTTATTATTATACAAATGATTTCGCTCCCTAGTTTCAAGATCTGGCTCTCCATACCCATCTCCATATTGGTAGAAACATTGTGCTGTTCTTGGTATATCAACTAAA  
TTTCTAAAAGACTCCACATATTTGAAGATATTACATGTTCTTTATTCAATTTCTTCCAATAATTTCTTATCAAACATCTAATATAATCTCGAGCAGTTGTTTCTGAAACATTTTTCTTTTATA  
TAGCATTGAATTGATTTAAAACGTCTCCTCTTTGGATCTCTGCCTGCAATAAATACAAAATATCATTCTATCATAAATAAATGAATCATTCAAAAAGAGAAAAGAAAACATTAAGATTACAT  
TCTTAGATTGAAGAAAATGCTCATATTTACCATGTCAGTTCCCAAATCATTGTAGAGTCGGAAAATCATAATGAATGTTGAACGATGGGTGGATAAAAATTTATACTATCAAGAGCTTCAA  
CATTCAAGTCATCACTTAGACAATATGATGCTGATAGTCCACAATTTCCGGATATTGTTACCCAAGCATTCTCCAAGTACTCATCCAATGTTGGGGTGTATCTATTATGATAACCACCTTGCTTC  
AATTAAGTATGCTTTGCATAAATCGACCCACACTCTTTAAGGCATGGAAGAATATCCAATTTCTTTTCCCTTTAAAAATGAGTACGCAACATCATTCAATTGATTGAAAAGTGCCATCAAGCA  
TATCTTCATACAATTTGGAAGTTGTTGAGCTGCATCCATTTCCAATCTTCAACGGCATTGTAAAGATCTCTAGCTCATCTAGAGTGCCATAAACATCATAAACATCATCAATTGTTGTTAC



CAAACAATTAATCTTGGTGATTGCTTTCCTGCTTCTCCAAAATTTAGGTTGAAATGTAATCCTAAAGCCATAAATGGTTCTCCACTAGCCTGTCTCTTATAAAAATCAAGCTCATCACAAA  
GAACACCAAGATTTCTCCACCAACTGTGAAAGGAAATAATATTTCTTAGAAGAATTATGAGAAGGATTGATCATGTATATTAATAAAAAAATTCAAAATACTTAGAGATTTCTTTAAGCTCTG  
TCATATAAATGCTCTGTACTATGTTGAAATCTAGTTTGGCCAACCTCAAGCAATATGGGATTAACATTTTCTTGTTCCTCCATAAGCATCAATGAACCACCTACTATGCAGCCTTGGCATCCTCC  
AATGCAAGGGTAGCTCCAAGGCATGATCTATTTCTTCAATAAGTTGTGGACTTAGTAAAGATCTATCAAGACGTCTTAAGTGCTCCATAGCAAACCTTTCCTGCCTCATCCAGTTCTTCCTCT  
CCTTCCATAGCAAGGTAGGAAGCCTCATACAAACCTGATCATTTCCTTAAACATCATATTGATGATTGGGCTTGAAGCTTTCTCTCACTTTTTTGAAGCAGCTTATCAGAGTATCAAACCTTACG  
AAATAATTAATAAGGATTTTATTAAGCATACTTATTATAAAAATGCAATAGAAATTAATATCATATTTGACGTTCAATAAGGTAAATATTTTATTCATTAGCATTTTAGTCCTATTCCGAAAGCATC  
TTGATGTACATAAAAATTAATGAATTGCTAAATATTAGTCTTGCTAACTAATAGCTAAAATTAGTTACAATAAGAAAAAATGATACATCATTATCCCTATTGGCATTCTAGATAAGATTGCAAT  
AGAATTTAATGACATAGAGTGTCTTTTATGATATAGTTATCTCAATATTGTTGTTAGGTAACATTTTATTTAGATTTATATCGGACTTTTTTAAGGATGGAAACATATCATAAATATTATTTACTT  
AGAAGTAGAGAACAATATTATTTATAGATCCAAGGGCATAAGTCCATTGGAAAAAACAAGAAATAAGACTAGCCATAAATAAAAATATCACATAGAGATAAAAATATAGATTTTCTTTTAAAG  
GAAGTCATAAAGATGGAATTGAATTTATGACTCTATTATACCCAAGAAATTAGGGAGAATATTGCTTGAACCTAAATTTTATAATTATATTTACTGAACCTAAATAACCCTTAAATGAAAAAT  
TTATATGCATGCACATGTTGGTACATACCTTAGTATTGCAGCATTATTGATGCCATGCTCCCTTAGAAGCCTAAAGAGCAATGCAGAGCCATAAAGATTGTTATTCTTTATCAAGTTATATATAT  
TTTCCGTTGATGAACTAATATTACTCAACAAATTTGTGATATCTGAATTAATGATAATCAATTCCTAACTGTGCTAGGGCATCCACAAGTTCAAGCTGTTTAAACAAGTTCATGTTGTTGGC  
CAATCAAAACACCTGACTTCCCTCCTTCAATTTATCTCTTTGGTATATATACTTCTCCTCCTGTGCATACGTAATTTTTCATCAACTTCAATGATGTACTACTCTTAAGAAAAATAAGCAAT  
ATTATCCTTGGCATTAAATCATTAAGGATATAGGTTCAATAATGTGCCAATATATCTTGAGTAATAACATTAATAAAAAATGGATTGCTAGAAATTGAGTTGGGTTGAGTTCGAATCGAGATGAA  
ACTGAACGATTCAAACCTAACATATATGTTAGTTCAAGCCAAATCTCTTACGCTTTGTTTGGGATGACTTTCTTACTGTTTCTTAAAGCAGATTTCTAATACAAAAAAGTTATTTTTGTATTA  
AAACTCTATTT

>comp175421\_c1\_seq15

TTTTTGGCACTAAGGGAAAAAGGAAGCATTACTTAATAAGATAACAAATTTAGCAATATCCTAAATTGCACATAACAAACATTTATAGAAAAGAATATCCATTTTTCAAAGTGTCATCACCT  
TTAAAGTGAAATTGGCTTTATTATTATACAAATGATTTCGCTCCCTAGTTTCAAGATCTGGCTCTCCATACCCATCTCCATATTGGTAGAAACATTGTGCTGTTCTTGGTATATCAACTAAAAC  
TTTCTAAAAGACTCCACATATTTGAAGATATTACATGTTCTTTATTCAATTTCTTCCAATAATTTCTTATCAAACATCTAATATAATCTCGAGCAGTTGTTTCTGAAACATTTTTCTCTTTCATA  
TAGCATTGAATTGATTTTAAAACGTCTCCTCTTTGGATCTCTGCCATGTCAGTTCCCAAATCATTGTAGAGTCGGAAAAATCATAATGAATGTTGAACGATGGGTGGATAAAAATTTTATACTA  
TCAAGAGCTTCAACATTCAAGTCATCACTTAGACAATATGATGCTGATAGTCCACAATTTCCGGATATTGTTACCCAAGCATTCTCCAAGTACTCATCCAATGTTGGGGTGTATCTATTATGA  
TACCACCTTGCTTCAATTAAGTATGCTTTGCATAAATCGACCCACACTCTTTAAGGCATGGAAGAATATCCAATTTCTTTTCCCTTAAAAAATGAGTACGCAACATCATTCAATTGATTGAAA  
AGTGCCATCAAGCATATCTTCATACAATTTGGAAGTTGTTGAGCTGCATCCATTTTCCAATCTTCAACGGCATTGTAAGATCTCTAGCTCATCTAGAGTGCCATAAACATCATAAACATCA  
TCAATTTGTTGTTACCAAACAATTAATCTTGGTGATTGCTTTCTGCTTCTCCAAAATTTAGGTTGAAATGTAATCCTAAAGCCATAAATGGTTCTCCACTAGCCTGTCTCTTATAAAAATCA  
AGTCTATCACAAAGAACACCAAGATTTCTCCACCAACTGTGAAAGGAAATAATATTTCTTAGAAGAATTATGAGAAGGATTGATCATGTATATTAATAAAAAAATTCAAAATACTTAGAGAT  
TTCTTTAAGCTCTGTATATAAATGCTCTGTACTATGTTGAAATCTAGTTTGGCCAACCTCAAGCAATATGGGATTAACATTTTCTTGTTCCTCCATAAGCATCAATGAACCACCTACTATGCAG  
CCTTGGCATCCTCCAATGCAAGGGTAGCTCCAAGGCATGATCTATTTCTTCAATAAGTTGTGGACTTAGTAAAGATCTATCAAGACGTCTTAAGTGCTCCATAGCAAACCTTTCCTGCCTCAT  
CCAGTTCTTCTCCTTCCATAGCAAGGTAGGAAGCCTCATACAAACCTGATCATTTCCTTAAACATCATATTGATGATTGGGCTTGAAGCTTTCTCTCACTTTTTTGAAGCAGCTTATCAGAG  
TATCAAACCTTAGTATTGCAGCATTATTGATGCCATGCTCCCTTAGAAGCCTAAAGAGCAATGCAGAGCCATAAAGATTGTTATTCTTTATCAAGTTATATATATTTTCCGTTGATGAACTAAT  
ATTACTCAACAAATTTGTGATATCTGAATTAATAAGATAATCAATTCCTAACTGTGCTAGGGCATCCACAAGTTCAAGCTGTTTAAACAAGTTCATGTTGTTGGCCAATCAAACACCTGACTT

CCTCCTTCAATTTATCTCTTTGGTATATATACTTCTCCTCCTGTGCATACGTACTCATTTTTTCATCAACTTCAATGATGTACTACTCTCTAAGAAAAATAAGCAATATTATCCTTGGCATTAAAT  
CATTAAAGGATATAGGTTCAATAATGTGCCAATATATCTTGAGTAATAACATTAAAAAAATGGATTGCTAGAAATTGAGTTGGGTTGAGTTCGAATCGAGATGAAACTGAACGATTCAAACCTC  
AACATATATGTTAGTTCAAGCCAAATCTCTTACGCTTTGTTTGGGATGACTTTCTTACTGTTTCTTAAAGCAGATTTCTAATACAAAAAAGTTATTTTTGTATTAAAACCTCTATTT

>comp175421\_c1\_seq16

TTTTTTGCACTAAGGGAAAAAGGAAGCATTACTTAATAAGATAACAAATTTAGCAATATCCTAAATTTGCACATAACAAACATTTATAGAAAAGAATATCCATTTTTTCAAAGTGTATCACCT  
TTAAAGTGAAATTGGCTTTATTATTATACAAATGATTTCGCTCCCTAGTTTCAAGATCTGGCTCTCCATACCCATCTCCATATTGGTAGAAACATTGTGCTGTTCTTGGTATATCAACTAAAAC  
TTTCTAAAAGACTCCACATATTTTGAAGATATTACATGTTCTTTATTCAATTTCTTCCAATAATTTCTTATCAAACATCTAATATAATCTCGAGCAGTTGTTTCTGAAACATTTTTCTCTTTCATA  
TAGCATTGAATTGATTTTAAAACGTCTCCTCTTTGGATCTCTGCCTGCAATAAATACAAAATATCATTCTATCATAAATAAATGAATCATTCAAAAAGAGAAAAAGAAAACATTAAGATTACAT  
TCTTAGATTGAAGAAAATGCTCATATTTACCATGTCAGTTCCCAAATCATTGTAGAGTCGGAAAATCATAATGAATGTTGAACGATGGGTGGATAAAAATTTATACTATCAAGAGCTTCAA  
CATTCAAGTCATCACTTAGACAATATGATGCTGATAGTCCACAATTTCCGGATATTGTTACCCAAGCATTCTCCAAGTACTCATCCAATGTTGGGGTGTATCTATTATGATACCACCTTGCTTC  
AATTAAGTATGCTTTGCATAAATCGACCCACACTCTTTTAAAGGCATGGAAGAATATCCAATTTCTTTTTCTTTTAAAAATGAGTACGCAACATCATTGATTGAAAAGTGCCATCAAGCA  
TATCTTCATACAATTTGGAAGTTGTTGAGCTGCATCCATTTCCAATCTTCAACGGCATTGTAAAGATCTCTAGCTCATCTAGAGTGCCATAAACATCATAAACATCATCAATTGTTGTTAC  
CAAACAATTAATCTTGGTGATTGCTTTCTGCTTCTCCAAAATTTAGGTTGAAATGTAATCCTAAAAGCCATAAATGGTTCTCCACTAGCCTGTCTTTATAAAAATCAAGCTCATCACAAA  
GAACACCAAGATTTCTCCACCAATTAGAGATTTCTTTAAGCTCTGTCAATAAATGCTCTGTACTATGTTGAAATCTAGTTTGGCCAACCTCAAGCAATATGGGATTAACATTTTTCTTGTTC  
CATAAGCATCAATGAACCACCTACTATGCAGCCTTGGCATCCTCCAATGCAAGGGTAGCTCCAAGGCATGATCTATTTCTTCAATAAGTTGTGGACTTAGTAAAGATCTATCAAGACGTCTT  
AAGTGCTCCATAGCAAACCTTTCTGCTCATCCAGTTCTTCTCTCCTTCCATAGCAAGGTAGGAAGCCTCATACAAACCTGATCATTTCTTAACATCATATTGATGATTGGGCTTGAAGCT  
TTCTCTCACTTTTTTTGAAGCAGCTTATCAGAGTATCAACTCTACGAAATAATTA AAAAGGATTTTATTAAGCATACTTATTATAAAATGCAATAGAATTAATATCATATTTGACGTTCAATAAG  
GTAATTAATTTTATTCAATTGGCATTTTAGTCTATTTCTAAAGAATCTTGGTATACTTTTTTTTTTAAAGAATCTTGGTGTACATAAAATTCATACTAGGCTTACTAATAAGCTAAAATTA  
TTACAACAAGAAAAAATGATAGATCATTAGCCCTATTGGCATTCAAGATAAGATTGCATTAGAGTTAATGAAATAGAGTGCCTTTTATGATATAGTTATCTTAATAATGTTGTTTAGGTAA  
CATTTTATTATAGATTATATCGGATTTTTTAAAGGATGGAAACATATCATAAATATATTTACTTAGAAGTAGAGAACAATATTATTATATAGATCCAAGGGCATAAGTCCATTGGAAAAAACA  
AGAAATAAGACTAGCCATAAATAAAATATCACATAGAGATAAAATATAGATTTTCTTTTAAAGGAAGTCATAAAGATGGAATTTGAAATTTATGACTCTATTATACCCAAGAAATTAGGGAGAAT  
ATTGCTTGAACCTAAATTTTATAATTATATTTACACTGAACTAAATAACCTTTAATGAAAATTTTATATGCATGCACATGTTGGTACATACCTTAGTATTGCAGCATTATTGATGCCATGCTCC  
CTTAGAAGCCTAAAGAGCAATGCAGAGCCATAAAGATTGTTATTCTTTATCAAGTTATATATATTTTCCGTTGATGAACTAATATTACTCAACAAATTTGTGATATCTGAATTA AAAATGATAAT  
CAATTCCTAACTGTGCTAGGGCATCCACAAGTTCAAGCTGTTTAAACAAGTTCAATGTTGTTGGCCAATCAAACACCTGACTTCTCCTTCAATTTATCTCTTTGGTATATATACTTCTCCTCCT  
GTGCATACGTACTCATTTTTTCATCAACTTCAATGATGTACTACTCTCTAAGAAAAATAAGCAATATTATCCTTGGCATTAAATCATTAAAGGATATAGGTTCAATAATGTGCCAATATATCTTGA  
GTAATAACATTA AAAAATGGATTGCTAGAAATTGAGTTGGGTTGAGTTCGAATCGAGATGAAACTGAACGATTCAAACTCAACATATATGTTAGTTCAAGCCAAATCTCTTACGCTTTGT  
TTGGGATGACTTTCTTACTGTTTCTTAAAGCAGATTTCTAATACAAAAAAGTTATTTTTGTATTAAAACCTCTATTT

>comp175421\_c1\_seq3

TTTTTTGCACTAAGGGAAAAAGGAAGCATTACTTAATAAGATAACAAATTTAGCAATATCCTAAATTTGCACATAACAAACATTTATAGAAAAGAATATCCATTTTTTCAAAGTGTATCACCT  
TTAAAGTGAAATTGGCTTTATTATTATACAAATGATTTCGCTCCCTAGTTTCAAGATCTGGCTCTCCATACCCATCTCCATATTGGTAGAAACATTGTGCTGTTCTTGGTATATCAACTAAAAC  
TTTCTAAAAGACTCCACATATTTTGAAGATATTACATGTTCTTTATTCAATTTCTTCCAATAATTTCTTATCAAACATCTAATATAATCTCGAGCAGTTGTTTCTGAAACATTTTTCTCTTTCATA

TAGCATTGAATTGATTTTAAAACGTCTCCTCTTTGGATCTCTGCCTGCAATAAATACAAAATATCATTCTATCATAAATAAATGAATCATTCAAAAAGAGAAAAGAAAACATTAAGATTACAT  
TCTTAGATTGAAGAAAATGCTCATATTTACCATGTCAGTTCCCAAATCATTGTAGAGTCGGAAAATCATAACATGAATGTTGAACGATGGGTGGATAAAAATTTTATACTATCAAGAGCTTCAA  
CATTCAAGTCATCACTTAGACAATATGATGCTGATAGTCCACAATTTCCGGATATTGTTACCCAAGCATTCTCCAAGTACTCATCCAATGTTGGGGTGTATCTATTATGATAACCACCTTGCTTC  
AATTAAGTATGCTTTGCATAAATCGACCCACACTCTTTAAGGCATGGAAGAATATCCAATCTTTTTCCCTTTAAAAATGAGTACGCAACATCATTCAATTGTATTGAAAAGTGCCATCAAGCA  
TATCTTCATAACAATTTGGAAGTTGTTGAGCTGCATCCATTTTCCAATCTTCAACGGCATTGTAAAGATCTCTAGCTCATCTAGAGTGCCATAAACATCATAAACATCATCAATTGTTGTTAC  
CAAACAATTAATCTTGGTGATTGCTTTCCCTGCTTCTCCAAAATTTAGGTTGAAATGTAAATCCTAAAGCCCATAAATGGTTCTCCACTAGCCTGTCTCTTATAAAAATCAAGCTCATCACAAA  
GAACACCAAGATTTCTCCACCAATATGCAGCCTTGGCATCCTCCAATGCAAGGGTAGCTCCAAGGCATGATCTATTTCTCAATAAGTTGTGGACTTAGTAAAGATCTATCAAGACGTCTTA  
AGTGCTCCATAGCAAACCTTCCCTGCCTCATCCAGTTCTTCCCTCTCCTTCCATAGCAAGGTAGGAAGCCTCATACAAACCTGATCATTCCCTAACATCATATTGATGATTGGGCTTGAAGCTTT  
CTCTCACTTTTTTTGAAGCAGCTTATCAGAGTATCAACTCTACGAAATAATTAATAAGGATTTTATTAAGCATACTTATTATAAAAATGCAATAGAATTAATATCATATTTGACGTTCAATAAGGT  
AAATTATTTTATTCATTAGCATTTTAGTCCTATTCCGAAAGCATCTTGATGTACATAAAATTAATGAATTGCTAAATATTAGTCTTGCTAACTAATAGCTAAAATTAGTTACAATAAGAAAAAA  
ATGATACATCATTATCCCTATTGGCATTCTAGATAAGATTGCAATAGAATTTAATGACATAGAGTGTCTTTTATGATATAGTTATCTCAATATTGTTGTTTAGGTAACATTTTATTTAGATTTATAT  
CGGACTTTTTTAAGGATGGAAACATATCATAAATATTATTTACTTAGAAGTAGAGAACAATATTATTTATAGATCCAAGGGCATAAGTCCATTGGAAAAACAAGAAATAAGACTAGCCAT  
AAATAAAATATCACATAGAGATAAAATATAGATTTTCTTTTAAAGGAAGTCATAAAGATGGAATTGAATTTATGACTCTATTATACCCAAGAAATTAGGGGAGAATATTGCTTGAACCTAAATT  
TTATAATTATTTTACTGAACCTAAATAACCCTTTAATGAAAATTTTATATGCATGCACATGTTGGTACATACCTTAGTATTGCAG

>comp175421\_c1\_seq6

TTTTTGCACTAAGGGAAAAAGGAAGCATTACTTAATAAGATAACAAATTTAGCAATATCCTAAATTGCACATAACAAACATTTATAGAAAAGAATATCCATTTTTCAAAGTGTATCACCT  
TTAAAGTGAAATTGGCTTTATTATTATACAAATGATTGCTCCCTAGTTTCAAGATCTGGCTCTCCATACCCATCTCCATATTGGTAGAAACATTGTGCTGTTCTTGGTATATCAACTAAAACCT  
TTTCTAAAAGACTCCACATATTTGAAGATATTACATGTTCTTTATTCAATTTCTTCCAATAATTTCTTATCAAAACATCTAATATAATCTCGAGCAGTTGTTTCTGAAACATTTTTCTTTTATA  
TAGCATTGAATTGATTTTAAAACGTCTCCTCTTTGGATCTCTGCCATGTCAGTTCCCAAATCATTGTAGAGTCGGAAAATCATAACATGAATGTTGAACGATGGGTGGATAAAAATTTTATACTA  
TCAAGAGCTTCAACATTCAAGTCATCACTTAGACAATATGATGCTGATAGTCCACAATTTCCGGATATTGTTACCCAAGCATTCTCCAAGTACTCATCCAATGTTGGGGTGTATCTATTATGA  
TACCACCTTGCTTCAATTAAGTATGCTTTGCATAAATCGACCCACACTCTTTAAGGCATGGAAGAATATCCAATCTTTTTCCCTTTAAAAATGAGTACGCAACATCATTCAATTGTATTGAAA  
AGTGCCATCAAGCATATCTTCATAACAATTTGGAAGTTGTTGAGCTGCATCCATTTTCCAATCTTCAACGGCATTGTAAAGATCTCTAGCTCATCTAGAGTGCCATAAACATCATAAACATCA  
TCAATTGTTGTTACCAAACAATTAATCTTGGTGATTGCTTTCCCTGCTTCTCCAAAATTTAGGTTGAAATGTAAATCCTAAAGCCCATAAATGGTTCTCCACTAGCCTGTCTCTTATAAAAATCA  
AGCTCATCACAAAGAACACCAAGATTTCTCCACCAATATGCAGCCTTGGCATCCTCCAATGCAAGGGTAGCTCCAAGGCATGATCTATTTCTTCAATAAGTTGTGGACTTAGTAAAGATCT  
ATCAAGACGTCTTAAGTGTCCATAGCAAACCTTCCCTGCCTCATCCAGTTCTTCCCTCTCCTTCCATAGCAAGGTAGGAAGCCTCATACAAACCTGATCATTCCCTAACATCATATTGATGATT  
GGGCTTGAAGCTTTCTCACTTTTTTTGAAGCAGCTTATCAGAGTATCAACTCTACGAAATAATTAATAAGGATTTTATTAAGCATACTTATTATAAAAATGCAATAGAATTAATATCATATTTG  
ACGTTCAATAAGGTAAATTTATTTTATTCATTGGCATTTTAGTCCTATTTCTAAAGAATCTTGGTATACCTTTTTTTTTTAAAGAATCTTGGTGTACATAAAATTCATACTAGGCTTACTAACTAA  
TAGCTAAAATTAATTACAACAAGAAAAAAAATGATAGATCATTAGCCCTATTGGCATTCAAGATAAGATTGCATTAGAGTTAATGAAATAGAGTGCCTTTTATGATATAGTTATCTTAATAAT  
GTTGTTTAGGTAACATTTTATTTAGATTTATATCGGATTTTTTTAAGGATGGAAACATATCATAAATATTATTTACTTAGAAGTAGAGAACAATATTATTTATAGATCCAAGGGCATAAGTCCAT  
TGAAAAAAAACAAGAAATAAGACTAGCCATAAATAAAATATCACATAGAGATAAAATATAGATTTTCTTTTAAAGGAAGTCATAAAGATGGAATTGAATTTATGACTCTATTATACCCAAGA  
AATTAGGGAGAATATTGCTTGAACCTAAATTTTATAATTATATTTACTGAACCTAAATAACCCTTTAATGAAAATTTTATATGCATGCACATGTTGGTACATACCTTAGTATTGCAGCATTATT

GATGCCATGCTCCCTTAGAAGCCTAAAGAGCAATGCAGAGCCATAAAGATTGTTATTCTTTATCAAGTTATATATATTTTCCGTTGATGAACTAATATTACTCAACAAATTTGTGATATCTGAA  
TTAAAATGATAATCAATTCCTAACTGTCGTAGGGCATCCACAAGTTCAAGCTGTTAACAAGTTCATGTTGTTGGCCAATCAAACACCTGACTTCCTCCTCAATTTATCTCTTTGGTATATA  
TACTTCTCCTCCTGTGCATACGTACTCATTTCATCAACTTCAATGATGTACTACTCTCTAAGAAAAATAAGCAATATTATCCTTGGCATTAAATCATTAAGGATATAGGTTCAATAATGTGC  
CAATATATCTTGAGTAATAACATTAAAAAAATGGATTGCTAGAAATGAGTTGGGTTGAGTTCGAATCGAGATGAACTGAACGATTCAAACCTCAACATATATGTTAGTTCAAGCCAAATCT  
CTTACGCTTTGTTGGGATGACTTTCTTACTGTTTCTTAAAGCAGATTTCTAATACAAAAAGTTATTTTTGTATTAAAACTCTATTT

>comp175528\_c1\_seq4

TTTTTTGAGGAAAATCAAAGCAAACAACCTTGCATTCCACTAGTAGATGAATAAAAAACAGTAACGATACAATATTCTTCAACTTGAGAGAGAGAATAACTCTCCAAAATCTCTAGCCAAA  
AAGACTAGAGCCACGCCTCCAAGAAGATCCCAAATTCCTTCCAAATTCAAGATGAAACCTAATTCTAACATTAACATTAATTAAGACAAAAGGAAAATTACAAATTCCTTAAACAA  
CCCCTAATTCAAAATTTCCCTCCAAACAAGCATTACTCAAGGTGTGGGGCTCAAAGGAGTGGCCGGCCCCCTCTCTTCCCTCGCTTGGGCCGGCGGTGGTAAACCCAAACCGGTCCAC  
AAGGGACCGGTTCCAGGAATAGTAGCCGGCCCTCCTAAGCCAGCGAAACAGCATCACAACTCAAGTTGATAGAAATACATATTCAATGAATAATGAAGATTTACTCAAACAAAAGGCAG  
CTACCATAAGAAAACAAAATAGATGATAAAAAGGAGATGCCGTGCTTTAGCATAAGTTTTAATCACTAAATTTACATTTTATAAGCCATGCTTCATGCTAAATTTTCTAGTCTGTATACGTTG  
AATTATATAGCATATTCTCATTTCAGGAAAACCTGCATTTCAAAGTTGTTAATGAGCAATGTTCAAAGCAATATGCAAAGTTAAGTGGAGTGCAAGCTTCAATAAAAGTCAAATCATTAAAT  
ACACATTCTACATAACCACTGCCTAGCATAATACCTGAAAAGTATCAAGAAACGAATCACATTAACCTTATCAACAGGTTATTCACATTGTTAAGAGAAGACGACGACGACGACAACA  
TCAAGCCTTTATCCC

>comp175543\_c0\_seq5

GAACTCACCAAGGCCCTCGCAGGTTTGATTCTGGCGCCTTCTCTCTCGAATGGATTCTAGTACAGAAAAATTAGATTCATTTGTGTTGTGATATCTGTAAAAAAGTGATTTTTGATAA  
GGATTGGGAGGGCTTGGAGTGGAAGAGAAGTCTGTGGTGGCGGCAATGGGGAGATGGCGCCCGGCCAGAAACACTGGCCCAGTTCAGAAAAAAGTTGGTGGTCTATTTAAGGCTG  
ATAATGGAAGCTTTGCACGAGTAGACCTTGATTACATTCATTTCTCGAGTTCGAATATGCGAGGTTAAGAAGTTGACTTTTCAATGGGCAATGCATCCATGGGAAAGGGATGCTCGTTG  
GGCTCACCAAGTAATCCACAAAGGTCAATCCCCTACAATTTCTGTTGAAATTGCTTGCCTCGATCAGCAGCCGAGCTTTTAGGGGCAAGGAAGGCATATCATGCCTTATTTATCATTCCC  
TTGAGGAAGAAGTTGCCTATAGCATCTCTGGAAGCCATGTTAATTTCTGGTCAAGCTTGTGAGCTCCTACAGATATGAAGGCCCTCATGTGCACGAGGAGATAGCAAAATCAGAGGCCA  
AAGCTCTCCATAATGCCATTAGAAAAAACACCAGAGAACCTCATAGTGAATGAGGATGTAGTGAGGATCCTTACTACGAGGAGCAAGTCGCAACTAAGAGTAACCTTCAAATTTCTACA  
AGGAACTTTTTGAAAGTCCATAGAAGAGGATCTTGGAGATGAGCCATACATAATAGATACAGTTGAGAGCATCAATTCAGCTCCTGTATATTTAGCAAGGTAATGATAGGAAGTACTT  
GTAGATCTCAAGTTGCCTATCAATCGTCATAAAAATAGCGAGCTTTCTCTATCAAAAATCCACACAAAACCACA

>comp175570\_c0\_seq3

AGTCCCTGGCTGAGTCCGAACGGAAGTTGCATCAAGACTCCGCAAGTAATAATTTCTCTTCTACAAGGGATTA AAAAGCAAATAAATCACATTCAAGTTCTTAAGACTAAGCTTCCATG  
CAGCAATAACACAGAACAACAAAAACAACCATTTGTAGAAACCATCTAAAGCTGCCATATACTTTCCCTTAGATGGCAAATCATTAGCAAAATCACTATCAAACATAGGAAATAACCCATT  
TGTATCGATACACCAATGTTGCAGCACTGTATTTCAAACAAGCTAATTACAATAATTAATCATCCACAATCCACAAGTTCATCCCAAATTTATCAGCCGTCTCTAAAGAAAACCCAAAC  
AAATAATCCTCAGTTCTGCATTCTGATAAAAAAAAAACATAAAATTTATATCTACAACATATATTGCTAAATGGACTCAATTCATAAGCATTCAACTACCTAACAGACCTTAACAATTACAGC  
AAAGGCCATGGCATTCTTTCCATGAGCTACCGATCTGCCTTACCTGCAAGCATTCTAATTTCTAACCCACTTCTTAAAGGAAATGGAAAACATGTACGAACACCAAAGACAAACCTTTTA  
TCGATTACGAATACGACAAAGATCCCCGCAACGATGCGGGGACGAGGATGCGGTGGAGGAGGGCGGAGTTAGGGAAGAGACGGAGGAGGACGGCGTAGGAAAGGATGACCTTGGAG  
ATTAACATGAGGAAGAGCATCGTGGCGCGGTGGGAGGGCAGAGGAAGATGAGAAGGGAGAACC AAAAGGAGGAGGGCGTAGTGGACGCGGAAGGCGGCGAGGTTGCGTGAGATGCG

GGAAGCGGCGGCGGAGCGATTGGCGGGGAGGGAGAAGGCGCCGGGGCGAGCGAAGCAGGTGATTGCTCGGCGGGTGGAGCGGGCGTGGAAGCGAGAGAACGGCGGATGGCCGGAG  
GATGGCAATAAGAAGCCTACTATTCAAAGCCATGCAGCAGCCCCGACATGCTAAGTACTGAGCCTCCGGCCATCCTTGGACGAGAAGTAGAGCGCCATCATCCTGAAGAAGACATGA  
CAGATAAGAAGGCTATCAGAGCCCCGCTGGTGCGCCTTCCCTACCTCACGTTCCGACCATCAACTGCTTCGCCAGACGCTCCAATCCACCATGGAGACCGCAGACCCGCATCAAACACTTG  
ATATCATAGATTCCGCCACAGAAAATTAACCTCGTATACTCCAAGAAGCTTCCAGCGTAGCTGGTAGAATAGACTTCGTCATCTTCGCGCACGGCCTCATCCACTGCCACACCCCTTCA  
GCAAAATAGCGATATCATATCCTCCCTGAAACACCAACCATTGGGCTTTTGATCCAAGACCTATCAATCCAGAGTTGATCAGCAACTGAGCGAGCCATACGAAGGGCACACCGAAACGAT  
GAATGTGCTTGAGGTTGAGGCCGGAAGATTCGAGAAGGGCGATGGATTACAGAACGTGACGGTCCCGGCTAATATCGAAATCGCAGAGATCGAATTGCCAGGTGATGCTGTAGCGTCCA  
ATGTAGCAGATGGTGATGCCGACCTGGATGGGTTGAATATCTTCAACGTTGGCTTTAAGCAGGGCGTAGCGCTCTGCCGAGAAAGAACATAGTGAGGTTTGGCGGAGGTGTAGATGCTG  
CCGGGGAATCTGTGTCTAGAAACACCACGGCGTCGGACCATCGCCGGAAACAGAGATGAAGAAATCGTATTCTAAATTGAAGTTTCGGACGTCCACTCTCCTTACGAAATTAGTCATT  
TTTTGGATTGAAAAATGAGGGTGGTGCAACAACCTGCTCTTGATCTTAATTATATAGTTTTGGATGCCAACTTTAAATAATATTAATAATTAATTGGGTGGTCCAGG

>comp175570\_c0\_seq5

TACATTTAGGTCAATTAAGACAAAATAACACATACATATCACATATATTAGACTCGAAGCCAAGACATCAGGGCTAGAACCAGCCTTAGTTTTTTTTTTTTGGGGGGGGCGGGCAAACCTTATT  
AATAACGCATTTACATAATGTGTTAATTTTGCTGGTGAGGGGAATCACCTAAAGATTATAGTATTTAATTTTTTATCATATCCTCCCTGAAACACCAACCATTGGGCTTTTGATCCAAGACC  
TATCAATCCAGAGTTGATCAGCAACTGAGCGAGCCATACGAAGGGCACACCGAAACGATGAATGTGCTTGAGGTTGAGGCCGGAAGATTCGAGAAGGGCGATGGATTCAGGAACGTGA  
CGTCCCAGGCTAATATCGAAATCGCAGAGATCGAATTGCCAGGTGATGCTGTAGCGTCCAATGTAGCAGATGGTGATGCCGACCTGGATGGGTTGAATATCTTCAACGTTGGCTTTAAGCA  
GGGCGTAGCGCTCTGCCGAGAAAGAACATAGTGAGGTTTGGCGGAGGTGTAGATGCTGCCGGGAATTCTGTGTCTAGAAACACCACGGCGTCGGACCATCGCCGGAAACAGAGAT  
GAAGAAATCGTATTCTAAATTGAAGTTTCGGACGTCCACTCTCCTTACGAAATTAGTCATTTTTTTGGATTGAAAAATGAGGGTGGTGCAACAACCTGCTCTTGATCTTAATTATATAGTTTTG  
GATGCCAACTTTAAATAATATTAATAATTAATTGGGTGGTCCAGG

>comp175588\_c0\_seq3

TTGTCTTTTTTATATATAAAAATCCCACAAACATCAAGTACATCGTCCAAAATAACAACACATGAACAACAAGAACATACAAACAATCATCGCAACAAAATAAAAAGCAACTCAGAAAAG  
CATCAATACAATTCTACAGAATCTTAAGATCATCATCGTCCTCTTCCAACCTCGAAGATCTTTTGCAAATCACTCTCCAATCTTCGCTGCTAGAGTCTGGAGAAGGATCACCAGAAGCC  
TGGCTCGGGGTCAACCCCTCGATCTCCCTCTGTTCTTGCGTTTCACTGCACGAACGCCCTTCATGAAGCCTTTAATGAAGCCATCCTGCATAAGCTCTGCTTCTAAAGCCTTCACCTTAC  
GTCATAAAAATAATCGAAAACCTCCTGGACTTGATCCTCGATAAAAATCTTAAACCATAAGATCTTTTGAACCTCTACGGCTGAAGATGGAGATAATGGAGCTACCTTCTCCGACAATT  
TGTCAGAAAGTTTCTTATTTTCGGCCTCGAGGGCTTGATATTTTTAGTTGTTGGTTGTTTGTGCTCTGCCTCCACTAAGTATGCAAGCGATCCATCCGCTCGTTCTGAGAAGAA  
GATGAAGTAATCTTGTTCCGAATCTGCTCTACATTCATGAAGCTGACTCTCCACTGATTCATTTCTTTACCCTGCTGCTATATTTCTTCTTGATTTCTCCCTGGAGGTATTTAACCTTCA  
CAAACCTCATCGTTCCAGACATCCAACATTTTGTTCACCTCAAGGAACAAATCTTTGAGCCGTCGACGACTGAAACACTTATGCTTCAGCACTTCTCGGGGATGTATATCCTGGACGGAG  
AAAAGCGAGGGGCTTTGCCGCAACCGCAAAAACCTCGTCTGACTTTTCTTCTTCCGGTGTATGAGAATCTCCATCGCCTTAGGTCGCCTGGATTGAGTTATCGGGACTTCTGAGACTTT  
CGTAGATATCTTCAAGTTTCTGTGCACTTGACCTCCCTGCATGAGTGGATATCCACCTTAAATAAATATCTCATCCAAGCACTTGCTAAGAGAAAGCATCTCGCAACGAAGAGCTTCGG  
TAGTAGGGAGCTTTAACATGCTCAACAAGTCATCCACTCCTAGATCAAGAGGAATGGGTAACCTTCAACGTTCCCACTTCTCTTGGAGACCCCAATCATTCTTACAAAAAAGAAAT  
CACATCATCAACTTTTTTCGCCTTAGAGGATTTCTTTGAACCCTCTGAACGCGCAGCTGGGCGATTTCCACGACGGACACATCTTTGGTAGAAGTTTGATCTCCATTTTTTTGCTCGCAA  
GAATTCACCAAGATGAAATCC

>comp175588\_c0\_seq5

TTTTTCAGAGAACATGGAGCGGTGTTGTCTGTAGAATGCTTATCCCGGATGGGGTGTATTTATAACCGTCGTCGACGGACCGATGCACTTATGTTTCATTACATCCTCGGGGATATATATCCTA  
GACGGAGAAAAGCGAGGGCCCTTGCCGGCAACTGCAAAAACTTCATTGACTTATTCTTCTTAGGCGTATGTGAATCTCCCTCGCCCTCAGGTGCGCTGGATTGAGTTTTTTGGGCCTCC  
AGAACTTTTGC GGATATCTTCATTTTCTGTGTATGCGACCTCCCTACATGAGTGGATAGCCCCACCTTGAATAAATATTCCTCGTCTAAGCATCTGCTAAGAGAGCGCATCTCGTAATGAAG  
AGCTTCAATATCAGGTAGCTTCAACATACTCAACAACCTCATCCGCTCCTACATGAAGAGGGATAGGTAACCTCCCTCAACTTTCCCCACCTTTCTTGGAGACCCCAATCAATCTGCACGAAG  
AAATAATCGCTAATCCAATCTTTGGATGGATCCCGAGTACGAACTTCCAACCAGTTGGATCTAAAGGAAAATTCGACCCTGTGTGTCGGTATAGATACGCCCCATTCCGGGATAAGCATTCTAC  
AGATAATACCGCTCCATGGTTTCTGAAGAATGCGATCAGACCCACTACGACCGACATAGCCCGGTAGGAGAATTGAGACAACTCAATCCACAAGCCGTCAGGATATCAACCAGTTCAGG  
CGGCGGCGGAAATCGCAACCCCCGCTCGCAAACTAAACTCGTACACTGTACATATCCTTGGGGAGGGAAGCAGGCACGCTCAGATCTTGTGATACCTTCATCACCAAGTCATTAGGAA  
AATGAAACTTTTTCTAAAAGAAATGAAATAGTCTTCGGTAATGGTGGAGATAATGTCGTCGGCTTTTGTGCTCTTAGGTGCCTTCTTGGAAACCCTCTGAATGCGCAGTAGGACAATCTTC  
CACAATGGAAACATCTTTGGTAAAAGTGCATCACCCATTCGATTGCCTCACGAGAGGAGTGGTGCTAATTCGAGCAGGAAAAATTTCTCACTCGCAAATAGCGGAAGCCTTAACCGTC  
AGAAAAGTCGGAGCAGTCGAGAATCTGTGCTCTGTGGGAAACTATCCCACTACTTCGAGTACTGCTACGATGGTGAATAGGCGCAGCAGTCGTTTGGTTGGAGCTTCTCGCTCCAACCTC  
TCGTCAGTCCAGAAATCCGCTTATTAATCATCGATGACCAATGTCAGCATCTTTGCATCCTAGGGGGCAGAATGCTGCCGGAGAAAGGACATCGAGACCTTCTTTGGAAGAAAGAATCCG  
GAAAATGGAAGAATCTCAGAACGAGATTCTTCAACTCCTGCGAGAGAATCGACAGCCGGCATTAGCACAACAGGAGGAAGTTTTTCTCCCCTAGAATCCACCACGAGTTGAGGATGTCC  
AATTTGAACATCTTCAAGCAGAAGTTCATCTCCCCCACTTAGAAGATTCTCAGTCTCGACAGGATAATGAACTTGTGATACGGCAAGTTTACACATCCTCCACCTTCAATTCGACAG  
CCTTGCATCCTCCCAGATCTCCCTGAAGACTTTGCTCAACCACATGGAGTGGAGTCCCTCACGACGCCCTGCGTCACGAACTGCGAAAATTTGGTAAGGGAAGAATCCCCCAAGGGGA  
TGCGAGACAACTCTCCGAGAGAGAGACTTTCAGGAATCATCACCTTAACTGAGGTCATACTACAACATCCATTCCGGCTAGATTTAAGCTACCCAGCATCGAGTCTTACGACGGAAC  
GTCCGACCCGTACGAGCATACTGACCACTACAGAATCTCAAGATCATCATCGTCTGCTCTTCTAACGCGAAGATCTTTTGCAAATCACTCTCCAATTCTTCGCTGCTAGAGTCTGGAGAA  
GGATCACAGAAGCCTGGCTCGGGGTCAACCCCTCGATCTCCCTCTGTTCTTGCCTTACTGCACGAACGCCCTTCATGAAGCCTTAAATGAAGCCATCCTGCATAAGCTCTGCTTCTA  
AAGCCTCACCTTTACGTCATAAAAAATAATCGAAAACTTCTGGACTTGATCCTCGATAAAAAATCTTAAAACCATAAGATCTTTTGAACCTCTACGGCTGAAGATGGAGATAATGGAGC  
TACCTTCTCCGACAATTTGTCCAGAAGTTTCTTATTTTCGGCCTCGAGGGCTTGATATTTTTTTCAGTTGTTGGTTGTTTGTGCTCTGCCTCCACTAAGTGAATATGCAAGCGATCCATCCG  
CTCGTTCTGAGAAGAAGATGAAGTAATCTTGTTCGCCAATCTGCTCTACATTCATGAAGCTGACTCTCCACTGATTCCATTCTTTCACCCTGCTGCTATATTTCTTCTTGTATTCTCCCTG  
GAGGTATTTAACCTTCAAAAACCTCATCGTTCCAGACATCCAACATTTTGTTCGCCTCAAGGAACAAAATCTTCGAGCCGACGACGACTGATACACTTATGCTTACAGCACTTCTCGGGGATG  
TATATCCTGGACGGAGAAAAGCGAGGGGCTTTGCCGCCAACCGCAAAAACTTCGTCTGACTTTTTCTTCTTCGGTGTATGAGAATCTCCATCGCCTTTAGGTGCGCTGGATTGAGTTATCG  
GGACTTCTGAGACTTTCGTAGATATCTTTCAGTTTCTGTGCACCTGACCTCCCTGCATGAGTGGATATTTCCACCTTAAATAAATATTCCTCATCCAAGCACTTGCTAAGAGAAAGCATCTCG  
CAACGAAGAGCTTCGGTAGTAGGGAGCTTTAACATGCTCAACAAGTCATCCACTCCTAGATCAAGAGGAATGGGTAACCTCCTTCAACGTTCCCCACTTCTTGGAGACCCCAATCATT  
TTCACAAAAAAGAAATCACTGATCCAATCTTTGGAAGGTTCCCGAGTACGAACCTCCAACCCTTTGACCTAAAAGAAATTCGACCCTGTGGGTGCTTGTAAATACGCCCTATCCGGGGT  
AAGCAATCCACAGACAGCACCGCTCCACGTGCTTAAAAAATGCAATTAGACCCACCACCACCGACATGGCCCGATAAGAGAATTGAGATAAACTCAATCCACAAGCCACCAGAATGTC  
AACCAGTTCGGACGGCAGCGGAAATCGCAACCCCGCTTTAAGCTAAAACCTATACACCGTTACATATCCTCGAGGAGGGAAACAGGCGCGCTCAGATCTTGTGGAACCTCTCATACCA  
GATCATTAGGAAAATGATACTTTTTCTAAAAGCGATAAAGGAGTCTTCTGTAATAGTAGAAATCACATCATCAACTTTTTTCGCTTAGAGGATTTCTTTGAACCCTCTGAACGCGCAGCT  
GGGCGATTTTCCACGACGGACACATCTTTGGTAGAAGTTTGATCTCCATTTTTTGCCTCGCAAGAATTCACCAAGATGAAATCC

>comp175617\_c1\_seq7

CTGCTCCGGCAACGAAACTCCTTCCCAAACCCGAAAGAAGCTGACAGAAGAAGAAGAAGAAGAAGCAAGGAAGGAGAAGGAAGATGCGTGCATGCGGAGTAATAAGTTTGTAT

TCATAACAAGATCAACTATTGATTAGTACCTGCAAAATGAGCTTTTTCTTCACTCTGGTCCTCCTCCTTTGGTCGTCGTCGTCCTCCTCTTTCTCCTCTTCCAGCTCCTACTGAGCCGCCAC  
AACACAATCCTCCTCATCGACTTCGCTGCCACAAAGCCACCGAATCGTGCAGCCAAACTCACCAAGCCTACGTCGAACGCAGCATAGTTCTCGGAACCTTCACCAAAGACAATGTGGC  
CTTCCAAAACGGATTTTGGAGAGGTCCGGCGTCGGCCACTCCACTTACTTCCCGGAGGGCGTGGCGAGAATACCGCCGGCCTTGTTTCATAGCGGAGGCCAGGAAGGAGGCGGAGATG  
ATGATATTCCGGTGTGTGGATCGACTGTTGGAGAAGACCGGAGTTGATGTGAGGAAGGAGATCGGTATTTTGGTGGTTAACTGTAGCTTGTTCGGGCCGACGCCTTCTCTGTGCGCCATG  
ATTGTGAACAAGTATAAAGATGAGGGAGGATGTGGCGAGCTTTAATCTTAGTGGGATGGGATGCAGCGCTGGTGTATCTCCATTGATCTCGCTCGCCACCTTCTCAAGGTGAGGCCGAAC  
AGCTACGCCCTCATAGTCAGCACCGAAAACCTAACCTCCATGGCTACTACGGCAACAACCGTCCTATGCTCGTCACCAACTGCCTCTTCCGTATGGGCGCCGCCCGCTCCTCCTCTCCA  
ACCGCCGCTCCGATCGCCACCGCTCAAATACCAACTCCTCCACTCCATCCGCACCCACACCGGCTCCTCCCCTCGCTCCTACTCCTGCATCTTCCAACAAGAAGACTCTTCCGACCACC  
TCGGAATCTCCCTCTCAAAGACCTTATG

>comp175668\_c0\_seq12

TTTTTTTTTTTTTTTTTTTTTATTCTATTTCATTTTTTCAAATCAAATGCTTAACAACAAAAACACAGTAACACACTGGTTTCCCTCATGCCTTAAAGGTAATACACATCACAACAAGCA  
ACCACTGTTCAATTACAAAATATTCACACACAAAGGTTAAAAAAAACCAAACAATAAAAAATAATTAATATAATAATAACAGCTCCTCATTATTATTGAATAGCGATCATTGTCAGTG  
AATTAGAATGCGCCATGTCAACGAGTACACAGCGGTACACCGCACCGGTACAGAGTAAGAAATTACGTGGCACATACTAATTCGTCTCTGGACGCCGTCCAATGACCGCGTGGAATTTTA  
TTTTTATTTTGGTGACGAGGAACCCCTCCACTTTGCGGCGAGTAAACCCCGATCAACCTAACAGACAACCCACACCATTTACCCAGGCCAACACATAAGGTTGTCACGGCCGCCAAAGG  
GATTTGAGCCC

>comp175685\_c0\_seq2

TATTTTATTTTTTAAATTATTAATGTGCTTTTAAATACTTGTATTATTGATTTATTTGCGTGACCTACGAGGAATGGTATCGATCAAGAAAGCAAAGGGAAAAGGAACAAAGACGTCAGTCG  
CTCCTATCTAACCGGGTGGGGGTGCTATGGGTGAAAATATCAGACATTAGCTCCAGTATGTTAAGGAAAGAAGGCTAAGGAGAGAAGACGGAAGAAGTGAAGAAAAAAGATATATCCTA  
TTTCAAATTCACTTGGCTCGGTCTTAGTATAAAATTCGGGTTTGTGTACTGGTACCCGAGAACTTATTTTTTCAGCAAATTTGTATTGTAAATA

>comp175719\_c0\_seq1

CAGTTTTGCGAAATAATAGGGAGAGAGGGCCACGGACGGGCTGGAGTAATTATTGTCCTGACATCCAATACGTCCAGAGGTCAATAACAAAGCAGCACTCGGTATTACTCAATATTCGTT  
CAGATTTTTAATTTTTTATTGGGACGTAATAATTTTTCCACGGGCTGGATTCAAACCTGGCCCTGACTTCCACTTGTATCGTGTGGGGAGATGGTCAAACCCGGC

>comp175753\_c0\_seq14

TTGTAATTTAATTTTATTATTGAGTAAAGCATAAGCAGACGAAGTTAGAAATTAGTTTAGTAGGAGTTAAAACCTGTGTCAAGTTCAAGAAAAGTTCATTGTTAAAAAAGACATTCAAC  
ATAATGTTCAAATCTCATGAATCTCATCAACTCTTAAAACTGCTATAACCTGCAATTAATAAATAAATAGAGAGAGAGATACAAAGAAATAAGTAATAAAGATCTAGAGTATCAAGCG  
TAAAATATGTATGTTAAACATGAATAAAGATGAAAGTTTAAAGAACGTCTAATTTGATTCTTTTAGGTTTCGATCTCAATAACTTCATCAGATATTTCTTTTATTGATTGAACTGTAATTGAACG  
AAAGCTTCGATTTCCATATTCTTTATCTTGAACCTTTACTGAGAATATCAGCTCCTTATCACAAATATTTGTGATAATGTTATTATAATCTTCAATATTGGATGCCTTTATTTCTCTAAATTTGT  
AAGTGGCATGCCAATGATTTGTTCCACTTCATTATCAAAAACCTGTAAATATTGCAGATGAACTAATATCCTCAACACGCAATTTGATAAGATACTCAAACCTATATTGACATTTTCTTTCAA  
ACATTTAGAACATTTTGAATACCATCAATAAAAACTTTTGATTTACATGTATTGCATGAATTGTACCATAGATTCCCTTCTTGATTAAGTCCTTTTATTACGACTCTTGTGGAGTAGTAC  
TTGACCTCTCCAATGATTGTTTCCAGATGTGTTGATAATTTGTAGATTTGTCATCAAATATGTATCAGAAACAGATGATATATGTTGATGAATAATTTTATTGGACAAATCCAAGAGTTCTTTTG  
ATGATGGCAGATTTGGATTAATTTCTAAAGTTGTTGATTGCGTTGTTGAGAGAATGAAACCATTAAAATATTTGCCAATGACGCCTTTTGCTAAAATGATTGTTTTTTTTTAAATTTCTC  
CAATTTGTTTCCCTTCTACTGTTGCCAATCCTTCCCATAAAGTGAAAGTACAGACTTCTGACCTTATGTCAAGAACTTGTAATCTCATTGAGAATTTTTTTTTTATCAGTCTTTCTGTAGTTA

TCCGCACTTCAAAAACGTTCAAAACTAATAAAAATGATATCTGACGGAGAATTTGGATTTGACTTGATATCTTCAATTACCGATAAATTGATTCTTACTGGTTCTATTTTCATCGGTGATTGCAA  
CTTGTATTTCTGAGTTGCTATTTAAAATAATCTCAAAATTTTCATTGACATTATAGAAAATCTTTATTTGTAGCATTGATTTGCCATTTGAAAAAATATAAGTCTTTCCAATCTGTAGCATGTTA  
TGAAATCTGTCAATTATTTTCATTGAACATGATGGCATAAATTTTTGAACCCCTCTTTATCCATTAAGTAAGCTTCTGAATCTTTCCTTGCCCAGATTTGAACATCTTAACAGGGTCAATTTGAT  
TTATAACAGCAGTGATACTCCAGTAACGTTGATTTAGAGATAAACTCTTGATAAGATTGATGATTCCATTAAGTTAACCTTTGTTTTGCTCATTGATATCTCTCTTGATAATGCAACATATA  
ATTGCCCATGTGAGAACACATTATGTGGAAGGTAAATTTCCAACATTAGGAATTGTTTGGCCTTGTGCTTTATTGATAGTCATTGCAAAAACACAAACGTA CTGGA AATGTTTTCTCTGAAAT  
TTGAATGGAAGAGCTTCATCATCACTTGTACATAATGGAATTCGAGGTATCATAACTGTTCTGCCTAAGAATTGCCCATTTGAAATTTGCGCAATAATCACATTATTTTTAAATGATCTGCAA  
ATCATTTCGTGTTCCGTTGCACAAAACCAATTTGAAGGGTCAAGATTTCTTAGTAACATTATTGGACAATTATCTTGAGAGTAAGTCGATGAGGAGGAAGTCCATTTGGTGTCAAAGAATTTA  
GAAATTCAACTTGATAAAGATTATACTATCAGTGACACTGTCAAAGCTAAAATAAATAAATTCATCCCCAGGAAAAATATTAATAAGCTTTTGATTTAGCTTATCAACATATTCATTTTT  
AGTAGCAAGAATTGACCTTTCCATAATGTATTCTGATGATGAAAAATTTTCGCGTAGGGAAGGAAATATAGTACATATTAATGAATGTTCTGAAGCTTCATTATTTGAATATTCTATCACTATT  
TCATTTGGAATATGCACCAATTCATCTTCAATTTCTCTTCATCTCCATTTCTAATTCAAAGAATAAAATCACTAAATAAATGATCTGTTCTTACCCGCATATTTTCTTTAACTTGAAAACCTC  
CATTTTTTAAGATAAGTATGACTTAACCTTGTGTAGCAAAAAGTTTCTAATCTTGATACACGTCTTACACCTAGTAATACTTGTGAGAAGTCACCTACAAATAACAATACTTTACCACAAA  
AGATATAGA ACTATT CATAATATCTTTCAA AATTATATCTAAAATTTAATTGCTATTCGTTTTACCATTGGAGCTTCATCCACATTATAATGTTTGATTGTTAAGTAACTAAGAAAGTCCAC  
TTTTTTTGTTAATTGCACATAATGATGTTTTTATTGAATTTATTGGTATTTTGAACCTTGAATGCCCTGTTTCGCCCTTTAGGCAAAAATTGAAGCGGCTACTCCTAACGTAGCTGTTACAATTGC  
TATATGACCATCACTTCTTAAAGTTGAAAGAATAGCACGATACAAATATGTTTTACCCGTATCTCCAGTACCATCTATGAAGCACATGCCATTACATTTCTGATTAACACAATTGATAATTTCT  
TCAAATGCATTCTTATTAAGTGTATTTATTATATTTATATCTTCAACTGGAGTAACGACATTTTGCTCTTCATATATTTCTCTTTTATTGAGCTCATTATTTAAATCCTAAAAGATCTCTTCAACAT  
GTGGA AATTCAGGCAAGTCAA AATCATCTATGGACTTTCCCATTTCTCTCAAGAAATAAGTTGATATCCAATAATGTTTTTGAAACACAATCATCATAAGAAATATCCTTAATGGCTTGATAAT  
CATGAGACAAATCTGTGTAGA ACTCATCCATAATTGAAGA ACATTTGTTGGCTCACAGTAGATAAGAAGAATAGCAAATAATTGTCTGAGTGCATTTGGCATTGATAATTTGATGCATCA  
TTAAGCAATCTGATATATAAGTATCCGTTTCCAGTAAACCATGCATTTTTGCAGCTTCTTTAAAAGTTGAGCATTGAATTCATGAACTCGTAATAAATCAGAAAATGAAGTTGGTCCATAT  
ACATGATTTAACAAAATTTCTAAGGTAATATCTTTACCATCTGAGGGATTTGTTGTATTTATACGGCCAATTTGTTTCATATTTTTTCTCCTCTTCCATATTTTTTTGTTTTATCCCACACATAT  
TTTTCAGGAATTTCTCTATACAAGTACTTCCCTTGCCCTCTGAATCAATTGTATTGAGATTA AAAAACTCAGTCAGCATGGTTTTTTTTTCCATTGTGCGGTTTCGTAATATATCAAGCAAATTTTGAT  
TGTCTTTATAATAAACTGCTTGATGGTCTTCTAAATGCAGTTGTAAATTACACACTGATGGATACATCTCATTTAAATCAAATTCAAATATTCTCCATAGCCAGTAAGGACGTGGTACATGTC

>comp175764\_c0\_seq11

CTACATGTAATTCGCCTTCAA AATCATTGGA ACTCAA AATAATAAGGAAGCTGCATAAGACATGTTACAAAATAGTTCGGCACCTCAA AACCAATGAAAAATTGCATATACTTGTTTCCC  
ACAACAATTCGGGACCTTAAAACAAGCAA AATCTGCACTTACCTTTACAAAACCGGTGAGAAAAAGCTTACAAA AACTGTAGGAAATTTACCAGCAAAGCAATGACAAACCTATCCAA  
ATGTCTTAGGAGTTTTGTGTA AAAACAGCCATAACTTCTAAAATATGTACTCATTTTCTACCCAAAACAGTAGGAAAAGTCACACAAAAGCAGTAGGGAACCTCACAAATAACAATG  
AAAGCTTACCCAAATATCGTAGGATTTCTCATGTACAATAGCCATAAAATCTCAAATTTCTGCACTTATTTGAATATTTGCACGATACTAAAATATCGTTCTTTCTTAGCTTTAAACGATTAT  
ACTTCTTTACAAATATCAACTAAAAA AAGTCGTGGCGGAATGTAGGCTTAGAATAATTATACACCTTTGTTCTAACTTTCTCCAACCATTTCGTGAAATTTTGTGAATAGA ACTAATATA  
AGGCCTAACCATCCATGATTGTCCAATAGCTACCAAACACAACAACTTTCATAAATACTATAAACTTTTCATGGAACCCTCATAGTTTGAACGATCACCTTCTAAGGTAGACTTTGCCTTT  
ACTCATGCCTACATATGTA CTAAATATGACAATCAAAAAGCACTCGTTGAGAACTTTAATGCAACCATCAAGTATTTTCATGTAGTAGAAGTTTTATTTAAGCAAGGACATGTCGTAGCT  
TTATGTTGTTTCACAAACTATGAAATATGCATTGCATGATATAAACTATAGATGTTCCAAATAGCATGAACTAACGCATGAGCCTTAAAGAAGATATTAACCAACA ACTCTTCTGAAACAATC  
CATCATTTTTTTTTCTTTAGGAAAATTA AAACTCCATTTTTTCTATAATAAAAAGAAATCTAACAACATTAGCTAACACGAATTGACAATAGATGCATCACCAA ACTACTAGCAACAAGCTA



TAATGAAGATATAATCATTCTCATAATCCATGTGGAGATCATTTTAGAAAAAAGTTATTGTTCCAACAGACATTTAAAACATCAAGTTAGCAATCAAGGCTAAATGCTAATCCGCTGTAG  
CTTACTCCCAAAGGAAAAGGTTTTAATCCTTGACACTTACATAAGATCTACGCATGGAGATAAAGATGCGATATGTTAGCTTAAACTTGTCATCAACTCAAATTTAAGAAAAGAGCTCAAC  
AAAGCTCACCACAAACATAACAATGGCAAAGCATTTTAAACACTAAGCCTTCTATTAGAGAACTATGAAGAAGGTTTTCCAAGCATGACAATGTTTAAACTTACAAAGGACAATATAA  
AGGAAAGTTCATCTAGCATTTAGTTACACCTCATGAGTATCCAATTATAAGCCATCAAAAAGTCTTAAAGGAATCTTACCAAACACCTTATATGCATAATTTAGTGAAGAAGGAAAATGGT  
CTTTTCAAGTTTTGCCATCAATCACACCTAAGGCTTCTAAAATTATGTGATATAACTCAAGCATAAATTCACATGCTAGTGGCTCATTCCCAAATGATATAACTACAAAGTATATCAAACT  
CCACAAATAACAAGGATGCAAGTTTTTTTTTTTAGGAAAATCACGTAGCACAACTATTCACTTTTATAAAATAAAGTTTGCTCTAAATAAATCCACACATTATGAATGAGAACATGTGGAA  
TCTTCATATCTAAATATGATTAATTAACATTTGGTTAAGTGGCTTCAAATGCAAACCTCAAGCTTCATAGATTGCCAACCCGATATACAATTTCTTTAAAGACATTTCAACAAACACTTGAT  
GTGCATGACTTTGATAGGAGATCAAGATGGTTTTCTCTATATTTGCAAAGCTCACACCTAAATTCTAAGTCATACAGCATGAAGTAAAAGTAAAGTACCATACTAATTTGCCATTCTAAAA  
AGATAAACACATTAGAGGAAAATAATCCTCACATGATTCTCAAAGCCAACAATACCAAATATCATGAAATCTAATATGGAGAATGAATACATTTATTTAGAAATCAAATGAACTAATGGTG  
TGATGACATACACACCATGAAAGCTCAATCTACAATTAACCTTAGCCAAAATTAGTTTCACATATCACATCCTAAATGAGAAAATAAGTAAAGCTTGAGGAAGAGGAAGCTTGGAAGGGAA  
CAAGCAGAAGAAGAAGAAGAACCATGAAGGGGGAAAAAGAGGAAGATGAGGATGAAGATGATGCCAAAGGAGAAGAAGATAAGAGGGATACTCACCTTGAAGAGCTCGGAATCAG  
CCCAGACGGCGTCGGAACAGAGGACGGACAAGGGCTTCGGCTCCTGTTTGAGTTCCGATCGGAGAGGGATCCCGTCCAGATGGCTTTGGGATCGGACGGAGGGCGGGTTCCGGTCTGG  
AGGTCCGGACGGACTCCGTGAAGACGAGAGGGAGGGAAACGGGGTGTCCGGTCTGGGCTTGGTTTTTGTGCAAACAGAGAAGAGAGGGGCGAGGTGTTCCGGGTGTGAGCGAGAGAGAGA  
GAGAGCCGGGGGAAGAATCAGAGAACCAGGAGAGAGAAGGCGTGAGCGAGAGTTCCAGTCTCTTTTCGTCGTCGGGATCTTTGCTTTTGTAGTAAGTTCGAACCTATCACCGAAGGGGG  
AAGCCCGCCAAATCGCTTCATCCTACTCCAGCCTCCGAACTTTCTTTTCGAGCTCCTGCTCTCTGCTCAACGTCTGCCCGAGATCAGAAAATCCACTGAGGAGCGGGATTTTAGCCGAA  
GCAACGATCTTGTTCGATCGTAGCCGTGAGGGCATTTTTCCCGATCTAGAAGAAGGATTCAAAATATTTAGAAAAGTTAAATGGCTCAAACAGGGATCAAATTTGAGCTGAATCGAATCACAT  
TCGGCTTCGAATTTGACTCGATCCAAACCAATTCAGGCTCGAGCCGGCGGACAAAAGTTAATCGAACAAGATTGAGCTCAAACAATAGTCAATTCAAATCAAATTAGGCGCGATGCAAC  
AAAATCAAATAATCGAGTCTAATCGAACATGTTTCGAGTCCGATCCGGCTCGAGTCCGGTTCGACTCGAGCTCGAATTTGGGTTTCGACGATGCTCAATTAATCGACCGAAAGCGCTCGAGC  
GAAAAACGAGGTCAACAAACGGACCCCAACATATACGGAGAACAACGGGTGAACCGTATATGTTGGCGTTGACCTTCTAACTCTAGGAAGGTACAACAAAAAAAAAACCAATAAAG  
AAGTTCAAAAAGCATTTAATCACACAACAATCATGCAATAAGTGTCCCACCATGGTATGCTCACACAATCATAAATGTTTATCCATGCATGCAATCATGCGATCGTATAATAACCATCAAAT  
CCCCCAATAATTATGTAATTAGACAATTTTTCCACACTCATGACATAACCAACAATCCACACGAAATCATATAACCAAAACAATATTCATAAATCATGTAACAATCATCCGAAACATGCAATAA  
TCGACCAATCATAAGATGATCATCAAAAATGCAGACTTCACCAATAATCCACACATAATGATGCAATGATCATGCAATCATAAATAAATGCAATTTATGCACAATTATATAATGAGTAATCC  
AATATGCAATGGTCATTTTATAATCACGCAATCATATAATGATCATGCACACAATCACATAAGCATAACAATCAATTAATCATGCAGCGATCACACTACAATCATATAGGCATACAAA

>comp175776\_c0\_seq9

CTCTCCTCCCTCCCTCCCAACGACCTTTTCTCCCTCTCTCTCAAATCCTCCTCCTTCCCTTCCAGCGCACAAATAGGAGGTACAGAAATCCGTAACAATAACAAAAAGGAAAAAC  
CACCACAAGAGAATACCTCGCTTCATCGTCAATCCCCCTGAGCCGCCGAGTCGGATCCGCCATGAGCTCCCTCATCTCCCACCCAAAAGCCAACCACATCTCCGCCATTCCTCCCTT  
CCTCCGCCTCTTACGCTGCGCCGTTGCAAATACCAGCGCAGGGCGCTGCACTCCCAGTGCACCCTCGCCCCTCATTTTCCGGCCAACAACCCCGGCGAGTTTCTCAACGTCCACCGCC  
TCTTCGGCGTCTCCAACATTCTAAAATCCTCAAGACCGTTGAGCCCCACCTGCACAAAGAAGCCATGGCCTCCATTATCTTCCAGGCCAACGCGCGCGCCCGGACCCCGTCCGGCGTT  
GCTACCGCATATTCTTACGCTTACGACCCAGCATGAGGCTCTCTTCCGAGCTTACAGTGTGTTCTTAACCAGATCGCTATCTATCGCACTCAGATCGAAAAAGCAGCCAGCATGATCGG  
TTCTGATGAGGCCATCTACACGCCACCAGACGCCGTCATCGACATCTACGAAAACATGGCTATCATGCAACAGCAACAGGCACAACAACAACAACAACAACAATCAAGCCTTTATCC  
CACTACGTG

>comp175941\_c0\_seq1

AATACCAGGGAACATTGTGGAACCTCCACTCAACACTATATTTCCATACAAATCCTTCCATTATCCACATCGCACTTCATAATCGAGTTGTATGTTGTCTCATGGATGCCTGATGCTTCCATA  
CCAATTAGTGATGGTTGGTAGAGGACCTCAGGGCAACGGAAACGTTTCAGCCCCAATGGTAATCACTTGCCCATCAGGCAACTCATAGCTCTTGTCCACAGAAGAGCTGGTCTTGGATGCC  
TCAAGCTCTTGCTCATAATCAAGAGCA

>comp176003\_c0\_seq1

ACATTATAATATCTTTAATATTAGCTAGACTAAACTCAATAGAAAATTAATAAAATTTATTTATTAACATGTTTTTTTAAACATCTGATTCCTTAATTTCTTACAATCGATCAATTTATAACAAGATA  
AATAAAAACCTCAAATAAACATCACAAACATAATCCCAATCAAGATGGGTCAATCTTGAACCGGCACAACGGGCAAGAGCCAGATTTTTCAAACCACCTTCAATGCAAGTATAATGAA  
ATTGATGAATGCAAGGGGTGAAAGCCAACCTCTTCCCTTCCCCATCCCCATCTCTTGCAAACAAATAGCACAAAAATCATCTCCTTCCCTGCCATTGCCATGTTCTTATTAACATTCTTTTG  
CCACAAATTCATCCTTCTCTTGCAAAGGAACTCCACATCATCTAATTCATAAAAACAAGATCTTCTTCTCTAGATTGATCTCCACAATGACATTCACCTGGGGTATATTTAGCCGTTCAAC  
TCCGACACAATTGTACACCGACGAAGCGATGATGTTTGAGATTCTTTCTCTTGTAATCTCATCTTGCAGATCAATTATTGCATCCAATGGAATAGACTTCTTTTCCCTCGATCAAGGCTTGAA  
AAAACAGTGCATTGCATTCGGTGAAGGTATGTCTTGACCAATACTAATATCATGCTCCACCCTCTCCCCGTTGATGTTGTAATTGAATCTGAGGACGAGATAAGGTTCTTCAGCATAATCG  
TTTATGCTAGATTTTTGAAATTTTTACTGTAGAAGATGTTGATGTCGTCGAAGAGATAATGTGTTGAAGCCATTCAGTTGAATTTGCTATACATTACGCAACTCCTCTTTATGATTTG

>comp176013\_c0\_seq1

AACAAGCTATGTAATAACATTGAGCCAGAAATGTTCTAAGCTTGAAATTCATTACATCTTATCACACGAATCAACAATCAATTTATCCAACCACACCACAAAATAGATCAAAAAATAC  
GACTGAACAATTAATTTACAAAACAAATACTTAAATTGGCATATAAATTACGATCACCAACCCACAAATGCTTAACATAATTCCTAATCATTACTATCTTACAAAATTTCTCTTCCATGACTT  
TAGCCTTGTGGTTGAGCCTTTGTCCATTCCCCGTCTTCTCCTTCCCTTCCGAAAACCCATCACCAATAATCACAAACGGATCTTCCACAAAGACGAGCACCAGAATCGCCT

>comp176031\_c0\_seq1

CTGAAATTGACAGGTCTAACAGGAACACACGCAAATTTTACATTAGACAAATATGCCATTTATGATGACCGATTTAAGGATTATCCGATTCAAAAATAGTCAAACATGTTCAAGCAAGAGCC  
GACCCAGGACCCCAATATCTTCATAAAACACCTCCTTGAACCTTCCCATATAACTCTCCTCCATGGCCATCACACCAGAACTCCTCCCTCCTCCTCCTCCTCCGGCGAACACGGCACAA  
TAAAAGCTTGCCAGCAACCTGCAAACACGCCGCTCCCATATAAAACGGCTTCCCCATCCAAAATCCGCGTCATAGATTGGCATACCCATCCAATAACCACCCACAAATCCGTCTCCG  
GTAGCACCCACGCTACTGCCCTCGGCCTAATGGCCTCAATCTCATCCACCTTCTCCTCCAAGTA

>comp176071\_c0\_seq1

ACTCTTGGATTTCTTATCAGCTCTATCATTGCCATATTATTGTAGCTGATGATGTATCTGTTCCAGCTATGAATGCTTCCCTGATCATTAAATGTATAATATCACCAATATTCAATATAAATTTCTTA  
GCTTTGGGAAACTATTTAATATTAAATTCGTAATTATAGTCCAATAATTATGAGTAAATAGAAAACTAATTCAATTACAAAGAAAATACATAAAAAACAAAATATAAAAAATATAACATAA  
ATAATATACAAAA

>comp176083\_c0\_seq1

CCATCCCAAATGAAGTCTATACTGACATTTAGCATTTTTGCTTTTCGCCATAATGCCTCGGATGTATTTTGTGAAACTCAATTGAGAACAATCCAACACATTCACAAGTAACATCTTATATGAC  
ATAATAAATAATAAAATGTCCATTTTGTGACCTTCAATCTTCTTCTTCTTCTGTGATAATAATTATAGATCACGAATTGAGTGATAAGGATGTCCTGTATGATTCAAGTAAGCATCCGCCAACA  
TGTTACCAAGTGTTACTTGGAGCTTGGGTTGTGAGATGCAAGTAATCAGGTTGAAGTGGTAAGCCTTTTGCATCAACACATAAGACATTATGAAGTTTGGAGACCTTTTTTGTGCATTTCTTACT  
ATTTCTATGATTTTCTTCCCCTGATGCAATAGCAACCTGAATAACGAGCAAATCCGGATCCCCCAAATCCCGCCT

>comp176354\_c0\_seq1

AAATGCACAAAAAAGTTTGTGTATAATAATCTCCCTTTGAACTCTTATTGATGAGAAGCTCACATATTGGTTTACACCCCAATTGTTCTATGTTGGAAGATCTAAAAAAGAACTGACTCC  
TAATCCCCAAAGCTACCTCACAGTAAGGATCTGACAAATGCAATGTGCATAACTATGAGAATTTTCAAAGAAAAAAGAATTATGGTGTAATGAAATAGCTATATTTTAGGTGAGTTTCACTT  
ACAAAGAACATTTACATTGGCCTAGATAAGATTCTTGAGCATTAAAGGCTTTGTTTAGGATAGTTTTATTTATGCTTCTTAAAGCAGTTTTTTTTGTACAAAATTTTAC

>comp176383\_c0\_seq1

TCTATATCCATTTGGTTTTGGGCTGACAACTAAGCCAGTAAAGACGAGTTATTGAGCTATGTTTCCATCAGCGCAATATATTAACCTATTTAATACCACATTTTCTAATGTATATCTGATCTCC  
TATAATCTCTCTATGCGTGTATCTACTACCTGTGGTAATCTATATTATTACCTTTCTTATTACAGTATACAAAAGTCCTATATATAGATTACCACAGGTAGTAGATACACGCATAGAGAGATTATAG  
GAGATCAGATATACATTAGAAAATGTGGTATTAATAGTTAATATATTGCGCTGATAGGAAACATAGCTCAATAACTCGTCTTTACTGGCTTAGTTGTCAGCCCAAAACCAAATGGATATAG  
A

>comp176394\_c0\_seq1

TCCGCCATCCTATGTGCGGTTGAGTTCTTTCCTCACCATGCTTCTCAAGACTTTCAGGATCAAGCGATTCCCTGGCCAAGAAACAAAAGCAGAATCGTCCCATTCCCTCAATGGATTCCA  
ATGAAAAGTGGCAATAAAATCAGGTACAACCTCAAGAGAAGACATTGGAGAAGAACCAAGCTGGGTCTATAAGAAGCAAGCTGGGTCTATGAGAAGTGGTCTTAACATGTAGACCCTT  
TTTTAAGCAGCCAGATCACAATGAAAACATCACTACTGTAATGCTTGGCCCATGATGTTATTTCCTCACTATCAGTCTGAGACCCAGCAATAAATATAAAAACGCTG

>comp176401\_c0\_seq1

CATTTCCAGGTGCATAAAGAGGCTACAGGTTAATGCTGTTTAAAAAAGAAAAAGTCAAGCATCTGCTAAGGAAGTGCTACATTTAATGAAAACCGCCTAAGATAGAAAAGGAG  
ACATGAGCTAACCATAGAACAGCCATTGGAGGTGAATTTCTGTCATGGAACACCTTCCCCACTGCAACATTGGACACGGCTGCACCCGTAAGCAGCAGAGCTAGAGGTGATGCC  
GAGCGTCAGGAAGGAGGCTCAATGGCCAGATGCACTGAGGCACGTGGAGAGGAGGAACCTGCAGGTGGGAGATCCCAGCTAGTGGGATGTGGTTTTGAAACCCGTCCTCCGCTGCAAG  
GCCGGTAACCCTAGGGCAAGTTAGCCGGTATCCCAAGCAGCCTCATTGGGTCTTGTCTGGTTGGACCCTCTGATTCCAAAAGGAAAAAACAACAACTGAAGGCAATTAATCAA  
TCCCTACATTCTCATGCCCTCCTCCTTCAACCCTTAAACAAGGATGTTACAAGGGCAACAGTTCTGAGCTCTCAGGAAATAGGGTCTTAGTTGCTTTTGGAGGTTTCAAGGCATGAA  
ACAGCCTTCTGGGAAATCCTTTTCACTTATGGCACTGAGTGAGTTTAGACTTGATTTCTCCTCCCCTCCCTCCATCCCTGTTCTGTCACCCCCAGATGCACAGAGTGGCACTGAAGAGCT  
CTAGCTTTCAATCTGTACTGGGATTTGCCAGCAGAAGAGACACTGGTCAATGTCATCCTGAAGTTTCCACTCCACCACAGTTTATAGAGGGGTTACTCGGCCCTTCACTGGCAGTTTATTC  
AGGTAGCTGTAGGTCTGGTCTTTCTGGATGGGGCAGTTGATTCCGCTCTTACAACCATCGGGGTCGGGGATGGGAAACGGAATCGGGACACCCATCACGATGCCGTGCACCACGGCTTTG  
CTGCCTTTGACTGAGTGTACTGGTGAAGGTGACATTCACACTGTAAGACTGTCCTTTGTGCAGCTGGCAGGGCTGGGTGGGACATGGGTAAACATTCACCTTCTTTATCACTCCAACC  
CCCGAGCCGCAGTCCCTGAAATGCACCGGCTCGGCCAGGGCAGAAGCGCTGAGTGTGAGGAGCAGGAACGCAGCGGCCAAGAAATGCATCGCAGCTCAGGAGGTTTCA

>comp176496\_c0\_seq1

AAAAGATCAGAACCTTCTCCCCTCTGATGGAGGATTTGTGTACAAGATCAAACACAAATTTTCATCTTAGAACCGCACATCATATTTTCCCTTGTGTTTGTGATGTTCTTTCAGCTCACTGTCA  
CTATAAAATTCATTTGCATGGGTCATGGTGTATTATCAAAACAGGGGTGGATGGAACCAACAGAGATGAGCAACTCAAGTCCAATTGGATGTCCTGCTAACTGTTTTAGGCGGGTCTGCAATC  
TAGATAAAATTTCACTTGTATATCTGTTGGCATCAGTACCAGAGTGTATATTTGTAGACGTGGAAGCTTATTTGAATTGTCATTATCATAAATATCAATGAAACCGCTTGTGATATTGTTTCA  
AACATCAAACCATGCTTCCCTTTCATCCTCCATGCTAGATGATATTTTTTACCAACTCTCTGAACAAATATTTTCTAGCTAATTTCTTTCCTTCTGCTTCTTTTATGAGATATTTGCTCC  
GAGAACTCATCAATGTTGAAATCTCTGGATCCAATTTCCAGAGGACATCATCAACAAAGGTTGGCCTAGCCAAACAAAGTGTGTTGAAATATTCTTCAAAGTTATTTTGAAGAGTGTGC  
CAGATAAAAGTACCTTGACTTGGTCTTCACTTCCATTATGAGGTTTCCCTCAGCTTTGAATTGGTGTCTCGTGGATTGTGACCCTCATCTAAAATCAGGAGACCTGGACTTTCCTGCAGCAC  
CCTCGCCATGAACTTTTTGTGTTCAAGTTTTGAATCCTTCTGCATTGAGGAAAAGGACGAGTAACTCATCAAGAGAATGCTTGGTTCTTTCATGCCATTTATGTAACCTTCGTTAGGCAGTCCA

TAACATGACTTATTTTCATGTTAGGCTTTCGTTGGTCCATAAAAAGGTGTCCTTGTTTTGCAATCCAGAGTTTCTTTTCTGTAGCTGTTAACTGGGTGCAT

>comp176528\_c0\_seq1

TGATTTGCAGCCTTATTTAATTGAATCAGGAAATTTGCATTTAGCACTTGAAAACTTTACTTCAGTAAATGAAAAATAATTGCAGGTAGCTTTGGCAGTGAAACAAAAAGAACATAGAG  
AACACAAGAGAACACTCTGAGAAGCATCCAAATAAGAAAGAGCTAAAAGCATTCCCAGGACAGCCCCAGGCATCCTAACACCTGACAGGGAGGGGTAGAGCCAGCATAGAAATGCC  
CAGGAAGTGCTCCAACCCAAATATTGCAAGCATCTCAAAAGCCCTATGTGGGAATCATATTTCTTCTCTGCTGAAGTTAATTTTCTGAAATTTCTATAACTCTGACTTTTCTGAAAAGCTCC  
TAAGGAATTCTAAAAATTTAGGATTTTGGAAATTAATTTCTAGGCATTTAGAATTACTAGGAGCATTTCATGTCCTCTCTTACTGCCACCACAAGTGTAAGAACTTTGTAGTTAAGATGACTA  
TTTTTTTGTGTTTTGTTTTATTTTTCTATTATAGTTGACTTATATTGTTTTGTCAATTTTCATATACATGTTTTGTCAATTACATATGTATGTATATTCATTCACATTCTTTTTCTCACATTATC  
ATTCATCGTGTTCCATCACAAGTGACTAGATATAGTCTCCTGTTGTATAACAAGCAGGATCTCATTGCTTATCCATTCCAAATGCAATAGTTTGCATCTACTAACCCCAAAAAAGGTGACTATT  
GTTTTGACTCCTTCACTAATAGGAAATGTACGGGACAGCCATTTACCTTTTAATTAAGTAGTAGAATCTGATGCTTCTTGAACAGATTTCTTGGCATTCTTCAGGAGAGAATGTCATTTAA  
ACCATAATTAATGGTAATTACATTAGGTTCAAATTAAGGTAAGCCTTTTCATGCTCCTAAGGAAAAAATCTCTTATAAGAGATATTTTGATTCTTAGACTCAGGGTTGTAATTTACCATCCTCT  
AAGTTTTGACTCTT

>comp176585\_c0\_seq1

ATATACAGCTATTAGATTCGGTAGAAGGAAATGATCATTACGAGAAAGATAACTTGTGTTCTTGCTTGATATGAGAATCTCGGTTGCTGCTCTTTTGTGCTTGGAATGGATTGATTTGCCTC  
TTTAAATAGGGATGGATCGAGAAAAGAGGATCTTATTCAAGAAGGACAGCGACGAGAGTGAGGTTCTTGCATGTGGATTGATCCAACCGTCATTTACAGGGCTCTAATCTCTGATGGGC  
CTAGCAATAGCTCCTCTTGCCGGATCTTTGAGTCTGCTTCTCCTCTTGCTTGATGGATTAGGAGGATAAGGACATAGTTGGAGGCGTGAGGGAGGTATCGTGATATTTGGCTAGGGCC  
TGGAGTCGTATGGGAGTTTGTGCTGCTATATGAAGAGTTAGAGAGCAGTGAACCTTCTTAGTCGATTGAACCTTCAAGATCCTTTGATCGAACACCTTGATTTCTTATATTTCTCCCTTGAAC  
ATCCCTAGTAGCCCAACCAACGTGAATGTGAAACAAAAGTGGAGGATAATGGCGGCCAGCCCTAGTAGCTTCCCAAAAATGAGTGAGAG

>comp176628\_c0\_seq1

ATATTTGATTATTTTATATGATATTACATGAATATTGTATAATCTACTTGTAAATGCTTTTAGATTGTTACCGAGTTTGGTGTGCCTGTTAGTTATTATTGTTAGATGGAAAGTTCAAGTTGTCA  
CTTGTATATGATTTACAACCTAGTTTGTACTACGACTACATGATAATAATAATAATAATAATAAAAATGAATAAATGCACAAAGTTATCAAATCATTGAAGCAGCAAACCTTTATTTATTCTTG  
AAAACCTTACCAGGGAAAAGCCAATATATAATATTTCAAAGGCTTCAATTTGGGATTATTTTTTCACTGCTTCTTAAAGCTGTTTTTTAATATAAAAATTTTCAATTTTTTATACTAAAAAATGACT  
TTAAGAAGCAAGAAGAAAACCG

>comp176643\_c0\_seq1

CATTGTCATCCACTTCTGCTTGTAGCCAAAATGATAAATTGGAATCTAGAATCTGATGTCATGAAATACATTTTGACTTTAATATGTATATTTTTATTCCAACATAATCTTTAAAAATGTTTGT  
TACTTCTTCTAAGAAAATTAATTTTGTAGCAAGACAACATTTACAATTTGTACTTATTGAACTTTGCCACCTATCTCTAGGCAGCTTACACACGTCTTCTTTCATCCATTTGGAACCTTTGA  
CTTGATCAAATTCATATTTACATATTTATTGTGTTTCGCCTTTTCAGCTTTGA

>comp176883\_c0\_seq1

TTAACATGGCTTAAATTAGATTTGATTATTATCAAACGATAGTTGATAACTTTCAATTTAGTCGTAATTTGACGATACAGATCAATTAATAATTAGAACATCCAAAATAATAATAATAAATTC  
GAAACAAGGTAGCCGAGGTTCAAATCCTCAAAAACAATTTGAAAGTCTTTATCAGTATGGCAACCCGGGATTAACCCGGAGTAGATGAAAGATCTACCATGGTTAGCTAGGGTTTTAGAT  
TGAGGGACTGGGAAAAAAGTACCTCGTTCTCGAGCCGGCATT

>comp176960\_c0\_seq1

TATTGCAAGAGTGGCTTGAAATCGATACTGTTGATTCTCACAGACGTATTTCTAGTTCCTCCATATGTTTATCATTTTTAGATATTAAGAAATTTAAAAGAAACATCATCACATCTAGGAGAT  
GGTTTAGTTGTATGACCAGTAAGATATCCATCAAAGCTGTTTGCAAAGAAAAGTTTGAGGATCTGAAGCCGTCAAATGGGATAGTTTTTCATTTGTAAGTTGATTGTGGATTATGAGTTTGA  
GGTTGGTCATGAGAACTTATGTGGAGAGGGAATGGTGAAGTCGGCCATTGCTGCTGACATGGAGGATGTGTGTTGAAACAGAGAAGATGAGTTGTGATCAGCCACATTGAGGTGAAGG  
AGGGAAGAAGGGTTAATGCCTCGGCTCTGATACCATGAAGGAAGTCTGCAAGGTTAGTTAAGAAAAAAGCTAAAAAGAGAAGATAGCAGAGGAGATGATATCTGATTCAATCCATTT  
AATGGAAAAGCACACAGGCTTTACAATAGCAGTTTGTATATATAAGTAAAAGGGAATGATCTAAAATGAGCAGAACTGGAAACCAGGAGGTATGTCAGAAAGTAGTGGAGACATTCATGTG  
CTGATATAGTGGGAAACAGATGGGTTTTGTGGTCTTCCGGTACACCTTGAGTGGTCTAACACTATTATTCGTTGAGTTATTTTAGGATTACAAGTTTGGGGAGCTTAGTACAAGATTAAGAG  
TCTATTAGAGTTATTGGAAGAGTAAATCATGCAATTGCAGAACAACCTGGTTCTCTGGTTCATGCATGTGTCAAAAACATGCTTTTAAGATTGATGTTGGCTCATTAAAACCAAAAAGTAA  
GAAAAATAACTAAGAAATAACAATAGCTATCTAGATAGAAGATTAAGAGGAAAGAACATCAGGAAGTGAATGAAAGGTCTATGAACTTAACATGATCTTGAGGTTGGTTGATGTGAAACA  
TATGTGAATGGA

>comp177100\_c0\_seq1

TTTTTTTAAAAATTTTATATTTATTACGTCATTCAGTTCAATCCCAGTTCGTCCCCAGTTGAACCATTGAACATTGAATCTCTCATTCTTCTGGTTCAATGTTCCGGTCCGATTTTCCACAACCT  
TGTTTAATAATTCATTTAAATTTAACTTCGAATCAAATAAAGAAATTAATATGCATAAGAATTTAAAGAATTTCTTAATGGAAAATAATGAGTTTATAATCATTGTCAAATAACGATTATG  
CTACGACTCACCATAAAGCAATTTATAAAGGTCAT

>comp177104\_c0\_seq1

CCGGCCTTCACATCATGCCACCAAAAGGGCTTGTCTTCTCCATCACACTACACTTATAAATGAAGAAAAATCCTTCCGGTGGCAAATAAAGGCTATAACTCCGCTCTTTCATCCTCAACA  
GTTCTTCTAAGCTCGTTCACATTATCAGCTAAGTTCACCTCCACCTCCAACCTTTCATTCCCATCGCCACCCTCGGCACCAATACCGTCACCTTCATCCTTCCCCACCGCCATTGGTG  
GGCTCGGGCTCGGGCTCGGGCTC

>comp177105\_c0\_seq1

GAGAGAGAGAGAGATTTGTGCCATAACATATTAGCCCAAACATAAGAAACAACACTATTATATTAGAAATTTATAAAATTAATGTTGTTGGGATTAGCAGTACCCTTCCAATTCAGACAAAC  
ATAAATAATATTGACAATAGGGATAACATAGATGTTATCCTTAATGTTTATATGCACAGAGGGAGGGAGGCCATGTCCTATTATAAATAAAGTCAATAACCAAACTGTCATCAAATGAGC  
ATGAAAATATAACCATCCACTAAAGTAGCAATGGATTTTCCATTAATCCAAGGGTCTCAATAGAAAGAAAGTTGGGAAATTGACTTAACCAAAAATTTTAAAGAAACATTCATATAATCAA  
CCATGCCCTAATAGAACTCCACCATTTTAAGCCTTTCATAATACTACCATTCTAGAAAGAAAAATATTTTGATTTGTAGTAAGAATAAAGAGAAG

>comp177186\_c0\_seq1

GGGAGGGCCGTGGATTGTTGGTGGCAATATTATTGGTATGGATAGATGGTCCCCGTCGGCTACCCCCAACTCGCTACATGGTCTACACTCGCCGATCTGGATTGCGCTTCCCCAACTACCTT  
TGATGTATTGGGACACTAGCAACATTACACGCATAGCCAATATGCTTGGAGATCCTATGTGGATGGACTCCCACACTAGTAAGTGGGGTCGATCCTCTTTTGCTCGCATTTGTGTTGATTT  
GACCTTTCCAAAGACTTGTGCCGGGAATTTGGATCAATGGTATTACGGGAGGTTCTTCCAAAAGGTTGAGTACGAGGGCCTTACGAACTTCTGTTTTGATTGCGGCTTCATTGGCCAC  
GCTAAGGGGGCTGCTCGGCCAAGTCCACAACACAGGACATTCCCCAAGTTACTAAACCCGCTCGGCCTCCTACAGCTCAAACCGTGGAGCAACCTGCAGCCGCTCCCCGTCGGCTG  
AGATGAACCAGGCTCGGGTTGAGCCCCAGCTGGTCACGAACCCGAAGACAACCTCGTTTGGTGATTGGAACCTGGTCACTCGCAGGAAAAAGGGTAAGGCTAAGCAAGGGAATCCTCA  
ACCAATTCACAAGGGAAGCAGCTACCCGACCAGTTGCAGCAGGCCGAGACTACCAAAGCCGTCCCCAGCTCTAAGGAGGCTATCCGACGTATGGAGGCTATCTCAGACCGGATTGTTA  
ATCCGAACAGCAAGCATCATAGCAACCACAATGTGGTTTTCAATGCGGAACGACCAACTTCGGATCCTGATGCTCTTTCAGTCAATCTTCCAAACGCCAGCACAAAGCATCTAAAGCAT  
ACATGGAGAAGCAGCTTCTTCAGTTGGGTCCCATTGCCACTCTCCCCGCAA

>comp177284\_c0\_seq1

TTGTTAGTAGAAATGTTGTCGGGGTTTCTCAAACGTATGGTGTGACGGTGGAAGCTTTCGTATTGTCATTCCAGAGATGCGGAAACGAAAGAAGGGTTCTTACCTTTCGTTGAGAGG  
CAAAGGCTTCTCATATTAGGAAAAGAAAAACAGGGCACCTACTAGAGAGATTAAGGATCCTATGGATGAAACAGTTTTCCATGTTGTATAAGCGTCTGGGTAATCTGAGTATCGTCGTGG  
CATTCCAGCTAAACCTAGGAAAGTGTGTGGGAAGAAGGTTAGGTTAACCCCTATAAACATTATGAAGAATTGAACCTTTGATCATAGTGGGTGAAATGCGGTTCTTGAAAAAAGTGAAAA  
TCAATGTGTAAATCCGGCAAATATAGCAAATACAGCACCCATTGATAGTACATAGTGGAATGTGCAACAACATAGTAAGTGTCTGTAGTATAACGTCTATTGAAGAATTAGCTAATACAA  
TCCCTGTTAGTCTCCTACAGTGAACAAAAAAACAAATCCTAGAGCTCAAAGCAGAGGGGTCTCTCAGACTAACTTTGACCCTTGTAACGTGGCCATCCATCTAAATACCTTTATTCCGGT  
TGGAACAGCAATAATCATGGTAGCTGCTGTGAAGTAGGCACGGGTGTCTACATCCATAACCAACAGTAAACATATGGTGGGCCAAA

>comp177362\_c0\_seq1

TTTATCATCGTACTACTTTTTTTTGTTCACTCGACATATCTACCTTTTTCTTAGGTTTTGTAGTTAGATTGATTCTCAAGTTTTCCATGTTTTTCATCTTTTTTCTTTGGGCATATATAAGCCAT  
ATACTAGCTTTATCTATTTTTCTGTCCAAACTTTCTGATTTGACAATATAATTAGTGAGGAAATATAGAATGCCATAAATACAATGCTTTACTTCCCTATTATAAAGGTAAATTTTCATTTATAA  
GGTATGTAAAGAAGGGCTTATCGGTGCATATATTTGTACTTTGATGTAGTAAGCATTTGGGTTTCATCAATCTTTGTTTTGTTTGCATGTTTTTTGAACACCTCGAACCATCGAGATATGTTGAT  
TCCTATCAAAATTTTGAGATTATGCTTGTCTTGACCCATTCAATTTTTGTAGAATCTAACTGGAATTTTTTATCCCATCCCAAGCCTACGGTGACAGTTTTCTCTACTATGAACTTTCACCGT  
ACTTGCTATATGAGAGCATATCATCAAGCACTATATCAGATCATGCTTCCCTGAGGTTTTTAAAGGATTTCAACTTCCCTCAAACACCATATTGGCTCCTGCATCATAGTATATTGGCTTATACTT  
AATTTTTTCTGTATTGTTAGTCTCTTTGCTTAGTTGCCATTTATC

>comp177375\_c0\_seq1

TTAAACCATATGCTAAAACAAAAAATAAAAAGAAAAATAAAAGCCAAAGAAATTACATTGAACAAATAAAATTTACTGGAAAAACAACATCTTACATGAGTGCATTTGCGTAAAAAATAT  
GAAAATCATTTCCCAAATTTCAAACCACTTACCTCAATACCCGGGCAGCTCCCATCAAATTTCTCAAATGAAGCTCATTTTATGCACCTTCTGAATTCGTACCATATTTTC

>comp177518\_c0\_seq1

CCTCAGTATATATAAATACTCAAAATATAAAAGTAATTTTAATATTTACAACCTTTGACACTTTATGTTTTAATTTTTTTTTTGCATGTATTTGGAAATATTTTTGTATATGAAAAATATATGTGTGT  
GTTCTGGAAATGAGTCCCGGAATTTGGATATTTTTTGGGAAAAAGTCTAAATTTTTTACTATTTTAGGGCCTAAGTATTGGGTGTTTCGAGCATCAATAGCCTTGAGGTGTCAAATACTAACA  
TTTCAGCTCTATAGTCTCGGGTTTTAGAAAATGAACTAACGTATAATGCTAGTTGATAGTATTGCAGCGTTATGCCACTATCTACTATAACAATTTAAATATTAATAAATCAACTATTACATT  
CATTTCGAGCGCTATAGCCAGTCGAGCAAGAGAGAGATCGAAGGAGAGGGTTTTGGAGGGGAAGAAGCATTTTTTAGCCGTCAGTCAAGTTGGAAAAGTTGTCTGAATTGAGGTAGTTCA  
TATTATACATATCTTAGTTTTAAAAAATAAATGAAGTGTCTTTTTTTTTTTTTTTGAAATTTTTTCTTTGACTAAATAAATAATGTGAGAATATTCTAATTGATTTTTTTTTTTAGAAATGAAATTAAGAT  
TTGGGAAAAAGTTAAAATTTGGATCTCTAAATTTT

>comp177555\_c0\_seq1

CTCTCTCTCTCTCTCTGTGAAGATCGGGGAGGAGGCTGGAGGTCTGGGAGATCGTCGAGGCTTCGGAAGATAGGGGAGGTGGCGACGGGATTGGAGTTGGAGAGGAAGGAGGTTCGAC  
AGTGGAGATGGGGTCTGGCGGGAGCAGGCGACGGGTTGAGTGGAAATGGCAGAGGATTCGCGTCTGTGGGAGTGGCGAGAGCTACTGGAGGCGTCGACATAGGGAGAAGGGAGATCGTG  
TGTAGTCGGAGGAGAGGTCGTGAGAGTGGGGGGAGCTACGGGAGAAAGCTTGCGGCTTGTGG

>comp177681\_c0\_seq1

CACCAAAAAAAAAAAAAAAAAAATCTAAGCTATCTTCTAAGCATGTAAGGTGTGAAGCTAAGCTTCTTCTTCTCAGGCGGCAGCCATTGTTTCTTCTCAGCTTTTCTGAAGCCTTAGATGCC  
TGAGAGTTCGTCTGAGCAGAGGCCTTCTTCATCATGGAGAAGAGGAATAAATTCAATTTCTCCTTCTTTATATCATGATTTATCAGCTGCTGACGACACTTCAAGCTGCAGAAGGCTTCAC

CCCTATACATCAAGATGTCGCAGGAGGGG

>comp177992\_c0\_seq1

GTGGTTTTGGAACTTTTATGCGTGTTGGTGATTCTAATTATCACCTTGCATGGAATGAATGATCTAAGGAGAAATTTGCTCTAATTTAAAGCTCCTTTTTTAATCGAGATTGTTGTAAGAGAA  
AATTTGTCCTTTGATCATGAATCAATGCAAGGCGGTAATTAGAATCCGAACACACATAAAAGTTCTAAAACCGCCAACCAGAAAGAACTTTCTTGTCAAAGCCTCATTCTCTCAACCA  
ACTATGAATAACCCAAATCCCAGAATTTACCAAGGCAAACCTCCCAATCTCGACCCCGTAACACCACCATCAATATCAGTAGGGCCTTCACTTACTATAGATTTCCCCCAATTCTACTAAGG  
AAGAGGTGAGACACACACAATATCAACATGGA

>comp178070\_c0\_seq1

CCAAGAGATGAGATTTGGACCGAGAAAGGTGCAAAATCCCGAGATGGATTTGCGATTGGAAGAGTCAGACGCCAGTCGGCGTCGGAATAAGAATGTAGCTTGAGTGAGCCTGTGGTG  
ATGGGCAAGCCGTAGGAGAGGGTGTCTGTTGATGTAGCGAAGAAGGAGTTTGAGGGCTTTGAAATCTTGATCGGTTGGTTGTTGCATATGTTGTCAAACCTCTATTAGTGGCAAAGGCGATA  
TCCGGCCGTGTGATCGAGAGATATTGAAGTGATCCGGCTAGACGACGGTAGAGGGATGGATCATGGAATGGTTGAGCGGTTGACTCATGATGCTTGAGATCAGGTACGATCGGTGTCCGA  
GCCAGCTTACAGTTTGCATAACCTGCATCATGAAGTAGTTTAGTAGCATAGTGTCTTGGGAGAGAAAATAACCAGTGGTGGATTGAAATACCTGGATATGTACCAAGGAAAAGAGAAAT  
GTTCCCGAGTTGTTTGAGAGCGAATTGAGACTGTAATTGCTGAAGGAGCTGCTTGAGCGTTGTGGTGTGTTGCCTGTAAC TAAGAAATCATCAACATAGATGAGAATAAATATTTGAGTA  
TGAGTGGTGTCTAAAATTAGAAGCGACGGGTCTGCGCGGTGAAGGTGAAGCCTTGAGATTGAAGAAAACCTTGTCAGTTTTTGA AACCATGCTCGGCGCTTTCTTGAGACCGTACAA  
CGATTTCTGGAGTTTGC AAACAGCATTCCGATGGTTTTTGATTAATGAAGCCAGGTGGATGTCGCATGTAAATGTCATCCGGGAGATCACCGTGAAGAACGCATTGGAAATGTCAAGTTG  
GTACATGGGCGATTGACGATGAAGAGCAAGAGTGAGAAGCAGCCGGATTGTGGGCATCTTGGCGACGGGGCTGAAGGTCTCGGTATAG

>comp178133\_c0\_seq1

CGAATGAAGCCTTAATTTAATTATCTTTATATATGATGCACCCAAGTAAAGAAAAAAGGTAGAAAATAAGCCGAGCCAAGTTTAACTCGCCCTCAACATAAACTTGAGCTACAATAATCAAT  
TCAGTTCAAGCTCAAGCTCGATTCTAAGACTTTGAGGTGGCAGAAGAGCCGGTTCGTTTATCGTTAAAGGAGAAAATGATTTTGATCCGAATAATTATTATAACAAAATGGTAAAAACAAT  
GAGAAATTATAAGGAAAAAATAAAGATGCAGTACATATAAGAA

>comp178295\_c0\_seq1

TTATTTTGAAGTTAGATACCCCTTTTTTATTTACTTTATTCCACTTATAATTTCAAAAATAGTATTTATTTTAAACAAAATTTTAAAAAGGGGCAAATGTAATATTTTTTCATTATGTGAGCAA  
ACATGAAATTATGTCCTTTTTGATGTTACTAGGCATGATGAACTAAACAAAACCTGGTCCCATTGTTTGGTCCAATCCATTTGTGCTTTAAGAAAAATATATACACATTTCAAAAATTTAACTT  
TTCATATGGCCTTCACCCAATCTCTTGCGAACCGGTCTACATGTTTACCATGTCGTGCTTGGCACCAAAAATAGACCAAAAATTATTATATAATTTATTCTCTTTCTATTCAAATCATTGAC  
AAAATCTAAATTTAAAATAAATGAAAAAATAAATAATCATAATTTCAAAAATATTCATTAATTTTTTTTTTACCTCA

>comp178399\_c0\_seq1

TGGTATTACATTCATATTGATTGTAGTACAGATTACTGTGGGCTTCTCCCTCCTCTGTTTCAGCTCATTTTTACATTCTGTGCTCATGGTTACAGTAGCCAGTAAAGAGAGGTTCTGCAGCTA  
TTCTCGCCTGACCATTCTGCAGCGGTGAATGGTTAGTCTGCTGTAGGCATCATGTATGTCTCGGACATCTTTATGACTCCAGAGTCTCTCACCAACAGCACTTGCTCGAGGCCATAGTCTT  
GGAGTAAGGTTGGTTGCATCCACATATTCTCCCATAGGCAAGCTTCTCCGCCAAGGACACGCTTTCTCTCTTTGTCAGAACCAGGAAAATCTTGAGGTTCCACTTCATAGTAATTCTTCC  
AATCTTGCCATAACTGATCAAGTCTAAGTACCATGGAGCAGAAAAGGATCACAGGGAAGCCAGCTTTGTAATAAGACTTTGTTCCATTTATAGTCTTCTATTTTCCATACCTGAACTACT  
GTGCCGGGCATAAACTTGTCTCTGCCATCAAAAAGCCTCTTGCCAGACTATGGGTCTCTTCTTCATGGCTGAAATCATATTTGAAATCTTGAACACGTAGAAAGATTGGAGTTTAGTGAAT  
TTTTGCTAAAGCCTTTTTCTGCATGAACTGCAGGATTTCTGAATTGGATGCCCAACAATCAAAGTCTACTTCATCTCCTCCAATATGAATGAATTCATCTGGAAACACGGTACTAATTTCTT

TGAAAAATTTAGACAGGAAGTTATAAGTTGTATTCAAAATAGGGTTAATAGGTCCAAAAGTCCCAGAGAGA AACTGTTTTCTATAACATGGCGTCAGGAGGTCTTTCTGGCCTTTTCCCCA  
AGACCGTGAATGGCCAGGGGTATCAAATCTGGCATGACCCGAATCCCTCGTATTCTGGGCATATTCAATCACCATCCGAACATCATTTGGTGTATAAACATGAGACAAAGAATAGCTTCCC  
TTACTGCTTAGTAGAGGAAAATTGATGCTCTGATAAGGGAAAAGACTGGTCATCAACTATGTGCCAGTGGAGAACATTAACCTTATTAAGCCATGGCATCCAGAGTTTTAAAAATGGTCT  
TTACTGACAGGAAGTGTGCGCCCTGTGTCAATTAATAATTCCTCTATGAGGAAACCTCGGAAAATCTATAATTTCCGATTTCATTGACGGTGAAAGTCCCATAAGAATCTTGATAAATTAAGTGG  
CTAAAGGTCTCTAAACCTCGCAAAGCTCCCCAAACTGTGTTGGCCCTGAGCAAGGCCTCTGGTCCTTTTACATGTAAAACATAGGACTCATTTGAAGAGATGCTGGGGAAAAGTGTACAC  
TCCGACTCCACGTGGACTTGAAGCTGCTGCAATTCCTGTCGCAAAACATAACTGGTAAGAGCCTTGATGCCACTTGTAGAAACCAAAAAATAAAGTCATAATATCGCCGAAACGCTTCCTGA  
AGGATTTTCGAGGAGGAGCCGGCTTTGGAAGTGGGGCTGTGGCCGAAGAAAAAGTTGTTGGGAGAGAGGTGAAGCGAGCGCGGGGATATATCCACGGCAAAGGGCAAGGGCCACAG  
ACCCAGGCTCTCCGCGCCAGAGGTGTCCCTGGCCACCCTTTCCGGCACCACCAGAGCCGCCAGCAGCGCCAGGAGGCCGGGTAGCCACCTCCATCCGTGGCGCTCCATAGCCATCCTAC  
CGCTGTCTGC

>comp178466\_c0\_seq1

GAATGTTTTTTCGCTTGACTTGAAATCAAATGACGAGGGTTAATTCCCTCCTCCTCTTATGATCCTCATCAGTAGATGCACACATATAAGAAAAGCCAAACTACGTCTACGAAGTGTCAAGT  
ATCATGCAGCGGCTTCAAATCCAAAGTGGTGGTGGTTAGAGAAATGGTGGCTTAGTAACCGAAAAAACATACGGCTAGAAAGGTGGTTCCTATTATTACATGCAACCCGTGGAATCCGG  
TTGCTACAAAGAAGGTAGAACCATATACTCTGTGCGCAATAGTAAAGGGGGCATCTAGATAATTCTCATGCCTGTAGAGCTGTGAAGTACAGTCTAGAAATTACGGTTAACCCCTAGTGCTTG  
CACCGCTTCCCCTCGATTTTTCTCTATTATTCTATGGTGTAGCCCAAGTTATAGTGGCTCCTGAGGATAGTAATACTGCTGTTTTTAGTAAGGGGACTAGAAATGGTTTCAGCGCGTCAATTCC  
TGTGGGAGGTCATGAAACCCCTATTCTACTGTGGGTGCCAGTCTTCTGTGAAAGAATGCTCAGAAAAAGGCAAAGAAAAAGCAAACCTTCTGATGTTATGAATAATATCATTAGTATCGT  
AAGCCTTAATAAC

>comp178507\_c0\_seq1

TGCTTAAAGGAAGAGGGCTACCTCCCGCCTTATCAGAAGGATTTTTACAGCAGTTAAAGTCACCTATAATTGCCAAAGGAAGAGTAATGTTACTAGCCAGGCTAGCAGTAAAATTCCAAA  
GACCTTGCCTGTCCAAAATAGAGTTTGATGCATAAATAACAGAAATACAGCAAATATCCAAATCACCCCGGTGAACCACCCCATGAATGAGTTGGGATGTAGTAAAAAGAGGTCTAAAAG  
AAACAGTTTGGGCATTCCATTTAATCCATATTCTACCAGGGGAGGAATATGCAAATTTAATAAAGATCCCTCCACCGGAAAAACCGAGTGAGAGCGAGAGAACCAGCTATCAGCTAAAG  
ACTGCCCCGAAATTTTTGCTTCCAGTAAGAAAACCATATCCAGGTTAAATTTATTGATCAACGACTTACAAGACAAAACCTTTGGCTGGATTATTAATCCCTCACGTTCCAGGAAGCCAA  
TCTGGGAAGGGTCATTTATGTTTAGATTTGGAGTTGTTAGCCTTTTTGGCTTGTGTTGCTCCTAGTGTCTTAGGACTGGCTTTGTCTTGAGAAGGATTGTAAGTGTGCTGGCACTATGAGA  
GGACGGGGTAGAAGAGGTGTTATCAGGGGAAGATAGGAGAATAGAGCTATCGTGGATAACTGGAGGAGTGGGGTTATTGGATTGACATTTGATTTGGGGCGAGGAGATGGAGGGCTGAG  
GGTCTTGATGTTTCTGCTGGTTCGAGATGACCAGTAAGAAGCTCAAATTTATTCGTAGTAGGAAGAAGATTTTTATCATGAGGAATAGGGGACATATCAACCTTAGGAGGTGAAGAGTTGGT  
TGTAAGCAAGCTTCGTTAGAAGGAGAATTCAGATTAGGAATGATAATTGGGAGGGCAGAGATAGGTGCGAGATTCGGGGGATTGGGGAGAAGAGGCTGTTGTGTAGCTGGGGTCGCA  
GCTGAGGAAGAAGGTCTAAGAAAGTTTTGGGGAGGAGGAGGCTGGCTTTTTCTAGGGCGACGGCTAGAACTACGACCACGAGCCGTAGTAGGAAAGTTGGACGGCTTGAAAAAGGG  
GGAGGGTTAGTCTGAGGGTTTGGATTTTTGGGCATTGAGGAGGCGCATGATAGATGGAATTACAAAGTTCACAAGGGGTTGGCTTCCAATCGTAAAGAACAGAGAGGGGAGTTAATTT  
ACCATCCACAGATATAAAAATTTCTGCTGGTAAAGGGTCAGAACATGAA

>comp178560\_c0\_seq1

CATCGGGCTAGCCATAAGAAAAGTTGAGGGTTATTTGCCACTCGGCCAAAATCAGGTCACCCAAGATGATGAAGTTTACATCAACTGAAGATGAAAACAATAATAGAAATCATCAGAAT  
AATCAAGCCATGTCTTCTCTGAAAATATGACATTAGCAATTGTTTCGTTTCTTGGTACCTCATCACAATTTCCATTGCCAAATGAAAAACCCAAAGTACACGAATGCT



>comp178591\_c0\_seq1

CCCCAGAAATCCAAAATTTCCCGTAGCTCGTCCAAAGACCACCATTTAAAATATAACCCTTACAGCAATTATAAACCCAATTCACCTCAAGCTCACTCGCAATAGCAGCACCCCTCAGAAA  
AGCTATTAAGAGCACCAGACCGGCACACAATCAGACTATTCAGGTAAGAACCCTTCTACAAAAACACCACATACAGCTAATCCAAACCCAGTAAAACAAATACAAACCAATGCAGTAA  
ATAAAATGAATTCTATCCTTATCAAGCCTCCCTAAAAGAAGGCAACATAATCTGAAAACCAACAACTGTACCGGAGCAGCATGTACAAAATGCCGCAGTATTTCCAAACATTCCTATTTA  
ACCCATAAGCATAAGTGCAATTGTAATACCAGTTAATTAGAAAACAATTCTCAAGAACAGCCGCAGCGCAAATTTCTGTTAAAGAGAATTGTTTTCTAATTAAGTATTACAATTGCACTT  
ATGCTTATGGGTAAATGGGAATGTTTGGAAATACT

>comp178603\_c0\_seq1

CCAAATTCAAAAGCAAATAGAGTCAAATCATATCCTCAAAAATTGTTTTGAACTAAGTTAAAACCTTGGAAAAGATCGGCTAATAAATTCAAATGATGTGATGGTATATGAAGACACGGAAACAT  
CTGAAATTTTTTACATATTTTTCTCATCTCATTGGATTGCAAATAATTAGTTCAAATTTGTATACAGAGGAGGAATCAGTTTTTTTTTTTGGGTGAATAAATTTACCATATAAATAAAATGT  
TAAATCCTTAAAAAAATTTTAAAGAATTTTTTTTATCTATAAAAAGTTAATAATTATT

>comp178701\_c0\_seq1

TTTCTTCAGTTCGTCCGGGACTAAAGTCAATTCATCCGGACTAACAGCACTCAAAAAATCAACTTCGGAGGGGTTTTAAAGTTAAGTTCTTAAAGGTCAAACCCCATCAGAAGGCGCTA  
CCTCCTTGAAAGTCCCGACATATCTACAAAGTGTGTGAAAACCAAGAACATGAACAAACAAAGGTCGAGCCAAATTCGAGGCAACTCCAACCCATCCAACATATTTTTTTAAAGAAAATAA  
TCAACATATTTATTTCTAATTTCTGGATCAGAAGCATATAAAGTCTTTTTTTTTTCAAACGCTTACTCTGTCTTGCCACTCATAACATCCTTCTAACTAATGACATATCTCTTCATT  
CTTTCAGTTTTTATTTTTGTTTCTACAATTTT

>comp178704\_c0\_seq1

TCTTTGTACAGGAGCTGGACTTATTCAAAGTTAGATTTCTTCTTTTTTCTGTAACACGGAAGCATTTTAAATGCAATAAATCAACCGTTATTTTCAGTTTTGGAGATTAGCATTTCTTTTCCA  
CCTAGTTACAGCAGAACAACCTTTTGATGTTCTTGGCATTTTTAAATCGCTCATGTTAATCAATCTTGTTATTTTAAATTGCTTCACTTCTCCGTAGCAGCAAATGTGCATGATTTTTGCCGATA  
GCATGAATGCTTCATCCTGAAATAGATCTTATTTGTCTTTATTTTTCAACTTTTTCTTAAATGTTAACTTACCATATCGATTTCTAATCTTCTATGCAGGTTGTGGGGACACTTTTCACT

>comp178728\_c0\_seq1

TGGTTATGAGCTATTACAAATAATTAAGAGGTATTATATTCGAGTCTTACGTTGTTGTGATGTGTGATTATTCTCTTATGAAATATGCATCCTCAGTATATTTAAAATATTGAAGGGCAAAT  
ATTAAATTAGTATGAACTTAATAAAAAAAATTACATTTTATATTTATTTCTCAAATGTTTTGCTCTACGAAGCTTGAATGATTGAATAGAACTTATTTTATTCTGCGGGGGTTAGATTTCTCA  
TAAGGAAACCCTATATGATTAATTATATGTCAAGGATATTTAACTCTTGAGAAAGCATTTGATTA

>comp178857\_c0\_seq1

ATGCAAATGAAGATGAAACACGAAAACAGCCACTCCATAATGACAAAATTTCCATGAAGCAGCGATCATGATCAAACAGAGGGAAGAAACATATACTTAGATAAAAATGTCAAAAATTC  
AGATTC AAGCTTAAATTTCTAAGTCAATAGTAACATAAAAAATCCCAATTTGACTATGGAAAATGCCACAAAATCCCTAAAAATTTGGAAATTTCCATATTAATCTAATAAACAAGATCA  
TCTACGCCCTTAAACAACCAATCAAAATTCATTTTTTCCACTATACCCACCTT

>comp178916\_c0\_seq1

TCGTCATGCACAAATCCAAAGTCTCATTCCGGTTCCGCCATGCATTCTCGCCAAGGGTTGAAGGAGTACCCAAGGGAAAAGGAAGAATTTTAGATTTTGGAAATCAAAATCTGAGAAAAC  
TTCCAGTTTTTTTTCTAAATCTTCCACAAAGCTGAAATAATCTTTGGAGGAATCTGAAATATTTCAAGTATATTGTCAAGATAGAAAAGATGATGACTTACCCCTGCCAATACATTTGAAG  
AGAGATGATTTTTTCTTTTGGC

>comp179104\_c0\_seq1

ATGGCTTGGGACTGACCACATGGACTCCTCTAGCATCAGGTTTTCTTACTGGAAAATATAGCAAGGGAAGCATATTTCTTGACAGTCGGTTTGCTTTGGATAATTACAAGGTATTTTTTTTT  
TTTGAATAACTGCATCCATGTTATTAATTTTTGATGTAAACATGTAATTTTGGTTTGATTCTGATGGAACATGGCTATCCAGTTTTTCATCATTATGATTTTTGTTGTAATTTAACACTACTAAG  
GTGCTATTAATATCCTGCTCTAAACCCTATAGCCTTCTGAAAACGATCTAGAACTCTTTAAGTTTTAATTTAATCTGTTTTCTCTAGACAATTTTGAAACATCTTATAACAGATTTGATGAG  
TTGTAGAGAATGTTTGGTAGCTTCGTACAAGTTAAGCTATTTTAGTAGAACAAATTGTACCTTGCTTCTTGCTAAAAAATAAAAAACAGA

>comp179128\_c0\_seq1

CTCTCTCTCTCTCTCACAATCTGCGACAAATCAAGATGTTAGAAAGCAAGAGACCACGTTTCGCTTTGCTTTGAGGCGGACGACAAGCATGAAGGATGTGTGCGCGAAGGACGG  
GCCGCCCGCCCGCCAGCCCGTCCGACCAAGAGATTCCGGCAACCGTCGACGAAAATAGGCAACAGCGCGGCGGAGGGTGGCTGAAGTCCAGAAGTTAGAACGGCGGTGGAACGG  
AACTGATTCGACGGTGGCGCCATCGGTGGAGATGCTTTCATCATTGGGATCTGCAGGAGGCGCCGGCGATTTCCGGCAGCGACGACGATAAAGCTTCTCCTTTCCTTGTGGATTGTTCA  
CTCTGCAAGTTGCATCTCCTCCCCTCCTGCGACATCTTCATGTATAGGGGAG

>comp179262\_c0\_seq1

AAAGTCTTGACCAGCAATGACAAGAAAAAGTAAAGCACCTTTAAAAGCAGTTGATTTTCAAGATTAAAATAATTACGGCTTTTAAAATATTTCTTTAAATTCTTGACTACACTCTACTTT  
TAAACCAATATTTTAGAAAATTAATCAGGGAAATGTATAAGTTTTGGCATTATATAGAAATGTTTTTCATCTTCTGGGACTTTTGTGTTTCTGACCAGTTGAGGTAGTTGAAAACAGGGAG  
GTCTTTTTGAATTGCGTGTGTTGACTATTTAGAAAGAATGGTTATCTTTAACGATAAACATAGTCATTGCTTTGCAAATGGGCTAGGATTCAAAGAATGTAACGCAGTGTAATTGGAAGAG  
TGTTGAAGTTTATTTATTATAGCACCATTTGAGACATTTGAAATGGGAACTGGTAAAAAATAGAACAAAAAGCATTGCAACTGTATTTGGTGTGACAGAAAAAGTATCCTTTTTAGGTCA  
AATTATCCTTTTTCCAAAAATTTGGAAATAAATACTGGAATTTAGTTGGTCACTTGTACTGGTTGACAAGATGAGAACAAAAGGAACACATATGGAGTGTGAAATCTTTTGCTGGGAAT  
TCAGATAGAGTTTGGTTTATAAAAAGCAAACAGGGCCAATGTCCGCACCAAATCTTGATCAGGACCACCAATATCATAGGGTGAATATCTACAATAGGTAGTCTCACAGCCTTGCCTGT  
TCGATATTCGAAGACTGTCTTGCCCATCCCCAGTGTGTTTAGTGCAACCATCCTCCAGAACGGTGTATGTGAATTTGCTATTTCTTCCAGCCTTGAATTCACCTTCATTGATCCCATCAG  
CCTCAAGGCTTTCTTTACATTCCCCTGGCATGTTCCATGTACGCAATGCTATTCTTGCAGTGATATGTGATGTTCTGGGAAGCTCGGCTAGAGAGAAGTCGAAGGAATGCCAACTGGACA  
TCAAGGACATCTCAGGAAGTTCAGGATTGCCATAGCTAAACTGAAAACCACCATTTCATGGATTCTCAAACCAAACATATTTCTTCTCAGCACCAGAATCTGTCCACCAGTTCTTACGTG  
GAACAGTAGAAGGACTGGCACTTATGCATGTTTCCCCAGTTTCCATGTTACAAAATAGAT

>comp179364\_c0\_seq1

CGTCAGTGTGACAGTGAATGGCTTGCTAAAATCGGGCAAGATCAAAAACAGGGGCTGTAGTTAACGCCAGTTAATCGCATTGAAGCTCTGTTGTTGCTCCTCAGTCCAGAGAACTGC  
GGTCTTTTGAACATCCGTAATTGGCGCCATTATGCTACTGAAGCCACGGATAAATTTGCGGTAAAAATTAGCCAAGCCGTGAAAGCTTCGTATATCGGTTAAACACTGGGGAATCGGCC  
ATTCTTGTATTGCTGTTACCTTTTTTGGGTCAA

>comp179718\_c0\_seq1

ATATATGGCCTTCCACTTATCATAAATAACCGACATGCCATGGGAAGCCGTTAAGGTTCTTGTAAACCGAATTATTATCTGCTGTGGCAATTTCCAACCTTCATAGTATTCTGCACCACCAAAC  
GCTAATTGTTTGTACCCAAAAAGAAAAAATAATCATGAGAATTCTATCTGGGACTTTATGAAAAGTACATGGCTGAAGAAAAATAGGCTAAGTAGGTTGAGAATTTGATCGGCTGAG  
TTACAGCAAAGCAAACCTTTGTGCTATGGATTAGCCAGCAACTACTTTAAGTGGTCCGGAGACTTTGACGTGAGACTAAGAAAAATAATATTGTAGTTGGCCTAACTCGTTTGTGCTCATAGC  
TTTCCATGGAAGCAAACCAATCTTCATGCTCACGCAATTCACCGAAAGCTACAAAGGCAACTAG

>comp180007\_c0\_seq1

TTTCCTTAAGGGGCAATATATTATTATAACAAGACGTTCAATTTTGAGACTGTAGATTCAATATCAGAATTCCCAAATAAGATTAAATCTTTAAAAAATCCACTTTTCAGAATTTCCACCAA  
CAGTTGGGAACCTTCAGGAGCCTCATTATGTCTTCCTCTTCGACGTGCATAAGGGCTGGAATATCTCTTATCTTCCATACTTCTCTAATAGGCCTCAGTCGTTCTTCACAAAAAAGAAGGT  
ACTGGCTCATCTCTTCGCGGGATCACAGGAGCACATGTCCAATCATTGGACTTGAATGCCACACACCCCTGCATGTCCTAATGAGTTGACCCATCGTACCACATCGTTTGAGAAGTGA  
AACTTTTTGGGTAGAATGATCAAAGAATCACCAGT

>comp180254\_c0\_seq1

CCACACAATATATATATATAATAAGTCTTAAGAAAAAAATTATCTTACTTGACCACTATAGATATATTTAACTTTGCATATACCTCCCAGGTTTTGGAGTATAGCTTTATTTATGCAGCAA  
TCACCATTGTGCCTAAGAAAGCAGAAAATCCTTCCTACTAATGCAGCAAATCTTCCTATCCATCAACCTTGCCAAATACTCCAAGCCCACATATCCCCACATTCTTAAAAACCAAATAGGCC  
CTGGTAACTTGCCATCAAAAAAAGTCAAAGATAACGCAATATTTGACGTAAAAAAGCAAACAATTAATAAAATTAGATATTTGGGTACAGTTTTTTTTATGATTTTTATTTGAAAAAGACAG  
ACAAACCTAAATCTTAAGATT

>comp180524\_c0\_seq1

GAAATGTTGAGATTCATCTTTGGTAAAATTAATGAAAGGCTAGGATGGCATTGGGTGGAATCACAAGTCAATTTTATATATACTAATGGATTCATTCAAACCTGTGCCAAGCCCCATGATTT  
TCCCCCTTTTCAGGGCTTTTCCACGTAAAAACTCTGTTGTCTTATAATTATTACACCCTCTGTTACTTATTTGATTGTGTTATAAATTTTCGTACAATGCTAAGACTTAAACTATAAATTTCT  
ATTCATAAATTACTTAAACTATAAATCCGTATAAATTTAATATAGCTATATAAGTTGCCATGAGTTTCTTTTACATTTTATCAAATT

>comp180603\_c0\_seq1

ACCTCGCAAGGGGAAGGAAAAGAAGGAAGAACAGGTCATCAGCCTCGGCCCTCAGGTGGCTGAAGGAGAAAATGTATTTGGTGTCTGCCACATCTTTGCGTCCTCAATGACACTTTTG  
TGCACGTCACCGATCTTTCTGGCAAGGAAACCATCTGCCGTGTAAGTGGTGGGATGAAGGTGAAGGCTGACCGAGATGAGTCCTCTCCATATGCTGCCATGTTGGCTGCCAGGATGTAG  
CCCAGAGATGCAAGGAGCTGGGCATCACTGCCCTCCACATCAAACCTCCGGGCCACAGGAGGAAATAGGACCAAGACTCCTGGACCAGGGGCCAGTCAGCGCTCAGAGCCCTCGCCCG  
CTCAGGGATGAAGATTGGGCGGATTGAGGATGTCACCCCATCCCTCCGACAGCACCCCGCAGGAAGGGGGGTGCGCCGTGGTGCCTGTGTAACAGG

>comp180659\_c0\_seq1

TAATGATTTTGATTGGAATAGTCTCTTGGCAGCAAGAGGCTCTCTTGATTCTCACTTTAATGTTGGTGGTGATGACCAATATTGCTGGGGATGGCAATGATGAAGATCAACATTGATTGAG  
ATGACATATATTGGCCTTACTAGTGTGTTGTGACTCTACCTTGGATGCATATGTTGGCTTTAGCTTTATGACATCAATGTTAGTGTGATGGAAAACATCATCATTATTATTGTTGGGTGTC  
AACTTATTATATTGTCAATCATTAGTCTTATTGGCTACATCAAGCATCATCCGTATTGACAATAGAGTACATTAACATTGACGGCTATAATGGGCTTCAATGGGCATCATGTTTATAAGTATTG  
TCATGCTTCTAGCTTGGTGAGCATGAATTGACCTTGGTAGCATTGGCGTGTGTTGACCTTAGTGGCATCAATGAGCATTGGCCTTGATGGAACCAGCGAACATTGATCTTGTGGTAAAGA  
AGAGCATTAATCTTGTTAATAAAAATGGGTTTCAACAATATTGAAATATTAGGCATATTCCTTATTGGTGATGGTAGACATAATTAGTATTTGTAGCAACATTGGGTAATAATTTGGTGTCC  
AATAGTGAGAATTAACCTTGGTGGCATCACTGGTCAATTTGCCTTTTGTAGCACAGTTGGGCATCAGTTGTAAGATATAAGCTAATTATT

>comp180717\_c0\_seq1

ACAAATAATGAGGCAGCTGAAATCACAAATCACAAATTAATTTTTACCTAGTATCGCCTCTCGAAACTCTTCCTAAATCCCGCAAATTAGGCTGAAAAATCCCTGCTGAGCGACGTGACAC  
AGTCCTTAAATCCCGCGAAATAATCACTCCCTGGTGAATGGAGTTCCGTCGTTAAAATGACTCAAACGAAGCCTTGTTAGAGGTTCTTCGTTTCGC

>comp180921\_c0\_seq1

TTACCAAACCGTTTTAGGATTTAGGCCCTCAGTATTTTCGAAATCCGAATTTAACAGATTTACAAAACCTTACTTAAATCAAATCCTGAACGCTACCAAACAGCCCCTTAGTCCCAATAC  
ATCAAATTTTTTAGAGTTATAGGTTTACAGCTGCATAGCATTTTAATTTGAATTTACAGTTTCAATAATTTATAATATACACTTACATTTTATGTTTCTAAAAGAAAAAACTCACAATAAAAAATAA

GAAAAGGATTTTTTTAAAGGAATTGCTTACTGTTTTTCTATCCTCAACGGTCAATTATCCCTGCAGTTAAAAATATTGCTCAACTCA

>comp180953\_c0\_seq1

CAGGGGGATGTGAACAAACCTGATCATAATTTAGGACCTCTTCAGATTGGTAATCGATGGCAGCTACAGTTCCAACAGGCTGCCCCGCGAAAATACACCAAAGAGCGTCCGAGAGCATCC  
CAGGCATCGACGACATTGGGATTCGGGGACCTCGGAGTCGATGAAATCGGGCGTTTCAATCCCAGCCTTGGCCCCGTTTCCATAGTTGAATTCATGCTCTCACTGCTGTCAACAGCTTTCG  
CATTCCCCATGACAGAATGTTGCTCATCGCCCCGCTCATCTAATGATCTATGCCGGTCAATGTTAACCGCCCTCGGCCTATCGAGCAGCCGCGTGATATCGAAGACATCAGTATCAATAGAT  
GATTGAGATCCAACCTTCCGAATTCCTGGATCCCTCAACCCGTCCATTACACCTTCTTGACCCTCGGCTCTACACCCAAAATCCAGAATCTGCGAAATGGAACGAATAGTGTGAGCGCTAG  
CGAGAGAAAGCAAGAGAAG

>comp181080\_c0\_seq1

AGAATATAATTTTTAAAAAATTAAGAGCTTAAAAACATTTGGCATTTTTCAGGAATCGCAAATTTGCATTTTCATAAAAAACACAAAAAATTGCAATAAGAAGTTCATTTTTTTTTTGACC  
TCTACTAAGCAGCCAAAAGAAACAGACAAAACAAAATAAAAAATATATGCTTGAAATCATTACCTGTGTGCGAGATCTCCCCATATCCCGCTAAAGTCGCTACAGTCCCGTCACTGCAGCG  
ACCTACCCATACCTCTGCAGCGGCACCGAAGATGTCTCACCTGACGTAGAGATACGTCCTC

>comp181102\_c0\_seq1

TTTATGGTGCAGAATGTTGGTCATTCCCAAAAAGCATAAAATAGAGTTTGTATAGCCAACATGTGGCTAACTTGACAGCAGAGTTAGAAAATGTCTGAAAATCACAAGCGGGCATTAACAT  
TCAGATATTGGATAAGCTTTGGAGATTGAGGGAGCAGATTGACGGAAATTAGCCTCCACATGCATCGGTGAGCAGGAGAGTAAAGATACAAACTCCACTTAGATTGTCTTCTTAGGTTTT  
TTATGCATTTTATTTTTATTATAAGAACAAATTTACTTTAACAGTGTTATAATAATTGTTGAACAGATGGAATGTGATTGTCTATATGAGTAGTTGGATTGTGATTGTAGAACAATGTGTTCT  
TATGTTTATTTTAGCAATATTTGTTAATTTTT

>comp181186\_c0\_seq1

TCCTTTTCTCATTTGTTATACTATTTGCGAATGCTGAAGTACAAATTTTTGTTGTAAGTGCCTGTGGTTTGTGCAATGCCTGCATTGTTGCTACGAGGAAATCTTTTGGGATAGTTGGAAC  
GATTTCTATTACAGGAAATAGCTCATTTAAAAGCAAAAAAATGCAACAACATCGAGCCTTTATCCAATAAATGAGATCGGCTACATGAATCATT

>comp181429\_c0\_seq1

AAAAGCCGCCAAAATTAGTTAAAATTTTTACTAGAAATCTACTGTAATAAGTAGTAAAAAAGTTGCCCAAAACAAATTCTAGAACGAAAACAAAACACAAAACGTTGCCTTGGCGAG  
GGCAAATTATTATGCTAGGCGTCTGGATTCATCCAAAGGCGAATCCGGATGCACCATGTACCCCCGACCCCGATAAATTTGGGTGACGTGGCGCATCCGAATTCACCTCAAGACCATTAAG  
AAACCTGAAAAGCAACAAGCGCATAATATATGACTTACTGCTACAGAGCGATCGGCTGAC

>comp181709\_c0\_seq1

TCCACGGACCGAGCGATCACTCGAGAAGGATACAAGGCATCGGAGACATGCGCTGTCTGCTTGTGACTTTCAACAACCTCATGTGTTCCCAGCACAGGGAGGTCTCAGACTTCATATC  
CCAGCAAAATCACATTGCCCAAAATTTAAACGACAACAACAACAACGAAGAAATCCAAACAAAAACGAACAAGGTCAACAAGCTTTAAATTACGGCGGGCAGTCCGATATTTCTGA  
GTACTCATCAAGCAAAGATTTGGAGAGGATTACGATGTAACCTTGATCTTAAATACTGTGAGCTGCTTGACGGAAACCAGAAGAGAGGAAGGAAAGGGCAGCGCTTAGGATGTAACAT  
ATAAATTAACAACGCCAAGTGGAGAGCCTTCTTAACCTCCCTCTCGACGGCAGCGATTACCCGCGAGGGTATGAGTGGCTTTCCTCGCGGCCCCCGCATCCTTCGTCCTGACTTTTGT  
TCTCCTCCTCGGCACGGCTACAAGCCCCACGTACATGGATTGACTACAAGGAGGCCACGTTTTGGAACCCACCTACTCACAGATCCTTCGCTTCGTAATAATTGGAACCGAAGAACAAAA  
GGTGGGAGGTGGAAGGCAACGGGACTCAAGGGACCGAAGGAAAGGTCTGAGGGGGTCCCATCCGAGGCTGGTGACCACGCCGCG

>comp181871\_c0\_seq1

ATTTGCAAAAATAAAAACAAAAACGCAGCAAAAAGCGCAACAAATATTTCACTCATTGTGTATTTGATGGCCTTTTACTGCGTTTTTTAAATACTCAGCAAAATGACAGCTAATATGCACAAT  
AAAAGCACATATTAGCTGTCATTCTACAAAAGTATATAAAAAACGCATTA AAAACGCATGAAAAGTGCAGAATTCAGAAAGCAGATTCAAGTCCGGCGAACGGACCTAATAATTCGCCGA  
GCGAAGGGGGGTGGAAATAGAGATTTGAGGGCGAATTATTACGCCTGGTCACCGGATATCCGGACATCCAATCTAGACGCACCACGTCACCCAAAGACATTGGGGCCCGATGTACTTGGT  
GCGTATGAATTGATGTC

>comp182114\_c0\_seq1

TTTTAGAAGCAATAATACCAATTTTATCTTTGGAAATAAGAGGTTCAATCAAACTAATAACCAAATACCATGAATTCTAGATAAATTACAAGTTCTAGCAATAGAATCCTTTCCCCAATGC  
CTCTAACATTCCAAATAAGAGCTTTAATCATTAAAGACATTTGTAAGAATTTTGAGCACAGGTTGTCCGAGAAGTAGTGGGTTGAGAGTTTTTAGCATTTTTGCCTTTCTTTCTTACCCTTT  
AGTAAAGTTCTCATCACCCTATTTTGGGATTGAATCTTATCATGTGTAGAGGAGGAAGGTAGGTTTGAAGATAGTATAGCATTTTTCATCACATTTTGAACAGCAACAGGAGAATCATTAC  
TTACAAGGTGTTGAGCCTCTTGCTCAATATTTTGTTCCTACTATTAGAAGGAGGAATGA

>comp182157\_c0\_seq1

TTAATTATCATTTAATTTGATAAGATATCATGGTGTGTTTCATTCTTATATTAATCATACAAATTTACAAGAAATACCTGAGTTGTACAATCATGTAATCAGTTGTGTACATCGAGAAAAGATT  
GCACATAAGCAAAAAGGGTCAATAAAATTGCCAAAATTAACCTCTCTCTAAGAGTGGCAACAGAACCTAAAAACATCACTCTACAGACATATTCAGAAATAATTAGTAACTTCTAACAA  
GAAGATAAAGAAAACGTACTAGTTTTAAACATCAAGAAATTCACCTCAAATTTTGCAAGCCCCACCAG

>comp182374\_c0\_seq1

ATAATACAATTTTGATTTATTTTCAATTTATCTTTTCTAAAAAACTTAATAAATTTCTCTAGAACAAAAAAATTCATTAAGTATATCCAACATTAGCAGGTTAAAAAAAGCTATGAGCAAAC  
TATAAGTGCAGTTGTATATCTACTTCTCCCGTCTCTTGGATTCAATGGATTCAATGAAAAGTTGAATTTGATTTATTCAATGTTGACCAACAGGTACTCAATATAAAGATCTTATTGCTTCCA  
GCTGTATATTTCAATTTACCCTTTATGACAATTTTTTATTGTTGAGGCTATCATATGCATTCATTATAACCAAAAATGAAATATGAAAATCATTAAATACATAAGACATTTTTTTTCATTATCAGG  
ACCTACTATAGACCTTTCACTACCTGCATATTTTCTTTCAAATAAACATGCTTTGTAAGATTAAGTAGATAATTAATTGCAAACAGT

>comp182379\_c0\_seq1

AAAGGATGAAAGGGAACCAGGGGCGTTCAACAAGGTGCATTTGGTTTGCTACTGAATTCGATTATTCTTGGGAATCAGTTCAATGCTCCTTGAGCCTATGTGCCGCAAATTTACATCAAGAA  
TTGTGTGGGTTATAGGCAACTTCACCCTGTTCTTAGCCATGGCTGCAGTAACTGCCCTTAGTGTCAATTTCCACAAATGGCTACCATTCTAAACTCAGCTCTGTGGGTAATGGGGATGAGGGT  
ATCAAAAATTGGAGCATTGGCTATCTTCACAATTCCTCGGATTTCTCAAGCTATTCTATATAGTATTCCTTTTGCCTGTGCTGCACAGCTTGCTGCAGATGAAGGAGGCACGCAACAAGGACT  
GGTCACCGGTGTTCTTAAC

>comp182771\_c0\_seq1

TTTTTTTTTTTCATTTCCACTGACCAATAAACAGAACTACAGGTGCACCCAACCACGGACATGCATTAACTCGTCATGAGAAATCTAGGGAGGCTAAGTAGGATGAGAGAATGTTTGTTC  
TCCAAAAATACCTGGGGAGGAAGAATGGAGTCTTGGTATCGAGATACATGTGGACAGGCTAAGTGGGCTGTCTGAAAAGTTAGCATTATCCACAACATTA AAAAAAATATCAAAAATAAGA  
AAGGCTGTAAATCAAAAAGAAAACACAGAAAATACTGCTTTCATAAAGATCTGATTGCCTTGGCACAGGCCCTGCGGGCAGAATCAAACGTATCACCCCGACTCCCCCTTGCAGAAG  
ACAAGATGTTTCGGACCTTAGTGATGGAGTGCATGTAACAGCAGTTCAGGTACAAAGAGATGTAAGTACTGTAATTTTTCAGACATTGCGCTTTAAACTCCAGGACTGATTGGTAGCGTTGACT

>comp182787\_c0\_seq1

TAAATTGTATGTTACTTAAAGAGGTCCCTAATATGTAAGCTTTTCTAAACTGCTTTATGGTAAATGCTAGAAATTTGTGTTGTCTTTGTGAGCATGGTTGGGAACCTTCTGTTGATTTATCGG  
TTGTTCTCTTTAATTTGTTATCGTTTGTACTATTAATTTTGGCATCAACAATTGCATTATATGGGGAAATGGGGAAGTTAATCACAGCACCTTCATTAATTTCTTTACGTAAATGATACTATG

CTTACTTGACACTAATTTGTATGGCACAGATGCTTCTCCC

>comp182846\_c0\_seq1

AAAAAAAAAAAAAAAAAATTTGCTTTCCACATTGCACTTTGCACTTTGAAAATACAGCTCATAGATCTCTCACGAACATGTGGCTTGAACAGCTAGCCTCCTGCTACTTAAATAGCTGCATTC  
ACTTGAACCAAAGTCTTCTCATCAACAAGAATCGAGCAAGTCGACTGTCCAACACATGCCTGCCAAACAATACCATAGGCATATCAACATTACAAGTTCCAATTTGGAAGGAGCCAC  
AAGTACCATGAGGGTCTCCAAAAGTGGCAACTTGAAGAGCAGAGATCTTTTGTGGACCTTGGCATGACAATGTCAAGATAATCCCTTCAACTACATTAGCACAAAACAATCCCCACTATAA  
CTGTTTGAAGTTCACCTGACTAGGATCACCACCAGCTTCCTCAAACAAAACCAATGTGTTTGGTTCACCAGCCTTCAAAAATGACCTAGGAACATGATACCATCTTTGTGCTGGTTCGC  
CGCAACCAGTTTGGCAGCTATTAGATTGGAAGGGTCTCTGTAATCACAAAGGACTGCAGCCACCGGACCAGGTAAGATAACTTGGCCAATATCGGCCAATGCTTTGGCCATTAACCC

>comp182858\_c0\_seq1

ATAACATGAACAAATTGATTTATTCTATGAGAAGGTCATATGCATCAAGCTTTTATGTATTATTTTGAAGCATCAACTCAAATATTAGCGAATGTATTGCTAAACAACAAATGAAGGCAAT  
AATGATCTGAATTGCATGAGGTGTACTTCAAGATGACTTAAACAAGCTAAAATTGTTGCAAATATATCCCATGAATCTTCAAAGCCAACTCACTCCTTGAGTTTCAACCAGTAAATCTATTT  
AATCATTCTGTTGGGATTTTATCGTGAATTAGGCCATAGCTTTCACAGAAAATAACAAGGTATTATGAGCGTTGTGAAGCTGAGGAGGTGCATGCATAGTAGATTACCTTCATTTTAAGCATC  
ATTGATGTTTTTGAATCATGAATAATAAACACATCCATCATATCG

>comp183049\_c0\_seq1

CCGACGTCGTGCCAGACGTGTAGTTGAGTGAGATGGCATCCCATTATCTGTAATTACCGGAAGCTCTGCAGTCGGATCTCCCGCCGCGATTAGTTCTTCATATTCTAAGCCTCCGACAGT  
GTTTTTGTGTGTCGTGGTGCCGGCCGGTTCTTCTATGACAACCATGATTGGCAAAGGTTCCGCCTTTTCTTCTCGGAGATGGCGAAGGGCATTGGAAGCGAGAGGGACTAATTGGTGGTC  
GACGAAGAGGAGTTTGGCTTCGGAGTGATGGAGAATTAAGGCAATGTTGGGGGCATCAAGGCGGGTGTGATGGTGTGAGGATAGCTCCCGCCATCGGAACGGCGAAGTGCATCTCAT  
ACATGGCTGGAACGTTTGGAGCAAGGACGGATACTACATCGTTCTTGGAGATGTGGAGAAGGGAGCGGAGGGCGGCGGAGGCGGCGGAACGGATGTGAGTCTGTTCCAGGTGA  
AGTGGGTGCGGTTGTATATAATTGAGGTTGAGTTGAGTATACGGTGGCGGCTCTATGAAGAAAAGTTAGCGGGGTGAGGGCGGCGAAGTTAGCCGGGTCTTTGGCAATGCTTCCATTG  
TTATGAGGAGCACCCAACAGGGAACGGAAAGAA

>comp183071\_c0\_seq1

TGTGACCGCCTAAGGCTTGTCCAGTAGAAAAAGTCTTGCCACAGATTGAGCAATTTATGACTTTCAAATTTCTTGTGATTTTCTAATAGTTTGCATATCGCAATCCTGATTAATCAATTTCT  
CGTTAGCTCCTTTTATCTTAGTGTGGCTTGTGCTGTGGCCGCTCAGAGCTTGATATGAAGGGAAGCTCCTCTCGCAGATTGTGTAGACGTAATTTGTTTCTTTCGAGATTATACATTCCAT  
ATTCACAATCGCATTGCTTTGATGAACCGCCCGAACTGATATCGCCATGATCACAATTTTTCGGAAAGATGAGATTTTTCGCTTTTTGAACTGCTGCTGATCTTCATCTTCAGAAGGAAAA  
AAGTGAGCTTTTTTTCAGCTTTTTTCCACGTCCAATCATGCGAGAAATCTCATCGGGTAAATATGGGATTGAATGAATGCCTCTTGATAACATCAACAGACACAGAGCTCCATTATTATAT  
CGTTCTTGTACTCCGAGGATGAAGCTAATGGAGCAGAGAAAGCAGAGATCTTCATAGCCTTCTGTGATGTCCTCCTCCGCTTCTCGCCGGCATTGAAATTAAGGAACTTCGCTATCAGA  
TTGACTCGACATTTCTCGGCTTGTCTATATAACTTCCCTTCGCTCCATAAATCGTCGTCCTGCTCATCATCTTTGGCATCACAGATGAAGAATTCGCTGAGAAGAAAACCTTCGCTTTCC  
TGGCATGAACCATATGCTTTTCTTCTCCGGACACACATCATCAAATCGTTGCAACTTCTTTGGATTATCTCTAAGGTCATATTTACTGACTGGCTTGTCTTCATCTCCATGGTAGAGCTAG  
GCACAACATGAGTCTCATGTGACCTCCAAGTGATCTCCCGCTGGGAAAGCTCCGCCACATACTTTGCAAATGTGCTTCTCCAT

>comp183200\_c0\_seq1

ATATAAAATATGAAAAAAAAGGAAAAAATCATAAGACAAAACCAATATAAAATGATTAACATATAGATATACTGCAAAAATATGCTCTCCCTCTCAATTGGGGATGACAGGATTACAAAT  
TCATATTTTATAAATATGGGGGAGAATGCTGGAGATGTAGTAGTTATATGATATTAATCGGATAATGACGATCATGATCATAACAATAACAATCAAGTGATAACATCGAGAGATAGCAGTAAC

AGTTGGGCAATACTTGTCTAGTCATTGACAATTCGATGATAGCAATCAAACGATGGAGATAAATGGCAGTAATCTTTAGCGTTGAATATCATATAGAGCTCTAGAGTTCCTCAAATTTTCAAG  
CTCTCTAATCACTCTAGTCAAGCTTTCTTGCATGTGGAGATTGAAGATTTATTTATAATATATAGAGAGCAAGTATT

>comp183289\_c0\_seq1

GGAAAGCATTGGGCCCTGAAAATCTCATAAGATCTTGGGATGTCACCATCTTCTTAGAAGGCCATGAGATCCTCATGGATTCTCATTACATCCATACAAATCAAATCGTGGTTCACATTC  
TTTCTTAGGAATTGTCAAATGCTTTACTATTATAAGCATATCTCTAATGCTTAGTTTGGGAGAGCTTCTTTACTGTTTTTAAAATAGTTTTTTAGTACA

>comp183501\_c0\_seq1

AATCCATTTCACTGTTTTATTCAATGTTATCTGATCACATTAATAATAAAATTTAAATGTAATTTGTAAAAATTATAATTTTTTTTTTAATCTTTTTTAGGTTCAAATTTATATATAAATGATCAATCC  
ATTTTCATCTCAAATAAAATTGCAAGAAAATGAAAAAGCAAGGCAGAAATTCACCAGCAGAACAGAACTAAGTAAACTGCAGAGAATCAGATCAGAGCAACAGAGTAACAGAGCATGT  
ATTTACCAGAGGGTACAGCTGCGCCGCCG

>comp183579\_c0\_seq1

TTTATTGGAAAACAAATATACAACCTTGAATGGATTTGAGGCAAATTTGTGCCATAAGCAGATTTTCTTTAAGTGGCTAAAACAAAGTTTAAAAAGCAAGTAACAATAAAAAGAAAATGTTTC  
TGGTACAGGACCAGCAGTACAAAAAATAGTGTACGAGTACCTGGATAAAAACACCCGTTTTGCAATAGTGCAACTTTTAAAGTACATATTGTTGACTGTCCATAGTCCACGCAGAGTTACA  
ACTCCACACTTTAAACAACAACATGCTGACAGTTCCTAAAGAAAAT

>comp183683\_c0\_seq1

GGAGTCCATTGAGGATGTACATAACAATATCCTCTTGATCAATCTTGGTGCCGGAGGCCGCAATGTTATCCACGATGTTCTTGATTTGAGATAGGTAAGTCTGCATCGTGAGATTGTTCAATT  
GAACATGGTGTAGTTCGTTCTTGAGTTGGATTACTCGAGAGCGACTAGAGGATTGTAGCCGGGGTTCAAGCGTCACCCAGACTTCTTGGGTGGTAGTAGACGTAATGACGTAAGGAAGA  
AGCGTGGGGGAGAAAGTTGAGAATAGAGCGGATATTAGATTGCTGTCTGATTAGACGCTAGCATGCATAATTCGGCAAATGCAGATCAGCTGGAGGAGTTGCTTTGCCGGTGAGGTAATCT  
GCGTACCCATTGGTGGAGAGGTTCTGAAAGATTTGGATTGCGCCGAATTGCGTAGTTATCGGTGGTGAGGGAGTGAGCGATTAGATTCTTGATGTTGGATATGTGAATTTGAGGGACGCCGG  
GATTGTTAGTCATCTGATGGGGCGGCGAGCGTAGTGGTGGAGGGCGGGAGGGATTG

>comp184055\_c0\_seq1

CGGATTGAAGAAATCGCCGCCGATGTGCAGCGACTCGCGATTGATATACGCAGGGAGTTTAAATCTCCTGCGTACGATACCTATGAACCAAGATCATCCCCGTGAGGAGGCCCGAGTAAAT  
CGGCAGATACCACGGAGAAGAAGAGGCGGTGAACACTTTGGAAGACGGCATCAGTTCAACCGGCTGGAAGCTACTGATTGAGAGGAAGAACCCGTTCTGACGCGGGATTTGAATCCAC  
CATACTCTAGCGGCGAGGAGGTGGATGATTTGAAAGTCGCAAATCCACCACGAAATAGGCGAACACCACAAAACCGACAGCAATTTGGGGAGTTCAAGGTAAAAATGGACATTCATT  
TTTTGATGGTCATTTGCATATT

>comp184314\_c0\_seq1

GGATTTGCATTGACATAAGCTTTGATCCACCTCCTAAAACCTTCAAGTGTGAATCATTTTTCCCACTAATGCTTTGGGAATTGATGATAATCAATCTTGAGAATGCGTAGCAGTGGAAATTTG  
ACGTTGGTAGCCAGTTATGCAAAGAAGAGGTTATGTCTAATATCCTAGTTTTAATGTGCTCAAGAGGCTTGTCTATGAAGCTATGTGAACCAGGGCTAACCAAAGAGCTCCTAAATAGCAA  
AAGAAAGTCATATGGGTAAAAAATATATGATTTTACGGTAATGCAAGTATGTTATTATTTGAAGGAGCGTCGTAGTCAATCTGTCTACTTTAGATAAATAACTCAACCCCTTTGATTTAATTC  
AAAAGGATAGTAATAGTAGGATTGCCTCATCTTAGCCCTTGATTTTGTACGAAATACAACATAATTTTTAGCCCTGAAGAGTTTGGAGCTATGATGTTGTGAACCAAGGAGAAGAATCACA  
ATCTAACATTTCAATATGACAACAATCAAACATATGATTAATGTAATTGAAATAGAACACAAAATAAAGTTACAAAAAAACTGCCAAGATTGTAGCACAGCTAGCTATTATACCAAATAAT  
AAGTTCCTAAAATTAATGTATGATCATCTGATGTAGATAACCTACCAGGTATGTTGGAGTAGATAACTAGTGCCCATAGTATATGAGAATGTTGAGTAGCTCTAAACAGTAAACGATTCCA

CAAAAAGATTTCCAATGCAATGTAAAGTCAAATCAATAACTTCTTCTAACAAGGAATTGATATGTCGAAATTTACTAGCACAAAGTGTGCTTTGGTTTATGGTTGAAACAAGAACAAT  
AGTCAAAAGTTAACTAAAACCTATCACTAAAGGTAGTTGAAAATGAAATTAGTAGTCTTTGATTAACGCCCTTCTATAAAATCCATCAGTGGGGATCCTAAGAATGTTACTCCAATGTTCAA  
GTCAACAAGATAACAAATGATATTGAAGTTCTTTCGGAAGAGGATGAAGGTTGACTTCCCTGAGAGAGTGTATGGTTATTGGATTATGGAAATAGTGGCGAAGGATTCTCCAATAAGTTG  
T

>comp184322\_c0\_seq1

GATAGCATTTTTAATGATGCTAATAATAGTTTCCGGAGAATTCCTTTTGTGACAAAGTGGCGATTATTTCTTTCTCTCCATATATGATATACAGTGCAGCAAACCGTAAGACAGCAGAAAGC  
CTTCTCCAATTGATCAGATGCAGCGGGTTATCCAAATATCTAAAACCTGAAGAAAATTTGGTCTAAGTAAGAAAGAATTAAGTCAAGGAATTAGTTTAATAATGACATGAAAGGTAAAG  
TCATAGTAAAAGAAAAGATGGTTGTGATCTTTTCGGGGCTTTGTTGCAAAGGTAGCAATCCGATGTGAACTGGATTGATCTTTGATCAGTAAGTCAAGCAACTTTCAATTTCTGCAAAATGG  
CCATCCAAGTAAGAATAGAATATCTAAGAGAGTAAGATTTATACCACACATACTTGTGCCAGTTAACCTCTTCT

>comp184332\_c0\_seq1

ATGTTTCAAAGTTTCAATGATTAGTGTAGATATGGACAGCACAAAGGACTAAGATTATTTTGTAGTAAAGCTTTCTGAAGTAGCTTATCTATTTATTTTCTTAATTATGGTGTTTCAAGTGGGGTT  
TATTCTATATTATGGGATATTAGATAATTGTGAATTTAGGATTTAGGTCTCGTTTGGGACAGCTTTTTTGTACTTTTCAAAGCAGTTTTTTAGTATAAAATT

>comp184345\_c0\_seq1

TCTTCGGCGCTTCTTCTCTCGCAATGATTTGCCAGTTCACCATGGAGTTAAAAGACAAGTCCAATTTCTGAGTTCAATTTTTGGGCCTGATTCTATCTTCGAGCTCAAGCTGATTTTCTGACT  
GAGTGACTTTTATCAAGGAGCAAGATTCACGCTTCTTCTTTCTGGAGCTGAGTAGAGGAAAAGAGAAAGGCTTGAACTTCCACGCGCGATGTAGCGAAGAGAGGAAAGCTCGAA  
ACTTAAGGGAGAAAGCCGACTGCGAACGTTGG

>comp184400\_c0\_seq1

TATTGTTAGATTAGAGATTTTTGTAAAGGCTATTCTATTTGCATGACTTGATTTTCTATGTTGTTTTGATAATCCAAGTGTGTTAGTGTGTAAGTCTAGCCTAAACGGAAGTGACCGCTTAATAA  
TTTTACTTTGTGGTTTTAGTGGCTAATAACGAGAAATCCAAAGTTGCTCTTTAAATACTTTTTGTGCAAAGTTACTGTTTTGCATTTAGTTCTGCATCACGGCCTCTTTGAAGGGGCCGGAA  
GTGGACCGGTCTAACATAACCCTATTTTCTTCAATATAATGAAATCATTACATCTCCATGGACGTAGGCAATTTGCGCCGAACCATGTAAATTGCTGTGTTTTGATTGTGTTTGTCTAGTT  
GTTTCTGCTATATTATTGCACAACATTTTTTGGGGGATCAATTTGTTCCTTTTGCAACTCCTTTACCTACCTATTTTGTCTCACTGTAAGGTTTTTTTTAAATAATATAACAAATAAGAACATGC  
GAACT

>comp184709\_c0\_seq1

TTCCATAACCCTCTCCAACACTGAAAGCCTGCGAAGACTGCGAAGAAGGAAGCTAACAACCCCAACCCAAACAGGATGCATAAGCTGAAGGACATGAGCAGCGAGGCCAAATATAAGC  
TGAAAGAAAGCACCATAGCAACCCAGGAGACGAAGGAGAAGGCTACTGCTAGAAACAGGCAGGAGAAAAAGATTGCGGAGGAGAGAGCTAAGGCTAAGAAGGCTCAGGCCAAGGCC  
GAGCTCCACCAGGAGAAGGCCAATCACGGGGCTACGTCAGCTGCTCATGCGCGCCACCATGTTTCTCACCAGGCCACCATCACCACCACCATCACCACATGCTGGAAGTCTGCT  
GCTCTACAACCTCATGCGTATACAGGCGGGGCCAG

>comp184889\_c0\_seq1

CATCTTGAGAAGGTGCCAGAGGAAGGCAGAAGAAGCCTCAGATACAACCTATTTCCAGTCAGTACAGGCATACTCGATGCGTCAATGCAGCACAGCTGATGAAGACCACAGAAAATAT  
GAAATATTTCATTTTTTTACATACGGTCTTGCAAACACCTTTCATTCCGACGATGTATTAATAATCTTCTGATGTAAATGTTCTGTCCACTTCTAACTGGTGGAAACATAGAAGAGCAAGA  
CAAGGACCACAAAGACCAAGAGTAAGCTC



>comp184935\_c0\_seq1

AACGAAGCCTCAGCAGATAGTTCTAAATTTTCAATTATTTTCCTTCCCCTCAAGATACTTCTATGGCATTGCTAAATCATAAGCTACAACAAAGTGAAGTCTGACTTCCCCCTTCGGTTTCCAT  
TATACAACATTCAGATAAAACAACCAAAAAAATCATTCTTCTCCTAATTTCCGTTCTTCATTTTTTCAGTAATAAATTTTAGAAAAGCTTGCAAGTTTAATTAATTCAAGAAAAGGGGAAATATA  
TTCTCACCTTGTTCAAAGGGACAACCGGCAG

>comp185586\_c0\_seq1

AATTACAAAGTAATTGAAACCATTAAGATTGTTCTGGGGCAGGACCCCAGACATCTGAATGAATAAAAAATATGCAGGTAGAAGTAGTAGAGCTTTTATTAATTTGAGCTTATGG  
CTCTTGGCCATGTTACAAGAAGTGCAAGAAGGCTGTCCGGAAGTGTCAACCTTGTTGGGGAGGAGCCTGCGAAGGTTAGAAAACAACCTTGATGAGGGTGCCCAAGCCTGTTGTGCCA  
CAGGTTTGCTAAAATCTTGTGTTGCTAGATTGGCTTCCGGTTCGCTCTACGGGAGAGTTCCGGATGGTGAAAGTCCATTATGCAGTCGAACACGAAGAAGAAGGCGATTGTCCTAAAGGTC  
CTTAATCACAAAGCCATTAGCATCAGAAGAGATCGAAACTTGTTGTCATTAGTTAATTTTAAAATAGAGATTAAACTATGCGTGAGGG

>comp185706\_c0\_seq1

CAACGTACGAGTGAAGTATTAGAGAGTCACCTGAGATCGGTAATCCATAATCTGCCGTTCTTTGAGGAATCGGAGAATGCGTTTTAAGGCTTCGAAGTACTATCAAGCGGATTATGCAT  
GGCCTGACTTACTTTGCTTACAGCATAAGAGATATCAGGTCTGGTTAGTGTCAAATACTGCAGAGCACCAACCAGTTGTCGGTATAGCAGCTGATTTGCGCATGGCTTGTCTTCCATTCTG  
GCTGCCGTTGTTTTGAGTTGTGTCGGAGTCGCTACTGGCTTGCAGTTGAGCATTCCCCTCGTTCCAGGATCGTGTTAACGTACCGCTGCTGATTCAAGATAACTCCTGATGAGGTGTA

>comp186926\_c0\_seq1

CACCCTTCGTCTTCGTCGCTCGAGGTATAACAAGTTTGTGAAACACTATGCATTTATTTGTTATTTGGGGGCCATTCCAAGTTAAAGCCGATGTTTCAGACTAGAAAAGTGCATCATATC  
TTCTTAGTTAAACATTTTTCTCATTAATTCATTTTCATGGCGTCTCAGCTTCACATGCCAATGCCGAAGAATCCTCTTCTATCTTCCTCACCGCATGTGGTCCGGTTCATTGTCTCCTAATCT  
CTCGCCACCAAAAATTACAAATCTTATATTTTTTCTTCATCATTCCGGACCCACCATTGTTCTCCTCGACAAGTGTCCAGCGGTAGATTCAGCCTCACAAGTTTCAAGCACTTCTACTAT  
ACTTTATAATAATAGTATCTCATCTAGTAGTGCAGAGAAGGCTGGAAGGAAATGACTCAGAGATTGAGAGACTTAAAGTTGTGATGTTTATGTTGGGTATTGTGGGAGAAAAAACTTTG  
TTAATACGTTTTGTGAATTGGTTGCGGGCAGAGATGGTGATGCATGGCTTTTTATGCTTTGTGTCTTACCGTGCTACATGTTTCAGATGCTAAATCCCATGTAATGGCAAGGATAGCAATGGA  
GGAGGCTCCTCTTGGTGTGGTATTGTCACTAGAAAAGTCTTTTTCTAGCCCTTGGAGTGTGAGGAGCTCAAATTTTGTGTTGGGGAAAAACAAATTGATTCCAATATTTTTTGGATTGAAG  
CAAGGAGATTGCTTTTCTAGGGATATTGTTGAAAAAAGGGAGAAATTTGGGGTAAGTATGGTGGCACACTTTGGAAGAAATATGAAGGGTTGGAAGAAGAGTGGAGCGAGG

>comp187049\_c0\_seq1

GAGCAATGTTAGCACAACAATTGGCTAACTTATTACAATTTCTATCTATAACAATGAAATAAGATTTGATTAAACTCCTTAAGAAAAGAGAAATCAATACCTTTGCCGAGATCCACTTTGAAC  
TCCCATTTATTCACCAAATTAATAATGATAACATTGTAGTTGTTGCGTGCTAGAATATACGTGGCGGTAGAGTTTGTAATTTG

>comp188082\_c0\_seq1

CAAAATTAACAAAAAAGCATAGTTTGGCAATAAATACGTTTTGATAAGTTAAATAAGCTTTTTTATAATGATGTGCAGTGACAAGCAAAATTTTTGCTCTCCAATTTCTGAAAGTTATATG  
AAGTTTAAAACCCAGGGAAAAAAGCATGGCGTGAGTGTCTAAGGATAGACCTACGGTATTCTAGAGCAAAAACCATTAAGCTACTTCTACGGGAAATCGTTTTACACAGATATTGTAT  
GTGGAATGAATACCATTAACTGCTCACCCCTTACATGTTTTTTTTTTAAGC

>comp188135\_c0\_seq1

AACCTTTTATGCTAATATATTCCGACATTTGGGGCCCTGCCCTGTTTCTCCACTAATGGCTTTAGGTAATGTTATTTTCATTGATGATAATACCAGATATACATGGCTTTACTTAATGCACA  
CCAGAAACATTCTCTAAATTCAAACAATTGCATACTCTAATTCTCAACAAATTCATTCTAAAATACTCACACTTCACTCAGACGGCGGAGGAGAATTCAGTCAATATCTTTGAGAAATA

CCTTACAAATCAAGGCATCACACATCAACTGAGCTGTCCACACACCCCCAAAACAAAATGGCACTGTGAGCGCAAACATCACCCTTACTTAAAACCATAAGAGCTCTTATTCATCAAGC  
CAACTTACCTCACCATATGGGACGAGGCCATTTACTTCCAACCTACCTCATCAACTGTTTGCCCTCAAAGAGCATTACAACAACGTACCATATTAGCTATTATATAATCAATCCCCAGC  
ATATTCTCACCTCAAGACCTTTGGCTGCTTATGCTTTCACTGGCTACAACCAACAACCCCATCCAAACTACATCCT

>comp188323\_c0\_seq1

CAACATTTATTTTTTTAAGGTAGGTACTCTGGGAAAGTTGGGTTTGATTCTATGAGTTTCTTATTTCGAGGCTTCTATTGTAAGCTAGCAGCTGCCAGGATGACCAGTAGGTTAGAGT  
AAGGACCTTCATCTTATTAGCACATCCTCTTAGATATCACCTGTAATGATTTAGAATTATCAGATATCTCAATCGTGATGCATGAACAGCTTATCTGGTTTATCAGGCATGGGTGAATATATTT  
GGTCAACAAACTAGCTAATTTATTCTGAAATTCTGAAAACAAGTGCATGCATGGAGGGAATATCAAGCAACTCGTCCCTCAATGGTATAAGAAGTTTGATTCTTCACGACTACCAAAGAA  
ATTATTGGGTTATGTTAATTGGATATTCATAAAAAGTAATTTTGCAAAGAGTTTTTTGAAGGATGCCGTAGCAATAAACTTAATGACTTAGGCTTCATTCGGGACAGCTTTTGCACCTTCTTCT  
TAAAATGGCTTTCTG

>comp188543\_c0\_seq1

TTACATATTAGGGACCTCTTTAAGTAACATACAATTTACCCAATGATCCCAATAAAAAGAAATGGGAGCCTTATACGATACCATGAAGCTGTAATTTGTCTTGGCCATAGTAGCAATTTTCCA  
AAAAAATTCCAAAAAAGAAGACTTAGTGACACGGGCTTCCAAGGGGACACATAGTGTGTAAGCCAAGAAGCTAATGGGCTGCTCCCATGTATAATTTCCAATAAGAGCAC  
AAGTGTAACATAATTGCACTAAATATAAGGAGGGGATCCCAAGACCACAAAGTTTTTCAGCTTACAAGTGTTCATGAAATTATATGTAATTTGCGAGCCACGGTATCCCCAAAGTAAA  
GAAATTTAGCAGAAAGTTTCTCTATTTGCTTAATAATAGTTTTTGGAGAATGGAGCCACGGATCCAGTAAGCTATAGAATTCAAAATAATGAACCTCAAAAATTTAATCTACCGACAAATG  
ATAAAGTCTTAGTTTTCCACCCAGAGAGTTTGTAAGTAACGGTACCCATGAGTTTAAAGAAATATGAAATTTTTGGGTTGTAAGGGGATAAGTGACTTCGAAGGTAAGTAATGAAAGAGG  
TGTGAGGGATATTAAGAAT

>comp188635\_c0\_seq1

AGAAGAAGCCTAGACTTCGTCAATGTATTGCACAATCACAAGGGACTTACAATCAATACATATCTCAAAAATTTTTGGGATATTTAGACTAATTAAAAACAAATTCACACATATCACATATCC  
AAGACTCAAATCTAAGATCTCTTAGTTGATAGTAAAACTCACAATCAATACACTAAAGACAGTTCCGTAGGCTTATCTCAATGAATGAGTATAAGTGCCTTCTTGTAGATTGAATTGTATT  
TCAAATCGAGAGCATTGGTTATACGTTTCGTTAGAACTAAGACCTCTTATTTAATGTACTTTAATATT

>comp188863\_c0\_seq1

AAAAAATAGCCCTAAAAAACTTCTGTAAAGTAACACCAAAAAAATACAGGAAATAAACCTAAGAAATTAGCTACCTTGCCCCAAGCTGCAGCAGAAACAGCCAAAAACAGCAAAAA  
CCATCAGCAAAAAACAGCCTTTTAAACAAAAGGAATAAAAAAGAACAAAAAACTCCACATAATAAGAAGCCTGGACTCAGAATAAATTTGATAATCAGCACACGTGCAATATAAACAGT  
TCCCTGTTGCCGGAAGACCGTCCGAGGGGGCCAGCAGTGGGAGGTTTCATCATCGTCCAAGCCTCTGTGCAAGGCAACAGCTGGCAAAATCGAAGGCAACTGAACCAGATCCAACAGA  
ATAATAAATCTCCATCGGAACCGCATCAGAACAACCTCCAGAATGTCTTCATTTTTTCTCCACTTCAAAGCCTTTTCAAACACAGCTTTCTTGATAGCCATGACAGTAGTGGTATAACAATT  
GAAAGAATTACCAAACCTCCTAAGGTTTCTTTCCTTCCAAATAAAGTAAATAGCACAGCAATTGAAAAGATGGTAAAGTGATTAACATGCGACTTTGCATTAATCTCACCATCAATCCATT  
CTCCAGTTGCAGAATAGAAGGTCTAAGTAGAAACCTCATTTCAGGTGGCATAAGACTAGAGATCACAGCAAAAAGAGTAAGAACAACCTCAAAGAAGAGGTGTGAAA

>comp189107\_c0\_seq1

TCCAACAATGGCTTCCCTCTCCACAGCACGGCAAAAAGTCATCTTTATTCTCGGTTGACTGCAACGGGCAAGTCCAAGCTAGCCATAAACCTCGCCCTTCTGTTCAATGGCGAAGTCAT  
CAACTCTGACAAAATGCAGGTCTACGATGGTCTGCACGTTATAACCAATAAAGTCACTCCCGATGAATGCGCCGGCGTCCCCACCACCTCCTCGGCTTCGTCCACCCGAACGACGACTT  
TACAGCCGAAGACTTCCGTATGGCGGCGATGCGAGGGGTTCGGGGACAT

>comp189167\_c0\_seq1

CCATTTTCTAGAAAATTATAGTAGATATTGTAAGTTTGTAGGATAAAATTTAGTTGGTGTAGATAAAAGACCAGCATCCATCTTCTGATATTTTTAATCAAGTATTGTGTGGCGCACATCAAT  
GAACAACATATGATACCTCTCTTTCTGGTCAGTGTACCTTTCATCATATCTAGAGAATGACTAAGTTGACCATCAACCATCACGTGACTTTAAATGTTCCCTAGTTGAACATCATTGATGCCT  
ACATGTAATTGATTTTGTGACGTTTGTAGCGACCATTATCTGCCACCCATTTTCACGATCTCCTACTCTCACCAATTATCTTGATGACGATGGAGCAAACCCTGCCCATTGCTCAACTTTTG  
AAACTTGTAGTAGATTATTATTAAGCACATACTAATATTAGCATTCGATAGTTGATGCTTACCTTTCCAATCATTTAGTCTCTTCCCCGATTGAGAGAATAATCAACCATACTGCCAATCATT  
GCCCACATTTTGTTCCTATTGATCATCATCACGTGCTTACCAATGACTAATATTTAATGTATGTCATCCATCAGTTCCCTAATAACCATCATTTTAATTATTGATGTCCTTTATATTAAGA  
GAATGATCAAGCATATCATTGATTATCGCTCAACTTTTGTATTTCCCAATCAAACATCTCATATTGCTTGATAACGACGACATCCATAAGCCATTGACATTCAATGCAAGCCTTCCTAGTCACT  
TGCTCGCAAACCAAGCCAATCTCTCATCATTATCTAATAATGACTTTAAAATCTCAAGGTTCCCTCCATTATCTCCCTCTCATAGCTTTTATAATTTGTATCTACTATATCATATTAACCTAA  
TTCTATGGAAGGATGTCATTTTTTAAATCTTAGCTCGCATTAGTAGTCCTTTGAACTTGATTTTCAGATATAAAATTTGTATCTCATTGTGCTGCTCTCAACT

>comp189551\_c0\_seq1

GCATTGTAAATTATCTTTACTGTAATAAAGGTTGGTACTAAACATTTCTTAAAATGGAATGGACGAATGATGGAGCTTAATAAGCCACCTGACAAGTTAGCTCGCATGTGCAGCTTGCTGG  
TTGAGCGAAGTTGTTTCTTCCAATGCGGCTCACGTTGCAACCGCTAACTGCCAAAAGAAAAAAAAAACTTAATTTTGCAAATGAGCAGATTAGTTTAGTCATAGAAAACCTTATCTTTA  
TAAAATTACTTCACTCATGAAGGTGAGAGAACTCTTCTAATAACAAAAGAAAATCTTATATATATATATTGAAAACATTTTTTAACTTGACGGCGAATTAACCTTAAAATCTT

>comp189658\_c0\_seq1

CTCTACCATTTTCCCTCTTTTGTGTTTTTCTAACGTTGCTCCATGGCCACTCTCTTCTCGTCCTCTTTCTCTCCTCACCCTTGCTCATCGGTGTCCAACGAAAACCTCCATGAACGCCGAT  
GAGCACAGCGCCCTCCTTGACCTCGTCGGCTCGCTCCTGGCCGATTCCAGCTGGACCGAGCTCCACCCTCACCCGTGCACAGACTCCTTGCCCCGGCATTCAATGCGAGTCCGACAT  
TTCAGATGCCGACTTGCTCCACGTTACCTCCATACACATCGGCCCTGACCTCCTCTCACCTCCTCCCTGCAAATCCTTTGCTTCCCTCTCCCCAGCCTCCTTCTCCACCTCCCATTCTCA  
AAACCTTCTCT

>comp189788\_c0\_seq1

CCTTTTCTGCTAATCTATTTCTGTGAAAATAATAATTTCAATTTGGTACCATACAGTGACAACACAACACTATCAAACAAAGCTAATCTGACCCTCGACTGACAAAACATTTACCAAATAAGA  
AGAGAAGCACAAAGCTCCTCCTTGAACCATGTAACACAAAACAGTAGGTTGCAAGTGAAAGTCTGCATCTGTGGAGGCTGAGAGCATTGAGGCTTCTGAGGACAAGCAGATAATTGT  
AAAAACACTTCAGAAAGGAGTTTACCTCGATATCCAACACTAGAATGCATATCTCTTATTAATAAAGTCCCTTTCTTCGCCATTGATTCAGTTTATTCAGATGCAAACAACAGTCCCTTATGA  
TTAACATTGATAATCTGAAAAACATCATAAGCATTCTTTGCCCATTTTTTTCTAAAAAACTTGCAAGAAATTAGTATGTCAGATGTCATAAAGTGCATAAAACCCAAAGTGAAAAAAA  
AATCTATTAATAAAGGAGGCAGCAAATAGGGCTGTCAAAACAGGTTGATGGTTTGGTTTCAGGTCGAACCCGAGTTGACTCGAGTATAAACAGGTCAAACCCGAATCCGACCCGGTTTTAC  
AAATGGGTCAGGATTTCTAACCC

>comp189811\_c0\_seq1

GATACTCATGCATGATCCAATCTGACTTTCTACCATTTGGTGCTCGGCCTTCATAGAACAAGAGTCTTCTCATTCCAATTACTTTTGACTTTGAAACTATTTCTTATCTCTTCCAGTTGC  
TTTCCAGAATCCAGAAGCAGTGGCCCTATTTGTGCGAGTTCCACTTGGATACTTCTGTCTTATGACTGAAGAAATACCATTTCATT

>comp190076\_c0\_seq1

CCGTTCAATATAAAGATTAAAGTTTCATGCAAAAACAAAACAAAAAAAATCAGATTTTTATTGCTGCAGAGAACCAAGGATTGATTTGAATGCAAGAGAATCATAATTACATTGCTAAAT  
CTTATTTGCAGCAAAAAAAATATGTTATTGCAACCAAACCTGCTTCATTGATAAAGATCAGTGCACCTTTATCTGCAATTCCTTTTCCCTGAAACATGAAATTGTTACAAATTCGTGCAAAA

AGAAAATTTTCATGAATACAATATGCTTTTCTTTCAAACAAGTTTCAGTCACAGTCAAAAAGCCTTGATCCCCAGATGGTCCAAAAGACAAATAAAGGATCTTCTAATAATTAGCATGAGAA  
AAGTACTTGGAATTGCTACAAAAGGTGTGCTTGAAGGAAGAAAAATACACAGCAAAAAGGAGATCAGTAAGATCCTCGCCATTGCTCCCTTCTCATTCTAACGGTTCTCTACTATTTGA  
AAGTTTCGAAAGAACACGCAATGTA

>comp190114\_c0\_seq1

GCCCTGAGCACAAGATTCCTTACCATCAAAAACAGCTAATTTAACCTCTTCATAAGAAAACCGGGGCAACCAAGGAGTCAAAAAGGTGAGGTGGAACCATCTTGCCAGGGTTGATATTA  
AGGGTTGCCGGTGGAGAAAAAGAGGGATTGTAGAGGTTTTGAAAGTGGGAAACAATGGCTTTAGAAACCTCTGTATGTGAATTAAGTGGCCTTCATCAGTGGTTATTTCTTGATGTGA  
TTCTTATTGCTTCTATGCCTCAACTTAGCGAAAAGGAAACCAAGGTCATCCTCACCTTGAGTGAGCCAGGAAGCTTTGGCTCTTTGTGCAATCCAAGAGGACCAGTGGGATTGCAGGACA  
GCAAGATTTTCATTGATATTTTTAAAGTTGCTGTTTAGAAGAGTATCCAAAGGCTGATTTTGAAGCTCAAGCAAGCAAGAGTGCTGTTTAGCTTTAAGGTCCAAAATGGAGCTAGATAAGA  
AGTTGGAAGAAGCCCAATGCCTGAGTTTAAGAGATCTTTTGAGACATTGCAAACTGTGAGAGAACGCAGCAAGAGGACTTCTAGAAGTTTTAACAGAAAAAGCAGAGTAGACATCATC  
CCAGAAACCTTCCATATTTATCCAATAGTTTTTGAATTTAAATCTAGCAGAAGTAGGTTTAGCATGGCTTGAGATAAAGATTAACGGGGGAATGGTCTGAACCGTACGGAGGTTCAACTTTAT  
AATAAGCCAACGGCAGATGATCCAGTAAAGCAGAATTGACCAATATTCTATCCAATTTTATATGAATCGGGGTGCCACTCGTTGATTGCACCAGGTATAGAACAAGCCAGTAGAGGATAA  
ATCTTGCACACCACATTTGAAAACAAAATTATTGAGCTCCCCAAATCTACTATCCGAAAGACTAGTGCCACCCGCTT

>comp191751\_c0\_seq1

CCCAACCACAATGCACCTCTCCATTATAAAATTAAGGAGTTGTGCTACATCCACAAACATCTCAAGATCTTGCTTTTCTTTATGCACATCCTCTGCTACTACCCGTTGTGGAGAAGACTTCC  
AACTAACAGTTTAGTTAAATATAGTAAAAACATAAATAGAAGCCCATCTTCTGGTGTCAAACAGCTGTATAATCTGAATGTGTAAATCTTTAACAAATCTCCATTCATAGCTCCACCTTGG  
AACATAAAATCGAAAATCGATGACATAGAACCAACAATACATCACTATACTCTTGTAATAATATAGGAAAACAGCACCAACATCCCAGCATTAGAAAATAGCCAAATTTGAGAGAATCATAG  
TTTGAATCTTGTAGCATATTCAGTGTGAAATCGAAGATAAGAAATAATTATTTCAACATATAGAAAATTCATTATTACAATGGCTCGGATTGTAGGAAATCACAATATACGTACCTACAGGTG  
CAATATACGAGACATAACTCAAACCATTAAGCTTTATCCTAATTTTGTAGTAGCAAGCCAACAGCATTAGTGAAGAAACAGAGAATGGAAATGTGCCAGAACCAAGAACAAGAGAGAA  
GGTGCAAACAAAAGAAGTGAATTTCTATCATATCCTCGATACATTGAGATTACAGCTTGTATATAGAGAACAGAAAATCTAAGAGCCAATGAGCTCATGCCACCTAAGCAATAAAAACTAG  
ATACAAATATTTATTTATTTCTGTTTACACTTAACAATTAGCATCGTCCCAAATGTTAATGCATGATTCAAAGTATGACTC

>comp191943\_c0\_seq1

AAGAGACACCTCAAGTCATATCATAAAAGTCTTGTAAGATGACAAAATATCCGGGTAATATCCTAGCCATTTTTAGATAAATTGACCCAAAATCACTTGAATATTAATAGAGCTAGGAGGGA  
ATTTTTGGAGCCCACAAAACCAAAGAGTATAGCATAATTTTTGCACTCAAAAACAGAAAATGAGAATATAGGAGGTTGGTTGAAAAAACCATTAATTTAATCTCACTTTCTACAAAAGAA  
TGAAGTTTTTGGGACTTCAAATTTGCAAATTTTTTCTTCATAAGATTTGGACCTACAAATTT

>comp192160\_c0\_seq1

GAAATCCCCCTATTGATGGGTGCCGGAGCACCGCCGCTTGTCCTGCTATCCACCCTCTCACTATTATCCCTCTTTTGCCTACCCTCTGTTCTATCTCCGCCACCTCCGGCGAAGCCGAGGCC  
TCTCTAATCACCCATATAAATGCCACACCGGAATCCTCCAACCCTCTCCCTATTTCCAAAATCTGTTTTTCCGGCATTCCGGCAGAGACTCCCAAAAACACACATAGATCACCGATCTCTCCGG  
CTTCTTCTTCAGCCAGGTCATAATTTGACTATTCTGTTCTCTTCTCGCTACATCTGATTGTAGAACTGGGCAATCAGGAAAATACGTTTCCCATTCCCTCTGGTAATGCTCGGCATA  
GCCTGGTTCCAAATCTGTAAAATATTGATAACAATACCAGTGGTGAATCGATCTGCTTGTGTTAGCAAGAGCGAAGAAAT

>comp192507\_c0\_seq1

GCCAAAGAACAGAGGCTTTCAGATTAATAGGAGTCCAAGGGGTACCATATTTAGTGTCCAATAAGAGAAGAGAATGGACTTAGAATTATAAAATCTGAATAACAGAGAACAATGGTTGG

CAAATTGAATGGCTTGAAGATCCATTATACCCAACCCACCAAACATTTTGGTTTGAAGTATTCCTCCAAGCAATAAGATGCAATTCCTAGCCTCCACATCACCAAAGAAAAGAAATCT  
AGAACATAACCGGTTTCATATTTTTAATGCAAGATTTAGGTAAAACGGACCCCCTAATCCAATAAGATATAG

>comp194028\_c0\_seq1

GATATACAACAAAGAACTGCACATATGTAAATAAACAATACGATGATACACAAACACCTATGATACCATTACACAATGGTGGGGGAAGAAATGGAGGCCATTGTGGGCAGGGGTGGGTC  
AGCCTCCCCACTTTCTCACATTACATTACAGGAACACAGACACATTTCAGACATCTCTACAAAAAGAGAAGTCTGGGTTCTGAAGTCATAGAGTGGGGGCGTGAACACAACCTTCTTCACT  
CAGTTCCACACAAGCCATCAGTTTCACACTTTAGGAGCATGAGAGATACATTAGGGCCTCAGATCCTGTCTTCTTTCAGTTTGAGTATAGCTCCCTCCATCTCCATCTGAGCGTTTCTTC  
CCAG

>comp194082\_c0\_seq1

AGTGGCAGCGCCACATACAGTCAGCTTGTATGAGGAGTGGCAAGTGCCCTCCTGTGGGAGAACCCTCTCTCTTTTCCAAACATTGTGTGTGGGTCATTGGTTAGTTGTTGGTGATGTCA  
ATATTATCTTGCTAATAGTGAAAAGATGTAGGGGACCTAATCCTATGGTCAAATTTATGGAAGATTTTGCTGAATTTATTCTTGATCATGTGCTTTTGACAAGGGCTTCATTGGTCATCCTTT  
CATATGGGACATTCATTCTCTTTGGCAAGGACGGAAACATTTCTTTTTAATAATAATGGAATTACTTTATTTTCC

>comp194397\_c0\_seq1

TGAAATGAGTTGGTAGTTTCTTGAAGAATTCTGGTGGAAAGCAGGTGTCACAGTAAACTGTTCCGACGATCATTGCAGATGGGGGATGGTTCTGATTAGTGCTGTCATAAGCAGCAGAGAA  
GCAGATGTGGCTCAGAGCAAGGAATGGAATCCAGGAGATCATGTAGTAGAAGCCATTGTTTCGATTGCTCCTCAATCGTGAAGAACAAGGTGAGTTT

>comp194534\_c0\_seq1

TAATTCAGCTCCAGCAGCGTATATTAATTTGCTGCAGTTAAAAGCTCGTAGTCGGATTTCTGGCCGGGGCGGGCGGTCCGCCGTGAGGCGTGCCTGCCCCGTTCCCCTTCTCCCCGTC  
AAACGGGAGTCGTGGGAGATTTTCCCGCCAGTGATTCGGTTGGTCTGCGGTGCTCTTAACTGAGTGCCGTGCGGAGACTGGAACGTTTACTTTGAGAAAATTGAAGTGTCAAAGCA  
GGCCAAAGTGCCGAACAGCTCAGCATGGAATAGTGAAGAGGACCTCGGTTCTATTTCTGTTGGTCTTGAGATCCTGAGGTAATGATCAAGAGGGACTGCCGGGGCATTTCGTATTGCG  
GCGTGAGAGGTGAAATTTGGATCGTCGCAAGACGCCCCGACAGCGAAAGCATTGCCAAGAATGTCTTCA

>comp194603\_c0\_seq1

AAGTCTTCCTCTTTACCATTTCCGGTAGCTTATAAATTCACAAACTTTTTCTCATTTTCACCAAGAAGTTTGAAGCAAAAAGTATCCATTGCAGAAGAAATTTAGCAATGGGGGAGTTTGTA  
AATAAATGCAGTACATGTCTTGAGCTTGGCCACTTGAACCAGATGGCAACTCAGACTGTTTCATGGTGCACAGTTTGTGCTCGAGTTTCCAAGTGTGAAACTTGTGTGGAAATGAACAAA  
AAGGGAAAATGTCGGGAAAAAATAAGGGAGTGGTTTTGGAGAGCGATTATCATAAAAGTGAATAAGTTCATTGTTTCATTAGTCATCAACATGGTTGGA

>comp194936\_c0\_seq1

TTCCATCAGAATTATTAACAAACTCTGCTTCAATAAGAGGTTCTTTGAACAAAATGAATCAAGGATATTTGCTTCAAAGTCTTATCTACAACAGCTATATCATTCTATTTGTCCTGAGAA  
AGTACCGAGGCTATATTCAAACCTGCAAAATTTAGAAATTTGGATATCTATTACCCTGTCACTTTTCCCAACCGCAACCAAATCAGCTTCAACAATTGATTTTTTTGAAAAATTTGAATCAGG  
AATACATCCATCAATAGCCATATTTTCATCATCTGTAGCCATATTAATCAATTTGTTTTGAGATATAGCCATATTTGGTAGAATCCATCTTCACACCAGCAAATTCAGATTCATGAATCTCCAATA  
TCCTTTCTTCAACCAACCCATTAATTTATCATGAGATAATACATTAAGCTTGTAGTAGCTTGAGATTCTGGAAGCTTCATAGAATCCAAATTTTACCAACTTTCCAAATTTTCTTCT

>comp195001\_c0\_seq1

GGTAAGCAAATGGCTCCATGGATCCATAATAAAAAATTTGTAGTCCCTGAAATATAAGTGTCAATCAATCAACATCATGATGCACCAAAGAACAAGTCTGTATTATGCACCTAATTTGGTG  
AAATGTTCCAGCATCTGGCTTGATCATGTGCAGTAAAACCTAAGGTCTTATGTATCCTTATTAGCCCTACTATGAAGCTGCAGGTACGTATTAATAATGGCTAATCTATTACTTGTTCAG

CACTGCGACTCTAGTAAGTCCTGATCCTGCATTCAAAGATGTCAGAACCTCCTTTTAATTTGTATGTATTGAAAGAGATCAATGAGTTCCATTCT

>comp195074\_c0\_seq1

TTTGGGGACATTTCTTTGAAATTTATGTGGACCTCTCCGATTGATATTTGCATTCAACATGATCATTATTGGGATTCTATAAGTATTGTCATTTCAATTAATTGGACCTTGTCAACTCTATTTGCT  
TGCAAATGAAGGATCAGGTCCAGCTCCTAATTTATGGAGTTATTGTATAGACGTTAGAACTGGGGGTATCCATTTAATGCGTGAACCTTCGACCATGCATTTTTTCAG

>comp195219\_c0\_seq1

CCACCTTTGTTCCAGGTTGAATTAGAGTTGTCAAGATACTTGTGGCTTCTCCCCCTCGAGCCCCACCTTGTAGGACCATGTACTGAAAGACAAATCAATTGTATCATTATAATTTCCAATT  
AGTTTGACTGGACCACCAACAATTCCAGCAGGCATCAGCTCATAGTAAGGGCCATAGTTCTTAAGACCAACTGTTGCACTAAGTAGTGCAATGATGTTTGTCTTGGTTCAATATAACAT  
CCTTCTCGAACACAAATGAGAACTTTCCATTGGGGGCATACTCAGAACCTATGAGATCACCATTGACAAAGGCATGGAGAATGTGGCCAGTTGTGCTCACTTGAAGGCTCATTTGTTGAT  
CTTGTGACACATTCACACTTGTATATACCACAAGTAGTCACTAGCATCAACAGAAGCCAATATTTGATCTCTGAGTGTATTTGTAGTGAAATCAGGCTCCAATCCTTGAACAGCTTTGCTT  
AAATCCTCTGGTTTCCATGACCAGATAAGGCTTGTGGTTCTGCTTACGCTGATTTGGCTTCTTCCATGATAGAGGTCTGCGCATTGACCTTGGCAGTATTGTAAACTTCTTGCTTACA  
ATCAGGAAGAATACTAACGGACCAAGCTGGTAAAAAGTACTTAGTTCCTTCAAATCTAAGGTGGCTTCGTCGGTTTTGTTCTTGTGTTGCAAGAAGCAGCCAGGCACAACGCCAATACC  
AAAGAATTTTGTCACTGATAAGCCATTTTCAAGCTCAGTTGTTTCTGCGTTTCCATAAGTCAGTGCCTTCTCCATCTTCTTAATAACAGCATGAAGGTTCTTCAAATGCCCCCACTTCGGCT  
GTCGTATATTTCCATATTCATCAAGAGGAGCATCATAATCATACGTTGTTGTGATATATGGAC

>comp195787\_c0\_seq1

TGGAATAGTGGGAGAGGCATGGGAATGAACCACAGATGTTGGGGTGAGAGTGAACGGAGAGTGTTCGAGGATTCAGAGTTGCGCAGGATATCTTGAGTGGCAAAGGGAAAGATCTGT  
TCATGGAATTTGACGTTGCGAGATATGGTGATTTTGTTCGTGTGTCTATTAAGGCATTTATAGCCTTTATACGTATCGGAATAACCGATGAAGATGTGAGGCAGAGCCTTGGGTTGCAGCTT  
GTTGACGAGCGTGATGCGGCATGAGCGGAAAGCATTACACCCGAAAATTTAAGGTGACCATAATCCGGTTTTTGCTTG

>comp195918\_c0\_seq1

AATGGGCCTTGAGGACACAGGCCCAACTAGCTCATCAGCCCAATCTTTTGATAGAATAAGTTCAATTAATAAATCTAACTTTTTTTGGAAGACTCATATTAGGGGTGTCAAAGCACATCTT  
CGAGTCAGGTTTGGGTCAAATTTGAAATTGACAAGCTCTTAACACATCTGACTCGAACTTGATTTGCTTGTCCAAACAGATTAATAATATAGAAACGAGCCTGACCCGACACCTACCCAA  
CCCGTTAAACCCGTTGAGTGCGAAAGGGCGAGGGTGAGTGCGAGCAGCAGAGTACTAGCGAGTGCCATTAACGCTGGCAATGAGTGCAACTAGTGTGAGCATTGGTGAGATGCAATT  
GAGTGAGTGTGTTGAGTCAAATGGGATGAACAAGTGAGAACGTGATGGACGGATCAAACGGATTCCATTCAGGTTTCATAGGTTAACGAGATATGCTTTACATTTTACAGTTTTAACGATCAT  
ATATTTAATTTTTATATTAATAAATCTTCTTTTTTTCTTTTTTAATCACCAATGTTGTTCCAAAGTCGAACGAAAAATATTGTAATCAGTATTTTAAAATCGTCAATTTGTACCCCCACACAAA  
AAGATTTCTAGCTCCACTCCCCTGATGAAAGGGAGAGCTGAAGGCCATTCCATGATTCCATCACTTTATCTCTCAAAGACCAACATTATATGAAACATTATAAGATTTACTTCAATTTTGCTT  
TGGGACTGATATATTATGGCTTCTTCTTTTTTACCAAAGATGATGCTTTTGATCACATGGCCCCATTCAACCATACAAACCAAAGAAGCTTGAATTTGGTGGCAATTAATGAGGAGAACTT  
TAAATAGATAATGCCACATAATGCTTTAATCTTGCTTTTAGGATAGAGAGCTTTAATTTAAAGTATGGCATAGATTGAAATAAAAGGAGCTGATTTGAGATGGAAA

>comp195985\_c0\_seq1

TGCCGTGACGGTCTATACCCGCTCACGGTACCGGTTGGCTCTGCTCCATATAACCGCTTTGCAGACGGTTATCAAGAAAGCTATACCTTGGCATCAAAGATTGGGTCACCCAAATCATAGGA  
TTCTTGCTTCTCTTGCTGCTTGTAACAAATTTCTGAAAATTGATAAAACGTTTCATTCTGTCACTTCTGTAATAAGTCTAAAACTCATAAACTCAAATATGAGAATTCCTCAATACGACACA  
GTTTTCCACTCGCTTTAGTTCCTGATGTTTGGGGTTCCTCGCCGATCCCTTCTTCTAGTGGTTTTTGTATTACGTTATTTTTATTGATGATTACTCTCGTTTCTCCTGGTTTTATCCTATGC  
GAACAAAATCGGAAGTTTTTGATATTTTTGCTGCGTTAAACTTCAAGTTGAAAATGCTCTTTCGATGAAAATT

>comp196742\_c0\_seq1

AAAAATAAAACCTAATAAGATAATTCAAATAAAAAAATTGTGTCATGAATAGAAATAAGCTTAAAATTTATGAAAATAGGCCCGGTTCAAATTTGTTATAGATTGATTTGATTTCTTCTAAC  
TAGATTATGGACAGTTGAGCTTTTGTGGATTGTTTGGCATGTTTGAAGGCTTCTTATTGCATAAATTTAATGGCCCTTGCCATGTCAAGTGACATAATTGATATCTTACATAACAAAATGG  
TACAATCCAACCTTGATTGTACA

>comp197043\_c0\_seq1

TGTGTTAAGTTTAAATGTCTTTAATTTTTTATAAAAGAGCACATATTATGGATGAGATTATAGCCTAATAAAATTGTGACAAGTTGTTTGAATAAGAAGTATCTTACAAATATTATCCCTCAA  
GAGACGCTACTGGATTAAGAAAATATTATAAAATGGTGACTAGGCCAGCTGTGGTCTGGATTGGACTGATAGGACTTGGCATTAAATAAATAGACAAGTCAAGTCAACTAATCAAAAAGAAGA  
ATTTTAAGATAGATATGTGATAGAAATGGAAATGATAGTTGAGAAATGATTAATAAAATCATGAAAATAGCATTTATTAAGGAAAATATAATGAAAAATAAGTTTAGATGGTTCAAAACAATTA  
TTGAAGATAAATAAAAAAATTAGTAGACATGGGTGAGGCTTCGTTTGGGACTACTTTCTT

>comp197203\_c0\_seq1

GAAAGCCATTTTAAAAAATAGTTGAAAGCTGTCCCAAACAAAGGCTTCATTTGGGACACCTTTTTTGCTGCTTTCTAAATCGGCTTTCTAATACAAAGATTTCTAATTCACAAAATTTTTA  
TACTAAAAGATGTTTTAGAAAGCAGCAAAAAAATTATCACAAACAAAGCCAAAGTCTAAATTTTATGGCAAATGGCTTTTAGTTCTATTAGCCGGCTTTTGCAGCTTTTCGTGGCTTCTTC  
ATTTGACAAGTTGA

>comp197461\_c0\_seq1

AAAGTTCACGCAGCTTCGCGACACGGGCGTTGCAGGAAGGAAGTTCGAGCAACAATAAATCGCATTAATCCACCGAAGCATGGGATAAGGATTTACCTGGATTTATCGGAATTCATGCC  
GTAAATCCATAAATCCCATATTTACGAATTCGCGGGATCTACATTGCGTGGAATATGTTTGGCTGGATTCACGTTAAATCCTACTTAAAACTTATGCCAAATCCGATACCAAAAAACCCATA  
AAACCAATCTAAAACTTTAAAACACATTACGATAAAAAAATAATTCCTCAAATTTGATCAATTTAAATACCCAAAATTTTGTGTTTGGAGCAGCCATTTATGTTAGGATATTGATATCTTACCA  
TACGGGACCGGGAAACGACGTA

>comp197542\_c0\_seq1

TCCCATTTGATTGGGTATTTCAAAGTTTGTAGCTTATTTATGTAGTCTGTTTATGAAATGGACGACGATTTGATGACTTTGATTGTGATTGAAGCGTTTTAATTTAGATTTGCATGACGCCA  
AGTCGGTTGTATGCCGTTTTTATTGTACTGGACCAAATCGGTTGCTGGGGTCTTTCTTGGTAATCCAGTGCTCTTGACGGATGGGAGCTATCTATTTTATGAAATGACGTAATACTTACTTATGTA  
TTTTTTGCTTTAGTCGATATGTTTTGAACAAGATTGGCGTGAAATTCATTTATTGTCCACTGTATCTGGCGTTGTCATCTAATTTGATCGGTTTGGGTTGC

>comp198170\_c0\_seq1

ACACCTGGAACCTCGTTAAGGTTAACACATGCAATCCCTTCTATATTCGCTCCTGTTTGCATTTGGAATTCGTTGCTGATTTGAGATGTGTGGCTGCTTTGACATGCTTAGCATTTTATCTTT  
CTTCTGCCCCAAGAGTATTTCTGAGGATGATCAAGCATGCTAATTTAAGGAGAATTTACATACATTCCACAAAATTTCTACTATATTTCTATCGAACAATAAATCTTCGAATGGGCAA  
CACCTAATTTGTTATTTTCAG

>comp199524\_c0\_seq1

GCGCCATGGAGTCGATAACTTGATATCAAATATGAGTGGTAGTATTAGATCAGACACATAAAGAGCCACACAAACAAACATGACGTGGCATTACTCTACCGCTGTATCCCTATTTGTAACATA  
GCGCTCTCTGTATATAAGTAGGTCCTGTGTACTAAATCAAATATAGAAAAAGAGTTTTCAATCCATCTCTTCTGTGTTCTTCTTATGCGTTTCTTTATGGTATCCAGAGCAGGTGGC  
CAAACCGCTGAAATGGCGAACTCGGCTTCGTCGGAACCTCAATGAAGGCATGGAGAATACGCATCAAGAAGAGCCTACCATCTCTGCCAGCCTGAAATTTGTGGTGTCCAACATCAAGA  
ACATCGTTTCAACAGAGCTCAATCAAGATAACTATGCGGTATGGCGATCGCAGATCCTCAAACCTTCCGAGCGAATGGATTTCGATAAGTTTCTTGAATCCTTCTCGCCCTCTTTGCCTCCT

TCTCTTCCCCATTCAACTGGTTCCTCTCAAACAACCTCGTAAGCTCAAACCTATCTCAAATCTTCCATTACCTCAATTACGGTTTAATTTACTGTCAATTTCTAAACTAACGAGAGACAATGAT  
ATCTCGATTACTTTTAAACCCTGCTGGTTTTGTCTTTAAGGATCTGAAAACGCAGCAAATCCTCCTTCAAGGACCATGTAACAATGGGCTATATCCAATCCAAACGGCTG

>comp199899\_c0\_seq1

CCGCTTTGCGCCCTCAGCATTTTCAGGAGAATGCAAATGACTACAACCTAAATGGCACAGTTTCATTCTACTTGAGGAGTTTTGCTTCATTCTACTAAAAAAATTTATGATCAGCTCACGT  
TACATTAGTAACTGACGTCTTCACTACTATCTTTAAATATAAATCAAACCATCTACGAGATAGATAAGGATACTAAAGATGACCCTTTTAAGTTTCGAGAGATGGTTCCCATCATATAGCATTTT  
GTCTCAACAGATTCAGGTGATGACTATCATGACACAACACTTTAGCATGTAACACTTATTTTCCATATTTTGATTGATGGGTTGGTTTGATTTTCATTTGTAAGCTTCTCTTAGGTTTCATTT  
GAGACAACCTTTTTCACT

>comp200257\_c0\_seq1

CAATCCGAGTCCAAACGAGTCCAAATCAAAGACACAAAATGCAATCTGAAGGTTTAGAGCATAATTTGAATTATCAAACAATTTCCAAACGTGACATGCCTATAGTCAAATCTAGCGGCT  
CTACTAGATGAATCAAACGAGCCCAAGATCACTTGATTTTGACATTGTTAAGACATTCAAATATTTATAAATGATTTACAATCAACGGGACTGATATGAACCATGCAATGAAGTGC GTTAA  
ATTCTGACCCAATTTATCAAATATCAATCCCTAAAAGGCAATAGATAAATCATCTTCTTTAGAAAGGATGGTGGAAATAGCCGAGAGAAATAACGAACTATTTTGATTTTATGACTGCC  
ATCATCGACAATCACCTCAGGTCCTCAACAATGGCCACCAACCATGGGCTTCTTTCAACATCTAACCTATTTTGGATATTAATTGTCCGCATGTGAGCATTTTGATTTTGAAATTCCTGCA  
AACCGAATCAATGAATTGTTCTCAATTGT

>comp200344\_c0\_seq1

ATATTGGAGATTCATGAATCTGAATTTGCTGGTGTGAAGATGGATTCTACCAATATGGCTATATCTCAAACAAATTGAGTAATATGGCTACAGATGATGAAAATATGGCTATTGATGGATGT  
ATTCTGATTCAAATTTTCAAAAAATCAATTGTTGAAGCTGATTTGGTTGCGGTTGGGAAAAGTGACAGGGTAATAGATATCCAAAATTCTAATTTTGCAGGTTTGAATATAGCCTCGGT  
ACTTTCTCAGGACAAATAGAATGATATAGCTGTTGTAGATAAGACTTTTGAAGCAAATATCCTTGATTCATTTTTGTTCAAAGAACCTCTTATTGAAGCAGAGTTTGTAAATAATTCTGATGG  
AAAAAATTTGAGCAATTATAAACTGGAAATTAACATATCTCGAACTACCATGGATGAGTTGGAGCCTACTGTGTCATGCCCTGATGTTGTTATGGCAGAATTTGATCAGAAAAGAATAAAA  
AATTGTTGTGGAATGGGATCTCAGGAATTGGTTTTTTCTCCCAAGCATGTGGTTTCTAAGATAAGTTCAAATCTTCTTGTCTTATTGATAACCATAAAGAGGTAGGGTTGGGTAGTGTTAA  
ACAAAAAAGCACTAAACAACCTTAAATTCTTAGGACCTATTGAAGACTATCCTAGGAAAAGGAAAATTGATTTGAAGCCTTTTAAGGGTGACACTTTCAATATTGTCTC

>comp201028\_c0\_seq1

GTTATTAGGGATATCCAAGATGCCAGTGTGTATGATGTATACGCTCTACCAAAACTTTACGCAAAGTTACTACTGCGTAAGCTGTGCCATTCACTCCAAGGTTGTGCGTAACCGTTCTAA  
GGAAGCTCGTAAGGACCGTACCCCTCCGCTCGTTTCAGGCCAGGCATGCAGTCTCAACAACAGAGGCAAGGACAGAGCGGCCCTGGTGGGGGTGGTGGTGGCGGTAACACTGGC

>comp201667\_c0\_seq1

CTCTATGTGGTATTGATCATAAAAATATAAATTTCAAATCATGTGAAATGTATTTCTCAAAGATCTTTCTATGGATTAGAATCATTTGGACTCCAATCCAAGGCCATAATATTAGGTTTGGGA  
TGTTTGGATTGGGTTTAGGGTCATTCTATAGTTTGGGTAAATTTGGGTTAGACATGGTTACTGGGATTGTACTATATATCCGACATGAGTCAAAAATATTCATAATAATAATTAAGTTTAGACT  
ATAGTTGTAAGTCATAATGACACTTTTTATTTTCTATTCTATTTGGATTAAGAGTTAAGAAATATTCTTGAATCTATAGGGTGAGTAAAAGAATGAGTCAAAAAGTTCTAGGATGAATCTT  
AATGTCAAAAATTACCTAGGGAAGGTCATAGGATTTGGGTTATTTATGTAGTTTTGAGTACATTTGGGTTTGGTCTAGAGCTTTTGGGTTATTTACGTAGTATTGAGTCCATTTTGGTTTGGT  
CTAGAGCTTAGTTAAGGTTGACTTAGTGGAGTTCAATAATTATCTATTGTAACCTACGGAGTTTCTTAAAGGATTGATAGGGGTTTCTTGGGTTAATCAATGGTTTTAATTAGATGATAGGTAGT  
ATAATAAGGCCCATGGTGTATCACCTATGGACAAACTTAGTTTTTGGGTTTTTGAATAATCCATCCCTTAGATAATGAGATTTTGAATGGTTAATA

>comp201730\_c0\_seq1



CTTCTTCTTCTTCGTCTGGCTCAAAGATGGCTTTGAAGGTAGTGGGAGATGCTAAACTTGTGGGTGAGGATTCGGAGAGGTTTGGTTCTAAATTCATGGATTCTGCTGGAATTAAGTTGAA  
GATGATCCATGTCTCGAAAAATGATAAGAGAGATTTTAATCATGCTAATCTATTGATACTTCAAACCGTGAAGATGTTTCGCTCAGTCCAATCGGTGGTTGATATTGAGAAGATCCTTATTG  
TGAAGAAGGAGATATGGGTGAATGCAATAAAGATGACAATCGACCAGCTGTTCCCAAACAATTGTCTAGCAATGTGTTGCAAAATGCTTGGAGTAAGAAGTCGAATATCAATGTCAG

>comp202092\_c0\_seq1

CGGTTTACAGGATGCATCCTCTCCCCTAATGGAAGAGCTAATCTATTTTCATGATTACACGTTAATTATACTAACTTTAATAATTAATTTTGGTATTTTATGGACTTATATCTTGTACTTCGTCTC  
TTACCAAACGATTTTTTCTGGAAGGGCAAGAAGTAGAGACCATATGGACAATAGTGCCAGCGTTTATACTAATATTTATTGCCTTTCCCTCTCTTCAACTACTCTACTTGATGGACGAAGTC  
AAAAATCCCTTCCTAACAATTAAGGCGATAGGACATCAATGATACTGAAGATATGAA

>comp202276\_c0\_seq1

ACCACGAAGCTCTCCAATAAGGAAGTTGTACACAACCCCTCATCGTAAAGCTTTCATAAAACAAACGTCGTATGAAAGCCTTTAAAACAAAGACACTAAATACAAATCGACTTAAAAAG  
AAAGCTCTGACCATAAACTGTTCCAAAACAAGATTAAGAAATCTCCGATATAAACTAACCATTTCATACTCGAACAACCATTTTTAATGGATAGAATTGCCATAAGACAAGGATAGAGC  
ACGAATTTACAAGAATACCAACTCAACTTTAGAATTCATGAAAGCTTTTAACTCTCTTAACTACTATTATGCAAAAGGGTTATGAGTAGTTAC

>comp202787\_c0\_seq1

TGATTGTGTAAGGGCCTATGAGATTGGGAAGAAGAGGTTGAAAACCTTACTAGACACACTTAGCAGAGTTAGTTTTACCATTGATTTATGGAAGTCTGGTCAGGACATTCATTACATAATC  
CCATTTTATTGATATTGATTGGAACTTCAGAAAAGAGTGCCTAGTTTTGTTGATTTTCCCCACCCCAAGGCTACAAACATGCATAACGCTTATATAAATGTTTGAAGGATAAGGTA  
TTGAGAACAAGGTTGCTACCATTACTATAGGCAATACAACATATAATACATCTGCAGTTAACATGTTGAGAAGTATTGAGTTTCACAAAAAGCTTCTCTTGGAGAAGGAATA

>comp203281\_c0\_seq1

CGCATTCATGTCACCACCTTTGACGACGTTCCCTTCTTGTGTCATCCAAAGTCTCCACCTTCGACGACGTTCCCTTCTTGTGCAACAGAAGTCACACCTCTCGCCGCTCTTCTCTCGCATCC  
AAAGTCACACCTCCTTCGCAACGACGGGAGCTTGGTCTTGTGAAGGTATCCATCCTTCTTCCATTTGCACACTTCATCCAAATCTTTCAATTGATCGGCCGAACCTCCCTCCCTGCAGCCGA  
GCTTTGTTGCA

>comp204930\_c0\_seq1

CAAAATGCCCACTTGTCTCATTTACAATAATACAATATGTCACAGTTTCTATGTACAATATTATAAAAAAGGTTGCACAGTACAAGTTAAGGCGTTATTTTTACAAGGCATCAAGCCTCGAT  
CCTCTAGTGTAGACCCGGTGGGGCCGGGGGAAGACGACGCTTAATTATTGCACCATTTTAAAACAAAACCTCGTCAAGGAGGATCGTGGTCTTCTCCACCGGGCCTCAGTCTCTGCTG  
GGGTTCGGGCATCGTGGAGGGGGGGCGGTGCGGGGAGGAGCACCCCTCGGTGGCCACGCTGTGCCCGGCC

>comp20562\_c0\_seq1

TTCAAATCAAAATATTAATAAAAAATAAAGTTTAAAGAACTGCAATTGAATTATAATCAAATAATATGAAGCCCGTTGACTGTCACAATGCGGTGATTGGTGGTGCAAACGTGGGTGCGAC  
AAACACCTCTCGTTCAAATAAAAAATCTTTCTATGAAATCTATGCTAGACGTTACTGTTCTTTGAAATAAATAAATAAATAATAGTAAATATTTCTTAAATATATATGATTTTTCAAGAAAA  
GATTTGTGTCAGAGTTTGTCTCACACAACCTCTCCTTGGCCTATT

>comp206292\_c0\_seq1

TAATACTAGGTAGGGGATGGCGGGGTTAGCGATGATTTGGTGGTAGATAGTTGCATTAATTGGCTAAATGGATGCTTCAAGTTCTTATATGTAGATCATGCCCGTCCACACTTATGCACTATG  
CCTTAATCATGTATGCGTATGTTCTGATTATGAAGTTGCAAAGGTCTGTAACCATAGCATTTAAAGTTGCTAATCAATAAGTTCTCATCGTGTACTTTTTAAACTGTCTCTTCTTACAATTTG  
ATTTTAATTTTTTGGCCCTTCGCTGTCTATAATTATGTTAACTACTGGTGTCACTCTGCAGTCATTGATT

>comp207370\_c0\_seq1

AGCACCAATGGTCCCAGAGAATGAAAATCGGGCTATTCAAATTAATATTAGACTTAAAGTTTGTGTTTACTAGAGAAGCAGTGTGCAAATAGACTTTCAAAGGCAGTATTATGGTGATG  
ACATCTTTCCAGGGAGAACTTTATTATACTCCAAGACTTTTACTTTGACGTACTTCAGAATAATTATTTGCAGGAAAATAAATTAATTCATGTCCATGTGAAAGTGTGTTGATTATATCTAAAT  
GAAGATGCAAAGTATGTATTTAAAGATGTCATGAAGGCTTGATTCATCTTATCATAAATACATATTT

>comp207730\_c0\_seq1

GCTTTCTAGTACAAAAATTTATTTAATTTGAAAATTTTGAACATAAAAAGTCATTTTAAAAAACAGTACGAAAGCTATCTCAAATGAAACCTTCATAGGGCAAAGAAAGGTTTAGGCTTCAA  
TTGTTATGATGCACCAATCTCCAATGAAATGTGTTTCTATTCTGTCCTAATTTAGAAGCCAAACCATATTATTGCATGCAATCATTTCCGTCGATTAATTAATATCTCATATTCTACACTGAA  
ATTCAGTTTTGTTTGCATAATTAAGCCTTTACCAGCAAAGAAAGAGATTTGATATAAATGATTTGGCTGTTTCTTATATGGAAGATCATAAAAAAGGAAGTTTAATATCTTAAAGATGTGG  
AAAAGTTGGCTTGTTATTTAATTATATGTAACCATGTGATCGTTCTCTTTTAGATGACAGTTGTGGTAGCCATATCTTTTCTATATTGCTCACCTAATTTAGCAACTTTTCATCAATCGTTAT  
TTCTTTCTTTTAGGTCATGATCTTCTTTTCAGTATCTTGATGCGACGTTTA

>comp209081\_c0\_seq1

GTGCTGCGAGAGCTCTATATCCGGACTCGGTAGAGGAACGAGCGACAGTGGTCTGTTTCTTGACAGTCCACGAGATAAGCGTGTGCGCAAGAAATGAGCAGAATCCGGTTGTAGATTTG  
CGTGACGTTGGGTCTCCCGCCAATCCGCATCTGAATAAGAGGTAAGACGGAGATTAGATTTGGTTATAGGAATTCAAAAGTCTAACGTACCTTTGATGTAGCGAAGTAGACGTTTGAGCA  
TGTAGGCGTGCTTTGGCTGGGGATCATGCATGTGTTGAGAGAGTTGATTGACACTGAACGCAATATCTGGACGGGTTATTGTAAGATATTGTAGCGAGCCCCTAAGTCTTTTGTACAGAGT  
TGCGTCCCTGGAGTGAGGAGACGGTGGCACTTCATTTGGCCATTTGGTACAGGATGGGTTGGCCAACGGATTGCAGTGGAAGAGATCTGCCTGATGCAGTATTTTCTCCGCATAGCGTTG  
CTGGGACAGGAAAATGTTGTTTCGCCTCCCGTTGGATTTTGATACCGAGAAAATTCAGTTGCAGCACCTAGGTCTTTCATGGAGAATTCCTGTTTAAAGTTTATCAATGATGTCATTGATGGCAT  
TCTTATCATTGCCGGTGATAAGTATGTCATCAACATATAACCAGGAGATAGACGGTAGCTTTGTTTTTGTGATATATG

>comp209106\_c0\_seq1

TGCGATGTAATTTTACCAGTTCAATCGCTCGAAATATCAAAATTTCTCTCAAATAAAAAGCATCTTAGAACATTGTAGGTATTGATGATGATGTTACCCAATCATCCACCATATTCATTGAGGC  
ATTAACAACAACACTTACCCTAAGTACAATAAATGTTGCCTAAGGTATTAGGTATAAAGATCTATTTTCTCCACTTTCTAGTCTTGACAAAGCTTTGTTTAAAGCTGCTTTCTAAAAAAAAG  
CTACTTCCAAGATGATATCTTTTAAAGAAAGAAACATGATCTGATCAACATGCAACATTATGGGATGCTCAAGAAAAAAAAAATACTAGTTAGACGTTAGAAGAATTTCTTCTCTGAGGTG  
TTTTTGTGTATAAGATCATCTTCAATTGAACTACAACCACACGTATGTGTCGCCCAATTGCTTCAACCGAACACCAAGCACAACTCTATATTCCCGCTGAATAAGGAGTTCAAACTTGT

>comp209239\_c0\_seq1

GGGGAGATATTATTGTTGGTGGATATGGGACTAGTGTCTAAAACAGGGTCATGAACTTTCCCATTAATAACGGAGGGAACGTCTGCTTGAGGGGGTTCGACGATGGGGGATGATGAAGCA  
ATTTCAACATCCACAGGGGAGCAGTCAGATGGGAGATTGAGATTGGGGATAGATTCCGGAGGAGGGGGAATGTGGTTGACCGCAACTAACATTGCTTCATTTGGATGTGACTGTCATTA  
AGCATCGTAGTCTTAGGAGGAGCCTGTATTGGAGGGGGAGGGGGAAGAATAGCAGGGGAAGTGGAAACAGGGAGCGGGCCCTACCTCGAGTTCTGCTTTTGCTTCTAGCTCGGATATG  
GTCCGAGCTGGGAGGTTTAGGTTGAGGATTTTTGGGGCACAAATTGGGAGGGTGAACAAGCGAGCCACATCCCGAACAAAGGGGTCGGTTTCCAGTCATAGATTACTCTGAGGTTGAC

>comp209722\_c0\_seq1

GATCTCAATTAAGCAAGAAATTTCTAATTTCAAATGTCCCCTTTTTTTTTCATACCCGTTCTACATCAAGACTACATCATTATACCAAGCAAAAACAGTTTAAAATGGTAATAGCCTCATACT  
TCTGTATGATATTTGAAGTAACAATTTCAAAAAACATCAAACATAAAAATATTCCTACGATAACTAAAGCTGTAAAGTAGAACAGTAATAGTCAACTATTTCAA

>comp210735\_c0\_seq1

AAGGTGTTGAGGAAGATGAGAATGGCGCATGATGCTATGCCGAGAAACCATGCCCTGAAAGTCATGACCGGCATCGCCGGATCGTCGGTCTCCGGCACGACGAGCGCCACCTCTTCTAC  
GACTGATCTCTGCATTTTCTCCATTCCTCGTTTCCTTTCTGCTCCCTCTTTTTCTGTTTCGTTGAAACAGAGGAGGCAGCGATGGAGGATTTTATAGTAGCCTTTGGAGAAGGAAG  
GGTATGTTGAATGACGGAGATGGGTAGGGTCCGTTAATGGTGGATAGAAAAGCTGTCGGGAAGGTGGAGGGTGGTTTGGTAATTCGTTGGAGCGAATGGGTTGGGGAAGGAAGCGCTG  
CGGCCGCGTTGTGGCGGGCACGGGTACGTCGCCGGCGGCATGCAGGGAAGCTGTGGCGAAAAGGTCGGGCTT

>comp210794\_c0\_seq1

GGCCAATATTCATGCATTATTAACATACTACCTATAACAATAAGCCTGTTCTAATATATCCTCACACCCCATGCTTTGTGCATAGGATGTGAGTGCGCCACGTATGATATCCCCATCAGCAGACA  
CATCATGTAGGTCCCCGGCACCCAGGCTCACTACATAAGTGAATTCTGCATCACTTGGGATACGTATACTATTTATTCTTAGGGGCATGCCCTCACAGCACCAGGCTTGTGTAAAATGTACT  
ATTATTGATGCATAATCTTGTGCGACTCGGATATGTACACCATATTGCACAAGATTTTGCATTACTATGTACAGCTTCTATAGTTTCTGGAACATAATTATCCATGAAAACCTATTTTTATCATT  
TTTAATAGTATTTTTCCGGTGGATGACATGTCAGCACCCAACGAAAGCAGTACACCCCTCACCAATCTAGTGAGATGGTTCTGCCATTGTTTGCCAATTCATGACATCACTTATTGCTCT  
CCTCTGATTGGGAGACAATCCTTCCCGTGATTTAGGGAATTC

>comp211110\_c0\_seq1

TACATCTTCATTAATTTATGCCTTACACCATCAGTTAATTACCCCATAAAAATTTAATTCGGTGTATTATATACTTTTTAAGACAAAGTAGAGAAGCTGGCCTGGAGCTGATGAAGATTA  
TTTTCCATACAGATACTTCTCTACCAAATTCAGTAATTTCTTGTATGAGTGCCTTTCTTTACTTCAACCAAATCTAGATGGATAATTTGTATGTAGTTTAGTCTGATATTGTCATATTC  
ACGTTTTACACCTTGATTTTACTTCACAAAACAGTTTCCAGCTTCTGAAGATATACTGTTATTTTTTAAAGCTTTTGCTAATGCTCATGTTATTTTTTTGTTATTTATATATCTATTTAGGGT  
TGTTTGGACAACCTTATTATTGTTTTTTAAAGCAATTTTT

>comp211232\_c0\_seq1

TTCTGAAATCTGGCTTGGATCTGAAATGAAAGGGTATTTTCAAAGGTAGAGTTGAGAATTTACCAATTTTCTGTTCTTTTTGTATGATGCACGGTCATGCTGTTAATGATTGTTTTAGGA  
AATTTCTAATTTGCGAAATGAAAGGAATACGTTAAAGCAGTCCAAAGAAATTTAGAACTGCTATAGATAATGTTAATCCTTCGGAGTCTACTATTAATGGGCAGGATGTTTCATTTGGGT  
ATTCCGTTGGAACCCGAGGCTTTGAATGTTGCTAACCCAGGTAACAGGTTAATTTAATTAATGATCAAGAAGAGGATGT

>comp211243\_c0\_seq1

AATTTATTTTCATCTAGCTTTGAAACTTCGCATTATGACCTTCCCTAACCTTAGGTATGTATTATTACTGGTTGATGTGTTGAGGTTTGGAAATCTACTTATAACTGGCCTAATCACCTATAATCAA  
AGAGCTTGGAATGCCTTTTAGTCCTATTTCTTAAGGGTTACATATGAATACGAAGATTTGCCATGTGGGTTAACTCCAATGAAAAGTGGAACCTAAGGTATGTGCTAAGTTGAGCGTCCTTT  
TTATCCATCATATTAATCCCCATTTGCTAATTTGCAGTTTCTCTTATAGTGAATTTCAAATCAGACTGTAGCTAAGTTTATTCTTGGCTTTATCACTCCATTTGAGAAAACCTCATGTGGTA  
TCCTTGCTAAGATTGATCATCATAATTTCTTTTTAAGTAAAAAACTTAGGATATTTCAAGGTTTATTACAAG

>comp211843\_c0\_seq1

TCTCAATTGAGTGTACAGGAGTACGACTGAACCAAGGAAGAGAGTGATGTTTCCTTGCAGGAAAGGTTCCATCAGAGAACGCTTGAGCTTGAAATTTAAACCCTAAACTTGAAAAAATTT  
CATTAAGCTTAAAAAAATTCATTTTCAATTTGATGCTTGGTGATGTTTCATGTTGTGATTTGTCTTTAATTTAGGTCCATTAGCAGGTTGGGTGGAGTAGAGCTAGCACATGTTATCAAAAGT  
TGTGGGAGAAAATCATGTCCTAGTGGAGATATGATGTTCAAATTTGTCTTGCCAATGTTGGGTTTGTGTATGTAGCCTTACTCTGCATTACAAACAAGCTATTTTATGGATGGAAGTTAT  
TGATAAAGAGTAAAGAGTTGATTA

>comp211976\_c0\_seq1

CTGCACATATCATGTGGTTTAAATGTAGTAACCACAGAGGTTGCTGAATTCCTCATCTGCATATTGAACCTGTTGGGGTTTTCCATCTCCACTAACCCAAGTTAACTTCATAGTTGTTCCAGTT

GAATCAACACTGGAAAGATGACCATATAAGGGTTGATTAGGGTTTGCAAACCAATTGGCTGTGATCTTTTGAGTATGCAAGGGGTATCAAACCACCGGTGAAGAACACAACTCTAAC  
TCAGTTCTAATATTCACAAAATGGAATGTTACAGAGCCACTGCAGGTTTGTATCGAGC

>comp212072\_c0\_seq1

AGAATGGGGGTGTATCTGCTCTGAGTACAAAGTCACATATTTTGCTTGAGTTTTTTTTTTTCCATTTTTTATGATAAATCCAAAATGGTTCAATCTTGAAATTTGAAGATATTTTATGA  
TAAGATCATCTATGATTGAGATTTACTTTCAATACAGTCGTATCAAGGAATAAATATTTATTATTATGTGGAGAATATATTGCATGAATCCTATCGACAATTATTCATATGGGGTTTTGCTCATGA  
TATTTATCGACTTAATGATCTTCTCGACTCTAATAGATCGCTTGTAGAGCATTAGGTATAGGAAATATTATATATGCATTTGACATTTAAATTTGATTTTCCAAAATTATGATATATCATGCATT  
GTATTTAGGGACAGGACTTACATCCTTGATATTTGAGGAAGGCCTAGATAACAATTATGACCTTCCCTAAGGCAGGATGGCCCAAAAAA

>comp212105\_c0\_seq1

GCAAAGTCTTTTCCAGTTTTTGAATCACCAATTCGAAAAGAGAAAATTAAGGATGCTTGATGCCACAATATTTAGTAACCATAAACTTGGCCCAAAGACTCTTTTGGCTCTAAAATTAT  
ACCATAATTTAAGATTAAAAGTTTTAGCCATGCTTTTATGGTTCTAAACCGAAGTTTTCTTCTTCCAAAGTCCCAGAACAATTTTCCAAAAGCCCCAAAATAATAGCATTAGATCCTTCCT  
TTGAACCCCAAAGAAATTTGTTGAAAAGAGCCTCTAACCTTCTCGAAACATTAATAGTCGGGTCCAAAGTGTGGAGCAAATAAACAGGAATAGAACAAGAACATGTTTAAATGAGAACA  
AGTCTACCACCATAAGATAAG

>comp212536\_c0\_seq1

ACCCTTTTCTTTGCTTGAGTGATCCTTAAGTTTAGGACAATTAGCTTTGACATTTCTGGCTTCTACATTCAAACAGACAACATCATAAAAACCTTTTATAATTTTTGTTATCCTTACCTTTT  
TTCCACTACTGATGATGCTTGTGATTCCTCCTTAGAAAACCTTTGAATTGCTGCATGATTAAGGCAATATCATCACTTTCAAACCTCGAAAGAATTTGTATCCATATTATTATCCTTCAGTGCAT  
AATATTCT

>comp212665\_c0\_seq1

TTATGAAAGAAATCAAATTAATCAAAATGCAAGAGAAGGCCGGCTGGGGTTAGAGATTGGCTTGGTCGGCGGCAGGCTTCCTTGAGCAGAACAATCGGGAGGGAGTTTGGGATTACGA  
ACTGCAGAGGAGATAGGGTCTTTGTGCGAATGCAAGAGGAGCAGGAGTCGCGAACTGTAGAGATAGAGGCGAATGGGAGCGCATGAGGGCTATTCGTGCGAATGGAGAGGGAAACGGC  
TGGGAGGAGTTCCGAACCTTGAGAGAGAGGTCTGTTGTTTCTGCCAACTGTAGGCGTGAGAAAGGTTCCGGGAGTTTTGAG

>comp213505\_c0\_seq1

ATTATTCTGTGCGGATACCAATGGCATTAGAGATCAATAAAAAAGTTACCACGTCACATTTTTACTTTACAGCGGCTCAGTATTGCTCGGTACCGTGACATCCGGACGTAGAGTTGCGTC  
CGGCTTCGGTACATAAATTTCTCTCGTTTGGGACAATCTTCTTACTGCTTCTTACAAGAAGAGAAAACAGTCCCAAACAAGCCTAAGTTGGAATATTCACCTTTGCATTGTCAGTTCTG  
CCAT

>comp213538\_c0\_seq1

CTCTCACCTATCTCTCTCTCTCTTCCCGCTCTCTTTCCCGTGCAGCAAAGCGGAAGACGCCAAATCTTTTGGTGAACGCTTTGGTTTTGTGCAGAAATAGCCAAATATTTGACGATATCTT  
CACAAATGTATACTGCAACATTCAGTTTAGTGACTTTGCTTCTATTTAATTTTTTTTTTAAACGCAGCTCATTATAATTTAGATTTTTTGTATGCTCCTTTTTAAAAATTTGCTGAATGGAACTA  
TAGGAGATGAAACATAGACATGAGCCCCATGACCTATAGGCATAACTCTAGTCAAGGACAAGAGATTCACTACAACAGAACCTC

>comp214019\_c0\_seq1

ATTAATATCCAGTAAGAACTCAAAAAGATAGCTCGGCGACCTCCGACACAACCTGCACTCTATGTGCAAACTCCGGCAATTACCGTGGGAAAAATCAATACCAATCGGCCAAGTATCGA  
TCATCCGCACCAAGACAAGACAACCTCGGGTCCAACTGAACAGACCGTCGCTCCAAAGCAATCGGATCGCCCAACTTGTCAAATTTGCGGGAAAACGCGGTCACAGCGCTCTAACTGTT

GGCACTAATGCAATCTCAAATACGCACCGATGCAATCTCCAGCACCTCAACGAGCCTTGATGACACAACAATCCTAAACTCCTATCAGCGGGTGGATTCTTGATTTTCGGGGCTTCCGCCCA  
CCTCACACCGGATCTCACAAATCTGCAACAGCGATCAAATTACCACGGACCAGATTCGATATCTATTGCAAACGGATCTTCACTCTCCATCCAAAACCTCGGGACAGGGTCTTCTTCCATTA  
CCCGACTCGGCCCGTAAGCTATATCTTCAAATCTTCTTCATGTCCCTACCCTCACGCATAGTTAATCTCTATTTTAAAATTAATAAT

>comp215026\_c0\_seq1

TATTGGAGAGGAGGATGTATCTGCAGAACAAACGCAGAAAAGTGAAGATTGTTAGAATTCTAAGCTATGGCATTAGGTTAGTTTGGTTCGAAGGTACATAATTGGAATAGAAGTAGTTTCA  
AGCGTTTGTTCGAATGTAATAAAAAGTGAAATACTATTTCGAACTAGTTTCAACATATATCAGTTAACCAAAACAATCTAGTCATTTGCTGAAGATTGTTGAACATTTGATTCATTTGCAACC  
CTAGATCCAACACCTCTTGATGCTAATTATTAACCTTCATAATACTAAGCGTTTGTCAATTAACATTGTTAGAATTCTTGGTTAACTGATATATGCCTAGTCTAACTACTATCATCAGCTTTG  
CTCCTTCATGAATGCCAAACACTTTGCTGATCGATATCGCCTGATTACTTAGTTAAACAATGAGCATTGGTATCCTACAATAGATGTCAAT

>comp215728\_c0\_seq1

CATTTCTATTCGGTTAATGTAATTGAAAAAGGATCTAGTCTGTCGAAATACATTCAAGAGGAAGGAGCAAATTTAAGTTGCTTTTACTTTGAGCAGGAAGAGGACGGTGGGCTCAGCCTT  
GCATTGCAGGAGACAATATAAAAACAAAAAAGTTGCTTAGGATCCTAATGCAGCCCTGTTTTTTTGTAGAAAATTAGAGGTATTTATGCCTAGGCAAGGTTCTATTTGCGATCTTCT  
TGAAGTGCCTGTTTCATTGCAAACCTTCT

>comp216291\_c0\_seq1

GCTTACAAGTTTTTCTTATTAATCATCCCTCAAATTACTTTCCAATTCCATTTACAATAAAGGTAGCTTTTATAAAGTTCAATTCTATTTGAATAATTATTAATAGAAATACCTGGCAAATGC  
AAATTTTTGGCTTGATTGTGATTATGTTTATATGCAAACCAAGATTTGGATATCTTATTTATACAATGACATGCTATTAATTATATAAATTTCACTCCAACCTTGCTAAAACCTTTATCTGGA  
GATGTTAGTAATTGATTACTAGTGCATGCATACTTCTACCTAGCAGACTGATAGACCGGCCGATTTGATTGG

>comp216363\_c0\_seq1

GAAGTCCAGCGTCGGGTAGAAGTTCGATGAAAATACAGCAACGTGCAGATGTTCTATGACGAGCGGAAGTCCGACATCATGTAGAAGTCCGACGAAAGTCCGACAACCTAGTAAAAGTTT  
GACGAAAGTAGGACGACACATAGAAGTACGACGTAGGGAAGGACTTCGACGACAAGCAGAAGTCCGAAGATGGAAGGAAGTTCGATGTCATGTATAAATCCGACAAAAGTCCGATGAC  
AAAAGGAAGTCTGGCATTGGGTAAAATTTGGAACATACGAAAATCCGACGTCCGGTAGAAGTTCGACGAAAGTCCAGAGATGGGCAGAAGTCAGGTGTCAGTCACTGCTTGGTGAA  
AGTCCG

>comp216727\_c0\_seq1

TGCCCATTTACATACCAAGGACCTCCCTCTAACAAATTATCTACAACCTCCGTAGAAAAAAGGAGCAAAGAACCCAGCCTAAACCAAGGATGGTTATGTGAAATTTACCAAATGCAC  
CCATTGTCGACGTAGTTTAGTAGCAATCAAATGAATTGGAATCTCCTTCCCAAAAACCTTTAACCACCACAAAAAATTTGAAGCTTTTTTGTATAAGCCTTAACACTAGACTCATGCAATTTG  
CAGCCACTCCATCTTTAGAAAGAATAGAATCATCCTTAAAAAATTAATTTTGATACTTGGTCATCTAGCATAACAGGTTGCTAGCAGCTAGAATAGGTATAGCATCCTTTTCCATCAAACTC  
CTGTTGACAAATCTTATGAAGATTTTCTCCTTGTTATTTCTACAAACATTAACATCTTGTTCAATTCATGTTGTTGAAAGAATCAACCTTCTCCATAGAATAAG

>comp217051\_c0\_seq1

AATTAATAAATAAGCTTTAGATAAGATTTTAAAATTCATATTATGTTCAAACCTCAATTCAAACTTGATAAGAAAATAAATCAATGAACTTGAACAATATAAGTCTGGCTCAAATCTAAGCAC  
AAATTTACATGTCTTTCTAATTCCTAAATGATGCGTCAATTTATTTTCGAGACACCTTTGCTTGATACTTATTTGTGTATATTCCATCTTATTTATCAGTTATATTATTGTTCAATCTCTAAATAG  
GTCCAATCTGTGACGGTCCATGCC

>comp218857\_c0\_seq1

TGAAATCTCTTTTGTGGAGGTCAAACCTCTCTCCATACCCATTAATTGAGTTACTTATCTATATTTGTGAGTGAAAGCTCATTTTCAACAGCAACTCTGTATCTTTGATAGTGTAAAGAAG  
CCAGCAATGGCATTTGGCAACATTGTAAATGAGTGACTGTCTACTACGAAAGTATGAAAGCCAGTTGCTGAATCAAAGCAAGGAATGCTGTTTATTTCCAAAATAAGAACATGAAGAAAAA  
CTGGCAAATGCGAGGAAACAGTCAAAGGAGTTTATTTTAGAAGTTGCTTTCTGTGACTGCATTTGCTATAAACATATTACATACTATACTTACCAATATTCTGCAAGATAACAAGCACAGCAA  
AGGGAGCTTAGAAAATCTTGAATAACATACTTTCCCATGGATTGATAACCTAATGTATGGTTATAACAACCTGCTTCCATAAATTAAGAAAATTATAGAATTATTGGTATACCACATCAT  
GTGCCATCCATTTACTCAATCTCAACCAAATAAGAATACCCAATACACATTCTTTCTT

>comp219237\_c0\_seq1

CCTCAACAATTATCAAATGATGATTTAGATTTCAGATATGGAAGAGAATGAACAGGCAAAAAGAAGTGCTTAGGAACCTCCAACCTTATGGGGAAAAAATGCAGAGCAAGCTTGATTTTCAGC  
ATGATTCTGAAAGTACTGTGTTGAGTAGCTTGATGAAAACAAATTTACATACAGGATGAAAAGTAAAACATATTTATATCATGCAAACAAAACTAGAAGCAATTAAGGATTT

>comp219553\_c0\_seq1

TCTTTTCGTCGTTGTTGTTTCGGTTCCGTTGCTTCACCAGAGGTGCGGAAATTGCACGCGCCGCTCCTTCGGTTCCCTCGTAGCCATTCAGCTTCGTTACTTCGCAGGAGGCGGAGATTGCA  
CGCGTCGCTTCTGCGGCTCCTTTGTGCTTGTCCGAATTCGTTGCTTCGCAGACATTGGACGAGTCGCTCCTCGGCTCCATCGTTGCCGTTTCGACTTGTCTTCATAGGAGGAATAGAGATC  
GCACGGGTTGCTCCTTCGGCTCCATAGTGGCTATCCGACTTTTGTCTATTGACTCCTCTCCCTTATTGTGCTTTGGCTTCGTTGCTTTGCAGGAGGTATAGAGATTACGCTAGTTATTTGT  
TCGGCTCCTTTGTACCTTTTACTGACTGCCTTCAACGACGATCTGAGCCGAACCCAAACATCTG

>comp219612\_c0\_seq1

TTAAATCCTGAAAATATTTGACTTGATAGATGCAAATCTGAGTAAATTCTAATAATTAGATGAATATTTTCAAGATTAAGAATTGTAATGGAGGAGAAGAAGAGGCACAATAAAGAGAA  
GTAATGCAAATATTTCAATCCTGCTTCTCCTATTATATGGTTCAAAAACCTGTCTGATAAGATTTTGTCTAAGCCATAGCTAAATCTTTCAACCAAACAACTCAATATATTGATTTAGTTC  
ATCGCAAATCAAATTTGATAATGGCAAACAAATTTTCATCAAATCTTAATAAGCCTTTTATTATTTTATATAGTAAATTAGGGATTGTGTTGCATATTTTCAGGCCCTG

>comp220201\_c0\_seq1

TTTGTCACTGGACTAAACATTTTGTATAGTCTATACCTTGTTCCTGCCGATTTCCCTTGAGCAACTAGCTTCGCTTTAAATCATACTATGGTACCATCCGAGTGGTATTTGATTTGAAATAATG  
TCCATTTGCAACCCAAAATTGAAGCATTTCGGTGGTGGTTTAAACAAGAATCCATGTACCCTGTTGTTGGAGGGCGAAAAATTATGCAACCATCAC

>comp220327\_c0\_seq1

GTCTGATAAATGTTGCTAGGAGATCTAATGCTTTAGATGTCTTCATTATGTGTCTTGAGTTACAAGTAGCTTAAGATTTTTTTTTTAATAATCATGAGCTATTAATAGATGAGTGATTGTTAATG  
GGATATTAGTGAATATTTCAATGTGCATTATAGTTAATTGTTTTTGTGGATATTGAATTATATTGATGATTTGTAGAAGCTCTAGTTGATAATTAAGATAAAAATAGGCGATTCATCTAAA  
TTTGATTTTGGAGTGTGACAGCTGCTCCCTCCTGCGAAGATCA

>comp220756\_c0\_seq1

GATAAATCAGTGAAGTCCGTTTCAGTTACAAGTTTTTAAAAAGTCAGTTTTTTTGTGGTAACATATTTTTCATTGTAGTTATAAACTCAGATTTGATTTACAATTACATGTATTCTCGATTTGTG  
AAATGAATTCAGCCAGTCGACGACATCAATGTGAAACCTGAGGACATCCAATATATTGCCGTTTTAATATGCAATGTTCAATTTTTACATGCTATAAACTGAATAATCATGACAGAAAAT  
TCTACTGAAGCCACGTAACAAATCAGAGGGTATGATTGTTGATTTTTTAGGTGGATCGACAAACGAAATGACTTATCGAAAGAAATGAATAAGTTTTAAAAATGCAAAGCACTTGAAGTC  
CATTTCAACTAGGCTGTCTCAGTTACAACCTGTTTTTATTTTTTTTTTTT

>comp220894\_c0\_seq1

TGGCTTAAACAATCTTTCATCCTCAATAAAAACCTTCAAGCTCAGTTCCCGAAGATAAAAAGATATTGACGAATTATTATGTCATTATAATTTAGATACATTTTCGTCAAATTAAGAAGATGTTTCA

GCACAACATTA AAAAGTTCAC TTGCTTGTGCGCATCAAACCTGAAGCTCCTACAGCAATTCATTATCAACTTAGAAGAATGAAAGTTAGAAACCACATTCAAAGTCTACAGCAACCCATTAT  
GAGGAGCTTATTTCTCTACCATTAACACACATTTTTTCAGACAATAATTTTGGTTTTTATTTAATGACAATAATTTTGCCTTCTATTTAGTGGGACTAAGAAAAGGAAATTATCTCAGCCTCCC  
AGGCTATTACCTGTATCAGAAATAGAAAAAGCTTGGAAAAGGAAACAGTGGAATCAGGAGATGAAAAGGATGATTTATCCAAGTAAAAACCAAAGCAAACCTGTACCTGTAAGCTCCAA  
AAGGTCTTGT

>comp222020\_c0\_seq1

TCTAATAGTTCTATTTATCTTTACTCCATAGAGGAAGAAGAACAAGGTTAAAAGTACAAAAATGAACAAGAACCCTTACCCAGGATGCAGGATGACGTTTCGGACTTGTTTATCTCAATA  
TTTAGAGGCAGAATGTGCAGAATAAGGGCAATTGGACCCAAGTCAGGAGAAAAGAGATCAAGACACCATTTGAAAATATTATCTATAATATTGAGATGTGTAGTTTGT TTTGTGCTGTGA  
TTTAGAGTAAAATGTTGTTTCATGATACTAAGATTGTTGTCTAAATGC

>comp222293\_c0\_seq1

TTAATCTTCTCAAACCCGGAAGCAGATTTTCTTTTTGGCATTCTCTTCGTTTTTCAAAGTTTCCTTCTCCTGAAATAACAAAATTCAAATTCTCTGAGAAGGGAAGCGATATTTGTTTG  
TGGCAATTGCAATGGCGGACGCAAAAGGATCACTGGATTACTGGAGGAAAATTTTCAGCAGTGCGAAAATCTGATATTTTGGATTTGATCGAAAAAGCAATCCTAGTAGCGGCAACCGATT  
GTCCCAATGAATTTAAGGACAAAAAGGATATGATCGTCGAGAAGCTTTACACCTGCCAGCTTTCCCTCAATAATGGCGACCAAGAAAGTCCCAAGGAGGAGAAAAATAGTTGCAGCTCT  
GGCAACTCGGACGAGACTG

>comp222585\_c0\_seq1

TATATCTCATCAGTATTTGAATACCTTAGATAGTTTCTCTTTCAAATGGATAGAAAACACCGATTACTCAATGAAATAGATAATATAAGGGCCACAGTTTTAATGTACATCTTCTTGAGTTAA  
ACACAACAGATGAGTCCTAATGTCCAATATTTTTAGTTGAGTTCTTATGCTAGTAAAGGCATCATGAATCGTAACAAGCAACATGACATATAATACATGCCTCATGCTAGGGTACACATCAC  
ATTCAGATAAAGTTAGTTAGGTTGATCAAACCATCAATGGTTTCCAAATTCTAAACCACTATT

>comp222756\_c0\_seq1

AGGGGTGTCAATTTCCGGGTCACATATTGGATTCCGGGTCGAACCCAAAACCTAACCCGGCATTATTTCCGGGTC AACCCGAAATGACCTTTTTTTTACAAACGGGTCAGTATTTCCGGACCCGAACT  
TGACCCGCTTCAAGTCCGGGTC AACCTGACATAACTCGAATGACTCGGGGGCGTGAAAATATTACTAGTTTTTCGGGGCAAAAAACGGGTTAATCTCCGCTTTTCCGGGTC AAAACCCGGGTC  
GAAAACATGTCAATCTCGGGTTTTCCGGATCAA

>comp223099\_c0\_seq1

TCAATCGAATATGGCTAAGCAATAAACAGTGCTTGCCATAGTGCACAAATCGGGTTTTAAAATGCATCAAACATATAAAAAGTTACTCTATTTGATATTTGTTTCATAAGATGGATTATGAGAAT  
TAGTCTGAAAAGTCAAATGGCCTTAGATGGACATCTACATTTTGGTGTCTCGTGAGGAAAAGAGATAAAAAAATTTACTTTGAAAAGTGGGCGAGCATTGCTTGAATTTGGGAAAAGAG  
CATCTCAATGCATCAAAGCTTTGAAAATATCCAAAATGGAACCTCATGTTGCTTAGATCACCATATGATAGCAAAACACGGAAATTACCTACACGTGTGAGATGACAATGAATTTGGTGT  
GTGCAAATGATGAAACCTTTTGAAT

>comp223248\_c0\_seq1

ACCTCAGGATACTGTTTCGTTTCGTTGGCAACACACTCATATCATGGAGTGTCAAAAAGAAGCAACGGTAGCAAGGTCTTCCACCGAATCAGAATACAGATCCCTAGCAACAGCTCTTGCGT  
ACATACTATGGCTTCGGCGACTTCTCGGTGACTTCGGAGTCACCAACTTACCGCCGACCAAGCTACATTGCGACAGCACCTCGGCTATAGCACTCGCAAATAATCCCGTATTTTCATGCGAG  
AACGAAGCATATAGAAATTGATCATTTCTTAATCAGGGATCAAATTCAGGCAAATAATGTACAGATTCTTCCAATCTCAACAAAATACCAGTTGGCCGATATCTTACCAAGCCATTGTCCA  
CTCCCCGG

>comp223568\_c0\_seq1

TGGGCGTTCCGATCCCATTGCTTCGTCCAAGCTTGTAGCAAGCCGAACCATAGCAGGGTGTCTGGACGGTGTCTCCTCCTGGTCATCTTTCATGCTGGAAGGTGCGGTAGAATCCCGCCC  
CGAGTCATCCCTATCATTACAAAGGGAAGCCTCTTGGTGGACTCAGTAGCCCTGACCAAGTTCATCTCCTGGTGTCTCATCAGATTGAGCCTCCTCCTTCAGGGCGAACATCATCCTCCATG  
GCATGTTGGCTGGACGTCCAACACGCCTCCCCCTTTCAATGGCTCGGCCGGTCTCCCCAAGCATAACATGTAACCGGAGTGGAGATATTGATGGAGCTCATAATCAACTCACGCACA  
GCCGCCGGCTTGGGA

>comp223673\_c0\_seq1

AAGGTACTAAAACCTTAAACCTAAATATAAAAATTTATTTAACCTTTGAACAACTAAATTCATTCGGCATAGGGCTTGAGTGGTGGCATAATGAGTAGTTCTGGCTTATATCTAGAACTTCT  
GCGCACACCTTTATGCTGTTATACAAGGGATTCTAAAGGTTCATGGCTGGGATCGAGATTTTCCTTCAAGCTTACGTCCAAGTCGACGGTGGAGGGAAGCAAAGATATACGTTGATATTTA  
CATCGTCAAGTGGACCTCGCTGATGA

>comp224554\_c0\_seq1

TGGGAGGCCACATGCATGGCACTTGAGCATTTTTTTAATCAACTATTTCAAGCAAACTATAAGCAAGACTATTTGAAGGCATCTAACTGCATTGGCCTTTCAAAAAAAGAAAAGTCATCCT  
TCTTAGCTCTAACCTAAGCTTACAGAATCTGTACACCGAACAGTTAGTTTTCTCGTACACTCGATGTTGTAGGCTTTTGATCGCCATGCTGAATATATTTGGTGGCCCCATAAATTGCAACG  
ATCACATTTATGGCTCATTTTTGTTTTCTTGGCAACTTCTAAAAAGTTTTTATTTCGTATTTTCTTTGGTCTTCCATGAGGCCGAAGTGAATTTGGTGTATCAACCAACTCAGCATCACTGAA  
TATGGACCATTGTTCTTTTCTGGAAGTGTGAAATAGCTCCATCGTAGACAATTTTGTACC

>comp225557\_c0\_seq1

TTTGACGCAACAATCCTTCACAACATGAGAAGAAATTTGAATATATATATAAAAAAATTTTAAAGCATCGATTTTTGTTCTCCTCCAAGTTGGCATAATCAGTTGGCTTATAAGAGGTGA  
ACCATTACAGCAAGAAAACCCTTCTTCCTTTTGGGATTGCAACCCATATCTTTACACAACCTGATCATTATACCAAAGATGAAGAGAAGTAATGCATGATCTTCGAAAAAATTTCCCAAATAT  
CTCTTCATGATTTGTCCCATTCTTTCACACTCTTCTCCATATCATTATGCTC

>comp227310\_c0\_seq1

ATGAACTATATGATAAATAAAAATTTTAAATCATCCAATTAATTGGCTTTATTACTCACATGCTTTTTTAATATTGTAAAGAGAGAAAGAAAAATAAAAAGATAAATCCACATTGTTTCGGG  
CTAGAATATACGTAGCAGTAGAGTGGGAATATTTTTTCATCTTAGCGTTGCACGGATGTCCAACACACAAACAAAGAACTCAAAGTTTACTATTGGATTGCAGACATTTGAGTTCGGATGG  
TCCCGAAATCAATTCAGACTTTTCTGATTCAACTTTGCCTAGAGATTCATGCCCGATCAAGATAAATTTTTTTATGATATATCAA

>comp227389\_c0\_seq1

TGGCCAAAATTTATGAAATTAACACATGAATACTCAATAAAAATTTTTTTCTGCAAGAAACAACCTACATACCCTAAGAAAAAAAAAAGGATAACTAGGCATCTAAAGTTTAAAATTGC  
AAGCAAGCCCATGCTTATCCAGAACCTATGCAAAAGCTAGTACGTCACAAAATATGGTACCTTTTGGCTGGAAGAATAAAAGGAAATAAAGAGTTGTTCAAGAAAATATTGGGAAGAC  
ATGGTACAGAAATTTTATGATAAAATCACGAAAAGACATGGAAAACCTATGATTGAGAATGGCCTCTCATCCATATCATTAAATTAGGTTCACTGCGACGTAGCAAAGCAGAACATAACAAAA  
CTTGATAACAATATGTTGAAATCTTAGAAATTTAAGCTTGTTAATCATATTTGCAACCATCTTCAAAAAAATCAGAAATTGATTTCAATTA

>comp230378\_c0\_seq1

AACAACAACCTCCTTAAATTACATTCCATAGAAACAAGAGCACTTTATGCAACCAACACACAAGCTCCTCCAACCTTCTTAATCTTGTCTTCTGCAAGTTTGTGAAAACTTGGCCTTCA  
CAATGACTGGCTGCTTAGGGAGTACACCCTTGCCGAGAACCTGTAGTATCCGCCTTGAATGACATCAATAACAGGGGCCCTGTCTGTTTTTTGGCATAGTTGAGCCTCGTTTGTTCGCT  
GACCAAGGTCCAAAGTTTGTCCAGATTGATTGCTG



>comp230697\_c0\_seq1

AGAATAGAGCTGATATTATCTGCATAATGACAGTTGGTAGGTAAAATGATTAAACTTTTCTCAAAGTTGACCTCAAGGCCGAGGCAGCAGAAAATTTATCAAGCAACTTACAAAATTATAC  
CACAATTGTGTATATCAGATCTCCCAAATAGAAGAAGGTCATCGACAAACATAAGGTGGGAAATCCTATTTCTGCAAACCTGAGGAGCCTCAAAAGATTCACTATTGATGGGACTATCTAA  
AAGGAAAGATAAGCAT

>comp230949\_c0\_seq1

GCGGCGGCTGGAGATGGGGAACAACGGCGGAGAAAGACAACATCTAGAATATTAATACAGAAATATCATATGCAAATCATAGGGAAGAACGTAAAAGTGAGCGTCAGGAATCAGAA  
ACCCTGAAATTATTACTCATCACATCAGTTGGGGCGTTCCTACTAACTTCTCATAACAGCAGTCCTCCCTCGCTTAGATCTCTGCGACACTGATCGGCCTGCAGCACCAAATCCTCAATGTT  
CTTCATGAACAACCTTCATCTTCTTCCAATTTCTCAATTTTCAGCACTAAAATTTGAGCTCATGAGAATTTCTCGAGCAAACAATAATTTGATCCTGCACCATATTCACCATAGCCTTAATCCC

>comp231688\_c0\_seq1

AAACAGGTAAAGGCATGTTCTCAAGTTGCAGAGTTGATTACAGGAGATAGCAGTTTCTACATAAATATTGCTATAATGCATGCAGGGGTGGCCAATATGACGAAGAGCATAACTCTAATTT  
TTGAGTTCTTTTGAAAGCAGTGGAGGGAAATCATCCTTGCCAAAACACTACAAGACGGGAATTTATAATTTTATAGTGCTCCTCATCTTCTTGAGTATTAATCTATTTGCCTTCTTCATTGCA  
TAGATATATGATCAATTAGACGCTGATAAGAAGACTGGTGTTCCTATCCTTGCAGACAGTTTAATCTGGTTTATAACATGTTTATGTACAATATAGTTCTTGTTCATGACAAATGGTATATAA  
CTAATACAATCTAAAATGATCATTTCTTTTTATTTTGCTTTTCATTTAATCTTCATTAGTTCATATCCATAAGCATTTTC

>comp232025\_c0\_seq1

GTGTTTATAAAGTTTTTATTTTCAGTTTTCTTAAAATAACATTTGATTTCTTTTATGCATGTGTGAAGTGTACTTGCTTTCTTAGGCTGAGTTAATAGGCAGATAAAGACAACACGAGGCAG  
GGTCCCAAGTAGAAGTGGGGGGAGGGGGCATGTGAAAGGGAGGCGGGGCACAGGGGAGAGGGTGGGTGACCCACGGGACGCTTGAGTGCCCATCAATGCACAGACACGGTCTAAC  
ACTTTGTTTTTCGATTTTTTTTAAAGACATCTAAAATTACTGAGAGATACAGTTTCAGCACTTAAATATACAGACGGAAATCCAAGCACTTGAACACAATTTCTTAACTCTAAGCTCAGTTAT  
TGCACATAACACAGTTTAAAGTAGGCTTCAGGCTATAAGCTCTGCT

>comp232800\_c0\_seq1

ACAAATATTAATATTTATTAATAGTTTTCTAAATGAACTATTATCCCATACTTTTTATTTAACACTATTGTAGCAGTAACAAATCTACTACAGCAATTTTCATCATTTCGAAACAAATTCATGAC  
ATACAGTTGCCCGGTAATTAGTCAGCTATTATAGATTGCACTTATATATCTATAATTGCTTATATACATCCTGAATTGAAGCTTTTAACTTTATCTATCTTGTACCGAAGCTAGAGGCAGAA  
GAAGTAGAGGGGCTCAGGTAAGCTTAAGCAGAGAAGGATAAAGGAGAAGAAGTGAAGAAGTTGAGGAAATAAAAGGATGAGGAGAAGCCGGGAAGAAGAATAGAAGAAAACAAGA  
AGAAAAGGAGAAGAAGAAGGTAAGAAGACATTAGAAAACCTTAAAAAACCTATTTTTCGCGTTTCTTTCTGCAAATG

>comp233071\_c0\_seq1

GAGGAAGGTGACAATGCGACCATCTACTTGCTGATGCCTTTATTGTAGTGGAAGAGCCATTACAGAAAAAAAAAAAAAAAAACCTAGACTTAGCTTAAAGGATTGCAACCTGAAATGAGAG  
GAACTTTAAACAAGTGGAAAGTAGTTGAAAGTAACAAAACCCCTCAAACGAATTAACATAGAAAATCGAACTTAAAGTTACCATGAAAATGCACACTTGTTGTAGTAAGAATGATACAA  
AAGCACACTTGTTGCTAGCAAATTTGACATTGACCACACAAAGTTAA

>comp235381\_c0\_seq1

GTTCTTGATTAAGCAGTCCTTTGCAAAAATCTCTCATATCTTATTTCTTGATGATGAATTTATTTTTGGAAAAGTTTTATTTGTAATTCATAATGGACACTACTTAAAAATGCTAATTAATTA  
CTGACGATGGAATTTCTACGAAAATTTACTGTAGAAATCTGCCGGAATTTCAAACGGATATTTGAGGGAATACTTGAGAAACATTTTTGGTGGCTTTATGTTGCTTTCCGATGGATTT  
CAATGAAATTTCTCTAAAATATTTCTGGCGGATTTTAAAATTTTTGAAAAATAATTATATATTTATAATTTAAAAAGAAGAATTATCTAATTTGAAATTTTATATTAATTGATTAACCTAATTAAGT

AAAT

>comp235815\_c0\_seq1

TTATTGGTGTTCAGTTGAATCCTAGCATTTTTTTTGTAATTTATCAGGAAAAGTGGCTAATGGCATGCCTGTACTTATTTGAATATGAGTGCATTTTTTTGAGCATTTC AATTTGTAAGCCAAT  
CTTTACAATCCAGCCTTAGTTCCTTCTTCTTCCAAATTATTAAGTTTCTGATTTCCCATAGCTTTCTACAAATTGCATCAGCCTTCCTTTTTATACTTTAAATTTTCACTTCCCAGAGTCATA  
TTTCCACTTTAGGCATGACTACAAATTTTATTTATCTGAGTGCAGA

>comp236054\_c0\_seq1

TTGGTCCACAGTTGGTATTTTCACATTATTTCTTGGTCCTAGGGCTCCCGGGCAGGGGCTGGTCCCTGTGGAGGCCTTTGGGTGGGGGTCCCTGTGCAGTACTTGGTGGGGGAGTGGGGA  
CAAGTGGGGGGGTGGGGGCTGGCTTTGTCTCAAGCGCTCAGA AACTCCACTGTCCTGCCTGGGCCTCAGTGTCCCACTGGGCCCTGGGAGGGCCAGGATTGGTGATCTGAGAGTCT  
AGGGAAATCCATGAGGCCTAAAATATTTGGGACTGTGGCCTGACCTTCTC

>comp237304\_c0\_seq1

GACATCACTGCTCAAGACCGTGAAAGCGGTAGAGGATGAGGCCACCAAAGGCACGCGGCCCTGGAGGCCACAACGGAGCATATTCGGCAGGAGCTGGCGGTCTTCTGCTCCCCAGAG  
CCACCTGCCAAGACCTCGACCCCTGAAGATTTATCCGCATGACCAAGGGTATCACCATGGCAACCGCCAAGGCCGTTGCCGCTGGGAACTCCTGTCGCCAGGAGGATGTCATTGCCAC  
AGCCAATCTGAGTCGCCG

>comp239110\_c0\_seq1

GTCCTATCTTCATGTTTAACAAAATAACTTATAATATATTTATGAACTATCTGTTCCCTCCAATGCCAAAATCCTAAGCTATTAAGATAAACGTGTATGATTAAGAAGTGAAGTATACA AACTTC  
ATCATAGCCAATGAAAAAGTGGCGGAGCCAAAAATATTA AACTGAGGGGCACAAAATTTGACTGTCAAAAATACCCTCAAGTTTTTTCATTTTAGCTTGAAATGGAAATTATGGTTTCAA  
TTATTATTATAATTACTATTAATTGTAAGAAGATAAATTTAATGAT

>comp239898\_c0\_seq1

CAATTAATAATGTATTAGAACAACCAAATGAGTGAGCACAGCTTTAACAGTTTAGCTTACGCATTACATGCAACACCAGGTAAAGCAAAACGCAAGATCCCGATCCAAAACGTAAAAT  
TAACAATATTATATCTCAAATATGGCCAAAGACTTCATGAAGCATGATAAATGGCAAGCTCTGACAGTATATCAATGTTAAGATACTGAGGTAGTAAAACTATCCATGGTTAAGGATGATG  
AAATCCAAATAGAATCATAAACCCATGCTTCCTATCGTGCAAGATGCCGCGCTTTTCTCCTGAGAAGGATTATTTGCACGAAAATGCTAGATCAAGCCGTGCATGTAGAAAATCATAAGC  
CTATAGTA

>comp240457\_c0\_seq1

AACATGTAGAACAAGTGGAGGGTCTCTGCTTTCCGGCCATTCCTCTCAGTTCCTTCCTCCACACGTGCTTCTGTAGAAGACCACAGAGGCTTTCTCTCTCTCGACCGACTTTAGAGCGAT  
AAAAAAGGGAATAAATAATAATTTCTAAACAATTATTTTATAAAATTTAGGATTTATACGAAATCTTAAATAATTTTCATTAATTA AAAAATACAGCTTAAATATTTTGAAG

>comp240638\_c0\_seq1

AATTTATTGTCACCTGAGTTGGAGTAGGTAACGCGACAGGGGAAGCTTGTTTCTGAGCTGGTTTTGGGGTGTGGTCTAAATAGAGACTTGACCCCGATTGTCCGAAGCAGTGAAGTCAC  
TGAAATGTCGGCGCTGATGGAATGAACGGGAAGGCCTATTGAGTTGCATTTCCGCCTTAAATGCAAAGTTGACAGCCTGTGACAAGGACCAAATAGAATTCAGCTCGAGCTTGCTTTGTA  
TGGCTTCTTTCAACCCCAATATACCGAGCTACTATTTGATTAGTAGTTTCATTAAGGTTGTTGCGAGCACTAAGGCGGTAGAATTCCTCGGTATAATCGCTCACACTTCGTTGTCCTTGCA  
TACATTGTTGAAATTTTCATGTAGAGTAGTTGATCATAATCCGTCGGCAGGTATTGGTTCCTCAACATTTGCTTCATCTTTGTCCACTGCCGA

>comp241426\_c0\_seq1

GGATTGTGTGCGAGAGCAATTGCGGATGTATTGTCGCAATAGATGGTTGTAGGTGTAGATTGTGGAATGTGGAAGTCCTCGAGGAGACGTCGGAGCCAAATAACTTCTGAAGCTTCAGTG  
GCCAGGGCTCGGTACTCCGCTTCGGTAGAAGATCTGGCCACGATAGGTTGCTTTTGGCTTGCCAAGATAATTATGGAATTGCCGAGGAAGTTGCAATATCTTGAAATGGATTTGCAGTCGT  
GGGCGTTGGTGGCCAGTCTGCGTTGGCATATCCTTGTAGAGTTAGACTGTTCCGGTGCATTGGAATACCGGTGGCGGTGGTGCCTTGAATGTAGCGGAGTAACCTTTTGAGAGCGTCSA  
AGTTGCCATTTAGAGGGTTTTGCATGTGTTGGCTTAACTGATGCACAGAAAATTGGATGTTCCGGGCGGGTTAAGGTGAGGTATTGGAGAGAGCCAATTAGGTGGTGGTATAGTTGCGGAA  
TTTAGTACTGCAGGGTGGTTGATTCTCAGTTTTGCATGAGGTAGGGGTGTTACGGGCTTGGAATTATGCATGCCTGCACGCGTCAGAATCCATTTGGCATAATTGTTCTAATGTAGAAGGA  
TAC

>comp242396\_c0\_seq1

GTCTTCTCCTCAGCTCCTCTCAAATCTCTCTCCGCTAACCAGAGAACTCCGGCCATGGACAACGACGATCCGCAGCGTCAGCTCCTCCTTCTGATACGCGACTACTCCGCTGAGAAAACG  
AAAGGAGAGCGTACGCTTTCCGATCTGAAAAACGCCTTCTAGAGCTCCATGCCGATTATGAAGCTGCGAGTGCTAAGCTCGAGCAAACAAAGCGGGTTCGGGAGGCTGCCGAGCGGG  
AGCTGAGGGGATCGCAGGCTCAGCTCGATCGGACCAATGCATCGCTGCTTGCATGGAGACAAGGAATTCGGGGTTGCAGG

>comp242444\_c0\_seq1

TGAACAGACATATATCCACCAAGGGTCTTTTTCAGTGACTTTTAAACACATCCCTTGACTAAATAAAGCCAATACCACCGCCGATCTCATGGCCGCCTCTCCCGCTAACAGCATCCTTAATTC  
ATCCTCCTGATGAGCTGGTTGATGTAGTTCTCTCTGTTGCCGTAGTCACCACCCTCGACCCAGTGGTTACCTTCTTCCCTGTACCCTCCCCTTGGTGGGTTTCAAGTTTGAACGGCCACAGAA  
AGTTGCTGACCCTCTTGAAGTCGGGACCCACTGTGTACATTTCTGTTGATGATATCCTCAATGCAGATGATATTCTTCCCTTCCGAGTTCTTCTCAATGATGGCATTGTCTGTGAGGGGAATG  
CGAGAGCCCTGATTTTTCCGTAACCACGTTTGTAGATGAGCTCACGGACAGACTTCAGGTTCCGGGTAGCCCCAAGCAACGTATGGCTCTACCAATC

>comp243548\_c0\_seq1

CTCCGAGGGCAATCAAGGAAATAAAGAAGTTTGCACAGAAGATGATGGGCACAGACGATGTCAGAGTGGACACCAGATTGAACAAACATATCTGGGCTAAAGGCATCAGGAGTGTTC  
ATACAGGGTGCAGTAAGATTGGCCAGGAAGAGGAACGAAGATGAGGACTCCATACATAAACTTTTACCCTTATTACATACGTGGAAGTACCATCTTTCAAAGGACTCCAAACCCTCAA  
TGTAGA

>comp243615\_c0\_seq1

GCTTCAGCCTTCCGCAATCCAGTACTGCTTTGATATCTTGCTTTCAAATGTATCTGAAACAATGAACATCTGTATCATTAGCTAACAGTTGTTCCAAAGGAACAATTTAACATGTCTTTCTTG  
AAGGAAATGCTTAATTGTTCCCAAGGTTTCTGCATCAGGATGAGTTTTGTTAAGCGGGATAATTCACAACGGTATGGGCACATCTGTGAGAATGATTGGGTCTGAGCTGGCCAAATTTATT  
GCATCCGGTCCGCCGACGTGAAAAAT

>comp243716\_c0\_seq1

TCTGATATACACAATTGTGGTATAATTTGTAAGTTGCTTGATAAATTTCTGCTGCCTCGGGCCTTGAGGTCAACTTTGAGAAAAGTTAATCATTTTACCTACCAACTGTCATTATGCAGAT  
AATATCAGCTCTATTCTTAATATCCCTCACACCTTTTCATTACTTACCTTCGAAGTCACTTATCCCCTTACAACCCAAAAATTTATATTTCTTTAAACTCATGGGTACCGTTACTTACAAAC  
TCTCTGGGTGGAAAATAAGACTTTATCATTGTGCGGTAGATTAATTTTGGAGGTTTCAATTTTGAATTCTATAGCTTACTGGATCCG

>comp244082\_c0\_seq1

AAATTTCTAATGAACTTCCGGTAGAAGTTGGCTAGACCATGGAAACTCCGGATGTCAAATAAGGATTTCCGGTGGTGGCCAGTCACGGATTGCTGCCACTTTTTGAGGATCCATGTGGATTC  
CCTCTGCTGAGATCACAAAGCCAGAAATTTCACTTGTGACATGGCCAGTTCACACTTTGGGAGATTAACAAATAATCTCTGTTCTTTAAGGATTTCAAATATAAGTTAAGATGCTGTAAA  
TGCTGTTGGCGGTCAGAGCTGTATACAAGTATGTCATCGAAGTAAACGATGCAAAATTTACCCAAAAACGGCTTCAAATCTCATTCATCATTCTATAAATGTAGATGGAGCATTGCATAA

ACCGAACGACATTACCTTCCATTTCGTACAAACCTTGCGGGGTTTTGAAAGCC

>comp244701\_c0\_seq1

GACATCTCCTTTGTTCATCAACACCTTATGTAAACACATGCATAATCCCTCTTCCACACACTATCATATTCTAAAATGTCTTCTTCGCTACATCAAAGGCACTCTCTCATATGGATTACCCATCT  
CGGTTGGGTCGCTCGAGCTACACTCCTATTCCGACGCCGATTGGGCGTCCGACTCCTCGGACCGCAAATCTATCTCAGGTTTCTGTACCTTTCTTGGTCCTAATCTTATCTCTTGGACGGTG  
AAGAAGCAAACACTACGGTCGCTAAATCATCCACTGAAGCCGAATATCGTTTCGCTATCCGCAGCCACCTCGGA

>comp246127\_c0\_seq1

TATTACCGGGTTGAAGTGGAAGCCATAATTTTTTGTGCCTTGAATGTATCTTAGAATACGTTTAAAGAGCTAAGAAATCAGCATTTGTTGGATCATGCATTTTTTGACAAACCGAATTAACG  
GCGAATGCAATATCAGGCCGTGTAATGGTAAGATAATTGAGAGAACCTGCTAGCCGACGAAACAGAGAAGGATCGGTAAATTGCTGAGTTGCTGAAGCTGCATGAGACGGTTTGACTGT  
AATCGGAGTAGGTAAGTACTGAGGCTGAGTTGGTGAATCCAGCGGAAAGCAATAAATCCATGGCATATTTGTCTGATGTAAGAGAAGTCCGGTTGGTGTCCGACTAAGTGAATACCAAGAAA  
GGTATCTACGGGACCAAGTTGTTAAGAGAATATGTAGTTCTTAGCATAAGCAGTAAACGATCAACTGTTGGAGTGTGATTCCCAGTCAACAGTAAGTCATCCACATAAATTTAAATATAG  
AGTTGTATGTGCTGTTGCCGAAATAAAAGAAGGGATGGGTCGGCTTTGCTGAATACAAAACCAAAGTGAAGTAAGGATTGTGTGAGTTTGGTATACCACTGACGAGGAGCTTGTTC  
ACCATATAAAGCCTTATGAAGACGGCAAACATAATGTGGATGTTGAGTGTCAACAAACCCAGGTGGTTGCTTCATATAAACTTCATCATA

>comp246716\_c0\_seq1

AGAAGGGCGTGCAGGAAGAAGTGACCAAGAAGAGGACCAGGAAGACGACTAAATTCAGCGCTCTATCGCTGGGACCTCCCTGGCAGAGATCATGGCTAAGAAGAATCAGAAGCCAG  
AGGTCAGGAAGGCCAGAGAGACCAGGCAATCAAAGCTGCTAAAGAGAAGAACAGGTCCAAGAAAGATACAAGGAAGCCACCTGCAAAACCTGCACAGAAATCCCAGAAGCAAAAG  
GCAGAGAAAAAGATGAAGACGGCAGCTCCCAGGGTCGGAGGAAAGCGATAAGTTT

>comp246939\_c0\_seq1

AGCAGCTGCCAGGAGGCAGGCACTGACACTGCAGGGAAAGGGGAGCCCCAAGCACCCAAGTCCCCTCCCAAGGTCCGGCGGCAACAGATGGACCTCATCTCTGAGCTAAAACGGAA  
GCAGCAGAAAGAGCCACTCATCTATGAGGGTGACCGTGATGGGGCCATTGAAGATATCATCACAGATCTACGGAACCAGCCCTACATCCGCGCAGACACAGGCCGGCGAAGCGCTCGTC  
GGCGCCACCGGGACCCCCG

>comp247004\_c0\_seq1

TTTTAATCTTTCTATTACTACATTTGATTATTGCTAGATTCATTAATTTTAAACTCTTTGGATTTTTATTGTTTCGAAAGCTGAATTATATATCTAGAGCTTTTTTTTATCATGCTATAGGGTTTC  
GATGGATTTGCGGCAAAATTTTTGTACACATGATGATACGATGAATGAGTATCGTCCTTTGCGATGGAAATATCTATCACAAAGAGCAACATATATGTGACGGTTGTTCCAT

>comp247984\_c0\_seq1

CTTCTCCTTGTTAGATGTTGGTTGTTATTTAACATGTTAATTCTGTATTTACTTAAAGTCTTTGTTTTAGGTTATTTTGCTTTTTTGCCCTTTGGGTTATTTAGTATAGATAAGAGTGAAGTAA  
ATTTGTTTCAAGGTGAATAATAAAATAAGTTCTATTTTTCTTCAAAGCAATGAGTTCTCTCACCTCTCTCCCGATATTTTTTTCCCTTCTCTCTCTCTCGGTAGAAAGCAGCTAGAGAACT  
ATTGGCTCTCGGTCAGGTAGTGAACCAAGGGTGTGGTGTAGGTGGCAGCTAGAGAGCTATT

>comp248263\_c0\_seq1

GTCAGTCAGCGGATGCTAAGGCTTAGGCACATGAGGGTAGGTTAGGGCACATTCATCTTCTTAGGATTCTGTGGCTCCTTCTCTGGGGCAGGGAGAGCGCATCATGAGGGCGGAGCAATC  
GAAGAGCAGCGAGGGAGAGGTTAGGGATGGCAGAGCGCTCCTAACCTGAGAGAAGGCACCACAATAGGCAGCAACATCTGGTCAGTAGGGGAAATGGGGAGGGGGCACCTGGTTGG  
CTTCTTGGGGAGGGGCCCCGTCTCAAGAATACCTGGTGTTCCTAACAGCAGAGTAGGGCAGGGCCCAAAGCCCCTCTCCCTG

>comp249521\_c0\_seq1

CTTTTTAAATCCAATAACTTTACTGTAGACAAACCAAAATCACTTGCCCTTCATCTTTTTTTATGCACCCTTCTCCAATTCACGATGCGAGCATCAGATCAACTCAGTGGCTTTCT  
TGGGGTGGTACATCAGTTGCCGCCAACGATAGGGTGAGGATGGTTGTGAAGACGTTGATGATAGTGGTGGAGCAATGGGGAAGCTGCATTACCCACACGGTGAAGCAAATGTTGCAAGA  
CAGGG

>comp249977\_c0\_seq1

TGATTGCCGGAATCAGAAAAAGAAAATTCTGACAAGTTGGCCGAATAGCGTCAAGAAAATTTAGACAACAGAATGAAATCAGTATATCAGTAATAACAACCTTTATCAGGAAGAGTAACA  
AAAATAATAATTGGATTACAACATGTTATTCAAATGCTAAATTTTCAGCAATATGTTATCTTCCACGTCAGTGAACCTACAG

>comp253523\_c0\_seq1

GATCATTCCGGGATGATTCTCTCTCTAGAAAATTTTCGTACATACGAAAATTAGTTTCATCCCTAGACGATGCTCTCTGGACAAAATTTTCGTCCCGACGGTTTGTATAGGTTTCGTACAGACG  
AACCATACATATTTTTTATAGTTTTTTTCAGTTCGTACGGACTAACAGCACTAAAAAATGAAAATTGAGGAGTTTACACACACAACCTCGGATAAGTCTTACATCATTGGTGGATCCAA

>comp255331\_c0\_seq1

TTTTTAATTTTTTCTCTTATTATTACACATTACCAAATTCCAAACCAATGATTCAGAACTCGAAAACAGTGCTAGAAAACATCTATTTTATGTCCTTTACTTGAAGATCTGGAGGCAAAG  
ATTGACGGAGCTTCTCGGCCCTCTCTGAGTCCTTGATGACCAGGGTGTAGAGGTAACGGCTACATCGAACCTTAAACTTCCAGTTATCTGGGTTCTTCTTGATCTTACCAGATCTTGCATCT  
TTCCTGCGAGCAATCAGCAGAAAGTTCCTTGATTTCCTTGACCTCTTTAGGCATTTT

>comp255941\_c0\_seq1

CGTGATTGCTTGAAGTTAAAAACATGTTCTGAAAAACAATAAAGTTTGTAGTTTGTATCATTGATAGGATGTAGATAGAAATCTGCATTGCTTTAAGCTCCGCAATATCGCTTAAACTTT  
CTAAAATATAGTGATTTTCAGTTTCACATGAAACGAATGAAACAAAATTATTATTTTTCAAATATTTTTTATATCTGCAAGAAGCCAGATGAGCCCTAATATTTATATCATTCTTGTGGTTGAT  
TGACCAGGTTGATCAACT

>comp256002\_c0\_seq1

TAACTCTTCAATTAATTTCAATAAAATTTAGTTCAAGAAGCACAAAGGTCTTTTTTAAAACCTCTCTTTTTGAGATAATAAATATTGCATAACTATTATCCACAAACAATATTATTAATTAAGG  
GTGGTGCATTTTCTTCATATCCTTGTGGTCCCCTGATCTTGTGAAATCATTGAGGATGGTGTAACTGAAGCCATCAATATCCATGTGAACTGAAGGCATCAGTCAAAGAGTCCGAAGCCCA  
TATCGTCCGACTCGGAATCAGATTCTTCCTTCTCTCCTCCTTGGCTGCCTCCTTCGGTGCTTCTCTGCTGCCTG

>comp256294\_c0\_seq1

GTTGAGGATGGCATTATGGACTCTGCTAACTTTGAGCAGTTTCTCCAGGATCGCATCAAGGTAGACGGGAAGACCAAGAATTTACGGGTCTGCTGAGCATCGAGCGGAAGAAGAGCAA  
GCTCACCATCACCACAGATTTTGATTTTTCAAAGGTACCTGAAATACCTCACAAAGAAGTATCTCAAAAAGAACAACCTTAGGGATTGGCTGCGAGTGGTGGCATCAGACAAGGAG

>comp257685\_c0\_seq1

AGTTAATGAACTCAATGTTACTTTATCCTAGATGCTGTCCATGTAAGAATTGGAAGGAGGCCTAAGTCCAGATAAGTTGGCTTTACTTCATACTAAAGTTAATGAACTCAATGATACTATGT  
TCAGATTATCTACTTGGTGAATCAAAGAGCGAAGGCTACATGGAATGAAGATGGTAACACCAACTGAAAGTTTTTTCATGACTATGCTTCGACTAGAAGGAATGGAAAGTTGATTAGAC  
AAATTAAGGATAGAAACAACATGGTTGTTGAAGACATGGAG

>comp258594\_c0\_seq1

ACGTATTCATCATTATCATCCTAGTATTCACAGATGAATGCCCGGGTCTTCTGCATTGTTTCATCATCCATTTTCCGAAGTCAGAAGTTGTTTTCAAATCACCGCACAGTGCTGATCCTCT

ACGGCATTGTCCGGCTGACCACTATCCCATCTGGTGTAGGAGCTAGTACTTCCATCGATCCACCGCCATCTTCCCTCTGAACCACTGTCAGTGTA

>comp261540\_c0\_seq1

CAAGCAGTTAGAGATGTTTTAGCACTTTCTGATTTTGAAAAGAGTCAAACCTTGGATTATTTTATGATCATATAAATAATTAACCTATTTTTCTGTTCTTTAGTACCCATGTGCGTGGTTTTGA  
AAACATTAATCGTTGATGGAAGTTTTTCATATATTGTCAGCAAGGTACACATTATAATCTCAAAAAATTTACTCTGAACATTTACATGCGACAAAATTTGCTTGCAACCTCCTTTTTGTT  
AGTAACTTCCTAAAGGTACTAATTTCTGAAACTTAAAAATTGAAAGCAGCTGCTAAAAATGAAGTGATATATCATGAATGACATCAAAGATTAGTTGGGACCCACATGTCTACCGCCCC  
TTCTCCTACTGTGGGACCCGCATGCCTACCAAAGAAGATGAGGATTCTAGAGTTCAAAGATGGCACAAAATATGAAGAAGAACTAGAAAAGATTACAGTTAATGAGAGGGAGAGAGCAAT  
AAATGAGGGAAGGTAGAGCAAAGGATCGCAAACAATAGGAAAGATATTTTAGCAAGGGTACTCTTTGTAAGGATAATCTGTTAGGGATAGCAAATTGGATATCATGCAACAGCATAACT  
GTGTTGGTTAAGTCAAGAATCAAATGTTACATGGAAGCAAGGAGACCATATAGGGAAGTTCTAAGAAC

>comp265258\_c0\_seq1

CAAAGAACGATACAACCTGCAAAGCCCAACACCACATTCCAACCAAATGAAAGCCAACCACATCGTTAAAAGCCGCCATTAGAGTGGCGCACACCAGCCCAAACAAAAAGAAGACC  
CCCAACTATAATAGAACAATCACAATTACTTCCTTTTCTAAACAAAACCCAAAAGCTTTGCTAAGTTTATGCTTTTCATTGAGAACATCAACATTGTCATGTTTCATTGGCTTTTCTTTAGTGG  
CCGATATAAAATTCCAACCTCAGAAATTATAAAATAAAATATCTCATATTAACCT

>comp269052\_c0\_seq1

GACATTATAAGTACCATCGCTCCATATCAAACAGCTGAGATAGTGATCTTTGGAGCATCCCCTTCAATTTTGATTGAAAATGATTTCTTCTCCAAAAGGGCTTCAAAGCCAAGACGTTTCG  
GTTCAACATTAATCTTGAGACTAGAAGGAGAATTCACGATCGCCTTGTAAGTGGAATTTGACACTCCACATTAGTGACTGTTCTTTGGAAGGAAGCTGAAAAGGTCTTTCCTTGTG

>comp271609\_c0\_seq1

GTAAATTTCCCTTTATTTACTTTTCATAAATCGTCAAAAAAATTTCTTTACAATTAGAGATAAAATTAATGGGAAACTTTTGAAATTAATTTCTGTGACCATCTGAACTTCAATTTACCAAA  
TTTATGGTTGAACTAAACATCTCTAAAACACGAATCCAATGACACCAAATTCATCAAATTCGAGCCCAAATGGACCCAAATTTGAGGGTCCAAAGCACGTTTAGAAGCTTCAAAGCATAA  
ATTCGACAACCAAACGATTTCCAAAGGTGACAAGCTTATAATCGAATCAAGCGGCTCTAGGGCTTTCAAATCAAG

>comp27294\_c0\_seq1

TTATACTAAAAAACTATTTTAAAAAGTACTTAGAAAAGCTATCCCAAACAAACCCGTTGTCTCTCTTATATATCTTAATCAAAGACACATTTGAGCTCAAGGCTTCAATTTATTTTATATAT  
TTTCTATTCAAATATGATCACTTTCTAGAACACAAATGAATCTTGTTAATGATTCAAATTAATAAAGTTTATATTTAATTTTATTTAGTTGGCTTCTGACTCAAGTACCAAC

>comp274339\_c0\_seq1

AAGCCATGCATTACACCATATTCACCAACAGAAGGCTGACTTGGCTCAATCTCTCCCAACTGTGGCCCTGTCTGGTGAGGCAATGGAGGAGAGAGAGGTTGCCTCTGCTTAAACCACA  
ACTGGTTTCTTCATAGGACAGTTGTTGTCAGGTTGAAGCTGTTGAAGATGTCCATGGAAATGAAAAAACAGACCCCTTAGACTTTCTGGAGCGGCCCGTCTCAAACCTACCTTCCTCCTT  
TGCCAGCTGCAGCTAAATTTGCTCAGGCCCTGGGAGCCACAGGGCGCAGTGGCATTAGAGGCTCACTGGCTTGGGGTGATGAGGCCCCATGCAACTCAGCCTCTAGAGACCTACTCTTT  
GTCAGGGGTCTGTCACTGGAGTGGACCCAGGTGGCCA

>comp276418\_c0\_seq1

AGTCATAAGTGAACGTGATGAAAGGGCTGCAAGAAGACACAATGCACTTCTTGACATTCACAAAACCTGATGTGAAGATGCCTTCTGGGAAAGCACCTCATAACCAACACATTTAACTG  
ATTCAAAAGAAAACCATTTTCTTGATGATGAGAGTAAGACAACCTTTAGAAAAGGAATGCCAATGTTTCGAGAGTAGTTCAGATTCTGAAGAAGTTGAAAACATAGCAACTCCAAAAGATT  
ATTATGCTGAAGACAGTTCATCTAAAGAGGTGACACAAATTCAACTAAAAAGTA

>comp276822\_c0\_seq1

TGTTTTGTTCAATGCATTGAATTTCTGGCCAGGAACTGCTGTATTTTTGTTCTTTATTGATGCAGTTGAGGCAGTGGCATGCAGAGGATTTTTAAATTTCTTTATTTTTCTTGAATTGCTTCTG  
TCGTGTCAAGCTAATGTGATTAGATATAATTTCTTTACGTTTGTTATGTCCTCTAGACTGATTTTTGGATTTTCTGAATATATTCAATGTACGTGAGATAATTTTTTTATTTGAATTGAATTGAAT  
TGATCTTCCTTTC

>comp277535\_c0\_seq1

CGATTTTAAATTTAGGTTGATCTACAAGACATAACATCAATGTAACCTATAAATAGGATGTATAGATTGATGTAAGGTGCCCAATTTCTCTGTCTCCCTCTCTCTCTCTCTTCCAAGAA  
GGCTCAACAAGAAAAGAGAAGAGAAAAAGAAGACTAATTTTTCTGTGTGGACGTTGAATGCCGTCGTCCCAAGCCAATCAGAATGCGCCACATC

>comp281084\_c0\_seq1

CAGTGACGGGAACTCGTGGAGTGCTCAAGAAGAAGTTCAAGCACCTTGCTGTGGATATACAGATGGTTGGCAAGAAGCAGGTTTTGGTTACGAAATGGTTCGGAACAAAGAAACAAC  
GGCCAGTGTTCGTACTGTTGCTCTCACATTGAAAACATGATCAAGGGAGTAACTCTGGGTTTCTGTACAAAATGAGATCAGCCTACGCTCATTCCCAATCAACTGCAACGTGAAAGA  
AGAGGGAAGTATGCTGGAGGTCAGGAACTTCTCGGTGAGAACCTGAAACCGTG

>comp284697\_c0\_seq1

CAGATAGATGTAACAAATACTTAAAAATATAACAATTTATTATGAATGTGTTGGATGAAAGTATGAAACCTAATGACGCCAACTTATGTTTCAGCAATCAAGATTCAAGAGAGTTCAGCAC  
GGTTACCGTGTCCGAGACTACAATTAGCAAGCATGGTTAAGCTTCAATTTGTCTACCAATTTAAAGTCTCACTATGCTAGTAAACAATTAGGTAATTTCTTGAAAGAATGACAGCCTCA

>comp284947\_c0\_seq1

TCAATTAATACATTCTTACAATTTAAATAATTTGAGCAAATATATATAAAAAACAACCTTCAAAGAAATTGATCTATATCTAATTTAACTAATCAAATGAAATTGAACATTGGAAGTCCCATTA  
TTGGGCTTCTTGTAGCGAACAGTAGATATGTTTACATTTTGGCAGGTATAATCAATAGTGATTTGTTTTGGCCTAGGCTTAAAGCCTTCTTCTTAGCCAGAGGGGCTAGAGTAGGTGCAAC  
CGATAGTCTTGAAAATACAAAAGGTCTGGGTGCAACAGCATTCTTAGTCATCATCTTTCTGGTTGGTGCAGTTTACCCGGAAAGGAACTCGAACACTTAGGAAATAGTTCTGAATTGCAA  
CGT

>comp286910\_c0\_seq1

AGAAATCAACAGAATATATATATAATTAATAATATAGCTTGATAAAATGTGGGCAGACAACAATGGTGTAATAATGTATATTAAGAACTGATGAGGGAAAAAATAAATATCTAACTTGAAC  
AAAAATACCTTATATTGAATCACGATTTAGGCGGAAAAAAAAAATAAAACATACCTTGCAACAATCCGAGAGACAAAGCAAGGCCGC

>comp288191\_c0\_seq1

GGCATTATCTCTTAATCTAACAATGCCGTTATAATTTAGCATAAATAATTTAGCAATAAATAGGCCATTCTATAGCTGTCCAATCGACTCCCATTTATACAAATAATCAACAAATCTACTGCATGC  
TCTACAAGTCTCATAACAGGCAATGAAATGCCAAAAAATACATTCAATTATCAGCAGCCATGAATCTTAATGCATTAATAAACAATTCTAATAATCATTAGATCCACAAGGATTTGCGCTG  
GAAGAAAACTTTTAGTCAGAACAGTA

>comp288554\_c0\_seq1

CTTAACTGCAATAACTGAGTCTCTTATTCAATTTATTCTCAGCCTCTCAAAAAAGAAAAAATTGTTGTGTCCAGACAGCGTACCGAGTGGTACCGTCGTCGGCACCGAGTGATACCGCCG  
TCGGTACCGAGCTCGGTACTGAGCGCCTAGTGATATGGAGTTTTTTTTATTGGTCTCTGAACACAATAATTACTCCTTTGTTTGGATTGAAAATAGTCGTTTTAACTAGCCAGGTGACCGT  
GCCAGTGAAGTAAATAAGTGTCATTATAACCACTT

>comp288766\_c0\_seq1

GCGTTACACACTTATCAGAAGTTCAAAAATTCTGGCCACACTGCTTGTCTTGCCAAGACCTTACAACCGCAGCTGCAAGAAAAACATACCTGTCCCCAAAAGTTGTTTTTATGCACTGTG  
TCTCGTCTAGGCAAGCGCTTCCAAGAAGCCAGGATTCACCTTGAGAATGTGTCTCTCTCTGGCAGGTCTCGACATGACGACTACTGTGTAGGTGAGGGAGGAACTTTCAAAGCACTGCTT  
TTTTTCCCCTGACTACGTGTGAGAAAGTTGCTCCTGCTCTAGATCTTATGTGCCAG

>comp290626\_c0\_seq1

CTTCTCTCGTTCTATGGGATTGATTCATTTCTTTAGTCACGTCTTTGTATAATTTACATACAACCTTTTGATCCAACGTTATTTTTATCATGGTGGGTGCAAGTTATGTCAAAGACTAAAAAC  
ATGAAAATGGATCACTTTAATAACCACAAGATGTTCTTACAATGTGAAGAACCCTAATTTTTACATCACTTCTAAGCAACAAAATTACATGGATGGTTGTTTAAACCAAGATAATTTAAAGCAT  
ATTTTAGCACTTTTGATAACGCACTACACTTCCTCCTTCCCCTTATGGAATTAAGAGAGCCTTTGATATCCATCAAACCTCAATGTCCTTGACACTAAGGTAAACTCTAGTTAGTTCATCATA  
AGATAAA

>comp290629\_c0\_seq1

CACATGTAATAATAATTACAAATACTTTGATTAATGATAACAAGGATAAAAAGTTGCCAAATAGATGCTTCAAGTCTCATGTTAGTACAAGGAGTACTCTCAAACGTTTTTCATCAATACTTGCA  
AATTGCTTGAAGAATTTATAGAACATATTTTCAAGAAATTAATGTAATGGGATAATTATCTATTGGATGAAGAACTATTAGGGCGAAATTTGGGCCATTGTTTAGAATCCTCATTGAAGCAAT  
ACAAAGACATAATAATCATCAACAGAACCCTTCATTAAGATTACAAAATCAATA

>comp292782\_c0\_seq1

AGGAACTAATTTGGGCGTTCAACGGGAGGTCCATATATCAACAACGATGATTATGATGCTCCTCTTGATGAATATGGAAATATACGACAGCCGAAGTGGGGGCATTTGAAGAACCTT  
CATGCTGTTATTAAGAAGATGGAGAAAGCACTGACTTATGGAAACGCAGAAACAACCTGAGCTTGAAAATGGCTTATCAGTATGGTTTCTTTAGTTCTATAATGTTTA

>comp293379\_c0\_seq1

AACTTGGTGCCAAGGAGGAGCGCAGAGATGAGATTAGGGGGGCAGGCTGCGACGTTATCAGTCTCGAATTGATATCAAACCTCCGTCAGGCATGCAATTTGCAGAACTAGAGAAGACAG  
AAAACCTCAAGGAGCTGTTCCGGATGCAGACTTTGAGCAGGATTTAAGCACTACTTAGCCCAAATCATTCCTTCACAGCAAGCGAGCT

>comp294051\_c0\_seq1

GAGTTTGTATATACCTTGGACAACCTTCAGCAGGTCCATGGATCACCAAGCCTTGAGTGCTCAGTGACAACAAAGAGCATGTTAATATTTCAAGTAAGCAATAATAGAAAAGTTAGCAG  
AATATAAAGTTCTTACAACCTTTTTTCATTAATAATTTACCCTGTAAAAAGCATTTTGCAAGTTTTGATAAAGTTTACCAAAAAACAGTTTATTTACCACAATCATGGTATAGAATATTTCCGTC  
ACTTTTCCCCTTCCCAAATTT

>comp300579\_c0\_seq1

CTTTTTGAGAAAAAAAATCTTGATCCTCCTCGTGTGAAGCCACAAGCTATGAAAAATGACATAGAGTCCAACCCTTAGACAAATCCAGTGGAAAAAGAAGATTTGTTGGAAAAAATCGT  
GAAAGATGGATTAGATTATATTATGTGTGTGGATGCTGACGGTGATGAGAAGCATGCTCCTAATGTTGTGGGTGAAAATGGAGTTGAGATGATAACAGGGGATGGTCTACTACTATTTCAT  
TTGTTAATACAATTTTGGAGA

>comp300676\_c0\_seq1

ACACACAAATATAAGAGCATGTCATACCCAATTCAAAAATATAAATATTTAAGCATAAGCAATGATAAAGTAAATGCACAAAAATAAAATATCTAACTATAGAAAAAGTATTTTACATTACTT  
GACGCCCTAAGTTAACATGTAAGCCTTTCCCTTGCTAGGATTATGCTAACCACTCCATCGCAAGTCAAACCTTTCCATTATTGAGCTAGTGGAGAA

>comp304254\_c0\_seq1

TCAAGAAAAAGAAGAAGCTTATTGGAGGCAAAAAGCCTCCAAATTTCTTGTGGAAGGAAATTGTAACATTTTTTATTTTCATAACCTTGCTAATCATAATAAAATCAGTAGGAGTATTCAC



AACCTCACTGCCCTGATGGTAATGTGATTGAGGACCCGGATCAGATTGTTTCTTCGAGTGCTCTTTATTTTGAAAGTACTTTCAAAATAAAGAG

>comp311451\_c0\_seq1

TTGTTATAGTTTGTCTTTGCTTCATGCTAAATAACATTGTCCCTATCCTTCTTATATGGATGAACAAGGTGCTCTGTCAAGTGTGTTGCCATTGTTATGCCAAAGGTGCACATGCTGTATATT  
ACTTTTTGGAGCATGCTCTTTTTTCACAAATTAGTATTTTGATGTCAACTTTTGGCGAAGCGAAGCAATTGAAAGCATTGCCAAACATGGCTGCAAATCTATTTCTACTGCACTATTTTTTAG  
TGTATCTCTTCGTGATATAATTTTTCTTTATTAGATTTAAATG

>comp313183\_c0\_seq1

CCCCTTAATTTAACTCAACTTAGACTTAATAAAGAAAGTCAAGCCAAGAAATATATCAACTAGATCATCAAATCATTAAAATTCTTCCTTAAAATTTTCGTAGTCCTCTAAATCCTTGTTCAAG  
GAAAACCTTGAAAGTGAAACTTCTATCTCCAAGAGGAAAGGTCTTGTTACTCTTTATATCACCTCCCCTCTTGTTATGATAACCGGGGTAA

>comp314912\_c0\_seq1

CTACCCTACTATCATTGGATCTCTCAGCCCTGGCCATTGTGGCAAAAATTCTTTGAAGCAGGAATTATTAGTATTTCCATGTCACGATTTGGCTTAGAGGCTTAAATTAATTAGGTGGGAACA  
GACAATCGGACAATTATTTAATATTTTGTTCCTAAAATTACTAACAACACTATTTTAAATATACTGAAAGAGCCATACACGTTCCACTCATTTAAATTTCTTTGGATACCTATGTAAGCTTGTTT

>comp319596\_c0\_seq1

GGCACTCTACCCACAGGGAGCGTCACCCTGGTTCCTTCGACATCTGTCTCAAGGATTCACAGAACCATACTTTTCAGCACCCGGCTGAGTAATGTGTTTCATCATCGGCAAAGGACAG  
AAACCTTACATCTCGTTGCCGAGAGGAAAGGGCATCAGGCTCACCATCATGGAGGAGCGGGAGAAACGCTTGGCACAGAAACAGTGAATAACTGCGGTGGTTGTACTGCAGGCATTGC  
CCAGAAAATTTTAAACCCATGAACCTCTTGATTTGTTCTTATGATTGGGTACTTGTGTCTGGAGTAATAAATATAACAAAACACTAGCTGAATAAAAAAGTTTCAAAAAA

>comp320584\_c0\_seq1

AAAAGATGAAGAAAGCGGTCTTCAAAGTCAAGAAAATTAAGTTTAGTGCCAGTATAAGAAGATGAAGAAGCATTGCTTTTGACCTGAGGAAAAGCATAAACAAGATAACTACTAAAAT  
GTAAAATAGTATGAGGAAAAACGCTATAGCCTTCTCACAACAGAATTATGCCTTTACATTTTCCCCCACTCATCTAATACAATAGTAATATATATACTTAGGTTGATGCATACAGTTTGATAA  
GAGTTGTTGTCCGT

>comp329865\_c0\_seq1

TTGAAGGCCAAGAACCTAGCAAGTATAAACTACTGCGAGGATTATTTCTAGTAAGAAAAAGTCTGTGTGAATTAGGATATGAATCTTAGAGAAAAAATAGATGAATAAACCAAATAGAG  
AAGTCCTAAGTGATGTGGGAAGAAATCAAAGTAAAAGGAGTCATCGTTCCCTTCACCCCTCCCCCATCCCTTCTTGTTTCCTTCTTTGGATATATTAGCCTGAGTGCAACTTTACCTA  
ACGTTGTATTCAAATTGCAGCACTAATCTCTTCCTCTA

>comp33706\_c0\_seq1

GTTGCAGAAATCATACTTGAAGATATGGAGAAGAATATGGAAATATACATAGAACAATCAAAGGCAGCTCAAAGAGCAGGAAGAGCTATCAAATTGCACACAGTGATAACTTCAGCTA  
CCTGAAGGCCTCTTCAGGTCTTCAGACTTAAATGAGATGAGCAGAAGGGCGCAAAGCGCTCGCTTTGATGAGTTCATCTCCTTCACTGCATCGAAGAACAGCTCTCAGTTCTCATCAGG  
AGCTTCTAACAGGCCTGGAAGAATGAGCTTTTCCGAGGAACCTTCTAATGCAAGAGAAGCCTTACCTGATTTCCCCTGAATCACCACCGCACCCAAGCTACATGGCCAGACTGAATCCTG  
GAGAGCCAAAGCAACATCACAGAGCGTGCCAAGGAGAATTCCTGAATCTTTTGATCAAAAACACTAACGAGTAAACAAAGAGAATTTGAAGGAAGGAGCTTTGGCAGAGGTGCAGCAAG  
CAAATTCATGGAAGATGTTCTTGATTGGACTGAGTTAATTGACTAATATGGCTAAGCCTAGCAGTTTGATTGCAGAAGGATTTCAACCATTTCTTGTT

>comp341963\_c0\_seq1

AGTTAATAGCCAAAATCTACATGAGGCAAATCAAGTGCAAATCCCTTTAAAAGCATAACACTGACATTTCTATTACTGATGGGTGTGTGAGTGTGTGTGGGTGGAAACCACCTGAAA

GTTATAAAATCTTCAAAGGTGATCATCAGCTGAGAGCTCACATAATGCACAGCTGCCTGTCCGGGAGAGAAACAGGAGCGACTTCGTCAGTCATCTCTATTCTTTGGGTTGCGGATTTTT  
CTTATTTCCCTTCTTGGCAAACCTCATGTTACGGAGGAACTTTCTGTCCATCCCACAAAGTGACACCTTCTGAACCTTCGTAGGCTTCTTG

>comp341983\_c0\_seq1

GATTTTTTGGTGTTCCTATCTTGTTCGCTGTGTGTGGAATTTGAGTTCAATTCTATTCAACATTTGGTTTATATGATCCAGTATACTTATTCTTTGAAAGGTGGTGATTCTATGTTTTATTGT  
GGCTTGTCTTGGTTCCTTCATATTTTGTGCCATGAGATATCTATTTCAACTCCTGCCTATTGCTCACCGTTTTGG

>comp34844\_c0\_seq1

AAACTCTAAACCCATTAATAACTGCTCATTCTCCTCCTCAGCCCCTGGCAACCACCAGGAATAGAATTCTTTCAAATATATCTGAACAATCTATGTTTTACCAAACCTCATCAAAGCC  
AAATGGATAACTGTTGTAACAGTCTCATAAAAACCTCAACTATCAGGATTTCCCTTGAGGGCAGCAGGTCAAGGATCTGGTGTGTGCACTGCAGTGGCTCTGGTGGTTGCTATGGCCTA  
AGACCAATCTATTTTTCACTTTTAAATATTTTATTGGAATCCTTTTGCTAAAACCAAGTAAAGAAGTGAAGACCACCTAATTGATATTTAAGGGTCCCCAAATTTCTAGGCAGTTCGCC  
TGGCTCGGAAGAGTTGATAGCTGCTCCCATGTGTAATGCAGGAAAGATGTGAAGCTCCCAAGATCTGTCCAACACCAGAGAGGACATCCTTTTGTGTCTGCAAAGTTCACAGAACCCA  
AGCTGAAGGCATCTTCTCCACTTCTCACAGCCTGTTCAAGTGGCAGGAACCACTATATGGGCACCACAGCCATCCTGTGCTCAAGAGAATTCCAAACCTTAGGCCTTCCAGAATC  
TTTCCAGTCTAGCCCAGATCTCTGAAAGGGACAGCCCCTGGCTGGGCTTCAAAGATAAGGAGCTCTCGGGCCTTATTCAAATAAGGAGTTCCCGCTCTTGCGCACTGTGTTAAAAATA  
CGACTGCAGCTGCTGGGGTTCGCTGCGGAGGTGCG

>comp35333\_c0\_seq1

AAAATATGCATAAAAGATCCTTAAAATATAAGACAAATATTC AATACATTCATTTTATGAATTTTTTCCATAATCACTTCTCTATAGGAGTTACTGTCATGACTGCCCTTTATCACTATCCACA  
TTAATACCTCTGAAATCCCTTTGTTGCCACCTCTAGAGGTGACAAACCCATCCATCTTAAATTGTCTATGTGACCTTTCTGAGTTGCTCCATCACCACCTTCAGGTCTTGCCATCTTACCAT  
TACAAGAAGGCTAATATGAATGCCATCAATAATTTGGCATCTTCCCGTCCAACCTCCATCACCTCCTTCAACTTGTATTGTCTCAATCCCTAGGGAGAATTAATCTAGCCATCTTTTGTGGC  
TTGTATGATCTTCTGTATTATTTGGCATTGCCTCAGGTCTGTGCTCCCCACACATCTAAAGAAGAACCGATTCAACCATCTTTAGTAGCTTTCAAGACCTTCTAACATTGCATTATCATAA  
CATTAAGTCATGGCATCTCCACAAAATTAATAATCAATCCGATCGTCATAAATAG

>comp35479\_c0\_seq1

CTTCGAGGTACCTGTTTTAAAAATACATAATTTTTCACCGCAGACACCGTAGCTCAGACACGGGACTTAAAGTTATCTTTGATAGGCTACAAGAGCGTGTATAGAGCATACTCTCCCCACC  
GCAACCGTCGCTCCTAGCTCCCTCTTATTGTGCTACAAGAGAGCGTATAGGGGGTCCCCGACATGTCATGAGCGCCAAGAATAGGATTTGGAATATTATACCTTACACGAGGGTGATGAAG  
GCGGCTATGCTGATGTTGACGGCTATTTTCGACGTTGAAGGATGTGTGCGAGGCTGAGGGCACGAACATCGAAGCAAAAAGAATTATTTCCACTCTCTCGTCTTTTTTATTTTTTATATTTCCCT  
TTTTTCTATTTTTCTCTATTCCTTTTTTTAATCATTAATTGTAATTAATCATAATTAATAGTAATTAATTATGGTTATTTATGGTTAATGATTATTAATGTAAGTCAATAGTGAACATGATATTG  
CTCAAATATCACTGTGCTGCCTGTTCACTTCGGCATTCAATATTTGAATGCATGCTTCAAAGCTGCTATTAATTTTGAACCATGCTCTGCAAAGGAAATTAGGGAAATCACCAGAAA  
ATATAAATTAACCTTATTCATATGTTGGTGAAAAATGCATGCTTTCACTTAGAGAACTCTATTCAAGTTTAGCAAGATAAGGAGAAGACAAAAAGCAATTTAGATTCTAGAGTTTTATTA  
GAGAGAAATTGCATGGATATAAAATATATCATAAAGAGATAAATGTGCTTATTTCTTAAGACCAAATAGGAAACAACATTATGCAACTTCCAAGCTTCAAACCTAGGTGCTGGGCTTAAATA  
TATGCCTGGATAAACCACAAGGGGTGTCGGAAGCTTTATAAATGGAATTTTTGAGGAATTAATGAAAGTTCAGGTGTTAGAGCTTCATTTTGAAGAAATAATGAGCAAGAAGGTTTGTAAAT  
TAGGTATGAATAAATGGTCTGATGGCATAAGTCTTTGGTACATGTGGGTTTCGAAACCTCAATGATTTAAGTATTATTCACCTGGTTTATTAGAAAAGATTGAACAAAGAAATTCACCTATC  
GTTACTATTTTCTCTGACTAGATTAGTGACAATAGTGTGCAAAGCATGCTTCTTTTTTGGAAAAGATATAATGACCATTGAATATGTAATTTATACTGCGTATTGTGTTGCTCTAAG  
CATGATTTTTTGTGCATATGCATTTAACAACCTGTGACATATTTGCTCTTCTGGTTGCCAAAAATGTGTCGGCGTTGATTTGCTTATACATATTATTGAATACCATAATATGTGCTTCAAGTA

TAAATCAGTTGGTGTAAATCATGTTAAAACGTCCATTTGGATGATAAAGGTACTGTAATTTTCCTTTTTTAACTTGTGAAATTGTGTGAGTATTTCCAACCTTCTGTTTGGACTGTATGCTGT  
CATGGTGTGTGATGATTAGGTGGTAATCATCGTCATGCAATATGTAGATAAAAATATAACATCTTTTTTATGATCTGTGTGAATGCTGCCTAAGTTTCAAAAAA

>comp35777\_c0\_seq1

TAAATGAAGAAACCCATACTCGTTCAATTTTTTTTTTGTGGATGCGTAAGATAAAAAAGATGTGCCAAGTTGCATGTCATTATTGGCATTATTGGAGTAAATGCTCCATATGTCGCTTGGTA  
TTTTACATCTTACATGGATGTTCAACTTGCCCAAACCTAACTACTATAAGTGCCTTGTGGGAGCTCACTGTCAATAATACTACCTAAACCCCTTGGTTTGTGGTTGTGCGAAGTTGGCTTACT  
CCTTGATATTGGATGGTGCATTTGGATGGTTGATGTGGAAATGCTTGAGATAGTATTAGCACATGAGTTGTTATACACTATGCTTCAATTAATAGGTTGTTACTTTGTGTGGCCAACCATCT  
AATGACTATCATCATAAATTTTAGCTATCACTCCTCGGGAAGTGACCAAACGATCCGCTTCACCTACTTCTCTGATGCAAGCAACCAG

>comp36213\_c0\_seq1

AATTTTGAATGAATGGGGTTTTCAAATTCGGTCTATTGGAACTTTTTCATGAACGCTGCATTTGGTTGGAAAAATCTGCATTTAACAACGATTTTCTTGCTAATCTTTATTGTTCCGCTATTTTC  
CTTTGTTGGAAATCCATAAACAAGCTGTGCATGGTGATATGGAAGATAGTAATCTGACTATTGCTACAAATTCAGTGGGAATGGCTTCCATTTCCCTGTTAGACAAAACATCAGAATAA  
AACACATCAGAATAAAAATCGGGCATCTAGGTAATAACAAGGTTTCGGTTGTTTCAGAAATTGTTGGCATCCTCCTCTCAATTGGATCAAAGTTAATGTAGATGCTTTTTTATTATCTTTTTA  
TAAGGCTGGAGTTGGAGGTGTTTTCCGGGACCACAAAGGAAGGCTCTTATTAGCATTGGGTTCAATGGTGTTCATTGGGACATTTCTCGTTGGAAATGTTAGCTATTCACTCATTGGAA  
TTGGTCTTCAATTTGGATGATGCAGTACAAATGAATTATAATTGAAGGGGATAATGTCAATGTTATTAAGTATATCCAGGAAGATATTAAGAAGATGAAGGCGTGCAAGTCTGGCAATGGAA  
TTGAATATTTGTCTTTTATTAAGAATTTTCATCATGTCATTTTTAATTGTGTGAATAGGGATTGCAATAAGTTAGCAGATGTTTGTGCTAACATTGCTCTT

>comp36740\_c0\_seq1

TCTGCTCAGAAGTGGTTGGAAGTGAGAAATATGAAGTCTTTTTGGGGAAATAGGAAGGCCCAAGTAGATGAGGGATTCTTTGACTTGATGTATCCCCAAAATCTCACATATCTGAAGCAT  
GTCAGATCCAGGAGAAGAGAAAACAATAGAGCTTTTAGTTGCATTAATTTGGAGCCCAGATAAAGATCCAAAAAGGAGCAGGGAGGAGTTGAGGGCAGCAGCATTAGCCCTAGAAGCA  
GTTCCAAAACTAGAAGATCATCGGCATACATAAATGATTGATGCAGAGATTCTTACAGTGAATACCATTGAAGCTGTTAGAGGAGTTGCTGAGAATATTAGAGAGACCGTCCATTACAA  
TGCAAAATAAAAGGGGTGAAAGGGGGCATCCTTGTCTGAGACCAGCTGAGGAGTTGAAAAACCTTCAAGTGAACCATTAATACAAAACAGAGAAGTGGACATCCATAATACAACCTTTT  
ATCCAAGACACAAAGGCTTCAGGAAACCCCTTTTGGATTAGCCTAGCTAACAAAACTCTCTAGAAACAGAGTCGAAGGCCTTCTTGATGTCTAGCTTGGCACAAAATTTCTTGTGAGG  
ACCTTTGAAATCCCTAAGAATTTCAGAAGCTAAAATAATGTAATCAGTGGAGCTCCTCTTAGCAATGAAGCCAGATTGACTATCATGAATAATCA

>comp37100\_c0\_seq1

GCCTCTCTGGTGCCCAACATGCACGTTACAGTCAAGAAATTGTATGAATATCATTAAATAGTTCTACAATATTATATTGTTGTAAAAAATGCAATAGATAAAGGAATAATAAACTGACCAA  
CTTTACAACCAACCTAAATTACAAGAAGGAAGATAAACATGATAGGAATGGAATCTGTTGAACTTTGATATAAATTGATGTGCATCAGCAAAATCAGTCATGAATATGTTTATTAGGCTTC  
GTTCCGGACCGCTTCTTATGGTTTCTTAAAGCAGTTTTTTAATATTTAACTAAAGTTAGAGAGGCTTTAAAGAAA

>comp37137\_c0\_seq1

ACTCCTCTTTTACATATTGAACACATTAACATTGTCTGAAGTAATCTTTGTATTCCACTGATAAGTACTCTTATATGTATCTCAATACTTATTATTTCGTAACCATATCTGCATCTACATCAACTA  
TTCTAATGCAATAATCATGAATAACTTCATTAATGTTATTATGCTTGAGTACCGTTTCATAAATTGGATCAACTACCCTAACATCCAAATCTTTAGAACCATCGTCGCTAGAACCCTACTCAT  
TTTCTTGTACCCTTATCAGCAATAGGGTCATAACCTCCGATCCAGACTGGTTTTCCCTAGAATAAAAAATCAAAATATATATGCATAGAAGGACCAGATACATCAGTTGCACATTCTCTTTCT  
GCATATCTGCATTGTACTAATATATATTCAGTAAAACCTACACCAACAAAATTTAATTCTAAATCACCATGCTATGAATGTGCTCAATGTTGAACTTACCTCATGCTAAGTCAAACAGTACACAT  
ATGACTAAACTAGACCTAGAGTAATAGAGCTGCCTAGCTCCCTCTGACCAGTTCCAAATAGTCTCTTTATTACAGAACCATTGCTTATACTAAAAGATCCCTTATTAATATACATGGTGGAA

ATGTTCTCACTCCCTATTGGTCTAATACAATTCTCAACCCTAGATTGAAAACATCGATTCTATCATGACATATCATTTATCCATACAAAAACACTAACATAACATTTAGTAATACTGTCTCATAT  
GTCTCCTTCCACAACCTAGCCACACTAGTGCTCCACTTATAGAACCTCCAAAAC

>comp37335\_c0\_seq1

ACGCCTTCATCTTCTTAATATCTTCTGGATATACTTAATAACATTGACATTATCCCCCTCAATTATAATTCATTTGTAAGTGCATCATCCAAATTGAAGACCAATTCCAATGAGTGAATAGCTAA  
CATTTCCAACCGAGAAATGTCCTCAATGAACACCATTGAACCCAAATGCTAATAAGAGCCTTCCCTTTGTGGTCCCGGAAAACACCTCCAACTCCAGCCTTATAAAAAGATAATAAAAAAGC  
ATCTACATTAACCTTGGATCCAATTGAGAGGAGGATGCCAACAATTTCTGAACAACCGAACCTGTTGATTAGTACCTAGATGCCCGATTTTATTCTGATGTGTTTTATTCTGATGTGTTTGTCT  
AACAGGGAAATGGAAGCCATTCCCCTGAATTTGTAGCAATAGTCAGATTACTATCTTCCATATCACCATGCACAGCTTTGTTTATGGATTTCCAACAAAGGAAAATAGCGGAACAATAAA  
GATTAGCAAGAAATACGTTGTTAAATGCAGATTTTTCCAACCAATGCAGCGTTTCATGAAAAGTTCCAATAGACGGAATTTGAAAACCCCATTCATTCAAAAATTTGCATTATTCTGAAGGAG  
TTTTGAACAGCTACCTGCCACATGTTCCATAGTCTTCCATCACCTTACATCCTCTATGACATAAATTACCATCTCTTAACCTTCTATATTTCAAAAACTGGAATGTGGGAATAGCATTTTGATAT  
AGCCTCCAACATAAAAACCTCCACCCTGGATTAAGCTTAATCTTATTAATCCAATTCCAATACTTCTTTATAATCGAATACGCCACAGCAGCTTCAAATGATAGAGCAGAGATCGATTTACCT  
GCCACTTGCTGAATGAGTTCTACTTGGTCTTTAGTAAGACTTGGATCAATCTGGACTTCACAAATAAGCTTCATCAATTCCTCTCCAAATGATTTCTGAAGCTCTTCCACGTCTTAGTCACC  
ATTCTTGATGTAATAGTCAAAAAGTCATCTCATCACTTTGTAAGTTAGAAAACAAAAGTAGACCCTTAATGGGAGCTTTATCCAATACCCAAACATCTTAAATCACATTCACGGATTCCCCTG  
TTGAGATCTTCCATCTCACAATCGGTTGTAGAGCCATAGCACCCTCAAAATTATCTACCAAGCAGTAGACAAATTCTACTTGACTTCAGGATTCCAGTATACCGAACCATATCTGAACTCC  
ATGGTCTTATACAACAAAGAATCATTTTCATTAAGAACTTCCATGCCAACTTAGCTCTTAATGCTCCACCTTGCTTACTCATGAATGCAGTCCACGGCCTCCAGATTGAATAGGTTTACA  
CAATGTTTCCCAGTACACATAGTGAAGACCCCTTCTCGTGTCATTCTTATGCAAAAATAAATCCCTATTTTTGCTGAAGCCTCAATGATTGCTTTAACCTCGCATTGATGAAGCTAAAATGA  
TGCTATTCTCAATTGGCTCTTTATAAATAGTGGGTTTGTCTTG

>comp37469\_c0\_seq2

TATAAAAAAAAAAATTGGAGCAAAAGATAATACCATAAAGCATGTCCATCCCCAGTTAAAAAAAAACACAAAAACAAAAGCAAAAATAAATATCATTAAAGACTTTTCTATCCCCCATTGAAA  
GCAAAAAGGCATGCTGCTGAACCAACGAGAAAATTTGGATATATCTTGTGCTTCAAAAAGCTTCTTCAATGAGATTTTTCTTTTGAAGGTGTAACCTTCCACTTTGTTCCATGATATT  
CAACCGGAGACTCTTTGCTCCAGCGTAGTTGAGGAGGTTGGTGTGGTGAATAAAGACGAATCCATGGCATAATGCA

>comp37832\_c0\_seq1

TCACTGCCTGCCCTGCACTTGACCATATGAGGCCAAGATCTCAATATCACATCAGTGATTTGGTAAAGTATCCAATTATGCTTCAGCTACAAGTGTAGATTATGATTTCTCTTGATTAATGGT  
GATTGAATCTCTTTAATGTGACTCCTTCAGGCCAAGGCAAGTATGGAGAGAGGGGAGGTTAGAAGAGATACTAGATGCAAGTCTCCAACCTCGGACCATGTAACATGAAAATGGTTCTGAAA  
ATGGCACAGTTAGGCATTAATGCACAGCTTGGCAGCCCAAGGATAGACCAACCATGAGACAAGTTGTCATAGAGCTGGAGGAGGCTCAATACGTGCAATAAGTAGCATGCAAAAATC  
CTCAGATGCAGAAGAGTTGCAGAGTATTAGTATCAACAACGTGCAGTTGCAGAGATTTCTGTTGGAAGCTATGATGACCTTTCTATCAGGAGTACAAGCTTGAGGTCCTTGATGTCAAT  
GGCAATAGTAGAGGACAGGAGTAAGTTATCTGGAATAAACGAGGAAATGAATGGACGACAGTGCTGAGAAAAATCGGTAGTTGTTTTGAATGTTGTGTAGATAATTGTTGCAGTTACA  
TTATGTACCGTTAATAGAAGAATTCTTCAGTTGAATCATTCAACATTTATGTAGATTATTTGGGTTATAACACCTGAATTTAGAAAAATAAT

>comp37887\_c0\_seq1

TAAATATAGATTATTTTCAATCCCAGTAACACCCATTTAATAAAAAAGGGTAGCTGCTGGTTAGTCCTTTGGCAATTTTGATTGTTTATATTTTTTTTGGCTCCACACTGAGTCTCTAGGGTGAG  
ATTTATTAGCATAAATTCATTATAAAGCATATACATCCATTGTAATAAAGTGTCAAAGTCGATATAAACTTGAGAAAAAGTGAATAATGATTGATGGGTTGAATATTTATATGAGGTCATTT  
ATTTCCAAGATACCTAATGCATCCAACGTAGTTTCTTGACTATTTAAATATGATTCAAAAATAATCCCTCTCACAAAATCACTGTAATTTGAAGGAGGAAGTGTGGAAAGAGTTAATGAAATA

TTCATCATGTAAAGTTCAAGGAGGGAGTGTGGAAGGAGTATTTGTTTAAAAATGATATTTCCGCCAAATTCTATTTGAGGAGTTCATGTATTGTAGTAGACACATTAGATAGTGCAACAAT  
AACACAATCCTTTATTCC

>comp38330\_c0\_seq1

TCTCCCCAGCTGCAGAACTGAACACCCCTGAACGCTGGGCCACGGCAGGAGAAGTGGCAAAAGAAATTGAGAAAGCAGAAGAAAAAACAGTGGGGCCACCTACAGCCCCACTTCA  
ACCACCCAGGGGCCCAAGCACGCAGATGTGGACACCAGCTCTGCGTCCCCGGGCCACGTCTTTGCCACACAGCAGCGAAATACACCAGCACAAGTGGGGACGGGG

>comp38521\_c0\_seq1

AAAATCAATCATTTATTGTGATTCTGAAGGGAAATCAAAATAGGAACATGGCTAAAGCTTAAATCAATGATGCCTTTGAGAATAACATTAGCATTTCATGAGAATCACTTTGCATGTGAATGGT  
GACAACAATGAGTTCTATTTTTTTTTTAATGGCAAGGCAAGTAGTACGTTAAATAAATAGAGGTGGCCTATGTACAATCAATATGAAACAACACTATTATACCGAGCTGTTGTTTTGAACATCATA  
AAAGAGGAAGGACCATGTTTGATACTGACCAGACAAATTTCTTCCCCTAACATTTAGTAAGTTTAAAAATTTCTAATAAACAAGACATACAATTGTGCCTATAAATTTTCCCCCTAACTATTA  
TTTACTAACTCTTATGATTGCTACCTTCAACTAAGTCTAAAATCATACCAATAAAAAAAGTCATGGCCAGTTTCAAATGTGGATGAAATCATATATTTAGA

>comp38865\_c0\_seq1

TGTGGAAATTGAAAGGATCGCTTTCTTCTCTCTTGGCCGACGACTTCTTCTTGTGAAGTTTACTGCGGTGGAAGATTACGACTTGGTGTGGTTCGGGTGGTCCGTGGTTCCCTCCTCGG  
AAGACCCTTCATCTGCAGCGCTGGAATCCCAAATTCAGCCGACGAGAGATGAGTCTGCTTCGATACCCTTGTGGATTAAGGTGCTAAATCTACCTCTTGGCCTCTGGACTCCGGCAGGT  
ATTTCTAAAATTGCTAGTTTCGTTGGTGAACCTCTATATGTTGACACTTTGACTGCTAAGAGAAGTACTAGCTTACCTTTGCGAGAATTTGTGTCAAAGTGGATAAAGATTCCGGAACCTCC

>comp38946\_c0\_seq1

AGAAAAGAAAAAAGAGAGGAAGAAGAGATTTTGTGCATTTCTATATTTTTGTCTACTCGTTGTTGTCCCGACACCGCCACCGCCGACCTTGCTTGTAAAGGTATAATGACTTCAAACT  
CAAAAAGCCCAAAAATCCTGCTTTTTGGCGCTCGCGGAGCACCAAAAAATCACATATACATGCTTTTTTCTAGCGTGGTGGGAGAGAATCCGGTGTGAAGCTTACGGCGAAATTAGTAGG  
CCCTATACAAGTTTTTCTCTAGTGTGGTGGGGACAACCTTAAAGTACCAATGAATGTGACGTCATGCTTGCAGGAAAGAACCATGCATTTAGACAGGTACCCTTGAAGACTCATAATGCC  
TTTATTTGGTGTGGTGGGATTGAAGACCAAGGCTGAAGTGTCTGTCACACATAACATACACGTTTTTTCGCTAGAGTGGTGGGAAGGCCAGCTCCTGAAATTC

>comp39327\_c0\_seq1

AATCCAATGATTTTATTTGAGACCATAATCACACAGAGTCGATAGCCATCACATTTGGTCTTTCATCTATGGCTTCATAATACGTTGTCCATCTCATGCCAACTCTTCCAAATCTATTGCGACAA  
TCATAGGATCAATATTCGATGCCTTCCATATCTACTCAAGATCTCACTAGATGAGTAGCCTGTCACCCTCGTATGCTAATTTCTAACCAGTCGCAAAACACCTGTTATTTTGGGCCTTCATTGA  
CGAACAAAAAAGCAACTCCAAAGATTTGCCAACTCCTCACTTTCGCAACTTGACCCTTAAGACTTTTTTCATTCACATTTATAAACCGACAGTGTCCATCACTTTTCGCCAGATTCACAAG  
TTAACTTTGACTCTGGAACCTTCGAGCTTACTTCTATGACAGCAGCCAATCGTTCTCTATTTTCTATTTAAGCTCAGGTTATGAACCGATCCAACAATCGCCGCATCTTCCATGGCGGCATAT  
TGAGACGAGTATCTTTGTCTCCATCTTGTATCTCCTTTTTTCATTCTTTAGTTAGTTAGAAGTGGTTTCTCATCATAAAGCCTTAATTTATTTACTGCAATAAGCATTGAAATATCATGC  
TTCTGATAATATATCTATGTGATTTGATAATCTTATGAAATATTTGTCATCCTCCAATATATAGACGAAGTGGATGATAATTTACAGTAAATTTTCATGAACTTTGT

>comp39539\_c0\_seq1

CAGGACCAAGTAGCTCATATTTCACTAAAGCCCTCCCCATCATGCGCTATCACTTAGAGACAAGTTGGAGATCACATACCTTAGCCCGTCAACTTGAGGAGAGGTGACAAACCTCTCTCC  
ACTATAGGCTACAGCAGGAATACTCCAAACAGCACAGGCACAATCTCTGAAAATGAATCATAACCATCACATCACAACCTCCCTAAAATTTAGCCATTGATCCCCATTGTGCACCTA  
CATCATTGTCATCTCATAACTTATTCTAATATAAATGAGCAACATTGTACGCCTTTGTAAATTAATTAACCTTACAAAATGTAACCTATTGCTACTCATCCTAATACTGAACTAAAATACA  
ACAGCTTCTACTCTTTTCTGTTCTGTATCATATATCTGCTTGGTTTTACCAATAGCCAACACAACAAGTTTATGATTTTCATGGTCTGTACCAATGGAAATATCAAACTCATATGAGACAAT

ATCATGGTAATCACCACACTGATTTTACTAGCTTTGATCTGGAAAGTACTCAAAAACCTAGGAAATGTATATCTACTGAAAGAAAAACATCAAAAAACAAACACTTTCCATAAGCAGCTG  
GCATTTAGAAAAGAAAGAATTGTAATAGCATACACCCCTTAAGTTGTGCATCCAGCAAAACCCTAAACGAATTTCCAGACATGAATTTT

>comp39982\_c0\_seq1

ATTCTTCACATTTCCATATATATAGAACATATATTACTAATAACTCTGGATGACATTCCCAATTGATAGAAGTTGTAAATTGGGAGAAAGGTTAGGCAATTCCTGAAGCATATATAGGAACGC  
CCCAAATATATATAGTTCATAAGAAGAAAGATGTTTGCAGCTTATGTAATTTCAAATTATCAGGGATCAATATCGATAGGGATCAATATCGATACTCGGAATGTGAGCAA

>comp40354\_c0\_seq1

TCATGCTTGATTGTGATTTATTTATCTCCATAATGGATGTAGGTCAGTCTTACCAGATCATATAATCCTGACGCTCTTATCTGTTAGTTTGCTTTATTATTCTTTAACATCTTTCTGTAAGGTGG  
AAACATTTGTTTACCTTGGTTAATTCCATTGCCCTTTTTTATTGCTTGTAAGAAAGAGGAGATTTATGCCATTACCTTTTTAAAAAATAGTTTCATAAGAGCTTGATTATTCCGAAGAGATGAC  
ATCATCCATTATATTGAAGCCTTCCGTCTACCCTATCAAAAATTAGTTTATTTAAGGTGAAAAATAATTTAAAATTTTCTAAAATGACGATAAACCTATCTTCGCTTAAGGCTTCAAAGTGAA  
AGAATCCCCGACTGGTATAGATGAGAAGGGGATGGATCAAAAACCAACTCTTCTATTATTCTCAGCTTGGTAAAAAGGCTCATAGACATGCAACATATTAGAGTAATAAACCGGATATAT  
GAAAAATGTAAAAA

>comp40804\_c0\_seq1

AGTCTTGGTTGTGCATCTACCATCCAAGGATGCAATATGGATGTAGACCTTGCACATCATCGTCCACAAAACTCCAGTTGCAGCCAACCAAAATTACGGGCATTGAAGAAAACCTGAAACC  
AGTCAAAAAACCTGGAGCACACAGCAGTCCAGCAAAAATAATAGACAAAAATAGAAACCAGCAACAGCAGAACACCAAAAACCTCAGTCCAGAATTTCCCTGAATTTCTCCTTGAGTCT  
TTCATAATGCTTCCACTTAATAACTTTAGCTCTAATCGCTAGAATGATCAAACCTTTTCAGTTCAAAATGACTTTCATAAGATTAGAGAACCTCCTGCAATTACGCTCCCTCCAA

>comp42048\_c0\_seq1

GAAACATACATGCTTCATCAAGCAAAGCAATGATCCCTCCAGGTTTCTTTTCAATAAGATCTAAGACATCCTGGTTATCAACAAACTCAATGTAGCTCCAATCAATCTCCTCTTTGGTATAC  
TCTCCTGTTCCATCTTGAAGACATGCTGATTGAAATGCTGTTGCAGTTTTTCATTTGTAAGTTAATACAAAACCTGCTCAAAAACCTGTTTGTATATAAACTTTCAAACCATATATATCAAGG  
ACACCAATGAGAGACTTGGACTTAACGTCTTGCCCAATTGAGCTATTAATTTTATCAACTAGCCAGTCAAATAAACGGGAGTACACTGTCTTTGCCAAAGCATCCCTGCTACCAGTTGCTG  
CAACTGGATCTAGAGGTCTCCTTATAAATTCTTCAGGTGTTATCATTACACGCTTACAAAGAGCATCTTCTAAGGCCTGAGGATCACACATGAGAAGTTCAGCAGTTATCTTTAGATGGAAC  
TTAGACTTCTCGTCTTTAAGAACAGATGAATCAATTTCTTGACCCTTAGCAAAATTTATGTTGCCTAAATGAAGAATAGCTGCAACAACCCTAAAAATGGCATCCTGTTCTGTGTACTAAT  
CCCAACTATTTCCATTGCCCTCCTGGTAGCTAAATATTCTTTGGCATCACTTACACCAGCCAATTCATAGCAATTTGATTGGTTAAGATAGTGAAGTGACCTTGGATTCCCCAACTTATATTTT  
TCTATCTCCTCGGGAGGGGCTGCACATAGAAGGTAAAAACAATGGTAGTTGCGCTCAGGATCAGAACTTGGCAAACTCTTGACCTTTCTAGCAGGTATGTTCTGATGGCAGCACCAGAT  
ATCCTTCCTTTGTTATCAAACCTGGATCTCTA

>comp43123\_c0\_seq1

AATATTGAAGACATTGTTGTATGCATATTATTCACTACCCACAACACCTCCACTTTAATAACCTTAAATTTTATTATTGCATATATCTTCATTTCTTGTTCGGGAATTCATAATGGTTGAATCAT  
TAACAACATAAATCAGTTGATATTATAGGAATATTTACAAAATCATATTTTTTACCTTAAGGAAAATTACATATAATGTAGTTATTCTTTCATATATTAATTACAGGTAATGCTTGGTTCCCTTC  
ATGCAATATTGCTTAACTGACTCTTGATTCAAGATTTGCCCGATATCCACCACCATTCTATCAATAGTGCATCACAGCAAGTCCCTTGCATCCAAAACCTCCATCCTTCAAAGCCAGA  
TGCTTGCTCGATTCTTAAATATTTCTTGTCTTTTCCCTTTTAGCACCCAAAATTTGTGCTCGACTCCACATCTATGATGGTAATGAATCTTTTCTTTATTCCTATTTTTTAATAGTACCTCACCT  
CTCCAATGCTTATTTCTTTTCTAATGGATTAATATTAGTAAGGAGGCTATGCCAATTTATGTAGGCTATTATCATACCAACACTTTCTAGGACAATTCTACTAATTCATTAGAAAAGCATAGA  
AGCAAAAATGCTTTCTCTTTATCTACTTTACTAAGGTGATAGTTGGAGGGTATTCTGCAACATGACATATTTATAAATGGAATCTATATCACTTTTGGAGGTAACCTATCCCCCTCA

>comp43223\_c0\_seq2

CTTCTGCAACAATACATTCCATCACGATCTTCTGCAAAACGAGCTTTCCCGCACGATCTTCTCAATCGACGACAAGCATTCCGTTCTGATCAGTTGAAGTTGGATAGCTTTTGGGGACTTC  
TGAGCCTCGTTCCGGCGAATCAGCTTCCAGAACCGTCTTATCAATCGAGGATCATCATGGTTACGGATACGGTATTGATTTTCTTTGGAAGGAGAAAGCGATTATTTACTCAGGCAGCGGA  
GTTTTTCATCGATCTCCCTTATCCTGATTGTTTTCAACTACGGCATCGTTTTAACTGGTAGCTTGGAAATCCTCCAAGTCCAGAGGGGCATCAATGGCGTCTTTCGATGAACTGCGCCTCG  
TCTTCAACCGCAAGCTTCTCCATGAGCTGCCTGGTTGGAGTGGTGGAGTGACAGAGCCAGAGCGAGTGGGGGAGCTGGACTGTACTAAGGACGACATACTGTTGCACCAGCAGGGCGAC  
AGAGCCGATGCCGAATGGGATTCCGACGTAC

>comp43498\_c0\_seq1

CACACAAATCAGCCTCTTTATTACATTCTCTATAGGTATGATTAATAATTACCTTGTGAAGTCATTTAAAAATGACATCTTCTCAGAAATCAAGATATTAGCCGAATATGTTGATTTTCATCAT  
TGAATCTTGAAGGAATTTGATAATGTTGTAGTTGTCACCTTCAATTATTACACTTTTACTTTCAAACATCCAATCTTGTAAGAATTTTTCATGGTAGAAATAGCATCCACCTCAAGTTGATG  
TATATCCCAATGCATCTTCTTTTTACCAAAAGCAAGAAGTAGTATACTTTAAAATCTCTGACTATACCTCCAATGCTCGCTATATTAGAGTCCAATAAAGAAGCATCCATATTATCTTTATCT  
AATCTAGAGGTGGGGGGTGCCAACAAGAACCAAACTCCAATTGGAGAGAAGCACCCAGTCAACTAGCATCATATATCTAGTCATGAAAATGGATAAAAATGTTTGCAGCAACAACCGAT  
GTAGGTAAAATAGGATTACCATGTTTACTATCATTCCGGCATTTCAGGAGAAAAAATGACTGTACAATAGACCTTCACAGTATTCAAGTAATATTTGGAAAGAGTTTTAAGCTGAGTTAA  
ACAGTTAGCCAAAGATTGGAAAATAGGAATATTAATCCCCAAAGTCTCAATTTGCAAAATGATATCAATAAGATATTTGCAATGAACAACAATATGTGAATAATCTTCAACTTCTTGGCAAC  
CTTTAATACAAAGATCACTATGCCAAAGTCTTATATATTTAAAATTCATTAGTAGGTAAGGCGTAGCTTCTCATCCTCCACCAAAAACAATTCAACTCTTTGTTTGGAGTTTTAATTTCTTAA  
CCAAATGGAGAAGCCAAAATCATCATCCTCATTGTTATATTTGGCAAATCTGCATAAGAAAAAGCACAAATCGATTTTCTAGAGAGTTGGAAAATAGGTTCCACCTGATCTTTGTGTCCA  
ACGTGAATAGCACAAATGTTGCAAAATTAGATTTACATGGTCTGATTGAAAAATTGAGACAGTTTCAGGCAAGTTCATTAAACCATCCCGAAGTGGAAACTACTATAGCATCACCCATCTA  
AGCCAGCACAGTCAGCTAACATAGGCCATTTGTTAAAACACCTGTCCAATAACCAAAATATCATTACATAACATTCATACTTTCTCCATTTACAACCTGCCATTTAACAATAGTTTTAAGTAAG  
AAGCACCATCCAATAGAATAAACCAAGAAGCCAAATGGCCTCTTTTGAAGTCTCCATCCAAATATTTTTACCATATTTAGCAGCAATGCATCTATGCAGCAAAATATGAAGGATTTTGAGAA  
AACCTCCAAGACAATCTAGCTCTTAGAGGACCAATTTTTTTAACAGCGGAATATAAACCCATTCTGCCTAGATTTTTGGGTTTACATAAATCTTCCCATGCAACATAATGAAGGCTACGTCT  
ACCATAATCTTTGTGCCAAATGAAATCTCTACAAAGCCTATCCAATTCATATTAATAACATTTGGGAACCAAAAGAGTGAGTTGATAAAAAAAGTTGGCAAAGATAGAAAAGAAGACTTTAT  
AAGAACCATCCTACCAACCAAGATAAAAATCTAGCACCCCAAGCATTAAGTCTCTCCAATGCATGATCAATGATGGATTGAAAGTCATCCTTCAACCACTCTCCTTAAAACAATATTTATAC  
CCAAGTAATGTAGCTTATTTACAACCTTTGAAACCAAAATTTCTTCCCAATTTCTTCTCAAGCTTGGTCTCGCAGATTTTCCAAAAAGAATATGAGATTTTGAATTGTTGATATTTGTCTAT  
CCATCTATAATATTCATAACAAAATTTCTTCATAGCTTGAACCATATGAGAAGATGCTATCCCAAATAATAGCACATCATATGCATAAAGGAGATGAGTAATTTTAGGAGCTCTTGGAGAAGT  
TTGGATGCCCAACTGTTGTCTCTTTGATTAATAGCATTTGATAAAAGCTAAGAGCACATGATGAAAAGATACGGTGACATAGGACAACCTTTGATGAAATCCACTTTTTTGTCTCAATCCAT  
TTAGAACTCTTACCATTTAAAAGGATAGAAAATTGCACGTTTATCACACATTCCATGATAAGATTGGATATCTTAGTTGGAAAACCTGAACCATTTTAAAACAAGATCCAAGGTTTCCCAACT  
CATAATATCGAAAGCTTGTTCATATCAAGCTTAACTGCCATAAGTCCATTTTTCTTTTTGGAAAATCTGAATTTATTAATAA

>comp43612\_c0\_seq2

TTTTTATGCAAACATGTGAATTGGAGAATTGGAAGTCCCCTTTTATTTCATTCAATAATTGTAATCATTTACAACATAAAAAGATGACATGGAGCAAGGACCTGTTAATTCCACGGGAAGCC  
AAACTACTCCATTGGGCTTTCTAAGATAATAAACAGGTTGAGAAAGTGCATAACACAACGGCATTGTTAAGCAAAGCAAATTACTTTGTTATGTAATGATCTCCACATGTGATTCACAACTC  
AAACGATGCAGTTTTGTAAAAAATCAGCTCAATGCTCCTCATTTCAGGAAAGGAGCGCTCATTGTCAACCATTTTGTCAAAGGACTGTTTCATATGCATTCAGAACATCAAAAACAATCC  
AAGAAGAGTATACGTACTGCACGAGTTGCAACTTGCACACAATAAAAACAATCTACATGTGAATAGAGACGAGGGAAATTTGCGAGTGAGAGCCATTAATAATTCGTGGGAAAGTTATAG

TCGCGGCTCGTGGTGGATTGACTCAGGCGAAAGCTCTGGTAGCTCCCCGGAGAAGATATTGCAGAGGTAGCATATGGAGAAGGCTTAGGAAGCTCGCCGTAGAAGGTGGAACGGAGTT  
GAAAATCAGCACCAATGAAAGCTCCATTTG

>comp43651\_c0\_seq1

GAAATTCGGATGATTCTCTCTGTCTGTCAGGTGTTTACCTAATAATTTGTCCGTTTACAGAAGGTATGGGACGCGACTATAGCAACGGATTGATTTGTGCAGAGGGATTTGGCCAGAGCACA  
GGTAATGATTTACCCCTTTTTTTCAGTATTTTTATTTTTATTTTTATTTATGAATTGTCATTTGTAATTTTTTTTAATTAATATAATTGAGCTATGCCCTTAATTTTTTCAAAGAAAAAAACTTT

>comp43858\_c0\_seq1

TCTAGA ACTACGAGAAGAGTTTGACGACACCTTCAATTTTGTATTTATCACA CTAGCATTCTTAGTTTGCATCTATGAAGCTCCTCAAGATATCCGAGGGGGATGCCTTGACACTCTAAGGC  
TTCAATTAACGACTCCAAGAGCTCGAGAGGCATCGAAGCTGCTCATGAAAGCTCTTGGGTCCAACCTTGAGGAGAAATGGATGAGATCATTGAACCTCGCTATAACTAATCAGATAGTCG  
AGCTTAGAGCCACAAATCACTCATTCAAACACCTTCACTATTGTTTTTTCATATGCTTTTTTCTACAGTTGGGCTATGGAAAAGTGCAGTGTACTGCCCCATAATAGCCATGAAATTGGAACT  
ACAAGCTCCAGGATCGCAGATGACCGCTTGTATTCTCTCTCAACAACCAACA ACTTGAGGCTGTGATTAGCTTGCCTACATGGTACATGATAGCAAAAGTTGGATAGATGTAGTGGTCA  
GCATAGACAATATAAGGTGTGATGTGAATCCGCTAGTTTCTGAAACACTATTAATGAACGAGGGTATGGCTCTCAAGAGAAGCACTTCCCGTCTCGAATATCGCTGCAGCTCACTCCGAC  
GGTCCAGAATGAAACTCTCAGTATCTGTAACAAAATCATCGGAAAACCCACCCGAGAAGTGGGAATAGAGAAATCCATTGAAGGTGGTTTTTGACCCTCCAATTCATATATGGGCATC  
ACAGCTACAGCATCTGAGTCTGTA ACTATCAGCATTAAGCCATGGAAAGTTTGAACAATCAGTGTTTGGCGACTGCAAACTTGAATTTGGTTTTCTTCATGATGGGTGAATGGAAAGGGAAG  
TCTCTCTTCCAAGCCATCAAAGCTCGCGCTTCTCCAACCCAAAGCATGGTTTTAGAGATCGCTACTCAAGCGCTTACAGGCCCTTCAAAAACAAGGAGGTGTAATTTTTGCGGGAGATG  
AGTATGGAGAGAGTGTGAGATGGAGAATTTGTCAAAATGCAATGGGGAAAAACATTGAGTGGGAAATCAAAGGCGAGATTTGGCTAACCTATTGGCCCAACAAACAGAGAACATTTTCAT  
AGTGA AACTAAAAGTTGGAGTTTAAAGGAGCTCCTTGATCTTCACTTGTC AAAGCATAGCAGACAAAATCATGTATATTTAGTAACTAATTTGTGCCTCCTTATCATATATTTCTGTTTTAA  
ATCTGCATATTATGATCTAAAATGTATCTCACAAGTTAAATGTAAGTCTTCAA AATTAATAAGCTGGC

>comp43953\_c0\_seq1

TTTTTTATTTATTTATTTATAAATATAATGAAAGGACAAGATAATAAATAAATAAATAAATAA AAAACCATGTGGGCAATAAACCCCTCACTCTGATAGTGATAATTGTTTCAGTTGGCTCTCCACAT  
CTCTACTACAATGATATTCCTTTTACCAGATTTTCGGTATATGCAGCCACTTCTCTGCAGGTTTGTCTTATAGCTCATCATATCTCAGCTGATAACAATTCTAGCCGTTGGTTTTGTAATAAACT  
AGGGGTAATCCGGTAATTATGCTAACTATAGATAACACACACACACC

>comp44032\_c0\_seq1

GAACAAGCTCGCAAGCTTTTTCCAACA AAAACCCCTCAGGATTTCTATTCCAAAATCTGATTATATATTCCTCTCTTAACATTACAAAACATCACCTATTTATAGAAGAAAATGGGGCAGCCA  
AACATTTCTTTTATCTTCATTTAATCCCATTAAATTAGGCCAGAATTTATTCCAAAACAACACCTGAAAAGCCTCACAAAAAACAGAGAAAAGCAGCCACGGGACAACCAGCCAGGGGA  
GGAACCGAAGGGG

>comp44145\_c0\_seq1

TAGCTCATTAAATGTTTGTAGCTGCTATTTTAGCTCATTAAAGTGGAGTGGAAATTTGGTCTTTCCCTTCTCTTTGCCTATTCCGTTTTCCCTTTTTGGTTGCTGGTTCCGTTTCTGTGCTGCCT  
CTTCGATTTCTTCCCTGGGTGCTTATCCCGTGGCTGCTTTGCACGGTCTCTGTGCTGCCTTTTCGGGTCTGTTCTAGCTCCCTGGCTGCTGTTCCAGTGGCTGCTTTACCCGAATTTCTG  
TGCTGCCTTTTTGGTGTGTTCTGAAATGAATGTGGCCTTCTAACTTCCCTTTTTGATTGGCTCAATTGGGAGTAATTATGGGCTGTTTGGCTGCTCCTTTTCTCTATAATAAATAAAGT  
GTTTTGGCAAATAAAAAGATTGATATAATGTGATTTTGGACATGAAAACCTAAGGGTTTTTTTTGGAAAAGCT

>comp44347\_c0\_seq1



AAAGGATGGTTGATGCTTGGGGAAGTTGGAGCCTCTTTCAAGTTTTGCTTCAAACACTGAAGAACATTGCATCAAAGCACGGGGTTTCTATTCCCTCCGTAGCCGTTAGATATGTTTTGAA  
TCAGGCATCAGTTGCAGGATCAATGGTTGGAGTTAGGCTAGGTCTATCTGAGCATATAAAAGACACATGTGCCATATTGTCCCTTGATCTGGATGAAGAAGATATGAGAAGTATCACAGAG  
GTGTCAATGAACGGGAGAGATCTTTTGAAAGCGATCGGAGACTGCGGTGATGAATATCGCTAGGCCAAAACACTTTTTTTAAGCACCTTTTAAGTTTAGAAATATACATATAAATAATATTT  
TATATATTTATCCAATAAGATGTAGATCAAGCCAGATTTAAACAATAAGTCTTACGGTTTGTTCGCAGAGTACGAAGATATTCGTGTTTGATAATTATTCATAATGAAACTATTTTGATTCTAAT  
AATTAATTTATACTAACGTTGTGCTTTCACTGAACATCAG

>comp44373\_c0\_seq1

TTTTTTTTTTTTTTCTTAAAGCAATTTTTTAGTTAAAAAATTATTA AAAAAGTTGCTTTTGAAAAACAATTA AAAAAAATCCCAAACA AATTCTTTGCAGTGAGAATATTTTTTTTCCCAAT  
AATATTTGTTTCATTACATTGCGTAGAAAACAACCATTATGTATTCTTTTTATAAGATCTTGATGGTCTTCCTCAAGCATAATTTGTT

>comp44373\_c1\_seq1

AAAAAAAAAAAAAAAAAAGCTGTCCCAAAGCTGAAGTCTCAATTCCATCTTCAACGGCATTCACTACTGATTAGTGGCCACACTCGTAAATTCAATCAACCCCTACCTCGGGTCCCTCGGC  
CATGAATTCAGCCAAGAAATCCACAATCCCTTGGTATCTTCTTGCCTTCCCCCCCAGCTCATTGCTGCTCCGCTTGCAATCTTTCTCTTCTGCTTCATAAACCCCCCACCAATCCGTTT  
GACCAGGCTCTGCTATACATATAGATATATGTATTATAAATGTATACGTGCATGATGATCTCCCTCTCTCTCTCTCT

>comp44471\_c0\_seq1

TTGGAGCTCTTCTCCCGGGCGGGTCTCGCGCCGGGCCAAACACTGAATCGCCATCTCCATCTCAAGAAAATTTCAAACCCTGCTGTTTTTTTTTCTCTGAATCCTCCCTCGTTTGCCATG  
TTCGCTGGAAGCCTTTAAATCTTTTCGCTGTTGTCAAATCCTCTTTGGTCTGTCGTTCCCATTTCTCGATTTCACTTTCCAAGCTCGCATGACTGAGAGATGTCAGTGGCCCAAGGAA  
CGATAACGTTCAAATACGAGAGGTTTGGGATGACAATCTGATAACAAGAATTTGCTCTTATCCGCGAGATTGTGGACGACTTCCCCTTCGTCGCCATGGACACG

>comp44584\_c0\_seq1

CAAGGTTGTTTTTATTAAGCTTTATGTTTAAAGTTTACAACACTAAGTTTTTCAGGCATTACTTCATTTCACAAGCAGACATTCTACGAAACATTTCAACAAACTCCAAGGGCTTCAACACTACAGG  
GACTAGAGCACATCTACTCTGCAGTTAACAGGTACAAGTACTTCAAGGGGTTGTCAAGGGAAAAGAAGCTAAACA ACTGGTCTCTTCTATAAAAATGATTATTTTTGACAAGTTGCTACAA  
AGAAAAGCACACA ACTATTACAGAGTTAGAGAGATCGTTTCATCCAAATCCATTCTTTTCATTACAGATAGGATTTGGGGGTCATTATCAGAAGGTAAATGATTCTTTCAGTGTAAAGCTACA  
TGTCAAGTTTTCTATGTGTAGTATTAATGCTATTATGATTAGTTTATGTTTAAAAAATCAAGGAAAAGAACAATTTTGCATTTAAAACCCACTATGATATATTAGCCACTATAGGAGACGTTAG  
CCATTGAGGAGTCATCTCTGCAATCCTGTAGTTTATGAGTTCTTCTGAGAAATTTGATTGTGACTGTCTTGATCTCTGTGTATTATGGAGACCATATTCTCCGAGTTCTCGTCCATTTCCA  
GACATCTTGAATCCACCAAAGGGGCAATGGGCAGATAACACACCATAGCAGTTACCCACACTGTCCCAGACTGAAGAGCAGAGGAGACTGTGATAGCTTTATCAATGTCTTTGGTAAA  
AATTCCTGCTGATAAGCCATAGAGAGTATTGTTTGTCTCTTGTATCACATCATCTAAAGATTTAAACTTCATGATTTGTTGCACTGGTCCAAATATCTCCTCTTTGGCAATGCGCATCTCATCT  
GTAACATTAGAGAAAACCGTGGGTTGGATAAAGTAGCCTTTATCCCCCATGGGCCTCCACCACACTCCAGTTTTGCTCCTTCTTTCTCCACTTTCAATAAGGTCAAGTATTTTTTCATAT  
TGTTCCTTATCAATCTGAGGGCCTTGATTGACCCCTGGGGTCAGAGGATTTCCAAGAACATACTTTTTAGCCCGCTCAACACTCTTTCGAACAAATTCATTGTAATTTGATTCTTCCACAAA  
AAGCCGAGATGCAGCTATGCAACATTGGCCCTGGTGGTAGAAGAGCCCGTGATGTGCAAAATCAACAGCAGCGTCCAGGTCAGCATCTGCAACACAATGCAAGGACTCTTTCACCGA  
GTTCCAGGGTCACCCTCTCAGATTGCTTTTCCCGGCAGCTTCTTTGATCATTTTGCCAACCTGTGTAGATCCCGTGAAGGCCACTTTGTCTACATCCATGTGAGAAGAAATGGCTGCCCC  
TGCGGTAGGCCATAACCGGGAACAATTTACTACTCCAGGAGGAAATCCTGCCTCTTTTATTAAGATGCCACATGAAGAGCAGTGAGAGGGGTTTGTCTAGCTGGTTTGACAACCAC  
TGTGTTTCCACAGCTAAGGGCAGGCCCTATCTTCAAATGAGCATGACCAACGGGAAATTTCCAAGGAATGATCTGGCCACACACTCCAATAGGCTCACTTCTGTATAAGTAAAAAAGTT  
TCCATCCATCGGTATTGTGCGGCCATGGATCTTGTGAGCCAGCCAGCACAGTAGCGCAGTGTCTTATGCAGCCTCCTAAATCCATCAGATATGCATTGGAAAATAGTTTTCCACCATTCA

TTGACTCCATTGTAGCCAGGAGCAGACGATCTCTTTCAATTAATCAGCCAGTTTGTATTATTAGCTGTCTCTCTGAAGCATCCATAGTACGCCATGGAGAGCCGATCTGAAAAGCTTGT  
CTTGCGGCCTTCACTGCTTTGTCAACATCCTCCTTATCTCCTTCTTCTACCTCGCAGAGTTTTTCCCTCAGTTGCAGGATTAAGACTGGAAATTTCTTGCCACTCACTGAATTATGCCATTCA  
TTATTTATGAAAATCTTAGTATATTGAACTTCAAATTGGTCACTGGGACAGGTATGTCTGGCATGGCTGAGGACGACATTTCTGGTTCAGCTCCTGTAATACAGGTGACAGGCTCAG

>comp44605\_c0\_seq1

ACCTTTACCTTTCTTTAACCAAGAGACCTTCCACAACCAAGCCGAGTTTCCCGCAAAACTCCAACCGTCCAATTCCAACGGCTCCCTCATCCAAATTTATAAAAAATTTCCCTTTATTGAA  
AAAAACAATGAGAAAACCATTTGTCTACCGCAATCTCCTTCGTAATCTTCATGCTCGTTGAATTCCTTCTCAAAGCTTAACGCAAAGCAAATGGAGAAGGACAATCAGCCCAGCCATGT  
GAAGACCATCAAGGAGATCATGGACGAAGAGTGCAGAAAAGGAGAAGAGGTCACCTGGAGGCCTTTCAAAGATAACCTGCGTCTCCGCTCTGTGAAGACTCGGACCCGCCACAACGGC  
TAAAGACGGCATCGACCATCCCCGCCGCCCTGACTCCCCGTTGTCTTGGAAATGCCGGCGAGAATGATACAGAAACGATCACCGCCGGCGAAGGAGAAGCCGGTGAAGATATCGTTGA  
TGGCGTTGCTAGCAGATGAAGATGATGACGATGATTGCAACAAGGGGGAGAGGAATGGTGGTGGTGAGAGTGAGACGATGATGCCTTGTGGGCACACCATTTGTCACCTTACCAGAGA  
GAGCTTCGGGCTAGCCATGAGAATTGCCCTCATTGCAGCAGCTTCATCATGGAGATTTTGGATGTCTTGAAATCTTCCGTGTTGTTCTTATTGTTGATGCTCATCACAAATCACAAATGGTGG  
TGGTCATGGAGATGATGGAGAATTATGTGTTAATTGTTTGTATGAATGATGATGGTGTATGATAATATTTACATACATACCATTTTATTT

>comp44780\_c0\_seq1

ATTATGGTTGCCAAAGCACATTTTAGAGGCTGATTCTGATCACGATGATCCAGCTGATGAAAGGGTGTCTTTCACCTGCATTAACATGATAGAAAGTGGAGAAACAGACATAGTGATTTAT  
GGGAGTTATTGTGGACATAAGAAGCTCGCAGGTTTGATATCTTTGAAAATAAATGTGGCCAAACTCCGTGGAGATAGTAAACACGTCATGTTGCATGCGAAGCTAAGTGGGGCGATTTTA  
TGAAATCTTCATTTTCGTTCCAAATATATTTTACTCCGTCGCTAAGGGCACATCACTCAAAGTCTTGTGTTAGATTTATTTTGGATAAATAATAAAAATATATTTAATATTTTTATTATATTT  
AGTTTTTAAAATATATAACCGTTCAATTTTCATAGTTTGTATCCTCTTGTGCTTTTATTTTTTTGTACAGTTATCAGCAATTCCTACCTACCGAGGCACCGACGAAAAGACTGCCACGATC  
CCAAACGCCAGGCACGCAGCGCCACCAACTAGTGGCCTTATCCGTAAATTACTCCAAAACAAGGCCCTTAAAAAAACACAACACACACTGAGTACT

>comp44867\_c0\_seq2

CTTAATAACATTACATTATATAAAAACCCGTGAATGAACCAAGCACACCATAATGTGGAACCTCTTAATCTTGCAAAAAATACTTTGAAGTTTTAGGAAACCAGCACAAAATATATCAAAAA  
CAGCCAAAATTACATCTGACTTTTAGTTTTAGCATCACAAAAGAACAACCAAAAAACAGCCAAAATTACAATCTCAAAACCCATCAAGAGGTAGGCACTCAAACCTCCACTCCATCGTT  
GATAGTCTCAGCAGTCCGCTACTATCCAACCTTCTACGTTTTGATAATGGGTTTTTCGTTTTGTGTCATTGTATCATTGTTCTGTAATGGGTTCTTGCATGTGCTCCGATGATGCCCC

>comp44971\_c0\_seq1

CATGGGTACCCAACTACGACCCCATGTAGGGCTTTGATGGTCAAGGGTCGGAGTAAGAGCTCAGTACACAATCAAGGGAGGGAAGAGAGGAATCAGGAGATTTTGGAGCTCATTTTTTA  
TTTAGAAAACATTTCTTACTAGTGTGTTAAAATTGAGCTAGGCACTAACCTACTCATTGCAATGAGGCATGGTGAGGCCATAGTGCCTCGTGAATTTCCCTAGATGGGCATCATAATGAAGG  
TGACTTAGACAAGCACCTAGCTTTAAGGTGTCAGACGGTGAGGCGGTGAGATGAGTGTCTTGCCTTGATTTAGAGAAGGGTGCTCATAACTTAAGTATTGAAGTTGATTTTATTTTTAT  
GATGAATTTTTTATATGAGATAATGTAATAAATGAACATCAAGAGTTTGAAGAACAAGTGGGCATCTTGAAACAAGTTAATCTAATGTAGATGTGAGAACTAAAGTTCTAGAGTACTACTAA  
TGAAGATAAAGAGAATGAATACAAGGAAACAGATGCAGAGAATGAGGGGTTATAAATCTGTTGATAGAGAAGAGAGCATAATGATTATGAAGGTGGAACAGATTATTCACAAGATTACA  
TTATCTTTAATATATACATGTTAAAAACTTAAGTG

>comp45067\_c0\_seq1

TGCCAAGTTGAACACAACCCTGCTCCTATCTTCTTTAAAGCTGTAGCCGACTTGCTCCAGTCCTTGTCTTGAAGCCCCTGATGTTAAGGCTTTCTTGCTCCTTCGACTGCGTCACCTAG  
GCAATCTTGAACATACTGGAGCTAATGTCTGATATTTCCACCCATAGCACCCCCACCCGGTTAGATAGGAGCGACTGACGTCTTTGTTCCCTTTCCCTTTTGCTTTCTTGATCGATACCATT

CTCGTAGGTCACGCAAATAAACAATAAAACAAGTATTA AAAAGCACATTTAATAATTTAAAAAATAAAATAATTA AAAAAAACACTATTTAAATTCAAACGTATCATTTTTTCGGGCTTTTACA  
CCGATTTGTAAATTTGCTTTTGGAAATCTCTACTTTTGCA

>comp45264\_c0\_seq1

GTCAATAGAATCATGAAGCAATGAGCGAGGGAAGAACCAATGCAGCGCCATTTTATCGGTGTGGTCAAACATGATGTGAACAGATCAGCTGGAAATTCATCACTTTGTGGAAGAGTTTC  
CTGTGCTCACAGGCAGCAAACAAAATGCAGTCAATTTGAGGAGCCTGAAGCACCAGAAGAGTTGACTCTTGATGCTCAATTAAGCATTTACAATAACGCCTGCAGCTGAGCAGTCAA  
AAACATACATTGATGGAGTCTTTAGCCAGGAATCAAGTTCACTTATCGGCAAAGGAATATATTGAGTGTAGCCCTTGTTGAAAACCCAGATTTACCATTAGCTGTTGGTTTAGGCACACC  
ATGGCCATTATAATGGAAGAGA AACTCTCTCAGACTTAGCATTTTTACGGCAACTGCAACAAAGCTTTTTCACTTCCTCAATTGTAGGATCAAGTTGAAGACCATAACGAGCCCTAGGTTGC  
CATCGTTCAATTGAGCATGCAAGCTTTTTCCAATTCTGTCAAGA AACTTTTGCACCCGTCACAGAGAACGGATCTATCCAGCATTCCATTCTTGCACAAGGAGATATT

>comp45280\_c0\_seq1

ATGACTCAACGGTATACGCTTGTTTTGTCCTTACATAGAGTAGCGTAGCCAGCGGGGGTGGGGGTGGAGCAGGGGGAAGACTACTAAAGAGAATGTAATGAACGGTAACCTCAAAGTA  
TGTGCGCCACGCGCGCTGTTGCAGTGTCTCTGAGTGGCCATTTGTATTACACATATATTTAATCAATATGTGATATAACCGGATGGTTTTTCGACCGCGCAGGCGCGCACATTATTTTTC  
GATTTTTCCCCAAAATTGGTAACGTTTTTGTACCAGAAAAGGAAATTTAGTACATGAATTTAGTTAATAAAAATGGTAATGGGAGCACTATTTGCATCTAAGACCTTTTCGAGAAACAAA  
TACCCCTCCTCTTATACCCCTCTCCAGGACAGCGATCCACCGCTATTTGCCTGAAAAAGGGGACAGAAAAAATGACTTTTCACCCCTCTCCTCCCCACACAAAAGCCTAGCTACGC  
CCTGCTTACATAAGAACA AAAAGTCATAACCATTACACTTTGACTTCCTAAAGAGTACGATTGTTAAATGATATCGTTTTTTGCTTTTGATTTTCAAATGTTTATCGAAAAGACAACATCAGCAT  
TTACGCGATAATTGTAATAAACTGGAAGAGTCCG

>comp45380\_c0\_seq1

TTTATAATAACATTTGTAAA AACTGTTTTAAGAAGTAAGAAAGCCGTTCCATACGAAGCCAAATCAAATAGCTTTAAATCAACCATCAACTGGCGTGGTATTTACTCATTTACAAAAGAAAA  
CACAGTCTTTATTTCTTATTCTTCCATAAAATCTGTGAAAATATTAATCACCTACAGTGGCCGCATGAAAACAACATTCGCCATGCTTTTGAACAATGCTCATTCTGCTCAAATGAAAGGGG  
ACATTC AAGTGAAAATCTATCAATTTGATTCGTTTTGCTTGTTGGAAGACCGTCAAAGTTTAATAACTAGATTTGCAGAGCCATAGATAGCAGATCTGGTCACAATAGTTTCATTTTGGCGCT  
ATATGCTATTATAGTATTTGAATATGCTTTTACATGATTTCCCTTAATTATCTGGAAGTTCCTGATATCTTACTGTTCTGCTGGAAAAGTTCTTTATATTTTGTTCCTTGAAGCAAAAATTGAAAT  
GCCTCGCCATCGTAAAATCCCAAAAAGCTGGTTCCCATGAGAGTTTTGCGTTCCAATGTATTA AATTTCTAGAATGCATGCAAAAAAATTGGACCTTTACATGCAAAAAAATTGGACATTTTTTA  
TTT

>comp45785\_c0\_seq1

CAATTTGTATAAACTAAATTTCTAGAGCAAATAGTTTAATACAAGCCTGAGTGTTTTTCTTTACCATCTTGACATAAAATTTTTCTCATTTTATCCACTATATATCCTTTACATATAAATAATATAT  
AATAAGATATTACTCAACACGACTCAACTTATTTATAGGTTGTGGAGCAATGCCATGTTATCCTTGGAGATCATGTTTAGACCTTATGAAATTGGTTGATTA AATGATTGGATCTTCACTGCAT  
ATCTCTTTCATATAAATATTAGAAATGCTATTGAGGAGCAATGACTTTATGGATCCCTTAATCTGATGACTTGGAGCACTAAATCCATCTCCATGTTGGTACATGAAACTTGCCATTCTTGCA  
AGATTTATAGAAGCATCAATGAATCTTTGAGGGAATAGTGGCTTAGAACAAGCTGAATATTCTCTGTTTCATATCATTCCATGCATCATTATCAATATTGATATATATAAGCGAGCTTCTTCCTC  
AGAAGCTCCTGTTTCTTTCATGTAGCATTGAACTGATGTTGCGACATCGCCTCTCTCTGTTTCTACCGATGATGTTGCTAAGTCGTTGCAGAGGCGGAATATTAGGGATGGTAATCGAATGA  
TATTTGGGAAATCTTGAAGCTGTTGTAGAGTCTCCTTACTTATTTTACATTTTAATAAGATATAAGCATGAAAAAGTATGACATGGCCTGATATTGAGATGGAAGCATTAGAAAAGATACTCTT  
TTAGTGTGGAAATGTATCCTTTCTTATGCCATTTTGCTTCTACCAAGAATGTCTTGAATAAGTCTGCCACACTCTTTTAATAATAAGGTATGGCTTCCAATCTATCATCTAAATAGAGATGATT  
GCGACTCCATTGATAGTGTGCTTGAGGGCAGAAAAACA AATCTTCATATAAT

>comp46021\_c0\_seq2

ATGATACCTCTTGTACACAAGAAGGAAGAACAACAAACTATGTTTTGGTTCAAGGTAGTGCTATTTCAATTTGAAAGAATTGCTCATTATGATAGTTGGTACATTTGTTACCTATTAAGATGAGGT  
TTTTGACATTCATTAATCATTAAAGGATGAGATGGCTTCCTGTAAAAATTTACATTATTAAGTATTTGAATATTCATGATGGTAAAAAGAGAGAGAATTATTATCTTAGTGTATACTAAGA  
TTTTGCACATAACAAAAGAGCTACAAGTAACCTCGCATAATATAATTTTTATGTGAACTT

>comp46066\_c0\_seq2

AAATTTTTATTTATAACTGAATTGGACTAATCAGAGCTGTTGCTTCCAGCCTATGACAGGATCACAGTATTGCCAGATCTGAGCTGTGTCTGTGACCTACACCACAGCTCATGGCAATGCTG  
GATCCTTAACCCACTGAGTGAGGCCAGGGATCGAACCTGCGTCTCATGGATGCTAGTCAGGTTCCCTCCCGCTGAGCTATGGCGGAAACTCTCCTTCTTTCCCTAAACTCAGTTTGCTTT  
AATTTGCAGCAGATGGTCCAGTCTTCACAGTATTTAATTGCATATTCGTCATTGTGCGACTTCATTTTGCAGTTTCGGCGTCTCCAGGACATCCTTTATAAGAAAAGTAACTTCTGGCTGG  
AGAAACAATGGATAACAAGATGAGGACCCCAAGGATGGAAAGCAAGACCCTCATGGTTAAGTTGGTTGGAGAGACTCTAGCTGGGATGAAGAGGACCTCTTCTACGTTCACTACTCAA  
GAAGTGAGTTGCCGTATGATTATTGA

>comp46120\_c0\_seq1

TGGGTGTTCAACCAGGCTTAAACCTGTCATAAGGTTTGTGATATCATCAACGCTCATATCCATACGATGATTTATCTGATTTAACTGTTCAACCAAGTTTAAATCCATTGTGATATTCGTGATA  
TCATCAATACTCATATATGAATGAAGGTTTGTGCATTCAAAGTGCTCGACTAAGCTCAAACCTTTCATGAGTCTTGTGACACTATCCATAAGCATATCAGACCAGTGATGCGTTGGTTCCAC  
TTCCATATAATCTGGTGTCTTCTCAACCCTTCCCGCAATTCCTTACTCCAGATAGTTGTGTCAATTAACATCCTTATTTACTTTCAATCGTTTAGAGCTTAGGTACTCATCTA  
GCTCAATGGCACAACCTTGTGCAAGCCGGTGTCTTTTTATGTTTCAGCGCCAAACCTTTAACCTCATAACATTGAATTTTTCTTTCTCTCTCTTTTCAGTTTACGTTTTTTAATCCTGAGAC  
GAGAATCATGTTTCTTTGTGAACATTTTTGCACTATTCTCTTCCAAGCGGAAATATTTTCTTTGTATTGATCAACCGTGCTCGAAAGAGAGGGATGTTTTTCTCTAATATAACTTTGG  
GAGCATAATTCGTCTATTCTTTTCAAACCTGAGCTGGCTGTCTTCTAAATTTATCAACCGCACTGAAATGATAAGAGTACAATAACAATGAATGTTGATTGTTGATTTCAAACCTACGAAAAT  
TCCTAGGAACAAAGGCACTTATAGCCAAAGTATGCA

>comp46163\_c0\_seq1

ATATTTTTATGTCTAATTAGAAATCTTGCTGAATAATTAACAGGATTCAGAAATTAACCTCAAATTATAAAAACATATATCTTTATTTATCTGTTTATTTAAATAACATTTCCATCAATGTCAGAT  
AAATCAGATCATGATCAACAGTCGTAAAAACAGTAGCATGCATAGGCAGTTCCAGCTGTATTGGAAATGCACTCTCCAAAGCCATTCTTCTTCCGTTTAAAGCACTCTTCTCTGCAAACAG  
GAAGGTTGCAGCTGTTGGGTGCGAATCACTTGGCATCTCTTTTGTGCCTCCACCTTTGGCACCATCATTTCAACTGAAGCAAAAACAATGAGGATCAAGAGAAGGAAGGAAATGCTC  
GAAGGCTTGCCCGCCATTGTCG

>comp46238\_c0\_seq1

GAAGAAGAAGAAGAAGAAGTAATGGTGTAGGAAGTTCTATTGTTTTCATACCTTTAACAAAACCGTTTATTCATTGCAGTTGAGAAAAGCTAGATAACTTAGAAAAGTTGGTAGTCA  
TCTGATCCAAAATAAAATATAATTGAACTTTTTCCATGCAATAAATATGAATTTAATGACATTTTTCTGAACATATTAACAATTGCAAAAAAATATTTATATTTAAATCTCTTTCCCTGA  
TACAAAATGATTATTTGACCTCTTGAGAAAATTTCTTTCTTTTATACAGTCCATTTACATCTTACACGATTTGACCCACATTTGATTATTTGATTTTAGTATAACAAAATATTTGATTTAT  
GTGAATTTATGTTAATTTGAATTTATGAATTTATTTTGGAGAAAAAATTTAGGAGTGCCAATGAAGAAGGAAGTT

>comp46386\_c0\_seq1

TAGTACAAAGGACTACAATATGACAAAGCAATCATATTGCTGTTCAAACAAATTTTCTTGTGTTTACTTACAATCAAACAAAATTTTTCAGACTCAGACCCATTGATAGAGCAGTCATAT  
TGCTATTCATTCAAGAGACAGAACACACATGTTACATTGACTCAAAGTTACATTTACTCACAGTGATTGTACAATCAAATTTAGGATAAGCACTATCACAAACAAGATTTTTATTTGTA

GCTCCGCTCTAACTGAAACAACATGAGTTATGCTGGCTTTGACAACATTTAAACTTCTTCAGTAATCCATATCATAACGCTGATTCATTAATTTATCACACCATCGAAGAAAAAGACAATCA  
TCTTCTGATCTATTCTAGGGGCATATGTA AAAAATTTCTTCCACCACTACGCGATTTGTATGATGATATATATGTCATATTTCAATTATCAATGCTAATATATTTAATTACTTAGGTTTTAATTAGCA  
TTGCCGAGGAACCTGAACTCATTGTAGAATGGCTTTATGACTTGGGATGCAATAGCA

>comp46511\_c0\_seq1

TTATTCAAGCATGGCAATCATTATTTCAGTTAAGACAATCTCATGTCAATAATTTCAAGGAATAATGAAACAATTTATTGATCTGGAAGAGCAGAGGATAGAAAATGGCCCTGCAGAGTTACA  
TTAAACTTTTACTTCACATATACTAGAGTTCTAAGATCACAATCATTCTTTTGTATATCCCTATAAACAACCTCACCCAGCTTGCCTGAAACACCAAACAAGGCTTCGTTTGGGACGGCT

>comp46570\_c0\_seq1

CGCCCTGAATGCAGATCATGGGAATTTCTACGATCTGTTGAGATAAAGAAAAGCTTGGGGTGTGCCACCATTTTCTATAGACAATGATGATGGTTTCAATGACCCACAATAACGGCGCCAATT  
TCTCTTTATAATACCAACGACACGGCCGAATGAGCGACTTGAAACAGCACAAGCTTGCTCCATCAACATTACCATTAACATTCTCCTCCGTCTGCTGGCATTGAGGCAAAAAGCTCCACCGC  
AACATATCTCCATTGAAAGCCCTATTTCATGTTAACTCTATCAAAAATGGCTATCTCTTACCAATACTTTTCGCTTCCAACATAGCCACAAAATGGGAAACTGTAACTATTAACCTAAACGT  
TCCTTTATGGTAAAATCCATGGAGAAGGCCAGAAGTAATGTCTGAAGCAGATTTGTGCTCTGGGTAGATTTTCCCGCTTTGATATTCTTAGATCCTTCATTTCTCCCTTTAAAAATTACTC  
GTTTCTGAAGAAAAGCCGATTCAATGGCGTTTTTCGTATT

>comp46902\_c0\_seq1

CTCTTCTTCGTCTTCCTCTTGATTTCCCTCAGCATTTTCGCATCTAATCCAAGAAAAACGGAAATCTGATTCGCATATTCCATAACAATAAAGAAAGGGAGACTAAAATCACTCCACTCATATC  
ATGAGAAAGGGGCCCGATTAGGTTTCCTTTTCTTGGACTCTTTTTCCCTTCGGCAGCGACGGAGGCTGGATGCTGTCGGAAGAGCTATCGCCGGGTGCACCTTCATTGATGGCCGCAG  
GAGTGGAGCTCTGTTGAGGAATCGCCATGTCTTTCAGAGCAACTTCGCCGGCGATGGCAGCGGAGACGATCTCTGGCTTCTCATTCTTGGAAATGGGAATTTCCGGATTTGCGACTTCTT  
GTTAGTGGTGAAGGTGGAATCTGTGGTGTGGAAGGTGATTTAATAATAGAGATCTTGAGATCGCCATTGCCTCTTGTGGCGATAACTAACTTTTTAGGCCTTCCACGTTTTCTTTGTGCA  
AAGAAGAAGAAGAAGAACAACAGAGGAGGCGGGCTTTCGCTTGCATTTGTTTTCGTGGGTTTGGAGGCTGCGGAGGAGGTTTTAGTGGAA

>comp46927\_c0\_seq1

GTGCTCTAAATGCATCTATTCCATGTTGTGTTGGGTGTGTACTGAAGAGTGCAGAACATTTAAAAATTTCTATGACCAGAGATACGGACCCAGTGCCTTGTGACACACCAAGCTCTCCT  
AATAATCTCTCCCCTCCAACACCCACCACTTCTCATGCATGCATATTTAAATTTTACCAGTAAATTTAAAGGTGCAACGTATTGGCAAATCACCATAACAGTTTGCATTTGAATTTAA  
AAAAATTATGCGCCTAGATGACAAAAGCGATGAATTTGCCATACAATTTGAAAATGGTGAACGTCTAATCCAAAGGGATGCAAAAAGGACAACAACAGTTAGCAGATATCATTGAAAATGT  
AAAAGTTTCTGAGAAAATAATAATAATAAAAACAGGGTGGAAAAGAAAAGTTGGAGAGAAACAGAAAAATGCAAAAACAATAGCCATAATTACTCACTTACTGCCTAATAAGCATAAT  
CATCTTTTTGTTTTATCAAAGAATACAAATGTGCCGTTGAAAATTTAACAGCAAGATCCTCTGAACAGGAAAACCTTGGCGAAAAGAAATTATTGTATAGGCTCAAGTAACAACCTACCTGGAC  
AAGTGCTTGGATTC

>comp47203\_c0\_seq1

AGACTGTAAAGTCTCTTGTTCGGATGACCAAGCCTTGCCTGCCAGAGATGTGGGGAGGTGTTCTTAGTGTGAAAGGCCGTTTGGAGATGCAATCGTCGGTTGGCGAATTTGATAAAGACC  
ATTGCTAAGACGTCCACTGAGAAGAAGACGATGATCCTGAGAATCTTTCATTTGAAACTGTTAGCATGAAATGTGATATATATAGAATTATCGGCAGTTAATTTGACACAGAAAGAAGG  
TTGTGTGTTAGTTACGGTACGTGTAACAAATTTGTAAGTAGAGCTTACGCGCATTGTCCGGTAGAGGAAGCAAACCATGACCAGAATGTTGGATTGGAACAGAGGATCCATTGGCAACG  
GAGATTGAATCTTGACCGTTATACGCGGAGGGAGCTTGAAGATTTGAACTGTCCGGGGTCAGATGAGATGAGGCCCTGTGTGCATAATCCAATCCTGTGTTGGATAAGAGGATGGTTGG  
GTGAACATGGCTCTCGGGTTACGAGTTGTTGTTGGAGCAT

>comp48093\_c0\_seq1

ATTTATTTCTTTTCCTCTTTTGCCTCAAAGGGTCATATTGTTCCCGTATTGCTCATAAAAGTCATATTTGTGTTTTTTGCACCATATTTGATACTCCGCAATCATCATGCACAAGCATTTTCATAT  
TCTTTCCATATAAGTATAAATTCCTTTCCATAGAACCTTCATATATCTCAAACATGAAGTAAATATTTGACATGTATCTTA

>comp48457\_c0\_seq1

CAAATCTTCAAAAATAACAGAACGAATATCAAAAATCAACAGAAGTATTTTCCATACAAAAACGTCTTTTAGAAATGTCTGATCTGAACTTTTGAGCAAAGGGCAGCATTTAAAACCTCCA  
AAATTTCAACTTGACAGTTTGACAACAAATCCAGTGAGATGAGTCAGTAAGCATTAGTTATGTTATCCAGAAAAGGTGGAAAGTTTTCACTCAGTCTAATGAACTTGGCAGCTCCTGGC  
ATCCTTCTCTCCAGCTTGACTGAAGGTCCAGGCCAACCAAGACCAGATGAAAACCTGCGGTGAAGTCGTCAAGTAAAGTAATTGGAGTGGATACGCGAAGGAGACTCTCTACTTGGACC  
TGGCCCTCATCTTTCTTCTTTTTCGCT

>comp48859\_c0\_seq1

GTGCAGGACATCAAGAACAACCTGAAAGAGGCCATTGAAACCATCGTGGCTGCCATGAGCAACCTGGTGCCTCCAGTGGAGCTGGCCAACCCTGAGAACCAGTTCAGAGTGGACTACA  
TCCTGAGCGTGATGAACGTGCCTGACTTTGACTTCCCTCCCGAGTTCTACGAGCATGCCAAGGCTCTGTGGGAGGACGAGGGCGTGCAGCGCTGCTACGAGCGCTCCAACGAGTACCAG  
CTCATCGACTGCGCCAGTACTTCTGGACAAGATTGACGTCATCAAGCAGGCTGACTACGTGCCAGCGACCAGGACCTGCTCCGCTGCCGCTCCTGACTTCTGGAATCTTTGAGACC  
AAGTTCAGGTGGACAAAGTCAACTTCCACATGTTTGACGTCGGTGGCCAGCGTGACGAGCGCCGCAAATGGATCCAATGCTTCAATGATGTGACTGCCATCATCTTCGTGGTTGCCAGC  
AGCAGCTACAACATGGTCATTCGGGAGGACAACCAGACCAACCGCCTGCAGGAGGCCCTGAACCTCTTCAAGAGCATCTGGA

>comp49317\_c0\_seq1

GGGTAGCAGTTACAGAACGAACAAGAGATATCCACCCCAATATTTCTTCTGTAAAGCTCAACCGCAGTTTTAAAGGCCACCAACTAAAGAAAGCCAGGAATAAACCGAGTACCTAAGAATA  
TGCTTTTTGTGCCAATAAAGCAATCCCACTGGCAAAGAGGAAGCATTTTATAATAATCTGAGACAAAATCTTTGAATTTAGCTTTTCTACCAGTAACCGTGTCCCAAACCAGGCATTCTCT  
GTAATTATCATGAATAATAACTGCTAATGCAATTAACAGCCACACTATGAATATTAATTGGAAGTTGCCAAGAGC

>comp51452\_c0\_seq1

TAATGCAAGAAATTATGAGGCAAATTATTTATTAGGAAACTTTGATCTGAGTCTACAATCTCGACAACCTCAATCGCTTAATATTCCTGTAAAATTGTACACCTTTCAACTAAATTGTATCAT  
AACTGCATCAGTCATCAAAAAGTTGCCACCACAATTGACACCTCCATTGATGGGGCAAGGGAATAATGCGTTCTTTGATAATCTGTCTCAAGAGGCACAAGGACTTAAAGAGCTATTTAATG  
AATGATTATTTAGCAATTGTTGACCAGTTGTATTGCCATTACGGAGACGTTGTTACCATTGTCAATGCCACAATCGGCACTGCCACTGCTATCGAACACTAAGCATTATCAATAGATC  
ATCTTTGTAACCTGGGTGAATCAGATATCTTTATTGGTGAGCTCTTCTATAATTTCACTATATTCCTTAGTAAATTAGTTTATTTCAATAAAAATTTCAATGTATTGTACCTAAGTT

>comp51937\_c0\_seq1

AAAAGATAAAAAATGACAACCTAGTAAGAATCTCATATAACATTACAAAAATTCAAAAAAGCAAACAAGAAATACAAAAAACAATATATCTAAAAAACGAACTACTAACAACAG  
TAACAAAAATCAGTCCATAATGAACTTCAACTTCATCCTTTGTAGAAAAGATTCCCATCATGCTTCAGCATCTCCTTTTCTAAACCGGCTGAAAACCTGATCTTTCCTGCAATATTTAAGAA  
AATCATCACAACTATAATTGCCATGTTCTTCAATTCAAGAAGATCAGAATAAGGAAATCTGCATCATTAGATTCAAAAATAATGAAAACCTCTTTTCTCATATCTACATTTCTGAAAGAAATCA  
TAGCTTTCCTCATAAAAGCTCCTTCCACTTGCCA

>comp52243\_c0\_seq1

GAATTTGTTGTGTTGAATTATAAATTGCAAATAAAAAGGGCATTATGTAACACTTGGCTTTGTCTTGAGTGAATAATGTAGAGAAATGTCTATAAAAACCTCAACAATTTCAATCTAGCA  
TCACTAGTTTTAGCCTTTTCAAAGCTCCTTCACTCAAATCATAGCAATTTTCTCACCTGAAAATGGATGGTTCCATTGAACCAAAGTTACCTTCAAAGTCTGTCAAAACAGTTATGAAAC

CGCATGCATGCATTCAGGCAATTCATCATTTCAAAGCTGAAAATAATCACATAGAACAATATTTATTTGTACAAATCTCATCAAAACAAATTATTTCTCTCTAAATCAACAAATGCAGTCAGC  
CTGTAGTGATTTTTGTTCTTTGCCTGCATTTCTGTAAAGTTATGGAGAGGAACAAACAAGCTCTTGATCTCTCTGTTCATATACTTTTCGCCTCTTTGCCTCTGGAATGCTTCGTTTTTTCAGA  
TCATTGATGCTGTGGGCATCCGAAATGCACCTTGAAAGATTTTGATTTGCCAGAGAAATATTTAGAGAGTCTCTCTTTTGAGGAAGGCTGATGGAGAGAGACTCCATGTTGAAGATCACA  
CAGCCTTTGCATTTCTTCTCTCTCTCTGAGGCATTAGATGCCATGATATAGATGATAAG

>comp53850\_c0\_seq1

GAGAGCCTCAGACACCATTTTTCCCGGCATTCAGTCTGATGAACAGTGGCAGTGGCAGATTGGCGTCCCCTCATTCTGATAAAAACGCGAAAGAAAAGACAATGATTTTGGGGCAAAT  
GACATTACACTGGAGATGAATCACGACACTTTTTGATTTTACTGTATTTGCAGTGAAAATCAGAGTTTCGGTTGGAGATGCCCTT

>comp5422\_c0\_seq1

TCTCGGTCGTCCAGTACGATCATCACTGATCGTCTGGACAATTGGATTGAACAAATTAATCATAATTAATTTTTTAATCGCAGGATCAATTTAGACATGATTGTCATATATCGTCCAGTATGA  
TGATAGATTGTCCTGTACAATTAGAACAAAATTTGAATCTTAAAATGTTGCCATAATTATCATTGACGGATATTTTTTATGATAATAATTGATCGTCTTGGATGATCTAAATCGTCCAGTACGAT  
TTGTTAGATGAGTTGATCGTACAATACGATTTAAATCATATAGTACGATGAGTTCAAAATTTTAACTCCTGG

>comp55077\_c0\_seq1

TGTTCTCGGAGGCAATCCCTTTTTTCTGTTCTCTTTAATTTGCTGTGGAGTGCTCAAATTTGAATGAATTAAGGTACAGGAAAAAGGGATTGCCTCCAGGAACAATGGGATGGCCATTCTTT  
GGTGAGACTACAGAGTTTCTGAAGCAAGGGCCAGCTTCATGAAGAACCAGAGCGCAAAGCATGGAAGTTTGTTCAAATCACACATACTGGGAAGCCCAACAGTTGTCTGCATGGAAC  
CAGAGCTGAATAGGTACATGCTTATGAGTGAAGGCAAGGGCTTGTTCGGGATATCCTCAGTCTATGTTAAAAATAATGGGGAAATGGAACATTGGTGCAGTTGAAGGATCTCTTCATAA  
GACTATGAGAAGTTCTATGCTTGGATTAATCAGGCCTACTATGATCAGAGATAAGCTCTTATCAAAGATTGATGAGTTCATCAATGCCTTTCTTTGCCATTGGAATGGCCAAGTCATTGATAT  
TCAAGAGAAAACCAAAGAGATGTGGCTGCTCTCAGCTCTGAAACTGATAGCTGGAATTGAAACAGGTCCACTTTTCGGAATCTATGAAGAAAGAATTATATGGGGTTCTAACAGGAACCA  
TCTCTTTGCCAATCTACTTTCTGGTACTAACTATTACCGAGTTTTTAAGGCAAGAGAGAAGGTGCTCTCCATGCTTGAAAATATTATCAAAGAGAGAAGAAAAGATCCACTTTGTTGTCA  
AGCTGATATGCTTGATTCTCTCTTGAACCTGATTCTGAGAATGAAGCAAAATTATCTGATGAACAGATTATTGATACTATTCTAACTTTAGTTTATTCAGGATTTGAGACTGTTTCTACTACT  
ACAATGATGGCCATCAAATATCTTCATGACCATCCACAAGCTCTTGAAGAATTCAGGAATGAACATTTTGAATAAAGAAGAAGAAATCATCTGACTATAAGATTGATTGGAATGACTATA  
AATCCATGGAGTTCACACGCGCAGTTATATGTGAAACTCTAAGATTAGCCACAGTAGTTAATGGAGTGCTAAGGAAGACAACAAAAGATACGGAATTTAAAGGTTATATCATTCCAAAAG  
GATGGAAGATTTATGTCTATTCAAGGGAAATGAACTATGATCCATTAGTGTATGATGAACCTTTTTTCATTCAATCCATGGAGATGGATGAACCAGAACTTGGAGTCTCACCATTACTTCCTCT  
CATTTGGAGGAGGAGGAAGGCTATGCCAGGGAAAGAGCTTGGGATTGTACAAGTTTCTTATTTCTTCACTACTTTGTGACTAGATATAGATGGGAGGAAATTGGAGGAGAGAAAAGTGC  
TGAAATTTCCAAGAGTTGAAGCACCAAAAGGGTTTCATATTCGGATTTGGGACTATTGATTATAGATTATTTTTTTAAACCATCAGAAGCTGCTGGCCCTGCAGAAAATAAAGGATAAAAA  
ACCTCACATTTGCTTCCTTTTTTCTTACTCTAAATTATTAATCAATTGTTACAGTTAGTGATTGCAGCACTCTGATATTTGATTGAATCTTGTATTTCAATTATGGCCTGGAAATTTATGGGC  
TGGTCTACATTTGGGTAATAAAATAAGAGTTTATGATTCTAACTGTTTTGAGATGATCAAAGGACCAATTTAGGGTGGTCCAAAAGG

>comp55285\_c0\_seq1

ATATGTTCTTTATTAATCAAAACACAGTACCAATGGCCGTACAATATCCATTCTAGTGACCTCAAACCAAGCCTTGTTTATTTTGTCTCCAATTTCTCAGTCAGTCTTTCCCTTTCCCTTTCTC  
AGAAACAAGGAAAGCAAAGAGCTACCAATTTTTCTTTCGCTTCTTGTCAAATGGATCATCTCCGAGATAAAGGTGGAAGTAAGCCCTGCAAAGAAGCTTGCTTTGCACCACGCTTATC  
ACTTACCTTTCACTTTTGTCTGGAGAACATACCCTGGAAGCCTCGAAAATTTCAATAACTGATCCAGAAGGAAGCTTGATGTTTTCCGT

>comp55545\_c0\_seq1

TATATCATATTAATCATAAAACAAATTATTCAATGATAATAAAATAATCCTAATAAAATTTAAATTTAAATACTCCAAAGTACTAAATTTACCAGCATTGTATCATCCAGTCGCCAATAGCCTGG  
CCTTCTCTCCATCCTCCATTCCTCCCATAAGTATCATAACAACGGCTGATCCAACGTCTCCGGCATATACAAAGCCATCACTCCCCCACCCTCCACAAACCCCAACACCAAAAACGTCAC  
ATCTCCCCCATCACC

>comp55721\_c0\_seq1

CGGAAGTCGCTCGGGCTTCGCCTTCATGGTTAAGTTTCTTCGGGCGGAACAAGATGATGATGGTGAGGAAGAAGAGGCAGAGTATGGGAAGACAAGAGATTGCTATGAAGAGGATAGA  
GAATGAGGAGGCTAGACAAGTTTGTTCGAAGCGGCGGACGGGATTGTTCAAGAAGGCTACGGAGCTTCTATTCTATGTGGGGCGGAGATTGGTATAGTGGTGTTCACCGGCAGG  
TAAGCCTTTCTCGTTCGGCCACCCTTCGCTTGACTATATAACGAAACGGTTCCTCGGCGGCAGCGCAATGGCAACGGCGTCAAGTGGTGGGGCCATTGTGTGGGATGTTTCGTTGAAGG  
TCAAAAATTGCTTCAACTAAAATCAAGAGCATGCAGTTTGACGGAGAAGTTGGAGGAGGCGAGGAGAATAAGG

>comp55757\_c0\_seq1

GCGACACTAATATTGACGTCGGATTGTTACCTATACCAAAAATTTGGTTGCCGAAGACGATTGCGAAAAGAGAAGAAAGCGAGCAAAATAGGAGAGAGATTGTTACCTTCGTAGGAAGC  
GCCAAAAGAAGAAAAAATACAATTCAATTGGAGATGAATTACGTGAAAAATAAAATTTTCAGTTTGAGATGCCCTAAGCATACTCTTCAAATGCAAATGAATGAAATTTTCTTTTGCAT  
TTGTAC

>comp55968\_c0\_seq1

AAGTTGCTTTAAGAAGCAATAAAAGGTCATTCCAAGCGAAGCCTAATTCACATTGGGAACCTGAATCAGGTCCTAAAATCAGCTGATTATGAACAACATTGAACTACCTACAACCTGAAA  
CCCAAGCACCCGAAGCCTCAAGTCATTCAATAACATATCTTACGCAAGTGGATGGGAAGTATCGCCATAGCCGACGGCCACAACGCCTCTCCCTTACCCAGTCTGCCTCTGCAGAAAT  
CCGAATTTCTACTCATAAAACATGTTCTACTCACCCAATAATTTCTCTATATTCCACCACATCCCATGGAATAGAAATACCACTACTAAATCAGCCCCTACACTTCCATCTTACCCTCCA  
GTCAATCTAGTTAGTCTTAGGCTTCATTGGAATGTCTTTCTTACTGCTTTTAAAAATAGCTTTCTAAAATAAAAAATTAATTTTTTATACTAAA

>comp57465\_c0\_seq1

CTTCAGCAATGAGGGGCCGGATCTCTCGTTTTTTATGGGATTCAAGAAAGTTCTTTTTTTCAGTATATAAACAGGAATAGCAATTGGCCAGCTCACTTCTAAGCCAATTTAGCTTTACAGGATA  
GTTTTACTTTTCTTAATGTAAATAATGATGAGTTCCTCAACTCTCTTAAGTTTGTGAGGGAGGAAAGTGATAGGATATAGTTACTTTGAGTGTTCCTTGTAAGTACTTCCGTTTA  
TTAATGCAAAATGCAACGTT

>comp58363\_c0\_seq1

AAACCACCTGAAGTCCATTCTTGCAGGACTTACATTTCCCTATGAAGTAGCCACCACGAATAGGCATAAAATCAAATAACCAATCCGGTATGGAATCAGGAATGACATTAATTTGTTTACT  
GCTGTGTTAGAGTACTCTTCTGTTTTGTAAACGATATATGCTGTTGAGTTGCTGGAAGTCAAGCCAAAAGTAAGTTCGTATGTGGTAACTTAAAGCATGAACGCGTGTACAATTTTCTCAAT  
AAACTCCTTTCTTCTGCATCTTGTTAAGCAGTGCAAAGGCGCATCGCAGTGCCATAAAGAAAAGGGCTTGGATTTCAATTGGATAACCGTAAATACCCATTCTCCGATCGATCATGGAG  
CAACCATCAGCACATAGCAATGTTGGGAAAGTGTCAAACCCTCTGACAAGCATAAAGATAATATAAGCCTCATTCCCTTTTGAACAATCAGTTCGATTCTGCCAAAAGAGGTATCTCCAGTTG  
ACTTTGTATAAGCTCGGAGAAGTATAATCCACCAGAAGCCAGAGTCAACAGGTGCCACCCTTCCGATAGCGCTTTCACCAAAATCTGCAACCCTGTATCAGTTTTTCGATTAGAGTCATG  
AAGTACCTTGAAGCTCGCTGGCATAGCCCCTTCTCCAAGCTTAAAGCGGTCTATCCTC

>comp58377\_c0\_seq1

CGCTTGAAGGTCCTAAACGAAGATCTCTTTCTAAGATTAATGAACTGAATATAAACTAAGATTGTCCTTGTGTTTTGTTTTTATCTTAATTAACATGAAGAATCAAGTGATGT  
GTTTTGTGACGATTGTAGTAGATTGATTACATACGTATATGAAGATTGAAGTAGAATTTCTGTTGTATTTAAGGTGTGAAATATT



>comp59112\_c0\_seq1

TTTCTTATCTCCTAAAACCTATTTATGTAGATGTTGAATTTTTTTGTCCAAAACCTAAAATATAAAAATGCATACTCTCAAACGTAAATTTTATAGCACGTAACAAATCTAAATAATATTGCTGCTTG  
GAAGTATATTCTCAGTGATAGAATGAGAAAAGTTAAAGTTCTTTGTTTTATACAAAAGTCTTTGAACAAATATAAAAAGAGGAGTTTCAAGATACATTAGCATTTTTATGTGGAAAGAAAA  
ACCTCAAGGCCTAACAAGTAGGAAAGGATGGCTCAAAAATAGAGGTTATAACCAAGTCTTTTTCTTTCCCTTAATCTTTATATACGGTTGTACCAGTGTAGTTTTAATGTTATACATTAGCAT  
TAAACAGTCGCCCATCAGTTGTTGTCAAACCTTACATCACATATGCCAACTCTTGGTTTTACTCACAGTGAGACTGATCCATCTTTACTTGTCTACAATGACAATTCAATCTTCTATATTTT  
ATTATCTATGTTGATGACATCTTGTGACTGGCAATGAAACTTCAGCTACTACTGCTCTTATCAGCAATCTTAAACAAAACCTTCCAATTAGAACTCTTGGGGATCTATCTCAGTTTTTGGGA  
ATTCATGCCATGCCTATCTCAATTGGATTACGCCTAAATCAATCAACATATGTAGCAGACATCCTTGGCCAAGCAGGTTTTGATAATTGTAACCATTTGTTACACCTCTTCCCTCAAAAAGTT  
TCAACGGATGCAGCTGTTCTTTCTTAATTGT

>comp59230\_c0\_seq1

TTTCATGAGTCTTTGGAAAAGAGTAAGGGGTCATTAATTATTCTTTCTCATTACTGTTGTAAGGGTTTATGGGAACTTGTATGTTGCAACGATGTTTTCTTTAGTATAGTAGCATGAGTATG  
TTTTAAAAAACGAAGGGTACAGTGAAGCTTGATTGTTGGAGAATGAAAAGTGTTTTGTTTTGAAAAGGTGATATGTGTGAGAAAATAATAATGGGGCTTGTGGTTTTCAAAAATGTGAAACT  
TGTGTGTTTTGGAAAGGTGGAATTATGCTTGTGAGAAGTAATGTGTATGTTGCATCTCTTGGAAAGTGTGGGTGATATGTTTGGAAAGTGATTTGTGTAGATGTGTTGAAAAATGGAATT  
ATGGAATTTGTATATATTT

>comp60219\_c0\_seq1

TAAGTTAAATTGTAATTACTCTTTGGAGGATCTTTTCTATAAAAAGGAATTTGATTTTGTTTTTCTTATCTAGCTACTCAGCATTAGAGGAAGTAATCTGAGAAAAGGCAGTTGACAGTAA  
TCAATTTTTATTAATTTACAAGTAAGTTGACATCAAGGTGTAAGTTGATTAATCGTGGATTGGACTGAATATACCGATTCAACAGAATTAATCGTGAATTTGGTTCTTTGACTAGAAAATATAGAA  
TTGAGAAATATATTTTTTTGTACAGGTCCTCAAGAGGGGACAACAAAAGAATAACATTAATTTTTTCATAAAGGGTAACATTAATTTCCATAATTTTAAATTCATTCATTTGCATATCCTTCATA  
TAATCTCCCTTCTAGGTTCAATGGGACATCCAAATAAATTTTTCTTATCGCAGATAGGGTATCCACAATAACAAACAACAATATCAAGAATTTGTCCCACTACAAGGGGTGAGCTAAA  
TGAA

>comp62085\_c0\_seq1

TGTAATTCCTCAACCAATTTATGACATGATCAATGCTTCTCCTCCCTTAAAGATTTATACTCGCAAACCATGATTGTTTCTGTTGAAGGAACTCAATCCATCACTTCAACTACGGCTGAGCAT  
TCACCTGAACCTAAACCAATAATGTGCATCTTTCCATTGCTCTATGAAAAGATAAACACCCTTGTATTAACCATTTGATGCACTTTATTATATCATTGATCATCCATGCTCTTCCCTTTAGTCT  
ATTTGCCTCATCTCAATCTACAATCTCTATTCTTAGGATGCATTAGAAGGGCGCAGCTCGATCCTAAGTAGAAGCATGCAATGAACATTGAAATGGATTTTTATGAGATTAAACC

>comp62352\_c0\_seq1

TTTCCACACTTGAATCTACGTCAAAGTTCTAGTTTGGTCGTTTGGTGGCGTTCCGTTTCATGTCATAGCTAACACCGTTAGCAGCTAGAAAATCATCCTCAATGGGAGGGCGCATCTTCCCTC  
ACTGTTTAAAGTTAACCCTGGCTCAGGCATCTTAGTGCATCTTGCATCACTACCCACTGCAATATTCTCGGCACAAATCTTCTCAAATATTTTCATATTGATGGAATGGGTGCCTTCTAAATCG  
AGCTACCTTTGGGTAAACCTAGAAAAATGAAGTACTGTTGATTAGATGCATTAATAATTAATAATTATATATGATTGTAAAGAGCCAAAAATACCTGTTGAATTTTCATCCACAACCTCGTCAG  
TAGCTACAGGGATGTGTAATTCCTCATCCCAACCCATCCGCTACGGTTTGTAGTTGATATAGTGTCTAAAATCAGCCTTCATATTTTTAAATTTTATCATTACGGACGAGTCAGTGTAGTT  
TGTTCTAAGACG

>comp65439\_c0\_seq1

AATAAGTGTTTTTATTTTTCTGAAGACTCAGAGAATTGGACATTGAGTCAGATATCCTGTACTTCAGTGGGAGCTGTTCTTGCTCAGTTTGAAACTGAGGAGGAGCTGAACTTTCTGACAA

GATACAAAGACATTTTTGACTATTGGATTGGCCTTAGCAGAGAATCATCACATCATGCTTGAAGTGGACAGACAACCTCTAAACTTAATGTCCCATTTGTCATCCAAGGAACTGGAGAATG  
TGCCTACCTGACTGACTCTGGAGTTAGTAGTGGCAAGAGATACGTAATTAGAAAAAGGATTTGCAGCAAGACAAATAGTAATGTCTCCATATCCTTAGATGCATTATAAATTACTATATATAG  
TTGCTGCTGTACTGCCA

>comp69105\_c0\_seq1

AAACGATACGTTCTAGCTTAGTTTTATGATGGATTAGACTAGCACAAATAATACCTCACATACGTACGTGCTAGGTTATGACTATTGACGTCAAAGTTATTCTATGCGAACACCGAACGTTGT  
TCAAAGACCAGCCAGAATGGGCCATATCGCTCTGAGCTAATGAGTGGAGTCAAGATTGGCTCAAGTATAGCTCGTTAGCTCATTGAATTAAGTCAACGAATAATTTATCGAGTCATATTCG  
AGCCGACTCACGATTCAACTTAAC

>comp71041\_c0\_seq1

AACAATTTATTATAGAGAGAAGAAAAATTTCTCATCCAAAATATAGAAATCTGTACAACCTTTGCCACAATCAATATACATGAACTGTACAAATTTACACCAGTTCATAATTTACCAAATAAA  
AGATGACTAACAAAGTTCACAAAATAGATGGTGGTTTGTGGAAAAGACTTTTACCCAATTAAGTACAAGGAGAGTTACAAACCAGACCTCCACTTTCTAAAAATAAGAAGTTTACTCAGT  
CTTAGAAAACACTACAAGCTAGCAAATGTACAGAGAGCTGGCTGGTGTAAACACCACAGTTGAGACAGTGTCTTTTTAAAGGCTTTTTTTAAAGCCTGTTGCCATGGCAGATTCTGGTCACT  
TGCTACTTTCAAGGCCAAAAACACAATACAAGGTCTGACCATTTCCCAGGTCATGCTTACTAGTTTTGTCTTATGTACATTTATACATATTTAAGTGTCTAGGTAAGTCTTGTATATAAAT  
TTCCAGTACTACCGGTTTTAAATGTTGAGCTTTCCCTATCGAGCTGCCAAAAAGGATAACAATTTAAGTGTAAATAGTGCAAATTTCCCTCTGCCAAGTTCTACCGCAGAGAAAGGTTCTTTG  
AAATATGGATTTGTGTTAAAGGGACTGATGTAAAAATTTAGGTATCATGTCCGGGAGAAAATGAAACCACCCAGGACTTCACTCCCTAGCAAATAAGGTGATCAATTTACTTGGACTCAC  
A

>comp72792\_c0\_seq1

CAAGTTTCTTCATTCTTTGAATTTTTGCAACGCCCATCTTGTGCTTCAAAAATGCGCCCATGGCTTTTTAGAAATGATCATCAATTAGAGAGAAAAATGCATGCCCCACTATGCAATTCT  
ACAAAAAGGCCCCCAAGATTGACTGAATGGAGCCAAGAAGTCCATCTTTCTTGAACATTGAGATAAAAAACATGAGCATCTTTAAGTTCCTATAATGTTCAAAAAATCAAGATTGCC  
AATCTTATCACCACATGACAATCATTGTTTCACAAGTTCTTTAGGCCCTTTAGACTTGTATGGCCAAGCCTCCTTCAAAAAGCGGCCCTTTTAT

>comp73791\_c0\_seq1

CGATATGCCTGGGGTCAAATCTGGAGACATCAAGGTTCAAGGTCGAGGACGGCAAAAAGCTAACCATTGTAGGTGAGCGTCGCCGGGACGAGGATGACAAGGAAGGCGGCAAGTACCAT  
TGCTCAGAGCGCAGGATGGGGAAATTTATGCGCAAGTTCTCTCTTCCCGACAACGCCAATCTCGAAAACATCACAGCCGTTTACCGCCACGGTATTCTAACTGCTACAGTGCAGAAGCTA  
CCGGAGGCTGAATCTAAGTATCCGAAGACAATCGAGATTAAGATTGATTGAATCGATCAGTACATCTGAAATTTCAAGGTTTGTAACTACGTTCTCGAAGTGTGGTTGATGTTTTGTGT  
TTTTGGTCTGAATTTGAATCGTCCTTATCTGCTTTCAATTCAAATTTGTTCTATGCTTTCTTTAAAGGATTTTTTGTGCGTTAATAATTTGGTTAATTCCTATGATCTCTTCGTGTGCTGAGC  
TAATTTAACAATATTAATAAATCAAGTAATAATCAAGTCACGTTGGTAACATTCTTCAATTTGGAGGGCTATAAGCCTTCTTCATTGTTTC

>comp7462\_c0\_seq2

ATTTTAATAACATGTCTCATGTTACACCAGCAACAAATTTCTAATTTGTCATAATTAATAGTTTATCTTCAGAGAATATCCTCATGTAGATCATGCATGTGCTGTGCAAAAATGACTGCAATTT  
ACAGGCCTAGATTCAGTAGGAGTTCTATAAGATCTATAACAATTTAAATAGAATCATGCATGTATACCTATTAATAGATGAATTATATGCAAATAAAAATCATATGTAATATCATATCTCAACTA  
AATACACATTTTTTAAATCAAATAACGGAATGTCTCATAGAAAATTAACACTACAATTTGA

>comp74827\_c0\_seq1

CCTTCAAATGAAGTGTGAGAACGTCGAGAATAGGCCACCTTTAGGAATTCTCCAACACTAGGTTGTTGTAGGAGAGATTTAAAGCAGAAAGGAACATTAAGAAACAAGTTCAAGAGG

GATTTCTCCAGAAAGATGGTTTTTTAGAGAGATCCAAGTACTTGAGTTGTGTCAGATTGCCAAGCTGATGAGGAATTGGACCTGTC

>comp74918\_c0\_seq1

GCTCAACAAAATAGTATCAACTTAGCAACTAATTCCTAGAATAAGATCGACTCCAAAAAATTAGAAAATGAATACAGACTCTAAATATAGGCAAGTGATTAATAAAATAAACCTTGTAAT  
ACTCCGATTTTTTACCCATTAATGTTTGGAGACCATTTAATTTAGGTATGATCTTCTCCAAAAGCTGCTATTAAAGCAAAACATTTAATACCCTCCCTTGGCTAGTTTCCTGCACTAGA  
TTTGCTTGAGTTATTCCAGAGTTGCTGGTGGACATGTTGATGACTTGAAAACCTCTAAAAAGATCTTAAGATCTTCTGAATTAGCTTGTTAGGCATCAAGCACTTCCCATAAGTGTCTCCAC  
ACAGGGAAAGAGACAAATAATAGCCTTTCTCCAACCA

>comp75317\_c0\_seq1

TTTGAAATTGCAAGAATCCCTATATCACTTCAGTTTCACGATTTGAAATTCAGAACGCATAAAAATGACACGAAGGCTCCAAAGAAAAATTTATTAAGATCCATATTCACAACTAAGAG  
TCTAAAAGATCGAGAAATCAGTGAATGGAGACCACATTCGCGTTGAAAGAATAATGCTTATTTCCGCCGGCGAGCTCACTTCTTGTCTTCTTCTTCGGACGTGAAGACGCCGGCTTCT  
TCGCACCCCAAGACGCCACCTTCGTAGGACCCGAAGACGCCGCCTTCGGAGTA

>comp75575\_c0\_seq1

TAGGCACCATAATTTTGAAGAATCGGTATCTCATCTTTTTTATGCGTGCTTACTCTTTTTCTGTGTTAAACGAGCTTATCTCAGTTACTGTCGGGCTGCTTCTAAGACCTAGTCTGTTACAT  
CTTTTTTGCTTGGGTTAATGCTACTTACAAAGGCAAGGCTTCGATTAAATTTTTTACAACTTATGATTTGCTGCACCCTTATTACATATGGAAGGAAAGGAACTCAAGGAGATTTGGGG  
ACAACATGCTTAGTTCTACCACACTATCTTACTTATTA AAAAGAGTAGTGTTTGAAAAAGTATTA AAAATGGAAGGACTCCTCTCAATTGCTGGAATGATTTAACAGGCAGGATTTGGTTT  
CTGTGAAGTGGAAATTTTTTGGTTGGTGCAACTGTGCTAACGAATATCTCTGTGCTAGAAAATATCGGGTCCCCTCGTCCCTTCGATTTGCCTGAAAAGCTTTGGCTGGACAATGATGAAG  
CTCCCTTTAGCTGGTCCCTTGGACGGCCTTCGGGCAACC

>comp76010\_c0\_seq1

CTGGTTGATGTTCTCTCATCTATTTTCATTCTTGTCTTGATCTTCTTGGTTCCCCTCAGTCGCCAGTTCTCTGGCAGCGATCAGACCGACCTTGCGACCAGCTGATGCATCTCTGCGTA  
CAGTCGATGGAGACCCAATATGTTGATGGTTACCACCACCATGAGGATGCTCTACAGGGTTCATGGCCACACCACGCACC

>comp76255\_c0\_seq1

AATACCTAAACATCGAAAACTTAAATACTATGGAAAAAAAACATTGCAAAATAGAAAATAAATAAAAAAAGGAAAGGAAACTTTGAACCTTATGTACCGAGCAAATGCCAGGTCTAG  
CAAACATAATGCTAGTCTAGATTACTTATTGATTTAAAAACAACAAAAAACACAAAAAACAAACATAACACAACCAATCTGGATCGGACCA

>comp77092\_c0\_seq1

AGCACACAGCAGCACCTGAGGAAGCATTTCCTTCAAAACTCATCAATGCATCAGAGAGGGGCTTGCAAAGGGACTGAATTATCTGCATATTCTCTCTATCTGGAGCCCAAGGATCAATCC  
CATAAAGTGCCATTGCAGAAACCCTTTAGAGCAAGATTCGAATGATTCCACACATGAAGACAAGGTCCTCAATATAACAGACATAATTTTCCAATGTTTGGGGTGATTTTTTGACCATG  
CAATCTTGCGAGCATTTCAAAACCAATATGGCATTATCTTCAGATGAATCACTAGCATCAATTGCTTCGGAGACTGTAGCAATAAAGCCAGGTATCATCTGAGTATCCAGGTCTTTGGCAT  
AAGCTTTCAGGTTCTTCAAGGAAACAATGTGGTTGTCTGGGTCTCTATCAAGCATTGCAACTCTTTTGGAGTACTGGAATCAGGCTGGCACTCATGTTACTGAATTGAGAACATGAG  
AAGCTTCGAAATCTTTCTTGGATAAAAAAGGTATTTTTGGATTGTTACTAGCGCACATCTTCTATATTACAATCTTTTCGAAAATGCCCTTGG

>comp77199\_c0\_seq1

AAGAAGCGGCTTTAAGAAGCAGAAAAAAGTTGTCCTAAACGAAACCTTATATATGGACAACAAAAGGTAATACTCATAAAGAGGTATAAAAAAAGTGTGATAAACTTGTAGCAC  
ATGAGAAGTCCAAATATTTGTCAAAAATAGGTTTAGAATTTCTTGGCATTACTCAATAGATGGAGGGAAGGGATGAAAGTTGATCCTAAATAATTGAGCTTAAAGATTTGATTGGGATGGC

TGTAATTTTTTTTTAAAGATTATTATAAAGTTATTGTGGGGAAAATAATTTTTTTAAAAAAAATTGCTTTTTACTTTTTAGCATATAAAAATTATGAAAAGCAATAATAAAATAGCAGTCAAACA  
AAAATGTGGTAGCAATTTGAAAAGTAAAACAATAAAAACCTCGTCCCAATCAAATCTTTA

>comp77380\_c0\_seq1

TTACAACATGAAGTCACAAACCCAATTCATTCTCATGTAGATGATTTAAGTTAAAGACTGAAAAAAGCTTCTAGTTACAATTTCTTGGTTAACTTATGAGATTCTTGTCTTTCTTTCATTCC  
TTTTTGTATGAGAATTATTTTGGCATATACTTCAAGACTTAATTAGGCTCTTTAAAGATTACAGCTGACGCAGTCATATATATGCTGTAAATGATGCATGTTGTGAATGGAAGGTTTATTTA  
TGCCCTTTTTCAGATGGTTCTGCACAAGTGAACGATTTGAAAAGAAAAAAAACATTTAGAAAAGAGAAATGACCTAAAAAATTGTATAAGATAGCCAACTATATTAGTTAACTTGTA  
ATTATATTACTAGCGGAGGGAACCTTTGGACAATACATGTCATTATAGCTTAAATGCTTAATAAGTGACATGGATAGTTATAAAAATGAAGTAAAATAGC

>comp77842\_c0\_seq1

ATGATTACCAAAAAGATCAAACAAATCTAATTCAACTTCAAATTAAGCCTAAACATTATTACAAAGAATAATTTATTCTATCGTTAAAATGAATCTAAAAACCTTAAAGAAGCTGAAATTAATA  
TAAATATTAATATTAATTAATAAATATTATTTCTCGTCACTAACTTCAAACCCACCACAAACATGGCCCAGTCGGTTCATCTATATCAATCATAACCCCACCACATATAACATAAAATA  
TTGCATGAAAATGTTACATTTTAAAGGGGGTATATGTGAAGACGGACTTCAAATAACAAAAAGCCCAGCCTCTAACAAATATGAACACAAAAATGTGGGGGGTCAAATATACGTAAAAA  
AACTTTATAATTATCAAATTTATTTTGTAGATGAGATGATTGCAACACGAAAAGACTAATCAATCAAAATTTATATTACTCATCTCAATTTTAGCAAAGTTGAGTCCTGACCCATATTTCTTT  
CATCAAGACTTTGTCAATTTGAGCACCAAATTTGAAAATTCAAATGGCAAGCGAGGGTGAGGGTGAGGCTGACCCTGCACTTAAACTCACCTGACAGACCACACTACCTTTTCATTATTTTT  
TTCAGATTCACATCAGCATAAAAAAAAAGG

>comp79793\_c0\_seq1

TTAAGCAATCAAAGCAAGCCCACACTTGAAAAAGAAGATTAAACCAACCCAGATTGAGCCCGTCTCGTCTACTTCGGCCTAGTTTCGAGAAATTCGAGGTTTATTTGACGATTTCGAACC  
AGCATGCAAGTTGGTTGAACCAATTTGGCTTATTTAAGCATGGATCAAATAGAATCAATTCAAATTTGTCGAATTTCAAATATTATTTTCGACGGAGAAAGATTTTGAAGGGCCTAATATG  
GTCCATTTATTTATTAAGAAATTCACATGTGAGAATTATTGGTTTTAAATTAAGAGTGGGACGGCA

>comp80101\_c0\_seq1

ATTCTAAAGGCTTTTATAAACAATAATCATGCAAGTTTGTGCACAGTTTTTATTTCAAAGAGATCAGTGGAATAACCAGATTCAGTTACTTGAAGACGCCTGCTGCAATATTTATTTATTGT  
TTATTGAAATGAAAAGAACATAATTACAAGCACATTGCTGCTCCATGTTCTTCAAACCTAGAACTAACAAATAGTTGAAAAAATTATTGAATAAAAAAATTAATAAAAAAAGGTTGCTCTAT  
T

>comp80328\_c0\_seq1

GGTTCATCCCACGAGTCTCAGGGCAAATGGTAACTCGCGACGCAACAGTGACTGCTGGGATGACTATATAGTTGGGAGACGAGGGCTGCTCCACAGACGAATGAACGGGTCAAACCTT  
TATAAATAAACATCCAGTGAAGAGAAAGTGACACCTCTAATTCATCCTTATACACAGAGCACTCTAGGGGTGGCGCGGCCGGAGGCCTGCATCCTCACTGGTTCGGGGCCTGGATGGGT  
GAGTGGTGGCCCGGACGTCCACGGCACGGGGCTGGCAGGGGCAAGGCTGGGGCAACAGACGATGGGCACTAGGACACTGCGCATTTACAAGACCAACTACAGGGGGGGCGGAGGCC  
GTGCGTGTGTGTCAGGCTGTTCTGTTCTGGAATGAGGAGGGGTGGTCTTTACATCCTATTCTGTGTCTGGTGGGCCCGGAGGGGCTACTTTGTGGAGAGGATGAGGGCAACGATGAGACC  
GTAGAGGCCGAGCACTTCCGCGAAGATGAGGATGAGGATCATGCCACGAAGAGCCGGGGCTGCTGGGCAGTGCCCCGCACGCCTGCATCGCCACAATGCCGATGGCAAAGCCGGCT  
GCCAGCCCCTCAGGCCCACTCAAGCCTGCGCCCAGCTGAAGGAACTCCTGTAGAGACTGATGCCG

>comp80464\_c0\_seq1

TTCAAACACCCGCTTCATTAATAAATAAGCAACTGTTAGGAAAAAAAACAATCTTAATATGCTTGTAACAGAAACCAAGCAAAAATAATCCTTTTTATCTTCAGTTCAGTTGGGGAG

ATGAAACCAGCCTCGCAGCCCTCCACCTCTTCCTACCTCCAACCTCCCTTTATTGTAGCAAAAAGAAAGAAGAGAGAAAAGATAGAGAGAGAATTAGAAGGAAGTGAGTAAGGCAAAGAAG  
AGAAAACCTTTATCCAATATATGGCTCAAAGCCATTTCTATTTGTTCTTCTCCTTGGAAAGCCTGTGTGCTCTCCTACTTAGAGTCTCCTACGCACATAAAGACCATGTAGTCGGTGGAGCA  
TTTGGCTGGAAGATCCCTCCTAATGCTACTTTCTACAAGGAATGGGCTGCAACTAAGACCTTTGTAGTTGGCGACAAGCTCGTGTTCCTGTACAGGACAAGCGCAGAGAACGTTCTCGAA  
GTATCCGCCAAAGACTACGAGGATTGCGGCAATGGCGATATCATTGAAATTTATTACCGAGGCCCCAGCACCGTTCAGCTCAGCACTCCGGGCCGACACTTCTTCTACTCCGGCATCGGCC  
TCCACTGCGAGGCCGGCCAGAAGCTCGCAGTCAACGTCGTCACAACCGCGCCACCGCCACCTTTTCGTGCGCCGACGACTCCCTCTACTCAATCGGCGGCTCGAAATCTTCACCTCACCC  
GAGCCGTCGCCGCTGAGGGCGACTGCGTCGGCTTCGTTAGCTGATACGCGCCGTAATGTTGCTC

>comp80557\_c0\_seq1

TCACGTTTTCTGACTTTGTTGCCAGAATTAGGTTTCCAGAACTAATATTGAGGTTGAAGGTTGCTTTAACGACTGCTCACATAAAAACTATTTATTAACAAAGGGTATTTGGATTAAGGTTCT  
TAAACACTTGTACAAGACTTGGTAATATTCTTTCCTCACTTCAATACCTTAAATAATATTGTTCCCAAAGGCCCAAATATTTTGTAAACATTGATTTTCGTACATGCACATTCCAAGACATAAA  
CTTTCAAAGAAGAACACTATTTTTTTACTATTTATCCTTGGTAAGAAATGTCACTGGCAAATGATCCTGGCAAGCAACTACAGCCCAAATCAACCAACTCTTACCCAAA

>comp81384\_c0\_seq1

AAATCCCCCAAAAATAAAAGAGCTTTGTATTTTTTTTTGCTCTCATGTGACTCTTTTGTTCATAGCAATATTTATCAGATATGTACATCTAAACAAATATCCTTATTAATTTTTTTCTTCATTA  
ATTTTCTTCTTAGTTAAAAGGGAAATCTCTTACCATCCAAACAAATCAGCTCCACAATTAGGCTTATCCCCCTAACCTTCATCACCTCAATCTCATAGCAATGCACCTTGACCGGCACCTT  
ACCGAATGCCACCATCCGAGCGCCAAATCCACCGTCACGTGCCATTCAAGATCCACCAACAATGCCCCACCTTAAACTGCCGGTCAAGCTCCGCCGCTTATCCGCCGCCACATACCG  
CCTTGCTGCCGCCCGCCGTCACCTTAATGACCGTTGAGTTCATCGGCTCTTGCGAAAACCTCCGGCACCGTTCGCCTCGGCTAACACCAGCCCTAGCTTACCGGACGGATAGACCAGTATATG  
GGACTCGGCGTAGACGAGCCGGACGGCGGCGTTGTTGTTGGATAGGTGGAGGACGATGGGTGCCGCCACGTGCAAGTAGTTGTGGTGATGGGTGAAGCGGGTGAGGTTTATCCGTCG  
AGAGAGAAGGTGGGGATGCGGGGGTGGAAATGGGAGTATAGGATGGAGAGGGAGGCGGGCGCAATAGGAGAGTGACGAGAAGGGCGGCGGTGGTCCAGAGGCAGAGGGCGGCAGC  
AGCTGCAATGGTGGCGACGGAGGCGGTTCGTGGTGAAGGCGGTGGGAAGGGATGGCGAGGGCCATGGCAGGGCGAAGGGAGGGAGTGAGTAGGAGG

>comp82426\_c0\_seq1

AAGAATTAAGCTATATATTGATGAAGAAAACAATCTAAATTGGTTCGTGAAAATTTTTTAGTGTAGATGAGAAGAGCAAAAAGCATGGCTGCTTCCATCTCCTCTCACATCCATAAACTAAG  
ATAAACTTTCTGGAGCTTCTCAAGAAAATTCGACCGTTGAAGTCATCAGTGAATGGATTCAAAGCTGTCACCTTCTTAAATATTTGGTAGAGATCCTGGGAAGCTTAGCCAGGCCAACA  
AAGACTCCGATGATGGCGAGGGCGCCAGCGAGTGCAAAGGCTGGGATGTTGCCTTTGTCAAAGAGAGCATCCCAGGGACCAGCACTAAGGGCTATGATCACCTGAGGAACAACGATGG  
AGATGTTAAGAACACCGGTGACCAGTCCTTGTGCGTGCCTCCTCATCTGCAGCAAGCTGTGCAGCACAGGCAAAAAGGAATACTATATAGAATAGCTTGAGGAAATCCGAGAATTGTGA  
AGATAGCCAATGCTCCAATTTTGATACCCTCATCCCCATTACCCACAGAGCTGAGTTTAGAATGGTAGCCATTTGTGGAAATGACACTAAGGGCAGTTACTGCAGCCATGGCTAAGAACAG  
GGTGAAGTTGCCTATAACCCACACAATCTTGATGTAAATTTGCGGC

>comp82565\_c0\_seq1

TCGAGCAAGCAGAAGTTCCAAATGATTATATAAAGCTTCTAATATATTGTCGCCTTTTGGAAGTTTTCTGCTAAGTTAAACAGGAGTGTAGTCCTAAATTTCTGTGGGAATGACATGGAATT  
TATCTTTCATAACATGAAACCTGAAGATGCCTAAAATAGCCATTGAAAGAGCTTCTTCCCTTTGAAAATGTTTCAGATTGAATTTCTTAACAAATCTATGAGCATATAAACTTCCCGGATG  
ATTGCAAGCCAGTAATCTCTCCTTGAATGCCAATGATTTGAGGAAAACCAAAAAGATTGGCTCTGTTAGAGAACTCGCTTTGTACATTACAGCATTATCAAAGAGATGCGCGCCCCATG  
GCCAGTCAGTTCACGTTTACCCTTGTCTTAAATCTGTTGCCAAGTCATACATAATAGCTTTGTATATGAGCCAACCCCAAATCGCTCGAAGTAAAGGGCATGGCTGGTCAATGTTAA  
CCTTCCAGGTGATGTGGACATTCCAATATGTTGCAGTACTAAATTAGTGGGCATTGTGCCATGAAAATCTAATATAATTTCTTCATGAGCGAGATGAAGAGACGAAATTGATGCTGGCCCTT

TGAAACATCTTGCAGAATTGAGCACCTTATTTAGGCATTTTCAGATACTTGTTCATATATCAGCAAATGAAGTTGCCCGCCTGAAGAACTAGTGAGTGCATCAAAAAGGTTGTGGACGGTGAT  
TGAATCGGCTATAGCAGGGCAAGCAGGAGCTATTTTGGCAAAGGCTTCTAATCCAACAGTATTTTGTAAATCCACCTGGACAGCCATGCTTGTAGCGCTTATATAAAAATAATGATCCACCAT  
CCTCCTCAATTATTGGATACTTACAGAAGGAAGATTCTTGTAGCAAAGCTTCACTATCTGTGTCTGGGGTTTCCCATGCAAGCATCATCTCAAAACATTAAGCGGCGAATCGATTTGTTACCA  
AGTAGTTCTAGTTGTTTGTAGTTATCACAAGAAGTGTCTTGTAAAGAACAATAATTTCTATGATATCCGAAAATATTTTGATTGAAGTTTGTACATTGTGCAGAAAGTTTCATTCTCAAAAGACTCCAG  
CAGCCTAGCTGTTGAAATAAGCAAAATCCTGAAAACATCATCTCACTGATTTAGTTTCCCATCAAACCTCCAGATGGCAATATCAGCCATCAGGCAACTTAATATGATGAAAATAAAGTTCAGT  
AAAAGTAA

>comp82702\_c0\_seq1

CTAATTCACCTTAAGAGTCTTCATTAATAAAATTTTTATTTTCGTTTTTTCCTATCAGAGAAAATAGAAACCCAAAATCAAAAAGAAAGGAGATAGAAAATAAAAAAACCTAGATTTGAAGGCC  
ATAGAGCAATTTTCGTCCGTAGACCTAGTTTGA AAAACTTGTCTGTCTCGCTGTAAGGAATCATTACCCTATTTCTGGTCATATGATTTTGGAGCGTCAGGTGTCCTAAAATTATAACTTATTT  
TGATATCCTAGAGCTCTTCCATTACCCTATATATACAAAAAGTCAAAAAACATAAGATTTTTATGTGAAAAACTCATAAGATTTAGACAATTGCCACTTATTTAAATTTTGATTTACAATTAGTC  
ATCATTCCCCAAAATTA AAAACAATGTCTAGTACCATGTAAGAATCTAGACTATGGAACTATCCCTTGTGTAGTGTGCGAAGCAAATCCAGACGCAATGTCATATAGGGCGATGGAAGGCAA  
CGAGTAACGATCCCTCTAGAAATGGCTGTGTTTGGAGAATCCAAAAGCTCTAGGAGGAAAAACTTGGGATCCCCAAGATGAAGAGTTCGAGAAGAATCAAAGAACACAACGATGCGAA  
ATATGGGAATACCATAGTGGAGAATCCGAGAATAGTAAAGTAGAGAAATACTAGAGTAAACAATCTGGGAAAGCTAAGTCCGACAAAATGCATTAGGCAGGCAACTGAAAGATTTGTGATC  
AACAAACGGACAAGGCTTCATAAGCAATCAGAGCTTTGAAATTTTCTATAATCTCTGG

>comp83719\_c1\_seq1

TTATTTATAGTAAGTACAGGGATGGGTTCAAGCACTATGTTCGCTTGATAAGTTGGTATCACAGCTGTGAAAAATGAAATAGCATCTTGACATAGTAAAGTCTACTCCACTGCAGCACTGGCT  
AATATAGCATGCTTACTAATTGAAATGGAGCATCTTTTTGCTGAGTCAGCGTGGCTCCTCATGTTGATAAATTGGTCTGTTGTGGCACTCCATAAGTTTGAGCATTGAGGCAACTGATGGGGA  
ATTTGACACTGAGGCATTGAAAGGCATGACATTGCAACACTCATTGTTATAGACTTGGCGCTGCAGTGCTAAATTTGGTACAATGATGTTGTATTATGCCATGGTGCTAACTATGGTA  
CCGGTGAAGCAATTGCAAATAGAGAAGATCGATGCTATAATGTGCGAAAATGAGCACCTCGACATGATTGATCTCGGCACTGCAGTGTGGTATAAGTCGGCGCAACGGTGCTACTTATCACT  
TGCGCTTTTCTATTATTTCTAAATACGTCATGTACAAAGATAATTAATAATACATTTCTTTTGA AAAATCAAACACAATAAACAATATATAATTTACTTAACAACCTTCTTAGGTTATCTTGG  
GTTTGTGTTGAATCAACTCAAAACAAGCTTTATTAAGCTCAATAAACATAATCAAGTTCAATCATCGTTTAAAGGACATACGGCATTTAGTTAGCTAGCTCCATTATATTAATTATGGACCATT  
TGACAAATTGACTCTTAATGACCATTTATGATGGTCAATTTTGACATCAATGATCAACCAATATGACTAGTGAGCTTTGGGCTTCCCTAAGGTCTCATAAACACATTTGGCTCCACTTGGATT  
TTTTGCTTAGTTTGATGAAGCCATGGCAACCTTAAA

>comp83815\_c0\_seq1

AGATTAGATGTTTATTAAGATAAGACTAAACATATTGAAGATGATTGCAACGATGTTTGTAGTGTAGTAAAGAAAGAACAGCTGATAAACTAACTGAATTCCATGGATCATTTTCTTCA  
TAACTGCAAAAACACTAACTTCTGCTTCTTTCTTCCATTAAGCTCACTTCAATGGATTTATCAATTTGGAAGAGGCAGGCCATGACATGAAGACTGAAAGCCACTTAGAATAGCCAAGGAA  
ACTTGCCATTGAACAACATCAGAAACATCTGAAAAATACTGCAAAAATAAAAAAAAATCACGACTATTTTACATTGAAATCTGTGTTCTTTCCACTATAAATCTCTATCAACAACAATTGA  
GGCTTCAGAATACAGATCTCAATATCAAAAAAATCTGTAGAATTTCTTTTCTGAGACAACTGAAAAATTTCTTCAGATGGCTCTAATGAGTACAAAGGCAAGTCATCCTTGGCTACCAAAG  
AATGGCTAGCTCGTCTTCATGTAAGACCTCTC

>comp84895\_c0\_seq1

TAAAATTTTAAGATATGCAATTAATAATGACATTTTTAAGTAATATAGGACAATTACATCAAACCTTTGATAGCGGTAAGAACAACAAGATTACTTGGGCTTTATTTTAAAACAACAATAATG

TATATGTGTAATACTTAATTGGACAGTTTTATAAAAAATTTTCACCCAACAAAATAGGCTTATAAAAGAGTTACATAACCATAATTTCAATTTGTGTGATAACAAATGATGGAAAATACTATAAT  
GCTTGTATGCCTCCACTATTACTTCAAATCATCTCAAACCCGAACCTGCATACCATTGTATGCAGTCTGCGAATTGTTGCATTTGAACTCCAAATCT

>comp84939\_c0\_seq1

AAATTCAAAAGTTTTAGAAAAAATTACTAAATTTGACCACCTTCAGCATGCAAACATAATTGCTACAGAATTTAGTCTTGCCATTAATAACACACTTCATTCCAGCGAACAGTCCACGCGAT  
CAACGATCCTTGAGAAAACAAGGATATCGGACGGCTTCTCAGCAACTCTCTCTTCGCTTTTTGATTTGTTTCGTGCGGGCTTGCCATCATTGTTGACGCGGTAGGATGAGGAAG  
GGACGACTGATGATCCTCTTCTTTCTGGCTTTTTAACCTCTCTAATTCATCTTCGTCTCCGCCTTCCTTCGCCTCCATTAGTCTGTATGCTTCCTGGAACA

>comp85962\_c0\_seq1

TCACTGTGTGTCAGGAGGAATTCCACCTGCACCTGAGAGGAGGAGGGGAATGTGAATGTGTTTCAGCCATTTTTTCTCTGGAAGGCTTTGGAAAGCCACCAGAATGGAACAGGAAG  
CAAGAAGCCAATGATGAAGAAATAGTTCAGGAAGAGTAAAGCCCAAGTTTTCCAAACATTCTTACAGGGCCAACGAGTCCCATATAATGGATGCGTTGTAGAAGACTGCATCGTTTGG  
GCAAGTCCATGGACTTCCAGTTGGAAGCTCATCTACATCACATATGTTCTCCACTGTGCTTAGAAGAAACCAAGCTGTTCCAAATGTGATGGCTGATGATATTATGGTTTCCTGCTAGCTGTG  
AGATGAACATAGCCTTTGGTGGAATTTTCATGTAGTGGCCCCAGGTTTTAAATCACTAAGAAGTCCCAGTGCCTGTGCCATGCTTATATAACCATATGTCTTGAATGTCACATTGGCTAGAGGT  
TTTCCAGGCAATATCAGACCGATTATATACTCTGTAATTATATTAAGCCCTGGTGCCTGATTTGTGGTTGCCAGTATAACTCCAATTGGTAAAGTAAAGAATAAGCCTATGGCACAAGCGAAC  
AAAACACCCCCACCAAGGAAGTTGTAGTTGACCACCAAAATCCAAGACAAGTAAAATAGAGAGTCCAAACAACTAAAACAAAAGAACATGAAACCACCATTGAGGCACAGGCTCA

>comp86482\_c0\_seq1

CGTTTGGAAAGCAGGATCGAGAGGACGAAACAACAGGATCATCTCAAAAAAAGCTCTCGATTCTCTAGGGCAAGAGGATCGGCTCTCTCTCGGCTCCTTCTCTCTCTACTCTCGGTA  
GAAGCCCCCAGGCGGACCGATCCCAGCTCCGACTCTCGAGCAGAGCCTGAAGCCGACCTCCCCTTGCCCTAGCCGAGGCCAAAGCCTTTCCCCGGTCCGATCTACAGCAGCCAGGCG  
GAACCCCTTCTGCTTCCGCTTTCGGCTTCGCACGTTCCGACCAAGTCCGACCCTAGGATCGACCTCAATGGCCGCCACCGATCTCCCTGCTCTCGCCGCCCGACCGACCCCGACC  
TCTCCGGACCGAACCTGAGCTCGACAGCAGTACCCGACTTTTCCTGCTCTCGGCTTTACACGCCTGAACCAGATCCGAAGTAGCTAGGATCGTTACCTGGATATACCCGAGCTTCCCCAT  
CTTGCAAGGTGAGTACTCTTCCCCTTTCCCCTCCTTTCTCCTTTTTCTCCTTTCTTCTTCTTCTTTCATTTCTCCTATTCCTTCCCTTCCTCCATCTCCTATTTCTATTTCTTCATGATAATCTTAAAA  
AAAATGACAGTACTTGAGTTCTTTACAAAAATCTGAGAGCGGCATTCCCTTTGGTTCCCTTTTCCATATGAATGCACATGTATTATTTGTGAAATGATTATTGTATGGATCATGAAAGTATTA  
TGCAAATTATTTAGAAGATTCCACTGGAATAGGTGTGAAATCAAACCTCATGTTGGCTTGTTTTATGTAACCTTATAAATATTGCACAGTAAAGTGTGTTGACCAAATGTCTTTAAAGAGAG  
ATTGTGATATTTGCTTGATAACTCATGAAGCCTAGGCTTGCACATGAGG

>comp86896\_c0\_seq1

ACTGAAAAGCTGTTTAAAGAAGCAGTAGGAAAGCTGACCCAAACGAAACCTTAAATCACCTGACCCGCTTGCGGTCCCTGCCTGAATGGTCTGACCACCTTCTCTCATCTGGCTTCTCT  
TCATCCCCTCCTGAAAGTTTAAACATTATTACTTTGAAACTTCCGAGAAGAATAATTATGCTCATCAATGGAGGTTGGGTGCCATCTTCTTTGCATGTCTTCTCCTCATATTCGCCGCGCTG  
GTTGCTCCACCCTGTGGAGGGGCTTTGGCCAGATTGCCTCTTTACCCGTGTCATCTCCTCATCTCCATATCCAACTCAATTCCATCCTCAACCTGCTTTGCAATAGGATCATTTTTCTTGG  
CATCATCATTTTGGAGTTTCTGTGCCTTTTCGACTGCAGAAATAACTTCTGCAGCACTTCCCCTATCATGCTTTGAAAGAGTTCAGATCTTCTGCTGTGGATGATTCCCGGGCGGCTGAAACT  
AGCTCAGTCTCTCGATATGAACCATCTTCCCATTACAATCTGCACCTTTGGTCCCTGACACCAACAGTCTTACCATCAGCACTACTACCATGGCCATGGCGATGATTCTGAGTATTCAGAAA  
ACCCAAACGTTTACTATCAGGATTAGATTGTTGGATTCTGATGGGCCTCATTGGTGGAGCAGGTTGACCTCGAGAGGCATTATTTACAGATGGTGAACCTCTCACTGACAGTTGAAAGTTGTT  
GTTCCCGTAAGATGATGATTAATTCCAGCAAAAGAGCTTCCATTAGTTTCATTACAATGAGATTGTTGGGTTGCTTGATTTTGCTCGTAAAGCTCCAACAATTGATTGCTAACATCTTCAAG  
CTGCCGTGGAGTAAACATCAAACACTTGCCACCACGCTTTCTCTCCATCGGAGGGAAAGCTTCACCTTTATAAACTTGGAAGCGAGAAACATGGCACCAGCAGCTATGTGCATGGGCTTGAA

CTGAAGGCACAGTGATGTCCGCAAGCCATCATTCACAAAATTCCAGGCCACTTTAGCAAGAGAACTTTGTGCTACGTTGAACAATCTAATTGCATCTACAAGGGATC

>comp86916\_c0\_seq1

CGCGCAGTGAGGATCTCGTCTCTGCGCCTTGAGCCATGCCGTCCAAGGGCCCTCTGCAGTCGGTGAAGTCTTCGGACGTAAGAAGACGGCCACAGCCGTGGCGCACTGCAAACGAGG  
TAACGGCCTCATCAAGGTGAACGGACGACCCCTGGAGATGATCGAACCGCGCACGCTGCAATACAAGCTACTGGAACCTGTTCTGCTCCTGGGCAAGGAGCGATTTGCTGGTGTGGACA  
TCCGCGTCCGAGTGAAGGGTGGTGGTACGTCGCCAGATTTACGCCATCCGCCAGTCCATCTCCAAAGCCTTGGTGGCTATTACCAGAAATATGTGGATGAGGCTTCCAAGAAGGAGA  
TCAAAGACATCCTCATCCAGTATGACCGGACCCTGCTGGTAGCCGATCCCCGTCGCTGCGAATCCAAGAAGTTTGGAGGTCTGGTGGCCGTGCCCGCTACCAGAAATCCTACCGATAAG  
CCCGTCATGAAGCCAGCGTTTCCCTTTACAGCACCTTTATAATAAAT

>comp87567\_c0\_seq1

TATTAATAATATTGTATATAATACACGTGTCATAATTTAATTGAAGTATGAACACAGAACAAACATTCGGATTCCTCACATAATAATTGGGTTTGCCTGTGTAACATGGGAAAATTATCTGTCT  
CGAGTCCAAACTCCAATGAAAATGCGCCACATCCGATATCGAGCAACTACCGAGCGGTACTGAGTACCGCTCGGTACCTAAGCATAAACAGACGCTTCTCCGGTCTGATGTATGTAAG  
AATAATCTCTCGTAACATGAAAGAGATAATCTAGCTTGACTGGGAAGTACTCAAAAGTAATTGAATGTTTAGCGCAGTTAGATTAATCATGTACTTTGGTATGTTGCTGGTGGATGGAGGG  
CAGCGACAGACCGGGGAATAGTTTATCGAGCTGTTGCTGTATGTGCTGGGCCGCTTAGTAGGCCGTCGGCTAGGGCGGGATCCAGTAATTGCGATGAAGTCATCTTCGATCTCTTTACGT  
GAGAGGGAAATTGAGAACTTTGGCAAATAATCACGCTTCTCCGGATTTTCAGATCGGAGTCGGACGCTCCTTCTTTGC

>comp87746\_c0\_seq1

CACAGTTCCAATCCAAAGCTTCCCCTCCACTTCCTTTACTTCACTTACAAGCTTCATCACTTGACCTTCTCTGTCTTCCAGCACTTCTATGACCTGGCTATTTTCATCAAATAGAGCGATCAC  
AGTATACATCTTCAATTCCTAGTCGCCGAGCCAGAAAGTGGAGGTTCAAGTGAAGTATGCTTCTCAGCCATGGATTCCACGAGAGAAACTCTTGGCTTCGAGTTCTACAGCA  
GTCAATGGCCACCCAGAATTGTCCTTTATCGTTCATTCTAACGTTGTCAGGGAAGCCCGCAGGTTAGCGAATACCTCAAGTTGACCACTCTTTGGACCTTCTAGCCAGAATCTCATAACC  
CTGCAGTTAGTCGCTCTGTGAAGAGAAGAAACATTTGGTTCAGCTGATAGTTGCACGCCATTGGGGAAAGCTAAGCCATTTAAGACAACATGGGTTGTCATGTTCAAGGGATCATAACGA  
AGAAGCCTACCCGTATTCTCCCCTTCAAGTAATATCAGGAAGTGATTTCTTCTGGTATACCTCATACTGGTATCTGTGAAGAAGAGAGAGCCATTCTTATGAATGTCCAGATCATTAGCGAA  
GAGGATTGGCTTCCCCTCAACTGTGTTAGCAAGAGAAACGGCTAAACCCGCCCTCCGGTCCAACAGCCATCAACCCGTAATAGGCGTCGGCTATGTACAGATCTCCGGTTTTTTTTATCGAAT  
CTCAGACCCAATGGCCGGCCGCAITGCTCCTCCTTTGCGTGTGCTTTTTTAGTCGTTGAGTTCACTCCATTGGCACACACCTTCTCACTCCAATTTGACTAACAAGAGCGAAGGTCTCCC  
ACCCACAGCTTCACCCATCCACCGCACAACACGACCGTCGGCTAAGCCAGCATATGGACCCCGGCCGACGGGTCGAACTCGATCGACTCGGGCCCAAACAACCTGGCCCGAAAACCTC  
GAGCTTACCGGAGCTCAAACGGTTCTCACCGTCAGCCGG

>comp87753\_c0\_seq1

ATACCAAACAGCCCTAAATAATTTTACGGATTACTTTTCTCTGCTTCGCTCCGATCGAATTCGCATGCGGTAGGGTTTTGAACGAATCGCTAAAGGGCTTCTTCGCCTACTTCGATGAG  
TTTCTTCTGTGCAATCGGAATTCGCGACAGTTCCGGCGATCGGAAGTAGCTCGCTGCGAAGGTAGTAATTTGTTGCCATTGC

>comp87963\_c0\_seq1

AGATTAAGAAAAAACCACAAAATTCAGCATGAAACGAGTTAGTGTGGCGATCCATACCACCAGAACTTATATAACAGAAAGATAAACGTAAGACCACATATTATTAACCTTAC  
AATCATTCCTGCCTGTGAACACATGTAGAAGTTATAGTTTCCGGGATGACAAACTTGCTTATCAACAACAGTCCCAGGTGGAACATTGTCAGGAGATCCACCAGCTAAGAAAACTTCGT  
GTGGTGTCTTTTCTGTGCAATTATCAATGTAATCTTTGGAAACCAATTGTTTCGTAAGAAAATTTGCAAGCCTCTTTAATCTGATTTAGCTCAACATAAAGAACCTGGTCAACTGATTCTCAC  
TAACACCATCCCTGAAAATAATAATCTGATCGGGCTTTCTTTTCCCAGAACTGAAGTAAAATTCGACAAAAGCTTCACGAATAATTCATCATCGTAAGTGCCCTTACCATCAGCACGAGA



AACTAGTTTAAATATGGAATCAATCATCTCTTCCTTAGGTGATTGTGTTTGAAGTATGATGCTCTGTATTTGGAGATCAATGGCCACTGCCTTGAAGTACGACTGCAGCAATTGATGGAACAT  
CAGATCTTCCAGGAGAACCATGAGAAACATCCATTCCCAAATTATAGTAGCAGCCTTTGAGACAATAGGAAAAGCAGTAATGTTTTCAAGCTGTAATAAGGAGTTCATACCACCAAGCT  
GTGAAGTCAGGTATTAATATTTAAATAAA

>comp88225\_c0\_seq2

ATTCTTCATTCATTACATAAAAACTAGAAGAACATTGTGTCTGACTATCATATATTAATAAGCAATGTGGCTAAACATATGTAATGTCAAAGAAATCCCTTGCACAACAAACAATCACAAAT  
TCCAATACAAATATTTCTCAAAGCTTAACTTAGACTTAGGTTTCGTTTGGGACATCTTTCTTACTGCTTCTTAAAGTCATTTAGAGATACAAATTAATAAAAAATTTTAAACAAAAAAGCTGTTT  
AAGAAGCAGTAAGAAAGCCAT

>comp88594\_c0\_seq1

AAAATATTGCTTTAGAAAAGCAGTATGAAAAGTTGCCCAAATAAAACCTAAAAGTGACGAAAAGACAATATAGTTTTGATAGCGATGAAGAGATTGATGAATGATATCTAATGATTTGTTTA  
AAGAGAACATTGATCAAAATCATGCGATAGTCGTTCTTGTAAGGTGGCTAATAACCATTGCCTCCTTACCCTGTCTTAAAGCAGTTATTGCAGAAATCTATTGCAGCTAAATTGTTAAGCAG  
AAATCGGCTATAGATTACTTTTATATCAATATTCAATATTTTTTACTGCAAGTTGTATGAGATGTGGCATAAAACGGCGGTCTCCGAAGAGCCGGTTAGGAAAGTAGATGCATTAGATTGGA  
CTTATGTTAAGAAGAGTAAAGGTAGACCTAAAAAACTTGATTA

>comp89261\_c0\_seq1

AAAAATGGGGGCAAAAGCCCGTATATTAATCACCAAAGAGATTACAAGTAAACCCAATTACAAGTAAACCTAAACCAGCAGAAAAGTAAAATGGAAAAGAAATACAAAAGGACTCAGTAT  
AAAATGAACTACATCAGAATAACAAAAACCAAAACCGGCAAACCCAACGAAGAGCACTGGTTGCCTGAAGCAGCAGCAAAAAGACCATCCACGTGCCCAAAAAGCAGTCATGGTTGCC  
CAAAAGACCATCCAAAGATGCAAAACTGATGAAGATCAATAACATCATCGTCCTTCAAAAAATCACGAAGCAGCCACATCGAATTCAGACGAACATTGGAACCAGCCTCAAATCACAG  
CAGCAAAGAGCATAACCAGAACACCACATCAATCCAGAATAGCACTGAACCTATCTTTAAGGCTATCATAAGTTCTTCCACTTAACAGTTTTAGCATGAATAGCTTGAGAAATCACCTCCTTC  
AGCTCAGAATGACCCTTCCAGGTATTAGAAAATCTGCGGGAATTCGGTTCCCTCCAAATCCAGTAAACCAAAACAGCAATAGCCAAGAAAACAAAATTAAGTTTCAGCTCGGCTATAACAC  
CCAGAATTGCTTAAAAATTCATATACCTGGAACAAATTAGGTCTCAAGTAGAAATTCTCCAAAGCAGGAATAAGCTCAGTAATAAGCTTAAAAGAAAAATCACATTCAAAAAATAAATGT  
GAATGGCATTCCCTGCTGTAAGAACAAAAGAGCACTCAGCCGTGACAGAGATCCCTCTACTAAGCAGAAGATCCGCAGTTTTAAGTTTCCTAAGAATAGCCATCCAAGCATAGGATGCA  
TACCTCAAAGCAAAACCTTTATGCCAAATATATTTAGCCCAACTAACATCTTCCATATCAGAAAAATAAAATTTAGAGAAGTTATTTCAGAGTTTGAGAAAACAGTCCCAACCAGTAAACAG  
TATGAGTCTTAGAGCTTAGCTCCACCGTCATAATTTCAAATAATGTCTCCAGGAATCCCTCAGGCAAAGTCCACAAATTATTTGAAATAACCTCCTTTAACTTCAAATTGGAAAAAGTA  
GAGGGGCAAGCAAGTTCAGAAATAGACTTTTGGTGGCACCATGGATCCCAAAAAGAAAGATAAATTGCTGTTACAATGGACTTCAAGAGAAATGAAATCTTTAATCTCAGCAGCTTTGAG  
ACAACAAAACCTTCCAAATTTAGAAGCGCAGGTGGGAGGAGTTTCCAAGGAGAGCAGAATTTTCTTTAAACCATACACCAAGCATGTTATCACAGTTATACATACGAAATATGAAAGA  
GCACATCATATTGTGGTAAAGATACTCAATGGTGGGAAGGCCAGGCCACCCTTC

>comp89365\_c0\_seq1

TGCTGTTTATAGTAGAAAAATAGTCCCTCCATGGAGATAAAGTAGTAAATACATTGCTGATAACGTAAATGACATTCAGAATATTCATTTGGTATAAATTTAAGTAATTAAGAAGAATACA  
AGCAAACACGTCAGGTAATCAGAAGACTATGAAAATTTCAATCTAGAAAACATTTACGGTAAAGTATTCCCCATATGAAGAGGTCTTAAACTTAGGTTTCATTTGGTTCAGCCTTTTTATT  
GCTCAATAGTCTGGTAAATATGGGAAGTATTCTTCGAAAATCATATTTTGCATGTGTGATTTCTTAAAATTTTCATGAACATCTGAGCTAACTAAGGGAGCATATCTCATATTTCTACGAG  
ACAATGATTTTATTTCTTAAACCACAATAAAACACAACATCAACATAACCTAGATGCTTAAATGACATTTGATGGCCAAACGTTTCAGAATTGAGCTGATTTAAAGATTTGGGTGCAAAGGA  
GAACTTGAATCATGAAAGAAATAGGCATCTAAAGCATGATGATGATGAATGTTTAAATTATTTTCATGGACATGAAAGGAATTGGTGTTTAAAGCATGATGAAGACAAATGTGT

>comp89680\_c0\_seq1

CAAAGTACTCAATAATATGACAAGAATGATGACCTAATGGCCCTACATAAATTTCTTGGCCACCTCTCTTCATTAGAAAGAGCTGAATTCAATTA AAAAGACATCAATAATTTACAATACAAA  
AACTTATATTAGCTAATGTA CTGATTAGTGT TAGCATATTAAGAAGTAGAAGTGGTAGACATAAGACAATTTTGATTGAAGTTATTCAAAGC ACTTGCGAAGAAGAGGTTTAACGTCCTAG  
ATAACAATTAGTTGGAAGGATTGAAAAATAAGGATTCATAAAATCGATCAATAATGGTTGGGATAAGACTAATAATGATTATGATAATAATGAATTAATTAATTAATTTCTTGATTCCCTTACCT  
CATCAAAAAGCTTCAAATATATCAATGCTAGGCTGATGGATTGTGCACACC ACTGTTCTTCCCTGTGTCTACAATATTCCTCACAGTTCGCATAACTATTGCAGCAGCCCTTGCATCAAGCCCA  
GAGGTAGGCTCATCCATGAATATAATTGTCGGATTAGAAACAAGCTCAACAGAAATTGTTAGCCTCTTTTCGTTGCTCCCTTGTTAAGCCATTCACTCCTGGCAATCCTATTAGTGCCCCCT  
CAACGGAGCAAGTTCCAAAAGCTCCATAACCTCTTCTATAAACATCTTTCTTGTGTTGAAGAATCTACTTCAACCGGCAATCTGAGCCATGCAGAATAGACTAGGGATT CATAAACTGTTACG  
AGAGGGGAATGTATATCATTCTGTTACAGTATCCTGACACTCGAGCAAATGTTATTTGTTTCTTTGGATACCCATTTATCATTATGCTCCCTCTACATATCCTCCAGTTTTTCTCCAGCCA  
AGACATCCAACAATGTAGTCTTACCTGCTCCAGTTACACCCATTAGAGCTGTGAGCACACCTGGTCTAAAACATCCACTTACACCCCTTAGAAGTTCTAATCGGTTTTCTGAGCACCTTG  
TGCCTTTATCTCCTGTGGCATGTCCACTGAGTATCTTATATTTTGAATGTCATTA AAAAGTGGTGCAAAGGAAGAACCATTCT

>comp91915\_c1\_seq1

AGAGGCTGTCATGCCTTCAATCATTAAAGCTAAATGCTAACGTCATCATCTTTCCATAGAGTGCTAAAATATCTTCCCATGTCCACAGCCAAGCTGAGCTATCATCCAAGTAATGGCATGCA  
TGCATGCAGAATGGCTAGGTCCTTGCAAACGTTGATGTTGCTCGCCTTGTGTTGGACACTTTAGTGCCACTTCCGACGGCAGCGAATGACGCAAACGTTCTTGAAGACAAAATTCATCCA  
TTATGAACCAATCAAGCGCGGTGCTGTGCCGTGCAAGAAGACGACCTTGTCTCAATTTAACTGCAGACCTCATAGGGCAAATCCTTACCATAGTTCATGCTCAAAGTTGTCAAGGTGCAG  
GGGGACGATAAAATATAGAAGAATAAGATGATGATATAATACATGAGTAAGCGGGGAACTTAAATTTGCTCATAACTTAATCGTTAAAATTTATAATTGAGCATGGTCAGCCATACAAA  
ATCTGCTTTGTTTATGGCTAATTATATTGCAAGCTAGGCTGTGTGGGTTATTAATTATTATGTGAATAATTGTGCGGTACTGTGCTAGCACATCATAATTAATATGACGAGGTTTGAAGTTCATA  
ATGTCTTTGTGTGTTGAGAATAATATCTGTTAACATCGATCAATTCTGCTGTTGGATGTAACAGATTAGATTGCTTATGTTTTTCTGTGTTTAAAGAAAAATATCTATTAATATCGATCAATT  
CTGC

>comp9193\_c0\_seq1

GGTGCTTCGATGGTGGTCAGGCAGGAGTCCGACTGAGATTGAAAGATGGTCACTGATCTGATGACAATCAGTGGCCGAGCAGTGTGTTTGGCAATTCTCGGTGGCCGGACGGTGGTCTGA  
CGATGGTTGGGAGGAAGTTTTATGGAGATCAACAGATATGCGAAAGTTCAATTGTGATCGGTGGTGCGATGATGATTAAGCGGAAGTTTGGTTGAGGTCGGCAAATGAGCGATGGTCCAA  
CGGCAGTCATTTACCCGTGGCCAGCGGTGGTTCATAAAAGCTTGCCTGC

>comp92090\_c0\_seq1

ACTATACAAGTTGCAAGAATGTAACATATGCAAATAACAACCTCTCTTAAACACGTCGTTAAAAGAGCAAAGA ACTGAAGCATTGCGTTCGCTCTTTCCCATCTCTATGCTCTTGTCT  
TCCCCCTTCGCTGGCTCCTGCATCGCTGTTGACTTTGCCCTTCAACGACTTTCCTTTTCATGTCCGACCAAAAATTACAATAGTTTGATTGGAAGCAACGACGGGAGCTCACC ACTATG  
AAGGTAATGTTCTCCCTGTTGCACACTTCTCCGGCACCTTCACTGTTGTGAGTTTCTCTCCTGCAGTGACATTCCTTCTAGTCGAATAGGAAGAAACAATAAGAGCCCCCGCTGTGATG  
GTAATTTTACCCCTTCCACCTGCTTCTTCGGCCAAATCCAGTAAATACGCTGAATTTTAGGGATTTAGGCAAGATGAGGAG

>comp92236\_c0\_seq1

AGAATGTTTGATGAGGAGA ACTCTGGTGGCTCACATTGATTACATTTACACACAGGGGAAGATTCATGACTGATCTTTGGCTATGGATTAGGGCTTCTAGGGTTTGGAAATTTCTATGCTGGT  
TTTCTGAATGTAATCATCCATGTTTATATCTGAATAATGATGATAATGGCTTTGGGGATTTACCATCTGTGTCGATTTGTGTATGGTTTGATTTGGCTGAGTTTGATTGTTTGGTTTTTGTTC  
AGATTTTGATGATTTCCGGGTAAATTTGGTGAAGAAAGAGGGAAATTTAGTATCCCTGTCTGATGAGGTTGGTTTATCTGTTTTGTATTGTGATTTG

>comp92267\_c0\_seq1

ATTTACAAGGTTTTGGAGACCTGAAGTATGGGTAGTCATTATACCGTATCATTATTTACTAAGTTAGGTTAGCGTTTTCTTTGAATTAGTTCATTTGATGACCAAACGATTTCCCTAGCGTGA  
CATGTATCTAGTTCGAATCGAGCAGCTCGACGAGACTAATCCAATGGGCCTAATATTGTTGAATTTTGATATCTTTAATAAAGACATTCAAATACCTAATAAACGGTTCACGAACAAGGGAAT  
CAATATTTGTTGTCTTTTTAAACCCACTCCCAAAGTAATCTTGATCT

>comp92347\_c0\_seq1

GTGTAAAGCCTGTAAGTGTTCAGCCCAAGAAATTGTGGAGATGATATTCTTTCCAGTTGTAATGAGGCATGCAGGGTAATGGATGAAGGAGTTGTAGTTCGAGCATCTGATATTGATGT  
TGCTTCTATACTTGGAATGGGTTTTCCCAAATATAGGTCTTTCAAGGAGGAGGATCAGCCTCGAAATTTTAGATTGTTTTTACATGTAACTGTGCAACATTCTTCGATGATGATTTAGG  
AGTGTAACATCTTTGTTGAAGCACATGCGTCATGCGGGG

>comp92582\_c1\_seq1

GCATGAAATACAGTATCAATGGAGAGTGAAGAAGGCTTCTAGAAATGCAATGATCCACACACTTGCTTCAAGGAGAAAACCTGCAGACATATTTTCAGGTCTCTGCTAAGGAAATGTTTAT  
TTGCACTCAATACACTTGGGAAAAGTCTGCTACATAGCTAAGGTCCTGTGACCACAGAACAACAGATGAAAAGGATAAAGCACTGAACAGCAAGAAAAATGCATCCACCCTCATAAGA  
ATTTAAGTGAACCAGTAAAAAATTGAAGATAAACAATAAACAGATACAGCCTTCATCTTTACGAATATACTTCTCCCAATATTTCCCAATATAAACACTCTCGAGTGTATATATATT  
CAGTGCAAGGAACAGTATCTTCGGTACATTTGAAACACCTCTGAAGAATAAAGCTAAAAAAAAAATCTAATTCTGAATACATTTTCAGTGTGGTGAATAATGATATTATTACACTATCGTGA  
TGGGAGAGAGGCTATGATAGCACCCATCTGCATTCCACATGAAAAAACAACCTTAAGATCATTTCTAAAAATTCTACAAGCCACATACTTTGGAAAAAAATTTCTTTTTTGGAAATAGG  
ACTGACTGCTTTATCTTGTAATTGAAGACACAACCTGTTACACAACTGCAAATAAAGATTTAAAGGGTTTATCAGCAGCTACAAAAATCGGAAAACCTCATGCTATAAGTCACTCTCCCAT  
AAATACTTTTAGCCTGTGTTCAATTAGTCAATTCTGAATTGGTTACCTCTGGATTAGACTTCTAAAGTCTTTACACAGAGTGAAAGAAATGGTAAAAATGGAAGATGGTATTCTATCCTGT  
ACTTTTTGACCCTGGAAAGGTGTGGGTCTGCTTAACAAAGGAAGAAGAAACATACACTTAATTACAATAAAGCTTAACACTATGCAGAGCTTATAATCATTTTTTCAGCAACAGACTGCAA  
GCTGCACAGTGAAGACAATGCATAGCAGAGGAGAAAGCTGGGAATTTGGGGAAACTAGGAAGGTAAAACAGTGTCAACACAGTGAAGATGTGATGAAAACATCTGCATCTATTCTGG  
AGCTCACATGCCCTGGGAGCGTTCCTGAAAAAACACCTGCTCG

>comp93169\_c0\_seq1

TTTATATGTATTAAGATGATGCAGTGAAATGAATATTGAGCGTGTTATTATATATGTTTATTTTATTATATATATTGTGAAATATGTGTATGTAAGAAATGTTAGCCATATATGATTGACTTATTTA  
GGTTGGCTAAAGATATATTACCCTGTATAGGAGGATGGACTGGCAGACTTTCTTTAAAATAATAATATAAAAAGGGAGACATAAGGATACAGTATGATACGCCACCGGATAGAAAGTGATG  
ACTTTTGATATAAAAGCCACCTGACCGAAATGACTTGTAATTGAGACTGATTTCGTGTAGGATTGACCAACAGGACAAAATACAGGAAAAATATCATAGATAG

>comp93480\_c0\_seq2

TTATTCTCAAGGTTTTGCGTTATTCAGGATTCAAAGTTTTCGAATGGGACTGATTCTATAACTATCGGCATAAATCTGTGATTTGCTCCGCATATCTCCGAGCATTGCCCGTAAAATAATCCT  
GTTTCGTCTTAATAGGAAAGAGGTCTGGTTAAGACGACCCGGCACGGCATCCATCTTACTCCTAGGGAGGGGACGGCTCATGAGTGAATACATCAGCAGATGACACCAAAACCCGGATA  
GGGTTTTGGTAGGGCAACACTAACCGTTGTCTACTTCAAGTAGTCGGGTAAACCTGCTTCCAAGTCTGAGGTTGGTACCATGTAAGAGTCAAATTCTATTTTCATGGTAATCCGTGTATT  
CATATCTTCAGTATCATTGATGTCCTATCGCCTTAATTGTTAGGAAGGGATTTTTGACTTTCGTCCATCAAGTAGAGTAGTTGAAGAGAGGGAAAGGCAATAAATATTAGTATAAACGCTGGC  
ACTATTGTCCATATGGTCTCTAGTTCTTGCCTTCCAGAAAAATCGTTTTGGTAAGAGACGAAGTAACAAGAGATATAAG

>comp93636\_c0\_seq1

TTTAACCATCTTTAGCAACTTCCATGATGACTTTACAATGCCACCCTTTTAGACCGTTGGATCAATCAAAAACTCCTTAAAAATAACACACGTAAGAAACAATAAATAGATTATTTCCAGC

CTCAAACCTCCTGCCATTCATGGCTTCCATTTATTTCTACGAAGAAAAAGGAAAACCATCCTCCACCTCTCATAAAATTAGCATACAAAAGACTGAACCAGATCAGAAAACCCAGAACCA  
AAGGACTCTCTCCTCCTCCATCCTCTCCTTCCCTCTCCTTCTTCTTTCGTAGAAGCCGCCATGGCCATGGCCTTCAAGCTCAAGACAGCTATAATCCTCATCTTCTCTCTGGCCATGAAACA  
GACAGAACATTCGAGAAAGCTTCCACGTCTGTCCTGCCTTGCCTGGAGAGATTCCCTCCATGCCAATATTACATGCATGATTTGAATCCTCCAGACTTCTGCTGCATGCACCTGAAGGGA  
ATGATGGCCTATGATCCTAATTGCATTTGCTCAGTCTTTAGAAATGATAATATCCTACGCGCATTGAACACTACCACGTTAGAAGCTGCAAATCTGACCGCCAATTGTGGACTGATCAAGCC  
TGACTTCAAGATCTGTGATGATAAATCGACTAGCAGTATTACTCTTGGAGAAAACCTTGAGAAATGCTAATGTTTTTCATCTGGGTTTCAATTTTATTATTGATAATGGTTGGATTAATGTAACC  
TTATTTAACTTTATGATTTTATTTGGGTGAATTCGATTTTTTGTCTTATTTTTTATTTTTTAAAAATATAATTTCTTTTATTTGTGCGAGATTTAACTAAATTTTTTATTTCTACCCA

>comp93899\_c0\_seq2

AACAGAAGCATAACAGAAACGATGGTGCCTGAGTATGATTTTATTTACATTTTGGAGAAATTACGTTCTTAGAATTTGACGATTTTAGTATTGGCGTTAACGAAGGTTTTAATTGTTCTGATTTG  
ATCATTGCAGCTAAAGCGATAGATCAAGGAATTGCTTATATGCTCATGCTGATAGCACTTGTACTGACGTATCTTATTCATTGAAGCTGGGTTGATTATTTCCAGAAAAACGTATCAGCAGTC  
GATTATATATCCACTTGGTTTCTTATTCGTGATTGGTGAATGCATGCTAAATAAGCTGCAGATTGTAACGACTGTTGAAAATTATATTGCCATAATATTTGTTGAAAATAATAATATGCTTCT  
GACTTTATATTTAATTTGTGG

>comp94271\_c0\_seq1

TTCATGTAAGTAACTTTCTGGTTAGCCAAGCCATGTAGTAACTCCGTATCTTGCAGCGTTTGGTAGCAGCAAAGCTAATAATAAAGTGGTAACCACCGGTGAGCAGCTTTATCAATATAT  
ATTTTTTCCCTCAAAAAAAGTATGATTATTTCAAGTTTGGAGCCCTGGTCAGGCGTAGGGTGTCAAATGAGTCGATGGGATGGGTTGGGGTACACCTAGATTGACTTGGGTCTAAACATG  
TCAGGAGTAGGGTGTCAAATGAGTCGATC

>comp94830\_c0\_seq1

GCGCTTAGTAAAAACAAATCATTGTGATTGATTTTTATTAGGAAGGATCACCAACCAATCAACATCATAATATGCAATACATATAAGTGGTGATATAGCCATATAATTAAGGTGGTGGTGA  
AGGGAATCTCACATATAACGAAGAATGTGAGCAATAATAATTTAGAGAAAAGTAAAGAAGCATTAAAGAACTTAACATAGTGCATTGTATAAGTAATAATATGATAACTAAGTATAAGGTGAA  
CCACACCTTGAAATAGAAGGTTATATAAAGTAAGATAAAGCAAGGTGTCCTATGAATGGATTTGAGATGAGTATAAGGTTCTAAAAGAGTAGAGGCAATTTTTTACGCC

>comp95249\_c0\_seq1

GATTGGATTTGAAAATAAGACACTAAAAAGAGATTTCACTCTCATTCTGCGAGGACTTTATGATATGAGTTATGGTTTTCTATAGGCCCAACCCCTATAGTTAATTACCCAGCCAGGCAAAGA  
CGGAGAACTTTCGATTAAAGGCTAGTCGTCAGTCAAATAGGTGGAGATACGCAATATCTGGTGTATAATAGCAGCATTGGTTTAGGTGTTTGGAAAGTTTGGCATTAAAATTAGAAATTTCA  
TCAT

>comp95357\_c1\_seq1

TCATTTTATTTAATTTTTTAATATAAACTCATCATTTATATACTTTTTCAACTAATTCACAATTAGTCCCTTATAGTTTTCTATTTCTTATCTGTGCTAACTGTGTTTACAACAGTTTTTACAAA  
AGTTCTTTTTTGATCCATTTATATTTAATTAAGTGGAAAAACGGATTTTACAATTTTTTACCATTTTAGTGTACTTCTCTACCTAAATGGACCTTTCAATATCATAAAAAATAAGAATAACTTTTTTA  
ATGAATTTAAATATAAAATA

>comp96501\_c0\_seq1

ACCGTGTTTTTTTTTTTTTTTTTGATAAATCTATATTTTGCTTAGATAGAGCATTAGATGAAGATAATGTTGAAAAGTGAGAGCATTATAGTTCTCTCACTCTTTTTCTTCAACATGTATAA  
AGTCCTGAGTTTTGTATTCTTTGTATGATAGATAGTTATCTTAAAGGTAAAAGTTTTATGTTGAAAATTGTGAGCATATATTGTCTGCACGCACGAGCTCATTGTTCTAATAATTGGATAAAT  
CTACCTTAGAATTACAACCTCATGTGCTTCATCTAGCTATTGGCTGCTCTTGGTGTATTTCTTTTTTAAATTAATTTTTCCCTAACAGTAAAAATATAAAAGTGA

>comp96779\_c0\_seq1

GAGAAATTGATTAATCAGGATTGCGATATGCAAACATTAGAAAATCACAAGAGAATTTTGAAAGTCATAAATGCTCAATCTGTGGCAAGACTTTTTCTACTGGACAAGCCTTAGGCGGTC  
ACAAGAGATCACATTTGGCTGAAGGAAATAGTTCTGCTTCTGCTGTTCTTGTCTACTACTGGTACTAATGGTGTTCATCCCCAACAGTAGGATTGGACATCGAGCAGAACTTTTCTAA  
GCCGAATCCATTGATCTGAACTTGCTGCAACAGATAACGACTGTTGAAAAATTTAAAATTGTACAGTTTCTTTGATAAAAATTGCAGC

>comp96950\_c0\_seq2

GGAACCCTCATATCCACATACGAAAGGTTTAAATATTCACAACCAGGTGAAAGTTTTCTAGGTCACTACAAGATGGAAGCTTGAATAATCACACGAAGTCGAAAAGTTTGTGTAATCACA  
AATAGAAATATGTCTGAGTGTGTCAGATAAGCAAGTTCGTTTCCAGCACCAAACAATCAATCCATATGCCTTTGACCAATCCAATCGAATTTCAACAGCCGCTAAATGGTTAACGATATTC  
AAGTTGATTGAATGCACCTAACTCTACCCTCACCAAATGATTAACGATGTGAGAT

>comp97048\_c0\_seq2

AAAACAACATAGGAAAAGAATATCTATTATCCAATAGGTAGGACAAAAGTAATCTTTCTCTCTCTCTTTTGTGTGTGTGGACGTCAGGCTGGAACGAACAGAGCAAGGGGAACGGAAC  
AGGGAGCTCGGTGCTGGAGAGGAGATCGGGCGTGAGGGAGCGTAGTGGAGTCGGAGAGCTCGATCGTGTGGAAGAAGTATCGGGAGAGGAGTGTGGAGGCGAGCGTTGTGTGCGAGC  
AGCCGAGAAGAAGAGGCCTCAGCTTCTATTTAACGACGCAAAAAGGGTGCTTTTCGACGGGATTCCTGCAGGATTCGCGGAGAAGCGAACGGTGCCGAATCAGCGGGTTTCGCGGACG  
TCTTTGACAGATACGAGGTAGGGAGCGGGATTT

>comp97095\_c0\_seq1

CCTCGCTTTGATTCTAGCCATGGAAGTGACGTTTGCACACAGAAGCTCATGAGATAGAGAGAGAGAGAGAGGATCGGAATAAGATATTAGGGTTTTTATCGTGTAGCACAAGAAGAGAA  
AGGGAAAGCAAGGAGGGTTCAGTTACCTTGTGTTTGTGCTTAGGGATTCAAAGGCATGTGCAAGATTGGATTTTTGAGGAGAGGGGTCAGGGAGTTTTGTTGTAACATAGAAAGTGTCA  
GGCTTTCAATTGCATAGTGTGTTATGGTAAAGGGAAAATGCATAATAAGCAAAGAAAGAGCAAGGTGGAAGCATTCTATGTATATTTGTGTACAGTTAGAAAGCCAGTTTTGTATCTTTATGG  
TTGTTTGATCCTGAGAGATCTGTGAATGTTGAAGGCTTTTGATGCCTTTATATATTTTTGAAA

>comp97533\_c0\_seq1

TTCAACACATTAGCTGTACTGGATTATTGCAATGGTGTCAATCTTCCCCTTCTATTCAATAATCACATGTTCAATTACCATAACGAATTGCCACCAACATATCATGCTTGTAACAAAAATA  
AAAGGAAAAACTGGTTATATTTAATACAGATAAAAAATATCTTCTACACTATACATTCAAAAATAAGAATCAAAGCAGTGAGACAACCAAATCTCCTTGTATATTAATTAATTCAACTTGAA  
TACATTTTTGACCTCAAATTTTTTCATGTAATTGGTAGAAGTGTAGAACAATCTCCACCTCTTCATCTTCT

>comp97568\_c0\_seq1

GGGACAAATCAAGTTGTCGAATGATGTCATTATTAAGACAATTTCAATGCGCCCCTCAGTTGAAGGCAGTGGAGGTGCAACATTCTGGGTATCCTCAGCAGCTCCAGTTAAAGAAAGAT  
CAAAATTTCCCGAAGGATTGAAAGCGACGGAGAGCGAAACATCAAGCTTAGAGCGATTTTGTGAAGAGGACGCGAGTTGGAATTGAAGCAAAGTTTTGAAGCTGAAACTAGGGTTTTT  
CCCCTTAAACATGAGAGAAGAGAGGGGTTACTGGCGACGGCCGCGAGCGACATCGACGATAATGGGAGCGAAAGCGGGGAGCAAAAACGTTTTTACTCGGGATAGCCATCGTTATCTCC  
TCGCAAAAGCTCGT

>comp97654\_c0\_seq2

CTTTGTTCCACTTATTTTGATTTAATAATGGAAGGTATCCTTAAGATTCAATGACCGAGGATATTCTTTGAGAAGGCGATAGCTATGCGTAGTTTTCAATTTATTCAAGGCCATGATTGCTTAACT  
TAATGTGGAGATATATAATTCAAAGATCACTTACTAAGTTTGCTAAGAATCATTTTGTCTATTGCCTTTTTGACATTACACTGTTTTTATCTGTAACAAATGAATTTGAAGAAAATGTTTATATG  
TGAGGAATTCATGTTGGGTCTTTATTCAAAGGAAAATAAGGCATAAGAAGCACAAAAAACATTTTCTCAAATTCATTTGTTACAGATAAAAAACAGTGAATGTCAAAAAGGCAATAGC

AAAATGATTCTTAGCAAACCTTAGTAAGTGATCTTTGAATTATATATCTCCACATTAAGTTAAGCAATCATGGCCTTGAATAAATGAAACTACGCATAGCTATCGCCTTCTCAAAGAATATCCT  
CGGTCATTGAATCTTAAGGATACCTTCCATTATTAATCAAAATAAGT

>comp97720\_c0\_seq1

CCTGGTACCCAAATTTGCATCTATGTTGGAGCTCCCATGGCTCAATTTATAGAGGTCTATGTCAGCTATAATCTCTATATCAATCCTCTGAGAAGAAATTTTCTTGTTAGGTAGTAACCCAC  
AAGCTCTTCTCTGTTGGGTGGAATCTAAAACCTGGTGGGACACAGGATTCCACTTCCATTGCTGGCTTACCCTAAATTAAGTTGCCAACTCCGTAGTTCTCTGTGACCAAGCGAAGAG  
AGGGATCCAGAAAGTTTTTTTTTTTTGGAGAGAGAGAGAGAGAGAGGTTAAGAGTGAGACTGTGAGTAAGATAGAA

>comp97877\_c0\_seq1

AATGAAAACATGAGAAACAATCGTATTAAATCAAACAAAGTGATCGAACTAATATATTCAAACAGAAATGAGAGAACAATTTAATGGTGGAAACAGTACTGAAACATGACGCAGATCGAT  
CACAAACGACTACTTAATTAAGAGACAAACACACACATCATGACATCAATCGATCGCATATAATAGCTGATTTAGATTATCGAAGGAGATGGAGCAGGCGCAGCAGCACCATCATCCGTAG  
AAGTGAAGGAGGAGAACTTGTAGATCTCGTACCTTATCGCACAGCTGCTGCCGAAGAAACGGCAACCCACCTGCTCTCTGCACAAATCTGTCATAATTTCCAACCTTCTTCCAGGCACT  
CGTTGCACTCCCTCTCCCAAGGTCGCGTGCCTGTGCCATTCCATACACGGTCAGCTTAATTTTCGTTTCGCATAATTTCCCGTAACCAAATTTCTTCTCCCTTGCACCGTCTCCGCA  
ATCACCTCCCCATTAGCTCACCCACTGCTTGTCAAATCGCTTGGGATTTGCAGCAGCGTAAAACGAAAACACACAGAGGCGTACCTTTTGTCCGCCTTGCCGATGAAGTTGGTGGTG  
TCGTAGTGAAGGAAGCAATTTTCATAACCAATGTGAGACTCGGCCAATCTGGGCAGGAGGTTCCGATCTTCTGAGCTGCGCCGGTGATGCAAGCAGAGCATTTCCACGCCTCATGTCT  
GGTTCACATCGTGTGACGCCATAGACAGATTCACAGGTATTAGTGGCGTAGGAGGAGATCGCGTAGCCTTGAAGAGAATCTGGGCGACCATGTCGAGAAGGACGTTGTTGATATTGTCC  
TGCAACTTGTCAATTTGAGTGAAGTTTTTCTCGCATTGTTGGTAGAGTATTGATTCCGAGCCGCGGTGGCGATGGGGAGGATCAGGGCCAGGAAGAGGCGGAAGAAGAAGAGCTGGTG  
GCTTGAGAACGCCGCAATGCCATTTGCCACCAATAGTCAAGCAGTCTTAATTGAGCTAGCTTCTTTGTGCCTTCTGATATCTGTAGTAGCTTGCTCTTTCTT

>comp98234\_c0\_seq2

GGATCTGTACTIONCGCTTCGGTGGAGGACTTGGCGACGGTGCCTGCTTTTTGACCGTCCAGGAGATGAGGTTTGTCCCGAGAAATGTGCAGAAGCCTGAGACGGACTTCCGATCTGTGG  
TATCTGACGCCAGTCCGCGTCGGAATAGGACCGTAGTTCAAGTGACCCGGTAGTGATGGGCAGTCCGAACGATGTAGTGCCTTAGATGTACCGCAGGAGGCGTTTCAAATCTTTGAAGT  
TTTGTTCGGTAGGAGACTGCATATGCTGACAGATGCGGTTTGTGGCGAAGGCGATATCCGGCCTTGTGATGGAGAGGTATTGTAATGACCCGGCTAGACGCCGGTAGAGCGATGGATCTG  
GGAATGGTTGAAGGTTGGGCTCTTTCTTGTTCTTGATGGAGGTGATCGGTGTTGGAGCAAATTTGCAATCTTTGTAACCTGCGTCATTGAGTAATTTAGTAGCATAGTGTCTTTGAGA

>comp98652\_c0\_seq1

TCTCGGCCGGATCTAAGATCGACGCGAGGGCTTGAATTTAAATCATCCCGACTGGATGTAATAAATCAACTGTGCGAGGGCTTCAGCGAGGGCTTCATTTGATACATCAGTGGAGGAGGTAG  
AATTCACGAAAAGACAGGCAGCGAAAGTTGGGGACTTCGTTTGGTTGGTATTGCCGCTGACAGAGGCAGAGAAACAGTCGAATGATCTAATGTTTCAGTGGATGGAAGGAAAGATGA  
TCGAGAGCCCATCTTTCTTAGCCAAATTCAAACTGTAGATGGGTCTGGGCAGGACGTGTGTCGAGGGTCTGAGTTTGGGCTCTGTTTCGTATGAAGGAAATGGCTTGCCGGCAGAGGCA  
GTCTTCGGCGGAGGTTCCCGTAACTACAGGGCGGAAGGATTTATGTGTCTCGGTGGCTTGCCCGAGACGACTGAGATGATTCCGGAAGCAAAGAAGACGGCGAATTGGTGTCTTTC  
ATTTGATTGCCGGTCAGAGGTCAATGAACGGTGCAGAGCATCGAGGCAAAGCCGAAATCAAAGAAGTCTCGTGGCCGCCCTCTGTTCTGCCTTCGGGCAGTTACGCGCAGCCCTCCT  
TTTTTTTTCTTTAACAGCCCCTATATTTATGCATGCTGAATATATTTTGAACCTTATAAAATGAACAGAAGCTTGGCCTGCTCTCGTATCTTTCTTAGCCAAATG

>comp98851\_c0\_seq1

TTTTTCTATATATATATAGTAGTTGAATGAGAGAATAAGATTTATAATAACTTTTTAATCCTTCTTTGTGTTTATCATTTCACATCTAAATAAAATTCACTCTTAAATGGCAGACTCAAATCT  
CCCTTCCCAAGTAGAAATCCCTACCTCCAAACCCCTACCCATCATTGACCACCTTCATTATAATGGCATCTTTCCAAAAAATGGCAAATGGACATCAGAAATTTATAGTTGGCGTGATTCTA

AATTCATATATCTCGGTGTCTATTCCAAGCCAGAAAATGGCGGCCGTTGCTTATGATGTGGCTACGCTCGCGTTCAACGGGGATAAAGCGGTGTTGAATTTTCTGATGCAATACGATCACAT  
CCTGTGCCAAAATCAAATTC AATTCATATTC AAGCTGCAGCAATCTTAGCAGCAACAAAGTTTGGTGCAGGCTTGAGGGTGTGGATGCATATGAGGTACGAAACCCAGTCTCGAAC  
ACCAAACCAAGTGGTCTCCCCCTCATTATCATGGAGTCTACTTCTGGAAAGGAAAATGGTTAACAAAAGTTTATAAGAGTGAAAATTGTACAAGTATGTATATCGGGATTTATTCCACAC  
CAAAAATGGCCGCCATTGCTTATGATGTGGCCATGCTTACAATCCATGGGGACAATGCAATATTTAATTTTCTGACATTATACGATCACATCCCATGCCAAAATCAAATTC AACTGATGATA  
TTCGAGTAGCAGCAAAGGCAGCAGTAGAACAATTTAGTGCAGGCCCTGAGCCTATGGAAACATCTGAGATGCCACCACAAGAGACAGGTGAGTATGTGGATGAGGAGAAACAATTCAA  
TATGCCACAGATTATACGATCAAATCCTGTGCCAATATCAAATTC AATTTCTGATATTGGATTTGATATTGGCACAGGATTTGATCGTATAATCTGTGGCATATTGAATTGTTTCTCCTCATCCA  
CATACTCACCTGTCTCTTGTGGTGGCATCTCAGATGTTTCCATAGGCTCAGGCCTCGCACTAAATTGTTCTACTGCTGCCTTTGCTGCTACTCGAATATCATCAGTTGAATTTGATTTTGGCA  
TGGGATGTGATCGTATAATGTCAGGAAAATTAATATTTGCATTGTCCCATGGATTGTAAGCATGGCCACATCATAAGCAATGGCGGCC

>comp99075\_c0\_seq2

TGTTGAATTGCATAGTCATATCCATAAGCGGCAGGAGGACCACCAATGGGTTTACGAGCGAGCGAGGAAAGCTTATGAGTACACACGACTTCGAGAAAATTAGGCTACAGTAGGTGAAG  
GTTCTTCTGCTAGATCAGCGGAATATTCTAACTATCGCACTTGGCAGCAAGCGGCAGGAGGAATGTAGCACGACAGAGTATATGGATAGCTGTCTTAAAATCAAGCT

>comp99153\_c0\_seq1

AGCAAAACGCATAAGAAGGTCGAACTCATCTACCCAGCTACTATCGCCGTCAAAAAGGAGGCCGAAGGACACGTAGGCGTCAAAGCAGAAAAGCCCGACAAAAGACAAGGACCAGAGA  
AACGCCGATGGTAACAGGCCAAATGTGACTAATTCGGCTACGTCGGTGGTTCTCAAGGTCCAGCTACATTGCAAGGGATGCACCCAACGAATAATAAGCAAATTTATAAAATCAAAGGA  
GTCGATAGCGTTTCAGTAGACTCTGCGAAGGATCTGGTCACCGTGAATGGGACCATGGACGTGAAGAACCTTCCGGGCTTTTTGACGGCGAAGCTGAGGAAGACAGTGGAGATCGTCAA  
TCTGAAGAAAGACGGAGACGGTGATAAGGAGAAAAACGAGAAAAAGGATAACGGCGATGCGGGAAAAGAAGAAAGCCGCAACGACTGCGACGGCGATGGACGCGAGCAAGATGGATT  
TCTACGTCGGTGGTGCGTACGGTTTCTATCCATACCGCATGGAGAGTGTGCAAGCACCGCAGCTC

>comp103083\_c0\_seq1

TCTAGCAAAACAATCCAAGGTAAGTTTGGACTTAAACCTTTCTTTTGTATTGTTAATATGAATGGAAATATTGATAACAAAGCTCTCTTGGGTATATTATTGAAATAATTTGAACCAAATCAAA  
CCAGGCCAGTTGAAAAAACTGATCTAAACCTTTTATGTGACCCAACCTCATGTTCTATTGAATCATATGAACATGCATTTTATTTATTCAATAGCTATCATTATTGAAACAAGTTACCTGAT  
AGCACCTAGGACCAGCAAGGAATTCAGACAAAGAAGAACA AAAAAAACTTGAAATAGAGAGGAACACTTCTCGGATTGGAGTTGAGAAACTACTCAAACCCATTTGCTAGGAGGATCT  
TGAGGATTTGGGATCGCCATAGTCATAGTTATCAGCGGAGAGTTGAGTTGGAACGATGTGCTTGAGATTGGATAACAACAATTTCATATTCAACGGGATGGACGGAGCTTCGGCGATGATC  
GGATCGGTCTGTTTCGCCAGTATGAGATGTGTTGGAGGAAGTGGAGATGGAGGAAAAAATGCACCGCAAGATCATCTTGCTTCAACCCGCTCTTGATAACCATGTGGAAATCAACGGTTCTT  
GGCAGAAATAAGAAGAACAGAGAAAGGAGATGAAGACAGATAAAGTAAAATGAGTAGAGTTGTATTTCTTGATAACCTCTGTTACAGACACATTGCTTAAATAGAGAAGGAGAGAGTGG  
CCCGTTTACAATAAACCAATTACATGGTGCCACCTCACATACATGAGAA

>comp105867\_c0\_seq1

AAAAAAGACAAGACAAATCAGAAAACATCTGACACCCAAACGCCACCCAAATTC AAAAAGA ACTACAATTGTCAACTTTTTTTTTTTTTTGCCTACTCCTTATTCAACCTCCTTGAGCTA  
AAGCTTTCTCACTGACACCACCAACTCAAGTTGTACAAAGAAAATTCCTCCTCATACCCTTTC AATCCACCCCAATACCACAGGGGGATGAGAAAGAATCATCCAGCCAGTCAATTT  
TGTTTCGAGCAATTGCCCTACAATTGAGCATGCTAAGCTTCATTTCGTTATAACAGAACTCGCACGTCAATGAATGGCACACTCACCAGCACTAGTTCAAAAAGGAACCAAAAGAGATTGAG  
CTGAAACATCAACAACACCATTAGTATTCTCAACAACCACACCAGCAACCTGCACATCAAACCAAGCACCGCCCCATCCTCTAAATAAAATAGAGCTAATAGCTTGATCCGCCAATATA  
TCAATAGAAACCTTAAAGTCCCCATACGCATCCTGCCCCATCAACATCCAAAGCACAGGCCCTATCCTCCAATGAAACAGAATTAGCAGCTTGATCCGAAATAGCCTCTCCGCATCATTCT

CCATATTAATTTTCAGTGCAGCAACACCATCTTCAAATAAAGGGGTTTCCAAATTCAAAACCCCATCATCCACCAAATAGCCACAGATGAAAGAGGAAGAATAAAAGGAAAAGAAGTT  
AGAGGAGCATCAAATTTTAAACAATAGAATTCACCTTCCGTTATTGGTACTAAATAAATTAGGATTAGTAGAAGGAAGCAACCAGACAAAGGATGATAAATG

>comp107869\_c0\_seq1

TCAACACAATCTCAATCCCTTTAAATGATACTCAAAAACCTCTTTAACTTTAATACAATTTTATATACTATTCATCACAATCACTTCAACAAAAAAAAAAAAAAAAAACTAAGCGTTTTTTATAG  
CACACGGTGCCCGGCCCTCAGTTCTCCGCCGTCGGCCTCACACCACGTACGTGCTTCTCACCTTCGTCTTCGGCGACGGCAGGGCCGGCGGGTTCAACAGCTCCGCCTTGAGCCTC  
GACTGGGCCCGCCGGCGCCGGCTTCTTCGGGCTGAGAGGGCTCATGTTACTCTCGTCTTTCAGCCGGACTACAATCGGAACCAATCCTGCGACTTGGAGTACATGAAACGGACCATGGG  
GGCTTCCCCGTCGACTGATCCATTCTGGCGCCATGATCTTCTCTTTCTTGGCTTCGAGCTCGGAGAGAACCGGAATTATACTTTCAAGGCCTCTTGATGAGTAAGGGTCTTGTATTGG  
TGCTGGAATGCTTCTTCTCGTGCCTTTGGGCGTCGAAGGTGAAGAAAGCTCGTCTCGGCGTGGCTGAAGCTGGAGACACCGCAAAACATTGCTCTAGAATGTAATATGGTGAATGTG  
G

>comp110337\_c0\_seq1

AAAATTGATTTATTCTAATATAAAATGAATAATGATGAGGCTTTCCTGATAGAGATCTCTTTCAGAGATTCCTTATGGGATTTTCAGTTCAAATCTTAACCTCTTATTTATAGGCAAATGGAAGA  
AGCATTTAGTAAGCTCAAATCTTTATAGAATTTGACAGAGTTGGGAGGATGGAGAAGGCTACTTGTAAATCATGGAGGAGCTTCTGCTTCTACTTATATTTCTACTCTGCAAGCACAG  
CTTTTGCTGAGGGCTGGATGCCAGCCACTGCAACTTTCTATGGTGAAGTGATGCCTCTGGCACTATGGGAGGAGCTTGTGGCTAT

>comp112828\_c0\_seq1

TCCACTTCAACAATCCAACCTGAATTCTATTGATAATATCCCATCTATTTCAAACGATTTGATCAAATAGGACTGTGAATGATTTAATTTTCAGGCCATATAATTTAATTTAAGATCAGTT  
CAAACGATTTGATCTGAGTTGATTCTTTCTAATCTCTAGGATGGTTAGGAGTGAAACTATTTTGGCCTAGTAAAGTAAAAAAGATAAAAAAATTGCGATTAATAATTTGATCTT

>comp113024\_c0\_seq1

CTTGAATGCCGCTTCCACTCGTCCCCGGGACGAATCCTTATTTGGTGATAACCCTACGTAGATCAAGCTTTGAGAAAATCTGTGATCCCGCCAATTTCTCCAGCATTTCTGTCATCCGTG  
GCATAGGAAACCGGAACTTGACTGTTATCTTATTAACAGCCCTGCTATCGACGCACATCCTCCAACTCCCATCTTTCTTTGGTACTAATAATGCCGGAAGTGCACATGGACTGAGACTGTGT  
TGATAAGTTGTTTCTCTAGTAGTTCGTCAACTATTTGCTGCAATATCCGATGCTCGGCGGGACTCAGCTTGTAGTGTGGTAAGTTCGGTAGTGAGGCACCGGGAGTCAGATCGATTTGATG  
CTGAATATTCCTCATTTGGAGGAAGCTCCGCCGGAAGATGTTCAAGTCCAATGTCCTGAAACTGTTTTAGTAAAGCCTTGACTGATTCAGGAATAGCGTGAGGGTCATTGATATAGGCTTGT  
TCCTTCAACACCAGGGCCAAGATTTGCGTTGAGTCCCTCCAGGCTCGTAATAGTTGGTTACCTGAAACTACAAGTGAATTGGATTTATTTTTCTCAGTTACACAGTCCGTACCTTGAACGT  
TTGGCAGTAGCCGAATTGATTTGCCTTTCCAATCAAACGTGTATGTATTAGCTCGGCAGTCATGTGTCGCGCTCACGTCAAACCTGCCACGGTCCGCCAAGAATTATGTGACATACATCCATA  
TCTATTACATCACATAACCACTTCGCTTGCCTGAGTCTTTCCGATGGATAACGGTACACGGCATAATTCAGTAATCTCCATTTCCACCCCTTCTTTACCCAATAACTTTGTAGGGATTTCGAA  
TTCTTGACGTTTTAAGCTGAAGAGCTTCCACTGCGGCCCTCGACACAACATTTTCGGTGCACCCACTGTCTACCAACAGAGTGCACACCTTACCCTTGACTGTGCATTTCTGCTTAAAC  
AATGCGTTTTCTCTGAGAGCCAGTAGGTAGCCGTGGTGACAAGAGTAACTTCTGAAGCACACATATGAGCGGTTCCCTACGTCGCCACCTACTTCTTCAAATGAATCATCCAGTTCATCCT  
CAACGTCATCTCGAGGATCTTACATTCAGCTTCCACTAGTTGCAATTGCGGCCTGGTTGGACTCATTTCGATTTGTGTCCTTGCTGGAAGCATCTAAAGCATTGATGTTTCATCGGCTTT  
GCGTAAGGATTGTCTTTCAATTGTCCTCGCCCTCTCGGCACATATTTCTTCTGCACTTTTACTACCCATAACAGCAGGACTTGGATTATTGGCGGTGGGATTTGAATTTGCTTGCCTGA  
GTCGCACTGAAGCTGTTTGATCGTGGTTGATCTCCACTCTCCCTGTTTCAGTTCCGGTGCCCTCCTGGATTGACTGTTTCTGCTGTGCCGAGCCAAGTGGATTTCAACCTTCCAGGGCGTAAT  
TAACTGCTTGCGAAACGGACCACACCGTGTTCATTCAGCTTATCTTGAATTGCTTCCCGCAATCCACCAACATACCTTGCACCAATTGATTTGTGGACTCATTGAGATTATTTCTTGCA  
CCCAACCGGTAAACTCTTCCGTGTAGTCACTCACAGTTCGACTACCTTGAACGCAATGCTGATATTGTAGATACAACATCTGCTCGTAATCGGTAGGCAAGAAATGGCCACGCAATAGTT



GTTTCATCCTCCACCAACTGCGCACAGGTCCTTGCCTTCACGCCTTCTCGACTGCATAAGTTGTAGCCACCACGCGCTAGCTCCAGATTTAAGTCGACAGGCAACATATTTGACCTGTTT  
TTCCGGTTCAACTTCCATGTATTCGAAGAAGGTTTCT

>comp114042\_c0\_seq1

CTTCTTCTTCTTCTTCTTCTTTGATCTTCTGTGTTAGCAGTAGAGGTTGTTGCACCATCAAACCATTGGATCCAAGCATCTAAGTTGTTCTTCTTTGACATATCCAAGCAT  
GGAGAGGAAGATTGGAGGAGTAGGACATGAGTAATTGGTATTTTTTTTTTTCAGTAGGAAGATTGAATAAAGAAGCTGATCAAGAAGTGAACAGATCAAGGAAATAAAAATAGCTTTAGGAG  
GAGAACGAGGCAGGAGTTTATATATCCGATGCTGACTTTTACGAAGGCACTTCTCCCTACGCAACAACTGAGGCTGATGCCTAAATGGAATAGATGAAAAGCTTATTA

>comp119682\_c0\_seq1

CTGCCGGTCGAGCCACCGAATGCAATCTGAGTTAACCGGTTCCGGTCCGGTTAGAAGGTTTAGCGGACCGACGAGCCACGCTCGTCTCCGGCCACCGGTTTCGTAGAACGATTCCAGTA  
GTTTAAACGTACGCCGGCGGCTCCAGCTCGGCAAAGCTGTTGACTATTACTCCCAACTCCCGACGTCCATTTCTTCGTTTCGACTTCATGGACTGAGTCAACGGGTCAAGGGGGTTGACTA  
CTTGACGCACGAATTCTGGCACATCGGTCATGGTGAGGCGGAGAGTCGGTGGTGCTCCGACAATCGGGAAGGTATCGTTCGTCGGTAGAAAACGGTTGGAATATTGGGCCAAAGAGACTTG  
ATGAGGGAAATGGAGAAGGTGGAGGAGCCGTGGAAGACGAGGCGGGGAAGGCCGAAGCGGGAGGATATGGGGAGAGTCCAGCCGAGGAAGTAGTCGGAGATGAGGCAGAGGGGAG  
GG

>comp121651\_c0\_seq1

AACCAAAAGGATTCATCAACCATCTCACATGGAATATAAAAAATCATGTAATAAATCAAACCTATGTATATCAATTAATTCTTACTACATACTTCTCTCCATAAATATACAAAAAAAACACAAT  
AGAGTAAAAATGGTGGAAATAACTCTGCCAAAATCCACCACCATTACCAAACAACATACAAATTATAAAGAGATAAAATGATCAGTAATGTGAGCAGAGAAGCATTATTATGCATCTTC  
TGATAATATAAAGCCGAGCTCTCTGCTCTTTAATGGCTCCACCAAGCCCTCTTCTTTCTCTCCACCTCTTTCTTCCATCTTCTTCTCCCTTGAAAGCTTCTTCTCGCTTCCCATCTTAC  
CATCTTAGTTAAAATCTGAGTTACAGTTGTACTTT

>comp126715\_c0\_seq1

AATCCTCAAACATAATTACCATAATTAGCACTAATCTCTTTCTTTCTTCACTCCATGGGGAATTCATTTGCTTGTTTTACTTCTCAGAAAGCCATGATCAGAAGCAAAACACCACTCTGCTAAA  
GTCTGCGATGAATTACAGTATTACAGATTACAGAGCAGCCTTCATTGAACTCTCTGAACAATTTGAAGAAGAAGAAGAAGGCTAAGTTGAAGAGAAATGATCATAAAGCTAACAGCAG  
AAGATTAAGCTCGACAGGAGATAATGATGATGGAGCAGTCAGAATCAAGATGGTTCTTACAAAGAAAAGAGGCAGATCTTCTGTTATCAATGCTTAGAGAAAACGAAAGTATTGGAGGAG  
TTTCTTTTGATTTTGTGGAGCTGTAAGAAGCCATGAGTGGAAGCCATCTTTGCAGCGTATAGAAGAGGAAGATGAGTTCTGTTGAGAATAATGAATTGTGTAGTTTGTGTTTTAGAAC  
TGTCGTTCTATTCTTGAGAGGCAGATTGATGCATATTGATTAAATTAACCTTAGGAAGGGTGAGTTGGAAAAAATTTATATAGATAATGCTCAGATGTTTATAAGAGATGATTTTCGCTGATTGG  
AACCTTTCATTTTTGGTTGGTGCAAATTGCGTTAAGGAGGTGAACTTTAAAAAGTCCTTCCAACGAATTTTATACAAGAAAGATATCAAATAATCTGTGAATTATGTAGGGATAGA

>comp126871\_c0\_seq1

CGGACTAGCGGAACGCAAAACATCGACACCTTCTCGAGATCACCCGGGCTCTTCTTACGCTTCCAACGTGCCACACAAAATTTGGGCGGACGCCCTGTCCACCGCCCACTACCTGGTAA  
ATCTTTTACCTTCAAAGCTATCAATCTGAAAATACCTTTCCAACGTCTGCAGGGGAAACCACCAACCTACAGTCATCTTCGGACCTTCGGCTGCCTCTGCTTCCCGTGGCTCAAGCCCTA  
CACTGCCAACAAGTTCTCACCTCGCTCAGCAGAATGCGTCTTCTCGGCTATTACCCAATCATAAAGGATACAGGTGTTACGACATCAAGAACGACCGTCTCTACACTTCTCGGCATGTG  
GTCTTTACAGAGAATTTTCCCTACACGATACCAATCAGCCTACACCACAGCCTGAACAACATCTGACTCCAGCCCACTACCACTGCTCCTACCACCAGCTACAACTCTTCCATCT  
CCATCCAAACGACTACACCATCCCGCTCCACAATCTCAACAACATATGACCAATCTACCTTCTAACACATACCAATCACCTACTGCTTACCCATCTGCTCGTCTCCGACCAGGCTCAG  
CACACAACAACCCCAACCGAGACACCAAATGCAAACCAGACTAAAGTCGGGCATCTCAAAGCCTAAACAATCCTTAATCTACTTGCTCATTCCAGCCAGCCCGAGACACCTTCCACGT

ACAATCAGGCATCCAAATCTGCTCACTGGACTCGGGCTATGACAGAGGAATTCCAAGCACTGAAAGCTCAAAACACTTGGTCCCTGGTTCCTAAACCATCGAACAAATCAGTCTTGGGC  
AGCAAATGGACCTTCAAGACTAAGCTCTTACCAAACGGACAGGTAGATCGATACAAAGCTCGGCTCGTCCGACTCGGCTACAACCAACAATTCTGGGATCAATTACTGAAACTTTCAG  
CCCAGTGGCAAAAATGCCTACTATTTCGTTCTCTCTAACTCTCGCCGTAACCGTCAAGTGGCCCATGCACCAGCTGGACGTATCCAACGCCTTCTACACGGCGACCTTCCCGATGACATC  
TACATGCGGCAGCCCCCTGGCTTACCGATCCGAATCAACCCGACGCCGTATGCAAAGTCCCTTTATGGGCTTAAACAAGCACCCCGGCAATGGTTCACCAAACCTCACGAC  
CTTTCTTCAAACCTCAAGGATTCCGGTTTAGTCGTTCTGACCCCTCTCTTTAATCTTTTATAAAAATAATATCCAAATATACTTCTAATCTACGTCGATGACTTCTTATCACAGGAAAACAAT  
GCCTCAGCAATAAAACAACACTACTTCAGCAGCTACAAGCACAATTCGCACTCAAGCAGCTCGGACAAATCTCTCTTCTCCTCGGCATTCAAGTACTTCAATCCACAAACGGTTACTTCTTAT  
CACAACAACACTATGCTACCA

>comp127710\_c0\_seq1

TTATTCTTCTTATCACATGACAATACTGTCTCCTTTTTGTTGTCTAACATAAAGGCAATCTTGTTTAATATTGAAGTGCAGAAGTATACCTGCCTAGAAGGCATATTATGAATAGGAGAGA  
GAGCATTTAACCATCCTTCTTCTCCTGCTCACTTCATCAAATCACCATGAATGTCTTCTCAAAGCTTTGTCTATCTTTCTGTTCTTATTCTCATGAAACTGCTCTTGTGTTCTCAGCTGATA  
TCTCTCTCCCCGAAATGAAGTCTTCAAGGGAGAAGATTCAAGTTCGAAGGATGATGCTGACAGTGAATCAAATTTCTGATTTTCTTAAAGGGTTGAATGCATCTTTAAAGAATGAGAAG  
GAAATTGGTGAGAGCTTAAAGAATCTCCACCAACCAAATCAAATCCAACCTCATAATTAGTGGATATGTTTAGCCAGAAGAGAAAGGAGATAGTACATGCAGCATTCTCTTCTTCCAATTT  
TGTTGCTGTGTTTTTTTTTTTTGTCTTATTGCAAAACGTTTGTGTTGTTATTTTTCACTCTTTATGCCCTTCTATTTAGTTCGAGATGGAATAGTGGTTATAGAAGTGTCTTCTGTTTTTTGTC  
TAATTTCAAGTAGTCAGAAGTAGGAAGAAGAAAATAGTTTCGCTGTGTAATGATAGAAATATTAGTAAAGCAGATCTGTGATAAATCGCATGTATGATTCAGCCATTTTCTTGTTTTTAAC  
ACTATATATACATAAAGACGAGCTTTTTAATTACCTTTGTTACTCATTCGATGGAAGAATGATGTATTGGATTCCAATGGACTGCATTAAGCCTTTAAACAGTAAAATTAATAGCAATGTC  
AGAAATAGCAACGCGTTCAAGCCAAAAGTATGATAAATGGTATGATATAAATTTACATCTTGAACCTCAGCATCTGGACTAGTCGTAGGAAGTAAAGAGATTGACTAAGGAATTGAAGATCA  
GGTAACTCGCCTCAAAGGAGCTCAACCAAGAGGAGTACTCACCAAGAGAGGCACTTGCCTTAAAAGTGTGTTGTTCTGATAGGGGACTCACCTATGAAGAGTGAACCCCGCTGGAA  
CAACTTGCCCTCATGAAAGCGCTTAGGTCTACCAGAGGACCCTCGCCCCATTAGCTGTAGATGCTTGTCTATTCTAACTTTGCTATGACGACTATATCTGCCAAGTTGACACCTCAATCTA  
AGATGTTATTCAA

>comp128204\_c0\_seq1

GAGAGAGAGAGAGAGAGAGAAAATATAATTTATATGCGGAAAAGAGCCATAAATAACAATTATGATTTGCATTTAGTTATGAGCTAGCCATGGTTCTTGTGTGTAGATGTAAGTCAACCTG  
AGCAGCAAGTGTCTTCTCATCAAACACTCTTCTCTCCCACTCCTTCGCAAACTTGCTCAACCTCTTCTTGGCTTCTCAGTGGGATTGAAGAAGCCAGTGGCCTGGTGGATTGAACTGA  
GGAAGCAAGGAAGAGGAGGATTGCAAGGAAAAAGCTTGTGGTTTGCTTGGTAGACATGGCTTTTACTTTGTAGATTCT

>comp130216\_c0\_seq1

CTGTTTCTCCTCTCCATTGTTTTCGATATATCTTACACAACGTAGTCCTAAGAGCTATGGCTCTAGCTACATAGCACAACCTGACTAGCTAATTAATTAAGAACAGGAAACAGGCAAAAAC  
CTGCAGCTTATAGCTATTTAGCTATCTAGATCAATCATGTTCGAGCCGCCGATCAAGGTCATCAAGGCAGGCAGCCAGCTCTTCGCGCATCACTGAACAGCAGGTCCGGGAACTCGTCTCCA  
AGCTTCAGACTCTTCTCCCTCGTCAACAACCACTGAACAACGATAATGACACGGCATCGACATCAAGAGTATTAAGGGAGGCGTGAATTACATAAGGAGCTTGACAAGGAAGTCGAC  
AATCTCAGCGAGAGGCTTTCTGAGCTGCTACAGAACACCGATAACGACACTGATTTGGAAGCCGTCCTTAGGCGCATGCTCATGTGATCGTATTACATATAATTAATGTACTTGCCTACTC  
GCAAACCTACTTATCTAGCCATGCCAGTTCTATATATGCTTAGAAATTAATGGATCTTTCCTTTATTTCTACTTTCTAGCTGCTCTTCTATCAGTTAATGCAATATTATATATTCATGCCACTTTTT  
TAAATTT

>comp134099\_c0\_seq1

GCTAAATCTAATGATATCTACTATCTAGCTTTCTCCTTGCCGGATCAGATAACTTAAGGAACAACCTAACAGAAAAGAAAAGAGCTAGTAATCACTAATCTGACAAAACCTTTTTTATAATTATAC  
AAAGGATTACAATCTAATTCGTTAAATTCTTATAATACAATGCAGCAGATTCTGAACAAGTGAAATCAAATCTGACAAAATACTCATCTTCTCCACAGCCATCAGAATCAAAGTTACGCCTG  
TAACTGAGAGGATCATAGCTACAGTTGAAGTACTTCACAGGCCTCTTCTCCATGCAGAACTTCAAGCATCGCTTCTTCAGCTTCTCATGAGCTGACTCAAGCAATTGCAGCATCCTGGCC  
TGCAGATACTGAAACTGGCCCGAGACCTGAAAAAGCTTCACTTCCAGATTCAATGGCGCTGCAGGCGGAAAGAGCACGCTTCTCCTCCTCCACTTCATGCCTATGAGATTTTCTATC  
TCCTCTGTATGGTGAGATGGCCAAGCGTGCTCTTT

>comp136124\_c0\_seq2

AAAAGAAGAAGAAAAGAAAATGGCGGAAGGCGGACGTTATCGGCTCGTCTCGATCTGTGAGAAGTTTGAAGAGCCAATAAATTTCTCAGAAAAATAGTAACCACGTCAATTTCTTTCTGT  
TCATGTTCTCCTCTTGGTTAGGGTTACGTTTCTTGATATGGACGGCGATGATGACCAGCAGCAATCGAAGCTCATCGACGAGCTCTGCGCTCTCATCTTCGCCCTTCTCCGCTCTCCCCACC  
TTTTCTTCCCTTCGGCATCGACGCCTTCGCGGACGCTGCGGCCCTGTGGCGGCGCCGTCGCGGCTTTGTTCCGTCCGCAGCAACGATCGCAGTTCCTCCGATGGGCTTCGTGTCGCTCC  
TTCTTGAGCTTCGCTAGCGCTTATACTTTGTGGATCCGTCACGTTCTGTGCTCGGATGCATTCTGATGCCCTGGATCATAGGCGTATTGATGTTTTCTACTTCGTAGAGGTCATCTCGAGTC  
TCTCTGAGATTGGCAAAGCGGTGTTGTGCTTGTTCGAGCCTGCGCCGCTGAGGACCCCGGCGAAGGAGGTCTCAGGTAAACTTCCCGATAAATTGCCCTATTTTGGATTTGGGTTTCTCT  
CATATTTTCATTTCCGATGGAAATATTCGGTTAATTTGTGATTTATGCTGAGAAAAAAGTAAAATTTGTCTTTCTACTTAGTCCTGCTTTGTTCTGTTCTTTGTTGCGTCCAAGAAAGT  
GTTACCAGACCGATAAATATTCATGGAGGATGCCGGCTCCCATAGTATGTGATACAAATTATAGTGATAATCTTTCTTCTGCTTTTTCTTTTATTTTGTGAAGGAAGATAGCGATAAATGTGT  
TCACCCATAGT

>comp137919\_c0\_seq1

TTTTTAAAAAATAAAATAGTTAAATTTTTTATCAATAATCAAGAAAATCAAGTGCTCAAATGGCATCATCGTTCTCCATCTCAGTCAAAGATAGAATTTTCAATTTCCCCCCCCAAAATAATT  
ACAGAAATGGACACTTCAATGCATGTAAGAGTATATTTATAAATGAAGAAATAAAAGAAACAAAGAAAATATTACATAAATATATTTTAATTAAAAATGGTTATAATCAACCCATCGTTTAA  
CTAAAAATTTGAGCTTTTATTGATAAAAAGCTGGAATCCTCATCTTCGGCTCAAGAGCAACGTTGATGTCTGGCACAGAACGAATCAATACAGAGCATGACGCCGGAGTCAAGCAGACG  
CAGCCGCCCCCGCCCGGCGATGGTTTTCCGGTGAGCCGCTGGACCAGTCCATAAACTCCTGGGGCTTCGCATAGATGATCCTCGCCGGCTCCATATGAACGATCAGAGGCAGCCGGC  
GGTCGGGACTCGTAGGCTTCTCAGCTTCCATGAATCCTTGGCTGGTCTAAGGGTTGTAGGAGTTGAAGTTTGGGGTTTGGAGGAAGAAGGAGACATTTTTTTCAAATATAATAATGAGAT  
GAAGGTGGGTTACCGTCG

>comp139894\_c0\_seq1

TAGCAAAGATTAAAAATGGCCTCCACATTCGATCCTAGCTCTATTCTCTTAATCATCGCCTCCACTGCATTTGCACAAAAGCTAGCCCCGAGCCCCGGCGGTCCCGCCCCTCTCCAC  
CGCCATCAAAGAGGGCTTCATCCCCATCTCCTTCCCCATCCCGACATTCTCCAGCGCCCTCGCCCCACGCACCGACGCTTCAGCAAACCTCCCACTCCATCGCCCTCTGTTCCAGCTCT  
GTCGCCATCTGATCCAATCCATCGGGCTCCTCTTACCGCCGGCAGGGAGCTCATCATCGGACACGCAGCCCGCGGCTCCAAGTGCTGCCACGATGATCACCACAGGGTGGATCGCCA  
CCGCGGCCTTCGCGATCGCCGCTTCATAACATTCTAGAGGTGCTGTCGCTTGTATGATGTTTCTTCCGTCATGGATTCTCATTTGTTGTGCTGGGTGT  
CTGAGCGTTATACCGTCGGTTGTATGATTACTGTTCTCAGTGATTATTTTGTCTTATTCATCGAAAGGCTCCAGTTGACC

>comp140803\_c0\_seq1

TTTTTCGAAATAAAAATATCACACATCTTCAAATATTTTTATAAAATATTCAAACCTTCTTACATCCCAAATTTCTTTCACAACACGAGAAAAGTCAACGCAACTCGGGTGGCGCAATCCG  
GTTCCGGCGGCGCCCGGCCCTACGGGAACATTACGGAGGGTGGCGCCGGCCGTCAGTAGCGGTGGCAGGCCTTGCAGAAGTGGCGGGGCTGGTTCACGTTATAGTTGTTGAAGTAG  
CAGAACTTCGTCTCCTGGCTCTTGCATCGAGGACACGGAAGCGAAGCCGCCACGTCAACCTTCTCCTCCCCCGCCGCTCCGTCGCTACGTCATCATCCTCCGGCGCCCGCCAGCGTT

CTCTTATCGGTTGCAATCACCGCCCCGAAGAGCTTGAAGCCCGAAGAGTCTCTAACGCTTCCATTTGACGTTGTCGCCGGCGAGAGAGATTGTTCAAGTAATTTGTTTGAAGAGGAA  
CCCCCTCTTATCG

>comp140936\_c0\_seq1

TGTTGCTGGTGATGCTTTGAAGACTAACATCACCACTTTGGGCCCTCTTGTATTGCCACTATCAGAGCAGCTTCTCTTCTTTGCAACTTTAATAGGAAGGAAAGTTCTAAAGAGGAAGATT  
AAGCCTTATATTCCGGACTTCAAGCTGGCATTGAGCACTTCTGCATTCATGCAGGAGGAAGAGCAGTGCTTGATGAGCTAGAGAAGAACCTTCAGCTTTCAGAATGGCACATGGAGCCA  
TCGAGAATGACACTTTACCGATTCGGGAACACATCGAGCAGTTCTCTTTGGTACGAATTGGCCTATGCAGAGTCGAAAGGGAGGATTAAGAAGGGAGACAGGACATGGCAGATTGCATT  
TGGATCAGGATTTAAATGCAATAGTGCTGTTTGGAGGGCACTAAGGGCTGTGAATCCTGCAGAGGAGAAGAATCCATGGATGCATGAGATTGACAACCTTTCCTGTTGAGGTTCCAAAAGT  
TGCTGAATGAGGAGTTAGCTTATCTGAAATGGTGGTAAGGAATCACTGTAGTCACAGCTTAGGATTAAGCTGTTTTGAGAATATAGCTAAAGCTGGTGTTTTTTTTCTTTTTTCTCTCC  
CGTCTCCAGGAATCTGGGGTCCATTCCATTTTCATTTCTGTGCTATTATTTATGCTCATGCTACAGAAACATGTGATCAATGTTGTTGGCTAATTATCTTGAACACCACAAGTGTTCGATT  
TGCTGAACAATCCTAAAATGTGTTCTTATTTGGACTATGGAAAAGAATTATCCACATTTGTAGGATTTTGTATTATAGCTTTGAATTCTTCCAAAACCATCATATGCAATCTTTATCTTTGA  
TTTATCTTTTGCAAATTCATGAATCTCAATATT

>comp141131\_c0\_seq1

GGCAAGATTTTATCGACCAGAATCTGTATTGAGTGCTCCTACAGAAGTTCTATAGCATTTTTTTTTTCATCTTCAGTAAGCTTTTATTAATAAAAAACCAGAACAATGATTCACATTAATGTTCTCA  
AAGAACTCGCTTAAATACACGGATCGTTATTCATCACCTCGAATGAAACCTGGCGAAAACATAGGCAATGTCGCCGTGGTGCTCCTCGGCGTCGTGCGACAATAGCAAGCCTGCAAATCC  
TCCAGATCTTCAAATCGTCGAATCCATTCTCACTTGTCATCTCCTTCATCGAAACCGTCAAGGGAGATCTTCGTCATCTCATCTCTGATTGGGAGAGCTTCGGTTGGTGAATACTGAAA  
GAAAAAGAGGAATAAGAGAGATGGTCGGAGGCAGAGAATCTGGTGCAGAGGAGGCGGTGCGGGGAGAGTACGAGATACAAGGAGAGATTAGGGTTGGCGAGGCACTGAC  
GGTGAAGTGGGCGACGGGAGCCGGAGCTGCTTGATTGGGGATGACTGAAGGCGGAGAGATAGGTTCAAGGTTGATGTGGCTTTGATGATGGCGTTTCGATCTTTTGTTAAAGAAGGGGG  
AAAGCAGATCGAGCAGGATGAAGAAGCAGGAGCACGAAGAGTTTTTCTTCTCTGCGCTTGCCTTGATTTTGTCTGTGTACTTTCTGCTTCATCTTGCTCTTCTCCTTCGCTTCAGT  
GAAAGGGGCTAGGGTTTTGGGGGAAATTTCAAGTGGAGAATAGCAGATTTATATTGTTGGAAGCGGGGGAT

>comp141320\_c0\_seq1

CGTTCACGTCCATTCCAGTATCTCCTTTCCAATTGGAGCTCAGAAACTTCTCGCGTAGTTGACATCAACTGCATTGCCGGCCATGCAGCCAGACCCATCGAATCCCTCTCTTGTCTCATTTT  
ACCTCTCCTACTTCTCTGCTCTAAGAGGAGAATCGAGAGCGGAGAGGAAGAGAGTTGAGAGAAAACGCCAAGATGCAAAGCTACTGCCTTGTCACTGCTCTGCTCTTCACTCAACTAC  
TGCCAACGCCGCTTGCCCTGAACCCCGAAGTAGATAATCTTTCAAGGTGAAGGACGGTCTAGACGACCCAAATAACGTCCTTTCCAAGTGGAACTCAGCGATTCCACCCCTGCAAC  
TGGACTGGCATCACCTGCTCTCCCCCGCCGGAGACGACGCCGAAACCGTACCCTCACGTCAGTCATTCTCACCGCTTCGACTTAGCTGGCCCTTTCCCGTAGCTCTCTGCCTCCTC  
CAAAACCTCAGCTTTCTCTGCTCTCATAAATTACATCAACTCCTCCCTCCCCGACTTCCCTCCTCAACTGCTCCTCCTCCCTTACCCACCTCGACCTCTCCAAAACCTC

>comp141628\_c0\_seq1

GGCCACTATCACTGACAATCTCCATGGATTCAAGTCAAAGCAAGCAACAAAATCACAGACGTAGTAAGGCTTCAGCAAATACTGAAGAAGTGAAGAAGTTTCGCGATTACTCAAAAGAGC  
AATAGCAAGAAGAGCATCAGCCTACTCAAAAAGACCTTTTCTTTCTCAGATAGTTCATCAGTGCTGAACTGCTATGTTCCAAAAGGATATCTTGCACTGTGTGTTGGAATAGAGATGAAGA  
GATTTGTTATTCCTATGGAGTATTTGAGGCACAAAGCCTTTGAAGTTCTTCAAGAAGCTGAAGAGGAGTTTGATTTCAAATGAAGGTGTTCTGAGGATTCTTGTGAGGTCTCCAT  
GTTTGAAGATGTGCTTAAAGATGGTGGATAAGAAGAACAAGGTTGGATTTCTGCTACTGCTTCTCAGAGACTGATCTGAGTCAGGTTTGTCTCCACCAGAATGAATGTGTAGGCGAATGTTA  
TTTAGAGCTGCTTCTATCTTGAATTTTCAGGAAAAGAAAGAGGCAGCTCGTTACTGATTTCTTCTTTCTGCAATTTCCCCCTTTTTTTAATGGGTAGATTGAGGTGCTGTGTTGTTAGCA

TTTGAACTAGAAAAGAGGAAGGTTAACTGTCAGATTATCAACAGAGCAAGAGATTTACTTAGTTTTTTTTTTCATTTCTGTAACATAATGGATTAATAGACTTTCCAAAGGTAAGTTGGAGA  
CATCAATTTCTTATTTTCAGGCAACAAAAGAGCATTGATCAGCTTTATTCTCAGCAGTAATTGCATTCATGAACATGTTTGCATAACAAATAATTGAATTAATACTCAGATTTTCTATGGT  
>comp141900\_c0\_seq1  
GCAATATCAGACCATAAGTAGCTTTGTGAATTTGCACACAGTGTGGGTATATAGGATCTTTGAAACCAGATGACTGTGTCATGAAAAGACAGTCATATATATAACGTGATTTAGTTCCCAAT  
GGTTGCGAATAGCCACCAAATAAAAAATTTGAATACTTTGCATCTTTGCAACTGGACAGAAAGTTTCAGTGAAGCCTTTACTGTATTCTTATTTATAACCTCGAGCAACTAAACCATCCTTA  
TAACGATGAAATGCTTTGTCGCTAATGTGGCTTTTTTGCAGCAGACAGCAGTAGTGTAGCAGGTTGGATCATAGATCATAAGCCTCACAATGGTGCAGCAATGTGAAAATTTGCCAAGGTT  
TTAGGTGACCTGAATATTTAATATACTCTCCAGAGGATGAAAACCTAGGTGCTGCTACCGGTTGGGTAGGAGCTAAAGGAATACTGTCCAAATTATCAGAAAAGTTGCGAGCTGATGGGACG  
ACCAGGCTTAGCATGAAGAGGTGAAGATGTGAGAGTAGAAGACGATGGTTAGCTGCGTTTGCCTTCAAGAACGCGATTGATTAGCAGGAGCACTTAGAGCAGGAACAAGTGTAGGGC  
AGGAGGATCTGAAGTATAATTGAATTTAGTAGAAGAAGATGTACAAAAGGCCAGGGTGTTCAGTCAAGGATAATTGCAGACAGAACCAGCAGGCCGATGACCGAGACCCTGATGCCAG  
AAGTTCTGATCGAAGGTTGCGGAGAAAAGAGCCCGGAGATC

>comp142076\_c0\_seq3  
GAATTCAGTAATCAATTTCTGTAAACAAAACATCATAACATAAAAACTGACTAAGAGCATGCTTGGCTTTGAAAGGAAGTAATAAACTTAGCTAGAATCATAGAAAGGATAAAAGCTCAT  
ATCTAAGATTACAATTTCCACCAAACAGAATTCCTCCTCTCACACCATGACAGTAGCTTGGAAAGCTTAGCAATGGCCGATTCAAACATCTTTTACAATCCCCACCTGACAAATCCTTTGT  
ACACTGCACCAATCCAAACAATTTCTCCATTCCACCAAGCTGCATCTCTCCAGTAGCAAACAACAATGGTGTGAGATAAGCCGTCTTACCAACTTCTCATTAGTTCCTAACCTTGGTG  
TCCAAAACCGATTTCTCTGACACAGTCTGTGTCTGTAACATAAAATTTTTTACTATCATCGATTCTCCAAAGAATTTCGCGGTGCGCATAGCGAACAAGACAATGATCAAGCCATATCTT  
TGCTTCTTCTTGGAGGGGCAATGGTGAATGATGATCATTAGCTTCGTGTATGCAGGCTGTGCAGGCAGAGCTAGGTATGTCTCCCCTGCACATGGCGAGGCCGAAAACCCGGCCTTG  
GCCATGGCAAATTGACCTTAAACCGAAGCCGATAGTTGGAGCTTCGTGGAGAAGAAGACGCATTAATTTGCTCAAGCTGGTTGAAAATTTGATCACCAGAGCTGTAGTTTCTCGAACTGGA  
ACATGAGCTGAGGACAGGAGAATGACTGATAGCCGCGAGCAACAGAGGGCCAGAAGGAGAACAAGTATGATGAGGAATTTCTTCATCTTATGCGTAGGAGAAAGCTTGAAGATGCTTA  
TTTTAGGAATGAAGAGTGTCTAAATAATGGCCTTGAAGAGCCTCCCTGAGGTGGAAGCTTAGCTATGTAAGAA

>comp142575\_c0\_seq1  
CGTGGAAGTGGTTGTACGCGGGCAGGAGGAATTAAGGAGGAGGAAGTAGAGATGGATAACAACGGAGGGCCGTCTGTTTTGAGGTGAAAATAGGGAAGGGAAGAGCGTGGAAGTGGTTG  
TACGCGGGCTCAATGCTACTGGGTTGCTTCTGATTTGGGTGTACAGGGCCTCGCACGTGCCGGAGGCCGGAGAGAAGGGGAGGTGGGC

>comp143634\_c0\_seq1  
CGACGCTCTTCGATCTAACCACCTACCTCTGGATGACCACTATACCCAAAGCTCCCTACACTTCACATCATCTCTTCTGCAATCGCTATAAAAATAACAAGTTAACATCAACTTCTTCA  
TCAACCACATACAATTAAGCAACCTTAGTCTCTCCTCTCCAGTTCCCTTCCCTTTTTCCCTCCATGGCTCACTCAGTTCAGTACTTCTTCTTCTTCTTCTTCTTCTGACGCTCGTCTTGCTCAA  
AAGCTCAGTATGTTATGGGGCGCGCCATCTCCTCGACTCGCCGGCCCTGCGTGCCTGCTTCGACACCGGCCACGCGGCCCTTACCTACCGTTCCAAAGCTTGCACGGTCC  
GCCGTTCCCAACATTCATCAATCCCCGGCATCCCCACCATCCCCACCATCCAACCATCCAACCTTTTCACTGCCTCATTCCTTCCATTTCTGGACTTCCTTTCAGTATTCCTCAACAA  
TATTATCCCAATTTCCATCCATTCTTCTCTCACCACCACCTGGTAAGTAAAAGCCATACGAGACATGTTGGGACCGTCTATGGTGTACAGTTGCAGTTGGAGCACAGTACTGAAG  
CTTTCTTCAGTTGTTTGTAGTAGGGACGTTTGTATCTTATAATGTGTGGTTGTTTTGCTTATACTGTTCTGAATAATGGTGTGTTTGGTTGTTTTACGTGGAATGGTCTGCGCATTTATCTAAA  
TTGTTGCTTATTTTGTAAATGTTATAATATATGTTTGCTCCATCTATGTTGGATTCTA

>comp144100\_c0\_seq2

TCAACAACCTTCATTTCTTGACTCTTATTAGGATGATTGACTGAGCGAATAGTTTTTTTTTCAAAAACCTTGTTGTTCTGAAGTTCCAAACAAAATGGGAAATTAACCACATAAGGATATTC  
CTTTCCACCATAAAAAATATACGCGTAGTTTAAGGGAAATAATAGAAGCTTCTGCAATATTTTCAAAAATCTGGAAGCTTATCAGCTTCAGATCTTAATTTTCCAAGACGACAGTTTTTATACAT  
ATAAAAGAGATTGAATGAGCTTGAAAGCATCCCTCCAGCTGCAGCAGGAAGTAAGCATAACTTCTGTGTAAGAACAAGGAATAAAATTAAGATAGCTTCTAATGAAATAGTTTCTGA  
ATTAGACATACTTTACCTTAGCCTTAGCTTAAATTTACAGTAGTTTTCTTGTGCATTCACTGAAACATATGAACAGAAAGTGTGTTCTTGTGAGCTTCAAGTTGGGAAGGGGTGAGGCTGCC  
GAGCATGACCTAGAAATGACTGAACTTTTCTATGTATAATGAATCAAAAACACCTTCTGTGAAAGGAGATTAAGCAAAGGAGATTGCAATCTTCTCTGAAAGATTGTACTCATTTTTTTAGA  
AGAGTTTAGCATTACAAATTAAGATTAACCTTTTCGATTGCAAAAACCTTCTATATAATTAAGAGAAAAACCAAAGTAAACATAAAATTTACATATCACTACATATATTGCGGGTCATATGCAACT

>comp144453\_c0\_seq3

TCGAACTTTTTATTACTTGCAGAACTTGACGAACAATTACAATTCAAATAACTCAGCAAAGATGGTGGAAGCAAATCATTATTTAACGGCTAGTACAGTAACAGAGATTCTAGAAATG  
CAAATTCATGCAAACTCCATGACTAGGCTTCCAGATAGAATACAAAACACCAGCATTACAAGTTAGCAACTCAATAATATAAGCAGTACAGTTAAGAGAGTGGCATAAGTCAGATGCGATAA  
AGGAAAAAATTATCTGTGCAGATCCGGATAGCGTCTGGAGACCAATCAGAACGTGCCACATCACTTTTTTTCTCGGTACCCTTGTACCGGGTGATGTGCCACGTTCTGATTGGCATCC  
GGACCGTCCGGTGTCCGCACAGAATA

>comp144543\_c0\_seq2

TTGACTCAAACTCTCTCCTTTCTTGTAGCAACCCCTCCCTTCCAAAACCATAAATCCCCCTCTTTCTCTCCTTCTTTCCCTCTCTCATATGACATACAGCTCCTCATCATCTCA  
ACATGCAGAAGACATACTACCAAAGAAAGGCAGTTCAAATCACTGTGTATTAGAGAAACCAAGAAGAATAAAGCTTGTAAGAGCACTCATGAACAGTTCTCCGACAGCAGCCG  
CGGCCACCACCAACCGCCAGCGCCGGAGCCGCCTATGACCGGAAAGCTGAGCTTCTTCTTACTCTCGTCAGCTGAGAGCTGAAGCTTCCCTTCAGAAGTCTTCCAGTTACAAACCTC  
AATCACAGCTCAAAGTTAAAGAGATTCTTCGGATTACATCAATCGACAACTAAAACAAGCTCACTTGCAGAAATCAAATAGCTATAAGTCTAATCAGAAACCAGAAGAAGATCTTCAGA  
TTACTTCCGGAAAAAATCCTCATCAAAAAGTTAAAGAGGTTTCGACAGATCAATCCTGCTGTCCCCTGGAAGGTTGTGCCATTGGAATAAACCATCACAAGCAAAGTTACCAAGGCCA  
CCTCCTTCTTGCTTGGTGATTGGAGAAATATTTTCTTCCCTGCCTTCTGCATGAGAAAGTTGAGGTAAAGGGAGAAGCAAATGAGCAGAGAAAGAAGAAGAAGAAGAACTTTGT  
TATAAGTGTGGTTTACAGAAATATACTCCCCTTCCACTAGTGGGGAAATTAGTGTTCAACTAAGCAAGTTTCTTCATTTAAATATGGTAACATATCGAACATACTATTTAAGTTCTCCATTA  
TGGGTTTCATCCAGCATAACAAGGCGATTG

>comp144748\_c0\_seq1

TGGAAATAATCTGCAGAACAAGCTTGTTAAAATCTGAAACCCATTGTGGCCGAATTGATCGAATCTTCAAAGTCCACAACACCCAGAAAACCTCTCGCTCGCTTCGAAGAACATCGAGAA  
ATGATAAAGAACAAGTCAGCAAACCTTCCCTAAGAAGCATCCTCGCTGCCTTGCTGATGGAAATGAGCTGTTGAGATTCCATGGCACAACAATTTCTGCAATCTCGGCATTAATGGCTCTT  
CAAGCCTCTGTGTTTCAGAGAAATGCAGAGTTTGTGAAATCATAAGGCATGGATTCTCTGCAAAGGAGCTGAAGGGAGGATTTGGAGTCTTCACAACTTCAACCAGTGCAAGAGCAATT  
GATTCGATTGAGCTATATCATAATGATTGTTCAATAAAGAAGGCCCTGCTGGTTTGCCGAGTTATTGCAGGGAGAGTCCACAGGCCATTAGACAACCTTCCAGGAGATTTAGGTCAATCTG  
GATTTGATTCTTTTGCTGGAAAAGTTGGTCTCTATTTCCAACATTGAAGAGCTCTATTTGCTAAATCCTCAAGCTTCTTACCTTGTTTTGTGGTAATTTTAAAGGCTTAAACGACTTTAGTAG  
TTTTTGTACTGTAATATTTAAGATTGAAACCACTGTTTTCAGCTATTTTGAATAACGGTCAAATTTTCATCTAAAGAAGTATCAGATCTC

>comp144830\_c0\_seq1

CACCCACTGAGCCAACACCTAAAAGGCACGGCAACCTTTCTTTCCATATAAAATCCACACGCAAACGTAAGCCATCTTCTTCTCATCTCTCTCTCTCATCGATGGTCACAGAAGCC  
ATGGAATCACCTGAATACAAAGTCTCTCCCTGCCGACGTGCGGCTCTTCTTCAAATTCAGCTCCGACGAACCCAAATCCCCTTACTCCAAACAAAAGAAAACCTAAAGCGTTCAAAT  
CTCATCCCCAACCCCTCCGAAGAAGAAAACCTCGCTCTCTGCCTCCTCATGCTCTCCGGCTCCCAATCCCACCTCAAATCTCTCCCACAAATGCTCTCTCTGTGGCAAATCTTTCC

CATCCTACCAAGCCCTTGGCGGCCACAAAACCTAGCCACCGAAAATCCACCCCCGCCACCGCCACCGAAGACCGTCCTTCCGCCGGCTCCCCCTCCGCCTCCGCAATGTCCGGCGGTGGG  
CGGGTCCACCAATGCTCAATTTGCCAAAAACGTTCCCAACCGGTCAAGCTCTTGGAGGACACAAGCGGTGTCACTATGACGGCACCATCGGAAGCGCCGCCGGCTCCGGCCACCGT  
GATTTGATTTGAATCTGCCG

>comp145028\_c0\_seq2

TGAGGACAAAAATGTCATTGCAATGCCGCTGCCCATTTGTGCTCCGGTGCCCCCATTTCTGCTTCTACCTTTGTGCGGATCAACTATTTAAGAGGGGAGGGTCACTCACTGGACCGTAG  
GAGGCATCGCTAATTTAGAAGATCGATCTATGCACACACGAAGCGGACTCAAGCTCTCGAAGTCGCCGCTGGCGAGACATGATGGCCAAACCGCCGGAGCTAGCCGGAAGCGTGTGTTGT  
GCTTCAGTGAAAGCAGTCGATTTCTTTGACGGTCTCCGGACGATCTCGTTCTCTCATCTTGTCCAAACTTTCTGTCCTACTGCCTCTTCTCCCTCCGATCTCATCAACCTTCTCCTCACATG  
CAGGAGATTCAATGGATTAGGAACGCATCCGATGGTTTTGTCTATAATTTAGCAAAAAGGGCTTTCTGTGAGAGCCACCACTTGGTCTGAATCGGCACACCAATTTTTAAGAGATGCGCC  
GACGCCGGGAGCCTGGAAGCCTGTTACACGCTTGGGATGATCCGCTTCTACTGCTTAGAAAACCGGGGAAGTGGTGCGGCGATGATGGCAAAGCGGCCTTGGGTTCCTACTCCGCAGC  
GCTTACTCGCTCGCCGTCATCCAGTTAACGGCAGCGGGCGGCTTAAAAACGAGAAAGATCTCCGTGCCGGCGTGCAGCTTTGCGCACGGGCGGCCTATTTGGCCATATCGACGCGCT  
AAGAGAGCTCGGCCACTGTCTTCAAGACGGCTACGGCGTTAAACAAAACATTGGCGAAGGGCGTAGATTTCTGCTTCTGGCCAACGCACGGGAACCTACTTCGGTTTTTTTTCGAATCAA  
AGGCGGGGTCTTTGGCCGTTGCGGCGAGTTCTTTGCTTAGTGATTTTGGGTGTACCGTGCCGGCGGTGCAAGAACATGATGTGAATAGGTTTATGGTGGAGTGGTTGAGGGGAAAGGA  
GAGGGAAGGGATAGGGAAGGATTGAGGATGTGTTTCGCATGGTGCCTGCGGGAGGCCGGAGACGAGGAGGCATGAGTTTCGGCGATGTTCTGTTTGGCGGTGTTGTGAATTATTGTTTCGAG  
AGCGTGTCAAGCGATGCACCTGGAAAGTTGCGCATAAGTTGGATTGTGCGCCGATGGAGAGATGGCTAGATGGTGGTGAAGGGATTCCGGCGGGGGGAAGGTGGTGGGGATGTGAAT  
TTTGAGGGTCAAGAGAGTTGGTGGAGTTTTCCGGCTCTGTTTTCTTTTTTTTTTAATTTAGATCATTTTTATTTTATTTGATGTTTTTGGAGAGATTTAGTTAATCATCTGATGTAC  
AGTCTTAGATCGTATCTTTAAAATATTTTAGGCTTCGAGCATATCGCGAAAAGTTTCATTTTTTATAATTTTATTAGTTTTTTTTTTTTTTCTTTAGTGAGATGTAAAGTAAATATAGTGGCACTCC  
TTTGAGGAATTTGAAATCTTTCCCTAGTTAATTTTTTATTATTTAATACATCAAAAACTCTGACCCCAACCATCACTCGC

>comp145150\_c1\_seq2

ACTCTCTCTCTCTCTAGATCTCGATGACAAATATAAAAATTGCTGCCATCTCCAGTGATCTCCATGCTCCTCCTACCTTGCTTACCACCCCTCTTCTTCTCATCAAACCTCTTTTAAAAATC  
CTTCTTACCCAGGAAACAATGTCCTCACATGGCCATTGAACTTCGACTCCATCGATCGCTATCTCAGCGTTTTTGATCAAGACTTGTCCATCTTAGATACAGATGTCCGAATCTCTAAGTA  
CAGACAAACACCAGGGGAACAACCTGAAGTGTGTTTTCTGTCTCTCAGATATCAGCGAAGGAGAGGAGATCCGAAAACTAAGGTGCGGCCATATTTTTTACCAGGATTTGCTTAGACAAAT  
GGCTCAAGTATCAGAGGGTCAGTTGCCCTCTATGTCGCTCTTCTTTGGCTTCATTAGAGGTGAAGGAGAAGCTTGATGAGGCATGGGAGGAAGAGCCTGAGGATTTCTGGTCTCCTCTAC  
TGGCTTTTGTTCAAAAGTGAATGGTGGGGGAGATGTATATATTCTCTTGGTTGAAAGAGGATTTGTAGGTGGTTTGCCTCTGTAGCTAGCTTAGAATCACAGCTGGAAGAAAGATTATTGTT  
GCAATAACTGTTAGTTAGTCTTCTTTTTCTTCATTTGCCTGAACTGCTGGTTTGATAGCTTATGATCCTTTTTTCATGTACATAAAATAAAAATTGGACACTTCTCCTTTCTTTTTCTCCTTC  
AATCTCTCCCTTCTTCTTTGTCTGCCGATCCAAGTACTTTAGGTTACTCACACTCATTCTTGGGGAAATTATTAGGTTTCGGACATCGGACACAGAGAATCATCAGAATTTCTGTCAAGCT  
ACATTTTGATTGTGTTTTTATTATAGATAGAATTTTTTTTTGATGATTTTCTCTGTCTGATATCCGCATCTGATAATTTGCCCCATTGATGACCCATATAACTAACCCTTGAATCCACAACCATGC  
CTTCCAGCCGCACGGATCGCGCTACGTTTTCAATTATTCTCCTTAACCACC

>comp145217\_c1\_seq1

TGCCGTAAGTTTATTTGAATAATAATGACAATTAAGTGTATTTTTATAAATAAAAAGGATTTCCAATTATATCCTCAAATATCCATAATTATAATGTTGTGGTATTCACACAACCTTACAACACC  
CGAACAACCTCAAGCATATTGACACATTCCATAGAAGCACTTCACCCACGTGAGCACCGTTTTGCCACAGCTGCCACAGTTGTGCTTATTAACGTTACATCGACGCATTTCCCTCGCAGC  
AGGAATCTGTATACTTGCATATTCTACCGCACCGACCACAATTGAGCGTGTGCGGGCTCGTATCAGTGCACAGATTGGCGCAGCAAGTTGGCCCGCGCTCCCTGGAGTGTGGCAGACTG

CCGGATTTCTTGAGCACCTGCTGCTCTTAACAGCGAGTCCGGCGAGGAATCGGGAGCCGGTAGCAGAGGAAAGGGAAACAGTGGCTAGCATTATGACGGTGATGGCGAGGAAGGTGAA  
GGTCGCCGGTGGAAATCGTGTTCATGGCGGGTTTTGGGGAGTGAGAGGAGATAGTGGGGGAAGAAGAGGCAGTAGGGATTTATAGTGGAGTGTATGGGAGTTTTGATTTGATTATGTG  
CAAAGATGAAGATTTAAGCAAAGGTGGAATGCAAGGAGATGTG

>comp145313\_c0\_seq1

GAAGAGCTCAATGGAGTCTCACTTGATCGTCCCGTCCATGGCTCTTCTGATCTCCATCTCCCTTCTCCTCCCTTCTTCTTTGGCAGCGTGATCTGTGAGGATCTGCCGTTGGATCTATGTG  
CTTTCTCCATCTCATCAACAGGCAAACGTTGTCTTCTGGAGATGAGTTTCCCAATATGGAACATGAATATCAATGCACGATGGCAGATGTGAAAGTAGAAAAGATTTTCAAGATTGGATTGA  
AACGGATGACTGTGTAAAGGCTTGTGGTGTGATCGGAGTGCAGTCCGATATCATCAGACGACTTTCTTCAGCCGCGCTTCACTGCTAAGCTTTGCTCATCAGCGTGTATCAGAGTTGC  
CCAAATATTGTTGATCTCTACTCTAACCTTTCGCGCAGCAGAAGGTGTCTACCTTCCGGACTTGTGCGAGGCCAGACGGTTGAACACTCGGCGGTCCATGGTGGAGCTCAGTTCCGGCGTC  
GCAACCGGTCCGGCTGCTTACAGGCCTCGTCGCCGTTGCTCCGTCTACGGCATAGTAATCACTTGAGATATCTATTATCTGTGTCCGCTCTTATTTAAAGACTGAAAGTGGAGTACTATAGAG  
ATATGTATTCGTAGCTAGTGGTTGTAGTAGTTGAGGGCTC

>comp145539\_c0\_seq1

GCACTAAAAAAGCCGTTCCAAACATGTGCTTTATAAAATTCATATAGTCAGATCTAGAGTACTTGTTCATCTTTATATGCAGATCCTTCTCCTTCACTTTGCTAATCTTTGAGCATGTCTTGCTG  
AACCTTCTTCTTAGCTTTGAGAGAGGAGGAGATAACAAGGAGAGAGATAGACTGCATTCCACCTTCTCCTTCCCTTGTGCAATTAAGTTTAAAGATAAAGTCAGATCTGGTA  
AGATTTCACTATCTTCTTCTCCTCATGATCTGATCATTTCTTGTGTTTCATAGAAAAGATTTTGTCTTTCAAGTCTTTATGATAGAGGAACTGTTTCATGGAAGTGAGTAATTATGTCTGATA  
TCCAGCATGGAATTTAAGAAGAAAGGAAGGGATTTTCATACCTCAAGTTTGTGATCTTTCTGAAGACTGTGTAATAATTGGAAGATAGTTAAGTCTGTCTTTGATCATGTAGCTTGGATT  
GGCTATAACTTGGCCAGAACCATCAATCCTTACTTCTATACATTTGTAAATGGCTTTTGTGAGTGTGTTACTGAGTCCCTAATGTTTCATTAGTTGCAGAACAAAGCTTAGGGCTTGTGCTG  
ATCTTGTCTCCAAGTCTTTCAACTGCCCCGAGCAAAGCACATATGAAGATCTGGAGTCCATCGAAGCCTTGGAGCTTTGGATCTGTTGTACTGCCTCACAGATCCTGAACTCTTAGGGTTC  
TACTTTCCCGTCTTTCATCTTCTTCTTCCATGTTGGAAGAATTAGGGTTTGTGATTCAATAGAAGAAGCTTCACTGCCATCACAAGCAACTGCTACAGCTGAATTTTATGAACTTGTAG  
TTGAGAATATTACTGTCTGCTTGCCTTTCCTATAGAGCAACTGCCATTTTGTACTTGTGACTCATCTGAAATAGATGAAAGGAAGGAAAAGAGGATTGAAGGGGAGTTCTGAAAACCCTA  
GCTAGGCTACTAA

>comp145539\_c0\_seq2

TATACATCTGATATAGAGAAATTCAAACAGAAAAACATAAAATTCAGTAAATATTTATATATGGAAGAGTAACTAGCTAATAAATCTACAAGATATACGTTGCTAAATTTACTTACTTGTA  
ATGGCTTTTGTGAGTGTGTTATACTGAGTCCCCTAATGTTTCATTAGTTGCAGAACAAAGCTTAGGGCTTGTCTGATCTTGTCTCCAAAGTCTTTCAACTGCCCGAGCAAAGCACATATGAAGA  
TCTGGAGTCCATCGAAGCCTTGGAGCTTTGGATCTGTTGTAAGTGCCTCACAGATCCTGAACTTTCAGGGTCTTACTTTCCCGTCTTTCATCTTCTTCTTCCATGTTGGAAGAATTAGGGTT  
TGCTGATTCAATAGAAGAAGCTTCACTGCCATCACAAGCAACTGCTACAGCTGAATTTTATGAACTTGTAGTTGAGAATATTACTGTCTGCTTGCCTTTCCTATAGAGCAACTGCCATTTT  
TGCTACTTGTGAGCTCATCTGAAATAGATGAAAGGAAGGAAAAGAGGATTGAAGGGGAGTTCTGAAAACCCTAGCTAGGCTACTAA

>comp145854\_c0\_seq1

TGATCCAAGTTAATTTGTCAATTATTCAATTTACATATTTATTAGGGCTGAAATTAATAAAAAAATTATAGGAGAATTCATATACATAGTAGACAAAATTTTCAAATTTATATATTTAACAT  
ATAAACTTCTTATTTATTCAGATAACACTTAAAGTTTTAAATATCAATAAAACCCAAACATCGTCTTGTATTATGTCTCATCTCGCATGTGTTCTCATGACGTCGATCATGTCATTGTTGTC  
ACCTTCGCACGTTTTGGTCTAGAACAAGGCATCGATGACTTTGACGTAGGAAGTAGCAATGGAGCTCGCTAGGGCAACACATCGATTGCTGTACTCTCGCAGCGCTGAAGATCTCGGCGT  
TGACAAACCTTCTGATACGCCGCCAGTGATCATTATAAGGAGAGAAAGCGATGTCGAGGCCGCCGTAGGAGAAGCGGTGGTGGCGAAGAACGGGCGGCTGCAGAAGACGAAATC



TTATGTTTTGATGATATCTGCGGCGGTTTCCGGCGAGGAGGCGATGATGGTCAGGATTTGGCCTAATTTGAGGTGGATGAGCGGGCCGTACTTATGAGAGAGGTTGCGGAGGGTGATGTG  
GGGGAGGTCGCCGAGGAGCTCATGGAGGTTTCCGATGAAGGGGAGTGGTGGTTGGCCCGGAGGAAGTCTCCGGCGAGGATTCAACGTCCTTTTCCTTCTTTAGATGAATAATGAAGA  
GGAGGAAGAGTATGAAGAGAATCCATAGGGGCGT

>comp146819\_c0\_seq4

TTTAACGAATTTAATGAGGATATATAATTCTGGTATAAAGTGTTTTTCATAGAGAAATAGAGATGGGAAGGTAAGTACTGATCATCATAATGGAAGAAATTAAGGAGCATTTTTGAACCTCAGATAACAT  
AACTGGAAGAGGAGCATTGAAACTCAATTCTTCTACTCATGTGCATACACGCATAGAAAAGAAAATAATGAATCCATCAAGGCACATGATCAGCCCAAATAAAGTTCCAAACCCTACA  
TAATTGAAGAACTGACTATCCGCACTACTATGAGTAAAGATTTTGATAAACGCCGGAGGTCATGAAACCCGCAAGCAGCTCCGTCCAGGAGGAGAAACCATGCTCCGGGAAGAAGGCGG  
CGGCTTGGTTGAAGTAGACTCCTTCACTGTCGTCATTGTGATGGATGATGAGGAGGCGGAGAATGAGACAGATAGATCGTCAGCCGGTGGAGAAAAGCTGTATCCTGTAGCAGCGAAT  
TCGGCCGGAAGCTGAGGAAGCGGATACGGCTCCGAAGAATAGGGAAAGTTTGAATCGAGCGTTGCGGGAGGGAGAAAGGCCTCGGCTTTCATCACCGGAATTGATCTGGTGGTGATG  
TGGCAAGGGTGGATGGGGAGGGATGGTGAATTTTATTAGTAATTTGGCTGTTTGTGTCAGGATAATTAATGGTTTCTCCGGCCGCCATTATTTTTTTCATTAGCTTCGTGTTCCAGTAGTTCT  
TGACGTCGTTATCGGTTCTTCCATGGAGATGAGAAGCAATAACAGACCATCTGCTTCCAATGGTCTTGTAAGAGAGAGAAAATGATCTTGTCTCTTCTCAGTGAAGCCACCATGCTTGAT  
ATCAGGACGGAGGTAGTTGAGCCAGCGCAGTCGGCAGCTTTTGCCGCATCGTTTAAGGCCTGTAATCGAATCCGAAAGCCGTTATGTGGGGGAAAAAAAAACGACAGAGGAAAATCATCA  
TAACTTTGTAAAAAGAAGGGACAAAGAAAGGCGTACTATCGGTTTGACCTGCTTTCTGAGGCAAGGAGATCCAGTTGCCGCCGGTGCCATGGCGCTCGACGTAGCTGCGAAGAGCGG  
CATCTTCTTCGGGAGACCATGGGCCGCGCTTACGTTAGCTTTGTGCGAGCAAGGAGCTCGCCCCATAATAGGAACTGACGAAAACAGACAAGAAGAGCGGCGGCGAAGGAGAGAGA  
GAGGAATTGATGGCGAGCGATCCGGATGAAACCAAGATAAAGTCTGAAATGAGTGAGAGATAGTAGAAGTGTCCGAGATAGGGCGACGGAAAAATGTTGTTTCGTCTGCTTTGGTGGCC  
CTGCAATATAAAGAGCGTAGGTTGCAGCCTCTCTCTCTCTTTTCAGGCTTTTGGTTCGAAACGGCTTGACCCGCTACGACAAAAGAGGAGTTTTTAGTGTGTGCGGAAAAGTTGTGGGGCTG  
GGGACCAATGCAATAATTAATACGAAATTATATATTTAGATATATATTCAGTTTAAATATATCTGAAATT

>comp146858\_c0\_seq1

TTATATCTCCATCTTTCCCTTAATTGCCACCTTCCCTCACTTCCTTTCTCACTCTCTCTCTCTAAAATGACCACCTTCAATGATCCCAACCAAGTAATTCACCTCAACATCATGAACCCCTCAT  
CCTCCATTAATCTCTCTCTCTCTCTTACCTCCACGCCACAGTTCACCTTCCCTCCCTTACCCCTCTCCCCCACCACCTCCAACACCACCAAGCTCTATAGAGGGCTCCGGCAG  
CGCCATTGGGGCAAATGGGTGGCCGAAATTCGCTCCCCCGCAACCCGACCCGTATATGGCTCGGCACCTTCGACACCCGCCGAGGACGCCGCCATGGCCTATGATGCTGCCGCTTCAAG  
CTTCGAGGCGAATTTGCCAACCTCAACTTCCCCAACCTCAAACACCACATAGCTCGATCGGCTGCCGCCATCTCCTTGCTTGAAGCCAAGCTCAAGTCTTTTAAGGACAATGGCGGCGGC  
CACGATGCGAGGAAGAGGAAGAGGATGGAGGAGGAGGAGAGAAGA

>comp147826\_c0\_seq1

GACTTTTATGAGGAAGAAAGCAAACCAAAAGAGGGATTCCTCTTCTGATAAACTTACAGAGGAATAAAGATCAAAGCAAGGCAAATTAGTATAGAACATAAAAGCACACAACAAACA  
CAAATAAAGCAGACATCACACGGTAAAGTGGAATGTGAAATTTGAGGAAAGCAAAGGAAAGAAATGGAGAGCGTGCGGAGAAAGAAACCAACGCACTACGGATTCTCCGAAACTA  
CATGACCACAACCTCATTATTAGATATAAGAAGGAGAGAAAACAAGAAGCACACAGAACCCATGTTTCCGAAGAGAACGGTGCATACAAAGAGAAAAGAAATCTTTGACTTGAAA  
AGAAAAAGCAAAATATATAGTTACCGCAAAGGACCCAGCTTCTCTTCAACGGAGCAGCAACCCGTAGTCCTTTACTACCGAAGAGAAGCGCTGAAGAAGCCGCACAGACTTCCAGTTT  
CTTGGATATCTCTGCCTTTCCTCTTCCCCGAGAAATATCCGAAACCAGAGAGTAAGAGAGAGCGCGAACAGTGAACATAAATGGAGTCAAGCAGAGAAAACCAATGGCCTA

>comp148295\_c0\_seq2

TTAATGAGTTTTTCCCTCTCTTCTTCTTTTCCCTTAAATTTACATATATTGACATTGATATCATCAAACCTCTCCTCTTACCATTTCATGACCACTTAAGAAAAAAATGCAAAATTC

AATTTTTTCTTCAACAAGGTGATCCAAGTGTGCAAACAAATGGGCAGCCAATCTTCTCAAGGAATGTGCAAAGGCAATCTCTGATAAGGATTCTGCAAAGATTCAGCATATCTTATGGA  
TGCTTAATGAGCTTGCTTCCCCTTATGGAGATTGTGAGCAAAAGATAGCTTCTTACTTCTTCAAGCTCTCTTCTGCAAGGTGACAGAGTCCGGCGAGCAATCTTACAGAACTCTTGTTC  
TGCAGCTGAGAAGAGCCATTCTTTCGAGTCGGCGAGGAAGGTGATTCTTAAGTTTCAGGAGGTAAGTCCATGGACAACCTTTGGTCATGTAGCTGCCAACAGTGCAATCCTGGAGGCTTT  
AGAAGGTGAGCCAAAGCTTACATAATTGATATCAGTAACACTTACTGCACCCAATGGCCTACTTTACTTGAATCATTGGCGACCCGTAGCGATGAGACGCCGCACTTGAAGCTTTCTGTT  
GTAGTCATCGGCGGCGGCCGGGAGGATCTGTGATGAAGGAGATAGGCCAAAGGATGGAGAAATTTGCGAGGTTGATGGGAGTACCATTTGAATTCATGTCATAAACAGGAATCCAG  
TTTATCTGAGCTGAGGGAGAAGGAATTTGGAGTAAAGGAAGATGAAGCTGTTGCTGTGAATTGCATAGGAGCTTTTCGAAGAGTGGGGGTAGAAAGGCGGGAAGAGTTTGTTCGAATGA  
TCAGTTCTCTTCGGCCGAGAGTTGTTACTGTTGTGGAGGAAGAAGTAGATTTCAGTAGCAATAGAGATGATTTCTTCAAGTGCTTTGAAGAGTGCTTGAGATTTTACAGTATGTTTTTGA  
GATGTTGGAAGAGAGCTTTGTGCCTACTAGCAATGAGAGACTTATGTTGGAAGGGAGTGTTCAAGGAGTATACTTGGTCTTTTGGCTTGTGGAGAAGATGCTGAGTGTGCTGAGAGAA  
GAGAGAAGGGGACTCAATGGTGTAAGAGATTATCAGAAGCTTTTCGTGCGGCGAGTTTCAGCGAAGATGCTATTGATGATGTGAAGGCTTTACTGAAGAGATATCAGCTAGGTTGGTCTC  
TTCTACCAGCATCTGGAGATTCATCAGGGCTGTTTTTAACATGGAAGGAGGAACCCAGTTGTTTGGGCTTCAGTATGGAAACCAGTCTGAGCAAAAGGAAATGAAAAAAGAGTTGATAA  
AGTTTAAATCAATCAATGTGTGCAGATTATAATCAATTTATAAAGTTTTTGGAGATTTGATTTCAATTCGCTTCTTCAGTCCAAACAAAGCCTTAATGTTTGTTCCTTTGTGTTCTTATTTTTCT  
TCTTTGTTCAAGTCTCTTTGGAGAAAACCTCCTTAGTGCTATGAATTATAAACTTTTGAGTAAATATTTTAAAGGA

>comp148808\_c0\_seq1

GCTTTCATGAAATTGCCTTCTAAAATGGCTAATACTTTAAAATTTAAATCCCTATAATTAACGATCTTTGCTAAAACTATAGATAATTAGTAGTGGCAGTAGACTAGTAGTCCTTTTCCCCTC  
CCTCGCCTCTCCCCTCGACAACCTCAGCCGTCTGCTCCTCGCACCTTCCCTTCCACAGCCATAACCACTCTTCATTCATCCTCCATATAAATTCCCTTTCTCTGCCGATCTTCCCTCTGAAGGG  
AGACGAGAGAGAGCAAGAGCGAGCGGGGAAGAAGAGAAGACTGGGGAAAGACATGGAAGTGGTGATGCCGGTTCAAGAGTTCCACTTCGAAAGCGCGACTACGCCGTACATGAGC  
GCGCCGTCGAGCCAAAACACTTCGGCGTAGATCCCATGGAATTTACTACCCCTACGCCGGCGCCCAACTAGCCCCACCGCCCGGAAGTTGAAGACGAATTTGCCTTCGACTTCAGC  
GGCCATCTCGAGAAGAACGCGCAGCCGCCGGCGTTAACATCAGCCGACGAATTTTCGACCAAGGCAAAATCCGACCCCTCAGACCCCTCCCCGTCTATGCTCCCTCCACATGACCCC  
TTCGCCGAACCGTAAACAGAGGAAGAAATAGTACTCCCTACTCTGCCTTTTCGCCCTCCATTTCCCTTTCCCAAAGCCCAAAAAAATCGAGATCTTTATCTCCTCTTAGAGCTGGAAAAG  
GAAGTACGGATCACTTCCAACTCCAGTCTCCTCTCACCTCCTCCAATAGCAACCGTCTCATGCTCTTGCAAGGGCGGCGGAAGCGATGGAGGTTGGAAGTGGCGTATCAAGGACTTTC  
TACTCTTCCGAGCGGTCGGAGGGCCGCGCCACAGGTACAGCAGCAAGGATTTTCTTCGAAAGTTCACAGAGCTACCTTCTCATCATCTTCTCCGCCAAAGCTTAAAGAAAGCAGGC  
AGCGGAGATGTGTCCAGAAGCTCGAGTTTCCGGTCTGTGGATAGCAGTGGGTCTGTGTGCGGCGAGGTAGCACGAGGCGTGGGTGTGCGCCGACGCGAGGCATTATACGGCGAACA  
AAGCGGCGGCGGATGAGATGAAGAAGAAGACGGCGCTGCCATATCGGCAGAGCTTCTTTAGCTGCCTTCGCTTCTCTCCGGCTCTTTCACAGTCTTACCAGCAGGGGTTGATGATCACCAT  
TTCTCCAACCTTGGACGACCTGATCATGAAAAAATCAATCAAGATGATCTGAGAGAAAAAAGTTAAAACCAAGACGAGGAAATTTTGGCGTTAATTTGTATTTGGATCGA  
TGCAAATTTAAAGAGGCACCTGATCATAGTCTTATTTGTTCAATTTGACTTCTTTGAGAAGATGAGAATTTGCAAGTTATTGTTTGTACTCTGTTGTCTGTGTTTTGAAATGGTAAGAC  
ACGGCGGAGCAGAATGTTCTGTTTTCTGTTTTCTGTTTCTGTTTCTGCTTGCAAATTAATAAAGTAAAGGATGAAAGGTTCAAGAAAAAAGGATTGAGGGTATTGT

>comp148876\_c0\_seq2

GATTTAAGGTTGCACTTAATGAAGACAGAAATGAAACACAATAGTGAACGTGGGAATGTTGAAATGTTGGATGAAGATCCTAACTTGCACACAACAATAAGAGAAAGAATCAAGGAGA  
AGCGATAAGACATGTTATCGCAACTGATATGTGGAATGCCCGGATAAATTGTCAAAGAAATGATCGTGTGAGGAAGATACTCTCCAATGCAACAAATATCAACATCACCATATGTTGTA  
GTCTATTATCTGTAGTTGTTAAGCGGTGTCCAAAAAATAAATTCATGTTGTCTGACTCTTTATGCTTTTAGTTGTTTTCGTTGAATGATGTTATGTTTGGTTAATTTGGCATATTACT  
CATTTAAT

>comp149025\_c0\_seq1

CAAAGCATCACCAGCAACAGCCATGAGCTCCTTTGACAGAGAAACTCCAACCTTCCCCATAGGATCCTCTTCTTGAGTGACACAGGTGAAACATTTGTCTGTCGGCACCCCTTATGTGTACG  
AACTGTGTGGACTAACTGATACTTGGAGCAACGGTGATCCGATCTTCTGTTAGACAGGAGAATCGCGGCGCCACCCATTGAAACAAGCAATTTGAAACGAGCATGGAACGGCTATTTCC  
AAAGTACCAATTGAGAGTAATGTTCTCCATGCTGATAACCAAGCATAGGTGTTGGGATGCACTTGAAGAAGATCTTTTGAAGATCTATAGAGATGAGGCCAGCACTGCATCCCATACCA  
CCAAGATTATAGCTGATGATATTTCTCTAAGCTTGTAGTGGTTAAACAACCATGGAAGAGAGGGAAAGGGTGGGATTAAACAAGCTGCAATTCACAATCAATATACCTATATCTTTAGGCTT  
CACATGAGTCTTAGCAAAGAGCTCATCAATGGCCCCAAACATGACCATCTTAGCTTCCTTCTCGCCTCCTCCATCGAAGGATTGGGTGGAACCTCTGATGACTGCCTCAGGGAGGTAGGT  
GGATTCACCGAGGCCAGATCTCTCAATGATTTTTCGCTGGAATTTGATGTTTTCTTGAGAAAATAAGCCGAGAGCACGAGTTCATCCATGAAGGTCTCTCTAGGGCATTTCGGGCTTCC  
TCAGGTTTGTAGCAGGAGAAGTTTACCAGATAGACAGGGCGAGGTTGGCTCAGGAAGTAGGCAGTGGAGAGGGAGACAAGAAGAGTGGAGCATAGTATGGTGGAGATAAGATTAAGC  
AAAGGTGATCCCAAAGATCATGGAGGTCTTGGAGGGAGAAGGTGGACATATGGGCAAAGGTGAGACCAAGTAAGGGCAGAAGGAAAATGTACATTCCATGGGTATGAGGTAGTGGTA  
GCCGAGTTTGACGTATTTGAGCTTCACAGATTTTTTGAAGTCAGGAAGATTTCTTGATGGGTATGTCAGTAATGGAGTCTTTCCTTTGGTTTCAGCCATGAGACCTCTTCTTCTTAGGTT  
TGATCTGGAGCAAATATCAGCGTTACGCCATTTCGAATAATCCGAATTTTGAATAACTAATTCGAGATTTTAGAACCAGGAAAACGTTCTGTTTTTTTTTCTTCTCAATGATTCCAAAAGCAA  
AAAGAGAAATTTTTGAGATGAAAACCTTTGGAGGAAATGCAGTATATTGTTTTGATTATCTCTATTGATTAGATTATAAGGAAGAAACGTATAAAGATCATTCTTTTCGGATTAAAGAAAAT  
ATCAGAACACAAAACGAGTAAAAAATCTAAACGGATAAAAAAGAACAAGCATTTAGTTTTATATCTGATTCGACGATTCATTACACAGATAATGGCCTCGAATCCGATAGCGGATCTATTG  
AGAAAACCTCCAAAAAAGCTTTTTGATTTGCAGGGGAAGAAAAGAGCGCAGACGGCTAAAGACAGATGAAGAAGACAGCTCTATTGATTTCTGCAACAGCCCTTCTTCGTTTGTGCT  
TCTGGACTTTCTGTTCTTTCAGCACCGTATTTATAGAGCAAAAACGCTAAAGAATTCAAATTA

>comp149137\_c0\_seq2

GTGCTCAAATCCTCTAAAACCTTCTCAAATCATATCACACTACACAGTTGCTCCATGTCCTGCAGTTCGGCATCGTTTCTAAACGCGGACAGTAGCCCATCCTGCACCTCGACTCTTCT  
CCCCTAACGTCGTTAAAATTAGAGCAAAGTGGAGCCCTTCGATTCTTCTCTCGCATGAGATTTGCCCTGCAAGCCGTAGTCGATACCTTGCTCTGTCCCGACCCCTCTACAGCCAG  
CAAGCTCCAATATTCCTCTTGCAGGCCAACGACTAGACTTGACGCCTTCTCTTAGCCACAAGACTGAGCTTCCCAGCTCGTGCGAACCCCTTCGATAAGCTCCACTCAACCGGCCTCT  
TACCTGTTTGAACACCTTTAGCTAGATCCCGTTCCATCTCTAAATCCCTGTCTGGTTCTATTGGTCCCAGCTCCACCTGCTGCAAGCCTCCCTATTCTCTTAAGCCATCAGCAACTTCG  
TCGGCTGAGCCTTTCTACTCGTGAACCACAGACTGAACTACCTCAATCCCACGCCAGCCCTTCGATTTCCAGTCTCCACACCACTACAGCTTGCAAGAAACCAACCAATCAAGCCGTC  
GATTCGAATCCAGCATCCAACCTGCATAGTAACCCAGCCCTTCGATACCATTACAAATCTCCACCACCTCCAGTTTATTCTCTCCACCACCACCGGTTTATAAATACAAATCTCTCTCC  
CCCTGTTCACTCTCCACCATCGCCAGTTTATCATTACAAATCACCACCACCGCCTGTTGATCACTCTCCACCACCACCTATTTATCATTATAAATCACCACCACCACCTGTGTACCATTAT  
AAGTCTCTCTCCACCTATTTACCATCACAACCTCCTCCACAACCAATTTATCATTACAAATCTCCCCACCACCTTTTACCATGCCCTACCCCGCACATTTACCATTATAAATCTCCA  
CCACCA

>comp149327\_c1\_seq1

TGACAAATAATTTATTCTACCATTTTTTTTATATATCATGTGACATGAAAATAAAAATAATACATGTCCTGTCATGCATAAGACAAGTTGGCCATGCCTTATCTTTTGAATATATTTAACAAA  
ATAAGAAAAATAAGTGCATTTCTGTTCAACAAAAAAGACAAATTTGATAATTGAAGGATTAAAATAATATCATTACTTTAACTACTCATTAAATTAGAGGAAAATGACATTTATTCACCACA  
AATCTGTCACTCAGATCTTCTACTTATTCAAAACATCAAGAAAAAATCATCCTACTTTGCGCCATTAGTCTCTCTTCTTTTATCTGAAAGCAACTTCGCAAATCGGATAAGAGCTTC  
CTCATTTGTTCTTCGCCTTCAACAGGCTCATATCTCCAGTCTCAATATTGACCCTTGAACCTGGCTTCTTCAACAGATTATTTCTATCTTAACCAACCCCTCCAGGTTCTCTTAGTCGAT  
ATATCCACAGATGCTGAGTTTCCACTCAGTGTATCGTCTGAAGGCGAAGATAATTTGCTCAGAATGCAAAGTTTGGAAAGAGTATGGATGTTAGTATGTCAGCCATATCTGCACTTGCTTG

AGAGTACATATCAATAATGGGTGTATGGCCATTGAGATATAGCCATGGAAGAACACCCCACCTTTGCTGCACTTTTTGCGTCGTA CTCTCTCCAGTTTGGCTGCTCCAGTACCAAGAGATA  
GCACAAGAACTTGCTATATTCAGCTGGTTTTACTGGGAAATCTTCTTGCAAGTGGCTTGAATATGCTCTTACTCACCATATTTATTGCAAGCAAAGTAGGATTATTTGCTGCAAGTCCTCCAT  
CAGCAAGATTGAAGCTTCGAGTTTTGCCTTTTGGAGTCTTTAGTTTTCAAAGTAGTGAGCAGGTAAGTAAGTTGGTGCAGCTGAAGTGCCAATGCAGATATCTGATAAATTAGCATCCTTTAA  
AGGTGTGGCTTCTACCTCGAATGAGGAGAAGATAGTGGGTTGAAGGAGCTTGATATCGAAAGTTGGGATGACAACATTGGTTAGAGTTTGGATGAAGCTTTGTATCTCCAAGAATGCCTTT  
AATTAGAGAATGGAGGTATTTCCCATCGTATTTAGGCCAGCAAATTCACATACTAAATTACTTTGTGCGTGCCAAATAATCCTGCCATTTTCTGAGGAAAGATCTTTGGTGAGTTCTTTAGATA  
GAAGTCGTTGATATCTTTGGCTGAATAGAGGGGACGATTAGATTTGTTTGGAGCAGTTAGCATTGTGGTGACCAAGCCTCCAGTGCTTGTCTGCAATCACATCAAAGTAGTCTGCAATC  
CTTACATTCTCTCCATCAAGCTCCTGCAGCTTGGATTCAAGAAAAGCAAGAATGGTTCTTGGAAATAATCCTCTCACACCTCCTCCATCTATGCTTAGAACAGTAATCTGTGTGAGACCAG  
CAAAGCTAGGAGAAGCTTTGGGTGAGGGCGAAGAGGAGCTATCTTCTTTGTTGCCATTGATGCAAAGCTTTAATTAAGATAATTAGTAGCTATAAATGATTTCTGATATGCTGTAATTA  
AGTCATGAATCCCAATATTTATAGTAGAGCTTTCTTGTGAAGAGAATAATGTGAGGGGTTGGATGACGTTGACCTAAATTATATTATCCGTAATTATGCC

>comp149351\_c0\_seq3

AACATCCAAATTGCTATCGGCACCAAAATATTTCAAATGAAAAGAGGACACAATCACAAATTTTGAGCAAGTCTGATTTGATTAGTTCTTTAACATTCTCTTAACCAAACCTTCAAGTGA  
ACATGGAACAATAACAAAAAACTACAGCTCCTCCATCGATCACACAAAACCATAGGAACAAATTTCCAATTCACAAAACTACTAAAACTTCTTTTTTCTACTGCAGAATTAGTAATC  
TTAAGAGAAAGTTAGGCATAAGAACAATGATCAAACTTGGATCAGTAGTGGTGATCAATCCAGAGTTGCTGAAGTAGCAGTTCCAGTAGTTCTACCCACGGCTTGGTAGTAGAGGTTT  
ATTGCTATGGAAGCATGGGATATGAGGGTGTGGGAAAGCACAGTCCCTATGTAATGCTGCAGTCCACCTGAGAACAGGAATAGTTGAGGTTTCGCGCTCAAAGTAGCATCGTCAGAA  
GAAGGCTTCGCCACACACCAAGTTTTCTCCGGCTGTTCCGGTGCATTGAACTCCACCTGAGTAGAGTAAGAGCAGCATAAGCGGAAAATAATGGAAGCTTCAACTTTTCTTGCCATAGCT  
CTATCTCAACGGTTATTTTTCTTCTTCTACCCGCCGCTGATGGTGCAAACAATAGAAGGCTCTGTGTTGAATTTCTCCTCTTGATGAGGAAAAGGAAGAGGATAATATAAGCACGAT  
GAGGCAGCGACTGAC

>comp149365\_c0\_seq1

CGGGGAGAAATCAACACAGAGCCTTCTATTGTTTGCACCATCAGCGGCGGGTAGAAGGAAGGAAAAATAACCGTTGAGATAGAGCTATGGCAAGAAAAGTTGAAGCTTCCATTATTT  
TTCCGCTTATGCTGCTTACTCTACTCAGGTGGAGTTCAATGCACCGAACAGCCGGAGAAACTTGGTGTGTGGCGAAGCCTTCTTCTGACGATGCTACTTTGAGCGGAACCTCAACT  
ATTCCTGCTCTCAGGTGGATTGCAGTATTTTACAGAGGGACTGGGCTTTCCAGACACCCTCATATATATCCCATGCTTCTGTAGCAATGAACCTATACTAGCAAGCCATGGGTAGGAACTA  
TTGAACTGCTACTTCAATAACTCTGGATTGATCTACAAATTCACTCTAAATTCACAAGTATTACAAGGACACAAAATGACGTTACTATTCTGTAAAGAAGATACTTTATATGCATTATTTATT  
TTGCTTAAATATACTTATAATAAGTTTTAAATTTGTATATGGAAAATATTTAATTTATATAATTTATTTTGTATTTGCCTTATGTTTATAAAAATTTTTTTT

>comp149463\_c0\_seq1

TGCATTCATGTTTGAACATATTGGTGCCCGTTAAATTTGGAGCCTAATAAAAAGGGCATGAGAGAGCGGTGAAGAGAAGGGAGAGGAAAGAGCGAAACGACTGAAGCGGCAGAAGAG  
AACAGAACTGTACGAGCGCTGGTAGTGGGATGGCTTACCACCATCGCTGCAGAGCCGCGGCTAATGGGAATTTTACAAACGCCTAGTGGGCATTTGAAGAATACAAGTTCCCGCC  
GATTGAGGTGGAAGCCATATCTATATGAGATTTTCATTCCTTCGCGGCGGTGGAATCTCGGGAGGAGGCCTTATCCCTACTTTTTCAGTGGGCGATTACGGCGATCGGAGAGAGGGGTGGT  
GGCATGGGGTTGGCGGCGGACACCAGAGTCCGTTGCCAGAGAGGGAGAGGAAAGAAGGATGTGGTTGTGGTGATCATGGGCGCGACAGGGACGGGGAATCGAAGTTGTCCATTGAC  
GTTGCAGAGCGGTTCTCGGGGAGGTGGTGAACGCTGACAAAATCCAGGTCTACCGCGGCCTCGATGTTACCACAAATAAGATGCCGATTCCTGATCGGCGCGGCGTGCCGCACCATTT  
GCTTGGTGTCTGGATCCTGCTGCCGCGAGCTTCCGGCGGAAGGGTTTCGATCTCTGGCTTCCGATGCGGTGGAGGCCATTACCACGAGGGGGAAGATTCCAGTGATCGCTGGGGGCT  
CCAACTCATAACATCCATGCGATGATGGTGAATGGGTATGATCCCAGGATCGACCCCTTCTCCGGACCGCGGCGGGGAGGCATCGGCTCCGCTACCGAAGCTGCTTGCTATGGGTGGACG

TAGAAGCAGCGGTACTTGAGAAGCATCTGGACAGGCGGGTGGACGAGATGGTAGGGTTGGGGATGGTGGAGGAGCTGGAGAAATACTTCGCCAGGGGAGAAGGAGATCGGCATCCCG  
GGTTAGGGAAGGCAATAGGAGTGCCGGAGTTCACTGAATACTTCAGGCGGAGGACGGCATCAGCATACTGAGGATGCAATCATGGCGATAAAGGAGAACACGCGACGGCTAGCAGAGGA  
GCAGGTGAGGAAAATAAAGCGGCTGGGTGAGATGGGTGGCCGCTGCAGCGAGTTGACGCAACGGCCACGGTGGCCGCTCGGCTGGCAGGCGACGGTAGTGCCGCGCAAGCGGCAGC  
CTGGGAGCGGGACGTCCTCTGTCCCAGCCTCCGCGCTGTTGAGAGATTCTCGAAGATAGACTCGACGCATCAGCAGCAACTCAAGTCATATAGCAATCAATCCGCGACTCGAACCCCTC  
GAGCTCAATCGATCGATACTCTTCGACACCCACGCGCGCTATTCTTCCATTTGAGATAAAACAACAATGAAGCGATGCAAAGTTGCAACGAAGCCGAAGAAAAAGTAAAAAAAT  
ACAAAGAATGAAAAAGGTGGCCGTGTATCATTATCATTATAATTTGTTTTGTCGTTTATCTGTTTTATGGAAGCTCCAATGATCAGAGAAGAGATGAGAAATGTAGTGGAGAGAGAAGGA  
TAATATAAATAAAAAAGAGAACGGATAAAAGAGTAATTTGAAGGCCGGAGCAGTAGCAGCATTGGAGGCGGCCAATTTGAAGCGCCTGGACGCCTCTCACAGTAGCCGACCGCCGGT  
GTTTCTCTTCGTAGTGAACGGTAACACGTCGAAAGAAGAAGACAATGTAGAGAGTTGGATTAGTTTCGTTTCATGACTCCTGGACGGGCGGGATGGGAATATGAGCCCTTTCATGGGTGTTT  
TAGTCTTTTCAATATTTATATCTTTTTTTTTTTTTCTTATAGACCCACTTGTATAGAGCTGCTTTATATACTCCATATTCTGCGTAGGCCCTCCGTTTTTTTTTCTGCATTATAATTCCT  
CTTAATATTTTCTTCTAATTTTCCAATATTCTTAAACAC

>comp149637\_c0\_seq2

TCCCTAAGTTCATATAAACCCTCTCTTCCACTTATAATCCCTCCATTTACAGCTCTTCTTACACCCATTGTGATTCAACTACAACTTTGCTTAGAAAGAGTTGGCAAACAAGTACTCATGGTA  
TTTGCTCAGTTCAAAAGCCTCTATCTTTGGCTTTTGTGTTTTCTTTAGCTCTAAGAGACTCCATTGGTTCAGCACAGCATGAGTTTTATGATGAGGCTAAGTACAGAAGTGGAAAGAAGG  
ATGGGGGCTTTATGGAAGGAGAAGAGAAGAGCAGAATCCAGAATACAGGGAATCCTAAAATTCACAAAACCAGGAACCTAAGGCTAGCAAGCAATACTAAAAGGATATTAATTTTCG  
AATGAAAACCTGAAGCCAGTGGTCTAAGCCTGTAAACTACTATAGTTTTCTTACAATGGTAGGAGCATTGGATCCAAAGAATCACATTCAGTTTCTATAGAGCTACAGATCAATTTTCAG  
AAAACCTAAGACTGAGAATTATATAGATGCTGTTGCTGAGGTTTACAACATGATGGCTAAGGACTACCATAAAAAGCCAAAAGCAAACCTCCCATCAACAACCAACAACCATTTGATGAG  
GAGCCTTAGCTAGTTTTTTGGATGCTCAAACCTCAGTAGATGTTCTAAATCTCTAACAAAATAACCTATAATTATTGCCTTTGTTAATTTGGAAAGATAAACGGGGCTATATATATATTAATAATA  
TTTAGTCTAGTATTCTAGGTATGCTATATTTGGTGTAATAACAGTTCAATAGTTCATCAAAACCATCCTAGTTTTATATCACTATAATATGTAGTCCTTTGTACACTGGAGAACCAGTTCA  
CAGGACAATTTTGATGTAGATGTAACGTCAGGTTTTTCTAATAATTTGCTTTGT

>comp150067\_c0\_seq2

TATATACATATGATACACTTCTTTAATTTACTGATTATGCAAGTTGTTTCATGAAAATTTTCATCATTTCTGTTTGTGACTTCAAAGTGTTTAACTTTTAAAAAGATACACAAATAAAGCTAA  
AAAAAAACCATAGAATTAAGAGAAAACCCAAAAAAAATACAAATTCGTACCCTTCAACCTATGATTCTTAGTTACAATGCACTTTTAGCTCACCTTGAATTGCGTATTAAGTTGATATTA  
ATGTGATCATTTTTGCAATTTATCCAATGCTTAACTCTAGTTCAGTTTCTCAAGACCATCTCCATTAGTAAATCATTCCAATAATCTATAGGCCCTGGCAGGCACCAATGAAGGCAATCATT  
CTGCACCACAACATTCCTCCCTTTCCCAAAAAGGATGAAATTTCTAAAAGGCCAGGATGCCCATCAGGTCTTTGTGCTGAAAGATTATACATATCTAATAGCTTGAGATTTGTAGCATTTT  
TCATCATAGCATTATTAACCTCTCTATCTCAATACCTCTCATCATTTTATCAACATCTTTTTCATAAATCAAGCCTCCCTTAAATGGCTCTGTTTTATTACAACCTCCGCCATTAGACCATTCC  
TTGATTCAAATGGCTTGGTGACCATGTCCTATAGATTACAAGAGGCTTATGATTTGCTGATAAGAAGAACTTAAACCTATTTTGGAACTTTACGGTAGGAATAGGTCAAAGGAAGCT  
CTACTAAGTTCTTCTTTGGGCAGTAATGGCAACCTGTGATAGTGTGTTCTCCAAATAAATGTTGTTTTGAGGAACCACTGGCCTCCAGAAATAACAATGTAGTTGAACTGTTGTATTCA  
TTAGACCACTTGGTATCAATAGTATCAAGATGAAGTTGGATGTCTGATTCGACACACCATCACTGTCCTCAAAGATTCGGCTTTCATGAGCATAGGAGACCATATGAGTGAAATGGTGA  
AGTTGTAGTTGGTGAAGATCCATTTCTAGACTTAAACTGTTTCATCATGGTAGACTTCAAGAGGCACCTCTTCTTCTGAAGAAGACAGATCAATGACAGAACCTGATTCCGTAGTATAGA  
ATCACCAATAAAGGCCCATGATTTACTTCTCATGGCTTTCAGAAATCTCGGTGCACCTAAAGAAGAAAGATGGCATCCTTCTGGCTTCCACTTCCAGTAGAGGAAAGCAGTATCAGGCCT  
GCCATTTTGTATACAGTTCTGAGGAGGTTCAATGAAAGGGCAGGTTCGCGTTGTTGTAAGCCGGTCTACTGTGTTCTTTATCCATTTACCAGTGAAAATATCGCATTTCTCTGCGCTATCAG

ATATTCAACAGCAAAGAGAAGCAACATTGGTAGAACAAGAGGAAAATCGTTAAGTTGATGTATACTGGTTGGTTTCAGGTGACTTACCATTGCCAGATGAAGAATGATGAGATTTGAATA  
AGTTGGAAGATGGTTGAGAAAAGGAGAAGAAAATGGTGATGGAATTAGAGAAGAAGAAGTAGTAGAAGAAAGTGAAAAGAAAAGAAGAGAGTAACAGCTTCAGAAAAATGCTGCTG  
TATTTCTGGTTTGGAGCCAGCCAAGCATTAGATCTACGCCAAGCATCTGAATCGAACTGTAAGTAAAAGACTGAGATGGATAAGGAGAAAAGAGATTAGTCAAGGAAGACAGTGTTC  
TTGTTTAAGAATTTTGCTTTTTTTATGGGGAGCAATGT

>comp150104\_c0\_seq1

CATTTTCAATCCTTCCAAGTTCACCTCAAGATTAGCTTAGAATTAACCTTGCTTTTCAGGGTTGCATTCTTACAACCTAGCAAGTGGCTAAAAATCTCAAGCTCAAACCTACCACGTGAACGCG  
CTTCTACATATTGCCTCTCAACTAGATTAATTCATAGCTTTCAAATCATCAATCATCTAATTGAGATTTCAATACAAGGCAACTGAAACCAACAAAAGCTAACTAAGAAAACAATAACACA  
ACCTAACATTTCTTACAACAAGAAAAGAAAATTAACCTACAATGCTAATTAATAATTATGTCCATAGCGACTCTCTCTTGAGTGGGTCTTGACCAACATTACTTGTAGATGCAAAGTTCATT  
AGCTGGGGAATAGGATTAAGAAGAGAGTTATCATTATGAGGAGATATCATATTTTGTGGTGGTGGTTTTTCATGAGTCAAGGGTTGATCTTGTTCATCTGTATGCAGAGAATTTAGCTTG  
GGCAACAGCTAACTGCATTTGGAGCTGAGACACTTGATTCTGAAGGTAAGAGATGGCTCCACGCAACCATAGACCCGGATCTCGCATTCTTGCAATTAGCTTCATAGACAAGGCTGCTCAC  
TGCATCAGCTCTTTGATGAATTGGAAGCTCCTGCAACATCTTACTAACAATTACTAGCTCCAAAAACTTTGTGTACAATAGCAAACCTTCTGAGGATCATCAGATGGAAGAATGGGGAGAA  
GATACAGTCCTTAGTACATCGTCTTCTTAGTAGTTTGCAAGAAGCACATGGAGAATTACCTCCATTGTCTTCTGGATCTTACACAAAAGAAAGGAATTTTCTTGTAAAGTTGAAGGATGG  
TGAGAGTTAGGCGGATGTA

>comp150374\_c0\_seq1

CTGCAATATTCTTTATTGGCATCAATGCATCATCGGCTTGATCTTCCAAAGTGACCACGCGCAGCTGCGGCAAACAGCGCGGAGGCGGAGGCGGAGGCGGAGTTGGGGCGGCGAGTGGA  
GAAATTGGTGCGGGTATTGGTTCCGCGGAGGAGGCAGGCGGCTTCGTGCTAGGCCCGGGCGGCTTCCCTCGGCAGTTTCGAAGGTGCCGAGCCACATGCGGATCTTCTGAGTGGTGTCTT  
TGATCTCGGAAACCCATCTCCCCGACGGCCGTTGACGGACGCCAACGAACCTTGTGCGCCGCTGCCGCCGCGCAGCGGCTTTAGATTTGGATTTGAATTTGGTTGATTGGATGGGAGATA  
AGAGAGATTGTTGTTTTTGGAGTTGGAGTTCCATTGTGGGGGGCTTGTGGTGGAGAAGAAAAGATATGAGCT

>comp150689\_c0\_seq2

GAATGGGAAACACAATAAACAGCCCCCACGTTCTCCTCATCTCTGTCGTCCTTTCTTTATTCTCCCCATCTTGACAAAGCGAGACCTCTACCTCCATAAATACTCTCTTATTACCACTAA  
ACCTCCTAAGTTTTCATTGCTTACTTTCTACGTCATCTAAATCTGCTTCTAAGTTGAATGTGATTATGGCAAATTGGAAGCCAGCATGGCTACAGGCTCTGGACACGCAGAAAGTTCTTCATTG  
GGTGCTCAGCCCACGAGAACGCGAGGAAGAACGAGAAGAACATCTGCTGCTTGGACTGCTCTACAAGCATCTGCCACACTGCGTGCCGGCACACCAGAGCCACCGGCTCGTGCAAGT  
CCGGCGCTATGTGTACCATGATGTGGTAAGACTAGAAGATCTTGAGAAGCTCATAGACTGCTCCAATGTCCAGGTCTGCTATTTCTTCTTTTCTTGATATATATATAAAGCGATTTTGGAAAT  
CCAATGGTGGGATAAGTCATTGTGTTTTCTATCTTATGTATGCGTGTTTTGTAAAGCAGTCATATAACCATTAACAGCTCCAAGGTAGTATTTATTAAGAAGAGGGCCACAGAACAGGCAGTT  
CAAGGGGTCAGGGAACATCTGCACCTCTTGTGATAGGACTCTTCAAGAGCCTTATCTCCATTGCTCTTTGGGTTGCAAGGTAGATTACATACTAAGGCACAAGAAGGATCTTCTCCTTAT  
CTCCGAAGATGCAAGTCATTGCAATTGAGCCCTGATTTCCCTCATCCCACAAGAAGCCTATGGTGGAGATGATGAAATGAATGAGACCACACATTCACCATTGTTGAAGGTGATGAGCTTA  
TGATTTTCATCAGATTCAGAGAATTTGAGCCTAACACCAAGCGCAGAGATAACTCGAAAAAAGCGTAGTGGACTCTACTTGTGTGCAAGATCAGCAAGCAGAATTTCTGATGAGGATCCA  
GCAATTACCATGAGCAGAAGGAAAGGAATCCCACAAAGGTCTCCTCTATGCTGAGTTGATCAATAAGCTTTTGTGATCTGCTTCTTTCAGTCCCTACTTTACCACTCATCAAGCGGTTCTT  
AATTCTAAGCTTTTAAATGTACAATGCCAAATAGGATTTTCTTACTTAATTTCTCGGCAAGTCATAAGCTTCACTGTTGTGGCTAGTTGTTTCTGATCTTGTGATTGTTCCACTACATATTAAG  
GTTTCGTAATAATCATGGTTATGGAATTTTTTTCATGTTATCAGATACGTTTGCATGCATGGGAGAGCACAAAAAA

>comp150837\_c0\_seq1

AATGTTTGATCTTGACAATAATGGGTAGGTTTTTTTACATTCTAATCTCAAATCCAATGGTAAATGTTACTTTTTTTTTCTGGCTGAAACTTTTGGTGGCCTTAACTTTTACGAGTTCAAGTCT  
CTTATTTCTGAGAACCTGCATATTCTTACCTGATTGTGTTATGAAAATTGATACCTTCTTTGGGTACCATTGATTTGATTTCCCTATCCCCATTTGCAAGTTTATTAGTAATTTGGAGAGAACATT  
CTAAATGGGATCTTTTTGTAATCACCAATTTGCTAGTTTTTTAATAGGTAGGTCTAGAGTCATGGTTGGGTTGAGTTCATTGTACAATTTGGAGGCCACGGGTTGGATTCATGCAAACAACCTT  
TGTAGTTTAGTTGTAAGGCTGCATATATCTACCCTTTAAAGGCCACACTTTGATTGGGAATCGCATTGCATGAGCTTATTTTATTGAACCTACTTCTATGTTGTTGATATTGTATCATAAGG  
GGGAATTGGTAGATGATTTTTGTTTTCTTCTTATATTGTTTCGATTGATGATTACCTATCTAGTTTAGTCAAATTTCTTCTAACAGGATGAGAAATCTGAAAGTTGAAAGTAATGATTCTCTTAA  
GAGTCTCAACTTGTTCAATTCCATTGTTTCTGTTGGGAAGGCTAGCCAAGATAGGATACAAAATGATTAATATTTGAAATATGATGATGGCGCAGTGTGTTGTTGAGTTTTGATTGGCCATAA  
GGCCATAACTCTTCAACTTATGAACCTCACATGAAAGGACTCGATCTTACCTGATTGTAAAGTATCTTGTAAATAATAATTTGTTACCCTACAGGAGAAGGAAATGGGTTGTTTCATGTGT  
AATCATGAAACATGTGAAGGAAAGAAGGGTTTTATATATTACTTGTAAAGTATTTTATGCTAAGCTTTATAACAGTGAGTTTCAGTAAAGAAAAATGTTTTATGCAGTTTATTAGAAGCAGCC  
ATACAGCATTCTCGACTTTTTCTTTCTGCAGTATTAATACTTATATTCACTCTTTCCCTCATGCTTAAAAGTACCTATTTCAATTTGGTGTGGTTTTCGTTACAATTTGTCTGAATTCATGTG  
CTTCCATTACTTGCATCTGTCTTATAATTTACGCCTGCAATTTTATATGCTTGTAGGCTTCATTAGGCTTCGTTTTG

>comp150989\_c0\_seq2

TGCATGAGCTGCTCATCTCCTCACATTCCATTTCTTCTCTTTCTCCTCCTAATCTCCTTCACTCTCTTAGGAAACTCTCCCACTCAACACACTTTAACAACCTTCTTCTCCTCTTTCAATG  
CTTCCATTCCAAAGCTTGAAGGGCTCTCTATTTCCAATATCTCAACCAGCTTCTCCTTCTTCTTCAATACTTCAATCGCAAAGCATCAAAGACAACAATGGCCGCCATTATTTCCA  
AGCACCAGACCAGCAGAAATTGATAAAGAATTGAAGCTCAGCCAGCTCGAGAAGGGACTTGAGAGAGCTCGAGCTGCCATTCGCAAAGCAATCCTTCATCGCAACTACACTTCAAACA  
AAGACGAGGACTTCGTCCCCAGAGGCTCTGTCTATCGAAATGCCAACGCTTTTACCAGAGCTATATAGAGATGGAGAAGAGATTCAAGGTGTGGACATACGAGGAAGGAGATCCCCCT  
ATTGTTTCATGGAGGCCCTGAAGCAGACATATACGCTATTGAAGGGCACTTTCATAAGTGAAATGGAGGACAGAAGGAACCCATTACAGGGCTCGCCATCCAAGCGAAGCTCATGTCTTCTT  
CTCCCCTTTAGTGTGGTGAATATTGTAGAGTATGTTTACAAGCCAGAAGCCAAGGATTATTGGGGTCTCTCAAGAGATTAATAGCTGATTATATTAATGTGATCTCGGATAAGTATCCTTAC  
TGGAATCGGAGTCATGGAGCTGATCATTTTATGGTTTTCTGTCTATGATTGGGCACCGCACCTATCGGTCGCGAACGCGGATCTGCACCGCAATTCATACGCGCCATCTGCAACGCCAACA  
CATCGGAAGGCTTCAAGCTCGGCAAGGACGTCACCCTGCCGGAAGTCCACCTCCCCGATGGCGGCCTCTCCTCGCCGGCGGGGAGCAAACTTCCGTGACAGCCGAAAGTTGCTCGC  
CTTCTTCGCCGGCGGAGCCACGGCTACATAAGGGAGGCCCTTCTTCGGCACTGGAAGGATAAAGACTCCGACGTGGTCTGCTATGAGTACCTCCCCAAGGGGATCAACTACGGCCAGA  
TGATGAGTAAAGCCAGGTTCTGCTTATGCCCAAGCGGATTTGAAGTGGCGAGTCCGAGAATCGTTGAGGCCATCTTCAATGGTTGTGTGCCGGTGATTATCTCCATTGACTACCCGCGCC  
GTTCCGCCGACGTGCTCGACTGGAGCAAATTCGATAGAGATACCGGTGGAGCGAATACCGGAGATTAAGATATACTGGGGAACATATCAGCAAGAAGATATGGGGTTCTGCAGAGAA  
GAGTGGTGCAGGTGCAGCGCCATTTTGTGCTGAATAGGCCGGCTAAGAGATTTGATGTGTTTCATATGGTTTTGCATTCTATATGGCTGAGGAGGGTTAATTTGAGGCTTAATTATTGAGGT  
AATTAATCAAATATTAGCGGTTGATTATGTATGTGTTTGTATTTCATAAATTTGTGGGAATGTATATGTATAAAATAGTTATTTTTTTTAAACATAATTTCAATGTAAATTATGCCTCCGTTTT

>comp151041\_c0\_seq1

TGGCGTTCAGTACTGGCCGCTAACTAATCCACGGTGGGCAGAGAAGCCGGCCGCGGGCTCCATTCCCAATAAATAACTATTCTATAACCAAATCAAATTTTTCTAATTATCTGATG  
GCATCATCTCCCCACCACCATCCTCTCCTTCCAACAACCTTAGCAAACTCGACTACTACTTTCGTCATCGGCCTCGCACTTGTGCGCCATCGTACTCCTTGTACCAACGCTATCGCCGT  
CGGTTGCTGCTCTTGGTTTCGCCAATTCCTCTCATCGCGTGACATGCTAAGCAGCGGGCAAAACGAAGCAGAAGTGTGGCGTTGGATTCCGTGTTCAAGTATCGTAAGAAGGAACATGG  
GGTTGGTGGAGGGGAAGGAGAAGCCGCGCCAGAGTGCACGGTTTGTCTATCAGCGTTTGTGATGAAGGGGAGGAGGTTAGACAGTTGCCGTCTTGTGGGCACTCTTTTCATGCAGAATGTA  
TTGATATGTGGCTCAACTCGCATAGCAGCTGTCCGGTTTGGCGGGAAGTGTTTTACCAACACCGTCACATTTCGATGGATTTGTGCGGCTCAATTTCACTCTCAGGTAAATCTCTGCCGAG  
GGCGAGCGGCGACGAAGAGGTTGGGGGATCTGTATGAGTACTTATTGAATAATAGTTTATATACAGATAGATTTGGCTCTAAGAAGTATTGATTGTGAGTTGGGTTCAACTAAAAATTAATC

TATATGAGCTATTTTCAGTGAAGCAAAGGCGTATATATTGGAGGCATGTGAAGTTTTTTTTGATGAGGTGGGGGCTTAGGAGGAGAAAGCAGTTTTTTTTTTCTTCTTCATCTATTGTTTATAT  
ACATACATTTATTGAAAGTATTGGAAGACTTTTTTTTTCCTTTTGATTTTTAAATATTAAGTCCATAAATAATTAATTTCAAGTTGAATATAGCTCAGATAAATCTGATTCGTAAAGAACTTTT  
CAATCAATTTTGTAAGTTTTATATATG

>comp151122\_c0\_seq2

CAAACGAAACCTGAATTTAAGCCCAATATATTAGTGCTTGGATATCCTTAATTCAAATCTACTAAGAATAGAACATATTCAGATTTTTAGGCTTTGTTTGGATTGAAGTAAAGCGGAGAAAA  
TGAAATGAAATCGTAATATTTTATTGGTTGATTATGAATTGCAGCCATTGATTTAAGTTTTTCATTTCCTTTCACTGCTTAATAAGTTTCCATGGCCAAATTGAAGAATAAAAACCCCTTCCA  
AATTAATCTATAATCGTCAATCTATATTATGCAAACGTAAACAAGTTCCTCAATCTTTGCAGCTGTGAAGGAATTCGCTTCATTGTAGACAAAACCTGAGGAACTGAACAATGAGAAGTAC  
ATATTA AACAGTCCATCATTGAGGGTGGGCTCATTGGCTTAAGGCTCAAGTCTTACTCCTTTGAAATGAAGCTTGATGTTGGGAACAATGGTGA AAACTTGCAGAAGACCACAGTGTTT  
TATGAAACTTTGGATGATACTCCTCTCAGTGCAGAAGAGCAAGAACAGATCAGTGC AAGCTTGTCTATGATGACAAAGGCAGTTGAAGCATATCTGATTGCAAATCCAGCAGCTTATGCCT  
AAAAACATGATAGTTGTTGTTGATCTCAAGTAGTCTTGTCTGATGGTTTATTTGTGGCTTGTGTACGGGTTATATGAGTGAGCTTCCTTCTTTTTCTTCAGAGAACA AAAAGAGTGATT  
CTCTTCTAGTATTTGTCTCTTGTGTTTTCCCTATGTTTCGATTTTCTCCACAGGTGTTTGGTTTTGAATAAAAATTTGTGTTTATTTGTGGCTTGTGTTTGGTGATAAGAATGG

>comp151614\_c0\_seq3

TGATTATAAATTACATCAGACAAACATGAAAATTATAATATTTGCTTTTACAATATCTTTATATATAAATAGCATCAATCTCAAAGCAAATCCAACAACCTTTAATCTTATTATCATATATTTAT  
GTGAGGATAACCTGACATAAAATTATTCTAAGGTGCAAATATAATTTCAATGTAGATCTCCATTGAAAGCCTACTTTTTCTTGAGCCAAAGTTTGAACAGGGATTTCCAGGGTTGCAGCAA  
TTTGGTTGAAAGTGCGATGGTGCTCGAGCCTCCCCATGTAAGCAATCATCCCAATAAGAGATATTATTAGGAGTAAATAAGA ACTCGCGGTGCGATGGTGCTCGAGCCTCCAG

>comp151954\_c0\_seq3

CCAAAAGCTGCTCGTAAATGCCAAGCACTTCCAAAGGAAAAGCACTTCCATCACCGAATTTATTGCTCGCCATATTTATATCGTCAGTGTAGCCAAGAATTGGAATAATCCAAGCTCGCTT  
TCCTTACAGTTCAACCACTGGATTTGAAGGCCCAAAAATCAACTCTGCGCTGCCATCACTGAAGAAGTGAACAGTGCTACATGATAGGTTTTCTTTGGCCCTTTTCACAGCCTCGGCTTCA  
TCATCGGTGCCGAGATAGGACATCCAACCTCTGTAAATATGGCTTGGGTACCAACTTCTGCGTTAGTAGCCGTTTTATTGCCATGAATTATCCGACGTCGGCCACCTTCGCCATAAACTC  
CGGCAACCTCTCTCCATCTTTTTCAACAATCACGTCACTCGCGACTATCGACGTCTCCCCTCCCTCCGGCGATGGCTCGCTGCAGCAGAAGAATATCTTCGATGGCACAGTCGGACGCTGA  
TTATTAATTCACCGTTAATATTA AAAAAAATCTCAATTA CTGGTGATATTGATTTACGATTGTTTCAACTTTTTAACGGCTTTTTTTTTGTACAAATTTTTATGGCTCCAGTAGCGTTGGGATCT  
AGAAAAAATATTGTGGGTTATCCCAAGACTAATCAGAATGTGCTACGTCGCCACGGTTCGATTCTCTGACGTTGCGCATTTTGATTGGTTTCCAGACGACGTTCTTCATCTGATCTCCAC  
ACAACATACTCCTGATTTAGGGCATCTCCATTTGCTCCTTTTTCTCTCCC GCGAGCATCCACCCAAAAAACA AATGAAAATATATTTTATCATTTTATATTTTATGTGAAGAGTGTAATGTCAA  
TATCGATTA AAAATAATATAAAAATAGAGATGAAAAAGAACATGCCTAGAATCTTCTTTTGTGTTAGAAAATGAAGTTAAATTAAGATGAATTA CTATTT

>comp152682\_c0\_seq4

TTGCGAAGAATAGGATGAAATCATATATATTTTTCTTTTTCTTTTTCTGTCTATAAATAGATACAGAAGCAGACAGAGCGGCACGCATCCCCAAGAAAGCGAGTTAGTTCCCGTCAATTAATT  
AAGCTATTAACAGCTTCTCCATAATTCATCTCTTCTTTATATATATTA CTACGCCAGATCGATCGACATGGCTCGTTGGATGAAACCAGAGGTGTACCCGCTGCTGGCAGCCATGACGTTTG  
TGACAAGCATGTGCGTCTTTCAGATCACCAGGAATGTTCTCATGAATCCTGATGTCAGGTAATTTATTTGATTCATGCATCATCATTTTCAATTATCACCATCATCTTCTGCATGCTTTCCCTA  
CAAATTCCTTCTTAACTTATATATGTGAGTGGCAGAAATTAAGAAAAGCAACCGAGCCTCAGCGGTTTTGGAGAATGCAGAGGAAGGCTACAAGTACAGCCAACATGGTTTTCGCAAGTT  
TCTTAGCGATCGCACACCTCAAGTCTTTCCTGCACTCAATAGTTTCTTCTCAAAGACTGACA ACTGAATGATGCTGAACCTTATACTAATTACAAACAATGTTAAGAAGGATAAAAATTTT  
CGGTCAATTTTCACTTTCTTTTTATTTGTTTCAAACCTTTTCATGTTATAGAATTTTGTACAGATAAATATCCACGATGTCAATGCTTACATGTTTGTATCTACTAAATAAATGGAATATGGTTGT



TGACTTCATGTTGGTTCTGCTACATTGAATGACTTGCAACATCAGAAAACAGAATTTAAGAACAAAATTCAAATAATTTGATAATCATTCTACTAATTGAAATTTAAACAGGGTATTGATCTA  
ATTGGTTTCCAAATAAAAATATGATTGGGGCCAAATTAATAACCGGCATTGGTGGGCACAACAATTAATATTGCAAATTAATTTATTAATTAATTTGATAGGAATGCCTTCCTTGTGTATCTAC  
CAATTGAACCATGGTAGTTTTACAAATTTATAGAAATATGATGAAAAGTAGTATAAAGTAAATTAACAGCTAGCTCGCTGATCACAAACCAAGAGATCAATATGCAATACGCGCGGCAGTA  
GTGGTTTATTATAAATATCAAGCGAGAAGCCAGAAATCCTTGTGCTTCCTCGTGGTAATCAAGTATCCCCACCAGCCCTCCTCCCTCGCTCCTCACTCCCACCGCCATGCAACTCGCATT  
CTTTATGCAGTAATCCACCACCGCTTTGCTACCTTTACCACTACCACGGCCCCGCCACACCATCAGCAACCTCCACATCACCATCATCGGCCTCCTCTTCTGCTCCCTAGCACCAAAAAGC  
GCCGCTCCCTGTTTCTTTGCCGCCTCCACTATCACTGGTCCCTTGTCCCTCCCTTCCACCAAGCATATCTCCACTTTCACCTCGGGTTTCTTCTGCTGTGAAATCCTCTTCATGGCACACAA  
GAGATCGTAGCTTCTAGGGTCTTTCATCTCGTCTCCGTCGACGGCGTGGGAGACATTAATATTAATGTTGGATGATGATGAGGAGGAGGAGGATGGCTTGACAACGTTGAGGAGGAGAAT  
GGTGTCTTGGCTCTGAGCGGTGTGTGAGAGCGCCATTGCAATGCAACTTTTGACTCTCTACTCGAGTCTACGACGATCATGATCTTCTGCTAGCACCTGCTGCTTCCCTCCGTCAGCT  
TCCACTGATGAATTGTCTTCTATATCATCGGCGCCTCCACGGTGCTTGAGATGGGGTTGATTTTCATGGTCCGTGACCTCGGCGCTCCTCGACTCAGCCTGAAGCTTGGCAACTTGCCGC  
TGCTAATGCTCCTCCAATCATGCCATCCTCGCTAATTAATCAATTCACCGCTACTACTGCACATCTTTTGGCGCATATGGCTTTATTTT

>comp152707\_c0\_seq2

AAGTGAGAGCTGCTTCAATGGAGGCCATCAAGAGCTTGAAGTTCTACTGGCGCCGAAGAGCCTACCAGAGATTAGAGGACGTGCCGGCAAGCAAGAAGCTTGCAGTTGTAAGGCTCGG  
AGCCGGCCAAAAAGCTGGCGGCGGTATGGAAGGCGGTGGCGGTGAGGCCGGCGCTGAGACTGAAGAGACTGATTGTTCTGGCTTACCAGGGAACTACTGGCCAGGCTGAGGGA  
CGCTTATATGAACGGTATGCTGATGCTCGCCGGAGGTGCTGGCGCTGCTGCGAGGAAGAACGGGGCGGTGTGGGATCGCCGATTCCGAAGGCGAGGCAGGGGAGTTTAAAGGTGGA  
AACTTTGAGAAGAAGGTGTTGATTCATCTTTATAACTCTGTCTGATGCGCGGTAGCGCTGTAATTTGCTGCGCCTGCAGGTTGAGTCTTTTTTATAATTTTGTGCTTGTGAATCCAT  
TTACAGGAATTATGGATATAATTTGCAAGCTATGCATAGAAATAAACTTTTTTTTTTTTTGCTAATTTCTGTAACGATGAGAACAAAATTTCAATAAAAAAAAAAAGAGTTTTTAAAACTTTA  
TTACAACACATAACCAACATCCATCATACCAACAAAACCTCATCGGCGTAATTGCCACAAAACCAACATCTATTATCGCCAAAACATTGACATCCGCCATCACCGGCAATTCTAATTTCTA  
CCATCATCAATTCATCATCAACAATAATGTTTATCATCATCGCTAATGTTAATATTCACTGTCAACACGACATTAATGTCTGTCATGACCAATAAGACTGATGTCCATCAACGTCGATCAACA  
GTAGTGACTGCCCCACTATGGCGACAGAACACAACATTACCAATAAGATTGATGTCCATCAACGTCACCAGTA

>comp152707\_c1\_seq1

TTCAGTGATCAAACTCCATGTTTGTATCATTTGAAATATCGGGATTAATCGATATGATGTTGGATGCATTTGCGATCATTCTGGCGATCAAAAACCTATGTTTGTTCGTTTGGCATTCCAAATGC  
GTACAGGCAATGCTTATGAACGAAAAAGATCAACAATTGATTAAGAAGTGTTCAAACAAAATAAATAGACTAAACAAAATTTTCATTCATAGTTTCACAAACAATTTTGTGATTCTCTAA  
GTATAACAGCAGTCAAAAATTAAGAGCTACCGAGTAGCGATAACAGAGTTATAAAGATGAATCATCAATCTTCTCGAAGTCTCCGCTCTCAAACTCCCATGCCTCGCCCTCGGAATCC  
GGCGATCCCACACCGCCCCGTTCTTCTCGCAGCAGCGCCAGCACCTCCGGCGAGCATCAGCATAACCGTTCATATAAGCGTCCCTCAGCCTGGCCAGTAGTTTCCCTGGTGAAGCCAGAA  
CAATCAGTCTTTCAGTCTCAGCGCCGCCTCACCGCCACCGCTTCCATGACCGCCGCGAGCTTTTTTGGCCGGCTCCGAGCCTTACAACCGCAAGCTTCTTGCTTGCCGGCACGTCCT  
CTAATCTCTGGTAGGCTCTTCGGCGCCAGTAGAACTTCAAGCTCTTGATGGCTCCATTGAAGCAGCTCTCACTTCTTCTTCTGCTGGTTCGTCCTCTAATCTCTGGT

>comp152730\_c0\_seq8

AGATCATTTTCAATATAAAATACTTTGCAACAATATTTTCATTTAAATGAATGAATTTATAATCAGATGAAAAATAAAAAAAAAATCATAGTTACAAACGAATGAATATCTGTACATAAAAATAT  
CGGTCAATAGAATTTAGCTACGACTCCATACGCTTTTTCTTCTGCTTCTTCTCCTCGACGCGTTGAATGCGCAGTCCGTTTCGGAAGGTGCGAGCTAAAGGTCCAAAATCAAATCTTGGCTA  
GCATCCTTCGGTCTCTCGCCAGCCAAGATAGACCAGGCTAGCCAGATAGTGCGTGTAAGCCCCGCAACCACCAACACATGGAATAGCTGGTGGCTGTGTCCGGCGAGATCGAACTTCCC  
CGGCAACCACCGTTCTGGCACTCTCGCCGCGTAGACCACCACGCCGACCAATAAAAACATCCCCATCAGCATCTCATACCCTGTTGTCAGCATCGCCTCCGGCCTGTGTCCGAAAGCCAT

CATCTTGTGCGGATGGGCACCATCCCTGATGCCGCCATACACGCGAACAGCACCGCCCTGACCGGCCGGAACACTGCGGGGAATCGAACACAGGCATGAGGGAGACGACTACGGTAGCG  
AGGCCGAAGAAAGTGATGGAGGCGAGGTAGAGGTCTCGGAAGAAGGGATTGCAGGTGAAGGTGTAGTAGACGAGAGGGTAGAAGGAGGAGACGATGAGGATGGAGATTCGGCCGTA  
GTCAAATCGGAGGGTGAGATAGCAGGTGAAGGAAGAGTGACAGGAGAGAAGATGGCAAGCGCAGCTACTGAGCAGACAGAACATGGCGCCGGCTAAGTAGAGATAGAACGGCCAGC  
GGGAGACGAAGGTGTCCGACGTTGATGCACTTAAGCTGTTTGACGAATTTCTGAGCGGTTTTGACTGGTTGGGAAGAGGGTGGATGCGTGGTAAGTGAGGATGAGGAAGAGGAAGAA  
GCCGATCAAGTGCCTGCAGAGGAAGAAGAAGGTTAGAAATTAGTAAAAACCCTAAGAAAACAAATCAAAATATAATTGAAGAGAACAAGAGAAATCCATATGGTGTGTGAGATTCTTAC  
GTCCAGATATTGAGGGTTTTGTTGGATGGAGAAGATGCTGAGAATGGTTTGTCTGAGAGGCCACTCAGATCGGTAGTGATTAAGGATGAACTCGTTATGCTTCAGGAATTCAGGAAGA  
GAGTCGTAATCCACCAATTCGCAATTACAATTCGTCTTCTTTGCTGTGTTCTTCTCTATCTTTCCACTTTCGATCACACGAGGAGAAATCAAAAACACTGCATTTCCGATTCTCCGTTGAAGA  
TGATGAGGTGCTTATGATCTCCAAGCACACCGAGGACGCCATTGTTGCAACTTCCAGGCACATTTTTCTTCCACTTGGTAGAGAGAGAGAGATGTGTTGAAGAAGAAGGGGGGGCGG  
CGAGGAGCTGTGTTATAGTTGTGCCGGCTTTCAACTTTGAAGGGGTAAGCCGGTTGGAGGACTTGGTCGTTTTCTGCACGCGGAGGCTGGAGAGTCCAAGGTCAATGGTGAATAAAAA  
TGTTTTTATTACACCATTGACCTTGGACTCTCCAGCCTCCGCGTGCAGAAAACGACCAAGTCCCTAACC GGCTTACCCCTTCAAAGTTGAAAGCCGGCACAACCTATAACACAGCTCCTC  
GCCGCCCCCTTCTTCTTCAACACATCTCTCTCTCTCTACCAAGTGGAAAGAAAATGTGCCTGGAAGTTGCAACAATGGCGTCCCTGGTGTGCCTGGAGATCATAAGCACCTCATCAT  
CTTCAACGGAAGAATCGGAAATGCAGTTTTTGATTTCTCCTCGTGTGATCGAAAGTGAAAGATAGAGAAGAACAACAGCAAAGAAGACGAATTGTAATTGCGAATTGGTGGATTACGAC  
TCTCTTCTGAATTCCTGAAGCATAACGAGTTCATCCTTAATCACTACCGATCTGAGTGGCCTCTCAAGCAAACCATTTCTCAGCATCTTCTCCATCCACAACGAAACCCTCAATATCTGGAC  
GCACTTGATCGGCTTCTTCTCTTCTCTCATCCTCACTTACCACGCATCCACCCTTCTCCCAACCAGTCAAACCCTCAGGAAATTCGTCAAACAGCTTAAGTGCATCAACGTCCGACACC  
TTCGTCTCCCGCTGGCCGTTCTATCTCTACTTAGCCGGCGCCATGTTCTGTCTGCTCAGTAGCTGCGCTTGCCATTTCTCTCTCTGCTACTCTTCTTCCCTGCTATCTCACCTCCGATTT  
GACTACGCCGGAATCTCCATCCTCATCGTCTCCTCCTTCTACCC

>comp152897\_c0\_seq2

TTTTTGCTGGATATTAATTTGATATTTATTAAGAAGTAAATTTGAGCAGATTGAAAAAGTTCAGATAGTTACAAATGATTATGAGCCAAAAGCTCACACATACAACCTCATCACATTATTA  
TAACACAATGCATATAAATAAGATAAAAATAAATCCTCATACAAAGCGGGATGGAAGTATACATAACATACAAAGCAAACAAATTCATGAACTATGCCGTTTGGAACTATAAGAAGA  
GTAAGAAAGTGAGGAATTTCCCCAGCTGTGATGGATAAGCTCTGCCTTGGCGTCTCCCCCGCAGCTCCAAGAGCGACATGCAAAGGATAGAAGTGGTCTGGCTGCGGATGCGAAATTT  
TAGCACTTGGAGCCTTCTTATCATAGTGTTTCACATCTTCATGTCTGCAGCAGAAATAATAGTTAATGTCAITTAAGATTTCATTTTGTTCTGTAAACGTGAAGGAATAACAAGAAATGAAC  
AGAGTTGTACAAATCAAACTCTCATGCTCTGCAACTATTTAGTCAAATTTGTAGGTTGGGTCAAATGACACAGGCCATGGAGGCGTAGGGTGGCAATTTCTTCTTTTGGTTTTCTTACA  
TTTTTAACAAAAGGAATTTGGGACTTTAAAATCGGCAAATATATGAAATTTGTGTATGCCAAACCCTCGTCAAATTC AACATGGATTAACCTAAGCCGTATATGCAGGGTCAGGGGCGGATCC  
AACTTCATTTTTTCAGGATGAACAAAATTTAATTAACAAGAAATTAATAATAATAATAATAATAATTAAGATAATGATTAATAATAATAATGATAATAAAAAGGGTTGTTGGAGAGTGTGGTTGAT  
GAGGCT

>comp153510\_c0\_seq1

CCAGACAGGCATAGCGGTGGTGGGCCCATCCACCGCCCATACGCACGGTGTGCTATTATCAAATCATCAATCAATTAATCAAAGAGAAAACACCCAAAACCAAACCTCTCAGCCTTAGC  
TCTCTCTCTAATCCCTTTCTTACTTTGACCTAACCCCTTCTCCAATCCCTACTGCTCTTCTTCCCCTCTCCTAATACCCCAACCACAAATCTCTCGTACCCAAATCGTAGAAGAAGCTTTGATT  
GATTTCTTCTGCAATGAAGAAGACGAAGACGACCAGCATGTACGACAAGCTACTTACCAAGCTCGTCTTTGCCAGCCGGTAAAAGGCAAAAAGGGAGAGCCAGCCAGACAGCCCGCCGT  
CTTCCTTTTCTGACGTACCTTTTAAACCTGAAAGCTTAGAGAAAAAGAAATTAAGCGAGTGATCGATCAGTTGGAATAATGGATCCGGTACCGCTTCGCCGCATGGCCACCACCTCCCT  
CCTCCCTTCCACCACCGCGACTTCTCCCTCCCGTTTACCAGCAACTGATCCACCACGCGCCAGCACCGCACCTGAATCCACACCCGATTACTCTGCAACCGAAATCCGAAGACCAGCTT

AGCACAACTCCCAGCTTAATCTCTAAACCGAACAAACGAAGAAGGCAACAGCGACGAACCGGCGAAGCTGGAACCAAGTGCCGATAGCGAATTAAGTCCGCCCTCGCGGCCGCCCTT  
CCGGATCTAAAAATAAGCCAAAGCCACCGATAATCATCACGCGCGACAGCCCCAACGCCCTGCGCTCTCACGTGATGGAAATCTCCGCCGTTGCGATGTCGCCGAAAGCCTCGCCACTT  
TCGCAGCCCCGCCAGCGCGGGCGTCTGCATCCTCAGCGCTTGGCGGCGCCGTCATCAACGTTACTCTCCGTCAACCCGGTTCATCGGCCTCCGTGTCACCCCTCACGGCCGCTTCGAGA  
TACTATCCCTATCGGGATCTTCTCCCTGCTCCGGCGCCCGCGAAGCTTCCGGACTCGCCGTGTACCTCGCAGGCGGACAGGGACAGGTGGTTGGCGGAAGCGTGTGGGTGCGCTG  
ATTGCGTCCGGGCCGGTGGTGGTTATGGCAGCTTCGTTTGGGAACGCGGCGTATGAAAGGCTGCCGCTTGACGAAGAAGAAGCGGCAGTGGGGTCACCGGGGATGGCGGAGCAGATGC  
TGAAAAATTCTGGAATTCCGCCGTCGCAGCTTTTTAGGCTATGGCGCCGAATCTTCTGAATAACGTGCAGATGCAAGGTGAGGCGTACGGGTGGGCCAACGGCGGCCGGACTCCGTTTT  
AATTTGCTTTGTTTTAATTTCTTTGCTTATTTTTGTCTAGTTTCGATCAGGGTTATGGTTTTTGTGTAAGATGGTAAAGGAATGTGTAAATTGAACCTATGAATTGTTGGTGTGGCTATCTAGTA  
TTCAACGGGGAAAGGGAAAGGAGGATTCTTTTTCTTTCTGTAACCTGGTTGCAGGAAATAATTGTTGGGAGAAGGGAAAGTGACAGAGAAGATGAAGAGAATGGAAGAATCATTCCGCTTT  
CTCCTTTATTTCTTTTTCAGTACTTCAGTTTCAGTATGTATATGTCAAAAAAGCTGGAGAGAGATCGCTGGAGAAAGCTAGCTAGGTTGCAAGAGAAAGGTAGAGGGGAAGAGGAAGAA  
GGAATTGAAGTACTTGAACAGCTTGAGTGACCATCTGGTTGAGGAAGACGATTGCTCTCTATCTATTTCTTCGTACCAACAGCGCTGAGCATTCCCGTTCTCTATTTCTGCTAAAAATTTACT  
CTTTTTGGGATAAAACATAGCCGACTGTGAGAATCTTTGACTCCAATTTGCTTTTTCTCGTAAAATAGTAACTGTATTGTTATTATGATATGATTATCTGTTGTTGTCTTCGTCCATGCATAGAG  
ATGAACAGAGATAGATTATTATTTTTGTTAATTTTTTATTTTAGAATTTTACGCATGGTTAGGATAAATAAGGGGGGTGTAGAGTACACGTGCAGTCTTCTGTTAGGGGATTCTTCTGTTAGA  
GGCAAGCATGCTGCCCCATTAAGAAGAGAGGGATGGCAGGAGCAAGTGCAGTCTTCTGTTTGCAGGTGTA

>comp153574\_c0\_seq8

TGCTTCAAGAAGCAGTAAGAAAGCGTCAAAAACAAATCTCAATAACGATTGAAGAAATCCATGAGAGGCTGATAACAAGCTGGCTGGCGTTTTTCAGCCATTATAAAATCCATATGTGC  
ATAATCCCCAACAAATTGGACGGTCAAATTAATTTCTATTATGATGATCAATGATTTCCAAAAGATGCGCCACATCATTACATCCGCAAGCACATCTTCTTTCCCGTAGCTCATAAAGAGCGG  
AAAATCGTTTGAATACCGACATATTGTACGCTGGAGCGGTTTTCTGGCCATAATGCGCCATGTTCTTTGCTTCATCGTGTAGTCATATTTGTCAACATGGCGCTTCTCATTGTCTGAGA  
TAAGTGAACAATGTTCTTCGTTGAAAGTTGACTGCAGAGCATGGTCCAAAACAATTGAACAGATGATGAGTTCAGGCAGCAGTTTTTACCTGTGATTAATGTTAGCAAGTCATAGCAGTC  
AAATCCTGTAAACAAACAGACCGTCTCCAAAATGTTTTCACTGCTGATCTAGTTGGATTTAGTTGAGCAACGCCAGCCAGTAAAGTTGTTCTCCAAGATAAATTCTGGCAGCTGCATG  
CATGAATAATGATGGAATTTGATTCAAATAAGCTATTGGACAAAGCAAGGCAGCAGACCTTAGTCTGTAACTAGATTTTGTTCAGTACTGATGCCAGAACAGTTAAAGTTCCCTGAGAG  
TGCCCAACATAATGGATTTTTTGATGACCTGCTTGTGGTACACATAATCAATTGTGGCAGGAAGATCATAAGGCTGCTAGTTCATCCCATGACCAATCCCAATAAGCTGAATCACTTGAAGA  
GAGAGAAGTGTGTCCAGACTATAAACAGTTCTCTACCATTTGCGATCCATACATCATAGCCATGATCCGCAAGAACATATCCTAATGACTGATTTGGCGAGTTCACCAACCATGCGAAG  
CCATCCATGAAAAGGCCATGTTGTAGCAAAACAGGGCCTTTGTTGCCTTTGGAGGAATCACCTGTCTCCACCAGGAATTTTGTGCAAGCTAAGCATGTATCCATCTTTTGTGTGACCG  
AGTGATTTCTCGCATGGATAACCAAGATCTCCACCCTTGACTTGCATGTACCATCATCAGAAGACAAATATTTCTCAGTTTTGTAGTGATGCCGGTTGCTCCTCTTCTACTCATGAGCTCT  
TTTCTTCTCCATGAAGTCTTTCTACAGTTAATTCCAAGCTGAACAATAAGATTAGTAGTAGAAGAGATTTTCTCATTGCCATAGTTCATGATGAAGACTTCACCTCAGTTTTGTAGTGATGC

>comp154252\_c0\_seq1

TGGCTTGGATGATGGTGAAGGTGTGATTGTGGGAGGAGGCGGTGATGATAAGAATGCCGACGGACCAGATTGGGAGCATGCGGATGATGGATTTGAGCTCCTCGATGCGGTGGACGGTA  
GATAGTCGCCATGGACGTGAAAGCCGGCGGCGGTGATGTCGGAATCGGTGCAGATCGCCGCCCGTCTAAGAACGTGAAGTGTTGCGGTGTGTAAGAGCCGTCACGCCACTGATATGTC  
AGCATCCATCTCCTTATCCGATACAGAACGCGCTATCATCCGGCAAGGCAAGCTTCCGCTTCCGAACCGCCGCCACCACCACTTGTGCCAGTCCGGTTCAGCGGGTCCCCCGGGCTT  
CCTTCTTATATAAAGCGGTACCCATAATAAAAGCAATTACAGAAAAGAACATAACGACTGTTGGGATACCGAAGCCCAACCCCATCCACATTGTCCTGTATGTAACCACCACCGT  
AGAGCCATTAACAATGCTACCCCATGCTGAAGAAATAGAGGTTGAAGAAGTTCCATTGCTGGCCCCACCCACCGGCCGTTGCTGCCGACGGTCCAGCTCGAACTGGTCCGCCCGAA

CGCGACGACACAGGGTCCGGATGCCGCCGACCCGACCGCTGTGAAGAAGAGGGAGATGTAGAAGATGGCTAACTGGCAGGCCGAAGCTTGCTGGCAGGATGGCGACTGGGAAGGGCA  
CGGCGGCGGGCGAAGGGCGGGGAGGATTGCTGATATGGTAACTCCCAACATGCCTAGTTGATAGATCATTGATCCAACGGCTATAGTCCAGAAACGGCCAGCAAAAAGAGTCTGCAATAA  
GGGCACCGATGATCGGTGTGAGGCTGGCTGTGCCACCGAAGTTGTTAAGAGTATTAGTGGCCTGAATAAGAGGAAGATGGAGCTCATTCTGAAGGTATTGAACCATATTAGCATTAAAAC  
CAGCTGTGGCAAACCGGTCGCAGACTTCATTTGCTAATATGAAAGGCATGGTTTTTAGACCACCCAACCTCTTCTTCTTCTCATCTTGTCTTCCCTTCTCCGGCCATCCCTTTGTCTTCTTTA  
CTGAAGGGCGAGAAGAGCTACAGTGCAGTTTCAGAAAATTATTGTAGAGTGAAAGAGTGGAAGGACTGTGCCTCTATTTAACTATGGTTGCATGAGAAGAGAAGTAAAGGAAAGGGA  
TGTCCGCATAGGGTATTTATAGCATTTTTACAGCTCTGAAATGAGTGGTGCGCCCAAGTATTGTAGATAGTTGATGAAAGTGGGCATTTTGAATGGTCATGAATACA

>comp154416\_c0\_seq1

TTCATCTCACAACCTTCTGATGACCAGAAGAAAGAGAGATATTGATTACTAATAAGTCCATCAAATCCTTCTATTTCAGAACCAACTTGAGAGAGTTTCATGTAAAGTTGAGAACATAAA  
CAGCTCCTGCTGCAATTTTCCAAACTGGTCTTGTGTTGATTCCCAGCTCAAGAAGCCAAATATTCCATGCCTTCAATGCTTCTTTGTTGTTTCCCTCTCTTTATGATTTGTCTTTGCTGGTCTTTA  
TCCTTTCTTGTCTCCTTCCCTCCATTCCCATTGATTAAATCCTTTAATGCCGCAGTTAGATTGGTTTTCTCCAACGTTTGCTTACCTCAGCTTGTCTTAAGCCATGGGGAGTTTGTCTCTCT  
AAGCAAAGAAGTAAAAAGGAAGAGAAAAGGGAAGGATAAAATGCCCGTGTATGGGTTTTCTCTCAAGAGATCTCTCCACTGTATGCCAGAGCCAGGTGAAGTACTTGATCCAGAAGCTA  
GAGGCCATGTTGGTTCCATCCTCAACAGGAGACTTAGTAGGTCTGGCTGCTCAAGATCCATAGCCAATCTCAAGGATGTTATCCATGGAAGTAAAAGGCACTTGAAAGACCGCAAAGTT  
GCAGTCCAAGGTCGATAGGAAGTAGCGAGTTTCTCAATCCAATAACACATGAAGTCATTCTGAGCAATTCCAAGTGTGAGCTAAGGATTACTGGCTTCAATGGCTGCTATGAGGGAGATA  
CTGAGGGGATGAGTTCTACCTTCGTGGGCACTCTGAGGCCAGGGACTCCAGGGCCTTTGGGGCATTGAGAGGGATGGGTACTCTCACTCCTCCAAGAAGATCACCTACTGTGTTGGTT  
GGTAAGAGAGAGGGCAATGGATTTGGGGGATCAAGTCTTGCTGGTTCTATAGGTGGAATAATGGAAGTGAATAAGGATTTTCATGGCGTTTCTACACCCAGGACTTCAGTTGAGTATGCTT  
CTTTTAGACTGGCTTGTGATAAATGTGGAGAGAAGCTTCTCAAGTTTGTGACTTGGAAAGCTCATATTTATCCAACATGCAGTTACTGAACTAGTAGAAGGAGACTCCTCCAGAAAAT  
AGTGAAATAATCTGCAGA

>comp154428\_c0\_seq7

CGGTACATATTATCATAAAAAAAAAAATTCATATCACATCCAAAGGGAAGATTATTCTAAAATAGAATATAATTATAATATAAAAATTTTAAATTATGAAGATAAATCTTGAAACATTAAGACTT  
TATCTATAAGCCTTAACTTTATTAATAAAAAAAAAAATGAAAAAAAAAGTGAAGGTTAACTTGTGCTATCTCACCATTTCTCCCTCACAAACAAAAACAAAAAGCAAAACCCCTCCCTACAC  
AATATTTAAATTACAAAACAGCCCTTTTCCCTCACCTCACAAACCTGCAATCAAGCCTCACCTCCTTCCCTCCCTTCAGACTGCCCATCTTAACCATCGACTTAACAAAATTTGCGTTAAAT  
TTCGCCTGAGAGCTCGCAAATTGAGTGATTAGTTGTTTAGTTCTTGGGTTGGTGAGCAAGGCCTGGTCAGAGGAGAAGAGGCTCTCCCTTGAAGAAGAAGCTTGAAGTAAGCGTTGTC  
GAAGATGGTGGCGGTGGAGTCCAAGCCGGCGCCGGCGCTCCTCACCTTGTGTGAGCGGGGCGAGATCTTTCTGAGGCCAACGGCGAAGGAAGAGCTCAGGGAGGGATCAACGTCGAC  
GCTTTGGTTGAAGTTGTGGATCCGGTTTTTGAAGGAGGAGCAATGCGCAAAACCTAGAGTGTGGCCTCCAGAGAGAACAACGAGGTCAGCAATGGAGAGGCCTCGCTGGGCGAAGCT  
GAGCCTCAACTGGGAGAAGTTGGCGGTTGGCGATGGGAGTTGCAGTGTGCTACTTGCCCTTGAATCTTCCATCTTTTCTTCCACTGGAACCTCCCAATTTGACCCCTGACAAGGC  
CACAGCATCTTTGCTGCAAGCGCGAGTATATCAGCACAGGATAACAACCTGGGCACGAGCTCTCCACTGCCTTCTTCGCACGGTCGATCACATAGAATGCGTGCAGTGAGATTTGGG  
AGGGCCATCCTTCTCTGCACTGTTCTGCTGCGTCAATTCAACAGCACCGATCCATCGACCCCTGATGAAACAGTCATGAAAATGCATGCGAAGCAGCGCAGCTGGAACAGTTCCATC  
ATTTGCTATCGCCTTCTTAACTGCGACAGTAACCAAGCTTTCAACATTGGGCAAGAATTGTTATAGTAGTTGATGTTAAGAGCATTAGAACTGGAACGAATACAGAAGATCGTCAAGAGG  
ATAGACGAAGCAAAGACTGTAAGCATATTTGCCATGCAGAGAGTTTGATATATGAATTTAGTGTCTTAAACATCAATTAATAACAATTTGCCCCGAATGTTGAAAGCTTGGTTACTG  
TCGCAGTTAAGAAGGCGATAGCAAATGATGGAAGTGTCCAGCTGCGCTGCTTCGCATGCATTTTCATGACTGTTTCATCAGGGGGTGCATGGATCGGTGCTGTTGAATTCGACGCAGC  
AGAACAGTGCAGAGAAGGATGGCCCTCCCAATATCTCACTGCACGCATTCTATGTGATCGACCGTGCGAAGAAGGCAGTGGAGAGCTCGTGCCAGGTGTTGTCTCTGTGCTGATATAC

TCGCTCTTGCAGCAAGAGATGCTGTGGCCTTGTTCAGGGGTCCAAATTGGGAAGTTCCAGTGGGAAGAAAAGATGGAAGAATTTCAAGGGCAAGTGACACACTGCAACTCCCATCGCC  
AACCGCCAACCTCTCCCAGTTGAGGCTCAGCTTCGCCAGCGAGGCCTCTCCATTGCTGACCTCGTTGTTCTCTCTGGAGGCCACACTCTAGGTTTTGCGCATTGCTCCTCCTTCCAAAA  
CCGGATCCACAACCTCAACCAAAGCGTCGACGTTGATCCCTCCCTGAGCTCTTCCTTCGCCGTTGGCCTCAGAAAGATCTGCCCCGCTCACAACAAGGTGAGGAGCGCCGGCGCCGGCT  
TGGACTCCACCGCCACCATCTTCGACAACGCTTACTTCAAGCTTCTTCTTCAAGGGAAGAGCCTTCTCTCTGACCAGGCCTTGCTACCAACCCAAGAATAAGCAACTAATCACTC  
AATTTGCGAGCTCTCAGGCGAAATTTAACGCAAATTTGTTAAGTCGATGGTTAAGATGGGCAGTCTGAAGGGAGGGAAGGAGGTGAGGCTTGATTGCAGGTTTGTGAGGTGAGGGAAA  
AGGGGCTGTTTTGTAATTTAAATATTGTGTAGGGAGGGTTTTGCTTTTTTGTTTTTTGTGTGAGGGAGAAATAATGGTGAGATAGCAACAAGTTAACCTTCCACTTTTTTCTTTTTTTTT  
TAATAAAGTTAAGGCTTATAGATAAAGTCTTTTAATGTTTCAAGATTTATCTTCATAATTTAAAATTTTATATTATAATTATATTCCAA

>comp154478\_c0\_seq1

ATATTC AAGCAATCTCCTTTAGTCTTCCTGTTCTTTTCATCAAAGGAGGCTTAAACCTATGGCAGGAGGCATTGGAAGTGCGAGGTATGATGAGGTGAGAAAAGAAGTAAAAGTAAAG  
AAAAAGTTTTATACTTGCTGAATGGTAGTGAATTAAGAGAGCTCTAATGCTTTTTTTTTTTCTTTCTAATTCATAGGAGTTCACAACAGGTTTACAAGGGGTGAGGCTGTTACTTGTCG  
ATGGCTGCCGAGAAACGAGATCCGAAATCTCTGGTTTTTCTCTGCCATGGATATGGCATGGAGTGTAGCATCTCAATGAGAGTCACCGGTACTCGATTGGCGAAAGCCGGTTTTCGCCGT  
CTATGGAATTGATTACAGAGGACATGGCAAGTCCACTGGCTTGCAGGGCTATATTCCAAGCTTTGATGAGCTTGTCAATGATTGCTCTAAATATTTACATCTGTTTGTGAGATGATGGCAA  
ACAGGAATAAGATGAGATTTCTACTTGGTGAATCCATGGGAGGAGCTGTTGCTCTTATGTTGCATAGGAAGAAACCATCCTTCTGGCATGGTGCGTTTTGGTTGCTCCTATGTGCAAGAT  
TGCTGAAGAGATGAAACCACATCCACTGGTCATCAAACCTTAAACAAAAGTGAAGCAGTGTATTCCAAAATGGAAGATAGTTCCTTCCAAAGACATCACAGAGAGCGCATTCAAGAATC  
CAGATTGGAGAGATGAGATTAGAAGTAATCCTTTTTGCTACAAGGGGAAGCCTCGCCTACAAACTGCCAAAGAGCTTCTCATGATCAGCATAGACATTGAGAAGAACCCTTCATCAAGTCT  
CATTGCCTTTCTGGTAATTCATGGTGGCGATGATACGGTGACAGATCCGACAGTAAGCCAAGCCTTGTACGACACCGCCGAGAGCAAAGACAAAACCTTCAAATTTATATCCAGGAATGT  
GGCATGCACTGACATCTGCAGAGTCTCAGCAGAATCTCCATCTCGTCTTCTCTGACATTCTGGCATGGCTTGATGAGAGATCAATGAAAATAAGCTCGGTATCAGAGATGGAAAACAAGC  
CTGGTTATGACAAAACAAGGGTGAACCTCCGAAATCTGTGAGAACAGGGGCACCAAAGATGCGTTGATGCAGGAAGCATTTTTATGTTGGTGTATAAAGAGGATGTTTTGACATTTGT  
CAACAAAATGCAAGCTGATTATCATCTCAGTCGAATTCATGATTTAAGCTTCTTTTTGGTAGGTTTTTTATTGTTTC

>comp154629\_c1\_seq16

GTTGCCTCTATTATCCTCACACCCCATCAAAGCTCCATCAAAGAAAGTAATGTTCAAGCAATGGCTTACAAAGAACATGCCTGTGTTTGGCTATGATAAGCTTGCAGTTCATATATGCAAG  
CATGGCCCTTGCAACCAAAGCTAGCTTGGACAAGGGATTACAGCCCTGTAATCTTTCTTGTTTACAGGCAAATAGTTGCCTCTATTATCCTCACACCAGCATCCATCATAAATATGAGGAAAC  
CAACTGAAAAGACTATGGGAATGAAGGGTTTTCTTTCTGGTGTCTTGGCTGCTCTGTTGGGTATGCTTTTCTTAAATTTCCAATCCATTAATTATAACTCTTTAGGACCTGTTTACAGGTTT  
TATGCATGGTGAGTTGTTTTGAAGGCATTGTAATTGATTATATTTATTGTTTTCTGTTCTTAGAGTGGCAATGAGTGCGAACTTC

>comp154629\_c1\_seq3

AGGAAACCAACTGAAAAGACTATGGGAATGAAGGGTTTTCTTTCTGGTGTCTTGGCTGCTCTTGGTGGATTGGAGAAGGTGAGACTTGGGAACATTAGAAGCATGGCTAAAGTTCTTGG  
AACAAATTATATGCCTCTGTGGAGCTACTGTCATGATATTATCGAAGAGCCAAAAGCTTATGAACAGTGAGATCAGAAAGATTATCGTAAGTTCATTATTACAATTAGCAGCAGGAGACAAAT  
GGCTTCTGGGCGTCTTCTTTCTTATAGCATGCTACACTTGCTGGTCTGCTTGGCTTATTATACAGGTTAATTATTAATTGGATCTTAATCTCATCTATTACAGTTTATTTTTGGTTCTAAAAGA  
CTTCAAAAAAATTTTTTTTTGATAATTTTACTGCAGGTGCCAATATGTAGAAA

>comp154664\_c1\_seq1

TTAACGTCCCAAAGGGAATGTTTGTCTATCTAGTAACTTGATAATGCTGCAAGGATCTCTGATAAGAGAATTAACCTGATAGCATTTCGAAGATCAAGCAAGGCAATAAAAGAGATAAACA

GAAGGATATATCCTCCCTGCTTCCTTCTCCTCTCCCACACCATTTTCCACATGACAAAAGCATAAAACCATCCTAAAAAAGTGCTTCTTTTTTCTTTCAAGCAGCCATGAGAGAATGAATA  
TTCATGGATCTCCTACTCCTAAATCCAAAACCTCACCAACTTCAATACTTTGAAATACCTTTCATTAACCACTCATTCCACCTTTTCTCGTTCTTGCAAAGCTATCCACTTCCCTCCTTTTAGT  
ACTCTTTACCTCTCAACTTTTTCTTTTGAAGAGAACCAAACTAACTTTGACTCAAATCCATCCACTTACGGAGGATGGGCAAAGAGCCTGAACTCCAACGCCTAAAAAATCTCTAGTG  
ATCTCTCCTCCATCTCTTCCGACGCCGATATCATACTTATGAACATTGTAAAGGCTCGCCATTGCCGGCTGTGGCGGTGGCGGTAATCTCCGACCAAAGTAGACTTCATGTCAAAGCCCA  
CCAAAAGGGAAGGGCCAGTGCTCGAGACCACACCCATTTGCGCTGCCTTCTGCAACAACGAGGTTGCTGACATGTCCGGCACCCGCATCCGCCGGTGCTCCTGTTGAGTACTAAGTAGA  
AAAGGCATGCTTACAAGAGAAGAATTGCTGCAGGGTTCCTTAATAGGAAGCTCTCCTCCATTGCTTGGAGCTGGGAGTTTGTCTTATTATAAATCCAGTTCAACTGACACTCGAGTTGCT  
CAGCGTTTGGAGCAGGAGGAGAAGAAGCCAGAGCTATAAGGGGAGAGATTTGGCAAAGCCATGGCTTCGTTTGGCTCTTGGTTTCATCCAAAACGAGAGACCAGGAACTTCTGGGAGAGG  
TTGTAAGTGGGCCTTGTAGATTTGGATTAAAGCACGGTAATTGATCATGTTGGTTATGGAAACAGTATTGTTGATGTTGGAAGCTGCTGAGATCCTGGCAGCTTCTCCGCCAGTGCG  
TCGCAGAAGGCTCTGTGGGTTATAAAGCTGTCTCTCCTTGAGAAAATGGTTCACAATCGCAGCGATACTCTTGTGCCACAAACCTTAGCGTGAGCTTCCAATCCGACTGGACTGCG  
TATCTCTTTGAGCACTTATCGCACTTCCA

>comp154832\_c0\_seq1

TTACTTTACAATTAATTAATACTAATCCAATTTTAAAATAGAAGAAAAAAATCTTATTAATGTAAGTCAAACCTGAAAACTAAAAAGATTATAAAATTCACATTAACATCAGATTATA  
GTATTAATTAAGAGGTATTAACAAAAAACTAAACAAAAATAAACTGCATAAAACCACAATAAACCTCGCCAAATACGGGAGAGCCGAAGAAGAAATCAGAAAAAAAAGGAAAAACAA  
GTCAGCCAGTGTACAAGAACGGATCATTTCCCTAAAATTTGCGAGCTAACCTTTCTTATATTTCTCTTTCCAGTTTCAGGCCTTCTTCTTCTTTGCAGAAATTTCTTTTTCCCGACTGTTA  
AAATTGCGGCGGCCGGTTAGTCGTTCCATCCCCGGTCCAACCATGCCCTCCTCCGACCCGGCAACTGACCCGCCATGTTAAGCGGTAGATTAAAGAAGGGCAATCCCGCCGCCCGGATT  
AGGAAACGGATTCCCCTTGTTCCTTCATCTCCAGCGGAGCTCTGAAGCTGCGGGCGGCTGCAGATCTTCTTCTCGAGCGGCAGCCGCTCGTATGCCACGTTGGTGAACGAAGCCGCAAT  
AACTATCACCCGCCAGCGGCGAAAAGCTCTCCGACGACGTTTCTCCGACTACTTGCCCCTGTCCACCCGGCTAGAAAAGATAGAGAGGCTTGTGGCTCCAGGCGGTGCCGGTGGAGGTA  
GAAACGAACCCGATAGAGATAAGATCTCAAACCGTCCGTGAAGCGCCACGACAGCTCCGGATGAGGAAGGTTGGCGAAGGCTGACTTTAGTAACTGTTCCGCTGCCGCTAAGTACACA  
GATGCCGCGCTGCCGACGGCGCGCATAGGTGGCGACGCAGTCAAAGACATCGCAGCCGGCGCCGATCTCTAGTATATGTGCACGGAGTGTGTTCCGCGCTTTCCCGCTTATGATAACCGG  
TGGCTTTGGCTTGTTTTTGGAGCCTGGCGGGCGTCCACGCGGTGCCCGCCCTGCTAGGTGCCCGGAAGAAATTAGTTCAAGGGCTTGAGCGTTATCGCCGCCCGGCTAGTTGATTGGTGT  
GTTTTTATGGTTTTCTGTCGGAAGTGTGCGGGTTTTGGTGTGGAGATGGAGGTCAGGAAGGTGGTGGAGATGGCTCATAAAACGGGAGGCGGTGCCTAGATCAAGGCCCGCCATGGTTA  
CATCCATGGGAAAAAATATAGAATAAAAAGGGCAGGAAATTAATGTTATAAAAAGGATTTTTTATGATTTAGATTGAATAAAGAAGGATGAACAGAAGCAGTGGAGGAGGGGAATATAG  
AAAGAACGTGGAACCACTGAAGAGGAAGCAAAGGAGACGATGGAGGGACAAAGAGAAGGGGAGAGCTTCCACTGCACTCGAGGATATATGTATATAATATTGAGCTAAGCGAGAGAG  
ACAGAGAGAGGAGAGCGTGGGTGTGCGTGGGGAAAGAAGAGTAGTATTTATGATATGATATGTGATATAATGATGATGGTGATGTGATGCTATTTAAAATGTCGTGAA

>comp154993\_c0\_seq4

TTTATTTAGTGCTAAGGTCAATTTCTTCTTGCAAGGTCTCCATTTTGAATGGAGCTGACCTGAGCAGAAATAGAATTAATAAAAAAAAAAAAACTATATGTACATTCAAATATATTAAGTT  
TGGTTCAAACAAGCTTTCATGGATTTATTTAACGTTATTATATGTTCTAAAACAAGCTTCATGGATTTAAAATAAAGAGCATCCTATTCTTCATTTTCATCATGCATTTGCACATCAGCTCTGA  
AACATTTCTCATGCTTTTTTCCGGAATAGCATCTGCAACGTTATGGATTCCGGCACTTTGCAGAGAATAATAAGTACAAAACGCTTTAGTTAATCAATCAACTGCTGATATGCACAAAATATG  
CGTGCTGGTTAGCGTTTCAGAACTGCACAGCCCTTCATCGGATCTATTTTATCTGTTACGATTGCAATTTCTTTGCCGATGTGCTGTCACCTCATAATTTCTTCTGGTTTGCATCCTTCAA  
CTCAAATTCATCTTTGATGCCTTTTTCAATACGATCATCAACATCCAATCCTCTGCACCTTGAAACATTAACCTCCTCCAATTCCTTACATCCTTCCAAAATCATCAGCAAATCATTTTTT  
CTCAGAAATGATGCACTCATAAACAAACACTTCAACTTTGGCAAGCATCTGATTATTGCCTGTGCATCCTTTCCATTGAAGAAGCCACAGAGGTTAAGCTCACTGAAGTTTGGGCAGTAG

AGCTTGATTTGCTCAAGCATTGAAGGAATGAAATTGGCTTCCATGTCATTTCCAATGATTCCATTTCTTCCACTTGCATATCAGCTCAGGGAGTTGCTTGTCATCATTCCATAGAAGTGTA  
GGTAGAGAAAGTACCTTTAATTTTGGGCACTTGATGGAAATCAAACCAAATCTTGCTGCAACGAAGCACCAAGCAAGGATGGAATTCGAAGCTCGATGACAGATCCATGGCTTTTGTG  
ATGCAGAGCTTCAAGAAAGATGAGAAGGAGAAGCTCTGCAACTGATACAGTCGTTTGAACCTTGCTATGAATTTGCTCTTTGTGGAGAAATCTAACTCCTTAAAGTTAAGAAGCTCTCCAG  
CAGTCAGGATCAATGGAGGCCTTATACCATGATTTGCAAACAAAGGGGACAGCAATTGTGAGATCCTCAAATCCCAACTTGCAGAAAACAAGATCAAGCAATCAAATGGCAAATCCTC  
CCATCTCCTTCTTTCATGACTTCCCTTCTACTCTCACTCTGTGGAGTTGAAATCCTATTAATAGAAGAAAATCAACAGTGCATTATATTGTTTCGGGGCTTCATGATAACAATTGACAGTCCA  
GATTGAACGAGAAGAAGCTTGCATTTGACGATGCAAAAACCAAAGAACAACCAAGAAAAACAAGAAAAACAGCCTAAATATGGTAAATTTGCAGGCCTGAATATTATTAGAAAATACAGA  
AGTTAAGATTTCACTGTCATGGAAATTTTCATGGAGGACTCAGCATTCTTGTATAGAGAATTTTTATGTTGGATTAGCCGATATTTTTATGCAAAGACAAA

>comp154993\_c1\_seq3

GACGGTTAAACTCCGACGTCCGACCGTGCACCCAGTACGACCCCAAACCGACCGCCGACTTCCAATTCTCAACCATAGATTTCTATTTAAGAGGTGACAGCACATACGGCAAAGAGAAT  
GCAATGCTGAACAGATAAAATAGATCCGATGAAGGGCTGTGCAGTTCTGAACGCTAACCAGCACGCATATTTGTGCATATCAGCAGTTGATTGATTAATAAGCGTTTTGTACTTATTAT  
TCTCTGCAAAGTGCCGAATCCATAACGTTGCAGATGCTATTCCGGAAAAAAGCATGAAGAATGTTTCAGAGCTGATGTGCAAATGCATGATGAAATGAAGAATAGGATGCTCTTTATTTTA  
AATCCATGAAGCTTGTTTTAGAACATATAATAACGTTAAATAAATCCATGAAAGCTTGTTTTGAACCAAACCTTTAATATATTTGAATGTACATATAGTTTTTTTTTTTTAATCTCTTGATT  
TTTGGAGAATAACAAGAATAAAATTTCTATCTTGG

>comp155459\_c0\_seq1

CGAAAATGAAATTAATTATGAGTCTGCATTCAATGGTTATTCAACAAAAGCATCCCAACTGTTATTAGAAAGAATATGAAACAAAAAAGCTAATCTATTTCTATACAATCTGAACTAAACA  
TTTAAATCCTCGAGTGAAGTCTTAAATGACCTCTTAAAGCTGTTTAAATCAGAAGTCTCAATGCATTCTCTGTACCTTTGAGCCATTCAACATTCTCAGTAACTCACTCGCCTTCTCCT  
TCGTGTTGTCACTGCACCCAACTTGCAGCAATAGCAGCAGCTTCTGAAAAGCTCCAACTGCATCGCCTCCTCAGACACTTCTCTCTACCAACATTATCTTCTGATTCTTACAGAGCTT  
CCAAATCGCCGATACCGGAATTCGTCGTGATATCCGACACCCTGAACATCTTCTTACGAGCAACGGCACTGTGAGGGCATGACTTGATGCCTTTTCCCTCCCAATTTCCGAGTTCAA  
ACTCCATCGATCACAACCAGCCCTTTCTCACACAAGTTCTTCTGAGCATCAACAAGCATGTCCAATAGAACAGTAACAAATCCTATCTCTGAAAACCTCGAAGCCACTTTCTCGTCTGAG  
GAGACCAAGTAATAGGCGGCGACGAGCGACGCCTTGGTTGCCCTGCGGCGAAAATGGCTCCTTGACAAGCCTCACAATTGACTCGATTAAGCCATCAGTTGCGGCAATTTGAGCAGCTTG  
TTCTGTATCGGCTGCAGCAATTTCTTTCACCATCAAACGGCATGAAGCCTACCTGACAGATTACCATTCCTCATCACAGAAACAATGGAGTTAAGAGATTGAGTCGAAGACAATAGCTTC  
CTCGCCTCCTCGCTAAGCGGAAGCATGCCGGCAAGTACCGACAGACCCTGTTCCGGAAGGGAATTCCTTAAAAACCTCTGAAACCACCCGTGCGGCGGCTCCGTTTGACGAAATGCACCG  
TCGGTTTCTTTTCGCTCTCATTTGACCAAGTTTGTAGTTTGGCCACAAGGTCAGAACATCGGGGACCATCCCTCTCAGCAAAGCCGCCGATATCTCAGAAAGCGTCTCCGCAACTTGTAC  
AGAGGTGATGGGAGATTTGGGTGTGGGATTTCGCTCGATGCCGTGGGAGCGGTGAGCGACACACCATTTGGATCATGCGGCGGATGGTGTGGTTAGGGATGAGGCCGCCGTGCGGCA  
CGAGAGGGAGTGGGAGGAGTTGGTTGGTGAGGGGACACGTGAGGTTGCCTGCTTCGAGCCAGGTCTCAATGCTTCGGCGATCGTACGTGATTCCGGTGGGAGGGTGACGGGGTCTTT  
CATTAGGTCTAAGGAGATTGGGCAACGAAAATGGTTGGGGATCGGGACGTGCGGAGGGGGAAGTAGAGTTTTAGTGGTGGTGGTGGGTCGCCGGGAAGTGAGTTTTGGGGCTAGTCTG  
CAGAATCTAAGAGGCA

>comp155724\_c0\_seq1

TTTTTTGCCGCAAAGGCTTTGACGAGAGTGGAGGCGTTGGAGAGAGGGGAGGGGAGATTAGCGCTGGCTTCCAGAGGATAAGGAGATGTTGCCGTCGCGGCGACCGGAGGGGAATTTGGT  
AGGAAATGTTGCCGTTAGGGCGGATGAGTCGCGGGCGCAAAGGCGATGATGTCGGCACAGGAGACTGTGTTGGGGCATTGGCTTCCACGGCGGATTTAGCGGCGTCGATCACCTCG  
AAGCCGTGTAAGCTTGGGTTGTTTGGGGGAGCGTCTTTTCTGCCGATTGTTGGCCGTTGAATCTATTAGCACTGAGCCATCGCAACCCTGCATGTTGAAATGATTGGGTTTTCTATTATA

TGTTGTATTTTGTCTGGGAAATTTTCTTATTTAATCTAAGCAAAGTAGGGTTGTGGGTGTGTTTGGCACAGCTTTTTAATATTTAATAGTAGAGTTTATTATTTTGTAAATATTTATTTGAGTTT  
TTTTTTAATGAGGATAAAGAAGCTCGTGGTTTGGAGGAAAAAAAAAACTCAAATAAAATATTACAAAATAATAAACTCTACTATTAATAATATAAAAAGCTGTGCCAAACACACCCACAA  
CCCTACTTTGCTTAGATTAATAAGAAAATTTCCAGCAAATAACAATAAATGAAAACCCAATCATTTC AACATGCAGGGTTGCGATGGCTCAGTGCTAATAGATTCAACGGCCAAC  
AATACGGCAGAAAAGACGCTCCCCAAACAACCAAGCTTACACGGCTTCGAGGTGATCGACGCCGCTAAATCCGCCGTGGAAGCCAAATGCCCAACACAGTCTCCTGTGCCGACA  
TCATCGCCTTTGCCGCCGCGACTCATCCGCCCTAACCGGCAACATTTCTACCAAATTCCTCCGGTCGCCGCGACGGCAACATCTCCTTATCCTCTGAAGCCAGCGCTAATCTCCCCTC  
CCCTCTCTCCAACGCCTCCACTCTCATCAAGGCTTTTGCAGCAAAAAACCTTACCGTCGATGAGCTCGTCACATTGTCCGGGGCCCACTCCATAGGGGTTTCCCATTGCTCGTCTTCAGA  
AACAGGATCTATAATTTAGCTCAACTAGTCAGGTGGACCCACGCTGAGCGCCGCATATGCGACACTATTACGGTTGGCTTGCCATTCAATACTTCCCAGTCGGGAAATACAACGGTGG  
CGTTGGATCTTATTACGCCGTCGGCGCTCGACAACGCATATTATAAGGGGGTTCAGTTGACACTGGGGTTGTTACGTCGGACCAGGCGTTGTTGACGCAGGCAAATTTGAGCACTGCCG  
TGAATGATAACGCAAACAATGCCAGTGGGTGGGCTACCAAGTTTGGGAGGGCGATGGTGCAGATGGGAACAACCTGAGGTGAAGACGGGAACGCAGGGGGAGATTGCGAAGAATTGTC  
GTGTTGTGAATAGTGCAAATCTCGGGAGTATTATAGGAGTGGATGTTAAGGAAGAGGAGGAGGATGAGTCTTTGATGGCTTCTATGTGAGTGAGAGGTGCATGTGTATGACTAACGGCCTA  
TGCTTTGCTTTATAAAATAAGATTGGAGGATGTCATTTACTTTGTCTTAGGACTAGCAATAATATATAGCTATCGATGTACGTACGCTGTTTTTTGACAAAATAATTGGTCATCCTTCTTTGT  
TGTTGTTCGCATGGGTACGTATAACAATTCCTCATGAGTGATGTTATAACTTAATATTTTTATTAATAAGTTGGTAAGTTGGGTGCATCAATATAAAGTTTTCTATTTTGTCTCTC

>comp155724\_c0\_seq4

CTTGCCTCTAATTGAAACAAACTATTTCGTGCGAGCTAGTAAAAGTAGTTCAAATAAAAATGCTTTCTTTAATGAAACTGCTATCCCTTTTTCTCCTCATCGTAGCGGTGGCTCCGCCGGCCG  
CCGTGGACGGCCAGCTGAAGGTAGGGTTCTACAGCCAGAGCTGTCCATTGGCCGAGAGTCTCGTCAAGCAGACGGTGGCATCTGCCTATGCCAACAACCCCGGCGTCGCTGCCGGCCTC  
ATTGCAATGTTCTTCCACGATTGCTTCGTCAGGGGCTGCGACGCTTCCGTCCTAATAGATTTCGACCAGTAGCAACTTAGCAGAAAAAGACGCTCCCCCAATAACCAAGCCTCCACGGC  
TTCGGAGTAATTGACGCCGCCAAATCCGCCGTCGAAGCCAGATGCCCAACACCGTCTCCTGCGCTGACATCATCGCTTCGCCGCCGAGACTCCTCCGCCCTCACGGCAACATTTTC  
TACGATATCCCCTCCGGTCGCCGCGACGGCAACATATCCTTATTCACCGATGCCCTCGCCAATCTCCCCTCCCCTCTCTCCAACGCCTCCACTCTCGTCAAAGCCTTTGCGGCAAAAAACC  
TCACTGCCGATGAGCTTGTACGCTGTCCGGGGCCCACTCCATTGGGGTTTCCCATTGCTCATCTTTCAGAAACAGGATCTATAATTTAGCTCAACTAGTCAGGTGGACCCACGCTGAG  
CGCCGCATATGCGACACTATTACGGTTGGCTTGCCATTCAATACTTCCCAGTCGGGAAATACAACGGTGGCGTTGGATCTTATTACGCCGTCGGCGCTCGACAACGCATATTATAAGGG  
GTTGAGTTGACACTGGGGTTGTTACGTCGGACCAGGCGTTGTTGACGCAGGCAAATTTGAGCACTGCCGTGAATGATAACGCAAACAATGCCAGTGGGTGGGCTACCAAGTTTGGGAG  
GGCGATGGTGCAGATGGGAACAACCTGAGGTGAAGACGGGAACGCAGGGGGAGATTGCGAAGAATTGTCGTGTTGTGAATAGTGCAAATCTCGGGAGTATTATAGGAGTGGATGTTAAG  
GAAGAGGAGGAGGATGAGTCTTTGATGGCTTCTATGTGAGTGAGAGGTGCATGTGTATGACTAACGGCCTATGCTTTGCTTTATAAAATAAGATTGGAGGATGTCATTTACTTTGTCTTAGG  
ACTAGCAATAATATATAGCTATCGATGTACGTACGCTGTTTTTTGACAAAATAATTGGTCATCCTTCTTTGTTGTTGTCGCATGGGTACGTATAACAATTCCTCATGAGTGATGTTATAACTT  
AATATTTTTATTAATAAGTTGGTAAGTTGGGTGCATCAATATAAAGTTTTCTATTTTGTCTCTC

>comp156337\_c1\_seq3

TCCATTTCCATGGAGCTTGTGCTCAAGCTTAGCTGCAAATCCGGCATCTTCTCATTTTCTTCTTTTATAAGCCGATCTCTTTTGTATCTCTTAGAGGTTCCCTCCCTTTCCAAAATTTCTTGC  
TTTGTTAACTCAGCCTGGTGTATTAGAGACTGAAAATTTGAGTCTCTTGTCTAGATTGAAAGGCAAAGGATCACGAAGGGAAGACTGGTTAATGATGTAGTTATTTACTCTCTTCCCAA  
AGTTAGAATTGCTCATGGAAGAACTAATCGAATTTCTATTGTGATATGTGCTCCTTCCCAGTTGCCATTGCCCTCTCCTCTTGGAGCTTGTAAGGTTTTCTTGATATCTCATTAAGTGTGAGCA  
CATCCCTCACATCAAATAAATGAGAAGCTGCTGTCTTCCCTTCTTTCTTAAAGATCATAACCATGTAATAATCCATTGGCATGGTCTTGTCTTTGATTGTGTTGGCTCTTGCTGCTATATGCTG  
GTTGAATACCCATTCTTGGTTTCTGAAGCTGGTGTCTTGAATCTGATATTGGTTGTTGGGACTGAGATTTCTGCAAAACCTTATAAAACCAATCATCTTCATGAATGTTTCCCTGCTCGAA



AGAAGCCCCCTCTCTCCATTCTGAAAGGCTGGTATGAACCAGGTCTTTGATAAAACATCTCATGGAAACGATCTTTCTCATATGAGCATCAAATGGTGACAATGCTGAAGAAATGTTGGA  
TCTTTCTTGCCAGAAATCATCAAGTTTTTTGCTTCTATACATCTGCAAGTGGCTTTTTACATGTGCAATACTAAGCCCCCTCACATTCATCATCTGAAGCACCAACTTTGGCGTTGCTCTCTC  
TTGGCCTCCAAGCCTTTCAACTGCATGAACAAAGGATAGGTGGAGCTCCGGCGTCCACCGCAATCTTGGCATTTTAGATCTGACATATTGTCTAACCGTTGGCCCCAACTGCTCCCTTCTC  
CCCTCTTACCCTCCTTGTCTCTACTCGATCCTCTACCTCCTTACCCTTGTACTCCCATGGTCGCTTTCTCCATAACTTCACTTGAGCTTCCCTTATCTTCTCCTCTTCTCTTTCTTTCT  
CTTCATTGACTTCTCGTTGAGGTCCAACGGCTTCGTGGCAGCCTAAGCTCAAGAGTTTCTTCATCATAAATCTCCACCACATCCTTCCCCTTTTCTCATCCATCACTTTCTTTTTCTTAG  
TTTCCAAGAGGTTGGAAGACTAAGTTGAAGGAGGTGATTGAGAAGAACAATAGTCTAAGCATATTGGTGACATGAATGGTTGAACCGTGAAGTAGAAGTATAGATAATAATATAAATAG  
AAGTAGGTGTTATATTTTATTAATCATGAAGGCCATATGAATTACAAGTATCCCTACATTGATTGGCTGTGTTCTTATAGTCTTCTTCTCTTTCTTCTTATGGGGGTAAACCCCTCA  
CATTAAGAAAAAGAAAAAAGAACAGTGGGTTGTA

>comp156389\_c2\_seq15

CTCTATCTCTCTCTTCTCTTCTCTCTCTCTTAAACTAGACAGCAAGCTCAATTCCTCTTCTCCCATGATTGGAGATTAAGGAAGCCAAAGAAGAACAAGAAGATCACAGAGC  
TAGCTTGATTTGCTTTCTGCCACTCCTGCTTAGTACTAAGCAAGATCATGTGTGATTACTTCTGGCAAAGGATGGATCAGAATAACCAAGGAGACCTCTCAGACATCTTCCGAAACAGCAG  
CAGCCACACCAGCAACGACTCCTGGCATCCACTGCCGGAGCCCGCCGGAGCCTTCGCGCCACCGTCCAACCTCTTCGGAGACCCTTTCGCTGAGATCGGAGACCCTTTGCTCGGTGAAT  
TCGCCACAACCAACTACTTCAACTCGTCTGAGACTACGATTGTTAAGACGAATAGCACTGGTCGTAGTGATGACTGCGGTGCACAAAAGATGCTACTTGAGGAGGAAGGGAAAGAGTAGC  
ATCTTCTCAAGGATGTTGCAAATCTCTCCGGTGATCCCCAGCAAGATGTCCGGCAGAGATCGGACCATCGCCGCTTGTGGGTACTATGGCCGGGGATAGCAGTGGATGTTTGCAAATCTCAT  
CAACAAGAGTGCAAGGGATCAAGAGAAGGAAAAGTCAGGTAAAGAAAAGTGGTATGCATACCAGCACCAGCTGCAGCAAGTGGCAGGCCAAGTGGAACTGGAGAAGTAGTTCCTTCTG  
ATCTCTGGGCTTGAGGAAATACGGCCAGAAACCAATCAAAGGTTCTCCTTATCCTAGAGGTTACTATAGATGCAGTAGCTCAAAGGGATGCTCAGCAAGGAAACAAGTGGAAAGAAGC  
CGACAGATCCTAACATGCTAGTCAACCTACACTTCAGAGCACAAACATCCATGGCCAACTCAAAGAAATGCTCTTGCAGGATCAACAAGATCTCATCCTTCAAAGAGCAATAATAGT  
GCTTCAACTTCCAAGAATCTCCTCACAACTTAAACCAATTAGCAACAAATATCAAGGAAGAGCACAAAGAGTGTTGAGCTCAACCATCAATTTAGTCAAAGAAGAAGAAGCATATGA  
GATGGAGAAAGCTTTGGTTGATCCTCAAGATCATGATTTTGATCAAGTGTTGATGAGAGTACTTTTATGATGTCAGATTGCAACCAGCCCGACGACTTCTTTGCAGATTTGGCTGAGCTT  
GAGTCATCCGATCCAATGAACCTCATCTTCCCAAAGGGATTTCATGGGAGATCACGATCATGCTAAGTTGGATGAGGAGAGGGAAAGAATAAGGCCCTTGGATCCCTTCAACATGTTTGAT  
TGGGAAGGAGGGAGTTCAATTGAAGAAACAAAAGAGGTTTATGACATGACCTCTCGAAACAAATCAACACCTTAGGCTTCATTCCGGAAAGCTTTTTCAGCTGCTTTGTTTTCAAAAA  
TCTCGCATGTTATATAATTTAGGCTTCAATTGGGATAGCTTCTTATTGTTTTCTATAGCCGCTTCTAATACA

>comp156389\_c2\_seq3

CTTTCTTACTGATTCTTAAACAGCTTTAAAAACAATAAGAAAGCTATCCCAATTGAAGCCTAAATTATATAACATGCGAGATTTTTGAAAAACAAGCAGCTGAAAAGCTTTCCCGAAT  
GAAGCCTAAGGTGTTGATTTGTTTCGAGAGGTCATGTCATAAACCTCTTTTTGTTTCTTCAATTGAACTCCCTCCTTCCCAATCAAACATGTTGAAGGGATCCAAGGCCTTATTTCTTTCCC  
TCTCCTCATCCAACCTTAGCATGATCGTGATCTCCCATGAATCCCTTTGGGAAGATGAGGTTTCATTGGATCGGATGACTCAAGCTCAGCCAAATCTGCAAAGAAGTCGTCGGGCTGGTTGGA  
ATCTGACATCATGAAAGTACTCTCATCGAACCTTGTATCAAATCATGATCTTGGAGATCAACCAAAGCTTTCTCCATCTCATATGCTTCTTCTTCTTTGACTAAATTGATGGTTGAGCTCGA  
ACACTCTTTGTGCTCTTCTTGTATTTGTTGCTAATTGGTTAAGTTGTGAGGAGAATTCTTGAAGTTGAAGCACTATTATTGCTCTTTGAAGGATGAGATCTTGTGATCCTGCAAGAG  
CATTTCTTTGAGTTGGCCATGGATGGTTGTGCTCTGAAGTGTAGGTGATGACTAGCATGTTAGGATCTGTCCGGCTTCTTTCCACTTGTTTTCTTGGCTGAGCATCCCTTTGAGCTACTGCAT  
CTATAGTAACCTCTAGGATAAGGAGAACCCTTTGATTGGTTTCTGGCCGATTTCTCCTCAAGCCAGAGATCAGAAGGAACACTTCTCCAGTTCCACTTGGCCTGCCACTTGTGTCAGCTG  
GTGGCAGGCCAAGTGGAACTGGAGAAGTAGTTCCTTCTGATCTCTGGGCTTGGAGGAAATACGGCCAGAAACCAATCAAAGGTTCTCCTTATCCTAGAGGTTACTATAGATGCAGTAGCT



>comp157125\_c0\_seq7

AGGATTCAAATACATAAAATACTCTAAAGATTTCTTATTCAATCTCTTGCAGATAAAAAATTTCAAATATAGAACTAAATATATTTATAAACAAAAGCTGGATCTGAAGAGGCCACTCTTTCTA  
CATGCATAAATCATAACGCGATTTTGACAGAGCTTTTTTGTCTGTTTTGCTGTCAATTTCCCTCTATTACAGCTCTTCTCTATTCCTCTCCAGAACCTTGGTTTTCTTCTGTAATCCAATCTTCTTT  
CTTTTCTCCCTTCCAGCTTCCAGTTTCCAATTCTCAGAGTTCTGAAAATGAATGATCTTCTAAAGAACTCTTTTGTCTTAGAATAGAGAGGCCAGACAGGTCTCCAAGAGAAAAGAGATAT  
AGAGTTAGGATTTCCAATGCAAAGCTTAAGAAGTGATTATGGAATGGAGGAATTTTTCAAACAGGTAACAAGTTGAGGAGCTTATGATAAAGCTCTCTAATAACCTCAAGAAGCTTCA  
GGAAGGCAATGAGGAGATCAAGGCTGTAACCTAAGGCTACTACAATGAAAGCTTTTAAAGAAAATAATGGATAGGGATATGGAAGAAGTGGGAATAATTGCACGCGCCATCAAATGAAATT  
AGAAGAAATCGATCTAGATAACTTAGAGAACAGGAAGAATCCTGGCTGTGGAAAGGGGACTGCTGTTGATAGATCAAGAACAGCCATGACAGTTTCTTAAAGAAGAAATTGAGGGATA  
AAGTTAATGATTTCCAGAATCTGAGGCAAAGTATACAAGAAGAATACAGGGAAATTTGTTTACAGTACAGGGACAACACCAACTGAAGAAATGATCGACGAACTG  
ATCGAGAATGGTGATAGTGAAAGAATCTTTAAAAAGGCAATTCAAGATATCGGAAAAGGGCAGGTAATTGACACCTTGGAAAGAAATCAAGAAAGGCATGATGCTGTTAAGGATATTGA  
ACATAAGTTGTTTGAAGTGCATCAAATTTTCATGGACATGGCAGTGCTAGTTGAGGCGCAAGGAGAAATGTTGGATAATATTGAAAGTCAGGTAGCAAATGCAGTGAATCATGTACAGAA  
TGGAACAGAAGCCCTTCAAATTTGCCAAGAGCTTGCAAAAAGAAATCAAGAAAATGCATGTTTAGTGCAATAATTTGTTCTGATAATTGCAATTATTATTGCTCTCTCAATCATTAAACCTT  
GGAAGAGATGAAACAGAAATTAACCTCTTTCACTATCATGAACTCCCCTCTTTCAACTCTCTTGTGATTTGCAGCTTTCAGGTGGCCAAAGAACAAGTTTTAAGGCATATTCAGTACTAAA  
ATGTAATTTCTTACTTATACTGGCTGTGTGTTTTGTTGCCAAATATGCTGTACAATGACTTCCCTCCACATTCTCCATCAAGCTATGTAAGTAGTAATTCGTTATTTTGAATTCATTGTAAAAG  
GTAATGATTACAGAATGTTTCAGCTGAATTTGAAATTTATAGAAAATATAGCTTCTTCTAAGTTTATGGTATTTATGAGAACTCGGTAATAATTTTAGTTTCTTGCTACA

>comp157483\_c1\_seq3

ATTTCTTTTATTATCTTTGGCCCCTTTTTTCCCTATAAATCTTCTTGTGTAAGCTTGGCCACATAATTTGTAGCGTGTATTAATGATTCTTTACTGAAGCTGTTATCTTGTAGTCATAAGAAAAA  
AAAAAAAGCTGCTTCTCATTATGCAACTATATATATGATACATTTATAAGCACCTAATGCACAAAGACAAAATACTCATTACAGAGAGAAAAAAGGAAACACAATTCAGG  
CCCTACATAATATGAACATAAGGGCTTAACAAGATAGCTTCCCAGAACTTTTTTTTTTTTTTTTTTATGTTCCCTCCTTAGTTTTCTAATCTTCTGTTTTTAACTTTCATATGAACTGACTCG  
TATCCAGCAAGTCAGGAATATGGAAATCAAATAAGTTGCTACAGTAACTATCTTTCTCATCTTCTTTACTGTTGTTGATGGTTGTAGAAGAGTTGTTTGAAGTCATGCTCGGCACAGGCCTC  
GATAGTTTTGTATCAAGATTATGTATAAGTTCTGCTCGCAAGAGAACTCACCGTTGGAGGCCTCATATAACAACTAGACATTTGGCTGTCCATGTTCCATTATTAGCTTTACTATTAGCT  
GCCATTAATTTTCACTCAAATTTGAAAGAGTTTACTTCGTTGACTGCCATGGACTTGCATTTATGAACTGAGCTGGGTTATAAAGTAAAGATGATGGAAGTTGTTGCGATATCGTTTGGTA  
ATAATTTGGCTGTGATCTTGAACCTGATTGTGTTTGAACAAGTTTTGCTTTTTGGTGCATGAGATTGATAGCAATCCTCAGTAACTCATGAGTGTTTAGTTGAGGCTTGATATCAAGCAATCT  
CAACGCATCGAGCCGAGCTGGCTGATTGAAAAGCACCGTATTGAGAAGGGAAGATAAGTTGAGGAGATCGAGCCTGGGTCTATGCGTACAGGGTTCGATTCTGAGCGAAGAAGCCTC  
TTCTTGATATGGGTGTTCCAGTAATCTTTATCTCATTATCAGTTCTTCCAGGCAAATGCGCAGCAACTGCAGACCATTTGTTGCCTAAGACGCTGTGCAATTGGATGATGGTCTCCTCCTCT  
TCAGAAGAGAATTTTCTCTCTTTATGTCTGGTTCGAAGATAGTTCCGCCATCGAAGCCTGCAGCTTCCCACATCTTGCAAGACCTGCATTCTTGGGGAGGGTTCTCCAAGTGCCATGGC  
CATGCTTCTGTATATAATCAATGAGCTTCTGGTCCCTCTGCGCTCCATGGCCCTTCTTCAAGCCAACCTTCTCACAGCAAGGGGATCTGCCCATATTCTTTGGCTTCCAAAGTTGTGAC  
AACAAAGGAGATTCTTCTGAAGGTCTCTTATTACAGTATTATCATGAAACGAGAGTGAAATTTCTGCTTATGGGATAAATTTGGCCATTAGACTGGGAGGGGAAGGATAAATAGTGACGGAG  
GGTAGAGGGAATAGCGAAAGGACAAACAATAATTTGATATTTATAAAAGTGGCCATCTTTTGGATATCGGAGTCTTGTCTGAGGTATATTCCAAGGTAAATAAATGAAAACAGATTATT  
ATCTAAACCAAATAAATCTATACAGTTCCCTCACTTCCCTTCTTCAACAATAGCTTTAGTTCCGAAGTCCCTCATGGCTCGTTAGTTTTATTTGTGCACTCTCTGTAAATTTGTAAAAATAATTA  
GCTTAGCCTTGTGGGCGCACAGTTGTATATTTAAATTTCTTCCACTTGACAACCTTTCATTGATTCTGATTGCCTCAATTATATGAACTAAGGCTCCGTTTAGGACAACCTTCTTATTGCT  
TTCAAAGTAGCTTCTTGTAAAAAATTTATTGTTCAAAAAAATTTTGTACTAAAA

>comp157807\_c0\_seq1

TTATTATTTAGAGGACTTACTTATTTTTTATCGCTAAAAAATATCTTTAGCAACCAATTTCTTTTTGTCTCTATTTTTTTGATTGCTATTGACCTATTTTCTTTTAGATAGATCAAAGGGAAGGG  
AAGGGTGCCTCAAACCTGAACATAATAGCGCGCAATCTATGGAACCTAGATTTACTAATAAGAAAGATAATGGTTGCTTAATTAGGAACTTCTGGAGTACTGGTCCTAGCATCTGGCATA  
ATGACAAGTGGAAAACCTACGATAACCATAATTAAGTACTAGATGGAGCTAACACACCAATTAATCAAACAGCTATTATCAATGCTAAACTCATCCGCTGCCTTCATAAACTTGCATTTGTT  
CACGAAGAGATCTTTGTCTAAGTAACCCAACGCCCTTTACTGAAAGGCTGTGTCTTGATCAATGGATTTCTATCGAAGAAGTTGAAAGGACGAAGCTCAAAAACACAGCTCAACATCGA  
CATTAATGGAAAATCTTCTTGGCTTGGAAATGTGATGAAACCCCACTGTGTACCACAACACAATATCTGTATTTTCAATTGATCGATTCCATGCTCCATTGGGCCAAATTATCATCTCCCCT  
GCTCTGATCCGCATAAAGGCCGGCTGCCCATTTCTCCTCCCTGTTATACGGCGTCACCCACAACCTGCTTCTTTGTATACGCCGCTCGAATCTGCGGGTAATCATCATCACTCAAAAGCGATG  
TTGCCGCCGATTACTGCCAACAGACGGTACCCTGCCGCTTTCCCAACGCAGTTCTACCCCGTTGTTGACAATAAGTAGTTCCGACGCCGTGCTGCCGAGTTGGATCCGTGCGTCCG  
CCTCGGTCTTCGCCGTTTCCCTGACGACGGTCCAGTAACTTCTCCTCGGCGTGGGATGGGCCGAGTTGGACCGGACGGTTTTGAGGTTGGCTTTGACGAAGGAGTTGGCCGGACCGGCG  
ACGTCGAGGTCGAGGTGGAAGGTGACAAAGTGGTCTGTTAGACGGCGATGGTATTGCGGCCACAAGCTCGCCGTGTTCTGCTGGTGTGATTGGTTGGTGTGGGTATGGGTGGAGGC  
TTTGAGGGCCAGAATCCGGTAAGGCCCGCCGAAACTTTGATGGTGCCAGTGGTCTTAAACTCCCAGTCAATCATGTAGTCATAGTTTCCAACGGTTGAAACCATTCTGACAATAAGCT  
CACCTCTTCTGCTCTCAGTGATTATTTCTCCCGAAGCAAAGTCTCTGTATGTCTCCACGAAGGATCACCCGCATATCGCTCGAAGATGCAGAAGACGTTGGATATGCGGAGAGTTTCG  
CCATTCTGAGCCGCATAGTAACCATCCATGAACCTCGGCGTTGGGCCGGCAATCGACCGTTGGCTCAAGCGGCAAGCAAGGAGGCCAAAGCCATACTCACCGGCATCCATGTACGTCTT  
GAAGTACCATTCTCACAAGGATCCATGTAGGGGATGAAGAGCTCCGAGACGAAGCCCCGGTAGAGAACGCTCTCCGACCGGCCATGGTGGCGGACGTGTCTGTTGATGGAGGCCAGG  
GAGATGACGGCGCCGGCACGGAGTCTGAAGGCCAGGTGGAAGTCCCAATTGGCCACCTGATCATATGGCCATGGATGCTGAAGCCCTTCCCTCCGGCTGCACCACCACGACCTGTT  
CCCCCTTGGCCAAACGGCGACCTTTGCCTCGCCGCCATACTCTGTTCTTCCGCGCTGGCACTGACAACACCACTCTATCCCTATACTCCACTATCTCCATATCATCTAAGTCGACCG  
TTATCGTTACTCCCTCAATAGGCCTCGCATAGAAGTTCGCCGTCTCGCCGGCAACAAAGCAGAGCACCGCGGCTCTCCTCCTGTTCTGCTTCTTCCCCAAACCACCTCTCGCATAACGA  
TGACACACAACATCCTCAATCTTCGCTCCTCTTCTCCTCACTGACTCCAAAATGGCTTGTAGTTCATTGGAAGCAATCCGGCTTGCCTTCTCATTGTTGAAAGGATGGGTAGGCG  
GGGCCAGGGTAGATGTGGTGGGAGATGATGGAGGCTTTGGTGATGTGATGATGAGTTCGTGGGTTTGGCGGTGCGCGGAGGATGGCGAAGGCGCGGAGGGGGAAAGGGGGAG  
GAGGAGGCCGACCAGGATAGGATGGTGGATTTGTGCGGATCGTCGAGACCCACATAGTGAAGGAGAGGGAGGAGGAGGCGTTGAGATGGGAGGAGGTGATGATGGAGCGGATGGTT  
GAGAGTTCAGAGGGAGTGAGGGGGTCAATGGGTGAGGGTGGGAGTAAGAGGAGGAGGAGGAAGCAGAAGAGGAAGAAGGGGAGGAGGCAAAGCTTCATGGTTGGTTTCATCTA  
GCTGCGTATAGGGTTTTTGTCTAAGTACGCCATGGAAGTACGTGATATTTATGCAGAACTGGCATGGATATTG

>comp157887\_c0\_seq1

GTGTGCTCCAAAATGGCTCTCCACAGCCTTCTCGTACCATCTTCTCCTCTCCGGCTTACCAGCCGCTCCTTTGCCAGTTTAAACAGTGGCAGACCAATCACTACCAGCCATGGCCCGGC  
TGGATTGATTGACCCAGTTCTTCTCGAAGCCCTCGGCCACTCTCGCCACTCCTTTGCTTTGCCAATTGCTCAAAGTATGGGAAGAGCTACGGATCTGTGGAGGAGACCAGGAAGA  
GATTCGGGATCTTCATGGAGAATTTGGAGCTAATTAATCCACCAACCGAAAAGGGTTATCCTACACACTAGGAGTCAAACAAGTTCGCCGACTGGACTTGGGAGGAGTTCAAAGCGAGC  
CGGCTGGGAGCCGCACAGAAGTCTCGGCGACTCTCAAAGGCAATCATAAATTGACCGAGGCGAAGCTCCCCGATACGAAGGACTGGAGGAAATCTGGCATAAGTAAAGCTCGGTGAAGG  
ACCAAGGAAGTTGCGGGTCTTGTGGTCTTTCAGCACTACTGGAGCCTTAGAAGCTGCATACAAACAGTTAACTGGAAAGGAAATATCTCTATCAGAGCAGCAACTTGTAGATTGTGCAT  
CTGCGTTCAATAACCATGGCTGTGATGGAGGCTTACCTTCAAAAGCTTTGAGTACGTGAAATACAATGGAGGTCTCGAAGCAGAAGAAGCTTACCCGTATAAAGGTGTCAATGGCGTAT  
GTGGCTTTAAGCAGAAAATATTAGCGTCAAGGTTATTGATTACGTTAATATCACTACTGGAGCTGAGGATGAGCTGAAGAAGGCAGTGGGACTAGTTCGACCAGTTAGTATTGCATTCTGA  
GGTTGTACGTGGGTTCCGGCCTATACAAGAAAGGAGTTTACAAGAGTGATAAATGTGGGAGTTCTCCAATGGATGTGAACCATGCGGTTCTCGCTGTTGGCTATGGAGTAGAGGGTGGAGT

ACCTTACTGGATTATTAAGAATTCCTGGGGAAAAGACTGGGGTGATGATGGCTGCTTCAAGATGGAATTAGGCAAGAACATGTGTGGTATTGCTACTTGTGCATCTTATCCTATTGTTGCAG  
CTTAGAAGAATCTTCTGTGAAGAATAATAATTATATGGAAGAATAAAGTTGATATCAAGGTTGAAATAGACATGTAAATGAGGACATGAGAATTATTCAATGAATTGCATGTTTTGGTTGTTT  
GGTTGAGAAGATGATTAATAATGATGTGAAAATTCCTCCTGTGTAGGGTTAATGAAAGAAGAAATCTATCCAATCTCTCTTAGTATAAAGTAAATAATTAAGAATTTT

>comp157887\_c0\_seq2

AAAAAAAAACGAATAGTTATAAGCAATAAGCAGGACTACTGTACTTGATTATACTGTATGGTTAATTAATACTTTGTAGTTAACTCAAAAACTCCATTTTGTATAAGGATGTGAACCATGC  
GGTTCCTCGCTGTTGGCTATGGAGTAGAGGGTGGAGTACCTTACTGGATTATTAAGAATTCCTGGGGAAAAGACTGGGGTGATGATGGCTGCTTCAAGATGGAATTAGGCAAGAACATGTG  
TGTTATTGCTACTTGTGCATCTTATCCTATTGTTGCAGCTTAGAAGAATCTTCTGTGAAGAATAATAATTATATGGAAGAATAAAGTTGATATCAAGGTTGAAATAGACATGTAAATGAGGAC  
ATGAGAATTATTCAATGAATTGCATGTTTTGGTTGTTTGGTTGAGAAGATGATTAATAATGATGTGAAAATTCCTCCTGTGTAGGGTTAATGAAAGAAGAAATCTATCCAATCTCTCTTAGTAT  
AAAGTAAATAATTAAGAATTTT

>comp158132\_c0\_seq5

AGTCTTCATCCTGAACATGAGAAAATCTCTTACTACTAATCTTATTGTTTCAGCTTGGAAATTAAGTGTAGAAAGCAGTTCATGGAGAAGAAAAGAGCTCATGAGTAGAAGAGG  
AGCAACCGGCATCACTACAAAAGTGAAGAAATATTTGCTTCTGATGATGGTACATGCAAGTCAAGGGTGGAGATCTTTGGTTATCCATGCGAGAATCACTCGGTCACAACAAAAGATGG  
ATACATGCTTAGCTTGCAAAGAATTCCTGGTGGGAGGACAGGTGATTCCTCCAAAGGCAACAAAAGGCCCTGTTTTGCTACAACATGGCCTTTTCATGGATGGCTTCGCATGGTTGGTGAA  
CTCGCCAAATCAGTCATTAGGATATGTTCTTGCAGATCATGGCTATGATGATGGATCGCAAATGGTAGAGGAACTGTTTATAGTCTGGGACACACTTCTCTCTCTTCAAGTGATTCAGGAA  
CTTTAACTGTTCTGGCATCAGTCAGTGAACAAAATCTAGTTAACAGACTAAGTCTGCTGCCTTGCTTTGTCCAATAGCTTATTTGAATCAAATCCATCATTATTCATGCATGCAGCTGCCA  
GAATTTATCTTGGAGAACAATTTACTGGCTGGGCGTTGCTCAACTAAATCCAAGTATGATCAGCAGTGAACAAATTTTGGAGACGGTCTGTTTGTGTTACAGGATTTGACTGCTATGACTT  
GCTAACATTAATCACAGGTAAAACTGCTGCCTGAACTCATCATCTGTTCAATTGTTTTGGACCATGCTCTGCAGTCAACTTCAACGAAGAACATTGTTCACTTATCTCAGACAATGAGA  
AGCGCCATGTTGACAAAATATGACTACGACGATGAAGCAAAGAACATGGCGCATTATGGCCAGAAAACCGCTCCAGCGTACAATATGTCGCGTATTCCAAACGATTTTCCGCTCTTTATGA  
GCTACGGGAAAGAAGATTTGCTTGCAGATGTGAATGATGTGGCGCATCTTTGGAAATCATTGATCATAATAGAAATAATTTGACCGTCCAATTTGGGGGATTATGCACATATGGAT  
TTATAATGGCTGAAAACGCCAGCCAGCTTGTATTATCAGCCTCTCATGGATTTCTCAATCGTTATTGAGATTTTGTGTTGTGACGCTTCTTACTGCTTCTTGAAGCA

>comp158132\_c0\_seq7

CCGACAAGGAGATTCGTCCGGATTCGTTGCGTATTTACTGAGTATTTGATGCGTATTTGTAAATACTTAACGCATCAAATACTTAGTTGTCCTATTACTAAGTATTTTGTGAGTATTTGCTGAT  
TACTGCATGTGATTTATTGAGTATTTACTAGTATTTAAAAATACTCAGTAAATACGCAACAATCCGGATGATTCTTCTCCTCCAGAGTCCCCACAGAATAATTTCTCGTTTGAAACAGCTT  
AACTTTTTATAAAGTTGATTATAAAGTTGTTGTAGAGAAAATAACTTTCTTTGAAAGCTATTGTAACGACGCATGATCGCGAGTCGGGAGAGCCCAACCAGCACAAGAAGGTAGGTT  
GGACAATAGCATCGTTAAAAGTCTGCTAATACCCAGTTTTGACAGCAGTTTTCAAACCGTCCATAACAAGTGTGCGAATGATCACATTTTTCAATAGTGTGCAGCTTCTTATTATTAG  
CTAAAAAAATATGATAGCAGTCTATCTAAATCAAACTTGATGCTCATTTAAAGCTTTCAGGGATCCAGTTAGTCCACATTATGATTAAGAAATGAGTTAAAATTTCTTATAATCATATT  
AATTCATAATACCTTATATAGGCTTATTGGGATTGGTCATGGGATGAACTAGCAGCCTATGATCTTCTGCCACAATTGATTATGTGTACCAACAAGCAGGTCATCAAAAAATCCATTATGT  
TGGGCACTCTCAGGGAACCTTAACTGTTCTGGCATCAGTCAGTGAACAAAATCTAGTTAACAGACTAAGTCTGCTGCCTTGCTTTGTCCAATAGCTTATTTGAATCAAATCCATCATTAT  
TCATGCATGCAGCTGCCAGAAATTTACTTGGAGAACAATTTACTGGCTGGGCGTTGCTCAACTAAATCCAAGTATGATCAGCAGTGAACAAATTTTGGAGACGGTCTGTTTGTGTTACAGG  
ATTTGACTGCTATGACTTGCTAACATTAATCACAGGTAAAACTGCTGCCTGAACTCATCATCTGTTCAATTGTTTTGGACCATGCTCTGCAGTCAACTTCAACGAAGAACATTGTTCACT  
TATCTCAGACAATGAGAAGCGCCATGTTGACAAAATATGACTACGACGATGAAGCAAAGAACATGGCGCATTATGGCCAGAAAACCGCTCCAGCGTACAATATGTCGCGTATTCCAAACG

ATTTTCCGCTCTTTATGAGCTACGGGAAAGAAGATTTGCTTGC GGATGTGAATGATGTGGCGCATCTTTGGAAATCATTGATCATCATAATAGAAATAATTTGACCGTCCAATTGTTGGGG  
GATTATGCACATATGGATTTTATAATGGCTGAAAACGCCAGCCAGCTTGTATTATCAGCCTCTCATGGATTTCTTCAATCGTTATTGAGATTTTGTGTGACGCTTCTTACTGCTTCTTGAAG  
CA

>comp158325\_c2\_seq4

GGACTCTGATTTCCAATAAAAATAGAGACACTATCTCACCACAAGATAGTACCAGGCCACCCAGCAACTTCCTCTAAGTCCCAGCTGATCAAGTATAAAATACCAGTCGCAGCATCCACTCT  
CTCCATCACTAGAAAGCAAAATGGCTTGCAATACTACTTTGGTCTTCACATTGTCTCTTCTCCTCGCCCTCGTCTTCTCTAACAAGTACTCACCATGCCACGCCGCTCGCCTTCTGCTACAAG  
TCACCGGGAATCCAGAACTCCCTCCTTTCCCTGAAATCCCAGCTTTTCCCAAGCCGAATTGCCTCCGTTTCCCGAGCTTCCCTCCCTTCCCTGAATTCCCCGCTTCCCTAAACCCGA  
CCCTCCATTACCAGAATTCCCCACACTGACAAAACAGGGAGAGTCTGATTTCGGCGAAGGTGGAAGAGCCGAAGCTGTTTCGAGCCCCGAGCTGCCTCCGTTGCCCGAGATCCCTCTTGACT  
TGCCCAAGCCCGAGCTTCCGCCATTGCCGGAGATCCCAGATGGCTTGTCTGAAGCCTGAGCTTCCGCCATTGCCCGAGATCCCTCATGACCTGCCGAAGGTGGAGCTTCCGCCAGTGCCG  
GAGATTCCTCACTAATTCCCAGAAGAGCCAAAGCTGCAACCATAAACTTCTCACCATAGTCCCTGTCTTGCTTTGTAGTCGATTAATCAATCTATCTTATATTAATATTGCTACCGAAATATT  
AATACGAATATAATTATGATTTTCATACATAAAATTTTTGTGTTCTTTTTTATATTAGTGGAGTGAAAGTCGGATGAACGCCTCATCAGTTACAAAAAA

>comp158648\_c0\_seq1

TAGATGGCCAAGGAGGTCCACTTTACACAGGTTTCATGTTGCTTCCATAGGAGAGATTGCTTGAAAGGGAGAAAATACAGTGAACCTAAGTAACTGAGCTTAAATGGGAAAGACCTCAG  
ATTCTTGAAGCAAGTAGTAGAATTTTAGAGGAAAAAACTAAGGATCTTGCAACTTGCTCCTACGAAGAGAGCACCCAATGGGGAAAGGAGATTGGTTTGAAGTATGGATGTCCAGTAGA  
AGATGTGATCACTGGATTTGTCATTCAATGTCGAGGATGGAATCTGTATATTTCTGTCCAAAAAGAGAGGCTTTTCTTGACTTGCTCCTACAACACTATCTCAGACTCTAGTACAACACA  
AGAGATGGTCTGAAGGCGACCTTCAAATTTTCTCTCCAAGTATTGCCCTTCTCT

>comp158648\_c0\_seq4

TACTAATTGATGGAAGAGATCAAAAATGCTCGAGACTCCGAAGGATTTGTAATGCCTACAGTTGTTTATGTGGCTCGTGAGAAAACGCCGAAGTTTACCATAATTTTAAAGCTGGGGCCCT  
TAATGCATTGTTGAGAGTTTCTGAGAAGATAAGCAATGGACCAATCATTCTAACTATTGATTGTGATATGTATGCTAATAATGCTGGATCGGTTAGGGATGCTTTGTGCTTCTTTATGGATGA  
AAAGCAAGGCCATGAGTATGCTTTTGTGCAGTTTCTCAAACCTATAAAAACACCACAAAAAATGACTTGTATGCAAGTTCCTTAAAAATATTCAAAGGTGGATTTCCAGGGTTAGAT  
GGCCAAGGAGGTCCACTTTACACAGGTTTCATGTTGCTTCCATAGGAGAGATTGCTTGAAAGGGAGAAAATACAGTGAACCTAAGTAACTGCGAGCTTAAAG

>comp158912\_c0\_seq3

ATGACGCAAGTACTTCCGTCCTAGACGCATGGGTCCATTCCTTCTCGCCTACTTAAACAACCTCCATGCTCAAGCTGAATCAGCGTAGCTTCCGAGCCCCTAATAGTCTCCTGTTACTTCA  
GACAAATTAATAACCGGAGCAGCGGCGGCGGACACCCATGGCCGGAGAGACGGTGATCGGCCGCATAAAGCTAGGGTCAACAAGGGCTCGAAGTCTCCGCTCAAGGCCTCGGCTGCA  
TGGAATGTCTGCCTTTTACGGCCCCCGAAGCCCGAGCCCGACATGATCGACCTCGTTCACCATGCCGTTGCTCTGGCGTCACTTTTCTCGACACCTCCGACATCTACGGTCCCTTAC  
CAACGAAACCCCTATTGGAAGGCTTTAAGAGAAGGGTGGCGGGAGAAAGTTGAATTAGCGACAAAAGTTTGGCATAAGGGATGGAGGGAATGGGATTAGGGAGGTACGCGGGGAACCC  
GCTTATGTAAGGGCGCCTGCGAGGGGAGCTTAAAGAGGCTTGGTGTGACTGCATCGATCTGTATTATCAACATCGTATTGACACTCGCGTTCCAATCGAGGTACAGATGGGAGA  
AGAACTGGTTGAAGAAGGAAAGATAAAATACATCGGATTATCTGAAGCTTACAGCGTCAACTATAAGGAGAGCTCATGCAGTTCACCTATTACTGCTATCCAGTTGGAATGGTCTTTATG  
GACTAGAGATTCTGAGAAAGAGATAATTCCTACTTGCAGAGAACTTGAATTGGAATTGTTGCATATAGTCCACTTGAAGAGGTTTCTTGTCTTATGGGCCAAAGATGGTTGAAGGACTA  
TCAGAGCAAGATGCTCGCAAGAAAATGCCTAGGTTTCAAAGTGGGAATGTGGAGCAAAATGCCGGGATATTTGAACGTGTGAATCAATGGCATCAAGGAAGGGATGTACTCCATCTCA  
GCTTGCCCTGGCTTGGGTTTCATCATCAGGGAAATGATGTCTGCCCCATACCTGGCACAACCAAGATTGAAAACCTCAACCAGAACATTGGAGCACTATCTGTAAAGCTTAGCCCTGAAGA

ATTGGCTGAGCTCGAATCCTATGCTTCAGAAGATGTCGTGAAGGGTGACCGGAAGATCGCCGGAGCTCCCAGTTGGGTGGATTCTGAAACCCCGCCTCTTTCTTCATGGAAAGGAGAAT  
GAATGATTCTATATTGCTTGTGCCATGCGGATGCAGAAGCAGGTTACAAGTTCTATTTTCTGCATACTGTACTTCAGTTTAAGAAATGCTTGCTGGTATTTTATGTTTGTGGTGATTAGTGTGC  
TGTGTTGAGTGTATATGTTGCTAATGTATGACAACTTTATTGAGCTTAAAAGGAAGGAAATCACATATGGCTCATCTTGATCTGTTGGTTGGGGGTTTTGACTACTAACTAAGAGGTCTTG  
AGTTCGAAACTTGTGTGTGTGAGTTTGCCTTAATTGGCCTAAATGTCCCCAAAAAAAAGAGTGTGTTTCAGCGGAGTGATTATTCGTCCTGTTACTGCATCCGAAAACCAATACTAAAAC  
GCCACGTCACTAAAGTGCTCGGTACAGCGCACTCGGTACACTCGGTATGCTCGGTATTGCTCGGTATTTTCATCGGATGTAATAATTTTTCCAATACAGGCTTCGTGACACAAGAAAATGG  
TTTATATTTGACCACATGTGATATGAAATTTTATGCTAGATTTAGGAGTAGTGGTAGGTTGT

>comp159033\_c0\_seq1

AAAATTCACGCAGCTTCATCTAAATAGATTTCATCATTTAAATACAATAAATCTTCTACTATGCCCTATAAGCAGAAGTAAACCTTCTATACAAATAAATTAATTCAGCATATATAAACGACA  
CTTACAATATTCGGCAGAGCTTCTTTAGTTAGCACAGTTCGTTGACAAGCTAGCTTTTTACAGTACTGAATTTGCATGAGAGCATGTATTGTGACTCACCCATACTCATCAAACACAAATGA  
AATATGACAAAATATACCATGAAGAGTGTGATTAGAGGCATCCATTCATTCTCTCTATCACTCCTCGCTCGAATTCACGAAGGTGAAGAGCATGAGTCAAGCTTCTTCTCTATTTTCATCC  
GCCATTAGAAATGGCTTCTCAGCATTCTCATCTGCAATACAAGCATGGATGCTGCTCAAACCCCTGCTTCTTAAGCAACTCCCTTACCTTCAACACCACCTCCTTGTAACCTTATCATCTC  
CTCATCATTTTTCTCTCCTCTCTCATCATCATCTGTATCGCATTGCTGAATGCACCATATGCCTTCCCCTCTGTCCCCTCCACCTCATTTGGGCTCATGTGCGCCGATGTCTCATCGGTTTGA  
CATCCACTAAGCAAAATTCACCATCCTTGTGTCATCATCTGCATCTTCATCATCAGTATATGATCGATGGAGAAGTGTGCCTGGGACAAACATGGGGCTAGCGTTGGAGCCAAAGAGGT  
TGGTGAGGTGATCGCTGACGTTTGGAGATGTGAGGCCAGAGATGGAGGAGAGATGGTGGAGGACTGAGTCAAGGGAATGTACTTGGGTCGTTGATGAGCAAGGATGTGCTTGTCTCGG  
TGTGGGAAGGTGGAGTTGGAGGGCCGATCTGCTCCTTCTCATTTTGAATTAGGCCGCCGAGTGGCACGAATCAGAGATCATGGTGAAGGTTGCATCTTTAGGAAGTTGGTTAACCAG  
CTCTCGAAAAGTCTACGTCGGTTAGAAGATTGAAGTCACATGGAACAATGGCCTCGTCGCGGGCGGGTGGCGACGGCCATTGTGTGGATTACGGATGGTATGAGTGTCCCATGACCGCT  
GTAGTGA AAAACACGATATCGCCCGATTGGCCTGATCAATCATGCGTCTTAACGCTTGTGCAATATTGGCGCCGGTCCGAAGCAGCTGTGCTCCTGGCTCATCAGTTAGGATGACTATA  
TTGGAGGCATCGAACCCGAACCGGTGCGATGAGAAGGTCCCTCATGGCTTCCACATCATTGATGCATCCACGAAGCTCATTCCTAGTGCCGGCATAAGTTGCACCCTACCAAGGTAGCCAGC  
CTCTTCTTAATTTCCATATTACAATTCTCTGGAAGTCTACTTACAGGAAGGAAAAACAAGGGAAAAGAAGGTGGAAGTGGTGTCAAGTCGAGGAATCTTGATGAATATTTGGTTGAGTTG  
TTTTC

>comp159051\_c1\_seq14

TGACAAAAGAAGGAATACGCAAAGGGCCCTGGACAGAGCAGGAAGACCTGCAACTGGTATGCTTTGTGAGCTTGTTCGGTGAACGTCGTTGGGATTCATAGCAAAAAGTGTGAGGTTT  
GAGTGGTGGCGGGGGCTACTACGTAGGTTACAGGTGGAGCTAACAGTTTAAACAATACAAAAGGGCTTTTGTTTTATCTTTTGCAGGTCTTAACAGAACAGGAAAGAGCTGCAGGTTGCGC  
TGGTTTAATTACCTTCAACCTGGCCTCAAGCATGGACGCATGACACCACAGGAAGAACGCCTCATTCTTGAGCTCCACTCTGAATGGGGCAATAGGTGGTCTCGCATCGCTCGAAGACTC  
CCGGGCCGAAGTATAATGAGATAAAAAACTACTGGAGAACCCATATGAGAAAAAAGCACAAGAGAGGAAGAAAAACTCTTCTTCTCAGCTTCAACGATTTCAACTTGCCTCTCTAC  
TCACAGTGCATCACCATTAGATGCAACTACAACGAAAAACGAGGAAGATGGGAGTTCTTTGATTACGGAAAAAGAATCCAGAGAAAAAGAATATGCTGTTAATGTGTATCCTATGGAACA  
GATATGGAATGATATTGCCTCCTTGAATCAGGAGGCTCGAGCTTTGCCAGTGCACGGTTGAGCGTTGCAACTTGTATGTGATCCTCCTCCAATGACCTCCTGTCCAGGAACACTTT  
GTTGATTATCTATGGATGATGGATGACAATGAATTCAGCAAGATTGCTACTTCAATGATTTCCGGTTTCTGACTTCTGGCATAATAGAGTCTTAGAATCAACTAAGTGTGACTCTCCCTC  
TGATAATTTTCAAATATGTGAAATTTTATTAGCACTTAGGAAACCAGGCTCTCTCTTTTGTAAAATTAATTGCACCTTGTCCAATGGTCAGATGTCCTACTTGAATCTACTATGCATTATAAG  
TTATTAGTTACCTATTCAGGCATTTTTTGGAGTTCACCTAGTCTTCTAACGCCATATCCATAAGATTTAAATGAATTGTACTACCGTACATGTGTGTGCTTAAGCATATATGATAGTGTGAAAT  
CCTTAAAATTTTTAAGATTTTTTTTTACTGATCTAGAACAGTCAATAATAATTTCAATAGTTATTATAAGTCTAAATCACAAATCATCTTTGCCAGAACAT

>comp159078\_c0\_seq3

ATTATTATTAATAATATATAATAATATCATTATAATTAATTTTCAGTAGATAATTCATAGAAATTCCTTTAGGGATTCATAAATTACAAAAAGATAGTCATAAATTAAGTATTTATTAGAAA  
ATTATTGTGAAATCGGTTTGCAAAACGGACACCTAACGGTCCAAAAATCTCACTTGACCGACATTTCAACAATGCCAAAAATTAATAAAAAATTAGGGAAGCTAAAACAAAAACTA  
TAAATGTTCTGGCAAAGATGATTTGTGATTTAGACTTATAATAACTATTGAAATTATTATTGACTGTTCTAGATCAGTAAAAAAATCTTAAATTTTTTAAGGATTCACACTATCATATATGCT  
TAAGCACACACATGTACGGTAGTACAATTCATTTAAATCTTATGGATATGGCGTTAGAAGGACTAGGTGAACTCAAAAAATGCCTGGAATAGGTAATAAATCTATAATGCATAGTAGAA  
TTCAAGTAGGACATCTGACCATTGGAACAAGTGCAATTAATTTTACAAAAGAGAAAGCCTGGTTTCCTAAGTGCTAATAAAATTTACATATTTGAAAATTATCAGAGGGGAGAGTCAAC  
ACTTAGTTGATTCTAGGACTCTATTATGCCAGAAGTCAGAAACCGGAAATCATTCCAAGTAGCAATCTTGCTGAATTCATTGTCATCCATCATCCATAGATAATCAACAAAGTGTTCCCTGGA  
CAGGAGAGGTCAATTGGAGGAGGATCACATGACAAGTTGCAACGCTCAACCGTGCCTGAGCCCTCGATTCCAAGGAGGCAATATCATTCCATATCTGTTCCATAGGAT  
ACACATTAACAGCATATTCTTTTTCTCTGGATTCTTTTTCCGTAATCAAAGAATCCCATCTTCCTCGTTTTTCGTTGTAGTTGCATCTAATGGTGATGCACTGTGAGTAGAGAGGCAAGTTG  
AAATCGTTGAAGCTGAGGAAGAAGAGTTTTTTCTTCTCTCTTTGTGCTTTTTTCTCATATGGGTTCTCCAGTAGTTTTTATCTCATTATCAGTTCGGCCCCGGGAGTCTTCGAGCGATGCGA  
GACCACCTATTGCCCCATTAGAGTGAGCTCAAGAATGAGGCGTTCTTCCCTGTGGTGTGCATGCGTCCATGCTTGAGGCCAGGTTGAAGGTAATTAACCAGCGCAACCTGCAGCTCTTT  
CCTGTTCTGTAAAGACCAGTTGCAGGTCTTCCCTGTTCCGTTCCATGGTCCTTTGCATCTCTTCGCTCACCACCACCATCAATCTCTTCTGCGTTGTCTTTATAGGATTATCTGGAAGAAGCT  
TGACCTTCTCCACTCCTCAGAAACAGCTTGCAACTTGTTTTGCTTGGAAAGATTAGTAGTCTT

>comp159078\_c0\_seq4

ATTATTATTAATAATATATAATAATATCATTATAATTAATTTTCAGTAGATAATTCATAGAAATTCCTTTAGGGATTCATAAATTACAAAAAGATAGTCATAAATTAAGTATTTATTAGAAA  
ATTATTGTGAAATCGGTTTGCAAAACGGACACCTAACGGTCCAAAAATCTCACTTGACCGACATTTCAACAATGCCAAAAATTAATAAAAAATTAGGGAAGCTAAAACAAAAACTA  
TAAATGTTCTGGCAAAGATGATTTGTGATTTAGACTTATAATAACTATTGAAATTATTATTGACTGTTCTAGATCAGTAAAAAAATCTTAAATTTTTTAAGGATTCACACTATCATATATGCT  
TAAGCACACACATGTACGGTAGTACAATTCATTTAAATCTTATGGATATGGCGTTAGAAGGACTAGGTGAACTCAAAAAATGCCTGGAATAGGTAATAAATCTATAATGCATAGTAGAA  
TTCAAGTAGGACATCTGACCATTGGAACAAGTGCAATTAATTTTACAAAAGAGAAAGCCTGGTTTCCTAAGTGCTAATAAAATTTACATATTTGAAAATTATCAGAGGGGAGAGTCAAC  
ACTTAGTTGATTCTAGGACTCTATTATGCCAGAAGTCAGAAACCGGAAATCATTCCAAGTAGCAATCTTGCTGAATTCATTGTCATCCATCATCCATAGATAATCAACAAAGTGTTCCCTGGA  
CAGGAGAGGTCAATTGGAGGAGGATCACATGACAAGTTGCAACGCTCAACCGTGCCTGAGCCCTCGATTCCAAGGAGGCAATATCATTCCATATCTGTTCCATAGGAT  
ACACATTAACAGCATATTCTTTTTCTCTGGATTCTTTTTCCGTAATCAAAGAATCCCATCTTCCTCGTTTTTCGTTGTAGTTGCATCTAATGGTGATGCACTGTGAGTAGAGAGGCAAGTTG  
AAATCGTTGAAGCTGAGGAAGAAGAGTTTTTTCTTCTCTCTTTGTGCTTTTTTCTCATATGGGTTCTCCAGTAGTTTTTATCTCATTATCAGTTCGGCCCCGGGAGTCTTCGAGCGATGCGA  
GACCACCTACAGCCAAAATTCATCATTATTTATCTTAGAATGTTTGAAGAGAAAAAATAAATAAATGTTTGGATATGGCAAAGATCAACCAGCTCAATGGAACAGTAGAATAGGAG  
AGGTTGATAAGTGCAAGATGAGTTATGGTGAAGAATATAATGAAACCTATTGCCCCATTAGAGTGAGCTCAAGAATGAGGCGTTCTTCCCTGTGGTGTGCATGCGTCCATGCTTGAGGCCA  
GGTTGAAGGTAATTAACCAGCGCAACCTGCAGCTCTTTCCCTGTTCTGTTAAGACCAGTTGCAGGTCTTCCCTGTTCCGTTCCATGGTCCCTTTGCGTATCTTTCGCTCACCACCACCATCAA  
TCTCTTCTGCGTTGTCTTTATAGGATTATCTGGAAGAAGCTTGACCTTCTCCACTCCTCAGAAACAGCTTGCAACTTGTTTTGCTTGGAAAGATTAGTAGTCTT

>comp159155\_c0\_seq4

TAGAAACCAACAATAATATACCAAAAACAATCATGGAAACATCAAATACTACTTTAAATACAAATTGAGACATTAATCTCAATAGAAATTAACCAAATCTCTCTCAACTATATCGACTAAA  
TAATAATATTGAAACAAATTCAATTGAAGCGAGAACAATCTCTCCTGATCTCCCATTTTTCCCAGTCTTCACTCTACCCGCCAGTCTGATCATGGCTTGTGAAAACGCCGAGGTGAA  
GCTCTGAGGATTGAAAGCGAAGTTGTTTACTATCGGCTTTGATATGGGATTGCCGAAAAGCACTTGATCTGAACTGAATATCCCCCTCCCATTCACCAACTCACGGTAGTAAGCGTTATCA



AACACGTTTGGGGTTTGTGGGTCCATGCTAATTGCTACCCTTGGGTCCACATTCTCGGGCAGGCCTGCATCAATTGTCGTGCATATGTTGGGTTGAGGGACGGGTTCGACCTTGTGGGTTCG  
CATTAAATGAATACAGACGTTTTGCAAAAACGGTTGCAGTGAGCGAACCCGATTGTATGCGCACCCGAAAGGGCTATCATATCCGTGACCGATAAGTTATTTTTGCGAAATATCCAGGATAG  
TAAGTTAAAGCTGAGCTCGGGTGTAGGGAGATTTCCAGGGACCCGCCACCGATGAGATACCAGCCCATCTCGCCGCCGAGTTTCGACCGAGAAGTTCCGGTCCGCCTGACTGCTCAAAGA  
ATTGAATTGTGGAATAACTTAGTTATTTCAATCAATTAACATCCTGGAATATGCATAACTTATAGAGATATTTACTAATTTATATGAAGAGATACTTACCATAAGAACAACATCTCTAGCAGC  
TATGGCCAAGATATCAGCACATGAGACTACACCGGGGCAAGCAGCCTCCACCGCTTGCTTGGCCTTTATAACCGTGTGCAAGCCATCTCCGGCGAGGGAGAGATTGTCACTTGCATCCTT  
TTCAGTATCTCCCTTCGTAGATTGAATTAGGATTGATCCGTGCAACCCTCAACAAAACAATCATGGAAAAAGAGCCTTAGTGTTGCTGGAACCGTCACAAAAGTTTGGCTCTTTTTCCAT  
GATTGTTTTGTTGAGGGTTGCGACGGATCAATCCTAATTCAATCTACGAAGGGAGATACTGAAAAGGATGCAAGTGACAATCTCTCCCTCGCCGAGATGGCTTCGACACGGTTATAAAG  
GCCAAGCAAGCGGTGGAGGCTGCTTGCCCCGGTGTAGTCTCATGTGCTGATATCTTGGCCATAGCTGCTAGAGATGTTGTTCTTATGTCAGGCGGACCGAACTTCTCGGTGCAACTCGGG  
CGGCGAGATGGGCTGGTATCTCATCGGTGGCGGGTCCCTGGAAATCTCCCTACACCCGAGCTCAGCTTTAACTTACTATCCTGGATATTTGCAAAAATAACTTATCGGTACGGATATGAT  
AGCCCTTTCGGGTGCGCATACAATCGGGTTCGCTCACTGCAACCCTTTGCAAAAACGTCTGTATTCAATTAATGCGACCCACAAGGTCGACCCGTCCTCAACCCAACATATGCACGACAA  
TTGATGCAGGCCTGCCCAGGAATGTGGACCCAAGGGTAGCAATTAGCATGGACCCACAAACCCCGAACGTGTTTGATAACGCTTACTACCGTGAGTTGGTGAATGGGAGGGGGATATT  
CAGTTCAGATCAAGTGCTTTTCGGCAATCCCATATCAAAGCCGATAGTAAACAACCTTCGCTTTCAATCCTCAGAGCTTACCTCGGCGTTTTACAAGCCATGATCAGACTGGGGCGGGTA  
GGAGTGAAGACTGGGAAAAATGGGGAGATCAGGAGAGATTGTTCTCGCTTCAATTGAATTTGTTTCAATATTATTATTAGTCGATATAGTTGAGAGAGAATTTGGTTAATTTCTATTGAGA  
ATAATGTCTCAATTTGTATTTAAAGTAGTATTTTGATGTTCCATGATTGTTTTGGTATATTATTGTTGGTTTTCT

>comp159160\_c0\_seq4

AAATAGTTGTTCAATACATCATTCAATTCCTTCATACTCTCCAAAAATATATTAACATTTAATACTTATTTATTTATAAACTACAAAAGTACTTTAAAAGTTACTAACACAATCTAATTACAAAT  
TGCCTTATAGACCCCTTGCATCAGATTACTGGCAGAAGTGGAGGCCTCGTAGTCTCATCAATCTCAGCTTCATGAATCTCTCCTCTTCTGCATTTCCGAATCTCCAGGTATCATCTAGGTCT  
ACTGCGGGGTGGATATTTGCTGAACCAAAACTTGGCATGGCCATCACTTGCTGATTTTCCCCCTCACTTTCCCTTCTATAAAAATCTACCATCCTCAACATCATAAAAAGTTCCAGTCCCTCAC  
TTCCTGAGCCAGCGAGCATGACCAACAGAATAGCCATTGCATGAAATCAGTGAAATCTGGATACCCACAGCAGAAATGGTTTTTCAGGAAGTTTGAATTTCTTTCTCATTGAAATCCTCCAA  
AATCCTCCATATAGAAGCCCAACATGCAAAGAACAATGCCTGTAATCCCCACCATGTATCTAATTACAACATCATTGATATTGAGAGCTGTTACGGGAGAACTATAACTGTTGCACCGCA  
GAGAAATACGAATGTGAAGATGTGAACATACATGTTACCAAATCCAAGCCTCTCCATGTTCCATCCGAAAAACGCAAGATGTGCAGAAGAAGGAGAGAGAAGCAACAGCTTGATAATCCC  
AGCAATCAAAGAGTCTCCAATCCACTCTGGTGAAGTATCCACCACCCTATTGCTGTATTGCCTTGTCTCATTAATCGAATTCTCATCCCTGCTATTTATTGTCATGGCTACCTGACTCACCG  
CTTCTTCATCGTTCTCAGCTTCAGTCTTCCTTCCAAGAGGGGCCAAAGAATGCATAAATACCAGCAATGACTGGTGCTACAGTTCCTGTAGCAATGCAGATAATCTGTGGCCAGGCAGGCCT  
CGTGTGCTTGAATATGCCAAAAGAGAGTACAAAGGCCATATTGAGAGAAAACAAGTTATGTGCAGGAGGACAACAACAACATCATATGAGCTCTCTCATGTGGCTTTCTTGTTCATT  
CTTGCAGTATATCTTTCTCAGCTCCAGAATGTCCTTTGATCTCCACTTACATAAGAGAACCAAAATGGTGGAAAGATCCTCGGGTGCTGATACAAGCACATGATGGTGAAGAGAGCATTGAGG  
ATTTGGTTGAAGATCTCTGTCCATTTCTTTGCAACCGAGCTTTTGGGATGGCATTGTTGAGGAGCCCAACCATGAACAGGAAGAGCACAACAAGGCAGGCAGCAACGAAAAAGAACC  
AAACAAGAAGAGCTTTATTCATTGGGTGCTTGATCCAGTTCTTGCAGTATCTAACAATGGCTTCCAGTTGATCTTTCGGATAAAAAGGGATATGGAAGCGGGCGGCTCCCATTTATGGTGGC  
GGTTATGAGATCAGGATGTGAAGAGCTGCTCCTTGTGTTCTGGCTCCGACTTCTGTTGAAGAAGTAGAAAGGATGGATTCTGGTTACAAAATTGAATTTGTGAAACCAATCTTTCGATGGA  
TTAGCTTTCAAAAAATGTAGGAATCCTTTCTTGCAGGATGATTCTCATTGAGGAGAACCTTTGTAAGTGTGGGATGTCTTCGAGATTTACATTTGTGCTAACTGTTGTTGCTTCTTTTGTCTCA  
CCAATGACACTAGACTCCATCTTTTGTGCAACAAGTAATTGATAGTAGATATCCTTTGAAGAGCACAGGCTAATTAAGGAGAGAAATCTCGACTGCTCTCCCTTGTCTCTCTCTAGCT  
TGTCAGAAAGTCAGCGAATGGT

>comp159173\_c2\_seq1

GTTAGGAAATGACCGTTTTGTTTTTCAAATATTTAAATGAAATAATACAAACGGTGAGAAGGTTCGGATATTGCTTCATTGCTTGCCACCAAGAAAAATGTGATAGCTTTCTTGCTTGGC  
CACCACGCCCTCAATAACAAAGAGTGACGCCTTCCCATGCGTAAGCTCTGTTGTCTGAGCCTTTTCTGTGTGCTCCTCATCAATAATTGAGAAAAACATCTTACATCTTCAACGTGCCTGTT  
AAAGTCCTCCCTTATCAAGAGAAATTATTATGTGAGGTTCTGTGTGGAGATTGGACTCAGCTCTATATCGGAGGTGAATCAGGTGCAATCAGTAAGTTCTTTAGTGCCTTGCCAGCAATTT  
TTGGGAATATTTTTTTTGGCACTGGATGATGATCAAAGGAAAAAAAACCTATAAAAGATGCCGACTGGGCTGGAGATCCCATCACCCGAAATCTACTTCTGGATATTGTTCTTTTCTTG  
ACAAAACATCTCATAACTTGAAACGTTAAAAAGCAACACACCGTTGCAAGATCCTCCAAAGAATATGAATATAGATCATTAGCGGCCCTTACCTCCGATATAATTTGGCTGAGACGATTACT  
AGCTGAGTTCGACATCTCTCCAGATCAACCCACGGATATGCATTGCGACAACACGTCCGCCATTGCTTTAGCCAACAATTTGGCGTTTCATGCCCGCACAAAGCACATTGAGATCGATCAA  
AAGTTTATAAGAGATCATATTC AACATAACAACATTCGTCTTTTACCATAAGCACTATTGATCAGGTGGCCGATATATTCACCAAGCCACTATCCACAAGAAGATTCATCAACTACGGCTC  
AGACTGACGATCGCTCAAGACCCATCAATTTGCAGGGGACATTAAGGACAATTCCAAATAACATTTATTTGTTAATACAATTGGCATCACCTCATTGGCTCTAGCTTGTCTTAAGTCTTGT  
CCTTTTCTATATATAGATACCTATATTGTAGTCTCGGAATATGAAAAATAATACATCTCCTTCTTCTTAAA

>comp159194\_c0\_seq10

TCTTTATATTTTACAGTAAACATTTGATCTTGTGGAAATATCATGAGAGAACAATCATAGATTGGTATAAAATTGAGAAATCTTGTAGTAAGAATTTGATTTTGTGAAGAACATTTACAGAA  
CAAGCAAGAGCTAGTTAAAAATCAGTAGATTTTCGCAGTAAAAATGATCTTGTCTGAAGAACCGACCAAGGTAAGCCGTGACAGCATCGGTGTAGGTGTAGTTACGCTTGCCGGAGATGG  
GATCGCCGGAGCGATAGCAGTCGGAGAGTAGAGAAGAAGTGTAAATATATGACGAAGGAGAAGAGGATCATGACGACCCGGCCGGCGACCCACCCGAGCTGGGCGATGGCCAGGCCA  
GAGAAAGCACACCGGAGCCTATCACTGCGGTGATTATGTGAGCACTCGCCGTCCACATCGTTCCTTTTCGCTTTAAGCGGCCGTCTGTCATCGAAGCTTTTGAAGCATTTCGTGCTTTTCATT  
CTGGCTAAGCTCTATGGAGACTTCCATGGGAGTGAACACAGCTTGAGAGTAGTACTTAACAGCATTGTTTTCGGTCATTTTATCGAATAGAAACAAACAGTGAGCGATAGTAGGAAACGA  
GAAGGAAGCGAGTGAGCTGAGAAGAAGTGGGACGATGAAAGTGTGGATGAGGGAAGTTGCAATATATAGAGAGAGATGACGCGTCTCAACCTCAGTATCTGCTGTCAAATCCCATCTCTA  
CTTTCTCACGGCCGATTTGCTGGTAAATCTTCTTGGCGTAATCAGTTTCATTCCCCTCCTCTCTCTCTCTCCCTCTACCTCTCCCTCTGTACCTCATCATTTTAATACCATGAAGCCTACA  
TTCCTACCGA

>comp159260\_c0\_seq1

GCAATGGAAGGAAAATGGGTGAAGCTAGAGCAGAAAGGAAGCGTACCCGGCGCAAGAAGCTCTCACGCTGTTGCTGCAGTTGGGAAGAAAGCTTATGTCTTCGGGGGCGAGTTCACA  
CCTCGCGTCCCAGTCGATAACAAGCTCCATGTATTTGACCTCGACCACCGTGTCTGGTCCAGCCCTAAGGTCGTTCGGAGACATTCCGCCGCCTCGAGTAGGCGTCACAATGGCCGCCATT  
GGCGACATTATCTACGTCTTCGGCGGCCGCGATGCCGATCAAAAGGAGCTCAACGAGCTCTTCTCATTTCGACACCCGCACCAACGAGTGGTTTCTGCTCTCGTCGGAAGAAACAGGTCC  
TCCCCACCGCAGCTACCATTCCATGGCGGCGGATGACCGTCGCATTTACGTCTTTGGTGGATGCGGAAATGCCGCGCGGCTTAATGATTTATGGGCGTACGATGCTACTGATCACGAATGG  
ATACAGTTCCCATCGCTGGGGAGGAATGCCGCGCGGAGGCGGTTTACGGGCTGGCTGTATCAGCAGGGAAGGTATGGGTTGTGTATGGATTCTCAGGCGCGGAGCTTGATGATGTGCA  
CGCATTTGATCTTTCGAGCAAGGAATGGTTCGGTTCGTGATAACCACCGGCGGCGGCGGCAAAAGCCGAGCCCGAGGAGCGTGTTCGAGCGTTGGTATTGGGAAGTATGTTTTATTTA  
TGGCGGAGAGATTGATCCAAGTGACTTGGGGCATCTTGGTGTGGCAGGTTTGTGGGGAGGTTTATGGACTTGATACTGAGACCTGTGGTTGGATTAAGGTTTCCGTCGGCGGCGGCGG  
CGAAAGTCCGGGACCGCGTGGGTGGTGCATCTCTGGTGCAGGATGATGGTGAGAAAGGACTCTTTGTTTACGGAGCCACCAAATTTGGTTGGACGCTGGTCCAAAATGTAGAAG  
CACATGCACAACCAAATTCAGGCATGCATTTGTGCAGCACTTTCTCAAACAGAAAAGTAGGAAGACCACAATGTTGAGATTTAATGCCTTCCAGATATCCTTTAATTAAGCAGTTGTTT  
TTCATAGCTTCTCTAATTTAATATGGA

>comp159366\_c2\_seq5

CTTCAGACCATCTCTTGTGTTGTACTAGAGTCTGAGATAGTGTGTAGGAGCAAGTCCAAGAAAAGCCTCTCTTTTTGGGCAGAAATATACAGATTTCCATCCTCGACATTGAATGACAAA  
TCCAGTGATCACATCTTCTACTGGACATCCATACTTCAAACCAATCTCCTTTCCCCATTGGGTGCTCTCTTCGTAGGAGCAAGTTGCAAGATCCTTAGTTTTTCTCTAAAATTCTACTACT  
TGCTTCAAGAATCTGAGGTCTTTCCCTTTAAGCTCGACGTTACTTAGTTCACTGTATTTTCTCCCTTTCAAGCAATCTCTCCTATGGAAGCAACATGAACCTGTGTAAAGTGGACCTCCTT  
GGCCATCTAACCTGGAAAATCCACCTTTTGAATAATTTTAAAGGAACCTGCATACAAGTCATTTTTTGTGGTGTTTTTATAGGTTTGAGGAACTGCACAAAAGCATACTCATGGCCTTGC  
TTTTATCCATAAAGAAGCACAAAGCATCCCTAACCGATCCAGCATTATTAGCATAACATATACAATCAATAGTTAGAATGATTGGTCCATTGCTTATCTTCTCAGAAACTCTCAACTGCATG  
TTTAAAAATGATTTTCGTTAGGCAAGAAAGAAAATTCAACAAAAATAATAAAAAATTTGTGATAAGAAAATTCAAATATAAGTAATTTACTTAAAAATAAAATTATTCATGAACCATATAGGC  
AAGAAAAATATATGTTGTATTGCTTATATTTAATGAGTTGGTTTCAGAAATAGCATGTCAAGATTCTACCAATGCATTAAGGGCCCCAGCTTTAAAAATTATGGTGAAACTTCGGGCGTTTCTC  
ACGAGCCACATAAACAACCTGTAGGCATTACAAATCCTTCGGAGTCTCGAGAATTTGGATCTCTTCCATCAATTAGTATCT

>comp159366\_c2\_seq6

TTTTTTTTTTTTTTTCTTGTCTTCTTCTTAATATCCATTTAAGAGTGCCTTTGTAACTTGAACCTAAAAATGCGATTGATAATCTTACATGAAACCAAGATGATTTTTTTGAATTTATAAAAT  
TTTAGGGTTTACCTTTTGAATAATTTTAAAGGAACCTGCATACAAGTCATTTTTTGTGGTGTTTTTATAGGTTTGAGGAACTGCACAAAAGCATACTCATGGCCTTGCTTTTCATCCATAAA  
GAAGCACAAAGCATCCCTAACCGATCCAGCATTATTAGCATAACATATACAATCAATAGTTAGAATGATTGGTCCATTGCTTATCTTCTCAGAAACTCTCAACAATGCATTAAGGGCCCCAG  
CTTTAAAAATTATGGTGAAACTTCGGGCGTTTCTCACGAGCCACATAAACAACCTGTAGGCATTACAAATCCTTCGGAGTCTCGAGAATTTGGATCTCTTCCATCAATTAGTATCT

>comp159408\_c0\_seq3

TAATACAAATTTGGTTTGGAAAAAAATAGTCAATTCAACATTACAGTGCAGCTCCAGCGCTGCAATTCCCTCCAGATATAATTAGTCAAAGCCGCGCACTCCTCCCCTTTCGAATCCTCC  
GCCTCCCTCTATTTCTCCTTCCGTCCTTCGATCCGATCGAAAAGCTTCGCTCGCGCGCGCATGATGCAGTTCACCGAAAACCTCCTCCTCCGCCTCTCTACCCAACCCGCCCATGGCCGGA  
TTTCCCGAACTCCGCCAAATCGCTCGGAAGCTTCAACAACGCGGGCGTGTATGGAGCAGCTGCTCGTCCACTGCGCGCACGCCATCGAAGCCAACGACGCCACTCTCGACAACAGCTCC  
TTTGGGTTCTCCACAACATCGCCCTCCTGACGGTGATTCCAACCAAAGGCTTACCTCTGCTTTTCTCCGCGCTCTGCTCCTCCGCGCATCTCGCTCCGGCTCTTCCATATCCGCTCCGGCG  
ACACCGCACCACCCACAGTTCCTCTCCGTCCTCAGCTATATCCCTCGCTGGCTTCATTGACCTGACTCCATGGCATCGCTTTGGCTTCTCTGCGGCTAACTCTGCAATTGCCGATGCGGC  
TGATGGATTTCTGTTCTGCATCTGGTCGATTGACTACGACTCACTGTATGCAGATTCGGACGCTTATAGACGCTTTAGCGTCCGCGGCTGAAGGTCCTCCTTTTCTTCGACTTACCTTACC  
GAGCACGCCGGCGTCAACTTCGCCGCCGCCGACGCTTGATATCACTGGACGAGCTGGGCTCCAGGCTCGTTAATTTCCGCGGATCCCGCAACGTCGGGATGGACTTCCGAGTTGTTCC  
TTCTACGCCGCCGACGGCTTCCATTCCTCCTTGAGTACCTTGGAGCCAACTGCAACAACGCCGGCGAAGCCCTGGTAATAAACTGCCACATGATGCCGCACCCGCATCCCCGACGAATC  
AGCCGGCGGGATTCTATCACCGCGAACGGTGTTCGCCAAGTCTCTTCGCTCACTGGACCCATCGCTCGTCTGCTCGTACGACGAAGAAGCCGACTTACATCCTCCGACGTCGTAACGA  
GGCTGCGCGCGGGGTTCAACTACATGTGGATAACGGTTCGATGCGGTGGAACGTTTCTGCCGGCGGGGAGCGAGCAGAGGCGGAAGTACGAGGCAGCGGTTTGTGGAAAGATTGAGAA  
TGTGATAGCGCAGGAAGGAGTGCAGAGAGTGGAGAGGTTGGAGCCGAAGGGAAGGTGGGGCAGAGGATGAGGGCGGCTGGGTTTGCCTGGGATTGGGTTTGGGGAGGAGGCGGCGA  
TGGAGGTGAAGAGTATGCTCGACGAGCATTCCGGCGGGGTGGGGGATGAAGAGAGACGACGATGATTTGGTGCTTACGTGGAAAAGGACATGACGTGGCTTTTGTACTGCTTGGGTTCT  
TCGTCGCCACATCATGAGATCGACCTCATATTTCTTCTTCGTCGCTTCTTTCGCTTCTTTCAGCTGAATGTTGGTTTCTTCCATCGAAGCGAGTAGCTGGTCGACGCTTGTCTTGTGTTGG  
GAATTAATTGCGTTTTATTTTTATTGTTAGGTACCCAAATATAAATTTAAATGCAATCAACAAGTTTTTCAGTTTGTATATACAGAATGTGTTGAGTTTAGAATTAATTTACTTAT  
TGGA

>comp159539\_c0\_seq3

CTGTATGACCATGACCTTGAAAGGTGCTTTAAAACCTTTAATCTGAGTCTTCATCCTAATTGTTAATGTTTAACTTTGTTTAAATTGGACCACTACTGCAACTATTATTTCAAATCTCCGTT

CCTTTCGTGAAGCTTATATTTAGCATGGTTGGATCTTCTAGTGTTTATTGGTACTACATATTACAATTATAATTTTTCCATGCTTGGATCTTGATTTAATGTCATGGTTTTGACATAGTATTTACC  
CTACAAAATGTACAATCCTTGGCTTCGACTTAGTTTTCTTCTCATTTTTGCCGCACCCTTTGTCAAAAATTTCTCCTCTGCATCCTACAAAAATACATGAAGGCATTGTGGAGGTTGTTCTGCTG  
TTTTACAGCTACATGTAAATTTTATTCAATTGGTATGGATATGTGAGTTTTTATGGATAATCTCAAAGTAGCTCGAATAGATATTTAAATATTATATGTTACTAATGTAATGTTAAAAATTTTCAAG  
TGCTGTGATAATCTTAAGCAGTTTAGCAGCTTGGTCATTTTTTTCTTTGTTTTTATTAATATTAATAATGCTTCATGCAGCTATGCACCTTTTTGGCATGGATGGCCAACAGGTTCTCAAGAGCT  
CGTCATTAAGTTGGAGAAGCATTGAGAAAATCTCAAAG

>comp159783\_c0\_seq3

TTAGTACAAAAATTTTTAAACTAGAAAATTTTTGTATTGAAAATTTATTTTAGAAAGCAATAAGAAAAGTAATCCCAAACGAAGCCTTAGAATAAGAAAATATTATTGGAAGTTAGAATCAGC  
ATACTAAGTGATGGGGACATCGGAGCTTGGAAAGTCTATCAAAGATGTGGCCGTCAATGTACGACCACGATCGAGTCGATGATTTTTGAGTAGTATTATGATTTTGTCTTTTTATTGTTTTATA  
TATGTTTGTATTTGCTTTTTTTTTTATTTCTACTCTTACCCCTTACTTAAGGGATGTCATGTGCAAGTCCAAAGAGCATTGTCGCTTTTTATTTTTGAGTTCTTTGCATGAGGCTATATATATC  
TCTTATGTTATCTTTTCATGTTGAATGAATGATTACTGAAATTTCAACTTTTGTGTCTCTTGGTGAGTTTATTAGTTTTGGAGAAAAGCTTAGGAGAGGCTAAACGCATTACCAAATAAT  
GAGTTCTTGGTTCTCTAACCTTTTTCCCTTTCTTCTCTCCCTTGTATCTGTCCGCCAAAGATCACCACCAAG

>comp159874\_c0\_seq1

AAAAACAAACAATAATTAATCTGTTATTTCTTTTTATTTTACTTAGAAGCTTGATCGATCATGGCGGGCCTAGATCTCAGCACCTCCGCCACTTCTCCACCCTTTCACCATCTTCCCAA  
TCACACTCCCACCTCATCAGACCACAACAACCTCCGACGACAACGTTTCCCCTTCCGCCGCCAAAGCCGGGGCCTTTGACCTTATCTCCCCCGGGAAGTCATCGGCTCAAGACCACGTG  
GCCGCCACCTGGTTCCAAGAACAACCCAAGCCACCAATCATCATCACCCGCGAGAGCGCCAACTGTCTGCGGGCCACATCCTCGAGATCTCCGGCGGCTGCGATATCTCGAAAGC  
GTTGCTAATTACGCTCGCCGCCGGCAGTGCGGCGTCTGTGTACTCAGCGGCAGCGGCACCGTCACCAACGTCAGGCTCCGGCAACCGGGCGGATCCGGCGGCGCAGTCGCTCTCTCCA  
CGTTCGCTTCGAGATCTTATCTTTTCGGGATCCTTCTTCCGCCGCCGGCGCCACCGGGAGCCACCTCGCTCACCGTCTTCTTGCAGGAGGTCAGGGGCAGGTGGTCCGGCGGGAGTGT  
CGTGGGCCCGTTGATTGCCGCAGGACCCGTGATAGTTATATCCGCCTCCTTCAAAATGTAGCGTATGAACGGTTACCGCTGGAGGAGGAGGCGCCTCCGCAAATGGAGCTGCCCGTAGG  
CGGCGAGGAAGGCGGCGGCCGGCGATTTTGTGATCCGTCGGGAGTCGGATTGCCGTTTTTTAATCTACCGTTGAATATGGAGAGCTTGCCTTTTCCATCGTAAGTCCGTGAGGTTGG  
AAGTTGCAAAGGTTTGAACCTTGAATCGAAGGGTTTTGCTCTGTGTGGACATTAATTAGTTTATAAATATATCTACTCTCTGTCTTCTTAATTTTCCATTTTCTGCTTGTGTTCTTGGTCTCAT  
CGGATGGCTTTTCATGTATTACTATAATTTTTTGTATATTTATTTCAAGATCCAATCTTTAGCAGAAGTTCAAGTACATAAGCAGCCAGCGGTGCCAGCCGCCAGTATCGTTTGAACAAA  
CTGTCCACTAAGTAAATTCATCCCTCGGTGAATTTCTTCGTCCCTATCACCAAATCTGCACGGAGCTGCCGGCGGCCTCTCCGGCCGCTACCAACTCCTTGAGCTTTGTTCCCGTCGCGA  
TCATCGTTGGATTCTTGTCTTGACAGAAGTTTGAATCTGCCATCAAATCACAATAAGATGTTTTGAAATTATGTGTGATTGATTCATCGGGGAAGATTCAAAGTTCAAATTTGTCGCAATC  
TGTCAAACTCGCAAATATGAGTCATTTACCTATAAGAAGATTGGAGCCACTTGGCCATTTTCGGATCTTCCAGCTGCTCATAGCATGGATCATATTTTTTTGAGATTATTCTGACTCTTT  
CTTATATGCAGTGATTTGTGAACCGTCAGTAGTACTGGTACTTTGTCACTCTTGGACAATCAAGCCATTAATAATTTAATATATCAACTGCATTGTTGTTTTTTTTGTTGACAACTTCAATGA  
GCTAGGTACCCTCCATTTGGAAATAATGGAGTTTTGTAGGAGCTACCTTGGAGATCCACCCTTGTGACCCGCATGGGCTGGCTAACATATTACCAATCGATCTGACTAAGCCAACCCA  
GAAGGAGAATGTTTAGTCACTTTTTAAAATGAGAAGGGAACCATTTTCATTTGTTGATTCAAGGCATTGATTTGGTGGATTATGTGGAGTTGTTTTAAACCACCATTTTTTAGAACTTTG  
GACTAGGAGCACATATAGGAATTGTAGAGGATCCTAGAGTTTTGATTGCTTTTAGGGAAACCATATAACCATACTTGTTCATGCTTATTTGATATTTAGCGATTGATGTTATATGACTTTAT  
CACTAATTGATGTTTACCTAACATATATCTTATTCCTAAACATCATCAATCAAGGCCGTCAACCTA

>comp159962\_c2\_seq1

CAAACCATTAGAAGGGGGGAAATTAATATATTAGATAAGCAGTTTCTACAACAACCTCCATTAAGGCTTACAAGACAAGGACAAACTTCCATTTTATTTCACGATAAGAACACACACAG

AGCAAGGAAATTA AAAAGCATGCTTGAGATAATAAACCCATTCATCCAGCACTCACACGCATGCATGTCTTATTCATTATTCATTAATACGCATAATTATAAAAACCCAGACTATTCATTGCTCAT  
AAGCTTCATAGTTTTCCCATTTTCCCTCATGTTATTCTGCTCCTCGCTTGAAACTCCTGTTGTCCCTTTAAGTGCAGTGGCGATGTCAACATCGTTAGAACCATAGGTACTCTTCCCAATAGA  
CCAAATGGTTGGACCGTATATAACAACATTATGGCTCGTTAGTAGTATGAGGATATAGTTTCCATCTTTTCCCTTCAGGTCTTTTATTATTCATATGCGAATACCATTTTTGTATAGATAATGA  
GGTTGCCGTTCTTTGTAAAGGTGAGGTAGCAACCTGAACTTTCATCTTTGGTGTTCGAAGACCATATCTCATCCCCAGAGTTGTAGAGGACGAGGTTGCAATCATTTCGGATAGTAAAATT  
GTCGCTACCCTGTATGAGGGCTTCGCTGTGTTGAGCCGCTCATTGCTGAGCAAGTAGCTGGAGGTCTGGCCTGAGGCAGGGGTGGTGAGGAGTGAGAGGGAAGTAGTGCAAAGGAGA  
AGGACCTTCATCATGGAGAAGAAAGCCATGATTAATTAAGTAGA

>comp159962\_c2\_seq10

CAAACCATAGAAAGGGGGAAATTAATATATTAGATAAGCAGTTTCTACAACAACCTCCATTA AAAAGCTTACAAGACAAGGACAAACTTCCATTTTATTTCAACGATAAGAACACACACAG  
AGCAAGGAAATTA AAAAGCATGCTTGAGATAATAAACCCATTCATCCAGCACTCACACGCATGCATGTCTTATTCATTATTCATTAATACGCATAAATATAAAAACCCAGACTATGCATCACTCA  
TAACCTCCATAATTTCCCATTTCCCTCACGTTATTCTGCTCTTGGCTTGAAACTCCTATTGTTCCATTAAGTGCAGTGGCAACGACAACATCGTCAGATTCATAGTTATTATGTCATTAGA  
CCAAACGCTTGGACCGTATATAGCAACTTCATGGTTCCCTTTGTAGTAGTATGAGGATATAGTTTCCATCTTTCCCTTTAGTTCTGTCTTCCATATGATAAATACCTTTTTTTGTTAATAATATTGAGTT  
CGCCGATTCTATTTAAGGTGAGGTAGCAATCTTTACCAAGACCTTTGGTGTTCGAAGACCATTTCTCTGTCCCAAAGTTGTAGAAGGAGAGGTTGCAATCATTTCGATAATAAACTTGTA  
GTCACCCACTTCGAGGGCTTCGCTGCGTTGAGGCGGTCACTACTGAGCAAGTAGTTGAAAGCCCTTGCCCTGAGGCAGGGGTGGTGAGAAGGAGTGAGAGAGAAGTAGTGCAAAGGAG  
AAGGGCTTGAGGATTCTAATGATGAAATTGAAGTGTTCAGGTATGAAATCAAAGCTATAGACTAAATTTTATCCAGAAACAGATGATAAAGAACAAGATTTTGAATACGTGAGCCCGTAAC  
AGTTCATT CAGAAGCCCATGCTGGAATCCACTGGTCCGGTCAAAGATTGAAGAATTGCGGACTTGTGTCTGGGAAACGAGACATTCCCAAGGGCATGTTGTTTCGAACATCAGGACCAC  
TTGCTCGAGA

>comp160072\_c0\_seq1

TTTCTTGACTAAAAATCATAGATATTGAGAAATAGGAAATTAATTTGCACCTTTTTTTTTTAAAAGAAATCAAGAGTGAATTTACATTTAGAGCACATAAAAAAGGCATACCAATTTTTCTGTC  
ACCAGAAATATTT CATATAACGACAAAAGCCGAGAAGAACAATAAAAAGACCGCCAAAATTA AAAAATAAAA ACTAGCTCATGATGGCTAGGTCTTGGATCCGATCATCTCCTCGAGGA  
GAATAACGATGGCCATGGCGACAGCAGAGTCGAAGCTTGGCTGAACCACAAGACGGAATACATCGAGTCCAAAAGCCGCACCACTCACGGCCTCCTTCAGCTGGATCTCAGCCATTGCC  
CGCCGCTTCTCGTGAACACAGCGCACCGCCGCTGTTTGTACGATCCCTCCACTTCGTACCCCTCGCCGCGGCGATGGAGACTTTGCAGCCGCATCCGACTGGCGCCGCGGAACGAGG  
GGATAGGCGAGCAAGCGCCTTCGACTGGAAGAGGCTCTTGTGCTTTGCACTGAAAATCTAGGGTTCGTCTGATGTTTCGCCTTCGTAAATCCCCAGTGCTCGCCAGAATCAGCTTCGT  
CTTGCGGCGAATAGTGAGACAGGGCTTGCCGGCGGCTCCATGAGTACGATCTCGCCCTGGCTTCCAGATTTGGAGTAGTTGTGCGACACGATAAATGAGATTTCCCTTTGAATCGAAGAC  
AGTGAATCCGTTACAGTTGAATAGAAGCGATTTCCGCCAAACGGTGAGGGTCTGCGCGCCGCTGTCTGAAGAGGTGGGTGAGGATGGAGTTGGTGGTGGTTCGACGCAGGAGGGCTTT  
GGGTGTGCAATGAAGAGGAACTAGGATGGATCTTCTTCTCATACCCCGATGGAGATGGTTTCCCGTCCCGGAAACCGATCGGAGGTGGAAGTGCATGAGGTTTTGATGCGAG

>comp160072\_c0\_seq2

TTTCTTGACTAAAAATCATAGATATTGAGAAATAGGAAATTAATTTGCACCTTTTTTTTTTAAAAGAAATCAAGAGTGAATTTACATTTAGAGCACATAAAAAAGGCATACCAATTTTTCTGTC  
ACCAGAAATATTT CATATAACGACAAAAGCCGAGAAGAACAATAAAAAGACCGCCAAAATTA AAAAATAAAA ACTAGCTCATGATGGCTAGGTCTTGGATCCGATCATCTCCTCGAGGA  
GAATAACGATGGCCATGGCGACAGCAGAGTCGAAGCTTGGCTGAACCACAAGACGGAATACATCGAGTCCAAAAGCCGCACCACTCACGGCCTCCTTCAGCTGGATCTCAGCCATTGCC  
CGCCGCTTCTCGTGAACACAGCGCACCGCCGCTGTTTGTACGATCCCTCCACTTCGTACCCCTCGCCGCGGCGATGGAGACTTTGCAGCCGCATCCGACTGGCGCCGCGGAACGAGG  
GGATAGGCGAGCACTGGGGGATTTACGAAGGCGAAACTACGACGAACCCTAGATTTTTCAGTGCGAAAGCACAAGAGCCTCTTCCAGTGAAGGCGCTTGCTCGCCTATCCCTCGTTCC

GCGGCGCCAGTCGGATGCGGCTGCAAAGTCTCCATCGCCGGCGGCGAGGGGTACGAAGTGGAGGGATCGTACAAACAGCGGCGGTGCGCTGTGTTTCGACGAGAAGCGGCGGGCAATG  
GCTGAGATCCAGCTGAAGGAGGCCGTGAGTGGTGCGGCTTTTGACTCGATGTATTCCGTCTTGTGGTTCAGCCAAGCTTCGACTCTGCTGTCCGATGGCCATCGTTATCTCTCGAG  
GAGATGATCGGATCCAAGACCTAGCCATCATGAGCTAGTTTTTATTTTTAATTTTGGGCGGTCTTTTATTTTGTCTTCTCGGCTTTTGTCTGTTATATGAAATATTTCTGGTGACAGAAAAAT  
TGGTATGCCTTTTTTATGTGCTCTAAATGTAAATCACTCTTGATTTCTTTAAAAAAAAGGTGCAAATAATTCCTATTTCTCAATATCTATGATTTTTAGTCAA

>comp160108\_c0\_seq2

AAAGCGCATTTCTTTATGGGGAGGAAAAGAAGAGAGTGCTCTCTACTGTGCTTGGAAACAAAGAGGTGCAAGACGAGCCCAAGTGTGCAAGAGAGAGAAGAGGAATTGGATAGCGCC  
GTGAGCATGCCGCGGATACCGCCGCGCAGACACCCGCGGAGCCTATGGAGTTCCCTCTCCCGCTCATGGAGCCTCTCCGCCTTCGAGATCTCCCGTGCCCTCCTCGCCAGCAACAATAAG  
CCCAAATTTGTGCGCGATTGCCACCCGGATTCTTCCGTCCACCTCCACCGCGGCAACGAAGCGGCTATAGGCACGTGGGTTTCGGCAAGGGGAGCTGCGTAAGGAGAAGGCGAGGAGCA  
AGGAGAAAAGTGAGGATAGCGAGTGC GCGGATCCACGCGGCGTTTCGGTGGCTGGGGTGGCTGCAGCGGTGGCGGCCGAGGCCGCCGGGATGAGATCGCAAACCCCGGATCGAAGA  
TGGGCGCCGCCCTGGCTTCTGCCACCGAGCTGCTCGCATCGCACTGCGTGGAGATGGCGGAGATGGCCGGCGCGGCGCACGAGCAGGTTCGCAGATGCAGTCAGCTCAGCAGTGGACGT  
CCGCTCCGTGCGCGATCTGATGACGCTCACGGCGGCTGCGGCGACTGCATTGCGAGGAGCTGCGGCGCTGAAACAAAGAGTGCAGAGAGAAGCAATCAGGAGCAATGCTGCCGAGT  
GATACCTTACGATAGGGGATCCTACAGTGTGAGCCCGGATATCTGGTGAAGGAAGGCGATCTTCTCAAAGAAACAGAAATGGAGCCTTCCAATGGAAGAAGGTGTCGCTTTACATCAA  
CAGCAAGTCACAGGTCATAGTTAAGATCAAAGCAAGCACATAGGAGGAGCTCTGTCAAAGAAGAAGAAAAGTGTGTTTATGGTGTATATGATGAAGAACTGGAATGGAATGGGTTGG  
AGAAGAAGGGTAGAGGAATTGGAGTTAGCTTTGGGTTGAGAACTGCAGAAGGGAACCTTGTATTGATTGTGCGGACAGCTTTTGTAAAGCAGAAATGGGTGGATGCAGTGCAGAATCTT  
CTTCGGCAAGTTAATGGGCTAAGTATGGAGACTATGGAATGCGACGGTCTATGGAAGTCTTAAGATCATTAGTTAGAGATTTTCTCGATATGTACAGAGTTTAAAGCTTGAAATGTGAA  
GGAATGAGAGGAGTTTTGATATGTATAACGTAAATCGGTTCTATAAAATTTTTGAACAGTGCATGACTGATCCAACACATTTTCAGTGCGATTTTTTTTGAAGCTTTTATGATGAGAGACTC  
AAATTTGATTGATAATGGTGTATTGATTGCATAGCCATCCGCAGCATGAGCTAGTCAAATAAATAGTGTCA

>comp160108\_c0\_seq5

AAAGCGCATTTCTTTATGGGGAGGAAAAGAAGAGAGTGCTCTCTACTGTGCTTGGAAACAAAGAGGTGCAAGACGAGCCCAAGTGTGCAAGAGAGAGAAGAGGAATTGGATAGCGCC  
GTGAGCATGCCGCGGATACCGCCGCGCAGACACCCGCGGAGCCTATGGAGTTCCCTCTCCCGCTCATGGAGCCTCTCCGCCTTCGAGATCTCCCGTGCCCTCCTCGCCAGCAACAATAAG  
CCCAAATTTGTGCGCGATTGCCACCCGGATTCTTCCGTCCACCTCCACCGCGGCAACGAAGCGGCTATAGGCACGTGGGTTTCGGCAAGGGGAGCTGCGTAAGGAGAAGGCGAGGAGCA  
AGGAGAAAAGTGAGGATAGCGAGTGC GCGGATCCACGCGGCGTTTCGGTGGCTGGGGTGGCTGCAGCGGTGGCGGCCGAGGCCGCCGGGATGAGATCGCAAACCCCGGATCGAAGA  
TGGGCGCCGCCCTGGCTTCTGCCACCGAGCTGCTCGCATCGCACTGCGTGGAGATGGCGGAGATGGCCGGCGCGGCGCACGAGCAGGTTCGCAGATGCAGTCAGCTCAGCAGTGGACGT  
CCGCTCCGTGCGCGATCTGATGACGCTCACGGCGGCTGCGGCGACTGGTCTGTATGCGAAATTCGAATCACTTCTCCGATCGAAACATTTTAATTAATTACCACTAATGGTGTCTGTGCA  
CAGCATTGCGAGGAGCTGCGGCGCTGAAACAGAGAGTGCAGAGAGAAGCAATCAGGAGCAATGCTGCCGAGTACCTTACGATAGGGGATCCTACAGTGTGAGCCCGGATATCTGG  
TGCAAGGAAGGCGATTTCTCAAAGAAAACAGAAATGGAGCCTTGCAATGGAAGAAGGTGTCGCTTACATCAACAGCAAGTCACAGGTCATAGTTAAGATCAAAGCAAGCACATAG  
GTGGGGCTCTGTCAAAGAAGAAGAAAAGTGTGTTTATGGTGTATATGATGAAGAACTGGAATGGAATGGGTTGGAGAAGAAGGGTAGAGGAATTGGAGTTAGCTTTGGGTTGAGAACT  
GCAGAAGGGAACCTTGTATTGATTGTGCGGACAGCTTTTGTAAAGCAGAAATGGGTGGATGCAGTGCAGAATCTTCTTCGGCAAGTTAATGGGCTAAGTATGGAGACTATGGAATGCGA  
CGTCTATGGAAGTCTTAAGATCATTAGTTAGAGATTTTCTCGATATGTACAGAGTTTAAAGCTTGAAATGTGAAGGAATGAGAGGAGTTTTGATATGTATAACGTAAATCGGTTCTATAA  
AATTTTTGAACAGTGCATGACTGATCCAACACATTTTCAGTGCGATTTTTTTTGAAGCTTTTATGATGAGAGACTCAAATTTGTATTGATAATGGTGTATTGATTGCATAGCCATCCGCAGCA  
TGAGCTAGTCAAATAAATAGTGTCA

>comp160218\_c0\_seq1

TTTTCTGATATAATTTGTATCAGAATATGTTCAAGAATCCTCAAATTTGGGTATATATGATAATAATGAACGGGAAGCTAAAAATCTTGAGTTCCTTTTAAATTTACAATTTTTTTTTTGAA  
TCAGAGGGCCCTTTTAAACCCCTCTGAAATCTAAAGTCTCAACACACTCTTCCTTCCCTTCCAATCCATTCAAAATCCTCAACAACCTCACTCGCCTTGTCCTTCACTCTATCACTGCAACCA  
ACCTGCAAAAGCAGCAATAGCTTCTGAAAAGCTCCAAACTTCAACGCCTCAACCGCACACTTCTCCGGCCTTCTTCCCTCCCCTTCTCCCCACTTCTTACACATCTTCCACATTCCTGACA  
CCGCAAACCTCCGTCGCCAAATCGGACACTCTAAATACCTTCTTCAACAAGCACCGGCATCGCAAGGGCGTGCTCCGCCGCACTCTCCCTCCCCTTCGCTTCCCTCCAGAACTCCATCAAGCG  
CCGCCAATGCTTTTTCCGACAAGCTCTTCTCGGCATCAACAAGGATCTCCAGCAGAATAGGAACGAGCCCTGTTTCAGCGAGCTTCGTGCGCTGGGTGAAGGATAAGTAATAGGCTGCAA  
CGAGAGATGCTTTGGTGGATTCTAAAGATATGGGATTCTTTATCAGCATCACGACTTTTTCAACCAATTGTTTCAGTTCTAGCAACTGTGATTGCTTGTCTGTTTCATGAACAGCTACGAGC  
AGTCCCTCAGCACCAGAATAGCGTTGTGCTTCCCCGAAAGGGATCCTTGGCTTAAGATGAGGATAATGGATTTTAAAGATTTCGTGCGAAGTGAGCTGCAAGATGGTTTCTTTATCATCTA  
GATTTGATATCCGGCGAAAGCTGAGAGGAAATTCTCTGTTTTAAAGCGGAGGAAGGCGGCGGCTAGTACTGGCGTGGCGCCGTTTCGATAAAATGCAGCGCAGGTTTCTTTTCGCTTTCTT  
CAGCGCTTTTCTTTCAGCAATGCGATCAGTTTCGGCGCAGAGGAGGCGGTCGCCGCTCCGGCAAGCAGCGGAAATCTCCGCAAGCGTGTGCGGAGACCTGGAGGGACGTGATGGGGGTCTT  
TGGCGTAGGGATGCGCTCGACGCCATGGGAGCGGTTGGCAACGCACCAGTCTTGGATCATGCGCCGGATGGAGTGGTTGGGGATGAGGAGTTGGTTCGTAAGCTCGACAGAAAGGAGG  
GTGACAGGGCAAGTGCGGTGGCCGAGGAGAGCCAGAGTTTCGATGGTGCAGCGATCATAAGTGATGCCGGAGGGAAGAGTGACGGGGTCTTGCATAAGATCGAGTGAGATAGGGCAG  
ATGAAATGGGAGGGGATGGAGAGTGACGAGAGGGAGGGTTTGGCTCGACGGCGGAAGGGGAACATCGCCGTGGCTTTGAATGCTCTCAGGGCCATAGAAAAGATGAAGTTGTGTG  
CTGTGGATCAATGGAGGTAACGAGAAGAAGTGGAAGAAGATAGATTTAAGAAATGGGGAAAACCGGGAAGAGGTTGGAATAGGACGGGTATTGGGGTTAGGATTTGAATGTTGACCGT  
TGAAAGTTTGAATTTTGGGGAGCGGAAATTGTGAGAGGGTTGATTTGGTGTAGATAGATCTGATTTCTTTTTAAAGTATATTTATGGAGGGACTTATGTTTTTTTTTAATTTATTTTATT  
ATTTTTAGTGCCTTAATGCATAGTTGATACTCATTTATATAAGGCTTGTATTATGTTCTTTTATTTACATAATTGAATAAGCTCGTATAGATTTTAAAGGCTTATTATATAAATGGACAAATTTGA  
ATATTAATTTACTTGTATTATTTATTTTCGTGAACATATTTGTTTGTGTTTATTGAATAATTTGTG

>comp160423\_c0\_seq2

AATTTGAAGTTCCAATCAAGAAAATAGTCAAGATCACAAGTAATAAAGAACTAACATCAATTGAGTTCAACAAAAAACTGGACTGGAAACCATGAATTACAATAAATTCGAACAAAATC  
GAGGAAAAAAATAACTAAAAGATAATTATAGCTACAGTCATAAGCACAAATTAATTAAGATGTTTCGATAAACGAAATGCCAAACCAAAAGAACGGAATTTGCAGTTGAGATTAATTTGC  
TGCAGAGCAAATGAGGGAAGAGGCAGCTTCTATGTGAGTAAGATACCTCACTCTTAAAAAAAATTAATGGTTCATTCTCCAGGTAGTGATATGTTAATATCAGTAGCAGAGTTTCTAGAG  
TCAGGTACTGAAGAATGTAGAGAGGCAGACCAGTTTTCTCCTTTGAAGGAAGATGAGATGGTAAGGCTTGGCTTTGGTGTAGAAGCCAATTGTTGTCCTTGCCCCCCTACTACTGTAAGTA  
TCTTCTACCTCCGTAGGCATTCGAACTGCAACTCCGGCTGCCGGCATTGCCGCTGATGTCTCCAGTTTAGGTTTCTTTGTTTTCTGCTCCAGTTGGTAGCCGGGCAAGAAGCTGCCACCA  
CGACCTGCACAGGACTAGCAGCAACCAAAAAGACCAGCTACGCCTCCCCCTAGAACACGACCATCAGGGCTTGCTAATGAGACACTCATCCCAGGACCGGCTCTTTGTTCCACCATTT  
TCATTTGGCATAAATGATCCTGATAAGGAGAGTAATTCAAATATGCCCTCGTATGTCAAGGTGCCGCCGAGGAATCTGGTTGTGCAAGAGTAACATTTGAAACCACACCATTTGCTGAGA  
GGATACAAATTTGCTCGAGGCCCTTGTGAGAAAATGACATTATCTTCATAGTAACATCCTCTCCAGAAGCCACAGTGATTATAGAGGGGTGAAATTTGCACCAGCTGAGCATGCCACCAT  
CTCGCCTAAAGATTCCAGCTCAATCCGCGTTGTTGCTTGGTCAAGAACCCCCCTGGCCGCCCTTACCCCGCTTCAAAGAGAAAGCGGGCGGTGCGGAGTGCTCCCCCGGCGGCAGAG  
ATGCCGAGATCGGCGTGGGGTTCAGCGGCATCACACTCCCATCCGGCGCGTACTTCTGGGCCTCCCCCTTCTTCTTCCCCGGCATCCCCGGCCATGCCGTCAACCCAGCGGACGCCT  
TCGTGCGGCTCAGGGCCGAGCTGGTTGATGAGTTTGCAGGATCACCGCGCGGAAGGAGTTGGAGTAAGTACCCTCGGACTAAGATTCTCGACCCTTGTACCACCGGGGCC  
GCCGATGCCGCGCGGCGGAAGGCATCGGGTTTTGATAACTCCACCAACCTCTGGCGCCGCATAAAACCACAGGTTTCATCCCTTCCCTTCCCTCCATGCATAACATATGCCCTAAAA  
AATCCTGGCAAATCTTCAATCTTTAGCTGGTGGTTTATATATAATTCAAATCTGAGGACCCTTCTCAATCTCCTCAGCAGCTCAAGACTACTCCAATGAGAATGACGGATCGAAGATTGAG

CGACGGAAGTGTAACTTTCTCGTCCGATTGAAAGACTAAATTTTTATCAAGCTCCAGTCTTTAGATATAATTGCAGCAAAAAGAGCTCAAGCGCAAGAAGCTCAATCTCGCATAAAAA  
CTCTTTTGGCGTGTCTTTCACAGTAGATTCCGGCAATCTACAGCGCCGAGATGGCCGAAAACAGCTGATTTTGGTAGCAGAAGCTGCCGCCGGCTCGTCGTTAACGGATTTAGGCGCTCT  
TTGAACCTCGCCTGAGAGGAAGAGAGTGGGAGAACTGGTCCGAGAGCTGAAAAATTAATTTATGCTAAATAATTAATAATCAATTAGTTGGTGATAAAGCAAAATAATAATTACTAATTT  
GGAGATTTTTTTGAAATCGAAGGGAATATTTATGCGGAGGAGACACAAAAATCGAAATATGCTTTCCAACCTTTCCGTCCATCACGGGAAATTATTAAGGTGCATTATGGAAAAAAAAGGT  
TTTTTAATCAA

>comp160643\_c0\_seq7

CATTAATCGATCCATGGAGAAGGCTGAGTTTGAGAAGAGATGGTCCCTTCATGGAACCACTGCTTTGGTCACTGGTGGCTCCAAAGGCATAGGGTAATTAGCCCTTCTATTTTTTCAGCAT  
CTTTCGCGCTTGTCTTGAATGCAATAAAAAATGAAAAGCTGATTTTTATTATATTCCACTGAATCAGGAAAGCTATAGTTGAAGAGCTG

>comp160757\_c1\_seq8

AGAACAATGACGTTTTATAGGAAAGTCCATTCGATCCTAGCCGTTGGTTTTAAATTATTGAGCATACTGGGCCCAAGCCCAAAGCCCAAAGCCCAATAATTTAAACCAACGGCTAGGAT  
CGAATGGACTTTCCTATAAAACGTCATTGTTCTTCTCCACTATCCACTCATCAGGAAAAATATAGAGCCGTATTAGTCAATTAATGGCTCCGTTTTTAGTAGGGATAGATTTGGAACAGAGC  
CCTTACGCGTTGGTGGCTTTGTACACACCAAATATATTGTTGCTCAAGGAACCAAGACATAAAGGTAAACGGAATTCGAGCTCCGACCAGTGGCGAAGTGGTGGTGGCCTTTCAGGAC  
GCCAATCAGGTTGTGAAATCCTTCTTCGTCGGCCCTAATTTGAGGTAATGATGAAGATGATTGGTACAATGTTGTGAATGTTAATGATATCGGGCTTAATTGAGCTCGCTTTCAGGGCGC  
GGTGGTGGTGGTGCCAAACTCCACCAGCTCAAGCAACCGCGACGCGGTACCAGCCGCGGAGAGCCGAGGGTTTCAACGTCATCGAAGTCATCAACGAGCAAGCCGCGGTGCGCCG  
CGCTTACGCCGAGATAGTAAACCCACTTCGAACAAAAGGCTGGCCATCGTCTCCGTCATCAACGGCGTCTCGACGTCAGCGTCGTCACCGTAAAGCCCGGTTTAGAATTCGTTGTAGA  
AGCACACGAAACCCATTTAGAACCCATCGAGTTTGAGGAGCAAAAAAGCAGGAGAGCAAGCACTCTGGGCCGGGGGGCTGATCGGAATCGTGGGCGGAGTGGTGGGAGGCGTGGT  
GAAGACTCTAGTGGTGGATCCGTTGGATATGGTATTTGATATACTGTTGAAATTGCTGTCAAGTCCAAAGCTGGGAAAGTCACCAGTGGATGAGTTGGTTTTGATCGGAAAGGCTTTCAG  
GTCTGAGAAGCTGAAAGAGGTGCTGAAGAAGAAATTTCCAATGCGAGAGTCTGGTGCCTAACGATTTCCGGGCGGACGAAGTGGTGGCGTACGGCGGGGAGTGCTGGCATATAAG  
CAGAAGCCGGCCGATACGACTATTGAAACTCCGCCGGCGAAGCTGCCGGTGGATTCTGAGGAATTGGATTCGGGAAAGGGAAATGTGAATGTTGTTGAGGAAAAACACGGGGAAGAAG  
GTGGCGAGGAAGAAAAACATGGCGAAGAAGGCGGCGAGGAGAAAACGGATCAAAGCTCGAAGAAATTTGTGCCTATTTTCGAGTGTGATTTTCTGAACTGGAATCGGAAATAAGTTTAG  
GGTTTTTTTTAAGCCATTTCTATTCAAGACGATAATGCTAATGAGGAAATCTTTTCTTACTAAGGATATTAATCTGTAAATTCAGCATTGAATCTGATAAATCCCCTCGGCTGTATGGTTTTA  
CTTCTAAGTTCTTTAGAGACATTTAGCATATAATAGGAAGC

>comp160822\_c0\_seq1

AAAGGGGACCTTGATTTGAAACCTCTTGAGCTTCTTACACTATGAAGTTTGAATCCCCTGCATTTCTCTAATTTCTCCTTTGCTTTCTAGTCCATTCGTAGGGGAAAGATTATCCCTTCTTT  
TTGTAATTGTCATTAGATTTGAAGTTTGGGGCGAGTAGAGTTTCAATCGCACCAGCGAAGGGTAAAAACACTTTCTCTGGTCCATGTTGTAAGCTGCACCTAAAGGAGACCTCAGATTT  
TGTTAAGGCAGCCCAGCAATGGAGTCTAAAGAGAGTATTGAACTTCTGAAGAATTCTGCTGAGAGGAAGGAAGGAGTGGGCTCTGCATGGTTGCAGAGGAGGCTGGAAACTCCTTCGA  
CGCCTGGCCGGCCAGTCTTTCAGCTTTCAGCACAGGAAACCTTTATAGGAAGAGCTTTCTTCTAAGTGGGATAATGCAGAGAAGTGGTTGATGAGTAGCTCCTGCCATGAATCTCCTGCGC  
ATGGAATCAAACCTTGGGAATCATCAGACTCTTCTAAACCAAATGAAGCTCCCCGACAGAAAGCTCAAGCTTTTGGAGCCCTTTGCAAAGAAGCAAAACCTTACTCAGACACATACAGCT  
CTTCATCGTATCTCCACAGAAGCTCTTGAAGATAAATTCACAGATAGCGCAGAACCTGCCTTATCTAATTTCCATATGTCCTGAGACAAGCAAAGAAGATTTTTTTCTGAAAGATTCTC  
ACTTTGAATCCGCGAAAAAGACTGAAACTTCAGTTTCAAAGCTTTATAGTAGAGATGTTGGGACTGAGATAACTCCGCTTTGCAGCTTGAACACTTCGAGTTGCCACACTCCCATCAAGA  
GTTCTTCTCCAGCTAGGCATAATACTCCTGCTGACAGGTCTGGACCTTTGGTGGCTTCCAGTACTAAAATAAACATTTCTGAACTCCATAACTTCAATTTTGCGAAGCTTGAGTTCAGTGCT



CAGTATGATTCTACGGTCTGCAGCTGGAACCTCAAAGGAAGAAGAGGAAGAAGAGGTTTCAAAGAGTTTAAGACACTGTGAAATGAATGATGGAAGGAAGAGCATTGCAGACTCCAGAG  
CTTCACTATGGGAAGCTGAGGAGAGAGCCAAGAGCTGCATTAGGTATCAAAGAGAAGAAGCAAAGATTCAAGCTTGGGTTAACCTTCAGACTGCCAAGACTGAAGAAAAGTCTAAAAA  
ACTTGAGGTGAAGATTCAGAACATGAGATCAAACCTTGGGAAGAGAAGCTGATGAAGAGAATGGCTGTTGTTTCACAGGAGATCTGAAGAGTGGAGAGCTGAAGCACTGCTACAGCACTCA  
CAGCAGCTTTTAAAAGCAGTAGAACAAGCTCAGAAGATGAGAAGAAGCCAGCAAAGCTCTTACTTGGGAGATCAAAAATGCTTCATGTGGTTGCTTCCCAAAGCAACAGTAAGCAGCTT  
TGGATTAGAGAAAAAAGAGAAAAGAACCATCATACTTTTCTATATTGTGATCTCATGCATTTGGTGCTGTTTAGTTGAATGTTTTTTTAAATGCATGCAACTTAGAAAATGCTGAGTAAATCATA  
TGTATTGAAATTATATTTTTTTATTAAGATGCATTGAATTAAGAGTAATTGGAATATTTTTTTAATAGA

>comp160860\_c0\_seq1

CCCACGATAAATCCGATAACCAAACCGCCCCTAAATCTCCGCAATGAAGATGAAGAGAGTCTCCAGCGCCTGCATGGCGCTTCTCACCTTTTCCCTCTCTTCGCATTTCGTATCCATGGCTC  
CAGCCCGCGTTAAGTGGTCGGAAGTGGTGGGACTTAAGCCGATTTTGGCCGAGGAGAGGATTCGGAAGATATGCCTACAGCCAAGTTCAGGTGCTGAAAGTGGGTCAAGCTGTCACC  
ATGGATTTTCATCCCATGGCGCGTTCCGATCTTCGTTGATTTCGTCGGGGAACGTTGCCAGAATCCCCGTAGTTGGGTAAACAAGTATCGAATATCATGGGAATTTTATAGTTACGTGATATGATT  
AGAAAGATATCTATCAGATGTATGCTTAAATAAAGAAGCTTTCATGCGATGGGAAGCTTGTAAAGGGTAACCACACATCAAGATCAGGCTATATATGCTCCTTGGAGTGTATACCTTTTACT  
GGAAGTTTAGAGCTTGTGTATGAATTAGTAATGTGTATTGCTTCAGTTTCAATTTGGTTATCCGTTGATATCAATGAGTTTTTTTTTTATATATAAATAATTCGTGTGACACCATATGTTTCGATT  
TAAGATATTGTGTTTGTGCTTGCAGGATTAATTAACGATGAGGAAAAATATTAAGATCACTTCAGCAGCTAAAAGTGTTTCTGATTGGGTTATTTTAGATTTTATGGATGACCAATTACGTG  
ATCTATTACAGGAAAGAG

>comp160964\_c0\_seq1

CTGGATACTCCCACCTCTTGTGTCTTTTCTTTTCATCTCCTTGTGCTTAGAGAAACAGGGCCGACATTCCACACCCTTCCCATATCTCGGCGTAACGATCAGCATATTCATACTCTAACT  
CATAGAAACTATTACCAACGTGCCAAAGCTCTTTGGTTCCACCTCTGTGCGCTCATTAAAGTACATCCAAGAGGAACTCCAACGGAGTTCCTGCTAATTTGTTGAAGTCCATGACTTGAGT  
TTTTAACATCTCTATTTTGTGTGGGAGATCGGGAAGGATAAAGGAGTTGACCTCGTCCGCTAGCGGGCAACAACGCTCGAAAGCACTTTTGACACAGAGTGAAAAGTTGTTGGTGCCAT  
GAAAGACAAGCCGCAAAAATACCTCTTGCAGCAGCAACATAGTATGTCCACGGCATGAACATATCAGTTACAACACAGTCAGGGTTGAGATCTCTAAGCACGGAGTCAAAAAGGTTGGCGA  
AGCGAGGCGATAGCCTTGATGAAATTGATACGTTGGTCTTCAGAAAAGAAATGAATGAGCGATTCTCGCAACCACTGGGGAGGCCAAATTCAGCTATGGGGAAGGGGATGATGTGGAGATT  
GATAGAGTCATCGATGTTGGGACAAATGATTGCTGCATTAACAGGGGTAGTGAGGATGGTGACGCGTGCACCATGGGCGGCGAAGACCTTGGCCATGTGACCATGGGGAGCATGTGGC  
CTTGCGCCATGTAAGGGAAGAAAAGCATGTGTAGATGGCTGTGTTCCGAGTCCATAGCTGAAGGAGTGGGAAGAAAAAAATGTGAA

>comp161912\_c1\_seq3

TACTAAAAATTTACTTTAAGAAATAATAAAATAGCCGTCTCAAATGAAGTCTTAGTATTCATTAGGAACAACCTTTTTTACAGTTTTTTTAGAGCAAATTTTATAGGATAAATTTTTTTGAAATA  
AAATCTTAAGCAAAAATATTGAAAATTAGTAAATTTTTTTGAAATATCTCAAAAACAAAAGAGGGGTGGGTATTGGAACCTGTTGCAGGAGAACTTCTGGTTACTGTCATTCTGGCATATCC  
CCTCCATTTAGAAGGAATGGGTCCCATATCATATCCCTGAAGCTCTCAGCCTCTGGCCAGACACCAGTATCAAGATTAGCGATAATTACATCTCTCCAAATCTAGCTTTTGTCCACAGTG  
ATTTCTTAGGGACTCTGCCATTTCTCTCCAGGCCAAGGAACTGCCATGAACGGGTTGTGTGAAGCTTGCCTCTCTGTTCTCAAAGACAGAAACAACGCTTGGATTCTTTGAGATCTGCA  
CAGCGTCTTCTCCTCGAGGATTGCAGCGAAGCCATTCATGTACCTTGTGTAGGAATAGAAAATTGCTTCTTGGCCCTCTCCTTGTCTTGGAGGTATGATTCTAAGAGTTCATAGTGGGAT  
TCTCTGACCGTTTGTATCGGCATGAGCAGTATTTCTTCAGCAGAGTTGGATTGGGCTCCAAGGTAAACAATATAGGACTTTTGAGCAGCAAAAAGCCGGGCATTGAAGAAAATAGAAGGCT  
GTGATGATAAGAAACGGCAGAAAACCTCGCTGTTTTCTGGATCTTCTCATCTTTGCTCTTCTTCTTCCGCTGAAGCGGAAGAGAATGGTCTGCTTCTCCTTTGTTTATAGAATGGCGA  
AGGTT

>comp162206\_c0\_seq1

AAAATGGAAAATTAAGAAGACAGAGAGTAGATATATTTATAAACTAATTAATGTCCACACAGAGCAAACCCTTCGATTCCAAGTTCAAACCTTTGCAACTTCCAACCTCACGGACTTAC  
GATGGAAAAGGCAAGCTCTCCATATTCAACGGTAGATTAATAAACGGCAATCCGACTCCCGACGGATCGACAAAATCGCCGGCGCCGCCCTTCCTCGCCGCCTACGGGCAGCTCCAT  
TTGCGGAGGCGCCTCCTCCTCCTCCAGCGGTAACCGTTCATACGCTACATTTGTGAAGGAGGCGGATATAACTATCACGGGTCTCGCGCAATCAACGGGCCACGACACTCCCGCCGAC  
CACCTGCCCTGACCTCCTGCAAGGAAGACGGTGAGCGAGGTGGCTCCCGGTGGCGCCGGCGGGAAGGAAGGATCCCGAAAAGAGATAAGATCTCGAAGCGACCGTGGAGAGAGAC  
GACTGCGCCCGGATCCGCCCGTTGCCGGAGCCTGACGTTGGTGACGGTGCCGCTGCCGCTGAGTACACAGACGCCGCACTGCCGGCGGCGAGCGTAATTAGCAACGCTTTCGAAG  
ATATCGCAGCCCGGAGATCTCGAGGATGTGGGCCCGCAGACAGTTGGCGCTCTCGCGGGTGTATGATGATTGGTGGCTTGGGTTTGTCTTGAACCAGGTGGGCGGCCACGTGGTCT  
TGAGCCGATGACTTCGCCGGGGATATAAGGTCAAAGGCCCGGCTTTGGCGGCGGAAGGGAAACGTTGTCGTCGGAGTTGTTGTGGTCTGATGAGGTGGGAGTGTGATTGGGAAGA  
TGGTGAAAGTGGTGGAGGAAGTGGGCGGAGGTGCTGAGATCTAGGCCCGCCATGATCGATCAAGCTTCTAAGTAAAATAAAAAGAAATAACAGATTAATTATGTTTGTGTTTTGGGGG  
ATTTAAGGAGGAAATTTGAGAATTTGAAGTAAAAGAGGATGGAGAGGAGAAAGTCAAGAAAAGTGAAGGGAAGAAGGGAAGGATAGAAGTGAGATGAGGGACGGAGTGGGAGAA  
TATAGAAATAACGAGGAAAGAGAGGCAGCAATAGCGAACTGTAGAGAGAGAAAGAA

>comp162382\_c2\_seq6

AAATACATAACTTTGGTTTACTCCATTCTTTAACATGTGGATAGATGAAAAACAATTATTCCTCTCCATAATAAAAATAGTATATGATATCAGATTATGCAAAACACAAGAAATAAATCTCA  
CATTATTTATGCGAGCAAGGAAATACATAACTTTGGTTTACTCTGAACTCAGAGGAACAGAACATGCTGAAATAATACAGCCAAACTACTGACAGCTCCATCAGAACCTCTGAAAATTTTT  
ACTGCCACTTCAACTTATTTGAGAGAATTCTCAATATCAATCACAAAGCGATACTTGACATCCTTGTTCACAAGCCTGTCAAGGGCTTCATTTATATCTTGTATTTGAATCGTTTCAATCTGT  
GGGTATATCTTATTCGCTGCACAAAAGTCTATCATCTCTTGAATGTCCTTGGTACCTCCTACAGCACTCGCAGCTATGGCCTTTGA

>comp162514\_c0\_seq2

TATAGGATCCAGAAACCATGGAACATCAAAAGATAGAGCTCGTGAAGTAGCTAATCTATCTACAGGAGTATCTGTAAATGGTTCCAGCCAGTTTGACGCCATTACAATGCCAATAAAGCCT  
CCTTGTGTTTACCTGATATTTTTTCTGTATATGTCAACAGCAGCAGCATGGCATAATATAATGTTGTGAGCAGCAATATATGGTTCTGTTTTAGAATCGCCTGAAGGACAAGAAGGCTGTGAA  
CAACGACCTGGAGGGTTTTGGCCTGTCATATAACCCATTTTGGCATAAGATTTGGCTCATTACTGTGCTCCAGTACTTCACTTTATTACCAAACGCTTTAAAACATGTATCTGCAAAGTAT  
GCAAAATCTTTCCTGAAAAAGAAGAAAAAATGTTAAAAATAAATGAAAAATATCATAAGAGAGAGAGAGAGAGGAACCTTTAATAGGTGTCCTCGTAGCTCTACATCCGGACGCCAATAA  
AATGTCGCAACGTGCTCTTAATTTTTACCATGCGGCCCGACGACCCG

>comp162536\_c0\_seq1

AGTGAAGGTTTTAAGGACATTCGTGGGAAAGGGAGGAGCGAGTCTTTCTCCTCACCTCTCCCACGAATGTCCTTAAAACCTTCACTCCATCTCTTTGCTTAGATCACAGGACTCGCTC  
CTCCCTTTCTCCTTCACTCTCTCTCTCTCCGATTGAGGAGATGCAGATAAGCTCAGAGATTAAGGGTGAAGGTGGATGGAAGCCATTATGGTGACCAGCTTGATCAGCGTTCAA  
TTGAGCTTGGCCTTCTACACTGTCTTATCTCCAGGTTCTCGCCGGCGGCCTCCAACCGCTCTCCTTGTGCGCCAGTAGCTTCCTCAGTGCCTTCTTCTCCTCCCCTTAGCTATTCTC  
TTTGAAAGGAAAAATTGGCCAGAGAAAAATAGGACTCTATTTGACTATTCGGTTTGTCTAATCGCAGTTGGAGGGACACCTTTGTACCAAGTCTCTTGCTCATAGGAGTAAAGAAGACA  
ACCCAGCAGTCGCCACAGCTATGCCTAACTTAGCTCCAGGACTCATCTTCTCATTGCTTCTTGTCTAAGGTGACCATATTGATTAACAAAACCTATATTTTTATAATCTTCTAATAAATTACC  
ATGGTAATTAACCGGCGGTAGCCTGCGTTTTGACCGCCGGAAAAAGGCCGTGATAATCCCTTTCCTATGCGGTTTTATCTGGCGGTTTTTGAAACTGGAAAACCGCCGAAATTTTCAAAA  
CCACCAGAAAACCTATTTTAACCGTCCGAAAAAGCCGCCGTAAGTACTGATGATTTTTCTATGGTGTGATTAATATTTTACTTAGAATATATGATATAATTGCCATTATAGGATTGAGAAATTTG  
ATATTAAGTGCAAGCATAACAAGATATAAGGTGATGGGGACTCTGATGTGCTTGAAGTGGAGCCATGGCCATGAGCTTCATGCAGGCAGATTCTGTAAACTTACCAGCAGAATCACCAAATTT

AAGATCAATATTGTTTCATGAGAGAAAATTTGAGCAGTACTGATAACCACCTCTAATGACTGGATTATTGGTTGCCCTCTATCTCCTTGCAGCTGTTGTGGTTCCTTTCTTGTGTCATGGTTTTACA  
GGCTACAACAATGGCCGATTTTCCTGCACCGATTTCTCTGGGTGCTATATCTGGCATAATTAGGCTCTTTTTTTTTCTGTAAATATTCAGTATATCTTGAAGGCAATATAAGCACCGGAGCTGAT  
AGCCTCAGCATCACAAAGCATTATCGCTGCTGTGTTAGCGGGAGGATCAGTGTCATTTCTGACTGCTACAATAGTAAACAATGTGTGTTTCATAAAAAAGGACCAGTTTTTTGTTTCAGCCTTCA  
ATCCCACACAAAACAGTCTGTGCAGCAGTTCTTTCAGCAGTAATACTGAAGCAGTTCATCAGTCTTGGGAGCTTAATCGGTATGGGACTCTGTTTTGCTGGTTTTGTACATTTTCTTGTGTGGC  
AAAGATGAAGGAAGCTGATATGGAGGAGGTGACAAAGGTGCTCCAGATGAAGAGAGAGCTCTTCTCTTTTAGGGTTTTTTGGATACTTGTGCTAATAGTTATGCACACAAAATGAAGGA  
AACTCTATGAGTAATGTATAATTAGGTGTAAATATTATTATCAAAATTTGGTAACATTATGTATAGAAGTGAAGATATCATAGTTGATCGAGGCATCTTTAGTGTTTTCACAAAACAAA

>comp162543\_c0\_seq11

AAGGACATAATAGAATGAAGAATTAATATTGGATTTCGTTAGACCGACGGCGATCATGCATAAAAAGTCTTCGTGCTATTATGTCCTTCCTCCTCCTCCTCAGTTCATATCCAACCCCAGCA  
ATCTCCTCGACATACGAGAGATCAATCGATGCCGGCGCCGCGGAGACCATGGAAGCCCTTCACTGCCCAGTTCGCTGCACAGTCGACAACCGCTTAGTACTCGGAAACCTCAGCCTTA  
ACTTGAGCAGGTGCCGTCCAACACGCCCCGATTTCTCCAAGAAGGTGGCGGAGCCGCGCTTTCCGCCGCATCTCCATCTCAGACCTAAGCAGCTCGTCTTCGGCGAGGTTCAACGAG  
GAGTTTGCAGCTGCGTTTTGGAGCCGGGTATAACGCCTTCCAGCTGAGCGAGCTGAAAGCCATAACGCACGACTTCTCAAAACAGTACCTTCTTGGTGAGGGAGGGTTCCGGCACCGTGCA  
CAAAGGCTATATGGATGATAGGATGCGGCCTGGTCTAAAAGCGCAGGCCGTCGCCGTTAAGCTTCTTGACATAGAGGGTCTTCAGGGTCACAGGGAGTGGCTTGCGGAGGTGATATTTCT  
CGGGCACCTGAGACACCCTCATTAGTGAAGCTGATAGGTTATTGCTGCGAAGATGAAGAGAGACTTTTGGTCTACGAATTCATGCCACGTGGCAGTCTGGAGAACCATCTCTTTAAGAG  
AATATCAGTGTGACTACTGTCATGGGGAACAAGGATGAAGATTGCCACCGGAGCTGCAAGAGGGCTTGGCTTTCTTACGGCGCGGAGAAGCCCATCATTATCGCGACTTCAAGACATC  
CAACATCCTTCTCGACTCTGTCTGTGATCTTCCAATCCATCTTCTAATTCGTGCTCCTCTCCTGTATGGCTAAAATGTATACAGTAATATTAATGCGCGCAGGACTTCAGTGCTAAGCTGTCC  
GACTTTGGGCTCGCTAAGATGGGGCTTCGGGTGAAGAGACGCACGTGAGCACTCGGGTGATGGGGACACAGGGCTACGCCCGCGCCTGAATACGTGATGACAGGCCACCTGACAATA  
AGAACGACGTCTACAGCTTCGGCGTGGTCTTCTGGAGCTTTTACGGGGCGCCGATCGGTGACGAGTCGCGGCCAAAGAAGGAGGAGAAGCTGGTGAATGGTCCGAGCCCTACCT  
GAGGAACAGCCGGAAGCTGCGCTGCATCATGGATCCAAGCTCGCCGGTCACTACTCTTTAGGTGCGCAAGGGAGGGTGTGCTCTCGCTCTGCGCTGCATCAGCCCCACCCAAAGG  
ACCGCCCCAAGATGTCCGAGGTTGTTACTGTTCTCCAAGGCCTACGCAGCAGCTTCAGGGAGAAAACGTCATGATATCTATATCTGGCTCGGATCGACGACTGTAGATGGTCTGCCTGC  
GTATTTCTGTTAATTAAGTACCGCTGATCTGTTATTTATATGCCTAATTACTGTTTTCAACTGTGAATTGCTTTGTAATTAATGCATAACTAAATAAACAACAGGGCATTACAGTAGGAGATGC  
TCTGTTTCGGTCATTGCCCTTACTTACTTACTTGTCTAAACTGAATAAA

>comp162543\_c0\_seq18

AAGGACATAATAGAATGAAGAATTAATATTGGATTTCGTTAGACCGACGGCGATCATGCATAAAAAGTCTTCGTGCTATTATGTCCTTCCTCCTCCTCCTCAGTTCATATCCAACCCCAGCA  
ATCTCCTCGACATACGAGAGATCAATCGATGCCGGCGCCGCGGAGACCATGGAAGCCCTTCACTGCCCAGTTCGCTGCACAGTCGACAACCGCTTAGTACTCGGAAACCTCAGCCTTA  
ACTTGAGCAGGTGCCGTCCAACACGCCCCGATTTCTCCAAGAAGGTGGCGGAGCCGCGCTTTCCGCCGCATCTCCATCTCAGACCTAAGCAGCTCGTCTTCGGCGAGGTTCAACGAG  
GAGTTTGCAGCTGCGTTTTGGAGCCGGGTATAACGCCTTCCAGCTGAGCGAGCTGAAAGCCATAACGCACGACTTCTCAAAACAGTACCTTCTTGGTGAGGGAGGGTTCCGGCACCGTGCA  
CAAAGGCTATATGGATGATAGGATGCGGCCTGGTCTAAAAGCGCAGGCCGTCGCCGTTAAGCTTCTTGACATAGAGGGTCTTCAGGGTCACAGGGAGTGGCTTGAGAGAGAACAATTAAT  
ATTTCCCCTATATATGCATTAATATATCTTTCTGTTTGATGAAATGCTTGCCTGTGTTAATATTCTCATTCCCTATATATGCCTACTGTTGTATTGGTTCGGATGAGCTATATATATATGTAGCATT  
AATTTATTAATGATGATGCTGGTGCAGGCGGAGGTGATATTTCTCGGGCACCTGAGACACCCTCATTAGTGAAGCTGATAGGTTATTGCTGCGAAGATGAAGAGAGACTTTTTGGTCTACG  
AATTCATGCCACGTGGCAGTCTGGAGAACCATCTCTTAAAGAGTAAGTTGCATGCTGATTTGGTCACCCATCCCATCCGGATGCAACGAGAGAATGAAGAATTAATACGTAATAATGTATT  
TGCTGCATGTTTTATATATTTAAGAACAGGAATATCAGTGTGACTGTGCTGATGGGGAACAAGAATGAAGATTGCGACGGGAGCAGCAAGAGGGCTTGCTTTCTTACGGCGCGGAGAA

GCCCATCATTTATCGCGACTTCAAGACATCCAACATCCTTCTCGACTCTGTCTGTGATCTTCCAATTCCATCTTCTAATTCGTGTCCTCTCCTGTATGGCTAAATGTATACAGTAATATTAAT  
GCGCGCAGGACTTCAGTGCTAAGCTGTCCGACTTTGGGCTCGCTAAGATGGGGCCTTCGGGTGAAGAGACGCACGTGAGCACTCGGGTGATGGGGACACAGGGCTACGCCGCGCCTGA  
ATACGTGATGACAGGCCACCTGACAACCTAAGAACGACGTCTACAGCTTCGGCGTGGTGCTTCTGGAGCTTTTGACGGGGCGCCGATCGGTGACGAGTCGCGGCCAAAGAAGGAGGAG  
AAGCTGGTGAATGGTCCGAGCCCTACCTGAGGAACAGCCGAAGCTGCGCTGCATCATGGATCCAAAGCTCGCCGGTCACTACTCTTTCAGGTGCGCAAGGGAGGCTGCTGCTCTCGC  
TCTGCGCTGCATCAGCCCCACCCAAAGGACCGCCCCAAGATGTCCGAGGTTGTTACTGTTCTCCAAGGCCTACGCAGCAGCTTCAGGGAGAAAACGTCATGATATCTATATCTGGCTCG  
GATCGACGACTGTAGATGGTCCTGCCTGCGTATTTTCGTTAATTAAGTACCGCTGATCTGTTATTTATATGCCTAATTACTGTTTTCAACTGTGAATTGCTTTGTAATTAATGCATAACTAAATA  
AACAAACAGGCGATTACAGTAGGAGATGCTCTGTTTCGGTCAATGCCCTTACTTACTTACTTGCTCAAACCTGAATAAA

>comp162543\_c0\_seq4

AAGGACATAATAGAATGAAGAATTAATATTGGATTCGTTAGACCGACGGCGATCATGCATAAAAGTCTTCGTGCTATTATGTCCTTCCTCCTCCTCCTCCTCAGTTCATATCCAACCCCAGCA  
ATCTCCTCGACATACGAGAGATCAATCGATGCCGGCGCCGCGGAGACCATGGAAGCCCTTCACTGCCCGCAGTTGCTGCACAGTCGACAACCGCTTAGTACTCGGAAACCTCAGCCTTA  
ACTTGAGCAGGTGCCGTCCAACACGCCCCGATTTCTCCAAGAAGGTGGCGGAGCCGCCGTCTTTCCGCCGCATCTCCATCTCAGACCTAAGCAGCTCGTCTTCGGCGAGGTTCAACGAG  
GAGTTTGCGCGTGCCTTTGGAGCCGGGCTATACGCCTTCCAGCTGAGCGAGCTGAAAGCCATAACGCACGACTTCTCAAACAGCTACCTTCTTGGTGAGGGAGGGTTCGGCACCGTGCA  
CAAAGGCTATATGGATGATAGGATGCGGCCTGGTCTAAAAGCGCAGGCCGTGCGCGTTAAGCTTCTTGACATAGAGGGTCTTCAGGGTACAGGGAGTGGCTTGTGAGAGAACAATTAAT  
ATTTCCCCTATATATGCATTAATATATCTTTCTGTTTGATGAAATGCTTGCCTGTGTTAATATTCTCATTCTATATATGCCTACTGTTGTATTGGTTCGGATGAGCTATATATATATATGTAGCATT  
AATTTATTAATGATGATGCTGGTGCAGGCGGAGGTGATATTTCTCGGGCACCTGAGACACCCTCATTTAGTGAAGCTGATAGGTTATTGCTGCGAAGATGAAGAGAGACTTTTGGTCTACG  
AATTCATGCCACGTGGCAGTCTGGAGAACCATCTCTTTAAGAGTAAGTTGCATGCTGATTTGGTACCCATCCCATCCGGATGCAACGAGAGAATGAAGAATTAATACGTAATAATGTATT  
TGCTGCATGTTTTATATATTTAAGAACAGGAATATCAGTGTGACTGTCATGGGGAACAAGAATGAAGATTGCGACGGGAGCAGCAAGAGGGCTTGCTTTCCTTCACGGCGCGGAGAA  
GCCATCATTTATCGCGACTTCAAGACATCCAACATCCTTCTCGACTCTGACTTCAGTGCTAAGCTGTCCGACTTTGGGCTCGCTAAGATGGGGCCTTCGGGTGAAGAGACGCACGTGAG  
CACTCGGGTGATGGGGACACAGGGCTACGCCGCGCTGAATACGTGATGACAGGCCACCTGACAACCTAAGAACGACGTCTACAGCTTCGGCGTGGTGCTTCTGGAGCTTTTGACGGGG  
CGCCGATCGGTGACGAGTCGCGGCCAAAGAAGGAGGAGAAGCTGGTGGAAATGGTCCGAGCCCTACCTGAGGAACAGCCGGAAGCTGCGCTGCATCATGGATCCAAAGCTCGCCGGT  
CACTACTCTTTTCAGGTGCGCAAGGGAGGCTGCTGCTCTCGCTCTGCGCTGCATCAGCCCCACCCAAAGGACCGCCCCAAGATGTCGAGGTTGTTACTGTTCTCCAAGGCCTACGCAG  
CAGCTTCAGGGAGAAAACGTCATGATATCTATATCTGGCTCGGATCGACGACTGTAGATGGTCCTGCCTGCGTATTTTCGTTAATTAAGTACCGCTGATCTGTTATTTATATGCCTAATTACTGT  
TTTTCAACTGTGAATTGCTTTGTAATTAATGCATAACTAAATAAAACAAACAGGCGATTACAGTAGGAGATGCTCTGTTTCGGTCAATGCCCTTACTTACTTACTTGCTCAAACCTGAATAAA

>comp162543\_c0\_seq6

AAGGACATAATAGAATGAAGAATTAATATTGGATTCGTTAGACCGACGGCGATCATGCATAAAAGTCTTCGTGCTATTATGTCCTTCCTCCTCCTCCTCCTCAGTTCATATCCAACCCCAGCA  
ATCTCCTCGACATACGAGAGATCAATCGATGCCGGCGCCGCGGAGACCATGGAAGCCCTTCACTGCCCGCAGTTGCTGCACAGTCGACAACCGCTTAGTACTCGGAAACCTCAGCCTTA  
ACTTGAGCAGGTGCCGTCCAACACGCCCCGATTTCTCCAAGAAGGTGGCGGAGCCGCCGTCTTTCCGCCGCATCTCCATCTCAGACCTAAGCAGCTCGTCTTCGGCGAGGTTCAACGAG  
GAGTTTGCGCGTGCCTTTGGAGCCGGGCTATACGCCTTCCAGCTGAGCGAGCTGAAAGCCATAACGCACGACTTCTCAAACAGCTACCTTCTTGGTGAGGGAGGGTTCGGCACCGTGCA  
CAAAGGCTATATGGATGATAGGATGCGGCCTGGTCTAAAAGCGCAGGCCGTGCGCGTTAAGCTTCTTGACATAGAGGGTCTTCAGGGTACAGGGAGTGGCTTGGCGGAGGTGATATTTCT  
CGGGCACCTGAGACACCCTCATTTAGTGAAGCTGATAGGTTATTGCTGCGAAGATGAAGAGAGACTTTTGGTCTACGAATTCATGCCACGTGGCAGTCTGGAGAACCATCTCTTTAAGAG  
TAAGTTGCATGCTGATTTGGTACCCATCCCATCCGGATGCAACGAGAGAATGAAGAATTAATACGTAATAATGTATTTGCTGCATGTTTTATATATTTAAGAACAGGAATATCAGTGTGAG

TACTGTCATGGGGAACAAGAATGAAGATTGCGACGGGAGCAGCAAGAGGGCTTGCTTTCCTTCACGGCGCGGAGAAGCCATCATTATCGCGACTTCAAGACATCCAACATCCTTCTC  
GACTCTGACTTCAGTGCTAAGCTGTCCGACTTTGGGCTCGCTAAGATGGGGCCTTCGGGTGAAGAGACGCACGTGAGCACTCGGGTGATGGGGACACAGGGCTACGCCGCGCCTGAAT  
ACGTGATGACAGGCCACCTGACAATAAGAACGACGTCTACAGCTTCGGCGTGGTGCTTCTGGAGCTTTTGACGGGGCGCCGATCGGTTCGACGAGTCGCGGCCAAAGAAGGAGGAGA  
AGCTGGTGAATGGTCCGAGCCCTACCTGAGGAACAGCCGGAAGCTGCGCTGCATCATGGATCCAAAGCTCGCCGGTCACTACTCTTTCAGGTGCGCAAGGGAGGCTGCTGCTCTCGCT  
CTGCGCTGCATCAGCCCCACCCAAAGGACCGCCCCAAGATGTCCGAGTTGTTACTGTTCTCCAAGGCTACGCAGCAGCTTCAGGGAGAAAACGTCATGATATCTATATCTGGCTCGG  
ATCGACGACTGTAGATGGTCTGCTGCGTATTTGTTAATTAAGTACCGCTGATCTGTTATTTATATGCCTAATTACTGTTTTCAACTGTGAATTGCTTTGTAATTAATGCATAACTAAATA  
ACAAACAGGCGATTACAGTAGGAGATGCTCTGTTTCGGTCATTGCCCTTACTTACTTACTTGCTCAAACCTGAATAAA

>comp162802\_c0\_seq2

CTTAAATATAGAGACACTTAAAAATTTTACAATACTCTAGAACAAAACATCCCTTTTCAAGTTCAGATTTCTAAGTACAATCTTTTCAGCATCTCCTTTCTCTATGTTATTTGGTTTATCCT  
ATGCTCTCGTGATGGGTTCCATGATAATAAGAAGGCTTTATAGGAAAGCTAGGAAGGGGACATATAATGGCTCATTGGGCTTCAGCCAGTTATACTTTGAAGTTCAAGCAACACCTAACATA  
TATATATTGTTTGTCTTGTACAGACATTGCAATGCAGACCAACAAATGATACCCTAAAATAATACAACTAAAATACAGATCATTGTACAAGAGAACGTCCAATATACATATATTTAAGTA  
GTTTCTTAATCTCAGCTGGTTATGGCTTGATCTTAATTGGAAGACCTTTTGGGAAATCGAGGAAGGGAAAGGCGAAGGCGCAATCGGGCTCGTCAAGCTCCCATCGAACTTAAGTACG  
AGATGGTGAAGAACAACACTGCCATTTCTAACTTCGCCAATTCTGTGCCCGCACATAGCCGTGGGCGCCACCATATGCCATGAAGTTGCTCATGGATGGCATTCTGAGTATTCCTCCATCT  
CCAAGGATTGAATTGGTGTGGCTCAGTGTAAGCTCCTCATCCAAATGGACGGCTGCAATACAGGCAGAACTTTCCACCCACTTGGGATGTCATAACCTTTATAACGCACGTCTCGAAT  
GGCCTTCTGTGGACGAACCGAACAACGTTCCCAAGCCTGAGGGTCTCATTTATGACACACTGTGTAAAGTCCATTAGCTTGTAGTCTCCAGCTTAGTCCATGCTCCCCCTTTTCTCTC  
ATCTTCTCAAATATTTGTTGTCTCCTCCTGCAGTTCTTGAACAGCTTTAGGACAGCTCTCAAGGAAGAAGATGGTCAGGGCCAAGGCCATTGAGGAGGTCTCATGGCCTGCAAATAGA  
AGACTGAGAAGTAGGTCCATTATTTGCTCCTTAGAAAAAGCAGACTGTTTCAAAGCCCAGCCATTAGATCATCTCCCTTTCTCTCTTCCCCTATCTCTATCATCTCTTGTCTCCTCTCT  
TCCATCTTCTCTCAATCACTCCAGAATGCTCGATCTTGACTTCAAAGCCTTCCAGTATGAAGTTCTGGAAGATTTAAGGGAGCAGAGACCACCCCTTCATGAATGTTATGTACTCTCT  
TCTCAGCTTCTCAGTTTCAGGTTCCCCTGGCTCCAGGCTCATAATATCTTTGCCATTAAGTTGAAAGTAAACTTTTTAACTTCTTCTTGGGCAGAGAAGGCGACTCCCTCCTTCCAGGAG  
GCCATCACCATGAGGGTTTGGCGCTCGACCTCCGGCAGGAGGACGGTTCGAAGACGGGCGCTGCTGAGAAAATTAAGAGAGATCATTCTCATGCTTTGATGCATCTCTCCAACCAACAC  
CAACATTGACCATTTTCCGAGTATCCACCAATGCTCTTCGGATAGCTACACTCGAACAATCGGCCCTCGTTTAGTAGGATGAATCGGTTTCAGACCGGCATCTGCTGATACGATCGTCGGCT  
CCCCGAACAGGTTTGAACGATAGATCTTTCCATGTCTGTTTATGTGAAGCTCCATGAATTTTCTATGGTGGTGGCGGAGTGAGGCTTGAGATAGCCAAAGGTTTCGCCGAGAAGCGGAA  
AGCCTCGACTGCCGGCGGGAGGTTGGGATGCTTTCTTGTCAATGAAGTGAAACCATGGAGAGAAGTGTTGGAGTTAGGCTTTAAAGGTTCTCTGGTGGAGGAGGGTATTGGAAAGGAGAG  
AT

>comp162802\_c1\_seq1

CAGATGCAAGAGAAAGCATCTCTCCTTTCCAATACCTCCTCCACCAGAGAACCTTTTAAAGCCTAACTCCAACACTTCTCTCCATGGTTTCACTTCATTGACAAAGAAAGTTTCAACTCT  
CTGCTCTGCTTCCATGTCCATACTAAAAGAGCTTCTCCTCCTCTCTCCTTCAGCTTCTTGGCCCTTCTCATCTTCTTCTATCTAGCTAGATGCAAGAGAAAGCATCCCAACCTCCCGCCGG  
GCAGTCGAGGCTTTCCGCTTCTCGGCGAAACCTTTGGCTATCTCAAGCCTCACTCCGCCACCACCATAGGAAAATTCATGGAGCTTCACATAAACAGGTGAAAGTCTACAATTGTTAGTT  
CAGTAATCCCAACCTACTTCGAAAATATTTTATAGAATCAATCTCAGCAGTCCAAAGTGAGCTGAATGGTTCAGATTGGAGAATAACAGACATGAAAGATCTATCGTTCAAACCTGT  
TCGGGGAGCCGACGATCGTATCAGCAGATGCCGGTCTGAACCGATTATCCTACTAAACGAGGGCCGATTGTTGAGTGTAGCTATCCGAAGAGCATTGGTGGAAATACTCGGAAAATGGT

CAATGTTGGTGTGGTGGAGAGATGCATCAAAGCATGAGAATGATCTCTCTTAATTTTCTCAGCAGCGCCCGTCTTCGAACCGTCTCCTGCCGGAGGTCGAGCGGCAAACCCTCATGG  
TGATGGCCTCCTGGAAGGAGGGAGTCGCCTTCTCTGCCCAAGAAGAAGTTAAAAAGTTTACTTTCAACTTAATGGCAAAGAATATTATGAGCCTGGAGCCAGGGGAACCTGAAACTGAG  
AAGCTGAGAAGAGAGTACATAACATTCATGAAGGGGGTGGTCTCTGCTCCCTTAAATCTTCCAGGAACCTTCATACTGGAAGGCTTTGAAGTCAAGATCGAGCATTCTGGGAGTGATTGAG  
AGGAAGATGGAAGAGAGGAGCAAGAGGATGATAGAGATAGGGGAAGAGAGAGAAAAGGGAAGATGATCTAATGGGCTGGGCTTTGAAACAGTCTGCTTTTTCTAAGGAGCAAATAATGG  
ACCTACTTCTCAGTCTTCTATTTGCAGGCCATGAGACCTCCTCAATGGCCTTGGCCCTGACCATCTTCTTCTTGAGAGCTGTCTTAAAGCTGTTCAAGAAGCTGCAGGAGGAGCACAAACA  
ATATTTTGAGGAAGATGAGAGAAAGAGGGGAGCATGGACTAAGCTGGGAGGACTACAAGCTAATGGACTTTACACAGTGTGTCATAAATGAGACCCTCAGGCTTGGGAACGTTGTTCCG  
TTCGTCCACAGGAAGGCCATTCGAGACGTGCGTTATAAAGGTTATGACATCCCAAGTGGGTGGAAAGTTCTGCCTGTATTTGCAGCCGTCCATTTGGATGAGGAGCTTTACTAGCCCA  
CACCAATTCATCCTTGGAGATGGAAGGAATACTCAGGAATGCCATCCATGAGCAACTTCATGGCATATGGTGGCGGCCACGGCTATGTGCGGGCACAGAATTGGCGAAGTTAGAAATG  
GCAGTGTCTTGCACCATCTCGTACTTAAGTTTCGATGGGAGCTTGACGAGCCCGATTGCGCCTTCGCTTTCCCTTCTCGATTCCCAAAGGTCTTCCAATTAAGATCCAAGCCATAA  
CCAGCTGAGATTAAGAACTACTTAAATATATATGTATACTGGACGTTCTTGTACAATGATCTGTATTTAGTTTGTATTATTTAGGGTATCATTTGTTGGTCTGCATTGCAATGTCTGTAC  
AAGACAAACAATATATATATGTTAGGTGTTGCTTGAACCTCAAAGTATAACTGGCTGAAGCCGAATGAGCCATTATATGTCCCTTCTAGCTTTCTTATAAAGCCTTCTTATTATCATGGAA  
GCCATCACGAGAGCATAGGATAAACCAAATAACATAGAGAAAGGAGATGCTGAAAAGATTGTACTTAGAAATCTGAACTTGAAAAGGG

>comp163485\_c2\_seq1

TTTTTTTATTTTCATAAGAACGGATATATTATAGATTATAGTGAATACAGTGATTTCTTTAGTTTTTTGGATATTTGAGCCATTAAGGCAAACCTCACACACACAAGTTTCGAACTCAAGACCTC  
TTAGTTAGTAGCCAAAACCCCAACCAACAGACCAAGATGAGCCATATGTGATTTCTTCTTTAAGCTCAATAAAGTTGTCATACATTAGCAACATATAAACTCAACACAGCACACTA  
ATCACCAAAACATAAAATACCAGCAAGCATTTCTTAAACTGAAGTACAGTATGCAGAAAATAGAACTTGTAACCTGCTTCTGCATCCCATAGGCACAAGCAATATAGAATCATTCAITCTC  
CTTTCCATGAAGAAAGAGGGCGGGGTTTTCAGAATCCACCCAAGTGGGAGCTCCGGCGATCTCCGGTACCCTTCACGACATCTTCTGAAGCATAGGATTTCGAGCTCAGCCAAITCTTCAG  
GGCTAAGCTTTACAGATAGTGTCCAATGTTCTGGTTGAAGTTTTCAATCTTGGTTGTGCCAGGTATGGGGCAGACATCATTTCCCTGATGATGAACCAAGCCAGGGCAAGCTGAGATG  
GAGTACATCCCTTCTTGTATGCCATTGAATTCACACGTTCAAATATCCCGCATTTTGTCTCCACATTTCCACTTTGAAACCTAGGCATTTTCTTGCAGCATCTTGTCTGATAGTCCTTCAA  
CCATCTTTGGCCATAAGACAAGAAACCTTCCAAGTGGACTATATGCAACAATTCCAATTCCAAGTTCTCTGCAAGTAGGAATTATCTCTTTCTCAGAATCTCTAGTCCATAAAGACCAT  
TCCAAGTGGATAGCAGTAATAGGGTGAAGTGCATGAGCTCTCCTTATAGTTGACGCTGAAGCTTCAGATAATCCGATGTATTTATCTTTCTTCAACCAGTTTCTTAAAGTTCTCCCATC  
TGAGGAAAATGAAAATGATGAATAAAGGTTGTTTCAGCCAATAAAATATATTATTAGCAAATCATGGTCGCACGGGCAGATAGCATATCAGTTGCATATTGATACTGCTCCTACGCCAA  
TGCTTGCAATCATCCAGCGAAATTACACGCACACAGAAAGAGAGAACCCAGCTGCTTGCAGCAAATGAACACAAAGGTCATGTTTTTAAATTAATTTTGAATAATTTTTCGAAATG  
CTAAATAACAAATGAATAGAATCATAAATATCAAAGTTCTAAGTATAGTTTCAATGAATTCTAATAATAGTTATATTTATATACTTTTTTCAATTGGCATAAAA

>comp163485\_c2\_seq14

AAATCCTGTACCAAACAGCCCTTAAAGTTTCCAAAACGGTGGCGTACCTTGGCAGCATCTTGTCTGATAGTCCTTCAACCATCTTTGGCCATAAGACAAGAAACCTTCCAAGTGG  
ACTATATGCAACAATTCCAATTCCAAGTTCTCTGCAAGTAGGAATTATCTCTTTCTCAGAATCTCTAGTCCATAAAGACCATTTCCAAGTGGATAGCAGTAATAGGGTGAAGTGCATGAGCTC  
TCTTATAGTTGACGCTGAAGCTTCAGATAATCCGATGTATTTATCTTTCTTCTTCAACCAGTTTCTTAAAGTTCTCCCATCGTGACCTCGATTGGAACGCGAGTGTCAATACGATGTTGAT  
AATACAGATCGATGCAGTCAACACCAAGCCTCTTAAAGTCCCTTCGAGGCCGCCCTTACATAAGCGGGTTCCTCCGCGTACCTCCCTAATCCCATCCCTCCATCCCTTATGCCAAACTTT  
GTCGTAATTCAACTTTCTCCCGCCACCCTTCTCTTAAAGCCTGCAGGTCGAACACTTGATATGCAACCGCGAAGCAGGCAAATCCCGCAAACAGGGGAAGCAGAAGAACGAAAGGGA  
GTACCTTTCCAATAAGTGTTCGTTGGTGA

>comp163560\_c1\_seq3

TTCCAATAAGCAAAAATTCATACAATCTAGATCAGGTCCTAAATTGTAAATTCATCTTGTTCATACACTCTCCATAAATACTAAAACGACCAACAACCTCAATAGACTAGAAAACCTGACA  
GAACTATCTCACTAAAACCTTTGCCCAAAAATTAGCGAGTTTATGTACAAAGAGTACATTCCTCATAGATTTTTACTCAGCTTTGTACAACAGCAAAGAAGAAATTAATAAAAAAAGGA  
AGAAGAAGACGATCATCACAATCTAAATCAGAGCAAAATTCAGATGATCTGAGGATTTGCCACTTCTCTTGATAACAAGTAACGAAAACCTGAAGTTATGAGGCACCCATTGGATGATCTT  
CTGAGATCTTCTCGCTGACATCTCTGCACTGCGATCCGCATAGTCTCAGAAAGATGGCATTGAATCATATCAACGGTCTTCTGTGAACTTACACAGATATCTTTTGTATAAGATTCTATCAG  
TTTAGGCAGAAGAACTTTCTTCTCTCAGAACACCAACTGTAGCTCGAATGTACTCTTCTTTTGGCTGTTTCTAGTTGCTGGTATAATCTCTTTGCAGTATATATTCTGACTGCAGGATCAGA  
ATGGCTTCCAGAATAATGCAAAATGAAGGAGAGGTTCCCTTTTCTCAATGGCATAGAACCCTTCTCCTTTTCATCTCTGGCCTTAAACTTAATCCTTGGATGCTTAAATGTTTGAAGCCACT  
GTCCAGATAAACGCGTACGGCAGCCAAGAAATGAATCTTGAATCATTTCCGGCATTACGGAGTGGCCTCTACTATGCATGTGGCCTTGACGAGCAGTGAAGTTCTTTTTAACTACTTGG  
AGGAACTCCATGCACCAAATATGCATGCATCATCAAAGCATTGTGTAAGTTGATCCAAAAGGGCATCTTTTCATCATTCTTCATCTTGCTTACATCGACAGTTGCCAACTTTTGAACAAGAG  
ATTTGTAAGTATCCAGCAAGTCTCCTGTAATCTTGAACCTCTGACTGTCCCTGTTAATTGATGACACTTCCACCATGGCATTGTATGGACCACTGAACTCTTTCAACCCCTCTTTAATTTGGT  
GAACTGATAAGCCCATAGGACTTTGGACAGATATCACATGAGATTCATGACTCTGATGAGCTGTTAGATTTCTGAAAGATAAGCTTCTTCACTGTATTAATGGATGTGTTTGGACAGATAGG  
GAAGATCATTTTTTAAACAGAGGAGGATTTCTCACATCATATTCATGTGAGTATTTGTACAAAGCACAATGACTATGGAGTATTTGAGTACTGTCAGATTTTTTGTACTTAAGCAATTA  
AATGATTAATAAATATTCTGAGAGGCAAAATATTTATTAAGATAAAAAATATATTTATTTAAATTAACAAAATGTTTCAAGTACATCAAAGGCAGTTTCAATTTTATTTTTTGAATAAAAAATTA  
TTTATTTTTATATGTTTATCATACTTGCCTGAAATATCATAACCGACATTGTCCAAATTTATGATCAATTTTAAAAAATGGGATTGAATCGGTTTCGTTCAATCAGGAATCGGTCTATTCAAAA  
CTAAGAAGTGTCTTAACTTTGAACCGAGCGATCAAATTTGGAGCGAACCGCAAGTTGTACAAAGTAACTTGGCATTTGGTATCATTTATAGGTAAGATGATAACATCATCCATCTCTCATT  
TTTTCCATCGTATGACTTTT

>comp163696\_c0\_seq8

ATAATCCTTCTCTCCAATCTCCATCAACTTAAATAAAGCCTTCTTACCTTCTTCTTTGCCATTTTGTCTATCTGTTTCTCCTTATCATAGCATGGGGAGGCAGCCATGCTGTGATAAGGAG  
AGGGTGAAGCGGGGTTTATGGACGACCGAGGAAGATCAGAACTTGTGACTTCATCCTCAACAATGGCATTCAATTGCTGGCGCCTCGTGCCGAAGCTTGCAGGTTTGTATGAGATGTGG  
TAAGAGCTGTAGGCTGAGATGGATCAATTACCTTCGCCCTGATCTTAAAGAGAGGGGCTCTATCTGAAACTGAGGAGAAGCAGATAATTACGCTCCATTCTAATCTTGGTAACAGATGGTTCG  
AAGATTGCTTCGCATTTTCCGGGCAGAACCGACAACGAAATCAAGAACATATGGAACACCACAATCAAAAAGAAGCTGAAGCTTCAAGAGCTCGGATCAACTGACTGCCAAGAACATTG  
AGGCTGACAGGAAGAAACACATTTCCAAGGTTGAAGGCTTGGTAATTGAAACCAGCACTGAAAGCTCAAAGAGCTCTTCATTTCAAGAACTGGAACAGAAGCTGGACTCAAGAGATGAA  
GCTAATGCAAGCTAATCTTTCTATTAGCTGCAGTGCTTCAACATCCATGGAAGGAAATGTTAATCCATCTTCATGGGAAGGAGAATCAAATGTTTATGGAGAATCTGATGAGCTCTTTGGG  
CTGATACAATTGATTACTCCTCATCATGGGAGGCCTATAATTTTGTGATGATTTTCTGCATTATGAAAACCTACCCATGAGATTTTTTTTTTTTCTTGTTCCTCAGTAAATGGAGGGATTATTG  
GGTTCGGACACCAGACACATCTTACCGTTCGGTACTTCACAGTACCGAGTAATACTGAACTCGGTACTGTGAAGTACCGAGTTCGGTACCGAAGCAGTACCTGTACTGAGCTCGGTACTG  
CGCAGTACTGAGCTCAGTACCAAGTAAAAGGTGAAGTGGCGCATTTTCATTGGGCTCCGGTGTGCTCCGGTGTCTAAACCCAATAATTTCCCTGAGGATCCATTGGTGTAAACTAGTA  
TGATTACTGTTACTTATTTCCATTGCCATATGTAAATTTTATTGATCAATTTGAATTATACTCATTGAGTGTTTTTTTTTTCTGGACAAA

>comp163697\_c0\_seq6

GAGCGGTAATCTTCAATTAATTTTATATCTCATGCTTTAAATTTAACAGCCCTAAGATTACAATATATGATAGTTTTTTAGCAGTAAAATAATCTTTTTTTTTAACTTTTGAATTAACATGT  
TTCATCTTTTAAATAGAGGATTTTGAACCTTATTTTGTATGCATAATTTTTATATACATAATAGAGCATTTCTCCTCATTTGTTTGCAGGAGACACCAGTCCACACACTTGTGCTGGGATG  
GGAGCCCTCCAAGGAGTTATCATGGAGATTGTTCTCACCTTTTCACTCCTATTCACGGTCTATGCTACTATAGTCGACCCTAAGAAGAACGTCCTACTGGGTTTCGGCCCATTTCTTGTGG

GCTTGTGTTGGAGCTAACATTTTGGCAGGTGGGGTTTTCTCAGGAGCATCAATGAACCCTGCTCGATCATTGGGCCAGCGTTGGCATCTGGTGATTGGACCGACCATTGGGTCTATTGG  
GTTGGGCCCTCTCATAGGTGGCGGGCTTGCTGGGCTTATCTATGAATACTTTTCAAAAATGATACACATGTTCTCTTCCAAGGGAAGAACCATTTTAGGCCGGGCATCATATGAGTTTTCT  
CCTTACTCTATGGTTAATTTATTTCAATTATGAGCCCATTTTTTTAACTTTCTCTTTGTGACTTTTGTAAATGGGATGATTTGCTTCCATTGTTCTAGGCTGAGACCTATGATTAATAAATATA  
TGATCTTACTGATGTGGATCATTATAGTTATAGTGCACCACTACATAATGTATCTTTGTTATGTTTAGCACCACCTCTTAAATTTCTGCTATTTTAATTACATAGTACATTTTACGAAAAA  
>comp163821\_c1\_seq2

AAAAACAAAAAAACAAAAAAGGTGCCTTACACGCAGCACCTGAGAACAAGCGTCGAACCTCCGCATAGCTATTTAAGCGCGAGACAATTCGGTTTATTCCGCGCGAATGCTAGGAA  
GGCAAAGATAGCGGCCAAGAGAAAAAAGCAGGAACGGCTTTGGATTTCGCCGTTCAAAAATCCATGGCCGGAGAATCGCGTGGGTGGATGATCTTGATGGTGACGATTTGGATCCAGG  
CGTGCCTGGCACCACCTTCGACTTCTCTTCTACTCGTCCGAGCTTAAAGCAGCGATGGGAATCTCGCAAGTACAGCTTAATTACCTCGCCGTTGCTTCGGATCTTGGTAAGGCGTTTGG  
ATGGTCTCCGGTCTTGCTCTTCTTTATTTTCTATGCCTGCTGTGCTATTTCTTGCTGCTGGATTTGGATTCTGGGTTATGGTTTGCAGTGGAGTCTCATCACTGGTCGGATCTCGATGAC  
CTATGCCCCGGTGTGTTGTGCTATGCTTGTGGCCGGGCTAAGCATATGCTGGTTCAACACAATATGCTTTCGTTCTCTGCATCCGAACTTACCACAGACCGCTCCCTCGCCTTGTCTCTCA  
CCGTCAGCTTCAACGGTATCAGCGCTCTTATACAGCCTCGCCGCCAACTCCATCAATGGCTCTCTTTCATCTACCTAATCTCAACGCTGTCTCCCTTCCCTCACCGCTCTTTTTGCTC  
TCAACCTCATCCTCCGCCAACCGCTCCCAATCCCCACACGCCTCTCCGATCGTCAAATCTTCTCGTCTACATACCGTCGCCTTCTCACCGGCGTTACCTCCTCCTCCTCAACCCC  
GCCTCCCCAAACCAATTCACCTCCCGGCTAATCCTTGCCGGCGCAGCGATCCTCCTAGCCTTACCCTAGTCTGTTGCGAGAGAATGGGCTAGTCTCTATTTTCTCCTGGCTGGAAG  
GCTCCAATGATTACGACTTGCAGAAGGAGCTGATTGTTGTAGAGGTCGTAGATGAGGACGATGAGAGCACCACCAGTCCACGGGACATTGACGGCTCCAATGGGTGGCTGTGCTGCTTC  
AACGAGGTGATGACCAAAGACAGAATAACTAAGCTTGGGGAGGAGCACGGGGCGAGGAGACTTATCCGCCGGTTGGATTCTGCTCTACTACATTTCTTATTTCTGCGGCGGCACTGTT  
GGTCTTGTGTACAGCAACAACCTGGGTGAGATCGCCAGTCTGGGGCGGACGTCGGAGACCACATTTCTCGTGAACGTCTACTCCTCCTGCTCCTTCTTCGGCCGCCTCATCTCCGCT  
GCGCTGACTTTTTGGCTGGGAAAATAAGCTTCGCCAGAACCAGGCTGGCTAGCTGCGGCCCTTGTGCCGATGCCGCTGGTCTTCTACATCATGGCTAAGACAGAAGATGGGCAGGCTCTT  
GTCGCTGGAACAGCGCTGATTGGTCTGAGCTCCGATTATCTTCGCGGGCGCCGTCTCCGTGACGTGCGAACTCTTCGGGCCTTCAAGCTTTGCAGTGAACCACAATATCGTCATAACT  
AACATTCCTTTGGGTTCCCTCCTCTACGGATTGCTCGCCGCACTGGTATACGACGCCAACGGCAGCGTTGGGATGAAGCGGATATGCGAGGCCTTCGCGACGCTGCTGCGGGACGGCATG  
GTGGTTTGCATGGGTCCCGGTGCTATGGGAAGACATTTCTCGCGTGGGGATGCACTTCGGTGCTCGGTCTCACTTGCAGTGTGCGCTTACTTGAGGACTAGGGGGGCTTACCGATGC  
GCGGCTGAGAATGGTGGCCGGAGGTTTGTGCGGACCTGTTTCGGTGGTATCTGGTAAATTTATATATTTATTTCCAGATCTCAGGAAATCATGATGAACAAAAACAATAAGCCTAGCAG  
GCTACGTGGGTGCGCTAGGTGTTTGAAGAAGGGAAAAAAAATGTGTTGGTGAAAAAAACCTATTAATACATGTTTTAAAGTCTTACTACCTAAAATTGGCTGTATAATTCAAATAAT  
ACAAACACGATACTAATATTTATATAAATCCAAAAACATCAACGTTTCATATAAAAAAAAAAAAAA

>comp163922\_c2\_seq11

AGCATATTTTTTAAAAAAATTATTGTTAAATTTTTTATTCTTGCTTATAAGGAGTAAGAAAGAAAAAAGGATTTAATTGACGCTGAAAATAAGGATTATCAGCTAAACAAAATAATTAATG  
AAAAATCAATGAAATGAAAATAATTAACAGTGTTCATTTAAAGAACTAAGTAAGGCTTCTTCGAGGTTATTTTTCAGATATCTTCTCGTGATCATTCTTCTCAGAATTTCTAATCATTCTGT  
CATTATCATCAGCTCCATGCTGTTTCTTACCATCATTTATGTCATTAGCTTTCCCCCAAAGCACAACATACAAACCTGCTACAATGGCTGCTGCACCTCCCAAGCTGATCAAAGATGTTTTGC  
CAGTAAACATTTTGAAAAAAAATTGTACTTATAATTCAATAATTTAGGAAGATTATTATTGAAGTTTTGTAACAAAATGAAATGATAATTAATTGTGCTTACCTTCTATATAGAGTTCTTC  
ATGAAGCAAGAAGGAAGCAGCAATTGTAGTAATCACAGTGCAGAGAGGGTTAAACATAGCAGAAAATAGTGGCCCTCTGATTGCTATGCACCAGGACTGGACAAAAGTAGCTAACAGCA  
CAGCAGAATCCAGTATAATGCAAAACAGAAGAGACAAGCCTGACACAGGTCTCCAGACTTTCCAGCCTGGTTCTACGAGTAGAGCTAAAATAGCTGTTAGCCAAACAGATATTACAGA  
CATCCAAGCAGATAATGAGAGTGGATCCAGATGGTTTCTACATATTGGCACCTGTATAATAAGCCAAGCAGACCAGCAAGTGTAGCATGCTATAAGAAAGAAGACGCCCAGAAGCCATTT



GTCTCCTGCTGCTAATTGTAATAATGAACTTACGATAATCTTTCTGATCTCACTGTTTCATAAGCTTTTGGCTCTTCGATAATATCATGACAGTAGCTCCACAGAGGCATATAATTGTTCCAAGA  
ACTTTAGCCATGCTTCTAATGTTCCCAAGTCTCACCTTCTCCAATCCAACCTGCAGCTGCTATGACAAATGTTACAGCAGGTACTATGTTGGATATAGCAGTAGCAACAGATGCAGAAGCCA  
ACTGCAATCCTTTGAAATAGAAAGTTCGCACTCATTGCCACTCCAACAAGAGCAGCCAAGAACCAGAAAAGAAACCCTTCATTCCCATAGTCTTTTCAGTTGGTTTCCTCATATTTATGAT  
GGATGCTGGTGTGAGGATAATAGAGGCAACTATTTGCCTGTAAACAAGAAAGATTACAGGGCTGAATCCCTTGTCCTCAAGCTAGCTTTGGTTGCAAGGGCCATGCTTGCATATATGAACTGC  
AAGCTTATCATAGCAAAACACAGGCATGTTCTTTGTAAGCCATTGCTTGAACATTACTTTCTTTGATGGAGCTTTTGCTTTTCACTTGAAATG

>comp163922\_c2\_seq12

AGCATTATTTTTAAAAAAATTATTGTTAAATTTTTTATTCTTTGCTTATAAGGAGTAAGAAAGAAAAAAGGATTTAATTGACGCTGAAAATAAGGATTATCAGCTAAACAAAATAATTAATG  
AAAAATTCAATGAAATGAAAATAATTAACAGTGTTCATTTAAAGAACTAAGTAAGGCTTCTTCGAGGTTATTTTCAGATATCTTCTCGTGATCATTCTTCTCAGAATTTCTAATCATTCTGT  
CATTATCATCAGCTCCATGCTGTTTCTTACCATCATTATGTCATTAGCTTTCCCCCAAAGCACAAACATACAAACCTGCTACAATGGCTGCTGCACCCCCAAGCTTCCTATATAGAGTTCTT  
CATGAAGCAAGAAGGAAGCAGCAATTGTAGTAATCACAGTGCAGAGAGGGTTAAACATAGCAGAAAATAGTGGCCCTCTGATTGCTATGCACCAGGACTGGACAAAAGTAGCTAACAGC  
ACAGCAGAATCCAGTATAAATGCAAAACAGAAGAGACAAGCCTGACACAGGTCTCCAGACTTTCCAGCCTGGTTCTACGAGTAGAGCTAAAATAGCTGTTAGCCAAACAGATATTACAG  
ACATCCAAGCAGATAATGAGAGTGGATCCAGATGGTTTCTACATATTGGCACCTGTATAATAAGCCAAGCAGACCAGCAAGTGTAGCATGCTATAAGAAAGAAGACGCCCAGAAGCCATT  
TGTCTCCTGCTGCTAATTGTAATAATGAACTTACGATAATCTTTCTGATCTCACTGTTTCATAAGCTTTTGGCTCTTCGATAATATCATGACAGTAGCTCCACAGAGGCATATAATTGTTCCAAG  
AACTTTAGCCATGCTTCTAATGTTCCCAAGTCTCACCTTCTCCAATCCAACCTGCAGCTGCTATGACAAATGTTACAGCAGGTACTATGTTGGATATAGCAGTAGCAACAGATGCAGAAGCC  
AACTGCAATCCTTTGAAATAGAAAGTTCGCACTCATTGCCACTCCAACAAGAGCAGCCAAGAACCAGAAAAGAAACCCTTCATTCCCATAGTCTTTTCAGTTGGTTTCCTCATATTTATGA  
TGGATGCTGGTGTGAGGATAATAGAGGCAACTATTTGCCTGTAAACAAGAAAGATTACAGGGCTGAATCCCTTGTCCTCAAGCTAGCTTTGGTTGCAAGGGCCATGCTTGCATATATGAACTG  
CAAGCTTATCATAGCAAAACACAGGCATGTTCTTTGTAAGCCATTGCTTGAACATTACTTTCTTTGATGGAGCTTTTGCTTTTCACTTGAAATG

>comp163922\_c2\_seq13

AGCATTATTTTTAAAAAAATTATTGTTAAATTTTTTATTCTTTGCTTATAAGGAGTAAGAAAGAAAAAAGGATTTAATTGACGCTGAAAATAAGGATTATCAGCTAAACAAAATAATTAATG  
AAAAATTCAATGAAATGAAAATAATTAACAGTGTTCATTTAAAGAACTAAGTAAGGCTTCTTCGAGGTTATTTTCAGATATCTTCTCGTGATCATTCTTCTCAGAATTTCTAATCATTCTGT  
CATTATCATCAGCTCCATGCTGTTTCTTACCATCATTATGTCATTAGCTTTCCCCCAAAGCACAAACATACAAACCTGCTACAATGGCTGCTGCACCCCCAAGCTTCCTATATAGAGTTCTT  
CATGAAGCAAGAAGGAAGCAGCAATTGTAGTAATCACAGTGCAGAGAGGGTTAAACATAGCAGAAAATAGTGGCCCTCTGATTGCTATGCACCAGGACTGGACAAAAGTAGCTAACAGC  
ACAGCAGAATCCAGTATAAATGCAAAACAGAAGAGACAAGCCTGACACAGGTCTCCAGACTTTCCAGCCTGGTTCTACGAGTAGAGCTAAAATAGCTGTTAGCCAAACAGATATTACAG  
ACATCCAAGCAGATAATGAGAGTGGATCCAGATGGTTTCTACATATTGGCACCTGTATAATAAGCCAAGCAGACCAGCAAGTGTAGCATGCTATAAGAAAGAAGACGCCCAGAAGCCATT  
TGTCTCCTGCTGCTAATTGTAATAATGAACTTACGATAATCTTTCTGATCTCACTGTTTCATAAGCTTTTGGCTCTTCGATAATATCATGACAGTAGCTCCACAGAGGCATATAATTGTTCCAAG  
AACTTTAGCCATGCTTCTAATGTTCCCAAGTCTCACCTTCTCCAATCCAACAAGAGCAGCCAAGAACCAGAAAAGAAACCCTTCATTCCCATAGTCTTTTCAGTTGGTTTCCTCATATTTA  
TGATGGATGCTGGTGTGAGGATAATAGAGGCAACTATTTGCCTGTAAACAAGAAAGATTACAGGGCTGAATCCCTTGTCCTCAAGCTAGCTTTGGTTGCAAGGGCCATGCTTGCATATATGAA  
CTGCAAGCTTATCATAGCAAAACACAGGCATGTTCTTTGTAAGCCATTGCTTGAACATTACTTTCTTTGATGGAGCTTTTGCTTTTCACTTGAAATG

>comp163922\_c2\_seq2

GTGGTATGTATGTAAATTTCCCTATTTTAAATACCGGTGAAAAACCGGCGGAATATGCGCTAGTGTCTAACGGCGGAAATTCGCCGTTAAGTTACCGGCATATATTCTGCCGATTAGACA  
ACCGCTTTTTCCGACGTATGTCTGTCCGTCGTTATTGACAGATTTCTCTGCATGATCCTGAAGTAGATGCGGTAAATAAGAATTTTAGATAAAATTAAGTGTCTAATAATCATAAAATAGAAG

TATTAGAAAAATAATATGTATAGAAGTGCTTGTAAATAATAAATAGATTTTTGCAGCTAAATTAGTACTCAGCAGATTCTGCATCTAATTTGATGTAAACTCACAGTATAAATGCAAAAC  
AGAAAAGACAAGCCTGACACAGGTCTCCAGACTTTCCAGCCTGGTTCTACGAGTAGAGCTAAAATAGCTGTTAGCCAAACAGATATTACAGACATCCAAGCAGATAATGAGAGTGGATC  
CAGATGGTTTTCTACATATTGGCACCTGTATAATAAGCCAAGCAGACCAGCAAGTGTAGCATGCTATAAGAAAGAAGACGCCAGAAGCCATTTGTCTCCTGCTGCTAATTGTAATAATGAA  
CTTACGATAATCTTTCTGATCTCACTGTTTATAAGCTTTTGGCTCTTCGATAATATCATGACAGTAGCTCCACAGAGGCATATAATTGTTCCAAGAAGCTTTAGCCATGCTTCTAATGTTCCCAA  
GTCTCACCTTCTCCAATCTGATTCATCATAATTTGTTTTTCTTTGCTTTCTCAGAAAGTAAATTTTTCCAAAGCAAAAATTTCCGGTAAAAAATAGAAAAATCTGCTTTTCTATAGCTGCTTTTCC  
TACCAAAAAATAAATAGAAAATAGGCACCAAACGGAATGCAACTAAAGCTTTGTTTGGGACGGCTTTTCTGCTGTTTCTTAGGCAGCTTTTAAGGTAAAAAATTTAAATTT

>comp163922\_c2\_seq3

AGCATTATTTTTAAAAAAATTTATTGTTAAATTTTTTATTTCTTGCTTATAAGGAGTAAGAAAAGAAAAGGATTTAATTGACGCTGAAAATAAGGATTATCAGCTAAACAAAATAATTAATG  
AAAAATCAATGAAATGAAAATAATTAACAGTGTTCATTTAAAGAACTAAGTAAGGCTTCTTCGAGGTTATTTTCAGATATCTTCTCGTGATCATTCTTCTCAGAATTTCTAATCATTCTGT  
CATTATCATCAGCTCCATGCTGTTTCTTACCATCATTATATGTCATTAGCTTTCCCCCAAAGCACAAACATAACAACTGCTACAATGGCTGCTGCACCTCCCAAGCTGATCAAAGATGTTTTGC  
CAGTAAACATTTTGGAAAAAAATTTGACTTATAATTCAATAATTTAGGAAGATTATTATTGAAGTTTTGTAACAAAATGAAATGATAATTAATTGTGCTTACCTTCTATATAGAGTTCTTC  
ATGAAGCAAGAAGGAAGCAGCAATTGTAGTAATCACAGTGCAGAGAGGGTTAAACATAGCAGAAAATAGTGGCCCTCTGATTGCTATGCACCAGGACTGGACAAAAGTAGCTAACAGCA  
CAGCAGAATCCAGTATAAATGCAAAACAGAAGAGACAAGCCTGACACAGGTCTCCAGACTTTCCAGCCTGGTTCTACGAGTAGAGCTAAAATAGCTGTTAGCCAAACAGATATTACAGA  
CATCCAAGCAGATAATGAGAGTGGATCCAGATGGTTTCTACATATTGGCACCTGTATAATAAGCCAAGCAGACCAGCAAGTGTAGCATGCTATAAGAAAGAAGACGCCAGAAGCCATTT  
GTCTCCTGCTGCTAATTGTAATAATGAAGTTACGATAATCTTTCTGATCTCACTGTTTATAAGCTTTTGGCTCTTCGATAATATCATGACAGTAGCTCCACAGAGGCATATAATTGTTCCAAGA  
ACTTTAGCCATGCTTCTAATGTTCCCAAGTCTCACCTTCTCCAATCCAACAAGAGCAGCCAAGAACACCAGAAAGAAACCCTTCAATCCCATAGTCTTTTTCAGTTGGTTTCTCATATTTAT  
GATGGATGCTGGTGTGAGGATAATAGAGGCAACTATTTGCTGTAAACAAGAAAGATTACAGGGCTGAATCCCTTGTTCCAAGCTAGCTTTGGTTGCAAGGGCCATGCTTGCATATATGAAC  
TGCAAGCTTATCATAGCAAAACACAGGCATGTTCTTTGTAAGCCATTGCTTGAACATTACTTTCTTTGATGGAGCTTTTGTCTTTCACTTGAAATG

>comp164037\_c2\_seq3

CCCTTCCAATGAATAAACTCATTCAAATCATAAAAAAAGTCTTAAAATAGATTACTATCAAGCTACTAAATACACAATCACATGAGCTATTAGGACATAGTTCCCTATAGAAAATAGAAAA  
AAAAATCATTTAGAAACAATAATCATTACCTCTTTAATCCGAGAAATTATTACATGCGGAGAGATCCCGGACGCAGCGCAGCTTGCAGCCGAACGTAGCTTGCAGCAGGACTCTGCACG  
TAATAGTTTCTCCTGGAATCCACCTCCATGCCTTGCATCAACATAATCACACATGCATTTCTTTTCATGAATTAAGCATCCTAAGTCCATATAAATCTAACTTTACCAAATGATCAAATTTAT  
TCATCTCTCCTTCCATAAATGACTCATCACAACTCCAAACAATATGATACAAAGAAGTAACTCCATCTATGTCAGCCATCCACCATGCTATGTAGATTTATATTTATATAATTGCAAAGCAC  
TCCAAATCCTTACATTAATCCTAACAAATTAAGAACATAAAGAAAGTAATTAGAAGTGTCTCACCCCTCGATTTTATAATCGATCAATAATCATATAACAACTCTTCTTAGCTTCCATGT  
TCGTTCTTCTTCTTCTTTCATCATCATCTTCTTCTGCTTCTGCTTATGCTTCTTAAATGATCTTAGAAATTCGGCCGGCCATGAGCCCATGGTCCAAAGGCATCGACTAGCTGGCCTGAACCG  
TTGGGCATCAGATTAGGCGGAAGGTTAAATATAGGCATACCTGACTGGTCTAGCAATCCTCCGCCGCTGCCGAGTCCGGCCGGGGACCTGCCGAAAGCTGCCCGCCGGGTTCAATTTGCT  
TCTTCTTCTTCTTCCAAGGGTAGTCTTTTATAAGTTGCGTTTGAAGAAAGTGGCGGGGACAACCCATAACCGGTCCAGCAGCTTCCAGAGGGCCACGACGCTGCCCGGACCCTTGCCCC  
TGCCCGCCCGGAGATAAACGGTCAAGTCCGGTGGAGCCAGGAGGAGCCGGGCGGGCAAAAACGTTCCGGTTAGGGAAAGAATCTCGAACCGCCGCGAAGAGCTACGACGGCGCCA  
GGGGCTGCGGGGTGACGTAAGGTGACGTTAGCAACGGCGCCGGCTCCGCTTAGCACGCAGACGCCGCGTTGACGGCGGGGAGAAGTGGGGCATAGAGTCCGGCGACGTCGGCACCA  
CCGGCAACTTCCATGACGTGGCTACGGAGCGCGTTGGGGCTGTCACGAGTACGAAAATAGGGGGCTGGGGCTGTTTTTGGAGCCCGGAGGACGGCCCGTGCCCTGCGGTTGCCGAT  
ATCAACGGCTCCTTCTTTGGGTTCTGTTCTGTTGTCGATTCTCTCGTCGTTGGTTCGTCGGCGGACGCCGTAGCGCGGCTTGGATCGGAGGGTCTTTTAGACCGATGTTCAATTTCTGG

GTGAGTTTTCCAGGACCGGAGGAGCCGGAGGACGCCGGTTCATTGATTCCACCGCCGAGGCCAGCTGCGAGGCCTAGCTGGCCGGCCACCAACGGTTATTCGCCAGCTTTGGATGATT  
TTAAAGCTCGATGGATCTTTGGAAGGAAAATAAAAAGGGAGAAGAAATATTAAGGGAGGAAGAAGATAAGAAGTAGATATGGGGAAGAAGAGAGCTTTGCTTCGCTAACCTGTAAC  
GATTTCTGGAGAAGTAGCAGAGAAGAGAATAAGGTGAGATTAACAAGAGGGGGAAGAGGCTCTTCTGTTAGATAAGAGCTCAACAACCTATGAAGACCTAGCTACCCTCAGGGCCTA

>comp164086\_c0\_seq5

AAGGCTTGATGTTGTACATTTTTATATTTATTCAACACTCAAGTGCCTAAAGATATTCTCTTCGAATTCAAAAACAAAATGGCTAAGAGACTCATTAGTAAGATCTGAGAGTTCTTTCATCCA  
CCAGACTCTATGGTGTGGACTTCAATAATATCTTCACCATCTGTTTATAATTCAAATCAAGTAACCTAATAAAGACGAGCCATTCTAAATGTACCTCAATCCATAGAGCCAGCTTTGGCCT  
GCCCTTGTAATGTCATAGTTCTTTATATCAGCAAAT

>comp164110\_c0\_seq8

ACATAAATGGAGAAAAATTAATAACAATTGCTTTTATATTTGACTTTCTTTTGAGGCTATTGCCTGTTGACATGTAAAGCCTTATTTATGCCTTGTAACGGTGATATGAGTCGGCTGCGACAT  
CTCCATTGCTTCGGTCTGCGATTCTTCTGGGAATTTATGTGTGTAGGTGTCCCAAATGCTTGGCCCTCTTCTCCTTGGTCTGCTGCCCTTCGATCTGATAAGCTGCAGTGGCAGCTCCG  
AAGACAAAGTCTGGTGGAAAAGTTCGCTTCTCTATGCGTGGTTGCGTTGCAGGAACATCATCTTCTATGGTAAGGACCCCGCCATTGCTCACCTTGCTGTTCTGTGCTTCAGCACATA  
CAAAGCTTCTGTTGGCTGTTTCGGCTAAGAGGAGAAACACAGAGAGCCTTTCTTTTAAAGGAAGAGGCTTTCTTTTGTTCCTCAAGAAGTCTATGAGCTTTCAGGGTTTGATCATGGCCTG  
TGATAATGGTTGCGGTGGGAATGTTAATTAGAGAAAAAGCCATG

>comp164303\_c0\_seq3

CATAATTAAAAAAAAAAAAAAAAAACATACTAAAAAGTTATTTTTACACAACACTTAAAAATATATGTATTTTACAAAAGCTGCATCTCTTCCAAACGGGTGAAATTATTCTGTGTGGATTTGG  
ACGCCATCCGGAGGTGAATTAGAATGCGTCAAGTCAACTGTTTGTGTATACAGGGTAATGTTGCACGTTCTGATTGACCTCCAAACGATCCGATATCCACACAGAATAGTTTCTCCTGAA  
ACAAAACCTAAGACATGGTATAACTATTTTGTGGTTTTTGCAGAAGAGCGCTCATGTGGTTTTCCATCGATGGGCATCAAGATGTTCTGCAAATGACGAGAACTCTTTGCTGAAAGCAGT  
GGCGAATCAGCCCGTCTCAATTGCCATTGAAGCAAGCGGCTTCGGCTTCCAGTTCTACTCCGAGGTTTCGTACGAATCACCTGACCTAAAACCTTCTAATTAAGCAAAAAAGAAGAA  
GGAAGATCGATAGATATAATCCCTTACATTAATCGCCATTGCAGGGAGTTTTACCCGGCAGGTGCGGCACAGATTTGGATCATGGAGTCGCCATCGTAGGGTACGGGAAAAACACAGCAGG  
GAACTAAGTACTGGATTGTGAGGAACTCATGGGGAGCAGATTGGGGAGAGGGAGGCTACATAAGGATGCATCGCGGCATCTCAGATCGGAAGGGTTTGTGCGGCCTTGCAATTGAGCCT  
TCTTATCCGATCAAACTTCGCCGAATCCTACCGACAAGCGCAGGGATGAACTCTAAATATTTCAAAAACAATTATGTAATAAAGCTATAAGTAATTGCTTATGTAATTTGTGATGATTTTATC  
TTTGTGTCTTATGCATTTTAATTTCTTGATGTATATCAAATGTTTTAATTAGCAATCTACTTTGTATTCAAATGAACCTATAATCTTATGATTATTACTTTTTAAAAA

>comp164303\_c0\_seq6

CATAATTAAAAAAAAAAAAAAAAAACATACTAAAAAGTTATTTTTACACAACACTTAAAAATATATGTATTTTACAAAAGCTGCATCTCTTCCAAACGGGTGAAATTATTCTGTGTGGATTTGG  
ACGCCATCCGGAGGTGAATTAGAATGCGTCAAGTCAACTGTTTGTGTATACAGGGTAATGTTGCACGTTCTGATTGACCTCCAAACGATCCGATATCCACACAGAATAGTTTCTCCTGAA  
ACAAAACCTAAGACATGGTATAACTATTTTGTGGTTTTTGCAGAAGAGCGCTCATGTGGTTTTCCATCGATGGGCATCAAGATGTTCTGCAAATGACGAGAACTCTTTGCTGAAAGCAGT  
GGCGAATCAGCCCGTCTCAATTGCCATTGAAGCAAGCGGCTTCGGCTTCCAGTTCTACTCCGAGGGAGTTTTACCCGGCAGGTGTGGCACAGATTTGGATCATGGAGTCGCCATCGTAGG  
GTACGGGAAAAACACAGCAGGAACTAAGTACTGGATTGTGAGGAACTCATGGGGAGCAGATTGGGGAGAGGGAGGCTACATAAGGATGCATCGCGGCATCTCAGATCGGAAGGGTTTG  
TGCGGCCTTGCAATTGAGCCTTCTTATCCGATCAAACTTCGCCGAATCCTACCGACAAGCGCAGGGATGAACTCTAAATATTTCAAAAACAATTATGTAATAAAGCTATAAGTAATTGCTTA  
TGTAATTTGTGATGATTTTATCTTTGTTGTCTTATGCATTTTAATTTCTTGATGTATATCAAATGTTTTAATTAGCAATCTACTTTGTATTCAAATGAACCTATAATCTTATGATTATTACTTTTT  
AAAAA

>comp164303\_c1\_seq4

GAGTTCAACCCGAACACGAGCCGAAATCCGAATTTGACACCCCTAATATAATTTCAACAACAGAAAATACAGAACCGATAATCAAACCTGGAAATGTGTCATTAATTCTAAATAGAAAGC  
AGTGCGCCAATCGAAGCATTTGTAATACAAAATACATCAAGCAAAGATAACATATCTGAGATCAGACTAACAAAAGCACTACAGTTTTTCATAAGCAAAAATTGCTCCTTTATTTTCCTTCC  
ACATAGCGCACGCAGCAATGCTTACAGTTCATCCTTAGGCTTGTGGGTAGGATTGGGAGAAGACTTGATTGGATACGAAGCCTCCATTGCCAGGCCACACAAACCCTGCGGATCTGAGGA  
GCCGCGAAGCATCCTTATATAGCCTTTCTCCCCCACTCGGGACCCCATGAGTTCCTACAATCCAGTACTTTGTTCCTTTCTGTGCTGTTCCGTATCCTACGATGGCAACTCCATGATCCA  
AATCTGTGCCGCATTTGCCTGTGAAAACCTCCCTGCATGGGCCAAAACATAACCATCAGCTTTTTTTTTTCTCCACATAGTTCAGTCACTAGAAAAAATAGTGTATTTTCAGGCGCAAAATTCT  
GAATTTTTTGGCGGATTTCAAATTTTTCCGGCGAAAACGATTTTCGACGGTAAATCAAGCGTCGGAAAGCGTTCCTCGTTGAAAAAAAACCTCCGCCGAAAACCTTTCCGACTGCTGTGCG  
GCGAAAAAATCTGTCAAGAAAAATAAATAAAGATTTTCAAATTTAATTCCTGCCCCAGCCAGCAGGAGCGCCGCGGCCACCCGCAGGTGCGCCGTGCGCCCTGGCTCGCTCGCGGAAA  
TATTTTCATCTTTAGTCCGCCGAAATCCGTGGACGATTTGTATTATGATGTTGTGTGTGTCAGATGATGATTCATAGAAACCTCGGAGTAGAACTGGAAATCAGAGCCGCTGGCTTCAATG  
GCAATCGATACAGGCTGATTGCCACTGCTTTCAGCAAAGAGTCCCTCGTCATTAGCAGGAACATCTTCATGCCCGTCGATGGAAACCACAGGATTGCTTTTCTCAGCGGCGCAGCTGCCG  
TCTGCTTCTGCGTATGGATACGCTGCTTCTGAAGTAATTCGCCATTATTTTTAATGAATTCAAAGGCGTAATCCATCAGCCCTCCATTGCATCCGTTGTTTTCTTTAGTGTACAGTTCGATTA  
GCTCCTGCTCAGACAAAGAAACCAACTTCTTCGTCTTAATTTGATTTATCCCTCCACTGCAGCCACCGTTGAGAATGCCAGCAACTCCCGCACTGCCCTTGGTCTTCACGGCTGTGA  
CGGCGCCCTTCTGGCGCAATCGACGGAGGCAGGAAGGCTATTGACGTCGAGGCTCTTATACGTGAATGAATTGGCTACGCCACGTCGAGGGCCGCGCAGTGCAGCGGTGGTGGTTTATG  
CGGGAGCCGGCGTAGGGCGGAGCGGAATTCCTGGTTGGTTAAATCGGCGAACTTGTGAGGTGAAGCTTGTAAAGGTGCGTCTTGCCTTGTGAACTCATGGATATAGCGAGCATTCTCC  
TTAAACACATTGAAGCGCTTCTTCTTCATCAAGATCTCTTGAGACTGTGTGATGACTTCTCCAACGCTCGTAGAGACTCCAAAGGCTGTCTGCTCTCCAATCCTTCTCGACTATGT  
CAATGGCGGTAGCTGTAGCAGCGAGGAATAATAAGGCTGATAGTAGATAAAGGAGCTTCATTTTCTCCGTTTTCTTCTTCTTCTTCCGGAGGAAAGGGGGTTGTGAAGACGAAGGGAAGA  
ATGGAGGTTGGGATTTATAGGAACAATGAGAGGAAGAATGGGGGCTGAGTGGGAGTTGCTTGTGGGGATCAAATTTGTAGTTGAAGTGCTGAAATGGACGATGGTTGATTTGAAAGTCG  
ATTAATTGCATATATTTATATATAATTTATTATGTTGATAATCAATATCTAATGGAAAAA

>comp164303\_c1\_seq5

GAGTTCAACCCGAACACGAGCCGAAATCCGAATTTGACACCCCTAATATAATTTCAACAACAGAAAATACAGAACCGATAATCAAACCTGGAAATGTGTCATTAATTCTAAATAGAAAGC  
AGTGCGCCAATCGAAGCATTTGTAATACAAAATACATCAAGCAAAGATAACATATCTGAGATCAGACTAACAAAAGCACTACAGTTTTTCATAAGCAAAAATTGCTCCTTTATTTTCCTTCC  
ACATAGCGCACGCAGCAATGCTTACAGTTCATCCTTAGGCTTGTGGGTAGGATTGGGAGAAGACTTGATTGGATACGAAGCCTCCATTGCCAGGCCACACAAACCCTGCGGATCTGAGGA  
GCCGCGAAGCATCCTTATATAGCCTTTCTCCCCCACTCGGGACCCCATGAGTTCCTACAATCCAGTACTTTGTTCCTTTCTGTGCTGTTCCGTATCCTACGATGGCAACTCCATGATCCA  
AATCTGTGCCGCATTTGCCTGTGAAAACCTCCCTCGGAGTAGAACTGGAAATCAGAGCCGCTGGCTTCAATGGCAATCGATACAGGCTGATTGCCACTGCTTTCAGCAAAGAGTCTCTCGT  
CATTAGCAGGAACATCTTCATGCCCGTCGATGGAAACCACAGGATTGCTTTTCTCAGCGGCGCAGCTGCCGTCTGCTTCTGCGTATGGATACGCTGCTTCTGAAGTAATTCGCCATTATTT  
TTAATGAATTCAAAGGCGTAATCCATCAGCCCTCCATTGCATCCGTTGTTTTCTTTAGTGTACAGTTCGATTAGCTCCTGCTCAGACAAAGAAACCAACTTCTTCGCTTAATTTGATTTATC  
CCCTCCACTGCAGCCACCGTTGAGAATGCCAGCAACTCCCGCACTGCCCTTGGTCTTCACGGCTGTGACGGCGCCCTTCTGGCGCAATCGACGGAGGCAGGAAGGCTATTGACGTC  
GAGGCTCTTATACGTGAATGAATTGGCTACGCCACGTCGAGGGCCGCGCAGTGCAGCGGTGGTGGTTTATGCGGGAGCCGGCGTAGGCGGAGCGGAATTCCTGGTTGGTTAAATCGGCGA  
ACTTGTGAGGTTGAAGCTTGTAAAGGTGCGTCTTGCCTTGTGAACTCATGGATATAGCGAGCATTCTCCTTAAACACATTGAAGCGCTTCTTCTTCTCATCAAGATCTCTTGAGACTGT  
GTGATGACTTCTCCAACGCTCGTAGAGACTCCAAAGGCTGTCTGCTGTCTCCAATCCTTCTCGACTATGTCAATGGCGGTAGCTGTAGCAGCGAGGAATAATAAGGCTGATAGTAGATAA  
AGGAGCTTCATTTTCTCCGTTTTCTTCTTCTTCTTCCGGAGGAAAGGGGGTTGTGAAGACGAAGGGAAGAATGGAGGTTGGGATTTATAGGAACAATGAGAGGAAGAATGGGGGCTGAG

TGGGAGTTGCTTGTGGGGATCAAATTTGTAGTTGAAGTGCTGAAATGGACGATGGTTGATTTGAAAGTCGATTAATTGCATATATTTATATATAATTTATTATGTTGATAATCAATATCTAATG  
GAAAAA

>comp164320\_c1\_seq3

CCCACATGCCATCACCCATACTTCAGGAGAATCCTCTCAAGCAATAAAGCGGAAGAATTATGTTGTTGCATTCCCTCCCATTCTCCACCAGTTAGCTTATAACAATCCACATTATAAACTGTA  
CGAGTCATTCCAAACCGAGAAGACTGGACCCCCATGGCAAGCTGAAGCCACATTCCCCGCCCTTGATGCCATCGTCGCCTGAGCCGAAAGGCCCCATCCACTAAAGCCGCCACCGCTCA  
GCTCATGTCCATTGGCCGCCTTACCATGCCCCGCCGGTAGCTGCTCATAGCTATTATAAGTACAAGTCCCCATATAGTTCTCAATCTCCATCTGCTTTCCATGCTCATCTCCAAAACAACCCC  
TCCCTTCGTTAATACTCACAGGCAACATGAATCCGGCGCAGTCAACCGAGTTCGAAGCTGTGCTGTGCTCCAACGAAGCAGAGCCAAAGTCCCTGCATGCTCAGAAAAGCTGTTTCATTGCG  
GCCGTCGGCGGGAAGAAGTCGTGGGTGTTTAGATGATGAAGGTCCTGCATGCTGTGGGTGGCAGTAGAAGCAGCGGGGACGAATGGGTCTTGCTCTTGCTTGACCATCCTTTTTGTCAG  
TGCGAAAGGGTAACAAATGCTCAGGGGGTTTGGCTGCGGCTGCTGAAAGGAGATTGAGGGCCAGCCGAATCCGGCTGAGGCGGCGGAAATTGTGCCGGAGTAGTGAGAGGCAAGGCT  
TTTGATGGCGCTTACCGGCCTTCGGCCGTTGATGGTGGAGACAGAGTGATCGGAGGCCCTCCTTGAGGCGTTTTGAGACGCCGCCGATGGGTAGATTGCTGCTCTCTAGAATGCTCTTGAC  
ATCGTAGCGGTTTCATGTCGAAGTTGGTTCACGGCGTTCAGGCCGCGGAATTTGATGGCGGCGATGTCGTAGGCCTCCGCCGCATCTTCTGTGTGCTAAAAGTTCCCAAGTAAAGATCCTTA  
TTGCCGTGCCACCCCTTCTATTCTTGCTTGCCACCTTCCATGTTGGTGTGCTTGTAAACCCACGATAGATTGACGCACCACGAGAAAACCCACTGCTTTTTCTTCTAAGAGAGGCAACATA  
TTCTTGCTTGTGATGTGCTTCATTTCTCGAGCTCCTTATCGTAATTGCTTACTGGAAAATTAGTCGTTGTAGGTGGCCCCAATATTTGAGTGCTGCCAAATCGTAAGCCCTCGCAGCCTT  
ATCTTCTTTGTCATAACCACCCAAATAGACTTGTCTACCCCTTCGGCTCTGCCCTTCTCTTCTGCAACTGTTGTCCCAAAGATGTGCCTCATATCTCCAGTCCATCTATGCCTAGTAACCTC  
CCGATAAATCGAAGTTCTTTGACCAAAAGTATCGATCGACTTCTTAGTAAGTACTGCTTCCATCGCGCTTTGTCCCCATAGCCTACCCCTATCCGGCGCAGCAGAGCTCTCCCCTCTTCTCCTC  
GTTCACTACTAGTCGCCATTAACGTCAAAGCAGAGCTGGACTGGGAAGTCATGCTCATCGAGAGTGAAAGTCCCTGCGAGCTATTTGACCTCCAAGCTTCCCAGCCACCACAACGGCG  
CCAGAACTCTTCTCCTCCTTACATGCTGCGTCACCGGCTGGTTTCTCAACCAAGTCTTAATCATGGAGAGCCCTATAGAGCTTCCCACGTCGTTGCAGTCGGAGAACACATAGTCTTCAG  
AAGAGGAATGGCTTCCGAGAAAAGTCTTCAAGCTTTGGTTTCTCGACTTCCATATGGTTATTCAATCGGTTACTGCTCGTACCAACTACCATGGAGAGATCAGAAGGGCTCCGTTTGAAGTC  
CAAGCACTTTATGTTCCAATCTTGGTTTTGTTGGTTCGTTCTATTGACTGCTTCCAAGATGTCAAAGGGAACATCTTCTTCTTAGGGTTGAGACGCCAATGGGCGGTTCTGAAGAGGAGTCG  
CCGAAATGCAGAAGCAGTCAGCGGTAGAAGCGTCATCGGTGGGGATGAGTGTCTCATGGTGGGGGTGGGAAGAGGATAGTTCATGTGGAGAGAGAGAAAAGGCTAACCAAGTTGTTA  
TGGACGCCATGGAAGAAGATTAATTAGCGTTTAGGGTGTGCGAGTGACCAGTGGCAGTCGAGTGGATGCTATTAAGGTTAGTGATGTTTCAAATGCGTTAATGGTGAGATTTGATCGAT  
GGAGGGATTTGGAGGGTCAGTTT

>comp164320\_c1\_seq4

GATATTCTATAGATAAATATCAATTATCCCCACATGAAGTTTACAAATATCCAAACGAGTTCTACATTCCTACACTTACAAAATTCTACATGTAAGGGCTTGAAGTCTCTTCCATATCTAT  
CACCATCACTTCAGCATAACCTACATGTTAGCATTAGTGTTAAATTAACGGAAGGAACTGACCATTTACCTACCTTTCTCAGTTCTCCACAAAATATTCTGCAAATTAACCTTATAA  
AAAAGAAAAAAAAAAAAACCATAATGATCCCTTCTGCAACCATAAGCCATGTTAACCAAGCTAATTAAGCGTCATCCACACAGTGAAAAGAGGAGGCGCCGCCTGGCAATTGCCCATC  
CCACCACCACCTGCCTCGCCCCAACCGCCGGCGCTGAATTCACCATCCAACCATTTCCATTCTCGTATCCATTATTCTCCTTACCACACTATTTGAATAGTAAACATTTCTCCACTATAA  
GGATCTGAACTACCCAACATATTCTCGTAGCCACCACCATTAACTCCACCAACAACCTTGGCTTCCATCTACCATCATTGAGCTCATTGGTATCACATAGCCACTCCCACCATACATCATTGA  
GCTTGAAGACCCTCCACTTTGCTCCATTGATGATTCAATACCACCATAATTATGAATTCGGAAAGGTTGGAAAAAATTATGAGTGGTGCTTCCAAGGTGGATTTCTTGCTGCATATCTTGCA  
CGCCATGGCCTAATGTGACTACATCTGGCTCCGGCTTACACCAACCCCTTTGCTGGCCTACAGTATAAGGATAGTGCAACCCTATATGCTGTTGTGGCTGCTGGAAAGCTATGGTTGGCCA  
ACCATAGTGTGCGAGGAGGCGTAGCCGGCGAGAGCGGCCTCTTAGCTGAGAGGCGACGACAATGGAGCTGCTGCTATCATCAGAGCGTTGCCCGTCGATGCTGGATTCCGAGTGGC

CGTCAGCGACATCTTTCAAACGCTTCGCCGCACCACCGATGGGAAGGGTGCTGCTCTCCAGTATGCTCTTGACATCGTAGCGGCTCATATCGAAGTTGGTGACGGCATTGAGGCCGCGGA  
ATTTGATGGCGGCGATGTCGTAGGCCTCGGCCGCCCTCCTCTGCGTGCTGAATGTGCCCAAGTAGAGATCCTTGTTTCTGCTACTCTTCTTATCTTGCTTGCCATCTTCCATGCTGGTGG  
TGCTTTGTTACACCACGGTAAATGGAGGCTCCACGAGAAAAACCACTGCTCTTCTCCTCAGGGATGCCACATACTCCTGCCTTGTCATATGCTTCATCTCCTCCAACCTCTTCGTAGTT  
ATTAATAGGAAAATTGGTGGTTGTTGTAGTACCCCAATACTTGAGTGCAGCTAAATCATAAGCCCTTGCTGCCTTTTCTCCTTGTCATAGCCACCCAGGTAGACTTGTCTTCCCTGCGGG  
TTTGTCCCTCTCTTCTGCAGCTGTTATCCCATAGATGTGCTTCATATCTCCCCGTCCACCTATGCCTTGTAACCTCGGTAATGAAGTCTTTGCCAAAAGTATCAATAGACTTCTCG  
GCACAGCTTCTATGGCACCCTCTGTGCATCAGTCTTCCACAATTTCCACCACCCTTCTCCTTCTCCAACAACAAGCTCTCCCTCCGTCATCGCCGCCGCCAGTCTCCCCACTGC  
CACAAGCTGCAAAGCCGAACCTTGACTGCGAACCGGTGCTCATCGACAACGCCAAGCTCTGCGACGTTCCACCTCTTCTCCTCTCATTCACAACATCATCTCCACCTTCAATTGCCCTCCATC  
ATTGGCCCCGACGGTGCCGGTTGGTTTCTCAACCATGTTTTGATCATCGACAGCCCAATAGAACCATTCCCTCCACCACCAGACGCAACTCCTGGAACCTTGATAGCGAGCAGTTTGAATATA  
AATAATGATCCCCGGCCAAAGATCCGATCTTTGGCTCATGGTCGGAGAATGAGTGGCCGCCGAGAAAATCTCAAGCTTCGGCTCGTCGACAACAACATCCTCCATGTTTCCACGCTTTC  
CCCCGCTCGAGTCCACTATCATGGAGAGCTCCGAAGGGGTCCCTTTGAAATCTAAACTCTTATACTCCAATCGTTAGAAGTGCGGTTAAAGGCTTCAAGGATGGAAAAGGAGCCATCAG  
GCCTTAGGGTTGGATTGGAGCCATAGCAGTCAGCTTCTCGGTGGAGAGCGAGTGTCTGAGGAGATAGAGAAAAGCCGAGCCAGTTGTTTCATAGAAGCCATTTAAAAGATATGTGTG  
GAAGGATAGAGAGGTGGAGTTGTGCTTTTTGTTTGAAGATGGAAGCTAGAGAGAGAGGAGGATGAAATTGATAAGTGAGAAGAAGGGAGAACAGTGCATTGGGTTTTGGAAGAGGG  
GAGG

>comp164320\_c5\_seq2

CTTTCGGCTCAGGCGACGATGGCATCAAGGGCGGGGAATGTGGCTTCAGCTTGCCATGGGGGTCCAGTCTTCTCGGTTTGAATGACTCGTACAGTTTATAATATGGATTCTTCTACTTTT  
TTAGTATTACTGTACTTTTAGTTGAACAATAGTTGCAAACCTAATTGGGAGGGAAAGGGAAGGGAAGCAACAACATAATTTCTGCTTTATTGCTTGAGAGGATTCTCCTGAAGTATG  
GGTGATGGCATGTGGGGTGTTCATCCTCAATCTGCTGTTAATTTGGGTTCTTCAGATGAAGGAATCCTTTTTGGAGCGGTAATTTGTATAGTTGCTAGAATAATAACTTTATAAATGATG  
CTTGAAAT

>comp164974\_c0\_seq2

AAATCTTCAAGCTTTTACCCTCTGCAGAAGAATTTTTATGGAAAAAAGACAACAATGCTTCAAATTAGATCAAGAAAGTGAAGTCAAAATAGATCATTAAATTTAGAGTTTGAAGAT  
TATCTCCTTACCTTATTCCTCATGAAAGCTTCTCTACTGGTGGTAAGGAGGTGGTGGAGACTTGTAGAGATAAACAGATGGTGGAGGTGAATTGTAGACAGGCAGCGGTGGAGATTTT  
GATGATACACAGGTGGTGGTGGAGATTTGTAATAATAAATGTGAGGCG

>comp165178\_c2\_seq7

ATAAAAAAATTTTAAATTCATCGTGATCAAATATGATGAGATTGAGATCCTCACCTAATTTTTTTTCTTCCACAAATTCATCAGCTGTAAGTGGTGAGTGTTTGGGACTGTATTTTTCT  
GCTTCTTAAATCAATTTTCTAGTACAAAGATTTAATGTTTGTACTAAAAAGTTGCTTCAGGAACCAGTTGGAAAGCCATCCCAAACGGATCCTCAGTCTCACTCCCACAATAGTTTACAA  
GAAGCCAAAACACAAATTAATACTACTGCTACAGTAATACACAGATCAAACCTACCAAGCTCAGCCAATTCAAACCTTGCTAGTGCCAAGCATAGACGAGGTACCCAGCTCAGTCTTCA  
ACTCTCCCAGCAAACACCTCCGACTCTCTTCCCCTCTTCTTCCAGCTCCACCTCCACCTTCATCATACAAGCAGCATCGCCGGAGCCACCACCCGACCTCCACCGTCATCACCG  
CCCCCACCGCCCACTCCTTTCGTCCCTCCCCCTCCTTCTCCTCTCAAACACAAATCCAAGCTTCTTCCAACCTTCTTATCCTCCCCACCACCGCCTCAGGTGTCGCCGTGATGTA  
AATCTCTTTCCCTTTCTCTCTACCCTTCCCCTCCTCATCAAATAACTGTGATGCCGATGCCAGCTCCCCGTGCGTTCAACGCGTTGACATAATTTCCAGTCAGCGGGGCTGGATTTAT  
CACGGTTATTTGATGAGGAGGGGAAGGGTAGGAGAGAAAGGGAAAGGAGATTTACATCGACGGCGACACTTGAGGCGGTGGTGGGGAGGATAGAGGAAGTTGGAAGGAAGCTTGGAT  
TTGTGTTTGAAGAGGAGGAAGGAGGGGGGAGGGACGAAAGGAGTGGGGCGGTGGGGGGCGGTGATGACGGTGGAGGTGGGGTGGTGGCTCCGGCGATGCTGCTTGTGATGATGAAG

GTGGAGGGTGGGAGCTGGAAGGAAGAGGGGAAGAGAGTCGGAGGTGTTTGCTGGGAGGAGTTGAAGACTGAGCTGGGTGACCTCGTCTATGCTTGGCACTAGACAAGTTTGAATTGG  
CTGAGCTTGGTGAGTTTGATCTGTGTATTACTGTAGCAGTAGTTAATTTGTGTTTTGGGCTTCTTGTAACACTATTGTGGGAGTGAGACTGAGGATCCGTTTGGGATGGCTTTCCA  
ACTGGTT  
CCTGAAGCAACTTTTTAGTACAAACATTAATAATCTTTGTACTAGAAAATTGATTTAAGAAGCAGGAAAAATACAGTCCCAAACACTCACCCTTACAGCTGATGGAATTTGTGAAGGAAA  
AAAAATTAGGTGAGGATCTCAATCTCATCATATTTTGATCATGATGAATTTTAAATTTTTTATTTGTTTTAAGATTAGTACAGTAATAATTTATTAATTACTTGTATATTGCACTCATT  
TTAAA  
ATAAATTTAAAGATTTTAAATGTATCATGATCAAATTTTAGTCAGGCATACTGACCAATTTTCTCATTTTTGTGCATAGAAAAGTAGGGTGGGGATTTCTTTGTTGATTTGTTGTTAGTAAGG  
AGATTGGGAAGGAAGTTTCCATGTAACAGATCTCTTTTTGCTCATTGTTTTTCTATTTTCTTGATGCTTCAAAAA

>comp165178\_c2\_seq9

CAGAGCAAATAGTGGCAAATGGCCAAACGAAAAGAAATCCAGCCGGCCGACGTTCTCCTCGGCAAATACGAAATCCGCCGCTCCTTGGTCGCGGCACCTTCGCCAAAGTCTACGAA  
GCCCCGATCCCTCGCCGACAACCTCACCGTCGCCATCAAATCCTCAATAAACCAGACCTCATCTCCAACAACATAGCCACCCGCATCCTCGACGAAGTCTCCGCCATGCGCCGCCTCAAC  
GACCACCCAAACATCGTCAAACCTCACGAAGTCTCGCCACCCGCTCCAAGATCTACCTCGTCATGGAGTACGCCAGCGGGCGGCGAGCTCCTCTCATATCTTGGCAGGCGCGGCCGCCTC  
CCTGAGCCCACCGCCGCCGTTACTTCCATCAAATCCTCTCCGCCCTCCGCTTCTGCCACGCCACGGCGTCGTCCACCGCGACGTTAAGCCCCAAAATCTTCTTCTTGATTGCAACGGTA  
ACATTAATAATTTCCGACTTTGGGCTTTCTGCGCTGCCAGAGCACCGCCGCAAGACGGGTTGCTGGTTACGGCTTGTGGTACACCCGCTTATGCTGCGCCGAGATTGCTCGGCGGAGAC  
CCTACGATGGAGCCCGTGCCGACGCGTGGTCTGCGGCGTCATCCTCTACGTTCTCCTCGCTGGATATTTGCCATTTGATGACTCTAATTTGACTGAGATGTATCGCAGGATACACCGACGA  
GATTACAGGTTCCCTTCTGGTTCTCCCCAGCTGCAAAACGAATAATTTCTCGTTTGCTCGATCCTAATCCGGAGACTCGAATCACCATTGATGCTGTAACCGAGCTTTCATGGTTCCGAAG  
GGCTAATAGTCTTGGGGATAGCCTCATCCACTTCAGTGACGTGCTTCAGCCGGAGGCTGTGATGCCGATGCCAGCTCCCGTGCGTTCAACGCGTTCGACATAATTTCCAGTCAGCGGG  
GCTGGATTTATCACGGTTATTTGATGAGGAGGGGAAGGGTAGGAGAGAAAGGGAAAGGAGATTTACATCGACGGCGACACCTGAGGCGGTGGTGGGGAGGATAGAGGAAGTTGGAAG  
GAAGCTTGGATTTGTGTTTGGAGGAGGAAGGAGGGGGGAGGGACGAAAGGAGTGGGGCGGTGGGGGGCGGTGATGACGGTGGAGGTCGGGGTGGTGGCTCCGGCGATGCTGCTTGT  
GATGATGAAGGTGGAGGGTGGGAGCTGGAAGGAAGAGGGGAAGAGAGTCGGAGGTGTTTGCTGGGAGGAGTTGAAGACTGAGCTGGGTGACCTCGTCTATGCTTGGCACTAGACAAG  
TTTGAATTGGCTGAGCTTGGTGAGTTTGATCTGTGTATTACTGTAGCAGTAGTTAATTTGTGTTTTGGGCTTCTTGTAACACTATTGTGGGAGTGAGACTGAGGATCCGTTTGGGATGGCTTT  
CCA  
ACTGGTTCTGAAGCAACTTTTTAGTACAAACATTAATAATCTTTGTACTAGAAAATTGATTTAAGAAGCAGGAAAAATACAGTCCCAAACACTCACCCTTACAGCTGATGGAATTT  
GTGAAGGAAAAAAATTAGGTGAGGATCTCAATCTCATCATATTTTGATCATGATGAATTTTAAATTTTTTTATTTGTTTTAAGATTAGTACAGTAATAATTTATTAATTACTTGTATATTGCA  
CTCATTTTTAAATAAATTTAAAGATTTTAAATGTATCATGATCAAATTTTAGTCAGGCATACTGACCAATTTTCTCATTTTTGTGCATAGAAAAGTAGGGTGGGGATTTCTTTGTTGATTTGT  
TGTTAGTAAGGAGATTGGGAAGGAAGTTTCCATGTAACAGATCTCTTTTTGCTCATTGTTTTTCTATTTTCTTGATGCTTCAAAAA

>comp165223\_c0\_seq2

CGAACGGAGACCCTCTGCAATAAAAAATTAGCTATGTCTCGCTGCAACTGTAAGCTTTTCTCTCTCTTTGTACCTTCTTCTTCTTCCATGCATTGCTTCTCGCGACAGCTCTCAGAA  
GCCATGGAGAGGCCACGGAGCAGGACAAGAAGGCTTATATCGTGTATATGGGCGAGAGGCTGAAGATGGACGGGTTTTCCATAAAGTTAGTTCATAAAAAATCTGCTCAATAAAGTAATTG  
CAAGTGATGATGCATCAGAACGCCTGATACACAGTTACACCAGAAGCTTCAATGCCATGGCAGCTATGCTCTCCGAGGAAGAGGCAAGAAGCTATCAAATATGGATGAGGTGGTGTCTG  
TCTTCCCTAGCCAGCGAAGAGAGCTTCACTACTACGAGATCATGGACTTCATGGCCTTCCCATCGAGCGCATCTCATGGTGCCTTCGAGTCCGATGTTATTGTCGGCATGCTCGACACCGG  
GATTTGGCCAGAATCCGAGAGCTTCAATGACGCCGGCTTTGGCCCCCCCCGCAAAAGTGAATGGCACTTGGGAGACGGCCAATCACAACCTTACCTGTAACAACAAGTCAATTGGAG  
CCCCTACTACCATCTTCAAGGCAATATAAGCGCAGGCAACATCGCATCCCCGCGGACACCGCCGGCCACGGTTCCCACACCTCCTCCACTGTCGCCGGAAGGTTAGTTGCCAACGCCA  
GCCTCTCCGGCCTCGCCCAAGGCACCGCCCGGGTGCAGTACCTTCAGCTCGGCTTGCCGTCTACAAGGTATGTTGGGATAACGAGGGCTGCTATGACGTCGACCTCCTCGCTGGTTTCG

ATGATGCTGTTGCCGATGGCGTTGACATCATTTCATTTCCATTCGGCTCAAGCTTCCCTAGTGATTACTTCTCCGACCCGATTGCCATTGGCAGCTTCCATGCGGTGAAGAATGGTGTCTG  
GTCTCTGCCCTCGGCTGGGAATTCTGGTCCAGGCAGGTACAGCGTGGCAAACCTTCGCCCCGTGGATGCTCACCGTGGCCGAGCACTATTGACCGCAAGTTTATTTCTCAAGTCAAGCTC  
GGCAATGGTGTATGTTTATCAGGGAATGGCAGTGAACACCGAGGGAGCCAAGGACAATTTGTACCCTCTGATATACGCTGCAAATGCGCCTAACAAAACCTGGAGGCTTTGATGGATCAATC  
TCCAGGTACTGCGTTGAAGGAAGTTTGGATCGCAAATTTGTCCAGGGGAAACGTACTTATATGTGATGGCTTGAATGATGGCTCGGGACCGCAACTTGCAGGTGCTGTTGGGGCAATTATG  
CCAGCACAAGGTGCGAATGATGTCGCCTTTGAGTTCAAGCTTCTGTCTGTGTTGGGAGTTAATGATACTGCCAAAGTTCTCTATACTCCAATAAAAACACGAAATCCTACGGCATATG  
TTGCGAAGAGCGAAGGAGTGTCCGATGGGCTTGCGCCTTATGTGGTTTCATTCTCATCTCGTGGGCCACATCCTATCACATCTAATTTACTCAAGCCTGATTTGGCGGCACCGGGAGTCGA  
TATCCTTGCAGCATGGTCTCCACTTAGTACTCAAAAATCTTCATTGTACAATATTATATCGGGTACATCAATGTCTTGCCTCATGTTAGTGGCTCGGCTGCCTATGTCAAGTCATTCAACCC  
AACTTGGTCTCCAGCTGCAATCAAATCTGCCCTTATCACCACCGCATAACAATATGAGCCCGAAAAGGAACATTGAAGCAGAATTGGCATATGGAGCAGGACAAGTAAACCCCTCGGTGC  
ACTAAAGCCTGGCCTTGTATTATGATGCAGATGAGATTGACTACGTAAGATTTCTATGCGGTCAAGGCTACACCACCAAAAATCTTAGACTTGTAACAGGAGACTCAAGCAGTTGTACTGCT  
AAAACAAATGGGAGCATCTTTGATCTCAATTATCCCACTTTTGGTTTATCAATCACCCAGGAAAGCCCTTTTCAGCAACGTATAATAGAAGTGTCACTAATGTTGGTGATTCAAATTCTAG  
CTATAAGGTCAGTGTGCCCTCCTGATGGACTTAAGATTAACGTTGATCCACAAGTCTTGACATTTAGAGCATTCTTGAGAAGAAATCCTTTGTGGTGACATTGGAAGGAAAAACTAA  
GAAGACTCTTCTCTCGGCTAGTTTAGTGTGGAGTGATGGTGTGCATAAGGCAAGAAGCCCTATTATCGTGTATGGTGCTTGAATATTAGATTGTTTTAGTCATGGACTTATCAATGGAGCTTT  
ATATGATTAATGTTAAAAAGTTTTACTCTTAATTTTATCTCTTGATAGGCCATATGAACCTTATTATTATCATTGAAATGAGAAGCTTATCTTGA

>comp165249\_c2\_seq8

AGTGTTTAATCTCACACAAACCAAAAAAAAAAAAAACAATTCTAACTGAGAATCCATATTTTTGAATGCATGTTTCAGAGTTTTTTTTTCTTAATTAGAATAATCAAAGGACATGCCATTCAT  
TTTTCATCTTGCAGCAATCTAATATCACTCAAATATGAGAAAAATAAATCAACATGTCTTGTTTAATTAAGATCTTTAAACAAAATAAATAAATAAAACTGGCCACAGTGGAGCACTCAGGCC  
TCGTTGAGATGGTTTTTTTATTGCTTCTTGAAGCTTAATTTTTTACTAAAAAACAGCTTCAAAAAATAAATAAAAAACCGTCTCAAACGAAATCCAATCACAGATCACAGTCAATCCTAGTG  
GATCTCTAGGCACAGATCATTGATTCATCCATATGATACATCTGAGACTCTTCCCCTGAACCAGTAAATCAAAAAGCTTTGTTTATGTCCATGAAATTCACCTCATGAGTTATGAACTCATCCA  
AATGCAGTTCCTTGTTTAGATATTGTTTTGCTAGGATTGGAATGTCAGTCTTCGCTTTGATTCCACCAATAAAGAACCATAATACACTTCCCCTTCAAATTTTCAGCTGAATCTATTGATAT  
TGGGTTTCCATGCATTTCCACTCCAAGAATGATAGTTTTGCCAACACCCTGAATACAGTGGAGCAAAACATATAAATTATAATTACATTCCTAAAACACAAATTAGGGGGAAGATAATAAAT  
GAAACCTCAATATTTTTTTTTCTATTTTTTTAACTTTCATTTTGGCTGGATTATTTCTCATAATATAAGAAGTATTTAAGTTGCAAGTTGAGCTTAAAACACTTTACTTTGATCTGTAAGATTAT  
AGAGGACAATAAATTAGGAGAGAGAGAGAGAGAGACCAATCGGGAGCAATTGAAAGCATCACTCATCAAAGAGGCCAAACCAATGCACTCAAAGCAGTAATCAGCACCTCCATC  
AGTCATCTCTTTGATTATCTCAACCACAGATTTTCCCCGTTATCCTTTGGGTTAACAAAATGAGTAAGCCCCAATTTTTTTCCGATATCAAACCTTATCAGGGTTAACATCTACCCCAATTATT  
TTGGCAGCCCCTTCAAACCTTGGCCCTTCAACAACCGCTAATCCTACTGCACCTAGCCCAAATATGACCACTGAGGATCCTGCCTCCACTGCAGTATCTTTTGAACGGCTCCGACTCCCG  
TGGACACACCGCAACTGAGCAGACAGGCTTTCTCCGGCGGGAGTGCCTATCGACCTTGGTACCTGAGCGATATCAACAACAGTATACTCGCAGAACTTGACACGCCGAGAAAGTTG  
TTCACTGGCTGACCGGCTGCATCCGTGAACCGGACCGTTCCATCCCTCGGCATCCCTGGAAACACAGAGAACGGGGCCACCGAGCAGAAATTTCCCTTCTCCGACCGGCACTCCCTACA  
CTCCCACAGTTTGATAGAAACGTTGGCACCACCGCTCCCCACCTCCATCCCTTTACCCCATCACCAAGCTCTCAATAAACCCGAAAGCCTCGTGCCCGAGGATGCGCGGAAGGAA  
GATTGAGAAATCTTGTCTGCGCCAGAAAGTGAGGTGCGTGTGGCAAAGTGAGGTGCAGATGATCTTGATGCGGACTTCGAAAGCTTTGGGAGGAGCCACCTCGACTTCTTCGATGACAA  
GAGGCTCGCCGGGAGCTCTGCACACGGCCGCTTTGCAGCGAATGGCCTTTGGGGAATTTCCATTGATGCGTGCCTAGCTTTTTCTGTATGAAGATGAAGATTGCCTTTGATCGACCCGT  
GGGAGGGACGGTCCGGGTACTAATAAGGGGTGTGTGACAGTTCTTTCTTTTATTATTATGATTTTTTTGTTTTCTTCTATTAGTCCTTCTAAGAATTTTTAATTGAACGGACAACACTT  
ACA



>comp165358\_c2\_seq2

CTCACTGCCCTCTTCGCCAGTCTCCTCCATCTCGAACATGGAAGCTTATTACACAATCACCGCCCTCTCTCGCCAATACTACTTCTCCTCATCTCCTTTCTCTTCTCTCAGTCTAAATTAAG  
AAAATAACCAACTTTCTCCCTCCAAGCCCTCCCTCCCTTCCGATCCTCGGCCATCTCCACCTCTTTATGATGAAAACTCTTCATTGCCCCGACCCCTCGCCGCCATCTCCGAGACCACG  
GACCCGTTATCCTCCTCCGCTCGGCTCCCGTACCGTACTCCTCGTCTCCTCCTCTCGCTCCGTCGAGTGTTCACCACCAACGACCTCGCTTTCGCCTCTCGCCCTTCTCCCTCC  
ATCCGCCCATCTCTTTCAACTATTCGGTCTCGCCACCGCCCCCTACGGCCACCCTGGCGCACTTTTCGCCGCCTCACCATCAATGAACTCGTATCTTCTCCCGCTTACGTTCAATCGC  
CGACACCCGCGGAGCAGAGCTCCGCGCTCTGCTCACCAAGCTTCTCGACGACTCCAAAGGAGATAAGTACTGAGTTAAACCAATTATTTCTCATCTGATTAGCATTTTATTCAATATTACCA  
TACTAATTGATTGAAACAGCTGGTGCCCGATTGAGCTGAAGTCGAGAGTGTGGGGATGGCGTTGAACGTCATCGTGAGGATGCTCACAGGAGAGAAATATTACGGCGAAGGAGAGCTG  
GGTATGAAGAAGATGGAGGAGTTCAAGGAAATGGAAGAGGAGCTTATGGCGAGAGGGGGGGTCTTCGTCACCGACTTCTTTCTTTTCTGAAGCTGATTGGTTTACAATGGCTGGA  
ATCGAGGTCAATGAGCAGATTATTGTCCAGGAGAAACACCATCTTACAACGCCTTATCGATGGCCACCGACAGAAGAAGAATTCTTCGAGCACGGATCATAGCAAGTGTATGGATCTT  
CTGCTTTCTATGCAAGAAGAGTCCCCTGACCACATAACCGACGATGTCATCAAAGCCACCGTTCAGGTCCTCTATCTTCTCCTTAAGTTGTATTTACTTGCATTTAATCTAACTGGTACATAA  
ATGGCAGTCTTTGGGGATTGCGGGTCTATCCCTGTAACAGAGACGCTCATTGGGTTATGTCCCTTCTTCTAAACCACCCAAGTCCATGAACAAAGTCAAGGACGAGATAGACACCTT  
CATCGGCTCCCAACGCCTCGTGAAGAGGAAGACCTCCCAATCTCCATACCTCCACGCCGTCATCAAAGAACTCTCCGTCTCTACCCGGCGGTGCCGCTCCTGCATCCGCACGAGG  
CGCGTGAGGATGACGGTAGCTGGCTACCATGTCCGGCGCGCACCATGCTGCTCGTTAATGTTGGGCCATCCATCGTGACCCGGTGGAGTGGGCCGCGGGAGGAGTTTCGGCCG  
GAGAGATTTGTGGGGAGTGAAGCAGTGGGAATGGGATGATGAAGACGATGATTCCTTTTGGGATGGGGAGGCGAGGGTGTCCGGGAGAAGCCATGGCGAGCCTTCAGATTCCGCTTAT  
GCTTGCGGCGATGATTCAGTGCTTTGAGTGAAGGAGATGGAGGATAAGGAAGTGGATATGATGGATAATGGGAATACATTAAGTCTTCTTAAAGCTGTTCCCTTTGAAAGTATTGTGCCGC  
CCGCGTCGAGAGATGATGAGTCTTCTTCTGCAGCTTCATGATTGAATTATCCTCTTTAACTGCTAAGCAATCGTCTTCTTTCTTTTGAAGAATTTTGAAGGAAAGCATGTAATCCGATGGC  
CTTGAATTCAAGTTTTTTTTTTTTTTTTATGATGGGC

>comp165793\_c0\_seq10

ATTGCCAGGAECTACAAGGTAAGTTAATTTTTGGCTTTTTTGATGAGTTATTTGGGATTTAGATGATAAATTGGTGCGCGTCTTGAGCAGGGGTTGCAGGACAAGATAAACTGGTGCCG  
ATTGATCTGCAGAACAGGCCTGCGTGGTACAAGGAGAAGGTCTATTCTGTAATAAGGTCCCTTCTTTAGAGCATAACAATGAGGTCAAAGGGGAGAGCTTGGATCTGCTCAAGTACATC  
GATGAGCATTTTGAGGGCCCTTCTTTGCTTCTGATGATCCGGAAAAAGAAGTTAGCTGAAGAAGTCTGGCGTTCACCGACTCTTTCAATGGTGCT

>comp165793\_c0\_seq4

AGGCATCTATCTTGTTTCAGCTCCTATAATGTTAATTTCTCAATTAATAGAACGAATTTTCATACAGAAGACAATGATTAGGTAGTACTAAAGGAAAAAAGAAATGTTAAGTGCTTCTGCTTG  
CTGTGACTGCTAGCAAATATGATCTTATTTATACATTTTACACATTATATTTGTAGAAGACACATCTAATTGATGAGATCTTCATTGAGATAAGTGAGAGAAAATATTTTAAAGATAACAAAT  
TAAGATTAATAAAGCAAATAACTAGTTAACTACATTCTAAATGACAAGTTAAATGAAAAGTGTATATGATAGATTTGAGAATCTTGAATTTGAAAGTTGCAAATAAATACTCATAAAACATTT  
CTCCAATATCTCAATGAAGATCTCATCAATTAGATGTGCTTCTACAAATATAATGTGTAAATGATATAAATAAGATCATATTTGCTAGCAGTCACAGCAAGCAGAAGCACTTAACATTTCTT  
TTTTCTTTAGTACTACCTAATCATTGTCTTCTGTATGAAAATTCGTTCTATTAATTGAGAAATTAACATTATAGGAGCTGAACAAGATAGATGCCTATAGTCACACACGAATTAATCCTCAAG  
AGTTGATAGCTACCACTAAGAAGAGGTTTGGGATAAACTGAAGGGTTCGGCATTCTCCTTTTCAGGTGTCGCGTATTTGAGCTGGAGGCCTAACTATGAATTTGCAAGTCTGGAATAATA  
TTACTGTATAAGTTGTGAAATAAATGATTTGCTTTTCAGTATCCCTGCCGAGTTATTTAGTTGTAATGTTTTCCAACGGTCTACTACTAATAAAGAAGTTTGAATTTCTGTTGTTGATTG  
CTGTACAATGTGATGAAAAATGCAAGTCTGTTTCTAGATCAATTGCTGTAGAAAAAGAAGTGAACATGCAGAGATTTAACAGTATCAGATGCATCAAGCAGCTATTATTCATGTCAAATG  
ATTTTCAAGAGGGTGGTTGTGAGTGTAAAGGGGATTTAGATTTTGTGGGACGGTTTTTT

>comp165793\_c0\_seq5

TTAAACAATTATTATAATAAAAATGGCAAAAAGAATGAGAAATTATTTAAAATAATAATAATGAATAACTTAATATAAAGAAATGAACATAACTTTTCATACATTTTCAAGAATTTTGTACTTAAA  
ATCCTGAATCCTAATATATTTTAAAGTTTATTTTTTAAATGAGCTAGCTCGTGAGCTAACCAAGTCGAGTCGGGGTTGGCTCAAACCTGGCTCGTTAGCTCATCGAGCTGGGCTCATAGCCATTT  
ATTGAGCCAAGCTCGAGTTGACTCACAAGCCAGCTTGACTCACGCCTCTAACTCTCTCTAATCTTATCTGTCACTGAAACTACTCCAACCTTTTCCTGGATATACTCGTTTCACATTCTGTC  
TCTAAGAGTAAGTCCACTCATCCACTTGAGCATCCTCATCACTATAATACTTAACTTAATATTATGCAAATATAAAAATGTAGATATTACATAAATAAATACATAAATACATAAAATTATGTGAA  
ATGTGTGTAATCCCCTATATATTTATTAAGATATTGAACTATATAGATATTGGAGAAATGTTTTATGAGTATTTATTTGCAACTTTCAAATTCAAGATTCTCAAATCTATCATATACAGTTTTCA  
TTAACTTGTCAATTTAGAATGTAGTTAACTAGTTATTTGCTTTATTAATCTTAAATTTGTTATCTTTAAAATATTTTCTCTCACTTATCTCAATGAAGATCTCATCAATTAGATGTGTCTTCTACA  
AATATAATGTGTAATAATGTATAAATAAGATCATATTTGCTAGCAGTACAGCAAGCAGAAGCACTTAACATTTCTTTTTTCTTTAGTACTACCTAATCATTGTCTTCTGTATGAAAATTCGTT  
CTATTAATTGAGAAATTAACATTATAGGAGCTGAACAAGATAGATGCCTATAGTACACACGAATTAATCCTCAAGAGTTGATAGCTACCACTAAGAAGAGGTTTGGGGTAAGTTTCTACAT  
AATTTGCAGCTCAGTTCACCTTCAGCCATTCTATAGTTAATTGACTCTCCTTTTTTCTTGTTTTCTTTTCAAGATAAACTGAAGGGTTCCGGCATTCTCCTTTTCAGGTGTGCGTATTGAGC  
TGGAGGCCTAAACTATGAATTTGCAAGTCTGGAATAATATTACTGTATAAGTTGTGAAATAAATGATTTGCTTTTCAAGTATCCCTGCCGAGTTATTTTAGTTGTAATGTTTTCCAACGGTC  
TACTACTAATAAAGAAGTTTGAATTTCTGTTGTTGATTGCTGTACAATGTGATGGAAAATGCAAGTCTGTTTCTAGATCAATTGCTGTAGAAAAAGAACTGAACATGCAGAGATTTAACAG  
TATCAGATGCATCAAGCAGCTATTATTCATGTCAAAAATGATTTTCAAGAGGGTGGTTGTGAGTGTTAAGGGGGATTTAGATTTTGTGTTGGGACGGTTTTTTT

>comp165793\_c0\_seq6

ATCTTCATAGAAATCCGAAGCTAGAGTTACGAGCAGGATGCGAGCGAGCGATAATGGAGAAGACAGTCAGTTCCATCTTACCCTCACCGCTGACGTTTTCAAGAACGAACTTTCCAGAA  
CGAAGTCACAACCTGCTTTCTTAAATCTCGATCTCCTTTCTCCCTCCCGTTCTATAAATCCAAGCTCGGTTCCCTTCGCCACTCATCTTCATAGAAATCCGAAGCTAAAACCCGAGAGGAGATT  
TAAGTTCTTTGCCATGGCCGACGCCGTCGCGAGTTACACGAAGGAGGAGCTTCCCCCTCTCTGGATGCTACTGCGGAGCCACCTTCTCTGTTTCGATGGAACGACGAGGTTGTACATATC  
TTACGTTTGGCCGTTTCGCACAGCGCACCTGGATTGCCAGGAACTACAAGGGGTTGCAGGACAAGATAAACTGGTGCCGATTGATCTGCAGAACAGGCCTGCGTGGTACAAGGAGAAG  
GTCTATTCTGTAAATAAGGTCCCTTCTTTAGAGCATAACAATGAGGTCAAAGGGGAGAGCTTGGATCTGCTCAAGTACATCGATGAGCATTTTGAGGGGCCTTCTTTGCTTCTGATGATC  
CGAAAAGAAGAAGTTAGCTGAAGAAGTCTGGCGTTCACCGACTCTTCAATGGTGT

>comp165793\_c0\_seq7

TTAAACAATTATTATAATAAAAATGGCAAAAAGAATGAGAAATTATTTAAAATAATAATAATGAATAACTTAATATAAAGAAATGAACATAACTTTTCATACATTTTCAAGAATTTTGTACTTAAA  
ATCCTGAATCCTAATATATTTTAAAGTTTATTTTTTAAATGAGCTAGCTCGTGAGCTAACCAAGTCGAGTCGGGGTTGGCTCAAACCTGGCTCGTTAGCTCATCGAGCTGGGCTCATAGCCATTT  
ATTGAGCCAAGCTCGAGTTGACTCACAAGCCAGCTTGACTCACGCCTCTAACTCTCTCTAATCTTATCTGTCACTGAAACTACTCCAACCTTTTCCTGGATATACTCGTTTCACATTCTGTC  
TCTAAGAGTAAGTCCACTCATCCACTTGAGCATCCTCATCACTATAATACTTAACTTAATATTATGCAAATATAAAAATGTAGATATTACATAAATAAATACATAAATACATAAAATTATGTGAA  
ATGTGTGTAATCCCCTATATATTTATTAAGATATTGAACTATATAGATATTGGAGAAATGTTTTATGAGTATTTATTTGCAACTTTCAAATTCAAGATTCTCAAATCTATCATATACAGTTTTCA  
TTAACTTGTCAATTTAGAATGTAGTTAACTAGTTATTTGCTTTATTAATCTTAAATTTGTTATCTTTAAAATATTTTCTCTCACTTATCTCAATGAAGATCTCATCAATTAGATGTGTCTTCTACA  
AATATAATGTGTAATAATGTATAAATAAGATCATATTTGCTAGCAGTACAGCAAGCAGAAGCACTTAACATTTCTTTTTTCTTTAGTACTACCTAATCATTGTCTTCTGTATGAAAATTCGTT  
CTATTAATTGAGAAATTAACATTATAGGAGCTGAACAAGATAGATGCCTATAGTACACACGAATTAATCCTCAAGAGTTGATAGCTACCACTAAGAAGAGGTTTGGGATAAACTGAAGGG  
TTCGGCATTCTCCTTTTCAGGTGTGCGTATTGAGCTGGAGGCCTAAACTATGAATTTGCAAGTCTGGAATAATATTACTGTATAAGTTGTGAAATAAATGATTTGCTTTTCAAGTATCCCT  
GCCGAGTTATTTAGTTGTAATGTTTTCCAACGGTCTACTACTAATAAAGAAGTTTGAATTTCTGTTGTTGATTGCTGTACAATGTGATGGAAAATGCAAGTCTGTTTCTAGATCAATTGCT

GTAGAAAAAGAACTGAACATGCAGAGATTTAACAGTATCAGATGCATCAAGCAGCTATTATTCATGTCAAAATGATTTTCAAGAGGGTGGTTGTGAGTGTTAAGGGGGATTTAGATTTTGT  
TTGGGACGGTTTTTT

>comp165793\_c0\_seq8

TAGACAGCATATCAGCGTGTGTTTCATGCAGTTTCTGAATTTCCGTATTGACGCCGCTCATCTGCCGATGAAATGTGACATACAGCCCTCCAGAATGAGGTGAAAAGATCAAGCCAGCAAC  
TATTGTGTGCGGGTATGCATGGTTCCAATCCGTCAGGGTCCGTTCTAACCCTGCTAATTTCCAACCTCCAACGTATCTCCTATGCCCCCGAGTTTTGTCTCCTCCATGTCGTTCCAACG  
CTTAAGCAGAGGCCCTTGACCTTGGCCAGAGCCTTGCCTCCTCGAATCGGCGCTGGTTCTTAAGGCGCATGACCTTGAAGCGGTGGAAGTCGGTAAGGTTCTTTCTCCGCTGCCCTGAA  
GGTTCGGCATTCTCCTTTTCAGGTGTCGCGTATTTGAGCTGGAGGCCTAAACTATGAATTTGCAAGTCTGGAATAATATTACTGTATAAGTTGTGAAATAAATGATTTGCTTTTCAGTAT  
CCCTGCCGAGTTATTTAGTTGTAATGTTTTCCAACGGTCTACTACTAATAAAGAAGTTTGAATTTCTGTTGTTGATTGCTGTACAATGTGATGGAAAATGCAAGTCTGTTTCTAGATCAAT  
TGCTGTAGAAAAAGAACTGAACATGCAGAGATTTAACAGTATCAGATGCATCAAGCAGCTATTATTCATGTCAAAATGATTTTCAAGAGGGTGGTTGTGAGTGTTAAGGGGGATTTAGATT  
TTGTTTGGGACGGTTTTTT

>comp165793\_c0\_seq9

AGGCATCTATCTTGTTCAGCTCCTATAATGTTAATTTCTCAATTAATAGAACGAATTTTCATACAGAAGACAATGATTAGGTAGTACTAAAGGAAAAAGAAATGTTAAGTGCTTCTGCTTG  
CTGTGACTGCTAGCAAATATGATCTTATTTATACATTTTACACATTATATTTGTAGAAGACACATCTAATTTGATGAGATCTTCATTGAGATAAGTGAGAGAAAATATTTTAAAGATAACAAATT  
TAAGATTAATAAAGCAAATAACTAGTTAACTACATTCTAAATGACAAGTTAAATGAAAAGTGTATATGATAGATTTGAGAATCTTGAATTTGAAAGTTGCAAATAAATACTCATAAAACATTT  
CTCCAATATCTCAATGAAGATCTCATCAATTAGATGTGCTTCTACAAATATAATGTGTAATAAGTATAAATAAGATCATATTTGCTAGCAGTCACAGCAAGCAGAAGCACTTAACATTTCTT  
TTTTCTTTAGTACTACCTAATCATTGTCTTCTGTATGAAAATTCGTTCTATTAATTTGAGAAATTAACATTTATAGGAGCTGAACAAGATAGATGCCTATAGTACACACGAATTAATCCTCAAG  
AGTTGATAGCTACCACTAAGAAGAGGTTTGGGGTAAGTTTCTACATAATTTGCAGCTCAGTTCACTTCAGCCATTCTATAGTTAATTGACTCTCCTTTTTTTCTGTTTTCTTTTCAAGATAA  
ACTGAAGGGTTCGGCATTCTCCTTTTCAGGTGTCGCGTATTTGAGCTGGAGGCCTAAACTATGAATTTGCAAGTCTGGAATAATATTACTGTATAAGTTGTGAAATAAATGATTTGCTTT  
CAGTATCCCTGCCGAGTTATTTTAGTTGTAATGTTTTCCAACGGTCTACTACTAATAAAGAAGTTTGAATTTCTGTTGTTGATTGCTGTACAATGTGATGGAAAATGCAAGTCTGTTTCTAG  
ATCAATTGCTGTAGAAAAAGAACTGAACATGCAGAGATTTAACAGTATCAGATGCATCAAGCAGCTATTATTCATGTCAAAATGATTTTCAAGAGGGTGGTTGTGAGTGTTAAGGGGGATT  
TAGATTTTGTGGGACGGTTTTTT

>comp166193\_c0\_seq3

CGCGTACTGCGGCACCAGCCAGAACACGCTGATGGGCACGGTGGCGCTCGGGTGGTCTGCGAGGCCATGTGTTACTGCAGTAGATCGTCGCCGGCTTTCGACGAGCGCGGCGGAGATG  
TTGGAGAGGAGGGAGATGGCGAGGCCGACGGCGATGCGCTGGAGGTAGGAGAGGCCGGTGGGGCGGCGGGTGAGGCGGCGGACAAGGGGGGTGAGGAGGCGGTCGTAGATTGCGAG  
GGTGAGGAGCATGGAACGATGGAGAAGATGGAGAGGGTGGCGGCGGGGATTTGGAAGTTCCGGCGAGGTGGCGGTCATGGATTTGGCTTGGATGATGGTGAAGGTGTAGTTGTGG  
GAGGCGGCGGTGATGATGAGAATG

>comp166272\_c1\_seq5

TATATAATTTAATCATATTGTACGTTTGATTACGTACACTAATTAATCATTAATATTTGATTAGCAAGTTTGATGGAATTCATCAATTCTGAACGTGAGAAATACCTGATCTTTCTTCAGTAAGA  
TATCCCATCCTTCTGCAATACTAATGACCTCGTCTCTTCATCTGGTAAGGAAATCTATAGTTCAAGTCACCAAGCAAGATTATTCGCTCATGATCGTATATCTTTCTTGGCAAATCAAGAG  
ATGGTCTTGAGGGAAATCTAGTTCTTGAGAAAATCTCCATGGCGTTTGAGTTCCCTATGCATCCCATCCCCTCTTTTTCTCCTGAAGCCAAATGACAGCACACTACGCAGAAGCTCGTTTC  
ATGTAATAAAAAACCTAACCGATACTGACCCCTGCATGCAAAAACAATTCCACAGCTCAATTTTAATTTT

>comp166482\_c1\_seq5

TTTCACTCCAAAATACAGTGAAACCAAAAAGTGCCGTGATTTCGTCTCCAATCGAACGTCATTTTGCCCCCTAACGTCGCACTGTTTCATCCGAGATCAAATGGAGGAGGAAAAGGAGTTAG  
GTTGCGACGTTTGAGGGCCTCCATTCGGTTGTTTGCCGAACGGTTGGAGATGATCTTACCTTCAAAAATATGATGAAATCATAACCAAAGAACCAATCCAATGGACAATAACTCAGAGCATA  
AGAAAAACAAAAGACCACTATACATAAATATTTAACCTAAAAAATAAAAATAAAAATTTACGTATCACGATCATCGAGAGGATAGCATGTGTCTTCGCCGCCGGTGTCCACAAGAA  
GTGGGCGTAGTTGGCGGAATAGTAGCTGTTTGCCGGATCTGCTGAAATGGCTTCCAAGAATGTCTCCTCTGCCGCCCCCAAATCCTTCTCGCCACCCACAAGAAGTTCGCGTACCGGCA  
TAGTGTCTCCGCTCCGCCGGCTCAGCTCGTAACGCCCTCTTAAAATATTCTCCGCCCTGTTTCAGCACCCGACAACAAAATTAAGATTTTTTTTTTGGGAAAATTAGGGAACAAAATTAA  
GACTCACCTCAAACTTTTTTTTTATTTTAAAATTTAAGTCCAGCTTTTTTTTTTATGAAAAATAAATTTAAAACGTATTAATTAATTAATAATATAAATTAATCATATCAATAATT  
T

>comp166482\_c1\_seq8

TTTCACTCCAAAATACAGTGAAACCAAAAAGTGCCGTGATTTCGTCTCCAATCGAACGTCATTTTGCCCCCTAACGTCGCACTGTTTCATCCGAGATCAAATGGAGGAGGAAAAGGAGTTAG  
GTTGCGACGTTTGAGGGCCTCCATTCGGTTGTTTGCCGAACGGTTGGAGATGATCTTACCTTCAAAAATATGATGAAATCATAACCAAAGAACCAATCCAATGGACAATAACTCAGAGCATA  
AGAAAAACAAAAGACCACTATACATAAATATTTAACCTAAAAAATAAAAATAAAAATTTACGTATCACGATCATCGAGAGGATAGCATGTGTCTTCGCCGCCGGTGTCCACAAGAA  
GTGGGCGTAGTTGGCGGAATAGTAGCTGTTTGCCGGATCTGCTGAAATGGCTTCCAAGAATGTCTCCTCTGCCGCCCCCAAATCCTTCTCGCCACCCACAAGAAGTTCGCGTACCGGCA  
TAGTGTCTCCGCTCCGCCGGCTCAGCTCGTAACGCCCTCTTAAAATATTCTCCGCCCTATCGTGGTTCGCGACGAACAGTGTAAGAAAGAACTGGGCGAAATTTGAGAGCAGGAGAGCGTC  
GTCGGGGTTCTCGGAGAGTGCATCTGTACGACAGCTCCGTCGCAGAGTAAGCCGATAAGTCGTCGGCTCGGCCTTACCCTAACGGGTGACACGAATCGCCGCAACGTGTGGGGAT  
CCATCAGCGACTCGTGCCGCCCGCTGGCCATAATCATCTCCGCCGATTCTCCACTATCCCTTTCCATGCCGTCGCCATCTCCTCGTCCATAGCCGCCATCGAAATTGCCTTTGAGAAGATC  
ATGCCCTCCGTCACCCAAGGAAGATGAAGACCGATCCGAGCCGTCGTCGCCAGAGGCGGTGATCGCCGGTGGCTTGCCACCGCCACTACCGTTTCCACCGACGGCGGAAGATCTGCAGA  
CGGAGAATGTTTTGATGGTGGATGAATTGAATCGAGGAGTAGGGTTTTGGGATTTCTCGATTGAGGCGGAGAGGGATTGAGGTGGCGGCAAGGGTGGCGGTGGCGGCATGGTGGTGGTG  
ATTGAGAAGACGGTGAATTTGGCGAGAAGGAGCATGAGGTAGACCATGAGGGTGGGAGTGGACGAAAAGATACGATGGAAGAGCCAGACGAAAGAGGCATGGAGCTCGCTATGGACC  
CTTGCGAGGGTCTCCTGGATTTGGAAATTTGTCGGATGAGAGTAGGGCTTCTCGCATGCGAATCACTTGGCTTTGGAGCTCGCGCACTATAAACACCATAGAGGAGAAGGCTTTCATTACG  
GAGGAGTAGACGGAGTCCGTCATCTCATCCGATCCCATCGTTTCTTCTTGCTTTGCAGAATTCGCAGCGACAGGGGTATATCGAAGCTATTTGCCCTCCGCTCCATCTTTTGAACGCGAA  
TCCGTCACTGCCAGCCCAAGATTCCGGCGGCATCGCTGGAATTTCCGGGTTTTATTGAAATCGGGAGAGGTGAAATCGAGTCGGAAGCGGGGGGAATGGAATGGATTTCTTCCAAACATG  
AAGAAGAAGAAGAAGAAGGGGCTGATTCGTCGCAACTATTGCTGGTTTTCTGCATCTTGAATTTCTGAGATTCGGCTTCGATTTTAAATTTGAGGTTTAATTCGTTAACCCCTCTTCACAAA  
TTCTCTCGTTTTTCCGCCCATCAACGAAGCCGTCGAGGTTGGCACTGCAAGAAACCCTTTTTCTTCCACCTCTCACTAATTTCTTTGATGACAGTGATGAAGAAGGGCAGTTCCGAG  
GAAGGGTGTATGATGGCAGTATTATGCGTGATGACGCGATCGTGGGAGTTGCTTAAGGAAGTGTAAGGAGAGAAGAAATGGCGTGGGCTACGGTTTTGGCCGAGATAGGGCCTCGGA  
GGTGGCGGGCTGAGACCAATGCAAGCAAGTTCCGGCGATCTCCACGGCCATCACCGGCCGGTGGTGAAGGAGAGGAAGAGGGGAAACGAATCAACGACTGGCTTTCTGGACTGTC  
AGTTGGTCCGATCTAGGCGTCTCTGGTCTTATATATAGGGACTTTGATCAACCACAAGTACGCGAAGTTGAAGGTGGATTTAGATGCTACAGCTTTAAATCTAGAGTTCTTGAGCCTGCTG  
AGATTATTCATCTTCTTGCTGTAGAGACTATCAATTAATAAAAATGTTGTTGCAATGAGGAAAGGAGAACTAATTGCTCTCTCTGAGTTGAATACCTCAAATGATGACTTTATTTCTATGCA  
CTTACCAGTTCAGAAGGTAGTTTCTTCATCTTGGGATGCTGCTGTAGCAGATGCAAAAAAGAAGTGTGTAGAAATTACTTTACTTAATGTCTCTTATGAGAAGGAGAGTGTATTTGAAAC  
CGACTGATCCTAAAGTCATTAATATTGATTTGGACTTTACCTATGGGAAAGATGAGACGTCTGATGTTACATAGAAGGTTACTTCTGAGAGATTTTTTGGAGTTGATATGAATATTCTGGTGA  
AGGAAAAAAGTATTAATGTTTAATTCATTTTTGATTTGACGGAAGGT

>comp166736\_c1\_seq1

TCACCTTCTCCTCCACCTCCTTACCATTATAAGTCTCCACCTCCTCCATCGCCTTTCCACCTCCTCCATATTATTACAAATCACCACCACCACCATCTCCTTCTCCTCCTCCACCATAACCATT  
ATAAATCTCCACCACCACCATCACCTCTCCACCACCTCCTTATCATTATAAGTCTCCTCCTCCTCCATCTCCTTCTCCACCACCTCCATATTAT

>comp166873\_c0\_seq1

TCGATCGTCTATCATCCTATATAGGAAGAGCTTCATAACTCGGCTTTCTCACATCCAAAATTCTCTTCTCTACAAACGCTAAGCTCCGACGATCCATAGTTTTTCTGTAGTCTCTTATCTCG  
CCCAGTAGATACAGAACTTCATTCTCTGAAGCATTGAAAGATGAGTTCGGTCAAAGCTTCTGCTCTGATCTTCTCCTCGCCTTCTTTTTGTCTGGGCTTATGGA

>comp167159\_c0\_seq1

TCTGTGCGGACACCGGACGGTAAAACCATCCGGTTAAGCGCTTGGTACCGAGCTGTACCGAGCACGGGTACCAAGCGCGGTACATTCTTGGAGTGACGTGGCTTATTTTTATTGGTCTCC  
GGTCGCCCTCCGACTCCGCATAGAATAATAAATCTGGCTTGACACAGTTCACATAACCAAATGCACAAGTTAATACAACATAGCTCATATTCTCTACACTTTTTAATCAGGAAGTGTATG  
ACAAGGACACATT

>comp167541\_c0\_seq11

GCTCTTCCCCTTACTGCACTTAACAAAAGCCTCTTCTAACTGTAGCAGTGCGGCTAACAGTTGCTCCTTCGCTTCTGCTATGCTCTCCTCTTCGTTACTCCGGACCAACTCGATTATGAG  
GAGCTATCTTGCTGTCAACATAGGCAGCCGAGAAGCGAGCGATGGCGCGATCGTAGGGATCGGCGGGGAGGATGGAAGGGCCGGAAGAAGCCCAAACCTTGATCGATGACTCCACAATA  
ATAAGGGACTCGCAGACGGGCTTATCTCCATGGATGAGAACGGGGACCGTCTTGTAGACCGGATTGGACTTGAGAAGAAGCTCGCTTTTGTAAACAAATCATCTGCGAGGTACTCGTAT  
TCAACACCCTTCAGATTGAGAGCAATCAGTGCCCTCGTCACGTAGGCGCTCGCCAGACGCCGATCAGCTTCACCTCGTCTTGTTTCGCCATTCTCTTTGTAGATCTGAAAGTAGTTTCCA  
ATTTAGCAAGGATGATTTGGATTCTTCAGCTGAGCTTGGCGGGTATTTAAAGCTCGAATGCACAACAAAGGTCT

>comp167607\_c0\_seq5

TTCTCTCCTCTCTTTCTCATCCAATCCACCAGCTTGTTCTTTGACCTAACCTGGTCCTAACCTTCTCTAAAACCCACCAACAAAAACCTTATGGCTAATAGAACCATCAGAAGAAC  
TCACTTCATGAGATGAACGAACAGATTCTTCAGCTAATTCAGCTTCTATTTATTTTCATGATGATGAAGAAGAAGAGCTAACAAAGCATAAGAAGCGCTTCAACATCCTAAAGTCTTCACCT  
TTCTCCACTTTTCTTATCAATTCCTACCTTTCTTAAATTTCCCTAACTTTCTTGCTCGCATCTCTTTCGGATCCTCCATGGATCCAATCACCGCTTCTTCACACGGCCACCACCTCCCTCCA  
CCTTTCCACACCCGTGATTTCCACCAACAGCTCCACCACCTTCTCCCAACTTCACCAACTCCAAATCAGACGCCGACGACTTGATCCTTACCAGCGGCAAGAAAACGCGATAGCATC  
GACGATGATAGTTCCAACAACCATAGCGGTGGTGAGGGTAAGGATATCATTCAAGGAAACGGTAGCGACGGGGATATGATGCGTCGCCACGCGGTGACCTGCCGGATCTAAGAATAA  
GCCGAAGCCGCAATTATAATCACCCGCGACAGCGCAAACGCCCTCCGTTCCACGTTATGGAATAGCCGGTGGCTGCGACTTAGTCGATAGCCTTGCAGCTTTCGCCCGCCGCGTCA  
GCGCGGCGTTTGTGTTCTTAGCGGTAGCGGTACCGTTACAAACGTTAAGCTCCGGCAACCTGGTTTCGAGTACTGCTGTTGTTAGCCTTACGGCCGATTGCAAATCTTTCACTTTCAGGT  
TCGTTTCTCCC GCCCGCGCCGCTGCGGCGACGGGACTGACTGTTACTTAGCCGGCGGACAGGGGCAAGTTGTTGGAGGGAGTGTGTTGGGGCCGTTGATAGCTTCTGGACCTGT  
GGTTATAATGGCGGCTTCGTTTGGGAACGCAGCGTATGAAAGATTGCCGCTTGAGGAGGATGAAACGATGGCAGTTCCAGGGGGATGGGATCACCGGGGATGATGGGATCGCCTCCGA  
CGTCGGGCGGAGGTCCGATGACGGAGGGAGGGGGAGCGCCGCGGGTTTATTTACGGCCTGCAACAAAATCTATTGAACAACGTGCAGATGCCGGGAGAGGCATATGGGTGGGCTAC  
GGGAGGAGGAAGGCCATCTTTCTGAACCTTCTTTTTTAGTCTTCTTCTTTTCTTCTTCTTCAAATCTACCTGTCCAAAAAGCCTGCCTCCACCAGAACGAGGCGCCACCA  
GAGGCACCAAAGCAGCACAAACGAACCAACGTCACCGAGAGTGAGCTGTATGGCCAGATCAAGCGTGCAAACCTACCTCCACCAGCTTCCGCTGCCGAATCCACCACCGCTCCGACAT  
GGCTTTTCTTTTTTCCGGTTTTCAGCTTCTTCTCCTCCGCTCCAGTTGCTGCTCTCCGGCGACCGGTAAGTCGAAGAAACAGATGACTGAGGCCAGAGGCTTGAGAGTGGAGGAGATG  
GACCCGCTCTTCCGGTGGAGAAAAGGAAGGAGAAGCCGTATTACGTCGAGAGCTTGTGGAGGAGAAGGTGCCGAGATAGGGATGAGCTCACACAGCTGGAGCTTTGCCAGCCGGTG

AGGCTGCCGGCGGCCTGCTATGGCGTCGTAGATTGAGATTCGTGGGCTTTTTTGTCTGTTATATTATAGTTTAATGTGGGGATTTATTTTATTTGTCCTTGTCTTTTTTTTTTTAATATAG  
AGGTGAGCTAACATCAAACCTGTCCAGAGACCAAAAATAAAGCACCATCATTTGGGCGCTCGGTACCGCACTCGGTACTCAATATGCTCAGTATTCTATCCAGACGTAATAATTTTT  
CTAGCTAAAAAGCCATAGCTCGATCTACTCCATGTACTTGCTCTTGATATTATAGCTCATGGATGGCCAACATATGGCTTTTTTTT

>comp167661\_c0\_seq2

ATTCCAATTAACAACATTAATAATCAATAATTCAATACTTTTTATTCCAATCATAGTGTTGAATACCAGCTCATTTAGCTTAAACAACCTTCTATTCTCTATCTCAAGCCTAGCAATTTCAACTAGC  
AGAAATAATAGCCCTCTATCTTTCCAGCCACAGCTTGACACACTCAAATAAAAGCACTAGCCTAAACATACATATATATATATATGAAGCTGATAAAAGTAAGTAGTCTATTAATCAAAC  
GGTGATTTAGCCTTAGAATAAGAGAAAAAGCTGGTAGATGAGAAGTTACTGTTATTGATGATGCTACTATTGCCATGGCCTTGCAGGCTTTGTGCGAAGACAGAGGTTGCCGATGTAGTTG  
CGTTCATGGCCGGCACCGGAGAGGGCAACGGAGAAGGAGAAGAACCCTTCAGGAGAACATCCACCTTAGCATAATCTTCCCTTTCAAGTCTGATTTCCCTTGAGCATTGCGGCCACATCC  
TTCATGGTCGGCCTCTCATCTGGGGTAGGATTGACGCAGAGGAGAGCCACCCCAAGAGCTTGGAGCATCTCCTCCACCTCTGAGTCCGACCGGACGCGGAGGCTGACATCAAGAACTTC  
AGGATTCCTTCTTCACTTACCCAACTGCTAAATGTAGACCATCTGGAATTGTAGGGTCAATCGGTTGCTTCCCTGTTAATACCTCGAGAACCACCACTCCATAGCTGTACACATCGC  
TCTTCTCAGTGATCTTCATCATGTAACCATATTGAGGAGCTATGTAGCCATAGGAGCCTGCAATGGTGTTCGATGACCGGGCAAAGTCACCCTCCTCCACAAGCTTCGCCAAGCCAAAATC  
TGCAATGTAAGGCTCAAAGTCGAGGCCGATCAGAATGTTGTTGGCCTTGATATCCCTGTGGACAATTGGAGGGATGCAATCGTGGTGGAGATAAGCCAGCCCCTGTGCTGCTCCAAGTAT  
AATCTGATACCTGAGATCCCATTTCCAAGGGGCATCCATTCCTGTATGAAGCAATCCACCAAGGCTCCCATTTGGCCATATAATCATACATCAGCAACCTTGTGCTCCTGTTCCAGCAACAGC  
CTAAGAACCTGACAATGTTCTTATGCCGATTGCTCCAGCGTCTCACCTCGGCTGAGAAAGAATCCCTCACTCTAACACTGTTCCCTTCGTCTTTGCTCGTCGTTGCCACCCCAACGGT  
ACTCGGCCATAGCTTCTTGACAGCAATCACTTCGCCATTGCCATGCTCACTCTGTAACTATGCCTGAGCAGCCTTTGCCGATTATATTGGCATCAACCAAACTGTGGACAACCTGTTCG  
ACGAAAAGCTCAGTTTTTGAATGGAGTGAAGTCCATGGCCAAGTCATCTCGCTGCGGAGATCTGGATCTTCATTTCTCCACCTTCCCTCCACTCATTCTTTGCTTGGATCACTC  
CCAGCATTCGAGGACCATTGCCACCGTAACTGTGATAAGGAGAACAATGGCAAGCTTCAGTTTGTGCAGTCTCCGGCTTTCCTTGGTAGTGGATGTTACACCATTGACATTGCTGCTCAC  
GAAGCAGACGTCTCCATCGTGAGTGCAGAGGCCTTCGTTGCCAGCAAGGTTGCAAGCCGAAAGCTGATGGAAGAGCTTGGTGTGAGGCAGGTATCCGGTGAAGTTGTTGTTGGAGACG  
TTTAGAACGATCAAATATCGAGTCCCGAAGCTCGGCGAGGCTGCCGTCGAGGTTGTTGTAGGAGAGGTCGAGCACGGAGAGCTTGGCAAGTTTGGAAATATTTACTGGAATCGGACC  
AGTAAGCATGTTTCTGCTCAAATCCAAGGCAATATCTAGCCCTTCGATCTCGCAGAGCTCATCCGGGATGCCGCCAGTCAAGCGATTGTTGCTCAGATCAAGCAGTTCGAGGCTCAAGCA  
GCGAGAGAGAGATGATGGGATTGGCCCGGAGAGCAAGTTTCCCTTCAAGTATCAGTTTGTTCATAGACGCCAACTTCCCTAAGCTCTCTGGTATCGGCCCGATAAATTGGTTAAGGATGC  
GTCAAGGATCAGGAGGCCGGTAATGGAGCCTAGTGATGCAGGGAGCTCGCCAGAGAGAGTGTTGTTGCTTATATTAAGCATTGGAGCTGGGAACACTTTCCAATCTCAAACGGAACAG  
TGCCAATGATCCGGTTGCTGGAGAGGTCGAGAAAGTTGATTCCAGCAAGGCCCGGATTGCAAGGGAATGCGGCCTCCAATGCGGTTGCAGCCGAGACGTAGGCCGACAAGGGAGCG  
GCATTGACCTATCTCCGGCGGGATGGCGCCGAAATGTCATTTGACAGGAGCAACAACCTTGGTGAGGTTTTGTAGAAGGAAGAGCCCCGGCGGAATGGAGCCCCTGAGATGATTGTGGG  
AGAGGTCTAAGGCTTGGAGGCTGGTGAGGGAACCGAAACTGGAAGGTATGCTGCCCTCGAGCTGGTTCTGCCATGCGAAGAATACAACGAGGTTGAAAGTTCACCGAGCTCCTGCGG  
GATTAGGCCAGATATCTGATTCGTGTGAGCTGCAGCTGCGAGAGCGATGTGAGCTTCGAGATAGAAGGGGAATCGATCCAGAGATCTTGTATCGCTAAGCATAAGTTCTGTAGATTAG  
TTAAACCTCCAACGAAAGCGGGATGGCGCCAGAAAATCGAATTGATGGAGAGATCAATGACCTGGAGGGAGGAGAGGTTGCCAACTGTTCCGGGAGGAATCCGGAGAGCGAGTTCTG  
CCAGAGAAGAATCCGCTGCAGATTAGATAGTCTGCCGAGGTCCGGCGGGAGCGAGCCGGAGAGTGAGTTCTCGTACAGAAACAGATTTGTGAGCTCAGTGCAGTTGCCAAGCTCCGGA  
GGAATGGAACCTGAGAGCATCGCTGTGTAACAGAAAAGCGTCTGCAAATTGGAGAGGCGTCCAATCGAAGCGGGAATAGAACCAGAGATCTTGGTATCTGCAAGGCCAAGAACGGTAA  
GATTGCGGCATTGGGAGAGGGAATCCGGAATCTGACCGGAGAGATCGCGGTTTCCGCCGCGCGGAGGGTTTGCAGCCTGGAAAGATTACCAACGGAATCGGGAATGGGGCCGGACAG  
GCGGTTGTCGTAGAGAAGGAGGTTTCCAGGAGAGCAGTAGACTCGCCAAGTGAAACGGGGATCTGACCTGACAATAAGTTGGAGTTGAGAATGAGAGACTGGAGCAACGGAAGGCCGAA

GAGAGAGGCGGGGATTGGACCAGAAAGAGAATTGGAGCTGAGATCAAGTACTGCAAGGCGGCGGCAGTTGGAGAAGGAGGAAGGAATGGAGCCGGTAAGGTTGGAAGCGGAGATGG  
AGAGAGAGGAAAAGGGAGGGGAGCGAGAAGCAGAGGGTTCGTCGGGAGGGGAAGGGCGAGGGGGTGGATATGATGGAGATGGAGGAGACGGAGCCGGCGGAGTCGCAGGCGACATG  
GGTCCAGTTGCAGGGGGAAGAATCCGTTGGGTTCCAGTCGGGGAAAGGGGAAGGCGATTGGCCGGAAGTGATCCAGGTGAAGAGCGCGGTCGTTTCTGGGTTTCGGAGAGGAGAACGA  
TGAAGAGAGGAGGAGGAGGAGGAGGAGGCTAATATAGAAGTACTGCGAGGGTTGGAGCTGGTCGTGAGGGATGAGAGGTAGTAGCAACCATTGAGAACGGCCGTAGACATTGTGCGA  
GGGGCCGAATACTTCTATATTAGCCTCTTCCTC

>comp167806\_c0\_seq1

CCACCCGACACACACTCCCACACTCCAGCCTCAGCACCTCGCAGACATGATCGTCTGGCCCCGAAGACATGGCCTCCTCCATCCTCATAGACGATCCCTTTAACCCCTACACCTTTCATGC  
CCTCTTCCCTCCGCCACCGTCTCCTCTTGGGACTCCACTATCACCTCCAGCTCCCCACCCGACGCTCTTCAGCTCCGCTTCAGGCTCTGATCGAATCGCACTCAGACTCCTGGACCTACG  
CCATCTTCTGGCATTCTTCTCAAACGCCATGCTTTCTGGGGCGACGGCTTCTACAAGGGCTCCCTTGATCCCCCATCAACCACCGGCACCGCCCCTACTCTCCGGAGCAAGAGCACC  
GAAAGCGTGTGCTTCGTGAGCTCAACTCTTATCTCCACTTCGGTCGATGATGCCATCGAGGAGGAGGTAAGTATAAGAGTGGTCTTCCTAATCTCCATGACTCATTGCTTGGTAGC  
TCCCACCTCCCTCCTGATCCAGGCACAAATGTCAGGCGAACTATATGGATTTTCAGGAAATAATCGATTGGGTGCCGCGCAATGTGATCGCGCTCGCCAGGCGGGCGGCGTTTGGTATTTCG  
ACGATGGCTTGCATTCCCGTCGCAAATGGCGTGGTGGAGCTGGGTTCCACGAATGTCGTATTCAAGAACCCCGACACCATAAGCAGAATTAGGGATTCTTTAGCTTCCCTTCAGTAGAA  
ATCCCAATTTTGAATCCGCAATTCCTTGTGCGAGAACCCAATTTTCGTGCGGAGCTGTTACTCCTTCTCACGACCCGCGGATCGGAAAATTCGGACCTGGCTTTGACGGTGGAACTGAA  
AGACGCCCTAGAAAACGCGGCCGGAAGACGGCTAATGACCGCGACCAACCGCTCAACCATGTGCAAGCAGAGCGGCAGCGGCGAGAGAAGCTTAATCAACTATTCTACTACTCCGAG  
CTGTGGTGCCCAATGTATCCAAGATGGATAAGGCCCTCCCTGCTCGGCGACGCCGTGCGGTACATCACGGAAGTCCAGGAGACGATAAGGTCGCTCGAATCCTGTAATGGATCGCTTCGTT  
CTCAAGTGGATGTTCTGAAGAGCAATGTCAATGGCTTTCTTGGCGAAGTTGGTGGAAAGAGAAGGGAAATTTGGAGGGGCTTGAATTGGAGGTGAAGGTGATTGGGACGGATGCCATGATC  
AGATTGCAGAGCAAGAGGAAAGGTCACCCTTCAGCAAGGTTTCATGTCGGCGCTCGAGGCTGTGCGGCTCGAGGTGCTTTACGGGAGCTGCTCCGTGGTGGAGGATCTAATGCTACAGCA  
TTTTACAGTGAGGTTAACGGATTTTAGATCGCAAGAGCAGCTTAATGAAGAGATATTTGCAAGACTTTTTCGGTGATGCTGCTGCCGGCGGCGACTGCTTTCAGCAATTTTCGTAGCCGTCC  
AACTTCCAAGTTTCCGCCGGAACCCATTTTCGTGTTTTTTCGGGTGGACTAATATTTTTTTTCTTATATATATTTTCTCGGGCATATAAGTAAATACTAAAATTGTGATGTATTTTTTTTTTGT  
TTTAGAATTAAGGGATAACTATAGTGCACGTCATATAGGCATAACTCGAATTTAAAATCTCTTAGTTGATAATCAAATGTCTCAACTAATAGAACAAGAAAGCTTTGTGGATATTTAAATATG  
TTAAAAGTACTTTGCATGAAAATTTTGTTTTTGTGTTGTGAGAACTCTAATATTAGAGGGTAAATTTATTAGGTACGTTTCATCCAATGAAAACCTTGTACGTTGATTTGACCGCACTT  
TAGGTCCGCTTTGACTGTGCTTTACTTGCACCTTTTACGCGTT

>comp167806\_c0\_seq5

AATTTTCATTGGATGATCGTACCTAATAATTTACCCTCTAATATTAGAGTTCTCACAAAAACAAAATTTTCATACAAAGTACTTTTAAACATATTTAAATATCCACAAAGCTTTCTTGTCTATTA  
GTTGAGCATTTTGATTATCAACTAAGAGATTTTAAATTCGAGTTATGCCTATATGACGTGCACTATAAGTTATCCCTTAATTCTAAAAACAAAAAATAACATCACAAATTTAGTATTTAC  
TTATATGCCCCGAGAAAATATATATAAGAAAAAATATTAGTCCACCCGAAAAACACGAAATGGGTTCCGGCGGAAACTTGGAAAGTTGGACGGCTACGAAAATTGCTGAAAAGCAGTCG  
CCGCCGCGCAGCAGCATACCGAAAAGTCTTGCAAATATCTTTCATTAAGCTGCTCTTGGGATCTAAAATCCGTTAACCTCACTGAAAATGCTGTAGCATTAGATCTCCACCACGGAGC  
AGCTCCCGTAAAGCACCTCGAGCCCGACAGCCTCGAGCGCGACATGAACCTTGCTGAAGGGTGACCTTTCTCTTGCTCTGCAATCTGATCATGGCATCCGTCCCAATCACCTTACCT  
CCAATTCAGCCCTCCAATTTCCCTTCTCTTCCACCAACTTCCGCAAGAAAGCCATTGACATTGCTCTTTCAGAACATCCACTTGAGAACGAAAGCGATCCATTACAGGATTCGAGCGACCT  
TATCGTCTCCTGGAGTTCCGTGATGTACGCGACGGCGTCGCCGAGCAGGGAGGCCTTATCCATCTGGATACATTGGGCACCACAGCTCGGAGTGAGTAGAATAGTTGATTAAGCTTCTCT  
CGCCGCTGCCGCTCTGCTTCGACATGGTTGAGAGGCTGGTCCCGCTCATTAGCCGTCTTCCGGCGCGTTTTCTAGGGCGTCTTTCAGGTTCCACCGTCAAAGCCAGGTCCGAATTTCC

GATCCGGCGGTCGTGAGAAGAGGAGTAACAGCTCCGCACGAAATTGGGTTCTCGACAAGGAATTGCGGATTCGAAATTGGGATTTCTACTGAAGGGAAGCTAAAGGAATCCCTAATTCT  
GCTTATGGTGTCTGGGTTCTTGAATACGACATTCGTGGAACCCAGCTCCACCACGCCATTTGCGACGGGAATGCAAGCCATCGTCCGAATACCAAACGCCGCCCTGGCGAGCGCGATC  
ACATTGCGCGGCACCCAATCGATTATTTCTGAAATCCATATAGCTCCACCTCCCTCCTGATCCAGGCACAAATGTCAGGCCGAACTATATGGATTTTCAGGAAATAATCGATTGGGTGCCG  
CGCAATGTGATCGCGCTCGCCAGGCGGGCGTTGGTATTCCGACGATGGCTTGCATTCCCGTCGCAAATGGCGTGGTGGAGCTGGGTTCCACGAATGTCGTATTCAAGAACCCCGACA  
CCATAAGCAGAATTAGGGATTCTTTAGCTTCCCTTCAGTAGAAATCCCAATTTGCAATCCGCAATTCCTTGTGAGAACCCAATTCGTGCGGAGCTGTTACTCTCTTCTCACGACCGCC  
GGATCGGAAAATTCGGACCTGGCTTTGACGGTGGAACTGAAAGACGCCCTAGAAAACGCGGCCGGAAGACGGCTAATGACCGCGACCAACCGCTCAACCATGTCGAAGCAGAGCGG  
CAGCGGCGAGAGAAGCTTAATCAACTATTCTACTACTCCGAGCTGTGGTGCCCAATGTATCCAAGATGGATAAGGCCTCCCTGCTCGGCGACGCCGTGCGGTACATCACGGAACTCCAG  
GAGACGATAAGGTCGCTCGAATCCTGTAATGGATCGCTTCGTTCTCAAGTGGATGTTCTGAAGAGCAATGTCAATGGCTTTCTTGGGAAAGTTGGTGGAAAGAGAAGGGAAATTGGAGGG  
GCTTGAATTGGAGGTGAAGGTGATTGGGACGGATGCCATGATCAGATTGCAGAGCAAGAGGAAAGGTCACCCTTCAGCAAGGTTTCATGTCGGCGCTCGAGGCTGTCGGGCTCGAGGTG  
CTTTACGGGAGCTGCTCCGTGGTGGAGGATCTAATGCTACAGCATTTTACAGTGAGGTTAACGGATTTTAGATCGCAAGAGCAGCTTAATGAAGAGATATTTGCAAGACTTTTTCGGTGATG  
CTGCTGCCGGCGGCGACTGCTTTCAGCAATTTTCGTAGCCGTCCAACCTCCAAGTTTCCGCCGGAACCCATTCGTGTTTTTTTCGGGTGGACTAATATTTTTTTTCTTATATATATTTTCTCG  
GGCATATAAGTAAATACTAAAATTGTGATGTATTTTTTTTTTTGTTTTTTAGAATTAAGGGATAACTATAGTGCACGTCATATAGGCATAACTCGAATTTAAAATCTCTTAGTTGATAATCAAAA  
TGCTCAACTAATAGAACAAAGAAAGCTTTGTGGATATTTAAATATGTTAAAAGTACTTTGCATGAAAATTTTGTTTTTGTTTTGTGAGAAGTCTAATATTAGAGGGTAAATTATTAGGTACGTT  
CATCCAATGAAAACCTTGTACGTTGATTGCATTTTGACCGCACTTTAGGTCCGCTTTGACTGTGCTTTACTTGCACTTTTGACGCGTT

>comp167841\_c2\_seq4

ATCACAAAACCTCAATAAGCGCTTATAGAAAAGTCCTGACAGCAATGGTGCATGCATCATGATATATATATTTTTTAATTTGTCAACTGAATCAGAAGTCCTGCAAGCTATCTATGTTCAACTA  
ATCGTAATAAATCTGCTACCACCTGCTAGACTTCAATGTCTCTATATAGCCCTCAATAACAGAGAGAAATCAAACAGATCCGAAAAGTAAATAGAGATGGACGATGAAGTGAAGTTATTGG  
GTCTTTGGCTGAGCCCCATGAGTCGCCGAGTTGAAGTCGGCCTCAAGCTTAAAGGCGTCTCCTTTGAGTTTTTCAGATCTGGATGTCTTCTTCTCCAAGCCTCTGAGCTTCTTCAGTACAA  
TCCTGTGCATAAGAAGATCCCAGTACTTCTCCACCATGGAAAACCTATTGCAGAGTCGCTCATCATTCTCGAATACATAGATGAAACCTGGCCTGATTCTGGGATTCGCCTTCTTCCAAAG  
GATCCTTATGAGAGAGCCATGGCGCGTCTTGGGCAAGTTTTTCGACGACAAGTGTAGTCTTCTCTATGGATGTCATGTTGGACAGAGGGAGACAAGCAACAACAACCTTGGCAGA  
GTCCAAGCTGAATCTTACCACCATGGAAGGAGCTTTGAAGGGTAAAAAATTTCTTTGGAGGAGACGAGATAGGAATTGTAGACATTATAGTGTGTTTTGCTCTGTTTACTGGGCTGAAATAGCT  
CAAGAAGTAGTTGGAGTGAATGTTATCAATGAAGAAAAGCATCCTGTTCTATGCAAATGGATGAAGGAAACTGTTGACTCGAAAAGTCTGAAGGATTACATGCCTCCAAGAGAGAGACT  
TTTTTGTCAATTCAGACTTATAGAGATGCCATTGCTGCTTAAATGAATGCTAGATTTGGTCTAATTAGTTGTTTGGTGAAGAAAACATGATTGGAAAAGTTTTTACTTTGTATGCTGTATCAG  
TTGTTTGTGATGTTGTGATATGTATGAGATGAATTTGGCCACTTATAAACTACCTTCCATTTTAAATTTGCAGGTTCAATTTTCATGCTCTGATTTATAAAAATGGCATTGCTATTTTAAAGTCTGC  
TCGATATGGTTTTGATTAGATGTTGAATGAAGGGAAATGATGGGTAAGTTTGTGCTTTG

>comp167848\_c0\_seq10

AAAAAGGAAAAAAAATTTGGGCTGGGCGGAGAGATTATTTTTCGGGAGTGAAAGGCGGAAGCGGAGGCCGAAAGCCGAAACTGAATGGTTTTAAAAATCAAATTTAATCTTATACTTAAT  
AAATTAATGGGCTGGTTTTTAATTATAATATAAATAGTGACCACGCATATCATGAAGATCGATTAAACAAAGCAGATAAGTTCAATCTTTCAGAAATATAAGCCCCGCATTTCCCAAGCA  
GAAATCATAGCAGCAAACCACTTCTCTCTCTGCCAAATAGCAAAGCAAGAGATAGTGAGAGAAACATGATCGGGCACATGATCGGTAATGTTTTGTGGCAGGGAACGAAGGTGAAG  
GGCCATCTCGTCTCATGGAGAGGAACGTTCTTACTTCAACGACTTCGGTGCAACTGTCGTCAATAGTATCCAGGACTTCTCGGCCAGCAAGTCTCGCTTCAGCTAGTCAGCGCCACC  
GCCGGTGATTCCAGTGCGTACACCTTCCACGACCTTCGTATCAGCGATTGTCAAAAAAGCTCTAATTTTATTAATTAATCGCATAAGTTCAATAATGGCGTAGTAATTAATTAGCTAAAATG



ATTTTTAAAAGCTAAACTTTTTGGGGTGGTGAGTGATGTCGAGCTGAAATTTGAAACCTGTGCAGATAACGATGACAGAGGATTGGTCGGCGAGCCGGCGTATCTGGAGCCGCCGCTGAT  
CCCCTCCTTACCGTCATCGCCGAGAGATAAAATTTGGGGTGACGTTCCACGTAAAGGAAGGAGAAGGGATTCTTGGCGCAGTAATCGTGAAGAACCGCCACCTGGCGGAGTTCT  
TCCTCAAATCGATCACCATCGAGGATTTCCCCGGCAAGGGCCGCATCCACTTCGATTGCAACTCTTGGGTCTATAATGTCACCAAGTACACTTACGACCCGCGTTTTCTTCGCCAACGACAC  
TTATTTGCCGAAAGACACGCCGGGACCGCTGAGGCCGTACCGGGAGGAGGACTCCAGCACCTACGAGGAGACGACGTGAGCCGGCAGCTGGAGGAATGGGACCGCGTGTACAATA  
CGCGTATTACAACGATCTCGGCAACCCGGATCTAATGTCGGGCCTCCGTCGTCGGTTCTCGGCGGATCAGACAAGTACCCTTACCCTCGTCGCGGAAAGACTGCTCGCCCTCCGACCAA  
GACTGATCCGGAGAGCGAAAGCAGGTTGTTCTCGCTGGATATGAACATCTACGTGCCGCGCGACGAGCGTTTTGGCCACCTTAAGATGTCGGACTTCTTGGGCTACACCATCAAGGCCGT  
GGCCAAGTCGTTGGTGCCTGTTCTTCAAGCTGTGTTTCGACAAGACACCCGAACACTTTTCGACAGCTACGAAGACGTTCTTAAGCTCTATGAAGGCGGGTTGCCGCTTCCGGATATTCTCA  
AGTGCAAGCGCTGATGCAGGCCTTACCTCTTGAGATGCTGAAAAGCATACTACCCAGCAACAGGACAGCGCAGTTTTCTCAAGTGTCCCATGCCGTAATCATAACGATGATAAGGG  
GATATGGAAGACTGACGAAGAATTTGCGAGAGAAATGCTGGCCGGAGTGAACCCTGTCGTCATCGAAAACTCAAGGAATTTCCCGCAACCAGCAATCTCGATCCCACACTGTTTGGAC  
AGCAGAATAGCACGATTACAGCAGAGCATATAGAGAGAAATCTTGGCGGCCTCACAGCAGAGCAAGCACTGAATGGGAGCAGGCTCTTTATCATCAACTATCATGACGCGCTTATGCCTT  
ACCTTTCACGAATCAATTCAACCTCAAGCAAAATCTATGCCACCCGAACGTTCTCTTCTGAGAGACGATGACACTCTCAAGCCAATCGCCATCGAGCTCAGCCTGCCGCATCCGGAGG  
GTGAGAAGCACGGCGCTGTAAGCACCGTCTACACGCCGGCAGATTCGGCGTCGAGGCTGCGATCTGGCAACTAGCCAAGGGCTTTGTGCGCGTAAATGACTACGGCGTACACCAGCTC  
ATTAGCCACTGGCTGCGCACCCACGCAGTGATGGAGCCGTTTGTGATCTCAACGAACAGGCACCTCAGCACACTTCATCCCATCAACAAGCTCCTCGTCCCTCACTACCGCGACACCATG  
AACATAAACGCTCTCGCTCGCCAGGCTCTTATCAACGCCGGCGGTATCATCGAGTTCTCCGTCTTCCCTTCCACATACGCTATGGAGTTGTCGTCGTCATCTACAAGAGCTGGAATTTGCG  
CGACCAGTCCCTCCCCGCGATCTCTCAAGCGGGGAATGGCGGTGGAGGACCCATCGAGCCCAGCTAAGCTCCGACTCGTGATCAAAGACTACCCCTACGCCGTGGACGGTCTCGCCA  
TCTGGTCGGAAATCGAGTCTGGGTGACCGAGTACTGCTCCATCTACTACCCAGACGACTCCATCATCCGGGACGACGCCGAGCTCCAATCCTGGTGGAAAGAAGCCGTGGAGGTCGGA  
CATGGCGACCTCAAAAACAAGCCTTGGTGGCCGAAGCTCAACTCCCTGCCGAACCTCGTCCATATCTGCTCCACCATCATCTGGATAGCCTCCGCCATGCACGCCCGCGTCAAC

>comp167848\_c0\_seq13

AAAAAGGAAAAAAAAAATTGGGCTGGGCGGAGAGATTATTTTTCGGGAGTGAAAGGCGGAAGCGGAGGCGAAGCCGAAACTGAATGGTTTTAAAAATCAAATTTAATCTTATAACTTAAT  
AAATTAATGGGCTGGTTTTTAATTATAATATAAATAGTGACCACGCATATCATGAAGATCGATTAAACAAAGCAGATAAGTTCAATCTTTCAGAAATATAAGCCCCGCATTTCCAAGCA  
GAAATCATAGCAGCAAACCACTTCTCTCTCTGCCAAATAGCAAAGCAAGAGATAGTGAGAGAAACATGATCGGGCACATGATCGGTAATGTTTTGTGGCAGGGAACGAAGGTGAAG  
GGCCATCTCGTCTCATGGAGAGGAACGTTCTTGACTTCAACGACTTCGGTGCAACTGTCGTCAATAGTATCCAGGACTTCCTCGGCCAGCAAGTCTCGCTTACGCTAGTCAGCGCCACC  
GCCGGTGATTCCAATAACGATGACAGAGGATTGGTTCGGCGAGCCGGCGTATCTGGAGCCGCCGCTGATCCCACTCCTTCTACGGTCATCGCCGGAGAGATAAAATTTGGGGTGACGTTT  
CACGTAAAGGAAGGAGAAGGGATTCTTGGCGCAGTAATCGTGAAGAACCGCCACCTGGCGGAGTTCTTCTCAAATCGATCACCATCGAGGATTTCCCCGGCAAGGGCCGCATCCACTT  
CGATTGCAACTCTTGGGTCTATAATGTCACCAAGTACACTTACGACCCGCGTTTTCTTCGCCAACGACACTTATTTGCCGAAAGACACGCCGGGACCGCTGAGGCCGTACCGGGAGGAGG  
AGCTCCAGCACCTACGAGGAGACGACGTGAGCCGGCAGCTGGAGGAATGGGACCGCGTGTACAATAACGATCTCGGCAACCCGGATCTAATGTCGGGCTCCGTCGT  
CCGGTTCTCGGCGGATCAGACAAGTACCCTTACCCTCGTCGCGGAAAGACTGCTCGCCCTCCGACCAAGACTGATCCGGAGAGCGAAAGCAGGTTGTTCTCGCTGGATATGAACATCTA  
CGTGCCGCGGACGAGCGTTTTGGCCACCTTAAGATGTCGGACTTCTTGGGCTACACCATCAAGGCCGTGGCCAAGTCGTTGGTGCCTGTTCTTCAAGCTGTGTTTCGACAAGACACCGA  
ACACTTTCGACAGCTACGAAGACGTTCTTAAGCTCTATGAAGGCGGGTTGCCGCTTCCGGATATTCTCAAGTGAAGCGCTGATGCAGGCCTTACCTCTTGAGATGCTGAAAAGCATA  
TCACCCAGCAACAGGACAGCGCAGTTTTCTCAAGTGTCCCATGCCGTAATCATAACGATGATAAGGGGATATGGAAGACTGACGAAGAATTTGCGAGAGAAATGCTGGCCGGAGT  
AACCTGTCGTCATCGAAAACTCAAGGAATTTCCCGCAACCAGCAATCTCGATCCCACACTGTTTGGACAGCAGAATAGCACGATTACAGCAGAGCATATAGAGAGAAATCTTGGCGG

CCTCACAGCAGAGCAAGTAACTTCCTTTAATATCCTATCACCAGTTGTTAATTAGCTGGTTTTACAGTTGAGAACAGAGAGTGACTTCGTTTTCTGTTTCATATAGGCACTGAATGGGAGCA  
GGCTCTTTATCATCAACTATCATGACGCGCTTATGCCTTACCTTTACGAATCAATTCAACCTCAAGCAAAAATCTATGCCACCCGAACGCTTCTCTCCTGAGAGACGATGACACTCTCAAG  
CCAATCGCCATCGAGCTCAGCCTGCCGCATCCGGAGGGTGAGAAGCACGGCGCTGTAAGCACCGTCTACACGCCGGCAGATTCCGGCGTCGAGGGCTGCGATCTGGCAACTAGCCAAGG  
GCTTTGTGCGCCGTAATGACTACGGCGTACACCAGCTCATTAGCCACTGGTGATGAATCCTATTTCCCTGTTTCTCTCTCAAGCTCTCACTGTTTGCTTACAAGTGCTTTGTTTCTTTCCC  
AGGCTGCGCACCCACGCAGTGATGGAGCCGTTTGTGATCTCAACGAACAGGCACCTCAGCACACTTCATCCCATCAACAAGCTCCTCGTCCCTCACTACCGCGACACCATGAACATAAA  
CGCTCTCGCTCGCCAGGCTCTTATCAACGCCGGCGGTATCATCGAGTTCTCCGTCTTCCCTTCCACATACGCTATGGAGTTGTCGTCCGTCTTACAAGAGCTGGAATTTGCCGACCAG  
TCCCTCCCCGCCGATCTCCTCAAGCGGGGAATGGCGGTGGAGGACCCATCGAGCCCCGACTAAGTCCGACTCGTGATCAAAGACTACCCCTACGCCGTGGACGGTCTCGCCATCTGGTC  
GGAAATCGAGTCTGGGTGACCGAGTACTGCTCCATCTACTACCCAGACGACTCCATCATCCGGGACGACGCCGAGCTCCAATCCTGGTGAAAAGAAGCCGTGGAGGTGGACATGGCG  
ACCTCAAAAACAAGCCTTGGTGCCGAAGCTCAACTCCCTGCCGAAGCTCGTCCATATCTGCTCCACCATCATCTGGATAGCCTCCGCCATGCACGCCGCCGTCAAC

>comp167848\_c0\_seq14

AAAAAGGAAAAAAAAAATTGGGCTGGGCGGAGAGATTATTTTTCGGGAGTGAAAGGCGGAAGCGGAGGCGAAGCCGAAACTGAATGGTTTTAAAAATCAAATTTAATCTTATAACTTAAT  
AAATTAATGGGCTGGTTTTTAATTATAATATAAATAGTGACCACGCATATCATGAAGATCGATTAACAAAGCAGATAAGTTCAATCTTGCAGAAATATAAGCCCCGCATCCCAAGCA  
GAAATCATAGCAGCAAACCACTTCTCTCCTCTGCCAAATAGCAAAGCAAGAGATAGTGAGAGAAACATGATCGGGCACATGATCGGTAATGTTTTGTGGCAGGGAACGAAGGTGAAG  
GGCCATCTCGTCTCATGGAGAGGAACGTTCTTGACTTCAACGACTTCGGTGCAACTGTCGTCAATAGTATCCAGGACTTCCTCGGCCAGCAAGTCTCGCTTCAGCTAGTCAGCGCCACC  
GCCGGTGATTCAGTGCGTACACCTTCCACGACCTTCGTATCAGCGATTGTCAAAAAAGCTCTTAATTTTATTAATTAATCGCATAAGTTCAATAATGGCGTAGTAATTAATTAGCTAAAATG  
ATTTTTAAAAGCTAAACTTTTTGGGGTGGTGAGTGATGTCGAGCTGAAATTTGAAACCTGTGCAGATAACGATGACAGAGGATTGGTTCGGCGAGCCGGCGTATCTGGAGCCGCCGTGAT  
CCCCTCCTTCTACGGTATCGCCGGAGAGATAAAAATTTGGGGTGACGTTCCACGTAAAGGAAGGAGAAGGGATTCTTGGCGCAGTAATCGTGAAGAACCGCCACCTGGCGGAGTTCT  
TCCTCAAATCGATCACCATCGAGGATTTCCCCGGCAAAGGCCGCATCCACTTCGATTGCAACTCTTGGGTCTATAATGTCACCAAGTACACTTACGACCGCGTTTTCTTCGCCAACGACAC  
TTATTTGCCGAAAGACACGCCGGGACCGCTGAGGCCGTACCGGGAGGAGGAGCTCCAGCACCTACGAGGAGACGACGTGAGCCGGCAGCTGGAGGAATGGGACCGCGTGTACAATA  
CGCGTATTACAACGATCTCGGCAACCCGATCTAATGTCCGGCCTCCGTCTCGCGGATCAGACAAGTACCCTTACCCTCGTTCGGGAAAGACTGCTCGCCCTCCGACCAA  
GACTGATCCGGAGAGCGAAAGCAGGTTGTTCTCGCTGGATATGAACATCTACGTGCCGCGGACGAGCGTTTTGGCCACCTTAAGATGTCCGACTTCTTGGGCTACACCATCAAGGCCGT  
GGCCAAGTCGTTGGTGCCTGTTCTTCAAGCTGTGTTGACAAGACACCGAACACTTTTCGACAGCTACGAAGACGTTCTTAAGCTCTATGAAGGCGGGTTGCCGCTCCGGATATTCCTCA  
AGTGCAAGCGCTGATGCAGGCCTTACCTCTTGAGATGCTGAAAAGCATACTACCCAGCAACAGGACAGCGCAGTTTTCTCAAGTGTCCCATGCCGTAATCATAACCGTTAATTGTT  
CATCTATTTCTTCTCCGTTTTATAAAAAACTCCTTTTCACTCTGTTTCTGATTTATTATTGGGCGGCTCTGACTCTTTTTGTTCCAACCTTTTGAATTTGAAGATGATAAGGGGATATGGAAGA  
CTGACGAAGAATTTGCGAGAGAAATGCTGGCCGGAGTGAACCCTGTCGTCATCGAAAACTCAAGGAATTTCCGCCAACCAGCAATCTCGATCCACACTGTTTGGACAGCAGAATAGC  
ACGATTACAGCAGAGCATATAGAGAGAAATCTTGGCGGCCTCACAGCAGAGCAAGTAACTTCTTTAATATCCTATCACCAGTTGTTAATTAGCTGGTTTTACAGTTGAGAACAGAGAGTG  
ACTTCGTTTTCTGTTTCATATAGGCACTGAATGGGAGCAGGCTCTTTATCATCAACTATCATGACGCGCTTATGCCTTACCTTTACGAATCAATTCAACCTCAAGCAAAAATCTATGCCACCCG  
AACGCTTCTTCTCCTGAGAGACGATGACACTCTCAAGCCAATCGCCATCGAGCTCAGCCTGCCGCATCCGGAGGGTGAGAAGCACGGCGCTGTAAGCACCGTCTACACGCCGGCAGATT  
CCGGCGTCGAGGCTGCGATCTGGCAACTAGCCAAGGGCTTTGTGCCGTAATGACTACGGCGTACACCAGCTCATTAGCCACTGGTGATGAATCCTATTTCCCTGTTTCTCTCTCAAG  
CTCTCACTGTTTGCTTACAAGTGCTTTGTTTCTTTCCAGGCTGCGCACCCACGCAGTGATGGAGCCGTTTGTGATCTCAACGAACAGGCACCTCAGCACACTTCATCCCATCAACAAGC  
TCCTCGTCCCTCACTACCGCGACACCATGAACATAAACGCTCTCGCTCGCCAGGCTCTTATCAACGCCGGCGGTATCATCGAGTTCTCCGTCTTCCCTTCCACATACGCTATGGAGTTGTCG

TCCGTCATCTACAAGAGCTGGAATTTCCGCCGACCAGTCCCTCCCCGCCGATCTCCTCAAGC

>comp167848\_c0\_seq2

AAAAAGGAAAAAAAAAATTGGGCTGGGCGGAGAGATTATTTTTCGGGAGTGAAAGGCGGAAGCGGAGGCGAAGCCGAAACTGAATGGTTTTAAAAATCAAATTTAATCTTATAACTTAAT  
AAATTAATGGGCTGGTTTTTAATTATAATATAAATAGTGACCACGCATATCATGAAGATCGATTAAACAAAGCAGATAAGTTCAATCTTTCAGAAAATATAAGCCCCGCATTTCCAAGCA  
GAAATCATAGCAGCAAACCACTCTTCTCTCCTCTGCCAAATAGCAAAGCAAGAGATAGTGAGAGAAACATGATCGGGCACATGATCGGTAATGTTTTGTGGCAGGGAACGAAGGTGAAG  
GGCCATCTCGTCTCATGGAGAGGAACGTTCTTGACTTCAACGACTTCGGTGCAACTGTCGTCAATAGTATCCAGGACTTCCTCGGCCAGCAAGTCTCGCTTCAGCTAGTCAGCGCCACC  
GCCGGTGATTCCAATAACGATGACAGAGGATTGGTTCGGCGAGCCGGCGTATCTGGAGCCGCCGCTGATCCCACTCCTTCTACGGTCATCGCCGGAGAGATAAAAATTTGGGGTGACGTTT  
CACGTAAAGGAAGGAGAAGGGATTCTTGGCGCAGTAATCGTGAAGAACCGCCACCTGGCGGAGTTCTTCTCAAATCGATCACCATCGAGGATTTCCCCGGCAAGGGCCGCATCCACTT  
CGATTGCAACTCTTGGGTCTATAATGTCACCAAGTACACTTACGACCGCGTTTTCTTCGCCAACGACACTTATTTGCCGAAAGACACGCCGGGACCGCTGAGGCCGTACCGGGAGGAGG  
AGTCCAGCACCTACGAGGAGACGACGTGAGCCGGCAGCTGGAGGAATGGGACCGCGTGTACAACTACGCGTATTACAACGATCTCGGCAACCCGGATCTAATGTCGGGCCCTCCGTCTGT  
CCGGTTCTCGGCGGATCAGACAAGTACCCTTACCCTCGTCGCGGAAAGACTGCTCGCCCTCCGACCAAGACTGATCCGGAGAGCGAAAGCAGGTTGTTCTCGCTGGATATGAACATCTA  
CGTGCCGCGGACGAGCGTTTTGGCCACCTTAAGATGTCGGACTTCTTGGGCTACACCATCAAGGCCGTGGCCAAGTCGTTGGTGCCTGTTCTTCAAGCTGTGTTTCGACAAGACACCGA  
ACACTTTCGACAGCTACGAAGACGTTCTTAAGCTCTATGAAGGCGGGTTGCCGCTTCCGGATTTCTCAAGTGCAAGCGCTGATGCAGGCCTTACCTCTTGAGATGCTGAAAAGCATA  
TCACCCAGCAACAGGACAGCGAGTTTTCTCAAGTGTCCCATGCCGCTAATCATAACGGTTAATTGTTTCATCTATTTCTTCTCCGTTTTATAAAAAAACTCCTTTTACTCTGTTTCTGA  
TTTATTATTGGGCGGCTCTGACTCTTTTGTTCCTAACTTTTGAATTTGAAGATGATAAGGGGATATGGAAGACTGACGAAGAATTTGCGAGAGAAATGCTGGCCGGAGTGAACCCTGTCGTC  
ATCGAAAAACTCAAGGAATTTCCCGCAACCAGCAATCTCGATCCACACTGTTTGGACAGCAGAATAGCACGATTACAGCAGAGCATATAGAGAGAAATCTTGGCGGCCTCACAGCAGA  
GCAAGCACTGAATGGGAGCAGGCTCTTTATCATCAACTATCATGACGCGCTTATGCCTTACCTTTCACGAATCAATCAACCTCAAGCAAATCTATGCCACCCGAACGCTTCTCTTCCCTG  
AGAGACGATGACACTCTCAAGCCAATCGCCATCGAGCTCAGCCTGCCGATCCGGAGGGTGAGAAGCACGGCGCTGTAAGCACCGTCTACACGCCGGCAGATTCCGGCGTCGAGGCTG  
CGATCTGGCAACTAGCCAAGGGCTTTGTGCGCGTAAATGACTACGGCGTACACCAGCTCATTAGCCACTGGCTGCGCACCCACGCAGTGATGGAGCCGTTTGTGATCTCAACGAACAGG  
CACCTCAGCACACTTCATCCCATCAACAAGTCTCTCGTCCCTCACTACCGCGACACCATGAACATAAACGCTCTCGTCTGCCAGGCTCTTATCAACGCCGGCGGTATCATCGAGTTCTCCG  
TCTTCCCTTCCACATACGCTATGGAGTTGTCGTCCGTCATCTACAAGAGCTGGAATTTCCGCCGACCAGTCCCTCCCCGCCGATCTCTCAAGCGGGGAATGGCGGTGGAGGCCATCGA  
GCCCCACTAAGCTCCGACTCGTGATCAAAGACTACCCCTACGCCGTGGACGGTCTCGCCATCTGGTCGGAAATCGAGTCTGGGTGACCGAGTACTGCTCCATCTACTACCCAGACGACT  
CCATCATCCGGGACGACGCCGAGCTCCAATCCTGGTGGAAAGAAGCCGTGGAGGTCGGACATGGCGACCTCAAAAAACAAGCCTTGGTGGCCGAAGCTCAACTCCCTGCCCGAACTCGT  
CCATATCTGCTCCACCATCATCTGGATAGCTCCGCCATGCACGCCCGCGTCAAC

>comp167848\_c0\_seq3

AAAAAGGAAAAAAAAAATTGGGCTGGGCGGAGAGATTATTTTTCGGGAGTGAAAGGCGGAAGCGGAGGCGAAGCCGAAACTGAATGGTTTTAAAAATCAAATTTAATCTTATAACTTAAT  
AAATTAATGGGCTGGTTTTTAATTATAATATAAATAGTGACCACGCATATCATGAAGATCGATTAAACAAAGCAGATAAGTTCAATCTTTCAGAAAATATAAGCCCCGCATTTCCAAGCA  
GAAATCATAGCAGCAAACCACTCTTCTCTCCTCTGCCAAATAGCAAAGCAAGAGATAGTGAGAGAAACATGATCGGGCACATGATCGGTAATGTTTTGTGGCAGGGAACGAAGGTGAAG  
GGCCATCTCGTCTCATGGAGAGGAACGTTCTTGACTTCAACGACTTCGGTGCAACTGTCGTCAATAGTATCCAGGACTTCCTCGGCCAGCAAGTCTCGCTTCAGCTAGTCAGCGCCACC  
GCCGGTGATTCCAATAACGATGACAGAGGATTGGTTCGGCGAGCCGGCGTATCTGGAGCCGCCGCTGATCCCACTCCTTCTACGGTCATCGCCGGAGAGATAAAAATTTGGGGTGACGTTT  
CACGTAAAGGAAGGAGAAGGGATTCTTGGCGCAGTAATCGTGAAGAACCGCCACCTGGCGGAGTTCTTCTCAAATCGATCACCATCGAGGATTTCCCCGGCAAGGGCCGCATCCACTT

CGATTGCAACTCTTGGGTCTATAATGTCACCAAGTACACTTACGACCGCGTTTTCTTCGCCAACGACGTAATCGAAAAATCAGTCTTTCTTGGTTCTCTTTTCTCTCTCTGTCTCTCTCA  
GATCAAAAGCTTTTTGTCTTTGTAGACTTATTTGCCGAAAGACACGCCGGACCCTAAGGCCGTACCGGGAGGAGGAGCTCCAGCACCTACGAGGAGACGACGTGAGCCGGCAGCTGG  
AGGAATGGGACCGCGTGTACAACACTACGCGTATTACAACGATCTCGGCAACCCGGATCTAATGTCGGGCCTCCGTCGTCCGGTTCTCGGCGGATCAGACAAGTACCCTTACCCTCGTCGCG  
GAAAGACTGCTCGCCCTCCGACCAAGACTGATCCGGAGAGCGAAAGCAGGTTGTTCTCGCTGGATATGAACATCTACGTGCCGCGGACGAGCGTTTTGGCCACCTTAAGATGTCGGAC  
TTCTTGGGCTACACCATCAAGCCGTGGCCAAGTCGTTGGTGCCTGTTCTTCAAGCTGTGTTTCGACAAGACACCGAACACTTTTCGACAGCTACGAAGACGTTCTTAAGCTCTATGAAGGC  
GGGTTGCCGCTTCCGGATATTCTCAAGTGCAAGCGCTGATGCAGGCCCTTACCTCTTGAGATGCTGAAAAGCATACTACCCCAGCAACAGGACAGCGCAGTTTTCTCAAGTGTCCCATG  
CCGCTAATCATAACGATGATAAGGGGATATGGAAGACTGACGAAGAATTTGCGAGAGAAATGCTGGCCGGAGTGAACCTGTCTCATCGAAAACTCAAGGAATCCCGCCAACCAG  
CAATCTCGATCCCACACTGTTTGGACAGCAGAATAGCACGATTACAGCAGAGCATATAGAGAGAAATCTTGGCGGCCTCACAGCAGAGCAAGCACTGAATGGGAGCAGGCTCTTTATCAT  
CAACTATCATGACGCGCTTATGCCTTACCTTTCACGAATCAATTCAACCTCAAGCAAAATCTATGCCACCCGAACGCTTCTCTTCTGAGAGACGATGACACTCTCAAGCCAATCGCCATC  
GAGCTCAGCCTGCCGATCCGGAGGGTGAGAAGCACGGCGCTGTAAGCACCGTCTACACGCCGGCAGATTCCGGCGTCGAGGCTGCGATCTGGCAACTAGCCAAGGGCTTTGTGCGCCG  
TAAATGACTACGGCGTACACCAGCTATTAGCCACTGGCTGCGCACCCACGCAGTGATGGAGCCGTTTGTGATCTCAACGAACAGGCACCTCAGCACACTTCATCCCATCAACAAGCTCC  
TCGTCCCTCACTACCGCGACACCATGAACATAAACGCTCTCGCTCGCCAGGCTCTTATCAACGCCGGCGGTATCATCGAGTTCTCCGTCTTCCCTTCCACATACGCTATGGAGTTGTCGTCC  
GTCATCTACAAGAGCTGGAATTTGCGCCGACCAGTCCCTCCCGCCGATCTCCTCAAGCGGGGAATGGCGGTGGAGGACCCATCGAGCCCGACTAAGCTCCGACTCGTGATCAAAGACTA  
CCCCTACGCCGTGGACGGTCTCGCCATCTGGTCGAAATCGAGTCTGGGTGACCGAGTACTGCTCCATCTACTACCCAGACGACTCCATCATCCGGGACGACGCCGAGCTCCAATCCTG  
GTGAAAGAAGCCGTGGAGTTCGGACATGGCGACCTCAAAAACAAGCCTTGGTGGCCGAAGCTCAACTCCCTGCCGAAGCTCGTCCATATCTGCTCCACCATCATCTGGATAGCCTCCG  
CCATGCACGCCGCCGTC AAC

>comp167848\_c0\_seq34

AAAAAGGAAAAAAAAAATTGGGGCTGGGCGGAGAGATTATTTTTCGGGAGTGAAAGGGCGGAAGCGGAGGCCGAAGCCGAAACTGAATGGTTTTAAAAATCAAATTTAATCTTATAACTTAAT  
AAATTAATGGGCTGGTTTTTAATTATAATATAAATAGTGACCACGCATATCATGAAGATCGATTAAACAAAGCAGATAAGTTCAATCTTTGCAGAAATATAAGCCCCGCATTCCCAAGCA  
GAAATCATAGCAGCAAACCACTTCTCTCTCTGCCAAATAGCAAAGCAAGAGATAGTGAGAGAAACATGATCGGGCACATGATCGGTAATGTTTTGTGGCAGGGAACGAAGGTGAAG  
GGCCATCTCGTCTCATGGAGAGGAACGTTCTTGACTTCAACGACTTCCGGTGCAACTGTCGTCAATAGTATCCAGGACTTCCCTCGGCCAGCAAGTCTCGTTCAGCTAGTCAGCGCCACC  
GCCGGTGATTCCAATAACGATGACAGAGGATTGGTCGGCGAGCCGGCGTATCTGGAGCCGCCGCTGATCCCACTCCTTCTACGGTCATCGCCGGAGAGATAAAATTTGGGGTGACGTTT  
CACGTAAAGGAAGGAGAAGGGATTCTTGCGCAGTAATCGTGAAGAACCGCCACCTGGCGGAGTTCTTCTCAAATCGATCACCATCGAGGATTTCCCGGCAAGGGCCGCATCCACTT  
CGATTGCAACTCTTGGGTCTATAATGTCACCAAGTACACTTACGACCGCGTTTTCTTCGCCAACGACACTTATTTGCCGAAAGACACGCCGGGACCCTGAGGCCGTACCGGGAGGAGG  
AGCTCCAGCACCTACGAGGAGACGACGTGAGCCGGCAGCTGGAGGAATGGGACCGCGTGTACAACACTACGCGTATTACAACGATCTCGGCAACCCGGATCTAATGTCGGGCCTCCGTCGT  
CCGGTTCTCGGCGGATCAGACAAGTACCCTTACCCTCGTCGCGGAAAGACTGCTCGCCCTCCGACCAAGACTGATCCGGAGAGCGAAAGCAGGTTGTTCTCGCTGGATATGAACATCTA  
CGTGCCGCGGACGAGCGTTTTGGCCACCTTAAGATGTCGGACTTCTTGGGCTACACCATCAAGGCCGTGGCCAAGTCGTTGGTGCCTGTTCTTCAAGCTGTGTTTCGACAAGACACCGA  
ACACTTTCGACAGCTACGAAGACGTTCTTAAGCTCTATGAAGGCGGGTTGCCGCTTCCGGATATTCTCAAGTGCAAGCGCTGATGCAGGCCCTTACCTCTTGAGATGCTGAAAAGCATA  
TCACCCAGCAACAGGACAGCGCAGTTTTCTCAAGTGTCCCATGCCGCTAATCATAACGATGATAAGGGGATATGGAAGACTGACGAAGAATTTGCGAGAGAAATGCTGGCCGGAGTG  
AACCTGTCTCATCGAAAACTCAAGGAATCCCGCCAACCAGCAATCTCGATCCACACTGTTTGGACAGCAGAATAGCACGATTACAGCAGAGCATATAGAGAGAAATCTTGGCGG  
CCTCACAGCAGAGCAAGCACTGAATGGGAGCAGGCTCTTTATCATCAACTATCATGACGCGCTTATGCCTTACCTTTCACGAATCAATTCAACCTCAAGCAAAATCTATGCCACCCGAACG

CTTCTCTTCTGAGAGACGATGACACTCTCAAGCCAATCGCCATCGAGCTCAGCCTGCCGCATCCGGAGGGTGAGAAGCACGGCGCTGTAAGCACCGTCTACACGCCGGCAGATTCCGG  
CGTCGAGGGCTGCGATCTGGCAACTAGCCAAGGGCTTTGTGCGCGTAAATGACTACGGCGTACACCAGCTCATTAGCCACTGGCTGCGCACCCACGCAGTGATGGAGCCGTTTGTGATCTC  
AACGAACAGGCACCTCAGCACACTTCATCCCATCAACAAGCTCCTCGTCCCTCACTACCGCGACACCATGAACATAAACGCTCTCGCTCGCCAGGCTCTTATCAACGCCGGCGGTATCAT  
CGAGTTCTCCGTCTTCCCTTCCACATACGCTATGGAGTTGTCTGTCGGTCACTACAAGAGCTGGAATTCGCGGACCAGTCCCTCCCCGCCGATCTCCTCAAGCGGTACGAAAGCAATCTA  
AACATATAAAAACCAATTGCAGAATTGAGATTGGACAATTGCTAACTTAAACAAAAGTTGAATCTTTTATCGCTAATCACTTGCTTTTTGGGCAGGGGAATGGCGGTGGAGGACCCATCGAGCC  
CGACTAAGCTCCGACTCGTGATCAAAGACTACCCCTACGCCGTGGACGGTCTCGCCATCTGGTCCGAAATCGAGTCTGGGTGACCGAGTACTGCTCCATCTACTACCCAGACGACTCCA  
TCATCCGGGACGACGCCGAGCTCCAATCCTGGTGGAAAGAAGCCGTGGAGGTCCGACATGGCGACCTCAAAAACAAGCCTTGGTGGCCGAAGCTCAACTCCCTGCCGAAGCTCGTCCA  
TATCTGCTCCACCATCATCTGGATAGCCTCCGCCATGCACGCCGCCGTCAAC

>comp167848\_c0\_seq37

AAAAAGGAAAAAAAAAATTGGGGCTGGGCGGAGAGATTATTTTCGGGAGTGAAAGGGCGGAAGCGGAGGGCGAAGCCGAAACTGAATGGTTTTAAAAATCAAATTTAATCTTATAACTTAAT  
AAATTAATGGGCTGGTTTTTAATTATAATATAAATAGTGACCACGCATATCATGAAGATCGATTAAACAAAGCAGATAAGTTCAATCTTTCAGAAATATAAGCCCCGCATTCCCAAGCA  
GAAATCATAGCAGCAAACCACTTCTCTCTCTGCCAAATAGCAAAGCAAGAGATAGTGAGAGAAACATGATCGGGCACATGATCGGTAATGTTTTGTGGCAGGGAACGAAGGTGAAG  
GGCCATCTCGTCTCATGGAGAGGAACGTTCTTGACTTCAACGACTTCCGGTGAAGTGTCAATAGTATCCAGGACTTCCCTCGGCCAGCAAGTCTCGCTTACGCTAGTCAGCGCCACC  
GCCGGTGATTCCAATAACGATGACAGAGGATTGGTCGGCGAGCCGGCGTATCTGGAGCCGCCGCTGATCCCACTCCTTCTACGGTCATCGCCGGAGAGATAAAATTTGGGGTGACGTTT  
CACGTAAAGGAAGGAGAAGGGATTCTTGCGCAGTAATCGTGAAGAACCACCCTGGCGGAGTTCTTCTCAAATCGATCACCATCGAGGATTTCCCGGCAAGGGCCGCATCCACTT  
CGATTGCAACTCTTGGGTCTATAATGTCACCAAGTACACTTACGACCGCGTTTTCTTCGCCAACGACACTTATTTGCCGAAAGACACGCCGGGACCGCTGAGGCCGTACCGGGAGGAGG  
AGCTCCAGCACCTACGAGGAGACGACGTGAGCCGGCAGCTGGAGGAATGGGACCGCGTGTACAACACTACGCGTATTACAACGATCTCGGCAACCCGGATCTAATGTGCGGGCTCCGTCGT  
CCGGTCTCGCGGGATCAGACAAGTACCCTTACCCTCGTCGCGGAAAGACTGCTCGCCCTCCGACCAAGACTGATCCGGAGAGCGAAAGCAGGTTGTTCTCGCTGGATATGAACATCTA  
CGTGCCGCGGACGAGCGTTTTGGCCACCTTAAGATGTCGGACTTCTTGGGCTACACCATCAAGGCCGTGGCCAAGTCGTTGGTGCCTGTTCTTCAAGCTGTGTTTCGACAAGACACCGA  
ACACTTTCGACAGCTACGAAGACGTTCTTAAGCTCTATGAAGGCGGGTTGCCGCTTCCGGATATTCCTCAAGTGCAAGCGCTGATGCAGGCCTTACCTCTTGAGATGCTGAAAAGCATA  
TCACCCAGCAACAGGACAGCGAGTTTTCTCAAGTGTCCCATGCCGTAATCATAACGATGATAAGGGGATATGGAAGACTGACGAAGAATTTGCGAGAGAAATGCTGGCCGGAGTG  
AACCTGTCGTCATCGAAAACTCAAGGAATTCGCGCAACCAGCAATCTCGATCCACACTGTTTGGACAGCAGAATAGCACGATTACAGCAGAGCATATAGAGAGAAATCTTGGCGG  
CCTCACAGCAGAGCAAGCACTGAATGGGAGCAGGCTCTTATCATCAACTATCATGACGCGCTTATGCCTTACCTTTACGAATCAATTC AACCTCAAGCAAAAATCTATGCCACCCGAACG  
CTTCTCTTCTGAGAGACGATGACACTCTCAAGCCAATCGCCATCGAGCTCAGCCTGCCGCATCCGGAGGGTGAGAAGCACGGCGCTGTAAGCACCGTCTACACGCCGGCAGATTCCGG  
CGTCGAGGCTGCGATCTGGCAACTAGCCAAGGGCTTTGTGCGCGTAAATGACTACGGCGTACACCAGCTCATTAGCCACTGGTGATGAATCCTATTTCTTGTCTCTCTCAAGCTCT  
CACTGTTTGCTTACAAGTGCTTTGTTTCTTCCAGGCTGCGCACCCACGCAGTGATGGAGCCGTTTGTGATCTCAACGAACAGGCACCTCAGCACACTTCATCCCATCAACAAGCTCCT  
CGTCCCTCACTACCGCGACACCATGAACATAAACGCTCTCGCTCGCCAGGCTCTTATCAACGCCGGCGGTATCATCGAGTTCTCCGTCTTCCCTTCCACATACGCTATGGAGTTGTGCTCC  
GTCATCTACAAGAGCTGGAATTCGCCGACCAGTCCCTCCCCGCCGATCTCCTCAAGCGGGGAATGGCGGTGGAGGACCCATCGAGCCCGACTAAGCTCCGACTCGTGATCAAAGACTA  
CCCCTACGCCGTGGACGGTCTCGCCATCTGGTCCGAAATCGAGTCTGGGTGACCGAGTACTGCTCCATCTACTACCCAGACGACTCCATCATCCGGGACGACGCCGAGCTCCAATCCTG  
GTGGAAGAAGCCGTGGAGGTCCGACATGGCGACCTCAAAAACAAGCCTTGGTGGCCGAAGCTCAACTCCCTGCCCGAAGCTCGTCCATATCTGCTCCACCATCATCTGGATAGCCTCCG  
CCATGCACGCCGCCGTCAAC

>comp167848\_c0\_seq4

AAAAAGGAAAAAAAAAATTGGGCTGGGCGGAGAGATTATTTTCGGGAGTGAAAGGCGGAAGCGGAGGCCGAAGCCGAAACTGAATGGTTTTAAAAATCAAATTTAATCTTATACTTAAT  
AAATTAATGGGCTGGTTTTTAATTATAATATAAATAGTGACCACGCATATCATGAAGATCGATTAAACAAAGCAGATAAGTTCAATCTTTGCAGAAATATAAGCCCCCGCATTCCCAAGCA  
GAAATCATAGCAGCAAACCACTTCTCTCTCTGCCAAATAGCAAAGCAAGAGATAGTGAGAGAAACATGATCGGGCACATGATCGGTAATGTTTTGTGGCAGGGAACGAAGGTGAAG  
GGCCATCTCGTCTCATGGAGAGGAACGTTCTTGACTTCAACGACTTCGGTGCAACTGTCGTCAATAGTATCCAGGACTTCCTCGGCCAGCAAGTCTCGCTTCAGCTAGTCAGCGCCACC  
GCCGGTGATTCCAGTGCGTACACCTTCCACGACCTTCGTATCAGCGATTGTCAAAAAAGCTCTTAATTTTATTAATTAATCGCATAAGTTCAATAATGGCGTAGTAATTAATTAGCTAAAATG  
ATTTTTAAAAGCTAAACTTTTTGGGGTGGTGAGTGATGTCGAGCTGAAATTTGAAACCTGTGCAGATAACGATGACAGAGGATTGGTCGGCGAGCCGGCGTATCTGGAGCCGCCGCTGAT  
CCCCTCCTTCTACGGTCATCGCCGAGAGATAAAAATTTGGGGTGACGTTCCACGTAAAGGAAGGAGAAGGGATTCTTGGCGCAGTAATCGTGAAGAACCGCCACCTGGCGGAGTTCT  
TCCTCAAATCGATCACCATCGAGGATTTCCCGGCAAGGGCCGCATCCACTTCGATTGCAACTCTTGGGTCTATAATGTCACCAAGTACACTTACGACCGGTTTTCTTCGCCAACGACGT  
AATCGAAAAATCAGTCTTCTTGGTTCTCTTTTCTCTCTCTCAGATCAAAAAGCTTTTTGCTTTGTAGACTTATTTGCCGAAAGACACGCCGGGACCACTAAGCCGTACCG  
GGAGGAGGAGCTCCAGCACCTACGAGGAGACGACGTGAGCCGGCAGCTGGAGGAATGGGACCGCGTGTACAACACTACGCGTATTACAACGATCTCGGCAACCCGGATCTAATGTCGGGC  
CTCCGTCTCCGGTTCTCGGCGATCAGACAAGTACCCTTACCCTCGTCGCGAAAGACTGCTCGCCCTCCGACCAAGACTGATCCGGAGAGCGAAAGCAGGTTGTTCTCGCTGGATAT  
GAACATCTACGTGCCGCGGACGAGCGTTTTGGCCACCTTAAGATGTCCGACTTCTTGGGCTACACCATCAAGGCCGTGGCAAGTCGTTGGTGCTGTTCTTCAAGCTGTGTTTCGACAA  
GACACCGAACACTTTCGACAGCTACGAAGACGTTCTTAAGCTCTATGAAGGCGGGTTGCCGCTTCCGGATATTCCTCAAGTGCAAGCGCTGATGCAGGCCCTTACCTCTTGAGATGCTGAA  
AAGCATACTCACCCAGCAACAGGACAGCGCAGTTTTCTCAAGTGTCCCATGCCGTAATCATAACGATGATAAGGGGATATGGAAGACTGACGAAGAATTTGCGAGAGAAATGCTGG  
CCGGAGTGAACCCTGTCGTCATCGAAAACTCAAGGAATTTCCCGCAACCAGCAATCTCGATCCCACACTGTTTGGACAGCAGAATAGCACGATTACAGCAGAGCATATAGAGAGAAAT  
CTTGGCGCCTCACAGCAGAGCAAGCACTGAATGGGAGCAGGCTCTTTATCATCAACTATCATGACGCGCTTATGCCTTACCTTTACGAATCAATTCAACCTCAAGCAAAATCTATGCCA  
CCCGAACGTTCTCTTCCCTGAGAGACGATGACACTCTCAAGCCAATCGCCATCGAGCTCAGCCTGCCGCATCCGGAGGGTGAGAAGCACGGCGCTGTAAGCACCGTCTACACGCCGGCA  
GATTCGGCGTTCGAGGCTGCGATCTGGCAACTAGCCAAGGGCTTTGTGCGCGTAAATGACTACGGCGTACACCAGCTCATTAGCCACTGGCTGCGCACCCACGCAGTGATGGAGCCGTTT  
GTGATCTCAACGAACAGGCACCTCAGCACACTTCATCCATCAACAAGCTCCTCGTCCCTCACTACCGCGACACCATGAACATAAACGCTCTCGCTCGCCAGGCTCTTATCAACGCCGGC  
GGTATCATCGAGTTCTCCGTCTTCCCTTCCACATACGCTATGGAGTTGTCGTCCGTCATCTACAAGAGCTGGAATTTTCGCCGACCAGTCCCTCCCCGCCGATCTCTCAAGCGGTACGAAA  
GCAATCTAAACATATAAAACCAATTGCAGAATTGAGATTGGACAATTGCTAACTTAACAAAAGTTGAATCTTTTATCGCTAATCACTTGTCTTTGGGCAGGGGAATGGCGGTGGAGGACCC  
ATCGAGCCCGACTAAGCTCCGACTCGTGATCAAAGA

>comp167848\_c0\_seq47

AAAAAGGAAAAAAAAAATTGGGCTGGGCGGAGAGATTATTTTCGGGAGTGAAAGGCGGAAGCGGAGGCCGAAGCCGAAACTGAATGGTTTTAAAAATCAAATTTAATCTTATACTTAAT  
AAATTAATGGGCTGGTTTTTAATTATAATATAAATAGTGACCACGCATATCATGAAGATCGATTAAACAAAGCAGATAAGTTCAATCTTTGCAGAAATATAAGCCCCCGCATTCCCAAGCA  
GAAATCATAGCAGCAAACCACTTCTCTCTCTGCCAAATAGCAAAGCAAGAGATAGTGAGAGAAACATGATCGGGCACATGATCGGTAATGTTTTGTGGCAGGGAACGAAGGTGAAG  
GGCCATCTCGTCTCATGGAGAGGAACGTTCTTGACTTCAACGACTTCGGTGCAACTGTCGTCAATAGTATCCAGGACTTCCTCGGCCAGCAAGTCTCGCTTCAGCTAGTCAGCGCCACC  
GCCGGTGATTCCAATAACGATGACAGAGGATTGGTCGGCGAGCCGGCGTATCTGGAGCCGCCGCTGATCCCCTCCTTCCCTACGGTCATCGCCGAGAGATAAAAATTTGGGGTGACGTTT  
CACGTAAAGGAAGGAGAAGGGATTCTTGGCGCAGTAATCGTGAAGAACCGCCACCTGGCGGAGTTCTTCCCTCAAATCGATCACCATCGAGGATTTCCCGGCAAGGGCCGCATCCACTT  
CGATTGCAACTCTTGGGTCTATAATGTCACCAAGTACACTTACGACCGGTTTTCTTCGCCAACGACACTTATTTGCCGAAAGACACGCCGGGACCGCTGAGGCCGTACCGGGAGGAGG

AGCTCCAGCACCTACGAGGAGACGACGTGAGCCGGCAGCTGGAGGAATGGGACCGCGTGTACAACACTACGCGTATTACAACGATCTCGGCAACCCGGATCTAATGTCTGGGCCTCCGTCGT  
CCGGTTCTCGGCGGATCAGACAAGTACCCTTACCCTCGTCGCGGAAAGACTGCTCGCCCTCCGACCAAGACTGATCCGGAGAGCGAAAGCAGGTTGTTCTCGCTGGATATGAACATCTA  
CGTGCCGCGCGACGAGCGTTTTGGCCACCTTAAGATGTCGGACTTCTTGGGCTACACCATCAAGGCCGTGGCCAAGTCGTTGGTGCCTGTTCTTCAAGCTGTGTTTCGACAAGACACCGA  
ACACTTTCGACAGCTACGAAGACGTTCTTAAGCTCTATGAAGGCGGGTTGCCGCTTCCGGATATTCCTCAAGTGAAGCGCTGATGCAGGCCTTACCTCTTGAGATGCTGAAAAGCATA  
TCACCCAGCAACAGGACAGCGCAGTTTTCTCAAGTGTCCATGCCGTAATCATAACGATGATAAGGGGATATGGAAGACTGACGAAGAATTTGCGAGAGAAATGCTGGCCGGAGTG  
AACCTGTCTCATCGAAAACTCAAGGAATCCCGCCAACCAGCAATCTCGATCCCACACTGTTTGGACAGCAGAATAGCACGATTACAGCAGAGCATATAGAGAGAAATCTTGGCGG  
CCTCACAGCAGAGCAAGTAACCTTCTTAAATATCCTATCACCAGTTGTTAATTAGTCTGTTTACAGTTGAGAACAGAGAGTACTTCGTTTCTGTTTCATATAGGCACTGAATGGGAGCA  
GGCTCTTTATCATCAACTATCATGACGCGCTTATGCCTTACCTTTCACGAATCAATTCAACCTCAAGCAAAAATCTATGCCACCCGAACGCTTCTCTTCCCTGAGAGACGATGACACTCTCAAG  
CCAATCGCCATCGAGCTCAGCCTGCCGCATCCGGAGGGTGAGAAGCACGGCGCTGTAAGCACCGTCTACACGCCGGCAGATTCCGGCGTCGAGGCTGCGATCTGGCAACTAGCCAAGG  
GCTTTGTCTGCCGTAATGACTACGGCGTACACCAGCTCATTAGCCACTGGCTGCGCACCCACGCAGTGATGGAGCCGTTTGTGATCTCAACGAACAGGCACCTCAGCACACTTCATCCCA  
TCAACAAGCTCCTCGTCCCTCACTACCGCGACACCATGAACATAAACGCTCTCGCTCGCCAGGCTCTTATCAACGCCGGCGGTATCATCGAGTTCTCCGCTTCCCTTCCACATACGCTAT  
GGAGTTGTCTCCGTCATCTACAAGAGCTGGAATTCGCCGACCAGTCCCTCCCCGCCGATCTCCTCAAGCGGTACGAAAGCAATCTAAACATATAAAACCAATTGCAGAATTGAGATTG  
GACAATTGCTAACTTAAACAAAAGTTGAATCTTTTATCGCTAATCACTTGCTTTTGGGCAGGGGAATGGCGGTGGAGGACCCATCGAGCCCGACTAAGCTCCGACTCGTGATCAAAGACTA  
CCCCTACGCCGTGGACGGTCTCGCCATCTGGTTCGAAATCGAGTCTGGGTGACCGAGTACTGCTCCATCTACTACCCAGACGACTCCATCATCCGGGACGACGCCGAGCTCCAATCCTG  
GTGAAAGAAGCCGTGGAGTTCGGACATGGCGACCTCAAAAACAAGCCTTGGTGGCCGAAGCTCAACTCCCTGCCGAACCTCGTCCATATCTGCTCCACCATCATCTGGATAGCCTCCG  
CCATGCACGCCGCCGTC AAC

>comp167848\_c0\_seq5

AAAAAGGAAAAAAAAAATTGGGCTGGGCGGAGAGATTATTTTTCGGGAGTGAAAGGCGGAAGCGGAGGCGAAGCCGAAACTGAATGGTTTTAAAAATCAAATTTAATCTTATAACTTAAT  
AAATTAATGGGCTGGTTTTTAATTATAATATAAATAGTGACCACGCATATCATGAAGATCGATTAAACAAAGCAGATAAGTTCAATCTTTCAGAAATATAAGCCCCGCATTCCCAAGCA  
GAAATCATAGCAGCAAACCACTTCTCTCTCTGCCAATAGCAAAGCAAGAGATAGTGAGAGAAACATGATCGGGCACATGATCGGTAATGTTTTGTGGCAGGGAACGAAGGTGAAG  
GGCCATCTCGTCTCATGGAGAGGAACGTTCTTGACTTCAACGACTTCCGGTGCAACTGTCGTCAATAGTATCCAGGACTTCCCTCGGCCAGCAAGTCTCGCTTACGCTAGTCAGCGCCACC  
GCCGGTGATTCCAGTGCCTACACCTTCCACGACCTTCGTATCAGCGATTGTCAAAAAAGCTCTTAATTTTATTAATTAATCGCATAAGTTCAATAATGGCGTAGTAATTAATTAGCTAAAATG  
ATTTTTAAAAGCTAAACTTTTTGGGGTGGTGAGTGATGTCGAGCTGAAATTTGAAACCTGTGCAGATAACGATGACAGAGGATTGGTTCGGCGAGCCGGCGTATCTGGAGCCGCCGCTGAT  
CCCCTCCTTCTACGGTATCGCCGGAGAGATAAAAATTTGGGGTGACGTTCCACGTAAAGGAAGGAGAAGGGATTCTTGGCGCAGTAATCGTGAAGAACCACCACCTGGCGGAGTTCT  
TCCTCAAATCGATCACCATCGAGGATTTCCCCGGCAAGGGCCGCATCCACTTCGATTGCAACTCTTGGGTCTATAATGTCACCAAGTACTTACGACCGGTTTTCTTCGCCAACGACAC  
TTATTTGCCGAAAGACACGCCGGGACCGCTGAGGCCGTACCGGGAGGAGGACTCCAGCACCTACGAGGAGACGACGTGAGCCGGCAGCTGGAGGAATGGGACCGCGTGTACAAC  
CGCGTATTACAACGATCTCGGCAACCCGGATCTAATGTCGGGCCTCCGTCGTCGGTTCTCGGCGGATCAGACAAGTACCCTTACCCTCGTCGCGGAAAGACTGCTCGCCCTCCGACCA  
GACTGATCCGGAGAGCGAAAGCAGGTTGTTCTCGCTGGATATGAACATCTACGTGCCGCGCGACGAGCGTTTTGGCCACCTTAAAGATGTCGGACTTCTTGGGCTACACCATCAAGGCCGT  
GGCCAAGTCGTTGGTGCCTGTTCTTCAAGCTGTGTTTCGACAAGACACCGAACACTTTTCGACAGCTACGAAGACGTTCTTAAAGCTCTATGAAGGCGGGTTGCCGTTCCGGATATTCCTCA  
AGTGAAGCGCTGATGCAGGCCTTACCTCTTGAGATGCTGAAAAGCATACTACCCAGCAACAGGACAGCGCAGTTTTCTCAAGTGTCCCATGCCGTAATCATAACGATGATAAGGG  
GATATGGAAGACTGACGAAGAATTTGCGAGAGAAATGCTGGCCGGAGTGAACCCTGTCGTCATCGAAAACTCAAGGAATCCCGCCAACCAGCAATCTCGATCCCACACTGTTTGGAC

AGCAGAATAGCACGATTACAGCAGAGCATATAGAGAGAAATCTTGGCGGCCTCACAGCAGAGCAAGTAACTTCCTTTAATATCCTATCACCAGTTGTTAATTAGCTGGTTTTACAGTTGAG  
AACAGAGAGTGACTIONCTGTTTTCTGTTTCATATAGGCACTGAATGGGAGCAGGCTCTTTATCATCAACTATCATGACGCGCTTATGCCTTACCTTTTACGAATCAATTCAACCTCAAGCAAAAT  
CTATGCCACCCGAACGCTTCTCTTCTGAGAGACGATGACACTCTCAAGCCAATCGCCATCGAGCTCAGCCTGCCGCATCCGGAGGGTGAGAAAGCACGGCGCTGTAAGCACCGTCTACA  
CGCCGGCAGATCCGGCGTTCGAGGCTGCGATCTGGCAACTAGCCAAGGGCTTTGTGCGCGTAAATGACTACGGCGTACACCAGCTCATTAGCCACTGGCTGCGCACCCACGCAGTGATG  
GAGCCGTTTGTGATCTCAACGAACAGGCACCTCAGCACACTTCATCCCATCAACAAGCTCCTCGTCCCTACTACCGCGACACCATGAACATAAACGCTCTCGCTCGCCAGGCTCTTATC  
AACGCCGGCGGTATCATCGAGTTCTCCGTCTTCCCTTCCACATACGCTATGGAGTTGTCGTCCGTCATCTACAAGAGCTGGAATTCGCCGACCAGTCCCTCCCCGCCGATCTCCTCAAGC  
GGGAATGGCGGTGGAGGACCCATCGAGCCGACTAAGCTCCGACTCGTGATCAAAGACTACCCCTACGCCGTGGACGGTCTCGCCATCTGGTCGGAAATCGAGTCTGGGTGACCGA  
GTACTGCTCCATCTACTACCCAGACGACTCCATCATCCGGGACGACGCCGAGTCCAATCTGGTGAAAGAAGCCGTGGAGGTCGGACATGGCGACCTCAAAAACAAGCCTTGGTGGC  
CGAAGCTCAACTCCCTGCCCGAACTCGTCCATATCTGCTCCACCATCATCTGGATAGCTCCGCCATGCACGCCGCGTCAAC

>comp167848\_c0\_seq52

AAAAAGGAAAAAAAAAATTGGGCTGGGCGGAGAGATTATTTTTCGGGAGTGAAAGGGCGGAAGCGGAGGCGAAGCCGAAACTGAATGGTTTTAAAAATCAAATTTAATCTTATAACTTAAT  
AAATTAATGGGCTGGTTTTTAATTATAATATAAATAGTGACCACGCATATCATGAAGATCGATTAAACAAAGCAGATAAGTTCAATCTTTCAGAAATATAAGCCCCGCATCCCAAGCA  
GAAATCATAGCAGCAAACCACTTCTCTCTCTGCCAAATAGCAAAGCAAGAGATAGTGAGAGAAACATGATCGGGCACATGATCGGTAATGTTTTGTGGCAGGGAACGAAGGTGAAG  
GGCCATCTCGTCTCATGGAGAGGAACGTTCTTGACTTCAACGACTTCGGTGCAACTGTCGTCAATAGTATCCAGGACTTCCTCGGCCAGCAAGTCTCGCTTCAGCTAGTCAGCGCCACC  
GCCGGTGATTTCAATAACGATGACAGAGGATTGGTTCGGCGAGCCGGCGTATCTGGAGCCGCCGCTGATCCCACTCCTTCTACGGTCATCGCCGGAGAGATAAAATTTGGGGTGACGTTT  
CACGTAAAGGAAGGAGAAGGGATTCTTGGCGCAGTAATCGTGAAGAACCGCCACCTGGCGGAGTTCTTCTCAAATCGATCACCATCGAGGATTTCCCCGGCAAGGGCCGCATCCACTT  
CGATTGCAACTCTTGGGTCTATAATGTACCAAGTACACTTACGACCCGCTTTTCTTCGCCAACGACGTAATCGAAAAATCAGTCTTTCTTGGTTCTCTTTTCTCTCTGTCTCTCTCA  
GATCAAAAGCTTTTTGCTTTGTAGACTTATTTGCCGAAAGACACGCCGGGACCACTAAGGCCGTACCGGGAGGAGGCTCCAGCACCTACGAGGAGACGACGTGAGCCGGCAGCTGG  
AGGAATGGGACCGCGTGTACAACACTACGCGTATTACAACGATCTCGGCAACCCGGATCTAATGTCCGGCCCTCCGTCTCGTCCGGTTCTCGGCGGATCAGACAAGTACCCTTACCCTCGTCGCG  
GAAAGACTGCTCGCCCTCCGACCAAGACTGATCCGGAGAGCGAAAGCAGGTTGTTCTCGCTGGATATGAACATCTACGTGCCGCGGACGAGCGTTTTGGCCACCTTAAGATGTCCGGAC  
TTCTTGGGCTACACCATCAAGGCCGTGGCCAAGTCGTTGGTGCCTGTTCTTCAAGCTGTGTTTCGACAAGACACCGAACACTTTTCGACAGCTACGAAGACGTTCTTAAGCTCTATGAAGGC  
GGGTTGCCGCTTCCGGATATTCTCAAGTGCAAGCGCTGATGCAGGCCTTACCTCTTGAGATGCTGAAAAGCATACTACCCCAGCAACAGGACAGCGCAGTTTTCTCAAGTGTCCCATG  
CCGCTAATCATAACAGATGATAAGGGGATATGGAAGACTGACGAAGAATTTGCGAGAGAAATGCTGGCCGGAGTGAACCTGTGTCATCGAAAAACTCAAGGAATTTCCCGCAACCAG  
CAATCTCGATCCCACACTGTTTGGACAGCAGAATAGCACGATTACAGCAGAGCATATAGAGAGAAATCTTGGCGGCCTCACAGCAGAGCAAGTAACTTCCTTTAATATCCTATCACCAGTT  
GTTAATTAGCTGGTTTTACAGTTGAGAACAGAGAGTGACTTCGTTTCTGTTTCATATAGGCACTGAATGGGAGCAGGCTCTTTATCATCAACTATCATGACGCGCTTATGCCTTACCTTTCA  
CGAATCAATTCAACCTCAAGCAAAATCTATGCCACCCGAACGCTTCTCTTCTGAGAGACGATGACACTCTCAAGCCAATCGCCATCGAGCTCAGCCTGCCGCATCCGGAGGGTGAGAA  
GCACGGCGCTGTAAGCACCGTCTACACGCCGGCAGATTCCGGCGTTCGAGGCTGCGATCTGGCAACTAGCCAAGGGCTTTGTGCGCGTAAATGACTACGGCGTACACCAGCTCATTAGCC  
ACTGGTGATGAATCCTATTTCCCTTGTCTCTCTCAAGCTCTCACTGTTTGTCTTACAAGTGCTTTGTTTCTTTCCAGGCTGCGCACCCACGCAGTGATGGAGCCGTTTGTGATCTCAAC  
GAACAGGCACCTCAGCACACTTCATCCCATCAACAAGCTCCTCGTCCCTACTACCGCGACACCATGAACATAAACGCTCTCGCTCGCCAGGCTCTTATCAACGCCGGCGGTATCATCGA  
GTTCTCCGTCTTCCCTTCCACATACGCTATGGAGTTGTCGTCCGTCATCTACAAGAGCTGGAATTCGCCGACCAGTCCCTCCCCGCCGATCTCCTCAAGC

>comp167848\_c0\_seq58



AAAAAGGAAAAAAAAAATTGGGCTGGGCGGAGAGATTATTTTTTCGGGAGTGAAAGGCGGAAGCGGAGGCCGAAGCCGAAACTGAATGGTTTTAAAAATCAAATTTAATCTTATAACTTAAT  
AAATTAATGGGCTGGTTTTTAATTATAATATAAATAGTGACCACGCATATCATGAAGATCGATTAAACAAAGCAGATAAGTTCAATCTTTGCAGAAATATAAGCCCCGCATTTCCCAAGCA  
GAAATCATAGCAGCAAACCACTTCTCTCTCTGCCAAATAGCAAAGCAAGAGATAGTGAGAGAAACATGATCGGGCACATGATCGGTAATGTTTTGTGGCAGGGAAACGAAGGTGAAG  
GGCCATCTCGTCTCATGGAGAGGAACGTTCTTGACTTCAACGACTTCGGTGCAACTGTCGTCAATAGTATCCAGGACTTCCTCGGCCAGCAAGTCTCGCTTCAGCTAGTCAGCGCCACC  
GCCGGTGATTCCAGTGCGTACACCTTCCACGACCTTCGTATCAGCGATTGTCAAAAAAGCTCTTAATTTTTATTAATTAATCGCATAAGTTCAATAATGGCGTAGTAATTAATTAGCTAAAATG  
ATTTTTAAAAGCTAAACTTTTTGGGGTGGTGAGTGATGTCGAGCTGAAATTTGAAACCTGTGCAGATAACGATGACAGAGGATTGGTCGGCGAGCCGGCGTATCTGGAGCCGCCGCTGAT  
CCCCTCCTTACCTACGGTCATCGCCGGAGAGATAAAATTTGGGGTGACGTTCCACGTAAAGGAAGGAGAAGGGATTCTTGGCGCAGTAATCGTGAAGAACCGCCACCTGGCGGAGTTCT  
TCCTCAAATCGATCACCATCGAGGATTTCCCCGGCAAGGGCCGCATCCACTTCGATTGCAACTCTTGGGTCTATAATGTCACCAAGTACACTTACGACCGCGTTTTCTTCGCCAACGACAC  
TTATTTGCCGAAAGACACGCCGGGACCGCTGAGGCCGTACCGGGAGGAGGACTCCAGCACCTACGAGGAGACGACGTGAGCCGGCAGCTGGAGGAATGGGACCGCGTGTACAATA  
CGCGTATTACAACGATCTCGGCAACCCGGATCTAATGTCGGGCCTCCGTCGTCCGGTTCTCGGCGGATCAGACAAGTACCCTTACCCTCGTCGCGGAAAGACTGCTCGCCCTCCGACCAA  
GACTGATCCGGAGAGCGAAAGCAGGTTGTTCTCGCTGGATATGAACATCTACGTGCCGCGCAGCAGCGTTTTGGCCACCTTAAGATGTCGGACTTCTTGGGCTACACCATCAAGGCCGT  
GGCCAAGTCGTTGGTGCCTGTTCTTCAAGCTGTGTTGACAAGACACCGAACACTTTCGACAGCTACGAAGACGTTCTTAAGCTCTATGAAGGCGGGTTGCCGTTCCGGATATTCCTCA  
AGTGCAAGCGCTGATGCAGGCCTTACCTCTTGAGATGCTGAAAAGCATACTACCCCAAGCAACAGGACAGCGCAGTTTTCTCAAGTGTCCCATGCCGTAATCATACACGGTTAATTGTT  
CATCTATTTCTTCTCCGTTTTATAAAAAACTCCTTTTCACTCTGTTTCTGATTTATTATTGGGCGGCTCTGACTCTTTTGTTCAACTTTTGAATTTGAAGATGATAAGGGGATATGGAAGA  
CTGACGAAGAATTTGCGAGAGAAATGCTGGCCGGAGTGAACCCTGTCGTCATCGAAAACTCAAGGAATTTCCCGCAACCAGCAATCTCGATCCCACACTGTTTGGACAGCAGAATAGC  
ACGATTACAGCAGAGCATATAGAGAGAAATCTTGGCGGCCTCACAGCAGAGCAAGCACTGAATGGGAGCAGGCTCTTTATCATCAACTATCATGACGCGCTTATGCCTTACCTTTCACGAA  
TCAATTCAACCTCAAGCAAATCTATGCCACCCGAACGTTCTTCTTCTGAGAGACGATGACTCTCAAGCCAATCGCCATCGAGCTCAGCCTGCCGCATCCGGAGGGTGAGAAGCAC  
GGCGCTGTAAGCACCGTCTACACGCCGGCAGATTCCGGCGTGCAGGCTGCGATCTGGCAACTAGCCAAGGGCTTTGTCGCCGTAATGACTACGGCGTACACCAGCTCATTAGCCACTG  
GCTGCGCACCCACGCAGTGATGGAGCCGTTTGTGATCTCAACGAACAGGCACCTCAGCACACTTCATCCCATCAACAAGCTCCTCGTCCCTCACTACCGCGACACCATGAACATAAACG  
CTCTCGCTCGCCAGGCTCTTATCAACGCCGGCGGTATCATCGAGTTCTCCGTCTTCCCTTCCACATACGCTATGGAGTTGTTCGTCCGTCATCTACAAGAGCTGGAATTTCCGCCGACCACTCC  
CTCCCCGCCGATCTCCTCAAGCGGTACGAAAGCAATCTAAACATATAAAACCAATTGCAGAATTGAGATTGGACAATTGCTAACTTAACAAAAGTTGAATCTTTTATCGCTAATCACTTGC  
TTTTGGGCAGGGGAATGGCGGTGGAGGACCCATCGAGCCCGACTAAGCTCCGACTCGTGATCAAAGA

>comp167848\_c0\_seq59

GACGAAGAATTTGCGAGAGAAATGCTGGCCGGAGTGAACCCTGTCGTCATCGAAAACTCAAGGTATGACTTTGATGGTAAGCTCGGGAAGCAGAGCGCAAAGCAAAGAGGGCTAA  
CTGTTTATCTTTCTTGAAGGAATTTCCCGCAACCAGCAATCTCGATCCCACACTGTTTGGACAGCAGAATAGCACGATTACAGCAGAGCATATAGAGAGAAATCTTGGCGCCTCACAGC  
AGAGCAAGCACTGAATGGGAGCAGGCTCTTATCATCAACTATCATGACGCGCTTATGCCTTACCTTTCACGAATCAATTCAACCTCAAGCAAATCTATGCCACCCGAACGTTCTCTTC  
CTGAGAGACGATGACTCTCAAGCCAATCGCCATCGAGCTCAGCCTGCCGCATCCGGAGGGTGAGAAGCACGGCGCTGTAAGCACCGTCTACACGCCGGCAGATTCCGGCGTGCAGG  
CTGCGATCTGGCAACTAGCCAAGGGCTTTGTCGCCGTAATGACTACGGCGTACACCAGCTCATTAGCCACT

>comp168033\_c0\_seq2

TGCACTATGACTGAGTGTCACTGACATAGGACCATCATTTCCAGCTGCAGCGACGGGAATGATTCCATATTGTATGGCTGCCATAGAACCCCTAGAAATTACATCCTCATAAAGTGATCAT  
TATGAAAGCCACCAATAGACATCGAGATAATGTCCACCCATCTTTTATCGCTTGATCGATAGCAGCATAACGTGTCAACTCTCCACACAGAACTTTGGAAAGCAAACCTTTGTAAATGGA

GAGA

>comp168033\_c1\_seq4

TGATGCAGGTTTCCCATGCAATAATAAGATCATCGGAGCAAAGGCATTTTATCTAGGGTTTCACCCTCCCATTCAAGACACAACCGGGCATGGAACATCATGTGTCAGGCATCGCAGCTGGC  
AATTTTGTCAAGGATGCAAATATTCTCGGAATGGCAAAGGGTGACCCGGCATCTGGCATGGCACCCATGGCTCATCTCTCCATTTACCAAGTTTGCTACTTTAATGAAGGATGTGGTGGGG  
CTAACACATACGCTGCTATCGATCAAGCGATAAAAGATGGGGTGGACATCATTTTCGATGTCTATTGCTGGTGGTTCTACTAATACGTTTTTTGAGGATTCAGTTTCTAGGGGTTCCATAGCTG  
CCATACAACATGGAATCATTCTGTAACTAGTGCTGGAAATGCTGGGCCTAATATTGGGACAGTTAGTAATGGCGCGCCATGGGTATTAACGGTTGGAGCATCGACCACTGATCGAAGAAT  
CGCATCTATTGTAGAGTTGGGAGATAATAGAACGTTTCTTGGGGAGTCAGCGTACCAACCAACAAATTGGAACCTAATGACATGTGGCCGCTTGAATATCCTGGCAAGTATGGTGACCA  
AAATGCCAGTTTTTTGTTTGCCTAGTGAATTGGCTAACTGGAACCTAAGAGGTAAAATCGTGATCTGCGAGGTTGGCATAATAAGTGATGTGAAAAAAGGAGCGGGCGGTATACCAAGCTGG  
CGCAAAGGGCATGATCCTATTAACAAGCCTTCTTGGGGGCACACCACTTCTTCTTCTGCTCATGTTCTTCCGGCATCGAATGTCGACCACCCGTCAAGATTAGAAATTTTAGACTACTAC  
TTCAACAACCAACCCAATGCATCTGCCAGCATACTTTCGAGGCACCCAATTCAAATTCGCTCCCTCCCCACCGTCGCATCCTTCTCCTCCCGCGGGCCAAGTCCCATGAATGGCGGGA  
TCATCAAACCCGACGTCCTCGCCCTGGGGTCAACATCTTGGCCGCTCGCTCACAGATGTTGGCCGAATCCAGATCCATTGGCGACTCACACATTCGCTTTAACAGTGGAACCTCCAT  
GGCCGCGCCACACGTAGCTGGGATTGCGGCATTGGTGAGGAGCAAGCACCTCGGGTGGACCCATCCGAGATCATATCAGCGATCATGACAACCTGCAGACGACTCAGCTTCTGGCAATC  
TCATCGTTGATGATCACTCATAAAACTGCAGGAATATATGCTACGGGGGCTGGTCAGGTTAACCCGATCAAGGCCATGGACCCAGGCCTTGTGTTTGGGCTCACCTTGAATGACTACAT  
CGGTTATCTTTGTGGCCTTGGGTACAGTGACTTTGAGGTCCAATATACGATCGGAAAACCAACGAGTTGCAATGGTGTTCATATCTAACTGCGTCTCAACTTAATTACCCGTCAATCGCG  
GTCAATTTAACGAGGTTAGCGACGAGTCAAACAGTGGGCAGAACGGTAAAGAATGTGGGGGATGCAAGAGAGGACTACTCGGCTAAGATTACCGAGCCGGTGGGGGTAACGATTTATCT  
CTCGACTTATAAGCTTCAATTTACGAGGTTGGATCAGGAGGTGAGCTACAGCATCAACTTTGCCTTGAATGGTGCTTATCCGAGCCAGGGGAGTGACATGATAAGAAGAGGGGAAAATTGT  
ATGGGATTCAGGCAAGCATGTGGTGACCACACCCATTGCT

>comp168097\_c0\_seq2

TAAAAAAAAAAAAAAAAATACATATTCAATACTATATAATAATACATATTCAACTATATATATATAACAAAATCAATATTTAATACAGTATTGTATTATAGTAATTAATAAGTAACCATAACGAAAA  
CAAAAAATCGCCAGAGTTATCCAAACCGTCCAAACTCCTCCAGTCATGAATCCATCCCTAATCCCAACAATCTACACTACAGTACAGTGCCTCCAACGTTTAGCCAATCAAACCGCATT  
TAAGCGGGCCCAAATCTATTCTAGCTTAGACTTAAGAGAGTCGAAACATTGGTCACTTTTTTAGGTGTTAATACACTCTCCGCCTCCAGTACCCTCGCTCCCTTCCACCTCCCTTCCCGTA  
CCGTCTGAGCCCCGTTTCATCGCGCCCGCAATTTTTTCCCTCCAAATTTCCACGAGGTGATCGTATCTGCCACTCTCAACTCTCCTGCTCTTCTTCCACTTTATATATAACCTCCACTTTC  
TTCTTCTCAGAGACAAAACCTTGTACAAAATCGAAACACAATGGCAGTAATCAGAGAACGAAGACTCCCTAAGGGAAATCTCACCTCGACCTCTCCCGCCAGGATTCAACGGCCGGC  
ACTGATTGCTGCCAGCGCTTCAGTTTGCCCAACTGGCGGCGTTGCCGACTGCCGCGTTCCTTCCGGCGGCGAGCATCGGCTATCAGACTTCGAAAAGATCAAGGTAAGTGGGTGATGG  
AAATGGAGGAACCGTCTACCAGGTCCGACACCGCCGACCGGGTGCATACGCTCTCAAAACGCTCACAGCCGATGACTCTCTCCGGCGACGACAGATCACACGTGAGGTTGAAATC  
TCCGACGACCGATTCCCCCACCCTAATTCATTGCCACGGGGTAATGCCACCACCTCCGGCGACGCTGCCCTGCTCCTCGAGTTTATGGACGCCGGATCACTCGAATCCCTCCTCGCCCG  
CCGTGGCGTCCCATTCCCTGAATCGGCCATTGCTGGAATCGCCGCCAGGTCTCCACGGTCTTTCGTATCTTCATTCTCAAAGATCGTCCACCGCGACATTAAGCCCCGGGAATCTCCTC  
GTCAACACCGCAGGCGAGATTAAGATCGCCGACTTCGGGGTGGAGAAAATCATGCGCCGATCTTTGACCCCTGTGTCTCCTACGTCGGCACGAGCGCGTATATGAGCCCGGAGAGGTT  
CGATCCTGATTGATGGTGGCCACTACGACGCCTATGCGGCTGATGATGGAGTCTGGGGCTCACCGTGTGGAGCTCCATCTTGGTCACTTTCCCTGTTGCCGCGGGGCAACGACCG  
GATTGGGCGACTCTTATGTGTGCGATTTGCTTCGGCGAACACCGGAGTGCAGAGACGGCTTCAAACGACTTCCGGGACTTTATCGGCCGGTGCCTACAGAAGGAATCGAGCAAGCG  
GTGGTCCGGTGGCGCAGCTACTTGCGCACCCCTTTCATTGCTGGGTGGGACCACGGGGAGTCGGTTCTGGTCTTTCGAGAGATAATTTCTCCGGTACAGTCGCCGGCGGAGTCATGAGCCG

CGCCGGCTCGGAGAAGCGGCTGATTTTGTGAATTTGTACATAAATGGCTTCTAAGTTCTAACGAAACTTCGCTGCCGTCTCCGTCTTTAGGGTTTCTGTCAACCTTCCCCAAAATTTTCA  
TTGATTAAGATATCTCAAATTGAGATTTTTTTTGTGTTTTCTGTATTGAGAAAGCTAAATGGAAGTGTCTCTCACTCAAGTGAGACCAAAGAAAAGCTTCAATTGTAAATCTCGTTTTTTA  
GGAGTTAATTAATTTTATTTGTAGCTAAAAGGTTACTGCAAGCCCTCCATTACTTTTTTTTTTAATGATTTAATATTATTAATTATTGCGAAAA

>comp168471\_c0\_seq12

ATATTTTCAGTAGTTTAAGAATTAAGTTATTAGCTGCAGTAATGGCTCCCACTCGAATTGGCATCGATCTGACCGACTCTCCGCTGAAAAGTCCGGCGCCGGGTGATGGGCCAGTACATCGTC  
GTCGAAGGATCGAAGGGTTATCACAATATCTTCTTCTTATTTTTTATTAGTTCCGAACAAAATTTCTGATCAATTTTTTTTTTAATTAATAAAGTTTAAAATTTTCATACTATTTTTTTTTTA  
ATATTTATTTTTCTAACTAAGTTAGTTTATCTGTAAAAAATTCATATATCTTTTTCAATTTAAAATCTAAAATTAATAAAGTAAAGTTTAAAATTTTCATACTATTTTTTTTTTTA  
GCCAATTAAGTTAAAATCTCACATATCAAGATGAGTCAAAAATCTGAACCACCAGATGAAGATGAGCTGCCTATATTTATTTATTAATAAATAAAGTAAAGTTTAAAATTTTCATACTATTTTTTTTTTTA  
CTGCTTCGACAACAAAGGAAGAAGTGGTGGCGATTCTGAAAGATGCGGTGGACGTTGTCAAGGGCTTCTTCGGGGCCCCAAAATTTGACGCTGCCGTTATAGTCATTCCTAACAGCACG  
AGTGGAAAATCCCAAGATGACATAATCTCGTACGGGAGGGGCAATGGCTTCAACATCACACAAGTCATCAAGAACACACCGCCGTTCCGCGCTCTATGTCGAGAAGGTTCAACCAA  
AATCTCCACAAACCTCACCATCATTTCTCTGACGGGTGGCATCCTCGAATCAGCGTGGTCTCCATAGTTCCCGTAGAAGACCAATACATAGGCTATCACGTCATCCTAAAGGCGCACAAA  
GCTCATCCTGAGGTGGTTCGACTTGGATGAGTCGAAGGATCAGGGTCATGATCAGAAGGGTGGTGGGAGTGAATAATAGGACTTATTGGAGGAGCTGCGAAGGCACTCGTTGTAGACCC  
ATTTGAGAACGTTTTGGGTATTCTGAAGAATATATTGGAGATTCCAAATATCAAGAAGAGTGAGATAGATAAGGTAGTGTGTTGGTAAAGGCATCAAGGTCGGAGAAAAGTGAGGAAGGC  
GGTGAAGAGAGTTTTAGCAAGGCTGAGGTGTGGGAAGGGATAGATGATCCTGATGAAATTGTGGCATATGGCGCTACGTATCTGTCTTATGAGGATAAAAAGATACCGCTGTACATGCC  
AGATGATCCTAATGTTGATCTGAGACCGGATGGGCCGGGTACACCATGGGTTGACCATGAATATATCGTATATGGACTTCAAGCCATGCCTAGTGTTAATTATAATATATTAATGATCTGTA  
ATCTTTGCTTTCAATAAGGGAAAGCTCTTTGCCATATGCATGGATGGGGAGGGCGGTACGTACCTTTGTACGTATGTTTTATTCCCAGCATGGCTTGTGTTTTGTCCCTTCATTTTCTGTACTA  
CCATATGTTCAATGGATAAGCATGTCGAAGAATGATATGTATATGTGCGTTTTGTATCATTTAATGTATTATTGTTGTGTTCTATCTATCAATCAT

>comp168564\_c1\_seq1

TAATTAAGTAAAGTTGTTGAGTTATAATTAACATATAATCCATTCTATCACTAAATTTCTCTTGCAAAACATATCCTGAAATTCGCGAGCTTAAACAATTAAGTTTCAAAA  
TTTTACTCCTTAACCTCAAATTTGATTTAATTTTCAAATACGAGGACTTATCCTTTGGCAAAAATAAGAACTAAGAAAGGGAAAGAGATCTGGCAGGAAAAGTTTCTAGAGTGAAAAGC  
TTGCAAAAAGAAATCAATTGATAACAATACAGGATATAACATTGAAAATGTTTACTCAAAGGTACATATGATGCGCAATACTACTTAACTTTTGGCAGATCTCCAACCGAAGCTCGAGATC  
CAACTCTTCAACTATCTCTGGACTCAGATTGATCACCTCATCTTCTCAAATTCCTGCAGCTTTTCTCATCCAATAAAAATGAATTCATTTTTTTCTCTTCTTATTGTTTTATGCTCATCTT  
CTTCATCATCTAAGCCCCTCTTCGACCCCAACTTCAGTTCTTCTCCCAACAAACAGTGTGTTTCCGAATAATTCACATCATTGATGGCCTTCGTAGAAGGACTGAAGAGAGCTACCTGAGC  
AAGGGATACATCAACTCCAAAATTAGGGTTAGGGTTAGGGTTATGATTTGAAAAGACCAATATTGATCTGGTGTGATCATCATGATCTTCTTCTCCAACCATAGATGACTGTTAAGCCTTG  
CCCGATCTCGCCGGTGAACGTTATGTGGCCACCAAGGGCTTGTGCCGATCTAAATTCCTTCCACAGAAGCTACAAGAATAAGATCTAGGAGGCCAAACACAGCCACCTAAAAGTCCC  
GCTGAGTCTTCAGCAAAAAGCTTTCTCCTCCCATGATTCAATTATAGAAGGCAGTGGCTGCGACTGCTGAAGCAGGAATCGGAGTAGAAGTCAGCGAGTCGAAGAGAGGTGCTTTACAGG  
GTATTTCTCTTGTCCACATCCAGTATTTGGTTTGTCTCCATTGCCTGTGCATGGAAGAAGGAAAAATATGTAGAAGATATAGATTTAGATGTTTATTACTTTGAGAGGCGGAGTTGTTGTG  
AGATTGGTGGAGAGGTGGATAGCTAGAGAAAAGCATCCACATCAAATTAAGTTGGGGCATGGAAAGCTACAGAAGCATCTAGGGTGTATAAGACATTAAGAGAGGAGATTAATGGTAGT  
TCATTTAGATGCTAATCTGTGTTATTTCTTTAACTCAAGTCTTTGGTTTTGGCGGTATGAGGGAGCATTCCTTGTGGAGTTACTTCCAGCCCCGACAAAATAATGACGTTGGATATTTT

>comp168609\_c1\_seq1

TTTTTAGAAAAGTGAGTGTGTGTTGATGAGAGAAAAAATTTTATGGTAAAAAATTTTAAAGAATAAACAAAACAAAAACATAAAAATAAAAATGAAATAAAAATAAAAAAATAAAA

AATAAAAAGGAGGGAGGGAAAGCAAAGAGCTGATGGCAACGCGGAAAGTGTA AAAAGTAGAGACGGCAAAGCAAACGCCGCCCTTGTTTCGCCTTGGAAATCTAACACTTACTATTAC  
TTGCTACTAAGCAGTAATAACTATGCAAAAGCATTCTCTTCTCCCTCTCCCGTTTCAGAGCTATAGCCATGGTTTTTCACTTTTCCCTGTGTCTGCATTATTGAATGCACGCGTCTCTTTT  
TTTTCTAGATAACTGGAGAGAGAACTTGATAAGACACAGAGAAATAACCTTTGTAAGAGATAGATAGAGAGAGAGAGA

>comp169022\_c0\_seq15

GAGTTTGCATTGAAGATAATTCAAATTATTATCATTGTA CTCTGGATGAATCCACAATGGATGACAAAATTTCTTTTGTATTCTAAGAACATCAAATTTTTTCGGAGACACAAAACCAAACCTT  
TGGGCTAAAATGCTGGCAAACCTTAGGATCATTGTATA CAAGTTGAGCAAGTGTGTCTTTCCCACTCCCCCATGCAACAATGGGAATTACAATGTTCTCCTTCTCTGAATCAGACATTAA  
CAATTGAAATATCTTCATCCTTTCCCTTCTCCCTTCCA AAAAACATCAGATTCAAGTAGAATAGA ACTACTTGGTGGCCTATTTATAAAATCATTAAAATGAGGCCACCTAGGATGCCTAGGTGC  
ATCTTTTTCACTAAGAAGAAGTGCTTTTCTATCATTGCAAT

>comp169124\_c1\_seq1

CGACATATAGATGAATTTTGAGGAGTAGAGGGAAGGGATATCAGGGAGGGTAGAACGTGGGGAATGAGTTTTTAATATTTTATTTGTTTGGTTTTGTTTTGTTTTGTGAGATGGGTTTTGA  
CAAAATTTATAATAATAATTAGAGCTATTGGTAATTTATAGACTTGCTTTTTCTTAAGAGTGGGGCATTGTAAGCTGTAAGACACCGGATGTCTTATAAATCAAGGCTGGGATATTTGATTTTAT  
TTTTATTTTGGCGATGATACATATTGATCTTATTATTTATTTAATTTTCGGCTGTTGGCTACCACTAGGATTTAGCTACTTACGATTTAGTAAATCATGTAAATCCCGAGTCTCTTAAATCCTA  
AAACATGTGTTGACCTCTACAATCAACTCAAGAATCTTAAATTTGATAAAGAGAATTCAGCTTGAATATGGATTGTATTGGGTTTTATTATGCACTGGTGGGAAGAAGCAATCAAATGGGGA  
ACATCAAGCTTCTATTAATGGAGCTGATTTGTACAGAAAAATATCTCTCTACCTATAGTGGGGCATGGCGGTATGGGAAAGACA ACTCTCCTACAACATGTTTATGAAGATGAAATG

>comp169129\_c1\_seq2

GACTTTAGAGACCACGACTGCTCTTATTCTCTGCAACTCATCCTATATAAGGAAGACATAAATCCATGGCCTTTCAAACCATCACACCCAAGTGGCAACTTAAAAGAATAAGAAGAAGAA  
GATAGAACAAATGGGTACCGCCCTTTCTTCTGCAATTTGCTTCCACAGCTTGAAGAGGTTTTTTAATGTTGTTCTGTTTGCCTGATCTAATATACAGATATGTTCTTTATTCTCGCAGAATC  
CATCATATTTGATCGAAGGATGACCAATCTTCAAGCAATTTAACGCCTACTGTGATGCCTTTTCTGTGTGCGGATGAGTTGCTCGGCACCTTTGTGCCTATTGCTGTTTATTGGATATACTC  
AGGCATCTATGTGATGCTCGGTGATTTGAACCAATACAGGCTTACACCAAGGCTGAAGAGGACAAAAAGAACGTTGTTTTCAAAGAGAACC GTTGTGAAGGGCGTCTCATCCAGCAA  
GCTTTCCAAATGCTGTCTCCCTCCTCCTCTTACGTTTCATGAGCGGTGACAGCGGCTTGTCTGCTTTCAGCCTTCTCTCCGGTGATCGTCTCCAATTCATGGTGGCCATGGTGGTGAT  
GGACACGTGGCAATACTTTATGCACCGATTCATGCACATCAACAAGTTTCTGTACAAAACACATCCACTCCAAAACACCACACGCTGGTTCGTCCTTATGCTTTTTGGAGCTCTCTACAACCAT  
CCTCTCGAAGGGCTAATCTTGACACAATTGGGGGAGCTCTCTCCTTTCTGATTTTCAAGGATGACACCTCGAACC GCCATATTCTTCTCTCCTTCGCCACCATCAAGACTGTGACGACC  
ATTGCGGTCTCTGGCTTCCCGGAAACTTGTTACATGTTTTCTTCAACAACAACAGTGCTTATCATGACATCCACCATCAGCTGTATGGCACAAAGTACA ACTTCTCTCAGCCATTCTTTATC  
ACTTGGGATAAGATCCTTGGAACTCACATGCCTTTCTCGCTAGAGAAGAGAAAGGAGGGAGGATTCGAGGCCGACCAATTAAGAAGATTAATTGATTCTTTTCAGGAATTGTTGCCTGAT  
ATATATATGAATGCATACCCAAATCCATTATCATGTATTATTTACTTTGTTTTGTTTTCGATATTAACATAGATACTTTCCAACA AAAAAGTGACTTAGAGCAATGCACATCGATATAAATCATT  
CCAGAAAACAAAACCTGATGAATGTTATATGAGGACATAAAAAATAAATTTGAATGCATGAGAACATTA AAAAATATTGAAGGAAGACATTATACACCTAAATTTACTTGTGAATGTTAG  
ATGAGGCTCTTTAA

>comp169282\_c0\_seq3

CCCATTCTAGATTGATTTATTCTTCTTCTTCTTTCTATTCTCTCTCCTCCCCCTTCTCAACTCAAGCCAACGACACC ACTCTTCCCGGCTCCATCGCCCGCACCACCAAGCAACAAC  
TCCTCGCCGCTTTTACCCGGCAACCCCTCCGCTCCGAGCCCTTCTCTCTTCCCCGAGCGGCAAATACTCCGCTACTTCTC CGCCGCGGAACCGCCCCGTCCCGTCCCGGACG  
CTGGTGGCTTCGGCAACGACTTTTGCTACATCCAAGTCGCAGAAATCAACACA ACTGATAGCTGGTGGGAGTCGGACTGCGTTCCGGTGAGCATTCGAACGCATGCTCCCTCATCTTCT

CCGACTCCGGCCTCGAGATTCTCGACGGAAGCAACTCGGCGTGGAGCACCAACGCCGACTCCGAATCCCTGTTCAAATCTAGAGCTTGATGATGAAGGGGACATGAGGATAACGGGC  
GAAGACGGTCAGTTGGCGTGGAAAGCCAGTGATGAACCTCGACAGAACCAGCATTGCGGGGAGACGGGATCGCCGGGGCTGGTAGCGGCGGCACCGCCTTCTGCACAGACTATTGGC  
AAGGGATCAGAGACTCCGCTTGAGCAGCCGCCCGGGAAGGTGACGCGGGCCGGGTCGGGCCGACGCCGGAAGGTGTGAATGGGGCGGGGATTGGATATGGTGGGCTGCCGTTGGTG  
GATAGCACTCCTTACGACAGTGGAAAGTTAAAGCCGGTGGTGGGTTGGGTTGGGACGGGAAGAGCGTTGCTTCTTTGTTGGGCGCTATAGGTGGGGTCTCTTTTGATATAATTTGTGT  
TATTATTACTAATAGGAAAAAATGGGTATGATATTTAAAATAATTTTTGAATTAGGATGAAATTTAAAATTATTAACCTATTTTGAGATTAATGCAATATAAATTTATTTATTTATTTAT  
ATATTGCATTTATATCAAATTAATTTAATAATTTTACAACCTCATCACATTCAAAAATTATTTAAGATATTGTGCCAAAATATTTTCTTACTAATATTATGTGTGTTATATGTTGGTCTTAAGAA  
GGAGAAGAAAACCTCTCTCTCTGTGTGGCAAGTAAGGGTTTTTTGAATTTGGTTAATGTATGGAGTTTGAGGTTTGGTTGTTGAAGGATGGGATTGCTTGTCTTAGTTGAGTGTGCA  
TTGTGCTTTTTCTTTAAAAAAAAGTATTTTTAGTGAAA

>comp169409\_c1\_seq10

TCGAGACAGATTTCTTTTATAAAGTAATAAAAAAATGTTCCAAATAGTTTCTGTAATGAGTTATCCTTCTTACTATTTTTCGAATATTTATATTTAACAAATAATTTACACCGATCTAAATAT  
ACAGTCCAAGGGAACAGAGTATGATAAGTTGGAAGCCAGATGATCAGAGCATATACATACAGAATCAATGGTTCCTCTAAGGACGGAAAAAAACCCACCACCAGACTTCTCCTTGGCG  
CGTCTTCAGATTCATCTTTAACCTGTTTAAAAGTTAAAAATTTCAAAGGGATTTCAAGTAGAATAAATTTACATCTGAATTAGACCTCCTTGGCTATGAGCTGGAGTTTATCCAGAATTT  
CAGAGAAGTCTGGCCGCAACGCAGGGTCTTGCTGCCAGCATTCTCAAGCAGCTCGGCAAGCTTGAGATTCGTATGCTTCGGGATTGCAGGCCCTCAATCCCTTTTGACCACACCAACA  
GCTGCTTGAAGTGGTGTCAAGTACTCATATGGAAGCTTCCCTGTTAGAAGCTCCCAGATCATTATAGCAAACTGAACACATCGGCTTTGTGATCATAGGGATTATGTTCTATGACCTTCAA  
TAAAAACCACATTTTCATATGAAAATGGCGGTATGTAAAGCCTCTGGAGCCATCCACCGATATGTTTCTGTTCTGCAGTCATAACACCAGATTGAGCTTTAACACGCGCAACACCAAAT  
CGGCAACTTTGACAACCTCATTTCATCCATTAATAATTGGCAGTCTTCAGGTCCCTATGTATGATATCATTTTGGTGCAAAATAGCTCATTCCCTTGCAAACATCAATTGCTACTCTAAGCA  
GAGTTGAAAGTTTGAAGACACCTTTCTGCTTATGAAGAAAATCATAACAGACTTCTCCAGACATGAATCCGTAACAATGAATAAACTAGGTGGTTGTGTGCAAGCCCCAATAAACTGAA  
CAACATGTTTGTGGCGAATCTTTCTCATAATATAGACTTCCCTGCGCAAATTCACGCTGCATATCCAACTAACATGCTCTGGCTTAAATACTTTGATAGCTACATCTTGACTACAATATGTGC  
CTCGGTATAGATTACACTGAGACCCTGATGCTAACTTATTTTGAAATTTTCAAGAGTTTGTATCAATCTCCCAAACATCAGTACCATCAGTCGGTATTTTGATATGATCCGAAAAACCTTCTT  
TGGAAGGCAAATTATCATATTTGGATGGCCATTGCCTAGGTGGCAAGCAAGCTTGTCTCAACTTTATGAATCTTCTTCTGCAAAGCATCTCTCAGCTGATTGGTTTCTCATCTGGCCAG  
CCATCAACAACAAAGACATCTAATGAGTAACCATCATTGTTGAAAAAGCATGGGCTTCTTGGATATTAAGCCAGCCTCAGAAAAGCAGAGTTGTCAACTGACTTAGAAGCTTTGGCTTG  
TCCTCCGTTGAAAATGTAACCTTCATGCATGGGTCTGGAAAAGTTAGAAAATGACCTTTGAAGCGCTTCCCCATCTTGAACATGTTCTCATTGACTTCAAGCACAAGGCTCTCAAGATTTG  
TTGACGAACCAAAAGTTGGAGGAGGATGAATGTAAGTATCTTCTCCGATTGTGAATTAATACCATAGGATTACCACGAGGCATCTGAACAGGTCGAATATCAAAAAGCAAGCTGAATGA  
CCGGGTCTTGCCTGCTGCAACAATCTTGTGCGTTAAAAACATCTTCTGCCCTCTCTACATTCACGTCCAATGCGTAACGGACGGGTAAGCGATTGAAATGCGACCATAGCTCCTCCTT  
GAATGAAGGAGCGAGAACCTCAGGAGAGCCAGATTCTTCAACCGGCGCAGAACCTCATTGTAACCTCGAGCTTGTGTGATGGCGCTGATACTGCAAGGTATTCTCCACGAAAGCCC  
GGCTTTCGACGCTCTCAGCATCACTAATCGCCATTACCGATTCCCAATCCCCACAATGCTCGATAAGAAGCTCGGAGCAAAAAGTAGGGTTGAATGGCTCGGAGCAGCCGACGAG  
CGAGGGCACGAAGCGTCTCGAGTCTCTCGTGACGACCAACGAGCGCAAGAAAAGCGATGTGATGCGGAGAAACGGAACCGTTGGTGGGCGAGTGAGCTTGTGCAAGAAGATGGTGGG  
AGGAAATATATATAAACGCGATAATAAATAATTAAGTAAATAAATAAAAAGGATTGGGAAACGGGGACAGGATAAGTGCGAAACCTCGCGGAAAGGTTAATTAGGTGTTTTTGGAGTTTTG  
ACTAGGAAGGGTTTTAT

>comp169409\_c1\_seq11

TCGAGACAGATTTCTTTTATAAAGTAATAAAAAAATGTTCCAAATAGTTTCTGTAATGAGTTATCCTTCTTACTATTTTTCGAATATTTATATTTAACAAATAATTTACACCGATCTAAATAT

ACAGTCCAAGGGAACAGAGTATGATAAGTTGGAAGCCAGATGATCAGAGCATATACATACAGAATCAATGGTTCCTCCTAAGGACGGAAAAAACCACCACCAGACTTCTCCTTGCGC  
CGGTCTTCAGATTCATCTTTAACCTGTTTGAAAGTTAAAAATTTTCAAAGGGATTTTCAGTAGAATAAATAATTTACATCTGAATTAGACCTCCTTGGCTATGAGCTGGAGTTTATCCAGAATTT  
CAGAGAAGTCTGGCCGCAACGCAGGGTCTTGCTGCCAGCATTCTCAAGCAGCTCGGCAAGCTTGAGATTCGTATGCTTCGGGATTGCAGGCCTCAATCCCTTTTGCACCACACCAACA  
GCTGCTTGAAGTGGTGTCAAGTACTCATATGGAAGCTTCCCTGTTAGAAGCTCCCAGATCATTATAGCAAACTGAACACATCGGCTTTGTGATCATAGGGATTATGTTCTATGACCTCTGG  
AGCCATCCACCGATATGTTCTGTTTCTGCAGTCATAACACCAGATTGAGCTTTAACACGCGCAACACCAAAAATCGGCAACTTTGACAACCTCATTTCATCCATTAATAATTGGCAGTCT  
TCAGGTCCCTATGTATGATATCATTTTGGTGCAAATAGCTCATTCCCTTGCAAACATCAATTGCTACTCTAAGCAGAGTTGAAAGTTTGAAGACACCTTTCTGCTTATGAAGAAAATCATAC  
AGACTTCCTCCAGACATGAATCCGTAACAATGAATAAACTAGGTGGTGTGTGTGCAAGCCCCAATAAACTGAACAACATGTTTGTGGCGAATCTTCTCATAATATAGACTTCCTGCGCAA  
ATTCACGCTGCATATCCAACTAACATGCTCTGGCTTAAATACTTTGATAGCTACATCTTGACTACAATATGTGCCTCGGTATCTGAAGAAGAAAACAACATGGACACGTTGACTGTAACAT  
AAACAAACATAACCATACCTGGAGATATATTTGCTTTGAATTACTGTTAGACATACAGATTACACTGAGACCCTGATGCTAACTTATTTTGAATTTCAGAAGTTTAGTATCAATCTCCCAA  
CATCAGTACCATCAGTCGGTATTTTGATATGATCCGAAAAACCTTCTTTGGAAGGCAAATTATCATATTTGGATGGCCATTGCCTAGGTGGCAAGCAAGCTTGTTTCTCAACTTTATGAATCT  
TCTTCTGCAAAGCATCTCTCAGCTGATTGGTTTCTCATCTGGCCAGCCATCAACAACAAAGACATCTAATGAGTAACCATCATTTGTTGAAAAAGCATGGGCTTCTTGGATATTAAGCCC  
AGCCTCAGAAAGCAGAGTTGTCAACTGACTTAGAAGCTTTGGCTTGTCTCCTCGTTGAAAATGTAACCTCATGCATGGGTCTGGAAAAGTTAGAAATGACCTTTGAAGCGCTTCCCCATC  
TTGAACATGTTCTCATTGACTTCAAGCACAAGGCTCTCAAGATTTGTTGACGAACCAAAAGTTGGAGGAGGATGAATGTAAGTATCTTCTTCCGATTGTGAATTAATACCATAGGATTCA  
CCACGAGGCATCTGAACAGGTGCAATATCAAAGCAAGCTGAATGACCGGGTCTTGCCTGCTGCAACAATCTTGTGCGTTAAAAACATCTTCTGCCCTCTCTACATTCACGTCCAAT  
GCGTAACGGACGGGTAAGCGATTGAAATGCGACCATAGCTCCTCCTTGAATGAAGGAGCGGAGAACCTCAGGAGAGCCAGATTCTTCAACCGGCGCAGAACCTCATTGTAAACCTCGAG  
CTTGCTGTGATGGCGCTGATACTGCAAGGTATTCTCCACGAAAGCCCAGGCTTTCGCAGCTCTCAGCATCACTAATCGCCATTCACCGATTCCCAATCCCCACAATGCTCGATAAGAAGCT  
CGGAGCAAAAGAAGTAGGGTTGAATGGCTCGGAGCAGCCGACGAGCGAGGGCACGAAGCGTCTCGAGTCTCTCGTGACGACCAACGAGCGCAAGAAAAGCGATGTGATGCGGAGAA  
ACGGAACCGTTGGTGGGCGAGTGAGCTTGTGGAAGAAGATGGTGGGAGGAAATATATATAAACGCGATAATAAATAATTAAGTAAATAAATAAAAGGATTGGGAAACGGGGACAGGATA  
AGTGCGAAACCTCGCGGAAAGGTTTAATTAGGTGTTTTTGGAGTTTTGACTAGGAAGGGTTTAT

>comp169409\_c1\_seq14

TCGAGACAGATTTCTTTTATAAAGTAATAAAAAAATGTTCCAAATAGTTTCTGTAATGAGTTATCCTTCTTACTATTTTTTCGAATATTTATAATTAACAAATAATTTTACACCGATCTAAATAT  
ACAGTCCAAGGGAACAGAGTATGATAAGTTGGAAGCCAGATGATCAGAGCATATACATACAGAATCAATGGTTCCTCCTAAGGACGGAAAAAACCACCACCAGACTTCTCCTTGCGC  
CGGTCTTCAGATTCATCTTTAACCTGTTTGAAAGTTAAAAATTTTCAAAGGGATTTTCAGTAGAATAAATAATTTACATCTGAATTAGACCTCCTTGGCTATGAGCTGGAGTTTATCCAGAATTT  
CAGAGAAGTCTGGCCGCAACGCAGGGTCTTGCTGCCAGCATTCTCAAGCAGCTCGGCAAGCTTGAGATTCGTATGCTTCGGGATTGCAGGCCTCAATCCCTTTTGCACCACACCAACA  
GCTGCTTGAAGTGGTGTCAAGTACTCATATGGAAGCTTCCCTGTTAGAAGCTCCCAGATCATTATAGCAAACTGAACACATCGGCTTTGTGATCATAGGGATTATGTTCTATGACCTTCAA  
TAAAAACCACATTTTCATATGAAAATGGCGGTATGTAAAGCCTCTGGAGCCATCCACCGATATGTTCTGTTTCTGCAAGTATAACACCAGATTGAGCTTTAACACGCGCAACACCAAAAT  
CGGCAACTTTGACAACCTCATTTCATCCATTAATAATTGGCAGTCTTCAGGTCCCTATGTATGATATCATTTTGGTGCAAATAGCTCATTCCCTTGCAAACATCAATTGCTACTCTAAGCA  
GAGTTGAAAGTTTGAAGACACCTTTCTGCTTATGAAGAAAATCATAACAGACTTCCTCCAGACATGAATCCGTAACAATGAATAAACTAGGTGGTGTGTGCAAGCCCCAATAAACTGAA  
CAACATGTTTGTGGCGAATCTTCTCATAATATAGACTTCCTGCGCAAATTCACGCTGCATATCCAACTAACATGCTCTGGCTTAAATACTTTGATAGCTACATCTTGACTACAATATGTGC  
CTCGGTATCTGAAGAAGAAAACAACATGGACACGTTGACTGTAACATAAAACAACATAACCATACCTGGAGATATATTTGCTTTGAATTACTGTTAGACATACAGATTACACTGAGACCCT  
GATGCTAACTTATTTTGAATTTTGAAGTTTAGTATCAATCTCCCAAACATCAGTACCATCAGTCGGTATTTTGATATGATCCGAAAAACCTTCTTTGGAAGGCAAATTATCATATTTGGAT

GGCCATTGCCTAGGTGGCAAGCAAGCTTGTTTCTCAACTTTATGAATCTTCTTCTGCAAAGCATCTCTCAGCTGATTGGTTTCCTCATCTGGCCAGCCATCAACAACAAAGACATCTAATG  
AGTAACCATCATTTGTTGAAAAAGCATGGGCTTCTTGGATATTAAGCCCAGCCTCAGAAAGCAGAGTTGTCAACTGACTTAGAAGCTTTGGCTTGTCCCTCCGTTGAAAATGTAACCTCATG  
CATGGGTCTGGAAAAGTTAGAAATGACCTTTGAAGCGCTTCCCCCATCTTGAACATGTTCCCTCATTGACTTCAAGCACAAAGGCTCTCAAGATTTGTTGACGAACCAAAAGTTGGAGGAG  
GATGAATGTAAGTATCTTCTCCGATTGTGAATTAATACCATAGGATTCACCACGAGGCATCTGAACAGGTCGAATATCAAAAGCAAGCTGAATGACCGGGTCTTGGCCTGCTGCAACAA  
TCTCTTGTGCGTTAAAAACATCTTCTGCCCTCTCTACATTCACGTCCAATGCGTAAACGGACGGGTAAGCGATTGAAATGCGACCATAGCTCCTCCTTGAATGAAGGAGCGAGAACCTCAGG  
AGAGCCAGATTCCTTCAACCGGCGCAGAACCTCATTGTAAACCTCGAGCTTGCTGTGATGGCGCTGATACTGCAAGGTATTCTCCACGAAAGCCCGGCTTTTCGACGCTCTCAGCATCACT  
AATCGCCATTCACCGATTCCCAATCCCCACAATGCTCGATAAGAAGCTCGGAGCAAAAGAAGTAGGGTTGAATGGCTCGGAGCAGCCGACGAGCGAGGGCACGAAGCGTCTCGAGTC  
TCTCGTGACGACCAACGAGCGCAAGAAAAGCGATGTGATGCGGAGAAACGGAACCGTTGGTGGGCGAGTGAGCTTGTGCAAGAAGATGGTGGGAGGAAATATATAAAACGCGATAAT  
AAATAATTAAGTAAATAAATAAAAGGATTGGGAAACGGGGACAGGATAAGTGCGAAACCTCGCGGAAAGGTTTAATTAGGTGTTTTTGGAGTTTTGACTAGGAAGGGTTTAT

>comp169562\_c0\_seq20

TTCCTGAGTTTTAATTTGGATTAGGAGTGGAAGGAAAGGCATCTGTAGCAATGGGAGATGAAACAGCTCACCTTCCTGCCATTCCCTCGGCTGGAATATCATTCTCAGATGGTTGGCAAG  
TTGAAGAGAACAACCATCCCATTGAGGAGGTGAGGCTAACAGTGGACCCCTTCGACAATCCAAAACCTACCAGCATCAACATTCGTGCATGGCTGCTCGGAGTGAGCTCCTGTGTATTGC  
TCTCCTTCATAAATCAGTTCTTCGCGTTCAGGACAAATATGCTGGTTATCAGTTCCGTTTTGTATTAGATTGTCACACTACCCATAGGGAGATTTCTTGCAGCAACTCTCCCAAGAAAGAC  
ATAAAGCTCCCATTACAGACTGGTCTTCTCGCTCAACCCAGGACCATTTACAATGAAAGAACATTGTCTTATAACCGTCTTTGCAGGCACAGGAGCACATGGCGTTTATTCTGTCCATC  
TTTTCACTGTAGTCAAGGCCTTCTATCATAGAAAGATCAATCTAATGGCAGCCTTCTGTTAGCACATACATCACAGTTGCTGGGCTATGGTTGGGCTGGTATTTTCAGAAAATACCTGGTT  
GAATCTCCATATATGTGGTGGCCAGGAAACCTTGTTCAGTCTCCCTCTTCAAGTACTAATTTATAAAGTTGTGCGTAATGGATATCTACATTCATAAATAATATTATTTTAGAGAATATCTTAC  
CATTTGCTCACTAATTTGGCAGAGCAC

>comp169562\_c2\_seq10

TATTCCAATCTCAGGTCTTTGATAATTATAGCTAGTGCATAAATAAGCGAACAGTAACGAATCAAGTTGACTTGAGAAGTCTTTCTCATGAGTGAATTGCCAAGTGAACATAAACATCAC  
CAATACGATTTTATTTCTGCTTTGGATGGATATGAACACTTCTCTTTAAAAGATAAAGGGTGATACAATGGTATCTACTATTACTTATTAGACCAACTTACAGCCCAAGGATTGATGGATGCAT  
AATCCTAAAATATGCTGATGAGCTTTAGTTACATTGGCTTTAATAGCTAGAGTCTAGAGACATTCTTATTGCGTGATTGGGCATCCTTTAACGGACACTTCAGGACTAGTAGGACAACCTAGC  
AAGTGGACAATAATCATTTCATATCCACCCACCAATCTATGCCATTTATGTTCTTAAATTGCATAGAAAAGAAGATTAGCACTCCCATGAAAGCCACTCCGGCTTCTAAGGCAGCTGACA  
TTACGTAGGTGTGTTTTGCCACCAATTCTTGTGCCTTGTGTAATGTAATAATTGAAGAAAATACCAACCGTGCCCCACATGATGTAGTTCACTGCGTGTACTGGTGGAAATGGCATTTC  
CCTGAGATTAGCAGGGGAATGTGAATATGTTAAGCCATCTCTTCTCAGGGAATGCTTTTCGCAAGCAACCAAAATGGAATGGGTAACAAGAAACCTATTAGAAAGAAGTAATCAAAAGT  
GAGTAATGACCAAGTTTGCCAAATATTCTTTTAGGACCTACAAGACCCCAAATGATGTTGACTGTGAAGTGGACGCTATCCACAGGGCAAGTCCATGGGCTCCCTGGAGGAAGTTTGCTT  
GTGTCGCATATGTTCTTTATAGTATTAAGGAGAAACCATGCTGTTGCAAAGTGAACGCATGTTGCTATTATGGAACCTGTTAACTGTACAATGAACATGGACTTTGGCGGTATCTTCATGTA  
CTTCCCCAAGTTTAGATCACTAAGCAGTGTGAGTGCCTGGCCAACGCTTATGCTGCCATAAGTCTTGAATGTACATTTGCGAGAGGCTTTCCAGGTAATATTAACCTATGATGACTCTG  
TAATGACATACAGACCTACTCCCTGTATTGCAACTTTTAAATATTATAAATACCGCAAATTTGAAAAGATTTTCTTTTGGGCATTTTAAATTTACGATGTAACCTATTGACCTATTAGTTATCTT  
TGCTCCATTAAGGGCATTATTCGCGGTTAGGGTATTCTACCGAGTTGGATAGATTTTCTTTCAAAAATACATTATAAAATACAGAAACAACAAACCTGATTTGTAGTAGCCAGGATTACTCC  
AAAAGGTAATGTGAAAGAAAAAGCCATGGCGCATGCAAAGAGTACCCCCACCATGGAAGTTGTAGTTGTCTATTGAAACCTAGGCATGTAATAATGGAGAGTCCAATCATAGAAACTA  
AGAGAAGATGGAACCACCATGAGGCACTGGCTCATAATTTCTTCTCATCAATCTTGTATGGACATCTTGTAACTTATCCGTTGAATATTCTCTATCATTTTTCCATATCTTCCAAATATCCTT

TCCATTATGTAGAGCAACATGCATGATGGAAGCTGTTAAGGTTGCAAAGCTCAGGCCATAACCAAAGAAAATATAATACTAGTGTTAATCTTGCTATAATTCTCTTGTCTTGAACATCTA  
GAGTGAATGTTTTGCCATTGATGATCCGCGAGATATTGTAGATGTTTCCATAACTGTCAAATACATTGGACGATATCATAGGGAAACGTTTGGCATCATAAGTGTGGTCCAATAAGTAATTG  
GGAGAAGAACATAAACTTTCAAGAAGAAGCTTATCATTATGTTAAAGATAGCTATTGCTGGCGTCGCTAATGGGGTGCCAAGGAAGCCGGCAACAGTGGACCAGTCAAGGCCAAATGAG  
CCAAAGCCAAGCCCCTCAGTCTGAACCAATTTGCTGCATGGTGACAGACTTCTTATATATTAACAGAGAAAAGAGATGGCAGAGATGGCAGGGAAGATGAAACCAGGGATGGCATA  
GTATGCAAAGCTTGATATGAAGACAATGATGAAGAATTGAAACCGTGTATTGCTCCCCTTTTTCTGTTCTCCTTTTGGATGCAGTGCTTTGAAGAGGGAGACTTGAACAAGGTTTCTGGC  
CACCACATATATGGAGATTCAACCAGGTATTTCTGAAAATACCAGCCCAACCATAGCCCAGCAACTGTGATGTATGTGCTAACAGGAAGGCTGCCATTAGATTGATCTTCTATGATAGAA  
GGCCTTGACTACAGTGAAGATGGACAGAATAAACGCCATGTGCTCCTGTGCCTGCAAAGACGGTTATAAGACAATGTTCTTTTCATTGTAATGGTCTGGGTTGAGCGAGAAGGACC  
AGTCTGTGAATGGGAGCTTTATGTCTTTCTGGGGAGAGTTGCTGCAAGAAATCTCCCTATGGGTAGTGTGACAATCTGAATACAAACGGAACTGATAACCAGCATATTTGTCCTGAACGC  
GAAGAAGTGAATTTATGAAGGAGAGCAATACACAGGAGCTCACTCCGAGCAGCCATGCACGAAATGTTGATGCTGGTAGTTTTGGATTGTGGAAGGGGTCCACTGTTAGCCTCACCTCCTC  
AATGGGATGGTTGTCTCTTCAACTGTAAATGATTTAGTTGGTCAGTTCTGTTGTGATCGCTCTTTGTTCCACGGGCTGATTTCTCTTACAAAATGCTGATATATATTTGGTAAGTTCAGTTTT  
GATAACTATTTGTTCCAAGAGCTGATTTCACTTACTAAAAATTGTTGATATATTTTGTCTTCAATTTGTTTTTATTGAAAGGAATTTCAATATGCTTGAATGGAAGGGATGTTCAACCGATT  
GGAAACTGGTGTTCATGATGAAAGGATGTTTTGTTTACGAAGTTGTTTCGGATTTTCGCTCGAAGATATGGCATTGGTCTGTTGAAGACGTTCAAGTTTTGCTCTTGAAGCTTGCCAACC  
ATCTGAGGAATGATATCCAGCCGAGGAATGGCAGGAAGGTGAGCTGTTTCATCTCCCATTGCTACAGATGCCTTTTCTTCCACTCCTAATCCAAATAAAACCTCAGTGAAGAAGAAAC  
CTCATCTTACTGATATATAAAGCATGTTTTCTCGAAATAAATAGTTATTTGATGGTTCTATTTGAATATTTAATATTTATCCTCTTTGTTCTCTTGCAGTGAAAAGAACGTGATGAATGAG

>comp169562\_c2\_seq22

AAGGCTTGATTGTTGTTGTTGTTGCTTTTGAATAATATCATTATATTTTGTCTTCTGCTTGAACATAATATGGTTATCATTGATACATATCAATGTTTGAATAATTCAGAAATCAGAATT  
TTCGAGAACTTCCATATTTAGTAGTTAGAGAAATTGCACTTACGAACTGCAATAGGAACTATTTAAGCGTGAAGAGTGCATATCAAGCGAAAGACAGTCTAAAGCTCTTATTTTTCT  
TTGAATTTTTCTATAAACTCACAATGAAATATTTTTAGGAATATATATATATATATGTTTATTAGATTGATGTTGTATGTTGTACAATACATGATCGCGTTAGTATAGTTATGTTTGTATTACA  
CATTCTACTGCTGTTTTTAATGCACAGACTTGAATTTTTGGATTTCTTCTATGTGCTTGAGGATTGAGGAAGTTACCTGTACAATGAACATGGACTTTGGCGGTATCTTCATGTACTTCCCCA  
AGTTTAGATCACTAAGCAGTGTGAGTGCCTGGCCAACGCTTATGCTGCCATAAGTCTTGAATGTCACATTTGCGAGAGGCTTCCAGGTAATATTAACCTATGATGTAATGACTCTGTAATGACA  
TACAGACCTACTCCCTGATTTGTAGTAGCCAGGATTACTCCAAAAGGTAATGTGAAAAGAAAAGCCATGGCGCATGCAAAGAGTACCCCCACCATGGAAGTTGTAGTTGTCTATTGAAA  
CCTAGGCATGTAATAATGGAGAGTCCAATCATAGAACTAAGAGAAGATGGAACCACCATTGAGGCACTGGCTCATAATTTCTTCTCATCAATCTTGTATGGACATCTTGTAACTTATCCGT  
TGAATATTCTCTATCATTTTCCATATCTTCCAAATATCCTTTCCATTATGTAGAGCAACATGCATGATGGAAGCTGTTAAGGTTGCAAAGCTCAGGCCATAACCAAAGAAAATATAATACT  
AGTGTAAATCTTGCTATAATTCTCTTGTCTTGAACATCTAGAGTGAATGTTTTGCCATTGATGATCCGCGAGATATTGTAGATGTTTCCATAACTGTCAAATACATTGGACGATATCATAGGG  
AAACGTTTGGCATCATAAGTGTGGTCCAATAAGTAATTGGGAGAAGAACATAAACTTTCAAGAAGAAGCTTATCATTATGTTAAAGATAGCTATTGCTGGCGTCGCTAATGGGGTGCCAA  
GGAAGCCGGCAACAGTGGACCAGTCAAGGCCAAATGAGCCAAAAGCCAAGCCCCTCAGTCTTGAACCAATTTGCTGCATGGTGACAGACTTCTTATATATTAACAGAGAAAAGAGATG  
GCAGAGATGGCAGGGAAGATGAAACCAGGGATGGCATAGTATGCAAAGCTTGATATGAAGACAATGATGAAGAATTGAAACCGTGTATTGCTCCCCTTTTTCTGTTCTCCTTTTGGATGCA  
GTGCTTTGAAGAGGGAGACTTGAACAAGTTTCTTGGCCACCACATATATGGAGATTCAACCAGGTATTTCTGAAAATACCAGCCCAACCATAGCCCAGCAACTGTGATGTATGTGCTA  
ACAGGAAGGCTGCCATTAGATTGATCTTCTATGATAGAAGGCCTTGACTACAGTGAAGAAGATGGACAGAATAAACGCCATGTGCTCCTGTGCCTGCAAAGACGGTTATAAGACAATGTT  
CTTTCATTGTAATGGTCTGGGTTGAGCGAGAAGGACCAGTCTGTGAATGGGAGCTTTATGTCTTTCTTGGGGAGAGTTGCTGCAAGAAATCTCCCTATGGGTAGTGTGACAATCTGAAT  
ACAAACGGAAGTGAATAACCAGCATATTTGTCCTGAACGCGAAGAACTGATTTATGAAGGAGAGCAATACACAGGAGCTCACTCCGAGCAGCCATGCACGAAATGTTGATGCTGGTAGTT



TTGGATTGTCTGAAGGGGTCCACTGTTAGCCTCACCTCCTCAATGGGATGGTTGTTCTCTTCAACTGTAAATGATTTAGTTGGTCAGTTCTGTTGTGATCGCTCTTTGTTCCACGGGCTGATT  
TCTCTTACAAAATGCTGATATATATTTGGTAAGTTTCAGTTTTGATAACTATTTGTTCCAAGAGCTGATTTCACTTACTAAAAATTGTTGATATATTTTGTTCCTTCATTTGTTTTTATGAAAG  
GAATTTCAATATGCTTGAATGGAAGGGATGTTCAACCGATTGGAACTGGTGTTCATGATGAAAAGGATGTTTTGTTTACGAAGTTGTTCCGATTTTCGTCTCGAAGATATGGCATTGGTTCT  
GTTGAAGACGTTTCAGGTTTTGCTCTTGAAGCTGTTCAAATTTCTTTTCATTTTTTTAAAGAAATTGGAAAAATATATTTGTAAACAATAATAAAGCTAACTTATGGTATAGTTTATATAATTATA  
CAAGTGCCTAGTTTTAAAAATATACATGCACAATATGGTTTATGGTGGGACTATTTTAATTTGTTTTTAAAGACTTGAGAGATCAGA

>comp169699\_c0\_seq8

GACGATTCTTTTTTCGTCGGACTCCACACAGAGTAGTTTCTCCGATAAAAAGAGCTTCTTATTATATGCTAAATGTCTCTAAAGAACTTAGAAGTAAAACCATACAGCCGAGGGGATTTATCA  
GATTCAATGCTGAATTAACAGATTTAATATCCTTAGTAAGAAAAGATTTCTCATTAGCATTATCGTCTTGAATAGAAAATGGCTTAAAAAAAACCCTAAACTTATTTCCGATTCCAGTTCAGA  
AAATCACACTCGAAATAGGCACAAATTTCTTCGAGCTTTGATCCGTTTTCTCCTCGCCGCCTTCTTCGCCATGTTTTTCTCCTCGCCACCTTCTTCCCGTGTTTTTCTCAACAACATCA  
CATTTCCCTTTCCCGAATCCAATTCCTCAGAATCCACCGGCAGCTTCGCCGGCGGAGTTTCAATAGTCGTATCGGCCGGCTTCTGCTTATATGCCAGCACTCCCGCGCCGTACGCCACCACT  
TCGTCCGCCCCGAAATCGTTGGGCGACCAGACTCTCGCATTGGGAAATTTCTTCTCAGCACCTTCTCAGCTTCTCAGACCTGAAAGCCTTTCCGATCAAAAACCAACTCATCCACTGGT  
GACTTTCCAGCTTTGGACTTGACAGCAATTTCAACAGTATATCAAATACCATATCCAACGGATCCACCACCAGAGTCTTACCACGCCTCCGACCACTCCGCCCACGATTCCGATCAGCC  
CGCCCGGCCAGAGTGCTTCTCTGCTTTTTTTGCTCCTCAAACCTCGATGGGTTCTAAATGGGTTTCGTGTGCTTCTACAACGAATTTAAACCGGGCTTTACGGTGACGACGCTGAC  
GTCGAGGACGCCGTTGATGACGGAGACGATGGCCAGCCTTTTTGTTTGAAGTGGGTTTCACTATCTCGGCGTAAGCGGCGGCGACCGCGGCTTGCTCGTTGATGACTTCGATGACGTTGA  
AACCTCGGCTCTCGCGGCGGCGGTGACCGCGTCGCGGTTGCTTGAGCTGGTGGAGTTTGGCACCAACCACCACCGCGCCCTGAAAGCGAGCTCAATTAAGCCCGATATCATTAACATT  
CACAACTTGTACCAATCATCTTCATCATTACCTCAAAATTAGGGCCGACGAAGAAGGATTTCAACACCTGATTGGCGTCTGAAAGGCCACCACCCTTCGCCACTGGTCCGAGCTCGA  
AGTCCGTTTACCTTTATGTCTGTATTTTTTAAAAATTTTTTTTACTTAAATTAATCGAGAAAGTTGATAAAGCAATAAAAAACGTGGCTTATAAATAAATTTTGTTTTTATTATATACTATA  
ACCATGAATTTAAATTTTGAAGCAATAATTAATTTGGGAGGATGGATCAAAGAAGAAGATGAAGGGCAAATTTATTAGGTGCGGATACCG

>comp169922\_c0\_seq2

AACTTTGCGAGTAAATTGAAGTCTCACGAAGCTGAAGGAGTTTTATCGTGAATTCAGGCGTGTGTTTTCTGATTTATACACAGAGGACGCAAAAGGAGGGTCAAAGCTCTGTAATTTA  
TATTGCTGCAGAATTCAAAAACAAGCTTTCATATTATACATGGCTATATAAGAATTTTTTTTTTTTTTTTAAATTTAGAGGCAGTTTGGCTGCAGGTAGGATTTGTAAATCCTGCAAAGGAAA  
GTAAAAAAGTCTATTTATCATAATGACTAAGCAAAGTTCATAGAACCCTTTGGCCTAAGCTCTAATTTAGCTTTATAAGCATAGTACACAAGTGCATTCTTTTTATTCTTTCACTTAGCGTT  
TGTCATCTTTAAGTCATTTAAGTTGCCTCCTTCACTTGTGTCAGAAAGGAAATGTTCTGTTAGTCTTCAAGATTCTCAGCGTTCTCAGACTGACCTTTCAGATTCCGCTTGCTTCTCATACC  
GGTCTTACTTTCTGTTGCACTTTCTCCGAATTTCCACAGTTTCTGACTGTCTATGGATTTGGCTCCCTTACCTGCTTCATTCTGCATTGTTTCAGTGAAGCCATCTCTATCTGTTACTTGC  
TTAATCCCTTCCATTTCTTCTACATCTTGAGTTTTCTGTATCAAATCGTACTGACTCTGATTTGAAGAAGATCCAATTTATATTTTCATATTTGGCAAAGCCTTTTACTGCATTTTCACTGTCATT  
TTTGGCTGCCAGTTCTGAACCTTCAGGAGACTTCAGTTGTCGGTTGATCTCTTCAACATTTTCATGGTCAACTCTTCCATTTCTACCTGTTTCTTTCAGTTCTTTTGGCATCGCCTTTACCTT  
TTCTGTTCCATTTCACTTCTTTAATAGCTACAGTTTGATTTCCCTCAGAATAATGTAGCTTTTTTTTTCAGCTTCTTCTGATTTCTACTGTTTACATTTTTCAGCTTTCAGGTCAACTTCATCCTTGT  
TTATCTGAAATTTAGACCAATCTCCTTTTCTCCTCACTAACAGTAAGGCTTCTTTGTAGAGATTTCTCATTTTGTGCTGTTGAATTCTTACCAGTGATTGCTTTGTAAGACTTCTCTTCAT  
TTCTTCAACTTCATCTTCTTTTGGCTTCAGGAGTGATGTCAGGTTGGCAATCTTAAGCTTCGTTAATATGAATTCCTTACTTTCATCTGTTAATTTATCAACCTGGATTTGTTTCTCCACTAAA  
GCTGCTCCAGATCAGTCCCTCATCTTCTTAAGTTGAGTTGCGATGTTCCGAGTATCTGCGAGCTTATCAGTAAGCTCCATCTTTGGTTTTCTCAAAGCGAATATCTTTGCTTTCATGTCATCT  
ATTTTTCTTTCATTTCTTTTGAAGTTTTCTTCTTCTTCTGCAAGAGGATTTGAAGGGTGGCAAGCTTCTGTTCTCTTCCCTGGATTAGGAGGCTAAGAAGCTTGCCTCCCTAAGCTGGT

AAGCACCCTGCGCACATAACTGCCATGCCAAGAGCAAGCAGCAGAAGCAACCCATATGGCCTCTTCCTGTTGTTACTTCCTGCCATTTTTGCCATAGAGAATCTCTCTCTCTCTCTC

>comp170116\_c0\_seq1

TTATTCTGCGAAAAGGATATCACAGCGATTGCTCCCAATTCTCCACTTTCCTTCGCTTGATGCTCCGCCGCCTCTCTCCTTCTCCAGCTCTCGGTGGAGCATCGTTGAGAGGACAGCG  
ATAATGCAGACGTATAGAGAGCGGATGTAAGAAGTTCTAGAAAAGAGAGAGACCAGAGAGAGAGAGAGTGTGGGAGGGGATAACAGAGAGGTTGGGCCCGCGGGGTTAGCTTTTACCTGC  
AGAGCTAACGTGAGGGTGGGGCTATTGAGGCGGAGATAGAATTGGGGAGGGATATGGTAGATAAAGAGGACGAAGAATAAAGATGAAGAGAGAAAATAAGACAGCGAGTGAGTGACAAG  
GAGGTGGAAGAGTGAAAGGGGGGGAACAGGAAGATATTGTGAGAAAAGAGAAAAGAGAGAGTTTTTTTTAGAAAAGAGAAATGGTGGGCTCGGGAACAGGAGGTGATAGTAGGAGC  
AAAGAAGCAGTTGGGATGATGGCTCTTCACGAGGCTCTGCGCAACGTTTGCTCAACTCCGACTGGACTTACTCCGTCTTCTGGACCATTTCGCCCTCGCCCTAGGTGCAGAGGAGGCAA  
CGGCTGCAAGGTCGGAGATGATAATGGAAGCTTGATGTTGATGTGGGAAGATGGGTTCTGCCGCACAAGGATGACCGACTGCCTCGACGAGATCGACGGCGAGGATCCAGTTTCGAAAA  
GCATTCAGCAAGATGTCCATCCAACCTGTATAATTATGGAGAAGGGTGGGACTGTACTGTATATATGGATTATTTTTGTGCTGTTCTTCTAACTTCCTGAAAAGAGAAAGTAGACCGTTTCGAT  
ACTAACCATCTAGTTTTTATGAAACTCTTGAATACGAGTCATTATAGTCTTGA AAAAGAGCACATAAATGCCTCAGCTTTTAGTAAAATATTTCAAATGGAAATGAAGGAATACATTG  
TTTATATAGACGTGTTTGATTTTCTTACTTC

>comp170419\_c0\_seq3

AGAAAATGATTATTGTTATTTGATAATGCGGTGAACAGTTACAACCTATATATAGAGTCTATTACAGGGTATTACACGTGTA AACATATGATTGGTCTAATAACTAATAAAAGTGAAAACAGGT  
AAAGTGATTAAGCTAAAACCGGTGTTAAGGATTGCGCTAATAACTACAAATGCTTCTTAGGCTCTCAACTCGTCAAGAACAGTGGCCGATCAAAATTAAGCTAAAAATTTTTGGTTGATT  
ACCTATTCTGATAACAACACTTTGGCTGACCACAATCTGCTCACGTAGTTCTGAAGAGCACCGCTAAGAATAGTCACATTAGCTTCTAGTCGCTTACCCAGTTTTAGCTCCACCTGCT  
GCTTCTCTCATCTATTTGCTTGTCATCTCCATCTTCTCTTTGTTATCTTGAGAATCTTCTGCACCTTCTTCGTTTCTTGTACTTCTCTTTTTCTGTTTAAGAGTTGGATAAGACAACCT  
AAACAGATATCTACATCATCACTTCTAAGCAGCTCCTCTGCTACTTCAAGCAGGAGTCACTTGCACCTCCTTCAACAACCTTCAATCTCCTCAAACAGAGGGTGTCTCATCAATATCATGGTA  
GTTAGAAGCCAGCACCTTGA AACTGTTTGGGCCACAGTAACCCATCTGGATGTGCATGTCCATTCTACCAGGTCTCAGCAGTGTGGATCAAGCCGATCCTTG TAGTTGGTAGTGAGTAC  
GATGATTCTCTCTCCCCGCTCGTCGACCATAATCCGTCAATGAAATTTAACAGCCCTGAGAGTGTTACATCATCCTTGCTAGGCTTCTTTTTATCCTCACCTCTTCATCTCTGTTTTGCAG  
ATCAATGGAGCAGTCGATGTCTCAATCACTAATACTGATTTGTTTTTCATGGCTACTAACAGCCTTTTTAGTCTAGTGTTTCGAGGTAACCTCCTTAGATCCAAGTCGTAGATGTCAAACCT  
GAGGTAATTAGCAATGGCGGGACCAAGCTCGATTTGCCAGTTCTGGAGGACCAAAAGAGCAGATATCCAGCTTCCAGGCCCTCCCAATTTTTTTATAGTACTGCTTTTCGTTGACAAAT  
CTCGCCAAGTCCTCAATGATTGTCTGTTTCAGCTCTGGCTCCAATGCCAGCGTCTCCAATGTTGCAGGGTGGTTCAGATCAATGCAACTCCAACCTGCATACTGATTCATATAAAGCTTCAA  
CCGTTTGTACAGCGCCCTTGATGTCTTAGATCTCTCCAGAATGTGAGGAAAATAGGCGTTCAGTGTATTTCCTTGTACTTATTGTGGAAGCTGAGCTCATAACATTTGACTTTGATTGCTC  
CACCGCGAGGGGACTCTTCTCTTCGCTGACGAGCTTCCACTTGTACTCCGCGCCTTGGAAAGATGTCTGCGAGCCCTTCGCCGTCGTCGAGGGGAGACGATAATGTTGTTATTGTCCTCGCT  
CTTGCTCGCCCTTAGCCGCTTCATCGTTGGAGAGATCTTGGTGCGCAAGTAGATGCTGGCTGCATCGTAGAGCTCATTGG

>comp170544\_c0\_seq3

GGGCATAACTCTCCATTCAACAATCCTTCCCTAGTTTTAAATGCTGTTTTCCACTCGTCACCCGGCCTGATTCGTATCTGGTGATAACCGCTGCGAAGATCGAGCTTGGAGAATACCGTTG  
CACCTGCCAATCGTTCCAACATCTTCTAAACGCGGCATCGGAAAGCGGAACTTAACGGTAATTTGTTGATAGCCCGCTATCAACACACATCCTCCAGGATTTATCCTTTTTCGGTACA  
AGTAAAGCCGGGACAGCACATGGACTCA

>comp170858\_c0\_seq13

TTTTTAGAAGGAAAAAAAATCAACAATTAATAATAAGAATTGAATCCATGAGTTTTTGAATCTTATGTACATCAAACTGCAATAGATTCTTATTGAACTGAAACCAAATGAAAATTTCC

TTTAACCATTAAGATAGGAGATAAAGAAAAAGTGTGGACCAAGCAGTGAGAGCTAATGCAGAAAGCAAATACATCCATAAGAAAATGACAGAGCTCTCCTCCAGTCTACACCAAATAG  
CTGAGCCATCACACCAATAGCCACAGCAGGAGGAAGAGTGAAGTGTGTGAGCAGAACATAGCTAAACAAAGGGTCTTTAGGAAGGAAACCAAAGGAGCTGGCAGCCTTAACAACAAA  
AATCCCTGAAATTGGAAGTGCTATATATCTCACTAAAGCAATTGCCACTATTGCTGAAGGCTTCACTGTTGTTTTTCCAATACCTCTAGTAAGATTTCTCCAAGAATAAGAGTAGTACAAG  
GAACTGTGCCATTTCCCAGCAGTCTAGTGTGTTCTGAATCACTCTAAGAGGAGCATTGCTTCCAATTATGACTGATTTAAGCCATGGTATTGCACCCACTGCAAAGCCAGTAATCGCAGC  
AACTGTTGGTGGTTCAACTAATTCTTCTGCGAGTTCATGAAACGCTCCTATGACCGTCTTCCAGATATGCTCTCCAGGCTTCATCTTTCTATTGGCTAATAGCGGTTGCCTCTGTAATTAGAT  
TTTGACGAAGAAAGCTTAATATGTTGTAGAGGCTTAGAACCTTAATCCTATTCCCAAGAAGCCTATATAATCATTGTTCAITCAGGCCTATAGCAGTTTGGCTTGCACTAGCCATGCATTCA  
ATTGTTGTTTAAACACATTCTACTAGAATAAGGTTGATGATAAATCTAACTCAAGAAGTACTTGTATAAGATAAAAATTGTTATATTATTTGCCTATGATTATGCTATTTTGTGCTCGTAAATAATCA  
TTGTGTTTTGTGCAGAAAATTATAAAAAAAGCAAGAAAAGTGATCCAGTGCCGACGCGCCAGACCTTCAGGGCCGCTACAAAAAACTCACCGAAAATTTGGTTGGAGAACTTAGTGTGTA  
GACGCTACCCACCAAGCGACACAACACCAAATTACCCGGCACCGCAACGAAGAACAGTTGGACTGGTGAAGTGAAGTGTGGTGAACCGCAACGCGCCGGTTTAGTAGCGCCAC  
GGCGTAGTTCAAAAAAAATTGAAAAAAAATATAAATAAGACAAAATTTCAAGATAAATTTCTTAAATGCATGCTTGGTGTTTAAGAGCGTTAACCATGAAATTGTTAATAGTACAAT  
ACTAACACACATTTTCATAAAAAAG

>comp170858\_c0\_seq27

TTTTTAGAAGGAAAAAATCAACAATTAATAATAAGAATTGAATCCATGAGTTTTTGCAATCTTATGTACATCAAACTGCAATAGATTCTTATTGAACTGAAACCAAATGAAAATTTCC  
TTTAACCATTAAGATAGGAGATAAAGAAAAAGTGTGGACCAAGCAGTGAGAGCTAATGCAGAAAGCAAATACATCCATAAGAAAATGACAGAGCTCTCCTCCAGTCTACACCAAATAG  
CTGAGCCATCACACCAATAGCCACAGCAGGAGGAAGAGTGAAGTGTGTGAGCAGAACATAGCTAAACAAAGGGTCTTTAGGAAGGAAACCAAAGGAGCTGGCAGCCTTAACAACAAA  
AATCCCTGAAATTGGAAGTGCTATATATCTCACTAAAGCAATTGCCACTATTGCTGAAGGCTTCACTGTTGTTTTTCCAATACCTCTAGTAAGATTTCTCCAAGAATAAGAGTAGTACAAG  
GAACTGTGCCATTTCCCAGCAGTCTAGTGTGTTCTGAATCACTCTAAGAGGAGCATTGCTTCCAATTATGACTGATTTAAGCCATGGTATTGCACCCACTGCAAAGCCAGTAATCGCAGC  
AACTGTTGGTGGTTCAACTAATTCTTCTGCGAGTTCATGAAACGCTCCTATGACCGTCTTCCAGATATGCTCTCCAGGCTTCATCTTTCTATTGGCTAATAGCGGTTGCCTAATTGTTCCATC  
CAGGTTACATCAATTTGTTTAAATGATGAAGTCAGCTGAGACTCTGGATCATTAAATGGCTTCTCCAATCTCAGTAGTAAATGCTGGTTGATCTTCTAAACTTCCACTTGAAAATGTTTGG  
CCATCTTCTTCACTGACTCTTCTCTAATTAGCTCCTCATATGTAGTCCATCTCTTTTAATTAGACTATATGTGTGTGTCCATATGTAGATACTCCCGATCGCCATTGAAGTTGAAACATAAGA  
GAGCCCACGAAGACTGCAAGTGCTTATCTCCAAATGGATTTCCATCCTGAAGGCAAACCTGCGGGGACTATCATCAACATCAGGTTGCCCAAATTTCCAGCTGAACAATTAGCTATGATG  
AGGCCTTCGAGGTGGCGTGCCGGTTTTAAGATCTTGACGACTATCCAGCCAAGAATTCCTCCAATCAAGAACGTGATTCCAATATTAACAGGCATGTACCACCAAGAAAGGAGTTCTTCA  
AGAGTAACAGTTTTAGCCAGTGAGGAGAATACGAGCGAGGGAAAAAATACTGCAAATACAATCTTATTCAAGTTTCGTCTAACATTATCTGAAAATATTGAACTACATCGATATGCAAGAA  
AGGCTCCAAGGAGACCTATCAGCAGAAGTTGCAGAAGTGGCATGCTTGCCACCACTAGTAAATTCGAAGAAGTCCATCTTCTTTTACAACCTTCTTACTCTTTCTATGTGGTTTTCTATGAATC  
TTATAGAAAACCATAGAAAGAGTAAGAAGTTGTAAGAAGATGGACTTCTTGAATTTACTAGTGGTGGCAAGCATGCCAGTTCTGCAACTTCTGCTGATAGGTCTCCTTGGAGCCTT  
TCTTGCATATCGATGTAGTTCAATATTTTCAAGATAATGTTAGACGAAACTTGAATAAGATTGATTTTGCAGTATTTTTCCCTCGCTCGTATTCTCCTCACTGGCTAAAATGTTACTCTTGAA  
GAACTCCTTTCTTGGTGGTACATGCCTGTTAATATTGGAATCACGTTCTTGATTGGAGGAATTTCTGGCTGGATAGTCGTCAAGATCTTAAAACCGGCACGCCACCTCGAAGGCCTCATCAT  
AGCTAATTGTTTCACTGGAATTTGGGCAACCTGATGTTGATGATAGTCCCGCAGTTTGCCTTCAAGGATGGAAATCCATTTGGAGATAAGAGCACTTGCAGTCTTCGTGGGCTCTCTTAT  
GTTTCAACTTCAATGGCGATCGGGAGTATCTACATATGGACACACATATAGTCTAATTAAGAGATGGAAGTACATATGAGGAGCTAATTAGAGAAGAGTCAGTGAAGAAGATGGCCAA  
ACAGTTTTCAAGTGAAGTTTAGAAGATCAACCAGCATTACTACTGAGATTGGAGAAGCCATTAATGATCCAGAGTCTCAGCTGACTTCATCTTAAACAAATTGATGTGAACCTGGAT  
GGAACAATTAGGCAACCGCTATTAGCCAATAGAAAGATGAAGCCTGGAGAGCATATCTGGAAGACGGTCATAGGAGCGTTTCATGAACTCGCAGAAGAATTAGTTGAACCACCAACAGT

TGCTGCGATTACTGGCTTTGCAGTGGGTGCAATACCATGGCTTAAATCAGTCATAATTGGAAGCAATGCTCCTCTTAGAGTGATTCAGAACACACTAGAACTGCTGGGAAATGGCACAGTT  
CCTTGTACTACTCTTATTCTTGGAGGAAATCTTACTAGAGGTATTGGAAAAACAACAGTGAAGCCTTCAGCAATAGTGGCAATTGCTTTAGTGAGATATATAGCACTTCCAATTTAGGGAT  
TTTTGTTGTTAAGGCTGCCAGCTCCTTTGGTTTCCTTCCCTAAAGACCCTTTGTTTAGCTATGTTCTGCTCACACAGTTCACTCTTCCCTCTGCTGTGGCTATTGGAAAAATGAAGATGTAGA  
AACTCGCCATCGTTGTGGGCTCCTGCGGGGTGTCACTGTCGCTCTACATCTCTTCTTTTTCTAGCTTTTTATTGTGCGGTGGAGCTGTCTCAAGTGGCACTTCTCTTCAGTTTCAACAA  
TAATTTTCATGTAAGACTAGTAAATTTTATGATAAATCCAGTAGGCGGGCTACCTTCTGCACTGCAATTCGCTCGCTGCCAGCCTACACAGTGCATTTGGGTTTGTCTGTCGCGGGTC  
GGGTTAGCTCAACCCGACAACACATGCGAGTCGGGTCCGGGTTGAGAAACCTGACCTTTTTGCAAACCGGGTCAGATTCGGGTTGACCCGTTTGGATCCAGATCAGGCCTGGTTGGAT  
CCAAACCTAACAGTTGACCCGTTTTTACACCCCTACTTTGAGAGATGATAGTTACTTGCTGAGTTTGATTTATCAAACCTCACTCGTTTTTCAATTGCTCATAAAAAGCTCACTTGCTGTATT  
TGATTAATCAAACCTCGTTTTTAAATTTATCACAAAAGGCTCTACCAAACCTGCTTGGTGGACCATACCACAAGAGCTGACTTATCAACAGTAAGATATCATTTTTGTATTTAAAGATTTTTTTA  
TAGTAATTTATTTTTATTCCCTGGATTTAAGTTGTTTTATTTCTGTATTTGTTACTTTTCAGTTTCCTTTTCATTTGGTGTGTTACTTCTTTGTTGATGTACTCTCATTTTGATTTATGATAATAAA  
ATAAAATCTTAATTTCTTCTTTGTTTACTCTAATATGTTTTGTTTATATAGTTTGTATATGAATTTTTTTTTCCGAGTAAAAACAAGTTTTTACAACCCCTTCGTTAAAAACAAGTTGTG  
ACACATTAATTGATTCATCCTAACTAGTTTTAGCTAAAACCAACAATGAGGCCCGATAAAGTAGTAGAACCATTTGGAAGTTGGCATCTCCCTTATGAGACTTCTGAGATAAATCACACCAA  
AGTTTTATTGTAACAAGTGATAAAAGATGAATTTTAAACAAACATTCATAAAGAAAATGACTGGCATAAAGATCCACTCTACACCTTGACTAATGCCATCTCAAACCTAAAAAATAGAAT  
GGTAACTCCTTCGAAGGCCACATCAAAAAAGAAATACAAAAACAGTTAATAAAAACTATACCGGAGGATCTGTCTCAACATCATA

>comp170951\_c1\_seq3

AAAAAAAAAAAAAAAAAAAAATATTATGTGCATATTCCGGATGTTCGTACGGAGGCAAATCATAACACATCGTGTTCATCCGTTTGCTGGTTTTCGATGCTCAGTACCGCTATATACTGGTGGC  
GTGGCGCACTAAGATTCACCTCCGAACGATCCAAATCCGCACAGAATAATTTCTCACAAAAAGAGTCCCCTTATATTAATTTCCGTTTAATTAACAACCAAAAAAGATAGCAAACCTTG  
TACGGTTTAATTATGCAAATTAGCAGACTATTTGAAATATATGACAGGGCTATCAGAAGAAGGTCCCAGGTCCCCGCCTCCTTCATGTACTCAAGGTACCTCATCATCTCCGGCTTGGCC  
GCCGCCTTCTTTTATTTGATGCACCGAAGAAATTTAGCACCAGGATGGCCTTTAGAGCTATGGGCAGCAGCGCCGGCGGCCTTCTTTGGATCGGCGGTGTTCTGCTCTTCTGTAAAGGAT  
CAGACCGCAAGCCAAGTTTAGGGCGCGGTAGCTTCGTCCGCACTTCTTCAGGGAGCCAGACATGGTCGGAAGAATTAGAAAGCTCAGATTTTTTTTTTCTCACCGGTGGTTGG

>comp171097\_c0\_seq9

ACAGAAAGAAGTAAAGCACATAGTGAGTTTTAAGAAGAGTCGTATTTCTACATAGAATTTTTTAAAAACATAAACTTTGCTCAATTTATTTTTAGGAAGCAAAGGCATTGGTGTCTTGTC  
ATCCAGAGCCATACCCGAGAGCAGTATATTATTGTCACACGGCAAAGAACATTGAAGCATATGCGGTGCATCTATATGGGGCAAATGGAGCGGCAGTGGACGCTGTAGCGACGTGCCATA  
CAGACACCTCAGCGTGGGATCCAAATTATGTAGGCTTTAAGATGCTGAAGGTGAAGCCAGGAACTGAACCAATTTGCCATTTTCTACCTCAAGGCCATCTTATCTTTGCTGGGCTATCAAA  
G

>comp171539\_c0\_seq3

ATTACCTTATCCGAAGGCTTGCTTTCTTCTTGCTCATAAGGCTTCGACGGTCCAACCTATCCCAAGACGAGCATCTTCGGACCATCCTTCTCAGTTCCACCATAGTAATCGACTCAATATTCAT  
AGCTTCCAGAAAGTCTCATTTAACACTTCTAAAGCCTTTACCTAATTAATCTTCAAGATATGGCTTCAAAAAGAAAAATAATAAAGAAGAAGGTATATGCGTTGATGTTTAGGCAATGA  
TCAATATGAGAAATTGAGGCAAGATGAATCAAAT

>comp171587\_c0\_seq20

TTACACCATGCAAATCTTGCAATCATATCAATAAATTAAGAGTCTGCCGTTCTAGCCTGAACGCCATTACGTATCTTCTTCGTTTACTTCTTGCACGAGCCGTGGCTCTGCCTCTCTCT  
CTCTCTCTGGGCTAGTGAGATCAAGCTGCGATCATGGAGATCACCAACGTTTCGGAGTATGAGGCCGCTGCTAAGGAGAAGTTGCCGAAAATGGTCTTTGACTACTATGCTTCTGGTGCG

GATGACCAGTGGACTCTTAAGGAGAACAGGGAAGCATTTCAGAACTACTGTTTCGCCCGGTATACTTATTGATGTCTCAAGGATTGATCTAACTACAACCTGTTCTGGGTACACAAGATCT  
CTATGCCCATCATGCTTGCTCCATCTGCTATGCATAAGATGGCTCACCCAGAAGGAGAGAATGCTACAGCTAGAGCAGCATCTGCAGCTGGCACTATTATGACTATATCAACATTTTCTACTT  
CAAGTTTTGAAGAAGTTTCCTCAACAGGACCAGGAACCTCGCTTCTCCAGCTTTATGTTTTAAAAGACAGGAATGTAGTTGCACAG

>comp171587\_c0\_seq9

TCTCTTAACCAACCTCTTTTATTGATGCATTTATCACTTAGGCATCATCGGCCGGTCATCTGCGGCTTTCATTTATGATTATGGTTTTGGATCATGCATGGAAATATCTATCCCAAACCTTAGCTG  
ATTAGAACGATTAGGGTTTCATTATGTATGCTAATCTATTTATGCTTACATAATTGGTTTTGTTTTGTGTGGTCAGTGAGATCAAGCTGCGATCATGGAGATCACCAACGTTTCGGAGTATGAGG  
CCGCTGCTAAGGAGAAGTTGCCGAAAATGGTCTTTGACTACTATGCTTCTGGTGCAGGATGACCAGTGGACTCTTAAGGAGAACAGGGAAGCATTTCAGAACTACTGTTTCGCCCGCGTA  
TACTTATTGATGTCTCAAGGATTGATCTAACTACAACCTGTTCTGGGTACACAAGATCTCTATGCCCATCATGCTTGCTCCATCTGCTATGCATAAGATGGCTCACCCAGAAGGAGAGAATGCT  
ACAGCTAGAGCAGCATCTGCAGCTGGCACTATTATGACTATATCAACATTTTCTACTTCAAGTTTTGAAGAAGTTTCCTCAACAGGACCAGGAACCTCGCTTCTCCAGCTTTATGTTTTAAA  
AGACAGGAATGTAGTTGCACAG

>comp171735\_c0\_seq4

CCATTAATAATATACAGAACACCACCCTTAGCCCTTAGGGTAGCTAGGTCTTCATAGTTGTTGAGCTCTTATCTAACAGAAGAGCCTCTTCCCCTCCTCTTGTTAATCTCACCTTATTCTC  
TTCTCTGCTACTTCTCCAGAAATCTAGTTACAGGTTAGCGAAGCAAAGCTCTCTTCTTCCCCATATCTACTTCTTATCTTCTTCTCCCTTTAATATTTCTTCTCCCTTTTTATTTTCTTCCAA  
GATCCATCGAGCTTTAAAATCATCCAAAGCTGGCGAATAACCGTTGGTGGGCCGGCCAGCTAGGCCTCGCAGCTGGCCTCGGCCGGTGGAAATCAATGAACCGGCGTCTCCGGCTCCTCC  
GGTCTTGAAAACCTCACCCAAGAAATGAACATCGGTCTAAAAGACCCCTCCGATCCAAGCCGCGCTACGGCGTCCGCCGACGACCAAGACGACGAGAGAATCGACAACGAAGACGAG  
CCCAAAGAAGGAGCCGTTGATATCGGCAACCGCAGGCCACGGGGCCGTCCTCCGGGCTCCAAAAACAAGCCCAAGCCCCCTATTTTCGTGACTCGTGACAGCCCCAACGCGCTCCGTA  
GCCACGTCATGGAAGTTGCCGGTGGTGGCGACGTCGCCGACTCTATCGCCAGTTCTCCCGCCGCGTCAACGCGGCGTCTGCGTGCTAAGCGGAGCCGGCGCCGTTGCTAACGTCACC  
TTACGTCAGCCCGCAGCCCTGGCGCCGTCGTAGCTCTTCGCGGCCGGTTCGAGATTCTTCCCTAACCGGAACGTTTTTGCCCGGCCGGCTCCTCCTGGCTCCACCGGACTGACCGTT  
TATCTCGCGGGCGGGCAGGGGCAAGTGGTGGGGGCAGCGTCGTGGGCCCTCTGGAAGCTGCTGGACCGGTTATGGTTGTGCGCCGCACTTTTTCAAACGCAACTTATGAAAGACTACC  
CTTGGAAGAAGAAGAAGCAATGAACCCGGCGGGCAGCTTTCCGGCAGGTCCCCGGCCGACTCGGCAGCGGCGGAGGATTGCTAGACCAGTCAGGTATGCCTATATTTAACCTTC  
CGCCTAATCTGATGCCAACGGTTCCGGCCAGCTAGTCGATGCCTTTGGACCATGGGCTCATGGCCGGCCGAATTTCTAAGATCATTAAGAGAAGCATAAGCAGAAGCAGAAGAAGATGA  
TGATGAAGAAGAGGGCTTCTCGAGATGGACTCCACTGTTCTCTGGTTTATGAGGTCTTCTTCGGTCTTTGACTGGAATGACTACTAGAACTAAGCTATTCTGTGAGGGAGCAGGATC  
TGGCATTGGAGGTTTACAAATGCATAATGGCATTCCACACTTGCCTCAAGTACAGTGGCAACAGCTTCCCTAGAGAATGAATCTGCTTCTGGAGCATCATTCTCATCCACATTTAATCTTG  
AAACCCCATTACTACAGAAGCAACTGTATCATAGGAACCTTTGACCATTTTCTCTAGACCTAAACAAGAAAATCAGGCAACATGTAAGGTGATGGAAAACATCCAAAGGAAATTTTGATT  
AAAAAAGGCAGTTTGTGTTAACCTGCAAATAGATATGCATAATAGGAAGGGTAAGACAAAGCAGAGAATTGACAGATAATCACTTTAAATTGCACAAACCTGTGACCCAAAAATTA  
AACGCTAGGAAGATCATATAGGTAAGTACAGTCTCAATTATGTGCCCAACATAGAAGAACTTCAAACCTTTGTTTACGAAGGAAAGGTTTCAGACATGAACGGATACCCATATAAAT  
TTTGAATATTTGATCTGAAGTTACTATGGAGCTGAACATAATCCATGTTCTCAAATCATATTTAAAGGAGCATGCTATACTACTGGGCAGGAACTTAACAGCTAATGCTTTTAAAGCAAAAGT  
GTAACCTTGACATCAATGAAGCAGTCAGCTCCAAGAAAGAGGAATAGACGGCAAACCAAGCATTTCCTCAACAATACTGTCATTACGAAACCAGACTGAATTACGTAAACTAAAAGAT  
GCAACTGATTTT

>comp171802\_c0\_seq6

AAGTAACTTGATTTGATAGGTTAAAATCGTTTCCTCATTATTCAGTTAAGATTACTAAACAAATTGTTTTTGCAGTTAATTTTGCTTAATTTTTCACAAAATGAATAAATCAAATATATTTGA

CTATAAATATCATCCGCCGTAGGCATCAAATAAAGGTGCCACAGGCATTTGGAAAAGGCCAGCACTGGAATTCAGTGATAGTTGTATGTTTGTGAACATGCATGCAACCTACAAGCATCAT  
TGCCCATGATTTCTTCGGGCATTGACCAATGACCGCCTCTATTTCGCATTCGGCTGGTGACAGCCAATGAATAAATCGATTGACTAATAGTGTCTATAAGAATGTGCATGCATAAATGAGTTT  
TTATCATGCATACACGGTCTTCTATCCAACCAATTATATAATTATAAACCATGATTTAAGCTACATCTGAGAGAACAATTCATGAAGTATCTACTGTATGACCGGAACTATTTTCATCATGTTTTT  
ATTTTCAATTTTCCCATGATGTACTAACACTTCATATTAAGGGGAGTGTCCAACATGCATCCAACACATATCAGATATAACTATCATGTGTCCAAACAAAATAATAATAATAAAATCAAACA  
GGCGTGACCGATAGTCCTGTCATTAATACTTTTTTTTTTTTTTAATTAATAAACACATTATCTTAAAGAAGGCTTGCTTGCCAATTGCCATGCATACACTCAGCTGATAATTATTAGGATTTTT  
TTTTTCCCAAAGATGAAAAGTGAAAACCAGAACGATTTTCTTAAATAAAAAATATAAATTTAATAATTACATCATCTCTGCATCCGAACAGTAAGTAACTAGCTACCATTGTTTCACTGC  
TCCCAATCCGCATAGTCTCTTCATAGCCGGATGCCATAGGTATTACTGGTAGGGTGAAAGAGTTCATCTCACTCCAAATAAAGCTTTCGGATACATTAACGCTCTCATTGATCAAGCTGCT  
CATTCCATAGAAGAAATCAAATCCTTCAAGCTTCATTAATGAGTTATTATTAGTGAAGTAAAGTCTTGCTCGAAAAATTCTGGACCCACATTCCTAAACGGCGAGCCATCGTTCACTATAT  
TCTCATGGATGGAATAAGCCATTGTACTATTCACTGGAGTTTCGTCATAGATGGCCTGTGGAATTTTAAGGAAGGAGCAACTTGGGCTTGATGGGATCCATTTCCACAGCATGGAAACCT  
CACATCAGAAAAGTTTCTATCTGTAATTTACTGATTGAACCTTGGCTGTAATGATCATTAGAAGCATAATCAGTAAAGTGGAAACGGAATTGTGCTGATGGCAGGCTGTTAAGCCATCCGTTGT  
TAGCTTCATTAGAAGCACTTCCAGACTGACTATCAGCTTTCTTTTTTCATCATAGCTTGCTTTAGAATGCAGGAACGACGGTCTGTGATTTTTTGCGCTGTTTGCCGAGGAGTCTTGTCTTC  
AGCTTAGTGTCCAGTGATTCTTGATGTGCTTGTCTGTTCTTCCAGGAAGATGCGCAGCTATAATAGACCATCTGCTTCCAATTGCAATATAAAGGCTGCATATGATGCTATCTTCTTCATCC  
GAGAAGCCTCCATGCTTTATATTTGGTCTAAGATAATTAAGCCACCGAAGGCGGCAGCTCTTCCCGCATCTCTTGAGGCCTTATTAGAATGGAGTAATTCGTCTATTAACCCCTCAATATGG  
AAATCTGTATATATATCAATACAACGAACACATCAACATATACGCATGTAAGTAATTACCTATCTTTTGAGGGAGAGCAATCCAGTTGCCTCCCGTACCATGCTTCTCTATGTAAGACTT  
AAGCCTTTCATCTTCCCTCAGGAGACCATGGACCTTCTTTCACGTTGGCTTTGTACAGCAAGGAGCTCTCCCATCTGATTGATTCTAATCGTTCTCCTTCTTGTCTGTTGGGTAAGAGGA  
TAACTGGTTCTTCTCTTCTTTTTCTTTTTTTTGCACATAGATGATGTTGAGGCCTTTGAATTATGTGGTTTACAGCAGCTACTGAAATGGGGAATTTATGAATTTATTGTTGTGACTA  
GATTGAATATGGATGTGGTTGGCCTGCCTGGGATGTGTCTACTCACAGTTGGATCTGTCCCGCTGAGAATATTGGGAAAAACGTCACAAGTTAAATATTATCAGGATGTAAGACATTT  
TCTTAGCTGCAAGGCAATCTTTATATCTGGCATGTTAGTATCGTCTTGTAATAAATT

>comp171996\_c0\_seq1

ACAACGTAAGATTCCCGCATTCGTACGCTTATGCGCTTGTGATTTAAAATTTGCCGGAAGTCACTCTCGAACTCCGAGCCAGGCCGGCAGCTCGGCATCCCTCTTCTCCATCTCCGCC  
GGAACCTCCGGAAGTCAACCTTTCCCTCGCCAACAATGCCCGAAAAGCAGAAGATTCAGTAGAGGCGAAAAGACCTAACCCGCTTCTCAACTCCACTGTCCGCAGCTTCGTGCTAGACC  
GACTCCTCGACCGCGACCGCCGCTCCGCCACAAAGAAGACTGCGCCGAGCGTCTCGCCGCCGCCCTCAGCCGAAACGAGGTCCGATATGCCGATCAGGCAGTCCCTGCGAACCT  
TGATTGGGGCATCGATGCTCTCGAGGATGCCATCGCCACATCCAATCATGAGGCTAAGCTCGCTCGCCTCGACCACGCCGAGCGGATGCTTCAGGTCTGCGCCATGCTTGATCCCGTTGGC  
TCAACGGCCGGCGTTCCAAACTCCTATCTCTGTGCTTGGGCCATCTCCATCTCGCTGCTCTCGCGCCTCCGTGATAACGCTACCGTCTCGCGGGCTGCTACACTACACGCGCTCGAGA  
TGTTTCGATGTTGAACCTTTTTCGCCGCACGGATTTGCGCCTGACCTTTGGGAGTCGATGTTCTGCCGCACATGGCGTCTATCGTGGGATGGTACTCAGAAGCGCGACATCGGATCGT  
AATGGAGGTGATCCGGACGCGCGGATCTCTCGATGACGACGGCTGATTTCCGAGAGCAGCTGTTAACGAGTCGGTGGTGGCGGGGAGGCTGACCAAGCGGAGAACCTGCGC  
GAGTTAGAGATGGAGTATGGGAGTCGCTTGATCGGAGCACGAGGGTATACGCCAAGTATTACAAGGAGATTCTCAGCCATGAGTCGCCGGAGATGCAGACATCTACTGGTAGAAAGG  
CATGCCGGCGCTGCCGCGATCGCCGAGCCGCCAGTGACGCCGCAGCACGAGGTTAGCCGCTCGATCCCCGATTCGTCAAGTTCGGGCCATCTTGCCGAAAAGCGCCGGCTTTGCAT  
TCGGGAAGAGGGACGCCGGGACAGGGTGGGCTCCAGTCATGATAGGATGGGTGCGGTGCCAGATTCTGCACAGGAACATAAATAACTTCAATAGACAGACCTTGAAGGAGGACTTCCC  
TGAGGCGAATTATGATACTAGTGATTTTGTGATGCGAGTTTGTCTAATGTGGATTTGATTTTCTACTTTAAAAAACTGTCTTCTGAAAATATGATATCAATGGCAGACAAGGGAAGCATCA  
CCAAGGTCAGATCACCAAAAAAGGATCAGTTTGTTCAGCGAAAAATTCATCATTGGAATCTCTAGGGCTCCTAGACTCGCGCTTCTAAATCACTTGCTTTTTTCCAAGAAAGAGTTGG

AGCAACCTGTTTCATGGTGCAGCCAATAAAATCAGTAGTTCTGCACACAAGAAGTTTGCCTCAGTGGACCACCAGCTCAAGGCATCCTCTCCAAGGAGTTCACCTGTAAGGCTTCAAAGA  
AAAGCAGAACAACGGGCAATACATATCTCAAGTCTCTCTTCAACTTTATCTCCATCTTTCGGGAGTATCTCAGATGAATCTGATGATGATTTGGAAATTCGTAGTTGCAGCAACAGCCCTTG  
CAGGGTTGTGAAGTCTTTAACCAGCCTAACAACTAATATGCATTTATCAGCTCCCAGTTTACATTCCAAAGCAGAAGAAGCAAACACTATAAATAGTTCTTCTGTAGAAAAGGCAATGCAA  
AGAACAAAATCACCAAAGGATTTTGTATGCCCATCACTGGGCATCTATTCAATGATCCGGTAACTCTAGAAACAGGTCAGACATATGAGAGAAAAGCAATTCAGAATGGTTGAAGAGA  
GGAAACACAACATGCCAATCACTCGTCAATCTCTCTTCAAATGTTCTGCCAAAACCAATTATGTTTTAAAAAGGCTGATTACAACCTGGATGGAGCAAAAATCCTGATATTGCATTAG  
AGTTCTCATAATGGAGACACCTACCGCTTCTCCCAGACCTGTCTTTTCAAAGGAGCAGCTTTTGGAGTCCAACACCACAGTTGATCTAGAATGTCCTCTCTCTTTATCTAGGCCCAATACT  
ATGAAAAATGAGAAAAGAAGTAAACGTTTCATGAGAGGCCATCTACTTCACCAAGAAGTGTAAATATCCCAAGCTGCTAGTGAAACAGTAATGAATGCCTTGAAGACATATGCCTCCTGT  
CTCTGTACTTCAGAGGACCTGCAAGAATGTGAAGCAGCTGTCCTGAAAATAGCTCGGCTATGGAAGGAATCGAAGTCTAACACAGGAGTTCAAGCTTTTCTATCTTACCAACAATATTG  
AATGGATTTCTGGAAATCCTATCAGCTTCTACCAATAGGGAAGCTCTTAGAGCTTCTGTTTACATTCTTTCCGAACCTATTTTGGCAGATGAAAGTATAGCTGAAATACTTAGTAATGTGGAC  
TCAGATTTTACTGCCTCTCTGCTTTGCTTCTAATGGACTGGCTGAGTCTGCTGTTCTCATATGCCAACTGCGACCCACATTCTCTCAGATTTCCGGGCCATGATATTGTGCAATCCTTAGTT  
CAAGTAATAATGAGCAAAGGAGAACATGTGGATGACTTCAGTTGTGCAATGGAGCCAAAGAATGCAGCAATATCATTGTTAGAGCAATTACTATCTGGGGGAGATGAGACTAACCGTTCA  
ATAAATGCTTCATTTGTTATTTACGCAAATGGACTTCCTGCTCTTATCAAGTGTGGATCAAATGGAAGGAAGGGCCTCTGTTGTATCAATACTTGTAAAGTTGTATGAATGCTGATAAACG  
CTGTAGAAAATTTGATTGCAGGGAGGGCTGACTTGTCCCCTGTTCTGGAATTTTTCATGCTGGGAATGACAATACAAGGAGCGTATGCATTGATTTTATCTCAAACATTATTTGTTTAAAA  
GGAGGACGTTCTGTAATCAGATTTTACAGATAATTAAGATGAGGGAGCATTAGTAGTATGCACTCCTTTCTAGTCTATCTTCAAATGGCTCCAATTGAGCAGCAGCCATTGGTTGCTAGC  
CTCCTTCTCCAGCTTGATCTTCTGGTTGAACCTCGAAAGACAAGCATTACAGGGATGAAGCTATTGATTCAATAATAGAAGCTCTTAAACAAAAGATTTTCTCTTGGCCAAATCATTGC  
TCTAGAGACATTATTTTCTCTGACTGGGCGGTTGAATGCTTCAGGGGAGCCTATAACTGAAGCATGGTTATTGAAGATTGCTGGGGTTTATCAGCTAAATAGCATCTTGAAGGATGAAGAA  
GAAGACGGAATCTCTATTGATGTCGTGGAATCAAATGTGGAAGAGGAAGCAAAGCTATGAGTATTTGGGAGAGAAGAGTGGCCTTTGTACTATGTAATCATGAAAATGGTGCATTTTT  
AAGGCACTGGAGGAATGTCTAATGAGCAAGTCCATGGAGATGACCAAGTCATGTCTTGTATTGCTACATGGCTCATAATCCTCAACATCTTCCAGATACTGGTGTGAGAGTTATTGC  
AAGTCGCTGTTTACTTGTACTTGTAGATATCCTTGAATCATCTAAAAGCATGGAGGAGAAAGTCCTTGCCACCTTGGCTTTGAAAACTTGTGTTAGTGATCCAGATTTAGATAAAGGA  
GTTGTAGCGTATGCAAAGCGAATTTACAAGCCTTTGAAGAACTTAAAAGGTATTCTTCACTGGTTGCGGAAACCCTGAAAGAAATAATGAACCTGCCATCTGTTGACACGTCAGAATTC  
TGGTCTTGTGCGGAATTAATTTGAGATAGACTCAACTTTTAAATGGTGAGGTATTGTCCCTGGTTTCATTTCGAGAGGTCGGCTCTTTAGCAGCCACTCTGATGGAACATTAAGGTGTGGGATGT  
TGGGAAGAGGGGATGGCAGTTGATTCAAGAAGTTCAAGGACACTTGAAGGCGGTTACTGGCCTTCATATCCTCTATCAAGTGATAGATTATACAGTTGTTCTCTTGATAAAACCATCCGA  
GTCTGGACAACCTGAACCAGAAATTCATAGCCTCAGGTTTATGACATGAAAGAACCAGTTCACTGCTTACTGCTAATGCCAGTATTTGTGTTTCTCATCTCAAGGATCAAGCGCCAAGA  
TCTCTAACTGGATTGGCATGCCAAAGCAAGTAAACGTCAGCAAAAATGTGAAATGCATGGCCATGACAAATGAAAGTTTATATTGTGGCTGCACTGGCTACAGCATCCAGGAAGTAGATC  
TGAAGAGGTATACATCAAATACATTTTATTCAGGAACAAGGAAATTGTTGGGCAAACAGACTATACATGCCCTCTGCATTCAAGATGGTGTCTCTTTGCTGGCGGGTCTTCTGTTGATGG  
AATCGCTGGGAAGGTATTCTCTTTGACAACAAAACCGCAATAGGATCTTTTATGACAAATTCGGACATCCACAGTATCGCTGTAAACGATGATTTTGTGTTTCACTGGTACTAAAAATGGAT  
TCATTGAAGTTTGGATGAAGGATAGATTGATAAGAATTGGCTATCTCAAAGTAGGAAATACAGGAAATACAAAGGTTACATCTCTGGTATCAGATTCTGAAGGAGAAATGCTGTTTTCAGG  
TTCTTCTGATGGAAAAATTAAGGTTTGGACTCTTACTGAGAACAAATAGCTGTTCTTCTTCCATGAAATTTCTTTGGGATGAAGGTAGATTGAACCAGAGGAACAATGATCTATTTGA  
GCTCACCAACAGAATCTTATTTACAGTAAGCTTTTGTCTTCCACATTTGCTTAATAATTTTCATGTTTTGATGGGCTTACAGAGTTCTGTAAATGAAATTTTGCATGCTTTTCATCTACA  
CTTTGAAATGTTAATAAATTCAAAAGCCATTGTTTAAAGGCAATACCCATCTTAATATATGTACATATTTGTTCTGTAGATGATTTTTTCTAAGGCGTTTTTATTTTATGTTATCCAAA

>comp172652\_c5\_seq1

GCAATATGATCATTTAACCTTCAGCTATTATAGAATCTTGCCAGCTCCTTCACACAAATCCGGCCCCGAATTATCTTACTCTCCCAGAGATTCTTACATTTCTAAAGGCAATTAAGCATAAAAA  
GAGTTTTATTAAAATACAAAAACATTCAGAACGATAATATGTGCTTCATGCACGAGGAAAGCATGCACCTTATTTATAGTAATACGACATAACAAGTAAGCTAGCCAGATTTATAGCACTCG  
AAAACCTTCACTGACGCCAAAGCTTATACTGGATTCCAACCTCCCAAAGGGCTGAGATCAACAGCTAGGAATTGACACTTTGCAGTAATTAGCTACATTTCCGGGCATTTGGAGAGTTGATA  
>comp172717\_c0\_seq1

CGAATAGGGAATGAGCGGCTTTGAACTACAGAAGAACGGGTTCCGGAGGGTTGTAGTTTGGCTACGGGAGGTGGGTTAGAAGGTGGATCGGCACTGTGCTTTGCACGAAATGGAGGAGT  
CCGGACGCTTGTTCGTGCGTGGATTTCGGCCTGGTGTGGATCGTAGGGTTTGCATCACGTGAGGAATAGAGGGCCGATTGGATCGAGCAGTGGTACGAATGTGATAGGTTATCGACTTGC  
TCGATCAGATAGAGGAATTTTCGACTGTGGTTTGACAGGGAATGCAGTCGGGTTTTGCGGCAGCCGTGGATCAGACGTAGGAAACGGGAGATTTTGGCTTAAGAGGAAGTGAGAGGGTT  
GGAGTGGGAGGTTGTGCGTCTGGTTCAGGTGAACCGGAAATGTGGCGCGGCACAGTCGGAACGGGCTGTAGTAGCGACTGGGTTCCGGAAGCGAAGGAGATTGACACAGTGATTGG  
GTCGTGCGACTGAGGAAGAAGGGAAGCTCGCGATTGGATAAGGGTTGAGTATTCGATCGCGAAAGGCAGAGGGATCAAGGCCTTACAGACATGCTTAAGACGATAAATTTTCGACGGTGC  
CCGCAGAGATCATGGCTATGATGGCTATGACCAGGCCAACGCCATCCTTTGCAGCTCAGTGGGTCCGCTGCTGTTGCCGGTGAGTCTGCAAGCGAAGGGATGAAGAACACGGCGATAA  
AGGAAGACGAACAGTGCTACACTTAGAATATCAAATGCTGACATGCTTGCAGGGGGGATTTGGAAGGAGCCTATGTTTGTTCATGACTGCTCCCTGTTCCACAAAGAGGGAGGCCATT  
TGTGTGAACACAACAGAGTAGAGGATAGTGCAGAGCCAGATAGGGAGGAGACGGAGCACACACTTCAATTCCTCAACTTGAGTGACGGTGCAGAGGTGCCAGGGGTGGCTTTGCAGG  
GTGGGCTCATCTTTGGCTTGAATGATGGCTGCTCTATCCAGGAACCTTGAATCCTTCAGTGTGAAGCAACTTCCTACTTCCAGTAGAAGCAAATTCCTTCGATCCAAGTTCATGCAACTCCT  
TCGAACTGGATGGCTTATCAGCATCCCATTTCTGGACGCAGCTACAATCACTTGACTCACCTGGAAAGAGGGTTTCCACTTGGATGAAAATGGCGATACTGCCGGGTACCAGCAAGGA  
AGAGCAGTAGAGCTACCATGGCGGATGCTGCAGAAGCCCCAAAAACCTAATGCCAGGAGCCATTGTTCTGAAAGTATCCGAGGAAGGTGTTGGAGAAGAGGGAACCAAGGTTGAGGG  
CAAGGTAGAAGTAACTGAAGAAGGAGATTTTTGAATGAGCTTCCCTTGATCCTGCTCGTCAAATGGTTCAGCTCCAAAGGTGGCTATGTTTGGTTGGTAACCTCCATTGCCTAAAGCAA  
CAAGGTACTGATAGGTAGAATAGCCCAACTTTGAAACCAGAGTGTGGCTCGCAAATGTATGTCCATCTCCACACCCAGATGGCTTTAGTAAGAACAAGCTTGAAGTTAATGACATCAT  
CACCAATCCCCTACAAAGATGATCTGAAAGATTGCACAAGTCTTGATCTTCCCCAGTAGGAGTCGCTAAGAAAGGCACCAATGAGAGAGAAGAGGTAGACTGTGCCAGTCCATTTGC  
TAACATTGTTGGCCGACGCTGCATTGTCTTGTGTAAGCACCCCTCGTCAAGAATATAACCAAGTTCACTCCCACACCAAAGAATGCTAAAGTAGCCAGGCCTTGGTTCACAAGCACAAAGAG  
ATGCAGCCAACCATCCCCACTCTTTCCTCTCCTGGCAGGCCTACTCTTGAAGTCCACAGAGCCATCCATTGTCCATTTCATCTCCATGTTTCAATTAATGGCTTCACTTCCCTTCTCCTTCTCCT  
TTCTCATCGGTAACCTTATTATCTGCACCTAACATTGCAGCTGATTAGAAGAAAACTTATAGATGACCGAAGAAGATATAGTGCAGATGAGGAAGAAGATATATAATGGAGAGAGCGCAGGA  
GGAAGCTGGAGAAAGAGAGGCTGAGATGGTGATTTTATAGAGTTGCCCGTTTGTGTTATGATTTA

>comp173318\_c0\_seq10

CAACCTGAACTTCGTTAATATCAGTACACAACCTCATACAAACAAGAACTAAATTCATTTTTTATTTTCATAGGAGCATAAGCTGATAAGAGCATGAGCTGAAAACATATCATCACAATCAAA  
ACTTCATTAATATCAAAATAAACAACACAATAACAAGAGCTGAATTCATTCCTTAAATATTTATTTGATTCATAATCTTTCCTTCTGACCCTCCTCAAACCTTCTTAAATTTTTAGATAAACA  
TAAAGTGCAACATCATAATAGAGGAGGAAAAGAAGAAATTACAGTATTCTGATCGCAAAACTCCTAAGCCAGTACTGAAGCACCATTATTTCCAATTCAAGAAACATAACTCAAATAGTG  
GAGATGGCATAGTCCAATGCATCCACCAGGAAATCTGCATCCTCTTTGCTGAAGCACATTGGTGGTTTTATTCCGGAATACATCCCATGAAGACCTCCTTTTCCAAGTAGGACTCCAAGAT  
CTTTAAGCTTCTCAAATAATATCAAAGTCTCTGCTTTGGCTGGAGTTTTGTCTTTTCTATCAGTGACGAGTTCACACCAAGCATTAGTCCCCTGCCTCTGACATCTCCAATGACTGCAAAG  
TAAACATTACTCAATGAGGAATTTGTATGATATGGAACCGTGAAGTCAAGTGAAGTATGATCAATTTTTGAGAAGTTCGAATATTTGGTGAACAAACTATAGTTAAATATTAGTGAATCTCTAGATAAAT  
TTCTAGTCATGCATCATGAAATCAATCTTATAGACAAGAAATAAATGAGCATTAAATCTAATAAGAGCAAATATCATGAAAATAATTGCAGTATGATAAAAGAAACACATCTCACTTCA

>comp173318\_c0\_seq9



AACACATCTCACTTCATTATTGCACATTATGAAATGTAAAAGTAAGAATCAAGAGTCTCCTAGAAAGTGTGGACTAAAAAGCAGATAACCATACACTAATTAATACAAACGAATGTAGG  
ATCTTGCTTCTCTTAATCCATCACCGTATTTAGAAATCAAATCTATCATGAAATGAATAGCAAATATTTTATGCGCATAAAAGCCAAAGAATTTGCAAGGCCTTTCTATATACAAATAATGT  
AGGTTGATTGAAAAGTGTGGTAAAGCAAAATCTCGGTAGAAAATCTCACTTTTCATGCTTATTTTGAAGTCTTTTCAATCGTCCAAGTGAAGACCCGACATCTGCACAAT  
GCGTTTGACGATTCTCCTTGTCAAGAACTTTAAGCACTGCATGTCCACCAGCAGAACACACAGGATTCCCACCAATGTATTGAATTGTATCCTTTGAGACATCACTTGAGCTATCTCAGG  
AGTCGTGACTACTGCTCCCAATGGTAAAGCCATTACCAATGCCCTACATTTTTGACAAATAAATATTATCCTTAATCTAAGGATCACAAGTGCTATTAACATTAATTTGTCATATGGACTGAA  
GCGAGATGTTGATTATCTAGAAGTCATGAGTTATATGATACTAAAATATAAGTCAAAGAGTATAATGCATTAATGAATTTTGAACTTCCAGAAAAAAAAAAAAA

>comp173544\_c0\_seq3

CCAAGAGAAGAACCAGCAAAGAGGCACCTTAGATCTTCTCCTCAATCTTCAAAAATCCAACAGATATAGATTCTTCTTCTCTGAAGATTGAGCTCTTTTCTCATACTTCAAATTATCTCTT  
GCCATGAAATTTATCTCCTTGTTAAAGAACCAGAATACCTGTAAGAACAGCCATGAAGAGGTGAAATTGAGCTCCTTTCTATGCTCATCTTGGTGAATTCTTCTGCCTTCTAACTCACAGCA  
TCAGATGTTTCAAGGCTGATATTAAGGAAAGGCCATGGATTTCAGAGAAAGAAGTGAATTTGCAGCTCCTGAGAGTCTTAAAGGAGCTCAAGAGCTCAAAAATATGATTGATAATTGGTC  
CAAATCTTCGAATTTCAACGGGCAACAAAATGACATTTTCAATGATCTTCTAGTAGGAACAGTGGAGCTCCAGGAATCACTATTAATGCTTTCAAGGCTTCAGATCGAATCAAGCAAAAATG  
CTAATGAACAAAACAAGGCAAAGTGAAGAGAAGAATTTGCAGAACAAAACCTCATTGATTTAAGCAGATATAACAGATTGCACGAACGTAGACTCTCTGCTGACAGTTCTTTGACGAA  
TTACAAGCAAGAAATGAAGCAAGAGTTTCAAGGATAAGTTTAAACAAAATTTGATAATAAAAACGTTACTTCGAACAAAATTCGGTTCTGCCAAAAAAGTTGAATTTTCTGCCAGGGAA  
AGAAGTTGAAAGCTCCAAATTTGATTGCCAGGCTCATGGGTTTAGAAGATTTCTTTCAGATGATCAAATTTGAAGTCAAGAAAAAGGAGAAGGTGCTTAAGAGAAGTCAAAGTCATGTG  
GTAATAACAAAAGTTTGGATGAGATTATTGAAACCATGAGATCTACAGGTTTTCTGAAGAGAGAACAATTTATGAGTAAGAAATATGGAGCAAGTCATAGTAAGAAAGACGGCATCCCG  
CCGATTGTGATTATGAAATCTCTGAATTTGCCTTATAGGGAGAGAGAAGATATAAATCTAATTTTCAAGAAACATCTGATTCAATCTTAGAAGACAAAAGTTTCTGATATTGACTGTGAGTTTTC  
GGAAAATTTGAAACAAAATGAAGTGTGAGCTTTGAAAAAGAGAAAATGGAAGCACCACAAAGGCTTACAACAGCTTGGCTTACAACAGCTTCTGTTTTCAAGGGAAGGAAAATGGCT  
GATGATTTACAGAAGATGGAAATTAATGGAAAGAAACAGGTGGAGAAGAAGTTGAAAGCCATAAGAGAACCAATGAAGATGACTCCAGAAAAAATGAAGGCTGAAAAATTACAG  
GCCTCAGAAAGGCTCACTTCTCAGACAAATAGAAGTCATGAACAAGATAGAAAAGAATAAATTTTTCAGTGAAGTCGACATCAATTCATTAGTTCTGTGAAGGAGGAGAAGATTTCA  
GCAGGAAGACCAATAGAAAATCAAATAAGACTGAAGACAAAAGACTAAATATGGAAAGTTAAATTACGCTTTAACTGAAAGCCCTGCAATTTCAAGAAGCAAGAGCCTTTTGGCTGC  
TGATAGCCTCCTTAAACAAGCACAAGGATCCCACAAAGCCTTCTAAGAGAGGTAACCTATAAGGTCCTAGCTCTTTATTTGGGCTCACTGACATCAAATCTGACTCGAACCCAGCCCAA  
ATAGATTTAAGTTCTTAGCAATATGCAATCTCAAGTCAAATAACAGCTCTATATGCAGGAGCTGAGTAGTCTGAGTAGAAGTTACTCAGTTCTCTGACACTTGGCAACTTAATACTATTATT  
TGATCACAGATGAGATCAGAAAAGGCCGCAAGGTAATATGTGAAGTGTAGCAAGGAACTACCAAGCTGGAAGAAGTGTAGAAAATGATTGAAGAATCTATCAGGAAATCTTACTACAAA  
CACCTACAAAAGAAATGCAGCTGAAATCAGAAACCTCCTTAAACCTCTTTTATTAAGAGCCAATCTTCTCCAACCATATGCATGACCTCTTTGGCACCAATGTTATAAACTGACAGGAG  
CTGAGCTGTTTTATTCTATTAACCTCAGGCTAGATTAATCTGTATGGTAGCTTATATGGTTGTATAGGAGTAGTGCTTTCTTATGTTGGGTGTAGCCTATTATGTTGATACCTTTGTCTATAAAT  
ATTTAGCTAATGCTTGTAAATAGGGAGATTTTGGAGATTAATAAAATGAAGACTTTTGTGATGTTACTTTTGATTCAATGATATCCTGAATTG

>comp173681\_c0\_seq1

ATAAATAGAAAACCAACCCACCCATTAACCAAGCAAGTAACTCTCTACTTAACCAACCATGGCTTTCTTCTCCATGATCAAGGCCCTTCTCCTTTGCACTACTTCTCTCTCACTCCT  
TCTCACCACCCCTGCCTCAGGCAAGGGCTTCAACTACTTGCTCAGTGGTGACCGCCTCAACGCAGGCGAAGCCCTCGAAGTGGGTGACTACAAGTTTATTATCGAAAATGATTGCAACCT  
CTCCTTCTACAACCTTTGGGACAGAGAAATGGTCTTTCGAACACCAAGGTCTTGGTAAAGATTGCTACCTCACCTTAAATAGAATCGGCGAACTCAATATTATTAACAAAAAAGGTATTATC  
ATATGGAAGACAGGAACTAAAGGGAAAGATGGAACTATATCCTCATACTACAAAGGAACCATGAAGTTGCTATATACGGTCCAAGCGTTTGGTCTAATGACAATAAATACTATGAATCTG

ACGATGTTGTCGTTGCCACTGCACTTAATGGAACAATAGGAGTTTCAAGCCAAGAGCAGAATAACGTGAGGGAAATGGGGAAAATTATGGAGGTTATGAGTGATGCATAGTCTGGGTTTT  
ATATTTATGCGTATTAATGAATAATGAATAAGACATGCATGCGTGTGAGTGCTGGATGAATGGGTTTATTATCTCAAGCATGTTTTTAATTCCTTGTTCTGTGTGTGTTCTTATCGTTGAAATA  
AAATGGAAGTTTGTCTTGTCTTGTAAAGCTTTTAATGGAGTTGTTGTAGAAACTGCTTATCTATTAATTTCCCCCTCTAATGGTTTGATCTTTAAAAAATAAATGATAAATTATTTAGTTTC  
A

>comp173797\_c2\_seq1

GCCATTTGGGCTGTGTAATGCACCAGCCACGTTTCATGCGCTTGATGAACGAAATTTTAAAACCCCTTCTCAACAAATGTTGTGTTGCTTATTTTGATGACGTTCTAGTATTCAGCAGCAATC  
TAGAGACCCATGTTCAACATTTGCGCCAGCTTTTTGAGGTATTCCGTGAACAACGACTTTTCTTAAATATAGAGAAGTGTGAATTTGCTATGCAAGTTGTGTCTTTCCTTGGATTCAAATA  
TCTGCCACCGGTGTAAGTGCTGATCCCAGAAAGGTGAAGTCTATAGTTGAGTGGCCGACGCCAAGATCATTACTGAAGTGAGGAGCTTTCATGGATTAGCAAATTTCTACAGGAAGTTT  
ATAAAAGGCTTTAGTATTATGTTAGCTCCATAACTGATTTGCTTAAGCTGAAACAATTCCTACTGGAAAGCCGAACAGCAGACCAGCTTTGAAGCCATCAAATCAGCTTTATCTTCGGCAC  
CAGTCTTTCCTTGGCCGACTTTGATAAACCAATTTTTCAGTGGAAACCGATGCTCTACAGTAGGAATTGGAGCTGTTCTAGTACAAGAAGGCCGACCAGTTGAGTCTTCAGCGAAAAAC  
TTTGGCCGTCCCGCAACGGTGGTCAGTATATGAGCAGGAATTGTATGCGGTGGTGCAGCTTTGAAACAATGGGAGCATTACCTATTGCACCAGGATTTTATCCTCTGTAGTGATCACAA  
GGCGCTGCAGTACATCAATACCCAAAAAATATAAATCGGATGCATGCTAGGTGGGTTCTGTTCTTACAGAAATTTACTTTTGTTTTGAACATAAAAGTGGGACTCAAACCGGGTTGCT  
GACGCCTTGAGTAGAAGATCTGCACTCATTACTCAATTACAGACCAATTTTGGGGGCTGGAATGCTTGCAGGAGCTTTATGAAGGGGATCAGGACTTTGCAAAGGCATGGATCAAATGC  
CTTAATAAGGAACCTCTGGAAGATTATAATGTTAGGCACGGTTTTTTTATTCAAAGGTAACCTACTGTGTATACCGAACTCGTCTTGGCGACACTTGCTGATACAGGAAACACATGGAGGAG  
GGCTGGCAGCTCATGCTGGACAAGACAAAACCTTAACACAGCTGCAGGAGAGGTTCTACTGGCCGCATATCCGAAGAGATGTGATCAGATTTCGTGGAGCGTTGTTCTGTCTGTCAAAGT  
TATAAAGCCAACGGACAGAATACAGGCCTGTACCAACCTTTGCCGATACCGGACTCCATCTGGGAGGATCTGAGCCTTGATTTTGTACTCGGTTTACCGCGCACTAAGCGGGGAAACGAC  
TCCATCATGGTAGTCGTTGATAGATTTTCGAAAATGGCACATTTTATCGCGTGCAAAAAGACGTTTGACGCACTGAATATAGCAAAGTTATTTTCAAGGAGATTGTGAGATTGCACGGGG  
TGCCGAGGAGTCTGACATCCGATCGAGATGTGAAATTCCTCAGCCACTTTTGGCGTGAGTTATGGAAGAGATTCAAACACGCCTGCAATTGAGCTCTTCGTATCACCCCAAACCTGACG  
GACAAACAGAAGTGGTGAACCGAACTTTGGGAAATTTACTGAGGTGCCTGGTTCAAGAGCAGCCGAAGTCATGGGATGATGTGCTCGGTCAAGCGGAGTTTGCTTTTAATTCAATGCCG  
AATCGATCTACGGGTAAGTGCCCATTTAGTATTGTATACAAAAATGCCAAACCATGTTCTTGATGTAGCAGTTATACCCAACCTGTAAGAGCAAAGCGGCGTCTGACTTGGGTAGATCAAT  
TCTCGGATATGCTAGAGAAGGTTTCGGCTCAAACCTGCAGGAATCTACTGCAAAAATACAAGCAGGATGCGGATCAACATAGAAGGAAGAAAGTATTTTCAGCCAGGCGACCTAGTGTGGGTT  
CGCATGCAGAAGGAACGTATGCCCGCGGAACTTACAACAAGCTCAACCGAAAGAAGTTTGGGCCTTTTTTTCAGTGAAGCACCGAATTAACGATAACGCTTATGTTATCGACTTACCCGCT  
GAGTTCATAACTTCAAACACTTTCAACATTGTGGATCTATATCCTTACTTTCCACCAGATGAAGTTCCTGACGTCGGAAATTAGCTGAGGAATGCCTCTTTTGCAGAAGGGGCGTATGATG  
CGGAGCATCTTTAGCAAGGGGACTGGAGGCATAACTTACCTGCACATGCTCTGTTAGAAATGGAGCCACTATCCTTTACTTTTATTACTGTTTTTGTCTTTAGTTAGTTATTTAGTCAGAATATT  
TCCCTTTATACTATTTTLAGAATAGGCTTGATTATAGAAGCAGATATATGTGCTAGGGAGGAAAGGGGGAGGCAGCTTTTCATTTTTTCATAGAAGAATTACAGAACCAGTAGTTTTACTGTTT  
TATTGCTTTGTTCTGTTGCTCGGCTAAACTTCTGTGCAGGATCCCATTGCACCCTTTCCGGTTCGACCAGTCGGTTTTTCTACAGATGCAGCATCGAAGGATACCAAGACACACTCTG  
CGTCTACACACAGCGCCAATTCTACCGCAATGCGACATTTACGGCACAAATCGACTTCATCTTCGGCAACGCGGCGGTCGTCATCCAAAACAGCAATATCTTCGCCCGAACCTCCGCAAAA  
GGGAGAAGCCAACGTGATCACAGCCCAAGGCCGACCGACCAGAACCAGAACACAGGTATCGTGATCCAGTCATCCACCATTCAAGCCGCGGCGGACTTCAAACCCGTTTCATCGGACG  
GTGAAGTTCGTACCTCGGCCCGCCGTGGCAGCTCTACTCGCGCACGGTCTATCTAGAGAATTTTCATGGACAGCATAATTGATCCTGCCGGATGGTTGCCGTTCAACGGAACTTTGCCCTCG  
ATACGTTATATTATGCCGAGTTCCAGAACACTGGGCCAGGAGCCAGAGTTTTTAAGGCTGCGTGTGAAATGGAAGGGGTTTCATATCATTGCAAGCCGTCGCAAGTGAGGCAGTTCACGG  
TCGGAAATTTTCATCGACGGCGGCACTTGGTTGCCGGCGACGGGAGTGCCATTTGCTTCCGGGCTTTAAGCCGGGGAAATATTTGTACAATTTTCGGGTCAGGTTTTTCTGATCACCAATGC

TTCGATCATATCTATCGTTATATTTATTTTTAGATGAATATAGCATATAAAAATTTTATTAAGTTTTATGCTAAAATT

>comp173797\_c2\_seq3

CGCGTTGCCGAAGATGAAGTCGATTGTGCCGTAATGTCCGATTCCGCGGTAGAATTGGCGCTGTGTGTAGACGCAGAGTGTGTCTTGGTATCCTTCGATGCTGCATCTGTAGAAAACCGA  
CTGGTCGGAACCGGAAAGTGGTGAATGGGATCCTGCACAGAAGTTAGCCGAGCAAACAGGAACAAAGCAATAGAACAGTAAACTACTGGTTCGTGAATCTTCTATGAAAAATGAA  
AAGCTGCCTCCCCCTTCTCCCTAGCACATATATCTGCTTCTATAATCAAGCCTATTCTAAAAATAGTATAAAGGGAAATATTCTGACTAAATAACTAACTAAAGCAAAAAAAGTAATAAAG  
TAAAGGATAGTGGCTCCATTTCTAACAGAGCATGTGCAGGTAAGTTATGCCTCCAGTCCCCTTGTCTAAAGATGCTCCGCATCATAACGCCCCCTTCTGCAAAAGAGGCATTCTCAGCTAATT  
TCCGACGTCAGGAACCTCATCTGGTGGAAAGTAAGGATATAGATCCACAATGTTGAAAGTGTGTTGAAGTATTGAACTCAGCGGGTAAGTCGATAACATAAGCGTTATCGTTAATTCGGTGC  
TTCCTGAAAAAGGCCAAACTTCTTTCGGTTGAGCTTGTGTAAAGTTCGCGGGGCATACGTTCCCTTCTGCATGCGAACCCACACTAGGTGCGCTGGCTGAAATACTTCTTCTCTTCTAT  
GTTGATCCGCATCCTGCTTGTATTTGCAGTAGATTCTCTGCAGTTTGTAGCCGAACCTTCTCTAGCATATCCGAGAATTGATCTACCCAAGTCGACGCCGCTTTGCTCTTACAGTTGGGTATA  
ACTGCTACATCAAGAACATGGTTTGGCATTFTTGTGTATAACAATACTAAATGGGCACTTACCCGTAGATCGATTCCGGCATTGAATTAAGCAAACTCCGCTTGACCGAGCACATCCTCCA  
TGACTTCGGCTGCTCTTGAACCAGGCACCTCAGTAAATTTCCCAAAGTTCGGTTCACCACTTCTGTTTGTCCGTCAGTTTGGGGGTGATACGAAGAGCTCAATTGCAGGCGTGTFTTGA  
TCTCTTCCATAACTCAGCCAAAAGTGGCTGAGGAATTCACATCTCGATCGGATGTCAGACTCCTCGGCACCCCGTGCAATCTCACAATCTCCTTGAAAAATAACTTTGCTATATTCAGT  
GCGTCAAACGTCTTTTTGCACGCGATAAAAATGTGCCATTTTCGAAAACTATCAACGACTACCATGATGGAGTCGTTTCCCCGCTTAGTGCGCGGTAAACCGAGTACAAAATCAAGGCTCA  
GATCTCCCAGATGGAGTCCGGTATCGGCAAAGGTTGGTACAGGCCTGTATTCTGTCCGTTGGCTTTATAACTTTGACAGACAGAACAACGCTCCACGAATCTGATCACATCTCTTCGGAT  
ATGCGGCCAGTAGAACCTCTCCTGCAGCTGTGTTAAGGTTTGTCTTGTCCAGCATGAGCTGCCAGCCCTCCTCCATGTGTTTCTGTATCAGCAAGTGTCCGAAGACGAGTTCGGTATA  
CAGGAAACACATGGAGGAGGGCTGGCAGCTCATGCTGGACAAGACAAAACCTTAACACAGCTGCAGGAGAGGTTCTACTGGCCGCATATCCGAAGAGATGTGATCAGATTCGTGGAGC  
GTTGTTCTGTCTGTCAAAGTTATAAAGCCAACGGACAGAATACAGGCCTGTACCAACCTTTGCCGATACCGGACTCCATCTGGGAGGATCTGAGCCTTGATTTTGTACTCGGTTTACCGCG  
CACTAAGCGGGGAAACGACTCCATCATGGTAGTCTGTTGATAGATTTTCGAAAATGGCACATTTTATCGCGTGCAAAAAGACGTTTGACGCACTGAATATAAGCAAAGTTATTTTTCAAGGAG  
ATTGTGAGATTGCACGGGGTGCCGAGGAGTCTGACATCCGATCGAGATGTGAAATTCCTCAGCCACTTTTGGCGTGAGTTATGGAAGAGATTCAAAACACGCCTGCAATTGAGCTCTTCG  
TATCACCCCCAACTGACGGACAAACAGAAGTGGTGAACCGAATTTGGGAAATTTACTGAGGTGCCTGGTTCAAGAGCAGCCGAAGTCATGGGATGATGTGCTCGGTCAAGCGGAGT  
TTGCTTTTAATCAATGCCGAATCGATCTACGGGTAAGTGCCCATTTAGTATTGTATACAAAAATGCCAAACCATGTTCTTGATGTAGCAGTTATACCCAAGTAAAGAGCAAAGCGGCG  
TCGACTTGGGTAGATCAATTCTCGGATATGCTAGAGAAGGTTCCGGCTCAAACCTGCAGGAATCTACTGCAAAAATACAAGCAGGATGCGGATCAACATAGAAGGAAGAAAGTATTCAGCCA  
GGCGACCTAGTGTGGGTTCCGATGCAGAAGGAACGTATGCCCCGCGGAACTTACAACAAGCTCAACCGAAAGAAGTTTGGGCCTTTTTCAGTGAAGCACCGAATTAACGATAACGCTTA  
TGTTATCGACTTACCCGCTGAGTTCAATACTTCAAACACTTTCAACATTTGTGGATCTATATCCTTACTTTCCACCAGATGAAGTTCCTGACGTCGGAAATTAGCTGAGGAATGCCTCTTTTG  
CAGAAGGGGCGTATGATGCGGAGCATCTTTAGCAAGGGGACTGGAGGCATAACTTACCTGCACATGCTCTGTTAGAAATGGAGCCACTATCCTTTACTTTTACTTGTFTTGTCTTAGTTA  
GTTATTTAGTCAGAATATTTCCCTTTATACTATTTTTAGAAATAGGCTTGATTATAGAAGCAGATATATGTGCTAGGGAGGAAAGGGGGAGGCAGCTTTTCATTTTTCATAGAAGAATTACAGA  
ACCAGTAGTTTTACTGTTCTATTGCTTTGTTCCTGTTTGTCTCGGCTAAACTTCTGTGCAGGATCCCATTGCACCACTTTCCGGTTCGACCAGTCGGTTTTCTACAGATGCAGCATCGAAGG  
ATACCAAGACACACTCTGCGTCTACACACAGCGCCAATTCTACCGCAATGCGACATTTACGGCACAATCGACTTCATCTTCGGCAACGCGGCGGTGTCATCCAAAACAGCAATATCTT  
CGCCCCAACTCCGCAAAAGGGAGAAGCCAACGTGATCACAGCCAAAGGCCGACCCGACCAGAACCAGAACACAGGTATCGTGATCCAGTCATCCACCATCAAGCCGCGGGGACTTC  
AAACCCGTTTCATCGACGGTGAAGTCGTACCTCGGCCGCCGTTGGCAGCTCTACTCGCGCACGGTCTATCTAGAGAATTTTCATGGACAGCATAATTGATCTGCCGATGGTTGCCGTTCA  
ACGGAAACTTTGCCCTCGATACGTTATATTATGCCGAGTTCAGAACACTGGGCCAGGAGCCAGAGTTTTAAGGCTGCGTGTGAAATGGAAGGGGTTTCATATCATTCGCAAGCCGTCGC

AAGTGAGGCAGTTCACGGTCGGAAATTTTCATCGACGGCGGCACTTGGTTGCCGGCGACGGGAGTGCCATTTGCTTCCGGGCTTTAAGCCGGGGAAATATTTGTACAATTTTCGGGTCAGG  
TTTTTCTGATCACCAATGCTTCGATCATATCTATCGTTATATTTATTTTAGATGAATATAGCATATAAAATTTTATTAAGTTTTATGCTAAAATT

>comp174253\_c1\_seq11

TCAAACATAATGTCATAAAAGACTATATTAGAAGTGGAACTGAAATTTATGATTTTATTTGTAACTTAGAGCATGCTCATAACAAAATAACATTATTTAGATAGTCTCACACTCA  
AAACGTCTCAGCGTTCAAGTGGAAAGTTGGCAGGCAGCAGCCAACGGTAAGCTAACGGTAACAACTTATTCAAATCAGTGACGTTCAATTCCTCCACATTTGTATTCTATTCAACA  
CCAAGCTCCTTCCTTCGCGCGCTAAACAACCTCGTACACCTTCTTTGGTTTCAGGGAGAGACTTGGCGACGCTCTCCGCTCCAAGCAGCGCTTTCCCCACGCCGCAAGTTTGGGGAAGT  
CTCCTCCACGCTCAACAAGTGAAGGCCTGGAACTGTAGAACCACGAGGTGAAGGGAACGAATGTGATGTCGACGAACCCAAAGTCTCGCCGCCGAAGTATTTCTTCTCTCCGAGC  
TCCGCCTCAAGCGTCTCAGGTTCTTACCAACTCCTTCTTCGTCTCCTCAAGCTCCTCACCTTCTTCAGCTTCCAAATGCGAAGCGCATATTGAGAGATCTTCTGTCAATAAAGTCAG  
CCCAGAAGCGGGCAAGGGCGCGCGCTAGGGATCGGAGGGGAGGATAGGGCTTTTACTGGGGAAGACTTCGTCAATGTACTGGACTATGATGAGCGACTCGCAGATAGGTTTGCCGTG  
GTGGATCAGAACGGGGATCTTCTGTGCACTGGGTTGATTCAGCAGGAGCTCGCTTCTCTCCGAGAATTAGATTCTTCTCCTCCTGTACTCATACTCCACCTCTTTTTCCGCCAATG  
CGATTCTGGTTCGGACTCCGAAAGGGCTCAACCAGAAATCCAGCAGCTTCACTTCTTCTTCCGCCATTGCTCTTTCAGCTAGACCTCTCTGGCTCTCTCGCTCACGTAATGCTTAGA  
AATTGCTATGAAGGCAAAGTGTTCGATGGAATGCGTAGTTAACGTTGAGGGGAGTGGTTTTTATAGCGCCAATTCGGCTTTTCTTTACTCGGCTGACCCTCGAGATAGTTCATGCTTTTGT  
CATCGCTTGGTCAACTCCGTCA

>comp174253\_c1\_seq3

TCAAACATAATGTCATAAAAGACTATATTAGAAGTGGAACTGAAATTTATGATTTTATTTGTAACTTAGAGCATGCTCATAACAAAATAACATTATTTAGATAGTCTCACACTCA  
AAACGTCTCAGCGTTCAAGTGGAAAGTTGGCAGGCAGCAGCCAACGGTAAGCTAACGGTAACAACTTATTCAAATCAGTGACGTTCAATTCCTCCACATTTGTATTCTATTCAACA  
CCAAGCTCCTTCCTTCGCGCGCTAAACAACCTCGTACACCTTCTTTGGTTTCAGGGAGAGACTTGGCGACGCTCTCCGCTCCAAGCAGCGCTTTCCCCACGCCGCAAGTTTGGGGAAGT  
CTCCTCCACGCTCAACAAGTGAAGGCCTGGAACTGTAGAACCACGAGGTGAAGGGAACGAATGTGATGTCGACGAACCCAAAGTCTCGCCGCCGAAGTATTTCTTCTCTCCGAGC  
TCCGCCTCAAGCGTCTCAGGTTCTTACCAACTCCTTCTTCGTCTCCTCAAGCTCCTCACCTTCTTCAGCTTCCAAATGCGAAGCGCATATTGAGAGATCTGGTAAGCCAATGCAGACC  
ACAACTGTTTAATCAATTGCTTAAATGAAAACGATATTATTAATCGGGATAGGAGGGGATCTATTACCTTCTGTCAATAAAGTCAGCCAGAAGCGGGCAAGGGCGCGCGCTAGGGAT  
CGGAGGGGAGGATAGGGCTTTTACTGGGGAAGACTTCGTCAATGTACTGGACTATGATGAGCGACTCGCAGATAGGTTTGCCGTGGTGGATCAGAACGGGGATCTTCTGTGCACTGGGT  
TTGATTTAGCAGGAGCTCGCTTCTCTCCGAGAATTAGATTCTTCTCCTCCTGTACTCATACTCCACCTCCTTCTCCGCTAACGCAATCCTGCATCGTTGTCCGAAAGGGCTAGACCAG  
AGATCCAGCAACTTCACTCCCTTCTCCTCCGCCATTCTTCTTCTCTCGTTTGGAGCTCTGGGAAATATGCACGCAAGTTGTTTGGATGAAATGGCCGCGAGGCCGCGGTTTATAAGGG  
AAAATGAGGAGGTGAGTTGTTTCTGGAGTGTTCGGTTTTTGGGCTTAAATGTCATTGCTCGCGTCACCTGAGAAACGAAGTCGCGAGAATTAATTTTTACGGTGGATTCCG

>comp174253\_c1\_seq5

TCAAACATAATGTCATAAAAGACTATATTAGAAGTGGAACTGAAATTTATGATTTTATTTGTAACTTAGAGCATGCTCATAACAAAATAACATTATTTAGATAGTCTCACACTCA  
AAACGTCTCAGCGTTCAAGTGGAAAGTTGGCAGGCAGCAGCCAACGGTAAGCTAACGGTAACAACTTATTCAAATCAGTGACGTTCAATTCCTCCACATTTGTATTCTATTCAACA  
CCAAGCTCCTTCCTTCGCGCGCTAAACAACCTCGTACACCTTCTTTGGTTTCAGGGAGAGACTTGGCGACGCTCTCCGCTCCAAGCAGCGCTTTCCCCACGCCGCAAGTTTGGGGAAGT  
CTCCTCCACGCTCAACAAGTGAAGGCCTGGAACTGTAGAACCACGAGGTGAAGGGAACGAATGTGATGTCGACGAACCCAAAGTCTCGCCGCCGAAGTATTTCTTCTCTCCGAGC  
TCCGCCTCAAGCGTCTCAGGTTCTTACCAACTCCTTCTTCGTCTCCTCAAGCTCCTCACCTTCTTCAGCTTCCAAATGCGAAGCGCATATTGAGAGATCTTCTGTCAATAAAGTCAG  
CCCAGAAGCGGGCAAGGGCGCGCGCTAGGGATCGGAGGGGAGGATAGGGCTTTTACTGGGGAAGACTTCGTCAATGTACTGGACTATGATGAGCGACTCGCAGATAGGTTTGCCGTG

GTGGATCAGAACGGGGATCTTCTTGTGCACTGGGTTTGATTCAGCAGGAGCTCGCTCTTCTCTCCGAGAATTAGATTCTTCTCCTCCTGTACTCATACTCCACCTCCTTCTCCGCTAACG  
CAATCCTGCATCGTTGTCCGAAAGGGCTAGACCAGAGATCCAGCAACTTCACTCCCTTCTCCTCCGCCATTCTTCTTTTCTCTCGTTTGAGCCTCTGGGAAATATGCACGCAAGTTGTTG  
ATGAAATGGCCGCGAGGCCGCGGTATTTATAAGGGAAAATGAGGAGGTGAGTTGTTTCTGGAGTGTTCCGTTTTTGGGCTTAAATGTCATTGCTCGCGTCACCTGAGAAACGAAGTCGCG  
AGAATTAATTTTTACGGTGGATTCG

>comp174780\_c0\_seq9

ATTGAAGAAGATTGGTACCAAACACGTCAAATATGGTGTACTTGATGAACATTTTCGAGGTATTACCACCATGAATACAATCTCTAAACTACAATATTTTGCTACTCGTATGTGAATTACTTTA  
TCTGTGCTTACAGGTTACAAGATTTGCATTGCTGGAGACAATAAAAAGAGGCCGTTCCCTGATATGTGGAGCGCAGAGATGAAGACTGCATGGACTGTAGCTTATAATCACTTAGTTGCAGCT  
ATAAAGGAGGAGATGAACTCCCTTCCCTTGAGAGCTTAATTGGTTTCTGAATTCTGTCAGCATAAGTAGTGTATGTTGTTGAGTTCTTTCTCTTGGTTTAGGCTTCTTATTGTTTTTTAAAGTA  
GTTTTT

>comp174805\_c1\_seq1

TTTTTTGAGTGGAATTTAATCACTTTTATTAATAAAAAAGGCACGCCGTTCAAACCTTACAAGGTTTATGATAAAAAAAGAAAAACATAACAAGTAGCACACGGTACATATAATAGCCTC  
GATATTTTGCTAAACACCACAATAAGCTTTTAGGGCATCATCAACTCTCTCTCCTTCATCTGAAAAGCGAAACTTCACGTAGTCATAATTTGAAAGGCTTGAAAAGTAAGGGGTGTTGT  
TCATCAATCAATTTCTTCGGAGCACTTATTATATCATTTGTGATATTTGGTATTGTGCTGAAAACCACTGCATATCGTTTTTCAGTCTCACTCTTCACTCGATGAGTAGGAGCGTAAA  
GTCTTCCATTACTCCAAGCCTTGAATGCTTCGCCAACTAAAACCGTAAATGAATTTTTTCATAGGTTTTGATTGTAACCATTACCATTTTCAGCCTCTACTTCAAGTCCTTCAACGTTGTGTG  
GGCAAATTATGCTTATATAGTTTGGATCTTTGTGAGAAGGCAAAGCAAGATTGATTCCATCATCTAATGTGTCCTTATAATAGTTTGAGAACCTTATTGAATATGCTAGGGAATTCATATGTGA  
ATCATAGTGATCCTCTAAGCCCAAGCTCTCAATAATCATCTTATGGATCATATTCATGAGCTCTTGCATATGCTTTGCATACTTCAACACAATATTGCAGAAAAAGTCATTTCCCTTGGGGCCA  
AATAGAATTGGCATATCTTGAACATTAATCAGAGAATTAGGATCGGTCAACTGAAGGGCCAAGAAAGGGAAACCTAACTTCGTGAACCAGTTACCATGGTAGGGCAACTCTTGGCCATC  
ACTAAGTTTGTTCATAACTGGCATGGTGAACATGTTTGGCACGATCAATCCAAGCAACTCAATTCGGAGCTCAGAACTAACCTCATCGTAAACAACCTTGAAGCCACCATAAGTTTCTAGA  
GCTTCTCCAATTTTTGATCGAGCTATCGCCCAACTCTTTTCATCGAACCTCGTCATGTCCAATCCACTCAAATCCACTATTGGTAGCTCAAGGTTTTTTCTATCAACACCACTCAGATATCCC  
ATTCTTGCTAGTTACTTCTAAGCTTTGCCTCTTGATGCTACCAATAGTGGAG

>comp175298\_c0\_seq1

TATCTTCTTCGGTCATCTATAAAATCACCATCTCAGCCTCTCTTTCTCCAGCTTCCCTCCTGCGCTCTCTCCATTATATATCTTCTTCCCTCATCTGCACTATATCTTCTTCGGTCATCTATAAGTTT  
TCTTCTAATCAGCTGCAATGTTAGGTGCAGATAATAAGTTACCGATGAGAAAGGAGGAGGAAGAAGGAAGTGAAGCCATTAATGAACATGGAGATGAATGGACAATGGATGGCTCTGTG  
GACTTCAAGAGTAGGCCTGCAAGGAGAGGAAAGAGTGGGGGATGGTTGGCTGCATCTCTTGTGCTTGTGAACCAAGGCCTGGCTACTTTAGCATTCTTTGGTGTGGGAGTGAACCTGGT  
TATATTCTTGACGAGGGTGCTTCAACAAGACAATGCAGCTGCGGCCAACAATGTTAGCAAATGGACTGGCACAGTCTACCTCTTCTCTCATTTGGTGCCTTTCTTAGCGACTCCTACTGG  
GGAAGATACAAGACTTGTGCAATCTTTCAGATCATCTTTGTAGTGGGATTGGTGTATGTCATTAACCTCAAGCTTGTCTTACTAAAGCCATCTGGGTGTGGAGATGGACATACATTTG  
CGAGCCACACTCTGGTTTCAAAGTTGGGCTATTCTACCTATCAGTATACCTTGTGCTTTAGGCAATGGAGGTTACCAACCAACATAGCCACCTTTGGAGCTGACCAATTTGACGAGCAG  
GATCCAAGGGAAGCTCATTCAAAAATCTCCTTCTCAGTTACTTCTACCTTGCCCTCAACCTTGGTTCCTTCTCCAACACCTTCTCGGATACTTTCAGAACAATGGCTCCTGGGCATT  
AGGTTTTTTGGGCTTCTGCAGCATCCGCCATGGTAGCTCTACTGCTCTTCCCTTGCTGGTACCCGGCAGTATCGCCATTTTCATCCAAGTGGAAACCCCTTTTCCAGGGTGAGTCAAGTGATT  
GTAGCTGCGTCCAGGAAATGGGATGCTGATAAGCCATCCAGTTCGAAGGAGTTGCATGAACCTGGATCGAAGGAATTTGCTTCTACTGGAAGTAGGAAGTTGCTTCACTGAAGGATTC  
AAGTTCCTGGATAGAGCAGCCATCATCAAGCCAAAGATGAGCCACCCTGCAAAGCCACCCCTGGCACCTCTGCACCGTCACTCAAGTTGAGGAATTGAAGTGTGTGCTCCGTCTCCT

CCCTATCTGGCTCTGCACTATCCTCTACTCTGTTGTGTTTCACACAAATGGCCTCCCTCTTTGTGGAACAGGGAGCAGTCATGGAAACAAACATAGGCTCCTTCCAAATCCCCCTGCAAGC  
ATGTCAGCAATTTGATATTCTAAGTGTAGCACTGTTTCGTCCTTCCTTTATCGCCGTGTTCTTCATCCCTTCGCTTGCAGACTCACCGGCAACAGCAGCGGACCCACTGAGCTGCAAAGGATGG  
GCGTTGGCCTGGTCATAGCCATCATAGCCATGATCTCTGCGGGCACCGTCGAAATTTATCGTCTTAAGCATGTCTGTAAGGCCTGCATCAACGAAGAAAGCTCAATGAGCATATTGTGGCA  
AATCCACAGTATATGCTCATTGGAGCATCAGAGGTGTTTCATGTACGTAGGACAGCTCGAGTTTTTCAATAGCCAGACTCCAGATGGACTAAAGAGCTTTGGAAGTGCATATGCATGACC  
TCCATCTCCTTCGGCAACTATGTGAGTAGCTTGCTTGTGACAATTCTGATGGATATCACGAAGAGAGGGGGGAAGCCGGGGTGGATACCTGATAACTTGAACAAAGGGCACATGGATAGG  
TTCTACTATCTACTTGCATTACTGACTGCTGCAGACTTAGTACTGTATATAATCTGTGCAAAATGGTACAAGAGCATCAAGGTTGAAGGGATGGAAGAGGAAGGTAATGATGAAGATGAGA  
TTGATGACATCAAGATTGATGATTTGAAAGTTTCTGTGGTCTGAGATAAACAATCCAGTTATTGGGTTGAGAATTTATGAGATTCACATTAACTCGAATTTCCCTTGCTTTTGCTTACCTTGAT  
TGCAAGAGTTAATGATTTGGTAAGCCCAGGTTTGGTGGAAATGCCGCACACGACACGGGGCGGTGGAGCTATTTATATATGATGTAGAAATTGAAGAGAGAAATTATGACTTGTTCOAAGG  
TGAAAGGTCCCTAATATTAAGAGAAACAAGCTGATAAAGAATCTTTGGAACCTTGATAAAATGTGTTATGCATGTACATGTTAAACTGCTTGCCAGCAGGAACAATCAAGGGATGGCAA  
ATTTGGAATAATGACTTTAGAAAAAACTTGTATTTGCTTCTAGAGATGTAGTGCCTTTTGGCTTCAATTTATTTGGGGTGAATAAGGGATTGGGCGGCTTGCAAAAATATTTCTATGAT  
GCAACTCATCTTGATCTATTGGTTGGGTATTTTGCCAGCAATTTGCCATTAACTCATCTAGTGCCTCAGTTAAATCTAACAATGTGATTAGAGATATTGTCGTAGATAGAGGCCAATG  
TAGCAAGAGTATACTTGTATAGGTTGAGAGGTAAAGGAGCTTTTGGAGAAAGGATCTAATGATGTGCATGTCTCAAATGAGGAGATGGAGAAAAGAAAAGTATAGTCTTATAAAAAATTA  
CTTCGATAGAAGTATACAGTCTCCCTATATGAAGATCATAACACCAATAACCTTTATGAGGGTGAAAGTACTTAAGAAAAGATGCATAAAAAACACAATAAGAGAGTTTGACATACAAGTAA  
AATGAACGAACAAAGCAATTGCATCCAAAACTAATACTGTAAGGAGAAAATAACCAGACAAGGGCAAAGAGTGTATATGGATGAGAACTGGTCAACAAGAGGGTATAGGATGTTATTA  
ATGAAATTTCAAGTGATCAAACCAACATACATGCAAACTAATGAGGAACATTCATGTGAAACAACAAGTTCCCTTGCAATTAAGAAGGTGGCAACTTTCTCATCTAACTACAACATTCT  
ATGAAGATGTATATAGGTAAGATGTTGGAAGAAAAATATGATTGGTAAAAGTAAAATGGGGATTGCATAAATTATAAATTATTAGCCTGTCATATTTGAGTAAGGTAGAAAATTTAAATTTTA  
TTGAAAAAAACATTGAAATATATGAATGACTTCTGTGCAACATCTAATCAAGTAACCCCTGTCCCTGTAACCAGATAAAATCATCAGTAAATGTGATAAAAATAGCGAAAGGCCAAGTAAG  
AAAGAATAGATCTAGGAACCCAAATGTCTTAGTAACTAATTAATAATGACATGAAATACAACCTGGTCGTAGAAAATGAAAAGGAAATGCGAAAAGGCCAACCTTGATCCCTCTGCCTTTC  
GCGATCGAATACTCAACCCTTATCCAATCGCGAGCTTCCCTTCTCCTCAGTCGCACGACCCAATCACTGTGTCAATCTCCTTCGCTTCCGAACCCAGTCGCTACTACAGCCCGTTCCGAC  
TGTGCCGCCGCCACATTTCCGGTTCACCTGAACCAGACGCACAACCTCCCACTCCAACCCTCTCACTTCCCTCTTAAGCCAAAATCTCCCGTTTCCCTACGTCTGATCCACGGCTGCCGCA  
AAACCCGACTGCATTCCTGTCAAACCACAGTCGAAATTCCTCTATCTGATCGAGCAAGTCGATAACCTCTCACATTCGTACCACTGCTCGATCCAATCGGGCCCTCTATTCTCACGTGATC  
GCAAACCCTACGATCCACACCAGGCCGAATCCACGCACGAACAAGCGTCCGGACTCCTCCATTTCTGTGCAAAGCACAGTGCCGATCCACCTTCTAACCCACCTCCCGTAGCCAAACTAC  
AACCTCCGAACCCGTTCTTCTGTAGTTCCAAGCCGCTCATTCCCTATTCGTTCTCCCACTCATGTGATAAGAGGAAAACGTTTTTTTTTATTATTATAATCATAATTATAATTATAGTAATTAT  
GATTATTATTATTGTTTTGTTTTTTTTTTTTTCAAGTTTTGTCTGTCTATTTTTCTTTTCGTTGATCAGAATTCAGTTTCTGGAGAGATTTATTCTGGCTTATAAGACACTGGGAGTTGTGTTG  
GCGGCCTCGTCACATCTCCTCTCTATGTTTATCCTTCCATGAACTTGGATTCCCAACAGAAGATGATTATTTGGGTATTTATAGCATCATGTTCTGGACTCTAACTCTAATTGGGGTGGTCA  
AGTACGTCCCTCATTGCTCTTAAAGCTGATGATAATGGTGAAGGTGGCACTTTTGTCTCTATTCCTACTTTGTAAAGCACATTAACATTGGCAGCTCTCTTCAATCAAAGAGTGTCAATTCA  
AGGACAATTTTTTCTTATTCTGATGGAGCTATGGTAACAGAAACAAGAAATAAACTCGGAAAGTTTTTGTAGAAAAATATAATAGCACAAAAGGATTGTGCTGTTTCATAGCAATGTCAGGAG  
TCTGCATGCTTATTGGTGTGGCATACTTACACCAGCTATTTAGTTCTATCAGCAATTGAGGGACTTCGAGGTCCCTTCCCTTCAGTAAGCAAAGTTGTTGTGGAGGGTCTTTCTGTTGCT  
GTGTTGCTTGTCTTTTCTCTTGCAAAAGCATGGCACTTCCCGAGTGAGTTTTCTATTTTCTCCAATCATGGGTGCCTGGACCTTTACTACTCCATAATAGGCCTATATAGCCTATTAAG  
TACTATCCAAGCATATTCAAAGCCTTATCACCTCATTACATTGTACATTTCTTTCTGAGAAATAAAAGCAAAGGTTGGCAATTACTTGGGGTACCATCTTGTGTATTACAGGTGCTGAAGC  
AATGTTTGTGATCTAGGCCATTTCAATAAAAGGTCAATTCAGATGGCCTTTCTCTTGACAATATATCCTTCATTGATCCTCACATATGCCGGCCAAACTGCATATCTCATCCGACATCTAAAT

GATCACAGTGATGGATTCTATAAATTTGTTCCACACGTTGTGTACTGGCCCATGTTTATCATTGCAACACTTGCAGCAATTGTTGCAAGCCAATCCTTAATATCTGCCTCCTTCTCTGTGCATC  
AAGCAGTCACTGCAACTGGATTACTTTCCTCGTGTAAGGATAATCCATACATCCCAAAACAAAAGAAGGCGAGGTCTATTCTCTGAAACTAACTACATCCTCATGGTTCTATGTGTACTGAT  
CATTCTTTATTTTGGAGATGGAAAAGATATAGGGAATGCCTTCGGTGTGTGGTTATACTTGTGCATGCTCATCACAACAATATTGTTAAACAATAGTGATGATCATAATCTGGAGAACTCCAAT  
CATTATTGCCATGTTGTATTTTGTCCATTTTTCATCATGGAAGGAGTTTATACAAGCGCTGTATTACAAAAGATCCCAACAAGGTGGATGGATTCCTTTTGGCATTTCATCATCTTGCATCT  
GTAATGTTTTTCATGGCACTATGGAAGGCAGAGAAAAGTTAGAATATGAGATGAAAAACAAAATCCCTATAGATTGCCTTAATGAGCTTTATCAAGACCAGAAAATCCAAAAGAGTTGCAGGC  
ATTTGCTTCTTCTATAACAAGATAGAAGATGGGATTACACCGTTATTTGGGCATTATTTGAAGACCATGAGATCCTTGCATAAGGTGACGATCTTTATCACTCTTAGATATATGTTAGTTGCTA  
AAGTGGACTCTAACGAAAGAATTATCATAAGAAAGCTTGGGATTGATGGAGTATGAGTGTGTAATTCATTGTGGGTTTGGCTGATTCTATT

>comp176191\_c0\_seq1

ATAATAATAATAATCATATTAAGTCATACGATGGAAAATAATGAGAGATGGATGATGTTATCATCTTACCTATAAATGATACCAAATCGCAAGTTACTTTGTACAACCTGCGGTTTCGCTCC  
AATTTTGATCGCTCGGTTCAAAGTTAAGACACTTCTTAGTTTTGAATAGACCGATTCTGATTGAACGAACCGATTCAATCCCATTTTTTAAATTGATCATAAATTTGGACAATGTCGGTTA  
TGATATTTCAAGGCAATGTATGATAAACATATAAAAATAAATAATTTTTATTCAAAAAATAAAATTGAAATACTTCTCCTACTAGTGCCTTGGCTAGAGATCATCATGAATTTTGTGTTAGGATT  
GCTTAGAACTACTTGTGGACGAATTCATATCGGTGTTGCTCGATAAATTTCTAATATTATGGTTTATTTCTTAGTTAGACTATTGGTGGCCCGCGTATGGCCAAATTATATGTTAAAGAAAT  
CATTCAATTATATGGTCTTCCAACCTCCTTTGCATCTGATAGGATGCAAAGTTTATTAGTTAGTTC

>comp177866\_c0\_seq1

ATCATTATCAAAAAATATAAAAATATATAGTAAATTTTGATAGTATATAAAAAATATTTAAAATTTAATTTTATGCATATCTTTCACCAATTA AAACTATTTAATAAACAAAAATATCATCAATT  
AATTATTTATTTAATTTCAAATATTTGGATTTTTGTGCTCGTTTAAATGAATAAAAAATTTAATGCATTTAATTAATAATAAATAAATTTTAAATCTGATAAAATCTGTAATTTTAGTCATTTAAA  
AAAAATAGAGAGAGAAAGAGAGTAGAATACTAACCGGCACGTGCGAATCTCGTGC

>comp182035\_c0\_seq1

ATTAGTTGGTTCAAGTAAAGCATTGATCTTTGAAAGAGCGTATTAAGAGTATGAATCTCTTGTCAAGACAAGATCTAAAAGAACAGATTTGTGCAAGTTTACTCTTAATTGAAAAAATATG  
CCCAGGATTACCTAGCTAATCTTATATTTAATATAGAGCTTCCTTCAGCGTCTCTTTAGTAAAAACAGTTGAGAAAAGAACATGAAATCATGAATAACCAACCTAAAAAATTTCTTCACAA  
GACCTCCTGACTTTGTTTGGTTTGAAGAAAAGTGAAGGAAAAGAATGAAATAAAAAACAATTTGCATGTTGATTTGAGATTTTTGCAACATTTTGCATTTCTTTTGGATTAATAATCTCCA  
GCATTCAAACATAGCCACTGTGAAAAGAACCTCGCAACAAGAATCATCAAGACAGCATCAGGCTGAGTCCATTCCTCGTCTTTTTTGGCAGGTAGATTACATACTAAGGCACA

>comp187502\_c0\_seq1

TAAGCTGTACCTAAACTTACCAAGTGTGAAATTGCTTCCACTGAAGTCTACTTTCTGGGCTTTATCGTCTCTGGCAACGGCGTCGCCACCGATCCCAGTAAAATTGCTGCTGTCCGTGAG  
TGGCCAATCCCCGCTCCTTAGCTGACGTTCCGAGTTTCCACGGGCTCGCGAATTTCTACCGCAGGTTTCATCAAAGGCTTCAGCATCATCATGGCACCCATCACCGATTGCCTTAAGAACA  
AACAAATTTTCGTGGTCCGACGAATGTCAGCGGAGTTGGGATACCATGAAGCAAGCTCTATGTTCCGCACCAGTTTGGCACTACCCAATTCGAAGCTCCCTTCCATGTAGATACGGACGC  
CTCTGCAGTGGGCATAGGCGGGTACTGTCCCAAGCTGATCGACCCGTGGAGTATTTAGTGAAAACTGAGCACTGCCAGACAAAAGTGGACTGTTTATGAACAGGAATTATACGCTG  
TCATTCGCGCGCTCAAGCACTGGGAGCATTATTTACTTCATCAAGACTTTGTCTT

>comp188802\_c0\_seq1

AAAAATCTGAACATGCTGCGTTTCTGGCCTTGCTAGTTCCTTTAATTTTAGGTTTGGCTTTATTTCTTTATGATTGTATTTAGGAGGGTCTTTGGCTTGTGATTTCTTTTCTTTTTTATT  
GTAGCTCGCCGGATTAGTAGTGAGTATTATATCCCTACTAAGGACTTGTAATTTTTCGTTGTATTAACATGTACGTCCATGAGTGGGTTTTCTCCAAAGAAA

>comp189731\_c0\_seq1

AATACTTTGAAGACATGGGAGATGTCTATCTAGCACTCGACCTGATCCATCCCATTACATTACAGTTTTCAAGGGTTATATCTCGTAACTTAGACCATGCGGGATCTCCAACCCACCACGGGA  
ACCGTATCCCAGGGTAACCATCTATCTCTAATTCTTTGAGGTTTTTGTGAGGCTGCAATGCATCAAGCTTGGCCTCTACCAGTTCAAAAAGTTTGTCTCAAATACCAAATGTTTAGTAATA  
AATATGTAAACATCAAATGAATGTTTAGGTACATTCCTATAATACCAATCTATTAATAGTCCCCAAATGTGCTTCTTCCAATAATATTTGTCTTCCTGAGACCCTCAACATCATGTGCATTATA  
TATATTACCGATAACAACAGCTCCCTGTAAGGCTTTCTAAGCTTCAATCTCACCTAGTCCACCACCTTCTAGGCTTTGCTCAATCACCTTACATGTTTTAAAGTCTGGAGATTAGTTAACTT  
GCTTATCCAACATGGCATGATAGAATCATATGGTAGA

>comp35841\_c0\_seq1

GGCATAATTATCAGCTTAAACGGGAAAAGTGGGAACTTTTTTTTTTGGGACAGGGAGTATTGGCCTTCGGCCCTCCCCGGTCGACCTAGCGGACTACCCACACCAATTCGTCCGGGCCAAC  
ACTTAAGGCTTTCGTGACCACCCATGGGAATCGAACCAAGACCTAAGATTTGCCAAGGAGGTTCTTTCCCGCACGAGCTA

>comp36142\_c0\_seq1

GATCCCCGGCCAATCAGCATCTGTAAAGGATTTAAGCACAAAGATCAGATTTTGTAAATAGGAATACCAAATTGAAGTGTACCTTTAATATAGCGTAGTAGTTTCTTGAGCAGATAGACGTGT  
TGTGATTCCGGTTGATGCATATGCTGGGAGAGCTTGTTAACGCTGTATGCAATATCTGGTCGAGTTAGTGTGAGATACTGTAGAGAACCTGTAATTCGGCGATACATTGCTGGATCAGACAA  
CTGAGCATCCGGTTTGAGGTTCTCAGGAATTTTGTACAGGTGGGATTTGCGGTTGGGTTACAGTTGAGGAGGCCGGCTTGCTGTAAAATAGAATTAGCATATAGTGTGTTGTGATAGGAAA  
TAAAAATCACTGTACCGATCAATTTTAATTCCAAGGAAATCATGTACAGATCCTAAATTTTTCATAGAAAATTGTTGACTGAGTTTGTGCATAACCGAGTCTACTAAATCTGAATTAGAGCC  
GGTAATTAATATATCATCT

>comp44516\_c0\_seq1

TAGTTCATCCATAGTAAGAAGATTTAACAAAAATCATTACAACAGAATTCATAATAGAAAAAATAAATTTACAAATTTTTTTCCTTATTTCTCATACTCGATTATCCCAAGCCTGAT  
TGACATGTGGTTCCCTACTACAATACTACTAATACTAGATCGGCCATTTCGAGCAGAGCTCCTCAATCGTCTCTAATTCGGGCTCCACATCGGCGGTTGAACCACAGAAACCGTCCACCG  
GCCATTACATCCTCCTCCTCCGAGTACGGTTCACCCTGACTTAGTCCACTATCCGGTGATGTGGATCGATCAGCCATTGCTTTGAGCCGCTCACGAGCACGACGAGGCTGGCCGGAGTA  
GCGTCCGAATGGAGCACAACGGCATCAGGGAGAATGAAATAGATGTTACCTGGTTCAAGCCGATCTGTCAAATGGAGTGGAAACCGGACCGGTTGATAAAAGCCGCGTTGCGGTCCAAAC  
CGCATATCCGTTGAGCCGTTTTCCGAGGACTTGTTGAGCAGTCGCCGGAGGGGAGAAATATTCGACGTGGCCGTTGATGTGAACAGCACGGATGAAATTGGATGGCAGAGATTGATCGC  
CGGAGGAAAAGAAGCAGCAGAAGTAGAAGCTCCTCATCTTTGGATTTCTCTCTCAACTTGCCACCTTATACATT

>comp88516\_c0\_seq1

CGCCCAGAAGATTACTCGCCATACTTAGAAAAGAAAGCTCTGTCTCCATTAAGAAAAATAAAATGGATCATACAATGGCAGGAGAACCAACATCCATGGCTTTACCATCAAATCTACATCA  
AGATCCCAACACTCTCCATTAATGATCAAGAAGAAGAGGAATCTCCAGGAACACCAGATCCTGAAGCAGAAGTGATAGCTTTGTCTCCAAAGACTCTGATGGCTACAAACCGGTTCTT  
ATGCGAGATATGTGGGAAAGGATTTCAAAGAGATCAAAACCTTCAGCTTACCGAAGAGGGCATAACCTGCCATGGAAGCTGAGGCAGAAGAGCAGTAAGGAGCCACGGAAGAGAGT  
CTACGTCTGTCTGAGAAAAGCTGCATTCACCATAATCCTTTGAGGGCCCTCGGTGATCTCACAGGCATCAAGAAGCACTTTTGGCGTAAGCATGGCGAGAGTGGGGCCCCG

>comp89759\_c0\_seq1

ATAAGAGAGATGTCTCCTTACTCTTCAAAGACAAATTTCTCTCCTCCAATTCGAAGGGCGACTAAGGAGTATTTAAAGCTTAGGAGGCCGTCAAGCCCTCGACCCTTGTCTCCAGTGATTG  
TGCAGATGGAGCCGATGAGGATAATACATGTTCAACCACATGAATTCATGCCGCTGGTGCAGAAGCTCACCGGAAAATCATCGCCGGCGGCAACAGAAGGTGCTTCTGCCATGGCTCCG  
GTGACAATGCCATCCTCTCATGCGTTGATTGATATTAACGTGGCTTATGTTGGAGATGATGACGAGTCTATCTTTTGTGAGTAAAAGGGTTTAGACAGATGAAAAGATGGGTGGGATGACAA



ATTTAAGTCGCACAGTAAATTTAAGTTGATGCACATAAAATATGTATAAGATTTTCTTTTATTTATTTATTTATGTTCGGTTGGCTTAGACTTCCTAATCAAATGACTTTGAATTTATGCTCTTTAGAT  
GCGAA

>comp92950\_c0\_seq1

TAAGGACAGAACTGAATAATTATACCATACACAACCTTTGATAATTGGAGAGAATGCAAATGTCATGAACAACCTTCATTACACGAACAATCTAGAACTAAAAACAACAAATAGAATTTG  
AAAATTAATACTATCTCATAAACGCATATGATATATAATTTAAAAATACTGTATAAAAATTGTAAGGAATTTGAGCAGGCGGCCGATTCTCCTAAAAACGGGTTCCAGCGAGAGCCATGAAACT  
GGCCTGGAAAAGCAGGCCCTTCCACCACCTTGGCCTCCGTCATGAGCTCCACTACCGTTCTTCCTAAGAAATCCACGCCCTCTCCAAATCCCGGCGCCGGATTATAAAACCCACCATCAA  
ATCTGGCGGCGGCCGCTGCCGTGCTGCCAAAACCTTCGTTAGTGACGCCGCTTCCGTCTTCAAAGCTGAGGGACTGGTCACGATCTCCGGAGACGTTTTCCGGCTCCTGCTGCCTTGCCA  
TACAATTCCTGTCCCCTTCGCTTTCCTTATACCTGTTAAGATAAGTCCTTAGAGGAACACATAGGAATCAAATCCAAGGGTACTCATGGCCAAAAGAAGATCATCCCATGATTGTCTTT  
CGTTTTTCCCGCTGGCACTTATCAGAAGCCTCGCCGGTTACGAAGCTGATAAACTCGGATACACACTCCTGCACTGTCTCTTTGGCTTCTTTTGATATCTTGGCGTTTCGCTGGAAGAGAGC  
GCTTCATTATGCGGCTAACGTTGGCGATGGGGAGGAAGCGGTCCTGTTCTTTGGAAGAGCCGGACATGTCCGGCTCCGACTGTGGGCTGCTCGCCGGAGATTGTTGAGATGTGCTTTTCC  
TGCTTCTTTTCATTGCAAATTGACTAGATCAATGGAGAAAGGAAAAAAGGAAAAGGGTGGGAGAAAGAACGAGCGGTTTTGAGTGCTGGATGTTCTGTTTTACCAGTGAAGAACCGGTT  
ATAAAGAAGGGGAAACAGATCAGGCGAAGGGGAAAGTGGAGGGCCACCGGGCCGGCTGTTTTGATTTGACGTCAAGTAATACAAAATGCGCGGGGTGAACCG

>comp93984\_c0\_seq1

CCTCCACCACCTGTTTCTCTCTACACCACCGCAATTCATCAATCTTCGCCACCGCCTGTTTATCATTACAATTCTCCACCACCGCCTATTCATCACTCTTCGCCACCGCCAGTTTATCATT  
ATAAATCTCCACCACCGCCTGTTACCAGTCTTCACCGCCACCTACTTATCATTACAAATCTCCACCACCGCCTGTTTATCACTCTTCACCATCACCTAT

>comp101679\_c0\_seq1

ATCACAGAAAAAGTAAACCCCTACCGCGTGCCAAGTGTCCCAGAAATACCCACCAACACCAAGAATCTTAGTCCATTAATAAAAAAAAAAAAAAAAAACTGGATAAAGAGCTGCAGAGCTCG  
CGAAAAATACCCGAGATGACAAGAATTGCATCGTTGGAATCCAGGAGCCAACAATGCAGGGCTAAAGGGTTAAAGAAACAGAGTTAATGAACAAAATTAATTAATACTACCCAGCATGAG  
TCAAAAAAGTAAGTGTCTCAAATGGATTTTCAATTCCAACCTGAAAATAACCTGCTATCATTTGACCCCGACTGAAACCCAACCAATTAAGGAAGCACGTTACAAACCCAGATCCGAAC  
CTCACCCGATTCAAACCTAGAGTCTACCCGACACGACCCTCTGATATGGTTGGAGCACACACAACAAGCAGAACAGCGGACGATCACTCGCAGGGGCGGGGAGCAAGAGAGCACTAGC  
AAGGTGGATGAGCAAGCGCAAGCAGGAGTAGATGATTGAGCGCGTGCAGGGGCGAGCATGAGCTAGAGGCGACTGCAAGGCGACCCACACGCAAGACCAGGTTCGATTCCGGGTTGCT  
TTTGGATTTTCGGGTTGACCCGAACCTGATCCAAAATAGCAATCGGGTCATAATATGGAACCCGACCCATTTT

>comp110908\_c0\_seq1

TGCATTTACCATTAATATCAAATATTTTGGTGTGATTTCTCTCAAGTCTTCTCTCAATTTTCTTGTTTTTCTCTGTTGGCTTTTGTTTTACTGCTGAAAACAGCAGTTTGGTTGCTGTTAATA  
CTGATTTGGGCTGAGAAATACTTGATTTTCGAGTGTTCCTATCACAAACATGATCTTTATGGGGCGCTTATCATAATTTGTTATGGGGAATTTGTTGACCACTAACTCTAGCTCACGTGCGG  
TTCGCTCCCAAGCAACGCAACCATCGCTCCCCAAAAAACTACTGATCACTCATGCTCTCCCTCATAACTCTCGTCACTACCCACTCGCAGCACAAAAACCACCCGTTCAAGAAATTC  
CCAAATTCGCAATCTACGAACCGCACGTAAGAATTCTCATGCTCGCCCCGGCTCCAATCGACTCTTGTACACACAAGGAACGGCCCATCACTCTAAACATTTGATACTCATATGCAGG  
ATCCTCACACTCAACTCCCTCTACCGCACGGCAAATTAT

>comp122712\_c0\_seq1

AAATCACAAGGTGTTGACTAGTTAAATAGCTTTTAATAATGTGAAGGGCGTTACAAGGTTCTGCCTTTCCTCCTAGAAATTAAGATGGCTTGACTATAATGCATGATGATAGCTTGTAGAGC  
TGCTGCAGATTGGGTTTAGGATAGTGGTTGGTGTACTCGAAAAGTTAGCTATGTTAGAAATATTATTACAAGAGATGGCCGTGGCAGAAGTTGTGGGAAGATAGTTCAAAAAGATGATTGTG

ACATAGGTTTATGGGAGATGGTAAAGGCTTAGTTTTGAAGGACATAGCTGCGATGTAGGTTTATTAATGACGGCTACAATGCAAGTTTTCTGGAGACGGTGACATAGTTATTGTAAGAG  
AGGGTTGTGATGTAAGTCTTGTAGGAAACAAGTCTTATGGGTAACAATTATGATGTAGTTATTATTGGGGACAATAACAATACAAGTTCTATGAGAGATGATCGTGATAGG  
TAACGCTAATTCTCATGAACTTATCAATATCGGAAGAAAACAACGAAAAGTCACCCAAAATCTCCCTCCAAATCAGAAAAACAGTAGTTCTCTTTTAGAAAACGATGGAA

>comp132035\_c0\_seq1

TGATTTCAAGTAGTTCTAGCCAAATCTAAAATAGAACAAGGAGAAAAGTGTGTTTTTCAGCAGTGGGCAGCAGTTTTGCATAATAAAAACAATGAGAGATCGTGAAAAAACTGAGAGAA  
AACTCAAGCAAGAGCTTGTATTTACTAGTAGGCGAATAAAAACAGCAAAGATACAATTTGTTCTTTAATCCGACAGGAAGAATAACTTTCCAATCTCCGGCAACGCCA

>comp132667\_c0\_seq1

CTCACTTGAGCTTCCCTGTAGCGTCGAGGCGTTCAACTTGGTGCTCTGGGAAATGGACCAGGAAGAGGGCGGATAGCGCTGCCGCGGCATCTCCGGCGTTGTGTGGGTTCCGCCCTCGC  
CTTTGAGGGGAACGAGAAAGGGTTATCGCCTGCTTAGTCCGTCTCGGCTCTTCGCCGTCACCTGCCCGTTATAGATTATCATGCTGACTGATTGTGGCATTATGGGTAGTGGCTGCATGTTT  
TTCAACACGTGGTTTCTTAGGGCAGCAAAAGGGGTGCATGATTGATTAATAAATTGTAAGTTCAAGTTTCAGTTGATTAATTTCTTATAAAAAATTAATGTTACAAAGTAACGGTATATTG

>comp136368\_c0\_seq1

TTTGCCTTCAATATCATCATAATTGAATATTGAGATTGCCCTTTTAGCTATCCTCTTCTTCTTCCCTATTTCAAATCCTTCTCTCTCACCCTCCATTATCAATCCTTCCCTTTCTA  
AAAAATCATCTCAATTCTTCTTGTAGATCTGTTTTGCTTCCATACGCCAAAACCAACTCCCTAATTTGAAACTCTTGCTTATGCCTTTATGTAGTATTCTATTTTTACAAATACAATA  
AAAGATGTTATGAATGTAACACGCAAGAAAATTAATGACTCGCATATCAAAGACAATAACTAAATAAAAAATCCGCATTCAGCAGGCACAAACAAGACTAAATTAGAAATATAAAATT  
TTATAAATAGGCAATTTCAAGTAAATGCAAGAAGATCTTGAATAAATAGAGTTCTTGAATAAATAGAGAACTTGAATATATACCGAGCTTCACTCATTTAGCACACCTCACTCTCCC  
TCCTTTGCCTTTGACAGAGTAGGCACAAGAGTCGATGTCTCGTGCTTGTGAAAATGGCGAAGACTAACGACTGAACAAGTCAGATCACAATGTCTGTGAGCGAAAATGATGAGAAGAC  
AAGAAAACCTTAAATCGGTCTTACCTAGCTTCAAATAGAAATGTAACATGCTCGATTGGCTTCGCCTCATCGCGAAATGATGAAGGGTTGAAAACAGACGAATGGGGAAGCCAAAA  
AAAATGAGGGAATGGGGATATGCCGGGCTTCAATCGAACAATAGCTCACTCGGTTGGCTTGCCTATCGCGCAAAGGAAGACACACAAGGAAGAAGACGAGGGGAGACAAATCGTGAAA  
AGGGAAAACCTAGTGCTCTCTATACATGACGTGAATACTATATATACACCTTTTATTTTATTAAGAATATTAATAAATAAGCATTTTATAATTTAATAAATTTAATTATCAAATATTAGG

>comp137559\_c0\_seq1

CTGCCAATTGTACCTTAGTTTTTAATATTATTGATTGATAATTGGTAAAATAATACCCACTAAAATTATATATCATATACTCAATATATATTCTAGTAGTTTAAGGCCATTATTTGTTAAACATTT  
CTTTGTTTTATTTTCACTTATTTAATTGAAAATACCACAACCAAATGAGGGAACGTTGGTACCAATTGAGGTTGCTGATGACCAGGTGGTAGCCTTGCAATGGAAGAGCTGTTAGAGTA  
GCCAACTCTTGCTATGAAATTCCTTGCCTAAGGTAGGAGCGGATCTATATCAATTTGTTATCATTCACCTAGGGTTGGATTAATTTGGCCGGATTGATTGAATCTCTCTTTTAGGATACGGC  
TTGACCAATCTACAAAATTAACAATTTCCCTCCAGAATTTTCTGGGAAGTCAATTTGAATTAATTCAGGTTTCATCCAAACTTTTGTTCATTAATCTGTTAAACTTGATGAACCCATGTTTTG  
CTTTTTTTCGGCTCTTCGAATTTGTGCTTCATGTAATAAATATGCTTAATCAAATGGGATTTTTTTCCGATCTAAATATGTCTTCGCTTACTTATTGATATAGGAAGCTTCACAACTTC  
TTCTAATGCATTATCTAGATCTTTATGCATTCAGAAATTTGTGCAACACTACTTTTTGGTTTTATTTAACTGCTTGAGGAGTTTATCCAATACAGTGTTAATTTTTTTGTCTATACTTTTTTG  
GTTGCAATATTATCAGTTTCTCTAATCCAAATATCTGCTTGTGTTGTTTTCT

>comp142015\_c0\_seq1

ATTCGTATCAGTGAATCACAGAAGGTAATATGGCTTGTTCCTTATATAAACGTGTTTTAGATTTTTTAGTGGCCATATATTGAATTTCAACTGAAAAAGTAAGAGAAAAGCAATCATCCT  
TCACACACACAAAATAAAGGCGCACCCGTTGCATTAAGTTTCCGCCAATGCGAGCTTTGGGTAGGGGGTGATGCATACTGCCTTACCCTTGCTTTGCTATGATACTATTTTCAGGACAGG  
CAACTTAGCAACTTCTCCAAGCTTAACCTTTAAAGATTGGAAACAAGTATTGCGTTGACAATGGATTCAAACCTGTGCAGGCTCAAATCCTATTGTCCGGTGAAGGTTTTGTTTTAAATTT

GTAGAGGGTGGATCAATTGTGCGCTTCCAAAATGATAGTTCATTTTCATTGTCATGCACATTGATTTTCTTTTTTTTCTGTCTTTAATTTAAAAATACGTGCATCTTCTCTAGTTTGCATCTT  
GATAGTTGAATTACGCATCT

>comp149196\_c1\_seq12

CCAAATTGAACGCAACCACCTCCAGCAAGTTTTAAATATCAAACCAAACCTATCGGACCCATTCTCAGGTTCTGGGTCAACTTGGTTGACCTGAGAGGCCCTTTAATGGTCTAAACAGGT  
GTTTTAACTCAAACGACCTATCTAAGCCATGAAATCATTCTATTGGTTTTCAAATGTCATTTCAAACCTATTGAGCCTGATTCCAGCCCTTGGGTCAACCTGGTTGACCAAATCGACCCAA  
ATGACCCTTAATGGGCCCAATAAAGCCATTTAGTCAAATCAAACCTACAAACCTTGGGACCATATCCAGTAGACTCTAAATATCATTGAACCCATTTCCAGATCCTGGACCCACTTGGTT  
GACCAAGTCAACCAATTTTGACTCAAAGCCATTAAGGCCCAAATAGGCTCATTGATCCAAATGGCTTATTTAATCCCTGAAATCACCTCTACCAGACTCTAAATTTGTTTCAAACCTG  
TCCAGCCTAGACCCACACAATGGGTCAACCTGGTTGACTCAGTCAACCTAGGTTGACCAAATCAACCTTAAGCTCTTTTACTTTGAATCAAACCTCAAATAACATTCAAATCTCATCAAAC  
CCTCTTCAAGGTATTTAATCAACTCCTCAACTGTCCTTGGCTGCCACCTCAGCATTGTTGACCATGTTGACTGGTCAAACCAGTCAACACAAGCATTCAAGGTGTGGGGAATGGTCAAA  
GGTGGTCAAATGGCTCCTTAAATGTAATCCCCTCTAATCCAAACCTATCCAGCTGTTTGGAGAGACTCTAGAACATTCCTAAATCTTATTCCAGCCCTTGGATCTAAATCAAACAGCCCCCA  
TTGCTTTTCACTCAAATTAGGAGTTCAAAGCACCTTTCCACCTCACATGTTCTTTTGTCTTTGATCCCTTGATCCAACCAACTCCTAGGGGCACTTGGCAACCATCTAGGAGCTCAAGC  
AGTTAATCCCAGCCATCCAAATGCACTTAGGTGGCTTGAGTAGGAAAATATATTAAGGACATGCAAATCCCCTTTAAGTCTCTCTCATTCATCCATCTCTCATCCAAGAGCTATCCCAGC  
CA

>comp149468\_c0\_seq2

GTAGCGAGATCACAGTGATAGCCCTGAAGGTTAACAACAGAAATAGAATCACAATCTTTGAGAATGGTGGAGTTAAGCTTACAGTGTATATATGTTATAATGAAAATTGAGATCATAAATTT  
ATTGCATAATAAAAATTGTGATTAGAACTTTCTTTTCTTTTATGATTTTTATTACACTTTTAGTCAGCAGGCGATGGTGGTCCGGATGAGATCTGGCATGTTAGCATTCCGGGAAGAGTTCTGACAA  
TAGTTGGAGAACGAGCGAAAGTTCAACCCGATCGGTGGCCGGAAGAAGTCCGGACGGTCAACACATTGGATGGAAAATGCAAGAGAGACCATAAGCTTTCTTTCTTCTTCTCCCCTC  
CCATAATGTGAAGAATGGAGGGACTATTGATAATTTTTGAGAGTGAATGGCTAGTAATTATGGATAAAATCAAGAGCATGTTAGAAGTATTCCATTGGACGACATATATTAGTTCCCTTCAT  
CATAGAGCGTTTATTGAGCATTGAGTGCTTTAATGATGTCATAATTGGTGATCTTGGGCTCGTTGAATTCGTC

>comp152503\_c0\_seq5

TTTTTTGAGAAAATTAATTAATCAATTAATTATTAAGATTCTTTTTAAGGCAACTAATAAAAATAAAAAGGTTATTAGTAAATAAGTATTAGCATATCACTAATAAATATTTATTCAATAAG  
AATAATGCTATATAATTCAATCGCACCATAAAAAATCATATTTATATGACTTAATAATTAATAATATGTACAAAACATAATCACGCGAGGAGATTCTATTCTTTCTCTCTTTCTGTCTATCT  
AACTCTTGTTGCTGGGCAAAAATATTAATATGTTTAATCTATTTTACACTAAAATAATGCTAATTTTGTAAATATATTTAATGTCAAGGGTCATATATTTTTTAAACATATAAGAATTATTA  
TATAATTTAATTGAATTTAACATTAATATAATATTGTTGCGTCCAGGAGTATTTCGC

>comp153325\_c0\_seq1

CTACTGAGAATATTTCTGATTTCAATATCTAAGTAAGAAGACGTCAAATGCATTTTTTTTTTTAGCAAACCTTCATTAGTTTTCTTACCGATCGTGTGAATCCAGAGAAAGAGACGAGGG  
TTGTTCTGATCTTCTTTTTAAGTCTCGTACGAAGTCGAGAAGAGATGTAGAGAAAAGGTTCCGGCTTCTTCTTCCAGGATTTCCGAATTTGGCGAACTGGGCATATGCCAACTGCCGAG  
AGGGAAGGGGTTCCAGAATGAGAGCACCGTGAGTGTTTTTCTTCTCTGTATGCGAATGAGAGAGTGTATGGGGTTTGTGTTTTGCAAATTCTAGAGCGGAGCGAATGGATAGTTTGGCTGT  
ATGTATGCGAATAGAGAAAAGTGGAAAGTTTCGATTGAGGGCTGTGGGTTTGTATTTTGGCAACTGCAGTGAGAGGGAGTGGGATTGAGGGCCTTTTCTGTGTATGCGAATGGATCGTGA  
GGGAGGCAACGAACAGAGGAGTCACGGTGAGGGAGTTCAGGATTGTGGGCTTTTTTCTGTGTATGCGAATGACTGGGAGGAGGAGGACTTCGTGCAAACCTGTGAGAGTAGGAGAG  
GGAGTTTGGGAGTTGGGTGGTTTTGTGCGAACTGGAGTAGAAGAGGAGGAGCAGTTTCGCAAACCTGCAGGCGTGACGGGGTTCGGTTTGGAGGTTTACGAACTGCAGTGGAAGCCA

CGGCTTGAGGGATGGCTATTCGTGCGAATAGAGAGAGGAGACGGG

>comp153359\_c0\_seq4

CGACGTCCGATCGACAAACGGACAACACCATTGCATCCGGAACATCGTTCGAAATTCAGAATATACATTTTATTTAATCAAATTGGATCGTTTGAGATGGTGGTGGATTCTAGGCGATGCA  
AATATGATATTAAGGCCTGCGTTGCGACGGAAATGAGGCCTCGATGATACTTGAACGACGTCCGATTGACAAACGGACAGCGCCATTGCGTC

>comp155876\_c1\_seq1

ATCCCAATTGAAATCCTTGCCTAATTTGGGGTGCATGATATTAGGGCTTAATTTGAAATTCTAATTTCTTTCCTAATTTAGTCCACCTATTTTGGAAAAGTGTTTAATTCCATTCAATTGAAATTT  
AAATTCAAAATCCGATTTATTGGCTCCATTTCATAACTCCCAAATTCAAATCTATGAGCATTAAATTCCTAATTCTCTCCACATCCCGTCAACTTTCTTACAGGCTTGCTGAATTGAAATCTT  
GGAAATAAAATTTCCCACTTATTACTCAATCCCGCCAGCCCCTCCATCCCCCTTGGCTTAAATCAATATTTGTTTCTAAAACCCATCCTATGCTATTACAGAAAACAATTCCATATCTCCCT  
AGGAATTTCTCTGGTCCCCCCCCGGATTTTCTCCATTGAATTCTCTCAGGTTTTTTTTTTTT

>comp156118\_c0\_seq20

TTTTCAACTGAAATAAAAAATCAATTACATCTAAACCGTACATTAATTCACAACAATCTCATAATGAATCAAATTACCCCAAGTTACAGAGCCAACTACTCCAACAACCTATTCATTAATT  
ATGATCTTAAATACCCTTCTAATCACACAAACACAACATAAACCTTAGAAGCCTGCAAAGTAAATTCAATGTGAGATCTTATCACAAAAGAACAATGGAAGCAAAACAGAAATGTACTC  
AAATTCCTATAAACAACATGCTTTTGCCATTCATTTCTATGAAGCTAATAATGTACATATCAGGCCATCAACCTGATCTACTACATCTGAGGAAAACAAGAAATATCATTCAAACCTTCCAG  
AATATAGATTTCTAACTAGAGAAATGAAAGGATTTTCATGTTAGAAAGAGAGTGAGAGAGAGAGAGAATCACACCATTTCCAAAATTTTGATGTTGCCACTCGAATTCGCCGCAACTAGAG  
TCGAAGATTGGTCTCGCCAGCACACGCAGGAGATGAACTGGTTTCGCATTGCAGTCTTCAAGGCCAGAAATGGATCAATGCAGCCAAAATGTAAGACATAACAGGCATGGGGAAAGCT  
TTTTGATATACAAAACCTCATTTGTTTCAGAACCTGTAGCAATATAGCCATCAGAAATGGAGAGACCGACAAAATTTCTGAAAAAAGTTAAAACCTTATTAGAAGAGAAGTTTAAAGAGAC  
TGGCACAAGAGTTATCATAATGACCACAATGAAGGAAACAGCATTTCATGTCTAAAAACACTGTCTATTGTCAGTTTTCAAGTCCTGAAGGAGAAAAGTAAAATGTTGCGTTAGATAGTCG  
ACAACCTG

>comp157728\_c0\_seq1

TGGATTTGAACTTGATCTGAATTTGAACTCAAGAAGACAACAGGGGACTTAATTTGAATGATCAAAGAACCTGGACATGAATCAAATTCAAAGAACTACAGGGGACTCGGACGAATGG  
AAGAGGTTTATTAAGGACCTGAACTATACTTGGACTGAAACAAAAATTTGTGGACTTGGACTTGGATTTCATCTGGACACAAAAGTACCTACAAAATACTTGAACCTAAGTAAAATAAAAT  
TGAATACAAGCTTAGACTTGGCAAATAACTACAGGACTCTGAATTGAATCAATAGTGGACTGCAAGAGACTTGTAATTTGATAAACTCAAGTCTAAATGAACTGAGATCAGAACCAAA  
AAAAGAATAGAGCCTGAATCATATGCGAAGGAATTCA

>comp158397\_c0\_seq5

TCAGCCTCAGATGACTGACTACAGAAGCTTCCAACAACATCACCTTCACAAACCAGGAGACAAGATTGGATCAGGCAGCAGTAAGTTGAAAAAAGGAAGTCACGAGAACCAGAGCTCT  
TTGAAGAGCCGTTTCATCTTCTTCCCCGCCATGGATTCTGTGAGCGAAGCTCCACGGCCTTTTTTGCACCTTGGCAGCCGCCAGATGAGCCACAAACAACACCCGCGAGAATCAGCTCAT  
GGATCGAACTGCATTGCCTGCTTCATCTTGCCAATCATGGCAGCTGCCATTCTTATGCTGCTCGTCTTCTTACTTCTGTTCGTTCTTCGTCGAGCGAAAAGGAAGACTGATGGGGGAAACA  
GCTTCGGCAAGAAAGGCTTTGATGAGACGAAGCAGGTTTCCAGGTGCAGTTCTGATATCAAGATAAATGGAATCCGATATAGTCCAGATGTGAGAAGTTGCCTCTATGGAAGTAAATTA  
GCTTTGCTCCACAAGTTAAAAGAAAGGTGGTTTCAGGTTTCACTTACAAGGAGCTTGGAGCAGGCCACTGATGGATTTCAGTGAGAGAAATCTTATTGAAAAATGGTGGATTTGGTGTCTGT  
ACAGAGGAGTAATGAGCGATGGAACCTGCAGCGCCGTCAAGCTTTTGAAGTTGAAGGAAAGCAAGGGGAGAAGGCATTGAGAATGGAGGTAGACCTGTTGAGCCGACTGCAATCTC  
ACTATTTGGTCATCTTGCTTGGCTATTGTGCCGATCAGCACCACCGCCTGCTTGTCTTTGAGGACATGCCCAATGGCTGCCTTCAGCAACATCTCCATCCCACAACATATCAGGCGGATAAA

CCATACCGGCAGCTTGATTGGAAGATCCGTTTAAAGATTGCTCTTGACTGTGCTCGTGGCCTTGAGTTTCTCCATGAGCACTCCATCCCTCCAGTCATCCATAGGGACTTCAAGAGCAGCA  
ACATACTATTAGACCACAATTTTAGTGCTAAGGTATCAGATTTTGGCATTGCGAAGTCATGCTCTTATAAGGTCAATGGCCAAGTGCAGACTAGGGTTGTTCGGCACTACCGGATATGTTGCC  
CCCGAGTGAGTTTTTCTCTTTGCGTTTGATTTTCAATTGTAATCATCTAAAGACAAATTGAAATCACGATTCTTGTGCTTTCGAATAATGCTTGATCTATTAGCTTATATAGCAGATATGCAGC  
AACCAGCAAGCTAACGACAAAATCAGATGTTTACAGCTATGGAGTTGTTCTTCTTGAACTTTGCACAGGTAGAGTACCTGTGGATATCACTAGGCCTCAAGGAGAACATGTTCTTGTCTTCT  
TGGGCTCTTCCGAGACTAACAAACAGAGAGAAAGTGATAGAAATGGTGGATCCAGCTCTTCAAGGCCAGTATCCATGAAAGAGCTTATTCAGGTTGCGGCCATTGCTTCCGTTTGTGTG  
CAATCAGAAGCAGATTACCGACCTCTCATCACCGACGTGGTGCAGTCGCTGATTCCTCTAGTAAAAACACACACACAACTTGTATTCTACTCCAGCTAGATTTAAAGAAGATCAAGTAT  
CGATTATAATGTGATAGGCTTTCTTCTGTTGGATTCCATATTGAAGACGACAATAAGCAGAAGAAATGGCTCAAATTTGACAAGAAGAAGAGGAGATGTATAATTTGTAGACCAGTTAACT  
TCTAGAGAAAGAAGTGCTATGATTAGTACTAGCTAGTGAATATTTTCAGCCAAACAATTCAGAACTATACTGTTATTTCTTGCATAAAATCATGTTTTTTTACAACAAAGCTCTCCTTAAGAA  
TTTGCAGTAGTTTTAAATAATAAGAAAACACCATGCTATGTAATTTTCATATTCATAAATTTCTAACCAGTGAATCAACTTGACTGTGGCCTAGAAGAATACATATGCATGTGTGAGCCTGATGG  
AGGATAATAGAAGGCAATTGCATAATAATCTCTGGTTTGGTCTTAGTTAATTAAGCATAAAAAAC

>comp160156\_c0\_seq11

AATATTTAAAACTATGCTTCTCTTCTTATCTTTTGTGATTTTTCATAACTTCTTATAATCATTATTTATTATAACAACAGCTTGAATCCAAATGAACTATTAGAATTGAGGTTAAACCTGAACTC  
GATTATTCGTTCAAGCTCGAGCTTAGAGGTTAGGAGCATATCTAATACCTGGACTATATCGGATTCCATTTATCTTGATATCAGAACTGCACCTGGAAAACCTGCTTCGTCTCATCAAAGCCTT  
TCTTGCCGAAGCTGTTTCCCCATCAGTCTTCTTTTCGCTCGACGAAGAACGAACAGAAGTAAGAAGACGAGCAGCATAAGAATGGCAGCTGCCATGATTGGCAAGATGAAGCAGGCA  
ATGCAGTTTCGATCCATGAGCTGATTCTCGCGGGTGTGTTTGTGGCTCATCTGGCGGCTGCCAAGGTGCAAAAAAGGCCGTGGAGCTTCGCTCACAGAATCCATGGCGGGGAAGAAGAT  
GAAACGGCTCTTCAAAGAGCTCTGGTTCTCGTGACTTCTTTTTTCAACTTACTGCTGCCTGATCCAATCTTGTCTCCTGGTTTGTGAAGGTGATGTTG

>comp160968\_c0\_seq11

AGCCTCATCAAGCATGGAGGCAGTGTCCATTTTCTGCCACCAGGAACGAGCCTCTGCAACACTCTTAGCCTCTCACTGATCCTCTCCCTACGGTGCCTCGCTGCCGTGGTCTGTGGGTG  
ACTCGATATCTTCAAGTTCTTTCTTCTTGGCTTCTCCACAATCTCCTCCACCCCTAAGCTTACAGGCCTCAATGCTGCAGCTCTGTATATCATTTCTTTCACCTGAGCAATTGCCTCGCCATC  
AATCTCCTCTCTGCCTTCTCTTGGAAATCAATACTCTCAAGCTTAGGGCAGTCAAGTTTAGCCTTCTTGGACTTCAATGGATTACAAGAATCTTACACCTTCTCGTGACAGGCTTTATAT  
TTGAATCTATTCTCTGATCACTGAAGGAATAAGGATGTTTGTGCAACTCGACAGAAGAAACATTGCTACAGGTTGAACTAAAAGTTAGAATATTTCTGAGGAGTTGCAGGCTTTCAGAAC  
GGCTAGTGATCAGAGGAAGAGGAAGCAACTGATCAGAAGCAAAAATTTCTTCTTGTGCTGCTGAAAAAATCTTGATCCGTTTCTTTGTAGTTTGCATTCATCTCATGAGGCCAGATGAGTT  
CTTGAAGATCTAATGAGTTGGGTAGAACTTCAATTCATGATCTCAGCTTTGTGGCTTACTTCCCTGTGCGTTCTCTCTGGTTTCATGTAAATTATCATAAAAAATTATTACAATTTAAACTATCCAT  
CAAGAGTAGGCCGTGAAATGAGAGTTATGAAGCTTAGTAATGACATGGAGGAGATAAGCTCGTAACTTTATATGACTAAATATTCTCAGGACTTACCAAATGAAGTTGTGATCTCAAGCA  
CTTATCTTAGTCATTAAGTGAAGGAGAAAAAATTTCTTAGGACTCACACTCCTGGCAGAGATGGAATTTGCAAAGCAAATAGTAATTAATAAAAAAATCTGGAAATCACAATAG  
CCACTAACATGCATTTATCTACCTGTTTGTATGAAAAAGAGAT

>comp160968\_c0\_seq6

GCTGGTTATGGGAGCTCAGGGGGCCCGGCTCCTTTTTCATAGCAAACAGGTAGAATAAATGTATGTTAAGTGGCTATTGTGATTTCCAGATTTTTTTTTTAATTACTATTTGCTTTGCAAATT  
CCATCTCTGCCAGGAGTGTGAGTCCTAAGAATTTTTTCTCTTTTCACTTCAGTTAATGACTAAGATAAGTGCTTGAGATCACAACCTCATTTGGTGAAGTCTGAGAATATTTAGTCATATA  
AAGTTACGAGTAAGTTAATTTCTGTTTTGTGGCTTTGAAGAATTTATGTTTCATCTGATATTGATTAATCTTCTATGTAGGCTTATCTCCTCCATGTCATTAAGCTTCAACTCTCATT  
TCACGGCCTACTCTTGATGGATAGTTTAAATTGTAATAATTTTTATGATAATTTACATGAACCAGAGAGAACGCACAGGGAAGTAAGCCACAAAGCTGAGATCATGAATGAAGTTCTACCC



ATGCAACAAATCAACAATTAATAGGAAAATGTTGAATGTGTTCTACCTCCCTATTCATATATCTCAAAAACAAATACCATTGTTTACGAAAATGCTAAGAAATTGTTCCCTCTCATTGAGAGA  
AACATTTGTATTTCAAGGAGTCTCAAAAAAGTGAAAGTGTAGCTGCCAATAATTTGGAGGAGTTTGGGAACATGGAAAAGTCATCATCGTTGGACTTTTCCCTAACTATCTAGCTTGTTCATTAT  
AAATACTCATTTCTCATCTTTCCAATGAGTGTGTATGAGGTGTTAAACTAACTCATTGTAATCATTFTTTAACAAATTTTATCCATGTAACCTTAGGTTTACCTGCTTTCCCTACTTGATCATCTA  
ACGTTATTTTATGTTCTCTCTAACGGGTGTGTTTTCTATCTTCATTATATATGTCCAAACTATTTGTCTATTTTCGACCATCTGATCTTCAATAGATGTCACTCCAGCTTTTATCTAATATATGTA  
TTCCTTAGTTTATCCTAGTTACGGCATATCAATCTTAGCTTTTCCATTTATCCATAATTACTTTATATATTAATGACCTTTTATAGTCCAACATTCAGATCCATAAACATCGTTAGCCTAATCATG  
GCTTTGTAAAATTTAGCTTTAAGCCTCTTTCATATCTTGTATCACACAAAACCTCTTAAGATATTTGGTAATTAGCCTTAACTTAGAAGTTATATTTCTCATTATATATATCCATTCTTCTTTAT  
AATAGATCCAATATACTTAAACCTACTACA

>comp163815\_c1\_seq1

AGGGGCCTACGCGTTAATATAAATCAAAATTACATAGTCCTTAAGGGGACATTCAGCTTACTAATGCTCGAAGAGCTACAAACAGTAAAAAAAAAAAAACCTAAGTGCCGATTGTCCCCT  
ACTAACCAATATATAAAATTGTCTAGATACAATCTAAGGCGGCACTAAGAAAGCGACCAAAAAATAGAAAGATCCACAAAATCACATTCAGAACAATCTTCTGCCAAAAAATCCCTCCA  
TGCCATAGGAAACCTACAAAAAAAAAAAAAGCACAAGAAACCAAAAGAAAAACACTACAATAACCAATAATTACCAGTAATCAAAAAGAAATGCCCAGGACTGATGAGCCACTGCAA  
GATATGAACTAAACCAACACAGCTGTACACAGCACTGCTCCAAGAAAACCTGGAGATGATTTGTTCTCGGAAGATCGTATAAAAAGACAATTACTCGATCGATCACTGTGGTCGATTGTATT  
TGTC AATCTTATATGATTTCTCGCTAATTCC

>comp164089\_c0\_seq9

TAATTTAGTAGGATTTAGTAAATCTTGTAATCCGGATTTAATAAATCCTGAGGCTGTAAATCTTGAAAATTGTTTGGTATGATAGATGTTAAATCCTGAGAACTATTTGACAACATATTGT  
AACATTTCAAAACAGTTAAATCCGCGGAGTTGGGATGATACTGCGCGTAGACAAGTACCTGCGCGCTCAACTGTAAATCCCGTTAAATCCACAGAAGAATCGGATTAAGATTTATCCTGA  
TTTATACGAATTTGGGGCGTAAATCCGTAAATCCAGGATTTAAGTCGTTGCCGGATTTACCGTCATGCAAAAATACCGTTTGGCTGGATTT

>comp164945\_c0\_seq24

CAATAAACGCTCTATGATGAAGGGAACATAATATATGTCGTCCAATGGAATACTTCTAACATGCTCTTGATTTATCCATAATTACTAGCCATTCCACTCTCAAAAAATTATCAATAGTCCCTCCA  
TTCTTCACATTATGGGAGGGGAGAAGAGAAGAAAGAAAGCTTATGGTCTCTCTTGCATTTTCCATCCAATGTTGTGACCGTCCGAGTTCTTCCCGGCCACCGATGCGGTTGAACTTTCGCT  
CGTTCTCCAACATATTGTCAGAACTCTTCCCGAATGCTAACATGCCAGATCTCATCCGACCACCATGCGCTGCTGACTAAAAGTGTAATAAAAATCATGAAAGGAGAAAAGTTCTAATCACAA  
TTTTTATTATGCAATAAATTTATGATCTCAATTTTCATTATAACATATATACTGTAAGCTTAACTCCACCATTCTCAAAGATTGTGATTCTATTTCTGGTCTTAACTTTCAGGGCTATCACTGT  
GATCTCGCTACGGAAGAACTGCAGGTCTTCTTGCAGAATTCTATTTGCGGCATCGAGATAGTTCAATGACCATAGTTTCATGAGTATGCAAAGAGGAAGTTGGGAAACTGTTTGACCGAA  
GTTCTCACTGAGTGACGCAGTAAATAGCATAGCTGGGCATTAATTTTTTATTCATGCAGGATGAGATAAGAAACGCAACAGGCTGATTTCCCTAATACCATGCCAGATATTCGTCTGGTTGA  
CTGGTATTGAAGTCATGCACATCTCGGGTTTCATGTGCTGAGCCTTGGTGAACAGTGCTAACTTTTTAACATATTTTATTAACCTTATATTTATGTTTACCGATCTGACTTGTGTTGTGCAATTA  
CTCGGAAGTCATCGGATTTAGCTTCCCTAAATTATTCGATCTGCAATAGTTTCAACGTAGTCAGCCATTCCACCCACTTAAAAAGCTTTTCGAGGCCTGAACTGCTGAACATGGCCGAAGAAT  
AAGAGACCTGAGCCATATCGAAGAAGCTTTATTCTCTCCAGGTTCCACGCTTACCTTTTCTACTTCCCTGCTGCTTCTACTTAATTAAGAAAATTCTGAAACAATGATTTTGTGTTGGGGC  
AACTTTCTAAGAACATCTCCAACCGAACGCCAAACGAGCGTATGGTGTGCTTGGTCACTCCAGCCGAACGCCAAATTTTCGCCAATTACTTGCGGGTGAATAGTACGACGCCAATATTG  
GAGTCGCACTATTTCGCCACGCTATTTTGTCTCTCAACTGGAAAAAACACGCGAAAGGAAGAAGAGTCATTAACCTTCGTAGAAAGCACATGGAACAGCACCACGGCATTGTTGGAGTTT

>comp168953\_c0\_seq2

TGAACTCCTATTTTAGCTTGGGACTGCTTCTGGATTTGGCTTCTTGTGCGCTTCCGTTTTTCTCTTTGTTTTTATTATTTTTTTGGCAAAAATTTGAGGTCTAGATCACTGTTACAATGGAAA

AAAATCTAAGAATACTCACTTGATTGGAAGATTTTCCATGAGCAATGACAAATCAAGGAGATGATCAGAAGAAGAAGAAGAAGCATCATCCTCCATGAGATCGCTCGCCGAAGAAA  
AGACTGAATCATCAGATTCTTCAACTGAAATGAATCCAGAATCCAAGAACTTGCAGTCACCAAATCCTCTCTTCTAGCCATTGGGAAGCCACAGAGAAATGAAGAACAAGCTTCTGATG  
AACAAATTGTATGTATGTAGCTTCTTGATGTTGCTTTAAATAGGATCAGGAATCAAGGGGGAGGATTTAGATGATGAAGTATATTTTTTTGACTTGGATGGTACTGTCTCTCCTCATTATATA  
ATAAAAATTTAAAGTTATCTTTTATTTATTTA

>comp169017\_c1\_seq13

AAGCCGTCCCAAACGAAGTCTTATACTAACTTGTTCCGGGTCAGCTTTATGAATATCTTTTTAATTAATTTATTAATTGTAAAATTTATCTTTGTAGATAATTCTAAACAACCTTCTATCTATATC  
CAGTTTATAAAAATTTTCCTTTAATATTGATTTTATCCATGCTCCTAATGGTGCATTTTCTCCCTTCAAAGTCTTATACTAACTTGTTCG

>comp169903\_c0\_seq2

TTTTTGGAAATTAATCACCCCTAAAAAGTGTATTAATGCTGGATTAGTCATTAATTCACAGTGATTAACAATATACATACATCAAATTATAATAATTCATACATTTTCAGATCATCATCAAATAG  
AGTATTAATGCATAATATCAAATCTACAGCACTAATAATAAAATTTAAAATTTAATAAAATTAAGATATTAACATAAAATCATTAACAATAAGCTCTGCTCCAGAATTTCTTGACTGTGT  
AGTAGTCAAGAATTTCCCAACAGAGATTGGTTTTTGGTGCATCTAGGAGTTTTGAACTGACTCAGTGCAGCCCCATTAGCAATGTAGTACTCCAAAATCTTCTAAATGTTCCCTCCCTCGAC  
GATCCTGAGCTCCAACGGTCCGATCGAGTTCGCCTTTCTCGACACGACATACCCGTAATCGATGAAAGATAGGTCCATCTCAGTACAACAATCGTTCAATAACAGATCAGATGTGACCCG  
TTGATCTCCAATAGATCACGTAATGTCCGGGTTCTTTGACAGTATCAGCATGACTTGTGAAATCGACGAGCTCGACCTTGGCTTCACAAGACAAGAGTTTGAGGGGCTTTTTCGACGGCG  
AGTTGCAGGTCATTTTCGGTATTTTTGTGCGATGTTGATGGTCAAGATTAGTTTTCTCCTGCAAATAAATTTTAGCTGGGGGGTTTCTTGTAAAAGCCTGACACCTCGACAACGTCACCTAG  
TCGGTACCTGTATAAACCTGTAAAAGTAGTGAGAACGACCTCATATTGTTGGCCACTTTAACCTTAGAGAGCGGCAACGCTTCTCCCTCCTCAAATCATCTTCTTCGACCCGACGATCC  
CTGGCCTTCGTTAGCGGTATGAATTCGAAGTATGCGAAGGTAGGAATTAAGTAAAGCGTGCCTCTGGGGGATCCGACGGCTCAAGATTCACCCCGATCCAGCATTCGGTGGATCCG  
TAGTCGGCGCATAAAGCGGCAATCCGCCGCATAATGTCTCAGTTTCCGAAGGTAAGGGAGCATTGACCCGGTCATGATAGAGTACAGGTACTTGGCGTTCCGGCCACAAGAACCGGATC  
GCGCCGGCCACTCCCAGTTCACTAGATCCTCACATTTCTTCTCATTCTCGGCCCGGTCCGGGTCGGGCCGACCCATGAGGCTCAGCACGGCTCTCCTAACAGAGCTCACTGCCGC  
CGCGTTCAGCGTTCAGTTCTAATATCATGGCAGAGATCAGGCCAGACCAGCTCCAGAGCAGAAAGGGCTTGAACGAGACTATAGGCGAAAGTAGAGGGGATGAAATCTACATCGTCGG  
AGAAGACGAAGCCGAGCAAAGGTGACAGTAAGTAGACTGCCGGTGTATCGCCGGCGGCGACTTCCAGCGGGCTGCAGGAGAAGGATTGAGTTGCTAATTGCCTCAATCTGAATTC  
CTCGCTGGCGAACC AATGGGTGGTCGCCGTTCCAATGGTGACCCGACCACCGTTTGTCTTAACCGCTTGCTGCTGTATATAAATTCAAAATCTTGCTTTTGGGTCTTATGGGAAAATC  
CTCGATCGATACGCAGCAGCGAGGCGAAATATCCTAAGAGTCATCTGAGAACTGAATCTGGTAAACGGAACAAGCTTTTGCCGGCCATCCGTAGTCCCCGAACCTAAGCGAAAGCATGCT  
GATATTTTCTCCGGTGACCAAACCGGCCGACGGCTCTCCATCGGCGATGCGGCGAATCAACGGTTCGATGTGCGCGTGAGACGAGAGGGGCACTCGTGAGGAGAAGAGGGGATTGCAGG  
TTGTTTAAATCGAGATAATCACCGATCTCGAAATCGGCCCGGAGAAATCGCCGGAGGTATTCGGTGTGGCTATTGAGCTCCAGGATTCGGCGAAGTGTGTTTGGCTTGGGAGATTCCGGCGT  
TGGCCGCGTGGTTTTCGAACCATTCGATGACGTCTTCGGGCTCCTGCGGCATTTCTCCGGCAAGTCTCCGGCGGCCGAGATTCTTCGACGGTCATTAGGCTTTTCTCTCTCCTCTC  
TCGCTCGCAGTTTCAGTGGGCAAGGAAGTGGGCA

>comp169903\_c0\_seq3

AAATTGACAAAATTTGATTAGAATATCCGATCGAGTTTTTCTCTTATTTATATAAGAAATTTACTAATATTAAGTTAATGTGAAATACATATTTTATTAAGATAATTTGTAAATCTACAG  
AAAAATGGCTTGTCTGTAGCAAAAGAAAATGATTAATTTTTTAAAAAATCTAAAATCAAAGACCGGGAAAAAATCAACCCCTAATAATTTAAATTTAAATTTCAAAAATCCAAAAGCG  
ACCACCCCTTCAATGCAAACAAAACCTAACAGAAAAGGCTCAAAAACCAAATCAATCAACGAACCAACCTCGATCGATACGCAGCAGCGAGGCGAAATATCCTAAGAGTCATCTGA  
GAACTGAATCTGGTAAACGGAACAAGCTTTTGCCGGCCATCCGTAGTCCCCGAACCTAAGCGAAAGCATGCTGATATTTTCTCCGGTGACCAAACCGGCCGACGGCTCTCCATCGGCGATG



CGGCGAATCAACGGTTCGATGTCGCCGTGAGACGAGAGGGGCACTCGTGAGGAGAAGAGGGATTGCAGGTTGTTTAAATCGAGATAATCACCGATCTCGAAATCGGCCCGAGAAATC  
GCCGGAGGTATTCGGTGTGGCTATTGAGCTCCAGGATTCGGCGAAGTGTGTTGGCTTGGGAGATTCCGGCGTGGCCGCCGTGGTTTCGAACCATTCGATGACGTCTTCGGGCTCCTGCG  
GCATTTCTCCGGCAAGTCTCCGGCGGCCGGAGATTCTTCGACGGTCATTAGGCTTTTCTCTCTCTCCCTCTCTCGCTCGCAGTTTCAGTGGGCAAGGAAGTGGGCA

>comp170376\_c0\_seq5

ACAGTCAAATGCTTTTAATCGAGACGTCAAAGAAAAGGCCCGCCGGACAATCTCTCCGTCCGACTAATGCGGGACGGCGAAGATTACCCGATACATTGGAATCAGCATCCGCTGCCA  
CGCTCGAAGGAAATTAATCAGGCGATGATTTAATAAGATGCTAGAACAGATTTTCAATACGTACGATAAGTTCGGCGGGCGGAATCCGGGGAACCTGCCTCGCCGGAGAATGGAGAAC  
CGCCGACCCTTCAGAACGGCTTCGTAGTTAAGCTTCAAGCCGAGCTTCGCCTTCAAATACCATCTTCGGCGGAGAAAACAGCGGTATTGACCTTCTTATCTATCGCTTCCACC

>comp171332\_c1\_seq2

TTATCAAAGAGGAAGTTGCAAGTTTTATGCTGCTGAAGTTATTGTTGGCCTGGAATACCTTCATTGTCTAGGAATAATATATCGTGATTGAAAGCCTGAAAATATTCTACTCCAGGAAGAT  
GGGCATATAATGTTAACAGACTTCGATCTATCATTCTGACAAATTGCAAACCTCAAGTAATCAAGCATGCAACGCCAACAAGAAGAAGATCCAAAGACCATCTCCACCAATCTTTGTAG  
CAGAGCCAACCGCAATCAAATTCATTTGTAGGAACAGAAGAGTACATAGCACCTGAAATCATCACAGGTGCAGCCCATAGCAGCGCCATTGACTGGTGGGCTCTTGAATATTGCTCT  
ATGAGATGCTGTATGGCCGGACACCATTTAGAGGAAAAATAGACAAAGGACATTTGCCAACATTTTGTACAAAGATCTTACCTTTCCAAGCAGCATACCGGTTAGCCTTGCAGCAAGGC  
AGTTGATAAATGGATTGCTGCACAGAGACCCTACCTATCGTTTTGGGATCTAACATTGGTGCCAACGAAATCAAGCAGCATTCTTTCTCCGTGAGATCAACTGGCCACTCATTGCTTGCAT  
GCGTATTCCAGAGTTAGATGTTCTCTTCAACTAACAGCAAGGAAACAAATTCCTATGCAAAGGATGCAAATTCGATAACGAGGATGTGCTGATCCAGAGTAGAGAAATTTTATGAGG  
TTGCTGATCAGCAAAGATAAAACAATATGTGCTTACCTTTCTCTGAATGTTTCTAAGAATAAGGCCCAGTGCTCTGTTTTTTGAGGCAGAGAACAACAAGAAATGCCTCTTTGGCGAGC  
AAATGGCTTACAAAGCCAAAAGAACAGGCAGTGCCAAAGGTCTCTTAATTATCTATCTACATGAAATGTTGTGAAAATGGTGAACAAGCATTTTGAGAATTGTAATATTTTTCAACCATC  
GCCAAGATCAACAGCCAGTTCTGAGGAAAAATCATTATAATCAATGAATTCAGTGTATTTTTGTATATTATCGACTGTGAGAGATCACTAAGAAAATGACAAATGATAATAAAGAAATA  
AAAATTACATAGATAGAGAAGTACAGGAGTTATAATAAGAGGATAAACAAAGTTGGCATTAAATTGATTCTTTTTTGTGATTGTTTAAAAAA

>comp171332\_c1\_seq4

TTATCAAAGAGGAAGTTGCAAGTTTTATGCTGCTGAAGTTATTGTTGGCCTGGAATACCTTCATTGTCTAGGAATAATATATCGTGATTGAAAGCCTGAAAATATTCTACTCCAGGAAGAT  
GGGCATATAATGTTAACAGACTTCGATCTATCATTCTGACAAATTGCAAACCTCAAGTAATCAAGCATGCAACGCCAACAAGAAGAAGATCCAAAGACCATCTCCACCAATCTTTGTAG  
CAGAGCCAACCGCAATCAAATTCATTTGTAGGAACAGAAGAGTACATAGCACCTGAAATCATCACAGGTGCAGCCCATAGCAGCGCCATTGACTGGTGGGCTCTTGAATATTGCTCT  
ATGAGATGCTGTATGGCCGGACACCATTTAGAGGAAAAATAGACAAAGGACATTTGCCAACATTTTGTACAAAGATCTTACCTTTCCAAGCAGCATACCGGTTAGCCTTGCAGCAAGGC  
AGTTGATAAATGGATTGCTGCACAGAGACCCTACCTATCGTTTTGGGATCTAACATTGGTGCCAACGAAATCAAGCAGCATTCTTTCTCCGTGAGATCAACTGGCCACTCATTGCTTGCAT  
GGTAATTTCAATTTTATACACATAAAGGTAGAATTTCAAGCGAAGTGAAAGAAGACAACATAAACTAAGTACTCCAAGATAAGTCAAATTATGGCATTGTAATCTCAATTTGAGCAGG  
GAGGTTTACTTTGTAGTTATCAGATCTACAAGATAATTCTCAATGGTAACTGTGTCTCTGTTTGCTCATAATGTTGATTATTATATTAACATAAAATGCCACTGATATAAAGATAAAGAAAG  
ATTATTCAGTACGTAATGTCCTGGATTAATGCCAGATTTTCTTAACATATATGTGAACTCATATAAATATCACCTTGATGGAAAATATTTCAAAGTGAAACTTAAAAAGGTTCAAGTTCC  
TGCCAGTTAAGATAAACTATGTTTAGGATATAAATCTGAAATTTTGATAAGATTAATAAATAATGATTAAGAAAAGTCAAAGATGATTTCGCAACAAATGCTATGAGGAAATCTGAAAATTAT  
GAATTTTTTTTTTACAGCGTATCCAGAGTTAGATGTTCTCTTCAACTAACAGCAAGGAAACAAATTCCTATGCAAAGGATGCAAATTCGATAACGAGGATGTGCTGATCCAGAGTAGAG  
AAATTTTATGAGGTTGCTGATCAGCAAAAGATAAAACAATATGTGCTTACCTTTCTCTGAATGTTTCTAAGAATAAGGCCCAGTGCTCTGTTTTTTGAGGCAGAGAACAACAAGAAATGCC  
TCTTTGGCGAGCAAATGGCTTACAAAGCCAAAAGAACAGGCAGTGCCAAAGGTCTCTTAATTATCTATCTACATGAAATGTTGTGAAAATGGTGAACAAGCATTTTGAGAATTGTAATATT

TTTTCAACCATCGCCAAGATCAACAGCCAGTTCTGAGGAAAAATCATTCAATCAATGAATTTTCAGTGTTATTTTGTATATTATCGACTGTGAGAGATCACTAAGAAAATGACAAATTGAT  
AATAAAGAAATAAAAATTACATAGATAGAGAAGTACAGGAGTTATAATAAGAGGATAAACAAAGTTGGCATTAAATTGATTCTTTTTTGTGATTGTTTAAAAAA

>comp174367\_c3\_seq1

GGTAGATTGGCTCTCCCAAACAACCTTAGACTGCACCAGGAAGTCCTCACAAAAAGAAAACCTATAACAACCTCCGAAATAAAAATTCTTCATACAAAACATAACATAAACCCACTTGTAGCAA  
ACAATAAACAAACAATATCAAAAAGCCCTTCCCCCAATTCCCTCTCAAATTAGCCCTAAAATATGTCATCTTCAATTAGGAA

>comp174889\_c2\_seq12

TCCTCCTCCTCCTCCTCCTCCTCCTCGCTCTTATCGTAATACCATCTCTTCGAACTCCTCCTCCTCCTCCTCCCATCTGTTTCTTCGAGCCCTCGACTCATCCGCAACGCTCCAGTTCTTGCTACCCCTT  
CCACCCTCACTACAGCCGTGGAAATGGCGTCCGTTGATCGATTGAAATCCGGTTTTGAGCAGTTTAAAGAAGGAAGTTTACGAGAAGAAGCCCGAGGTGTTTAAACCAGCTTGCCGAGGGC  
CAGAGTCCAAAGTTTCTAGTATTTGCGTGTTCCGATTACGCGTGTGCCATCTGTATTGTTCAACTTTCAACCTGGGGAGGCTTTTACCATCCGCAACATCGCTAACATGGTACCACCCTA  
TGACAAGGTATATTTACTTAAACATTCATCCTTCTTCTACATAACATTTCCCTTCAATTATTTGTGATTTATAACACTTCAGTGTACTTATTATGATTATTTTTTTTCTCCTCT

>comp174889\_c2\_seq13

TCCTCCTCCTCCTCCTCCTCCTCCTCGCTCTTATCGTAATACCATCTCTTCGAACTCCTCCTCCTCCTCCTCCCATCTGTTTCTTCGAGCCCTCGACTCATCCGCAACGCTCCAGTTCTTGCTACCCCTT  
CCACCCTCACTACAGCCGTGGAAATGGCGTCCGTTGATCGATTGAAATCCGGTTTTGAGCAGTTTAAAGAAGGAAGTTTACGAGAAGAAGCCCGAGGTGTTTAAACCAGCTTGCCGAGGGC  
CAGAGTCCAAAGTTTCTAGTATTTGCGTGTTCCGATTACGCGTGTGCCATCTGTATTGTTCAACTTTCAACCTGGGGAGGCTTTTACCATCCGCAACATCGCTAACATGGTACCACCCTA  
TGACAAGACAAGATATTCTGGTATTGGTGCTGCTGTTGAGTACCCCGTTGTTACCTCAAGGTAGAGAATATTATTGTTATTGGACACAGTCGTTGTGGAGGAATCAAAGCGCTCCTCCTCT  
ATTAAGACAATGCTTCTCCTCGGCACTGACTTTATAGAGGATTGGGTCAAATCTGCACTCCGGCAAAAAGAAGCAGTGAATCAAGCTCACAGTGATCTCCTTTGAAGAACAATGCTCA  
AAGTTGGAGAAGGTAATTATTAATTTATATTTGTCCTCCTCGTTGTACCCTTATCTTGATATAAATTAAGAAATTCATTATTCAACAGGGTGATATCAATGTAAGAGATTAGGGCGCTATTAGC  
TACACAAGTGGCATTAAAGTAAATTCATACGCTTAAGAATGATACACCAATAAAATTAATCTATTTTTGGCAAAAACAACAATATCAAATAAATAATAAGATTTCTAATTTTTGGAGTTAAATGAT  
AATCTATTTCAAATAACTATAAATC

>comp174889\_c2\_seq15

CTATCGAAATCCAGAAATAGAGTGTATTATATATATACCTTTTTTCATTTCTTTCTATTTTATTCTCTTTACTGTTCTATTTCTGTAATCTAATCTCCTATCTGCAGAGCTTGGTATTTTCATCCTTCT  
GATTATGTTTGTATGCTCCATTTCAATTAATGATTGCAGGAAATGGCGTCCGTTGATCGATTGAAATCCGGTTTTGAGCAGTTTAAAGAAGGAAGTTTACGAGAAGAAGCCCGAGGTGTTTAA  
CCAGCTTGCCGAGGGCCAGAGTCCAAAGTTTCTAGTATTTGCGTGTTCCGATTACGCGTGTGCCATCTGTATTGTTCAACTTTCAACCTGGGGAGGCTTTTACCATCCGCAACATCGCT  
AACATGGTACCACCCTATGACAAGGTATATTTACTTAAACATTTTCATCCTTCTTCTACATAACATTTCCCTTCAATTATTTGTGATTTATAACACTTCAGTGTACTTATTATGATTATTTTTTTT  
CTCCTCT

>comp175125\_c4\_seq34

TCCATATAATTTGATCCCATGAAGCAGGACAAATCCTGTGAACCTTTTAAGCTTCTTTTCATCTCACGTAATGCACGTCTCCACCCACGAGAAAGCAAGTAAGAGTCCGCTTTGCCGTTT  
AGCTTTGCTCTGTTTGTATCTATTAATGGCGATTCTCTCCTTCTTCTTGCCGCTTCTGCTCCCTTTGGCGCTACTGCTGCTGGTGATGCCGACTGGTTTTGAGCTCGGAGCGCTACGACAGGA  
GGCCGACGAGCGAGCGCAAGTTGCCGCCGGGCTTGTGTTGAACATCCTCTCCGTTGGCCGCCGTTTTCAGCAGCAGAGATGGCCGCGGCCTGCTGAGCTGACGGATCATGGATAGGGCT  
TGATTATATAGTCAAAAACCTATTTAGCATAGTTAGAATTAATAAGTAACTTAATAATAGGGGTGTCAAATTCGGGTCAGCGGTCGGGTTCCGGTTCGAATCCGAATCGACCCGACTCTAAACG  
GGTCAATCTGACCCGACCCATTTTTATAAGCATTAATAATTAAGTTAATATCATATTGATTGTTGGGGATTTACATACCCACTTGAAACTATATATTTAATGCTTACAATTTATCTTGTAATAA

>comp175269\_c0\_seq7

GAGACCTGAGGCCTTGTGGGAAGTCCACTCAAAACCTGTCTTTCCAAAGCCACACAATAGTAATAAATCTTCATGGAAAGCAATAGAGAAGCGTACATTTAGTGGAACCTGAAGGCACA  
AACCAACTATTTGCTATGAAGGCAATGGACAAAAGTAGTTATGATGAACCGCAATAAGGTGCATCGAGCATGCATTGAGAGGGAAATTTACTCGTTACTGGACCATCCCTTCCCTTCCAACAT  
TATACGCTTCTTTTCAGACTTTTGTCCGGGAGGAGAGTTATTTGCATTGCTTGATAGGCAGCCTATGAAGATTATCAAAGAGGAAGTTGCAAGGTACTGTAAATTAGCATATGTAAAATCTT  
TTGCAC

>comp175639\_c2\_seq1

ATGTTTCGCAAAAATATTGGTTTAGCTGTGAGCGTAAGCCCCCAAATTCACCATTCTGATTGGAGAGGTCAAGGAAAGTCAGCTTCGTCAAGCGAGATATACCAATGGGAATTTCCCCA  
GCAAAACCGGCATTGGAAAGATCGAGGCTTGAAAAGATTTGCAAGCTGATCCCACCCATAATTTGGAATGGATATTCCTTGAAATATGTTGTTGGAAAAATTGAGATCATGTAAAGATGT

>comp185013\_c0\_seq1

AGTCATCCCAAACAAAGCCTAAGTTTCTATGGATTTTCCGATAGATTACTTGTTCATAAAGCACATTGAAATGACTATGAAACATCATGACATTTAAATACCACATTCATCTCAAATTAAC  
ATATTTACAGCCTCATACTTGCAGAAAATGAAAATGATTCCTTTTCTTTGCAAATCTTTCATATTCCTTTTAAAGATGAGATAGCATTTTAAACACACTATCATATAGGTTTACATTGCCTCCATTC  
TTA

>comp99245\_c0\_seq1

TGGAAGGATTGAAAGAAGCTTTTTAGCTAGTCGAGATCAAATTTGAGAGATAAATTAATACAATTTCTTAAAATAAATAAATAAATAACCAATTAATTAATAAAGGGAATTTCTTAAAATA  
AATAAATAATCAATTAATTGATGTTAATTAATACAAAATTGAGAGATCAAATTAGTCAGCTGGATTACATGAGGCAATTTTTGGGTAAGAAAAGATAGTTAATTAGTATGTTTTAAATAATAT  
TTATGCATTATAAAGCATATATGGGGATTTAAAAAAGTATATATGGGGATGGGGAATAAATTGTCAATTTAATAATATGATGCTTTTCGATAAATCCAGAGTTCTTTGCTTTATCTCTATTTA  
GAACATCTACATGGCGCACACAGGATCACTTCTAGACATTGATATCTATATGTATTCTGTAATGCATTATTGTTGTTGTTGTTGTTATT

>comp10084\_c0\_seq1

GCGCGCCTTAGACTGAAGCTCGCGCACTTGGCGGAGGTAAGCCTCACGGCGCGTGCGGCAAAGGGATTGGTTTCAGGGGCGGCGCCCGCTGCTCGTCGTATGCGGCGCGGAGGCGA  
CCGATAAGGGCGTCGAGGCTTCCCAGGCCTGCCGGAGAGGGCACGGACAAGGGGAGGGGGGTTGGGCTGGCCGAAGAAAGGACAAGCGATGGAGTGGACTTTGGTCTTGCCGAAT  
TGGTCTAAGTAGCGGAGGAATTCGAGCACGTGAGCGCCGCTGCAGCGGGAGAGGGTGAGAGGGGGCGGTGGTTGCGGAGGTATTGGCCGAAGGTGTTCCAGTCGCGGAGCTTCTGG  
TATTTCTAGCGG

>comp127509\_c0\_seq1

TATATAACCCTAAAATAATGATCTATATCAAAGCTTTAGTAAACGGGTCCAATTGGCCGACTAGTAATAGTCGTAACAAAGGTTAGGTACTACTAACAGAACATATTAACATAAAGAG  
TTGACACATATTAAGTAATTATTTAAACCACAAATAGCATCAATAAAGTTACATAAAGCATGCGATCCAAAGAGGATTTACGATGACCTGAGAATTGGGCCATAAGCCGTTTGTTCATAT  
TGCCGCAACGGCATCCACCTCTCCACCTCTACGTAATGCATGAACTCAATGTCTTGGAGCAACGCCCGCATGGTTTCGGGCGCAAGGCAAACCTCCAGGTCAACGCTCCCTCCCCCTTC  
CCTCCAGGAAACGCCGATATCTCCCGTCGAACTTATTCGCTTCCCGCTCCTTACCGCCACTGGCTCACCCACCCGAAATCATTCCTTTTCGTACATTGGAAATCTCGGCGAGCTTCCCA  
TCGTCAGCCCTGCTCCTCCGGGATTCCCCAAAGGAAAACATCTCGGCGCCGTCTCCACTCCGCCACTACCTTTCTTATCTTCTCATCCCCGTGCGCAGCCACATTCCGGCGAAGCATCCC  
AGCAATCCAATAAGCTCTCCAGCCGCCACTTCTCCGACCGCCGCGGTTGTGCGGATGCTCTGTATCGCGTTCCCGAAGTAACAATCGTCCACCGCCGGCAGTACTCTCCGACGACAGTT  
CACCGCATGCGGAACGTCGTCGGCGTTGACGGCTGGAGGTGTTTCTTTCGCGGAGTCACCGACCGCCACAGCTGCGCGCACAGAGATTGAAATGAGGAAATCTTCTACTTCTTTGA  
AATGTTTTCTGTCGTGGATAGATTTGCCGTACGCCTCAGCGTTTTGGGAAGAGTGGTAGTTATTTGCTTTCGCTTTCGAATTCCTGAATTGATTCACGGCGGAAATGGAATATTCTCTCTTA

TTGGAGAGTCAACCGGGAAGGTGACGGCGGGACCCTTGCCGCCGGGAAAACGTAGAACGGCGGAGGAGTCGGGGAAGAAGTTTCGCATAAAGTTCCGGAGGACGGGAGATGGTGGTTA  
GAGTAGGTGAACGGCAGAGTTTCGGCCCAAGCGTTGAAGAAATTCAGAAGGAAGTGCCGTCGACGACGGCG

>comp127993\_c0\_seq1

GCAACCGAGTCAAGTCCGCTTGCAGCTGACTCGAGCTCGACTCGTTAACAAGCTCGAAACTTGAGCCCAAATTATAGCTCATAACATTATATGTGCTAGAGTTCGAGCCTTATGAAGCTC  
AGCCTATTGGCTTGTGAGTTGCCCTGAATAAATTCTTATAGAGTATGAATCATATTTATCCCTTATTTGACGTTAAATCTTGATCACCTATTTCTTAACTTAAATCCACAAGGCTCATGAACCC  
CTTAAACCTAAACTCGTAAGTCTAACAACCTCCATTTCTTCTCAAATGCCATTGGACCCATCTTAAACCAGGGACATCATAACCCACTTGGTAGGTTAGTCCTCATTTCCTGACCATTCACTC  
ATTTTGGCTTTACCTCATTAACATCAATCACTCCTATAAAAATTTGAGCACAAAGCATTAATTTCTTAAATGAGAATGTTCTTGGGCACACCTAAGATGTAATAATCTTAGGATCTTGCTCC  
TTTGGGAAACCTCAATCTCTAGAATTAATAAACCTGCTTGGAGCTACATTCCTTGTAACCTACTTGGAGCCACATTCCTTGTAGCAACAATCTATGAAACATAAACTCA

>comp134280\_c0\_seq1

AATGTATGATGGAGATGTAATTTGGAGAGATGGCTTTGTTGGATAGTGGTCTTATTGCTTTTTAAAGTAAATTTTTATTAGAAAATTGCTTTAAAAATCCGTCTCAAACAAAGTCTTAA  
AAAGACTATATTGCTAGCATAAATAAACAGTTGAAATATTGAAAAGAGAGATGAAGCGTTAAACTTTCATGCGCTGAGGACAATATAATTTTTTACCAAAGAATTTATAACATACTGA  
CCTGTTCCATCATTGCAGCATGCACTGGAGTTGGTCTATCTAGGAGCAGTGGCCATGATATCTGCATGGATAGGGGTAGCATTTTGGATGCAGACTGGAGAGAGGCAGACAGCTCGTCTTA  
GGGTGAAGTATATCCAATCTATTTACAACAAGACATTAGCTTCTTTGACACAGATGCAAGAGATGAAAACATAATTTCTCATATAACAAGTGATGCTATACTAGTACAGGATGCCATAGGT  
GATAAGGTAACAATATCAACCTTTTATTCCCTTGCAAAGA

>comp139268\_c0\_seq2

TTTATGGTTACATATATAGAAAAGTATAAATAACCACTCCTTTTCTGCTTTTTTCACTTCTTGATTACAGCTCGACAGATAGCTACTAACCAGATACTTAACTTAATGAAGGAGGCTTAGGGTTTCG  
AAGGACTTCACAGTCTCCATCTTCTGTGGCAGTGAGTGCATATACTTGCAGTTTGGGCAGGAGGGCGATGAACGGTATAGCATTACCAGAAGGTGGCAATTAAGCAGACAATGGCAAC  
CATGCTGCTGCTGCCATTACTAGAGCTACTTGGTTTCTTACCTCCTCCTCCAAGTTTTGGCAGATTCTTTTCTGAACTTGTGAAAGTTGAAGGAGTTGAGATATTGAGCTCCAAGTCTA  
AGTTCTGCTCTTTCGGTCTCACCCAGCTCTTAGTCAGAGTTTTTCTATTTAGGTAGTATATCCTTCCAGACTGCCATAGAAAAATAAGATTTAATTGAAAACAACAGTGGAATTAGAAAA  
GTTTAAGATATTTTATCTGATTGCATAACACATTTTTTGTAAATTTAATGAT

>comp139707\_c0\_seq3

CCATATGGCATTGACTACCCGACGCACCGGCCGACCGGACGGTCTCCAACGGGCTCAACATACCCGACATAATCAGTAATTCTGATAATTGACAAATTTACAGTGTCTGAGCTTATATT  
CTCATTGTTGAGTTGCTGAACATGTTTATTACTTGCAGGTGAACGCATTGGTGAGGAGCCTACATTGCCTTACCTGAGCCCTGAACTGCAAGGGGAGCGGTTGTTCTGTCGGAGCCAACCTT  
TGCTTCAGCTGGAATTTGGCATTGTAACGCACTGGAATCCAATTTCTGAACATTATAAGGATCAATCAGCAATTTGGGATACTTTCAGCAGTATCAGGAGAGGGTAAGTTCTCTCATTGGT  
CCTGATGAGACACAACGGCTAGTAAATCAGGCTCTTGTCTGATAACTCTTGGCGGCAACGATTCGTCAACAATTACTACTTAGTACCCTTTTCTGCTAGATCTCGGGAGTTCTCTTTGCC  
AGATTATGTTTCACTACATAATCTCTGAATACAAGAAGATTCTTGCGGTATAATTCTTACTACTAATATCAACCACAATTGCACGATCCATATT

>comp144837\_c0\_seq1

AAAATTGACATATAAACTATATTGATTGTAAACATGAAAGTTTTGCATTTTATAACTTTGGAAGAGATTTTTTCACTCAGACTTTCAATTGTGATTCTGCCACTGACTGTTTCATAGATATGG  
AAGATGAAGAGAGAAACTCAGGCAGCAGCGGCCGATTGCACGGCGGAGGCGCCGCAACCGATGAAGGCATCGAACTTACTACTTTGGCCGATGAATGCTTCAAGAGCTCTTC  
TTTCATTGCTCGGAGCTGCGTTTCCAGCTCCTGTACTTTTTTCTGAAGGACTATGATAGCTCCCATGCATCCATAAACTGGATCCTGAAGCCTTAAGTTGGCCTCATAGACTAAGCTGTTCG  
CAGCATCAGCTCTCAGTGCTTCTGGAACCTCCATTAGCATCTTGGAGACATTGCTAGCACCAAAGACCTTATGTATGGCTGCAAATTTTTGGGGCTCATTAGGGGAGAAGTAAGGGAAGA



AGTTCATCTCCTGCGGCTCCGTCGCAGTCAAGGGAGGCCGCGCAGCCGCCGCTCCGCCGGCGCTCCGGCTACTGTTAAGGGTAGGAAGAGTGGAGAAAGCCTCGAAAGGGAGGCGG  
CGGAGTTGCAGTGTATGTCGGTGAATCCACGGCGGGTGGGGAATATCCCTTGGAGGAGAAGGAGTATTTAGTGGCAGCATCGTGGAGGCCATGGCCGAGACCGGACGAGTGTGCCT  
GAACCGGCCATGAAGAAATCCAACCTCTACAAGGAAGAAAGGGGAGGCAAGGTGGGCATTGGAGAAGAGGAAGAGAAGGAGAGTGCAGAAGGAAGAGTGAGAGGAAAGTGCATTC  
CTGGCATGAAGCGCAGCTCAGCGAAGCAGAAAGAGCAGGAGCAGGAGCAGCAGCACATCAGACGCAGCAGGAAATGAGAGGCTTGCTGATTACCTGTTTCAGTTTCTTTGGGTGGGTG  
GGGTCTGGTTATAAATATTAGAAAATTGTCGGACGGGTTATTAATGTGTC

>comp150249\_c0\_seq1

TATTTTATTTTTTTTTTACATTACAAACCTTTTATATATAAAAATAGAAACCAAAGCAGTCCCGATCTTTTGATTGAAACCTTCACCAAATCCAACCTTCTACTAAGCAAATACCTTTAATTAGA  
GAATACACCTTCGAAGCCTAAATAAAAAAAGCTTCATTTTGCCATAACAATGGCAATATAAGAAAGAAACACTAGCTAAAGAGTTATATGGCTCCTGTGCAAGCTGTGTTAGTGGGA  
AGAAAGCAAACCTCAAATCAACTAAGAAATCTCTGTAACCTCACCTCAAAGCCAAACAAACAGCATAAAATAACACAAACCCTAATTATTCACGAACCAGTACTTCAATTCATGTTCTTC  
TTCTTCACTTTTCTATCTTTCTTCTTACCAACTTCTCCACCGCCATCATCCCATTCAAAAACCCCTGCGTCTCTCCTCCAGCCCTCTATTCTGACCCAAAATCCCATCACGAGGAGCA  
CTTGAGCTAAACAAAACCTTCTCCTTCATCATGATCTGTAGCTCCACCTGCACCAACCTGAAACCTAACCCTAATTCTGCAACCCGAAAACCTCGTGCATGAAATTAATTTCCCATCTGTC  
TCCCTGACATACCTCCACCCCTCAAATCCCCAGCTCCGGCAACCCAGATCCTCCGCCTTGTGAAACCTAAGGTTAAGATCTCGTACTTGATCAGTACTACTGAACTTTGGGTGGTTCTG  
CATGGAAGAAGAAGAAGGTGTAGATGATGACGTGGCAGTTATCGACCGTTTGTGTTTTCCGTGAGCCGCCGCGGACGGGGATGTTACGGAGGGACCCCTCCTCCGTCCAATAACGGCGGC  
AAGTCTTACAAAAGTAACGTGGCTGTGTGAGGCTGTAGTTGTTATAGTAACAGAATTTAGTATTATTTGAGTTGCAGCGAGGGCAGTTAAGCTGTTTCTGATCATTCTTCTACGATTTTTT  
CTCTCCGAGATCGCCGAGCCTTCGTGCGCGCGTCTCCGCTACAGCTGCTTCTTTGACCACTGAGCGGCGTCCATGCAAATGAAATTAGATCTTGATTTCTATGATCTGGATTAATTTCT  
TTTCTCCCTGCTAGCGTTAGATCGATCAGAGAAAAGATCGAGCCTTGTGATGAAGAAAGCAGTGGTGATTCAGAAGCTCCGATCCTTTGGATCTCTCTTCTTTTGATGGGCTATGTTGA  
GAAAGAGGAAGATGGAAATCTGTGAGGAATTTCCAGTATGGAGCTTTATCAT

>comp150605\_c0\_seq1

TCTTTCCGGTTGGTCTCGAGATGACGTTCTGCGTTCAGTCTCCGCATAGAATAACTTCTCCAAATAAAAGGGGTAAAAACTTTTACCCAAACGTGCCCTCTATAGGATTGACAGAGTGATG  
AGTCAGTTGCTTTGGCAGCCATTAGCGAGTCCAAAATCTGAAATCTGAGGCTCATAGTTTGAGCCCAGAAGCACATTTGAGGCCTTGATGTCTCTGTGTATTATGCGGTGAGGGCAGCCT  
TTGTGAAGGTAATGTATTCTCTCGCTATTCCCATTTGCAATCCTGTATCTTGCAGTCCATTCTAGAATCTTGTTGCTTTTGCCATGCAGGGCTGAAGCCAAACTTCCATTGGGACAGAAATC  
AAAGATCAGATGGAATCCATTCTCAAAGCAGCAGCCTTTCAAGGAAGTGGTATTTGGATGACAGACATGTCCAAGTATACCAAGCTCTGCAAGAAACTCTCTCTCCTTTTCTCTCTGTG  
CTTTTTGACAGTCTCTTCACTGCTACATCAACTCCATGGAGAGATCCTTTGAATACTTCTGAATAACCTCCCCTGCCACCATGTTATCTGCATGGAAGTTTCTGGTTGCGTGTGAGATCTC  
ATCATAGCTAAAGCATCTCCATGAAGGTTTCTGCTCCTCATACTTCTTTGGCAAGCTATCTTCTCCTATTTCTTTCCAGATAAACCTTCTGCTGAGCCAAAAAGAAGGAACTTCAACTTGG  
AGAAACCCCTCCGCATCTTTCTCCTATTCACTCCACCATGTAGGTACTTGAAGAACTATGGATTTCTCAAGTCCATCTAATACAGTAACAGGTGAGCTCAGCTCACCGAAGCTCTCTCCG  
GCCGAGTGTGCTGCGCTTTCCCTTTGAATTTTTGATCCAAAAGCTTTGTGATGGTGAAAGGAGTCTTGGTTGCTGGAGTTCTTTGTTAGCCATTTGAAGCTTGAAGAGTGTTCATTTT  
CAGATATAGCAGATTCTGAAGGAGGGTCTGAGGTAGCAATGATTGAGTTTGTGTTGCCATGACAATCAGTGAGCAGTTCTCAGGAATGTGCTTGAAGCAGTATTTGGTGATTAGATAAGA  
TTACTTTGTGAAATCCTACTTGAACCGCAGCCGAGAAGAAGAAAATTAGCTTCAAGCAATGTAGCCTTTCAGCAAGTCCCTCTCCAACGCTGCTGCTGCTCCTGACTTTTGCTTCTAAC  
CTCACCTGTTTTGCTGAGAGATCTCTGCAAATTTCCAAGCATGGAGATAACTGAGGCCTTGGCCTGTGCAAATCTTTTACATCCGAACAAATTTTCTTTCTCCTTAGCCATAATGAC  
ATGCAAGGCAATCACTGTATCGTTTGAACGAGTTAAAAGCTCCATCCCCATGAAAGAAGCTCAGAAGTACTTTGGAATCGACTGAAACACCAACAAGTATTTCTTCTGCCATGAGAGCC  
CTGCAAGGAGCTCATTCTGTCAGCACTGTCTGGTTTCTTTTCACTGCAGAGTGACAGAGAAATCTTCCAATTTGTAGGGGGTGAAGAAGCATTGTGTGGAGGCCACCGTTGGTTTCAT

TCA

>comp150605\_c0\_seq5

AAAATACTGCATTCACTACATAAATTACAAACACAAAAAATTTCTTCTCTCCACTCTCACAGCTACAACGCTACATGCCAAAGCCTTAGCCTCAAACCTATTCTTCCCCAACAAAAACAA  
AATCTTAAGAAATTACAGATCTTTAAATAGTCTAACAAGCAGAACAATATCTGATTACAGTAGAAAAATCATCAAAGTCATCGCTGTGGCATTCCGGAATCTTCCAGCTCTCGGCTTCTTTC  
CAGGCTTCCGACCTATTTTCTCGAACAGCAGCTGCTGAACTCAGTCATCGATGGCGCCAGATAGGCGAAGGCCTCACGCAGTAGGAAGCAATTTGAACTAATCTCTTTAGCTGA  
TCTTTGTACATAGTTTTACCAAGCCTTGAATCAACCAATTTAGTGAACCTCCCAGCCTCCATGAGTGGCTTTGCCAAACAAGAAGACTCTGCTTTGAGGCATCGATTGGCTTCTTCCCTG  
TAACAATCTCAAGAAGCAGGACACCAAAGGCAAAAACGTCTGTCTTCTCATCTACCATTCCATACATGAAGTATTCTGGCGCCAGATAGCCAAACGTGCCCTCTATAGGATTGACAGAGT  
GATGAGTCAGTTGCTTTGGCAGCCATTTAGCGAGTCCAAAATCTGAAATCTGAGGCTCATAGTTTGAGCCCAGAAGCACATTTGAGGCCTTGATGTCTCTGTGTATTATGCGGTGAGGGCA  
GCCTTTGTGAAGGTAATGTATTCTCTCGCTATTCCCATTTGCAATCCTGTATCTTGCAGTCCATTCTAGAATCTTGTTGCTTTTGGCATGCAGGGCTGAAGCCAAACTTCCATTGGGACAGA  
AATCAAAGATCAGATGGAATCCATTCTCAAAGCAGCAGCCTTTCAAGGAAGTGGTATTTGGATGACAGACATGTCCAAGTATACCAAGCTCTGCAAGAACTCTCTCTCTTTTCCCTCTCT  
GTTGCTTTTTGACAGTCTCTTCACTGCTACATCAACTCCATGGAGAGATCCTTTGAATACTTCTGAATACCTCCCCTGCCACCATGTTATCTGCATGGAAGTTTCTGGTTGCGTGTGAGA  
TCTCATCATAGCTAAAGCATCTCCATGAAGGTTTCTGCTCCTCATACTTCTTTGGCAAGCTATCTTCTCCTATTTCCCTTTCCAGATAAACCTTCTGCTGAGCCAAAAAGAAGGAACTTCAAC  
TTGGAGAAAACCCCTCCGCATCTTTCTCCTATTTCACCATTGTAGGTAAGTGAAGAACTATGGATTTCTCAAGTCCATCTAATACAGTAACAGGTGAGCTCAGCTCACCGAAGCTCTC  
TCCGGCCGAGTGTGCTCGCCTTTCCCTTTGAATTTTGTATCCAAAAAGCTTTGTGATGGTGAAAGGAGTCTTGGTTGCTGGAGTTTCTTTGTTAGCCATTTGAAGCTTGAAGAGTGTTC  
TCTGTCTATGGAAGCAAAATATTAGTCAAGAACGTTAGAACAGAACAAAAGCAGTGGCTGATTTGGTTTATGTAAGGAGATTTTTTTACTTTTCTAGATATAGCAGATTCTGAAGGAGGGTCT  
GAGGTAGCAATGATTGAGTTTGTGGCCATGACAATCAGTGAGCAGTTCTCAGGAATGTGCTTGAAGCAGTATTGGTGATTAGATAAGATTTACTTTGTGAAATCCTACTTGAACCGCA  
GCCGAGAAGAAGAAAATTAGCTTCAAGCAATGTAGCCTCTTCCAGCAAGTCCCTTCCAACGCTGCTGCTGCTCCTGACTTTTGTCTTAACTCACCTTTCATGAAATGAATAAAGAAGCAA  
GTATGAATCAGACTAATTATTTTCTTACCTGCTCGAAATTCAGATTCCAGACTTACCTGTTTTGCCTGAGAGATCTCTGCAATTTCTCCAAGCATGGAGATAACTGAGGCCTTGGCCTGTC  
GAAATCTTTTACATCCGAACAAAATTTTCTTTCCCTTCCCTTAGCCATAATGACATGCAAGGCAATCACTGTATCGTTTGAACGAGTAAAAGCTCCATCCCCCATGAAAGAAGCTCAGA  
AGCTTTGGAATCGACTGAAACACCAACAAGTATTCTTCTGCCATGAGAGCCCTGCAAGGAGCTCATTCTGTGAGGAGTGTCTGCTGCTTCTTCTTCACTGCAGAGTGCAGAGAAATCTTC  
CAATTTGTAGGGGGTGAAGAAGCATTGTGTGGAGGCCACCGTTGGTTTTCATTCA

>comp152562\_c0\_seq1

GTTTGAAGTTGTCGATGCTGTTGTGTCGTCGGCACCTTTGCTTGTACCCAGTCTCGTTGCTCTCGTCGCATGCCATTAGATGAAGCTCCAGGACTTCGGAGGTGGCGTTATCGAGACCCGT  
TCCAGCAGAAGCGAAGCAACCGCAGTTGCAAAGTCTTTATGGTTGCGGTCGGGTGCGAGAAAAGCCGGCCTTCCGGCCCAAGGCCTAGCCCTTCCAGCAATAA

>comp153090\_c0\_seq3

CAAATAAGCCTACATCACTCATATCTCCTATATCCACTCAAATCTTTTTTCATGCTTCTTAAGCAAGGAATGCTTGAATGAAACCAACGGTGGCCTCCACACAATGCTTCTTACCCCCTA  
CAAATTGGAAGATTTCTCTGTCACTCTGCAGTGAAAGAGAAAACAGGACAGTGTGACAGAATGAGCTCCTTGCAGGGCTCTCATGGCAGAAGAATACTTGTGGTGTTCAGTTCGATT  
CCAAAGCTAGTTCTGAGCTTCTTTCATGGGGATGGAGCTTTTAACTCGTTCAAACGATACAGTGATTGCCTTGCATTGGCTAAGGAAGGAAAGAAAATTTGTTTCGGATGTGAAAAGATT  
TCGACAGGCCAAGGCCTCAGTTATCTCCATGCTTGGAGAATTTGCAGAGATCTCTCAGGCAAAAACAGGTAAGTCTGGAATTTGAGCAGGTAAGAAAATAATAGTCTGATT  
ATACTTGCTTCTTATCCATTGCAAAGGTGAGGTAGAAAGCAAAAAGTCAAGGACAGCAGCAGCGTTGGAGAGGGACTTGTGAAAGAGGCTACATTGCTTGAAGCTAATTTCTTCTTCT  
CGGCTGCGGTTCAAGTAGGATTTACAAAAGTAAATCTTATCTAATCACCAAATACTGCTTCAAGCACATTCTGAGAAGTCTCACTGATTGTCATGGGCAACAACTCAATCATTGCTA

CCTCAGGACCCTCCTTCAGAATCTGCTATATCTGAAAATGAACACTCTTCAAGCTTCAAATGGGCTAACAAGAACTCCAGCAACCAAGACTCCTTTACCATCACAAAGCTTTTTGGA  
TCAAAAATTCAAAGGGAAAGGCGACGACTCGGCCGGAGAGAGCTTCGGTGAGCTGAGCTCACCTGTTACTGTATTAGATGGACTTGAGGAAATCCATAGTTCCTCAAGTACCTACAA  
TGGTGGAATGAATAGGAGAAAGATGCGGAGGGGTCTCTCCAAGTTGAAGTTCTTTCTTTTTGGCTCAGCAGAAAGTTTATCTGGAAAGGAAATAGGAGAAGATAGCTTGCCAAAGAAGT  
ATGAGGAGAAGAAACCTTCATGGAGATGCTTTAGCTATGATGAGATCTCACACGCAACCAGAACTTCCATGCAGATAACATGGTGGGCAGGGGAGGGTATTCAGAAGTATCAAAGGAT  
CTCTCCATGGAGTTGATGTAGCAGTGAAGAGACTGTCAAAAAGCAACAGAGAGGAAAAGGAGAGAGAGTTTTCTTGCAGAGCTTGGTATACTTGGACATGTCTGTGCATCCAAATACCACT  
TCCTTGAAAAGGCTGCTGCTTTGAGAATGGATTCCATCTGATCTTTGATTTCTGTCCCAATGGAAGTTTGGCTTCAGCCCTGCATGGAAAAAGCAACAAGATTCTAGAATGGACTGCAAGAT  
ACAGGATTGCAATGGGAATAGCGAGAGGAATACATTACCTTCACAAAGGCTGCCCTCACCCGATAATACACAGAGACATCAAGGCCTCAAATGTGCTTCTGGGCTCAAACCTATGAGCCTC  
AGATTTTCAGATTTTGACTCGCTAAATGGCTGCCAAAGCAACTGACTCATCACTCTGTCAATCCTATAGAGGGCAGTGTGGCTATCTGGCGCCAGAATACTTCATGTATGGAATGGTAGAT  
GAGAAGACAGACGTTTTTGCCTTTGGTGTCTGCTTCTTGAGATTGTTACAGGGAAGAAGCCAATCGATGCCTCAAAGCAGAGTCTACTTGTGGGCAAAGCCACTCATGGAGGCTGG  
GAAGTTCACTAAATTGGTTGATTCAAGGCTTGGTGAAAACCTATGACAAAGATCAGCTAAAGAGATTAGTTCAAATTGCTTCCCTACTGCGTGAGGCCTTCGCCTATCTGGCGCCCATCGATG  
ACTGAGGTTTCAGCAGCTGCTGTTTCGAGAAAAATAGGTGGCAGGAAGCCTGGAAAGAAGCCGAGAGCTGGAAGATTCCGGAATGCCACAGCGATGACTTTGATGATTTTTCTACTGAATC  
AGATATTTGTTCTGCTGTTAGACTATTTAAAGATCTGTAATTTCTTAAGATTTGTTTTTTGTTGGGGGAAGAATAGGTTTGGAGCTAAGGCTTTGGCATGTAGCGTTGTAGCTGTGAGAGT  
GGAGAGAAGAATTTTTGTGTTTGTAAATTTATGTAGTGAATGCAGTATTTTTTTCTCTATGTGCTTTTTGGTGGATGGCAA

>comp153459\_c0\_seq2

GCTCGTCACTCCTCTCTTTCTTAAAGCCTCCATCTTCTCTCTCCAGCTTCCATTCTCTGCATCTCTTCTCCATCCATTCCCTCAGCTCTACACTCTGCCCGACCGCGAGTCGGCGATGGGG  
AACTGCCAGGCGGCGGAGGCGGCGACGGTTCTGTATCCAGCACCCAGGAGGCAGGATCGAGAGGATCTACTGGTCCCTTAGCGCTAGCAAGGTCATGGCCTCCAACCCCGGCCACTACG  
TCGCCGTCATCATCACCTCGCAGCTCCCGGTCCAAATCTATCCGGCGCCGCTGCTCCGGTGAAGCACCTCAAACCTCCGACCCGACGACTCTTCACATCGGACATGTTTATCGACT  
CGTTAGTTTTCGAAGAAGTTTGAGGGAATTCGTATCGAAGAAGCACGTAAGGCTTAGCAAATGGTAAATGCCGCAAGGAGAAGAGGCGGAGCCGGTTCGATGAGAGGCGAAGGAGAT  
ACGCCGGCAGGCACCGGCGAGACCTTGATGCAGACTAGGGATGCGGCTGCCGACGGCAAAAAGGGTCCGTGAAGCGGCGGCCACC GCCCGGGTTGCGGCAATGGAGACCGGCTTTG  
CAGAGCATTGATGAGGTCGTGGGGAGTTAAATCACCGGAAATTTGCTAAATAAAGCTGCAAATAGTAAAGATTCTAGACTTCTAGCAGTAGAAAAACTGGAAATTTCTTCTTCACTTGT  
CTGCCTCGATTAATAATAAGTTTCTTTATGTTTCTTTTGA AAAAGTTTTAAAGGATACATGTGAGGCCTTCTGGCCTTGATTTTGTTCATTGTGAAGGAAGGAAAAATTTGAAGTTCAAAG  
GCTCATTCTGATTGAATTGGGGCTTAACCAGATGATATAATAAGGATTAATGATATGTTTATAAAAAACTTACATGA

>comp154068\_c0\_seq4

AAAATGTAGCTCCATAAAAACGAGTAGACAAAAAGATTGTCATCAACATCTATGAAATATGCACTTAGCAATTATATATGTTTCAATACATAAAAACATATAAAAAGGATCACTGAGCCACTCC  
ACAATAGGATGAATTATTTGTACGGACAATGGGAAGAACAGTCTGGTTTGTCTCTATGAACAATAAAGAACAGTTCACTTTGCTTTTACTATTACAAAGATAAAACCGGTTCTCCCCG  
TCTGGTATCCGCATAGAGTAATCTCTAGCACAAAGAGAATTCAGAAAAACAATAAAATAAGGGGATACAATAATACTAGTAGTTCTGCTGGGAAGAATAAACAGACAGACAATATGCTGAG  
GAGATTTCTTTCGTTGAGCATCTGAAGTCATGTGGTCTCTTTCAGCATAAGCAGGCTCAAGAACAGCAGCCTCGGCTTCCCTGGACTTCCCTTCTCAGTCTTCCCTACCTTTCTTCGACTTGTA  
GTAGACACTCATGAAGGTTCCACAGCCCCATATTTCAAACGGCATTTCATATAAAGGTCGCCATCGAACATCCTCCAAAAGTTCTTCTCATTGAGTTCAGATACTGAATACTGAGGTTGG  
AATCCATGATTTTCAATCAACCACTGTTTCGAGCCGATGAACAGCCTCAACTCCATTGAACTCCTCGCCTCTGATGACAGGCTCCTGGAGCGTAGTAGACACCAATGTCTGAAAACATTTGG  
GCATAGCTCGTGTCTCCCTGCCTATGGTGGAGCTCGAAGCCTGGTTCTGAAAAGATCATGGTTTTCACTGGCTTTTTGAACAGGCGGTGTGGGCAGAGCCAGAGGGGATAAACCTCCATT  
TCTTGGTGAAGAAATTCAGAGCATACCAACTTTATAAAGAGGAATCAAATATCCCTGTATCACATGCCTATCATGATAGTAAATTTCTAATAGCTTCTACTTGTGTGATCTTAAGCAGCGA



AAGCTTTGGAGGCATCATCCAACCCAGAAGCCATCTGAACCACCACTGATCCCCAAATGGCAATATAAGCTTCCCCTCCCAATATATAGATCTGGTGTGCCTATGATAATACTCCCTCGTCG  
GAATATATTCAATAAACTCTCCCTTCTCCAATGCTTTCTGCGCATATTGGTAGAACCAGGGCTTAAACCACCATCCATAATTGTTTATCACATTTCCCTTCTTCTTAGCCTCTTCCCTAGAAGC  
ATAAACTCCAGTCATGAACACAGCCTCAGTAGGACTGTATATCATCCCCTCTACAAAATCTGGAACCTTAGATTGGTCCACATTTGTTGGTGCAAAAGAATCAGAATAAGCCTTTGCAAGT  
TCCTTCAAGTTCCTCTTGACAGGTTTATAAGTTAACTTCATAAACTCTTTGATTGG

>comp155674\_c1\_seq1

AAAACATACACAGCCCATTCCCTCACCTATATGTACTCTCTTTGTCAATTTTCATTAGTTATTTGAGGAGAGGGCGTGACCCTGGAGTTATCTCCAATAACAATTAATGAAGATACCTAAG  
GGAAAGCTTCCACTCTCCATATTGGCGATCGTTATATGCACTGTGGTATTTGCAGGTTTAATTTTACAGAGGATCTCTGGGCTATCACTGGCACGTCAATTTTAAAGCACAAACCCTGTTC  
TAAGAAGGAAACTGTGACGAATTCTAGTAAGAATACTACAGAAGCGAGGGAGAAGCAAAAGGCCACCTCATTTGACGATGATTTTCATTGAAGAAGATGAGAGTTATTTTAAATCTCATCA  
AAGTTGCAGCATAGAGAACGGGAAATGGGTTTTTAATACATCAGCAGAACTATTTTATACTGATGAGAGCTGCCCATATTTGGATAAGCAAATAGCATGCTTAAGAAACGGAAGACCTGAG  
AGTGACTACTTGTACTGGGAGTGGCAGCTTGATGACTGCATATTGCCAAGGTTAATGCTACAGCTCTGCTTGAGAACTCAGAGGAAAGAGATTAATGTTTTCTGGAGACTCATTGCAA  
AGAGAACAATGGCAGTCCCTTGTCTGCATGGTAGAGTCTCATATACCATCAGATAAGAAGTCGATGAAGCGTAGTCCATCTCTGTGAGTGTAAAGATTGAGGATTACAATGCTACGATCG  
AGTTCTACTGGGCACCTTACCTCATCGAATCCAATTCTGACGATCCTATCATCCCAGATACAAAAAGAGAATATTAAGGGTGGATTCAATCGCCAAACATGCACAGCATTGGGTTGGGGT  
GGACTTCTTAATCTTCAATAGTTATGTTTGGTGGACCAGTGACCCCAAATGAAGTCTCTGTAAGTTCTAACTTCTTACACAGTCATTTACCTTATTTTGATATTTTCATGAAGTTTCTTCTAG  
GTGGGGATCATTTGCCAATGGTGAGGAAGGGTATGAAGAAGTGGATTCTATCATTGCTTTTACAATGGCACTTAAACATGGGCCAATTGGATAGATTCCAATGTGAACCGGAGCAGCAC  
AAGGGTCCTTTTACCCACAGCTTCCCCACACATATGAGTTCTTAAACATACAGTAGCGCAGATTGGAAAAAGAGAAACCAACTCGTTGTTCTAACGAGACAAAGCCTGTAACAGGAAG  
AGGATACTGGGGAAGTGGCTCTAATAAAAGGATGATGGAGGTGGTTTTCAAGTATAAGTTGGGAGGATGAAGTTCCTGTTACCTTTGTCAATATAACACAGCTCTCGGATTACAGGAAAGAT  
GGCCATGTATCACTTTATACCGGAGAAGTCTCAGACAAGGAGAAGGATGATCCATATACGTATGCAGATTGTATCCATTGGTGTCTGCCTGGAGTTCCTGACACATGGAATCAAATATTGTA  
TTCATATCTGTAAGCTAGGTGAAGCAAGTCTCAGTGCCATAGCTTGGTTTGATTCAAATTCAGGAAGATTTTTTGTATCAAATTTGAAAACCAAATTTTTTTTTGTATTCAACTATAAGTTA  
CCTATTTATTGATCAATAAATCAGGAAAAAGTGAAGCACATGTTCCACCTTGAAAAGGAGGAAGATTTGGTATTTCATAGTGCTTCATTAGGCTGGCACGCCAGCCATGAATGACTGAGG  
GGTGATTAATGAACAACAAGAGCAGCTCAGCCTGAGGGTCCAGGTTGTTAAGCCATTATTAATCCATTGAATGAACTTGGCAGAGTTGAAAGCAAAGCTTGGACCAACCATCAACCT  
TGGAGAGCCTGCAGAAACACATTCGATTTATGATCTTGAAAATTATGGAATACGTATATGAAATGAAGAAAGGAAGGAACTAACTCTTCTCGTGGCAATAATAGGCTCCTAAGGAACATT  
AGGTATAAATATGCCTCTTCAGTTGTTGTACTTTATGGGGAGAGAAGAGGTTAGTATTTTTCATCATTTTGTGACAGACACC

>comp158300\_c0\_seq4

GTGTCCGGACGAATCCGGACACCGAACGTAATAATTTGCCGTGGTTAAGGCTTTATTTTTATTTTCAATGGTGTGTAATGAGAATAATTTTCATAGTGTAAGACTGTTGGGGAGTGTGAG  
GCATGATTGTGCTATAAATAAGTGATTTGGGTTCAATTCATTATATATATGTGAGGTGAATTTGCAAAATGATACTTCTAATTTTATAAATTTATTATTACACTACTTGGTGTCAACAAAA

>comp159808\_c1\_seq1

GAAGAAGAAGAAGAAGAAGAGAAGCGGAAGGTAAATATCAGATCACAGGCTAAACATGGGAGGACATTTACAGCCTCACTGAGCTCACCTTTTCATTTTGATAAGGATTGTCCAAGTTG  
CCTGTAAAAACCTCACCTTTTTGTGTTTTCTGAAAAATATCAGCTTTTCAGAGTCAAGATTAGAAGTCCAGTGAGTAAGATGAACAGAAGCCGAGTAGAACTGGATATCACAGTCTAAA  
GAGGGGAGGATAACTAAAGCTTTCTTGTTACCTGTAAAAATTTGATCTTTTTCAATTTTGATCTGTAATTACTTTGTAAACGATAAAAAAAACCACCTTTTTCGTGTTTGATGTGAATTTTC  
TGCGCTTTAGACCTTGGATTACGAATCAAAGAAGCGGCGGATAAGAAGAAGAAGAAGAAGTGCATAGCAAAAACTTATAAAATTATATCTGACTACTTAATTACTAGGATATGAAGG  
CTTAGAACCCACCGCCGAGCCGAGCTGCCGCTGCCGCTGACCAGACGCCGCCAAACACCTCATTCAAGAGAAGCTTTGGCGCCGGCATGTTATACAGTGGCATTGCTGGTAATTTCTT

CTCCAACACGGCCGGCGGCGATGCTCCACCGCAGCCAGCGGAAATCCCACCTCTCACCGGACTCTGTTTCGAATTTTCTAAAGTCGCCGCCGGCGACTCCTCGAGAGGCAGCCTCTCGT  
ATACGGTGTTCCTGAAGGTGGCGGCAACAACCATGACCGGACCCGAGGCCACAAGCTCACCGGCGATGCTCCCCCTACAACCTGCCCCGTCTCCAGCAAGAATCACGGTCAGTCCT  
GTTGCCGCCGGCAGGAAAGATCCGGAGAGAGAAAAGAATCTCAAAACGACCTCGTAGCACGATTACGTCCGAGCCGGCAGGTGCTCCAGGCTGCCGGAGAGAGATGTCGGAAACTACG  
CCGGACGCGCTTAGAACGGATACCCCGCATCCGCCGGCGAGCATAAGCGGCGATAGAGCCGATGATGTCTGCTCCTGTTACGATCTCGAATAAGTGGGATCGAAGAGCGTTGGGAGTT  
TCCCGAGTGAGGATAATAGGTTGCTTTGGCTTGTTTTTGGATCCCGGAGGACGGCCGCCGGGAACGGCGGAGGGAGGCGCAGTTTGAGGCGGCGAGCTCGCCGGAGGACGGAGAAGAG  
GAGTGCATTTCCGGTTCACAAGGCCACGGTTTAATTTGGAAGCTCCTCTGCTCTTGCTAGCGTTTCTATATTGGCCAATGA

>comp159808\_c1\_seq6

GAAGAAGAAGAAGAAGAAGAGAAGCGGAAGGTAAATATCAGATCACAGGCTAAACATGGGAGGACATTTACAGCCTCACTGAGCTCACCTTTTCATTTTGATAAGGATTGTCCAAGTTG  
CCTGTAAAAACCTCACCTTTTTGTGTTTTCTGAAAAATATCAGCTTTTCAGAGTCAAGATTAGAACTCCAGTGAGTAAGATGAACAGAAGCCGAGTAGAACTGGATATCACAGTCTAAA  
GAGGGGAGGATAACTAAAGCTTTCTTGTTACCTTTTCGTGTTTGATGTGAATTTCTGCGCTTTAGACCTTGGATTACGAATCAAAGAAGCGGCGGATAAGAAGAAGAAGAAGAAGT  
GCATAGCAAAAACCTTATAAAATTATATCTGACTACTTAATTAAGGATATGAAGGCTTAGAACCCACCGCCGAGCCGAGCTGCCGCTGCCGCTGACCAGACGCCGCCAAAACACCTCAT  
TCAAGAGAAGCTTTGGCGCCGGCATGTTATACAGTGGCATTGCTGGTAATTTCTTCTCCAACACGGCCGGCGGCGATGCTCCACCGCAGCCAGCGGAAATCCCACCTCTCACCGGACTCT  
GTTTCGAATTTTCTAAAGTCGCCGCCGGCGACTCCTCGAGAGGCAGCCTCTCGTATACGGTGTTCCTGAAGGTGGCGGCAACAACCATGACCGGACCCGAGGCCACAAGCTCACCGGCG  
ATGCTCCCCCTACAACCTGCCCCGTCTCCAGCAAGAATCACGGTCAGTCTGTTGCCGCCGGCAGGAAAGATCCGGAGAGAGAAAAGAATCTCAAAACGACCTCGTAGCACGATTAC  
GTCGGAGCCGGCAGGTGCTCCAGGCTGCCGGAGAGAGATGTCGGAAACTACGCCGGACGCGCTTAGAACGGATACCCCGCATTCGCCCGGCGAGCATAAGCGGCGATAGAGCCGATG  
ATGCTGCTCCTGTTACGATCTCGAATAAGTGGGATCGAAGAGCGTTGGGAGTTTCCCGAGTGAGGATAATAGGTTGCTTTGGCTTGTTTTTGGATCCCGGAGGACGGCCGCCGGGAACGG  
CGGAGGGAGGCGCAGTTTGAGGCGGCGAGCTCGCCGGAGGACGGAGAAGAGGAGTGCATTTCCGGTTCACAAGGCCACGGTTTAATTTGGAAGCTCCTCTGCTCTTGCTAGCGTTTCTA  
TATTGGCCAATGA

>comp160155\_c0\_seq3

GTAATTTCTTTGCTCTTCTACAGCTAGATAGCATAACTGATTGCGTGTATATTATTATTAAGCTTAAATTTACATTA AAAAGAAATTAATAACCGATTTGGCACCAATAATTACAGTGCACCAA  
AAGGGGAAGTTTAGCTACTAAAAACGTAAATATCCACAGCTAATTAATCTCTTTGTTCTAATAATATCCGAAGAATTTTACTGACGATTTTCTAACGAGCAGATCTATATATTGAACAGT  
ATTCTCTGTACATTTATATGCTAAATCTGTATTGTAACAATTGCATAATATAATATAATATTAGATTA AAAATACAAATTCAGCTCATACTAACATAGTAACATATCATGAATTACATTCCTCCA  
TTGATTTGAGGCGATATAATTCTCTTCTTAATATAGATTATAGATCTATTAAGCCTAACCAGCACTACTTAGTAAGATAATTCACAGTTGTAGTAGGCGAGTTAGGATAGTAGGTGACGACT  
GAAAGGAGAAATTGAGAAAAGAGAGAGAGTACCGATCACCGTTGATTGTCCGCTGGAAAACCTTTTAGCAGATGTTAGCCCTCCAGTCTAGAGGCGGCGCCGCCCTTCAGGAATTCATC  
CATTGGTTTCCGAAATGAAACCATATGACTGTTACCATATACGCCGTGACCCTCTCCGAAACCCTAACCTCTTCCATCATCATCTCTTCAACCTCTGAGTGAACCTCCGGAACGAATATCA  
AATCCACACTACACCCACCCACCCGGGCTTCAAAACCCTAATCATCTCCCCCAATCCCCCTCCCCCTCTGCCCGAGCCGCCGAGGGGAATCCCCCGGCGGCGTCCGATTCCGCTGA  
GATGAATCGAGGAGACTACAACATCAAAGTATCCATCGGGGAAGGGAAGACGACGGGCATCGCCCTCGCGGCAAGTAACGTACTCCTGAACTCCCTCGGCGCCGGCGCGACGAAGTGC  
GGCGACGGCGATCTCGCGGCGCAATCGAGGCCAACACCCGACCGGAGCTTCCCTGCTTCTTGAGCTGCAGAGCAACGGCGTTGAGGAGTATGCCTCGGCCGACGCCGACATCGAGC  
GCTGTACGGACGGCGGACCGATCAGGGACGGTGGAGATCATGCGCTGGGCCATGATCCAGCGAAGGGGGACGGAGGAGTACATAATGTTCCGCGCGGCGAAGAGGAGGCAGAGGGCG  
GAGAGGGCCAGGACGGATCCAGAGAATCCGGCGGCGAAGCGGAGGAAGGGGGTTGGGAGGGAGGGGAGGAGAGTGAAGGAAGGAGAGAAAAGGGGAGAAGTAGAGGAGGAGG  
AGAAGGGAGGAGATGATGAAGACGAAGGCGTGAAAGAACAGGAATCCAATCGTCTGCCACTCGTCCGGTCCGCTAGATCGAGTAGATCTGCATCCAATCACGGCCACCGGACTTACTCAT

TTCTCCGATCTTCTTCTCCCGCTACTTTGCTTCTCCGATCGAGTGGTTTTGAGATCCCCGAGCTTTGAAAGAACAACGGGGGCTCTCTCTTTCTCTCTGCAGAGTAGACGAGGGAGAGAG  
TGGGGAGGAGGGAAGATGTCGGAACATTTTAAAGCTAGATCGTTAAACCTGCAGAGTATTTGGCTATATACAGTTACATCCGTAAAGAAGCTGACCTGCTATCATCGGTCATCTAGGTTA  
ACTGCAACGTGCAAGCGAGTTTACGCAGGATTAATATAAAAAGAG

>comp161190\_c0\_seq1

AAGATTTTGGCTCCTAGATGAAGCAACTAGTGCACCTGGACTACGAATCAGAGCGACTGGTACAAAATGCATTGGAGAAGGTAAAGTTGGACAGGACAACAGTTGTAATAGCACATAGGTT  
ATCCACAATTAGCAATGCCACATAATTGTAGTGTTAAACAATGGGAAAAGTTACTGAAAGTGGCACACATGAAGAGCTGATGACAAAAGGAGAGAAAGGAGAGTATGCAATGCTAGTGC  
ATGCACAACCTATTGGACCATAGAAAATAACAAAAGCCTGAATGATCACAAAGAGACAATGAATTCATCTGAAAAAGCAGTTTCTACAAATGCATGTGAAGTAGAAAAGAAATCATGAGAAA  
GCTGGTCTAAAAACATTAGGAAATAAGGAAATTAACCAAGATTTTGGTTCAGCCAGGTCAACACCAGTCCCATCAATCAGAAAAGATAATTAGATTGAACCAACCAGAATGGCCATTTGCA  
GTAACCTGGATCACTGGGTGCTATATTAGCTGGTGCAGAAGGCCCTCTGTTTCGCTTTTGGGATCACTCATGTTCTGACTGCTTTTTATTACATGACAAATCACATATCAGGAGTGAGATCAG  
AATGGTGTCTCTCATATTCATTGGAGCAGCAATCATTACTGTACCAATATATGTTTTGCAGCATTACTTCTATACACTGATGGGAGAGAAACTCACCTCGCGCGTCCGCCTAACATGTTCTC  
AGAAATACTTAAAAATGAGATTGCATGGTTTTGATCGGGATGAGAATAGTAGTGGTTCATTGGCATTGAGCTTAGCAGCAGATGCTACTTTGGTCCGAAGTACAGTTGCAGACCGAATGTCA  
ACCATCATTGAGAATATCTCACTGACAATGACAGCATTATCATAGCATTGTGCTAAGTTGGCGTATGGCAGCGGTGCTCCTTGCAACCTTCCCTTTGCTTATTGCTGCCTCAATAGCTGAG  
GTATTTCAATACAAAATGCGTCAACGAATTTGTTTATAAGATAAGTTTTCATCTAATTAACCTTGCCTTATGCAGCAACTATTTCTTAAGGGATTTGGTGGAAAATATACAGTGGCTTATGCCCGA  
GCGACTTCGGTGGCCCCGAGAAGCAATCACTAACATCAGAACAGTGGCAGCATTGTTGCTGAAGACCAGGTTTCATCTCAGTTCACACAAGAATTAGACCGGCCAAACAAGAAAGCATT  
CACACGTGGCCATATAGCAGGAATAGGTTATGGCTTATCACAGTCCTTGCATTTTGTTCCTATGCACTTGGTCTTTGGTACGCAGCACAGCTTATCAAGAATGGAACCTCCAACCTTTGGTA  
ATATCATGAAGTCCTTCATGGTGTGATAATTACATCACTCGGAATAGCAGAAACATTGGCTCTCACACCAGACATTGTGAAGGGGTACAAGCTCTTGGTTTCAAGCTTTTCAATTCTGGA  
AAGGAAAACAAGGATAGATGCCAATGACCCAAGTTCAGAAGTGGTGAAGAAATCAAGGGGGACATAGAATTCAGGAATGTAAGCTTCAGATATCCTACAAGACCTGATATAACTGTCT  
TGAAGGAGCTAAGCTTGCATGTAGCAGCAGGTAGAAGCCTAGCATTGGTGGGTCAAAGTGGATCAGGAAAGAGCTCTGTAATATCACTCCTGATGAGATTCTATGATCCTTCATCCGGGG  
AAATTCTAATAGATAACAAGAACATTAAGCGTAAACTTAAAGATCCTTGAGAATGAGAATAGGCTTAGTTCAGCAGGAGCCAGCATTGTTCTCCACAACCATCTATGAAAATATTGCTTA  
TGGGAAGCCAGGTGCATCAGAAATTGAAGTACTGAAAGCTGCAAAGCTGCAAATGTGGATGGATTTATTAGTCAATGCCTGAAGGTTATACCACTCAAGTTGGAGAAAGGGGTGCC  
AACTATCTGGAGGGCAGAAACAAAAGGGTGGCAATTGCCCGAGCAATTCTAAAAGACCCATCAATTCTCCTTCTGGATGAGGCCACCAGTGCATTGGATACAGCGTCAGAAAAGGTAGTG  
CAAGAGGCTCTCAATAGACTCATGGAAGGGAGAACAACAATTCTAATTGCTCACAGACTATCAACAATTCGTGATGCCAATGTTATTGCAGTGCTTCAGGAAGGTATAATTGAAATTG  
GCAGCCATGAGGAACCTTCTTAGACAACCAACGGCATTATATACTAGTTAGTTCAACTACAGAACGAAACCCATTAATTAGGAGCTATGAAATCTTTTTCTTTTGGTGGGGATTCCAAAT  
GACTCAACATTTGTATTATAACTTTATTTTGTCAAAGAAATTTATTTCTTGTTTTTATCAAAGAAGTTTTCCAGAATTGGCAACTCCAGTTCAAATGGAAGAATGCAGGCAATTCCAAAGG  
TTTCAACAATACTGTATATTGTATTAACCTCCACATACCCTTTAACAGAGTAA

>comp161575\_c0\_seq6

CATACTAAATAAAAATTAAGGATGTTTTCTGACATAATAAATCCACGTAAATAATTATAAAGATATCATAGAATACATTTACCATTACTGTCCAAATAAACATTGGACACAAAAACATAA  
TGGATCATTTAAAAGGCAACAATTGATAAGTTCAAATGCTAATTTGCAAAAAGCCTAAGATGCATCAGCACTTATTTTTCGAGTGATTTCGGTCAATAAGGTATTGACCCCACTCCTTCC  
CAATACTAGAAGATAATTTCTTCTATTGATCGATCAGTTCTGGCAAAGTCTAAGAAAACCCATGACTCATGATGCTTATGATCATGAAGATACTTTTCTCAGCACCCACCACCCATAGTT  
AGTGCACCTGCGAAGATGACTGCAGAGAGGATGAAGACGATGATGGAAGCTCTCTCAGAACCTTCACTAGCTTCTTACGAAGAACTGACCCAGAATCCAGCCATTACAGATACAGC  
TATCAGGTAAACGGCATAAGGCATAGGAAATCTTTTGGAGAAAATAGAACTCCACAACCTGATAGTGATGATGAGAACAACATAACAAACGTGGCGGTAGCGCTGGCAACCTGGGGTATTAC

GCCAATCTCGAGTAATAAAGGTCCAAGGATGAAGCCTCCGCCGGAGCCAAAAGGCCACCGACGGTGCCGCCAAGGAGACCACAGAGAGCGCATAACAAGAGTTGAAGCGCGCTCCA  
CTCGATTGACGCCCTCGCATACGCACTCCCAGACTCCACGCTGACGCCTTGACCTGCTCTCTCGCCACAGCCGAGTAGCCTCCCACGCGTACACGCTCAACGCAACAGGAACTGGAGGA  
TGTTGAAGAGCCAATAGAAGGTGCTGCAGACCTCTGTGCCATTCTTGAGAATCTGGAGGAGGAGGAAGGAGAACCAAAACGAGCATCAGAGCCAGTATGCGTTTCCAACGCAGGTTTAG  
AAGTAAAATATCTATTCCGGACTTTTCTGCACCGGGGAAGCAGAGGTTTCGTATAGAGAATCTACTATAACATCACTCCCTTCAGATCTAGCTTTCGCTTCCATCTCTCTCCTCTCCGTTTC  
CATCTTAATGATAGTTTCTCTTTCCACATCTGGATTCTTTGAAGAAAGACCTTGATGAAGTGCCGTAATCCAAAATAGCACGCACCCATTACCCATTTTGGTAAAAATAAAAGGAAAA  
AATGAAAGCTTTTGAATCGGCTGCAGAAGAAAGCACGCATGTATGCTACAAAATGCAAACCAAGAAGAGAATGATGATCAGAACGCTGATGAGCCAATAAGGAAAGACAACACTAAG  
AGCGACGCCAATGGTGATTCCCAGCATCAGCATAGGCTGGAAGAGCAGGGCAAGGTCATAGTCTATGATGGGCACCTCCTTCGATGGGTGTGAAACCCGTAGATTATACCAAACAGAAG  
AAGCCGATGCGCCCATGATCATAATTTGAGAGAGCTGCGGCGGATTTGGTGTGCAAGCCGACGATGAGATTAAGCATTGGAACAAAGATGCCTCCTCCGCCTACACCACCGACCGTAC  
CGAAGGCCGAGCCGAGGAAACCGATGATTGTGGCTAGCGCGCTCCGCCAGTTCACCTCCAGCTTGGGCCAGACTCGAGGGCTGCGCGATGAGAGGTTGGAGCGGAGGCCATGAGAGG  
ACTCGCTGGAAAGGAAGAAGGTGACCGAAATGACGATGGAGGCCGCGGAGAGGAAGTGGACAATGAAGCTTTTAGGGCTGCATCCTCTGCAGACGGAGAGATAGGAGATGCTGCTGT  
CCATATATGGCCCAATTGTTTCTTGTTCACAAAGATTGTTGCTTGAAGCCTTTTTGACTTGGAGCTTTGCTTGGAAAGGAGAGGAAGAGGAATTTGAAACCCCTAATCCGCGATATATAACGGA  
AAAACATGAGAATTGGGGTAGACCGAAAGAGGAAGATGTTGAAGCGACGTCGTTTAATTGGTAATCGGCGGTTGCTAAATTTAAACATGGAGAAATTTACTTTG

>comp162571\_c1\_seq1

GCAGAATCTGAAAAATCCAAAAGTAATAGAAGAAATATTTTATGTAATTTTGTAAAGGTTAGTGGAATTATTTGGTTTCTGAACATTCATATTATTCTAACATAAAAAACATTTCCATAGTA  
ACATACATCAATATTGTTGCTTTACAAGCTTGCCTGATAAGGATATATCATAAAGGAAAAATGACCTTACCTGCATCCATTCAGATCTCACCAACTCCACCGGCACGAAAATAAATGGAGGA  
GCAAAAACCGCAGATGTAGATGGTAGTTGAGGACCATCTTAATTGTGACAATAAGCCCAACCAGCCTGTATATATATGGATATGTATTGTCATGGCCAACCTATTCTTAAGCAGAGCGATATC  
TTCTTTCTTTACTCACAACACCTCTTACCATTGAAGTTAAAAATCATGGCTAAAAAGCTTGAATTGAAGTGGAAAGTAAGTTCACCTGCTGACAAATTCTGGGAAAGCATCAGAGATTC  
AACAAATCTGTTCCCAAGATCTTCTCAGCAATACCAGAGCATCCAAGTAATAGAGGGAGATGGGAAAAGCGTTGGTTCTGTACGTGCTCTCCATTATGCAGAAGGAATTCCTTTTCGTC  
AAGTTTGCAAAGGAGAAGATTGAGGTCGATGATGAAGCCAACAAGCTAGTCTCGTACAGTGTGATCGAAGGGGACATACTGAGCTACTATACAAGCTTCAGGCCAACTCTTCAGGTTTTTA  
TCCAAAGGAGATGGGGCTGTGGTAAAGTGGAAATGTGGAGTATGTGAAGCTGAATGAAGAAGTTCCTGACCCTGAGCTTATCAAGCAATGGCAACTCAAACCTTTTAAAGAAGTGGACGC  
ATATCTGCTCAAGAAGTAAAGGAACTGCTCGATCTCATCTTCGATCTTAAGAAAATCATTTGTATGAATAAGAGTGGAAAGGTTTTATGTGTAATATGGTGTCTGATGGAGTTGTCTGTTG  
GTGATTTGCTCTGAACCTTGCCCTTTCAATATCTCATTCTATTAATAAATTATGTTTGCATGATACCCAT

>comp162571\_c1\_seq2

GCAGAATCTGAAAAATCCAAAAGTAATAGAAGAAATATTTTATGTAATTTTGTAAAGGTTAGTGGAATTATTTGGTTTCTGAACATTCATATTATTCTAACATAAAAAACATTTCCATAGTA  
ACATACATCAATATTGTTGCTTTACAAGCTTGCCTGATAAGGATATATCATAAAGGAAAAATGACCTTACCTGCATCCATTCAGATCTCACCAACTCCACCGGCACGAAAATAAATGGAGGA  
GCAAAAACCGCAGATGTAGATGGTAGTTGAGGACCATCTTAATTGTGACAATAAGCCCAACCAGCCTGTATATATATGGATATGTATTGTCATGGCCAACCTATTCTTAAGCAGAGCGATATC  
TTCTTTCTTTACTCACAACACCTCTTACCATTGAAGTTAAAAATCATGGCTAAAAAGCTTGAATTGAAGTGGAAAGTAAGTTCACCTGCTGACAAATTCTGGGAAAGCATCAGAGATTC  
AACAAATCTGTTCCCAAGATCTTCTCAGCAATACCAGAGCATCCAAGTAATAGAGGGAGATGGGAAAAGCGTTGGTTCTGTACGTGCTCTCCATTATGCAGAAGGTATAAATATAAAG  
ATCTAAATCGTTGCTTGGTAGCCGGAATACGGTAAATCCTGCCGTCGACCATGTTAACCCATAAATAGTTTTAAATCTCGTTTTCTCCTCCGTTTTGCGTTAAATCCAGATTTAGTAAATCC  
AGATATTAGGCGGATTTGATTTACTTGAAGCCAGAAATCTTATGAACCTCCTTCTTCATCACGCTCCACTGACACAGTCGATGCTTTTGCAGCTAGCTCCCATCGCGACTTGCAGGCTTTT  
TTGCCGTCGAAGGGTATCGGGAATTTGAGGACGAAGAGGGTGCGAATTTAAAAACTATTCATTAATAAATAATAATATTTT

>comp163445\_c1\_seq16

AAAGAAGAGAGAGAGAGAGAGGCTATAAGTAAAAGGAAATGGAAGAGAGCCTCAAGTCCATGTCAATGGATTACCTTAACCTTCTCATCAATGGTCAGGCCCTTCAGCGACGTGACCTTC  
AGCGTGGAAGGCCGCTCATCCACGCCACCGTTGTATCCTTGCCGCCCGCAGCCTTTTCTTTTCGAAAGTTCTTCTGCGGGCGCGTCGATGCTCCGGCCTCCCTCCTCGACCCCCACAGC  
CCCCGTTCTCCGCCGGCGAGGGGGGCTGTGATACCTGTCAGCTCGGTTGGCTATGAGGTCTTCTGTGCTTCTTTCAGTTTCTCTACAGCGGCCAAGTTTCGATCCAGCTGCAGAAGCAT  
GAACCTCGCCCCAACTGCGGGCGATCGTGGCTGCTGGCACACACACTGCACCGCCGCCATCGACCTCGCCCTCGACACCCTCGCCGCCGCCGCTCCTTCGGTGTGCACCAGCTTGCTTT  
ACTAACCAGAAGCAGCTTGAAAGCATGGTGGAGAAATCTTCAATCGAGGACGTGATGAAAGTCCTAATGGCCGCCCGGAAACATGAGATGCATCAACTCTGGTCCACCTGCTCCCATC  
TGGTAGCCAAATCCGGTCTACCACCGAAATCCTCGCCAAACACCTCCCCCTCGACGTGGTTCGAAAACACTAGAAAGAACTCCGGCGGGCTCTCCTCCCGTCTTCCCTCCTCGTCTTCCGACC  
ACATCACCTCCCTTTGTACCGACCACCACCAAAAATCCGCCGTATGCGCCGCGCCCTCGACTCCTCCGACGTGCAACTCGTCAAACCTCATGGTCATGGGAGAAGGCCCTCAACCTCGAC  
GACGCCCTCGCCCTCCACTACGCCGTCGAGCACTGCACCCGCGAGGTGCTCAAAGCCCTCCTCGAACTCGGAGCCGCCGACGTCAAACCTCCCGCGGGGCCACCGGACGCACTCCCC  
TCCATATCGCCGCTCAGCTCGTCAGCCCCGACATGGTCGCCGTGCTTCTCGACCACCACGCCGATCCAAACGCCCGCACGCTCGACGGCGTAACGCCGCTCGATATACTGCGGTCCCTGA  
CGTCGGATTTTCTCTTCAAAGGGGCGCTTCCGGGAATCAACGCCGCCCATTTTCGAGCCGAATAAGCTTAGGCTGTGCCTCGAGCTCGTGAATCCGCGGTGATGGTTGCGTCGAGGGAG  
GAGGCGGGCGGAACCTGAGCTTAGATTGAGGATGGTGTATTTGAATTTGGGAGTGGCGGCCGCAGCGGGCGCAGATGGGTTATAAGGTGGATGATGGTGGTGTGCAGGGAGATGT  
ACGGAGCAGGAGAACTACAGTACTGACTCAGGCGGGAGGTAGTAGTATTCGACCTTCTTCTTCTCGTCTTCTTCTATTATGATTTCTCCTCATCATGACTTCCCATGATCATCTCTTTATA  
GATCTCTTTCTTATTAATATTTTCTTTCATTTTAGATATATGTGGCATAAGATTAATAATGATGAATTTGGTGCCGGAAGGCTGATTTATTAAGCAAAGTTATTGAGATTAAAGCCAGCTGCATA  
GTGA

>comp163930\_c0\_seq1

GAGAAGGTCGGGCGAATTATTACGCCCGGTCACCGAACGTCCGGACATCCAATCCAAACGCGTCATCTCACCTGAATACACTAGATCCTGATGTATATTTTTTGGTGACGTAGCACGTCTG  
AATTGATATCAAGACGAATCAGGACAACGGACGTAATAATTTGCCGTAAGTAGTAGAAGGCCGGGACAAAGCCGGGCAACAACTAATGCCGGTCACATTCGTGCGCGTTGGCCGCCAC  
AGCTCGAGCTGGTAACCCAACAAATATTAATACACCTTCAACCATCGCTGTATATATAACTCTTTTGCATTAATCTTACAGCTTGAATTAATTCGATCCATTTCTCTCACGAGAAAATAC  
AATACGCAACATCGAGCAGCGAATACCAATAGAATCGAATCAGCTATAGAATCTCACAAACACACACAATAAATTTCAACAAATCAAACAGCCATCTACTTTACAACGTCGATCGGTTGGT  
GGTAGGAAGAGTTGTTGAGCGGAGAGAATCACAGTAGTACGTGTTTCGCTTGCCGGCGGTAATTAGCACTGGCGAGCTCGAGTTTAGAGCTTACCACCTCGGGTATGAAGACGGGGTAA  
CGGTCAATGGAATCACCCACGGCCATCCAACGGTATCTTAACGGTCTCATGCATTTCAAACGGCGCTGTTGCACTTGAATCCGCTCCCGAACCCAATCTGCCAAACGCGATCGCCG  
CGTTCATACGCCCTTTTCGATTGATGTAGTTGAGCTCGTACCAGAGCGAGCTGCTCGACGTGTTACCGAAGCGGTGCAGTGTATCCGCGAAGCCTCCACGTGCTCTGCCGAAAGCTGC  
AAATTTTTCTGCAGCTCGTCGATCACCGCTCGCCCGCGGCGTGAATACAGAAGTGCTCGAAAGCTTGCTTGAAGTCTGGAATATAAGGTTTCCATTTTCGGGTTTATTATTTTTCTGTCGAT  
GAGTGTGAAGAGGAAGAGGAGTTGCTCGGAAGCAGGGAGGACTAAAGGACCAATGGTCTGTGATGTTGGATTTACGCGCTTACCCGCGATGGCCATCAGGTCTTTGAAAGAGAAATT  
CCGGAATGGCCATCCTTGCTCTTCTCTCGTAGACGCAACGGTAGGCTTTTTTCATCAGCGCCCTTATGTGTTCCGGACTAGGTGGACGAGGCGGTATTTGGCGCGGGCAGCGTCCGCGCGG  
CGGTTGGAGAGGAGAATTGCGGGCGGCCCATGCGGAAGAGGCAATTGGGAAGAAGCATGGAGCGTTGGTTGCCGGCGTAGAAATTGGGGGTGATGATCTCCGTTGAGACGACGAGG  
GCGGTGGAGTTTGCCTGAACCTGGAGTAGATCTCTGGCGAGGTCTATAGAGATGAGACCAGCGCTGCAACCCATGCCGAGAGATTAAAGCTGTGAATGTTGCCGCGGAGTTTGTAGCG  
GTTGACTATCATAGCGGAGAGGGAAGGTGTTGGGGAGAAGAGGCTGCAATTGACGACGAGAATGTCGATGTCTTTGGGTTTGATAACGGTGCGGGCGAGGAGGTGCTCGACGGCGGAG  
AAGATGACAAGTTTGGCTTCGGCGGGGAGGCTTCCATGTTGGGGCTTGGGGGATATAGTGATTAGCAGGGGGGAGACAGGTCTTCTTCCAAGGCCGGAACGTTTCGAGGATGCGGAC  
TTGGAATTTGGTAGCTCTTCTCGTCGGAGCAGATGAGGCGGGTGTGTTCCATGAAGGTGGAGAAGGGGACGCGACAAGACATAGGAGGTTTGAAGCAGGCGTAGTCGAGGAGATAGATC

GGGCGTGGGCGGGACATGAAGTAGACGGTGGCGACGAAGACGATGATGAAAGCGGAGCAGAGGATTCGAGGAGGTCCAAGTGCAGGGAGCGCCAAAGGGAAAGGAATTCGGACGG  
GCCCATTCGGGCCACTTCGAGACCGACGGCGGCGATGATGGGTATCAGGAGGAGGGTGAGGATATGGTTTACCAGGTATTGGTAGCCAAGTTTGACGTATTTGAGCTTGACGGAGTTTTT  
GAACTCTGGAAGGGGAGGGGAGGGGGATGACGAGGAGGAAGAGGAGGATGGCATGCTTGAATTTTTGTTTTTGGATTAATGTGGGTGATGAGTGGTTTTGTTTGGCCAGGAAAAATGGA  
ATTTTTTTTTTCTCCCGGTGGCTTTTGGCGAGAATGGATTGGGGAAAGAGGGAGGGAGGGGAATTTAAAGGGGGGTTTGTAGTGCGCAATGAATGGGGTAGATGGTGGTTTAA

>comp164910\_c0\_seq13

GATCCATCTCTACAATTTTGACATATTCTTCTCATTACAATCCATCTCAAAAAGGATGGTGTGGTGATCTTCTGTAGTTCTGCTGCCTTAGTGGTGTAGATTGTGACTCTTGAACCATACGGA  
TTCTTTCAGCTCGGGCTCTGTCTTGAGCGTTAACCAAGTGCTTGCATGCATCTAAGGGTTGCAGTGGCTTGTCTTCTAACCAGGTGTCCCCTCACCAAAGCTTGCATTTTTACTAATCCTTTC  
AGTGCATTTAGAGCTTTTCTTGCCAGATAAGATCTGAAGAAAAGACTGGATTTTGTATGGCAGATTTCTCCTCAATGGCTCTCGTTGTTCTATCATTTGCTTTACTGGTGAGCCGAACCTACAGC  
TGCGGCAGCCTGTGCTGCTACCACAGCAGCTTCTGCAGCAGCTGCAGTGGCCACTGCTACAGCCATGGCATGCCTCTTCTGATCAAACCTCAGAGTCTGATAATCCATGGCAAGGTTCACT  
AAAACCTGCCTCTGTGGAATCAAGTCCTTTGAAGCTCCCATAGATCTCCTGAAGCTCCATCTCTTCTCCTTTGTTGCTGTATCGGGCACTGGAGAAAATCTGCTTCTGTAGGCCAGTTA  
GGAGTTGAGTCTCCACCCTTCTCCTTCGCCTTCTTCCCTGCAAAGAAGTTTCTAAGCCATTTTCTTGCCTTTCCCATATTCTAAAGCTTTCTGCTGAGAGAAAATCATGGGGAAAGGTATCTAT  
ATATAGATATACTTCTGAGACTCTCTACGAATCTGGTCTCTTTGTTGCTCTGTGAAATTTCTCCTCTGGTGCATTAGTTGCTAAATAGGAAAGAGATCTGGTAAGAGGAAATCATACAGTAG  
CACAAAGGAATAATAAGATTTTCTTATTATAGAATAAGATAGAGTACTGTTTAGATTTTCTTACCAGATCTCTTCTTCTTATTAGCAACTAATGCACCAGAGAAAAAATTTACAGAGCA  
ACAAAGAGACCAGATTCGTAGAGAGTCTCAGAAGTATATCTATATATAGATACCTTCCCCATGATTTCTCTCAGCAGAAAAGCTTTAGAATATGGGAAAGGCAAGAAAATGGCTTAGAACT  
TCTTTGCAGGGAAGAAGGCGAAGGAGAAGGGTGAGACTCAACTCCTAAGTGGCTACAGAAAAGCAGATTTTCTCAGTGCCTGATAACAGCAACAAAGGAGAAAGATGGAGCTTCA  
GGAGATCTATGGGAGCTTCAAAGGACTTGAATTCACAGAGGCAAGTTTGTAGTGAACCTTGCATGGATTATCAGACTCTGAGTTTGTATCAGAAGAGGCATGCCATGGCTGTAGCAGTGG  
CCTGCAGCTGCTGCAGAAGCTGCTGTGGTAGCAGCACAGGCTGCCGCAGCTGTAGTTCGGCTCACAGTAAAGCAAATGATAGAACAACGAGAGCCATTGAGGAGAAATCTGCCAT  
CAAAATCCAGTCTTCTTTCAGATCTTATCTGGCAAGAAAAGCTCTAAATGCACTGAAAAGGATTAGTAAAAATGCAAGCTTTGGTGAGGGGACACCTGGTTAGAAAAACAAGCCACTGCAA  
CCCTTAGATGCATGCAAGCACTGGTTAACGCTCAAGACAGAGCCCGAGCTGAAAAGAATCCGTATGGTTCAAGAGTCACAATCTACACCACTAAGGCAGCAGAACTACAGAAGATCACCA  
CACCATCCTTTTGGAGATGGATTGTAATGAGGAAGAATATGTCAAATTTGTAGAGATGGATC

>comp165301\_c0\_seq2

AAGCCATGTCTTGTGTCAGATTCTAACATGCTGGGCTCAATCACGCCCTGTTCCATATCTTTAATTCATGAATCTGTAAAAGTTTCATTAATATTATAAAAAAAAAAAAAACTAGAGTAAGAAT  
AAGACCGCATATATCAATTCCTGTTCTATTTCTTTTATGCATCTCTCTAATAAACAATGCGAAAAATGAATGCTAGAAAATCAGATTATTATAAAATCCCCGAAAAAATCCACCATCTTC  
CTCCCTCATCCTGCCTATATAAAACCCACACTCCCTCCACCTCTTCCCCAAATCTCTCTACATCCCTTACTCAGAACTCTCTCTTCTCTGCACTTTTAGCATATTAACAGGGAGGGAGAAA  
GATACAGAGATTTAGTAAATGGCAGCCAAGATACTCTTCTTCTCCTGCTTACCTTCTTCTCCTCGTTTCTGCCATTGCAACCTCTCGTTCTCCATTGTCTTCTACGGCGGCAGTCCCCAACCC  
CGAGCTGGTTGTTGAGGAAGTTCACAGACGAATCAACGCCTCCCGTCCGCAACTAGGCTATCTCTTTCGCGAACCGGCAATCCCATTTGACGATTGCTGGCGCTGTGACCCCAACTGGG  
AAACCAACCGTCAGCGGCTCGCTGACTGCGCAATTGGCTTTGGCCGCAATGCCCTCGGCGCAAAGGCGGCGAAACTTACATCGTAACTGATAGTGGCGACGACGATCCGGTGAACCCC  
AAACCTGGCACTCTCCGCTACGGCGTCATTCAAACGAACCCCTCTGGATCGTGTCCAACGCGATATGGTTATCCAGCTCAAAGAAGAACTCATAATGAACCTCTACAAAACCCCTCGAC  
GGCCGCGGCGTTAGCGTCCACATTTGCCGGCGGCCCTGCATCACCCTGCAATATGTCAGCCATATTATCATCCATGGCCCTGAATATACACGATTGTAAGCAAGGGGGGAATGCTTATGTGC  
GTGACTCCCCTGGACATTATGGATGGCGAACACTGTGCGACGGCGACGGCGTCTCCATATTTGGCGGAAGTCATATTTGGGTTGATCATTGTTGCTATCAAATTTGTCGGGATGGGCTTGT  
CGACGCCATTCGTGGATCGACGGCAATCACCATTTGCAACAATTATATGACTCATCATGATAAGGTGATGCTGCTCGGCCATAGCGATGAGATGGTGGAGGATAAGAACATGCAGGTTACT

ATTGCTTTTAACCATTTTGGGGAAGGATTGGTTCAGAGGATGCCAAGGTGCAGGCTTGGATATTTTCATGTAGTGAACAACGACTACACGCACTGGGAAATGTACGCAATCGGAGGAAGC  
GCAGCGCCGACGATTAACAGCCAAGGAAATAGATTCTGGCGCCGACGACCGTTTCAGCAAAGAGGTGACGAAGCGCGAGGACGCACCGACAAGCCAGTGGAAAGAGCTGGAAGCTGGA  
AGATCAGAGGGTGATTTGATGTTGAACGGAGCCTTCTTCACCCCCTCAGGCGCCGAGCCTCGTCCAGTTATGCCAGGGCTTCGAGTCTAGGAGCTAGATCTTCCTCACTGGTTGGAGCC  
ATAACCAATTCTGCCGGTGCTCTGGTGTGCAAGAAGGGCCGAGCTGCTGATCATCAACAAAATTCCTACATATGGCCAGAACCATAAATACTATATGCTTGTATGAAATCGCCTATAAG  
GTGAAATATTAGAATAAAATTCTCTTTTTTTTTTAATTTTTCTATGATTTAGTGCCTCTTGTGTACCAACCTCAAGCTGCTGTCATCTTGAGAAATTAATCATAAAGGCATGCAGTAAAGATG  
TGTTGGGAGGAATGTTTCTGAAGTATGCTATATTAATTTGAGGCTATTTATATATGTCTTGTATTAATTTATTGTCTGGCACAAATTTCTTACTGATAGAAAAGATTAGTTATGCCAA

>comp165358\_c0\_seq1

TTTATCCAAACATTGTTTTTAATAGCTGATTATTTCTATAAAAAAGCTTTAATATAAATCATTATAAATTGCAAATATAAAAAATACGTAGAGAGTTTACATGTGGAATGTAGTCCTTAGTTGAT  
CATGCAATAATAGGAAGGTGTTGGGGGCCGAAGCACAGAAAGCCATGGAGATGGAGCTGAGAAGAGCCTGTTCTCTACCAGGTGTTACCGTGCTTCTTCTTCTTGCCTTATCTCTGCA  
ACACTAGCAGTACTGCTACAGCCATGGAAGCTCGTATCCATGGCTACGCTGATTTCATCTTCACAGAGAGTTTTTATTATCAGAGTGGGGTTAGATTACAGAGAATGGAAGAAGGCTTCT  
TCAGACAACAAAATACTTAGGTTATGGTTCTCTGGACAAAGATAGACCTGCTGTGAGCCCTTCAAAGCCTGGGAATGCATACACAAGAGGTTGCGAAGCTAGCCATTACTGTAGAGGTTA  
GTTGTTGAATTAGGGTTGGAGCTCTTGCTTTCTAAGCCTTCTTATGTCAAATTACCATGATGATGCGTTTCATGTTTTTTGTTTGGAGAGAGAGAAGTTAGGATCTTCTCTCCAAAAGAAA  
AAAAAAATCAATGGATCTTATTTTTATGAGTGGATTGATCAGATTTGACTGGGTGTAATCACTTTTTGCTTGGGAAGAGCTTTTATCACATCACCTCATCAAGCGCTTATATGACTGAGATT  
TTGCGTAAATTTTCTGAAGAATATATATAATTAACAGTTTCATTTCTTAATTGTAGTTTTTCAGTTTGATGCTTGTGAAAGATATAATATGATGAAATTAATGCTGGTCAA

>comp166591\_c0\_seq22

CCATTTGAACTGGAGTTGCCAATTCTGGAAAACCTTTTGATAAAAAACAAGAAAATAATTTCTTTTGACCAAATAAAGTTATAATACAAATGTTGAGTCAATTTGGAATCCCCAGCAAAAGA  
AAAAAGATTTTCATAGCTCCTAATTTAATGGGTTTCGTTCTGTAGTTGAACTAACTGAGTATAAATGCCGTTTGGTTGTCTAAGAAGTTCTCATGGCTGCCAATTTTCATGAATTATACCTTCC  
TGAAGCACTGCAATAACATTGGCATTACGAATTGTTGATAGTCTGTGAGCAATTAGAATTGTTGTTCTCCCTTCCATGAGTCTATTGAGAGCCTCTTGCACTACCTTTTCTGACGCTGTATC  
CAATGCACTGGTGGCCTCATCCAGAAGGAGAATTGATGGGTCTTTTAGAATTGCTCGGGCAATTGCCACCCTTTGTTTCTGCCCTCCAGATAGTTGGGCACCCCTTTCTCCAACCTTGAGTG  
GTATAACCTTCAGGCATTGACTAATAAATCCATCCACATTTGCAGCTTTTGCAGCTTTCAGTACTTCAATTTCTGATGCACCTGGCTTCCCATAAGCAATATTTTCATAGATGGTTGTGGAG  
AACAAATGCTGGCTCCTGCTGAACTAAGCCTATTCTCATTCTCAAGGATCTTAAGTTTACGCTTTTAATGTTCTTGTATCTATTAGAATTTCCCCGGATGAAGGATCATAGAATCTCATCAGG  
AGTGATATTACAGAGCTCTTTCCTGATCCACTTTGACCCACCAATGCTAGGCTTCTACCTGCTGCTACATGCAAGCTTAGCTCCTTCAAGACAGTTATATCAGGTCTTGTAGGATATCTGAA  
GCTTACATTCCTGAATTCATGTCCCCCTTGATTTCTTCCACCCTTCTGAACTTGGGTCATTGGCATCTATCCTTGTTTTCCCTTCCAGAATTGAAAAAACTGAACCAAGAGCTTGTGACC  
CCTTCACAATGTCTGGTGTGAGAGCCAATGTTTCTGCTATTCCGAGTGATGTAATTATCAGCACCATGAAGGACTTCATGATATTACCAAAGTTGGAGGTTCCATTCTTGATAAGCTGTGCT  
GCGTACCAAAGACCAAGTGCATAGGAACAAAATGCAAAGGACTGTGATAAGCCATAACCTATTCCTGCTATATGGCCACGTGTGAATGCTTTCTGTTTGGCCGGTCTAATTCCTGTGTGA  
ACTGAGATGAAACCTGGTCTTCAGCACAAAATGCTGCCACTGTTCTGATGTTAGTGATTGCTTCTCGGGCCACCGAAGTCGCTCGGGCATAAGCCACTGTATAGTTTCCACCAAATCCCTT  
AAGAAATAGTTGCTCAGCTATTGAGGCAGCAATAAGCAAAGGGAAGGTTGCAAGGACGACCGCTGCCATACGCCAACTTAGCACAAATGCTATGATAAATGCTGTCATTGTGCTGAGAT  
ATTCTGAATGATGGTTGACATTCGGTCTGCAACTGTACTTCGGACCAAAGTAGCATCTGCTGCTAAGATCAATGCCAATGAACCACTACTATTCTCATCCCGATCAAACCATGCAATCTCAT  
TTTTAAGTATTTCTGAGAACATGTTAAGGCGGACGCGGAGGTGAGTTTCTCTCCATCAGTGATAGAAGTAATGCTGCAAAAACATATATTGGTACAGTAATGATTGCTGCTCCAATGAAT  
ATGAGAGACACCATTCTGATCTACTCCTGATATGTGATTTGTCATGTGAATAAAAAGCAGTCAGAACATGAGTGATCCAAAAGCGAACAGAGGGCCTTCTGCACCAGCTAATATAGCA  
CCCAGTGATCCAGTTACTGCAAATGGCCATTCTGGTTGGTTCAATCTAATTATCTTTCTGATTGATGGGACTGGTGTGACCTGGCTGAACCAAAAATCTTGGTTAATTTCTTATTTCTAAT

GTTTTAGACCAGCTTTCTCATGATTTCTTTCTACTTCACATGCATTTGTAGAACTGCCTTTTCAGATGAATTCCTGAAAATGAAAAGAGAGACGTAATGAATTCCTTCTATTGCAGGAGAA  
TATCAGAAAATGGAATAAAAAAGGCTCTCACATTGTCTCTTTGTGATCATTAGGCTTTTGTATTCTATGGTCCAATAGTTGTGCATGCACTAGCATTCATACTCTCCTTTCTCCTTTT  
GTCATCAGCTTTTCATGTGTGCCACTTTACAGTAACTTTCCATTGTTTAACTACAATTATGTGGGCATTGCTAATTGTGGATAACCTATGTGCTATTACAACCTGTTGCTCCTGTCCAACCTTA  
CCTTCTCCAATGCATTTTGTACCAGTCGCTCTGATTCTGTAGTCCAGTGCCTAGTTGCTTCATCTAGAAGTAAAATCTTGGGATTGCGTAAAATGGCTCTAACTATTGCAATGCGCTGTTTCT  
GGCCTCCAGAAAGCTGGAAACCTCCCTCTCCTACCTCAGTTGAGTAGCCATTGGGTAGACTTTGAATAAAACAATGAGCATTGCTATTTTTGCAGCGTTAATTATATCTTCCATGCCTGCA  
TCTTCTTTCCATATAGGATATTCTTGGCAATGGAAGCTGAAAACAATGCAGGTTCTTGACTTACTAATCCCATTGATTTCTTAGCCACTTCAATTGAAGAGACTTTATGTCATGACCATCC  
AGAAGAATTTCTCCGAAGTTGGCTCATAAAATCTTCGATCAGGGATATGATTGTGCTCTTCCCTGATCCGCTTTGCCCCACGATTGCATTAGTCTTCCGGCTGTGATTGAAAAGCTTAG  
ACCTTCAAAGATAATGCTTTTACGTGATGGGTATGAAAAGAGACCTCACAGAACTCAATTTGGCCTTGCCTTGGGGTAAGACTGCTCCATTGGATTGTTCTGATACGTTAGAAACCTTT  
TCTATCATCCTTATGATAGTACTTGTGCGCTTGACCTTTAGCAAGGGAACCTCAGGTTTGGAGCTGCTTGTCCAAGAGCACTGCAAAGGACTAGGACTCCAGCATAACCAAAGAAGTAGA  
GCCAGGCACAGAAAAGTATCCCATATGTACAACCCACACCGACTCCTTTTGCAAGTCCGCTTTCCCTGCCAGTTTCAGTGCATTTTCGAGTGATCTCGAGTATGCTGCTATAGCTTTGTC  
TTCCCAACATACGAGTATACGGTACGGACTTGTGAGATTACCTCTTCTGCAACTTTCCCTGCTTCAGCATAGGCACTCTCACCTTTCTTTGCCAAACCGGCCATTACCACCGCATATGTGC  
CACCCGCAATGACAATCAATGGAACGACAGCCAAGGTAAGAAGCGTAAGCTGCCATACTGAGGTAAATCCGACGACAAATCCGACTAAAAATTGAGATAGGTACCGCAAACAGTGCCCA  
GTCTGCATATGATATAGAGAAAAGTTTAGTTCTATCTTTGTTCTCAGACCTCAGTGAATTCGCAAACCATTAAGGCTTCGTTTG

>comp166591\_c0\_seq42

CCATTTGAACTGGAGTTGCCAATTCTTGAAAACCTCTTTGATAAAAAACAAGAAAATAATTTCTTTTGACCAAATAAAGTTATAATACAAATGTTGAGTCATTTGGAATCCCCAGCAAAGA  
AAAAGATTTTCATAGCTCCTAATTTAATGGGTTTCGTTCTGTAGTTGAACTAACTGAGTATAAATGCCGTTTGGTTGTCTAAGAAGTTCCTCATGGCTGCCAATTTTCATGAATTATACCTTCC  
TGAAGCACTGCAATAACATTGGCATCACGAATTGTTGATAGTCTGTGAGCAATTAGAATTGTTGTTCTCCCTTCCATGAGTCTATTGAGAGCCTCTTGCCTACCTTTTCTGACGCTGTATC  
CAATGCACTGGTGGCCTCATCCAGAAGGAGAATTGATGGGTCTTTTAGAATTGCTCGGGCAATTGCCACCCTTTGTTTCTGCCCTCCAGATAGTTGGGCACCCCTTTCTCCAACCTGAGTG  
GTATAACCTTCAGGCATTGACTAATAAATCCATCCACATTTGCAGCTTTTGCAGCTTTTCAGTACTTCAATTTCTGATGCACCTGGCTTCCATAAGCAATATTTTCATAGATGGTTGTGGAG  
AACATGCTGGCTCCTGCTGAACTAAGCCTATTCTCATTCTCAAGGATCTTAAGTTTACGCTTTTAATGTTCTTGTATCTATTAGAATTTCCCGGATGAAGGATCATAGAATCTCATCAGG  
AGTGATATTACAGAGCTTTTCTGATCCACTTTGACCCACCAATGCTAGGCTTCTACCTGCTGCTACATGCAAGCTTAGCTCCTTCAAGACAGTTATATCAGGTCTTGTAGGATATCTGAA  
GCTTACATTCTGAATTCATGTCCCCCTTGATTTCTTCCACCACTTCTGAACTGGGTCATTGGCATCTATCCTTGTTTTCTTTCCAGAATTGAAAAAACTGAACCAAGAGCTTGTGACC  
CCTTACAATGTCTGGTGTGAGAGCCAATGTTTCTGCTATTCCGAGTGATGTAATTATCAGCACCATGAAGGACTTCATGATATTACCAAAGTTGGAGGTTCCATTCTTGATAAGCTGTGCT  
GCGTACCAAAGACCAAGTGCATAGGAACAAAATGCAAAGGACTGTGATAAGCCATAACCTATTCTGCTATATGGCCACGTGTGAATGCTTTCTTGTGTTGGCCGTTCTAATTTGTGTGA  
ACTGAGATGAAACCTGGTCTTACGACAAAATGCTGCCACTGTTCTGATGTTAGTGATTGCTTCTCGGGCCACCGAAGTCGCTCGGGCATAAGCCACTGTATAGTTTCCACCAAATCCCTT  
AAGAAATAGTTGCTCAGCTATTGAGGCAGCAATAAGCAAAGGGAAAGTTGCAAGGACGACCGCTGCCATACGCCAACTTAGCACAAATGCTATGATAAATGCTGTCATTGTCAGTGAGAT  
ATTCTGAATGATGGTTGACATTCCGTCTGCAACTGTACTTCGGACCAAAGTAGCATCTGCTGCTAAGATCAATGCCAATGAACCACTACTATTCTCATCCGATCAAACCATGCAATCTCAT  
TTTTAAGTATTTCTGAGAACATGTTAAGGCGGACGCGGAGGTGAGTTTCTCTCCCATCAGTGATAGAAGTAATGCTGCAAAAACATATATTGGTACAGTAATGATTGCTGCTCCAATGAAT  
ATGAGAGACACCATTTCTGATCTCACTCCTGATATGTGATTTGTCATGTGAATAAAAAGCAGTCAGAACATGAGTGATCCAAAAGCGAACAGAGGGCCTTCTGCACCAGCTAATATAGCA  
CCCAGTGATCCAGTTACTGCAAATGGCCATTCTGGTTGGTTCAATCTAATATCTTTCTGATTGATGGGACTGGTGTGACCTGGCTGAACCAAAAATCTTGGTTAATTTCTTATTTCTAAT  
GTTTTAGACCAGCTTTCTCATGATTTCTTTCTACTTCACATGCATTTGTAGAACTGCCTTTTCAGATGAATTCATTGTCTCTTTGTGATCATTAGGCTTTTGTATTCTATGGTCCAATAG



TTGTGCATGCACTAGCATTGCATACTCTCCTTTCTCTCCTTTTGTGCATCAGCTCTTCATGTGTGCCACTTTCAGTAACTTTCCCATTGTTTAACTACTACAATTATGTGGGCATTGCTAATTGTG  
GATAACCTATGTGCTATTACAACCTGTTGTCTGTCCAACCTTTACCTTCTCCAATGCATTTTGTACCAGTCGCTCTGATTCGTAGTCCAGTGCCTAGTTGCTTCATCTAGAAGTAAAATCTTG  
GGATTGCGTAAAATGGCTCTAACTATTGCAATGCGCTGTTTCTGGCCTCCAGAAAGCTGGAAACCTCCCTCTCCTACCTCAGTTGAGTAGCCATTGGGTAGACTTTGAATAAAAACAATGAG  
CAATTTGCTATTTTTGCAGCGTTAATTATATCTTCCATGCCTGCATCTTCTTCCATATAGGATATTCTTGGCAATGGAAGCTGAAAACAATGCAGGTTCTTGACTTACTAATCCCATTGATT  
CTTAGCCACTTCAATTGAAGAGACTTTATGTCATGACCATCCAGAAGAATTTCTCCCGAAGTTGGCTCATAAAATCTTTCGATCAGGGATATGATTGTGCTCTTTCCTGATCCGCTTTGCC  
CACGATTGCATTAGTTCTTCCGGCTGTGATTGAAAAGCTTAGACCTTCAAAGATAATGCTTTTACGTGATGGGTATGAAAAGAGACCTCACAGAACTCAATTTGGCCTTGCCTTGGGGT  
AAGACTGCTCCATTGGATTGTTCTGATACGTTAGAAAACCTTTTCTATCATCTTATGATAGTACTTGGCTGCCGCTTGACCTTTAGCAAGGGAACCTCAGGTTTGGAGCTGCTTGTCCAAGAGC  
AAATCCACTAAATATGACATTTATTATTGTCGTGAATGCTTTTCCACCATTTGGTATCTTGATGCAGGACTAGGACTCCAGCATAACCAAAGAAGTAGAGCCAGGCACAGAAAAGTATCCCAT  
ATGTACAACCCACACCGACTCCTTTTGCAAGTCCGCTTTTCTGCCCAGTTTTCAGTGCATTTTCGAGTGCATCTCGAGTATGCTGCTATAGCTTTGTCTTCCCAACATACGAGTATACGGTA  
CGGACTTGTGAGATTACCTCTTCTGCAACTTTCCCTGCTTTCAGCATAGGCACTCTCACCTTTCTTTGCCAAACCGGCCATTACCACCGCATATGTGCCACCCGCAATGACAATCAATGGAA  
CGACAGCCAAGGTAAGAAGCGTAAGCTGCCATACTGAGGTAAATCCGACGACAAATCCGACTAAAAATTGAGATAGGTACCGCAAACAGTGCCAGTCTGCATATGATATAGAGAAAA  
GTTTAGTTCTATCTTTGTTCTCAGACCTCAGTGAATTCGCAAACCATTAAGGCTTCGTTTG

>comp166591\_c0\_seq46

CCATTTGAACTGGAGTTGCCAATTCTGGAAAACCTTTTGATAAAAACAAGAAAATAATTTCTTTTGACCAAATAAAGTTATAATACAAATGTTGAGTCATTTGGAATCCCAGCAAAGA  
AAAAAGATTTTCATAGCTCCTAATTTAATGGGTTTCGTTCTGTAGTTGAACTAACTGAGTATAAATGCCGTTTGGTTGTCTAAGAAGTTCCTCATGGCTGCCAATTTTCATGAATTATACCTTCC  
TGAAGCACTGCAATAACATTGGCATCACGAATTGTTGATAGTCTGTGAGCAATTAGAATTGTTGTTCTCCCTCCATGAGTCTATTGAGAGCCTCTTGCACTACCTTTTCTGACGCTGTATC  
CAATGCACTGGTGGCCTCATCCAGAAGGAGAATTGATGGGTCTTTTAGAATTGCTCGGGCAATTGCCACCTTTGTTTCTGCCCTCCAGATAGTTGGGCACCCCTTTCTCCAACCTTGAGTG  
GTATAACCTTCAGGCATTGACTAATAAATCCATCCACATTTGCAGCTTTTGCAGCTTTTTCAGTACTTCAATTTCTGATGCACCTGGCTTCCCATAAGCAATATTTTCATAGATGGTTGTGGAG  
AACAAATGCTGGCTCCTGCTGAACTAAGCCTATTCTCATTCTCAAGGATCTTAAGTTTACGCTTTTAATGTTCTTGTATCTATTAGAATTTCCCGGATGAAGGATCATAGAATCTCATCAGG  
AGTGATATTACAGAGCTCTTTCCTGATCCACTTTGACCCACCAATGCTAGGCTTCTACCTGCTGCTACATGCAAGCTTAGCTCCTTCAAGACAGTTATATCAGGTCTTGTAGGATATCTGAA  
GCTTACATTCCTGAATTCATATGCCCCCTTGATTTCTTCCACCACTTCTGAACTTGGGTCAATGGCATCTATCCTTGTTTTCTTTCCAGAATTGAAAAAACTGAACCAAGAGCTTGTGACC  
CCTTACAAATGTCTGGTGTGAGAGCCAATGTTTCTGCTATTCCGAGTGTGTAATTATCAGCACCATGAAGGACTTCATGATATTACCAAAGTTGGAGGTTCCATTCTTGATAAGCTGTGCT  
GCGTACCAAAGACCAAGTGCATAGGAACAAAATGCAAAGGACTGTGATAAGCCATAACCTATTCTGCTATATGGCCACGTGTGAATGCTTCTTGTTTGGCCGGTCTAATTTCTGTGTGA  
ACTGAGATGAAACCTGGTCTTTCAGCACAAAATGCTGCCACTGTTCTGATGTTAGTGATTGCTTCTCGGGCCACCGAAGTCGCTCGGGCATAAGCCACTGTATAGTTTCCACCAAATCCCTT  
AAGAAATAGTTGCTCAGCTATTGAGGCAGCAATAAGCAAAGGGAAGGTTGCAAGGACGACCGCTGCCATACGCCAACTTAGCACAAATGCTATGATAAATGCTGTCATTGTCAGTGAGAT  
ATTCTGAATGATGGTTGACATTCCGGTCTGCAACTGTACTTCCGACCAAAGTAGCATCTGCTGCTAAGATCAATGCCAATGAACCACTACTATTCTCATCCCGATCAAACCATGCAATCTCAT  
TTTTAAGTATTTCTGAGAACATGTTAAGGCGGACGCGGAGGTGAGTTTCTCTCCATCAGTGTATAGAAGTAATGCTGCAAAAACATATATTGGTACAGTAATGATTGCTGCTCCAATGAAT  
ATGAGAGACACCATCTGATCTCACTCCTGATATGTGATTTGTCATGTGAATAAAAAGCAGTCAGAACATGAGTGCATCCAAAAGCGAACAGAGGGCCTTCTGCACCAGCTAATATAGCA  
CCCAGTGATCCAGTTACTGCAAAATGGCCATTCTGGTTGGTTCAATCTAATTTATCTTTCTGATTGATGGGACTGGTGTGACCTGGCTGAACCAAAAATCTTGGTTAATTTCTTATTTCTAAT  
GTTTTTAGACCAGCTTTCTCATGATTTCTTCTACTTCACATGCATTTGTAGAAAAGTGCCTTTTTCAGATGAATTCATTGTCTCTTTGTGATCATTGAGGCTTTTGTATTTCTATGGTCCAATAG  
TTGTGCATGCACTAGCATTGCATACTCTCCTTTCTCTCCTTTTGTGCATCAGCTCTTCATGTGTGCCACTTTCAGTAACTTTCCCATTGTTTAACTACTACAATTATGTGGGCATTGCTAATTGTG

GATAACCTATGTGCTATTACAACCTGTTGCCTGTCCAACCTTACCTTCTCCAATGCATTTTGTACCAGTCGCTCTGATTTCGTAGTCCAGTGCCTAGTTGCTTCATCTAGAAGTAAAATCTTG  
GGATTGCGTAAAATGGCTCTAACTATTGCAATGCGCTGTTTCTGGCCTCCAGAAAGCTGGAAACCTCCCTCTCCTACCTTATGTTGCAAAATAAGTCAAAAGAAAATTTAGTGCAAGATGG  
TAAAAGCAAACCTCAAGACTTCCTATCAGACAATTATTTCCAACCTCAGTTGAGTAGCCATTGGGTAGACTTTGAATAAAAACAATGAGCATTTGCTATTTTTGCAGCGTTAATTATATCTTCCA  
TGCTGCATCTTCTCTCCATATAGGATATTCTTGGCAATGGAAGCTGAAAACAATGCAGGTTCTTGACTTACTAATCCCATTGATTTCTTAGCCACTTCAATTGAAGAGACTTTATGTCAT  
GACCATCCAGAAGAATTTCTCCCGAAGTTGGCTCATAAAATCTTTGATCAGGGATATGATTGTGCTCTTTCCTGATCCGCTTTGCCCCACGATTGCATTAGTTCTTCCGGCTGTGATTGAA  
AAGCTTAGACCTTCAAAGATAATGCTTTTACGTGATGGGTATGAAAAAGAGACCTCACAGAACTCAATTTGGCCTTGCCTTGGGGTAAGACTGCTCCATTGGATTGTTCTGATACGTTAG  
AAACCTTTTCTATCATCCTTATGATAGTACTTGTGCGCCTTGACCTTTAGCAAGGGAACTCAGGTTTGGAGCTGCTTGTCCAAGAGCAAATCCACTAAATATGACATTTATTATTGTCGTG  
AATGCTTTTCCACCATTTGGTATCTTGATGCAGGACTAGGACTCCAGCATACCAAAGAAGTAGAGCCCAGGCACAGAAAAGTATCCCATATGTACAACCCACACCGACTCCTTTTGCAAGT  
CCGCTTTTCTGCCCAGTTTCAAGTGCATTTTCGAGTGATCTCGAGTATGCTGCTATAGCTTTGTCTTCCCAACATACGAGTATACGGTACGGACTTGTGAGATTACCTCTTCTGCAACTTTC  
CCTGCTTCAGCATAGGCACTCTCACCTTTCTTTGCCAAACCGGCCATTACCACCGCATATGTGCCACCCGCAATGACAATCAATGGAACGACAGCCAAGGTAAGAAGCGTAAGCTGCCAT  
ACTGAGGTAAATCCGACGACAAATCCGACTAAAATTGAGATAGGTACCGCAAACAGTGCCAGTCTGCATATGATATAGAGAAAAGTTTAGTTCTATCTTTGTTCTCAGACCTCAGTGA  
ATTCGCAAACCATTAAGGCTTCGTTTG

>comp167462\_c1\_seq2

AAAAATAAAAGAATTATATATCTAAATATTAATATTTAAACATTAGACTGTAAAACCTCCACTGATTAATGCACATATTACCATATGATATCAACTAAGTGGGTCTTAATTATACATAAAAAAG  
CTCATTAAGGAGCAGTGGCGGCAACTCCCAAACCCATTGGGATCTCTCCTCATGCATGTGAAGCCTTAAGAGCTCTGTGCGGAGGCCATCACAGACTTCTTCTCTCTTTTTCTCA  
ACATTTATCACTCTCTCACTCTCTCTCTTCTGTTATATATATATAGCCGTTTGAAGATACTTCAGTGATTCATCAAGGTAGAAGCCTTGAGCTTCTTCTACGTTTCTTCTTTTATCTGT  
CAGGTTTGGCTCCGATATGGGGCCTCAACGGCACCGGAGCCGAAGCCTGCTCTTAGGCTTCTTTGCTCTTCTTCTTCCCCACCTTCTGTCTTCTGTAACTACTGAGAGTTCTGCTGTTA  
TTGGCTCTGTGGAGTGTCTTGACTGTGCTACAAAGAGCTTGAACACAGAAGAAAATTTATAAAGGTCTGAAAGTAAACAATCAAATGCAAAACAAGCAACCCCAATGAATACAAAACCAAA  
GCCACAGCAAACCTCAACAAAGATGGCACCTTCCACATCCATCTCCCCACACATCTTCGTGTCGTCGGCGACTGCACCGCTCGGCTTCATGACTCATCAAATAAACCATGTAGCCATGGC  
GACGCTGATGAGCCCTGAAGCTTGTCCACAATGGTATGGCACCTATGTTGTTGCCACCGCAAGCTTCGATTCTCGTCGGCAACGTGCTCGTCAAAGCTGTTTTGGCCCTGCCTCCA  
CTACCCACATGGCATCCATACACAAATATTTCCCTTGGCATAAGCCAATCCTATCTTTTCCCTCCATTACCGCCTAAACCGCCGATCTACAAGCCACCTATAGTCATA

>comp168568\_c0\_seq1

GAGACCCTAGGCTTTGGATTCTCCTTTTGCAAACTGCACCCGGTCCCACACCCAAGCTTTCACCACACACGCACGGCAGCCATGCGGGCACCTTTTCTTCGTTTGAATTCGAGAGGAGG  
GCTCCCCCTTACCACCATCCAGTGCCTTTGAACTGCGGCCGAGCGCTTCTTCTTCCACTCCGACGAACCTGCTATATAATAGAGATGACCTCCTCGAAGTTCTTCCCTTATTTGCCGC  
CTCATTTCTCTGCCTCTTAAGTGCATTTCTGTAGTTTGAAGGAAAGCTTGCTTGTATTTATTTCCCTCGTTCGCTATTGTTCTTTCAGTCCATGGCGACGGCGTCAGCGTCATCGTCGGAGGC  
CATCGGGGACGCAAGGCGGAAGCTTCCGGGGGAGAATGGCCGACGATTGATGAGCCGACGCCGGGTGTTGTGTTGAAGAAGGCCAGAAAGGAGAGGGTTTGTACCGCCAAGGAGAG  
GATCAGCAGGATGCCGCCCTGCGCCGCCGGCAAGAGGAGCTCCATATACCGGGGTGTCACCAGGCATAGATGGACGGGAAGATATGAGGCTCACCTTTGGGATAAAAGTACTTGAATC  
AAAATCAAATAAAAAAGGAAAACAAGTCTATTTAGGTGCATACGATGATGAGGAGGCTGCTGCTAGAGCTTATGATCTTGTGCTGATTGAAATATTGGGGCGCTGGAACCTTATTAATTT  
TCCTGTTAGTGATTATGCAAGGGATTTGGAGGAGATGCAGATGGTTTCAAAAAGAAGATTACCTTGTATCTTTAGAAGAAAAAGCAGTGCTTTCTCGAGAGGGTTCACTAAATTTCTGTTG  
AATCCAAAGACAACCTCAAAGCACCAGATGGGAGGCACCTTTTGGCCAAATGCTTGGAAACGAATACTACAACCTGCAGTACAAGTAGGGATCCGACCACAGAAGGGAAGTATGCTGGT  
GGTTTTGGCATGGAAAGAAAATAGATCTAACAAGCCATATACGGTGGTGGGCTCCAAAAAATCACGCCAGCCTGAGTCAGTCTCCAGCCATGAAGATGTGAGCAGAGAAGTACGAGC

TGTGGAGAGCTCTGTTCAAGCAACTGAGCCATATAAGCTTCCTCTGCTTGGCCTCCCACAAAAAGAGAAGTCTCAAGTCAGAGGAACATCTGCCTGCAGCATATTATCCAGATCTGCAGC  
CTTCAAGAATTTTCATGGAAAAAGCTTCACAAATTCAGGAAAGTACTACCAGTAAAGAACCAGATCAGGGGAAGTCAATTCACATTTTTTTGCTAGCAGTGAACCTTGATAGCTCTGGTAT  
TTCAATGGGATTTGGTGAACCTGCAATACAGAGATCCCAGTACTCTCTGTCTCCTCCTCACAGCTCCACTTAGGACATCTTGAATCCTGTAGATCCAATTCAGATCCTGTTTTTTGGA  
CCAGTCTTGTTCACCAACCGGGCAGTCTCTCACAACAGCAGTTTCATCCTTACCAACAAACCCTGCCCTTAGATATCTTTTGTGCTCTTAATACCTGTTTTCTTCTTATAGTTCTGGTTG  
AAGCATATAAGAGCAAGGGGGGATTGGGTTATCATATATTGTGAGAAGATCCAACCCTATTAGGTTAAGTGTCTTTTGTATTTTGTAAATTTGTAATTTGTCCAGAGAATATCTTGAATCATG  
AATCAGAAGTGTTTTAGAACATTAATTTGTACCAGCTCTGAAAATGTATCTTGTATTTATAACAATAAGGAAATGCAGAATCTTGGTGGTTTAATTTG

>comp168857\_c0\_seq53

TGAAGATGTAAACAAATGAGTTCCGTTTCATCAATAACAGCTGCCAGTGAAAATTTGCCCTTGAGAAGCTCAAACCTTTTAACCCCGTAGCAAGAAGTTGATAGAGCAGCAGGATGATTAT  
GTTCTTTGTAAATGGAACCTCCAATTCATCATTCAATCTCTTACCAACATTTGATAATCTAAAACCTTCAACAAATTTTGTACAGGAATAAACTGGTATGGTCTGTCAAAAAGAAGACCAG  
TATTGCTGTTGGTCTTTCTTAGATATAAATTCTTGCAAAAAGTCAGCCACATTTTTCTCTCAGGACAACTAAATCCCATGGCTGCAAGAAGTCTAACGCTGCAACACGTGGACCTTGAT  
AAACAATGTGTCCCTCAGATATGAGTATGATATCATCAAATAACTCAAAGTTTCTGGAGCTGGTTGCAACAAAGAGATAATTGTGGTTCCATCAAGAGCTTGGGTTGAGTGCCTAAGATA  
TTAATTATTGATAAGTAGTTGAGCTGTCAAGCCCAGTTGATATCTCATCCATTAATAACACTCTAGCTGGACCAACTAGTAATCACCTGTGGTAAGGCGCTTCTTCTGCCACCAGATAT  
CCCTTTGATCATCTCGTCTCCTACTAGTGTGTCGGCACAATATCCAGGCCCTTATTATATACTCTACCACAAGGCTGGTCTGCTTTCCCTCCAAAGCTAATGCCTTCATAATATATCAAGAT  
CCTCGTCAGGCTTAATCCCTGCATTCTTCTCCCTTCTAGAAAAGCTCCATGAGCATATCATATTTATTTCCACACCCTGACATCGACCTGAAAATTTCTAAAGTTTCTCTGACCGTCATTTAG  
AAGCATGCAGATCAACTTGACTAACATAAGCCGATGTTCTTTGAGGAACAACTCACTTAGCCTGTGTCCATTGTAAGTAATGTTCCAGACATCTGTAAATCAGTATTGAGCCGTCCAGC  
AAGAGCTAAAAGTAAAGTTGTCTTTCCAGAGCTTGGAGGACCCAAAAGCAGTGTCAATCTGTAGCAATGACAAAAACATAATCTAGCAGCTAGTACCTTTAATAGTCGATACATTA  
GTGAAATTTCTCTTACCTAGAAGGCTGCACTATCCCGCTAATATTATCCAGAATGGACAATTTCTTCTCCTACCTGGAAAAATCTTTAACTGCCTCAAGAAGGCTCTGTATGTTGTA  
AATAAAATTAGGAATCGTAGGTAAAGCTCTGCTTCCCGTATAAACATATGCGTCAACTTTCAGCTCCTGGAATCGAACCTCAATTTAGGAAATCAAGGTTTACTGCGTCGAATCTCTGGC  
GAATTTCTTGGAAAAACCGCTCGGGGTCGCCGAAGTCTCCAAGGAGGCGGTGATTAGGGCAGTGCGTTCACGAAATGTCAAATTCGCCACGTCAACTTCCGAAAAATCGCCAGCGTC  
GCGCCGTATAATCCCGCGGCGGATACGAGCAAAAGTTGGGAGACGCTCTAGTGCCGCCCCACCTGAGCGCTCCTCCTCCTCTCTGCGCATTCTCGGTAGGAGCTCGAACGGGAGAAAG  
CCGCCCTCGTGGAGCTCCACATTTCTGAGTTAACCTTGAGCTAACCTAATTTCTGCTCTAATCTGGATGAAGGCAGTGAGATAAAGAGCGGATGGGTTTTAAATGCGCAGGCATCGGAG  
AGAGGAGGACGACGATGGATGGCCAGTAAGCATTCAATCCAACAGCAAAGCAAATGTGGGGTCTTTCAGACGAGCAGCATTAACTCTCTCTGTCTCTCTCTCTTTG

>comp169360\_c0\_seq3

TTTTTGTAAATCAAGTAAATAAGAACATGTAAATTAAGAGGCTTTGTGTTTACAAGAGACGAGACTGAATTACATTGATGAAATACAAATCTCTTCGATTCTCTGCATGATAGTAATTAAGCG  
ATCTAATTTGTAATTTACAGTTTTGGTAGCATTGATAATTAGGAATTAAGATGAAGAAGATAAACTAATTAAGTACAATTAATTAATAATCACGAGCTAAGCCTCATCGATCATTGCATACT  
AATTAATTTGCAGAAGTAGTAGCTAGGGAACAAAGAATCTCATTCCCTTCGATCCTCTTTGCTCTTCTAACGATAAATTAATATTTTTCTTCTCATTTCCTCTGAACCTCTATGAGCTAAGGAA  
GAAAAATCTAAGGATAATGCTTCTCAGATCTTCTTCATATAGCTAGATTAAACTTGCGGCCATCCGCTCCATTATTGTATCATGACGCCTTAATTAATCACTTAAGGAAAAGCGGATGGAA  
GCGGGTTAATCCTGCTGCAAGTACGTACTCCATCGATCTTCTTATCTATGATGATCAATCCTGGAACAACCTCAGAAGCGTCACTTAGCGGCAAATCCACTAAATCCTGATGATCATCGCCT  
CCATTCCCGACGCTTAAATCGTCAAAAAGCCAGTTCTCGATGAAAGAGAGCGGCGGTGCAACGGCCGAGCTCTTTTGTCTCCTCCTGCAACACTGATCTCCCAACGACTCAATCTTC  
ACCGATCGAAAACCTAATTCATGAGTTGATCCCATCATTACTTTCCCAATTGGCGCGGTGTTGTCGACTCCATGGTAGTCGTCTCGGAGCACACATTGTCTATCGAACCAAGCTAGCCCT  
ACTTCTTGATTTCCGGGTGCTTTCATCCAATTCCTCAAGTAACCTAGAGATGTTCTCGGTGCTCGAAGCATAGGTGCAGGTGTTGGTTCGGACCGACGAACGTCGGCGGGGATGGCGATT

GAGATTCATTGTGTCGAGGGATAAGGCCTCGGAGAGAGCTTGTTTCGCCATGTGGATGTCCGTTTGAAGCCTCCTTTCCATTGCCCTTTGGAGACGGATTGATGATGGTTGTTTCGAGATC  
TGTTGATTGTTTCGACCTCCATCCTCGCCGGAGAAGCTGAAGCTTCTTCAGCTTCTTCTTTAGATGAGTGTTCGAATAGTTCTTGATATCATTATCTGTTCTCTCTGGAAGGTAAGAGGCTATG  
GCTGCCCATCTGTTTCCAAGGAGTGCTTGAAGATGAATTATGAGCTTCTCCTCCTGATCTGTGAAGTTACCACGCTTGATTCCCTGGCCTGAGATAGTTGGTCCATCTCAGCCTGCAGCTCTT  
GCTGCATCTCATCAAACAGTATTTGTAGGAACAGCCCTCCAATTTCCAGGGCCATGCTCTTGTATGTAAGAGACAAGGATGATATCTTCTTCAGGTGTCCATGGACCTTTCTTAACCCCTT  
CCTTTTCGCAACAAGGAGGCCTTCCCATAGCACCTTTTTTCTCTATTGCGCTGATTAAGCGGAGGAGAAATAATATGTAGATATAGATCAAGAAAGCTAAGATTTCTCTTTTCCTTGTTG  
TATTTCTTCTTCTTCTTTGTTGAGCAGAGACAAAAGGCCTTAATAAAAGGGGTTGTTTCTGTGTTATAAATACACAAGTGACCCTTGGGAAAGGGTCTCTCGTTAGCCTACGCTGACCTT  
AAAGAAGGATAGCCATGGGAGAGTAGAGCTGAGAAAACAGTGAGAGATGGAAAAGTCAGAAGAAGACAGCAAGGATCATTACTCTTAGGTCTCCCTATAAAGTCAGCTTGCTCGGAT  
GAAGTGAATGCATGGCCTCTCGCTCTCTCTCATATTGAATGTAGTTGCATAGGGAAAAAA

>comp170838\_c1\_seq1

TTTTAGAAAACAACAAAAAATTATATGAAATGAAACATGAATGCTGACTGCAACATTTGAGCTAAGGATTACTTTTAAAATAGTAAGCCTCTGCCTTCTTCCAATCGTAAGATATAAGAT  
ACACAAGACAGTTCATACTATCTTCAACATAGCAAAAATACCACAGAACGAATCACACGATAAAGTTAAGACTCTTAACGAATACCAAGTAGTAAACTCTTCTCATTATATTCTTATTCTT  
CCACAAAAATCATTAGATAGCAGACTGATCTACACCATATTACATAACGCCAACATTAAGAGACACGAAGAACTAATTCAAAGCTTCTTATTCCATAAAGGACATCAGGTTTCTCCTTT  
TGCTCGCAGTCTCTCATTAGGATCTTAAACGCCCATGTACCTTCCAAGCATCATGACCGTCGCCGTGCGGATTCGTCCCAGGCGAGAAATAGAAGGTGGAGCCATCAATCACCTCAGCCCA  
TCAACGCCAATAACTCTGTAATCCCCATCAACAACCTTCCCACCTGGCACCCCATGGTAATGCCAGATAGTCATCACCGTATCCTTGCAAAACTGCTCCAGATCCTTGGAGTCGTTTT  
GGTGCCTCGGCAGCAAGTTCACCGGAAAGTTCACCGTCATGTTGAGCAGAGCCTCTATGGAGATGAAGGGGTATCTGAACTTGCAGGAAAGGGTTTGGTTTGAATGACTTCTCGATGGTCT  
TGATGCCTTGGACGCATCGGCGGAGATCGAGCGGGTTGCTGAAATAGTTGAAGGTGACGGATGGGTTGTCGTGCGGGTTTAGGGTTTTGAGCTCCAGGTGGCCGGTTCGAGAGCGGTCCG  
ATGACTTTTTTCGAGGATGAAGCCCGCGAAAGCCCGATTTCGTGAGATTGTTTCATGGCTTTTACGGCGCGTTCGATGGCTCAGGGGTTCTTTGCTTTGGCGGGACGGTGGAGAGCTGC  
CCTGTCTGAGGCGAAAATATGCCGAAATCCCTCGCCGCCGGCGCCTCCGCACCACCACCACCAGTCGAGCCAGCGAAAAAATGCCACTAGCGGCCTCAATATAACTCCCAAACCTT  
CGTAATCCCCACCACCTGTATCAACGAAGTCTCCACCGGCGTCGGCGACGGCACAAATATAGCATTTCATTGGATTATCCGACATCCCCTTCCCCACCATCGGCTGATCCACCACCACCTTTA  
TCCCTTTCTTCTCCAAGTCCGCTCTCGGCCCCACGCCGCTTAGCATTAGCAACTGCGGGCTCCCCAACGCGCCCGCCAGCGTAATCTCACCCCTCTCTTACATACGCTCTCTTCCA  
CCTTCCCGTCTCATCCTTAAACAGCACTCCGTTCCGCCCGGTTTTCTCCTCCCATCAAATCCATAATATCTTGGACGCCGTGCCCCGTAGAAGAACCCTCAGGCGTGATGGATTTCGCGT  
ACGCCAGCAGGTCCGCCCGCGTGTGTCGGTGTCCGTTACGGTTCGAAGATGGTCCCACCGACCTTGGTCCCATAGATGTGATCATAGGTGAATCCGTTGTACGGCGTCACACCGGCCGCCA  
GCAACCCGTCCCTCACCGCGATTGCCACTGCAGCATCGGCGGGTGA AAAAGCAACGAGCCGCTCGACCCAGCTATAAGACTCATTAAACAAGGCGCCATCACTCCATCCGGCCCGACGA  
ACATAGTCCGGGTGGCCCGAGTATAGAACCCGGCGTTCAGGCAACTGCCGCCACCGAGAACGCGCGCTCGGGCGTTTATAACGCCGTCTCCGATAACGAAGCGCTGCGACGCGGAGTT  
CGGTGAAAGATCGGCGAGAGTGTCTGCGAAGGAAGCGAGGTTAGTTATGTTGCTGTTGCCGTACGGTACGGTACGGCGCGTTCGAGGAGGAGGACGCTGAACTTTTGGGAGAGAGTGGCT  
GCGAGGGGGCAGCCCGCGGTGCCGCCCGCGATGATTATGTAGTCGTAGTAGGAGGCGGCTGGGGCTTCAAGTTGCTTTCAGGAACGTGATTTTCGGAGCAAATTCAGAGTGGCAGAA  
ACCAACAAAGCAGAAAAATAGCAGAAGACAACCTTTTTGTAATCTTCTGACTTCCATCCTTTACCCAACAGAGAGAGAGAGAGGGGATGCAGTACTGCAGTAG

>comp171899\_c0\_seq2

GACTTTGCATATTTTCATTAAGATAAATAATCGAGTGGGCATAACTAATCTTTTCTATCAGTAAGAAATTTGTGCCAGACAATAAATTAATAACAAGACATATATAAATAAGCCTCAAATTTAA  
TATAGCATACTTCAGGAAACATTCCTCCCAACACATCTTACTGCATGCCTTTATGATTAATTTCTCAAGATGACAGCAGCTTGAGGTTGGTACAACAAGAGGCACTAAATCATAGAAAAAT  
TAAAAAAAAGAGAATTTTAATCTAATATTTACCTTATAGGCGATTTACATACAAGCATATAGTATATTTATGGTTCTGGCCATATGTAGGAATTTTGTGATGATCAGCAGCTGCGGCCCTTC

TTGCACACCAGAGCACCGGCAGAACTGGTTATGGATCCAACCAGTGAGGAAGATCTAGCTCCTAGACTCGAAGCCCTGGCATAACTGGACGAGGCTCCGGCGCCTGAGGGGGTGAAGA  
AGGCTCCGTCAACATCAAATCACCTCTGATCTCCAGTTCCAGCTCTTCCACTGGCTTGTGCGGTGCGTCTCGCGCTTCGTCACCTGCATCACTACCAATTCAATCAAATTAACACCTT  
AACCAAGCAGCTAATCTGTACAGATTAACAGCTAATCTGTGCAGAAATTTATAAAAAGAAATGCGTTAAATGTGTGAAAAGTGATTTCTCCAACCTGTTTTTGTGTCAGGGAAAGTGTCGGTG  
TCTTACAGATATAGGAACCAAAAAAAAAAATCAAAAATTTATATACAAAAGATGATAAAGGAGAATCGAACCGTGCCACAACAGTACCAAAGTTTTGGAAGCCACATAACGCAAATAAT  
GAAACAACCTCAACAACCTTCAATAATTTGCAGTTGAAAGCTTTGGATTCAATGGCCATCGATCTCCAACCGACAAACATATCACTCCCTCTTCTTACACCAGTAAATATGCAATTAAG  
AGACTCTCACCTCTTTGCTGAAACGGTTCGTCGGCGCCAGGAATCTATTCCTTGCTGTTAATCGTCGGCGCTGCGCTTCTCCGATTGCGTACATTTCCAGTGCGGTGTAGTCGTTGTT  
ACTACATGAAAATATCCAAGCCTGCACC

>comp171899\_c0\_seq4

TTAATCGTCGGCGCTGCGCTTCTCCGATTGCGTACATTTCCAGTGCGGTAGTCGTTTCACTACATGAAAATATCCAAGCCTGCACCTGCTTCATCACATCAACTCTTCCAGTTATAA  
TAACTATCATAATCCTCCACCAAATAAGCTGAAGCAAAAGTACTAAGTACAGCTATAAAGTCTTCAGTTTTTAATTGCATTGTATGAAATATCTCAATTA AACAGGGGAGATACAA

>comp174020\_c0\_seq7

GCCGCCGCCGCCGCCGCCACGGCTAGTTGCGGTGGTGGAGAGAGGGCCTAACGACCTCGAGTGCAGCGCGCTCCAAGATCTAGAAAGGAATTCCATTGGGTCTTTTGCCATCT  
CTTGCTGCTTGTGCGGCACTGGCGGCTGAATCTGACGGCCAGTGCTCGCTGGAGCTGTCCATTGCCGGCGGTGGAGAAAGGATGTTGGATGGGAGAGTTCGGGCTCGCTTAGCTTT  
ATAGGGGAAGAATTGGAGAGACAACTGGCTTAGAATGTCAGAGAGAGAGAGAGAGAGTTAGAGAGTAAGTGGAGAATAGGTGTTTGCTGTGAAAGAGGGAATATGGGCTGATTTGGA  
GAGTGTGAGGATAGCGGGCTGAAGTAGTGGTGGGCTATTAGCTTTGTGAGTGGAGTTTTAATTGTTGGTTGGAGGCAATGTTTAAAATTGCGTATTTGGGTATTGAGGCGTTTTTCATT  
CG

>comp176711\_c0\_seq1

ATGAACTCCTTACAAGACTTCCCAATAAGAACCATGCCTTACAACCTCCCTTCTACTTCACTCTCCCTCCTCCTCCTCCTCCTCCTCCTCCTCCTCCTCCTCGTTGTCACCATGCTCTCTAACTCACCGTCGT  
CCCTAACAAAGAAATCAACTTTTTTCAGACCTAAAGCTCTCAGTCTCCGACCTCCCATGCTCTCTTGCCACTACATTCAAAAAGGCCTCTTTTCCCGCCACCTCCCATCCCATCCTCCCCC  
TCTTCTCTCCTCGCCACCTCCCTTCCCGCGCCCTCTCCTGCTTCCCACTCGCCGCCGCCCTCTTCACTGACGCCGAAGGCCGCGTCTTCATGTCCTTACGGACGCCGGCTCCGA  
GTTCTCCCTTGCGAGCGCACCTTCCCTGAACCTTCCCTCCTCCTCCACCTTCTTCCGACGTCCCATCCAAGTCAAATCCTTCTCCCTCTCGACTGTACCGTCAGCCACGACGGCCAT  
TTCCTTCCTCTCCTCCTTCCAACCTCACCGAAGCTCGGCGACGGAGCCGTCTTCTCGCCTGCACTATCAACCACGCCGTCGTTCGACGGC

>comp184226\_c0\_seq1

AAAAAAAAAAAGGAAAATAAGATAGGATTTTTTAATTTTAATTTCTAACTAGTAATTATATAGCACATAAAAAGGCGATTTCAATTGACGCATATATTTATGTCTCTAGCGATTAGCTGAGACCT  
TTAAATTTACATAAACATGTAGAAATTCAGGTAATGATTAGCAGCTCCGCCCCTTCTTGCAGATCAGAGCACCGGCCGAACCTGGTTATGACCCAACAAGAGAGGAAGATCTAGCTCCCA  
AATCGACGCCCTGGCAGCTCGACGAGGCTCCCGCGCCGACGTGGTGAAGAAGGCGCCATTCAACATTAATCACCTTCTGACCTCCAGTTCCAGTTCTTCCACTGGCTTGTGGTG  
CGTCTCTCGCTTCGTCACCTCCTTCTGCTGAAACGGTGTGTCAGGGGCGAGGAACCTATTTCCCTGGCTGTTAATCGTCGGCGCCGCGCTTCTCCGATCGCGTACATTTCCAGTGCGTATA  
GTCATTGTT

>comp199478\_c0\_seq1

GGCTTTGTGGTTGGTTTTTGGCATCAAGAGGGAAAGAACGTAAGCCATCAGACTTTGGAATTGAGCTTTGGCATCTAGAGTGGATGCGAAGTTGGGAGACGAGCATGTGAGAGTCGAGCT  
TTGGAAGCCGGTAGTTGGATTCGTAGATCTAGCAATGTGACCTGATCCCTAGCCAAACATGGGAGAAAGGAAAATGTTGGG

>comp226042\_c0\_seq1

TTAACTCGCTACCTTCATTACCTAGCTCGGCATTCCCTCCTGTCATGCATAGAACAGATATTCAACAAACGTTGATAATTAACAAAAACCATAATTAATAGCTAATTATTCCTACAAAAACCA  
CCTTGGATTCAATAAAGCTGATACGGCATCCTATTACCAGACATCCGATCCAAGCTTACTCAAGCTCAGGGTCATTACTTCCTTGCCTCCACTGTCACTTTAA

>comp231923\_c0\_seq1

GAAGACTACGTAAAAATATTCAGTAGTAATAATGCAGCTTTATAACAACGCGGTATTGAGTTGTGCTTTCCTATACTAAGCTCGAAGAACCCTGCAGCCACTGGCTTGAGCTCATAACCTCT  
AAAAGATGGCGTTCGTTCTATTAATTCTTCCAAAGTCTTGGTGCCTTTTTTCTTATGCAATCTTCTCCTCGCAATGTATCCTTTGATCCATGGCATTACGCTCTCACTGACCTTGATCATGATG  
AAGAAGATGAATCGGTAGGAGATGATCATGCCGAAGAGCACGGCGAGGTCCCACCATTTTGATCTTTGCACGTCGATCTGAAAGATTTGTTCAAGTATGTATTCTCCTGGGATCTTCAAGT  
CGTATGGGCTTTGGCTGTGAAAAGAAGTCCTTTGAAGTCGTTTTGAAAC

>comp35910\_c0\_seq1

AAGAAGACCCCTCTTCCCCACAGCCCTCGCCGCCTCTTCTTCATCACCTGCATTCCCCGTCGCACCTGCTTCCCTTCCTCACCTTCCATCAATTCTTCAACCTTCGCCACTTCCTCC  
CTCCTCACACCCATTCTCCCTTCCCTTACCCTCAGCGCCACCTTCGCGCCTTCTCAAGCAAAACCGCATTCATTTTCTGCTCTGCGTAAAGCGGCCACGCAACAATCGGCACACCAT  
TCACCAAGCTCTCCAGCACGGAGTTCCACCCGCAATGAGACACGAACCCACCAGTCGCATTATGGCCAACACCTGACGCTGTGGCGCCATGACATCACCGTCATCCCCCTCTCCTTCG  
TGTTCTCCACGAATCCTTCAGGAAGAACTCCATAGGGTCATCTCTGCTCTGATTGCGGTTAAAAAACTGCCACTCAGCCCGGTGTGCGACGCCCGCCGACCACCCATAGGAATCTCT  
GTTGCTCATCTCTAATCCGAGCGCAAGTTCTCGCGTCTGCTCCCATGACATAGCACCGCCGCTGCC

>comp43805\_c0\_seq1

TTACTAATATGTATCGCCAACCAATCAAGTTATGACAAGTGTACCTAGCAGGCTTAGACACGACTATATATACCTACAGCTGCTATGTAATAAGACAGGAAAGATAATAAACTTTCTGAATA  
TTTTCTTGATCCCGTTACTATATCTTCTCCTCTAGCATTTTAAGTTTCTACAAAATCAGCAACATGTCAGTTGACTCATATAGCTCAGAGACAACCGAATAAATTAGAAATCAAAGATG  
CCGGCTTAAGCACATAGGAAAGGAGAGCATTGTCTGATGATTGATCTGTATCTGTTGCAATTTGTCTATGAATTGATCATAATTTAGCTTATCAAAATTTTTGTTTGGGCAACA  
AATTACTCAATATAACTCTGCGGTCTTTGATAAACTGACCCTAAATAGACTCTTGATTATCCACGTAGATCGCGGAATCTTTTTTAAGTTATTACTATAGGTTAAAGATTCTAAACTATAA  
TTATTTTTCATGATGCGTGGGCTTTTTGCTTGTGTTGAAGGGTAGTGGGTGGATGATACAAGCAGAAAGTTCCTGGAGAAATTCCTCGAAGGATTTATGCTCTCAATTCAGCAGCTAGATCT  
GAAATCTACCCTCCACTGAAAAGAAGGAAATCGGACCTCTCTCTCTCACTCTCTCT

>comp45349\_c0\_seq1

GAAGGAGTTATGCCATTCAGCAAGGAGCCAAGATTTAGCATGACTTGCACACCCTTTGCCTTTGAGGAAGCAACAAATATGGCATGGCCAGGGAGTTTTATAAGTCGAAATTTCC  
AAACCACCACCAGAACTGCAGAAGCTAGACCTGAACCTCAAAGTGTGACCTCTTACTAAAAGGTACAGACCTTTCCCATCTTGTATCTCACCATCTTTTTCAAGTCCAGATTTGTGCTT  
GTTTTAGCCATGTTAACTTACTCCAGAACACCAAGAACTCCATCAGTACCAGGACGAAACCCATAATAAGTTAAGGTTGTGTATGTGCAGATTTTCTACAATAAGTGTATTTCTGAG  
TTGCAGATGTTATTTCAAATTTTACCTAAATAAGGTAACACAGGTTTTTCATTAGTGGTTTTGTTTCAGATCAACAATCTGTAATTAGTATGCCGAATTTATGGACCCTTTCATGGAGCAA  
ATTCTCCTTGAAATGGTGAAGGTGTTAACAG

>comp58595\_c0\_seq2

TCCCTTTCTTTATCTAAATAATATTGACAACTTCCTTATCTTTCTATTGATTAGAGAGTTTCCTAGGTTTTCAATTTGGTATTTTCTGATAGCTACTGGGGAAATGATTCCAATACACAGTAAA  
GTTTCAAGAACTACTGTATGTACCCCTTCTTGAGATCATTTTTCTTAGTTTTAAATCTTTGGGGTCTGTAGAAGCTAGCAAGTGGATAAGGAAATGGCGAAGAAGTTTTCTGAAGTGTTT  
GAGGATGAAATCTAGACTCAAAGAAGCCAGCAGGTTGCATTGGTGGGATTTTTAGCTGTTTGATTGCCAACAGCTCCTTGGTGGAAAGGCAACTCAGTGAACAAGGCAATAGAAGGGA

TCCTTCAGGTAATTCTTTGCTTTCCTCCTCCCATGATGATTTCTACAAGTTTCTTTGACTCTTTTAAAGTCGAGCTTCTCCTCTACTTCGTATTGTCGTA AAAATTTAGATCCTCATT TTTATGTT  
TTTCTAAGGTTAGGTCTAGGGGCTTTAACAGTTCTGTTTTCTAAATAGGAAAGGGCAGAAAGTACACCGCAGATAAATAACATTGT

>comp74633\_c0\_seq1

GGTCACAGCGCCAACAATCATCAATTGGGTTGCCGGTGCAGGAGAGATAGCCTAGCTGTGACGAGAGGCGTTGATGCTCCAGTGA ACTTCCCTCAACGACCAGCTCGGGGTTTGGG  
ACTGCCGCTGTAGAAGACAATGGAGGAGTGCTAGAGGTTGCAATGGCAGAAATGAGGAAGAAGGTGGGCGGGAGGAGGAAGAATATTATTTGGCTGCCATTTATTGAATCTCTGTATCA  
TTCTCCACTTTAAACATATACACAGAGAGGGAGAAAGATACAGAGATTCAATAAATGGCAGCCAAAATAATATTCTTCCTCCTCCCGCCACCTTCTTCCTCATTCTGCCATTGCAACCTC  
TAGCACTCCTCCATTGTCTTCTACAGCGGCAGTCCCAAACCCCGAGCTGGTCGTTGAGGAAGTTCACTGGAGCATCAACGCCTCTCGTCGACAGCTAGGCTATCTCTCCTGCAGCACCGG  
CAACCCAATTGATGATTGTTGGCGCTGTGACC

>comp97270\_c0\_seq1

CACAATTAATACATAAAAATAGGTTCTTATCCTAGTACAATTTTTTTCAAGGTTTCGAGCCAAAACCTCTCCTTTCATAGGTA AAAAGAAGGTAAGAGAGAAGATATGTA ACTTCCCTAGCAA  
AAGAACTTCTTTTCAATCTTTCATCACTCAGAAATTAATGCACAAGCCGATCCAAAAAAAAAAAAAAAAATCATAGATGACTAATTGTAACCAATATTAAGAAGCATGCAGCTTAAAGTTCAT  
GGAGTTGAGTCTTTGTTGTGATCCAAGGAGAAAGGCCTCGCCAGAAAAGTCGGCTTCTCGTCTCCGGCCATGATGACTACGATCTTTGGCTCCATGTCAAGTACGCCGGCGTTCACCGGC  
AGCTTCTCCGCAGTCTCCGACGGCGAAGTCGAGCTGGTGTGCGAAGGATTGCGTTTGGTGCAGGTAAGAATGATCAGAGCTAAGGTAATGAGGAAAACTATAACACCTATTCCTCCCAA  
GAGATATGGTACCGGTGACCGGAGTCCTGTAGAGCTTTCACCTTCTCCAGGCCTCATTTCCCTCTCTTTTCTGCTCTGCTACGGTTTAAACAAAAGGAAATTAAGGAGAAGGGGAGT  
TCTGGACTAGTTATAGAGAGAAGAAGGGAAGGTATGATCAGCCCGCGGAGAACTCCAATCCTAATTTCCAAGATATTACACAGAATTTCAAGCTTCTTAACAAATTTTGAGAAAATAAT  
TC

**Data S2** Sequences of the transcripts predicted to be miRNA precursors in Figure S2.

>comp44555\_c0\_seq1

CAGTTC AAGAAAGCTGTGGAAGACAACAAGGAAGACCATCTCAACTTCTACTCTGTGTGAGAGAGAAAAGAAAGATAGAGAGAGGTTTTGAAGGGAGAAGAGAAGAAGATGTTTTATT  
ATAGAAAAAAGAAGATAAAAAGGAAGAAGAGCTGCGGAGTTGGGTGAATACTGTACCCAATCCCGAGAAGAATATAGGCCTGGAACCACGAGCTCTTCTCCTTTTTATCTTCTTTTT  
TTTCTATAAATAAAACATCTTCTTCTTCTTCTCCCTTCAAAACCTCTCTCTATCTTCTTTCTCTCTCACACAGAGTAGAAGTTGAGATGGTCTTCTTCTTGTGTCTCCACAGCTTCTTGAAC  
TG

>comp46993\_c0\_seq1

ACGGGGGGCAGTATAATAAACTCAGAGCCTCCTTCTGTTCTGTTTTTCAGAAAACCAGAAGGAAAACCCCTAGTCGAGGAGAAGCATGGAGAAGAAAAATCTCACGTTGGAAGTATCAT  
TTCATCTTCTTGCTATTCTCCTGGTCTTGTCTATCTTCATCGATTTTTTCATCAAGCGAGTTTGATAGAATTTGACAGAAGAGAGTGAGCACACAG

>comp133774\_c0\_seq3

GAGAAGAGGTAAGATAAAAGTAGATCAGAATAGTAAAGGGTTGTGTGATAACTTCTTCTTGATGGGGGTAAGGAATGGTAAATTTATCGTTTTGTTCTTGTTTAAGAGGGCAAAGGAGAG  
GTCGGTGAAGGTAGCAAAGGCTGTGCCTGGCTCCCTGTATGCCACACATATGGTTCCTTACTTATTAGATTGGCTATTCTGGGTGGCGTGCCTGGAGTCAAGCAGGATTCTCTTTCCCTCTC  
TCTCTCCCTCTGTTTGTCTTCTTCTTCTGTTTGTGTGTTGATCATGGTATAGGCCAAAACAAGTAGATAAGATCAGTTAACAGCTTTCTATTCTGTGTTTCTGACTAATATTACTTTTTATTT  
TCAAAATAATGGCTGATGAAAGATTTCACTTTTTGAGCAATATTTGATTATGTCTCAACTAAAAGCAACTAACTTAATTTTTTTGTCATACGGTTATGTACAGGTTAATTTATTTCAATTCAT  
AGCTGTTTCTGTAATGGATAGTGAAGAGTTTCGATCAGTATATGGTTTGACGAAGAAAAGTAACGAGGTAAGCCATAGTTTGTGTTTGTCTTCTGTATGCCACACGCACAGATCAATCTC  
TTAAACAATATTTTGTACTGTAAGTGGCGTACGAGGAGCCAAGCATATCCTTACTCTCCCTTTCTCTCTACTCTTTTCCCTTTTTCTTTATCTTCTTTTCCCTGTATGACAAAGTATACGGGTT  
AATCAACTTATTGTAATCGCTGTTTGGGTATATTTCTGGTTTTTCATGGTTTCATTTGCATATATTTCTGGTCTTTTTAGTTGGTTTATATATATTTTATGCTTTATAAGCATGATTCCATGTATTC  
TCTTCTTTGTAGAGAGCTCTGAAGACCTTGGCTTCAACATATTATGGCTATATCTTTACCAAGATAAGATTTATAGAAGTTGTAATTTGTAATAAATAAATTCCTTCTATTATTGCTCCCTTG  
CATGCAGCTGAAGGAAATCATTTATTGGCAGCCCTACTTTCCAGATCTTATTCTTAAAAATATTGTAATAATATGAAGAACAGATACATTTGTTTCGACATTATACTTACCGGATCTTTCCATCT  
CCATTTCAAATCAATCTTTTAGTGACTTCTAAACAACATGAAATGAAATATAATTTTGAATGAAATGAACAAAGTTCTCTAGGATTTGCAACCTTCAACATCTATCTTCTAGCCTA  
GCTACGACCTACGTAATCATGCATCTATTCCATGAAATGATGTGGAGATGAAAGCTAAGGTTTGAAAAATCTGAGCCACTCCTTTTTGAAAGATTCTCCATAATTGGTAGTGCC  
AGTTTCATATAAACTGCATATACAGTTTGGATACTTTATGCATGTCTGTACATATTTCTTCTTCCCTCATCGATCTCTTTAAATGTTTTGTCA

>comp149400\_c0\_seq2

AAAACACGATTTACCATTACAGCTCTCAACCCCGTCCCTGTGATCTCTGCTACGGTTGCAGCTGCCCTTCTATAAATGTATCACTTCATCAATACTCTCTTCCCTCCAAGAAAGTCACACCT  
TTTACCTTTAGTTGGCTAACCATCTCTCCTCCACATTCAAGACCCCTCTTTAGCCTCTTCTCTCACTTCCCTTCTCCTTACAAAATTTATTTCAAAGTCTTTTTGCCTGCCTCTTTACCAA  
TTTGAAGTCCCTTTCTTCAACACAGCCATCTCCGTTGTTTACAAATTCATTGCCATACCTCTTCTATATATGTCTTTACAGCCTAGCTATTCTTCTGTGTTGTCTTCTCATAAGCTGGG  
TCATGTGAGAGTGAAGGTTGTGGGTGCATAGTGGCCGGTGTGTTGCTCAAGACCGCGCAACGTTTCCATATTACACCGCATCGCTGTACTGGCCTATCAATTAGAGGAGCTTCTTCTTGTG  
AGCAGAAGAGAAGAAAGAGAAGATCGAGTACTGATCAATGGATAGGCTGTCACGCCGATGCGCTGCTTATGGCCTGGCTGCGTGGTCTTGCAGCAAGATAACACCGCTTATCCGCTCTTCT  
CTGTGCTTTACACGCCATAGCTGTCTTCTCTGCTATCAAACTTTCTTCTTTTCTTTTTTTTAAATATCCTATCATGGCAAAAAAATAGCATCTATTCTTCTCCTTCCCTTACCACAGG  
CATTACATGGTTTAACTCGCAAGTGTGTTTTATTTATCTTCTTAGCTATTTCTTTCTTTCTGTTATATTTTCATATTACATGGTTTGTCTTGGCCAATATTCTTCTGATCATTCATAGATGCAGCGC



ATTTCTGTAAGAGAAAGGACAAAGACTCGACCTGACGTGGTTTTGGAGCAGAAACCTAGCATCTCGCAGGATGGAATTGACGAAGGCAATCGCCGACAAGGAGGTTAGGATTTGGAAGA  
CACCGAGGCGGCCACGGCGCGTGCAGAAAGGGAAGGCCCGATCGCCCGGAATTTGGCCCGAAGGGGCGGGCAGGTCGATGCTGGCTAGCTGCCGACCCATCGGGTCACATCGGAG  
GCGACAACCAGGCCGGTGAGGGACGGCGTGTGCGCCACGCCGAACGGTCCCCTTACGCCCTTCTCTTTCCCTCAGTTGGCATGTGGGGGCAAATTTCTTTGTATGGTTCCGGGTACGAGATG  
AGATCGGGTTGGACAAATGTGCGCGTTTTGTGCTTCGCCGAGGAACTCATTATCCTTACGTTATTTATTTGAGACAAAAGAAAACGATGTGGCTTCCGCATTCAATCCCATCCCTTTGTA  
ATGTTGGTAGTATTTATTAGTTTGTGATATAGCCGGTGCATAGGTTGAAATCTGCTGCACTGGGAAAAGTCCAGCTCATTATGTGAGTTTTATCTACAGGGAAATGATAACGGTGCTGCTT  
ATATCTATATATATATATATATATTAATCTCTATATGTTTACCTTCCAGTTTTATATGGCTTGTTTTCAACATGTGCGAAAAGAAGTCAGAGAGTGGCCTTCATGAGTCCAAATCTCACAGAGGAGC  
AGACTACGCCTCTCAAGTCTCTCAAGTCTACTTAGATACGCAATCAAGGGAGAACAAGTCATCAATCAAAAACAGAATTTTCAGACTTCTTCAGCTCATCGCCAGAAAGATTGTTGAGCT  
GTATCAAGAACAGTGTTA

>comp149400\_c0\_seq4

AAAACACGATTTACCATTACAGCTCTCAACCCCGTCCCTGTGATCTCTGCTACGGTTGCAGCTGCCCTTCTATAAATGTATCACTTCATCAATACTCTCTTCCCTCCAAGAAAGTCACACCT  
TTTACCTTTAGTTGGCTAACCATCTCTCCACATTCAAGACCCCTCTCTTCAGCCTCTTCTCTCACTTCCCTTCTCCTTACAAAATTTATTTCAAAGTCTTTTTGCCTGCCTCTTTCACCAA  
TTTGAAGTCCCCTTTCCTTCAACACAGCCATCTCCGTTGTTTACAAAATTCATTGCCATACCTCTTCTATATATGTCTCTTACAGCCTAGCTATTTCTGTGTTGTCTTCTCATAAGCTGGG  
TCATGTGAGAGTGAAGGTTGTGGGTGCATAGTGGCCGGTGTGTTGCTCAAGACCGCGCAACGTTTCATATTACACCGCATCGCTGTACTGGCCTATCAATTAGAGGAGCTTCTTCTTTC  
AGCAGAAGAGAAGAAAGAGAAGATCGAGTACTGATCAATGGATAGGCTCTGCACGCCGATGCGCTGCTTATGGCCTGGCTGCGTGGTCTTGCGCAAGATAACACCGCTTATCCGCTCTTCT  
CTGTGCTTTACACGCCATAGCTGTCTTCTCTGCTATCAAACTTCTCTTTCGTTTTTTTTTAATATCCTATCATGGCAAAAAAATAGCATCTATTCTTCTCCTTCCCTTACCACAGG  
CATTACATGGTTTAACTCGCAAGTGTTTTATTTATCTCTTAGCTATTTCTTTCTTTCTGTTATATTTTCATATTACATGGTTTGTCTTGGCCAATATTCTTTCGTATCATTCATAGATGCAGCGC  
ATTTCTGTAAGAGAAAGGACAAAGACTCGACCTGACGTGGTTTTGGAGCAGAAACCTAGCATCTCGCAAGTGCAGCGCATCCTCGCCATCTTCTTAAATTTTCATGATCATTTTGTTCCT  
TTAATTTGATTCCCCCCTCTCTCTCTCTAAAGCTGGTTTTTTATGTATCTATTTATATACATATGTGATGTCGAAATAGTTCTTGGGAAAACGCAGGATGGAATTGACGAAGGCAATCGC  
CGACAAGGAGGTTAGGATTTGGAAGACACCGAGGCGGCCACGGCGCGTGCAGAAAGGGAAGGCCCGATCGCCCGGAATTTGGCCCGAAGGGGCGGGCAGGTCGATGCTGGCTAGC  
TGCCGACCCATCGGGTCACATCGGAGGCGACAACCAGGCCGGTGAGGGACGGCGTGTGCGCCACGCCGAACGGTCCCCTTACGCCCTTCTCTTTCCTCAGTTGGCATGTGGGGCAAAT  
TCTTTGTATGGTTCCGGGTACGAGATGAGATCGGGTTGGACAAAATGTGCGCGTTTTGTGCTTCGCCGAGGAACTCATTATCCTTACGTTATTTATTTGAGACAAAAGAAAACGATGTGGCT  
TCCGCATTCAATCCCATCCCTTTGTAATGTTGGTAGTATTTATTAGTTTGTGATATAGCCGGTGCATAGGTTGAAATCTGCTGCACTGGGAAAAGTCCAGCTCATTATGTGAGTTTTATCT  
ACAGGGAAATGATAACGGTGCTGCTTATATCTATATATATATATATATTAATCTCTATATGTTTACCTTCCAGTTTTATATGGCTTGTTTTCAACATGTGCGAAAAGAAGTCAGAGAGTGGCCTTC  
ATGAGTCCAAATCTCACAGAGGAGCAGACTACGCCTCTCAAGTCTCTCAAGTCTACTTAGATACGCAATCAAGGGAGAACAAGTCATCAATCAAAAACAGAATTTTCAGACTTCTTCAG  
CTCATCGCCAGAAAGATTGTTGAGCTGTATCAAGAACAGTGTTA

>comp165001\_c0\_seq8

CGCTGGCATGCATGTCTCCTCTCTATGAAGGATGATGGCAATATTTTGGCTTGGGCTTTTTGCATTGACAACGAGAGAGAGACGCTGGCTGGTTCGGCGGCCATGAACGCGGTCTGTGACCG  
TTTATTTGCTCGCTCCCTCTTGTGCTCATCCACTTCGCCCTGTAAAATGGCTGCCAGGAAATTCGGAGCCGTGGCTCTCTTACCAGGAGATTCTACTGTATGAAAGAAGATCAAAAACA  
ACCTTGCT

>comp165001\_c0\_seq9

CGCTGGCATGCATGTCTCCTCTCTATGAAGGATGATGGCAATATTTTGGCTTGGGCTTTTTGCATTGACAACGAGAGAGAGACGCTGGCTGGTTCGGCGGCCATGAACGCGGTCTGTGACCG

TTTATTTGCTCGCTCCCTCTTGCTGTATCCACTTCGCCCTGTAAAATGGCTGCCAGGAAATTTGGAGCCGTGGCTCTCTTACCAGGAGATTTCTACTGTATGAAAGGTAAGCCTAATAAA  
TTTTATAAAATTTCTTGATATTTATATATCTA

>comp165001\_c0\_seq15

CGCTGGCATGCATGTCTCCTCCTATGAAGGATGATGGCAATATTTGCTTGGGCTTTTTGCATTGACAACGAGAGAGAGACGCTGGCTGGTTCGGCGGCCATGAACGCGGTCGTGACCG  
TTTATTTGCTCGCTCCCTCTTGCTGTATCCACTTCGCCCTGTAAAATGGCTGCCAGGAAATTTGGAGCCGTGGCTCTCTTACCAGGAGATTTCTACTGTATGAAAGGGTGATTGAAGAC  
AGATTCCTGTAGCAGTCGAGTCCAAGCAATTGAAGTTCCATATTCAAATTTGTTGTAAACTTTTTGTAGTTTACAAATTGATTTGTAAATGACTAATGAGCAATTGA

>comp169101\_c1\_seq1

GCTCGCCCACTCACACGCAACACAAGAAGAACAATTTCACTACCCAGCCCGACCCTTCATTAICTCATCTCCTTCCAACCCTCTTAAATATATTCTCCACCTATCCTCAGCTCCCTCTGCCA  
CCACACCCTTACTCGCTTAGAGGAAGAAGAAGCCTCTTCAACTTCAGAGCTCTTATGCGCAAGCCTGTTTTCATATAGGTTTATTAAGGTTTGCTTGCAGAGGTTATTGGCATTCTGTCCA  
CCTCCTACTCTCTTATATTCAAATTCAGAGATCTAACAACGGAGGTGGGCATCCTGCCAACAGATCTCCGTTGGCATCCCTTTGTAAAACCTGTATGATTCTCACTCTACCTCTCAA  
AGAATAGATAAGAAGCTTTATTGGCTAAGTATATCAGGTGAGAGACCAGATCTGTCTGTTGGTAACAGATCCGTGCTAGGTTATTTGAAGTTTGAAGCTTCTAAAGTCTATATTTGCTGTGA  
TTAATTTGTCCCTCATAATTTAGCTTTCCCTTTTCTTAACTTGAAAACATCTTTCCTTTTATCTTTTTTACTTTTTTCTTTGAATCCCATGCTATAATCATATTGCATGGAGGGATGCATGCATTT  
TCATACTTGAATCATTACAGCATGCAGGTTGTGGTTATTTTTTTAGTTTTTCGTATTTTTTTTTGGTTTATGAGATGATCTCTCCTTTTATGCCAGTTTTGTTTTTCGTGTTTGACTGGAAGT  
CAAAGCCAAGTGTAGAATTAATTTGTTCTTTTTATGCTCTTAAATGCAGATCTGTAATCTGAATCAGAGGTGGGCAGATCCGCTCTATCAGGTTTGAATTTCAAGTATGCAGAGTATCTTCATA  
TTGCTAAGAAGAGTACTTCTGACATGAACACAATGGGTTTTGGTTAATTAGCGAGAGTAATAATTCTTTTATCTAGAAAATAATGAAAGCTTGCCTGCTTTTGGCTGAACTTTCCTCTTC  
TCTATCTGTGCGTTAACCTATCCTTTCTGGGCAGCTTTTAACTTTCTGACCGCACTTTTTCAAACCCTAAACCTAATTTCTCCTTTGGTGGTGATCATGGTCTCAACTTTCAATGCATTTATT  
GCATCTTTTTTATTCAACGATTATGGTTGAATGGTTTGCTTTTTGTCCA

>comp169101\_c1\_seq2

GCTCGCCCACTCACACGCAACACAAGAAGAACAATTTCACTACCCAGCCCGACCCTTCATTAICTCATCTCCTTCCAACCCTCTTAAATATATTCTCCACCTATCCTCAGCTCCCTCTGCCA  
CCACACCCTTACTCGCTTAGAGGAAGAAGAAGCCTCTTCAACTTCAGAGCTCTTATGCGCAAGCCTGTTTTCATATAGGTTTATTAAGGTTTGCTTGCAGAGGTTATTGGCATTCTGTCCA  
CCTCCTACTCTCTTATATTCAAATTCAGAGATCTAACAACGGAGGTGGGCATCCTGCCAACAGATCTCCGTTGGCATCCCTTTGTAAAACCTGTATGATTCTCACTCTACCTCTCAA  
AGAATAGATAAGAAGCTTTATTGGCTAAGTATATCAGATCTGTAATCTGAATCAGAGGTGGGCAGATCCGCTCTATCAGGTTTGAATTTCAAGTATGCAGAGTATCTTCATATTGCTAAGAAG  
AGTACTTCTGACATGAACACAATGGGTTTTGGTTAATTAGCGAGAGTAATAATTCTTTTATCTAGAAAATAATGAAAGCTTGCCTGCTTTTGGCTGAACTTTCCTCTTCTCTATCTGTGC  
GTTAACCTATCCTTTCTGGGCAGCTTTTAACTTTCTGACCGCACTTTTTCAAACCCTAAACCTAATTTCTCCTTTGGTGGTGATCATGGTCTCAACTTTCAATGCATTTATTGCATCTTTTT  
ATTCAACGATTATGGTTGAATGGTTTGCTTTTTGTCCA

>comp170298\_c3\_seq1

CATTCATGCGTCACCCTCGTTTCTTCTGCATCTCCATCTCTCCATAAATACTCCAACCTCCCCATTGCTCGGTGCTTGGCCCATTTATTGCATTTCAAGTCCCTCCCATCCTTTCTATTTATGATC  
CACCTCTACTTTACAAACTCCTTCGTGTTCTTCTCCTTCTCACATCTGTTTCTATCTCTTCCCTGTCCATGGCCATGGCCTTGTTACTTCTCAACGCTCTTCTCTTCCAGGCATGTCTCCC  
TTCTTAAAGGAAGTTGGTGTGTTGATATATTCTCCACCCTGATTGTTCTTTTTTCCAATCTTCTTTTTCTCGGTGCTCATTTGGTTTTTTAATTAACACTTTAAAGAGAGTTTTAAGAGAA  
TATATTATATATAATCAATGTAACCTAAGGGTATCTTCAACCTTCCAGCTCTTCAAGATCTTCACTCTCTTCTGTTTTTGAATAGTTTTTCTTCTTCTTTGAAATTTTTCTGTGAAAGAAGTTCTT  
CTCCTTTTGATGCAGAAGGTTTTTGTCTTAAATGGATAATTGGTGCAGTTCAAAATTTGTTTATTTGAACGGGATATTGGTGCAGTTCAATTAGAGCGCAGTGCTGAAAGAATGTAAG

TTCTTCTCTTTGATTGAGCCGTGCCAATATCGCGTGCCTTTGTCTTCTTTTTTTTGATATTAGCCATTTTTAGGGTTTTATAAGAACCCTCAAATATATTGCGTTTATTTCTGAATAAACAAACGA  
TGCCATTATTGAAATCTCTGTTACTGTTCCCTTTGAATGGAAGAACATTGGGAGTAGAAGAGTAACAAATTGTCATAGAATATCTTTGAGCTTCTGAATAAATGGAAGACATTCAAATTTTAG  
CTTGTAACGATAATTACATTGAAGTTCTGTTTTATAGTAAAATAATTATCACTATAATAGTTTTTTAGTCATATCTATACTTAATATTGAATTATTAGATATCATATTTTAAAGAGAAATTCATA  
TTATTTTGAATATTTAATCACATTTTTTATGAATGAATTATTGATGATGTGGCTAATAGTACTTTTGATTTTTATGATTATTTAATTTTATTTTATAACATTAGGATTAATTTTTTATTCTTTAT  
TTATAGTACTTTCATTTTTTAAAAAATAGACTATAATATAGAAAATTAGTTTGAGGGCCTACATGGGATCGGATGATTGCAGTTCTTAAAAAGAGGATTTTTTGAAGTTGTTGTAAAAATAATT  
TTATTATCACATAAATTTTTTGAAGATATAAGAATGTAATAGCTAAATTGAATTATAGTTGCGGACTAGAAAAGTAAAATAATGAGAAAATTGACCTAAATAGATTATATGTTACAACCTTCGA  
AGTTCAATTTACTATAATTTGAGGCTTTATCTTA

**Data S3** Sequences of the transcripts predicted to be miRNA precursors in Figure S3.

>comp46034\_c0\_seq1

CCTCTCCACGTGAAAGATGGTTGCAGTAAGAGGGTCCACTTACTTTACCCGCAGGTACCCCCACACGAGGGTAATAATGAAGCTACTCTCCCTTTGAGTACTATAAAGCAAGCGCTCA  
GCCATAAAGCTGGAGAAGGTAAACCGAAACAACCACCTAATTCGAGTCCCGTCACCTCCCTTCCTTCTCCCTCCCTCACTGTCTTCTCTCTTTTCTCAAATGAGCCTCTTCATTCCC  
TTCCACAGCTTTCTTGAAGTCTTTAATGGCCTCTTCGTTCTTCTCAGAGATGAGTAACAGTTCAGGAAAGCTGTGGGAAGATATGGAGAGAATGCAAATGGAGGATAAAGGCATATG  
AGGGGATGACCTCTAGTGAATCCAGCTTCGCATCAAGTTCACAGGAGCCCTTACATAGTCAACAGATAAAT

>comp89672\_c0\_seq1

GGGGAATGTTGTCTGGCTCGAGGCTTTCTTCTCGCGCTTCCTTCTCTCTTCTTAGCCATGAAATCTCCCTCTCTCTCTCGCTTCTCTCTCTGTATTCTTCTCTTAGCTGTAG  
AAGAAGATCTCGGACCAGGCTTCATCCCTCAATCACAGCTTCCATGAATCTTGTACGCTGACTCTGGTAGGCTTGATCTGCTTCTCGTTTTTGTTTAATTAATATTTTTATGGTTTATG  
TAACTTGAGCAGATTAGCGTAATGATGATGGAATTTGACTCATTCTCTCT

>comp112901\_c0\_seq1

TCTTCCACAGCTTTCTTGAAGTGCATCCATAATTCTACAGAGAAGAAGAGTTATAGCTGCAATTTGCAGTTC AAGACAGCTGTGGGAGATTACAGGGAGAGACCAATTCTGAAGAAGCCT  
AGAATTATATACATGAATATGCAATTATACATTTTGATGAGATCTGTTACTATGTTGTGAATTTGTTTCTGTTTTCTTTCTTCTGTTGCCTTTGAAGGCTTTAAATTTTAGTGGGAAGAACAGT  
TTTTGTGGTGTTAAGGCTTTTTTCTTTAAACAATATGTACATGTTGGTGAGATCTGTTATTTCTTGCAAGGTTCAAGTTGAGTTTCTTACTTTTCTTATCTTGAAGACTCTAAATTTTGTAAAG  
AAGAACAGTTTTTTGGGTGAATATAGAGGAATTATATAAATATATGTGAGATCTGATGCTTTCTTGTGAAATTAGGTTAAGTTTTATCTTCTTCTTGTCTTGTCTAAACACTTAAGGCCCT  
TTTTCTTTTACACATACTGCAGGAGAGATCCATTGCTTTCTTCTGAAGTTAGGCTAATTATTAGTTCTATCTT

>comp139714\_c0\_seq1

TCTCCTTATTCATCTCTGTTTACCGGACTATGCGTTAATCTCGTCGCGCTCTCGAATTCGCTTGGTGCAGGTCGGGAACCGATCTCGATCGTACGTCTGGAGTTCACGGATTGTCAGTTCCC  
TACTTGCACCAAGGGAATTCGAGAAAAAACGGCGAAAAAAGAGCTTTTTTTTCATCTGGCAATCCATTGCGTTCTCTCTCTCTCTGAACGGTATTGGTTTTAATCTAATATTGTTAAACGC  
TTTGATATCTGTTCCCTCTAGTCTTGGAAATTGTATACCAATGAAGAACTTCTCTCCTTACAAGGAATAGATTCGTGATTCAACTGTCGAGTATCTTTAAGTTGGGGAAATGGGGAATGAAAT  
AGTGGTTAGTACTTACTGGATGGTTTTTGTGATTATAGAGATGTGTTCCAATACTACTGTAATTGCTGATTGCGATTGTTTGTCTCATATATAGAAGTGTTAAATCAAGTGAATTCGAGATTAA  
AAAAGGAATGGGTTTTCTTGTTTTAGAAAAAAGGAAGATCATTCAATTTAAGGAATAGATTTGAGATTAGAGCTTTTTAAGGAATGGATTTGATAACTGTGTTATTAGTTCAGCTTTCTAAG  
TAGCTTTGTGTAATTTATAAGCTATATCTTTCTTTGGTTTCTCATGCCTGATCACTAGTTTCCACTTACATCAAATGAAATGATAATCTGTTTGGCTAGCTCACTAATTTGCATCAAATACT  
TCATCAAACCATGCTTTTTTGTGGTTAATTCATTTTTGAACTTTGCTTAAACCATGGTAGATACTAGCTGAGACTTATGGGAGTCATGAATTGAATTGACTTCTCAATCCATGTGAAACCAT  
TTGCCATGTATCACTTGTCAAATGGGTCAAGGTTGCGCTAGATATAACCACTGGCCAAACCTGTTTTGAGCTCAAATGTTTCATTTGTTATTTTAGTTCTTTGTAAATTTCTTTTATATTATGT  
TGGAGTTTATTAACCTTTTTCTTATAATCATTCTCAGATAGATGCTCAATTTGAGGTTGGTTTTGGCAACTGGATTGAAAGAACCTCTTATGAAGGAATTATTTAAATTTGTTTTCTTAT  
AGTATAGGTTTGATTCTCATTGTTAGAGTTATCTCAACTATTC AAGGTTTTATGAATGCGTAGTAGCTTTTTCAATTCAGCACAGGCCCTTTGATTGATTATTGTAATGCCACAATTC  
CATGCTTGGACAAAGTTA

>comp139714\_c0\_seq2

TCTCCTTATTCATCTCTGTTTACCGGACTATGCGTTAATCTCGTCGCGCTCTCGAATTCGCTTGGTGCAGGTCGGGAACCGATCTCGATCGTACGTCTGGAGTTCACGGATTGTCAGTTCCC

TACTTGCACCAAGGGAATTCGAGAAAAACGGCGAAAAAAGAGCTCTTTTTTTCATCTGGCAATCCATTGCGTTCTCTCTCTCTCTGAACGATAAAGGAATATTGCAGCAAGGAATCTAT  
GGAGCAACTTTTGTATATCTCTTTGTGCTGTTGGAGTTATGCCCTGCTATTATTTCCATCCTTTGTCTTGTGGAAATAACTTTTCTAATACAGCATGGAATCTCAATTGAAACATCAACATCT  
TTCTGTATCCTTCTCTTGTAAATTCAGCCCTTTTCTTGTGCTGACTTCAGCTGAAGTTATATATGCTGAAGGTGGTCTGTGGTCCCTCCATATTTCTCATAATTTTCATGGAATTTTCATATCAT  
ATATTTATTTATTATATCCATGTGTGCCGACTGTTGATGGTATAATGCTATTCAATTTGGCAAAAAATCAATCCTT

>comp140839\_c0\_seq1

AAATAATAACAAGTTGTGAAGTTTCAGAATAACAGGCAACTCTCCTTTGGCAGAGAGAACAGCCACAACGATGGCTTCATTTGTATTAAGCTATTTGTTTTTTTTCCCTTCTTTCTGCCAAA  
GGAGAATTGCCCTGCTATTCAACCACACAGGCACAAGAAAGCTTTTCTGCTTAGGATGGAAGATTTTCTTACCAAATAAGGTAAACCTTCCCTTGCAAAGCTCAATCAGACTGATGGCTT  
CTGTTCTCTGGTTTCTTCATTGATCGATTTCTAGCTAGAAGATCTGATCTTGGAATTTTTGCAGTAACGTTTTGAACATCTTAATGTTTTCTTCTTATTGATAGGTTCAATTAGCAATTGAAA  
CTTACTGATTATCCATCTAACTGTGCAGATTTTCTCACCATCAGCTCGATTTTCTCCTTGAAATAATTTTTCAGTGAATTTTAAAGTTGTGAAAGAAGAAAAAAGTCAAACATATAGGT  
ACTGTACATGTACTGGACATTAATAATTATAAGTTGCAAATCTATGAATTTGAGTTAGAATTTGAGCAATAATTTATATTTATGAGTATA

>comp140839\_c0\_seq2

AAATAATAACAAGTTGTGAAGTTTCAGAATAACAGGCAACTCTCCTTTGGCAGAGAGAACAGCCACAACGATGGCTTCATTTGTATTAAGCTATTTGTTTTTTTTCCCTTCTTTCTGCCAAA  
GGAGAATTGCCCTGCTATTCAACCACACAGGCACAAGAAAGCTTTTCTGCTTAGGATGGAAGATTTTCTTACCAAATAAGGTAAACCTTCCCTTGCAAAGCTCAATCAGACTGATGGCTT  
CTGTTCTCTGGTTTCTTCATTGATCGATTTCTAGCTAGAAGATCTGATCTTGATTTTCTCACCATCAGCTCGATTTTCTCCTTGAAATAATTTTTCAGTGAATTTTAAAGTTGTGAAAGAAG  
AAAAAAGTCAAACATATAGGTACTGTACATGTACTGGACATTAATAATTATAAGTTGCAAATCTATGAATTTGAGTTAGAATTTGAGCAATAATTTATATTTATGAGTATA

>comp140839\_c0\_seq3

AAATAATAACAAGTTGTGAAGTTTCAGAATAACAGGCAACTCTCCTTTGGCAGAGAGAACAGCCACAACGATGGCTTCATTTGTATTAAGCTATTTGTTTTTTTTCCCTTCTTTCTGCCAAA  
GGAGAATTGCCCTGCTATTCAACCACACAGGCACAAGAAAGCTTTTCTGCTTAGGATGGAAGATTTTCTTACCAAATAAGATTTTCTCACCATCAGCTCGATTTTCTCCTTGAAATAATT  
TTTCAGTGAATTTTAAAGTTGTGAAAGAAGAAAAAAGTCAAACATATAGGTACTGTACATGTACTGGACATTAATAATTATAAGTTGCAAATCTATGAATTTTGAAGTTAGAATTTT  
GAGCAATAATTTATATTTATGAGTATA

>comp144790\_c0\_seq1

TCTCTCTCTCTCACAAGCTCCATTTAATGCTTTAGTTGTGGAATTTGACCAAGAGTGCCTAGGGGAACAGGTGAAGCTGCCAGCATGATCTAGGTTTGGGTGATCTTGATAAAGTTATTT  
CTATCAGAGTTGCATATGACCCGCAATATATGTAGTGATATGTAAATTTTATGTTTACTTTGGTTTTTCTCTTAATTATATAGAAGTTTTCGAATCGAAAAGTTAATCTAATTTGTAATGCTAAA  
CTCTTCTAAAAAATGAGTACAATCTTTAGAGAAGATTGCAATCTCCTTTGCTTAATCTCCTTTACAGAAGGTGTTTTTGATTCATTATACATAGAAAAGTTCAGTCATTTCTAGGTCATGC  
TCGGCAGCCTCACCCCTCCCAACTTGAAGCTCAAGAACAACACTTTCTGTTTCGTATATTTAGTGTACATACACAAGAAAAATGCTGTAAATTTAAGCTGAAGCTAAGGAAGTTATGCTT  
ACTCCCTGCTGCAGCTGGAGGGATGCTTTCAAGCTCATTCAACTGTGGTTTTGGAAAATTAAGATCTGAAGCTGA

>comp144790\_c0\_seq3

TCTCTCTCTCTCACAAGCTCCATTTAATGCTTTAGTTGTGGAATTTGACCAAGAGTGCCTAGGGGAACAGGTGAAGCTGCCAGCATGATCTAGGTTTGGGTGATCTTGATAAAGTTATTT  
CTATCAGAGTTGCATATGACCCGCAATATATGTAGTGATATGTAAATTTTATGTTTACTTTGGTTTTTCTCTTAATTATATAGAAGTTTTCGAATCGAAAAGTTAATCTAATTTGTAATGCTAAA  
CTCTTCTAAAAAATGAGTACAATCTTTAGAGAAGATTGCAATCTCCTTTGCTTAATCTCCTTTACAGAAGGTGTTTTTGATTCATTATACATAGAAAAGTTCAGTCATTTCTAGGTCATGC  
TCGGCAGCCTCACCCCTCCCAACTTGAAGCTCAAGAACAACACTTTCTGTTTCGTATGTTTCAGTGAATGCACAAGAAAATACTGTAAATTTAAGCTAAGGCTAAGGTAAAGTATGTCT

AATTCAGAACTATTTTCATTAGAAGCTATCTTAATTTTATTC

>comp151410\_c0\_seq1

GACTTGAGCTTCATTCTCCATTAATTTGACCCTAGAGAAGATACATAAATCCATCAAACATTGCAGCTTTGAATTTGTTTTGTTGATGGTCAGCTAAGCATCTGCCGTTTCATCTTTTCAAGG  
AAGATGAAATCAATGATTAGATGACCATCAGCAAACATGTTACAAGCGTTGCAAACCTCCATTCTTCTTTGTTCCACAGTGAGTTAATTATTTGAATTTGGTATAATATTATATATGATCTCGAT  
CGATCTGATCTAAGAGTTTTCAAATGCCAGATTATTAATTTTCTTTCTCGTCATCTCACTGTGATCTGTCTGTTTGCATTATAGTATTTTATGATTGAGCGAATTTTTTATTGTTTCATGCTTCAT  
AGTTAATTTAGAAAAATGTTGAGGGAAGAAAATAGACTGGCTTTCATTATCCTTTTGTGTATATGCAGACCTATAAGTAAGTTTTATATGGTCATTTTGAAGATATTTGTAATTTTTTCTAT  
TTATGATCACATTTTACTGAAATGTCGCACAATAGAAGATAATTTGCTAGGAGTGGCAAGAAATGTAGCAATCTTTCTATTTATCCTCTCTTTCTCGCTATCTCGTGTGCAATATATGAGTGA  
AAGTAAAATCATCATTTTTTTAGAATGTAATTTTTTAAATACATGCAAAAAAATGAGACATTTGCCTAATCCTAAATGTTTTTAAAGGCCTTTTTTTTATGCATAAAAATAGATACTTTCTATTATA  
CACAACTTTTTTTTTTCCACCAAATTT

>comp153713\_c0\_seq1

TCTCCTCCTTTCCTTCTCTATAAATATCACTTATATCTTCAACTCTCTTCATAGCTTTAGGTTTTTCATCTCATTCTTTTCGCTTTCTCTTCTGTTTCATGACAGAAGAAGAGATGGCCTTCCTT  
GTAGTCTTCCACAGCTTTCTTGAAGTGCCTTTTCTTCTGGAATGGAAGATTAGGGTTAGGGTTGCAGTTCAATAAAGCTGTGGGAAATTACAGGGAGAGAGACCAAATTCTATAGAAG  
TTCAGCCATAACTACAGTCGGGATTAGATCTGCCACTTTCTTTTACATATTTTTCCATCTTTTTAGAGGGTAAGGATGATAGATCTGGTTTATAGTTTAAATTTTCCCTTATTATTTATTCTCTTT  
ACGTTGGGTAGCTTCTGAATTATCTTAAATTTCTGGAATTTAATTACAAATACTGCTATGGATGTTATTGTTTTCAAATATTTTTCTTCATTTTCATTAGAAAATCTTTAGAAAATGACAAGAATTC  
AAATCTCTGGAAGGGTGAGTTGCCTGTGCATTATATTTTTGGAAAGCTGGCTTTCATATGATGTAATTTAATTGTAGATTTCCCTTATATGTACTGTATGAAGACATAAAAAGGTAATAAAAA  
CGTGGATGGAGATGACATGCAAGCATAAATGTTACTTACTTTGATCTGGTTAATTTCTCTTTAATTTAATTTGCTCTCCACCTTTCTACATATCTACTGACAAGAACCTACCTTACCATCTT  
TTGATCTGTTAAATTCATTGGCCTATTAGAATTTCTGTTTCTCTTTTTTTCATTTAGCTTTTATAAATAAGTACATATATAAATGATCTCAATGTTAAGGGACCACAATTTTTGTCTATGTTTT  
GCTGTCAAGTTCATTGGATCTGATAAGCCTAAGGCAGGTAAGCTTATAGAACGCTATTATGTTGCTGTTTGAAGTGCTTATTTTTCTAACACAGTTCTTGAGCTTTTTGTTTCTTTTTGGA  
CAAGTATTGATTTAGATTTAGGCTTTTTGAGATAATTTGGTTGGGCTTATACGTGAAGGAGCAGCTCCAGTGGAAAATATGATTAGAGAGAGTTGCCTTAGATGGTTTTGGTTACATATATTA  
ACGGAGGTCTTTCGTTGATCTGATTAGGAAAGTTGAGGCATTAGATTTGACTTACCTTAAAAAAGTAGAGGTAGACCTAAAAAAG

>comp159822\_c2\_seq1

ATATATTCAACTGCTGAAAGCAATGGAGTTATCTGCAGAGAACTATGAGAAGAGAGAGAGAGAGGAAAGCATCAAGGCAGGGATGAGGCAGAGCATGAGATGGGGTCATCAACACACC  
AATGTAGAGATAGAGAGAGAGATGTAGAGAGAGAAAAGATAGAGGCTGATTGCTTGTGAAAGTTTGTGTTGCCCCTCCCATGCACTGCCTCTTCCCTGGCTTTCTCTTCTCCTTTCTCTTC  
TCCTTATCTCTCGCCATTATCGAAGCACGCTTCATGAAAATGGAGGTCTCACATAGTTAAGGAGAGATTTTGATGGAGAATGGCAATGAAGAGCTCATTATGTCAACTTTTTTAAATTTTAT  
GTATTTGTTAATAATTTTAGTGTATTTAATTATATATAGTGAATGCATATATCTTTTGATGCATTTAATAATCATGAATATATACTTGTAATGATGTCATTGGAAAATTTGAGAATGTATAATCT  
TATTTAAATTTTGGTTTATTTATGTTTAAAGTCAATAAATGATAAATAGTATGATGTTTGTCTCAATAATAAGGGTTTTTTGTTGATGGCTAATGAATTAGGTTGTTTGGTGATCCATGAAGA  
GAACGAGAAAGAGAGAGAGATTAGAGGTAGAGCTAAAGCTTACTTTAATATATGTTATTGGAAAGACAAAACAGTATTCAAGGAGAATACAATTTCCACACTCATAATTCGGTGTTACAATC  
ATTGTATGTATGATACTATGATGTGAAGCTATGACCGATTGTAATAGGTTGCATTACGTTAGCAATGTTAATCATATCAGTGTATATGCTGAGTGATTGATTGCTTTGGCAGCATAGTAGTTGTT  
CCAGTTTGCTAAATCATTTGAAGTTTACTATGTCACATAATTCATTACCACCCCTAAAGTTGATGAGCTATGACTGAATAGTCAATTTTTAAACGCAGTTGTATAAAAAGTTTAGTAAGGATA  
TCAGATGATGTGAAAAATTTT

>comp159822\_c2\_seq3

ATATATTCAACTGCTGAAAGCAATGGAGTTATCTGCAGAGAACTATGAGAAGAGAGAGAGAGAGGAAAGCATCAAGGCAGGGATGAGGCAGAGCATGAGATGGGGTCATCAACACACC  
AATGTAGAGATAGAGAGAGAGATGTAGAGAGAGAAAAGATAGAGGCTGATTGCTTGTGAAAGTTTGTGTTGCCCTTCCCATGCACTGCCTCTTCCCTGGCTTTCTCTTCTCCTTTCTCTTC  
TCCTTATCTCTCGCCATTATCGAAGCACGGTTGTTTGGTGATCCATGAAGAGAACGAGAAAAGAGAGAGAGATTAGAGGTAGAGCTAAAGCTTACTTTAATATATGTTATTGGAAAGACAAA  
CAGTATTCAAGGAGAATACAATTTCCACACTCATAATTCGGTGTTACAATCATTGTATGTATGATACTATGATGTGAAGCTATGACCGATTGTAATAGGTTGCATTACGTTAGCAATGTTAATC  
ATATCAGTGTATATGCTGAGTGATTGATTGCTTTGGCAGCATAGTAGTTGTTCCAGTTTGCTAAATCATTGAAAGTTTACTATGTCACTAATTCACTATTACCACCCCTAAAAGTTGATGAGCTA  
TGACTGAATAGTCAATTTTAAACGCAGTTGTATAAAAGTTTAGTAAGGATATCAGATGATGTGAAAAATTTT

>comp159822\_c2\_seq4

ATATATTCAACTGCTGAAAGCAATGGAGTTATCTGCAGAGAACTATGAGAAGAGAGAGAGAGAGGAAAGCATCAAGGCAGGGATGAGGCAGAGCATGAGATGGGGTCATCAACACACC  
AATGTAGAGATAGAGAGAGAGAAAAGATAGAGGCTGATTGCTTGTGAAAGTTTGTGTTGCCCTTCCCATGCACTGCCTCTTCCCTGGCTTTCT

>comp159822\_c2\_seq5

ATATATTCAACTGCTGAAAGCAATGGAGTTATCTGCAGAGAACTATGAGAAGAGAGAGAGAGAGGAAAGCATCAAGGCAGGGATGAGGCAGAGCATGAGATGGGGTCATCAACACACC  
AATGTAGAGATAGAGAGAGAGATGTAGAGAGAGAAAAGATAGAGGCTGATTGCTTGTGAAAGTTTGTGTTGCCCTTCCCATGCACTGCCTCTTCCCTGGCTTTCTATTCTCCTTTTTCTTC  
TCCTCATCTCTCGTCATTATCAAAGCATTGTACTGAGTGAAGTGGCGCATTTCAGATTCGTTCCGAAACGATCCAGTGTTACACACAGAACAATTTCTCAACGACATTGAGTATAAGTTT

>comp160245\_c0\_seq1

AAAGAGAAAGCAAGTGAGTGAGAGATAGTTAAAGAGAAAAGAAAGAATGCATGGGAGATAAAAGAGTGAGAGAGAAAAGAGAGAGTGGATCCCGTCGCGCTTATCGGGCTACGCGAAAC  
CCTACCCCAACCACTCCATGGAAGCACGAGCAGCCGAGCCTCGCTTCCCTCGATCTCTCTAGGGTTCTCTCTGTTATGTTCCAGACTGATCAGGACCGTCGCGATAACAATCGAACGGTCA  
ACGTGGGCACTAGGTGCGCCGGCCTGACGGCAGTAATTATGTATAAATGAGGGCTGGGTGGAAGAGGAGATGGTAAGAGATGTGTGAGGAATTGTGAGGCGAGTCTGAGGAGAGAGA  
AAGGGATAGAAGAGCATCACGTGGTGCGGAGAGCAGTTAGAGAGAGAGTAGGGGTTGTGCAATGCATGATGGGGTCGTGGTCAATTTCTGGTAGAGAAGTTAGAGAGAGAGTTGGGGTA  
GGGACCGCAACCTGCACCTTTGTGTTGTCTTTTACTCTGTCTCTTTTTCTTTCTTCTTCCCTTATTATTGCTCCTGCCTACGACTCTTCTGAGGCTGACCCACTACATTTACTCCTCGCTTTCTC  
TTTCTCTTCATTTTTCTCTTTTTAATAGTGGGAGTTTGGTTGAGCTTTTACTCTCCTGTCTTCTCTCTTTCTTTCTCTCTGTTTCAGATTAATCATTGTTGTCATCATAACCTCTTCACCGC  
CTCTTTATCTCCACCCCAACCTGAGCCGCATCCCTGAGAGAGAATCCGGGTCTCATGGGCGAGAGAGAATGAGAGAAAAAAAAGGGCTTTTGTGCGCGTGCCTTTCAGTAAAGTGGAA  
GCTTTCTCTTTGAGGGGAATGTTGTCTGGCTCGAGGCCTCCGGCCGATCTCTTTGTTTCTCTCTTTTCTTTTCTATGGCCGGTTTCTAACAGAGCTTTCGATGAGGAGGTCTCGGACCAG  
GCTTCATTCACCCCAATCACTGCTTCCCTCTCCACGTCAAATGCTCTCATGCGGTGATAAGAGATCTGATGCCCAAATTCGAATAACGCCTCGTTATATAGCATAACAGGTAATGCATTGAT  
CAGCATGCCACAGATCATAGAAAGGATAAGAAGTGAAGAAAATAATTCATCTATTAGTTACTTGAAGGGTTTGATATG

>comp160245\_c0\_seq2

AAAGAGAAAGCAAGTGAGTGAGAGATAGTTAAAGAGAAAAGAAAGAATGCATGGGAGATAAAAGAGTGAGAGAGAAAAGAGAGAGTGGATCCCGTCGCGCTTATCGGGCTACGCGAAAC  
CCTACCCCAACCACTCCATGGAAGCACGAGCAGCCGAGCCTCGCTTCCCTCGATCTCTCTAGGGTTCTCTCTGTTATGTTCCAGACTGATCAGGACCGTCGCGATAACAATCGAACGGTCA  
ACGTGGGCACTAGGTGCGCCGGCCTGACGGCAGTAATTATGTATAAATGAGGGCTGGGTGGAAGAGGAGATGGTAAGAGATGTGTGAGGAATTGTGAGGCGAGTCTGAGGAGAGAGA  
AAGGGATAGAAGAGCATCACGTGGTGCGGAGAGCAGTTAGAGAGAGAGTAGGGGTTGTGCAATGCATGATGGGGTCGTGGTCAATTTCTGGTAGAGAAGTTAGAGAGAGAGTTGGGGTA  
GGGACCGCAACCTGCACCTTTGTGTTGTCTTTTACTCTGTCTCTTTTTCTTTCTTCTTCCCTTATTATTGCTCCTGCCTACGACTCTTCTGAGGCTGACCCACTACATTTACTCCTCGCTTTCTC  
TTTCTCTTCATTTTTCTCTTTTTAATAGTGGGAGTTTGGTTGAGCTTTTACTCTCCTGTCTTCTCTCTTTCTTTCTCTCTGTTTCAGATTAATCATTGTTGTCATCATAACCTCTTCACCGC

CTCTTTATCTCCACCCCAACCTGAGCCGCATCCCTGAGAGAGAATCCGGGTCTCATGGGCGAGAGAGAATGAGAGAAAAAAGGGCTTTTGTGCGCTGCGTTTCAGTAAAGTGGA  
GCTTCTCTTTGAGGGGAATGTTGTCTGGCTCGAGGCCCTCCGGCCGTATCTCTTTGTTTCTCTCTTTTCTTTTCTATGGCCGGTTTCTAACAGAGCTTTCGATGAGGAGGTCTCGGACCAG  
GCTTCATTCACCCCAATCACTGCTTCCCTCTCCACGTCAAATGCTCTCATGCGGTCGGTGAGTTATTTCTTAAATTTCCGATCTTTGATTTTGATTTCTTTCCGTTTTTGGCTGGATCGTCC  
GATTGAGGTTTCGATTTTCTAGTTTTTTTTTCTCTGAATTTGTTTGTTCGGTAAGCTTTTTTTTTTGGAAAGAGGGGAGGAGAGAGAAAAAGGAGGGCTGATTGCTGCAATGATATGGGGT  
TTGACCATGGATGGCTTTAGACTTTTTGTATTTCATTTCTTTTTTTAATTTTTGCTTCTGTGTGATTTTTGTTTTATTCTCTGCCTTCTGTGCGCAAGGATAAAAGTATTCATCATGTCTAGT  
AAAAGTTTCTCTGATTGCTTCACTTTTTGACCTTTTGCATGATTTCTTCATTTTTTTTTCTTTCTTTCTATTTATTGCTAAGCTTTGAGCATCGCACGATTTTCTAATTTTTACCTAATTCAG  
AAGGCCGCGTTCTCTCCATCTTTCCAGAATCTTCTATCAGTTTTCTTCATCTTCTTTCTTTATTTCATCTACCTTCTAGTCACCTCCTTCATTTTTAAGATCTTTATAATTTATTTTATTTA  
TTTGGCTTAGCAAAAAAATTATGAAGTTGGCTACAGGTTCCGATCGATCAAGATTATTCATGTGTGCAAACCTTTGATCTTTAGTTTATTTCTTATCTTGTATTATTTATGCATTTGTTTTTC  
TTTACTACCGAGGGATGAAAGAAAGATAAGAGATCTGATGCCCCAAATTCGAATAACGCCTCGTTATATAGCATAACAGGTAATGCATTGATCAGCATGCCACAGATCATAGAAAGGTGAG  
CGAATAATTCTGACAATTTCTTTGCTTGGAAAGGAAATCTCTTCCTTCTTCATCTTCTAAGCTACTGCCTCTTTGGTAATGAATACACTTAAAGACAAAATCAATTGGTAATCACTAGAAA  
TTTTGTTTTGTATTTGATCGCATGTTTTTAAAACTTATTCAAGATTTTTTTTTGTTTGGACAGGATAAGAAGTGTAATAATAATTCATCTATTAGTTACTTTGAAGGGTTTGATATGCTGTG  
GGTCTAGACATTCATATTCATTAATAAACAGGCTTTCACATCAGCGCTAATTTTTTACTAATTTGCTAGCAATGTTGAATAAACGAAGTCTCTTATCTTAATGAGATTCTTAGTTAAAAA  
AATAAAAAAATTTAAGTGCACATCTCAAGAGATGCTCCGCGGAGACTTTTTAATCTGGTGTACCAGTTCTACTGCAATTTTTAATCAGTGACAGAAAAACAAGTCAACTGAGAGCCTT  
TCACGGGAGGAAAGTATTATACTGTGGTACCTCACAACTATTTTTTGTGATTCTCACTCAATTTATTTATTTATTTTATGTTATCATAATTAATATCTATGCAAATAACATAGATGATAATTACA  
ATTACAATCAAAAAAATTTTACTAGCCTTTCATGACCGACATAAGATCAGCAACTAACATATATAAAAAGTAAATACTAAACCTAATGTGTTGAGATAGGCTATTATCCATTAATTATG  
TGTTAAACAATGAGAAAAACATTTAGTTTCAATTTCCGATGCCCTCCTTAATTTCTTTTGCATTCCCATAAGTTCAATTTTAAAGCTGCAATGTGCCATTACCTTGAGCACAACCTTTT  
TTTCGTTATAATGACTGTGCAAGTAAGTGCATCTTCGGCCTTATCAATTTCCAATGGAAGATGCTCCAACCTGCGTTACTTTTATGTTTGACCACCATAAAAAGTACCTCTCTTTCTCCCTC  
TCTCTCTCTCTCACGAGATCGAAAGCAAGAGGTGGGATAGGGAGATGGGATTGGGAGTGGAGGTGGGTAAGGCTACAGGCGGCGGCTCGGGGCTGAGGAGGTGGGAGAGGTCT  
CGCGGTTTGGCCGTGAGAGTGGGACGGGGTAAGACAGAAGGAAGCAGCGAGTGTCTCCATTCCTTCGCTATTTAACGACCTCTTCGGACGCTCGATCGAGGCCGGCTCTGAGCACA  
AATCGCGGATGCGACTCAAACGG

>comp160421\_c0\_seq1

CAAATAATGAGATTTTTTTTGCAGCTCTCTCTCCTATCGTTCTCTCTCTCCCTCGCTGTCTAATCCTTTAAATGTAAACTAATTCATGTACGAGGGCAGGGAATCGATGATCGGAAACAGC  
CGGCGTTTGGCTGGTGTGGCATCATCAAGATTCTCACACAGCAGCAGGATCCAGACCTTCACTCCCTCTCCAGTGAGAATCTTGATGATGCTGCATCGGCAATGGGCGGCTATATCTGATA  
TCTGTTCTTCTCTTTGAAGCTAGAAGAACAGTTTGATTCTATTCAGGAAGATGGTGTGAACGTCTA

>comp160421\_c0\_seq2

CAAATAATGAGATTTTTTTTGCAGCTCTCTCTCCTATCGTTCTCTCTCTCCCTCGCTGTCTAATCCTTTAAATGTAAACTAATTCATGTACGAGGGCAGGGAATCGATGATCGGAAACAGC  
CGGCGTTTGGCTGGTGTGGCATCATCAAGATTCTCACACAGCAGCAGGATCCAGACCTTCACTCCCTCTCCAGTGAGAATCTTGATGATGCTGCATCGGCAATGGGCGGCTATATCTGATA  
TCTGTTCTTCTCTTTGAAGCTAGAAGAACAGTTTGATTCTATTCAGGCTTCAGAATTAATTTGAAAAGAGAAGTTTCTACTTTGTTTTGGCTTCTTTGCATGATTC

>comp160421\_c0\_seq3

CAAATAATGAGATTTTTTTTGCAGCTCTCTCTCCTATCGTTCTCTCTCTCCCTCGCTGTCTAATCCTTTAAATGTAAACTAATTCATGTACGAGGGCAGGGAATCGATGATCGGAAACAGC  
CGGCGTTTGGCTGGTGTGGCATCATCAAGATTCTCACACAGCAGCAGGATCCAGACCTTCACTCCCTCTCCAGTGAGAATCTTGATGATGCTGCATCGGCAATGGGCGGCTATATCTGATA



TCTGTTCTTCTCTTTGAAGCTAGAAGAACAGTTTGATTCTATTCAGGTATGTTCAAATCCTTTTGTGTTTTTCTTCATTTCTTGTGAGTAGATGGTATATATATTGTGATCCAGTGATTTTGCAT  
AGATTATTCTCTTTGCCATAATAATTTATGGATTTTTTGGCCGCTTTTAGGCTTCAGAATGAATTTGAAAAGAGAAGTTCCCTACTTTGTTTTGGCTTCTTTGCATGATTCCTAGACTTCCTTTT  
CTCTTGCTGGAAGAACTTGTGTTTTGTTCAAGTTGCAGAATCTTTTGAATGTATCTCGATCATCAGGATTACGCAGCTCACTTGATCTATTGATTTGGAGCTTTAAGCCTTCAACTATCAATCA  
TAGAACAGTTTGCACTTTTTCTGTTTGTGTTGAAGTTCTCCCTTAAGCTCTTTAAGAAAATCCCTTGATGTTTCATATTCATAATAAAAAAATTGTGATAAAAAGTGGTACTTGACTCTTCATTC  
TTCAACATAACATAAACCTATTAGTAACTGACAAAAGATACTATATTAGTTAACAGATCTACTTATATAGCTATTCTAGATCTTAGAAGGTGATTTTGCAGTAAGAGCTCAAGGGTTCTTATTT  
ATAGGTTTTTTACTTCAAGAGGTAGAAAATTTATCTCATATTTTCAATTGGTCATATAAACTATATGACCAATTAATAAGCAAGCAATATTAATTAGACCATCTCCAATTGAGCTGTATACTGTG  
GTATGCTGTCTATCATTTCGCTCCATTCGAAGCTTAGATCGCACGCAAAAATTCAGTAGGTGAATAGTGTGATGTCAAATTTGTCAATGTTGGCGTTGTACTATTACCAACGCCAATTTTATTT  
GTTATAGGATTTGTGCAAGAAGCGCTCCAAAGATGAGAAATATGATTATTCTCGCAACTAGAAGAAGCGCACGAAAGAGGGGAAAGAAATGAAATTTGATTGAAGATGAATTACTGCATT  
TTAAAATTTTGCTGTATTTTGGAGTGGAAAATGGGTTTT

>comp163033\_c0\_seq3

TCCAACAGCCAACCTGTACTGCTCCTGTACTGCTCTCCTCCTCTTCTTGTCCAAGTTACTGCCTTCAAATACATCTAACGCTTCCACATCTAAGAAAATCAGAGTAAAAGAATTGAGATTG  
AGACAAACAGCAGCAGTGGAAGGGGCATGCAGAGGAGCTCTATCAATTGGCAAGTGTGACAACGTCGAAGCTCCTATGTATGCCTCCTCCACTTCTGCTGCTAGCCTCCTATGCTACTGT  
TTGTTTTGATATTGTCAAGCGGCAACATCAAAGCTCTTAGTTTCTCTCGTTTATCTCTACTGTTAAGCATCTTAATCAGTGTGGAAAGCCCAGAGATGGTTTTCTCAT

>comp163033\_c0\_seq4

TCCAACAGCCAACCTGTACTGCTCCTGTACTGCTCTCCTCCTCTTCTTGTCCAAGTTACTGCCTTCAAATACATCTAACGCTTCCACATCTAAGAAAATCAGAGTAAAAGAATTGAGATTG  
AGACAAACAGCAGCAGTGGAAGGGGCATGCAGAGGAGCTCTATCAATTGGCAAGTGTGACAACGTCGAAGCTCCTATGTATGCCTCCTCCACTTCTGCTGCTAGCCTCCTATGCTACTGT  
TTGTTTTGATATTGTCAAGCGGCAACATCAAAGCTCTTAGTTTCTCTCGTTTATCTCTACTGTTAAGCATATTAATCAGTGTGGGATGACTCTCGCTCCTATTAGATTAGATTTGAGAACT  
TTTATATGGTTATACATATTATAGAAGTTTATTTTAAATTTTTTTATAATCATGCGCTAATAATAAAAAGTTTTACCTACTTTTTAATTTGTGATAATTTAATTATCTTCTCTTGTAGAACTCT  
AATTTCACTACTGATCTTGACCTTTTGCTCGTAAGCACTCGACTCGCTTTAATGTTTTGTTTGAACGGTTTTCTTATGCTACTTAAAGCAGTCTTTTACTGAAAAGTTGATTTAAGAAG  
CAGTAAGAATGTCATCCCAAAGCCTAAGATTCGTTTGGGACGATTTTCTCACTGCTTTCTAGAAAAAATTTCTAATCAACAAATTTTATGCTGAAAAGCCGTTTTATAAAGCAATAAG  
AAAGTTGTCTCAAATGAAACCAAATTTGAGATGTTTCATTACTACTCAATTACCTTTAATCACTTGGGCTTCGTTTGGGACAACCTTTCTTTCTATTTCTTAAAGCAGTTTTTTTAG

>comp165001\_c0\_seq1

TTATCTTAATCCTGTTCCCTTGACAGCGATGTCTCGCTTATCATTATACTGTCTTCTGCATCTGCATCTGCATCTGCATCTGCGGAGAGCGAGGGGCAGTAGATCTCGGAGCTCAGATCTGC  
AAGCGCAGAGCTATTTTCTCTTCTACGCGTTGATCTAATCTAGCGGTTTCCCTTCTAGTCACTCGGCTTCTGATCAGAAGATGATGAGCATCCTGTCTTGTGTTTTTGTCTCGATCTTTTGT  
ATTCAGATGAGTGCCAGTTCGGTAAAGAAGAATCCTTTTTCTGGAGATTTAACTACTCGATCTAAACGATATCAATATTTGGCTATTATACTGTTTCGATCCCGGTCATATTCTGGAGTTCGA  
CGCCAAATACGGATTTGTTTTGTAAGTCTGATGCAATGATTTTGGTCTTGTAGATGAAGGATGATGGCAAGATTTTGTGTTGAGCTTGTTCATTGACAACGAGAGAGACGCTGGTT  
GGCGGCTGAACCCGGTCATGACTGTTTACTTGCCTGCTCCCTCTCGCTGTCACTTCCGCTCTACAAAATGGCTGCCATGAAATGTGAGTGGAGCTGTGGTTTTTGTAGTAGGAGATTCT  
ACTTTCTAAGAGGTGCTGTTTGCAGCAGAGAGGAGATGGGGATAGTAAGGATGATCAAAGTATGTAGATAGTAGGGGGTAGGGGGTTCATGAAATAGCGAGAGCTATTGCCTATAGTGAAG  
CTAGAAAGATGGCCGATTTGAGCAATAAATATTTCCAAAACCAAGAGGCTTTTGTATTAGAGGGAAGCTAATGCAGCCTTACAGATTTTCAACGCTAGTAAAGATTGTGATTTTCGTTG  
AGATGATTTTCTTCTGCTTTTTAAGATGACTTTCTTGTACAAAATTTTCAA

>comp165001\_c0\_seq4

TTATCTTAATCCTGTTCCCTTGACAGCGATGTCTCGCTTATCATTTTATACTGTCTTCTGCATCTGCATCTGCATCTGCATCTGCGGAGAGCGAGGGGCAGTAGATCTCGGAGCTCAGATCTGC  
AAGCGCAGAGCTATTTCCCTTCTACGCGTTGATCTAATCTAGCGGTTTCCCTTCTAGTCACTCGGCTTCTGATCAGAAGATGATGAGCATCTGTCTTGTTTTTTGCTTCGATCTTTTGT  
ATTCAGATGAGTGCCAGTTCGGTAAAGAAGAATCCTTTTTCTGGAGATTTAACTACTCGATCTAAACGATATCAATATTTGGCTATTATACTGTTTCGATCCCGGTCATATTCTGGAGTTCGA  
CGCCAAATACGGATTTGTTTTGTATGCTTCTCTCGATCTCGCTGGTAACTGCTGATGCAATGTATTTTGGTCTTGTAGATGAAGGATGATGGCAAGATTTTGTGTTGAGCTTGTTCATTGACA  
ACGAGAGAGAGCACGCTGGTTGGCGGCCTGAACCCGGTCATGACTGTTTACTTTCGCTGCTCCCTCTCGCTGTCATCCACTTCGCTCTACAAAATGGCTGCCATGAAATGTCAGTGGAGCT  
GTGGTTTTTAGTAGGAGATTCTACTTTCTAAGAGCACCAAGAGCACAAAGATGACATAAAAGGTTCAACTCCAGGGCTCAATCCAGAAAAGTTGTAGCTGAGCATAGAGGCACATCACAA  
GGAGCCAATTGAAGACCCAACCTAGTTAATTTCTTATTGATTGTTATTTGGATATTATGTATGTGCTAGAACTTTATGTAGTGTATGTGTAATTGTAGAAAATTTAGGTTTTAAGACTTTGAAA  
CTTAAATATTAATGATATGAAGTATTGATAAGTTAAAAATGAGATATTATAATTAATTATTTAATTAATTATAATTTACAAAAGGAGGGCCGGCCATGGAGTTTAGAGGAAGTTATTCTAT  
GTGGTGGTTACCCTTGGGAGGGGGTTTCATATAGTTACATGTGAGGTTGACCACTGTAACCTTTCCCTCCCTTGATAATTCGAATTAAGTTTGTAAACACTTATAAAGTGTGTGCATTTCTA  
GAATGAAAGTTTAAAAATATTTGTTGAC

>comp165001\_c0\_seq13

TTATCTTAATCCTGTTCCCTTGACAGCGATGTCTCGCTTATCATTTTATACTGTCTTCTGCATCTGCATCTGCATCTGCATCTGCGGAGAGCGAGGGGCAGTAGATCTCGGAGCTCAGATCTGC  
AAGCGCAGAGCTATTTCCCTTCTACGCGTTGATCTAATCTAGCGGTTTCCCTTCTAGTCACTCGGCTTCTGATCAGAAGATGATGAGCATCTGTCTTGTTTTTTGCTTCGATCTTTTGT  
ATTCAGATGAGTGCCAGTTCGGTAAAGAAGAATCCTTTTTCTGGAGATTTAACTACTCGATCTAAACGATATCAATATTTGGCTATTATACTGTTTCGATCCCGGTCATATTATACGGATTTGT  
TTTGTATGCTTCTCTCGATCTCGCTGGTAACTGCTGATGCAATGTATTTTGGTCTTGTAGATGAAGGATGATGGCAAGATTTTGTGTTGAGCTTGTTCATTGACAACGAGAGAGAGCACGCT  
GGTTGGCGGCCTGAACCCGGTCATGACTGTTTACTTTCGCTGCTCCCTCTCGCTGTCATCCACTTCGCTCTACAAAATGGCTGCCATGAAATGTCAGTGGAGCTGTGGTTTTTAGTAGGAGA  
TTCTACTTTCTAAGAGCACCAAGAGCACAAAGATGACATAAAAGGTTCAACTCCAGGGCTCAATCCAGAAAAGTTGTAGCTGAGCATAGAGGCACATCACAAAGGAGCCAATTGAAGACCC  
AACCTAGTTAATTTCTTATTGATTGTTATTTGGATATTATGTATGTGCTAGAACTTTATGTAGTGTATGTGTAATTGTAGAAAATTTAGGTTTTAAGACTTTGAAACTTAAATATTAATGATAT  
GAAGGTATTGATAAGTTAAAAATGAGATATTATAATTAATTATTTAATTAATTATAATTTACAAAAGGAGGGCCGGCCATGGAGTTTAGAGGAAGTTATTCTATGTGGTGGTTACCCTTGGG  
AGGGGGTTTCATATAGTTACATGTGAGGTTGACCACTGTAACCTTTCCCTCCCTTGATAATTCGAATTAAGTTTGTAAACACTTATAAAGTGTGTGCATTTCTAGAATGAAAGTTTAAAAATA  
TTTGTGAC

>comp167111\_c1\_seq1

TGCTTCCAGCTTTCTTATAATATATCATATATATAACACTGAAAGCTAACAATCCATCGTATCTCTTCTTTACTTTTCTCTCTATTTCTCCTTTGCCTCAACTTTGCTTCTTTTTCATGTGCACCA  
GGAGCAGCTGAAGCTGCCAGCATGATCTGAAATATTCATTCTCTCACAAAATCATGGAAGTCTCAGATCATGTTGCAGTTTACCTGCTGATAGGAGCACAAAGAAACACTTCAGCTTAATT  
ATGGCTTTATCTACAACCTGTCTCTTCTTGTAGTTACTTGAATGAAGGAAAATGAAGGAAATGAAATTCATAATATCTAGAGTTTAAAGAGAAGATATATGTGAAGATGATTGGGAATAT  
TAATTTCTTCTAAGATGGAAGAAAGAAGGCAAGGATTGCGTCTCTCATGGTTAATTAGTGCTTTGAAGATCTATGTTGCCATCGGTGCTCAAGAATCCACATGCTTGATGCTTCTTCTT  
TGTGAGCTCTCTTATATGTTAAAAATATTTCTTTCTTACAAAATGAATACACTCTCTACTTTGATTTTGTGCCATGGGGATGATTGCTGAATTGAAAGATTTGTCTTTCTATAGAAGCA  
AAAAAGTAGATTAATTTAGCCTTGCAACATGAAGTTTTTCATTGGAAAGAAAGCATAAGAAATTAATAGAGCTATGAACATTAGTTGATATCTGCACAAGATTGAGAGTCTTTTTGTATTT  
ATATTTACAGTCATGAAAATATGTTCTTGAATATGAAGATTT

>comp167111\_c1\_seq7

TTCCCCACCACTATTTATCCCCCTATCTTTTGCTAAACCCTAAAATCCAATCCCTCTCTTCTCTCCCTCTCCTCTACCTTCCTTTGATTTCTTCTGTGCACCAAAAGTTGCTGAAGCTG

CCAGCATGATCTGATTTGCTCATCAAACTTCATAGATCAGATCATGTGGTAGTTTCATCTACTATTAGGAGCACATCAAACCCTAATAATCTGCATGCAGGTATCCAAATTTCTCTCTCTTT  
CTCCTCCTCCCCCTCCTCTTCCCTCCTCCTCCACCACCGCTACTACTTACCTTAGTCACTTCTCTTCGGCATCGCCGCTCCACCCACACCTGGTCCCGCCGCGAGAATACCTCCGCG  
CTTGGTGGCGCCCTGGAATCACCCGCGGCATCGTCTTTCTCGACTCCATACCCCATTCTTCCCCGATAATGATCGAGGCGTTCCTCCATTTTGAATATCAGCGGACACCTCCCGCTTACCA  
TATTCCTCAAAGGAGGCCAACGATCCGCCATACGCGTCGCGCGGATAGCCAAGGAGCTGTTTCGACGCGTTCGATGGGAAGATTGCGTACGGTGACGTGAGGTGGATTGTGCTTGGGGA  
CGATGATACTGTGTTCTTCCGAAAACCTTGGCGGACTTTGGCGAAGTATGATTGGGAGCAGTGGTACTACGTTGGTAGTTTTTCGGAGAGCGCGGAGCAGAACCGGAAGCATTCTTT  
TGATATGGCTTTTGGCGGAGGGGGTTTTGCGATCAGCTATCCGTTGGCTAGGGTTTTGTCGAAGGTTATGGATTCTGTCTTCTGAGGTACGGGCATTTGTTTGGGAGCGATGCTAGGGTT  
TTTGTCTTGGCTTGGCAGAGCTTGGAGTGGGACTCACTCGTGAACCTGGGTTTTATCAGGTTGACCTGCGAGGAGACCTTTTTGGTTTTGCTATCCGCCATCCATTGTCACCTCTGATATCCC  
TCCATCACCTTGACTCTGTGGATCCCTTATTTCTGACAAGAACCATTGAGAAGCCTTGCGTCAATTTGTTGAAGGCAGCAAATATTGATCCAGAAAGGATTCTTCAGCAAACAGTTTGTTA  
TGATCACAAAGAGCTTCGCACCATCTCTGTTTCTTGGGGTTTTGCAGTGCAGGTATTTGAGGGTAAACGAACTCCTCAATGACCTTCTGGCATCGCAAAGGACATTTAGACCATGGAAGAG  
GGGCCGTTCTGCAACTTCAGCCATTATATGTTGATACAAGGGAGTTTCTAGAGACCCATGTAAAAGGCCAGCGATTTTCTTTCTGGAAAGTCTGTATTCCTCTGTGAGTAGAACTGAA  
AGCAATTACAGTAGGCAAACATCTGGAAATTGCTTAGGAAGTAACGTTTTCAACTAAGAGACTTCAGCAGATAACTGTTTCTTCGGAGAAGTCTCATCTTGAAATCGGGAAGGCTCTTAGA  
AGACATTGCTGTGATGTTATAGATTCTTCTCATGAAGCAGTCATGAATGTTAAGATCAGGAAATGTAAAGATGATGAGTTGATTGCTATGCATTCTAATGGAAGTTTCCCCTATCAGACTGT  
ACAGGAAAGTTATTTGATCCCTTAAGAAGAGGGGGAGAAAATAGCCAAAAGAAATTTGCTAATTGATATTGAAAAGGATGCATCTTCTCTCTTTTTTAATTCATACTTCTCTTTTATTGTGAA  
GATATCAAACCTGTAAATAACCCTTTTTTGCACCTTCGATGACTATAG

>comp167111\_c1\_seq12

TGCTTCCAGCTTTCTTATAATATATCATATATATAAACAAGCTAACAATCCATCGTATCTCTTCTTTACTTTTTCTCTCTATTTCTCCTTTGCCTCAACTTTGCTTCTTTTTTCATGTGCACCA  
GGAGCAGCTGAAGCTGCCAGCATGATCTGAAATATTCATTCTCTCACAAAATCATGGAAGTCTCAGATCATGTTGCAGTTTCACCTGCTGATAGGAGCACAAGAAACACTTCAGCTTAATT  
ATGGCTTTATCTACAACCTGTCCTCTTCTTGAGTTACTTGGAAATGAAGGAAAATGAAGGAAAATGAAATTCATAATATTCTAGAGGTTTATTAGAAATCTGAGATTCTTTATTTAATCTTTTC  
AATCTCTTTCTTTTTGTTTTTTGTTTGGCTTTTGGCCTCAAATTGGCTAACATTCAACACAGCAAAGTGTGAGTTAAGAGAAGATATATGTGAAGATGATTGGGAATATTAATTTCTTCT  
AAGATGGAAGAAAGAAGGCAAGGA

>comp167111\_c1\_seq13

TGCTTCCAGCTTTCTTATAATATATCATATATATAAACAAGCTAACAATCCATCGTATCTCTTCTTTACTTTTTCTCTCTATTTCTCCTTTGCCTCAACTTTGCTTCTTTTTTCATGTGCACCA  
GGAGCAGCTGAAGCTGCCAGCATGATCTGAAATATTCATTCTCTCACAAAATCATGGAAGTCTCAGATCATGTTGCAGTTTCACCTGCTGATAGGAGCACAAGAAACACTTCAGCTTAATT  
ATGGCTTTATCTACAACCTGTCCTCTTCTTGAGTTACTTGGAAATGAAGGAAAATGAAGGAAAATGAAATTCATAATATTCTAGAGCAAAGTGTGAGGTCAGATTGCTTCATCGCGCGG  
TTAAGAGCTTTGATTTGTCCGATTGATTCAGTACTATTCTTCTATTCCATGGATTAATATTAGTTATTTAACTGCTGTCTTTCTTTTTCTTTTCTCCTTTCTCCTTTGCAA

>comp167111\_c1\_seq14

TGCTTCCAGCTTTCTTATAATATATCATATATATAAACAAGCTAACAATCCATCGTATCTCTTCTTTACTTTTTCTCTCTATTTCTCCTTTGCCTCAACTTTGCTTCTTTTTTCATGTGCACCA  
GGAGCAGCTGAAGCTGCCAGCATGATCTGAAATATTCATTCTCTCACAAAATCATGGAAGTCTCAGATCATGTTGCAGTTTCACCTGCTGATAGGAGCACAAGAAACACTTCAGCTTAATT  
ATGGCTTTATCTACAACCTGTCCTCTTCTTGAGTTACTTGGAAATGAAGGAAAATGAAGGAAAATGAAATTCATAATATTCTAGAGGTTTATTAGAAATCTGAGATTCTTTATTTAATCTTTTC  
AATCTCTTTCTTTTTGTTTTTTGTTTGGCTTTTGGCCTCAAATTGGCTAATTAACATCCACCACAGCAAAGTGTGAGGTCAGATTGCTTCATCGCGCGGTTAAGAGCTTTGATTTGTCC  
GATTGATTCAGTACTATTCTTCTATTCCATGGATTAATATTAGTTATTTAACTGCTGTCTTTCTTTTTCTTTTCTCCTTTCTCCTTTGCAA

>comp167111\_c1\_seq16

TTCCCCACCACTATTTATCCCCCTATCTTTTGCTAAACCCTAAAATCCAATCCCTCTCTTCTCTCCCTCTCCTCTACCTTCCTTTGATTTCTTCTGTGCACCAAAAGTTGCTGAAGCTG  
CCAGCATGATCTGATTTGCTCATCAAACTTCATAGATCAGATCATGTGGTAGTTTCATCTACTATTAGGAGCACATCAAACCCTAATAATCTGCATGCAGGTATCCAAATTTCTCTCTCTTT  
CTCCTCTCCCCCTCCTCTTCTCCTCCTCCTCCACCACCGCTACTACTTACCTTAGTCACCTTCTCTTCGGCATCGCCGCCTCCACCCACACCTGGTCCCGCCGCCGAGAATACCTCCGCG  
CTTGGTGGCGCCCTGGAATCACCCGCGGCATCGTCTTTCTCGACTCCATAACCCCAATTCTTCCCCGATAATGATCGAGGCGTTCCTCCATTTCGAATATCAGCGGACACCTCCCGCTTACCA  
TATTCCTTCAAAGGAGGCCAACGATCCGCCATACGCGTCGCGCGGATAGCCAAGGAGCTGTTGACGCGTTCGATGGGAAGATTGCGTACGGTGACGTGAGGTGGATTGTGCTTGGGGA  
CGATGATACTGTGTTCTTCTCGAAAACCTTGCGGGTACTTTGGCGAAGTATGATTGGGAGCAGTGGTACTACGTTGGTAGTTTTTCGGAGAGCGCGGAGCAGAACGCGAAGCATTCTTT  
TGATATGGCTTTTGGCGGAGGGGGTTTTGCGATCAGCTATCCGTTGGCTAGGGTTTTGTCGAAGGTTATGGATTCTGTCTTCTGAGGTACGGGCATTTGTTTTGGGAGCGATGCTAGGGTT  
TTTGCTTGTGGCAGAGCTTGGAGTGGGACTCACTCGTGAACCTGGGTTTCATCAGGTTGACCTGCGAGGAGACCTTTTTGGTTTTGCTATCCGCCATCCATTGTCACCTCTGATATCCC  
TCCATCACCTTGACTCTGTGGATCCCTTATTCCTGACAAGAACCATTGAGAAGCCTTGCATGTTGTTGAAGGCAGCAAATATTGATCCAGAAAGGATTCTCAGCAAACAGTTTGTTA  
TGATCACAAAGAGCTTCGCACCATCTCTGTTTCTTGGGGTTTTGCAGTGCAGGTATTTGAGGGTAAACGAACTCCTCAATGACCTTCTGGCATCGCAAAGGACATTTAGACCATGGAAGAG  
GGCCGTTCTGCAACTCAGCCATTTATATGTTGATACAAGGGAGTTTCTAGAGACCCATGTAAGGCCAGCGATTTCTTTCTGGAAAGTCTGTATCCTCTGTGAGTAGAACTGAA  
AGCAATTACAGTAGGCCAAACATCTGAAAATTGCTTAGGAAGTAACGTTTCAACTAAGAGACTTCAGCAGATAACTGTTTCTTCGGAGAAGTCTCATCTTGAATCGGGAAGGCTCTTAGA  
AGACATTGCTGTGATGTTATAGATTCTTCTCATGAAGCAGTCATGAATGTTAAGATCAGGAAATGTAAGATGATGAGTTGATTGCTATGCATTCTTAATGGAAGTTTCCCCTATCAGACTGT  
ACAGGAAAGTTATTTGATCCCTTAAGAAGAGGGGGAGAAAATAGCCAAAAGAAATTTGCTAATTGATATTGAAAATTTTAGTGGGACTAATTTGTTGGAGCTTCATTACAACACTTCTGAC  
TTGCACTTTGATGATTTTTCAGAAGAGATTGCTGATGCGTGATGAGGATGATCTCCTTTCTTATGTTATATCATAAGTGAGCGACAACGTGTTTGTGGAGATATTATCCATGAGGTCATCATA  
CCGTCCGAGTGAATCAGGATGTGTACGTCACCTGGTACACAGGATCTGTACACATCAAAAATGATGTGACGCATTCTGATTGCTCCTCAAACGGCGTCCGGTGATCACAGAGAATA  
ATTTACATTCTTGTGAGCTTGGATGAAATGTAGAATTGATCTGCGATTGAGAATGAAAGTTATAAGCTTAATGGTGATGAAAAAGTTTTGACTGGCATGATTATATTTAATGTATAATTGAT  
ATTTTTACTAATGAAATTTATAGGTCTGATCTATTTCTTTGCTCCTTGATTCTTGAATTGAGTATTGTTTCAAGTCTTCTCATAGATCTTCAAGGTGAATGTTTGTGTTGTGCTTGTGG  
GACAGCTTCTAGTTGTTTT

>comp167111\_c1\_seq18

TTCCCCACCACTATTTATCCCCCTATCTTTTGCTAAACCCTAAAATCCAATCCCTCTCTTCTCTCCCTCTCCTCTACCTTCCTTTGATTTCTTCTGTGCACCAAAAGTTGCTGAAGCTG  
CCAGCATGATCTGATTTGCTCATCAAACTTCATAGATCAGATCATGTGGTAGTTTCATCTACTATTAGGAGCACATCAAACCCTAATAATCTGCATGCAGGTATCCAAATTTCTCTCTCTTT  
CTCCTCTCCCCCTCCTCTTCTCCTCCTCCTCCACCACCGCTACTACTTACCTTAGTCACCTTCTCTTCGGCATCGCCGCCTCCACCCACACCTGGTCCCGCCGCCGAGAATACCTCCGCG  
CTTGGTGGCGCCCTGGAATCACCCGCGGCATCGTCTTTCTCGACTCCATAACCCCAATTCTTCCCCGATAATGATCGAGGCGTTCCTCCATTTCGAATATCAGCGGACACCTCCCGCTTACCA  
TATTCCTTCAAAGGAGGCCAACGATCCGCCATACGCGTCGCGCGGATAGCCAAGGAGCTGTTGACGCGTTCGATGGGAAGATTGCGTACGGTGACGTGAGGTGGATTGTGCTTGGGGA  
CGATGATACTGTGTTCTTCTCGAAAACCTTGCGGGTACTTTGGCGAAGTATGATTGGGAGCAGTGGTACTACGTTGGTAGTTTTTCGGAGAGCGCGGAGCAGAACGCGAAGCATTCTTT  
TGATATGGCTTTTGGCGGAGGGGGTTTTGCGATCAGCTATCCGTTGGCTAGGGTTTTGTCGAAGGTTATGGATTCTGTCTTCTGAGGTACGGGCATTTGTTTTGGGAGCGATGCTAGGGTT  
TTTGCTTGTGGCAGAGCTTGGAGTGGGACTCACTCGTGAACCTGGGTTTCATCAGGTTGACCTGCGAGGAGACCTTTTTGGTTTTGCTATCCGCCATCCATTGTCACCTCTGATATCCC  
TCCATCACCTTGACTCTGTGGATCCCTTATTCCTGACAAGAACCATTGAGAAGCCTTGCATGTTGTTGAAGGCAGCAAATATTGATCCAGAAAGGATTCTCAGCAAACAGTTTGTTA  
TGATCACAAAGAGCTTCGCACCATCTCTGTTTCTTGGGGTTTTGCAGTGCAGGTATTTGAGGGTAAACGAACTCCTCAATGACCTTCTGGCATCGCAAAGGACATTTAGACCATGGAAGAG

GGGCCGTTCTGCAACTTCAGCCATTTATATGTTTCGATAACAAGGGAGTTTCTTAGAGACCCATGTAAGGCCAGCGATTTCTTTCTGGAAAGTCTGTATTCCTCTGTGAGTAGAACTGAA  
AGCAATTACAGTAGGCAAACATCTGGAAATTGCTTAGGAAGTAACGTTTCAACTAAGAGACTTCAGCAGATAACTGTTTCTCGGAGAAGTCTCATCTTGAAATCGGGAAGGCTCTTAGA  
AGACATTGCTGTGATGTTATAGATTCTTCTCATGAAGCAGTCATGAATGTTAAGATCAGGAAATGTAAGATGATGAGTTGATTGCTATGCATTCTTAATGGAAGTTTCCCCTATCAGACTGT  
ACAGGAAAGTTATTTGATCCCTTAAGAAGAGGGGGAGAAATAGCCAAAAGAAATTTGCTAATTGATATTGAAAATTTTATGTTGGACTAATTTGTTGGAGCTTCATTACAACACTTCTGAC  
TTGCACTTTGATGATTTTCAGAAGAGATTGCTGATGCGTGATGAGGATGATCTCCTTTCTAAGTGAACGACAATGTGTTTGTGGAGATATTATTCTGTGAGGTCATCAGATCGTCCGGAGGC  
TAATCAGGATGTGTACGTCACCTGGTACACAGGATCTGTACACATCAAAAATAATGATGTGACGCATTCTGATTCGCCTCCAAACGGCGTCCGGTGACCACACAGAATAATTTACATTCT  
TGTGAGCTTGGATGAAATGTAGAATTGATCTGCGATTGAGAATGAAAGTTATAAGCTTAATGGTGATGAAAAAGTTTTTACTGACTGGCATGATTATAATTAATGTATAATTGATATTTTTACTAA  
TGAAATTTATAGGTCTGATCTATTTCTTTGCTCCTTGATCTTGAATTGAGTATTGTTTCAAGTCTTTCCTCATAGATCTTCAAGGTGAATGTTTGTGTTGTGCTTGTGTTGGGACAGCTTTCT  
AGTTGTTTT

>comp168357\_c1\_seq6

AAACTCAACATGGGGCGCTGCCCCACCATAAAATTTAAAGAAAGAGAAAGCTGACCTCCACTAGATCTACTTCCCCTCTTATAAAAAACACCCCATTTCTCTTGGAGATTCAAAAAATT  
TTGAAGAGGAAGAGGAAACTCCATTACTTTGGCCTTGAAGTTCTTCTTTGTCTATGTTTATTATGCAGCGGTGAAGTGTTTGTGGAGCTTTTTTTCTTTTCATGGATGAAGTTCTGCT  
CTGTTGATTAATATGATGATGGTTTGGAGCCTTTGAGGGAGAATTGGCTTAGTGGTAGAGCTCTTTTTGTCCAAATGAGGGCCTTGGAGGGTTTTTTAATTGAGCTGCTTGGTTATGGATAC  
CACTGTCCTATTCCATATGGAAGAGAAGTATATATTTGTTGGGATAGGCCGTTGGTTTGCATAACTCAGGAGCTTTATTGATCCTCCATGAACCTTCTTTGGATTGAAGGGAGCTCTGCAT  
GTTACTAGCCCAAACTCTCAACTCTCATCATCTTCATAAACATAATCAACCATCTCTCTCTCCATTTCTTTGGCATTTGTTTTACAGATTCTTATTGTTCTTCAAAGTTTTCTATAATTACTT  
TTAGGTTCTTCTGAAAGGATGCAAGTTTATTTTCATGCTATTCTATGTATCAGCAAGGGCGTTTCTTTTTTCCCTTGACAGTTACATTCAGCTCTTTAGTTTTAACTTTGGCTTTGATACTTCATG  
ATTTTTCTTACATAAATATTTATTTTCAGGATCTTAGGCTAGTTTTTTATGGAGATATCGTTGATCATTGGCGTTATTTTTTCCGTTTTACGAAGCAGAAACTTTTTGAATTATTTTCTCAAGTAT  
TATACGCAGGAATTTTCTACTTATTTGTTTATTGTTGGAAGCTAAATTAAGGGTTAGCTAGACCATTAGCTGTTAACTAGCTGATTAAGGATGAACATAAATAACTGTTAGCTATAAC  
CTGCAGAGTGTATTTTTTGTACTGATTATTGGTGAGCTATAATGTTTTTCTGTCAAACCTCTGTATGAGAAGACGTTTAAACCGTTCTTTGTAATTCTGAATTAAGCCTTGGACTTTTTATTTTT  
TTGTAATATATAGAGCTTTTAAGCATTGCTATGCTGAGAACGAACTGATTGAAAAAATAATTCTTAATTTTCGTTTCAGTTCTCATTTAATAGTTTTTAGATTAGATTAATTTTAAAAAGGGTT  
ATTTTTTTGTTCAATTTTAAATTTAGGGTTTAGTGTGCTATTTTGTGTGTACAGATAAAATATTATTTCTGTAGAAGCGTAAACATTTTGTAAATTTATATTTAATATTAGAAAAATTTACA  
TTAAATTAATATTCGAAAGTTAATTGGACAAGTAT

>comp168949\_c1\_seq1

CTGGTCTTCCACAGCCTAAACCTAACCTTTTCATAGCCTACCATCCACTGTCGCTATCTAGAAAGACGATTCTCTTGTGAAGCGAGTGAGATCCCCTTTCCACCGATTAAGTTTAGGGTAAG  
AAGACCAGAGATCTGGAGATTCCGGCAAAGTCAAGGGCTTTCTTTTTTGGTGGCCGCTGTCGCCGCCGAGCTGATTCGCTTGGTGCAGGTCGGGACCGGGCAGAATCCTTCGGGATC  
GGAACCTGGATCCTGCCTTGCATCAACTGAATCGGCTGCGGAGAGCGAAGATTTGGTGATCCTGATCTGGGAAATGATGCGTTTTTCTTTTGAAGATCGGTTTTTTTATTTCGATTCCCTTGAAT  
TTATTTCAGCAAGTGATATAGAATTTTCGTGGATCCGTTGAAGTTCGCTGTTTTTTTTTACAGAGATGGTTTTTTGGGTCTTGATTGCTTCTCT

>comp170626\_c2\_seq1

GAGAGAGAGAGAGAGAGAATGGCTTCTCTTGATGCTTAGCATGATTGAGAACACGAGGGGGTTGGGACCATAGAGAGAGAAAGTGATGAGGAAGCATAAAGATGGCTCCTTTTATTATT  
ATTTTTTTTTCTCAAAGAAATATCCAAGAAGCTGTATTTGGCTAAGTTCAGGAAGACAATCTCATTCTACAAATAGCAGAAGAGAAAGCACTCCTGCAAGCCGTTTGTATCGAAGAGAAAAAC  
GCTCTGAGTTGAGAAGGTTACATGAAGAGAGAAGAAGAAGAGAAAAAGAGGATCAAATAGATCGCAGATCGGGATCTGATCTTCTTACAAAACAATTTTCTTCTATCTCTCCCAT

CTGTATTTATTATTATTGGATCGATGAGAGTGGGCTGACAGAAGAGAGTGAGCACACAGCGTTGAAGACTGCATCGACGAATGCCGTTCTTGTTCGCTGCTCACCTCTCTATCTGTCAGTC  
AGCCTTATTATTGGCCACTTTAATCGAACCCGTAGCTCTTCTTTCTCTTTAGGTTTGCTTTTCCCTTTGCTTTTCTTCTTATCTATCCATCACATGCCTCAACGCGAAGACAAAACAGAAAGA  
AATAGAGAGCTTTGTTGCAGAGCATTGGTTGTGGCTCATCCAAATGGCAGATCAGATCTCCACTCTTCTGACACGTCTCCCTGGGCTCGAATTTCCACAGACTTGCTGTTCTCGAGAT  
TCAAGAGGAAGCAAAGAACAGATCAGGCGGCGTGGGTTTTGAGATAGAGAGCGAGAGGACAATGGTTTATCCCCCTCTCCAACCCAAAAGAAAAAAGAAAAAAGAAAAAATTTGGGCTC  
GGAGAGCGAGAAGATGAGATCGAGAAGCGTACGCCTCCTCTGCTCTCCGTGCAATCTGGCTTAAACGGACCCTACTGTTGACCGGTCCTTGCTCCCTCTTCTCTTTTTCACTCTCTGCCT  
TCGCTGCCTCTTTTGCTTCTTCGCTCTCTTTTTCTGTGTATATTCGTTTTTTATTTTCTCAGAAGATCTGTTTTCAGTCGCTACCGGCTCTTGAAAGACAAGATCTTTGTCTTCGTGAATAAGGTTTG  
ATGACAAAAACCCTAATCTAAGCACTCAACTTTCTTCTCTCTCTCGCTCGCTCGCTCTCGCTTTCTTAAATTGCGAGGGTGATAAAGGGATGACGGGTTTCGGCCAGGTGGTTATCGG  
GCCTCCGGGTTTCGGGAAGACCACATACTGCAACGGCATGTGCGAGTTCTCAAACCTCATCGGAAGGAAAGTGGCTGTAGTCAATTTGGATCCTGCAAACGATGCATTACCATATGAATG  
TGCTATTAATATCGAAGACCTCATTAAAGCTTGGTGATGTTATGGCTGAGCATTCTTTGGACCAAATGGAGGTCTAGTCTACTGCATGGATTACTTGGAGAAAAATATCGATTGGCTGTTATC  
CAAGTTGAAACCTCTTCTCAAAGATCATTATTTCTTTTGATTTTCTGGCCAAGTTGAACTGTTCTTTCTTCAATGCAAAGAAAGTTATTTGGAAGCTTATTAGGGAGTTGGATC  
TCAGGTTAACGGCTGTTCAATTTAGTTGATGCCATTTATGCTGTGATCCTGGAAAAATGTAAGCGCTTTACTTCTGTCTACTGACAACCATGATACACTTAGAACTCCCTCACATTAATGTAT  
TGTTCAAGATTGATCTCATTGAGAGCTATGGCAAGTTAGCGTATAATCTTGAGTTCTATACAGATGTAGAAGATTTGTCTTATTTACAACATCACCTTGATCAAGATCCACGGTCATCTAAGT  
ACAGAAAACCTCACAAGGAGCTATGTGACGTCATTCAAGATTTTAGTTTGGTTAATTTTCAACCTTGGATATACAGGATAAAGAAAAGTGTGGAAATCTTGTGAAGCTTATAGACAAAA  
GCAACGGATATATATTTTCGGGTATTGAGGGAAGTGTGTGGAATTTAGCAAGATAGCTGCTGCTCCTCTCGACTGGGATTATTATAGAACAGCTGCAGTTCAAGAAAAGTATATGAAAGAT  
GACGAGTTTTTATAGAAGTTGATGGAGTTGATGGAATCAATTGGCTGTGGTGAGACATCTTTTCTCTTACATTTTTAAATCTTGTTTTGGAAATATTTTAGTTGGATTTCAGGATAAATTG  
GCAGCCAACCTGTTCTACATTTTTCTTTTGAATAGTTTTGAACATAATTTGGAAAACCTGGGCCTAATCAGATTGCACGCTGTTTTTGATTTGTTTTATCAAACCTGAAACAATATTTTTTATG  
ATGATTTTGGCTTTTCAGCCGATCTGCAAAGCTTTTGTGTGTTGAAATCACTCTACCCTACTATCATTTG

>comp170626\_c2\_seq3

GAGAGAGAGAGAGAGAGAATGGCTTCTCTTGATGCTTAGCATGATTGAGAACACGAGGGGGTTGGGACCATAGAGAGAGAAAAGTGATGAGGAAGCATAAAGATGGCTCCTTTTATTATT  
ATTTTTTTTCTCAAAGAAATATCCAAGAAGCTGTATTTGGCTAAGTTCAGGAAGACAATCTCATTCTACAAATAGCAGAAGAGAAAAGCACTCCTGCAAGCCGTTTGATCGAAGAGAAAAC  
GCTCTGAGTTGAGAAGGTTACATGAAGAGAGAAGAAGAAGAGAAAAAGGGATCAAATAGATCGCAGATCGGGATCTGATCTTCTTACAAAACAATTTTCTTCTATCTATCTCTCCCAT  
CTGTATTTATTATTATTGGATCGATGAGAGTGGGCTGACAGAAGAGAGTGAGCACACAGCGTTGAAGACTGCATCGACGAATGCCGTTCTTGTTCGCTGCTCACCTCTCTATCTGTCAGTC  
AGCCTTATTATTGGCCACTTTAATCGAACCCGTAGCTCTTCTTTCTCTTTAGGTTTGCTTTTCCCTTTGCTTTTCTTCTTATCTATCCATCACATGCCTCAACGCGAAGACAAAACAGAAAGA  
AATAGAGAGCTTTGTTGCAGAGCATTGGTTGTGGCTCATCCAAATGGCAGATCAGATCTCCACTCTTCTGACACGTCTCCCTGGGCTCGAATTTCCACAGACTTGCTGTTCTCGAGAA  
GCAAGAGGAAAAAATCTTGCCTTGATGATTTTGTAGATTCAAGAGGAAGCAAAGAACAGATCAGGCGGCGTGGGTTTTGAGATAGAGAGCGAGAGGACAATGGTTTATCCCCCTCCTC  
CAACCCAAAAGAAAAAAGAAAAAAGAAAAAATTTGGGCTCGGAGAGCGAGAAGATGAGATCGAGAAGCGTACGCCTCCTCTGCTCTTCCGTGCAATCTGGCTTAAACGGACCCTACTGTTGA  
CCGGTCTTGTCCCTCTTCTCTTTTTCACTCTCTGCCTTCGCTGCCTCTTTTGTCTTCTTCGCTCTCTTTTTCTGTGTATATTCGTTTTTTATTTTCTCAGAAGATCTGTTTTCAGTCGCTACCGGCT  
CTTGAAAGACAAGATCTTTGTCTTCGTGAATAAGGTTTGATGACAAAAACCCTAATCTAAGCACTCAACTTTCTTCTCTCTCTCGCTCGCTCGCTCTCGCTTTCTTAAATTGCGAGGG  
TGATAAAGGGATGACGGGTTTCGGCCAGGTGGTTATCGGGCTCCGGGTTTCGGGGAAGACCACATACTGCAACGGCATGTGCGAGTTCCCTCAAACCTCATCGGAAGGAAAGTGGCTGTAG  
TCAATTTGGATCCTGCAAACGATGCATTACCATATGAATGTGCTATTAATATCGAAGACCTCATTAAAGCTTGGTGATGTTATGGCTGAGCATTCTTGGACCAAATGGAGGTCTAGTCTACT  
GCATGGATTACTTGGAGAAAAATATCGATTGGCTGTTATCCAAGTTGAAACCTCTTCTCAAAGATCATTATTTCTTTTGGATTTTCTGGCCAAGTTGAACTGTTCTTTCTTCAATGAAATG

CAAAGAAAGTTATTTGGAAGCTTATTAGGGAGTTGGATCTCAGGTTAACGGCTGTTCAATTTAGTTGATGCCATTTATGCTGTGATCCTGGAAAATATGTAAGCGCTTTACTTCTGTCACTG  
ACAACCATGATACTTAGAACTCCCTCACATTAATGTATTGTCCAAGATTGATCTCATTGAGAGCTATGGCAAGTTAGCGTATAATCTTGAGTTCTATACAGATGTAGAAGATTTGTCTTAT  
TTACAACATCACCTTGATCAAGATCCACGGTCATCTAAGTACAGAAAACTCACAAAGGAGCTATGTGACGTCATTCAAGATTTTAGTTTGGTTAATTTACACAACCTTGGATATACAGGATAA  
AGAAAGTGTGGAAATCTTGTGAAGCTTATAGACAAAAGCAACGGATATATATTTTCGGGTATTGAGGGAAGTGTGTGGAATTTAGCAAGATAGCTGCTGCTCCTCTCGACTGGGATTAT  
TATAGATATCCTTTTATGTTAAATTTCTTTTACTTCTCTAAATGGTTATTAATAGCTTGGCGTTTTTTGTGTAACAATTCCTCGTTGAAATTGTTGGCATATTTTTTCTTATACATCTATCGCCT  
GCCTAAATTCCTTTCCCTTAGGAAGTTAGCTGTTGGTTTTTTTTTTGTAGTGCAACCTCAGGACATTATAAATACTCTTAAGTAGGCATTTCCCATTCATTATTTATTTAATACTTTCAATAT  
AGTTATTTTCATTCCTTTGGATTAGTCACACATATTTGAAGTCAGTTACTACTGCATTATCAAGGGTAATATGAGACATTTATAAATAGAATAAAAATTCACTTTTTAATTTTTCTACTTGTAGT  
TGGCCAGCCCAATTTCTTGGAGTTTTGTCAAGTTTTTATGCATACAGAATGTTCTTCGCCTTTCTTTAATTTTAGTTCAACAACAGCTGCAGTTCAAGAAAAGTATATGAA

>comp170626\_c2\_seq4

GAGAGAGAGAGAGAGAGAATGGCTTCTCTTGATGCTTAGCATGATTGAGAACACGAGGGGGTTGGGACCATAGAGAGAGAAAGTGATGAGGAAGCATAAAGATGGCTCCTTTTATTATT  
ATTTTTTTTTCTCAAAGAAATATCCAAGAAGCTGTATTTGGCTAAGTTCAGGAAGACAATCTCATTCTACAAATAGCAGAAGAGAAAGCACTCCTGCAAGCCGTTTGATCGAAGAGAAAAC  
GCTCTGAGTTGAGAAGGTTACATGAAGAGAGAAGAAGAAGAGAAAAGAGGATCAAATAGATCGCAGATCGGGATCTGATCTTCCTTCACAAACAATTTCTTCCTATCTATCTCTCCCAT  
CTGTATTTATTATTATTGGATCGATGAGAGTGGGCTGACAGAAGAGAGTGAGCACACAGCGTTGAAGACTGCATCGACGAATGCCGTTCTGTGCGTGCTCACCTCTCTATCTGTCACTG  
AGCCTTATTATTGGCCACTTTAATCGAACCCGTAGCTCTTCTTTCTCTTTAGGTTTGCTTTTCTTTCTTCTATCTATCCATCACATGCCTCAACGCGAAGACAAAAACAGAAAGA  
AATAGAGAGCTTTGTTGCAGAGCATTGTTGTGGCTCATCCAAATGGCAGATCAGATCTCCCACTCTTCTGACACGCTCCTCGGGCTCGAATTTCCACAGACTTGCTGTTCTCGAGAA  
GCAAGAGGAAAAAATCTTGCCTTGATGATTTGTAGATTTCAAGAGGAAGCAAAGAACAGATCAGGCGGCGTGGGTTTTGAGATAGAGAGCGAGAGGACAATGGTTTATTTCCCTCCTC  
CAACCCAAAAGAAAAAAAACGAAAATTTTGGGCTCGGAGAGCGAGAAGATGAGATCGAGAAGCGTACGCTCCTCTGCTCTTCCGTGCAATCTGGCTTAACGGACCCTACTGTTGA  
CCGGTCTTGCTCCCTCTTCTTTTCTACTCTCTGCCTTCGCTGCCTTTTTGCTTCTTCGCTCTTTTTCTGTGTATATTTGTTTTTATTTTCAAGAATCTGTTTCACTGCTACCGGCT  
CTTGAAAGACAAGATCTTTGTCTTCGTGAATAAGGTTTGTATGACAAAAACCCTAATCTAAGCACTCAACTTTCTTCTCTCTCTCGCTCGCTCGCTCTCGCTTTCTTAAATTTGCGAGGG  
TGATAAAGGATGACGGGTTTCGGCCAGGTGGTTATCGGGCTCCGGGTTTCGGGGAAGACCACATACTGCAACGGCATGTGCGAGTTCCTCAAACCTCATCGAAGGAAAGTGGCTGTAG  
TCAATTTGGATCCTGCAACGATGCATTACCATATGAATGTGCTATTAATATCGAAGACCTCATTAAGCTTGGTGATGTTATGGCTGAGCATTCTCTTGGACCAAATGGAGGTCTAGTCTACT  
GCATGGATTACTTGGAGAAAAATATCGATTGGCTGTTATCCAAGTTGAAACCTCTTCTCAAAGATCATTATTTCTTTTTGATTTTCTTGCCAAGTTGAACTGTTCTTTCTTCAATCAAATG  
CAAAGAAAGTTATTTGGAAGCTTATTAGGGAGTTGGATCTCAGGTTAACGGCTGTTCAATTTAGTTGATGCCATTTATGCTGTGATCCTGGAAAATATGTAAGCGCTTTACTTCTGTCACTG  
ACAACCATGATACTTAGAACTCCCTCACATTAATGTATTGTCCAAGATTGATCTCATTGAGAGCTATGGCAAGTTAGCGTATAATCTTGAGTTCTATACAGATGTAGAAGATTTGTCTTAT  
TTACAACATCACCTTGATCAAGATCCACGGTCATCTAAGTACAGAAAACTCACAAAGGAGCTATGTGACGTCATTCAAGATTTTAGTTTGGTTAATTTACACAACCTTGGATATACAGGATAA  
AGAAAGTGTGGAAATCTTGTGAAGCTTATAGACAAAAGCAACGGATATATATTTTCGGGTATTGAGGGAAGTGTGTGGAATTTAGCAAGATAGCTGCTGCTCCTCTCGACTGGGATTAT  
TATAGATATCCTTTTATGTTAAATTTCTTTTACTTCTCTAAATGGTTATTAATAGCTTGGCGTTTTTTGTGTAACAATTCCTCGTTGAAATTGTTGGCATATTTTTTCTTATACATCTATCGCCT  
GCCTAAATTCCTTTCCCTTAGGAAGTTAGCTGTTGGTTTTTTTTTTGTAGTGCAACCTCAGGACATTATAAATACTCTTAAGTAGGCATTTCCCATTCATTATTTATTTAATACTTTCAATAT  
AGTTATTTTCATTCCTTTGGATTAGTCACAGTTACTTCTGCATTATCAAGGGTAATATGAGACATTTATAAATAGAATAAAAATTCACTTTTTAATTTTTCTACTTGTAGTTGGCCAGCCCAATT  
TCTTGGAGTTTTGTCAAGTTTTTATGCATACAGAATGTTCTTCGCCTTTCTTTAATTTTAGTTCAACAACAGCTGCAGTTCAAGAAAAGTATATGAA

>comp170626\_c2\_seq5

GAGAGAGAGAGAGAGAGAATGGCTTCTCTTGATGCTTAGCATGATTGAGAACACGAGGGGGTGGGACCATAGAGAGAGAAAGTGATGAGGAAGCATAAAGATGGCTCCTTTTATTATT  
ATTTTTTTTCTCAAAGAAATATCCAAGAAGCTGTATTTGGCTAAGTTCAGGAAGACAATCTCATTCTACAAATAGCAGAAGAGAAAGCACTCCTGCAAGCCGTTTGATCGAAGAGAAAAC  
GCTCTGAGTTGAGAAGGTTACATGAAGAGAGAAGAAGAAGAGAAAAAGAGGATCAAATAGATCGCAGATCGGGATCTGATCTTCCTTCACAAACAATTTTCTTCCTATCTATCTCTCCCAT  
CTGTATTTATTATTATTGGATCGATGAGAGTGGGCTGACAGAAGAGAGTGAGCACACAGCGTTGAAGACTGCATCGACGAATGCCGTTCTTGTTCGCTGCTCACCTCTCTATCTGTACAGTC  
AGCCTTATTATTGGCCACTTTAATCGAACCCGTAGCTCTTCTTCCTCTTTAGGTTTGCTTTTCTTCTTATCTATCCATCACATGCCTCAACGCGAAGACAAAACAGAAAGA  
AATAGAGAGCTTTGTTGCAGAGCATTGGTTGTGGCTCATCCAAATGGCAGATCAGATCTCCCACTCTTCTGACACGTCTCCCTGGGCTCGAATTTCCACAGACTTGCTGTTCTCGAGGT  
GTTAATTTTATTGGTTTCTTCAAATTTGCTTTGGAATAGCGTGAATATAATTTGGATAAAGTTGATATCTTGATTATTTGTAGAAGCAAGAGGAAAAAATCTTGCCTTGATGATTTGTAGATT  
CAAGAGGAAGCAAAGAACAGATCAGGCGGCGTGGGTTTTGAGATAGAGAGCGAGAGGACAATGGTTTATCCCCCTCCTCAACCCAAAAAGAAAAAACAAGAAAATTTTGGGCTC  
GGAGAGCGAGAAGATGAGATCGAGAAGCGTACGCCTCCTCTGCTCTCCGTGCAATCTGGCTTAACGGACCCTACTGTTGACCGGTCCTTGTCCCTCTTCTTCTTTTTCACTCTCTGCCT  
TCGCTGCCTCTTTTGCTTCTTCGTCTCTTTTTCTGTGTATATTCGTTTTTATTTCAGAAGATCTGTTGACGCTACCGGCTCTGAAAGACAAGATCTTGTCTTCGTGAATAAGGTTG  
ATGACAAAAACCCTAATCTAAGCACTCAACTTCTCTCTCTCTCGCTCGCTCGCTCTCGCTTTCTTAAATTTGCGAGGGTGATAAAGGGATGACGGGTTTCGGCCAGGTGGTTATCGG  
GCCTCCGGGTTTCGGGAAGACCACATACTGCAACGGCATGTGCGAGTTCTCAAACCTCATCGGAAGGAAAGTGGCTGTAGTCAATTTGGATCCTGCAAACGATGCATTACCATATGAATG  
TGCTATTAATATCGAAGACCTCATTAAGCTTGGTGATGTTATGGCTGAGCATTCTTTGGACCAAATGGAGGTCTAGTCTACTGCATGGATTACTTGGAGAAAAATATCGATTGGCTGTTATC  
CAAGTTGAAACCTCTTCTCAAAGATCATTATTTCTTTTTGATTTTCTGGCCAAGTTGAACTGTTCTTTCTTCAATCAAAGAAAGTTATTTGGAAGCTTATTAGGGAGTTGGATC  
TCAGGTTAACGGCTGTTCAATTTAGTTGATGCCATTTATGCTGTGATCCTGGAAAATATGTAAGCGCTTTACTTCTGTCACTGACAACCATGATACACTTAGAACTCCCTCACATTAATGTAT  
TGTTCAAGATTGATCTCATTGAGAGCTATGGCAAGTTAGCGTATAATCTTGAGTTCTATACAGATGTAGAAGATTTGTCTTATTTACAACATCACCTTGATCAAGATCCACGGTCATCTAAGT  
ACAGAAAACCTCACAAAGGAGCTATGTGACGTCATTCAAGATTTTAGTTTGGTTAATTTACAACCTTGGATATACAGGATAAAGAAAGTGTGGAATCTTGTGAAGCTTATAGACAAAA  
GCAACGGATATATATTTTCGGGTATTGAGGGAAGTGTGTGGAATTTAGCAAGATAGCTGCTGCTCCTCTCGACTGGGATTATATAGATATCCTTTTATGTTAAATTTCTTTTACTTCTCTA  
AATGGTTATTAATAGCTTGGCGTTTTTTGTGTAACAATTTCTCTGTTGAAATTTGTTGGCATAATTTTTCTTATAACATCTATCGCCTGCCTAAATTCCTTTCCCTTAGGAAGTTAGCTGTTGGTTT  
TTTTTTTGTAGTGCAACCTCAGGACATTATAAATACTCTTAAGTAGGCATTTCCCATTCATTATTTATTTAATACTTTCAATATAGTTATTTTCATTCTTTGGATTAGTCACACATATTTGAA  
GTCAGTTACTACTGCATTATCAAGGGTAATATGAGACATTTATAAATAGAATAAAATTCACTTTTTAATTTTTCTACTTGTAGTTGGCCAGCCCAATTTCTTGGAGTTTTGTCAAGTTTTTAT  
GCATACAGAATGTTCTTCGCCTTTCTTTAATTTTAGTTTACAACAGCTGCAGTTCAAGAAAAGTATATGAAAGATGACGAGTTTTTATAGAAGTTGATGGAGTTTGTGGAATCAATTGGCT  
GTGGTTGAGCAATCAATGATGCATTTGGAGGTTGCTGAAACTAAAATGTTGATCATCACCTTATATGTTGGATTATGTAAACCACATGTTGTACTTCATGTAATGTGTGGGGTGTTCATTG  
TTGATTAATTTATGAATTAATCATATATGATTAATGATCTCTTTTTCTTTTCATTTTTTTGTTTGG

>comp170626\_c2\_seq6

GAGAGAGAGAGAGAGAGAATGGCTTCTCTTGATGCTTAGCATGATTGAGAACACGAGGGGGTGGGACCATAGAGAGAGAAAGTGATGAGGAAGCATAAAGATGGCTCCTTTTATTATT  
ATTTTTTTTCTCAAAGAAATATCCAAGAAGCTGTATTTGGCTAAGTTCAGGAAGACAATCTCATTCTACAAATAGCAGAAGAGAAAGCACTCCTGCAAGCCGTTTGATCGAAGAGAAAAC  
GCTCTGAGTTGAGAAGGTTACATGAAGAGAGAAGAAGAAGAGAAAAAGAGGATCAAATAGATCGCAGATCGGGATCTGATCTTCCTTCACAAACAATTTTCTTCCTATCTATCTCTCCCAT  
CTGTATTTATTATTATTGGATCGATGAGAGTGGGCTGACAGAAGAGAGTGAGCACACAGCGTTGAAGACTGCATCGACGAATGCCGTTCTTGTTCGCTGCTCACCTCTCTATCTGTACAGTC  
AGCCTTATTATTGGCCACTTTAATCGAACCCGTAGCTCTTCTTCCTCTTTAGGTTTGCTTTTCTTCTTATCTATCCATCACATGCCTCAACGCGAAGACAAAACAGAAAGA  
AATAGAGAGCTTTGTTGCAGAGCATTGGTTGTGGCTCATCCAAATGGCAGATCAGATCTCCCACTCTTCTGACACGTCTCCCTGGGCTCGAATTTCCACAGACTTGCTGTTCTCGAGAA



GCAAGAGGAAAAAATCTTGCCTTGATGATTTTGTAGATTCAAGAGGAAGCAAAGAACAGATCAGGCGGCGTGGGTTTTGAGATAGAGAGCGAGAGGACAATGGTTTATTCCCCCTCCTC  
CAACCCAAAAGAAAAAACAACGAAAATTTTGGGCTCGGAGAGCGAGAAGATGAGATCGAGAAGCGTACGCCTCCTCTGCTCTTCCGTGCAATCTGGCTTAACGGACCCTACTGTTGA  
CCGGTCCCTTGCTCCCTCTTCTTTTTCTCTCTGCTTTCGCTGCCTCTTTTGGCTTCTTCGCTCTCTTTTTCTGTGTATATTTTCGTTTTTTATTTTCAGAAGATCTGTTTCAGTCGCTACCGGCT  
CTTAAAAGACAAGATCTTTGTCTTCGTGAATAAGGTTTGATGACAAAAACCCTAATCTAAGCACTCAACTTTCTTCTCTCTCTCGCTCGCTCGCTCTCGCTTTCTTAAATTGCGAGGG  
TGATAAAGGGATGACGGGTTTCGGCCAGGTGGTTATCGGGCTCCGGGTTTCGGGGAAGACCACATACTGCAACGGCATGTCGCAGTTCCTCAAACCTCATCGGAAGGAAAGTGGCTGTAG  
TCAATTTGGATCCTGCAAACGATGCATTACCATATGAATGTGCTATTAATATCGAAGACCTCATTAAGCTTGGTGATGTTATGGCTGAGCATTCTCTTGGACCAAATGGAGGTCTAGTCTACT  
GCATGGATTACTTGGAGAAAAATATCGATTGGCTGTTATCCAAGTTGAAACCTCTTCTCAAAGATCATTATTTCTTTTTGATTTTCTTGCCCAAGTTGAACTGTTCTTCTTTCATTCAAATG  
CAAAGAAAGTTATTTGGAAGCTTATTAGGGAGTTGGATCTCAGGTTAACGGCTGTTCAATTTAGTTGATGCCATTTATGCTGTGATCCTGGAAAATATGTAAGCGCTTTACTTCTGTCACTG  
ACAACCATGATACACTTAGAACTCCCTCACATTAATGTATTGTCCAAGATTGATCTCATTGAGAGCTATGGCAAGTTAGCGTATAATCTTGAGTTCTATACAGATGTAGAAGATTTGTCTTAT  
TTACAACATCACCTTGATCAAGATCCACGGTCATCTAAGTACAGAAAACTCACAAAGGAGCTATGTGACGTCATTCAAGATTTAGTTTGGTTAATTTACAACCTTGGATATACAGGATAA  
AGAAAGTGTGGAAATCTTGTGAAGCTTATAGACAAAAGCAACGGATATATATTTTCGGGTATTGAGGGAAGTGTGTTGGAATTTAGCAAGATAGCTGCTGCTCCTCTCGACTGGGATTAT  
TATAGAACAGCTGCAGTTCAAGAAAAGTATATGAAAGATGACGAGTTTTTATAGAAGTTGATGGAGTTTGTGGAATCAATTTGGCTGCGGTTGAGCAATCAATGATGCATTTGGAGGTTGC  
TGAAACTAAAATTGTTGATCATCACCTTATATGTTGGATTATGTAACCACATGTTGTACTTCATGTAATGTGTGGGGTTGTTCAATGTTGATTAATTTATGAATTATTCATATATGATTAATGAT  
CTCTCTTTTTCTTTTCATTTTTTTTGTGG

>comp170626\_c2\_seq7

GAGAGAGAGAGAGAGAGAATGGCTTCTCTTGATGCTTAGCATGATTGAGAACACGAGGGGGTTGGGACCATAGAGAGAGAGAAAGTGATGAGGAAGCATAAAGATGGCTCCTTTTATTATT  
ATTTTTTTTTCTCAAAGAAATATCCAAGAAGCTGTATTTGGCTAAGTTCAGGAAGACAATCTCATTCTACAAATAGCAGAAGAGAAAGCACTCCTGCAAGCCGTTTGATCGAAGAGAAAAC  
GCTCTGAGTTGAGAAGGTTACATGAAGAGAGAAAGAAGAAGAGAAAAGAGGATCAAATAGATCGCAGATCGGGATCTGATCTTCCCTCACAAAACAATTTTCTTCCCTATCTATCTCTCCCAT  
CTGTATTTATTATTATTGGATCGATGAGAGTGGGCTGACAGAAGAGAGTGAGCACACAGCGTTGAAGACTGCATCGACGAATGCCGTTCTTGTGCGTGCTCACCTCTCTATCTGTCACTG  
AGCCTTATTATTGGCCACTTTAATCGAACCCGTAGCTCTTCTTCCCTCTTTAGGTTTGCTTTTCCCTTTGCTTTTCTTCTTATCTATCCATCACATGCCTCAACGCGAAGACAAAACAGAAAGA  
AATAGAGAGCTTTGTTGCAGAGCATTGGTTGTGGCTCATCCAAATGGCAGATCAGATCTCCCACTCTTCTGACACGTCTCCCTGGGCTCGAATTTCCACAGACTTGCTGTTCTCGAGAT  
TCAAGAGGAAGCAAAGAACAGATCAGGCGGCGTGGGTTTTGAGATAGAGAGCGAGAGGACAATGGTTTATTCCCCCTCCTCCAACCCAAAAGAAAAAACAACGAAAATTTGGGCTC  
GGAGAGCGAGAAGATGAGATCGAGAAGCGTACGCCTCCTCTGCTCTTCCGTGCAATCTGGCTTAACGGACCCTACTGTTGACCGGTCCTTGCTCCCTCTTCTTCTTTTTCACTCTCTGCCT  
TCGCTGCCTCTTTTGGCTTCTTCGCTCTCTTTTTCTGTGTATATTTTCGTTTTTTATTTTCAGAAGATCTGTTTCAGTCGCTACCGGCTCTTGAAGACAAGATCTTTGTCTTCGTGAATAAGGTTTG  
ATGACAAAAACCCTAATCTAAGCACTCAACTTTCTTCTCTCTCTCGCTCGCTCGCTCTCGCTTTCTTAAATTGCGAGGGTGATAAAGGGATGACGGGTTTCGGCCAGGTGGTTATCGG  
GCCTCCGGGTTTCGGGGAAGACCACATACTGCAACGGCATGTCGCAGTTCCTCAAACCTCATCGGAAGGAAAGTGGCTGTAGTCAATTTGGATCCTGCAAACGATGCATTACCATATGAATG  
TGCTATTAATATCGAAGACCTCATTAAGCTTGGTGATGTTATGGCTGAGCATTCTTGGACCAAATGGAGGTCTAGTCTACTGCATGGATTACTTGGAGAAAAATATCGATTGGCTGTTATC  
CAAGTTGAAACCTCTTCTCAAAGATCATTATTTCTTTTTGATTTTCTTGCCCAAGTTGAACTGTTCTTTCTTATTCAAATGCAAAGAAAGTTATTTGGAAGCTTATTAGGGAGTTGGATC  
TCAGGGTATTGTAGTCAATCTATCATAATTTGAAGATGTGTATGATATGGTAGCAGCGATGACAGGGCTCAGTGTGTTGCTATTCTTTGCTTTATTTTGAATTTACCATTTCTTTGTGCAGT  
TAACGGCTGTTCAATTTAGTTGATGCCATTTATGCTGTGATCCTGGAAAATATGTAAGCGCTTTACTTCTGTCACTGACAACCATGATACACTTAGAACTCCCTCACATTAATGTATTGTCCA  
AGATTGATCTCATTGAGAGCTATGGCAAGTTAGCGTATAATCTTGAGTTCTATACAGATGTAGAAGATTTGTCTTATTTACAACATCACCTTGATCAAGATCCACGGTCATCTAAGTACAGAA

AACTCACAAAGGAGCTATGTGACGTCATTCAAGATTTTAGTTTGGTTAATTTACACAACCTTGGATATACAGGATAAAGAAAGTGTTGGAAATCTTGTGAAGCTTATAGACAAAAGCAACG  
GATATATATTTTCGGGTATTGAGGGAAGTGTTGTGGAATTTAGCAAGATAGCTGCTGCTCCTCTCGACTGGGATTATTATAGATATCCTTTTATGTAAATTTTCTTTTACTTCTCTAAATGGTT  
ATTAATAGCTTGGCGTTTTTTGTGTAACAATTTCTCGTTGAAATTTGTTGGCATAATTTTTCTTATAACATCTATCGCCTGCCTAAATTCCTTTCCCTTAGGAAGTTAGCTGTTGGTTTTTTTTTT  
GTAGTGCAACCTCAGGACATTATAAATACTCTTAAGTAGGCATTTTCCCATTCAATTATTTAATTTAATACTTCAATATAGTTATTTTCATTCTTTGGATTAGTCACAGTTACTTCTGCATTATC  
AAGGGTAATATGAGACATTTATAAATAGAATAAAAATTCACTTTTTAATTTTTCTACTTGTAGTTGGCCAGCCCAATTTCTTGGAGTTTTGTCAAGTTTTTATGCATACAGAATGTTCTTCGCC  
TTTTCTTAATTTAGTTTCAACAGCTGCAGTTCAAGAAAAGTATATGAA

>comp170626\_c2\_seq8

GAGAGAGAGAGAGAGAATGGCTTCTCTTGATGCTTAGCATGATTGAGAACACGAGGGGGTGGGACCATAGAGAGAGAAAGTGATGAGGAAGCATAAAGATGGCTCCTTTTATTATT  
ATTTTTTTTCTCAAAGAAATATCCAAGAAGCTGTATTTGGCTAAGTTCAGGAAGACAATCTCATTCTACAAATAGCAGAAGAGAAAAGCACTCCTGCAAGCCGTTTGATCGAAGAGAAAAC  
GCTCTGAGTTGAGAAGGTTACATGAAGAGAGAAGAAGAAGAGAAAAGAGGATCAAATAGATCGCAGATCGGGATCTGATCTTCTTACAAAACAATTTTCTTCTATCTATCTCTCCCAT  
CTGATTTTATTATTATTGGATCGATGAGAGTGGGCTGACAGAAGAGAGTGAGCACACAGCGTTGAAGACTGCATCGACGAATGCCGTTCTTGTGCGTGCTCACCTCTATCTGTGTCAGTC  
AGCCTTATTATTGGCCACTTTAATCGAACCCGTAGCTCTTCTTCTCTTTAGGTTTGCTTTTCTTCTTATCTATCCATCACATGCCTCAACGCGAAGACAAAACAGAAAAGA  
AATAGAGAGCTTTGTTGACAGAGCATTGGTTGTGGCTCATCCAAATGGCAGATCAGATCTCCCACTCTTCTGACACGCTCCTCGGGCTCGAATTTCCACAGACTTGCTGTTCTCGAGGT  
GTTAATTTTATTGGTTCTTCAAATTTGCTTTGGAATAGCGTGAATATAATTTGGATAAAGTTGATATCTTGATTATTTGTAGAAGCAAGAGGAAAAAATCTTGCCTTGATGATTTTGTAGATT  
CAAGAGGAAGCAAAGAACAGATCAGGCGGCGTGGGTTTTGAGATAGAGAGCGAGAGGACAATGGTTTATTTCCCTCCTCCAACCCAAAAGAAAAAACAAGAAAATTTTGGGCTC  
GGAGAGCGAGAAGATGAGATCGAGAAGCGTACGCCTCCTCTGCTCTTCCGTGCAATCTGGCTTAACGGACCCTACTGTTGACCGGTCCTTGTCCCTCTTCTTTTTTCACTCTCTGCCT  
TCGCTGCCTCTTTTGGCTTCTTCGCTCTTCTTTTTCTGTGTATATTCGTTTTTATTTCAGAAGATCTGTTCACTGCTACCGGCTCTTGAAGACAAGATCTTGTCTTCGTGAATAAGGTTTG  
ATGACAAAAACCCTAATCTAAGCACTCAACTTCTTCTCTCTCTCGCTCGCTCGCTCTCGCTTCTTAAATTGCGAGGGTGATAAAGGGATGACGGGTTTCGGCCAGGTGGTTATCGG  
GCCTCCGGGTTTCGGGAAGACCACATACTGCAACGGCATGTGCGAGTTCTCAAACCTCATCGGAAGGAAAGTGGCTGTAGTCAATTTGGATCCTGCAAACGATGCATTACCATATGAATG  
TGCTATTAATATCGAAGACCTCATTAAAGCTTGGTGATGTTATGGCTGAGCATTCTTGGACCAATGGAGGTCTAGTCTACTGCATGGATTACTTGGAGAAAAATATCGATTGGCTGTTATC  
CAAGTTGAAACCTCTTCTCAAAGATCATTATTTCTTTTTGATTTTCTTGGCCAAGTTGAACTGTTCTTTCTTCAATCAAATGCAAAGAAAGTTATTTGGAAGCTTATTAGGGAGTTGGATC  
TCAGGTTAACGGCTGTTCAATTTAGTTGATGCCATTTATGCTGTGATCCTGGAAAATATGTAAGCGCTTACTTCTGTCACTGACAACCATGATACACTTAGAACTCCCTCACATTAATGTAT  
TGTTCAAGATTGATCTCATTGAGAGCTATGGCAAGTTAGCGTATAATCTTGAGTTCTATACAGATGTAGAAGATTTGTCTTATTTACAACATCACCTTGATCAAGATCCACGGTCATCTAAGT  
ACAGAAAACCTCACAAAGGAGCTATGTGACGTCATTCAAGATTTTAGTTTGGTTAATTTACACAACCTTGGATATACAGGATAAAGAAAGTGTTGGAAATCTTGTGAAGCTTATAGACAAAA  
GCAACGGATATATATTTTCGGGTATTGAGGGAAGTGTTGTGGAATTTAGCAAGATAGCTGCTGCTCCTCTCGACTGGGATTATTATAGATATCCTTTTATGTAAATTTCTTTTACTTCTCTA  
AATGGTTATTAATAGCTTGGCGTTTTTTGTGTAACAATTTCTCGTTGAAATTTGTTGGCATAATTTTTCTTATAACATCTATCGCCTGCCTAAATTCCTTTCCCTTAGGAAGTTAGCTGTTGGTTT  
TTTTTTTGTAGTGCAACCTCAGGACATTATAAATACTCTTAAGTAGGCATTTTCCCATTCAATTATTTAATTTAATACTTCAATATAGTTATTTTCATTCTTTGGATTAGTCACAGTTACTTCTG  
CATTATCAAGGGTAATATGAGACATTTATAAATAGAATAAAAATTCACTTTTTAATTTTTCTACTTGTAGTTGGCCAGCCCAATTTCTTGGAGTTTTGTCAAGTTTTTATGCATACAGAATGTT  
CTTCGCCCTTTCTTTAATTTAGTTTCAACAGCTGCAGTTCAAGAAAAGTATATGAAAGATGACGAGTTTTTATAGAAGTTGATGGAGTTGATGGAATCAATTTGGCTGTGGTTGAGCAAT  
CAATGATGCATTTGGAGTTGCTGAAACTAAAATGTTGATCATCACCTTATATGTTGGATTATGTAAACCACATGTTGTACTTCATGTAATGTGTGGGGTTGTTCAATGTTGATTAATTTATG  
AATTATTCATATATGATTAATGATCTCTTTTTCTTTTCATTTTTTTGTTTGG

>comp170626\_c2\_seq9

GAGAGAGAGAGAGAGAGAATGGCTTCTCTTGATGCTTAGCATGATTGAGAACACGAGGGGGTGGGACCATAGAGAGAGAAAAGTGATGAGGAAGCATAAAGATGGCTCCTTTTATTATT  
ATTTTTTTTCTCAAAGAAATATCCAAGAAGCTGTATTTGGCTAAGTTCAGGAAGACAATCTCATTCTACAAATAGCAGAAGAGAAAAGCACTCCTGCAAGCCGTTTGATCGAAGAGAAAAC  
GCTCTGAGTTGAGAAGGTTACATGAAGAGAGAAGAAGAAGAGAAAAGAGGATCAAATAGATCGCAGATCGGGATCTGATCTTCCTTCACAAACAATTTTCTTCCTATCTATCTCTCCCAT  
CTGTATTTATTATTATTGGATCGATGAGAGTGGGCTGACAGAAGAGAGTGAGCACACAGCGTTGAAGACTGCATCGACGAATGCCGTTCTTGTGCGTGCTCACCTCTCTATCTGTCAAGTC  
AGCCTTATTATTGGCCACTTTAATCGAACCCGTAGCTCTTCTTTCTCTTTAGGTTTGCTTTTCTTTGCTTTTCTTCTTATCTATCCATCACATGCCTCAACGCGAAGACAAAACAGAAAGA  
AATAGAGAGCTTTGTTGCAGAGCATTGTTGTTGTTGCTCATCCAAATGGCAGATCAGATCTCCCACTCTTCTGACACGTCTCCCTGGGCTCGAATTTCCACAGACTTGCTGTTCTCGAGGT  
GTTAATTTTATTGGTTTCTTCAAATTTGCTTTGGAATAGCGTGAATATATTTGGATAAAGTTGATATCTTGATTATTTGTAGAAGCAAGAGGAAAAAATCTTGCCTTGATGATTTTGTAGATT  
CAAGAGGAAGCAAAGAACAGATCAGGCGGCGTGGGTTTTGAGATAGAGAGCGAGAGGACAATGGTTTATCCCCCTCCTCAAACCCAAAAGAAAAAAAAAACGAAAATTTGGGCTC  
GGAGAGCGAGAAGATGAGATCGAGAAGCGTACGCCTCCTCTGCTCTCCGTGCAATCTGGCTTAACGGACCCACTGTTGACCGGTCCCTGCTCCCTCTTCTTCTTTTCACTCTCTGCT  
TCGCTGCCTCTTTTGTCTTCTCGTCTTCTTTTCTGTGTATATTTCTGTTTTTATTTTCAAGATCTGTTTCACTGCTACCGGCTCTTGAAGACAAGATCTTTGTCTTCGTGAATAAGGTTTG  
ATGACAAAAACCCTAATCTAAGCACTCAACTTTCTTCTCTCTCTCGCTCGCTCGCTCTCGCTTTCTTAAATTGCGAGGGTGATAAAGGGATGACGGGTTTCGGCCAGGTGGTTATCGG  
GCCTCCGGGTTTCGGGGAAGACCACATACTGCAACGGCATGTGCGAGTTCCTCAAACCTCATCGGAAGGAAAGTGGCTGTAGTCAATTTGGATCCTGCAAACGATGCATTACCATATGAATG  
TGCTATTAATATCGAAGACCTCATTAAAGCTTGGTGTATGTTATGGCTGAGCATTCTTGGACCAAATGGAGGTCTAGTCTACTGCATGGATTACTTGGAGAAAAATATCGATTGGCTGTTATC  
CAAGTTGAAACCTCTTCTCAAAGATCATTATTTTCTTTTGAATTTCTGGCCAAGTTGAACTGTTCTTTCTTCAATGCAAAGAAAGTTATTTGGAAGCTTATTAGGGAGTTGGATC  
TCAGGTTAACGGCTGTTCAATTTAGTTGATGCCATTTATGCTGTGATCCTGGAAAAATGTAAAGCGCTTACTTCTGTCACTGACAACCATGATACTTAGAACTCCCTCACATTAATGTAT  
TGTTCAAAGATTGATCTCATTGAGAGCTATGGCAAGTTAGCGTATAATCTTGAGTTCTATACAGATGTAGAAGATTTGTCTTATTTACAACATCACCTTGATCAAGATCCACGGTCATCTAAGT  
ACAGAAAACCTCACAAAGGAGCTATGTGACGTCATTCAAGATTTTAGTTTGGTTAATTTTCAACCTTGGATATACAGGATAAAGAAAAGTGTGGAATCTTGTGAAGCTTATAGACAAAA  
GCAACGGATATATATTTTCGGGTATTGAGGGAAGTGTGTGGAATTTAGCAAGATAGCTGCTGCTCCTCTCGACTGGGATTATTATAGATATCCTTTTATGTTAAATTTTCTTTTACTTCTCTA  
AATGGTTATTAATAGCTTGGCGTTTTTGTGTAACAATTTCTCTGTTGAAATTGTTGGCATATTTTTCTTATACATCTATCGCCTGCCTAAATTCCTTTCCCTTAGGAAGTTAGCTGTTGGTTT  
TTTTTTTGTAGTGCAACCTCAGGACATTATAAATACTCTTAAAGTAGGCATTTTCCCATTCATTATTTATTTAATACTTTCAATATAGTTATTTTCATTCCTTTGGATTAGTCACACATATTTGAA  
GTCAGTTACTACTGCATTATCAAGGGTAATATGAGACATTTATAAATAGAATAAAATTCACTTTTTAATTTTCTACTTGTAGTTGGCCAGCCCAATTTCTTGGAGTTTTGTCAAGTTTTTAT  
GCATACAGAATGTTCTTCGCTTTCTTTAATTTTAGTTTCAACAGCTGCAGTTCAAGAAAAGTATATGAAAGATGACGAGTTTTTATAGAAGTTGATGGAGTTGATGGAATCAATTGGCT  
GTGGTGAGACATCTTTTCTCTTTACATTTTAAATCTTGTTTTGGAAATATTTAGTTGGATTCAGGATAAATTTGGCAGCCAACCTGTTCTACATTTTCTTTTGAATAGTTTGAACATAATT  
TGAAACTGGGCCTAATCAGATTGCACGCCTGTTTTGATTTGTTTTATCAAACCTGAAACAATATATTTTTATGATGATTTTGGCTTTTCAGCCGATCTGCAAAGCTTTTGTGTGTTGAAA  
TCACTCTACCCTACTATCATTG

>comp170626\_c2\_seq10

GAGAGAGAGAGAGAGAGAATGGCTTCTCTTGATGCTTAGCATGATTGAGAACACGAGGGGGTGGGACCATAGAGAGAGAAAAGTGATGAGGAAGCATAAAGATGGCTCCTTTTATTATT  
ATTTTTTTTCTCAAAGAAATATCCAAGAAGCTGTATTTGGCTAAGTTCAGGAAGACAATCTCATTCTACAAATAGCAGAAGAGAAAAGCACTCCTGCAAGCCGTTTGATCGAAGAGAAAAC  
GCTCTGAGTTGAGAAGGTTACATGAAGAGAGAAGAAGAAGAGAAAAGAGGATCAAATAGATCGCAGATCGGGATCTGATCTTCCTTCACAAACAATTTTCTTCCTATCTATCTCTCCCAT  
CTGTATTTATTATTATTGGATCGATGAGAGTGGGCTGACAGAAGAGAGTGAGCACACAGCGTTGAAGACTGCATCGACGAATGCCGTTCTTGTGCGTGCTCACCTCTCTATCTGTCAAGTC

AGCCTTATTATTGGCCACTTTAATCGAACCCGTAGCTCTTCTTTCTCTTTAGGTTTGCTTTTCCTTTGCTTTTCTTCTTATCTATCCATCACATGCCTCAACGCGAAGACAAAACAGAAAGA  
AATAGAGAGCTTTGTTGCAGAGCATTGGTTGTGGCTCATCCAAATGGCAGATCAGATCTCCCACTCTTCTGACACGTCTCCCTGGGCTCGAATTTCCACAGACTTGCTGTTCTCGAGAT  
TCAAGAGGAAGCAAAGAACAGATCAGGCGGCGTGGGTTTTGAGATAGAGAGCGAGAGGACAATGGTTTATTCCCCCTCCTCCAACCCAAAAGAAAAAAGAAAAAAGAAAAATTTGGGCTC  
GGAGAGCGAGAAGATGAGATCGAGAAGCGTACGCCTCCTCTGCTCTCCGTGCAATCTGGCTTAACGGACCCTACTGTTGACCGGTCTTGTCCCTCTTCTCTTTTTCACTCTCTGCCT  
TCGCTGCCTCTTTTGCTTCTTCGTCTCTTTTTCTGTGTATAATTCGTTTTTTATTTCAGAAGATCTGTTTCAGTCGCTACCGGCTCTTGAAAGACAAGATCTTTGTCTTCGTGAATAAAGTTTG  
ATGACAAAAAACCTAATCTAAGCACTCAACTTTCTTCTCTCTCTCGCTCGCTCGCTCTCGCTTTCTTAAATTGCGAGGGTGATAAAGGGATGACGGGTTTCGGCCAGGTGGTTATCGG  
GCCTCCGGGTTTCGGGGAAGACCACATACTGCAACGGCATGTGCGAGTTCTCAAACCTCATCGGAAGGAAAGTGGCTGTAGTCAATTTGGATCCTGCAAACGATGCATTACCATATGAATG  
TGCTATTAATATCGAAGACCTCATTAAGCTTGGTGATGTTATGGCTGAGCATTCTTTGGACCAATGGAGGTCTAGTCTACTGCATGGATTACTTGGAGAAAAATATCGATTGGCTGTTATC  
CAAGTTGAAACCTCTTCTCAAAGATCATTATTTCTTTTTGATTTTCTGGCCAAGTTGAACTGTTCTTTCTTCAATCAAATGCAAAGAAAGTTATTTGGAAGCTTATTAGGGAGTTGGATC  
TCAGGTAAACGGCTGTTCAATTTAGTTGATGCCATTTATGCTGTGATCCTGGAAAATATGTAAGCGCTTACTTCTGTCACTGACAACCATGATACACTTAGAACTCCCTCACATTAATGTAT  
TGTTCAAGATTGATCTCATTGAGAGCTATGGCAAGTTAGCGTATAATCTTGAGTTCTATACAGATGTAGAAGATTTGTCTTATTTACAACATCACCTTGATCAAGATCCACGGTCATCTAAGT  
ACAGAAAACCTCACAAAGGAGCTATGTGACGTCATTCAAGATTTTAGTTTGGTTAATTTACAACTTGGATATACAGGATAAAGAAAGTGTGGAAATCTTGTGAAGCTTATAGACAAAA  
GCAACGGATATATATTTTCGGGTATTGAGGGAAGTGTGTGGAATTTAGCAAGATAGCTGCTGCTCCTCTCGACTGGGATTTATATAGAACAGCTGCAGTTCAAGAAAAGTATATGAAAGAT  
GACGAGTTTTTATAGAAGTTGATGGAGTTTATGGAATCAATTGGCTGCGGTTGAGCAATCAATGATGCATTTGGAGGTTGCTGAAACTAAAATTTGTTGATCATCACCTTATATGTTGGATT  
ATGTAACCACATGTTGACTTCATGTAATGTGTGGGGTTGTTTCATGTTGATTAATTTATGAATTATTCATATATGATTAATGATCTCTCTTTTCTTTTCATTTTTTTGTTTGG

>comp170626\_c2\_seq11

GAGAGAGAGAGAGAGAGAATGGCTTCTCTTGTATGCTTAGCATGATTGAGAACACGAGGGGGTTGGGACCATAGAGAGAGAAAAGTGATGAGGAAGCATAAAGATGGCTCCTTTTATTATT  
ATTTTTTTTCTCAAAGAAATATCCAAGAAGCTGTATTTGGCTAAGTTCAGGAAGACAATCTCATTCTACAAATAGCAGAAGAGAAAAGCACTCCTGCAAGCCGTTTGATCGAAGAGAAAAC  
GCTCTGAGTTGAGAAGGTTACATGAAGAGAGAAGAAGAAGAGAAAAAGAGGATCAAATAGATCGCAGATCGGGATCTGATCTTCTTACAAAACAATTTCTTCTCTATCTATCTCTCCCAT  
CTGTATTTATTATTATTGGATCGATGAGAGTGGGCTGACAGAAGAGAGTGAACACAGCGTTGAAGACTGCATCGACGAATGCCGTTCTTGTGCGTGCTCACCTCTCTATCTGTACAGTC  
AGCCTTATTATTGGCCACTTTAATCGAACCCGTAGCTCTTCTTTCTCTTTAGGTTTGCTTTTCCTTTGCTTTTCTTCTTATCTATCCATCACATGCCTCAACGCGAAGACAAAACAGAAAGA  
AATAGAGAGCTTTGTTGCAGAGCATTGGTTGTGGCTCATCCAAATGGCAGATCAGATCTCCCACTCTTCTGACACGTCTCCCTGGGCTCGAATTTCCACAGACTTGCTGTTCTCGAGGT  
GTTAATTTTATTGGTTTCTTCAAATTTGCTTTGGAATAGCGTGAATATATTTGGATAAAGTTGATATCTTGATTATTTGTAGAAGCAAGAGGAAAAAATCTTGCCTTGATGATTTTGTAGATT  
CAAGAGGAAGCAAAGAACAGATCAGGCGGCGTGGGTTTTGAGATAGAGAGCGAGAGGACAATGGTTTATTCCCCCTCCTCCAACCCAAAAGAAAAAAGAAAAAAGAAAAATTTGGGCTC  
GGAGAGCGAGAAGATGAGATCGAGAAGCGTACGCCTCCTCTGCTCTCCGTGCAATCTGGCTTAACGGACCCTACTGTTGACCGGTCTTGTCCCTCTTCTCTTTTTCACTCTCTGCCT  
TCGCTGCCTCTTTTGCTTCTTCGTCTCTTTTTCTGTGTATAATTCGTTTTTTATTTCAGAAGATCTGTTTCAGTCGCTACCGGCTCTTGAAAGACAAGATCTTTGTCTTCGTGAATAAAGTTTG  
ATGACAAAAAACCTAATCTAAGCACTCAACTTTCTTCTCTCTCTCGCTCGCTCGCTCTCGCTTTCTTAAATTGCGAGGGTGATAAAGGGATGACGGGTTTCGGCCAGGTGGTTATCGG  
GCCTCCGGGTTTCGGGGAAGACCACATACTGCAACGGCATGTGCGAGTTCTCAAACCTCATCGGAAGGAAAGTGGCTGTAGTCAATTTGGATCCTGCAAACGATGCATTACCATATGAATG  
TGCTATTAATATCGAAGACCTCATTAAGCTTGGTGATGTTATGGCTGAGCATTCTTTGGACCAATGGAGGTCTAGTCTACTGCATGGATTACTTGGAGAAAAATATCGATTGGCTGTTATC  
CAAGTTGAAACCTCTTCTCAAAGATCATTATTTCTTTTTGATTTTCTGGCCAAGTTGAACTGTTCTTTCTTCAATCAAATGCAAAGAAAGTTATTTGGAAGCTTATTAGGGAGTTGGATC  
TCAGGGTATTGTAGTCAATCTATCATATTTGAAGATGTGTATGATATGGTAGCAGCGATGACAGGGCTCAGTGTGTTGCTATTCTTTGCTTTATTTTAGAATTACCATTTCTTTGTGCAGT

TAACGGCTGTTCAATTTAGTTGATGCCATTTATGCTGTGATCCTGGAAAATATGTAAGCGCTTTACTTCTGTCACTGACAACCATGATACTTAGAACTCCCTCACATTAATGTATTGTCCA  
AGATTGATCTCATTGAGAGCTATGGCAAGTTAGCGTATAATCTTGAGTTCTATACAGATGTAGAAGATTTGTCTTATTTACAACATCACCTTGATCAAGATCCACGGTCATCTAAGTACAGAA  
AACTCACAAAGGAGCTATGTGACGTCATTCAAGATTTTAGTTTTGGTTAATTTTACAACCTTGGATATACAGGATAAAGAAAGTGTGGAAATCTTGTGAAGCTTATAGACAAAAGCAACG  
GATATATATTTTCGGGTATTGAGGGAAGTGTGTGGAATTTAGCAAGATAGCTGCTGCTCCTCTCGACTGGGATTATTATAGATATCCTTTTATGTAAATTTTCTTTTACTTCTCTAAATGGTT  
ATTAATAGCTTGGCGTTTTTTGTGTAACAATTTCTCGTTGAAATTGTTGGCATAATTTTTCTTATACATCTATCGCTGCCTAAATTCCTTTCCCTTAGGAAGTTAGCTGTTGGTTTTTTTTTT  
GTAGTGCAACCTCAGGACATTATAAATACTCTTAAGTAGGCATTTTCCATTCATTATTTATTTAATACTTTCAATATAGTTATTTTCATTCCTTTGGATTAGTCACAGTTACTTCTGCATTATC  
AAGGGTAATATGAGACATTATAAATAGAATAAAATTCACTTTTTAATTTTTCTACTTGTAGTTGGCCAGCCCAATTTCTTGGAGTTTTGTCAAGTTTTTATGCATACAGAATGTTCTTCGCC  
TTTTTTAATTTTAGTTTACAACAGCTGCAGTTCAAGAAAAGTATATGAAAGATGACGAGTTTTTATAGAAGTTGATGGAGTTTATGGAATCAATTGGCTGTGGTGAGACATCTTTTCTCT  
CTTACATTTTTAAATCTTGTTTTTGAAAATTTTTAGTTGGATTCAGGATAAATGGCAGCCAACCTGTTCTACATTTTTCTTTTGAATAGTTTTGAACATAATTTGGAACTGGGCCTAATCAGA  
TTGCACGCCCTGTTTTGATTTGTTTTATCAAACCTGAAACAATATTATTTTATGATGATTTTGGCTTTTCAGCCGATCTGCAAAGCTTTTGTGTGTTGAAATCACTCTACCCTACTATCATTG

>comp170626\_c2\_seq13

GAGAGAGAGAGAGAGAGAATGGCTTCTCTTGATGCTTAGCATGATTGAGAACACGAGGGGGTTGGGACCATAGAGAGAGAAAAGTGATGAGGAAGCATAAAGATGGCTCCTTTTATTATT  
ATTTTTTTTCTCAAAGAAATATCCAAGAAGCTGTATTTGGCTAAGTTCAGGAAGACAATCTCATTTACAAATAGCAGAAGAGAAAAGCACTCCTGCAAGCCGTTTGATCGAAGAGAAAAC  
GCTCTGAGTTGAGAAGGTTACATGAAGAGAGAAGAAGAAGAGAAAAGAGGATCAAATAGATCGCAGATCGGGATCTGATCTTCTTACAAAACAATTTTCTTCTATCTATCTCTCCCAT  
CTGTATTTATTATTATTGGATCGATGAGAGTGGGCTGACAGAAGAGAGTGAACACTGCATCGACGAATGCCGTTCTTGTGCGTGCTCACCTCTCTATCTGTGAGTC  
AGCCTTATTATTGGCCACTTTAATCGAACCCGTAGCTCTTCTTCTCTTTAGGTTTGCTTTTCTTCTTATCTATCCATCACATGCCTCAACGCGAAGACAAAACAGAAAGA  
AATAGAGAGCTTTGTTGCAGAGCATTGGTTGTGGCTCATCCAAATGGCAGATCAGATCTCCCACTCTTCTGACACGCTCCTCGGGCTCGAATTTCCACAGACTTGCCTGTTCTCGAGAT  
TCAAGAGGAAGCAAAGAACAGATCAGGCGGCGTGGGTTTTGAGATAGAGAGCGAGAGGACAATGGTTTTATCCCCCTCCTCCAACCCAAAAGAAAAAAGAAAAAAGAAAAATTTGGGCTC  
GGAGAGCGAGAAGATGAGATCGAGAAGCGTACGCCTCCTCTGCTCTTCCGTGCAATCTGGCTTAACGGACCCTACTGTTGACCGGTCCTTGTCCCTCTTCTTTTTTCACTCTCTGCCT  
TCGCTGCCTCTTTTGCTTCTCGTCTCTTTTTCTGTGTATATTCGTTTTTTATTTTCAAGAAATCTGTTTCAAGTCTGTTGAAAGACAAGATCTTTGTCTTCGTGAATAAGGTTTG  
ATGACAAAAAACCTAATCTAAGCACTCAACTTCTTCTCTCTCTCGCTCGCTCGCTCTCGCTTTCTTAAATTTGCGAGGGTGATAAAGGGATGACGGGTTTCGGCCAGGTGGTTATCGG  
GCCTCCGGGTTTCGGGAAGACCACATACTGCAACGGCATGTGCGAGTTCTCAAACCTCATCGGAAGGAAAGTGGCTGTAGTCAATTTGGATCCTGCAAACGATGCATTACCATATGAATG  
TGCTATTAATATCGAAGACCTCATTAAGCTTGGTGTATGGCTGAGCATTCTTGGACCAAATGGAGGTCTAGTCTACTGCATGGATTACTTGGAGAAAAATATCGATTGGCTGTTATC  
CAAGTTGAAACCTCTTCTCAAAGATCATTATTTCTTTTTGATTTTCTGGCCAAGTTGAACTGTTCTTTCTTCAATGCAAAGAAAGTTATTTGGAAGCTTATTAGGGAGTTGGATC  
TCAGGTTAACGGCTGTTCAATTTAGTTGATGCCATTTATGCTGTGATCCTGGAAAATATGTAAGCGCTTTACTTCTGTCACTGACAACCATGATACTTAGAACTCCCTCACATTAATGTAT  
TGTTCAAGATTGATCTCATTGAGAGCTATGGCAAGTTAGCGTATAATCTTGAGTTCTATACAGATGTAGAAGATTTGTCTTATTTACAACATCACCTTGATCAAGATCCACGGTCATCTAAGT  
ACAGAAAACCTCACAAAGGAGCTATGTGACGTCATTCAAGATTTTAGTTTTGGTTAATTTTACAACCTTGGATATACAGGATAAAGAAAGTGTGGAAATCTTGTGAAGCTTATAGACAAAA  
GCAACGGATATATATTTTCGGGTATTGAGGGAAGTGTGTGGAATTTAGCAAGATAGCTGCTGCTCCTCTCGACTGGGATTATTATAGATATCCTTTTATGTAAATTTCTTTTACTTCTCTA  
AATGGTTAATAGCTTGGCGTTTTTTGTGTAACAATTTCTCGTTGAAATTGTTGGCATAATTTTTCTTATAACATCTATCGCCTGCCTAAATTCCTTTCCCTTAGGAAGTTAGCTGTTGGTTT  
TTTTTTTGTAGTGCAACCTCAGGACATTATAAATACTCTTAAGTAGGCATTTTCCATTCATTATTTATTTAATACTTTCAATATAGTTATTTTCATTCCTTTGGATTAGTCACACATATTTGAA  
GTCAGTTACTACTGCATTATCAAGGGTAATATGAGACATTATAAATAGAATAAAATTCACTTTTTAATTTTTCTACTTGTAGTTGGCCAGCCCAATTTCTTGGAGTTTTGTCAAGTTTTTAT

GCATACAGAATGTTCTTCGCCTTTCTTTAATTTTAGTTTACAACAGCTGCAGTTCAAGAAAAGTATATGAA

>comp170626\_c2\_seq15

GAGAGAGAGAGAGAGAGAATGGCTTCTCTTGATGCTTAGCATGATTGAGAACACGAGGGGGTGGGACCATAGAGAGAGAAAGTGATGAGGAAGCATAAAGATGGCTCCTTTTATTATT  
ATTTTTTTTCTCAAAGAAATATCCAAGAAGCTGTATTTGGCTAAGTTCAGGAAGACAATCTCATTCTACAAATAGCAGAAGAGAAAGCACTCCTGCAAGCCGTTTGATCGAAGAGAAAAC  
GCTCTGAGTTGAGAAGGTTACATGAAGAGAGAAGAAGAAGAGAAAAGAGGATCAAATAGATCGCAGATCGGGATCTGATCTTCCTTACAAAACAATTTTCTTCCTATCTATCTCTCCCAT  
CTGTATTTATTATTATTGGATCGATGAGAGTGGGCTGACAGAAGAGAGTGAGCACACAGCGTTGAAGACTGCATCGACGAATGCCGTTCTTGTGCGTGCTCACCTCTCTATCTGTCAGTC  
AGCCTTATTATTGGCCACTTTAATCGAACCCGTAGCTCTTCTTTCCTCTTTAGGTTTGCTTTTCCCTTTGCTTTTCTTCTTATCTATCCATCACATGCCTCAACGCGAAGACAAAACAGAAAGA  
AATAGAGAGCTTTGTTGCAGAGCATTGGTTGTGGCTCATCCAAATGGCAGATCAGATCTCCCACTCTTCTGACACGTCTCCCTGGGCTCGAATTTCCACAGACTTGCTGTTCTCGAGGT  
GTTAATTTTATTGGTTTCTTCAAATTTGCTTTGGAATAGCGTGAATATATTTGGATAAAGTTGATATCTTGATTATTTGTAGAAGCAAGAGGAAAAAATCTTGCCTTGATGATTTTGTAGATT  
CAAGAGGAAGCAAAGAACAGATCAGGCGGCGTGGGTTTTGAGATAGAGAGCGAGAGGACAATGGTTTTATCCCCCTCCTCCAACCCAAAAGAAAAAACAAGAAAATTTGGGCTC  
GGAGAGCGAGAAGATGAGATCGAGAAGCGTACGCCTCCTCTGCTCTCCGTGCAATCTGGCTTAACGGACCCTACTGTTGACCGGTCTTGTCCCTCTTCTTCTTTTCACTCTCTGCCT  
TCGCTGCCTCTTTTGCTTCTTCGCTCTTCTTTTCTGTGTATATTCGTTTTTTATTTCAGAAGATCTGTTCAAGTCGCTACCGGCTCTTGAAAGACAAGATCTTGTCTTCGTGAATAAGGTTTG  
ATGACAAAAACCCTAATCTAAGCACTCAACTTCTTCTCTCTCTCGCTCGCTCGCTCTCGCTTCTTAAATTGCGAGGGTGATAAAGGGATGACGGGTTTCGGCCAGGTGGTTATCGG  
GCCTCCGGGTTTCGGGAAGACCACATACTGCAACGGCATGTGCGAGTTCCTCAAACCTCATCGGAAGGAAAGTGGCTGTAGTCAATTTGGATCCTGCAAACGATGCATTACCATATGAATG  
TGCTATTAATATCGAAGACCTCATTAAGCTTGGTGATGTTATGGCTGAGCATTCTTGGACCAATGGAGGTCTAGTCTACTGCATGGATTACTTGGAGAAAAATATCGATTGGCTGTTATC  
CAAGTTGAAACCTCTTCTCAAAGATCATTATTTCTTTTGTATTTCTCGCCAAAGTTGAACTGTTCTTTCTTCAATCAAATGCAAAGAAAGTTATTTGGAAGCTTATTAGGGAGTTGGATC  
TCAGGTTAACGGCTGTTCAATTTAGTTGATGCCATTTATGCTGTGATCCTGGAAAATATGTAAGCGCTTACTTCTGTCACTGACAACCATGATACACTTAGAACTCCCTCACATTAATGTAT  
TGTTCAAGATTGATCTCATTGAGAGCTATGGCAAGTTAGCGTATAATCTTGAGTCTATACAGATGTAGAAGATTTGTCTTATTTACAACATCACCTTGATCAAGATCCACGGTCATCTAAGT  
ACAGAAAACCTCACAAAGGAGCTATGTGACGTCATTCAAGATTTTAGTTTGGTTAATTTACAACCTTGGATATACAGGATAAAGAAAGTGTGGAAATCTTGTGAAGCTTATAGACAAAA  
GCAACGGATATATATTTTCGGGTATTGAGGGAAGTGTGTGGAATTTAGCAAGATAGCTGCTGCTCCTCTCGACTGGGATTATTATAGAACAGCTGCAGTTCAAGAAAAGTATATGAAAGAT  
GACGAGTTTTTATAGAAGTTGATGGAGTTTGTGGAATCAATGGCTGCGGTTGAGCAATCAATGATGCATTTGGAGGTTGCTGAAAATAAAATGTTGATCATCACCTTATATGTTGGATT  
ATGTAAACCACATGTTGACTTCATGTAATGTGTGGGGTTGTTCAATGTTGATTAATGCTTTATAAATATTTCATATATGATTAATGATCTCTCTTTTCTTTTCAATTTTTTTGTTTGG

>comp170626\_c2\_seq16

GAGAGAGAGAGAGAGAGAATGGCTTCTCTTGATGCTTAGCATGATTGAGAACACGAGGGGGTGGGACCATAGAGAGAGAAAGTGATGAGGAAGCATAAAGATGGCTCCTTTTATTATT  
ATTTTTTTTCTCAAAGAAATATCCAAGAAGCTGTATTTGGCTAAGTTCAGGAAGACAATCTCATTCTACAAATAGCAGAAGAGAAAGCACTCCTGCAAGCCGTTTGATCGAAGAGAAAAC  
GCTCTGAGTTGAGAAGGTTACATGAAGAGAGAAGAAGAAGAGAAAAGAGGATCAAATAGATCGCAGATCGGGATCTGATCTTCCTTACAAAACAATTTTCTTCCTATCTATCTCTCCCAT  
CTGTATTTATTATTATTGGATCGATGAGAGTGGGCTGACAGAAGAGAGTGAGCACACAGCGTTGAAGACTGCATCGACGAATGCCGTTCTTGTGCGTGCTCACCTCTCTATCTGTCAGTC  
AGCCTTATTATTGGCCACTTTAATCGAACCCGTAGCTCTTCTTTCCTCTTTAGGTTTGCTTTTCCCTTTGCTTTTCTTCTTATCTATCCATCACATGCCTCAACGCGAAGACAAAACAGAAAGA  
AATAGAGAGCTTTGTTGCAGAGCATTGGTTGTGGCTCATCCAAATGGCAGATCAGATCTCCCACTCTTCTGACACGTCTCCCTGGGCTCGAATTTCCACAGACTTGCTGTTCTCGAGAT  
TCAAGAGGAAGCAAAGAACAGATCAGGCGGCGTGGGTTTTGAGATAGAGAGCGAGAGGACAATGGTTTTATCCCCCTCCTCCAACCCAAAAGAAAAAACAAGAAAATTTGGGCTC  
GGAGAGCGAGAAGATGAGATCGAGAAGCGTACGCCTCCTCTGCTCTCCGTGCAATCTGGCTTAACGGACCCTACTGTTGACCGGTCTTGTCCCTCTTCTTCTTTTCACTCTCTGCCT

TCGCTGCCTCTTTTGCTTCTTCGCTCTCTTTTCTGTGTATATTCGTTTTTATTTTCAGAAGATCTGTTTCAGTCGCTACCGGCTCTTGAAAGACAAGATCTTTGTCTTCGTGAATAAGGTTTG  
ATGACAAAAAACCTAATCTAAGCACTCAACTTCTTCTCTCTCTCGCTCGCTCGCTCTCGCTTCTTAAATTGCGAGGGTGATAAAGGGATGACGGGTTTCGGCCAGGTGGTTATCGG  
GCCTCCGGGTTTCGGGGAAGACCACATACTGCAACGGCATGTGCGAGTTCCTCAAACCTCATCGGAAGGAAAGTGGCTGTAGTCAATTTGGATCCTGCAAACGATGCATTACCATATGAATG  
TGCTATTAATATCGAAGACCTCATTAAGCTTGGTGATGTTATGGCTGAGCATTCTTTGGACCAAATGGAGGTCTAGTCTACTGCATGGATTACTTGGAGAAAAATATCGATTGGCTGTTATC  
CAAGTTGAAACCTCTTCTCAAAGATCATTATTTCTTTTGTATTTCTGGCCAAGTTGAACTGTTCTTTCTTCATTCAAATGCAAAGAAAGTTATTTGGAAGCTTATTAGGGAGTTGGATC  
TCAGGGTATTGTAGTCAATCTATCATAATTTGAAGATGTGTATGATATGGTAGCAGCGATGACAGGGCTCAGTGTGTTGTTGCTATTCTTTGCTTTATTTTAGAATTACCATTTCTTTGTGCAGT  
TAACGGCTGTTCAATTTAGTTGATGCCATTTATGCTGTGATCCTGGAAAATATGTAAGCGCTTACTTCTGTCACTGACAACCATGATACTTAGAACTCCCTCACATTAATGTATTGTCCA  
AGATTGATCTCATTGAGAGCTATGGCAAGTTAGCGTATAATCTTGAGTCTATAACAGATGTAGAAGATTTGTCTTATTTACAACATCACCTTGATCAAGATCCACGGTCATCTAAGTACAGAA  
AACTCACAAAGGAGCTATGTGACGTCATTCAAGATTTTAGTTTGGTTAATTTCACAACTTGGATATACAGGATAAAGAAAGTGTGGAAATCTTGTGAAGCTTATAGACAAAAGCAACG  
GATATATATTTTCGGGTATTGAGGGAAAGTGTGTGGAATTTAGCAAGATAGCTGCTGCTCCTCTCGACTGGGATTATTATAGAACAGCTGCAGTTCAAGAAAAAGTATATGAAAGATGACGA  
GTTTTTATAGAAGTTGATGGAGTTTGTGGAATCAATGGCTGTGGTGAGACATCTTTTCTCTTACATTTTTAAATCTTGTTTTTGAAATATTTTAGTTGGATTGAGGATAAATTTGGCAGC  
CAACTGTTCTACATTTTCTTTTGAATAGTTTGAACATAATTTGGAACTGGGCCAATCAGATTGCACGCCTGTTTTGATTTGTTTTATCAAACCTGAAACAATATTTTATGATGAT  
TTTGGCTTTTCAGCCGATCTGCAAAGCTTTTGTGTGTTGAAATCACTCTACCCTACTATCATTG

>comp170626\_c2\_seq18

GAGAGAGAGAGAGAGAGAATGGCTTCTCTTGATGCTTAGCATGATTGAGAACACGAGGGGGTTGGGACCATAGAGAGAGAAAGTGATGAGGAAGCATAAAGATGGCTCCTTTTATTATT  
ATTTTTTTTCTCAAAGAAATATCCAAGAAGCTGTATTTGGCTAAGTTCAGGAAGACAATCTCATTCTACAAATAGCAGAAGAGAAAGCACTCCTGCAAGCCGTTTGATCGAAGAGAAAAC  
GCTCTGAGTTGAGAAGGTTACATGAAGAGAGAAGAAGAAGAGAAAAGAGGATCAAATAGATCGCAGATCGGGATCTGATCTTCCCTCACAAACAATTTCTTCTCTATCTCTCCCAT  
CTGTATTTATTATTATTGGATCGATGAGAGTGGGCTGACAGAAGAGAGTGAGCACACAGCGTTGAAGACTGCATCGACGAATGCCGTTCTTGTGCGTGCTCACCTCTCTATCTGTACGTC  
AGCCTTATTATTGGCCACTTTAATCGAACCCGTAGCTCTTCTTTCTCTTTAGGTTTGCTTTTCTTTGCTTTTCTTCTTATCTATCCATCACATGCCTCAACGCGAAGACAAAACAGAAAGA  
AATAGAGAGCTTTGTTGCAGAGCATTGTTGTGGCTCATCCAAATGGCAGATCAGATCTCCCACTCTTCTGACACGTCTCCCTGGGCTCGAATTTCCACAGACTTGCTGTTCTCGAGAA  
GCAAGAGGAAAAAATCTTGCCTTGATGATTTTGTAGATTCAAGAGGAAGCAAAGAACAGATCAGGCGGCGTGGGTTTTGAGATAGAGAGCGAGAGGACAATGGTTTATTCCCCCTCTC  
CAACCCAAAAGAAAAAACAACGAAAATTTGGGCTCGGAGAGCGAGAAGATGAGATCGAGAAGCGTACGCCTCCTCTGCTCTTCCGTGCAATCTGGCTTAACGGACCCTACTGTTGA  
CCGGTCCCTTGCTCCCTCTTCTTCTTTTCACTCTCTGCCTTCGCTGCCTCTTTTGTCTTCTCGTCTTCTTTTCTGTGTATATTTTCGTTTTTATTTTCAGAAGATCTGTTTCAGTCGCTACCGGCT  
CTTGAAAGACAAGATCTTTGTCTTCGTGAATAAAGTGGTTGATGACAAAAAACCTAATCTAAGCACTCAACTTCTTCTCTCTCTCGCTCGCTCGCTCTCGCTTCTTAAATTGCGAGGG  
TGATAAAGGGATGACGGGTTTCGGCCAGGTGGTTATCGGGCTCCGGGTTTCGGGGAAGACCACATACTGCAACGGCATGTGCGAGTTCCTCAAACCTCATCGGAAGGAAAGTGGCTGTAG  
TCAATTTGGATCCTGCAAACGATGCATTACCATATGAATGTGCTATTAATATCGAAGACCTCATTAAGCTTGGTGATGTTATGGCTGAGCATTCTCTTGGACCAAATGGAGGTCTAGTCTACT  
GCATGGATTACTTGGAGAAAAATATCGATTGGCTGTTATCCAAGTTGAAACCTCTTCTCAAAGATCATTATTTCTTTTGTATTTCTGGCCAAGTTGAACTGTTCTTTCTTCATTCAAATG  
CAAAGAAAGTTATTTGGAAGCTTATTAGGGAGTTGGATCTCAGGGTATTGTAGTCAATCTATCATAATTTGAAGATGTGTATGATATGGTAGCAGCGATGACAGGGCTCAGTGTGTTGTTGCTA  
TTCTTTGCTTTATTTTAGAATTACCATTTCTTTGTGCAAGTTAACGGCTGTTCAATTTAGTTGATGCCATTTATGCTGTGATCCTGGAAAATATGTAAGCGCTTTACTTCTGTCACTGACAACC  
ATGATACTTAGAACTCCCTCACATTAATGTATTGTCCAAGATTGATCTCATTGAGAGCTATGGCAAGTTAGCGTATAATCTTGAGTCTATAACAGATGTAGAAGATTTGTCTTATTTACAAC  
ATCACCTTGATCAAGATCCACGGTCATCTAAGTACAGAAAACCTCACAAAGGAGCTATGTGACGTCATTCAAGATTTTAGTTTGGTTAATTTCACAACTTGGATATACAGGATAAAGAAAG

TGTTGGAAATCTTGTGAAGCTTATAGACAAAAGCAACGGATATATATTTTCGGGTATTGAGGGAAGTGTTGTGGAATTTAGCAAGATAGCTGCTGCTCCTCTCGACTGGGATTATTATAGAT  
ATCCTTTTATGTAAATTTTCTTTTACTTCTCTAAATGGTTATTAATAGCTTGGCGTTTTTTGTGTAACAATTCCTCGTTGAAATTGTTGGCATATTTTTCTTATACATCTATCGCCTGCCTAA  
ATTCCTTTCCCTTAGGAAGTTAGCTGTTGGTTTTTTTTTTGTAGTGCAACCTCAGGACATTATAAATACTCTTAAGTAGGCATTTTCCATTCAATTTATTTTAATACTTTCAATATAGTTATT  
TTCATTCTTTGGATTAGTCACACATAATTTGAAGTCAGTTACTACTGCATTATCAAGGGTAATATGAGACATTTATAAATAGAATAAAAATTCACTTTTTAATTTTTCTACTTGTTAGTTGGCCA  
GCCCAATTTCTTGGAGTTTTGTCAA

>comp170626\_c2\_seq19

GAGAGAGAGAGAGAGAGAATGGCTTCTCTTGATGCTTAGCATGATTGAGAACACGAGGGGGTTGGGACCATAGAGAGAGAAAAGTGATGAGGAAGCATAAAGATGGCTCCTTTTATTATT  
ATTTTTTTTCTCAAAGAAATATCCAAGAAGCTGTATTTGGCTAAGTTCAGGAAGACAATCTCATTTCTACAAATAGCAGAAGAGAAAAGCACTCCTGCAAGCCGTTTGATCGAAGAGAAAAC  
GCTCTGAGTTGAGAAGGTTACATGAAGAGAGAAGAAGAAGAGAAAAGAGGATCAAATAGATCGCAGATCGGGATCTGATCTTCCTTCACAAACAATTTTCTTCCTATCTATCTCTCCCAT  
CTGTATTTATTATTATTGGATCGATGAGAGTGGGCTGACAGAAGAGAGTGAGCACACAGCGTTGAAGACTGCATCGACGAATGCCGTTCTTGTGCGTGCTCACCTCTCTATCTGTCAGTC  
AGCCTTATTATTGGCCACTTTAATCGAACCCGTAGCTCTTCTTTCTCTTTAGGTTTGCTTTTCTTTCTTCTTATCTATCCATCACATGCCTCAACGCGAAGACAAAAACAGAAAGA  
AATAGAGAGCTTTGTTGCAGAGCATTGGTTGTGGCTCATCCAAATGGCAGATCAGATCTCCCACTCTTCTGACACGTCTCCCTGGGCTCGAATTTCCACAGACTTGCTGTTCTCGAGAT  
TCAAGAGGAAGCAAAGAACAGATCAGGCGGCGTGGGTTTTGAGATAGAGAGCGAGAGGACAATGGTTTTATCCCCCTCCTCCAACCCAAAAAGAAAAAAGAAAAAAGAAAAATTTGGGCTC  
GGAGAGCGAGAAGATGAGATCGAGAAGCGTACGCCTCCTCTGCTCTCCGTGCAATCTGGCTTAACGGACCCTACTGTTGACCGGTCTTGTCCCTCTTCTCTTTTTACTCTCTGCCT  
TCGCTGCCTCTTTTGCTTCTCGTCTTCTTTTTCTGTGTATATTCGTTTTTTATTTTTCAGAAGATCTGTTTTCAGTCGCTACCGGCTCTTGAAAGACAAGATCTTTGTCTTCGTGAATAAGGTTTG  
ATGACAAAAACCCTAATCTAAGCACTCAACTTTCTTCTCTCTCTCGCTCGCTCGCTCTCGCTTTCTTAAATTGCGAGGGTGATAAAGGGATGACGGGTTTCGGCCAGGTGGTTATCGG  
GCCTCCGGGTTTCGGGAAGACCACATACTGCAACGGCATGTGCGAGTTCCTCAAACCTCATCGGAAGGAAAGTGGCTGTAGTCAATTTGGATCCTGCAAACGATGCATTACCATATGAATG  
TGCTATTAATATCGAAGACCTCATTAAGCTTGGTGATGTTATGGCTGAGCATTCTTGGACCAATGGAGGTTAGTCTACTGCATGGATTACTTGGAGAAAAATATCGATTGGCTGTTATC  
CAAGTTGAAACCTCTTCTCAAAGATCATTATTTCTTTTTGATTTTCTGGCCAAGTTGAACTGTTCTTTCTTCAATCAAATGCAAAGAAAGTTATTTGGAAGCTTATTAGGGAGTTGGATC  
TCAGGGTATTGTAGTCAATCTATCATATTTGAAGATGTGTATGATATGGTAGCAGCGATGACAGGGCTCAGTGTGTTGCTATTCTTTGCTTTATTTTAGAATTACCATTTCTTTGTGCAGT  
TAACGGCTGTTTCAATTTAGTTGATGCCCATTTATGCTGTGATCCTGGAAAAATATGTAAGCGCTTTACTTCTGTCACTGACAACCATGATACTTAGAACTCCCTCACATTAATGTATTGTCCA  
AGATTGATCTCATTGAGAGCTATGGCAAGTTAGCGTATAATCTTGAGTTCTATACAGATGTAGAAGATTTGTCTTATTTACAACATCACCTTGATCAAGATCCACGGTCATCTAAGTACAGAA  
AACTCACAAAGGAGCTATGTGACGTCATTCAAGATTTAGTTTGGTTAATTTTACAACCTTGGATATACAGGATAAAGAAAGTGTGGAAATCTTGTGAAGCTTATAGACAAAAGCAACG  
GATATATATTTTCGGGTATTGAGGGAAGTGTGTGGAATTTAGCAAGATAGCTGCTGCTCCTCTCGACTGGGATTATTATAGAACAGCTGCAGTTCAAGAAAAAGTATATGAAAGATGACGA  
GTTTTTATAGAAGTTGATGGAGTTTGTGGAATCAATTGGCTGCGGTTGAGCAATCAATGATGCATTTGGAGGTTGCTGAAACTAAAATGTTGATCATCACCTTATATGTTGGATTATGTAA  
ACCACATGTTGTACTTCATGTAATGTGTGGGGTTGTTTATTGTTGATTAATTTATGAATTAATCATATATGATTAATGATCTCTTTTTCTTTTCATTTTTTTTGTGTTGG

>comp170626\_c2\_seq20

GAGAGAGAGAGAGAGAGAATGGCTTCTCTTGATGCTTAGCATGATTGAGAACACGAGGGGGTTGGGACCATAGAGAGAGAAAAGTGATGAGGAAGCATAAAGATGGCTCCTTTTATTATT  
ATTTTTTTTCTCAAAGAAATATCCAAGAAGCTGTATTTGGCTAAGTTCAGGAAGACAATCTCATTTCTACAAATAGCAGAAGAGAAAAGCACTCCTGCAAGCCGTTTGATCGAAGAGAAAAC  
GCTCTGAGTTGAGAAGGTTACATGAAGAGAGAAGAAGAAGAGAAAAGAGGATCAAATAGATCGCAGATCGGGATCTGATCTTCCTTCACAAACAATTTTCTTCCTATCTATCTCTCCCAT  
CTGTATTTATTATTATTGGATCGATGAGAGTGGGCTGACAGAAGAGAGTGAGCACACAGCGTTGAAGACTGCATCGACGAATGCCGTTCTTGTGCGTGCTCACCTCTCTATCTGTCAGTC



AGCCTTATTATTGGCCACTTTAATCGAACCCGTAGCTCTTCTTTCTCTTTAGGTTTGCTTTTCTTTGCTTTTCTTCTTATCTATCCATCACATGCCTCAACGCGAAGACAAAACAGAAAGA  
AATAGAGAGCTTTGTTGCAGAGCATTGGTTGTGGCTCATCCAAATGGCAGATCAGATCTCCCACTCTTCTGACACGTCTCCCTGGGCTCGAATTTCCACAGACTTGCTGTTCTCGAGGT  
GTTAATTTTATTGGTTTCTTCAAATTTGCTTTGGAATAGCGTGAATATATTTGGATAAAGTTGATATCTTGATTATTTGTAGAAGCAAGAGGAAAAAATCTTGCCTTGATGATTTTGTAGATT  
CAAGAGGAAGCAAAGAACAGATCAGGCGGCGTGGGTTTTGAGATAGAGAGCGAGAGGACAATGGTTTATCCCCCTCCTCCAACCCAAAAGAAAAAACAAGAAAATTTGGGCTC  
GGAGAGCGAGAAGATGAGATCGAGAAGCGTACGCCTCCTCTGCTCTCCGTGCAATCTGGCTTAAACGGACCCTACTGTTGACCGGTCCCTTGCTCCCTCTTCTTCTTTTCACTCTCTGCCT  
TCGCTGCCTCTTTTGCTTCTTCGCTCTTCTTTTCTGTGTATATTCGTTTTTTATTTTCAAGATCTGTTTTCAGTCGCTACCGGCTCTTGAAAGACAAGATCTTTGTCTTCGTGAATAAGGTTTG  
ATGACAAAAAACCTAATCTAAGCACTCAACTTCTTCTCTCTCTCGCTCGCTCGCTCTCGCTTTCTTAAATTGCGAGGGTGATAAAGGGATGACGGGTTTCGGCCAGGTGGTTATCGG  
GCCTCCGGGTTTCGGGAAGACCACATACTGCAACGGCATGTGCGAGTTCTCAAACCTCATCGGAAGGAAAGTGGCTGTAGTCAATTTGGATCCTGCAAACGATGCATTACCATATGAATG  
TGCTATTAATATCGAAGACCTCATTAAAGCTTGGTGATGTTATGGCTGAGCATTCTTGGACCAAATGGAGGTCTAGTCTACTGCATGGATTACTTGGAGAAAAATATCGATTGGCTGTTATC  
CAAGTTGAAACCTCTTCTCAAAGATCATTATTTCTTTTGTATTTCTTGGCCAAGTTGAACTGTTCTTTCTTCAATGCAAAGAAAGTTATTTGGAAGCTTATTAGGGAGTTGGATC  
TCAGGTATTGTAGTCAATCTATCATATTTGAAGATGTGTATGATATGGTAGCAGCGATGACAGGGCTCAGTGTGTTGTTGCTATTCTTTGCTTTATTTTAGAATTACCATTTCTTTGTGCAGT  
TAACGGCTGTTCAATTTAGTTGATGCCATTTATGCTGTGATCCTGGAAAATATGTAAGCGCTTACTTCTGTCACTGACAACCATGATACACTTAGAACTCCCTCACATTAATGTATTGTCCA  
AGATTGATCTCATTGAGAGCTATGGCAAGTTAGCGTATAATCTTGAGTTCTATACAGATGTAGAAGATTTGTCTTATTTACAACATCACCTTGATCAAGATCCACGGTCATCTAAGTACAGAA  
AACTCACAAAGGAGCTATGTGACGTCAATCAAGATTTTAGTTTGGTTAATTTTACAACCTTGGATATACAGGATAAAGAAAGTGTGGAAATCTTGTGAAGCTTATAGACAAAAGCAACG  
GATATATATTTTCGGGTATTGAGGGAAGTGTGTGGAATTTAGCAAGATAGCTGCTGCTCCTCTCGACTGGGATTATTATAGATATCCTTTTATGTAAATTTCTTTTACTTCTCTAAATGGTT  
ATTAATAGCTTGGCGTTTTTTGTGTAACAATTTCTCGTTGAAATTTGTTGGCATAATTTTTCTTATACATCTATCGCTGCCTAAATTCCTTTCCCTTAGGAAGTTAGCTGTTGGTTTTTTTTTT  
GTAGTGAACCTCAGGACATTATAAATACTCTTAAGTAGGCATTTTCCCATTCAATATTTATTTAATACTTCAATATAGTTATTTTCAATCCTTTGGATTAGTCACACATATTTGAAGTCAGTT  
ACTACTGCATTATCAAGGGTAATATGAGACATTTATAAATAGAATAAAATCACTTTTTAATTTTTCTACTTGTAGTTGGCCAGCCCAATTTCTTGGAGTTTTGTCAAGTTTTTATGCATACA  
GAATGTTCTTCGCTTTCTTTAATTTTAGTTTACAACAGCTGCAGTTCAAGAAAAGTATATGAAAGATGACGAGTTTTTATAGAAGTTGATGGAGTTTGTGAATCAATTTGGCTGTGGTTG  
AGCAATCAATGATGCATTTGGAGTTGCTGAAACTAAAATGTTGATCATCACCTTATATGTTGGATTATGTAAACCACATGTTGTACTTCATGTAATGTGTGGGGTTGTTCAATGTTGATTA  
ATTTATGAATTATTCATATATGATTAATGATCTCTTTTTCTTTTCAATTTTTTTGTTTGG

>comp170626\_c2\_seq21

GAGAGAGAGAGAGAGAGAATGGCTTCTCTTGATGCTTAGCATGATTGAGAACACGAGGGGGTTGGGACCATAGAGAGAGAAAGTGATGAGGAAGCATAAAGATGGCTCCTTTTATTATT  
ATTTTTTTTCTCAAAGAAATATCCAAGAAGCTGTATTTGGCTAAGTTTCAAGGAAGACAATCTCATTCTACAAATAGCAGAAGAGAAAGCACTCCTGCAAGCCGTTTGATCGAAGAGAAAAC  
GCTCTGAGTTGAGAAGGTTACATGAAGAGAGAAGAAGAAGAGAAAAGAGGATCAAATAGATCGCAGATCGGGATCTGATCTTCTTACAAAACAATTTCTTCTTATCTATCTCTCCAT  
CTGATTTATTATTATTGGATCGATGAGAGTGGGCTGACAGAAGAGAGTGAGCACACAGCGTTGAAGACTGCATCGACGAATGCCGTTCTGTTGCGTGCTCACCTCTCTATCTGTGAGTC  
AGCCTTATTATTGGCCACTTTAATCGAACCCGTAGCTCTTCTTTCTCTTTAGGTTTGCTTTTCTTTGCTTTTCTTCTTATCTATCCATCACATGCCTCAACGCGAAGACAAAACAGAAAGA  
AATAGAGAGCTTTGTTGCAGAGCATTGGTTGTGGCTCATCCAAATGGCAGATCAGATCTCCCACTCTTCTGACACGTCTCCCTGGGCTCGAATTTCCACAGACTTGCTGTTCTCGAGGT  
GTTAATTTTATTGGTTTCTTCAAATTTGCTTTGGAATAGCGTGAATATATTTGGATAAAGTTGATATCTTGATTATTTGTAGAAGCAAGAGGAAAAAATCTTGCCTTGATGATTTTGTAGATT  
CAAGAGGAAGCAAAGAACAGATCAGGCGGCGTGGGTTTTGAGATAGAGAGCGAGAGGACAATGGTTTATCCCCCTCCTCCAACCCAAAAGAAAAAACAAGAAAATTTGGGCTC  
GGAGAGCGAGAAGATGAGATCGAGAAGCGTACGCCTCCTCTGCTCTCCGTGCAATCTGGCTTAAACGGACCCTACTGTTGACCGGTCCCTTGCTCCCTCTTCTTCTTTTCACTCTCTGCCT

TCGCTGCCTCTTTTGCTTCTTCGCTCTCTTTTCTGTGTATATTCGTTTTTATTCAGAAGATCTGTTTCAGTCGCTACCGGCTCTTGAAAGACAAGATCTTTGTCTTCGTGAATAAGGTTG  
ATGACAAAAACCCTAATCTAAGCACTCAACTTCTCTCTCTCTCGCTCGCTCGCTCTCGCTTCTTAAATTGCGAGGGTGATAAAGGGATGACGGGTTTCGGCCAGGTGGTTATCGG  
GCCTCCGGGTTTCGGGGAAGACCACATACTGCAACGGCATGTGCGAGTTCCTCAAACCTCATCGGAAGGAAAGTGGCTGTAGTCAATTTGGATCCTGCAAACGATGCATTACCATATGAATG  
TGCTATTAATATCGAAGACCTCATTAAGCTTGGTGATGTTATGGCTGAGCATTCTTTGGACCAATGGAGGTCTAGTCTACTGCATGGATTACTTGGAGAAAAATATCGATTGGCTGTTATC  
CAAGTTGAAACCTCTTCTCAAAGATCATTATTTCTTTTGATTTTCTGGCCAAGTTGAACTGTTCTTTCTTCATTCAAATGCAAAGAAAGTTATTTGGAAGCTTATTAGGGAGTTGGATC  
TCAGGTTAACGGCTGTTCAATTTAGTTGATGCCATTTATGCTGTGATCCTGGAAAATATGTAAGCGCTTTACTTCTGTCACTGACAACCATGATACTTAGAACTCCCTCACATTAATGTAT  
TGTTCCAAGATTGATCTCATTGAGAGCTATGGCAAGTTAGCGTATAATCTTGAGTCTATACAGATGTAGAAGATTTGTCTTATTTACAACATCACCTTGATCAAGATCCACGGTCATCTAAGT  
ACAGAAAACCTCACAAGGAGCTATGTGACGTCATTCAAGATTTTAGTTTGGTTAATTTACAACTTGGATATACAGGATAAAGAAAAGTGTGGAAATCTTGTGAAGCTTATAGACAAAA  
GCAACGGATATATATTTTCGGGTATTGAGGGAAGTGTGTGGAATTTAGCAAGATAGCTGCTGCTCCTCTCGACTGGGATTATTATAGATATCCTTTTATGTTAAATTTCTTTTACTTCTCTA  
AATGGTTATTAATAGCTTGGCGTTTTTGTGTAACAATTTCTCGTTGAAATTTGGCATATTTTTCTTATACATCTATCGCCTGCCTAAATTCCTTTCCCTTAGGAAGTTAGCTGTGGTTTT  
TTTTTTTGTAGTGCAACCTCAGGACATTATAAATACTCTTAAGTAGGCATTTCCCATTCATTATTTATTTAATACTTTCAATATAGTTATTTTCATTCCTTTGGATTAGTCACAGTTACTTCTG  
CATTATCAAGGGTAATATGAGACATTTATAAATAGAATAAAATTCACTTTTAATTTTCTACTTGTAGTTGGCCAGCCCAATTTCTTGGAGTTTTGTCAAGTTTTATGCATACAGAATGTT  
CTTCGCCCTTTCTTTAATTTAGTTTCAACAGCTGCAGTTCAAGAAAAGTATATGAAAGATGACGAGTTTTTATAGAAGTTGATGGAGTTGATGGAATCAATTTGGCTGTGGTGAGACATC  
TTTTCTCTTACATTTTAAATCTTGTTTTGGAAATATTTAGTTGGATTGAGGATAAATGGCAGCCAACCTGTTCTACATTTTTCTTTTGAATAGTTTTGAACATAATTTGAAAACCTGGGCC  
TAATCAGATTGCACGCCTGTTTTTGTATTTGTTTTATCAAACCTGAAACAATATTATTTTATGATGATTTTGGCTTTTCAGCCGATCTGCAAAGCTTTTGTGTGTTGAAATCACTCTACCCTAC  
TATCATTTG

>comp170626\_c2\_seq22

GAGAGAGAGAGAGAGAGAATGGCTTCTCTTGATGCTTAGCATGATTGAGAACACGAGGGGGTTGGGACCATAGAGAGAGAAAGTGATGAGGAAGCATAAAGATGGCTCCTTTTATTATT  
ATTTTTTTTCTCAAAGAAATATCCAAGAAGCTGTATTTGGCTAAGTTCAGGAAGACAATCTCATTCTACAAATAGCAGAAGAGAAAAGCACTCCTGCAAGCCGTTTGATCGAAGAGAAAAC  
GCTCTGAGTTGAGAAGGTTACATGAAGAGAGAAGAAGAAGAGAAAAGAGGATCAAATAGATCGCAGATCGGGATCTGATCTTCCTTACAAAACAATTTTCTTCCTATCTATCTCTCCCAT  
CTGTATTTATTATTATTGGATCGATGAGAGTGGGCTGACAGAAGAGAGTGAGCACACAGCGTTGAAGACTGCATCGACGAATGCCGTTCTTGTGCGTGCTCACCTCTCTATCTGTGAGTC  
AGCCTTATTATTGGCCACTTTAATCGAACCCGTAGCTCTTCTTTCTCTTTAGGTTTGCTTTTCTTTCTTATCTATCCATCACATGCCTCAACGCGAAGACAAAACAGAAAGA  
AATAGAGAGCTTTGTTGCAGAGCATTGGTTGTGGCTCATCCAAATGGCAGATCAGATCTCCCACTCTTCTGACACGTCTCCCTGGGCTCGAATTTCCACAGACTTGCTGTTCTCGAGAA  
GCAAGAGGAAAAAATCTTGCCTTGATGATTTTGTAGATTCAAGAGGAAGCAAAGAACAGATCAGGCGGCGTGGGTTTTGAGATAGAGAGCGAGAGGACAATGGTTTATCCCCCTCCTC  
CAACCCAAAAGAAAAAAAACGAAAATTTGGGCTCGGAGAGCGAGAAGATGAGATCGAGAAGCGTACGCCTCCTCTGCTCTTCCGTGCAATCTGGCTTAACGGACCCTACTGTTGA  
CCGGTCCCTTGCTCCCTCTTCTTTTCACTCTCTGCCTTCGCTGCCTCTTTTGTCTTCTCGCTCTTTTTCTGTGTATATTTTCGTTTTTATTTTCAAAGATCTGTTTCAGTCGCTACCGGCT  
CTTGAAGACAAGATCTTTGTCTTCGTGAATAAGGTTTGTGATGACAAAAACCCTAATCTAAGCACTCAACTTTCTTCTCTCTCTCGCTCGCTCGCTCTCGCTTTCTTAAATTGCGAGGG  
TGATAAAGGGATGACGGGTTTCGGCCAGGTGGTTATCGGGCTCCGGGTTTCGGGGAAGACCACATACTGCAACGGCATGTGCGAGTTCCTCAAACCTCATCGGAAGGAAAGTGGCTGTAG  
TCAATTTGGATCCTGCAAACGATGCATTACCATATGAATGTGCTATTAATATCGAAGACCTCATTAAGCTTGGTGATGTTATGGCTGAGCATTCTTGGACCAAAATGGAGGTCTAGTCTACT  
GCATGGATTACTTGGAGAAAAATATCGATTGGCTGTTATCCAAGTTGAAACCTCTTCTCAAAGATCATTATTTCTTTTGTATTTTCTGGCCAAGTTGAACTGTTCTTTCTTCATTCAAATG  
CAAAGAAAGTTATTTGGAAGCTTATTAGGGAGTTGGATCTCAGGTTAACGGCTGTTCAATTTAGTTGATGCCATTTATGCTGTGATCCTGGAAAATATGTAAGCGCTTTACTTCTGTCACTG

ACAACCATGATACACTTAGAACTCCCTCACATTAATGTATTGTCCAAGATTGATCTCATTGAGAGCTATGGCAAGTTAGCGTATAATCTTGAGTTCTATACAGATGTAGAAGATTTGTCTTAT  
TTACAACATCACCTTGATCAAGATCCACGGTCATCTAAGTACAGAAAACACAAAGGAGCTATGTGACGTCATTCAAGATTTTAGTTTTGGTTAATTTCACAACTTGGATATACAGGATAA  
AGAAAGTGTGGAAATCTTGTGAAGCTTATAGACAAAAGCAACGGATATATATTTTCGGGTATTGAGGGAAGTGTGTGGAATTTAGCAAGATAGCTGCTGCTCCTCTCGACTGGGATTAT  
TATAGAACAGCTGCAGTTCAAGAAAAGTATATGAAAGATGACGAGTTTTTATAGAAGTTGATGGAGTTGATGGAATCAATTGGCTGTGGTGAGACATCTTTCTCTCTTACATTTTAAAT  
CTTGTTTTGGAAATATTTTAGTTGGATTACAGGATAAAATTGGCAGCCAACCTGTTCTACATTTTTCTTTTGAATAGTTTTGAACATAATTTGGAAAACGGCCTAATCAGATTGCACGCCTGTTT  
TTGATTTGTTTTTATCAAACCTGAAACAATATATTTTTTATGATGATTTTGGCTTTTCAGCCGATCTGCAAAGCTTTTGTGTGTTGAAATCACTCTACCCTACTATCATTG

>comp170626\_c2\_seq23

GAGAGAGAGAGAGAGAGAATGGCTTCTCTTGATGCTTAGCATGATTGAGAACACGAGGGGGTTGGGACCATAGAGAGAGAAAGTGATGAGGAAGCATAAAGATGGCTCCTTTTATTATT  
ATTTTTTTTCTCAAAGAAATATCCAAGAAGCTGTATTTGGCTAAGTTCAGGAAGACAATCTCATTCTACAAATAGCAGAAGAGAAAAGCACTCCTGCAAGCCGTTTGATCGAAGAGAAAAC  
GCTCTGAGTTGAGAAGGTTACATGAAGAGAGAAAGAAGAGAAAAGAGGATCAAATAGATCGCAGATCGGGATCTGATCTTCCCTCACAAAACATTTTCTTCCCTATCTATCTCTCCCAT  
CTGTATTTATTATTATTGGATCGATGAGAGTGGGCTGACAGAAGAGAGTGAGCACACAGCGTTGAAGACTGCATCGACGAATGCCGTTCTTGTGCGTGCTCACCTCTCTATCTGTCCAGTC  
AGCCTTATTATTGGCCACTTTAATCGAACCCGTAGCTCTTCTTCTCTTTAGGTTTGCTTTTCTTTGCTTTTCTTCTTATCTATCCATCACATGCCTCAACGCGAAGACAAAACAGAAAGA  
AATAGAGAGCTTTGTTGAGAGCATTTGGTTGTGGCTCATCCAAATGGCAGATCAGATCTCCCACTCTTCTGACACGCTCTCCCTGGGCTCGAATTTCCACAGACTTGCTGTTCTCGAGAA  
GCAAGAGGAAAAAATCTTGCCTTGATGATTTTGTAGATTCAAGAGGAAGCAAAGAACAGATCAGGCGGCGTGGGTTTTGAGATAGAGAGCGAGAGGACAATGGTTTATTTCCCTCCTC  
CAACCCAAAAGAAAAAAAACGAAAATTTGGGCTCGGAGAGCGAGAAGATGAGATCGAGAAGCGTACGCTCCTCTGCTCTTCCGTGCAATCTGGCTTAACGGACCCTACTGTTGA  
CCGGTCCCTTGCTCCCTCTTCTTTTTCACTCTCTGCCTTCGCTGCCTCTTTTGCTTCTTCGCTCTTTTTCTGTGTATATTTGTTTTTATTTTCAAGATCTGTTTCACTGCTACCGGCT  
CTTGAAGACAAGATCTTTGTCTTCGTGAATAAGGTTTGATGACAAAAACCCTAATCTAAGCACTCAACTTTCTTCTCTCTCTCGCTCGCTCGCTCTCGCTTTCTTAAATTGCGAGGG  
TGATAAAGGATGACGGGTTTCGGCCAGGTGGTTATCGGGCTCCGGGTTTCGGGGAAGACCATACTGCAACGGCATGTCGCAGTTCCTCAAACCTCATCGGAAGGAAAGTGGCTGTAG  
TCAATTTGGATCCTGCAAACGATGCATTACCATATGAATGTGCTATTAATATCGAAGACCTCATTAAGCTTGGTGATGTTATGGCTGAGCATTCTCTTGGACCAAATGGAGGTCTAGTCTACT  
GCATGGATTACTTGGAGAAAAATATCGATTGGCTGTTATCCAAGTTGAAACCTCTTCTCAAAGATCATTATTTCTTTTTGATTTTCTTGCCCAAGTTGAACTGTTCTTCTTCAATTCAAATG  
CAAAGAAAGTTATTTGGAAGCTTATTAGGGAGTTGGATCTCAGGGTATTGTAGTCAATCTATCATAATTTGAAGATGTGTATGATATGGTAGCAGCGATGACAGGGCTCAGTGTTTGTGCTA  
TTCTTTGCTTTATTTTAGAATTACCATTTCTTTGTGCAGTTAACGGCTGTTCAATTTAGTTGATGCCATTTATGCTGTGATCCTGGAAAATATGTAAGCGCTTTACTTCTGTCACTGACAACC  
ATGATACACTTAGAACTCCCTCACATTAATGTATTGTCCAAGATTGATCTCATTGAGAGCTATGGCAAGTTAGCGTATAATCTTGAGTTCTATACAGATGTAGAAGATTTGTCTTATTACAAC  
ATCACCTTGATCAAGATCCACGGTCATCTAAGTACAGAAAACACAAAGGAGCTATGTGACGTCATTCAAGATTTTAGTTTTGGTTAATTTCACAACTTGGATATACAGGATAAAGAAAG  
TGTTGGAATCTTGTGAAGCTTATAGACAAAAGCAACGGATATATATTTTCGGGTATTGAGGGAAGTGTGTGGAATTTAGCAAGATAGCTGCTGCTCCTCTCGACTGGGATTATTATAGAA  
CAGCTGCAGTTCAAGAAAAGTATATGAAAGATGACGAGTTTTTATAGAAGTTGATGGAGTTGATGGAATCAATTGGCTGCGGTTGAGCAATCAATGATGCATTTGGAGGTTGCTGAAACT  
AAAATTGTTGATCATCACCTTATATGTTGGATTATGTAACCACATGTTGTACTTCATGTAATGTGTGGGGTTGTTTCAATGTTGATTAATTTATGAATTATTCATATATGATTAATGATCTCTCTT  
TTCTTTTCAATTTTTTTGTTGG

>comp170626\_c2\_seq24

GAGAGAGAGAGAGAGAGAATGGCTTCTCTTGATGCTTAGCATGATTGAGAACACGAGGGGGTTGGGACCATAGAGAGAGAAAGTGATGAGGAAGCATAAAGATGGCTCCTTTTATTATT  
ATTTTTTTTCTCAAAGAAATATCCAAGAAGCTGTATTTGGCTAAGTTCAGGAAGACAATCTCATTCTACAAATAGCAGAAGAGAAAAGCACTCCTGCAAGCCGTTTGATCGAAGAGAAAAC

GCTCTGAGTTGAGAAGGTTACATGAAGAGAGAAGAAGAAGAGAAAAAGAGGATCAAATAGATCGCAGATCGGGATCTGATCTTCCTTCACAAACAATTTTCTTCCTATCTATCTCTCCCAT  
CTGTATTTATTATTATTGGATCGATGAGAGTGGGCTGACAGAAGAGAGTGAGCACACAGCGTTGAAGACTGCATCGACGAATGCCGTTCTTGTGCGTGCTCACCTCTCTATCTGTACAGTC  
AGCCTTATTATTGGCCACTTTAATCGAACCCGTAGCTCTTCTTTCTCTTTAGGTTTGCTTTTCTTTGCTTTTCTTCTTATCTATCCATCACATGCCTCAACGCGAAGACAAAAACAGAAAGA  
AATAGAGAGCTTTGTTGCAGAGCATTGGTTGTGGCTCATCCAAATGGCAGATCAGATCTCCCACTCTTCTGACACGTCTCCCTGGGCTCGAATTTCCACAGACTTGCTGTTCTCGAGGT  
GTTAATTTTATTGGTTTCTTCAAATTTGCTTTGGAATAGCGTGAATATAATTTGGATAAAAGTTGATATCTTGATTATTTTGTAGAAGCAAGAGGAAAAAATCTTGCCTTGATGATTTTGTAGATT  
CAAGAGGAAGCAAAGAACAGATCAGGCGGCGTGGGTTTTGAGATAGAGAGCGAGAGGACAATGGTTTATTTCCCTCCTCCAACCCAAAAGAAAAAAAAAACGAAAATTTTGGGCTC  
GGAGAGCGAGAAGATGAGATCGAGAAGCGTACGCCTCCTCTGCTCTCCGTGCAATCTGGCTTAACGGACCCTACTGTTGACCGGTCCTTGCTCCCTCTTCTCTTTTTACTCTCTGCCT  
TCGCTGCCTCTTTTGCTTCTTCGCTCTCTTTTTCTGTGTATAATTCGTTTTTATTTTTCAGAAGATCTGTTGAGTCGCTACCGGCTCTTGAAGACAAGATCTTTGTCTTCGTGAATAAGGTTTG  
ATGACAAAAACCCTAATCTAAGCACTCAACTTTCTCTCTCTCTCGCTCGCTCGCTCTCGCTTTCTTAAATTGCGAGGGTGATAAAGGGATGACGGGTTTCGGCCAGGTGGTTATCGG  
GCCTCCGGGTTTCGGGGAAGACCACATACTGCAACGGCATGTGCGAGTTCCTCAAACCTCATCGGAAGGAAAGTGGCTGTAGTCAATTTGGATCCTGCAAACGATGCATTACCATATGAATG  
TGCTATTAATATCGAAGACCTCATTAAGCTTGGTGATGTTATGGCTGAGCATTCTTGGACCAAATGGAGGTCTAGTCTACTGCATGGATTACTTGGAGAAAAATATCGATTGGCTGTTATC  
CAAGTTGAAACCTCTTCTCAAAGATCATTATTTCTTTTTGATTTTCTGGCCAAGTTGAACTGTTCTTTCTTCAATCAAATGCAAAGAAAGTTATTTGGAAGCTTATTAGGGAGTTGGATC  
TCAGGTTAACGGCTGTTCAATTTAGTTGATGCCATTTATGCTGTGATCCTGGAAAATATGTAAGCGCTTTACTTCTGTCACTGACAACCATGATACACTTAGAACTCCCTCACATTAATGTAT  
TGTCCAAGATTGATCTCATTGAGAGCTATGGCAAGTTAGCGTATAATCTTGAGTCTATACAGATGTAGAAGATTTGTCTTATTTACAACATCACCTTGATCAAGATCCACGGTCATCTAAGT  
ACAGAAAACCTCACAAAGGAGCTATGTGACGTCATTCAAGATTTTAGTTTGGTTAATTTCAACCTTGGATATACAGGATAAAGAAAGTGTGGAAATCTTGTGAAGCTTATAGACAAAA  
GCAACGGATATATATTTTCGGGTATTGAGGGAAGTGTGTGGAATTTAGCAAGATAGCTGCTGCTCCTCTCGACTGGGATTAATATAGAACAGCTGCAGTTCAAGAAAAGTATATGAAAGAT  
GACGAGTTTTTATAGAAGTTGATGGAGTTTATGGAATCAATTGGCTGTGGTGAGACATCTTTCTCTTACATTTTAAATCTTGTTTTGGAAATATTTAGTTGGATTCAGGATAAATTG  
GCAGCCAACCTGTTCTACATTTTCTTTTGAATAGTTTGAACATAATTTGAAAACCTGGGCCTAATCAGATTGCACGCCTGTTTTTGATTTGTTTTTATCAAACCTGAAACAATATTTTATG  
ATGATTTTGGCTTTTCAGCCGATCTGCAAAGCTTTTGTGTGTTGAAATCACTCTACCCTACTATCATTG

>comp170626\_c2\_seq25

GAGAGAGAGAGAGAGAGAATGGCTTCTCTTGATGCTTAGCATGATTGAGAACACGAGGGGGTTGGGACCATAGAGAGAGAAAGTGATGAGGAAGCATAAAGATGGCTCCTTTTATTATT  
ATTTTTTTTCTCAAAGAAATATCCAAGAAGCTGTATTTGGCTAAGTTCAGGAAGACAATCTCATTCTACAAATAGCAGAAGAGAAAGCACTCCTGCAAGCCGTTTGATCGAAGAGAAAAC  
GCTCTGAGTTGAGAAGGTTACATGAAGAGAGAAGAAGAAGAGAAAAAGAGGATCAAATAGATCGCAGATCGGGATCTGATCTTCCTTCACAAACAATTTTCTTCCTATCTATCTCTCCCAT  
CTGTATTTATTATTATTGGATCGATGAGAGTGGGCTGACAGAAGAGAGTGAGCACACAGCGTTGAAGACTGCATCGACGAATGCCGTTCTTGTGCGTGCTCACCTCTCTATCTGTACAGTC  
AGCCTTATTATTGGCCACTTTAATCGAACCCGTAGCTCTTCTTTCTCTTTAGGTTTGCTTTTCTTTGCTTTTCTTCTTATCTATCCATCACATGCCTCAACGCGAAGACAAAAACAGAAAGA  
AATAGAGAGCTTTGTTGCAGAGCATTGGTTGTGGCTCATCCAAATGGCAGATCAGATCTCCCACTCTTCTGACACGTCTCCCTGGGCTCGAATTTCCACAGACTTGCTGTTCTCGAGAT  
TCAAGAGGAAGCAAAGAACAGATCAGGCGGCGTGGGTTTTGAGATAGAGAGCGAGAGGACAATGGTTTATTTCCCTCCTCCAACCCAAAAGAAAAAAAAAACGAAAATTTTGGGCTC  
GGAGAGCGAGAAGATGAGATCGAGAAGCGTACGCCTCCTCTGCTCTCCGTGCAATCTGGCTTAACGGACCCTACTGTTGACCGGTCCTTGCTCCCTCTTCTCTTTTTACTCTCTGCCT  
TCGCTGCCTCTTTTGCTTCTTCGCTCTCTTTTTCTGTGTATAATTCGTTTTTATTTTTCAGAAGATCTGTTGAGTCGCTACCGGCTCTTGAAGACAAGATCTTTGTCTTCGTGAATAAGGTTTG  
ATGACAAAAACCCTAATCTAAGCACTCAACTTTCTCTCTCTCTCGCTCGCTCGCTCTCGCTTTCTTAAATTGCGAGGGTGATAAAGGGATGACGGGTTTCGGCCAGGTGGTTATCGG  
GCCTCCGGGTTTCGGGGAAGACCACATACTGCAACGGCATGTGCGAGTTCCTCAAACCTCATCGGAAGGAAAGTGGCTGTAGTCAATTTGGATCCTGCAAACGATGCATTACCATATGAATG

TGCTATTAATATCGAAGACCTCATTAAGCTTGGTGATGTTATGGCTGAGCATTCTCTTGGACCAAATGGAGGTCTAGTCTACTGCATGGATTACTTGGAGAAAAATATCGATTGGCTGTTATC  
CAAGTTGAAACCTCTTCTCAAAGATCATTATTTTCTTTTGAATTTCTGGCCAAGTTGAACTGTTCTTTCTTCATTCAAATGCAAAGAAAGTTATTTGGAAGCTTATTAGGGAGTTGGATC  
TCAGGTTAACGGCTGTTCAATTTAGTTGATGCCATTTATGCTGTGATCCTGGAAAATATGTAAGCGCTTTACTTCTGTCACTGACAACCATGATACACTTAGAACTCCCTCACATTAATGTAT  
TGTCOAAGATTGATCTCATTGAGAGCTATGGCAAGTTAGCGTATAATCTTGAGTTCTATACAGATGTAGAAGATTTGTCTTATTTACAACATCACCTTGATCAAGATCCACGGTCATCTAAGT  
ACAGAAAACCTCACAAGGAGCTATGTGACGTCATTCAAGATTTTAGTTTGGTTAATTTACAAACCTTGGATATACAGGATAAAGAAAAGTGTGGAAATCTTGTGAAGCTTATAGACAAAA  
GCAACGGATATATATTTTCGGGTATTGAGGGAAGTGTGTGGAATTTAGCAAGATAGCTGCTGCTCCTCTCGACTGGGATTATTATAGATATCCTTTTATGTTAAATTTCTTTTACTTCTCTA  
AATGGTTATTAATAGCTTGGCGTTTTTTGTGTAACAATTTCTCCTGTTGAAATTTGTTGGCATATTTTTCTTATACATCTATCGCCTGCCTAAATTCCTTTCCCTTAGGAAGTTAGCTGTTGGTTT  
TTTTTTTGTAGTGCAACCTCAGGACATTATAAATACTCTTAAGTAGGCATTTCCCATTCATTATTTATTTAATACTTTCAATATAAGTTATTTTCATTCCTTTGGATTAGTCACAGTTACTTCTG  
CATTATCAAGGGTAATATGAGACATTTATAAATAGAATAAAAATTCATTTTTAATTTTTCTACTTGTAGTTGGCCAGCCCAATTTCTTGGAGTTTTGTCAAGTTTTATGCATACAGAATGTT  
CTTCGCCTTTCTTTAATTTAGTTCAACAGCTGCAGTTCAAGAAAAGTATATGAAAGATGACGAGTTTTTATAGAAGTTGATGGAGTTGATGGAATCAATTGGCTGTGGTGAGACATC  
TTTTCTCTTACATTTTTAAATCTTGTTTTGGAAATATTTAGTTGGATTGAGGATAAATGGCAGCCAACTGTTCTACATTTTTCTTTGAATAGTTTTGAACATAATTTGGAACCTGGGGCC  
TAATCAGATTGCACGCCTGTTTTGATTTGTTTTATCAAACCTGAAACAATATTATTTTATGATGATTTTGGCTTTTCAGCCGATCTGCAAAGCTTTTGTGTGTTGAAATCACTCTACCCTAC  
TATCATTG

>comp170626\_c2\_seq26

GAGAGAGAGAGAGAGAGAATGGCTTCTCTTGATGCTTAGCATGATTGAGAACACGAGGGGGTTGGGACCATAGAGAGAGAAAGTGATGAGGAAGCATAAAGATGGCTCCTTTTATTATT  
ATTTTTTTTCTCAAAGAAATATCCAAGAAGCTGTATTTGGCTAAGTTCAGGAAGACAATCTCATTCTACAAATAGCAGAAGAGAAAGCACTCCTGCAAGCCGTTTGATCGAAGAGAAAAC  
GCTCTGAGTTGAGAAGGTTACATGAAGAGAGAAGAAGAAGAGAAAAGAGGATCAAATAGATCGCAGATCGGGATCTGATCTTCCCTCACAAACAATTTCTTCCCTATCTATCTCTCCCAT  
CTGTATTTATTATTATTTGGATCGATGAGAGTGGGCTGACAGAAGAGAGTGAGCACACAGCGTTGAAGACTGCATCGACGAATGCCGTTCTTGTGCGTGCTCACCTCTCTATCTGTGAGTC  
AGCCTTATTATTGGCCACTTTAATCGAACCCGTAGCTCTTCTTTCTCTTTAGGTTTGCTTTTCTTTGCTTTTCTTCTTATCTATCCATCACATGCCTCAACGCGAAGACAAAACAGAAAGA  
AATAGAGAGCTTTGTTGCAGAGCATTGGTTGTGGCTCATCCAAATGGCAGATCAGATCTCCCACTCTTCTGACACGTCCTCCCTGGGCTCGAATTTCCACAGACTTGCTGTTCTCGAGAT  
TCAAGAGGAAGCAAAGAACAGATCAGGCGGCGTGGGTTTTGAGATAGAGAGCGAGAGGACAATGGTTTTATCCCCCTCCTCCAACCCAAAAGAAAAAAGAAAAAAGGAAAATTTGGGCTC  
GGAGAGCGAGAAGATGAGATCGAGAAGCGTACGCCTCCTCTGCTCTCCGTGCAATCTGGCTTAACGGACCCTACTGTTGACCGGTCTTGTCCCTCTTCTTCTTTTCACTCTCTGCCT  
TCGCTGCCTCTTTTGCTTCTCGTCTTCTTTTCTGTGTATATTCGTTTTTTATTTTCAAGAAATCTGTTTCAGTTCGCTACCGGCTCTTGAAGACAAGATCTTTGTCTTCGTGAATAAGGTTTG  
ATGACAAAAAACCTAATCTAAGCACTCAACTTTCTTCTCTCTCTCGCTCGCTCGCTCTCGCTTTCTTAAATTTGCGAGGGTGATAAAGGGATGACGGGTTTCGGCCAGGTGGTTATCGG  
GCCTCCGGGTTTCGGGAAGACCACATACTGCAACGGCATGTGCGAGTTCTCAAACCTCATCGGAAGGAAAGTGGCTGTAGTCAATTTGGATCCTGCAAACGATGCATTACCATATGAATG  
TGCTATTAATATCGAAGACCTCATTAAGCTTGGTGATGTTATGGCTGAGCATTCTCTTGGACCAAATGGAGGTCTAGTCTACTGCATGGATTACTTGGAGAAAAATATCGATTGGCTGTTATC  
CAAGTTGAAACCTCTTCTCAAAGATCATTATTTTCTTTTGAATTTCTGGCCAAGTTGAACTGTTCTTTCTTCATTCAAATGCAAAGAAAGTTATTTGGAAGCTTATTAGGGAGTTGGATC  
TCAGGGTATTGTAGTCAATCTATCATATTTGAAGATGTGTATGATATGGTAGCAGCGATGACAGGGCTCAGTGTGTTGTTGCTATTCTTTGCTTTATTTTAGAATTACCATTTCTTTGTGCAGT  
TAACGGCTGTTCAATTTAGTTGATGCCATTTATGCTGTGATCCTGGAAAATATGTAAGCGCTTTACTTCTGTCACTGACAACCATGATACACTTAGAACTCCCTCACATTAATGTATTGTCCA  
AGATTGATCTCATTGAGAGCTATGGCAAGTTAGCGTATAATCTTGAGTTCTATACAGATGTAGAAGATTTGTCTTATTTACAACATCACCTTGATCAAGATCCACGGTCATCTAAGTACAGAA  
AACTCACAAGGAGCTATGTGACGTCATTCAAGATTTAGTTTGGTTAATTTACAAACCTTGGATATACAGGATAAAGAAAAGTGTGGAAATCTTGTGAAGCTTATAGACAAAAGCAACG

GATATATAATTTTCGGGTATTGAGGGAAGTGTGTGGAATTTAGCAAGATAGCTGCTGCTCCTCTCGACTGGGATTATTATAGATATCCTTTTATGTTAAATTTTCTTTTACTTCTCTAAATGGTT  
ATTAATAGCTTGGCGTTTTTTGTGTAACAATTTCCCTCGTTGAAATTGTTGGCATATTTTTCTTATACATCTATCGCCTGCCTAAATTCCTTTCCCTTAGGAAGTTAGCTGTTGGTTTTTTTTTT  
GTAGTGCAACCTCAGGACATTATAAATACTCTTAAGTAGGCATTTTCCCATTCAATTTATTTTAAATACTTTCAATATAGTTATTTTCATTCCTTTGGATTAGTCACACATAATTTGAAGTCAGTT  
ACTACTGCATTATCAAGGGTAATATGAGACATTTATAAATAGAATAAAATTCACTTTTTAATTTTTCTACTTGTAGTTGGCCAGCCCAATTTCTTGGAGTTTTGTCAAGTTTTATGCATACA  
GAATGTTCTTCGCCTTTCTTTAATTTTAGTTTACAACAGCTGCAGTTCAAGAAAAGTATATGAA

>comp170626\_c2\_seq28

GAGAGAGAGAGAGAGAGAATGGCTTCTCTTGATGCTTAGCATGATTGAGAACACGAGGGGGTTGGGACCATAGAGAGAGAGAAAGTGATGAGGAAGCATAAAGATGGCTCCTTTTATTATT  
ATTTTTTTTTCTCAAAGAAATATCCAAGAAGCTGTATTTGGCTAAGTTCAGGAAGACAATCTCATTCTACAAATAGCAGAAGAGAAAGCACTCCTGCAAGCCGTTTGATCGAAGAGAAAAC  
GCTCTGAGTTGAGAAGGTTACATGAAGAGAGAAGAAGAAGAGAAAAGAGGATCAAATAGATCGCAGATCGGGATCTGATCTTCCTTCACAAACAATTTTCTTCCTATCTATCTCTCCCAT  
CTGATTTATTATTATTGGATCGATGAGAGTGGGCTGACAGAAGAGAGTGAACACTGCATCGACGAATGCCGTTCTTGTGCGTGCTCACCTCTCTATCTGTGAGTC  
AGCCTTATTATTGGCCACTTTAATCGAACCCGTAGCTCTTCTTTCTCTTTAGGTTTGCTTTTCTTTCTTCTATCTATCCATCACATGCCTCAACGCGAAGACAAAAACAGAAAGA  
AATAGAGAGCTTTGTTGCAGAGCATTGGTTGTGGCTCATCCAAATGGCAGATCAGATCTCCCACTCTTCTGACACGTCTCCCTGGGCTCGAATTTCCACAGACTTGCCTGTTCTCGAGGT  
GTTAATTTTATTGGTTCTTCAAATTTGCTTTGGAATAGCGTGAATATATTTGGATAAAGTTGATATCTTGATTATTTGTAGAAGCAAGAGGAAAAAATCTTGCCTTGATGATTTTGTAGATT  
CAAGAGGAAGCAAAGAACAGATCAGGCGGCGTGGGTTTTGAGATAGAGAGCGAGAGGACAATGGTTTATCCCCCTCCTCAACCCAAAAGAAAAAACAAGAAAATTTGGGCTC  
GGAGAGCGAGAAGATGAGATCGAGAAGCGTACGCCTCCTCTGCTCTCCGTGCAATCTGGCTTAACGGACCCTACTGTTGACCGGTCCCTGCTCCCTCTTCTTCTTTTCACTCTCTGCCT  
TCGCTGCCTCTTTTGCTTCTTCGCTCTCTTTTTCTGTGTATAATTCGTTTTTTATTTTCAAGAAGATCTGTTTCAAGTACCGGCTCTTGAAGACAAGATCTTTGTCTTCGTGAATAAGGTTTG  
ATGACAAAAACCCTAATCTAAGCACTCAACTTCTCTCTCTCTCTCGCTCGCTCGCTCTCGCTTTCTTAAATTGCGAGGGTGATAAAGGGATGACGGGTTTCGGCCAGGTGGTTATCGG  
GCCTCCGGGTTTCGGGGAAGACCACATACTGCAACGGCATGTGCGAGTTCCTCAAACCTCATCGGAAGGAAAGTGGCTGTAGTCAATTTGGATCCTGCAAACGATGCATTACCATATGAATG  
TGCTATTAATATCGAAGACCTCATTAAGCTTGGTGATGTTATGGCTGAGCATTCTCTTGGACCAAATGGAGGTCTAGTCTACTGCATGGATTACTTGGAGAAAAATATCGATTGGCTGTTATC  
CAAGTTGAAACCTCTTCTCAAAGATCATTATTTCTTTTTGATTTTCTGGCCAAGTTGAACTGTTCTTTCTTCAATCAAATGCAAAGAAAGTTATTTGGAAGCTTATTAGGGAGTTGGATC  
TCAGGGTATTGTAGTCAATCTATCATAATTTGAAGATGTGTATGATATGGTAGCAGCGATGACAGGGCTCAGTGTGTTGTTGCTATTCTTTGCTTTATTTTAGAATTACCATTTCTTTGTGCAGT  
TAACGGCTGTTCAATTTAGTTGATGCCATTTATGCTGTGATCCTGGAAAATATGTAAGCGCTTACTTCTGTCACTGACAACCATGATACACTTAGAACTCCCTCACATTAATGTATTGTCCA  
AGATTGATCTCATTGAGAGCTATGGCAAGTTAGCGTATAATCTTGAGTTCTATACAGATGTAGAAGATTTGTCTTATTTACAACATCACCTTGATCAAGATCCACGGTCATCTAAGTACAGAA  
AACTCACAAAGGAGCTATGTGACGTCAATCAAGATTTTAGTTTGGTTAATTTTACAACCTTGGATATAACAGGATAAAGAAAGTGTGGAAATCTTGTGAAGCTTATAGACAAAAGCAACG  
GATATATAATTTTCGGGTATTGAGGGAAGTGTGTGGAATTTAGCAAGATAGCTGCTGCTCCTCTCGACTGGGATTATTATAGAACAGCTGCAGTTCAAGAAAAGTATATGAAAGATGACGA  
GTTTTTATAGAAGTTGATGGAGTTTGTGGAATCAATGGCTGTGGTGAACATCTTTTCTCTTACATTTTAAATCTGTTTTGAAATATTTTAGTTGGATTTCAGGATAAATTTGGCAGC  
CAACTGTTCTACATTTTTCTTTTGAATAGTTTTGAACATAATTTGGAACTGGGCCAATCAGATTGCACGCCTGTTTTGTATTTGTTTTATCAAACCTGAAACAATATTATTTTATGATGAT  
TTTGGCTTTTCAGCCGATCTGCAAAGCTTTTGTGTGTTGAAATCACTCTACCCTACTATCATTG

>comp170626\_c2\_seq29

GAGAGAGAGAGAGAGAGAATGGCTTCTCTTGATGCTTAGCATGATTGAGAACACGAGGGGGTTGGGACCATAGAGAGAGAGAAAGTGATGAGGAAGCATAAAGATGGCTCCTTTTATTATT  
ATTTTTTTTTCTCAAAGAAATATCCAAGAAGCTGTATTTGGCTAAGTTCAGGAAGACAATCTCATTCTACAAATAGCAGAAGAGAAAGCACTCCTGCAAGCCGTTTGATCGAAGAGAAAAC

GCTCTGAGTTGAGAAGGTTACATGAAGAGAGAAGAAGAAGAGAAAAAGAGGATCAAATAGATCGCAGATCGGGATCTGATCTTCCTTCACAAACAATTTCTTCCTATCTATCTCTCCCAT  
CTGTATTTATTATTATTGGATCGATGAGAGTGGGCTGACAGAAGAGAGTGAGCACACAGCGTTGAAGACTGCATCGACGAATGCCGTTCTTGTGCGTGCTCACCTCTCTATCTGTACAGTC  
AGCCTTATTATTGGCCACTTTAATCGAACCCGTAGCTCTTCTTTCTCTTTAGGTTTGCTTTTCTTTGCTTTTCTTCTTATCTATCCATCACATGCCTCAACGCGAAGACAAAAACAGAAAGA  
AATAGAGAGCTTTGTTGCAGAGCATTGGTTGTGGCTCATCCAAATGGCAGATCAGATCTCCCACTCTTCTGACACGTCTCCCTGGGCTCGAATTTCCACAGACTTGCTGTTCTCGAGAA  
GCAAGAGGAAAAAATCTTGCCTTGATGATTTTGTAGATTCAAGAGGAAGCAAAGAACAGATCAGGCGGCGTGGGTTTTGAGATAGAGAGCGAGAGGACAATGGTTTATTCCCCCTCTC  
CAACCCAAAAGAAAAAAAACGAAAATTTGGGCTCGGAGAGCGAGAAGATGAGATCGAGAAGCGTACGCCTCCTCTGCTCTCCGTGCAATCTGGCTTAACGGACCCTACTGTTGA  
CCGGTCTTGTCCCTCTTCTTCTTTTCACTCTCTGCCTTCGCTGCCTCTTTTGTCTTCTCGTCTTCTTTTCTGTGTATATTTTCGTTTTTATTTTCAGAAGATCTGTTTCAGTCGCTACCGGCT  
CTTGAAAGACAAGATCTTTGTCTTCGTGAATAAGGTTTGTGATGACAAAAACCCTAATCTAAGCACTCAACTTTCTTCTCTCTCTCGCTCGCTCGCTCTCGCTTTCTTAAATTGCGAGGG  
TGATAAAGGGATGACGGGTTTCGGCCAGGTGGTTATCGGGCTCCGGGTTCCGGGAAGACCACATACTGCAACGGCATGTCGCAGTTCCTCAAACCTCATCGGAAGGAAAGTGGCTGTAG  
TCAATTTGGATCCTGCAACGATGCATTACCATATGAATGTGCTATTAATATCGAAGACCTCATTAAAGCTTGGTGATGTTATGGCTGAGCATTCTCTTGGACCAAATGGAGGTCTAGTCTACT  
GCATGGATTACTTGGAGAAAAATATCGATTGGCTGTTATCCAAGTTGAAACCTCTTCTCAAAGATCATTATTTCTTTTTGATTTTCTTGCCAAAGTTGAAGTGTCTTTCTTTCATTCAAATG  
CAAAGAAAGTTATTTGGAAGCTTATTAGGGAGTTGGATCTCAGGGTATTGTAGTCAATCTATCATATTTGAAGATGTGTATGATATGGTAGCAGCGATGACAGGGCTCAGTGTTTGTGCTA  
TTCTTTGCTTATTTTAGAATTACCATTTCTTTGTGCAGTTAACGGCTGTTCAATTTAGTTGATGCCATTTATGCTGTGATCCTGGAAAATATGTAAGCGCTTTACTTCTGTCACTGACAACC  
ATGATACACTTAGAACTCCCTCACATTAATGTATTGTCCAAGATTGATCTCATTGAGAGCTATGGCAAGTTAGCGTATAATCTTGAGTTCTATACAGATGTAGAAGATTTGTCTTATTTACAAC  
ATCACCTTGATCAAGATCCACGGTCATCTAAGTACAGAAACTCACAAAGGAGCTATGTGACGTCAATCAAGATTTTAGTTTGGTTAATTTACAACCTTGATATACAGGATAAAGAAAG  
TGTTGGAAATCTTGTGAAGCTTATAGACAAAAGCAACGGATATATATTTTCGGGTATTGAGGGAAGTGTGTGGAATTTAGCAAGATAGCTGCTGCTCCTCTCGACTGGGATTATTATAGAT  
ATCCTTTTATGTTAAATTTCTTTTACTTCTCTAAATGGTTATTAATAGCTTGGCGTTTTTTGTGTAACAATTTCTCGTTGAAATTTGTTGGCATAATTTTTCTTATACATCTATCGCCTGCCTAA  
ATTCTTTCCCTTAGGAAGTTAGCTGTTGGTTTTTTTTTTGTAGTGCAACCTCAGGACATTATAAATACTCTTAAGTAGGCATTTCCCAATCATTATTTATTTAATACTTTCAATATAGTTATT  
TTCATTCTTTGGATTAGTCACAGTTACTTCTGCATTATCAAGGGTAATATGAGACATTTATAAATAAGAATAAAATTTCACTTTTTAATTTTTCTACTTGTAGTTGGCCAGCCCAATTTCTTGG  
AGTTTTGTCAAGTTTTTATGCATACAGAATGTTCTTCGCCTTTCTTAAATTTTAGTTCACAACAGCTGCAGTTCAAGAAAAGTATATGAA

>comp170626\_c2\_seq30

GAGAGAGAGAGAGAGAGAATGGCTTCTCTTGATGCTTAGCATGATTGAGAACACGAGGGGGTTGGGACCATAGAGAGAGAAAAGTGATGAGGAAGCATAAAGATGGCTCCTTTTATTATT  
ATTTTTTTTCTCAAAGAAATATCCAAGAAGCTGTATTTGGCTAAGTTCAGGAAGACAATCTCATTCTACAAATAGCAGAAGAGAAAAGCACTCCTGCAAGCCGTTTGATCGAAGAGAAAAC  
GCTCTGAGTTGAGAAGGTTACATGAAGAGAGAAGAAGAAGAGAAAAAGAGGATCAAATAGATCGCAGATCGGGATCTGATCTTCCTTCACAAACAATTTTCTTCCTATCTATCTCTCCCAT  
CTGTATTTATTATTATTGGATCGATGAGAGTGGGCTGACAGAAGAGAGTGAGCACACAGCGTTGAAGACTGCATCGACGAATGCCGTTCTTGTGCGTGCTCACCTCTCTATCTGTACAGTC  
AGCCTTATTATTGGCCACTTTAATCGAACCCGTAGCTCTTCTTTCTCTTTAGGTTTGCTTTTCTTTCTTATCTATCCATCACATGCCTCAACGCGAAGACAAAAACAGAAAGA  
AATAGAGAGCTTTGTTGCAGAGCATTGGTTGTGGCTCATCCAAATGGCAGATCAGATCTCCCACTCTTCTGACACGTCTCCCTGGGCTCGAATTTCCACAGACTTGCTGTTCTCGAGGT  
GTTAATTTTATTGGTTTCTTCAAATTTGCTTTGGAATAGCGTGAATATATTTGGATAAAGTTGATATCTTGATTATTTTGTAGAAGCAAGAGGAAAAAATCTTGCCTTGATGATTTGTAGATT  
CAAGAGGAAGCAAAGAACAGATCAGGCGGCGTGGGTTTTGAGATAGAGAGCGAGAGGACAATGGTTTATTCCCCCTCCTCAACCCAAAAGAAAAAAAACGAAAATTTGGGCTC  
GGAGAGCGAGAAGATGAGATCGAGAAGCGTACGCCTCCTCTGCTCTCCGTGCAATCTGGCTTAACGGACCCTACTGTTGACCGGTCTTGTCCCTCTTCTTCTTTTCACTCTCTGCCT  
TCGCTGCCTCTTTTGTCTTCTCGTCTTCTTTTCTGTGTATATTTTCGTTTTTTATTTTCAGAAGATCTGTTTCAGTCGCTACCGGCTCTTGAAAGACAAGATCTTTGTCTTCGTGAATAAGGTTTG

ATGACAAAAACCCTAATCTAAGCACTCAACTTTCTTCTCTCTCTCGCTCGCTCGCTCTCGCTTTCTTAAATTGCGAGGGTGATAAAGGGATGACGGGTTTCGGCCAGGTGGTTATCGG  
GCCTCCGGGTTTCGGGGAAGACCACATACTGCAACGGCATGTGCGAGTTCCTCAAACCTCATCGGAAGGAAAGTGGCTGTAGTCAATTTGGATCCTGCAAACGATGCATTACCATATGAATG  
TGCTATTAATATCGAAGACCTCATTAAGCTTGGTGATGTTATGGCTGAGCATTCTCTTGGACCAAATGGAGGTCTAGTCTACTGCATGGATTACTTGGAGAAAAATATCGATTGGCTGTTATC  
CAAGTTGAAACCTCTTCTCAAAGATCATTATTTCTTTTTGATTTTCTGGCCAAGTTGAACTGTTCTTTCTTCATTCAAATGCAAAGAAAGTTATTTGGAAGCTTATTAGGGAGTTGGATC  
TCAGGGTATTGTAGTCAATCTATCATAATTTGAAGATGTGTATGATATGGTAGCAGCGATGACAGGGCTCAGTGTGTTGTTGCTATTCTTTGCTTTATTTTAGAATTACCAATTCCTTTGTGCAGT  
TAACGGCTGTTCAATTTAGTTGATGCCATTTATGCTGTGATCCTGGAAAATATGTAAGCGCTTTACTTCTGTCACTGACAACCATGATACACTTAGAACTCCCTCACATTAATGTATTGTCCA  
AGATTGATCTCATTGAGAGCTATGGCAAGTTAGCGTATAATCTTGAGTCTATACAGATGTAGAAGATTTGTCTTATTTACAACATCACCTTGATCAAGATCCACGGTCATCTAAGTACAGAA  
AACTCACAAAGGAGCTATGTGACGTCAATCAAGATTTTAGTTTGGTTAATTTTACAACCTTGGATATACAGGATAAAGAAAGTGTGGAAATCTTGTGAAGCTTATAGACAAAAGCAACG  
GATATATATTTTCGGGTATTGAGGGAAGTGTGTGGAATTTAGCAAGATAGCTGCTGCTCCTCTCGACTGGGATTATTATAGAACAGCTGCAGTTCAAGAAAAGTATATGAAAGATGACGA  
GTTTTTATAGAAGTTGATGGAGTTTGTGGAATCAATTGGCTGCGGTTGAGCAATCAATGATGCATTTGGAGGTTGCTGAAACTAAAATTGTTGATCATCACCTTATATGTTGGATTATGTA  
ACCACATGTTGTACTTCATGTAATGTGTGGGGTTGTTCAATGTTGATTAATTTATGAATTATTCATATATGATTAATGATCTCTCTTTTTCTTTTCATTTTTTTTTGTTTGG

>comp170626\_c2\_seq31

GAGAGAGAGAGAGAGAGAATGGCTTCTCTTGATGCTTAGCATGATTGAGAACACGAGGGGGTTGGGACCATAGAGAGAGAAAGTGATGAGGAAGCATAAAGATGGCTCCTTTTATTATT  
ATTTTTTTTTCTCAAAGAAATATCCAAGAAGCTGTATTTGGCTAAGTTCAGGAAGACAATCTCATTCTACAAATAGCAGAAGAGAAAGCACTCCTGCAAGCCGTTTGATCGAAGAGAAAAC  
GCTCTGAGTTGAGAAGGTTACATGAAGAGAGAAGAAGAAGAGAAAAGAGGATCAAATAGATCGCAGATCGGGATCTGATCTTCTTCCACAAAACAATTTCTTCTCTATCTCTCCC  
CTGTATTTATTATTATTGGATCGATGAGAGTGGGCTGACAGAAGAGAGTGAGCACACAGCGTTGAAGACTGCATCGACGAATGCCGTTCTTGTGCGTGCTCACCTCTCTATCTGT  
AGCCTTATTATTGGCCACTTTAATCGAACCCGTAGCTCTTCTTCTCTTTAGGTTTGCTTTTCTTCTTATCTATCCATCACATGCCTCAACGCGAAGACAAAACAGAAAGA  
AATAGAGAGCTTTGTGTCAGAGCATTGTTGTTGTTGCTATCCAAATGGCAGATCAGATCTCCCACTCTTCTGACACGTCTCCCTGGGCTCGAATTTCCACAGACTTGCTGTTCTCGAGAA  
GCAAGAGGAAAAAATCTTGCCTTGATGATTTTGTAGATTCAAGAGGAAGCAAAGAACAGATCAGGCGGCGTGGGTTTTGAGATAGAGAGCGAGAGGACAATGGTTTTATCCCCCTCCTC  
CAACCCAAAAGAAAAAAGAAACGAAAATTTGGGCTCGGAGAGCGAGAAGATGAGATCGAGAAGCGTACGCTCCTCTGCTCTTCCGTGCAATCTGGCTTAACGGACCCTACTGTTGA  
CCGGTCTTGTCCCTCTTCTTCTTTTCACTCTCTGCCTTCGCTGCTCTTTTGTCTTCTCGTCTTCTTTTTCTGTGTATATTTGTTTTTTATTTTCAAGAAGATCTGTTTCAAGTACCGGCT  
CTTGAAAGACAAGATCTTTGTCTTCGTGAATAAGGTTTGTGATGACAAAAACCCTAATCTAAGCACTCAACTTTCTTCTCTCTCTCGCTCGCTCGCTCTCGCTTTCTTAAATTGCGAGGG  
TGATAAAGGGATGACGGGTTTCGGCCAGGTGGTTATCGGGCTCCGGGTTTCGGGGAAGACCACATACTGCAACGGCATGTGCGAGTTCCTCAAACCTCATCGGAAGGAAAGTGGCTGTAG  
TCAATTTGGATCCTGCAAACGATGCATTACCATATGAATGTGCTATTAATATCGAAGACCTCATTAAGCTTGGTGATGTTATGGCTGAGCATTCTCTTGGACCAAATGGAGGTCTAGTCTACT  
GCATGGATTACTTGGAGAAAAATATCGATTGGCTGTTATCCAAGTTGAAACCTCTTCTCAAAGATCATTATTTCTTTTTGATTTTCTTGGCCAAGTTGAACTGTTCTTTCTTCATTCAAATG  
CAAAGAAAGTTATTTGGAAGCTTATTAGGGAGTTGGATCTCAGGGTATTGTAGTCAATCTATCATAATTTGAAGATGTGTATGATATGGTAGCAGCGATGACAGGGCTCAGTGTGTTGTTGCTA  
TTCTTTGCTTTATTTTAGAATTACCAATTTCTTTGTGCAGTTAACGGCTGTTCAATTTAGTTGATGCCATTTATGCTGTGATCCTGGAAAATATGTAAGCGCTTTACTTCTGTCACTGACAACC  
ATGATACACTTAGAACTCCCTCACATTAATGTATTGTCCAAGATTGATCTCATTGAGAGCTATGGCAAGTTAGCGTATAATCTTGAGTCTATACAGATGTAGAAGATTTGTCTTATTACAAC  
ATCACCTTGATCAAGATCCACGGTCATCTAAGTACAGAAAACCTCACAAAGGAGCTATGTGACGTCAATCAAGATTTTAGTTTGGTTAATTTTACAACCTTGGATATACAGGATAAAGAAAG  
TGTTGGAATCTTGTGAAGCTTATAGACAAAAGCAACGGATATATATTTTCGGGTATTGAGGGAAGTGTGTGGAATTTAGCAAGATAGCTGCTGCTCCTCTCGACTGGGATTATTATAGAA  
CAGCTGCAGTTCAAGAAAAGTATATGAAAGATGACGAGTTTTTATAGAAGTTGATGGAGTTTGTGGAATCAATTGGCTGTGGTGAGACATCTTTTCTCTTACATTTTAAATCTTGTTT



TGGAATATTTTAGTTGGATTCAGGATAAATTGGCAGCCAACCTGTTCTACATTTTTCTTTTGAATAGTTTTGAACATAATTTGGAACTGGGCCTAATCAGATTGCACGCCTGTTTTGATTT  
GTTTTTATCAAAGTAAACAATATTATTTTTATGATGATTTTGGCTTTTCAGCCGATCTGCAAAGCTTTTGTGTGTTGAAATCACTCTACCCTACTATCATTG

>comp170626\_c2\_seq33

GAGAGAGAGAGAGAGAGAATGGCTTCTCTTGTATGCTTAGCATGATTGAGAACACGAGGGGGTTGGGACCATAGAGAGAGAAAAGTGATGAGGAAGCATAAAGATGGCTCCTTTTATTATT  
ATTTTTTTTCTCAAAGAAATATCCAAGAAGCTGTATTTGGCTAAGTTCAGGAAGACAATCTCATTCTACAAATAGCAGAAGAGAAAAGCACTCCTGCAAGCCGTTTGATCGAAGAGAAAAC  
GCTCTGAGTTGAGAAGGTTACATGAAGAGAGAAGAAGAAGAGAAAAAGAGGATCAAATAGATCGCAGATCGGGATCTGATCTTCCTTCACAAACAATTTTCTTCCTATCTATCTCTCCCAT  
CTGTATTTATTATTATTGGATCGATGAGAGTGGGCTGACAGAAGAGAGTGAACACACAGCGTTGAAGACTGCATCGACGAATGCCGTTCTTGTTCGTGCTCACCTCTCTATCTGTACAGTC  
AGCCTTATTATTGGCCACTTTAATCGAACCCGTAGCTCTTCTTTCTTTAGGTTTGCTTTTCTTTCTTATCTATCCATCACATGCCTCAACGCGAAGACAAAACAGAAAAGA  
AATAGAGAGCTTTGTTGCAGAGCATTGGTTGTGGCTCATCCAAATGGCAGATCAGATCTCCCACTCTTCTGACACGCTCTCCCTGGGCTCGAATTTCCACAGACTTGCCTGTTCTCGAGGT  
GTTAATTTTATTGGTTCTTCAAATTTGCTTTGGAATAGCGTGAATATATTTGGATAAAGTTGATATCTTGATTATTTGTAGAAGCAAGAGGAAAAAATCTTGCCTTGATGATTTGTAGATT  
CAAGAGGAAGCAAAGAACAGATCAGGCGGCGTGGGTTTTGAGATAGAGAGCGAGAGGACAATGGTTTATCCCCCTCCTCAACCCAAAAGAAAAAACAAGAAAATTTTGGGCTC  
GGAGAGCGAGAAGATGAGATCGAGAAGCGTACGCCTCCTCTGCTCTCCGTGCAATCTGGCTTAACGGACCCTACTGTTGACCGGTCCTTGTCCCTCTTCTTTTTCACTCTCTGCCT  
TCGCTGCCTCTTTTGCTTCTTCGCTCTCTTTTTCTGTGTATATTCGTTTTTTATTTCAGAAGATCTGTTTCAGTCGCTACCGGCTCTTGAAGACAAGATCTTTGTCTTCGTGAATAAGGTTTG  
ATGACAAAAACCCTAATCTAAGCACTCAACTTCTCTCTCTCTCGCTCGCTCGCTCTCGCTTCTTAAATTTGCGAGGGTGATAAAGGGATGACGGGTTTCGGCCAGGTGGTTATCGG  
GCCTCCGGGTTTCGGGGAAGACCACATACTGCAACGGCATGTGCGAGTTCCTCAAACCTCATCGGAAGGAAAGTGGCTGTAGTCAATTTGGATCCTGCAAACGATGCATTACCATATGAATG  
TGCTATTAATATCGAAGACCTCATTAAGCTTGGTGATGTTATGGCTGAGCATTCTTTGGACCAATGGAGGTCTAGTCTACTGCATGGATTACTTGGAGAAAAATATCGATTGGCTGTTATC  
CAAGTTGAAACCTCTTCTCAAAGATCATTATTTCTTTTTGATTTTCTGGCCAAGTTGAACTGTTCTTTCTTCAATCAAATGCAAAGAAAGTTATTTGGAAGCTTATTAGGGAGTTGGATC  
TCAGGGTATTGTAGTCAATCTATCATATTTGAAGATGTGTATGATATGGTAGCAGCGATGACAGGGCTCAGTGTGTTGTTGCTATTCTTTGCTTTATTTTAGAATTACCATTCTTTGTGCAGT  
TAACGGCTGTTCAATTTAGTTGATGCCATTTATGCTGTGATCCTGGAAAAATATGTAAGCGCTTTACTTCTGTCACTGACAACCATGATACACTTAGAACTCCCTCACATTAATGTATTGTCCA  
AGATTGATCTCATTGAGAGCTATGGCAAGTTAGCGTATAATCTTGAGTTCTATACAGATGTAGAAGATTTGTCTTATTTACAACATCACCTTGATCAAGATCCACGGTCATCTAAGTACAGAA  
AACTCACAAAGGAGCTATGTGACGTCAATCAAGATTTTAGTTTTGGTTAATTTCAACACCTTGGATATACAGGATAAAGAAAGTGTGGAAATCTTGTGAAGCTTATAGACAAAAGCAACG  
GATATATATTTTCGGGTATTGAGGGAAGTGTGTGGAATTTAGCAAGATAGCTGCTGCTCCTCTCGACTGGGATTATTATAGATATCCTTTTATGTTAAATTTCTTTTACTTCTCTAAATGGTT  
ATTAATAGCTTGGCGTTTTTTGTGTAACAATTTCCCTCGTTGAAATTTGTTGGCATATTTTTCTTATAACATCTATCGCCTGCCTAAATTCCTTTCCCTTAGGAAGTTAGCTGTTGGTTTTTTTTTT  
GTAGTGAACCTCAGGACATTATAAATACTCTTAAGTAGGCATTTTCCCATTCAATTTATTTAATACTTTCAATATAGTTATTTTCATTCCTTTGGATTAGTCACAGTTACTTCTGCATTATC  
AAGGGTAATATGAGACATTTATAAATAGAATAAAATTCACTTTTAATTTTTCTACTTGTAGTTGGCCAGCCCAATTTCTTGGAGTTTTGTCAAGTTTTTATGCATACAGAATGTTCTTCGCC  
TTTCTTTAATTTAGTTTCAACAGCTGCAGTTCAAGAAAAGTATATGAAAGATGACGAGTTTTTATAGAAGTTGATGGAGTTTGTGGAATCAATTGGCTGTGGTTGAGCAATCAATGAT  
GCATTTGGAGGTTGCTGAAACTAAAATGTTGATCATCACCTTATATGTTGGATTATGTAACCACATGTTGTAATGTGTGGGGTTGTTTCATTGTTGATTAATTTATGAATTATT  
CATATATGATTAATGATCTCTCTTTTTCTTTTCATTTTTTTGTTTGG

>comp170626\_c2\_seq34

GAGAGAGAGAGAGAGAGAATGGCTTCTCTTGTATGCTTAGCATGATTGAGAACACGAGGGGGTTGGGACCATAGAGAGAGAAAAGTGATGAGGAAGCATAAAGATGGCTCCTTTTATTATT  
ATTTTTTTTCTCAAAGAAATATCCAAGAAGCTGTATTTGGCTAAGTTCAGGAAGACAATCTCATTCTACAAATAGCAGAAGAGAAAAGCACTCCTGCAAGCCGTTTGATCGAAGAGAAAAC

GCTCTGAGTTGAGAAGGTTACATGAAGAGAGAAGAAGAAGAGAAAAAGAGGATCAAATAGATCGCAGATCGGGATCTGATCTTCCTTCACAAACAATTTTCTTCCTATCTATCTCTCCCAT  
CTGTATTTATTATTATTGGATCGATGAGAGTGGGCTGACAGAAGAGAGTGAGCACACAGCGTTGAAGACTGCATCGACGAATGCCGTTCTTGTGCGTGCTCACCTCTCTATCTGTACAGTC  
AGCCTTATTATTGGCCACTTTAATCGAACCCGTAGCTCTTCTTTCTCTTTAGGTTTGCTTTTCTTTGCTTTTCTTCTTATCTATCCATCACATGCCTCAACGCGAAGACAAAAACAGAAAGA  
AATAGAGAGCTTTGTTGCAGAGCATTGGTTGTGGCTCATCCAAATGGCAGATCAGATCTCCCACTCTTCTGACACGTCTCCCTGGGCTCGAATTTCCACAGACTTGCCTGTTCTCGAGGT  
GTTAATTTTATTGGTTTCTTCAAATTTGCTTTGGAATAGCGTGAATATAATTTGGATAAAAGTTGATATCTTGATTATTTGTAGAAGCAAGAGGAAAAAATCTTGCCTTGATGATTTTGTAGATT  
CAAGAGGAAGCAAAGAACAGATCAGGCGGCGTGGGTTTTGAGATAGAGAGCGAGAGGACAATGGTTTATCCCCCTCCTCCAACCCAAAAGAAAAAAAAAACGAAAATTTTGGGCTC  
GGAGAGCGAGAAGATGAGATCGAGAAGCGTACGCCTCCTCTGCTCTCCGTGCAATCTGGCTTAACGGACCCACTGTTGACCGGTCCCTGCTCCCTCTTCTCTTTTTACTCTCTGCCT  
TCGCTGCCTCTTTTGCTTCTCGTCTCTTTTTCTGTGTATAATTCGTTTTTTATTCAGAAGATCTGTTGAGTCGCTACCGGCTCTTGAAGACAAGATCTTTGTCTTCGTGAATAAGGTTTG  
ATGACAAAAACCCTAATCTAAGCACTCAACTTTCTCTCTCTCTCGCTCGCTCGCTCTCGCTTTCTTAAATTGCGAGGGTGATAAAGGGATGACGGGTTTCGGCCAGGTGGTTATCGG  
GCCTCCGGGTTTCGGGGAAGACCACATACTGCAACGGCATGTCGCAGTTCCTCAAACCTCATCGGAAGGAAAGTGGCTGTAGTCAATTTGGATCCTGCAAACGATGCATTACCATATGAATG  
TGCTATTAATATCGAAGACCTCATTAAGCTTGGTGATGTTATGGCTGAGCATTCTTGGACCAAATGGAGGTCTAGTCTACTGCATGGATTACTTGGAGAAAAATATCGATTGGCTGTTATC  
CAAGTTGAAACCTCTTCTCAAAGATCATTATTTCTTTTTGATTTTCTGGCCAAGTTGAACTGTTCTTTCTTCAATCAAATGCAAAGAAAGTTATTTGGAAGCTTATTAGGGAGTTGGATC  
TCAGGGTATTGTAGTCAATCTATCATAATTTGAAGATGTGTATGATATGGTAGCAGCGATGACAGGGCTCAGTGTGTTGCTATTCTTTGCTTTATTTTAGAATTACCAATTCCTTTGTGCAGT  
TAACGGCTGTTCAATTTAGTTGATGCCATTTATGCTGTGATCCTGGAAAATATGTAAGCGCTTACTTCTGTCACTGACAACCATGATACACTTAGAACTCCCTCACATTAATGTATTGTCCA  
AGATTGATCTCATTGAGAGCTATGGCAAGTTAGCGTATAATCTTGAGTTCTATACAGATGTAGAAGATTTGTCTTATTTACAACATCACCTTGATCAAGATCCACGGTCATCTAAGTACAGAA  
AACTCACAAAGGAGCTATGTGACGTCAATCAAGATTTAGTTTGGTTAATTTTACAACCTTGGATATACAGGATAAAGAAAGTGTGGAAATCTTGTGAAGCTTATAGACAAAAGCAACG  
GATATATATTTTCGGGTATTGAGGGAAGTGTGTGGAATTTAGCAAGATAGCTGCTGCTCCTCTCGACTGGGATTATTATAGATATCCTTTTATGTTAAATTTTCTTTTACTTCTCTAAATGGTT  
ATTAATAGCTTGGCGTTTTTTGTGTAACAATTCCTCGTTGAAATTGTTGGCATAATTTTCTTATACATCTATCGCCTGCCTAAATTCCTTTCCCTTAGGAAGTTAGCTGTTGGTTTTTTTTTT  
GTAGTGCAACCTCAGGACATTATAAATACTCTTAAGTAGGCATTTTCCCATTCATTATTTATTTAATACTTTCAATATAGTTATTTTCAATCCTTTGGATTAGTCACACATAATTTGAAGTCAGTT  
ACTACTGCATTATCAAGGGTAATATGAGACATTTATAAATAGAATAAAAATTCACTTTTTAATTTTCTACTTGTAGTTGGCCAGCCCAATTTCTTGGAGTTTTGTCAAGTTTTTATGCATACA  
GAATGTTCTTCGCCTTTCTTTAATTTTAGTTTACAACAGCTGCAGTTCAAGAAAAGTATATGAAAGATGACGAGTTTTTATAGAAGTTGATGGAGTTTGTGGAATCAATTGGCTGTGGTG  
AGACATCTTTTCTCTCTTACATTTTAAATCTTGTGTTTGGAAATATTTAGTTGGATTGAGGATAAATTGGCAGCCAACTGTTCTACATTTTCTTTTGAATAGTTTTGAACATAATTTGGAAA  
CTGGGCCTAATCAGATTGCACGCCTGTTTTGATTTGTTTTATCAAACCTGAAACAATATTATTTTATGATGATTTTGGCTTTTCAGCCGATCTGCAAAGCTTTTGTGTGTTGAAATCACTCT  
ACCCTACTATCATTG

>comp17735\_c0\_seq1

GAAGGCCATCAATGGAAGTTGGGCTGGGCAAGATGGAGAAGCAGGGCACGTGCATTGTTCTCTATAAATTCGGTCCACTTTCTTCTCTCTTGGAGATAAAGATTCAGAGAGCTTTTCATGT  
GCCATCTTCTCCATCATAATCCATCTTACCTAATTCAGCAACTGATAGAAGGATTAGTACATGGAATTCATAAAGATTTTAGCTAATTTCTCCTATTCTCCTCCCTCCTATCTTTCGGCTGTTTT  
TTACAGATGTGAGAGACTTTCTGCCCCAATTTGCTTTATGTTGGTGTGGGAGATTTCTATTATGTTCTAACCTCTCATACTTGGGCAAATGTGAGAGATTTAAAGAGATCGAGTTATACATA  
AAAGTGGAGTTATAAACAGGCATCATGATATATGCATAATATATTATGATCACAATATGATAATTTAAATATGTTTAAATATAAGCAAAAATATGCTGATAAGTAAATTCCTAACACATATGT  
AAAGTGAATTTTGGAAAG

>comp218447\_c0\_seq1

CTTACATGAAGATGAGAGCCATTCTTTGGTAGCCAAGGATGACTTGCCTTTGTACTCATTAGAGCCATCTGAAGAATTTTCAGTTGTCTCAGAAAAGAAATTCTACAGATTTTTTTTGATA  
TTGAGATCTGTATTCTGAAGCCTCAATTGTTGTTGATAGAGATTATAGTGGAAAGAACACAGATTTCAATGTAAAATAGTCGTGATTTTTTTTATTTTTGCAGTATTTTCAGATGTTTTG  
ATGTTGTTCAATGGCAAGTTTCCTTGGCTATTCTAAGTGGCTTTCAGTCTTCATGCTAGGCCTGTCTCTTCCAAATTGATAAAGC

**Data S4** Sequences of the transcripts predicted to be miRNA precursors in Figure S4.

>comp85453\_c0\_seq1

GCTCCTTTTCTCCCTTGCTCTTCTCCAAGCCAAAAAGCCATGAACTCCTCCTTATTGCTCAAGAAGAATAAAGATCTTCCCCAAAAACCAATCTGTTCTTACAATATTATATCCTCTTCA  
TGACCTGATCATTATGTGCCAAAGAATGGTGGAAAGTGGATGGTGGGAGGAGGAGGAGATTTGCTGTTTCGGAATGAAGTTTGATCCAAGATCTTCATGTGTACAAACGATGAAGAAGAA  
CTGGTTTTACTAATCCAAGTTTCTTTGGAAGAGATAATGGAGAGATCTCGGACCAGGCTTCATTCTTGCCTCGCTTTCTAGATCATGGCGCATTTGTGATCGAAGAAGAGGACTGCAG  
GTTGTCTGATGAAACACAATATGACCGTTGGATTATCATTTCCATAAATATTTCTATCAGTAATTTATTTGGATACTGCAGTTGTTTTGCCTTCTCTATCTTCACAAAAAAGCTTGGATGAAGA  
TATCCTGACATAAAATTTATTAGCATTTTCTTGTATATTCATCTTATA

>comp86146\_c0\_seq1

TCTATCATGTTCTTCTCTCTCTATATGCTTCTTCTTGCTAGATCTCCCTCTTGATCCTGTTTAGGGTTTAGTGGATGATGAGATGAGATCTATATAGTATTTCTTCATTTATTTCTTTCT  
TTGTCTCTCCCTTCTTCTTCTAGCTAGCTAGCTTGTCTTCTCTGCTAATTTAACAGTGAAGCCAGAGGAAGAAATGAGAAGAAGTTGGTGGTTGCAGATGTGGCATCATCAAGATTCA  
CATATTTGATCTTGCTCGAATGAGAATCTTGATGATGCTGCATCAGCAACTATCAACTAATAAGTATTAGTAAATATCTATATGATTATGCACGATCCTGCTTCAAGGTTGGTGTCTATGTCCT  
TGAGAAAGGACCATCTCCGATTCTGCCACACCACCAAGTTATAGAGCTACAATAATAATCTTCTACTTCACTGCTTGAATCTGCTATTCCAGCTTCTCTTTATACTACTTTCATCTCAAACT  
TTAAATTTTGATCGTTTATTTAATGGGAAGGGAGACTGAAGAGATAGAATTACATAGTTAATACAGTGAATTGTACAAGCATCTCTTTATGAGATTCTCAGACATTAATAAACATGTCCTTA  
GAACAAACAGCTTTGTTGAGCTGATGCAGGTGTC

>comp108689\_c0\_seq1

AAGAGCATCGACGTGCATTAATCAAAGGTTTCATGGAAGAAGAGAGAGAGTACAGCCTCTGGCATTCCCTCACCATCATCATATAAATAACTCTTTGGGGAGTGTTAGACCAGCTGTGCT  
ATCTCTTCTTCTCTTTGCCTTCTGATGAAATGGAGGACCTGTAAAGAGTTTCTGTTCAACTATTCTCTCTACATAATTTGGTTAATTATCTTTTTTCTCTGGTAACTTAATGGTTATATTGCT  
ATAGGTGTGCTTTTTTAATGGAGATTTCAATG

>comp112901\_c0\_seq2

TCTTCCACAGCTTTCTTGAAGTGCATCCATAATTCTACAGAGAAGAAGAGTTATAGCTGCAATTTGCAGTTCAAGACAGCTGTGGGAGATTACAGGGAGAGACCAATTCTGAAGAAGCCT  
AGAATTATATACATGAATATGCAATTATACATTTTGATGAGATCTGTTACTATGTTGTGAATTTGTTTCTGTTTTCTCTTTCTGTTGCCTTTGAAGGCTTTAAATTTTAGTGGGAAGAAGCAGT  
TTTTGTGGTGTAAAGGCTTTTTTCTTTAACAGATATAGAATTATATGTACATGTTGGTGAAGATCTGTTATTTCTTGCAAGGTTCAAGTTGAGTTTCTTACTTTTCTTATCTTGAAGACTCTA  
AATTTGTAAGAAGAAGCAGTTTTTTGGTGAATATAGAGGAATTATATAAATATATGTGAGATCTGATGCTTTCTTGTGAAATTAGGTTAAGTTTTATCTTCTTCTTGTCTTGCTAAACAC  
TTAAGGCCCTTTTTCTTTTACACATACTGCAGGAGAGATCCATTGCTTCTTCTGAAGTTAGGCTAATTATTAGTTCTATCTT

>comp124801\_c0\_seq1

TCAATCTCTCTTCTTCTTCTTAACTTACTAAAATCCTACACTTAGCTTGTCTCAGTACTCTTCTACCATGTTCAATGCATTCGACATTTCTTTACCTCAAATGGCTACTATGCTTTTTATTT  
TTTTGTTGTTATTTCAATTTTGTATTGTGATTTTACTTTAAGAGTGACTTAATCATGGAAGGCTTAGCATGGGAAGTAAAAATAAAGAGAGCTTCCCTCAGTCCACTCATGGATGGCGATAGG  
ATTTGTTTAGCTGCCGACTCATTCATCAAATGCTAAGTGAGAAGAATTAGCAGAAGAAATGGTATAGGCTTAGTAGATGAATGAATGATGCGGGAGATAAAGTCGGATCCTATGCTATCTT  
TGCTTGGACTGAAGGGAGCTCCCTTCTCTTGTGCTATGCTATGTTACTCTCTATCTTCTACAGTTTCGCTTGTATCAAATTTGTTAATTTCTTTTGTGAAAGTGTATCTTAAAT  
CTGTGATTAATGTTATATTATTAGTCACATACCTTTCAATTAAGCGCCTTTATAACTATTTTTTTATCATTTGTT

>comp140839\_c0\_seq4

AAATAATAACAAGTTGTGAAGTTTCAGAATAACAGGCAACTCTCCTTTGGCAGAGAGAACAGCCACAACGATGGCTTCATTTGTATTAAGCTATTTGTTTTTTTCCCTTCTTCTGCCAAA  
GGAGAATTGCCCTGCTATTCAACCACACAGGCACAAGAAAGCTTTTCTGCTTAGGATGGAAGATTTTCTTACCAAATAAGGTAAACCTTCCCTTGCAAAGCTCAATCAGACTGATGGCTT  
CTGTTCTCTGGTTTCTTCATTGATCGATTTCTAGCTAGAAGATCTGATCTTGATTATCTCACCATACAGCTCGATTTCTCCTTGAAATATATTTTCAGTGAATTTTGAAGTTGTGTAAGCAGA  
AAACACAAAAGAAAAAAGTCAAACATATAGGTACTGTACATGTAAGTGGACATTAATAATTAATTTATAAGTTGCAAATTTCTATGAATTTTGAAGTTAGAAATTTGAGCAATAATTTATATTTATG  
AGTATA

>comp146035\_c0\_seq1

CAAAAAGCTAAGCTCCTCTTTTATTACAAGTATGGGAGACCCATTAAGCTCAGGAGGGATAGCGCCATGGATCATTAGAGAGCTGATTAGCTCTCCATTCATTTGAGCCTTTTCTCTCAAT  
TTTTGCTGTGACGCTATCTATCCTGAGTTTTATAGGTTCTTCTTACTCTTTTCTCCTCTCCGTCTCTGCTCTTCTGGCAAAGCTTTCAGTGGGCAATAAAATCTATGATGGGTACATGAAGGCAG  
AGGCGGCTAATATTCAACAGCTGGGCCATGATGACATTTATGATGATGATGATGCCATAACCCATGAATGCATTATTGCACAGCTTGATGGAATGCATGTATGAACTGGTCACATGCTTTCA  
TGTAAGTGTGATAAATCTATTATCACCATACATGGAAGGAATGAATGCTGAGCTTTACTGTTGCAGCAGAAGCAGCAGTAGATTTATTGGACATCCTAACAGTAGGACCCAGCTGCATG  
TGTTGTTTGTAATGCCTCTAAGTCTGCTGCAGCCACATGCAAACCACTAATGAATCTTTATTTGCAATTTACCCCAACCTTTACATGAAATTAATGTTTTAAGATTAAGTATTATGG  
TATTTGTAATATATGTTTGTGATAAAATGTCGTCGGTATGCATTTACTAGTTAGATGTCCTCACTCCAACCATAACGAAGAAAAGCCACATGTTTCACAGCTTTCCCTCACTTGATAAGA  
ATTTAGGTATTCTTAACACCGCCTCAGCTCTTTTCAAGTTTCCAATGAGTCAAACACTAGTCAATCAACATCCATATCAA

>comp146186\_c2\_seq1

AAAGGGTAAGGTGTTCACTTCGGTTGCTTCTTCATCAGTTGAGGAGAGTTGAGCATGGTGGAGAAGCAGGGCACGTGCATTGCAGTCTCTATACTCCTCTCACTCCATTTTAGGAGTTAG  
ATTGTTCTTCTTCATGTGCCATCTTCTCCATTTTGCTCACCTCACCTATATATTTTTTCTTCTCCTCCATGTACGAGTTACTAAAAGCACTCTTTGATCTCCAATGAGATCTCTCACTATAGG  
AAAATATGTCGTTACCGTCGGACTTTCCGGCGGCCCTCCCGATGAAATATGCACTGGTAAATTAACGACGAAATGGCTGTGGTAAACAGAACGTTTTCATGTAGTGTCTCTAGCTTACTATG  
TACTGAAAACCTTCTATCATGCATGGTTACAGCTTTCATCTCACTGACCAATCTGAAACTTAGAATTATCTGTAATATGCAAGGATCAACTGAACTTATGAACTAACCTGTTTGATTTCAAAA  
ACATTCAGAGGTCTAAATATCAGTTCTTTAAGTGGAGAAAGCATGTTGGTTGTTGCAAGGTTTATGTATCTTTGCAGAACTCAGCAAATCAAGAGGATATGTATGCTTGCCCCCAAC  
ACTATAACATTTGATGTATCCCTTTTTTTTTTCTTTAGTTTTTTTCATGATTTTGTGATTTATTGATAATAACAGTATGTTGCATATCATAATTTGTAA

>comp153713\_c0\_seq2

TCTCCTCCTTTCCCTTCTTCTATAAATATCACTTATATCTTCAACTCTCTTCATAGCTTTAGGTTTTTCATCTCATTCTTTTCGCTTTCTCTTACTCTTCTCTTCTGTTTCATGACAGAAGAAGAG  
ATGGCCTTCCCTGTAGTCTTCCACAGCTTTCTTGAAGTGCCTTTTCTTCTGGAATGGAAGATTAGGGTTAGGGTTGCAGTTCAATAAAGCTGTGGGAAATTACAGGGAGAGACCAA  
ATTCTATAGAAGTTCAGCCATAACTACAGTCGGGATTAGATCTGCCACTTCTTTTACATATTTTCCATCTTTTCAGAGGGTAAGGATGATAGATCTGGTTTATAGTTAATTTTCCCTTATT  
ATTTATTCTCTTTACGTTGGGTAGCTTCTGAATTATCTTAAATTTCTGGAATTTAATTACAAATACTGCTATGGATGTTATTGTTTCAAATATTTTTCTTCATTTCAATTAGAAATTTTAGAAAA  
TGACAAGAATTCAAATCTCTGGAAGGGTGAGTTGCCTGTGCATTATATTTTTGGAAAGCTGGCTTTCATATGATGTAATTTAATTGTAGATTTCCCTTTATATGTACTGTATGAAGACATAAA  
AGGTAATAAAAACGTGGATGGAGATGACATGCAAGCATAAATGTTACTTACTTTGATCTGGTTAATTTCTCTTTAATTTAATTGCTCTCCACCTTTCTACATATCTACTGACAAGAACCTA  
CCTCTACCATCTTTTGATCTGTAAATTCATTGGCCTATTAGAATTTCTGTTTCTTTTTTTTCATTTAGCTTTTATAAATAAGTACATATATAAATGATCTCAATGTTAAGGGACCACAATTT  
TTGCTATGTTTGTGTCGAAGTTCATTGGATCTGATAAGCCTAAGGCAGGTAACCTTATAGAACGCTATTATGTTGCTGTTTGAAGTGCCTATTTTCTTAACACAGTTCTTGAGCTTTTTG  
TTTCTTTTTGGACAAGTATTGATTTAGATTTAGGCTTTTTGAGATAATTTGGTTGGGCTTATACGTGAAGGAGCAGCTCCAGTGGAAAATATGATTAGAGAGAGTTGCCTTAGATGGTTTTG



GTTGAGATAGGCTATTATTCCATTAATTATGTGTTAAACAATGAGAAAAACATTGTTTAGTTTCATTTCCGATGCCCTCCTTAATTTCTTTTGCATTCCCCATAAGTTTCAATTTTAAAGCTGC  
AATGTGCCATTACCTTGAGCACAACTTTTTTCGTTATAATGACTGTGGAAGTAAGTGCATCTTTCGGCCTTATCAATTTCCAATGGAAGATGCTCCAAGTGCCTTACTTTTATGTTTGACC  
ACCATAAAAACTGACCTCTCTTCTCCCTCTCTCTCTCTCACGAGATCGAAAGCAAGAGGTCGGGATAGGGAGATGGGATTCGGCAGTGGAGGTGCGGGTAAGGCTACAGGCGGGC  
GCTCGGGGCTGAGGAGGTGCGGAGAGTCTCGCGTTTGGCCGTGAGAGTGGGACGGGGTAAGACAGAAGGAAGCAGCGAGTGTCTCTCCATTCTTCGCTATTTAACGACCTCTTCG  
GACGCTCGATCGAGGCCGGCTCTGAGCACAAATCGCGGGATGCGACTCAAACGG

>comp163033\_c0\_seq7

TCCAACAGCCAACCTGTACTGCTCCTGTACTGCTCTCCTCTCTTCTTGTCCAAGTACTGCCTTCAAATACATCTAACGCTTCCACATCTAAGAAAATCAGAGTAAAAGAATTGAGATTG  
AGACAAACAGCAGCAGTGGGAAGGGGCATGCAGAGGAGCTCTATCAATTGGCAAGTGTGACAACGTCGAAGCTCTATGTATGCCTCCTCCACTTCTGCTGCTAGCCTCCTATGCTACTGT  
TTGTTTTGATATTGTCAAGCGGCAACATCAAAGCTCTTAGTTTCTCTCGTTTATCTCTACTGTTAAGCATCTTAATCAGTGTGGGACTTGGGACCTGACAACGGCAGTGTAAAGAGAAAA  
AAGATTCATGTAGCCGA

>comp164879\_c1\_seq2

CAGCATCTTCTCTCCAAATCAATCAAAGATTCTATTGATGCCGAAGACGGCAAGATCTCATAGTAGAGGCAGCCGATGCTTCTCCTTTTCGCTAAAAGAAACCGACCGTCCGATTGAG  
CATTGGCAATATCGTAATTCGCAATCATTCTCGCCTATTTAAGCCAAGCACGCCAACGTCACCATGATCGCACACAAATTTATTAGTTTTTCATCTTCTTCTAGGGTTCCAAAATCGGA  
ATCCCCTCTCTCTTCCATTCTGAGATCTAATCGTGCCATGGCGACTTTGGGGTCATGGGAGGTAAGAAGCCGGGACGAGTTTGTATGGGATGTCTAATATCTATCCTTCGAGGGGATTT  
AATTTCTTTTATTCTTCTTTGTATAGTTTCTTTTTTGTCTTCTGGCTCGGGTGATTGCTGGGCGCAGCGGTTTATCGATCTTTTCCTTGCCTTGTGTCTCTGATTCGGAAAATGATTGGA  
CAGGTAAGGTGGCGAGGGTGCAAAGCGGGAATTGGTCGATAAACCTCTGCATCCGGCTCTCACTTTTTTTTTTTTTTTTAAACTTTTTTTTTTATTTCTGTTTTCTTTGTTAATTGATTATTG  
CTTCTGTTTTTTTTTTTTTTTTTGGTTTGTAGAATATCATTATCTGGAAAGGACTGATTTGTGATGAGTCTGGGTTGTGTCAATTCATTTTATATTTTAAAAGTGTTCGCTCTTTGATTTCTT  
TACTGAGTCCGGCATTAGTTGACTTTAGTGAGGAATTAGGAATGATTTGTTATTCGCAGAAGAAGATATGGAGGCATATATGTTGGTTGACAAGCTCTTTAAGGTTTCACTTCAACTTGATCC  
TGCTAGGTCAATAGCTCTTTTTTTTTTTTTTTGAAAATTTTAGTAAAGTCCAGTCCGACTTTGAAGAACCATATATCACGGATTTCCATATGATCTTCACCCTCTGTTCCATACAATATATCC  
TATTATTAATCTTTTGGTTCAATTTATCTAACCTTGACATTATAGCATAATCTTGTGAAACATTTTGAGTCTAAAAGACAGTAGGTTCTTATTTACTAGGTATTTATTAGAGAGTCGTAGTC  
CTTGTGATTTCTAGTCTTTCTTACTTTTAAAGAAATATGGAAGTAATTGCATGTGTGATAACTATCCAAAATTATTACTATCAGTCTATCACACTATACTTTACGTCCTTCTTAGATATGGAT  
GACATGATGTGAAATTGGTAATCTTTTTTAAAATTAATCTCCAAGGTGGTTATAATCAAATTAGGATTCTTGAGGGAGACTATTGAAAATTAATTTCACTTCTAGGAAAAGTGTATGTGAC  
TACATCGGCTATGCCTCTTGGATTGTTCTGTGCAACTAGAATATAATGGGAATTATGAGCATGTCCATTCTCTCGTTAGTGATTTTAAATTGTTTATTTTATAATATTTTATGATTATAGCAAGT  
CTAGAAGAACCACCTTGTTCATCTTAGGAGGGTCTTGAAGCCTTGACAAAGGAAAATTTTATGTTAATTTTATGTTGTTATCTTTGTAACCTCTTTTACAATAATCTTAGGCTTTATTTTTT  
TTTTGGTAAGGGTGTTTTTGTATATTTGAAAATGTAAAACTATTTAAGAATGCCCTAAACTAATAGTATTTACTCATAAGACAAGAAGTTTCCATTAGCTAATTAATTTAATAAAATATT  
TAAAAGGCTTATTTTAGAAGTGTATTGCTCTCATTATCATTGAGTTATGAAATGTGATTTTAAATTGAACTGAATTGCTTAGGGAGCTTTCTAGAAAATTGAGAGTAAAATTCAACCATGC  
TGCTATTTTTAGATCCCGAATTTATAAATCTTTATATATATATAAAGAT

>comp168357\_c1\_seq16

AAACTCAACATGGGGCGCTGCCCCACCATAAAATTTAAAGAAAGAGAAAGCTGACCTCCACTAGATCTACTTCCCCTCTTATAAAAAACACCCCAATTTCTCTTGGAGATTCAAAAAATT  
TTGAAGAGGAAGAGGAAACTCCATTACTTTGGCCTTGAAGTCTTCTTTGTCTATGTTTATTATTCGACGCGTGAAGTGTGTTTGTGGAGCTTTTTTTCTTTTCATGGATGAAGTTTCTGCT  
CTGTTGATTAATATGATGATGGTTTGGAGCCTTTGAGGGAGAATTGGCTTAGTGGTAGAGCTCTTTTTGTCCAATGAGGGCCTTGGAGGGTTTTTAAATTGAGCTGCTTGGTTATGGATAC

CACTGTCCTATTCCATATGGAAAGAGAAGTATATATTTTGTGGGATAGGCCGTTGGTTTGCATAACTCAGGAGCTTTATTGATCCTCCATGAACCTTCTTTGGATTGAAGGGAGCTCTGCAT  
GTTACTAGCCCCAAAACCTCTCAACTCTCATCATCTTCATAAACATAATCAACCATCTCTCTCTCCCTCTCTCTCTCCATTCTTTTGCATTTGTTTTCACAGATTCTTTTTTGTCTTCAAAGTTTT  
CCATAATTACTTTTTAGGTTCTTCTGAAAGGATGCAAGTTTATTTTCATGCTATTCTATGTATCAGCAAGGGCGTTTTCTTTTTTCCCTTGACAGTTACATTCAGCTCTTTAGTTTTAACTTTGGCTT  
TGATACTTCATGATTTTTCTTACATAAATATTTATTTTCAGGATCTCTAGGCTAGTTTTTTATGGAGATATCGTTGATCATTGGCGTTATTTTTTCCGTTTTACGAAGCAGAACTTTTTGAATTAT  
TTTTCTCAAGTATTATACGCAGGAATTTTCTACTTATTTGTTTGATTGGAAGCTAAATTAAGGGTTAGCTAGACCATTAGCTGTTAACTAGCTGATTTACTGGTAAGGATGAACTAATTAACCT  
GTTAGCTATAACCTGCAGAGTGTATTTTTTGTACTGATTATTGGTGAGCTATAATGTTTTTCTGTCAAACCTCTGTATGAGAAGACGTTTAAACCGTTCTTTGTAATTCTGAATTAAGCCTTGG  
ACTTTTTATTTTTTTGTAAATATATAGAGCTTTTAAAGCATTGCTATGCTGAGAACGAACTGATTGAAAAAATAATTCTTAATTCGTTTCAGTTCTCATTAAATAGTTTTTAGATTAGATTAATT  
TTAAAAAGGGTATTTTTTTTGTCAATTTTAAATTTAGGGTTTAGTGTGCTATTTTGTGTGTACAGATAAAATTAATTTCTGTAGAAGCGTAAACATTTTGTAAATTTATATTTAATATTAG  
AAAATATTTACATTAATTAATTTTCGAAAGTTAATTGGACAAGTAT

>comp168949\_c1\_seq3

CTGGTCTTCCACAGCCTAAACCTAACCTTTTCATAGCCTACCATCCACTGTCGCTATCTAGAAAGACGATTCTCTTGTGAAGCGAGTGAGATCCCCTTTCCACCGATTAAAGTTTAGGGTAAG  
AAGACCAGAGATCTGGAGATTCCGGCAAAGTCAAGGGCTTTCTTTTTTGGTGGCCGCTGTGCGCCGCCGAGCTGATTGCTTGGTGCAGGTCGGGACCGGGCAGAATCCTTCGGGATC  
GGAACCTGGATCCTGCTTGCATCAACTGAATCGGCTGCGGAGAGCGAAGATTTGGTGATCCTGATCTGGGAAATGATGCGTTTTTCTTTTGAAGATCGGTTTTTTATTCGATTCCCTTGAAT  
TTATTCAGCAAGTGATATAGAATTTCTTGGATCCGTTGAAGTTTGTCTTTTTTATAGAGATGGTTTTTTGGCCCTTGATTTGCTTTTTCACTTCGTCATCAAGATTTTCTTTTAAAGTAAA  
AGTTGCGAGCTTTTGAATTTCTGATCTTAGTTCGAGTTTACAGAACTACTCAATGTTTCTATTTAAGTTTTGACTGAATATGCACGATGCATAACGTCATAATTTGAAGAAGTACTGCGGCT  
TGTTTTGATCTGATTTAGGGTATTTAATGAAGTAATTTTAAATGGTTACTTTCACTCCTTGATTTATTTATATGAAGATGTGTTTTGGTATAGAGAGTATATTTTATGCCCTGTGTTCTATTTTTT  
GTAGCTGTTAATTCCTCTTTACCTGATGATCTTTCTTTTTTCAGGAAAATAATGATTTTGTAGAAAACATCTTGGGAAAGTATTATGAAGGAAATTAATATTGATTGGCTGTATGAACTTAG  
GGTCTGTTTGGTTAAATGTTATGTAGATAGCAGCACTATCTAGGTGAAAATAGCATTACAGGCAATGCTGTTATCTATTAATATAAGTGTGTTTGGTTTAACTTACTTTAATTTGCAATGTTATCT  
AGAAGCTTAACTATAGCTATGATCTTTTTTTGTTGTTATTTTATAATACATTAAGTAGCATATAGATTTAGACAGATGTGGCATGAACAAAAAATATAGCATCACATAGCAATTGTCAACAAAC  
CAAACAACCACTTAATAAAATAGATACATGATAATAGAGAGAATGGTGCATTTTCTAGTCTTTCCATCATTGAGTATAAATATTCATGTTTAGGTTAGATATTTGGAGGTTTTTACTTTTTGTT  
TTTAAAGTATGTATATAAGAACTTCGTATAAGTTAAATTTATAACATGGATTATTTTGGATTACATGATAATTGCATGTTGCAATCGTCTTAATCTCAACCATTCCTTTCACTTTAAAGTTTTTTACA  
AAATCGGTTTGGTTTGTGGACTCAATCAAGATGCCAAATTAGAATGTATGGTTTGACCGGGTTGCATCTTGCATCGCCACCATATGGGGAGTGGATGCATATCTTCCAAGTGAGTATAT  
CATCTATGAATGAATGCATTTTCATTGTAGCTTCTTTCATTTTTTGAACAAAATTGAATGTAACAATGAAAAGTGAGGTTTTATAAGTAAACATGAAAATAGTTATAGGTAAGTGATAGA  
TCTATGACATATTTTGTAGTTGGAAGTCCGATATGAAAATAGTTATAGATAAGTAAGCATGAGGCCAATAATAGAGAATAAGGGCACAAAGTTAATTATAAATAGATTTGGCATATGGAATG  
TAACAACCTCAAATCTTATCTATTGATATATTGAGATTATCTGCTTTGTTCTAATGGCCACATGATTTTGTCCATTGGTGTAAATGTTTTAAGAGATTACTTATCCCAGAAGTGCTTCTATATGA  
GCATGCTTAATTTGTTGCTCGAAAAGGAATTTTGTATTTAAAGGTGTAGTTCATTTTATTTAAGGTGGTTCACATGGAGTTAGTGAATTTAATTGAAAAGATGTCACAGGCTGGTTTTTAT  
CTATGAGCAGCCTATCCCAAATCTATGACTTCTACGCTAAGATTAATAGAGTATGCCTCTTCGGTTGGAACTTTTAGCTGTACTGACCATGATAACTAAGGTGTATATGCTTATGAAAATTTT  
GCTAGATCTATGATCTATTTGTTTCTTATTGAATATTTATCCATTTAGTGTTCAGAACAATTTTAAATGCTTCAAATCTGGATAATTGAAGGCATTTTGTGGTTCGATTTGTTTCAAGCCTAT  
GACTTGTATACTAAGGCTTCATTT

>comp170626\_c2\_seq35

GAGAGAGAGAGAGAGAGAATGGCTTCTCTTGATGCTTAGCATGATTGAGAACACGAGGGGGTTGGGACCATAGAGAGAGAAAGTGATGAGGAAGCATAAAGATGGCTCCTTTTATTATT



ATTTTTTTCTCAAAGAAATATCCAAGAAGCTGTATTTGGCTAAGTTCAGGAAGACAATCTCATTCTACAAATAGCAGAAGAGAAAAGCACTCCTGCAAGCCGTTTGATCGAAGAGAAAAC  
GCTCTGAGTTGAGAAGGTTACATGAAGAGAGAAGAAGAAGAGAAAAGAGGATCAAATAGATCGCAGATCGGGATCTGATCTTCCTTCACAAACAATTTTCTTCCTATCTATCTCTCCCAT  
CTGTATTTATTATTATTGGATCGATGAGAGTGGGCTGACAGAAGAGAGTGAGCACACAGCGTTGAAGACTGCATCGACGAATGCCGTTCTTGTTCGCTGCTCACCTCTCTATCTGTCTCAGTC  
AGCCTTATTATTGGCCACTTTAATCGAACCCGTAGCTCTTCTTTCCTCTTTAGGTTTGCTTTTCTTCTTATCTATCCATCACATGCCTCAACGCGAAGACAAAACAGAAAAGA  
AATAGAGAGCTTTGTTGCAGAGCATTGGTTGTGGCTCATCCAAATGGCAGATCAGATCTCCCACTCTTCTGACACGCTCCCTGGGCTCGAATTTCCACAGACTTGCTGTTCTCGAGAT  
TCAAGAGGAAGCAAAGAACAGATCAGGCGGCGTGGGTTTTGAGATAGAGAGCGAGAGGACAATGGTTTTATCCCCCTCCTCCAACCCAAAAGAAAAAAGAAAAAAGAAAAAATTTGGGCTC  
GGAGAGCGAGAAGATGAGATCGAGAAGCGTACGCCTCCTCTGCTCTCCGTGCAATCTGGCTTAACGGACCCACTGTTGACCGGTCTTGTCTCCCTCTTCTCTTTTTACTCTCTGCCT  
TCGCTGCCTCTTTTGCTTCTCGTCTCTTTTTCTGTGTATATTCGTTTTTATTTTTCAGAAGATCTGTTTCACTGCTACCGGCTCTTGAAGACAAGATCTTTGTCTTCGTGAATAAGGTTTG  
ATGACAAAAACCCTAATCTAAGCACTCAACTTTCTCTCTCTCTCTCGCTCGCTCGCTCTCGCTTTCTTAAATTGCGAGGGTGATAAAGGGATGACGGGTTTCGGCCAGGTGGTTATCGG  
GCCTCCGGGTTTCGGGAAGACCACATACTGCAACGGCATGTGCGAGTTCCTCAAATCATCGGAAGGAAAGTGGCTGTAGTCAATTTGGATCCTGCAAACGATGCATTACCATATGAATG  
TGCTATTAATATCGAAGACCTCATTAAGCTTGGTGATGTTATGGCTGAGCATTCTTGGACCAAATGGAGGTCTAGTCTACTGCATGGATTACTTGGAGAAAAATATCGATTGGCTGTTATC  
CAAGTTGAAACCTCTTCTCAAAGATCATTATTTCTTTTTGATTTTCTGGCCAAGTTGAACTGTTCTTTCTTCAATCAAATGCAAAGAAAGTTATTTGGAAGCTTATTAGGGAGTTGGATC  
TCAGGTTAACGGCTGTTCAATTTAGTTGATGCCATTTATGCTGTGATCCTGGAAAATATGTAAGCGCTTTACTTCTGTCACTGACAACCATGATACACTTAGAACTCCCTCACATTAATGTAT  
TGTTCAAAGATTGATCTCATTGAGAGCTATGGCAAGTTAGCGTATAATCTTGAGTTCTATACAGATGTAGAAGATTTGTCTTATTTACAACATCACCTTGATCAAGATCCACGGTCATCTAAGT  
ACAGAAAACCTCACAAAGGAGCTATGTGACGTCATTCAAGATTTTAGTTTGGTTAATTTCAACCTTGGATATACAGGATAAAGAAAGTGTGGAAATCTGTGAAGCTTATAGACAAAA  
GCAACGGATATATATTTTCGGGTATTGAGGGAAGTGTGTGGAATTTAGCAAGATAGCTGCTGCTCCTCTCGACTGGGATTAATATAGATATCCTTTTATGTTAAATTTCTTTTACTTCTCTA  
AATGGTTATTAATAGCTTGGCGTTTTTTGTGTAACAATTTCTCGTTGAAATTGTTGGCATATTTTTCTTATACATCTATCGCCTGCCTAAATTCCTTTCCCTTAGGAAGTTAGCTGTTGGTTT  
TTTTTTGTAGTGCAACCTCAGGACATTATAAATACTCTTAAAGTAGGCATTTCCCATTCATTATTTATTTAATACTTTCAATATAGTTATTTTCATTCCTTTGGATTAGTCACAGTTACTTCTG  
CATTATCAAGGGTAATATGAGACATTTATAAATAGAATAAAATTCACTTTTTAATTTTTCTACTTGTAGTTGGCCAGCCCAATTTCTTGGAGTTTTGTCAAGTTTTTATGCATACAGAATGTT  
CTTCGCCTTTCTTTAATTTTAGTTTACAACAGCTGCAGTTCAAGAAAAGTATATGAAAGATGACGAGTTTTTATAGAAGTTGATGGAGTTGATGGAATCAATTTGGCTGTGGTTGAGCAAT  
CAATGATGCATTTGGAGGTTGCTGAAACTAAAATTGTTGATCATCACCTTATATGTTGGATTATGTAAACCACATGTTGTACTTCATGTAATGTGTGGGGTTGTTCAATGTTGATTAATTTATG  
AATTATTCATATATGATTAATGATCTCTTTTTCTTTTCATTTTTTTGTTTGG

>comp170707\_c6\_seq1

CTCTCTCTCTCTCTTACACCACAAGCACACACCACAACAACAAGTCTTCTCTTCCATGTAATGAAGCTCATATATAGTTTTCTCTAGATCATATATTTTGATATCAATTATAAGTTGTTAGT  
GATGAAGAGAAGAAGAAAACTTAATGGAGGTATTGGCGTGCCTCAATCTAAAGACATGGCCGAGTTCTTCTCATCCATGTTCTTGGCTTGAGCCGCGTCAATATCTCCTTTGATACAAG  
CTCATGCTTCTCTCTATCTATTTCTTTTATCTTCTAATACAAATTTTCTCTTCTTAAAGTAGTCTTAAATTTCTATTTTAAATCTCTATTTCTTCTTTTTATGGATGATATCAAATTCAGAGGTAT  
AATTCCTCCACCTACCTGTTCTTCTTCTTTTCAATTTGGTGTAGTTATTGAGCAAATTTGTTGGGATATTCATTCTGATCTTAGATCATTCTTTTAGTAAAATTTCTAAGCATTCAAAGA  
AATCATATTTAGAGCCAAATCATCTATAAATTCTATGGATACACTAAAAGAGAGCATAATTAAGCATGATATGATCAAAGTTAATTATGCGACCCATTTCTGTAAATTTCTCTATTTTAT  
ATGTAATCATGGTTGTCATGGGCTGGCT

>comp233795\_c0\_seq1

GTGTTTTCTCCTTTTCTTTTATGAATTAATTTGATTATTTTCTCAGAATTTAGAAGGTTTCGTGTTTCGATTATCCCCTGGACTAACATAAGGGTAAATTTGATCATTGATCGTGGCCGTCAGATC

TTCTGATAGGAGTGTTGGGTTCCGACTCCGCTCGACTGGATGATTCATGTGGAATACGTGGTGCAGGTGTTTGTGGTGTATTCCTTTACGTTTTTTATTTTATACTACAACATTTAGCAA  
ATTAATAAGAAGTCGTTGTAGTATAGTGGTGAGTATCCCGCCTGTCACGCGGGTGACCCGGGTTCAATCCCCGGCAACGGCGAGATTTTTTTATCCTGTCTGATAATAATTGATTTAAGGG  
CTGAAA

**Data S5** List of miRNA--target pairs identified based on degradome-seq data.

Target transcript Regulatory miRNA

comp245637\_c0\_seq1 dof-miR-97  
comp245637\_c0\_seq1 dof-miR-98  
comp245637\_c0\_seq1 dof-miR-99  
comp294936\_c0\_seq1 dof-miR-345  
comp294936\_c0\_seq1 dof-miR-1020  
comp294936\_c0\_seq1 dof-miR-1021  
comp294936\_c0\_seq1 dof-miR-1022  
comp294936\_c0\_seq1 dof-miR-1023  
comp294936\_c0\_seq1 dof-miR-1024  
comp294936\_c0\_seq1 dof-miR-1034  
comp330605\_c0\_seq1 dof-miR-688  
comp46034\_c0\_seq1 dof-miR-964  
comp46034\_c0\_seq1 dof-miR-965  
comp46034\_c0\_seq1 dof-miR-966  
comp46034\_c0\_seq1 dof-miR-967  
comp46034\_c0\_seq1 dof-miR-968  
comp46034\_c0\_seq1 dof-miR-969  
comp46034\_c0\_seq1 dof-miR-970  
comp46034\_c0\_seq1 dof-miR-971  
comp46034\_c0\_seq1 dof-miR-972  
comp63081\_c0\_seq1 dof-miR-417  
comp68197\_c0\_seq2 dof-miR-606  
comp82421\_c0\_seq1 dof-miR-122  
comp82421\_c0\_seq1 dof-miR-123  
comp84482\_c0\_seq1 dof-miR-726  
comp84482\_c0\_seq1 dof-miR-727  
comp84482\_c0\_seq1 dof-miR-728

comp84482\_c0\_seq1 dof-miR-729  
comp84482\_c0\_seq1 dof-miR-730  
comp84482\_c0\_seq1 dof-miR-735  
comp86146\_c0\_seq1 dof-miR-112  
comp86146\_c0\_seq1 dof-miR-113  
comp86146\_c0\_seq1 dof-miR-114  
comp86146\_c0\_seq1 dof-miR-115  
comp86146\_c0\_seq1 dof-miR-377  
comp86146\_c0\_seq1 dof-miR-378  
comp86146\_c0\_seq1 dof-miR-718  
comp111313\_c0\_seq1 dof-miR-802  
comp111313\_c0\_seq1 dof-miR-803  
comp111313\_c0\_seq1 dof-miR-804  
comp126829\_c0\_seq1 dof-miR-1047  
comp135526\_c0\_seq4 dof-miR-689  
comp153832\_c0\_seq1 dof-miR-992  
comp154855\_c0\_seq1 dof-miR-1017  
comp154855\_c0\_seq1 dof-miR-1019  
comp154855\_c0\_seq1 dof-miR-1020  
comp154855\_c0\_seq1 dof-miR-1021  
comp154855\_c0\_seq1 dof-miR-1022  
comp154855\_c0\_seq1 dof-miR-1023  
comp154855\_c0\_seq1 dof-miR-1024  
comp154855\_c0\_seq2 dof-miR-1017  
comp154855\_c0\_seq2 dof-miR-1019  
comp154855\_c0\_seq2 dof-miR-1020  
comp154855\_c0\_seq2 dof-miR-1021  
comp154855\_c0\_seq2 dof-miR-1022  
comp154855\_c0\_seq2 dof-miR-1023  
comp154855\_c0\_seq2 dof-miR-1024  
comp155533\_c0\_seq1 dof-miR-1017

comp155533\_c0\_seq1 dof-miR-1020  
comp155533\_c0\_seq1 dof-miR-1021  
comp155533\_c0\_seq1 dof-miR-1022  
comp155533\_c0\_seq1 dof-miR-1023  
comp155533\_c0\_seq1 dof-miR-1024  
comp155533\_c0\_seq1 dof-miR-1034  
comp155533\_c0\_seq3 dof-miR-1017  
comp155533\_c0\_seq3 dof-miR-1020  
comp155533\_c0\_seq3 dof-miR-1021  
comp155533\_c0\_seq3 dof-miR-1022  
comp155533\_c0\_seq3 dof-miR-1023  
comp155533\_c0\_seq3 dof-miR-1024  
comp155533\_c0\_seq3 dof-miR-1034  
comp156499\_c0\_seq2 dof-miR-985  
comp156499\_c0\_seq2 dof-miR-986  
comp156499\_c0\_seq2 dof-miR-987  
comp156499\_c0\_seq2 dof-miR-988  
comp156499\_c0\_seq2 dof-miR-989  
comp156499\_c0\_seq2 dof-miR-990  
comp156499\_c0\_seq2 dof-miR-991  
comp157325\_c0\_seq1 dof-miR-985  
comp157325\_c0\_seq1 dof-miR-986  
comp157325\_c0\_seq1 dof-miR-987  
comp157325\_c0\_seq1 dof-miR-988  
comp157325\_c0\_seq1 dof-miR-989  
comp157325\_c0\_seq1 dof-miR-990  
comp157325\_c0\_seq1 dof-miR-991  
comp157325\_c0\_seq2 dof-miR-985  
comp157325\_c0\_seq2 dof-miR-986  
comp157325\_c0\_seq2 dof-miR-987  
comp157325\_c0\_seq2 dof-miR-988

comp157325\_c0\_seq2 dof-miR-989  
comp157325\_c0\_seq2 dof-miR-990  
comp157325\_c0\_seq2 dof-miR-991  
comp159541\_c0\_seq2 dof-miR-1001  
comp159541\_c0\_seq2 dof-miR-1005  
comp159541\_c0\_seq2 dof-miR-1006  
comp159541\_c0\_seq2 dof-miR-1017  
comp159541\_c0\_seq2 dof-miR-1020  
comp159541\_c0\_seq2 dof-miR-1021  
comp159541\_c0\_seq2 dof-miR-1022  
comp159541\_c0\_seq2 dof-miR-1023  
comp159541\_c0\_seq2 dof-miR-1024  
comp159541\_c0\_seq2 dof-miR-1034  
comp159541\_c0\_seq3 dof-miR-1001  
comp159541\_c0\_seq3 dof-miR-1005  
comp159541\_c0\_seq3 dof-miR-1006  
comp159541\_c0\_seq3 dof-miR-1017  
comp159541\_c0\_seq3 dof-miR-1020  
comp159541\_c0\_seq3 dof-miR-1021  
comp159541\_c0\_seq3 dof-miR-1022  
comp159541\_c0\_seq3 dof-miR-1023  
comp159541\_c0\_seq3 dof-miR-1024  
comp159541\_c0\_seq3 dof-miR-1034  
comp159674\_c1\_seq1 dof-miR-1009  
comp159674\_c1\_seq2 dof-miR-1009  
comp159674\_c1\_seq3 dof-miR-1009  
comp159674\_c1\_seq4 dof-miR-1009  
comp159674\_c1\_seq5 dof-miR-1009  
comp159674\_c1\_seq6 dof-miR-1009  
comp159674\_c1\_seq7 dof-miR-1009  
comp159674\_c1\_seq8 dof-miR-1009

comp138266\_c0\_seq1 dof-miR-803  
comp138266\_c0\_seq1 dof-miR-804  
comp142681\_c0\_seq1 dof-miR-815  
comp142681\_c0\_seq1 dof-miR-816  
comp142681\_c0\_seq1 dof-miR-817  
comp148821\_c0\_seq1 dof-miR-803  
comp148821\_c0\_seq1 dof-miR-804  
comp149205\_c0\_seq2 dof-miR-831  
comp149205\_c0\_seq3 dof-miR-831  
comp149205\_c0\_seq5 dof-miR-831  
comp149794\_c0\_seq1 dof-miR-802  
comp149794\_c0\_seq1 dof-miR-803  
comp149794\_c0\_seq1 dof-miR-804  
comp150463\_c0\_seq1 dof-miR-522  
comp150463\_c0\_seq1 dof-miR-523  
comp150481\_c0\_seq1 dof-miR-831  
comp150481\_c0\_seq2 dof-miR-831  
comp150481\_c0\_seq3 dof-miR-831  
comp151738\_c1\_seq1 dof-miR-835  
comp151738\_c1\_seq1 dof-miR-836  
comp151738\_c1\_seq1 dof-miR-837  
comp151738\_c1\_seq1 dof-miR-838  
comp151738\_c1\_seq1 dof-miR-839  
comp151738\_c1\_seq1 dof-miR-840  
comp151738\_c1\_seq2 dof-miR-835  
comp151738\_c1\_seq2 dof-miR-836  
comp151738\_c1\_seq2 dof-miR-837  
comp151738\_c1\_seq2 dof-miR-838  
comp151738\_c1\_seq2 dof-miR-839  
comp151738\_c1\_seq2 dof-miR-840  
comp151738\_c1\_seq3 dof-miR-835

comp151738\_c1\_seq3 dof-miR-836  
comp151738\_c1\_seq3 dof-miR-837  
comp151738\_c1\_seq3 dof-miR-838  
comp151738\_c1\_seq3 dof-miR-839  
comp151738\_c1\_seq3 dof-miR-840  
comp153810\_c0\_seq1 dof-miR-725  
comp153810\_c0\_seq1 dof-miR-726  
comp153810\_c0\_seq1 dof-miR-727  
comp153810\_c0\_seq1 dof-miR-728  
comp153810\_c0\_seq1 dof-miR-729  
comp153810\_c0\_seq1 dof-miR-730  
comp153810\_c0\_seq1 dof-miR-731  
comp153810\_c0\_seq1 dof-miR-732  
comp153810\_c0\_seq1 dof-miR-733  
comp153810\_c0\_seq1 dof-miR-734  
comp153810\_c0\_seq1 dof-miR-735  
comp153810\_c0\_seq1 dof-miR-736  
comp153810\_c0\_seq1 dof-miR-796  
comp153810\_c0\_seq2 dof-miR-725  
comp153810\_c0\_seq2 dof-miR-726  
comp153810\_c0\_seq2 dof-miR-727  
comp153810\_c0\_seq2 dof-miR-728  
comp153810\_c0\_seq2 dof-miR-729  
comp153810\_c0\_seq2 dof-miR-730  
comp153810\_c0\_seq2 dof-miR-731  
comp153810\_c0\_seq2 dof-miR-732  
comp153810\_c0\_seq2 dof-miR-734  
comp153810\_c0\_seq2 dof-miR-735  
comp153810\_c0\_seq2 dof-miR-736  
comp153810\_c0\_seq2 dof-miR-796

comp153810\_c0\_seq3 dof-miR-725  
comp153810\_c0\_seq3 dof-miR-726  
comp153810\_c0\_seq3 dof-miR-727  
comp153810\_c0\_seq3 dof-miR-728  
comp153810\_c0\_seq3 dof-miR-729  
comp153810\_c0\_seq3 dof-miR-730  
comp153810\_c0\_seq3 dof-miR-731  
comp153810\_c0\_seq3 dof-miR-732  
comp153810\_c0\_seq3 dof-miR-733  
comp153810\_c0\_seq3 dof-miR-734  
comp153810\_c0\_seq3 dof-miR-735  
comp153810\_c0\_seq3 dof-miR-736  
comp153810\_c0\_seq3 dof-miR-796  
comp153810\_c0\_seq4 dof-miR-725  
comp153810\_c0\_seq4 dof-miR-726  
comp153810\_c0\_seq4 dof-miR-727  
comp153810\_c0\_seq4 dof-miR-728  
comp153810\_c0\_seq4 dof-miR-729  
comp153810\_c0\_seq4 dof-miR-730  
comp153810\_c0\_seq4 dof-miR-731  
comp153810\_c0\_seq4 dof-miR-732  
comp153810\_c0\_seq4 dof-miR-733  
comp153810\_c0\_seq4 dof-miR-734  
comp153810\_c0\_seq4 dof-miR-735  
comp153810\_c0\_seq4 dof-miR-736  
comp153810\_c0\_seq4 dof-miR-796  
comp153810\_c0\_seq5 dof-miR-725  
comp153810\_c0\_seq5 dof-miR-726  
comp153810\_c0\_seq5 dof-miR-727  
comp153810\_c0\_seq5 dof-miR-728  
comp153810\_c0\_seq5 dof-miR-729

comp153810\_c0\_seq5 dof-miR-730  
comp153810\_c0\_seq5 dof-miR-731  
comp153810\_c0\_seq5 dof-miR-732  
comp153810\_c0\_seq5 dof-miR-733  
comp153810\_c0\_seq5 dof-miR-734  
comp153810\_c0\_seq5 dof-miR-735  
comp153810\_c0\_seq5 dof-miR-736  
comp153810\_c0\_seq5 dof-miR-796  
comp153810\_c0\_seq6 dof-miR-725  
comp153810\_c0\_seq6 dof-miR-726  
comp153810\_c0\_seq6 dof-miR-727  
comp153810\_c0\_seq6 dof-miR-728  
comp153810\_c0\_seq6 dof-miR-729  
comp153810\_c0\_seq6 dof-miR-730  
comp153810\_c0\_seq6 dof-miR-731  
comp153810\_c0\_seq6 dof-miR-732  
comp153810\_c0\_seq6 dof-miR-733  
comp153810\_c0\_seq6 dof-miR-734  
comp153810\_c0\_seq6 dof-miR-735  
comp153810\_c0\_seq6 dof-miR-736  
comp153810\_c0\_seq6 dof-miR-796  
comp154265\_c0\_seq2 dof-miR-908  
comp154265\_c0\_seq2 dof-miR-910  
comp154499\_c0\_seq1 dof-miR-718  
comp154499\_c0\_seq2 dof-miR-718  
comp154657\_c0\_seq1 dof-miR-606  
comp154657\_c0\_seq2 dof-miR-606  
comp154657\_c0\_seq3 dof-miR-606  
comp154657\_c0\_seq4 dof-miR-606  
comp154657\_c0\_seq5 dof-miR-606  
comp154657\_c0\_seq6 dof-miR-606

comp154862\_c0\_seq1 dof-miR-908  
comp154862\_c0\_seq1 dof-miR-909  
comp154862\_c0\_seq1 dof-miR-910  
comp156499\_c0\_seq2 dof-miR-799  
comp156499\_c0\_seq2 dof-miR-800  
comp156499\_c0\_seq2 dof-miR-801  
comp159228\_c0\_seq1 dof-miR-831  
comp159228\_c0\_seq2 dof-miR-831  
comp160962\_c0\_seq2 dof-miR-835  
comp160962\_c0\_seq2 dof-miR-836  
comp160962\_c0\_seq2 dof-miR-837  
comp160962\_c0\_seq2 dof-miR-838  
comp160962\_c0\_seq2 dof-miR-839  
comp160962\_c0\_seq3 dof-miR-835  
comp160962\_c0\_seq3 dof-miR-836  
comp160962\_c0\_seq3 dof-miR-837  
comp160962\_c0\_seq3 dof-miR-838  
comp160962\_c0\_seq3 dof-miR-839  
comp160962\_c0\_seq3 dof-miR-840  
comp160962\_c0\_seq4 dof-miR-835  
comp160962\_c0\_seq4 dof-miR-836  
comp160962\_c0\_seq4 dof-miR-837  
comp160962\_c0\_seq4 dof-miR-838  
comp160962\_c0\_seq4 dof-miR-839  
comp160962\_c0\_seq4 dof-miR-840  
comp160962\_c0\_seq9 dof-miR-835  
comp160962\_c0\_seq9 dof-miR-836  
comp160962\_c0\_seq9 dof-miR-837  
comp160962\_c0\_seq9 dof-miR-838  
comp160962\_c0\_seq9 dof-miR-839  
comp160962\_c0\_seq10 dof-miR-835

|                     |             |                    |             |                    |             |
|---------------------|-------------|--------------------|-------------|--------------------|-------------|
| comp160962_c0_seq10 | dof-miR-836 | comp161049_c0_seq3 | dof-miR-928 | comp161891_c1_seq9 | dof-miR-738 |
| comp160962_c0_seq10 | dof-miR-837 | comp161049_c0_seq4 | dof-miR-926 | comp143285_c0_seq1 | dof-miR-51  |
| comp160962_c0_seq10 | dof-miR-838 | comp161049_c0_seq4 | dof-miR-927 | comp150463_c0_seq1 | dof-miR-237 |
| comp160962_c0_seq10 | dof-miR-839 | comp161049_c0_seq4 | dof-miR-928 | comp150463_c0_seq1 | dof-miR-238 |
| comp160962_c0_seq10 | dof-miR-840 | comp161891_c1_seq3 | dof-miR-719 | comp150463_c0_seq1 | dof-miR-239 |
| comp160962_c0_seq11 | dof-miR-835 | comp161891_c1_seq3 | dof-miR-720 | comp153810_c0_seq1 | dof-miR-298 |
| comp160962_c0_seq11 | dof-miR-836 | comp161891_c1_seq3 | dof-miR-721 | comp153810_c0_seq2 | dof-miR-298 |
| comp160962_c0_seq11 | dof-miR-837 | comp161891_c1_seq3 | dof-miR-722 | comp153810_c0_seq3 | dof-miR-298 |
| comp160962_c0_seq11 | dof-miR-838 | comp161891_c1_seq3 | dof-miR-723 | comp153810_c0_seq4 | dof-miR-298 |
| comp160962_c0_seq11 | dof-miR-839 | comp161891_c1_seq3 | dof-miR-724 | comp153810_c0_seq5 | dof-miR-298 |
| comp160962_c0_seq11 | dof-miR-840 | comp161891_c1_seq3 | dof-miR-738 | comp153810_c0_seq6 | dof-miR-298 |
| comp160962_c0_seq12 | dof-miR-835 | comp161891_c1_seq5 | dof-miR-719 | comp154499_c0_seq1 | dof-miR-112 |
| comp160962_c0_seq12 | dof-miR-836 | comp161891_c1_seq5 | dof-miR-720 | comp154499_c0_seq1 | dof-miR-113 |
| comp160962_c0_seq12 | dof-miR-837 | comp161891_c1_seq5 | dof-miR-721 | comp154499_c0_seq1 | dof-miR-114 |
| comp160962_c0_seq12 | dof-miR-838 | comp161891_c1_seq5 | dof-miR-722 | comp154499_c0_seq1 | dof-miR-115 |
| comp160962_c0_seq12 | dof-miR-839 | comp161891_c1_seq5 | dof-miR-723 | comp154499_c0_seq1 | dof-miR-377 |
| comp160962_c0_seq12 | dof-miR-840 | comp161891_c1_seq5 | dof-miR-724 | comp154499_c0_seq1 | dof-miR-378 |
| comp160962_c0_seq13 | dof-miR-835 | comp161891_c1_seq5 | dof-miR-738 | comp154499_c0_seq2 | dof-miR-112 |
| comp160962_c0_seq13 | dof-miR-836 | comp161891_c1_seq8 | dof-miR-719 | comp154499_c0_seq2 | dof-miR-113 |
| comp160962_c0_seq13 | dof-miR-837 | comp161891_c1_seq8 | dof-miR-720 | comp154499_c0_seq2 | dof-miR-114 |
| comp160962_c0_seq13 | dof-miR-838 | comp161891_c1_seq8 | dof-miR-721 | comp154499_c0_seq2 | dof-miR-115 |
| comp160962_c0_seq13 | dof-miR-839 | comp161891_c1_seq8 | dof-miR-722 | comp154499_c0_seq2 | dof-miR-377 |
| comp160962_c0_seq13 | dof-miR-840 | comp161891_c1_seq8 | dof-miR-723 | comp154499_c0_seq2 | dof-miR-378 |
| comp161049_c0_seq1  | dof-miR-926 | comp161891_c1_seq8 | dof-miR-724 | comp154855_c0_seq1 | dof-miR-206 |
| comp161049_c0_seq1  | dof-miR-927 | comp161891_c1_seq8 | dof-miR-738 | comp154855_c0_seq1 | dof-miR-340 |
| comp161049_c0_seq1  | dof-miR-928 | comp161891_c1_seq9 | dof-miR-719 | comp154855_c0_seq1 | dof-miR-341 |
| comp161049_c0_seq2  | dof-miR-926 | comp161891_c1_seq9 | dof-miR-720 | comp154855_c0_seq1 | dof-miR-342 |
| comp161049_c0_seq2  | dof-miR-927 | comp161891_c1_seq9 | dof-miR-721 | comp154855_c0_seq1 | dof-miR-343 |
| comp161049_c0_seq2  | dof-miR-928 | comp161891_c1_seq9 | dof-miR-722 | comp154855_c0_seq1 | dof-miR-344 |
| comp161049_c0_seq3  | dof-miR-926 | comp161891_c1_seq9 | dof-miR-723 | comp154855_c0_seq1 | dof-miR-345 |
| comp161049_c0_seq3  | dof-miR-927 | comp161891_c1_seq9 | dof-miR-724 | comp154855_c0_seq1 | dof-miR-346 |

comp154855\_c0\_seq2 dof-miR-206  
comp154855\_c0\_seq2 dof-miR-340  
comp154855\_c0\_seq2 dof-miR-341  
comp154855\_c0\_seq2 dof-miR-342  
comp154855\_c0\_seq2 dof-miR-343  
comp154855\_c0\_seq2 dof-miR-344  
comp154855\_c0\_seq2 dof-miR-345  
comp154855\_c0\_seq2 dof-miR-346  
comp155533\_c0\_seq1 dof-miR-343  
comp155533\_c0\_seq1 dof-miR-344  
comp155533\_c0\_seq1 dof-miR-345  
comp155533\_c0\_seq1 dof-miR-346  
comp155533\_c0\_seq3 dof-miR-343  
comp155533\_c0\_seq3 dof-miR-344  
comp155533\_c0\_seq3 dof-miR-345  
comp155533\_c0\_seq3 dof-miR-346  
comp159541\_c0\_seq2 dof-miR-206  
comp159541\_c0\_seq2 dof-miR-342  
comp159541\_c0\_seq2 dof-miR-343  
comp159541\_c0\_seq2 dof-miR-344  
comp159541\_c0\_seq2 dof-miR-345  
comp159541\_c0\_seq2 dof-miR-346  
comp159541\_c0\_seq3 dof-miR-206  
comp159541\_c0\_seq3 dof-miR-342  
comp159541\_c0\_seq3 dof-miR-343  
comp159541\_c0\_seq3 dof-miR-344  
comp159541\_c0\_seq3 dof-miR-345  
comp159541\_c0\_seq3 dof-miR-346  
comp167920\_c2\_seq2 dof-miR-1047  
comp167920\_c2\_seq11 dof-miR-1047  
comp167920\_c2\_seq12 dof-miR-1047

comp162234\_c0\_seq1 dof-miR-804  
comp162234\_c0\_seq2 dof-miR-804  
comp162234\_c0\_seq4 dof-miR-804  
comp162234\_c0\_seq5 dof-miR-804  
comp162345\_c1\_seq1 dof-miR-796  
comp162345\_c1\_seq2 dof-miR-796  
comp162345\_c1\_seq3 dof-miR-796  
comp162345\_c1\_seq4 dof-miR-796  
comp162345\_c1\_seq5 dof-miR-796  
comp163033\_c0\_seq10 dof-miR-831  
comp163033\_c0\_seq12 dof-miR-831  
comp163430\_c1\_seq2 dof-miR-992  
comp163430\_c1\_seq4 dof-miR-992  
comp164322\_c0\_seq1 dof-miR-985  
comp164322\_c0\_seq1 dof-miR-986  
comp164322\_c0\_seq1 dof-miR-990  
comp164322\_c0\_seq1 dof-miR-991  
comp164769\_c0\_seq1 dof-miR-815  
comp164769\_c0\_seq1 dof-miR-816  
comp164769\_c0\_seq1 dof-miR-817  
comp164769\_c0\_seq3 dof-miR-815  
comp164769\_c0\_seq3 dof-miR-816  
comp164769\_c0\_seq3 dof-miR-817  
comp164769\_c0\_seq4 dof-miR-815  
comp164769\_c0\_seq4 dof-miR-816  
comp164769\_c0\_seq4 dof-miR-817  
comp164769\_c0\_seq5 dof-miR-815  
comp164769\_c0\_seq5 dof-miR-816  
comp164769\_c0\_seq5 dof-miR-817  
comp164769\_c0\_seq6 dof-miR-815  
comp164769\_c0\_seq6 dof-miR-816

comp164769\_c0\_seq6 dof-miR-817  
comp164769\_c0\_seq7 dof-miR-815  
comp164769\_c0\_seq7 dof-miR-816  
comp164769\_c0\_seq7 dof-miR-817  
comp164958\_c0\_seq1 dof-miR-831  
comp165418\_c0\_seq1 dof-miR-815  
comp165418\_c0\_seq1 dof-miR-816  
comp165418\_c0\_seq1 dof-miR-817  
comp165418\_c0\_seq2 dof-miR-815  
comp165418\_c0\_seq2 dof-miR-816  
comp165418\_c0\_seq2 dof-miR-817  
comp165418\_c0\_seq3 dof-miR-815  
comp165418\_c0\_seq3 dof-miR-816  
comp165418\_c0\_seq3 dof-miR-817  
comp165418\_c0\_seq4 dof-miR-815  
comp165418\_c0\_seq4 dof-miR-816  
comp165418\_c0\_seq4 dof-miR-817  
comp165418\_c0\_seq5 dof-miR-815  
comp165418\_c0\_seq5 dof-miR-816  
comp165418\_c0\_seq5 dof-miR-817  
comp165418\_c0\_seq6 dof-miR-815  
comp165418\_c0\_seq6 dof-miR-816  
comp165418\_c0\_seq6 dof-miR-817  
comp165418\_c0\_seq7 dof-miR-815  
comp165418\_c0\_seq7 dof-miR-816  
comp165418\_c0\_seq7 dof-miR-817  
comp165418\_c0\_seq8 dof-miR-815  
comp165418\_c0\_seq8 dof-miR-816  
comp165418\_c0\_seq8 dof-miR-817  
comp165418\_c0\_seq9 dof-miR-815  
comp165418\_c0\_seq9 dof-miR-816







comp163584\_c0\_seq3 dof-miR-752  
comp163584\_c0\_seq4 dof-miR-718  
comp163584\_c0\_seq4 dof-miR-752  
comp163584\_c0\_seq8 dof-miR-718  
comp163584\_c0\_seq8 dof-miR-752  
comp163807\_c0\_seq1 dof-miR-718  
comp163807\_c0\_seq2 dof-miR-718  
comp165566\_c0\_seq1 dof-miR-606  
comp166460\_c0\_seq3 dof-miR-606  
comp167643\_c0\_seq1 dof-miR-602  
comp167643\_c0\_seq1 dof-miR-603  
comp167643\_c0\_seq1 dof-miR-604  
comp167643\_c0\_seq2 dof-miR-602  
comp167643\_c0\_seq2 dof-miR-603  
comp167643\_c0\_seq2 dof-miR-604  
comp167643\_c0\_seq3 dof-miR-602  
comp167643\_c0\_seq3 dof-miR-603  
comp167643\_c0\_seq3 dof-miR-604  
comp167643\_c0\_seq4 dof-miR-602  
comp167643\_c0\_seq4 dof-miR-603  
comp167643\_c0\_seq4 dof-miR-604  
comp167804\_c0\_seq1 dof-miR-522  
comp167804\_c0\_seq1 dof-miR-523  
comp167804\_c0\_seq2 dof-miR-522  
comp167804\_c0\_seq2 dof-miR-523  
comp168648\_c0\_seq1 dof-miR-649  
comp168648\_c0\_seq1 dof-miR-650  
comp168648\_c0\_seq1 dof-miR-651  
comp168648\_c0\_seq1 dof-miR-652  
comp168648\_c0\_seq1 dof-miR-653  
comp168648\_c0\_seq1 dof-miR-654

comp168648\_c0\_seq1 dof-miR-655  
comp168648\_c0\_seq1 dof-miR-656  
comp168648\_c0\_seq1 dof-miR-657  
comp168648\_c0\_seq1 dof-miR-658  
comp168648\_c0\_seq1 dof-miR-659  
comp168648\_c0\_seq1 dof-miR-660  
comp168648\_c0\_seq1 dof-miR-661  
comp168648\_c0\_seq1 dof-miR-662  
comp168648\_c0\_seq1 dof-miR-663  
comp168648\_c0\_seq1 dof-miR-664  
comp168648\_c0\_seq1 dof-miR-669  
comp168648\_c0\_seq3 dof-miR-648  
comp168648\_c0\_seq3 dof-miR-649  
comp168648\_c0\_seq3 dof-miR-650  
comp168648\_c0\_seq3 dof-miR-651  
comp168648\_c0\_seq3 dof-miR-652  
comp168648\_c0\_seq3 dof-miR-653  
comp168648\_c0\_seq3 dof-miR-654  
comp168648\_c0\_seq3 dof-miR-655  
comp168648\_c0\_seq3 dof-miR-656  
comp168648\_c0\_seq3 dof-miR-657  
comp168648\_c0\_seq3 dof-miR-658  
comp168648\_c0\_seq3 dof-miR-659  
comp168648\_c0\_seq3 dof-miR-660  
comp168648\_c0\_seq3 dof-miR-661  
comp168648\_c0\_seq3 dof-miR-662  
comp168648\_c0\_seq3 dof-miR-663  
comp168648\_c0\_seq3 dof-miR-664  
comp168648\_c0\_seq3 dof-miR-669  
comp168648\_c0\_seq4 dof-miR-648  
comp168648\_c0\_seq4 dof-miR-649

comp168648\_c0\_seq4 dof-miR-650  
comp168648\_c0\_seq4 dof-miR-651  
comp168648\_c0\_seq4 dof-miR-652  
comp168648\_c0\_seq4 dof-miR-653  
comp168648\_c0\_seq4 dof-miR-654  
comp168648\_c0\_seq4 dof-miR-655  
comp168648\_c0\_seq4 dof-miR-656  
comp168648\_c0\_seq4 dof-miR-657  
comp168648\_c0\_seq4 dof-miR-658  
comp168648\_c0\_seq4 dof-miR-659  
comp168648\_c0\_seq4 dof-miR-660  
comp168648\_c0\_seq4 dof-miR-661  
comp168648\_c0\_seq4 dof-miR-662  
comp168648\_c0\_seq4 dof-miR-663  
comp168648\_c0\_seq4 dof-miR-664  
comp168648\_c0\_seq4 dof-miR-669  
comp168648\_c0\_seq5 dof-miR-648  
comp168648\_c0\_seq5 dof-miR-649  
comp168648\_c0\_seq5 dof-miR-650  
comp168648\_c0\_seq5 dof-miR-651  
comp168648\_c0\_seq5 dof-miR-652  
comp168648\_c0\_seq5 dof-miR-653  
comp168648\_c0\_seq5 dof-miR-654  
comp168648\_c0\_seq5 dof-miR-655  
comp168648\_c0\_seq5 dof-miR-656  
comp168648\_c0\_seq5 dof-miR-657  
comp168648\_c0\_seq5 dof-miR-658  
comp168648\_c0\_seq5 dof-miR-659  
comp168648\_c0\_seq5 dof-miR-660  
comp168648\_c0\_seq5 dof-miR-661  
comp168648\_c0\_seq5 dof-miR-662

comp168648\_c0\_seq5 dof-miR-663  
comp168648\_c0\_seq5 dof-miR-664  
comp168648\_c0\_seq5 dof-miR-669  
comp168648\_c0\_seq6 dof-miR-648  
comp168648\_c0\_seq6 dof-miR-649  
comp168648\_c0\_seq6 dof-miR-650  
comp168648\_c0\_seq6 dof-miR-651  
comp168648\_c0\_seq6 dof-miR-652  
comp168648\_c0\_seq6 dof-miR-653  
comp168648\_c0\_seq6 dof-miR-654  
comp168648\_c0\_seq6 dof-miR-655  
comp168648\_c0\_seq6 dof-miR-656  
comp168648\_c0\_seq6 dof-miR-657  
comp168648\_c0\_seq6 dof-miR-658  
comp168648\_c0\_seq6 dof-miR-659  
comp168648\_c0\_seq6 dof-miR-660  
comp168648\_c0\_seq6 dof-miR-661  
comp168648\_c0\_seq6 dof-miR-662  
comp168648\_c0\_seq6 dof-miR-663  
comp168648\_c0\_seq6 dof-miR-664  
comp168648\_c0\_seq6 dof-miR-669  
comp168648\_c0\_seq7 dof-miR-649  
comp168648\_c0\_seq7 dof-miR-650  
comp168648\_c0\_seq7 dof-miR-651  
comp168648\_c0\_seq7 dof-miR-652  
comp168648\_c0\_seq7 dof-miR-653  
comp168648\_c0\_seq7 dof-miR-654  
comp168648\_c0\_seq7 dof-miR-655  
comp168648\_c0\_seq7 dof-miR-656  
comp168648\_c0\_seq7 dof-miR-657  
comp168648\_c0\_seq7 dof-miR-658

comp168648\_c0\_seq7 dof-miR-659  
comp168648\_c0\_seq7 dof-miR-660  
comp168648\_c0\_seq7 dof-miR-661  
comp168648\_c0\_seq7 dof-miR-662  
comp168648\_c0\_seq7 dof-miR-663  
comp168648\_c0\_seq7 dof-miR-664  
comp168648\_c0\_seq7 dof-miR-669  
comp169140\_c0\_seq2 dof-miR-522  
comp169140\_c0\_seq2 dof-miR-523  
comp169140\_c0\_seq3 dof-miR-522  
comp169140\_c0\_seq3 dof-miR-523  
comp169140\_c0\_seq5 dof-miR-522  
comp169140\_c0\_seq5 dof-miR-523  
comp169140\_c0\_seq6 dof-miR-522  
comp169140\_c0\_seq6 dof-miR-523  
comp169140\_c0\_seq8 dof-miR-522  
comp169140\_c0\_seq8 dof-miR-523  
comp169140\_c0\_seq9 dof-miR-522  
comp169140\_c0\_seq9 dof-miR-523  
comp169832\_c1\_seq1 dof-miR-522  
comp169832\_c1\_seq1 dof-miR-523  
comp162345\_c1\_seq1 dof-miR-298  
comp162345\_c1\_seq2 dof-miR-298  
comp162345\_c1\_seq3 dof-miR-298  
comp162345\_c1\_seq4 dof-miR-298  
comp162345\_c1\_seq5 dof-miR-298  
comp163584\_c0\_seq2 dof-miR-112  
comp163584\_c0\_seq2 dof-miR-113  
comp163584\_c0\_seq2 dof-miR-114  
comp163584\_c0\_seq2 dof-miR-115  
comp163584\_c0\_seq2 dof-miR-377

comp163584\_c0\_seq2 dof-miR-378  
comp163584\_c0\_seq3 dof-miR-112  
comp163584\_c0\_seq3 dof-miR-113  
comp163584\_c0\_seq3 dof-miR-114  
comp163584\_c0\_seq3 dof-miR-115  
comp163584\_c0\_seq3 dof-miR-377  
comp163584\_c0\_seq3 dof-miR-378  
comp163584\_c0\_seq4 dof-miR-112  
comp163584\_c0\_seq4 dof-miR-113  
comp163584\_c0\_seq4 dof-miR-114  
comp163584\_c0\_seq4 dof-miR-115  
comp163584\_c0\_seq4 dof-miR-377  
comp163584\_c0\_seq4 dof-miR-378  
comp163584\_c0\_seq8 dof-miR-112  
comp163584\_c0\_seq8 dof-miR-113  
comp163584\_c0\_seq8 dof-miR-114  
comp163584\_c0\_seq8 dof-miR-115  
comp163584\_c0\_seq8 dof-miR-377  
comp163584\_c0\_seq8 dof-miR-378  
comp163807\_c0\_seq1 dof-miR-112  
comp163807\_c0\_seq1 dof-miR-113  
comp163807\_c0\_seq1 dof-miR-114  
comp163807\_c0\_seq1 dof-miR-115  
comp163807\_c0\_seq1 dof-miR-377  
comp163807\_c0\_seq1 dof-miR-378  
comp163807\_c0\_seq2 dof-miR-112  
comp163807\_c0\_seq2 dof-miR-113  
comp163807\_c0\_seq2 dof-miR-114  
comp163807\_c0\_seq2 dof-miR-115  
comp163807\_c0\_seq2 dof-miR-377  
comp163807\_c0\_seq2 dof-miR-378

comp167387\_c0\_seq2 dof-miR-185  
comp167804\_c0\_seq1 dof-miR-237  
comp167804\_c0\_seq2 dof-miR-237  
comp169140\_c0\_seq2 dof-miR-237  
comp169140\_c0\_seq3 dof-miR-237  
comp169140\_c0\_seq5 dof-miR-237  
comp169140\_c0\_seq6 dof-miR-237  
comp169140\_c0\_seq8 dof-miR-237  
comp169140\_c0\_seq9 dof-miR-237  
comp169832\_c1\_seq1 dof-miR-237  
comp169832\_c1\_seq1 dof-miR-238  
comp169832\_c1\_seq1 dof-miR-239  
comp170683\_c0\_seq1 dof-miR-606  
comp170683\_c0\_seq5 dof-miR-606  
comp170683\_c0\_seq6 dof-miR-606  
comp170683\_c0\_seq7 dof-miR-606  
comp170683\_c0\_seq9 dof-miR-606  
comp171031\_c0\_seq1 dof-miR-421  
comp171031\_c0\_seq1 dof-miR-707  
comp171031\_c0\_seq1 dof-miR-708  
comp171031\_c0\_seq1 dof-miR-710  
comp171031\_c0\_seq1 dof-miR-711  
comp171031\_c0\_seq1 dof-miR-712  
comp171031\_c0\_seq1 dof-miR-713  
comp171031\_c0\_seq1 dof-miR-715  
comp171031\_c0\_seq5 dof-miR-421  
comp171031\_c0\_seq5 dof-miR-707  
comp171031\_c0\_seq5 dof-miR-708  
comp171031\_c0\_seq5 dof-miR-710  
comp171031\_c0\_seq5 dof-miR-711  
comp171031\_c0\_seq5 dof-miR-712

comp171031\_c0\_seq5 dof-miR-713  
comp171031\_c0\_seq5 dof-miR-715  
comp171031\_c0\_seq9 dof-miR-421  
comp171031\_c0\_seq9 dof-miR-707  
comp171031\_c0\_seq9 dof-miR-708  
comp171031\_c0\_seq9 dof-miR-710  
comp171031\_c0\_seq9 dof-miR-711  
comp171031\_c0\_seq9 dof-miR-712  
comp171031\_c0\_seq9 dof-miR-713  
comp171031\_c0\_seq9 dof-miR-715  
comp171031\_c0\_seq10 dof-miR-421  
comp171031\_c0\_seq10 dof-miR-707  
comp171031\_c0\_seq10 dof-miR-708  
comp171031\_c0\_seq10 dof-miR-710  
comp171031\_c0\_seq10 dof-miR-711  
comp171031\_c0\_seq10 dof-miR-712  
comp171031\_c0\_seq10 dof-miR-713  
comp171031\_c0\_seq10 dof-miR-715  
comp171031\_c0\_seq11 dof-miR-421  
comp171031\_c0\_seq11 dof-miR-707  
comp171031\_c0\_seq11 dof-miR-708  
comp171031\_c0\_seq11 dof-miR-710  
comp171031\_c0\_seq11 dof-miR-711  
comp171031\_c0\_seq11 dof-miR-712  
comp171031\_c0\_seq11 dof-miR-713  
comp171031\_c0\_seq11 dof-miR-715  
comp171031\_c0\_seq12 dof-miR-421  
comp171031\_c0\_seq12 dof-miR-707  
comp171031\_c0\_seq12 dof-miR-708  
comp171031\_c0\_seq12 dof-miR-710  
comp171031\_c0\_seq12 dof-miR-711

comp171031\_c0\_seq12 dof-miR-712  
comp171031\_c0\_seq12 dof-miR-713  
comp171031\_c0\_seq12 dof-miR-715  
comp171031\_c0\_seq13 dof-miR-421  
comp171031\_c0\_seq13 dof-miR-707  
comp171031\_c0\_seq13 dof-miR-708  
comp171031\_c0\_seq13 dof-miR-710  
comp171031\_c0\_seq13 dof-miR-711  
comp171031\_c0\_seq13 dof-miR-712  
comp171031\_c0\_seq13 dof-miR-713  
comp171031\_c0\_seq13 dof-miR-715  
comp171031\_c0\_seq15 dof-miR-421  
comp171031\_c0\_seq15 dof-miR-707  
comp171031\_c0\_seq15 dof-miR-708  
comp171031\_c0\_seq15 dof-miR-710  
comp171031\_c0\_seq15 dof-miR-711  
comp171031\_c0\_seq15 dof-miR-712  
comp171031\_c0\_seq15 dof-miR-713  
comp171031\_c0\_seq15 dof-miR-715  
comp171031\_c0\_seq16 dof-miR-421  
comp171031\_c0\_seq16 dof-miR-707  
comp171031\_c0\_seq16 dof-miR-708  
comp171031\_c0\_seq16 dof-miR-710  
comp171031\_c0\_seq16 dof-miR-711  
comp171031\_c0\_seq16 dof-miR-712  
comp171031\_c0\_seq16 dof-miR-713  
comp171031\_c0\_seq16 dof-miR-715  
comp171031\_c0\_seq18 dof-miR-421  
comp171031\_c0\_seq18 dof-miR-707  
comp171031\_c0\_seq18 dof-miR-708  
comp171031\_c0\_seq18 dof-miR-710





|                     |             |                     |             |                     |             |
|---------------------|-------------|---------------------|-------------|---------------------|-------------|
| comp171031_c0_seq47 | dof-miR-713 | comp172995_c3_seq18 | dof-miR-992 | comp175766_c0_seq4  | dof-miR-986 |
| comp171031_c0_seq47 | dof-miR-715 | comp173744_c0_seq1  | dof-miR-804 | comp175766_c0_seq4  | dof-miR-987 |
| comp171031_c0_seq48 | dof-miR-421 | comp173744_c0_seq2  | dof-miR-804 | comp175766_c0_seq4  | dof-miR-988 |
| comp171031_c0_seq48 | dof-miR-707 | comp173744_c0_seq3  | dof-miR-804 | comp175766_c0_seq4  | dof-miR-989 |
| comp171031_c0_seq48 | dof-miR-708 | comp173744_c0_seq5  | dof-miR-804 | comp175766_c0_seq4  | dof-miR-990 |
| comp171031_c0_seq48 | dof-miR-710 | comp173744_c0_seq6  | dof-miR-804 | comp175766_c0_seq4  | dof-miR-991 |
| comp171031_c0_seq48 | dof-miR-711 | comp171429_c0_seq1  | dof-miR-908 | comp175766_c0_seq6  | dof-miR-985 |
| comp171031_c0_seq48 | dof-miR-712 | comp171429_c0_seq1  | dof-miR-909 | comp175766_c0_seq6  | dof-miR-986 |
| comp171031_c0_seq48 | dof-miR-713 | comp171429_c0_seq1  | dof-miR-910 | comp175766_c0_seq6  | dof-miR-987 |
| comp171031_c0_seq48 | dof-miR-715 | comp171429_c0_seq3  | dof-miR-908 | comp175766_c0_seq6  | dof-miR-988 |
| comp171031_c0_seq49 | dof-miR-421 | comp171429_c0_seq3  | dof-miR-909 | comp175766_c0_seq6  | dof-miR-989 |
| comp171031_c0_seq49 | dof-miR-707 | comp171429_c0_seq3  | dof-miR-910 | comp175766_c0_seq6  | dof-miR-990 |
| comp171031_c0_seq49 | dof-miR-708 | comp172488_c0_seq2  | dof-miR-802 | comp175766_c0_seq6  | dof-miR-991 |
| comp171031_c0_seq49 | dof-miR-710 | comp172488_c0_seq2  | dof-miR-803 | comp173794_c0_seq3  | dof-miR-831 |
| comp171031_c0_seq49 | dof-miR-711 | comp172488_c0_seq2  | dof-miR-804 | comp173794_c0_seq4  | dof-miR-831 |
| comp171031_c0_seq49 | dof-miR-712 | comp172594_c3_seq3  | dof-miR-831 | comp173794_c0_seq7  | dof-miR-831 |
| comp171031_c0_seq49 | dof-miR-713 | comp175766_c0_seq2  | dof-miR-985 | comp173794_c0_seq10 | dof-miR-831 |
| comp171031_c0_seq49 | dof-miR-715 | comp175766_c0_seq2  | dof-miR-986 | comp173794_c0_seq13 | dof-miR-831 |
| comp172995_c3_seq1  | dof-miR-992 | comp175766_c0_seq2  | dof-miR-987 | comp173794_c0_seq16 | dof-miR-831 |
| comp172995_c3_seq2  | dof-miR-992 | comp175766_c0_seq2  | dof-miR-988 | comp173794_c0_seq17 | dof-miR-831 |
| comp172995_c3_seq3  | dof-miR-992 | comp175766_c0_seq2  | dof-miR-989 | comp173794_c0_seq18 | dof-miR-831 |
| comp172995_c3_seq4  | dof-miR-992 | comp175766_c0_seq2  | dof-miR-990 | comp173794_c0_seq20 | dof-miR-831 |
| comp172995_c3_seq5  | dof-miR-992 | comp175766_c0_seq2  | dof-miR-991 | comp173794_c0_seq21 | dof-miR-831 |
| comp172995_c3_seq6  | dof-miR-992 | comp175766_c0_seq3  | dof-miR-985 | comp173794_c0_seq22 | dof-miR-831 |
| comp172995_c3_seq8  | dof-miR-992 | comp175766_c0_seq3  | dof-miR-986 | comp173794_c0_seq25 | dof-miR-831 |
| comp172995_c3_seq11 | dof-miR-992 | comp175766_c0_seq3  | dof-miR-987 | comp173794_c0_seq26 | dof-miR-831 |
| comp172995_c3_seq12 | dof-miR-992 | comp175766_c0_seq3  | dof-miR-988 | comp173794_c0_seq27 | dof-miR-831 |
| comp172995_c3_seq13 | dof-miR-992 | comp175766_c0_seq3  | dof-miR-989 | comp173794_c0_seq28 | dof-miR-831 |
| comp172995_c3_seq14 | dof-miR-992 | comp175766_c0_seq3  | dof-miR-990 | comp173794_c0_seq33 | dof-miR-831 |
| comp172995_c3_seq15 | dof-miR-992 | comp175766_c0_seq3  | dof-miR-991 | comp173794_c0_seq34 | dof-miR-831 |
| comp172995_c3_seq16 | dof-miR-992 | comp175766_c0_seq4  | dof-miR-985 | comp173794_c0_seq39 | dof-miR-831 |

|                     |             |                     |             |
|---------------------|-------------|---------------------|-------------|
| comp173794_c0_seq45 | dof-miR-831 | comp174401_c2_seq4  | dof-miR-647 |
| comp173794_c0_seq50 | dof-miR-831 | comp174401_c2_seq5  | dof-miR-642 |
| comp173794_c0_seq53 | dof-miR-831 | comp174401_c2_seq5  | dof-miR-644 |
| comp173794_c0_seq54 | dof-miR-831 | comp174401_c2_seq5  | dof-miR-645 |
| comp173794_c0_seq57 | dof-miR-831 | comp174401_c2_seq5  | dof-miR-646 |
| comp173794_c0_seq63 | dof-miR-831 | comp174401_c2_seq5  | dof-miR-647 |
| comp173794_c0_seq66 | dof-miR-831 | comp174401_c2_seq6  | dof-miR-642 |
| comp173794_c0_seq71 | dof-miR-831 | comp174401_c2_seq6  | dof-miR-644 |
| comp173794_c0_seq73 | dof-miR-831 | comp174401_c2_seq6  | dof-miR-645 |
| comp173794_c0_seq74 | dof-miR-831 | comp174401_c2_seq6  | dof-miR-646 |
| comp173794_c0_seq75 | dof-miR-831 | comp174401_c2_seq6  | dof-miR-647 |
| comp173794_c0_seq81 | dof-miR-831 | comp174401_c2_seq7  | dof-miR-642 |
| comp174401_c2_seq1  | dof-miR-642 | comp174401_c2_seq7  | dof-miR-644 |
| comp174401_c2_seq1  | dof-miR-644 | comp174401_c2_seq7  | dof-miR-645 |
| comp174401_c2_seq1  | dof-miR-645 | comp174401_c2_seq7  | dof-miR-646 |
| comp174401_c2_seq1  | dof-miR-646 | comp174401_c2_seq7  | dof-miR-647 |
| comp174401_c2_seq1  | dof-miR-647 | comp174401_c2_seq11 | dof-miR-642 |
| comp174401_c2_seq2  | dof-miR-642 | comp174401_c2_seq11 | dof-miR-644 |
| comp174401_c2_seq2  | dof-miR-644 | comp174401_c2_seq11 | dof-miR-645 |
| comp174401_c2_seq2  | dof-miR-645 | comp174401_c2_seq11 | dof-miR-646 |
| comp174401_c2_seq2  | dof-miR-646 | comp174401_c2_seq11 | dof-miR-647 |
| comp174401_c2_seq2  | dof-miR-647 |                     |             |
| comp174401_c2_seq3  | dof-miR-642 |                     |             |
| comp174401_c2_seq3  | dof-miR-644 |                     |             |
| comp174401_c2_seq3  | dof-miR-645 |                     |             |
| comp174401_c2_seq3  | dof-miR-646 |                     |             |
| comp174401_c2_seq3  | dof-miR-647 |                     |             |
| comp174401_c2_seq4  | dof-miR-642 |                     |             |
| comp174401_c2_seq4  | dof-miR-644 |                     |             |
| comp174401_c2_seq4  | dof-miR-645 |                     |             |
| comp174401_c2_seq4  | dof-miR-646 |                     |             |



**Data S6** Transcript sequences for Data S5 and Table S5.

>comp111313\_c0\_seq1

CATCTCCTCATTCTACCACAAGCCGATCTCTCCTTCCTCGTTCTTCTTTCTGTGCAAAGAGTGCTAAGCGTGTGATGGCTCAGGGAAGAGACAGTGCAGGAAAAGCCATGGCTTTTGGTCTCGCTCTACTCTTTCTTATGCTTCTGCACAGCGAGCTCGCCGAGTCCGGCGCCGTTTACACCGTCGGGAATCAAAATGGCTGGACCTTCAACCCCGCGGCCTGGACCAAAGGCAAGCGCTTTCGTGCCGGCGACGTCCTTATCTTTAAATACAGCCCATCGGTGCACAACGTGGTGGCCGTAAACGCAGCGGGCTACAATGCATGCACGACTCCTA

>comp126829\_c0\_seq1

AGGAACTGCGCGGTCTTGAGCAAACCTTTGGAAGAGTCTCTAAGAATTGTTAGGCAGAGAAAGTATCATGTGATCGCCACACAACTGACACTTACAAGAAAAAGCTTAAAAGCACCAGGGAGACCTACAGAGCTCTAGTACATGAACTGGAGATGAAAGACGACAATCCGAATTATGCTTTCAGTGCAGAAAACCACAACAGAGTCTATGAAAACCTCGATTCCAATGGTGAATGATTGTCCTCAGATGTTTTCTTTCAGGGTTGTTTCAGCCAATCCAGCCAAATCTGCTTGGTATAGGATATGAATCACATGATCTTAGCCTCGCATGATATGAAGAAGTCTTATAAACTTTATGATTTGATGTTGTGTTAATAAGATTGGAGAGACTAACGATTTGTGAGTTCATGAGATGAGTGATAGATTCAGAGAACTATCCTTTCATTTGCTTGTTCAGTTGTTTCTATTTCAGTTTGGTATGTTTATGTTTTTCAATGTGTTTTTGAACCTGATAGCTATATGAGTTTTTGTGTTTTGGTATGGATGATAAAGAATATAGTGTATATAAGAATTTTTTTTTTGTATTAGTTAAGAAGTTCATATTCATTTGGTCGTTATAAGAGCTGATATTGAACAATTTTTTAAAGTCTTTCAGCTAGTTTTTCTAAATAAGCCAAATAAAAAACAGCACACACACACATGTGCACACATACGCA

>comp135526\_c0\_seq4

GGAATTGTGAATTTGAAACAAGGGAGAGAGGGAGGGGGTGGCGGCTAGGTGGATTGACCGTGGGTGGGGAAGGGAAGAGGGGTGGGTGAGATGGGGTTTTGGGTGTTAGCCAACGGTCGAGGGTGGAGCAATTAATTGGATGGTTGTGGGGCTTTCGTGGAGGTGGCCGACGGCTTGTGGTGAAGGGGTGGGGGGCCGGTGGTGTAGGGTGGAGGGAAGAGGGGGAAGACAAATAACAATAAACTAACCATGAG

>comp138266\_c0\_seq1

CATGGCCGATGGCCATCTAATAACTAGCAAACCGTTGACTAAGCCAAGCTATTTACCACTCACAACTTTTGTGCGATGTTATGGCCCCTAAAAGCATGACTGAGTTAGAAAGCACGATGCTGCCAGCGAAGATTTCAATCAGATCGATCAGGCATAGAGTCATTCTTAGGTCTCTCTCATCATCAATTGCAGACAGTTAAGCACAACTGCAATAATAGAAATCTATTACTTTAGAATAAAATAACGCCAGATCTTTATATAGGGATCCCTCTTCTCTCAAAAACAATTAGCTCCTTCATCTTCTTGGCTTCTTCTCTCTCTCGCTTGCTGAGTGGCAAAAGATGGCAAGTCGCACTACTTGACAGTAATGGGAGCCATTCTTCTTATATCGAGCTGCATTGACCTCGGCCACTGAGTACATAGTCGGGGAGTCGTCTGGATGGACTGCTGGTGTGATTTCTTCTCATGGACAAAACGGGAAGATATTTGTCGTTGGAGATAGTCTGTCTTCAACTACGCACCTGCAACACACACCCGTCACGAGGTGAAGGCGAAAGACTACAAGAGCTGCACAGCAAGCAACTACCTTTCCACTGACAGCAGCGGCTCAACAACAATATGCCTCAAGAAGCCGGCACCCATTATTTGTTTTGCAGCATTCTGGCCACTGCAGCTCTGGGATGAAGCTCGCCGTGACCGTCGTCATGCATCGTCTTCTTCCCCTTCTCCCTCCCCCTCCCCCTCGCCACCCCTCCCTTGGCTTCTTCAACCATCCCAGCCCCAACCCAGGCGGCTTCGTCGAGCCCCGAGAAAAGTAAAAGCCAACCAACACCTCCGCTGGACACCGGAACGCTCAATCATTGGTGTGGCCCTACTTGTGAGCCTGCTCATTCTGAGTATTCTCTAAAGACTAGTCAGGCCGGAGGCAGTGCTTTGTTTTGTTTCGTAACTTCATATATTAGTATTTTTTGGCTAGGGAGCTGGTTTTTTTTTGGGAGATTTACATACATAAATTAATACTATTCTATTACATATT

>comp142681\_c0\_seq1

CTGTTAAAGCCCGAAGAACCAGAACAGCACCGCAGTCTCTTCGTTCTCTTTCTTCATAATTCCTCTCAAGGCCTTGTCTCTTCCCCATAAAACGCGTCCGTCTCAAATCACAGCCGGAAACCCTCTACAATCCCTATAACTCTTACCTAAATCCTAATGTTGTCATCCCAGTATCCCGTTCACTAGATTACAGCATCTGGAAGGCTTGCGCCGGTGGTTCCACCAGACTCCCGGCGATCGGTTCCGGGCGTCTTCTACTTCCCAGAAGGCCACGCCGAACACGCAACTTCCCCTCCTGACTTCTCCTCGCTACTCCGATTCCCATCCTTCTTTCAATGCAATGTCACCGGCATCTCCCT

CCTTGCCAACCAACACAGCGACGAGGTTTACGCTCAGATCTCACTCGATCCCCGCCATCCAATGCCGCCACTGCCATGTGGCCAGACGACGAATCGTCGGTTTTCGTCATTCGCGAAGGT  
GCTCACTCCAAGCGACGCGAATAATGGGGGAGGACTGTCAGTACCACGATTCTGCGCGGAGTCCATGTTCCCTCCTCTCGACCATATGATGGATCCGCCATTCCAAACCATCTATGTCCTC  
GATGTCCATGGAAAATCCTGGAAATTCGACACATCTACCGCGGTACACCACGCCGGCATCTCCTCACCTCGGGTTGGAGCGATTTTGTAAATACTAAAAAATTGATATCAGGGGACACGG  
TCGTGTTTATACGAAATCTTGCCGGGAACTTTTTGTTGGGATCCGCCGCACTGGACGGAGCTATGGAGGACAAATAAGTTTLAGAGGGCGGAGGTTTTAAGGATGAGGTATTTTTGAGGA  
ATAGGGGGAGAGTACTGCCTGAGTCTGTGATCGAGGCCGTGAGATTGGCGGATATGGGAAAGCCTTTTCGAGGTGCTTTTTTACCCTATGGTTGGATTGCTGGCGTTTTGTTGTGGCGAAGG  
AGATGGTGGAAGCGGCATGGTCGTGCCTTGGGGGCCGGAATGAGAATAAAGATGGCGGTGGAGTCGGGGACTCGTCGAGGACGACGTGGTTGCAGGGGACAATTCCTGCGCTGC  
TGTACCGGAGCGCGGCCGGTGGGCCCCGTTCACTGTGGCGAATGCTCGAGATTAATGGGATGAACAAGATGTTCTCGACGGATTGAGAGCTGTAAACCTTGGCAAGTGGAGTTGATAT  
CATCTGTCTACCATTTACGTCATGAAAAAGCTCAAGCTTACTGAAGGCCTTAAGGTATTAGTTGAAGGACATGGAAACATGACCTTTTCAATAACAGGATTTGGTGGCACAGGGATGC  
AGAGCTTAATCCAGCACCATACAATATCAGTGAATCTCCCTCTGGCAAACAGGGAGCCAGGCATATTTCTCTAGTCTATCGTCTTCTTTGGTGCCAGGAGCACTAATCAGGTGCTCTCT  
GATAATATCCATGGCTTTGACAATGCATATTATCCAAATGTATCAAGATCTGACGGTATAACCCAAGTCGTTAAAGAAGTAATCCATCACAATGGAGTGGAGATTGCTAGTGCCTGCAAGAC  
AATATGAAGTCACGAAAAGGATCAATTCAGTTATTTGGTCAGGTCATTGACGGAGCAGCTAGACGATAGAAATGTTTCAACTGAATTTCCCTCTCTCATTACACATAAGCAACTGCTT  
GACAAACAGATTAGGGTTTCAGCTGTTGGTGAATGTAAGTAGGGGAGCCTTTCAGCTTGTACAGCTGTAACCGGTGAAGGAAGCAGAATATAAATGGTTGCTTTTTCTTCTTGCTTGA  
CTAAAAGCTTAGTAACTATGAATTCACATTTCCATGTTAGCTTCTTCTACTCAGTTGATAAATGTTTAGCTGCTAATTTTGGTGTGGTAGCACTTATCCTTATGTTAAGATGACTGTGAC  
CCTTCTTTTGCTTAAATTATCTGACAATCATGGTCAAGTAGACATTGGTTGATCATCAATTTCTGCCATAGAGGTAGCCTCTAGTGATTATATTAACTTAATTGTAATATGGAGTCTAAGGT

>comp143285\_c0\_seq1

TTTCATGCATGGCAATGATATTCTCTGTATGAGATATAGTTGTCTTCCATTAACCTTTTTCTTCCCTTCTCTCGTCTTTCCTCTCATTAACCCCTTCTCTTTACATCTCCGCTCCCTCGATC  
TCTCCCTTTCGTTCTTCAGAATAAGAGTACTTCAAGAAGAGAAGAAGGCAAGAAAGGGAGGAGATAATGGTGTCTTAAAAGCTTGTGTTGTGGAAGGAGGAAGAGGTTTTCTTTTA  
TGAAATCTCCTCATGACTAATAATAGCCTGGTGCTATCCTGTCTGAGCTTTATTTAGGTTGATTTTTATATATTTTTTGTATGTTTTGTCGTATATTCTTCTTGCCACACCATTATCTTCTGC  
TCTAGTATTTTTTCTGGTGCCTCCCTTCTTGACCTTGTAAAGACCTTTTCTTGACCTTGTAAAGACCCCACTCATCAATTTTTTCTTCGATCTTTGCTCTTACGTGCTATAAGAGCTTTCTCT  
GTGTTCTTCTCCTTCTCCCTTCTATCCCTCCTGAGCTAATGAGGACTTGTGATTGAATAATGAAAGAAATGAACCTTTGTGTTTCAATTAAGCTAATTAAGTGAATCTTTATCCTTTTGAA  
TCTGATTATGTATTTTTGTTGATAGGCTATAAGTCTTTTTGTAATATCTGGCAGAACAATTGCCTACAGTGACAGAGGCAGATAATTTGTTTTATGTGATGGCTTTGTAATTAGGTGGGGAG  
AGGGAAGTGGAAATATTCTTCTCGTGAATTCGAAGCAGTACCTGCAACTATTTGACATTTTTCTTCTTTACAATTATTTCAAGTTTGTCTTCTGTTAAA

>comp148821\_c0\_seq1

TAATTGTTAGGCATGGCGTCTTTCTTAAGCCACTCTAATTATCAATTTAACAGTGTGGAACCTATCAATCCTTCTTCCCTAATCACTCTTCCCTCCTTCTCCTCTTTATATAGGGCTCCCTCTT  
CTTTCTTTCCACAACCTTCAGACATACCTTCTCTCCTCCTCTCTGAATTAAGGTAAGAAATGGCAAAGCTTATTTTTGCAACACTGGGTGCAATTTCTTCATGTGTTGGCTAAGCT  
TGGCACAGCCACAGTGTACAATGTTGGCGATACATCCGGTTGGGATACTGGTGTAGATTATTCAAGCTGGGCAAGTGGGAAGACCTTCGCTGCTGGAGATAGTCTTGTCTTCGCCTACGG  
GTCTGGAGCGCACACAGTCAACGAAGTGTGCGCAAATGACTACCAGTCGTGTTGACGAGCAACTATCTCAGCACCAGCTCCAGCGGCTCGACGACGATCACTCTCAAGACCGCCGGT  
ACCCATTACTTCGTCTGCGGAGTCCCCGCCATTGCATCGGCGGCATGAAGCTCGCCGTAACAGTCGGCGGCACCTCTTCTTCAACCGGTTCCCTCCGCCACGCCTCCACCCCTCCACC  
ACCACCACCGGCTACCACTATTCGCGCCATCAAAAACACAGATTCCTGCGGCGGTGGCCGGATTGCTGATGATCATAATGGGTCGCTTCTTTGAGATTGGTGAAGTCAGGGTGGAGAC  
AGTGCTCGCGCTCTCATCATCGTATCAGGAGTTAGTAGAAATTTGACGGCTTAGATCAGTTAGATGTTATCTTGTATTTCTTCTTTTTTAGATAGATTGTTGGTGTATGATTGTGTT  
GAAATTATATTAATTAGTGGGTCTTTAATTTGTGTTAGTAATTTAATTACCAGCTTTTTAGTCATGAGATGTAATAATTGAGTGCTTATTTAATTTGTTCGGATCCAATAATGATTTTGTGGGA

CGGCTTTCTTAC

>comp149205\_c0\_seq2

AAAAGGAAAATACAGCCATTAAATAATAAAAAACCTGCTCAACGATCGCCGTTCCGTTTATCAGCTCATGGCAGCTTCTATGGCTCCC GCCATATTGATTGCCCAAAAACCTATCACC  
TTTCTCCAAAAACATAACCTCAGAGGACCCCGATCGGCTCGAGCACTAAAAGGTCGGTGACAATCGCTTCCTCGTCGCCGCTTTTCAGGAACGGAAGTCCGCCGGAGACAGAGTGCCT  
GTTCTTGGGATCAGCAGCCGGTGAACGAGTACCAGGCCCTCTCCTCTTCATTTCCCTTCTCCTTGGCCTCAGCAAATCTCCGTGACTACTGTATCAGGCTCTCTTTTTAGGATCTTCCTT  
CGCGATCCTCGTCGGCCTCCCCGTTGCTACTTTTCGGCAATTCCGATGTCACCAACACATCGGCCGTCGCTCTCAGTTGCGGTCTCGGCGCGGCTTCTTCTGGAATCCTTTTCGTCATGCTT  
GTCGTGCTCCGGATGTATCTTGGATGGGCCTATGTTGGCAATCGCTTGCTCAGCGCTACGGTTGACTATGAGGAGACGGGATGGTATGACGGGCAGATATGGGTAAAGACTCCAGACGTT  
TACTCGTGATCGTCTATTGGGCTCTTATTCAGTGAAGCCTGACTGACCAAAGTGAAGTTTACATTGATTGGCTTGGCAATTTCTTTGGCTGTTTGTGTTATTATCCTTGTGATGTCGAGA  
ATCCAAAGTACATTCTGTTAATACTAAAGGAAAAGTGATAGCCGGAGTTTACAATGAAGAAGCTGCAAGGTCATTTGAGCCTGATGCATTCTGCGGAGATTCTGATTTGTCTTAAACCTC  
AGGAGGGTCGGCTATTAATTGTAAGTCTGCTCTTACTACTAGTGCAGCTGGGAGTTCATCATCATCATTTCCGATGCAAATTAATCTCTTACCTTCTCTAGCCATTTCCATGCCTCGGGCT  
CTGGTTTTAGGTGATGCAGTTGTATCTTTTCTGCAATCTGTTATAACATGAATTGAAGTAAAAGGTAGTCAAAAAGTTTGGTGAATGTATTGTCATGTAGCTATTGTTGAAAAAACTTGAATAA  
AAGAAAGTACTGATGTTGGACATATTCTGTTAATAACATTTGAAATGACAATTATTACTTATGACGCTTCTATAATACACATCAGGAT

>comp149205\_c0\_seq3

AAAAGGAAAATACAGCCATTAAATAATAAAAAACCTGCTCAACGATCGCCGTTCCGTTTATCAGCTCATGGCAGCTTCTATGGCTCCC GCCATATTGATTGCCCAAAAACCTATCACC  
TTTCTCCAAAAACATAACCTCAGAGGACCCCGATCGGCTCGAGCACTAAAAGGTCGGTGACAATCGCTTCCTCGTCGCCGCTTTTCAGGAACGGAAGTCCGCCGGAGACAGAGTGCCT  
GTTCTTGGGATCAGCAGCCGGTGAACGAGTACCAGGCCCTCTCCTCTTCATTTCCCTTCTCCTTGGCCTCAGCAAATCTCCGTGACTACTGTATCAGGCTCTCTTTTTAGGATCTTCCTT  
CGCGATCCTCGTCGGCCTCCCCGTTGCTACTTTTCGGCAATTCCGATGTCACCAACACATCGGCCGTCGCTCTCAGTTGCGGTCTCGGCGCGGCTTCTTCTGGAATCCTTTTCGTCATGCTT  
GTCGTGCTCCGGATGTATCTTGGATGGGCCTATGTTGGCAATCGCTTGCTCAGCGCTACGGTTGACTATGAGGAGACGGGATGGTATGACGGGCAGTTTACATTGATTGGCTTGGCAATTT  
CTTTGGCTGTTTGTGTTATTATCCTTGTGATGTCGAGAATCCAAAGTACATTCTGTTAATACTAAAGGAAAAGTGATAGCCGGAGTTTACAATGAAGAAGCTGCAAGGTCATTTGAGCC  
TGATGCATTCTGCGGAGATTCTGATTTGTCTTAAACCTCAGGAGGGTCGGCTATTAATTGTAAGTCTGCTCTTACTACTAGTGCAGCTGGGAGTTCATCATCATCATTTCCGATGCAAATTA  
ATCTCTTACCTTCTCTAGCCATTTCCATGCCTCGGGCTCTGGTTTTAGGTGATGCAGTTGTATCTTTTCTGCAATCTGTTATAACATGAATTGAAGTAAAAGGTAGTCAAAAAGTTTGGTGAAT  
GTATTGTCATGTAGCTATTGTTGAAAAAACTTGAATAAAAGAAAGTACTGATGTTGGACATATTCTGTTAATAACATTTGAAATGACAATTATTACTTATGACGCTTCTATAATACACATCAG  
GAT

>comp149205\_c0\_seq5

AAAAGGAAAATACAGCCATTAAATAATAAAAAACCTGCTCAACGATCGCCGTTCCGTTTATCAGCTCATGGCAGCTTCTATGGCTCCC GCCATATTGATTGCCCAAAAACCTATCACC  
TTTCTCCAAAAACATAACCTCAGAGGACCCCGATCGGCTCGAGCACTAAAAGGTCGGTGACAATCGCTTCCTCGTCGCCGCTTTTCAGGAACGGAAGTCCGCCGGAGACAGAGTGCCT  
GTTCTTGGGATCAGCAGCCGGTGAACGAGTACCAGGCCCTCTCCTCTTCATTTCCCTTCTCCTTGGCCTCAGCAAATCTCCGTGACTACTGTATCAGGCTCTCTTTTTAGGATCTTCCTT  
CGCGATCCTCGTCGGCCTCCCCGTTGCTACTTTTCGGCAATTCCGATGTCACCAACACATCGGCCGTCGCTCTCAGTTGCGGTCTCGGCGCGGCTTCTTCTGGAATCCTTTTCGTCATGCTT  
GTCGTGCTCCGGATGTATCTTGGATGGGCCTATGTTGGCAATCGCTTGCTCAGCGCTACGGTTGACTATGAGGAGACGGGATGGTATGACGGGCAGGTGAAGCCTGTACTGACCAAAGTG  
AAGTTTACATTGATTGGCTTGGCAATTTCTTTGGCTGTTTGTGTTATTATCCTTGTGATGTCGAGAATCCAAAGTACATTCTGTTAATACTAAAGGAAAAGTGATAGCCGGAGTTTACAAT  
GAAGAAGCTGCAAGGTCATTTGAGCCTGATGCATTCTGCGGAGATTCTGATTTGTCTTAAACCTCAGGAGGGTCGGCTATTAATTGTAAGTCTGCTCTTACTACTAGTGCAGCTGGGAGT

TCATCATCATCATTCGATGCAAATTAATCTCTTCACCTTCTCTAGCCATTTCCATGCCTCGGGCTCTGGTTTTAGGTGATGCAGTTGTATCTTTTCTGCAATCTGTTATAACATGAATTGAAG  
TAAAAGGTAGTCAAAAGTTTGGTGAATGTATGTTCATGTAGCTATTGTTGAAAAAAGTTGAATAAAAGAAAGTACTGATGTTGGACATATTCTGTTAATAACATTTGAAATGACAATTATTA  
CTTATGACGCTTTCTATAATACACATCAGGAT

>comp149794\_c0\_seq1

TCGCACAAATAAGTTTCTCTTTGAAGGAAGACATGGCTGGTTTCATGGGAGCTCTGGTTGTTCTCTGCTTGGTGGTGGTGGCGATGGTGCCGGCGTTTGGGAAGGATTATACGGTCCGGCG  
ACTCTCAGGGGTGGACGAGTGGTGTGGATTATAGTACTTGGGCTTCTGGCAAAGTCTTCAAGGTTGGAGATTCGTTATTGTTACCTATAGTGGGCTCCACAGCGCAGAGGAGGTGAGCA  
AATCCGACTACGACTCTTGCAGTACCAGCAACGCCCTCCAGACCCACACCGATGGTAATACTAAGATAAGTCTCACCGCTCCCGGCTCCCGTTACTTCATCTGCGGCACTGCCGGCCACT  
GCGCCAGCGGCATGAAGCTCGCCGTCACCGTTGCCAAAGCCAGCTCCGCCAGCCCGCCGACCGGAAGTTCGCCGACAACCCCTACGCCGTCGGGAGGATCATCGACCTCGCCTCCCTCC  
ACCCCTAACTCTCCTTCGCCGCCAGGACCCGCTGGCGGCAAAAGCGCCGCCGGCTTCAGCGGATCCGCCGTTGGCGATGCAGTGGTCTTGGTGGTCTGATTGGGCTTGGGCTTGTGT  
CATGGGCTAGGCGAGAGGCAGTGGGTTTTCTATGGGCTTAATTGTTTTTAATGGGCTTTTCGCTTTAGAATGTGAATTTATGTTGTTTGTAGATGTTATGATTGGAGATTAACGAGACCT  
TTGCTGCCTTCTTTTTCTGTAATTTTGTCTGCTCGGTATTTATTTTTGCTCTTTTTCTGCTGTAAGAAAATGAGCCCTTATATGTAAGAAAATTTTTTTTTGTCGTTCTTAAAATAAAGGGCTC  
TGCTCTACACCTGAAATTTCTCTTCAAGTAATCCTACGCTTATAACTGA

>comp150463\_c0\_seq1

TGCAAAGCAGTACCATGGAATTTGAGGAGAAGGCAGTACGTGCCAAGGCCGAAGTTGAAAAGAAGACTGTAAAGTCAAGAAAGCCATATCTTCACGAATCTCGTCACCTACATGCAA  
TGAGGAGAGCGAGGGGTTGTGGTGGCCGTTTTCTCAACACAAAGAAGAACGAGGCAGATTCTTCCAACAGTAATCCTGAGACTGGGCTTGCTTCAGCTTCTGTTTCTTTTGGTTATGAAT  
CCCTCCTCTCTGATACCTCAGCTAATCCAGATTCTGCACGCGCAAGGCCTGCTTTGCAAAGTGTGCTGAAACCACATAAAATACACCAGCAACAGTGATGGCTATCAACACAGTTCTGGATT  
CCAGTTATCTCCGTTCCATCCAAGCAAGGTGAAAGGATGGACGAAGGAGATTTCTCGGGTCAAAGGAGAGCTGATTAATGGCGAACCCAGCCCAAGAAGAGGGCTCTGGCTATCTAAA  
ATCGAAGAGTCACAGTTCTGGCTTGTGAGGAGAGAGCTTAGAGTTCACTGGTGAATACTTTGTTGAAGGCAATTCATTCTGGCTGTCCTCTTTTTCTTTCTTTCTTTCTTTTCCATG  
TTCTCAGTCAGGTGAAGGAAAGAGTAGCTGCTGCATTTTAATTTTGATCCAGAACTTTAACTTTTAAGCCTTTGATTGATATGAAAAGTCTGTTCTGGTTGGCTTTTCATAGGCTACATCTCT  
GCAGGCGCTCTTCCATTAGTATGAATCTCTAATCTCTAAAGTTCATGTCTTGCTATTTTTTTTTCTTTTGGAGAGTTCTCTGAAGTTGTAATCGTTGATGGTTTGAAACACTTCGCCTGCT  
TAAGAGGTCAATGTTCTTTAATTTGTTGAAGGGACATTTCTTTGCAGGAAAGCAGTGTGTACTATCTTTGTATTACTTCATATCTGTAATTTGTGATTTTCTCTAAAATTTTGAGTTTATTCG  
GAATCTGCTTAACGAATTTTAGTCGATTTGCAAAAACAGATTTTTTTAATTGA

>comp150481\_c0\_seq1

GACATCAGCAACTATATAGCAAGCAATTTCACTCAAACGCCAATCTATTGACTTATGGCTCTTTCTTTGAAAGTCGCTCTCTCCTTTGCATGTCTCTTCTTCAATTCGAATCTCCGGCGATC  
GCCGCGACATCATTCATCAAATCTAGAGCTGCTTATTATCCTAATTCTGAACAAAATGGCACTGCAGATGGCGCATGTGGGTATCGTTTGTATGGAGCGACTCTCAATGGTGGTGTATGTTTC  
AGCTGCTTCTGATCTCTATCGCAATGGTGTGGATGTGGTGCATGTTACCAGGTGAGGTGCACGAACATCAACTATTGCTCAGATAATGGTGTGACCAATTGTGATAACGGACTTGGGTTCCG  
AGCGGTGGCACCGATTTCAATTAAGCCAACATGCTTTTGAAGGATGGGGCAGACCGTCGACACCGGCAAACTCTGCTTGATCTGGTTGGGTTGATATTGAGTATGCCAGAGTTTCTT  
GCAGCTACCCAAATAAGAACATAACCATCAAGATTGATGAGAGTAGTATCTACCCCGATTACTTGGCCTTTGTCATAGAATATCAACAAGGAATCAAGGACATCATAGCAGTTCAGTTATGC  
GAGGTAGAATTTCTCTCATTTTTTTCATATTTTTTAAGGAACTCATGATCATTATGATTAAGATTGTATGAAATATTTTTCTAAAAAAGTTAATTAA

>comp150481\_c0\_seq2

GACATCAGCAACTATATAGCAAGCAATTTCACTCAAACGCCAATCTATTGACTTATGGCTCTTTCTTTGAAAGTCGCTCTCTCCTTTGCATGTCTCTTCTTCAATTCGAATCTCCGGCGATC

GCCGCGACATCATCAAAATCTAGAGCTGCTTATTATCCTAATTCTGAACAAAATGGCACTGCAGATGGCGCATGTGGGTATCGTTTGTATGGAGCGACTCTCAATGGTGGTGATGTTTC  
AGCTGCTTCTGATCTCTATCGCAATGGTGTGGATGTGGTGCATGTTACCAGGTGAGGTGCACGAACATCAACTATTGCTCAGATAATGGTGTGACCATTGTGATAACGGACTTGGGTTCG  
AGCGGTGGCACCGATTTTCATATTAAGCCAACATGCTTTTGAAGGATGGGGCAGACCGTCGACACCGGCAAATCTCTGCTTGATCTTGGTTGGGTTGATATTGAGTATGCCAGGTTAGTTT  
AAATAGTTTTAGATTTCAAGTATATTGGTAAAACTTTAGAGAAAATATTAACAATACATATTGAACATAATTACTCAGAGAGATTTGCGTAAAATAGTCTCTTCAAGCGACATTAACATAA  
ATAAACGAACAACGAGAATTCATAAAGATGGGGCAAAAAAAGATTGAATTGGGCTACTGATGTTGATTATGATGAGGATGATAGATAAAATTGTGCTCATTCTCTTATTTCAGCAAGTAATTTTC  
CATAATAATGAGGAGACTAAAAACAAAGTTTAAACTATATAAAGATAAAGAAACAAATGTCTACTTGAATCGGATAGAGCAAATCTTCATAAATAGCTACATTGGTAAATCACTTATATG  
CTATAAAATTTGTGCATTTTGT

>comp150481\_c0\_seq3

GACATCAGCAACTATATAGCAAGCAATTTCACTCAAACGCCAATCTATTGACTTATGGCTCTTTCTTTGAAAGTCGTCTCTCTCCTTTCATGTCTCTTCTTCAATTCCAATCTCCGGCGATC  
GCCGCGACATCATCAAAATCTAGAGCTGCTTATTATCCTAATTCTGAACAAAATGGCACTGCAGATGGCGCATGTGGGTATCGTTTGTATGGAGCGACTCTCAATGGTGGTGATGTTTC  
AGCTGCTTCTGATCTCTATCGCAATGGTGTGGATGTGGTGCATGTTACCAGGTGAGGTGCACGAACATCAACTATTGCTCAGATAATGGTGTGACCATTGTGATAACGGACTTGGGTTCG  
AGCGGTGGCACCGATTTTCATATTAAGCCAACATGCTTTTGAAGGATGGGGCAGACCGTCGACACCGGCAAATCTCTGCTTGATCTTGGTTGGGTTGATATTGAGTATGCCAGAGTTTCTT  
GCAGTACCCAAATAAGAACATAACCATCAAGATTGATGAGAGTAGTATCTACCCCGATTACTTGGCCTTTGTGCATAGAATATCAACAAGGAATCAAGGACATCATAGCAGTTTCAAGTTATGC  
GAGACTGTGAGTTTAAACATGTAAGCTATTAGATCGAAGCCGTGGCACAGTATGGGCTGTTGTCTCTCCTCTAGTGGCCCTCTATCTGTAAGGATGCTTTTGTGAGCAGTGACGATGACAATG  
ATGATGAGAGTTGGGCGACGCCTGTCAATGATATTCCAGTGAATTGGACACCTGGAAGTACTGATGATTCTGGGATGCAAATAAATAAAGTTGGTTGAGATGTTTTCTGAATGTTGATCGA  
TTGTATCAACATAGATTTTATCTACTAATAATTGCTTGATTTATATTATTTGTTAGTTGATGTTTGTGTTGCTGAAAAGTTTTGTTATTTGTTTTCTGAGAAGTTAGATGTTTAAATTGGAAGTTT  
GAAATAATATTTTAGTTTCAGC

>comp151738\_c1\_seq1

TCACTTTGCTTGATTGAACTAATCACTCTCTCTCTCTTTCATATTATCTTTTCTCTCTCTTCTTTCATATTATCTTTTTCTCTCTCTCTCTCAGTTAAGACAGGAGGCTAGAAAAGAGTGGTTATA  
GTTAAGGAGGCTATGAGTATCTTGAGCATGGTGGAGGCAAAGCTGCCTCCGGGATTCCGATTTTCATCCGAGGGACGACGAGCTGATTTGCGAATACTTGAGCCGGCGAGCCTCCGCGGC  
CTCCGACGGTGCAGAATTCATAGGCTTTCCGGCTATGGTTCGACGTCGACCTCAACAGGTGTGAGCCATGGGACCTGCCTGAGACAGCTGTGTAAGGGGGAAGGAGTGGTACTTCTTCA  
GTCTCAAGGACAAGAAGTACTCCACTGGGCAACGAACGAATAGAGCAACAGCTTCAGGCTACTGGAAGGCGACAGGGAAGGATCGACAGGTTCTACGTAAGGGAGAGCTTGTGGCTT  
GAGAAAGACCTTGGTGTCTACCATGGGAGAGCTCCCAAGGGGAAGAAGACGCAGTGGGTGATGCACGAGTTCAGAATGGTATCGTCCAGAGCTTCTGATTCTCCCAACTTCTCCTTCA  
AGGAGGATTGGGTTCTCTGCAGAGTCTTTTATAAGAGGAGACCTCTCTGTCCAAAATTAAGCTCTGAGACTTGCAGGAAGACAATGGTTCTCTTCTTCCACCTCTGACAGACTCTC  
ATATTACAAGTTGTAATCTTGTTCCTCTCAATAACCTTGAGGGACTTGAGCAGGTGCCCTGCTTCTCCAGCTTTTCTACAAGCCAAGAAAGTCTGGTCTTCTCTTCTTTCATCCTTCAAC  
AGTACTGTTTCTTGTGATGCGAAAGACTTGAAGGCAATGCTGAGCCAATCAGTAAGATTGAAGAGAACCAACAGATTAATGAAAGCTGCTTTTCTGAAAGTGAATTCGCACGTTGTG  
GAATCCATTTGCTAGTTTTTGTATGTAATTTTATGAAAATATGTGCGTTGGAAGGGAGCTTTATGATGGAGTGGAGATTGTGAACTTATATGTCATTGTCTGAGTGTATAGTATGTTTTGTAGTA  
AATTGAAGGTTGTTTTTAGTAAATTGAAGGTATGTCATAATGCACCACGTCACCTAGTACCCAGCA

>comp151738\_c1\_seq2

TCACTTTGCTTGATTGAACTAATCACTCTCTCTCTCTTTCATATTATCTTTTCTCTCTCTTCTTTCATATTATCTTTTTCTCTCTCTCTCTCAGTTAAGACAGGAGGCTAGAAAAGAGTGGTTATA  
GTTAAGGAGGCTATGAGTATCTTGAGCATGGTGGAGGCAAAGCTGCCTCCGGGATTCCGATTTTCATCCGAGGGACGACGAGCTGATTTGCGAATACTTGAGCCGGCGAGCCTCCGCGGC

CTCCGACGGTGCAGAATTCTATGGCTTTCCGGCTATGGTCGACGTCGACCTCAACAGGTGTGAGCCATGGGACCTGCCTGAGACAGCCTGTGTAAGGGGGAAGGAGTGGTACTTCTTCA  
GTCTCAAGGACAAGAAGTACTCCACTGGGCAACGAACGAATAGAGCAACAGCTTCAGGCTACTGGAAGGCGACAGGGAAGGATCGACAGGTTCTACGTAAGGGAGAGCTTGTGGCTT  
GAGAAAGACCTTGGTGTCTACCATGGGAGAGCTCCCAAGGGGAAGAAGACGCAGTGGGTGATGCACGAGTTCAGAATGGTATCGTCCAGAGCTTCTGATTCTCCCAACTTCTCCTTCA  
AGGTAAGGTTTTGAGGTCAGATTATGAGCAGAAATGGCTGTCAGTACACTCATTCTTTTCGTTTTTCTTCAGGAGGATTGGGTTCTCTGCAGAGTCTTTTATAAGAGGAGACCTCTCTGTCC  
AAAATTAAGCTCTGAGACTTGCGAGGAAGACAATGGTTCCTCTTCTTCCACCTCTGACAGACTCTCATATTACAAGTTGTAATCTTGTTCCTCTCAATAACCTTGAGGGACTTGAGCAG  
GTGCCCTGCTTCTCCAGCTTTTCTACAAGCCAAGAAAGTCCTGGTCTTCTCTTCTTTCATCCTTCAACAGTACTGTTTCTTGTGATGCGAAAGACTTGAAGGCAATGCTGAGCCAACTCA  
GTAAGATTGAAGAGAACCAACAGATTAATGAAAGCTGCTTTTCTGAAAGTGAAATTCGCACGTTGTGGAATCCATTTGCTAGTTTTTGTATGTAATTTTATGAAAATATGTGCGTTGGAAGG  
GAGCTTTATGATGGAGTGGAGATTGTGAACCTTATATGTCATTGTCTGAGTGTATAGTATGTTTTGTAGTAAATTGAAGGTTGTTTTAGTAAATTGAAGGTATGTCATAATGCACCACGTAC  
CTAGTACCCAGCA

>comp151738\_c1\_seq3

TCACCTTGTCTTGATTGAACTAATCACTCTCTCTCTCTTTCATATTATCTTTCTCTCTCTTCTTCATATTATCTTTTTCTCTCTCTCTCAGTTAAGACAGGAGGCTAGAAAGAGTGGTTATA  
GTTAAGGAGGCTATGAGTATCTTGAGCATGGTGGAGGCAAAGCTGCCTCCGGGATTCCGATTCATCCGAGGGACGACGAGCTGATTTGCGAATACTTGAGCCGGCGAGCCTCCGCGGC  
CTCCGACGGTGCAGAATTCTATGGCTTTCCGGCTATGGTCGACGTCGACCTCAACAGGTGTGAGCCATGGGACCTGCCTGAGACAGCCTGTGTAAGGGGGAAGGAGTGGTACTTCTTCA  
GTCTCAAGGACAAGAAGTACTCCACTGGGCAACGAACGAATAGAGCAACAGCTTCAGGCTACTGGAAGGCGACAGGGAAGGATCGACAGGTTCTACGTAAGGGAGAGCTTGTGGCTT  
GAGAAAGACCTTGGTGTCTACCATGGGAGAGCTCCCAAGGGGAAGAAGACGCAGTGGGTGATGCACGAGTTCAGAATGGTATCGTCCAGAGCTTCTGATTCTCCCAACTTCTCCTTCA  
AGTACACTCATTCTTTTCGTTTTTCTTCAGGAGGATTGGGTTCTCTGCAGAGTCTTTTATAAGAGGAGACCTCTCTGTCCAAAATTAAGCTCTGAGACTTGCGAGGAAGACAATGGTTCCTC  
TTCTCTTCCACCTCTGACAGACTCTCATATTACAAGTTGTAATCTTGTTCCTCTCAATAACCTTGAGGGACTTGAGCAGGTGCCCTGCTTCTCCAGCTTTTCTACAAGCCAAGAAAGTCCT  
GGTCTTCTCTTCTTTCATCCTTCAACAGTACTGTTTCTTGTGATGCGAAAGACTTGAAGGCAATGCTGAGCCAACTCAGTAAGATTGAAGAGAACCAACAGATTAATGAAAGCTGCTTT  
TCTGAAAGTGAAATTCGCACGTTGTGGAATCCATTTGCTAGTTTTTGTATGTAATTTTATGAAAATATGTGCGTTGGAAGGGAGCTTTATGATGGAGTGGAGATTGTGAACCTTATATGTCATT  
GTCTGAGTGTATAGTATGTTTTGTAGTAAATTGAAGGTTGTTTTAGTAAATTGAAGGTATGTCATAATGCACCACGTACCTAGTACCCAGCA

>comp153810\_c0\_seq1

ATTATGCAAATATAATTACTTCAATAAATGGCCTTAGGGCCAGCTAGTTTTGGCCCATCTACTACCTTTAATGGCTACCCCTAACCTAAAAAAGCAAATTTGAACTTCTCCGGATAACTATGG  
CATAGGTCTCTTCAATTATGTTAGCTACAGCTACGGCTATCTGTGATGAAATTACTCCTATTTGATAAGAACAAGGTGGCTATTAGTCTTAAACTACACTCCACTGCGCTGCTTCTTCCCTT  
CTCCCTTGCCTCGCTTTGTGGAATCCATGTCAGAGATTAAATGGTGGCAGAATCATAAACCAAATCAGTCTCTTGCTTCCCTCTCTGCTTGTAAAGTATTGAATGCGATCCAGCTATTTGTTT  
GAATCTTGAGTACTTTCGGTTGTCTTTAGGGTTTTGCAAGATGAGTCTTTTTTGTATTTGGGGTAGGTTAATTTTTCTCTTGCGTTCTTTAAGAAGACGTGGCTTCTTTTCGAACCGTCGA  
ATGGTCTATATGCTTTTCTGGTTTCTTTGATTTGGAGTTGCTGCCGATTAGTTAGGGTTTTCACTGATGTTTTTGTCAATTTCTTGCTTTCTTTGATCACCTTTTTCTCGGTAGGTAGGTGAC  
GATGCATTTCTTATTTTCTTGACTTTTCTTATGGCCCTGCGATTGTGAAATGTTCTTTTTTTCCCTTCAGATTCTTTTTATTTTCAATTAATTTTATGCTTTTTCGTGTTTCTTTCACGTCTTC  
ACGAATTGCTTTTATTTTTGTCTGTGATGGGAAAGGAGAAAGGTAATAAGATTTTTTAAGGATACGCATGGGTGTTTGCGGGATAGGGACAAGAGGCCAAATCGTAAAACAAAGAAAGT  
GATAGCTAGTAAACGAACCGAAAGTAGTGATAAAAGGAATTTTAGGTTTGTGGAAACAACCTTGTAAGGGTTGCTTTTCATGGAGTGGAACTTGAAGATGCCTCCTTGGGATTTGGCAGAGT  
CGCATCAAGAGACCGAAACACGTTTCTTCTCCTTAATCGGATCAAGCAGTGTCTCAACAACAAGCGGAAGAATTGATTGCTCGGTTGATTTGAAACTTGGGGAATTAGGAGATTTTCG  
GATTATCAAAGCAGTGGAAAGATGGAACCTTGAGGGCCTCAGCTTCCATGGTACTTCTCTGGTGCATCAAGGAGGGCTCGGGTTCCAAGCAGTACTGGTCATATTGCTACTTGTCTGT

TGGATGGCTGCGTTGCTGACCTTAGCAAGTGCAGGGAATATCACAAGCGGCACAAGGTGTGCGAGGCTCACTCTAAGACTCCAATTGTGGTGGTCGCAGGGCGAGAACAACGCTTCTGT  
CAGCAGTGCAGCAGATTCCACTCTTTGTCAGAGTTTGTATGAAGGGAAGCGAAGTTGCAGGAAGCGCCTTGATGGGCACAACAGGCGCAGAAGGAAGCCCCAGCTGGATACTCTAAACC  
CAGGAACTTACTCTCCAACCACCAAGGGACCGGATACTCTTACACCTGCAAATAAGCCCCTTACCATGCCTGATCCTAACTGGATCAACTTCTCAGCAAAATCTGAGCACGGAGCTC  
TCCACTCTCACTGCCTCCCTTTGCAGTTTCCCTTCCTGCAGCAGAGTGAAGCAGGCCTTGGCTCTGATCGTGCTTTCTCTCTTCTGTCATCTTCTGCCAATCTTCACAAATCCATCTAAGT  
CCAATGGCGTACAGTGCCGATAAGATCTCCACTGAACAACCTTTGCAGCAATGTAGCAGTGCAGAAGTGTATCCTTGGCTTTCATTCTCCTACTTGTGCATCAATGGCAGGGATGCCATGCG  
TTCAAACGGAGGATGAGAATGTGGGAAGCAACCTGGTATCGGAAGCTAATGGTACCAATCTCCATTGCCAAGGTATG

>comp153810\_c0\_seq2

ATTATGCAAATATATTACTTCAATAAATGGCCTTAGGGCCAGCTAGTTTTGGCCCATCTACTACCTTTAATGGCTACCCCTAACCTAAAAAAGCAAATTTGAACTTCTCCGGATAACTATGG  
CATAGGTCTCTTTCATTATTGTTAGCTACAGCTACGGCTATCTGTGATGAAATTACTCCTATTTGATAAGAACAAGGTGGCTATTAGTCCTTAAACTACACTCCACTGCGCTGCTTCTCCCTT  
CTCCCTTGCCTCGCTTTGTGGAATCCATGTCAGAGATTAAATGGTGGCAGAATCATAACCAAATCAGTCTCTTGCTTCCTTCCTCTGCTTGAGAAAGGTAAATAAGATTTTAAAGGATAC  
GCATGGGTGTTTTCGGGATAGGGACAAGAGGCCAAATCGTAAAACAAAGAAAGTGATAGCTAGTAAACGAACCGAAAAGTAGTGATAAAAAGGAATTTTAGGTTTGTGGAAACAACCTTGTA  
AGGGTTGCTTTCATGGAGTGGAACCTGAAGATGCCTCCTTGGGATTTGGCAGAGTCGCATCAAGAGACCGAAACACGTTTCTTCTCCTTAATCGGATCAAGCAGTGAGTCTCAACAACA  
AAGCGGAAGAATTGATTGCTCGGTTGATTGAAACTTGGGGAATTAGGAGATTTCCGATTATCAAAGCAGTGGAAAGATGGAACCTTGAGGGCCTCAGCTTCCATGGTGACTTCCCTCTGG  
TGCATCAAGGAGGGCTCGGGTTCCAAGCAGTACTGGTCATATTGCTACTTGGCTCTGTGGATGGCTGCGTTGCTGACCTTAGCAAGTGCAGGGAATATCACAAGCGGCACAAGGTGTGCGA  
GGCTCACTCTAAGACTCCAATTGTGGTGGTCGCAGGGCGAGAACAACGCTTCTGTGTCAGCAGTGCAGCAGATTCCACTCTTTGTCAGAGTTTGTATGAAGGGAAGCGAAGTTGCAGGAAG  
CGCCTTGATGGGCACAACAGGCGCAGAAGGAAGCCCCAGCTGGATACTCTAAACCCAGGAACTTACTCTCCAACCACCAAGGGACCGGATACTCTTACACCTGCAAATAAGCCCCTC  
TACCATGCCTGATCCTAACTGGATCAACTTCTCAGCAAAATCTGAGCACGGAGCTCTCCACTCTCACTGCCTCCCTTTGCAGTTTCCCTTCCTGCAGCAGAGTGAAGCAGGCCTTGGCTC  
TGATCGTGCTTTCTCTCTTCTGTCATCTTCTGCCAATCTTCACAAATCCATCTAAGTCCAATGGCGTACAGTGCCGATAAGATCTCCACTGAACAACCTTTGCAGCAATGTAGCAGTGCAG  
AACTGTATCCTTGGCTTTCATTCTCCTACTTGTGCATCAATGGCAGGGATGCCATGCGTTCAAACGGAGGATGAGAATGTGGGAAGCAACCTGGTATCGGAAGCTAATGGTACCAATCTCCA  
TTGCCAAGGTATG

>comp153810\_c0\_seq3

ATTATGCAAATATATTACTTCAATAAATGGCCTTAGGGCCAGCTAGTTTTGGCCCATCTACTACCTTTAATGGCTACCCCTAACCTAAAAAAGCAAATTTGAACTTCTCCGGATAACTATGG  
CATAGGTCTCTTTCATTATTGTTAGCTACAGCTACGGCTATCTGTGATGAAATTACTCCTATTTGATAAGAACAAGGTGGCTATTAGTCCTTAAACTACACTCCACTGCGCTGCTTCTCCCTT  
CTCCCTTGCCTCGCTTTGTGGAATCCATGTCAGAGATTAAATGGTGGCAGAATCATAACCAAATCAGTCTCTTGCTTCCTTCCTCTGCTTAGTCGCATCAAGAGACCGAAACACGTTTCT  
TCTCCTTAATCGGATCAAGCAGTGAGTCTCAACAACAAGCGGAAGAATTGATTGCTCGGTTGATTGAAACTTGGGGAATTAGGAGATTTCCGATTATCAAAGCAGTGGAAAGATGGAA  
CCTTGAGGGCCTCAGCTTCCATGGTGACTTCCCTCTGGTGCATCAAGGAGGGCTCGGGTTCCAAGCAGTACTGGTCATATTGCTACTTGTCTGTGGATGGCTGCGTTGCTGACCTTAGCAA  
GTGCAGGGAATATCACAAGCGGCACAAGGTGTGCGAGGCTCACTCTAAGACTCCAATTGTGGTGGTCGCAGGGCGAGAACAACGCTTCTGTGTCAGCAGTGCAGCAGATTCCACTCTTTGT  
CAGAGTTTGTATGAAGGGAAGCGAAGTTGCAGGAAGCGCCTTGATGGGCACAACAGGCGCAGAAGGAAGCCCCAGCTGGATACTCTAAACCCAGGAACTTACTCTCCAACCACCAAG  
GGACCGGATACTCTTACACCTGCAAATAAGCCCCTTACCATGCCTGATCCTAACTGGATCAACTTCTCAGCAAAATCTGAGCACGGAGCTTCCACTCTCACTGCCTCCCTTTGCAGTT  
TCCCTTCTGCAGCAGAGTGAAGCAGGCCTTGGCTCTGATCGTGCTTTCTCTCTTCTGTCATCTTCTGCCAATCTTCACAAATCCATCTAAGTCCAATGGCGTACAGTGCCGATAAGATCT  
CCACTGAACAACCTTTGCAGCAATGTAGCAGTGCAGAAGTGTATCCTTGGCTTTCATTCTCCTACTTGTGCATCAATGGCAGGGATGCCATGCGTTCAAACGGAGGATGAGAATGTGGGA

GCAACCTGGTATCGGAAGCTAATGGTACCAATCTCCATTGCCAAGATATATTCCAGGGTAGCAGTAAGGTTTTGTTAGAAGGAACATCTGAAACTCCTCCCAACCCCTGGCAATGGTAAAT  
CCTTTTTCTTTAATTATTATTAACTGTAGGAATCCAACAGGTGTTCTGACCATTAATCAGTCAGATGTTTCTTTTTATGGGAGTATTAGTTTAAAGCTGTATGATTGTAGTTTTTTGGTT  
TGTAAGATCTATAAAATTTAAAAAGTGGCATATGATTTTATTTAAA

>comp153810\_c0\_seq4

ATTATGCAAATATATTACTTCAATAAATGGCCTTAGGGCCAGCTAGTTTTGGCCCATCTACTACCTTTAATGGCTACCCCTAACCTAAAAAAGCAAATTTGAACTTCTCCGGATAACTATGG  
CATAGGTCTCTTCATTATTGTTAGCTACAGCTACGGCTATCTGTGATGAAATTACTCCTATTTGATAAGAACAAGGTGGCTATTAGTCCTTAAACTACACTCCACTGCGCTGCTTCTCCCTT  
CTCCCTTGCCCTCGCTTTGTGGAATCCATGTCAGAGATTAATGGTGGCAGAATCATAAACCAAATCAGTCTCTTGCTTCCTTCCTCTGCTTAGTCGCATCAAGAGACCGAAACACGTTTCT  
TCTCCTTAATCGGATCAAGCAGTGAGTCTCAACAACAAGCGGAAGAATTGATTGCTCGGTTGATTTGAAACTTGGGGAATTAGGAGATTTCCGATTATCAAAGCAGTGGAAGATGGAA  
CCTTGAGGGCCTCAGCTTCCATGGTGAATCCTCTGGTGCATCAAGGAGGGCTCGGGTTCCAAGCAGTACTGGTCATATTGCTACTTGCTCTGTGGATGGCTGCGTTGCTGACCTTAGCAA  
GTGCAGGGAATATCACAAAGCGGCACAAGGTGTGCGAGGGCTCACTCTAAGACTCCAATTGTGGTGGTCGCAGGGCGAGAACAACGCTTCTGTGACAGTGCAGCAGATTCCACTCTTGT  
CAGAGTTTGATGAAGGGAAGCGAAGTTGCAGGAAGCGCCTTGATGGGCACAACAGGCGCAGAAGGAAGCCCCAGCTGGATACTCTAAACCCAGGAACTTACTCTCCAACCACCAAG  
GGACCGGATACTCTCACACCTGCAAATAAGCCCCTCTACCATGCCTGATCCTAACTGGATCAACTTCTCAGCAAAATCTGAGCACGGAGCTCTCCACTCTCACTGCCTCCCTTTGCAGTT  
TCCCTTCTGACAGCAGAGTGAAGCAGGCCTTGGCTCTGATCGTGCTTCTCTCTTCTGTCATCTTCTGCCAATCTTCACAAATCCATCTAAGTCCAATGGCGTACAGTGCCGATAAGATCT  
CCACTGAACAACCTTTGCAGCAATGTAGCAGTGCAGAACTGTATCCTTGCTTTCACTCTCTACTTGTGCATCAATGGCAGGGATGCCATGCGTTCAAACGGAGGATGAGAATGTGGGAA  
GCAACCTGGTATCGGAAGCTAATGGTACCAATCTCCATTGCCAAGGTATG

>comp153810\_c0\_seq5

ATTATGCAAATATATTACTTCAATAAATGGCCTTAGGGCCAGCTAGTTTTGGCCCATCTACTACCTTTAATGGCTACCCCTAACCTAAAAAAGCAAATTTGAACTTCTCCGGATAACTATGG  
CATAGGTCTCTTCATTATTGTTAGCTACAGCTACGGCTATCTGTGATGAAATTACTCCTATTTGATAAGAACAAGGTGGCTATTAGTCCTTAAACTACACTCCACTGCGCTGCTTCTCCCTT  
CTCCCTTGCCCTCGCTTTGTGGAATCCATGTCAGAGATTAATGGTGGCAGAATCATAAACCAAATCAGTCTCTTGCTTCCTTCCTCTGCTTGAGAAAGGTAATAAGATTTTTTAAGGATAC  
GCATGGGTGTTTGCGGGATAGGGACAAGAGGCCAAATCGTAAAAACAAGAAAGTGATAGCTAGTAAACGAACCGAAAGTAGTGATAAAAGGAATTTAGGTTTGTGGAAACAACCTTGTA  
AGGGTTGCTTTCATGGAGTGGAACTTGAAGATGCCTCCTTGGGATTTGGCAGAGTCGCATCAAGAGACCGAAACACGTTTCTTCTCCTTAATCGGATCAAGCAGTGAGTCTCAACAACA  
AAGCGGAAGAATTGATTGCTCGGTTGATTTGAAACTTGGGGAATTAGGAGATTTCCGATTATCAAAGCAGTGGAAGATGGAACCTTGAGGGCCTCAGCTTCCATGGTGAATCCTCTGG  
TGCATCAAGGAGGGCTCGGGTTCCAAGCAGTACTGGTCATATTGCTACTTGCTCTGTGGATGGCTGCGTTGCTGACCTTAGCAAGTGCAGGGAATATCACAAAGCGGCACAAGGTGTGCGA  
GGCTCACTCTAAGACTCCAATTGTGGTGGTCGCAGGGCGAGAACAACGCTTCTGTCAGCAGTGCAGCAGATTCCACTCTTTGTCAGAGTTTGATGAAGGGAAGCGAAGTTGCAGGAAG  
CGCCTTGATGGGCACAACAGGCGCAGAAGGAAGCCCCAGCTGGATACTCTAAACCCAGGAACTTACTCTCCAACCACCAAGGGACCGGATACTCTTACACCTGCAAATAAGCCCCTC  
TACCATGCCTGATCCTAACTGGATCAACTTCTCAGCAAAATCTGAGCACGGAGCTCTCCACTCTCACTGCCTCCCTTTGCAGTTTCCCTTCTGACAGCAGAGTGAAGCAGGCCTTGGCTC  
TGATCGTGCTTCTCTCTTCTGTCATCTTCTGCCAATCTTCACAAATCCATCTAAGTCCAATGGCGTACAGTGCCGATAAGATCTCCACTGAACAACCTTTGCAGCAATGTAGCAGTGCAG  
AACTGTATCCTTGCTTTCATTCTCCTACTTGTGCATCAATGGCAGGGATGCCATGCGTTCAAACGGAGGATGAGAATGTGGGAAGCAACCTGGTATCGGAAGCTAATGGTACCAATCTCCA  
TTGCCAAGATATATTCCAGGGTAGCAGTAAGGTTTTGTTAGAAGGAACATCTGAAACTCCTCCCAACCCCTGGCAATGGTAAATCCTTTTTTCTTTAATTATTATTAACTGTAGGAATC  
CAAACAGGTGTTCTGACCATTAATCAGTCAGATGTTTCTTTTTATGGGAGTATTAGTTTAAAGCTGTATGATTGTAGTTTTTTGGTTTGTAGAATCTATAAAATTTAAAAAGTGGCATATGATTT  
TATTTAAA



>comp153810\_c0\_seq6

ATTATGCAAATATATTACTTCAATAAATGGCCTTAGGGCCAGCTAGTTTTGGCCCATCTACTACCTTTAATGGCTACCCCTAACCTAAAAAAGCAAATTTGAACTTCTCCGGATAACTATGG  
CATAGGTCTCTTCATTATTGTTAGCTACAGCTACGGCTATCTGTGATGAAATTACTCCTATTTGATAAGAACAAGGTGGCTATTAGTCCTTAAACTACACTCCACTGCGCTGCTTCTCCCTT  
CTCCCTTGCCCTCGCTTTGTGGAATCCATGTCAGAGATTAAATGGTGGCAGAATCATAAACCAAATCAGTCTCTTGCTTCCTCTCTGCTTGTAAGTATTGAATGCGATCCAGCTATTTGTTT  
GAATCTTGAGTACTTTTCGGTTGTCTTTAGGGTTTTGCAAGATGAGTTCTTTTTGATGTTGGGGTAGGTTAATTTTTCTCTTGCGTTCTTTAAGAAGACGTGGCTTCTTTTCGAACCGTCGA  
ATGGTCTATATGCTTTTCTGGTTTCTTTGATTTGGAGTTGCTGCCGATTAGTTAGGGTTTTCACTGATGTTTTTGTCAATTTCTTGCTTTCTTTGATCACCTTTTTCTCGGTAGGTAGGTGAC  
GATGCATTTCTTATTTTCTTGACTTTTCTTATGGCCCTGCGATTGTGAAATGTTTCTTTTTTCCCTTCAGATTCTCTTTATTTTCAATTAATTTTATGCTTTTCTCGTGTCTTTTACAGTCTTC  
ACGAATTGCTTTTTATTTTTGTCTGTGATGGGAAAGGAGAAAGGTAATAAGATTTTTTAAGGATACGCATGGGTGTTTGCGGGATAGGGACAAGAGGCCAAATCGTAAAACAAAGAAAAGT  
GATAGCTAGTAAACGAACCGAAAGTAGTGATAAAAGGAATTTTAGGTTTGTGAAACAACCTTGTAAAGGGTTGCTTTTCATGGAGTGGAACCTTGAAGATGCCTCCTTGGGATTTGGCAGAGT  
CGCATCAAGAGACCGAAACACGTTTCTTCTCCTTAATCGGATCAAGCAGTGAGTCTCAACAACAAGCGGAAGAATTGATTGCTCGGTTGATTTGAAAACCTGGGGAATTAGGAGATTTCCG  
GATTATCAAAGCAGTGGAAGATGGAACCTTGAGGGCCTCAGCTTCCATGGTGACTTCTCTGGTGCATCAAGGAGGGCTCGGGTTCCAAGCAGTACTGGTCATATTGCTACTTGCTCTG  
TGGATGGCTGCGTTGCTGACCTTAGCAAGTGCAGGGAATATCACAAGCGGCACAAGGTGTGCGAGGCTCACTCTAAGACTCCAATTGTGGTGGTCGCAGGGCGAGAACAACGCTTCTGT  
CAGCAGTGCAGCAGATTCCACTCTTTGTGAGAGTTGATGAAGGGAAGCGAAGTTGAGGAAAGCGCCTTGATGGGCACAACAGGCGCAGAAGGAAGCCCCAGCTGGATACTCTAAACC  
CAGGAAACTTACTCTCCAACCACCAAGGGACCGGATACTCTTACACCTGCAAATAAGCCCTTACCATGCCTGATCCTAACTGGATCAACTTCTCAGCAAATCTGAGCACGGAGCTC  
TCCACTCTCACTGCCTCCCTTTGCAAGTTCCCTTCTGAGCAGAGTGAAGCAGGCCTTGGCTCTGATCGTGTCTTCTCTTCTGTCTCTTCTGCCCCAATCTTCAAAATCCATCTAAGT  
CCAATGGCGTACAGTGCCGATAAGATCTCCACTGAACAACCTTTGCAGCAATGTAGCAGTGCAGAACTGTATCCTTGCTTTCAATCTCCTACTTGTGCATCAATGGCAGGGATGCCATGCG  
TTCAAACGGAGGATGAGAATGTGGGAAGCAACCTGGTATCGGAAGCTAATGGTACCAATCTCCATTGCCAAGATATATCCAGGGTAGCAGTAAGGTTTTGTTAGAAGGAACATCTGAAA  
CTCCTCCCAACCCCTGGCAATGGTAAATCCTTTTTTCTTTAATTATTATTAACTGTAGGAATCCAAACAGGTGTTCTGACCATTAATCAGTCAGATGTTTCTTTTTATGGGAGTATTAGT  
TTAAGCTGTATGATTGTAGTTTTTTGGTTTTGTAGAATCTATAAAATTTAAAAAGTGGCATATGATTTTATTTAAA

>comp153832\_c0\_seq1

GCAGAAGTTCACTACCATGACTTCATTGTGCAAGCAACGCCGGTGAATAAGCTTTGCAAGACCCATAATATCATCACTGTGAATGGGCAATTTCTGGTCCAACCTATTGAAATTCGCAATG  
GTGATACATTGGTGGTCAGTGTGTGAACCGGGCTCAGTACAATGTCACAATACACTGGCACGGGATTCGTCAAATGAGAACAGCATGGGCAGATGGACCTGAATTTGTAACGCAATGCC  
CGATTTCGACCTGGAGGACACTACACCTATAGGTTACCGTTACGGGCCAAGAAGGAACACTATGGTGGCATGCTCATAGCTCATGGCTTAGGGCAACTGTATATGGTGTCTTATCATTCA  
CCCCAAAGAGGGCAATAACTACCCCTTTGCCCAACCAACAGGGAATTTCCCGTCACTTGGTGTAGTGGTGGAAACCAAGATCCCATCACCGTCGTCCGGCAAGCCACACAACTGGCG  
CCGCCCCAACATCTCCGACGCCTTACCATCAACGGCGAACCAGGCGACCTGTACAACCTGCTCTTCAATCCACCACTACCTTCCCCGTCAAGCCTAACCAATCAACCTACTCCGTT  
TCATCAACGCCGCCCTCAACGACGAACTCTCGTCTCCATCGCCGGACACTCCATGACCGTCTTTTCGGGTGACGCTTCTTACACCAACCCTTACCACCTCCGTTCTGATGCTCGGAC  
CCGGCCAAACCACCGACGTCCTCGTCAACCAACCAGCCCTTTCGGTACTACATCGCCGCCCGCGCCTACGCCAGCGCGCAAGGCGTCGCCTTTGACAACACCACCACCACCGCC  
ATCCTTGAATACGACTGTGGGTGCCCTTTCCAACCTCCATCAAGCCCCTTTCCCTACCCTCCCCGCCTTCAATGATACAGCGACCGCTACCGCCTTTAGCCGCCAGTTCTTTAGCGCTTCCCC  
TGTCAAAATACCTTCCCCTGTCAACCGATAACCTTTTCTTACCGTCCGCTTAGGCCTCCTCCCCTGCCAACCCGGAAGAACCTGCGGGGGTCCCAACGGCACTCGCTTCTCCGCCAGCAT  
CAACAACGTCTCATTCTCTCCACAAAGCTTCTCCATTCTCCAAGCCACCATCTCGGCGTCGCCGGCGTCTTCTCCGCCGACTTCCCCCGAGCCCGCGGATCAATTCGACTACACT  
GGAAACGTGACCCGCGCTCTTTGGCAGCCTGTGCCGGCAACCAAAGTTTACAGATTGAAATACGGATCAGTAGTGAATTTGGTGTGTCAGGGGACTAGCATCGTCACGGCAGAGAACCA

CCCGATACATCTCCATGGATACGACTTCTATATCCTCGCTGAAGGATTCGGAACTTCAATCGGGCTACTGATACGGCGAAGTTAACTTGGTGAATCCGCCGCTGAGGAACACGGTGGGA  
GTGCCGGTGAACGGATGGGCAGTGATACGATTTGTGGCAGACAATCCTGGGGTGTGGCTACTTCATTGTCATTTGGATGTTTCATATCACTTGGGGATTGGCTATGGCGTTCTTGGTGGATA  
ACGGAGTTGGAGAGCTAGAGGCGTTGGAGGCGCCCGGAGGATTTGCCGCCTTGTTAGAAGCATTGGGTGGAAGTTGGAAGGAGAGGATGGAGCTGAGTAATCAGAGATTATAGAAA  
TTGTGTTCTTTTTTTTTTCTCATTATCATTATGTTATTTTTATTTTTATTTTTGTTGGGATTGGTGTATCAGAAAAGTTTATTGGGGATTATTTGAAGATTGAAGTATCTAATTGGCATTGTTTTT  
AAGTATCTAAATTGTATTGTTACTACAAGTTTGATTGATCTACTAATAAAAAATATTTATTTTTGAAAAAAAAGAATTATACTTAAAACAATACATTATAATTGTAAAAATAAAAAAATTCATG  
AATCATAGGGACAAAGCTAGCTAAGTTTGGTTATTATTATTGTAAGATGATTAGATATATAAAAAATAAATATTTATGAATCTTAATCAA

>comp154265\_c0\_seq2

TGACTCCACAGCCGATGTTTGGCGCAGCCTCTTCCATTTCTGACCGGCAAACCTATTTACACCTTCAAAGTAGTCAGCTATCGTCTCCTAAAGTGGTATAAAAATCGAAGGCAATGGCATCCT  
TCGTAAGAACCTTAACGACGGCCTCTCTACTCCCTGCAGCCGTCGCCGTTACCGCCTTATCCCATTCTTCTCTCTTTCCGCTTTCCGATTCCCCGTTAAATCCGATCTCCCTCTCCCCGCTT  
CCTTGCTTTTACGCTCGGCTCTGAGGTCCTTCGAAGCCGTCGAAATCCGTTCCGTGCTAACGCCGCTCTGCATATGGAATCCGTGGCGGTTGATGCCAAGCCCTACGATGAGCAAACGG  
GGGTTCTGCCGGAGCTCATGACTGAATTTATGGTAGATATGACATGCGAAGGTTGTGTTTCGGCAGTAAAGAACAATATGCTAAAGCTTGACGGGGTGAGTGGCGTTGATGTGGATTGGA  
GCAATCAAGTGGTAAGAGTTATTGGGTCCGTTCCCTGTGAAAACGATGCTTGAAACCCTAGAGCAAACCTGGTCGAAATACACGGCTGATTGGACAAGGAAACCCAAATGATTTTTTGGTTT  
CCTCAGCTGTTGCTGAGTTCAAAGTCCGAAGATCTTTGGGGTGGTACGCCTGGCTCAAGTGAACATGGAATTATCAAGAATTGAAGCAAGCTTCAGTGGTTTGTCTCATGGTAAGCATG  
GTTGGTCCATAAATGAGTATGGGGATTTGACTAGAGGTGCAGCAAGCACGGGGAAAACATTTAATCCCGCAAATCATTTATCAGAAGATAAGGCCTTGGGTGACCTGGGAACACTAGAGG  
TTGCGGAGAATGGGGAAGCTCACTTCTCCGTTTCAAAGAAAAGCTGAGAGTTTCTGATCTCATAGCCGCTCAATTGTGGTATATGAGAAGGAAGACAAATCAGATTCTGGCATTGCAG  
CTGCAGTCATAGCTAGAAGCGCTGGAGTAGGAGAGAATTACAAGAAGATCTGCACCTGCGATGGCATCACCATATGGGAATCTACTTAGTTTTGTTAGTGAAAAG

>comp154499\_c0\_seq1

AGAGCTTATGACAGAGCTGCCCTAAAGTTTCGTGGCGTTGAAGCAGACATTAATTTATCCTGAGTGACTATGAGGATGAACTGAAGCAGGTATAGGTTCTTAGGCAAGTAATTGATCAGT  
AATTTTATTGAAAAAGTTTAGCAAAATGCATTTATTTTTTTCTTGCAGATGGGTAATCTAACAAAGGAGGAATTTGTTCTTCTTCTTAGAAGGCCAAAGTACAGGATTTCTAGAGGAAGTTC  
TAAGTTTAGAGGGTTACCCCTCACAAATGTGGCAGATGGGAGGCTAGATTAGGCCAGCTTTTAGGCAAGAAATATGTTTATTTGGGTTTATTGATACAGAAGTTGAAGCTGCTAGGGCT  
TATGATAAAGCTGCAATAAGGCTCAATGGGAGGGATGCAGTGACCAACTTCGACCCAAGGAAATATGGAGAAGAGCTCAACTCTGAAGATGTAGAAGCTGATCATAATTTGGATCTCACT  
TTGGGGAGCTTCAGCTCTAAAAGAAGTCTTGCACCGATTGAAGATGATGGCTTGATGATCATGGATCAGAGGGTTCAAATGAGTTATGAACCTGAATGGATTAGAAGCACTGGACGCAAG  
TACGATGACAAGCCTAACCTGCCTGAACAAGAGCATTACAGAATAATCATCATCCCTCAAGCAGCATATATATCCAAACTCCAGTCCCTCCAGGCCCATCGGCTTGAATTTGCTAACCATA  
AGCAATTTGGAAGCAGTAGCCATGGAATGAAAACAAAAGATGAAGGTTTAGGACTATTTTCTTTTATCGGTCAGCAGCAACGAGCAGCTCGAAGGCTGCCGTTTCTGCAATGGGCGGC  
GGAATCCAGTGGCCAGCATCTGCAGCTTCACTGCAAGTAGCTCTCCTCATCTGTTTTCTGCCATGACAGCAGCATCATCAGGATTCTTATCAAACCTGTGAGGCCTCAGCCCAACAAAA  
TACAGAGGAACTGAACTATCAATAGTAACTTCATGGCTTTTCTTTTTTTCATGGTTCCCTCTGTGATGGGTTGGAGTTGCTTTGATCAGTTTTATTAGTTAACTTCAAGCACATAAGGAGTGCA  
AATAGTTTTAGATTTTTTCTGCATTTGGTAGGAACATGTGTTAGCACAAAGTTGAAAGGTTGAATCTAAATGCAACATTTTGAAGTTGTTTTATTGGGTTTTTTGTTTTTTTTAGTTCTTTTTCTT  
ACTCCTAATAAAAAATATTT

>comp154499\_c0\_seq2

GCTCATGCTGCTGCAAGGTAGTTAACCCCTTTCATTCTAGTCCAAAATTTTGTAAAGCTTTGTTCTGTTTCATTTCTCCCTTCTAAAATTTGAACCTTCAGATTGAATTCTATAGTTTTTTTC  
ATTTTTTTTTTAGAGCTTATGACAGAGCTGCCCTAAAGTTTCGTGGCGTTGAAGCAGACATTAATTTATCCTGAGTGACTATGAGGATGAACTGAAGCAGATGGGTAATCTAACAAAGGA

GGAATTTGTTCTTCTTCTTAGAAGGCAAAGTACAGGATTTCTAGAGGAAGTTCTAAGTTTAGAGGGGTTACCC TTCACAAATGTGGCAGATGGGAGGCTAGATTAGGCCAGCTTTTAGG  
CAAGAAATATGTTTATTTGGGTTTATTTGATACAGAAGTTGAAGCTGCTAGGGCTTATGATAAAGCTGCAATAAGGCTCAATGGGAGGGATGCAGTGACCAACTTCGACCCAAGGAAATAT  
GGAGAAGAGCTCAACTCTGAAGATGTAGAAGCTGATCATAATTTGGATCTCACTTTGGGGAGCTTCAGCTCTAAAAGAAGTCTTGACCCGATTGAAGATGATGGCTTGATGATCATGGAT  
CAGAGGGTTCAAATGAGTTATGAACCTGAATGGATTAGAAGCACTGGACGCAAGTACGATGACAAGCCTAACCTGCCTGAACAAGAGCATTACAGAACTAATCATCATCCCTCAAGCAG  
CATATATATCCAAACTCCAGTCCCTCCAGGCCCATCGGCTTGAATTTGCTAACCATAAGCAATTTGAAAGCAGTAGCCATGGAATGAAAACAAAAGATGAAGGTTTAGGACTATTTCTTTAT  
CGGTCAGCAGCAACGAGCAGCCTCGAAGGCTGCCGTTTCTGCAATGGGCGGCGGAATCCAGTGGCCAGCATCTGCAGCTTTCACTGCAAGTAGCTCTCCTCATCTGTTTTCTGCCATGA  
CAGCAGCATCATCAGGATTCTCTTATCAAACCTGTGAGGCCTCAGCCCAACAAAATACAGAGGAACTGAACTATCAATAGTAAACTTCATGGCTTTTCTTTTTTCATGGTTCCTCTGTGATGG  
GTTGGAGTTGCTTTGATCAGTTTTATTAGTTAACTTCAAGCACATAAGGAGTGCAATAGGTTTAGATTTTTTCTGCACTTGGTAGGAACATGTGTTAGCACAAAGTTGAAAGGTTGAATCT  
AAATGCAACATTTTGAGTTGTTTTATTGGGTTTTTTGTTTTTTTTTAGTTCTTTTCTTACTCCTAATAAAAAATATTT

>comp154657\_c0\_seq1

TTTGTCTTTGGGCTTGTCTAGGGTTGGCTATTTTAGTTGTTTGTCTCTATCAAGTGATACTGATTGGTAAAGGCGTCTTTTCCATGGGCGTTTTTGTCTTTGGGCTTGTCAAAGTGAAA  
AAGTTGAGATTTTTTTTTGAAAAAGTTGGGATCTTTCTTCCCTGACCTCAGATGATCTTGTCTCAAAGTTGGAGTCTTGGGTGGGCTGGATGCCCTTCTCTTCTGATTATTTGCAAGGA  
ATACTGAAAGGAAAAAAGTGAAAAACGAAGATCTCAGAAGAAAATTAAGGAAAAAATGAACTGCAGTTTACTTTTCTATAAATTTGTTTTCAAGACCTGGAAGGATAAAGGTGAAG  
AACTTATTTCATATATAGTTAGTTTGTGTGATCCTCGAAAGAAAAATCAAACATCACTAGAGAGGTTTTGTCCCTCTTCTCGCTCACGTTACAGGGTCTATTTCTACCTTTTATTCTTATTAG  
GAGCCTCTCCTAACTGTAGTTTCGACCTGTCTGTAATGCTACATGGTTTAAAGTAGTCATAGTCCCTTAGATATTCTGCTTATATCTATCTACCTTCCCTTATTCAGGAGTGTGCTCTGACAAC  
TCAACCTTAACATGCATGGAGCTGTGTCTGGGATCAGAGCACCTTACCCTTCCGAGTGGTTAGAACTGGAGCACCAGGCTCTGATCTACAAGTATATAGATGCAAAAATGTCAATAC  
CATCAAATTTGCTCATGACAATCAGACGAAGCAACAACCAATCTGGGTTCTCATCTTCACTGCTGGATCTTTTAGACAAAACAGGCACATGTAAGCCTTTGTTAATTCAAAATGAGCTGGT  
GACCAGTAGGTAACATAAATGTTTTGAATGATGAACTCTAGAAAAATAGTTTAGTCAGAAATGTTGAAACCTTTTTTACTTGTAGTATGCTCACCTCATTTTATCTAATACGCCATCATAT  
ATTATCTCCTGTGGTCTACCTAGTTAATAAGGTGTCAGTTTTCTTTCAAATATTATGAGCTCCGAATTATAGAGGTAGCTCGGCTGCTACTGTCTGTAGCATTGTTATTTTTAAAGCGGTGCTT  
TGATAAACCTACTCAGAATAATTCCAATTTGCATTTGTTCTTCTTGGTTTTGATTGCTCTCTTGTGCTAAAGGCTTTACTTGGATTGAAGGAGAGAAGGAAATGAAATGGAATTCGAATA  
ATACATTTGTTGATTATGAACCAAGCCATTGATTTAAGCTTTTTCAACTCTTAGCATTCATTTATTTTCACTAAAATTCATAGCCATCAAAAACATATGCTAGTTTTGTTTATAATGAAATGGTC  
GTTTGCAGTGGGATGGGAAATTTCCATCCAGGTTTCTCTGGAGGTGCTGACCCAGAGCCTGGCAGATGCCGTCGAACCGATGGAAAAAAGTGGCGGTGTTTCGAGGGATGCAGTTGTTG  
ATCAGAAGTACTGCGAGCGACACATGAACCCGGTGCATCGTTCAAGAAAGCGTGTGGAAGGCCACCTTGGCCATGCTGCAAAGGCAGCTGTGCCTGCCATCACTTCTTCACAATCC  
GCATCAGCTGTTTCCAGTGGTGGTTCTTCTAACAACCTTACCCTGCTCAGCAGCAGAGCGAAAACCTTACAATCAAGTGGGACAGAACCTTCATCCCTGCAATTGGATAGGTTGCTAATA  
AACAAAGACAATACAGGCGACCAAAGACGAAATTTCCAAGGTCTCTCCATGATGACTGATTTAATATCCAATCCACAGGTACCTTGTACCTATTTCCAAGCAACAAAATCCCTTTGAA  
GAAACATCGACCCGTGTAGACTTGGGACTGATATCTACTGATTCCCTACCTAACAGTCAAGGAACTGCTCCTCAGAGAACCTTAGTTTTGTTTTCTATAACCCTGAAATGAATGATCAAC  
ATATTAGATCCCATCCCTTTGACATTTTATTGATGATTGGTTCGAAAAACCTTCTGATGCTGCTGTGGCCGATAAGATGCAATCATAACAGAACCTCTCTATTTGATCCCCATCTCTT  
CTTTGGGCTTCTCATCATCCCCTTGCTCCCCATCCAAGACAAAACCTGTCATTTCCCCCTTCCAGATTATCTTCTGAGTTGGATCCTCTGAATGCTGGCAGCCAAAGAGGTTTAAAGTTGGGTA  
CCAATTTCTTGGGAACCAACCATTGGAGGACCTCTTGGCGAGGTTTTGACTAACACAAGCACCACCCCGAAGGACCTGGGTAGTAATTTATCGACTTCATCGCTGAACTTCATGACTGAT  
GGTTGGAACATGAGGACAAGATTTGAATCATACCAACAGGAGTGTTCAGGATTTGGTTCAATGTCCAGTAGTACAGGAAGTAGTCCCCGGGCAGAGAACCATAAGGCGCA  
CGAAAGTGATGACCTCCTTGGCACAACCTTTGTGAATCTATCGGTGAATCCCTCTCTCTAATTTCCACGGAAATAGAAATGGCACGTTGATGGAGATGATGCAGGCTGATCTGAAGAGT



TTAATTTAATGCACGGATTTATATATTTTTACATATATAAATGTATAAGAAAGAAATAAGCAAATATCGTCTTATTTATCTGGCTAGTATTCGATGCAGTATCGACATCTGACATCACCTTTCCA  
CAATTATTTGCTGGAAGCGTACATGCTGCCATAAGAAAACCAGCCTGGTTTCCTGATTTTCGAAACACTACAACCTTAGAAATGCTTCTAATCCACCAGCAACTTCGTTTCATCTCATTTCGG  
TTTCACATCCCTTCAACTCATGAACTCCCCTCTCCTTCTCATTCTCATCTCAGCTCACACTAGACATGGATTTAGGTTGTTCTCTGAGCTCTGATGGCTTGGTCTCTGTCTATTCTGACCCCA  
ATATTCGTATGCCCTCTCTTTGTTTCCCTTGAATCTGAACCCAGCAAGCAAAGGGGACTGTTCCAATCCAGTTTCTCCAAGCATGGAAGGTCCATTGTGGTTGAGGACAATGATGAATA  
CTGGAGTCGTTTGAAGACGGCTAGATGTGATACAATGCTCACAGCAACAAGCAAGGCGGCAGCTTGCCTCCTTAGATCCGGCTCTCATACCCTTTTCCCTGATGGAGAGCAAATGCTGAA  
CTTTTCTTCATGGAAACCAGAAGCTTTGGTGCTCAATAATCATTGGAACCTTACCTTTCTTCAACCATCCATCATCATCTTCATGCTCTTCAGCTTACCCTACCTTCAGGAACGCAGGAGTGT  
GCTCTGACAACTCAACCCTAACATGCATGGAGCTGTGTCTGGGATCAGAGCACCTTCACCACTTCGCAGTGGTTAGAACTGGAGCACCAGGCTCTGATCTACAAGTATATAGATGCAA  
AAATGTCAATACCATCAAATTTGCTCATGACAATCAGACGAAGCAACAACCAATCTGGGTTCTCATCCTTCACTGCTGGATCTTTTAGACAAACAGGCACATTGGGATGGGGAAATTTCCA  
TCCAGGTTTCTCTGGAGGTGCTGACCCAGAGCCTGGCAGATGCCGTGGAACCGATGGAAAAAGTGGCGGTGTTTCGAGGGATGCAGTTGTTGATCAGAAGTACTGCGAGCGACACATG  
AACCGCGGTGCGCCATCGTTCAAGAAAGCGTGTGGAAGGCCACCTTGGCCATGCTGCAAAGGCAGCTGTGCCTGCCATCACTTCTTCAATCCGCATCAGCTGTTCCAGTGGTGGTTCT  
TCTAACAACCTTACCACTGCTCAGCAGCAGAGCGAAAACCTTACAATCAAGTGGGACAGAACCTTCACTCCCTGCAATTGGATAGGTTGCTAATAAACAAGACAATACAGGCGACCAAAG  
ACGAAATCCCAAGGTCTCTCCATGATGACTGATTTAATATCCAAATCCACAGGTACCTTGTACCTATTTCCAAGCAACAAAATCCCTTTGAAGAAACATCGACCCGTGTAGACTTGGGA  
CTGATATCTACTGATTCCTACCTAACAGTCAAGGAAACTGCTCCTCAGAGAACCTTAGTTTTGTTTTCTATAACCCTGAAATGAATGATCAACATATTAGATCCCATCCCTTTTGACATTTT  
ATTGATGATTGGTCGAAAAACCTTCTGATGCTGCTGTGGCCGATAAGATGCAATCATAACAGAACCGAACTCTCTATTTTCGATCCCCATCTCTTTCTTTGGGCTTCTCATCATCCCCTTGCTCC  
CCCATCCAAGACAAACTGTCATTTCCCCCTTCAGATTATCTTCTGAGTTGGATCCTCTGAATGCTGGCAGCCAAAGAGGTTTAAAGTTGGGTACCAATTTCTTGGGAACCAACCATTGGAG  
GACCTCTTGGCGAGGTTTTGACTAACACAAGCACCACCCCGAAGGACCTGGGTAGTAATTTATCGACTTCATCGCTGAACTTCATGACTGATGGTTGGAACATGAGGACAAGATTTGAAT  
CATCACCAACAGGAGTGTGAGGATTCTGGATTTGGTTCAATGTCCAGTAGTACAGGAAGTAGTCCCCGGGCAGAGAACATAAGGCGCACGAAAGTATGACCTCCTTGGCACAACC  
TTTGTGAATCTATCGGTGAATCCCTCTCTAATTCTTCCACGAAAATAGAAATGGCACGTTGATGGAGATGATGCAGGCTGATCTGAAGAGTCTGAGGAACGGAGACTGAAGCACAGGA  
TTGCTGATGTTAACAAGGTTCTCGAAAAGTTCTAACGATCATAACTAATTTGGGAGGAAACCCGGTTCTGTATTTGTGTTTTCTTTTAAACTCATTACTTAAAAATTTCTATAGTGTGTG  
CTAGGAGTTGATGCTCTTCTGATGGCAGTTTTGGCTTCATTTTTTCATGCTCAACAAAAGGTTGCAGGCATTTCTCTATATGATTGCGACTAAGCATTGTGTTGCGAATTTATAAATTTGTG  
CCGTAAGAATAGCCTCAAATTTTCTGCTGTCCAAAAA

>comp154657\_c0\_seq4

TTTGTCTTTGGGTCTTGTCTAGGGTTGGCTATTTAGTTGTTTGTCTCTATCAAGTGATACTGATTGGTAAAGGCGTCTTTCCATGGGCGTTTTTGTCTTTGGGTCTTGTCAAAGTGA  
AAGTTGAGATTTTTTTTTGAAAAAGTTGGGATCTTTCTTCCCTGACCTCAGATGATCTTGTCTCAAAGTTGGAGTCTTGGGTGGGCTGGATGCCCTTCTCTTCTGATTATTTGCAAGGA  
ATACTGAAAGGAAAAAAGTGTAACGAAGATCTCAGAAGAAAATTAAGGAAAAAATGAACTGCAGTTACTTTCTCATAAATTTGTTTTCAAGACCTGGAAGGATAAAGGTGAAG  
AACTATTTTCATATATAGTTAGTTTGTGTGATCCTCGAAAGAAAAATCAAACATCACTAGAGAGGTTTTGTCCCTCTTCTCGCTCACGTTACAGGGTCTATTTCTACCTTTTATTCTATTAG  
GAGCCTCTCCTAACTGTAGTTTCGACCTGTCTGTAATGCTACATGGTTTAAAGTAGTCATAGTCTCTTAGATATTCTGCTTATATCTATCTACCTTCCCTTATTCTAGGAGTGTGCTCTGACAAC  
TCAACCCTTAACATGCATGGAGCTGTGTCTGGGATCAGAGCACCTTCACCACTTCGCAGTGGTTAGAACTGGAGCACCAGGCTCTGATCTACAAGTATATAGATGCAAAAATGTCAATAC  
CATCAAATTTGCTCATGACAATCAGACGAAGCAACAACCAATCTGGGTTCTCATCCTTCACTGCTGGATCTTTTAGACAAACAGGCACATTGGGATGGGGAAATTTCCATCCAGGTTTCTC  
TGGAGGTGCTGACCCAGAGCCTGGCAGATGCCGTGGAACCGATGGAAAAAGTGGCGGTGTTTCGAGGGATGCAGTTGTTGATCAGAAGTACTGCGAGCGACACATGAACCGCGGTGCG  
CATCGTTCAAGAAAGCGTGTGGAAGGCCACCTTGGCCATGCTGCAAAGGCAGCTGTGCCTGCCATCACTTCTTCAATCCGCATCAGCTGTTTCCAGTGGTGGTTCTTCTAACAACCTT

ACCACTGCTCAGCAGCAGAGCGAAAACTTACAATCAAGTGGGACAGAACCTTCATCCCTGCAATTGGATAGGTTGCTAATAAAACAAAGACAATACAGGCGACCAAAGACGAAATTCCCA  
AGGTCTCTCCATGATGACTGATTTAATATCCAAATCCACAGGTACCTTGTTACCTATTTCCAAGCAACAAAATCCCTTTGAAGAAACATCGACCCGTGTAGACTTGGGACTGATATCTACTG  
ATTCCCTACCTAACAGTCAAGGAAACTGCTCCTCAGAGAACCTTAGTTTTGTTTTCTATAACCCTGAAATGAATGATCAACATATTAGATCCCATCCCTTTTCGACATTTTATTGATGATTGGT  
CGAAAAACCTTCTGATGCTGCTGTGGCCGATAAGATGCAATCATAACAGAACCGAACTCTCTATTTTCGATCCCCATCTCTTCTTTGGGCTTCTCATCATCCCCTTGCTCCCCATCCAAGAC  
AAACTGTCATTTCCCCCTTCAGATTATCTTCTGAGTTGGATCCTCTGAATGCTGGCAGCCAAAGAGGTTTAAAGTTGGGTACCAATTTCTTGGGAACCAACCATGGAGGACCTCTTGGCG  
AGGTTTTGACTAACACAAGCACCACCCCGAAGGACCTGGGTAGTAATTTATCGACTTCATCGCTGAACTTCATGACTGATGGTTGGAACATGAGGACAAGATTTGAATCATCACCACAG  
GAGTGTGACAGGATTCTGGATTTGGTTCAATGTCCAGTAGTACAGGAAGTAGTCCCCGGGCAGAGAACCATAAGGCGCACGAAAGTGATGACCTCCTTGGCACAACCTTTGTGAATCTAT  
CGGTGAATCCCTCTCTCTAATTTCCACGGAAATAGAAATGGCACGTTGATGGAGATGATGCAGGCTGATCTGAAGAGTCTGAGGAACGGGAGACTGAAGCACAGGATTGCTGATGTTTA  
ACAAGGTTCTCGCAAAGTTCTAACGATCATAACTAATTTGGGAGGAAACCCGGTTCTGTATTTGTGTTTTCTTTAAACTCATTTACTTAAAAATTTCTATAGTGTGTGCTAGGAGTTGTAT  
GCTCTTCTGATGGCAGTTTTGGCTTCATTTTTTCATGCTCAACAAAAGGTTGCAGGCATTTCTCTATATGATTGCGACTAAGCATTTTGTTTGCGAATTTATAAATTTGTGCCGTAAGAATAG  
CCTCAAATTTTCTGCTGTCCAAAA

>comp154657\_c0\_seq5

TAAATTTAATGCACGGATTTATATATTTTTACATATATAAATGTATAAGAAAGAAATAAGCAAATATCGTCTTATTTATCTGGCTAGTATTCGATGCAGTATCGACATCTGACATCACCTTTCCA  
CAATTTTGTCTGGAAGCGTACATGCTGCCATAAGAAAACCAGCCTGGTTTCTGATTTTCGGAAACACTACAACCTTAGAAATGCTTCTAATCCACCAGCAACTTCGTTTCATCTCATTTCG  
TTTCACATCCCTTCAACTCATGAACTCCCCTCTCCTTCTCATTTCTCATCTCAGCTCACACTAGACATGGATTTAGGTTGTTCTCTGAGCTCTGATGGCTTGGTCTCTGTCTATTCTGACCCCA  
ATATTCGTATGCCCTCCTCTTTGTTTCCCTTGAATCTGAACCCAGCAAGCAAAGGGGACTGTTCCAATCCAGTTTCTCCAAGCATGGAAGGTCCATTGTGGTTGAGGACAATGATGAATA  
CTGGAGTCGTTTGAAGACGGCTAGATGTGATAAATGCTCACAGCAACAAGCAAAGGCGGCAGCTTGCCTCCTTAGATCCGGCTCTCATAACCTTTTCCCTGATGGAGAGCAAATGCTGAA  
CTTTTCTTCATGGAAACCAGAAGCTTTGGTGCTCAATAATCATTGGAACCTTACCTTTCTCAACCATCCATCATCTTCATGCTCTTCAGCTTACCCTACCTTCAGGAACGCAGGAGTGT  
GCTCTGACAACCTCAACCTTAACATGCATGGAGCTGTGTCTGGGATCAGAGCACCTTCACCACTTCGCAGTGGTTAGAACTGGAGCACCAAGGCTCTGATCTACAAGTATATAGATGCAA  
AAATGTCAATACCATCAAATTTGCTCATGACAATCAGACGAAGCAACAACCAATCTGGGTTCTCATCCTTCACTGCTGGATCTTTTAGACAAACAGGCACATGTAAGCCTTTGTTAATTCA  
AAATGAGCTGGTGACCAGTAGGTAACACATAAATGTTTTGAATGATGAACTCTAGAAAAATAGTTTAGTCAGAAATGTTGAAACCTTTTTTACTTGTAGTATGCTCACCTCATTATCTAAT  
ACGCCATCATATATTATCTCCTGTGGTCTACCTAGTTAATAAGGTGTCAGTTTCTTTTCAAATATTATGAGCTCCGAATTATAGAGGTAGCTCGGCTGCTACTGTCTGTAGCATTGTTATTTTA  
AAGCGGTGCTTTGATAAACCTACTCAGAATAATTCCAATTTGCATTTGTTCTTCTTGGTTTTGATTTGCTCTCTTGTGCTAAAGGCTTTACTTGGATTGAAGGAGAGAAGGAAATGAAATG  
GAATTTCAAATAATACATTTGTTGATTATGAACCCAAAGCCATTGATTTAAGCTTTTTCAACTCTTAGCATTCAATTTATTTTCACTAAAATTCATAGCCATCAAAAACATATGCTAGTTTTGTTTATA  
ATGAAATGGTCGTTTGCAGTGGGATGGGAAATTTCCATCCAGGTTTCTCTGGAGGTGCTGACCCAGAGCCTGGCAGATGCCGTGGAACCGATGGAAAAAGTGGCGGTGTTTCGAGGGA  
TGCAGTTGTTGATCAGAAGTACTGCGAGCGACACATGAACCGCGGTCGCCATCGTTCAAGAAAGCGTGTGGAAGGCCACCTTGGCCATGCTGCAAAGGCAGCTGTGCCTGCCATCACTT  
CTTACAATCCGCATCAGCTGTTTCCAGTGGTGGTTCTTCTAACAACCTTACCCTGCTCAGCAGCAGAGCGAAAACCTTACAATCAAGTGGGACAGAACCTTCATCCCTGCAATTGGATA  
GGTTGCTAATAAAACAAAGACAATACAGGCGACCAAAGACGAAATTTCCAAGGTCTCTCCATGATGACTGATTTAATATCCAAATCCACAGGTACCTTGTTACCTATTTCCAAGCAACAAAA  
TCCCTTTGAAGAAACATCGACCCGTGTAGACTTGGGACTGATATCTACTGATTCCTACCTAACAGTCAAGGAAACTGCTCCTCAGAGAACCTTAGTTTTGTTTTCTATAACCCTGAAATG  
AATGATCAACATATTAGATCCCATCCCTTTTCGACATTTTATTGATGATTGGTCGAAAAACCTTCTGATGCTGCTGTGGCCGATAAGATGCAATCATAACAGAACCTCTCTATTTTCGATC  
CCCATCTCTTTTGGGCTTCTCATCATCCCCTTGCTCCCCATCCAAGACAAACTGTCATTTCCCCCTTCAGATTATCTTCTGAGTTGGATCCTCTGAATGCTGGCAGCCAAAGAGGTTT

AAGTTGGGTACCAATTTCTTGGGAACCAACCATTGGAGGACCTCTTGGCGAGGTTTTGACTAACACAAGCACCACCCCGAAGGACCTGGGTAGTAATTTATCGACTTCATCGCTGAACTT  
CATGACTGATGTTTGGAAACATGAGGACAAGATTTGAATCATACCAACAGGAGTGTTCAGGATTCTGGATTTGGTTCAATGTCCAGTAGTACAGGAAGTAGTCCCCGGGCAGAGAACC  
ATAAGGCGCACGAAAGTGATGACCTCCTTGGCACAACCTTTGTGAATCTATCGGTGAATCCCTCTCTCTAATTCTTCCACGGAAATAGAAATGGCACGTTGATGGAGATGATGCAGGCTGA  
TCTGAAGAGTCTGAGGAACGGGAGACTGAAGCACAGGATTGCTGATGTTTAAACAAGGTTCTCGCAAAGTCTAACGATCATAACTAATTTGGGAGGAAACCCGGTCTGTATTTGTGTTTT  
CTTTTAAACTCATTTACTTAAAAATTTCTATAGTGTGTGCTAGGAGTTGTATGCTCTTCTGATGGCAGTTTTGGCTTCATTTTTTTCATGCTCAACAAAAGGTTGCAGGCATTTCTCTATATGA  
TTGCGACTAAGCATTTTGTGTTGCGAATTTATAAATTTGTGCCGTAAGAATAGCCTCAAATTTTCTGCTGTCCAAAAA

>comp154657\_c0\_seq6

TTAATTTAATGCACGGATTTATATATTTTTACATATATAAATGTATAAGAAAAGAAATAAGCAAATATCGTCTTATTTATCTGGCTAGTATTCGATGCAGTATCGACATCTGACATCACCTTTCCA  
CAATATTTGCTGGAAGCGTACATGCTGCCATAAGAAAACCAGCCTGGTTTCTCTGATTTTCGAAACACTACAACCTTAGAAATGCTTCTAATCCACCAGCAACTTCGTTTCATCTCATTTCGG  
TTTCACATCCCTTCAACTCATGAACTCCCCTCTCCTTCTCATTCTCATCTCAGCTCACACTAGACATGGATTTAGGTTGTTCTCTGAGCTCTGATGGCTTGGTCTCTGTCTATTCTGACCCCA  
ATATTCGTATGCCCTCCTCTTTGTTTCCCTTGGAAATCTGAACCCAGCAAGCAAAGGGGACTGTTCCAATCCAGTTTCTCCAAGCATGGAAGGTCCATTGTGGTTGAGGACAATGATGAATA  
CTGGAGTCGTTTGAAGACGGCTAGATGTGATAAATGCTCACAGCAACAAGCAAGGCGGCAGCTTGCCTCCTTAGATCCGGCTCTCATAACCTTTTCCCTGATGGAGAGCAAATGCTGAA  
CTTTTCTTCATGGAAACCAGAAGCTTTGGTGCTCAATAATCATTGGAACCTTACCTTTCTCAACCATCCATCATCATCTTCATGCTCTTCAGCTTACCCTACCTTCAGGAACGCAGGTATAAC  
AAGTTAGAAAGTATAAGAGGAGTTGGGTTGGCTATTTAGTTGTTTGTCTCTATCAAGTGATACTGATTGGTAAAGGCGTCTTTTCCATGGGCGTTTTTGTCTTTGGGTCTTGTCAAAGTG  
AAAAAGTTGAGATTTTTTTTTGAAAAAGTTGGGATCTTTCTTTTCTGACCTCAGATGATCTTGTCTCAAAGTTGGAGTCTTGGGTGGGCTGGATGCCCTTCTCTTCTGATTATTTGCAA  
GGAATACTGAAAGGAAAAAAGTGTAACGAAGATCTCAGAAGAAAAATTAAGGAAAAAATGAAGTGCAGTTTACTTTCTCATAAATTTTGTTTTCAAGACCTGGAAGGATAAAGGTG  
AAGAACTTATTTATATATAGTTAGTTTGTGTGATCCTCGAAAGAAAAATCAAACATCACTAGAGAGGTTTTGTCCCTTCTCTCGCTCACGTTACAGGGTCTATTTCTACCTTTTATTCTTATT  
CAGGAGCCTCTCCTAACTGTAGTTTCGACCTGTCTGTAATGCTACATGGTTAAGTAGTCATAGTCCCTTTAGATATTCTGCTTATATCTATCTACCTTCCCTTATTACAGGAGTGTGCTCTGAC  
AACTCAACCTTAAACATGCATGGAGCTGTGTCTGGGATCAGAGCACCTTACCCTTCCAGTGGTTAGAACTGGAGCACCAGGCTCTGATCTACAAGTATATAGATGCAAAAATGTCA  
ATACCATCAAATTTGCTCATGACAATCAGACGAAGCAACAACCAATCTGGGTTCTCATCCTTCACTGCTGGATCTTTTAGACAAACAGGCACATGTAAGCCTTTGTTAATTCAAAATGAGC  
TGGTGACCAGTAGGTAACACATAAATGTTTTGAATGATGAACTCTAGAAAAATAGTTTAGTCAGAAATGTTGAAACCTTTTTTACTTGTAGTATGCTCACCTCATTTTATCTAATACGCCATC  
ATATATTATCTCCTGTGGTCTACCTAGTTAATAAGGTGTCAGTTTCTTTTCAAATATTATGAGCTCCGAATTATAGAGGTAGCTCGGCTGCTACTGTCTGTAGCATTGTTATTTTTAAAGCGGT  
GCTTTGATAAACCTACTCAGAATAATTCCAATTTGCATTTGTTCTTCTTGGTTTTGATTGCTCTCTTGTGCTAAAGGCTTTACTTGGATTGAAGGAGAGAAGGAAATGAAATGGAATTCC  
AATAATACATTTGTTGATTATGAACCCAAGCCATTGATTTAAGCTTTTTCAACTCTTAGCATTCAATTTATTTTCACTAAAATTCATAGCCATCAAAAACATAGCTAGTTTTGTTTCATAATGAAAT  
GGTCGTTTGCAGTGGGATGGGAAATTTCCATCCAGGTTTCTCTGGAGGTGCTGACCCAGAGCCTGGCAGATGCCGTGCAACCGATGGAAGGAGTGGCGGTGTTTCGAGGGATGCAGTT  
GTTGATCAGAAGTACTGCGAGCGACACATGAACCGCGGTGCCATCGTTCAAGAAAGCGTGTGGAAGGCCACCTTGGCCATGCTGCAAGGCAGCTGTGCCCTGCCATCACTTCTTACA  
ATCCGCATCAGCTGTTTCCAGTGGTGGTTCTTCTAACAACCTTACCCTGCTCAGCAGCAGAGCGAAAACCTTACAATCAAGTGGGACAGAACCTTCATCCCTGCAATTGGATAGGTTGCT  
AATAAACAAAGACAATACAGGCGACCAAAGACGAAATCCCAAGGTCTCTCCATGATGACTGATTTAATATCCAAATCCACAGGTACCTTGTACCTATTTCCAAGCAACAAAATCCCTTT  
GAAGAAACATCGACCCGTGTAGACTTTGGGACTGATATCTACTGATTTCCCTACCTAACAGTCAAGGAAACTGCTCCTCAGAGAACCTTAGTTTTGTTTTCTATAACCCTGAAATGAATGATC  
AACATATTAGATCCCATCCCTTTCGACATTTTATTGATGATTGGTCGAAAAACCTTCTGATGCTGCTGTGGCCGATAAGATGCAATCATAACAGAACCTTCTATTTTCGATCCCCATCT  
CTTCTTTGGGCTTCTCATCATCCCCTTGCTCCCCCATCCAAGACAACTGTCATTTCCCCCTTCAGATTATCTTCTGAGTTGGATCCTCTGAATGCTGGCAGCCAAAGAGGTTTAAAGTTGG

GTACCAATTTCTTGGGAACCAACCATTGGAGGACCTCTTGGCGAGGTTTTGACTAACACAAGCACCACCCCGAAGGACCTGGGTAGTAATTTATCGACTTCATCGCTGAACTTCATGACT  
GATGGTTGGAACATGAGGACAAGATTTGAATCATCACCAACAGGAGTGTTCAGGATTCTGGATTTGGTTCAATGTCCAGTAGTACAGGAAGTAGTCCCCGGGCAGAGAACCATAAGGC  
GCACGAAAGTGATGACCTCCTTGGCACAACCTTTGTGAATCTATCGGTGAATCCCTCTCTCTAATTTCTCCACGGAAATAGAAATGGCACGTTGATGGAGATGATGCAGGCTGATCTGAAG  
AGTCTGAGGAACGGAGACTGAAGCACAGGATTGCTGATGTTTAAACAAGGTTCTCGCAAAGTTCTAACGATCATAACTAATTTGGGAGGAAACCCGGTTCTGTATTTGTGTTTTCTTTAA  
ACTCATTACTTAAAAATTTCTATAGTGTGTGCTAGGAGTTGTATGCTCTTCTGATGGCAGTTTTGGCTTCATTTTTTCATGCTCAACAAAAGGTTGCAGGCATTTCTCTATATGATTGCGA  
CTAAGCATTTTGTGGCGAATTTATAAATTTGTGCCGTAAGAATAGCCTCAAATTTCTGCTGTCCAAAAA

>comp154855\_c0\_seq1

AGCTGGAGCTCCCTTCACTCCAATGTCCAGATACTAATTATAGTAATTGGATGACATGCCCGGATACACCTCCTTATAATATCCTCGTCCAATCTCCTGGAAATGTTTCATTAATGTCCGACT  
GTGCTTACCAAGAAGCAATGGCCTGTTAGAAGCGTTGGTTTCCAGGAGTCGCAGAAGATAAACTGTGGAAGAACCAGTCATCTGAGAAAAGCTCCTGCTCTTCTGCCATTACTCTCAGC  
GACATAATGGAAAAGTACAACCTGTGAACCTTCTGCACTGCAGAATGGGAAGAAAATTTGTGACCAGAGATCTCCCTTCTCCCAATCTGTGATGAACACGCACAGATCACTAGCAATTCCTTG  
GAAGAACTTACTCCCAAAGCTACTTCAGGTTTCCAGATGGAAAAATGGTGGTTGAACAGGATTCCACCACCAGCACGCCGGACACACAGCCAGGTTTCTGAGACCTGATGCTTTGCTTGG  
ATCAAACCTGGAATTTAAGAGATTCCCGTAGAACAAAAGAGAACTCGGATTCTTTTTGTGCACTTCAAGGTGATAACTTGAGCCCAGCTGAGGTCTCTCTGGACTCTTGTCCATGGAATAG  
CATGCCCTCGATTACCAAGTACCTGAACATTAAGCTTTACTTGATTGCTGAAAAACCTTTAAAATGTTTTCCATTAGTTGTTTAAAGAGGAACTATTTAGTCTCTGTAGAGTTGTCCGAGA  
GCAGAGAAGGCATTTCTGTTTGTGGCAGCTTGGCATATTTAGGTTTAGAATTGTTGCCACTTGTAGATTTTTCTTGTGCTTGTCTATTCAATAACAATGCAGGATTGGATGGAT

>comp154855\_c0\_seq2

AGCTGGAGCTCCCTTCACTCCAATGTCCAGATACTAATTATAGTAATTGGATGACATGCCCGGATACACCTCCTTATAATATCCTCGTCCAATCTCCTGGAAATGTTTCATTAATGTCCGACT  
GTGCTTACCAAGAAGCAATGGCCTGTTAGAAGCGTTGGTTTCCAGGAGTCGCAGAAGATAAACTGTGGAAGAACCAGTCATCTGAGAAAAGCTCCTGCTCTTCTGCCATTACTCTCAGC  
GACATAATGGAAAAGTACAACCTGTGAACCTTCTGCACTGCAGAATGGGAAGAAAATTTGTGACCAGAGATCTCCCTTCTCCCAATCTGTGATGAACACGCACAGATCACTAGCAATTCCTTG  
GAAGAACTTACTCCCAAAGCTACTTCAGGTGAGCATTATTTGTACATATCGTTCATTTCTCGCTTTACATACAGGACGGGAAGCTTGAAAATATGGTTTCTGTAGGTTTCCAGATGGAAAAAT  
GGTGGTTGAACAGGATTCCACCACCAGCACGCCGGACACACAGCCAGGTTTCTGAGACCTGATGCTTTGCTTGGATCAAACCTGGAATTTAAGAGATTCCCGTAGAACAAAAGAGAACT  
CGGATTCTTTTTGTGCACTTCAAGGTGATAACTTGAGCCCAGCTGAGGTCTCTCTGGACTCTTGTCCATGGAATAGCATGCCCTCGATTACCAAGTACCTGAACATTAAGCTTTACTTGAT  
TGCTGAAAAACCTTTAAAATGTTTTCCATTAGTTGTTTAAAGAGGAACTATTTAGTCTCTGTAGAGTTGTCCGAGAGCAGAGAAGGCATTTCTGTTTGTGGCAGCTTGGCATATTTAGGT  
TTAGAATTGTTGCCACTTGTAGATTTTTCTTGTGCTTGTCTATTCAATAACAATGCAGGATTGGATGGAT

>comp154862\_c0\_seq1

GCAGAAGCAGAAGCAGAAGCAGAAGTAGAACCGAGTGGTTGGTAGCTGCGTGCTTGCCTACTCTCCAATCGCGAAGGGGTACCTGAGATCACAGAAAACAATGGTGAAGGCTATAGC  
TGTTCTTAGTGGTTCCGAAGAAGTGAAGGGCACAATCTTTTTTGGCGAGGAAGGAGATGGTCCAACATAAGTTACTGGAGTCATCTCTGGTCTTAAGCCTGGGCTTCATGGCTTCCATGT  
TCATGGCTTTGGTGACACTACAAACGGCTGCTTGTCCACTGGTGCTATTTAATCCTGATGGAAAAGAACACGGAGCTCCTGAAGATGAGAACCGTCATGCTGGTGTATCTCGGAAACGT  
GAAAGCTGGAGAGGATGGGACTGCAACAGTTGAAGTTTCTGATTTACAGATTCTCTCACTGGCCCAAACCTCCATCATTGGAAGGGCTGTTGTTGTCCATGCTGATCCTGATGACCTTGG  
AAAAGGTGGTCACGAGCTTAGCAAGTCTACTGGAAATGCTGGCGGAAGACTGGCATGTGGCATAATTGGACTGCAGGCTTGATTGGTCGTGCTCCGCTTCTATTTTACTGGCTGGTAATA  
TTGTGCTGTGTGTTAAATAAGAAGAAGCCAAAGTTTTTGGACAAATGCTATTGGCCTTACCAACTGCCTAAACTATATCCACTCCTTTCTGTTATATTTCTCTATGGTGGAGGGCTTCTAC  
TGCTGAATGTCCGCTGAGATAAACATTTAGTGTGATTGATGTGGGAATGATGTATGGTGTAACTCTCTATATAAAAACGCCAAAATTTATTTTATTTTATAAATTATCATTAACCTATTTAT



GTGTAAGATAATATCACTATTTTTTTAATAACTTGATAAAATATCAAACAAAA

>comp155533\_c0\_seq1

CACTTCTTTTTCTTCTTCTTCTTCGTTCGGCTTGCTCCGTGGTTAAAGATCTCGCCTTTCGTCTGACTGAGCGGCTAAAAAGTCTCACCTTTTTACCTTTCCGGGTAGTTTCTGCAGTTCTGC  
GTTTTGGAGTTCTGAAAGATTTTTGGCACTGAAATGGTGCAAGAAGAGCATCGGATCTTTTACGACGGAGGGGAAGCAACGCGGGAGTTCGTTGAAGAAGGTGAAACCCGACAAAGCAC  
CGAATCGTGGCCCTCGGGATAGCGGAGCTGGAGAAGCTCCGGAGAGAAGAATGGCAGAAAAGGGTCTCACCCGGGGAGCTAGTCTTCCATCCTCTTAACCCTCAGCAAAAACACGATCGT  
TCCTTTCCTCCCAGGGTTTGATCCCAGTTTCCCGTTCGGATAACAATGTTGAAAATTTCCCATGTTACGGTCTCATCTGCTAGATTCAAGCCCACTGGTTTCGAGCGACGGTACAATGCCAT  
TGTTATGGAGCTCATTCCAGAGCGATAACTCGTCCAGCTCTAACTCGCAGTTTTCCCTCGCCACCTCCGAATTGAAGCCGCCGCCACGGGAGTCGCAACCGCTTCTTATATTGCAGAAACC  
TGAGCCTCATCAGCAGATATCTCAGGTCGTGAATTAATCCTCGCTACATTCAGTTCCTGAAGCGGGTCTTCAGATGGAATTGGAGCTCCCTTCAAACCAAAGCTATTATGGCATTCTGACTC  
CCTCTTCCTGGGCAGATCAGCAGCTAATGATGCATCAGATTGTTGCCATGAATCATCCATGGCAAAATCAAAGGGTCTCTGTGGCAGAACCCATACTATTTCTCACCCAGATTGTGGCAC  
AATGAGGATCAATGGAACCTCAAGGAACAAGCACTGATTGTTCAATCAACCATCCTACAATGAAGAGGAATGTTGCATCTGAAGAAGACATTGCTGCTCCTATTGAGGGAAGTGCTCTCAG  
CTTGGTTTGCTTACATCCAATTAGTAGCAATGGTTGGTTCCTCGAAATCCGTTTCCGTCCGACCGTTTTCTGAGATGAGTGCTACTAAGAGACAGAAGAAGACTAAAGAAAGTGCGGGGAG  
AAAAGCTTCAGCCACTCCATCAGACGCTCTGGTTTTCTACAACCTCATGGAATTGCCTTACGTTGATTATGTAGCTGAGCGAGATGTGATTGTTAATAAGAAAAAAGGAGATGGGAAGG  
CTCAGAAGCTGTTGATGTTGATTTAAAGCTTTGAGATTATTTTAGGAAAAGACTGGAAAACCATCGATGCTACTTGGTCTTTATTTAATTGAACATGATAGAATCTTTCTTTCTTGTATTGTAA  
TCTTACTATTTAGAAAAAATTTATATTGATTTTTAAAAAAGTACATAGAATGGATAACTTATATTACTGTGTTGCACTATGATTGTGGAGATGCTTTGAACAATAAAGGACAGGATGATGGGAG

>comp155533\_c0\_seq3

CACTTCTTTTTCTTCTTCTTCTTCGTTCGGCTTGCTCCGTGGTTAAAGATCTCGCCTTTCGTCTGACTGAGCGGCTAAAAAGTCTCACCTTTTTACCTTTCCGGGTAGTTTCTGCAGTTCTGC  
GTTTTGGAGTTCTGAAAGATTTTTGGCACTGAAATGGTGCAAGAAGAGCATCGGATCTTTTACGACGGAGGGGAAGCAACGCGGGAGTTCGTTGAAGAAGGTGAAACCCGACAAAGCAC  
CGAATCGTGGCCCTCGGGATAGCGGAGCTGGAGAAGCTCCGGAGAGAAGAATGGCAGAAAAGGGTCTCACCCGGGGAGCTAGTCTTCCATCCTCTTAACCCTCAGCAAAAACACGATCGT  
TCCTTTCCTCCCAGGGTTTGATCCCAGTTTCCCGTTCGGATAACAATGTTGAAAATTTCCCATGTTACGGTCTCATCTGCTAGATTCAAGCCCACTGGTTTCGAGCGACGGTACAATGCCAT  
TGTTATGGAGCTCATTCCAGAGCGATAACTCGTCCAGCTCTAACTCGCAGTTTTCCCTCGCCACCTCCGAATTGAAGCCGCCGCCACGGGAGTCGCAACCGCTTCTTATATTGCAGAAACC  
TGAGCCTCATCAGCAGATATCTCAGGTCGTGAATTAATCCTCGCTACATTCAGTTCCTGAAGCGGGTCTTCAGATGGAATTGGAGCTCCCTTCAAACCAAAGCTATTATGGCATTCTGACTC  
CCTCTTCCTGGGCAGATCAGCAGCTAATGATGCATCAGATTGTTGCCATGAATCATCCATGGCAAAATCAAAGGGTCTCTGTGGCAGAACCCATACTATTTCTCACCCAGATTGTGGCAC  
AATGAGGATCAATGGAACCTCAAGGAACAAGCACTGATTGTTCAATAGATACTGCTTTAAGCTTGCACAATGTTGGTGTGAATCTAAACAGCAACCATCCTACAATGAAGAGGAATGTTGC  
ATCTGAAGAAGACATTGCTGCTCCTATTGAGGGAAGTGCTCTCAGCTTGGTTTGCTTACATCCAATTAGTAGCAATGGTTGGTCTCGAAATCCGTTTCCGTCCGACCGTTTTCTGAGATG  
AGTGCTACTAAGAGACAGAAGAAGACTAAAGAAAGTGCGGGGAGAAAAGCTTCAGCCACTCCATCAGACGCTCTGGTTTTCTACAACCTCATGGAATTGCCTTACGTTGATTATGTAGCT  
GAGCGAGATGTGATTGTTAATAAGAAAAAAGGAGATGGGAAGGGCTCAGAAGCTGTTGATGTTGATTTAAAGCTTTGAGATTATTTTAGGAAAAGACTGGAAAACCATCGATGCTACTTGG  
TCTTTATTTAATTGAACATGATAGAATCTTTCTTTCTTGTATTGTAATCTTACTATTTAGAAAAAATTTATATTGATTTTTAAAAAAGTACATAGAATGGATAACTTATATTACTGTGTTGCACTAT  
GATTGTGGAGATGCTTTGAACAATAAAGAACAGGATGATGGGAGAG

>comp156499\_c0\_seq2

AAAAAAAAAAAAAAAAAAGGAAAGAAACGGGGAGAAAGGAAGAGCAGGGAAGATGAAGAGTAGCAATTTATTGTGGGAGGGAAACGAGCGTGAGAACCGGATGAAGAAAGTCTTC  
TGCTTGTCTTCTTTGGAGAAGAAAAGCTTTGAAGTTCGCTTGCAACCCAATCCACTTCTCCCGGATTTGTCTCAGATTCAAAAAAGGGAAATGGTGCATGTTTGTCTAGACGGGGA

GAGAGAGAGTGAGTGAGAAGACTGGGATATTGCTCATCTGTTGTATGCGGAGGCGGTATTATTAGATGAGGGGGTTGCCCTTTAACTACCAGAGGAAGGGGACGGTGCTAGTATTAGAAT  
CTCAAGCGAGAGGAACCGGAGTGGAAGAAAAACCGGCGTCTTTTGGAGCAGCAGCGTTCAGAATAGGAAGAAAGGTGTCATCTTGGAGCCGAGATCGGTTCTGGATCAGAGAAGCC  
CGAGTCCCTCCAACCTCCACGTCCACCCTGTCTTCTCCCTCGGTGGCGGGGCCGCGCTTCACTGACACCGCCGGCGTGGCGGCTGTTTTCCGAAAACCCACCTTCAAATGGACCAAC  
ACCGCCGGCGAAGAAGGCGGAGAAAAGAGGAGTGGGCACCCGAGCTCCACCCTGTTCCGGCGTCACTGGAGGTGGATTGGGATAACATGCTCTCTGAATCCGCTGCTTCCCCTGGAC  
AGGAACAGACTTTTCTTCACTGGATCATGGGAGACATAGACGACCCAGCGAAGCAACAGCATCTGATGCTCTTCTCCAACCTTCATGGCAGAAATTGACTCCGGAAGCCATGGCGTTG  
GCTTCGGGCTCATCGATCCTGGCTTTGGATTTGAAACCAATGCTTCAGCCTCCGCCATTAGCAGCCATCCACCGCCGCCACAACCTGGATTCTGCTCCCGGTGAAAAAATCCCATTTTAC  
GGCCTCGCTGCCCCTTCTTACCTCAGGCAATGTTCTTCCAGGAAACAACGGAAGAAAAACCCAGTTCTTTGGCTCAAACCTCCTCCTTAACCAGTTCCAACAAACACAGGTTCCAG  
CAAACCCAGCCTTCTACGTACCCTTCCATCTTTCTCCTCCTCGATGGAGAACCTCGTTTCCACTCCTCATCCCGGCCAGATCTGAGATCTTCTCCGGCCGACGCCAACCAGCTT  
GAACTTTCATCAGCTCCACCCTGTTCTTACCATCTTCAGCATCGGCCTTTGAAGCCCAAGTCTCTATCGGCTGGGGACGAGGCCATTGCTATCCAACATCAGCAGCAGCAGGTTCTAGTC  
GATCAGCTCTTGAAGACGGCAGAGCTAGTTGAAGCTGGAACTTGGTTCGGCGCGCATGGGATATTGGCGCGGCTCAATCACCAGCTCCCTCCGCAATTGGGGAGCCCTTCTCCGCTC  
GGCCTTTTACTTCAAGGAGGCTTTGCAACTCCTTGTAATTCCGCTAATCCGCAGGCTGCGACCTCCTCCCTCCTCACCACCATCGAACTCCATTCACTTCTCCATTGGCTTCTCCATTGG  
ATGTTGTTCTCAAGCTCAGCGCTTACAAGGCCTTCTCAGAGGTCTCCCAATCCTGCAATTCACCAACTTTACTGCCACACAAGCTCTCCTTGAAGAGATTGGTGCAGCAGATTGCATTCA  
CATAATCGACTTTGACATTGGTGTGGGGGGCAGTGGTCTCCTTCATGCAGGAACTGGCACACCGTCCGTCATCATCAGCCATTTCCATGCTCAAATTACCGCCTTTGTCTCCCTT  
ATGCCCTTCCACCCCTTGGAGCTCCATCTCACCAAGGAAAACCTTTCACATTTTGCAGCAGACCTCAACATCCCTTTGAAATTAACATAGCAAGCATTGAATCCTTCGACCCTGCTGAGAT  
CCTTGTCTGTCTGCCGGTAGCAATGAGGCCATTGCTGTGAACCTCCCTGTTGGAGTTTGGCAAGGCCCTTCTTTTCCAACCTTCTTTCGCCTCGTCAAGCAGCTGCTGCCAAGATTGTC  
ATTTCCATGGATCAAGGATGTGATCGGGGGCAGCTTGTCTTCTCCATTACTTACGTATGCATTGCAGTCTGCATAGTTCTCCTGGACTCCTTTGATGCGGCAGGTAAGTACCAGGATCT  
AACTAATAAGATAGAGAGGTTTGTCTGCAACCTAGGATTGAGAATTGTGTGATTGGGCGCCACTGTACTGCTGAGAAGATGCTGCCATGGCGAACTCTTTTTGCCTCAGCTGGGTTTGT  
CCATTTCAATTCAGCAACTTACAGAGGCTCAGGCTGAATGCCTCTTGAAGGGGTTTCCATGTTGAGAAGCGCCAGGCTGCACTTTACCTGTATTGGCAACGAGG  
GGAGCTAGCTTCTGTGTCGGCTTGGAGGTGTTAACTGTATTCTACTGCTGTCTCCTTGTGGATTTCCTACTAGATGTTGCAGAGTAGGGTAATTATATAATCTTTCAAGGCATGTTAGATT  
CTAAAAAAGTGAAACTTCTGGGGTAAAAACCTTTTCTTGTATCCTAATTGGCTTCATCTTACCATGTGGTTCATTAATCTACTGATTCTGATGCGTTTCTAGACTGATTGATTCTCCAGTA  
GAAAGGTATTTGACAATTTTTGAATGTCTGGTTTAGTTTTATTATAAATTTTGCAAATGCATTTTATATTAGGCTAAAAA

>comp157325\_c0\_seq1

AGCAACTCCGTGCAGGCTTTCTACCGTGGGATACGAGAGAGAGATAGAGAGATATTTTCCCAAAAAAGAGAGAGCGAGCGATCGCTCGCGCGCTCGCTCGCGAAGAGAAAGCAAAAA  
TAGCGGGTAGCGGGGAGTGGGAGACGACGAAGAGGAGTGATGTGAGCAGGATAGCGGACAACGAGAACGCCGGAGGAAGAAAGGCGTCTGTTTCTGCTTCTATTCCAAGTAAAGGT  
TATGGAAGAAGTTCGCTTGCAGCAATCCACCTGCGCTCTCTCGTTGTTAGAGGGATTGAAACAAAAGTGGGGAAACAAAGACCAACAGTTATCTTCTCAGGAGCTGAGACACTTCA  
GAGATTTGGATTCCGGTTCTCTGTTGTATGAAGCGGTGTTGTTAATTAGTAGATGAAGGGCGTGCCCTTTAATCTCCAGTGGAACGGAGCGCTGCAAATAGCAGAATCGCAACAAAGTGG  
AACGTTGTGGAAGAAAAGGCAGCGCCTTCTGGGTTCGCGGTGGTCATAAGAGGACGAAAGGCGGAGTCTTGGAGCCCTTGTGCTCTCTGAATCAGACAAGGAGCCCCGAGCTCTCCT  
TCATCTACGTCAACCCTCACTTCCCTGGGCGGCGGAGCTGCAGGTTCCATCGACACCGCCGGCGGCGGCTGTTTTCAACAACGTCGCCCTCAAATGTCCCAACTTGAACCTTACCTCC  
GCCGCTGCTGCCAACTCCCTGAACGATTGGATGCTCTCCGACTCAACTGCTTCTCCCGCCAAGAACAGAACTTTCTCCACTTGATCATGGGCGACCTCGACGACAAGGGCTTGGGGCT  
CATCGATTCTGTGCTCGGATTTGCACCCATTAGCTTTGCATCTTGTCTTCTCCGATGACCTTCCAAATCAGCTGTGATAGCAACAGGAACAATCCTTCTCCCTTCAACGACAGCCTC  
CCTGCGTTAAAACTCCCAATTTTTCGCCGCTGGCACCTAGTGTAACCACACCTCCGCAGATTTCTTACCTCCGGCGATGTTCTTCCAAGAATCAATTGTTGAAAAATCACAGCTCTTGG

CCCAAACCTTCTTCTTCCACCAATACCAGCTAAACGAAAATTCTCTTAACCCAGGAATCTTTTTTCCCCTTCCATCTTGCCTCCCTCGCAGCAGCCTGACCAAAGCTTAAACTTTACCCAG  
CTCCACCACCTTTCCTTATCCCCAGCAGCAGCAACAGCAAGTTGTTGTAGATCTGCTCTTTAAAGCAGCTGAGCTCGTAGAGAGTGGGAACCTCGTTGGCGCTCAAGTGATATTGGCGCGG  
CTCAATCACCATCTCCCTTCCCGAATTGGTAAACCCCTCCTTCGCTCTGCTTTCTACTTCAAGGGGGCTCTGCAAGTCCTTGCAACTCTGTGAGTCCACAGGCAACAGCCTCGTCTCCAT  
TAGATGTGGTTCTTAAGCTGAGTGCCTTCAAGGCCTTCTCCGAGGTTTCTCCAATCCCCAATTTATATGCTTCACTGCCACTCAAGCTCTCATTGAGGAGCTCGGTGCTGCTGACTGCATT  
CACATAATCGACTTTGAC

>comp157325\_c0\_seq2

AGCAACTCCGTGCAGGCTTCTACCGTGGGATACGAGAGAGAGATAGAGAGATATTTTCCCCAAAAAAGAGAGAGCGAGCGAGCGAGCGAAGAGAAAAGCAAAAATAGCGGGTAGCGC  
GGGAGTGGGAGACGACGAAGAGGAGTGATGTGAGCAGGATAGCGGACAACGAGAACGCCGGAGGAAGAAAGGCGTCTGTTTCTGCTTCTATTCCAAGTAAAGGTTATGGAAGAAGTT  
CGCTTGCGACGCAATCCACCTGCGCTCTCTCGTTGTTAGAGGGATTGAAACAAAAGTGGGGAAACAAAGACCAACAGTTATCTTCTCAGGAGCTGAGACACTTCAGAGATTTGGATT  
GGGTTCTCTGTTGATGAAGCGGTGTTGTTAATTAGTAGATGAAGGGCGTGCCCTTAAATCTCCAGTGGAACGGAGCGCTGCAAATAGCAGAATCGCAACAAAGTGGAAACCGTTGTGGA  
AGAAAAAGGCAGCGCTTCTGGGTTCCCGGTGGTCATAAGAGGACGAAAGGCGGAGTCTTGGAGCCCTTGTCTCTGAATCAGACAAGGAGCCCGAGCTCTCCTTCATCTACGTCA  
ACCCTCACTTCCCTGGGCGGCGGAGCTGCAGGTTCCATCGACACCGCCGGCGCGGCGTCTTTTCAACAACGTCGCCCTCAAATGTCCCAACTTGAACCTTACCTCCGCCGCTGCTGC  
CAACTCCCTGAACGATTGGATGCTCTCCGACTCAACTGCTTCTCCCGCCAAGAACAGAACTTTCTCCACTTGATCATGGGCGACCTCGACGACAAGGGCTTGGGGCTCATCGATTCTGT  
CGTCGGATTTGACCCATTAGCTTTGCATCTCTTGCTTCTCCGATGACCTCTTCCAAATCAGCTGTGATAGCAACAGGAACAATCCTTCTTCCCTTCAACGACAGCCTCCCTGCGTTAAAA  
CTCCCAATTTTTCGCCGCTGGCACCTAGTGTAACACACCTCCGCAGATTTCCCTACCTCCGGCGATGTTCTTCCAAGAATCAATTGTTGAAAAATCACAGCTCTTGGCCAAACTTCTT  
CTTCCACCAATACCAGCTAAACGAAAATTCTCTTAACCCAGGAATCTTTTTTCCCCTTCCATCTTGCCTCCCTCGCAGCAGCCTGACCAAAGCTTAAACTTTACCCAGCTCCACCCTT  
CCTTATCCCCAGCAGCAGCAACAGCAAGTTGTTGTAGATCTGCTCTTTAAAGCAGCTGAGCTCGTAGAGAGTGGGAACCTCGTTGGCGCTCAAGTGATATTGGCGCGGCTCAATCACCAT  
CTCCCTTCCCGAATTGGTAAACCCCTCCTTCGCTCTGCTTTCTACTTCAAGGGGGCTCTGCAAGTCCTTGTCAACTCTGTGAGTCCACAGGCAACAGCCTCGTCTCCATTAGATGTGGTTC  
TTAAGCTGAGTGCCTTCAAGGCCTTCTCCGAGGTTTCTCCAATCCCCAATTTATATGCTTCACTGCCACTCAAGCTCTCATTGAGGAGCTCGGTGCTGCTGACTGCATTACATAATCGAC  
TTTGAC

>comp159228\_c0\_seq1

GCCAATGACGACGCTTATCTATTACTTCCTCAAACCCATCATCTCCTCTTCGTGCACCTTCCAAAACCAAACCTTCTCCTCCACTCCAGGAAAACCATCGTCCGCCATCCCCAAAAA  
CTCTCCTTTTCGAGCTTTAGCTTCAAAAAACGATATTGCGGATGCTGCCAATGGCAGTTTCTCTCGCCGTAACATCCTCATTGGCCCTCGGCGGCCTCTACGGCACAGCCACTGGCCTTGCCA  
TCGGCGCACCAAGTCCAACCGCTGATCTAACACAGTGTGGACCTGCTGATTTCCATCTGGCGCCACGCCGGTAAACTGCTGCCCTCCGGTGAACCTCTATCGTTGACTTTACTCTCCGCC  
GGCTTCTTCGCTCTCCGAGTGCGCCCGCCGCCACCTCGTCGACGCAGAGTATGTGGCCAAATACAACAAAGCTGTTGAACTGATGAGGAATCTCCCCGCCGACGATCCGAGGAACT  
TCATGCAGCAGGCCAACGTACACTGTGCTTACTGTGACGGCGCTTACGACCAGGTTGGGTTTCCCGGCGTCGAGCTTCCAGGTCCACAACCTGCTGGCTTTTTTTTCCCGTATCACCATGGT  
ACCTCTATTTCCATGAGCGTATTCTTGAAAGCTTATTGGCGATGACACTTTTTCGCTGCCCTTCTGAACTGGGATTCGCCGACGGGATGCAATTGCCTTCCATCTATACACCAACTTCT  
TCTTCCCTCTACGACGCTCTCCGCGACCCGGCCACCAGCCTCCGACCATCATCGACCTCGACTTACGCTTAGACACATCGCCGACAGCGGCCAGCAGCTAATCGACGATAATCTCAAG  
ATCATGTACCGACAAGTCGTCTCCAACGGTCCGACCTCCGAGCTCTTCTTGGGCGCCGCCCTCCGAGCCGGAGACCAGCCGACCCGGCGCCGGTTCGCTCGAAAACGTCCCACACGG  
CACTGTCCATCTCTGGACCGGCGACTCGCGCCAGCCCAACCGTGAAGACATGGGCGTCTTCTACTCAGCCGCCCGGACCCCATCTTCTTCCGCCACCATTCAAACATCGACCGCCTCTG  
GGACGTATGAAATCTCTCGGCGGCCAGCGCCAGGATTTACCGACACCGATTGGCTCGACGCCGGCTTCTCTTCTACGACGAGAACGCACAGTTAGTTAGAGTAAAGGTAATTTGTCA

CACAAAATTCATTATTTCTTATAAATTACAACCTCTTAATTATTAATTAGCATAAATTCCAATTA AAAAATTATGTCTTTTCTTCTCTTTCTTAAAAGCTTAAACTTTCAACGACAACATTCATTTT  
GAGCTCTAACCCCTATGTAGGACTTTAGGATCAAATTTGTAAAAA

>comp159228\_c0\_seq2

GCCAATGACGACGCTCTTATCTATTACTTCCTCAAAACCCATCATCTCCTCTTCGTGCACCTTCCAAAACCAAACCTTCCTCCTCCACTCCAGGAAAACCATCGTCCGCCATCCAAAAA  
CTCTCCTTTTCGAGCTTTAGCTTCAAAAAACGATATTGCGGATGCTGCCAATGGCAGTTCTCTCGCCGTAACATCCTCATTGGCCCTCGGGCGCCTCTACGGCACAGCCACTGGCCTTGCCA  
TCGGCGCACCAGTCCAACCGCCTGATCTAACACAGTGTGGACCTGCTGATTTCCATCTGGCGCCACGCCGGTAAACTGCTGCCCTCCGGTGA ACTCTATCGTTGACTTTACTCCTCCGCC  
GGCTTCTTCGCCTCTCCGAGTGCGCCCCGCCGCCACCTCGTCGACGCAGAGTATGTGGCCAAATACAACAAAGCTGTTGAACTGATGAGGAATCTCCCCGCCGACGATCCGAGGAACT  
TCATGCAGCAGGCCAACGTACACTGTGCTTACTGTGACGGCGCTTACGACCAGGTTGGGTTTCCCGGCGTCGAGCTTCAGGTCCACA ACTGCTGGCTTTTTTTTCCCGTATCACCGATGGT  
ACCTCTATTTCCATGAGCGTATTCTTGAAAGCTTATTGGCGATGACACTTTTTCGCTGCCCTTCTGGA ACTGGGATTCGCCGACGGGATGCAATTGCCCTCCATCTATACACCAACTTCT  
TCTTCCCTCTACGACGCTCTCCGCGACCCGGCCACCAGCCTCCGACCATCATCGACCTCGACTTCAGCTTAGACACATCGCCCGACAGCGGCCAGCAGCTAATCGACGATAATCTCAAG  
ATCATGTACCGACAAGTCGTCTCCAACGGTCCGACCTCCGAGCTCTTCTTGGGCGCCGCCCTCCGAGCCGGAGACCAGCCGACCCCGGCGCCGGTTCGCTCGAAAACGTCCCACACGG  
CACTGTCCATCTCTGGACCGGCGACTCGCGCCAGCCCAACCGTGAAGACATGGGCGTCTTCTACTCAGCCGCCCGGACCCCATCTTCTTCGCCACCATTCAAACATCGACCGCCTCTG  
GGACGTATGAAAATCTCTCGGCGGCCAGCGCCAGGATTTACCGACACCGATTGGCTCGACGCCGGCTTCTCTTCTACGACGAGAACGCACAGTTAGTTAGAGTAAAGGTAAGAGACT  
GCCTTAACACGGAGCTATTGCGTTACAAGTATCAGGACGTGGATAACCCGTGGGTGAATGCGAAGTCGGCCCTGCCGGA ACTGGAAGGCCGGT TAGGCCGGCAGTTGAGCCGACTTTC  
CCGGTACTCTTGACAAGTCGAATGTGACGGTGACCGTGAGTAGGCCGCCGACGTCGGGGAGGACAGGCAATGAGTATGAGTTTTGGAAGTGCAAGGAATCCAGTTTGACAGTACAG  
TTTACAATAAATTTGATGTGTATGTGAACGCGTCTTCGGCTGCTGTGTTGAGGCCGGCGGTGTCGGAATGCGCGGGGAGCTTCGCGCAAGTGCCGCATCTGAATCATCAGGGGAAGAAAA  
ATACGATGAAGACGACTCTTAAGCTGTGTATAACGGAGTTGCTCCAGGATATTGGGGCGACCGGCGACGATAGCGTGGTGGTGACGCTCGTGCCGCGTACAGGAGCGGTGACTATTGCC  
GGGGTGTCAATTCGTTAGTTTCTTGAGTGAGAAGATTGAGCCTTTGACGCGCTTTTTATACTGTAATAACTGTTTGAATAAAAAGTGGTGGTGCGCCGCCAAGCCGGTGGGTTTATGATATT  
TTCGGGAAAACAATATTGTTTTTTTATTGTGTGACAGTATGAATTGAATTA AAAATGTAATGTGATGTATTTAAATTTTATAAAATAAGTTTTCTTCAGAAAGTTTATACGAAAAAAA

>comp159541\_c0\_seq2

TCGTCATTTTGGGTGGGGGAACATGAGAGCCTCGACTCGCTCCCAAATAAAAATTTAATTTTGATTTTATTCTCATATTTTATTGGAAGCAAAAAATTTTTTTTTTTAGTATTTAAATCTAGTAG  
AATGGCGAGGAAGGAAGCAATCTACACCGTATCGTCTCTCTTTTCTTTTTCGCGAGCGGTTTAAGGAAATTGCGAGTACAGAAGCAGAAAAAAGGGGAGCTTTAGCTTGTTCGGTGAGAG  
ATGAGGCCGCCCTTGAAGAAGGAGCGAGCGAGTACGGCCGTCGCCGGTGGAGGGCGCATCTGCCACCACGCAGCAGCTGCAGAAAAGGGGACCGTGGACGCCGGCGGAGGACACGATT  
CTCAAAGAGTATGTGAGAAAACATGGAGCAGGTA ACTGGAACGTTCTGCAGAAGAACAGCGCCTTCAACGCACTGGCAAAAGCTGCCGGCTCAGATGGGTGAATAACTTTTCGGCCGA  
ATCTGAAGAAGGAATCGTTTTTCGCCTTACGAGGAGACGCTCATCCTTCTGCTGCACGATGAGCTTGGCAACAGATGGGCTCAAATCGCCAAACATTTGCCTGGGAGGACTGACAACGAA  
ATAAAAACTACTGGAATACTTTGATTAACCGGAGGAAGAGGGCGGGCTTACCTATGTACCGGCTGGAGAACCAACAGCACATGCCGTTAAAGAGTCAAAGGCAAGAGCAGTGATAGC  
CATTTCCCCGCCGCGCTCAAACCATCGCAAGCCATTCTTTTCATCGCTCCCTTCGGCCATGCCACA ACTTTTCAGAAAATCAACGTGTTTCTATCCGTCAATGCCCAAACCGAGGGAATAAC  
ATCTCCTTCCAGTTACCTTATTTTACATATCCCGTTGAGAACTGTTTGGGATACTTCGATCTCGGGCCGCCTCCTTACGCAGTGACAAAGGAGCTCCCTTCAAGCCAATTTTCTTCCAATTT  
GGGGATGAGCAGATGCCACAGGGCAGCAGACTCTTGATGATCTGCTGCACGTTATTGATCTCTATGGGATTGAAGTTATAGAAGAGACGCTGAAGGCTGATATACCCACACTGGTT  
GACTTGATACTAAGAGAGACGACCGCGCCAACGTCATTGACTGTTCTTCTCGGTTGGTACAACCATAGTAGCGGTGTGGGAGAGTTTTTGAATGATCCCATGGCGGTGATCACTGATAAA  
GAAATTGGGCTAGATGTGCAGCAGCTGGAGTGGATTCCGTCCGTGGCACCAGTGAATTTTACTAGGGTCTTGGGTCTGCTATTGGGGTAACATTCAGTAGAATAACATGCCCAGAATTT

TGCTGATAGTTTCACTACAGTGAAGTTTTTATATGGATGCATTATTATATATTGTGGTTTTGACTTGTCTTGCTGATTGTATTATGATGGCTTGAGAACTTTGTGTTTCGAGCAGCTTGTGGT  
GTTTTTATCTGGCTTGCTTACGAGTGCCTGATGGAACATAGAGTATTACATGTGTTAGCATGTAAACATTATTGTGTTGTTGCAAATGTTATTGAGAGTGTAAGTGTGTTGTTAGTGGAGTGA  
ACTTGTGTTTGTGCATGATAAGATTGTTATTTGTTTTTGTGTTGAGCTTAAATTTTTTCCTAGTA

>comp159541\_c0\_seq3

TCGTCATTTTGGGTGGGGGAACATGAGAGCCTCGACTCGCTCCCAAATAAAAATTTAATTTTTGATTTTTATTCTCATATTTTATTGGAAGCAAAAAATTTTTTTTTTAGTATTTAAATCTAGTAG  
AATGGCGAGGAAGGAAGCAATCTACACCGTATCGTCTCTCTTTTTCTTTTTCGCGAGCGGTTAAGGAAATTGCGAGTACAGAAGCAGAAAAAGGGGAGCTTTAGCTTGTTCGGTGAGAG  
ATGAGGCCGCCCTTGAAGAAGGAGCGAGCGAGTACGGCCGTCGCCGGTGGAGGGCGCATCTGCCACCACGCAGCAGCTGCAGAAAAGGGGACCGTGGACGCCGGCGGAGGACACGATT  
CTCAAAGAGTATGTGAGAAAACATGGAGCAGGTAACCTGGAACGTTCTGCAGAAGAACAGCGGCCTTCAACGCAGTGGCAAAAGCTGCCGGCTCAGATGGGTGAATAACTTTTCGGCCGA  
ATCTGAAGAAGGAATCGTTTTTCGCCTTACGAGGAGACGCTCATCCTTCTGCTGCACGATGAGCTTGGCAACAGATGGGCTCAAATCGCCAAACATTTGCCTGGGAGGACTGACAACGAA  
ATAAAAACTACTGGAATACTTTGATTAACCGGAGGAAGAGGGCGGGCTTACCTATGTACCGGCTGGAGAACCAACAGCACATGCCGTTAAAGAGTCAAAGGCAAGAGCAGTGCATAGC  
CATTTCCCGCGCGGCTCAAACCATCGCAAGCCATTCTTTTCATCGCTCCCTTCGGCCATGCCACAACCTTTCAGAAAATCAACGTGTTTCTATCCGTCATGCCCAAACCGAGGGAATAAC  
ATCTCCTTCCAGTTACCTTATTTTACATATCCCGTTGAGAACTGTTGGGATACTTCGATCTCGGGCCGCCTCCTTACGCAGTGACAAAGGAGCTCCCTTCAAGCCAATTTTCTTCCAATTT  
GGGGATGAGCAGATGCCACAGGGCAGCAGCAGACTCTTGGATGATCTGCTGCAGGTTATTGATCTCTATGGTAAATTGGTCTATTTGGATTTTCCCTTGGATGAATCCTTTTTTTGACAAAT  
CTCTCTTTATTCTTTCTTTTATGAGACCATTATGAATTTATTATGTTCTGTTTTCCATTCAGAAGGAAGCTGCAATTATAATTTGTCTGTGTTA

>comp159674\_c1\_seq1

ATAGAGAAGCTGAGGAGAGAGGTGGAAGGTGGAGCTCGTCCGGTTGGTGATGGAGAGGGTAGCGGTGCTCCGGCAGCTCGTCCGGTGAATTCAGGCGTTCCGCGACTTCTATGAGCGAA  
GATTGTGACCAATGCTTCCCCTGAAAGCAGCAGAAGGCGAAGGACAAATAGATAGATCCTCATTAGGCATGAAAAAGCTGGGAGCATATGATCGGTTCAAGAGCTTGAGAGGGATTGCT  
CTTGTGATAGCTATGATACGCAATGTGGCCAAGTGGTGTTCATTTGATTTTATAGTAGTTCAATTGAGGATGATTATTGTTGTTTGGATTTAGAAGAGAAATCTGAAATTTGTTAATATGTTG  
GAAGCCAATATGAGTCCAAACAAAAGATCACGGAGTGAAAAGAGTTGCAGAATATTGTTTACTATTCCAAATTTAATCGGTACAATGGAACAAGAAATATGGAAGGAACTCCCTGAAGAT  
CTTCATGAAGCTGTGATTGCACGACTTCCAATAGCCACTTTGTTTCGTTTCCGCATAGTATGCCAAAAGTGGAAATCCTTGCTGACCTCTAATAGCTTCTCACGGCACTTTTCGGAAGTTCA  
GCTAATGAATCCGTGGTTCTATACCATTGTTTCATGACGGGTTTGGTTTTGATAAAGTTGGTGGAGCCATGTATGACCCTTCTTTAAAAAAATGGCACCACCTATCCATCCCTGGAGTTTATCC  
GAAGATGTTTCTGTGAGTGGCTTCAGCTGGTGGTCTTGTGTTGCCTGTTGGATCTCAACACCAGGCACCTTCTATATATGCAACCCTCTCATTAAGGCGTTCAAAGAACTCCACCAAGTTCT  
GCTCGCTTTTGTGTTCCCGTGTGGTTGTAGGAATGGTTTTGACAGACAATGCAACTAATAGAAGTTACAAGGTAGTCTGGCTGGGATGCAATGGAGATTATGAGATCTATGATTCTGTGCAAA  
ACAGTTGGTCTCGTCGAGGATCTTTGCCTCAAAGTGTCAAGCTCCCCTCTCCATAAATTTCAAAGCACAAACAGTTTGTATTGGTAGCACAATCTACTTTATTCGAGCTAACCCCGATGG  
AATTTTGGAGATATGATGTCTCCACAGGCATTTGGAACAGTTCATTATACCATTGCCTTTGCATATATCGGACCATAACAATTGCAGAGTGTGGTGGAAAGGTCATGCTTGTGGACTGCTCT  
CAAAAAATGCAGCGACATGTGTTTGCATATGGGAGTTGCAGAAGATGACTCTTTTGTGGAAGGAGGTTGACAGAATGCCAAATGTCTCGTGTCTTAGAGTATTATGGAAGCCCGTAAAGA  
TGAGTTGCATGGGAAATCAGGGGATGCTCATGCTGCTGTTGAGATCAATAAGTCTAATCGTTTCATCACATATGATTGTTTCAAAAAGAAATGGGAGAAGGTTCCAGACTGCACTCTTCC  
TATTAACAAGAGGAAGCAGTGGATAGCTTGCGGCACCGCATTCTATCCTTTTCTACTGCTCTTCCCTTGATTATGTTTTTTCATCTTGCAGGAGGCTTGGATCACATCACCTCTACTCTGC  
TGATGAATAGGCTTAGATTTTGTTCCTTCACTTCTTCTGTTGTGCTCAAACCTTGTCTAATCACACACTCTTCTAAATATGTCAATGCCATTACCTTTACTGAGTATTTTAGCTTTGGTG  
ATGGAGAAAACCTTACAAAGTGTGTTGTTAGAGAAGAATCTATGAATGAGAGTATTGATAGATTAGATGATTGAAGTATGCATTTATTGAAATCATATAGTTGAAGTTATTATTTATGGTAAA  
TTGTAGTGTGTTGAGAAATGATAGAAATATGTATTTATTGAAGCGGCATAGTTAAAAAACATTATGGT

>comp159674\_c1\_seq2

ATAGAGAAGCTGAGGAGAGAGGTTGGAAGGTGGAGCTCGTCGGTTGGTGATGGAGAGGGTAGCGGTGCTCCGGCAGCTCGTCGGTGAAATTCAGGCGTTCCGCGACTTCTATGAGCGAA  
GATTGTGACCAATGCTTCCCCTGAAAGCAGCAGAAGGCGAAGGACAAATAGATAGATCCTCATTAGGCATGAAAAAGCTGGGAGCATATGATCGGTTCAAGAGCCTTGAGAGGGATTGCT  
CTTGTGATAGCTATGATACGCAATGTGGCCAAGTGGTGTTCATTTGATTTTGATAGTAGTTCAATTGAGGATGATTATTGTTGTTTGGATTTAGAAGAGAAATCTGAAATTGTTAATATGTTG  
GAAGCCAATATGAGTCCAAACAAAAGATCACGGAGTGAAAAGAGTTGCAGAATATTGTTTACTATTCCAAATTTAATCGGTACAATGGAACAAGAAATATGGAAGGAACTCCCTGAAGAT  
CTTCATGAAGCTGTGATTGCACGACTTCCAATAGCCACTTTGTTTCGTTTCCGCATAGTATGCCAAAAGTGGAAATTCCTTGCTGACCTCTAATAGCTTCTCACGGCACTTTTCGGAAGTTCA  
GCTAATGAATCCGTGGTTCTATACCATTGTTTCATGACGGGTTTGGTTTTGATAAAGTTGGTGGAGCCATGTATGACCCTTCTTTAAAAAAATGGCACCACCTATCCATCCCTGGAGTTTATCC  
GAAGATGTTTCTGTCAGTGGCTTCAGCTGGTGGTCTTGTTCCTGTTGGATCTCAACACCAGGCACTTCTATATATGCAACCCTCTCATTAAGGCGTTCAAAGAACTTCCACCAAGTTCT  
GCTCGCTTTTGTTCCTGTTGGTTGTAGGAATGGTTTTGACAGACAATGCAACTAATAGAAGTTACAAGGTAGTCTGGCTGGGATGCAATGGAGATTATGAGATCTATGATTCTGTGCAAA  
ACAGTTGGTCTCGTCGAGGATCTTGCCTCAAAGTGTCAAGCTCCCCTCTCCATAAATTTCAAAGCACAAACAGTTTGTATTGGTAGCACAATCTACTTTATTCGAGCTAACCCCGATGG  
AATTTTGGAGATATGATGTCTCCACAGGCATTTGGAAACAGTTCATTATACCATTGCCTTTGCATATATCGGACCATAACAATTGCAGAGTGTGGTGGAAAGGTCATGCTTGTGGACTGCTCT  
CAAAAATGCAGCGACATGTGTTTGCATATGGGAGTTGCAGAAGATGACTCTTTTGTGGAAGGAGGTTGACAGAATGCCAAATGTCTCGTGCTTAGAGTATTATGGAAAGCCCGTAAAGA  
TGAGTTGCATGGGAAATCAGGGGATGCTCATGCTGTCGTTGAGATCAATAAGGTCATCGTTTCATCACATATGATTTGTTCAAAAAGAAATGGGAGAAGGTTCCAGACTGCACTCTTCC  
TATTAACAAGAGGAAGCAGTGGATAGCTTGCGGCACCGCATTCTATCCTTTTCTACTGCTCTTCCTTGATTATGTTTTTTCATCTTGCAGGAGGCTTGGATTACATCACCTCTACTCTGC  
TGATGAATAGGCTTAGATTTTGTTCCTTCACTTCTTCTGTTGTGCTCAAACCTTGTTCATCACACTCTTCTAAATATGTCAATGCCATTACCTTTACTGAGTATTTTAGCTTTGGTG  
ATGGAGAAAACCTTACAAAGTGTGTGTAGAGAAGAATCTATGAATGAGAGTATTGATAGATTAGATGATTGAAGTATGCATATGGTTGAAGTTATTATATTTATGGTAAATTGTAGTGTGTTGA  
GAAATGATAGAAATATGATTTTATGAAGGCGGCATAGTTAAAAAACATTATGGT

>comp159674\_c1\_seq3

ATAGAGAAGCTGAGGAGAGAGGTTGGAAGGTGGAGCTCGTCGGTTGGTGATGGAGAGGGTAGCGGTGCTCCGGCAGCTCGTCGGTGAAATTCAGGCGTTCCGCGACTTCTATGAGCGAA  
GGAATCTTGTGGTCTTTGTGGAGTATCTAGTGGTTTCGTTCCGGCCTTCTGGTTTTGATTTCCGGCATATCCTCGGTTGATTTTAGTTTACGTTTATTGCACAAGATGCGCCGCCGCTT  
TATTGACATTATTATTTATATGCTTCTGCGAAGAGAGGTTGGTGTTCATTTGATTTTGATAGTAGTTCAATTGAGGATGATTATTGTTGTTTGGATTTAGAAGAGAAATCTGAAATTGTTAATAT  
GTTGGAAGCCAATATGAGTCCAAACAAAAGATCACGGAGTGAAAAGAGTTGCAGAATATTGTTTACTATTCCAAATTTAATCGGTACAATGGAACAAGAAATATGGAAGGAACTCCCTGA  
AGATCTTCATGAAGCTGTGATTGCACGACTTCCAATAGCCACTTTGTTTCGTTTCCGCATAGTATGCCAAAAGTGGAAATTCCTTGCTGACCTCTAATAGCTTCTCACGGCACTTTTCGGAAG  
TTCAGCTAATGAATCCGTGGTTCTATACCATTGTTTCATGACGGGTTTGGTTTTGATAAAGTTGGTGGAGCCATGTATGACCCTTCTTTAAAAAAATGGCACCACCTATCCATCCCTGGAGTTT  
ATCCGAAGATGTTTCTGTCAGTGGCTTCAGCTGGTGGTCTTGTTCCTGTTGGATCTCAACACCAGGCACTTCTATATATGCAACCCTCTCATTAAGGCGTTCAAAGAACTTCCACCAAG  
TTCTGCTCGCTTTTGTTCCTGTTGGTTGTAGGAATGGTTTTGACAGACAATGCAACTAATAGAAGTTACAAGGTAGTCTGGCTGGGATGCAATGGAGATTATGAGATCTATGATTCTGTGC  
AAAACAGTTGGTCTCGTCGAGGATCTTGCCTCAAAGTGTCAAGCTCCCCTCTCCATAAATTTCAAAGCACAAACAGTTTGTATTGGTAGCACAATCTACTTTATTCGAGCTAACCCCGA  
TGGAATTTTGGAGATATGATGTCTCCACAGGCATTTGGAAACAGTTCATTATACCATTGCCTTTGCATATATCGGACCATAACAATTGCAGAGTGTGGTGGAAAGGTCATGCTTGTGGACTGC  
TCTCAAAAATGCAGCGACATGTGTTTGCATATGGGAGTTGCAGAAGATGACTCTTTTGTGGAAGGAGGTTGACAGAATGCCAAATGTCTCGTGCTTAGAGTATTATGGAAAGCCCGTAA  
AGATGAGTTGCATGGGAAATCAGGGGATGCTCATGCTGTCGTTGAGATCAATAAGGTCATCGTTTCATCACATATGATTTGTTCAAAAAGAAATGGGAGAAGGTTCCAGACTGCACTCT  
TCCTATTAACAAGAGGAAGCAGTGGATAGCTTGCGGCACCGCATTCTATCCTTTTCTACTGCTCTTCCTTGATTATGTTTTTTCATCTTGCAGGAGGCTTGGATTACATCACCTCTACTC

TGCTGATGAATAGGCTTAGATTTTGTTCCTTCACTTCTTCTCTGTTGTGCTCAAACCTTGTTCCTAATCACACACTCTTTCTAAATATGTCAATGCCATTACCTTTACTGAGTATTTAGCTTTG  
GTGATGGAGAAAACCTTACAAAGTGTGTGTAGAGAAGAATCTATGAATGAGAGTATTGATAGATTAGATGATTGAAGTATGCATATGGTTGAAGTTATTATATTTATGGTAAATTGTAGTGT  
TGAGAAATGATAGAAATATGTATTTATTGAAGGCGGCATAGTTAAAAACATTATGGT

>comp159674\_c1\_seq4

TTCCGCGACTTCTATGAGCGAAGTGTTTTTTTTTTGTGGCCCCGAGGAAGAAAGTGGTAATTGGTAGATTTTAATGACACCTTTTTTCTGTGCAGGTGGTGTTCATTTGATTTTGATAGTAGTT  
CAATTGAGGATGATTATTGTTGTTTGGATTTAGAAGAGAAATCTGAAATTGTTAATATGTTGGAAGCCAATATGAGTCCAAACAAAAGATCACGGAGTGAAAAGAGTTGCAGAATATTGTT  
TACTATTCCAAATTTAATCGGTACAATGGAACAAGAAATATGGAAGGAACTCCCTGAAGATCTTCATGAAGCTGTGATTGCACGACTTCCAATAGCCACTTTGTTTCGTTTCCGCATAGTAT  
GCCAAAAGTGAATTCCTTGCTGACCTCTAATAGCTTCTCACGGCACTTTTTCGAAAGTTCAGCTAATGAATCCGTGGTTCTATAACCATTGTTTCATGACGGGTTTGGTTTTGATAAAGTTGGT  
GGAGCCATGTATGACCCTTCTTTAAAAAATGGCACCACCTATCCATCCCTGGAGTTTATCCGAAGATGTTTCTGTCAGTGGCTTCAGCTGGTGGTCTTGTTCCTGTTGGATCTCAACAC  
CAGGCACCTTCTATATGCAACCCTCTCATTAAAGGCGTTCAAAGAAGTTCACCAAGTTCGCTCGCTTTTGTCCCGTGTGGTTGTAGGAATGGTTTTGACAGACAATGCAACTAATAGA  
AGTTACAAGGTAGTCTGGCTGGGATGCAATGGAGATTATGAGATCTATGATTCTGTGCAAAAACAGTTGGTCTCGTTCGAGGATCTTTGCCTCAAAGTGTCAAGCTCCCACTCTCCATAAATT  
TCAAAGCACAAACAGTTTGTATTGGTAGCACAATCTACTTTATTTCGAGCTAACCCCGATGGAATTTTGTAGATATGATGTCTCCACAGGCATTTGAAACAGTTCATTATAACCATTGCCTTTG  
CATATATCGGACCATAACAATTGCAGAGTGTGGTGGAAAGGTCATGCTTGTGGACTGCTCTCAAAAAATGCAGCGACATGTGTTTGCATATGGGAGTTGCAGAAGATGACTCTTTTGTGGA  
AGGAGGTTGACAGAATGCCAAATGTCTCGTCTTAGAGTATTATGAAAGCCGTAAGATGAGTTGCATGGGAAATCAGGGGATGCTCATGCTGTCTGTTGAGATCAATAAGGTCTAATC  
GTTTCATCACATATGATTTGTTCAAAAAGAAATGGGAGAAGGTTCCAGACTGCACCTTCTCATTAAACAAGAGGAAGCAGTGGATAGCTTGCAGGACCGCATTCTATCCTTTTCTACTGC  
TCTTCCTTGATTATGTTTTTTCATCTTGCAGGAGGCTTGGATTACATCACCTCTACTCTGCTGATGAATAGGCTTAGATTTTGTTCCTTCACTTCTTCTCTGTTGTGCTCAAACCTTGTCT  
AATCACACACTCTTTCTAAATATGTCAATGCCATTACCTTTACTGAGTATTTAGCTTTGGTGATGGAGAAAACCTTACAAAGTGTGTGTAGAGAAGAATCTATGAATGAGAGTATTGATAG  
ATTAGATGATTGAAGTATGCATATGGTTGAAGTTATTATATTTATGGTAAATTGTAGTGTGTTGAGAAATGATAGAAATATGTATTTATTGAAGGCGGCATAGTTAAAAACATTATGGT

>comp159674\_c1\_seq5

ATAGAGAAGCTGAGGAGAGAGGTGGAAGGTGGAGCTCGTTCGGTTGGTGATGGAGAGGGTAGCGGTGCTCCGGCAGCTCGTTCGGTGAATTCAGGCGTTCCGCGACTTCTATGAGCGAA  
GGTGGTGTTCATTTGATTTTGTAGTAGTTCAATTGAGGATGATTATTGTTGTTTGGATTTAGAAGAGAAATCTGAAATTGTTAATATGTTGGAAGCCAATATGAGTCCAAACAAAAGATCA  
CGGAGTGAAAAGAGTTGCAGAATATTGTTTACTATTCCAAATTTAATCGGTACAATGGAACAAGAAATATGGAAGGAACTCCCTGAAGATCTTCATGAAGCTGTGATTGCACGACTTCCAA  
TAGCCACTTTGTTTCGTTTCCGCATAGTATGCCAAAAGTGAATTCCTTGCTGACCTCTAATAGCTTCTCACGGCACTTTTCGGAAGTTCAGCTAATGAATCCGTGGTTCTATACCATTGTTT  
ATGACGGGTTTGGTTTTGATAAAGTTGGTGGAGCCATGTATGACCCTTCTTTAAAAAATGGCACCACCTATCCATCCCTGGAGTTTATCCGAAGATGTTTCTGTCAGTGGCTTCAGCTGGT  
GGTCTTGTTCCTGTTGGATCTCAACACCAGGCACTTCTATATATGCAACCCTCTCATTAAAGGCGTTCAAAGAAGTTCACCAAGTTCGCTCGCTTTTGTTCCTGTTGGTGTAGGAAT  
GGTTTTGACAGACAATGCAACTAATAGAAGTTACAAGGTAGTCTGGCTGGGATGCAATGGAGATTATGAGATCTATGATTCTGTGCAAAAACAGTTGGTCTCGTTCGAGGATCTTTGCCTCAA  
AGTGTCAAGCTCCCACTCTCCATAAATTTCAAAGCACAAACAGTTTGTATTGGTAGCACAATCTACTTTATTTCGAGCTAACCCCGATGGAATTTTGTAGATATGATGTCTCCACAGGCATTTG  
GAAACAGTTCATTATAACCATTGCCTTTGCATATATCGGACCATAACAATTGCAGAGTGTGGTGGAAAGGTCATGCTTGTGGACTGCTCTCAAAAAATGCAGCGACATGTGTTTGCATATGG  
GAGTTGCAGAAGATGACTCTTTTGTGGAAGGAGGTTGACAGAATGCCAAATGTCTCGTCTTAGAGTATTATGAAAGCCGTAAGATGAGTTGCATGGGAAATCAGGGGATGCTCATG  
CTGTCGTTGAGATCAATAAGGTCTAATCGTTTCATCACATATGATTTGTTCAAAAAGAAATGGGAGAAGGTTCCAGACTGCACCTTCTCATTAAACAAGAGGAAGCAGTGGATAGCTTGC  
GCACCGCATTCTATCCTTTTCTACTGCTTCTCCTTGATTATGTTTTTTCATCTTGCAGGAGGCTTGGATTACATCACCTCTACTCTGCTGATGAATAGGCTTAGATTTTGTTCCTTCACTT

CTTCTCTGTTGTGCTCAAACCTTGTCTAATCACACACTCTTTCTAAATATGTCAATGCCATTACCTTTACTGAGTATTTTAGCTTTGGTGATGGAGAAAACCTTACAAAGTGTGTGTAGAGA  
AGAATCTATGAATGAGAGTATTGATAGATTAGATGATTGAAGTATGCATATGGTTGAAGTTATTATATTTATGGTAAATTGTAGTGTGAGAAAATGATAGAAATATGTATTTATTGAAGGCGG  
CATAGTTAAAAACATTATGGT

>comp159674\_c1\_seq6

TTCCGCGACTTCTATGAGCGAAGTGTTTTTTTTTGTGGCCCCGAGGAAGAAAGTGGTAATTGGTAGATTTTAATGACACCTTTTTCTGTGCAGGTGGTGTTCATTTGATTTTGATAGTAGTT  
CAATTGAGGATGATTATTGTTGTTTGGATTTAGAAGAGAAATCTGAAATTGTTAATATGTTGGAAGCCAATATGAGTCCAAACAAAAGATCACGGAGTGAAAAGAGTTGCAGAATATTGTT  
TACTATTCCAAATTTAATCGGTACAATGGAACAAGAAATATGGAAGGAACTCCCTGAAGATCTTCATGAAGCTGTGATTGCACGACTTCCAATAGCCACTTTGTTTCGTTTCCGCATAGTAT  
GCCAAAAGTGGAATTCCTTGCTGACCTCTAATAGCTTCTCACGGCACTTTTCGGAAGTTCAGTAATGAATCCGTGGTTCTATAACCATTGTTTCATGACGGGTTTGGTTTTGATAAAGTTGGT  
GGAGCCATGTATGACCCTTCTTTAAAAAATGGCACCACTATCCATCCCTGGAGTTTATCCGAAGATGTTTCTGTCAGTGGCTTCAGCTGGTGGTCTTGTTCCTGTTGGATCTCAACAC  
CAGGCACCTTCTATATGCAACCCTCTCATTAAAGGCGTTCAAAGAAGTTCACCAAGTTCGCTCGCTTTTGTCCCGTGTGGTTGTAGGAATGGTTTTGACAGACAATGCAACTAATAGA  
AGTTACAAGGTAGTCTGGCTGGGATGCAATGGAGATTATGAGATCTATGATTCTGTGCAAAAACAGTTGGTCTCGTTCGAGGATCTTTCCTCAAAGTGTCAAGCTCCCACTCTCCATAAATT  
TCAAAGCACAACAGTTTGTATTGGTAGCACAATCTACTTTATTTCGAGCTAACCCCGATGGAATTTGAGATATGATGTCTCCACAGGCATTTGAAACAGTTCATTATAACCATTGCCTTTG  
CATATATCGGACCATACAATTGCAGAGTGTGGTGGAAAGGTCATGCTTGTGGACTGCTCTCAAAAAATGCAGCGACATGTGTTTGCATATGGGAGTTGCAGAAGATGACTCTTTTGTGGA  
AGGAGGTTGACAGAATGCCAAATGTCTCGTCTTAGAGTATTATGAAAGCCCGTAAAGATGAGTTGCATGGGAAATCAGGGGATGCTCATGCTGTCTGTTGAGATCAATAAGGTCTAATC  
GTTTCATCACATATGATTTGTTCAAAAAGAAATGGGAGAAGGTTCCAGACTGCACCTTCTCATTAAACAAGAGGAAGCAGTGGATAGCTTGCAGGACCGCATTCTATCCTTTTCTACTGC  
TCTTCCTTGATTATGTTTTTTCATCTTGCAGGAGGCTTGGATTACATCACCTCTACTCTGCTGATGAATAGGCTTAGATTTTGTTCCTTCACTTCTTCTCTGTTGTGCTCAAACCTTGTCT  
AATCACACACTCTTTCTAAATATGTCAATGCCATTACCTTTACTGAGTATTTTAGCTTTGGTGATGGAGAAAACCTTACAAAGTGTGTGTAGAGAAGAATCTATGAATGAGAGTATTGATAG  
ATTAGATGATTGAAGTATGCATTTATTGAAATCATATAGTTGAAGTTATTATATTTATGGTAAATTGTAGTGTGAGAAAATGATAGAAATATGTATTTATTGAAGGCGGCATAGTTAAAAAC  
ATTATGGT

>comp159674\_c1\_seq7

ATAGAGAAGCTGAGGAGAGAGGTGGAAGGTGGAGCTCGTTCGGTTGGTGATGGAGAGGGTAGCGGTGCTCCGGCAGCTCGTTCGGTGAATTCAGGCGTTCGCGACTTCTATGAGCGAA  
GGAATCTTGTGGTCTTTGTGGAGTATCTAGTGGTTTCGTTCCGGCGTTCGGTTTTGATTTCCGGCATATCCTCGTTGATTTTAGTTTGCTTTACGTTTATTGCACAAGATGCGCCGCGCTT  
TATTGACATTATTATTTATATGCTTCTGCGAAGAGAGGTGGTGTTCATTTGATTTTGATAGTAGTTCAATTGAGGATGATTATGTTGTTTGGATTTAGAAGAGAAATCTGAAATTGTTAATAT  
GTTGGAAGCCAATATGAGTCCAAACAAAAGATCACGGAGTGAAAAGAGTTGCAGAATATTGTTTACTATTCCAAATTTAATCGGTACAATGGAACAAGAAATATGGAAGGAACTCCCTGA  
AGATCTTCATGAAGCTGTGATTGCACGACTTCCAATAGCCACTTTGTTTCGTTTCCGCATAGTATGCCAAAAGTGAATTCCTTGCTGACCTCTAATAGCTTCTCACGGCACTTTTCGGAAG  
TTCAGCTAATGAATCCGTGGTTCTATAACCATTGTTTCATGACGGGTTTGGTTTTGATAAAGTTGGTGGAGCCATGTATGACCCTTCTTTAAAAAATGGCACCACTATCCATCCCTGGAGTTT  
ATCCGAAGATGTTTCTGTCAGTGGCTTCAGCTGGTGGTCTTGTTCCTGTTGGATCTCAACACCAGGCACTTCTATATATGCAACCCTCTCATTAAAGGCGTTCAAAGAAGTTCACCAAG  
TTCTGCTCGCTTTTGTTCGCTGTGGTTGTAGGAATGGTTTTGACAGACAATGCAACTAATAGAAGTTACAAGGTAGTCTGGCTGGGATGCAATGGAGATTATGAGATCTATGATTCTGTGC  
AAAACAGTTGGTCTCGTTCAGGATCTTTGCCCTCAAAGTGTCAAGCTCCCACTCTCATAAATTTCAAAGCACAAACAGTTTGTATTGGTAGCACAATCTACTTTATTTCGAGCTAACCCCGA  
TGGAATTTTGTAGATATGATGTCTCCACAGGCATTTGAAACAGTTCATTATAACCATTGCCTTTGCATATATCGGACCATACAATTGCAGAGTGTGGTGGAAAGGTCATGCTTGTGGACTGC  
TCTCAAAAAATGCAGCGACATGTGTTTGCATATGGGAGTTGCAGAAGATGACTCTTTTGTGGAAGGAGGTTGACAGAATGCCAAATGTCTCGTCTTAGAGTATTATGGAAGCCCGTAA



AGATGAGTTGCATGGGAAATCAGGGGATGCTCATGCTGTCGTTGAGATCAATAAGGTCTAATCGTTTCATCACATATGATTTGTTCAAAAAGAAATGGGAGAAGGTTCCAGACTGCACTCT  
TCCTATTAACAAGAGGAAGCAGTGGATAGCTTGCGGCACCGCATTCTATCCTTTTCTACTGCTCTCCCTTGATTATGTTTTTTCATCTTGCGAGGAGGCTTGGATTACATCACCTCTACTC  
TGCTGATGAATAGGCTTAGATTTTGTTCCTTCACTTCTTCTCTGTTGTGCTCAAACCTTGTCTAATCACACACTCTTCTAAATATGTCAATGCCATTACCTTTACTGAGTATTTTAGCTTTG  
GTGATGGAGAAAACCTTACAAAGTGTGTGTAGAGAAGAATCTATGAATGAGAGTATTGATAGATTAGATGATTGAAGTATGCATTTATTGAAATCATATAGTTGAAGTTATTATATTTATGGT  
AAATTGTAGTGTTTGAGAAATGATAGAAATATGATTTATTGAAGGCGGCATAGTTAAAAAACATTATGGT

>comp159674\_c1\_seq8

ATAGAGAAGCTGAGGAGAGAGGTGGAAGGTGGAGCTCGTCCGGTGGTGGATGGAGAGGGTAGCGGTGCTCCGGCAGCTCGTCCGGTCAAATTCAGGCGTTCGCGACTTCTATGAGCGAA  
GGTGGTGTTCATTTGATTTTATAGTAGTTCAATTGAGGATGATTATTGTTGTTGGATTTAGAAGAGAAATCTGAAATTGTTAATATGTTGGAAGCCAATATGAGTCCAAACAAAAGATCA  
CGGAGTAAAAGAGTTGCAGAAATTTACTATTCCAAATTTAATCGGTACAATGGAACAAGAAATATGGAAGGAACTCCCTGAAGATCTTCATGAAGCTGTGATTGCACGACTTCCAA  
TAGCCACTTTGTTTCCGTTTCCGCATAGTATGCCAAAAGTGAATTCCTTGCTGACCTCTAATAGCTTCTCACGGCACTTTTCGGAAGTTCAGCTAATGAATCCGTGGTTCTATACCATTGTTT  
ATGACGGGTTTGGTTTTGATAAAGTTGGTGGAGCCATGTATGACCTTCTTTAAAAAATGGCACCACCTATCCATCCCTGGAGTTTATCCGAAGATGTTTCTGTCAGTGGCTTCAGTGGT  
GGTCTTGTTCCTGTTGGATCTCAACACCAGGCACTTCTATATATGCAACCCTCTCATTAAAGGCGTTCAAAGAACTCCACCAAGTTCTGCTCGCTTTTGTTCCTGTTGGTTGTAGGAAT  
GGTTTTGACAGACAATGCAACTAATAGAAGTTACAAGGTAGTCTGGCTGGGATGCAATGGAGATTATGAGATCTATGATTCTGTGCAAAAACAGTTGGTCTCGTTCGAGGATCTTTGCTCAA  
AGTGTCAAGCTCCACTCTCCATAAATTTCAAAGCACAAACAGTTTGTATTGGTAGCACAATCTACTTTATTCGAGCTAACCCCGATGGAATTTTGAATATGATGTCTCCACAGGCATTTG  
GAAACAGTTCATTATAACCATTGCCTTTCATATATCGGACCATAACAATTGCAGAGTGTGGTGGAAAGGTCATGCTTGTGGACTGCTCTCAAAAATGCAGCGACATGTGTTTGCATATGG  
GAGTTGCAGAAGATGACTCTTTTGTGGAAGGAGGTTGACAGAATGCCAAATGTCTCGTGTAGAGTATTATGGAAGCCCGTAAAGATGAGTTGCATGGGAAATCAGGGGATGCTCATG  
CTGTGCTGAGATCAATAAGGTCTAATCGTTTCATCACATATGATTTGTTCAAAAAGAAATGGGAGAAGGTTCCAGACTGCACTCTTCTATTAACAAGAGGAAGCAGTGGATAGCTTGCG  
GCACCGCATCTATCCTTTTCTACTGCTCTTCTTGATTATGTTTTTTCATCTTGCGAGGAGGCTTGGATTACATCACCTCTACTCTGCTGATGAATAGGCTTAGATTTTGTTCCTTCACTT  
CTTCTCTGTTGTGCTCAAACCTTGTCTAATCACACACTCTTCTAAATATGTCAATGCCATTACCTTTACTGAGTATTTTAGCTTTGGTGGATGGAGAAAACCTTACAAAGTGTGTGTAGAGA  
AGAATCTATGAATGAGAGTATTGATAGATTAGATGATTGAAGTATGCATTTATTGAAATCATATAGTTGAAGTTATTATATTTATGGTAAATTGTAGTGTGAGAAATGATAGAAATATGATT  
TATTGAAGGCGGCATAGTTAAAAAACATTATGGT

>comp160962\_c0\_seq10

CAACCTTATTCTCATTTCAATCAACTTGATGACAGAACAAGCGAAGCTGGGAGACAAAGAATGGTATTTCTTCTGCGTGAAGGATCGAAAATACCCCACTGGCCTTAGAACGAATAGAG  
CTACTGAAGCTGGTTATTGGAAGGCTACGGGAAAGGATAAGGAGATCTATAGGGGAAAGTTGCTGGTTGGAATGAAGAAGACGCTCGTGTCTACACAGGAAGAGCGCCGAGAGGAGA  
GAAGACCAGTTGGGTCATGCATGAGTACAGATTGGAGGGAAAGTATGCCATCAATGGTCTATACAGAGCTGCTAAGGTTGATTGTCCGTTTGAAGCTGGAAATTTTTGATCGCTGAGAT  
CATCTTCTCCTTCTTTCTTTAGTAACTATCTTCATCGACTAATTAATTTATATATGCTGTGCTGTTGAACAGAACGAGTGGGTGATCTGCAGAGTTTTCAAAAAAGCTCACTTGGGAATCC  
TTTCGGGATGGGAAAAATGGCTTCTTCTCTACGGAGAAGAGGTGGAAGATTCTCCGCTCCTCTCCGAAAACCTTCCGCCATTAATGGACATCCCAAGTCACGTGCCCTGCTTCTC  
CAACGGTATGGAGGGCCAAAAAGCCCATGAACAAGACATGTCCTCTATCTTCCAAGTTCATTCCCATGTCCACCGCTCTCTATGACGGTAGCATTATGAGCTTATTGAAAGCCATGGT  
TTCGAAGAGAAGCAAGGATGCAAGAAGAACAGGGAGATGCTGAGCTTCTCAGAACAGACTGAGCTTATCGCCGAAATGAACACAGAAATTTACTGTGATAACGAAATGGAAGGAGTT  
CTTTTGAAGACTGTCTTTGGAATTGCTAAATAATTCGATTTTGAAGTCTTTCATGAATTGATAGTATGTATTAGACTTATTTCTTCCGTTTGAAGATTGTGATTGTTGTGTTGGAAT  
TGTTTCTGTTTTGAAAATTTGAGCATTGTCAGTAATAAATAAGTGTCCAAGTTTGTAAAAA

>comp160962\_c0\_seq11

TAATTAGAACTCTAAAAACAGAGCATTCCCTTCTTGCCTCTCTCTCATTCCCGCCGCCAGCAATGTCCTCTTCTATTCTCTTCCCTACTTCTACTAATTCGTTTTTTTTTTTTTTTAAAGTTCT  
CATCTAATATTAATTCCTCTATTGGATTTCTATTTTGCTCATCTTCTAGTTAGATAAATTCTTTCCGCATCGTAAATATGTTCTTCATTAAGAATCATTCTAAAGCTCGTTCTCCTCCATTTCTC  
TTAGCTCTCAGTCTGGTTATGGAGAAAATAGAAGTGTCTATTAGCGATGGATTTGACAACAGCAACACAGGAACAGAGGATCAGATGCAGTTACCTCCAGGATTCCGTTTCCACCCACACA  
GATGAGGAGCTCATCACGCACTACCTCTCTAATAAGTTCTTAGACGCTCGATTAGATCCCTTGCATCGGAGAAGCCGACCTCAACAAGTGCAGCCATGGGATCTCCCAAACAAGCG  
AAGCTGGGAGACAAAGAATGGTATTTCTTCTGCGTGAAGGATCGAAAATACCCCACTGGCCTTAGAACGAATAGAGCTACTGAAGCTGGTTATTGGAAGGCTACGGGAAAGGATAAGGA  
GATCTATAGGGGGAAGTTGCTGGTTGGAATGAAGAAGACGCTCGTGTCTACACAGGAAGAGCGCCGAGAGGAGAGAAGACCAGTTGGGTCATGCATGAGTACAGATTGGAGGGAAAAG  
TATGCCATCAATGGTCTATACAGAGCTGCTAAGAACGAGTGGGTGATCTGCAGAGTTTTCAAAAAAAGCTCACTTGGGAATCCTTTCGGGATGGGAAAATTAATGGCTTCTTCTTCTACG  
GAGAAGAGGTGGAAGATTCTCCGCCTCCTCCTCCGAAAACCTTCCGCCATTAATGGACATCCCAAGTCACGTGCCCTGCTTCTCCAACGGTATGGAGGGCCAAAAAGCCCATGAACAA  
GACATGTCCTCTATCTTCTCCAAGTTCATTCCCATGTCCACCGCTCTCTATGACGGTAGCATTATGAGCTTATTTGAAAAGCCATGGTTTCGAAGAGAAGCAAGGATGCAAGAAGAACAGGG  
AGATGCTGAGCTTCTCAGAACAGACTGAGCTTATCGCCGAAATGAACACAGAAATTTACTGTGATAACGAAATTGGAAGGAGTTCTTTTGGACTGTCTTTGGAATTGCTAATAATTC  
GTATTTGAAGTTCTTGCATGAATTGATAGTATGTGTATTAGACTTATTTCTTTCGGTTTGATAAGATTGTGATTGTTGTGTTTGAATTGTTTCTGTTTTGAAAATTTGAGCATTTCAGTAAT  
AAATAAGTGTTCGAAGTTTGTAAAAA

>comp160962\_c0\_seq12

CAACCTTTATTCTCATTTCAATCAACTTGATGACAGAACAAGCGAAGCTGGGAGACAAAGAATGGTATTTCTTCTGCGTGAAGGATCGAAAATACCCCACTGGCCTTAGAACGAATAGAG  
CTACTGAAGCTGGTTATTGGAAGGCTACGGGAAAGGATAAGGAGATCTATAGGGGGAAGTTGCTGGTTGGAATGAAGAAGACGCTCGTGTCTACACAGGAAGAGCGCCGAGAGGAGA  
GAAGACCAGTTGGGTGCATGCATGAGTACAGATTGGAGGGAAAAGTATGCCATCAATGGTCTATACAGAGCTGCTAAGAACGAGTGGGTGATCTGCAGAGTTTTCAAAAAAAGCTCACTTG  
GGAATCCTTTCGGGATGGGAAAATTAATGGCTTCTTCTTCTACGGAGAAGAGGTGGAAGATTCTCCGCCTCCTCCTCCGAAAACCTTCCGCCATTAATGGACATCCCAAGTCACGTGCC  
CTGCTTCTCCAACGGTATGGAGGGCCAAAAAGCCCATGAACAAGACATGTCCTCTATCTTCTCCAAGTTCATTCCCATGTCCACCGCTCTCTATGACGGTAGCATTATGAGCTTATTTGAAA  
GCCATGGTTTCGAAGAGAAGCAAGGATGCAAGAAGAACAGGGAGATGCTGAGCTTCTCAGAACAGACTGAGCTTATCGCCGAAATGAACACAGAAATTTACTGTGATAACGAAATTGG  
AAGGAGTTCTTTTGGACTGTCTTTGGAATTGCTAATAATTCGTATTTGAAGTTCTTGCATGAATTGATAGTATGTGTATTAGACTTATTTCTTTCGGTTTGATAAGATTGTGATTGTTGTG  
TTTGAATTGTTTCTGTTTTGAAAATTTGAGCATTTCAGTAATAAATAAGTGTTCGAAGTTTGTAAAAA

>comp160962\_c0\_seq13

TAATTAGAACTCTAAAAACAGAGCATTCCCTTCTTGCCTCTCTCTCATTCCCGCCGCCAGCAATGTCCTCTTCTATTCTCTTCCCTACTTCTACTAATTCGTTTTTTTTTTTTTTTAAAGTTCT  
CATCTAATATTAATTCCTCTATTGGATTTCTATTTTGCTCATCTTCTAGTTAGATAAATTCTTTCCGCATCGTAAATATGTTCTTCATTAAGAATCATTCTAAAGCTCGTTCTCCTCCATTTCTC  
TTAGCTCTCAGTCTGGTTATGGAGAAAATAGAAGTGTCTATTAGCGATGGATTTGACAACAGCAACACAGGAACAGAGGATCAGATGCAGTTACCTCCAGGATTCCGTTTCCACCCACACA  
GATGAGGAGCTCATCACGCACTACCTCTCTAATAAGTTCTTAGACGCTCGATTAGATCCCTTGCATCGGAGAAGCCGACCTCAACAAGTGCAGCCATGGGATCTCCCAAACAAGCG  
AAGCTGGGAGACAAAGAATGGTATTTCTTCTGCGTGAAGGATCGAAAATACCCCACTGGCCTTAGAACGAATAGAGCTACTGAAGCTGGTTATTGGAAGGCTACGGGAAAGGATAAGGA  
GATCTATAGGGGGAAGTTGCTGGTTGGAATGAAGAAGACGCTCGTGTCTACACAGGAAGAGCGCCGAGAGGAGAGAAGACCAGTTGGGTCATGCATGAGTACAGATTGGAGGGAAAAG  
TATGCCATCAATGGTCTATACAGAGCTGCTAAGGTTGATTGTCCGTTTGAAGCTGGAAATATTTTATGATCGCTGAGATCATCTTCTCTTCTTCTTTTAGTAATCTTTCATCGACTAATTA  
ATTTATATATGCTGTGCTGTTGAACAGAACGAGTGGGTGATCTGCAGAGTTTTCAAAAAAAGCTCACTTGGGAATCCTTTCGGGATGGGAAAATGGCTTCTTCTCCTACGGAGAAGAG

GTGGAAGATTCTCCGCCTCCTCCTCCGAAAACCTCTCCGCCATTAATGGACATCCCAAGTCACGTGCCCTGCTTCTCCAACGGTATGGAGGGCCAAAAAGCCCATGAACAAGACATGTCC  
TCTATCTTCTCCAAGTTCATTCATCCATGTCCACCGCTCTCTATGACGGTAGCATTATGAGCTTATTTGAAAGCCATGGTTTCGAAGAGAAGCAAGGATGCAAGAAGAACAGGGAGATGCTGA  
GCTTCTCAGAACAGACTGAGCTTATCGCCGAAATGAACACAGAAATTTACTGTGATAACGAAATTGGAAGGAGTTCTTTTGAGCACTGTCTTTGGAATTGCTAAATAATTCGTATTTGAAG  
TTCTTGCATGAATTGATAGTATGTGTATTAGACTTATTTCCCTCGGTTTGATAAGATTGTGATTGTTGTGTTTGGAAATTGTTCTGTTTTGAAAATTTTGAGCATTTCAGTAATAATAAAGTG  
TTCCAAGTTTGTTAAAAA

>comp160962\_c0\_seq2

AGCCCCCTGCCCTCTCTCTCTCTCAATATATCTTTCTATCATCTGTTTCAAGCAACCACCCAATAACATCTTCTTCTTCTCCGCCTCCTCCTCCAGCTTCTCCTTCTTCTCCGTCAA  
CTATTATAATTCCTTATCTAATGGTGGGTCTTTATATTAACCTTCTCATCTTATATCAGACCTCTTGTTCTCACACTGATGTTGGTTTAAATCTCTTTCCAGTTATCAAGCTTGTGTTTTGTACCA  
ACAAAATCTAAATCTCTTTATTTTCTTCAGCGCAATGGAACAAGGAAATTCAGCTGTCAGCCATGGAATTGTCTTCACCAACACAGAAGATGAATACCAGATGGAATTACCTCCAGGTTT  
CAGATTCCATCCCACCGATGAAGAACTAATCACTCACTACCTCTCTAAAAAGGTCATCGACTCCAACCTTCGACCCACAAGCCATTGGCGTAGCAGACCTCAACAAGTGCGAGCCATGGGA  
TCTTCCAAGAGAGCCAAGCTAGGAGAGAAAGAATGGTACTTTTTCTGCATAAGAGATCGAAAGTATCCCACCGGCTTTCGAACAAATCGGGCTACTGATACTGGTTACTGGAAGGCTAC  
AGGTAAAGACAAGGAGATCTACAGGGGAAACAGATCGTTGGAATGAAGAAAACATTGGTTTTTACAGAGGAAGAGCTCCAAGAGGTGAGAAGAGTAATTGGGTCATGCATGAATTT  
AGATTGGAAGGAAATATTCAGCTTACAGTTTACCTGGAGCTTCAAAGAACGAGTGGGTAATCTGCAGAGTTATGAAAAAACTTAATTGTAAACGGGAAGAAGCTTTTCGGAGCAAC  
GGGAAAAATTGGATCTTTTCTTATGGAGAAGAGATGGAAGTTGAACTTCAAATCCAACCTCAACTCCCCCGCCATTAATGGACATTCAGCTCACGTGACCTGCTTCTCCAACGCCAT  
GGAAGGTCAAAAAATCCAAGACTCAGAGCTCTCAGGTTCTTCAACCTGCTTTTCCAGCTTCTCCTGCAATCAACACCTCTGCTGAGTTCTCCTCTTCTCTTCTCTAAATTTGCACCG  
ATTTCCGACTCTTCTCTGGTCATGGATTCATGAATTTGCTCGAAGAAGATCTAATAGCGAAGCAGGGATGCAAGTTGGAGAAGGAGATGCTAAGCATCTCGCAGGAACTGGTCTTACC  
AGTGATATAAACCCGGAGATCTCCTCAGGTAATGAAATTTGGGAGGAGTAACACTACGAAGAGTGCATCTGGAATTATTTAAATAAATTCAGAAATAATTCTGTGTGAATTTGGATATTATGAT  
ATTTATATATGGAATTGCTGGATGTGTATAAATTAGTATCAATTGTATAAGTTTATCCTCTTTGGATTATAATATAGTAGTAAATATATGATTGTTTGTGTTTGAAAAAAATCTTAATTTG  
TTGGCGCACTGAGTTAGCATAAGGGCACTAGATGCAATGCACAGTTACATCTCTCTCTCTCTCTTGGTGCTAACACATCATTTTTTTGTGGCTTTGAGCAGGGCTACATGACATTTCT  
CTTCTATTATGTATGTTCCATTTATATAAATTAATGTGTCCATTTTTTAATTAGAAATTTATTTGAGTAAATATATTGTGAATGTTATAGCTAAGATAAATCTTTATTTTTTCAAAAAATATTT  
AATCAAATATATTGTTAAATTGAACTTTCAAAGCATGATTGAGACTTCGTTT

>comp160962\_c0\_seq3

GCCACTTCAGCAAGCAAAAGCTCTCAGTCTGGTTATGGAGAAAATAGAAAGTGTCTATTAGCGATGGATTTGACAACAGCAACACAGGAACAGAGGATCAGATGCAGTTACCTCCAGGAT  
TCCGTTTCCACCCACAGATGAGGAGCTCATCACGACTACCTCTCTAATAAGTTCTTAGACGCTCGATTAGATCCCTTGCATCGGAGAAGCCGACCTCAACAAGTCCGAGCCATGGG  
ATCTTCCCAAACAAGCGAAGCTGGGAGACAAAGAATGGTATTTCTTCTGCGTGAAGGATCGAAAATACCCCACTGGCCTTAGAACGAATAGAGCTACTGAAGCTGGTTATTGGAAGGCT  
ACGGGAAAGGATAAGGAGATCTATAGGGGAAAGTTGCTGGTTGGAATGAAGAAGACGCTCGTGTCTACACAGGAAGAGCGCCGAGAGGAGAGAAGACCAGTTGGGTCATGCATGAGT  
ACAGATTGGAGGGAAAGTATGCCATCAATGGTCTATACAGAGCTGCTAAGGTTGATTGTCCGTTTGAAGCTGGAAATATTTTGTATCGCTGAGATCATCTTCTCCTTCTTTCTTTTAGTAACT  
ATCTTCATCGACTAATTAATTTATATATGCTGTGCTGTTGAACAGAACGAGTGGGTGATCTGCAGAGTTTTCAAAAAAGCTCACTTGGGAATCCTTTCGGGATGGGAAAAATGGCTTCTT  
CCTCTACGGAGAAGAGGTGGAAGATTCTCCGCCTCCTCCTCCGAAAACCTTCCGCCATTAATGGACATCCCAAGTCACGTGCCCTGCTTCTCCAACGGTATGGAGGGCCAAAAAGCCC  
ATGAACAAGACATGTCCTCTATCTTCTCCAAGTTCATCCCATGTCCACCGCTCTATGACGGTAGCATTATGAGCTTATTTGAAAGCCATGGTTTCGAAGAGAAGCAAGGATGCAAGAA  
GAACAGGGAGATGCTGAGCTTCTCAGAACAGACTGAGCTTATCGCCGAAATGAACACAGAAATTTACTGTGATAACGAAATTGGAAGGAGTTCTTTGAGCACTGTCTTTGGAATTGCTA

AATAATTCGTATTTGAAGTTCTTGCATGAATTGATAGTATGTGTATTAGACTTATTTCCCTTCGGTTTGATAAGATTGTGATTGTTGTGTTTGGAAATTGTTTCTGTTTTGAAAATTTGAGCATT  
GCAGTAATAATAAGTGTTCACAGTTTGTAAAAA

>comp160962\_c0\_seq4

GCCACTTCAGCAAGCAAAAGCTCTCAGTCTGGTTATGGAGAAAATAGAAGTGTCTATTAGCGATGGATTGACAACAGCAACACAGGAACAGAGGATCAGATGCAGTTACCTCCAGGAT  
TCCGTTTTCCACCCACAGATGAGGAGCTCATCACGCACTACCTCTCTAATAAGTTCTTAGACGCTCGATTAGATCCCTTGGCGATCGGAGAAGCCGACCTCAACAAGTGGAGCCATGGG  
ATCTTCCCAAACAAGCGAAGCTGGGAGACAAAAGAATGGTATTTCTTCTGCGTGAAGGATCGAAAATACCCCACTGGCCTTAGAACGAATAGAGCTACTGAAGCTGGTTATTGGAAGGCT  
ACGGGAAAGGATAAGGAGATCTATAGGGGAAGTTGCTGGTTGGAATGAAGAAGACGCTCGTGTCTACACAGGAAGAGCGCCGAGAGGAGAGAAGACCAGTTGGGTCATGCATGAGT  
ACAGATTGGAGGGAAAGTATGCCATCAATGGTCTATACAGAGCTGCTAAGAACGAGTGGGTGATCTGCAGAGTTTTCAAAAAAGCTCACTTGGGAATCCTTTCGGGATGGGAAAATTA  
TGGCTTCTTCTTCTACGGAGAAGAGGTGGAAGATTCTCCGCCTCCTCCTCGAAAACCTTCCGCCATTAATGGACATCCCAAGTCACGTGCCCTGCTTCTCCAACGGTATGGAGGGCC  
AAAAAGCCCATGAACAAGACATGCTCTATCTTCTCAAGTTCATCCCATGTCCACCGCTCTCTATGACGGTAGCATTATGAGCTTATTTGAAAGCCATGGTTTTCGAAGAGAAGCAAGG  
ATGCAAGAAGAACAGGGAGATGCTGAGCTTCTCAGAACAGACTGAGCTTATCGCCGAAATGAACACAGAAATTTACTGTGATAACGAAATTGGAAGGAGTTCTTTTGGAGCACTGTCTTT  
GGAATTGCTAAATAATTCGTATTTGAAGTTCTTGCATGAATTGATAGTATGTGTATTAGACTTATTTCCCTTCGGTTTGATAAGATTGTGATTGTTGTGTTTGGAAATTGTTTCTGTTTTGAAAATT  
TTGAGCATTTCAGTAATAATAAGTGTTCACAGTTTGTAAAAA

>comp160962\_c0\_seq9

AGCCCCCTGCCCTCTCTCTCTCTCAATATATCTTTCTATCATCTGTTTCAAGCAACCACCCAATAACATCTTCTTCTTCTCCGCCTCCTCCTCCAGCTTCTCCTTCTTCTCCGTCAA  
CTATTATAATTCCTTATCTAATGCGCAATGGAACAAGGAAATTCAGCTGTGAGCCATGGAATTGCTTCCACCAACACAGAAGATGAATACCAGATGGAATTACCTCCAGGTTTCAGATTCCA  
TCCCACCGATGAAGAATACTACTACTACCTCTCTAAAAAGGTCATCGACTCCAACCTTCGACCCACAAGCCATTGGCGTAGCAGACCTCAACAAGTGGAGCCATGGGATCTTCCAA  
AGAGAGCCAAGCTAGGAGAGAAAGAATGGTACTTTTTCTGCATAAGAGATCGAAAGTATCCACCGGTCTTCGAACAAATCGGGCTACTGATACTGGTTACTGGAAGGCTACAGGTAAA  
GACAAGGAGATCTACAGGGGGAAACAGATCGTTGGAATGAAGAAAACATTGGTTTTTTACAGAGGAAGAGCTCCAAGAGGTGAGAAGAGTAATTGGGTCATGCATGAATTTAGATTGG  
AAGGGAAATATTCAGCTTACAGTTTACCTGGAGCTTCAAAGAACGAGTGGGTAATCTGCAGAGTTATGAAAAAACTTAATTGTAAACGGGAAGAAGCTTTTCGGAGCAACGGGAAAA  
ATTGGATCTTTTTCTTATGGAGAAGAGATGGAAGTTGAACTTCCAAATCCAACCTCCAACCTCCCCCGCCATTAATGGACATTCAGCTCACGTGACCTGCTTCTCCAACGCCATGGAAGGTC  
AAAAATCCAAGACTCAGAGCTTTCAGGTTCTTCAACCCTGCTTTTCCAGCTTCTCCTGCAATCAACACCTCTGCTGAGTTCTCCTCTTCTCTTCTTCTTAAATTTGCACCGATTTCCGAC  
TCTTCTCTGGTTCATGGATTATGAATTTGCTCGAAGAAGATCTAATAGCGAAGCAGGGATGCAAGTTGGAGAAGGAGATGCTAAGCATCTCGCAGGAAACTGGTCTTACCAGTGATATA  
AACCCGGAGATCTCCTCAGGTAATGAAATTGGGAGGAGTAACTACGAAGAGTGCATCTGGAATTTAAAAATAAATTCAGAAATAATTCTGTGTGAATTTGGATATTATGATATTTATATAT  
GGAATTGCTGGATGTGATAAATTAGTATCAATTGTATAAGTTTATCCTCTTTGGATTCATAATATAGTAGTAAATATATGATTGTTTGTGTTTGGAAAAAAAATCTTAATTTGTTGGCGCA  
CTGAGTTAGCATAAGGGCACTAGATGCAATGCACAGTTACATCTCTCTCTCTCTCTTGGTGCTAACACATCATTTTTTTTGTGGCTTTGAGCAGGGCTACATGACATTTCTCTCTATTA  
TGATGTTCCATTTATATAAATTAATGTGTCCATTTTTTTAATTAGAAATTTATTTGAGTAAATATATTTGTAATGTTATAGCTAAGATAAATCTTTATTTTTTCAAAAAAATATTTAATCAAATA  
TATTGTTAAATTGAACTTTCAAAGCATGATTGAGACTTCGTTT

>comp161049\_c0\_seq1

TGCTCTTGGGCTCGCTCACAGTGCCTGCACATTTTCTAGGAGAAGATTCGGAGATTATCAATTGAACCCTTTAAAATTGGATCGCAGCTGCGTTTTGGAGCAAGGATTTGGTCCAAAAC  
CGCCTTCTTCTCTAACGCGCTCTTCTCTCCTTCATCACCTTCGTTTACGTTGCTTGTGATCAGGTCACCAGATTCTGAATGAGCTAGGGTTTTGTCATTTTATGCTTTGGTCCAGATTG

TTCGGAATCAGTTTCTTTTTGTTGATGGTCATCTAAGGATCCCAAGGAACGAGGAGTAGTTTCACAACCTCCAAAAATCGAAGATGGTAAACTTTGGGAAAAGGCTAATGGCTGACCAAAT  
GCCAGAATGGGAAAAGATACTATATTAATTACAAGCTAATGAAGAAAAGAGTCAAACAATACGTTCAACAATCTCAGCAAGGTGGAAACGATAAAAAGGCAAGTCCTGAAAGAGTTCTCAA  
GAGTGCCTTGATGATCAGATTGAAAAAATTGTCCTTTTTCTTCTAGAGAACAAGGGATTCTTGCAAGTAGAATTCAAGCACTGGGTGAGAAACACATAGCTATTTTAGAACAAACCAGAGC  
TATCTCAAATAAGTGAATTACGAGAAGCTTATAGAGCAGTTGGGCAAGATCTTTTAAAGTTGCTTAAGTTTCTTGATACGAATGCTACAGGCATTTCGTAAAAATTTAAAGAAGTTTGACAA  
ACGCATGGGATATACATTCAAAACTACTATGTGACCACCAGATCAAATCATCCTTATTCTCAGCTGCAGCAGGTTTTCAAACAAGTGGGTATCGGGCAGTTGTAGGAGCTTTATCTCGC  
AATCTTACAGATGTTCAAGATCAACAAGGCAGCTATATGTCTATTTATGATGATCCATCAATTGTTTTGAAGGACCCAGTTATAGACTTGATAAATGCATCCGTGGACAAACTGACCCATTC  
AACAAACTTCCTCCAATTTTTGGGAAAACGTGCTCTTATCATTCCAGATGATATACCAAGTTCTGAAGAAGACCATGTTGATGATGAAAGATATCATTTCATTTCACTTCTACTGAATCTGG  
CAAACACATTTTTATACATGGTCAATACGTATATTATTGTTCCCACTGCAGATGATTATTCGTTAAGCCTTGGAGCTGCAGCAACAGTTTGC GGAGTAATTATTGGGTCCATGGCTGTTGCGC  
AAGTATTTTCTTCAGTTTATTTAGTGCGTGGTCAAATAGATCATACTTCAAACCTCTTATATTCAAGCAGTATTGTACTGTTTTTTGGCAATGTTTTGTATGCGTTGGCTTATGATGGCTCATCC  
TTAAACAATTCTTCTTCGGTCGCTTATTCTGTGGGTGGGTTTCAGCTAGGGCTGTCAATCGACGATATATTAGTGATTGTGTGCCTCTAAAGATTTCGCATGCAAGCTTCTGCAGGATTGTT  
AGCGCCAGTGCTCTTGGAAATGGCTTGTGGCCCTGCCATTGCTGGCTTGCCTCAGACTAATTTCAAGATTTATTCCTTGACTATTAATCAAAACACGTTGCCTGGTTGGGTTATGGCTCTTTC  
TTGGCTGATTTATTTGATATGGCTATTGATTCATTCAAAGAGCCAACCTCATGACAATGTAGAGAAGATACAGCCGCAGGATAATACTGATGGGCATGTTGGCATTGGGGAAATGGAAAGC  
GGTCTTGCTCAACCTTTGCTATTAATTCAGAACATAAAGAAAATGATGGCGGAGAAGAATTTGATGATAGTGAAAGGGCTCCTGAGGACTCTCGCATGCCCGCAAATTCTATTTGTTTCAG  
CTTATAGGCTCCTTACACCATCAGTAAAGGTTCAACTATTAATCTATTTTCATGCTCAAATTTGGCATCGAGATTTTGTGTGAGAATCAAGTGTCAATTACGTCATATTACTTCAAGTGGACGA  
CCAGTTCTGTGCTATATTTCTTGCAATTCTAGGGCTCACGGTCTTCTGTTAATGCCATTGTGGGAAGTTACATATCCAACCTGTTTGAAGACAGGAAAATCTTATTGGCATCTGAGATTA  
TGATGTTACTAGGCATAGCCTTAAGCTTCCATGTTACAAGTTCTTATACAGTGATCCAATATGCTCCTCTGCACTCATCACCTTTGTATCTGCTGAAGTCCTTGAAGGTGTGAACCTTATCCC  
TCCTGTCTCGAGTAATGTCTTCGCGGCTTGTCTCGAGGAACCTACAACGGCGGACTTCTGTGACGGAAGCCGGGACATTGGCTCGGGTTGCTGCAGATGGCATGATAACATTGGCTGGGT  
TCTTGGGTGAAAGCAAACCTCCTGAATGTTACCCTTCTTCTTCTGTATTGATCTGCATTGTCTCCATTGCTGCCACATTCCTTACCTTCAACTCTCTTCTTAAAGAAAACAACCATCTTCCC  
AAACTCCTCCAGTTTTTATGGATAATTTGGCTGTTTTTTTTTTTTTTTTTTCTATTGGTTTGCCTGTATGCAAAGAATTAAGCCAGCCGATTCAATTTATTTTTTATTTAATAAATTTAGTTCTTCACT  
GTTGTGAGCAACATGGTCTCATTGCATTTGCTGAGGCTGTTCAGAAGCTTAGAATGATGATTTGAATGAGCTCTATGATGAGTGATAAAGTATATTTGAATCAACTCTTTAAAGAGGTTCTTT  
TTTAGCTCAATAAAAAGTTATTTTTTTAGTGGAGAAGCTGATTTTTTTTTTTTGGTTCTTTATCTAACTGATAATAATAAATATTGCATTGAAATTTTGATTTAGGCGTCGTTAGGGAGGATTTT  
TTTATTGCTTTTGAAACTAATTTTTTAATATAAAAATTTAACTTCTAAATTAAAAAGTTGTTTTAAGAA

>comp161049\_c0\_seq2

TGCTCTTGGGCTCGCTCACAGTGCCTGCACATTTTTCTAGGAGAAGATTTCCGGAGATTATCAATTGAACCCTTTAAAATTTGGATCGCAGCTGCGTTTTGGAGCAAGGATTTGGTCCAAAAC  
CGCCTTCTTCTCTAACGCGCTCTTCTCTCCTTCATCACCTTCGTTTACGTTGCTTGTGATCAGGTCACCAGATTCTTGAATGAGCTAGGGTTTTGTCATTTTATGCTTTGGTCAGATTG  
TTCGGAATCAGTTTCTTTTTGTTGATGGTCATCTAAGGATCCCAAGGAACGAGGAGTAGGTA CTCTGATTTTTCTTAGTTTCACAACCTCCAAAAATCGAAGATGGTAAACTTTGGGAAA  
AGGCTAATGGCTGACCAAATGCCAGAATGGGAAAAGATACTATATTAATTACAAGCTAATGAAGAAAAGAGTCAAACAATACGTTCAACAATCTCAGCAAGGTGGAAACGATAAAAAGGCA  
AGTCCTGAAAGAGTTCTCAAGAGTGCTTGTGATCAGATTGAAAAAATTGTCCTTTTTCTTCTAGAGAACAAGGGATTCTTGAAGTAGAATTCAAGCACTGGGTGAGAAACACATAGC  
TATTTTAGAACAAACCAGAGCTATCTCAAATAAGTGAATTACGAGAAGCTTATAGAGCAGTTGGGCAAGATCTTTTAAAGTTGCTTAAGTTTCTTGATACGAATGCTACAGGCATTTCGTAAAA  
TTTTAAAGAAGTTTGACAAACGCATGGGATATACATTCAAAACTACTATGTGACCACCAGATCAAATCATCCTTATTCTCAGCTGCAGCAGGTTTTCAAACAAGTGGGTATCGGGCAGT  
TGTAGGAGCTTTATCTCGCAATCTTACAGATGTTCAAGATCAACAAGGCAGCTATATGTCTATTTATGATGATCCATCAATTGTTTTGAAGGACCCAGTTATAGACTTGATAAATGCATCCGT

GGACAAACTGACCCATTCAACAAACTTCCTCCAATTTTTGGGAAAACGTGCTCTTATCATTCCAGATGATATACCAAGTTCTGAAGAAGACCATGTTGATGATGAAAGATATCATTTCATTT  
CACTTCTACTGAATCTGGCAAACACATTTTTATACATGGTCAATACGTATATTATTGTTCCCACTGCAGATGATTATTTCGTTAAGCCTTGGAGCTGCAGCAACAGTTTGGCGAGTAATTATTG  
GGTCCATGGCTGTTGCGCAAGTATTTTCTTCAGTTTATTTTAGTGCGTGGTCAAATAGATCATACTTCAAACCTCTTATATTCAGCAGTATTGTAAGTATTTTGGCAATGTTTTGTATGCGTT  
GGCTTATGATGGCTCATCCTTAACAATTCTTCTTCTCGGTCGCTATTCTGTGGGTTGGGTTTCAGCTAGGGCTGTCAATCGACGATATATTAGTGATTGTGTGCCTCTAAAGATTTCGCATGCA  
AGCTTCTGCAGGATTTGTTAGCGCCAGTGCTCTTGGAAATGGCTTGTGGCCCTGCCATTGCTGGCTTGGCTTTCAGACTAATTTCAAGATTTATTCCTTACTATTAATCAAAACACGTTGCCTG  
GTTGGGTTATGGCTCTTTCTTGGCTGATTTATTTGATATGGCTATTGATTTTCATTCAAAGAGCCAACTCATGACAATGTAGAGAAGATACAGCCGCAGGATAATACTGATGGGCATGTTGGCA  
TTGGGAAAATGAAAAGCGGTCTTGGCTCAACCTTTGCTATTAATTCAGAACATAAAGAAAATGATGGCGGAGAAGAATTTGATGATAGTGAAGAGGCTCCTGAGGACTCTCGCATGCCCG  
CAAATTTCTATTTGTTTCAGCTTATAGGCTCCTTACACCATCAGTAAAGGTTCAACTATTAATCTATTTTCATGCTCAAATTTGGCATCGAGATTTTGTGTCAGAATCAAGTGTCAATACGTCATA  
TTACTTCAAGTGGACGACCAGTTCTGTGCTATATTTCTTGAATTTCTAGGGCTCACGGTCTTCTCTGTTAATGCCATTGTGGGAAGTTACATATCCAACCTGTTTGAAGACAGGAAAATCT  
TATTGGCATCTGAGATTATGATGTTACTAGGCATAGCCTTAAGCTTCCATGTTACAAGTCTTATAACAGTGATCCAATATGTCTCCTCTGCACTATCACCTTGTATCTGCTGAAGTCTTGA  
AGGTGTGAACCTTATCCCTCCTGTCTCGAGTAATGTCTTCGCGGCTTGGCTCGAGGAACCTTACAACGGCGGACTTCTGTGACGGAAGCCGGGACATTGGCTCGGGTTGCTGCAGATGGCAT  
GATAACATTGGCTGGGTTCTTGGGTGAAAGCAAACCTCTGAATGTTACCCTTCTTCTTCTGTATTGATCTGCATTGTCTCCATTGCTGCCACATTCCTTACCTTCAACTCTCTTCTAAAG  
AAACAAACCATCTTCCCAAACCTCCAGTTTTATGGATATTTGGCTGTTTTTTTTTTTTTTTTTCTATTGGTTTGCCTGTATGCAAAGAATTAAGCCAGCCGATTCATTTATTTTTATTTAA  
TAAATTTAGTTCCTTCACTGTTGTGAGCAACATGGTCTCATTGCATTGCTGAGGCTGTTCAGAAGCTTAGAATGATGATTTGAATGAGCTCTATGATGAGTGTAAAGTATATTTGAATCAACT  
CTTTAAAGAGGTTCTTTTTTAGCTCAATAAAAAGTTATTTTTTTAGTGGAGAAGCTGATTTTTTTTTTTGGTCTTTATCTAACTGATAATAATAAATATTGCATTGAAATTTGATTTAGGCG  
TCGTTAGGGAGGATTTTTTATGCTTTTGAAACTAATTTTTTAATATAAAAATTTAACTTCTAAATTAAAAAGTTGTTTTAAGAA

>comp161049\_c0\_seq3

TGCTCTTGGGCTCGCTCACAGTGCCTGCACATTTTTCTAGGAGAAGATTTTCGGAGATTATCAATTGAACCCTTTAAAATGGATCGCAGCTGCGTTTTGGAGCAAGGATTTGGTCCAAAAC  
CGCCTTCTTTCTCTAACGCGCTCTTTCTCTCCTTCATCACCTTCGTTTACGTTGCTTGTGATCAGGTCACCAGATTCTTGAATGAGCTAGGGTTTTGTCATTTTATGCTTTGGTCAGATTG  
TTCGGAATCAGTTTCTTTTTGTTGATGGTCATCTAAGGATCCCAAGGAACGAGGAGTAGTTTCAAACTCCAAAATCGAAGATGGTAAACTTTGGGAAAAGGCTAATGGCTGACCAAAT  
GCCAGAATGGGAAAAGATACTATATTAATTACAAGCTAATGAAGAAAAGAGTCAAACAATACGTTCAACAATCTCAGCAAGGTGGAAAACGATAAAAAGGCAAGTCTGAAAGAGTTCTCAA  
GAGTGCTTGATGATCAGATTGAAAAAATTGTCCTTTTTCTTCTAGAAGAACAAGGGATTCTTGCAAGTAGAATTCAAGCACTGGGTGAGAAAACACATAGCTATTTTAGAACAACCAGAGC  
TATCTCAAATAAGTGAATTACGAGAAGCTTATAGAGCAGTTGGGCAAGATCTTTTTAAAGTTGCTTAAAGTTTCTTGATACGAATGCTACAGGCATTCGTAAAATTTTAAAGAAGTTTGACAA  
ACGCATGGGATATACATTCACAACTACTATGTGACCACCAGATCAAATCATCCTTATTCTCAGCTGCAGCAGGTTTTCAAACAAGTGGGTATCGGCGCAGTTGTAGGAGCTTTATCTCGC  
AATCTTACAGATGTTCAAGATCAACAAGGCAGCTATATGTCTATTTATGATGATCCATCAATTGTTTTGAAGGACCCAGTTATAGACTTGATAAATGCATCCGTGGACAACTGACCCATTC  
AACAACTTCTCCAATTTTTGGGAAAACGTGCTCTTATCATTCCAGATGATATACCAAGTTCTGAAGAAGACCATGTTGATGATGAAAGATATCATTTCATTTCACTTCTACTGAATCTGG  
CAAACACATTTTTATACATGGTCAATACGTATATTATTGTTCCCACTGCAGATGATTATTTCGTTAAGCCTTGGAGCTGCAGCAACAGTTTGGCGAGTAATTATTGGGTCCATGGCTGTTGCGC  
AAGTATTTCTTCAAGTTATTTTAGTGCATGGTCCAATAGATCATACTACAAACCTCTTCTTTTTAGCAGCGTCATGCTTCTAATAGGCAACACGTTGTATGCATTGGCTTATGATTTCAACTC  
TCTGGTGGTTCTTTTATTCGGTTCGCTTTTATGTGGGTTGGGCTCTGCTAGGGCAGTTAATCGTGCATACATCAGTGATTGTGTACCTTTTAAAGACTCGCATGAAGGCTTCTGCCGTTTTGT  
TAGTGCAAGTGTCTTGGAAATGGCTTGTGGCCCTGCACTTGTGGTTTGTCTCAAATGAAATTTAAACTTTATGCTATCACAATCAATCAAAATACATTACCAGGATGGGTTATGGCATTGCG  
CTTGGCTTGTGATATGCTATGGTTATGGTTTTTCATTTAAAGAACCATCCCAAGTTGTGAGGGAAAACCATCAAAATCTTAATGCTGGGGCAACGAAAGTGTGAATTAGAAAGTGGACT

TCGCCAATCATTATTGTCCAGTTCGAAAGAAAATCAAGATGAAGACGAAGAAAAAGAATGCGACGATAGTGAAGAGGCTTTGAAAGTACCAGCAAATTCATTGGTTCAGCTTATAGATT  
ATTAACACCATCTGTAAAGGTTCAATTATTGATTTATTTTATGCTAAAGTATGCAATGGAGATTTTGTATCGGAATCAAGTCTCGTAACCACATTATATTTTGGCTGGACTACGAGTGCAGTG  
GCCATTTTCTTAGCAATTCTTGGCCTAACAGTCCCTTCCGTGAAAATGCTGTGGTTGGAAGTTATATAACCAACTTGTTTCGAAGACAGGCAAATTTGTTTGGATCTGAAATTATGGTCTTAGT  
GGGTGTTATTTAAGTTTTTCGTGTCAGTCTCATACTCTGCTGTACAATATGTTTCCCTCGGCCCTCATCACATTCGTTGCTGCTGAAGTCTTGAAGGCGTCAACCTCTCTTCTATCCAG  
AATAATGTCATCAAGGCTTGTCTGTGGACCTTTAATGGCGGATTACTCTCAACTGAAGCAGGAACTTTGGCCAGGGTTGTTGCTGATGCCACTATCACATTAGCTGGCTATTTAAGGGAA  
GACTTGCTTCTTAATATTACTCTCTTTCCCTCTCTGTTGATCTGTATAGCTTCTATTACTGCTACATGTCTTACATATAACACTCTTTATTAATTTTTTTTCTTACTTTATTATTTTCTTTGTGCAG  
TGCTCTAAAACATTTATCAATGTATGTAATTCTTCTTTTTTTTTATTTTTTAGAAGTTCG

>comp161049\_c0\_seq4

TGCTCTTGGGCTCGCTCACAGTGCCTGCACATTTTTCTAGGAGAAGATTTCCGAGATTATCAATTGAACCCTTTAAAATTGGATCGCAGCTGCGTTTTGGAGCAAGGATTTGGTCCAAAAC  
CGCCTTCTTTCTCTAACGCGCTCTTTCTCTCCCTCATCACCTTCGTTTACGTTGCTTGTGATCAGGTCACCAGATTCTGAATGAGCTAGGGTTTTGTCAATTTATGCTTTGGTCCAGATTG  
TTCGGAATCAGTTTCTTTTTGTTGATGGTCATCTAAGGATCCCAAGGAACGAGGAGTAGGTACTCTCTGATTTTTCTTAGTTTCACAACCTCCAAAAATCGAAGATGGTAAACTTTGGGAAA  
AGGCTAATGGCTGACCAAATGCCAGAATGGGAAAGATACTATATTAATTACAAGCTAATGAAGAAAAGAGTCAAACAATACGTTCAACAATCTCAGCAAGGTGGAAACGATAAAAGGCA  
AGTCCTGAAAGAGTTCTCAAGAGTGCTTGTATGATCAGATTGAAAAAATTGTCTTTTTCTTCTAGAAGAACAAGGGATTCTTGCAAGTAGAATTCAGCACTGGGTGAGAAACACATAGC  
TATTTTAGAACAAACCAGAGCTATCTCAAATAAGTGAATTACGAGAAGCTTATAGAGCAGTTGGGCAAGATCTTTTAAAGTTGCTTAAGTTTCTTGATACGAATGCTACAGGCATTCGTAAAA  
TTTTAAAGAAGTTTGACAAACGCATGGGATATACATTCACAACTACTATGTGACCACCAGATCAAATCATCCTTATTCTCAGCTGCAGCAGGTTTTCAAACAAGTGGGTATCGGCGCAGT  
TGTAGGAGCTTTATCTCGCAATCTTACAGATGTTCAAGATCAACAAGGCAGCTATATGTCTATTTATGATGATCCATCAATTGTTTTGAAGGACCCAGTTATAGACTTGATAAATGCATCCGT  
GGACAACTGACCCATTCAACAAACTTCCCTCAATTTTTGGGAAAACGTGCTCTTATCATTCCAGATGATATACCAAGTTCTGAAGAAGACCATGTTGATGATGAAAGATATCATTTCATT  
CACTTCTACTGAATCTGGCAAAACACATTTTTATACATGGTCAATACGTATATTATTGTTCCCACTGCAGATGATTATCGTTAAGCCTTGGAGCTGCAGCAACAGTTTGCAGGAGTAATTATG  
GGTCCATGGCTGTTGCGCAAGTATTTCTTCAGTTTATTTTAGTGCATGGTCCAATAGATCATACTACAAACCTCTTCTTTTTAGCAGCGTCATGCTTCTAATAGGCAACACGTTGTATGCAT  
TGGCTTATGATTTCAACTCTCTGGTGGTCTTTTATTCCGGTCGCCTTTTATGTGGGTTGGGCTCTGCTAGGGCAGTTAATCGTCGATACATCAGTGATTGTGTACCTTTAAGACTCGCATGA  
AGGCTTCTGCCGGTTTTGTTAGTGC AAGTGCTCTTGG AATGGCTTGTGGCCCTGCACTTGTCTGGTTTGTCTCAAATGAAATTTAAACTTTATGCTATCACAATCAATCAAAAATACATTACCA  
GGATGGGTTATGGCATTGCTTGGCTTGTGTATATGCTATGGTTATGGTTTTCATTTAAAGAACCATCCCAAGTTGTGAGGGAAACCATCAAAATCTTAATGCTGGGGGCAACGAAAGTG  
CTGAATTAGAAAGTGGACTTCGCCAATCATTATTGTCCAGTTCGAAAGAAAATCAAGATGAAGACGAAGAAAAAGAATGCGACGATAGTGAAGAGGCTTTGAAAGTACCAGCAAATTC  
ATTGGTTCAGCTTATAGATTATTAACACCATCTGTAAAGGTTCAATTATTGATTTATTTTATGCTAAAGTATGCAATGGAGATTTTGTATCGGAATCAAGTCTCGTAACCACATTATATTTGG  
CTGACTACGAGTGCAGTGGCCATTTCTTAGCAATTCTTGGCCTAACAGTCCCTTCCGTGAAAATGCTGTGGTTGGAAGTTATATAACCAACTTGTTTCGAAGACAGGCAAATTTGTTTGGAT  
CTGAAATTATGGTCTTAGTGGGTGTTATTTAAGTTTTTCGTGTCAGTCTCATACTCTGCTGTACAATATGTTTCCCTCGGCCCTCATCACATTCGTTGCTGCTGAAGTCTTGAAGGCGTCA  
ACCTCTCTTCTATCCAGAATAATGTCATCAAGGCTTGTCTGTGGGACCTTTAATGGCGGATTACTCTCAACTGAAGCAGGAACTTTGGCCAGGGTTGTTGCTGATGCCACTATCACATTA  
GCTGGCTATTTAAGGGAAGACTTGCTTCTTAATATTACTCTCTTTCCCTCTCTGTTGATCTGTATAGCTTCTATTACTGCTACATGTCTTACATATAACACTCTTTATTAATTTTTTTTCTTACTT  
TATTATTTCTTTGTGCAGTGCTCTAAAACATTTATCAATGTATGTAATTCTTCTTTTTTTTTATTTTTTAGAAGTTCG

>comp161891\_c1\_seq3

CAAGGGTAACCACCACATAGAATAACTTCCTCTAAACTCCATGGCCGGCCCTCCTTTTGAAAATATTATAATTAATTAATAATTAATTATAATATCTCATTTTTAACTTATCAATACCTTCATAT

CATTTAATATTTAAGTTTCAAAGTCTTAAAACCTAAATTTTCTACAATTACACATACACTACATAAAGTTCTAGCACATACATAATATCCAAATAACAATCAATAAGAAATTAAGTGGTGGG  
TCTTCAATTGGCTCCTTGTGATGTGCCTCTATGCTCAGCTACAACCTTTTCTGGATTGAGCCCTGGAGTTGAACCTTTTATGTCATCTTGTGCTCTTGGTGCTCTTAGAAAAGTAGAATCTCCTA  
CTAAAAACCACAGCTCCACTGACATTTTCATGGCAGCCATTTTGTAGAGCGAAGTGGATGACAGCGAGAGGGAGCACGCAAGTAAACAGTCATGACCGGGTTCAGGCCGCCAACCAGCG  
TGCTCTCTCTCGTTGTCAATGCAACAAGCTCAAACAAAATCTT

>comp161891\_c1\_seq5

GAAAGAAAATCATCTCAAACGAAATCACAATCTTTACTAGCGTTGAAAAATCTGTAAGGCTGCATTAGCTTCCCTCTAATACAAAAGCCTCTTGGTTTTGGAAATATTTATTGCTCAAATAC  
GGCCATCTTTCTAGCTTCACTATAGGCAATAGCTCTCGCTATTTTCATGACCCCTACCCCTACTATCTTCATACTTTGATCATCCTTACTATCTCCATCTCCTCTCTGCTGCAAACAGCACCT  
CTTAGAAAAGTATAAATCTCCTACTAAAAACCACAGCTCCACTGACATTTTCATGGCAGCCATTTTGTAGAGCGAAGTGGATGACAGCGAGAGGGAGCACGCAAGTAAACAGTCATGACCG  
GGTTCAGGCCGCCAACCAGCGTGTCTCTCTCGTTGTCAATGCAACAAGCTCAAACAAAATCTT

>comp161891\_c1\_seq8

ATGCTGACGATGTCTCATCACTTGGTCGATAAAGTTCGCAGCTTCCCTTGAAGGTTGGAAAAGCCCTCAGTACTCTTTCTGGTGGTGGAAATACAACAACCTCAAATTTCCATTTTCGTGTA  
TAAGCTCTAAAACCTTCCATCATAGGTACCCTTCCAAAAGGAAGCTTCACGTCATTTCTGGGACAAAACCTGCAAACCTGAGCTACATATTGGCTTGGAGATTCTACTATACACACGCGC  
TCAACATTTTCATGCAAGTTGAAGCTGATTTGTGCCATTGTGAGGCTCAATCTTTACTAGCGGCGTTGTTGAAAATCTGTAGGGCTGCATTAGCTTCCCTCTAATACAAAAGCCTCTTGGTT  
TTGAAAAGATTTATTGCTCAAATACGGCCATCTTTCTAGCTTCACTATAGGCAATAGCAATTCATCTCTCGCTATTTTCATGACCCCTACCCCTACTATCTACATACTTTGATCATCCTTACT  
ATCCCATCTCCTCTCTGCTGCAAACAGCACCTCTTAGAAAAGTAGAATCTCCTACTAAAAACCACAGCTCCACTGACATTTTCATGGCAGCCATTTTGTAGAGCGAAGTGGATGACAGCGA  
GAGGGAGCACGCAAGTAAACAGTCATGACCGGGTTCAGGCCGCCAACCAGCGTGTCTCTCTCGTTGTCAATGCAACAAGCTCAAACAAAATCTT

>comp161891\_c1\_seq9

TTAGTCAAATATCATTCATAATTTATTTCTCAAACCTTCATATAACAATAATGTAGCTTGCTTAAAATCTATACATCAAAAAGAATAAGTATTAGATTACAAAATATCTCAAGGGCCCGGGTCTCA  
TTGATCCTGCCCTTATCAATTATACTCTAATGCTTCCCTTCTCTTCTCTTAGAAAAGTAGAATCTCCTACTAAAAACCACAGCTCCACTGACATTTTCATGGCAGCCATTTTGTAGAGCGAAG  
TGGATGACAGCGAGAGGGAGCACGCAAGTAAACAGTCATGACCGGGTTCAGGCCGCCAACCAGCGTGTCTCTCTCGTTGTCAATGCAACAAGCTCAAACAAAATCTT

>comp162234\_c0\_seq1

CAATTCTGCAGGTTCAAATTCCTCCCTATCGTGGAGGTAGCGGCAATCCTGGATCAACATTTAGCTCAGCAGCTCATAATCTTTGGGAAAATGGCGACGTAAACTATGGCACCAATTCTG  
CAGGTTCAAATTCCTTCTGAACTCTGGAAGTGGGAGTATTGCTGGATTTAGCAATGGTGGCTGAACTGGAGTGGCTTTTCTTCTCCTCTTGCAGCTCATGGTGTGAGTGATTCAACCTT  
TACTTCTGCAACTATGAATTATGCAGCAGGGAAGAATAATTTGGCTTGGTTGGTGGAAAGTTATGGAAGAGGCAGTGGCACTGGCTCTGCCAATTCTTCTTTGTTGCACCCATCAATGGT  
TTTGAAGGAAATTATAGTGATTATATGATGGAAGTTCAATTCATGGCGACCCTAATTGGCAGACAGCTCCTAAACTTGGTGGTTATAGTCCATTTGGTTATGGGCTTGGTTCTGCAGCTTC  
AGATGTCACATTTAAGGGTGGTTCAATTGATTACATGGGTGGTTATAATGTTTCGAATAGGCAGACGAATAGAGACGGATGACATTTGCGTGCATGTTTCTTCTTAGATATGTCATTTTCG  
CGAACAAGTGGAGTTTGTGTTTAAAATGTGTTGCTGCCTAGGAAGGTGTCATCTTTTTTGTGATGCTTATTATAGGTGAAGAAATCAGTAATAGCAGGTTTCATGACTGTGAATTTGGAATA  
TTTCATTGAATGTATAATGTGGTTAGTTAATTATTTAGGGCTAACCAGGG

>comp162234\_c0\_seq2

TTCTTGGGACACCAATGAGGATCGTCTTCGGGGTACTTCAAGAACTTTGGGGAGGTTGTGGAGGCGGTCATCATGAAGGACAGGACAACCTGGTTCGTGCCCGGGGATTCGGGTTTGTG  
TCTTTGCTGATCCCGCGTTGCTGACAGAGTTGTCATGGAGAAACATCAGATTGATGGCAGGATGGTTGAAGCCAAAAGGCTGTTCCAAGGGATGATCACCATATACTTAATAGAAACA



ACAGCAGCATCCAAGCTTCGCCTGGTCTTGGTTCGAACCAAAAAGATATTTGTTGGAGGCCTTGCTTCCAGTGTGACGGACGCTGACTTCAAGAAGTATTTGAACAGTTCGGAACCATC  
ACTGATGTTATTGTAATGTATGATCACAATACTCAAAGGCCAAGAGGATTTGGTTTCATAACCTTTGACTCAGAAGATGCTGTAGATAAGGTGTTGCATAAAAATTTTCATGAACCTCAATGG  
AAAGATGGTGGAAAGTCAAGAGAGCTGTTCCGAAAGAGCTTTCACCAGGGCCTAACTTGAGGTTACCAATAGGGGAATATAACCATGGTATTAATAGAATTAATAACTTTCTTAATGGATAT  
AATCAGGGTTACAATCCAACCTCAATGGGTAGCTATGGCATTAGAATGGATGGTAGATTTGGTCCTTAACTGGTGGAAAGGAAGGCCATCCCTTCTTTGACTCCTGGTTACGGAATTGGAA  
TGAATTTTGAGCCTGGGATGAACCAAATTTATGGTGGAAAGCTCGAATGTCAACGGTAGCGTTGGTTATGGTCGCTCCTTGAATCAATTCTTTGGTGGAAATTCGAGTAGGTTTGGTAATCC  
TATTGGTTATCGTGGAGGTAGCGGCAATCCTGGATCAACATTTAGCTCAGCAGCTCATAATCTTTGGGAAAATGGCGACGTAAACTATGGCACCAATTCTGCAGGTTCAAATTCCTTCCTG  
AACTCTGGAAGTGGGAGTATTGCTGGATTTAGCAATGGTGGCCTGAACTGGAGTGGCTTTTCTTCTCCTCTTGCAGCTCATGGTGTGAGTGATTCAACCTTTACTTCTGCAACTATGAATTA  
TGCAGCAGGGAAGAATAATTTGGCTTGGTTGGTGGAAAGTTATGGAAGAGGCAGTGGCACTGGCTCTGCCAATTCTTCTTTGTTGCACCCATCAATGGTTTTGAAGGAAATTATAGTGAT  
TCATATGATGGAAGTTCAATTCATGGCGACCCTAATTGGCAGACAGCTCCTAAACTTGGTGGTTATAGTCCATTTGGTTATGGGCTTGGTTCTGCAGCTTCAGATGTCACATTTAAGGGTGG  
TTCAATTGATTACATGGGTGGTTATAATGTTTTCGAATAGGCAGACGAATAGAGACGGATGACATTCCTTGCCTGTCATGTTTCTTCTTAGATATGTCATTTCCGGAACAAGTGGAGTTGTTTT  
AAAATGTGTTGCTGCCTAGGAAGGTGTCATTCTTTTTTGTGAGATCTTATTATAGGTGAAGAAATCAGTAATAGCAGGTTTCATGACTGTGAATTTGGAATATTTCAATTGAATGTATAATGTGG  
TTAGTTAATTATTTAGGGCTAACCAGGG

>comp162234\_c0\_seq4

TTCTTGGGACACCAATGAGGATCGTCTTCGGGGTACTTCAAGAACTTTGGGGAGGTTGTGGAGGCGTTCATCATGAAGGACAGGACAACCTGGTTCGTGCCCGGGGATTTCGGGTTTGTG  
TCTTTGCTGATCCCGCCGTTGCTGACAGAGTTGTCATGGAGAAACATCAGATTGATGGCAGGATGGTTGAAGCCAAAAGGCTGTTCCAAGGGATGATCACCATATACTTAATAGAAACA  
ACAGCAGCATCCAAGCTTCGCCTGGTCTTGGTTCGAACCAAAAAGATATTTGTTGGAGGCCTTGCTTCCAGTGTGACGGACGCTGACTTCAAGAAGTATTTGAACAGTTCGGAACCATC  
ACTGATGTTATTGTAATGTATGATCACAATACTCAAAGGCCAAGAGGATTTGGTTTCATAACCTTTGACTCAGAAGATGCTGTAGATAAGGTGTTGCATAAAAATTTTCATGAACCTCAATGG  
AAAGATGGTGGAAAGTCAAGAGAGCTGTTCCGAAAGAGCTTTCACCAGGGCCTAACTTGAGGTTACCAATAGGGGAATATAACCATGGTATTAATAGAATTAATAACTTTCTTAATGGATAT  
AATCAGGGTTACAATCCAACCTCAATGGGTAGCTATGGCATTAGAATGGATGGTAGATTTGGTCCTTAACTGGTGGAAAGGAAGGCCATCCCTTCTTTGACTCCTGGTTACGGAATTGGAA  
TGAATTTTGAGCCTGGGATGAACCAAATTTATGGTGGAAAGCTCGAATGTCAACGGTAGCGTTGGTTATGGTCGCTCCTTGAATCAATTCTTTGGTGGAAATTCGAGTAGGTTTGGTAATCC  
TATTGGTTATCGTGGAGGTAGCGGCAATCCTGGATCAACATTTAGCTCAGCAGCTCATAATCTTTGGGAAAATGGCGACGTAAACTATGGCACCAATTCTGCAGGTTCAAATTCCTTCCTG  
AACTCTGGAAGTGGGAGTATTGCTGGATTTAGCAATGGTGGCCTGAACTGGAGTGGCTTTTCTTCTCCTCTTGCAGCTCATGGTGTGAGTGATTCAACCTTTACTTCTGCAACTATGAATTA  
TGCAGCAGGGAAGAATAATTTGGCTTGGTTGGTGGAAAGTTATGGAAGAGGCAGTGGCACTGGCTCTGCCAATTCTTCTTTGTTGCACCCATCAATGGTTTTGAAGGAAATTATAGTGAT  
TCATATGATGGAAGTTCAATTCATGGCGACCCTAATTGGCT

>comp162234\_c0\_seq5

CAATTCTGCAGGTTCAAATTCCTCCCCTATCGTGGAGGTAGCGGCAATCCTGGATCAACATTTAGCTCAGCAGCTCATAATCTTTGGGAAAATGGCGACGTAAACTATGGCACCAATTCTG  
CAGGTTCAAATTCCTTCTGAACTCTGGAAGTGGGAGTATTGCTGGATTTAGCAATGGTGGCCTGAACTGGAGTGGCTTTTCTTCTCCTCTTGCAGCTCATGGTGTGAGTGATTCAACCTT  
TACTTCTGCAACTATGAATTATGCAGCAGGGAAGAATAATTTGGCTTGGTTGGTGGAAAGTTATGGAAGAGGCAGTGGCACTGGCTCTGCCAATTCTTCTTTGTTGCACCCATCAATGGT  
TTTGAAGGAAATTATAGTGATTATATGATGGAAGTTCAATTCATGGCGACCCTAATTGGCT

>comp162345\_c1\_seq1

TTTGGCGGTCCAGCTCCGTCTCTCAGTGCCTTGTCTCGTTGGCGATCGATTCCCTGGTTCATAAAGGCGCCAAATGGCGTTCGATTGGAGCCATACATGTGCTAATTACGATCGGATGAA

ATCTAGAGAGAGAGGGGGCGGCTGGGAATTGGTCGGCAATCTCAGCACATGATTGCACCCAGTGGCAAGTTTCGGATTGGCAGCCCTTTTCAAAGCTAAACCCTAGAAAGAGAAATGA  
TTGGAACGTCCAATAATTGGAGATGAGAGAAAGGCGACTGATCTGTTTATGTGGCGTAAATGTGCTTCCTTTCCGCGGAATTAGGTAAAGTGGGAACCTAGGGTTTTACTTGCCTTGCCCCG  
ATTTGGTTGGGGACAGAGTCCAGCTGGAAAAAGCGCAAAAAGCAGGGACGGGGGTGCACAAGTTCTTCCTTTTTTAGCATCTGTTGTGGTATGGAGTGGAACTTTAAGAATCCCTTAC  
AGTGGGATTGGGAAAACCTTAGGTTTGTTTAGTGGAAAAGAAAGTGAAGTTTCCAAGTCTACAGAGCTATCTGAGTGGAGAGCCGAAGGTGGAGCAATTAGTAATGGCTCCATGTATTCAT  
CTGGCAGTGGCACTTGCTCAGGTTCAGAACTGGGTAATGGTTCGTTGAAGAAAAACAGTAACAGCTTCCGTTGGTTTTTTATCAAAGGAAGGAAGTAAGACATCAGAGGTCAACCTCGAA  
GCAGCCCAAGGTATCATTGAGAACCAATTCAAGAATTATGAAATGGCCCAGGGAGAAGATTTTAGAACTTCCCCTGTGATTGTTAGATGTGTTGGTACTGGAGAGCCACCAATTGGTCTA  
AACTTGGCAAGAGAACCTTATTTGAAAATTTAGGTTCTGCAAATATTAAGACTTCTTCAGTTTCTATGACACCACCAGCTGCTTCAGTTAGAAGGTCTAGGGCATCTCATCAGGCCATTC  
AGCATGCTTACTGCCAGGTCGAGGGCTGCAGTATTGATCTAACGGCTGCAAAAGATTATCATCGCAAGCACAGAGTATGTGAAAGGCATTCTAAAAGTCTTAGGGTAATTGTTGCTGGTCA  
TGAACGTCGTTTTTGTGCAATGTAGCCGATTTTCATGATTTATGCGAGTTTGATCAGAAGAAACGGAGCTGTCGTAGGCGCTTATCTGACCATAATGCACGGCGACGCAAAGCCCAGCCT  
GAAACAATCTCCTTCAACCCCTCAACTCTTCCTTCTCTTTTTATGATGAAAGACAACAGATGAGTTTTTCTGAAATTTAGCTCCATTTAGTCATGTAAGACCTTCTACAAGCTCTATGTTG  
GATCAATCAGATGGCTTCAGCCTTTCAATGAGAAAAGGATCTTGGCTTAAAAACAATAAAAGCGGATGTTGATAGACAGTTACAGTTCCCTGAGATGGATTTCTCTAATAAAAATTAACCTT  
CTCGTGATGGCCTTAACAGACTTATACAATTCAAGTGTACCACTAATGAGGTCCTTAATCAAGGTCAGGAAGCTTATGTGCCTACTTCAAACCTGAATGGAGCACCGGACCTTCGGCGTGC  
TCTCTCTTCTGTCAAGTGATGCCTGGTGTCCATCGAGCACAGCGCAAAGCAGTATGATCCAGTTAGCCATTACCAATCCCATCACCACATCTAATCTCCGAGTTCGGACGGCGAATTA  
GCACCTGAATGCTGGCAGAATGATAATTCTCTGGCAGAACAGCACTACCTTTCAAACCTGCATGGCAATGGAAGCCACATTCAGGACTTGCAACTTAGCAAAGCTCCATATGAGAGCTCC  
TTTTTTGAATCCAACAGGCATTCTCCAAATCAGATGGCCATTTTACTGAGTTCAAGACTTGAAGGAATGGATATTTGCATTTTTTGAATCCTACTACAGATTGCAGTTGCTGCACCATTG  
AAGATGATGACTATCCTAACATTTTGTCTATGTTTCTGCACTGCCTGAAGCTTATTGGATGGAAAGATATGATTCTGAAGCTTGCCCTTGCCATCTGCAAAACTGATCAGCTTTGGGGTATA  
CAGTCCATCTTATGTTATCTAGTTGTTTTTGTGCTGATATAATATGAAACCTGCTGCAAGTTGAATCTTATATGTAAGTCCAACATAATCCATGCCATCATTATGTAAAACTCAACATGTAT  
GTATATGTATGATGTAAAACTCAACATGGATGTATGACTGGTGGCAGTTAATTTTTTTAAGCCCTTCTTGATTAATAATTTGGGACATTTTATTCTAAAAA

>comp162345\_c1\_seq2

TTAATTTAACTAAAACAAATAAGGAAAAATAATCATTAAATTACAGCATCAGTAGCTTTTTTATGATTTGATTTGCTTTGTGCTAGATATAGTTAAGATTCTATATATATTTTTATTTTTTCTTA  
CTTTGATGAGACAGGTGGCGTAAATGTGCTTCCTTTCCGCGGAATTAGGTAAAGTGGGAACCTAGGGTTTTACTTGCCTTGCCCCGATTTGGTTGGGGACAGAGTCCAGCTGGAAAAAAGC  
GCAAAAAGCAGGGACGGGGGTGCACAAGTTCTTCCTTTTTTAGCATCTGTTGTGGTATGGAGTGGAACTTTAAGAATCCCTTACAGTGGGATTGGGAAAACCTTAGGTTTGTTTAGTGGAA  
AAGAAAGTGAAGTTTCCAAGTCTACAGAGCTATCTGAGTGGAGAGCCGAAGGTGGAGCAATTAGTAATGGCTCCATGTATTCATCTGGCAGTGGCACTTGCTCAGGTTCAGAACTGGGT  
AATGGTTGTTGAAGAAAACAGTAACAGCTTCCGTTGGTTTTTTATCAAAGGAAGGAAGTAAGACATCAGAGGTCAACCTCGAAGCAGCCCAAGGTATCATTGAGAACCAATTCAAGAA  
TTATGAAATGGCCCAGGGAGAAGATTTTAGAACTTCCCCTGTGATTGTTAGATGTGTTGGTACTGGAGAGCCACCAATTGGTCTAAAACCTTGCAAGAGAACCTTATTTGAAAATTTAGGT  
TCTGCAAATATTAAGACTTCTTCAGTTTCTATGACACCACCAGCTGCTTCAGTTAGAAGGTCTAGGGCATCTCATCAGGCCATTCAGCATGCTTACTGCCAGGTCGAGGGCTGCAGTATTG  
ATCTAACGGCTGCAAAAGATTATCATCGCAAGCACAGAGTATGTGAAAGGCATTCTAAAAGTCTTAGGGTAATTGTTGCTGGTATGAACGTCGTTTTTGTGCAATGTAGCCGATTTCA  
TGATTTATGCGAGTTTGATCAGAAGAAACGGAGCTGTCGTAGGCGCTTATCTGACCATAATGCACGGCGACGCAAAGCCCAGCCTGAAACAATCTCCTTCAACCCCTCAACTCTTCCTTC  
TCTTTTTATGATGAAAGACAACAGATGAGTTTTTTCTGAAATTTAGCTCCATTTAGTCATGTAAGACCTTCTACAAGCTCTATGTTGGATCAATCAGATGGCTTCAGCCTTTCAATGAGAA  
AAGGATCTTGGCTTAAAAACAATAAAAGCGGATGTTGATAGACAGTTACAGTTCCCTGAGATGGATTTCTCTAATAAAAATTAACCTTCTCGTGATGGCCTTAACAGACTTATACAATTCAAG  
TGTACCACTAATGAGGTCCTTAATCAAGGTCAGGAAGCTTATGTGCCTACTTCAAACCTGAATGGAGCACCGGACCTTCGGCGTGTCTCTCTCTTCTGTCAAGTGATGCCTGGTGTCCAT

CGAGCACAGCGCAAAGCAGTATGATCCAGTTAGCCATTACCAATCCCATCACCACATCTAATCTCCGAGTTCGGACGGCGAATTTAGCACCTGAATGCTGGCAGAATGATAATTCTCTGGC  
AGAACAAGCACTACCTTTCAACTTGCATGGCAATGGAAGCCACATTCAGGACTTGCAACTTAGCAAAGCTCCATATGAGAGCTCCTTTTTTGAATCCAACCAGGCATTCTCCAAATCAGA  
TGGCCATTTTACTGAGTTCAAGACTTGAAGGAATGGATATTTGCATTTTTTGAATCCTACTACAGATTGCAGTTGCTGCACCATTGAAGATGATGACTATCCTAACATTTTGCTCATGTTTC  
TGCACTGCCTGAAGCTTATTGGATGGAAAGATATGATTCTGAAGCTTGCCTTTGCCATCTGCAAACTGATCAGCTTTGGGGTATACAGTCCATCTTATGTTATCTAGTTGTTTTTGTGCTGA  
TATAATATGAAACCTGCTGCAAGTTGAATCTTATATGTAAAGTCCAACATAATCCCATGCCATCATTATGTAAAACTCAACATGTATGTATATGTATGATGTAAAACTCAACATGGATGTATGA  
CTGGTGGCAGTTTAAATTTTTTAAAGCCCTTCTTGATTAATAATTTGGGACATTTTATTTCTAAAAA

>comp162345\_c1\_seq3

AAAAAAAAAGTGTGAGAAATCCATGTGTTTCGGTTGCTGGATAAGTAGATATGCTTGATTTCTCTTCAGTTGATTAGAACGTAAATCTGCAGTGCGGGTGAAAGGGACACAATCCCATTAGAT  
TACAGTATCGCATCAAGTTTTGCGTATCCATTTCCCAGTTTTCTCCTCTTGCATCCGTCTCTGCAGGGACGGGGGTGCACAAGTTCTTCCTTTTTTAGCATCTGTTGTGGTATGGAGTGGA  
ACTTTAAGAATCCCTTACAGTGGGATTGGGAAAACCTAGGTTGTTTGTAGTGGAAAAGAAAGTGAAGTTTCCAAGTCTACAGAGCTATCTGAGTGGAGAGCCGAAGGTGGAGCAATTAGT  
AATGGCTCCATGTATTATCTGGCAGTGGCACTTGCTCAGGTTCAGAAGTGGGTAATGGTTCGTTGAAGAAAACAGTAACAGCTTCCGTTGGTTTTTTATCAAAGGAAGGAAGTAAGACA  
TCAGAGGTCAACCTCGAAGCAGCCCAAGGTATCATTGAGAACCAATTCAAGAATTATGAAATGGCCAGGGAGAAGATTTTGAAGTCCCTGTGATTGTTAGATGTGTTGGTACTGGA  
GAGCCACCAATGGTCTAAAACCTTGGCAAGAGAACTTATTTTGAATAATAGGTTCTGCAATATTAAGACTTCTTCAGTTTCTATGACACCACCAGCTGCTTCAGTTAGAAGGTCTAGGG  
CATCTCATCAGGCCATTCAGCATGCTTACTGCCAGGTCGAGGGCTGCAGTATTGATCTAACGGCTGCAAAAGATTATCATCGCAAGCACAGAGTATGTGAAAGGCATTCTAAAAGTCTTAG  
GGTAATTGTTGCTGGTTCATGAACGTCGTTTTTGTGTCAGCAATGTAGCCGATTTTCATGATTTATGCGAGTTTGTATCAGAAGAAACGGAGCTGTGCTAGGGCGTTATCTGACCATAATGCACGG  
CGACGCAAAGCCAGCCTGAAACAATCTCCTTCAACCCCTCAACTCTCCTTCTCTCTTTTATGATGAAAGACAACAGATGAGTTTTTCTGAAATTTAGCTCCATTTAGTCATGTAAGAC  
CTTCTACAAGCTCTATGTTGGATCAATCAGATGGCTTCAGCCTTCAATGAGAAAAGGATCTTGGCTTAAAACAATAAAAGCGGATGTTGATAGACAGTTACAGTTCCCTGAGATGGATTT  
CTCTAATAAAATTAACCTTCTCGTGATGGCCTTAACAGACTTATAACAATTCAAGTGTACCACTAATGAGGTCCCTAATCAAGGTGAGGAAGCTTATGTGCCACTTCAAACCTGAATGGAG  
CACCGGACCTTCGGCGTGCTCTCTCTCTTCTGTCAAGTGATGCCTGGTGTCCATCGAGCACAGCGCAAAGCAGTATGATCCAGTTAGCCATTACCAATCCCATCACCACATCTAATCTCCG  
AGTTCGGACGGCGAATTTAGCACCTGAATGCTGGCAGAATGATAATCTCTGCGCAGAACAAGCACTACCTTTCAACTTGCATGGCAATGGAAGCCACATTCAGGACTTGCAACTTAGCAA  
AGCTCCATATGAGAGCTCCTTTTTTGAATCCAACCAGGCATTCTCCAAATCAGATGGCCATTTTACTGAGTTCAAGACTTGAAGGAATGGATATTTGCATTTTTTGAATCCTACTACAGAT  
TGCAGTTGCTGCACCATTGAAGATGATGACTATCCTAACATTTTGCTCATGTTTCTGCACTGCCTGAAGCTTATTGGATGGAAAGATATGATTCTGAAGCTTGCCTTTGCCATCTGCAAAAC  
TGATCAGCTTTGGGGTATACAGTCCATCTTATGTTATCTAGTTGTTTTTGTGCTGATATAATATGAAACCTGCTGCAAGTTGAATCTTATATGTAAAGTCCAACATAATCCCATGCCATCATTAT  
GTAAAACTCAACATGTATGTATATGTATGATGTAAAACTCAACATGGATGTATGACTGGTGGCAGTTTAAATTTTTTAAAGCCCTTCTTGATTAATAATTTGGGACATTTTATTTCTAAAAA

>comp162345\_c1\_seq4

AAAAAAAAAGTGTGAGAAATCCATGTGTTTCGGTTGCTGGATAAGTAGATATGCTTGATTTCTCTTCAGTTGATTAGAACGTAAATCTGCAGTGCGGGTGAAAGGGACACAATCCCATTAGAT  
TACAGTATCGCATCAAGTTTTGCGTATCCATTTCCCAGTTTTCTCCTCTTGCATCCGTCTCTGTAAGCATCGTTTCAGTGGAATGACGACTCTATAGTAGATTTATCCTTCTTCTTCCATCG  
TGATATTGACCTATGGCAGGGACGGGGGTGCACAAGTTCTTCCTTTTTTAGCATCTGTTGTGGTATGGAGTGGAACTTTAAAGAATCCCTTACAGTGGGATTGGGAAAACCTAGGTTTGT  
AGTGGAAAAGAAAGTGAAGTTTCCAAGTCTACAGAGCTATCTGAGTGGAGAGCCGAAGGTGGAGCAATTAGTAATGGCTCCATGTATTCTATGCGCAGTGGCACTTGCTCAGGTTCAGA  
ACTGGGTAATGGTTCGTTGAAGAAAACAGTAACAGCTTCCGTTGGTTTTTTATCAAAGGAAGGAAGTAAGACATCAGAGGTCAACCTCGAAGCAGCCCAAGGTATCATTGAGAACCAAT  
TCAAGAATTATGAAATGGCCAGGGAGAAGATTTTGAAGTCCCTGTGATTGTTAGATGTGTTGGTACTGGAGAGCCACCAATGGTCTAAAACCTTGGCAAGAGAACTTATTTTGAAG

ATTTAGGTTCTGCAAATATTAAGACTTCTTCAGTTTCTATGACACCACCAGCTGCTTCAGTTAGAAGGTCTAGGGCATCTCATCAGGCCATTCAGCATGCTTACTGCCAGGTCGAGGGCTG  
CAGTATTGATCTAACGGCTGCAAAAGATTATCATCGCAAGCACAGAGTATGTGAAAGGCATTCTAAAAGTCCTAGGGTAATTGTTGCTGGTCATGAACGTCGTTTTTGTGTCAGCAATGTAGC  
CGATTTTCATGATTTATGCGAGTTTGATCAGAAGAAACGGAGCTGTCGTAGGGCGTTATCTGACCATAATGCACGGCGACGCAAAGCCCAGCCTGAAACAATCTCCTTCAACCCCTCAACT  
CTTCTTCTCTCTTTTATGATGAAAGACAACAGATGAGTTTTTTCCTGAATTTAGCTCCATTTAGTCATGTAAGACCTTCTACAAGCTCTATGTTGGATCAATCAGATGGCTTCAGCCTTTCA  
ATGAGAAAAGGATCTTGGCTTAAAACAATAAAAGCGGATGTTGATAGACAGTTACAGTTCCCTGAGATGGATTTCTCTAATAAAAATTAACCTTCTCGTGATGGCCTTAACAGACTTATAC  
AATTCAGTGTACCACTAATGAGGTCCCTTAATCAAGGTCAGGAAGCTTATGTGCCTACTTCAAACCTTGAATGGAGCACCGGACCTTCGGCGTGCTCTCTCTCTTGTCAAGTGATGCCTG  
GTGTCATCGAGCACAGCGCAAAGCAGTATGATCCAGTTAGCCATTACCAATCCCATCACCACATCTAATCTCCGAGTTCCGACGGCGAATTTAGCACCTGAATGCTGGCAGAATGATAAT  
TCTCTGGCAGAACAAGCACTACCTTTCAACTTGCATGGCAATGGAAGCCACATTCAGGACTTGCAACTTAGCAAAGCTCCATATGAGAGCTCCTTTTTTGAATCCAACCAGGCATTTCTCC  
AAATCAGATGGCCATTTACTGAGTTCAAGACTTGAAGGAATGGATATTTGCATTTTTTGAATCCTACTACAGATTGCAGTTGCTGCACCATTGAAGATGATGACTATCCTAACATTTTGC  
TCATGTTTCTGCACTGCCTGAAGCTTATTGGATGGAAAGATATGATTTCTGAAGCTTGCCTTTGCCATCTGCAAAACTGATCAGCTTTGGGGTATACAGTCCATCTTATGTTATCTAGTTGTTT  
TTGTGCTGATATAATATGAAACCTGCTGCAAGTTGAATCTTATATGTAAAGTCCAACATAATCCCATGCCATCATTATGTAAAACCTCAACATGTATGTATATGTATGTATGATAAACTCAACATG  
GATGTATGACTGGTGGCAGTTTAATTTTTTAAGCCCTTCTTGATTAATAAATTTGGGACATTTTATTCTAAAAA

>comp162345\_c1\_seq5

TTTGGCGGTCCAGCTCCGTCTCTCTCAGTGCCTTTGTCTCGTTGGCGATCGATTCCCTGGTCCATAAAGGGCGCAAATGGCGTCGATTGGAGCCATACATGTGCTAATTACGATCGGATGAA  
ATCTAGAGAGAGAGGGGGCGGCTGGGAATTGGTCGGCAATCTCAGCACATGATTGCACCCAGTGGCAAGTTTCGGATTTGGCAGCCCTTTTCAAAGCTAAACCCTAGAAAGAGAAATGA  
TTGGAACGTCCAATAATTGGAGATGAGAGAAAGGTGGCGTAAATGTGCTTCCCTTTCCGCGGAATTAGGTAAAGTGGGAAGTGGGTTTTACTTGCCTTGCCCCGATTTGGTTGGGGACAG  
AGTCCAGCTGGAAAAAAGCGCAAAAAGCAGGGACGGGGGTGCACAAGTTCTTCTTTTTTAGCATCTGTTGTGGTATGGAGTGGAACTTTAAGAATCCCTTACAGTGGGATTGGGAAAA  
CTTAGGTTTGTTTAGTGAAAAAGAAAGTGAAGTTTCCAAGTCTACAGAGCTATCTGAGTGGAGAGCCGAAGGTGGAGCAATTAGTAATGGCTCCATGTATTATCTGGCAGTGGCACTTG  
CTCAGGTTTCAGAACTGGGTAATGGTTCGTTGAAGAAAACAGTAACAGCTTCCGTTGGTTTTTTATCAAAGGAAGGAAGTAAGACATCAGAGGTCAACCTCGAAGCAGCCCAAGGTATCA  
TTGAGAACCAATTCAAGAATTATGAAATGGCCCAGGGAGAAGATTTTAGAACTTCCCCTGTGATTGTTAGATGTGTTGGTACTGGAGAGCCACCAATTGGTCTAAAACCTTGGCAAGAGAA  
CTTATTTTGAATAATTTAGGTTCTGCAAATATTAAGACTTCTTCAGTTTCTATGACACCACCAGCTGCTTCAGTTAGAAGGTCTAGGGCATCTCATCAGGCCATTCAGCATGCTTACTGCCAG  
GTCGAGGGCTGCAGTATTGATCTAACGGCTGCAAAAGATTATCATCGCAAGCACAGAGTATGTGAAAGGCATTCTAAAAGTCCTAGGGTAATTGTTGCTGGTCATGAACGTCGTTTTTGTG  
AGCAATGTAGCCGATTTTCATGATTTATGCGAGTTTGATCAGAAGAAACGGAGCTGTGCTAGGGCGTTATCTGACCATAATGCACGGCGACGCAAAGCCCAGCCTGAAACAATCTCCTTCA  
ACCCCTCAACTCTTCTTCTCTTTTTATGATGAAAGACAACAGATGAGTTTTTTCCTGAATTTAGCTCCATTTAGTCATGTAAGACCTTCTACAAGCTCTATGTTGGATCAATCAGATGGCT  
TCAGCCTTCAATGAGAAAAGGATCTTGGCTTAAAACAATAAAAGCGGATGTTGATAGACAGTTACAGTTCCCTGAGATGGATTTCTCTAATAAAAATTAACCTTCTCGTGATGGCCTTAA  
CAGACTTATACAATTCAAGTGTACCACTAATGAGGTCTTAATCAAGGTCAGGAAGCTTATGTGCCTACTTCAAACCTTGAATGGAGCACCGGACCTTCGGCGTGCTCTCTCTTCTGTCA  
AGTGTATGCCTGGTGTCCATCGAGCACAGCGCAAAGCAGTATGATCCAGTTAGCCATTACCAATCCCATCACCACATCTAATCTCCGAGTTCCGACGGCGAATTTAGCACCTGAATGCTGGC  
AGAATGATAATTCTCTGGCAGAACAAGCACTACCTTTCAACTTGCATGGCAATGGAAGCCACATTCAGGACTTGCAACTTAGCAAAGCTCCATATGAGAGCTCCTTTTTTGAATCCAACC  
AGGCATTTCTCAAATCAGATGGCCATTTTACTGAGTTCAAGACTTGAAGGAATGGATATTTGCATTTTTTGAATCCTACTACAGATTGCAGTTGCTGCACCATTGAAGATGATGACTATCC  
TAACATTTTGTCTCATGTTTCTGCACTGCCTGAAGCTTATTGGATGGAAAGATATGATTTCTGAAGCTTGCCTTTGCCATCTGCAAAACTGATCAGCTTTGGGGTATACAGTCCATCTTATGTTA  
TCTAGTTGTTTTTGTGCTGATATAATATGAAACCTGCTGCAAGTTGAATCTTATATGTAAAGTCCAACATAATCCCATGCCATCATTATGTAAAACCTCAACATGTATGTATATGTATGATGATAA

ACTCAACATGGATGTATGACTGGTGGCAGTTTAATTTTTTTAAGCCCTTCTTGATTAATAATTTGGGACATTTTATTTCTAAAA

>comp163033\_c0\_seq10

TCGGCTACATGAATCTTTTTTCTCTTAACACTGCCGTTGTCAGGTCCCAAGTCCCAACACTGATTAATATGCTTAACAGTAGAGATAAACGAGAGAACTAAGAGCTTTGATGTTGCCGCT  
TGACAATATCAAAACAAACAGTAGCATAGGAGGCTAGCAGCAGAAGTGGAGGAGGCATACATAGGAGCTTTGACGTTGTCACACTTGCCAATTGATAGAGCTCCTCTGCATGCCCTTCC  
ACTGCTGCTGTTTGTCTCAATCTCAATTCTTTACTCTGATTTTCTTAGATGTGGAAGCGTTAGATGTATTTGAAGGCAGTAACTTGGACGAGAAGAGGAGGAGAGC

>comp163033\_c0\_seq12

GGTTGCGTTAGGTAGTCGACAGCAAGCGTAAAACCCAACACTGATTAATATGCTTAACAGTAGAGATAAACGAGAGAACTAAGAACTTTGATGTTGCCGCTTGACAAAATCAAAACAA  
ACAATAGCATAGGAGGCTAGCAGCAGAAGTGGAGGAGGCATACATAGGAGCTTTGACGTTGTCACACTTGCCAATTGATAGAGCTCCTCTGCATGCCCTTCCACTGCTGCTGTTTGTCT  
CAATCTCAATTCTTTTACTCTGATTTTCTTAGATGTGGAAGCGTTAGATGTATTTGAAGGCAGTAACTTGGACGAGAAGAGGAGGAGAGC

>comp163430\_c1\_seq2

GAGACAGATAGCTTGCATACCAATCCTTAGGGACAGGGAATACTTCCTACATAGCTTTTCCCTCTCCATTCATATTTATCTTAGTGAGCTTCATGGCTCGATCTGCATTGTTCTTGGTTTGTGT  
CATCTTTGCTTTCCCTCAGTTTCTCTGCGGAAGCTGAGGTGGTGGAGCACACTTTCATAGTGGGTAATCTTACAGTGAGAAGGCTTTGCAAGAACAACTTATCACAGCAGTTAATGGCGA  
ATATCCAGGCCCAACTATTAATGCTCATGAGGGTGACACTGTGGTCGTCTATGTCTCAATCAATCCCCCTATAATTTCCATTCATTGGCATGGGATATTCCAGCGTTTGACACAATGGGC  
TGACGGACCAAACTACATAACCCAATGCCCATTCAGCCACAAAATAGTTACACGTACAAGTTCAACATCATTGGGCAAGAGGGCACGCTTTGGTGGCACGCCACGTCTCCGCTCTCCG  
CGCCACCGTCTATGGCGCGCTTATCATCCGGCCGAGAGCCGGCGCCGCGCTATCCCTTTCCCCAGCCTTATAAGGAAGCCACCATTCTCCTTGGCGAGTGGTGGGACGCAGATGTGGT  
GAACCTTGAGAATGCTGCTCTCGCCGCGGGCGGTGCATTTAACAACCTCCGATGCATTACCATCAATGGCCGCCCCGGTGATCTCTACCCCTGCTCAAAAAACACACATAAACTAGA  
AGTAGAGCAAGGCAAGACCTACCTTCTCCGCATCATCAACGCTGCTCTCAACTCCCAACTCTTCTTCAAAATCGCCAATCACCTCTCACCGTCGTCGCCGCCGACGCCGCTATACCAC  
ACCTTTCCCAACCGACGTGATAACCGTCGCCCCCGGCCAGACCGTCGACGCCCTCCTGCACGCCAACGCTGCCCCCGGCCGATACTACATGGCCGCCCTCGCCTACGCCAGCACCCCTA  
ACCTCCCCGTCGACAACACCACAACCGTCGCCATCTCACCTACAAATACTCCTTCCCCCTTCTTCCCCGCGGTTATTGCCTTCCCTCCCGGCCTTCAACGACACCCCCACCGCCCACCA  
CTTCTACTCCAACCTCACCGCCCTCCAACGCCAAAACCTACAATCCGTCCCCCTCAATATCTCCGAGCACATGTTTATCACCTTCGGCCTCAGCCTCTCGCCATGCGCCGCCGACCAGCAG  
CTCTGCCAAGGCGTCGCCCTTATCCGCCAACATGAACAACGTCTCCTTTTCGTTTTCCGACTGCCATTTCACTTGGAGGCTCATTTTCGTGGACTCCAAGGGGTTTACACGAAGGACTTTC  
CTGATAGACCGCAACTGGCTTTCGATTACACGAATCCGAACGTAAACGCGGTGGGGGCGCCGTTGCCATCGTCGGATAAGGGGACGAAGGTGAAGAAGTTGCAGTACAACCTCGACGGT  
GCAGATTGTGCTGCAGAATACGGCGGTGCTTACGGCTGAGAGCCACCCGATTCATCTTACGGGTTAATTTCTATGTGCTGGCGCTGGGGTTTGGAAATTATAACGAGACGGAGGCCGT  
GAAGGCGTTTAAATTTGGTGAATCCGCAGGAGAGGAATACGATTGCGGTGCCGGCGGGAGGATGGGCGGTCAATCGGTTCTGGGCGGATAATCCTGGTATTTGGTTTCATGCACTGCCATTT  
GGATGTTACCTTCCGATTGGCCTGGGGATGGCATTGAGGTGGAGAACGGGCCAACGCCGTCGTCGACTTTGCCGCTCCGCCGCCGATTTTCTCGTTGTTAAGGAGCAGTTGAGA  
AGAAGAGAGCGGTTGAGAATAAGCAAATGAAGATTCCGGCAGCTTATTATTTGAATGGTTATGATAAGATTAATTGCATAATTGAGTGTGGATAATATTCGTTTAAAGATTGGATTGTGGGGTG  
ATTCAATTGTTTTTTTTTTTACAAGTTGTAATACTTGATTTATACTTTTTTTTTTACCTATAACAATGTGTGTAATATCATATTTGATTTGTGCTATGCAAAATGTTTTAATCTTTAAAAT  
TTAACTTGTTTACTTTTTGATATTCTACTTATTGTTCTCCTTATATAATTTTTTATCCTTTGATTTAAGATAAATAACATAACATTTATCTAGAATAAACATCAATGAAATATTAATAAATGATT  
ACC

>comp163430\_c1\_seq4

GAGACAGATAGCTTGCATACCAATCCTTAGGGACAGGGAATACTTCCTACATAGCTTTTCCCTCTCCATTCATATTTATCTTAGTGAGCTTCATGGCTCGATCTGCATTGTTCTTGGTTTGTGT

CATCTTTGCTTTCCTCAGTTTCTCTGCGGAAGCTGAGGTGGTGGAGCACACTTTCATAGTGGGTAATCTTACAGTGAGAAGGCTTTGCAAGAACAACTTATCACAGCAGTTAATGGCGA  
ATATCCAGGCCCAACTATTAATGCTCATGAGGGTGACACTGTGGTCTGCTATGTCCTCAATCAATCCCCCTATAATATTTCCATTCAATTGGCATGGGATATTCAGCGTTTGACACAATGGGC  
TGACGGACCAAACTACATAACCCAATGCCCATTCAGCCACAAAATAGTTACACGTACAAGTTCAACATCATTGGGCAAGAGGGGCACGCTTTGGTGGCACGCCACGCTCCGTCCTCCG  
CGCCACCGTCTATGGCGCGCTTATCATCCGGCCGAGAGCCGGCGCCGCCGGCTATCCCTTTCCCCAGCCTTATAAGGAAGCCACCAATTCTCCTTGGCGAGTGGTGGGACGCAGATGTGGT  
GAACCTTGAGAATGCTGCTCTCGCCGCCGGCGGTGCATTTAACAACCTCCGATGCATTCACCATCAATGGCCGCCCGGTGATCTTACCCTGCTCAAAAAAACACACATACAAACCTAGA  
AGTAGAGCAAGGCAAGACCTACCTTCTCCGCATCATCAACGCTGCTCTCAACTCCCAACTCTTCTTCAAAAATCGCCAATCACCTCTCACCGTCGTCGCCGCCGACGCCGCCTATACCAC  
ACCTTTCCCAACCGACGTGATAACCGTCGCCCCCGGCCAGACCGTGCACGCCCTCCTGCACGCCAACGCTGCCCCCGGCCGATACTACATGGCCGCCCTCGCCTACGCCAGCACCCCTA  
ACCTCCCCGTCGACAACACCACAACCGTCGCCATCCTCACCTACAAATACTCCTTCCCCCTTCTTCCCCCGCGTTATTGCCTTCCCTCCCGGCCCTTCAACGACACCCCCACCGCCACCA  
CTTCTACTCCAACCTCACCGCCCTCCAACGCCAAAACCTACAATCCGTCCCCCTCAATATCTCCGAGCACATGTTTATCACCTTCGGCCTCAGCCTCTCGCCATGCGCCGCCGACCAGCAG  
CTCTGCCAAGGCGTCGCCTTATCCGCCAACATGAACAACGTCTCCTTTCGTTTTCCGACTGCCATTTCACTTGGAGGCTCATTTTCGTGGACTCCAAGGGGTTTACACGAAGGACTTTC  
CTGATAGACCGCAACTGGCTTTCGATTACACGAATCCGAACGTAAACGCGGTGGGGGCGCCGTTGCCATCGTCGGATAAGGGGACGAAGGTGAAGAAGTTGCAGTACAACCTCGACGGT  
GCAGATTGTGCTGCAGAATACGGCGGTGCTTACGGCTGAGAGCCACCCGATTCACTTCACGGGTTAATTTCTATGTGCTGGCGCTGGGGTTTGAAATTATAACGAGACGGAGGCCGT  
GAAGGCGTTAATTTGGTGAATCCGCAGGAGAGGAATACGATTGCGGTGCCTGTAGGAGGCTGGGCGGTCATCCGATTCAGGGCTGATAATCCTGGTATTTGGATAATGCACTGCCACTTG  
GATGGGCACCTCTCGTTGGCCCTGGCGATGGCGTTGGAGGTGGGGAACGGGCCAACGCCGTCCACGACGGTGCCGCCGCCGCCAGATTACCCCCAGTGTGAGGTGTGCTGTGAG  
AAGCAAAAGAAATTGAGTTGCTTATTGGATTTGTAAGATTGGGTTCTACTGATCATGGGTTGTTTTCAAGCTTAGGTGCAATATGTAATTCATATTTTTTACAATTATACAAATAA  
TATAAAAATTATAATATAATTTGACCAAAGTTACACTCTCATAAATTAATAAAAAAATGAAATTTGATTGATACTTGTGTTCTAAGGCTTCGTTTG

>comp163584\_c0\_seq2

AAGCAAGTCTATTTAGGTGCGATTACTTTCGTTCAATTTTGTTTACTCGAATCAGTTGAATGAAATTTGGATGACTACAAACTCTTTTTTAATCGAGGCATCATATATCTTAAATTCATCT  
TTCTCTGCTTTTTGTTTTAAACCTTTTTTATAATTTTTATTTGTTCTGCAGGGGGCTTTGACACTGCTCATGCTGCGGCCAGAGCATATGATCGGGCTGCCATTAATTTTCGTGGAGTTGATG  
CTGACATCAATTTCAATCTCAGTGACTATGATGACGATTTGAGGCAGATGAGAAATCTGACCAAGGAGGAATTTGTGCATATTCTTCGTCGCCAAAGTACTGGATTTTCAAGAGGAAGCTC  
AAAATATAGAGGAGTGACTCTTACAAATGTGGTCGATGGGAAGCTCGCATGGGACAGTTACTTGGCAAAAAGTATATATATCTTGGGCTATATGACAGCGAAGTAGAAGCTGCAAGGGC  
CTACGATAAAGCTGCTATTAAGTGTAACGGAAGGGAAGCTGTCACCAATTTTGAACCAAGTACTTATGAAGGAGAACTTCTTTCCAAGGATGATGTGGAAGCTTTTGGCAAAGACATTGA  
TTTGAACCTTGAGTATATCTCAGCCTTCTGTCAGCAATTTGAAAAGAAATGTTAACCCAATGGGTTTACAATCCAATGTGGCCATATGAAGCTTCTAATGTCAAGAAAATGAAGGTCGAC  
CAACCTTCTTCCAATTCAGCTCTTCAAACACAGCACCTGGCTGTGGCACCCGAGCATCCTCGAGCCTGGAGTAATGTATATACAGGATTCATCCCCATCAATGAGGAAAATGCATCGAACA  
AGAAGGCTGAGCCAGGCTCAACAAGCTGGCCTTGAAATTCATAGTCTCTCCACCTCCCGCTTCTCTCGTCTGCAGCATCATCAGGATTCTCTGCCTCGAATACAATAACGAACCCTTC  
GATCCAGCCGCCACAATCGGCGTCAGCCTCTCACCTTACCATCCCCACCTCCACCACCTCCGGCCGCCAGCCATGGCTTCTTCCAAGGCTGAGTTCCCTTGCAAATTACAGTTGGCAAG  
CAAGTAGATTATCTACACGCTGGGATGGGAAGCAAAGCTACTACAGACAGTCTTCTTTTGTGTGCTGAGTGCCTTCTGCTGCAATGTGAACACCATTAATGCCTCTCTCTCTCTCCCT  
CTCTTTGGATCAAATAAATCGGGAGGTTAGATGTGGGGTTTCGGCTACTGGAGACAGAGAGAGCGACGGGTTTGGAGACCAGAACAAGGTCGGCTGCAGGCTCGAGTGGAGGCCGGCT  
TGATGGGGTCGACCTTGGACTGGGATTCGCGACTCACACAGAGGCCAGTTAGGACTGGGGTTTCGCGATTTGGAAGTACGGGAAGAAAGGCTTGGTCCGGTTGGATGCGACTTGGGCT  
CTGTTCCAATCGAAGGAGGAGACGGAAAGGAGTTCTGGCGTCTGTTAGCTTCAAGCGTTGAGAGCTCGAGAGTCCACGTATGTAGAAGGAGAGTATTGTCGAAGCCTTTTGCTTCGT  
TCCCTTGCTTTTAAACGACACAAAGGGCAAAGTCAAGACAAAGCACGCGATCAAAACACAGGAGGCGACACTTCGGTGCCGTCTGCAGATCAGGTATGGGGTGTCTGCATCTACAGGAT

TTGCGGTAGAGCTCCACCACAGGGCGAGTCTATGAAAGCG

>comp163584\_c0\_seq3

AAGCAAGTCTATTTAGGTGCGATTACTTCGTTTCATTTTGTCTTACTCGAATCAGTTGAATGAAATTTTGGATGACTACAACTCTTTTTTAATCGAGGCATCATATATCCTATTTAAATTCATCT  
TTCTCTGCTTTTTGTTTTAAACCTTTTTTATAATTTTATTTGTTCTGCAGGGGGCTTTGACACTGCTCATGCTGCGGCCAGAGCATATGATCGGGCTGCCATTAATTTCTGTGGAGTTGATG  
CTGACATCAATTTCAATCTCAGTGACTATGATGACGATTTGAGGCAGATGAGAAATCTGACCAAGGAGGAATTTGTGCATATTCTTCGTCGCCAAAGTACTGGATTTTCAAGAGGAAGCTC  
AAAATATAGAGGAGTACTCTTCACAAATGTGGTCGATGGGAAGCTCGCATGGGACAGTTACTTGGCAAAAAGTATATATATCTTGGGCTATATGACAGCGAAGTAGAAGCTGCAAGGGC  
CTACGATAAAGCTGCTATTAAGTGTAACGGAAGGGAAGCTGTCACCAATTTTGAACCAAGTACTTATGAAGGAGAAGCTTCTTTCCAAGGATGATGTGGAAGCTTTTGGCAAAGACATTGA  
TTTGAACCTTGAGTATATCTCAGCCTTCTGTCAGCAATTTGAAAAGAAATGTTAACCAATGGGTTTACAATCCAATGTGGCCCATATGAAGCTTCTAATGTCAAGAAAATGAAGGTCGAC  
CAACCTTCTTCCAATTCAGCTCTTCAAACACAGCACCTGGCTGTGGCACCCGAGCATCCTCGAGCCTGGAGTAATGTATATACAGGATTCATCCCCATCAATGAGGAAAATGCATCGAACA  
AGAAGGCTGAGCCAGGCTCAACAAGCTGGCCTTGGAAATCCATAGTCTCTCCACCTCCCGCTCTTCTCGTCTGCAGCATCATCAGGATTCTCTGCCTCGAATAACAATAACGAACCCCTC  
GATCCAGCCGCCACAATCGGCGTCAGCCTCTCACCTCTACCATCCCCACCTCCACCACCTCCGGCCGAGCCATGGCTTCTTCCAAGGCTGAGTTCCTTGCAAATTACAGGTACTTATG  
AACCAGCACAAATGTATTGTGTTAATTCGTTTTAATGTTACCTGAAGCTGAGGTTTAAAATTGTAGTATTGCTTTGCTTTGGGTAGTATAACTTGGGTGCTTGTTTTTGGTGTGTTACTT  
TACCACCATATACTACATATATCTATATTTTCAGGCACAAATATTTGAGATTTTATGCATCATATTGTCCATTCCTCTATGATGTGCTTATGCATTTCAATTATTGAGAATAAATATTGGTCAGTCA  
GAAATGTAAATGGCTTAGAAATGAAAACAAGAGAAAAAATTTTGAGAAAATGAATAAA

>comp163584\_c0\_seq4

TCGAATATTTTGGGGGCGAGCTATCCCTCTATAAGCGCATCTCTCGCTGCTTTTACTCGTCCCATCAGCTCTCTTTCTCTTCGGCTTCTCCTACCTCGATCCTTAACGCTACTCTTCGCCGC  
CGGCGAACTTCACCTCGACGGAGATAGTCAAATCTAACTGTCACGTCCACTTATGCCTGCAAGCTTCTTTGATTCCCCTTAGCTTTTCTGTCACTTGTCTTTCTTTTACCGGTGGATT  
CTTCGTTATTGCTGCTACTTTCTTCGTCGCGATTGCCGATCGGAGAGGATTTTATCTGTTCCGCCCTTTTCTAGTTTATTGTTGTAGAGGAAGAGGAAATATAGCCAATAACGGAGAAG  
ATGAAAGTCCAGAGTGGAGGGAGGAGGCATATCACATCTTCGCAATAAATGCTTGGAGATGTAAGGCCAATGTTCCGTAAGAACGATTCCGGCTCTCTCGTGTCTTCTATCTTTACCTCCTC  
TGGCTTTTCTTCCGAAATAGCCGAGGAAGCCCTATTAGGAAACGTTGACACCGGTTTTAACAAGCTTAGTTGGATTGTCTATAAGCTGTGGGAGCGTTAGTCTGCGTTTCAGAGATGGTG  
CTAGATCTCAACGTGGCATCTGGTTGCGAGTCGTCGTTGCCGAGAAAGCTCCTGCCAGAAGGATCTGTTGGAGTTCAAATGACCGATTCCGGGACATCGAACTCCTCTGTTCTCAAT  
GCTGAGGACTTAAGTAACATCGGTGACGAGGACTCTTGTCTAATCGCCCGGCTTTCAGGTTCAAGTATCTTGAAGGATGCAGATGAGGTAGAGGAGTACGGGGATGAAATCCGTGTTGCT  
TCGGAGGCTGACTTGATCACTCATCAGCTATTTCCACCGCAGGCTCAAACCTATTTTAGATGGCCCGCGGACTGGAACCTACGTTCCGCGTCATCTTCGTCCAGGCCGATTTGATAGACCTCA  
GCTTCTACCAGACTGATGCGTCGGCAACGGGGGAGGTTAAGCTTCTCAATCCCCAGCAACAGCAGCCTCAGGTGAAGAAGAGTAGAAGGGGGCCGAGATCACGCAGCTCTCAGTATCG  
GGGAGTCACGTTTTACAGGAGAACCGGAAGATGGGAATCTCACATATGGGATTGTGGGAAGCAAGTCTATTTAGGGGGCTTTGACACTGCTCATGCTGCGGCCAGAGCATATGATCGGGC  
TGCCATTAATTTTCGTGGAGTTGATGCTGACATCAATTTCAATCTCAGTGACTATGATGACGATTTGAGGCAGATGAGAAATCTGACCAAGGAGGAATTTGTGCATATTTCTCGTCGCCAA  
AGTACTGGATTTTCAAGAGGAAGCTCAAATATAGAGGAGTACTCTTCACAAATGTGGTCGATGGGAAGCTCGCATGGGACAGTTACTTGGCAAAAAGTATATATATCTTGGGCTATATG  
ACAGCGAAGTAGAAGCTGCAAGGGCCTACGATAAAGCTGCTATTAAGTGTAACGGAAGGGAAGCTGTCACCAATTTTGAACCAAGTACTTATGAAGGAGAAGCTTCTTTCCAAGGATGAT  
GTGGAAGCTTTTGGCAAAGACATTGATTTGAACTTGAGTATATCTCAGCCTTCTGTCAGCAATTTGAAAAGAAATGTTAACCAATGGGTTTACAATCCAATGTGGCCCATATGAAGCTT  
CTAATGTCAAGAAAATGAAGTTCGACCAACCTTCTTCCAATTCAGCTCTTCAAACACAGCACCTGGCTGTGGCACCCGAGCATCCTCGAGCCTGGAGTAATGTATATACAGGATTCATCCC  
CATCAATGAGGAAAATGCATCGAACAAGAAGGCTGAGCCAGGCTCAACAAGCTGGCCTTGGAAATTCATAGTCTCTCCACCTCCCGCTCTTCTCGTCTGCAGCATCATCAGGATTCTC

TGCTCGAATACAATAACGAACCCCTTCGATCCAGCCGCCACAATCGGCGTCAGCCTCTCACCTCTACCATCCCCACCTCCACCACCTCCGGCCGCCAGCCATGGCTTCTTCCAAGGCTG  
AGTTCCTTGCAAATTACAGTTGGCAAGCAAGTAGATTATCTACACGCTGGGATGGGAAGCAAAGCTACTACAGACAGTCTTCTTTTGTGTGCTGAGTGCCTTCTGCTGCAATGTGAACA  
CCATTAATGCCTCTCTCTCTCTCCCTCTCTTTGGATCAAATAAATCGGGAGGTTAGATGTGGGGGTTTCGGCTACTGGAGACAGAGAGAGCGACGGGTTTGGAGACCAGAACAAGGTCG  
GCTGCAGGCTCGAGTGGAGGCCGGCTTGATGGGGTCGACCTTGGACTGGGATTCGCGACTCACACAGAGGCCAGTTAGGACTGGGGTTCGCGATTTGGAAGTACGGGAAGAAAGGCT  
TGGTCGGGTTGGATGCGACTTGGGCTCTGGTTCGAATCGAAGGAGGAGACGGAAAGGAGTTCTGGCGTCGTGTTAGCTTCAAGCGTTGAGAGCTCGAGAGTCCACGTATGTAGAAGGA  
GAGTATTGTGCAAGCCTTTTGTTCGTTCCCTTGCCTTTTAAACGACACAAAGGGCAAAGTCAAGACAAAGCACGCGATCAAAACACAGGAGGCGACACTTCGGTGCCGTCTGCAGATCA  
GGTATGGGGTGTCTGCATCTACAGGATTTGCGGTAGAGCTCCACCACAGGGCGAGTCTATGAAAGCG

>comp163584\_c0\_seq8

TCGAATTATTTGGGGGCGAGCTATCCCTCTATAAGCGCATCTCTCGCTGCTTTTACTCGTCCCATCAGCTCTCTTTCTCTTCGGCTTCTCTACCTCGATCCTTAACGCTACTCTTCGCCGC  
CGGCGAACTTCACCTCGACGGAGATAGTCAAATCTAACTGTCACGTCCACTTATTGCCTGCAAGCTTCTTTGATTCCCCTTAGCTTTTCTGTCACTTGTTTTCTTTTCTTTTAGCCGTGGATT  
CTTCGTTATTGCTGCTACTTTCTTCGTCCGCGATTGCCGATCGGAGAGGATTTTATCTGTTCCGCCCTTTTCTAGTTTATTGTTGTAGAGGAAGAGGAAATATAGCCAATAACGGAGAAG  
ATGAAAGTCCAGAGTGGAGGGAGGAGGCATATCACATCTTCGCAATAAATGCTTGGAGATGTAAAGGCCAATGTTCCGTAAGAACGATTTCGGCTCTCTCGTGTTCATCTTTACCTCCTC  
TGGCTTTTCTTCGGAAATAGCCGAGGAAGCCCTATTAGGAAACGTTGACACCGGTTTTAACAAGCTTAGTTGGATTGTCTATAAGCTGTGGGAGCGTTAGTCTGCGTTTCAGAGATGGTG  
CTAGATCTCAACGTGGCATCTGGTTGCGAGTCGTGTCGGTGCCGAGAAGCTCCTGCCAGAAGGATCTGTTGGAGTTCAAATGACCGATTCCGGGACATCGAACTCCTCTGTTCTCAAT  
GCTGAGGACTTAAGTAACATCGGTGACGAGGACTCTTGTTCTAATCGCCCGGCTTTCAGGTTCAAGTATCTTGAAGGATGCAGATGAGGTAGAGGAGTACGGGGATGAAATCCGTGTTGCT  
TCGGAGGCTGACTTGATCACTCATCAGCTATTTCCACCGCAGGCTCAAACTATTTTAGATGGCCCGCGGACTGGAACCTACGTTTCGCGTCATCTTCGTCCAGGCCGATTTGATAGACCTCA  
GCTTCTACCAGACTGATGCGTCGGCAACGGGGAGGTTAAGCTTCTCAATCCCAGCAACAGCAGCCTCAGGTGAAGAAGAGTAGAAGGGGGCCGAGATCACGCAGCTCTCAGTATCG  
GGGAGTCACGTTTTACAGGAGAACCGGAAGATGGGAATCTCACATATGGGATTGTGGGAAGCAAGTCTATTTAGGGGGCTTTGACACTGCTCATGCTGCGGCCAGAGCATATGATCGGGC  
TGCCATTAATTTTCGTGGAGTTGATGCTGACATCAATTTCAATCTCAGTGAATGATGACGATTTGAGGCAGATGAGAAATCTGACCAAGGAGGAATTTGTGCATATCTTCGTGCGCAA  
AGTACTGGATTTTCAAGAGGAAGCTCAAAATATAGAGGAGTGAATCTTACAAATGTGGTTCGATGGGAAGCTCGCATGGGACAGTTACTTGGCAAAAAGTATATATATCTTGGGCTATATG  
ACAGCGAAGTAGAAGCTGCAAGGGCCTACGATAAAGCTGCTATTAAGTGTAACGGGAAGGGAAGCTGTACCAATTTTGAACCAAGTACTTATGAAGGAGAAGTCTTTTCCAAGGATGAT  
GTGGAAGCTTTTGGCAAAGACATTGATTTGAACTTGAGTATATCTCAGCCTTCTGTGAGCAATTTGAAAAGAAATGTTAACCCAATGGGTTTACAATTTCAATGTGGCCCATATGAAGCTT  
CTAATGTCAAGAAAATGAAGGTCGACCAACCTTCTTCCAATTCAGCTCTTCAAACACAGCACCTGGCTGTGGCACCCGAGCATCCTCGAGCCTGGAGTAATGTATATACAGGATTCATCCC  
CATCAATGAGGAAAATGCATCGAACAAGAAGGCTGAGCCAGGCTCAACAAGCTGGCCTTGGAAATTCATAGTCTCTCCACCTCCCGCTTCTCTCGTCTGCAGCATCATCAGGATTTCTC  
TGCTCGAATACAATAACGAACCCCTTCGATCCAGCCGCCACAATCGGCGTCAGCCTCTCACCTCTACCATCCCCACCTCCACCACCTCCGGCCGCCAGCCATGGCTTCTTCCAAGGCTG  
AGTTCCTTGCAAATTACAGTACTTATGAACCAGCACAAATGTATTGTGTTAATTCGTTTTAATGTTACCTGAAGCTGAGGTTTAAATTTGATGATTGCTTTGCTTTGGGTAGTATAACTTG  
GGTGTGTTTTTGGTGTGTTGATTTACTTTACCACCATATACTACATATATCTATATTTTCAGGCACAAATTTGAGATTTTATGCATCATATTGTCCATTCCTCTATGATGTGCTTATGCATTT  
ATTATTGAGAAAAAATATTGGTCAGTCAGAAATGTGAAATGGCTTAGAAATTGAAAAAAGAGATAAAAA

>comp163807\_c0\_seq1

CGCGTTGCTGTTGAGACGACACATGCCGATTCTTTTCGATTTGGTTAACGTGGGAAGGCCGAGGGTAATAATAACCATGATTCCAAAGCAAGAAATCCGTTTTCTTTTGCCTGCTCTTTT  
TCTCTCCTCCTCAAAAACTTAAAAGCATTTTGGGCCCTTTAATCTGCAACCTTAATGAAGGGAGAATTGGAAGAAAAGGGAAGAGTGATTAAGGTTATCCACCTTCATAAAAACTGTCATT



AATGGGAAGAGTATCGCTTGAGACTGGATGCCGTTTTCCATTTATATAAATGCTCTCGAACACCCCAATCGTTGGGCTGCACCAAGTTTGGCAAAAGTGGCCACTTTGTGACATATTACCT  
CTTCATCTCCAGCCTTTTTGCTTCTCTTCGCCCTGGCTCTCGTCTTAGGATTTAGTTTTGGCAGCGAGAAGGGGAGGGGGGGGAGGAAAGAAAGGAGGGATTTTTGAGACGGAGATGG  
GAAAAGGAGAGGGTTTTGAATGGCGGGAGCTGACCACCGAAGCTGAACCAGAGCGTAGAAGTTGGGGTGAGGCTGAGAGAGATGTGGGATCTCAACGGCTCGCCGGATAATATGGT  
GGGCTCGGAGGGGGACGAAGGCGAGAGTTCATCGCAGAGGAAGGAAAGGAGCCGGAGTCTGCTGTGTCGACGGAAAATTCAAGCTCGTCGGCGGTTGTCTGATAGAGGCTCCGACGA  
AGGGGAGGACAACCTCTGGCGACAGAGAAGTTGGAAAAATCTTCGGGATCAGCGTCACGGGCGCCAGCAGCCGTTTTGTGACGCGCCAGTTCTTCCCCTCTGGCGAAGCAGTGGCGCA  
GAACTGCGGTGATCCGCCACCGAGGGCGCACTGGGCGGCGGTTTCAAGTTTCGACCACCGAATCGGCAGCTGCGGCAGCGCCTTCAGGGCAACCGATGAAGAAGAGCAGGCGAGGACC  
GAGGTCAAGGAGCTCTCAGTACAGGGGAGTGACGTTTTACCGGCGAACAGGCCGGTGGGAATCCCATATATGGTTTGTTCCTCGCTTCAGTCAACCGAAAGCTAGAAAAAGAAGTTTT  
CCCTTTTTCTTTAAATTTTTCGGAACTTGGTTCTGATTCTAAACATCCTATCATTATTTTTGTTTCATTTAACTGTGCAGGGATTGCGGAAAGCAAGTGTATTTGGGTGGATTTGACTGCCC  
ATGCCGCTGCCCGGGCGTATGATCGAGCGGCGATCAAGTTTCGTGGTGTGACGCGCGACATAAACTTCCATTTGGATGACTATGAAGATGATTTGAAGCAGATGGGCAATTTAACAAGG  
AAGAATTTGTTTCATGTGCTCAGGAGACAGAGCACTGGGTTCCCAAGAGGAAGCTCCAAGTACAGGGGAGTCAACCTCCACAAATGCGGCCGATGGGAAGCTAGAATGGGCCAGTTCCCT  
TGGAAGAAGTATGTGATTTAGGCCTTTTCGACACCGAAGTGGAGGCAGCAAGAGCTTATGACAAGGCAGCGATTAATTTAATGGGAAAGACGCAGTGACAACTTTGATGCCAGCA  
TATACGCTGATGAGCTAGCTGTTCAAGCTGAGCACAATCTTGATCTGAGTCTGGGGAGCTCAGCCCCTAAGATAAGCACAGCCAATCCAATGGATGAGGAGAGCTCCGGCTGTGCAAGC  
AGCAGCGGTGGCGCAGATCAACGGTTTTCTGACTACTTGCCGTGATGTCATCAACACAAACACAAAGCTCAAGCTGCCTGAGAATGAAAGCAGAGTCAATTTCCACCTCGGCCATCATAT  
GGAAATGCTGAAGCATTCTTCTACATCCAGGCGCCGAGTTCGCGCTTCCCCACCGCAGGCAGTCCGGTTCCAGTTCATCCGTCACCAGCTCTCTCATCCTTCCAGTTTTTACCAATAT  
CATCCTGGCGCAACTTGGCCGAGCGAGGAGCAGTGGAGACGTTTCATCTTTCACTGGCGATCGACGGTGAAGCAGTGAAGTAAGTGGGCTCCGCTGCCCGCCGTCGTGCGCCCTC  
AATTTCTCTCCCCACCGCCGTAGTAGCTGCAGCATCATCAGGATTTCCACCGCAGGCAGTGAAGACCTCTCACAATTTGGCTGCACAAAACGGGTTGAGTCAATTTGGGCCGACCATGA  
CCCGACTCAACTCTCCCCACCAAAAAACACAGGGTTGAAAAATATAAGATTTTGTGTTGTTGAGATACTTGACAAAGGAGAAATGACAGCGCCTCTATCCTCTCTGCCTTTTTTTACCTG  
TTTTCTTTTCATTCGCATTTTTTGTGCAAGCAAACATTCTGTTCTAATGGAGATAGAGAGAGAAAGAGAGAGAAATTTTTCTGGAGAAGTAAAGAAAAATTTTTAAGAGACGAGGTGAT  
TATAAGAGCCCAAATCTGTTGCCGGCTGAAGCCGGCTATGTGTGATAAAG

>comp163807\_c0\_seq2

CGCGTTGCTGTTGAGACGACACATGCCGATTTCTTTTCGATTTGGTTAACGTGGGAAGGCCGAGGGTAATAATAACCATGATTCCAAAAGCAAGAAATCCGTTTTTCTTTTTGCCTGCTTTTT  
TCTCTCCTCCTCAAAAACCTTAAAAGCATTGTTGGGCCCTTTAATCTGCAACCTTAATGAAGGGAGAATTCGAAGAAAAGGGAAGAGTGATTAAGGTTATCCACCTTCATAAAAACCTGTCATT  
AATGGGAAGAGTATCGCTTGAGACTGGATGCCGTTTTCCATTTATATAAATGCTCTCGAACACCCCAATCGTTGGGCTGCACCAAGTTTGGCAAAAGTGGCCACTTTGTGACATATTACCT  
CTTCATCTCCAGCCTTTTTGCTTCTCTTCGCCCTGGCTCTCGTCTTAGGATTTAGTTTTGGCAGCGAGAAGGGGAGGGGGGGGAGGAAAGAAAGGAGGGATTTTTGAGACGGAGATGG  
GAAAAGGAGAGGGTTTTGAATGGCGGGAGCTGACCACCGAAGCTGAACCAGAGCGTAGAAGTTGGGGTGAGGCTGAGAGAGATGTGGGATCTCAACGGCTCGCCGGATAATATGGT  
GGGCTCGGAGGGGGACGAAGGCGAGAGTTCATCGCAGAGGAAGGAAAGGAGCCGGAGTCTGCTGTGTCGACGGAAAATTCAAGCTCGTCGGCGGTTGTCTGATAGAGGCTCCGACGA  
AGGGGAGGACAACCTCTGGCGACAGAGAAGTTGGAAAAATCTTCGGGATCAGCGTCACGGGCGCCAGCAGCCGTTTTGTGACGCGCCAGTTCTTCCCCTCTGGCGAAGCAGTGGCGCA  
GAACTGCGGTGATCCGCCACCGAGGGCGCACTGGGCGGCGGTTTCAAGTTTCGACCACCGAATCGGCAGCTGCGGCAGCGCCTTCAGGGCAACCGATGAAGAAGAGCAGGCGAGGACC  
GAGGTCAAGGAGCTCTCAGTACAGGGGAGTGACGTTTTACCGGCGAACAGGCCGGTGGGAATCCCATATATGGGATTGCGGAAAGCAAGTGTATTTGGGTGGATTTGACTGCCCATG  
CCGCTGCCCGGGCGTATGATCGAGCGGCGATCAAGTTTCGTGGTGTGACGCGCGACATAAACTTCCATTTGGATGACTATGAAGATGATTTGAAGCAGATGGGCAATTTAACAAGGAAG  
AATTTGTTTCATGTGCTCAGGAGACAGAGCACTGGGTTCCCAAGAGGAAGCTCCAAGTACAGGGGAGTCAACCTCCACAAATGCGGCCGATGGGAAGCTAGAATGGGCCAGTTCCCTGG

GAAGAAGTATGTGTATTTAGGCCTTTTCGACACCGAAGTGGAGGCAGCAAGAGCTTATGACAAGGCAGCGATTAAATTTAATGGGAAAGACGCAGTGACAACTTTGATGCCAGCATATA  
CGTGATGAGCTAGCTGTTCAAGCTGAGCACAATCTTGATCTGAGTCTGGGGAGCTCAGCCCCTAAGATAAGCACAGCCAATCCAATGGATGAGGAGAGCTCCGGCTGTGCAAGCAGCA  
GCGGTGGCGCAGATCAACGGTTTCTGACTACTTGCCGTGATGTCATCAACACAAAACACAAAGCTCAAGCTGCCTGAGAATGAAAGCAGAGTCAATTTCCACCTCGGCCATCATATGGAA  
ATGCTGAAGCATTCTTCTACATCCAGGCGCCGAGTTTCGCGCTTCCCCACCGCAGGCAGTCGGGTTCAGTTCATCCGTCACCAGCTCTCTCATCCTTCCAGTTTTACCAATATCATCC  
TGGCGGCAACTTGGCCGACGAGGAGCAGTGGAGACGTTTCATCTTCACTGGCGATCGACGGTGGAAAGCAGTGGAACTAACTGGGCTCCGCTGCCCGCCGTCGTCGGCCCTCAATTC  
TCCTCCCCACCGCCGTAGTAGCTGCAGCATCATCAGGATTCCCACCGCAGGCAGTGAAGACCTCTCACAATTGGCTGCACAAAAACGGGTTCAGTCAATTGGGCCGACCATGACCCGA  
CTCAACTCTCCCCACCCAAAAACACAGGGTTGAAAAATATAAGATTTTGTGTTGTTGAGATACTTGACAAAGGAGAAATGACAGCGCCTCTATCCTCTCTGCCTTTTTTTACCTGTTTCC  
TTTTCAATTCGATTTTTTTGTTGCAAGCAAACATTCTGTTCTAATGGAGATAGAGAGAGAAAGAGAGAGAAATTTTTCTGGAGAAGTAAAGAAAAATTTTTAAGAGACGAGGTGATTATAA  
GAGCCCAAATCTGTTGCCGGCTGAAGCCGGCTATGTGTGATAAAG

>comp164322\_c0\_seq1

TTGGTTAGATGGTGAAGCGCCCCCTCCCTTCTCCATCAATTTTCAAATCTTCTCCATAAAAGTATCGTTTTGCAATGAAGATCACCAAATCCTCTACCGGGCGGGACTACAAGCAGCGCT  
TCACCATCTAACCAAACCCATCGACTCCTCCCCTCTTACGAACCCACCTCCGTTCTTGACCCTCACATCACTTCAAGTCTTCCGCCGACGAGCAGCCGCCCGCCAGTGGCGGTGC  
ATGCCAGCGCCTTCCCTTCCCTGGGACTCCGCCTCCATCCCCCTGGCCCTCACTTCATCCGCCTCCGACGACTGGTCCGATCCCCTTTCCTTTCTCCTCGCCGACATGGACGACCCCTGC  
TCCTTCTTCCCCGACCTCTCCACCCTACACCACCACCGCCGGAGGCGAAAGCTCCCACCTTGACCTCCTCCTCCGCGCCGCACACGCCGTCGAGATCGGAGACCTCAATTCCTCCCTT  
TCGATATTGGCTCGGCTCAATTTATCCTCCCTGTTCCACCGGCTCCCCCTCCACCGCGCCGCTTCCACTTCAAAGACGCCCTACTCTCCCTCCTCCCCATCGCCGACCGCCCATCCC  
GGAACCCCTCTCTCTGCCATCGAACTCGTCTCCGCATCGCCGCTCACAAAGCCTTCTCAGATCTCTCCCCATCCCGCAATTTACCTCTTTCACCGCCAACCAAACCCCTCCTCGAATCC  
GTCGACGCCGCCCTTCCCTCCACCTAATTGACTTCGACCTTGGTCTTGGCGGCCAGTGGTCTCCTTCGCACACGATCTCGCTGCCCGCTCCCGCGCCCGCCGTCCTCCCGCTCCCCCTC  
TCCGAATCACCGCCGTCGTCCTCCGAAGAGACCGCCGAGACCGCCCTCGCCCGCGACAATCTTCGCGACTTCGCTCGTGGGATCGGTCTCCGATTAACGGTTCGAATTCGTCCTCAGCG  
CTCTCGCTGGAGTCCGGCTGGCCCCGGAGAGGCGGTGGCGGTCGTTCTTACGCCGACCATCTTCCGGCTGATCGGTGTCTCCGTCCTGCGGTTCTGTGCGGGGGTTGCGGGCGGGTG  
GTGTTGGTCTGATGGGGAGGGGTACTGCGGCAGCGTGGGATCATTCCGGCGGAGGTTCCGCCGAGGATTGGAGTACTACGCGGCTGCGATGGAGGTCTGGACGCTTGGGCGGCGG  
CCGCGGGGGCAGGTGAGGAGGCCGTGAGGAGAATCGAAAAGGCGCTGTTACGGCCAGAATTTTCGCTGCGGTGGCGGGCAGCAGCGGCGGTGGGAGATTGGAGGGAAGTGATGG  
CTTCGGCGGGGATGGTTGTGGCGGAGCTGAGTGAGTTCACGGAGTCCCAGGCGGAGTGGTTGCTGAGGCGAGCGCCGGTGGAGGGGTTCCACGTGGCTAGGAGGGAGGGAGCCTTGG  
TACTGAGCTGGAAGGGAAGGGAGCTGTCTGCCACATCGGCATGGCGGTGCCGCTGACTCTGAGTTTTGAAGAATGGATTGCTGATTTTAGCTTGTATTATCTCCATGAAATTTTCTCCGT  
ATAATTACTTCTTACTTTATTATTATGAATATTTTCTATAAATGGCATAGGAAAAGATCGATCAAGCAGGTCTTCGCCATGGATAATTTTTACTTTTAATAGATATATATGATGTAGCTTCTATTAG  
GTTTTTATTGGATTTTTTGGCTTCTGTAATATATAATATATATTGCAAGGGGTTTTAATTTTCATGGGATTATTAATTTGTATGTATGCATATATATTAACAAAATAGGAAAAATAATTTAAT  
GCACTTAATCATCTTTAGCATGAAAAAATAATTTAATGCACTTA

>comp164769\_c0\_seq1

TCTCTCTCTCTCTCTTTCTTGGCGTCTCTTTCTCTCCTGGCTTCTCTTTCAGTCTCTTCTCAGCATTCTCCTCCTTCCCTCACTTCTTCTCCAGCCACCGCACAGTTGAGCTC  
GTCGGAGGAGGCCGGGACGAGGACGGGAACCGCTGCGAAAAGGAGATTCAATCGCCGTGAGCGCAGAAGACGCAATCTATGTTCTGAACTAAGCGAAAAAGGAGATCATGGCGAGAAG  
GAGAAGAGGCAGCGATCGTCTTTAAATCGGAAAAATCCGACTGGTAGGATTCATCAAATTGCAGACTTAAAAACCAAACGGGAGGAAATGGGATTTAGCTATCAGATTTGCAGAAGAAA  
GAATGAAGAACATTGAAAATTGCTTGGATTCCCAATTATGGCATGCTTGCCTGGAGGTATGGTGCAGATGCCGCTGGTAAATTTTGTAGTCTATTACTCACCTCAAGGTCATTCTGAGCAT

GCAAAAAGCTCTGTGGAATTTGATAATTCTATGCAAATTCCTATGATTCTTTGCCGTGTAATACTGTAAAATACAAGGCTGATTCTGTCACTGATGAGGTATTCAGTACTGAGATAAAATT  
GGTTCCTTTAAAGCCTCATGAGTTGGATTATGATGAAGATGAAGGAATTTTCATTAGGGATCAACCGGTCAGAGATAGAGGAAAAACCTCTATATTTTGTAAGACATTAACCCAATCTGAT  
GCTAATAATGGTGGTGGTTTCTCTGTTCCAAGATATTGTGCTGAGACTATATTCCCAAGATTGGATTACTCGGCCACTCCACCTGTTCAAATGTTCTAGTAAAGGATTTACATGGAAAAGATT  
TGAAATTTAGGCATATTTATAGAGGGACACCTCGGAGACATTTGCTCACAACCTGGTTGGAGCAATTTGTGGGTGCGAAGAAGCTTGTGGCTGGTGATTGAGTTGTGTTCTTGAGAACT  
GATAATGGTGATCTTTGTGTGGGGATTAGACGAGCAAAGGTTGGTCATGATTTATCTGAAGGATGGAATCGTAAAAATTGTACCTTTGGGGGATTGGTGTTTACATGATGGATGGAGATAA  
AAGGTTAATTAGGGACAATGATAACATAAGTGGTATAAATTCTGATCCAAACAGTAAGGGAAAGGGGAAATTGAAGGTAGATTCTGTTATGGATGCAGCAACTCTTGCAGCTAGTGGGCT  
TCCTTTTCGAGGTTGTTTACTATCCGAGGGCTGCTGCACCGGAGTTCGTGCTGTAAGCAGTACAGTAGTGAGAGCTGCCATGAGAGTCCAATGGTGTTCAGGAATGAGGTTAAGATGGCTTT  
TGAACTGAGGACTCCTCAAGAATAAGTTGGTTCATGGGGACAATATCATCAGTTCAGGTTGCTGATCCTATAAGATGGCCTGGGTCTCCTTGGAGATTACTAGAGGTGACATGGGATGAG  
CCTGATCTTTTGCAGAATGTAACCGTGTGAACCTTGGTTGGTGGAACCTTGATCAACCATGTCTGCCATCCATTTAGAACCATTCTCACCTCCACGAAAAAAGCATCGGATCGCCCAGC  
ATCTGGATTCCCCATTGATCTTCAAATTTCAAGCCAATCGTTTGTGCGGAAGCCCTCTCATTCCAGTCTCCTAGATGGCACTACCCCTGCAGCTAGCATAACAGGGAGCCAGGCATATTCAA  
CATGGCACATCTTACCAGAACTCCACTTCAGAAAAGTTGCAGCCTGGGCTGTTCTATTCTGGAATTCATTGCTTCGCACGGCCTCCATAATCCCCACAGGCCTCATTCTCTCTAAATCTCC  
TATCTATGAAGATGACTCTAACTTGTTAAAAATTGGTTGTCCTCTCAAAGTGTGGGGAATGAATGTAACAAAGAATCCAAAGCAAACAAACCTCACATCATACTCTTTGGAAAACAGAT  
CTTCACTGAACCACAGCTCTCTCAGCTTAAACAGCTCATTGGATATGAATTCAGATAGATCTGATTGAGGATTCATCGAAAACGGCAAGGGGGACGGTTCACCTTGGCATTGGGATTTA  
AAAGCAAATGATATTAGTCCAGAGATTGTTTCAGTGCAAGGTGTTTCATGGAGTCCGAAGATATCGGCCGACCCTCGATCTCTCCGCTTTGATTTCATATGAGGAGATGTACAGGAGATTGA  
CAAACATGTTTGAATCGAGATTTTCAGAGCTAACCGCCGATTTATTTACAGAGATACAGCCGGCGCAGTTAAACACCCAGAAGATGAACCTTTTGCGTAAAGTTGCTCTTAAGCTGCCATG  
AATAAGTTTACTGAATTTAAATGAATGTTCAAACTCAATATTTTACTTCTTTATGTATTGTTCTTTGAGGCTATTTGTAAAGTAATTTCTAACTACATCAAATATCAAAGCAAATGAAGAAT  
ATAATTTATTAACATAATGTTTTTGGAAAATTTCAAGCAAATAAATGAGTCCAGAGTTCATTCCAATCCTGATTTCTTTTGTTCATGCGTAG

>comp164769\_c0\_seq3

TCTCTCTCTCTCTCTTTCTTGGCGTTCTCTTTCTCTCTCTGGCTTCCTCTTCAGTCCCTTTGATCTCTCTCAGCATTCTCCTCCTTCCCTCACTTCTTCTCCAGCCACCGCACAGTTGAGCTC  
GTCGGAGGAGGCCGGGACGAGGACGGGAACCGCTGCGAAAGGAGATTCAATCGCCGTGAGCGCAGAAGACGCAATCTATGTTCTGAACTAAGCGCAAAGGAGATCATGGCGAGAAG  
GAGAAGAGGCAGCGATCGTCTTTAAATCGGAAAAATCCGACTGGTAGGATTCATCAAATTGCAGACTTAAAAACCAAACGGGAGGAAATGGGATTTAGCTATCAGTAAGATTTAAGGATT  
TGCAGAAGAAAGAATGAAGAACATTGAAAATTGCTTGGATTCCCAATTATGGCATGCTTGCCTGGAGGTATGGTGCAGATGCCGCTGGTAAATTTTATGCTATTACTCACCTCAAGGT  
CATTCTGAGCATGCAAAAAGCTCTGTGGAATTTGATAATTCTATGCAAATTCCTATGATTCTTTGCCGTGTAATACTGTAAAATACAAGGCTGATTCTGTCACTGATGAGGTATTCAGT  
GAGATAAAATTGGTTCTTTAAAGCCTCATGAGTTGGATTATGATGAAGATGAAGGAATTTTCATTAGGGATCAACCGGTCAGAGATAGAGGAAAAACCTCTATATTTTGTAAGACATTA  
CCCAATCTGATGCTAATAATGGTGGTGGTTTCTCTGTTCCAAGATATTGTGCTGAGACTATATTCCCAAGATTGGATTACTCGGCCACTCCACCTGTTCAAATGTTCTAGTAAAGGATTTAC  
ATGGAAAGATTTGGAAATTTAGGCATATTTATAGAGGGACACCTCGGAGACATTTGCTCACAACCTGGTTGGAGCAATTTTGTGGGTGCGAAGAAGCTTGTGGCTGGTGATTGAGTTGTG  
TCTTGAGAACTGATAATGGTGATCTTTGTGTGGGGATTAGACGAGCAAAGGTTGGTCATGATTTATCTGAAGGATGGAATCGTAAAAATTGTACCTTTGGGGGATTGGTGTTTACATGATG  
GATGGAGATAAAAGGTTAATTAGGGACAATGATAACATAAGTGGTATAAATTCTGATCCAAACAGTAAGGGAAAGGGGAAATTGAAGGTAGATTCTGTTATGGATGCAGCAACTCTTGCA  
GCTAGTGGGCTTCCTTTTCGAGGTTGTTTACTATCCGAGGGCTGCTGCACCGGAGTTTCGTGCTGTAAGCAGTACAGTAGTGAGAGCTGCCATGAGAGTCCAATGGTGTTCAGGAATGAGGTTT  
AAGATGGCTTTTGAACCTGAGGACTCCTCAAGAATAAGTTGGTTCATGGGGACAATATCATCAGTTCAGGTTGCTGATCCTATAAGATGGCCTGGGTCTCCTTGGAGATTACTAGAGGTGA  
CATGGGATGAGCCTGATCTTTTGCAGAATGTAACCGTGTGAACCTTGGTTGGTGGAACCTTGATCAACCATGTCTGCCATCCATTTAGAACCATTCTCACCTCCACGAAAAAAGCATCG

GATCGCCAGCATCTGGATTCCCCATTCGATCTTCAAATTTCAAGCCAATCGTTTGTGCGAAGCCCTCTCATTCCCAGTCTCCTAGATGGCACTACCCCTGCAGCTAGCATAACAGGGAGCC  
AGGCATATTCAACATGGCACATCTCTACCAGAACTCCACTTCAGAAAAGTTGCAGCCTGGGCTGTTCTATTCTGGAATTCATTGCTTCGCACGGCCTCCCATAATCCCCACAGGCCTCATTCC  
TCCTAAATCTCCTATCTATGAAGATGACTCTAACTTGTTAAAAATTTGGTTGTCTCCTCAAAGTGTGGGGAATGAATGTAACAAAGAATCCAAAGCAAACAAACCTCACATCATACTCTTT  
GGAAAACAGATCTTCACTGAACCACAGCTCTCTCAGCTTAAACAGCTCATTGGATATGAATTCAGATAGATCTGATTTCAGGCATTCATCGAAACGGCAAGGGGGACGGTTCACCTTGG  
CATTGGGATTTAAAAGCAAATGATATTAGTCCAGAGATTGTTTCAGTGCAAGGTGTTTCATGGAGTCCGAAGATATCGGCCGCACCCTCGATCTCTCCGCTTTTCGATTTCATATGAGGAGATGTA  
CAGGAGATTGACAAACATGTTTGAATCGAGATTTACAGAGCTAACCCAGCCGTATTATTTACAGAGATACAGCCGGCGCAGTTAAACACCCAGAAGATGAACCTTTTGCCTAAGTTGCTCT  
TAAGCTGCCATGAATAAGTTCTACTGAATTTAAATGAATGTTCAAAACTCAATATTTACTTCTTTATGTATTGTTCTTTGAGGCTATTTGTAAAGTAATTTCTAACTACATCAAATATCAAAG  
CAAATGAAGAATATAATTTATTAATAAATGTTTTTTGAAAATTTCAAGCAAATAAATGAGTCCAGAGTTCATTCCAATCCTGATTTCTTTTGTTCATGCGTAG

>comp164769\_c0\_seq4

TCTCTCTCTCTCTCTTTCTTGGCGTCTCTTTCTCTCCTGGCTTCTCTTCAGTCCCTTTGATCTCTCTCAGCATTCTCCTCCTCCTCACTTCTTCTCCAGCCACCGCACAGTTGAGCTC  
GTCGGAGGAGGCCGGGACGAGGACGGGAACCGCTGCGAAAGGAGATTCAATCGCCGTGAGCGCAGAAGACGCAATCTATGTTCTGAACTAAGCGCAAAAGGAGATCATGGCGAGAAG  
GAGAAGAGGCAGCGATCGTCTTTAAATCGGAAAAATCCGACTGGTAGGATTCATCAAATTGCAGACTTAAAAACCAAACGGGAGGAAATGGGATTTAGCTATCAGATTTGCAGAAGAAA  
GAATGAAGAACATGAAAATGCTTGGATTCCCAATTATGGCATGCTTGCCTGGAGGTATGGTGCAGATGCCGCTGGTAAATTTTGTAGTCTATTACTCACCTCAAGGTCATTCTGAGCAT  
GCAAAAAGCTCTGTGGAATTTGATAATTTATGCAAATTTCCCCCTATGATTTCTTTGCCGTGTAATAATCTGTAAAATACAAGGCTGATTCTGTCACTGATGAGGTATTCACTGAGATAAAATT  
GGTTCCTTTAAAGCCTCATGAGTTGGATTATGATGAAGATGAAGGAATTTTCATTAGGGATCAACCGGTCAGAGATAGAGGAAAAACCTCTATATTTTGTAAAGACATTAACCAATCTGAT  
GCTAATAATGGTGGTGGTTTCTCTGTTCCAAGATATTGTGCTGAGACTATATTCCCAAGATTGGATTACTCGGCCACTCCACCTGTTCAAATTTGTTCTAGTAAAGGATTTACATGGAAAGATT  
TGAAATTTAGGCATATTTATAGAGGGACACCTCGGAGACATTTGCTCACAACCTGGTTGGAGCAATTTTGTGGGTGCGAAGAAGCTTGTGGCTGGTATTTCAGTTGTGTTCTTGAGAACT  
GATAATGGTGTATCTTTGTGTGGGGATTAGACGAGCAAAGGTTGGTTCATGATTTATCTGAAGGATGGAATCGTAAAAATTGTACCTTTGGGGGATTTGGTGTTTACATGATGGATGGAGATAA  
AAGGTTAATTAGGGACAATGATAACATAAGTGGTATAAATTTCTGATCCAAACAGTAAGGGAAAGGGGAAATTGAAGGTAGATTCTGTTATGGATGCAGCAACTCTTGCAGCTAGTGGGCT  
TCCTTTTCGAGGTTGTTTACTATCCGAGGGCTGCTGCACCCGAGTTCGTCGTAAGGATCAGTAGTGAGAGCTGCCATGAGAGTCCAATGGTGTTCAGGAATGAGGTTAAGATGGCTTT  
TGAAACTGAGGACTCCTCAAGAATAAGTTGGTTCATGGGGACAATATCATCAGTTCAGGTTGCTGATCCTATAAGATGGCCTGGGTCTCCTTGGAGATTACTAGAGGTGACATGGGATGAG  
CCTGATCTTTTGCAGAATGTAACCGTGTGAACCTTGGTTGGTGGAACTTGTATCAACCATGTCTGCCATCCATTTAGAACCATTCTCACCTCCACGAAAAAAGCATCGGATCGCCCAGC  
ATCTGGATTCCCCATTCGATCTTCAAATTTCAAGCCAATCGTTTGTGCGAAGCCCTCTCATTCCCAGTCTCCTAGATGGCACTACCCCTGCAGCTAGCATAACAGGGAGCCAGGCATATTCAA  
CATGGCACATCTCTACCAGAACTCCACTTCAGAAAAGTTGCAGCCTGGGCTGTTCTATTCTGGAATTCATTGCTTCGCACGGCCTCCCATAATCCCCACAGGCCTCATTCTCTCTAAATCTCC  
TATCTATGAAGATGACTCTAACTTGTTAAAAATTTGGTTGTCTCCTCAAAGTGTGGGGAATGAATGTAACAAAGAATCCAAAGCAAACAAACCTCACATCATACTCTTTGGAAAACAGAT  
CTTCACTGAACCACAGCTCTCTCAGCTTAAACAGCTCATTGGATATGAATTCAGATAGATCTGATTTCAGGCATTCATCGAAACGGCAAGGGGGACGGTTCACCTTGGCATTGGGATTTA  
AAAGCAAATGATATTAGTCCAGAGATTGTTTCAGTGCAAGGTGTTTCATGGAGTCCGAAGATATCGGCCGCACCCTCGATCTCTCCGCTTTTCGATTTCATATGAGGAGATGTACAGGAGATTGA  
CAAACATGTTTGAATCGAGATTTACAGAGCTAACCCAGCCGTATTATTTACAGAGATACAGCCGGCGCAGTTAAACACCCAGAAGATGAACCTTTTGCAAAATTCATGAAGGTTGCAAGGA  
GACTCACAATATCAATGGATGCGAGGTGCAACAACATTTGGCAAGTAATAGGAGAAATCTTTGTTAGAAGGACAGCTGAAGAAGCAGTTTCTTCCAAGTTTGAAGTAAGTTATCTTTAGT  
AGGAGATACCATAAATCTGTTCTTTGGGCATTGATGTTATTTGAGCTTCTAAAGTTAGCTCAGTATTTAGTTTCCATTCCATGCTTGTAATAGTTCTAATCTTCTACTATTCTTCTCTCA  
GGAATATCTTTTTTATAGCTCTTAAGGATTTGTTTCTTTTAAATGTTTCTTT

>comp164769\_c0\_seq5

TCTCTCTCTCTCTCTTTCTTGGCGTTCTCTTTCTCTCCTGGCTTCCTCTTCAGTCCTCTTGATCTCTCTCAGCATTCTCCTCCTTCCTCACTTCTTCTCCAGCCACCGCACAGTTGAGCTC  
GTCGGAGGAGGCCGGGACGAGGACGGGAACCGCTGCGAAAGGAGATTCAATCGCCGTGAGCGCAGAAGACGCAATCTATGTTCTGAACTAAGCGCAAAAGGAGATCATGGCGAGAAG  
GAGAAGAGGCAGCGATCGTCTTTAAATCGGAAAAATCCGACTGGATTTGCAGAAGAAAGAATGAAGAACATTGAAAATTGCTTGGATTCCCAATTATGGCATGCTTGCCTGGAGGTATG  
GTGCAGATGCCGCTGGTAAATCTTTAGTCTATTACTCACCTCAAGGTCATTCTGAGCATGCAAAAAGCTCTGTGGAATTTGATAATTCTATGCAAATCCCCCTATGATTCTTTGCCGTGTA  
AAATCTGTAAAATACAAGGCTGATTCTGTCACTGATGAGGTATTCACTGAGATAAAAATTGGTTCCTTTAAAGCCTCATGAGTTGGATTATGATGAAGATGAAGGAATTCATTAGGGATCAA  
CCGGTCAGAGATAGAGGAAAAACCTCTATATTTGTAAAGACATTAACCCAATCTGATGCTAATAATGGTGGTGGTTTCTCTGTTCCAAGATATTGTGCTGAGACTATATTCCCAAGATTGG  
ATTACTCGGCCACTCCACCTGTTCAAATTGTTCTAGTAAAGGATTTACATGGAAAGATTTGGAAATTTAGGCATATTTATAGAGGGACACCTCGGAGACATTTGCTCACAACCTGGTTGGAG  
CAATTTTGTGGGTGCGAAGAAGCTTGTGGCTGGTGATTCAGTTGTGTTCTTGAGAAGTATAATGGTGATCTTTGTGTGGGGATTAGACGAGCAAAGGTTGGTCATGATTTATCTGAAGGA  
TGGAATCGTAAAAATGTACCTTTGGGGGATTTGGTGTTTACATGATGGATGGAGATAAAAGGTTAATTAGGGACAATGATAACATAAGTGGTATAAATTCTGATCCAAAACAGTAAGGGAA  
AGGGGAAATTGAAGGTAGATTCTGTTATGGATGCAGCAACTCTTGCAGCTAGTGGGCTTCCTTTGAGGTTGTTTACTATCCGAGGGCTGTGCACCGGAGTTCGTCGTAAAAGCATCAG  
TAGTGAGAGCTGCCATGAGAGTCCAATGGTGTTCAGGAATGAGGTTAAGATGGCTTTTGAAACTGAGGACTCCTCAAGAATAAGTTGGTTCATGGGGACAATATCATCAGTTCAGGTTG  
CTGATCCTATAAGATGGCCTGGGTCTCCTTGGAGATTACTAGAGGTGACATGGGATGAGCCTGATCTTTTGCAGAATGTA AACCGTGTGAACCTTTGGTTGGTGGAACTTGATCAACCAT  
GTCTGCCATCCATTTAGAACCATTCTCACCTCCACGAAAAAAGCATCGGATCGCCAGCATCTGGATTCCCCATTGATCTTCAAATTTCAAGCCAATCGTTTGTGCGAAGCCCTCTCATT  
CCAGTCTCCTAGATGGCACTACCCCTGCAGCTAGCATAACAGGGAGCCAGGCATATTCACATGGCACATCTCTACCAGAACTCCACTTCAGAAAGTTGCAGCCTGGGCTGTTCTATTCTGG  
AATTCATTGCTTCGCACGGCCTCCATAATCCCCACAGGCCTCATTCTCCTAAATCTCCTATCTATGAAGATGACTCTAACTTGTTAAAAATTGGTTGTCTCCTCAAAGTGTGGGGAATG  
AATGTAACAAAGAATCCAAAGCAAACAAACCTCACATCATACTCTTTGGAAAACAGATCTTCACTGAACCACAGCTCTCTCTCAGCTTAAACAGCTCATTGGATATGAATTCAGATAGATC  
TGATTCAGGCATTCATCGAAACGGCAAGGGGACGGTTACCTTGGCATTGGGATTTAAAAGCAAATGATATTAGTCCAGAGATTGTTCAAGTGAAGGTGTTTATGGAGTCCGAAGATAT  
CGGCCGACCCCTCGATCTCTCCGCTTTGATTATGAGGAGATGTACAGGAGATTGACAAACATGTTTGGAAATCGAGATTTCAAGCTAACCAGCCGTATTATTTACAGAGATACAGCC  
GGCGCAGTTAAACACCCAGAAGATGAACCTTTTGCCTAAGTGTCTTAAAGCTGCCATGAATAAGTTCTACTGAATTTAAATGAATGTTCAAAAACCTCAATATTTTACTTCTTTATGTATTGTT  
CTTTGAGGCTATTTGTAAAGTAATTTCTAACTACATCAAATATCAAAGCAAATGAAGAATATAATTTATTAACCTAATTGTTTTTGAATAATTTCAAGCAAATAAATGAGTCCAGAGTTCATT  
CAATCCTGATTTCTTTTGTTCATGCGTAG

>comp164769\_c0\_seq6

TCTCTCTCTCTCTCTTTCTTGGCGTTCTCTTTCTCTCCTGGCTTCCTCTTCAGTCCTCTTGATCTCTCTCAGCATTCTCCTCCTTCCTCACTTCTTCTCCAGCCACCGCACAGTTGAGCTC  
GTCGGAGGAGGCCGGGACGAGGACGGGAACCGCTGCGAAAGGAGATTCAATCGCCGTGAGCGCAGAAGACGCAATCTATGTTCTGAACTAAGCGCAAAAGGAGATCATGGCGAGAAG  
GAGAAGAGGCAGCGATCGTCTTTAAATCGGAAAAATCCGACTGGATTTGCAGAAGAAAGAATGAAGAACATTGAAAATTGCTTGGATTCCCAATTATGGCATGCTTGCCTGGAGGTATG  
GTGCAGATGCCGCTGGTAAATCTTTAGTCTATTACTCACCTCAAGGTCATTCTGAGCATGCAAAAAGCTCTGTGGAATTTGATAATTCTATGCAAATCCCCCTATGATTCTTTGCCGTGTA  
AAATCTGTAAAATACAAGGCTGATTCTGTCACTGATGAGGTATTCACTGAGATAAAAATTGGTTCCTTTAAAGCCTCATGAGTTGGATTATGATGAAGATGAAGGAATTCATTAGGGATCAA  
CCGGTCAGAGATAGAGGAAAAACCTCTATATTTGTAAAGACATTAACCCAATCTGATGCTAATAATGGTGGTGGTTTCTCTGTTCCAAGATATTGTGCTGAGACTATATTCCCAAGATTGG  
ATTACTCGGCCACTCCACCTGTTCAAATTGTTCTAGTAAAGGATTTACATGGAAAGATTTGGAAATTTAGGCATATTTATAGAGGGACACCTCGGAGACATTTGCTCACAACCTGGTTGGAG  
CAATTTTGTGGGTGCGAAGAAGCTTGTGGCTGGTGATTCAGTTGTGTTCTTGAGAAGTATAATGGTGATCTTTGTGTGGGGATTAGACGAGCAAAGGTTGGTCATGATTTATCTGAAGGA

TGGAATCGTAAAAATTGTACCTTTGGGGGATTTGGTGTTTACATGATGGATGGAGATAAAAGGTTAATTAGGGACAATGATAACATAAGTGGTATAAAATTCTGATCCAAACAGTAAGGGAA  
AGGGGAAATTGAAGGTAGATTCTGTTATGGATGCAGCAACTCTTGCAGCTAGTGGGCTTCCTTTTCGAGGTTGTTTACTATCCGAGGGCTGCTGCACCGGAGTTCGTCGTAAAAGCATCAG  
TAGTGAGAGCTGCCATGAGAGTCCAATGGTGTTCAGGAATGAGGTTAAGATGGCTTTTGGAACTGAGGACTCCTCAAGAATAAGTTGGTTCATGGGGACAATATCATCAGTTCAGGTTG  
CTGATCCTATAAGATGGCCTGGGTCTCCTTGGAGATTACTAGAGGTGACATGGGATGAGCCTGATCTTTTGCAGAATGTAAAACGTGTGAACCCCTTGGTTGGTGGAACTTGATCAACCAT  
GTCTGCCATCCATTTAGAACCATTCTCACCTCCACGAAAAAAGCATCGGATCGCCAGCATCTGGATTCCCCATTCGATCTTCAAATTTCAAGCCAATCGTTTGTTCGGAAGCCCTCTCATT  
CCAGTCTCCTAGATGGCACTACCCCTGCAGCTAGCATAACAGGGAGCCAGGCATATTCACATGGCACATCTCTACCAGAACTCCACTTCAGAAAGTTGCAGCCTGGGCTGTTCTATTCTGG  
AATTCATTGCTTCGCACGGCCTCCATAATCCCCACAGGCCTCATTCCCTCTAAATCTCCTATCTATGAAGATGACTCTAACTTGTTAAAAATTGGTTGTCTCTCTCAAAGTGTGGGGAATG  
AATGTAACAAAGAATCCAAAGCAAACAAACCTCACATCATACTCTTTGGAAAACAGATCTTCACTGAACCACAGCTCTCTCTCAGCTTAAACAGCTCATTGGATATGAATTCAGATAGATC  
TGATTCAGGCATTCATCGAAACGGCAAGGGGGACGGTTCACCTTGGCATTGGGATTTAAAAGCAAATGATATTAGTCCAGAGATTGTTCAAGTGCAGGTTTCATGGAGTCCGAAGATAT  
CGGCCGCACCCCTCGATCTCTCCGCTTTTCGATTTCATGAGGAGATGTACAGGAGATTGACAAAACATGTTTGGAAATCGAGATTTAGAGCTAACCAGCCGATTATTACAGAGATACAGCC  
GGCGCAGTTAAACACCCAGAAGATGAACCTTTTGCAAAATTCATGAAGGTTGCAAGGAGACTCACAAATATCAATGGATGCGAGGTGCAACAACATTGGCAAGTAATAGGAGAAATCTCT  
TGTTAGAAGGACAGCTGAAGAAGCAGTTTCTTCCAAGTTTGAAGTAAGTTATCTTTAGTAGGAGATACCATAAATCTGTTCTTTGGGCATTGATGTTATTTTGTAGCTTCTAAAGTTAGCTCA  
GTATTTAGTTTCCATTCATGCTTGTAATAAGTTCTAATCTTCTACTATTTCCTCTCAGGAATATCTTTTTTATAGCTCTTAAAGGATTTGTTTCCTTTTAAATGTTTCTTT

>comp164769\_c0\_seq7

TCTCTCTCTCTCTCTTTCTTGGCGTCTCTTTCTCTCTCTGGCTTCCTCTCAGTCTCTTGATCTCTCTCAGCATTCTCCTCTCCTCACTTCTTCTCCAGCCACCGCACAGTTGAGCTC  
GTCGGAGGAGGCCGGGACGAGGACGGGAACCGCTGCGAAAGGAGATTCAATCGCCGTGAGCGCAGAAGACGCAATCTATGTTCTGAACTAAGCGCAAAAAGGAGATCATGGCGAGAAG  
GAGAAGAGGCAGCGATCGTCTTTAAATCGGAAAAATCCGACTGGTAGGATTCATCAAATTCAGACTTAAAAACCAAACGGGAGGAAATGGGATTTAGCTATCAGTAAGATTTAAGGATT  
TGCAGAAGAAAGAATGAAGAACATTGAAAATTGCTTGGATTCCCAATTATGGCATGCTTGCCTGGAGGTATGGTGCAGATGCCGCTGGTAAATTCTTTAGTCTATTACTCACCTCAAGGT  
CATTCTGAGCATGCAAAAAGCTCTGTGGAATTTGATAATTCTATGCAAATCCCCCTATGATTCTTTGCCGTGTAATAATCTGTAATAACAAGGCTGATTCTGTCACTGATGAGGTATTCACT  
GAGATAAAATGGTTCCTTTAAAGCCTCATGAGTTGGATTATGATGAAGATGAAGGAATTTCAATAGGGATCAACCGGTCAGAGATAGAGGAAAAACCTCTATATTTGTAAAGACATTAA  
CCCAATCTGATGCTAATAATGGTGGTGGTTTCTCTGTTCCAAGATATTGTGCTGAGACTATATTCCAAGATTGGATTACTCGGCCACTCCACCTGTTCAAATTGTTCTAGTAAAGGATTTAC  
ATGGAAAGATTTGGAAATTTAGGCATATTTATAGAGGGACACCTCGGAGACATTTGCTCACAACTGGTTGGAGCAATTTTGTGGGTGCGAAGAAGCTTGTGGCTGGTGATTTCAGTTGTGT  
TCTTGAGAACTGATAATGGTGATCTTTGTGTGGGGATTAGACGAGCAAAGGTTGGTCATGATTTATCTGAAGGATGGAATCGTAAAAATTGTACCTTTGGGGGATTTGGTGTTTACATGATG  
GATGGAGATAAAAGGTTAATTAGGGACAATGATAACATAAGTGGTATAAATTCTGATCCAAACAGTAAGGGAAAGGGGAAATTGAAGGTAGATTCTGTTATGGATGCAGCAACTCTTGCA  
GCTAGTGGGCTTCCTTTTCGAGGTTGTTTACTATCCGAGGGCTGCTGCACCGGAGTTCGTTCGTAAGCATCAGTAGTGAGAGCTGCCATGAGAGTCCAATGGTGTTCAGGAATGAGGTTT  
AAGATGGCTTTTGGAACTGAGGACTCCTCAAGAATAAGTTGGTTCATGGGGACAATATCATCAGTTCAGGTTGCTGATCCTATAAGATGGCCTGGGTCTCCTTGGAGATTACTAGAGGTGA  
CATGGGATGAGCCTGATCTTTTGCAGAATGTAAAACGTGTGAACCCCTTGGTTGGTGGAACTTGTATCAACCATGTCTGCCATCCATTTAGAACCATTCTCACCTCCACGAAAAAAGCATCG  
GATCGCCAGCATCTGGATTCCCCATTCGATCTTCAAATTTCAAGCCAATCGTTTGTTCGGAAGCCCTCTCATTCCCAGTCTCCTAGATGGCACTACCCCTGCAGCTAGCATAACAGGGAGCC  
AGGCATATTCACATGGCACATCTCTACCAGAACTCCACTTCAGAAAGTTGCAGCCTGGGCTGTTCTATTCTGGAATTCATTGCTTCGCACGGCCTCCATAATCCCCACAGGCCTCATTCC  
TCCTAAATCTCCTATCTATGAAGATGACTCTAACTTGTTAAAAATTGGTTGTCTCTCTCAAAGTGTGGGGAATGAATGTAACAAAGAATCCAAAGCAAACAAACCTCACATCATACTCTTT  
GGAAAACAGATCTTCACTGAACCACAGCTCTCTCTCAGCTTAAACAGCTCATTGGATATGAATTCAGATAGATCTGATTCAGGCATTCATCGAAACGGCAAGGGGGACGGTTCACCTTGG

CATTGGGATTTAAAAGCAAATGATATTAGTCCAGAGATTGTTTCAGTGCAAGGTGTTTCATGGAGTCCGAAGATATCGGCCGCACCCCTCGATCTCTCCGCTTTCGATTCATATGAGGAGATGTA  
CAGGAGATTGACAAACATGTTTGGAAATCGAGATTTTCAGAGCTAACCCAGCCGATTATTTACAGAGATACAGCCGGCGCAGTTAAACACCCAGAAGATGAACCTTTTGCAAAATTCATGAA  
GGTTGCAAGGAGACTCACAATATCAATGGATGCGAGGTGCAACAACATTGGCAAGTAATAGGAGAAATCTCTTGTAGAAAGGACAGCTGAAGAAGCAGTTTCTTCCAAGTTTGAAGTAA  
GTTATCTTTAGTAGGAGATAACCATAAATCTGTTCCTTTGGGCATTGATGTTATTTTGAGCTTCTAAAGTTAGCTCAGTATTTAGTTTCCATCCATGCTTGTAAATAGTTCTAATCTTCTACTATT  
CATTTCTCTCAGGAATATCTTTTTATAGCTCTTAAGGATTTGTTCCCTTTTAATGTTTCTTT

>comp164958\_c0\_seq1

CGCCGATCCTTCATCCTCCCCCACTTCCGAGTCTTTTCCAAGCTGGAGAATAATGGCTTTCTTCAAACCTCCTTCCACGAGGTCTGAGACGCCGCCGATCCTTCATCCTCTCCCTCGTCA  
GTCAAATTCTCCTTCTCGTCTCCTGAAGATGCCGCGGTGAGCGCCGTCGCCGTCGCCGCTCCTCGGCATGCCCTCCTTCTTCCCTTGGCGACATCCCACGTCCTTCGCTTCCCGACCA  
GCCTCCTGTTTCGAAAGGCCAAACAAGCCCTAGCATTCCCAAGCTCCCCGAACCCGCTTCTTCACTGTCTGGTCCCCGCTCCTCCTACACAACAACATCCTCTCCCTTCTACGCTCTGGT  
GATCTCCAAGAAGCCGACCTCCTAGTTCGCCATTCCGCTACTCCAGTTGCCGCCCACTATTTATACAGTCAACGCCGTCCTCTCTGCTCTCCTTGGAGAATCTCTCCACTCCGAGCTCCT  
CGCCCTACACCGCTTCGTCAATCAGGCTGGCATTGCCCCACAGTTGTCACGCATAAACCCTCAATCCAATCTTACATCGATAGCCGCAAGCTTGATCTTGCAGTCAGTTACTATCGCTTCT  
TATGCCGTGACCTCCCGCTCCTTCTTCTCCGTCCACCTATAGAATATTAGTTAAAGCCCTTCTAAGTGCATCTAGAATGGAAGAAGCTCTGCAGCTGAAAGATGAGATGATCGCCATGAC  
GGAACCGGACCTCGAGGTTTACAACCTCCTCATATCTTGGCTTGTGATAATGGAGATCCGGATGGTGCCTGGCTTTATATGAAGAGTTGACAGGGATGCTGGGGGAGAATCTGAAGGC  
TTTTGGCGAAATTGTTGATGGGAGTTTGTGTAAGGCGTATTTTAAAGAAGGGGATGGAGAGGGAAGCATTGGAGTTGTATAATTCTGCGTAGGAGAGGAGAGTTCCCCGTTTAGGTTTCCAG  
TGACAGAGCTACAACCTCTGTCTTGTATGCTTTCTGTAAAATGGTAAGTTTGGAGGAAGCATTGTCTTTGTTTGAAGGATGATGGGCGAGCATAGCCCTCCAAGAAGGCTTTCTGTGAAT  
TTGGAGAGTTTAAATTTGATGGTGGATGGTATTGTGCGACAGGGAGATTCAAAGAGGCCATTGATGTTCTTAGAAAGATTGGTGAAAAAAAATCAGTGCAGATACTTTGTCTTATAATA  
ATTTGATAAGGAAGCTTGGGCAGAATGGAATGGTGGTAGAAGCTGAAGAGCTTTATAGAGAGATGAGTGAATATGGGATTAACCAAATGAACCTTACTTTTGTTTTACTCATGGAAGCATG  
CTTTGGATCGAATAGAATAGAAGATGCAATTCGGTATTTTTCTGACATGGATGATGCAGGTGTTCAACCCGAGACATTGGCATAACAATACAGTTCTGTGTGGGCAAGTGAAGGTAGGAAAT  
CTTACTGAGGCTAAAGCTTTCTTTGATCGGATGATGGAGAAGGAGGTGAAGAGAGACCTTGTGACTTATGAGGTAAGGCAATTTTGTGACTCCAATAGATGGGAAGATGTGTTT  
GGGTTGTGAGAGCCCTTCTGATGGACAGCAAAATGGTTTTTCCAACCACAGATGAGGGAGCTTGTGGAGGATGCTGCAAGGAGAGAAAAATGGAGGGAGAATTGGCTAGGTTATATGA  
TGAGGTAGAGAAGGAGAAGGAAGATGCTCTTGGCTCAGGCCGCCGAGGAGAAGGCAAGAGCTGATGCCCTTTCAAGGGAAGAGAGACTGAGGAAAAGAGCAGAAGCTAAGGCTAAGC  
AGGCTGCTACTACAAAGATTACCAAAGAACATATTGAAATGCATATCAAAAAGTTCTCATTAAACAATGTAGAAGAGAAGCAAGATGTACCCTTTTGGTGGGATTTTTGGGAATGGAG  
GCCCTTCAAAATAGGTTTATGATAAAAGTAGCTCTTGTGAAGCAGTTGAAGTCAGGAATGAAGATGTTGCTGCTTGTGGTGTGCTGATAAGTTAGCATAGGATGGTTTCTAAGGTAAAAA  
GATGAATGGTGAAGATGGAAAGATTGTGATCGTCATCCTTTCAAATGTATTTGATCAGATTGCTAGATTCAAGCTGAACCTTTTCTTACCTTTTCTTCTTCTGAAGTAATTTTGAGCTGCAACC  
TGCAAGATGGTATTGCCACTAACCTTTTTATTCTGTTTCTTTTTGAGTAAATAATGTTGTTAAATGATTCCAACATTGACAGTCGTTGTAATAGATTACTCTATCGATTCAGGACCATGTGTT  
TGTTTTAGAAA

>comp165418\_c0\_seq1

GGAACCTAGGCTTTGCCAGCCAGCTTTTAAATATACTTACTCATAATTCTATTTTTAATTAGGCTTACTGTAAAAATTTGCCAAAATTATGCTTTGTAGTTTGTACACAGAGGTGGACCCGA  
GAACAAAAAATGGCTTCAACGGGTAAGAATAGTAAAAGATGGAGGTGAGTATGCCAAGAGAGCAAGCAGGAATCTTGCTGTCTCCTCAGCCGCGCAACAGGGAGTCTCTCTCCTCCT  
GTAGGTCCGAGAGTAACGCCGCTCAACGAGGGACCTTCAACGTCATCCTCGTCGAGAATAACTCACCCGACCAAAATATCGGGCTACTCGCTCTCAACATCTTAATCGGCTGCTCAGTT  
CTGTGCCCGCTTAGAGATCCGAGCACTGATAAAGAGAGAAGATGAGGAGAATGCTCCTACCATTCTGCTGAAACAATAAAGATTTGTTCTTTGAGTGTTCCTTCTTGCAGGAGCTTGAA

AGAGTGATTTTTCTGTAAAAAGATACGATCTTTCATCTCATCGGTTTAGAAAATCTCAGAAAAAAGGTGTGTGCAGTGCGGTTATTTGGTGTGAAGTCTGAAGAAGACGAGATGGGTTGAG  
TTTACAAATAGGGGTTGGCTGTTGAAACCTCCTATTGCACCAAACAGTAACAAAGCTTGTGAATTTCCAAAGGAAATGATGAATGACAATGACTTGGATTCTCAACTATGGCATGCTTGT  
GCTGGTGCAATGGTGCAAATGCCATTAATAAATTCTAAAGTATTCTACTTTCCCAAGGCCATGCTGAGCATGCACAAAGCCCAGTTGATTTTGGCAATTCTCTAAGAATTCCTCCTTAT  
TCTTTGTCTGTAACTATGTAATAACATGGCTGATAGTGAAACTGATGAGGTCTATGCCAAAATTTTCATGACCCCTCTAAGAGGCATTGAGCTAGATTATTGTGAAGATGATGAECTTA  
CCTTAGGAAGCAACGGGTGAGAATCACAAGAAAAACCTTCATCTTTTGCAAAAAACATTGACCCAATCTGATGCTAACAATGGTGGCGGTTTCTCTGTTCCGAGATATTGTGCAGAGACTA  
TCTTCCCTAGATTGGATTACTCTGCTGACCCGCCTGTCCAAGAAGTTCTAGCCAAGGATGTCCATGGCAAGATTTGGAAATTTGACATATCTATCGAGGGACACCTCGCAGGCACTTGCT  
CACCCTGGCTGGAGCAATTTTGTCAACGAGAAGAAGCTAGTGGCCGCGGATTCCATTGTGTTCTTAAGAACCAAGAATGGTGTATCTTTGCATGGGTATTGACGAGCAAATAGAGGATT  
TGGAATGGATTGAGTCCCTATAAGTTGGGATCATCTATGGGAAAATGCATGTATGAGGGACTCTCTATTTTATTGAGGGAGGAGGAGAGCAAGTTATAAAGGGAAACACTCATGGA  
GATTCAAACATGAGGCCAAGGGTAAAGTGAAGGCATGCACTGTGATTGAGGCCATTACACTTGCCGTTAATGGTCAACCTTTTGAAGTTGTTTACTATCCAAGAGCTAGCACTCCAGAG  
TTTTGTGTAAAGGCATCAGCAGTGAAAGCTGCAGTGAGGATCCAATGGTGTACAGGCATGAGGTTTAAAGATGGCATTGAGACCGATGATTCCTCTAGGATAAGCTGGTTCACAGGGACA  
GTATCTGATTCTCATGTTTCTGATCTACAAGGTGGCTGGATCACCATGGAGGCTTCTCAGGTTTCTTGGGATGAGCCTGACCTTTACAAAATGTAACAAGTGAAGTCCATGGTTAGT  
GGAATCATCTCAAACATGACAACCATCAACTTAGCTCACTTGTGCTCCGAGAAAAAAACTCGGAGCTCACAGCTTCTGATTTCCCACTCGATGCTCAACTTCCAACCTCCATAAT  
CCCCAAAACCTCCTTACTCCAGCAGCAGCCCTTTGTGTTTTCTCCAGATAAACTCCTGCAGCTGGTATACAGGGAGCCAGGCATAGTCAGTATGGATTATCTTTACCAGAACTGCGC  
TTTTTTCATGGACTCGATCACTTTCCTCCACCTTCGAGAATCTCTACTGGCATCAATGGTGGCGATAATTCTTGCATGTTGACCATAGAAAATTCTCAGAAGGGGAACAAGGAATGCAAGA  
AACGTCAGTTTATGCTCTTTGGAAAAGTTATCCTCACTGCAGAAGAGCTCTCAACTATCAACAAATACAGCCCATCAGGTTTGAATTCGATGAAGATGATGTCTGATAATTCATCTTCTGAA  
GCGCTTATTTGAATAAAGACAAGAAAGTTAATGAGCTTGGACTGGAGACTGGACACTGTAAGGTGATCATGGAGTCAGAGAATGTAGGCCGAAACCTTGACCTTCTACATTTGGTTCA  
TATGAGGAGCTGTATAGATTGGCAAACATGTTTGAATTCGAAAGTCTGAGCTTGCAAGCCGTTTACTTTACCGAGATCCAGCTGGGGGTGCTCAAACACACTGAAGATAAGCCTTTTGT  
GTAAGTTTGTATCTATCTCATTTATGATGCTTCCCTTCTTCTGAATTTGGTTGTAAAGCTGATACGAGGAAAAGAAAGTTTATATAAATTTCTTACGAGTATTAGAGAGAGAGAGATGA  
ATATTTCTTATAGCTTTTGTCAAAAGCAAATTTCTGAAAGCAAAAAATTTTGA AAAATAGTATTCAGATGACTGTAGCTCCAAATAAATTTCTTAAATATTCTTACTCAGATTACCCCAAACAA  
ATTATTAGGGTATGTTTGGGGTGTGCTGTATTTGATTAATTTAGTTGTATTGAAGTATTTTGGAAAAATAATTTAGAAATCTTATCCTATAAAGGAACTTTTTATTATATAAAT

>comp165418\_c0\_seq10

TAAAGGTTTCATCTATTTTTATCATTCCCTGAATCATTGTTACAGAAAAGTTTTGGAAAATATGAAATTTAGCTTTTTTTTACATATAATAGTAAACTTTGATTTTGATGTTTTATCATTG  
TACATCTTCTTAGGAAATACAAAATTTATCCATTTCTCCAAAAAATTATGGAGTTTTTGGCTCTTTTTTAATCATTAGTTCAGAATTCAGATTCTACTAAGGAAAAAATGCTAGGGATTG  
TTAGTGATCTGTTTTTTGATATTTTATCTTTTAAATTAATAGGATTTCTTGTAAATCTCATTATTGAAGAAACCCTCCTATTGCACCAAACAGTAACAAAGCTTGTGAATTTCCAAAGGAAAT  
GATGAATGACAATGACTTGGATTCTCAACTATGGCATGCTTGTGCTGGTGAATGGTCAAATGCCATTAATAAATCTAAAGTATTCTACTTTCCCAAGGCCATGCTGAGCATGCACAAA  
GCCAGTTGATTTTGGCAATTTCTAAGAATTCCTCCTTATTCTTTGTCTGTAACTATGTAATAACATGGCTGATAGTGAAACTGATGAGGTCTATGCCAAAATTTTCATGACCCCTC  
TAAGAGGCATTGAGCTAGATTATTGTGAAGATGATGAACTTACCTTAGGAAGCAACGGGTGAGAATCACAAGAAAAACCTTCATCTTTTGCAAAAAACATTGACCCAATCTGATGCTAACA  
ATGGTGGCGGTTTCTCTGTTCCGAGATATTGTGCAGAGACTATATTTCCAAGATTGGATTACTCAGCTGACCCACCTGTCCAAACGGTGCTAGCTAAGGATGTTTATGGTAAGTTTGGAA  
ATTCAGGCATATCTATAGAGGAACACCTCGTCGACATCTTCTCACCCTGGTTGGAGCAATTTTGTCAATGAGAAAAAATTTGTGGCAGGTGATTCCATTGTATTCTTAAAGAACGGAGAAT  
GGTGTATCTGTGTGGGATCCGACGAGCAAAGAGAGGAATGGAGGTGGCCCTGAGATGTCTGCAGGTTGGAATCAGCCTACAGGAACTTGTATGTATGGAGGATTCTCTGTTTTCTTG  
AGGGAGGATGAAAGCAAGTTTAAACAGAGGCATGGGAAATGGAGGCCGGATCAATTCTGGTTCAAGCTTGAGGGGAAGAGGGAAAGTGAAGCAGATTCTGTAATTGAGGCTGCGACAT



TTGCAGCCAGAGGGCAGCCATTTGAAGTTGTTTACTATCCTAGAGCGAGCACGCCGGAGTTTTGTGTGAAGGCATCAGCAGTGAGAGCTGCAATGAGAATTCAGTGGTGCTCTGGGATG  
AGGTTTAAGATGGCTTTTGAGACTGAGGACTCCTCAAGGATAAGTTGGTTTATGGGTACCATATCCGCTGTTTCATGTCGCCGATCTTATGAGGTGGCCTGGATCACCATGGAGGCTTCTTC  
AGGTTTCATGGGATGAGCCTGATCTTTTACAAAATGTAAAGCGTGTGAGCCCATGGTTGGTAGAACTCGTCTCGAACTTGCCAGCCATCCACTTAGCACCGCCCTTCTCGCCTCCGAGAA  
AAAAA ACTCGAATCCCTCAGCATCCTGAATCTCTCTTTGATGTTCAACTCTCAACCTCACCATTCCCAGAAAACACCCCTCATTCCCAGCAGCAGCCCATGTGTTGTCTTCCAGACAGCTC  
TCCTGCAGTTGGCATAACAGGGACCCAGGCATAGTCAGTATGGCTCAAATCTACCAGGACTTCACTTTGAAAAGTTGCAGTCTGGCCTGTTCCATACTGGATTTCTTCGGCTCGATCGTTTT  
ACGCCATCTCATAGAATCTCTACAGGCCTCATTGTTCCGAATTCGGCGGATCATGAAGATGTTTCTGCTTGTGACCATTGGGAATCCTTCTGTGTGTGTGAAAAAGGATTGTAACAAAG  
AATGCAATGCAATGACGCCAAGTTTAGGCTGTTTGAAAACCCATACTACTGAACAACAGCTCTCTCTTAGCCCAAACA ACTCTTCTAATATGAATTCTGACAAGACGACGA ACTTATC  
GAACGGTCTGGATCATCAATTCATCAAAACGGCATGGGGGATAATAATTCATCTTCTGAAGGGCTTCCCTGGTGCCGGGATCGAAA ACTAAATGAGCTTGGTTTAGAGGTTGGTCACTGC  
AAGTTGTTCTGGAATCTGAAGATGTAGGCCAGACCCTTGACCTATCTTCTTTGGTTCATATGAGGATTTGTACAGAAGATTGGCTAACATGTTTGGAAATAAGAAATCAGA ACTGAACA  
GCCGTGTTCTTTATCGTGATATCGCCGGTGTGTCAAGCACACCCGGCGATGAGCCTTTCGCGTAAGTTGCCATTTTAAAGCATAAGCTTTTGTCACTTCATCTAAGGATGCAAAACGAACC  
GAGCTTGTGCGAGCCCAAGTTCTCGGCTCATCACGCAGACGAGCTGAATTTGTTGTTTGTGTTTGGCTCGATAACTCAGCGAGCTGAATACAATTTGTTTGTGAACATAAAAATCTATCTAA  
AAGTCACAAATTATACATATTTGTGACTTGCAAGCAGATATTATTGAGCCCAACTTCATCTGCTGATCTTGTACTGCACCTTCCACACCTTACATTTACTGTTTGATTTCTTCTGTTAATG  
TGCAGTGATTTTCATGAAGGGAGCAAGGAGGCTAACAATATTCATGGATTCGAGCAGCGACAACATTGGCAAGTTGTAGGAGAATTCTCTTTTCAAATTTGCAGGTTTGAAGGAACAGTCT  
CTCCAAAGTTCAGCTATTTTTTCCATGTTAGTGAGAGACACCATAAATTCAAAGACCACATAACTTGTCTTTTTAAAGCATTAAATCTATCTTTTGA ACTGTGAGAGCTTTGAATATGAA  
CCTGCTATTTCTTTCTGCTGAATTACATTTCTGTAGCACGATCAATTTGTTGCCTAGTTTATATGTCTAATTTAGTTGATTTCCCTTTGTAGCTTTTTCAAGCAA ACTTCAGTTCTTGATCAGTT  
TCTGCTATTTCTTTCTGTAGCGTGATCAATTTGTTGCATAAATGATTAAGGCTTCTCCAAA

>comp165418\_c0\_seq12

GGAACCTAGGCTTTGCCAGCCAGCTTTTAAATACTTACTCATAATTCTATTTTTAATTAGGCTTACTGTAAAAATTTGCCAAAATTATGCTTTGTAGTTGTACACAGAGGTGGACCCGA  
GAACAAAAATGGCTTCAACGGGTAAGAATAGTAAAAGATGGAGGTGAGTATGCCAAGAGAGCAAGCAGGAATCTTGCTGTCTCCTCAGCCGCGCAACAGGGAGTCTCTCTCCTCT  
GTAGTCCGAGAGTAACGCCGCTCAACGAGGGACCTCTCAACGTCATCCTCGTCGAGAATAACTCACCCGACCAAAATATCGGGCTACTCGCTCTCAACATCTTAATCGGCTGCTCAGTT  
CTGTGCCCGCTTAGAGATCCGAGCACTGATAAAGAGAGAAGATGAGGAGAATGCTCCTACCATTCTGCTGAAAACAATAAAGATTTGTTCTTTGAGTGTTTTCTTCTTGCAGGAGCTTGAA  
AGAGTGATTTTTCTGTAAAAAGATACGATCTTTCATCTCATCGTTTAGAAAATCTCAGAAAAAAGGTGTGTGCAGTGCGGTTATTTGGTGTGAAGTCTGAAGAAGACGAGATGGGTTGAG  
TTTACAAATAGGGGTTGGCTGTTGAAACCCCTCTATTGCACCAAACAGTAACAAAGCTTGTGAATTTCCAAAGGAAATGATGAATGACAATGACTTGGATTCTCAACTATGGCATGCTTGT  
GCTGGTGCAATGGTGCAAATGCCATTAATAAATTCTAAAGTATTCTACTTTCCCAAGGCCATGCTGAGCATGCACAAAGCCCAGTTGATTTTGGCAATTCTCTAAGAATTCCTCTTAT  
TCTTTGTGCTGTTAACTATGTAAAATACATGGCTGATAGTGAAACTGATGAGGTCTATGCCAAAATTTTCATGACCCCTCTAAGAGGCATTGAGCTAGATTATTGTGAAGATGATGAACTTA  
CCTTAGGAAGCAACGGGTCAGAATCACAAGAAAAACCTTCATCTTTTGCAAAAACATTGACCCAATCTGATGCTAACAATGGTGGCGGTTTCTCTGTTCCGAGATATTGTGCAGAGACTA  
TATTTCCAAGATTGGATTACTCAGCTGACCCACCTGTCCAAACGGTGCTAGCTAAGGATGTTTCATGGTAAGGTTTGGAAATTCAGGCATATCTATAGAGGAACACCTCGTCGACATCTTCTC  
ACCACTGGTTGGAGCAATTTTGTCAATGAGAAAAA ACTTGTGGCAGGTGATTCCATTGTATTCTTAAGAACGGAGAATGGTGATCTCTGTGTGGGGATCCGACGAGCAAAGAGAGGAAT  
TGGAGGTGGGCCTGAGATGTCTGCAGGTTGGAATCAGCCTACAGGAACTTGTATGTATGGAGGATTCTCTGTTTTCTTGGAGGGAGGATGAAAGCAAGTTTAAACAGAGGCATGGGAAATG  
GAGGCCGGATCAATCTGGTTCAAGCTTGGGGGAAGAGGGAAAGTGAAGCAGATTCTGTAATTGAGGCTGCGACATTTGCAGCCAGAGGGCAGCCATTTGAAGTTGTTTACTATCCT  
AGAGCGAGCACGCCGGAGTTTTGTGTGAAGGCATCAGCAGTGAGAGCTGCAATGAGAATTCAGTGGTGCTCTGGGATGAGGTTTAAAGATGGCTTTTGAGACTGAGGACTCCTCAAGGAT

AAGTTGGTTTATGGGTACCATATCCGCTGTTTCATGTCGCCGATCTTATGAGGTGGCCTGGATCACCATGGAGGCTTCTTCAGGTTTCATGGGATGAGCCTGATCTTTTACAAAATGTAAAGC  
GTGTGAGCCCATGGTTGGTAGAACTCGTCTCGAACTTGCCAGCCATCCACTTAGCACCGCCCTTCTCGCCTCCGAGAAAAAACTCGAATCCCTCAGCATCCTGAATTCTCTCTTGATG  
TTCAACTCTCAACCTCACCATTTCCAGAAAAACCCCTCATTCCCAGCAGCAGCCATTGTGTTGTCTTCCAGACAGCTCTCCTGCAGTTGGCATAACAGGACCCAGGCATAGTCAGTATG  
GCTCAAATCTACCAGGACTTCACTTTGAAAAGTTGCAGTCTGGCCTGTTCCATACTGGATTCTTTCGGCTCGATCGCTTTACGCCATCTCATAGAATCTCTACAGGCCTCATTGTTCCGAAT  
TCGGCGGATCATGAAGATGTTTCTGCTTGTGACCATTGGGAATCCTTCTGTGTGTGTGAAAAAGGATTGTAACAAAAGAAATGCAATGCAATGACGCCAAGTTTAGGCTGTTTGAAAA  
CCCATACTCACTGAACAACAGCTCTCTTTAGCCCAAACAACCTTCTAATATGAATTCTGACAAGACGACGAACTTATCGAACGGTTCTGGATCATCAATTCATCAAAAACGGCATGGGGG  
ATAATAATTCATCTTCTGAAGGGCTTCCTTGGTGCCGGGATCGAAAACTAAATGAGCTTGGTTTAGAGGTTGGTCACTGCAAGTTGTTTCTGGAATCTGAAGATGTAGGCCAGACCCCTTGA  
CCTATCTTCTTTGGTTCATATGAGGATTTGTACAGAAGATTGGCTAACATGTTTGGAAATAAAGAAATCAGAACTGAACAGCCGTGTTCTTTATCGTGATATCGCCGGTGTGTCAAGACA  
CCGGCGATGAGCCTTTCGCTGATTTTCATGAAGGGAGCAAGGAGGCTAACAAATATTCATGGATTTCGAGCAGCGACAACATTGGCAAGTTGTAGGAGAATTCTCTTTTCAAATTTGCAGGTT  
TGAAGGAACAGTCTCTCAAAGTTCAGCTATTTTTTTCCATGTTAGTGAGAGACCCATAAATTCAAAGACCACATAACTTGTCTTTTTAAGCATTAAATCTATCCTTTTGAAGTGTGAG  
AGCTTTGAATATGAACCTGCTATTTCTTTCTGCTGAATTACATTTCTGTAGCACGATCAATTGTTGCCTAGTTTATATGTCTAATTTAGTTGATTTCCCTTTGTAGCTTTTTCAAGCAAACTT  
CAGTCTTGATCAGTTTCTGCTATTTCTTTCTGTAGCGTGATCAATTTGTTGCATAAATGATTAAGGCTTCTCCAAA

>comp165418\_c0\_seq13

TAAAGGTTTCATCTATTTTTTATCATTCCCTGAATCATTGTTACAGAAAAGTTTGGAAAATATGAAATTTAGCTTTTTTTACATATAATAGTAAACTTTGATTTTGATGTTTTTATCATTG  
TACATCTTCTTAGGAAATACAAAATTTATCCATTTCTCCAAAAATTATGGAGTTTTTGGCTCTTTTTTAATCATTAGTTCAGAATTCAGATTCTACTAAGGAAAAATGCTAGGGATTTGG  
TTAGTGATCTGTTTTTTGATATTTTTATCTTTTAAATTAATAGGATTTCTTGTAAATCTCATTATTGAAGAAACCCTCCTATTGCACCAAACAGTAACAAAGCTTGTGAATTTCAAAGGAAAT  
GATGAATGACAATGACTTGGATTCTCAACTATGGCATGCTTGTGCTGGTGAATGGTGAATGCCATTAATAAATCTAAAGTATTCTACTTTCCCAAGGCCATGCTGAGCATGCACAAA  
GCCAGTTGATTTTGGCAATTCTCTAAGAATTCCTCCTCTTATTCTTTGTGCTGTTAACTATGTAATAACATGGCTGATAGTGAAAAGTATGAGGCTATGCCAAAATTTTCATGACCCCTC  
TAAGAGGCATTGAGCTAGATTATTGTGAAGATGATGAACTTACCTTAGGAAGCAACGGGTCAGAATCACAAGAAAAACCTTCATCTTTTGCAAAAACATTGACCCAATCTGATGCTAACA  
ATGGTGGCGGTTTTCTCTGTTCCGAGATATTGTGCAGAGACTATATTTCCAAGATTGGATTACTCAGCTGACCCACCTGTCCAACGGTGCTAGCTAAGGATGTTTCATGGTAAGGTTTGAA  
ATTCAGGCATATCTATAGAGGAACACCTCGTCGACATCTTCTACCCTGGTTGGAGCAATTTTGTCAATGAGAAAAAACTTGTGGCAGGTGATTCCATTGTATTCTTAAGAACGGAGAAT  
GGTGATCTCTGTGTGGGGATCCGACGAGCAAAGAGAGGAATTGGAGGTGGGCCTGAGATGTCTGCAGGTTGGAATCAGCCTACAGGAACTTGTATGTATGGAGGATTCTCTGTTTTCTTG  
AGGGAGGATGAAAGCAAGTTTAAACAGAGGCATGGGAAATGGAGGCCGGATCAATTCTGGTTCAAGCTTGAAGGGGAAGAGGGAAAGTGAAGCAGATTCTGTAATTGAGGCTGCGACAT  
TTGCAGCCAGAGGGCAGCCATTTGAAGTTGTTTACTATCCTAGAGCGAGCACGCCGGAGTTTTGTGTGAAGGCATCAGCAGTGAGAGCTGCAATGAGAATTCAGTGGTGTCTGGGATG  
AGGTTTAAAGATGGCTTTTGAAGTCTGAGACTGAGGACTCCTCAAGGATAAGTTGGTTTATGGGTACCATATCCGCTGTTTCATGTCGCCGATCTTATGAGGTGGCCTGGATCACCATGGAGGCTTCTTC  
AGGTTTCATGGGATGAGCCTGATCTTTTACAAAATGTAAAGCGTGTGAGCCATGGTTGGTAGAACTCGTCTCGAACTTGCCAGCCATCCACTTAGCACCGCCCTTCTCGCCTCCGAGAA  
AAAAAACTCGAATCCCTCAGCATCCTGAATTCTCTTTGATGTTCAACTCTCAACCTCACCATTTCCAGAAAAACCCCTCATTCCCAGCAGCAGCCATTGTGTTGTCTTCCAGACAGCTC  
TCCTGCAGTTGGCATAACAGGACCCAGGCATAGTCAGTATGGCTCAAATCTACCAGGACTTCACTTTGAAAAGTTGCAGTCTGGCCTGTTCCATACTGGATTCTTTCGGCTCGATCGCTTT  
ACGCCATCTCATAGAATCTCTACAGGCCTCATTGTTCCGAATTCGGCGGATCATGAAGATGTTTCTGCTTGTGACCATTGGGAATCCTTCTGTGTGTGTGAAAAAGGATTGTAACAAAAG  
AATGCAATGCAATGACGCCAAGTTTAGGCTGTTTGGAAAACCCATACTCACTGAACAACAGCTCTCTTCTTAGCCCAAACAACCTTCTAATATGAATTCTGACAAGACGACGAACTTATC  
GAACGGTCTGGATCATCAATTCATCAAAAACGGCATGGGGGATAATAATTCATCTTCTGAAGGGCTTCCTTGGTGCCGGGATCGAAAACTAAATGAGCTTGGTTTAGAGGTTGGTCACTGC

AAGTTGTTCTGGAATCTGAAGATGTAGGCCAGACCCTTGACCTATCTTCTTTGGTTCATATGAGGATTTGTACAGAAGATTGGCTAACATGTTTGAATAAAGAAATCAGAACTGAACA  
GCCGTGTTCTTTATCGTGATATCGCCGGTGTGTCAAGCACACCCGGCGATGAGCCTTTCGCGTAAGTTGCCATTTTAAAGCATAAGCTTTTTGTCACTTCATCTAAGGATGCAAACGAACC  
GAGCTTGTGCGAGCCCAAGTTCTCGGCTCATCACGCAGACGAGCTGAATACAAGTTGTTTGTGAACATAAAATCTATCTAAAAGTCACAAATTATACATATTTGTGACTTACAAGCATATTT  
TATTGAGCCCCAACTTCATCTAGTGATCTTGTACTGAACCTTCCCTCACACCTTACATTTACTGTTTGATTTCTTCTGTTAATGTGCAGTGATTTTCATGAAGGGAGCAAGGAGGCTAACAAAT  
TCATGGATTCGAGCAGCGACAACATTGGCAAGTTGTAGGAGAATTCTCTTTTCAAATTTGCAGGTTTGAAGGAACAGTCTCTCCAAAGTTCAGCTATTTTTTTCCATGTTAGTGAGAGACA  
CCATAAATTCAAAGACCACATAACTTGTCTTTTTAAGCATTAATCTATCCTTTTGAAGTGTGAGAGCTTTGAATATGAACCTGCTATTTCTTTCTGCTGAATTACATTTCTGTAGCACGAT  
CAATTGTTGCTAGTTTATATGTCTAATTTAGTTGATTTCCCTTTGTAGCTTTTTCAAGCAAAACTTCAGTTCTTGATCAGTTTCTGCTATTTCTTTCTGTAGCGTGATCAATTTGTTGCATAAA  
TGATTAAGGCTTCTCCAAA

>comp165418\_c0\_seq14

TTACAAATAGGGGTTGGCTGTTGTAACAAAGCTTGTGAATTTCCAAAGGAAATGATGAATGACAATGACTTGGATTCTCAACTATGGCATGCTTGTGCTGGTGCAATGGTGCAAATGCCAT  
TAATAAATTCTAAAGTATTCTACTTTCCCAAGGCCATGCTGAGCATGCACAAAGCCCAGTTGATTTTGGCAATTTCTAAGAATTCCTCCTCTTATTCTTTGTGCTGTTAACTATGTAAAAT  
ACATGGCTGATAGTGAACCTGATGAGGTCTATGCCAAAATTTTCATGACCCCTCTAAGAGGCATTGAGCTAGATTATTGTGAAGATGATGAACCTACCTTAGGAAGCAACGGGTCAGAATC  
ACAAGAAAAACCTTCATCTTTTGCAAAAACATTGACCCAATCTGATGCTAACAAATGGTGGCGGTTTCTCTGTTCCGAGATATTGTGCAGAGACTATATTTCCAAGATTGGATTACTCAGCT  
GACCCACCTGTCCAAACGGTGTAGCTAAGGATGTTGATGGTAAGGTTTGGAAATTCAGGCATATCTATAGAGGAACACCTCGTCGACATCTTCTCACCACTGGTTGGAGCAATTTTGTCA  
ATGAGAAAAAAGCTTGTGGCAGGTGATTCCATTGTATTCTTAAGAACGGAGAATGGTGATCTCTGTGTGGGGATCCGACGAGCAAAGAGAGGAATTGGAGGTGGGCCTGAGATGTCTGCA  
GGTTGGAATCAGCCTACAGGAACCTTGTATGTATGGAGGATTCTCTGTTTTCTTGAGGGAGGATGAAAAGCAAGTTTAAACAGAGGCATGGGAAATGGAGGCCGGATCAATTCTGGTTCAAGC  
TTGAGGGGAAGAGGGAAAGTGAAGCAGATTCTGTAATTGAGGCTGCGACATTTGCAGCCAGAGGGCAGCCATTTGAAGTTGTTTACTATCCTAGAGCGAGCACGCCGGAGTTTTGTGT  
GAAGGCATCAGCAGTGAGAGCTGCAATGAGAATTCAGTGGTGCTCTGGGATGAGGTTTAAAGATGGCTTTTGAAGTGTGTTACTATCCTAGAGCGAGCACGCCGGAGTTTTGTGT  
TGTTTCATGTCGCCGATCTTATGAGGTGGCCTGGATCACCATGGAGGCTTCTTCAGGTTTCATGGGATGAGCCTGATCTTTTACAAAATGTAAAGCGTGTGAGCCCATGGTTGGTAGAACTC  
GTCTCGAACTTGCCAGCCATCCACTTAGCACCGCCCTTCTCGCCTCCGAGAAAAAAACTCGAATCCCTCAGCATCCTGAATTCTCTCTTGATGTTCAACTCTCAACCTCACCATTTCCAG  
AAAACACCCTCATCCCAGCAGCAGCCCATTTGTGTTGTCTTCCAGACAGCTCTCCTGCAGTTGGCATAACAGGGACCCAGGCATAGTCAGTATGGCTCAAATCTACCAGGACTTCACTTTG  
AAAAGTTGCAGTCTGGCCTGTTCCATACTGGATTTCTTCGGCTCGATCGCTTTACGCCATCTCATAGAATCTCTACAGGCCTCATTGTTCCGAATTCGGCGGATCATGAAGATGTTTCTGC  
TTGTTGACCATTGGGAATCCTTCTGTGTGTGTGAAAAAGGATTGTAACAAAGAATGCAATGCAATGACGCCAAAGTTTAGGCTGTTTGGAAAACCCATACTACTGAACAACAGCTCTCT  
CTTAGCCCAACAACCTTCTAATATGAATTCGTACAAGACGACGAACCTTATCGAACGGTTCTGGATCATCAATTCATCAAAACGGCATGGGGGATAATAATTCATCTTCTGAAGGGCTTC  
CTTGGTGCCGGGATCGAAAATAAATGAGCTTGGTTTAGAGGTTGGTCACTGCAAGTTGTTCTGGAATCTGAAGATGTAGGCCAGACCCCTTGACCTATCTTCTTTGGTTTCATATGAGGA  
TTTGTACAGAAGATTGGCTAACATGTTTGAATAAAGAAATCAGAACTGAACAGCCGTGTTCTTTATCGTGATATCGCCGGTGTGTCAAGCACACCCGGCGATGAGCCTTTCGCGTAAAGTT  
GCCATTTTAAAGCATAAGCTTTTTGTCACTTCATCTAAGGATGCAAACGAACCGAGCTTGTGCGAGCCCAAGTTCTCGGCTCATCACGCAGACGAGCTGAATTTGTTGTTTGTGTTTGGCT  
CGATAACTCAGCGAGCTGAATACAATTTGTTTGTGAACATAAAATCTATCTAAAAGTCACAAATTATACATATTTGTGACTTGCAAGCAGATATTATTGAGCCCAACTTCATCTGCTGATCT  
TGTAAGTGCACCTTCTCACACCTTACATTTACTGTTGATTTCTTCTGTTAATGTGCAGTGATTTTCATGAAGGGAGCAAGGAGGCTAACAAATATTTCATGGATTTCGAGCAGCGACAACATTGG  
CAAGTTGTAGGAGAATTCTCTTTTCAAATTTGCAGGTTTGAAGGAACAGTCTCTCCAAAGTTCAGCTA

>comp165418\_c0\_seq15

GGAACCTAGGCTTTGCCAGCCAGCTTTTAATACTTACTCATAATTCTATTTTAATTAGGCTTACTGTAAAAATTTGCCAAAATTATGCTTTGTAGTTTGTACACAGAGGTGGACCCGA  
GAACAAAAATGGCTTCAACGGGTAAGAATAGTAAAAGATGGAGGTGAGTATGCCAAGAGAGCAAGCAGGAATCTTGCTGTCTCCTCAGCCGCGCAACAGGGAGTCTCTCTCCCTCT  
GTAGGTCCGAGAGTAACGCCGCTCAACGAGGGACCTCTCAACGTCATCCTCGTCGAGAATAACTCACCCGACCAAATATCGGGCTACTCGCTCTCAACATCTTAATCGGCTGCTCAGTT  
CTGTGCCCGCTTAGAGATCCGAGCACTGATAAAGAGAGAAGATGAGGAGAATGCTCCTACCATTCTGCTGAAACAATAAAGATTTGTTCTTTGAGTGTCTTCTCTTGCAGGAGCTTGAA  
AGAGTGATTTTTCTGTAAAAAGATACGATCTTTCATCTCATCGGTTTAGAAAATCTCAGAAAAAGGTGTGTGCAGTGCAGTTATTTGGTGTGAAGTCTGAAGAAGACGAGATGGGTTGAG  
TTTACAAATAGGGGTTGGCTGTTGGATTTCTTGTAATCTCATTATTGAAGAAACCCTCCTATTGCACCAAACAGTAACAAAGCTTGTGAATTTCAAAGGAAATGATGAATGACAATGACT  
TGGATTCTCAACTATGGCATGCTTGTGCTGGTGCAATGGTGCAATGCCATTAATAAATCTAAAGTATTCTACTTTCCCAAGGCCATGCTGAGCATGCACAAAGCCAGTTGATTTTGGC  
AATTCTCTAAGAATTCCTCCTCTTATTCTTTGTGCTGTTAACTATGTAAAATACATGGCTGATAGTGAAGTATGAGGCTATGCCAAAATTTTCATGACCCCTCTAAGAGGCATTGAGCTA  
GATTATTGTGAAGATGATGAACCTTACCTTAGGAAGCAACGGGTCAGAATCACAAGAAAAACCTTCATCTTTTGCAAAAACATTGACCCAATCTGATGCTAACAATGGTGGCGGTTTCTCT  
GTCCGAGATATTGTGCAGAGACTATATTTCCAAGATTGGATTACTCAGCTGACCCACCTGTCCAAACGGTGTAGCTAAGGATGTTTCATGGTAAGGTTTGGAAATTCAGGCATATCTATAG  
AGGAACACCTCGTCGACATCTTCTCACCCTGGTGGAGCAATTTTGTCAATGAGAAAAACTTGTGGCAGGTGATTCCATTGTATTCTTAAGAACGGAGAATGGTGTATCTGTGTGGG  
GATCCGACGAGCAAAGAGAGGAATTGGAGGTGGGCCTGAGATGTCTGCAGGTTGGAATCAGCCTACAGGAACTTGTATGTATGGAGGATTCTCTGTTTTCTTGAGGGAGGATGAAAGCA  
AGTTTAAACAGAGGCATGGGAAATGGAGGCCGGATCAATTCTGGTTCAAGCTTGAAGGGAAAGAGGGAAAGTGAAGCAGATTCTGTAATTGAGGCTGCGACATTTGCAGCCAGAGGGCA  
GCCATTTGAAGTTGTTTACTATCCTAGAGCGAGCACGCCGAGTTTTGTGTGAAGGCATCAGCAGTGAGAGCTGCAATGAGAATTCAGTGGTGTCTGGGATGAGGTTTAAAGATGGCTTT  
TGAGACTGAGGACTCCTCAAGGATAAGTTGGTTTATGGGTACCATATCCGCTGTTTCATGTGCGCGATCTTATGAGGTGGCCTGGATCACCATGGAGGCTTCTTCAGGTTTCATGGGATGAG  
CCTGATCTTTTACAAAATGTAAAGCGTGTGAGCCCATGGTTGGTAGAACTCGTCTCGAACTTGCCAGCCATCCACTTAGCACCGCCCTTCTCGCCTCCGAGAAAAAACTCGAATCCCT  
CAGCATCTGAATCTCTCTTGATGTTCAACTCTCAACCTCACCATTCCCAGAAAACACCCTCATTCCCAGCAGCAGCCATTGTGTTGTCTTCCAGACAGCTCTCCTGCAGTTGGCATA  
AGGGACCCAGGCATAGTCAGTATGGCTCAAATCTACCAGGACTTCACTTTGAAAAGTTGCAGTCTGGCCTGTTCCATACTGGATTCTTTCGGCTCGATCGCTTTACGCCATCTCATAGAAT  
CTCTACAGGCCTCATTGTTCCGAATTCGGCGGATCATGAAGATGTTTCTGCTTGTGACCATTGGGAATCCTTCTGTGTGTGTGAAAAAGGATTGTAACAAAGAATGCAATGCAATGACG  
CCCAAGTTTAGGCTGTTTGGAAAACCCATACTACTGAACAACAGCTCTCTCTTAGCCCAAACAACCTTCTAATATGAATTCTGACAAGACGACGAACCTATCGAACGGTTCTGGATCAT  
CAATTCATCAAAAACGGCATGGGGGATAATAATTCATCTTCTGAAGGGCTTCTTGGTGCCGGGATCGAAAACTAAATGAGCTTGGTTTAGAGGTTGGTCACTGCAAGTTGTTTCTGGAATC  
TGAAGATGTAGGCCAGACCCTTGACCTATCTTCTTTGGTTTCATATGAGGATTTGTACAGAAGATTGGCTAACATGTTTGGAAATAAAGAAATCAGAACTGAACAGCCGTGTTCTTTATCGT  
GATATCGCCGGTGTGTCAAGCACACCGCGCATGAGCCTTTCGCTGATTTTCATGAAGGGAGCAAGGAGGCTAACAAATTCATGGATTTCGAGCAGCGACAACATTGGCAAGTTGTAGGAG  
AATTCTCTTTTCAAATTTGCAGGTTTGAAGGAACAGTCTCTCCAAAGTTGAGTATTTTTTCCATGTTAGTGAGAGACACCATAAATTCAAAGACCACATAACTTGTCTTTTTTAAAGCATT  
TAATCTATCCTTTTGAAGTGTGAGAGCTTTGAATATGAACCTGCTATTTCTTTCTGCTGAATTACATTTCTGTAGCACGATCAATTGTTGCCTAGTTTATATGTCTAATTTAGTTGATTTCCCT  
TTGTAGCTTTTTTCAAGCAAAAACCTCAGTTCTTGATCAGTTTCTGCTATTTCTTTCTGTAGCGTGATCAATTTGTTGCATAAATGATTAAGGCTTCTCCAAA

>comp165418\_c0\_seq16

GGAACCTAGGCTTTGCCAGCCAGCTTTTAATACTTACTCATAATTCTATTTTAATTAGGCTTACTGTAAAAATTTGCCAAAATTATGCTTTGTAGTTTGTACACAGAGGTGGACCCGA  
GAACAAAAATGGCTTCAACGGGTAAGAATAGTAAAAGATGGAGGTGAGTATGCCAAGAGAGCAAGCAGGAATCTTGCTGTCTCCTCAGCCGCGCAACAGGGAGTCTCTCTCCCTCT  
GTAGGTCCGAGAGTAACGCCGCTCAACGAGGGACCTCTCAACGTCATCCTCGTCGAGAATAACTCACCCGACCAAATATCGGGCTACTCGCTCTCAACATCTTAATCGGCTGCTCAGTT  
CTGTGCCCGCTTAGAGATCCGAGCACTGATAAAGAGAGAAGATGAGGAGAATGCTCCTACCATTCTGCTGAAACAATAAAGATTTGTTCTTTGAGTGTCTTCTCTTGCAGGAGCTTGAA

AGAGTGATTTTTCTGTAAAAAGATACGATCTTTCATCTCATCGGTTTAGAAAATCTCAGAAAAAAGGTGTGTGCAGTGCGGTTATTTGGTGTGAAGTCTGAAGAAGACGAGATGGGTTGAG  
TTTACAAATAGGGGTTGGCTGTTGGATTCTTGTAAATCTCATTATTGAAGAAACCCCTCTATTGCACCAAACAGTAACAAAGCTTGTGAATTTCCAAAGGAAATGATGAATGACAATGACT  
TGGATTCTCAACTATGGCATGCTTGTGCTGGTGCAATGGTGCAAATGCCATTAATAAATTCTAAAGTATTCTACTTTCCCAAGGCCATGCTGAGCATGCACAAAGCCCAGTTGATTTGGC  
AATTCTCTAAGAATTCCTCCTCTTATTCTTTGTCGTGTTAACTATGTAAAATACATGGCTGATAGTGAAACTGATGAGGTCTATGCCAAAATTTTCATGACCCCTCTAAGAGGCATTGAGCTA  
GATTATTGTGAAGATGATGAACCTTACCTTAGGAAGCAACGGGTCAGAATCACAAGAAAAACCTTCATCTTTTGCAAAAAACATTGACCCAATCTGATGCTAACAATGGTGGCGGTTTCTCT  
GTTCCGAGATATTGTGCAGAGACTATCTTCCCTAGATTGGATTACTCTGCTGACCCGCCTGTCCAAGAAGTTCTAGCCAAGGATGTCCATGGCAAGATTTGGAAATTTTCGACATATCTATCG  
AGGGACACCTCGCAGGCACCTTGCTCACCCTGGCTGGAGCAATTTGTCAACGAGAAGAAGCTAGTGGCCGGCGATTCCATTGTGTTCTTAAGAACCAAGAATGGTGTATCTTGCATGG  
GTATTCGACGAGCAAATAGAGGATTTGGAAATGGATTGAGTCCCCTATAAGTTGGGATCATCCTATGGGAAAATGCATGTATGAGGGACTCTCTATTTTATTGAGGGAGGAGGAGAGCAA  
GTTTATAAAGGGAAACACTCATGGAGATTCAAACATGAGGCCAAGGGGTAAAGTGAAGGCATGCACTGTGATTGAGGCCATTACACTTGCCGTTAATGGTCAACCTTTTGAAGTTGTTTA  
CTATCCAAGAGCTAGCACTCCAGAGTTTTGTGTAAAGGCATCAGCAGTGAAAGCTGCAGTGAGGATCCAATGGTGTACAGGCATGAGGTTAAGATGGCATTGAGACCGATGATTCTC  
TAGGATAAGCTGGTTCACAGGGACAGTATCTGATTCTCATGTTTCTGATCCTACAAGGTGGCCTGGATCACCATGGAGGCTTCTTCAGGTTTCTTGGGATGAGCCTGACCTCTTACAAAAT  
GTAACAAGTGTAAGTCCATGGTTAGTGAACCTCATCTCAAACATGACAACCATCAACTTAGCTCACTTGTGCTCCGAGAAAAAAACTCGGAGCTCACAGCTTCTGATTTCCCACTC  
GATGCTCAACTTCCAACCTCCATAATCCCCAAAAACCTCCTTACTCCCAGCAGCAGCCCTTTGTGTTTTCTCCAGATAAACTCCTGCAGCTGGTATAACAGGGAGCCAGGCATAGTCAGT  
ATGGATTATCTTTACCAGAACTGCGCTTTTTTCATGGACTCGATCACTTTCCTCCACCTTCGAGAATCTCTACTGGCATCAATGGTGGCGATAAATCTTGCATGTTGACCATAGAAAATTTCTC  
AGAAGGGGAACAAGGAATGCAAGAAACGTCAGTTTATGCTCTTTGGAAAAGTTATCCTCACTGCAGAAGAGCTCTCAACTATCAACAAATACAGCCCATCAGGTTTGAATTCGATGAAG  
ATGATGTCTGATAATTCATCTTCTGAAGCGCTTATTTGAATAAAGACAAGAAAGTTAATGAGCTTGGACTGGAGACTGGACACTGTAAGGTGATCATGGAGTCAGAGAATGTAGGCCGA  
AACCTTGACCTTCTACATTTGGTTCATATGAGGAGCTGTATAGATTGGCAAACATGTTTGGAAATCGAAAGTCTGAGCTTGAAGCCGTTTACTTTACCGAGATCCAGCTGGGGGTGCTC  
AAACACACTGAAGATAAGCCTTTTGTGTAAGTTTGTATCTATCTCATTTATGATGCTTCCCTTCTTCTGAATTTGGTTGTAAAGCTGATACGAGGAAAGAAAGTTTTTTTATAAATTTCTTA  
CGAGTATTAGAGAGAGAGAGATGAATATTTTCTTATAGCTTTTGTCAAAGCAAATTCTGAAAGCAAAAAATTTTGAAAAATAGTATTTCAGATGACTGTAGCTCCAAATAAATTTCTTAA  
ATATTCTTACTCAGATTACCCCAAACAAATTATTAGGGTATGTTGGGGTGTGTTGCTGTATTGATTAATTTAGTTGTATTGAAGTATTTTGGAAAAATAATTTAGAAATTTCTTATCCTATAA  
AGGAACTTTTTATTATATAAAT

>comp165418\_c0\_seq17

GGAACCTAGGCTTTGCCAGCCAGCTTTTAAATATACTTACTCATAATTCTATTTTAAATTAGGCTTACTGTAAAAATTTGCCAAAATTATGCTTTGTAGTTTGTACACAGAGGTGGACCCGA  
GAACAAAAATGGCTTCAACGGGTAAGAATAGTAAAAGATGGAGGTGAGTATGCCAAGAGAGCAAGCAGGAATCTTGCTGTCTCCTCAGCCGCGCAACAGGGAGTCTCTCTCCTCT  
GTAGGTCCGAGAGTAACGCCGCTCAACGAGGGACCTCTCAACGTCATCCTCGTCGAGAATAACTCACCCGACCAAATATCGGGCTACTCGCTCTCAACATCTTAATCGGCTGCTCAGTT  
CTGTGCCCGCTTAGAGATCCGAGCACTGATAAAGAGAGAAGATGAGGAGAATGCTCCTACCATTCTGCTGAAACAATAAAGATTTGTTCTTTGAGTGTCTTCTTCTTGCAGGAGCTTGAA  
AGAGTGATTTTTCTGTAAAAAGATACGATCTTTCATCTCATCGGTTTAGAAAATCTCAGAAAAAAGGTGTGTGCAGTGCGGTTATTTGGTGTGAAGTCTGAAGAAGACGAGATGGGTTGAG  
TTTACAAATAGGGGTTGGCTGTTGAAACCCCTCTATTGCACCAAACAGTAACAAAGCTTGTGAATTTCCAAAGGAAATGATGAATGACAATGACTTGGATTCTCAACTATGGCATGCTTGT  
GCTGGTGCAATGGTGCAAATGCCATTAATAAATTCTAAAGTATTCTACTTTCCCAAGGCCATGCTGAGCATGCACAAAGCCCAGTTGATTTTGGCAATCTCTAAGAATTCCTCCTTAT  
TCTTTGTCGTGTTAACTATGTAAAATACATGGCTGATAGTGAAACTGATGAGGTCTATGCCAAAATTTTCATGACCCCTCTAAGAGGCATTGAGCTAGATTATTGTGAAGATGATGAACCTA  
CCTTAGGAAGCAACGGGTCAGAATCACAAGAAAAACCTTCATCTTTTGCAAAAAACATTGACCCAATCTGATGCTAACAATGGTGGCGGTTTCTCTGTTCCGAGATATTGTGCAGAGACTA

TCTTCCCTAGATTGGATTACTCTGCTGACCCGCCTGTCCAAGAAGTTCTAGCCAAGGATGTCCATGGCAAGATTTGGAAATTTGACATATCTATCGAGGGACACCTCGCAGGCACTTGCT  
CACCCTGGCTGGAGCAATTTTGTCAACGAGAAGAAGCTAGTGGCCGGCGATTCCATTGTGTTCTTAAGAACCAAGAATGGTGATCTTTGCATGGGTATTCGACGAGCAAATAGAGGATT  
TGGAAATGGATTTCGAGTCCCCTATAAGTTGGGATCATCCTATGGGAAAATGCATGTATGAGGGACTCTCTATTTTATTGAGGGAGGAGGAGAGCAAGTTTATAAAGGGAAACACTCATGGA  
GATTCAAACATGAGGCCAAGGGGTAAAGTGAAGGCATGCACTGTGATTGAGGCCATTACACTTGCCGTTAATGGTCAACCTTTTGAAGTTGTTTACTATCCAAGAGCTAGCACTCCAGAG  
TTTTGTGTAAGGCATCAGCAGTGAAAGCTGCAGTGAGGATCCAATGGTGTACAGGCATGAGGTTTAAAGATGGCATTGAGACCGATGATTCTCTAGGATAAGCTGGTTCACAGGGACA  
GTATCTGATTCTCATGTTTCTGATCCTACAAGGTGGCCTGGATCACCATGGAGGCTTCTTCAGGTTTCTTGGGATGAGCCTGACCTTTACAAAATGTAACAAGTGTAAGTCCATGGTTAGT  
GGAATCATCTCAAACATGACAACCATCAACTTAGCTCACTTGTGCGCTCCGAGAAAAAACTCGGAGCTCACAGCTTCTGATTTCCCACTCGATGCTCAACTTCCAACCTCCATAAT  
CCCCAAAACCTCCTTACTCCCAGCAGCAGCCCTTGTGTTTTCTCCAGATAAACTCCTGCAGCTGGTATACAGGGAGCCAGGCATAGTCAGTATGGATTATCTTTACCAGAACTGCGC  
TTTTTTCATGGACTCGATCACTTTCCTCCACCTTCGAGAATCTCTACTGGCATCAATGGTGGCGATAATTCTTGCATGTTGACCATAGAAAATTCTCAGAAGGGGAACAAGGAATGCAAGA  
AACGTCAGTTTATGCTCTTTGGAAAAGTTATCCTCACTGCAGAAGAGCTCTCAACTATCAACAAATACAGCCCATCAGGTTTGAATTCGATGAAGATGATGTCTGATAATTCATCTTCTGAA  
GCGCTTTATTTGAATAAAGACAAGAAAAGTTAATGAGCTTGGACTGGAGACTGGACACTGTAAGGTGATCATGGAGTCAGAGAATGTAGGCCGAAACCTTGACCTTTCTACATTTGGTTCA  
TATGAGGAGCTGTATAGATTGGCAAACATGTTTGGAAATTCGAAAGTCTGAGCTTGCAAGCCGTTTACTTTACCGAGATCCAGCTGGGGGTGCTCAAACACACTGAAGATAAGCCTTTTGT  
TGAGTTCATGAAGGGAGCGAGAAAAGCTAACCATATAATGAAATGAATTCAGCAGCGAAGATGGCGCCATGTTGCAGCAGAACAGACGCTTCTTTCAAGTGTACAGAGCTGTCTATTCT  
AAGTTTGTTTTTGAGCATTAAATATGTCAGTTTGCCTACTCAGAGACTTAAAGTATGAAACTTAGTATTTATTCTCTTTCTAAACTTCTTTATAGAAATATCACATATGATATTCTAATGTGTT  
TAGTTTATGCAGTTCAATCTTGATCTGTTGGTTGTGAATTTT

>comp165418\_c0\_seq18

TAAAGGTTTCATCTATTTTTTATCATTCCCTGAATCATTTTGTTACAGAAAAGTTTGGAAAATATGAAATTTAGCTTTTTTTTACATATAATAGTAAACTTTGATTTTGATGTTTTTATCATTTTGA  
TACATCTTCTTAGGAAATACAAAATTTATCCATTTCTCCAAAAAATTATGGAGTTTTTGTCTTTTTTTAATCATTAGTTCAGAAATTCAGATTCTACTAAGGAAAAAATGCTAGGGATTTGG  
TTAGTGATCTGTTTTTTTGATATTTTTATCTTTTAAATTAATAGGATTTCTTGTAACTCATTATTGAAGAAACCCTCCTATTGCACCAAACAGTAACAAAGCTTGTGAATTTCCAAAGGAAAT  
GATGAATGACAATGACTTGGATTCTCAACTATGGCATGCTTGTGCTGGTGAATGGTGAATGCCATTAATAAATCTAAAGTATTCTACTTTCCCAAGGCCATGCTGAGCATGCACAAA  
GCCCAGTTGATTTTGGCAATTTCTTAAGAATTCCTCCTCTTATTCTTTGTGCTGTTAACTATGTAATAACATGGCTGATAGTGAAAATGATGAGGTCTATGCCAAAATTTTCATGACCCCTC  
TAAGAGGCATTGAGCTAGATTATTGTGAAGATGATGAACTTACCTTAGGAAGCAACGGGTCAGAATCACAAGAAAAACCTTCATCTTTTGCAAAAACATTGACCCAATCTGATGCTAACA  
ATGGTGGCGGTTTTCTCTGTTCCGAGATATTGTGCAGAGACTATATTCCAAGATTGGATTACTCAGCTGACCCACCTGTCCAAACGGTGTAGCTAAGGATGTTTCATGGTAAGGTTTGGAA  
ATTCAGGCATATCTATAGAGGAACACCTCGTCGACATCTTCTCACCCTGGTTGGAGCAATTTTGTCAATGAGAAAAAACTTGTGGCAGGTGATTCCATTGTATTCTTAAGAACGGAGAAT  
GGTGATCTCTGTGTGGGGATCCGACGAGCAAAGAGAGGAATTGGAGGTGGGCCTGAGATGCTGCAGGTTGGAATCAGCCTACAGGAACTTGTATGTATGGAGGATTCTCTGTTTTCTTG  
AGGGAGGATGAAAGCAAGTTTAAACAGAGGCATGGGAAATGGAGGCCGGATCAATTCTGGTTCAAGCTTGAAGGGGAAAGAGGGAAAGTGAAGCAGATTCTGTAATTGAGGCTGCGACAT  
TTGCAGCCAGAGGGCAGCCATTTGAAGTTGTTTACTATCCTAGAGCGAGCACGCCGGAGTTTTGTGTGAAGGCATCAGCAGTGAGAGCTGCAATGAGAATTCAGTGGTGTCTCTGGGATG  
AGGTTTAAAGATGGCTTTTGGAGCTGAGGACTCCTCAAGGATAAGTTGGTTTATGGGTACCATATCCGCTGTTTCATGTCGCCGATCTTATGAGGTGGCCTGGATCACCATGGAGGCTTCTTC  
AGGTTTCATGGGATGAGCCTGATCTTTTACAAAATGTAAGCGTGTGAGCCATGGTTGGTAGAACTCGTCTCGAACTTGCCAGCCATCCACTTAGCACCGCCCTTCTCGCCTCCGAGAA  
AAAAAACTCGAATCCCTCAGCATCCTGAATCTCTCTTGTGATGTTCAACTCTCAACCTCACCATTCCCAGAAAAACCCCTCATTCCCAGCAGCAGCCATTGTGTTGTCTTCCAGACAGCTC  
TCCTGCAGTTGGCATAACAGGGACCCAGGCATAGTCAGTATGGCTCAAATCTACCAGGACTTCACTTTGAAAAGTTGCAGTCTGGCCTGTTCCATACTGGATTTCTTCGGCTCGATCGCTTT

ACGCCATCTCATAGAATCTCTACAGGCCTCATTGTTCCGAATTCGGCGGATCATGAAGATGTTTCCTGCTTGTGACCAATTGGGAATCCTTCTGTGTGTGTGAAAAAGGATTGTAACAAAG  
AATGCAATGCAATGACGCCAAAGTTTAGGCTGTTTGAAAACCCATACTACTGAACAACAGCTCTCTCTTAGCCCAAACAACCTCTTCTAATATGAATTCTGACAAGACGACGAACCTTATC  
GAACGGTCTGGATCATCAATTCATCAAAACGGCATGGGGGATAATAATTCATCTTCTGAAGGGCTTCCCTGGTGCCGGGATCGAAAATAAATGAGCTTGGTTTAGAGGTTGGTCACTGC  
AAGTTGTTCTGAAATCTGAAGATGTAGGCCAGACCCTTGACCTATCTTCTTTGGTTTCATATGAGGATTTGTACAGAAGATTGGCTAACATGTTTGGAAATAAGAAAATCAGAAGTGAACA  
GCCGTGTTCTTTATCGTGATATCGCCGGTGTGTCAAGCACACCCGGCGATGAGCCTTTCGCTGATTTTCATGAAGGGAGCAAGGAGGCTAACAAATTCATGGATTTCGAGCAGCGACAACAT  
TGGCAAGTTGTAGGAGAATTCTCTTTTCAAATTTGCAGGTTTGAAGGAACAGTCTCTCCAAAGTTCAGCTATTTTTTCCATGTTAGTGAGAGACACCATAAATTCAAAGACCACATAACT  
TGTTCTTTTTAAGCATTAAATCTATCCTTTTGAAGTGTGAGAGCTTTGAATATGAACCTGCTATTTCTTTCTGCTGAATTACATTTCTGTAGCACGATCAATTTGTTGCCTAGTTTATATGTCTA  
ATTTAGTTGATTTCCCTTTGTAGCTTTTTCAAGCAAAAACCTCAGTTCTTGATCAGTTTCTGCTATTTCTTTCTGTAGCGTGATCAATTTGTTGCATAAATGATTAAGGCTTCTCCAAA

>comp165418\_c0\_seq19

TTACAAATAGGGGTTGGCTGTTGTAACAAAGCTTGTGAATTTCCAAAGGAAATGATGAATGACAATGACTTGGATTCTCAACTATGGCATGCTTGTGCTGGTGCAATGGTGCAATGCCAT  
TAATAAATCTAAAGTATTCTACTTTCCCAAGGCCATGCTGAGCATGCACAAAGCCAGTTGATTTTGGCAATTTCTAAGAATTCCTCCTCTTATTCTTTGTGCTGTTAACTATGTAAAAT  
ACATGGCTGATAGTGAAGTCTATGCCAAAATTTTCATGACCCCTCTAAGAGGCATTGAGCTAGATTATTGTGAAGATGATGAACCTACCTTAGGAAGCAACGGGTCAGAATC  
ACAAGAAAAACCTTCATCTTTTGCAAAAACATTGACCCAATCTGATGCTAACAAATGGTGGCGGTTTCTCTGTTCCGAGATATTGTGCAGAGACTATCTTCCCTAGATTGGATTACTCTGCTG  
ACCCGCCTGTCCAAGAAGTCTAGCCAAGGATGTCCATGGCAAGATTTGGAAATTTGACATATCTATCGAGGGACACCTCGCAGGCCTTGCTCACCCTGGCTGGAGCAATTTTGTCA  
ACGAGAAGAAGCTAGTGGCCGGCGATTCCATTGTGTTCTTAAGAACCAAGAATGGTGTATCTTTGCATGGGTATTCGACGAGCAAAATAGAGGATTTGGAAATGGATTTCGAGTCCCCTATAA  
GTTGGGATCATCTATGGGAAAATGCATGTATGAGGGACTCTCTATTTTATTGAGGGAGGAGGAGCAAGTTTATAAAGGGAAAACACTCATGGAGATTCAAACATGAGGCCAAGGGGTA  
AAGTGAAGGCATGCACTGTGATTGAGGCCATTACACTTGCCGTTAATGGTCAACCTTTTGAAGTTGTTTACTATCCAAGAGCTAGCACTCCAGAGTTTGTGTAAAGGCATCAGCAGTGA  
AAGCTGCAGTGAGGATCCAATGGTGTACAGGCATGAGGTTAAGATGGCATTGAGACCGATGATTCCTCTAGGATAAGCTGGTTCACAGGGACAGTATCTGATTCTCATGTTTCTGATCC  
TACAAGTGGCCTGGATCACCATGGAGGCTTCTTCAGGTTTCTTGGGATGAGCCTGACCTCTTACAAAATGTAACAAGTGTAAAGTCCATGGTTAGTGGAACCTCATCTCAAACATGACAAC  
CATCAACTTAGCTCACTTGTGCGCTCCGAGAAAAAAACTCGGAGCTCACAGCTTTCTGATTTCCACTCGATGCTCAACTTCCAACCTCCATAATCCCCAAAAACCTCCTTACTCCCAGC  
AGCAGCCCTTTGTGTTTTCTCCCAGATAAACACTCCTGCAGCTGGTATACAGGGAGCCAGGCATAGTCAGTATGGATTATCTTTACCAGAACTGCGCTTTTTTTCATGGACTCGATCACTTTCC  
TCCACCTTCGAGAATCTCTACTGGCATCAATGGTGGCGATAATTTGTCATGTTGACCATAGAAAATTTCTCAGAAGGGGAACAAGGAATGCAAGAAACGTCAGTTTATGCTCTTTGGAAA  
AGTTATCCTCACTGCAGAAGAGCTCTCAACTATCAACAAATACAGCCATCAGGTTTGAATTCGATGAAGATGATGTCTGATAATTCATCTTCTGAAGCGCTTATTGTAATAAAGACAAG  
AAAGTTAATGAGCTTGGACTGGAGACTGGACACTGTAAGGTGATCATGGAGTCAGAGAATGTAGGCCGAAACCTTGACCTTTCTACATTTGGTTCATATGAGGAGCTGTATAGATTGGCA  
AACATGTTTGGAAATCGAAAGTCTGAGCTTGAAGCCGTTTACTTTACCGAGATCCAGCTGGGGTGTCTCAAACACACTGAAGATAAGCCTTTTGTGAGTTCATGAAGGGAGCGAGAA  
AGCTAACCATTATAATGAAATGAATCAAGCAGCGAAGATGGCGCCATGTTGCAGCAGAACAGACGCTTCTTTCAAGTGTACAGAGCTGTCTATTCTAAGTTTGTTTTTGAGCATTAAATAT  
GTCAGTTTGCCTACTCAGAGACTTTAAGTATGAAACTTAGTATTTATTTCTTTCTAAACTTCTTTATAGAAAATATCACATATGATTTCTAATGTGTTTAGTTTATGCAGTTCAATCTTGATC  
TGTTGGTTGTGAATTTT

>comp165418\_c0\_seq2

GGAACCTAGGCTTTGCCAGCCAGCTTTTTAATACTTACTCATAATTTCTATTTTTAATTAGGCTTACTGTAAAAATTTGCCAAAATTATGCTTTGTAGTTTGTACACAGAGGTGGACCCGA  
GAACAAAAATGGCTTCAACGGGTAAGAATAGTAAAAAGATGGAGGTGAGTATGCCAAGAGAGCAAGCAGGAATCTTGCTGTCTCCTCAGCCGCGCAACAGGGAGTCTCTCTCCCTCT

GTAGGTCGAGAGTAACGCCGCTCAACGAGGGACCTCTCAACGTCATCCTCGTCGAGAATAACTCACCCGACCAAAATATCGGGCTACTCGCTCTCAACATCTTAATCGGCTGCTCAGTT  
CTGTGCCCGCTTAGAGATCCGAGCACTGATAAAGAGAGAAGATGAGGAGAATGCTCCTACCATTCTGCTGAAACAATAAAGATTTGTTCTTTGAGTGTTTTCTTCTTGCAGGAGCTTGAA  
AGAGTGATTTTTCTGTAAAAAGATACGATCTTTCATCTCATCGGTTTAGAAAATCTCAGAAAAAAGGTGTGTGCAGTGCAGTTATTTGGTGTGAAGTCTGAAGAAGACGAGATGGGTTGAG  
TTTACAAATAGGGGTTGGCTGTTGGATTTCTTGTAAATCTCATTATTGAAGAAACCTCCTATTGCACCAAACAGTAACAAAGCTTGTGAATTTCCAAAGGAAATGATGAATGACAATGACT  
TGGATTCTCAACTATGGCATGCTTGTGCTGGTGCAATGGTGCAATGCCATTAATAAATTCTAAAGTATTCTACTTTCCCAAGGCCATGCTGAGCATGCACAAAGCCAGTTGATTTGGC  
AATTCTCTAAGAATTCCTCCTCTTATCTTTGTCGTGTTAACTATGTAATAACATGGCTGATAGTGAAACTGATGAGGTCTATGCCAAAATTTTCATGACCCCTCTAAGAGGCATTGAGCTA  
GATTATTGTGAAGATGATGAACCTTACCTTAGGAAGCAACGGGTCAGAATCACAAAGAAAAACCTTCATCTTTTGCAAAAACATTGACCCAATCTGATGCTAACAATGGTGGCGGTTTCTCT  
GTTCCGAGATATTGTGCAGAGACTATATTTCCAAGATTGGATTACTCAGCTGACCCACCTGTCCAAACGGTGTAGCTAAGGATGTTTCATGGTAAGGTTTGGAAATTCAGGCATATCTATAG  
AGGAACACCTCGTCGACATCTTCTCACCCTGGTTGGAGCAATTTGTCAATGAGAAAAAAGTTGTGGCAGGTGATTCCATTGTATTCTTAAGAACGGAGAATGGTGTATCTCTGTGTGGG  
GATCCGACGAGCAAAGAGAGGAATTTGGAGGTGGGCCTGAGATGTCTGCAGGTTGGAATCAGCCTACAGGAACTTGTATGTATGGAGGATTCTCTGTTTTCTTGGAGGAGGATGAAAGCA  
AGTTTAAACAGAGGCATGGGAAATGGAGGCCGATCAATTCTGGTTCAAGCTTGGAGGGAAAGAGGGAAAGTGAAAGCAGATTCTGTAATTTGAGGCTGCGACATTTGCAGCCAGAGGGCA  
GCCATTTGAAGTTGTTTACTATCCTAGAGCGAGCACGCCGAGTTTTGTGTGAAGGCATCAGCAGTGAGAGCTGCAATGAGAATTCAGTGGTGTCTGGGATGAGGTTTAAAGATGGCTTT  
TGAGACTGAGGACTCCTCAAGGATAAGTTGGTTTTATGGGTACCATATCCGCTGTTTCATGTGCGCGATCTTATGAGGTGGCCTGGATCACCATGGAGGCTTCTTCAGGTTTCATGGGATGAG  
CCTGATCTTTTACAAAATGTAAGCGTGTGAGCCCATGGTTGGTAGAACTCGTCTCGAACTTGCCAGCCATCCACTTAGCACCCCTTCTCGCTCCGAGAAAAAAGTTTGAATCCCT  
CAGCATCCTGAATTTCTCTTGTGTTCAACTCTCAACCTCACCATTCCCAGAAAACACCCTCATTCCCAGCAGCAGCCATTGTGTTGTCTTCCAGACAGCTCTCCTGCAGTTGGCATA  
AGGGACCCAGGCATAGTCAGTATGGCTCAAATCTACCAGGACTTCACTTTGAAAAGTTGCAGTCTGGCCTGTTCCATACTGGATTTCTTCGGCTCGATCGCTTTACGCCATCTCATAGAAT  
CTCTACAGGCCCTCATTGTTCCGAATTCGGCGGATCATGAAGATGTTTCTGCTTGTGTTGACCATTGGGAATCCTTCTGTGTGTGTGAAAAAGGATTGTAACAAAGAATGCAATGCAATGACG  
CCCAAGTTTAGGCTGTTTGGAAAACCCATACTCACTGAACAACAGCTCTCTTAGCCCAAACAACCTTCTAATATGAATTTGACAAGACGACGAACCTTATCGAACGGTTCTGGATCAT  
CAATTCATCAAAAACGGCATGGGGGATAATAATTCATCTTCTGAAGGGCTTCCCTGGTGCCGGGATCGAAAACTAAATGAGCTTGGTTTAGAGGTTGGTCACTGCAAGTTGTTCTTGAATC  
TGAAGATGTAGGCCAGACCCTTGACCTATCTTCTTTGGTTTCATATGAGGATTTGTACAGAAGATTGGCTAACATGTTTGAATAAAGAAATCAGAAGTGAACAGCCGTGTTCTTTATCGT  
GATATCGCCGGTGTGTCAAGCACACCGGCGATGAGCCTTTCGCGTAAGTTGCCATTTTAAAGCATAAGCTTTTTGTCACTTCATCTAAGGATGCAAACGAACCGAGCTTGTGCGAGCCC  
AAGTTCTCGGCTCATCACGCAGACGAGCTGAATACAAGTTGTTTGTGAACATAAAATCTATCTAAAAGTCACAAATTATACATATTTGTGACTTACAAGCATATTTTATTGAGCCCCA  
CATCTAGTGATCTTGTACTGAACTTTCCTCACACCTTACATTTACTGTTTGATTTCTTCTGTTAATGTGCAGTGATTTTCATGAAGGGAGCAAGGAGGCTAACAATATTCATGGATTTCGAGCA  
GCGACAACATTGGCAAGTTGTAGGAGAATTCTCTTTTCAAATTTGCAGGTTTGAAGGAACAGTCTCTCCAAAGTTTCAGCTATTTTTTTCCATGTTAGTGAGAGACACCATAAATTCAAAGA  
CCACATAACTTGTCTTTTTAAGCATTAACTATCCTTTTGAAGTGTGAGAGCTTTGAATATGAACCTGCTATTTCTTTCTGCTGAATTACATTTCTGTAGCACGATCAATTGTTGCCTAGT  
TTATATGTCTAATTTAGTTGATTTCCCTTTGTAGCTTTTTCAAGCAAAAACCTCAGTTCCTTGATCAGTTTCTGCTATTTCTTCTGTAGCGTGATCAATTTGTTGCATAAATGATTAAGGCTTCTC  
CAA

>comp165418\_c0\_seq20

GGAACCTAGGCTTTGCCAGCCAGCTTTTTAATACTTACTCATAATTTCTATTTTTAATTAGGCTTACTGTAAAAATTTGCCAAAATTATGCTTTGTAGTTTGTACACAGAGGTGGACCCGA  
GAACAAAAAATGGCTTCAACGGGTAAGAATAGTAAAAGATGGAGGTGAGTATGCCAAGAGAGCAAGCAGGAATCTTGCTGTCTCCTCAGCCGCGCAACAGGGAGTCTCTCTCCTCT  
GTAGGTCGAGAGTAACGCCGCTCAACGAGGGACCTCTCAACGTCATCCTCGTCGAGAATAACTCACCCGACCAAAATATCGGGCTACTCGCTCTCAACATCTTAATCGGCTGCTCAGTT



CTGTGCCCGCTTAGAGATCCGAGCACTGATAAAGAGAGAAGATGAGGAGAATGCTCCTACCATTCTGCTGAAACAATAAAGATTTGTTCTTTGAGTGTTCCTTCTTGCAGGAGCTTGAA  
AGAGTGATTTTTCTGTAAAAAGATACGATCTTTCATCTCATCGGTTTAGAAAATCTCAGAAAAAAGGTGTGTGCAGTGCAGTTATTTGGTGTGAAGTCTGAAGAAGACGAGATGGGTTGAG  
TTTACAAATAGGGGTTGGCTGTTGGATTTCTTGTAACTCATTATTGAAGAAACCCTCCTATTGCACCAAACAGTAACAAAGCTTGTGAATTTCCAAAGGAAATGATGAATGACAATGACT  
TGGATTCTCAACTATGGCATGCTTGTGCTGGTGCATGGTGCATTAATAAATCTAAAGTATTCTACTTTCCCAAGGCCATGCTGAGCATGCACAAAGCCAGTTGATTTGGC  
AATTCTCTAAGAATTCCTCCTCTTATTCTTTGTCGTGTTAACTATGTAAAATACATGGCTGATAGTGAAGTGTGATGAGGCTATGCCAAAATTTTCATGACCCCTCTAAGAGGCATTGAGCTA  
GATTATTGTGAAGATGATGAACCTTACCTTAGGAAGCAACGGGTCAGAATCACAAGAAAAACCTTCATCTTTTGCAAAAACATTGACCCAATCTGATGCTAACAATGGTGGCGGTTTCTCT  
GTTCCGAGATATTGTGCAGAGACTATATTTCCAAGATTGGATTACTCAGCTGACCCACCTGTCCAAACGGTGTAGCTAAGGATGTTTCATGGTAAGGTTTGGAAATTCAGGCATATCTATAG  
AGGAACACCTCGTCGACATCTTCTCACCCTGGTGGAGCAATTTTGTCAATGAGAAAAAAGTGTGGCAGGTGATTCCATTGTATTCTTAAAGAACGGAGAATGGTGTATCTGTGTGGG  
GATCCGACGAGCAAAGAGAGGAATTGGAGGTGGGCCTGAGATGTCTGCAGGTTGGAATCAGCCTACAGGAACTTGTATGTATGGAGGATTCTCTGTTTTCTTGAGGGAGGATGAAAGCA  
AGTTTAAACAGAGGCATGGGAAATGGAGGCCGGATCAATTCTGGTTCAAGCTTGAAGGGGAAAGGGGAAAGTGAAAGCAGATTCTGTAATTGAGGCTGCGACATTTGCAGCCAGAGGGCA  
GCCATTTGAAGTTGTTTACTATCCTAGAGCGAGCACGCCGAGTTTTGTGTGAAGGCATCAGCAGTGAGAGCTGCAATGAGAATTCAGTGGTGTCTGGGATGAGGTTTAAAGATGGCTTT  
TGAGACTGAGGACTCCTCAAGGATAAGTTGGTTTATGGGTACCATATCCGCTGTTTCATGTGCGCGATCTTATGAGGTGGCCTGGATCACCATGGAGGCTTCTTCAGGTTTCATGGGATGAG  
CCTGATCTTTTACAAAATGTAAAGCGTGTGAGCCCATGGTTGGTAGAACTCGTCTCGAACTTGCCAGCCATCCACTTAGCACCGCCCTTCTCGCCTCCGAGAAAAAAACTCGAATCCCT  
CAGCATCCTGAATTTCTCTTTGATGTTCAACTCTCAACCTCACCATTCCCAGAAAACACCCTCATTCCCAGCAGCAGCCATTGTGTTGTCTTCCAGACAGCTCTCCTGCAGTTGGCATA  
AGGGACCCAGGCATAGTCAGTATGGCTCAAATCTACCAGGACTTCACCTTGAAAAGTTGCAGTCTGGCCTGTTCCATACTGGATTCTTTCGGCTCGATCGCTTTACGCCATCTCATAGAAT  
CTCTACAGGCCTCATTGTTCCGAATTCGGCGGATCATGAAGATGTTTCTGCTTGTGACCATTGGGAATCCTTCTGTGTGTGTGAAAAAGGATTGTAACAAAGAATGCAATGCAATGACG  
CCCAAGTTTAGGCTGTTTGGAAAACCCATACTCACTGAACAACAGCTCTCTCTTAGCCCAAACAACCTTCTAATATGAATTTGACAAGACGACGAACCTATCGAACGGTTCTGGATCAT  
CAATTCATCAAAAACGGCATGGGGGATAATAATTCATCTTCTGAAGGGCTTCCCTGGTGGCGGGATCGAAAATAAATGAGCTTGGTTTGAAGGTTGGTCACTGCAAGTTGTTCTGGAATC  
TGAAGATGTAGGCCAGACCCTTGACCTATCTTCTTTGGTTTCATATGAGGATTTGTACAGAAGATTGGCTAACATGTTTGGAAATAAAGAAATCAGAAGTGAACAGCCGTGTTCTTTATCGT  
GATATCGCCGGTGTGTCAAGCACACCGCGCATGAGCCTTTCGCGTAAGTTGCCATTTTAAAGCATAAGCTTTTTGTCACTTCATCTAAGGATGCAAACGAACCGAGCTTGTGCGAGCCC  
AAGTTCTCGGCTCATCACGACAGAGCTGAATTTGTTGTTTGTGTTGGCTCGATAACTCAGCGAGCTGAATACAATTTGTTTGTGAACATAAAATCTATCTAAAAGTCACAAATTATACA  
TATTTGTGACTTGCAAGCAGATATTATTGAGCCCCAATTCATCTGCTGATCTTGTACTGCACCTTCTCACACCTTACATTTACTGTTTGATTTCTTCTGTTAATGTGCAGTGATTTTCATGAA  
GGGAGCAAGGAGGCTAACAATATTTCATGGATTCGAGCAGCGACAACATTGGCAAGTTGTAGGAGAATTCCTTTTTCAAATTTGCAGGTTTGAAGGAACAGTCTCTCCAAAGTTCAGCTAT  
TTTTTTCCATGTTAGTGAGAGACACCATAAATTCAAAGACCACATAAATTGTTCTTTTTAAGCATTAAATCTATCCTTTTGAAGTGTGAGAGCTTTGAATATGAACCTGCTATTTCTTTCTG  
CTGAATTACATTTCTGTAGCACGATCAATTGTTGCCTAGTTTATATGTCTAATTTAGTTGATTTCCCTTTGTAGCTTTTTCAAGCAAAAACCTCAGTTCTTGATCAGTTTCTGCTATTTCTTTCTG  
TAGCGTGATCAATTTGTTGCATAAATGATTAAGGCTTCTCCAAA

>comp165418\_c0\_seq21

TAAAGGTTTCATCTATTTTTTATCATTCCCTGAATCATTGTTACAGAAAAGTTTTGGAAAATATGAAATTTAGCTTTTTTTACATATAATAGTAAACTTTGATTTTGATGTTTTTATCATTG  
TACATCTTCTTAGGAAATACAAAATTTATCCATTTCTCCAAAAATTTATGGAGTTTTTGGCTCTTTTTTAAATCATTAGTTCAGAATTCAGATTCTACTAAGGAAAAATGCTAGGGATTTGG  
TTAGTGATCTGTTTTTTGATATTTTATCTTTTAAATTAATAGGATTTCTGTAATCTCATTATTGAAGAAACCCTCCTATTGCACCAAACAGTAACAAAGCTTGTGAATTTCCAAAGGAAAT  
GATGAATGACAATGACTTGGATTCTCAACTATGGCATGCTTGTGCTGGTGCATGGTGCATTAATAAATCTAAAGTATTCTACTTTCCCAAGGCCATGCTGAGCATGCACAAA

GCCCAGTTGATTTTGGCAATTCTCTAAGAATTCCTCCTCTTATTCTTTGTCTGTGTTAACTATGTAAAATACATGGCTGATAGTGAAACTGATGAGGTCTATGCCAAAATTTTCATGACCCCTC  
TAAGAGGCATTGAGCTAGATTATTGTGAAGATGATGAACTTACCTTAGGAAGCAACGGGTGAGAATCACAAGAAAAACCTTCATCTTTTGCAAAAACATTGACCCAATCTGATGCTAACA  
ATGGTGGCGGTTTCTCTGTTCCGAGATATTGTGCAGAGACTATCTCCCTAGATTGGATTACTCTGCTGACCCGCTGTCCAAGAAGTTCTAGCCAAGGATGTCCATGGCAAGATTTGGAA  
ATTTTCGACATATCTATCGAGGGACACCTCGCAGGCACTTGTCTACCCTGGCTGGAGCAATTTGTCAACGAGAAGAAGCTAGTGGCCGGCGATTCCATTGTGTTCTTAAGAACCAAGAA  
TGGTGATCTTTGCATGGGTATTTCGACGAGCAAATAGAGGATTTGGAAATGGATTTCGAGTCCCTATAAGTTGGGATCATCCTATGGGAAAATGCATGTATGAGGGACTCTCTATTTTATTGA  
GGGAGGAGGAGAGCAAGTTTATAAAGGGAAACACTCATGGAGATTCAAACATGAGGCCAAGGGGTAAAGTGAAGGCATGCACTGTGATTGAGGCCATTACACTTGCCGTTAATGGTCA  
ACCTTTTGAAGTTGTTTACTATCCAAGAGCTAGCACTCCAGAGTTTTGTGTAAAGGCATCAGCAGTGAAAGCTGCAGTGAGGATCCAATGGTGTACAGGCATGAGGTTTAAAGATGGCATT  
TGAGACCGATGATTCCTCTAGGATAAGCTGGTTACAGGGACAGTATCTGATTCTCATGTTTCTGATCCTACAAGTGGCCTGGATCACCATGGAGGCTTCTTCAGGTTTCTTGGGATGAG  
CCTGACCTCTTACAAAATGTAACAAGTGTAAGTCCATGGTTAGTGGAACCTCATCTCAAACATGACAACCATCAACTTAGCTCACTTGTGCTCCTCCGAGAAAAAAACTCGGAGCTCACAG  
CTTTCTGATTTCCCACTCGATGCTCAACTTCCAACCTCCATAATCCCCAAAACCTCCTTACTCCCAGCAGCAGCCCTTGTGTTTTCTCCCAGATAAACACTCCTGCAGCTGGTATACAGGG  
AGCCAGGCATAGTCAGTATGGATTATCTTTACCAGAAGTGCCTTTTTTCATGGACTCGATCACTTTCTCCACCTTCGAGAATCTCTACTGGCATCAATGGTGGCGATAATTCTTGCATGTT  
GACCATAGAAAATCTCAGAAGGGGAACAAGGAATGCAAGAAACGTCAGTTTATGCTCTTTGGAAAAGTTATCCTCACTGCAGAAGAGCTCTCAACTATCAACAAATACAGCCCATCAG  
GTTTGAATTCGATGAAGATGATGTCTGATAATTCATCTTCTGAAGCGCTTTATTTGAATAAAGACAAGAAAGTTAATGAGCTTGGACTGGAGACTGGACACTGTAAGGTGATCATGGAGTC  
AGAGAATGTAGGCCGAAACCTTGACCTTTCTACATTTGGTTCATATGAGGAGCTGTATAGATTGGCAAACATGTTTGGAAATTCGAAAGTCTGAGCTTGAAGCCGTTTACTTTACCGAGAT  
CCAGCTGGGGGTGCTCAAACACACTGAAGATAAGCCTTTTGTGTAAAGTTTTGTTATCTATCTCATTTATGATGCTTCTTCTTCTGAATTTGGTTGTAAAGCTGATACGAGGAAAGAAAGTT  
TTTTTATAAATTTCTTACGAGTATTAGAGAGAGAGAGATGAATATTTTCTTATAGCTTTTGTCAAAGCAAATTCGAAAGCAAAAAATTTTGAAAAATAGTATTAGATGACTGTAGCT  
CCAAATAAATTTCTTAAATATTCTTACTCAGATTACCCCAAAACAAATATTAGGGTATGTTGGGGTGTGTTGCTGTATTTGATTAATTTAGTTGTATTGAAGTTATTTTGAAAAAATAATTTAG  
AAATCTTATCCTATAAAGGAACCTTTTTATTATATAAAT

>comp165418\_c0\_seq3

TTACAAATAGGGGTTGGCTGTTGTAACAAAGCTTGTGAATTTCCAAAGGAAATGATGAATGACAATGACTTGGATTCTCAACTATGGCATGCTTGTGCTGGTGCAATGGTGCAATGCCAT  
TAATAAATTTCTAAAGTATTCTACTTTCCCAAGGCCATGCTGAGCATGCACAAAGCCAGTTGATTTTGGCAATTTCTAAGAATTCCTCCTCTTATTCTTTGTCTGTGTTAACTATGTAAAAT  
ACATGGCTGATAGTGAAACTGATGAGGTCTATGCCAAAATTTTCATGACCCCTCTAAGAGGCATTGAGCTAGATTATTGTGAAGATGATGAACTTACCTTAGGAAGCAACGGGTGAGAATC  
ACAAGAAAAACCTTCATCTTTTGCAAAAACATTGACCCAATCTGATGCTAACAATGGTGGCGGTTTCTCTGTTCCGAGATATTGTGCAGAGACTATATTTCCAAGATTGGATTACTCAGCT  
GACCCACCTGTCCAAACGGTGTAGCTAAGGATGTTTCATGGTAAGGTTTGGAAATTCAGGCATATCTATAGAGGAACACCTCGTCGACATCTTCTCACCCTGGTTGGAGCAATTTTGTCA  
ATGAGAAAAACTTGTGGCAGGTGATTCCATTGTATTCTTAAGAACGGAGAATGGTGTATCTCTGTGTGGGGATCCGACGAGCAAAGAGAGGAATTGGAGGTGGGCCTGAGATGTCTGCA  
GGTTGGAATCAGCCTACAGGAACCTGTATGTATGGAGGATTCTCTGTTTTCTTGGGGAGGATGAAAGCAAGTTTAAACAGAGGCATGGGAAATGGAGGCCGGATCAATTCTGGTTCAAGC  
TTGAGGGGAAGAGGGAAAGTGAAGCAGATTCTGTAATTGAGGCTGCGACATTTGCAGCCAGAGGGCAGCCATTTGAAGTTGTTTACTATCCTAGAGCGAGCACGCCGGAGTTTTGTGT  
GAAGGCATCAGCAGTGAGAGCTGCAATGAGAATTCAGTGGTGCTCTGGGATGAGGTTTAAAGATGGCTTTTGGACTGAGGACTCCTCAAGGATAAGTTGGTTTATGGGTACCATATCCGC  
TGTTTCATGTCGCCGATCTTATGAGGTGGCCTGGATCACCATGGAGGCTTCTTCAGGTTTCATGGGATGAGCCTGATCTTTTACAAAATGTAAAGCGTGTGAGCCCATGGTTGGTAGAACTC  
GTCTCGAACTTGCCAGCCATCCACTTAGCACCGCCCTTCTCGCCTCCGAGAAAAAAACTCGAATCCCTCAGCATCCTGAATTTCTCTCTTGTATGTTCAACTCTCAACCTCACCATTCCCAG  
AAAACACCCTCATCCCAGCAGCAGCCATTGTGTTGTCTTCCAGACAGCTCTCCTGCAGTTGGCATAACAGGGACCCAGGCATAGTCAGTATGGCTCAAATCTACCAGGACTTCACTTTG

AAAAGTTGCAGTCTGGCCTGTTCCATACTGGATTTCTTCGGCTCGATCGCTTTACGCCATCTCATAGAATCTCTACAGGCCTCATTGTTCCGAATTCGGCGGATCATGAAGATGTTTCCTGC  
TTGTTGACCATTGGGAATCCTTCTGTGTGTGTGAAAAAGGATTGTAACAAAGAATGCAATGCAATGACGCCAAAGTTTAGGCTGTTTGAAAAACCCATACTACTGAACAACAGCTCTCT  
CTTAGCCCAAACAACCTTTCTAATATGAATTCTGACAAGACGACGAACTTATCGAACGGTTCTGGATCATCAATTCATCAAAACGGCATGGGGGATAATAATTCATCTTCTGAAGGGCTTC  
CTTGGTGCCGGGATCGAAAATAAATGAGCTTGGTTTAGAGGTTGGTCACTGCAAGTTGTTCCCTGGAATCTGAAGATGTAGGCCAGACCCTTGACCTATCTTCCTTTGGTTTCATATGAGGA  
TTTGTACAGAAGATTGGCTAACATGTTTGGAAATAAAGAAATCAGAATGAACAGCCGTGTTCTTTATCGTGATATCGCCGGTGTGTCAAGCACACCCGGCGATGAGCCTTTCGCGTAAAGTT  
GCCATTTTAAAGCATAAGCTTTTTGTCACTTCATCTAAGGATGCAAACGAACCGAGCTTGTGCGAGCCCAAGTTCTCGGCTCATCACGCAGACGAGCTGAATACAAGTTGTTTGTGAACA  
TAAAATCTATCTAAAAGTCACAAATTATACATATTTGTGACTTACAAGCATATTTTATTGAGCCCAACTTCATCTAGTGATCTTGTACTGAACTTTCCTCACACCTTACATTTACTGTTTGT  
TTCTTCTGTTAATGTGCAGTGATTCATGAAGGGAGCAAGGAGGCTAACAAATTCATGGATTCGAGCAGCGACAACATTGGCAAGTTGTAGGAGAATTCTCTTTTCAAATTTGCAGGTTT  
GAAGGAACAGTCTCTCAAAGTTCAGCTATTTTTTCCATGTTAGTGAGAGACACCATAAATTCAAAGACCACATAACTGTTCTTTTTAAGCATTAAATCTATCTTTTGAAGTGTGCGAGA  
GCTTTGAATATGAACCTGCTATTTCTTCTGCTGAATTACATTTCTGTAGCACGATCAATTTGTTGCCTAGTTTATATGTCTAATTTAGTTGATTTCCCTTTGTAGCTTTTTCAAGCAAACTTC  
AGTTCTTGATCAGTTTCTGCTATTTCTTCTGTAGCGTGATCAATTTGTTGCATAAATGATTAAGGCTTCTCCAAA

>comp165418\_c0\_seq4

GGAACCTAGGCTTTGCCCAGCCAGCTTTTTAATATACTTACTCATAATTCTATTTTTAATTAGGCTTACTGTAAAAATTTGCCAAAATTATGCTTTGTAGTTTGTACACAGAGGTGGACCCGA  
GAACAAAAAATGGCTTCAACGGGTAAGAATAGTAAAAGATGGAGGTGAGTATGCCAAGAGAGCAAGCAGGAATCTTGCTGTCTCCTCAGCCGCGCAACAGGGAGTCTCTCTCCTCT  
GTAGTCCGAGAGTAACGCCGCTCAACGAGGGACCTCTCAACGTCATCCTCGTCGAGAATAACTCACCCGACCAAATATCGGGCTACTCGCTCTCAACATCTTAATCGGCTGCTCAGTT  
CTGTGCCCGCTTAGAGATCCGAGCACTGATAAAGAGAGAAGATGAGGAGAATGCTCCTACCATTCTGCTGAAACAATAAAGATTTGTTCTTTGAGTGTTTTCTTCTTGCAGGAGCTTGAA  
AGAGTGATTTTTCTGTAAAAAGATACGATCTTTCATCTCATCGTTTGAATACTCAGAAAAAAGGTGTGTGCAGTGCGGTTATTTGGTGTGAAGTCTGAAGAAGACGAGATGGGTTGAG  
TTTACAAATAGGGTTGGCTGTTGAAACCTCCTATTGCACCAAAACGTAACAAAGCTTGTGAATTTCCAAAGGAAATGATGAATGACAATGACTTGGATTCTCAACTATGGCATGCTTGT  
GCTGGTGCAATGGTGCAAATGCCATTAATAAATTCTAAAGTATTCTACTTTCCCAAGGCCATGCTGAGCATGCACAAAGCCCAGTTGATTTTGGCAATTCTCTAAGAATTCCTCCTTAT  
TCTTTGTCTGTAACTATGTAATAACATGGCTGATAGTAAAAGTATGAGGTCTATGCCAAAATTTTCATGACCCCTCTAAGAGGCATTGAGCTAGATTATTGTGAAGATGATGAACCTA  
CCTTAGGAAGCAACGGGTCAGAATCACAAGAAAAACCTTCATCTTTTGCAAAAAACATTGACCAATCTGATGCTAACAATGGTGGCGGTTTCTCTGTTCCGAGATATTGTGCAGAGACTA  
TATTTCCAAGATTGGATTACTCAGCTGACCCACCTGTCCAAACGGTGCTAGCTAAGGATGTTTCATGGTAAGGTTTGGAAATTCAGGCATATCTATAGAGGAACACCTCGTCGACATCTTCTC  
ACCACTGGTTGGAGCAATTTTGTCAATGAGAAAAAATTTGTGGCAGGTGATTCCATTGTATTCTTAAGAACGGAGAATGGTGTATCTCTGTGTGGGGATCCGACGAGCAAAGAGAGGAAT  
TGGAGGTGGGCTGAGATGTCTGCAGGTTGGAATCAGCCTACAGGAACTTGTATGTATGGAGGATTCTCTGTTTTCTTGGAGGGAGGATGAAAGCAAGTTTAAACAGAGGCATGGGAAATG  
GAGGCCGGATCAATTCTGGTTCAAGCTTGAAGGGAAGAGGGAAGTGAAGCAGATTCTGTAATTGAGGCTGCGACATTTGCAGCCAGAGGGCAGCCATTTGAAGTTGTTTACTATCCT  
AGAGCGAGCACGCCGGAGTTTTGTGTGAAGGCATCAGCAGTGAGAGCTGCAATGAGAATTCAGTGGTGTCTGGGATGAGGTTTAAAGATGGCTTTTGAAGTACTGAGGACTCCTCAAGGAT  
AAGTTGGTTTATGGGTACCATATCCGCTGTTTCATGTGCGCGATCTTATGAGGTGGCCTGGATCACCATGGAGGCTTCTTCAGGTTTTCATGGGATGAGCCTGATCTTTTACAAAATGTAAAGC  
GTGTGAGCCCATGGTTGGTAGAACTCGTCTCGAACTTGCCAGCCATCCACTTAGCACCGCCCTTCTCGCCTCCGAGAAAAAAACTCGAATCCCTCAGCATCCTGAATTCTCTTGTATG  
TTCAACTCTCAACCTCACCATTCCCAGAAAAACCCCTCATTCCCAGCAGCAGCCATTGTGTTGTCTTCCAGACAGCTCTCCTGCAGTTGGCATAACAGGACCCAGGCATAGTCAGTATG  
GCTCAAATCTACCAGGACTTCACTTTGAAAAGTTGCAGTCTGGCCTGTTCCATACTGGATTTCTTCGGCTCGATCGCTTTACGCCATCTCATAGAATCTCTACAGGCCTCATTGTTCCGAAT  
TCGGCGGATCATGAAGATGTTTCTGCTTGTGACCATTGGGAATCCTTCTGTGTGTGTGAAAAAGGATTGTAACAAAGAATGCAATGCAATGACGCCAAAGTTTAGGCTGTTTGAAAA

CCCATACTCACTGAACAACAGCTCTCTCTTAGCCCAAACAACCTTCTAATATGAATTCTGACAAGACGACGAACTTATCGAACGGTTCTGGATCATCAATTCATCAAAACGGCATGGGGG  
ATAATAATTCATCTTCTGAAGGGCTTCCTTGGTGCCGGGATCGAAAATAAATGAGCTTGGTTTAGAGGTTGGTCACTGCAAGTTGTTCTGGAATCTGAAGATGTAGGCCAGACCCCTTGA  
CCTATCTTCCCTTGGTTCATATGAGGATTTGTACAGAAGATTGGCTAACATGTTTGAATAAAGAAATCAGAACTGAACAGCCGTGTTCTTTATCGTGATATCGCCGGTGTGTCAAGCACA  
CCGGCGATGAGCCTTTCGCGTAAGTTGCCATTTAAAGCATAAGCTTTTTGTCACTTCATCTAAGGATGCAAACGAACCGAGCTTGTGCGAGCCCAAGTCTCGGCTCATCACGCAGACG  
AGCTGAATTTGTTGTTTGTGTTTGGCTCGATAACTCAGCGAGCTGAATACAATTTGTTTGTGAACATAAAATCTATCTAAAAGTCACAAATTATACATATTTGTGACTTGAAGCAGATATTA  
TTGAGCCCCAACTTCATCTGCTGATCTTGTACTGCACCTTCCTCACACCTTACATTTACTGTTTGTATTTCTTCTGTTAATGTGCAGTGATTTTCATGAAGGGAGCAAGGAGGCTAACAAATTT  
CATGGATTTCGAGCAGCGACAACATTGGCAAGTTGTAGGAGAATTCTCTTTTCAAATTTGCAGGTTTGAAGGAACAGTCTCTCCAAAGTTTCAGCTATTTTTTTCCATGTTAGTGAGAGACAC  
CATAAATTCAAAGACCACATAACTTGTCTTTTTAAGCATTTAATCTATCCTTTTGAAGTGTGAGAGCTTTGAATATGAACCTGCTATTTCTTTCTGCTGAATTACATTTCTGTAGCACGATC  
AATGTTGCCTAGTTTATATGTCTAATTTAGTTGATTTCCCTTTGTAGCTTTTTCAAGCAAAACTTCAGTTCTTGATCAGTTTCTGCTATTTCTTTCTGTAGCGTGATCAATTTGTTGCATAAAT  
GATTAAGGCTTCTCCAAA

>comp165418\_c0\_seq5

TTACAAATAGGGGTTGGCTGTTGTAACAAAGCTTGTGAATTTCCAAAGGAAATGATGAATGACAATGACTTGGATTCTCAACTATGGCATGCTTGTGCTGGTGCAATGGTGCAAATGCCAT  
TAATAAATTCATAAAGTATTTACTTTCCCAAAGGCCATGCTGAGCATGCACAAAGCCAGTTGATTTTGGCAATTTCTAAGAATTCCTCCTCTTATTTCTTTGTCGTGTTAACTATGTAAAAT  
ACATGGCTGATAGTGAAACTGATGAGGTCTATGCCAAAATTTTCATGACCCCTCTAAGAGGCATTGAGCTAGATTATTGTGAAGATGATGAACTTACCTTAGGAAGCAACGGGTCAGAATC  
ACAAGAAAAACCTTCATCTTTTGCAAAAACATTGACCCAATCTGATGCTAACAATGGTGGCGGTTTCTCTGTTCCGAGATATTGTGCAGAGACTATATTTCCAAGATTGGATTACTCAGCT  
GACCCACCTGTCCAAACGGTGCTAGCTAAGGATGTTTCATGGTAAGGTTTGGAAATTCAGGCATATCTATAGAGGAACACCTCGTCGACATCTTCTCAACCTGGTTGGAGCAATTTTGTCA  
ATGAGAAAAAACTTGTGGCAGGTGATTCCATTGTATTCTTAAGAACGGAGAATGGTGATCTCTGTGTGGGGATCCGACGAGCAAAGAGAGGAATTGGAGGTGGGCCTGAGATGTCTGCA  
GGTTGGAATCAGCCTACAGGAACCTGTATGTATGGAGGATTCTCTGTTTTCTTGGGGAGGATGAAAGCAAGTTAACAGAGGCATGGGAAATGGAGGCCGGATCAATTTCTGTTCAAGC  
TTGAGGGGAAGAGGGAAAGTGAAAGCAGATTCTGTAATTGAGGCTGCGACATTTGCAGCCAGAGGGCAGCCATTTGAAGTTGTTTACTATCCTAGAGCGAGCACGCCGGAGTTTTGTGT  
GAAGGCATCAGCAGTGAGAGCTGCAATGAGAAATCAGTGGTGCTCTGGGATGAGGTTTAAAGATGGCTTTTGGAGACTGAGGACTCCTCAAGGATAAGTTGGTTTATGGGTACCATATCCGC  
TGTTTCATGTCGCCGATCTTATGAGGTGGCCTGGATCACCATGGAGGCTTCTTTCAGGTTTCATGGGATGAGCCTGATCTTTTACAAAATGTAAAGCGTGTGAGCCCATGGTTGGTGAAGCTC  
GTCTCGAACTTGCCAGCCATCCACTTAGCACCGCCCTTCTCGCCTCCGAGAAAAAAACTCGAATCCCTCAGCATCCTGAATTTCTCTTTGATGTTCAACTCTCAACCTCACCATTCCCAG  
AAAACACCCTCATTTCCAGCAGCAGCCATTGTGTTGTCTTCCAGACAGCTCTCCTGCAGTTGGCATAACAGGGACCCAGGCATAGTCAGTATGGCTCAAATCTACCAGGACTTCACTTTG  
AAAAGTTGCAGTCTGGCCTGTTCCATACTGGATTTCTTCGGCTCGATCGCTTTACGCCATCTCATAGAATCTCTACAGGCCTCATTGTTCCGAATTCGGCGGATCATGAAGATGTTTCTGCTG  
TTGTTGACCATTGGGAATCCTTCTGTGTGTGTGAAAAAGGATTGTAACAAAGAATGCAATGCAATGACGCCAAAGTTTAGGCTGTTTGGAAAACCCATACTACTGAACAACAGCTCTCT  
CTTAGCCCAAACAACCTTCTAATATGAATTCGACAAGACGACGAACTTATCGAACGGTTCTGGATCATCAATTCATCAAAACGGCATGGGGGATAATAATTCATCTTCTGAAGGGCTTC  
CTTGGTGCCGGGATCGAAAATAAATGAGCTTGGTTTAGAGGTTGGTCACTGCAAGTTGTTCTGGAATCTGAAGATGTAGGCCAGACCCCTTACCTATCTTCCCTTGGTTTCATATGAGGA  
TTTGTACAGAAGATTGGCTAACATGTTTGAATAAAGAAATCAGAACTGAACAGCCGTGTTCTTTATCGTGATATCGCCGGTGTGTCAAGCACACCCGGCGATGAGCCTTTCGCTGATTTTC  
ATGAAGGGAGCAAGGAGGCTAACAAATATTCATGGATTTCGAGCAGCGACAACATTGGCAAGTTGTAGGAGAATTCTCTTTTCAAATTTGCAGGTTTGAAGGAACAGTCTCTCCAAAGTTC  
AGCTATTTTTTTCCATGTTAGTGAGAGACACCATAAATTCAAAGACCACATAACTTGTCTTTTTAAGCATTTAATCTATCCTTTTGAAGTGTGAGAGCTTTGAATATGAACCTGCTATTTTC  
TTTCTGCTGAATTACATTTCTGTAGCACGATCAATTTGCTAGTTTATATGTCTAATTTAGTTGATTTCCCTTTGTAGCTTTTTTCAAGCAAAACTTCAGTTCTTGATCAGTTTCTGCTATTTTC

TTTCTGTAGCGTGATCAATTTGTTGCATAAATGATTAAGGCTTCTCCAAA

>comp165418\_c0\_seq6

TTACAAATAGGGGTTGGCTGTTGTAACAAAGCTTGTGAATTTCCAAAGGAAATGATGAATGACAATGACTTGGATTCTCAACTATGGCATGCTTGTGCTGGTGCAATGGTGCAAATGCCAT  
TAATAAATCTAAAGTATTCTACTTTCCCAAGGCCATGCTGAGCATGCACAAAGCCCAGTTGATTTTGGCAATCTCTAAGAAATCCTCCTCTTATTCTTTGTGCTGTTAACTATGTAAAAT  
ACATGGCTGATAGTGAAACTGATGAGGTCTATGCCAAAATTTTCATGACCCCTCTAAGAGGCATTGAGCTAGATTATTGTGAAGATGATGAACTTACCTTAGGAAGCAACGGGTCAGAATC  
ACAAGAAAAACCTTCATCTTTTGCAAAAACATTGACCCAATCTGATGCTAACAATGGTGGCGGTTTCTCTGTTCCGAGATATTGTGCAGAGACTATCTTCCCTAGATTGGATTACTCTGCTG  
ACCCGCCTGTCCAAGAAGTCTAGCCAAGGATGTCCATGGCAAGATTTGGAAATTCGACATATCTATCGAGGGACACCTCGCAGGCACCTGCTCACCCTGGCTGGAGCAATTTTGTCA  
ACGAGAAGAAGCTAGTGGCCGGCGATTCCATTGTGTTCTTAAGAACCAAGAATGGTGTATCTTTCATGGGTATTTCGACGAGCAAATAGAGGATTTGGAAATGGATTTCGAGTCCCCTATAA  
GTTGGGATCATCCTATGGGAAAATGCATGTATGAGGGACTCTCTATTTTATTGAGGGAGGAGGAGAGCAAGTTTATAAAGGGAAACACTCATGGAGATTCAAACATGAGGCCAAGGGGTA  
AAGTGAAGGCATGCACTGTGATTGAGGCCATTACACTTGCCGTTAATGGTCAACCTTTTGAAGTTGTTTACTATCCAAGAGCTAGCACTCCAGAGTTTTGTGTAAGGCATCAGCAGTGA  
AAGCTGCAGTGAGGATCCAATGGTGTACAGGCATGAGGTTAAGATGGCATTGAGACCGATGATTCCTCTAGGATAAGCTGGTTCACAGGGACAGTATCTGATTCTCATGTTTCTGATCC  
TACAAGGTGGCCTGGATCACCATGGAGGCTTCTCAGGTTTCTTGGGATGAGCCTGACCTTTACAAAATGTAACAAGTGTAAGTCCATGGTTAGTGAACCTCATCTCAAACATGACAAC  
CATCAACTTAGCTCACTTGTGCTCCGAGAAAAAAACTCGGAGCTCACAGCTTTCTGATTTCCCACTCGATGCTCAACTTCCAACCTCCATAATCCCCAAAAACCTCCTTACTCCCAGC  
AGCAGCCCTTTGTGTTTTCTCCCAGATAACACTCCTGCAGCTGGTATACAGGGAGCCAGGCATAGTCAGTATGGATTATCTTTACCAGAAGTGCCTTTTTTTCATGGACTCGATCACTTTCC  
TCCACCTTCGAGAATCTCTACTGGCATCAATGGTGGCGATAATTCTTGCATGTTGACCATAGAAAATCTCAGAAGGGGAACAAGGAATGCAAGAAACGTCAGTTTATGCTCTTTGGAAA  
AGTTATCCTCACTGCAGAAGAGCTCTCAACTATCAACAAATACAGCCATCAGGTTTGAATTCGATGAAGATGATGTCTGATAATTCATCTTCTGAAGCGCTTATTTGAATAAAGACAAG  
AAAGTTAATGAGCTTGGACTGGAGACTGGACACTGTAAGGTGATCATGGAGTCAGAGAATGTAGGCCGAAACCTTGACCTTTCTACATTTGGTTCATATGAGGAGCTGTATAGATTGGCA  
AACATGTTTGGAAATTCGAAAGTCTGAGCTTGCAAGCCGTTTACTTTACCGAGATCCAGCTGGGGGTGCTCAAACACACTGAAGATAAGCCTTTTTGTGTAAGTTTTGTTATCTATCTCATTTA  
TGATGCTTCTTCTTCTGAATTTGGTTGTAAAGCTGATACGAGGAAAGAAAAGTTTTTTTTATAAATTTCTTACGAGTATTAGAGAGAGAGAGAGATGAATATTTTCTTATAGCTTTTGTCAA  
AGCAAATCTGAAAGCAAAAAATTTTAAAAATAGTATTCAGATGACTGTAGCTCCAAATAAATCTTAAATATTCTTACTCAGATTACCCCCAAACAAATATTAGGGTATGTTGGGGTGT  
TTGCTGTATTTGATTAATTTAGTTGTATTGAAGTTATTTTGGAAAAATAATTTAGAAATCTTATCCTATAAAGGAACTTTTTATTATATAAAT

>comp165418\_c0\_seq7

TAAAGGTTTCATCTATTTTTTATCATTCCCTGAATCATTGTTTACAGAAAAGTTTTGGAAAATATGAAATTTAGCTTTTTTTTACATATAATAGTAAACTTTGATTTTGATGTTTTTATCATTTTGA  
TACATCTTCTTAGGAAATACAAAATTTATCCATTTCTCCAAAAATTTATGGAGTTTTTTGCTCTTTTTTTAATCATTAGTTCAGAATTCAGATTCTACTAAGGAAAAATGCTAGGGATTTGG  
TTAGTGATCTGTTTTTTGATATTTTTATCTTTTAAATTAATAGGATTTCTTGTAACTCATTATTGAAGAAACCCTCCTATTGCACCAAACAGTAACAAAGCTTGTGAATTTCAAAGGAAAT  
GATGAATGACAATGACTTGGATTCTCAACTATGGCATGCTTGTGCTGGTGAATGGTGAATGCCATTAATAAATTTCAAAGTATTCTACTTTCCCAAGGCCATGCTGAGCATGCACAAA  
GCCAGTTGATTTTGGCAATTTCTCTAAGAATTCCTCCTCTTATTCTTTGTGCTGTTAACTATGTAATAACATGGCTGATAGTGAAACTGATGAGGTCTATGCCAAAATTTTCATGACCCCTC  
TAAGAGGCATTGAGCTAGATTATTGTGAAGATGATGAACTTACCTTAGGAAGCAACGGGTCAGAATCACAAGAAAAACCTTCATCTTTTGCAAAAACATTGACCCAATCTGATGCTAACA  
ATGGTGGCGGTTTCTCTGTTCCGAGATATTGTGCAGAGACTATCTTCCCTAGATTGGATTACTCTGCTGACCCGCTGTCCAAGAAGTTCTAGCCAAGGATGTCCATGGCAAGATTTGGAA  
ATTTGCACATATCTATCGAGGGACACCTCGCAGGCACCTGCTCACCCTGGCTGGAGCAATTTTGTCAACGAGAAGAAGCTAGTGGCCGGCGATTCCATTGTGTTCTTAAGAACCAAGAA  
TGGTGTATCTTTGCATGGGTATTTCGACGAGCAAATAGAGGATTTGGAAATGGATTTCGAGTCCCCTATAAGTTGGGATCATCCTATGGGAAAATGCATGTATGAGGGACTCTCTATTTTATTGA

GGGAGGAGGAGAGCAAGTTTATAAAGGGAAACACTCATGGAGATTCAAACATGAGGCCAAGGGGTAAAGTGAAGGCATGCACTGTGATTGAGGCCATTACACTTGCCGTTAATGGTCA  
ACCTTTTGAAGTTGTTTACTATCCAAGAGCTAGCACTCCAGAGTTTTGTGTAAAGGCATCAGCAGTGAAAGCTGCAGTGAGGATCCAATGGTGTACAGGCATGAGGTTTAAAGATGGCATT  
TGAGACCGATGATTCTCTAGGATAAGCTGGTTACAGGGACAGTATCTGATTCTCATGTTTCTGATCCTACAAGGTGGCCTGGATCACCATGGAGGCTTCTTCAGGTTTCTTGGGATGAG  
CCTGACCTCTTACAAAATGTAACAAGTGTAAGTCCATGGTTAGTGGAACATCTCAAACATGACAACCATCAACTTAGCTCACTTGTGCGCTCCGAGAAAAAAACTCGGAGCTCACAG  
CTTTCTGATTTCCCACTCGATGCTCAACTTCCAACCTCCATAATCCCCAAAAACCTCCTTACTCCCAGCAGCAGCCCTTTGTGTTTTCTCCCAGATAAACTCCTGCAGCTGGTATACAGGG  
AGCCAGGCATAGTCAGTATGGATTATCTTTACCAGAACTGCGCTTTTTTCATGGACTCGATCACTTTCCTCCACCTTCGAGAATCTCTACTGGCATCAATGGTGGCGATAATTCTTGCATGTT  
GACCATAGAAAATTTCTCAGAAGGGGAACAAGGAATGCAAGAAACGTCAGTTTATGCTCTTTGGAAAAGTTATCCTCACTGCAGAAGAGCTCTCAACTATCAACAAATACAGCCCATCAG  
GTTTGAATTCGATGAAGATGATGTCTGATAATTCATCTTCTGAAGCGCTTTATTTGAATAAAGACAAGAAAGTTAATGAGCTTGGACTGGAGACTGGACACTGTAAGGTGATCATGGAGTC  
AGAGAATGTAGGCCGAAACCTTGACCTTTCTACATTTGGTTCATATGAGGAGCTGTATAGATTGGCAAACATGTTTGAATTCGAAAGTCTGAGCTTGAAGCCGTTTACTTTACCGAGAT  
CCAGCTGGGGGTGCTCAAACACACTGAAGATAAGCCTTTTGTGAGTTCATGAAGGGAGCGAGAAAAGCTAACCATATAATGAAATGAATTCAAGCAGCGAAGATGGCGCCATGTTGCA  
GCAGAACAGACGCTTCTTTCAAGTGTACAGAGCTGTCTATTCTAAGTTTGTTTTTGAGCATTAAATGTCAGTTTGCCTACTCAGAGACTTTAAGTATGAAACTTAGTATTTATTCTCTTT  
CTAAACTTCTTTATAGAAATATCACATATGATATTCTAATGTGTTTAGTTTATGCAGTTCAATCTTGATCTGTTGGTTGTGAATTTT

>comp165418\_c0\_seq8

GGAACCTAGGCTTTGCCAGCCAGCTTTTTAATATACTTACTCATAATTCTATTTTTAATTAGGCTTACTGTAAAAATTTGCCAAAATTATGCTTTGTAGTTTGTACACAGAGGTGGACCCGA  
GAACAAAAATGGCTTCAACGGGTAAGAATAGTAAAAGATGGAGGTGAGTATGCCAAGAGAGCAAGCAGGAATCTTGCTGTCTCCTCAGCCGCGCAACAGGGAGTCTCTCTCCCTCT  
GTAGGTCCGAGAGTAACGCCGCTCAACGAGGGACCTCTCAACGTCATCCTCGTCGAGAATAACTCACCCGACCAAAATATCGGGCTACTCGCTCTCAACATCTTAATCGGCTGCTCAGTT  
CTGTGCCCGCTTAGAGATCCGAGCACTGATAAAGAGAGAAGATGAGGAGAATGCTCCTACCATTCTGCTGAAACAATAAAGATTTGTTCTTTGAGTGTCTTCTTCTTGCAGGAGCTTGAA  
AGAGTGATTTTTCTGTAAAAAGATACGATCTTTTCATCTCATCGGTTTAGAAAATCTCAGAAAAAAGGTGTGTGCAGTGCAGTTATTTGGTGTGAAGTCTGAAGAAGACGAGATGGGTTGAG  
TTTACAAATAGGGGTTGGCTGTTGAAACCCTCCTATTGCACCAAACAGTAACAAAGCTTGTGAATTTCCAAAGGAAATGATGAATGACAATGACTTGGATTCTCAACTATGGCATGCTTGT  
GCTGGTGCAATGGTGCAAATGCCATTAATAAATTCTAAAGTATTCTACTTTCCCCAAGGCCATGCTGAGCATGCACAAAGCCCAGTTGATTTTGGCAATTCTCTAAGAATTCCTCCTTAT  
TCTTTGTCTGTGTTAACTATGTAAAATACATGGCTGATAGTGAAACTGATGAGGTCTATGCCAAAATTTTCATGACCCCTCTAAGAGGCATTGAGCTAGATTATTGTGAAGATGATGAACCTA  
CCTTAGGAAGCAACGGGTCAGAATCACAAGAAAAACCTTCATCTTTTGCAAAAAACATTGACCCAATCTGATGCTAACAATGGTGGCGGTTTCTCTGTTCCGAGATATTGTGCAGAGACTA  
TATTTCCAAGATTGGATTACTCAGCTGACCCACCTGTCCAAACGGTGCTAGCTAAGGATGTTTCATGGTAAGGTTTGGAAATTCAGGCATATCTATAGAGGAACACCTCGTCGACATCTTCTC  
ACCACTGGTTGGAGCAATTTTGTCAATGAGAAAAAATTTGTGGCAGGTGATTCCATTGTATTCTTAAGAACGGAGAATGGTGTCTCTGTGTGGGGATCCGACGAGCAAAGAGAGGAAT  
TGGAGGTGGGCCTGAGATGTCTGCAGGTTGGAATCAGCCTACAGGAACTTGTATGTATGGAGGATTCTCTGTTTTCTTGGAGGAGGATGAAAGCAAGTTTAAACAGAGGCATGGGAAATG  
GAGGCCGGATCAATCTGGTTCAAGCTTGAGGGGAAGAGGGAAAAGTGAAGCAGATTCTGTAATTGAGGCTGCGACATTTGCAGCCAGAGGGCAGCCATTTGAAGTTGTTTACTATCCT  
AGAGCGAGCACGCCGAGTTTTGTGTGAAGGCATCAGCAGTGAGAGCTGCAATGAGAATTCAGTGGTGTCTGGGATGAGGTTTAAAGATGGCTTTTGGAGACTGAGGACTCTCAAGGAT  
AAGTTGGTTTATGGGTACCATATCCGCTGTTTCATGTCGCCGATCTTATGAGGTGGCCTGGATCACCATGGAGGCTTCTTCAGGTTTCATGGGATGAGCCTGATCTTTTACAAAATGTAAGC  
GTGTGAGCCCATGGTTGGTAGAACTCGTCTCGAACTTGCCAGCCATCCACTTAGCACCCGCTTCTCGCCTCCGAGAAAAAAACTCGAATCCCTCAGCATCCTGAATTTCTCTTTGATG  
TTCAACTCTCAACCTCACCATTTCCAGAAAAACCCCTCATTTCCAGCAGCAGCCATTGTGTTGTCTTCCAGACAGCTCTCCTGCAGTTGGCATAACAGGGACCCAGGCATAGTCAGTATG  
GCTCAAATCTACCAGGACTTCACTTTGAAAAGTTGCAGTCTGGCCTGTTCCATACTGGATTTCTTCGGCTCGATCGCTTTACGCCATCTCATAGAATCTCTACAGGCCCTCATTGTTCCGAAT

TCGGCGGATCATGAAGATGTTTCTGCTTGTTGACCATTGGGAATCCTTCTGTGTGTGTGAAAAAGGATTGTAACAAAGAATGCAATGCAATGACGCCCAAGTTTAGGCTGTTTGAAAA  
CCCATACTCACTGAACAACAGCTCTCTCTTAGCCCAAACAACCTTCTAATATGAATTCTGACAAGACGACGAACCTATCGAACGGTTCTGGATCATCAATTCATCAAACGGCATGGGGG  
ATAATAATTCATCTTCTGAAGGGCTTCCTTGGTGCCGGGATCGAAAATAAATGAGCTTGGTTTAGAGGTTGGTCACTGCAAGTTGTTTCTGGAATCTGAAGATGTAGGCCAGACCTTGA  
CCTATCTTCTTTGGTTCATATGAGGATTTGTACAGAAGATTGGCTAACATGTTTGAATAAAGAAATCAGAAGTGAACAGCCGTGTTCTTTATCGTGATATCGCCGGTGTGTCAAGCACA  
CCGGCGATGAGCCTTTCGCGTAAGTTGCCATTTTAAAGCATAAGCTTTTTGTCACTTCATCTAAGGATGCAAACGAACCGAGCTTGTGCGAGCCCAAGTTCTCGGCTCATCACGCAGACG  
AGCTGAATACAAGTTGTTTGTGAACATAAAAATCTATCTAAAAGTCACAAATTATACATATTTGTGACTTACAAGCATATTTTATTGAGCCCAACTTCATCTAGTGATCTTGTACTGAACTTT  
CCTCACACCTTACATTTACTGTTTGATTCTTCTGTTAATGTGCAGTGATTTCATGAAGGGAGCAAGGAGGCTAACAATATTCATGGATTCGAGCAGCGACAACATTGGCAAGTTGTAGGA  
GAATTTCTTTTTCAAATTTGCAGGTTTGAAGGAACAGTCTCTCCAAAAGTTCAGCTATTTTTTCCATGTTAGTGAGAGACACCATAAATTCAAAGACCACATAACTTGTCTTTTTAAAGCAT  
TTAATCTATCCTTTTGAAGTGTGAGAGCTTTGAATATGAACCTGCTATTTCTTTCTGCTGAATTACATTTCTGTAGCACGATCAATTGTTGCCTAGTTTATATGTCTAATTTAGTTGATTTCCC  
TTTGTAGCTTTTTCAAGCAAAACTTCAGTTCTTGATCAGTTTCTGCTATTTCTTTCTGTAGCGTGATCAATTTGTTGCATAAATGATTAAGGCTTCTCCAAA

>comp165418\_c0\_seq9

GGAACCTAGGCTTTGCCAGCCAGCTTTTTAATATACTTACTCATAATTCTATTTTTAATTAGGCTTACTGTAAAAATTTGCCAAAATTATGCTTTGTAGTTTGTACACAGAGGTGGACCCGA  
GAACAAAAATGGCTTCAACGGGTAAGAATAGTAAAAGATGGAGGTGAGTATGCCAAGAGAGCAAGCAGGAATCTTGCTGTCTCCTCAGCCGCGCAACAGGGAGTCTCTCTCCTCCT  
GTAGGTCCGAGAGTAACGCCGCTCAACGAGGGACCTCTCAACGTCATCCTCGTCGAGAATAACTACCCGACCAAAATATCGGGCTACTCGCTCTCAACATCTTAATCGGCTGCTCAGTT  
CTGTGCCCGCTTAGAGATCCGAGCACTGATAAAGAGAGAAGATGAGGAGAATGCTCCTACCATTCTGCTGAAACAATAAAGATTTGTTCTTTGAGTGTTTTCTTCTTGCAGGAGCTTGAA  
AGAGTGATTTTTCTGTA AAAAGATACGATCTTTCATCTCATCGGTTTAGAAAATCTCAGAAAAAGGTGTGTGCAGTGCGGTTATTTGGTGTGAAGTCTGAAGAAGACGAGATGGGTTGAG  
TTTACAAATAGGGGTTGGCTGTTGGATTTCTGTAAATCTCATTATTGAAGAAACCTCCTATTGCACCAAACAGTAACAAAGCTTGTGAATTTCCAAAGGAAATGATGAATGACAATGACT  
TGGATTCTCAACTATGGCATGCTTGTGCTGGTGCAATGGTGCAATGCCATTAATAAATCTAAAGTATTCTACTTTCCCAAGGCCATGCTGAGCATGCACAAAGCCAGTTGATTTGGC  
AATTTCTAAGAATTCCTCCTCTTATTCTTTGTGCTGTTAACTATGTAATAACATGGCTGATAGTGAAACTGATGAGGTCTATGCCAAAATTTTCATGACCCCTCTAAGAGGCATTGAGCTA  
GATTATTGTGAAGATGATGAACCTTACCTTAGGAAGCAACGGGTCAGAATCACAAGAAAAACCTTCATCTTTTGCAAAAACATTGACCCAATCTGATGCTAACAATGGTGGCGGTTTCTCT  
GTTCCGAGATATTGTGCAGAGACTATCTTCCCTAGATTGGATTACTCTGCTGACCCGCTGTCCAAGAAGTTCTAGCCAAGGATGTCCATGGCAAGATTTGGAAATTTGCACATATCTATCG  
AGGGACACCTCGCAGGCACTTGCTCACCACTGGCTGGAGCAATTTTGTCAACGAGAAGAAGCTAGTGGCCGGCGATTCCATTGTGTTCTTAAGAACCAAGAATGGTGATCTTGCATGG  
GTATTCGACGAGCAAATAGAGGATTTGGAAATGGATTCGAGTCCCCTATAAGTTGGGATCATCCTATGGGAAAATGCATGTATGAGGGACTCTCTATTTTATTGAGGGAGGAGGAGAGCAA  
GTTTATAAAGGGAAACACTCATGGAGATTCAAACATGAGGCCAAGGGGTAAAGTGAAGGCATGCAGTGTGATTGAGGCCATTACACTTGCCGTTAATGGTCAACCTTTTGAAGTTGTTTA  
CTATCCAAGAGCTAGCACTCCAGAGTTTTGTGTA AAGGCATCAGCAGTGAAGCTGCAGTGAGGATCCAATGGTGTACAGGCATGAGGTTTAAGATGGCATTGAGACCGATGATTCCTC  
TAGGATAAGCTGGTTCACAGGGACAGTATCTGATTCTCATGTTTCTGATCCTACAAGGTGGCCTGGATCACCATGGAGGCTTCTTCAGGTTTCTTGGGATGAGCCTGACCTCTTACAAAAT  
GTAACAAGTGAAGTCCATGGTTAGTGGAACCTCATCTCAAACATGACAACCATCAACTTAGCTCACTTGTGCTCCGAGAAAAAAACTCGGAGCTCACAGCTTTCTGATTTCCCACTC  
GATGCTCAACTTCCAACCTCCATAATCCCCAAAAACCTCCTTACTCCCAGCAGCAGCCCTTTGTGTTTTCTCCAGATAAACTCCTGCAGCTGGTATACAGGGAGCCAGGCATAGTCAGT  
ATGGATTATCTTACCAGAACTGCGTTTTTTCATGGACTCGATCACTTTCCTCCACCTTCGAGAATCTCTACTGGCATCAATGGTGGCGATAATTTCTTGCATGTTGACCATAGAAAATTC  
AGAAGGGGAACAAGGAATGCAAGAAACGTGAGTTTATGCTCTTTGGAAAAGTTATCTCACTGCAGAAGAGCTCTCAACTATCAACAAATACAGCCCATCAGGTTTGAATTCGATGAAG  
ATGATGTCTGATAATTCATCTTCTGAAGCGCTTATTTGAATAAAGACAAGAAAGTTAATGAGCTTGGACTGGAGACTGGACACTGTAAGGTGATCATGGAGTCAGAGAATGTAGGCCGA

AACCTTGACCTTTCTACATTTGGTTCATATGAGGAGCTGTATAGATTGGCAAACATGTTTGGAAATTCGAAAGTCTGAGCTTGCAAGCCGTTACTTTACCGAGATCCAGCTGGGGGTGCTC  
AAACACACTGAAGATAAGCCTTTTGTGAGTTCATGAAGGGAGCGAGAAAAGCTAACCATATAATGAAATGAATTCAAGCAGCGAAGATGGCGCCATGTTGCAGCAGAACAGACGCTTC  
TTTCAAGTGACAGAGCTGTCTATTCTAAGTTTGTTTTTGAGCATTAAATTATGTCAGTTTGCCTACTCAGAGACTTTAAGTATGAAACTTAGTATTTATTCTCTTTCTAAACTTCTTTATAGA  
AATATCACATATGATATTCTAATGTGTTTAGTTTATGCAGTTCAATCTTGATCTGTTGGTTGTGAATTT

>comp165566\_c0\_seq1

CAATACTACATTGCAATGACGATGCAAAGCATAATTCATCGAGTTCCGAAACTACCCCTATCTCCCTGCTATAAATTTCTTATCCGCCCTCGCCGCCCCAATCTTCTCTTTCTTCTGCC  
GCAACCGCCGCGCTTACTGCAAATGGCAAACGAGAAGCTAACCTTACTCCCGTGTCTAGCTCTTCTGAGCTCACATATCTTCTTCTTCACTTCTCATTCTTTTTACCACTTGCTTTCT  
CCCCCTTTCTTCTTCTTCTTCTTCTGAGGCGAAGAGATGAGCAGCATGGCGGCGGCGGGTCCGGTGGAAAGGGGTGGATGCAGATGCCCTTCGACGGCTGTAGCGGCGGAGATGGGAT  
GGAGACAGCCGTTACAGCGGCGCAGTGGCGGGAAGTGGAGCACCAGGCGCTGATCTTAAAGTATCTGGTGGCAGGAGTCCAGTGCCTCCGGATCTTCTAATCCCTATTCAACGAAGC  
TTGGAGGCCTTGCCGTCTCGTCTTACCATCATTATCCCGCGCATTTCGAGTCCAGTGGGCTATTTTTCTTACTACGGCAAGAAGTTAGACCCGGAGCCAGGGCGGTGTAGGAGAACTGATG  
GAAAGAAGTGGCGGTGCTCCAAGGATGCACATCTGACTCCAAGTATTGCGAGCGGCATATGCACCGCAGTCGCAACCGTTCAAGAAAGCATGTGGAATCTAAAAGCAACATCTCCCCG  
CAGCAGTCTCAATCGAATATATCCTCTTCTTCAACTTCTACATCTCATGTGGCTTTGGGGAGCAGTGGAAAGCTTCCAAAACATTTCAATGCAATCTGCTATGACTGGTGAAGCAAACTC  
AGGGTCTTTGTTTCAGGCACTTCTGCTTCTTCTCACCTGCAATCAGATTCTCAACATTATGGCAAAGAGTACAGGTACCTTCATGGAGCTAAGATTGACCTGGATAAGCACAACCTTTTTCTC  
GGAATATCCTGGAAGCTTACAGACTGACCTCAGCGTGAATTTCTTACCAGATAACTCATGGGGCCTCATGCCATCCCAAGTCCCTTCGTTTTCCATCTCAAAGGAAAAACCAGTAATCCA  
TATGGACATTATTCATCCCAGCTTCATGCAATGCAAAATCTGAATGAAGTAACCATGAGATCAATAACAAAACAGCAGGAGCAGCTGCATTCTACTTCAAAGTAATTTTGGCTTACCCG  
ACCCAGTGAAGCAGGAATGTCAGGGTCTTGGGACTACATTTAATGAGTGGCCCAAGGCAAGGGAATCATGGCTGGACTTGAAAGACGAGCATTGAGAGAAAATTCCTTCTCTGCTACT  
CAGCTCTCGATTCGATCCCAATGGCCTCTTTCAGATTTCTCCACCACTACTTGTGCTCTCCAAATGATGATTGAAGAGAAAATGTTAGCTCAGTCTCTTCTAGATGAAGTCTTTGCTCTAC  
CTCTAATGGTAGAGAATTTTGTGCTGTATGATTGGTTACAGGCTGGGTTAACTCTACGCAGTATATTAGTGTGAGGGGATTTCTATTGTATCTCTCAACTTTGTTTGTACTAGTAACTTGAT  
ATTAGAAGTGTATTTTGCTAACCATGTATTATTTGTAATGTCTGCCAGGAATGAAAATTGCTTTTAAAGGGCCTAGAGGTACGAACTATTAAGTATATATTCTTCTTTGAAGTTCT

>comp166058\_c0\_seq2

AAAATGTGGAGTTGACTGATTTACATAGAGTAGCCATAATGGAGCAGGAGTGGCGGAGCGCTGTTCACTGTGAGCAAGCAGCGCAAGGCTCAGCTATTCAGGCAGGCTTAGAATGACAA  
CGCAGTAGGCCACGGTGAAGTTGAAACCCTAAACGCCTTCCCTGACTTTTCCATATAAAGAACCAGGAAAAAGTGAAGCCAAAAGACAAAGGCAAAGTTGTTCTGCCAGAGGATTA  
GTAGGTGAGTTGAGTAAAAATCTTAAAATCCTAGATCCCTCGAACAACGAGGGGCATGAGAGAGGGATGGAGAAGAACGGGATCCACTCAAGCAAGCGGTTTCAGGAGGGACGAGGAA  
AATGGAGACGTGAAAGGGGCCGGCGGCCTCCGACCATGGCAGAATGCTTCGTCGCGGATTATTAGGGTTTTCTCGCGTCTCCGGTGGAAAGGACCGACATAGCAAAGTGTGGACAGCGA  
AGGGGCTGCGAGATCGCCGTGTGCGTCTCTCAGTCTCCACCGCCATACAGTTCTACGACCTCCAAGACCGCCTTGGGTATGACCAGCCAGCAAAGCCGTGGACTGGCTCATTAGGCT  
GCTGACGCTGCCATTTCCGACCTCCCTGAACTTGATGGCAACACATTTCCGTTGCCACCTGCTATGGTTTTTCCCGGGCACATCAATCATCCAGATGGATCATCGGCCATTGACCAGCAGA  
TCTCGCCGTCCAAGTCAACATGCAGCAGCGCTTCGGAGACGAGTAAGGGATCGACACTGTCATTTTCGAGGTGCCAGACGAGAGCGACTGCCCGGAAAGGACATCAAAGAGAAGG  
AGAACGAGCTGGATGCAGCTGCCATCAGCATCAAATCTGACCACGCCAGCTTTTTCACTGAGCTGCTTACCGCAGGCTCCACCACTGAAGTGGCCGTTGCGGCACTGGTTTTGGC  
CTGAAGCAGCTGAGGCCACAGTTAGCCACGTCCACCGCTGATTATTTGGTCAAGCTGGGATCTTTGGGCAGGCACACAAAATTCCTCAATTGACGCCAGGATATTCTTCGATGCTGCAT  
GTAGGAAACAACACTCATATGGGAATGGGGATGATGTCATACAATGCTGCTGTGTTGGGAGAGCATCAGGATACGCAACAGTATTCTTTTATGCAGGATCACGTAATTCCTGTGGCAGCCG  
TGCGCCTGGGGTAGATTATGACCTAACGTCTCCGTTTCTTCTGTATTTACTGGATTTAATAGGGGGACCCTTCAGTCCAATTCACCGCATCACCACTTGTCCACGGTGCAAACCTTG



CCCTTTTTCTTAGTGCTACTCTTCCAATTCAGCATCAGCGGGTTGTTCCCTGGAGAACCAATTCCTGGTAGTTTTAATGGTCGTCTGCAACTTAGCTGTAACGAGGCACACAGGCACC  
CGGAAGTGAAGGGTGAGAGGAAGGGTTGAAGTTGCAATTATCCAATAATGTTCTGTTGCTGTAAGCTTCTTCAAGTCATCTCCTTTCTTGCTTTTATCTCCATTTTACTTGATAATTCA  
CTATTTACATGTAAAGATGCCTTAGGTTATAGCACTATGTATGTTGTGGGCTTGAGTAGATTTTTGTTACTTGCAGGATGCAATAGTTTGAAAATGATTGGAAAAGTATTTTGGTATAAAGAA  
GATGCATACATGTAAAACCTTTGGATCCATATGAGATGACTTGAAATTTGGAGAATTAAG

>comp166058\_c0\_seq3

GTATGTTATCTACCGCATTTCTTACGAAAATACCGCCTCTACTGTATATAATATAAAAATAAACGTTTCATTTTTAACTGTTGGGCAGTACATAGAGTAGCCATAATGGAGCAGGAGTGGCGGAG  
CGCTGTTCACTGTGAGCAAGCAGCGCAAGGCTCAGCTATTAGGCAGGCTTAGAATGACAACGCAGTAGGCCACGGTGAAAAGTTGAAACCCATAACGCCTTCCCTGACTTTTCCATATA  
AAGAACCAGGAAAAAGTGAAAGCCAAAAGACAAAGGCAAAGTTGTTCTGCCAGAGGATTAGTAGGTGAGTTGAGTAAAAATCTTAAAATCCTAGATCCCTCGAACAACGAGGGGCATG  
AGAGAGGGATGGAGAAGAACGGGATCCACTCAAGCAAGCGGTTTCAAGGAGGACGAGGAAAATGGAGACGTGAAAGGGGCCGGCGCCTCCGACCATGGCAGAATGCTTCGTCGCGG  
ATTATTAGGGTTTCTCGCGTCTCCGGTGGAAAGGACCGACATAGCAAAGTGTGGACAGCGAAGGGGCTGCGAGATCGCCGTGTGCGTCTCTCAGTCTCCACCGCCATACAGTTCTACGAC  
CTCCAAGACCGCCTTGGGTATGACCAGCCCAGCAAAGCCGTGGACTGGCTCATTAAGGCTGTGACGTGCCATTTCCGACCTCCCTGAACTTGATGGCAACACATTTCCGTTGCCACCT  
GCTATGGTTTTTCCCGGGCACATCAATCATCCAGATGGATCATCGCCATTGACCAGCAGATCTCGCCGTCCAAGTCAACATGCAGCAGCGCTTCGGAGACGAGTAAGGGATCGACTG  
TCACTTTTCGAGGTGCCAGACGAGAGCGACTGCCCCGGAAAGGACATCAAAGAGAAAGGAGAACGAGCTGGATGCAGCTGCCCATCAGCATCAAATCTGACCACGCCAGCTCTTTCA  
CTGAGCTGCTTACCGCAGGCTCCACCCTGAAGTGGCCGGTTGCGGCACTGGTTTTTGGCCTGAAGCAGCTGAGGCCACAGTTAGCCACGTCCACCGCTGATTATTTTGGTCAAGCTGGG  
ATCTTTGGGCAGGCACACAAAATTCCTCAATTGACGCCAGGATATTCTTCGATGCTGCATGTAGGAAACAACACTCATATGGGAATGGGGATGATGTCATACAATGCTGCTGCTGTGGGAG  
AGCATCAGGATACGCAACAGTATTCTTTTATGCAGGATCACGTAATTCCTGTGGCAGCCGTGGCGCCTGGGGTAGATTATGACCTAACGTCTCCGTTTCTTCTGTATTTACTGGATTAATA  
GGGGACCCCTCAGTCCAATTCACCGCATACCACCAACTTGTCCACGGTGCAAACCTTGCCTTTTTTCTTAGTGCTACTCTTCCAATTCAGCATCAGCGGGTTGTTCCCTGGAGAACCA  
ATTTCCCTGGTAGTTTTAATGGTCGTCTGCAACTTAGCTGTAACGAGGCACACAGGCACCCGGAACCTGAAGGGTGAGAGGAAGGGTTGAAGTTTGAATTATCCAATAATGTTCTGTTTGC  
TGAGCCGAAGACAATCAGCTGGAATTGGGGCAATCATCTTTCTGATTAGACCTTTGATGCCATCAACCTCTTGACTCTTTTAAACGAACTTTTATTGACTATGTTAGCCAAATGTCTCTTATTC  
TTGGTATTGCTTGCTGTGTGAAATGATGTAATCTTTTTGAATATTAGTTATCTTTTTTCAAACCTATCACATCTTTGATCTTTGGCATTAAATAGATGTTTTTCGATTAGCTGCTATAAGCTATGT  
GGTGGACATGGCTGCAATGTTTCTGGAAGTTAAAACATGCCATGCTTTGCCAAACCAATGGCCTTCAAATATTTGCATCTTGATAGATTTGGGTGATTAAAGAAAGTATGAGTAATTTCAA  
TCATCATTTATTATTCTAA

>comp166058\_c0\_seq4

GTATGTTATCTACCGCATTTCTTACGAAAATACCGCCTCTACTGTATATAATATAAAAATAAACGTTTCATTTTTAACTGTTGGGCAGTACATAGAGTAGCCATAATGGAGCAGGAGTGGCGGAG  
CGCTGTTCACTGTGAGCAAGCAGCGCAAGGCTCAGCTATTAGGCAGGCTTAGAATGACAACGCAGGTAAAAGCAGCGGGTTGCTGACACCTCGTTGACGACCCACTTTTTCTCACCTT  
CCTTTGCATTCCTCATCAATGCAGTAGGCCACGGTGAAAAGTTGAAACCCATAACGCCTTCCCTGACTTTTCCATATAAAGAACCAGGAAAAAGTGAAGCCAAAAGACAAAGGCAAAGT  
TGTTCTGCCAGAGGATTAGTAGGTGAGTTGAGTAAAAATCTTAAAATCCTAGATCCCTCGAACAACGAGGGGCATGAGAGAGGGATGGAGAAGAACGGGATCCACTCAAGCAAGCGGT  
TCAGGAGGGACGAGGAAAATGGAGACGTGAAAGGGGCCGGCGCCTCCGACCATGGCAGAATGCTTCGTCGCGGATTATTAGGGTTTCTCGCGTCTCCGGTGGAAAGGACCGACATAG  
CAAAGTGTGGACAGCGAAGGGGCTGCGAGATCGCCGTGTGCGTCTCTCAGTCTCCACCGCCATACAGTTCTACGACCTCCAAGACCGCCTTGGGTATGACCAGCCCAGCAAAGCCGTGG  
ACTGGCTCATTAAGGCTGTGACGTGCCATTTCCGACCTCCCTGAACTTGATGGCAACACATTTCCGTTGCCACCTGCTATGGTTTTTCCCGGGCACATCAATCATCCAGATGGATCATCG  
GCCATTGACCAGCAGATCTCGCCGTCCAAGTCAACATGCAGCAGCGCTTCGGAGACGAGTAAGGGATCGACTGTTCACTTTTCGAGGTGCCAGACGAGAGCGACTGCCCGGGAAAGGA

CATCAAAAGAGAAGGAGAACGAGCTGGATGCAGCTGCCATCAGCATCCAAATCTGACCACGCCAGCTCTTCACTGAGCTGCTTACCGCAGGCTCCACCACTGAAGTGGCCGGTTGC  
GGCACTGGTTTTGGCCTGAAGCAGCTGAGGCCACAGTTAGCCACGTCCACCGCTGATTATTTGGTCAAGCTGGGATCTTTGGGCAGGCACACAAAATTCCTCAATTGACGCCAGGATAT  
TCTTCGATGCTGCATGTAGGAAACAACACTCATATGGGAATGGGGATGATGTCATAACAATGCTGCTGCTGTGGGAGAGCATCAGGATACGCAACAGTATTCTTTTATGCAGGATCACGTAA  
TTCTGTGGCAGCCGTGGCGCCTGGGGTAGATTATGACCTTAACGTCTCCGTTTCTTCTGTATTACTGGATTTAATAGGGGGACCCCTCAGTCCAATTCACCGCATCACCACCAACTTGTG  
CACGGTGCAAACCTTGCCCTTTTTTCTTAGTGCTACTCTTCCAATTCAGCATCAGCGGGTGTTCCTTGGAGAACCAATTCCTGGTAGTTTAATGGTCGTCTGCAACTTAGCTGTAACGA  
GGCACACAGGCACCCGGAACCTGAAGGGTGAGAGGAAGGGTTGAAGTTTGAATTATCCAATAATGTTCTGTTTGTGAGCCGAAGACAATCAGCTGGAATTGGGGCAATCATCTTTCTG  
ATTAGACCTTTGATGCCATCAACCTCTTGACTCTTTTAACGAACCTTTATTGACTATGTTAGCCAAATGTCTCTTATTCTTGGTATTGCTTGTGTGAAATGATGTAATCTTTTTGAATATTA  
GTTATCCTTTTTTCAAACCTATCACATCTTTGATCTTTGGCATTAAATAGATGTTTTTCGATTAGCTGCTATAAGCTATGTGGTGGACATGGCTGCAATGTTTCTGGAAGTTAAAACATGCCATG  
CTTTGCCAAACCAATGGCCTTCAAATATTTGCATCTTGATAGATTTGGGTTGATTAAGAAAGTATGAGTAATTTCAATCATCATTTATTATTCTAA

>comp166058\_c0\_seq5

AAAATGTGGAGTTGACTGATTTACATAGAGTAGCCATAATGGAGCAGGAGTGGCGGAGCGCTGTTCACTGTGAGCAAGCAGCGCAAGGCTCAGCTATTCAGGCAGGCTTAGAATGACAA  
CGCAGGTAAAAGCAGCGGGTTGCTGACACCTCGTTGACGACCCACTTTTTCTCACCTTCCTTTGCATTCCTCATCAATGCAGTAGGCCACGGTGAAAGTTGAAACCCTAAACGCCTTCCC  
TGACTTTTCCATATAAAGAACCAGGAAAAAGTGAAAGCCAAAAAGACAAAGGCAAAAGTTGTTCTGCCAGAGGATTAGTAGGTGAGTTGAGTAAAAATCTTAAAAATCCTAGATCCCTCGAA  
CAACGAGGGGCATGAGAGAGGGATGGAGAAGAACGGGATCCACTCAAGCAAGCGTTCAGGAGGGACGAGGAAAATGGAGACGTGAAAGGGGCCGGCGGCCTCCGACCATGGCAGA  
ATGCTTCGTCGCGGATTATTAGGGTTTCTCGCGTCTCCGGTGGAAAGGACCGACATAGCAAAGTGTGGACAGCGAAGGGGCTGCGAGATCGCCGTGTGCGTCTCTCAGTCTCCACCGCC  
ATACAGTTCTACGACCTCCAAGACCGCCTTGGGTATGACCAGCCCAGCAAAGCCGTGGACTGGCTCATTAAGGCTGCTGACGCTGCCATTTCCGACCTCCCTGAACTTGATGGCAACACA  
TTTCCGTTGCCACCTGCTATGGTTTTTCCCGGCACATCAATCATCCAGATGGATCATCGCCATTGACCAGCAGATCTCGCCGTCCAAGTCAACATGCAGCAGCGCTTCGGAGACGAGTA  
AGGGATCGACACTGTCATTTGAGGTGCCAGACGAGAGCGACTGCCCGGAAAGGACATCAAAAAGAGAAGGAGAACGAGCTGGATGCAGCTGCCATCAGCATCCAAATCTGACCA  
CGCCCAGCTCTTCACTGAGCTGCTTACCGCAGGCTCCACCACTGAAGTGGCCGGTTGCGGCACTGGTTTTTGGCCTGAAGCAGCTGAGGCCACAGTTAGCCACGTCCACCGCTGATTATT  
TTGGTCAAGCTGGGATCTTTGGGCAGGCACACAAAATTCCTCAATTGACGCCAGGATATTCTTCGATGCTGCATGTAGGAAACAACACTCATATGGGAATGGGGATGATGTCATAACAATGC  
TGCTGCTGTGGGAGAGCATCAGGATACGCAACAGTATTCTTTTATGCAGGATCACGTAATTCCTGTGGCAGCCGTGGCGCCTGGGGTAGATTATGACCTTAACGTCTCCGTTTCTTCTGTAT  
TACTGGATTTAATAGGGGGACCCCTCAGTCCAATTCACCGCATCACCACCAACTTGTCCACGGTGCAAACCTTGCCCTTTTTTCTTAGTGCTACTCTTCCAATTCAGCATCAGCGGGTGT  
TCCTTGGAGAACCAATTCCTGGTAGTTTTAATGGTCGTCTGCAACTTAGCTGTAACGAGGCACACAGGCACCCGGAACCTGAAGGGTGAGAGGAAGGGTTGAAGTTTGAATTATCCAAT  
AATGTTCTGTTTGTGAGCCGAAGACAATCAGCTGGAATTGGGGCAATCATCTTTCTGATTAGACCTTTGATGCCATCAACCTCTTGACTCTTTTAACGAACCTTTATTGACTATGTTAGCC  
AAATGTCTCTTATTCTTGGTATTGCTTGTGTGAAATGATGTAATCTTTTTGCATTTAGTTATCTTTTTTCAAACCTATCACATCTTTGATCTTTGGCATTAAATAGATGTTTTTCGATTAGC  
TGCTATAAGCTATGTGGTGGACATGGCTGCAATGTTTCTGGAAGTTAAAACATGCCATGCTTTGCCAAACCAATGGCCTTCAAATATTTGCATCTTGATAGATTTGGGTTGATTAAGAAAG  
TATGAGTAATTTCAATCATCATTTATTATTCTAA

>comp166058\_c0\_seq6

AAAATGTGGAGTTGACTGATTTACATAGAGTAGCCATAATGGAGCAGGAGTGGCGGAGCGCTGTTCACTGTGAGCAAGCAGCGCAAGGCTCAGCTATTCAGGCAGGCTTAGAATGACAA  
CGCAGGTAAAAGCAGCGGGTTGCTGACACCTCGTTGACGACCCACTTTTTCTCACCTTCCTTTGCATTCCTCATCAATGCAGTAGGCCACGGTGAAAGTTGAAACCCTAAACGCCTTCCC  
TGACTTTTCCATATAAAGAACCAGGAAAAAGTGAAAGCCAAAAAGACAAAGGCAAAAGTTGTTCTGCCAGAGGATTAGTAGGTGAGTTGAGTAAAAATCTTAAAAATCCTAGATCCCTCGAA

CAACGAGGGGCATGAGAGAGGGATGGAGAAGAACGGGATCCACTCAAGCAAGCGGTTTCAGGAGGGACGAGGAAAATGGAGACGTGAAAGGGGCCGGCGGCCTCCGACCATGGCAGA  
ATGCTTCGTCGCGGATTATTAGGGTTTCTCGCGTCTCCGGTGGAAAGGACCGACATAGCAAAGTGTGGACAGCGAAGGGGCTGCGAGATCGCCGTGTGCGTCTCTCAGTCTCCACCGCC  
ATACAGTTCTACGACCTCCAAGACCGCCTTGGGTATGACCAGCCCAGCAAAGCCGTGGACTGGCTCATTAAAGGCTGCTGACGCTGCCATTTCCGACCTCCCTGAACTTGATGGCAACACA  
TTTCCGTTGCCACCTGCTATGGTTTTTCCCGGGCACATCAATCATCCAGATGGATCATCGCCATTGACCAGCAGATCTCGCCGTCCAAGTCAACATGCAGCAGCGCTTCGGAGACGAGTA  
AGGGATCGACACTGTCACCTTCGAGGTGCCAGACGAGAGCGACTGCCCGGGAAAGGACATCAAAAAGAGAAGGAGAACGAGCTGGATGCAGCTGCCCATCAGCATCCAAATCTGACCA  
CGCCCAGCTCTTTCACTGAGCTGCTTACCGCAGGCTCCACCACTGAAGTGGCCGGTTGCGGCACTGGTTTTGGCCTGAAGCAGCTGAGGCCACAGTTAGCCACGTCCACCGCTGATTATT  
TTGGTCAAGCTGGGATCTTTGGGCAGGCACACAAAATTCCTCAATTGACGCCAGGATATTCTTCGATGCTGCATGTAGGAAACAACACTCATATGGGAATGGGGATGATGTCATACAATGC  
TGCTGCTGTGGGAGAGCATCAGGATACGCAACAGTATTCTTTATGCAGGATCACGTAATTCCTGTGGCAGCCGTGGCGCCTGGGGTAGATTATGACCTTAAACGTCTCCGTTTCTTCTGTAT  
TACTGGATTTAATAGGGGGACCCTTCAGTCCAATTCACCGCATCACCACTTGTCCACGGTGCAAACCTTGCCCTTTTTTCTTAGTGCTACTCTTCCAATTCAGCATCAGCGGGTGT  
TCCTTGAGAAACCAATTCCTGGTAGTTTTAATGGTCGTCTGCAACTTAGCTGTAACGAGGCACACAGGCACCCGGAAGTGAAGGGTGAGAGGAAGGGTTGAAGTTTGAATTATCCAAT  
AATGTTCTGTTTGTGTAAGCTTTCTTCAAGTCATCTCCTTTCTTGTCTTTATCTCCATTTTACTTGATAATTCATATTTACATGTAAAGATGCCTTAGGTTATAGCACTATGTATGTTGTGG  
GCTTGAGTAGATTTTTGTTACTTGCAGGATGCAATAGTTTGAAGATGATTGGAAAAGTATTTGGTATAAAGAAGATGCATACATGTAAAACCTTTGGATCCATATGAGATGACTTGAAATTT  
GGAGAATTAAG

>comp166058\_c0\_seq7

GTATGTTATCTACCGCATTTCTTACGAAAATACCGCCTCTACTGTATATAATATAAAATAAACGTTTCAATTTTAACTGTTGGGCAGTACATAGAGTAGCCATAATGGAGCAGGAGTGGCGGAG  
CGCTGTTCACTGTGAGCAAGCAGCGCAAGGCTCAGCTATTCAGGCAGGCTTAGAATGACAACGCAGGTAAAAGCAGCGGGTTGCTGACACCTCGTTGACGACCCACTTTTTCTCACCTT  
CCTTTCGATTCCTCATCAATGCAGTAGGCCACGGTGAAAGTTGAAACCTTAAACGCCTTCCCTGACTTTTCCATATAAAGAACCAGGAAAAAGTGAAGCCAAAAGACAAAGGCAAAGT  
TGTTCTGCCAGAGGATTAGTAGGTGAGTTGAGTAAAAATCTTAAAATCCTAGATCCCTCGAAACAACGAGGGGCATGAGAGAGGGATGGAGAAGAACGGGATCCACTCAAGCAAGCGGT  
TCAGGAGGGACGAGGAAAATGGAGACGTGAAAGGGGCCGGCGGCCTCCGACCATGGCAGAATGCTTCGTCGCGGATTATTAGGGTTTTCTCGCGTCTCCGGTGGAAAGGACCGACATAG  
CAAAGTGTGGACAGCGAAGGGGCTGCGAGATCGCCGTGTGCGTCTCTCAGTCTCCACCGCCATACAGTTCTACGACCTCCAAGACCGCCTTGGGTATGACCAGCCCAGCAAAGCCGTGG  
ACTGGCTCATTAAGGCTGCTGACGCTGCCATTTCCGACCTCCCTGAACTTGATGGCAACACATTTCCGTTGCCACCTGCTATGGTTTTTCCCGGGCACATCAATCATCCAGATGGATCATCG  
GCCATTGACCAGCAGATCTCGCCGTCCAAGTCAACATGCAGCAGCGCTTCGGAGACGAGTAAGGGATCGACACTGTCACCTTCGAGGTGCCAGACGAGAGCGACTGCCCGGGAAAGGA  
CATCAAAAAGAGAAGGAGAACGAGCTGGATGCAGCTGCCCATCAGCATCCAAATCTGACCACGCCAGCTCTTTCACTGAGCTGCTTACCGCAGGCTCCACCACTGAAGTGGCCGGTTGC  
GGCACTGGTTTTTGGCCTGAAGCAGCTGAGGCCACAGTTAGCCACGTCCACCGCTGATTATTTGGTCAAGCTGGGATCTTTGGGCAGGCACACAAAATTCCTCAATTGACGCCAGGATAT  
TCTTCGATGCTGCATGTAGGAAACAACACTCATATGGGAATGGGGATGATGTCATACAATGCTGCTGCTGTGGGAGAGCATCAGGATACGCAACAGTATTCTTTTATGCAGGATCACGTAA  
TTCTGTGGCAGCCGTGGCGCCTGGGGTAGATTATGACCTTAAACGTCTCCGTTTCTTCTGTATTACTGGATTTAATAGGGGGACCCTTCAGTCCAATTCACCGCATCACCACTTGT  
CACGGTGCAAACCTTGCCCTTTTTTCTTAGTGCTACTCTTCCAATTCAGCATCAGCGGGTGTTCCTTGAGAAACCAATTCCTGGTAGTTTTAATGGTTCGTCTGCAACTTAGCTGTAACGA  
GGCACACAGGCACCCGGAAGTGAAGGGTGAGAGGAAGGGTTGAAGTTGCAATTATCCAATAATGTTCTGTTTGTGTAAGCTTTCTTCAAGTCATCTCCTTTCTTGTCTTTATCTCCAT  
TTTACTTGATAATTCATATTTACATGTAAAGATGCCTTAGGTTATAGCACTATGTATGTTGTGGCTTGAGTAGATTTTTGTTACTTGCAGGATGCAATAGTTTGAAGATGATTGGAAAAGTA  
TTTTGGTATAAAGAAGATGCATACATGTAAAACCTTTGGATCCATATGAGATGACTTGAAATTTGGAGAATTAAG

>comp166058\_c0\_seq8

AAAATGTGGAGTTGACTGATTTACATAGAGTAGCCATAATGGAGCAGGAGTGGCGGAGCGCTGTTCACTGTGAGCAAGCAGCGCAAGGCTCAGCTATTCAGGCAGGCTTAGAATGACAA  
CGCAGTAGGCCACGGTGAAAAGTTGAAACCCATAACGCCTTCCCTGACTTTTCCATATAAAGAACCAGGAAAAAGTGAAAGCCAAAAGACAAAGGCAAAGTTGTTCTGCCAGAGGATTA  
GTAGGTGAGTTGAGTAAAAATCTTAAAATCCTAGATCCCTCGAACAACGAGGGGCATGAGAGAGGGATGGAGAAGAACGGGATCCACTCAAGCAAGCGGTTGAGGAGGGACGAGGAA  
AATGGAGACGTGAAAGGGGCCGGCGGCCTCCGACCATGGCAGAATGCTTCGTCGCGGATTATTAGGGTTTCTCGCGTCTCCGGTGGAAAGGACCGACATAGCAAAGTGTGGACAGCGA  
AGGGGCTGCGAGATCGCCGTGTGCGTCTCTCAGTCTCCACCGCCATACAGTTCTACGACCTCCAAGACCGCCTTGGGTATGACCAGCCAGCAAAGCCGTGGACTGGCTCATTAAGGCT  
GCTGACGCTGCCATTTCCGACCTCCCTGAACTTGATGGCAACACATTTCCGTTGCCACCTGCTATGGTTTTTCCCGGGCACATCAATCATCCAGATGGATCATCGGCCATTGACCAGCAGA  
TCTCGCCGTCCAAGTCAACATGCAGCAGCGCTTCGGAGACGAGTAAGGGATCGACACTGTCACTTTCGAGGTGCCAGACGAGAGCGACTGCCCGGAAAGGACATCAAAAAGAGAAGG  
AGAACGAGCTGGATGCAGCTGCCATCAGCATCAAATCTGACCAGCCCAGCTCTTTCACTGAGCTGCTTACCGCAGGCTCCACCACTGAAAGTGGCCGGTTGCGGCACTGGTTTTGGC  
CTGAAGCAGCTGAGGCCACAGTTAGCCACGTCCACCGCTGATTATTTGGTCAAGCTGGGATCTTTGGGCAGGCACACAAAATTCCTCAATTGACGCCAGGATATTCTTCGATGCTGCAT  
GTAGGAAACAACACTCATATGGGAATGGGGATGATGTCATACAATGCTGCTGTGTTGGGAGAGCATCAGGATACGCAACAGTATTCTTTATGCAAGGATCACGTAATTCCTGTGGCAGCCG  
TGCGCCTGGGGTAGATTATGACCTTAAACGTCTCCGTTTCTTCTGTATTTACTGGATTTAATAGGGGGACCCCTCAGTCCAATTCACCGCATCACCACTTGTCCACGGTGCAAACCTTG  
CCTTTTTTCTTAGTGCTACTCTTCCAATTCAGCATCAGCGGGTTGTTCCCTGGAGAACCAATTCCTGGTAGTTTTAATGGTCGTCTGCAACTTAGCTGTAACGAGGCACACAGGCACC  
CGAACTGAAGGGTGAGAGGAAGGGTTGAAGTTTGCAATTATCCAATAATGTTCTGTTTGCTGAGCCGAAGACAATCAGCTGGAATTGGGGCAATCATCTTTCTGATTAGACCTTTGATG  
CCATCAACCTCTTGACTCTTTTAAACGAACTTTTATTGACTATGTTAGCCAAATGTCTCTTATTCTTGGTATTGCTTGTGTGAAATGATGTAATCTTTTTGAATATTAGTTATCTTTTTTCA  
AAACTATCACATCTTTGATCTTTGGCATTAAATAGATGTTTTTCGATTAGCTGCTATAAGCTATGTGGTGGACATGGCTGCAATGTTTCTGGAAGTTAAAACATGCCATGCTTTGCCAAACCAA  
TGGCCTTCAAATATTTGCATCTTGATAGATTTGGGTTGATTAAGAAAGTATGAGTAATTTCAATCATCATTTATTATTCTAA

>comp166058\_c0\_seq9

GTATGTTATCTACCGCATTTCTTACGAAAATACCGCCTCTACTGTATATAATATAAAATAAACGTTTCATTTTTAACTGTTGGGCAGTACATAGAGTAGCCATAATGGAGCAGGAGTGGCGGAG  
CGCTGTTCACTGTGAGCAAGCAGCGCAAGGCTCAGCTATTCAGGCAGGCTTAGAATGACAACGCAGTAGGCCACGGTGAAAAGTTGAAACCCATAACGCCTTCCCTGACTTTTCCATATA  
AAGAACCAGGAAAAAGTGAAAGCCAAAAGACAAAGGCAAAGTTGTTCTGCCAGAGGATTAGTAGGTGAGTTGAGTAAAAATCTTAAAATCCTAGATCCCTCGAACAACGAGGGGCATG  
AGAGAGGGATGGAGAAGAACGGGATCCACTCAAGCAAGCGGTTGAGGAGGGACGAGGAAAATGGAGACGTGAAAGGGGCCGGCGGCCTCCGACCATGGCAGAATGCTTCGTCGCGG  
ATTATTAGGGTTTCTCGCGTCTCCGGTGGAAAGGACCGACATAGCAAAGTGTGGACAGCGAAGGGGCTGCGAGATCGCCGTGTGCGTCTCTCAGTCTCCACCGCCATACAGTTCTACGAC  
CTCCAAGACCGCCTTGGGTATGACCAGCCCAGCAAAGCCGTGGACTGGCTCATTAAGGCTGCTGACGCTGCCATTTCCGACCTCCCTGAACTTGATGGCAACACATTTCCGTTGCCACCT  
GCTATGGTTTTTCCCGGGCACATCAATCATCCAGATGGATCATCGGCCATTGACCAGCAGATCTCGCCGTCCAAGTCAACATGCAGCAGCGCTTCGGAGACGAGTAAGGGATCGACACTG  
TCACTTTCGAGGTGCCAGACGAGAGCGACTGCCCGGAAAGGACATCAAAAGAGAAGGAGAACGAGCTGGATGCAGCTGCCATCAGCATCAAATCTGACCAGCCCAGCTCTTCA  
CTGAGCTGCTTACCGCAGGCTCCACCACTGAAAGTGGCCGGTTGCGGCACTGGTTTTGGCCTGAAGCAGCTGAGGCCACAGTTAGCCACGTCCACCGCTGATTATTTGGTCAAGCTGGG  
ATCTTTGGGCAGGCACACAAAATTCCTCAATTGACGCCAGGATATTCTTCGATGCTGCATGTAGGAAACAACACTCATATGGGAATGGGGATGATGTCATACAATGCTGCTGCTGTGGGAG  
AGCATCAGGATACGCAACAGTATTCTTTTATGCAGGATCACGTAATTCCTGTGGCAGCCGTGGCGCCTGGGGTAGATTATGACCTTAAACGTCTCCGTTTCTTCTGTATTTACTGGATTAATA  
GGGGGACCCTTCAAGTCAATTCACCGCATCACCACTTGTCCACGGTGCAAACCTTGGCCTTTTTTCTTAGTGCTACTCTTCCAATTTAGCATCAGCGGGTTGTTCCCTGGAGAACCA  
ATTTCCCTGGTAGTTTTAATGGTCGTCTGCAACTTAGCTGTAACGAGGCACACAGGCACCCGGAAGTGAAGGGTGAGAGGAAGGGTTGAAGTTTGCAATTATCCAATAATGTTCTGTTTGC  
TGTAAGCTTTCTTCAAGTCATCTCCTTTCCCTTGCTTTTATCTCCATTTACTTGATAATCACTATTTACATGTAAGATGCCTTAGGTTATAGCACTATGTATGTTGTGGCTTGAGTAGATT



TTTGT CAGC ATTTG ACTGAGATGAAAATTGAAAAGCTTGAAGTAGAAGAAGATTGGCAACAACCTGCAAGGAGGAGAAGACAATCAATCTTGGTTGAAAAC T

>comp167387\_c0\_seq2

TAAATTAATAACACAAC TAAGTAATTCATTACACTCAAATTATCTTTTGATTTTTTGAATCTCCAACCCCACTCCTTTTAAATGGTTGTGAGTATAAGCTGCTATTAATTCAGTACCGCTCCTT  
CATCAAATCTTTTATTTATTTATGATGTATTCAATTTATATGAGATAATATATCATCAACAATCAAATGATTCATTTCTTCATCATCAGTTCATTGCCTTTAAAATTTGAAATGTCTATTTTTAAAA  
TTTTTTTATTAAGCATAACGTGAATCAACTTTTTATTATGCATCTCCAATGGGATTTTGAGGTTTTACCTATTATGTTGTGAACGTTGCTAATGAGTTTCTCCCATCACGCTAAAAAATCATAT  
ATGAGTTCTACTCGTTCCAAACACGTCGCCACTGGGCTTCGAGGATTTTTGGGTTGTTGCATTTTATATTTGCGTGGAAGAATGCATTGATGAAGTTGATGACGGTAGAGCAAGCTTGGAA  
GTGAATGCGGCACAAAAGTTTTTTAATATTTTTCCCCTAGAGAGAGATTCTTTTAAGAGAGAGAGAACAGAGGATTGATATTGGATCTTCACTTTCTAGTTAAAAAGTTGAGTAGGGCGCA  
GGGAGGCTAGGCGGCAGTCGATTGGGGTTGGTGGTGGGATGATTTGCAGCAACTGCCTGGTGGTGGCGTGGAGTGTAGGAGGGGGGTGATGCCCTGTGAGGGTTGAGTGTGAGAGAAG  
AAGCACAGGGGGATTGGGCTAGAATATTGTGCGACTGAGGGGTAAGAGGCAGCTATTGTGGTGAATCATAGAGGGAGTGTTAGATTTAGTTTTATTA ACTTTTTATTTTTTGT TTTACTTCT  
ATTTTTGCACTCCCTTTTTTTAATTAGAAAAGGGGTACCCTTTTGATGCAATAAAAAGGATACAATACATGTAATAAACATTATAAATTTTAGTATTATAATTGTTTTAATTA ACTTAGATATA  
AATATATAGTTTTAAAAATTATTGAAATCGTAATTTTTAAATTTTACGAATAATTACATTGGTTTTTTAGTAGACATGCCTGTGTGCGTGTTCGTGTTGCCGTAGTCATGTCTGGACATTATAACCTC  
ACAACAATATAGATTTGTGTTTATCCTTGATTTAGTCCATGATAGCTTATGCTATTTCTCTCAAGAGGCTATACCTCAAATTCACATAATCTCAGTGTGTA CTTGTGAATTTCTATTTAAAAA  
AAATATTCAATTATGAAGTATTCTTAGGTATTTAGATTATAAATCCTGATTTTTGAGTGTATAATAAGAAATATGATTAGTATTATTTTTCTTATTGTTGTTGGTAAACAAC TGAAGCTGCCG  
TGTCATTCATAGTTTCAAATTTTCAACTTTTACCAAAAATAATGAACCTTCATTCTAGTTGTTGAAGCTTTATTATATATTCTTTTTAGGAGGTTATGCTTTTTCTTCTGCTAAAATTTGAAGC  
CTTCTGTGAAGTGTTTTTGG

>comp167551\_c0\_seq1

GAGCTTCACATCATCTTCTTAAAGCAACCCCTTATCTATGGAAAGCAACAGCACTGCTACCAAGCCTTTTTTTTCCCTTCTGCTTGTCTCTCTGTTCTCTCTACTCGTTCTTAAAGCCAATGC  
AGAAGTTCACTACCATGACTTCGTGATACAAGTCACGCCAGTGAAGAGGTTGTGCCATACACGCTCCATTATTACAGTCAATGGGCGGTTCCCGGACCGACCCTCCTGGTCAGGAATGG  
AGATAGTCTGGTGGTCAAAGTTGTAAACCAGGCCAAGTATAATTA CTCTTCATTGGCATGGAGTTAGACAGCTGAGAAACGGTTGGGCAGATGGGCCTTCCTATGTGACACAATGCC  
AATTCAGCCTGGAGGGACTTACACATACAGGTTCACTATAACAGAGTCAAGAGGGGACCTTATGGTGGCATGCTCACAAACACCTGGCTTAGGGCTACAGTCTATGGAGCTTTAATAATTCAT  
CCCAAAGACCATTTACCTATCCTTTTGCCACACCAAAAACGAGAATTCCAGTCATTCTTGGCGAGTGGTGGAAATTCGAATCCCAATTGACGTGATCCGGCAAGCCCTGAAGACCGGAACT  
TCTCCGAACAGCTCTGATGCCTTAACCATCAACGCCCAACCAGGAGATCTCTTCAAATGCTCCAGCCCAGAACTACAGTATTCTCGGTGGGCCCCGGCGAGACCATCCTCCTCCGCTTC  
ATCAACGCCGCCCTCAACACCGAGCTCTTCGTTTCCATCGCCGGACACTCCATGATGGTTCGTCGCCGCCGACGCCTCCTACGTCAAACCCCTCCTCACCTCCGTCATCATGCTTGCACCCG  
GCCAAACCACGGACGTCTCATCACTACCAGCCTACCTCCTCCCGTTACTACATCGCCGCCCGCTTATTCTCCGCCGAATCCCTCCCTTCGATAACACCACCGCCACGGCCATCCT  
CGACTACGACTGCGGTTGCCTCCCGGACCCACCAACCACCCCTGCCAAACCCATCCTCCCGCTTTCAACGACACCCCTCACGGTCACCGCTTCTCCGCCGCTTCAAGAGCCCCA  
CACCCGTCAAGCTCCCAAGCCCCGTGACGAGCACCTCTTCTTACGGTCCGCTAGGTTTATTGCAATGTCTGCCGGGTGAGATCTGCCGGCGGGCCGAACCACACCCGGCTCACCGCT  
AGCATCAATAACGTCTCCTTCGTTCTCCCGTACAGCTCTTCCCTCCTCAGGCACATAAATTGGCCGTTCCGGGGATTTTACCACCGATTTCCCTGCGAAACCACCGGTGGAATTTGATTA  
CACCGGCAAAAACGTGCGCAGGGAGCAGCCGGAACCCGCGACCAAGCTGTATAAGTTGAGGTTTGGATCAGTGGTACAGCTAGTATTGCAGGGGACGAGCATTGTTGCTGCTGAGAAC  
CATCCGATTCATCTCCATGGGTATAATTTCTACATCCTTGC GGAGGGATTTGGAAACTTCGATCCGGCTAGAGATAACCGAGAAATTC AATTTGATTGATCCGCCGTTGAGGAATACGGTCCG  
CGTGCCGATGAAGGGATGGGCGGTGATAAGATTTCGTAGCAGATAATCCAGGGGTTTGGCTGCTTCATTGTCAATTTGGATGTGCATATCACTTGGGGATTGGCCATGGCGTCTTGGTGGAG  
GATGGGCTTGGAGTGCTGGAGGCGTTGGAGCCGCCCTCTGGATCTTCCATTATGCTGAGCGGAGCGGGAAGCCAAGGACTGCTAGTTTACTATTTTGATTTACAAA ACTGTTTCGTAT

GGGGAGAATTGGGGTCTTCGAATTAATAGTTTTTCATTGTTGCCGATTCGCCATGTTTGATTGATTGAGCAATAAAGATAGAGGATACATACTCATTAAATTTGATCTTTTCAAATAGAATTTATTATA  
ATGTAAGAGTAAATTAATAAAGTTTAAATATCAAATCTTGATCTAATTTTCTCCATAAAGATTAA

>comp167551\_c0\_seq3

TTTTTCCTTCTGCTTGTCTCTGTTCTCTCTACTCGTTCCTAAAGCCAATGCAGAAGTTCACTACCATGACTTTGTGGTGCAAGCCAAGCCAGTGAAGAGGCTGTGCCATACTCGCTCA  
ATTATTACAGTAAATGGGCAGTTCAGGGCCGACCCCTCAAGGTCAGGAATGGAGACAGCTTGGTTGTCAAAGTTGTGAACCAGGCCAAGTATAATATTACCATCCATTGGCATGGAATTA  
GACAGATGAGAAATGGTTGGGCAGATGGTCCTTCTTATGTGACACAATGCCCAATTCAGCCTGGAGGTACCTACACATACAGGTTCAAATAGAGAACCAAGAGGGAACCTTATGGTGG  
CATGCTCACAGCTCTTGGCTTAGAGCTACAGTCTATGGAGCCTTAATAATCCTTCCCAAAAAGGATTCTTCCTACCCCTTTGCCACACCAAGAGAGAATTTCCCTGTCATTCTTGGTGAGT  
GGTGGAAATTCGAACCCCATGACGTCATCCGGCAAGCCCTGAAAACCGGAGCAGCTCCGAACAATTCTGATGCCCTTACCATCAATGGCCAACCAGGAGATCTCTACAAATGCTCCAGC  
AAAGAACTACGGTACTCCCGGTGGGTCCCGGCGAGACGATCCTCCTCCGCCTCATCAACGCCGCCATGGTCAACGAGCTCTTTTTCTCGGTAGCCGACCACAAAATGACCGTGGTGGC  
CGCCGACGCCTTTACACTAAGCCCTTTACAACCTCAGTCATCCTTCTTGGACCGGGCCAGACCAATGACGTCCTTATCCAAACCAACCAGCCCGCTGGCCGCTACTACCTAGCCGCCCA  
CGCCTACGAAAGCGGACCGCCGAACACCCCTTTTCGACAACACAACCACCACCGCAATCCTCAGCTACGAAAACCAATCACTTCAACACCGCCAAAGCCTGCCGCCTTACCAGCCTTC  
AACGACACGGCAACCGCCGCCGCTTTACAGCGGGCATTAAAGAGCCCGAGACCCGTCAAATACCCGGACCCGTAAATGAGAACCTCTTCTTACAGTCGGGCTGGGCCTTTTTAACTG  
CCCGCCGGGAAAAACATGTAGCGGTCCCAACGGCACTCGGTTACCCGCTAGCATGAACAATTACTCTTTTGTCTCCCGAAACGGCAGTCTTTGCTCCAAGCCGCGGAATTCGGCATTCC  
CGGCGTGTTCACGACAGATTTCCCGGCTACCCCTCCCGTCAAATTCGACTACACTGGCAACAATATAAGCCCGAGCCTTACCAACCCGTTAAAGCCACGAAGCTCTATCCGCTGAAATA  
CGGTTTCGGTTGTTTCAGCTAGTGATGCAGGAACCAACATCGTCGCCTCGGAGGAACACCCAATGCATATCCATGGTTACGAATTCTACGTGTTGGCGACGGGAACAGGAACTTCAATGC  
GAAGAAGGATACGGCGAAGTTCAATCTCGTGGACCCGCCGCGCAGGAACACAATTGGCGTGCCAGTGAAGGGGTGGGCAGTCATAAGGTTTCGTGGCCGATAATCCTGGCGTTTGGTTTG  
TTCATTGCCATATCGACTCTCATTGACATGGGGCTTGGCCATGGCGTTTCTGGTGGAGAATGGAGTTGGCAAATTGCAATCAACCATACCTCCTCCGCTTGACCTTCCAAAATGCTAGGG  
TTTGAAAAGAAGTGATCTCTGCTGCTCTGTTTGGATCTTGGCTGCTTATTGTACTTGTACGTGGTATATGGATTTACTGTAAGTTGATTATTATCAGAATTTGTTCTGCTTAATTAACAA  
TGGATTATTGGTGAGTTCATCTGAGCTGCAACTGAGATAAAGAGAAATTATTCTGCTTGGAGTTCTCACTTATTGTCATCCGACTATAATTAATAAGGCCATATTGTTTAGATATATAACA  
TGTGTATGATCATATACATTGTGTCTATAATACACATGTTATGTACAAATGAAGTGGTCAATTATAATTGAAGTATAGACA

>comp167551\_c0\_seq6

TTTTTCCTTCTGCTTGTCTCTGTTCTCTCTACTCGTTCCTAAAGCCAATGCAGAAGTTCACTACCATGACTTTGTGGTGCAAGCCAAGCCAGTGAAGAGGCTGTGCCATACTCGCTCA  
ATTATTACAGTAAATGGGCAGTTCAGGGCCGACCCCTCAAGGTCAGGAATGGAGACAGCTTGGTTGTCAAAGTTGTGAACCAGGCCAAGTATAATATTACCATCCATTGGCATGGAATTA  
GACAGATGAGAAATGGTTGGGCAGATGGTCCTTCTTATGTGACACAATGCCCAATTCAGCCTGGAGGTACCTACACATACAGGTTCAAATAGAGAACCAAGAGGGAACCTTATGGTGG  
CATGCTCACAGCTCTTGGCTTAGAGCTACAGTCTATGGAGCCTTAATAATCCTTCCCAAAAAGGATTCTTCCTACCCCTTTGCCACACCAAGAGAGAATTTCCCTGTCATTCTTGGTGAGT  
GGTGGAAATTCGAACCCCATGACGTCATCCGGCAAGCCCTGAAAACCGGAGCAGCTCCGAACAATTCTGATGCCCTTACCATCAATGGCCAACCAGGAGATCTCTACAAATGCTCCAGC  
AAAGGTAATCTAATCTTTCCATTGACAAATTGATACTTTACTGTCAATTTGAATATATACAGTTACTCGATACAGCCCAATTTCTGTGTCTTATTGAAATATAAGAATATGAAATCAATGCAGA  
AACTACGGTACTCCCGGTGGGTCCCGGCGAGACGATCCTCCTCCGCCTCATCAACGCCGCCATGGTCAACGAGCTCTTTTTCTCGGTAGCCGACCACAAAATGACCGTGGTGGCCGCCG  
ACGCCTTTACACTAAGCCCTTTACAACCTCAGTCATCCTTCTTGGACCGGGCCAGACCAATGACGTCCTTATCCAAACCAACCAGCCCGCTGGCCGCTACTACCTAGCCGCCACGCCT  
ACGAAAGCGGACCGCCGAACACCCCTTTTCGACAACACAACCACCACCGCAATCCTCAGCTACGAAAACCAATCACTTCAACACCGCCAAAGCCTGCCGCCTTACCAGCCTTCAACGA  
CACGGCAACCGCCGCCGCTTTACAGCGGGCATTAAAGAGCCCGAGACCCGTCAAATACCCGGACCCGTAAATGAGAACCTCTTCTTACAGTCGGGCTGGGCCTTTTTAACTGCCCGC

CGGGAAAACATGTAGCGGTCCCAACGGCACTCGGTTACCGCTAGCATGAACAATTACTCTTTTGTTCCTCCCGAAACGGCAGTCTTTGCTCCAAGCCGCGGAATTCGGCATTCCCGGCG  
TGTTACGACAGATTTCCCGGCTACCCCTCCCGTCAAATTTCGACTACACTGGCAACAATATAAGCCCCGAGCCTTTACCAACCCGTTAAAGCCACGAAGCTCTATCCGCTGAAATACGGTTC  
GGTTGTTTCAGCTAGTGATGCAGGGAACCAACATCGTCGCCTCGGAGGAACACCCAATGCATATCCATGGTTACGAATTCTACGTGTTGGCGACGGGAACAGGAACTTCAATGCGAAGA  
AGGATACGGCGAAGTTCAATCTCGTGGACCCGCCGCGCAGGAACACAATTGGCGTGCCAGTGAAGGGGTGGGCAGTCATAAGGTTTCGTGGCCGATAATCCTGGCGTTTGGTTTGTTCAT  
TGCCATATCGACTCTCATTTGACATGGGGCTTGGCCATGGCGTTTCTGGTGGAGAATGGAGTTGGCAAATTGCAATCAACCATACTCTCCGCTTGACCTTCCAAAATGCTAGGGTTTGA  
AAGAAGTGATCTCTGCTGCTCTGTTTGGATCTTGGCTGCTTCATTGTACTTGTACGTGGTATATGGATTTACTGTAAGTTGATTTATTATCAGAATTTGTTCTGCTTAATTAACAATGGAT  
TATTGGTGAGTTTCATCTGAGCTGCAACTGAGATAAAAAGAGAAATTATTCTGCTTGGAGTTCTCACTTATTTGCATCCGGACTATAATTAATAATAGGCCATATTGTTTAGATATATAACATGTGT  
ATGATCATATATAATTGTGTCTATAATAACATGTTATGTACAAATGAAGTGGTCAATTATAATTGAAGTATAGACA

>comp167643\_c0\_seq1

CAGATGGAGGGTAGAGGGAGATTGTGAGTGCTCCTAAGGAAGAGGAGCGAGGGAGAGGTCTTCGGGCATGGGAGGAGGGGGGTGGGCGGCGGAGGCGATGTTCCCGGACGAGGTATG  
GGAGTACGTGTTCTCTTTTGTGGAGGCGGACGCGGACAGGAACGCGATCTCGGTGGTGTGCCGGGGGTGGTACCGGATCGAGGGGCGTTGCAGGCGTCGGATCTTTGTTGGAACTGCT  
ACGCTGTTTCTCCGGCGACGGCGTTACGACGTTTTCTGAAATCAAGGCGGTGACCATCAAAGGGAAGCCTCATTTTGCAGATTTCATCTTGTGCCGAGCGACTGGGGCGGCGGAGCT  
GCTGCGTGGGTGGAGGCCTTGGCGGAGGCGTGTCCGCAGATGGAGGAGCTTCGGTTCAAGAGAATGGTGGTACGGATGACTGCCTCGAGCTTATCGGGAGGTCATTCAGGAACCTTA  
AGGTGCTCTCGCTTGCCTGCGTGCAGGGGCTTCAGCACTGCTGGGTTGGCATTCTGCTGCTTCCAATTGCCGAAACCTAAGGGAGTTGGACCTGCTGGAGAATGATTTTGAAGATAATTGTA  
GCCATTGGCTGAGTCATTTCCAGAATCTTGTACCTCGTTGATATCACTTAACATTGCAAGCCTTGATGGGAGATGAATTATTCTATCTCGAGCGGCTTGTGAGCAGATGCTCTAAGCTC  
AAAACACTCAAGCTCAACCACTCTGTGCCTCTTGATCGGCTTGTGGCATTCTCTGTAAGGCCCAACAATTGATTGACCTGGGAACCTGGCAGGTTTTTCAGCAGACTCTCGTCCAGAGCTT  
TTTGAAGACTTGAATCATCATTTACAGGATTTACAGGTCTCAAAGCTTATCTGGTCTTTATGATGCTGTTCTGTCATATCTCCAACCTACTACTCAGTGTGTGATGGACTTAGCTACTA  
AATTTGAGCTATGCTACCTTGCAAAGTGTGAACTTACAAAAGCTAATTACCCGGTGTAATAAATCTCAAGCGCTTATGGGTTATGGACTTGATTGAGGATGTTGGCCTTGAAGCAGTTGCAT  
CATCTTGCAAGCACATTGAAGAGCTTCGTGTTTTCCCTTTTCGATCCATATGATGCAGAACCTGTATCTCTCACAGAGCGTGGGCTTGTGAGCGTGTGAGCTGGTTGTCCAATGCTTCGCTC  
CGTGCTCTACTTTTGGCGGCAATGACAAATGCGGCGCTCATCACCGTTGCAATGAACAGCCCAGTTTGCATGTTTTCGACTTTGCATCCTAGAGCCACGAACCCCGATTATCTCACA  
CAACAGCCACTAGATATCGGCTTCAGCGCCATTGTTCAATCATGCAAGGAGCTCCGTCGCTCTCCCTCTCTGGCCGCTTACCGACCGGTGTTCCATAGCATTTGGAGCATATGCAAATC  
AGGTTAAAATGCTGTCAGTTGCCTTTGCTGGAGACAGTGACGCTGGCCTTCATTATATTCTATCAGGTTGCAGGAGTCTTAAAAAACTGGAGATTAGGGATTGTCTTTTGGGGATAAGGC  
TCTTCTCGCCAATGCTGCGAAACTGGAGACAATGCGATCCCTTTGGATGTGCTGCTGCTCCATAAGCTTTGGGGCTTGCAGATTACTGGCACAGAGAATGCCAAGGCTAAATGTAGAGGT  
TATCGATGAGAGGCATGAAGGATCACTAGAATCTAGACCTAATGACTGCCAGTTGAGAAGCTCTACATATACAGGACAGTTGCTGGTCTAGATCTGACATGCCGCTTGTGTTTGGACG  
GTATAGAGGTATAATTTGTGTAGGATGAAAGAATAGAGCCTCAGTTCTAAAGCCTTGTGTCAAATTAATAAATAGAATGTATTAACCTTATAGTGATCTTGC

>comp167643\_c0\_seq2

CAGATGGAGGGTAGAGGGAGATTGTGAGTGCTCCTAAGGAAGAGGAGCGAGGGAGAGGTCTTCGGGCATGGGAGGAGGGGGGTGGGCGGCGGAGGCGATGTTCCCGGACGAGGTATG  
GGAGTACGTGTTCTCTTTTGTGGAGGCGGACGCGGACAGGAACGCGATCTCGGTGGTGTGCCGGGGGTGGTACCGGATCGAGGGGCGTTGCAGGCGTCGGATCTTTGTTGGAACTGCT  
ACGCTGTTTCTCCGGCGACGGCGTTACGACGTTTTCTGAAATCAAGGCGGTGACCATCAAAGGGAAGCCTCATTTTGCAGATTTCATCTTGTGCCGAGCGACTGGGGCGGCGGAGCT  
GCTGCGTGGGTGGAGGCCTTGGCGGAGGCGTGTCCGCAGATGGAGGAGCTTCGGTTCAAGAGAATGGTGGTACGGATGACTGCCTCGAGCTTATCGGGAGGTCATTCAGGAACCTTA  
AGGTGCTCTCGCTTGCCTGCGTGCAGGGGCTTCAGCACTGCTGGGTTGGCATTCTGCTGCTTCCAATTGCCGAAACCTAAGGGAGTTGGACCTGCTGGAGAATGATTTTGAAGATAATTGTA



GCCATTGGCTGAGTCATTTCCAGAATCTTGTACCTCGTTGATATCACTTAACATTGCAAGCCTTGATGGGGAGATGAATTATTCTATCCTCGAGCGGCTTGTGAGCAGATGCTCTAAGCTC  
AAAACACTCAAGCTCAACCACTCTGTGCCTCTTGATCGGCTTGCTGGCATTCTCTGTAAGGCCCAACAATTGATTGACCTGGGAAGTGGCAGGTTTTTCAGCAGACTCTCGTCCAGAGCTT  
TTTGAAAGACTTGAATCATCATTTACAGGATTTACAGGTCTCAAAAGCTTATCTGGTCTTTATGATGCTGTTCTCGCATATCTTCCAACCTACTACTCAGTGTGTGATGGACTTAGCTCACTA  
AATTTGAGCTATGCTACCTTGCAAAGTGTGAACTTACAAAGCTAATTACCCGGTGTAATAAATCTCAAGCGCTTATGGGTTATGGACTTGATTGAGGATGTTGGCCTTGAAGCAGTTGCAT  
CATCTTGCAAGCACATTGAAGAGCTTCGTGTTTTCCCTTTTCGATCCATATGATGCAGAACCTGTATCTCTCACAGAGCGTGGGCTTGTGAGCGTGTGAGCTGGTTGTCCAATGCTTCGCTC  
CGTGCTCTACTTTTGCCGGCAAATGACAAATGCGGCGCTCATCACCGTTGCAATGAACAGCCCCAGTTTGACATGTTTTGACTTTGCATCCTAGAGCCACGAACCCCCGATTATCTCACA  
CAACAGCCACTAGATATCGGCTTCAGCGCCATTGTTCAATCATGCAAGGAGCTCCGTCGTCTCTCCCTCTCTGGCCGCTTACCGACCGCGTGTTCATAGCATTGGAGCATATGCAAATC  
AGGTTAAAATGCTGTCAGTTGCCCTTTGCTGGAGACAGTGACGCTGGCCTTCATTATATTCTATCAGGTTGCAGGAGTCTAAAAAACTGGAGATTAGGGATTGTCCTTTTGGGGATAAGGC  
TCTTCTCGCCAATGCTGCGAAACTGGAGACAATGCGATCCCTTTGGATGTCGTGCTGCTCCATAAGCTTTGGGGCTTGCAGATTACTGGCACAGAGAATGCCAAGGCTAAATGTAGAGGT  
TATCGATGAGAGGCATGAAGGATCACTAGAATCTAGACCTAATGACTGCCAGTTGAGAAGCTCTACATATACAGGACAGTTGCTGGTCCATAGATCTGACATGCCGGCTTGTGTTTGGACG  
GTATAGAGGTATAATTTTGTGTAGGATGAAAGAATAGAGCCTCAGTTCTAAAGCCTTGTGTCAAATTAATAAATAGAATGTATTAACCTTATAGTGATCTTGTATTATTGTTTGTAGTGAGGAG  
CTCTTAATGGATTTGCTGGTGGCCCTAGTTTATTGTAATGAGTGTCTTTTTTTTTTTTTTTTCAATTTCTTTAGGTAGTTCAATTTGCCAAACCTTGTATTTTACTTCATAGTTTTGCATTTTCATC  
CAAGAAATTCATATTTATCTATTGTTGGATTTATCTGCTTCTTGCTTCTGCTA

>comp167643\_c0\_seq3

CAGATGGAGGGTAGAGGGAGATTGTGAGTGCTCCTAAGGAAGAGGAGCGAGGGAGAGGTCTTCGGGCATGGGAGGAGGGGGTGGGCGGCGGAGGCGATGTTCCCGGACGAGGTATG  
GGAGTACGTGTTCTCTTTTGTGGAGGCGGACGCGGACAGGAACGCGATCTCGGTGGTGTGCCGGGGTGGTACCGGATCGAGGGGCGTTGCAGGCGTCGGATCTTTGTTGGAACTGCT  
ACGCTGTTTCTCCGGCGACGGCGTTACGACGTTTTCTGAAATCAAGGCGGTGACCATCAAGGGAAGCCTCATTTTGCAGATTCAATCTTGTGCCGAGCGACTGGGGCGGCGGAGCT  
GCTGCGTGGGTGGAGGCCTTGGCGGAGGCGTGTCCGCAGATGGAGGAGCTTCGGTTCAAGAGAATGGTGGTACGGATGACTGCCCTCGAGCTTATCGGGAGGTCATTCAGGAACCTTA  
AGGTGCTCTCGCTTGCCTGCGAGGGCTTACGACTGCTGGGTTGGCATTGCTGCTTCCAATTGCCGAAACCTAAGGGAGTTGGACCTGCTGGAGAATGATTTTGAAGATAATTGTA  
GCCATTGGCTGAGTCATTTCCAGAATCTTGTACCTCGTTGATATCACTTAACATTGCAAGCCTTGATGGGGAGATGAATTATTCTATCCTCGAGCGGCTTGTGAGCAGATGCTCTAAGCTC  
AAAACACTCAAGCTCAACCACTCTGTGCCTCTTGATCGGCTTGCTGGCATTCTCTGTAAGGCCCAACAATTGATTGACCTGGGAAGTGGCAGGTTTTTCAGCAGACTCTCGTCCAGAGCTT  
TTTGAAAGACTTGAATCATCATTTACAGGATTTACAGGTCTCAAAAGCTTATCTGGTCTTTATGATGCTGTTCTCGCATATCTTCCAACCTACTACTCAGTGTGTGATGGACTTAGCTCACTA  
AATTTGAGCTATGCTACCTTGCAAAGTGTGAACTTACAAAGCTAATTACCCGGTGTAATAAATCTCAAGCGCTTATGGGTTATGGACTTGATTGAGGATGTTGGCCTTGAAGCAGTTGCAT  
CATCTTGCAAGCACATTGAAGAGCTTCGTGTTTTCCCTTTTCGATCCATATGATGCAGAACCTGTATCTCTCACAGAGCGTGGGCTTGTGAGCGTGTGAGCTGGTTGTCCAATGCTTCGCTC  
CGTGCTCTACTTTTGCCGGCAAATGACAAATGCGGCGCTCATCACCGTTGCAATGAACAGCCCCAGTTTGACATGTTTTGACTTTGCATCCTAGAGCCACGAACCCCCGATTATCTCACA  
CAACAGCCACTAGATATCGGCTTCAGCGCCATTGTTCAATCATGCAAGGAGCTCCGTCGTCTCTCCCTCTCTGGCCGCTTACCGACCGCGTGTTCATAGCATTGGAGCATATGCAAATC  
AGGTTAAAATGCTGTCAGTTGCCCTTTGCTGGAGACAGTGACGCTGGCCTTCATTATATTCTATCAGGTTGCAGGAGTCTAAAAAACTGGAGATTAGGGATTGTCCTTTTGGGGATAAGGC  
TCTTCTCGCCAATGCTGCGAAACTGGAGACAATGCGATCCCTTTGGATGTCGTGCTGCTCCATAAGCTTTGGGGCTTGCAGATTACTGGCACAGAGAATGCCAAGGCTAAATGTAGAGGT  
TATCGATGAGAGGCATGAAGGATCACTAGAATCTAGACCTAATGACTGCCAGTTGAGAAGCTCTACATATACAGGACAGTTGCTGGTCCATAGATCTGACATGCCGGCTTGTGTTTGGACG  
GTATAGAGGTATTTATATCTTTCTTAGCCCTTGTCTTTTTCTCCATGAATCTGATAATGGTTGATTATGATATGGAGAATCAGTTTCTTCTGTTTTTCCAGGTATAATTTTGTGTAGGATGAAA  
GAATAGAGCCTCAGTTCTAAAGCCTTGTGTCAAATTAATAAATAGAATGTATTAACCTTATAGTGATCTTGTATTATTGTTTGTAGTGAGGAGCTCTTAATGGATTTGCTGGTGGCCCTAGTTT

ATTGTAAATGAGTGTCTTTCTTTTTTTTTTTTTCATTTCTTTAGGTAGTTCATTTGCCAAACCTTGTATTTTACTTCATAGTTTTGCATTTTCATCCAAGAAATTTTCATATTTATTCTATTGTTGGAT  
TTATCTGCTTCTTGCTTCTGCTA

>comp167643\_c0\_seq4

CAGATGGAGGGTAGAGGGAGATTGTGAGTGCTCCTAAGGAAGAGGAGCGAGGGAGAGGTCTTCGGGCATGGGAGGAGGGGGTGGGCGGCGGAGGCGATGTTCCCGGACGAGGTATG  
GGAGTACGTGTTCTCTTTTTGTGGAGGCGGACGCGGACAGGAACGCGATCTCGGTGGTGTGCCGGGGGTGGTACCGGATCGAGGGGCGTTGCAGGCGTCGGATCTTTGTTGGAACTGCT  
ACGCTGTTTCTCCGGCGACGGCGTTACGACGTTTTCTGAAATCAAGGCGGTGACCATCAAAGGGAAGCCTCATTTTGC GGATTTCAATCTTGTGCCGAGCGACTGGGGCGGCGGAGCT  
GCTGCGTGGGTGGAGGCCTTGGCGGAGGCGTGTCCGCAGATGGAGGAGCTTCGGTTCAAGAGAATGGTGGTCAACGATGACTGCCTCGAGCTTATCGGGAGGTCATTCAGGAACCTTA  
AGGTGCTCTCGCTTGCCTGCGAGGGCTTCAGCACTGCTGGGTTGGCATTCTGTCGTTCCAATTGCCGAAACCTAAGGGAGTTGGACCTGCTGGAGAATGATTTTGAAGATAATTGTA  
GCCATTGGCTGAGTCATTTCCAGAATCTTGTACCTCGTTGATATCACTTAAACATTGCAAGCCTTGATGGGGAGATGAATTATTCTATCCTCGAGCGGCTTGTGAGCAGATGCTCTAAGCTC  
AAAACACTCAAGCTCAACCACTCTGTGCCTCTTGATCGGCTTGTGGCATTCTCTGTAAGGCCCAATGATTGACCTGGGAACTGGCAGGTTTTTCAGCAGACTCTCGTCCAGAGCTT  
TTTAAAAGACTTGAATCATATTTACAGGATTTACAGGTCTCAAAGCTTATCTGGTCTTTATGATGCTGTTCTGTCATATCTTCCAATCTACTCAGTGTGTGATGGACTTAGCTACTA  
AATTTGAGCTATGCTACCTTGCAAAGTGTGAACTTACAAAGCTAATTACCCGGTGTAAAATCTCAAGCGCTTATGGGTTATGGACTTGATTGAGGATGTTGGCCTTGAAGCAGTTGCAT  
CATTTGCAAGCACATTGAAGAGCTTCGTGTTTTCCCTTTTCGATCCATATGATGCAGAACCTGTATCTCTCACAGAGCGTGGGCTTGTGAGCGTGTGAGCTGGTTGTCCAATGCTTCGCTC  
CGTGCTCTACTTTTGCCGGCAAATGACAAATGCGGCGCTCATCACCGTTGCAATGAACAGCCCCAGTTTGACATGTTTTGACTTTGCATCCTAGAGCCACGAACCCCGATTATCTCACA  
CAACAGCCACTAGATATCGGCTTCAGCGCCATTGTTCAATCATGCAAGGAGCTCCGTCGTCTCTCCCTCTCTGGCCGCTTACCGACCGCGTGTTCATAGCATTGGAGCATATGCAAATC  
AGGTAAAATGCTGTCAGTTGCCCTTTGCTGGAGACAGTGACGCTGGCCTTCATATATTCTATCAGGTTGCAGGAGTCTTAAAAACTGGAGATTAGGGATTGTCCTTTTGGGGATAAGGC  
TCTTCTCGCCAATGCTGCGAAACTGGAGACAATGCGATCCCTTTGGATGTCGTGCTCCATAAGCTTTGGGGCTTGCAGATTACTGGCACAGAGAATGCCAAGGCTAAATGTAGAGGT  
TATCGATGAGAGGCATGAAGGATCACTAGAATCTAGACCTAATGACTGCCAGTTGAGAAGCTCTACATATACAGGACAGTTGCTGGTCCATAGATCTGACATGCCGCTTGTGTTTGGACG  
GTATAGAGGTATTTATATCTTTCTTAGCCCTTGTCTTTTTCTCCATGAATCTGATAATGGTTGATTATGATATGGAGAATCAGTTTCTTCTGTTTTTCCAGGTATAATTTTGTGTAGGATGAAA  
GAATAGAGCCTCAGTTCTAAAGCCTTGTGTCAAATTAATAAATAGAATGTATTAACCTTATAGTGATCTTGC

>comp167804\_c0\_seq1

AAAGAGAAAAAGGGAGAGGAGGGTTTTGTAAGATGCAGAATATGGTTTGCTTTAAGAACACTAGCAGTGTGAGCCAGACTTCTCTTGGTCAGCCTGCCAGACATCTTTGGCTCCATGG  
TGGATTGGATCTCAACCACTCTATGGGGAACCCCTTCAGTCAATTCAAGAATTTGTCTGGGGAACACACGAAGGGAGACACCTCATTAACTTGTGCTTCCGGGCAAGTGCACCATGCTGTT  
GATCAAAGATTGGGTTTCATGTCAGCAAATAGAAGAGAAAGGGAATGGATGTGGTATTCTGCCAAGTTCCAGATTATCCGGGAAAGGGGCAGAAAAATCAGCCACATTCCACTACCAT  
CTCTCTACAATCCCCACCTGACTTTTCAGGGCCGTTTTGAGCTAGGACTTGGTCAATCAGTGGTTTGTCAAATTATCCGTACATTGATCAATGCTATGGCCTGTTTGC AACTTATGGAGCTC  
AAGCAATGCATGGGCGGATGCTTCTACCACTGAATATGACTGCTGATGTACCCGTATATGTTAATGCTAAAACAATACAACGGCATTGTTAGACGCAGGAAAGCTCGTGCAAAAGCAGAGAT  
GAAGAGCAAACCTGACCAAAATTAGGAAGCCGTATCTCCATGAGTCGCGCCATCAACACGCAATGCGGCGTCCAAGAGGCTGCGGTGGCCGTTTCTGAAATACAAGAAAGATGCGAAT  
GTTCAAACCTGAGAACAAGCCTGGTAACCCCAACAATGGCATGCGACCGACTCGTCTTGCTACATCTCCAAGCTCTGAAATTCTTCAATCCGATAGCGGAAACCCGAACTCGGCTAGCTGC  
GGCTCAAGCATATCCAGATCAGAAGTGACCAGCATGTATTCACAAGGCGAAAATGATCACTTCCATCTCATTGAGCATCTCCGTCCGTCTTTTACCATCCTCTATCGAGCATGATTGTTGG  
AGACCACAGCTCGGTTATCCCTTCGAAATGGGGAACAGCAGCTGATGGTTGCTGTGACCTTCTCAAGGTCTGAGGTGCCGAGCTTGTGCAACCAGATGGAAGAGCTAGCTGCAATAGC  
CGTGATACTGCTTTGCAGCCTTTGCTGCCATCTGGTTAGTTGAAAGGCAAATCATTCTTGGCTTAATCTGCATTGAGGCATATTTCTTTCAGTGACACTGATGGAAATCCTCACTGCTCTG

TATCAGACTTAATACAGCAGTAGTAGCCTTTAGCTCTTCTGCTTCTGTAGTGGTAGTCTGTGTGAGACAATAAGAAGTCGAAGTATGTGGGCTTTTTGTGTTCTGTGTGATGGTCATAGTA  
GTTGTGATGCTGCTAACTTTGTGCTTGTGTTTGTATAGTATTTATGACTGTTTCTGTGGAAGTGTAAAGCCTGGCCTTCAGTATTTCACTGTTAGCTAAGCTCTTTGAGAAGCTTTGAAGCTTGA  
ATTAAGTACTTTCTACTTAGGTTGTTGCTTCTTCGCTGATTCTATAATATACCTGTAGAGAGTACTTTAATTCCAAG

>comp167804\_c0\_seq2

GAAAATAAAATAGCAGTGGATTTGGGCTTGAAAGGCTCTGCGATTGGCGGAGGCCTCTGTCTCTCCTCATTACACATTCCGGCACGTATTCCCTTGTGTTTTCTCTCCTCTCCCTTTTT  
TCTCTTTGCCTACTTATAATCCTATTGGTTTTGCTGTCCCTCCTCTTCGGTTGTCTCACTTGGTACTGGGCTGCAGCTTCAGAACATTCCATTTGTGCTTCGGAGGGTTTGTAAAGATGCAGAA  
TATGGTTTGCTTTAAGAACACTAGCAGTGTGAGCCAGACTTCTCTTGGTCAGCCTGCCAGACATCTTTGGCTCCATGGTGGATTGGATCTCAACCACTCTATGGGGAACCCCTTCAGTCAA  
TTCAAGAATTTGTCTGGGGAACACACGAAGGGAGACACCTCATTAACCTTGTGCTTCCGGGCAAGTGCACCATGCTGTTGATCAAAGATTGGGTTTCATGTCAGCAAATAGAAGAGAAAGG  
GAATGGATGTGGTGATTCTGCCAAGTCCAGATTATTCCGGGAAAGGGGCAGAAAATCAGCCACATTCCACTACCATCTCTCTACAATCCCCACCTGACTTTTCAGGGCCGTTTTGAGCTA  
GGACTTGGTCAATCAGTGGTTGCTCAAATTATCCGTACATTGATCAATGCTATGGCCTGTTTGAACCTATGGAGCTCAAGCAATGCATGGGCGGATGCTTCTACCACTGAATATGACTGC  
TGATGTACCCGTATATGTTAATGCTAAACAATACAACGGCATTGTTAGACGCAGGAAAGCTCGTGCAAAAGCAGAGATGAAGAGCAAAGTACCACAAATAGGAAGCCGTATCTCCATGA  
GTCGCGCCATCAACACGCAATGCGGGTCCAAGAGGCTGCGGTGGCCGTTTCTGAATACAAAGAAAGATGCGAATGTTCAAAGTGAACAAGCCTGGTAACCCCAACAATGGCATG  
CGACCGACTCGTCTTGCTACATCTCAAAGCTCTGAAATCTTCAATCCGATAGCGGAAACCCGAACTCGGCTAGCTGCGGGCTCAAGCATATCCAGATCAGAAGTGACCAGCATGTATTAC  
AAGGCGAAAATGATCACTTCCATCTCATTGAGCATCTCCGTCCGTCTCTTTACCATCCTCTATCGAGCATGATTGTTGGAGACCACAGCTCGGTTATCCCTTCGAAATGGGGAACAGCAGC  
TGATGGTTGCTGTGACCTTCTCAAGGTCTGAGGTGCCGAGCTTGCTGCAACCAGATGGAAGAGCTAGCTGCAATAGCCGTGATACTGCTTTGCAGCCTTTGCTGCCATCTGGTTAGTTGA  
AAGGCAAATCATTCTTGGCTTAATCTGCATTGAGGCATATTTCTCTTCACTGACTGATGGAAATCCTCACTGCTCTGTATCAGACTTAATACAGCAGTAGTAGCCTTTAGCTCTTCTGCTT  
TCTGTAGTGGTAGTCTGTGTGAGACAATAAGAAGTCGAAGTATGTGGGCTTTTTGTGTTCTGTGTGATGGTCATAGTAGTTGTGATGCTGCTAACTTTGTGCTTGTGTTTGTATAGTATTATG  
ACTGTTTCTGTGGAAGTGTAAAGCCTGGCCTTCAGTATTTCACTGTTAGCTAAGCTCTTTGAGAAGCTTTGAAGCTTGAATTAAGTACTTTCTACTTAGGTTGTTGCTTCTTCGCTGATTCTA  
TAATATACCTGTAGAGAGTACTTTAATTCCAAG

>comp167920\_c2\_seq11

TTTTCTCCCTCCCCAAGTGGAACTTCTTCTCCTCTTTGTCTTCTTGTTCACCCCTCACCACCACTTCTCTGTGATTTCCACTTCCTGTCTGCCCGCTCCAGTCTCCACTAACCACCTCATT  
ACCACTCTAAAAATCCCTCCTTTTCAGTTTCTATTAATGCCGGCTTTCTCTCCACCGAATTGTAGAACAACACTTGCCTGCGTCTGCGAGAGGGAGAGAGAGATAAGAAAAGAGGTGAATT  
GCTGCTGAAGGGGGCGAAGGGAATGGGGAGAGGGAAGATTGAGATAAAGAAGATAGAGAATCCGACAAGCCGGCAAGTAACGTACTCAAAGAGGGCGAGTTGGGATCATGAAGAAGGC  
CGAGGAACTGACAGTGTCTGCGACGCTCAGGTCTCACTATTCATGTTCTCAAGCTCCGGCAAGTTATCTGGTTACTGCAGCCCTCCACAGAGTAAAACTCCTCTCATTACCTTTCTTT  
TTCTGCTCAAGCACGAATTACTTTAAACAATCTTTGGGCAGAATCAAGGATATATTTGAGAGGTATCAGCAAGTTACTGGCATCGATATATGGGAGGCCGAATACCAGAGGATGCAGAATA  
CTCTGAGGAATCTCAAAGAGATTAATGATAACCTTCAGAAGGAGATAAGGCAGAGGAAGGGGGAGAATCTGGAAGGGTTGGACGTTAATGAGCTGCGCGGTCTTGAGCAAAATTTGGA  
AGAGTCGATTAAGATTGTTGAGAGAGAAAGTATCATGTGATCGCTACGCAAACGGACACTTACAAGAAAAAGCTCAGAAACACCAGGGAAATATATACAGCCCTACTGCATGAACTGC  
ACGAATTCGAGGATGAGAATCAACGGTGCAGTTTTGTTGCAGAAGATCTTAGCGGCGTCTACGACAGCACCATCTCAATGGCAAATCAGCAGCACAGTCAGCCAAATAAGCAGAAAATA  
GTTTATGAGTCTCATGATCTTAGCTTTGCATGAACTGCATTTTCTTCTACTTATGATATACTGTGGATTTGATTAACCGTGCATTCATGTTTCAATATCATAGCCTTGTTTAACTGTTTGGTAGA  
TCTCCATTGCCCTATTTTGGTAGTTTCTAGTAAAATATTTGTTTGGGATAACTTTCTTACTATTTCTTAAAATAAATTTGTAATACAATAATTTAATTTT

>comp167920\_c2\_seq12



ATGAGGGTGATCATTGCAACCCACATTTGGCCCTCATGGTATGGCAGACCCGTTTGTAAATTTATCCTGACAGAATGTGACATGGTCTTTGGCCGGGCAATTGGCACAGATCATCGAGG  
GGATTATAGAGTTTCTCTCAAGCTTTCCCTGAAAATAGGGTCTCTTCTGGTTATGCAAGGCAAAAAGTGCAGATATAGCCAGGCATGCCATTCCCTCTATTGCAAGCAGAGAATCATTCTA  
ACATTTGGAAAATCTAACCCCAAAAAGACCTCCACCCATAGAAAAGCTCTCGCATCCCTATCTCCACCGTCTCCACGCAATCATGGGCTTACCATCAGCCAGGCCAAGTGTCCCTCGCCATT  
CTTCGTTGGGTTTAAACATTATGGAGTTGTCCCTGCAACTGGAGTCTGCCACCTCCGGCCGTTCCGCCCTCCTTCAAATGGTATAACAACATTATTTGTTGCCCAACCCAAGTTGCTCCA  
GCTGCTGTTCTTATCCCTCACCTGCCCCAGTGCCTCCAGTATCAGCTGGATGGCCCAATTGTAAGTCTTCAATGCATCCCGGACCTCGACTTCCAGTCCCCGGAACCGGTGTTTTCTCC  
GTCGTCCGGCTCCAATCATTCTCAACCACAACAGCTTCTTTCTCATCATTTTCCGAGGATAACAAGCCCTTCTTTGGAGGTAGAATCAAAACCTGAAAATCTGAAACTTGCAGAGGACAA  
ACCAAGCAGCCAAAATGGCTCTTCTCAAAGTATTGTCACAGAAAGCATGGAGATTCAACCAGACTGCAATGGAAGCATAGAAAATGGTCCCTCCTGCAGCTGGTCTGAAAGTCATTTCCA  
AGGAAGAAAACCAAAAATTTTACCCACATCAAGAAGAAGACATCAAGCAAACATTGACTGTAAGAGCTATAGAGTCAAAAAGAAGGAGACAGAGGAAAATGTTTATATTCTAAAATCTGGT  
AAAATATAGTTCAATATCTGCATGAGCTTGGGTCAAATGTAAAGAGCGGCAGAAAGAGGTGATGATGGCCAA

>comp168358\_c0\_seq2

ATGCGTAAAGAAGATTTGCGCGTTAGATATCGAAATGGACGTTGATCAAGCCGTGCATACGGATTGTTCCGTGCGGGATACGTGGAATGGACAAAGAGCCGGTGCAGGGGTTTTACCGAG  
TCCAACGACTTCCCCGAAATGCCCTCTGCTTTGACGGAAATACCCTCCCTCAAGACGAATCTTCGTCTAGGTCTCCTCCCTCTTTCTCTCTTTTCATCAACGCTTTGCATTTGCATTTG  
AGCGATTGCGGTGTAGCAGGAGAGCACAAAACGCGTGCTCTCCAAGCATCTATCGGTAATCAGATCCTCGAAACCCTAGATCTTCTCTCGGATCTTTCCCGATTTAGCTCCCTTCGATCCA  
GATCGACGGAATTCACGTGCCGTTTGCCATTGCGGGCGATTGCTGAAGTATTCTTGTCTTCCGGCTCGATTGCTGCTTGGATTACTTGGATTGGTCTTAGTTTTACCTACATTGCTGTAT  
TTTAGTTGTTCCGGGTATTAATAAGCTGGATCTGGGGATGAGGTGGAATTGCTGAGGCGTCGATGATGGCTGCGCAACCCGAGAAGATGCATTTCCCTGCTGGCGAAGCGCTGCCGCCG  
CGGCAGTGGTTTTCCGGACGAGAGGGACGGGTTTATCTTTGGCTGAGGAGTGAGTTTTCGGCGGCGAATGCGATTATTGATTGCTGGTGCATCATCTCCGGCTCACGGGGGAGCCCG  
GGAGTACGAACACGCCATAGGATGCATACAGCAGCGCGATGTAAGTGGACACCTGTCATCTACATGCAGCACTACTTCTCCATCGGGATGTGCTGCTTGGCTCTTACCAGGCTGGGTT  
GAGGAGGCAGCATAACAATATCAGAGGGAGGGGAAAAAGCCAAGTTCTTTTGGGTATAGGCAGGGACATCGGTGCGATAGTATTAGGGAGCATATGGCTCTTCTCCCTTTGTCATC  
GGCTGCCTCTGAGCTGGCTCATTCCGAGAAGGGAAAAGTATAAATCGGGATGTGGAGAAGATGGAAAAATATTGGGGGGAGATCAGTCATCAGGAGGAATGGGCTTGTCCGGTGGCGGCTG  
TGTTTCGAAAGGATGGCGAAGGGACTAATGGCACTTCTAGTTCAGAGATGGATGACAGACAAACGAATGAAGAAAATTATGGCCAGATGGAGCCTGCTGTTGTTGAAAATTGCCATGAC  
CAGCTCGTGAAGAAACAAAAAATGATCCTCTTCCACTTGATGGTGGCGATCAAAACCTAAAGCAAGATGGAAATCAGGAACTTATCCAGTTCACAAAATTTTTGTGGGAAATGAAAC  
AAGTATGGAAGATGGTCAATTTTGTGAAGGGCTTAAGTTATATGAGCAATTGTTTGATTGCTCAGAAATCACAAAATTGATTTCTTTGACAAATGACATGAGAGCAGCTGGGAGAAG  
GGGAGATTTCCAGGCAAGACTTTTTTTTTAAAAATCAAATTTTGTCTACAATTACATAAGAAAGACACCTATCTGACTATGTATACGCTATTGCCAACATTTCTTGACATAGATATTCGTT  
AACCTTCTTGTTTTTAATAATAAAGGTAAAGACAAAGATATTGTTTCATTCAGCGGTTCAATTTACTTTCAGGGATTTTCTTTTGAAGTTTACATATATTGTAATAATTGCTCTCTATTAGTTG  
ACAGCATATTATACCTGTCTTTG

>comp168358\_c0\_seq4

ATGCGTAAAGAAGATTTGCGCGTTAGATATCGAAATGGACGTTGATCAAGCCGTGCATACGGATTGTTCCGTGCGGGATACGTGGAATGGACAAAGAGCCGGTGCAGGGGTTTTACCGAG  
TCCAACGACTTCCCCGAAATGCCCTCTGCTTTGACGGAAATACCCTCCCTCAAGACGAATCTTCGTCTAGGTCTCCTCCCTCTTTCTCTCTTTTCATCAACGCTTTGCATTTGCATTTG  
AGCGATTGCGGTGTAGCAGGAGAGCACAAAACGCGTGCTCTCCAAGCATCTATCGGTAATCAGATCCTCGAAACCCTAGATCTTCTCTCGGATCTTTCCCGATTTAGCTCCCTTCGATCCA  
GATCGACGGAATTCACGTGCCGTTTGCCATTGCGGGCGATTGCTGAAGTATTCTTGTCTTCCGGCTCGATTGCTGCTTGGATTACTTGGATTGGTCTTAGTTTTACCTACATTGCTGTAT  
TTTAGTTGTTCCGGGTATTAATAAGCTGGATCTGGGGATGAGGTGGAATTGCTGAGGCGTCGATGATGGCTGCGCAACCCGAGAAGATGCATTTCCCTGCTGGCGAAGCGCTGCCGCCG

CGGCAGTGGTTTCCGGACGAGAGGGACGGGTTTATCTCTTGGCTGAGGAGTGAGTTTGC GGCGGCGAATGCGATTATTGATTTCGCTGGTGCATCATCTCCGGCTCACGGGGGAGCCCGG  
GGAGTACGAACACGCCATAGGATGCATACAGCAGCGCGATGTAAGTGGACACCTGTCATCTACATGCAGCACTACTTCTCCATCGGGGATGTGCTGCTTGCCTTCACCAGGCTGGGTT  
GAGGAGGCAGCATAACAATATCAGAGGGAGGGGAAAAAGCCAAGTTCTTTTGGGTATAGGCAGGGACATCGGTTCGGATAGTATTAGGGAGCATCATGGCTCTTCTTCCCCTTTGTCATC  
GGCTGCCTCTGAGCTGGCTCATTTCGGAGAAGGGAAAAGTATAAATCGGGATGTGGAGAAGATGAAAAAATATTGGGGGGAGATCAGTCATCAGGAGGAATGGGCTTGTTCGGTGGCGGCTG  
TGGTTCGAAAGGATGGCGAAGGGACTAATGGCACTTCTAGTTCAGAGATGGATGACAGACAAACGAATGAAGAAAATTATGGCCAGATGGAGCCTGCTGTTGTTGAAAATTGCCATGAC  
CAGCTCGTGAAAGAAAACAAAAATGATCCTCTTCCACTTGATGGTGGCGATCAAAACCTAAAGCAAGATGGAAATCAGGAACTTATTCCAGTTCCTAAAATTTTTGTGGGAAATGAAAC  
AAGTGATGGAAAGATGGTCAATTTTGTGAAGGGCTTAAGTTATATGAGCAATTGTTTGATTGCTCAGAAATCACAAAATTGATTTCTTTGACAAATGACATGAGAGCAGCTGGGAGAAG  
GGGAGATTTTCCAGGCCACACTATGGTGTATCAAAGAGGCCAATGAAGGGACATGGCAGGGAAATGATTCAACTGGGCATCCCTATCTCCGAAGGACCTGTAGAGGATGAAAATGAGA  
TTGGTTCCTTGCTGGAGAGGAAAGTGGAGCCTATTCCCAAGTACTACTTGATATTTTTTATCGCTTGGTGCAACTGCAAGCTTTTTCTGCTAGTCCTGATTTTTGTGTTATTGACTTCTTCA  
ATGAGGGTGATCATTTCGAACCCACATTTGGCCCTCATGGTATGGCAGACCCGTTTGTAAATTTATTCCTGACAGAATGTGACATGGTCTTTGGCCGGGCAATTGGCACAGATCATCGAGG  
GGATTATAGAGGTTCTCTCAAGCTTTCCCTGAAAATAGGGTCTCTTCTGGTTATGCAAGGCAAAAAGTGCAGCTATAGTCAGGCATGCCATTCCCTCTATCCGCAATCAGAGAATCATGATGT  
TATATTTTTTTAGCTGTAGCACCAAATGCTTGAACAAATTTATTTTTTATGTGATCTGTAGGTGAACTGCTATTTAGTTTATTTACAGGATTGTATTTGTCGATCTCCATAAACTGTTAGCAAG  
TAACATAAACATCCTTTGAAGAAGTATTATTTAAAGATGCCTAACAACTAAATAGACATCTTTAAATAATATAACATTATATTATAATTTTCTTATAATAATTTTTTTTTTTTCCGAAAAC TGGTCT  
T

>comp168564\_c0\_seq2

ATTAGCATCTAAATGAACTACCATTAATCTCCTCTCTTAATGTCTTATAACACCCTAGATGCTTCTGTAGCTTTCCATGCCCAAGTTAATTTGATGTGGATGCTTTTCTCTAGCTATCCACCTC  
TCCACCAATCTCACAACTCCGCCTCTCAAGTAATAAACATCTAAATCTATATCTTCTACATATTTTCTTCTTCCATGCACAGTGAATGGAGCAAACCAAATACTGGATGTGGACAA  
GAAGGAAATACCCTGTAAGAGCACCTCTCTTCGACTCGCTGACTTCTACTCCGATTCTGCTTCAGCAGTCGCAGCCACTGCCTTCTATAATGAATCATGGGAGGAGAAAGCTTTTGCTGA  
AGACTCAGCGGGACTTTTAGGTGGCTGTGTTTGGCCCTCCTAGATCTTATTCTTGTAGCTTCTGTGGAAGGGAATTTAGATCGGCACAAGCCCTTGGTGGCCACATGAACGTTACCCGGCG  
AGATCGGGCAAGGCTTAAACAGTCATCTATGGTTGGAGAAGAAGATCATGATGATCGACACCAGATCAATATTGGTCTTTTCGAATCATAACCCTAACCCCTAACCCCTAATTTTGGAGTTGAT  
GTATCCCTTGCTCAGGTAGCTCTCTCAGTCCTTCTACGAAGGCCATCAATGATGTGAATTATTCGGAAACACACTGTTTGTGGGGAGAAGAAGTGAAGTTGGGGTTCGAAGAGGGGGCTTA  
GATGATGAAGAAGATGAGCATAAAAAACAATAAGAAGAGGAAAAAATGAATTCATTTTTATTGGATGAGGAAAAGCTGCAGGAATTTGAAGAAGATGAGGTGATCAATCTGAGTCCAGA  
GATAGTTGAAGAGTTGGATCTCGAGCTTCGGTTGGGAGATCTGCCAAAAGTTAAGTAGTATTGCGCATCATATGTACCTTTGAGTAAACATTTTCAATGGTATATCCTGTGTATTGTATCAAT  
TGATTTCTTTTGAAGCTTTTTCACTCTAGAACTTTTCTGCCAGATCTCTTTCCCTTTCTTAGTCTTATTTTGGCAAAGGATAAGTCTCGTATTTGAAAATTAATCAAAATTTGAGGTT  
AAGGAGTAAAATTTGAAAACCTAAAGATTGAGTTAATTGTTTAAAGCTGCGGAATTCAGGATATGTTTGCAAGAGAAATTTAGTGATAGAATGGATTATATGTTAATATTATAACTGCAACA  
ATTT

>comp168648\_c0\_seq1

TGCTCTCTCTTTTCGCTCTTCTCTCTCCACTGTGTTCTTCTTTTACTTATTTTATTTATGCATTGGCTGGCCTGGCTTAGAGCGCTAAAGCTTTTCGCTTTTCTTGGAAAATGAGCAGCGT  
GGGAGGTGAGAAGAGCCAGTTAGGGTTAGGATTGATGCTTGATTTTCTTTTCTTGGCTTTGGTCTTCTTCCTCATCTTCTCCTCTGCTCTGATGTGGGAGGGCTTAGAGGGCTGGCTGAGTG  
GAAAGAGGGTTTCTTGAGCTTTCTAATTTGTGGTCTGCTCTCATCTGCTGGGTAAAGATTAGGGCTTTGGATAAGATGGCTACGGCGGGGAAAGATGGGAAATCTCAGCTGCATGAGCTG  
CAGCAAATTGATGCGGGGAAGTACGTGAGGTACACGCCGAGCAGGTGGAGGCGCTTGAGAGGGTTTATATGGAGTGTCCGAAGCCTAGTTCATTAAGGAGGCAGCAACTCATCAGG

AGTGCCCTATACTCGCCAATATCGAGCCCAAGCAGATCAAGGTCTGGTTTCAAACCGCAGATGTCGAGAGAAGCAGAGAAAAGAATCCTCTCGTCTTCAGACTGTTAATAGAAAATTG  
ACCGCCATGAACAAGCTGCTAATGGAGGAAAATGACCGGTTGCAGAAGCAGGTTTCTCAGCTTGTTTATGAGAATGGCTATATGCGTCAGCAGGTTAATACTACATCTGTGGCTACCACA  
GACACAAGCTGTGAGTCTGTGGTGACAAGTGGTCAGCACCATCAGCAGCAAAACCCAACGCCTCAGCATCCACCAAGGGATGCTAACAAACCCAGCTAGTCTACTCGCAATTGCTGAGG  
AGACCTTAGCAGAGTTCCTGTCTAAAGCCACAGGAAGTCTGTGTTGAGTGGGTTTCAGATGGTTGGTATGAAGCCTGGTCCGGATTCTATTGGAATCATTGCTGTTTCCCAACAATTGCAGTG  
GTGTAGCAGCCCCGAGCTTGTGGCCTTGTGAGTTTAGAACCACGAAGGTGCGGGAGTTACTCAAAGATCGTCTAAATTGGTATCGCGATTGTCGATCCCATGATGTGTTAACGGTTATCCC  
TGCTGGAAATGGTGGTAATATTGAACTTATTTATATGCAGACATATTCTCCTACTACTCTGGCATCTGCACGAGATTTTTGGACTCTTAGGTATACTGCAGGTTTAGAAGATGGCAGCCTGGT  
GATCTGTGAGAGGTCCTTAACTCCTTCAACTGGCGGTCCAGCTGGCCCCCGGCTGCTAATTTTGTGAGAGCTGAGATCCTTCCAAGTGGTTATCTGATACGACCCTGTGAGGGTGGTGG  
TTCAATGATTTACATTGTTGATCATGTTGATTTGGATGCTTGGAGTGTGCCAGAGGTTCTGAGGCCCTTGATGAGTCCCCAAAAATTTAGCTCAAAAATTGACCAATTTCTGCTCTGCGTC  
ATATTAGACAGATTTCCCAAGAAAGTAATAGTGAAATATCCTATGCTGGGGTTCGTC AACCCACTGTACTAAGGACTTTCAGCCAGAGGATGAGCAGGGGCTTCAATGATGCTGTAAATGG  
GTTTCTGATGATGGCTGGTCTTTAATGGGAAGTGATGGTGTGGAGGATGTGACAATTGCTATCAACACTTTCCCTAACAAAGCTTCTTGGTGGTCATTCAAGCTCTCTTTGTTTTCTTAC  
TGGGAGGTGGCATCTTATGTGCTAAAGCATCCATGCTTCTTCAGAATGTGCCACCTGCTTTACTAGTTCAGTTTCTGAGGGAGCATCGGTTCAGAGTGGGCTGATTGAGGTGTTGATGCTTA  
TTCAGCTTCTTCACTGAGAGCCAGTCTTATGCTGTTCTGGTTTGGAGGTCAGTAATGGTTTTTGGGCAGCCATGTTATTATCTCTTGCTCATACTGTGAAAATGAAGAGGTCCTGG  
AAGTTGTTAGGTTGGAATGTCCTGGATTCAACCAGGAGGATGTTCTATCCAGGGACATGATCTGTTGCAGCTATGTAGTGGTATTGATGAGAACGCAGTTGGTGCCTGCGCACAGCTTGT  
ATTTGCTCCCATAGATGAATCTTTTGCAGATGATGCTTTCCTGCTTCTTCGGGGTTTTCGAGTGATACCCCTCGACGTGAAAACAGACCCGCCATCTGCTACAAGAACAATTGACCTTGCT  
TCTGCTTTAGAAGTTGGAGGAGGTGGCACTGGAAGAGCTCCTAATGATCCAGTATCATATCCAAGCAATTCAAGATCAGTTCTGACCATTGCATTCCAATTTACATTTGAGAACCATCTCC  
GTGAAAATGTCACCGCAATGGCTCGGCAATATGTTTGAAGTGTGTGGCCTCGGTGCAACGGGTCGCCATGGCAATTTCTCCCTCTCGACTTTGCAACCAATTAGGAATGAAGCATACTG  
CTGGTTCACCTGAGGCTCACACCCTGTCGCTGTGGATTTCTCGAAGTTACAGGTTCCATACTGGAGTTGAACTCATTAGAACCGACTCTCAAGCTAGTGAAACTCTGAAGCTCCTGTGGC  
ACTATTCTGATGCAATCATGTGCTGTTCTCTCAAGGCTTCTCCATTGTTACCTTCGCCAACCAAGCTGGACTTGACCTGCTTGAAACCACTCTGGTTGCCCTCCAAGACATTTGCTCGA  
GAAGATACTCGATGACACCGGCCGTAAAGTTCTTTGTTCCGAGTTCCTAAGATAATGCAGCAGGGCTTTGCCTATCTGCCTGCCGGCATTGTCATGTCAAGCATGGGGCGGCCGGTGTCC  
TACGAGCAGGCCATCGCTTGAAGGTCTAAACGAAGAGGACTCTCCCACTGTCTGGCTTTCATGTTTGTAACTGGTCAATTTGTTTGAAGGTCATTTCACTGCCACCTATCTATTTATA  
AGTTATATGTAGTTGCTGTAAGAACATAGAACCTCAGAGCGTTTGTGCTTCTATCTAATTTGATCCTCATGGACTTAGGGGGTGCCTTTTTCAGCTCTTTTGGCGTTGTGTGGTATTGT  
AGTAATGAGCTGAATATAAACTAAGATTGGCACTCGTTTTGTATTTGGTTTTTTTTTAACTTGATTAACATGAAGGAACCTAAGTTCTCTATTTAGTTGGAGAATTCTGTGAAATTGAAATGT  
TAAGAGATGTGCATTAAGTTTCATGGCCTTTAAAAACTGAGCAGGACCTGCAACTTTGTTGATTCCTTTCTTGCCAGAGCAATACAG

>comp168648\_c0\_seq3

ATCTGGAAAAACAAGGAGAGTGTCCATACTCTCCAAAATCGAACCGAAGCAGATCAAAGTTTGGTTTTCAGAACCGCAGATGTCGGGAAAAACAAGGAAGGAAGCTTCTAGTCTGC  
AGTCTGTAAACAGAAAGCTTACGGCCATGAACAAGCTTCTGATGGAGGAGAATGATCGGTTGCAGAAGCAAGTTTACAGCTAGTTTATGACAATAGCTACATGCACCAGCAACTTCGTA  
ATGCATCTTTGGCCAACGCAGATGCTAGTGAATCTATGATTTTAGGTAGTCAACTACAGAATCCAATATCTCAGCCTTCATTGAGGGATGCTAGCAACTCAGACAGTCTACTTGCATTTGCT  
GAGGAAACATTGGCAGAGTTCCTGAAAAAGCTACTGGAAGTCCATCGATTGGGTTTCAGATGGTTCGGGATGAAGCCTGGTCCGGATTCTATTGGAATCATTGCTATTTCCCGCAATTGTA  
GTGGCTTAGCAGCTCGAGCTTGTGGGCTTGTGAGTTTAGAACCACAAAAGGTTGTGGATATCTTGAAGGATCGCCTAAGTTGGTATCGTATTGCCGATCCATTGACGTGTTGAAAGTTTT  
CCCTACTGGAAATTGTGAAAATATTGAAATTTTGTACATGCAGACATATGCGCCTACTACTTTGGCCTTGGCACGTGATTTTTGGACGCTTAGATATAGTACATCTTTAGAAGATGGCAGTCT  
TGTGAGCTGAGATGCTTCCCAGTGGATATCTAATCCGACCATGTGAGGGTGGTGGTGAATGATTACATTGTTGATCATGTAGATTTGGATGCTTCAACTGTGCCTGAGGTTCTCCGACCA

TTGTATGAGTCGCCGCAAATGCTAGCTCAGAGGATGACCATTGCAGCATTACACCATATTAGACAGATTGGTTATGAAACTAGTGGTGAAGCTTCTTATGATGGGGGCCGTCAACCTGCTG  
TTTTGAGAACCCTTCAGCCAGAGGTTGAGCAGGGGTTTTAATGATGCTATTAATGGATTTTCTGATGATGGCTGGTCTTTACTGGGATACGATGGTGGGGAGGATGTGACTATAAATATTAAC  
TCATCTCCTAGCAAGCTATTTGGAAGTCATTCCAGATCTGCTAAGTTTTCTTCTTGGGTGGTAGCATCTTGTGTGCAAAAAGCTTCAATGCTACTTCAGAATGTGCCACCTGCTTTACTAGT  
TCAGTTTCTGAGGGAGCATCGGTCAGAGTGGGCTGATTCAGGTGTTGATGCTTATCAGCTTCTTCACTGAGAGCCAGTCCTTATGCTGTTCTGGTTTGGGGTTCAGTAATGGTTTTTTG  
GGCAGCCATGTTATTATCCTCTTGCTCATACTGTGGAAAATGAAGAGGTCCTGGAAGTTGTTAGGTTGGAATGTCCTGGATTCAACCAGGAGGATGTTCTATCCAGGGACATGTATCTGTT  
GCAGCTATGTAGTGGTATTGATGAGAACGCAGTTGGTGCCTGCGCACAGCTTGTATTTGCTCCCATAGATGAATCTTTTGCAGATGATGCTTTCCTGCTTCTTCGGGGTTTTCGAGTGATAC  
CCCTCGACGTGAAAACAGACCCGCCATCTGCTACAAGAACACTTGACCTTGTCTTCTGCTTTAGAAGTTGGAGGAGGTGGCACTGGAAGAGCTCCTAATGATCCAGTATCATATCCAAGCA  
ATTCAAGATCAGTTCTGACCATTGCATTCCAATTTACATTTGAGAACCATCTCCGTGAAAATGTCACCGCAATGGCTCGGCAATATGTTGCAAGTGTGTGGCCTCGGTGCAACGGGTGCG  
CATGGCAATTTCTCCCTCTCGACTTTGCAACCAATTAGGAATGAAGCATACTGCTGGTTCACCTGAGGCTCACACCCTGTCGCTGTGGATTTCTCGAAGTTACAGGTTCCATACTGGAGTT  
GAACTCATTAGAACCGACTCTCAAGCTAGTGAAACTCTGAAGCTCCTGTGGCACTATTCTGATGCAATCATGTGCTGTTCTCTCAAGGCTTCTCCATTGTTACCTTCGCCAACCAAGCTG  
GACTTGACCTGCTTGAACCCTCTGGTTGCCCTCCAAGACATTTGCTCGAGAAGATACTCGATGACACCGGCCGTAAAGTTCTTTGTTCCGAGTTCCCTAAGATAATGCAGCAGGGCT  
TTGCCATCTGCCTGCCGGCATTTCATGTCAAGCATGGGGCGGCCGGTGTCTACGAGCAGGCCATCGCTTGAAGGTCCTAAACGAAGAGGACTCTCCCCACTGTCTGGCTTTCATGT  
TTGTTAACTGGTCATTTGTTTGAAGGTCAATTCCTGACCCTATCTATTTTATAAGTTATATGTAGTTGCTGTAAGAACATAGAACCCTCAGAGCGTTTGTGCTTCTATCTATTTTCGATCCTC  
ATGGACTTAGGGGGTGCCTTTTTAGCTCTTTTTGGCGTTGTGTGTGGTGATTGTAGTAATGAGCTGAATATAAACTAAGATTGGCACTCGTTTTGTATTTTGGTTTTTTTTTAACTTGATTA  
CATGAAGGAACCTAAGTTCTCTATTTAGTTGGAGAATTCTGTGAAATTGAAATGTTAAGAGATGTGCATTAAGTTCATGGCCTTTAAAACTGAGCAGGACCTGCAACTTTGTTGATTCCTT  
TCTTGCCAGAGCAATACAG

>comp168648\_c0\_seq4

AGAATGATCGAGCTTCTGATTTCTTCTCTTTCACACTTTTCTGAGTATTTATGTCGCCTCTGATCGGAAAACGCGGAGGGCGTGGACTTCACGTTTCTCGGGGATAACTCTTAGGGC  
CGGGACGGTGGGAACCCGGAGCTGGTGATGCTGGAAGGGTGGATTGGTCTCGATTCTGCAGCGACAGTGAATAGCCCAAAGGAAGTGAAGGACGTGCGGCAACTAGAGTCTAGGG  
TTTCGTCTCTTGTCTTGGTTTACCCTTAGGGTTGGATATGGCGATGTTGGTTAGCGGCAAGGATGGAGGAAAAGCGCTAATGGACTCGGGGAAGTACGTGAGGTACTCCAGAGCAGGT  
GGAGGCGCTTGAGAGGGTTTACAATGAATGTCCGAAGCCGAGCTCCTTGAGGAGGCAGCAGCTCATCAGGGAGTGCCATACTCTCCAAAATCGAACCGAAGCAGATCAAAGTTTGG  
TTTCAGAACCGCAGATGTCGGGAAAAACAAAGGAAGGAAGCTTCTAGTCTGCAGTCTGTTAACAGAAAAGCTTACGGCCATGAACAAGCTTCTGATGGAGGAGAATGATCGGTTGCAGA  
AGCAAGTTTCACAGCTAGTTTATGACAATAGCTACATGCACCAGCAACTTCGTAATGCATCTTTGGCCAACGCAGATGCTAGTGAATCTATGATTTTAGGTAGTCAACTACAGAATCCAATA  
TCTCAGCCTTCATTGAGGGATGCTAGCAACTCAGACAGTCTACTTGCATTTGCTGAGGAAACATTGGCAGAGTTCCTGAAAAAGCTACTGGAAGTGCATCGATTGGGTTTCAGATGGTC  
GGGATGAAGCCTGGTCCGGATTCTATTGGAATCATTGCTATTTCCCGCAATTGTAGTGGCTTAGCAGCTCGAGCTTGTGGGCTTGTGAGTTTGAACCCAAAAAGGTTGTGGATATCTGA  
AGGATCGCCTAAGTTGGTATCGTGATTGCCGATCCATTGACGTGTTGAAAGTTTTCCCTACTGGAAATTGTGGAATATTGAAATTTGTACATGCAGACATATGCGCCTACTACTTTGGCC  
TTGGCACGTGATTTTTGGACGCTTAGATATAGTACATCTTTAGAAGATGGCAGTCTTGTGAGCTGAGATGCTTCCAGTGGATATCTAATCCGACCATGTGAGGGTGGTGGTGAATGATTC  
ACATTGTTGATCATGTAGATTTGGATGCTTCAACTGTGCCTGAGGTTCTCCGACCATTGTATGAGTCGCCGCAAATGCTAGCTCAGAGGATGACCATTGCAGCATTACACCATATTAGACAG  
ATTGGTTATGAAACTAGTGGTGAAGCTTCTTATGATGGGGGCCGTCAACCTGCTGTTTTGAGAACCCTCAGCCAGAGGTTGAGCAGGGGTTTTAATGATGCTATTAATGGATTTTCTGATGA  
TGCTGGTCTTTACTGGGATACGATGGTGGGGAGGATGTGACTATAAATATTAACCTATCTCTAGCAAGCTATTTGGAAGTCATTCCAGATCTGCTAAGTTTTCTTCTTGGGTGGTAGCA  
TCTTGTGTGCAAAAAGCTTCAATGCTACTTCAGAATGTGCCACCTGCTTTACTAGTTCAGTTTCTGAGGGAGCATCGGTCAGAGTGGGCTGATTCAGGTGTTGATGCTTATTCAGCTTCTC



ACTGAGAGCCAGTCCTTATGCTGTTCCCTGGTTTGGAGGGTCAGTAATGGTTTTTTGGGCAGCCATGTTATTATTCCTCTTGCTCATACTGTGGAAAATGAAGAGGTCCTGGAAGTTGTTAGG  
TTGGAATGTCCTGGATTCAACCAGGAGGATGTTCTATCCAGGGACATGTATCTGTTGCAGCTATGTAGTGGTATTGATGAGAACGCAGTTGGTGCCTGCGCACAGCTTGTATTTGCTCCCAT  
AGATGAATCTTTTGCAGATGATGCTTTCCTGCTTCCTTCGGGGTTTCGAGTGATACCCCTCGACGTGAAAACAGACCCGCCATCTGCTACAAGAACACTTGACCTTGCTTCTGCTTTAGAA  
GTTGGAGGAGGTGGCACTGGAAGAGCTCCTAATGATCCAGTATCATATCCAAGCAATCAAGATCAGTTCTGACCATTGCATTCCAATTTACATTTGAGAACCATCTCCGTGAAAATGTCA  
CCGCAATGGCTCGGCAATATGTTGAAAGTGTGTGGCCTCGGTGCAACGGGTCGCCATGGCAATTTCTCCCTCTCGACTTTGCAACCAATTAGGAATGAAGCATACTGCTGGTTCACCTGA  
GGCTCACACCCTGTCGCTGTGGATTTCTCGAAGTTACAGGTTCCATACTGGAGTTGAACTCATTAGAACCGACTCTCAAGCTAGTGAAACTCTGAAGCTCCTGTGGCACTATTCTGATGCA  
ATCATGTGCTGTTCTCTCAAGGCTTCTCCATTGTTACCTTCGCCAACCAAGCTGGACTTGACCTGCTTGAAACCACTCTGGTTGCCCTCCAAGACATTTCCGCTCGAGAAGATACTCGATG  
ACACCGGCCGTAAGTTCTTTGTTCGAGTTCCTTAAGATAATGCAGCAGGGCTTTGCTATCTGCTGCCGGCATTGTCATGTCAAGCATGGGGCGCCGGTGTCTACGAGCAGGCCA  
TCGCTTGGAAGGTCCTAAACGAAGAGGACTCTCCCCACTGTCTGGCTTTCATGTTGTAACTGGTCATTTGTTTGAAGGTCATTTCACTGCCACCTATCTATTTATAAGTTATATGTAGTT  
GCTGTAAGAACATAGAACCTCAGAGCGTTTGTGTCTCTATCTATTTGATCCTCATGGACTTAGGGGGTGCCTTTTTACAGCTCTTTTGGCGTTGTGTGTGGTGATTGTAGTAATGAGCTGA  
ATATAACTAAGATTGGCACTCGTTTTGTATTTTGGTTTTTTTTTAAGTTGATTAACATGAAGGAACAAAGTTCTCTATTTAGTTGGAGAATTCTGTGAAATTGAAATGTTAAGAGATGTGCA  
TTAAGTTCATGGCCTTTAAAACTGAGCAGGACCTGCAACTTTGTTGATTCCTTTCTTGCCAGAGCAATACAG

>comp168648\_c0\_seq5

AGAATTGATCGAGCTTCTGATTTCTTCTCTTTACACTTTTCTGAGTATTTATTGTCGCTCTGATCGGAAAACGCGGAGGGCGTGGACTTCACGTTTCTCGGGGATAACTCTTAGGCGC  
CGGGGACGGTGGGAACCCGAGCTGGTGTGCTGGAAGGGTGGATTGGTCTCGATTCTGCAGCGACAGTGCAATAGCCCAAAGGAAGTGAAGGACGTGCGGCAACTAGAGTCTAGGG  
TTTCGCTCTTGCTTTGGTTTACCGTTAGGGTTGGATATGGCGATGTTGGTTAGCGGCAAGGATGGAGGAAAAGCGCTAATGGACTCGGGGAAGTACGTGAGGTACACTCCAGAGCAGGT  
GGAGGCGCTTGAGAGGGTTTACAATGAATGTCCGAAGCCGAGCTCCTTGAGGAGGCAGCAGCTCATCAGGGAGTGTCCATACTCTCCAAAATCGAACCGAAGCAGATCAAAGTTTGG  
TTTCAGAACCGCAGATGTCGGGAAAAACAAAGGAAGGAAGCTTCTAGTCTGCAGTCTGTTAACAGAAAGCTTACGGCCATGAACAAGCTTCTGATGGAGGAGAATGATCGGTTGCAGA  
AGCAAGTTTCACAGCTAGTTTATGACAATAGCTACATGCACCAGCAACTTCGTAATGCATCTTTGGCCAACGCAGATGCTAGTGAATCTATGATTTTAGGTAGTCAACTACAGAATCCAATA  
TCTCAGCCTTCATTGAGGGATGCTAGCAACTCAGACAGTCTACTTGC AATTGCTGAGGAAACATTGGCAGAGTTCCTGAAAAAAGCTACTGGAAGTGCATCGATTGGGTTTCAGATGGTC  
GGGATGAAGCCTGGTCCGGATTCTATTGGAATCATTGCTATTTCCCGCAATTGTAGTGGCTTAGCAGCTCGAGCTTGTGGGCTTGTGAGTTTAGAACCCAAAAAGGTTGTGGATATCTTGA  
AGGATCGCCTAAGTTGGTATCGTGATTGCCGATCCATTGACGTGTTGAAAGTTTTCCCTACTGGAAATTGTGGAAATATTGAAATTTGTACATGCAGACATATGCGCCTACTACTTTGGCC  
TTGGCACGTGATTTTTGGACGCTTAGATATAGTACATCTTTAGAAGATGGCAGTCTTGTGATATGTGAGAGGTCCTTGACTCCTTCAACTGGTGGTCTGGCTGAGCCAACCTAATTT  
TATCAGAGCTGAGATGCTTCCAGTGGATATCTAATCCGACCATGTGAGGGTGGTGGTGCAATGATTCACATTGTTGATCATGTAGATTTGGATGCTTCAACTGTGCTGAGGTTCTCCGAC  
CATTGTATGAGTCGCCGAAATGCTAGCTCAGAGGATGACCATTGCAGCATTACACCATATTAGACAGATTGGTTATGAAACTAGTGGTGAAGCTTCTTATGATGGGGGCCGTCAACCTGC  
TGTTTTGAGAACCCTCAGCCAGAGGTTGAGCAGGGGTTTTAATGATGCTATTAATGGATTTCTGATGATGGCTGGTCTTACTGGGATACGATGGTGGGGAGGATGTGACTATAAATATTA  
ACTCATCTCCTAGCAAGCTATTTGGAAGTCATTCCAGATCTGCTAAGTTTTCTTCCCTTGGGTGGTAGCATCTTGTGTGCAAAAAGCTTCAATGCTACTTCAGAATGTGCCACCTGCTTTACTA  
GTTTCAGTTTCTGAGGAGCATCGGTCAGAGTGGGCTGATTCAGGTGTTGATGCTTATTCAGCTTCTTCACTGAGAGCCAGTCCTTATGCTGTTCTGGTTTGGGGTCAGTAATGGTTTTT  
TGGGCAGCCATGTTATTATTCCTCTGCTCATACTGTGGAAAATGAAGAGGTCCTGGAAGTTGTTAGGTTGGAATGTCCTGGATTCAACCAGGAGGATGTTCTATCCAGGGACATGTATCT  
GTTGCAGCTATGTAGTGGTATTGATGAGAACGCAGTTGGTGCCTGCGCACAGCTTGTATTTGCTCCCATAGATGAATCTTTTGCAGATGATGCTTTCCTGCTTCTTCGGGGTTTCGAGTGA  
TACCCCTCGACGTGAAAACAGACCCGCCATCTGCTACAAGAACACTTGACCTTGCTTCTGCTTTAGAAGTTGGAGGAGGTGGCACTGGAAGAGCTCCTAATGATCCAGTATCATATCCAA

GCAATTCAAGATCAGTTCTGACCATTGCATTCCAATTTACATTTGAGAACCATCTCCGTGAAAATGTCACCGCAATGGCTCGGCAATATGTTGAAAGTGTGTGGCCCTCGGTGCAACGGGT  
CGCCATGGCAATTTCTCCCTCTCGACTTTGCAACCAATTAGGAATGAAGCATACTGCTGGTTCACCTGAGGCTCACACCCTGTCGCTGTGGATTTCTCGAAGTTACAGGTTCCATACTGGA  
GTTGAACTCATTAGAACCGACTCTCAAGCTAGTGAAACTCTGAAGCTCCTGTGGCACTATTCTGATGCAATCATGTGCTGTTCTCTCAAGGCTTCTCCATTGTTACCTTCGCCAACCAAG  
CTGGACTTGACCTGCTTCAAACCCTCTGGTTGCCCTCCAAGACATTCGCTCGAGAAGATACTCGATGACACCGGCCGTAAAGTCTTTGTTCCGAGTTCCTTAAGATAATGCAGCAGG  
GCTTTGCCTATCTGCCTGCCGGCATTGTCATGTCAAGCATGGGGCGGCCGGTGTCTACGAGCAGGCCATCGCTTGGAAAGTCTTAAACGAAGAGGACTCTCCCCACTGTCTGGCTTTCA  
TGTTTGTTAACTGGTCATTTGTTTGAAGGTCATTTCACTGCCACCTATCTATTTTATAAGTTATATGTAGTTGCTGTAAGAACATAGAACCCTCAGAGCGTTTGTGCTTCTATCTATTTGATC  
CTCATGGACTTAGGGGGTGCCTTTTTCAGCTCTTTTGGCGTTGTGTGTGGTATTGTAGTAATGAGCTGAATATAAACTAAGATTGGCACTCGTTTTGTATTTTGGTTTTTTTTTAACCTTGAT  
TAACATGAAGGAACTAAGTCTCTATTTAGTTGGAGAATTCTGTGAAATTGAAATGTTAAGAGATGTGCATTAAGTTCATGGCCTTTAAAAACTGAGCAGGACCTGCAACTTTGTTGATT  
CTTTCTTGCCAGAGCAATACAG

>comp168648\_c0\_seq6

ATCTGAAAAACAAAGGAGAGTGTCCATACTCTCCAAAATCGAACCGAAGCAGATCAAAGTTTGGTTTCAGAACCGCAGATGTCGGGAAAAACAAAGGAAGGAAGCTTCTAGTCTGC  
AGTCTGTTAACAGAAAGCTTACGGCCATGAACAAGCTTCTGATGGAGGAGAATGATCGGTTGCAGAAGCAAGTTTCACAGCTAGTTTATGACAATAGCTACATGCACCAGCAACTTCGTA  
ATGCATCTTTGGCCAACGCAGATGCTAGTGAATCTATGATTTTAGGTAGTCAACTACAGAATCCAATATCTCAGCCTTCATTGAGGGATGCTAGCAACTCAGACAGTCTACTTGCAATTGCT  
GAGGAAACATTGGCAGAGTTCCTGAAAAAAGCTACTGGAAGTCCATCGATTGGGTTTCAGATGGTCCGGATGAAGCCTGGTCCGGATTCTATTGGAATCATTGCTATTTCCCGCAATTGTA  
GTGGCTTAGCAGCTCGAGCTTGTGGGCTTGTGAGTTTGAACCCAAAAAGGTTGTGGATATCTTGAAGGATCGCCTAAGTTGGTATCGTGATTGCCGATCCATTGACGTGTTGAAAGTTTT  
CCCTACTGGAAATTGTGGAAATATTGAAATTTTGTACATGCAGACATATGCGCCTACTACTTTGGCCTTGGCACGTGATTTTTGGACGCTTAGATATAGTACATCTTTAGAAGATGGCAGTCT  
TGTGATATGTGAGAGGCTTTTACTCCTTCAACTGGTGGTCTGGCTGAGCCAACTAATCTAATTTTATCAGAGCTGAGATGCTTCCCAGTGGATATCTAATCCGACCATGTGAGGGTGGT  
GGTGCATGATTACATTGTTGATCATGTAGATTGGATGCTTCAACTGTGCCTGAGGTTCTCCGACCATTGTATGAGTCGCCGCAAATGCTAGCTCAGAGGATGACCATTGCAGCATTACA  
CCATATTAGACAGATTGGTTATGAACTAGTGGTGAAGCTTCTTATGATGGGGGCCGTC AACCTGCTGTTTTGAGAACCCTTCAGCCAGAGGTTGAGCAGGGGTTTTAATGATGCTATTAAT  
GGATTTTCTGATGATGGCTGGTCTTTACTGGGATACGATGGTGGGGAGGATGTGACTATAAATATTAACTCATCTCCTAGCAAGCTATTTGGAAGTCATTCCAGATCTGCTAAGTTTTCTTCC  
TTGGGTGGTAGCATCTTGTGTGCAAAAAGCTTCAATGCTACTTTCAGAATGTGCCACCTGCTTTACTAGTTCAGTTTCTGAGGGAGCATCGGTCAGAGTGGGCTGATTACAGGTGTTGATGCTT  
ATTCAGCTTCTTCACTGAGAGCCAGTCTTATGCTGTTCTGGTTTGGAGGTCAGTAATGGTTTTTTGGGCAGCCATGTTATTATTCTCTTGTCTACTGTGAAAATGAAGAGGTCCTG  
GAAGTTGTTAGGTTGGAATGCCTGGATTCAACCAGGAGGATGTTCTATCCAGGGACATGTATCTGTTGCAGCTATGTAGTGGTATTGATGAGAACGCAGTTGGTGCCTGCGCACAGCTTG  
TATTTGCTCCCATAGATGAATCTTTTGCAGATGATGCTTTCCTGCTTCCCTCGGGGTTTCGAGTGATACCCCTCGACGTGAAAACAGACCCGCCATCTGCTACAAGAACACTTGACCTTGCT  
TCTGCTTTAGAAGTTGGAGGAGGTGGCACTGGAAGAGCTCCTAATGATCCAGTATCATATCCAAGCAATTAAGATCAGTTCTGACCATTGCATTCCAATTTACATTTGAGAACCATCTCC  
GTGAAAATGTCACCGCAATGGCTCGGCAATATGTTGAAAGTGTGTGGCCCTCGGTGCAACGGGTCGCCATGGCAATTTCTCCCTCTCGACTTTGCAACCAATTAGGAATGAAGCATACTG  
CTGGTTCACCTGAGGCTCACACCCTGTCGCTGTGGATTTCTCGAAGTTACAGGTTCCATACTGGAGTTGAACTCATTAGAACCAGCTCTCAAGCTAGTGAAACTCTGAAGCTCCTGTGGC  
ACTATTCTGATGCAATCATGTGCTGTTCTCTCAAGGCTTCTCCATTGTTACCTTCGCCAACCAAGCTGGACTTGACCTGCTTGAACCACTCTGGTTGCCCTCCAAGACATTCGCTCGA  
GAAGATACTCGATGACACCGGCCGTAAAGTCTTTGTTCCGAGTTCCTTAAGATAATGCAGCAGGGCTTTGCCATCTGCCTGCCGGCATTGTCATGTCAAGCATGGGGCGGCCGGTGTCC  
TACGAGCAGGCCATCGCTTGGAAAGTCTTAAACGAAGAGGACTCTCCCCACTGTCTGGCTTTCATGTTTGTAACTGGTCAATTTGTTGAAAGGTCATTTCACTGCCACCTATCTATTTATA  
AGTTATATGTAGTTGCTGTAAGAACATAGAACCCTCAGAGCGTTTGTGCTTCTATCTATTTGATCCTCATGGACTTAGGGGGTGCCTTTTTTCAGCTCTTTTGGCGTTGTGTGTGGTATTGT

AGTAATGAGCTGAATATAAACTAAGATTGGCACTCGTTTTGTATTTGGTTTTTTTTTAACTTGATTAACATGAAGGAACTAAGTTCTCTATTTAGTTGGAGAATTCTGTGAAATTGAAATGT  
TAAGAGATGTGCATTAAGTTCATGGCCTTTAAAACTGAGCAGGACCTGCAACTTTGTTGATTCCCTTTCTTGCCAGAGCAATACAG

>comp168648\_c0\_seq7

TGTTCTCTCTTTTCGCTCTTTCTCTCTCCACTGTGTTCTTCTTTTACTTATTTTATTTATGCATTGGCTGGCCTGGCTTAGAGCGCTAAAGCTTTTCGCTTTCTCTTGAAAAATGAGCAGCGT  
GGGAGGTGAGAAGAGCCAGTTAGGGTTAGGATTGATGCTTGATTTTCTTTTCTTGCTTTGGTCTTCTTCCTCATCTTCTCCTCTGCTCTGATGTGGGAGGGCTTAGAGGGCTGGCTGAGTG  
GAAAGAGGGTTTCTTGAGCTTTCTAATTTGTGGTCTGCTCTCATCTGCTGGGTAAAGATTAGGGCTTTGGATAAGATGGCTACGGCGGGGAAAGATGGGAAATCTCAGCTGCATGAGCTG  
CAGCAAATTGATGCGGGGAAGTACGTGAGGTACACGCCGAGCAGGTGGAGGCGCTTGAGAGGGTTTATATGGAGTGTCCGAAGCCTAGTTCATTAAGGAGGCAGCAACTCATCAGGG  
AGTGCCCTATACTCGCAATATCGAGCCCAAGCAGATCAAGGTCTGGTTTCAAACCAGCAGATGTCGAGAGAAGCAGAGAAAAGAATCCTCTCGTCTTCAGACTGTTAATAGAAAATTG  
ACCGCCATGAACAAGCTGCTAATGGAGGAAAATGACCGGTTGCAGAAGCAGGTTTCTCAGCTTGTATTGAGAATGGCTATATGCGTCAGCAGGTTAATACTACATCTGTGGCTACCACA  
GACACAAGCTGTGAGTCTGTGGTGACAAGTGGTCAGCACCATCAGCAGCAAAACCCAACGCCTCAGCATCCACCAAGGGATGCTAACCAACCCAGCTAGTCTACTCGCAATTGCTGAGG  
AGACCTTAGCAGAGTTCCTGTCTAAAGCCACAGGAACTGCTGTTGAGTGGGTTTCTAGATGGTTGGTATGAAGCCTGGTCCGGATTCTATTGGAATCATTGCTGTTTTCCACAATTGCAGTG  
GTGTAGCAGCCCAGCTTGTGGCCTTGTGAGTTTAGAACCACGAAGGTGCGGAGTTACTCAAAGATCGTCTAAATTGGTATCGCGATTGTCGATCCCATGATGTGTTAACGGTTATCCC  
TGCTGAAAATGGTGGTAATATTGAACTTATTTATATGCAGACATATTCTCCTACTACTCTGGCATCTGCACGAGATTTTTGGACTCTTAGGTATACTGCAGGTTTAGAAGATGGCAGCCTGGT  
GATCTGTGAGAGGTCCTTAACTCCTTCAACTGGCGGTCCAGCTGGCCCCCGGCTGCTAATTTTGTGAGAGCTGAGATCCTTCCAAGTGGTTATCTGATAACGACCTGTGAGGGTGGTGG  
TTCAATGATTTACATTGTTGATCATGTTGATTGGATGCTTGGAGTGTGCCAGAGGTTCTGAGGCCCTTGATGAGTCCCCAAAAATTTAGCTCAAAAATTGACCATTTCTGCTCTGCGTC  
ATATTAGACAGATTTCCCAAGAAAAGTAATAGTGAATATCCTATGCTGGGGGTCGTCAACCCACTGTACTAAGGACTTTCAGCCAGAGGATGAGCAGGGGCTTCAATGATGCTGTAAATGG  
GTTTCTGATGATGGCTGGTCTTTAATGGGAAGTATGGTGTGGAGGATGTGACAATTGCTATCAACACTTTCCTAACAAGCTTCTTGGTGGTCATTCAAGCTCTTCTTTGTTTTCTTAC  
TGGGAGGTGGCATCTTATGTGCTAAAGCATCCATGCTTCTTCAGGTTTTTCATCTTCCAGAAAATGATTGTTGGTTTTTTTTTTCTTTTGTAAGTTGAGGCTTTGAGGCTT

>comp169140\_c0\_seq2

AAATCCGTCCCAAACGAAGCCTAAAATTCAATTGATTACTGCTATTATATGATTATTTACAAGTCCAATCCATCTCAACTTAATTGTTATAATGAGTTGCAGAAACCTCTGCCTCTTTTCGGC  
ACTCTGGCGCAATGCATTTCGAGAGCTATGAGAGGAAATTTACAGCATAATGGAGTTCTTAATGGCTTCTTGAAGCAAAAATTCTGCATTGATGAATTCTAAGCCTTTGTCCCTCGGCTTCAAG  
TGCTTCTCTGAAATCATTCTGGAGATAAATCAAGTGAAGAAAGCTGCTACTCCTAAAAGGCAATGCATCCTTTGGCTATGTGGTTGAGGATCAGAACTAAACCATTGTAAAGCCAAGGA  
TGAATGTAAGAAGCCTGAGATTGGTGGCCCTTACCGCCTTTTTGGGATTGATTTAAGCAAACCCCTCTGGTTTTTTCATCTCTTTCTGAGAAGAACCCGAGCAGTGAACCACAGAGGAGCC  
ATTATATCAACATTCTGAACAAAAAATTTCAACCAAATTGCATAAACTGAACTGGTTTTCTCCGAAGGAGATTGAGAGCAAGCACAGCGGTTCCGACCCGAAGCCGAATTAAGGTTTACAT  
GCACGGCGTTGCTGTTGGTAGAGCTGTGGATCTAATGAATCTAAGAGGGTATGATGAGCTGATTTAGAGCTAGAAAAGATGTTTGGAGATCAAAGGAGAGCTTTCTCAAGGGATAAATG  
GGAGGTAGTGTTCAGTATGATGAGGGTATATAATGCTAGTTGGTGACGATCCATGGCTGGAATTTTGTGAGATGGTGAGAAAAGATGTATATCTACCCAAGCGAGGAGGTCAAGAAGTT  
GAAGCAATAGAAGATAAGGCTCCGTTTGGGACAGCTTTCTTATTGCATTATTTTTCAGGCAAGAAAACACTGTTTTTGGTTGGCACTGTTTCTTAACCGTTTCTAATAAGTTTTTGTGCCAGA  
AGCTACTTTCTATAGTAGCTTTTCATAGCAATTTTACAATCACTTTTATAAAAAACAGTAGCCATCACAAACGGACTATAAACTAAATGACTAGCTGCTCGATTAGTTTAGTGGGAAACAA  
CAAGTGGGCTTCCCTCGGACTTCCGTTCCCGCGGCGGAACCGTCGCCGAGCTCAGCTCAGCTCTGGCCAGCCCTAACACACCTGAAGCTAAGGCTTTGAGCCACTGCTCTCTCTTT  
GTTGCGCCAGCTGCAACAATTTGTGACAAAGAAAGTTGTATAAATTTATAGCATAATTGATGTAAATTAGAAAACACTGTGGGATTTTGTTTTATTGAGTTTATATAGGATGATTTTGGAAAA  
AAAAAAAATTTTCAAGTGGGTGTAAGAATAATTTTGTAGAAAAAAAAGGTCCTTGTGGACATTCTGAGATTTTTAAAATTTTCATAGCATCATCAATATAATGCCTTAAACAGAAAGGA

TGCCCAGATCTGTAATGCTCATTCAATTAATACAATT

>comp169140\_c0\_seq3

AGAAGAAACGGAAGGAGTGTGGCAATTGACGAAGAAAAAGTGGGCGAAGTACAGAAGAGCAAGAAAAGAGTTTCATTTGGCGTTGAAAGAGAGAGGAAGATAGAGAAAAACAAGG  
AATTTTTTCTGGTGAATCAATCAAAACAAGTATGGGTGGAGACGATCTGTATGAGGAGCTGTGGAGGGCGTGTGCAGGGCCTCTTGTGGAGATACCTCGCGTTGAGGATAGGGTTTA  
CTATTTCCCTCAAGGTACATGGAGCAGCTAGAGGCATCGACGAATCAGGAGTTGGATCATAGAATTCCCTCTTTCAGCCTTCCCTACAAGATTCTTTGTCGTGTTTTGCACATAGAGCTC  
AGGGCGGAGGTTGAAACTGATGAGGTTTACGCACAGATCACTTTACTTCCAGAGGCAGAACAAACCGAACTCAAAACACCAGACCCATGCGTCCCTGAGCCAAAGAGGCCGATGATCA  
ACTCATTCTGCAAGATCTTGACTGCCTCCGACACGAGCACTCATGGAGGATTCTCAGTTCTCCGTCGCCATGCTAATGACTGTCTTCCCTCAACTGGATATGTCTCAGCCAACACCAACCCA  
GGAGCTGTCTGCAAAAGACCTCCATGGTTTTGGAATGGCGATTCAAGCACATTTATAGAGGTCAACCCCGGCGGCATCTGCTCACAACAGGATGGAGTACCTTTGTCTCCTGTAAGAGATT  
GGTGGCTGGTGTATGCATTTGTTTTCTGAGAGGAGAAAATGGAGAATTGAGGGTTGGTGTAAAGCGCCTAGCTCAACAAAAGAGCACTATTCCATCATCTGTGATCTCAAGTCATAGCAT  
GCACATTGGTGTCTTGCTACAGCTTCTCATGCTGTGAAAACCTATACCCGTTTACAGTCTGCTACAAGCCAAGGACTAGTCAATTTATCATTGGCGCAAATAAATACTTTGAATCTGTCA  
AAAATGAACTTTCCATTGGAATGAAATTCAAGATGAGATTTCGAGGGCGATGATGTTCTGAGAAAAGGTATACTGGAACTATAGTTAGCTTGGGAGATCTATCTTCTCAGTGGGAAGGCTC  
CAAGTGAAACAATTGAAGGTTTATTGGGACGAGCAGATGAACTTTCAGCGACCTGATAGGGTTTCTCCATGGGAGATTGAGCCTTGCAGTTCTTCGACGCCCACTGTGCAACGAACA  
AGAGGCCTAGGTTCTTGATGGATCAATCAGATTCTCTACCATTAGAAACCTCTGCCTTTTTTCGGCACTCTGGCGCAATGCATTTCGCAGAGCTATGAGAGGAAATTCAGCATAATGGAGT  
TCTTAATGGCTTCTGAAGCAAAATTCTGCATTGATGAATTCTAAGCCTTTGTCCTCGGCTTCAAGTGCTTCTCTGAAATCATTCTGGAGATAAATCAAGTGAAGAAAGCTGCTACTCCTA  
AAAGGCAATGCATCCTTGGCTATGTGGTTGAGGATCAGAACTAAACCATTGTAAAGCCAAGGATGAATGTAAGAAGCCTGAGATTGGTGCCCTTACCGCTTTTTGGGATTGATTTAA  
GCAAACCTCTGGTTTTTTCATCTCTTCTGAGAAGAACCCGAGCAGTGAAAACCACAGAGGAGCCATTATATCAACATTCTGAACAAAAAATTTCAACCAAATTCATAAAACTGAACTGG  
TTTCTCCGAAGGAGATTTCAGAGCAAGCACAGCGGTTTCGACCCGAAGCCGAATTAAGGTTTACATGCACGGCGTTGCTGTTGGTAGAGCTGTGGATCTAATGAATCTAAGAGGGTATGATG  
AGCTGATTTTCAGAGCTAGAAAAGATGTTTGAGATCAAAGGAGAGCTTTCTCCAAGGGATAAATGGGAGGTAGTGTTCACTGATGATGAGGGTGTATAATGCTAGTTGGTGACGATCCAT  
GGCTGGAATTTTGTGAGATGGTGAGAAAGATGTATATCTACCCAAGCGAGGAGGTCAAGAAGTTGAAGCAATAGAAGATAAGGCTCCGTTTGGGACAGCTTTCTTATTGCATTATTTTTCA  
GGCAAGAAACACTGTTTTTGTGGTACTGTTTCTTAACCGTTTCTAATAAGTTTTTGTGCCAGAAGCTACTTTCTATAGTAGCTTTTCATAGCAATTTTACAATCACTTTTATAAAAAACAG  
TAGCCATCACAAAACGACTATAAACTAAATGACTAGCTGCTCGATTTAGTTTAGTGGGAAAACAACAAGTGGGCTTCCCTGGACTCTCCGTTCCCGCGGGCGGAACCGTCGCCGAGCTCA  
GCTCAGCTCTGGCCAGCCCTAACACACCTGAAGCTAAGGCTTTGAGCCACTGCTCTCTCTTGTGCGCCAGCTGCAACAATTTGTGACAAAAGAAAGTTGTATAAATTTATAGCATAATT  
GATGTAAATTAGAAAACCTGTGGGATTTTGTGTTTATTGAGTTTATATAGGGATGATTTTGGAAAAAATTTTCAAGTGGGTGTAAAGAATAATTTGAGAAAAAAGGTCCTTGT  
GGACATTTCTGAGATTTTAAATTTTCATAGCATCATCAATATAATGCCTTAAACAGAAAGGATGCCCGAGATCTGTAATGCTCATTCAATTAATACAATT

>comp169140\_c0\_seq5

AAATCCGTCCCAAACGAAGCCTAAAATTCAATTGATTACTGCTATTATATGATTATTTACAAGTCCAATCCATCTCAACTTAATTGTTATAATGAGTTGCAGAAACCTCTGCCTCTTTTCGGC  
ACTCTGGCGCAATGCATTTCGCAGAGCTATGAGAGGAAATTTTCAGCATAATGGAGTTCTTAATGGCTTCTTGAAGCAAAATTTCTGCATTGATGAATTCTAAGCCTTTGTCTCGGCTTCAAG  
TGCTTCTCTGAAATCATTCTGGAGATAAATCAAGTGAAGAAAGCTGCTACTCCTAAAAGGCAATGCATCCTTGGCTATGTGGTTGAGGATCAGAACTAAACCATTGTAAAGCCAAGGA  
TGAATGTAAGAAGCCTGAGATTGGTGCCCTTACCGCTTTTTGGGATTGATTTAAGCAAACCTCTGGTTTTTTCATCTCTTCTGAGAAGAACCCGAGCAGTGAAAACCACAGAGGAGCC  
ATTATATCAACATTCTGAACAAAAAATTTCAACCAAATTCATAAAACTGAACTGGTTTTCTCCGAAGGAGATTTCAGAGCAAGCACAGCGGTTTCGACCCGAAGCCGAATTAAGGTTTACAT  
GCACGGCGTTGCTGTTGGTAGAGCTGTGGATCTAATGAATCTAAGAGGGTATGATGAGCTGATTTTCAGAGCTAGAAAAGATGTTTGAGATCAAAGGAGAGCTTTCTCCAAGGGATAAATG

GGAGGTAGTGTTCACCTGATGATGAGGGTGATATAATGCTAGTTGGTGACGATCCATGGCTGGAATTTTGTGAGATGGTGAGAAAGATGTATATCTACCCAAGCGAGGAGGTCAAGAAGTT  
GAAGCAATAGAAGATAAGGCTTCGTTTGGGAATAGCTTTTAAACCACTAATTTTTTGCTGCTTTCAAACAATTTTGTACTAGAAAAGTGTATATAAAAACAGTAAGAAAATTATTCCAAACA  
AAACTTAAGTCTGTATGATATTCTCTTATCACATTATATTCTTGATAAACTTATTCATAAAGACCACTCAAC

>comp169140\_c0\_seq6

TGAGATTTAGCCTTGCAGTTCTTCGACGCCCACTGTGCGCAACGAACAAGAGGCCTAGGTTCTTGATGGATCAATCAGATTCTCTACCATTAGAAAACCTCTGCCTCTTTTCGGCACTCTGGC  
GCAATGCATTTCGAGAGCTATGAGAGGAAATTCAGCATAATGGAGTTCTTAATGGCTTCTTGAAGCAAAAATCTGCATTGATGAATTCTAAGCCTTTGTCTCGGCTTCAAGTGCTTCTCT  
GAAATCATTCTGGAGATAAATCAAGTGAAGAAAGCTGCTACTCCTAAAAGGCAATGCATCCTTGGCTATGTGGTTGAGGATCAGAAACTAAACCATTGTAAAGCCAAGGATGAATGTAA  
GAAGCCTGAGATTGGTGCCCTTACCCTTTTGGGATTGATTTAAGCAAACCTCTGGTTTTTTCATCTCTTTCTGAGAAGAACCCGAGCAGTGAAACCACAGAGGAGCCATTATATCAA  
CATTCTGAACAAAAAATTTCAACCAAATTGCATAAAACTGAACTGGTTTTCTCCGAAGGAGATTGAGAGCAAGCACAGCGTTTCGACCCGAAGCCGAATTAAGGTTACATGCACGGCGT  
TGCTGTTGGTAGAGCTGTGGATCTAATGAATCTAAGAGGGTATGATGAGCTGATTTGAGAGCTAGAAAAGATGTTTGGAGATCAAAGGAGAGCTTTCTCCAAGGGATAAATGGGAGGTAGT  
GTTCACTGATGATGAGGGTGATATAATGCTAGTTGGTGACGATCCATGGCTGGAATTTTGTGAGATGGTGAGAAAGATGTATATCTACCCAAGCGAGGAGGTCAAGAAGTTGAAGCAATA  
GAAGATAAGGCTTCGTTTGGGAATAGCTTTTAAACCACTAATTTTTTGCTGCTTTCAAACAATTTTGTACTAGAAAAGTGTATATAAAAACAGTAAGAAAATTATTCCAAACAAAACTTAAGT  
CTGTATGATATTCTCTTATCACATTATATTCTTGATAAACTTATTCATAAAGACCACTCAAC

>comp169140\_c0\_seq8

TGAGATTTAGCCTTGCAGTTCTTCGACGCCCACTGTGCGCAACGAACAAGAGGCCTAGGTTCTTGATGGATCAATCAGATTCTCTACCATTAGAAAACCTCTGCCTCTTTTCGGCACTCTGGC  
GCAATGCATTTCGAGAGCTATGAGAGGAAATTCAGCATAATGGAGTTCTTAATGGCTTCTTGAAGCAAAAATCTGCATTGATGAATTCTAAGCCTTTGTCTCGGCTTCAAGTGCTTCTCT  
GAAATCATTCTGGAGATAAATCAAGTGAAGAAAGCTGCTACTCCTAAAAGGCAATGCATCCTTGGCTATGTGGTTGAGGATCAGAAACTAAACCATTGTAAAGCCAAGGATGAATGTAA  
GAAGCCTGAGATTGGTGCCCTTACCCTTTTGGGATTGATTTAAGCAAACCTCTGGTTTTTTCATCTCTTTCTGAGAAGAACCCGAGCAGTGAAACCACAGAGGAGCCATTATATCAA  
CATTCTGAACAAAAAATTTCAACCAAATTGCATAAAACTGAACTGGTTTTCTCCGAAGGAGATTGAGAGCAAGCACAGCGTTTCGACCCGAAGCCGAATTAAGGTTACATGCACGGCGT  
TGCTGTTGGTAGAGCTGTGGATCTAATGAATCTAAGAGGGTATGATGAGCTGATTTGAGAGCTAGAAAAGATGTTTGGAGATCAAAGGAGAGCTTTCTCCAAGGGATAAATGGGAGGTAGT  
GTTCACTGATGATGAGGGTGATATAATGCTAGTTGGTGACGATCCATGGCTGGAATTTTGTGAGATGGTGAGAAAGATGTATATCTACCCAAGCGAGGAGGTCAAGAAGTTGAAGCAATA  
GAAGATAAGGCTCCGTTTGGGACAGCTTTCTTATTGCATTATTTTTCAGGCAAGAAACTGTTTTTGTGGTGGCACTGTTTCTTAACCGTTTCTAATAAGTTTTTGTGCCAGAAGCTACTTT  
CTATAGTAGCTTTTCATAGCAATTTTACAATCACTTTTATAAAAAACAGTAGCCATCACAAACGGACTATAAACTAAATGACTAGCTGCTCGATTTAGTTTAGTGGGAAACAACAAGTGGGC  
TTCTCTGGACTCTCCGTTCCCGCGGCGGAACCGTCGCCGAGCTCAGCTCAGCTCTGGCCAGCCCTAACACACCTGAAGCTAAGGCTTTGAGCCACTGCTCTCTCTTGTGCGCCAG  
CTGCAACAATTTGTGACAAAGAAAGTTGTATAAATTTATAGCATAATTGATGTAAATTAGAAAAGTGTGGGATTTGTTTTATTGAGTTTATATAGGGATGATTTTGGAAAAAACAAGG  
TTTCAGTGGGTGTAAAGAATAATTTTGGAAAAAAGGTCCTTGTGGACATTTCTGAGATTTTAAAATTTTCATAGCATCATCAATATAATGCCTTAAACAGAAAAGGATGCCCCGAGAT  
CTGTAATGCTCATTCAATTAATACAATT

>comp169140\_c0\_seq9

AGAAGAAACGGAAGGAGTGTGGCAATTGACGAAGAAAAAGTGGGCGAAGTACAGAAGAGCAAGAAAAGAGTTTCATTTGGCGTTGAAAGAGAGAGGAAGATAGAGAAAAACAAGG  
AATTTTTTCTGGTGAATCAATCAAAACAAGTATGGGTGGAGACGATCTGTATGAGGAGCTGTGGAGGGCGTGTGCAGGGCCTTGTGGAGATACCTCGCGTTGAGGATAGGGTTTA  
CTATTTCCCTCAAGGTCACATGGAGCAGCTAGAGGCATCGACGAATCAGGAGTTGGATCATAGAATTCCTCTCTTCAGCCTTCCCTACAAGATTCTTTGTCGTGTTTTGCACATAGAGCTC

AGGGCGGAGGTTGAAACTGATGAGGTTTACGCACAGATCACTTTACTTCCAGAGGCAGAACAAACCGAACTCAAAACACCAGACCCATGCGTCCCTGAGCCAAAGAGGCCGATGATCA  
ACTCATTCTGCAAGATCTTGACTGCCTCCGACACGAGCACTCATGGAGGATTCTCAGTTCTCCGTCGCCATGCTAATGACTGTCTTCCCTCAACTGGATATGTCTCAGCCAACACCAACCCA  
GGAGCTGTCTGCAAAAGACCTCCATGGTTTTGGAATGGCGATTCAAGCACATTTATAGAGGTCAACCCCGGCGGCATCTGCTCACAACAGGATGGAGTACCTTTGTCTCCTGTAAGAGATT  
GGTGGCTGGTGATGCATTTGTTTTCTGAGAGGAGAAAATGGAGAATTGAGGGTTGGTGTTAAGCGCCTAGCTCAACAAAAGAGCACTATTCATCATCTGTGATCTCAAGTCATAGCAT  
GCACATTGGTGTCTTGCTACAGCTTCTCATGCTGTGAAAACCTATACCCGTTTACAGTCTGCTACAAGCCAAGGACTAGTCAATTTATCATTGGCGCAAATAAATACTTTGAATCTGTCA  
AAAATGAACTTTCCATTGGAATGAAATTCAGATGAGATTCGAGGGCGATGATGTTCCCTGAGAAAAGGTATACTGGAACTATAGTTAGCTTGGGAGATCTATCTTCTCAGTGGGAAGGCTC  
CAAGTGGAAACAATTGAAGGTTTATTGGGACGAGCAGATGAACTTTACAGCGACCTGATAGGGTTTCTCCATGGGAGATTGAGCCTTGCAGTTCTTTCGACGCCACTGTGCAACGAACA  
AGAGGCCTAGGTTCTTGATGGATCAATCAGATTCTTACCATTAGAAACCTCTGCCTTTTTTCGGCACTCTGGCGCAATGCATTTCGCAGAGCTATGAGAGGAAATTTTCAGCATAATGGAGT  
TCTTAATGGCTTCTTGAAGCAAAATTTCTGCATTGATGAATCTAAGCCTTTGTCCTCGGCTTCAAGTGCTTCTCTGAAATCATTCTGGAGATAAATCAAGTGAAGAAAGCTGCTACTCCTA  
AAAGGCAATGCATCCTTGGCTATGTGGTTGAGGATCAGAAAATAAACCATTGTAAAGCCAAGGATGAATGTAAGAAGCCTGAGATTGGTGCCCTTACCAGCTTTTTGGGATTGATTAA  
GCAAACCCTCTGGTTTTTCATCTCTTCTGAGAAGAACCCGAGCAGTGAAAACCACAGAGGAGCCATTATATCAACATTCTGAACAAAAAATTTCAACCAAATTCATAAACTGAACTGG  
TTTCTCCGAAGGAGATTCAGAGCAAGCACAGCGGTTTCGACCCGAAGCCGAATTAAGGTTACATGCACGGCGTTGCTGTTGGTAGAGCTGTGGATCTAATGAATCTAAGAGGGTATGATG  
AGCTGATTTTCAGAGCTAGAAAAGATGTTTGAGATCAAAGGAGAGCTTTCTCCAAGGGATAAATGGGAGGTAGTGTTCACTGATGATGAGGGTGATATAATGCTAGTTGGTGACGATCCAT  
GGCTGGAATTTTGTGAGATGGTGAGAAAGATGTATATCTACCCAAGCGAGGAGGTCAAGAAGTTGAAGCAATAGAAGATAAGGCTTCGTTTGAATAGCTTTTAACCACTAATTTTTTGTCT  
GCTTTCAAAACAATTTTGTACTAGAAAACCTGTTTTATAAAACAGTAAGAAAATTATTCCAAACAAAACCTTAAGTCTGTATGATATTCTCTTATCACATTATATTCTTGATAAACTTATTCATAA  
AGACCACTCAAC

>comp169373\_c0\_seq2

CAACCAACAAATCAAGATGAGCTTGCTTGGTATGCCAAATCTGTTGGATAACAAGATCAAACGTCTTCCCTGTTGATTTTATCGTAGTTTCAAAGCAGAACTTTCAGCAAAAAGCTTTACC  
AACGCCCTTGACTTGACTTCCATGAGACATTTAGCTTAGTAGTCAAACCACCTACCATCTGCACCGTTATCACTTACAGCAATGTAGTTCCACAAAGTTGGTCGCTTACTCAACATGATGT  
GAAATGGTCCACCATCAGCGAGAACCAGGCATCTCAAGTGGAGTTATTGAGATCTCACAACCAGACGAAAGAAGTATTTAAGAGTCCATTTTTGTGCGAAAATAAAATACGATGTCAATA  
CCTTCGATGTCAGGCAGTATTTGCTCCGCTCGTTCCAGGAAAACCTGTCGAGACCAGAAAACCTTACCTTCGCCAAGAATCCTCACTCCCTCCTCCGCGGTATATGATATCAGATCCCCCGA  
GCGCACCACTCAGTGACAGCGTCCTTGGCAGGTTTAGCGATCTCCTTACAAGGCACTCCGCTATCGGCCCTTGTATCCTTCAATATCGCCGCCGCGGATGCAACAGCTCCGCCCTC  
TTCCACAGAGGGCTCCTCGCCAAAGCCTTTGAGCCGCCTTCGCCCTCCATCACCTTGTTACCTCCTCCTGCGTGCATGCTTGAACCTTGTATTCCGGTTTCCGTGTAGTCGGATTAAT  
GATCGGAACTGACTTCCCGGAGCTAGACTTGTGCCACTCCCCCTCGGCGTAGTACTTGTACACCTCCCCCTCAATGATCTCACTGAAGACTCCCGTCCCTGCCATCGCTGCCGAAATCTTC  
AATTGCCGCTCTCTCCGCGTAATCACGGCTCTTTATCGCTCCGGTGACGACTAGCCTCCTACTTTGTAAGTAAAGCAGGCTGTGCGGTCGTGATCTTGTTTAGGTGGCAGGC  
TTTATATTGCGACAGAGGAGAACCACG

>comp169373\_c0\_seq4

CCAAGACCTCTTGGTTGATAGCCAAAGGTCCAGCTTGCTTGGTATGCCAAATCCTGTTGGATAACAAGATCAAACGTCTTCCCTGTTGATTTTATCGTAGTTTCAAAGCAGAACTTTCAGC  
AAAAGCTTTACCAACGCCCTTGACTTGACTTCCATGAGACATTTAGCTTAGTAGTCAAACCACCTACCATCTGCACCGTTATCACTTACAGCAATGTAGTTCCACAAAGTTGGTCGCTTA  
CTCAACATGATGTGAAATGGTCCACCATCAGCGAGAACCAGGCATCTCAAGTGGAGTTATTGAGATCTCACAACCAGACGAAAGAAGTATTTAAGAGTCCATTTTTGTGCGAAAATAAAA  
TACGATGTCAATACCTTCGATGTCAGGCAGTATTTGCTCCGCTCGTTCCAGGAAAACCTGTCGAGACCAGAAAACCTTACCTTCGCCAAGAATCCTCACTCCCTCCTCCGCGGTATATGATAT

CAGATCCCCGAGCGCACACCTCAGTGACAGCGTCCTTGGCAGGTTTAGCGATCTCCTTCACAAGGCACTCCGCTATCGGCCCTTGTATCCTTCAATATCGCCGCCGCGGATGCAAC  
AGCTCCGCCCTCTTCCACAGAGGCGTCCCTCGCCCAAGCCTTTTGGAGCCGCCTTCGCCCCCTCCATCACCTTGTTACCTCCTCCTGCGTGCATGCTTGAACCTTGTATTCCGGTTTCCGTG  
TAGTCGGATTAATGATCGGAACTGACTTCCCGGAGCTAGACTTGTGCCACTCCCCCTCGGCGTAGTACTTGTACACCTCCCCTTCAATGATCTCACTGAAGACTCCCGTCCCTGCCATCGC  
TGCCGAAATCTCAATTGCCGGCCTCTCTCCGGCGTAATCACGGCCTCTTATCGCCTCCGGTGACGACTAGCCTCCTACTTTGTAAGTAAAGGAAAGCAGGCTGTGCGGTGCTGATCTTGT  
TTAGGTGGCAGGCTTTATATTGCGACAGAGGAGAACCACG

>comp169832\_c1\_seq1

CAAAAATAAATGTTTAAAGAGGGCTGATTCGTACTATATTTTAAAGCAAGATTTTTTAAATGGCTTATTTTATCAATTCAGAGAGAGTAGAAGCAGGAGAAATAAAAGGGGGAAGCGGAAGG  
AAGTAGGCAGAAGCCAAGGGTTTCGAGCCTGGAGACATACTTTGCTCGGAGTTATCTAGAGATAATAGTTGCTTCTATAAAAAGACTCAGTAATTCACACTGTACCTTCTGACAATTGGAA  
AGGCTCTCCAATGCAAAATATGAGTGACAAGGATTCACAGCATGAATTAGTCCAATCAGCATAAATTATCCGAGCAATGGCATTCCATGGTGAATTCATGTGGACCACATATTTTGTGT  
ATCCAACCACCGTAACTTATATGCCAGCATGAACACTCCGGTATCCAATCAGATAAAACAAGTTGAAAATCAGATGTTGGAGCAAGAATCATCATCTACACAGTCCAGTGGGAGTCCCA  
TGGTGAATTTGCAAAAAGAGAGTGATGATAGCCCCAATGAATGGTGTCTGTCCAGGACAATCTGGTTCAATTCAGAAAAGATAAATGACAAAAGGTGATGAACATGCTCGTGAGAAATTC  
AAGAGGGTCAGACAAAACAGTTTTCTGGAAGGGAAATCACAAGTTTTCTCAGACCTACAAAATTTGATTCTAGCCAGTCTCTTTCTTATGTTCCATATGCTTATGCTGACACACAGTA  
CACGGGAGGCTTGGCTGCTTATGGTTCTCATGCTGTTGTTTCATCCTCAAATGATGGTATGCCACCTTCTCGTTTTGCGTTGCTGTTCCAGCCTCAGGGGAAGAACCCTATATATGTTAATGC  
TAAGCAATACCATGCCATCCTCCGTAGACGAGAGCACCGCGCAAAGTTAGAGTCTCAAAGCAAAACTGTGAAAACCCGCAAGCCATATCTTCATGAATCTCGGCACCAGCATGCCATGA  
AGAGGGCAAGAGGAATCGGTGGAAGATTCCTGAACACCAAGAACTTCAGGAGCAACAGTCCAGCTTTCTTCAAAAAGTCCAAACATTTGGCAAGCTCCGAAGACCGTC  
ACGCCGGCAGAACGATGGGCCTGTGCAACTTACTTCCGCCGACCGATATGCCGAAAATAACAAGTGTCTTCAACAGTGGGGGACCTAGGGGCATCTTCCAGTCTCAGCACCATTTTG  
GCTTCTCCTCCTCTGATCGCAATCTCAGTTCCAAAGGAACATTCATGAAGTTATGATGGCCTTCAACAATGGACCGAAGCCGGCGGTGCCGGTTAACAGGTAGAAATGGAGGTCT  
CATTGCAAGTGGCGGCAACTATCCTTGGCTTTTGTGTTCTTTCTCGATGAAAGACTTATTCTGCGAATGTATAATGAACTATACAAAATTAAGCTAGAAAATGGCTGTGTAGATGTT  
AGAGATGTTGTGTTTGGAAAGATGGTTGTGTTCAAAACTTGATAGCAGGTTTTATTATATTATGTTGCTCCATCTCTAATATTTTGAATGGTTAGATTGACACTTTTATTAACCTTGTGTTTTGC  
CTTTCCAAAATTGAAGCAAAGGGACTCTTCTTTGAT

>comp170166\_c1\_seq1

TTTTGTCTGTGATAGTTGATGATCAATCATGATTTTGTCAAATACTTCACCATTTTATATTTCTATTCTCTTTTTTCTACTTTTTTTTCCATTCAAATGAAATCTTAGCTCAACATCCCTGCA  
ATATGCCATACCATATCTTGACTATGCAGATTTCAAATACAACAACAATTCCACAATGTGTTAGAGGTATCAAAGGCAGACTACAATTCATGCAAAAAGTAGCTCTCCTTCAGCAACTTACT  
CCACTGGCAATGATTCATCACCATTAACCGCCGCCACCCTATTTTCATCTGTGGGATTCGGCCACTGTCAAATAGGCCAGAAGGTTGACATCTTCGTGCGAGGCGGCAAAGCTA  
CTGCACCTGCCTCCTCTGCTGCCCTTCTCCTTCTCTGTGCGCCGGCTTTCATCCAAGCACGGCCCCCTCGGCGAGCGCGGCACAGGCACCGAGCTCCGGTGTCAATTGCCACTGGCAT  
TGTCGACGATCATTGAGGTGGCGACCATGACAAGTGCTATTATATTGATGGGGCTTTAGATAGTATGATTTTGTGTTTATCTTTGGTTGTTTGTGTTATTGACAGAACCATTAGAAATGA  
GTTTTAATCATCAATAGTTTGTGGTAAGTTTGTCTGTTATTACCTTAAAGAGATTGGTTTTTTCTATAGTTAAGGAAAAGCTAAGTATTATGATGAGAAAATTTGTTAAATTTAGGAAAGGAT  
TACTTGAAATGCTATTATTCAGCTTTATAAATTGTCTTTC

>comp170166\_c1\_seq2

TGAATCTGTGCGCGCAGGATTCCTGCTTCAAAAACCTTCTCCTTCTCTTTTTCCACTGCTGAGAGAAGCAATCATGGCTTCTTTCGTCAAAGTAGGATTGTTTCTAGTTGTAGTGGTC  
GTCTTCGCCGGGCTGAATCTGTGCGCGGCGAAGATCTACACCGTCGGCGACTCGATCGGTTGGACGATACTGAATAGCCCCAACTACACAGCTTGGGCTGCTGGGAAGCCCTCCGTGA

GGGTGACATCGTCTATTTCAAATACAACAAACAATTCCACAATGTGTTAGAGGTATCAAAGGCAGACTACAATTCATGCAAAAAGTAGCTCTCCTTCAGCAACTTACTCCACTGGCAATGAT  
TCCATCACCATTA AAAACCGCCGCCACCCTATTTTCATCTGTGGGATTCCC GGCCACTGTCAAATAGGCCAGAAGGTTGACATCTTCGTCGGAGGCGGCAAAGCTACTGCACCTGCCTCC  
TCTGCTGCCCTTCTCCTTCTCTGTTCGCCGGCTTTCATTCCAAGCACGGCCCTTCGGCGAGCGCGGCACAGGCACCGAGCTCCGGTGCTCAATTGCCACTGGCATTGTTCGACGATCATT  
GAGGTGGCGACCATGACAAGTGCTATTATATTGATGGGGCTTTAGATAGTATGATTTTGTAGTTTATCTTTGGTTGTTTGTATTGACAGAACCATT CAGAAATGAGTTTTAATCATCAAT  
AGTTTGTGGTAAGTTTGTCTGTTATTACCTTAAAGAGATTGGTTTTTTCTATAGTTAAGGAAAAGCTAAGTATTATGATGAGAAAATTTGTTAAATTTAGGAAAGGATTACTTGAAATGCTAT  
TATTT CAGCTTTATAAATTGTCTTTC

>comp170683\_c0\_seq1

TCTCTTCCATTTTAGCTATAAATGCTAGCAAGAGCAACACTCAAACCTCATCGCTCTCTTATTTGGTTTTCTGCTCTCTTTCTTTCTTTCTGTTTTCTCTCTACTGTGTTGCATTTGCTGC  
AAGCTTAGACCTTTTTGCTATCCTAAAATGGCGAAGCCTTGCTGCTATCTCTTACCTGCAGGTAGGCGGACCGCCATTCCGGGTTTTATTTGCCGCGGAGTAGGCTTTATCTGAGCTCGGAG  
AGAGCAGGGAGCTTTCCTTCTGCAGCTTTCCTCTTCCTCCCTCTTTCTCTGTATTTCTCTGAAACCTACTCTTTTTTCGGCCCTTTTGTGGTAGACTTGTTAGGGTAAGTAGGACTGTAG  
GAGAAGGGTGGGGAAGGGGACAAATGAACAGTACGGCGGCAGCGGTGGGGGTAGGATGCAGACCACCGTTACGGCGTTCGAGTGGGAGGAGCTGGAGCACCAAGCCCTCATTTTTA  
AGTACCTGATAGCTGGGATTCCC GTTCCGCCGAGTTGCTTCTCCCGATT CGAAGGGGCTATGAGACCATGGCCGCCGCTTCTACCATCATCCAGCCCTGGGTTACTGCTCCTACTACGG  
GAAGAACTTGACCCAGAACCTGGCCGTTGCCGAGGACCGATGGCAAGAAATGGCGGTGCTCAAAGACGCGTACCCTGACTCCAAGTACTGTGAGCGGCACATGCACCCGCGGCCG  
CAATCGTTCAAGAAAGCATGTGGAAACGCCGCAAGCCCTCTCCAGTCGCAGTCGTCTTGCTCGACGGTGACTTCCCTAGCTCCCACCTCTCTGGGGAGTTCGGGAGCGGCAGTGGAA  
GCGGCGCTACCGCCTCCATTGGCGGAGGTAGTTGCAGCGGCGGGAGCTTCCACTCCCTTCTCTTCACTCGATCCCTTCAATGCATCATCAAGTCTCTGGCATTGGCGCTGCAACTTCCTC  
TCATCTCAGCATTGACCCATCTTCATACGGAAACGTATCTCCAAAGATTT CAGGTATGTT CATGGATCAAATCTGGGCTAGATGAGCGTGGCTTCTATTCTGAAGCTCCTGGAAGTGC  
AGAGTCTTGGCATGGACTCTGCATTGGATAGTT CATGGCGCCTGTTGTCATCGCCCGTCTCTACATTTCTCTGTCAAAGGAGAGAGAGAACTCTTTTCTCCATGTCAGTTACCCTCAAC  
TTCAGCCTCTGCAAGAACTTGGTCAGGTGACTATCAGTTCTTTGCCAAAGCAGCATCAGCAGCATCAACTCCTTCTTTGGAACCGATTATGGATCGACAGAGCCTCCCATCAAGACTG  
AGCAACCACTACGACCATTTTTCGATGAATGGCCTGGGACAAGAGATTCATGGTCGGATCTCGAGGATGAGAGAACCAATCGTAACTCTTTCTCTACCACACAGCTCTCCATGTCCATACC  
AATGTCGTCATCTGATTTCTCAACAACAAGTTCTCGATCCCCAAATGGTGTGTTATAATACTTCTCATCTTCTTGCAATTAGAACAATGTAATGTCCAAGTTAGGCTT

>comp170683\_c0\_seq5

TTTTTTTTTTTTTAAATAATAAATCTCTTTCTCATTCTTAATGGCTAGCATTGACAGATCTGAAACTTGACGAAATTTCTTAGCTGTTTCTCCTTTTCATTGATATTATCCGATATTTATCAGT  
GGGTTACTGCTCCTACTACGGGAAGAACTTGACCCAGAACCTGGCCGTTGCCGGAGGACCGATGGCAAGAAATGGCGGTGCTCAAAGACGCGTACCCTGACTCCAAGTACTGTGAG  
CGGCACATGCACCGCGGCCGCAATCGTTCAAGAAAGCATGTGGAAACGCCGCAAGCCCTCTCCAGTCGCAGTCGTCTTGCTCGACGGTGACTTCCCTAGCTCCCACCTCTCTGGGGAG  
TTCCGGGAGCGGCAGTGGAAAGCGGCGCTACCGCCTCCATTGGCGGAGGTAGTTGCAGCGGCGGGAGCTTCCACTCCCTTCTCTTCACTCGATCCCTTCAATGCATCATCAAGTCTCTGG  
CATTGGCGCTGCAACTTCCTCTCATCTCAGCATTGACCCATCTTCATACGGAAACGTATCTCCAAAGATTT CAGGTATGTT CATGGATCAAATCTGGGCTAGATGAGCGTGGCTTCTATT  
CTGAAGCTCCTGGAAGTGCAGAGTTCTTGGCATGGACTCTGCATTGGATAGTT CATGGCGCCTGTTGTCATCGCCCGTCTCTACATTTCTCTGTCAAAGGAGAGAGAGAACTCTTTTCT  
CCATGTCAGTTACCCTCAACTTCAGCCTCTGCAAGAACTTGGTCAGGTGACTATCAGTTCTTTGCCAAAGCAGCATCAGCAGCATCAACTCCTTCTTTGGAACCGATTATGGATCGACA  
GAGCCTCCCATCAAGACTGAGCAACCACTACGACCATTTTTCGATGAATGGCCTGGGACAAGAGATTCATGGTCCGATCTCGAGGATGAGAGAACCAATCGTAACTCTTTCTCTACCACA  
CAGCTCTCCATGTCCATACCAATGTCGTCATCTGATTTCTCAACAACAAGTTCTCGATCCCCAAATGGTGTGTTATAATACTTCTCATCTTCTTGCAATTAGAACAATGTAATGTCCAAGTT  
AGGCTT



>comp170683\_c0\_seq6

TCTCTTCCATTTTAGCTATAAATGCTAGCAAGAGCAACACTCAAACCTCATCGCTCTCTTATTTGGTTTCTGCTCTCTTTCTTTCTCTTTCTGTTTTTCTCTCTACTGTGTTGCATTTGCTGC  
AAGCTTAGACCTTTTTGCTATCCTAAAATGGCGAAGCCTTGCTGCTATCTCTTACCTGCAGGTAGGCGGACCGCCATTCCGGGTTTTATTTGCCGCGGAGTAGGCTTTATCTGAGCTCGGAG  
AGAGCAGGGAGCTTTCCTTCTGCAGCTTTCCTCTTCCCTCTTTCTCTGTATTTCTCTGAAACCTACTCTTTTTTCGGCCCTTTTGTGGTAGACTTGTTAGGGTAAGTAGGACTGTAG  
GAGAAGGGTGGGGAAGGGGACAAATGAACAGTACGGCGGCAGCGGTGGGGGTAGGATGCAGACCACCGTTACGGCGTTCGCAGTGGGAGGAGCTGGAGCACCAAGCCCTCATTTTTA  
AGTACCTGATAGCTGGGATTCCCGTTCCGCCCAGTTGCTTCTCCCGATTCTGAAGGGGCTATGAGACCATGGCCGCCGCTTCTACCATCATCCAGCCCTGGGTTACTGCTCCTACTACGG  
GAAGAACTTGACCCAGAACCTGGCCGTTGCCGAGGACCGATGGCAAGAAATGGCGGTGCTCAAAGACGCGTACCCTGACTCCAAGTACTGTGAGCGGCACATGCACCCGCGGCCG  
CAATCGTTCAAGAAAGCATGTGGAAACGCCGCAAGCCCTCTCCAGTCGCAGTCGTCTTGCTCGACGGTGACTTCCCTAGCTCCCACCTCTCTGGGGAGTTCCGGGAGCGGCAGTGGAA  
GCGGCGCTACCGCCTCCATTGGCGGAGGTAGTTGCAGCGGCGGGAGCTTCCACTCCCTTCTCTTCACTCGATCCCTTCAATGCATCATCAAGTCTCTGGCATTGGCGCTGCAACTTCCTC  
TCATCTCAGCATTGACCCATCTTCATACGGAAACGTCATCTCCAAAGATTCAGGTATGTTTCATGGATCAAATCTGGGCTAGATGAGCGTGGCTTCTATTCTGAAGCTCCTGGAAGTGGC  
AGAGTCTTGGCATGGACTCTGCATTGGATAGTTTCATGGCGCTGTTGTTCATCGCCCGTCTCTACATTTCTCTGTCAAAGGAGAGAGAGAACTCTTTTCTCCATGTCAGTTACCCCTAAC  
TTCAGCCTCTGCAAGAACTTGGTCAGGTGACTATCAGTTCTTTGCCAAAGCAGCATCAGCAGCATCAACTCCTTCTTTGGAACCGATTATGGATCGACAGAGCCTCCCATCAAGACTG  
AGCAACCACTACGACCATTTTTCGATGAATGGCCTGGGACAAGAGATTCATGGTCGGATCTCGAGGATGAGAGAAACCAATCGTAACTCTTTCTCTACCACACAGCTCTCCATGTCCATAAC  
AATGTCGTCATCTGATTTCTCAACAACAAGTTCTCGATCCCCAAATGATGATTAAGAAGCCTTCTTTGTTCTGCTGACTTTGAAGCTGGTGCAGGCTTGTCTTGTGTGAAGTTGCTTTAAA  
GCAAAGTTGCAGTAATTTATCATTCTACCGTCGCTTTGTATGACTGTTATTGAGCTGGATTTCTACTGGTGCTGCCAGACTAACTTATGCTTATCATTATTTTACAATTAAGCAACTTTGT  
TTGCTTTTATGACTGTTAAGCTTGTGATCATCGCCTTTGCAAAATCTGGAGAAATGCTAGTTCTTACTTTTTCAGGTTCTTTCTACTGTCCACTGGTAGTAATCACGTTTAGAGACAAATATAAC  
AAAGGC

>comp170683\_c0\_seq7

TCACTCACTACTGTTCTATTTCCCTTTGCAATCTCCCACCATTCTTCTATACTATAATGGCGAAGCCATTCGTTTCGCTGCTATCTGCTGCACTTTGTTGTGTCTAAGCACATTTGCAACTTTT  
ACCCACTCTTTACGCTTTGTTTCCGAGTAGAATAAGATAACGTCGGGAGAAACAGATGAATAGTGCGCCAGCAGCAAGTTTGAAGATGGATTACCGGCCGCCGTTCACTGCATCGCAATGG  
GAAGAGCTTGAACATCAAGCCCTCATTTTTAAGTATCTTATTGCTGGAATCCCTGTCCGCTGAACCTCTGATCCCGATTGGAAGAAGCTATGAGTCAATGGCGGCAAGCTTCTCTTCCC  
ATTCTTCTCTGAGTTATTGCTCTTTCTACGGGAAGAAGCCGGATCCAGAGCCTGGTTCGATGTCGCAGAACTGATGGGAAGAAATGGCGGTGTTCTAAAGACGCTTACCCAGATTCAAAGT  
ACTGTGAGCGGCACATGCATAGGGGCCGCAATCGTTCAAGAAAGCATGTGGAAATTTCTCAAACCTGTTTCTCAGTCTCAGTCACTGTGCTCGATGGCGACTATTCCACTTGCTGCTACTGT  
TGGTGGGACCTCCGGCAGCGGCTCCTGCAGTGGGAGTTTCATGGCCTTCCTTTTGGTTCTGCAGCAGTGGCGGGGGCGTCTCAAGCTCAGATTGATCCCC

>comp170683\_c0\_seq9

TTTTTTTTTTTTTAAATAATAAATCTCTTTCTCATTCTTAATGGCTAGCATTGACAGATCTGAAACTTGTACGAAATTTCTTAGCTGTTTCTCCTTTTCATTGATATTATCCGATATTTATCAGT  
GGGTTACTGCTCTACTACGGGAAGAACTTGACCCAGAACCTGGCCGTTGCCGGAGGACCGATGGCAAGAAATGGCGGTGCTCAAAGACGCGTACCCTGACTCCAAGTACTGTGAG  
CGGCACATGCACCGCGGCCGCAATCGTTCAAGAAAGCATGTGGAAACGCCGCAAGCCCTCTCCAGTCGCAGTCGTCTTGCTCGACGGTGACTTCCCTAGCTCCCACCTCTCTGGGGAG  
TTCCGGGAGCGGCAGTGGAAAGCGGCGCTACCGCCTCCATTGGCGGAGGTAGTTGCAGCGGCGGGAGCTTCCACTCCCTTCTCTTCACTCGATCCCTTCAATGCATCATCAAGTCTCTGG  
CATTGGCGCTGCAACTTCTCTCATCTCAGCATTGACCCATCTTCATACGGAAACGTCATCTCCAAAGATTTTCAGGTATGTTTCATGGATCAAATCTGGGCTAGATGAGCGTGGCTTCTATT  
CTGAAGCTCCTGGAAGTGCAGAGATTCTTGGCATGGACTCTGCATTGGATAGTTTCATGGCGCCTGTTGTTCATCGCCCGTCTCTACATTTCTCTGTCAAAGGAGAGAGAACTCTTTTCT

CCATGTCAGTTACCCCTCAACTTCAGCCTCTGCAAGAACTTGGTCAGGTGACTATCAGTTCTTTGCCAAAGCAGCATCAGCAGCATCAACACTCCTTCTTTGGAACCGATTATGGATCGACA  
GAGCCTCCCATCAAGACTGAGCAACCACTACGACCATTTTTTCGATGAATGGCCTGGGACAAGAGATTCATGGTCGGATCTCGAGGATGAGAGAACCAATCGTAACTCTTTCTCTACCACA  
CAGCTCTCCATGTCCATAACCAATGTCGTCATCTGATTTCTCAACAACAAGTTCTCGATCCCCAAATGATGATTAAGAAGCCTTCTTTGTTTCGTCGACTTTGAAGCTGGTGGCGCTTGCTTC  
TTGTGTGAAGTTGCTTTAAAGCAAAGTTGCAGTAATTTATCATTCTACCGTCGCTTTGTATGACTGTTATTGAGCTGGATTTCTACTGGTGCTGCCAGACTAACTTATGCTTATCATTATT  
TTACAATTAAGCAACTTTGTTTGCTTTTATGACTGTAAAGCTTGTGATCATCGCCTTTGCAAATCTGGAGAAATGCTAGTTCTTACTTTCAGGTTCTTTCTACTGTCCACTGGTAGTAATCA  
CGTTTAGAGACAAATATAACAAAGGC

>comp171031\_c0\_seq1

AGCACACAATTTTAATATTTTCACTTATAATTTACCCAGACGGGAAATCCCCGATATTTCCGGCTAGTGCTGTCTCTTCTTTTTCTCAGTGGCTTTACCGTCTGCCCAATTACATCCAATAT  
ATCCATTCACGGCGATCTGGAGCTAGTTCATTGCCGCGCTTCTCCATGCTAGCATTGCGCTGAGCTTTGTGTTCTTACAACCTTTCGAGGTGCGTGCTTTTCTATCCTCGAGTTACTTCTTC  
TGATATATCGTTTCCCTTTGAGGAGCTCTCCAAGGCCCGAACTTCGCTAGAAATTGTGCTTCCTGTGCGAGCTGCCAAGAAACAAGGGAAGTGTGAAGGCAGAGGTAGAGCTGCTTGGT  
TTCCTGATCAGGGAAGTGGTTATGAATTCTAGAGTTTGAAAGTTTATATCTTGGATTCCGTGGCCGCAAATGTTTTCTACTCAATTATGGAGTTGATTTGGCTTCTTGAGCCTTAAGAGTG  
AGGAATGTGAGATTTTTTTTTGAAGTCGATTTGGTAAGGTTCTCCGCGAGTTTTTATACTCGCAATGGTATTTAGGGGTTGGGATCGACGCGGTGAAGTTGGATATGTGCCCTGTAGGT  
TTCTCTTACTTGTGAGTGTTTACGGAGCTTTTTAGAGTGCTGCGATGAAGCTCTCGACGGTTGGAGTTCTGGTCCAGCAGGATGAGGAAGGGGGGGACAAGAGATGCTTGAACCTCCGA  
GCTTTGGCATGCTTGTGCTGGTCTCTAGTGTGTCTGCCAATGTCGGAACCCGTGTTGTCTACTTTCCACAGGGCCACAGCGAGCAGGTCGTGGCTTCCACTAATAAGGAGGTTGAAGG  
CCATATTCCTAATTATCCGAACTTGCCACCTCAATTGATCTGCCAACTTCACGATGTGACTATGCACGCTGATGCCGAGACTGACGAAGTCTACACACAGATGACATTGCAGCCTTTAAATC  
CGCAGGATCTGAAAGATACATACCTTCCAGCTGAGATGGGGCTACCTAGCAAGCAGCCATGAATATTTTTGTAAGACTTTGACTGCAAGCGATAACAAGCACTCATGGAGGGTTTTCTGT  
TCCTCGTCGTGCAGCTGAAAAAGTTTTCTCTCTGGATTTCTCTCAACAGCCACCAGCTCAAGAGCTGATTGCTCGAGATATTCATGATGTTGATTGGAAGTTCAGGCATATCTTTAGA  
GGACAACCCAAGAGGCATCTTCTACTACAGGCTGGAGTATCTTTGTCAGTGCTAAGAGACTTGTGCTGGTGAATCTGTTTTATTTATATGGAATGAGAAAAATCAGCTTTTGTGGGAA  
TCCGACGGGCTAATCGACCACAAAATGCTGTACCTTCATCAGTTATATCAAGTGATAGTATGCATATTGGACTGCTTGCTGCAGCAGCTCATGCTGCTGCAACAAATAGCCGTTTACCATT  
TTTTACCACCCAAGGGCTTGTCCCTCAGAGTTTGTGATACCACTCTCAAAATATGTTAAGGCTGTGTTTCACACTCGTGTCTCAGTTGGCATGCGATTTAGGATGCTTTTCGAGACTGAAG  
AGTCAAGTGTTCGTAGGTATATGGGGACTATAACAGGAATAAGTGATTTGGATCCTGTCCGATGGCCAAATCCCAGTGGAGATCAGTGAAGGTTAATTGGGACGAATCAACTGCAGGTG  
ACAGACAACCTAGAGCATCTTTATGGGAAATTGAGCCTTTGACAACATTTCCAATGTATCCATCACTATTCCTCTCAGACTTAAACCACCTTGGTACACTGGAGTTTCATCTCTAAATGAC  
TACAAGTTAGATGAGGGGAATGCATACATGTGGCTTAGGGGGAGCTCAGGGGGGGTATTAGGTCTTTGAATTTCAATCTCTGGAATTGGTCCGTGTGTTTCAGCAGCAGGTCCAACCA  
CAATTTGGGAAACAATCACACTCCTTACCAAGCAATGGATGCTGCAGCTTGTGATATTAGAGGCATGGATTAAGGAGCCATTTCTAAACTTCCAGCAGCCGTTTCAGTTCCCTCAGC  
AGTTCTGTATGAACCCATTGTTGCAGCAGCAAGTTATTCAACAAGCTCACCATGAACAGATAATGAATTTCTCAAGCTCAGTCTCTGTTGGATAGTCAACCAACATACTTCAAATCAGCT  
GTTGCAACAGCCATACGGTGATCAGCAGAAGCAAAAAGGTCAGCAGCAACCAACTTATCCAGAACTATTCATGTTTCAGATTAATAATATAGAACAGCAACAGCTGCCAATACCCTCTCC  
ATTATCTCAAAAATCTGTATTTCTGATTCAAGTATGAACTTTTTCATCAGTTGCAACACCCAGTTGCATACAGAATTTGTCAGCAGCGGCTTATTCTGGAACAAATGCTAATAACTTGCACCT  
TGCAAAAAGTGGTCAGACAATTCTGGCTGAGCAGCATCAGCAAAAATGGGATCCACAGTTTGCATTGCAGAAGTTTCTACTTTTGGTAATACAGTTTTGCTTCAACCATTTCACGAAA  
AGATGATACAAGGGAATCTGATGTTCTCTCCACTGATACACAAAACACAGCCTATTTGATATCAATGTTGGTTCTTCCTTGCTTCTTGGCAATGTTGTGCCTAATCTATTAACGCAAACA  
ATAATGACAATGTTGTATCCAGCATGCCATTTACCCTTCTTATCTTCAAAATTCACCTTATCACAGCCTTGTATGAGTATCAGGTATGTTGCAGCATACTACGACATTGATCCATCAATCAA  
AACTTTTGTAAAGGTTTACAAGTCAGGCTCGGTTGGGAGGTCAGTCTGACATCACTCGTTTCAGCAACTATACTGAATTACGAAAGGCACTGGGTCAGATGTTTGGTATTGAGGGTCAACT

TGAAAACCCCTCTTAGATCAGGCTGGCAGCTTGTATTTGTTGACAGGGAGAATGATGTGCTTCTTCTTGGAGACGACCCTTGGGAACCTTGTGCATTCATGGTTGGCCGATCAAAAACCTGTA  
CCTCTTCACCTGGTATTCATTTCTAATTAATGCAGATCGTTTTGTGAACAATGTGTGGTACATCAAATACTTTCACCAGAGGATGTTTCAGCAAATGGGGCAGCAGGGAGTTGACTTGAGCT  
AATTAACCTTTGAATTTCAATCAAACCAAATGGCAAGTAAGTTTTATTTGTGCTTGCACCAGAATATTCCTATACTGCGGTGAACATTCTAAGTATTTTTTTTATTTAGGCACTATCAAATCTTAA  
TACGCATAATTATATTTTGAATGTTGTTGCATGCATGTGTCCATGCCCTGTAATGTGGGGAATATATATTTATGTATAACCGGATAATATAAATGTATAATAGTTGTAGTTCCTCTTATTTAATTT  
AGTAAGGTGCTTTTTTTGTTTCCATTCCTCGGTTGCACAAGTTTTGCTCAAATCAAAGTTGGTCCACGGGGTATCTTATTTATAACGTGTGGGAGATTTTTTTGTTTGCATTTTCCAGTAGTA  
TTTTTTCTGATCAATATCAAAGATTGTCTAGAGAAGTGACTCCCTCCCCTCCTTCCCTCCCTCCAGAAGGATCCATATTATCATATTTTTAGTTGACTTTAAGCACTAGTCCGCCAAATGAAT  
CTACTTCAAAGTTCTGGGATGAAACTTTTATGAGTTTGGATGACGCTGTTGACCATCATCATAAACTGTTTTCCCTATCATTGGATTCATTGTGAGAAATAACGATGTGTTTTCTTCAAGTGG  
TTAACCGAGTAAATGCGACCTTTTTTAACGTTGCAAATACACTACGAAGGCATGCTAGTTTATGAGATTATTCATCATTATGGTATGAGAATATGAACGCTATTTCTGCACTTTTATCTGATC  
AGGTGTCATATTTGTAGGTCTGCTCGAGGTGAAATCCCCGTAGGTGCCCAAAGTCTGTACTGTCTACTGTAAACGTATGACAGTAAAATCTGCATAAGATACAGATATTTATGCTATAAA  
ATCCTTGTGTGCAGGTTCCATTTGCTCTCCATTTACTTCTCGCCAATAACCATGCTCTTAGCTGTTCCATGTACTCTTAAATAGTATATTTTATCTTCTTATCTTATTTAATTCTAATTTGTAA  
AGAACAAAGTGTCTAGAAATATATCTAAAGCGTGGATCTAAGATTGATTACTGGAATAATTTTGGACATCCAGTGAATTTAGCTCCTGTAATGTAAGTAGGATTCCGAGGACTGAGGAATTT  
ATCCTTATCCATGGATTTATGAAGAGATTTTTGTGCTTTGGATATTATCTCTAGATCACTAGTGAGATAACTTAATCAACGCC

>comp171031\_c0\_seq10

AGCACACAATTTAATATTTTCACTTATAATTTACCCAGACGGGAAATCCCCGATATTTCCGGCTAGTGTGCTCCTCTTCTTTTTCTCAGTGGCTTTACCGTCTGCCCAATTACATCCAATAT  
ATCCATTCACGGCGATCTGGAGCTAGTTTCATTGCCGCGCTTCTCCATGCTAGCATTGCGCTGAGCTTTGTGTTCTTACAACCTTTCGAGGTCGCTGCTTTTCTATTCCTCGAGTTACTTCTTC  
TGATATCGTTTTCCCTTTGAGGAGCTCTCCAAGGCCGAACCTCGCTAGAAATTTGTGCTTCCCTGTGCGAGCTGCCAAGAAACAAGGGAACCTGTGAAGGCAGAGGTAGAGCTGCTTGGT  
TTCTGATCAGGGAACCTGGTTATGAATTCTAGAGTTTGAAGTTTATATCTTGGATTCCGTGGCCGCAAATGTTTTCTACTCAATTATGGAGTTGATTTGGCTTCTTGAACCTTAAGAGTG  
AGGAATGTGAGATTTTTTTTTGAAGTCGATTTGGTAAGGTTCCCTCCGCGAGTTTTTATACTCGCAATGGTATTTAGGGGTTGGGATCGACGCGGTGAAGTTGGATATGTGCCCTGTAGGT  
TTCTTTACTTGTGAGTGTTTACGGAGCTTTTTAGAGTGCTGCGATGAAGCTCTCGACGGTTGGAGTTCTGGTCCAGCAGGATGAGGAAGGGGGGGACAAGAGATGCTTGAACCTCCGA  
GCTTTGGCATGCTTGTGCTGGTCCTCTAGTGTGTCTGCCAATGTCGGAACCCGTTGTCTACTTTCCACAGGGCCACAGCGAGCAGGTCGTGGCTTCCACTAATAAGGAGGTTGAAGG  
CCATATTCCTAATTATCCGAACCTTGCCACCTCAATTGATCTGCCAACTTACGATGTGACTATGCACGCTGATGCCGAGACTGACGAAGTCTACACACAGATGACATTGCAGCCTTTAAATC  
CGCAGGATCTGAAAGATACATACCTTCCAGCTGAGATGGGGCTACCTAGCAAGCAGCCATGAATTATTTTGTAAAGACTTTGACTGCAAGCGATAACAAGCACTCATGGAGGGTTTTCTGT  
TCCTCGTCTGTCAGCTGAAAAAGTTTTTCCCTCCTCTGGATTTCTCTCAACAGCCACCAGCTCAAGAGCTGATTGCTCGAGATATTCATGATGTTGATTGGAAGTTCAGGCATATCTTTAGA  
GGACAACCCAAGAGGCATCTTCTACTACAGGCTGGAGTATCTTTGTGAGTGTGTAAGAGACTTGTGCTGGTGAATCTGTTTTATTTATATGGAATGAGAAAAATCAGCTTTTTGTTGGGAA  
TCCGACGGGCTAATCGACCACAAAATGCTGTACCTTCATCAGTTATATCAAGTGATAGTATGCATATTGGACTGCTTGTGCTGCAGCAGCTCATGCTGCTGCAACAAATAGCCGTTTACCATT  
TTTTACCACCAAGGGCTTGTCTTCCAGATTTGTGATACCACTCTCAAATATGTTAAGGCTGTGTTTCCACTCGTGTCTCAGTTGGCATGCGATTTAGGATGCTTTTTCGAGACTGAAG  
AGTCAAGTGTTCGTAGGTATATGGGGACTATAACAGGAATAAGTGATTTGGATCCTGTCCGATGGCCAAATCCCAGTGGAGATCAGTGAAGGTGACAGACAACCTAGAGCATCTTTATGG  
GAAATTGAGCCTTTGACAACATTTCCAATGTATCCATCACTATTCCTCTCAGACTTAAACCACCTTGGTACACTGGAGTTTCATCTCTAAATGACTACAAGTTAGATGAGGGGAATGCATA  
CATGTGGCTTAGGGGGAGCTCAGGGGGGGTATTAGGTCTTTGAATTTCAATCTCTGGAAATTTGGTCCGTTGTTTCCAGCAGGTTCCAACCACAATTTGGGAAACAATCACACTCCTTA  
CCAAGCAATGGATGCTGCAGCTTGTGATATTAGAGGCATGGATTCAGTTAGGCAGCCATTTCTAAACTTCCAGCAGCCGTTTCCAGTTCCTCAGCAGTTCTGTATGAACCCATTGTTGCAG  
CAGCAAGTTATTCAACAAGCTCACCATGAACAGATAATGAATTCTCAAGCTCAGTCTCTGTTGGATAGTCAACCAAACATTACTTCAAATCAGCTGTTGCAACAGCCATACGGTGATCAGC

AGAAGCAAAAAGGTCAGCAGCAACCAACTTATCCAGAACTATTTTCATGTTTCAGATTAATAATATAGAACAGCAACAGCTGCCAATACCCTCTCCATTATCTCAAAAATCTGTATTTCTGAT  
TCAAGTATGAACTTTTTCATCAGTTGCAACACCCAGTTGCATACAGAATTTGTCAGCAGCGGCTTATTCTGGAACAAAATGCTAATAACTTGCACCTTTGCAAAAATGGTCAGACAATTCTGG  
CTGAGCAGCATCAGCAAAAATGGGATCCACAGTTTGCATTGCAGAAGGTTTCTACTTTTGGTAATACAGTTTTGCTTCAACCATTTACGGAAAAGATGATACAAGGGAATCTGATGTCTC  
TCCACTGATACACAAAACACAGCCTATTTGATATCAATGTTGGTCTCTCCTTGCTTCTTGGCAATGTTGTGCCTAATCTATTAACGCAAAACAATAATGACAATGTTGTATCCAGCATGCC  
ATTTACCACTTCTTATCTTCAAAAATCACTTTATCACAGCCTTGATGAGTCATCAGGTATGTTGCAGCATACTACGACATTGATCCATCAATCAAAAATTTTGTAAAGGTTTACAAGTCAGG  
CTCGGTTGGGAGGTCACCTCGACATCACTCGTTTCAGCAACTATACTGAATTACGAAAGGCACTGGGTCAGATGTTTGGTATTGAGGGTCAACTTGAAAACCCTCTTAGATCAGGCTGGCA  
GCTTGATTTGTTGACAGGGAGAATGATGTGCTTCTTCTGGGAGACGACCCCTTGGGAACCTTGTGCATTTCATGGTTGGCCGATCAAAAACCTGTACCTCTTCACCTGGTATTCATTTCTAATT  
AATGCAGATCGTTTGTGAACAATGTGTGGTACATCAAAAATACTTTACCAGAGGATGTTTCAGCAAATGGGGCAGCAGGGAGTTGACTTGAGCTAATTAACCTTTGAATTTCAATCAAACCA  
AATGGCAAGTAAGTTTATTTGTGCTTGCACCAGAATATTCCTATACTGCGGTGAACATTCTAAGTATTTTTTTTATTTAGGCACTATCAAATCTTAATACGCATAATTATTATTTGAATGTTGT  
TGCATGCATGTGTCCATGCCCTGTAATGTGGGAATATATAATTTATGTATAACCGGATAATATAAATGTATAATAGTTGTAGTTCCTCTTATTTAATTTAGTAAGGTGTCTTTTTTGTTCATT  
CTCGGTTGCACAAGTTTGTCTCAAATCAAAGTTGGTCCACGGGGTATCTTATTTATAACGTGTGGGAGATTTTTTGTTCATTTCCAGTAGTATTTTTCTGATCAATATCAAAGATTGT  
CTAGAGAAGTGACTCCCTCCCTCCTTCCCTCCCTCCAGAAGGATCCATATTATCATAATTTTAGTTGACTTTAAGCACTAGTCCGCCAATGAATCTACTTCAAAGTTCTGGGATGAACT  
TTTATGAGTTTGGATGACGCTGTTGACCATCATCAAAAATGTTTTCCCTATCATTGGATTCATTGTGAGAAATAACGATGTGTTTTCTTCAAGTGGTTAACCGAGTAAATGCGACCTTTTTT  
AACGTTGCAAATACACTACGAAGGCATGCTAGTTTATGAGATTATCCATCATTATGGTATGAGAATATGAACGCTATTTCTGCACCTTTTATCTGATCAGGTGTCATATTTGTAGGTCTGCTC  
GAGGTGAAATCCCCGTAGGTGCCCAAAGTCTGTAAGTGTCTACTGTTAAACGTATGACAGTAAAATCTGCATAAGATAACAGATATTTATGCTATAAAAATCCTTGTGTGCAGGTTCTATTG  
CTCTTCCATTTACTTCTCGCCAATAACCATGCTCTTAGCTGTTCCATGTACTCTTAAATAGTATATTTTATCTTCTTATCTTATTTAATTTCTAATTTGTAAAGAACAAGTGTCTAGAAATATAC  
TAAAGCGTGGATCTAAGATTGATTACTGGAATAATTTTGGACATCCAGTGAATTTAGCTCCTGTAATGTAAGTAGGATTCGAGGACTGAGGAATTTATCCTTATCCATGGATTTATGAAGA  
GATTTTTGTGCTTTGGATATATCTCTAGATCACTAGTGAGATAACTTAATCAACGCC

>comp171031\_c0\_seq11

AGCACACAATTTAATATTTTCACTTATAATTTACCCAGACGGGAAATCCCCGATATTTCCGGCTAGTGCTGTCCCTCTTCTTTTTCTCAGTGGCTTTACCGTCTGCCCAATTACATCCAATAT  
ATCCATTCACGGCGATCTGGAGCTAGTTCAATGCCGCGCTTCTCCATGCTAGCATTCCGCTGAGCTTTGTGTTCTTACAACCTCTTCGAGGTGCTGCTTTTTCTATTCCTCGAGTTACTTCTTC  
TGTATATCGTTTCCCTTTGAGGAGCTCTCCAAGGCCCGAACTTCGCTAGAAAATTGTGCTTCCCTGTGCGAGCTGCCAAGAAAACAAGGGAAGTGTGAAGGCAGAGGTAGAGCTGCTTGGT  
TTCTGATCAGGGAAGTGGTTATGAATCTAGAGTTTGAAGTTTATATCTTGGATTCCGTTGGCCGCAAATGTTTTCTACTCAATTAATGGAGTTGATTTGGCTTCTTGAACCTTAAGAGTG  
AGGAATGTGAGATTTTTTTTTGAAGTGCATTTGGTAAGGTTCTCCGCGAGTTTTTATACTCGCAATGGTATTTAGGGGTTGGGATCGACGCGGTGAAGTTGGATATGTGCCCTGTAGGT  
TTCTTACTTGTGAGTGTTTACGGAGCTTTTTAGAGTGCTGCGATGAAGCTCTCGACGGTTGGAGTTCTGGTCCAGCAGGATGAGGAAGGGGGGACAAGAGATGCTTGAACCTCGA  
GCTTTGGCATGCTTGTGCTGGTCTCTAGTGTGTCTGCCAATGTCGGAACCCGTTGTCTACTTTCCACAGGGCCACAGCGAGCAGGTCTGTTGGCTTCCACTAATAAGGAGGTTGAAGG  
CCATATTCCTAATTATCCGAACCTTGCACCTCAATTGATCTGCCAACTTCACGATGTGACTATGCACGCTGATGCCGAGACTGACGAAAGTCTACACACAGATGACATTGCAGCCTTTAAATC  
CGCAGGATCTGAAAGATACATACCTTCCAGCTGAGATGGGGCTACCTAGCAAGCAGCCATGAATATTTTTGTAAGACTTTGACTGCAAGCGATAACAAGCACTCATGGAGGGTTTTCTGT  
TCTTCGTCGTGCAGCTGAAAAAGTTTTTCCCTCTCTGGATTTCTCTCAACAGCCACCAGCTCAAGAGCTGATTGCTCGAGATTCATGATGTTGATTGGAAGTTCAGGCATATCTTTAGA  
GGACAACCCAAGAGGCATCTTCTACTACAGGCTGGAGTATCTTTGTCAGTGCTAAGAGACTTGTGCTGGTGAATCTGTTTTATTTATATGGAATGAGAAAAATCAGCTTTTGTGGGAA  
TCCGACGGGCTAATCGACCACAAAATGCTGTACCTTCATCAGTTATATCAAGTGATAGTATGCATATTGGACTGCTTGTGCTGCAGCAGCTCATGCTGCTGCAACAAATAGCCGTTTCACCATT

TTTTACCACCCAAGGGCTTGTCCCTCAGAGTTTGTGATACCACTCTCAAATATGTAAAGGCTGTGTTTCACACTCGTGTCTCAGTTGGCATGCGATTTAGGATGCTTTTCGAGACTGAAG  
AGTCAAGTGTTCGTAGGTATATGGGGACTATAACAGGAATAAGTGATTTGGATCCTGTCCGATGGCCAAATCCCAGTGGAGATCAGTGAAGGTTAATTGGGACGAATCAACTGCAGGTG  
ACAGACAACCTAGAGCATCTTTATGGGAAATTGAGCCTTTGACAACATTTCCAATGTATCCATCACTATTCCTCTCAGACTTAAACCACCTTGGTACACTGGAGTTTCATCTCTAAATGAC  
TACAAGTTAGATGAGGGGAATGCATACATGTGGCTTAGGGGGAGCTCAGGGGGGGTATTAGGTCTTTGAATTTCAATCTCTGGAATTGGTCCGTGTGTTTCAGCAGCAGGTCCAACCA  
CAATTGGGAAACAATCACACTCCTTACCAAGCAATGGATGCTGCAGCTTGTGATATTAGAGGCATGGATCACTTAGGCAGCCATTTCTAAACTTCCAGCAGCCGTTTCAGTTCCTCAGC  
AGTTCCTGTATGAACCCATTGTTGCAGCAGCAAGTTATTCAACAAGCTCACCATGAACAGATAATGAATTCTCAAGCTCAGTCTCTGTTGGATAGTCAACCAAACATTACTTCAAATCAGCT  
GTTGCAACAGCCATACGGTGATCAGCAGAAGCAAAAAGGTCAGCAGCAACCAACTTATCCAGAACTATTTTCATGTTTCAGATTAATAATATAGAACAGCAACAGCTGCCAATACCCTCTCC  
ATTATCTCAAAAATCTGTATTTCTGATTCAAGTATGAACTTTTTCATCAGTTGCAACACCCAGTTGCATACAGAATTTGTCAGCAGCGGCTTATTCTGGAACAAATGCTAATAACTTGCACCT  
TGCAAAAAGTGGTCAGACAATTCTGGCTGAGCAGCATCAGCAAAAATGGGATCCACAGTTTGCATTGCAGAAGGTTTCTACTTTTGGTAATACAGTTTTGCTTCAACCATTTCACGGAAA  
AGATGATAACAAGGAATCTGATGTCTCTCCCACTGATACAAAAACCACAGCCTATTTGATATCAATGTTGGTTCTTCCTTGCTTCTTGGCAATGTTGTGCCTAATCTATTAACGCAAACA  
ATAATGACAATGTTGTATCCAGCATGCCATTTACCCTTCTTATCTTCAAAATTCACCTTATCACAGCCTTGATGAGTCATCAGGTATGTTGCAGCATACTACGACATTGATCCATCAATCAA  
AACTTTTGTAAAGGTTTACAAGTCAGGCTCGGTTGGGAGGTCCTCGACATCACTCGTTTCAGCAACTATACTGAATTACGAAAGGCACTGGGTCAGATGTTTGGTATTGAGGGTCAACT  
TGAAAACCCCTCTAGATCAGGCTGGCAGCTTGTATTTGTTGACAGGGAGAATGATGTGCTTCTTCTTGGAGACGACCCTTGGGAACTTTGTGCATTTCATGGTTGGCCGATCAAAAACCTGTA  
CCTCTTACCTGGTATTCATTTCTAATTAATGCAGATCGTTTGTGAACAATGTGTGGTACATCAAATACTTTCACCAGAGGATGTTTCAGCAAATGGGGCAGCAGGGAGTTGACTTGAGCT  
AATTAACCTTTGAATTTCAATCAAACCAAATGGCAAGTCTGCTCGAGGTGAAATCCCCGTAGGTGCCAAAGTCTGTACTGTCTACTGTTAAACGTATGACAGTAAAATCTGCATAAGATAC  
AGATATTTATGCTATAAAATCCTTGTGTGCAGGTTCTATTTGCTCTTCCATTTACTTCTCGCCAATAACCATGCTCTTAGCTGTTCCATGTAATCTTAAATAGTATATTTTATCTTCTTATCTTA  
TTAATTCTAATTTGTAAAGAACAAGTGTCTAGAAATATCTAAAGCGTGGATCTAAGATTTCGATTACTGGAATAATTTTGGACATCCAGTGAATTTAGCTCCTGTAATGTAAGTAGGATT  
CGAGGACTGAGGAATTTATCCTTATCCATGGATTTATGAAGAGATTTTGTGCTTTGGATATTATCTCTAGATCACTAGTGAGATAACTTAATCAACGCC

>comp171031\_c0\_seq12

AGCACACAATTTAATATTTTCACTTATAATTTACCCAGACGGGAAATCCCCGATATTTCCGGCTAGTGTCTCCTCTTCTTTTCTCAGTGGCTTTACCGTCTGCCCAATTACATCCAATAT  
ATCCATTCACGGCGATCTGGAGCTAGTTCAATGCCGCGCTTCTCCATGCTAGCATTGCGCTGAGCTTTGTGTTCTTACAACCTCTTCGAGGTCGCTGCTTTTCTATTCCTCGAGTTACTTCTTC  
TGATATCGTTTCCCTTTGAGGAGCTCTCCAAGGCCGAACCTCGCTAGAAATTGTGCTTCCCTGTGCGAGCTGCCAAGAAACAAGGGAAGTGTGAAGGCAGAGGTAGAGCTGCTTGGT  
TTCCTGATCAGGGAAGTGGTTATGAATTCTAGAGTTTGAAGTTTATATCTTGGATTCCGTGGCCGCAAATGTTTTCTACTCAATTAATGGAGTTGATTTGGCTTCTTGAACCTTAAGAGTG  
AGGAATGTGAGATTTTTTTTTGAAGTCGATTTGGTAAGGTTCTCCGCGAGTTTTTATACTCGCAATGGTATTTAGGGGTTGGGATCGACGCGGTGAAGTTGGATATGTGCCCTGTAGGT  
TTCTTACTTGTGAGTGTTTACGGAGCTTTTTAGAGTGCTGCGATGAAGCTCTCGACGGTTGGAGTTCTGGTCCAGCAGGATGAGGAAGGGGGGACAAGAGATGCTTGAACCTCGA  
GCTTTGGCATGCTTGTGCTGGTCTTCTAGTGTGTGCTGCCAATGTCGGAACCCGTGTTGTCTACTTTCCACAGGGCCACAGCGAGCAGGTCGTGGCTTCCACTAATAAGGAGGTTGAAGG  
CCATATTCCTAATTATCCGAACCTGCCACCTCAATTGATCTGCCAACTTCACGATGTGACTATGCACGCTGATGCCGAGACTGACGAAAGTCTACACACAGATGACATTGCAGCCTTTAAATC  
CGCAGGATCTGAAAGATACATACCTTCCAGCTGAGATGGGGCTACCTAGCAAGCAGCCATGAATATTTTTGTAAGACTTTGACTGCAAGCGATAACAAGCACTCATGGAGGGTTTTCTGT  
TCTTCGTCGTGCAGCTGAAAAAGTTTTTCTCTCTGGATTTCTCTCAACAGCCACCAGCTCAAGAGCTGATTGCTCGAGATTCATGATGTTGATTGGAAGTTCAGGCATATCTTTAGA  
GGACAACCCAAGAGGCATCTTCTCACTACAGGCTGGAGTATCTTTGTCAGTGCTAAGAGACTTGTGCTGGTGAATCTGTTTTATTTATATGGAATGAGAAAAATCAGCTTTTGTGGGAA  
TCCGACGGGCTAATCGACCACAAAATGCTGTACCTTCATCAGTTATATCAAGTGATAGTATGCATATTGGACTGCTTGTGCTGCAGCAGCTCATGCTGCTGCAACAAATAGCCGTTTCACCATT

TTTTACCACCCAAGGGCTTGTCCCTCAGAGTTTGTGATACCACTCTCAAAATATGTTAAGGCTGTGTTTCACACTCGTGTCTCAGTTGGCATGCGATTTAGGATGCTTTTCGAGACTGAAG  
AGTCAAGTGTTCGTAGGTATATGGGGACTATAACAGGAATAAGTGATTTGGATCCTGTCCGATGGCCAAATCCCCTGAGATCAGTGAAGGTGACAGACAACCTAGAGCATCTTTATGG  
GAAATTGAGCCTTTGACAACATTTCCAATGTATCCATCACTATTTCCCTCTCAGACTTAAACCACCTTGGTACACTGGAGTTTCATCTCTAAATGACTACAAGTTAGATGAGGGGAATGCATA  
CATGTGGCTTAGGGGGAGCTCAGGGGGGGGTATTAGGTCTTTGAATTTCAATCTCCTGGAATTTGGTCCGTGTGTTTCAGCAGCAGGTCCAACCACAATTGGGAAACAATCACACTCCTTA  
CCAAGCAATGGATGCTGCAGCTTGTGATATTAGAGGCATGGATTCACTTAGGCAGCCATTTCTAAACTTCCAGCAGCCGTTTCAGTTCCCTCAGCAGTTCTGTATGAACCCATTGTTGCAG  
CAGCAAGTTATTCAACAAGCTCACCATGAACAGATAATGAATTCTCAAGCTCAGTCTCTGTTGGATAGTCAACCAAACATTACTTCAAATCAGCTGTTGCAACAGCCATACGGTGATCAGC  
AGAAGCAAAAAGGTCAGCAGCAACCAACTTATCCAGAACTATTTTCATGTTTCAGATTAATAATATAGAACAGCAACAGCTGCCAATACCCTCTCCATTATCTCAAAAATCTGTATTTCCCTGAT  
TCAAGTATGAACTTTTCATCAGTTGCAACACCCAGTTGCATACAGAATTTGTCAGCAGCGGCTTATTCTGGAACAAATGCTAATAACTTGCACCTTTGCAAAAATGGTTCAGACAATTCTGG  
CTGAGCAGCATCAGCAAAAATGGGATCCACAGTTTGCATTGCAGAAGGTTTCTACTTTTGGTAATACAGTTTTGCTTCAACCATTTACGGAAAAGATGATACAAGGGAATCTGATGTCTC  
TCCCCTGATACACAAAACCACAGCCTATTTGATATCAATGTTGGTCTTCCCTTGTCTTGGCAATGTTGTGCCTAATCTATTAAACGCAACAATAATGACAATGTTGTATCCAGCATGCC  
ATTTACCCTTCTTATCTTCAAAATTCATTTATCACAGCCTTGATGAGTCATCAGGTATGTTGCAGCATACTACGACATTGATCCATCAATCAAAAATTTTGTAAAGGTTTACAAGTCAGG  
CTCGTTGGGAGGTCACCTCGACATCACTCGTTTCAGCAACTATACTGAATTACGAAAGGCACTGGGTCAGATGTTTGGTATTGAGGGTCAACTTAAAACCCTCTTAGATCAGGCTGGCA  
GCTTGTATTTGTTGACAGGGAGAATGATGTGCTTCTTCTGGAGACGACCCTTGGGAGTAAGACTTTATTATTAACCTTGAACATCTTCAATTTAAAGAAACATTGATCAGCTTATGCTTCT  
CATCAACATTCATATATTCATTTCCCAACTATCTGCAACTTAAGCAACATCAATTTGTCTATAACTATTTTTTAGTTACATGTGTAGAGACAGTTATTTATATTGAGCTTTCTGAAGGCTCCAGC  
GACTAAGGTTTATATGATTTATAAATGCTTTATCAGGTGTATATGCTTCAAGGTTGAGAAACCTTAGCTCTCTAATACTAGTTCAAAAATTTCAATTAGCTTAAACGTGGCATGCTGTGAAC  
ATAACAATTAGATTTTCTACTATCATTGGAAGAAACCTTAATGCTGGTTCTGTGATGGGAATCCCACGTTGATACTAGTAATTTATTGAGCAGAAAACGAAGTTCAAATATCTCTGGTCCT  
GAGCAATGTCGTGCTAGGAAGTAGTAACCAAGTATGAAAACCTATGTATGCTGAGTAATTAATAATTTTTCTGGCAAAACACCTGGCGTACAGTTACTTATATACGCTTCAACATTTTGTAG  
CTATAAAAATTTCTTGTGTTATTTGTAAGATGTGATCAATATATCGTAGCTTTGTACAATGCCTATGCAGACTTTGTGCATTCATGGTTGGCCGATCAAAACCTGTACCTCTCACCTGGTATT  
CATTTCTAATTAATGCAGATCGTTTGTGAACAATGTGTGGTACATCAAAATACTTTACCAGAGGATGTTTCAGCAAATGGGGCAGCAGGGAGTTGACTTGAGCTAATTAACCTTTGAATTT  
AATCAAACCAATGGCAAGTAAGTTTATTTGTGCTTGCACCAGAATATTCTATACTGCGGTGAACATTCTAAGTATTTTTTTTATTAGGCACTATCAAATCTTAATACGCATAATTATTATT  
TGAATGTTGTTGCATGCATGTGTCCATGCCCTGTAATGTGGGAATATATATTTATGTATAACCGGATAATATAAATGTATAATAGTTGTAGTTCCTCTTATTTAATTTAGTAAGGTGCTTTTTT  
GTTTCCATTCTCGGTTGCACAAGTTTTGCTCAAATCAAAGTTGGTCCACGGGGTATCTTATTTATAACGTGTGGGAGATTTTTTGTGTTGCATTTCCAGTAGTATTTTTCTGATCAATATC  
AAAGATTGTCTAGAGAAGTGACTCCCTCCCCTCCTTCCCTCCCTCCAGAAGGATCCATATTATCATATTTTTAGTTGACTTTAAGCACTAGTCCGCCAAATGAATCTACTTCAAAGTTCTGG  
GATGAAACTTTTATGAGTTTGGATGACGCTGTTGACCATCATCAAAAATGTTTTCTTATCATTGGATTCAATTGTGAGAAATAACGATGTGTTTCTTCAAGTGGTTAACCGAGTAAATGC  
GACCTTTTTTAACGTTGCAAATACACTACGAAGGCATGCTAGTTTATGAGATTATCCATCATTATGGTATGAGAATATGAACGCTATTTCTGCACCTTTATCTGATCAGGTGTCATTTTTGT  
AGGTCGCTCGAGGTGAAATCCCCGTAGGTGCCCAAAGTCTGTACTGTCTACTGTAAACGTATGACAGTAAAATCTGCATAAGATAACAGATATTTATGCTATAAAAATCCTTGTGTGCAGG  
TTCTATTTGCTCTTCCATTTACTTCTCGCCAATAACCATGCTCTTAGCTGTTCCATGTACTCTTAAATAGTATATTTATCTTCTTATCTTATTTAATTCTAATTTGTAAAGAACAAAGTGTCT  
AGAATATATCTAAAGCGTGGATCTAAGATTGATTACTGGAATAATTTGGACATCCAGTGAATTTAGCTCCTGTAATGTAAGTAGGATTCGAGGACTGAGGAATTTATCCTTATCCATGGAT  
TTATGAAGAGATTTTTGTGCTTTGGATATTATCTCTAGATCACTAGTGAGATAACTTAATCAACGCC

>comp171031\_c0\_seq13

TCTTTTCTCAGCCTAACACCTGCCAATACCCTCTCCATTATCTCAAAAATCTGTATTTCCCTGATTCAAGTATGAACTTTTCATCAGTTGCAACACCCAGTTGCATACAGAATTTGTGAGCAGC

GGCTTATTCTGGAACAAATGCTAATAACTTGCACCTTTCGAAAACTGGTCAGACAATTCTGGCTGAGCAGCATCAGCAAAAATGGGATCCACAGTTTGCATTGCAGAAGGTTTCTACTTT  
TGGTAATACAGTTTTGCTTCAACCATTTACGGAAAAGATGATACAAGGGAATCTGATGTCTCTCCACTGATACACAAAACCACAGCCTATTTGATATCAATGTTGGTTCTTCCTTGCTTC  
TTGGCAATGTTGTGCCTAATCTATTAAACGCAAAACAATAATGACAATGTTGTATCCAGCATGCCATTTACCACTTCTTATCTTCAAAAATTCATTTATCACAGCCTTGATGAGTCATCAGGTA  
TGTTGCAGCATACTACGACATTGATCCATCAATCAAAACTTTTGTAAAGGTTTACAAGTCAGGCTCGGTTGGGAGGTCCTCGACATCACTCGTTTCAGCAACTATACTGAATTACGAAA  
GGCACTGGGTGAGATGTTTGGTATTGAGGGTCAACTTGA AAAACCCTCTTAGATCAGGCTGGCAGCTTGATTTGTTGACAGGGAGAATGATGTGCTTCTTCTTGAGACGACCCTTGGGA  
GTAAGACTTTATTATTAACCTTGAACATCTTCAATTTAAAGAAAACATTGATCAGCTTATGCTTCTCATCAACATTCATATATTCATTTCCCAACTATCTGCAACTTAAGCAACATCAATTGTCT  
ATAACTATTTTTTAGTTACATGTGTAGAGACAGTTATTTATATTGAGCTTCTGAAGGCTCCAGCGACTAAGGTTTATATGATTTATAAATGCTTTATCAGGTGTATATGCTTCAAGGGTTGAG  
AAACCTTAGCTCTCTTAATACTAGTTCAAAATTTCAATTAGCTTAAACGTGGCATGCTGTGAACATAAACAATTAGATTTTCTACTATCATTGGAAGAAACCTTAATGCTGGTTCTGTGATGG  
GAATCCACGTTGATACTAGTAATTATTGAGCAGAAAACGAAGTTCAAATTATCTCTGGTCTGAGCAATGTCGTGCTAGGAAGTAGTAACCAAGTATGAAAACCTATGTATGCTGAGTAATT  
AAATAATTTTTCTGGCAAAACACCTGGCGTACAGTTACTTATATACGCTTCAACATTTTGTAGCTATAAAAATTTCTTGTGTTATTTGTAAGATGTGATCAATATATCGTAGCTTTGTACAATG  
CCTATGCAGACTTTGTGCATTCATGGTTGGCCGATCAAAACCTGTACCTCTCACCTGGTATTCATTTCTAATTAATGCAGATCGTTTGTGAACAATGTGTGGTACATCAAAAATACTTTACC  
AGAGGATGTTAGCAAAATGGGGCAGCAGGGAGTTGACTTGAGCTAATTAACCTTTGAATTTCAATCAAACCAAATGGCAA

>comp171031\_c0\_seq15

AGCACACAATTTAATATTTTCACTTATAATTTACCCAGACGGGAAATCCCCGATATTTCCGGCTAGTGCTGTCCTCTTCTTTTTCTCAGTGGCTTTACCGTCTGCCCAATTACATCCAATAT  
ATCCATTCACGGCGATCTGGAGCTAGTTTCATTGCCGCGCTTCTCCATGCTAGCATTGCGCTGAGCTTTGTGTTCTTACAACCTTTCGAGGTGCTGCTTTTCTATTCCTCGAGTTACTTCTTC  
TGATATCGTTTCCCTTTGAGGAGCTCTCCAAGGCCGAACCTCGCTAGAAAATTGTGCTTCCCTGTGCGAGCTGCCAAGAAAACAAGGGAACCTGTGAAGGCAGAGGTAGAGCTGCTTGGT  
TTCTGATCAGGGAACCTGGTTATGAATTCTAGAGTTTGAAGTTTATATCTTGGATTCCGTGGCCGCAAATGTTTTCTACTCAATTATGGAGTTGATTTGGCTTCTTGAGCCTTAAGAGTG  
AGGAATGTGAGATTTTTTTTTGAAGTCGATTGGTAAGGTTCTCCGCGAGTTTTTATACTCGCAATGGTATTTAGGGGTTGGGATCGACGCGGTGAAGTTGGATATGTGCCCTGTAGGT  
TTCTTTACTTGTGAGTGTTTACGGAGCTTTTTAGAGTGCTGCGATGAAGCTCTCGACGGTTGGAGTTCTGGTCCAGCAGGATGAGGAAGGGGGGGACAAGAGATGCTTGAACCCGA  
GCTTTGGCATGCTTGTGCTGGTCTCTAGTGTGTCTGCCAATGTCGGAACCCGTGTTGTCTACTTTCCACAGGGCCACAGCGAGCAGGTCGTGGCTTCCACTAATAAGGAGGTTGAAGG  
CCATATTCCTAATTATCCGAACCTTGCCACCTCAATTGATCTGCCAACTTCACGATGTGACTATGCACGCTGATGCCGAGACTGACGAAGTCTACACACAGATGACATTGCAGCCTTTAAATC  
CGCAGGATCTGAAAGATACATACCTTCCAGCTGAGATGGGGCTACCTAGCAAGCAGCCATGAATTATTTTTGTAAGACTTTGACTGCAAGCGATACAAGCACTCATGGAGGGTTTTCTGT  
TCCTCGTCTGTCAGCTGAAAAAGTTTTCTCTCTGGAATTTCTCTCAACAGCCACCAGCTCAAGAGCTGATTGCTCGAGATTCATGATGTTGATTGGAAGTTCAGGCATATCTTTAGA  
GGACAACCCAAGAGGCATCTTCTACTACAGGCTGGAGTATCTTTGTGAGTGTGTAAGAGACTTGTGCTGGTGAATCTGTTTTATTTATATGGAATGAGAAAAATCAGCTTTTGTGGGAA  
TCCGACGGGCTAATCGACCACAAAATGCTGTACCTTCATCAGTTATATCAAGTGATAGTATGCATATTGGACTGCTTGTGCTGACGAGCTCATGCTGCTGCAACAAATAGCCGTTTACCATT  
TTTTACCACCAAGAGTTTTGTGATACCACTCTCAAAATATGTTAAGGCTGTGTTTCACTCTGTTCTCAGTTGGCATGCGATTTAGGATGCTTTTTCGAGACTGAAGAGTCAAGTGTTCGT  
AGGTATATGGGGACTATAACAGGAATAAGTGATTTGGATCCTGTCCGATGGCCAAATCCCCTGAGATCAGTGAAGGTGACAGACAACCTAGAGCATCTTTATGGGAAATTGAGCCTTT  
GACAACATTTCCAATGTATCCATCACTATTCCCTCTCAGACTTAAACCACCTTGGTACTGAGTTTCATCTCTAAATGACTACAAGTTAGATGAGGGGAATGCATACATGTGGCTTAGGG  
GGAGCTCAGGGGGGGTATTAGGTCTTTGAATTTCAATCTCTGGAAATGGTCCGTGTGTTTACAGCAGCAGGTCCAACCACAATTGGGAAACAATCACACTCCTTACCAAGCAATGGATG  
CTGCAGCTTGTGATATTAGAGGCATGGATTCACTTAGGCAGCCATTTCTAAACTTCCAGCAGCCGTTTCACTTCCCTCAGCAGTTCTGTATGAACCCATTGTTGCAGCAGCAAGTTATCA  
ACAAGCTCACCATGAACAGATAATGAATTCTCAAGCTCAGTCTCTGTTGGATAGTCAACCAAACATTACTTCAAATCAGCTGTTGCAACAGCCATACGGTGATCAGCAGAAGCAAAAAGG

TCAGCAGCAACCAACTTATCCAGAACTATTTTCATGTTTCAGATTAATAATATAGAACAGCAACAGCTGCCAATACCCTCTCCATTATCTCAAAAATCTGTATTTCTGATTCAAGTATGAACTT  
TTCATCAGTTGCAACACCCAGTTGCATACAGAAATTTGTCAGCAGCGGCTTATTCTGGAACAAAATGCTAATAACTTGCACCTTTGCAAAAATGGTCAGACAATTTCTGGCTGAGCAGCATCA  
GCAAAAATGGGATCCACAGTTTGCATTGCAGAAGGTTTCTACTTTTGGTAATACAGTTTTGCTTCAACCATTTCACGGAAAAGATGATACAAGGGAATCTGATGTCTCTCCCACTGATACA  
CAAACCACAGCCTATTTGATATCAATGTTGGTTCTTCCCTGCTTCTTGGCAATGTTGTGCTAATCTATTAACGCAAACAATAATGACAATGTTGTATCCAGCATGCCATTTACCCTTCT  
TATCTTCAAAATTCACCTTATCACAGCCTTGATGAGTCATCAGGTATGTTGCAGCATACCTACGACATTGATCCATCAATCAAAAATTTTGTAAAGGTTTACAAGTCAGGCTCGGTTGGGAG  
GTCACCTCGACATCACTCGTTTCAGCAACTATACTGAATTACGAAAGGCACTGGGTCAGATGTTTGGTATTGAGGGTCAACTTGAAAACCCTCTTAGATCAGGCTGGCAGCTTGTATTTGTT  
GACAGGGAGAATGATGTGCTTCTTCTTGGAGACGACCCTTGGGAGTAAGACTTTATTATTAACCTTGAACATCTTCAATTTAAAGAAACATTGATCAGCTTATGCTTCTCATCAACATTCAT  
ATATTCATTTCCCAACTATCTGCAACTTAAGCAACATCAATTGTCTATAACTATTTTTAGTTACATGTGTAGAGACAGTTATTTATATTGAGCTTTCTGAAGGCTCCAGCGACTAAGGTTTAT  
ATGATTTATAAATGCTTTATCAGGTGTATATGCTTCAAGGGTTGAGAAACCTTAGCTCTCTTAATACTAGTTCAAAAATTTCAATTAGCTTAAACGTGGCATGCTGTGAACATAAACAATTAGA  
TTTTCTACTATCATTGGAAGAAACCTTAATGCTGGTCTGTGATGGGAATCCCACGTTGATACTAGTAATTATTGAGCAGAAAACGAAAGTTCAAATTATCTCTGGTCTGAGCAATGTCGTG  
CTAGGAAGTAGTAACCAAGTATGAAAACCTATGTATGCTGAGTAATTAATAATTTTTCTGGCAAAACACCTGGCGTACAGTTACTTATATACGCTTCAACATTTTGTAGCTATAAAAAATTTCT  
TGTGTTATTTGTAAGATGTGATCAATATATCGTAGCTTTGTACAATGCCTATGCAGACTTTGTGCATTCATGGTTGGCCGATCAAAACCTGTACCTCTTACCTGGTATTCATTTCTAATTAAT  
GCAGATCGTTTGTGAACAATGTGTGGTACATCAAAAATACTTTACCAGAGGATGTTTCAGCAAATGGGGCAGCAGGGAGTTGACTTGAGCTAATTAACCTTTGAATTTCAATCAAAACCAAT  
GGCAAGTCTGCTCGAGGTGAAATCCCCGTAGGTGCCCAAAGTCTGTACTGTCTACTGTTAAACGTATGACAGTAAAATCTGCATAAGATACAGATATTTATGCTATAAAAATCCTTGTGTGC  
AGGTTCCCTATTTGCTCTCCATTTACTTCTCGCCAATAACCATGCTCTTAGCTGTTCCATGTACTCTTAAATAGTATATTTTATCTTCTTATTTAATTTCTAATTTGTAAAGAACAAGTGT  
CCTAGAATATATCTAAAGCGTGGATCTAAGATTCGATTACTGGAATAATTTGGACATCCAGTGAATTTAGCTCCTGTAATGTAAGTAGGATTCGAGGACTGAGGAATTTATCCTTATCCATG  
GATTTATGAAGAGATTTTGTGCTTTGGATATATCTCTAGATCACTAGTGAGATAACTTAATCAACGCC

>comp171031\_c0\_seq16

AGCACACAATTTAATATTTTCACTTATAATTTACCCAGACGGGAAATCCCCGATATTTCCGGCTAGTGCTGTCCCTCTTCTTTTTCTCAGTGGCTTTACCGTCTGCCCAATTACATCCAATAT  
ATCCATTCACGGCGATCTGGAGCTAGTTTCATTGCCGCGCTTCTCCATGCTAGCATTGCGCTGAGCTTTGTGTTCTTACAACCTCTTCGAGGTCGCTGCTTTTCTATTCCTCGAGTTACTTCTTC  
TGTATATCGTTTCCCTTTGAGGAGCTCTCCAAGGCCGAACCTCGCTAGAAATTTGTGCTTCTTGTGCGAGCTGCCAAGAAAACAAGGGAAGTGTGAAGGCAGAGGTAGAGCTGCTTGGT  
TTCCTGATCAGGGAAGTGGTTATGAATCTAGAGTTTGAAGTTTATATCTTGGATTCCGTGGCCGCAAATGTTTTCTACTCAATTATGGAGTTGATTTGGCTTCTTGAGCCTTAAGAGTG  
AGGAATGTGAGATTTTTTTTTGAAGTCGATTTGGTAAGGTTCCCTCCGCGAGTTTTTATACTCGCAATGGTATTTAGGGGTTTGGGATCGACGCGGTGAAGTTGGATATGTGCCCTGTAGGT  
TTCTCTTACTTGTGAGTGTTTACGGAGCTTTTTAGAGTGTGCGATGAAGCTCTCGACGGTTGGAGTTCTGGTCCAGCAGGATGAGGAAGGGGGGGACAAGAGATGCTTGAACCTCCGA  
GCTTTGGCATGCTTGTGCTGGTCTCTAGTGTGTCTGCCAATGTCGGAACCCGTGTTGTCTACTTTCCACAGGGCCACAGCGAGCAGGTCGTGGCTTCCACTAATAAGGAGGTTGAAGG  
CCATATTCCTAATTATCCGAACTTGCCACCTCAATTGATCTGCCAACTTCACGATGTGACTATGCACGCTGATGCCGAGACTGACGAAAGTCTACACACAGATGACATTGCAGCCTTTAAATC  
CGCAGGATCTGAAAGATACATACCTTCCAGCTGAGATGGGGCTACCTAGCAAGCAGCCATGAATATTTTTGTAAGACTTTGACTGCAAGCGATAACAAGCACTCATGGAGGGTTTTCTGT  
TCCTCGTGCTGCAGCTGAAAAGTTTTTCCCTCCTCTGGATTTCTCTCAACAGCCACCAGCTCAAGAGCTGATTGCTCGAGATTCATGATGTTGATTGGAAGTTCAGGCATATCTTTAGA  
GGACAACCCAAGAGGCATCTTCTACTACAGGCTGGAGTATCTTTGTCAGTGCTAAGAGACTTGTGCTGGTGAATCTGTTTTATTTATATGGAATGAGAAAAATCAGCTTTTGTGGGAA  
TCCGACGGGCTAATCGACCACAAAATGCTGTACCTTCATCAGTTATATCAAGTGATAGTATGCATATTGGACTGCTTGTGCTGCAGCAGCTCATGCTGCTGCAACAAAATAGCCGTTTACCATT  
TTTTACCACCCAAGAGTTTGTGATACCACTCTCAAAAATATGTTAAGGCTGTGTTTCACACTCGTGTCTCAGTTGGCATGCGATTTAGGATGCTTTTTCGAGACTGAAGAGTCAAGTGTTCGT



AGGTATATGGGGACTATAACAGGAATAAGTGATTTGGATCCTGTCCGATGGCCAAATCCCCTGGAGATCAGTGAAGGTTAATTGGGACGAATCAACTGCAGGTGACAGACAACCTAGA  
GCATCTTTATGGGAAATTGAGCCTTTGACAACATTTCCAATGTATCCATCACTATTCCCTCTCAGACTTAAACCACCTTGGTACACTGGAGTTTCATCTCTAAATGACTACAAGTTAGATGA  
GGGGAATGCATACATGTGGCTTAGGGGGAGCTCAGGGGGGGTATTAGGTCTTTGAATTTCAATCTCTGGAATTGGTCCGTGTGTTACAGCAGCAGGTCCAACCACAATTGGGAAACAA  
TCACACTCCTTACCAAGCAATGGATGCTGCAGCTTGTGATATTAGAGGCATGGATTCACTTAGGCAGCCATTTCTAAACTTCCAGCAGCCGTTTCAGTTCCTCAGCAGTTCGTGATGAAC  
CCATTGTTGCAGCAGCAAGTTATTCAACAAGCTCACCATGAACAGATAATGAATTCTCAAGCTCAGTCTCTGTTGGATAGTCAACCAAAACATTACTTCAAATCAGCTGTTGCAACAGCCAT  
ACGGTGATCAGCAGAAGCAAAAAGGTCAGCAGCAACCAACTTATCCAGAACTATTTATGTTTCAGATTAATAATATAGAACAGCAACAGCTGCCAATACCCTCTCCATTATCTCAAAAATC  
TGTATTTCCCTGATTCAAGTATGAACCTTTTCATCAGTTGCAACACCCAGTTGCATACAGAAATTTGTCAGCAGCGGCTTATTCTGGAACAAATGCTAATAACTTGCACCTTTGCAAAAATGGTC  
AGACAATTTCTGGCTGAGCAGCATCAGCAAAAATGGGATCCACAGTTTGCATTGCAGAAGGTTTCTACTTTTGGTAATACAGTTTTGCTTCAACCATTTACGGAAAAGATGATACAAGGG  
AATCTGATGTCTCTCCACTGATACACAAAACACAGCCTATTTGATATCAATGTTGGTTCTTCCTTGCTTCTGGCAATGTTGTGCCTAATCTATTAACGCAAAACAATAATGACAATGTTG  
TATCCAGCATGCCATTTACCACCTTCTTATCTTCAAAAATCACTTTATCACAGCCTTGATGAGTATCAGGTATGTTGCAGCATACTACGACATTGATCCATCAATCAAAAATTTTGTAAAGG  
TTTACAAGTCAGGCTCGGTTGGGAGGTCCTCGACATCACTCGTTTCAGCAACTATACTGAATTACGAAAGGCCTGGGTGAGATGTTTGGTATTGAGGGTCAACTGAAAACCTCTTA  
GATCAGGCTGGCAGCTTGTATTTGTGACAGGGAGAATGATGTTCTTCTTGTGCGGATGATCCATGGCCGGAGTTCGTGAACAATGTGTGGTGTATTAAGATACTCTCCCTACAGGAAGT  
GCAGCAGATGGCCAAGCAAGGCGTTAACCTCATAAACTCTGCACCACTGCGAAAAGCTTTCAACTGGAAGCTGTGACAATTACATCGCTCAGCAAGAATCGAGAAATCTGAGCTCCGAGA  
TCATGCCTGTAGCTTCTTTGGACTATTGAGTCTTATTGCTCTCTGAAAACCTTTTCTGTGCTTTGACTATCTTTCTGAAGACATCTAAAGCTATATATATGTGTATCTACAATAACTTTATTGT  
AACTTCAGAAGACTTCTTTTGTAGACTGTAAGACTTGATTATCTAGTTTACTCATGGTAACTGTTATTAGTCCATTGCTTGTAAATTTTGGCTAGAGCAATTGCATCAGAATATCCTGATAGAATT  
TGTGACTCTGTGTTAGATGATAAAATGCTCAAAACTAGAAGATAAGTGTTCAAAAATTACAAGGAATTTAAGTTTTATGTTACAGAAAAAA

>comp171031\_c0\_seq18

AGCACACAATTTAATATTTTCACTTATAATTTACCCAGACGGGAAATCCCCGATATTTCCGGCTAGTGCTGTCCCTCTCTTTTTTCTCAGTGGCTTTACCGTCTGCCCAATTACATCCAATAT  
ATCCATTCACGGCGATCTGGAGCTAGTTCAATTGCCGCGCTTCTCCATGCTAGCATTGCCTGAGCTTTGTGTTCTTACAACCTCTTCGAGGTGCTGCTTTTCTATTCCTCGAGTTACTTCTTC  
TGATATATCGTTTCCCTTTGAGGAGCTCTCCAAGGCCGAACCTCGCTAGAAAATTGTGCTTCCCTGTGCGAGCTGCCCAAGAAACAAGGGAAGTGTGAAGGCAGAGGTAGAGCTGCTTGGT  
TTCCTGATCAGGGAAGTGGTTATGAATTTAGAGTTTGAAGTTTATATCTTGGATTCCGTGGCCGAAATGTTTTTCTACTCAATTTATGGAGTTGATTTGGCTTCTTGAACCTTAAAGAGTG  
AGGAATGTGAGATTTTTTTTTGAAGTCGATTTGGTAAGGTTCTCCGCGAGTTTTTTATACTCGCAATGGTATTTAGGGGTTTGGGATCGACGCGGTGAAGTTGGATATGTGCCCTGTAGGT  
TTCTCTTACTTGTGAGTGTTTACGGAGCTTTTGTAGAGTGTGCGATGAAGCTCTCGACGGTTGGAGTTCCTGGTCCAGCAGGATGAGGAAGGGGGGGACAAGAGATGCTTGAACCTCCGA  
GCTTTGGCATGCTTGTGCTGGTCTCTAGTGTGTCTGCCAATGTCGGAACCCGTGTTGTCTACTTTCCACAGGGCCACAGCGAGCAGGTCGTGGCTTCCACTAATAAGGAGGTTGAAGG  
CCATATTCCTAATTATCCGAACTTGCCACCTCAATTGATCTGCCAACTTACGATGTGACTATGCACGCTGATGCCGAGACTGACGAAGTCTACACACAGATGACATTGCAGCCTTTAAATC  
CGCAGGATCTGAAAGATACATACCTTCCAGCTGAGATGGGGCTACCTAGCAAGCAGCCCATGAATATTTTTGTAAGACTTTGACTGCAAGCGATAACAAGCACTCATGGAGGGTTTTCTGT  
TCCTCGTGTGACAGTGA AAAAGTTTTTCTCTCTGGATTTCTCTCAACAGCCACCAGCTCAAGAGCTGATTGCTCGAGATTTATGATGTTGATTGGAAGTTCAGGCATATCTTTAGA  
GGACAACCCAAGAGGCATCTTCTACTACAGGCTGGAGTATCTTTGTGAGTCTAAGAGACTTGTGCTGGTATTCTGTTTTATTTATATGGAATGAGAAAAATCAGCTTTTGTGGGAA  
TCCGACGGGCTAATCGACCACAAAATGCTGTACCTTCATCAGTTATATCAAGTGATAGTATGCATATTGGACTGCTTGTGCTGCAGCAGCTCATGCTGCTGCAACAAATAGCCGTTTACCATT  
TTTTACCACCCAAGAGTTTTGTGATACCACTCTCAAAAATATGTTAAGGCTGTGTTTACACTCGTGTCTCAGTTGGCATGCGATTTAGGATGCTTTTTCGAGACTGAAGAGTCAAGTGTTCGT  
AGGTATATGGGGACTATAACAGGAATAAGTGATTTGGATCCTGTCCGATGGCCAAATCCCCTGGAGATCAGTGAAGGTGACAGACAACCTAGAGCATCTTTATGGGAAATTGAGCCTTT

GACAACATTTCCAATGTATCCATCACTATTCCCTCTCAGACTTAAACCACCTTGGTACACTGGAGTTTCATCTCTAAATGACTACAAGTTAGATGAGGGGAATGCATACATGTGGCTTAGGG  
GGAGCTCAGGGGGGGGTATTAGGTCTTTGAATTTCAATCTCCTGGAATTGGTCCGTGTGTTTCAGCAGCAGGTCCAACCACAATTGGGAAACAATCACACTCCTTACCAAGCAATGGATG  
CTGCAGCTTGTGATATTAGAGGCATGGATTCACTTAGGCAGCCATTTCTAAACTTCCAGCAGCCGTTTCAGTTCCTCAGCAGTTCTGTATGAACCCATTGTTGCAGCAGCAAGTTATTCA  
ACAAGCTCACCATGAACAGATAATGAATTCTCAAGCTCAGTCTCTGTTGGATAGTCAACCAACATTACTTCAAATCAGCTGTTGCAACAGCCATACGGTGATCAGCAGAAGCAAAAAGG  
TCAGCAGCAACCAACTTATCCAGAACTATTTTCATGTTTCAGATTAATAATATAGAACAGCAACAGCTGCCAATACCCTCTCCATTATCTCAAAAATCTGTATTTCCCTGATTCAAGTATGAACTT  
TTCATCAGTTGCAACACCCAGTTGCATACAGAAATTTGTCAGCAGCGGCTTATTCTGGAACAAATGCTAATAACTTGCACCTTTGCAAAAATGGTCAGACAATTCTGGCTGAGCAGCATCA  
GCAAAAATGGGATCCACAGTTTGCATTGCAGAAGGTTTCTACTTTTGGTAATACAGTTTTGCTTCAACCATTTCACGGAAAAGATGATACAAGGGAATCTGATGTCTCTCCACTGATACA  
CAAAACCACAGCCTATTTGATATCAATGTTGGTTCTTCCCTGCTTCTTGGCAATGTTGTGCTAATCTATTAACGCAACAATAATGACAATGTTGTATCCAGCATGCCATTTACCACTTCT  
TATCTTCAAAATTCACCTTATCACAGCCTTGATGAGTCATCAGGTATGTTGCAGCATACTACGACATTGATCCATCAATCAAACTTTTGTAAAGGTTTACAAGTCAGGCTCGGTTGGGAG  
GTCACCTCGACATCACTCGTTTCAGCAACTATACTGAATTACGAAAGGCACTGGGTCAGATGTTGGTATTGAGGGTCAACTTGAAAACCCTCTTAGATCAGGCTGGCAGCTTGATTTGTT  
GACAGGGAGAATGATGTGCTTCTTCTGGAGACGACCCTTGGGAATCGTTTGTGAACAATGTGTGGTACATCAAAATACTTTCACCAGAGGATGTTTCAGCAAATGGGGCAGCAGGGAGT  
TGACTTGAGCTAATTAACCTTTGAATTTCAATCAAACCAAAATGGCAAGTAAGTTTATTTGTGCTTGACCAGAATATTCCTATACTGCGGTGAACATTCTAAGTATTTTTTTTATTTAGGACTA  
TCAAATCTTAATACGCATAATTATTTTTGAATGTTGTTGCATGCATGTGTCCATGCCCTGTAATGTGGGGAATATATATTTATGTATAACCGGATAATATAAATGTATAATAGTTGTAGTTCTT  
CTTATTTAATTTAGTAAGGTGTCTTTTTTGTTCCTTCCATTCCTCGGTTGCACAAGTTTTGTCTCAAATCAAAGTTGGTCCACGGGGGTATCTTATTTATAACGTGTGGGAGATTTTTTGTGTTGCATT  
TTCCAGTAGATTTTTTCTGATCAATATCAAAGATTGTCTAGAGAAGTGACTCCCTCCCTCCTTCCCTCCCTCCAGAAGGATCCATATTATCATATTTTTTAGTTGACTTTAAGCACTAGTCCG  
CCAAATGAATCTACTTCAAAGTTCTGGGATGAAACTTTTATGAGTTTGGATGACGCTGTTGACCATCATCATAAACTGTTTTCTATCATTTGGATTCATTGTGAGAAATAACGATGTGTTT  
CTTCAAGTGGTTAACCGAGTAAATGCGACCTTTTTTAACGTTGCAAATACACTACGAAGGCATGCTAGTTTATGAGATTATCCATCATTATGGTATGAGAATATGAACGCTATTTCTGCAC  
TTTATCTGATCAGGTGTCATATTTGTAGGTCTGCTCGAGGTGAAATCCCCGTAGGTGCCCAAAGTCTGTACTGTCTACTGTTAAACGTATGACAGTAAAATCTGCATAAGATACAGATATTT  
ATGCTATAAAATCCTTGTTGTGCAGGTTCCATTTGCTCTTCCATTTACTTCTCGCCAATAACCATGCTCTTAGCTGTTCCATGTACTCTTAAATAGTATATTTATCTTCTTATCTTATTTAATT  
CTAATTTGTAAAGAACAAGTGTCTAGAAATATATCTAAAGCGTGGATCTAAGATTGATTACTGGAATAATTTGGACATCCAGTGAATTTAGCTCCTGTAATGTAAGTAGGATTCGAGGA  
CTGAGGAATTTATCCTTATCCATGGATTTATGAAGAGATTTTTGTGCTTTGGATATTATCTCTAGATCACTAGTGAGATAACTTAATCAACGCC

>comp171031\_c0\_seq19

AGCACACAATTTTAATATTTTCACTTATAATTTACCCAGACGGGAAATCCCCGATATTTCCGGCTAGTGCTGTCCCTCTCTTTTTCTCAGTGGCTTTACCGTCTGCCCAATTACATCCAATAT  
ATCCATTCACGGCGATCTGGAGCTAGTTTCATTGCCGCGCTTCTCCATGCTAGCATTGCGCTGAGCTTTGTGTTCTTACAACCTCTTCGAGGTCGCTGCTTTTCTATTCCTCGAGTTACTTCTTC  
TGTATATCGTTTCCCTTTGAGGAGCTCTCCAAGGCCCGAACTTCGCTAGAAATTGTGCTTCCCTGTGCGAGCTGCCCAAGAAACAAGGGAAGTGTGAAGGCAGAGGTAGAGCTGCTTGGT  
TTCTGATCAGGGAAGTGGTTATGAATTCTAGAGTTTGAAGTTTATATCTTGGATTCCGTGGCCGCAAATGTTTTCTACTCAATATGGAGTTGATTTGGCTTCTTGAGCCTTAAAGAGTG  
AGGAATGTGAGATTTTTTTTTGAAGTCGATTTGGTAAGGTTCTCCGCGAGTTTTTATACTCGCAATGGTATTTAGGGGTTGGGATCGACGCGGTGAAGTTGGATATGTGCCCTGTAGGT  
TTCTTTACTTGTGAGTGTTTACGGAGCTTTTTAGAGTGCTGCGATGAAGCTCTCGACGGTTGGAGTTCTGGTCCAGCAGGATGAGGAAGGGGGGGACAAGAGATGCTTGAACCTCCGA  
GCTTTGGCATGCTTGTGCTGGTCTTCTAGTGTGTCTGCCAATGTCGGAACCCGTGTTGTCTACTTTCCACAGGGCCACAGCGAGCAGGTCGTGGCTTCCACTAATAAGGAGGTTGAAGG  
CCATATTCCTAATTATCCGAACCTGCCACCTCAATTGATCTGCCAACTTCACGATGTGACTATGCACGCTGATGCCGAGACTGACGAAAGTCTACACACAGATGACATTGCAGCCTTTAAATC  
CGCAGGATCTGAAAGATACATACCTTCCAGCTGAGATGGGGCTACCTAGCAAGCAGCCATGAATTATTTTTGTAAAGACTTTGACTGCAAGCGATAACAAGCACTCATGGAGGGTTTTCTGT

TCCTCGTCGTGCAGCTGAAAAAGTTTTTCCTCCTCTGGATTTCTCTCAACAGCCACCAGCTCAAGAGCTGATTGCTCGAGATATTCATGATGTTGATTGGAAGTTCAGGCATATCTTTAGA  
GGACAACCCAAGAGGCATCTTCTCACTACAGGCTGGAGTATCTTTGTGTCAGTGCTAAGAGACTTGTGCTGGTGATTCTGTTTTATTTATATGGAATGAGAAAAATCAGCTTTTGTGGGAA  
TCCGACGGGCTAATCGACCACAAAATGCTGTACCTTCATCAGTTATATCAAGTGATAGTATGCATATTGGACTGCTTGCTGCAGCAGCTCATGCTGCTGCAACAAAATAGCCGTTTCACCATT  
TTTTACCACCCAAGAGTTTTGTGATACCCTCTCAAAAATATGTTAAGGCTGTGTTTCACACTCGTGTCTCAGTTGGCATGCGATTAGGATGCTTTTCGAGACTGAAGAGTCAAGTGTTTCGT  
AGGTATATGGGGACTATAACAGGAATAAGTGATTTGGATCCTGTCCGATGGCCAAATTCCCCTGGAGATCAGTGAAGGTTAATTGGGACGAATCAACTGCAGGTGACAGACAACCTAGA  
GCATCTTTATGGGAAATTGAGCCTTTGACAACATTTCCAATGTATCCATCACTATTCCCTCTCAGACTTAAACCACCTTGGTACACTGGAGTTTCATCTCTAAATGACTACAAGTTAGATGA  
GGGAATGCATACATGTGGCTTAGGGGGAGCTCAGGGGGGGGTATTAGGTCTTTGAATTTTCAATCTCCTGGAATTGGTCCGTGTGTTTCAGCAGCAGGTCCAACCACAATTGGGAAACAA  
TCACACTCCTTACCAAGCAATGGATGCTGCAGCTTGTGATATTAGAGGCATGGATTCACTTAGGCAGCCATTTCTAAACTTCCAGCAGCCGTTTCAGTTCCCTCAGCAGTTCTGTATGAAC  
CCATTGTTGCAGCAGCAAGTTATTCAACAAGCTCACCATGAACAGATAATGAATTCTCAAGCTCAGTCTCTGTTGGATAGTCAACCAAACATTACTTCAAATCAGCTGTTGCAACAGCCAT  
ACGGTGATCAGCAGAAGCAAAAAGGTCAGCAGCAACCAACTTATCCAGAACTATTCATGTTTCAGATTAATAATATAGAACAGCAACAGCTGCCAATACCCTCTCCATTATCTCAAAAATC  
TGATTTCCCTGATTCAAGTATGAACCTTTTCATCAGTTGCAACACCCAGTTGCATACAGAATTTGTCAGCAGCGGCTTATTCTGGAACAAAATGCTAATAACTTGCACCTTTGCAAAAATGTTG  
AGACAATTCTGGCTGAGCAGCATCAGCAAAAATGGGATCCACAGTTTGCATTGCAGAAGGTTTCTACTTTTGGTAATACAGTTTTGCTTCAACCATTTACGGAAAAGATGATACAAGGG  
AATCTGATGCTCTCCCACTGATACACAAAACCACAGCCTATTTGATATCAATGTTGGTTCTTCCCTTGCTTCTGGCAATGTTGTGCCTAATCTATTAACGCAAAAATAATGACAATGTTG  
TATCCAGCATGCCATTTACCACCTTCTATCTTCAAATTTCACTTTATCACAGCCTTGATGAGTCATCAGGTATGTTGCAGCATACTACGACATTGATCCATCAATCAAAAATTTTGTAAAGG  
TTTACAAGTCAGGCTCGGTTGGGAGGTCCTCGACATCACTCGTTTCAGCAACTATACTGAATTACGAAAGGCCTGGGTGAGATGTTTGGTATTGAGGGTCAACTTGAAAACCTCTTA  
GATCAGGCTGGCAGCTTGTATTTGTTGACAGGGAGAATGATGTGCTTCTTCTGGAGACGACCCTTGGGAATCGTTTGTGAACAATGTGTGGTACATCAAAAATACTTTACCAGAGGATGT  
TCAGCAAATGGGGCAGCAGGGAGTTGACTTGAGCTAATTAACCTTTGAATTTCAATCAAACCAAATGGCAAGTCTGCTCGAGGTGAAATCCCCGTAGGTGCCCAAAGTCTGTACTGTCTAC  
TGTTAAACGTATGACAGTAAAATCTGCATAAGATACAGATATTTATGCTATAAAATCCTTGTGTGCAGGTTCCATTTGCTCTTCCATTTACTTCTCGCCAATAACCATGCTCTTAGCTGTTT  
CATGTACTCTTAAATAGTATATTTTATCTTCTTATCTTATTTAATTCTAATTTGTAAAGAACAAAGTGTCTTAGAATATATCTAAAGCGTGGATCTAAGATTTCGATTACTGGAATAATTTTGGAC  
ATCCAGTGAATTTAGCTCCTGTAATGTAAGTAGGATTCGAGGACTGAGGAATTTATCCTTATCCATGGATTTATGAAGAGATTTTGTGCTTTGGATATTATCTCTAGATCACTAGTGAGATAA  
CTTAATCAACGCC

>comp171031\_c0\_seq20

AGCACACAATTTTAATATTTTCACTTATAATTTACCCAGACGGGAAATCCCCGATATTTCCGGCTAGTGTGCTCCTCTCTTTTTCTCAGTGGCTTTACCGTCTGCCCAATTACATCCAATAT  
ATCCATTCACGGCGATCTGGAGCTAGTTTCATTGCCGCGCTTCTCCATGCTAGCATTGCGCTGAGCTTTGTGTTCTTACAACCTCTTCGAGGTGCTGCTTTTCTATTCCTCGAGTTACTTCTTC  
TGATATCGTTTCCCTTTGAGGAGCTCTCCAAGGCCCGAACTTCGCTAGAAATTGTGCTTCCCTGTGCGAGCTGCCCAAGAAACAAGGGAAGTGTGAAGGCAGAGGTAGAGCTGCTTGGT  
TTCTGATCAGGGAACTTGGTTATGAATTCTAGAGTTTGAAGTTTATATCTTGGATTCCGTGGCCGCAAATGTTTTCTACTCAATATGGAGTTGATTTGGCTTCTTGAACCTTAAAGAGTG  
AGGAATGTGAGATTTTTTTTTGAAGTCGATTTGGTAAGGTTCCCTCCGCGAGTTTTTATACTCGCAATGGTATTTAGGGGTTGGGATCGACGCGGTGAAGTTGGATATGTGCCCTGTAGGT  
TTCTCTTACTTGTGAGTGTTTACGGAGCTTTTTAGAGTGCTGCGATGAAGCTCTCGACGGTTGGAGTTCTGGTCCAGCAGGATGAGGAAGGGGGGGACAAGAGATGCTTGAACCTCCGA  
GCTTTGGCATGCTTGTGCTGGTCTTAGTGTGTGCTGCCAATGTCGGAACCCGTGTTGTCTACTTTCCACAGGGCCACAGCGAGCAGGTGCTGGCTTCCACTAATAAGGAGGTTGAAGG  
CCATATTCCTAATTATCCGAACTTGCCACCTCAATTGATCTGCCAACTTCACGATGTGACTATGCACGCTGATGCCGAGACTGACGAAGTCTACACACAGATGACATTGCAGCCTTTAAATC  
CGCAGGATCTGAAAGATACATACCTTCCAGCTGAGATGGGGCTACCTAGCAAGCAGCCATGAATTTTTTGTAAAGACTTTGACTGCAAGCGATAACAAGCACTCATGGAGGGTTTTCTGT

TCCTCGTCGTGCAGCTGAAAAAGTTTTTCCTCCTCTGGATTTCTCTCAACAGCCACCAGCTCAAGAGCTGATTGCTCGAGATATTCATGATGTTGATTGGAAGTTCAGGCATATCTTTAGA  
GGACAACCCAAGAGGCATCTTCTACTACAGGCTGGAGTATCTTTGTCACTGCTAAGAGACTTGTGCTGGTATTCTGTTTTATTTATATGGAATGAGAAAAATCAGCTTTTGTGGGAA  
TCCGACGGGCTAATCGACCACAAAATGCTGTACCTTCATCAGTTATATCAAGTGATAGTATGCATATTGGACTGCTTGTGCTGCAGCAGCTCATGCTGCTGCAACAAATAGCCGTTTACCATT  
TTTTACCACCCAAGGGCTTGTCCCTCAGAGTTTGTGATACCCTCTCAAAATATGTTAAGGCTGTGTTTCACACTCGTGTCTCAGTTGGCATGCGATTTAGGATGCTTTTCGAGACTGAAG  
AGTCAAGTGTTCGTAGGTATATGGGGACTATAACAGGAATAAGTGATTTGGATCCTGTCCGATGGCCAAATCCCCTGAGATCAGTGAAGGTTAATTGGGACGAATCAACTGCAGGTG  
ACAGACAACCTAGAGCATCTTTATGGGAAATTGAGCCTTTGACAACATTTCCAATGTATCCATCACTATTCCTCTCAGACTTAAACCACCTGGTACACTGGAGTTTCATCTCTAAATGAC  
TACAAGTTAGATGAGGGGAATGCATACATGTGGCTTAGGGGGAGCTCAGGGGGGGGTATTAGGTCTTTGAATTTCAATCTCCTGGAATTGGTCCGTGTGTTTCAGCAGCAGGTCCAACCA  
CAATTGGGAAACAATCACACTCCTTACCAAGCAATGGATGCTGCAGCTTGTGATATTAGAGGCATGGATTAAGTGGCAGCCATTTCTAAACTTCCAGCAGCCGTTTTCAGTTCCCTCAGC  
AGTTCTGTATGAACCCATTGTTGCAGCAGCAAGTTATTCAACAAGCTCACCATGAACAGATAATGAATTTCTCAAGCTCAGTCTCTGTTGGATAGTCAACCAAACATACTTCAAATCAGCT  
GTTGCAACAGCCATACGGTGATCAGCAGAAGCAAAAAGGTCAGCAGCAACCAACTTATCCAGAATTTTCATGTTTCAGATTAATAATATAGAACAGCAACAGCTGCCAATACCCTCTCC  
ATTATCTCAAAAATCTGTATTTCTGATTCAAGTATGAACCTTTTCATCAGTTGCAACACCCAGTTGCATACAGAATTTGTCAGCAGCGGCTTATTCTGGAACAAATGCTAATAACTTGCACCT  
TGCAAAAAGTGGTCAGACAATTCTGGCTGAGCAGCATCAGCAAAAATGGGATCCACAGTTTGCATTGCAGAAGTTTCTACTTTTGGTAATACAGTTTTGCTTCAACCATTTCACGAAA  
AGATGATACAAGGGAATCTGATGCTCTCCCACTGATACACAAAACCACAGCCTATTTGATATCAATGTTGGTTCTTCCTTGCTTCTTGGCAATGTTGTGCCTAATCTATTAACGCAAACA  
ATAATGACAATGTTGTATCCAGCATGCCATTTACCCTTCTTATCTTCAAAATTCACCTTATCACAGCCTTGATGAGTCATCAGGTATGTTGCAGCATACTACGACATTGATCCATCAATCAA  
AACTTTTGTAAAGTTTACAAGTCAGGCTCGGTTGGGAGGTCACTCGACATCACTCGTTTCAGCAACTATACTGAATTACGAAAGGCACTGGGTGAGATGTTTGGTATTGAGGGTCAACT  
TGAAAACCCCTCTAGATCAGGCTGGCAGCTTGTATTTGTTGACAGGGAGAATGATGTGCTTCTTCTTGGAGACGACCCTTGGGAATCGTTTGTGAACAATGTGTGGTACATCAAATACTT  
TCACCAGAGGATGTTTCAGCAAATGGGGCAGCAGGGAGTTGACTTGAGCTAATTAACCTTTGAATTTCAATCAAACCAAATGGCAAGTCTGCTCGAGGTGAAATCCCCGTAGGTGCCAAA  
GTCTGTACTGTCTACTGTAAACGTATGACAGTAAATCTGCATAAGATACAGATATTTATGCTATAAAATCCTTGTTGTGCAAGTTCCTATTTGCTCTTCCATTTACTTCTCGCCAATAACCA  
TGCTCTTAGCTGTTCCATGTACTCTTAAATAGTATATTTTATCTTCTTATCTTATTTAATTCTAATTTGTAAAGAACAAGTGTCTAGAAATATATCTAAAGCGTGGATCTAAGATTCGATTACT  
GGAATAATTTTGGACATCCAGTGAATTTAGCTCCTGTAATGTAAGTAGGATTCGAGGACTGAGGAATTTATCCTTATCCATGGATTTATGAAGAGATTTTTGTGCTTTGGATATTATCTCTAGA  
TCACTAGTGAGATAACTTAATCAACGCC

>comp171031\_c0\_seq21

AGCACACAATTTAATATTTTCACTTATAATTTACCCAGACGGGAAATCCCCGATATTTCCGGCTAGTGTGCTCCTCTCTTTTTCTCAGTGGCTTTACCGTCTGCCCAATTACATCCAATAT  
ATCCATTCACGGCGATCTGGAGCTAGTTTCATTGCCGCGCTTCTCCATGCTAGCATTCCGCTGAGCTTTGTGTTCTTACAACCTCTTCGAGGTGCTGCTTTTCTATTCCTCGAGTTACTTCTTC  
TGATATCGTTTCCCTTTGAGGAGCTCTCCAAGGCCCGAACTTCGCTAGAAATTGTGCTTCCCTGTGCGAGCTGCCCAAGAAACAAGGGAAGTGTGAAGGCAGAGGTAGAGCTGCTTGGT  
TTCTGATCAGGGAAGTGGTTATGAATTTAGAGTTTGAAGTTTATATCTTGGATTCCGTGGCCGCAAATGTTTTCTACTCAATTTAGGAGTTGATTTGGCTTCTTGAACCTTAAAGAGTG  
AGGAATGTGAGATTTTTTTTTGAAGTCGATTTGGTAAGGTTCTCCGCGAGTTTTTATACTCGCAATGGTATTTAGGGGTTGGGATCGACGCGGTGAAGTTGGATATGTGCCCTGTAGGT  
TTCTTACTTGTGAGTGTTTACGGAGCTTTTGTAGAGTGTGCGATGAAGCTCTCGACGGTTGGAGTTCTGGTCCAGCAGGATGAGGAAGGGGGGGACAAGAGATGCTTGAACCTCCGA  
GCTTTGGCATGCTTGTGCTGGTCTTCTAGTGTGTCTGCCAATGTCGGAACCCGTGTTGTCTACTTTCCACAGGGCCACAGCGAGCAGGTGCTGGCTTCCACTAATAAGGAGGTTGAAGG  
CCATATTCCTAATATCCGAACTTGCCACCTCAATTGATCTGCCAACTTCACGATGTGACTATGCACGCTGATGCCGAGACTGACGAAGTCTACACACAGATGACATTGCAGCCTTTAAATC  
CGCAGGATCTGAAAGATACATACCTTCCAGCTGAGATGGGGCTACCTAGCAAGCAGCCATGAATTTTTTGTAAAGACTTTGACTGCAAGCGATACAAGCACTCATGGAGGGTTTTCTGT

TCCTCGTCGTGCAGCTGAAAAAGTTTTTCCTCCTCTGGATTTCTCTCAACAGCCACCAGCTCAAGAGCTGATTGCTCGAGATATTCATGATGTTGATTGGAAGTTCAGGCATATCTTTAGA  
GGACAACCCAAGAGGCATCTTCTACTACAGGCTGGAGTATCTTTGTCACTGCTAAGAGACTTGTGCTGGTATTCTGTTTTATTTATATGGAATGAGAAAAATCAGCTTTTGTGGGAA  
TCCGACGGGCTAATCGACCACAAAATGCTGTACCTTCATCAGTTATATCAAGTGATAGTATGCATATTGGACTGCTTGTGCTGCAGCAGCTCATGCTGCTGCAACAAAATAGCCGTTTACCATT  
TTTTACCACCCAAGAGTTTTGTGATACCCTCTCAAAAATATGTTAAGGCTGTGTTTCACACTCGTGTCTCAGTTGGCATGCGATTAGGATGCTTTTCGAGACTGAAGAGTCAAGTGTTTCGT  
AGGTATATGGGGACTATAACAGGAATAAGTGATTTGGATCCTGTCCGATGGCCAAATCCCAGTGGAGATCAGTGAAGGTTAATTGGGACGAATCAACTGCAGGTGACAGACAACCTAGA  
GCATCTTTATGGGAAATTGAGCCTTTGACAACATTTCCAATGTATCCATCACTATTCCCTCTCAGACTTAAACCACCTTGGTACACTGGAGTTTCATCTCTAAATGACTACAAGTTAGATGA  
GGGAATGCATACATGTGGCTTAGGGGGAGCTCAGGGGGGGGTATTAGGTCTTTGAATTTTCAATCTCCTGGAATTGGTCCGTGTGTTTCAGCAGCAGGTCCAACCACAATTGGGAAACAA  
TCACACTCCTTACCAAGCAATGGATGCTGCAGCTTGTGATATTAGAGGCATGGATTCACTTAGGCAGCCATTTCTAAACTTCCAGCAGCCGTTTTCAGTTCCCTCAGCAGTTCTGTATGAAC  
CCATTGTTGCAGCAGCAAGTTATTCAACAAGCTCACCATGAACAGATAATGAATTCTCAAGCTCAGTCTCTGTTGGATAGTCAACCAAACATTACTTCAAATCAGCTGTTGCAACAGCCAT  
ACGGTGATCAGCAGAAGCAAAAAGGTCAGCAGCAACCAACTTATCCAGAACTATTTTCATGTTTCAGATTAATAATATAGAACAGCAACAGCTGCCAATACCCTCTCCATTATCTCAAAAATC  
TGATTTTCTGATTCAAGTATGAACCTTTTCATCAGTTGCAACACCCAGTTGCATACAGAAATTTGTCAGCAGCGGCTTATTCTGGAACAAAATGCTAATAACTTGCACCTTTGCAAAAATGTTG  
AGACAATTCTGGCTGAGCAGCATCAGCAAAAATGGGATCCACAGTTTGCATTGCAGAAGGTTTCTACTTTTGGTAATACAGTTTTGCTTCAACCATTTTCACGGAAAAGATGATACAAGGG  
AATCTGATGCTCTCCCACTGATACACAAAACACAGCCTATTTGATATCAATGTTGGTTCTTCCCTTGGCTTCTTGGCAATGTTGTGCCTAATCTATTAACGCAAAACAATAATGACAATGTTG  
TATCCAGCATGCCATTTACCACCTTCTATCTTCAAATTTCACTTTATCACAGCCTTGATGAGTCATCAGGTATGTTGCAGCATACTACGACATTGATCCATCAATCAAAAATTTTGTAAAGG  
TTTACAAGTCAGGCTCGGTTGGGAGGTCCTCGACATCACTCGTTTCAGCAACTATACTGAATTACGAAAGGCCTGGGTGAGATGTTTGGTATTGAGGGTCAACTTGAAAACCTCTTA  
GATCAGGCTGGCAGCTTGTATTTGTTGACAGGGAGAATGATGTGCTTCTTCTTGGAGACGACCCTTGGGAGTAAGACTTTATTATTAACCTTGAACATCTTCAATTTAAAGAAACATTGAT  
CAGCTTATGCTTCTCATCAACATTCATATATTCATTTCCCAACTATCTGCAACTTAAGCAACATCAATTGTCTATAACTATTTTTTAGTTACATGTGTAGAGACAGTTATTATATTGAGCTTTC  
TGAAGGCTCCAGCGACTAAGGTTTATATGATTTATAAATGCTTTATCAGGTGTATATGCTTCAAGGGTTGAGAAACCTTAGCTCTCTTAATACTAGTTCAAAAATTTCAATTAGCTTAAACGTG  
GCATGCTGTGAACATAAAACAATTAGATTTTCTACTATCATTGGAAGAAACCTTAATGCTGGTTCTGTGATGGGAATCCACGTTGATACTAGTAATTATTGAGCAGAAAACGAAGTTCAAAT  
TATCTCTGGTCCTGAGCAATGTCGTGCTAGGAAGTAGTAACCAAGTATGAAAACCTATGTATGCTGAGTAATTAATAATTTTTCTGGCAAAACACCTGGCGTACAGTTACTTATATACGCTT  
CAACATTTTGTAGCTATAAAAATTTCTTGTGTTATTTGTAAGATGTGATCAATATATCGTAGCTTTGTACAATGCCTATGCAGACTTTGTGCATTATGGTTGGCCGATCAAAAACCTGTACCTC  
TTCACCTGGTATTCAATTTCTAATTAATGCAGATCGTTTGTGAACAATGTGTGGTACATCAAATACTTTTACCAGAGGATGTTTCAGCAAATGGGGCAGCAGGGAGTTGACTTGAGCTAATT  
AACTTTGAATTTCAATCAAACCAAAATGGCAAGTAAGTTTATTTGTGCTTGCACCAGAATATTCCTATACTGCGGTGAACATTTCTAAGTATTTTTTTTATTTAGGCACTATCAAATCTTAATACG  
CATAATTAATTTTTGAATGTTGTTGCATGCATGTGTCCATGCCCTGTAATGTGGGAATATATATTTATGTATAACCGGATAATATAAATGTATAATAGTTGTAGTTCCCTTATTTAATTTAGTA  
AGGTGCTTTTTTTGTTTCCATTCCTCGTTGCACAAGTTTTGCTCAAATCAAAGTTGGTCCACGGGGTATCTTATTTATAACGTGTGGGAGATTTTTTGTGTTGCATTTCCAGTAGTATTTT  
TTCTGATCAATATCAAAGATTGTCTAGAGAAGTGACTCCCTCCCTCCTTCCCTCCCTCCAGAAGGATCCATATTATCATATTTTATGTTGACTTTAAGCACTAGTCCGCCAAATGAATCTAC  
TTCAAAGTTCTGGGATGAAACTTTTATGAGTTTGGATGACGCTGTTGACCATCATCATAAACTGTTTTCCCTATCATTGGATTCAATGTGAGAAATAACGATGTGTTTCTTCAAGTGGTTAA  
CCGAGTAAATGCGACCTTTTTTAACGTTGCAAATACACTACGAAGGCATGCTAGTTTATGAGATTATCCATCATTATGGTATGAGAATATGAACGCTATTTCTGCACTTTTATCTGATCAGGT  
GTCATATTTGTAGGTCTGCTCGAGGTGAAATCCCCGTAGGTGCCAAAGTCTGTACTGTCTACTGTTAAACGTATGACAGTAAAATCTGCATAAGATAACAGATATTTATGCTATAAAAATCCT  
TGTTGTGCAGGTTCCATTTGCTCTTCCATTTACTTCTCGCCAATAACCATGCTCTTAGCTGTTCCATGTACTCTTAAATAGTATATTTATCTTCTTATCTTATTTAATTTCTAATTTGTAAAGAA  
CAAAGTGTCTAGAAATATATCTAAAGCGTGGATCTAAGATTCGATTACTGGAATAATTTTGGACATCCAGTGAATTTAGCTCCTGTAATGTAAGTAGGATTCGAGGACTGAGGAATTTATCC

TTATCCATGGATTTATGAAGAGATTTTTGTGCTTTGGATATTATCTCTAGATCACTAGTGAGATAACTTAATCAACGCC

>comp171031\_c0\_seq22

AGCACACAATTTAATATTTTCACTTATAATTTACCCAGACGGGAAATCCCCGATATTTCCGGCTAGTGCTGTCCCTCTCTTTTTCTCAGTGGCTTTACCGTCTGCCCCAATTACATCCAATAT  
ATCCATTCACGGCGATCTGGAGCTAGTTTCATTGCCGCGCTTCTCCATGCTAGCATTGCGCTGAGCTTTGTGTTCTTACAACCTCTTCGAGGTGCGTGTCTTTCTATTCCTCGAGTTACTTCTTC  
TGTATATCGTTTCCCTTTGAGGAGCTCTCCAAGGCCCGAACTTCGCTAGAAATTGTGCTTCTTGTGCGAGCTGCCCAAGAAAACAAGGGAAGTGTGAAGGCAGAGGTAGAGCTGCTTGGT  
TTCCTGATCAGGGAACTTGGTTATGAATTCTAGAGTTTGAAAGTTTATATCTTGGATTCCGTGGCCGCAAATGTGTTTTCTACTCAATTATGGAGTTGATTTGGCTTCTTGAGCCTTAAGAGTG  
AGGAATGTGAGATTTTTTTTTGAAGTCGATTTGGTAAGGTTCCCTCCGCGAGTTTTTATACTCGCAATGGTATTTAGGGGTTTGGGATCGACGCGGTGAAGTTGGATATGTGCCCTGTAGGT  
TTCTCTTACTTGTGAGTGTTTACGGAGCTTTTTAGAGTGTGCGATGAAGCTCTCGACGGTTGGAGTTCTGGTCCAGCAGGATGAGGAAGGGGGGGACAAGAGATGCTTGAACCTCCGA  
GCTTTGGCATGCTTGTGCTGGTCTCTAGTGTGTCTGCCAATGTCGGAACCCGTGTTGTCTACTTTCCACAGGGCCACAGCGAGCAGGTCGTGGCTTCCACTAATAAGGAGGTTGAAGG  
CCATATTCCTAATTATCCGAACTTGCCACCTCAATTGATCTGCCAACTTCACGATGTGACTATGCACGCTGATGCCGAGACTGACGAAGTCTACACACAGATGACATTGCAGCCTTTAAATC  
CGCAGGATCTGAAAGATACATACCTTCCAGCTGAGATGGGGCTACCTAGCAAGCAGCCCATGAATTATTTTTGTAAGACTTTGACTGCAAGCGATAACAAGCACTCATGGAGGGTTTTCTGT  
TCCTCGTCGTGCAGCTGAAAAAGTTTTCTCCTCTGGATTTCTCTCAACAGCCACCAGCTCAAGAGCTGATTGCTCGAGATATTCATGATGTTGATTGGAAGTTCAGGCATATCTTTAGA  
GGACAACCCAAGAGGCATCTTCTACTACAGGCTGGAGTATCTTTGTGAGTGCTAAGAGACTTGTGCTGGTGAATCTGTTTTATTTATATGGAATGAGAAAAATCAGCTTTTGTGGGAA  
TCCGACGGGCTAATCGACCACAAAATGCTGTACCTTCATCAGTTATATCAAGTGATAGTATGCATATTGGACTGCTTGTGCTGCAGCAGCTCATGCTGCTGCAACAAAATAGCCGTTTCACCATT  
TTTTACCACCCAAGGGCTTGTCCCTCAGAGTTTGTGATACTACTCTCAAAATATGTTAAGGCTGTGTTTCACACTCGTGTCTCAGTTGGCATGCGATTTAGGATGCTTTTCGAGACTGAAG  
AGTCAAGTGTTCGTAGGTATATGGGGACTATAACAGGAATAAGTGATTTGGATCCTGTCCGATGGCCAAATTCCTACTGGAGATCAGTGAAGGTGACAGACAACCTAGAGCATCTTTATGG  
GAAATTGAGCCTTTGACAACATTTCCAATGTATCCATCACTATTCCTCTCAGACTTAAACCACCTTGGTACACTGGAGTTTCATCTCTAAATGACTACAAGTTAGATGAGGGGAATGCATA  
CATGTGGCTTAGGGGGAGCTCAGGGGGGGTATTAGGTCTTTGAATTTCAATCTCCTGGAATTGGTCCGTGTGTTTACAGCAGCAGGTCCAACCACAATTGGGAAACAATCACACTCCTTA  
CCAAGCAATGGATGCTGCAGCTTGTGATATTAGAGGCATGGATTCACTTAGGCAGCCATTTCTAAACTTCCAGCAGCCGTTTCAGTTCCCTCAGCAGTTCTGTATGAACCCATTGTTGCAG  
CAGCAAGTTATCAACAAGCTCACCATGAACAGATAATGAATTCCTCAAGCTCAGTCTCTGTTGGATAGTCAACCAAACATTACTTCAAATCAGCTGTTGCAACAGCCATACGGTGATCAGC  
AGAAGCAAAAAGGTGAGCAGCAACCAACTTATCCAGAATAATTTTATGTTTCAAGTTAATAATATAGAACAGCAACAGCTGCCAATACCCTCTCCATTATCTCAAAAATCTGTATTTCTCTGAT  
TCAAGTATGAACTTTTCATCAGTTGCAACACCCAGTTGCATACAGAATTTGTGAGCAGCGGCTTATTCTGGAACAAATGCTAATAACTTGCACCTTTGCAAAAATGGTGCAGACAATTCTGG  
CTGAGCAGCATCAGCAAAAATGGGATCCACAGTTTGCATTGCAGAAGGTTTCTACTTTTGGTAATACAGTTTGTCTTCAACCAATTCACGGAAAAGATGATACAAGGGAATCTGATGTCTC  
TCCCCTGATACACAAAACCACAGCCTATTTGATATCAATGTTGGTCTTCTCCTTGTCTTGGCAATGTTGTGCTAATCTATTAACGCAACAATAATGACAATGTTGTATCCAGCATGCC  
ATTTACCACTTCTTATCTTCAAAAATCACTTTATCACAGCCTTGTGAGTCACTCAGGTATGTTGCAGCATACTACGACATGATCCATCAATCAAAAATTTTGTAAAGGTTTACAAGTCAGG  
CTCGGTTGGGAGGTCACCTCGACATCACTCGTTTCAGCAACTATACTGAATTACGAAAGGCACTGGGTGAGATGTTGGTATTGAGGGTCAACTTGAAAACCCTCTTAGATCAGGCTGGCA  
GCTTGTATTTGTTGACAGGGAGAATGATGTGCTTCTTCTTGGAGACGACCTTGGGAACTTTGTGCATTGATGTTGGCCGATCAAAAACCTGTACCTCTTACCTGGTATTCATTTCTAATT  
AATGCAGATCGTTTGTGAACAATGTGTGGTACATCAAAATACTTTACCAGAGGATGTTGAGCAATGGGGCAGCAGGGAGTTGACTTGAGCTAATTAACCTTTGAATTTCAATCAAACCA  
AATGGCAAGTCTGCTCGAGGTGAAATCCCCGTAGGTGCCAAAAGTCTGTACTGTCTACTGTTAAACGTATGACAGTAAAATCTGCATAAGATACAGATATTTATGCTATAAAAATCCTTGTG  
TGCAGGTTCTATTTGCTCTTCCATTTACTTCTCGCCAATAACCATGCTCTTAGCTGTTCCATGTACTCTTAAATAGTATATTTATCTTCTTATTTAATTCTAATTTGTAAAGAACAAG  
TGTCTAGAAATATATCTAAAGCGTGGATCTAAGATTCGATTACTGGAATAATTTGGACATCCAGTGAATTTAGCTCCTGTAATGTAAGTAGGATTCGAGGACTGAGGAATTTATCCTTATCC

ATGGATTTATGAAGAGATTTTTGTGCTTTGGATATTATCTCTAGATCACTAGTGAGATAACTTAATCAACGCC

>comp171031\_c0\_seq23

AGCACACAATTTAATATTTTCACTTATAATTTACCCAGACGGGAAATCCCCGATATTTCCGGCTAGTGCTGTCCTCTTCTTTTTCTCAGTGGCTTTACCGTCTGCCCAATTACATCCAATAT  
ATCCATTACGGCGATCTGGAGCTAGTTTCATTGCCGCGCTTCTCCATGCTAGCATTGCTGAGCTTTGTGTTCTTACAACCTCTTCGAGGTGCTGCTTTTCTATTCCTCGAGTTACTTCTTC  
TGTATATCGTTTCCCTTTGAGGAGCTCTCCAAGGCCGAACCTCGCTAGAAATTGTGCTTCTTGTGCTGAGCTGCCCAAGAAAACAAGGAACTGTGAAGGCAGAGGTAGAGCTGCTTGGT  
TTCTTGATCAGGGAACTTGGTTATGAATTCTAGAGTTTGAAAGTTTATATCTTGGATTCCGTGGCCGCAAATGTTTTCTACTCAATTATGGAGTTGATTTGGCTTCTTGAGCCTTAAGAGTG  
AGGAATGTGAGATTTTTTTTTGAAGTCGATTTGGTAAGGTTCTCCGCGAGTTTTTATACTCGCAATGGTATTTAGGGGTTGGGATCGACGCGGTGAAGTTGGATATGTGCCCTGTAGGT  
TTCTCTTACTTGTGAGTGTTTACGGAGCTTTTTAGAGTGTGCGATGAAGCTCTCGACGGTTGGAGTTCTGGTCCAGCAGGATGAGGAAGGGGGGGACAAGAGATGCTTGAACCTCCGA  
GCTTTGGCATGCTTGTGCTGGTCTCTAGTGTGTCTGCCAATGTCGGAACCCGTGTTGTCTACTTTCCACAGGGCCACAGCGAGCAGGTCGTGGCTTCCACTAATAAGGAGGTTGAAGG  
CCATATTCCTAATTATCCGAACTTGCCACCTCAATTGATCTGCCAACTTACGATGTGACTATGCACGCTGATGCCGAGACTGACGAAGTCTACACACAGATGACATTGCAGCCTTAAATC  
CGCAGGATCTGAAAGATACATACCTTCCAGCTGAGATGGGGCTACCTAGCAAGCAGCCATGAATTATTTTTGTAAGACTTTGACTGCAAGCGATAACAAGCACTCATGGAGGGTTTTCTGT  
TCCTCGTCGTGCAGCTGAAAAAGTTTTCTCTCTGGATTTCTCTCAACAGCCACCAGCTCAAGAGCTGATTGCTCGAGATATTCATGATGTTGATTGGAAGTTCAGGCATATCTTTAGA  
GGACAACCCAAGAGGCATTTCTCACTACAGGCTGGAGTATCTTTGTGCTGTAAGAGACTTGTGCTGGTGAATCTGTTTTATTTATATGGAATGAGAAAAATCAGCTTTTGTGGGAA  
TCCGACGGGCTAATCGACCACAAAATGCTGTACCTTCATCAGTTATATCAAGTGATAGTATGCATATTGGACTGCTTGTGCTGCAGCAGCTCATGCTGCTGCAACAAAATAGCCGTTTACCATT  
TTTTACCACCCAAGGGCTTGTCTTCAGAGTTTGTGATACTCTCAAAAATATGTTAAGGCTGTGTTTACACTCGTGTCTCAGTTGGCATGCGATTTAGGATGCTTTTCGAGACTGAAG  
AGTCAAGTGTTCGTAGGTATATGGGGACTATAACAGGAATAAGTGATTTGGATCCTGTCCGATGGCCAAATCCCCTGAGATCAGTGAAGGTTAATTGGGACGAATCAACTGCAGGTG  
ACAGACAACCTAGAGCATCTTATGGGAAATTGAGCCTTGGACAACATTTCCAATGTATCCATCACTATTCCTCTCAGACTTAAACCACCTGGTACACTGGAGTTTCACTCTAAATGAC  
TACAAGTTAGATGAGGGGAATGCATACATGTGGCTTAGGGGGAGCTCAGGGGGGGTATTAGGTCTTTGAATTTCAATCTCTGGAATTGGTCCGTGTGTTTACAGCAGCAGGTCCAACCA  
CAATTGGGAAACAATCACACTCCTTACCAAGCAATGGATGCTGCAGCTTGTGATATTAGAGGCATGGATTTACTTAGGCAGCCATTTCTAAACTTCCAGCAGCCGTTTTCAGTTCCCTCAGC  
AGTTCTGTATGAACCCATTGTTGCAGCAGCAAGTTATTCAACAAGCTCACCATGAACAGATAATGAATTTCTCAAGCTCAGTCTCTGTTGGATAGTCAACCAACATACTTCAATCAGCT  
GTTGCAACAGCCATACGGTGATCAGCAGAAGCAAAAAGGTCAGCAGCAACCAACTTATCCAGAACTATTTTCATGTTTTCAGATTAATAATATAGAACAGCAACAGCTGCCAATACCCTCTCC  
ATTATCTCAAAAATCTGTATTTCTGATTCAAGTATGAACTTTTTCATCAGTTGCAACACCCAGTTGCATACAGAATTTGTCAGCAGCGGCTTATTCTGGAACAAATGCTAATAACTTGCACCT  
TGCAAAAACCTGGTCAGACAATTCTGGCTGAGCAGCATCAGCAAAAATGGGATCCACAGTTTGCATTGCAGAAGGTTTCTACTTTTGGTAATACAGTTTTGCTTCAACCATTTCACGGAAA  
AGATGATACAAGGGAATCTGATGTCTCTCCACTGATACACAAAACCACAGCCTATTTGATATCAATGTTGGTCTTCCCTTGGCTTCTTGGCAATGTTGTGCCTAATCTATTAACGCAAACA  
ATAATGACAATGTTGTATCCAGCATGCCATTTACCACTTCTTATCTTCAAAATCACTTTATCACAGCCTTGTGAGTCATCAGGTATGTTGCAGCATACTACGACATTGATCCATCAATCAA  
AACTTTTGTAAAGTTTACAAGTCAGGCTCGGTTGGGAGGTCACTCGACATCACTCGTTTCAGCAACTATACTGAATTACGAAAGGCAGTGGGTGAGATGTTTGGTATTGAGGGTCAACT  
TGAAAACCCCTCTTAGATCAGGCTGGCAGCTTGTATTTGTTGACAGGGAGAATGATGTGCTTCTTCTTGGAGACGACCCTTGGGAGTAAGACTTTATTATTAACCTTGAACATCTTCAATTA  
AAGAAACATTGATCAGCTTATGCTTCTCATCAACATTCATATATTCATTTCCCAACTATCTGCAACTTAAGCAACATCAATTGTCTATAACTATTTTTAGTTACATGTGTAGAGACAGTTATTT  
ATATTGAGCTTTCTGAAGGCTCCAGCGACTAAGGTTTATATGATTTATAAATGCTTTATCAGGTGTATATGCTTCAAGGGTTGAGAAACCTTAGCTCTCTTAATACTAGTTCAAAAATTTCAATT  
AGCTTAAACGTGGCATGCTGTGAACATAAACAATTAGATTTTCTACTATCATTGGAAGAAACCTTAATGCTGGTCTGTGATGGGAATCCCAGTTGATACTAGTAATTATTGAGCAGAAAA  
CGAAGTTCAAATTATCTCTGGTCTGAGCAATGTCGTGCTAGGAAGTAGTAACCAAGTATGAAAACCTATGTATGCTGAGTAATTAATAATTTTTCTGGCAAAACACCTGGCGTACAGTTA

CTTATATACGCTTCAACATTTTGTAGCTATAAAAATTTCTTGTGTTATTTGTAAGATGTGATCAATATATCGTAGCTTTGTACAATGCCTATGCAGACTTTGTGCATTCATGGTTGGCCGATCAA  
AACCTGTACCTCTTCACCTGGTATTCAATTTCTAATTAATGCAGATCGTTTTGTGAACAATGTGTGGTACATCAAATACTTTACCAGAGGATGTTTCAGCAAATGGGGCAGCAGGGAGTTGA  
CTTGAGCTAATTAACCTTTGAATTTCAATCAAACCAATGGCAAGTAAGTTTATTTGTGCTTGCACCAGAATATTCCTATACTGCGGTGAACATTCTAAGTATTTTTTTTATTTAGGCACTATCA  
AATCTTAATACGCATAATTATTTTTGAATGTTGTTGCATGCATGTGTCCATGCCCTGTAATGTGGGAATATATATTTATGTATAACCGGATAATATAAATGTATAATAGTTGTAGTTCCTCTT  
ATTTAATTTAGTAAGGTGTCTTTTTTGTTCATTCCCTCGGTTGCACAAGTTTTGCTCAAATCAAAGTTGGTCCACGGGGTATCTTATTTATAACGTGTGGGAGATTTTTTGTTCATTTTC  
CAGTAGTATTTTTTCTGATCAATATCAAAGATTGTCTAGAGAAGTGACTCCCTCCCTCCTTCCCTCCCTCCAGAAGGATCCATATTATCATATTTTTAGTTGACTTTAAGCACTAGTCCGCC  
AAATGAATCTACTTCAAAGTTCTGGGATGAAACTTTTATGAGTTTGGATGACGCTGTTGACCATCATCATAAACTGTTTTCCCTATCATTTGGATTCATTGTGAGAAATAACGATGTGTTTCT  
TCAAGTGGTTAACCGAGTAAATGCGACCTTTTTTAACGTTGCAAATACACTACGAAGGCATGCTAGTTTATGAGATTATCCATCATTATGGTATGAGAATATGAACGCTATTTCTGCACCTT  
TATCTGATCAGGTGTCATATTTGTAGGTCTGCTCGAGGTGAAATCCCCGTAGGTGCCCAAAGTCTGTACTGTCTACTGTTAAACGTATGACAGTAAAATCTGCATAAGATACAGATATTTAT  
GCTATAAAATCCTTGTGTGCAGGTTCCCTATTGCTCTTCCATTTACTTCTCGCCAATAACCATGCTCTTAGCTGTTCCATGTACTCTTAAATAGTATATTTTATCTTCTTATCTTATTTAATCT  
AATTTGTAAAGAACAAGTGTCTAGAAATATATCTAAAGCGTGGATCTAAGATTCCGATTACTGGAATAATTTTGGACATCCAGTGAATTTAGCTCCTGTAATGTAAGTAGGATTCGAGGACT  
GAGGAATTTATCCTTATCCATGGATTTATGAAGAGATTTTTGTGCTTTGGATATTATCTCTAGATCACTAGTGAGATAACTTAATCAACGCC

>comp171031\_c0\_seq25

AGCACACAATTTAATATTTTCACTTATAATTTACCCAGACGGGAAATCCCCGATATTTCCGGCTAGTGTCTCCTCTCTTTTTTCTCAGTGGCTTTACCGTCTGCCCAATTACATCCAATAT  
ATCCATTCACGGCGATCTGGAGCTAGTTTCATTGCCGCGCTTCTCCATGCTAGCATTGCGCTGAGCTTTGTGTTCTTACAACCTCTTCGAGGTCGCTGCTTTTCTATTCCTCGAGTTACTTCTTC  
TGATATCGTTTTCCCTTTGAGGAGCTCTCCAAGGCCGAACCTCGCTAGAAATTGTGCTTCCCTGTGCGAGCTGCCAAGAAACAAGGGAAGTGTGAAGGCAGAGGTAGAGCTGCTTGGT  
TTCTGATCAGGGAAGTGGTTATGAATTCTAGAGTTTGAAGTTTATATCTTGGATTCCGTGGCCGCAAATGTTTTCTACTCAATTATGGAGTTGATTTGGCTTCTTGAACCTTAAGAGTG  
AGGAATGTGAGATTTTTTTTTGAAGTCGATTGGTAAGGTTCCCTCCGCGAGTTTTTATACTCGCAATGGTATTTAGGGGTTGGGATCGACGCGGTGAAGTTGGATATGTGCCCTGTAGGT  
TTCTCTTACTTGTGAGTGTTTACGGAGCTTTTTAGAGTGCTGCGATGAAGCTCTCGACGGTTGGAGTTCTGGTCCAGCAGGATGAGGAAGGGGGGGACAAGAGATGCTTGAACCTCGA  
GCTTTGGCATGCTTGTGCTGGTCTCTAGTGTGTCTGCCAATGTCGGAACCCGTGTTGTCTACTTTCCACAGGGCCACAGCGAGCAGGTCGTGGCTTCCACTAATAAGGAGGTTGAAGG  
CCATATTCCTAATTATCCGAACCTTGCCACCTCAATTGATCTGCCAACTTCACGATGTGACTATGCACGCTGATGCCGAGACTGACGAAGTCTACACACAGATGACATTGCAGCCTTTAAATC  
CGCAGGATCTGAAAGATACATACCTTCCAGCTGAGATGGGGCTACCTAGCAAGCAGCCATGAATTATTTTTGTAAGACTTTGACTGCAAGCGATAACAAGCACTCATGGAGGGTTTTCTGT  
TCCTCGTCTGCGAGCTGAAAAAGTTTTTCCCTCCTCTGGATTTCTCTCAACAGCCACCAGCTCAAGAGCTGATTGCTCGAGATTCATGATGTTGATTGGAAGTTCAGGCATATCTTTAGA  
GGACAACCCAAGAGGCATCTTCTACTACAGGCTGGAGTATCTTTGTGAGTGTGTAAGAGACTTGTGCTGGTGAATCTGTTTTATTTATATGGAATGAGAAAAATCAGCTTTTTGTTGGGAA  
TCCGACGGGCTAATCGACCACAAAATGCTGTACCTTCATCAGTTATATCAAGTGATAGTATGCATATTGGACTGCTTGTGCTGCAGCAGCTCATGCTGCTGCAACAAATAGCCGTTTACCATT  
TTTTACCACCAAGGGCTTGTCTTTCAGAGTTTGTGATACCACTCTCAAAATATGTTAAGGCTGTGTTTCCACTCGTGTCTCAGTTGGCATGCGATTTAGGATGCTTTTTCGAGACTGAAG  
AGTCAAGTGTTCGTAGGTATATGGGGACTATAACAGGAATAAGTGATTTGGATCCTGTCCGATGGCCAAATCCCAGTGGAGATCAGTGAAGGTTAATTGGGACGAATCAACTGCAGGTG  
ACAGACAACCTAGAGCATCTTTATGGGAAATTGAGCCTTTGACAACATTTCCAATGTATCCATCACTATTCCTCTCAGACTTAAACCACCTTGGTACTGAGTTTCATCTCTAAATGAC  
TACAAGTTAGATGAGGGGAATGCATACATGTGGCTTAGGGGGAGCTCAGGGGGGGTATTAGGTCTTTGAATTTCAATCTCCTGGAATTTGGTCCGTGTGTTTACAGCAGCAGGTCCAACCA  
CAATTTGGGAAACAATCACACTCCTTACCAAGCAATGGATGCTGCAGCTTGTGATATTAGAGGCATGGATCACTTAGGCAGCCATTTCTAAACTTCCAGCAGCCGTTTTCAGTTCCCTCAGC  
AGTTCGTATGAACCCATTGTTGCAGCAGCAAGTTATTCAACAAGCTCACCATGAACAGATAATGAATTCTCAAGCTCAGTCTCTGTTGGATAGTCAACCAAAACATTACTTCAAATCAGCT



GTTGCAACAGCCATACGGTGATCAGCAGAAGCAAAAAGGTCAGCAGCAACCAACTTATCCAGAACTATTTTCATGTTTCAGATTAATAATATAGAACAGCAACAGCTGCCAATACCCTCTCC  
ATTATCTCAAAAATCTGTATTTCCCTGATTCAAGTATGAACTTTTTTCATCAGTTGCAACACCCAGTTGCATACAGAATTTGTGTCAGCAGCGGCTTATTCTGGAACAAATGCTAATAACTTGCACTT  
TGCAAAAACCTGGTCAGACAATTCTGGCTGAGCAGCATCAGCAAAAATGGGATCCACAGTTTGCATTGCAGAAGGTTTCTACTTTTGGTAATACAGTTTTGCTTCAACCATTTACGGAAA  
AGATGATACAAGGGAATCTGATGTCTCTCCCACTGATACACAAAACCACAGCCTATTTGATATCAATGTTGGTCTTCCCTTGGCAATGTTGTGCCTAATCTATTAACGCAAACA  
ATAATGACAATGTTGTATCCAGCATGCCATTTACCCTTCTTATCTTCAAAAATTCACCTTATCACAGCCTTGATGAGTCATCAGGTATGTTGCAGCATACTACGACATTGATCCATCAATCAA  
AACTTTTGTAAAGGTTTACAAGTCAGGCTCGGTTGGGAGGTCCTCGACATCACTCGTTTCAGCAACTATACTGAATTACGAAAGGCACTGGGTGAGATGTTTGGTATTGAGGGTCAACT  
TGAAAACCCCTCTTAGATCAGGCTGGCAGCTTGTATTTGTTGACAGGGAGAATGATGTGCTTCTTCTTGGAGACGACCCTTGGGAGTAAGACTTTATTTAATTAACCTGAAACATCTTCAATTTA  
AAGAAACATTTGATCAGCTTATGCTTCTCATCAACATTCATATATTCATTTCCCAACTATCTGCAACTTAAGCAACATCAATTTGCTATAACTATTTTTTGGTTACATGTGTAGAGACAGTTATTT  
ATATTGAGCTTTCTGAAGGCTCCAGCGACTAAGGTTTATATGATTTATAAATGCTTTATCAGGTGTATATGCTTCAAGGGTTGAGAAACCTTAGCTCTCTTAATACTAGTTCAAAAATTTCAATT  
AGCTTAAACGTGGCATGCTGTGAACATAAACAATTAGATTTTCTACTATCATTGGAAGAAACCTTAATGCTGGTCTGTGATGGGAATCCCACGTTGATACTAGTAATTATTGAGCAGAAAA  
CGAAGTTCAAATTATCTCTGGTCTGAGCAATGTCGTGCTAGGAAGTAGTAACCAAGTATGAAAACCTATGTATGCTGAGTAATTAATAATTTTTCTGGCAAAAACACCTGGCGTACAGTTA  
CTTATATACGCTTCAACATTTTGTAGCTATAAAAATTTCTTGTGTTATTTGTAAGATGTGATCAATATATCGTAGCTTTGTACAATGCCTATGCAGACTTTGTGCATTCATGGTTGGCCGATCAA  
AACCTGTACCTCTTACCTGGTATTCATTTCTAATTAATGCAGATCGTTTGTGAACAATGTGTGGTACATCAAATACTTTTACCAGAGGATGTTGAGCAAAATGGGGCAGCAGGGAGTTGA  
CTTGAGCTAATTAACCTTTGAATTTCAATCAAACCAATGGCAAGTCTGCTCGAGGTGAAATCCCCGATGGTGCCTAAAGTCTGTACTGTCTACTGTAAACGATGACAGTAAATCTGCA  
TAAGATACAGATATTTATGCTATAAAAATCCTTGTGTGTCAGGTTCCCTATTTGCTCTTCCATTTACTTCTCGCCAATAACCATGCTCTTAGCTGTTCCATGTACTCTTAAATAGTATATTTTATCTT  
CTTATCTTATTTAATTTCTAATTTGTAAAGAACAAAGTGTCTAGAAATATCTAAAGCGTGGATCTAAGATTCGATTACTGGAATAATTTTGGACATCCAGTGAATTTAGCTCCTGTAATGTAA  
GTAGGATTCGAGGACTGAGGAATTTATCCTTATCCATGGATTTATGAAGAGATTTTTGTGCTTTGGATATTATCTCTAGATCACTAGTGAGATAACTTAATCAACGCC

>comp171031\_c0\_seq26

AGCACACAATTTAATATTTTCACTTATAATTTACCCAGACGGGAAATCCCCGATATTTCCGGCTAGTGCTGTCCCTCTTCTTTTTCTCAGTGGCTTTACCGTCTGCCCAATTACATCCAATAT  
ATCCATTACGGCGATCTGGAGCTAGTTTCATTGCCGCGCTTCTCCATGCTAGCATTGCGCTGAGCTTTGTGTTCTTACAACCTCTTCGAGGTGCTGCTTTTCTATTCCTCGAGTTACTTCTTC  
TGTATATCGTTTCCCTTTGAGGAGCTCTCCAAGGCCGAACCTCGCTAGAAAATTTGTGCTTCCCTTGTGTCGAGCTGCCAAGAAAACAAGGGAAGTGTGAAGGCAGAGGTAGAGCTGCTTGGT  
TTCTGATCAGGGAACCTGGTTATGAATTTCTAGAGTTTGAAGTTTATATCTTGGATTCCGTGGCCGCAAATTTGTTTTCTACTCAATTATGGAGTTGATTTGGCTTCTTGAGCCTTAAGAGTG  
AGGAATGTGAGATTTTTTTTTGAAGTGCATTTGGTAAGGTTCCCTCCGCGAGTTTTTATACTCGCAATGGTATTTAGGGGTTTGGGATCGACGCGGTGAAGTTGGATATGTGCCCTGTAGGT  
TTCTCTTACTTGTGAGTGTTTACGGAGCTTTTTAGAGTGTGCGATGAAGCTCTCGACGGTTGGAGTTCTGGTCCAGCAGGATGAGGAAGGGGGGGACAAGAGATGCTTGAACCTCCGA  
GCTTTGGCATGCTTGTGCTGGTCTCTAGTGTGTCTGCCAATGTCGGAACCCGTGTTGTCTACTTTCCACAGGGCCACAGCGAGCAGGTCGTGGCTTCCACTAATAAGGAGGTTGAAGG  
CCATATTCCTAATTATCCGAACCTTGCACCTCAATTGATCTGCCAACTTACGATGTGACTATGCACGCTGATGCCGAGACTGACGAAGTCTACACACAGATGACATTGCAGCCTTTAAATC  
CGCAGGATCTGAAAGATACATACCTTCCAGCTGAGATGGGGCTACCTAGCAAGCAGCCATGAATATTTTTGTAAGACTTTGACTGCAAGCGATAACAAGCACTCATGGAGGGTTTTCTGT  
TCCTCGTCTGTCAGCTGAAAAGTTTTTCTCTCTGGATTTCTCTCAACAGCCACCAGCTCAAGAGCTGATTGCTCGAGATTCATGATGTTGATTGGAAGTTCAGGCATATCTTTAGA  
GGACAACCCAAGAGGCATCTTCTACTACAGGCTGGAGTATCTTTGTGTCAGTGCTAAGAGACTTGTGCTGGTGAATCTGTTTTATTTATATGGAATGAGAAAAATCAGCTTTTGTGGGAA  
TCCGACGGGCTAATCGACCACAAAATGCTGTACCTTCATCAGTTATATCAAGTGATAGTATGCATATTGGACTGCTTGTGCTGCAGCAGCTCATGCTGCTGCAACAAAATAGCCGTTTACCAATT  
TTTTACCACCCAAGAGTTTGTGATACCACTCTCAAAAATATGTTAAGGCTGTGTTTACACTCGTGTCTCAGTTGGCATGCGATTTAGGATGCTTTTTCGAGACTGAAGAGTCAAGTGTTCGT

AGGTATATGGGGACTATAACAGGAATAAGTGATTTGGATCCTGTCCGATGGCCAAATCCCCTGGAGATCAGTGAAGGTTAATTGGGACGAATCAACTGCAGGTGACAGACAACCTAGA  
GCATCTTTATGGGAAATTGAGCCTTTGACAACATTTCCAATGTATCCATCACTATTCCCTCTCAGACTTAAACCACCTTGGTACACTGGAGTTTCATCTCTAAATGACTACAAGTTAGATGA  
GGGGAATGCATACATGTGGCTTAGGGGGAGCTCAGGGGGGGTATTAGGTCTTTGAATTTCAATCTCTCGAATTGGTCCGTGTGTTACAGCAGCAGGTCCAACCACAATTGGGAAACAA  
TCACACTCCTTACCAAGCAATGGATGCTGCAGCTTGTGATATTAGAGGCATGGATTCACTTAGGCAGCCATTTCTAAACTTCCAGCAGCCGTTTCAGTTCCTCAGCAGTTCGTGATGAAC  
CCATTGTTGCAGCAGCAAGTTATTCAACAAGCTCACCATGAACAGATAATGAATTCTCAAGCTCAGTCTCTGTTGGATAGTCAACCAACATTACTTCAAATCAGCTGTTGCAACAGCCAT  
ACGGTGATCAGCAGAAGCAAAAAGGTCAGCAGCAACCAACTTATCCAGAACTATTTATGTTTCAGATTAATAATATAGAACAGCAACAGCTGCCAATACCCTCTCCATTATCTCAAAAATC  
TGTATTTCCCTGATTCAAGTATGAACTTTTCATCAGTTGCAACACCCAGTTGCATACAGAAATTTGTCAGCAGCGGCTTATTCTGGAACAAAATGCTAATAACTTGCACCTTTGCAAAAATGGTC  
AGACAATTTCTGGCTGAGCAGCATCAGCAAAAATGGGATCCACAGTTTGCATTGCAGAAGGTTTCTACTTTTGGTAATACAGTTTGTCTTCAACCATTTACGGAAAAGATGATACAAGGG  
AATCTGATGTCTCTCCACTGATACACAAAACACAGCCTATTTGATATCAATGTTGGTTCTTCTTGGCAATGTTGTGCCTAATCTATTAACGCAAAACAATAATGACAATGTTG  
TATCCAGCATGCCATTTACCACCTTCTTATCTTCAAAAATCACTTTATCACAGCCTTGATGAGTCAACAGGTATGTTGCAGCATACTACGACATTGATCCATCAATCAAAAATTTGTAAAGG  
TTTACAAGTCAGGCTCGGTTGGGAGGTCCTCGACATCACTCGTTTCAGCAACTATACTGAATTACGAAAGGCCTGGGTGAGATGTTTGGTATTGAGGGTCAACTGAAAACCTCTTA  
GATCAGGCTGGCAGCTTGTATTTGTTGACAGGGAGAATGATGTGCTTCTTCTTGGAGACGACCCTTGGGAACCTTGTGCATTCATGGTTGGCCGATCAAAACCTGTACCTCTTACCTGGT  
ATTCATTTCTAATTAATGCAGATCGTTTGTGAACAATGTGTGGTACATCAAAAATCTTACCAGAGGATGTTGAGCAAAATGGGGCAGCAGGGAGTTGACTTGAGCTAATTAACCTTTGAAT  
TTCAATCAAACCAATGGCAAGTAAGTTTATTTGTGCTTGCACCAGAATATTCCTATACTGCGGTGAACATTCTAAGTATTTTTTTTATTTAGGCACTATCAAATCTTAATACGCATAATTATTA  
TTTTGAATGTTGTTGCATGCATGTGTCCATGCCCTGTAATGTGGGGAATATATTTATGTATAACCGGATAATATAAATGTATAATAGTTGTAGTTCCTCTTATTTAATTTAGTAAGGTGTCTTT  
TTTGTTCATTCCTCGGTTGCACAAGTTTGTCTCAAATCAAAGTTGGTCCACGGGGTATCTTATTTATAACGTGTGGGAGATTTTTTGTGTTGCATTTCCAGTAGTATTTTTCTGATCAAT  
ATCAAAGATTGTCTAGAGAAGTGACTCCCTCCCTCCCTCCCTCCCTCCAGAAAGGATCCATATTATCATATTTTTAGTTGACTTTAAGCACTAGTCCGCCAAATGAATCTACTTCAAAGTTCT  
GGGATGAAACTTTTATGAGTTTGGATGACGCTGTTGACCATCATCATAAACTGTTTTCTTATCATTTGGATTCAATGTGAGAAATAACGATGTGTTTCTTCAAGTGGTTAACCGAGTAAAT  
GCGACCTTTTTTAACGTTGCAAATACACTACGAAGGCATGCTAGTTTATGAGATTATCCATCATTATGGTATGAGAATATGAACGCTATTTCTGCACTTTTATCTGATCAGGTGTCATATTTT  
GTAGGTCTGCTCGAGGTGAAATCCCCGTAGGTGCCCAAAGTCTGTACTGTCTACTGTTAAACGTATGACAGTAAAATCTGCATAAGATACAGATATTTATGTATAAAAATCCTTGTGTGCA  
GGTTCCTATTTGCTCTTCCATTTACTTCTCGCCAATAACCATGCTCTTAGCTGTTCCATGTACTCTTAAATAGTATAATTTTATCTTCTTATCTTATTTAATTCTAATTTGTAAGAACAAGGTGTC  
CTAGAATATATCTAAAGCGTGGATCTAAGATTGATTACTGGAATAATTTGGACATCCAGTGAATTTAGCTCCTGTAATGTAAGTAGGATTCGAGGACTGAGGAATTTATCCTTATCCATGG  
ATTTATGAAGAGATTTTTGTGCTTTGGATAATTATCTCTAGATCACTAGTGAGATAACTTAATCAACGCC

>comp171031\_c0\_seq27

AGCACACAATTTAATATTTCACTTATAATTTACCCAGACGGGAAATCCCCGATATTTCCGGCTAGTGCTGTCCCTCTCTTTTTCTCAGTGGCTTTACCGTCTGCCCAATTACATCCAATAT  
ATCCATTACGGCGATCTGGAGCTAGTTTATTGCCGCGCTTCTCCATGCTAGCATTGCGCTGAGCTTTGTGTTCTTACAACCTTTCGAGGTGCTGCTTTTCTATTCCTCGAGTTACTTCTTC  
TGTATATCGTTTCCCTTTGAGGAGCTCTCCAAGGCCCGAACTTCGCTAGAAATTGTGCTTCCCTGTGCGAGCTGCCCAAGAAACAAGGGAAGTGTGAAGGCAGAGGTAGAGCTGCTTGGT  
TTCTGATCAGGGAAGTGGTTATGAATCTAGAGTTTGAAGTTTATATCTTGGATTCCGTGGCCGCAAATGTTTTCTACTCAATTATGGAGTTGATTTGGCTTCTTGAACCTTAAGAGTG  
AGGAATGTGAGATTTTTTTTTGAAGTGCATTTGGTAAGGTTCCCTCCGCGAGTTTTTATACTCGCAATGGTATTTAGGGGTTTGGGATCGACGCGGTGAAGTTGGATATGTGCCCTGTAGGT  
TTCTTACTTGTGAGTGTTTACGGAGCTTTTTAGAGTGTGCGATGAAGCTCTCGACGTTGGAGTTCTGGTCCAGCAGGATGAGGAAGGGGGGACAAGAGATGCTTGAACCTCCA  
GCTTTGGCATGCTTGTGCTGGTCTCTAGTGTGTCTGCCAATGTCGGAACCCGTGTTGTCTACTTTCCACAGGGCCACAGCGAGCAGGTCGTGGCTTCCACTAATAAGGAGGTTGAAGG

CCATATTCCTAATTATCCGAACTTGCCACCTCAATTGATCTGCCAACTTCACGATGTGACTATGCACGCTGATGCCGAGACTGACGAAAGTCTACACACAGATGACATTGCAGCCTTTAAATC  
CGCAGGATCTGAAAGATACATACCTTCCAGCTGAGATGGGGCTACCTAGCAAGCAGCCCATGAATTATTTTTGTAAGACTTTGACTGCAAGCGATAACAAGCACTCATGGAGGGTTTTCTGT  
TCCTCGTCGTGCAGCTGAAAAAGTTTTTCTCTCTGGAATTTCTCTCAACAGCCACCAGCTCAAGAGCTGATTGCTCGAGATATTCATGATGTTGATTGGAAGTTCAGGCATATCTTTAGA  
GGACAACCCAAGAGGCATCTTCTACTACAGGCTGGAGTATCTTTGTCAGTGTCTAAGAGACTTGTGCTGGTATTCTGTTTTATTTATATGGAATGAGAAAAATCAGCTTTTGTGGGAA  
TCCGACGGGGCTAATCGACCACAAAATGCTGTACCTTCATCAGTTATATCAAGTGATAGTATGCATATTGGACTGCTTGCTGCAGCAGCTCATGCTGCTGCAACAAATAGCCGTTTCACCATT  
TTTTACCACCCAAGAGTTTTGTGATACCACTCTCAAAATATGTTAAGGCTGTGTTTCACACTCGTGTCTCAGTTGGCATGCGATTTAGGATGCTTTTCGAGACTGAAGAGTCAAGTGTTCGT  
AGGTATATGGGGACTATAACAGGAATAAGTGATTTGGATCCTGTCCGATGGCCAAATTCCCCTGGAGATCAGTGAAGGTGACAGACAACCTAGAGCATCTTTATGGGAAATTGAGCCTTT  
GACAACATTTCCAATGTATCCATCACTATTCCCTCTCAGACTTAAACCACCTTGGTACACTGGAGTTTCATCTCTAAATGACTACAAGTTAGATGAGGGGAATGCATACATGTGGCTTAGGG  
GGAGCTCAGGGGGGGTATTAGGTCTTTGAATTTCAATCTCTGGAATTTGGTCCGTGTGTTTCAGCAGCAGGTCCAACCACAATTGGGAAACAATCACACTCCTTACCAAGCAATGGATG  
CTGCAGCTTGATATTAGAGGCATGGATTCACTTAGGCAGCCATTTCTAAACTTCCAGCAGCCGTTTCAGTTCCCTCAGCAGTTCTGTATGAACCCATTGTTGCAGCAGCAAGTTATTCA  
ACAAGCTCACCATGAACAGATAATGAATTCTCAAGCTCAGTCTCTGTTGGATAGTCAACCAACATTACTTCAAAATCAGCTGTTGCAACAGCCATACGGTGATCAGCAGAAGCAAAAAGG  
TCAGCAGCAACCAACTTATCCAGAATTTTCATGTTTCAAGTTAATAATAGAACAGCAACAGCTGCCAATACCCTCTCCATTATCTCAAAAATCTGTATTTCTGATTCAAGTATGAACTT  
TTCATCAGTTGCAACACCCAGTTGCATACAGAAATTTGTCAGCAGCGGCTTATTCTGGAACAAAATGCTAATAACTTGCATTTGCAAAAATGGTTCAGACAATTCTGGCTGAGCAGCATCA  
GCAAAAATGGGATCCACAGTTTGCATTGCAGAAGGTTTCTACTTTTGGTAATACAGTTTTGCTTCAACCATTTCACGGAAAAGATGATACAAGGGAATCTGATGTCTCTCCACTGATACA  
CAAAACCACAGCCTATTGATATCAATGTTGGTTCTTCCCTGCTTCTTGGCAATGTTGTGCTAATCTATTAAACGCAACAATAATGACAATGTTGTATCCAGCATGCCATTTACCACTTCT  
TATCTTCAAAATTCATTTATCACAGCCTTGATGAGTCACTCAGGTATGTTGCAGCATACTACGACATTGATCCATCAATCAAACTTTTTGTAAGGTTTACAAGTCAGGCTCGGTTGGGAG  
GTCACTCGACATCACTCGTTTCAGCAACTATACTGAATTACGAAAGGCACTGGGTCAGATGTTTGGTATTGAGGGTCAACTTGAAAACCCTCTTAGATCAGGCTGGCAGCTTGTATTTGTC  
GACAGGGAGAATGATGTTCTTCTGTGCGCGATGATCCATGGCCGGAGTTCGTGAACAATGTGTGGTGTATTAAGATACTCTCCCTACAGGAAGTGCAGCAGATGGCCAAGCAAGGCGTT  
AACCTCATAAACTCTGCACCACTGCGAAAGCTTTCAACTGGAAGCTGTGACAATTACATCGCTCAGCAAGAATCGAGAAATCTGAGCTCCGAGATCATGCCTGTAGCTTCTTTGGACTAT  
TGAGTCTTATTGCTCTCTGAAAACCTTTTTCTGTGCTTTGACTATCCTTTCTGAAGACATCTAAAGCTATATATATGTGTATCTACAATAACTTTATTGTAACCTCAGAAGACTTCTTTTGTAGA  
CTGTAAGACTTGATTATCTAGTTTACTCATGGTAACTGTTATTAGTCCATTGCTTGTAAATTTTGTAGAGCAATTGCATCAGAATATCTGTAGATAAATTTGTGACTCTGTGTTAGATGATAAAA  
TGCTCAAAACTAGAAGATAAGTGTTCAAAATTACAAGGAATTTAAGTTTTATGTTACAGAAAAA

>comp171031\_c0\_seq28

AGCACACAATTTTAATATTTTCACTTATAATTTACCCAGACGGGAAATCCCCGATATTTCCGGCTAGTGTCTCTCTTTTTCTCAGTGGCTTTACCGTCTGCCCAATTACATCCAATAT  
ATCCATTCACGGCGATCTGGAGCTAGTTCATTGCCGCGCTTCTCCATGCTAGCATTGCCTGAGCTTTGTGTTCTTACAACCTTTCGAGGTGCTGCTTTTCTATCCTCGAGTTACTTCTTC  
TGATATATCGTTTCCCTTTGAGGAGCTCTCCAAGGCCCGAACTTCGCTAGAAATTTGTGCTTCCCTGTGCGAGCTGCCAAGAAAACAAGGGAAGTGTGAAGGCAGAGGTAGAGCTGCTTGGT  
TTCTGATCAGGGAAGTGGTTATGAATTTAGAGTTTGAAGTTTATATCTTGGATTCCGTGGCCGCAAAATGTTTTCTACTCAATTATGGAGTTGATTTGGCTTCTTGAACCTTAAAGAGTG  
AGGAATGTGAGATTTTTTTTTGAAGTCGATTTGGTAAGGTTCTCCGCGAGTTTTTATACTCGCAATGGTATTTAGGGGTTGGGATCGACGCGGTGAAGTTGGATATGTGCCCTGTAGGT  
TTCTTACTTGTGAGTGTTTACGGAGCTTTTATAGAGTGTGCGATGAAGCTCTCGACGGTTGGAGTTCTGGTCCAGCAGGATGAGGAAGGGGGGGACAAGAGATGCTTGAACCTCCGA  
GCTTTGGCATGCTTGTGCTGGTCTCTAGTGTGTCTGCCAATGTCGGAACCCGTGTTGTCTACTTTCCACAGGGCCACAGCGAGCAGGTCGTGGCTTCCACTAATAAGGAGGTTGAAGG  
CCATATTCCTAATTATCCGAACTTGCCACCTCAATTGATCTGCCAACTTCACGATGTGACTATGCACGCTGATGCCGAGACTGACGAAAGTCTACACACAGATGACATTGCAGCCTTTAAATC

CGCAGGATCTGAAAGATACATACCTTCCAGCTGAGATGGGGCTACCTAGCAAGCAGCCCATGAATTATTTTTGTAAGACTTTGACTGCAAGCGATACAAGCACTCATGGAGGGTTTTCTGT  
TCCTCGTCGTGCAGCTGAAAAAGTTTTCTCCTCTGGATTCTCTCAACAGCCACCAGCTCAAGAGCTGATTGCTCGAGATAITCATGATGTTGATTGGAAGTTCAGGCATATCTTTAGA  
GGACAACCCAAGAGGCATCTTCTACTACAGGCTGGAGTATCTTTGTCAGTGCTAAGAGACTTGTGGCTGGTGATTCTGTTTTATTTATATGGAATGAGAAAAATCAGCTTTTGTGGGAA  
TCCGACGGGCTAATCGACCACAAAATGCTGTACCTTCATCAGTTATATCAAGTGATAGTATGCATATTGGACTGCTTGGCTGCAGCAGCTCATGCTGCTGCAACAAAATAGCCGTTTCACCATT  
TTTTACCACCCAAGAGTTTTGTGATACCCTCTCAAAAATATGTTAAGGCTGTGTTTCACACTCGTGTCTCAGTTGGCATGCGATTTAGGATGCTTTTTCGAGACTGAAGAGTCAAGTGTTTCGT  
AGGTATATGGGGACTATAACAGGAATAAGTGATTTGGATCCTGTCCGATGGCCAAATTTCCACTGGAGATCAGTGAAGGTTAATTGGGACGAATCAACTGCAGGTGACAGACAACCTAGA  
GCATCTTTATGGGAAATTGAGCCTTTGACAACATTTCCAATGTATCCATCACTATTCCCTCTCAGACTTAAACCACCTTGGTACACTGGAGTTTCATCTCTAAATGACTACAAGTTAGATGA  
GGGGAATGCATACATGTGGCTTAGGGGGAGCTCAGGGGGGGTATTAGGTCTTTGAATTTCAATCTCTGGAATTGGTCCGTGTGTTTCAGCAGCAGGTCCAACCACAATTGGGAAACAA  
TCACACTCCTTACCAAGCAATGGATGCTGCAGCTTGTGATATTAGAGGCATGGATTCACTTAGGCAGCCATTTCTAAACTTCCAGCAGCCGTTTCAGTTCCTCAGCAGTTCTGTATGAAC  
CCATTGTTGCAGCAGCAAGTTATTCAACAAGCTCACCATGAACAGATAATGAATTCTCAAGCTCAGTCTCTGTTGGATAGTCAACCAACATTACTTCAATCAGCTGTTGCAACAGCCAT  
ACGGTGATCAGCAGAAGCAAAAAGGTCAGCAGCAACCAACTTATCCAGAATAATTTATGTTTCAGATTAATAATATAGAACAGCAACAGCTGCCAATACCCTCTCCATTATCTCAAAAATC  
TGTATTTCTGATTCAAGTATGAACTTTTATCAGTTGCAACACCCAGTTGCATACAGAATTTGTCAGCAGCGCTTATTCTGGAACAAAATGCTAATAACTTGCACCTTTGCAAAAATGGTC  
AGACAATTTCTGGCTGAGCAGCATCAGCAAAAATGGGATCCACAGTTTGCATTGCAGAAGGTTTCTACTTTTGGTAATACAGTTTTGCTTCAACCATTTACGGAAAAGATGATACAAGGG  
AATCTGATGTCTCTCCACTGATACACAAAACCACAGCCTATTTGATATCAATGTTGGTCTTCTGCTTCTGGCAATGTTGTGCCTAATCTATTAACGCAAAACAATAATGACAATGTTG  
TATCCAGCATGCCATTTACCACCTTCTTATCTTCAAAAATCACTTTATCACAGCCTTGATGAGTCACTCAGGTATGTTGCAGCATACTACGACATTGATCCATCAATCAAAAATTTGTAAAGG  
TTTACAAGTCAGGCTCGGTTGGGAGGTCAGTGCATCACTCGTTTCAGCAACTATACTGAATTACGAAAGGCACTGGGTGAGATGTTTGGTATTGAGGGTCAACTGAAAACCCCTCTTA  
GATCAGGCTGGCAGCTTGTATTTGTTGACAGGGAGAATGATGTGCTTCTTCTGGAGACGACCCTTGGGAGTAAGACTTTATATTAACCTGAAACATCTTCAATTTAAAGAAACATTGAT  
CAGCTTATGCTTCTCATCAACATTCATATATTCAATTTCCCAACTATCTGCAACTTAAGCAACATCAATTGTCTATAACTATTTTTAGTTACATGTGTAGAGACAGTTATTTATATTGAGCTTTC  
TGAAGGCTCCAGCGACTAAGGTTTATATGATTTATAAATGCTTTATCAGGTGTATATGCTTCAAGGGTTGAGAAAACCTTAGCTCTCTTAATACTAGTTCAAAAATTTCAATTAGCTTAAACGTG  
GCATGCTGTGAACATAAACAATTAGATTTTCTACTATCATTGGAAGAAACCTTAATGCTGGTCTCTGTGATGGGAATCCCACGTTGATACTAGTAATTATTGAGCAGAAAACGAAGTTCAAAT  
TATCTCTGGTCTGAGCAATGTCGTGCTAGGAAGTAGTAACCAAGTATGAAAACTATGTATGCTGAGTAATTAATAATTTTTCTGGCAAAAACCTGGCGTACAGTTACTTATATACGCTT  
CAACATTTTGTAGCTATAAAAATTTCTTGTGTTATTTGTAAGATGTGATCAATATATCGTAGCTTTGTACAATGCCTATGCAGACTTTGTGCATTCATGGTTGGCCGATCAAAAACCTGTACCTC  
TTCACCTGGTATTCAATTTCTAATTAATGCAGATCGTTTGTGAACAATGTGTGGTACATCAAAATACTTTACCAGAGGATGTTTCAGCAAATGGGGCAGCAGGGAGTTGACTTGAGCTAATT  
AACTTTGAATTTCAATCAAACCAATGGCAAGTCTGCTCGAGGTGAAATCCCCGTAGGTGCCCAAAGTCTGTACTGTCTACTGTTAAACGTATGACAGTAAAATCTGCATAAGATACAGAT  
ATTTATGCTATAAAAATCCTTGTGTGCAGGTTCCATTTGCTCTTCCATTTACTTCTCGCCAATAACCATGCTCTTAGCTGTTCCATGTACTCTTAAATAGTATATTTTATCTTCTTATCTTATTA  
ATTCTAATTTGTAAAGAACAAGTGTCTAGAAATATATCTAAAGCGTGGATCTAAGATTTCGATTACTGGAATAATTTTGGACATCCAGTGAATTTAGCTCCTGTAATGTAAGTAGGATTTCGAG  
GACTGAGGAATTTATCCTTATCCATGGATTTATGAAGAGATTTTTGTGCTTTGGATATTATCTCTAGATCACTAGTGAGATAACTTAATCAACGCC

>comp171031\_c0\_seq29

AGCACACAATTTAATATTTTCACTTATAATTTACCCAGACGGGAAATCCCCGATATTTCCGGCTAGTGCTGTCTCTCTTTTTCTCAGTGGCTTTACCGTCTGCCCAATTACATCCAATAT  
ATCCATTCACGGCGATCTGGAGCTAGTTCAATTGCCGCGCTTCTCCATGCTAGCATTGCTCTGAGCTTTGTGTTCTTACAACCTCTTCGAGGTGCTGCTTTTCTATTCCTCGAGTTACTTCTTC  
TGTATATCGTTTCCCTTTGAGGAGCTCTCCAAGGCCCGAACTTCGCTAGAAAATTGTGCTTCTTGTGCTGAGCTGCCAAGAAAACAAGGGAAGTGTGAAGGCAGAGGTAGAGCTGCTTGGT

TTCTGATCAGGGAACCTGGTTATGAATTCTAGAGTTTGAAAGTTTATATCTTGGATTCCGTGGCCGCAAATTGTTTTCTACTCAATTATGGAGTTGATTTGGCTTCTTGAGCCTTAAGAGTG  
AGGAATGTGAGATTTTTTTTTGAAGTCGATTTGGTAAGGTTCCCTCCGCGAGTTTTTATACTCGCAATGGTATTTAGGGGTTGGGATCGACGCGGTGAAGTTGGATATGTGCCCTGTAGGT  
TTCTCTTACTTGTGAGTGTTTACGGAGCTTTTTAGAGTGTGCGATGAAGCTCTCGACGGTTGGAGTTCTGGTCCAGCAGGATGAGGAAGGGGGGGACAAGAGATGCTTGAACCCGA  
GCTTTGGCATGCTTGTGCTGGTCTCTAGTGTGTCTGCCAATGTCGGAACCCGTGTGTCTACTTTCCACAGGGCCACAGCGAGCAGGTCGTGGCTTCCACTAATAAGGAGGTTGAAGG  
CCATATTCCTAATTATCCGAACCTGCCACCTCAATTGATCTGCCAACTTCACGATGTGACTATGCACGCTGATGCCGAGACTGACGAAGTCTACACACAGATGACATTGCAGCCTTTAAATC  
CGCAGGATCTGAAAGATAACACCTTCCAGCTGAGATGGGGCTACCTAGCAAGCAGCCATGAATTATTTTTGTAAGACTTTGACTGCAAGCGATAACAAGCACTCATGGAGGGTTTTCTGT  
TCCTCGTCTGTCAGCTGAAAAAGTTTTTCCCTCTCTGGATTTCTCTCAACAGCCACCAGCTCAAGAGCTGATTGCTCGAGATATTCATGATGTTGATTGGAAGTTCAGGCATATCTTTAGA  
GGACAACCCAAGAGGCATCTTCTACTACAGGCTGGAGTATCTTTGTCAGTGTCTAAGAGACTTGTGCTGGTGAATCTGTTTTATTTATATGGAATGAGAAAAATCAGCTTTTTGTTGGGAA  
TCCGACGGGCTAATCGACCACAAAATGCTGTACCTTCATCAGTTATATCAAGTGATAGTATGCATATTGGACTGCTTGCTGCAGCAGCTCATGCTGCTGCAACAAAATAGCCGTTTCACCATT  
TTTTACCACCCAAGGGCTGTCTTCAGAGTTTGTGATACCCTCTCAAAAATATGTTAAGGCTGTGTTTCACACTCGTGTCTCAGTTGGCATGCGATTTAGGATGCTTTTTCGAGACTGAAG  
AGTCAAGTGTTCGTAGGTATATGGGGACTATAACAGGAATAAGTGATTTGGATCCTGTCCGATGGCCAAATCCCAGTGGAGATCAGTGAAGGTGACAGACAACCTAGAGCATCTTTATGG  
GAAATTGAGCCTTTGACAACATTTCCAATGTATCCATCACTATTCCTCTCAGACTTAAACCACCTTGGTACACTGGAGTTTCATCTCTAAATGACTACAAGTTAGATGAGGGGAATGCATA  
CATGTGGCTTAGGGGGAGCTCAGGGGGGGTATTAGGTCTTTGAATTTCAATCTCTCGAATTGGTCCGTGTGTTTCAGCAGCAGGTCCAACCACAATTGGGAAACAATCACACTCCTTA  
CCAAGCAATGGATGCTGCAGCTTGTGATATTAGAGGCATGGATTCAGTTAGGCAGCCATTTCTAAACTTCCAGCAGCCGTTTCAGTTCCCTCAGCAGTTCTGTATGAACCCATTGTTGCAG  
CAGCAAGTTATTCAACAAGCTCACCATGAACAGATAATGAATTCTCAAGCTCAGTCTCTGTTGGATAGTCAACCAAACATTACTTCAAATCAGCTGTTGCAACAGCCATACGGTGATCAGC  
AGAAGCAAAAAGGTCAGCAGCAACCAACTTATCCAGAACTATTTTCATGTTTCAGATTAATAATAGAACAGCAACAGCTGCCAATACCCTCTCCATTATCTCAAAAATCTGTATTTCTGAT  
TCAAGTATGAACTTTTCATCAGTTGCAACACCCAGTTGCATACAGAATTTGTCAGCAGCGGCTTATTCTGGAACAAATGCTAATAACTTGCAGTTTGCAAAAATGGTCAGACAATTCTGG  
CTGAGCAGCATCAGCAAAAATGGGATCCACAGTTTGCATTGCAGAAGGTTTCTACTTTTGGTAATACAGTTTTGCTTCAACCAATTCACGGAAAAGATGATAACAAGGAATCTGATGTCTC  
TCCCAGTATACACAAAACCACAGCCTATTTGATATCAATGTTGGTCTTCCCTTGTCTTTGGCAATGTTGTGCCTAATCTATTAACGCAACAATAATGACAATGTTGTATCCAGCATGCC  
ATTTACCCTTCTTATCTTCAAAAATCACTTTATCACAGCCTTGATGAGTCATCAGGTATGTTGCAGCATACCTACGACATGATCCATCAATCAAAAATTTTGTAAAGGTTTACAAGTCAGG  
CTCGGTTGGGAGGTCAGTCTGACATCACTCGTTTCAGCAACTATACTGAATTACGAAAAGGCACTGGGTCAGATGTTTGGTATTGAGGGTCAACTTGAAAACCCTCTTAGATCAGGCTGGCA  
GCTTGTATTTGTTGACAGGGAGAATGATGTGCTTCTTCTGGAGACGACCTTGGGAATCGTTTGTGAACAATGTGTGGTACATCAAAAATACTTTCACCAGAGGATGTTTCAGCAAATGGG  
GCAGCAGGGAGTTGACTTGAGCTAATTAACCTTTGAATTTCAATCAAAACCAATGGCAAGTAAGTTTATTTGTGCTTGCAACAGAAATTCCTATACTGCGGTGAACATTCTAAGTATTTTT  
TTATTTAGGCATCAAACTTAAATACGCATAATTATTTTGAATGTTGTTGCATGCATGTGTCCATGCCCTGTAATGTGGGAATATATATTTATGTATAACCGGATAATATAAATGTATAAT  
AGTTGTAGTTCCCTCTTATTTAATTTAGTAAGGTGTCTTTTTTGTTCATTCCTCGGTTGCACAAGTTTTGCTCAAATCAAAGTTGGTCCACGGGGTATCTTATTTATAACGTGTGGGAGAT  
TTTTTGTGTCATTTCCAGTAGTATTTTTCTGATCAATATCAAAGATTGCTAGAGAAAGTGACTCCCTCCCTCCCTCCCTCCCTCCAGAAAGGATCCATATTATCATATTTTTAGTTGACTTT  
AAGCACTAGTCCGCCAAATGAATCTACTTCAAAGTTCTGGGATGAACTTTTATGAGTTTGGATGACGCTGTTGACCATCATATAAACTGTTTTTCTATCATTTTGGATTCAATTGTGAGAA  
ATAACGATGTGTTTCTTCAAGTGGTTAACCGAGTAAATGCGACCTTTTTTAAACGTTGCAAATACACTACGAAGGCATGCTAGTTTATGAGATTATTCCATCATTATGGTATGAGAATATGAAC  
GCTATTTCTGCACTTTTATCTGATCAGGTGTCAATTTTTGTAGGTCTGCTCGAGGTGAAATCCCCGTAGGTGCCCAAAGTCTGTACTGTCTACTGTTAAACGTATGACAGTAAAATCTGCATA  
AGATACAGATATTTATGCTATAAAATCCTTGTGTGCAGGTTCTATTTGCTCTTCCATTTACTTCTCGCCAATAACCATGCTCTTAGCTGTTCCATGTACTCTTAAATAGTATATTTTATCTTCT  
TATCTTATTTAATTCTAATTTGTAAAGAACAAGTGTCTAGAAATATATCTAAAGCGTGGATCTAAGATTTCGATTACTGGAATAATTTGGACATCCAGTGAATTTAGCTCCTGTAATGTAAGT

AGGATTCGAGGACTGAGGAATTTATCCTTATCCATGGATTTATGAAGAGATTTTGTGCTTTGGATATTATCTCTAGATCACTAGTGAGATAACTTAATCAACGCC

>comp171031\_c0\_seq30

AGCACACAATTTTAATATTTTCACTTATAATTTACCCAGACGGGAAATCCCCGATATTTCCGGCTAGTGCTGTCCCTCTCTTTTTCTCAGTGGCTTTACCGTCTGCCCAATTACATCCAATAT  
ATCCATTCACGGCGATCTGGAGCTAGTTTCATTGCCGCGCTTCTCCATGCTAGCATTGCGCTGAGCTTTGTGTTCTTACAACCTCTTCGAGGTGCGTGCTTTTCTATTCCTCGAGTTACTTCTTC  
TGTATATCGTTTCCCTTTGAGGAGCTCTCCAAGGCCCGAACTTCGCTAGAAATTGTGCTTCTTGTGCGAGCTGCCCAAGAAACAAGGGAAGTGTGAAGGCAGAGGTAGAGCTGCTTGGT  
TTCCTGATCAGGGAACTTGGTTATGAATTCTAGAGTTTGAAAGTTTATATCTTGGATTCCGTGGCCGCAAATGTGTTTTCTACTCAATTATGGAGTTGATTTGGCTTCTTGAGCCTTAAGAGTG  
AGGAATGTGAGATTTTGTGAAAGTCGATTTGGTAAGGTTCTCCGCGAGTTTTTATACTCGCAATGGTATTTAGGGGTTGGGATCGACGCGGTGAAGTTGGATATGTGCCCTGTAGGT  
TTCTCTTACTTGTGAGTGTACGGAGCTTTTGTAGAGTGTGCGATGAAGCTCTCGACGGTTGGAGTTCTGGTCCAGCAGGATGAGGAAGGGGGGGACAAGAGATGCTTGAACCTCGA  
GCTTTGGCATGCTTGTGCTGGTCTCTAGTGTGTCTGCCAATGTCGGAACCCGTGTTGTCTACTTCCACAGGGCCACAGCGAGCAGGTCGTGGCTTCCACTAATAAGGAGGTTGAAGG  
CCATATTCCTAATTATCCGAACTTGCCACCTCAATTGATCTGCCAATTACGATGTGACTATGCACGCTGATGCCGAGACTGACGAAGTCTACACACAGATGACATTGCAGCCTTAAATC  
CGCAGGATCTGAAAGATACATACCTTCCAGCTGAGATGGGGCTACCTAGCAAGCAGCCATGAATTATTTTGTAAAGACTTTGACTGCAAGCGATAACAAGCACTCATGGAGGGTTTTCTGT  
TCCTCGTCGTGCAGCTGAAAAGTTTTCTCCTCTGGATTTCTCTCAACAGCCACCAGCTCAAGAGCTGATTGCTCGAGATATTCATGATGTTGATTGGAAGTTCAGGCATATCTTTAGA  
GGACAACCCAAGAGGCATCTTCTACTACAGGCTGGAGTATCTTTGTGAGTGCTAAGAGACTTGTGCTGGTGAATCTGTTTTATTTATATGGAATGAGAAAAATCAGCTTTTGTGGGAA  
TCCGACGGGCTAATCGACCACAAAATGCTGTACCTTCATCAGTTATATCAAGTGATAGTATGCATATTGGACTGCTTGTGCTGCAGCAGCTCATGCTGCTGCAACAAATAGCCGTTTACCATT  
TTTTACCACCCAAGAGTGTGATACCACTCTCAAAATATGTTAAGGCTGTGTTTACACTCGTGTCTCAGTTGGCATGCGATTTAGGATGCTTTTCGAGACTGAAGAGTCAAGTGTTCGT  
AGGTATATGGGGACTATAACAGGAATAAGTGATTTGGATCCTGTCCGATGGCCAAATCCCAGTGGAGATCAGTGAAGGTGACAGACAACCTAGAGCATCTTTATGGGAAATTGAGCCTTT  
GACAACATTTCCAATGTATCCATCACTATTCCTCTCAGACTTAAACCACCTGGTACACTGGAGTTTCACTCTAAATGACTACAAGTTAGATGAGGGGAATGCATACATGTGGCTTAGGG  
GGAGCTCAGGGGGGGTATTAGGTCTTTGAATTTCAATCTCCTGGAATTGGTCCGTGTGTTTACAGCAGCAGGTCCAACCACAATTGGGAAACAATCACTCCTTACCAAGCAATGGATG  
CTGCAGCTTGTGATATTAGAGGCATGGATTCACTTAGGCAGCCATTTCTAAACTTCCAGCAGCCGTTTTCAGTTCCCTCAGCAGTTCTGTATGAACCCATTGTTGCAGCAGCAAGTTATTCA  
ACAAGCTCACCATGAACAGATAATGAATTCTCAAGCTCAGTCTCTGTTGGATAGTCAACCAAACATTACTTCAAATCAGCTGTTGCAACAGCCATACGGTGATCAGCAGAAGCAAAAAGG  
TCAGCAGCAACCAACTTATCCAGAATAATTCATGTTTCAAGTTAATAATATAGAACAGCAACAGCTGCCAATACCCTCTCCATTATCTCAAAAATCTGTATTTCTGATTCAAGTATGAACTT  
TTCATCAGTTGCAACACCCAGTTGCATACAGAAATTTGTCAGCAGCGGCTTATTCTGGAACAAATGCTAATAACTTGCACCTTTGCAAAAACCTGGTCAGACAATTCTGGCTGAGCAGCATCA  
GCAAAAATGGGATCCACAGTTTGCATTGCAGAAGGTTTCTACTTTTGGTAATACAGTTTTGCTTCAACCATTTCACGGAAAAGATGATACAAGGGAATCTGATGTCTCTCCACTGATACA  
CAAAACCACAGCCTATTTGATATCAATGTTGGTTCTTCCCTGCTTCTTGGCAATGTTGTGCTAATCTATTAACGCAACAATAATGACAATGTTGTATCCAGCATGCCATTTACCCTTCT  
TATCTTCAAAATCACTTTATCACAGCCTTGATGAGTCATCAGGTATGTTGCAGCATACTACGACATTGATCCATCAATCAAACTTTTGTAAAGGTTTACAAGTCAGGCTCGGTTGGGAG  
GTCACTCGACATCACTCGTTTCAGCAACTATACTGAATTACGAAAGGCACTGGGTCAGATGTTTGGTATTGAGGGTCAACTTGAAAACCCTCTTAGATCAGGCTGGCAGCTTGTATTTGTT  
GACAGGGAGAATGATGTGCTTCTTCTGGAGACGACCCTTGGGAGTAAGACTTTATTATTAACCTTGAACATCTTCAATTTAAAGAAACATTGATCAGCTTATGCTTCTCATCAACATTCAT  
ATATTCATTTCCCAACTATCTGCAACTTAAGCAACATCAATTGTCTATAACTATTTTTAGTTACATGTGTAGAGACAGTTATTTATATTGAGCTTCTGAAGGCTCCAGCGACTAAGGTTTAT  
ATGATTTATAAATGCTTTATCAGGTGTATATGCTTCAAGGGTTGAGAAACCTTAGCTCTTAACTAGTTTCAAAATTTCAATTAGCTTAAACGTGGCATGCTGTGAACATAAACAATTAGA  
TTTTCTACTATCATTTGAAGAAACCTTAATGCTGGTCTGTGATGGGAATCCCACGTTGATACTAGTAATTATTGAGCAGAAAACGAAGTTCAAATTTATCTCTGGTCTGAGCAATGTCGTG  
CTAGGAAGTAGTAACCAAGTATGAAAACCTATGTATGCTGAGTAATTAATAATTTTTCTGGCAAAACACCTGGCGTACAGTTACTTATATACGCTTCAACATTTTGTAGCTATAAAAATTTCT

TGTGTTATTTGTAAGATGTGATCAATATATCGTAGCTTTGTACAATGCCTATGCAGACTTTGTGCATTCATGGTTGGCCGATCAAAAACCTGTACCTCTTCACCTGGTATTCATTTCTAATTAAT  
GCAGATCGTTTGTGAACAATGTGTGGTACATCAAAAATACTTTACCAGAGGATGTTTCAGCAAATGGGGCAGCAGGGAGTTGACTTGAGCTAATTAACCTTTGAATTTCAATCAAACCAAAT  
GGCAAGTAAGTTTATTTGTGCTTGCACCAGAATATTCCTATACTGCGGTGAACATTTCTAAGTATTTTTTTTATTTAGGCACTATCAAATCTTAATACGCATAATTATTATTTTGAATGTTGTTGC  
ATGCATGTGTCCATGCCCTGTAATGTGGGGAATATATATTTATGTATAACCGGATAATATAAATGTATAATAGTTGTAGTTCCTCTTATTTAATTTAGTAAGGTGTCTTTTTTGTTTCCATTCCCTC  
GGTTGCACAAGTTTTGCTCAAATCAAAGTTGGTCCACGGGGGTATCTTATTTATAACGTGTGGGAGATTTTTTGTTTGCATTTTCCAGTAGTATTTTTTCTGATCAATATCAAAGATTGTCTA  
GAGAAGTGACTCCCTCCCCTCCTCCCTCCCTCCAGAAGGATCCATATTATCATATTTTTAGTTGACTTTAAGCACTAGTCCGCCAAATGAATCTACTTCAAAGTTCTGGGATGAAACTTTTA  
TGAGTTTGGATGACGCTGTTGACCATCATCATAAAACTGTTTTCCCTATCATTTGGATTCAATTGTGAGAAATAACGATGTGTTTCTTCAAGTGGTTAACCGAGTAAATGCGACCTTTTTTAAC  
GTTGCAAATACACTACGAAGGCATGCTAGTTATGAGATTATCCATCATTATGGTATGAGAATATGAACGCTATTTCTGCACTTTTATCTGATCAGGTGTCATATTTGTAGGTCTGCTCGAG  
GTGAAATCCCCGTAGGTGCCCAAAGTCTGTACTGTCTACTGTTAAACGTATGACAGTAAAATCTGCATAAGATACAGATATTTATGCTATAAAAATCCTTGTGTGCAGGTTCCATTTGCTCT  
TCCATTTACTTCTCGCCAATAACCATGCTCTTAGCTGTTCCATGTAATTAATAGTATATTTTATCTTCTTATCTTATTTAATTCTAATTTGTAAAGAACAAAGTGTCTTAGAATATATCTAAA  
GCGTGGATCTAAGATTCGATTACTGGAATAATTTTGGACATCCAGTGAATTTAGCTCCTGTAATGTAAGTAGGATTCGAGGACTGAGGAATTTATCCTTATCCATGGATTTATGAAGAGATTT  
TTGTGCTTTGGATATTATCTCTAGATCACTAGTGAGATAACTTAATCAACGCC

>comp171031\_c0\_seq32

TTAATAGTTGATAGGCTTAATAGTATGTGATGTTAAGAATCCATATATATGATAAACATCTGTTGGCTCACATTTCTTTTCTTTCATTATGTCAGACTACAAGTTAGATGAGGGGAATGCATA  
CATGTGGCTTAGGGGGAGCTCAGGGGGGGGTATTAGGTCTTTGAATTTCAATCTCCTGGAATTGGTCCGTGTGTTTCAGCAGCAGGTCCAACCACAATTGGGAAACAATCACACTCCTTA  
CCAAGCAATGGATGCTGCAGCTTGTGATATTAGAGGCATGGATTCACTTAGGCAGCCATTTCTAAACTTCCAGCAGCCGTTTCAGTTCCTCAGCAGTTCTGTATGAACCCATTGTTGCAG  
CAGCAAGTTATCAACAAGCTCACCATGAACAGATAATGAATCTCAAGCTCAGTCTCTGTTGGATAGTCAACCAAACATTACTTCAAATCAGCTGTTGCAACAGCCATACGGTGATCAGC  
AGAAGCAAAAAGGTCAGCAGCAACCAACTTATCCAGAACTATTTATGTTTCAAGTTAATAATATAGAACAGCAACAGCTGCCAATACCCTCTCCATTATCTCAAAAATCTGTATTTCTGAT  
TCAAGTATGAACTTTTCATCAGTTGCAACACCCAGTTGCATACAGAATTTGTGAGCAGCGGCTTATTCTGGAACAAATGCTAATAACTTGCACCTTTGCAAAAACCTGGTCAGACAATTCTGG  
CTGAGCAGCATCAGCAAAAATGGGATCCACAGTTTGCATTGCAGAAGGTTTCTACTTTTGGTAATACAGTTTGTCTTCAACCATTTACGGAAAAGATGATACAAGGGAATCTGATGTCTC  
TCCCACTGATACAAAAACCACAGCCTATTTGATATCAATGTTGGTTCTTCCCTTGCTTCTTGGCAATGTTGTGCCTAATCTATTAACGCAAAACAATAATGACAATGTTGTATCCAGCATGCC  
ATTTACCACTTCTTATCTTCAAAAATCACTTTATCACAGCCTTGATGAGTCATCAGGTATGTTGCAGCATACTACGACATTGATCCATCAATCAAAAACCTTTGTAAAGGTTTACAAGTCAGG  
CTCGGTTGGGAGGTCACCTCGACATCACTCGTTTCAGCAACTATACTGAATTACGAAAGGCACTGGGTCAGATGTTTGGTATTGAGGGTCAACTTGAAAACCTCTTAGATCAGGCTGGCA  
GCTTGTATTTGTGACAGGGAGAATGATGTTCTTCTTGTGCGCGATGATCCATGGCCGGAGTTCGTGAACAATGTGTGGTGTATTAAGATACTTCCCTACAGGAAGTGCAGCAGATGGCC  
AAGCAAGGCGTTAACCTCATAAACTCTGCACCACTGCGAAAGCTTTCAACTGGAAGCTGTGACAATTACATCGCTCAGCAAGAATCGAGAAATCTGAGCTCCGAGATCATGCCTGTAGC  
TTCTTTGGACTATTGAGTCTTATGCTCTCTGAAAACCTTTCTGTGCTTTGACTATCCTTTCTGAAGACATCTAAAGCTATATATATGTGTATCTACAATAACTTTATTGTAATTCAGAAGA  
CTTCTTTTGTAGACTGTAAGACTTGATTATCTAGTTTACTCATGGTAACTGTTATTAGTCCATTGCTTGTAAATTTGCTAGAGCAATTGCATCAGAATATCCTGATAGAATTTGTGACTCTGTG  
TTAGATGATAAAATGCTCAAAACTAGAAGATAAGTGTTCAAAATTACAAGGAATTTAAGTTTTATGTTACAGAAAAAA

>comp171031\_c0\_seq33

AGCACACAATTTAATATTTTCACTTATAATTTACCCAGACGGGAAATCCCCGATATTTCCGGCTAGTGCTGTCCCTCTTCTTTTTCTCAGTGGCTTTACCGTCTGCCCAATTACATCCAATAT  
ATCCATTCACGGCGATCTGGAGCTAGTTCATTGCCGCGCTTCTCCATGCTAGCATTGCGCTGAGCTTTGTGTTCTTACAACCTCTTCGAGGTGCTGCTTTTCTATTCCTCGAGTTACTTCTTC

TGTATATCGTTTCCCTTTGAGGAGCTCTCCAAGGCCCGAACTTCGCTAGAAATTGTGCTTCCTTGTCGAGCTGCCCAAGAAACAAGGGAAGTGTGAAGGCAGAGGTAGAGCTGCTTGGT  
TTCCTGATCAGGGAAGTGGTTATGAATTCTAGAGTTTGAAAGTTTATATCTTGGATTCCGTGGCCGCAAATTGTTTTCTACTCAATTATGGAGTTGATTTGGCTTCTTGAGCCTTAAGAGTG  
AGGAATGTGAGATTTTTTTTTGAAGTCGATTTGGTAAGGTTCCCTCCGCGAGTTTTTATACTCGCAATGGTATTTAGGGGTTGGGATCGACGCGGTGAAGTTGGATATGTGCCCTGTAGGT  
TTCTCTTACTTGTGAGTGTTTACGGAGCTTTTTAGAGTGCTGCGATGAAGCTCTCGACGGTTGGAGTTCTGGTCCAGCAGGATGAGGAAGGGGGGGACAAGAGATGCTTGAACCTCGA  
GCTTTGGCATGCTTGTGCTGGTCTCTAGTGTGTCTGCCAATGTCGGAACCCGTGTTGTCTACTTTCCACAGGGCCACAGCGAGCAGGTCGTGGCTTCCACTAATAAGGAGGTTGAAGG  
CCATATTCCTAATTATCCGAAGTGGCACCTCAATTGATCTGCCAACTTACGATGTGACTATGCACGCTGATGCCGAGACTGACGAACTTACACACAGATGACATTGCAGCCTTTAAATC  
CGCAGGATCTGAAAGATACATACCTTCCAGCTGAGATGGGGCTACCTAGCAAGCAGCCATGAATTATTTTTGTAAGACTTTGACTGCAAGCGATAACAAGCACTCATGGAGGGTTTTCTGT  
TCCTCGTCGTGCAGCTGAAAAAGTTTTTCCCTCTCTGGATTTCTCTCAACAGCCACCAGCTCAAGAGCTGATTGCTCGAGATATTCATGATGTTGATTGGAAGTTCAGGCATATCTTTAGA  
GGACAACCCAAGAGGCATCTTCTACTACAGGCTGGAGTATCTTTGTCAGTGCTAAGAGACTTGTGCTGGTGATTCTGTTTTATTTATATGGAATGAGAAAAATCAGCTTTTGTGGGAA  
TCCGACGGGGCTAATCGACCACAAAATGCTGTACCTTCATCAGTTATATCAAGTGATAGTATGCATATTGGACTGCTTGGCTGCAGCAGCTCATGCTGCTGCAACAAATAGCCGTTTACCATT  
TTTTACCACCCAAGAGTTTTGTGATACCCTCTCAAATATGTTAAGGCTGTGTTTCACACTCGTGTCTCAGTTGGCATGCGATTTAGGATGCTTTTCGAGACTGAAGAGTCAAGTGTTTCGT  
AGGTATATGGGGACTATAACAGGAATAAGTGATTTGGATCCTGTCCGATGGCCAAATCCCCTGGAGATCAGTGAAGGTGACAGACAACCTAGAGCATCTTTATGGGAAATTGAGCCTTT  
GACAACATTTCCAATGTATCCATCACTATTCCTCTCAGACTTAAACCACCTTGGTACACTGGAGTTTCATCTCTAAATGACTACAAGTTAGATGAGGGGAATGCATACATGTGGCTTAGGG  
GGAGCTCAGGGGGGGGATTAGGTCTTTGAATTTCAATCTCTGGAATTTGGTCCGTGTGTTTCAGCAGCAGGTCCAACCACAATTGGGAAACAATCACACTCCTTACCAAGCAATGGATG  
CTGCAGCTTGTGATATTAGAGGCATGGATCACTTAGGCAGCCATTTCTAAACTTCCAGCAGCCGTTTCAGTTCCCTCAGCAGTTCTGTATGAACCCATTGTTGCAGCAGCAAGTTATTCA  
ACAAGCTCACCATGAACAGATAATGAATTCTCAAGCTCAGTCTCTGTTGGATAGTCAACCAAACATTACTTCAAATCAGCTGTTGCAACAGCCATACGGTGATCAGCAGAAGCAAAAAGG  
TCAGCAGCAACCAACTTATCCAGAACTATTTATGTTTCAAGTTAATAATATAGAACAGCAACAGCTGCCAATACCCTCTCCATTATCTCAAAAATCTGTATTTCTGATTCAAGTATGAACTT  
TTCATCAGTTGCAACACCCAGTTGCATACAGAAATTTGTCAGCAGCGGCTTATTCTGGAACAAAATGCTAATAACTTGCACCTTTGCAAAAATCTGGTCAAGCAATCTGGCTGAGCAGCATCA  
GCAAAAATGGGATCCACAGTTTGCATTGCAGAAGGTTTCTACTTTTTGGTAATACAGTTTTGCTTCAACCATTTACGGAAAAGATGATACAAGGGAATCTGATGTCTCTCCCACTGATACA  
CAAAACCACAGCCTATTGATATCAATGTTGGTTCTTCCCTGCTTCTTGGCAATGTTGTGCCTAATCTATTAACGCAAACAATAATGACAATGTTGTATCCAGCATGCCATTTACCCTTCT  
TATCTTCAAAATTCACTTTATCACAGCCTTGATGAGTCATCAGGTATGTTGCAGCATACCTACGACATTGATCCATCAATCAAAACTTTTGTAAGGTTTACAAGTCAGGCTCGGTTGGGAG  
GTCACCTCGACATCACTCGTTTCAGCAACTATACTGAATTACGAAAGGCACTGGGTCAGATGTTTGGTATTGAGGGTCAACTTGAAAACCCTCTTAGATCAGGCTGGCAGCTTGTATTTGTT  
GACAGGGAGAATGATGTGCTTCTTCTGGAGACGACCCTTGGGAACTTTGTGCATTGATGGTTGGCCGATCAAAACCTGTACCTCTTACCTGGTATTCAATTTCTAATTAATGCAGATCGTT  
TGTGAACAATGTGTGGTACATCAAAATACTTTACCAGAGGATGTTTACGCAAATGGGGCAGCAGGGAGTTGACTTGAGCTAATTAACCTTTGAATTTCAATCAAAACCAATGGCAA

>comp171031\_c0\_seq34

AGCACACAATTTAATATTTTCACTTATAATTTACCCAGACGGGAAATCCCCGATATTTCCGGCTAGTGTGCTCCTCTTCTTTTTCTCAGTGGCTTTACCGTCTGCCCAATTACATCCAATAT  
ATCCATTCACGGCGATCTGGAGCTAGTTTCAATGCGCGCTTCTCCATGCTAGCATTGCGCTGAGCTTTGTGTTCTTACAACCTCTTCGAGGTGCTGCTTTTCTATTCTCGAGTTACTTCTTC  
TGTATATCGTTTCCCTTTGAGGAGCTCTCCAAGGCCCGAACTTCGCTAGAAATTGTGCTTCCTTGTCGAGCTGCCCAAGAAACAAGGGAAGTGTGAAGGCAGAGGTAGAGCTGCTTGGT  
TTCCTGATCAGGGAAGTGGTTATGAATTCTAGAGTTTGAAAGTTTATATCTTGGATTCCGTGGCCGCAAATTGTTTTCTACTCAATTATGGAGTTGATTTGGCTTCTTGAGCCTTAAGAGTG  
AGGAATGTGAGATTTTTTTTTGAAGTCGATTTGGTAAGGTTCCCTCCGCGAGTTTTTATACTCGCAATGGTATTTAGGGGTTGGGATCGACGCGGTGAAGTTGGATATGTGCCCTGTAGGT  
TTCTCTTACTTGTGAGTGTTTACGGAGCTTTTTAGAGTGCTGCGATGAAGCTCTCGACGGTTGGAGTTCTGGTCCAGCAGGATGAGGAAGGGGGGGACAAGAGATGCTTGAACCTCGA



GCTTTGGCATGCTTGTGCTGGTCCTCTAGTGTGTCTGCCAATGTCGGAACCCGTGTTGTCTACTTTCCACAGGGCCACAGCGAGCAGGTCGTGGCTTCCACTAATAAGGAGGTTGAAGG  
CCATATTCCTAATTATCCGAACTTGCCACCTCAATTGATCTGCCAACTTACGATGTGACTATGCACGCTGATGCCGAGACTGACGAAGTCTACACACAGATGACATTGCAGCCTTTAAATC  
CGCAGGATCTGAAAGATACATACCTTCCAGCTGAGATGGGGCTACCTAGCAAGCAGCCCATGAATATTTTTGTAAAGACTTTGACTGCAAGCGATACAAGCACTCATGGAGGGTTTTCTGT  
TCCTCGTCGTGCAGCTGAAAAAGTTTTCTCTCTCGGATTTCTCTCAACAGCCACCAGCTCAAGAGCTGATTGCTCGAGATATTCATGATGTTGATTGGAAGTTCAGGCATATCTTTAGA  
GGACAACCCAAGAGGCATCTTCTACTACAGGCTGGAGTATCTTTGTCAGTGCTAAGAGACTTGTGCTGGTGATTCTGTTTTATTTATATGGAATGAGAAAAATCAGCTTTTTGTTGGGAA  
TCCGACGGGCTAATCGACCACAAAATGCTGTACCTTCATCAGTTATATCAAGTGATAGTATGCATATTGGACTGCTTGCTGCAGCAGCTCATGCTGCTGCAACAAATAGCCGTTTCACCATT  
TTTTACCACCCAAGGGCTTGTCCCTTCAGAGTTTTGTGATACCACTCTCAAAAATATGTTAAGGCTGTGTTTCACACTCGTGTCTCAGTTGGCATGCGATTAGGATGCTTTTTCGAGACTGAAG  
AGTCAAGTGTTCGTAGGTATATGGGGACTATAACAGGAATAAGTGATTTGGATCCTGTCCGATGGCCAAATCCCAGTGGAGATCAGTGAAGGTTAATTGGGACGAATCAACTGCAGGTG  
ACAGACAACCTAGAGCATCTTTATGGGAAATTGAGCCTTTGACAACATTTCCAATGTATCCATCACTATTCCTCTCAGACTTAAACCACCTGGTACACTGGAGTTTCATCTCTAAATGAC  
TACAAGTTAGATGAGGGGAATGCATACATGTGGCTTAGGGGGAGCTCAGGGGGGGTATTAGGTCTTTGAATTTCAATCTCTGGAATTGGTCCGTGTGTTTCAGCAGCAGGTCCAACCA  
CAATTGGGAAACAATCACACTCCTTACCAAGCAATGGATGCTGCAGCTTGTGATATTAGAGGCATGGATTCACTTAGGCAGCCATTTCTAAACTTCCAGCAGCCGTTTCAGTTCCTCAGC  
AGTTCGTATGAACCCATTGTTGCAGCAGCAAGTTATTCAACAAGCTCACCATGAACAGATAATGAATTCTCAAGCTCAGTCTCTGTTGGATAGTCAACCAAACATACTTCAAATCAGCT  
GTTGCAACAGCCATACGGTGATCAGCAGAAGCAAAAAGGTCAGCAGCAACCAACTTATCCAGAACTATTTTCATGTTTCAGATTAATAATATAGAACAGCAACAGCTGCCAATACCCTCTCC  
ATTATCTCAAAAATCTGTATTTCTGATTCAAGTATGAACTTTTCATCAGTTGCAACACCCAGTTGCATACAGAATTTGTCAGCAGCGGCTTATTCTGGAACAAATGCTAATAACTTGCACCT  
TGCAAAAACTGGTCAGACAATTCTGGCTGAGCAGCATCAGCAAAAATGGGATCCACAGTTTGCATTGCAGAAGTTTCTACTTTTGGTAATACAGTTTTGCTTCAACCATTTCACGGAAA  
AGATGATAACAAGGAATCTGATGTCTCTCCACTGATACACAAAACCACAGCCTATTTGATATCAATGTTGGTTCTTCCTTGCTTCTGGCAATGTTGTGCCTAATCTATTAACGCAAACA  
ATAATGACAATGTTGTATCCAGCATGCCATTTACCCTTCTTATCTTCAAAAATTCACCTTATCACAGCCTTGATGAGTCATCAGGTATGTTGCAGCATACTACGACATTGATCCATCAATCAA  
AACTTTTGTAAGGTTTACAAGTCAGGCTCGGTTGGGAGGTCCTCGACATCACTCGTTTCAGCAACTATACTGAATTACGAAAGGCCTGGGTGAGATGTTTGGTATTGAGGGTCAACT  
TGAAAACCCTCTTAGATCAGGCTGGCAGCTTGTATTTGTTGACAGGGAGAATGATGTGCTTCTTCTTGGAGACGACCCTTGGGAATCGTTTGTGAACAATGTGTGGTACATCAAAATACTT  
TCACCAGAGGATGTTTCAGCAAATGGGGCAGCAGGGAGTTGACTTGAGCTAATTAACCTTTGAATTTCAATCAAACCAAATGGCAAGTAAGTTTATTTGTGCTTGCACCAGAATATTCCTATA  
CTGCGGTGAACATTCTAAGTATTTTTTTTTATTTAGGCACTATCAAATCTTAATACGCATAATTATTTTTGAATGTTGTTGCATGCATGTGTCCATGCCCTGTAATGTGGGGAATATATATTTAT  
GTATAACCGGATAATATAAATGTATAATAGTTGTAGTTCCTCTTATTTAATTTAGTAAGGTGTCTTTTTTTGTTTCCATTCCTCGGTTGCACAAGTTTTGCTCAAATCAAAGTTGGTCCACGGGG  
GTATCTTATTTATAACGTGTGGGAGATTTTTTGTGTTGCATTTCCAGTAGTATTTTTCTGATCAATATCAAAGATTGTCTAGAGAAGTGACTCCCTCCCCTCCTTCCCTCCCTCCAGAAGGAT  
CCATATTATCATATTTTTAGTTGACTTTAAGCACTAGTCCGCCAAATGAATCTACTTCAAAGTTCTGGGATGAACTTTTATGAGTTTGGATGACGCTGTTGACCATCATATAAACTGTTT  
TCCTATCATTGGATTCATTGTGAGAAATAACGATGTGTTTCTTCAAGTGGTTAACCGAGTAAATGCGACCTTTTTTAACGTTGCAAATACACTACGAAGGCATGCTAGTTTATGAGATTATT  
CCATCATTATGGTATGAGAATATGAACGCTATTTCTGCACTTTTATCTGATCAGGTGTCATATTTGTAGGTCTGCTCGAGGTGAAATCCCCGTAGGTGCCAAAAGTCTGTACTGTCTACTGT  
TAAACGTATGACAGTAAAATCTGCATAAGATACAGATATTTATGCTATAAAAATCCTTGTGTGCAGGTTCCCTATTTGCTCTTCCATTTACTTCTCGCCAATAACCATGCTCTTAGCTGTTCCAT  
GACTCTTAAATAGTATATTTATCTTCTTATCTTATTTAATTTCTAATTTGTAAGAACAAGTGTCTTAGAATATATCTAAAGCGTGGATCTAAGATTGATTACTGGAATAATTTGGACATC  
CAGTGAATTTAGCTCCTGTAATGTAAGTAGGATTCGAGGACTGAGGAATTTATCCTTATCCATGGATTTATGAAGAGATTTTTGTGCTTTGGATATTATCTCTAGATCACTAGTGAGATAACTT  
AATCAACGCC

>comp171031\_c0\_seq36

AGCACACAATTTTAATATTTTCACTTATAATTTACCCAGACGGGAAATCCCCGATATTTCCGGCTAGTGCTGTCCTCTTCTTTTTCTCAGTGGCTTTACCGTCTGCCCAATTACATCCAATAT  
ATCCATTACCGGCATCTGGAGCTAGTTTCATTGCCGCGCTTCTCCATGCTAGCATTGCGCTGAGCTTTGTGTTCCTTACAACCTCTTCGAGGTCGCTGCTTTTCTATTCCTCGAGTTACTTCTTC  
TGTATATCGTTTCCCTTTGAGGAGCTCTCCAAGGCCCGAACTTCGCTAGAAAATTGTGCTTCCCTGTGCGAGCTGCCCAAGAAAACAAGGGAAGTGTGAAGGCAGAGGTAGAGCTGCTTGGT  
TTCTGATCAGGGAAGTGGTTATGAATTCTAGAGTTTGAAGTTTATATCTTGGATTCCGTGGCCGCAAATGTTTTCTACTCAATTATGGAGTTGATTTGGCTTCTTGAGCCTTAAGAGTG  
AGGAATGTGAGATTTTTTTTTGAAGTCGATTTGGTAAGGTTCTCCGCGAGTTTTTATACTCGCAATGGTATTTAGGGGTTTGGGATCGACGCGGTGAAGTTGGATATGTGCCCTGTAGGT  
TTCTTTACTTGTGAGTGTTTACGGAGCTTTTTAGAGTGCTGCGATGAAGCTCTCGACGGTTGGAGTTCTGGTCCAGCAGGATGAGGAAGGGGGGACAAGAGATGCTTGAACCTCGA  
GCTTTGGCATGCTTGTGCTGGTCCTCTAGTGTGTCTGCCAATGTCGGAACCCGTGTTGTCTACTTTCCACAGGGCCACAGCGAGCAGGTCGTGGCTTCCACTAATAAGGAGGTTGAAGG  
CCATATTCCTAATTATCCGAAGTTGCCACCTCAATTGATCTGCCAAGTTACGATGTGACTATGCACGCTGATGCCGAGACTGACGAACTTACACACAGATGACATTGCAGCCTTTAAATC  
CGCAGGATCTGAAAGATACATACCTTCCAGCTGAGATGGGGCTACCTAGCAAGCAGCCATGAATTATTTTTGTAAGACTTTGACTGCAAGCGATAACAAGCACTCATGGAGGGTTTTCTGT  
TCCCTCGTCTGCAGCTGAAAAAGTTTTTCCCTCTGGATTTCTCTCAACAGCCACCAGCTCAAGAGCTGATTGCTCGAGATATTCATGATGTTGATTGGAAGTTCAGGCATATCTTTAGA  
GGACAACCCAAGAGGCATCTTCTACTACAGGCTGGAGTATCTTTGTCAGTGCTAAGAGACTTGTGGTGGTATTCTGTTTTATTTATATGGAATGAGAAAAATCAGCTTTTTGTTGGGAA  
TCCGACGGGCTAATCGACCACAAAATGCTGTACCTTCATCAGTTATATCAAGTGATAGTATGCATATTGGACTGCTTGTGCTGCAGCAGCTCATGCTGCTGCAACAAATAGCCGTTTCACCATT  
TTTTACCACCAAGAGTTTTGTGATACCACTCTCAAAAATATGTTAAGGCTGTGTTTCACACTCGTGTCTCAGTTGGCATGCGATTTAGGATGCTTTTTCGAGACTGAAGAGTCAAGTGTTCGT  
AGGTATATGGGGACTATAACAGGAATAAGTGATTTGGATCCTGTCCGATGGCCAAATCCCAGTGGAGATCAGTGAAGGTTAATTGGGACGAATCAACTGCAGGTGACAGACAACCTAGA  
GCATCTTTATGGGAAATTGAGCCTTTGACAACATTTCCAATGTATCCATCACTATTCCCTCTCAGACTTAAACCACCTGGTACACTGGAGTTTCATCTCTAAATGACTACAAGTTAGATGA  
GGGAATGCATACATGTGGCTTAGGGGGAGCTCAGGGGGGGTATTAGGTCTTTGAATTTCAATCTCTCGAATTGGTCCGTGTGTTTCAGCAGCAGGTCCAACCACAATTGGGAAACAA  
TCACACTCCTTACCAAGCAATGGATGCTGCAGCTTGTGATATTAGAGGCATGGATTCACTTAGGCAGCCATTTCTAAACTTCCAGCAGCCGTTTCAGTTCCTCAGCAGTCTGTATGAAC  
CCATTGTTGCAGCAGCAAGTTATTCAACAAGCTCACCATGAACAGATAATGAATTCTCAAGCTCAGTCTCTGTTGGATAGTCAACCAACATTACTTCAATCAGCTGTTGCAACAGCCAT  
ACGGTGATCAGCAGAAGCAAAAAGGTCAGCAGCAACCAACTTATCCAGAACTATTTTCATGTTTCAGATTAATAATATAGAACAGCAACAGCTGCCAATACCCTCTCCATTATCTCAAAAATC  
TGATTTCCCTGATTCAAGTATGAACCTTTTCATCAGTTGCAACACCCAGTTGCATACAGAAATTTGTCAGCAGCGGCTTATTCTGGAACAAATGCTAATAACTTGCACCTTTGCAAAAATGGTC  
AGACAATTCTGGCTGAGCAGCATCAGCAAAAATGGGATCCACAGTTTGCATTGCAGAAGGTTTCTACTTTTTGGTAATACAGTTTTGCTTCAACCATTTACGGAAAAGATGATACAAGG  
AATCTGATGTCTCTCCACTGATACACAAAACACAGCCTATTTGATATCAATGTTGGTTCTTCCCTTGGCAATGTTGTGCCTAATCTATTAACGCAAAACAATAATGACAATGTTG  
TATCCAGCATGCCATTTACCACCTTCTATCTTCAAAAATCACTTTATCACAGCCTTGATGAGTATCAGGTATGTTGCAGCATACTACGACATTGATCCATCAATCAAAAATTTGTAAAGG  
TTTACAAGTCAGGCTCGGTTGGGAGGTCCTCGACATCACTCGTTTCAGCAACTATACTGAATTACGAAAGGCAGTGGGTGAGATGTTTGGTATTGAGGGTCAACTTGAAAACCTCTTA  
GATCAGGCTGGCAGCTTGTATTTGTTGACAGGGAGAATGATGTGCTTCTTCTTGGAGACGACCCTTGGGAACCTTGTGCATTCATGGTTGGCCGATCAAAAACCTGTACCTCTTACCTGGT  
ATTCATTTCTAATTAATGCAGATCGTTTGTGAACAATGTGTGGTACATCAAAAATCTTTACCAGAGGATGTTTCAGCAAAATGGGGCAGCAGGGAGTTGACTTGAGCTAATTAACCTTTGAAT  
TTCAATCAAAACCAATGGCAAGTCTGCTCGAGGTGAAATCCCCGTAGGTGCCAAAGTCTGTACTGTCTACTGTTAAACGTATGACAGTAAAATCTGCATAAGATACAGATATTTATGCTAT  
AAAATCCTTGTGTGCAGGTTCCATTTGCTCTTCCATTTACTTCTCGCCAATAACCATGCTCTTAGCTGTTCCATGTACTCTTAAATAGTATATTTATCTTCTTATCTTATTTAATTTAATTT  
GTAAGAACAAGGTGCTCTAGAATATATCTAAAGCGTGGATCTAAGATTCGATTACTGGAATAATTTGGACATCCAGTGAATTTAGCTCCTGTAATGTAAGTAGGATTCGAGGACTGAGG  
AATTTATCCTTATCCATGGATTTATGAAGAGATTTTTGTGCTTTGGATATTATCTCTAGATCACTAGTGAGATAACTTAATCAACGCC

>comp171031\_c0\_seq37

TCTTTTCTCAGCCTAACACCTGCCAATACCCTCTCCATTATCTCAAAAATCTGTATTTCTTGATTCAAGTATGAACTTTTCATCAGTTGCAACACCCAGTTGCATACAGAATTTGTCAGCAGC  
GGCTTATTCTGGAACAAATGCTAATAACTTGCACTTTGCAAAAATGGTCAGACAATTTGCGCTGAGCAGCATCAGCAAAAATGGGATCCACAGTTTGCATTGCAGAAGGTTTCTACTTT  
TGGTAATACAGTTTTGCTTCAACCATTTACGGAAAAGATGATACAAGGGAATCTGATGTCTCTCCACTGATACACAAAACCACAGCCTATTTGATATCAATGTTGGTTCTTCCTTGCTTC  
TTGGCAATGTTGTGCCTAATCTATTAACGCAAACAATAATGACAATGTTGTATCCAGCATGCCATTTACCACCTTCTTATCTTCAAAAATCACTTTATCACAGCCTTGATGAGTCATCAGGTA  
TGTTGCAGCATACTACGACATTGATCCATCAATCAAAAATTTTGTAAAGGTTTACAAGTCAGGCTCGGTTGGGAGGTCCTCGACATCACTCGTTTTAGCAACTATACTGAATTACGAAA  
GGCACTGGGTCAGATGTTTGGTATTGAGGGTCAACTTGAAAACCCTCTTAGATCAGGCTGGCAGCTTGTATTTGTTGACAGGGAGAATGATGTGCTTCTTCTTGAGACGACCCTTGGGA  
ATCGTTTTGTGAACAATGTGTGGTACATCAAAAATACTTTACCAGAGGATGTTTCAAGCAATGGGGCAGCAGGGAGTTGACTTGAGCTAATTAACCTTTGAATTTCAATCAAACCAATGGCA  
A

>comp171031\_c0\_seq40

TTAATAGTTGATAGGCTTAATAGTATGTGATGTTAAGAATCCATATATATGATAAACATCTGTTGGCTCACATTTCTTTTCTTTCATTATGTCAGACTACAAGTTAGATGAGGGGAATGCATA  
CATGTGGCTTAGGGGGAGCTCAGGGGGGGGTATTAGGTCTTTGAATTTTCAATCTCTGGAATTTGGTCCGTGTGTTTCAAGCAGCAGGTTCCAACCACAATTGGGAAACAATCACACTCCTTA  
CCAAGCAATGGATGCTGCAGCTTGTGATATTAGAGGCATGGATTCACTTAGGCAGCCATTTCTAAACTTCCAGCAGCCGTTTCAGTTCCCTCAGCAGTTCTGTATGAACCCATTGTTGCAG  
CAGCAAGTTATTCAACAAGCTCACCATGAACAGATAATGAATTTCTCAAGCTCAGTCTCTGTTGGATAGTCAACCAACATTACTTCAAAATCAGCTGTTGCAACAGCCATACGGTGATCAGC  
AGAAGCAAAAAGGTCAGCAGCAACCAACTTATCCAGAACTATTTATGTTTCAAGTAAATAATATAGAACAGCAACAGCTGCCAATACCCTCTCCATTATCTCAAAAATCTGTATTTCTTGAT  
TCAAGTATGAACTTTTCATCAGTTGCAACACCCAGTTGCATACAGAATTTGTCAGCAGCGGCTTATTCTGGAACAAATGCTAATAACTTGCCTTTGCAAAAATGGTCAGACAATTTCTGG  
CTGAGCAGCATCAGCAAAAATGGGATCCACAGTTTGCATTGCAGAAGGTTTCTACTTTTGGTAATACAGTTTTGCTTCAACCATTTACGGAAAAGATGATACAAGGGAATCTGATGTCTC  
TCCACTGATACACAAAACCACAGCCTATTTGATATCAATGTTGGTTCTTCCTTGCTTCTTGGCAATGTTGTGCCTAATCTATTAACGCAAACAATAATGACAATGTTGTATCCAGCATGCC  
ATTTACCACCTTCTTATCTTCAAAAATCACTTTATCACAGCCTTGATGAGTCATCAGGTATGTTGCAGCATACTACGACATTGATCCATCAATCAAAAATTTTGTAAAGGTTTACAAGTCAGG  
CTCGGTTGGGAGGTCCTCGACATCACTCGTTTTAGCAACTATACTGAATTACGAAAAGGCACTGGGTCAGATGTTTGGTATTGAGGGTCAACTTGAAAACCCTCTTAGATCAGGCTGGCA  
GCTTGTATTTGTTGACAGGGAGAATGATGTGCTTCTTCTTGAGACGACCCTTGGGAACCTTGTGCATTGATGTTGGCCGATCAAAAACCTGTACCTCTTACCTGGTATTCAATTTCTAATT  
AATGCAGATCGTTTTGTGAACAATGTGTGGTACATCAAAAATACTTTACCAGAGGATGTTTCAAGCAATGGGGCAGCAGGGAGTTGACTTGAGCTAATTAACCTTTGAATTTCAATCAAACCA  
AATGGCAA

>comp171031\_c0\_seq41

AGCACACAATTTTAATATTTTCACTTATAATTTACCCAGACGGGAAATCCCCGATATTTCCGGCTAGTGTCTCTCTTTTCTCAGTGGCTTTACCGTCTGCCCAATTACATCCAATAT  
ATCCATTCACGGCGATCTGGAGCTAGTTTATTGCCGCGCTTCTCCATGCTAGCATTGCGCTGAGCTTTGTGTTCTTACAACCTTTCGAGGTCGCTGCTTTTCTATCCTCGAGTTACTTCTTC  
TGATATATCGTTTCCCTTTGAGGAGCTCTCCAAGGCCCGAACTTCGCTAGAAATTTGTGCTTCTTGTGCGAGCTGCCCAAGAAAACAAGGGAAGTGTGAAGGCAGAGGTAGAGCTGCTTGGT  
TTCTGATCAGGGAAGTGGTTATGAATTTAGAGTTTGAAGTTTATATCTTGGATTCCGTGGCCGAAATGTTTTCTACTCAATTTAGGAGTTGATTTGGCTTCTTGGACCTTAAGAGTG  
AGGAATGTGAGATTTTTTTTTGAAGTCGATTTGGTAAGGTTCTCCGCGAGTTTTTATACTCGCAATGGTATTTAGGGGTTGGGATCGACGCGGTGAAGTTGGATATGTGCCCTGTAGGT  
TTCTTACTTGTGAGTGTTTACGGAGCTTTTTAGAGTGTGCGATGAAGCTCTCGACGGTTGGAGTTCTGGTCCAGCAGGATGAGGAAGGGGGGGACAAGAGATGCTTGAACCTCCGA  
GCTTTGGCATGCTTGTGCTGGTCTCTAGTGTGTCTGCCAATGTCGGAACCCGTGTTGTCTACTTTCCACAGGGCCACAGCGAGCAGGTCGTGGCTTCCACTAATAAGGAGGTTGAAGG  
CCATATTCCTAATTATCCGAACTTGCCACCTCAATTGATCTGCCAATTCACGATGTGACTATGCACGCTGATGCCGAGACTGACGAAGTCTACACACAGATGACATTGCAGCCTTTAAATC

CGCAGGATCTGAAAGATACATACCTTCCAGCTGAGATGGGGCTACCTAGCAAGCAGCCCATGAATTATTTTTGTAAGACTTTGACTGCAAGCGATACAAGCACTCATGGAGGGTTTTCTGT  
TCCTCGTCGTGCAGCTGAAAAAGTTTTTCCCTCCTCTGGATTCTCTCAACAGCCACCAGCTCAAGAGCTGATTGCTCGAGATAITCATGATGTTGATTGGAAGTTCAGGCATATCTTTAGA  
GGACAACCCAAGAGGCATCTTCTACTACAGGCTGGAGTATCTTTGTCAGTGCTAAGAGACTTGTGGCTGGTGATTCTGTTTTATTTATATGGAATGAGAAAAATCAGCTTTTGTGGGAA  
TCCGACGGGCTAATCGACCACAAAATGCTGTACCTTCATCAGTTATATCAAGTGATAGTATGCATATTGGACTGCTTGGCTGCAGCAGCTCATGCTGCTGCAACAAAATAGCCGTTTACCATT  
TTTTACCACCCAAGGGCTTGTCTTCAGAGTTTTGTGATACCACTCTCAAAAATATGTTAAGGCTGTGTTTCACACTCGTGTCTCAGTTGGCATGCGATTTAGGATGCTTTTTCGAGACTGAAG  
AGTCAAGTGTTCGTAGGTATATGGGGACTATAACAGGAATAAGTGATTTGGATCCTGTCCGATGGCCAAATTTCCACTGGAGATCAGTGAAGGTTAATTGGGACGAATCAACTGCAGGTG  
ACAGACAACCTAGAGCATCTTTATGGGAAATTGAGCCTTTGACAACATTTCCAATGTATCCATCACTATTCCCTCTCAGACTTAAACCACCTTGGTACTACTGGAGTTTCATCTCTAAATGAC  
TACAAGTTAGATGAGGGGAATGCATACATGTGGCTTAGGGGGAGCTCAGGGGGGGTATTAGGTCTTTGAATTTCAATCTCTGGAATTGGTCCGTGTGTTTCAGCAGCAGGTCCAACCA  
CAATTGGGAAACAATCACACTCCTTACCAAGCAATGGATGCTGCAGCTTGTGATATTAGAGGCATGGATTCACTTAGGCAGCCATTTCTAAACTTCCAGCAGCCGTTTCAGTTCCTCAGC  
AGTTCGTATGAACCCATTGTTGCAGCAGCAAGTTATTCAACAAGCTCACCATGAACAGATAATGAATTCTCAAGCTCAGTCTCTGTTGGATAGTCAACCAAAACATTACTTCAATCAGCT  
GTTGCAACAGCCATACGGTGATCAGCAGAAGCAAAAAGGTCAGCAGCAACCAACTTATCCAGAATAATTTATGTTTCAGATTAATAATATAGAACAGCAACAGCTGCCAATACCCTCTCC  
ATTATCTCAAAAATCTGTATTTCCCTGATTCAAGTATGAACTTTTCATCAGTTGCAACACCCAGTTGCATACAGAATTTGTCAGCAGCGGCTTATTCTGGAACAAATGCTAATAACTTGCATT  
TGCAAAAACCTGGTCAGACAATTCTGGCTGAGCAGCATCAGCAAAAATGGGATCCACAGTTTGCATTGCAGAAGGTTTCTACTTTTTGGTAATACAGTTTTGCTTCAACCATTTCACGGAAA  
AGATGATACAAGGGAATCTGATGTCTCTCCACTGATACACAAAACCACAGCCTATTTGATATCAATGTTGGTCTTCCCTTGCTTCTTGGCAATGTTGTGCCTAATCTATTAACGCAAACA  
ATAATGACAATGTTGTATCCAGCATGCCATTTACCCTTCTTATCTTCAAAATTCACTTTATCACAGCCTTGATGAGTCATCAGGTATGTTGCAGCATACTACGACATTGATCCATCAATCAA  
AACTTTTGTAAGGTTTACAAGTCAGGCTCGGTTGGGAGGTCACTCGACATCACTCGTTTCAGCAACTATACTGAATTACGAAAGGCACTGGGTGAGATGTTTGGTATTGAGGGTCAACT  
TGAAAACCCCTCTTAGATCAGGCTGGCAGCTTGTATTTGTCGACAGGGAGAATGATGTTCTTCTTGTGCGGATGATCCATGGCCGGAGTTCGTGAACAATGTGTGGTGTATTAAGATACTC  
TCCCTACAGGAAGTGCAGCAGATGGCCAAGCAAGGCGTTAACCTCATAAACTCTGCACCACTGCGAAAGCTTCAACTGGAAGCTGTGACAATTACATCGCTCAGCAAGAATCGAGAAA  
TCTGAGCTCCGAGATCATGCCTGTAGCTTCTTTGGACTATTGAGTCTTATTGCTCTCTGAAAACCTTTTCTGTGCTTTGACTATCCTTTCTGAAGACATCTAAAGCTATATATATGTGTATCTA  
CAATAACTTTATTGTAACCTCAGAAGACTTCTTTTGTAGACTGTAAGACTTGATTATCTAGTTTACTCATGGTAACTGTTATTAGTCCATTGCTTGTAAATTTGCTAGAGCAATTGCATCAGAA  
TATCCTGATAGAATTTGTGACTCTGTGTTAGATGATAAAATGCTCAAAACTAGAAGATAAGTGTTCAAAATTACAAGGAATTTAAGTTTTATGTTACAGAAAAAA

>comp171031\_c0\_seq43

AGCACACAATTTAATATTTTCACTTATAATTTACCCAGACGGGAAATCCCCGATATTTCCGGCTAGTGTGCTCCTCTTCTTTTTCTCAGTGGCTTTACCGTCTGCCCAATTACATCCAATAT  
ATCCATTACGGCGATCTGGAGCTAGTTTCATTGCCGCGCTTCTCCATGCTAGCATTGCGCTGAGCTTTGTGTTCTTACAACCTCTTCGAGGTCGCTGCTTTTCTATTCCCTCGAGTTACTTCTTC  
TGATATCGTTTCCCTTTGAGGAGCTCTCCAAGGCCCGAACTTCGCTAGAAAATTGTGCTTCCCTGTGCGAGCTGCCCAAGAAACAAGGGAAGTGTGAAGGCAGAGGTAGAGCTGCTTGGT  
TTCTGATCAGGGAACTTGGTTATGAATTCTAGAGTTTGAAGTTTATATCTTGGATTCCGTGGCCGCAAATGTTTTCTACTCAATATGGAGTTGATTTGGCTTCTTGGACTTAAAGAGTG  
AGGAATGTGAGATTTTTTTTTGAAGTCGATTTGGTAAGGTTCTCCGCGAGTTTTTATACTCGCAATGGTATTTAGGGGTTGGGATCGACGCGGTGAAGTTGGATATGTGCCCTGTAGGT  
TTCTTTACTTGTGAGTGTTTACGGAGCTTTTGTAGAGTGTGCGATGAAGCTCTCGACGGTTGGAGTTCTGGTCCAGCAGGATGAGGAAGGGGGGGACAAGAGATGCTTGAACCTCCGA  
GCTTTGGCATGCTTGTGCTGGTCTTAGTGTGTGCCCCAATGTCGGAACCCGTGTTGTCTACTTTCCACAGGGCCACAGCGAGCAGGTTCGTGGCTTCCACTAATAAGGAGGTTGAAGG  
CCATATTCCTAATTATCCGAACTTGCCACCTCAATTGATCTGCCAACTTCACGATGTGACTATGCACGCTGATGCCGAGACTGACGAAGTCTACACACAGATGACATTGCAGCCTTTAAATC  
CGCAGGATCTGAAAGATACATACCTTCCAGCTGAGATGGGGCTACCTAGCAAGCAGCCCATGAATTATTTTTGTAAGACTTTGACTGCAAGCGATACAAGCACTCATGGAGGGTTTTCTGT

TCCTCGTCGTGCAGCTGAAAAAGTTTTTCCTCCTCTGGATTTCTCTCAACAGCCACCAGCTCAAGAGCTGATTGCTCGAGATATTCATGATGTTGATTGGAAGTTCAGGCATATCTTTAGA  
GGACAACCCAAGAGGCATCTTCTACTACAGGCTGGAGTATCTTTGTGTCAGTGCTAAGAGACTTGTGCTGGTGATTCTGTTTTATTTATATGGAATGAGAAAAATCAGCTTTTGTGGGAA  
TCCGACGGGCTAATCGACCACAAAATGCTGTACCTTCATCAGTTATATCAAGTGATAGTATGCATATTGGACTGCTTGCTGCAGCAGCTCATGCTGCTGCAACAAATAGCCGTTTACCATT  
TTTTACCACCCAAGGGCTTGCTCCTTCAGAGTTTGTGATACCCTCTCAAAATATGTTAAGGCTGTGTTTCACACTCGTGTCTCAGTTGGCATGCGATTAGGATGCTTTTCGAGACTGAAG  
AGTCAAGTGTTTCGTAGGTATATGGGGACTATAACAGGAATAAGTGATTTGGATCCTGTCCGATGGCCAAATTCCCCTGGAGATCAGTGAAGGTGACAGACAACCTAGAGCATCTTTATGG  
GAAATTGAGCCTTTGACAACATTTCCAATGTATCCATCACTATTCCTCTCAGACTTAAACCACCTTGGTACACTGGAGTTTCATCTCTAAATGACTACAAGTTAGATGAGGGGAATGCATA  
CATGTGGCTTAGGGGGAGCTCAGGGGGGGGTATTAGGTCTTTGAATTTCAATCTCCTGGAATTGGTCCGTGTGTTTCAGCAGCAGGTCCAACCACAATTGGGAAACAATCACACTCCTTA  
CCAAGCAATGGATGCTGCAGCTTGTGATATTAGAGGCATGGATTAAGGCTAGGCAAGCTTCTAAACTTCCAGCAGCCGTTTCAGTTCCCTCAGCAGTTCTGTATGAACCCATTGTTGCAG  
CAGCAAGTTATTCAACAAGCTCACCATGAACAGATAATGAATTCTCAAGCTCAGTCTCTGTTGGATAGTCAACCAAACATTACTTCAAATCAGCTGTTGCAACAGCCATACGGTGATCAGC  
AGAAGCAAAAAGGTCAGCAGCAACCAACTTATCCAGAACTATTTTCATGTTTCAGATTAATAATATAGAACAGCAACAGCTGCCAATACCCCTCTCCATTATCTCAAAAATCTGTATTTCTTGAT  
TCAAGTATGAACTTTTCATCAGTTGCAACACCCAGTTGCATACAGAATTTGTGTCAGCAGCGGCTTATTCTGGAACAAATGCTAATAACTTGCACCTTTGCAAAAATGGTTCAGACAATTCTGG  
CTGAGCAGCATCAGCAAAAATGGGATCCACAGTTTGCATTGCAGAAGGTTTCTACTTTTGGTAATACAGTTTGTCTTCAACCATTTTCACGGAAAAGATGATACAAGGGAATCTGATGTCTC  
TCCCACTGATACACAAAACCACAGCCTATTTGATATCAATGTTGGTCTTCCCTTGCTTCTTGGCAATGTTGTGCCTAATCTATTAACCGCAACAATAATGACAATGTTGTATCCAGCATGCC  
ATTTACCCTTCTTATCTTCAAAAATCACTTTATCACAGCCTTGATGAGTCATCAGGTATGTTGCAGCATACTACGACATTGATCCATCAATCAAAAATTTTGTAAAGGTTTACAAGTCAGG  
CTCGGTTGGGAGGTCACCTCGACATCACTCGTTTCAGCAACTATACTGAATTACGAAAGGCACTGGGTCAGATGTTTGGTATTGAGGGTCAACTTGAAAACCCTCTTAGATCAGGCTGGCA  
GCTTGTATTTGTGTCAGAGGAGAATGATGTTCTTCTTGTGCGCGATGATCCATGGCCGGAGTTCGTGAACAATGTGTGGTGTATTAAGATACTCTCCCTACAGGAAGTGCAGCAGATGGCC  
AAGCAAGGCGTTAACCTCATAAACTCTGCACCCTGCGAAAGCTTTCAACTGGAAGCTGTGACAATTACATCGCTCAGCAAGAATCGAGAAATCTGAGCTCCGAGATCATGCCTGTAGC  
TTCTTTGGACTATTGAGTCTTATGCTCTCTGAAAACCTTTCTGTGCTTTGACTATCCTTTCTGAAGACATCTAAAGCTATATATATGTGTATCTACAATAACTTTATTGTAACCTCAGAAGA  
CTTCTTTTGTAGACTGTAAGACTTGATTATCTAGTTTACTCATGGTAACTGTTATTAGTCCATTGCTTGTAAATTTGCTAGAGCAATTGCATCAGAATATCTGATAGAATTTGTGACTCTGTG  
TTAGATGATAAAATGCTCAAAACTAGAAGATAAGTGTTCAAAATTACAAGGAATTTAAGTTTTATGTTACAGAAAAAA

>comp171031\_c0\_seq44

TTAATAGTTGATAGGCTTAATAGTATGTGATGTTAAGAATCCATATATATGATAAACATCTGTTGGCTCACATTTCTTTTCTTTCATTATGTCAGACTACAAGTTAGATGAGGGGAATGCATA  
CATGTGGCTTAGGGGGAGCTCAGGGGGGGGTATTAGGTCTTTGAATTTCAATCTCCTGGAATTGGTCCGTGTGTTTCAGCAGCAGGTCCAACCACAATTGGGAAACAATCACACTCCTTA  
CCAAGCAATGGATGCTGCAGCTTGTGATATTAGAGGCATGGATTAAGGCTAGGCAAGCTTCTAAACTTCCAGCAGCCGTTTCAGTTCCCTCAGCAGTTCTGTATGAACCCATTGTTGCAG  
CAGCAAGTTATTCAACAAGCTCACCATGAACAGATAATGAATTCTCAAGCTCAGTCTCTGTTGGATAGTCAACCAAACATTACTTCAAATCAGCTGTTGCAACAGCCATACGGTGATCAGC  
AGAAGCAAAAAGGTCAGCAGCAACCAACTTATCCAGAACTATTTTCATGTTTCAGATTAATAATATAGAACAGCAACAGCTGCCAATACCCCTCTCCATTATCTCAAAAATCTGTATTTCTTGAT  
TCAAGTATGAACTTTTCATCAGTTGCAACACCCAGTTGCATACAGAATTTGTGTCAGCAGCGGCTTATTCTGGAACAAATGCTAATAACTTGCACCTTTGCAAAAATGGTTCAGACAATTCTGG  
CTGAGCAGCATCAGCAAAAATGGGATCCACAGTTTGCATTGCAGAAGGTTTCTACTTTTGGTAATACAGTTTGTCTTCAACCATTTTCACGGAAAAGATGATACAAGGGAATCTGATGTCTC  
TCCCACTGATACACAAAACCACAGCCTATTTGATATCAATGTTGGTCTTCCCTTGCTTCTTGGCAATGTTGTGCCTAATCTATTAACCGCAACAATAATGACAATGTTGTATCCAGCATGCC  
ATTTACCCTTCTTATCTTCAAAAATCACTTTATCACAGCCTTGATGAGTCATCAGGTATGTTGCAGCATACTACGACATTGATCCATCAATCAAAAATTTTGTAAAGGTTTACAAGTCAGG  
CTCGGTTGGGAGGTCACCTCGACATCACTCGTTTCAGCAACTATACTGAATTACGAAAGGCACTGGGTCAGATGTTTGGTATTGAGGGTCAACTTGAAAACCCTCTTAGATCAGGCTGGCA

GCTTGATTTGTTGACAGGGAGAATGATGTGCTTCTTCTGGAGACGACCCCTGGGAGTAAGACTTTATTATTAACCTTGAACATCTTCAATTTAAAGAAACATTGATCAGCTTATGCTTCT  
CATCAACATTCATATATTCATTTCCCAACTATCTGCAACTTAAGCAACATCAATTGTCTATAACTATTTTTTAGTTACATGTGTAGAGACAGTTATTTATATTGAGCTTTCTGAAGGCTCCAGC  
GACTAAGGTTTATATGATTTATAAATGCTTTATCAGGTGTATATGCTTCAAGGGTTGAGAAACCTTAGCTCTCTTAATACTAGTTCAAATTTCAATTAGCTTAAACGTGGCATGCTGTGAAC  
ATAACAATTAGATTTTCTACTATCATTGGAAGAAACCTTAATGCTGGTCTGTGTATGTTGATACTAGTAATTATTGAGCAGAAAACGAAGTTCAAATTATCTCTGGTCCT  
GAGCAATGTCGTGCTAGGAAGTAGTAACCAAGTATGAAAACCTATGTATGCTGAGTAATTAATAATTTTTCTGGCAAAACACCTGGCGTACAGTTACTTATATACGCTTCAACATTTTGTAG  
CTATAAAAATTTCTTGTGTTATTTGTAAGATGTGATCAATATATCGTAGCTTTGTACAATGCCTATGCAGACTTTGTGCATTATGTTGGCCGATCAAACCTGTACCTCTTACCTGGTATT  
CATTTCTAATTAATGCAGATCGTTTGTGAACAATGTGTGGTACATCAAATACTTTACCAGAGGATGTTACAGCAAATGGGGCAGCAGGGAGTTGACTTGAGCTAATTAACCTTTGAATTC  
AATCAAACCAAATGGCAA

>comp171031\_c0\_seq45

AGCACACAATTTAATATTTTCACTTATAATTTACCCAGACGGGAAATCCCCGATATTTCCGGCTAGTGCTGTCCCTCTCTTTTTCTCAGTGGCTTTACCGTCTGCCCAATTACATCCAATAT  
ATCCATTCACGGCGATCTGGAGCTAGTTTCATTGCCGCGCTTCTCCATGCTAGCATTCCGCTGAGCTTTGTGTTCTTACAACCTCTTCGAGGTCGCTGCTTTTCTATTCCCTCGAGTTACTTCTTC  
TGATATCGTTTCCCTTTGAGGAGCTCTCCAAGGCCGAACCTCGCTAGAAATTGTGCTTCCCTGTGAGCTGCCCAAGAAACAAGGGAAGTGTGAAGGCAGAGGTAGAGCTGCTTGGT  
TTCTGATCAGGGAACTTGGTTATGAATTCTAGAGTTTGAAGTTTATATCTTGGATTCCGTGGCCGCAAATGTTTTCTACTCAATATGGAGTTGATTTGGCTTCTTGAGCCTTAAAGAGTG  
AGGAATGTGAGATTTTTTTTTGAAGTCGATTTGGTAAGGTTCTCCGCGAGTTTTTATACTCGCAATGGTATTTAGGGGTTGGGATCGACGCGGTGAAGTTGGATATGTGCCCTGTAGGT  
TTCTCTTACTTGTGAGTGTTTACGGAGCTTTTGTAGAGTGTGCGATGAAGCTCTCGACGGTTGGAGTTCTGGTCCAGCAGGATGAGGAAGGGGGGACAAGAGATGCTTGAACCTCCGA  
GCTTTGGCATGCTTGTGCTGGTCTTAGTGTGTCTGCCAATGTCGGAACCCGTGTTGTCTACTTTCCACAGGGCCACAGCGAGCAGGTCGTGGCTTCCACTAATAAGGAGGTTGAAGG  
CCATATTCCTAATTATCCGAACCTTGCCACCTCAATTGATCTGCCAACTTCACGATGTGACTATGCACGCTGATGCCGAGACTGACGAAGTCTACACACAGATGACATTGCAGCCTTTAAATC  
CGCAGGATCTGAAAGATACATACCTTCCAGCTGAGATGGGGCTACCTAGCAAGCAGCCATGAATTATTTTTGTAAGACTTTGACTGCAAGCGATAACAAGCACTCATGGAGGGTTTTCTGT  
TCCTCGTCGTGCAGCTGAAAAAGTTTTTCCCTCTCTGGATTTCTCTCAACAGCCACCAGCTCAAGAGCTGATTGCTCGAGATATTCATGATGTTGATTGGAAGTTCAGGCATATCTTTAGA  
GGACAACCCAAGAGGCATCTTCTACTACAGGCTGGAGTATCTTTGTGAGTGTGTAAGAGACTTGTGCTGGTATTCTGTTTTATTTATATGGAATGAGAAAAATCAGCTTTTGTGAGGAA  
TCCGACGGGCTAATCGACCACAAAATGCTGTACCTTCATCAGTTATATCAAGTGATAGTATGCATATTGGACTGCTTGTGCTGACGAGCTCATGCTGCTGCAACAAATAGCCGTTTACCATT  
TTTTACCACCAAGAGTTTGTGATACCACTCTCAAAATATGTTAAGGCTGTGTTTACACTCGTGTCTCAGTTGGCATGCGATTTAGGATGCTTTTCGAGACTGAAGAGTCAAGTGTTCGT  
AGGTATATGGGGACTATAACAGGAATAAGTGATTTGGATCCTGTCCGATGGCCAAATCCCCTGAGATCAGTGAAGGTTAATTGGGACGAATCAACTGCAGGTGACAGACAACCTAGA  
GCATCTTTATGGGAAATTGAGCCTTTGACAACATTTCCAATGTATCCATCACTATTCCCTCTCAGACTTAAACCACCTTGGTACACTGGAGTTTCATCTCTAAATGACTACAAGTTAGATGA  
GGGAATGCATACATGTGGCTTAGGGGAGCTCAGGGGGGGTATTAGGTCTTTGAATTTCAATCTCTGGAATTGGTCCGTGTGTTTACGAGCAGGTTCCAACCACAATTGGGAAACAA  
TCACACTCCTTACCAAGCAATGGATGCTGCAGCTTGTGATATTAGAGGCATGGATTCACTTAGGCAGCCATTTCTAAACTTCCAGCAGCCGTTTCACTTCCCTCAGCAGTTCTGTATGAAC  
CCATTGTTGCAGCAGCAAGTTATTCAACAAGCTCACCATGAACAGATAATGAATTTCAAGCTCAGTCTCTGTTGGATAGTCAACCAAAACATTACTTCAAATCAGCTGTTGCAACAGCCAT  
ACGGTGATCAGCAGAAGCAAAAAGGTCAGCAGCAACCAACTTATCCAGAACTATTTATGTTTCAAGTTAATAATATAGAACAGCAACAGCTGCCAATACCCTCTCCATTATCTCAAAAATC  
TGATTTCTGATTCAGTATGAACCTTTTCACTAGTTGCAACACCCAGTTGCATACAGAAATTTGTCAGCAGCGGCTTATTCTGGAACAAATGCTAATAACTTGCACCTTTGCAAAAACCTGGTC  
AGACAATCTGGCTGAGCAGCATCAGCAAAAATGGGATCCACAGTTTGCATTGCAGAAGGTTTCTACTTTTGGTAATACAGTTTGTCTCAACCATTTACGGAAAAGATGATACAAGG  
AATCTGATGTCTCTCCACTGATACACAAAACACAGCCTATTTGATATCAATGTTGGTCTTCTTGGCAATGTTGTGCCTAATCTATTAACGCAAAACAATAATGACAATGTTG

TATCCAGCATGCCATTTACCACTTCTTATCTTCAAATTCACCTTTATCACAGCCTTGATGAGTCATCAGGTATGTTGCAGCATACTACGACATTGATCCATCAATCAAACCTTTTGTAAGG  
TTTACAAGTCAGGCTCGGTTGGGAGGTCCTCGACATCACTCGTTTCAGCAACTATACTGAATTACGAAAGGCCTGGGTGAGATGTTTGGTATTGAGGGTCAACTTGAAAACCTCTTA  
GATCAGGCTGGCAGCTTGTATTTGTTGACAGGGAGAATGATGTGCTTCTTCTGGAGACGACCCTTGGGAATCGTTTGTGAACAATGTGTGGTACATCAAATACTTTACCAGAGGATGT  
TCAGCAAATGGGGCAGCAGGGAGTTGACTTGAGCTAATTAACCTTTGAATTTCAATCAAACCAAATGGCAAGTAAGTTTATTTGTGCTTGCACCAGAATATTCCTATACTGCGGTGAACATT  
CTAAGTATTTTTTTTATTTAGGCACTATCAAATCTTAATACGCATAATTATTTTTGAATGTTGTTGCATGCATGTGTCCATGCCCTGTAATGTGGGGAATATATTTATGTATAACCGGATAA  
TATAAATGTATAATAGTTGTAGTTCCTCTTATTTAATTTAGTAAGGTGTCTTTTTTGTTCATTCTCGGTTGCACAAGTTTTGCTCAAATCAAAGTTGGTCCACGGGGGTATCTTATTTATAA  
CGTGTGGGAGATTTTTTGTTCATTTCAGTAGTATTTTTCTGATCAATATCAAAGATTGTCTAGAGAAGTGACTCCCTCCCTCCCTCCCTCCCTCCAGAAAGGATCCATATTATCATATT  
TTTAGTTGACTTTAAGCACTAGTCCGCCAAATGAATCTACTTCAAAGTTCTGGGATGAAACTTTTTATGAGTTTGGATGACGCTGTTGACCATCATCATAAAACTGTTTTCTATCATTGGAT  
TCATTGTGAGAAATAACGATGTGTTCTTCAAGTGGTTAACCGAGTAAATGCGACCTTTTTTAACGTTGCAAATACACTACGAAGGCATGCTAGTTTATGAGATTATTCCATCATTATGGTAT  
GAGAATATGAACGCTATTTCTGCACTTTTATCTGATCAGGTGTCATTTTTGTAGGTCTGCTCGAGGTGAAATCCCCGTAGGTGCCAAAGTCTGTACTGTCTACTGTTAAACGTATGACAG  
TAAAATCTGCATAAGATACAGATATTTATGCTATAAAATCCTTGTGTGCAGGTTCCCTATTTGCTCTTCCATTTACTTCTCGCCAATAACCATGCTCTTAGCTGTTCCATGTACTCTTAAATAGT  
ATATTTTATCTTCTTATCTTATTTAATTTAATTTGTAAGAACAAGTGTCTAGAAATATCTAAAGCGTGGATCTAAGATTGATTACTGGAATAATTTGGACATCCAGTGAATTTAGCTC  
CTGTAATGTAAGTAGGATTCGAGGACTGAGGAATTTATCCTTATCCATGGATTTATGAAGAGATTTTTGTGCTTTGGATATTATCTCTAGATCACTAGTGAGATAACTTAAATCAACGCC

>comp171031\_c0\_seq46

AGCACACAATTTTAATATTTTCACTTATAATTTACCCAGACGGGAAATCCCCGATATTTCCGGCTAGTGTCTCTCTTTTTCTCAGTGGCTTTACCGTCTGCCCAATTACATCCAATAT  
ATCCATTCACGGCGATCTGGAGCTAGTTTCAATGCGCGCTTCTCCATGCTAGCATTGCGCTGAGCTTTGTGTTCTTACAACCTCTTCGAGGTGCTGCTTTTCTATTCCTCGAGTTACTTCTTC  
TGATATCGTTTCCCTTTGAGGAGCTCTCCAAGGCCGAACCTCGCTAGAAATTGTGCTTCCTGTGCGAGCTGCCAAGAAACAAGGGAAGTGTGAAGGCAGAGGTAGAGCTGCTTGGT  
TTCCTGATCAGGGAAGTGGTATGAATTCTAGAGTTTGAAGTTTATATCTTGGATTCCGTGGCCGCAAATGTTTTCTACTCAATATGGAGTTGATTTGGCTTCTTGAACCTTAAAGAGTG  
AGGAATGTGAGATTTTTTTTTGAAGTCGATTTGGTAAGGTTCTCCGCGAGTTTTTATACTCGCAATGGTATTTAGGGGTTTGGGATCGACGCGGTGAAGTTGGATATGTGCCCTGTAGGT  
TTCTCTTACTTGTGAGTGTTTACGGAGCTTTTAGAGTGTGCGATGAAGCTCTCGACGGTTGGAGTTCTGGTCCAGCAGGATGAGGAAGGGGGGGACAAGAGATGCTTGAACCTCCGA  
GCTTTGGCATGCTTGTGCTGGTCTTAGTGTGTCTGCCAATGTCGGAACCCGTGTTGTCTACTTTCCACAGGGCCACAGCGAGCAGGTCGTGGCTTCCACTAATAAGGAGGTTGAAGG  
CCATATTCCTAATTATCCGAACCTGCCACCTCAATTGATCTGCCAATTCACGATGTGACTATGCACGCTGATGCCGAGACTGACGAAGTCTACACACAGATGACATTGCAGCCTTTAAATC  
CGCAGGATCTGAAAGATACATACCTTCCAGCTGAGATGGGGCTACCTAGCAAGCAGCCCATGAATATTTTTGTAAGACTTTGACTGCAAGCGATAACAAGCACTCATGGAGGGTTTTCTGT  
TCCTCGTCTGCAGCTGAAAAAGTTTTTCTCTCTGGATTTCTCTCAACAGCCACCAGCTCAAGAGCTGATTGCTCGAGATATTCATGATGTTGATTGGAAGTTCAGGCATATCTTTAGA  
GGACAACCCAAGAGGCATCTTCTACTACAGGCTGGAGTATCTTTGTCAGTGTCTAAGAGACTTGTGCTGGTATTCTGTTTTATTTATATGGAATGAGAAAAATCAGCTTTTGTGGGAA  
TCCGACGGGGCTAATCGACCACAAAATGCTGTACCTTCATCAGTTATATCAAGTGATAGTATGCATATTGGACTGCTTGTGCTGACGAGCTCATGCTGCTGCAACAAATAGCCGTTTACCATT  
TTTTACCACCCAAGAGTTTGTGATACCACTCTCAAATATGTTAAGGCTGTGTTTACACTCGTGTCTCAGTTGGCATGCGATTTAGGATGCTTTTTCGAGACTGAAGAGTCAAGTGTTCGT  
AGGTATATGGGGACTATAACAGGAATAAGTGATTTGGATCCTGTCCGATGGCCAAATCCCCTGAGATCAGTGAAGGTGACAGACAACCTAGAGCATCTTTATGGGAAATTGAGCCTTT  
GACAACATTTCCAATGTATCCATCACTATTCCTCTCAGACTTAAACCACCTTGGTACACTGGAGTTTCATCTCTAAATGACTACAAGTTAGATGAGGGGAATGCATACATGTGGCTTAGGG  
GGAGCTCAGGGGGGGTATTAGGTCTTTGAATTTCAATCTCTGGAATTTGGTCCGTGTGTTTACGAGCAGGTCCAACCACAATGGGAAACAATCACACTCCTTACCAAGCAATGGATG  
CTGCAGCTTGTGATATTAGAGGCATGGATTCCTTAGGCAGCCATTTCTAAACTTCCAGCAGCCGTTTTCAGTTCCCTCAGCAGTTCTGTATGAACCCATTGTTGCAGCAGCAAGTTATTC

ACAAGCTCACCATGAACAGATAATGAATTCTCAAGCTCAGTCTCTGTTGGATAGTCAACCAAACATTACTTCAAATCAGCTGTTGCAACAGCCATACGGTGATCAGCAGAAGCAAAAAGG  
TCAGCAGCAACCAACTTATCCAGAACTATTTTCATGTTTCAGATTAATAATATAGAACAGCAACAGCTGCCAATACCCTCTCCATTATCTCAAAAATCTGTATTTCCCTGATTCAAGTATGAACTT  
TTCATCAGTTGCAACACCCAGTTGCATACAGAATTTGTCAGCAGCGGCTTATTCTGGAACAAAATGCTAATAACTTGCACCTTTGCAAAAATCTGGTCAGACAATTTCTGGCTGAGCAGCATCA  
GCAAAAATGGGATCCACAGTTTGCATTGCAGAAGGTTTCTACTTTTGGTAATACAGTTTTGCTTCAACCATTTCACGGAAAAGATGATACAAGGGAATCTGATGTCTCTCCACTGATACA  
CAAAACCACAGCCTATTTGATATCAATGTTGGTTCTTCCCTTGCTTCTTGGCAATGTTGTGCCTAATCTATTAACGCAAACAATAATGACAATGTTGTATCCAGCATGCCATTTACCCTTCT  
TATCTTCAAATTCACCTTATCACAGCCTTGATGAGTCATCAGGTATGTTGCAGCATACTACGACATTGATCCATCAATCAAACTTTTGTAAAGGTTTACAAGTCAGGCTCGGTTGGGAG  
GTCCTCGACATCACTCGTTTCAGCAACTATACTGAATTACGAAAGGCCTGGGTCAGATGTTTGGTATTGAGGGTCAACTTGAAAACCCTCTTAGATCAGGCTGGCAGCTTGATTTTGT  
GACAGGGAGAATGATGTGCTTCTTCTTGGAGACGACCCTTGGGAATCGTTTGTGAACAATGTGTGGTACATCAAATACTTTCACCAGAGGATGTTGAGCAAAATGGGGCAGCAGGGAGT  
TGACTTGAGCTAATTAACCTTTGAATTTCAATCAAACCAAATGGCAAGTCTGCTCGAGGTGAAATCCCGTAGGTGCCCAAAGTCTGTACTGTCTACTGTAAACGTATGACAGTAAAATCT  
GCATAAGATACAGATATTTATGCTATAAAAATCCTTGTGTGCAGGTTCCCTATTTGCTCTTCCATTTACTTCTCGCCAATAACCATGCTCTTAGCTGTTCCATGTACTCTTAAATAGTATATTTAT  
CTTCTTATCTTATTTAATTCTAATTTGTAAGAACAAGTGTCTAGAAATATCTAAAGCGTGGATCTAAGATTCGATTACTGGAATAATTTTGGACATCCAGTGAATTTAGCTCCTGTAATG  
TAAGTAGGATTCGAGGACTGAGGAATTTATCCTTATCCATGGATTTATGAAGAGATTTTGTGCTTTGGATATTATCTCTAGATCACTAGTGAGATAACTTAATCAACGCC

>comp171031\_c0\_seq47

TCTTTTCTCAGCCTAACACCTGCCAATACCCTCTCCATTATCTCAAAAATCTGTATTTCCCTGATTCAAGTATGAACTTTTCATCAGTTGCAACACCCAGTTGCATACAGAATTTGTCAGCAGC  
GGCTTATTCTGGAACAAATGCTAATAACTTGCACCTTTGCAAAAATCTGGTCAGACAATTTGGCTGAGCAGCATCAGCAAAAATGGGATCCACAGTTTGCATTGCAGAAGGTTTCTACTTT  
TGGTAATACAGTTTTGCTTCAACCATTTCACGGAAAAGATGATACAAGGGAATCTGATGTCTCTCCACTGATACACAAAACCACAGCCTATTTGATATCAATGTTGGTTCTTCCCTTGCTTC  
TTGGCAATGTTGTGCCTAATCTATTAACGCAAACAATAATGACAATGTTGTATCCAGCATGCCATTTACCCTTCTTATCTTCAAATTCACCTTATCACAGCCTTGATGAGTCATCAGGTA  
TGTTGCAGCATACTACGACATTGATCCATCAATCAAACTTTTGTAAAGGTTTACAAGTCAGGCTCGGTTGGGAGGTCCTCGACATCACTCGTTTCAGCAACTATACTGAATTACGAAA  
GGCACTGGGTCAGATGTTTGGTATTGAGGGTCAACTTGAAAACCCTCTTAGATCAGGCTGGCAGCTTGATTTGTGACAGGGAGAATGATGTTCTTCTTGTGCGGATGATCCATGGCCG  
GAGTTCGTGAACAATGTGTGGTGTATTAAGATACTCTCCCTACAGGAAGTGCAGCAGATGGCCAAGCAAGGCGTTAACCTCATAAACTCTGCACCACTGCGAAAAGCTTTCAACTGGAAG  
CTGTGACAATTACATCGCTCAGCAAGAATCGAGAAATCTGAGCTCCGAGATCATGCCTGTAGCTTCTTTGGACTATTGAGTCTTATTGCTCTCTGAAAACCTTTTCTGTGCTTTGACTATCC  
TTTCTGAAGACATCTAAAGCTATATATATGTGTATCTACAATAACTTTATTGTAACCTTCAGAAGACTTCTTTTGTAGACTGTAAGACTTGATTATCTAGTTTACTCATGGTAACTGTTATTAGTC  
CATTGCTTGTAATTTGCTAGAGCAATTGCATCAGAATATCCTGATAGAATTTGTGACTCTGTGTTAGATGATAAAATGCTCAAACTAGAAAGATAAGTGTTCAAAATTACAAGGAATTTAA  
GTTTTATGTTACAGAAAAAA

>comp171031\_c0\_seq48

TAAATAGTTGATAGGCTTAATAGTATGTGATGTTAAGAATCCATATATATGATAAACATCTGTTGGCTCACATTTCTTTTCTTTTATTATGTCAGACTACAAGTTAGATGAGGGGAATGCATA  
CATGTGGCTTAGGGGGAGCTCAGGGGGGGGATTAGGTCTTTGAATTTCAATCTCTGGAATTTGGTCCGTGTGTTTCAGCAGCAGGTCCAACCACAATTGGGAAACAATCACACTCCTTA  
CCAAGCAATGGATGCTGCAGCTTGTGATATTAGAGGCATGGATTCACCTTAGGCAGCCATTTCTAACTTCCAGCAGCCGTTTCAGTTCCTCAGCAGTTCTGTATGAACCCATTGTTGCAG  
CAGCAAGTTATTCAACAAGCTCACCATGAACAGATAATGAATTTCTCAAGCTCAGTCTCTGTTGGATAGTCAACCAAACATTACTTCAAATCAGCTGTTGCAACAGCCATACGGTGATCAGC  
AGAAGCAAAAAGGTCAGCAGCAACCAACTTATCCAGAACTATTTTCATGTTTCAGATTAATAATATAGAACAGCAACAGCTGCCAATACCCTCTCCATTATCTCAAAAATCTGTATTTCCCTGAT  
TCAAGTATGAACTTTTCATCAGTTGCAACACCCAGTTGCATACAGAATTTGTCAGCAGCGGCTTATTCTGGAACAAATGCTAATAACTTGCACCTTTGCAAAAATCTGGTCAGACAATTTCTGG



CTGAGCAGCATCAGCAAAAATGGGATCCACAGTTTGCATTGCAGAAGGTTTCTACTTTTGGTAATACAGTTTTGCTTCAACCATTTACGGAAAAGATGATACAAGGGAATCTGATGTCTC  
TCCCCTGATACACAAAACACAGCCTATTTGATATCAATGTTGGTCTTCCCTGCTTCTTGGCAATGTTGTGCCTAATCTATTAACGCAAACAATAATGACAATGTTGTATCCAGCATGCC  
ATTTACCACTTCTTATCTTCAAAAATTCATTTATCACAGCCTTGATGAGTCATCAGGTATGTTGCAGCATACTACGACATTGATCCATCAATCAAAAATTTTGTAAAGGTTTACAAGTCAGG  
CTCGTGGGAGGTCACCTCGACATCACTCGTTTCAGCAACTATACTGAATTACGAAAGGCACTGGGTCAGATGTTGGTATTGAGGGTCAACTTGAAAACCCTCTTAGATCAGGCTGGCA  
GCTTGTATTTGTTGACAGGGAGAATGATGTGCTTCTTCTGGAGACGACCTTGGGAATCGTTTGTGAACAATGTGTGGTACATCAAAAATACTTCCACCAGAGGATGTTGAGCAAAATGGG  
GCAGCAGGGAGTTGACTTGAGCTAATTAACCTTGAATTTCAATCAAACCAAATGGCAA

>comp171031\_c0\_seq49

AGCACACAATTTAATATTTTCACTTATAATTTACCCAGACGGGAAATCCCCGATATTTCCGGCTAGTGTCTCTCTTTTTCTCAGTGGCTTTACCGTCTGCCCAATTACATCCAATAT  
ATCCATTCACGGCGATCTGGAGCTAGTTCATTGCCGCGCTTCTCCATGCTAGCATTGCCTGAGCTTTGTGTTCTTACAACCTTTCGAGGTGCGTGTCTTTCTATCCTCGAGTTACTTCTTC  
TGATATATCGTTTCCCTTTGAGGAGCTCTCCAAGGCCGAACCTCGCTAGAAATTGTGCTTCCCTGTGCGAGCTGCCAAGAAAACAAGGGAAGTGTGAAGGCAGAGGTAGAGCTGCTTGGT  
TTCCTGATCAGGGAACCTTGGTTATGAATTCTAGAGTTTGAAGTTTATATCTTGGATTCCGTGGCCGCAAATGTTTTCTACTCAATTATGGAGTTGATTTGGCTTCTTGAACCTTAAGAGTG  
AGGAATGTGAGATTTTTTTTTGAAGTCGATTTGGTAAGGTTCTCCGCGAGTTTTTATACTCGCAATGGTATTTAGGGGTTGGGATCGACGCGGTGAAGTTGGATATGTGCCCTGTAGGT  
TTCTCTTACTTGTGAGTGTTTACGGAGCTTTTAGAGTGCTGCGATGAAGCTCTCGACGGTTGGAGTTCTGGTCCAGCAGGATGAGGAAGGGGGGGACAAGAGATGCTTGAACCTCGA  
GCTTTGGCATGCTTGTGCTGGTCTCTAGTGTGTCTGCCAATGTCGGAACCCGTGTTGTCTACTTTCCACAGGGCCACAGCGAGCAGGTCGTGGCTTCCACTAATAAGGAGGTTGAAGG  
CCATATTCCTAATTATCCGAACCTTGCCACCTCAATTGATCTGCCAACTTCACGATGTGACTATGCACGCTGATGCCGAGACTGACGAAGTCTACACACAGATGACATTGCAGCCTTTAAATC  
CGCAGGATCTGAAAGATACATACCTTCCAGCTGAGATGGGGCTACCTAGCAAGCAGCCATGAATATTTTTGTAAGACTTTGACTGCAAGCGATAAAGCACTCATGGAGGGTTTTCTGT  
TCCTCGTGTGACAGTGA AAAAGTTTTCTCTCTGGATTTCTCTCAACAGCCACCAGCTCAAGAGCTGATTGCTCGAGATATTCATGATGTTGATTGGAAGTTCAGGCATATCTTTAGA  
GGACAACCCAAGAGGCATCTTCTACTACAGGCTGGAGTATCTTGTGAGTGAAGACTTGTGCTGGTATTCTGTTTTATTTATATGGAATGAGAAAAATCAGCTTTTGTGGGAA  
TCCGACGGGCTAATCGACCACAAAATGCTGTACCTTCATCAGTTATATCAAGTGATAGTATGCATATTGGACTGCTTGTGCTGCAGCAGCTCATGCTGCTGCAACAAAATAGCCGTTTACCATT  
TTTTACCACCCAAGGGCTTGTCCCTCAGAGTTTGTGATACCCTCTCAAAAATATGTTAAGGCTGTGTTTACACTCGTGTCTCAGTTGGCATGCGATTTAGGATGCTTTTTCGAGACTGAAG  
AGTCAAGTGTTCGTAGGTATATGGGGACTATAACAGGAATAAGTGATTTGGATCCTGTCCGATGGCCAAATCCCCTGAGATCAGTGAAGGTGACAGACAACCTAGAGCATCTTTATGG  
GAAATTGAGCCTTTGACAACATTTCCAATGTATCCATCACTATTCCTCTCAGACTTAAACCACCTTGGTACACTGGAGTTTCATCTCTAAATGACTACAAGTTAGATGAGGGGAATGCATA  
CATGTGGCTTAGGGGGAGCTCAGGGGGGGGATTAGGTCTTTGAATTTCAATCTCCTGGAATTTGGTCCGTGTGTTTACAGCAGCAGGTCCAACCACAATTGGGAAAACAATCACACTCCTTA  
CCAAGCAATGGATGCTGCAGCTTGTGATATTAGAGGCATGGATTCATTTAGGCAGCCATTTCTAAACTTCCAGCAGCCGTTTTCAGTTCCCTCAGCAGTTCTGTATGAACCCATTGTTGCAG  
CAGCAAGTTATCAACAAGCTACCATGAACAGATAATGAATTCTCAAGCTCAGTCTCTGTTGGATAGTCAACCAAACATACTTCAAATCAGCTGTTGCAACAGCCATACGGTGATCAGC  
AGAAGCAAAAAGGTCAGCAGCAACCAACTTATCCAGAATAATTTATGTTTCAAGTATTAATAATAGAACAGCAACAGCTGCCAATACCCTCTCCATTATCTCAAAAATCTGTATTTCTGAT  
TCAAGTATGAACTTTTCATCAGTTGCAACACCCAGTTGCATACAGAATTTGTGAGCAGCGGCTTATTCTGGAACAAAATGCTAATAACTTGCACCTTTGCAAAAATGGTGCAGACAATTTCTGG  
CTGAGCAGCATCAGCAAAAATGGGATCCACAGTTTGCATTGCAGAAGGTTTCTACTTTTGGTAATACAGTTTTGCTTCAACCATTTACGGAAAAGATGATACAAGGGAATCTGATGTCTC  
TCCCCTGATACACAAAACACAGCCTATTTGATATCAATGTTGGTCTTCCCTGCTTCTTGGCAATGTTGTGCCTAATCTATTAACGCAAACAATAATGACAATGTTGTATCCAGCATGCC  
ATTTACCACTTCTTATCTTCAAAAATTCATTTATCACAGCCTTGATGAGTCATCAGGTATGTTGCAGCATACTACGACATTGATCCATCAATCAAAAATTTTGTAAAGGTTTACAAGTCAGG  
CTCGGTTGGGAGGTCACCTCGACATCACTCGTTTCAGCAACTATACTGAATTACGAAAGGCACTGGGTCAGATGTTGGTATTGAGGGTCAACTTGAAAACCCTCTTAGATCAGGCTGGCA

GCTTGATTTGTTGACAGGGAGAATGATGTGCTTCTTCTGGAGACGACCCCTGGGAGTAAGACTTTATTATTAACCTTGAACATCTTCAATTTAAAGAAACATTGATCAGCTTATGCTTCT  
CATCAACATTCATATATTCATTTCCCAACTATCTGCAACTTAAGCAACATCAATTGTCTATAACTATTTTTTAGTTACATGTGTAGAGACAGTTATTTATATTGAGCTTTCTGAAGGCTCCAGC  
GACTAAGGTTTATATGATTTATAAATGCTTTATCAGGTGTATATGCTTCAAGGGTTGAGAAACCTTAGCTCTCTTAATACTAGTTCAAAATTTCAATTAGCTTAAACGTGGCATGCTGTGAAC  
ATAACAATTAGATTTTCTACTATCATTGGAAGAAACCTTAATGCTGGTTCTGTGATGGGAATCCCACGTTGATACTAGTAATTATTGAGCAGAAAACGAAGTTCAAATTATCTCTGGTCCT  
GAGCAATGTCGTGCTAGGAAGTAGTAACCAAGTATGAAAACCTATGTATGCTGAGTAATTAATAATTTTTCTGGCAAACACCTGGCGTACAGTTACTTATATACGCTTCAACATTTTGTAG  
CTATAAAAATTTCTTGTGTTATTTGTAAGATGTGATCAATATATCGTAGCTTTGTACAATGCCTATGCAGACTTTGTGCATTCATGGTTGGCCGATCAAAACCTGTACCTCTTCACCTGGTATT  
CATTTCTAATTAATGCAGATCGTTTGTGAACAATGTGTGGTACATCAAAACTTTCCACCAGAGGATGTTACAGCAAATGGGGCAGCAGGGAGTTGACTTGAGCTAATTAACCTTTGAATTC  
AATCAAACCAAATGGCAAGTCTGCTCGAGGTGAAATCCCCGTAGGTGCCAAAGTCTGTACTGTCTACTGTAAACGTATGACAGTAAATCTGCATAAGATACAGATATTTATGCTATAA  
AATCCTTGTGTGCAGGTTCTATTTGCTCTTCCATTTACTTCTCGCCAATAACCATGCTCTTAGCTGTTCCATGTACTCTTAAATAGTATATTTTATCTTCTTATCTTATTTAATTCTAATTTGTA  
AAGAACAAGTGTCTAGAAATATACTAAAGCGTGGATCTAAGATTTCGATTACTGGAATAATTTGGACATCCAGTGAATTTAGCTCCTGTAATGTAAGTAGGATTCGAGGACTGAGGAATT  
TATCCTTATCCATGGATTTATGAAGAGATTTTTGTGCTTTGGATATTATCTCTAGATCACTAGTGAGATAACTTAATCAACGCC

>comp171031\_c0\_seq5

TCTTTTCTCAGCCTAACACCTGCCAATACCCTCTCCATTATCTCAAAAATCTGTATTTCTGATTCAAGTATGAACTTTTCATCAGTTGCAACACCCAGTTGCATACAGAATTTGTCAGCAGC  
GGCTTATTCTGGAACAAATGCTAATAACTTGCACCTTTCGAAAACTGGTCAGACAATCTGGCTGAGCAGCATCAGCAAAAATGGGATCCACAGTTTGCATTGCAGAAGGTTTCTACTTT  
TGTAATACAGTTTTGCTTCAACCATTTACGGAAAAGATGATACAAGGGAATCTGATGTCTCTCCACTGATACACAAAACCACAGCCTATTTGATATCAATGTTGGTTCTTCTTCTGCTTC  
TTGGCAATGTTGTGCCTAATCTATTAACGCAACAATAATGACAATGTTGTATCCAGCATGCCATTTACCACTTCTTATCTTCAAAATTCATTTATCACAGCCTTGATGAGTCATCAGGTA  
TGTTGCAGCATACTACGACATTGATCCATCAATCAAAACTTTTGTAAAGGTTTACAAGTCAGGCTCGGTTGGGAGGTCCTCGACATCACTCGTTTCAGCAACTATACTGAATTACGAAA  
GGCACTGGGTCAGATGTTTGGTATTGAGGGTCAACTTGAAAACCCTCTTAGATCAGGCTGGCAGCTTGATTTGTTGACAGGGAGAATGATGTGCTTCTTCTTGGAGACGACCCCTGGGA  
ACTTTGTGCATTCATGGTTGGCCGATCAAAACCTGTACCTCTTCACCTGGTATTCAATTTCTAATTAATGCAG

>comp171031\_c0\_seq9

AGCACACAATTTAATATTTTCACTTATAATTTACCCAGACGGGAAATCCCCGATATTTCCGGCTAGTGTGCTCTTCTTTTTTCTCAGTGGCTTTACCGTCTGCCCAATTACATCCAATAT  
ATCCATTCACGGCGATCTGGAGCTAGTTCAATTGCCGCGCTTCTCCATGCTAGCATTGCCTGAGCTTTGTGTTCTTACAACCTCTTCGAGGTGCTGCTTTTCTATTCTCGAGTTACTTCTTC  
TGATATATCGTTTCCCTTTGAGGAGCTCTCCAAGGCCGAACTTCGCTAGAAAATTGTGCTTCCCTGTGCGAGCTGCCAAGAAAACAAGGGAAGTGTGAAGGCAGAGGTAGAGCTGCTTGGT  
TTCCTGATCAGGGAAGTTGGTTATGAATTCTAGAGTTTGAAGTTTATATCTTGGATTCCGTGGCCGAAATGTTTTTCTACTCAATTAATGAGTTGATTTGGCTTCTTGGCCTTAAAGAGTG  
AGGAATGTGAGATTTTTTTTTGAAGTCGATTTGGTAAGGTTCTCCGCGAGTTTTTATACTCGCAATGGTATTTAGGGGTTGGGATCGACGCGGTGAAGTTGGATATGTGCCCTGTAGGT  
TTCTTACTTGTGAGTGTTTACGGAGCTTTTAGAGTGTGCGATGAAGCTCTCGACGGTTGGAGTTCTGGTCCAGCAGGATGAGGAAGGGGGGGACAAGAGATGCTTGAACCTCCGA  
GCTTTGGCATGCTTGTGCTGGTCTCTAGTGTGTCTGCCAATGTCGGAACCCGTGTTGTCTACTTTCCACAGGGCCACAGCGAGCAGGTCGTGGCTTCCACTAATAAGGAGGTTGAAGG  
CCATATTCTAATTATCCGAACTTGCCACCTCAATTGATCTGCCAATTCACGATGTGACTATGCACGCTGATGCCGAGACTGACGAAGTCTACACACAGATGACATTGCAGCCTTTAAATC  
CGCAGGATCTGAAAGATACATACCTTCCAGCTGAGATGGGGCTACCTAGCAAGCAGCCATGAATATTTTTGTAAGACTTTGACTGCAAGCGATAAAGCACTCATGGAGGGTTTTCTGT  
TCCTCGTGTGACAGTGA AAAAGTTTTCTCTCTGGAATTTCTCTCAACAGCCACCAGCTCAAGAGCTGATTGCTCGAGATTCATGATGTTGATTGGAAGTTCAGGCATATCTTTAGA  
GGACAACCCAAGAGGCATCTTCTACTACAGGCTGGAGTATCTTTGTCAGTGCTAAGAGACTTGTTGCTGGTGATTCTGTTTTATTTATATGGAATGAGAAAAATCAGCTTTTGTGGGAA

TCCGACGGGCTAATCGACCACAAAATGCTGTACCTTCATCAGTTATATCAAGTGATAGTATGCATATTGGACTGCTTGCTGCAGCAGCTCATGCTGCTGCAACAAATAGCCGTTTACCATT  
TTTTACCACCCAAGGGCTTGTCCTTCAGAGTTTGTGATAACACTCTCAAAATATGTTAAGGCTGTGTTTCACACTCGTGTCTCAGTTGGCATGCGATTTAGGATGCTTTTCGAGACTGAAG  
AGTCAAGTGTTTCGTAGGTATATGGGGACTATAACAGGAATAAGTGATTTGGATCCTGTCCGATGGCCAAATCCCCTGAGATCAGTGAAGGTGACAGACAACCTAGAGCATCTTTATGG  
GAAATTGAGCCTTTGACAACATTTCCAATGTATCCATCACTATTCCTCTCAGACTTAAACCACCTGGTACACTGGAGTTTCATCTCTAAATGACTACAAGTTAGATGAGGGGAATGCATA  
CATGTGGCTTAGGGGGAGCTCAGGGGGGGTATTAGGTCTTTGAATTTCAATCTCCTGGAATTGGTCCGTGTGTTTCAGCAGCAGGTCCAACCACAATTGGGAAACAATCACACTCCTTA  
CCAAGCAATGGATGCTGCAGCTTGTGATATTAGAGGCATGGATTCACTTAGGCAGCCATTTCTAAACTTCCAGCAGCCGTTTCAGTTCCCTCAGCAGTTCTGTATGAACCCATTGTTGCAG  
CAGCAAGTTATTCAACAAGCTCACCATGAACAGATAATGAATTCTCAAGCTCAGTCTCTGTTGGATAGTCAACCAAACATTACTTCAAATCAGCTGTTGCAACAGCCATACGGTGATCAGC  
AGAAGCAAAAAGGTCAGCAGCAACCAACTTATCCAGAATAATTTGATGTTGAGTTAATAATATAGAACAGCAACAGCTGCCAATACCCTCTCCATTATCTCAAAAATCTGTATTTCTGAT  
TCAAGTATGAACTTTTCATCAGTTGCAACACCCAGTTGCATACAGAAATTTGTCAGCAGCGGCTTATTCTGGAACAAATGCTAATAACTTGCACCTTTGCAAAAATGGTCAGACAATTCTGG  
CTGAGCAGCATCAGCAAAAATGGGATCCACAGTTTGCATTGCAGAAGGTTTCTACTTTTGGTAATACAGTTTGTCTTCAACCATTTACGGGAAAAGATGATACAAGGGAATCTGATGTCTC  
TCCCCTGATACACAAAACCACAGCCTATTTGATATCAATGTTGGTCTTCTCTTGTCTTCTGGCAATGTTGTGCCTAATCTATTAACGCAAACAATAATGACAATGTTGTATCCAGCATGCC  
ATTTACCACTTCTTATCTTCAAAAATCACTTTATCACAGCCTTGATGAGTCATCAGGTATGTTGCAGCATACTACGACATTGATCCATCAATCAAAAATTTTGTAAAGGTTTACAAGTCAGG  
CTCGGTTGGGAGGTCACCTCGACATCACTCGTTTCAGCAACTATACTGAATTACGAAAGGCACTGGGTGAGATGTTTGGTATTGAGGGTCAACTTGAAAACCTCTTAGATCAGGCTGGCA  
GCTTGATTTGTTGACAGGGAGAATGATGTGCTTCTTCTGGAGACGACCTTGGGAATCGTTTGTGAACAATGTGTGGTACATCAAAAATACTTCCACCAGAGGATGTTTCAGCAAATGGG  
GCAGCAGGGAGTTGACTTGAGCTAATTAACCTTTGAATTTCAATCAAACCAAATGGCAAGTCTGCTCGAGGTGAAATCCCCGTAGGTGCCCAAAGTCTGTACTGTCTACTGTTAAACGTAT  
GACAGTAAAATCTGCATAAGATACAGATATTTATGCTATAAAAATCCTTGTGTGTCAGGTTCTATTTGCTCTTCCATTTACTTCTCGCCAATAACCATGCTCTTAGCTGTTCCATGTACTCTTA  
AATAGTATATTTTATCTTCTTATCTTATTTAATTCTAATTTGTAAGAACAAGTGTCTTAGAATATATCTAAAGCGTGGATCTAAGATTCGATTACTGGAATAATTTGGACATCCAGTGAATT  
TAGCTCCTGTAATGTAAGTAGGATTCGAGGACTGAGGAATTTATCCTTATCCATGGATTTATGAAGAGATTTTTGTGCTTTGGATATTATCTCTAGATCACTAGTGAGATAACTTAATCAACG  
CC

>comp171429\_c0\_seq1

TTCAAGTCTTCTTGTCTCTCTATAGCTTATCAGCTATCTTCGTCTCTTTCTTCTAATGAAAATATGCTCCCTCTTTCTTGGCCAGGAGTTTACTTCTGATGCAGGCGATAGGCGCCATCT  
TCCCTCCTCCACCAATCAGTGGAAGGAGAACAGAAAAGAGAGAGAAAAGAGATAGGTGGAGTTCTCTGTTCTCACAGAAAACCATGGAATCTTTTTTATGATTTAATACAGCCTTTCTGAA  
ACTAGGACTTGATTGATCTCCATTCTTTCACACGTGAAATTCACACGCTTTTCAAGCTACCGCTGCCGTGATTATAGGGTAAGTATGCTCCCTGTCTCCCTCACTCTCCCTCTCTCTCAT  
TTATAACGAAGAAAAGTGTAGGTGTGTGCAACTAATGGAGTTATCCATGATTTGTAATACCGTTTTTCTGTCAGAAAGAAGGAAGATTTGGTTATGGATCTTCTATTGTGATTTCTGAAGTT  
AACATATAATTGGGTATTCTCAGCAAGCTTCCGTTTCTGTTTCAAGTTGAGTGCAAAGGGCACTGCGAAACAAAATGGCAGAAGAAGAGTTACCAAATTCGGCTGAAGAATTAATGCAC  
TCAGCGCATATCCGATGTAATTTGGCGTTTCGTGTGCTTTCCCTTGTCTTTCAGTTTCTGTGACGAGCAAGCGCAGAGCTTGGCCAGCGAAAAGTACTCGTTTGAAGAGATTTT  
GCTTCGAGGACGCGCCAGCTTTTAGGATTGTTATTTGAGAAAAGCTCAAAGAAGGCATGAGTTTCTACAAGAAAATGAGAGGAAGGCCATGTTGGAAGTCTTGGAGCTGAGGCAGATTC  
GCGCAGAGGACGCCAAGGCCAACGAGAAGGTTATGTCCATCTTTCAGGTCGCGAGCAGAGCTGGCAAGCAGAAAGGAGGCGCCTTTTGAATCAGATCCAGTCCCTGTGCGTGAATT  
GTCCTTAGACAAGTTGAGGAATGAGGAGGTCGTCTCTGATCTAAAGAAGAGAGTTTTTCAGGAAACAGCAGGCGAGAAGGATCAAAGATGATGGTTTTGAAGAAGAAGCAAGAAGAG  
GTTGGATTTGAAGAGAGGTTGCGAGCTGCGCAGAAAGCAGTTGAGGAGTTGAGGGAGAAAACAACAAGGAAGCGCAGGATCACATTTTAGAGCTCAGAAGGCATAAGACAGCTTT  
CACGGAGATGGTTTCCAACCAAAGGCAGCTGGAAGTACTAGAGATGGCTCGTTTGTCTTCGCCAAGCTGATGCACTAAAACAAGAGCTCGAAGAAGTTTTTGGAGCAGAAGGAAGAGGCTGGA

GCTATGGTGGAGAACTTTCGGATGAGTTTGTAAAGTTCAAAGGACGCCGAGCAGAAAGGGAAGATTGTTTCAGCCATGCTTAGAAAAGCGAAGCACGATACAGCTGAGAAACAGG  
CGCTTTTAAAGGAGGTGAAGATAACTAGGGCGAAGAAGAAGCAAGCGGAGCTTGAGGCTGAAAGGTGGAAGTGCATGTTGGAAGCAAACAGAAGAAGGGCTCACGAGAATTGCCTT  
CAGCTGAAGCTGGGAGTTCACGGGAAAGAGTTGCAGAGTTTCAATCAAGCACTAGGGTTGACCTGAGAACACGTTTACTTGAGTACTTGACCACAGAGAACAAAAGAGAGCCTCAACT  
TCCCACAGAGAAGGTGGAGAGTGTAAATCAAACCAATGGAGTTTCAGGTTTCAGTTCTTGAACGACAGTGATGATGATCTTGATAATGTTCAAGAGCTGCAAGATTGGGTTTCATCATGAAAC  
TAAAAAATACACAACAGTGTCTGGAGCAAAAAACATTATTCAGAGATTGAAGCATTTCAGAGCAACTGAGAATAAGAGATGAGAAGCTGGAGGCTTTGCACTGGCGACTACTAAGCACCG  
AGCTGGACTCAAAGAGGCTGCAATCTCACATCGAAGGGCTTGACGGCAGTCTTACACAGCTAAGGGATGATAACCTGAAATTGGAAGCTCTGTTATCGGATAGGGAAAGGGAATAAAA  
TCATTGAAGGAGAGATTACAGCCTTTATGGCAAGCATTTCAGGTGAGCAATTCTCCTTCCATTTCCGAGTTCGTGTTTGCCCCAGTCTTTTGATTCAATTAATGAAGGTGTCAAAAAAGGAAT  
CGAAAGCGGATGAAAGTTCATATGAAGTAGAAAAAATAAGCAGGAAGATAGTAAATGAAAAATGTAGATGAAATTGTATTGCTTAGAAAAGGAAGGATTGGAATGGAAGCGGAAGC  
AACCATTTGTAATGATTTCGTTTTTCATCGAAAAACGTTTCTGGGGATCAGTCAAATGAGGAAATTTTACTTGACGATCAATCAGGAAACGTTCAAATGATCTCTCAGTCTCTGAAGGAGAG  
ATTGAATTAGAGAGGGATATTGGCATGGCTCTCATTATTCCCATGCAAGGCACAATTCCTTGGAAGATGCCTTTGCCCTCAGTGTCCAGTAAGTTAGCTTCTGAAGGACAGCCTTTTTTAA  
AGATGGATTTTCAAGCTCTTGAGTTTTCTTCAAGATTAAGGCTAAAAACAGCAACTTCTTATACTGGAAAACTTGGCTGGTACACATTCATCTGATCATGCAACAGACAATTCTGATTC  
AACTGGCAGTACTAATGAGAAGAACGTTGAGTTGAAAGGTTTAATACAAGTAATTCCTTACTCAACAAGCAACTAAAGAGGTATCAAATCTTGAAGAGAAGATTGATGCCTTGTGCAA  
AAAGATGCATGAGAATTCTGGGACTGTTACTGGTTCGCTTCTTCTAGATGCTGGAACTAAAGATAAAAATTGACAAGCTTGAACAATTTCTTGAAGAGACCTTTCAGTTACAAAGGTACAT  
GGTTGCAACTGGGCAAAAGTTGATGGAATTGCAGTCCAAGATAAAAAGCAGTCTTGATGGTGTGAAAGCACAGGAGGAATCAGCTGTATTTAACCTGGAGCAGTTTTTAGATGTTGTAA  
GGACTCTTTTCAAAGAAGTTCAGAGAGGACTGGAGGTAAGAATAGCTCGAATAATCGGTGACCTTGAGGGAACTTTAGCTAGCGATGGCATCCTTAGAAGATGATACTCTCTGATTATGAT  
TTATTAGTCTTGCTTTAGAACGTATTTATTCTTGATAGTGAGTAATAAAAAGAGTATACATAAATGGATTTCATTACAAAATTCGCCTGATGTTCCTTTTTTCCACATAATTTACAAAGGGA  
AATCAAATCTCAGATAGGAGGCTAATTCATTTGCCATTGACATTTTGTGCTTTTATTTATTTGTGTTTGTAAATTGTTTTCCATTGTAATGAGTGATTGCTAAGCAAGTTTTCTTCAATTTGT  
TTATATTCATGATAATCAGGTGAAGTTCCCTGTTACGCTGAAGCACAAAGCAGCATAGGTGAATAGTTTCATGTTTTTGACCGAGTAGGTTATACAGGGAAAAGTGTTCATCCAAGTAA  
AGAAAATTCTGCTATGATGTATTGATTAACTTGTTTTTCCAATTGCATAAATGTTTTTGATGTTTTTTTCATCATTTAAATGTG

>comp171429\_c0\_seq3

TTCAAGTCTTCTCTTGTCTCTCTATAGCTTATCAGCTATCTTCGTCTCTTTCTTCTAATGAAAAGTATGCTCCCTCTTTCTTGGCCAGGAGTTTACTTCTGATGCAGGCGATAGGCGCCATCT  
TCCCTCCTCCACCAATCAGTGGAAGGAGAACAGAAAAGAGAGAGAAAAGAGATAGGTGGAGTTCTCTGTTCTCACAGAAAACCATGGAATCTTTTTTATGATTTAATACAGCCTTTCTGAA  
ACTAGGACTTGATTGATCTCCATTCTTTCACACGTGAAATTCACACGCTTTTCAAGCTACCGCTGCCGTGATTATAGGCAAGCTTCCGTTTCTGTTTCAAGTTGAGTGCAAAGGGCACTG  
CGAAACAAAATGGCAGAAGAAGAGTTACCAAATTCGGCTGAAGAATTAATGCACTCAGCGCATATCCGATGTACTTTGGCGTTCGTGTGCTTTTCTTGTCTTTCAGTTCTCTGTCTCTG  
TGACGGAGCAAGCGCAGAGCTTGCCAGCGAAAGTACTCGTTTGAAGAGATTTGCTTCGAGGCAGCGCCAGCTTTTAGGATTGTTATTTGAGAAAGCTCAAAGAAGGCATGAGTTT  
CTACAAGAAAATGAGAGGAAGGCCATGTTGGAAGTCTTGAGCTGAGGCAGATTGCGCGAGAGGACGCCAAGGCCAACGAGAAGGTTATGTCCATCTTTCAGGTCGCGAGCAGAGCT  
GGCAAGCAGAAAAGGAGGCGCTTTTGAATCAGATCCAGTCCCTGTGCGGTGAATTGTCCTTAGACAAGTTGAGGAATGAGGAGGTCGTCTCTGATCTAAAGAAGAGAGTTTTTCGAGGA  
ACAGCAGGCGAGAAGGATCAAAGATGATGGTTTTGAAGAAGAAGCAAAGAAGAGGTTGGATTTGGAAGAGAGGTTGCGAGCTGCGCAGAAAGCAGTTGAGGAGTTGAGGGAGAAAA  
CAAACAAGGAAGCGCAGGATCACATTTTAGAGCTCAGAAGGCATAAGACAGCTTTCACGGAGATGTTTTCCAACCAAAGGCAGCTGGAAGTACAGATGGCTCGTTTGCTTCGCCAAGC  
TGATGCACTAAAACAAGAGCTCGAAGAAGTTTTTGTAGCAGAAGGAAGAGGCTGGAGCTATGGTGGAGAACTTTCGATGAGTTTGTAAAGTTCAAAGGACGCCGAGCAGAAAGG  
GAAGATTGTTTCAGCCATGCTTAGAAAAGCGAAGCACGATACAGCTGAGAAACAGGCGCTTTTAAAGGAGGTGAAGATAACTAGGGCGAAGAAGAAGCAAGCGGAGCTTGAGGCTGA

AAGGTGGAAGTGCATGTTGGAAGCAAAACAGAAGAAGGGCTCACGAGAATTGCCTTCAGCTGAAGCTGGGAGTTCACGGGAAAGAGTTGCAGAGTTTCAATCAAGCACTAGGGTTGACCTGAGAACACGTTTACTTGAGTACTTGACCACAGAGAACAAAAGAGAGCCTCAACTTCCCACAGAGAAGGTGGAGAGTGTAATCAAACCAATGGAGTTTCAGGTTTCAGTTCTTGAACGACAGTGATGATGATCTTGATAATGTTCAAGAGCTGCAAGATTGGGTTTCATCATGAAACTAAAAAATACACAACAGTGCTGGAGCAAAAACATTATTCAGAGATTGAAGCATTTCAGAGCAACTGAGAATAAGAGATGAGAAGCTGGAGGCTTTGCACTGGCGACTACTAAGCACCGAGCTGGACTCAAAGAGGCTGCAATCTCACATCGAAGGGCTTGACGGCAGTCTTACACAGCTAAGGGATGATAACCTGAAATTGGAAGCTCTGTTATCGGATAGGGAAAGGGAACTAAAATCATTGAAGGAGAGATTGAGCCTTTATGGCAAGCATTTCAGGTGAGCAATTCTCCTTCCATTTCCGAGTTCTGTTTGCCCCAGTCTTTTGATTCATTAATGAAGGTGTCAAAAAGGAATCGAAAGCGGATGAAAGTTCATATGAAGTAGAAAAAATAAGCAGGAAGATAGTGAAATGAAAATGTAGATGAAATTGTATTGCTTAGAAAAGGAAGGATTGGAATGGAAGCGGAAGCAACCATTTGTAATGATTCGTTTTCATCGAAAAACGTTTCTGGGGATCAGTCAAATGAGGAAATTTTACTTGACGATCAATCAGGAAACGTTCAAATGATCTCTCAGTCTCCTGAAGGAGAGATTGAATTAGAGAGGGATATTGGCATGGCTCTCATTCAATCCCATGCAAGGCACAATTCCTTGAAGATGCCTTTGCCTCAGTGTCCAGTAAGTTAGCTTCTGAAGGACAGCCTTTTTTAAAGATGGATTTTCAAGCTCTTGGAGTTTCTTCAAGATTAAGGCTAAAACAGCAACTTCTTACTGAAAACCTTGGCTGGTACACATTCATCTGATCATGCAACAGACAATTCTGATTCAACTGGCAGTACTAATGAGAAGAACGTTGAGTTGAAAGGTTAATACAAGTAATTCCTTACTCAACAAGCAACTAAAGAGGTATCAAACCTCTTGAAGAGAAGATTGATGCCTTGTGCAAAAAGATGCATGAGAATTCTGGGACTGTTACTGGTCGCCTTCTTCTAGATGCTGGAACTAAAGA TAAAATTGACAAGCTTGAACAATTTCTTGAAGAGACCTTTCAGTTACAAAGGTACATGGTTGCAACTGGGCAAAAAGTTGATGGAATTGCAGTCCAAGATAAAAAGCAGTCTTGATGGTGTGAAAGCACAGGAGGAATCAGCTGTATTTAACCTGGAGCAGTTTTTAGATGTTGTAAGGACTCTTTTCAAAGAAGTTCAGAGAGGACTGGAGGTAAGAATAGCTCGAATAATCGGTGACCTTGAGGGAACCTTAGCTAGCGATGGCATCCTTAGAAGATGATACTCTCTGATTATGATTTATTAGTCTTGCTTTAGAACGTATTTATTCTTGATAGTGAGTAATAAAAAGAGTATACATAAATG GATTTCAATACAAAATTCGCCTGATGTTCCCTTTTTTCCCACATATTTTACAAAGGGAAATCAAATCTCAGATAGGAGGCTAATTCAATTGCCATTGACATTTTGTGCTTTTATTTATTTGTG TTTGTAAATTGTTTTCCATTGTAATGAGTGATTGCTAAGCAAGTTTTCTTCAATTTGTTTATATTCATGATAATCAGGTGAAGTTCCTGTTACGCTGAAGCACAAAGCAGCATAGGTGAATAG TTTTCATGTTTTTGACCGAGTAGGTTATACAGGGAAAACCTGTTTTCCATCCAAGTAAAGAAAATCTGCTATGATGTATTGATTAACCTGTTTTTCCAATTGCATAAATGTTTTTGATGTTTTT TTCATCATTTAAATGTG

>comp172488\_c0\_seq2

GGAAGCCAGAGCAAAATAGAAGGAAAAGGGGCTCGTGAGAAACAAACCCACACCCATATAAATTCCTAACACGTAAATAGCGACCTAAATAATAAGAGACAACCACGATCTTCCCCTTA TTTTCTCTCTTCGATTCGATAAGCCCCCTCTCCTCTCTCCTTCCCCAGCCTGTCTGGAGAGCCGGCACACACCTCGTGAATCCGAACCCCTCCGTCGCCGACGGCCTACTCTGGGTGAT GCGCCGTCGAAGCCCCAAACGATCGACCCCAATCCCTGCTTCGCAGCCGTTGATTTCTCGCTGGAGGCCGTGAAATCTTGTGAAATTACACATAAAGCCATCTGACAAAAATTCAAAAAT CTGCCCTCCCTCCTACGATTCCCAAACCCGCACGCCGACGCACAATCACTTCTCCGATCGCCGCTTCTATCTAAGATTATTAGTTTTCTCGCTTCCATTAGTGATAGCTTGTAGTGGATT TGGAGAGATTTCCATGTGAGAGGAGGGCAGATGGCATACTTCAGGAACCTCGATGAAAACATGGATTCCAGTCAAGACTTGAATGGGAAGGATGGTGGACGTGAAGCTGATGGAGCATA TGGATCTCCGGAACTAGAGACATGGATGCTAGTTTTGGTGAGAAGGAGGTTGACAAGAAGGCTGCAGGGCAGTACCAAAGTGAGGAGGAGCCATATGATGCTGGTGGGCTACAAAGT GATATGTGTGGCATGAATGGTATGGCAAAGGCTGGAAGAAGATTAATCCTGCTGGTACTTGGGGTTCAAGCTTTTGGAAAGATTGCCAACCAATGTGGGCTTCTAATGAGGATAATTATG ATTTCTATGAAAGTTGAAGAAGGGCCTGATTGTGACTCTAAGAAAGTTGAAGTAGAATCTCTTGGCTATTCTTGTGATGACTCGGATGGTCAGAGAGATGAAGATCATTTGCAGAGAGGAC AAGCTGATGTGCCTGCAGATGAGATGCTTCTGATGATTATTATGAGCAAGATGGTGAAGAGAATAGTGATTCTTTTCATGGTCGGGGTCTGAGCCAGCCTAGCACCTCCGGTTCAAGATT GCCACCAAGTCAACCTCTTCCAATAGAAACAGTTCTAAGAGTTTGAAGCAGTAAAATTTGATGAATGATGAGGATGAGGATTATGAAGAAGAAGATGAAGAAAATGAAGGAGATGAA GACGACCCTGATGATGTTGATTTTGGAGCTGAATTTGATGAAACAAAATAGGCACACAAGAAGCAAGGTTAAAATGTGAGAGAGTGATGAATTTGAGGAGGATGATGCAGATGATGAAGA TGATGACCTTGACCTCTCGGAGGAAGATGATATAGAAGAATGCACAAGTTTTTAAACGACAAAGAGCAAGGCGGAAAACCTGGGCAAAGATCAAAGGGATCAAAGAAAAGCAAATCCATT

CATATCAATAGACGGAAAAGAGGGAGAGCTTTTTTCAGAAGAAGCTGAATCTTTTGAAGATGATTCAGAAGAGGACATCGATGGGTACTTCGATCTAAAAATAAAGAGGGCGCCTCAGTC  
ACGTAATAAAAAGATTGGTTCACGATTAACCACATCAGCAATTATGAGCTCCCCGAGGAATGAGGTTTCGACATTCTGTTAGGTCTGTGAGAAAGGTCTCTTATGTTGAAAGTGAGGAAAG  
TGAGGATATTGATGAAGATAAGCTAAACAAGTCCCAAAAGGAAGAAGCTGAAGAAGATGATAGTGATTCAATTGAGAGGGTACTTTGGCACCAAAACAAAGGGGATTGCTGAAGAAGCT  
GCAAAGAACTATAGATCAACTTTACCTTCAGTGATGAGTGTAGTGTGTCAGAATCAGAACCTAATTGGAATGATGTTGAATTCTATATTAATGGAAAGGGCAGTCATATTTACATTGTGAATG  
GAAGCCATTCTCTGATCTCCAAAATCTTACTGGATTCAAAAAGGTTTTAAATTATATGAAAAAGGCAAATGAAGAGCGAATCAACAAAAGGGCTCTGTACAGTGAAGAGGCTGAGGTTCA  
TGATGTTAGCAAAGAAATGGAGCTTGATCTTATCAAACAGTATAGTCAGGTGGAGCGAGTATTTGCTGATAGAATCAGCAAAACTGGAAATGATGATGTGGTAACTGAATATTTAGTGAAA  
TGGCAAGGTTTACCTTATGCTGAAGCAACCTGGGAAAAGGATACAGATATTGCATTTGCTCAAGATAGCATTGATGAATTTAAGGCTCGTGAAGCTGCCATGACCGTGCAAGGAAAGCTG  
GTCGACTTTTCAGAGGCGAAAGAGCAAAGCTAGTTTACGGAGGCTTGATGAGCAACCTGATTGGTTGAAAGGAGGCAAACTACGTGATTATCAGCTTGAGGGATTGAACTTTCTGGTCAA  
TAGTTGGAGAAATGATACAAATGTCATTTAGCTGATGAAATGGGTCTTGGTAAAACGGTGCAATCAGTTTCTATGTTAGGGTTTCTTCAGTATGCTCAACAAATTCATGGTCCATTTCTTG  
TTGTTGTTCCCTTTTCAACTTTATCTAATTGGGCAAAGGAATTTAAGAAGTGGCTCCCTGAAATGAATATAAGTTGTATATGTTGGAAATCGTGCTAGCAGAGAGGTTTGTGAGCAGTATGAG  
TTTAATAATAACAATGGAAGTAGCAGACACATTAATTTAATACGTTGTTGACAACATATGAAGTTCTATTGAAAGACAAAGCCGTGCTTTCTAAGATCAGATGGAACCTTATGGTTGA  
TGAGGCTCATAGGCTGAAGAATAGCGAGGCATCATTATACACAACCTTTGTCCGAATTTAGTACAAAGAACAAGCTTCTTGTACTGGCACTCCTCTGCAAAACAGTGTGAGGAGCTATG  
GGCTCTTCTACATTTTCTTGATGCTGGAAAGTTTAGCAGCAAAGATGATTTTGTGAAAATTACAAAATCTAAGTTCTTCAATGAAATTGAGCTAATCTACACAAGGAATTGCGGCCAC  
ACATTCTACGAAGAGTTATAAAGGATGTGGAGAAATCTTTGCCCCCAAAATTGAGCGCATCCTTCGAGTGGAATGTCTCCTCTTCAGAAACAGTATTACAAGTGGATATTGGAGCGTAA  
CTTCCATAATCTCAATAAAGGAGTTCGTGGAAATCAGGTGTCACTCTTAAACATTGTCGTGGAATTGAAAAATGTTGCAATCATCCTTTCTTGTGTTGAGAGCGCAGATCATGGTTATGGTG  
GGGACAATGGTAGTGATAGCAATAAAGTTGAGCGCATGTTTTGAGCAGTGGGAAGCTAGTTATACTTGATAAATTGTTGCTTCGTCTTCGAGAAACAAATCACCGCGTTCTTATTTTCTCT  
CAGATGGTTAGGATGTTGGACATACTTGCCGAGTATTTAGCACTTCGAGGTTTTAGTTCCAAGGCTTGATGGTAGCACTAGGGCTGATCTCAGACATCAGGCAATGGAGCATTTTAATG  
CACCTGGAAGTGAGGATTTTTGTTTCTGCTGTCTACGCGTGCAGGTGGGCTGGGAATAAATCTTGCTACTGCAGATACTGTTATTATTTTCGACTCAGACTGGAATCCCCAGAATGACTT  
GCAGGCAATGAGCAGAGCCCATAGAATTGGACAGCAAGAAGTTGTAAACATTTACCGTTTTGTTACAAGTAGAAGTGTGAGGAGGAAATTTTGGAGCGCGCTAAGAAAAAATGGTCC  
TTGATCATTGTTTATTCAAAAGTTAAATGCTGAGGGTAGGCTGGAAAAGAAAGAGACTAAGAAAGGAAGTTCTTTATTTGACAAGAATGAGCTCTCTGCAATACTAAAATTTGGAGCGG  
AAGAGCTATTCAAGGAAGAGAAGAATGATGAAGAGAGCAAGAAGAGGCTTTTAAAGTTTGGACATTGATGAAATTCTTGAAAGAGCTGAGAAAGTTGAATCTAAGGGAGATGATGGGGA  
GACAGGAAATGAGTTGCTAAGTGCCTTTAAGGTTGCAAACCTTTTGCAGTGCTGAGGATGACAGCACATTTTGGAGTCGTTTGATAACAACCGGAAGCTGTTGACCAAGCTAATGAATCATT  
GGCACCTCGTGCAGCAAGAAATACTAAAAGCTATGCTGAACCTATTCAACCTGAGATTAATAACCAAGCAGAAGAAGAGAGTCCCTCTGTCTCGAGATAGAAATCAGAAGCGTCTGCCA  
AAGCTACAGATGCTCCAACCTATTTCGTTGCCAATGATTGAGGGTGCAGTTGCTCAAGTAAGAGGATGGTCTTATGGGAACTTAACCAAGAAAGATGCTTCCCATTTTGTCTCGTTCCGTTAA  
GAAATTTGGAATTCAGAGCCAGATTGGCTTAATAGTGGCTGATGTTGGTGGTATAGTTGAGTCAGCTTCCATTGAAGCCCAGATAGAGCTTTTTGATTTGTTGATAGATGGCTGCAGAGAA  
GCAGTCAAAGAAGGAACTTGGATGTCAAGGGAACCATATTAGATTTTTTTGGTGTAGCTATCAAGGCTTATGAAGTGCTAAATCGTGTGGAAGAGCTTCAGCTTTTAGCAAAGCGCATT  
AAACCATACAAAGATCCAGTTGCTCAGTTTCGCTGGTTACACAACATAAAAGCCCACAGTGGTCCAAAAGCTGTGGATGGAATTCAGTTGATGATGCACGATTACTTCTTGGGGTGCAC  
TATCATGGATTTGGAAACTGGGAAAAAATCAGATTAGATCCAAAGCTTGGCCTTGCGAGGAAAATTGCTCCAGCAAATCTTGGGGAAAGAGAGACATTTTGCCTCGTGTCTCCTAACTTG  
GATAACCGTGCAAGTGCTCTTCTGCAAAAGGAGTTTGCAAATGTTAATGGTAAGATTTCAAAGCTAAAGGGTCTCAGAAAAGCTTCAAAAAGGAAGAAAATGCAATGAAAACAAAC  
AGTCGAAGGACGTGAGCTGGAAAGAAAGTTCACCTGGATTGCATTCAGAGCTAAGAAAGTGTACATAATAAGCGCCGAAAGTTGAACCTACGGTTAAGGAAGAAGGTGAATTGTC  
AGAGTCCGAACAAGAGCGGTACCAGCAGTTCAAAGAAGAAAAATGGATGGAATGGTGTGCAGATGTCATGGAAGAGGAAGTGCAAAACATTAAGGCGCCTGGAAAGGTTGCAGACAAC

CAGTTTAAATCTTCCAAAAGAGAAGGTTCTGGCTAGAAATTAGAAAATATTTACAACCTTTTGGGTAGAAAAGATTGACAAGATTGTTCAACAGCATGAATTATCATATAAACAATCTAAAATGT  
ATATAAGGTTGTGGAATTATGTGTCTACATTCTCAAATTTATCGGGAGAAAAGATTACATGAGATCTATTCAAACCTTAAAAATGAGCAAGGTGAAGGTGGGTTTGGACACTCCTACTTAAAT  
AGTTCAGCGGCGGGAACCTCTGACAGGAGTGTCTGGTACTAGTCAGCCCACCTCTTTCAACACTGATTTCCGTGGTAGGAGCAATAAACCTCATCAGTTTCCGGTCCCAACATTCTGAAACA  
TTTCACAAAAATCATGGCACACCAAAATCAGAGGCTTGGAAACGTCGGAGAAGAGCAGACATTGATAACCAAGTTCAAAACCAGCAATTTACCATCACCCAGCAATGAATAATGGAGC  
TCGTTTGGCTTGGAGCCAAACAACCTCAGCTGGAATCTTGGTTGGGGTCCACCCGAAATGCGGGCATTAGTCAGGAAAAACCAAGTAGAACACATGTAGGACGTTACCCTTCAATTCAAA  
GACCGCCGGCCTGACCTGAGTTAGTTGGTTGGTTATCATCATTTGATGGCCAAAGATGTGCAAGGCAGCAATGGCTGCTTCAACCTGGAGAGGTGCCACGGCGCCACCGGATAATTTTTG  
CTCTTGATAATAAGGTTTACTGATCCCATCTTGTGATCTACTTACTTGCCTGAAGCTGCTGTTCTGGTTGAGGAGGCTTATATGTTAGCAGATTCCACATTTTTTTTCTTACGATGATAAAAGG  
GCGAAAGCCTGATCTCAAAGTTCCAAGGGCTTTTGCAGGTTTCAGACAACAGATAGTCGCCCAATTTTGAAGGGGTGAGTTCTGTAACAATACATCAGCAGTAATATTTTACTATGGTGA  
AGCAATAAAGATAACTGCTTCACATCTAGAAAGATCAAATCAAATCTATACATGTTTCCATTCTATGAACATTGAATAGATTGAACAAATTTTCATAAATATTTTTTTTAGTTGAATTTGCTTA  
TTCTTAATAACCTGCATCTATTTTTATGTAATGGATTTATCAGGTTGTATAGCCATTAATCTTTGTCGTTTAAATGAATTAATA

>comp172594\_c3\_seq3

AATGGCAAATTAGTAAAATGATACGGCATGTATGGAAAGGTCAGTGACAACACTAATAAGGTAAGAAGGAATTATCACCCATTTCTAACACAATTACATCATATTTTAGACGTGAAAGT  
AAAAAAGTATGATGTTAGCAATCCTTTTCGTCTACATCATCTTTTCTCAACAACATACTTTCTTGTCTTGGCGAACATCACCTAACTTAGATATCTCACCAATAATGTCCTCTCTCTCTA  
TCTCTATCTCAGATTTTCTCTCATCTGCTTTGCATATTATCTCTCTCTAAAATTGTAGAGAAAGGCAGAAAAGCAGAGCCATGGATTCTTCTGGGAAGGCTGGGCTACTGCTTGGCGTGAC  
GGTGGCGTTTTGGGCCGGGCCCGCCCTGTCAGGCGGGACGATCTTACCGTCGGCGATAGCGCGGGCTGGACGGTCGGCAACAACCTAACTACACCAGTGGGCTGCCAGCAAGACT  
ATTCGTGTGGCGACACGCTTCTTTTCAAATACAACAACCAATTTACAATGTGTTGGAGGTCAAAGAGCCTGACTTCAATGCATGCAAGAATAGTTCAGCTATCAAAGAGTACAAAACC  
GGTAAAGATTCCATCCCCATCACATCGACCGCCACCACTACTACATTTGTGGATTCCCCGGCCATTGCCAATTCGGGCAGAAGGTGCGAGTGCACGCCGTCGGCTCCTCTGCTGCCCTT  
CTTCATACCAACTGGCCTGTCGCCGCTCCCCCAATGCAGGTGACCGGTTGGTCAGGGGAAGTTCGGTTTTTCTTGGTGGCTTGATCATGGCGGCCTCCTGTGTTTTGTAGGGTTTTT  
GGGTTGAGATGAAGTTGATTTTGGCTTCTTTTGGGGATTGCTTTAATTAATGCTTCTTAAATCAGTTTTTTTAGTACAAAATTTTAAATTTTGAACATAAAAAATTACTTTAAGAAGCTAGAAGA  
AAGCCGCTCAAACAAAGC

>comp172995\_c3\_seq1

AAAAAAAAAAAAAAAAACATTAACAGATCAGAATCAAGATATTTCCATTGATCATATAAGTTTTCCGTGCAACACGAAACAAACCTGAGAAATTGTATACCAATCTTAGGCATGGAAT  
AAGGCAGATCCGAACCGGGTGGGCTGACGGACCTGCTTACATCACACAATGCCCGATCCAACCCGGCCAAAGCTACGTCTACAACCTCACCCCTACCCGACAAAGAGGCACACTTTGGT  
ATCACGCTCACATCTTATGGCTTCGAGCCACCGTCCATGGCGCCATCGTCATCAAGCCCAAGCTCCACGTCCCTTATCTTTCTCCAATCCCCACCAGGAAGTCGTTCTTGTTTTAGGCGAA  
TGGTGAACGCCGACACAGAGGCGGTGATCAACCAGGCTACGAAAACCTGGCTTAGCACCCAACGTCTCCGACGCCACACCATCAACGGCCATCCCGACCAATAGCTTCTTGTGTTTC  
TTCACAAGGTGAAAAGAAGCAAAATTTCTTAACAACCGCGCTTTAATCATAATTTGTATCTTAAACGTACAATGGCGGACAGATGGATATAAATTGAAGGTGAAGAGCGGTAAAACAT  
ACCTGCTCCGCATCGTCAACGCTGCACTCAACGAGGACCTCTTCTTCAAATCGCCGGGCACAAGCTCACCGTCGTGAGGTGACGCCATCTACACCAAGCCCTTACCGTGCACACG  
GTGGTGTACACCCCGCCAAACCACCAACGTCTCCTCACCGCAGACAAAACCTTAGGCCAGTACCTTGTACCGCCTCCCCATTTATGGACGCTATGATCGTTCGCGGTGATAATAAG  
ACCGTACAGCCACCTTGCATATGAGGGCACTTTTCCACCTCTCTATCACCGCGTCAAAGTGGCCCAAGAAACGCCACCTCCATTGCCACCAGCTTTGCTACCTCGCTCCTTAGCC  
TCAATTCAAAAAGTATCTGCTAATGTTCTCGGGAGGTGATCACTCCCTTCTTTTACCATTGGGCTCGGCATAAACCCCTGTTCAACCTGTGTCAATGGTAGCCGCATAGTGGCGGC  
CATTAACAATGTGAGCTTTGTGATGCCGAAACAGCTCTACTGGAGGCGCATTCTTCAATAAGCAAGGGGTGTTACCACGGACTTCCCCGGGAAGCCTCTCGTGCCATTCAACTACAC

GGGGAGCGGCCCAACAAACTTGCAGACGACGAACGGGACAAGATTGTATCACCTCGCGTACAATTCGCGTGTACAGGTCGTGTTGCAGGATACCGGGACCATTTCCGCCGAGAGCCAC  
CCCATTCAATTTGCACGGGTTTAACTTCTTTGTGGTTGGGCAGGGAGTTGGGAACTATGACTCAAATACCTCACCGTCGACGTTCAATCTCGTCGACCCGATTGAGAGGAACACCATCGGC  
ATGCCCTCCGGTGGCTGGGCGGCTATTAGATTCAAAGCAGACAACCCAGGTACAAAGAAGCATTAGAATAGGAATGGAGATGGCCTTTTGTAGTGTGTTGATAAAATGCCTCTTAAATTTTTA  
TTTGCAGGTGTTTGGTCTTGCACACTGCCATTTTGTAGGTGCACACGACTTGGGGTCTTAAGATGGCATTGTGGTGGATAATGGGATTGGGGTGAATGAGTCAATATTGCCACCTCCTAGTG  
ACCTTCCAAAGTGTTAGTGGGGTGTCTTAAAAAGGAGAAAATAATTTGTGCCGACGTGCAACGCAGTTCATCGTTCGGAGACCAATCATAATGCACCACATCAACAGTACCGAGCGTGGT  
ACCGAGCCGCAGTACCGAACGGAGGTGATGTGGCACATTTTGTGGTCTCTAGATTGTATTCGGCGTCCGTAAAGAATAATTTACCCTTAAAAAGCCACCCAAACTCTCAAGACCTATTA  
GTACGTAGAGCACTAATGATTTTGTATTTGTGGGTGTATTTTTTAAGTTTTTAATTGTTTTTTTTTTAATTCTTTATTGTTAGTATGTGTTGCCATGCAAGTAAAAGTAGTCCATCTAATGAA  
AAAAGTGTGAGAG

>comp172995\_c3\_seq11

AAAAAAAAAAAAAAAAACATTAACAGATCAGAATCAAGATATTTCCATTGATCATATAAGTTTTCCGTCGAACACGAAACAAACCTGAGAAATTGTATACCAATCTTAGGCATGGAAT  
AAGGCAGATCCGAACCGGGTGGGCTGACGGACCTGCTTACATCACACAATGCCGATCCAACCCGGCCAAAGCTACGTCTACAACCTCACCCCTACCCGGACAAAGAGGCACACTTTGGT  
ATCACGCTCACATCTTATGGCTTCGAGCCACCGTCCATGGCGCCATCGTCATCAAGCCCAAGCTCCACGTCCCTTATCCTTTCTCCAATCCCCACCAGGAAGTCGTTCTTGTTTTAGGCGAA  
TGGTGGAACGCCGACACAGAGGCGGTGATCAACCAGGCTACGAAAACCTGGCTTAGCACCCAACGTCTCCGACGCCACACCATCAACGGCCATCCCGGACCAATAGCTTCTTGTGTTTC  
TTCACAAGATGGATATAAATTGAAGGTGAAGAGCGGTAAAACATACCTGCTCCGCATCGTCAACGCTGCACTCAACGAGGACCTCTTCTTCAAATCGCCGGGCACAAGCTCACCGTCG  
TCGAGGTGACGCCATCTACACCAAGCCCTTACCGTGCACACGGTGGTGTATCACCCCGGCCAAACCACCAACGTCTCCTCACCAGACAAAACCTTAGGCCAGTACCTTGTACC  
GCCTCCCCATTTATGGACGCTATGATCGTCGCGGTGATAATAAGACCGCTACAGCCACCTTGCATATGAGGGCACTCTTTCCACCTCTCTATCACCGCCGTCAAAGTGCCCCAAGAA  
ACGCCACCTCCATTGCCACCAGCTTTGCTACCTCGCTCCTTAGCCTCAATTCAAAAAGTATCCTGCTAATGTTCCCTCGGGAGGTCGATCACTCCCTTCTTTTACCATTGGGCTCGGCATA  
AACCCCTGTTCAACCTGTGTCAATGGTAGCCGCATAGTGGCGGCCATTAACAATGTGAGCTTTGTGATGCCGAAACAGCTCTACTGGAGGCGCATTTCTTCAATAAGCAAGGGGTGTTT  
ACCACGGACTTCCCCGGGAAGCCTCTCGTGCCATTCAACTACACGGGGAGCGGCCCAACAACTTGCAGACGACGAACGGGACAAGATTGTATCACCTCGCGTACAATTCGCGTGTACA  
GGTCGTGTTGCAGGATACCGGGACCATTTCCGCCGAGAGCCACCCCATTCATTGACGGGTTTAACTTCTTTGTGGTTGGGCAGGGAGTTGGGAACTATGACTCAAATACCTCACCGTC  
GACGTTCAATCTCGTCGACCCGATTGAGAGGAACACCATCGGCATGCCTTCCGGTGGCTGGGCGGCTATTAGATTCAAAGCAGACAACCCAGGTGTTTGGTCTTGCACACTGCCATTTTGA  
GGTGCACACGACTTGGGGTCTTAAGATGGCATTGTGGTGGATAATGGGATTGGGGTGAATGAGTCAATATTGCCACCTCCTAGTGACCTTCCAAAGTGTTAGTGGGGTGTCTTAAAAAG  
GAGAAATAATTTGTGCCGACGTGCAACGCAGTTCATCGTTCGGAGACCAATCATAATGCACCACATCAACAGTACCGAGCGTGGTACCGAGCCGCAGTACCGAACGGAGGTGATGTGG  
CACATTTTGTGGTCTCTAGATTGTATTCGGCGTCCGTAAAGAATAATTTACCCTTAAAAAGCCACCCAAACTCTCAAGACCTATTAGTACGTAGAGCACTAATGATTTTGTATTTGTGGGT  
GTATTTTTTTAAGTTTTTAATTGTTTTTTTTTTAATTCTTTATTGTTAGTATGTGTTGCCATGCAAGTAAAAGTAGTCCATCTAATGAAAAAGTGTGAGAG

>comp172995\_c3\_seq12

GACCAATAGCTTCTTGTGTTTCTGCTCCGCATCGTCAACGCTGCACTCAACGAGGACCTCTTCTTCAAATCGCCGGGCACAAGCTCACCGTCGTCGAGGTGACGCCATCTACACCAAG  
CCCTTACCGTCGACACGGTGGTGTATCACCCCGGCCAAACCACCAACGTCTCCTCACCGCAGACAAAACCTTAGGCCAGTACCTTGTACCAGCCTCCCCATTTATGGACGCTATGATC  
GTCGCGGTGATAATAAGACCGCTACAGCCACCTTGCATATGAGGGCACTCTTTCCACCTCTCTATCACCGCCGTCAAAGTGCCCCAAGAAACGCCACCTCCATTGCCACCAGCTTT  
GCTACCTCGCTCCTTAGCCTCAATTCAAAAAGTATCCTGCTAATGTTCCCTCGGGAGGTCGATCACTCCCTTCTTTTACCATTGGGCTCGGCATAAACCCCTGTTCAACCTGTGTCAATGG  
TAGCCGCATAGTGGCGGCCATTAACAATGTGAGCTTTGTGATGCCGAAACAGCTCTACTGGAGGCGCATTTCTTCAATAAGCAAGGGGTGTTACCACGGACTTCCCCGGGAAGCCTCT



CGTGCCATTCAACTACACGGGGAGCGGCCCAACAACTTGCAGACGACGAACGGGACAAGATTGTATCACCTCGCGTACAATTCGCGTGTACAGGTCGTGTTGCAGGATACCGGGACCA  
TTTCGCCGGAGAGCCACCCCATTCATTTGCACGGGTTTAACTTCTTTGTGGTTGGGCAGGGAGTTGGGAACTATGACTCAAATACCTCACCGTCGACGTTCAATCTCGTCGACCCGATTGA  
GAGGAACACCATCGGCATGCCTTCCGGTGGCTGGGCGGCTATTAGATTCAAAGCAGACAACCCAGGTGTTTGGTTCTTGCCTGACGATTTTGGAGGTGCACACGACTTGGGGTCTTAAGAT  
GGCATTGTGGTGGATAATGGGATTGGGGTGAATGAGTCAATATTGCCACCTCCTAGTGACCTTCCAAAGTGTTAGT

>comp172995\_c3\_seq13

AAAAAAAAAAAAAAAAACATTAACAGATCAGAATCAAGATATTTCCATTGATCATATAAGTTTTCCGTCGAACACGAAACAAACCTGAGAAATTGTATACCAATCTTAGGCATGGAAT  
AAGGCAGATCCGAACCGGGTGGGCTGACGGACCTGCTTACATCACACAATGCCCGATCCAACCCGGCCAAAGCTACGTCTACAACCTCACCCTCACCGGACAAAGAGGCACACTTTGGT  
ATCACGCTCACATCTTATGGCTTCGAGCCACCGTCCATGGCGCCATCGTCATCAAGCCCAAGCTCCACGTCCCTTATCCTTTCTCCAATCCCCACCAGGAAGTCGTTCTTGTTTTAGGCGAA  
TGGTGGAAACGCCGACACAGAGGCGGTGATCAACCAGGCTACGAAAACCTGGCTTAGCACCCAACGTCTCCGACGCCCACACCATCAACGGCCATCCCGGACCAATAGCTTCTTGTGTTTC  
TTCACAAGGTGAAAAGAAGCAAAATTTCTTAACAACCGCGCGCTTAATCATAATTTGTATCTTAAACGTACAATGGCGGACAGATGGATATAAATTGAAGGTGAAGAGCGGTAAAACAT  
ACCTGCTCCGCATCGTCAACGCTGCACTCAACGAGGACCTCTTCTTCAAATCGCCGGGCACAAGCTCACCGTCGTCGAGGTCGACGCCATCTACACCAAGCCCTTACCGTCGACACG  
GTGGTATCACCCCGCCAAACCACCAACGTCTCCTCACCGCAGACAAAACCTTAGGCCAGTACCTTGTACCCGCTCCCCATTTATGGACGCTATGATCGTCGCGGTCGATAATAAG  
ACCGTACAGCCACCTTGCCTATGAGGGCACTCTTCCACCTCTCTATCACCGCCGTCAAAGTGCCCCAACGAAACGCCACCTCCATTGCCACCAGCTTTGCTACCTCGCTCCTTAGCC  
TCAATTCAAAAAGTATCTGCTAATGTTCTCGGGAGGTGATCACTCCCTTCTTTTACCATTGGGCTCGGCATAAACCCCTGTTCAACCTGTGTCAATGGTAGCCGCATAGTGGCGGC  
CATTAAACAATGTGAGCTTTGTGATGCCGAAACAGCTCTACTGGAGGCGCATTCTTCAATAAGCAAGGGGTGTTACCACGGACTTCCCCGGGAAGCCTCTCGTGCCATTCAACTACAC  
GGGAGCGGCCCAACAACTTGCAGACGACGAACGGGACAAGATTGTATCACCTCGCGTACAATTCGCGTGTACAGGTCGTGTTGCAGGATACCGGGACCATTTCCGCCGAGAGCCAC  
CCCATTCAATTTGCACGGGTTTAACTTCTTTGTGGTTGGGCAGGGAGTTGGGAACTATGACTCAAATACCTCACCGTCGACGTTCAATCTCGTCGACCCGATTGAGAGGAACACCATCGGC  
ATGCCCTCCGGTGGCTGGGCGGCTATTAGATTCAAAGCAGACAACCCAGGTGTTTGGTTCTTGCCTGACGATTTTGGAGGTGCACACGACTTGGGGTCTTAAGATGGCATTGTGGTGGAT  
AATGGGATTGGGGTGAATGAGTCAATATTGCCACCTCCTAGTGACCTTCCAAAGTGTTAGTGGGGTGTCTTAAAAAGGAGAAATAATTTTGTGCCGACGTCGAACGCAGTTCATCGTTCCG  
GAGACCAATCATAATGCACCACATCAACAGTACCGAGCGTGGTACCGAGCCGAGTACCGAACGGAGGTGATGTGGCACATTTGTGTTGGTCTCTAGATTGTATTCCGGCTCCGTAAAGA  
ATAATTTACCCTTAAAAAGCCACCCAACTCTCAAGACCTATTAGTACGTAGAGCACTAATGATTTTGTATTTGTGGGTGTAATTTTTTAAAGTTTTTAAATTGTTTTTTTTTAAATCTTTATTG  
TTAGTATGTGTTGCCATGCAAGTAAAAGTAGTCCATCTAATGAAAAAGTGTTGAGAG

>comp172995\_c3\_seq14

TTATGGCTTCGAGCCACCGTCCATGGCGCCATCGTCATCAAGCCCAAGCTCCACGTCCCTTATCCTTTCTCCAATCCCCACGAGGAAGTCGTTCTTGTTTTAGGTAATCAACAAATGGTCA  
ATGTCCACCACTCCCCTGTTTCATCTTCAAATTCATAAAGATTATATTTTGTGACTCGAATTGCAGGCGAATGGTGGAAACGCCGACACAGAGGCGGTGATCAACCAGGCTACGAAAACCTG  
GCTTAGCACCCAACGTCTCCGACGCCCACACCATCAACGGCCATCCCGGACCAATAGCTTCTTGTGTTTCTTCAAGATGGATATAAATTGAAGGTGAAGAGCGGTAAAACATACCTGC  
TCCGCATCGTCAACGCTGCACTCAACGAGGACCTCTTCTTCAAATCGCCGGGCACAAGCTCACCGTCGTCGAGGTCGACGCCATCTACACCAAGCCCTTACCGTCGACACGGTGGTG  
ATCACCCCGGCCAAACCACCAACGTCTCCTCACCGCAGACAAAACCTTAGGCCAGTACCTTGTACCCGCTCCCCATTTATGGACGCTATGATCGTCGCGGTCGATAATAAGACCGCT  
ACAGCCACCTTGCCTATGAGGGCACTCTTCCACCTCTCTATCACCGCCGTCAAAGTGCCCCAACGAAACGCCACCTCCATTGCCACCAGCTTTGCTACCTCGCTCCTTAGCCCAATT  
CAAAAAAGTATCCTGCTAATGTTCTCGGGAGGTGATCACTCCCTTCTTTTACCATTGGGCTCGGCATAAACCCCTGTTCAACCTGTGTCAATGGTAGCCGCATAGTGGCGGCCATTAA  
CAATGTGAGCTTTGTGATGCCGAAACAGCTCTACTGGAGGCGCATTCTTCAATAAGCAAGGGGTGTTACCACGGACTTCCCCGGGAAGCCTCTCGTGCCATTCAACTACACGGGGA

GCGGCCCAACAACTTGCAGACGACGAACGGGACAAGATTGTATCACCTCGCGTACAATTCGCGTGTACAGGTCGTGTTGCAGGATACCGGGACCATTTCGCCGGAGAGCCACCCATT  
CAITTCACGGGTTAACTTCTTTGTGGTTGGGCAGGGAGTTGGGAACTATGACTCAAATACCTCACCGTCGACGTTCAATCTCGTCGACCCGATTGAGAGGAACACCATCGGCATGCCT  
TCCGGTGGCTGGGCGGCTATTAGATTCAAAGCAGACAACCCAGGTGTTGGTTCTTGACTGCCATTTTGAGGTGCACACGACTTGGGGTCTTAAGATGGCATTGTGGTGGATAATGGG  
ATTGGGGTGAATGAGTCAATATTGCCACCTCCTAGTGACCTTCAAAGTGTTAGTGGGGTGTCTTAAAAAGGAGAAATAATTTGTGCCGACGTCGAACGCAGTTCATCGTTCGGAGACC  
AATCATAATGCACCACATCAACAGTACCGAGCGTGGTACCGAGCCGAGTACCGAACGGAGGTGATGTGGCACATTTTGTGGTCTCTAGATTGTATTGCGCGTCCGTAAAGAATAATTT  
ACCCTTAAAAAGCCACCCAACTCTCAAGACCTATTAGTACGTAGAGCACTAATGATTTTGTATTTGTGGGTGTATTTTTTAAGTTTTTAATTGTTTTTTTTTTAATCTTTATTGTTAGTAT  
GTGTTGCCATGCAAGTAAAAGTAGTCCATCTAATGAAAAAAGTGTGAGAG

>comp172995\_c3\_seq15

AACATGTAGTTATCTCTACCAAACCTTATTGATCAAGGCTCATCACCTCACCTAATATCTAAAACGACCTTGCAGCTATATCTTCTGCTCTTTTTAAGCACTGGATGTCTTGTCAATTACCC  
AGATGAACAAATTCATTCACTTATCAAAGGAAGAAGAACAGAGGTGGTGGTGGTTGTGGAGGGAGCAGGTGGCATGGAGTCCGTTTCGAGCTCTTCTGTTTCTAATTTGCTTGTTCAGT  
GCTTGCCAAATGGCTTGACTCGGCATTACAAGTTCAATATTGTGACGAGAAAAACGACCCGGCTTTGCTCCACCAAGCCCATCGTCACCGTGAATGGGCAGTATCCCGGCCCGACACTATC  
CGCCCGAGAAGGCGACACCGTGCTTGTGAAGTTGTCAACCATGTCAAATACAACGTTACCATTCACTGGCATGGAATAAGGCAGATCCGAACCGGTGGGCTGACGGACCTGCTTACA  
TCACACAATGCCCGATCCAACCCGGCCAAAGCTACGTCTACAACCTCACCCCTACCGGACAAAAGAGGCACACTTTGGTATCACGCTCACATCTTATGGCTTCGAGCCACCGTCCATGGCG  
CCATCGTCATCAAGCCCAAGCTCCACGTCCCTTATCCTTTCTCCAATCCCCACCAGGAAGTCGTTCTTGTTTTAGGCGAATGGTGGAAACGCCGACACAGAGGCGGTGATCAACCAGGCTA  
CGAAAACCTGGCTTAGCACCCAACGTCTCCGACGCCACACCATCAACGGCCATCCCGACCAATAGCTTCTTGTGTTTCTTACAAGATGGATATAAATTGAAGGTGAAGAGCGGTAAAA  
CATACCTGCTCCGCATCGTCAACGCTGCACTCAACGAGGACCTCTTCTTCAAATCGCCGGGCACAAGCTCACCGTCGTCGAGGTGACGCCATCTACACCAAGCCCTTACCGTGCAC  
ACGGTGGTATCACCCCGGCCAAACCACCAACGTCCTCCTCACCGCAGACAAAACCTTAGGCCAGTACCTTGTACCCGCTCCCCATTTATGGACGCTATGATCGTCGCGGTGATAAT  
AAGACCGCTACAGCCACCTTGACTATGAGGGCACTTTTCCACCTCCTATCACCGCCGTCAAAGTGCCCCAAGAAACGCCACCTCCATTGCCACCAGCTTTGCTACCTCGCTCCTT  
AGCCTCAATTCAAAAAGTATCCTGCTAATGTTCTCGGGAGGTCGATCACTCCCTTCTTTTACCATTGGGCTCGGCATAAACCCCTGTTCAACCTGTGTCAATGGTAGCCGCATAGTGG  
CGGCCATTAACAATGTGAGCTTTGTGATGCCGAAACAGCTCTACTGGAGGCGCATTTCTTCAATAAGCAAGGGGTGTTACCACGGACTTCCCCGGAAGCCTCTCGTGCCATTCAACT  
ACACGGGGAGCGGCCAAACAACTTGCAGACGACGAACGGGACAAGATTGTATCACCTCGCGTACAATTCGCGTGTACAGGTGCGTGTGAGGATACCGGGACCATTTCGCCGGAGAG  
CCACCCCATTCATTTGCACGGGTTAACTTCTTTGTGGTTGGGCAGGGAGTTGGGAACTATGACTCAAATACCTCACCGTCGACGTTCAATCTCGTCGACCCGATTGAGAGGAACACCAT  
CGGCATGCCTTCCGGTGGCTGGGCGGCTATTAGATTCAAAGCAGACAACCCAGGTGTTGGTTCTTGACTGCCATTTTGAGGTGCACACGACTTGGGGTCTTAAGATGGCATTGTGGT  
GGATAATGGGATTGGGGTGAATGAGTCAATATTGCCACCTCCTAGTGACCTTCAAAGTGTTAGTGGGGTGTCTTAAAAAGGAGAAATAATTTGTGCCGACGTCGAACGCAGTTCATCG  
TTCGGAGACCAATCATAATGCACCACATCAACAGTACCGAGCGTGGTACCGAGCCGAGTACCGAACGGAGGTGATGTGGCACATTTTGTGGTCTCTAGATTGTATTGCGCGTCCGT  
AAGAATAATTTACCCTTAAAAAGCCACCCAACTCTCAAGACCTATTAGTACGTAGAGCACTAATGATTTTGTATTTGTGGGTGTATTTTTTAAGTTTTTAATTGTTTTTTTTTTAATTCTT  
TATTGTTAGTATGTGTTGCCATGCAAGTAAAAGTAGTCCATCTAATGAAAAAAGTGTGAGAG

>comp172995\_c3\_seq16

AACATGTAGTTATCTCTACCAAACCTTATTGATCAAGGCTCATCACCTCACCTAATATCTAAAACGACCTTGCAGCTATATCTTCTGCTCTTTTTAAGCACTGGATGTCTTGTCAATTACCC  
AGATGAACAAATTCATTCACTTATCAAAGGAAGAAGAACAGAGGTGGTGGTGGTTGTGGAGGGAGCAGGTGGCATGGAGTCCGTTTCGAGCTCTTCTGTTTCTAATTTGCTTGTTCAGT  
GCTTGCCAAATGGCTTGACTCGGCATTACAAGTTCAATATTGTGACGAGAAAAACGACCCGGCTTTGCTCCACCAAGCCCATCGTCACCGTGAATGGGCAGTATCCCGGCCCGACACTATC

CGCCGAGAAGGCGACACCGTGCTTGTGAAGGTTGTCAACCATGTCAAATACAACGTTACCATTCACTGGCATGGAATAAGGCAGATCCGAACCGGGTGGGCTGACGGACCTGCTTACA  
TCACACAATGCCCGATCCAACCCGGCCAAAGCTACGTCTACAACCTCACCCCTACCCGGACAAAGAGGCACACTTTGGTATCACGCTCACATCTTATGGCTTCGAGCCACCGTCCATGGCG  
CCATCGTCATCAAGCCCAAGCTCCACGTCCCTTATCCTTTCTCCAATCCCCACCAGGAAGTCGTTCTTGTTTTAGGGCAATGGTGGAAACGCCGACACAGAGGCGGTGATCAACCAGGCTA  
CGAAAACCTGGCTTAGCACCCAACGTCTCCGACGCCACACCATCAACGGCCATCCCGGACCAATAGCTTCTTGTGTTTCTTACAAGATGGATATAAATGAAGGTGAAGAGCGGTAAAA  
CATACTGCTCCGCATCGTCAACGCTGCACTCAACGAGGACCTCTTCTTCAAAAATCGCCGGGCACAAGCTCACCGTCGTCGAGGTGACGCCATCTACACCAAGCCCTTCACCGTCGAC  
ACGGTGGTGATCACCCCGGCCAAACCACCAACGTCCTCCTCACCGCAGACAAAACCTTAGGCCAGTACCTTGTACCCGCTCCCCATTTATGGACGCTATGATCGTCGCGGTGATAAT  
AAGACCGCTACAGCCACCTTGCCTACTATGAGGGCACTCTTCCACCTCTCCTATCACCGCCGTCAAAGTGCCCCAAGAAACGCCACCTCCATTGCCACCAGCTTTGCTACCTCGCTCCTT  
AGCCTCAATTCAAAAAAGTATCCTGCTAATGTTCTCGGGAGGTGATCACTCCCTTCTTTTACCATTGGGCTCGGCATAAACCCCTGTTCAACCTGTGTCAATGGTAGCCGCATAGTGG  
CGGCCATTAACAATGTGAGCTTTGTGATGCCGAAACAGCTCTACTGGAGGCGCATTTCTTCAATAAGCAAGGGGTGTTACCCACGGACTTCCCCGGGAAGCCTCTCGTGCCATTCAACT  
ACACGGGGAGCGGCCCAACAAACTTGCAGACGACGAACGGGACAAGATTGTATCACCTCGCGTACAATTCGCGTGTACAGGTGCTGTTGAGGATAACCGGGACCATTTCGCCGGAGAG  
CCACCCCATTCATTTGCACGGGTTTAACTTCTTTGTGGTTGGGCAGGGAGTTGGGAACTATGACTCAAATACCTCACCGTCGACGTTCAATCTCGTCGACCCGATTGAGAGGAACACCAT  
CGGCATGCCTTCCGGTGGCTGGGCGGCTATTAGATTCAAAGCAGACAACCCAGGTACAAAGAAGCATTAGAATAGGAATGGAGATGGCCTTTTGAGTGTTTGATAAAATGCCTCTTAAAT  
TTTTATTTGCAGGTGTTTGGTTCTTGCCTGCAATTTTGAGGTGCACACGACTTGGGGTCTTAAGATGGCATTGTGGTGGATAATGGGATTGGGGTGAATGAGTCAATATTGCCACCTCCT  
AGTGACCTTCAAAGTGTTAGTGGGGTGTCTTAAAAAGGAGAAATAATTTGTGCCGACGTGCAACGCAGTTCATCGTTCCGGAGACCAATCATAATGCACCACATCAACAGTACCGAGCG  
TGGTACCGAGCCGACGACACCGGAGGTGATGTGGCACATTTTGTGGTCTCTAGATTGTATTTCGGCGTCCGTAAAGAATAATTTACCCTTAAAAAGCCACCCAAACTCTCAAGACCT  
ATTAGTACGTAGAGCACTAATGATTTTGTATTTGTGGGTGTATTTTTTAAGTTTTTAATTGTTTTTTTTTTAATTCTTTATTGTTAGTATGTGTTGCCATGCAAGTAAAAGTAGTCCATCTAAT  
GAAAAAAGTGTGAGAG

>comp172995\_c3\_seq18

TTATGGCTTCGAGCCACCGTCCATGGCGCCATCGTCATCAAGCCCAAGCTCCACGTCCCTTATCCTTTCTCCAATCCCCACGAGGAAGTCGTTCTTGTTTTAGGTACTCAACAAATGGTCA  
ATGTCCACCACTCCCCTGTTTCATCTTCAAATTCATAAAGATTATATTTTGTGACTCGAATTGCAGGCGAATGGTGGAAACGCCGACACAGAGGCGGTGATCAACCAGGCTACGAAAACCTG  
GCTTAGCACCCAACGTCTCCGACGCCACACCATCAACGGCCATCCCGGACCAATAGCTTCTTGTGTTTCTTACAAGGTGAAAAGAAGCAAAATTTCTTAAACAACCGCGCGCTTTAATC  
ATAATTTGTATCTTAAACGTACAATGGCGGACAGATGGATATAAATGAAGGTGAAGAGCGGTAAAAACATACCTGCTCCGCATCGTCAACGCTGCACTCAACGAGGACCTCTTCTTCAAAA  
TCGCCGGGCACAAGCTCACCGTCGTCGAGGTGACGCCATCTACACCAAGCCCTTCACCGTCGACACGGTGGTGTATCACCCCGGCCAAACCACCAACGTCCTCCTCACCGCAGACAA  
AACCTTAGGCCAGTACCTTGTACCCGCTCCCCATTTATGGACGCTATGATCGTCGCGGTGATAATAAGACCGCTACAGCCACCTTGCCTACTATGAGGGCACTCTTCCACCTCTCCTATCA  
CCGCCGTCAAAGTGCCCCAAGAAACGCCACCTCCATTGCCACCAGCTTTGCTACCTCGCTCCTTAGCCTCAATTCAAAAAAGTATCCTGCTAATGTTCTCGGGAGGTGATCACTCCCT  
TCTTTTACCATTGGGCTCGGCATAAACCCCTGTTCAACCTGTGTCAATGGTAGCCGCATAGTGGCGCCATTAACAATGTGAGCTTTGTGATGCCGAAACAGCTCTACTGGAGGCGCAT  
TTCTTCAATAAGCAAGGGGTGTTACCCACGGACTTCCCCGGGAAGCCTCTCGTGCCATTCAACTACCGGGGAGCGGCCCAACAACTTGCAGACGACGAACGGGACAAGATTGTATCA  
CCTCGCGTACAATTCGCGTGTACAGGTGCTGTTGCAGGATAACCGGACCATTTCGCCGAGAGCCACCCATTCATTTGCACGGGTTTAACTTCTTTGTGGTTGGGCAGGGAGTTGGGAA  
CTATGACTCAAATACCTCACCGTCGACGTTCAATCTCGTCGACCCGATTGAGAGGAACACCATCGGCATGCCTTCCGGTGGCTGGGCGGCTATTAGATTCAAAGCAGACAACCCAGGTGT  
TTGGTTCTTGCCTGCAATTTGAGGTGCACACGACTTGGGGTCTTAAGATGGCATTGTGGTGGATAATGGGATTGGGGTGAATGAGTCAATATTGCCACCTCCTAGTGACCTTCAAAG  
TGTTAGTGGGGTGTCTTAAAAAGGAGAAATAATTTGTGCCGACGTGCAACGCAGTTCATCGTTCGGAGACCAATCATAATGCACCACATCAACAGTACCGAGCGTGGTACCGAGCCGCA

GTACCGAACGGAGGTGATGTGGCACATTTTGTGGTCTCTAGATTGTATTCGGCGTCCGTAAAGAATAATTTACCCTTAAAAAGCCACCCAAACTCTCAAGACCTATTAGTACGTAGAGC  
ACTAATGATTTTGTATTGTGGGTGTAATTTTTTAAGTTTTTAATTGTTTTTTTTTTAATTCTTTATTGTTAGTATGTGTTGCCATGCAAGTAAAAGTAGTCCATCTAATGAAAAAAGTGTGGA  
GAG

>comp172995\_c3\_seq2

TTATGGCTTCGAGCCACCGTCCATGGCGCCATCGTCATCAAGCCCAAGCTCCACGTCCCTTATCCTTTCTCCAATCCCCACGAGGAAGTCGTTCTTGTTTTAGGTACTIONCAACAAATGGTCA  
ATGTCCACCACTCCCCTGTTTCATCTTCAAATTCATAAAGATTATATTTTGTGACTCGAATTGCAGGCGAATGGTGGAACGCCGACACAGAGGCGGTGATCAACCAGGCTACGAAAACCTG  
GCTTAGCACCCAACGTCTCCGACGCCACACCATCAACGGCCATCCCGGACCAATAGCTTCTTGTGTTTCTTCAACAAGGTGAAAAGAAGCAAAATTTCTTAACAACCGCGCGCTTAATC  
ATAATTTGTATCTTAAACGTACAATGGCGGACAGATGGATATAAATTGAAGGTGAAGAGCGGTAATAACATACTGCTCCGCATCGTCAACGCTGCACTCAACGAGGACCTCTTCTTCAAAA  
TCGCCGGGCACAAGCTCACCGTCGTGAGGTGACGCCATCTACACCAAGCCCTTACCGTCGACACGGTGGTGATCACCCCGGCCAAACCACCAACGTCCTCCTCACCGCAGACAA  
AACCTTAGGCCAGTACCTTGTACCCGCTCCCCATTTATGGACGCTATGATCGTCGCGGTGATAATAAGACCGCTACAGCCACCTTGCCTATGAGGGCACTCTTCCACCTCTCCTATCA  
CCGCCGTCAAAGTGCCCCAAGAAACGCCACCTCCATTGCCACCAGCTTTGCTACCTCGCTCCTTAGCCTCAATCAAAAAAGTATCCTGCTAATGTTTCTCGGGAGGTGATCACTCCCT  
TCTTTTACCATTGGGCTCGGCATAAACCCCTGTTCAACCTGTGTCAATGGTAGCCGCATAGTGGCGGCCATTAACAATGTGAGCTTTGTGATGCCGAAACAGCTCTACTGGAGGCGCAT  
TTCTTCAATAAGCAAGGGGTGTTACCACGGACTTCCCCGGGAAGCCTCTCGTGCCATTCAACTACACGGGGAGCGGCCCAACAACTTGCAGACGACGAACGGGACAAGATTGTATCA  
CCTCGGTACAATTCGCGTGTACAGGTGTTGCAGGATACCGGGACCATTCGCCGGAGAGCCACCCCATTCATTTGCACGGGTTAACTTCTTTGTGGTTGGGCAGGGAGTTGGGAA  
CTATGACTCAAATACCTCACCGTCGACGTTCAATCTCGTCGACCCGATTGAGAGGAACACCATCGGCATGCCCTCCGGTGGCTGGGCGGCTATTAGATTCAAAGCAGACAACCCAGGTAC  
AAAGAAGCATTAGAATAGGAATGGAGATGGCCTTTTGTGAGTGGTGGATAAAAATGCCTCTTAAATTTTTATTGTCAGGTGTTGGTCTTGCCTGACTGCCATTTGAGGTGCACACGACTTGGGG  
TCTTAAGATGGCATTGTGGTGGATAATGGGATTGGGGTGAATGAGTCAATATTGCCACCTCCTAGTGACCTTCCAAAGTGTTAGT

>comp172995\_c3\_seq3

AACATGTAGTTATCTCTACCAAAACCTTATTGATCAAGGCTCATCACCTCACCTAATATCTAAAACGACCTTGCAGCTATATCTTCTGCTCTTTTTAAGCACTGGATGTCTTGTCAATTACCC  
AGATGAACAAATTCATTCACTTATCAAAGGAAGAAGAACAGAGGTGGTGGTGGTGTGGAGGGAGCAGGTGGCATGGAGTCCGTTTCGAGCTCTTCTGTTTCTAATTTGCTTGTTCAGT  
GCTTGCCAATGGCTTACTCGGCATTACAAGTTCAATATTGTGACGAGAAAAACGACCCGGCTTTGCTCCACCAAGCCCATCGTCACCGTGAATGGGCAGTATCCCGGCCGACACTATC  
CGCCGAGAAGGCGACACCGTGCTTGTGAAGGTTGTCAACCATGTCAAATACAACGTTACCATTCACTGGCATGGAATAAGGCAGATCCGAACCGGGTGGGCTGACGGACCTGCTTACA  
TCACACAATGCCGATCCAACCCGGCCAAAGCTACGTCTACAACCTTACCCTCACCGGACAAAGAGGCACACTTGGTATCACGCTCACATCTTATGGCTTCGAGCCACCGTCCATGGCG  
CCATCGTCATCAAGCCCAAGCTCCACGTCCCTTATCCTTTCTCCAATCCCCACCAGGAAGTCGTTCTTGTTTTAGGCGAATGGTGGAACGCCGACACAGAGGCGGTGATCAACCAGGCTA  
CGAAAACCTGGCTTAGCACCCAACGTCTCCGACGCCACACCATCAACGGCCATCCCGGACCAATAGCTTCTTGTGTTTCTTCAACAAGGTGAAAAGAAGCAAAATTTCTTAACAACCGC  
CGCTTTAATCATAATTTGTATCTTAAACGTACAATGGCGGACAGATGGATATAAATTGAAGGTGAAGAGCGGTAATAACATACTGCTCCGCATCGTCAACGCTGCACTCAACGAGGACCTC  
TTCTTCAAAAATCGCCGGGCACAAGCTCACCGTCGTGAGGTGACGCCATCTACACCAAGCCCTTACCGTCGACACGGTGGTGATCACCCCGGCCAAACCACCAACGTCCTCCTCAC  
CGCAGACAAAACCTTAGGCCAGTACCTTGTACCCGCTCCCCATTTATGGACGCTATGATCGTCGCGGTGATAATAAGACCGCTACAGCCACCTTGCCTATGAGGGCACTCTTTCCACC  
TCTCTATCACCGCGTCAAAGTGCCCCAAGAAACGCCACCTCCATTGCCACCAGCTTTGCTACCTCGCTCCTTAGCCTCAATTCAAAAAAGTATCCTGCTAATGTTTCTCGGGAGGTGCG  
ATCACTCCCTTCTTTTACCATTGGGCTCGGCATAAACCCCTGTTCAACCTGTGTCAATGGTAGCCGCATAGTGGCGGCCATTAACAATGTGAGCTTTGTGATGCCGAAACAGCTCTACT  
GGAGGCGCATTCTTCAATAAGCAAGGGGTGTTACCACGGACTTCCCCGGGAAGCCTCTCGTGCCATTCAACTACACGGGGAGCGGCCAACAACAACTTGCAGACGACGAACGGGACA

AGATTGTATCACCTCGCGTACAATTCGCGTGTACAGGTCGTGTTGCAGGATACCGGGACCATTTCCGCCGGAGAGCCACCCCATTCATTTGCACGGGTTTAACTTCTTTGTGGTTGGGCAGG  
GAGTTGGGAECTATGACTCAAATACCTCACCGTCGACGTTCAATCTCGTCGACCCGATTGAGAGGAACACCATCGGCATGCCTTCCGGTGGCTGGGCGGCTATTAGATTCAAAGCAGACA  
ACCCAGGTACAAAGAAGCATTAGAATAGGAATGGAGATGGCCTTTTGAGTGTTTGATAAAATGCCTCTTAAATTTTTATTTGCAGGTGTTTGGTCTTGCACCTGCCATTTTGAGGTGCACA  
CGACTTGGGGTCTTAAGATGGCATTGTGGTGGATAATGGGATTGGGGTGAATGAGTCAATATTGCCACCTCCTAGTGACCTTCCAAAGTGTTAGTGGGGTGTCTTAAAAAGGAGAAATAA  
TTTTGTGCCGACGTCGAACGCAGTTCATCGTTCGGAGACCAATCATAATGCACCACATCAACAGTACCGAGCGTGGTACCGAGCCGAGTACCGAACGGAGGTGATGTGGCACATTTTGT  
TTGGTCTCTAGATTGTATTCGGCGTCCGTAAAGAATAATTTACCCTTAAAAAGCCACCCAACTCTCAAGACCTATTAGTACGTAGAGCTAATGATTTTGTATTTGTGGGTGTATTTTTTT  
AAGTTTTTAATTGTTTTTTTTTTTAAATTCCTTATTGTTAGTATGTGTTGCCATGCAAGTAAAAGTAGTCCATCTAATGAAAAAAGTGTGAGAG

>comp172995\_c3\_seq4

TTATGGCTTCGAGCCACCGTCCATGGCGCCATCGTCATCAAGCCCAAGCTCCACGTCCCTTATCCTTTCTCCAATCCCCACGAGGAAGTCGTTCTTGTTTTAGGTACTIONCAACAAATGGTCA  
ATGTCCACCACTCCCCTGTTTCATCTTCAAATTCATAAAGATTATATTTGTGACTCGAATTGCAGGCGAATGGTGGAAACGCCGACACAGAGGCGGTGATCAACCAGGCTACGAAAACTG  
GCTTAGCACCCAACGTCTCCGACGCCCACACCATCAACGGCCATCCCGGACCAATAGCTTCTTGTGTTTCTTACAAGATGGATATAAATTGAAGGTGAAGAGCGGTAAAACATACCTGC  
TCCGCATCGTCAACGCTGCACTCAACGAGGACCTCTTCTTCAAATCGCCGGGCACAAGCTCACCGTCGTGAGGTGACGCCATCTACACCAAGCCCTTACCGTGCACACGGTGGTG  
ATCACCCCGGCCAAACCACCAACGTCTCCTCACCGCAGACAAAACCTTAGGCCAGTACCTTGTACCCGCTCCCCATTTATGGACGCTATGATCGTCGCGGTGATAATAAGACCGCT  
ACAGCCACCTTGCATATGAGGGCACTCTTCCACCTCTCCTATCACCGCCGTCAAAGTGCCCCCAAGAAACGCCACCTCCATTGCCACCAGCTTTGCTACCTCGCTCCTTAGCCTCAATT  
CAAAAAAGTATCCTGCTAATGTTCTCCTCGGGAGGTGATCACTCCCTTCTTTTACCATTGGGCTCGGCATAAACCCCTGTTCAACCTGTGTCAATGGTAGCCGCATAGTGGCGGCCATTAA  
CAATGTGAGCTTTGTGATGCCGAAACAGCTCTACTGGAGGCGCATTTCTTCAATAAGCAAGGGGTGTTACCACGGACTTCCCCGGGAAGCCTCTCGTGCCATTCAACTACACGGGA  
GCGGCCCAACAACTTGCAGACGACGAACGGGACAAGATTGTATCACCTCGCGTACAATTCGCGTGTACAGGTGTTGAGGATACCGGGACCATTTCGCCGGAGAGCCACCCCAT  
CATTTGCACGGGTTAACTTCTTTGTGGTTGGGCAGGGAGTTGGGAACTATGACTCAAATACCTCACCGTCGACGTTCAATCTCGTCGACCCGATTGAGAGGAACACCATCGGCATGCCT  
TCCGGTGGCTGGGCGGCTATTAGATTCAAAGCAGACAACCCAGGTACAAAGAAGCATTAGAATAGGAATGGAGATGGCCTTTTGAGTGTTTGATAAAATGCCTCTTAAATTTTTATTTGCA  
GGTGTTTGGTCTTGCACCTGCCATTTTGAGGTGCACACGACTTGGGGTCTTAAGATGGCATTGTGGTGGATAATGGGATTGGGGTGAATGAGTCAATATTGCCACCTCCTAGTGACCTTC  
CAAAGTGTAGTGGGGTGTCTTAAAAAGGAGAAATAATTTGTGCCGACGTCGAACGCAGTTCATCGTTCGGAGACCAATCATAATGCACCACATCAACAGTACCGAGCGTGGTACCGA  
GCCGAGTACCGAACGGAGGTGATGTGGCACATTTTGTGGTCTCTAGATTGTATTCGGCGTCCGTAAAGAATAATTTACCCTTAAAAAGCCACCCAACTCTCAAGACCTATTAGTACG  
TAGAGCACTAATGATTTTGTATTTGTGGGTGTATTTTTTAAAGTTTTTAATTGTTTTTTTTTTAATTCCTTATTGTTAGTATGTGTTGCCATGCAAGTAAAAGTAGTCCATCTAATGAAAAAAG  
TGTTGAGAG

>comp172995\_c3\_seq5

GACCAATAGCTTCTTGTGTTTCTGCTCCGCATCGTCAACGCTGCACTCAACGAGGACCTCTTCTTCAAATCGCCGGGCACAAGCTCACCGTCGTGAGGTGACGCCATCTACACCAAG  
CCCTTACCGTCGACACGGTGGTGATACCCCGGCCAAACCACCAACGTCTCCTCACCGCAGACAAAACCTTAGGCCAGTACCTTGTACCCGCTCCCCATTTATGGACGCTATGATC  
GTCGCGTGCATAATAAGACCGCTACAGCCACCTTGCATATGAGGGCACTCTTCCACCTCTCCTATCACCGCCGTCAAAGTGCCCCCAAGAAACGCCACCTCCATTGCCACCAGCTTT  
GCTACCTCGCTCCTTAGCCTCAATTCAAAAAAGTATCCTGCTAATGTTCTCCTGGGAGGTGATCACTCCCTTCTTTTACCATTGGGCTCGGCATAAACCCCTGTTCAACCTGTGTCAATGG  
TAGCCGCATAGTGGCGCCATTAACAATGTGAGCTTTGTGATGCCGAAACAGCTCTACTGGAGGCGCATTTCTTCAATAAGCAAGGGGTGTTACCACGGACTTCCCCGGGAAGCCTCT  
CGTGCCATTCAACTACACGGGGAGCGGCCCAACAACTTGCAGACGACGAACGGGACAAGATTGTATCACCTCGCGTACAATTCGCGTGTACAGGTGTTGAGGATACCGGGACCA

TTTCGCCGAGAGCCACCCCATTCATTTGCACGGGTTAACTTCTTTGTGGTTGGGCAGGGAGTTGGGAACTATGACTCAAATACCTCACCGTCGACGTTCAATCTCGTCGACCCGATTGA  
GAGGAACACCATCGGCATGCCTCCGGTGGCTGGGCGGCTATTAGATTCAAAGCAGACAACCCAGGTACAAAGAAGCATTAGAATAGGAATGGAGATGGCCTTTTGAGTGTGGATAAA  
ATGCCTCTTAAATTTTTATTTGCAGGTGTTTGGTTCTTGCACCTGCCATTTGAGGTGCACACGACTTGGGGTCTTAAAGATGGCATTGTGGTGGATAATGGGATTGGGGTGAATGAGTCAAT  
ATTGCCACCTCCTAGTGACCTTCCAAAGTGTTAGT

>comp172995\_c3\_seq6

AAAAAAAAAAAAAAAAACATTAACAGATCAGAATCAAGATATTTCCATTGATCATATAAGTTTTCCGTCGAACACGAAACAAACCTGAGAAATTGTATACCAATCTTAGGCATGGAAT  
AAGGCAGATCCGAACCGGGTGGGCTGACGGACCTGCTTACATCACACAATGCCCGATCCAACCCGGCCAAAGCTACGTCTACAACCTCACCCCTACCCGACAAAGAGGCACACTTTGGT  
ATCACGCTCACATCTTATGGCTTCGAGCCACCGTCCATGGCGCCATCGTCATCAAGCCCAAGCTCCACGTCCCTTATCCTTTCTCCAATCCCCACCAGGAAGTCGTTCTTGTTTTAGGCGAA  
TGGTGAACGCCGACACAGAGGCGGTGATCAACCAGGCTACGAAAACCTGGCTTAGCACCCAACGTCTCCGACGCCACACCATCAACGGCCATCCCGACCAATAGCTTCTTGTGTTTC  
TTCACAAGATGGATATAAATTGAAGGTGAAGAGCGGTAAAACATACCTGCTCCGCATCGTCAACGCTGCACTCAACGAGGACCTCTTCTTCAAATCGCCGGGCACAAGCTCACCGTCG  
TCGAGGTCGACGCCATCTACACCAAGCCCTTACCCTGACACGGTGGTGGTATCACCCCGGCCAAACCACCAACGTCTCTCACCAGACAAAACCTTAGGCCAGTACCTTGTACC  
GCCTCCCCATTTATGGACGCTATGATCGTCGCGTTCGATAATAAGACCGCTACAGCCACCTTGCACTATGAGGGCACTCTTCCACCTCTCTATCACCGCCGTCAAAGTGCCCCAAGAA  
ACGCCACCTCCATTGCCACCAGCTTTGCTACCTCGCTCCTTAGCCTCAATTCAAAAAAGTATCCTGCTAATGTTCCCTCGGGAGGTCGATCACTCCCTTCTTTTACCATTGGGCTCGGCATA  
AACCCTGTTCACCTGTGTCAATGGTAGCCGCATAGTGGCGGCCATTAACAATGTGAGCTTTGTGATGCCGAAACAGCTCTACTGGAGGCGCATTTCTTCAATAAGCAAGGGGTGTTT  
ACCACGGACTTCCCCGGGAAGCCTCTCGTGCCATTCAACTACACGGGGAGCGGCCAACAACTTGCAGACGACGAACGGGACAAGATTGTATCACCTCGCGTACAATTCGCGTGTACA  
GGTCGTGTTGCAGGATACCGGGACCAATTCGCCGGAGAGCCACCCATTCATTTGCACGGGTTAACTTCTTTGTGGTTGGGCAGGGAGTTGGGAACTATGACTCAAATACCTCACCGTC  
GACGTTCAATCTCGTCGACCCGATTGAGAGGAACACCATCGGCATGCCCTCCGGTGGCTGGGCGGCTATTAGATTCAAAGCAGACAACCCAGGTACAAAGAAGCATTAGAATAGGAATG  
GAGATGGCCTTTTGAGTGTGGATAAAAATGCCTCTTAAATTTTTATTTGCAGGTGTTTGGTTCTTGCACCTGCCATTTGAGGTGCACACGACTTGGGGTCTTAAAGATGGCATTGTGGTGGGA  
TAATGGGATTGGGGTGAATGAGTCAATATTGCCACCTCCTAGTGACCTTCCAAAGTGTTAGTGGGGTGTCTTAAAAAGGAGAAATAATTTGTGCCGACGTCGAACGCAGTTCATCGTTC  
GGAGACCAATCATAATGCACCACATCAACAGTACCGAGCGTGGTACCGAGCCGACGACCGAACGGAGGTGATGTGGCACATTTGTTTGGTCTCTAGATTGTATTCGGCGTCCGTAAG  
AATAATTTACCCTTAAAAAGCCACCCAAACTCTCAAGACCTATTAGTACGTAGAGCACTAATGATTTTGTATTTGTGGGTGATTTTTTTAAAGTTTTTAATTGTTTTTTTTTTAATCTTTATT  
GTTAGTATGTGTTGCCATGCAAGTAAAAGTAGTCCATCTAATGAAAAAGTGTTGAGAG

>comp172995\_c3\_seq8

AACATGTAGTTATCTCTACCAAACCTTATTGATCAAGGCTCATCACCTCACCTAATATCTAAAACGACCTTGCAGCTATATCTTCTGCTCTTTTTAAGCACTGGATGTCTTGTCAATACCC  
AGATGAACAAATTCATTCATCTTATCAAAGGAAGAAGAACAGAGGTGGTGGTGGTTGTGGAGGGAGCAGGTGGCATGGAGTCCGTTTCGAGCTCTTCTGTTTCTAATTTGCTTGTTCAGT  
GCTTGCCAAATGGCTTGACTCGGCATTACAAGTTCAATATTGTGACGAGAAAAACGACCCGGCTTTGCTCCACCAAGCCCATCGTCACCGTGAATGGGCAGTATCCCGGCCCGACACTATC  
CGCCCGAGAAGGCGACACCGTGCTTGTGAAGGTTGTCAACCATGTCAAATACAACGTTACCATTCACTGGCATGGAATAAGGCAGATCCGAACCGGGTGGGCTGACGGACCTGCTTACA  
TCACACAATGCCGATCCAACCCGGCCAAAGCTACGTCTACAACCTCACCCCTACCCGACAAAGAGGCACACTTTGGTATCACGCTCACATCTTATGGCTTCGAGCCACCGTCCATGGCG  
CCATCGTCATCAAGCCCAAGCTCCACGTCCCTTATCCTTTCTCCAATCCCCACCAGGAAGTCGTTCTTGTTTTAGGCGAATGGTGGAAACGCCGACACAGAGGCGGTGATCAACCAGGCTA  
CGAAAACCTGGCTTAGCACCCAACGTCTCCGACGCCACACCATCAACGGCCATCCCGACCAATAGCTTCTTGTGTTTCTTACAAGGTGAAAAGAAGCAAAATTTCTTAAACACCGC  
CGCTTAAATCATAATTTGTATCTTAAACGTACAATGGCGGACAGATGGATATAAATTGAAGGTGAAGAGCGGTAAAACATACCTGCTCCGCATCGTCAACGCTGCACTCAACGAGGACCTC

TTCTTCAAATCGCCGGGCACAAGCTCACCGTCGTCGAGGTCGACGCCATCTACACCAAGCCCTTACCGTCGACACGGTGGTGATCACCCCGGCCAAACCACCAACGTCTCTCAC  
CGCAGACAAAACCTTAGGCCAGTACCTTGTACCCGCCTCCCCATTTATGGACGCTATGATCGTCGCGGTCGATAATAAGACCGCTACAGCCACCTTGCATATGAGGGCACTCTTTCCACC  
TCTCTATCACCGCCGTCAAAGTGCCCCAAGAAACGCCACCTCCATTGCCACCAGCTTTGCTACCTCGCTCCTTAGCCTCAATTCAAAAAAGTATCCTGCTAATGTTCTCGGGAGGTCG  
ATCACTCCCTTCTTTTACCATTGGGCTCGGCATAAACCCCTGTTCAACCTGTGTCAATGGTAGCCGCATAGTGGCGGCCATTAACAATGTGAGCTTTGTGATGCCGAAACAGCTCTACT  
GGAGGCGCATTTCTTCAATAAGCAAGGGGTGTTACCACGGACTTCCCCGGGAAGCCTCTCGTGCCATTCAACTACACGGGGAGCGGCCAAACAACTTGCAGACGACGAACGGGACA  
AGATTGTATCACCTCGCGTACAATTCGCGTGTACAGGTCGTGTTGCAGGATACCGGGACCATTTCCGCCGAGAGCCACCCATTCATTTGCACGGGTTTAACTTCTTTGTGGTTGGGCAGG  
GAGTTGGAACTATGACTCAAATACCTCACCGTCGACGTTCAATCTCGTCGACCCGATTGAGAGGAACACCATCGGCATGCCTTCCGGTGGCTGGGCGGCTATTAGATTCAAAGCAGACA  
ACCCAGGTGTTTGGTCTTGCATGCCATTTGAGGTGCACACGACTTGGGGTCTTAAAGATGGCATTGTGGTGGATAATGGGATTGGGGTGAATGAGTCAATATTGCCACCTCCTAGTGA  
CCTTCAAAGTGTTAGTGGGGTGTCTTAAAAAGGAGAAATAATTTGTGCCGACGTCGAACGCAGTTCATCGTTCGGAGACCAATCATAATGCACCACATCAACAGTACCGAGCGTGGTA  
CCGAGCCGAGTACCGAACGGAGGTGATGTGGCACATTTTGTGGTCTCTAGATTGTATTCCGGCTCCGTAAGAATAATTTACCCTTAAAAAGCCACCCAACTCTCAAGACCTATTAG  
TACGTAGAGCACTAATGATTTTGTATTTGTGGGTGATTTTTTTTAAAGTTTTTAATGTTTTTTTTTTTAAATCTTTATTGTTAGTATGTGTTGCCATGCAAGTAAAGTAGTCCATCTAATGAAA  
AAAGTGTGAGAG

>comp173744\_c0\_seq1

GTGATCTTCGTTGTTTCGTTTCAAATTGATATCTTTTCAGGGGCTAAACAGGGACTTCTTATAAGAGGAGGAGATGTTTTAGAGTGTTTAGCTGGCGTTGATATTGTGGCGTTAGACAAAA  
CTGGGACACTCACAGAAGGAAAGCCTACAATTACAGCAATTGCTTCTTTGGTTTACAATGAAACTGAAATTCTTCGACTTGCTGCTGCTGTGGAGAAAACGGCATGTCACCCCATGCAA  
CGCGCATCTTAAACAAAGCTGAAACTTTGAGGTTACAACCTAGTACTAGAGGCCAATTAACCGAACCTGGTTTTGGCTCTATGGCAGAGATTGATGGATCTCTAGTTGCCGTCCGCA  
AAATGGACTGGGTTTCATGAACGTTTTTCAGAGGAAAATAGCTAAAAAGGAATTGATGGATCTCGAAAATCATTTAGGTTACGTTTCATCCAATTGGGCACCATCATTGAATCAGTCAAGTTC  
AGTAGTTTATGTGGGCCGTGAAGGAGAAGGCATCATAGGTGCAATAGCAATCTCGGATACACTTCGTCCTTGATGCAAGTTCAACTGTGAAGAGGCTTCAGGAGAAGGGAATCAAACCTG  
TCCTCGTATCAGGTGACAGGGAAGAGGCAGTGGCTGATGTGGGAAGGATGGTTGGGATTGAACTTTTAAAGGTCATCTGTAACCTCCCAACAAAAGTTTGATTTTCATATCGAGCTTGCAAG  
CTGAAGGAAATCATGTTGCGATGGTTGGGGATGGCATAAATGATGCGCCATCTTTAGCACTTGCTGATGTTGGAATTGCTTTACAAATTGATGCCAAAGAGAACGCAGCATCAGATGCAGC  
TTCTGTAATACTTTTGGGTAACAGACTCTCTCAGATTGTCGATGCTTTAGATCTTGCTCGGGCAACTATTTCAAAGTGCATCAGAATTTAGCATGGGCGGTTGCATACAATTTGTGGCCAT  
ACCAATTGCTGCAGGAGTGCTACTACCACAATTTGACTTTGCTATGACACCATCACTCTCAGGAGGGTTAATGGCGTTGAGCTCCATCTTCGTTGTCTCTAATTCTCTGCTTCTGAGGCTGC  
AGTTTTCTGACAGGAAGAGGGAACTGCGCTAGCTAAAGAAAGATGGTTCTGTGATTTCCCTCCAACAATTTATTCTTTCCACAATATATTGGTTTCTTTGTATAACTAGTTCTCATTACCT  
GCTTTGCCTGTATTGTCAATTAATAATTGATTGGCTCAATAAAAGCTTGATCTTAGGTTTTGTATGAATTTGAATAAACCATTGACATAACTGCTCCTTGGAACTTGTCCAACCTTAGTGAA  
GTTAGCCAGCATATTGATGCTGATTCACTTCGACTTGAAAATCACTAATATCAAATATACTATACTACAGTTTACTACCTGAGCAAAAATTTTCATGCAACGTTACTATACTACAACCTTAAATCT  
TTGAACAAAATATCAA

>comp173744\_c0\_seq2

CTACCAGGTCCAAGCAGAGAAGCATTGAGAAAAGGCTACCAAATATGAATCTCTTGTGGGTTTTGGATCAATTGCTGCATTCCCTGATTAGCTCTGTTTCACTTGTGAACCCAGGCCTAG  
AATGGGAGTCTTCTTTGATGAGCCGGTCATGCTTCTTGGTTTTGTACTTTTGGGACGTTCTCTTGAAGAAAGGGCCAGGCTCCAAGCTTCCAGTGACATGAATGAACTGCTGTCTTTGGT  
CGTACCAAGTCACGATTAGTGATAACTTCATCTGAAGAACCCACATCACCTGATAGCTTGCTAAGTGTAGTTCCGTTAGCATTGAAATCCCAACTGATGATGTCCGGATCGGTGATTAC  
TTTTGGTGTGCTGGGGAACCATCCAGTTGATGGAAATGTTCTTGCAGGAAGAAGTGTGTTGATGAATCCATGCTAACTGGAGAGTCTCTCCGGTGTGAAAGAAAAGGTTAC

CCATTTCTGCCGGAAC TATTAATTGGGATGGTCCCCTAAGGATTGAAGCCTCAACAAC TGGTGCCATGTCAACAATCTCCAAAATTATTCGAATGGTTGAGGATGCACAGGCAAAGGAAG  
CCCCCGTTCAGAGACTTGTAGATTCGATTGCTGGGCCTTTTGTTTACTGTAAATGGCTTTGTCAGCTGCTACTTTTGCTTTTTGGTATTACATCGGAACAGACATTTTCCCAGATGTACTGC  
TGAACGATATTGCTGGTCTGAAGGGCATTCCCTGCTTTAAGCTTGAAGCTTAGCTGTTGATGTGTTAGTAGTCTCCTGCCCATGTGCTCTGGGTCTTGCTACACCTACGGCTATCTTAGTT  
GGCACTTCTCTGGGGGCTAAACAGGGACTTCTTATAAGAGGAGGAGATGTTTTAGAGTGTGTTAGCTGGCGTTGATATTGTGGCGTTAGACAAAAC TGGGACACTCACAGAAGGAAAGCC  
TACAATTACAGCAATTGCTTCTTTGGTTTACAATGAAACTGAAATTCTTCGACTTGCTGCTGCTGTGGAGAAAACGGCATGTCACCCATTGCAACGGCGATCTTAAACAAAAGCTGAAAC  
TTTGAGGTTACAAC TACCTAGTACTAGAGGCCAATTAACCGAACCTGGTTTTGGCTCTATGGCAGAGATTGATGGATCTCTAGTTGCCGTCGGCAAAAATGGACTGGGTTTCATGAACGTTTT  
CAGAGGAAAATAGCTAAAAAGGAATTGATGGATCTCGAAAATCATTAGGTTACGTTTCATCCAATTGGGCACCATCATTGAATCAGTCAAGTT CAGTAGTTTATGTGGGCCGTGAAGGAG  
AAGGCATCATAAGTGCAATAGCAATCTCGGATACACTTCGTCTTGATGCAAGTTCAACTGTGAAGAGGCTTCAGGAGAAGGGAATCAAAAAC TGTCTCGTATCAGGTGACAGGGAAGAG  
GCAGTGGCTGATGTGGGAAGGATGGTTGGGATTGAACTTTAAGGTCATCTGTAAC TCCCAACAAAAGTTTGATTCATATCGAGCTTGCAAGCTGAAGGAAATCATGTTGCGATGGTT  
GGGGATGGCATAAATGATGCGCCATCTTTAGCACTTGCTGATGTTGGAATTGCTTTACAAATTGATGCCAAAGAGAACGCAGCATCAGATGCAGCTTCTGTAATACTTTTGGGTAACAGAC  
TCTCTCAGATTGTGATGCTTTAGATCTTGCTCGGGCAACTATTTCCAAAGTGCATCAGAATTTAGCATGGGCGGTTGCATACAATTTTGTGGCCATACCAATTGCTGCAGGAGTGCTACTA  
CCACAATTTGACTTTGCTATGACACCATCACTCTCAGGAGGGTTAATGGCGTTGAGCTCCATCTTCGTTGTCTCTAATTTCTCTGCTTCTGAGGCTGCAGTTTTCTGACAGGAAGAGGGAAC  
TGCGCTAGCTAAAGAAAAGATGGTTCTGTGATTTCCCTCCAACAATTTATTCTTTCCACAATATATTGGTTTCTTTGTATAACTAGTTCTCATTCACCTGCTTTGCCTGTATTGTCAATTAAT  
AATTGATTGGCTCAATAAAAAGCTTGATCTTAGGTTTTGTATGAATTTGAATAAACCATTGACATAACTGCTCCTTGGAACTTGTCCAACCTTAGTGAAGTTAGCCAGCATATTCATGCTGATT  
CACTTCGTACTTGAAAATCACTAATATCAAATATACTATACTACAGTTTACTACCTGAGCAAAAATTTTCATGCAACGTTACTATACTACAAC TTAATCTTTGAACAAAATATCAAA

>comp173744\_c0\_seq3

GAGGACTCGAGCCCAACTTCTCTTCTCTCTCTCCATGGCGTCCCCTCTGCTAAGACTTGTCTCTCTCCTAGCCCTAAATCGAACAACGTAATCCTACTCCGTCAGATTGCTCC  
ACCATCTCGGTCCCCTCCGCGGTGGCCTTGCGGGCTCGGCAGCGGCGGGGAAGTCCGTTTCGAAGTCGCTGAGATTAGTCCGAGCAAAGGCCGTGGAGTTTGGAGCAAAGGAAGG  
GGGTATCCAGCATCAGGATGCAAGAAACACGACAATTCTCTTGGAGGTTGGGGGTATGATGTGCGGCGCCTGTGTCTCCCGTGTGAAATCGATATTGTCTGCCGACGATCGGGTCAATC  
GACGGTCGTCAACATGGTACCGAAACGGCGCGGTTAAAGCTGAGAGATGGAGTTGAAGAGGAAGGGGAGGAAAGAGTGGCCGAGGAGCTTGTAGGAAGTTGGCGGATTTTGGCTT  
TACGGCTAAGAGAAGGAGGTCGGGGCGGGGGTGGGGGAAAACGTGAGAAAAGTGGAGGGAGATGGCGGAGAAAAAGGAGATATTGCTTGCAAGAAGTCGGAATAGAGTATTTTTTGC  
CTGGACGCTGGTGGCTCTGTGCTGCGGATCGCATGCTTCGCATCTCCTGCATTCTCTTGAATACATATTGCACATGGATCGTTTTGGGATTTGCTGCATAACTCTTATTTGAAATGCAGTAT  
TGCAGCTGCTTCTTTGCTTGGACCTGGTAGAGATCTCCTTTTAGATGGTCTCAAAGCATT CAGAAAAGGCTCACCAAATATGAATTCTCTTGTGGGTTTTGGATCAATTGCTGCATTCCTGA  
TTAGTCTGTTTCACTTGTGAACCCAGGCTAGAATGGGAGTCTTCTTTGATGAGCCGGTCATGCTTCTTGGTTTTGTACTTTTGGGACGTTCTCTTGAAGAAAGGGCCAGGCTCCAAGCT  
TCCAGTGACATGAATGAACTGCTGTCTTTGGTCGCTACCAAGTCACGATTAGTGATAACTTCATCTGAAGAACCCACATCACCTGATAGCTTGCTAAGTGTAGTTCCGTTAGCATTGAAA  
TCCCAACTGATGATGTCGGATCGGTGATTCACTTTTGGTGTGCTGGGGAAAACCATTCAGTTGATGGAAATGTTCTTGCAGGAAGAAGTGTGTTGATGAATCCATGCTAACTGGAGA  
GTCTCTTCCGGTGTGAAAGAAAAGGTTACCCATTTCTGCCGGAAC TATTAATTGGGATGGTCCCCTAAGGATTGAAGCCTCAACAAC TGGTGCCATGTCAACAATCTCCAAAATTATT  
CGAATGGTTGAGGATGCACAGGCAAAGGAAGCCCCGTT CAGAGACTTGTAGATTCGATTGCTGGGCCTTTTGTTTACTGTAAATGGCTTTGTCAGCTGCTACTTTTGCTTTTTGGTATT  
ACATCGGAACAGACATTTTCCCAGATGTACTGCTGAACGATATTGCTGGTCTGAAGGGCATTCCCTGCTTTTAAGCTTGAAGCTTAGCTGTTGATGTGTTAGTAGTCTCCTGCCATGTGCT  
CTGGGTCTTGCTACACCTACGGCTATCTTAGTTGGCACTTCTCTGGGGGCTAAACAGGGACTTCTTATAAGAGGAGGAGATGTTTTAGAGTGTGTTAGCTGGCGTTGATATTGTGGCGTTAG  
ACAAAAC TGGGACACTCACAGAAGGAAAGCCTACAATTACAGCAATTGCTTCTTTGGTTTACAATGAAACTGAAATTCTTCGACTTGCTGCTGCTGTGGAGAAAACGGCATGTCACCC



ATTGCAACGGCGATCTTAAACAAAGCTGAAACTTTGAGGTTACAACCTACCTAGTACTAGAGGCCAATTAACCGAACCTGGTTTTGGCTCTATGGCAGAGATTGATGGATCTCTAGTTGCCG  
TCGGCAAATGGACTGGGTTTCATGAACGTTTTTCAGAGGAAAATAGCTAAAAAGGAATTGATGGATCTCGAAAATCATTAGGTTACGTTTCATCCAATTGGGCACCATCATTGAATCAGTC  
AAGTTCAGTAGTTTATGTGGGCCGTGAAGGAGAAGGCATCATAGGTGCAATAGCAATCTCGGATACACTTCGTCTTGATGCAAGTTCAACTGTGAAGAGGCTTCAGGAGAAGGGAATCA  
AAACTGTCCTCGTATCAGGTGACAGGGAAGAGGCAGTGGCTGATGTGGGAAGGATGGTTGGGATTGAACTTTTAAGGTCATCTGTAACCTCCCAACAAAAGTTTGATTTCATATCGAGCT  
TGCAAGCTGAAGGAAATCATGTTGCGATGGTTGGGGATGGCATAAATGATGCGCCATCTTTAGCACTTGCTGATGTTGGAATTGCTTTACAAATTGATGCCAAAGAGAACGCAGCATCAGA  
TGCAGCTTCTGTAATACTTTTGGGTAACAGACTCTCTCAGATTGTCGATGCTTTAGATCTTGCTCGGGCAACTATTTCCAAAGTGCATCAGAATTTAGCATGGGCGGTTGCATACAATTTG  
TTGCCATACCAATTGCTGCAGGAGTGTACTACCACAATTTGACTTTGCTATGACACCATCACTCTCAGGAGGGTTAATGGCGTTGAGCTCCATCTTCGTTGTCTCTAATTCTCTGCTTCTG  
AGGCTGCAGTTTTCTGACAGGAAGAGGGAAGTGCCTAGCTAAAGAAAGATGGTTCTGTGATTTCCCTCCAACAATTTATTCTTTCCACAATATATTGGTTTTCTTTGTATAACTAGTTCTC  
ATTCACCTGCTTTGCCTGTATTGTCATTTAAATAATTGATTGGCTCAATAAAAGCTTGATCTTAGGTTTTGTATGAATTTGAATAAACCATTGACATAACTGCTCCTTGGAACCTGTCCAACC  
TTAGTGAAGTTAGCCAGCATATTCATGCTGATTCACTTCGTAATCACTAATATCAATATACTATACTACAGTTTACTACCTGAGCAAAATTTTCATGCAACGTTACTATACTACAAC  
TTAAATCTTTGAACAAAATATCAAA

>comp173744\_c0\_seq5

CTACCAGGTCCAAGCAGAGAAGCATTGAGAAAAGGCTCACCAAATATGAATTCTCTTGTGGGTTTTGGATCAATTGCTGCATTCCCTGATTAGCTCTGTTTCACTTGTGAACCCAGGCCTAG  
AATGGGAGTCCCTCTTTGATGAGCCGGTCATGCTTCTTGGTTTTGTACTTTTGGGACGTTCTCTTGAAGAAAGGGCCAGGCTCCAAGCTTCCAGTGACATGAATGAACTGCTGTCTTTGGT  
CGCTACCAAGTCACGATTAGTGATAACTTCATCTGAAGAACCCACATCACCTGATAGCTTGCTAAGTGCTAGTTCCGTTAGCATTGAAATCCCAACTGATGATGTCCGGATCGGTGATTCAC  
TTTTGGTGTTCCTGGGAAACCATTCCAGTTGATGGAAATGTTCTTGCAGGAAGAAGTGTGTTGATGAATCCATGCTAACTGGAGAGTCTCTTCCGGTGTGAAAGAAAAGGTTTAC  
CCATTTCTGCCGAACTATTAATTGGGATGGTCCCCTAAGGATTGAAGCCTCAACAACCTGGTGCCATGTCAACAATCTCCAAAATTATTCGAATGGTTGAGGATGCACAGGCAAAGGAAG  
CCCCCGTTCAGAGACTTGTAGATTGATTGCTGGGCCTTTTGTTTACTGTAAATGGCTTTGTCAGCTGCTACTTTTGCTTTTTGGTATTACATCGGAACAGACATTTTCCCAGATGTAAGTGC  
TGAACGATATTGCTGGTCTGAAAGGCAATCCCTGCTTTTAAGCTTGAAACTAGCTGTTGATGTGTTAGTAGTCTCCTGCCCATGTGCTCTGGGTCTTGCTACACCTACGGCTATCTTAGTT  
GGCACTTCTCTGGGACTTCTTATAAGAGGAGGAGATGTTTTAGAGTGTTTAGCTGGCGTTGATATTGTGGCGTTAGACAAAACCTGGGACACTCACAGAAGGAAAGCCTACAATTACAGC  
AATTGCTTCTTTGGTTTTACAATGAAACTGAAATTTCTCGACTTGCTGCTGCTGTGGAGAAAACGGCATGTCACCCCATGCAACGGCGATCTTAAACAAAGCTGAAACTTTGAGGTTACA  
ACTACCTAGTACTAGAGGCCAATTAACCGAACCTGGTTTTGGCTCTATGGCAGAGATTGATGGATCTCTAGTTGCCGTCGGCAAATGGACTGGGTTTCATGAACGTTTTTCAGAGGAAAATA  
GCTAAAAGGAATTGATGGATCTCGAAAATCATTAGGTTACGTTTCATCCAATTGGGCACCATCATTGAATCAGTCAAGTTCAGTAGTTTATGTGGGCCGTGAAGGAGAAGGCATCATAG  
GTGCAATAGCAATCTCGGATACACTTCGTCTTGATGCAAGTTCAACTGTGAAGAGGCTTCAGGAGAAGGGAATCAAAAACCTGCTCCTCGTATCAGGTGACAGGGAAGAGGCAGTGGCTGAT  
GTGGGAAGGATGGTTGGGATTGAACTTTTAAGGTCATCTGTAACCTCCCAACAAAAGTTTGATTTCATATCGAGCTTGCAAGCTGAAGGAAATCATGTTGCGATGGTTGGGGATGGCATA  
AATGATGCGCCATCTTTAGCACTTGCTGATGTTGGAATTGCTTTACAAATTGATGCCAAAGAGAACGCAGCATCAGATGCAGCTTCTGTAATACTTTTGGGTAACAGACTCTCTCAGATTGT  
CGATGCTTTAGATCTTGCTCGGGCAACTATTTCCAAAGTGCATCAGAATTTAGCATGGGCGGTTGCATACAATTTGTTGCCATACCAATTGCTGCAGGAGTGTACTACCACAATTTGACT  
TTGCTATGACACCATCACTCTCAGGAGGGTTAATGGCGTTGAGCTCCATCTTCGTTGTCTCTAATTCTCTGCTTCTGAGGCTGCAGTTTTCTGACAGGAAGAGGGAAGTGCCTAGCTAAA  
GAAAGATGGTTCTGTGATTTCCCTCCAACAATTTATTCTTTCCACAATATATTGGTTTTCTTTGTATAACTAGTTCTCATTCACCTGCTTTGCCTGTATTGTCATTTAAATAATTGATTGGCTCA  
ATAAAAGCTTGATCTTAGGTTTTGTATGAATTTGAATAAACCATTGACATAACTGCTCCTTGGAACCTGTCCAACCTTAGTGAAGTTAGCCAGCATATTCATGCTGATTCACTTCGTAATTGA  
AAATCACTAATATCAATATACTATACTACAGTTTACTACCTGAGCAAAATTTTCATGCAACGTTACTATACTACAACCTTAAATCTTTGAACAAAATATCAAA

>comp173744\_c0\_seq6

GAGGACTCGAGCCCAACTTCTTCTTCTTCCCTTCTCCATGGCGTCCCCTCTGCTAAGACTTGTCTCTCTCCTAGCCCTAAATCGAACAAACGTAATCCTACTCCGTCGCCGTCAGATTGCTCC  
ACCATCTCGGTCCCCTCCGCGGTGGCCCTTGGCGGCCCTCGGCAGCGGGCGGGAAAGTCCGGTTTCGAAGTCGCTGAGATTAGTCCGAGCAAAGGCCGTGGAGTTTGGAGCAAAGGAAGG  
GGGTATCCAGCATCAGGATGCAAGAAACACGACAATTCTTGGAGGTTGGGGGTATGATGTGCGGGCCTGTGTCTCCCCTGTGAAATCGATATTGTCTGCCGACGATCGGGTCAATC  
GACGGTCGTCAACATGGTACCCGAAACGGCGGCTTAAAGCTGAGAGATGGAGTTGAAGAGGAAGGGGAGGAAAAGTGGCCGAGGAGCTTGTAGGAAGTTGGCGGATTTTGGCTT  
TACGGCTAAGAGAAGGAGGTCGGGGCGGGGGTGGGGGAAAACGTGAGAAAAGTGGAGGGAGATGGCGGAGAAAAAGGAGATATTGCTTGCAAGAAGTCGGAATAGAGTATTTTTTGC  
CTGGACGCTGGTGGCTCTGTGCTGCGGATCGCATGCTTCGCATCTCCTGCATTCTCTTGGAAATACATATTGCACATGGATCGTTTTTGGGATTTGCTGCATAACTCTTATTTGAAATGCAGTAT  
TGCAGCTGCTTCTTTGCTTGGACCTGGTAGAGATCTCCTTTTAGATGGTCTCAAAGCATTAGAAAAGGCTCACCAAATATGAATTCTCTTGTGGGTTTTGGATCAATTGCTGCATTCTGA  
TTAGCTCTGTTTCACTTGTGAACCCAGGCTAGAATGGGAGTCTTCTTTGATGAGCCGGTCATGCTTCTTGGTTTTGTACTTTTTGGACGTTCTCTTGAAGAAAGGGCCAGGCTCCAAGCT  
TCCAGTGACATGAATGAACTGCTGTCTTTGGTCGTACCAAGTACGATTAGTGATAACTTCATCTGAAGAACCCACATCACCTGATAGCTTGCTAAGTGTAGTTCCGTTAGCATTGAAA  
TCCCAACTGATGATGTCGGATCGGTGATTCACTTTTTGGTGTTCCTGGGGAAACCATTCCAGTTGATGGAAATGTTCTTGCAGGAAGAAGTGTGTTGATGAATCCATGCTAACTGGAGA  
GTCTCTTCCGGTGTGAAAGAAAAAGGTTACCCATTTCTGCCGGAACATTAATTGGGATGGTCCCCTAAGGATTGAAGCCTCAACAACCTGGTGCCATGTCAACAATCTCCAAAATTATT  
CGAATGGTTGAGGATGCACAGGCAAAGGAAGCCCCCGTTCAGAGACTTGTAGATTGATTGCTGGGCCTTTTGTTTTACTGTAATGGCTTTGTCAGCTGCTACTTTTTGCTTTTTTGGTATT  
ACATCGAACAGACATTTTCCCAGATGACTGCTGAACGATATTGCTGGTCTGAAGGGCATTCCCTGCTTTTAAAGCTTGAAACTAGCTGTTGATGTGTTAGTAGTCTCCTGCCCATGTGCT  
CTGGTCTTGTCTACACCTACGGCTATCTTAGTTGGCACTTCTCTGGGGACTTCTTATAAGAGGAGGAGATGTTTTAGAGTGTTTAGCTGGCGTTGATATTGTGGCGTTAGACAAAAGTGGG  
ACACTCACAGAAGGAAAGCCTACAATTACAGCAATTGCTTCTTTGGTTTACAATGAAACTGAAATCTTCGACTTGTGCTGCTGTGGAGAAAACGGCATGTCACCCCATGCAACGGCG  
ATCTTAAACAAAGCTGAAACTTTGAGGTTACAACCTAGTACTAGAGGCCAATTAACCGAACCTGGTTTTGGCTCTATGGCAGAGATTGATGGATCTCTAGTTGCCGTCGGCAAAATGG  
ACTGGGTTTCATGAACGTTTTTCAGAGGAAAATAGCTAAAAAGGAATTGATGGATCTCGAAAATCATTTAGGTTACGTTTCATCCAATTGGGCACCATCATTGAATCAGTCAAGTTCAAGT  
TTATGTGGGCCGTGAAGGAGAAGGCATCATAGGTGCAATAGCAATCTCGGATACACTTCGCTTTGATGCAAGTTCAACTGTGAAGAGGCTTCAGGAGAAGGGAATCAAACTGTCTCGT  
ATCAGGTGACAGGGAAGAGGCAGTGGCTGATGTGGGAAGGATGGTTGGGATTGAACTTTAAGGTCATCTGTAACCTCCCAACAAAAGTTTTGATTCATATCGAGCTTGCAAGCTGAAG  
GAAATCATGTTGCGATGGTTGGGGATGGCATAAATGATGCGCCATCTTTAGCACTTGTGATGTTGGAATTGCTTTACAAATTGATGCCAAAAGAGAACGCAGCATCAGATGCAGCTTCTGT  
AATACTTTTTGGGTAACAGACTCTCTCAGATTGTCGATGCTTTAGATCTTGTCTCGGGCAACTATTTCCAAAGTGCATCAGAATTTAGCATGGGCGGTTGCATACAATTTTGTGCCATACCAA  
TTGCTGCAGGAGTGCTACTACCACAATTTGACTTTGCTATGACACCATCACTCTCAGGAGGGTTAATGGCGTTGAGCTCCATCTTCGTTGTCTCTAATTCTCTGCTTCTGAGGCTGCAGTTT  
TCTGACAGGAAGAGGGAACCTGCGTAGCTAAAAGAAAGATGGTTCTGTGATTTCCCCTCCAACAATTTATTCTTTCCACAATATATTGGTTTTCTTTGTATAACTAGTTCTCATTACCTGCTTT  
GCCTGTATTGTCATTTAAATAATTGATTGGCTCAATAAAAGCTTGATCTTAGGTTTTGTATGAATTTGAATAAACCTTACATAACTGCTCCTTGGAACTTGTCCAACCTTAGTGAAGTTAG  
CCAGCATATTATGCTGATTCACTTCGTACTTGAATACTACTAATATCAAATATACTATACTACAGTTTACTACCTGAGCAAAATTTTCATGCAACGTTACTATACTACAACCTTAAATCTTTGAA  
CAAAATATCAAA

>comp173794\_c0\_seq10

AAACCCGGCCTCGGCGCAGGGAACAGAATCTCCGAACCTTTACTTCTGCGCATTTCTCTTCGTCAGCCATTCATCCTAATCCGAAAGCCTAAACCTAGTTATGGATCCCAGCTTTCATC  
CGTCGGATTTCTCTCTCTGAAACCCACAATCCCCACAAAACCCCGCCGCTGCATCCCCCTCCGCGGGAATCTCTCACTCTGAAATCGGCCAAACCACGGAGAGTTGGTCAAGTG  
AACAGCCTGCGATTGATGAGAGACTTGTTTTACAGGAGGAGATGCATTTATTACGTAGTAGAGCTGCTTCATTGGAAGCGGAACTTGAAAATCCCACCAAGAAAATGTTGATAGTCAGC

AACTTTGTCGCCAATTTGAAAAGGTGGAGTGTATTTGATAATATGAATGTATTCTTTCTTGACTAATGTTTTGCAAACATGGTTTATTTATTTATTTTCTCAGGAATTGAAGGACCTAAAAGA  
GCATGATCAACAAATGAAAATGAAGCAACTAAAGGTTCTATCTGATCTTCTGGTATCTGTCTCTAAAGTTGAGAGACAAGAAGCAAGGATGAAAATAAGGCAAGAATCCTTGAGGCTGG  
GCATTGTTAGTATTATCAGGTTGGCATCTAATATAACATTTCTAGAAGATTTTTTTCATCACATGCACAATGGAATTAATCAAAGTGGCCAATTTCTACTTGAACCTCGGTTTTCTTCAGGAAAT  
TTAAGATTATGCATGTAGGTTTACTGTTCATTTGAAATCAGACATTCCACCACGGATGTTTCTATTCATAAATGTTTCATGAACATATTAAGATTACATATGATATATCATAATCATTTTGATTAT  
GGCTTACTTTTTTTGCTGTATCGTGAATCTTTAGAGCAGGAACAGTCATTTAGAGATTGGGGAGGATGGTCAAATGCTGAAGGATATTAATGCTCATCTGAAATCTTTGTTGGAGACAAA  
AGAAGCTATTGATAGGTACCGAAAATCACTCAAGAAGAGGCAACCTGGAGGAAGAAAATCTTCTCGAGGAGAGGGACCGTTATGAATCGGAGAAGGCAAGGCTTATTCGCGAAATGAA  
GCGAGTAAGGGATGAGGATGGTTCACGCTTTAATAATTTCCAAGTTCTTAACCAACGATATGCTCTTTTAAATCTA

>comp173794\_c0\_seq13

AAACCCGGCCTCGGCGCAGGGAACAGAATCTCCGAACCTTTACTTCTGCGCATTTCCTCTTCGTCAGCCATTCATCCTAATCCGAAAGCCTAAACCTAGTTATGGATCCCGCGTCTTCATC  
CGTCGGATTTCTCTCTCTGGAACCCACAATCCCCACAAAAACCCCGCCGCTGCATCCCCCTCCGGCGGAATCTCTCACTCTGAAATCGGCCAAACCACGGAGAGTTGGTCAAGTG  
AACAGCCTGCGATTGATGAGAGACTTGTTTTACAGGAGGAGATGCATTTATTACGTAGTAGAGCTGCTTCATTGGAAGCGGAACTTGAAAATCCCACCAAGAAAATGTTGATAGTCAGC  
AACTTTGTCGCCAATTTGAAAAGGAATTGAAGGACCTAAAAGAGCATGATCAACAAATGAAAATGAAGCAACTAAAGGTTCTATCTGATCTTCTGGTATCTGTCTCTAAAGTTGAGAGAC  
AAGAAGCAAGGATGAAAATAAGGCAAGAATCCTTGAGGCTGGGCATTGTTAGTATTATCAGAGCAGGAACAGTCATTTAGAGATTGGGAGGATGGTCAAATGCTGAAGGATATTAATG  
CTCATCTGAAATCTTTGTTGGAGACAAAAGAAGCTATTGATAGGTACCGAAAATCACTCAAGAAGAGGCAACCTGGAGGAAGAAAATCTTCTCGAGGAGAGGGACCGTTATGAATCGGA  
GAAGGCAAGGCTTATTCGCGAAATGAAGCGAGTAAGGGATGAGGATGGTTCACGCTTTAATAATTTCCAAGTTCTTAACCAACGATATGCTCTTTTAAATCTTCTGGGAAAGGGTGGCTTC  
AGTGAGGTTTACAAAGTAAGTCCGCAACTCTATTTCTTAAAATTATCAACAAAGCAATTTTAGACTTATCTCGGGATTATTTGGTGCTCTCCTCTCAAGGAGTGAAGATTCGAGTGAGCTG  
CTATTCTCGTTTGGTAGATAAGGAGCATAGTTTTTCGCCACCGGTTCAATAAACTGCAGATTTTATACAGGGGTTGTGAATCAGCCAAATGTATGAAATGCCACAAAATTTGGCAATGTG  
GTAGGGCTGAAAACAGAGCAACTGCAACCAAACTTTATAAACTCTTCTAAGCATTCTTAAAATTTATTAATAATGGGATTATTAACCTTTTGATTTTTTTGCTTTGTTTCGGCTTTTAAAGC  
ATAACCTTTCTCATTGATTTGAAGTGGGAACTGTCATGCAGGCTTTTGATTTGGTGGAGAACAGATTTGTTGCATGTAAGCTTCATGGTCTAAATGTTTCAGTGGAGTGAAGAGAAAAAAC  
AGAGCTACATACGCCATGCAGTTCGGGAATACAACATACACAAAACACTGGTTCATCCTCATATTGTGCAGCTGTGGGACATATTTGAGATTGATCATAACTTTTTGTACTGTCTTGGAG  
TACTGCAGTGGTATCTGCCACCGGAATGCTTTGAGTTGAGCAAAACA

>comp173794\_c0\_seq16

AAACCCGGCCTCGGCGCAGGGAACAGAATCTCCGAACCTTTACTTCTGCGCATTTCCTCTTCGTCAGCCATTCATCCTAATCCGAAAGCCTAAACCTAGTTATGGATCCCGCGTCTTCATC  
CGTCGGATTTCTCTCTCTGGAACCCACAATCCCCACAAAAACCCCGCCGCTGCATCCCCCTCCGGCGGAATCTCTCACTCTGAAATCGGCCAAACCACGGAGAGTTGGTCAAGTG  
AACAGCCTGCGATTGATGAGAGACTTGTTTTACAGGAGGAGATGCATTTATTACGTAGTAGAGCTGCTTCATTGGAAGCGGAACTTGAAAATCCCACCAAGAAAATGTTGATAGTCAGC  
AACTTTGTCGCCAATTTGAAAAGGTGGAGTGTATTTGATAATATGAATGTATTCTTTCTTGACTAATGTTTTGCAAACATGGTTTATTTATTTATTTTCTCAGGAATTGAAGGACCTAAAAGA  
GCATGATCAACAAATGAAAATGAAGCAACTAAAGGTTCTATCTGATCTTCTGGTATCTGTCTCTAAAGTTGAGAGACAAGAAGCAAGGATGAAAATAAGGCAAGAATCCTTGAGGCTGG  
GCATTGTTAGTATTATCAGAGCAGGAACAGTCATTTAGAGATTGGGAGGATGGTCAAATGCTGAAGGATATTAATGCTCATCTGAAATCTTTGTTGGAGACAAAAGAAGCTATTGATAG  
GTACCGAAAATCACTCAAGAAGAGGCAACCTGGAGGAAGAAAATCTTCTCGAGGAGAGGGACCGTTATGAATCGGAGAAGGCAAGGCTTATTCGCGAAATGAAGCGAGTAAGGGATG  
AGGATGGTTCACGCTTTAATAATTTCCAAGTTCTTAACCAACGATATGCTCTTTTAAATCTTCTGGGAAAGGGTGGCTTCAGTGAGGTTTACAAAGTAAGTCCGCAACTCTATTTCTTAAAA  
TTATCAACAAAGCAATTTTAGACTTATCTCGGGATTATTTGGTGCTCTCCTCTCAAGGAGTGAAGATTCGAGTGAGCTGCTATTCTCGTTTGGTAGATAAGGAGCATAGTTTTTTTCGCCAC

CGTTCAATAAACTGCAGATTTTATACAGGGGTTGTGAATCAGCCAAATGTATGAAATGCCACAAAATTTGGCAATGTGGTAGGGCTGAAAACAGAGCAACTGCAACCAAACCTTTATAAA  
CTCTTCTAAGCATTCTCTTAAAATTTATTAATAATGGGATTCATTAACCTTTTGATTTTTTTGCTTTGTTCGGCTTTTTAAGCATAACCCTTTCTCATTGATTGAAAGTGGGAAGTGCATGCAG  
GCTTTTGATTTGGTGGAGAACAGATTTGTTGCATGTAAGCTTCATGGTCTAAATGTTTCAGTGGAGTGAAGAGAAAAACAGAGCTACATACGCCATGCAGTTCGGGAATACAACATACAC  
AAAACACTGGTTCATCCTCATATTGTGCAGCTGTGGGACATATTTGAGATTGATCATAATACTTTTTGTACTGTCTTGGAGTACTGCAGTGGTAAACTAGCTTTCATTTTTACTGTTTTTGGT  
GATTTCTTAAATAAAGCTGATTGCTTTGTCTTATCAGTTGGCCAAAGCTATATTCTTTATCATATGGAAATGGATTTTGTGAACTTTTTTTCTTTTATAACCTCACTTTTCTTTTGTGTTAGA  
TTAGTGGATTCAAATCACTTGATTTTGGTTTCTCAATTGCTGC

>comp173794\_c0\_seq17

AAACCCGGCCTCGGCGCAGGGAACAGAATCTCCGAACCTTTACTTCTGCGCATTTCTCTTCGTCAGCCATTCATCCTAATCCGAAAGCCTAAACCTAGTTATGGATCCCGCGTCTTCATC  
CGTCGGATTTCTCTCTCTGGAACCCACAATCCCCACAAAAACCCCGCCGCTGCATCCCCCTCCGGCGGAATCTCTCACTCTGAAATCGGCCAAACCACGGAGAGTTGGTCAAGTG  
AACAGCCTGCGATTGATGAGAGACTTGTTTTACAGGAGGAGATGCATTTATTACGTAGTAGAGCTGCTTCATTGGAAGCGGAACTTGGAAAATCCCACCAAGAAAATGTTGATAGTCAGC  
AATTTGTGCGCAATTTGAAAAGGAATTGAAGGACCTAAAAGAGCATGATCAACAAATGAAAATGAAGCAACTAAAGGTTCTATCTGATCTTCTGGTATCTGTCTCTAAAGTTGAGAGAC  
AAGAAGCAAGGATGAAAATAAGGCAAGAATCCTTGAGGCTGGGCATTGTTAGTATTATCAGGTTGGCATCTAATATAACATTTCTAGAAGATTTTTTTCATCACATGCACAATGGAATTAAT  
CAAAGTGGCCAATTTCTACTTGAACCTCGGTTTTCTTCAGGAAATTTAAGATTATGCATGTAGGTTACTGTTCAATTTGAAATCAGACATTCACCACGGATGTTTCTATTCATAAATGTTTCA  
TGAACATATTAAGATTACATATGATATATCATAATCATTGATTATGGCTTACTTTTTTTGCTGTATCGTGAATCTTTAGAGCAGGAACAGTCATTCAGAGATTTGGGAGGATGGTCAAATG  
CTGAAGGATATTAATGCTCATCTGAAATCTTTGTTGGAGACAAAAGAAGCTATTGATAGGTACCGAAAATCACTCAAGAAGAGGCAACCTGACAAGTGTGATGGAAGTGAATTTGAAACT  
GGAATGTCAGAAGAAGATTTCTTATACAAGATGAAATTTGCATATCACGCTTAGAAAGCATCAGATGAGGAAGAAAATCTTCTCGAGGAGAGGGACCGTTATGAATCGGAGAAGGCAA  
GGCTTATTCGCGAAATGAAGCGAGTAAGGGATGAGGATGGTTCACGCTTTAATAATTTCCAAGTTCTTAACCAACGATATGCTCTTTTAAATCTTCTGGGAAAGGGTGGCTTCAGTGAGGT  
TTACAAAGCTTTTGATTGGTGGAGAACAGATTTGTTGCATGTAAGCTTCATGGTCTAAATGTTTCAGTGGAGTGAAGAGAAAAACAGAGCTACATACGCCATGCAGTTCGGGAATACAA  
CATACACAAAACACTGGTTCATCCTCATATTGTGCAGCTGTGGGACATATTTGAGATTGATCATAATACTTTTTGTACTGTCTTGGAGTACTGCAGTGGTAAACTAGCTTTCATTTTTACTGT  
TTTTGGTGATTTCTTAAATAAAGCTGATTGCTTTGTCTTATCAGTTGGCCAAAGCTATATTCTTTATCATATGGAAATGGATTTTGTGAACTTTTTTTCTTTTATAACCTCACTTTTCTTTTGT  
GTTAGATTAGTGGATTCAAATCACTTGATTTTGGTTTCTCAATTGCTGC

>comp173794\_c0\_seq18

AAACCCGGCCTCGGCGCAGGGAACAGAATCTCCGAACCTTTACTTCTGCGCATTTCTCTTCGTCAGCCATTCATCCTAATCCGAAAGCCTAAACCTAGTTATGGATCCCGCGTCTTCATC  
CGTCGGATTTCTCTCTCTGGAACCCACAATCCCCACAAAAACCCCGCCGCTGCATCCCCCTCCGGCGGAATCTCTCACTCTGAAATCGGCCAAACCACGGAGAGTTGGTCAAGTG  
AACAGCCTGCGATTGATGAGAGACTTGTTTTACAGGAGGAGATGCATTTATTACGTAGTAGAGCTGCTTCATTGGAAGCGGAACTTGGAAAATCCCACCAAGAAAATGTTGATAGTCAGC  
AATTTGTGCGCAATTTGAAAAGGAATTGAAGGACCTAAAAGAGCATGATCAACAAATGAAAATGAAGCAACTAAAGGTTCTATCTGATCTTCTGGTATCTGTCTCTAAAGTTGAGAGAC  
AAGAAGCAAGGATGAAAATAAGGCAAGAATCCTTGAGGCTGGGCATTGTTAGTATTATCAGAGCAGGAACAGTCATTCAGAGATTTGGGAGGATGGTCAAATGCTGAAGGATATTAATG  
CTCATCTGAAATCTTTGTTGGAGACAAAAGAAGCTATTGATAGGTACCGAAAATCACTCAAGAAGAGGCAACCTGACAAGTGTGATGGAAGTGAATTTGAAACTGGAATGTCAGAAGAA  
GATTTTCTTATAACAAGATGAAATTTGCATATCACGCTTAGAAAGCATCAGATGAGGAAGAAAATCTTCTCGAGGAGAGGGACCGTTATGAATCGGAGAAGGCAAGGCTTATTCGCGAAAT  
GAAGCGAGTAAGGGATGAGGATGGTTCACGCTTTAATAATTTCCAAGTTCTTAACCAACGATATGCTCTTTTAAATCTTCTGGGAAAGGGTGGCTTCAGTGAGGTTTACAAAGTAAGTCCG  
CAACTCTATTTCTTAAAATTATCAACAAAGCAATTTAGACTTATCTCGGGATTATTTGGTGCTCTCTCTCAAGGAGTGAAGATTCGAGTGAGCTGCTATTCTCGTTTGGTAGATAAGGAG

CATAGTTTTTCGCCACCGGTTCAATAAACTGCAGATTTTATACAGGGGTTGTGAATCAGCCAAATGTATGAAATGCCACAAAATTTGGCAATGTGGTAGGGCTGAAAACAGAGCAACT  
GCAACCAAACCTTTATAAACTCTTCTAAGCATTCTCTTAAAATTTATTAATAATGGGATTCATTAACCTTTGATTTTTTTGCTTTGTTCGGCTTTTTAAGCATAACCCTTTCTCATTGATTGAA  
GTGGGAAGTGCATGCAGGCTTTTGATTTGGTGGAGAACAGATTTGTTGCATGTAAGCTTCATGGTCTAAATGTTTCAGTGGAGTGAAGAGAAAAACAGAGCTACATACGCCATGCAGTT  
CGGGAATACAACATACACAAAACACTGGTTCATCCTCATATTGTGCAGCTGTGGGACATATTTGAGATTGATCATAACTTTTTGTACTGTCTTGGAGTACTGCAGTGGTAAACTAGCTTT  
CATTTTTACTGTTTTTGGTGATTTCTTAAATAAAGCTGATTGCTTTGTCTTATCAGTTGGCCAAAGCTATATTCTTTATCATATGGAAATGGATTTTGTGAACTTTTTTTTCTTTTATACCTCA  
CTTTTCTTTTGTGTTAGATTAGTGGATTCAAATCACTTGATTTTGGTTTCTCAATTGCTGC

>comp173794\_c0\_seq20

AAACCCGGCCTCGGCGCAGGGAACAGAATCTCCGAACCTTTACTTCTGCGCATTTCTCTTCGTCAGCCATTCATCCTAATCCGAAAGCCTAAACCTAGTTATGGATCCCGCGTCTTCATC  
CGTCGGATTTCTCTCTCTGGAACCCACAATCCCCACAAAACCCCGCCGCTGCATCCCCCTCCGGCGGAATCTCTCACTCTGAAATCGGCCAAACCACGGAGAGTTGGTCAAGTG  
AACAGCCTGCGATTGATGAGAGACTTGTTTTACAGGAGGAGATGCATTTATTACGTAGTAGAGCTGCTTCATTGGAAGCGGAACTTGGAAAATCCCACCAAGAAAATGTTGATAGTCAGC  
AATTTGTGCGCAATTTGAAAAGGAATTGAAGGACCTAAAAGAGCATGATCAACAAATGAAAATGAAGCAACTAAAGGTTCTATCTGATCTTCTGGTATCTGTCTCTAAAGTTGAGAGAC  
AAGAAGCAAGGATGAAAATAAGGCAAGAATCCTTGAGGCTGGGCATTGTTAGTATTATCAGGTTGGCATCTAATATAACATTTCTAGAAGATTTTTTTCATCACATGCACAATGGAATTAAT  
CAAAGTGGCAATTTCTACTTGAACTCGGTTTTCTTCAGGAAATTTAAGATTATGCATGTAGGTTACTGTTCAATTTGAAATCAGACATTCCACCACGGATGTTTCTATTACATAAATGTTTCA  
TGAACATATTAAGATTACATATGATATATCATAATCATTTTGATTATGGCTTACTTTTTTTGCTGTATCGTGAATCTTTAGAGCAGGAACAGTCATTTAGAGATTTGGGAGGATGGTCAAATG  
CTGAAGGATATTAATGCTCATCTGGTAGGATTTTTATTTTGTTC AATTATTTATTCATTTTAGCTCAAATAACAGTAGAACAAATTTTGTCTTATATGA

>comp173794\_c0\_seq21

AAACCCGGCCTCGGCGCAGGGAACAGAATCTCCGAACCTTTACTTCTGCGCATTTCTCTTCGTCAGCCATTCATCCTAATCCGAAAGCCTAAACCTAGTTATGGATCCCGCGTCTTCATC  
CGTCGGATTTCTCTCTCTGGAACCCACAATCCCCACAAAACCCCGCCGCTGCATCCCCCTCCGGCGGAATCTCTCACTCTGAAATCGGCCAAACCACGGAGAGTTGGTCAAGTG  
AACAGCCTGCGATTGATGAGAGACTTGTTTTACAGGAGGAGATGCATTTATTACGTAGTAGAGCTGCTTCATTGGAAGCGGAACTTGGAAAATCCCACCAAGAAAATGTTGATAGTCAGC  
AATTTGTGCGCAATTTGAAAAGGTGGAGTGTATTGATAATATGAATGTATTCTTTCTTGACTAATGTTTTGCAAACATGGTTTATTTATTTATTTCTCAGGAATTGAAGGACCTAAAAGA  
GCATGATCAACAAATGAAAATGAAGCAACTAAAGGTTCTATCTGATCTTCTGGTATCTGTCTCTAAAGTTGAGAGACAAGAAGCAAGGATGAAAATAAGGCAAGAATCCTTGAGGCTGG  
GCATTTAGTATTATCAGGTTGGCATCTAATATAACATTTCTAGAAGATTTTTTTCATCACATGCACAATGGAATTAATCAAAGTGGCAATTTCTACTTGAACTCGGTTTTCTTCAGGAAAT  
TTAAGATTATGCATGTAGGTTTACTGTTCAATTTGAAATCAGACATTCCACCACGGATGTTTCTATTACATAAATGTTTTCATGAACATATTAAGATTACATATGATATATCATAATCATTTTGATTAT  
GGCTTACTTTTTTTGCTGTATCGTGAATCTTTAGAGCAGGAACAGTCATTTAGAGATTTGGGAGGATGGTCAAATGCTGAAGGATATTAATGCTCATCTGAAATCTTTGTTGGAGACAAA  
AGAAGCTATTGATAGGTACCGAAAATCACTCAAGAAGAGGCAACCTGACAAGTGTGATGGAAGTGATATTGAAACTGGAATGTCAGAAGAAGATTTCTTATACAAGATGAAATTTGCAT  
ATCACGCTTAGAAAGCATCAGATGAGGAAGAAAATCTTCTCGAGGAGAGGGACCGTTATGAATCGGAGAAGGCAAGGCTTATTCGCGAAATGAAGCGAGTAAGGGATGAGGATGGTTC  
ACGCTTTAATAATTTCCAAGTTCTTAACCAACGATATGCTCTTTAAATCTTCTGGGAAAGGGTGGCTTCAGTGAGGTTTACAAAGCTTTTGATTTGGTGGAGAAAAGATTTGTTGC

>comp173794\_c0\_seq22

AAACCCGGCCTCGGCGCAGGGAACAGAATCTCCGAACCTTTACTTCTGCGCATTTCTCTTCGTCAGCCATTCATCCTAATCCGAAAGCCTAAACCTAGTTATGGATCCCGCGTCTTCATC  
CGTCGGATTTCTCTCTCTGGAACCCACAATCCCCACAAAACCCCGCCGCTGCATCCCCCTCCGGCGGAATCTCTCACTCTGAAATCGGCCAAACCACGGAGAGTTGGTCAAGTG  
AACAGCCTGCGATTGATGAGAGACTTGTTTTACAGGAGGAGATGCATTTATTACGTAGTAGAGCTGCTTCATTGGAAGCGGAACTTGGAAAATCCCACCAAGAAAATGTTGATAGTCAGC

AACTTTGTCGCCAATTTGAAAAGGTGGAGTGTATTTGATAATATGAATGTATTCTTTCTTGACTAATGTTTTGCAAACATGGTTTATTTATTTATTTCTCAGGAATTGAAGGACCTAAAAGA  
GCATGATCAACAAATGAAAATGAAGCAACTAAAGTTCTATCTGATCTTCTGGTATCTGTCTCTAAAGTTGAGAGACAAGAAGCAAGGATGAAAATAAGGCAAGAATCCTTGAGGCTGG  
GCATTGTTAGTATTATCAGAGCAGGAACAGTCATTTCCAGAGATTTGGGAGGATGGTCAAATGCTGAAAGGATATTAATGCTCATCTGAAATCTTTGTTGGAGACAAAAGAAGCTATTGATAG  
GTACCGAAAATCACTCAAGAAGAGGCAACCTGGAGGAAGAAAATCTTCTCGAGGAGAGGGACCGTTATGAATCGGAGAAGGCAAGGCTTATTCGCGAAATGAAGCGAGTAAGGGATG  
AGGATGGTTCACGCTTAATAATTTCCAAGTTCTTAACCAACGATATGCTCTTTTAAATCTTCTGGGAAAGGGTGGCTTCAGTGAGGTTTACAAAGCTTTTGATTTGGTGGAGAAAAGATT  
TGTTGC

>comp173794\_c0\_seq25

AAACCCGGCCTCGGCGCAGGGAACAGAATCTCCGAACCTTTACTTCTGCGCATTTCTCTTCGTCAGCCATTCATCCTAATCCGAAAGCCTAAACCTAGTTATGGATCCCGCGTCTTCATC  
CGTCGGATTTCTCTCTCTGGAAACCCACAATCCCCACAAAAACCCCGCCGCTGCATCCCCCTCCGGCGGAATCTCTCACTCTGAAATCGGCCAAACCACGGAGAGTTGGTCAAGTG  
AACAGCCTGCGATTGATGAGAGACTTGTTTTACAGGAGGAGATGCATTTATTACGTAGTAGAGCTGCTTCATTGGAAGCGGAACTTGAAAATCCCACCAAGAAAATGTTGATAGTCAGC  
AACTTTGTCGCCAATTTGAAAAGGAATTGAAGGACCTAAAAGAGCATGATCAACAAATGAAAATGAAGCAACTAAAGTTCTATCTGATCTTCTGGTATCTGTCTCTAAAGTTGAGAGAC  
AAGAAGCAAGGATGAAAATAAGGCAAGAATCCTTGAGGCTGGGCATTGTTAGTATTATCAGGTTGGCATCTAATATAACATTTCTAGAAGATTTTTTTCATCACATGCACAATGGAATTAAT  
CAAAGTGGCCAATTTCTACTTGAACTCGGTTTTCTTCAGGAAATTTAAGATTATGCATGTAGGTTACTGTTCAATTTGAAATCAGACATTCACCACGGATGTTTCTATTACATAAATGTTTCA  
TGAACATATTAAGATTACATATGATATATCATAATCATTTTGATTATGGCTTACTTTTTTTGCTGTATCGTGAATCTTTAGAGCAGGAACAGTCATTCAGAGATTTGGGAGGATGGTCAAATG  
CTGAAGGATATTAATGCTCATCTGAAATCTTTGTTGGAGACAAAAGAAGCTATTGATAGGTACCGAAAATCACTCAAGAAGAGGCAACCTGACAAGTGTGATGGAAGTATATTGAAACT  
GGAATGTCAGAAGAAGATTTCTTATACAAGATGAAATTTGCATATCACGCTTAGAAAGCATCAGATGAGGAAGAAAATCTTCTCGAGGAGAGGGACCGTTATGAATCGGAGAAGGCAA  
GGCTTATTCGCGAAATGAAGCGAGTAAGGGATGAGGATGGTTCACGCTTAATAATTTCCAAGTTCTTAACCAACGATATGCTCTTTTAAATCTTCTGGGAAAGGGTGGCTTCAGTGAGGT  
TTACAAAAGTAAGTCCGCAACTCTATTTCTTAAAATTATCAACAAAGCAATTTTAGACTTATCTCGGGATTATTTGGTGTCTCTCTCAAGGAGTGAAGATTCGAGTGAGCTGCTATTCTCG  
TTTGGTAGATAAGGAGCATAGTTTTTTTCGCCCACCGGTTCAATAAACTGCAGATTTTATACAGGGGTTGTGAATCAGCCAAATGTATGAAATGCCACAAAATTTGGCAATGTGGTAGGGCT  
GAAAACAGAGCAACTGCAACCAAACCTTTATAAACTCTTCTAAGCATTCTCTTAAAATTTATTAATAATGGGATTCATTAACCTTTTGATTTTTTGTCTTTGTTTCGGCTTTTAAAGCATAACCCT  
TTCTCATTGATTTGAAGTGGGAACTGTCATGCAGGCTTTTGATTTGGTGGAGAACAGATTTGTTGCATGTAAGCTTCATGGTCTAAATGTTTCAGTGGAGTGAAGAGAAAAACAGAGCTA  
CATACGCCATGCAGTTCGGGAATACAACATACACAAAACACTGGTTCATCTCATATTGTGCAGCTGTGGGACATATTTGAGATTGATCATAATACTTTTTGTACTGTCTTGAGTACTGCA  
GTGGTATCTGCCACCGGAATGCTTTGAGTTGAGCAAAACA

>comp173794\_c0\_seq26

AAACCCGGCCTCGGCGCAGGGAACAGAATCTCCGAACCTTTACTTCTGCGCATTTCTCTTCGTCAGCCATTCATCCTAATCCGAAAGCCTAAACCTAGTTATGGATCCCGCGTCTTCATC  
CGTCGGATTTCTCTCTCTGGAAACCCACAATCCCCACAAAAACCCCGCCGCTGCATCCCCCTCCGGCGGAATCTCTCACTCTGAAATCGGCCAAACCACGGAGAGTTGGTCAAGTG  
AACAGCCTGCGATTGATGAGAGACTTGTTTTACAGGAGGAGATGCATTTATTACGTAGTAGAGCTGCTTCATTGGAAGCGGAACTTGAAAATCCCACCAAGAAAATGTTGATAGTCAGC  
ACCAATTTGAA

>comp173794\_c0\_seq27

AAACCCGGCCTCGGCGCAGGGAACAGAATCTCCGAACCTTTACTTCTGCGCATTTCTCTTCGTCAGCCATTCATCCTAATCCGAAAGCCTAAACCTAGTTATGGATCCCGCGTCTTCATC  
CGTCGGATTTCTCTCTCTGGAAACCCACAATCCCCACAAAAACCCCGCCGCTGCATCCCCCTCCGGCGGAATCTCTCACTCTGAAATCGGCCAAACCACGGAGAGTTGGTCAAGTG

AACAGCCTGCGATTGATGAGAGACTTGTTTTACAGGAGGAGATGCATTTATTACGTAGTAGAGCTGCTTCATTGGAAGCGGAACTTGAAAAATCCCACCAAGAAAATGTTGATAGTCAGC  
AACTTTGTGCGCAATTTGAAAAGGAATTGAAGGACCTAAAAGAGCATGATCAACAAATGAAAATGAAGCAACTAAAGGTTCTATCTGATCTTCTGGTATCTGTCTCTAAAGTTGAGAGAC  
AAGAAGCAAGGATGAAAATAAGGCAAGAATCCTTGAGGCTGGGCATTGTTAGTATTATCAGGTTGGCATCTAATATAACATTTCTAGAAGATTTTTTTCATCACATGCACAATGGAATTAAT  
CAAAGTGGCCAATTTCTACTTGAACTCGGTTTTCTTCAGGAAAATTAAGATTATGCATGTAGGTTACTGTTCAATTTGAAATCAGACATTCCACCACGGATGTTTCTATTCATAAATGTTTCA  
TGAACATATTAAGATTACATATGATATATCATAATCATTTTTGATTATGGCTTACTTTTTTTGCTGTATCGTGAATCTTTAGAGCAGGAACAGTCATTCAGAGATTTGGGAGGATGGTCAAATG  
CTGAAGGATATTAATGCTCATCTGAAATCTTTGTTGGAGACAAAAGAAGCTATTGATAGGTACCGAAAATCACTCAAGAAGAGGCAACCTGGAGGAAGAAAATCTTCTCGAGGAGAGGG  
ACCGTTATGAATCGGAGAAGGCAAGGCTTATTCGCGAAATGAAGCGAGTAAGGGATGAGGATGGTTCACGCTTTAATAATTTCCAAGTTCTTAACCAACGATATGCTCTTTTAAATCTTCT  
GGGAAAGGGTGGCTTCAGTGAGGTTTACAAAGTAAAGTCCGCAACTCTATTTCTTAAATTATCAACAAAGCAATTTTAGACTTATCTCGGGATTATTTGGTGCTCTCCTCTCAAGGAGTGA  
AGATTCGAGTGAGCTGCTATTCTCGTTTGGTAGATAAGGAGCATAGTTTTTTCGCCACCGGTTCAATAAACTGCAGATTTTATACAGGGGTTGTGAATCAGCCAAATGTATGAAATGCCAC  
AAAATTTGGCAATGTGGTAGGGCTGAAAACAGAGCAACTGCAACCAAACCTTTATAAACTCTTCTAAGCATTCTCTTAAAATTTATTAATAATGGGATTCATTAACCTTTTGATTTTTTGGCTT  
TGTTTCGGCTTTTTAAGCATAACCCTTTCTCATTGATTTGAAGTGGGAAGTGCATGCAGGCTTTTGATTTGGTGGAGAACAGATTTGTTGCATGTAAGCTTCATGGTCTAAATGTTTCAGTGG  
AGTGAAGAGAAAAACAGAGCTACATACGCCATGCAGTTCGGGAATACAACATACACAAAACACTGGTTCATCCTCATATTGTGCAGCTGTGGGACATATTTGAGATTGATCATAACTT  
TTTGTACTGTCTTGGAGTACTGCAGTGGTAAACTAGCTTTTCATTTTTACTGTTTTTGGTGATTTCTTAAATAAAGCTGATTGCTTTGTCTTATCAGTTGGCCAAAGCTATATTTCTTTATCATAT  
GGAAATGGATTTTGTGAACTTTTTTTCTTTTATACTCACTTTTCTTTTGTGTTAGATTAGTGGATTCAAATCACTTGATTTTGGTTTCTCAATTGCTGC

>comp173794\_c0\_seq28

AAACCCGGCCTCGGCGCAGGGAACAGAATCTCCGAACCTTTACTTCTGCGCATTTCTCTTCGTCAGCCATTCATCCTAATCCGAAAGCCTAAACCTAGTTATGGATCCCGCGTCTTCATC  
CGTCGGATTTCTCTCTCTGGAACCCACAATCCCCACAAAAACCCCGCCGCTGCATCCCCCTCCGGCGGAATCTCTCACTCTGAAATCGGCCAAACCACGGAGAGTTGGTCAAGTG  
AACAGCCTGCGATTGATGAGAGACTTGTTTTACAGGAGGAGATGCATTTATTACGTAGTAGAGCTGCTTCATTGGAAGCGGAACTTGAAAAATCCCACCAAGAAAATGTTGATAGTCAGC  
AACTTTGTGCGCAATTTGAAAAGGTGGAGTGTATTTGATAATATGAATGTATTCTTTCTTGACTAATGTTTTGCAAACATGGTTTATTTATTTATTTTCTCAGGAATTGAAGGACCTAAAAGA  
GCATGATCAACAAATGAAAATGAAGCAACTAAAGGTTCTATCTGATCTTCTGGTATCTGTCTCTAAAGTTGAGAGACAAGAAGCAAGGATGAAAATAAGGCAAGAATCCTTGAGGCTGG  
GCATTGTTAGTATTATCAGGTTGGCATCTAATATAACATTTCTAGAAGATTTTTTTCATCACATGCACAATGGAATTAATCAAAGTGGCCAATTTCTACTTGAACCTCGGTTTTCTTCAGGAAAT  
TTAAGATTATGCATGTAGGTTTACTGTTCAATTTGAAATCAGACATTCCACCACGGATGTTTCTATTCATAAATGTTTCATGAACATATTAAGATTACATATGATATATCATAATCATTTTGATTAT  
GGCTTACTTTTTTTGCTGTATCGTGAATCTTTAGAGCAGGAACAGTCATTCAGAGATTTGGGAGGATGGTCAAATGCTGAAGGATATTAATGCTCATCTGGTAGGATTTTTATTTGTTTCA  
ATTATTTATTCATTTTAGCTCAAATAACAGTAGAACAATTTTTGCTTATATGA

>comp173794\_c0\_seq3

AAACCCGGCCTCGGCGCAGGGAACAGAATCTCCGAACCTTTACTTCTGCGCATTTCTCTTCGTCAGCCATTCATCCTAATCCGAAAGCCTAAACCTAGTTATGGATCCCGCGTCTTCATC  
CGTCGGATTTCTCTCTCTGGAACCCACAATCCCCACAAAAACCCCGCCGCTGCATCCCCCTCCGGCGGAATCTCTCACTCTGAAATCGGCCAAACCACGGAGAGTTGGTCAAGTG  
AACAGCCTGCGATTGATGAGAGACTTGTTTTACAGGAGGAGATGCATTTATTACGTAGTAGAGCTGCTTCATTGGAAGCGGAACTTGAAAAATCCCACCAAGAAAATGTTGATAGTCAGC  
AACTTTGTGCGCAATTTGAAAAGGAATTGAAGGACCTAAAAGAGCATGATCAACAAATGAAAATGAAGCAACTAAAGGTTCTATCTGATCTTCTGGTATCTGTCTCTAAAGTTGAGAGAC  
AAGAAGCAAGGATGAAAATAAGGCAAGAATCCTTGAGGCTGGGCATTGTTAGTATTATCAGGTTGGCATCTAATATAACATTTCTAGAAGATTTTTTTCATCACATGCACAATGGAATTAAT  
CAAAGTGGCCAATTTCTACTTGAACTCGGTTTTCTTCAGGAAAATTAAGATTATGCATGTAGGTTACTGTTCAATTTGAAATCAGACATTCCACCACGGATGTTTCTATTCATAAATGTTTCA

TGAACATATTAAGATTACATATGATATATCATAATCATTTTTGATTATGGCTTACTTTTTTTGCTGTATCGTGAATCTTTAGAGCAGGAACAGTCATTCAGAGATTTGGGAGGATGGTCAAATG  
CTGAAGGATATTAATGCTCATCTGAAATCTTTGTTGGAGACAAAAGAAGCTATTGATAGGTACCGAAAATCACTCAAGAAGAGGCAACCTGACAAGTGTGATGGAAGTGAATTTGAAACT  
GGAATGTCAGAAGAAGATTTTCTTATACAAGATGAAATTTGCATATCACGCTTAGAAAGCATCAGATGAGGAAGAAAATCTTCTCGAGGAGAGGGACCGTTATGAATCGGAGAAGGCAA  
GGCTTATTCGCGAAATGAAGCGAGTAAGGGATGAGGATGGTTCACGCTTTAATAATTTCCAAGTTCTTAACCAACGATATGCTCTTTTAAATCTTCTGGGAAAGGGTGGCTTCAGTGAGGT  
TTACAAAAGTAAGTCCGCAACTCTATTTCTTAAAATTATCAACAAAGCAATTTTAGACTTATCTCGGGATTATTTGGTGTCTCTCTCTCAAGGAGTGAAGATTCGAGTGAGCTGCTATTCTCG  
TTTGGTAGATAAGGAGCATAGTTTTTTTCGCCACCGGTTCAATAAACTGCAGATTTTATACAGGGGTTGTGAATCAGCCAAATGTATGAAATGCCACAAAATTTGGCAATGTGGTAGGGCT  
GAAAACAGAGCAACTGCAACCAAACCTTTATAAACTCTTCTAAGCATTCTCTTAAAATTTATATAAAATGGGATTCATTAACCTTTTGATTTTTTTGCTTTTGTTCGGCTTTTTAAGCATAACCT  
TTCTCATTGATTTGAAGTGGGAACTGTCATGCAGGCTTTTGATTTGGTGGAGAACAGATTTGTTGCATGTAAGCTTCATGGTCTAAATGTTTCAGTGGAGTGAAGAGAAAAAACAGAGCTA  
CATACGCCATGCAGTTCGGGAATACAACATACACAAAACACTGGTTCATCCTCATATTGTGCAGCTGTGGGACATATTTGAGATTGATCATAATACTTTTTGTACTGTCTTGGAGTACTGCA  
GTGGTAAACTAGCTTTCATTTTTACTGTTTTTGGTGATTTCTTAAATAAAGCTGATTGCTTTGTCTTATCAGTTGGCCAAAGCTATATTCTTTATCATATGGAAATGGATTTTGTGAACCTTTT  
TTTTTTTTATACCTCACTTTTCTTTTGTGTTAGATTAGTGGATTCAAATCACTTGATTTTGGTTTCTCAATTGCTGC

>comp173794\_c0\_seq33

AAACCCGGCCTCGGCGCAGGGAACAGAATCTCCGAACCTTTACTTCTGCGCATTTCTCTTCGTCAGCCATTCATCCTAATCCGAAAGCCTAAACCTAGTTATGGATCCCGCGTCTTCATC  
CGTCGGATTTCTCTCTCTGGAACCCACAATCCCCACAAAACCCCGCCGCTGCATCCCCCTCCGGCGGAATCTCTCACTCTGAAATCGGCCAAACCACGGAGAGTTGGTCAAGTG  
AACAGCCTGCGATTGATGAGAGACTTGTTTTACAGGAGGAGATGCATTTATTACGTAGTAGAGCTGCTTCATTGGAAGCGGAACTTGAAAATCCCACCAAGAAAATGTTGATAGTCAGC  
AACTTTGTCCCAATTTGAAAAGGAATTGAAGGACCTAAAAGAGCATGATCAACAAATGAAAATGAAGCAACTAAAGGTTCTATCTGATCTTCTGGTATCTGTCTCTAAAGTTGAGAGAC  
AAGAAGCAAGGATGAAAATAAGGCAAGAATCCTTGAGGCTGGGCATTGTTAGTATTATCAGAGCAGGAACAGTCATTCAGAGATTTGGGAGGATGGTCAAATGCTGAAGGATATTAATG  
CTCATCTGAAATCTTTGTTGGAGACAAAAGAAGCTATTGATAGGTACCGAAAATCACTCAAGAAGAGGCAACCTGGAGGAAGAAAATCTTCTCGAGGAGAGGGACCGTTATGAATCGGA  
GAAGGCAAGGCTTATTCGCGAAATGAAGCGAGTAAGGGATGAGGATGGTTCACGCTTTAATAATTTCCAAGTTCTTAACCAACGATATGCTCTTTTAAATCTTCTGGGAAAGGGTGGCTTC  
AGTGAGGTTTACAAAGCTTTTGATTTGGTGGAGAACAGATTTGTTGCATGTAAGCTTCATGGTCTAAATGTTTCAGTGGAGTGAAGAGAAAAAACAGAGCTACATACGCCATGCAGTTCGG  
GAATACAACATACACAAAACACTGGTTCATCCTCATATTGTGCAGCTGTGGGACATATTTGAGATTGATCATAATACTTTTTGTACTGTCTTGGAGTACTGCAGTGGTAAACTAGCTTTCATT  
TTTACTGTTTTTGGTGATTTCTTAAATAAAGCTGATTGCTTTGTCTTATCAGTTGGCCAAAGCTATATTCTTTATCATATGGAAATGGATTTTGTGAACCTTTTTTTCTTTTATACCTCACTTT  
TCTTTTGTGTTAGATTAGTGGATTCAAATCACTTGATTTTGGTTTCTCAATTGCTGC

>comp173794\_c0\_seq34

AAACCCGGCCTCGGCGCAGGGAACAGAATCTCCGAACCTTTACTTCTGCGCATTTCTCTTCGTCAGCCATTCATCCTAATCCGAAAGCCTAAACCTAGTTATGGATCCCGCGTCTTCATC  
CGTCGGATTTCTCTCTCTGGAACCCACAATCCCCACAAAACCCCGCCGCTGCATCCCCCTCCGGCGGAATCTCTCACTCTGAAATCGGCCAAACCACGGAGAGTTGGTCAAGTG  
AACAGCCTGCGATTGATGAGAGACTTGTTTTACAGGAGGAGATGCATTTATTACGTAGTAGAGCTGCTTCATTGGAAGCGGAACTTGAAAATCCCACCAAGAAAATGTTGATAGTCAGC  
AACTTTGTCCCAATTTGAAAAGGAATTGAAGGACCTAAAAGAGCATGATCAACAAATGAAAATGAAGCAACTAAAGGTTCTATCTGATCTTCTGGTATCTGTCTCTAAAGTTGAGAGAC  
AAGAAGCAAGGATGAAAATAAGGCAAGAATCCTTGAGGCTGGGCATTGTTAGTATTATCAGGTTGGCATCTAATAAACATTTCTAGAAGATTTTTTTCATCACATGCACAATGGAATTAAT  
CAAAGTGGCCAATTTCTACTTGAACCTCGTTTTCTTCAGGAAAATTAAGATTATGCATGTAGGTTTACTGTTCAATTTGAAATCAGACATTCCACCACGGATGTTTCTATTCATAAATGTTTCA  
TGAACATATTAAGATTACATATGATATATCATAATCATTTTTGATTATGGCTTACTTTTTTTGCTGTATCGTGAATCTTTAGAGCAGGAACAGTCATTCAGAGATTTGGGAGGATGGTCAAATG



CTGAAGGATATTAATGCTCATCTGAAATCTTTGTTGGAGACAAAAGAAGCTATTGATAGGTACCGAAAATCACTCAAGAAGAGGCAACCTGGAGGAAGAAAATCTTCTCGAGGAGAGGG  
ACCGTTATGAATCGGAGAAGGCAAGGCTTATTCGCGAAATGAAGCGAGTAAGGGATGAGGATGGTTCACGCTTTAATAATTTCCAAGTTCTTAACCAACGATATGCTCTTTTAAATCTTCT  
GGGAAAGGGTGGCTTCAGTGAGGTTTACAAAAGTAAAGTCCGCAACTCTATTTCTTAAAATTATCAACAAAAGCAATTTTAGACTTATCTCGGGATTATTTGGTGCTCTCCTCTCAAGGAGTGA  
AGATTCGAGTGAGCTGCTATCTCGTTTGGTAGATAAGGAGCATAGTTTTTTTCGCCACCGGTTCAATAAACTGCAGATTTTATACAGGGGTTGTGAATCAGCCAAATGTATGAAATGCCAC  
AAAATTTGGCAATGTGGTAGGGCTGAAAACAGAGCAACTGCAACCAAACCTTTATAAACTCTTCTAAGCATTCTCTTAAAATTTATTAATAATGGGATTCATTAACCTTTTGATTTTTTTGCTT  
TGTTTCGGCTTTTTAAGCATAACCCTTTCTCATTGATTTGAAGTGGGAAGTGCATGCAGGCTTTTGATTTGGTGGAGAACAGATTTGTTGCATGTAAGCTTCATGGTCTAAATGTTTCAGTGG  
AGTGAAGAGAAAAACAGAGCTACATACGCCATGCAGTTCGGGAATACAACATACACAAAACACTGGTTCATCCTCATATTGTGCAGCTGTGGGACATATTTGAGATTGATCATAATACTT  
TTTGTACTGTCTTGGAGTACTGCAGTGGTATCTGCCACCGGAATGCTTTGAGTTGAGCAAAAACA

>comp173794\_c0\_seq39

AAACCCGGCCTCGGCGCAGGGAACAGAATCTCCGAACCTTACTTCTGCGCATTTCCTCTTCGTCAGCCATTCATCCTAATCCGAAAAGCCTAAACCTAGTTATGGATCCCGCGTCTTCATC  
CGTCGGATTTCTCTCTCTGGAACCCACAATCCCCACAAAAACCCCGCCGCTGCATCCCCCTCCGGCGGAATCTCTCACTCTGAAATCGGCCAAACCACGGAGAGTTGGTCAAGTG  
AACAGCCTGCGATTGATGAGAGACTTGTTTTACAGGAGGAGATGCATTTATTACGTAGTAGAGCTGCTTCATTGGAAGCGGAACTTGAAAATCCCACCAAGAAAATGTTGATAGTCAGC  
AATTTGTGCGCAATTTGAAAAGGAATGAAGGACCTAAAAGAGCATGATCAACAAATGAAAATGAAGCAACTAAAGGTTCTATCTGATCTTCTGGTATCTGTCTCTAAAGTTGAGAGAC  
AAGAAGCAAGGATGAAAATAAGGCAAGAATCCTTGAGGCTGGGCATTGTTAGTATTATCAGGTTGGCATCTAATATAACATTTCTAGAAGATTTTTTTCATCACATGCACAATGGAATTAAT  
CAAAGTGGCCAATTTCTACTTGAACCTCGTTTTCTTCAGGAAATTTAAGATTATGCATGTAGGTTTACTGTTCAATTTGAAATCAGACATTCCACCACGGATGTTTCTATTCATAAATGTTTCA  
TGAACATATTAAGATTACATATGATATATCATAATCATTTTGATTATGGCTTACTTTTTTTGCTGTATCGTGAATCTTTAGAGCAGGAACAGTCATTTTCAGAGATTTGGGAGGATGGTCAAATG  
CTGAAGGATATTAATGCTCATCTGAAATCTTTGTTGGAGACAAAAGAAGCTATTGATAGGTACCGAAAATCACTCAAGAAGAGGCAACCTGGAGGAAGAAAATCTTCTCGAGGAGAGGG  
ACCGTTATGAATCGGAGAAGGCAAGGCTTATTCGCGAAATGAAGCGAGTAAGGGATGAGGATGGTTCACGCTTTAATAATTTCCAAGTTCTTAACCAACGATATGCTCTTTTAAATCTTCT  
GGGAAAGGGTGGCTTCAGTGAGGTTTACAAAAGCTTTTGATTTGGTGGAGAAAAGATTTGTTGC

>comp173794\_c0\_seq4

AAACCCGGCCTCGGCGCAGGGAACAGAATCTCCGAACCTTACTTCTGCGCATTTCCTCTTCGTCAGCCATTCATCCTAATCCGAAAAGCCTAAACCTAGTTATGGATCCCGCGTCTTCATC  
CGTCGGATTTCTCTCTCTGGAACCCACAATCCCCACAAAAACCCCGCCGCTGCATCCCCCTCCGGCGGAATCTCTCACTCTGAAATCGGCCAAACCACGGAGAGTTGGTCAAGTG  
AACAGCCTGCGATTGATGAGAGACTTGTTTTACAGGAGGAGATGCATTTATTACGTAGTAGAGCTGCTTCATTGGAAGCGGAACTTGAAAATCCCACCAAGAAAATGTTGATAGTCAGC  
AATTTGTGCGCAATTTGAAAAGGTGGAGTGTATTGATAATATGAATGTATTCTTTCTTGACTAATGTTTTGCAAACATGGTTTATTTATTTATTTTCTCAGGAATTGAAGGACCTAAAAGA  
GCATGATCAACAAATGAAAATGAAGCAACTAAAGGTTCTATCTGATCTTCTGGTATCTGTCTCTAAAGTTGAGAGACAAGAAGCAAGGATGAAAATAAGGCAAGAATCCTTGAGGCTGG  
GCATTGTTAGTATTATCAGGTTGGCATCTAATATAACATTTCTAGAAGATTTTTTTCATCACATGCACAATGGAATTAATCAAAGTGGCCAATTTCTACTTGAACCTCGGTTTTCTTCAGGAAAT  
TTAAGATTATGCATGTAGGTTTACTGTTCAATTTGAAATCAGACATTCCACCACGGATGTTTCTATTCATAAATGTTTCATGAACATATTAAGATTACATATGATATATCATAATCATTTTGATTAT  
GGCTTACTTTTTTTGCTGTATCGTGAATCTTTAGAGCAGGAACAGTCATTTTCAGAGATTTGGGAGGATGGTCAAATGCTGAAGGATATTAATGCTCATCTGAAATCTTTGTTGGAGACAAA  
AGAAGCTATTGATAGGTACCGAAAATCACTCAAGAAGAGGCAACCTGGAGGAAGAAAATCTTCTCGAGGAGAGGGACCGTTATGAATCGGAGAAGGCAAGGCTTATTCGCGAAATGAA  
GCGAGTAAGGGATGAGGATGGTTCACGCTTTAATAATTTCCAAGTTCTTAACCAACGATATGCTCTTTTAAATCTTCTGGGAAAGGGTGGCTTCAGTGAGGTTTACAAAAGTAAGTCCGCAA  
CTCTATTTCTTAAAATTATCAACAAAAGCAATTTTAGACTTATCTCGGGATTATTTGGTGCTCTCCTCTCAAGGAGTGAAGATTTCAGTGAGCTGCTATTCTCGTTTGGTAGATAAGGAGCATA

GTTTTTCGCCCACCGGTTCAATAAACTGCAGATTTTATACAGGGGTTGTGAATCAGCCAAATGTATGAAATGCCACAAAATTTGGCAATGTGGTAGGGCTGAAAACAGAGCAACTGCAA  
CCAAACTTTATAAACTCTTCTAAGCATTCTCTTAAAATTTATTAATAATGGGATTCATTAACCTTTTGATTTTTTTGCTTTGTTTCGGCTTTTTAAGCATAACCCTTTCTCATTGATTTGAAGTGG  
GAACTGTCATGCAGGCTTTTGATTTGGTGG

>comp173794\_c0\_seq45

AAACCCGGCCTCGGGCGCAGGGAACAGAATCTCCGAACCTTACTTCTGCGCATTTCCTCTTCGTCAGCCATTCATCCTAATCCGAAAAGCCTAAACCTAGTTATGGATCCCGCGTCTTCATC  
CGTCGGATTTCTCTCTCTGGAAACCCACAATCCCCACAAAACCCCGCCGCTGCATCCCCCTCCGGCGGAATCTCTCACTCTGAAATCGGCCAAACCACGGAGAGTTGGTCAAGTG  
AACAGCCTGCGATTGATGAGAGACTTGTTTTACAGGAGGAGATGCATTTATTACGTAGTAGAGCTGCTTCATTGGAAGCGGAACTTGAAAATCCCACCAAGAAAATGTTGATAGTCAGC  
AACTTTGTGCGCAATTTGAAAAGGAATTGAAGGACCTAAAAGAGCATGATCAACAAATGAAAATGAAGCAACTAAAGGTTCTATCTGATCTTCTGGTATCTGTCTCTAAAGTTGAGAGAC  
AAGAAGCAAGGATGAAAATAAGGCAAGAATCCTTGAGGCTGGGCATTGTTAGTATTATCAGAGCAGGAACAGTCATTTAGAGATTTGGGAGGATGGTCAAATGCTGAAGGATATTAATG  
CTCATCTGAAATCTTTGTTGGAGACAAAAGAAGCTATTGATAGGTACCGAAAATCACTCAAGAAGAGGCAACCTGGAGGAAGAAAATCTTCTCGAGGAGAGGGACCGTTATGAATCGGA  
GAAGGCAAGGCTTATTCGCGAAATGAAGCGAGTAAGGGATGAGGATGGTTCACGCTTTAATAATTTCCAAGTTCTTAACCAACGATATGCTCTTTTAAATCTTCTGGGAAAGGGTGGCTTC  
AGTGAGGTTTACAAAGTAAGTCCGCAACTCTATTTCTTAAAATTATCAACAAAGCAATTTTAGACTTATCTCGGGATTATTTGGTGCTCTCCTCTCAAGGAGTGAAGATTCGAGTGAGCTG  
CTATTCTCGTTTGGTAGATAAGGAGCATAGTTTTTTTCGCCACCGGTTCAATAAACTGCAGATTTTATACAGGGGTTGTGAATCAGCCAAATGTATGAAATGCCACAAAATTTGGCAATGTG  
GTAGGGCTGAAAACAGAGCAACTGCAACCAAACCTTTATAAACTCTTCTAAGCATTCTCTTAAAATTTATTAATAATGGGATTCATTAACCTTTTGATTTTTTTGCTTTGTTTCGGCTTTTTAAGC  
ATAACCTTTCTCATTGATTTGAAGTGGGAAGTGTGCATGCAGGCTTTTGATTTGGTGGAGAACAGATTTGTTGCATGTAAGCTTCATGGTCTAAATGTTTCAGTGGAGTGAAGAGAAAAAAC  
AGAGCTACATACGCCATGCAGTTCGGGAATACAACATACACAAAACACTGGTTCATCCTCATATTGTGCAGCTGTGGGACATATTTGAGATTGATCATAACTTTTTGTACTGTCTTGGAG  
TACTGCAGTGGTAAACTAGCTTTCATTTTTACTGTTTTTGGTGAATTCCTTAAATAAAGCTGATTGCTTTGTCTTATCAGTTGGCCAAAGCTATATCTTTATCATATGGAAATGGATTTTGTG  
AACTTTTTTTCTTTTATACCTCACTTTTCTTTGTTGTTAGATTAGTGGATTCAAATCACTTGATTTTGGTTTCTCAATTGCTGC

>comp173794\_c0\_seq50

AAACCCGGCCTCGGGCGCAGGGAACAGAATCTCCGAACCTTACTTCTGCGCATTTCCTCTTCGTCAGCCATTCATCCTAATCCGAAAAGCCTAAACCTAGTTATGGATCCCGCGTCTTCATC  
CGTCGGATTTCTCTCTCTGGAAACCCACAATCCCCACAAAACCCCGCCGCTGCATCCCCCTCCGGCGGAATCTCTCACTCTGAAATCGGCCAAACCACGGAGAGTTGGTCAAGTG  
AACAGCCTGCGATTGATGAGAGACTTGTTTTACAGGAGGAGATGCATTTATTACGTAGTAGAGCTGCTTCATTGGAAGCGGAACTTGAAAATCCCACCAAGAAAATGTTGATAGTCAGC  
AACTTTGTGCGCAATTTGAAAAGGTGGAGTGTATTGATAATATGAATGTATTCTTTCTTGACTAATGTTTGCAAACATGGTTTATTTATTTATTTCTCAGGAATTGAAGGACCTAAAAGA  
GCATGATCAACAAATGAAAATGAAGCAACTAAAGGTTCTATCTGATCTTCTGGTATCTGTCTCTAAAGTTGAGAGACAAGAAGCAAGGATGAAAATAAGGCAAGAATCCTTGAGGCTGG  
GCATTGTTAGTATTATCAGAGCAGGAACAGTCATTTAGAGATTTGGGAGGATGGTCAAATGCTGAAGGATATTAATGCTCATCTGAAATCTTTGTTGGAGACAAAAGAAGCTATTGATAG  
GTACCGAAAATCACTCAAGAAGAGGCAACCTGACAAGTGTGATGGAAGTGTGATTTGAAACTGGAATGTCAGAAGAAGATTTCTTATACAAGATGAAATTTGCATATCACGCTTAGAAAG  
CATCAGATGAGGAAGAAAATCTTCTCGAGGAGAGGGACCGTTATGAATCGGAGAAGGCAAGGCTTATTCGCGAAATGAAGCGAGTAAGGGATGAGGATGGTTCACGCTTTAATAATTTT  
CAAGTTCTTAACCAACGATATGCTCTTTTAAATCTTCTGGGAAAGGGTGGCTTCAGTGAGGTTTACAAAGTAAGTCCGCAACTCTATTTCTTAAAATTATCAACAAAGCAATTTAGACTTA  
TCTCGGGATTATTTGGTGTCTCCTCTCAAGGAGTGAAGATTCGAGTGAGCTGCTATTCTCGTTTGGTAGATAAGGAGCATAGTTTTTTTCGCCACCGGTTCAATAAACTGCAGATTTTATA  
CAGGGGTTGTGAATCAGCCAAATGTATGAAATGCCACAAAATTTGGCAATGTGGTAGGGCTGAAAACAGAGCAACTGCAACCAAACCTTTATAAACTCTTCTAAGCATTCTCTTAAAATT  
TATTAATAATGGGATTCATTAACCTTTTGATTTTTTTGCTTTGTTTCGGCTTTTTAAGCATAACCCTTTCTCATTGATTTGAAGTGGGAAGTGTGCATGCAGGCTTTTGATTTGGTGGAGAACAGAT

TTGTTGCATGTAAGCTTCATGGTCTAAATGTTTCAGTGGAGTGAAGAGAAAAACAGAGCTACATACGCCATGCAGTTCGGGAATACAACATACACAAAACACTGGTTCATCCTCATATTGT  
GCAGCTGTGGGACATATTTGAGATTGATCATAATACTTTTGTACTGTCTTGGAGTACTGCAGTGGTAAACTAGCTTTTCATTTTTACTGTTTTTGGTGATTTTCCTTAAATAAAGCTGATTGCTT  
TGTCTTATCAGTTGGCCAAAGCTATATTCTTTATCATATGGAAATGGATTTTGTGAACTTTTTTTCTTTTATACCTCACTTTTCTTTTGTGTTAGATTAGTGGATTCAAATCACTTGATTTTG  
GTTTCTCAATTGCTGC

>comp173794\_c0\_seq53

AAACCCGGCCTCGGCGCAGGGAACAGAATCTCCGAACCTTTACTTCTGCGCATTTCTCTTCGTCAGCCATTCATCCTAATCCGAAAGCCTAAACCTAGTTATGGATCCCGCGTCTTCATC  
CGTCGGATTTCTCTCTCTGGAACCCACAATCCCCACAAAAACCCCGCCGCTGCATCCCCCTCCGCGGGAATCTCTCACTCTGAAATCGGCCAAACCACGGAGAGTTGGTCAAGTG  
AACAGCCTGCGATTGATGAGAGACTTGTTTTACAGGAGGAGATGCATTTATTACGTAGTAGAGCTGCTTCATTGGAAGCGGAACTTGGAAAATCCCACCAAGAAAATGTTGATAGTCAGC  
AACTTTGTCGCCAATTTGAAAAGGTGGAGTGTATTTGATAATATGAATGTATTCTTTCTTGACTAATGTTTTGCAAACATGGTTTATTTATTTATTTCTCAGGAATTGAAGGACCTAAAAGA  
GCATGATCAACAAATGAAAATGAAGCAACTAAAGGTTCTATCTGATCTTCTGGTATCTGTCTCTAAAGTTGAGAGACAAGAAGCAAGGATGAAAATAAGGCAAGAATCCTTGAGGCTGG  
GCATTGTTAGTATTATCAGAGCAGGAACAGTCATTTTCAGAGATTTGGGAGGATGGTCAAATGCTGAAGGATATTAATGCTCATCTGAAATCTTTGTTGGAGACAAAAGAAGCTATTGATAG  
GTACCGAAAATCACTCAAGAAGAGGCAACCTGACAAGTGTGATGGAAGTGATATTGAACTGGAATGTCAGAAGAAGATTTTCTTATACAAGATGAAATTTGCATATCACGCTTAGAAAAG  
CATCAGATGAGGAAGAAAATCTTCTCGAGGAGAGGGACCGTTATGAATCGGAGAAGGCAAGGCTTATTCGCGAAATGAAGCGAGTAAGGGATGAGGATGGTTCACGCTTTAATAATTT  
CAAGTTCTTAACCAACGATATGCTCTTTTAAATCTTCTGGGAAAGGGTGGCTTCAGTGAGGTTTACAAAGCTTTTGATTGGTGGAGAACAGATTTGTTGCATGTAAGCTTCATGGTCTAA  
ATGTTTCAGTGGAGTGAAGAGAAAAACAGAGCTACATACGCCATGCAGTTCGGGAATACAACATACACAAAACACTGGTTCATCCTCATATTGTGCAGCTGTGGGACATATTTGAGATTG  
ATCATAATACTTTTTGACTGTCTTGGAGTACTGCAGTGGTAAACTAGCTTTTCATTTTTACTGTTTTTGGTGATTTTCCTTAAATAAAGCTGATTGCTTTGTCTTATCAGTTGGCCAAAGCTATA  
TTCTTTATCATATGAAAATGGATTTTGTGAACTTTTTTTCTTTTATACCTCACTTTTCTTTTGTGTTAGATTAGTGGATTCAAATCACTTGATTTTGGTTTCTCAATTGCTGC

>comp173794\_c0\_seq54

AAACCCGGCCTCGGCGCAGGGAACAGAATCTCCGAACCTTTACTTCTGCGCATTTCTCTTCGTCAGCCATTCATCCTAATCCGAAAGCCTAAACCTAGTTATGGATCCCGCGTCTTCATC  
CGTCGGATTTCTCTCTCTGGAACCCACAATCCCCACAAAAACCCCGCCGCTGCATCCCCCTCCGCGGGAATCTCTCACTCTGAAATCGGCCAAACCACGGAGAGTTGGTCAAGTG  
AACAGCCTGCGATTGATGAGAGACTTGTTTTACAGGAGGAGATGCATTTATTACGTAGTAGAGCTGCTTCATTGGAAGCGGAACTTGGAAAATCCCACCAAGAAAATGTTGATAGTCAGC  
AACTTTGTCGCCAATTTGAAAAGGAATTGAAGGACCTAAAAGAGCATGATCAACAAATGAAAATGAAGCAACTAAAGGTTCTATCTGATCTTCTGGTATCTGTCTCTAAAGTTGAGAGAC  
AAGAAGCAAGGATGAAAATAAGGCAAGAATCCTTGAGGCTGGGCATTGTTAGTATTATCAGAGCAGGAACAGTCATTTTCAGAGATTTGGGAGGATGGTCAAATGCTGAAGGATATTAATG  
CTCATCTGGTAGGATTTTTATTTTGTTCATTTATTTATTTATTTAGCTCAAATAACAGTAGAACAATTTTGGCTTATATGA

>comp173794\_c0\_seq57

AAACCCGGCCTCGGCGCAGGGAACAGAATCTCCGAACCTTTACTTCTGCGCATTTCTCTTCGTCAGCCATTCATCCTAATCCGAAAGCCTAAACCTAGTTATGGATCCCGCGTCTTCATC  
CGTCGGATTTCTCTCTCTGGAACCCACAATCCCCACAAAAACCCCGCCGCTGCATCCCCCTCCGCGGGAATCTCTCACTCTGAAATCGGCCAAACCACGGAGAGTTGGTCAAGTG  
AACAGCCTGCGATTGATGAGAGACTTGTTTTACAGGAGGAGATGCATTTATTACGTAGTAGAGCTGCTTCATTGGAAGCGGAACTTGGAAAATCCCACCAAGAAAATGTTGATAGTCAGC  
AACTTTGTCGCCAATTTGAAAAGGTGGAGTGTATTTGATAATATGAATGTATTCTTTCTTGACTAATGTTTTGCAAACATGGTTTATTTATTTATTTCTCAGGAATTGAAGGACCTAAAAGA  
GCATGATCAACAAATGAAAATGAAGCAACTAAAGGTTCTATCTGATCTTCTGGTATCTGTCTCTAAAGTTGAGAGACAAGAAGCAAGGATGAAAATAAGGCAAGAATCCTTGAGGCTGG  
GCATTGTTAGTATTATCAGGTTGGCATCTAATATAACATTTCTAGAAGATTTTTTTCATCACATGCACAATGGAATTAATCAAAGTGGCCAATTTCTACTTGAAGTTCAGGAAAT

TTAAGATTATGCATGTAGGTTTACTGTTCAATTTGAAATCAGACATTCCACCACGGATGTTTCTATTATAAATGTTTCATGAACATATTAAGATTACATATGATATATCATAATCATTTTGATTAT  
GGCTTACTTTTTTTGCTGTATCGTGAATCTTTAGAGCAGGAACAGTCATTTAGAGATTGGGAGGATGGTCAAATGCTGAAGGATATTAATGCTCATCTGAAATCTTTGTTGGAGACAAA  
AGAAGCTATTGATAGGTACCGAAAATCACTCAAGAAGAGGGCAACCTGGAGGAAGAAAATCTTCTCGAGGAGAGGGACCGTTATGAATCGGAGAAGGCAAGGCTTATTCGCGAAATGAA  
GCGAGTAAGGGATGAGGATGGTTCACGCTTTAATAATTTCCAAGTTCTTAACCAACGATATGCTCTTTTAAATCTTCTGGGAAAGGGTGGCTTCAGTGAGGTTTACAAAGCTTTTGATTG  
GTGGAGAAAAGATTTGTTGC

>comp173794\_c0\_seq63

AAACCCGGCCTCGGGCGCAGGGAACAGAATCTCCGAACCTTACTTCTGCGCATTTCCTCTTCGTCAGCCATTCATCCTAATCCGAAAGCCTAAACCTAGTTATGGATCCCGCGTCTTCATC  
CGTCGGATTTCTCTCTCTGGAACCCACAATCCCCACAAAACCCCGCCGCTGCATCCCCCTCCGGCGGAATCTCTCACTCTGAAATCGGCCAAACCACGGAGAGTTGGTCAAGTG  
AACAGCCTGCGATTGATGAGAGACTTGTTTTACAGGAGGAGATGCATTTATTACGTAGTAGAGCTGCTTCATTGGAAGCGGAACTTGAAAATCCCACCAAGAAAATGTTGATAGTCAGC  
AATTTGTGCGCAATTTGAAAAGGAATGAAGGACCTAAAAGAGCATGATCAACAAATGAAAATGAAGCAACTAAAGGTTCTATCTGATCTTCTGGTATCTGTCTCTAAAGTTGAGAGAC  
AAGAAGCAAGGATGAAAATAAGGCAAGAATCCTTGAGGCTGGGCATTGTTAGTATTATCAGAGCAGGAACAGTCATTTAGAGATTGGGAGGATGGTCAAATGCTGAAGGATATTAATG  
CTCATCTGAAATCTTTGTTGGAGACAAAAGAAGCTATTGATAGGTACCGAAAATCACTCAAGAAGAGGCAACCTGGAGGAAGAAAATCTTCTCGAGGAGAGGGACCGTTATGAATCGGA  
GAAGGCAAGGCTTATTCGCGAAATGAAGCGAGTAAGGGATGAGGATGGTTCACGCTTTAATAATTTCCAAGTTCTTAACCAACGATATGCTCTTTTAAATCTTCTGGGAAAGGGTGGCTTC  
AGTGAGGTTTACAAAGCTTTTGATTGGTGGAGAACAGATTTGTTGCATGTAAGCTTCATGGTCTAAATGTTTCAGTGGAGTGAAGAGAAAAAACAGAGCTACATACGCCATGCAGTTCCG  
GAATACAACATACACAAAACACTGGTTCATCCTCATATTGTGCAGCTGTGGGACATATTTGAGATTGATCATAATACTTTTTGTACTGTCTTGGAGTACTGCAGTGGTATCTGCCACCGGAA  
TGCTTTGAGTTGAGCAAAAACA

>comp173794\_c0\_seq66

AAACCCGGCCTCGGGCGCAGGGAACAGAATCTCCGAACCTTACTTCTGCGCATTTCCTCTTCGTCAGCCATTCATCCTAATCCGAAAGCCTAAACCTAGTTATGGATCCCGCGTCTTCATC  
CGTCGGATTTCTCTCTCTGGAACCCACAATCCCCACAAAACCCCGCCGCTGCATCCCCCTCCGGCGGAATCTCTCACTCTGAAATCGGCCAAACCACGGAGAGTTGGTCAAGTG  
AACAGCCTGCGATTGATGAGAGACTTGTTTTACAGGAGGAGATGCATTTATTACGTAGTAGAGCTGCTTCATTGGAAGCGGAACTTGAAAATCCCACCAAGAAAATGTTGATAGTCAGC  
AATTTGTGCGCAATTTGAAAAGGTGGAGTGTATTGATAATATGAATGTATTCTTTCTTGACTAATGTTTTGCAAACATGGTTTATTTATTTATTTCTCAGGAATTGAAGGACCTAAAAGA  
GCATGATCAACAAATGAAAATGAAGCAACTAAAGGTTCTATCTGATCTTCTGGTATCTGTCTCTAAAGTTGAGAGACAAGAAGCAAGGATGAAAATAAGGCAAGAATCCTTGAGGCTGG  
GCATTGTTAGTATTATCAGAGCAGGAACAGTCATTTAGAGATTGGGAGGATGGTCAAATGCTGAAGGATATTAATGCTCATCTGAAATCTTTGTTGGAGACAAAAGAAGCTATTGATAG  
GTACCGAAAATCACTCAAGAAGAGGCAACCTGGAGGAAGAAAATCTTCTCGAGGAGAGGGACCGTTATGAATCGGAGAAGGCAAGGCTTATTCGCGAAATGAAGCGAGTAAGGGATG  
AGGATGGTTCACGCTTTAATAATTTCCAAGTTCTTAACCAACGATATGCTCTTTTAAATCTTCTGGGAAAGGGTGGCTTCAGTGAGGTTTACAAAGTAAGTCCGCAACTCTATTCTTAAAA  
TTATCAACAAAAGCAATTTTAGACTTATCTCGGGATTATTTGGTGTCTCTCTCAAGGAGTGAAGATTCGAGTGAGCTGCTATTCTCGTTTGGTAGATAAGGAGCATAGTTTTTTTCGCCAC  
CGGTTCAATAAACTGCAGATTTTATACAGGGGTTGTGAATCAGCCAAATGTATGAAATGCCACAAAATTTGGCAATGTGGTAGGGCTGAAAACAGAGCAACTGCAACCAAACTTTATAAA  
CTCTTCTAAGCATTCTTAAAATTTATTAATAATGGGATTCATTAACCTTTTGATTTTTTTGCTTTGTTTCGGCTTTTTAAGCATAACCCTTTCTCATTGATTGAAAGTGGGAACTGTCATGCAG  
GCTTTTGATTGGTGGAGAACAGATTTGTTGCATGTAAGCTTCATGGTCTAAATGTTTCAGTGGAGTGAAGAGAAAAAACAGAGCTACATACGCCATGCAGTTCGGGAATACAACATACAC  
AAAACACTGGTTCATCCTCATATTGTGCAGCTGTGGGACATATTTGAGATTGATCATAATACTTTTTGTACTGTCTTGGAGTACTGCAGTGGTATCTGCCACCGGAATGCTTTGAGTTGAGC  
AAAACA

>comp173794\_c0\_seq7

AAACCCGGCCTCGGCGCAGGGAACAGAATCTCCGAACCTTTACTTCTGCGCATTTCCTCTTCGTCAGCCATTCATCCTAATCCGAAAGCCTAAACCTAGTTATGGATCCCGCGTCTTCATC  
CGTCGGATTTCCTCTCTCTGGAACCCACAATCCCCACAAAAACCCCGCCGCTGCATCCCCCTCCGGCGGAATCTCTCACTCTGAAATCGGCCAAACCACGGAGAGTTGGTCAAGTG  
AACAGCCTGCGATTGATGAGAGACTTGTTTTACAGGAGGAGATGCATTTATTACGTAGTAGAGCTGCTTCATTGGAAGCGGAACTTGAAAATCCCACCAAGAAAATGTTGATAGTCAGC  
AACTTTGTGCGCAATTTGAAAAGGAATTGAAGGACCTAAAAGAGCATGATCAACAAATGAAAATGAAGCAACTAAAGGTTCTATCTGATCTTCTGGTATCTGTCTCTAAAGTTGAGAGAC  
AAGAAGCAAGGATGAAAATAAGGCAAGAATCCTTGAGGCTGGGCATTGTTAGTATTATCAGGTTGGCATCTAATATAACATTTCTAGAAGATTTTTTTCATCACATGCACAATGGAATTAAT  
CAAAGTGGCCAATTTCTACTTGAACCTCGTTTTCTTCAGGAAATTTAAGATTATGCATGTAGGTTTACTGTTCATTTGAAATCAGACATTCCACCACGGATGTTTCTATTCATAAATGTTTCA  
TGAACATATTAAGATTACATATGATATATCATAATCATTTTGATTATGGCTTACTTTTTTTGCTGTATCGTGAATCTTTAGAGCAGGAACAGTCATTTCCAGAGATTTGGGAGGATGGTCAAATG  
CTGAAGGATATTAATGCTCATCTGAAATCTTTGTTGGAGACAAAAGAAGCTATTGATAGGTACCGAAAATCACTCAAGAAGAGGCAACCTGACAAGTGTGATGGAAGTGATATTGAAACT  
GGAATGTCAGAAGAAGATTTTCTTATACAAGATGAAATTTGCATATCACGCTTAGAAAAGCATCAGATGAGGAAGAAAATCTTCTCGAGGAGAGGGACCGTTATGAATCGGAGAAGGCAA  
GGCTTATTTCGCGAAATGAAGCGAGTAAGGGATGAGGATGGTTCACGCTTTAATAATTTCCAAGTTCTTAACCAACGATATGCTCTTTTAAATCTTCTGGGAAAGGGTGGCTTCAGTGAGGT  
TTACAAAGCTTTTGATTTGGTGGAGAACAGATTTGTTGCATGTAAGCTTCATGGTCTAAATGTTTCAGTGGAGTGAAGAGAAAAACAGAGCTACATACGCCATGCAGTTCGGGAATACAA  
CATACACAAAACACTGGTTCATCCTCATATTGTGCAGCTGTGGGACATATTTGAGATTGATCATAATACTTTTTGTACTGTCTTGGAGTACTGCAGTGGTATCTGCCACCGGAATGCTTTGA  
GTTGAGCAAAACA

>comp173794\_c0\_seq71

AAACCCGGCCTCGGCGCAGGGAACAGAATCTCCGAACCTTTACTTCTGCGCATTTCCTCTTCGTCAGCCATTCATCCTAATCCGAAAGCCTAAACCTAGTTATGGATCCCGCGTCTTCATC  
CGTCGGATTTCCTCTCTCTGGAACCCACAATCCCCACAAAAACCCCGCCGCTGCATCCCCCTCCGGCGGAATCTCTCACTCTGAAATCGGCCAAACCACGGAGAGTTGGTCAAGTG  
AACAGCCTGCGATTGATGAGAGACTTGTTTTACAGGAGGAGATGCATTTATTACGTAGTAGAGCTGCTTCATTGGAAGCGGAACTTGAAAATCCCACCAAGAAAATGTTGATAGTCAGC  
AACTTTGTGCGCAATTTGAAAAGGTGGAGTGTATTTGATAATATGAATGTATTCTTTCTTGACTAATGTTTTGCAAACATGGTTTATTTATTTATTTTCTCAGGAATTGAAGGACCTAAAAGA  
GCATGATCAACAAATGAAAATGAAGCAACTAAAGGTTCTATCTGATCTTCTGGTATCTGTCTCTAAAGTTGAGAGACAAGAAGCAAGGATGAAAATAAGGCAAGAATCCTTGAGGCTGG  
GCATTGTTAGTATTATCAGAGCAGGAACAGTCATTTCCAGAGATTTGGGAGGATGGTCAAATGCTGAAAGGATATTAATGCTCATCTGAAATCTTTGTTGGAGACAAAAGAAGCTATTGATAG  
GTACCGAAAATCACTCAAGAAGAGGCAACCTGACAAGTGTGATGGAAGTGATATTGAAACTGGAATGTCAGAAGAAGATTTTCTTATACAAGATGAAATTTGCATATCACGCTTAGAAAAG  
CATCAGATGAGGAAGAAAATCTTCTCGAGGAGAGGGACCGTTATGAATCGGAGAAGGCAAGGCTTATTCGCGAAATGAAGCGAGTAAGGGATGAGGATGGTTCACGCTTTAATAATTTTC  
CAAGTCTTAACCAACGATATGCTCTTTTAAATCTTCTGGGAAAGGGTGGCTTCAGTGAGGTTTACAAAGCTTTTGATTTGGTGGAGAACAGATTTGTTGCATGTAAGCTTCATGGTCTAA  
ATGTTTCAGTGGAGTGAAGAGAAAAACAGAGCTACATACGCCATGCAGTTCGGGAATACAACATACACAAAACACTGGTTCATCCTCATATTGTGCAGCTGTGGGACATATTTGAGATTG  
ATCATAATACTTTTTGTAAGTGTCTTGGAGTACTGCAGTGGTATCTGCCACCGGAATGCTTTGAGTTGAGCAAAACA

>comp173794\_c0\_seq73

AAACCCGGCCTCGGCGCAGGGAACAGAATCTCCGAACCTTTACTTCTGCGCATTTCCTCTTCGTCAGCCATTCATCCTAATCCGAAAGCCTAAACCTAGTTATGGATCCCGCGTCTTCATC  
CGTCGGATTTCCTCTCTCTGGAACCCACAATCCCCACAAAAACCCCGCCGCTGCATCCCCCTCCGGCGGAATCTCTCACTCTGAAATCGGCCAAACCACGGAGAGTTGGTCAAGTG  
AACAGCCTGCGATTGATGAGAGACTTGTTTTACAGGAGGAGATGCATTTATTACGTAGTAGAGCTGCTTCATTGGAAGCGGAACTTGAAAATCCCACCAAGAAAATGTTGATAGTCAGC  
AACTTTGTGCGCAATTTGAAAAGGTGGAGTGTATTTGATAATATGAATGTATTCTTTCTTGACTAATGTTTTGCAAACATGGTTTATTTATTTATTTTCTCAGGAATTGAAGGACCTAAAAGA

GCATGATCAACAAATGAAAATGAAGCAACTAAAGGTTCTATCTGATCTTCTGGTATCTGTCTCTAAAGTTGAGAGACAAGAAGCAAGGATGAAAATAAGGCAAGAATCCTTGAGGCTGG  
GCATTGTTAGTATTATCAGAGCAGGAACAGTCAATTCAGAGATTTGGGAGGATGGTCAAATGCTGAAGGATATTAATGCTCATCTGGTAGGATTTTATTTTGTTC AATATTTATTCATTTT  
AGCTCAAATAACAGTAGAACAATTTTTGCTTATATGA

>comp173794\_c0\_seq74

AAACCCGGCCTCGGCGCAGGGAACAGAATCTCCGAACCTTACTTCTGCGCATTTCTCTTCGTGAGCCATTCATCTAATCCGAAAAGCCTAAACCTAGTTATGGATCCCGCGTCTTCATC  
CGTCGGATTTCTCTCTCTGGAAACCCACAATCCCCACAAAAACCCCGCCGCTGCATCCCCCTCCGGCGGAATCTCTCACTCTGAAATCGGCCAAACCACGGAGAGTTGGTCAAGTG  
AACAGCCTGCGATTGATGAGAGACTTGTTTTACAGGAGGAGATGCATTTATTACGTAGTAGAGCTGCTTCATTGGAAGCGGAACTTGAAAATCCCACCAAGAAAATGTTGATAGTCAGC  
AACTTTGTGCGCAATTTGAAAAGGTGGAGTGTATTGATAATATGAATGTATCTTTCTTGACTAATGTTTTGCAAACATGGTTTATTTATTTATTTTCTCAGGAATTGAAGGACCTAAAAGA  
GCATGATCAACAAATGAAAATGAAGCAACTAAAGGTTCTATCTGATCTTCTGGTATCTGTCTCTAAAGTTGAGAGACAAGAAGCAAGGATGAAAATAAGGCAAGAATCCTTGAGGCTGG  
GCATTGTTAGTATTATCAGGTTGGCATCTAATATAACATTTCTAGAAGATTTTTTTCATCACATGCACAATGGAATTAATCAAAGTGGCCAATTTCTACTTGAACCTCGGTTTTCTTCAGGAAAT  
TTAAGATTATGCATGTAGGTTTACTGTTCAATTTGAAATCAGACATTCACCACGGATGTTTCTATTACATAAATGTTTCATGAACATATTAAGATTACATATGATATATCATAATCATTTTGATTAT  
GGCTTACTTTTTTTGCTGTATCGTGAATCTTTAGAGCAGGAACAGTCATTTAGAGATTTGGGAGGATGGTCAAATGCTGAAGGATATTAATGCTCATCTGAAATCTTTGTTGGAGACAAA  
AGAAGCTATTGATAGGTACCGAAAATCACTCAAGAAGAGGCAACCTGACAAGTGTGATGGAAGTGAATTTGAAAATGGAATGTCAGAAGAAGATTTTCTTATACAAGATGAAATTTGCAT  
ATCACGCTTAGAAAGCATCAGATGAGGAAGAAAATCTTCTCGAGGAGAGGGACCGTTATGAATCGGAGAAGGCAAGGCTTATTCGCGAAATGAAGCGAGTAAGGGATGAGGATGGTTC  
ACGCTTTAATAATTTCCAAGTTCTTAACCAACGATATGCTCTTTTAAATCTTCTGGGAAAGGGTGGCTTCAGTGAGGTTTACAAAGTAAGTCCGCAACTCTATTTCTTAAAATTATCAACAA  
AGCAATTTTAGACTTATCTCGGGATTATTTGGTGTCTCTCTCAAGGAGTGAAGATTCGAGTGAGCTGCTATTCTCGTTTTGGTAGATAAGGAGCATAGTTTTTTTCGCCACCGGTTCAATA  
AACTGCAGATTTTATACAGGGTTGTGAATCAGCCAAATGTATGAAATGCCACAAAATTTGGCAATGTGGTAGGGCTGAAAACAGAGCAACTGCAACCAAACCTTATAAACTCTTCTAAG  
CATTCCTCTTAAAATTTATTAATAATGGGATTCATTAACCTTTTGATTTTTTTGCTTTGTTGCGGCTTTTTAAGCATAACCCTTTCTCATTGATTTGAAGTGGGAACTGTCATGCAGGCTTTTGATT  
TGGTGGAGAACAGATTTGTTGCATGTAAGCTTCATGGTCTAAATGTTCAAGTGGAGTGAAGAGAAAAACAGAGCTACATACGCCATGCAGTTCCGGGAATACAACATACACAAAACACTG  
GTTATCCTCATATTGTGCAGCTGTGGGACATATTTGAGATTGATCATAATACTTTTTGTACTGTCTTGGAGTACTGCAGTGGTAAACTAGCTTTCATTTTTACTGTTTTTGGTGATTTCTTAA  
AATAAAGCTGATTGCTTTGTCTTATCAGTTGGCCAAAGCTATATTCTTTATCATATGGAAATGGATTTTGTGAACTTTTTTTTCTTTTATACCTCACTTTTCTTTTGTGTTAGATTAGTGGATT  
CAAATCACTTGATTTTGGTTTTCTCAATTGCTGC

>comp173794\_c0\_seq75

AAACCCGGCCTCGGCGCAGGGAACAGAATCTCCGAACCTTACTTCTGCGCATTTCTCTTCGTGAGCCATTCATCTAATCCGAAAAGCCTAAACCTAGTTATGGATCCCGCGTCTTCATC  
CGTCGGATTTCTCTCTCTGGAAACCCACAATCCCCACAAAAACCCCGCCGCTGCATCCCCCTCCGGCGGAATCTCTCACTCTGAAATCGGCCAAACCACGGAGAGTTGGTCAAGTG  
AACAGCCTGCGATTGATGAGAGACTTGTTTTACAGGAGGAGATGCATTTATTACGTAGTAGAGCTGCTTCATTGGAAGCGGAACTTGAAAATCCCACCAAGAAAATGTTGATAGTCAGC  
AACTTTGTGCGCAATTTGAAAAGGTGGAGTGTATTGATAATATGAATGTATCTTTCTTGACTAATGTTTTGCAAACATGGTTTATTTATTTATTTTCTCAGGAATTGAAGGACCTAAAAGA  
GCATGATCAACAAATGAAAATGAAGCAACTAAAGGTTCTATCTGATCTTCTGGTATCTGTCTCTAAAGTTGAGAGACAAGAAGCAAGGATGAAAATAAGGCAAGAATCCTTGAGGCTGG  
GCATTGTTAGTATTATCAGGTTGGCATCTAATATAACATTTCTAGAAGATTTTTTTCATCACATGCACAATGGAATTAATCAAAGTGGCCAATTTCTACTTGAACCTCGGTTTTCTTCAGGAAAT  
TTAAGATTATGCATGTAGGTTTACTGTTCAATTTGAAATCAGACATTCACCACGGATGTTTCTATTACATAAATGTTTCATGAACATATTAAGATTACATATGATATATCATAATCATTTTGATTAT  
GGCTTACTTTTTTTGCTGTATCGTGAATCTTTAGAGCAGGAACAGTCATTTAGAGATTTGGGAGGATGGTCAAATGCTGAAGGATATTAATGCTCATCTGAAATCTTTGTTGGAGACAAA

AGAAGCTATTGATAGGTACCGAAAATCACTCAAGAAGAGGGCAACCTGACAAGTGTGATGGAAGTGATATTGAAACTGGAATGTCAGAAGAAGATTTTCTTATACAAGATGAAATTTGCAT  
ATCACGCTTAGAAAGCATCAGATGAGGAAGAAAATCTTCTCGAGGAGAGGGACCGTTATGAATCGGAGAAGGCAAGGCTTATTCGCGAAATGAAGCGAGTAAGGGATGAGGATGGTTC  
ACGCTTTAATAATTTCCAAGTTCTTAACCAACGATATGCTCTTTTAAATCTTCTGGGAAAGGGTGGCTTCAGTGAGGTTTACAAAGTAAGTCCGCAACTCTATTTCTTAAAATTATCAACAA  
AGCAATTTTAGACTTATCTCGGGATTATTTGGTGCTCTCTCTCAAGGAGTGAAGATTGAGTGAGCTGCTATTCTCGTTTGGTAGATAAGGAGCATAAGTTTTTTCGCCACCGGTTCAATA  
AACTGCAGATTTTATACAGGGTTGTGAATCAGCCAAATGTATGAAATGCCACAAAATTTGGCAATGTGGTAGGGCTGAAAACAGAGCAACTGCAACCAAACCTTATAAACTCTTCTAAG  
CATTCCTCTTAAAATTTATTAATAATGGGATTCATTAACCTTTTGATTTTTTGTCTTTGTTTCGGCTTTTTAAGCATAACCCTTTCTCATTGATTTGAAGTGGGAACTGTCATGCAGGCTTTTGATT  
TGTTGGAGAACAGATTTGTTGCATGTAAGCTTCATGGTCTAAATGTTTCAGTGGAGTGAAGAGAAAAAACAGAGCTACATACGCCATGCAGTTCGGGAATACAACATACACAAAACACTG  
GTTTCATCCTCATATTGTGCAGCTGTGGGACATATTTGAGATTGATCATAATACTTTTTGTACTGTCTTGGAGTACTGCAGTGGTATCTGCCACCGGAATGCTTTGAGTTGAGCAAAAACA

>comp173794\_c0\_seq81

AAACCCGGCCTCGGCGCAGGGAACAGAATCTCCGAACCTTACTTCTGCGCATTTCCTCTTCGTCAGCCATTCATCCTAATCCGAAAACCTAAACCTAGTTATGGATCCCGCGTCTTCATC  
CGTCGGATTTCTCTCTCTGGAACCCACAATCCCCACAAAAACCCCGCGCTGCATCCCCCTCCGGCGGAATCTCTCACTCTGAAATCGGCCAAACCACGGAGAGTTGGTCAAGTG  
AACAGCCTGCGATTGATGAGAGACTTGTTTTACAGGAGGAGATGCATTTATTACGTAGTAGAGCTGCTTCATTGGAAGCGGAACTTGAAAATCCCACCAAGAAAATGTTGATAGTCAGC  
AACTTTGTGCGCAATTTGAAAAGGAATGAAGGACCTAAAAGAGCATGATCAACAAATGAAAATGAAGCAACTAAAGGTTCTATCTGATCTTCTGGTATCTGTCTCTAAAGTTGAGAGAC  
AAGAAGCAAGGATGAAAATAAGGCAAGAATCCTTGAGGCTGGGCATTGTTAGTATTATCAGAGCAGGAACAGTCATTTTCAGAGATTTGGGAGGATGGTCAAATGCTGAAGGATATTAATG  
CTCATCTGAAATCTTTGTTGGAGACAAAAGAAGCTATTGATAGGTACCGAAAATCACTCAAGAAGAGGGCAACCTGACAAGTGTGATGGAAGTGATATTGAAACTGGAATGTCAGAAGAA  
GATTTTCTTATAACAAGATGAAATTTGCATATCACGCTTAGAAAGCATCAGATGAGGAAGAAAATCTTCTCGAGGAGAGGGACCGTTATGAATCGGAGAAGGCAAGGCTTATTCGCGAAAT  
GAAGCGAGTAAGGGATGAGGATGGTTCACGCTTTAATAATTTCCAAGTTCTTAACCAACGATATGCTCTTTTAAATCTTCTGGGAAAGGGTGGCTTCAGTGAGGTTTACAAAGCTTTTGAT  
TTGGTGGAGAACAGATTTGTTGCATGTAAGCTTCATGGTCTAAATGTTTCAGTGGAGTGAAGAGAAAAAACAGAGCTACATACGCCATGCAGTTCGGGAATACAACATACACAAAACACT  
GGTTCATCCTCATATTGTGCAGCTGTGGGACATATTTGAGATTGATCATAATACTTTTTGTACTGTCTTGGAGTACTGCAGTGGTAAACTAGCTTTTCATTTTTACTGTTTTTGGTGATTTCTTT  
AAATAAAGCTGATTGCTTTGTCTTATCAGTTGGCCAAAGCTATATTCTTTATCATATGGAAATGGATTTTGTGAACTTTTTTTCTTTTATACCTCACTTTTCTTTTGTGTTAGATTAGTGGAT  
TCAAATCACTTGATTTTGGTTTCTCAATTGCTGC

>comp174401\_c2\_seq1

CGGGTTAGCTTGCATGGAATTAAGTAGCAAAGATTGGAGATGTTACCCAAAACGCAAACGCTAACGCTGATGCAAACGACTTTATCGCAGGCTTAGCCTGTAAGGAATTAGACTGAGCA  
GTGCTCACCAAGAAACTGTCCAGAATCTACTGATCTCTGAAGTCTCCCTTGATAAAGTCTTTGGCGTCTTCTCGTGAAGAGCTGAGCGAAGTAGAGACAGAGAGAGAGAGAGTGAGAG  
GAGAGAGAAGTAGTTTCAAGGGGAAAACAGCCAGTTTCGGCAACAGCAGTGGATTTATTTAGCTTGTAAAGATGGTGAGAAAGAGAAGAACCGCTTCTCTGGCTATGCTGATGGTGG  
TGTTGAGGGCTCAGGATCTCAAAACCTGGTGGTGGTAGAAGAGATGGAGCTCAAACCTTCTACGGTTTCACAGCAACAGGGTGGAACTCATCACTCTCCAGCTCCACAGGAATTTGGT  
GGAGCTCAAACCTCTCAAGCACCAGGAGGAGCTGGAAGGGCATGTGGCCTGTCAATCCTCAACAATTAGGGGGACGCAGTGTGGTTATCACAGAGCGGTGGCGGACAGCCCTCTC  
GCGGGAGTATGGTCCAGCAGCAAGCTCCCCGGATGGGGTTCCAACATCCTGGTGGGCAACAGGGTAGTGGTGAATCTCAGCAGCATCACGCTGGCCGCAGAGTTGGTGCATATGCATCA  
GCTGGGCAAGGAATTTGCCATCTGTAGCCGAATCATCTAAGCTGCAGCGGCGTCCCGAACTGCACCAAGCAACACAACTCCACACCAAGCGGCACCTGCTCCGACAAGCTCATCAA  
GTCTGATGTGGCTCTGATGGAGGGTTTTTCAGGACCTTCTCTTCAGGCTGAATCCTCAGCTAGTCGGGCTATGGTTCCAGTTTCAAGCAAATCAATGAGATTCCATTGCGCCCAGGCAA  
AGGCAGTTATGGTACCAAGTGTGTGGTTAAGGCTAACCATTCTTTGCGGAGCTTCTAACAAGGATCTTCATCAATATGATGTTTCAATTACACCTGAAGTTACCTCACGTGGTGTAAACC

GAGCTGTGATGGAAGAGCTGGTAAGGGTGTITAGAGAGTCCCATTTGGGTGGCCGACTTCCAGCATATGATGGCAGAAAGAGCCTTTATACGGCTGGACCTCTTCCATTTAGTTCTAATGA  
ATTTACAGGTAACACTAGTTGATGAAGATGATGGAAGCTGGGGCTGAAAGGCGACATAGGAATTTAGAAATTTAGCTGCTCGTGTGATCTTCATCATCTGGGAATGTTTTTG  
GCTGGAAGGCAAGCAGATGCTCCTCAGGAAGCTCTTCAAGTTCTTGATATTGTGCTGCGTGAGTTGCCACTGCTAGGTATTCTCCTGTTGGGCGATCTTTTTACTCTCCCAATCTTGGTC  
GGAGACAACCACTTGGTGAAGGTTTAGAAAAGTTGGCGTGGATTTTATCAAAGCATCAGGCCGACACAGATGGGCTTGTCATTGAATATTGATATGTCATCCACTGCATTCATTGAACCACT  
GCCAGTCATCGACTTTGTAAATCAGCTTCTCAATAGGGATGTTAGGGATGTTCTATCTAGACCATTGTCAGACTCAGATCGTGTCAAGATCAAGAAGGCTCTAAGAGGCGTGAAGGTTGA  
GGTTACACATAGGGGTAATATGCGCAGAAAGTATCGTATATCTGGTTAACGTCACAGGCAACAAGAGAGTTGACTTTTTCTGTTGATGAGAGAGGTACAATGAAGTCGGTGGTGAATAT  
TTTCAAGAGACTTATGGTTTACCATCCAGCATACTAATTGGCCTTGCCACAAAGTTGGCAATCAACAGAGGCCAAATATTTGCCTATGGAGGTGTGCAAGATTGTAGAAGGACAGAGAT  
ATTCGAAGAGGTTGAATGAAAGACAAATAACTGCTCTTCTTAAGGTTACTTGCCAACGTCCAAATGACCGTGAGCGTGATATTATCCAGACTGTTTCATCACAATGCATATGATGAGGATCC  
ATATGCCAGGGAGTTTGAATTAAGAATCAGTGATAAACTTGCTTCTGTTGAAGCACGCATTCTGCCTCCCCCTTGGCTGAAATACCACGAAACCGGTCCGGAGAAGGATTGCCTACCGAT  
AGTGGGCCAGTGGAATATGAGAAATAAGAAAATGGTAAATGGTGGGAGGGTTAGCAACTGGTCTTGCATCAATTTTGTCCGGAATATACAAGAAAATGTTACTCATAAATCTGCAAAGA  
GCTAGCTGAGATGTCCATACGTCTGGAATGGAATTTGCTTCCGAACCTGTAATTCCTCCATCGTTTTGCACGGCCTGATCAAGTTGAAAGAGCATTGAAATCACACCATCATGATGCTATG  
ACTATACTGCATAAGCAGCACAAGGAGCTTGATTACTTATTGTAATATTGCCTGACAACAATGGTTCTCTCTATGGGGATTTGAAGCGTATATGCGAGACTGAGCTTGGGTTAGTTTACA  
ATGTTGTTTAGCTAGGCATGTATATAAACTGAACAAACAATACCTAGCCAATGTTGCTCTGAAGATAAATGTGAAGGTTGGAGGCCGAAATACTGTGCTTGTGGATGCTATATCTAGACGAA  
TACCTTTGGTCAGTGACAGGCCTACTATCATATTTGGCGCTGATGTGACACATCCTCACCTGGGGAAGACTCTAGCCCATCAATTGCTGCTGTTGTGGCTTCTCAAGACTGGCCCGAGAT  
AACCAAAATATGCAGGGTTGGTTTGTGCTCAGGCTCATCGCCAGGAACCTTATTCAGGACTTGTTTAAAATTGAACAGGATCCAAGGCGTGGTAATATCCCTGGCGCATGATTAGGGAACTA  
CTTATTTTCGTTTAAAAGGGCAACAGGAGACAAGCCTCAAAGGATAATTTTTTACAGAGATGGTGTGAGCGAGGGACAATTTTATCAGGTTCTTGTACGAACTTGATGCGATAAGAAAAG  
GCGTGTGCTTCTTTGGAGCCTGGATATCAACCTCCTGTTACTTTTTGTGGTTGTTCAAAGCGCCATCACACTCGATTGTTTGAACAACCCATAACGACCAACGTTCCGGTTGATAGAAGCG  
GCAACATACTTCTGGCACGGTTGTGATTCAAAAATTTGTCATCCCACCGAGTTTACTTCTACTTGTGCAGTCATGCTGGAATTCAAGGTAAGCTAGCCGGCCTGCACATTACCATGTATTA  
TGGGATGAAAACAAATTTCTGCTGATGCACTGCAGATGCTTACCAATATCTTATGCTACACATATGCAAGGTGCACAAGATCAGTATCAATTTGCGCCCTGCATACTACGCTCATCTTGC  
TGCTTCCAGGGCAAGGTTTTATTTGAATCCCATGACATCTGAAAATGCTTACAGCCAAGAGCTGCAGCTGCAAATGAGGCACCCAACACTAGTGAAGATAGAGATCGTGCTGTACAGCC  
TCTTCTGCTATCAAGGAGAATGTTAAGAATGTGATGTTCTACTGTTGAGTTCTGCAGTGCTGTCAGGGCCCTTCTCCTGCTCGCGAGGATAATGTTGAGGAAGTGTGTTCTATTGCTGAT  
TTCTGCGTTCTGCAATTCATGTTCTTTTTACTGCTGCGTCCATGTTGTTATTGAGTCTTCAACTGAAAGAGTTGACCAGGGAAATGTTTGTCTAAGTTTCTTTCAAATTTGATTGACTTGG  
GGTTTCAATAAACTTTTACCAGAAAATTGGATGGATACTTTATGCATTTTTTATATTAACACCTTTGAAAATAAATAAATATTTTCATTTTATTTTAA

>comp174401\_c2\_seq11

CGGGTTAGCTTGCATGGAATTAACCTAGCAAAGATTGGAGATGTTACCCAAAACGCAAACGCTAACGCTGATGCAAACGACTTTATCGCAGGCTTAGCCTGTAAGGAATTAGACTGAGCA  
GTGCTCACCAAGAACTGTCCAGAATCTACTGATCTCTGAAGTCTCCCTTGCAAAAAGTCTTGGCGTCTTCTCGTGAAGAGCTGAGCGAAGTAGAGACAGAGAGAGAGAGAGTGTGAGAG  
GAGAGAGAAGTAGTTTCAAGGGGAAAACAGCCAGTTTCGGCAACAGCAGTGGATTTTATTTAGCTTGTAAAGATGGTGAGAAAGAGAAGAACCCTCTTCTGGCTATGCTGATGGTGG  
TGGTGAGGGCTCAGGATCTCAAACCCTGGTGGTGGTAGAAGAGATGGAGCTCAAACCTTCTACGGTTTACAGCAACAGGGTGGAACTCATCACTCTCCAGCTCCACAGGAATTGGGT  
GGAGCTCAAACCTCTCAAGCACCAGGAGGAGCTGGAAGGGCATGTGGCCTGTCAATCCTCAACAATTAGGGGGACGCAGTGTGGTTATCACAGAGCGGTGGCGGACAGCCCTCTC  
GCGGGAGTATGGTCCAGCAGCAAGCTCCCCGGATGGGGTTCCAACATCCTGGTGGGCAACAGGGTAGTGGTGAATCTCAGCAGCATCACGCTGGCCGAGAGTTGGTGCATATGCATCA  
GCTGGGCAAGGAATTTGCCATCTGTAGCCGAATCATCTAAGCTGCAGCGGCGTCCCGAACTGCACCAAGCAACACAACTCCACACCAAGCGGCACCTGCTCCGACAAGCTCATCAA



GTCCTGATGTGGCTCTGATGGAGGGTTTTTCAGGACCTTTCTCTTCAGGCTGAATCCTCAGCTAGTCGGGCTATGGTTCAGTTTCAAGCAAATCAATGAGATTCCCATTGCGCCCAGGCAA  
AGGCAGTTATGGTACCAAGTGTGTGGTTAAGGCTAACCATTCTTTGCGGAGCTTCCTAACAAGGATCTTCATCAATATGATGTTTCAATTACACCTGAAGTTACCTCACGTGGTGTAACC  
GAGCTGTGATGGAAGAGCTGGTAAGGGTGTTTAGAGAGTCCCATTTGGGTGGCCGACTTCAGCATATGATGGCAGAAAAGAGCCTTTATACGGCTGGACCTCTTCCATTTAGTTCTAATGA  
ATTTCAAGGTAACACTAGTTGATGAAGATGATGGAACCTGGGGCTGAAAGGCGACATAGGAATTTCAAGATTGTTATAAAAATTAGCTGCTCGTGTGATCTTCATCATCTGGGAATGTTTTTG  
GCTGGAAGGCAAGCAGATGCTCCTCAGGAAGCTCTTCAAGTTCTTGATATTGTGCTGCGTGAGTTGCCCACTGCTAGGTATTCTCCTGTTGGGCGATCTTTTTACTCTCCCAATCTTGGTC  
GGAGACAACCACTTGGTGAAGGTTTAGAAAAGTTGGCGTGGATTTTATCAAAGCATCAGGCCGACACAGATGGGCTTGTCAATTGAATATTGATATGTCATCCACTGCATTCATTGAACCACT  
GCCAGTCATCGACTTTGTAAATCAGCTTCTCAATAGGGATGTTAGGGATGTTCTATCTAGACCAATTGTCAGACTCAGATCGTGTCAAGATCAAGAAGGCTCTAAGAGGCGTGAAGGTTGA  
GGTTACACATAGGGGTAATATGCGCAGAAAAGTATCGTATATCTGGTTAAACGTCACAGGCAACAAGAGAGTTGACTTTTTCTGTTGATGAGAGAGGTACAATGAAGTCGGTGGTGAATAT  
TTTCAAGAGACTTATGGTTTACCATCCAGCATACTAATTGGCCTTGCCTACAAGTTGGCAATCAACAGAGGCCAAATTATTTGCCTATGGAGGTGTGCAAGATTGTAGAAGGACAGAGAT  
ATTCGAAGAGGTTGAATGAAAGACAAATAACTGCTCTTCTAAGGTTACTTGCCAACGTCCAAATGACCGTGAGCGTGATATTATCCAGACTGTTCATCACAATGCATATGATGAGGATCC  
ATATGCCAGGGAGTTTGAATGAGAATCAGTGATAAACTTGTCTTCTGTTGAAGCACGATTCTGCCTCCCCCTTGGCTGAAATACCACGAAACCGGTCGGGAGAAGGATTGCCTACCGAT  
AGTGGGCCAGTGGAATATGAGAAATAAGAAAATGGTAAATGGTGGGAGGGTTAGCAACTGGTCTTGCATCAATTTTGTCCGGAATATACAAGAAAATGTTACTCATAAATTCTGCAAAGA  
GCTAGCTGAGATGTGCCATACGTCTGGAATGGAATTTGCTTCCGAACCTGTAATTCCTCCATCGTTTGCACGGCCTGATCAAGTTGAAAGAGCATTGAAATCACACCATCATGATGCTATG  
ACTATACTGCATAAGCAGCACAAGGAGCTTGATTTACTTATTGTAATATTGCCTGACAACAATGGTTCTCTCTATGGGGATTGAAAGCGTATATGCGAGACTGAGCTTGGGTTAGTTTCACA  
ATGTTGTTTAGCTAGGCATGTATATAAACTGAACAAACAATACCTAGCCAATGTTGCTCTGAAGATAAATGTGAAGGTTGGAGGCCGAAATACTGTGCTTGTGGATGCTATATCTAGACGAA  
TACCTTTGGTCAGTGACAGGCCACTATCATATTTGGCGCTGATGTGACACATCCTCACCCCTGGGGAAGACTCTAGCCCATCAATTGCTGCTGTTGTGGCTTCTCAAGACTGGCCCGAGAT  
AACCAAATATGCAGGGTTGGTTTGTGCTCAGGCTCATCGCCAGGAACCTTATCAGGACTTGTTTAAAATTGAACAGGATCCAAGGCGTGGTAATATCCCTGGCGCATGATTAGGGAACTA  
CTTATTTCTGTTTAAAAGGGCAACAGGAGACAAGCCTCAAAGGATAATTTTTTACAGAGATGGTGTGAGCGAGGGACAATTTTATCAGGTTCTCTTGTACGAACTTGATGCGATAAGAAAG  
GCGTGTGCTTCTTTGGAGCCTGGATATCAACCTCCTGTTACTTTTTGTGGTTGTTCAAAGCGCCATCACACTCGATTGTTTGCAAACAACCATAACGACCAACGTTCCGGTTGATAGAAGCG  
GCAACATACTTCTTGGCACGGTTGTGATTCAAAAATTTGTCATCCCACCGAGTTTGACTTCTACTTGTGCAGTCATGCTGGAATTCAAGGTACTAGCCGGCCTGCACATTACCATGTATTA  
TGGGATGAAAACAAATTTCTGCTGATGCACTGCAGATGCTTACCAATATCTTATGCTACACATATGCAAGGTGCACAAGATCAGTTTCAATTGTGCCCCCTGCATATTATGCCCATCTTGCT  
GCTTTTAGGGCAAGGTTTTATATGGAGACAGAGACGTCGGATAGTGGCTCAATGGTAAGTGTGCGGCTGGCCGAGCTTCTGCTGCAAGCGGTTCTCGCAACGATCGAGCACCTGGAAG  
TAGTGCTGTGAGGCCTCTACCTGCTCTAAAGGACAATATCAAGCAGGGGATGGTCTATTGCTGAGGTATTCTGCCAGTTATTGCTCTATTTTCTTATCTCATCAGGGTTCAAACCTGACTGT  
AAATTCAGACTTGTCTTTTATCTTAGAACATGTCTATTTCCCACGTCCAGCATAATTAGTATTTTGGTGTTTGGGAGTGTCTTTAAATGGGGATATTATTATGTGCAGAGACCGAATGCAGAA  
TATCATCCGAAACTGTCAGAATGTGTCACGTCAGTAGTACCGAGCCACGGTACCGAGCAAGGGGTGACGTGATATATTCTGGTTGGTCTTCGGTTCGGCGTTCGGCATCCGCACAAAATA  
ATTCATCATCTTCAAAGCTGCTGACAATCACATCTACTAGATTGGAATGCCAGTAATAAAAAAATTCCTTTTTTTTTTGGAGCAAAGATCTATAATTTGTGAAGTAGCTCTCAAAAAAATCT  
ATCCTTCCAGAATTCTACAATGAATTTACAGACAGCTGCAGCCAATGAAACTGACTCTCAATGATAGTCATGAGAAGCAATTCACCTTTTTGATTTTATACTAGGAAATTATATGCAATGCAA  
ACTTTGGCTTAGAGTGTCTTCTTGGGGGCTTGCCTTATCCATTATGAGCATATAATAAGCATTTTTTTTGTACCAAGAGACAGAGGAGCCAAAAGTAATTTTATTAATAAAAGCATCA  
>comp174401\_c2\_seq2  
CGGGTTAGCTTGCATGGAATTAACCTAGCAAAGATTGGAGATGTTACCCAAAACGCAAACGCTAACGCTGATGCAAACGACTTTATCGCAGGCTTAGCCTGTAAGGAATTAGACTGAGCA  
GTGCTCACCAAGAACTGTCCAGAATCTACTGATCTCTGAAGTCTCCCTTGCATAAAGTCTTGGCGTCTTCTCGTGAAGAGCTGAGCGAAGTAGAGACAGAGAGAGAGAGAGAGTGAAG

GAGAGAGAAGTAGTTTCAAGGGGAAAACAGCCAGTTTCGGCAACAGCAGTGGATTTTATTTAGCTTGTAAAGATGGTGAGAAAGAGAAGAACCGCTCTTCCTGGCTATGCTGATGGTGG  
TGGTGAGGGCTCAGGATCTCAAACCCTGGTGGTGGTAGAAGAGATGGAGCTCAAACCTTCTACGGTTTCACAGCAACAGGGTGGAACCTCATCTCTCCAGCTCCACAGGAATTGGGT  
GGAGCTCAAACCTCTCAAGCACCAGGAGGAGCTGGAAGGGCATGTGGGCCTGTCAATCCTCAACAATTAGGGGGACGCAGTGTGGTTATCACCAGAGCGGTGGCGGACAGCCCTCTC  
GCGGGAGTATGGTCCAGCAGCAAGCTCCCCGGATGGGGTTCCAACATCCTGGTGGGCAACAGGGTAGTGGTGAATCTCAGCAGCATCACGCTGGCCGCAGAGTTGGTGCATATGCATCA  
GCTGGGCAAGGAATTTGCCATCTGTAGCCGAATCATCTAAGCTGCAGCGGCGTCCCGAAGTGCACCAAGCAACACAACTCCACACCAAGCGGCACCTGCTCCGACAAGCTCATCAA  
GTCCTGATGTGGCTCTGATGGAGGGTTTTAGGACCTTTCTCTCAGGCTGAATCCTCAGCTAGTCGGGCTATGGTTCAGTTTCAAGCAAATCAATGAGATTCCCATTGCGCCCAGGCAA  
AGGCAGTTATGGTACCAAGTGTGTGGTTAAGGCTAACCATTTCTTTGCGGAGCTTCTAACAAGGATCTTCATCAATATGATGTTTCAATTACACCTGAAGTTACCTCACGTGGTGTAAACC  
GAGCTGTGATGGAAGAGCTGGTAAGGGTGTITAGAGAGTCCCATTTGGGTGGCCGACTTCCAGCATATGATGGCAGAAAAGAGCCTTTATACGGCTGGACCTCTTCCATTTAGTTCTAATGA  
ATTTCAAGGTAACACTAGTTGATGAAGATGATGGAAGTGGGGCTGAAAGGCGACATAGGAATTTCAGAATTGTTATAAAATTAGCTGCTCGTGCTGATCTTCATCATCTGGGAATGTTTTTG  
GCTGGAAGGCAAGCAGATGCTCCTCAGGAAGCTCTTCAAGTCTTGATATTGTGCTGCGTGAGTTGCCACTGCTAGGTATTCCTGTTGGGCGATCTTTTTACTCTCCCAATCTTGGTC  
GGAGACAACCACTTGGTGAAGGTTTAGAAAAGTTGGCGTGGATTTTATCAAAGCATCAGGCCGACACAGATGGGCTTGTCAATTGAATATTGATATGTCATCCACTGCATTCATTGAACCACT  
GCCAGTCATCGACTTTGTAATCAGCTTCTCAATAGGGATGTTAGGGATGTTCTATCTAGACCAATTGTCAGACTCAGATCGTGTCAAGATCAAGAAGGCTCTAAGAGGCGTGAAGGTTGA  
GGTTACACATAGGGGTAATATGCGCAGAAAAGTATCGTATATCTGGTTTAAACGTCACAGGCAACAAGAGAGTTGACTTTTTCTGTTGATGAGAGAGGTACAATGAAGTCGGTGGTGAATAT  
TTTCAAGAGACTTATGGTTTACCATCCAGCATACTAATTGGCCTTGCCATAAGTTGGCAATCAACAGAGGCCAAATTATTTGCCTATGGAGGTGTGCAAGATTGTAGAAGGACAGAGAT  
ATTCGAAGAGGTTGAATGAAAGACAAATAACTGCTCTTCTTAAGGTTACTTGCCAACGTCCAAATGACCGTGAGCGTGATATTATCCAGACTGTTTCATCACAATGCATATGATGAGGATCC  
ATATGCCAGGGAGTTTGAATTAAGAATCAGTGATAAAGTCTGCTTCTGTTGAAGCACGCATTCTGCCTCCCCCTTGGCTGAAATACCACGAAAACCGGTCGGGAGAAGGATTGCCTACCGAT  
AGTGGGCCAGTGAATATGAGAAATAAGAAAATGGTAAATGGTGGGAGGGTTAGCAACTGGTCTTGATCAATTTTGTCCGGAATATAACAAGAAAATGTTACTCATAAATTCTGCAAAGA  
GCTAGCTGAGATGTGCCATACGTCTGGAATGGAATTTGCTTCCGAACCTGTAATTCCTCCATCGTTTGCACGGCCTGATCAAGTTGAAAGAGCATTGAAATCACACCATCATGATGCTATG  
ACTATACTGCATAAGCAGCACAAGGAGCTTGATTTACTTATTGTAATATTGCCTGACAACAATGGTTCTCTCTATGGGGATTTGAAGCGTATATGT

>comp174401\_c2\_seq3

CGGGTTAGCTTGCATGGAATTAACCTAGCAAAGATTGGAGATGTTACCCAAAACGCAAACGCTAACGCTGATGCAAACGACTTTATCGCAGGCTTAGCCTGTAAGGAATTAGACTGAGCA  
GTGCTACCAAGAAACTGTCCAGAATCTACTGATCTCTGAAGTCTCCCTTGCAAAAAGTCTTGGCGTCTTCTCGTGAAGAGCTGAGCGAAGTAGAGACAGAGAGAGAGAGAGTGAAG  
GAGAGAGAAGTAGTTTCAAGGGGAAAACAGCCAGTTTCGGCAACAGCAGTGGATTTTATTTAGCTTGTAAAGATGGTGAGAAAGAGAAGAACCGCTCTTCCTGGCTATGCTGATGGTGG  
TGGTGAGGGCTCAGGATCTCAAACCCTGGTGGTGGTAGAAGAGATGGAGCTCAAACCTTCTACGGTTTCACAGCAACAGGGTGGAACCTCATCTCTCCAGCCCCACAGCAATTGGGTG  
GAGCTCAACACTCTCAAGCTGCACGACAGCAGGGTGGAGGAGCTGGAAGGGGATGGGGTCTGGTGGCCAACAACAGTTAGGGGGACGAGGTGGGGGTCATTACCAGGGTCGTGGTG  
GGGGTCAACACCAGGGTCTGGTGGTGGACAGCCCTCTCGTGGCGGAATGGTCCAGCAGCAACCTCCTCAGATGGAGTACCAGCATTATGGTGGGCCACATGGTAGAGGTGAAACCCA  
GCAGCAGCATGGTGGCCGCAGAGCTGCTGCACATGCACCAGCTGGGCAAGGAGTTGCCCCATCTGCAGCCGAATCATCTAGGCTGCCGCTTCCCGAGCTGCACCAAGCAACACTAGCTC  
AATGCCAAGCTGCACCTGGTTCTTTGTCAGAGGCAAGCTCATCAAGCACTGATGTATCTCTGACGGAGCGGGTTCAACACCTTTCTCTGCAGGCCGAACCTCAGCTAGTAAGGGTATTG  
TTCCAGTTTCGAGCAAAAACAATGAGATTTCCATTGCGCCCAGGCAAAGGCAGTTATGGTACCAAGTGTGTGGTTAAGGCTAACCATTTCTTTGCGGAGCTTCTAACAAGGATCTTCATC  
AATATGATGTTTCAATTACACCTGAAGTTACCTCACGTGGTGTAAACCGAGCTGTGATGGAAGAGCTGGTAAGGGTGTITAGAGAGTCCCATTTGGGTGGCCGACTTCCAGCATATGATGG  
CAGAAAAGAGCCTTTATACGGCTGGACCTTCCATTTAGTTCTAATGAATTTCAAGGTAACACTAGTTGATGAAGATGATGGAAGTGGGGCTGAAAGGCGACATAGGAATTTCAAGAAATTGTT

ATAAAATTAGCTGCTCGTGCTGATCTTCATCATCTGGGAATGTTTTGGCTGGAAGGCAAGCAGATGCTCCTCAGGAAGCTCTTCAAGTTCTTGATATTGTGCTGCGTGAGTTGCCACTG  
CTAGGTATTCTCCTGTTGGGCGATCTTTTTACTCTCCCAATCTTGGTTCGGAGACAACCACTTGGTGAAGGTTTAGAAAGTTGGCGTGGATTTTATCAAAGCATCAGGCCGACACAGATGGG  
CTTGTCATTGAATATTGATATGTCATCCACTGCATTCATTGAACCACTGCCAGTCATCGACTTTGTAAATCAGCTTCTCAATAGGGATGTTAGGGATGTTCTATCTAGACCATTGTCAGACTC  
AGATCGTGTCAAGATCAAGAAGGCTCTAAGAGGCGTGAAGGTTGAGGTTACACATAGGGGTAATATGCGCAGAAAGTATCGTATATCTGGTTAACGTCACAGGCAACAAGAGAGTTGA  
CTTTCTGTTGATGAGAGAGGTACAATGAAGTCGGTGGTGAATATTTCAAGAGACTTATGGTTTCACCATCCAGCATACTAATTGGCCTTGCCACAAGTTGGCAATCAACAGAGGCC  
AAATTATTTGCCTATGGAGGTGTGCAAGATTGTAGAAGGACAGAGATATTCGAAGAGGTTGAATGAAAGACAAATAACTGCTCTTCTTAAGGTTACTTGCCAACGTCCAAATGACCGTGA  
GCGTGATATTATCCAGACTGTTTCATCACAATGCATATGATGAGGATCCATATGCCAGGGAGTTTGAATTAGAATCAGTGATAAACTTGCTTCTGTTGAAGCACGCATTCTGCCTCCCCCTT  
GGCTGAAATACCACGAAACCGGTTCGGGAGAAGGATTGCCTACCGATAAGTGGGCCAGTGGAAATATGAGAAATAAGAAAATGGTAAATGGTGGGAGGGTTAGCAACTGGTCTTGCATCAAT  
TTTGTCCGGAATATAACAAGAAAATGTTACTCATAAATTCTGCAAAGAGCTAGCTGAGATGTGCCATACGTCTGGAATGGAATTTGCTTCCGAACCTGTAATTCCTCCATCGTTTGCACGGCC  
TGATCAAAGTTGAAAGAGCATTGAAATCACACCATCATGATGCTATGACTATACTGCATAAGCAGCACAAAGGAGCTTGATTTACTTATTGTAATATTGCCTGACAACAATGGTTCTCTCTATG  
GGGATTTGAAGCGTATATGT

>comp174401\_c2\_seq4

CGGGTTAGCTTGCATGGAATTAAGTAGCAAAGATTGGAGATGTTACCCAAAACGCAAACGCTAACGCTGATGCAAACGACTTTATCGCAGGCTTAGCCTGTAAGGAATTAGACTGAGCA  
GTGCTCACCAAGAAACTGTCCAGAATCTACTGATCTCTGAAGTCTCCCTTGCATAAAGTCTTGGCGTCTTCTCGTGAAGAGCTGAGCGAAGTAGAGACAGAGAGAGAGAGAGAGAGAGAG  
GAGAGAGAAGTAGTTTCAAGGGGAAAACAGCCAGTTTCGGCAACAGCAGTGGATTTTATTTAGCTTGTTAAGATGGTGAGAAAGAGAAGAACCCTCTTCTCGGCTATGCTGATGGTGG  
TGGTGAGGGCTCAGGATCTCAAACCCTGGTGGTGGTAGAAGAGATGGAGCTCAAACCTTCTACGGTTTCACAGCAACAGGGTGGAACTCATCTCCAGCCCCACAGCAATTGGGTG  
GAGCTCAACACTCTCAAGCTGCACGACAGCAGGGTGGAGGAGCTGGAAGGGGATGGGGTCTGGTGGCCAACAACAGTTAGGGGGACGAGGTGGGGGTCATTACCAGGGTTCGTGGTG  
GGGGTCAACACCAGGGTTCGTGGTGGTGGACAGCCCTCTCGTGGCGGAATGGTCCAGCAGCAACCTCCTCAGATGGAGTACCAGCATTATGGTGGGCCACATGGTAGAGGTGAAACCCA  
GCAGCAGCATGGTGGCCGCAGAGCTGCTGCACATGCACCAGCTGGGCAAGGAGTTGCCCCATCTGCAGCCGAATCATCTAGGCTGCCGCTTCCCGAGCTGCACCAAGCAACACTAGCTC  
AATGCCAAGCTGCACCTGGTTCTTTGTCAGAGGCAAGCTCATCAAGCACTGATGTATCTCTGACGGAGCGGGTTCAACACCTTTCTCTGCAGGCCGAACCTCAGCTAGTAAGGGTATTG  
TTCCAGTTTCGAGCAAAACAATGAGATTCCTTCCATTGCGCCCAGGCAAAGGCAGTTATGGTACCAAGTGTGTGGTTAAGGCTAACCATTTCTTTGCGGAGCTTCTTAACAAGGATCTTCATC  
AATATGATGTTTCAATTACACCTGAAGTTACCTCACGTGGTGTAAACCGAGCTGTGATGGAAGAGCTGGTAAGGGTGTTTAGAGAGTCCCATTTGGGTGGCCGACTTCCAGCATATGATGG  
CAGAAAGAGCCTTTATACGGCTGGACCTCTCCATTTAGTTCTAATGAATTTCAAGGTAACACTAGTTGATGAAGATGATGGAACCTGGGGCTGAAAGGCGACATAGGAATTCAGAATTGTT  
ATAAAATTAGCTGCTCGTGCTGATCTTCATCATCTGGGAATGTTTTGGCTGGAAGGCAAGCAGATGCTCCTCAGGAAGCTCTTCAAGTTCTTGATATTGTGCTGCGTGAGTTGCCACTG  
CTAGGTATTCTCCTGTTGGGCGATCTTTTTACTCTCCCAATCTTGGTTCGGAGACAACCACTTGGTGAAGGTTTAGAAAGTTGGCGTGGATTTTATCAAAGCATCAGGCCGACACAGATGGG  
CTTGTCATTGAATATTGATATGTCATCCACTGCATTCATTGAACCACTGCCAGTCATCGACTTTGTAAATCAGCTTCTCAATAGGGATGTTAGGGATGTTCTATCTAGACCATTGTCAGACTC  
AGATCGTGTCAAGATCAAGAAGGCTCTAAGAGGCGTGAAGGTTGAGGTTACACATAGGGGTAATATGCGCAGAAAGTATCGTATATCTGGTTAACGTCACAGGCAACAAGAGAGTTGA  
CTTTCTGTTGATGAGAGAGGTACAATGAAGTCGGTGGTGAATATTTCAAGAGACTTATGGTTTCACCATCCAGCATACTAATTGGCCTTGCCACAAGTTGGCAATCAACAGAGGCC  
AAATTATTTGCCTATGGAGGTGTGCAAGATTGTAGAAGGACAGAGATATTCGAAGAGGTTGAATGAAAGACAAATAACTGCTCTTCTTAAGGTTACTTGCCAACGTCCAAATGACCGTGA  
GCGTGATATTATCCAGACTGTTTCATCACAATGCATATGATGAGGATCCATATGCCAGGGAGTTTGAATTAGAATCAGTGATAAACTTGCTTCTGTTGAAGCACGCATTCTGCCTCCCCCTT  
GGCTGAAATACCACGAAACCGGTTCGGGAGAAGGATTGCCTACCGATAAGTGGGCCAGTGGAAATATGAGAAATAAGAAAATGGTAAATGGTGGGAGGGTTAGCAACTGGTCTTGCATCAAT

TTTGTCCGGAATATACAAGAAAATGTTACTCATAAATTCTGCAAAGAGCTAGCTGAGATGTGCCATACGTCTGGAATGGAATTTGCTTCCGAACCTGTAATTCCTCCATCGTTTGCACGGCC  
TGATCAAGTTGAAAGAGCATTGAAATCACACCATCATGATGCTATGACTATACTGCATAAGCAGCACAAGGAGCTTGATTTACTTATTGTAATATTGCCTGACAACAATGTTTCTCTATG  
GGGATTTGAAAGCGTATATGCGAGACTGAGCTTGGGTTAGTTTCACAATGTTGTTTAGCTAGGCATGTATATAAACTGAACAAACAATACCTAGCCAATGTTGCTCTGAAGATAAATGTGAA  
GGTTGGAGGCCGAAATACTGTGCTTGTGGATGCTATATCTAGACGAATACCTTTGGTCAGTGACAGGCCACTATCATATTTGGCGCTGATGTGACACATCCTCACCTGGGGAAGACTCT  
AGCCCATCAATTGCTGCTGTTGTGGCTTCTCAAGACTGGCCGAGATAACCAAATATGCAGGGTTGGTTTGTGCTCAGGCTCATCGCCAGGAACCTATTTCAGGACTTGTTTAAAATTGAAC  
AGGATCCAAGGCGTGGTAATATCCCTGGCGGCATGATTAGGGAACTACTTATTTTCGTTTAAAAGGGCAACAGGAGACAAGCCTCAAAGGATAATTTTTTACAGAGATGGTGTGAGCGAGG  
GACAATTTTATCAGGTTCTCTTGTACGAACTTGATGCGATAAGAAAGGCGTGTGCTTCTTTGGAGCCTGGATATCAACCTCCTGTTACTTTTGTGGTTGTTCAAAAAGCGCCATCACACTCGA  
TTGTTTGCAAAACAACCATAACGACCAACGTTTCGGTTGATAGAAGCGGCAACATACTTCCCTGGCACGGTTGTTGATTCAAAAATTTGTCATCCCACCGAGTTTGACTTCTACTTGTGCAGTC  
ATGCTGGAATCAAGGTAAGTACTAGCCGGCCTGCACATTACCATGTATTATGGGATGAAAACAAATTCTCTGCTGATGCACTGCAGATGCTTACCAATATCTTATGCTACACATATGCAAGGTGC  
ACAAGATCAGTTTCAATTGTGCCCCCTGCATATTATGCCCATCTTGTGCTTTTTAGGGCAAGTTTTATATGGAGACAGAGACGTCGGATAAGTGGCTCAATGGTAAGTGTGCGGCTGGCC  
GAGCTTCTGCTGCAAGCGTTCTCGCAACGATCGAGCACCTGGAAGTAGTGCTGTGAGGCCTTACCTGCTCTAAAGGACAATATCAAGCAGGGGATGGTCTATTGCTGAGGTATTCTGC  
CAGTTATTGCTCTATTTCTTATCTCATCAGGGTTCAAACTGACTGTAAATTCAGACTTGTCTTTTATCTTAGAACATGTCTATTTCCACGTCCAGCATAATTAGTATTTTGGTGTCCGGGA  
GTGCTTTTAAATGGAGATATTATCTGTGCGGAGACTGAATGCGGAGATTATCAGAATGTGCTACATTAGTAGTATTGAGCAACGGTACCGAACAGTACCGAGCAAGAGGTGACGTGGTTC  
ATAGTGATTATCTTCGGACAACATTCGGCATTTCGTACAGAATAATTAATCATTAAATGTGGCTGTAATGATTATGTAGTTGTGTTTGAAGTGACATTTTCTTAGCACCATGAACTTGTTTGT  
GATATACTTTGTAGTATATATGCTCATGTTTATTGTTTCGGATTTCAGTGCTTTTATTGATGATTTGTATTAGAATTGGTTGGATCTGTGTTGTGCTTTACAGCATGTAGCATCTGTAAAATTT  
GTTATCATTATCGACTTTTCATTAAGCTGCCATAATAAAAAACAAGTTGTAAA

>comp174401\_c2\_seq5

CGGGTTAGCTTGCATGGAATTAAGTAGCAAAGATTGGAGATGTTACCCAAAACGCAAACGCTAACGCTGATGCAAACGACTTTATCGCAGGCTTAGCCTGTAAGGAATTAGACTGAGCA  
GTGCTCACCAAGAACTGTCCAGAATCTACTGATCTCTGAAGTCTCCCTTGCAAAAAGTCTTGGCGTCTTCTCGTGAAGAGCTGAGCGAAGTAGAGACAGAGAGAGAGAGAGAGAGAGAG  
GAGAGAGAAGTAGTTTCAAGGGGAAAACAGCCAGTTTCGGCAACAGCAGTGGATTTTATTTAGCTTGTAAAGATGGTGAGAAAGAGAAGAACCCTCTTCTCGCTATGCTGATGGTGG  
TGGTGAGGGCTCAGGATCTCAAAACCCTGGTGGTGGTAGAAGAGATGGAGCTCAAACCTTCTACGGTTTCACAGCAACAGGGTGAACTCATCACTCTCCAGCTCCACAGGAATTGGGT  
GGAGCTCAAACCTCTCAAGCACAGGAGGAGCTGGAAGGGCATGTGGCCTGTCAATCCTCAACAATTAGGGGGACGCAGTGCTGGTTATCACAGAGCGGTGGCGGACAGCCCTCTC  
GCGGGAGTATGGTCCAGCAGCAAGCTCCCCGGATGGGGTTCCAACATCCTGGTGGGCAACAGGGTAGTGGTGAATCTCAGCAGCATCACGCTGGCCGAGAGTTGGTGCATATGCATCA  
GCTGGGCAAGGAATTTGCCCATCTGTAGCCGAATCATCTAAGCTGCAGCGGCGTCCCGAAGTGCACCAAGCAACACAACTCCACACCAAGCGGCACCTGCTCCGACAAGCTCATCAA  
GTCCTGATGTGGCTCTGATGGAGGGTTTTTCAGGACCTTCTCTTCAGGCTGAATCCTCAGCTAGTCGGGCTATGGTTCAGTTTCAAGCAAATCAATGAGATTCCCATTCGCGCCAGGCAA  
AGGCAGTTATGGTACCAAGTGTGTGGTTAAGGTAACCATTTCTTTGCGGAGCTTCTTAACAAGGATCTTCATCAATATGATGTTTCAATTACACCTGAAGTTACCTCACGTGGTGTAAACC  
GAGCTGTGATGGAAGAGCTGGTAAGGGTGTTTAGAGAGTCCCATTTGGGTGGCCGACTTCCAGCATATGATGGCAGAAAGAGCCTTATACGGCTGGACCTCTTCCATTTAGTTCTAATGA  
ATTTACAGGTAACACTAGTTGATGAAGATGATGGAACCTGGGGCTGAAAGGCGACATAGGAATTTTCAGAATTGTTATAAAATTAGCTGCTCGTGTGATCTTCATCATCTGGGAATGTTTTG  
GCTGGAAGGCAAGCAGATGCTCCTCAGGAAGCTCTTCAAGTTCTTGATATTGTGCTGCGTGAGTTGCCACTGCTAGGTATTCTCCTGTTGGGCGATCTTTTTACTCTCCCAATCTTGGTC  
GGAGACAACCACTTGGTGAAGGTTTAGAAAAGTTGGCGTGGATTTTATCAAAGCATCAGGCCGACACAGATGGGCTTGTCAATGAATATTGATATGTCATCCACTGCATTCATTGAACCACT  
GCCAGTCATCGACTTTGTAAATCAGCTTCTCAATAGGGATGTTAGGGATGTTCTATCTAGACCATTGTCAGACTCAGATCGTGTCAAGATCAAGAAGGCTCTAAGAGGCGTGAAGGTTGA

GGTTACACATAGGGGTAATATGCGCAGAAAAGTATCGTATATCTGGTTAACGTCACAGGCAACAAGAGAGTTGACTTTTCCTGTTGATGAGAGAGGTACAATGAAGTCGGTGGTGAATAT  
TTTCAAGAGACTTATGGTTTCACCATCCAGCATACTAATTGGCCTTGCCTACAAGTTGGCAATCAACAGAGGCCAAATTATTTGCCTATGGAGGTGTGCAAGATTGTAGAAGGACAGAGAT  
ATTCGAAGAGGTTGAATGAAAGACAAATAACTGCTCTTCTTAAGGTTACTTGCCAACGTCCAAATGACCGTGAGCGTGATATTATCCAGACTGTTTCATCACAATGCATATGATGAGGATCC  
ATATGCCAGGGAGTTTGAATGAGAATCAGTGATAAAGCTTCTTCTGTTGAAGCACGCATTCTGCCTCCCCCTTGGCTGAAATACCACGAAACCGGTCCGGGAGAAGGATTGCCTACCGAT  
AGTGGGCCAGTGGAATATGAGAAATAAGAAAATGGTAAATGGTGGGAGGGTTAGCAACTGGTCTTGCATCAATTTTGTCCGGAATATACAAGAAAATGTTACTCATAAATTCTGCAAAGA  
GCTAGCTGAGATGTGCCATACGTCTGGAATGGAATTTGCTTCCGAACCTGTAATTCCTCCATCGTTTGCACGGCCTGATCAAGTTGAAAGAGCATTGAAATCACACCATCATGATGCTATG  
ACTATACTGCATAAGCAGCACAAAGGAGCTTGATTACTTATTGTAATATTGCCTGACAACAATGGTTCTCTCTATGGGGATTGAAAGCGTATATGCGAGACTGAGCTTGGGTTAGTTTCACA  
ATGTTGTTTAGCTAGGCATGTATATAAACTGAACAAACAATACCTAGCCAATGTTGCTCTGAAGATAAATGTGAAGGTTGGAGGCCGAAATACTGTGCTTGTGGATGCTATATCTAGACGAA  
TACCTTTGGTCAGTGACAGGCCTACTATCATATTTGGCGCTGATGTGACACATCCTCACCTGGGGAAGACTCTAGCCCATCAATTGCTGCTGTTGTGGCTTCTCAAGACTGGCCCGAGAT  
AACCAAATATGCAGGGTTGGTTTGTGCTCAGGCTCATCGCCAGGAECTTATTCAGGACTTGTTAAAATTGAAACAGGATCCAAGGCGTGGTAATATCCCTGGCGGCATGATTAGGGAACTA  
CTTATTTTCGTTTAAAAGGGCAACAGGAGACAAGCCTCAAAGGATAATTTTTTACAGAGATGGTGTGAGCGAGGGACAATTTTATCAGGTTCTCTTGTACGAACTTGATGCGATAAGAAAAG  
GCGTGTGCTTCTTTGGAGCCTGGATATCAACCTCCTGTTACTTTTGTGGTTGTTCAAAGCGCCATCACACTCGATTGTTTCAAACAACCATAACGACCAACGTTCCGGTTGATAGAAGCG  
GCAACATACTTCTGGCACGGTTGTTGATTCAAAAATTTGTCATCCCACCGAGTTTACTTCTACTTGTGCAGTCATGCTGGAATTCAGGTTACTAGCCGGCCTGCACATTACCATGTATTA  
TGGGATGAAAACAAATTCTCTGCTGATGCACTGCAGATGCTTACCAATATCTTATGCTACACATATGCAAGGTGCACAAGATCAGTTTCAATTGTGCCCTGCATATTATGCCATCTTGCT  
GCTTTTAGGGCAAGTTTTATATGGAGACAGAGACGTGGATAGTGGCTCAATGGTAAGTGTGCGGCTGGCCGAGCTTCTGCTGCAAGCGGTTCTCGCAACGATCGAGCACCTGGAAG  
TAGTGCTGTGAGGCCTCTACCTGCTCTAAAGGACAATATCAAGCAGGGGATGGTCTATTGCTGAGGTATTCTGCCAGTTATTGCTCTATTTCTTATCTCATCAGGGTTCAAACCTGACTGT  
AAATTCAGACTTGTCTTTTATCTTAGAACATGTCTATTTCCACGTCCAGCATAATTAGTATTTTGGTGTCCGGGAGTGTCTTAAATGGAGATATTATTCTGTGCGGAGACTGAATGCGGAG  
ATTATCAGAATGTGCTACATTAGTAGTATTGAGCAACGGTACCGAACAGTACCGAGCAAGAGGTGACGTGGTTCATAGTGATTATCTTCGGACAACATTCGGCATTTCGTACAGAATAATTA  
TCATTTAAATGTGGCTGTAATGATTATGTAGTTGTGTTTGAAGTGACATTTTCTTAGCACCATGAACTTGTGTTGATATACTTTGTAGTATATATGCTCATGTTATTGTTCCGATTTTCAGTG  
CTTTTATTGATGATTTGTATTAGAATTGGTTGGATCTGTGTTGTCGCTTACAGCATGTAGCATCTGTTAAAATTTTGTATCATTATCGACTTTCATTAAGCTGCCATAATAAAAAACAAGT  
TGTA

>comp174401\_c2\_seq6

CGGGTTAGCTTGCATGGAATTAAGTAGCAAAGATTGGAGATGTTACCCAAAACGCAAACGCTAACGCTGATGCAAACGACTTTATCGCAGGCTTAGCCTGTAAGGAATTAGACTGAGCA  
GTGCTCACCAAGAAACTGTCCAGAATCTACTGATCTCTGAAGTCTCCCTTGCATAAAGTCTTGGCGTCTTCTCGTGAAGAGCTGAGCGAAGTAGAGACAGAGAGAGAGAGAGTGAAG  
GAGAGAGAAGTAGTTTCAAGGGGAAAACAGCCAGTTTCGGCAACAGCAGTGGATTTATTTAGCTTGTAAAGATGGTGAGAAAGAGAAGAACCGCTTCTCCTGGCTATGCTGATGGTGG  
TGGTGAGGGCTCAGGATCTCAAACCCCTGGTGGTGGTAGAAGAGATGGAGCTCAAACCTTCTACGGTTTCACAGCAACAGGGTGGAACTCATATTCTCCAGCCCCACAGCAATTGGGTG  
GAGCTCAACACTCTCAAGCTGCACGACAGCAGGGTGGAGGAGCTGGAAGGGGATGGGGTCTGGTGGCCAACAACAGTTAGGGGGACGAGGTGGGGGTCATTACCAGGGTCTGGTGGT  
GGGTCAACACCAGGGTCTGGTGGTGGACAGCCCTCTCGTGGCGGAATGGTCCAGCAGCAACCTCCTCAGATGGAGTACCAGCATTATGGTGGGCCACATGGTAGAGGTGAAACCCA  
GCAGCAGCATGGTGGCCGAGAGCTGCTGCACATGCACCAGCTGGGCAAGGAGTTGCCCCATCTGCAGCCGAATCATCTAGGCTGCCGCTTCCCGAGCTGCACCAAGCAACACTAGCTC  
AATGCCAAGCTGCACCTGGTTCTTTGTCAGAGGCAAGCTCATCAAGCACTGATGTATCTCTGACGGAGCGGGTTCAACACCTTTCTCTGCAGGCCGAACCCCTCAGCTAGTAAGGGTATTG  
TTCCAGTTTCGAGCAAAACAATGAGATTCCCATTGCGCCCAGGCAAAGGCAGTTATGGTACCAAGTGTGTGGTTAAGGCTAACCATTTCTTTGCGGAGCTTCTTAACAAGGATCTTCATC

AATATGATGTTTCAATTACACCTGAAGTTACCTCACGTGGTGTAACCGAGCTGTGATGGAAGAGCTGGTAAGGGTGTAGAGAGTCCCATTGGGTGGCCGACTTCCAGCATATGATGG  
CAGAAAGAGCCTTTATACGGCTGGACCTCTCCATTTAGTTCTAATGAATTTACAGGTAACACTAGTTGATGAAGATGATGGAAGTGGGGCTGAAAGGCGACATAGGAATTCAGAATGTT  
ATAAAATTAGCTGCTCGTGCTGATCTTCATCATCTGGGAATGTTTTGGCTGGAAGGCAAGCAGATGCTCCTCAGGAAGCTCTTCAAGTTCTTGATATTGTGCTGCGTGAGTTGCCACTG  
CTAGGTATTCTCCTGTTGGGCGATCTTTTTACTCTCCCAATCTTGGTCGGAGACAACCACTTGGTGAAGGTTTAGAAAAGTTGGCGTGGATTTTATCAAAGCATCAGGCCGACACAGATGGG  
CTTGTCATTGAATATTGATATGTCATCCACTGCATTCATTGAACCACTGCCAGTCATCGACTTTGTAAATCAGCTTCTCAATAGGGATGTTAGGGATGTTCTATCTAGACCATTGTCAGACTC  
AGATCGTGTCAAGATCAAGAAGGCTCTAAGAGGCGTGAAGGTTGAGGTTACACATAGGGGTAATATGCGCAGAAAGTATCGTATATCTGGTTTAAACGTCACAGGCAACAAGAGAGTTGA  
CTTTTCCTGTTGATGAGAGAGGTACAATGAAGTCGGTGGTGAATATTTTCAAGAGACTTATGGTTTACCATCCAGCATACTAATTTGGCCTTGCTTACAAGTTGGCAATCAACAGAGGCC  
AAATTATTTGCCTATGGAGGTGTGCAAGATTGTAGAAGGACAGAGATAATCGAAGAGGTTGAATGAAAGACAAATAACTGCTCTTCTTAAAGGTTACTTGCCAACGTCCAAATGACCGTGA  
GCGTGATATTATCCAGACTGTTTCATCACAATGCATATGATGAGGATCCATATGCCAGGGAGTTTGAATTAGAATCAGTGATAAACTTGCTTCTGTTGAAGCACGCATTCTGCCTCCCCCTT  
GGCTGAAATACCACGAAACCGGTGCGGAGAAGGATTGCCTACCGATAAGTGGGCCAGTGAATATGAGAAATAAGAAAATGGTAAATGGTGGGAGGGTTAGCAACTGGTCTTGCATCAAT  
TTTGTCCGGAATATACAAGAAAATGTTACTCATAAATTCTGCAAAGAGCTAGCTGAGATGTGCCATACGTCTGGAATGGAATTTGCTTCCGAACCTGTAATTCCTCCATCGTTTGCACGGCC  
TGATCAAGTTGAAAGAGCATTGAAATCACACCATCATGATGCTATGACTATACTGCATAAGCAGCACAAGGAGCTTGATTTACTTATTGTAATTTGCCTGACAACAATGGTTCTCTCTATG  
GGGATTTGAAAGCGTATATGCGAGACTGAGCTTGGGTTAGTTTACAATGTTGTTTAGCTAGGCATGTATATAAACTGAACAAACAATACCTAGCCAATGTTGCTCTGAAGATAAATGTGAA  
GGTTGGAGGCCGAAATACTGTGCTTGTGGATGCTATATCTAGACGAATACCTTTGGTCAGTGACAGGCCACTATCATATTTGGCGCTGATGTGACACATCCTCACCTGGGGAAGACTCT  
AGCCCATCAATTGCTGCTGTTGTGGCTTCTCAAGACTGGCCCGAGATAACCAAATATGCAGGGTTGGTTTGTGCTCAGGCTCATCGCCAGGAACCTTATTCAGGACTTGTTTAAAATTGAAC  
AGGATCCAAGGCGTGGTAATATCCCTGGCGCATGATTAGGGAACTACTTATTTTCGTTTAAAAGGGCAACAGGAGACAAGCCTCAAAGGATAATTTTTTACAGAGATGGTGTGAGCGAGG  
GACAATTTTATCAGGTTCTCTGTACGAACCTTGATGCGATAAGAAAGGCGTGTGCTTCTTTGGAGCCTGGATATCAACCTCCTGTTACTTTTGTGGTTGTTCAAAGCGCCATCACACTCGA  
TTGTTTGCAAAACAACATAACGACCAACGTTTCGGTTGATAGAAGCGGCAACATACTTCCCTGGCACGGTTGTTGATTCAAAAATTTGTCATCCCACCGAGTTTGACTTCTACTTGTGCAGTC  
ATGCTGGAATTC AAGGTA TAGCCGGCCTGCACATTACCATGTATTATGGGATGAAAACAAATTTCTCTGCTGATGCACTGCAGATGCTTACCAATATCTTATGCTACACATATGCAAGGTGC  
ACAAGATCAGTTTCAATTGTGCCCTGCATATTATGCCATCTTGTCTGCTTTTAGGGCAAGTTTTATATGGAGACAGAGACGTCGGATAGTGGCTCAATGGTAAGTGTGCGGCTGGCC  
GAGCTTCTGCTGCAAGCGGTTCTCGCAACGATCGAGCACCTGGAAGTAGTGTGTGAGGCCTTACCTGCTCTAAAGGACAATATCAAGCAGGGGATGGTCTATTGCTGAGGTATTCTGC  
CAGTTATTGCTCTATTTCTTATCTCATCAGGGTTCAAACTGACTGTAAATTCAGACTTGTCTTTTATCTTAGAACATGTCTATTTCCACGTCCAGCATAATTAGTATTTGGTGTGGGA  
GTGCTTTTAAATGGGGATATTATATGTGCAGAGACCGAATGCAGAATATCATCCGGAAACTGTCAGAATGTGTCACGTCAGTAGTACCGAGCCACGGTACCGAGCAAGGGGTGACGTGA  
TATATTCTGGTTGGTCTTCGGTTCGGGTTCCGGCATCCGCACAAAATAATTCATCATCTTCAAAGCTGCTGACAATCACATCTACTAGATTGGAATGCCAGTAATAAAAAAATTCCTTTTTTTT  
TTTGAGCAAAAGATCTATAATTTGTGAAGTAGCTCTCAAAAAATCTATCCTTCCAGAATTCTACAATGAATTTACAGACAGCTGCAGCCAATGTAACTGACTCTCAATGATAGTCATGA  
GAAGCAATTCATTTTTGATTTTATACTAGGAAATTATATGCAATGCAAACTTTGGCTTAGAGTGTCTTCTGCGGGTCTTGCCCTATTCCATTATGAGCATATAATAAGCATTTTTTTTTGT  
CCAAGAGACAGAGGAGCCAAAAGTAATTTATTAATAAAAAGCATCA

>comp174401\_c2\_seq7

CGGGTTAGCTTGCATGGAATTAAGTAACTAGCAAAGATTGGAGATGTTACCCAAAACGCAAACGCTAACGCTGATGCAAACGACTTTATCGCAGGCTTAGCCTGTAAGGAATTAGACTGAGCA  
GTGCTCACCAAGAAACTGTCCAGAATCTACTGATCTCTGAAGTCTCCCTTGCATAAAGTCTTGGCGTCTTCTCGTGAAGAGCTGAGCGAAGTAGAGACAGAGAGAGAGAGAGTGAAG  
GAGAGAGAAGTAGTTTCAAGGGGAAAACAGCCAGTTTCGGCAACAGCAGTGGATTTTATTTAGCTTGTAAAGATGGTGAGAAAGAGAAGAACCCTCTTCTGGCTATGCTGATGGTGG

TGGTGAGGGCTCAGGATCTCAAACCCTGGTGGTGGTAGAAGAGATGGAGCTCAAACCTTCTACGGTTTCACAGCAACAGGGTGGAACCTCATCATTCTCCAGCCCCACAGCAATTGGGTG  
GAGCTCAACACTCTCAAGCTGCACGACAGCAGGGTGGAGGAGCTGGAAGGGGATGGGGTCTGGTGGCCAACAACAGTTAGGGGGACGAGGTGGGGGTCATTACCAGGGTCTGTGGTG  
GGGGTCAACACCAGGGTCTGTGGTGGTGGACAGCCCTCTCGTGGCGGAATGGTCCAGCAGCAACCTCCTCAGATGGAGTACCAGCATTATGGTGGGCCACATGGTAGAGGTGAAACCCA  
GCAGCAGCATGGTGGCCGAGAGCTGCTGCACATGCACCAGCTGGGCAAGGAGTTGCCCCATCTGCAGCCGAATCATCTAGGCTGCCGCTTCCCGAGCTGCACCAAGCAACACTAGCTC  
AATGCCAAGCTGCACCTGGTTCTTTGTCAGAGGCAAGCTCATCAAGCACTGATGTATCTCTGACGGAGCGGGTTCAACACCTTTCTCTGCAGGCCGAACCCTCAGCTAGTAAGGGTATTG  
TTCCAGTTTCGAGCAAAACAATGAGATTCCCATTTGCGCCAGGCAAAGGCAGTTATGGTACCAAGTGTGTGGTTAAGGCTAACCATTTCTTTGCGGAGCTTCCTAACAAAGGATCTTCATC  
AATATGATGTTTCAATTACACCTGAAGTTACCTCACGTGGTGTAAACCGAGCTGTGATGGAAGAGCTGGTAAGGGTGTTTAGAGAGTCCCATTGGGTGGCCGACTTCCAGCATATGATGG  
CAGAAAGAGCCTTTATACGGCTGGACCTCTCCATTTAGTTCTAATGAATTTCAAGGTAACACTAGTTGATGAAGATGATGGAAGTGGGGCTGAAAGGCGACATAGGAATTTCAAGAATTGTT  
ATAAAATTAGCTGCTCGTGCTGATCTTCATCATCTGGGAATGTTTTGGCTGGAAGGCAAGCAGATGCTCCTCAGGAAGCTCTTCAAGTTCTTGATATTGTGCTGCGTGAGTTGCCACTG  
CTAGGTATTCTCCTGTTGGGCGATCTTTTTACTCTCCCAATCTTGGTCCGAGACAACCCTTGGTGAAGGTTTAGAAAAGTTGGCGTGGATTTTATCAAAGCATCAGGCCGACACAGATGGG  
CTTGTCATTGAATATTGATATGTCATCCACTGCATTCATTGAACCACTGCCAGTCATCGACTTTGTAAATCAGCTTCTCAATAGGGATGTTAGGGATGTTCTATCTAGACCATTGTCAGACTC  
AGATCGTGTCAAGATCAAGAAGGCTCTAAGAGGCGTGAAGGTTGAGGTTACACATAGGGGTAATATGCGCAGAAAGTATCGTATATCTGGTTTAAACGTCACAGGCAACAAGAGAGTTGA  
CTTTTCTGTTGATGAGAGAGGTACAATGAAGTCGGTGGTGAATATTTCAAGAGACTTATGGTTTACCATCCAGCATACTAATTGGCCCTGCCTACAAGTTGGCAATCAACAGAGGCC  
AAATTATTTGCCTATGGAGGTGTGCAAGATTGTAGAAGGACAGAGATATTCGAAGAGGTTGAATGAAAGACAAATAACTGCTCTTCTTAAGGTTACTTGCCAACGTCCAAATGACCGTGA  
GCGTGATATTATCCAGACTGTTTCATCACAATGCATATGATGAGGATCCATATGCCAGGGAGTTTGGAAATTAGAATCAGTGATAAACTTGCTTCTGTTGAAGCACGCATTCTGCCTCCCCCTT  
GGCTGAAATAACCACGAAACCGGTCCGGGAGAAGGATTGCCTACCGATAAGTGGGCCAGTGGAAATATGAGAAATAAGAAAATGGTAAATGGTGGGAGGGTTAGCAACTGGTCTTGCATCAAT  
TTTGTCCGGAATATACAAGAAAATGTTACTCATAAATTCTGCAAAGAGCTAGCTGAGATGTGCCATACGTCTGGAATGGAATTTGCTTCCGAACCTGTAATCTCCTCATCGTTTGCACGGCC  
TGATCAAGTTGAAAGAGCATTGAAATCACACCATCATGATGCTATGACTATACTGCATAAGCAGCACAAGGAGCTTGATTTACTTATTGTAATATTGCCTGACAACAATGGTTCTCTCATG  
GGGATTTGAAGCGTATATGCGAGACTGAGCTTGGGTTAGTTTCACAATGTTGTTTAGCTAGGCATGTATATAAACTGAACAAACAATACCTAGCCAATGTTGCTCTGAAGATAAATGTGAA  
GGTTGGAGGCCGAAATACTGTGCTTGTGGATGCTATATCTAGACGAATACCTTTGGTCAAGTACAGGCTACTATCATATTTGGCGCTGATGTGACACATCCTCACCTGGGGAAGACTCT  
AGCCCATCAATTGCTGCTGTTGTGGCTTCTCAAGACTGGCCGAGATAACCAAATATGCAGGGTTGGTTTGTGCTCAGGCTCATCGCCAGGAACTTATTCAGGACTTGTTTAAAATTGAAC  
AGGATCCAAGGCGTGGTAATATCCCTGGCGGCATGATTAGGGAACACTTATTTTCGTTTAAAAGGGCAACAGGAGACAAGCCTCAAAGGATAATTTTTTACAGAGATGGTGTGAGCGAGG  
GACAATTTTATCAGGTTCTCTTGTACGAACTTGATGCGATAAGAAAGGCGTGTGCTTCTTTGGAGCCTGGATATCAACCTCCTGTTACTTTTGTGGTTGTTCAAAGCGCCATCACACTCGA  
TTGTTTGCAACAACCATAACGACCAACGTTTCGGTTGATAGAAGCGGCAACATACTTCCCTGGCACGGTTGTTGATTCAAAAATTTGTCATCCCACCGAGTTTGACTTCTACTTGTGCAGTC  
ATGCTGGAATCAAGTACTAGCCGCGCTGCACATTACCATGTATTATGGGATGAAAACAAATTCTCTGCTGATGCACTGCAGATGCTTACCAATATCTTATGCTACACATATGCAAGGTGC  
ACAAGATCAGTATCAATTGTGCCGCTGCATACTACGCTCATCTTGCTGCTTCCAGGGCAAGGTTTTATTGAAATCCCATGACATCTGAAAATGCTTACAGCCAAGAGCTGCAGCTGCAA  
ATGAGGCACCCAACACTAGTGAAGATAGAGATCGTGCTGTCACGCCTTCTCCTGCTATCAAGGAGAATGTTAAGAATGTGATGTTCTACTGTTGAGTTCTGCAGTGTGTCAGGGCCCTCT  
TCCTGCTCGCGAGGATAATGTTGAGGAAGTGATGTTCTATTGCTGATTTCTGCGTTCCTGCATTCATGTTCTTTTTACTGCTGCGTCCATGTTGTTATTGAGTCTTCAACTGAAAGAGTTGA  
CCAGGGAATGTTTGTCTAAGTTTCTTTCAAATTTGATTGACTTGGGGTTTCAATAAACTTTTACCAGAAATTGGATGGATACTTTATGCATTTTTTATATTAACACCTTTGAAATAAATAAA  
TATTTTCATTTATTTAA

>comp175766\_c0\_seq2

TAAATCAGCCATCATTTTAGAATTAATAGAAAATCTTGACATGCAATGTTTGTAGGCCTTGGTACATAGCATCTCTCGCTTTGGCTCCCCTTACGGGCTAACGGGATATTCTCTGTCTTCTT  
GCTTGTACCAACTGCATCGCCGCTTTCGTGTTCATCCGGCGTCCGTGCGACGCTTCCAAGACTCCATGTGAGAGGTTGTGCATGCGATCATTGACCAGATCCACATGAAGTATTGTTGTCTT  
ATCACACCTTAAAAGAATAGTTTTATATTTTCGTTTTCTACAAATTTGTCTCGATTTCACTCAATTTTGTGGAGGTTTGTGCGGGGTGAGAGAAAGAGAGGGATCAGGATTTCCGGGGCGATTA  
CCGCATCTTTGAGATGCTGGCTTCCAATGCGATTGCGGTGGCAAGAATGGTGGCGGTGGCAGCGGCCACGGGCGGCGGGAGTGGTGGAGCCTCCGCCGCGCAGAGGGCGGTGATCGCT  
CTTGGGGCAGACATCCCGTTCTGCTCGATTTGGTGGTTTCGTGTACGCGGAATCTCGTGTGTTCTGGTGCTTTTTGCGGGAATTATGTCGGGCCTTACCCTTGGTCTCATGTGCTGGGCCT  
CGTCGAGCTGGAGATTCTGCAGCGCAGCGGCACACCAACTGAGAAGCGGCAGGCAGCTACCATTCTCCCGTTGTTCAAAAACAACACCAACTTCTGGTGACTTTGCTATTGTGTAATC  
TGCTGCCATGGAGGCCCTTCCTATATTTCTTGATAAGATATTTTCATCCAGTTCCTGTCAGTTATCTTGTCTGTAACATTTGTTCTGGCTTTTGGAGAGGTTATTCCTCAAGCCATATGCACAAGA  
TATGGTTTAGCAGTGGGTGCAAATTTGTTGGCTTGTGCGCATCCTAATGGTCATTTGCTATCCAGTAGCTTATCCAATTGGAAAGCTTTTAGATTGTGCACTTGGACATAGTATTGGCA  
ATTTTGTAGACGTGCTCAGTTGAAGGTTCTCGTCTCTATTCATAGCAAAGAGGCTGGTAAAGGCGGGGAACCTACCCATGATGAAACAACAATAAAGCGGTGCTCTTGATTTGACAGAA  
AAGACTGCTGAGGAAGCTATGACACCGATTGAATCAACATTCTCATTAGATGTCAATTCAAAGTTGGATTGGGAAGCCATTGGCAAATTTAGCTCGGGGCCACAGCAGAGTCCCTGTT  
TATTCAGGAAATCCAAGGAACATTATTGGTCTTCTACTGGTGAAGGCTTCTCACAGTTCGTGCTGAGACAGAGACACCAGTTAGTGCCGTTTCCATAAGAAGAATTCCTAGGGTCCCA  
GCGGACATGCCTCTATATGATATACTAAATGAGTTTCAGAAGGGAAGCAGCCATATGGCTGCTGTTGTGAAGGCTAAAGGGAAAACAAGGAGTCTCCCTCCCGCTGAAGGGAACAAGTC  
TGAAGAAAATAAAGAAGTTTATGGAGAATCTAACTTGACAACCTTTAATATCAAAAAGAGGATAGAAGCTTTGTAGTGGACATAGATAAGGTTCAAGAAAAACATGCTAATGGTAATAA  
CCCCACTTCCCTGCCACATAGTAGTTTACCAACTGATACAGGGGTTTCGTACAACAGAAGATGTTGAAGAAGGAGAGGTTATTGGCATCATCACTCTTGAGGATGTATTTGAAGAAGTCTTA  
CAAGAGGAGATTGTAGATGAAACTGATGAGTACGTTGATGTTCAAAAAGGATACGTGTGGCTGCTGCTGCTGCTGCATCTTCAGTTGCACGGGCTCCATCCATTAGGAGGTTAACTAAT  
CAGAAGGCAGCAGGAGCACAGCATAGGCAAGGGCATCAGCAGCAGCAGCCAGGAATACTGAAGAAACCTGGTGAAGGAGACCCAAACTCGCCAAGAAGCTTAAACAAGTGTCTGTAA  
TCTCATCCAGGAACTGAAGCTATCAGGCTAATCTGGCAGAGTTTGGTGATTACTCTGCCTTCCCATCCTAATTTTTGACCATCTGAGGGAGAGAGAGAGAGGGACAACATAGATTAAGGG  
AAGAGGGATGTAGGGAGAGGGCGAGTGAGCGAGGGACAACATAGATAAAGCAACCAAGAAGAGTGAAGGAATTAGACAGGCGGAAGATGCAAATCTGCAAACCTGGAAGATTATCG  
GTCTTTTATCCTTTTTTGGAAATGGAACCTCCCGATTAGGACTCGCGAAGGCATGTGAAGATGGAGAAATCTCTCCGATTAATTTTTCCCGTTTCAACTATGGTTTCTGCATGCTAAGCTTTAG  
ATGAAAGGTATGCTCTTTCATGCCCTAGAGGACGAGGTCTTTTTCTCGAATTGGACGAGGAAGAGCTTCCAAAGAGGGAGGAGAGCCAGATCAGTTCCTGGATAACCGAAGAAGCCC  
TAGCTCTCCGACTTCGACCTCAACCCCGACATGCTTCGATAACAACCGGTGTGGCGGGCGGTATTGATGTGCTGCCATAAATGTCAGCAGGTTTCAGCCTCGGAGAATGGTCGTCGGAG  
TTGAAACCCATCACGATGTCGCTCGGAAGCGTGGAGGGTTGGGACTCCATGCTTTTAGAGCCTCCGGCGATCGAGACGGCCAAACTCCGCTCGCTGCACAGTTTCTCCCGCTGGTTCATG  
GTTGACTCCAATGCAGGCGCAAGGCTTGAAGGTAAGGATAGGGCTTGGAGATCCTAGATCCGGAATTTGGTTTCCAACACATTGGAGGAATGAGAGGGCGATGGTCTATTATCCCGTG  
GTTCTGATACACCGTCCAACCTTACTCTCCAATTCTGGATTTACAAACAATTGCCTCAAAGCACCAGCCTTTGCAAACCTCCAACCTTCATCATCAACCAGAACCCTCATGAAAACCTATATGC  
CTAAAACCTACTTGGGTGCTTGCGCCATGCCTATCGAGTATCCTAATGAGTCTGCTTGGCTGCAGCATGCTGTCATTGACCTGCTCTTTGAAGCGGCTGAGCTAGTGAATCGGGAAACAA  
CATTAGCGCCCAAAGGATATTGGCGGGCTCAATCATCAGGTTCCGCCCCCTACGGGAAGCCTTATATCCGCTCTGCATTCATACATCAAGGAAGCACTCCTCACCATTTTGAACAGAGGT  
GGTGAGCAATGCGGCTTCCGCTTGCATCTCACTTGACATCTGCTCAAGCTTAGCGCTTACAAAGCCTTTGCTGAGATCTCCCTATCCTTAAATTCATAAGCTTTTTCATCCACCGAGCT  
TATTCTTGAGGAGCTAGCTGGCGCCAATATCATCCATATTATTGATTTTGTGTTGGAGTTGGTAGCCAATGGCCTGCACTCCTTCAAGAGCTATCAGAAAGGCGTTCTGCTGTCACAGGAG  
TGCCATTACAGCTTCGCATCACTGCCTTTTTCTCCATGCTTTCACATCACCAGCTTGAACCTCACTTAATTCAGAAAACTTAAATTTTTTGGCTGCAAACCTGAATGTTCCCTTTGAGCTC  
AATATCTTCTTATAGAATCTTTCGACCCTGCTGCAATAATTAGCTCTTCTCGCATCTGGTGGAGGTCATTGCTGTGAACTTTGCAATTTGGCTTTTGCAGTCACCACATATCAACTCAGCC  
CTTCTCCTCCTAATCAAGCAGCTTCTCCTAAGATACTTATTTAGCCAATCTTGGTTATGATTGGGGTGATCTTCTTTCTCCACCATGTCTCCTCCTTCCAGTCAAGCGCCGTTCTTC



TCGACTCCATAGAAGCATCGGGAGTGTCTCCTGAAATCACTGATAGAATTGAGGGTACTTGCTGCGACCATGGTTTAAAATTGCGCAATATGAGGCTCGCCTTGAGGCCCGCCTTTGCGC  
AATTCCAGTAAAAACGCCTCGATGCTTACGCCTCGAGTTTTTTTTATGAGGCTTGCCTCAACTTGATTGAGGCAGGCCTTGAGGCCTCCCTCGCCTCACTGGCATGAGGCTTACACCT  
CACGC

>comp175766\_c0\_seq3

TAAATCAGCCATCATTTTAGAATTAATAGAAAATCTTGACATGCAATGTTTGTAGGCCTTGGTACATAGCATCTCTCGCTTTGGCTCCCTTCACGGGTAACGGGATATTCTCTGTCTTCTT  
GCTTGTACCAACTGCATCGCCGCTTTCGTGTATCCGGCGTCCGTGCGACGCTTCCAAGACTCCATGTGAGAGGTTGTGCATGCGATCATTGACCAGATCCACATGAAGTATTGTTGTCT  
ATCACACCTTAAAAGAATAGTTTTATATTCGTTTCTACAAATTTGTCTCGATTCAGTCAATTTTGTGGAGGTTTGTGCGGGGTGAGAGAAAAGAGAGGGATCAGGATTCGGGGCGATTA  
CCGCATCTTTGAGATGCTGGCTTCCAATGCGATTGCGGTGGCAAGAATGGTGGCGGTGGCAGCGGCCACGGGCGGCGGGAGTGGTGGAGCCTCCGCCGCAGAGGCGGCGTGATCGCT  
CTTGGGGCAGACATCCCGTTCTGCTCGATTTGGTGGTTTCGTGTACGCGGAATCTCGTGTGTTCTGGTGCTTTTTGCCGGAATTATGTCGGGCCTTACCCTTGGTCTCATGTCGCTGGGCCT  
CGTCGAGCTGGAGATTCTGCAGCGCAGCGGCACACCAACTGAGAAGCGGCAGGCAGCTACCATTCTCCCGTTGTTCAAAAACAACCAACTTCTGGTGACTTTGCTATTGTGTAATC  
TGCTGCCATGGAGGCCCTTCTATATTTCTTGATAAGATATTTTCATCCAGTTCCTGCAGTTATCTTGTCTGTAACATTTGTTCTGGCTTTTGGAGAGGTTATTCCTCAAGCCATATGCACAAGA  
TATGGTTTAGCAGTGGGTGCAAATTTGTTGGCTTGTGCGCATCCTAATGGTCATTTGCTATCCAGTAGCTTATCCAATTGAAAGCTTTTAGATTGTGCACTTGGACATAGTGATTCCGCA  
ATTTTTAGACGTGCTCAGTTGAAGGTTCTCGTCTTATTCATAGCAAAGAGGCTGGTAAAGGCGGGAACTCACCCATGATGAAACAACAATAAAGCGGTGCTCTTGATTTGACAGAA  
AAGACTGCTGAGGAAGCTATGACACCGATTGAATCAACATTCTCATTAGATGTCAATTCAAAGTTGGATTGGGAAGCCATTGGCAAATTCAGTCTGGGGCCACAGCAGAGTCCCTGTT  
TATTCAGGAAATCCAAGGAACATTATTGGTCTTCTACTGGTGAAAAGTCTTCTCACAGTTCGTGCTGAGACAGAGACACCAGTTAGTGCCGTTTCCATAAGAAGAATTCCTAGGGTCCCA  
GCGGACATGCCTCTATATGATATACTAAATGAGTTTCAGAAGGGAAGCAGCCATATGGCTGCTGTTGTGAAGGCTAAAGGGAAAACAAGGAGTCTCCCTCCCGCTGAAGGGAAACAAGTC  
TGAAGAAAATAAAGAAGTTTATGGAGAATCTAACTTGACAACCTTTAATATCAAAGAGGATAGAAGCTTTGTAGTGGACATAGATAAGGTTCAAGAAAACATGCTAATGGTAATAA  
CCCCACTTCCCTGCCACATAGTAGTTTACCAACTGATACAGGGTTTCGTACAACAGAAGATGTTGAAGAAGGAGAGGTTATTGGCATCATCACTCTTGAGGATGTATTTGAAGAACTCCTA  
CAAGAGGAGATTGTAGATGAAACTGATGAGTACGTTGATGTTCAAAAAGGATACGTGTGGCTGCTGCTGCTGCTGCATCTTCAGTTGCACGGGCTCCATCCATTAGGAGGTTAACTAAT  
CAGAAGGCAGCAGGAGCACAGCATAGGCAAGGCATCAGCAGCAGCAGCCAGGAATACTGAAGAACTGGTGAAGGAGACCCAACTCGCCAAGAAGCTTAAACAAGTGTCTGTAA  
TCTCATCCAGGAACTGAAGCTATCAGGCTAATCTGGCAGAGTTTGGTGATTACTCTGCCTTCCCATCCTAATTTTTGACCATCTGAGGGAGAGAGAGAGAGGGACAACATAGATTAAGGG  
AAGAGGGATGTAGGGAGAGGGCGAGTGAGCGAGGGACAACATAGATAAAGCAACCAAGAAGAGTGAAGGAATTAGACAGGCGGAAGATGCAAATCTGCAAACCTGGAAGATTATCG  
GTCTTTTATCCTTTTTGGAAATGGAACCTCCCGATTAGGACTCGCGAAGGCATGTGAAGATGGAGAAATCTCTCCGATTAATTTCCCGTTTCAACTATGGTTTCTGCATGCTAAGCTTTAG  
ATGAAAGGTATGCTCTTTCATGCCCTAGAGGACGAGGTTCTTTTCTCGAATTGGACGAGGAAGAGCTTCCAAAGAGGGAGGAGAGCCAGATCAGTTCTGGATAACCGAAGAAGCCC  
TAGCTCTCCGACTTCGACCTCAACCCCGACATGCTTCGATACAACCGGTGTGGCGGCGGTATTTCGATGTGCCTGCCATAAATGTCAGCAGGTTTCAGCCTCGGAGAATGGTCGTCGGAG  
TTGAAACCCATCACGATGTCGCTCGGAAGCGTGGAGGGTTGGGACTCCATGCTTTTAGAGCCTCCGGCGATCGAGACGGCCAACTCCGCTCGCTGCACAGTTTCTCCCGCTGGTTCATG  
GTTGACTCCAATGCAGGCGCAAGGCTTGAAGGTAAGGATAGGGCTTGGATCCTAGATCCGGAATTTGGTTTCCAACACATTGGAGGAATGAGAGGCGATGGTTCTATTATCCCGTG  
GTTCTTGATACACCGTCCAACCTACTCTCCAATTCTGGATTACAAACAATTGCCTCAAAGCACCAGCCTTTGCAAACCTCCAACCTCATCATCAACCAGAACCCTCATGAAAACCTATATGC  
CTAAAACCTACTTGGGTGCTTGCGCCATGCTATCGAGTATCCTAATGAGTCTGCTTGGCTGCAGCATGCTGTCATTGACCTGCTCTTTGAAGCGGCTGAGCTAGTGAATCGGGAAACAA  
CATTAGCGCCCAAAGGATATTGGCGCGCTCAATCATCAGGTTCCGCCCCCTACGGGAAGCCTTATATCCGCTCTGCATTCTACATCAAGGAAGCACTCCTCACCATTTTGAACAGAGGT  
GGTGAGCAATGCGGCTTCCGCCTTGCATCTCCACTTGACATCCTGCTCAAGCTTAGCGCTTACAAAGCCTTTGCTGAGATCTCCCTATCCTTAAATTCATAAGCTTTTTCATCCACCGAGCT

TATTCTTGAGGAGCTAGCTGGCGCCAATATCATCCATATTATTGATTTTGTATGTTGGAGTTGGTAGCCAATGGCCTGCACTCCTTCAAGAGCTATCAGAAAGGCGTTCTGCTGTCACAGGAG  
TGCCATTACAGCTTCGCATCACTGCCTTTTTCTCCATGTCTTCACATCACCAGCTTGAACCTCACTTAATTCAAGAAAACCTTAATTTTTTGTCTGCAAACCTGAATGTTCCCTTTGAGCTC  
AATTATCTTCTATAGAATCTTTTCGACCCTGCTGCAATAATTAGCTCTTCCCTCGCATTCTGGTGAGGTCATTGCTGTGAACTTTGCATTTGGCTTTTGCAGTCACCACATATCAACTCACGCC  
CTTCTCCTCCTAATCAAGCAGCTTTCTCCTAAGATACTTATTTTCAGCCAATCTTGGTTATGATTGGGGTGATCTTTCTTTCTCCACCATTGCTCCTCCATTCTTCCAGTCAAGCGCCGTTCTTC  
TCGACTCCATAGAAGCATCGGGAGTGTCTCCTGAAATCACTGATAGAATTGAGGGGTACTTGCTGCGACCATTGGTTTAAAATTGCGCAATATGAGGCTCGCCTTGAGGCCCGCCTTTGCGC  
AATTCAGTAAAAACGCCTCGATGCTTACGCCTCGAGTTTTTTTTATGAGGCTTGCGCCTCAACTTGGTTGAGGCCCGCCTCGCCTCACTGGCATGAGGCTTACACCTCACGCTATATATA  
TAAAACCTTACATAAATCTTGAAGTAAATGCCCCGACATTGGACTCTATAGGAGAGGAGGAAGGGGAGAGAGCAGTTCATCATAATGATGATTCAAATGAAGAACCCCTTAGTGATGACAG  
TGCTGATGACTTATGAGTTCTTATGTGATATGTCATTGCTATTTATTTTTGGAAATTGGAATTATATGTTAATGAAAAGAATACTGGGATTTGGGAAAGATAAGAATTTTGGAGTTGAACTATATT  
TCATGTTGTCTTATTATTGGGATATTTGATTTCACTTCATATCTTATGCTTTTTTATGTTTTATATTATCACTCATTAGTATATAAAAAATTTATCATTTTATGTTTACGCAATCTTTTGGATTTG  
AGGCTTACGCCCTCAAACGCCTTGAGGCTTACGCCTCGCCTCACGAATGAAAAACGCCTCAATACCCGAATACGCAATTTTAAACATTGATTATACCCTTAAACAATGTTACCATCCCGAAT  
TGTTTTCTAATCCCCTGTTGATGAAATGTTCAATGAAGTACATAGCGCCACCATTATTCAAATTTTACTTACAACCCGACTATACCAAGTCCGAATGGCTGAACAAGGCAACCCAAA  
ATGTATCTTCCGAACCTCACGACAATCACTGCAGTGCATCGTCATGCTTTTTCAGGCTCCCAAATGCTCCCACGAAAATTCAAAGTTTGTGATGAACCAATTTTTTAAACTTTATCTACGTAACCTT  
TGTTATTGTTTTTTTTTCTGATGATACTCCTATAGAGCTGCAACTTATCTGATCATACTAAACACCTTATAATTGTGAGTGTCTGTCTAAACAACAAAAATTTCTATCTTAAATATACTAAATG  
CCTTTTTGTGCAACCACAAATTGAGTACCTAGGCCACGTCATGGCAGCCAACAATATCACTATGAACCCAAATAAAAATATACACACCATTACGACATGGCTAATGCTATCTACTATGAAATC  
TTTACAAGGATTCCTTGGATTGGCTGGATAATATCATTGTTTCGTCCAACAAGTCGCCACTATTGTCACACTCCATAAACTTTCTATAAAAAGAATAAAGGGATCAATTCCACTAGAATCCA  
ATCGCATCCCAAGATTTCAAGACCTAAAATCAATTATAGCTTCGCCACCCCTGCTTGACGAGTGATTATTGTGTCCGGACACCGAACGTGTCCAGATACCAATAAAAAAGCGCCACATCAC  
TAGGCGTTCATTATCGTGTCTCGGTACCATCTCGGTACCGTGTTCGGTAGACTCGGTACTGCTCGGTATGATGTCCGGACATAATAATTTTTCGACCTTGAGAGGGTCATTAGGATTGGGTAG  
TCTATTTTGTTCGATTTCAATTATTATTATTTTTTCCATATCAATAAATTATTATTATTTTTAGTTTGTAGAATACTACAGAAGCAGAAATGCATTCAAATAAATTATTTGCAGAATATTATTAACGTA  
AAAGTATAATTTTATTCATTTGAGAAAAAAATTAATACGGGTTCTCTTGTCTCTCATTGAAC

>comp175766\_c0\_seq4

TAAATCAGCCATCATTTTAGAATTAATAGAAAATCTTGACATGCAATGTTTGTAGGCCTTGGTACATAGCATCTCTCGCTTTGGCTCCCTTCACGGGTAACGGGATATTCTCTGTCTTCTT  
GCTTGTACCAACTGCATCGCCGCTTTCGTGTCTATCCGGCGTCCGTGCGACGCTTCCAAGACTCCATGTGAGAGGTTGTGCATGCGATCATTGACCAGATCCACATGAAGTATTGTTGTCT  
ATCACACCTTAAAAGAATAGTTTTATATTTCTGTTTCTACAAATTTGTCTCGATTTCAAGTCAATTTTGTGGAGGTTTGTGCGGGGTGAGAGAAAAGAGAGGGATCAGGATTTCCGGGGCGATTA  
CCGCATCTTTGAGATGCTGGCTTCCAATGCGATTGCGGTGGCAAGAATGGTGGCGGTGGCAGCGGCCACGGGCGGCGGGAGTGGTGGAGCCTCCGCCGCAGAGGCGGCGTGATCGCT  
CTTGGGGCAGACATCCCGTTCTGCTCGATTTGGTGGTTTCGTGTACGCGGGAATCTCGTGTGTTCTGGTGCTTTTTGCCGGAATTATGTCGGGCCTTACCCTTGGTCTCATGTCGCTGGGCCT  
CGTCGAGCTGGAGATTCTGCAGCGCAGCGGCACACCAACTGAGAAGCGGCAGGCAGCTACCATTCTCCCGTTGTTCAAAAACAACCAACTTCTGGTGACTTTGCTATTGTGTAATTC  
TGCTGCCATGGAGGCCCTTCTATATTTCTTGATAAGATATTTTCATCCAGTCTTGCAGTTATCTTGTCTGTAACATTTGTTCTGGCTTTTGGAGAGGTTATTCCTCAAGCCATATGCACAAGA  
TATGGTTTAGCAGTGGGTGCAAATTTTGGTTGGCTTGTGCGCATCCTAATGGTCATTGCTATCCAGTAGCTTATCCAATTGAAAGCTTTTAGATTGTGCACTTGGACATAGTGATTTCGGCA  
ATTTTTAGACGTGCTCAGTTGAAGGTTCTCGTCTTATTCATAGCAAAGAGGCTGGTAAAGGCGGGGAACTACCCATGATGAAACAACAATAAAGCGGTGCTCTTGATTTGACAGAA  
AAGACTGCTGAGGAAGCTATGACACCGATTGAATCAACATTCTCATTAGATGTCAATCAAAGTTGGATTGGGAAGCCATTGGCAAATTTCTAGCTCGGGGCCACAGCAGAGTCCCTGTT  
TATTCAGGAAATCCAAGGAACATTATTGGTCTTCTACTGGTGAAGTCTTCTCACAGTTCGTGCTGAGACAGAGACACCAGTTAGTGCCGTTTCCATAAGAAGAATTCCTAGGGTCCCA

GCGGACATGCCTCTATATGATATACTAAATGAGTTTCAGAAGGGAAGCAGCCATATGGCTGCTGTTGTGAAGGCTAAAGGGAAAACAAGGAGTCTCCCTCCCGCTGAAGGGAACAAGTC  
TGAAGAAAATAAAGAAGTTTATGGAGAATCTAACTTGACAACCTCTTAATATCAAAAAGAGGATAGAAGCTTTGTAGTGGACATAGATAAGGTTCAAGAAAAACATGCTAATGGTAATAA  
CCCCACTTCCCTGCCACATAGTAGTTTACCAACTGATACAGGGGTTCGTACAACAGAAGATGTTGAAGAAGGAGAGGTTATTGGCATCATCACTCTTGAGGATGTATTTGAAGAACTCCTA  
CAAGAGGAGATTGTAGATGAAACTGATGAGTACGTTGATGTTCAAAAAGGATACGTGTGGCTGCTGCTGCTGCTGCATCTTCAGTTGCACGGGCTCCATCCATTAGGAGGTTAACTAAT  
CAGAAGGCAGCAGGAGCACAGCATAGGCAAGGGCATCAGCAGCAGCAGCCAGGAATACTGAAGAAACCTGGTGAAGGAGACCCAAACTCGCCAAGAAGTAAACAAGTGTCTGTAA  
TCTCATCCAGGAACTGAAGCTATCAGGCTAATCTGGCAGAGTTTGGTGATTACTCTGCCTTCCCATCCTAATTTTTGACCATCTGAGGGAGAGAGAGAGAGGGACAACATAGATTAAGGG  
AAGAGGGATGTAGGGAGAGGGCGAGTGAGCGAGGGACAACATAGATAAAGCAACCAAGAAGAGTGAAGGAATAGACAGGGCGGAAGATGCAAATCTGCAAACTGGAAGATTATCG  
GTCTTTTATCCTTTTTGGAAATGGAACCTCCCGATTAGGACTCGCGAAGGCATGTGAAGGTCCGTATGCTCTTTTGCTGCTTCATATCTCGTGTTTTAATTTCCC GCCATTCCACAGATGG  
AGAAATCTCTCCGATTAATTTCCCGTTTCAACTATGGTTTCTGCATGCTAAGCTTTAGATGAAAGGTATGCTCTTTCATGCCCTAGAGGACGAGGTCTTTTTCTCGAATTGGACGAGGAAG  
AGCTCTTCCAAAGAGGGAGGAGAGCCAGATCAGTTCTGGATAACCGAAGAAGCCCTAGCTCTCCGACTTCGACCTCAACCCCCGACATGCTTCGATACAACCGGTGTGGCGGGCTATT  
CGATGTGCCCTGCCATAAATGTCAGCAGGTTTCAGCCTCGGAGAATGGTCGTCGGAGTTGAAACCCATCACGATGTCGCTCGGAAGCGTGGAGGGTTGGGACTCCATGCTTTTATAGCCT  
CCGGCGATCGAGACGGCCAACTCCGCTCGCTGCACAGTTTCTCCCGCTGGTTCATGGTTGACTCCAATGCAGGCGCAAGGCTTGAAGGTTACTGGGATAGGGCTTGAGATCCTAGATCC  
GGAATTTGGTTTCCAAACACATTGGAGGAATGAGAGGGCGATGGTCTATTATTTCCCGTGGTTCCTGATACACCGTCCAACTTACTCTCCAATTCTGGATTTACAAAACAATTGCCTCAAAGCA  
CCAGCCTTTGCAAACTCCAATTCATCATCAACCAGAACCCTCATGAAAACCTATAGCTAAAACCTACTTGGGTGCTTGCGCCATGCCTATCGAGTATCCTAATGAGTCTGCTTGGCTGCA  
GCATGCTGTCATTGACCTGCTCTTTGAAGCGGCTGAGCTAGTGAATCGGGAAAACAACATTAGCGCCCAAAGGATATTGGCGCGGCTCAATCATCAGGTTCCGCCCCCCTACGGGAAGCC  
TTATATCCGCTCTGCATTCTACATCAAGGAAGCACTCCCTCACCATTTTTGAACAGAGGTGGTGAGCAATGCGGCTTCCGCCTTGATCTCCTACTTGACATCCTGCTCAAGCTTAGCGCTTAC  
AAAGCCTTTGCTGAGATCTCCCCTATCCTTAAATTCATAAGCTTTTTCATCCACCAGCTTATTCTTGAGGAGCTAGCTGGCGCCAATATCATCCATATTATTGATTTTGTATTGGAGTTGGTA  
GCCAATGGCCTGCACTCCTTCAAGAGCTATCAGAAAGGGCCTTCTGCTGTCACAGGAGTGCATTACAGCTTGCATCACTGCCTTTTTTCTCCATGTCTTACATCACCAGCTTGAACCTCA  
CTTAATTCAAGAAAACCTTAATTTTTTTTGCTGCAAACCTGAATGTTCCCTTTGAGCTCAATTATCTTCTATAGAATCTTTGACCCCTGCTGCAATAATTAGCTCTTCTCGCATTCTGGTGA  
GGTCAATGCTGTGAACTTTGCATTTGGCTTTTGCAGTCAACACATATCAACTCACGCCCTTCTCCTCCTAATCAAGCAGTCTTCTCCTAAGATACTTATTTACAGCCAATCTGGTTATGATTG  
GGGTGATCTTTCTTCTCCACCATGCTCCTCCTTCCAGTCAAGCGCCGTTCTTCTCGACTCCATAGAAGCATCGGGAGTGCTCCTGAAATCACTGATAGAATTGAGGGGTACTTGC  
TGCGACCATGGTTTAAAATTGCGCAATATGAGGCTCGCCTTGAGGCCCGCTTTGCGCAATTCAGTAAAAAACGCCTCGATGCTTACGCCTCGAGTTTTTTTTATGAGGCTTGCGCCTCA  
ACTTGATTGAGGCAGGCCTTGAGGCCTCCCTCGCCTCACTGGCATGAGGCTTACACCTCACGC

>comp175766\_c0\_seq6

TAAATCAGCCATCATTTTAGAATTAATAGAAAATCTTGACATGCAATGTTTGTAGGCCTTGGTACATAGCATCTCTCGCTTTGGCTCCCCTTACGGGTAATCTCTGTCTTCTT  
GCTTGTACCAACTGCATCGCCGCTTTCTGTGTCATCCGGCGTCCGTGCGACGCTTCCAAGACTCCATGTGAGAGGTTGTGCATGCGATCATTGACCAGATCCACATGAAGTATTGTTGTCCT  
ATCACACCTTAAAAGAATAGTTTTATATTTCTGTTTCTACAAATTTGCTCGATTTTCAAGTCAATTTTGTGGAGGTTTGTGCGGGGTGAGAGAAAAGAGAGGGATCAGGATTTGGGGGCGATTA  
CCGCATCTTTGAGATGCTGGCTTCCAATGCGATTGCGGTGGCAAGAATGGTGGCGGTGGCAGCGGCCACGGGCGGCGGGAGTGGTGGAGCCTCCGCCGCGAGAGGGGCGGTGATCGCT  
CTTGGGGCAGACATCCCGTTCTGCTCGATTTGGTGGTTTCGTGTACGCGGGAATCTCGTGTGTTCTGGTGCTTTTTGCCGGAATTATGTCGGGCTTACCCTTGGTCTCATGTCGCTGGGCT  
CGTCGAGCTGGAGATTCTGCAGCGCAGCGGCACCAACTGAGAAGCGGCAGGAGCTACCATTCTCCCGTTGTTCAAAAACAACCAACTTCTGGTGACTTTGCTATTGTGTAATTC  
TGCTGCCATGGAGGCCCTTCCATATTTCTGATAAGATATTTTTCATCCAGTTCCTGCAAGTTTCTGAGTATTCTTGTCTGTAAACATTTGTTCTGGCTTTTGGAGAGGTTATCCTCAAGCCATATGCACAAGA

TATGGTTTAGCAGTGGGTGCAAATTTTGGTTGGCTTGTGCGCATCCTAATGGTCATTTGCTATCCAGTAGCTTATCCAATTGGAAAGCTTTTAGATTGTGCACTTGGACATAGTGATTTCGGCA  
ATTTTATAGACGTGCTCAGTTGAAGGTTCTCGTCTCTATTCATAGCAAAGAGGCTGGTAAAGGCGGGGAAGTACCCATGATGAAACAACAATAAAGCGGTGCTCTTGATTGACAGAA  
AAGACTGCTGAGGAAGCTATGACACCGATTGAATCAACATTCTCATTAGATGTCAATTCAAAGTTGGATTGGGAAGCCATTGGCAAATCTAGCTCGGGGCCACAGCAGAGTCCCTGTT  
TATTCAGGAAATCCAAGGAACATTATTGGTCTTCTACTGGTGAAGGCTTCTCACAGTTCGTGCTGAGACAGAGACACCAGTTAGTGCCGTTTCCATAAGAAGAATTCCTAGGGTCCCA  
GCGGACATGCCTCTATATGATATACTAAATGAGTTTTAGAAGGGGAAAGCAGCCATATGGCTGCTGTTGTGAAGGCTAAAGGAAAACAAGGAGTCTCCCTCCCGCTGAAGGGAACAAGTC  
TGAAGAAAATAAAGAAGTTTATGGAGAATCTAACTTGACAACCTCTTAATATCAAAGAGGATAGAAGCTTTGTAGTGGACATAGATAAGGTTCAAGAAAAACATGCTAATGGTAATAA  
CCCCTTCCCTGCCACATAGTAGTTTACCAACTGATACAGGGGTTCGTACAACAGAAGATGTTGAAGAAGGAGAGGTTATTGGCATCATCACTCTTGAGGATGTATTTGAAGAACTCCTA  
CAAGAGGAGATTGTAGATGAAACTGATGAGTACGTTGATGTTCAAAAAGGATACGTGTGGCTGCTGCTGCTGCTGCATCTCAGTTGCACGGGCTCCATCCATTAGGAGGTTAACTAAT  
CAGAAGGCAGCAGGAGCACAGCATAGGCAAGGGCATCAGCAGCAGCAGCCAGGAATACTGAAGAACTGGTGAAGGAGACCCAACTCGCCAAGAACTTAAACAAGTGTCTGTAA  
TCTCATCCAGGAACTGAAGCTATCAGGCTAATCTGGCAGAGTTTGGTGATTACTCTGCCTTCCCATCCTAATTTTTGACCATCTGAGGGAGAGAGAGAGAGGGACAACATAGATTAAAGG  
AAGAGGGATGTAGGGAGAGGGGCGAGTGAGCGAGGGACAACATAGATAAAGCAACCAAGAAGAGTGAAGGAATTAGACAGGCGCGAAGATGCAAATCTGCAAAGGATTATCG  
GTCTTTTATCCTTTTTGAAATGGAAGTCCCCGATTAGGACTCGCGAAGGCATGTGAAGGTCCGTATGCTCTTTTGGCTGCTTCATATTCTCGTGTTTAATTCCCGCCATTTCACAGATGG  
AGAAATCTCCGATTAATTTCCCGTTTCAACTATGGTTTCTGCATGCTAAGCTTTAGATGAAAGGTATGCTCTTTCATGCCCTAGAGGACGAGGTCTTTTTCTCGAATTGGACGAGGAAG  
AGCTCTTCAAAGAGGGAGGAGGCCAGATCAGTTCTGGATAACCGAAGAAGCCCTAGCTCTCCGACTTCGACCTCAACCCCGACATGCTTCGATACAACCGGTGTGGCGGGCGTATT  
CGATGTGCCTGCCATAAATGTCAGCAGGTTTTAGCTCGGAGAATGGTCGTGAGGTTGAACCCATCACGATGTCGCTCGGAAGCGTGGAGGGTTGGGACTCCATGCTTTTAGAGCCT  
CCGGCGATCGAGACGGCCAACTCCGCTCGCTGCACAGTTTCTCCCGCTGGTTTCATGGTTGACTCCAATGCAGGCGCAAGGCTTGAAGGTAAGGACTGGGATAGGGCTTGAGATCCTAGATCC  
GGAATTTGGTTTTCAACACATTGGAGGAATGAGAGGCGATGGTTCTATTATCCCCTGGTTCCTGATACACCGTCCAACTTACTCTCCAATTCTGGATTACAAACAATTGCCTCAAAGCA  
CCAGCCTTTGCAAAGTCCAACTTCATCATCAACCAGAACCCTCATGAAAATATATGCCTAAAACCTACTTGGGTGCTTGCGCCATGCCTATCGAGTATCCTAATGAGTCTGCTTGCTGCA  
GCATGCTGTCATTGACCTGCTCTTTGAAGCGGCTGAGCTAGTGAATCGGGAAACAACATTAGCGCCCAAAGGATATTGGCGCGGCTCAATCATCAGGTTCCGCCCCCTACGGGAAGCC  
TTATATCCGCTCTGCATTCTACATCAAGGAAGCACTCCTCAACATTTTGAACAGAGGTGGTGAGCAATGCGGCTTCCGCCTTGCATCTCCACTTGACATCCTGCTCAAGCTTAGCGCTTAC  
AAAGCCTTTGCTGAGATCTCCCCTATCCTTAAATTCATAAGCTTTTCATCCACCAGCTTATTCTTGAAGGAGCTAGCTGGCGCCAATATCATCCATATTATTGATTTTGATGTTGGAGTTGGTA  
GCCAATGGCCTGCACTCCTTCAAGAGCTATCAGAAAGGCGTTCGCTGTACAGGAGTGCCATTACAGCTTCGCATCACTGCCTTTTTCTCCATGTCTTCACATCACCAGCTTGAACCTCA  
CTAATTCAAGAAAACCTAATTTTTTGGCTGCAAACCTGAATGTTCCCTTGGAGCTCAATTATCTTCTATAGAATCTTTCGACCTGCTGCAATAATTAGCTCTTCCCTCGCATTCTGGTGA  
GGTCAATTGCTGTGAACCTTTGCATTTGGCTTTTGCAGTCAACACATATCAACTCACGCCCTTCTCCTCTAATCAAGCAGCTTTCCTCAAGATACTTATTTAGCCAATCTTGGTTATGATTG  
GGTGATCTTTCTTCTCCACCATGTCTCCATTCCTTCCAGTCAAGCGCCGTCTTCTCGACTCCATAGAAGCATCGGGAGTGTCTCTGAAATCACTGATAGAATTGAGGGTACTTGC  
TGCGACCATGGTTTTAAATTTGCGCAATATGAGGCTCGCTTGAAGGCCGCTTTGCGCAATTCAGTAAAAACGCCCTCGATGCTTACGCCCTCGAGTTTTTTTTATGAGGCTTGCCTCA  
ACTTGGTTGAGGCCCCGCTCGCCTCACTGGCATGAGGCTTACACCTCACGCTATATATATAAACTTACATAAATCTTGAAGTAAATGCCCGACATTGGACTCTATAGGAGAGGAGGAAG  
GGGAGAGAGCAGTTCATCATAATGATGATTCAAATGAAGAACCCCTTAGTGATGACAGTGTCTGATGACTTATGAGTTCTTATGTGATATGTCATTGCTATTTATTTTTGAAATTGGAATTAT  
ATGTTAATGAAAAAATACTGGGATTTGGGAAAGATAGAATTTGAGTTGAACTATATTTTCATGTTGCTTATTTATTTGGGATATTTTGATTTCACTTCATATCTTATGCTTTTTATGTTTTATAT  
TATTCATCATTAGTATATAAAAATTTATCATTATATGTTTACGCAATCTTTGATTTGAGGCTTACGCCTCAAACGCTTGAAGGCTTACGCCCTCGCCTCACGAATGAAAACGCTCAA  
TACCCGAATACGCAATTTTAAACATTGATTATACCTTAAACAATGTACCATCCCGAATGTTTTCTAATCCCCTGTTGATGAAATGTTCAATGAAGTACATAGCGCCACCATTATTCAAAA

TTTTACTTACAACCCGACTATCACCAAGTCCGAATGGCTGAACAAGGCAACCCAAAATGTATCTTCCGAACTCACGACAATCACTGCAGTGCATCGTCATGCTTTTCAGGCTCCCAAATGC  
TCCCACGAAAATTCAAAGTTTGATGAACCAATTTTTAAAACTTTATCTACGTAACCTTGTATTGTTTTTTTTTCTGATGATACTCCTATAGAGCTGCAACTTATCTGATCATACTAAACACC  
TTATAATTGTGAGTGTCTGTCTAAACAACAAAAATTTCTATCTTAAATATACTAAATGCCTTTTTGTGCAACCACAAATTGAGTACCTAGGCCACGTCATGGCAGCCAACAATATCACTATGA  
ACCCAAATAAAATATACACACCATTACGACATGGCTAATGCTATCTACTATGAAATCTTTACAAGGATTCCCTGGATTGGCTGGATAATATCATTGTTTCGTCACAACAAGTCGCCACTATTGT  
CACACTCCCATAAACTTTCTATAAAAGAATAAAGGGATCAATTCCACTAGAATCCAATCGCATCCCAAGATTTCAAGACCTAAAATCAATTATAGCTTCGCCACCCCTGCTTGACGAGTGAT  
TATTGTGTCCGGACACCGAACGTGTCCAGATACCAATAAAAAAGCGCCACATCACTAGGCGTTCATTATCGTGCTCGGTACCATCTCGGTACCGTGTTCCGGTAGACTCGGTACTGCTCGGT  
ATGATGTCCGGACATAATAATTTTCGACCTTGAGAGGGTCAATTAGGATTGGGTAGTCTATTTTGTTCGATTTCAATTATTATTATTTTTCCATATCAATAAATTATTATTATTTTTAGTTTGT  
GAACTACAGAAGCAGAAATGCATTCAAATAAATTATTTGCAGAATATTATTAACGTAAGTATAATTTTATTCATTTGAGAAAAAAATTAATACGGGTTCTCTTGCTCTCATTGAAC

>comp245637\_c0\_seq1

CTTAATGTTTATGAGGAAGTGGATACTATGAATTTAGATACTGCTCTTAAAGGTTTGTGTTGCTCGACAAGTCTTCTTTGCCAGGGTCAAGGATGATTAATTTCTTTGTGTTTCTGCTGTT  
GTTGTTACTGCTGTTGGTGTCTTCTCTAGTGTGTTGTGTTGTTATGCTGTAGCAGCTGATTGTGTTTTTGTGTTTTTCTGGCGCTTCTGGTTTCTCTTGGTTAACTGGTTGCCTGTCACGTG  
TGAGATTTGTTATTGTTTTATGATGGTGTGTTGGGCTCTACAAGGTGGATATCTGCTATTTTATTTGGGCTAAGTTGTATGCCAGGTTGGGGATTTAATGGTTAAGGTTTCTGGTGGGGTGGT  
TGGGGGTGTTTATGTGGCTGGGTTTTGGTTTTATCTTTTGTGGTGGGGTTTGGAGAGTTGGGGGCAGAGTAAGCATAAGGAGCTGGTTTTGGTGTTTTTGGTTGCTGGGTTTAAATTTCTG  
GTGCTGGAGGTTTTTGGCCTGGTGTAC

>comp294936\_c0\_seq1

TTAGCCAAGATAAAGGCATTGGTGGACAACATTGCGGCTGCCGGATCTCTGCTTGATCCCGAAGAGATTATACTGCACATACTGAATGGCTTGCCCTCCTTCATACAACCTCATTCAAGACTT  
CCATTGCAACCAGCCAGCTTCCCATAAGTCTTGATGTGATGTACACTCTTCTCTGCAGTGAGGAGATTACATGAGTTCCGGATATCAACGCGACACCTCTCAGACCTCAGACGCTACAGC  
ATTCTATGCTAATCGAGCAAACCTACCCGAGAGGACGCACCTGGCTACAGAGGTGGTAGAAGCCGAGGAGCTCCATCAAGCCAAATTGCAACATTCCTCGAACCACCTACACCGATACCA  
GCAAACCGATTTGTCAGATCTGCAATAAAACGGGACACTATG

>comp330605\_c0\_seq1

AGAATTCTGTCCACGTAAGTCTTCCACGGATTTATCGAACTCGGAATCGAAATCAAAGAAGGTTTCATCGACATTCCACGATCTCTCTTCTTGGGGACACTTGAAGGTGCGACGGCTTGTG  
AGAAAGAAGGGAGGGAAGCCGGCGGTTTTGGGGAGGGGCTCAGGTAGGGGAGGTGGAGGGAATAATTTAGAAAATCTGAAATCTGATTTTCAGG

>comp46034\_c0\_seq1

CCTCTCCACGTGAAAGATGGTTGCAGTAAGAGGGTCCACTTACTTTACCAGCAGGTACCCACACGAGGGTAATAATGAAGCCTACTCTCCCTTTTGAGTACTATAAAGCAAGCGCTCA  
GCCATAAAGCTGGAGAAGGTAAACCGAAACAACCACCTAATTCGAGTCCCGTCACCTCCCTTCTCTCCCTCCCTACTGTCTTCTCTCTTTCTCTCAAATGAGCCTCTTATTCCC  
TTCCACAGCTTTCTTGAAGTCTTTAATGGCCTCTTCGTTCTTCTCAGAGATGAGTAACAGTTCAGGAAAGCTGTGGGAAGATATGGAGAGAATGCAAATGGAGGATAAAGGCATATG  
AGGGGATGACCTCTAGTGAATCCAGCTTCGCATCAAGTTCACAGGAGCCCTTACATAGTCAACAGATAAAT

>comp63081\_c0\_seq1

AGCATGAATTTAAAGTAAAATAAATACATAAAAAAATTCATTTAAGCATAAAAAATACAAGCACTTATGAATTTAAATGAGGTATGAATACCTACCTAACGACTTCAAAACAGACTTCTACG  
ACGTACCACGTCGCTCTAACACTTGTCTCCTCTAAACAGTCAATACCTAACATTGCACATAAGATCCAAGTCACATTACATAATTTAATTTAATTTAATTTAATTTAATTTAATTTAATTT  
ATCAAAAATCCTACACC

>comp68197\_c0\_seq2

GCAGGCTTTGATCTACAAATACTTAGCCGCAAAAATGCCAGTACCATCAAGTTTGGTCATCCCAATCAGAAGAAACCTCAATCCGCTCTGGGTTCCCTTCCTTTGCTTCTGGATTTATAGAA  
CAGGAGCATGAATGCTGATCCAGAGTCCGGCAGATGCCTCAGAACCGATGGAAAAGAAATGGCGTTGTTCCAGGGATGCGGTTGGTGATCAGAAGTACTGTGAGCGGCACATGAACCGG  
GGCCGCCATCGTTCAAGAAAGCATGTGGAAGGCCACAATGGCCATGCTGCAAAAAGCAGCTATGCCTACCCCTCACAATCAGCATCGGCTGTTTCAAGTTGTTTCATCTAACAATATAAATA  
GTGCACATCAACAGCAGATCAAAAGCTTGCAGTCATGCATGGAAGAATCATCACCTACACAATTTGATAGGTTGTTTACAGCTTTATTTTCCTTCTTTATTTCTGGTTGTATTTTGTAAGTAA  
TCTCTCCAAGCTGTGCTCTAAATAAGTCGTACATATTTAAGAAGCATGGTTTCGAGCAGGAATCAACAAAATAGGTTGATTCTTAAGTAA

>comp82421\_c0\_seq1

CAGCCACACTGTCGGTGGGTTGGTGCAGAAGATGGAGTTATAGAAGTTGGAGATGCTTTTTTCATTTTTGTTAGAAGAGAATAAAAATGACCGCCAATTGGCACAGGGTAATGAGACTTGAA  
TGTCTAGTGTGCTAACATAGCAAAAATGAGAATGAAGACTTTATGATTTATGATCTTATTATGTGTCATACAAATTTGGTGCTGTGGCTCGTTGAGTAACCACAATCGGGAACAAAATGAT  
GCTATCGAGTCATGAATATTAACATAATCTAAAGCTAACTTTGGGGTTCATGGTGAACCTGACTAACCTGGCAGATTGATTAACCTTACAGATTGTCCACTATTCTGAGGTTAGTGTAAATA  
CATGAAAATTATTCTTCCACTAACTTCT

>comp84482\_c0\_seq1

TGCTCTCTCTTCTGTATCCTCAGCTCAGACCTCATGTATCAACCAAAGCCATATGGTTCCAGCGGATAGGATTCCAATGGGCCAGCCTTTGCTCTCTAATCTACACTATGGTGTGAGCC  
TCAGTGGATACTCTCATTACCAATGGAGGAAGACCATGTGGAACTGTTCTGGTTCAGATTCTGGTGAAACTGATCTCCATTGTCAAAGTATGTTTCAGGTTGGGGATGAAGAGGCCT  
CAGATTGTGCATCTGAGTCCATTCCCTTTTCATGGCAGTAGATCATTAGATGCTTGTAAATATTTGGTTTCTTCAGATTCAGCTTTGTGTTCTTATGTTTTGTTTACTGACTATTCTAAGAA  
TGGACCAGATGTTTCCTTTTTGTTGCTGTAACGTCAAAAAAGATCATGTTTGGAGGCATGCATGT

>comp86146\_c0\_seq1

TCTATCATGTTCTTCTCTCTCTATATGCTTCCTTCTTCTGCTAGATCTCCCTCTGATCCTGTTTAGGGTTAGTGGATGATGAGATGAGATCTATATAAGTATTTCTTCATTTATTTCTTTCT  
TTGTCTCTCCCTTCTTTCCTTCTAGCTAGCTAGCTTGTCTTCTCTGCTAATTTAACAGTGAAGCCAGAGGAAGAAATGAGAAGAAGTTGGTGGTTGCAGATGTGGCATCATCAAGATTCA  
CATATTTGATCTTGCTCGAATGAGAATCTTGATGATGCTGCATCAGCAACTATCAACTAATAAGTATTAGTAAATATCTATATGATTATGCACGATCCTGCTTCAAGGTTGGTGCTCATGTCCT  
TGAGAAAGGACCATCTCCGATCTGCCACACCACCAAGTTATAGAGCTACAATAATAATCTTCTACTTCACTGCTTGGAAATCTGCTATTCCAGCTTCTCTTTATACTACTTCATCTCAAACT  
TTAAATTTTGATCGTTTATTTAATGGGAAGGGAGACTGAAGAGATAGAATTACATAGTTAATACAGTGAATTGTACAAGCATCTCTTTATGAGATTCTCAGACATTAATAAACATGTCCTTA  
GAACAAACAGCTTTGTTGAGCTGATGCAGGTGTC

**Figure S1** Statistical results of the sRNA-seq experiment.

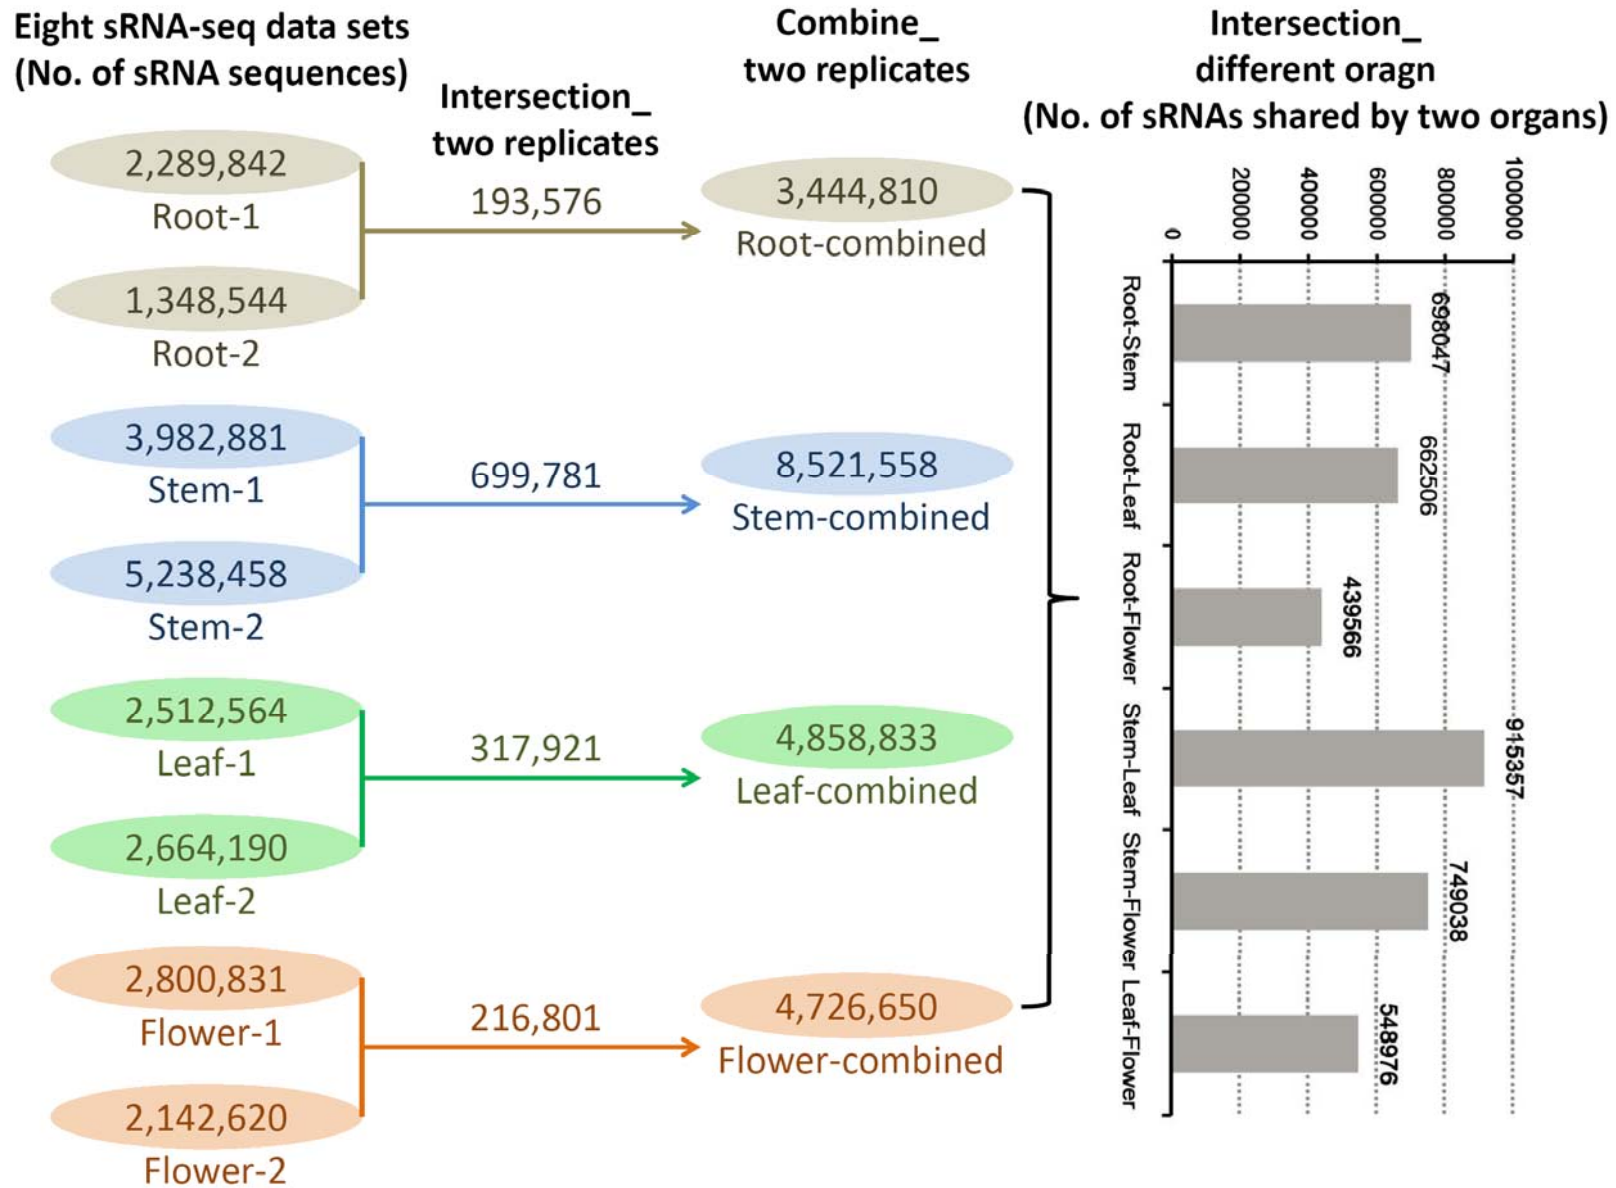

**Figure S2** Certain highly structured transcripts might serve as miRNA precursors. The transcripts were assembled by RNA-seq reads, and the transcript IDs were provided in the figure. The mature miRNA-coding regions on the long stems of the miRNA precursors were marked by red lines, and the mature miRNA IDs were provided. Note, for each mature miRNA, its average accumulation level in either organ (flower, leaf, root or stem; two biological replicates for each organ) of *Dendrobium officinale* should be 5 RPM or higher. The secondary structures of the transcripts were predicted by using RNAfold (<http://rna.tbi.univie.ac.at/cgi-bin/RNAfold.cgi>).



comp44555 c0 seq1

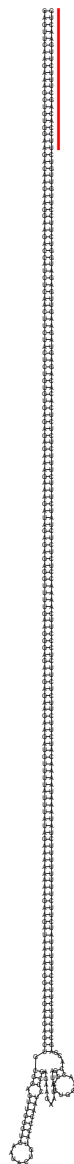

dof-miR-605  
dof-miR-966  
dof-miR-968

comp46993 c0 seq1

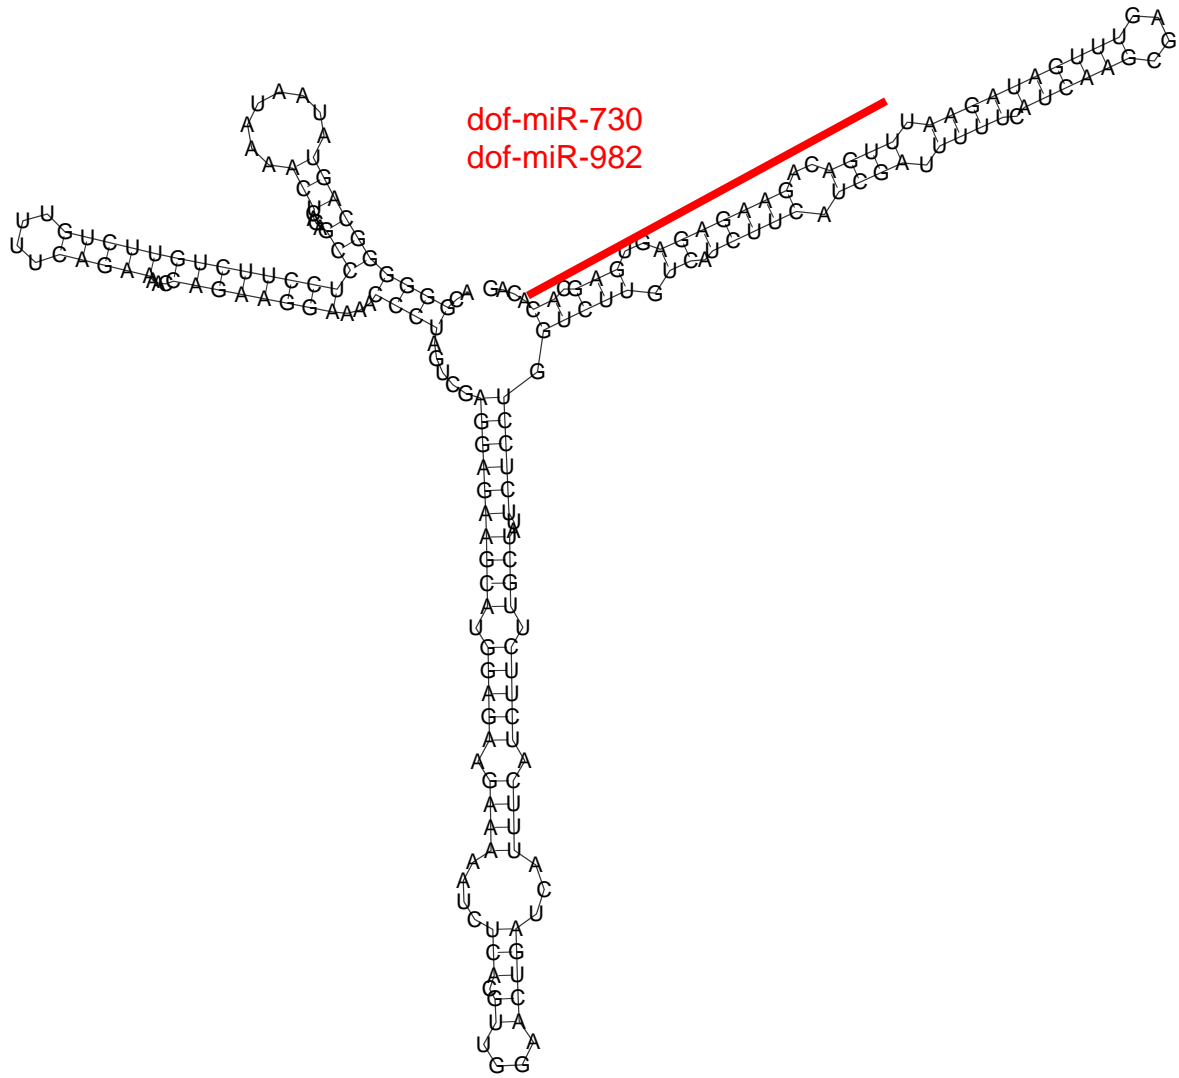

comp133774 c0 seq3

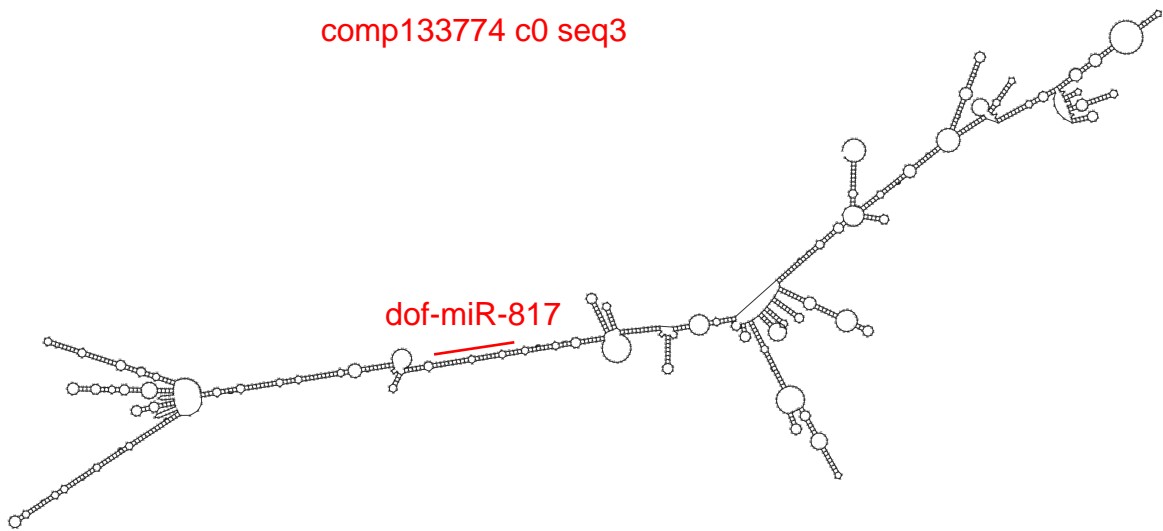

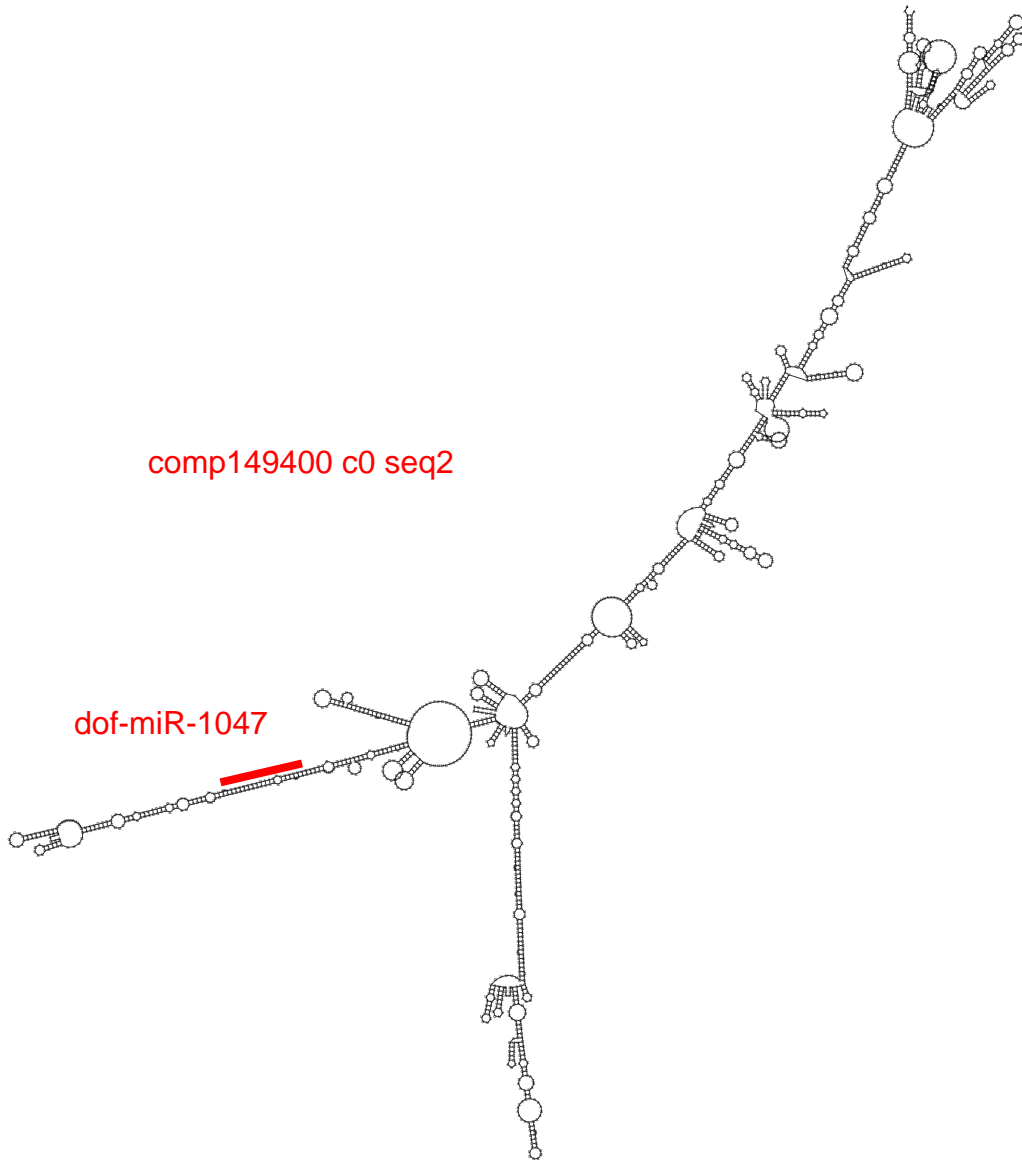

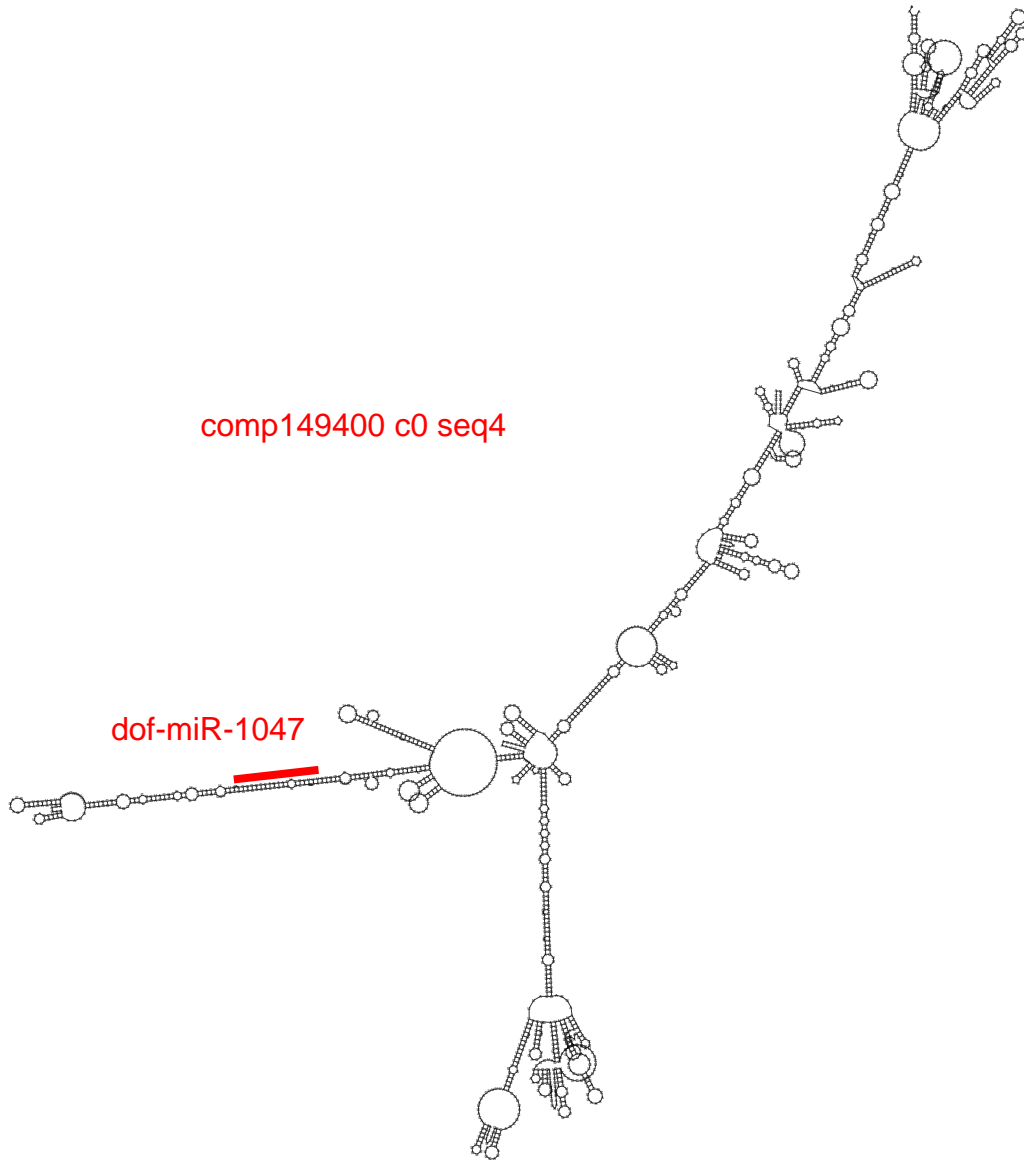

comp165001 c0 seq8

dof-miR-719

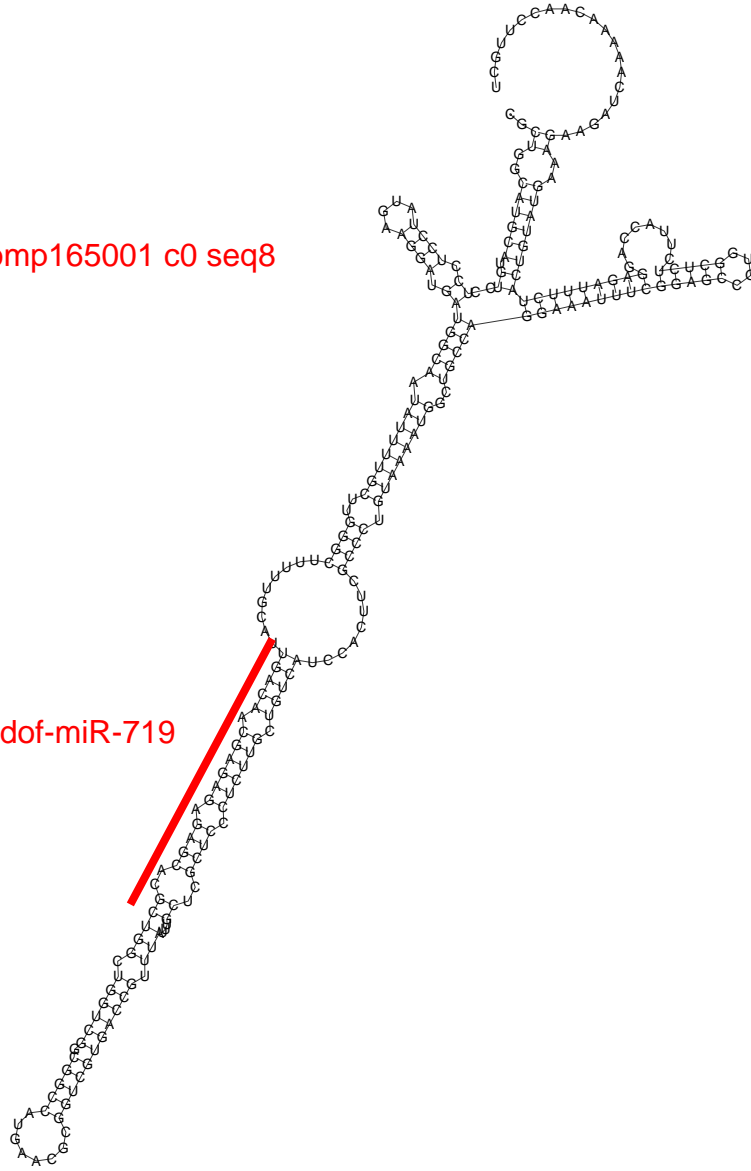

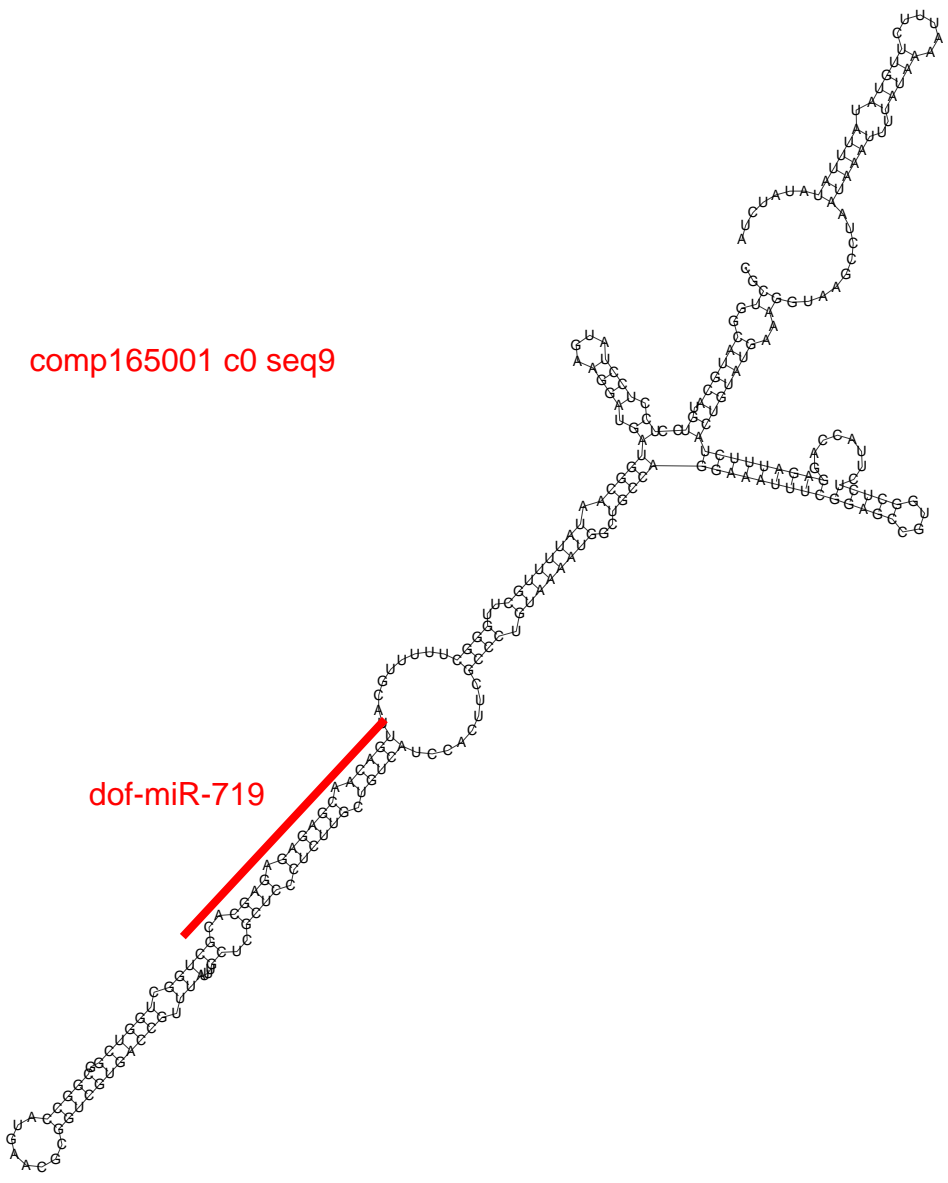

comp165001 c0 seq9

dof-miR-719

comp165001 c0 seq15

dof-miR-719

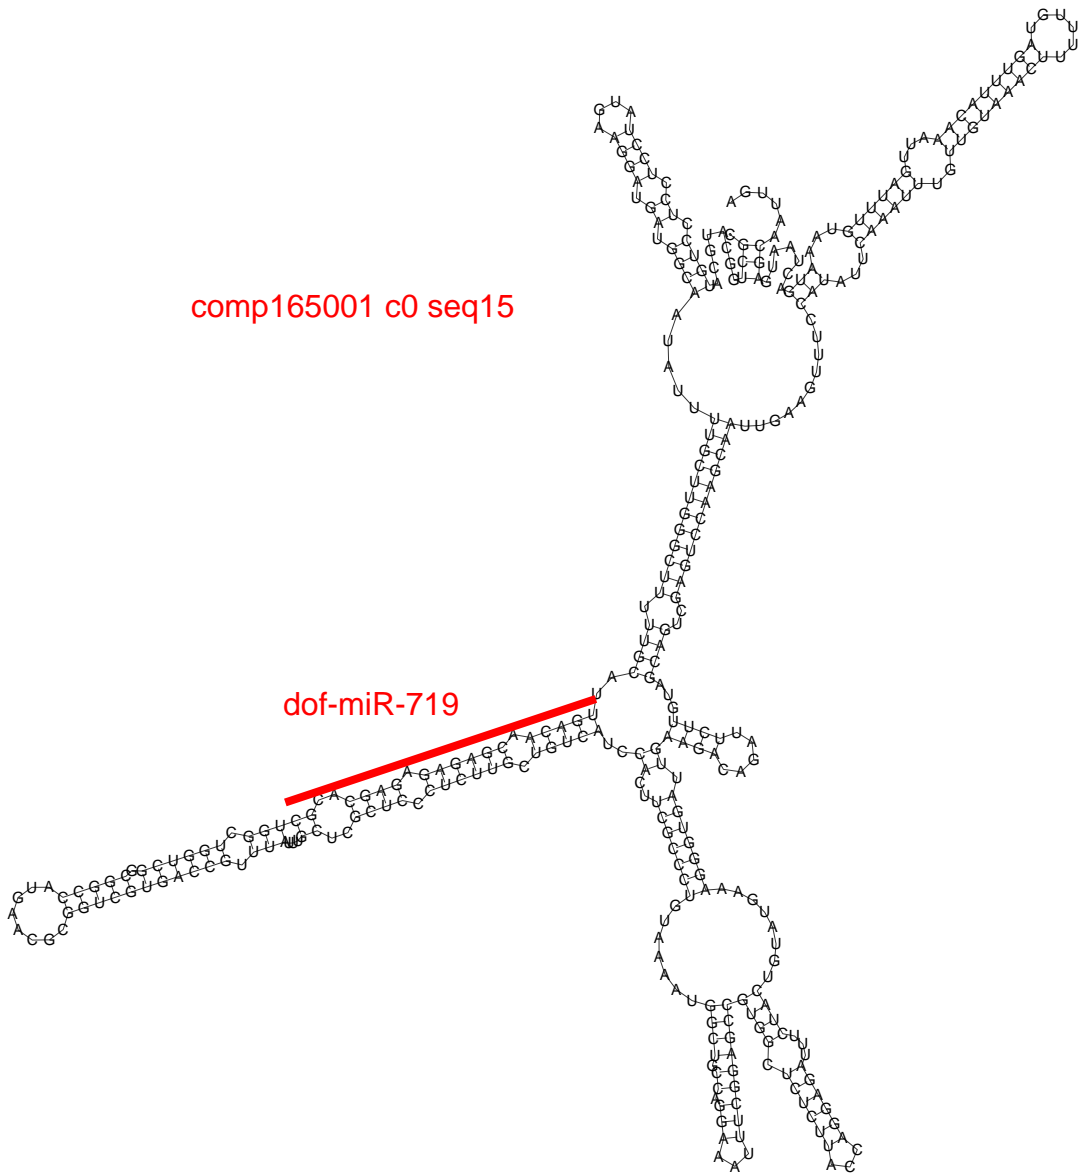



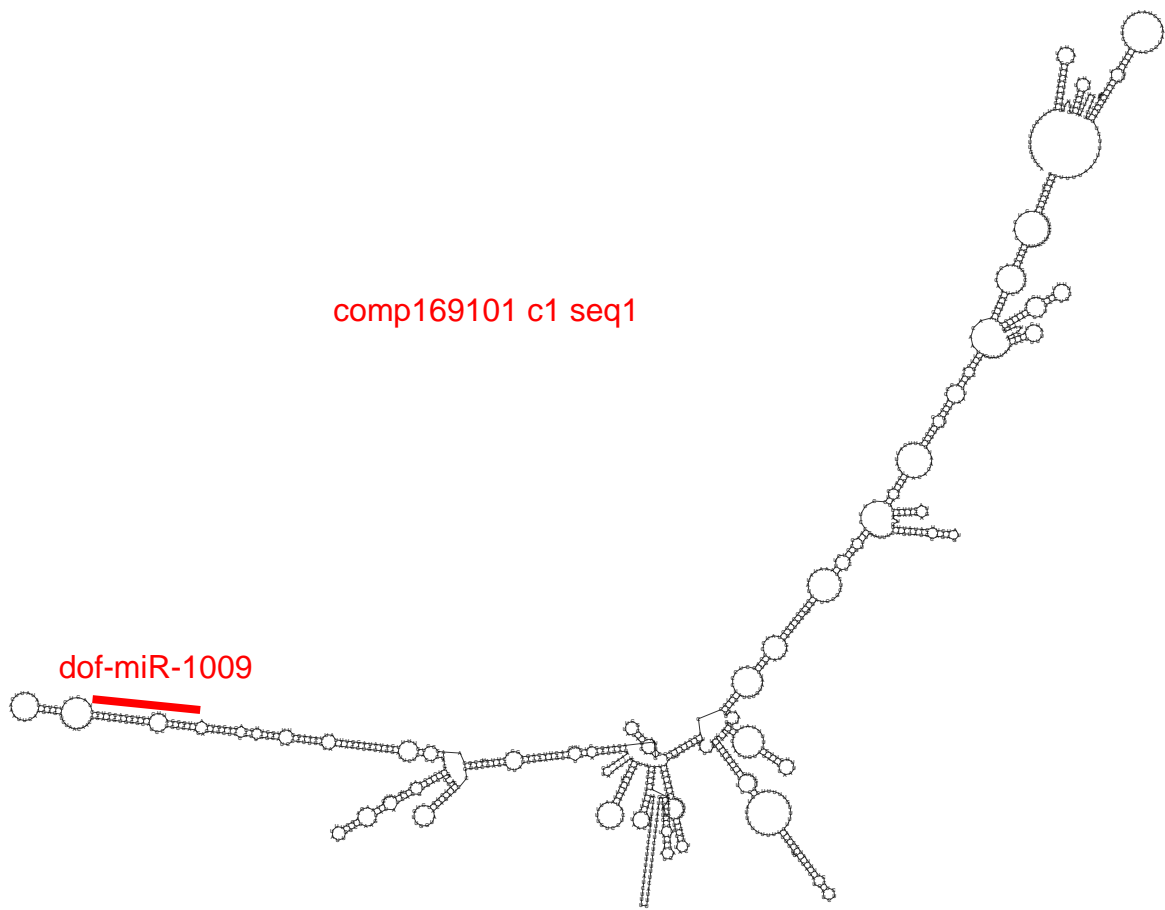

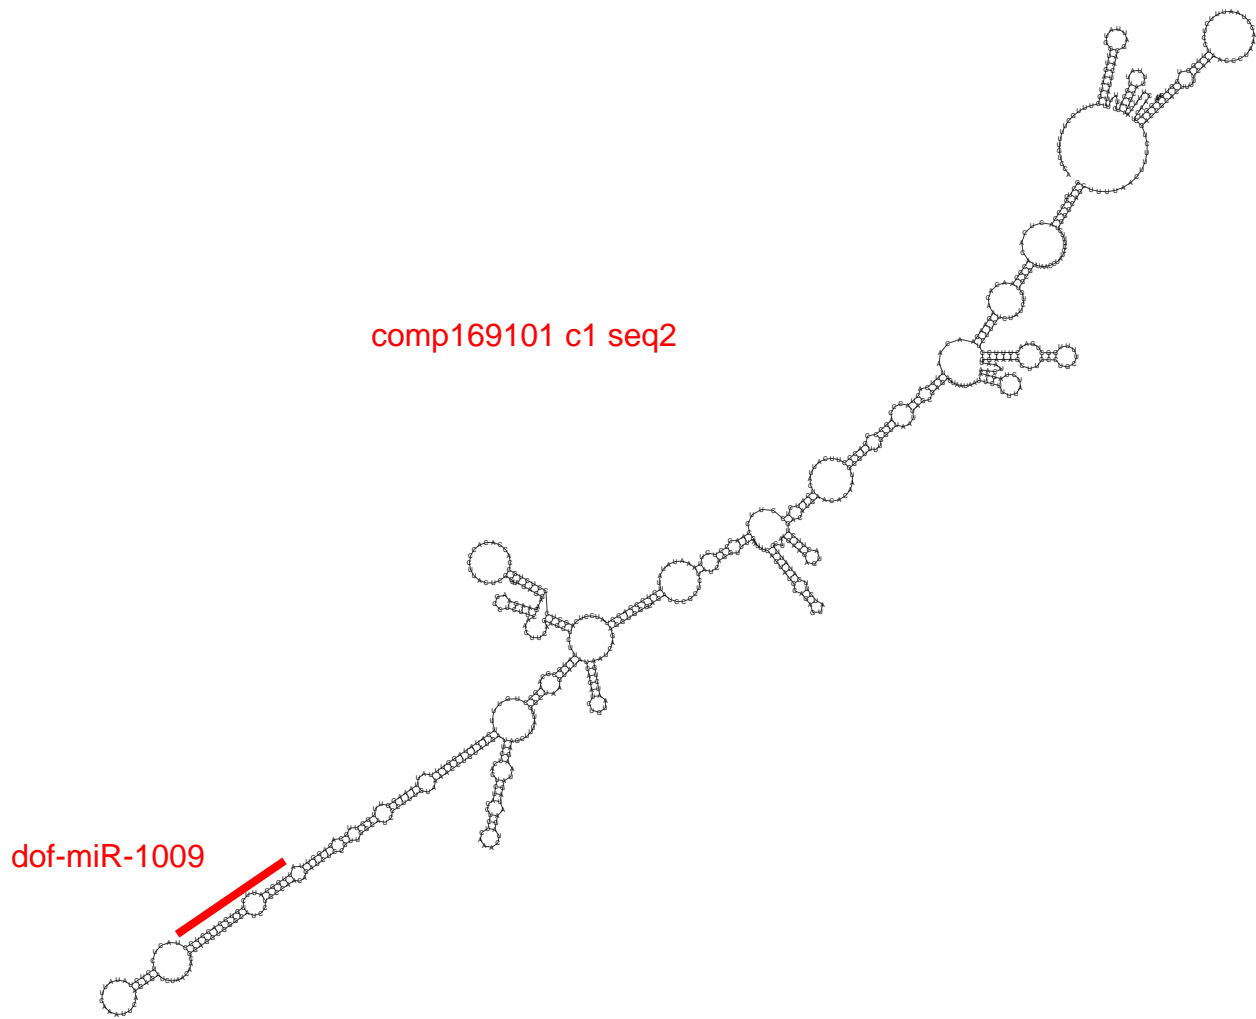

comp170298 c3 seq1

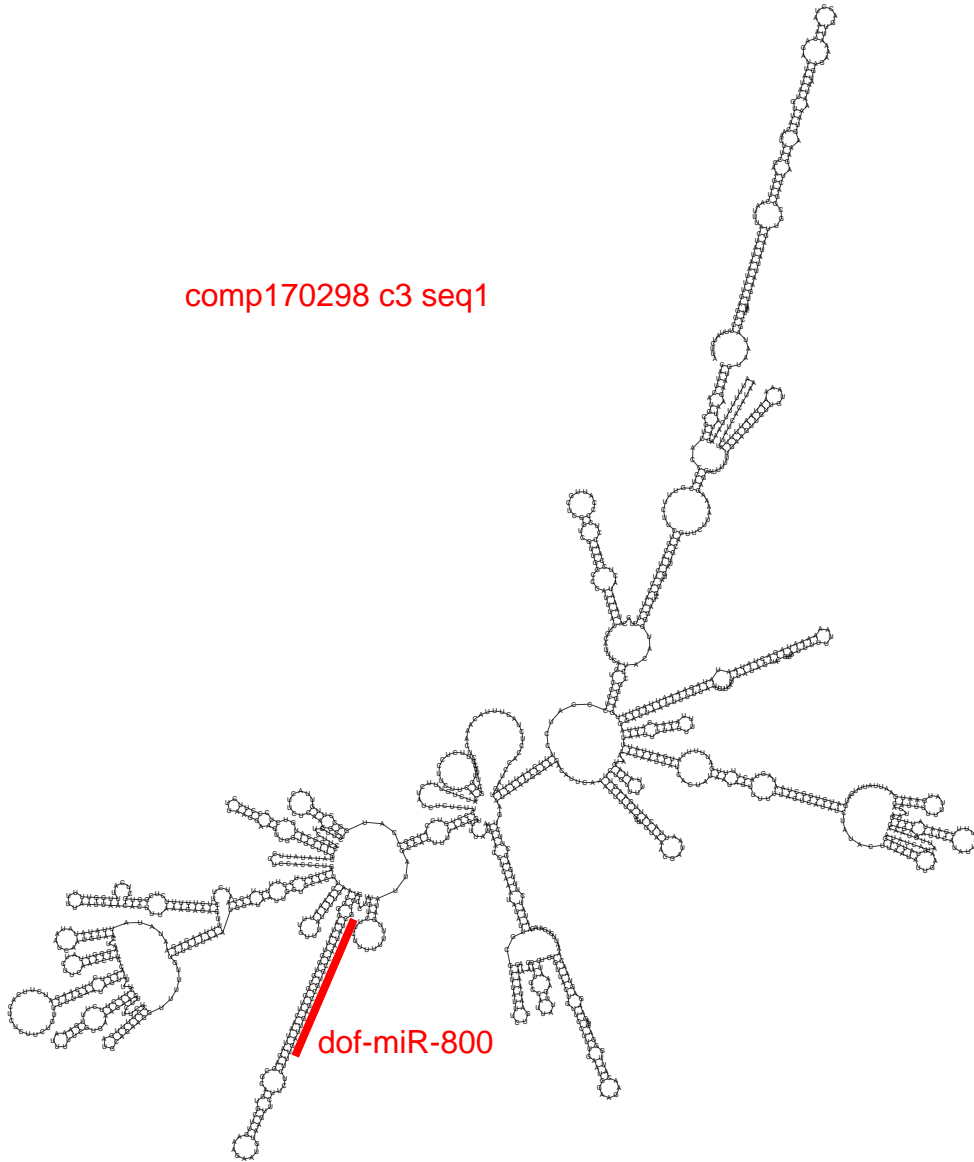

dof-miR-800

**Figure S3** Certain highly structured transcripts might serve as miRNA precursors. The transcripts were assembled by RNA-seq reads, and the transcript IDs were provided in the figure. The mature miRNA- and miRNA\*-coding regions on the long stems of the miRNA precursors were marked by red and blue lines respectively, and their IDs were also provided. Note, for each mature miRNA, its average accumulation level in either organ (flower, leaf, root or stem; two biological replicates for each organ; thus, there are a total of eight libraries) of *Dendrobium officinale* should be 5 RPM or higher. Besides, the accumulation level of each miRNA\* should be detectable in at least one sRNA-seq library. The secondary structures of the transcripts were predicted by using RNAfold (<http://rna.tbi.univie.ac.at/cgi-bin/RNAfold.cgi>).

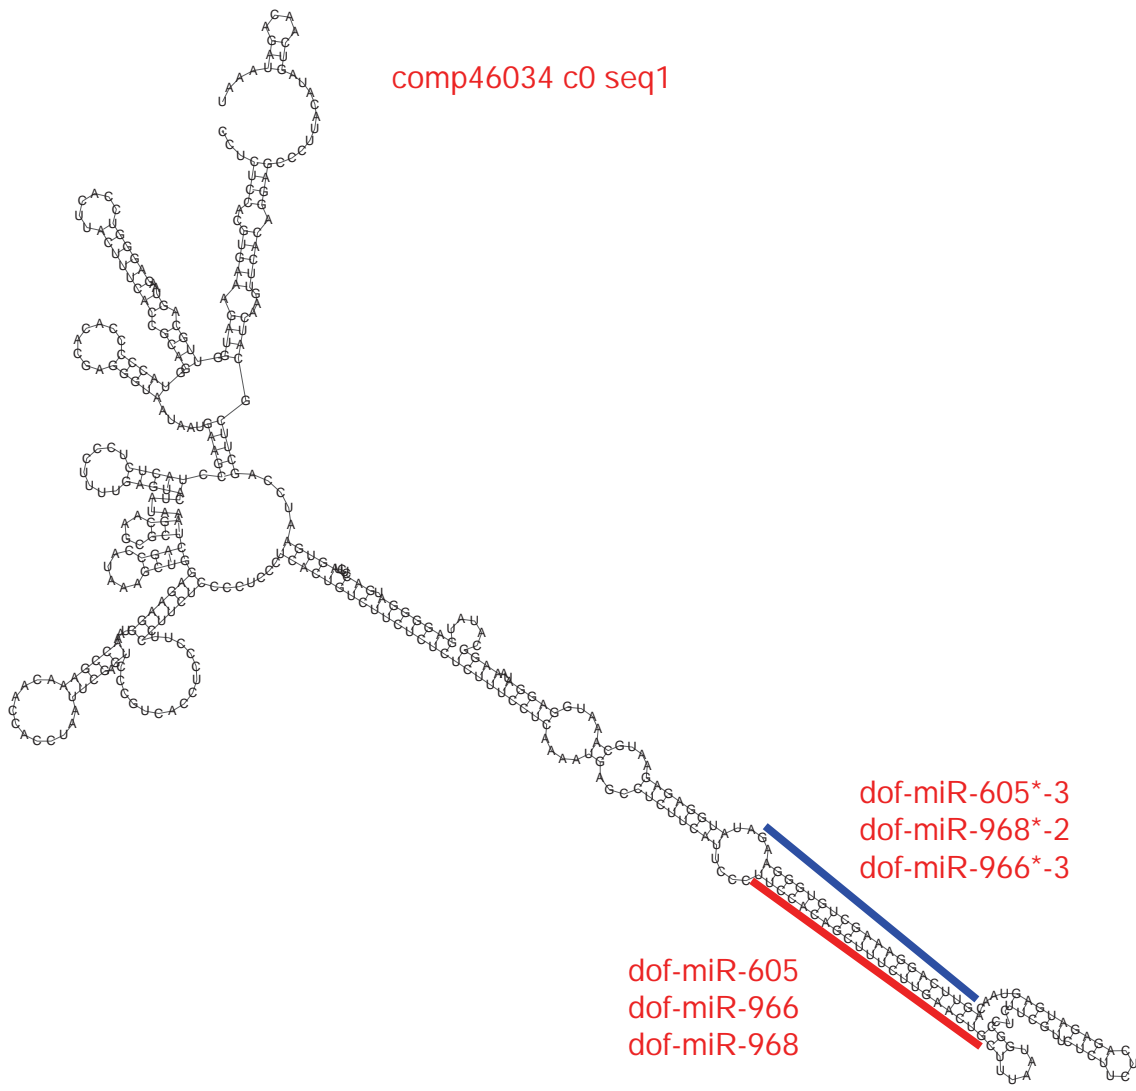

comp46034 c0 seq1

dof-miR-605\*-3  
dof-miR-968\*-2  
dof-miR-966\*-3

dof-miR-605  
dof-miR-966  
dof-miR-968

comp89672 c0 seq1

dof-miR-303\*  
dof-miR-381  
dof-miR-324\*  
dof-miR-385\*  
dof-miR-651\*  
dof-miR-652\*  
dof-miR-686\*-1

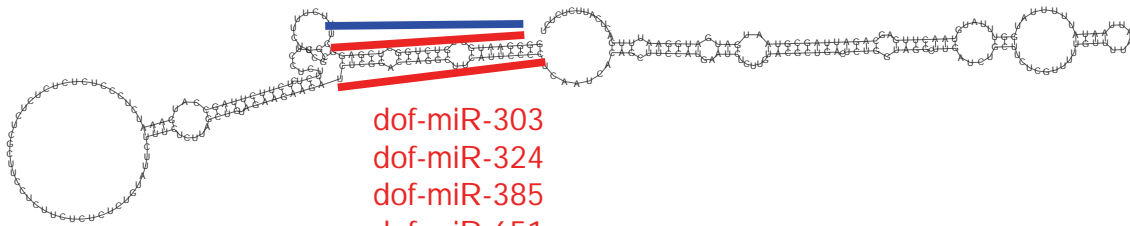

dof-miR-303  
dof-miR-324  
dof-miR-385  
dof-miR-651  
dof-miR-652  
dof-miR-653  
dof-miR-686

comp112901 c0 seq1

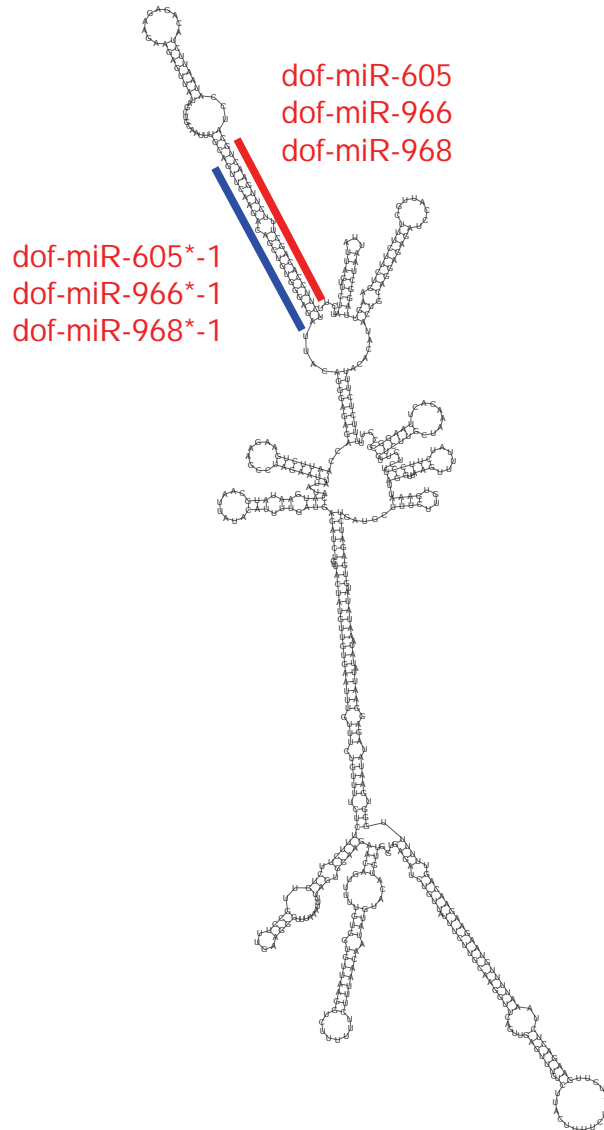

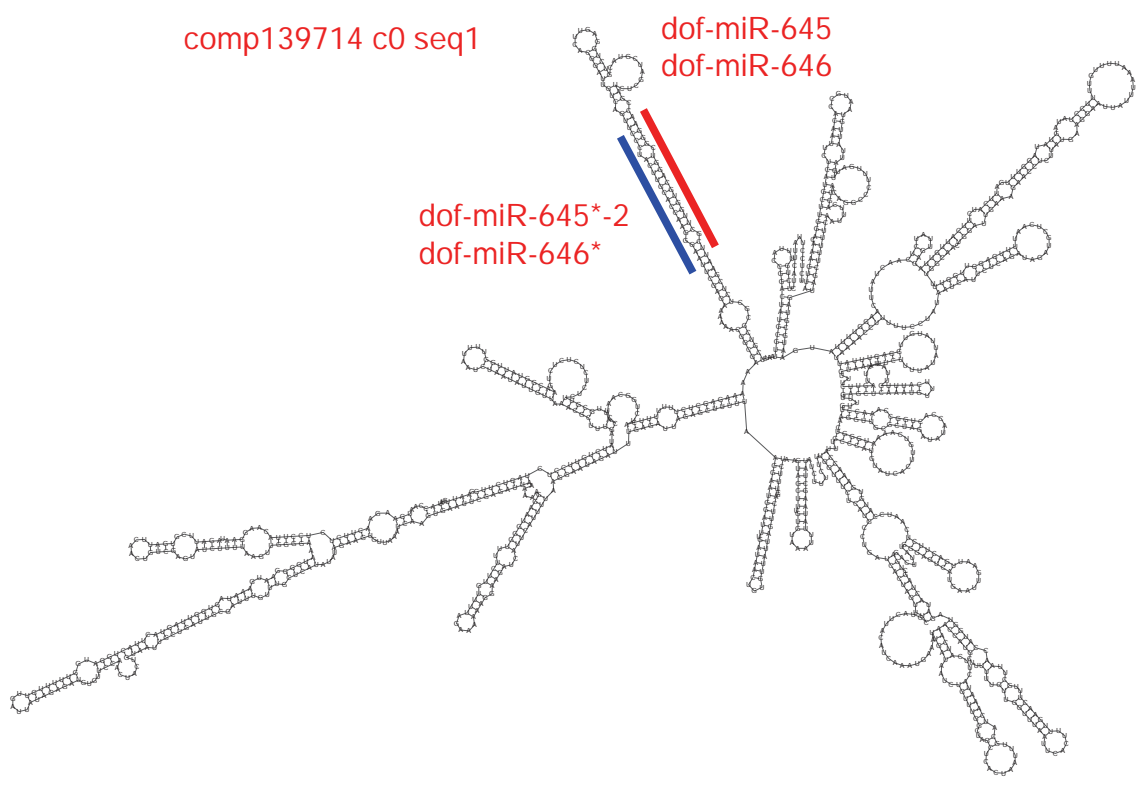



comp139714 c0 seq2

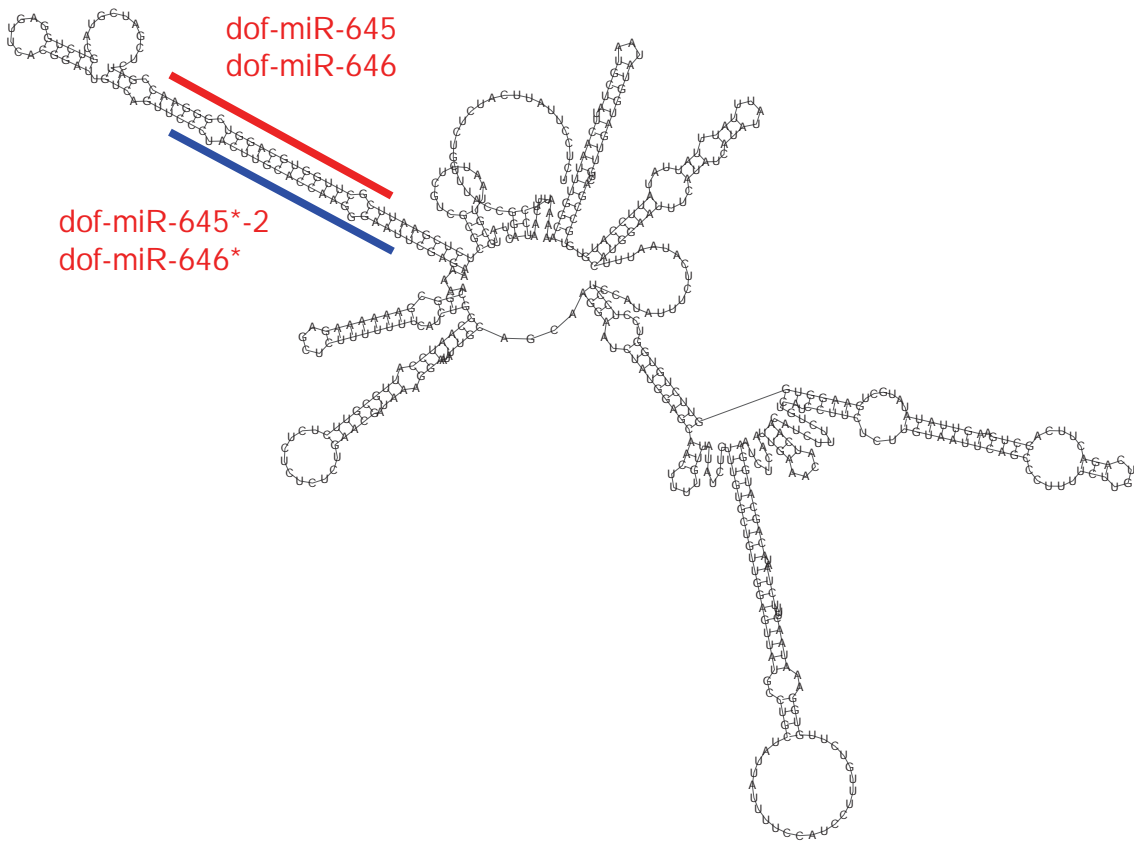

comp140839 c0 seq1

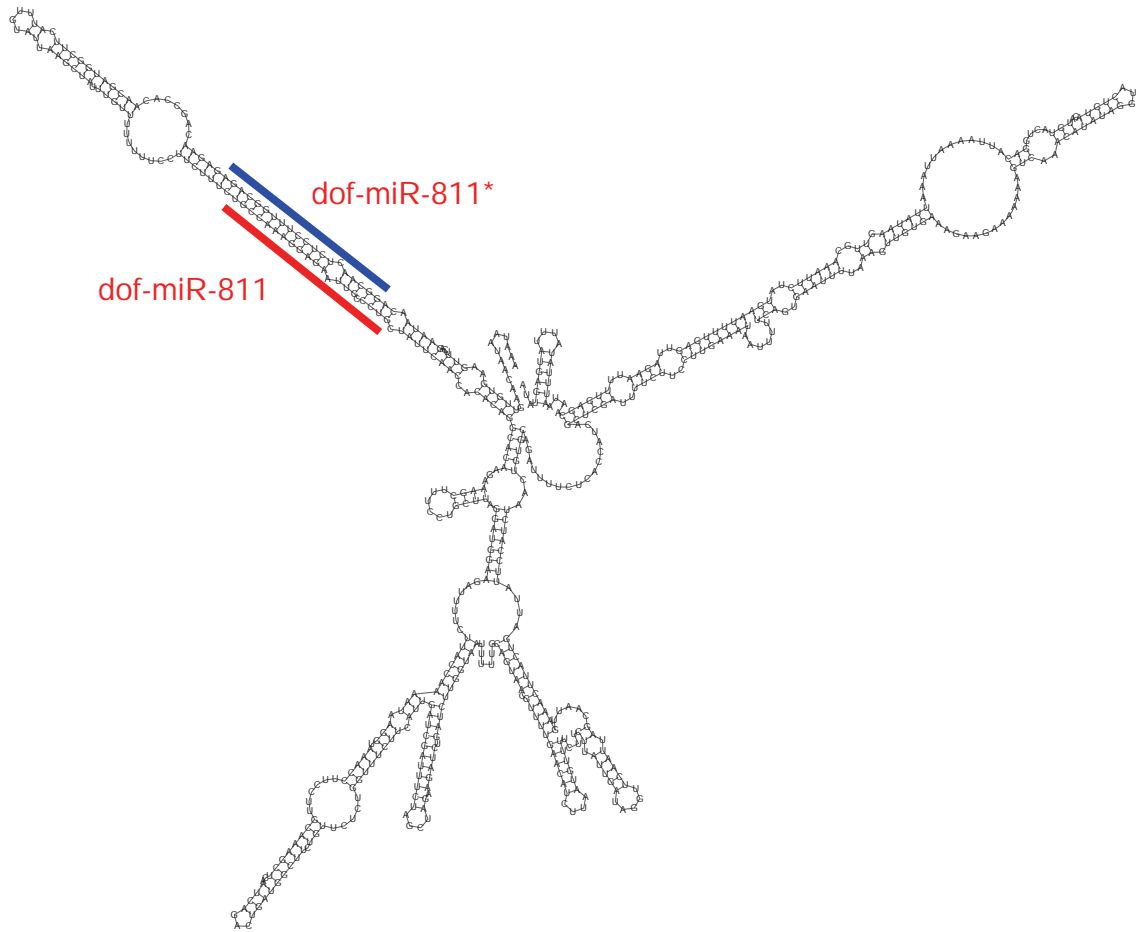

dof-miR-811\*

dof-miR-811

comp140839 c0 seq2

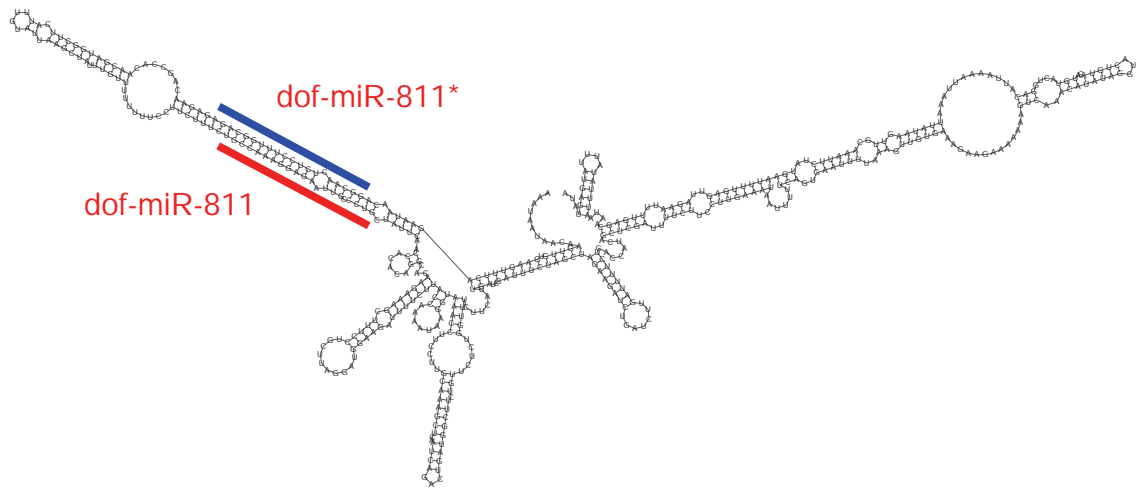

comp140839 c0 seq3

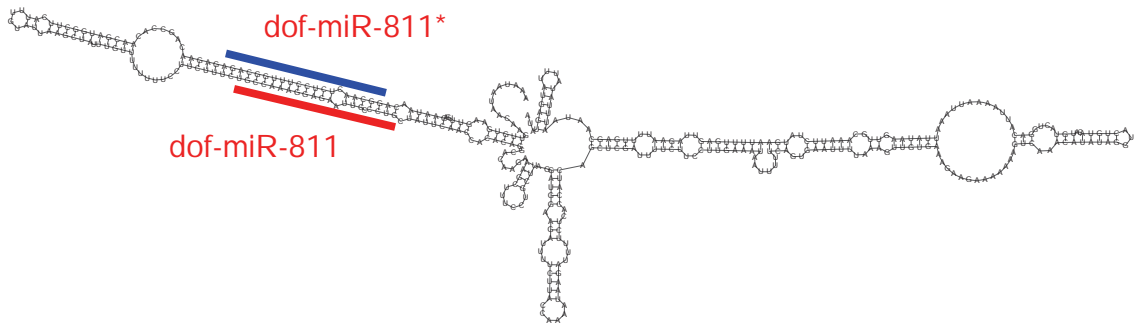

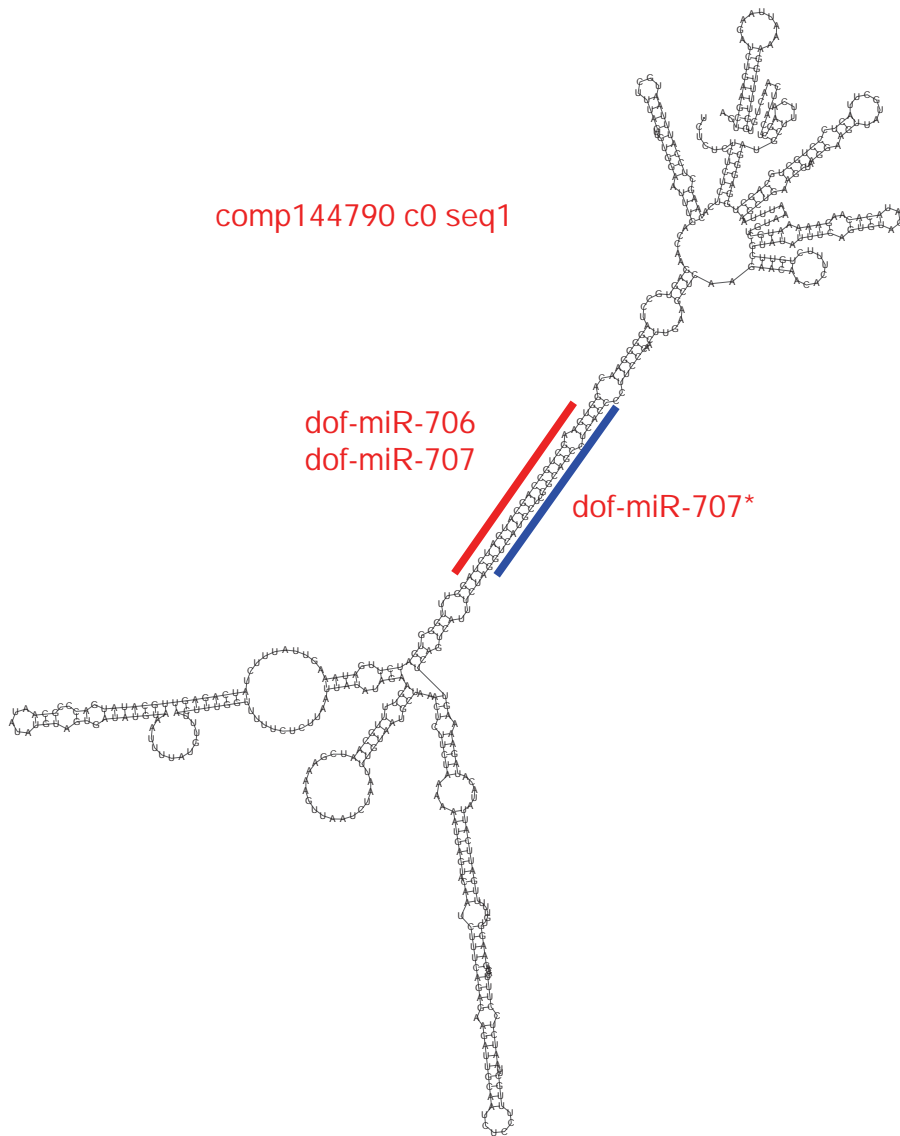

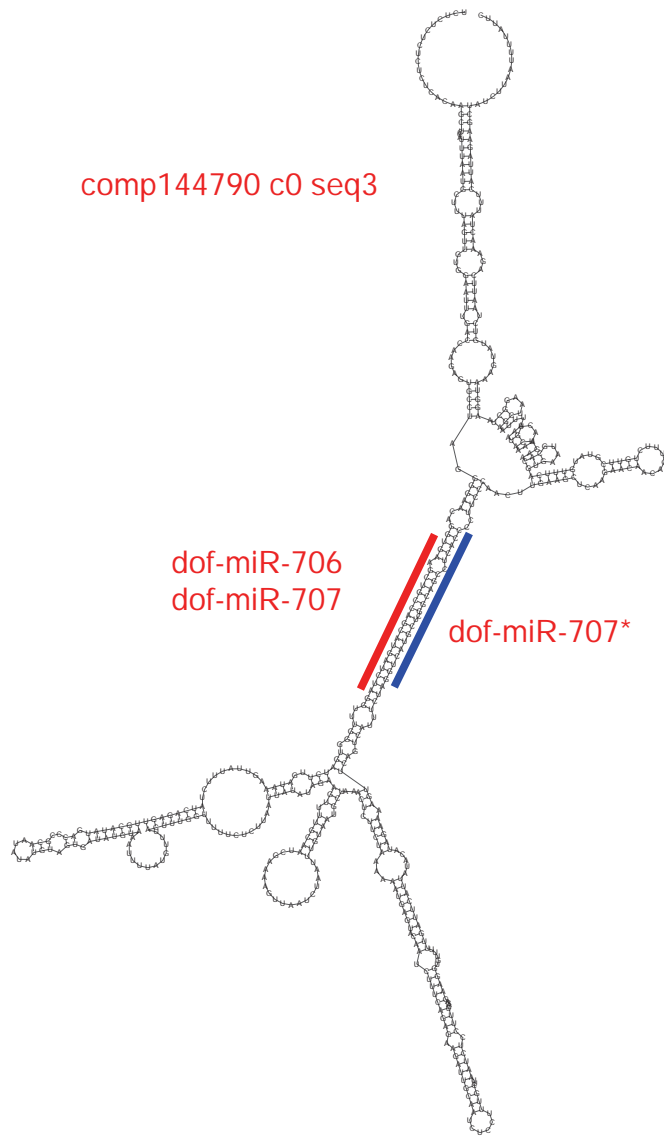

comp144790 c0 seq3

dof-miR-706  
dof-miR-707

dof-miR-707\*

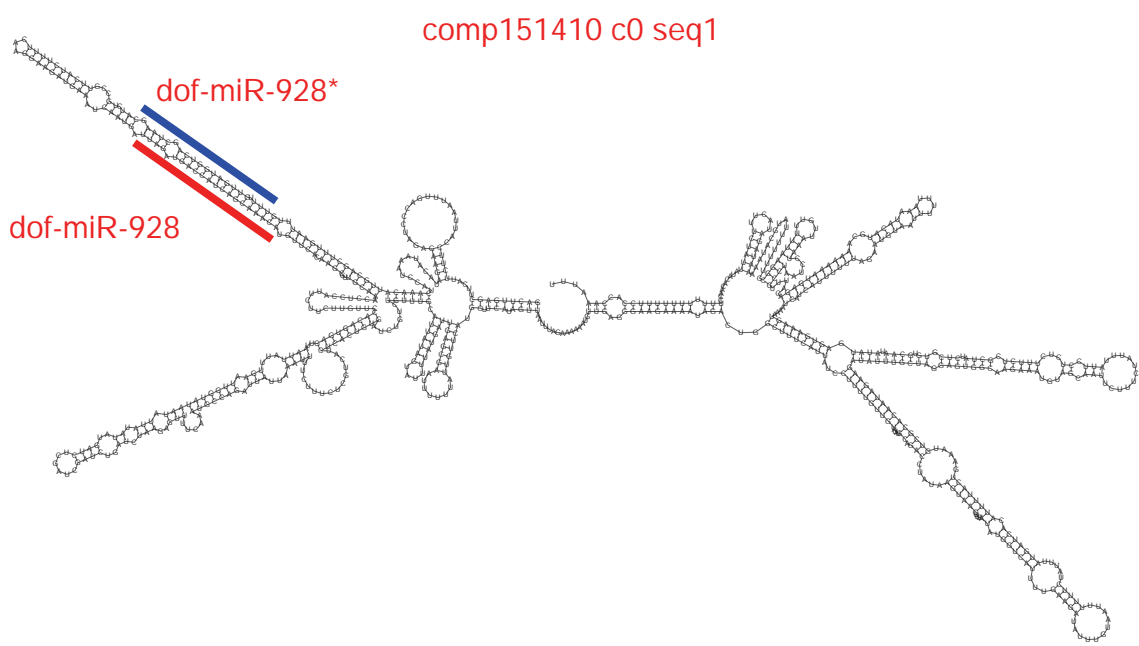

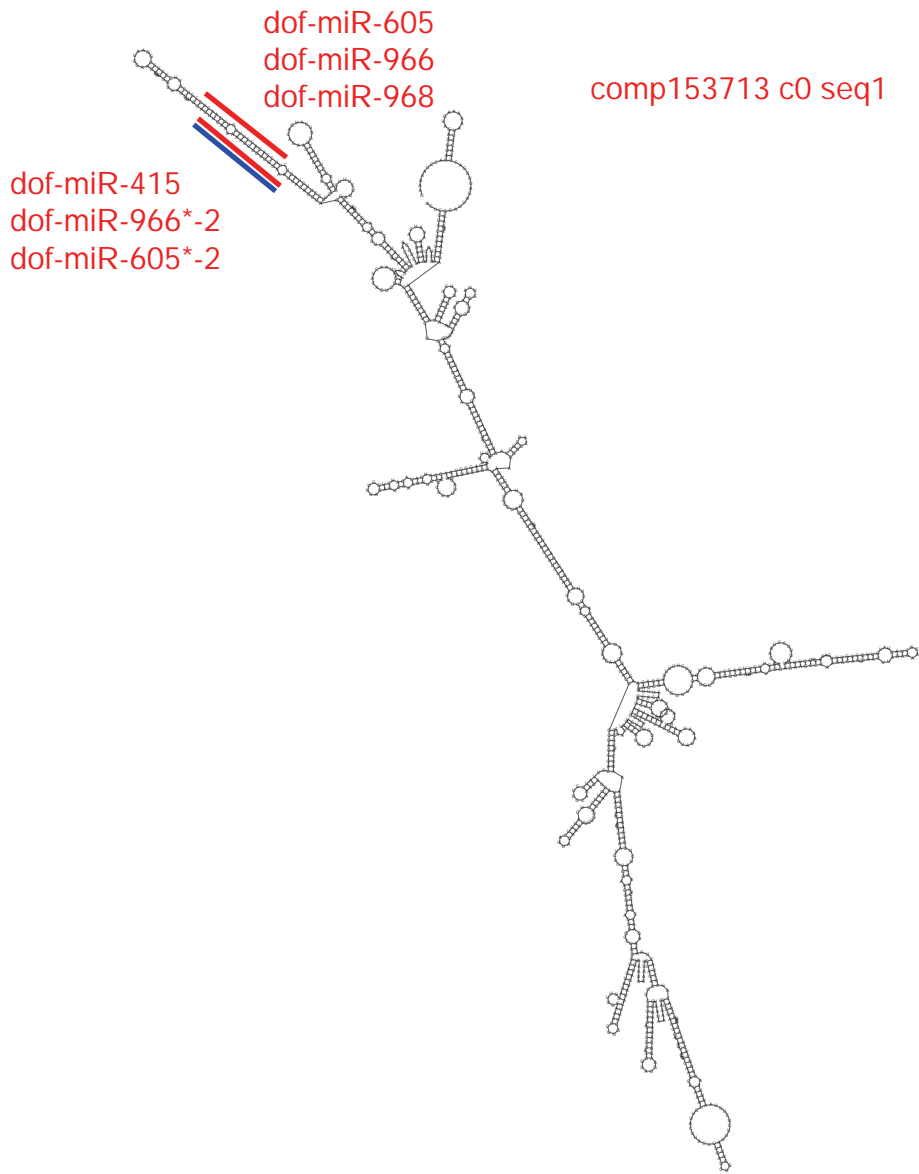



comp159822 c2 seq1

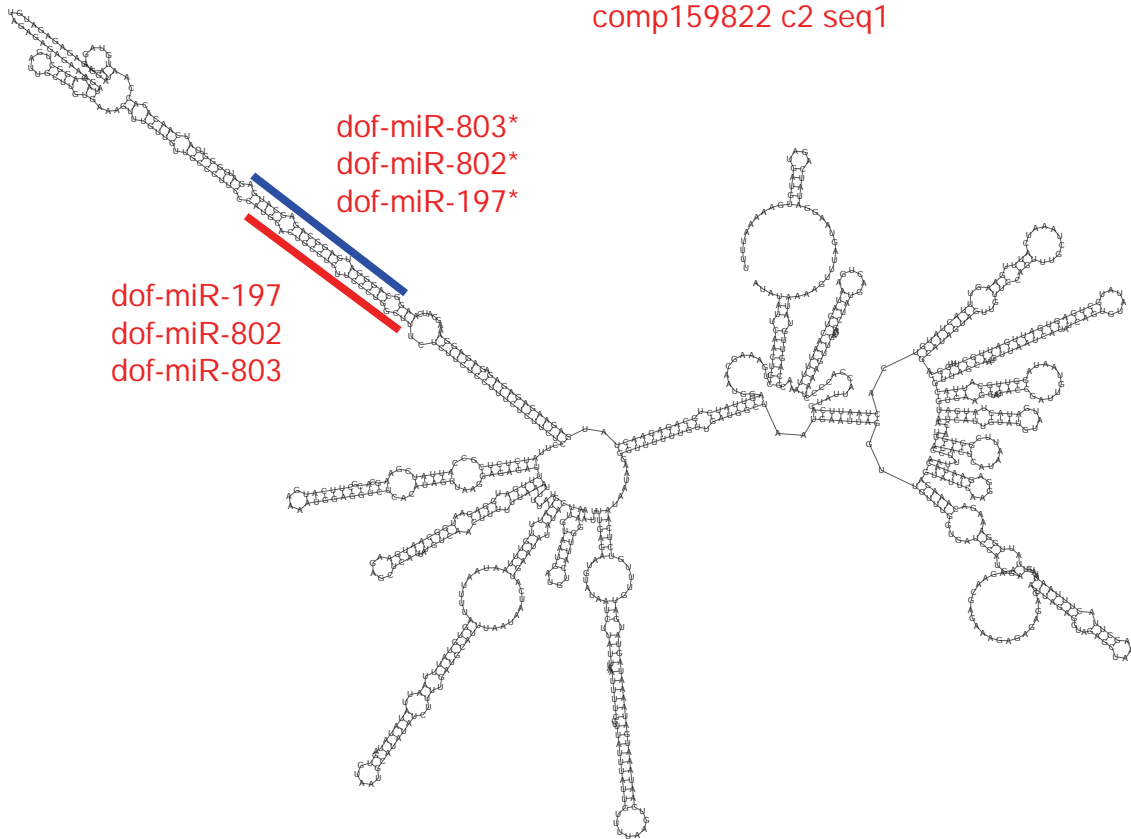

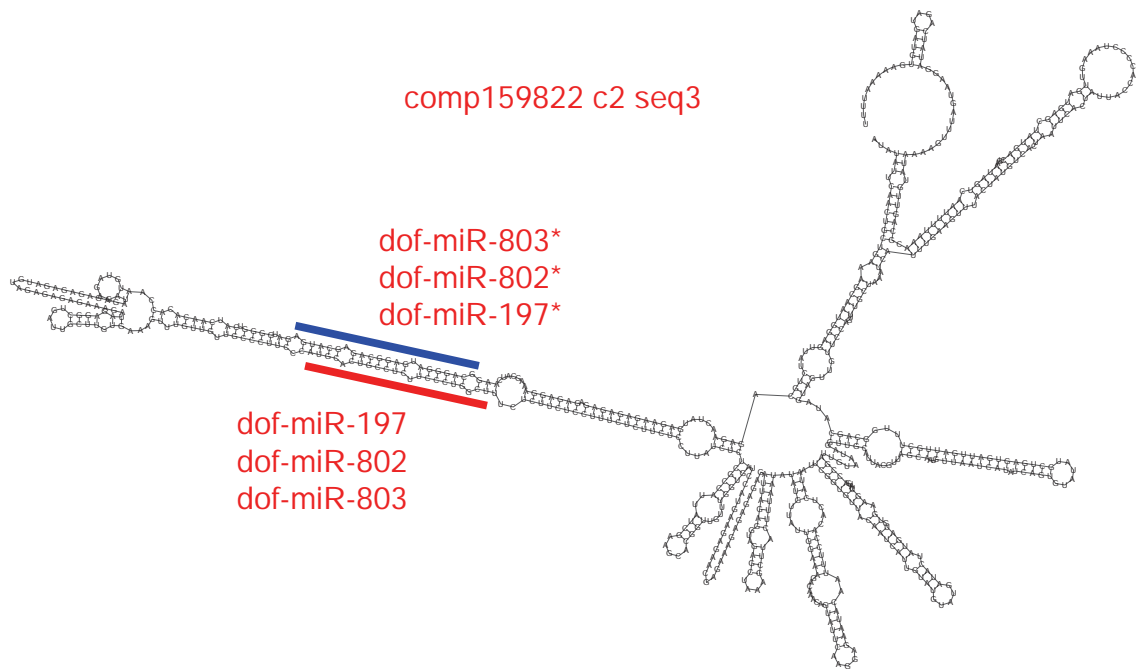

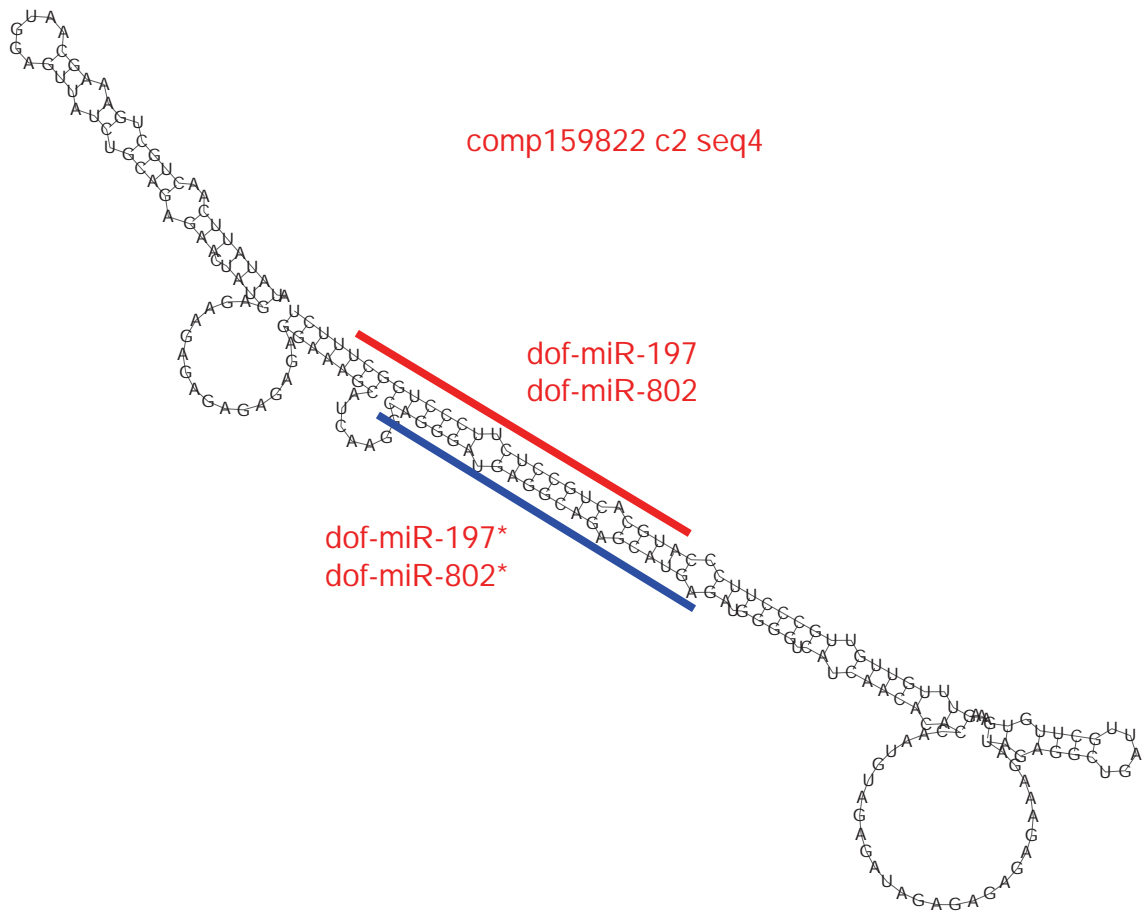

comp159822 c2 seq5

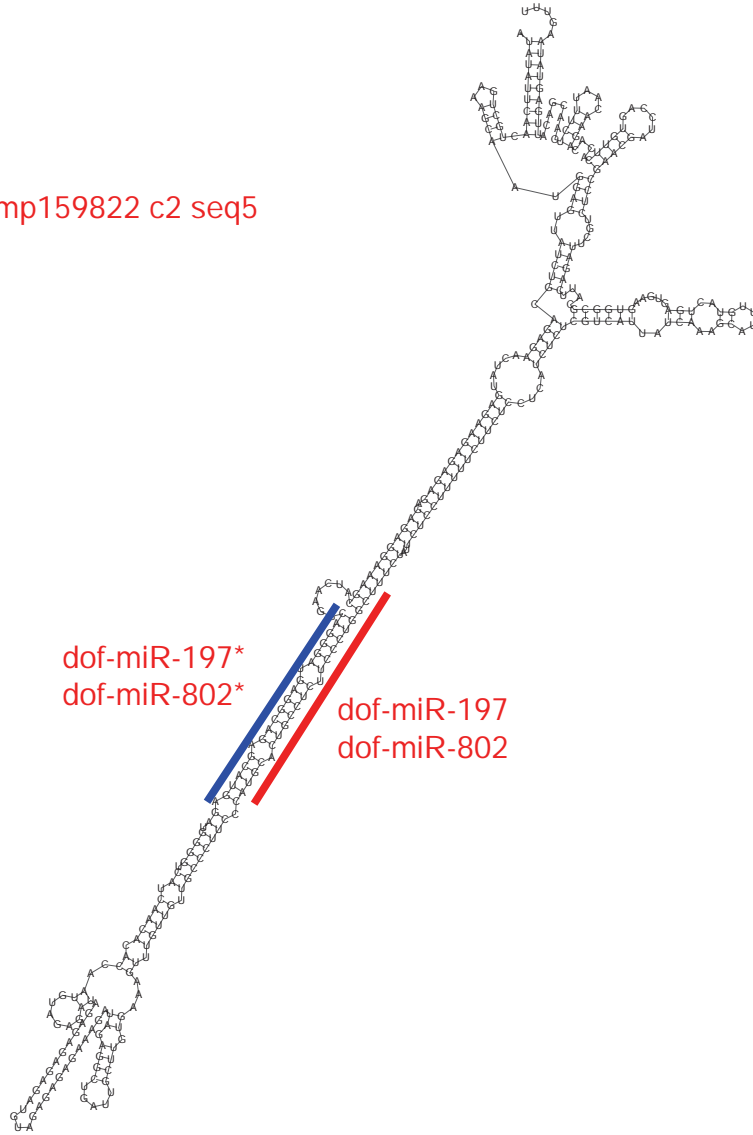

comp160245 c0 seq1

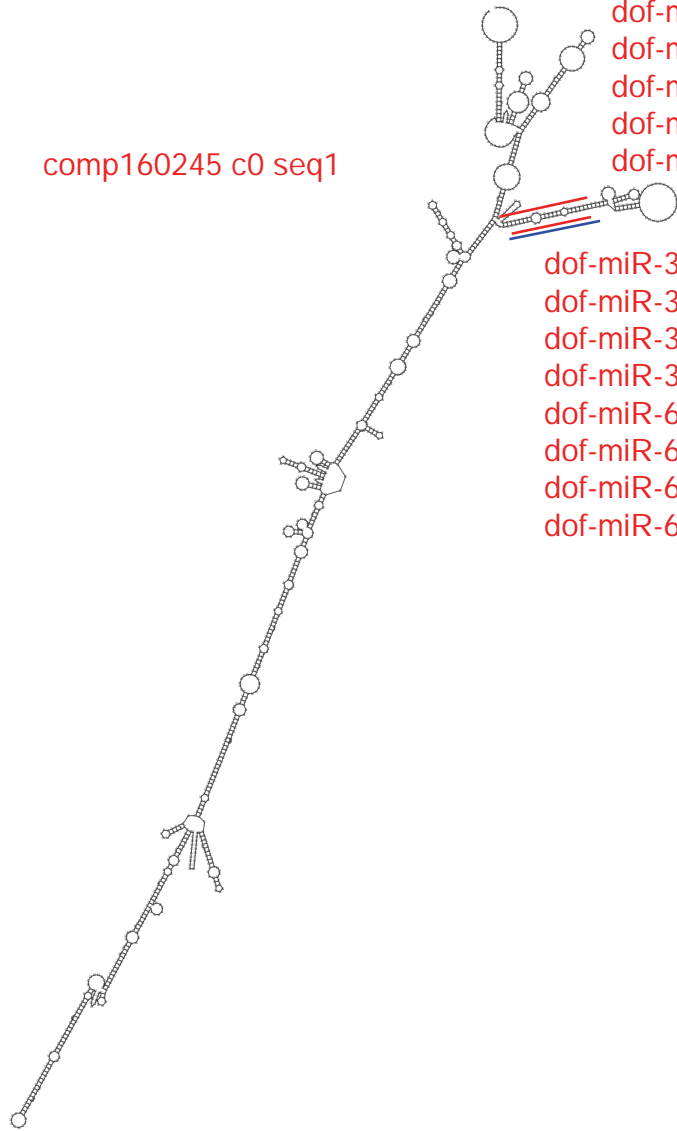

dof-miR-303  
dof-miR-324  
dof-miR-385  
dof-miR-651  
dof-miR-652  
dof-miR-653  
dof-miR-654  
dof-miR-686

dof-miR-303\*  
dof-miR-381  
dof-miR-324\*  
dof-miR-385\*  
dof-miR-651\*  
dof-miR-652\*  
dof-miR-654\*  
dof-miR-686\*-2

comp160245 c0 seq2

dof-miR-303\*  
dof-miR-381  
dof-miR-324\*  
dof-miR-385\*  
dof-miR-651\*  
dof-miR-652\*  
dof-miR-654\*  
dof-miR-686\*-2

dof-miR-303  
dof-miR-324  
dof-miR-385  
dof-miR-651  
dof-miR-652  
dof-miR-653  
dof-miR-654  
dof-miR-686

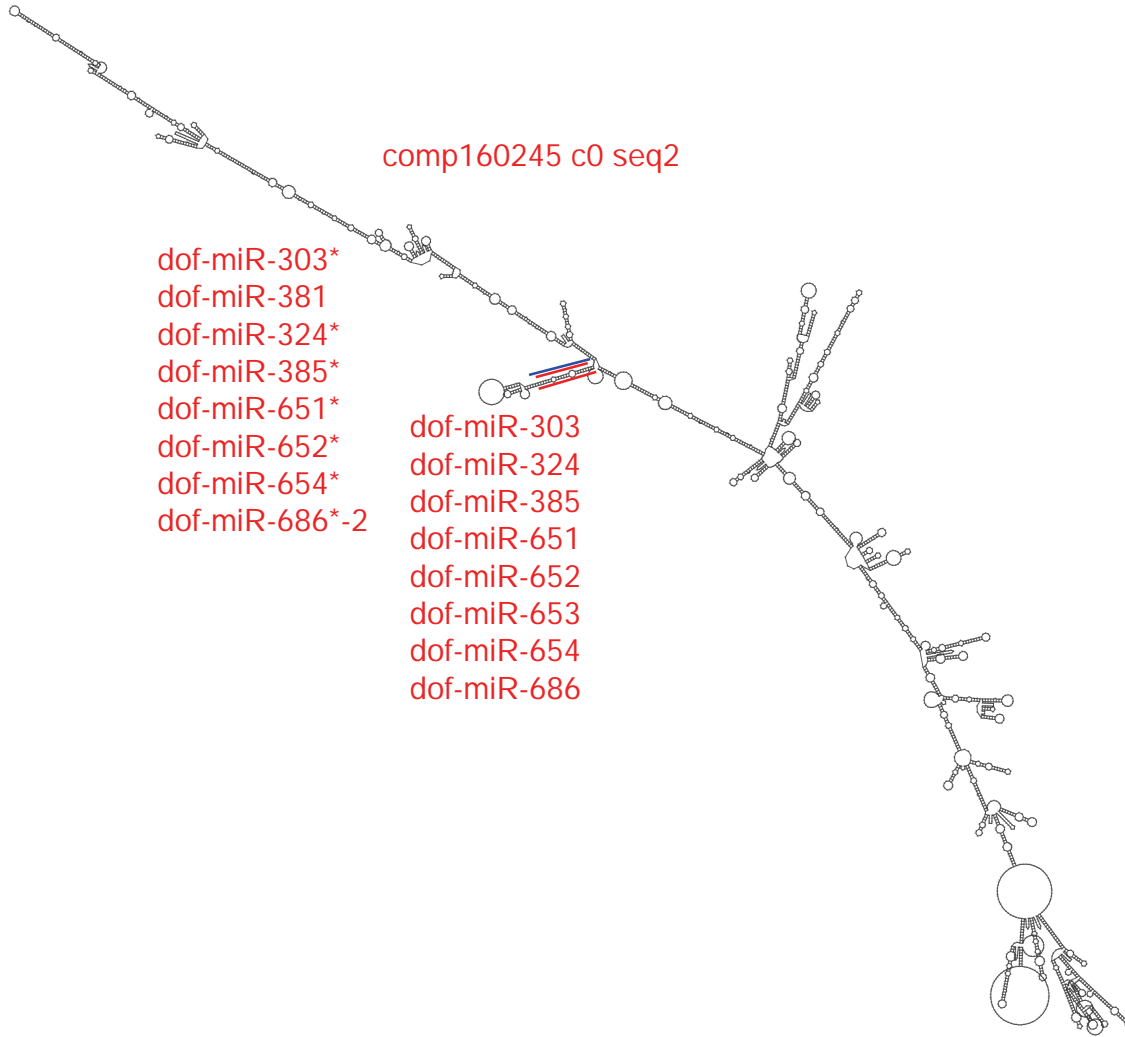

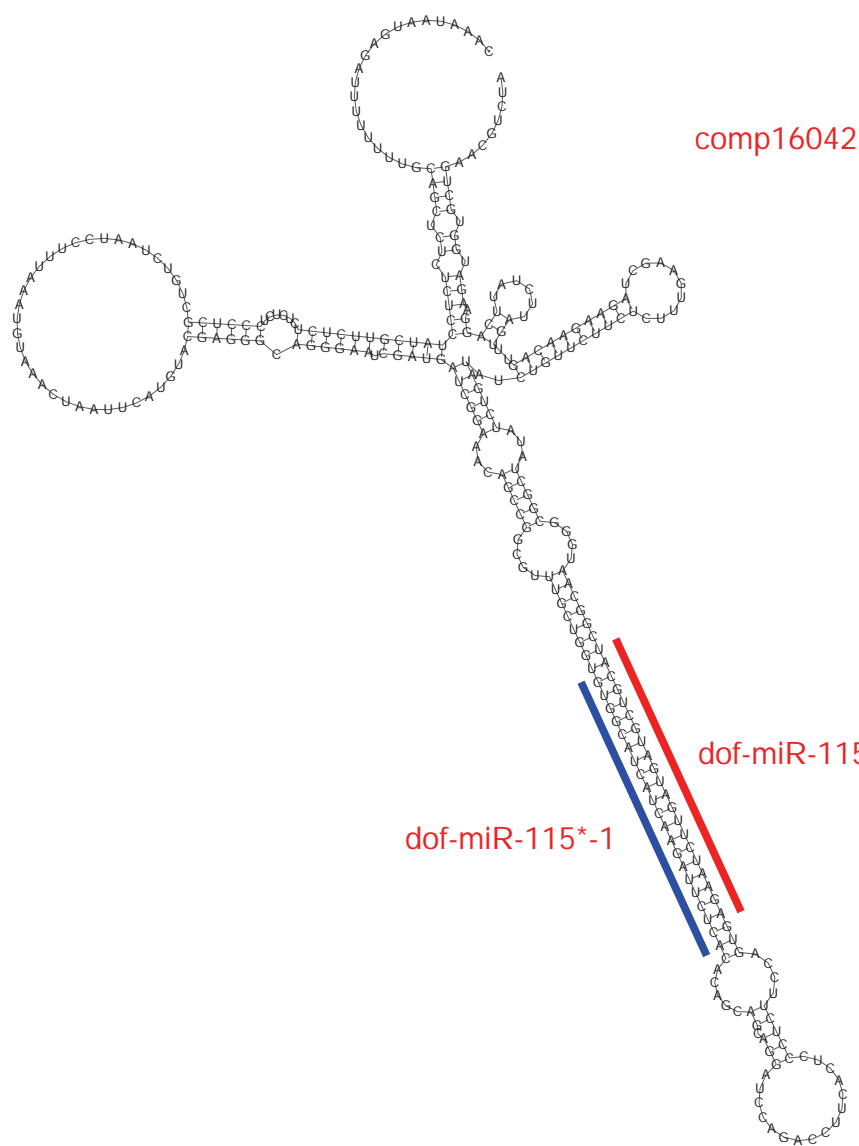

comp160421 c0 seq1

dof-miR-115

dof-miR-115\*-1

comp160421 c0 seq2

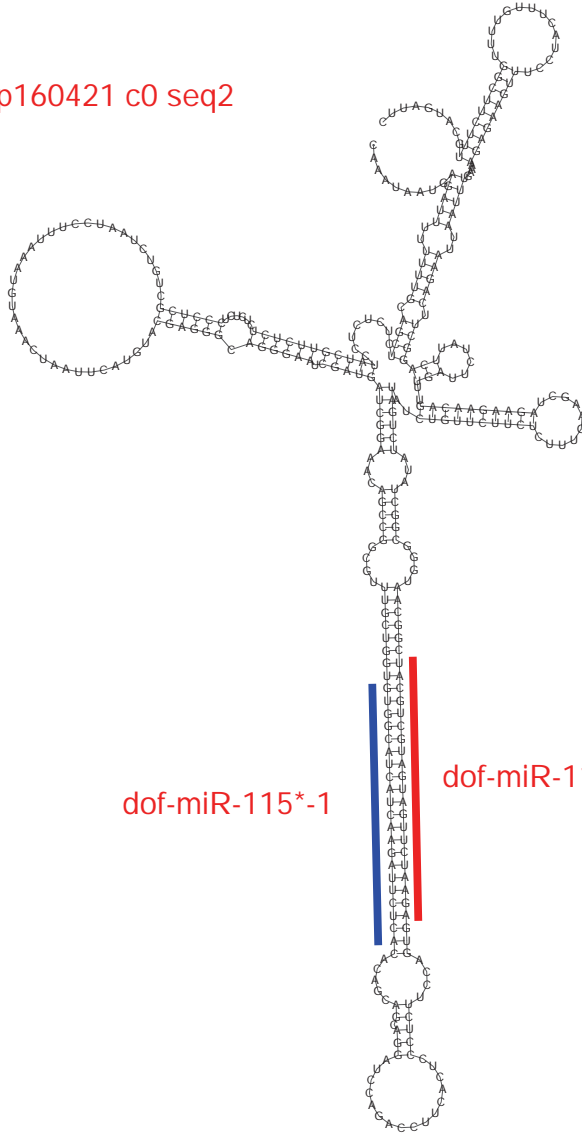

dof-miR-115\*-1

dof-miR-115



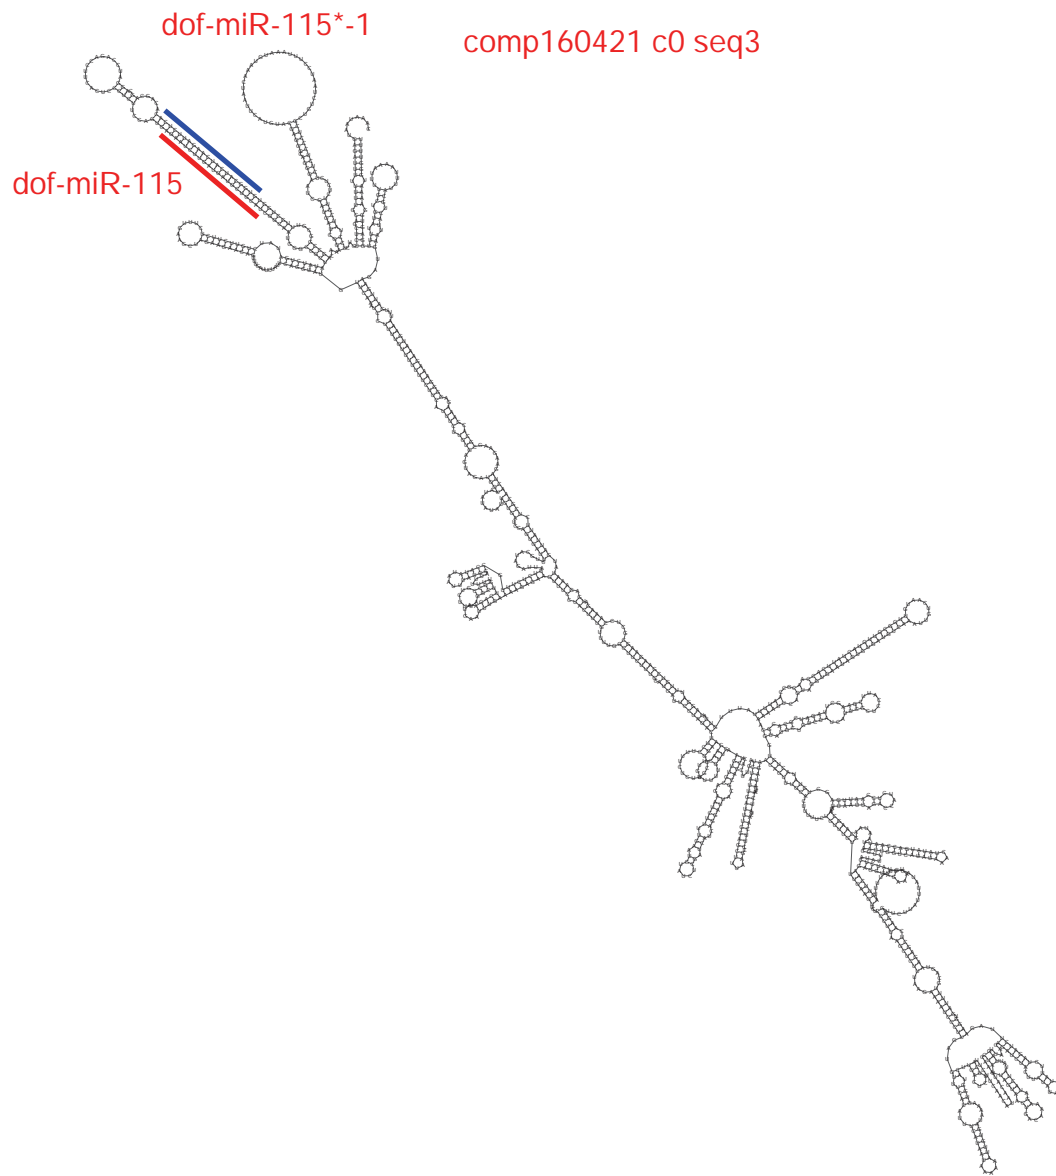



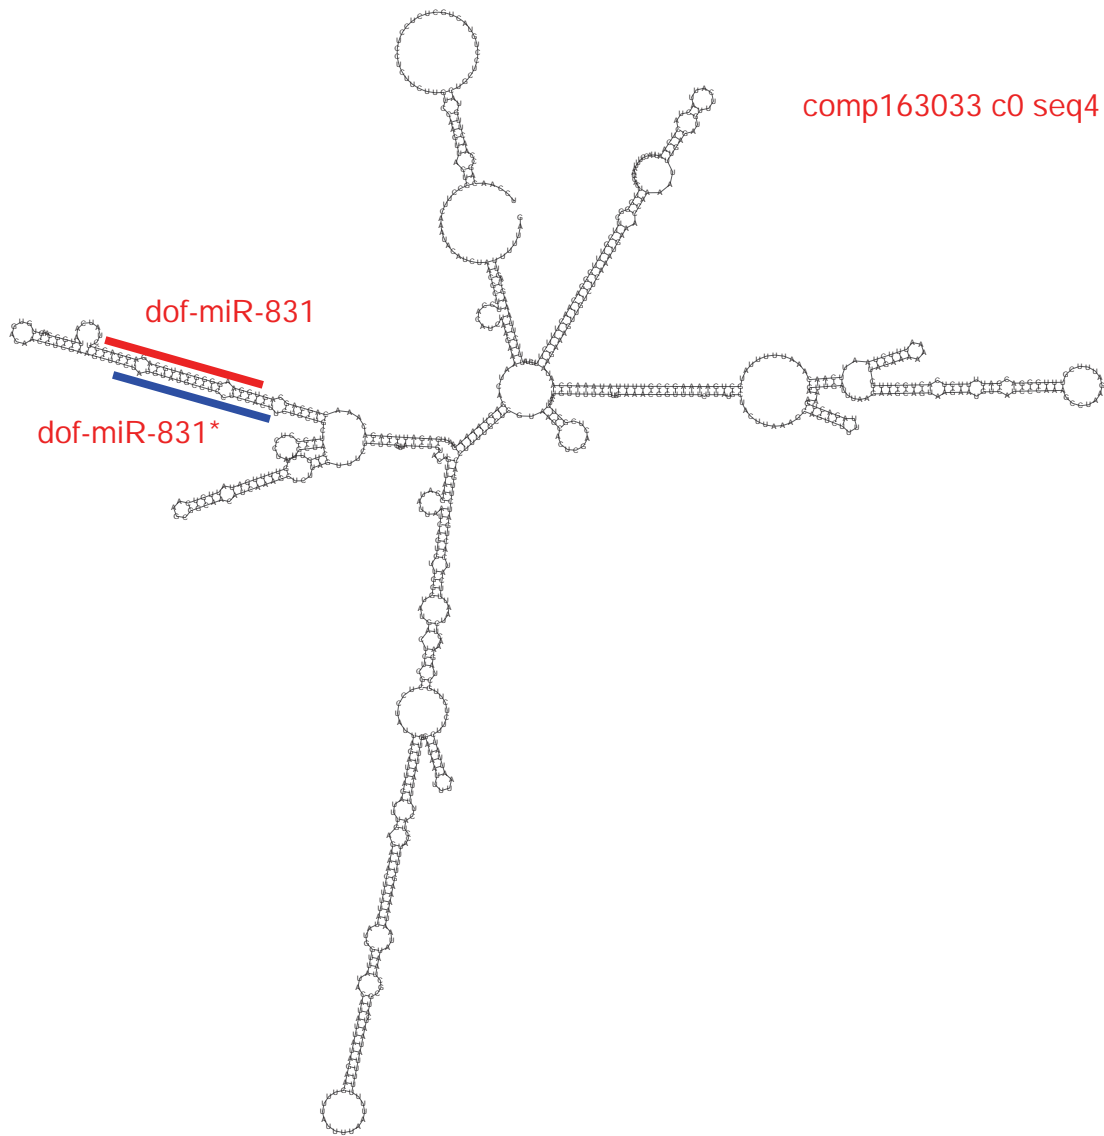

comp165001 c0 seq1

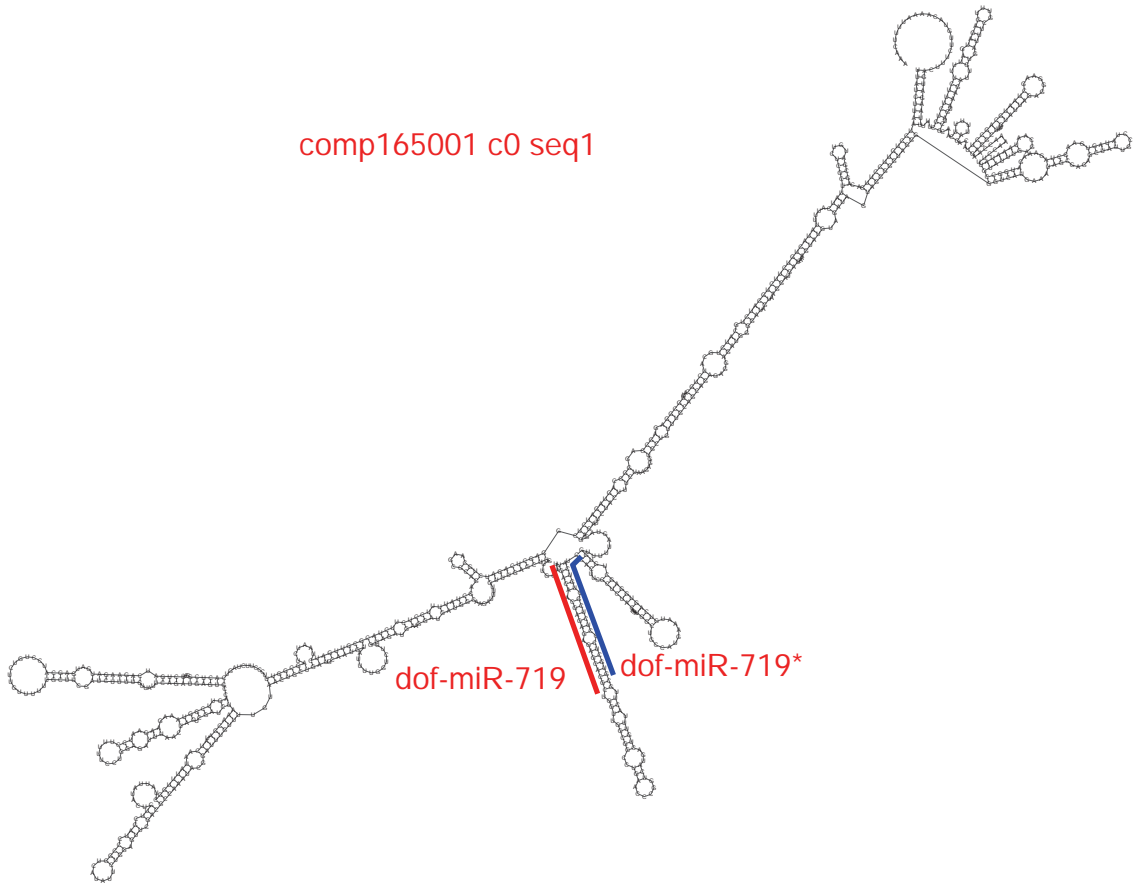

comp165001 c0 seq4

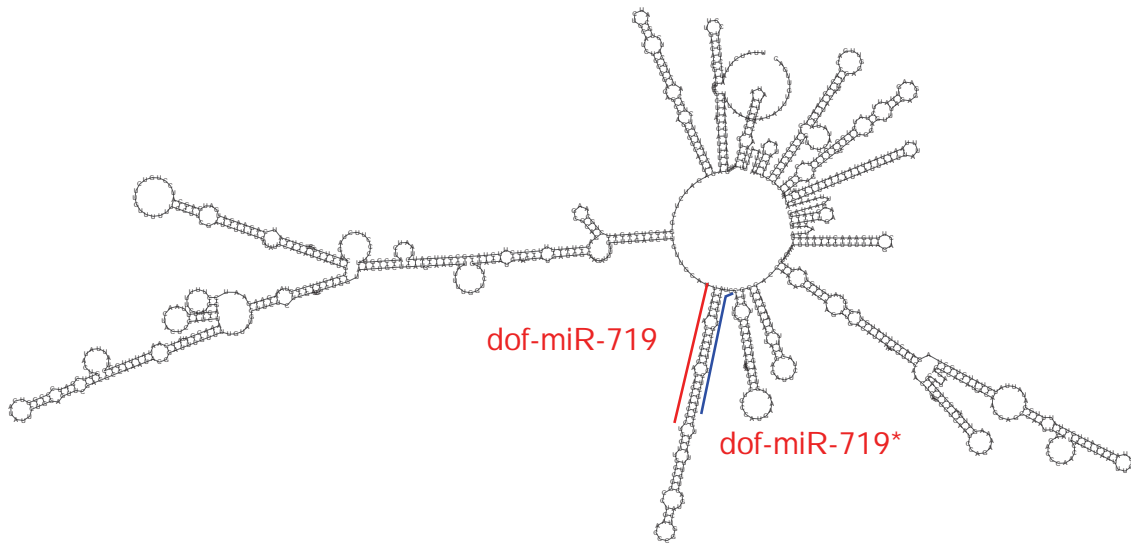

comp165001 c0 seq13

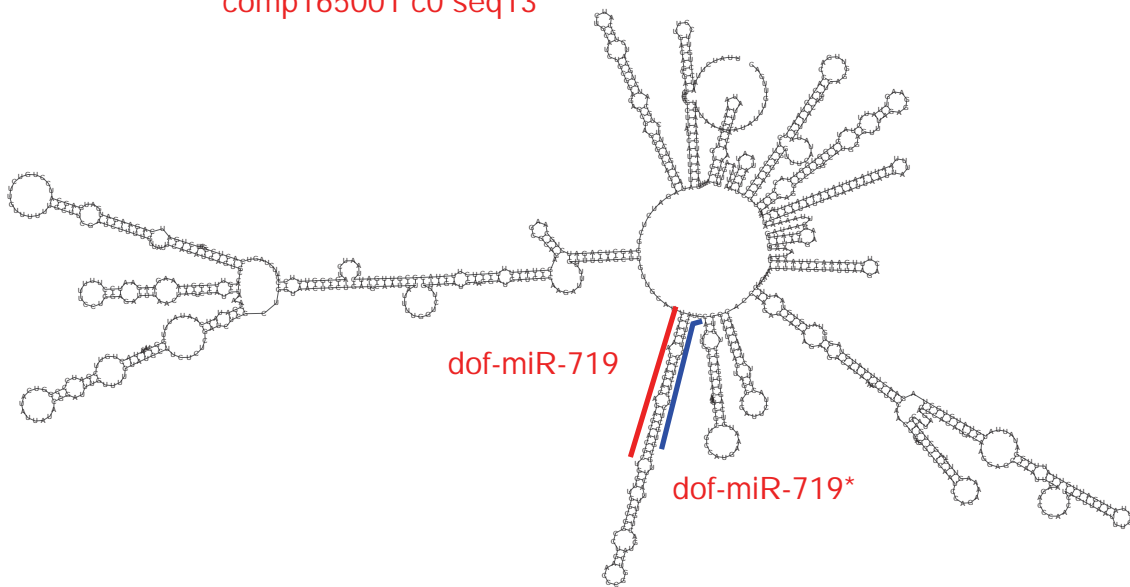

comp167111 c1 seq1

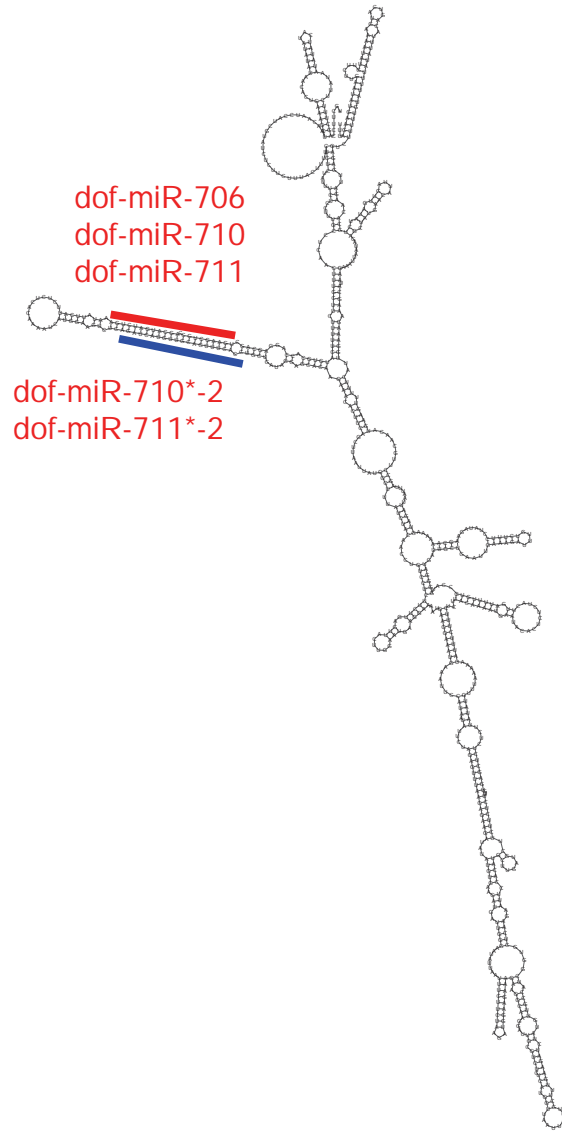

comp167111 c1 seq7

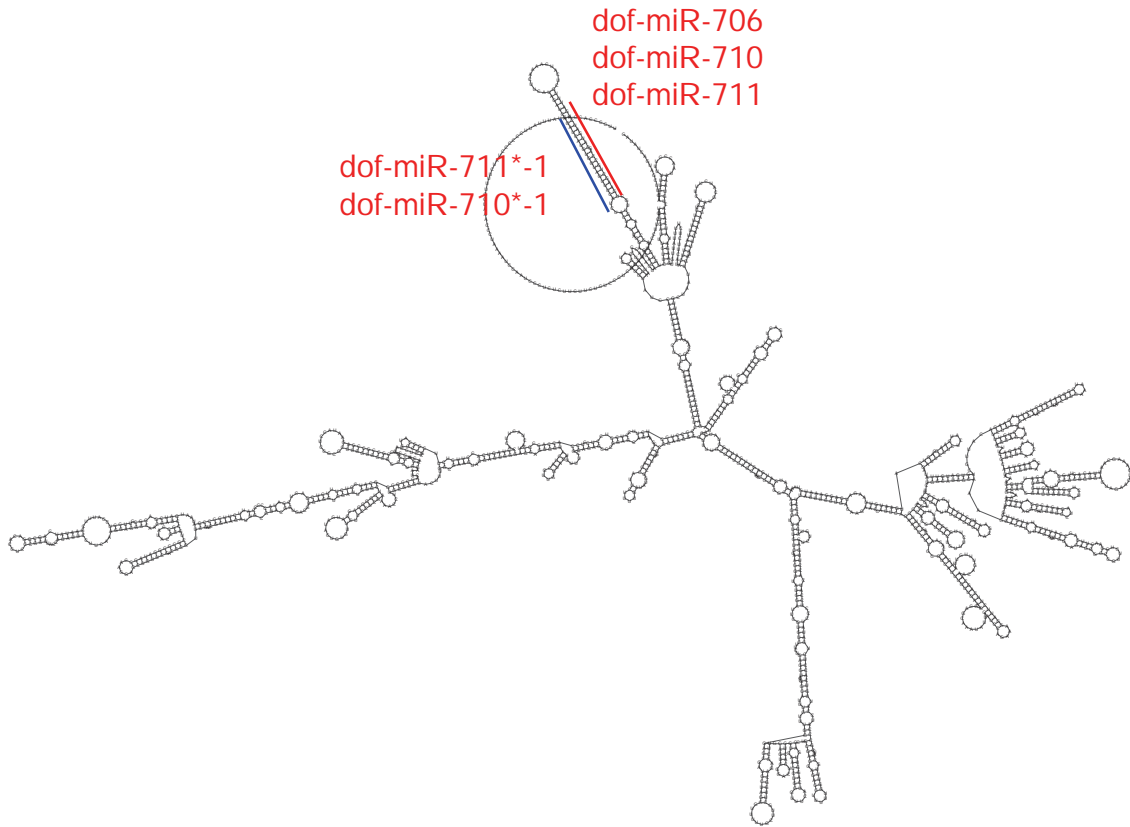



comp167111 c1 seq12

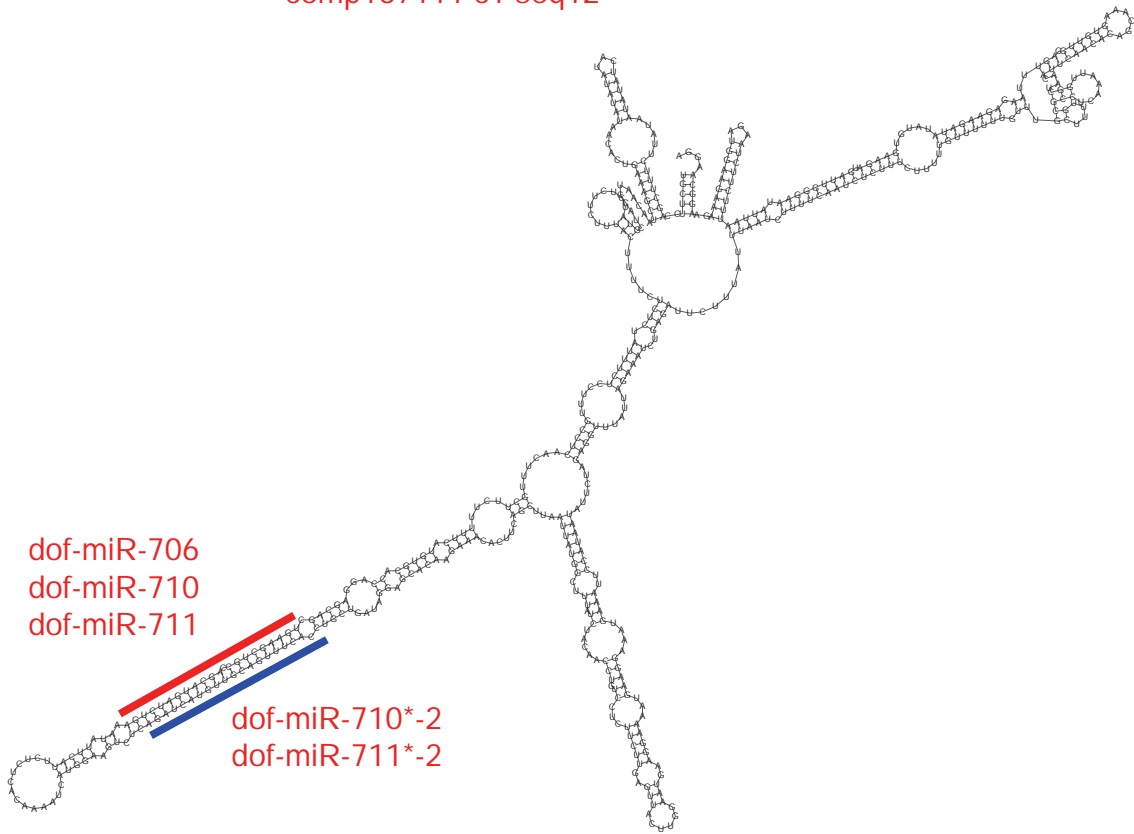

comp167111 c1 seq13

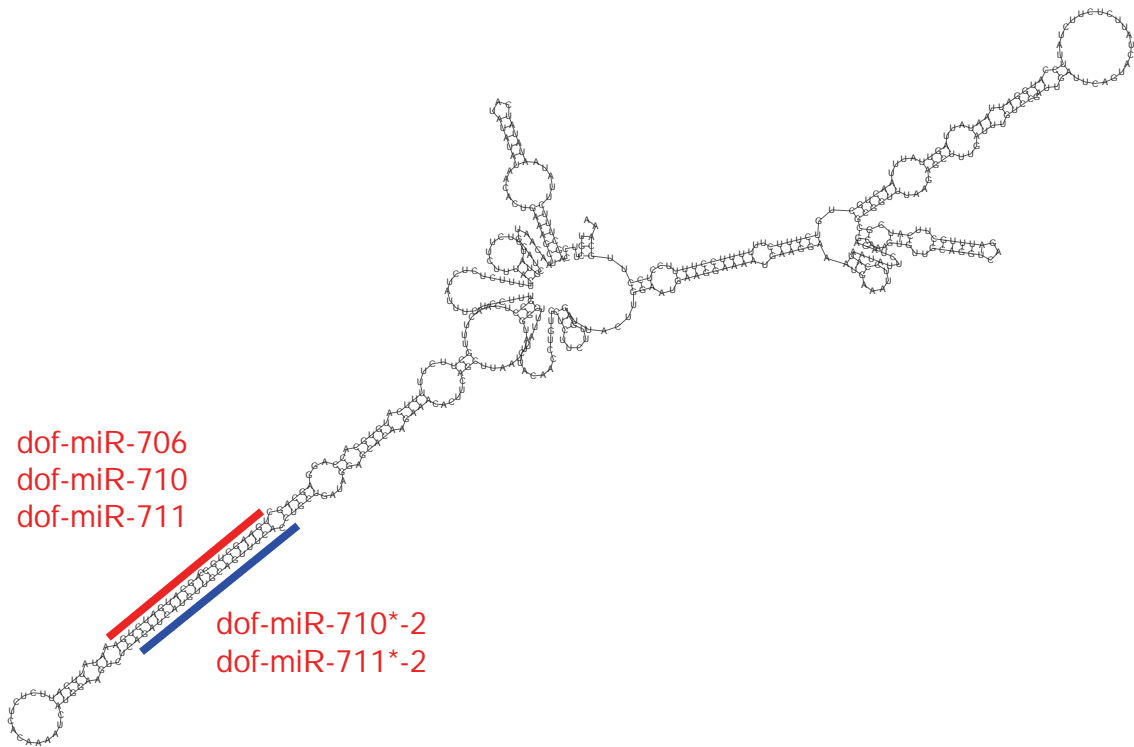

comp167111 c1 seq14

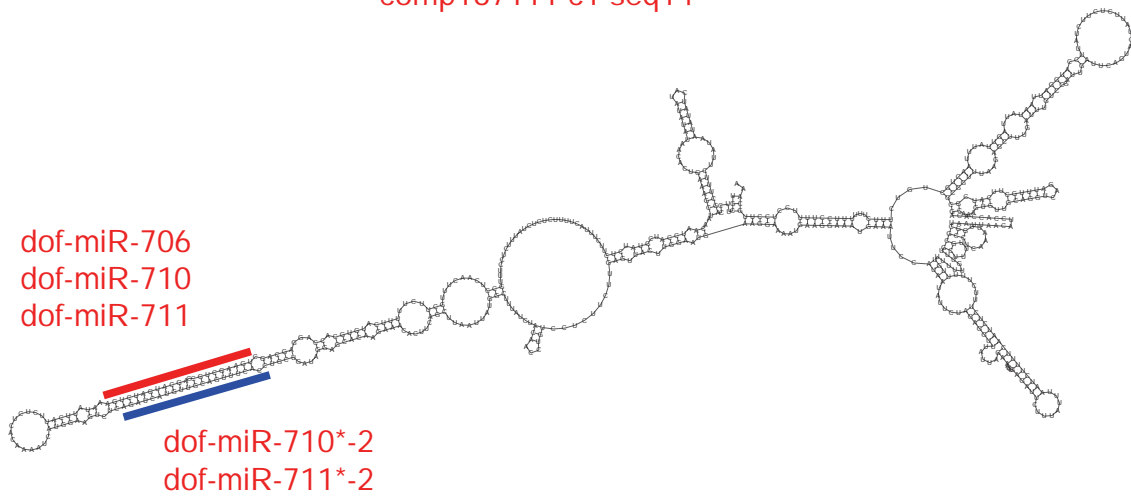

dof-miR-706  
dof-miR-710  
dof-miR-711

dof-miR-710\*-2  
dof-miR-711\*-2

comp167111 c1 seq16

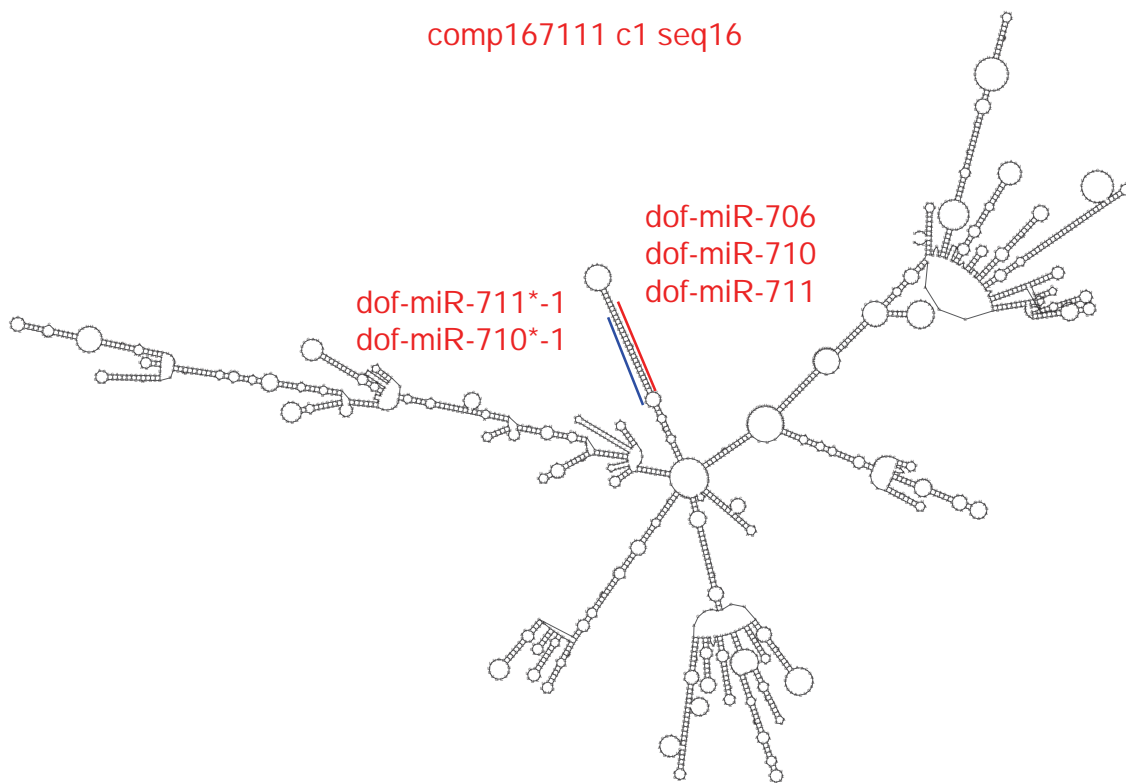

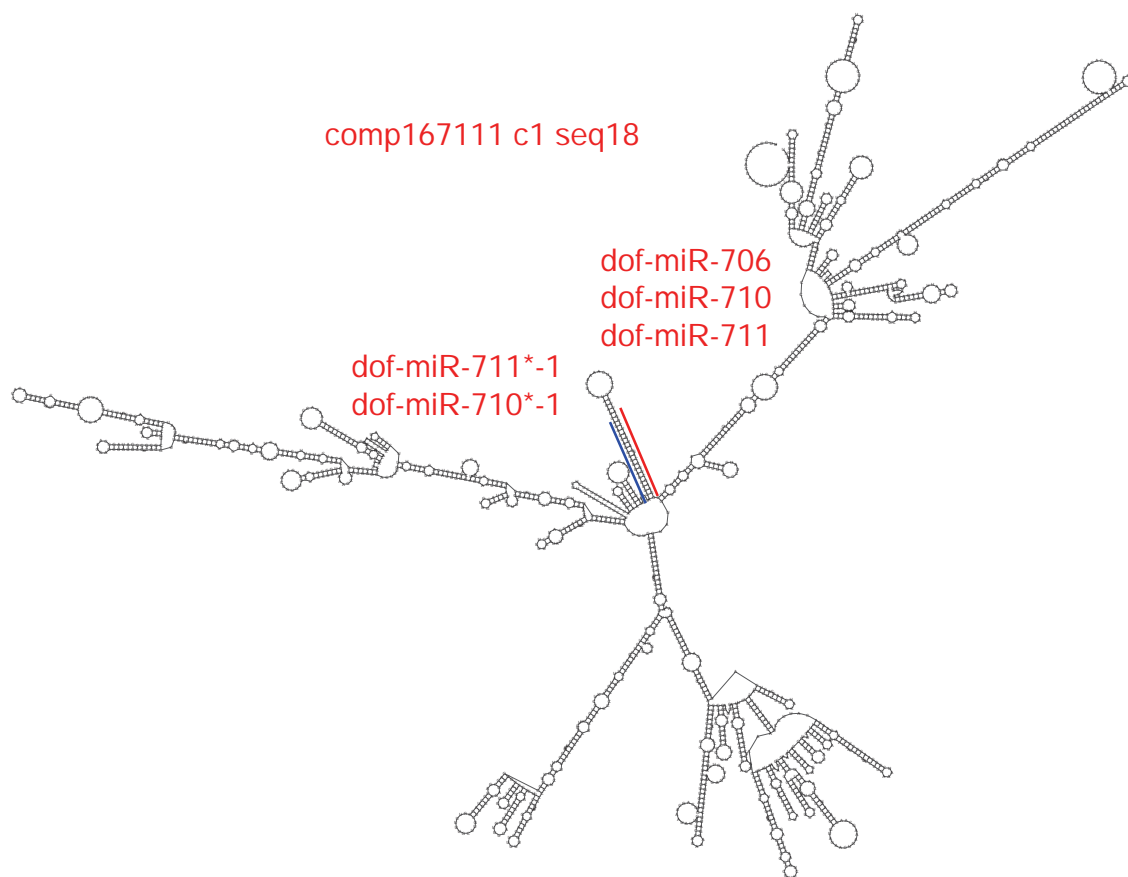

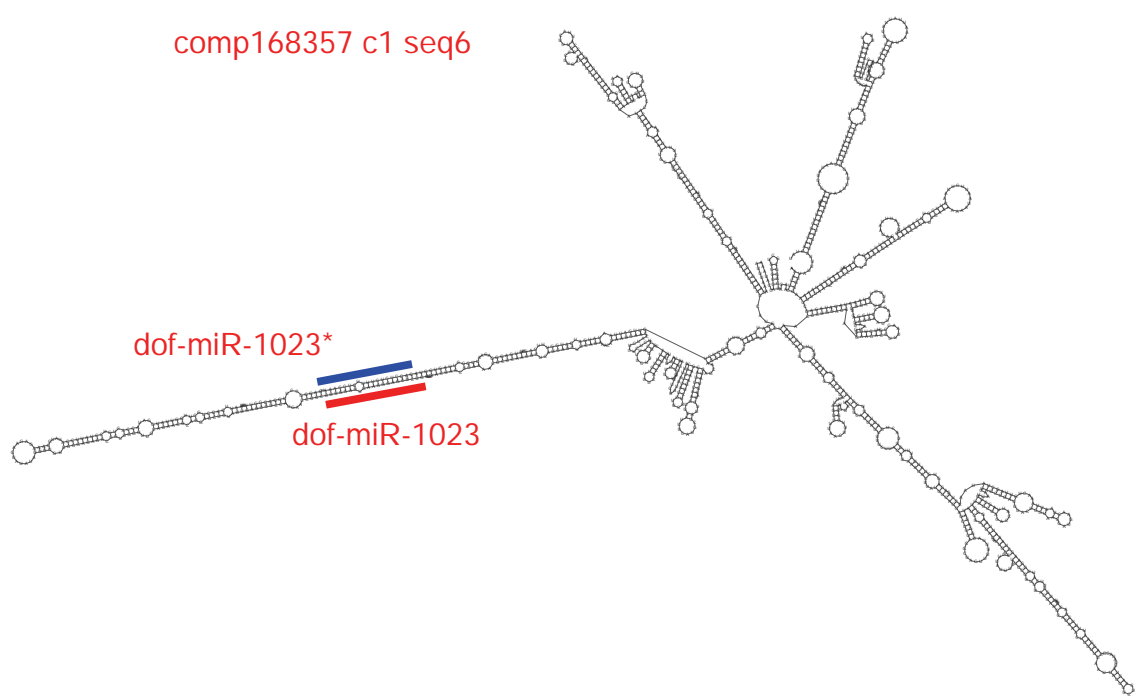

comp168949 c1 seq1

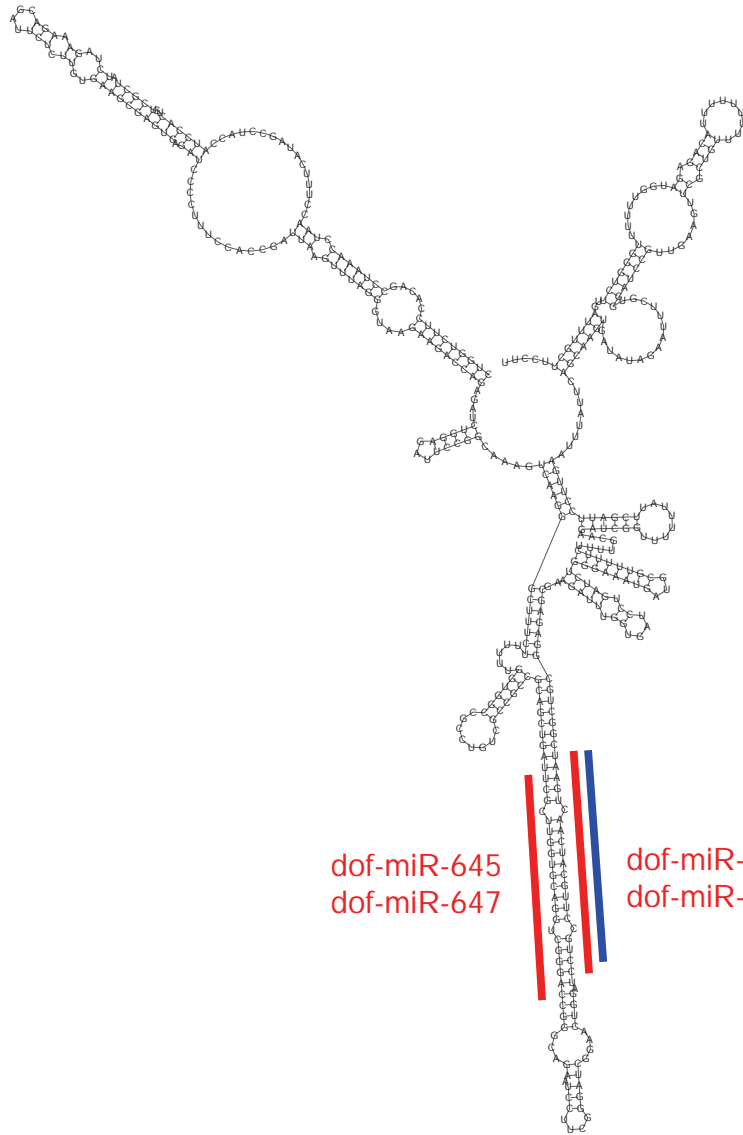

dof-miR-645  
dof-miR-647

dof-miR-296  
dof-miR-645\*-1

comp170626 c2 seq1

dof-miR-730

dof-miR-730\*

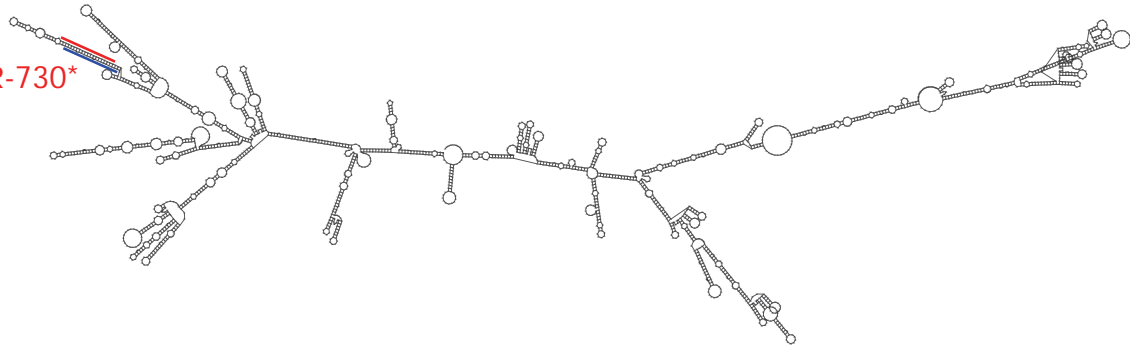



comp170626 c2 seq3

dof-miR-730

dof-miR-730\*

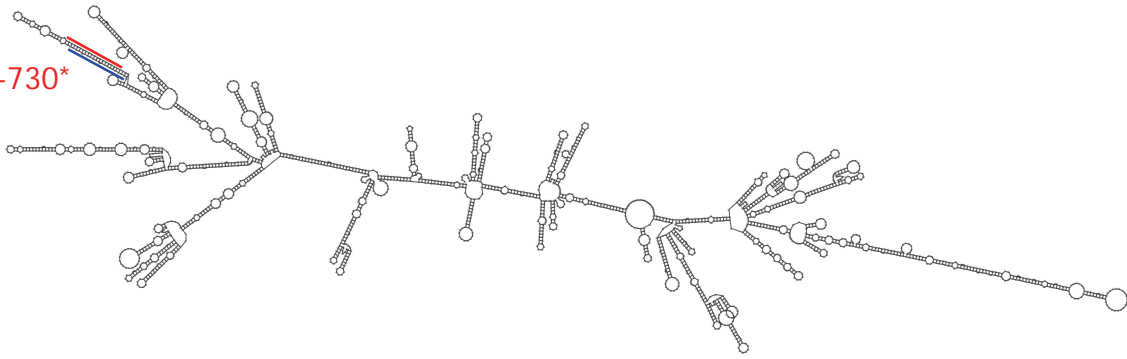

comp170626 c2 seq4

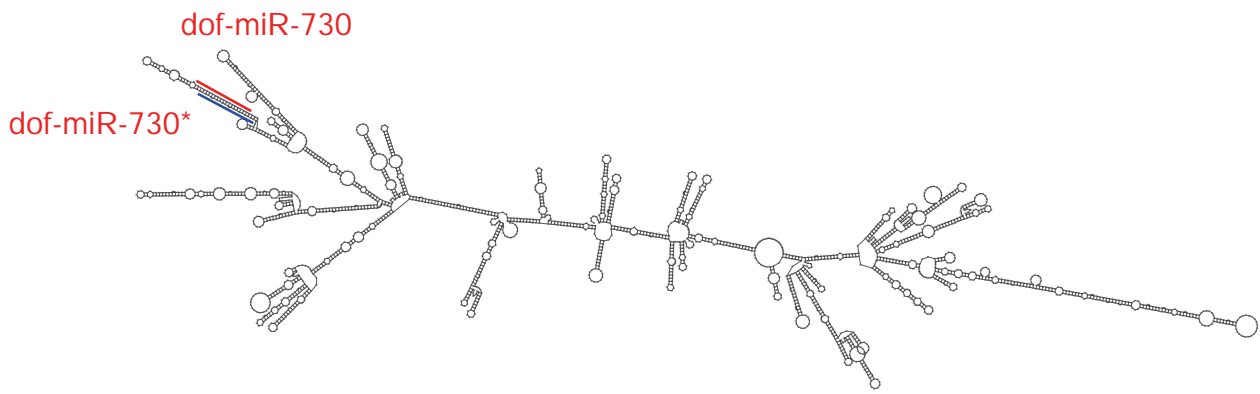

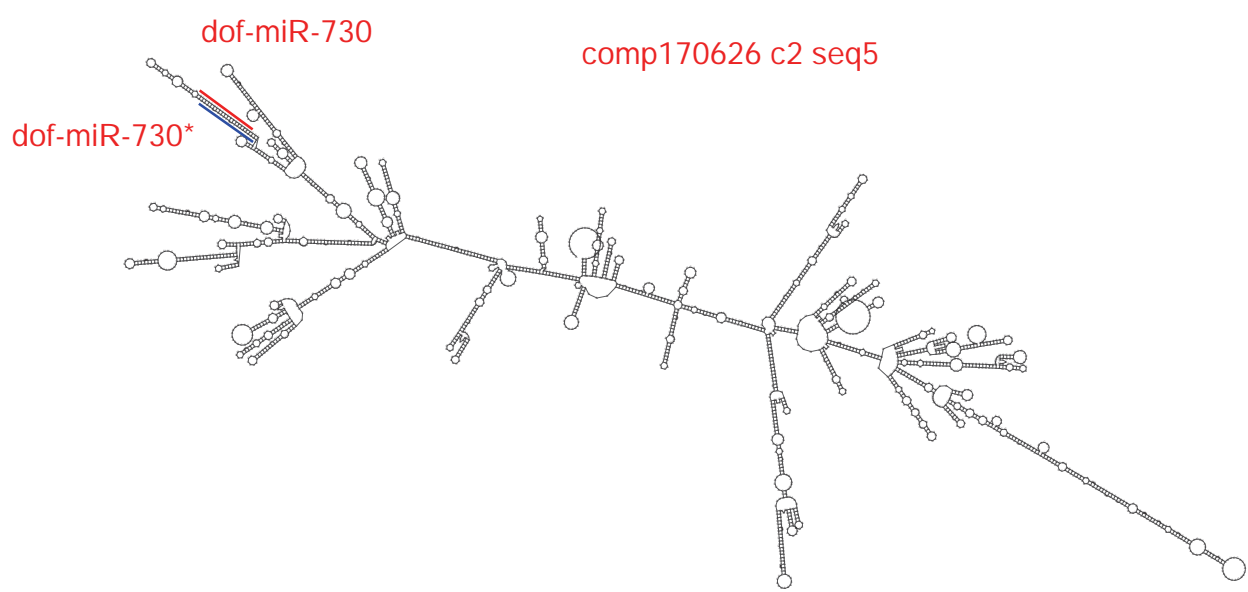

comp170626 c2 seq6

dof-miR-730

dof-miR-730\*

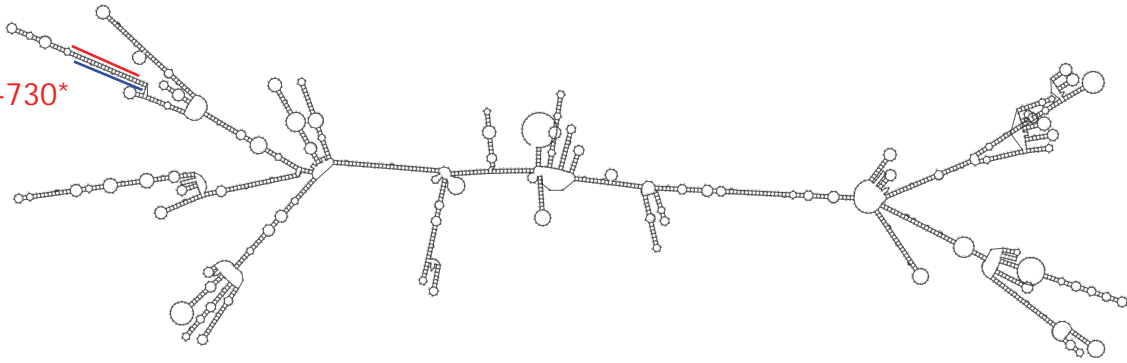

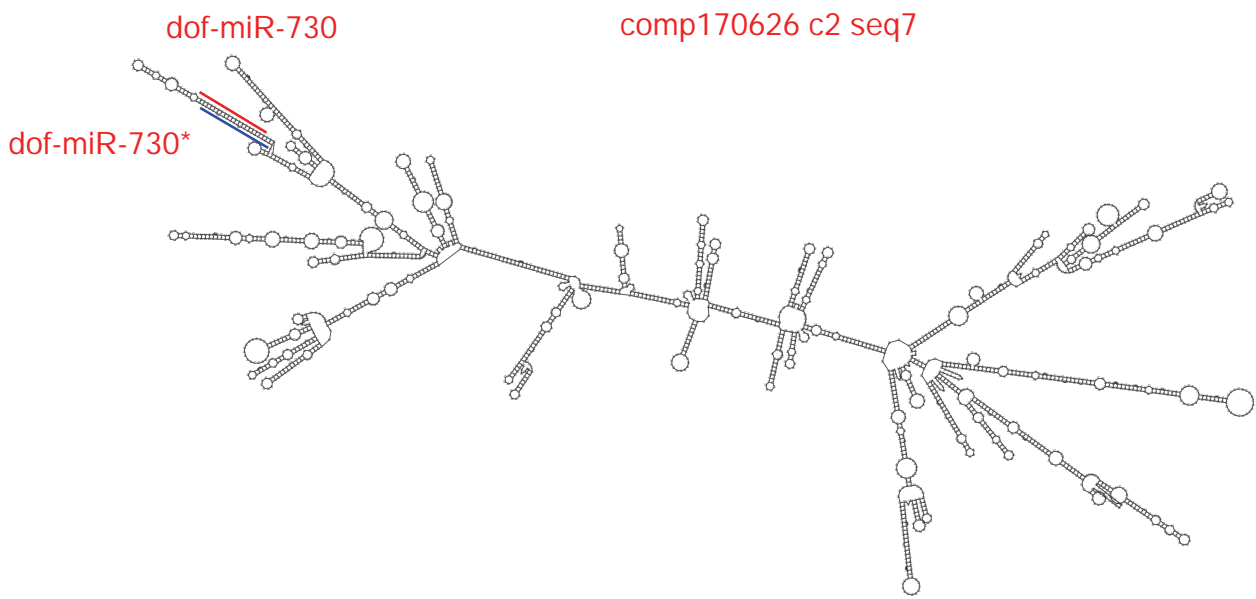

comp170626 c2 seq8

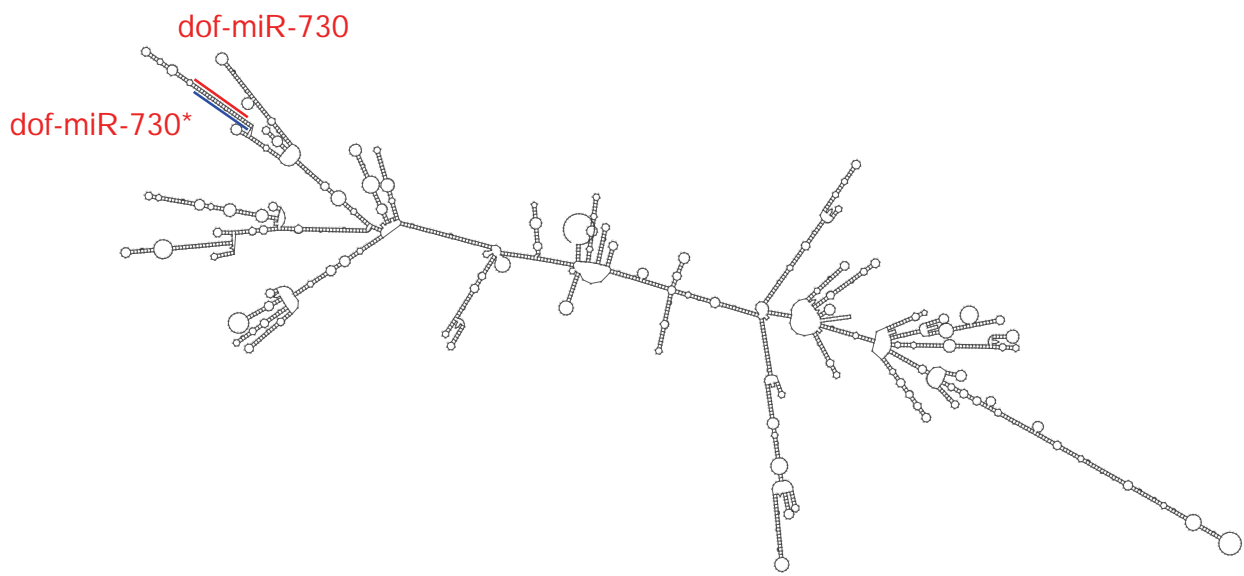

comp170626 c2 seq9

dof-miR-730

dof-miR-730\*

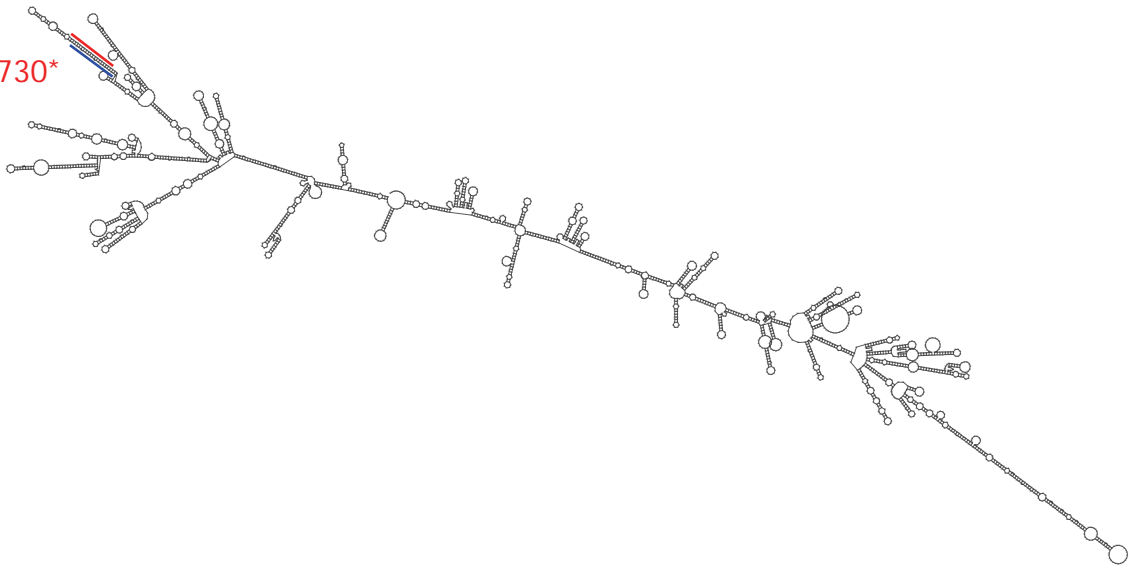

comp170626 c2 seq10

dof-miR-730

dof-miR-730\*

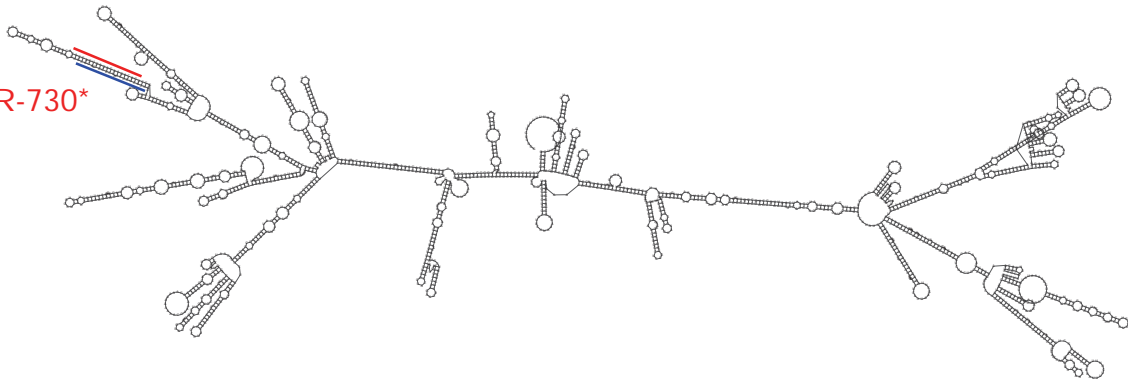



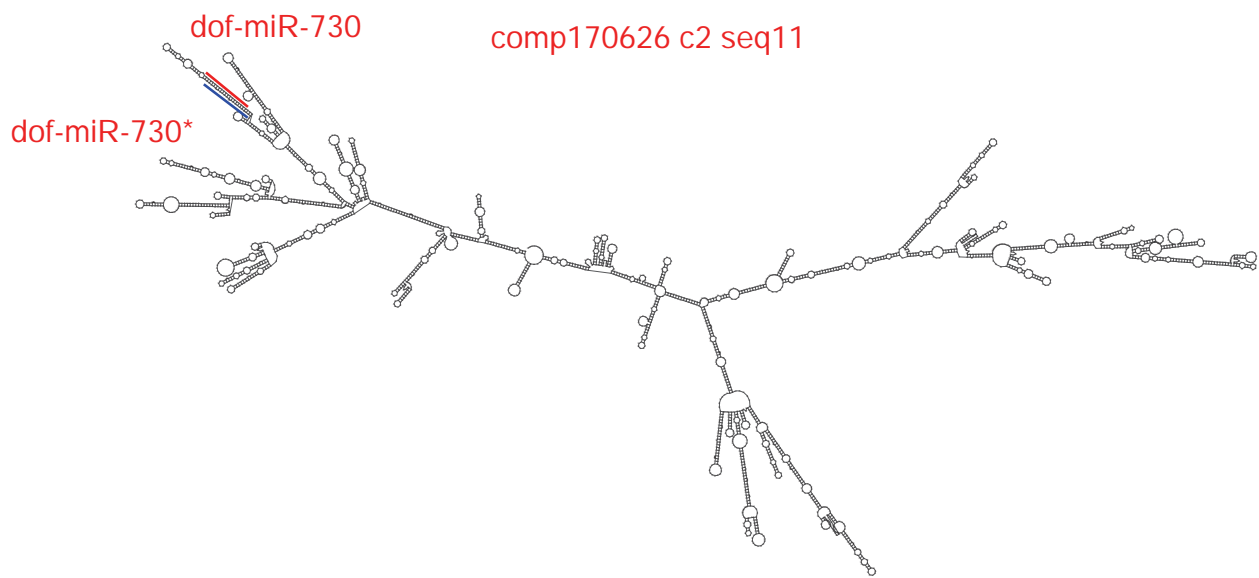

comp170626 c2 seq13

dof-miR-730

dof-miR-730\*

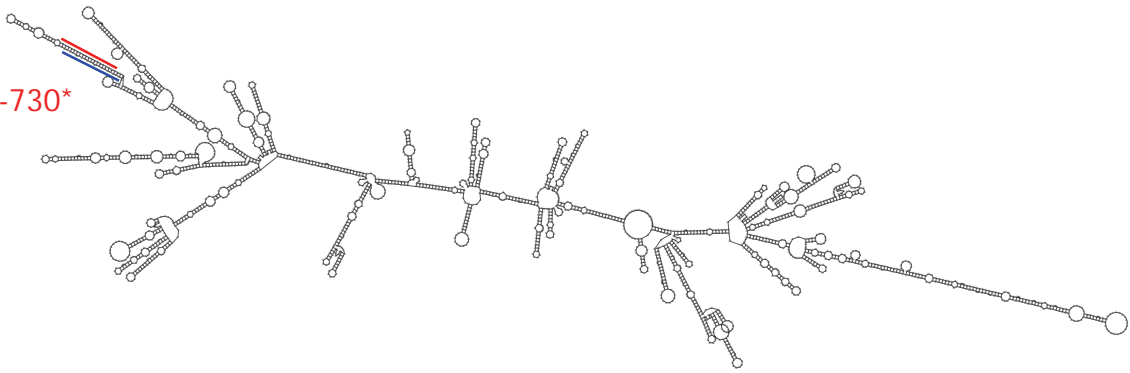

comp170626 c2 seq15

dof-miR-730

dof-miR-730\*

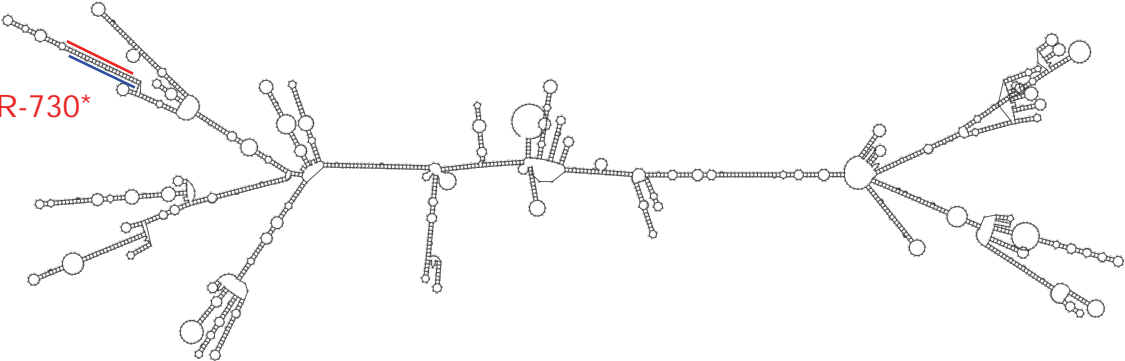

comp170626 c2 seq16

dof-miR-730

dof-miR-730\*

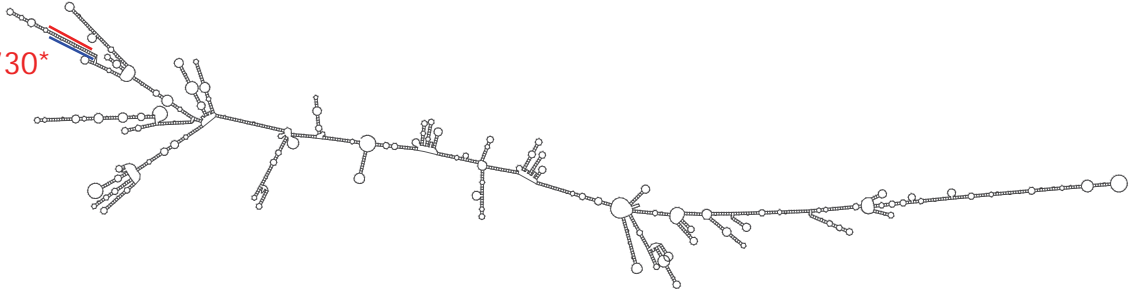

comp170626 c2 seq18

dof-miR-730

dof-miR-730\*

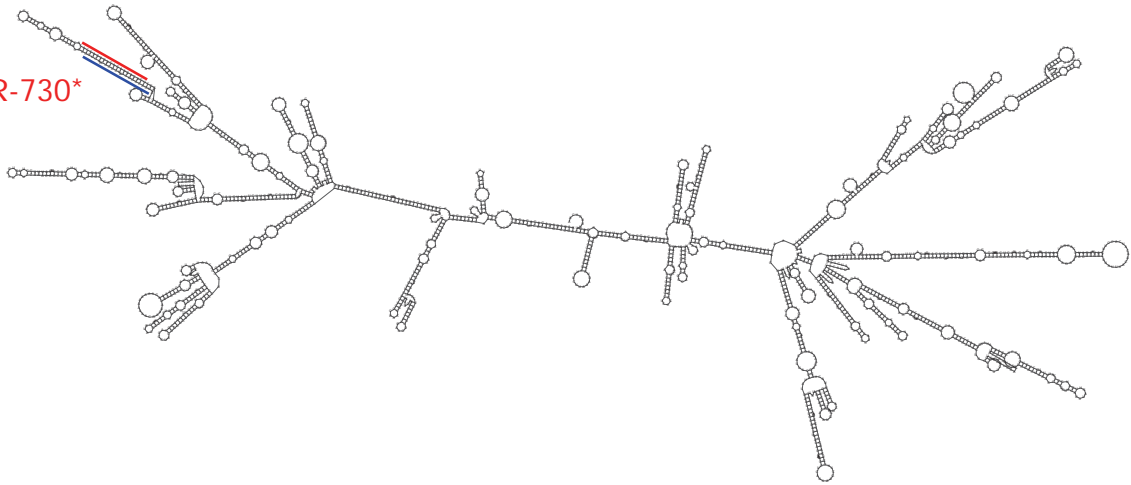

comp170626 c2 seq19

dof-miR-730

dof-miR-730\*

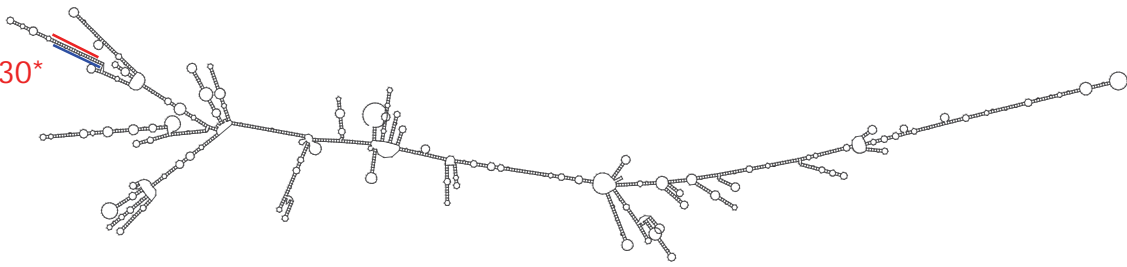

comp170626 c2 seq20

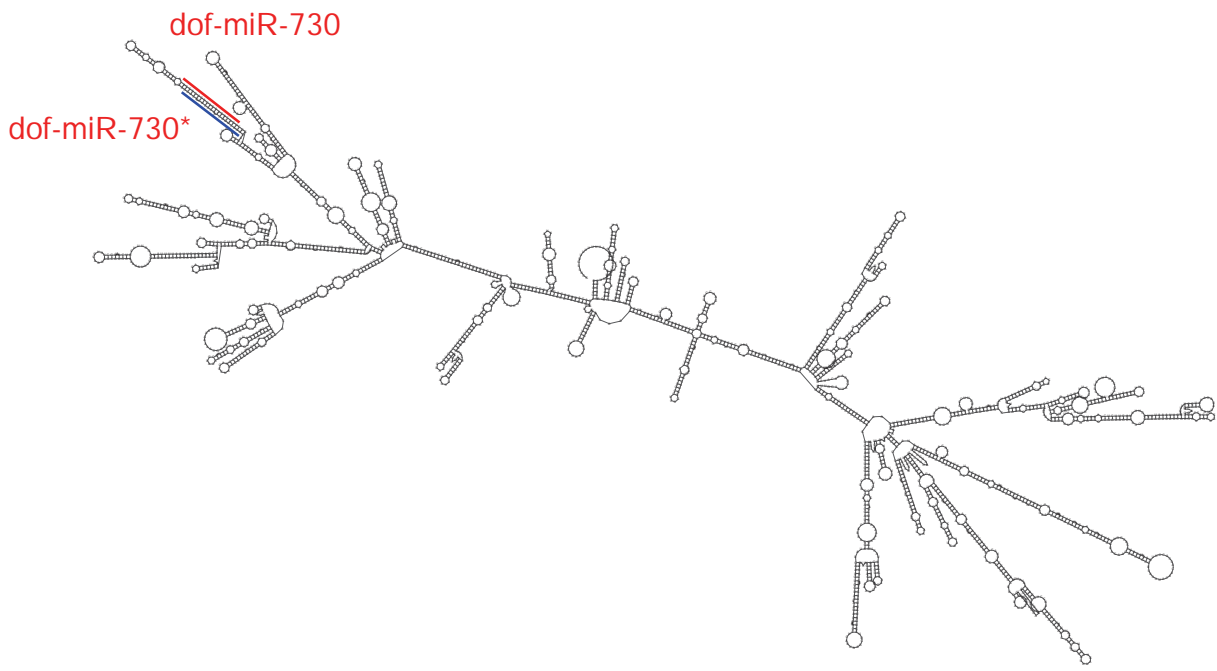

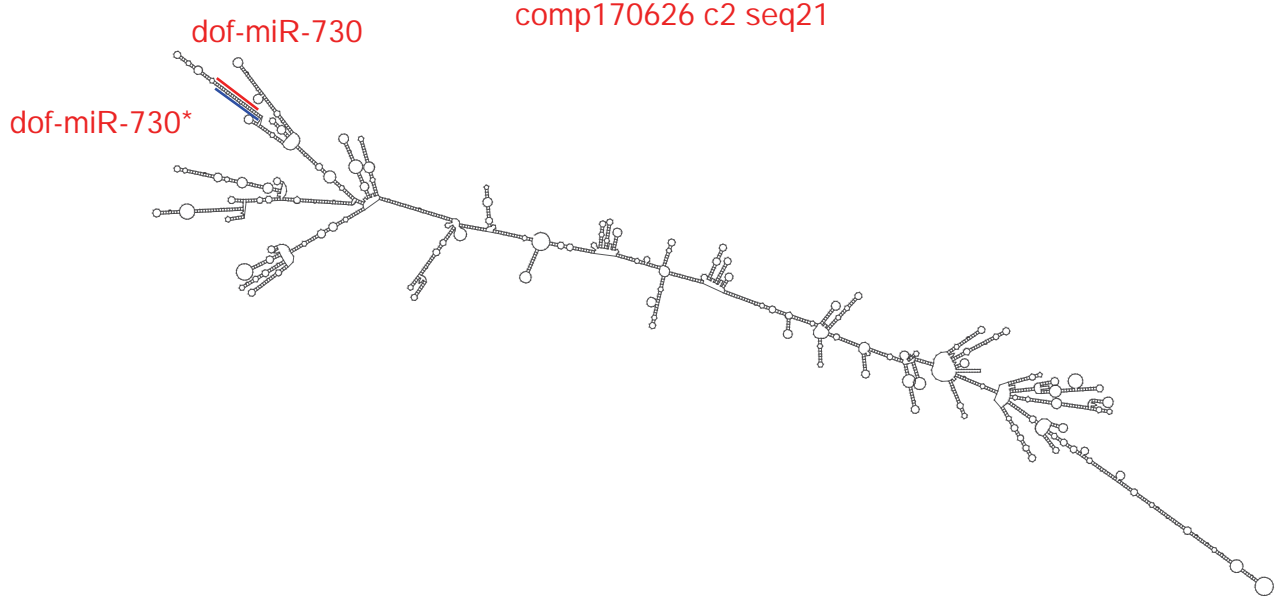



comp170626 c2 seq22

dof-miR-730

dof-miR-730\*

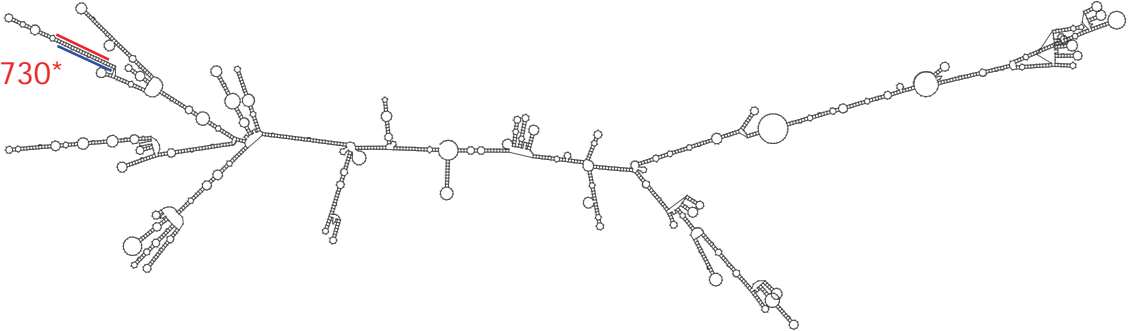

comp170626 c2 seq23

dof-miR-730

dof-miR-730\*

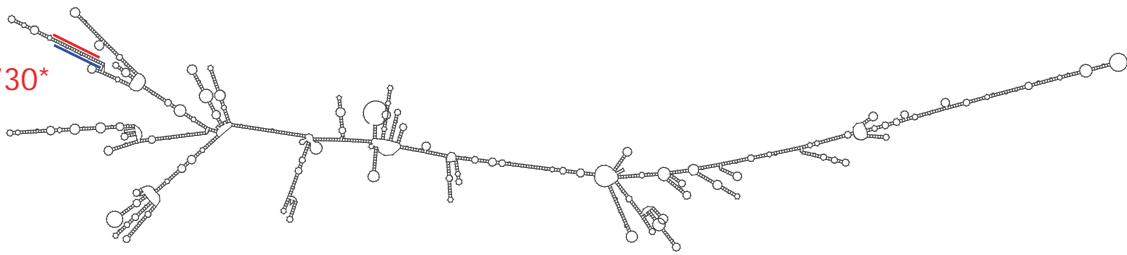

comp170626 c2 seq24

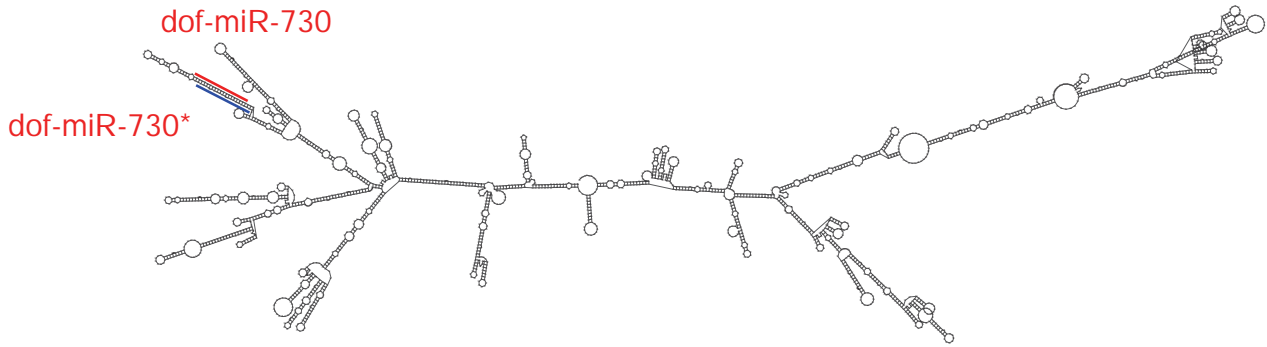

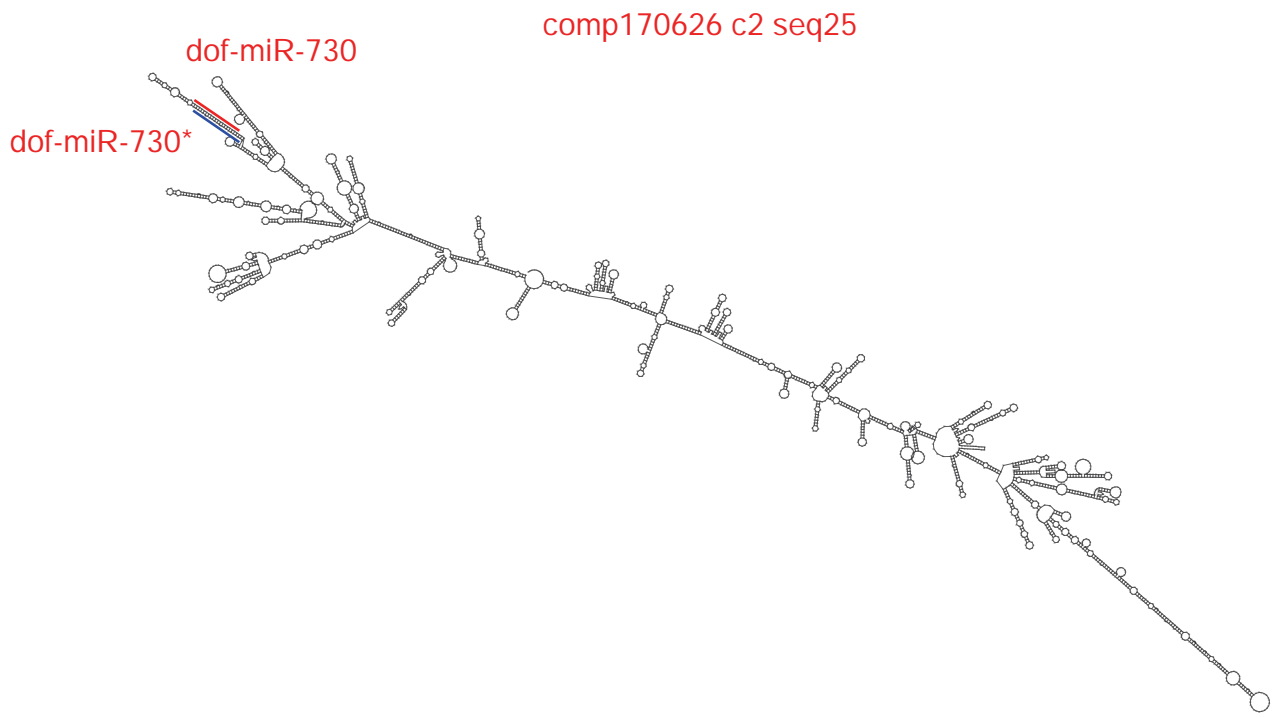

comp170626 c2 seq26

dof-miR-730

dof-miR-730\*

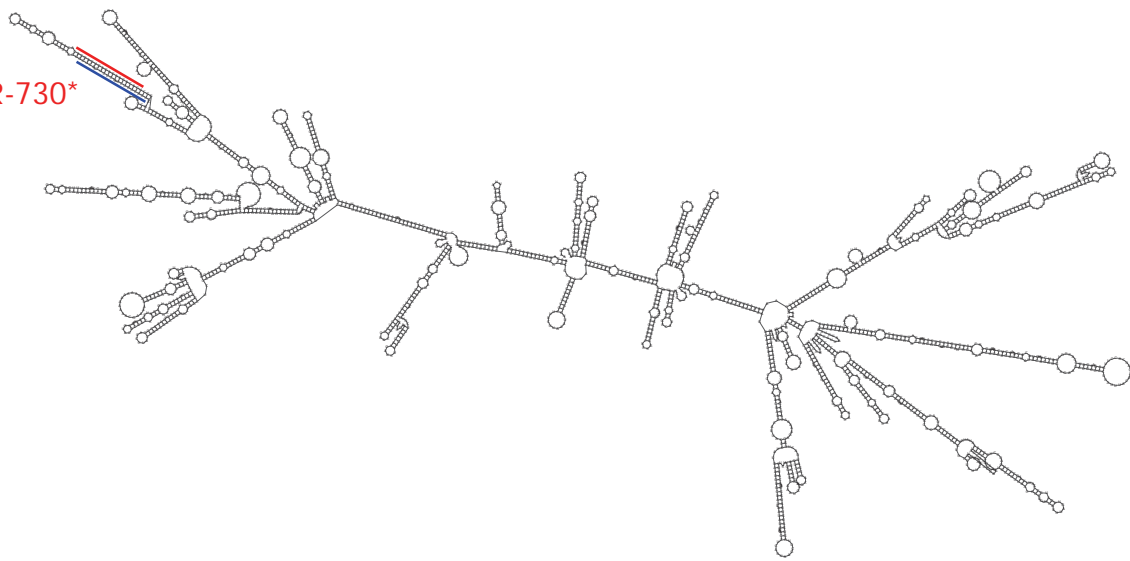

comp170626 c2 seq28

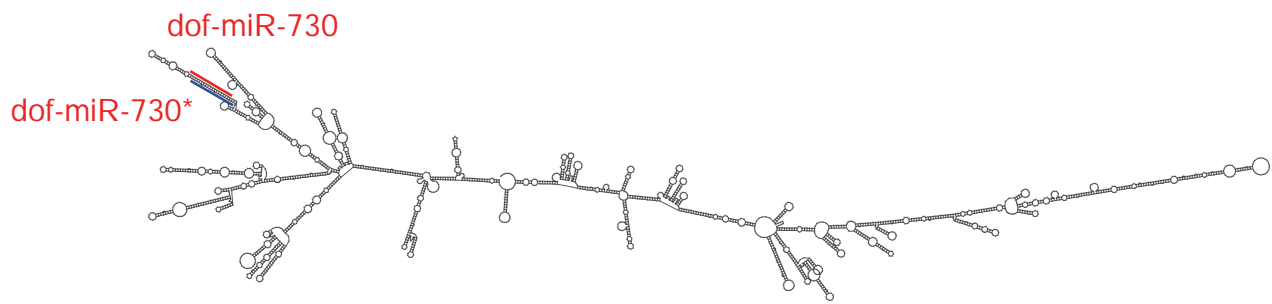

comp170626 c2 seq29

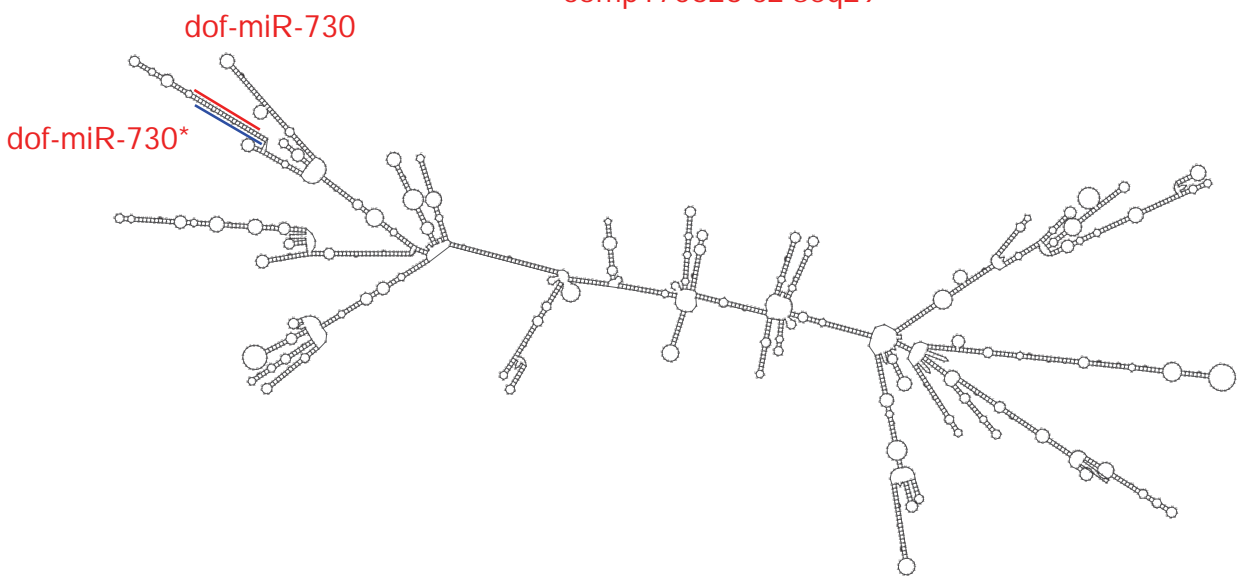

comp170626 c2 seq30

dof-miR-730

dof-miR-730\*

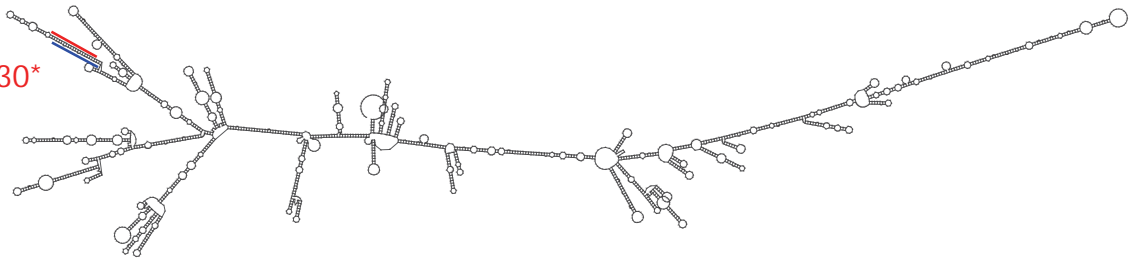



comp170626 c2 seq31

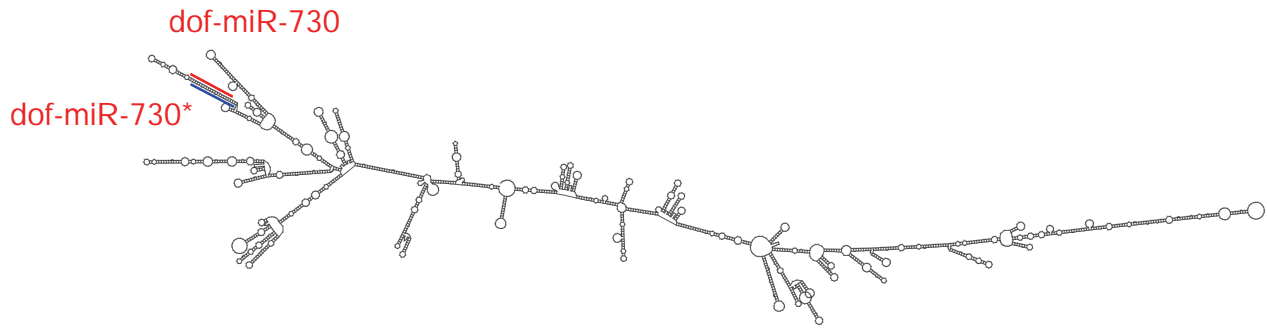

comp170626 c2 seq33

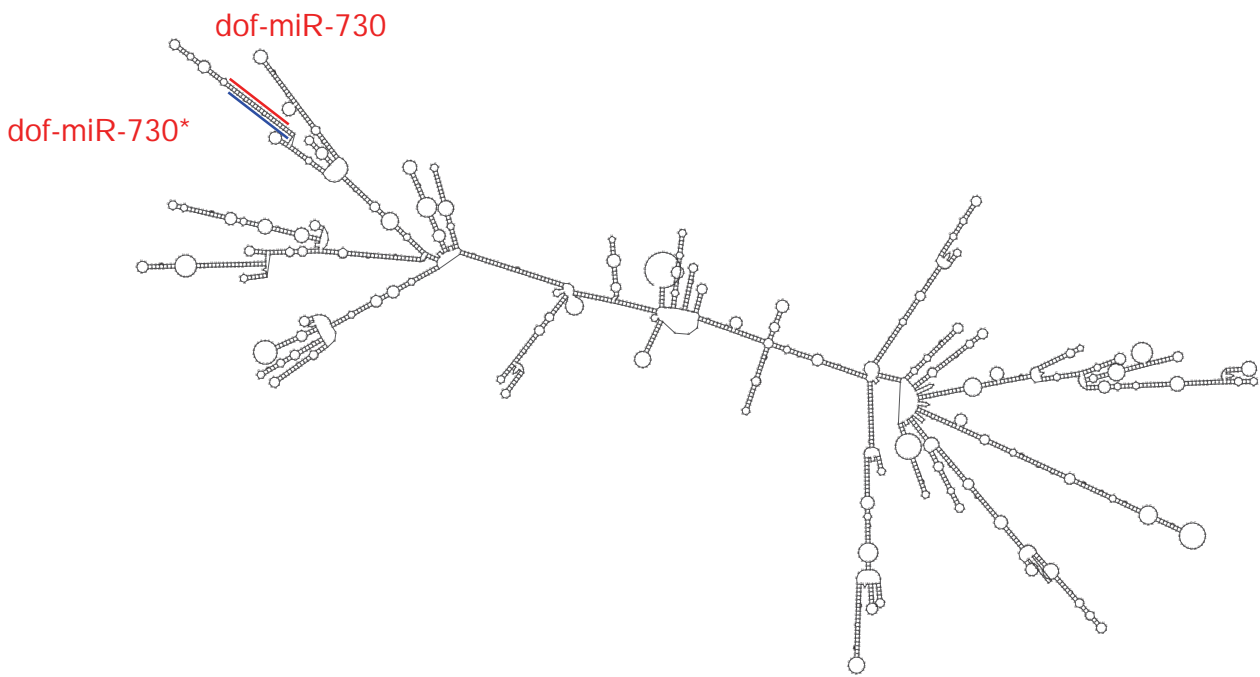

comp170626 c2 seq34

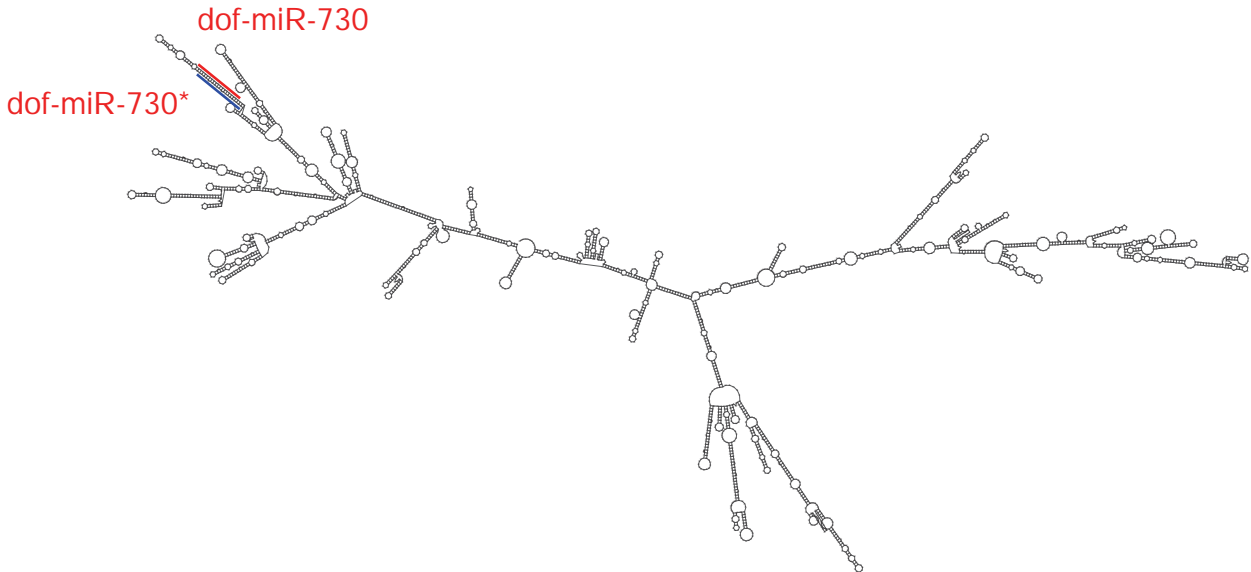

comp177735 c0 seq1

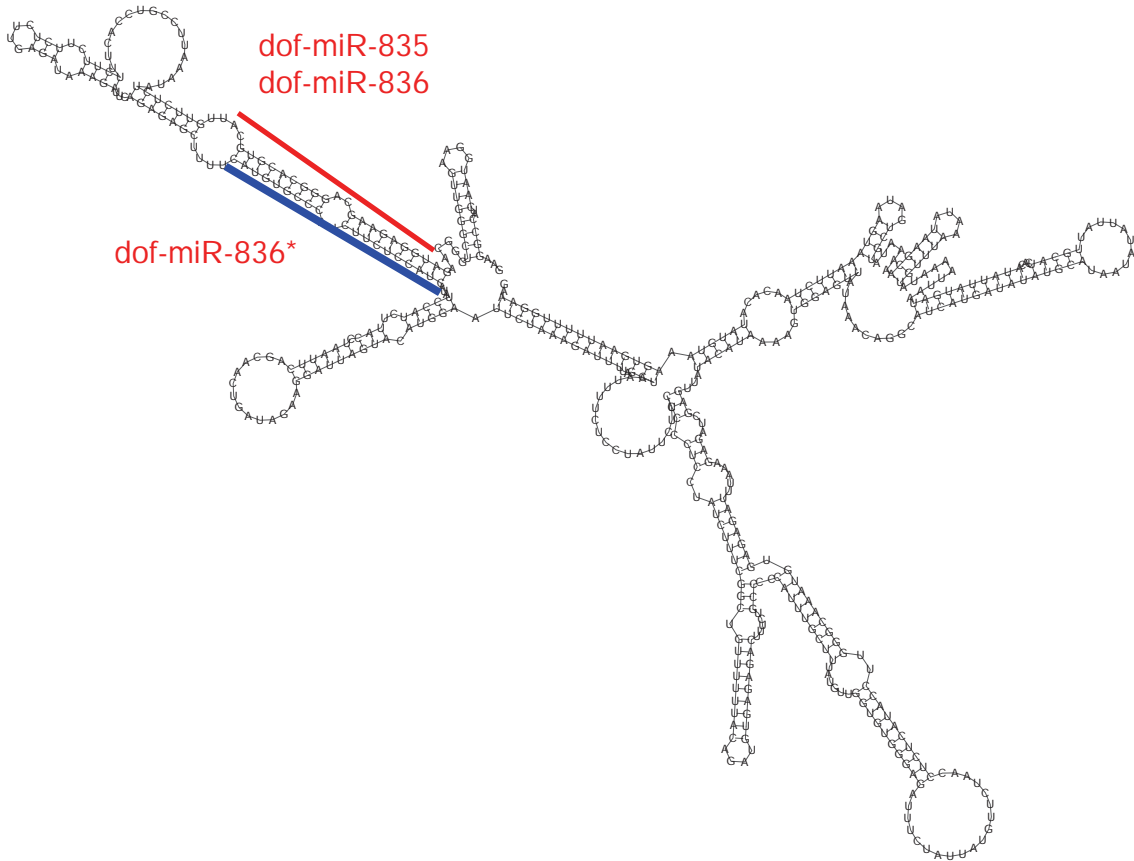

comp218447 c0 seq1

dof-miR-522

dof-miR-522\*

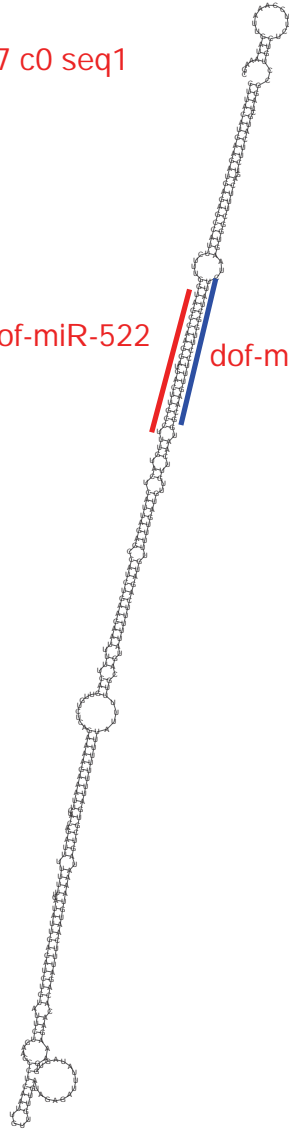

**Figure S4** Certain highly structured transcripts might serve as miRNA precursors. The transcripts were assembled by RNA-seq reads, and the transcript IDs were provided in the figure. The mature miRNA- and miRNA\*-coding regions on the long stems of the miRNA precursors were marked by red and blue lines respectively, and their IDs were also provided. The 5' ends of the degradome signatures supporting the processing of miRNAs and/or miRNA\*s from their precursors are represented by green arrows. Note, for each mature miRNA, its average accumulation level in either organ (flower, leaf, root or stem; two biological replicates for each organ; thus, there are a total of eight libraries) of *Dendrobium officinale* should be 5 RPM or higher. Besides, the accumulation level of each miRNA\* should be detectable in at least one sRNA-seq library. The secondary structures of the transcripts were predicted by using RNAfold (<http://rna.tbi.univie.ac.at/cgi-bin/RNAfold.cgi>).

comp85453 c0 seq1

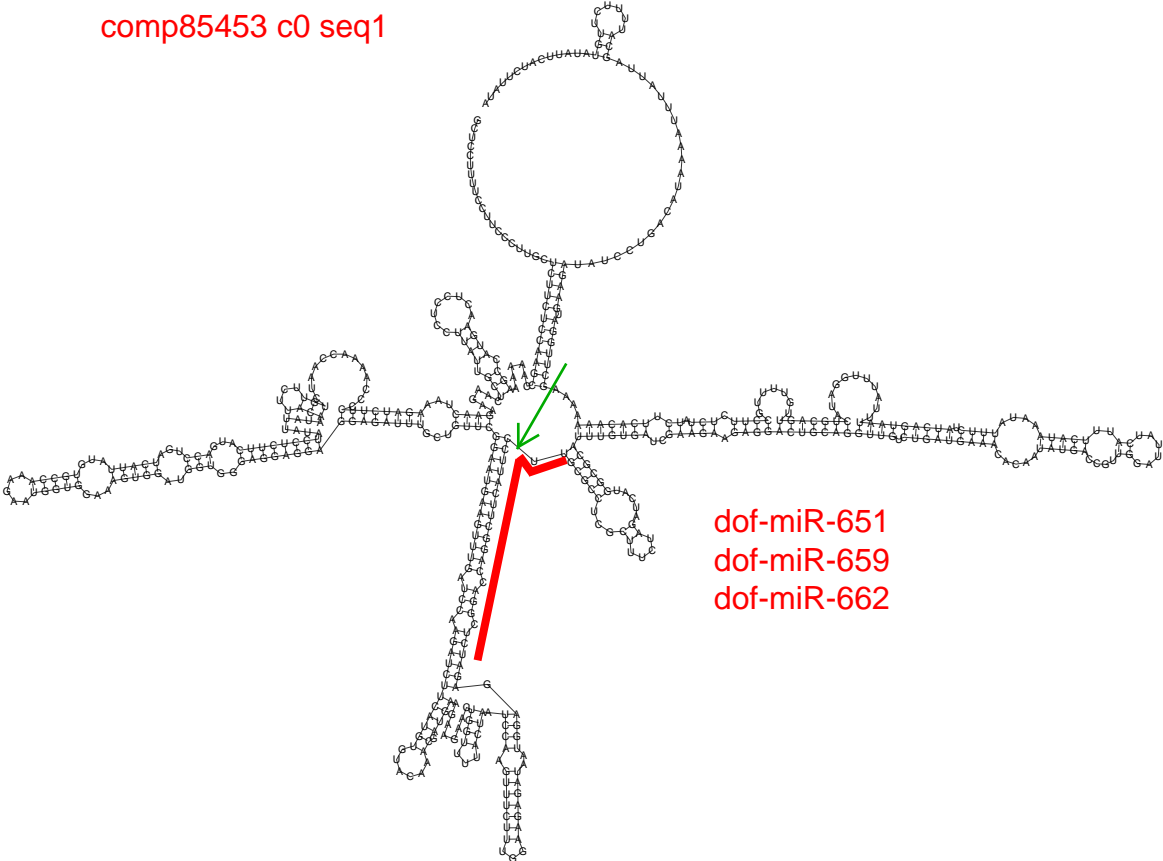

dof-miR-651  
dof-miR-659  
dof-miR-662

comp86146 c0 seq1

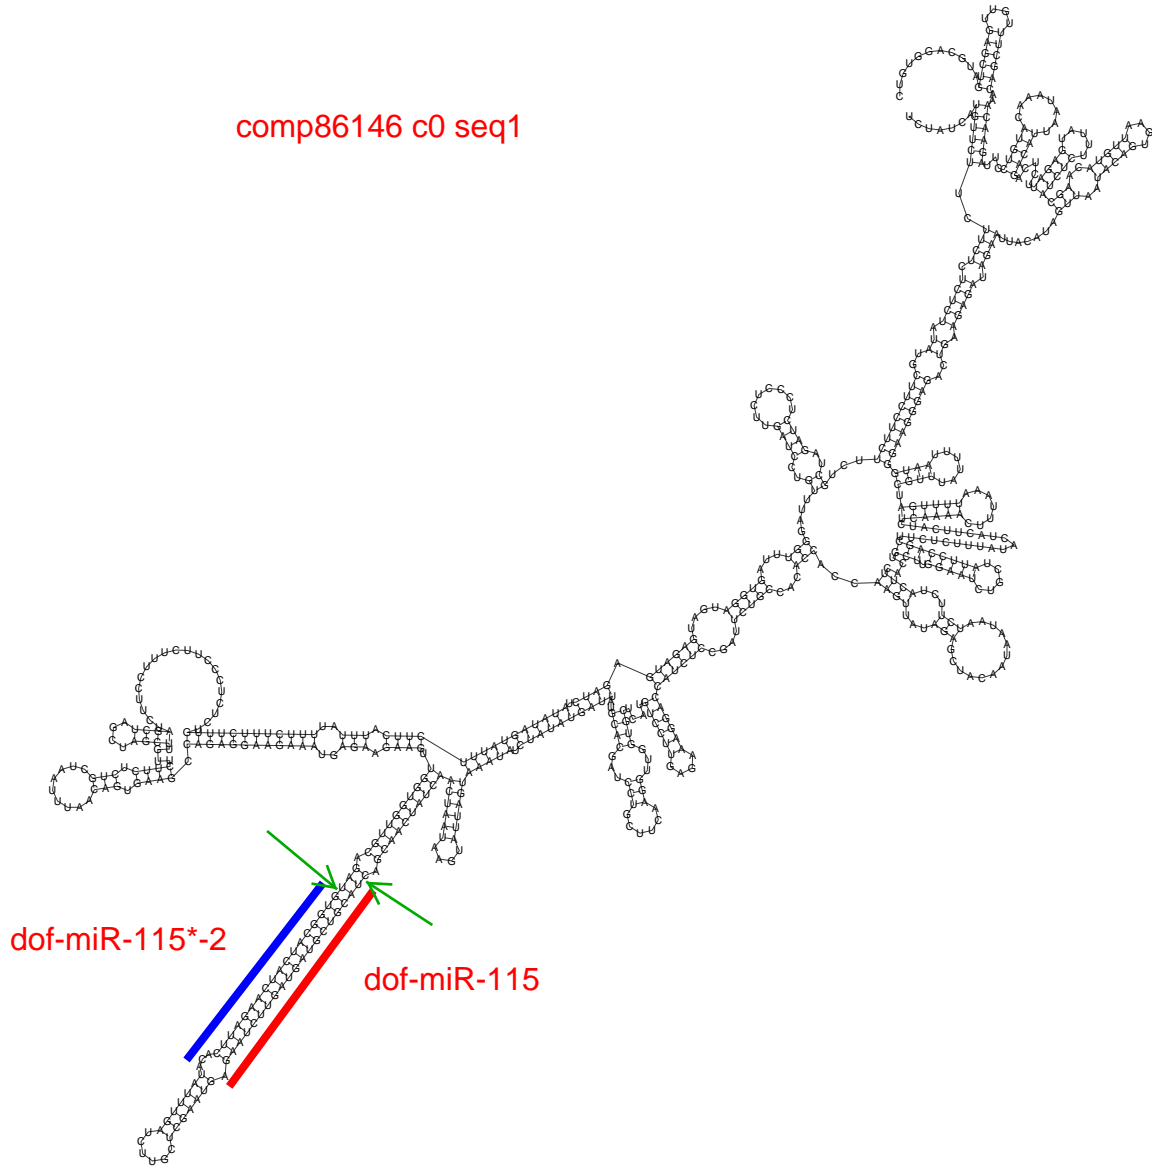



comp108689 c0 seq1

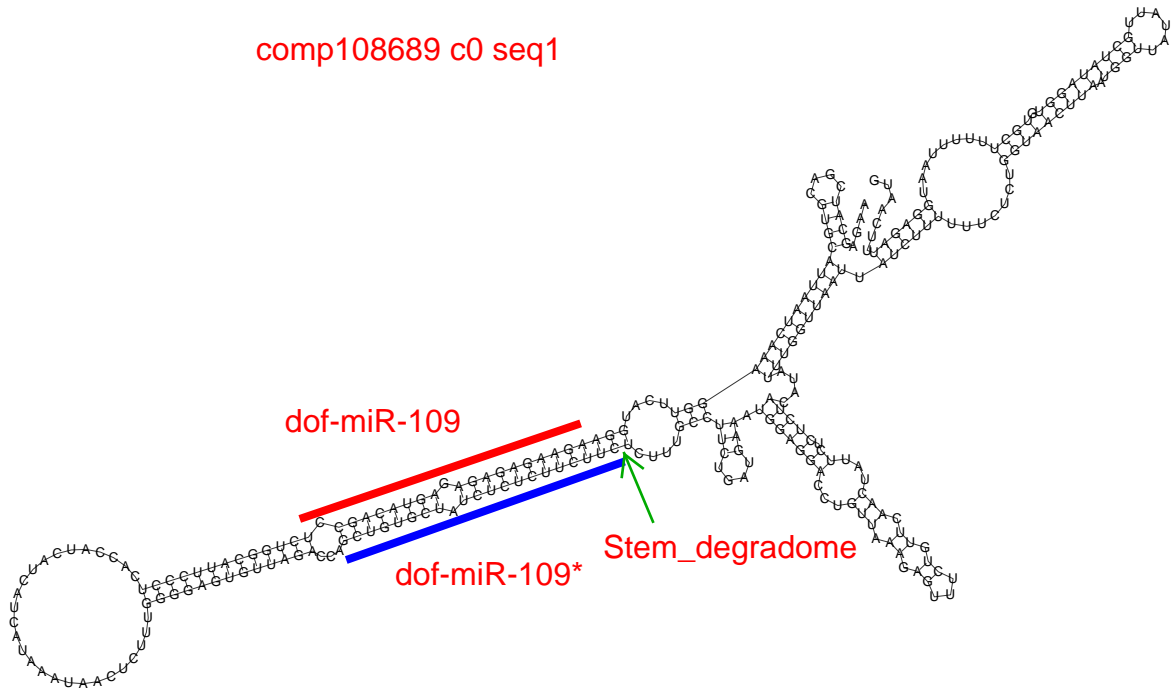

comp112901 c0 seq2

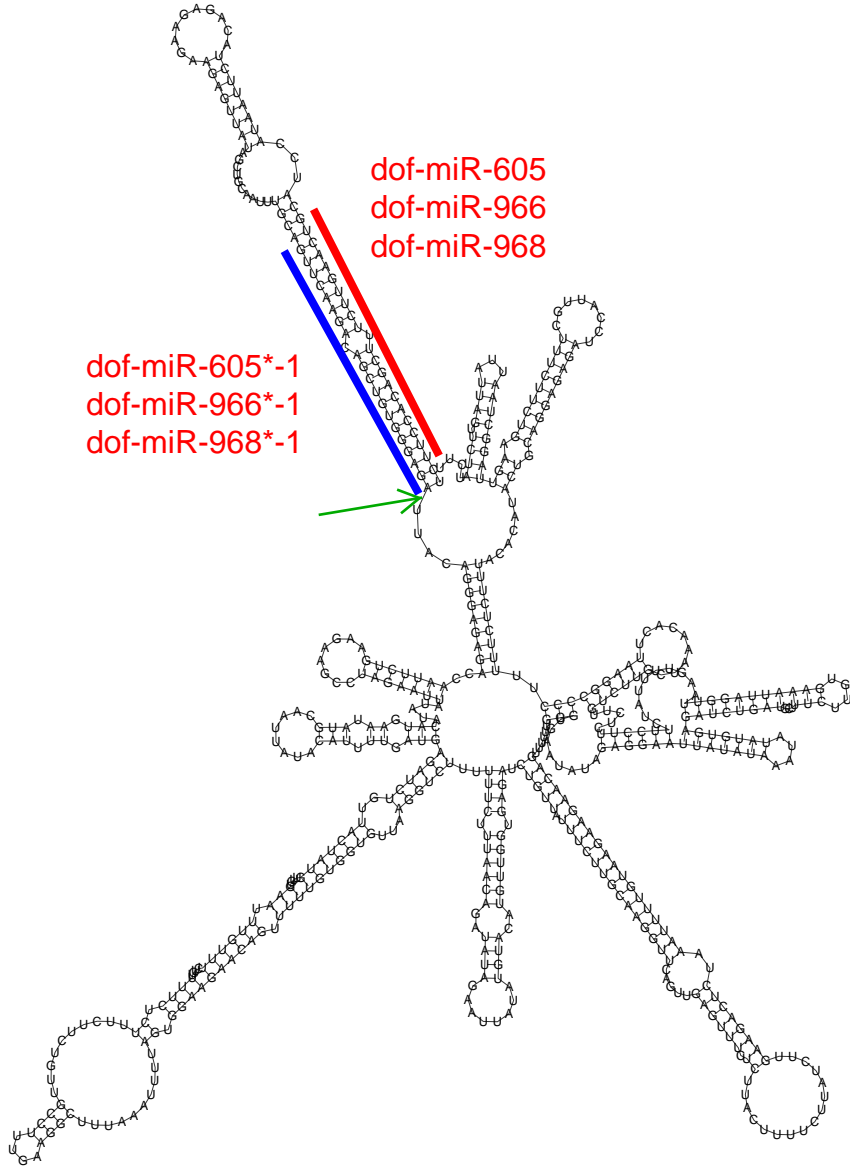

comp124801 c0 seq1

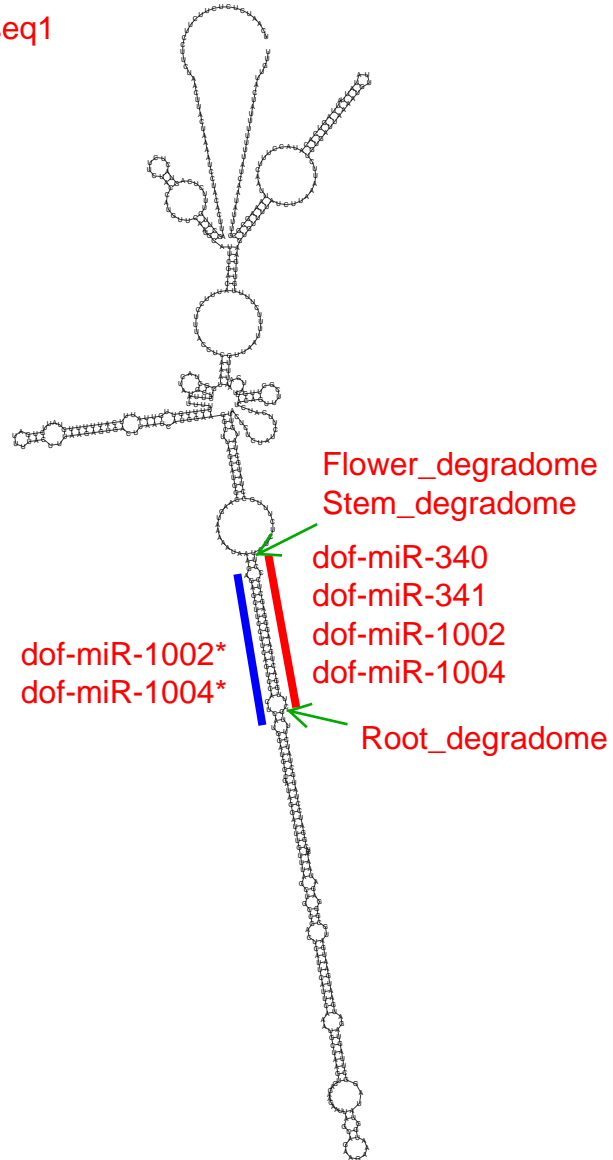

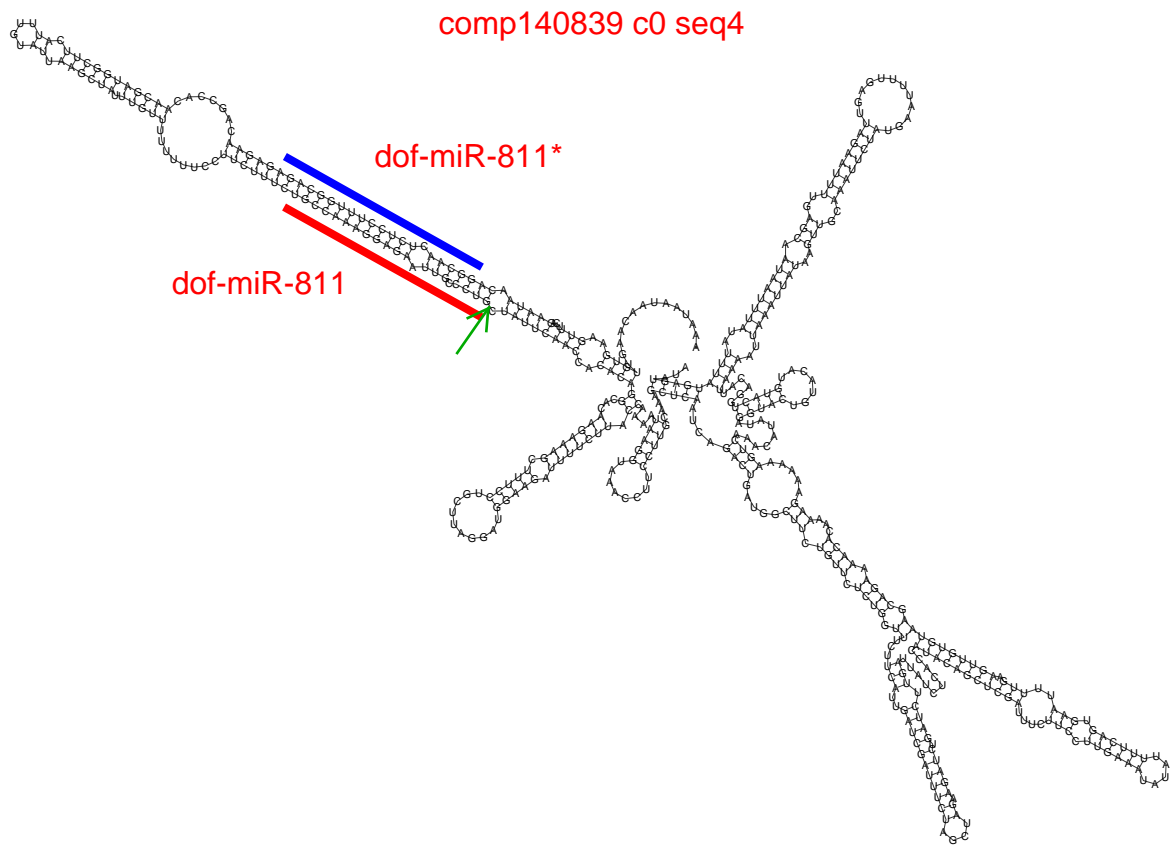

comp146035 c0 seq1

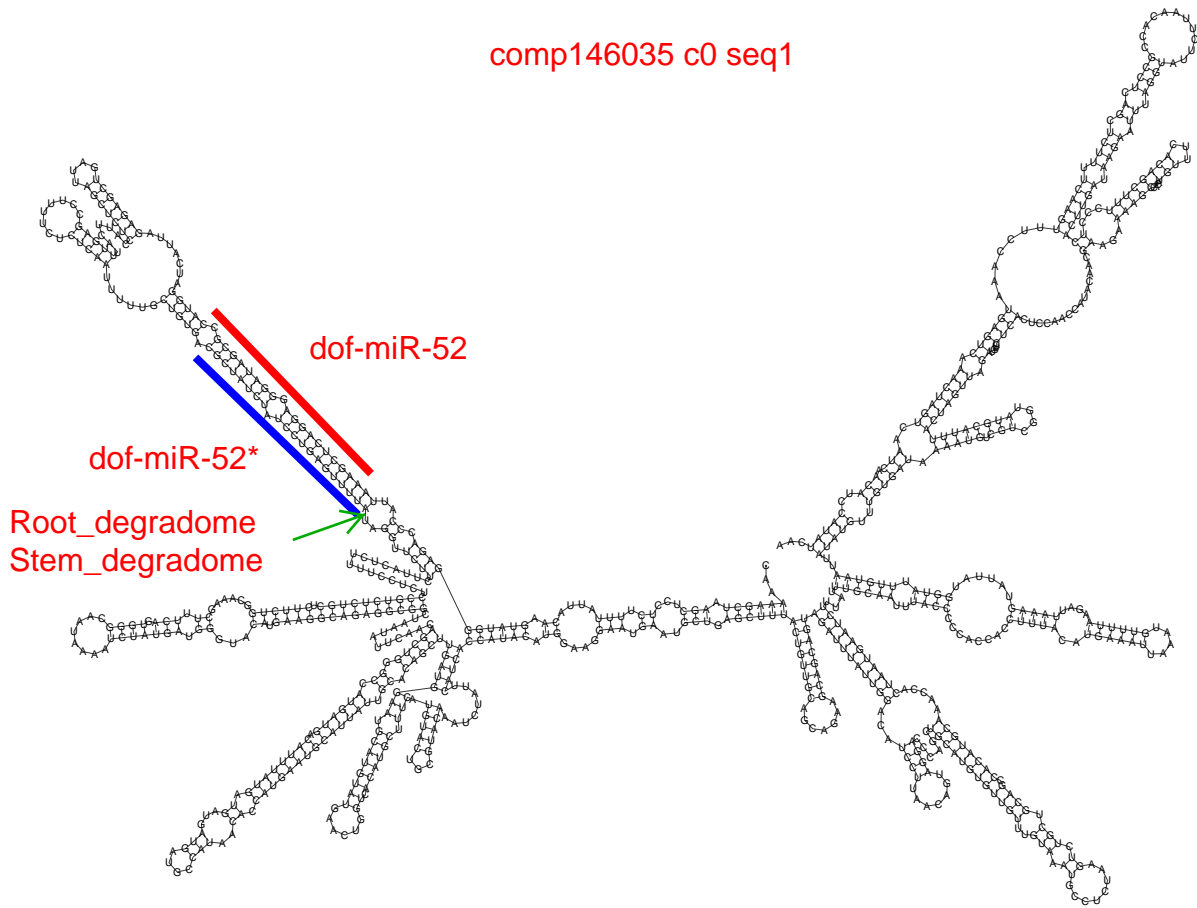

comp146186 c2 seq1

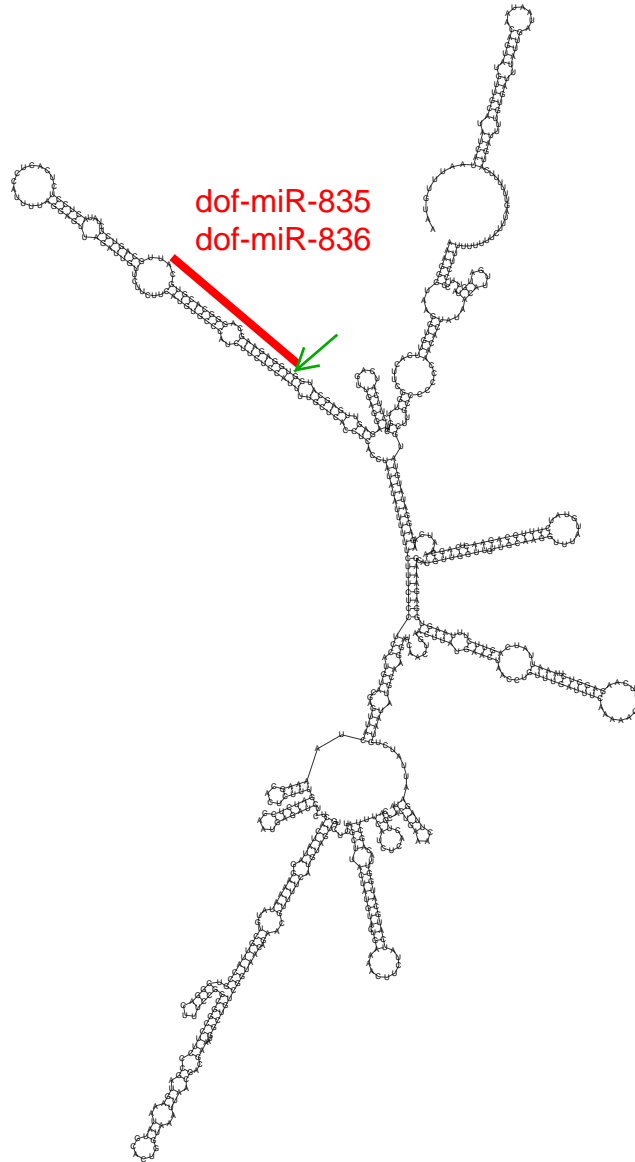

comp153713 c0 seq2

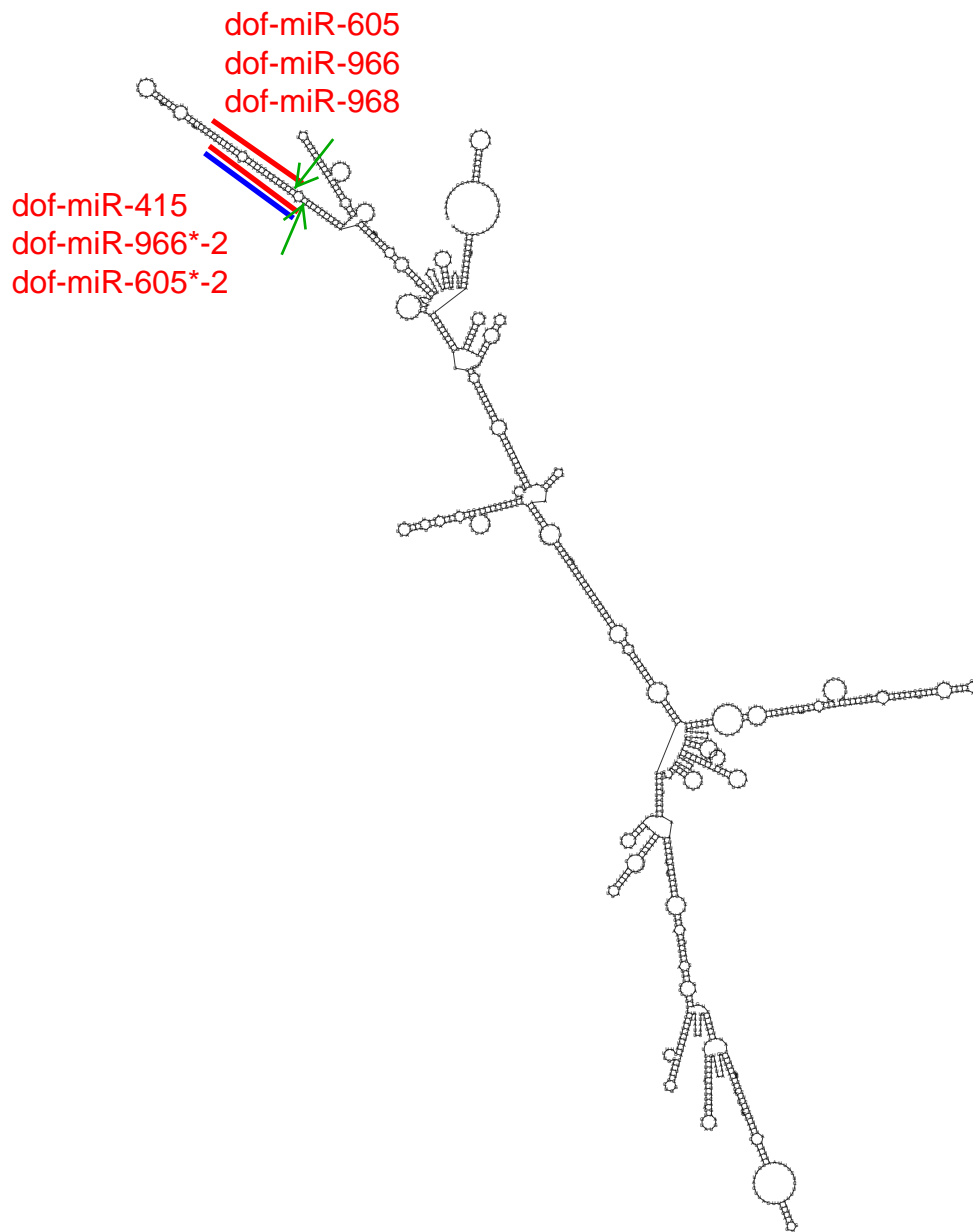

comp159822 c2 seq6

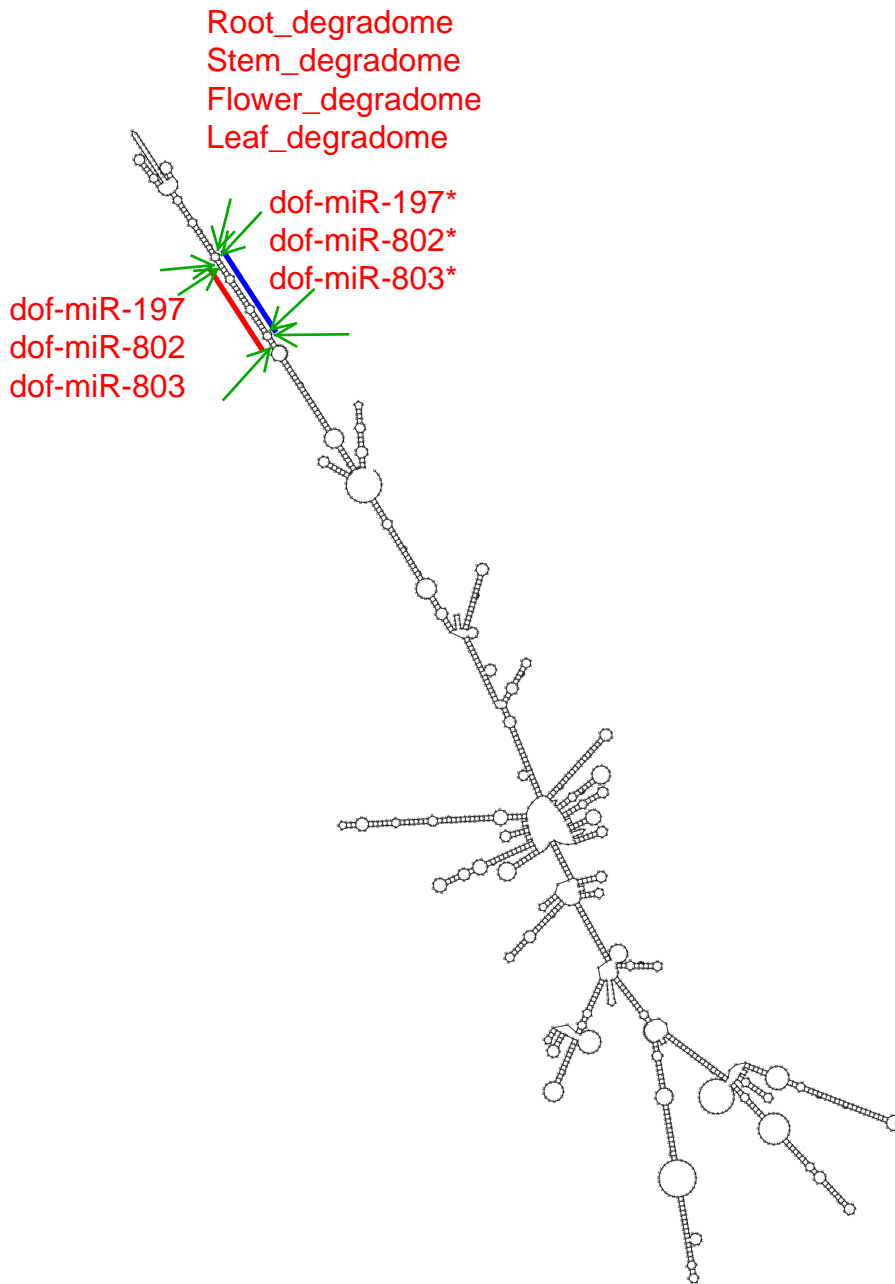



comp160245 c0 seq3

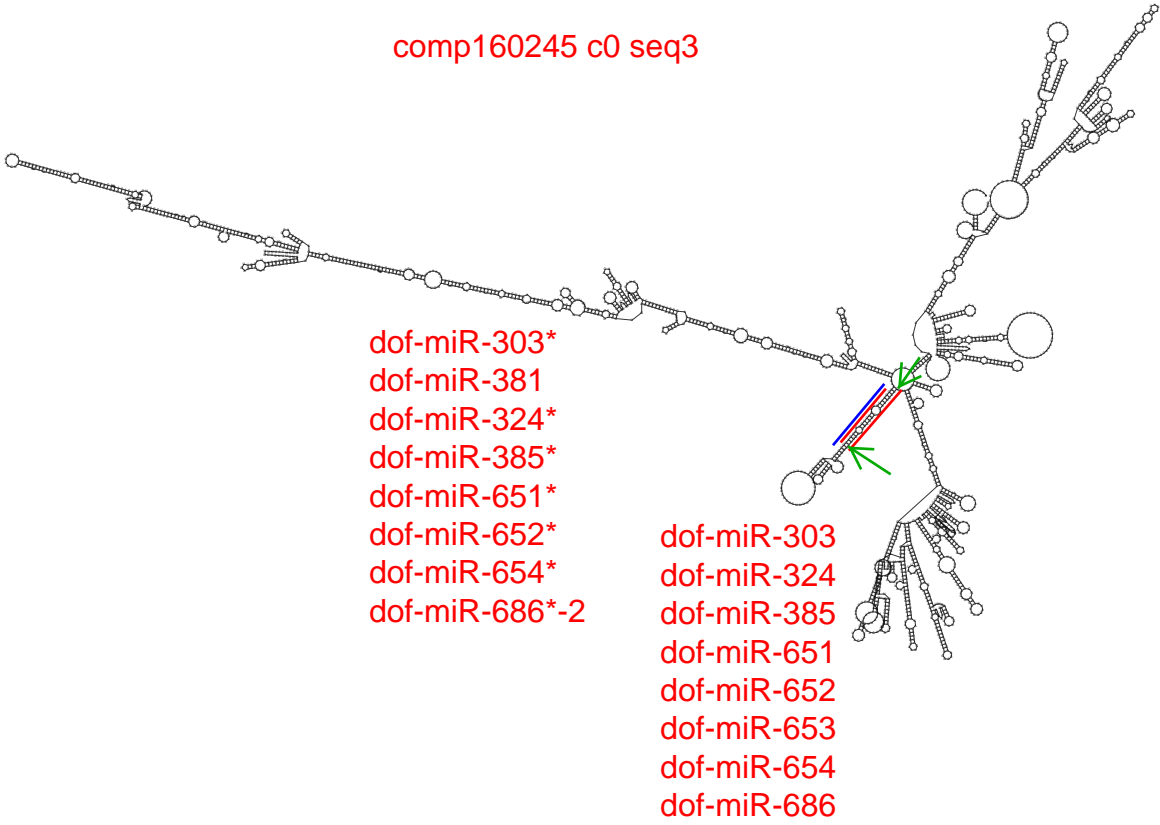

comp163033 c0 seq7

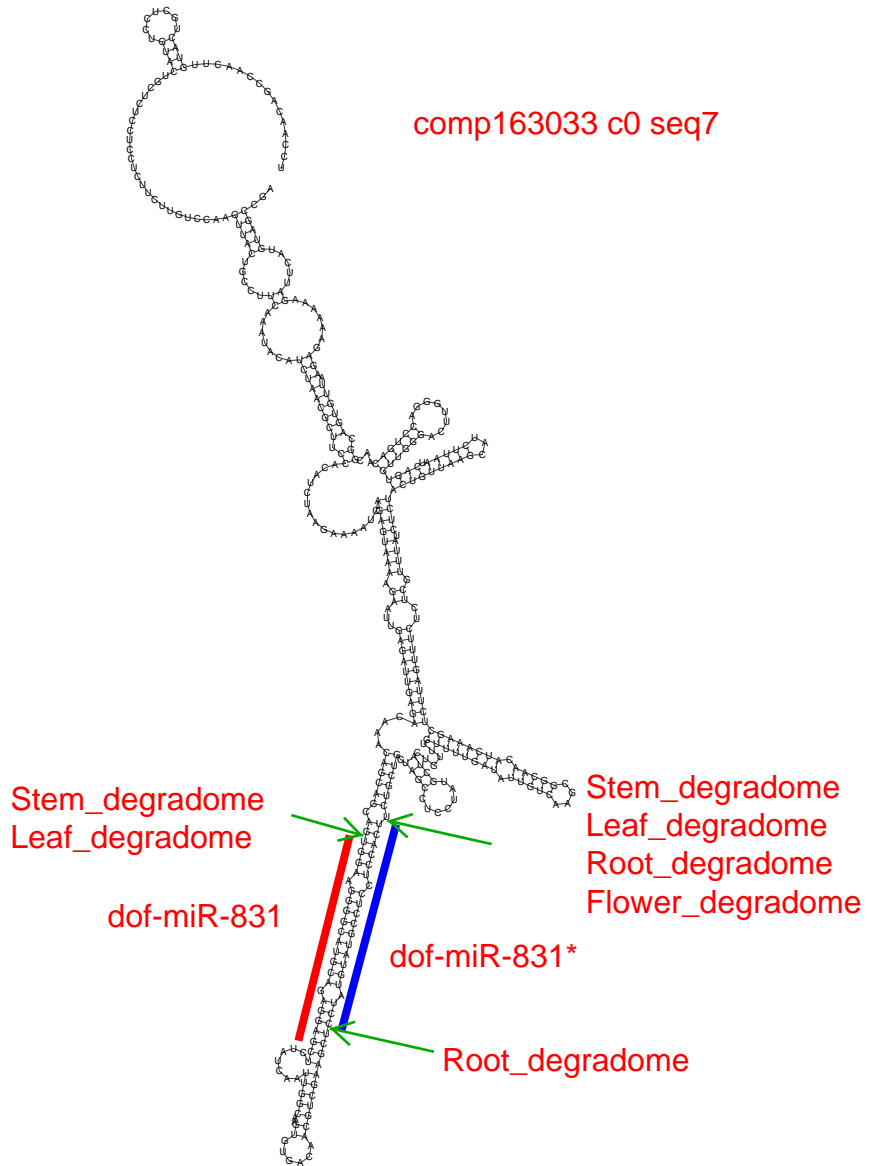

Stem\_degradome  
Leaf\_degradome

dof-miR-831

Stem\_degradome  
Leaf\_degradome  
Root\_degradome  
Flower\_degradome

dof-miR-831\*

Root\_degradome

comp164879 c1 seq2

dof-miR-640\*

dof-miR-640

Stem\_degradome  
Leaf\_degradome  
Flower\_degradome

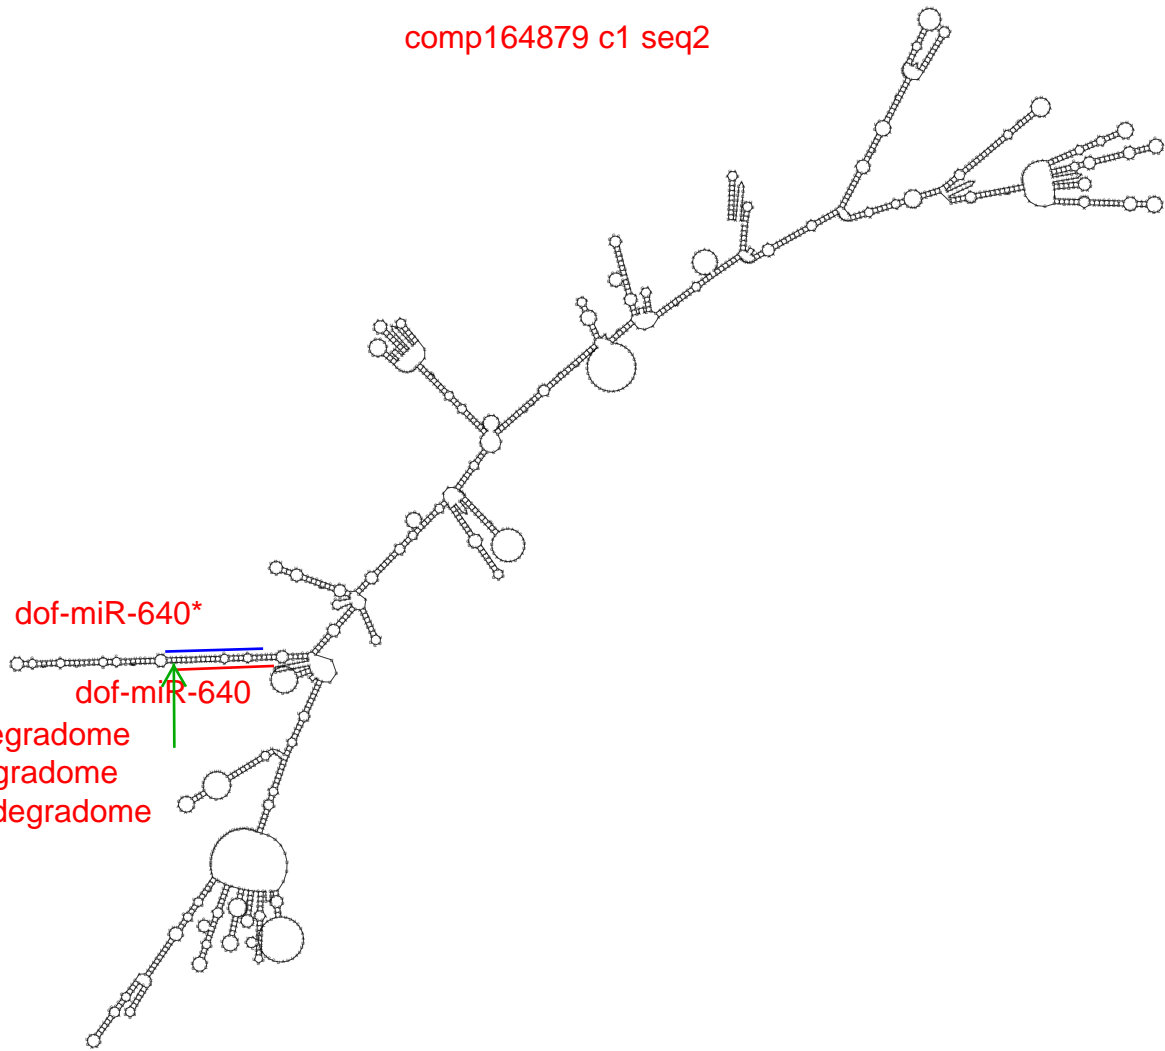

comp168357 c1 seq16

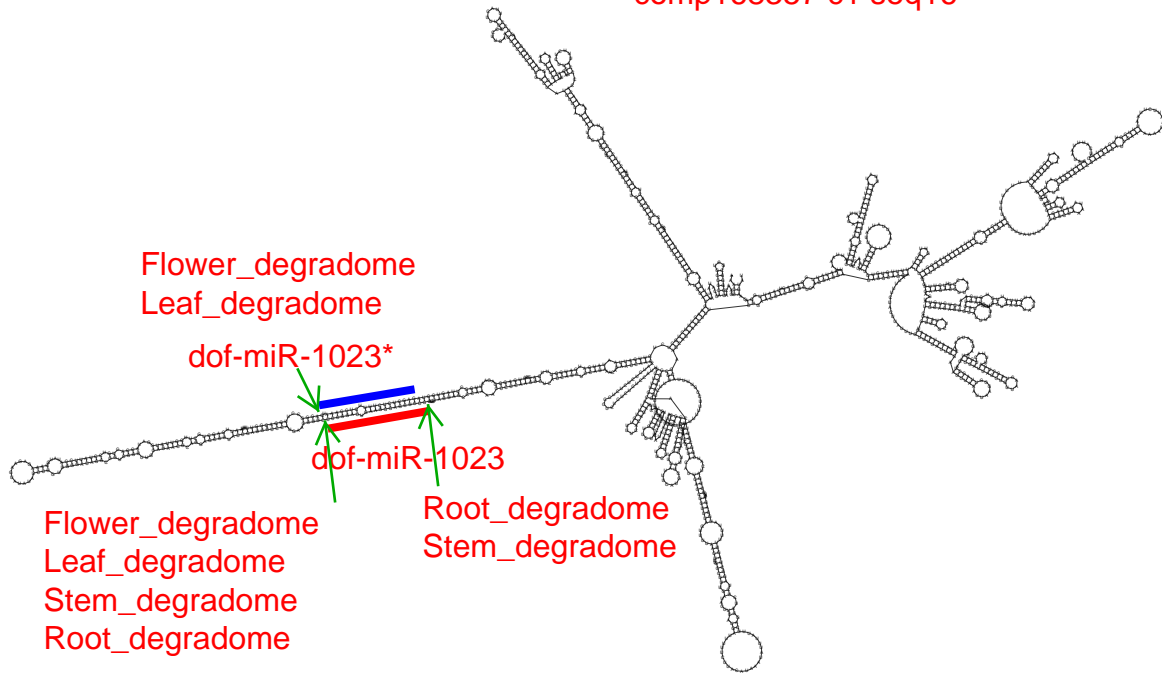

comp168949 c1 seq3

dof-miR-296  
dof-miR-645\*-1

dof-miR-645  
dof-miR-647

Leaf\_degradome  
Flower\_degradome

Stem\_degradome  
Root\_degradome  
Leaf\_degradome  
Flower\_degradome

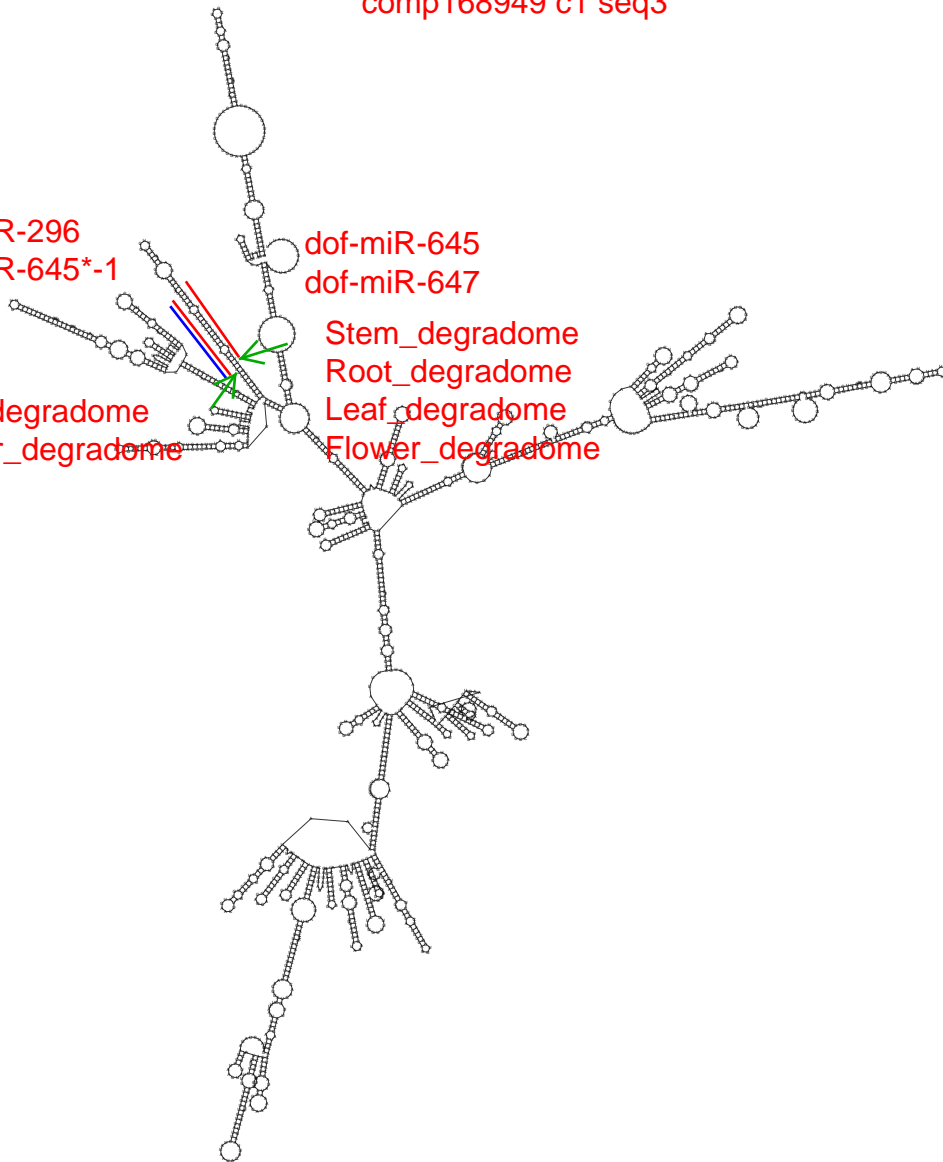

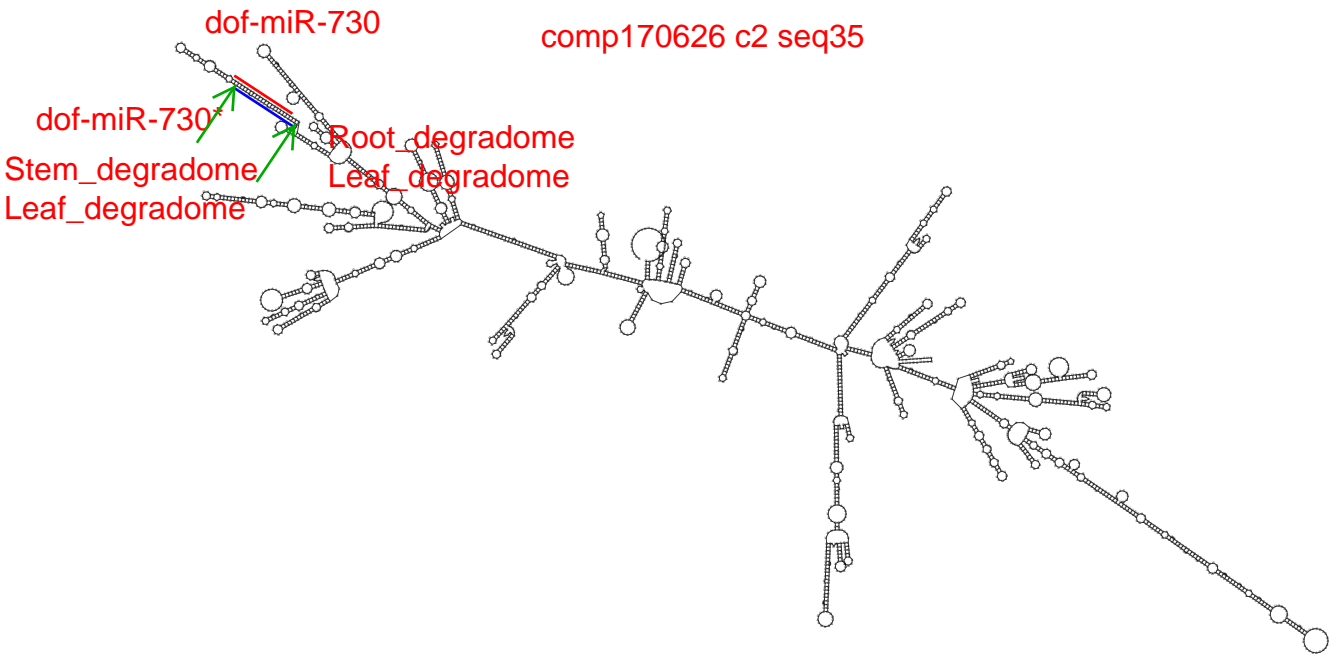

comp170707 c6 seq1

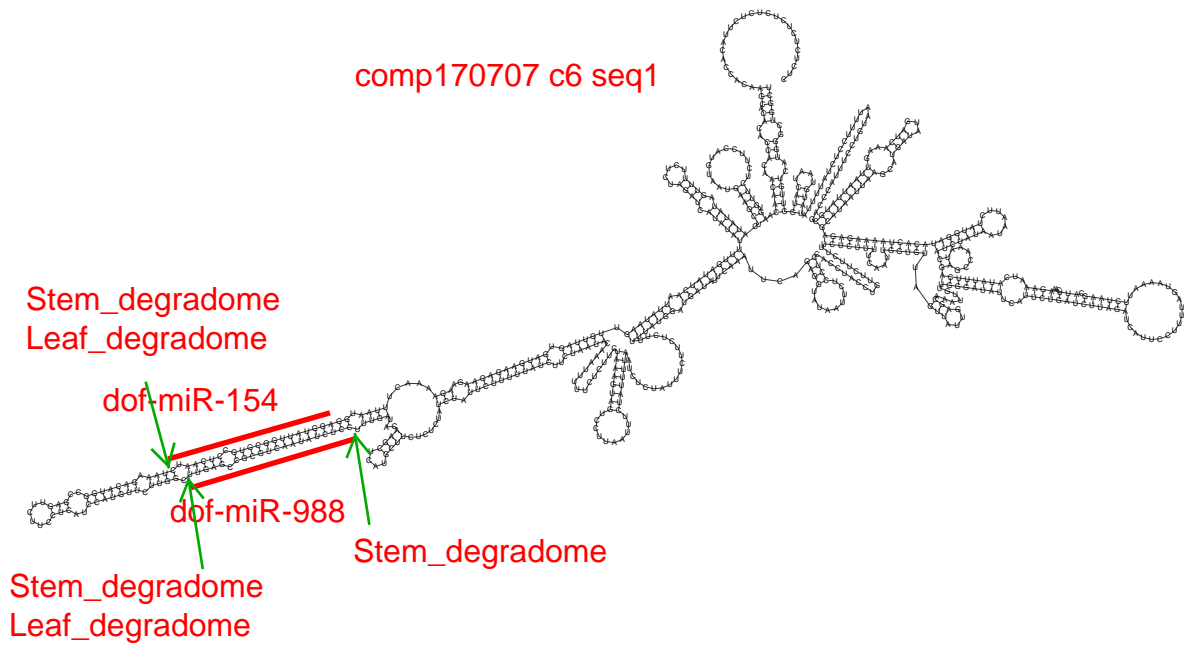

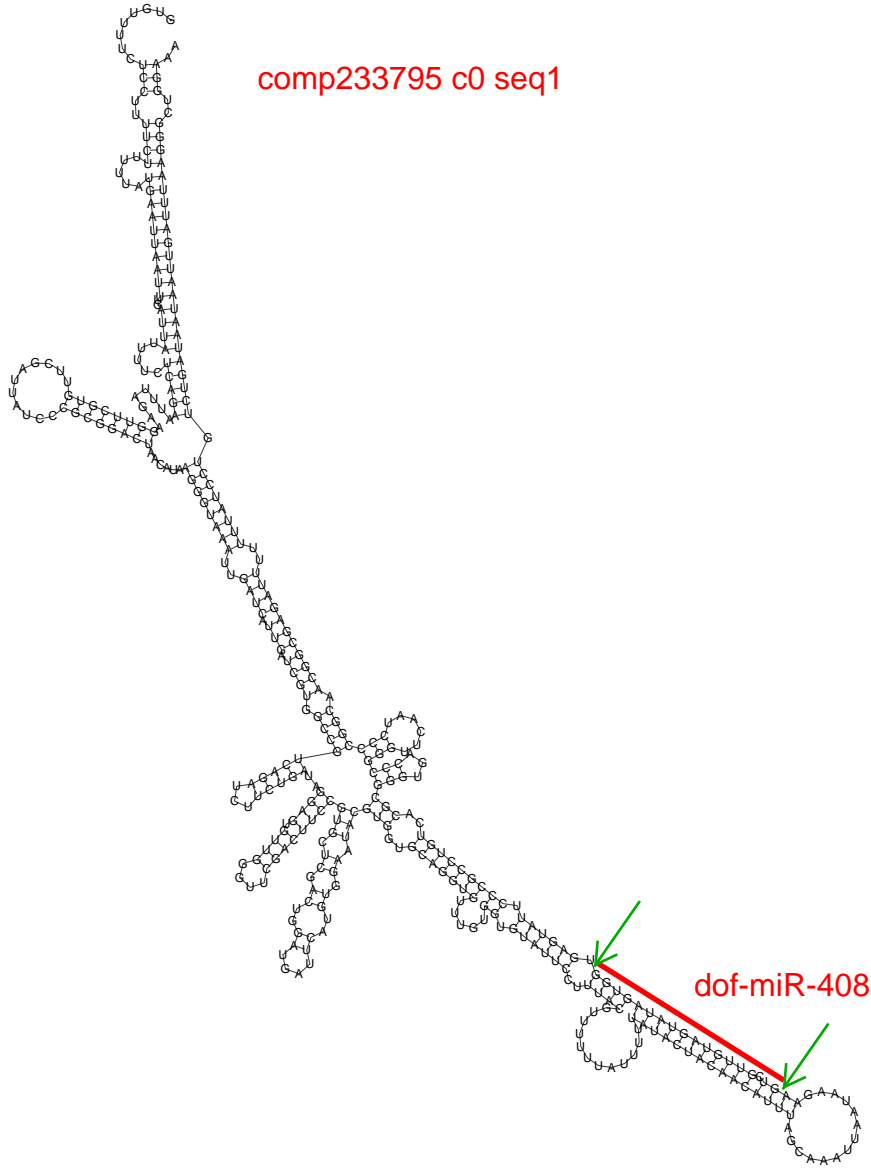

comp233795 c0 seq1

dof-miR-408



**Figure S5** T-plots providing degradome-seq data-based evidences for cleavage actions between specific miRNA--target pairs identified from *Dendrobium officinale*. Four degradome-seq libraries prepared from four organs (root, flower, stem and leaf; represented by four different signs) of *Dendrobium officinale* were included for drawing t-plots. For each miRNA--target pair, two scatter diagrams are provided. The left diagram with target ID provides a global view of degradome signals distributed all along the full-length target transcript. The right diagram with ID(s) of regulatory miRNA(s) provides a detailed view of degradome signals within about 60-nt region surrounding the predicted miRNA binding site (marked by a green horizontal line) on the target transcript. The y axis of each diagram measures the intensity (in RPM) of degradome signals. Please note: only the miRNA--target pairs supported by prominent degradome signatures resided within 10<sup>th</sup> to 11<sup>th</sup> nt from the 5' ends of the regulatory miRNAs are included in this figure.

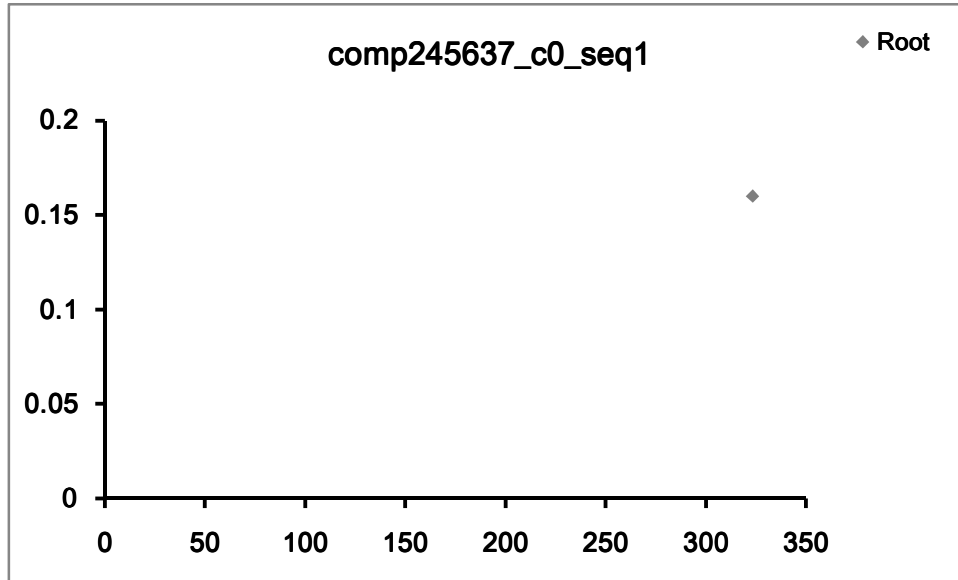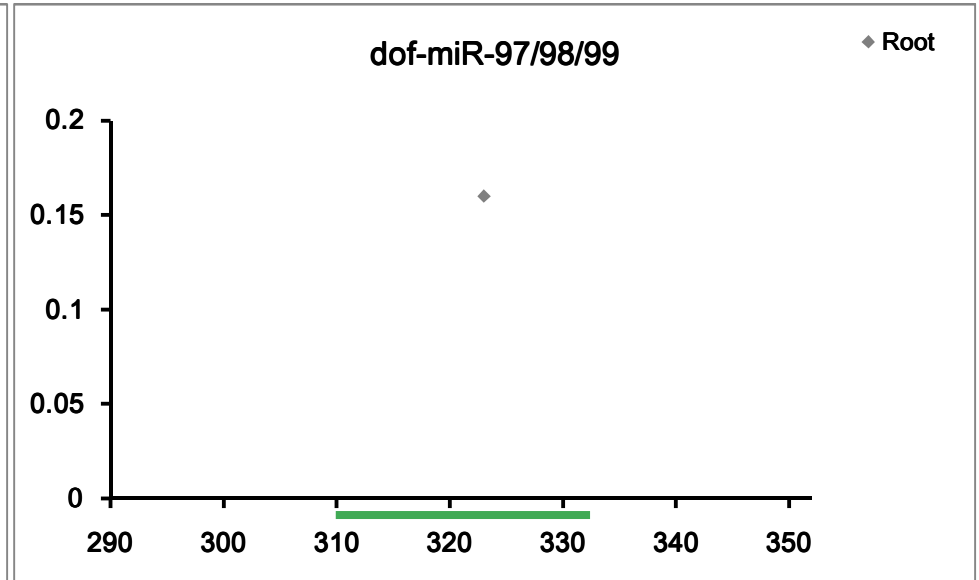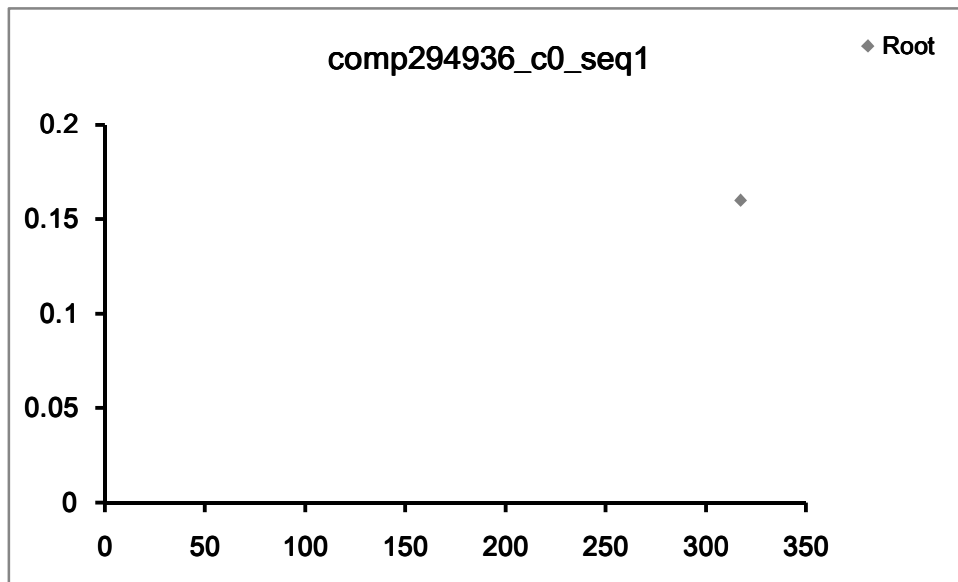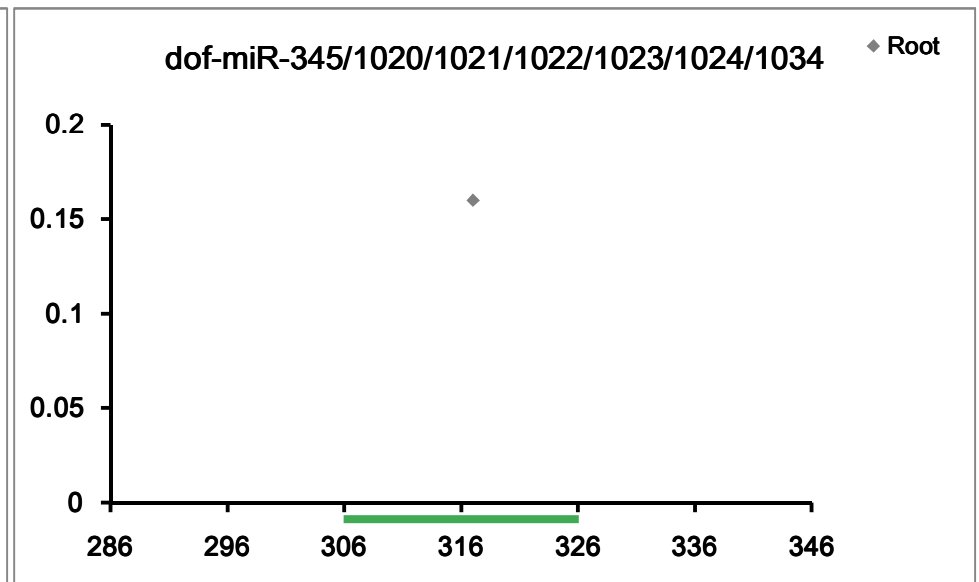

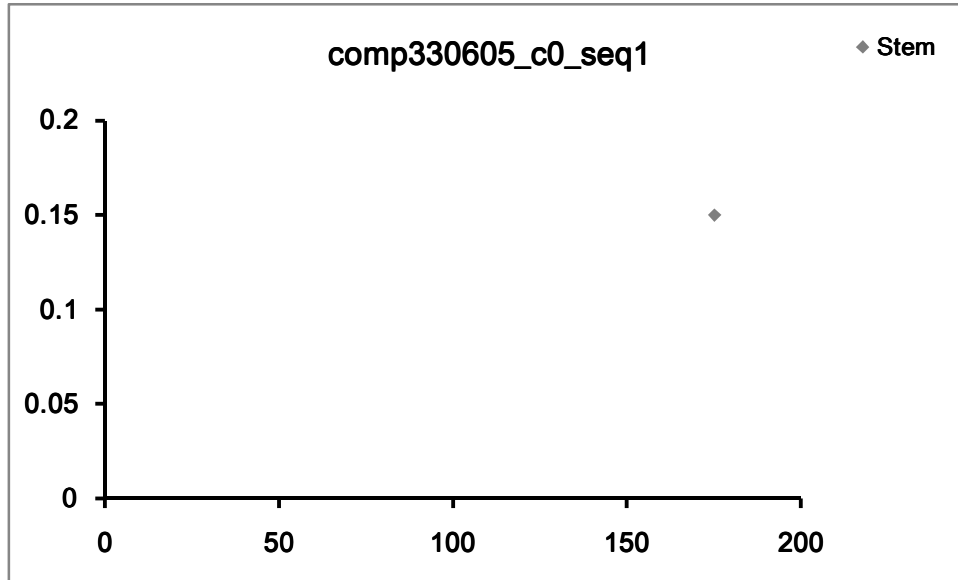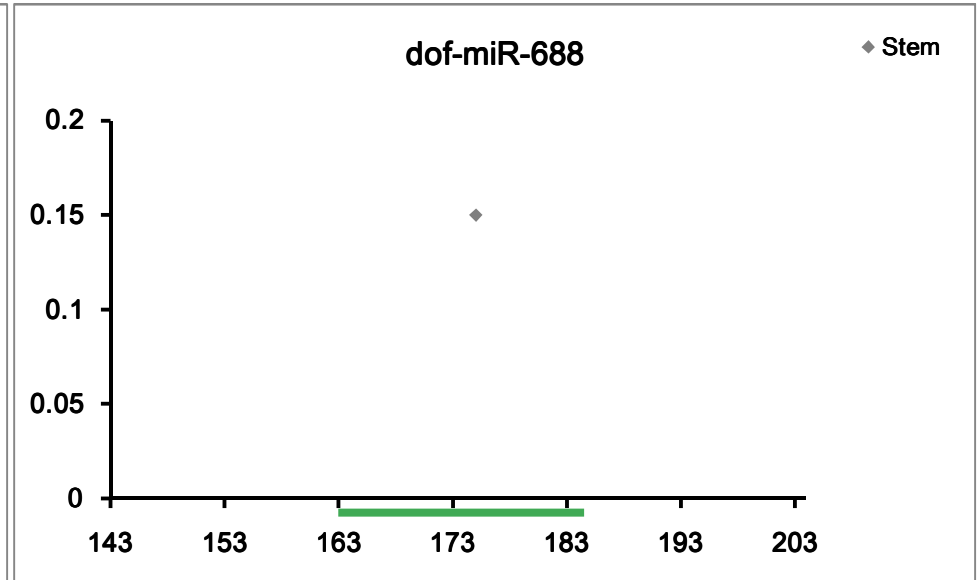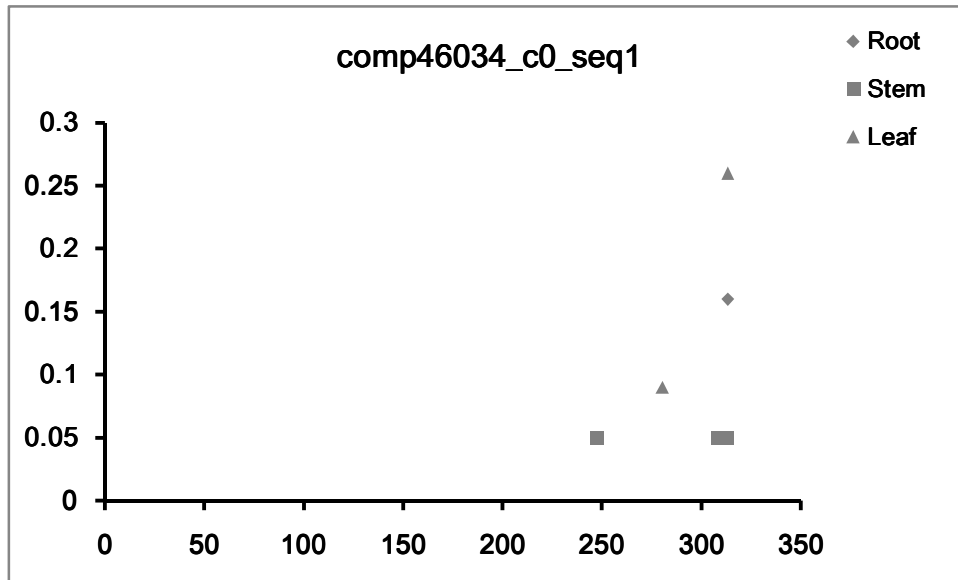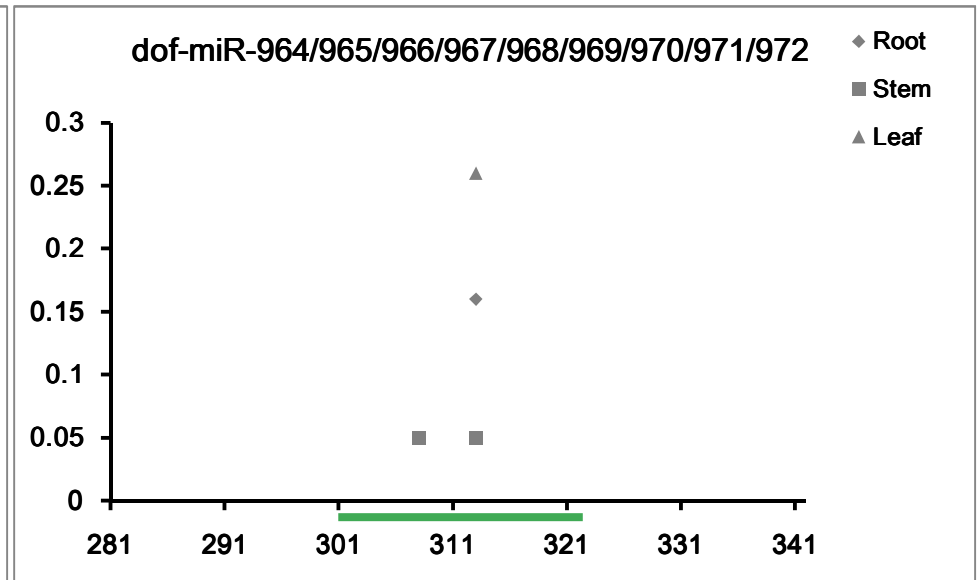

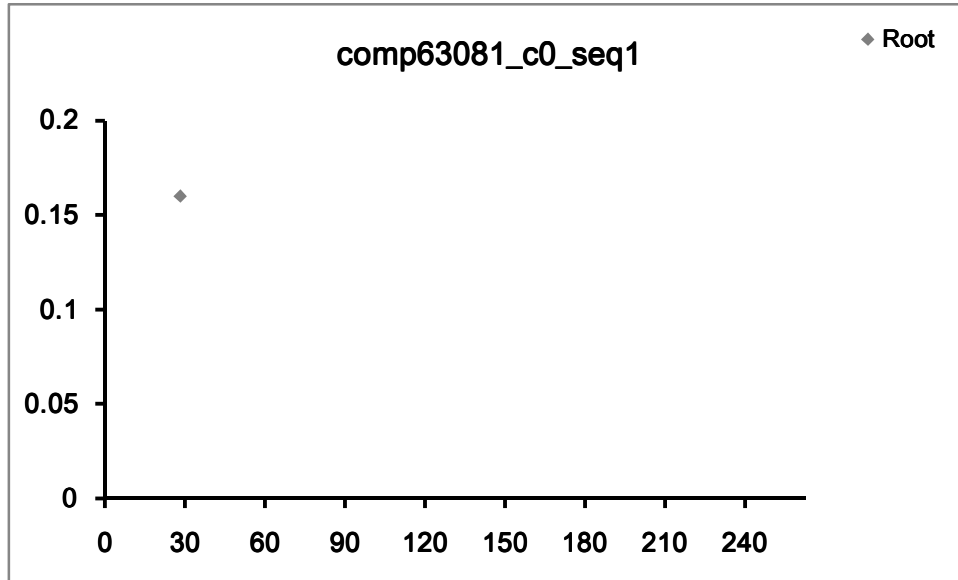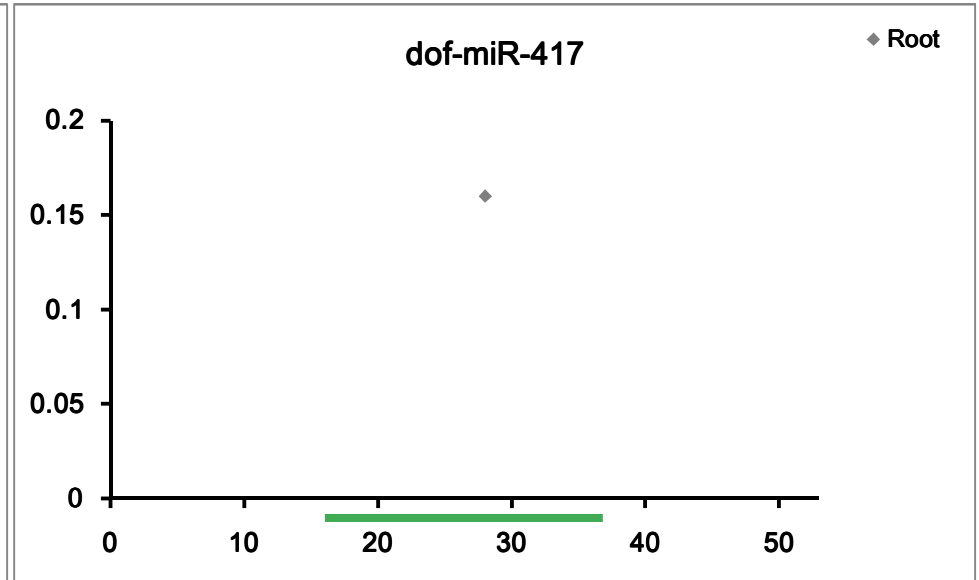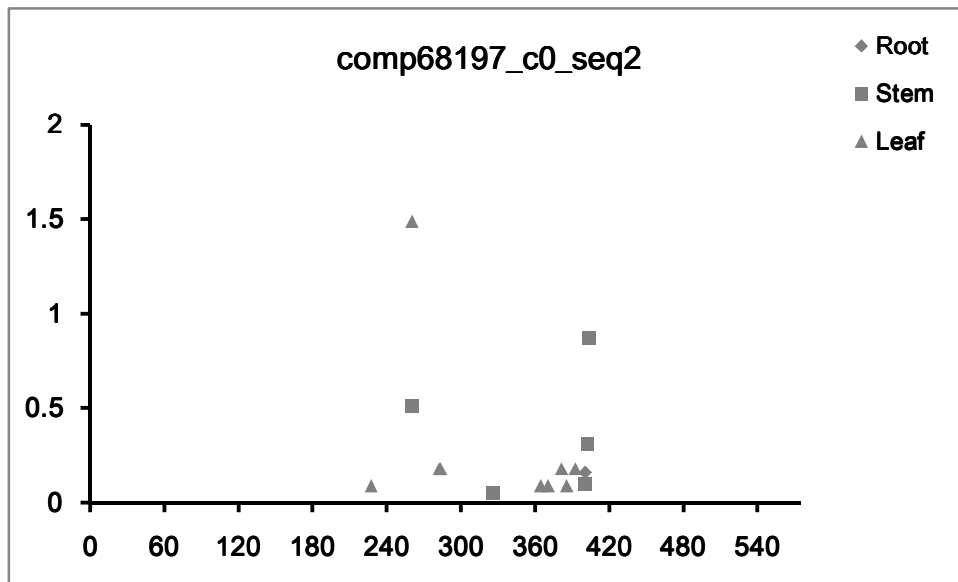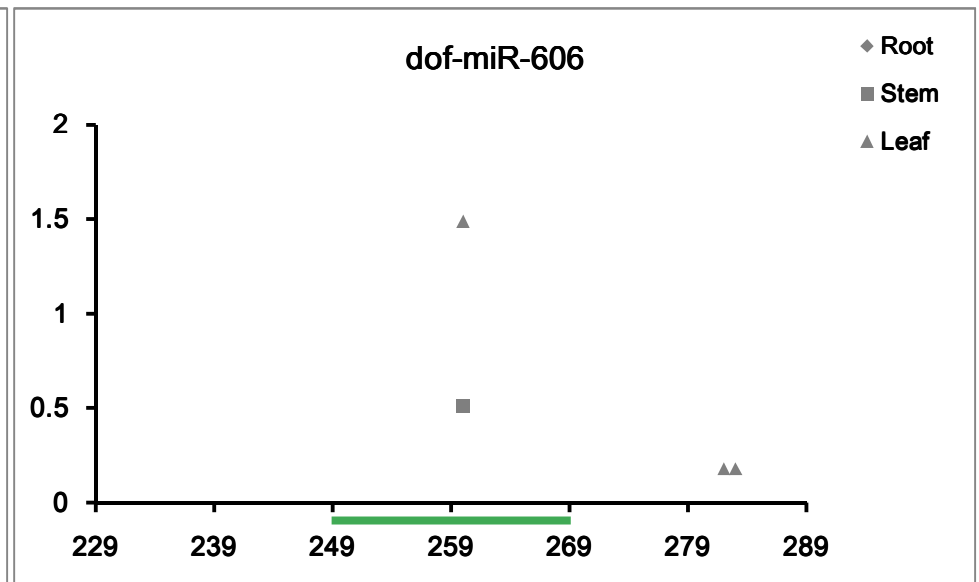

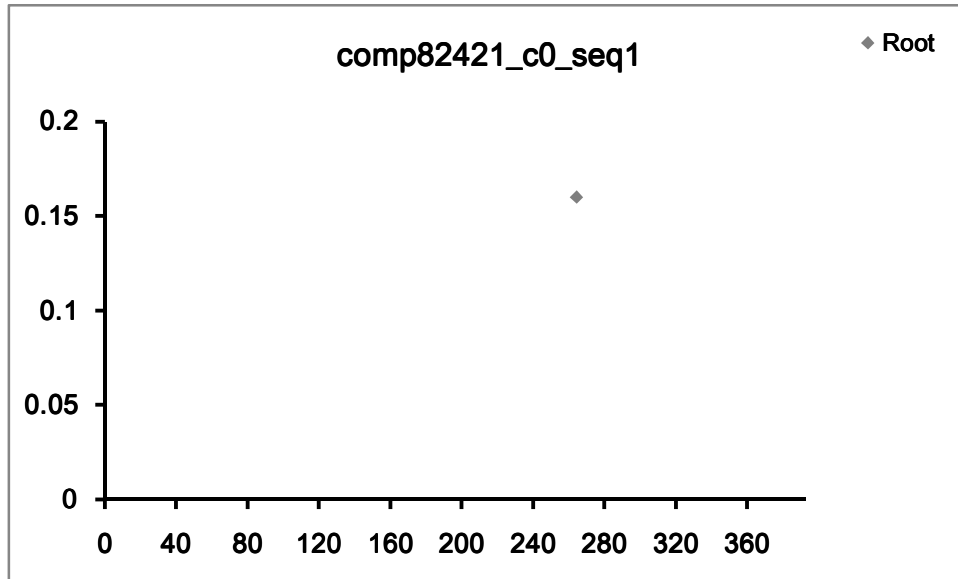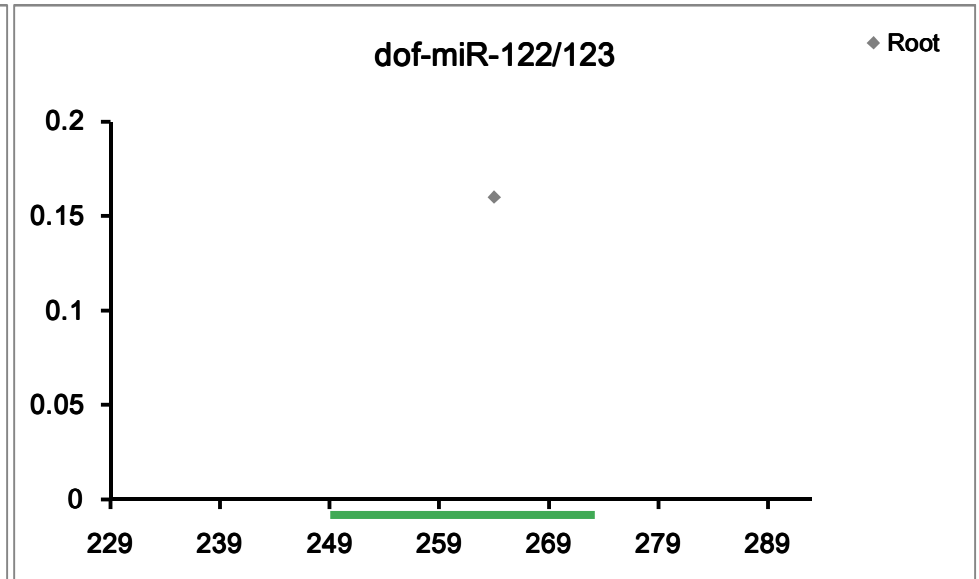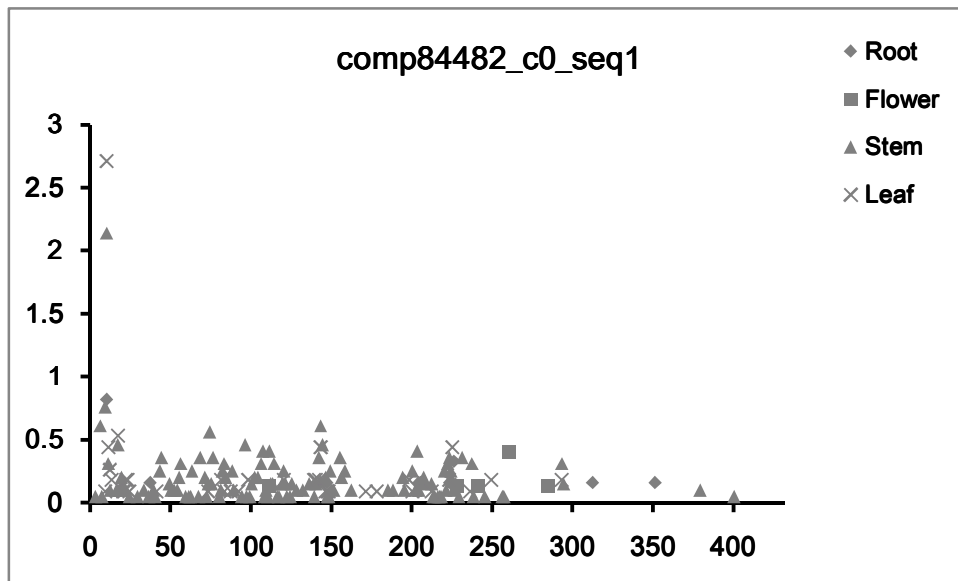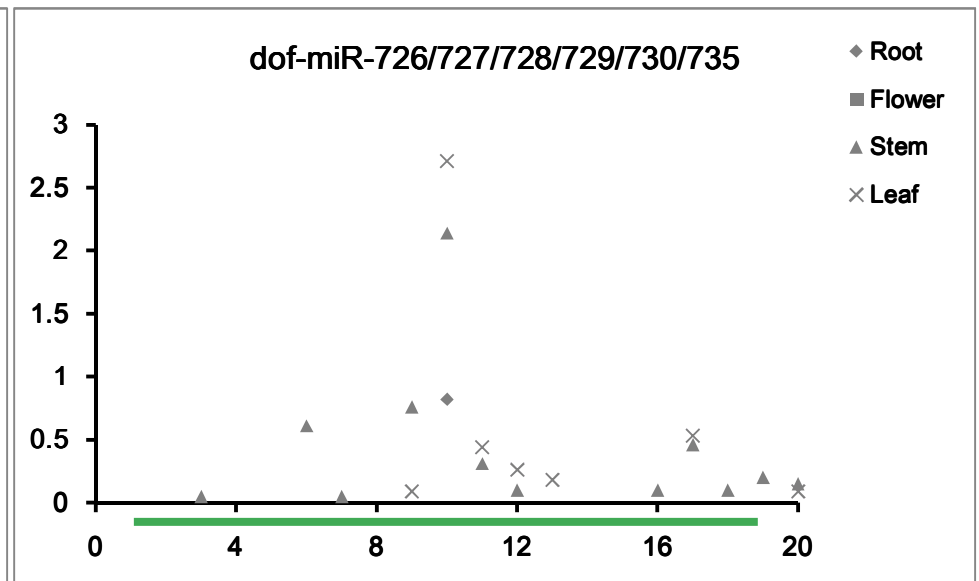

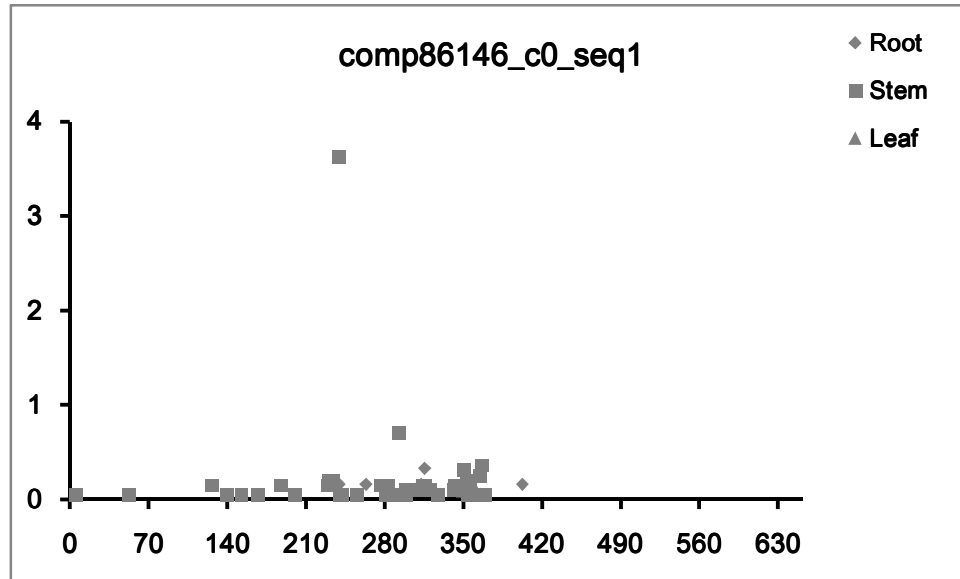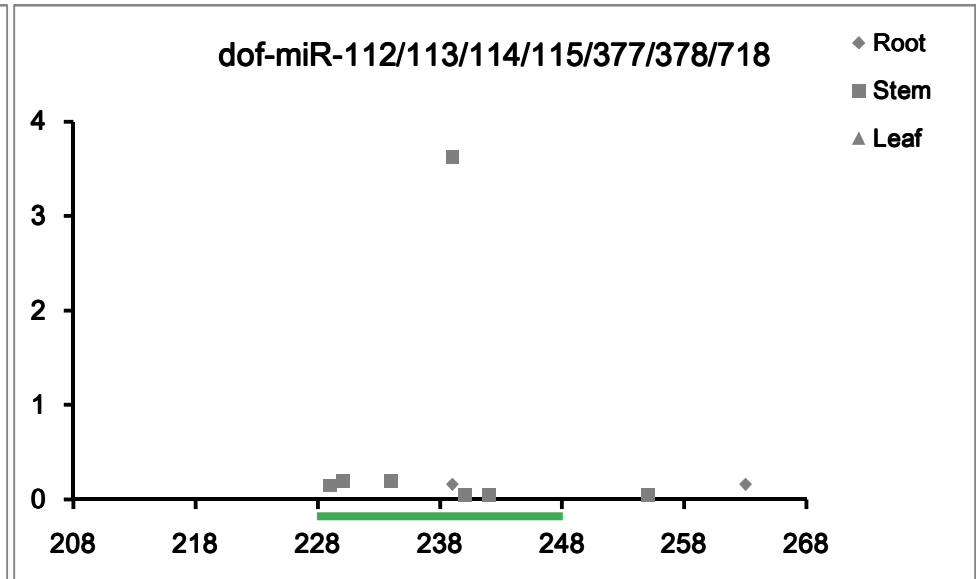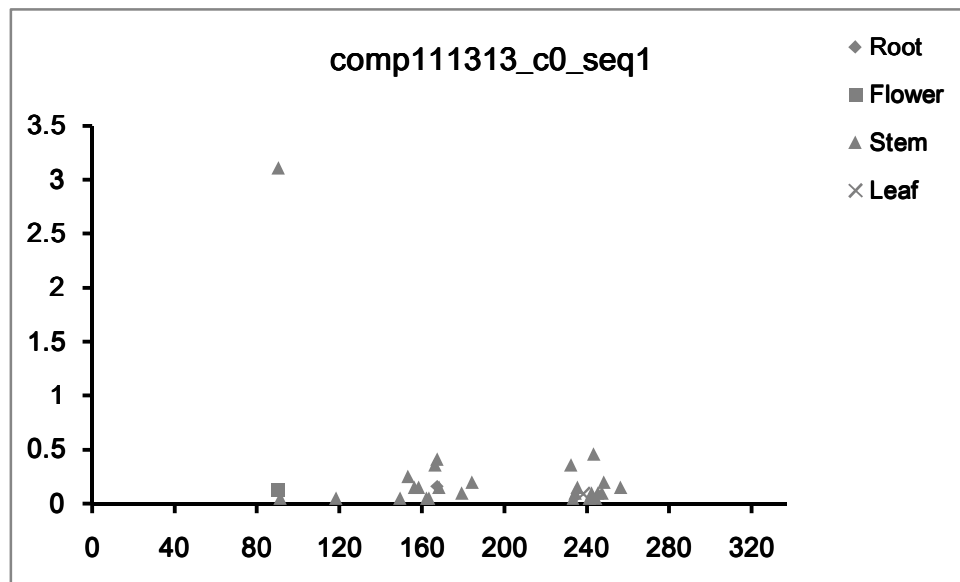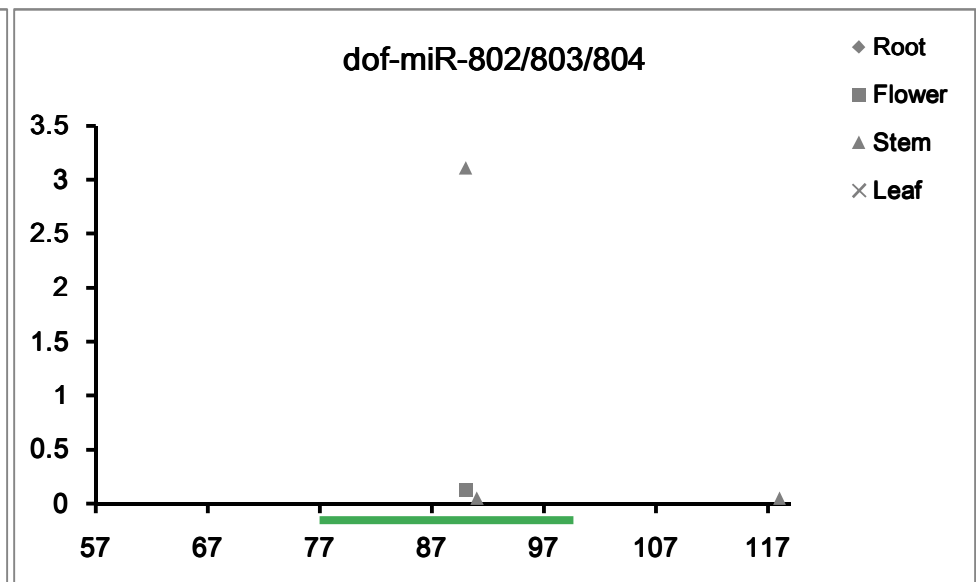

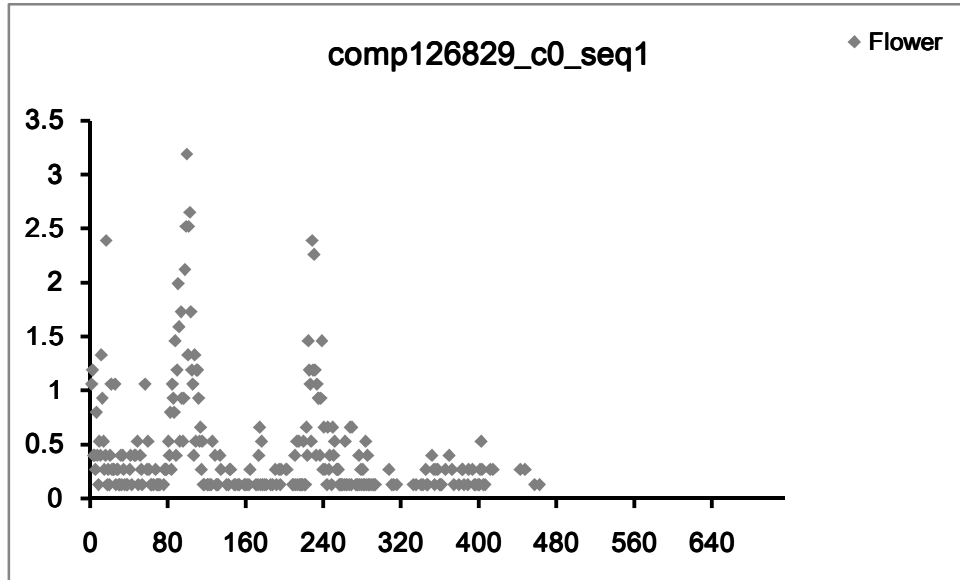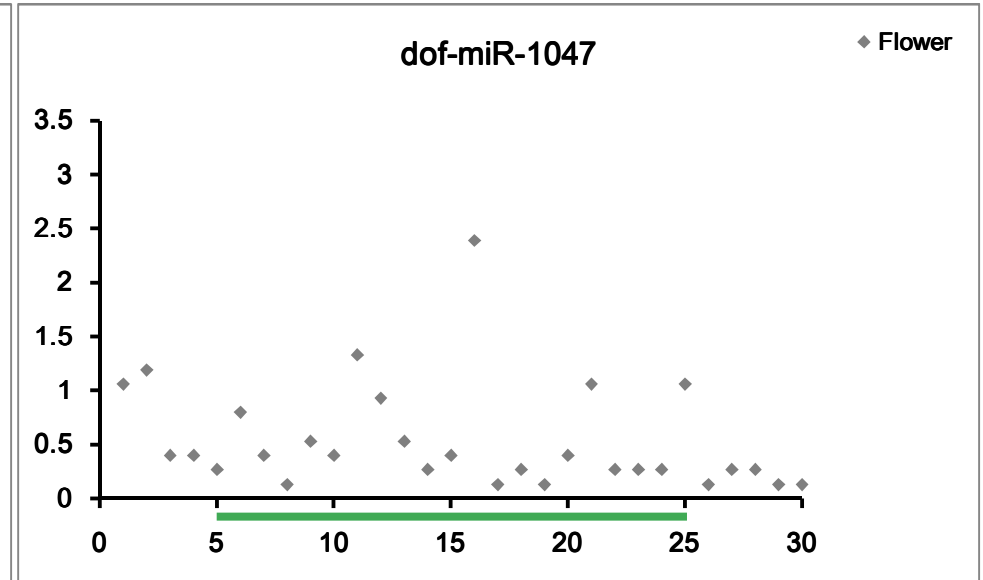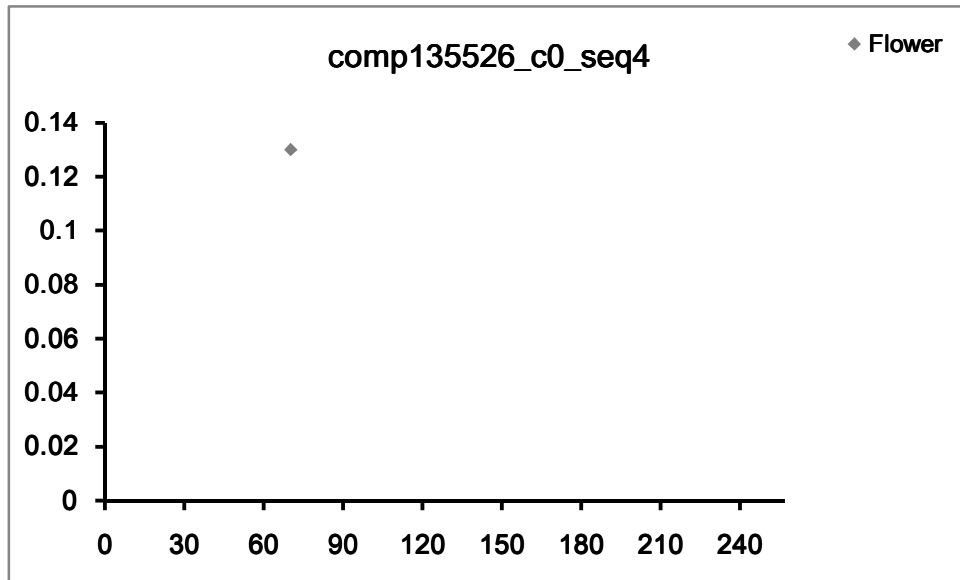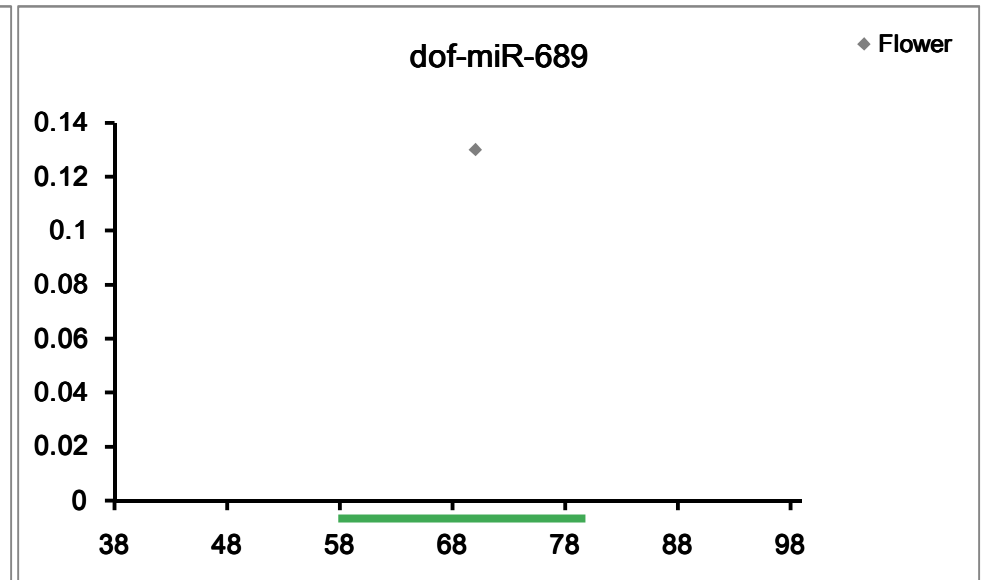

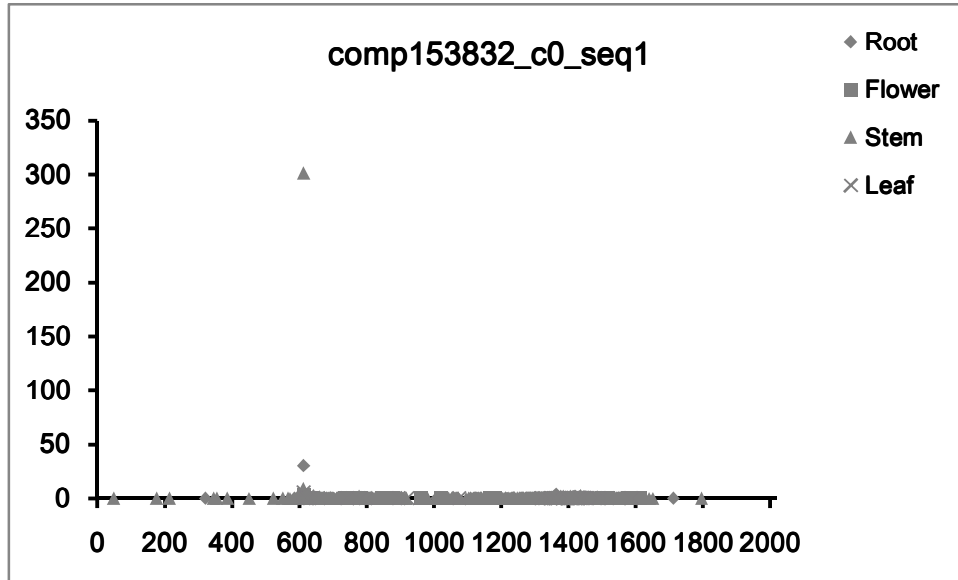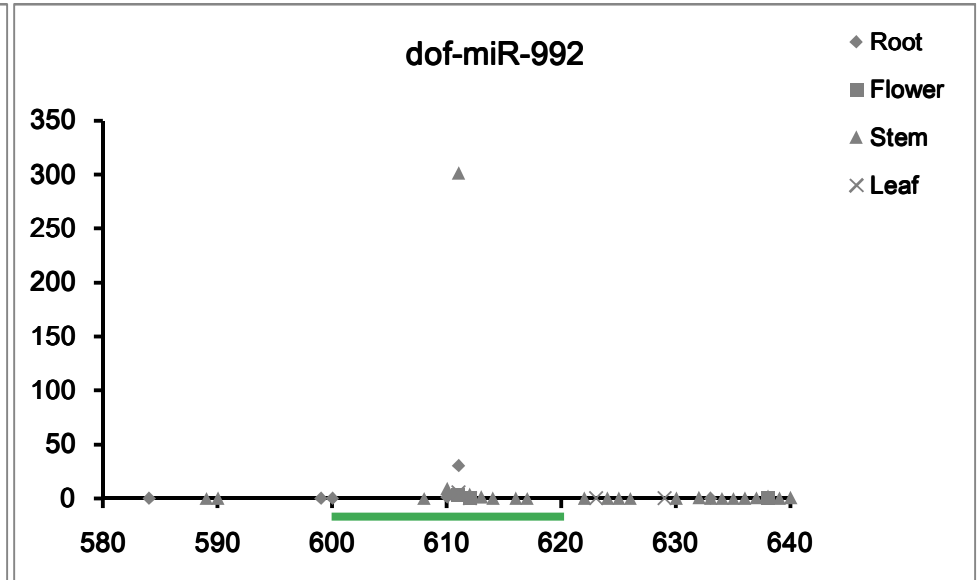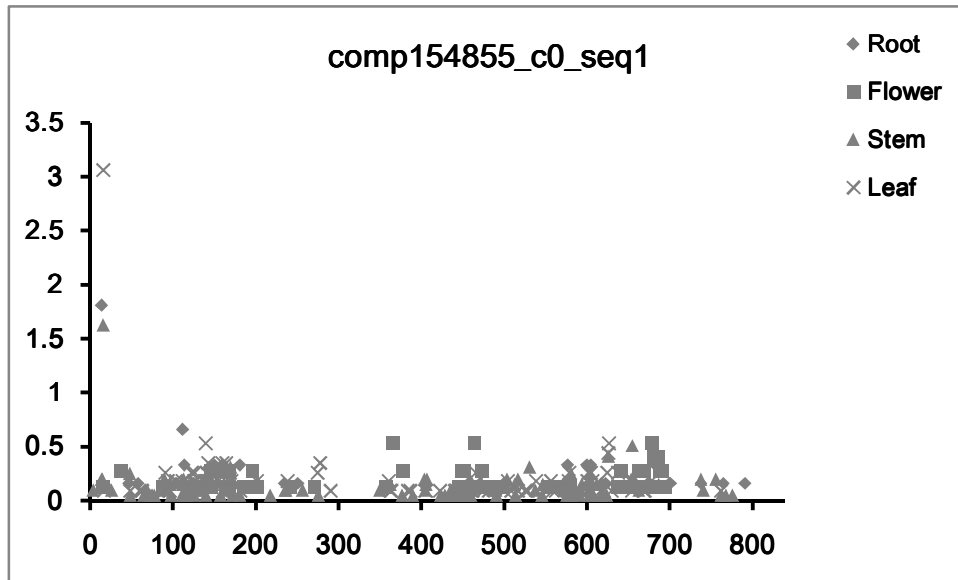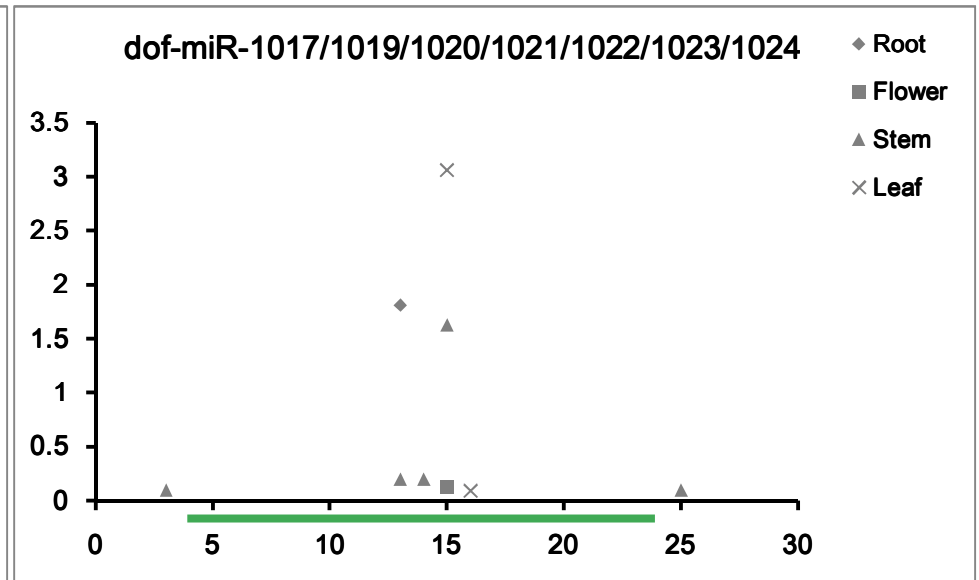



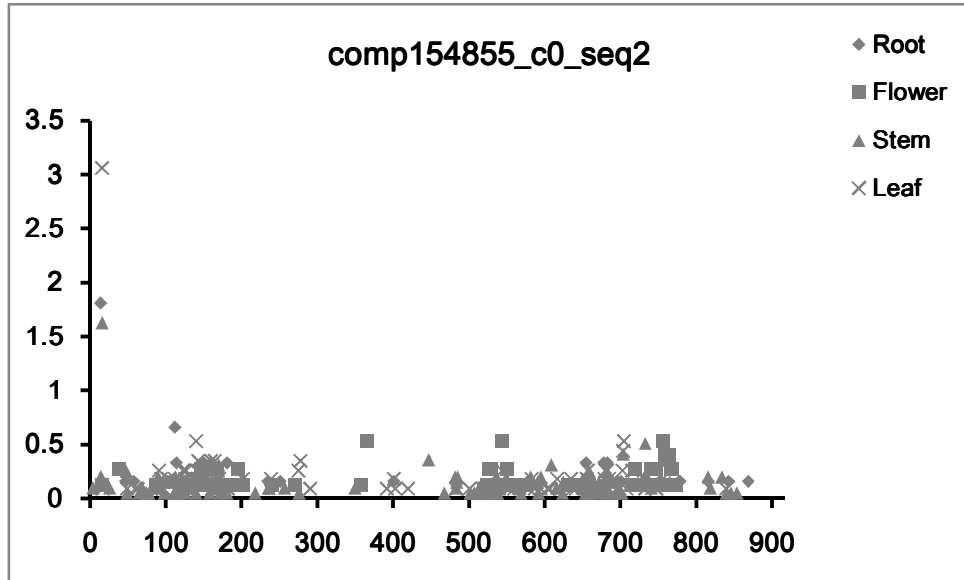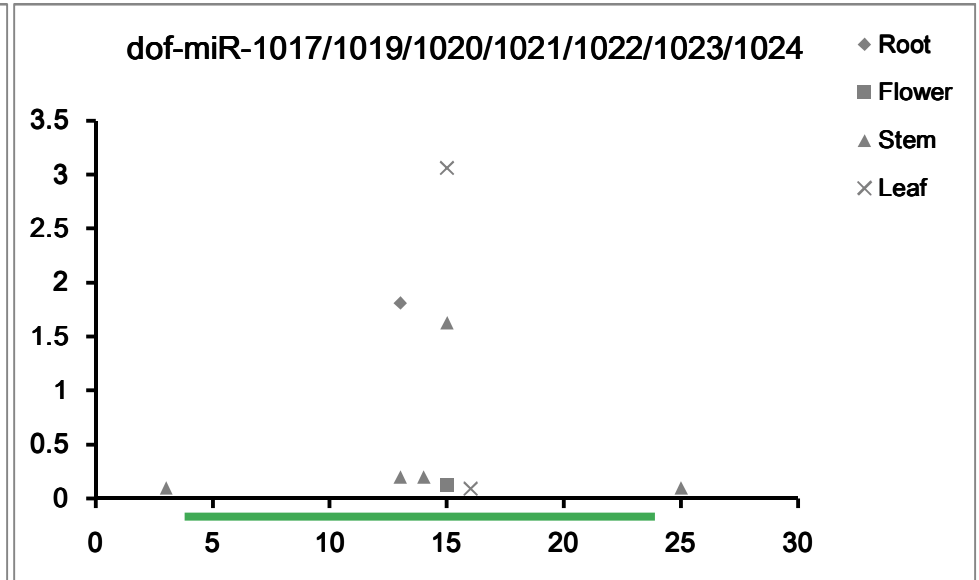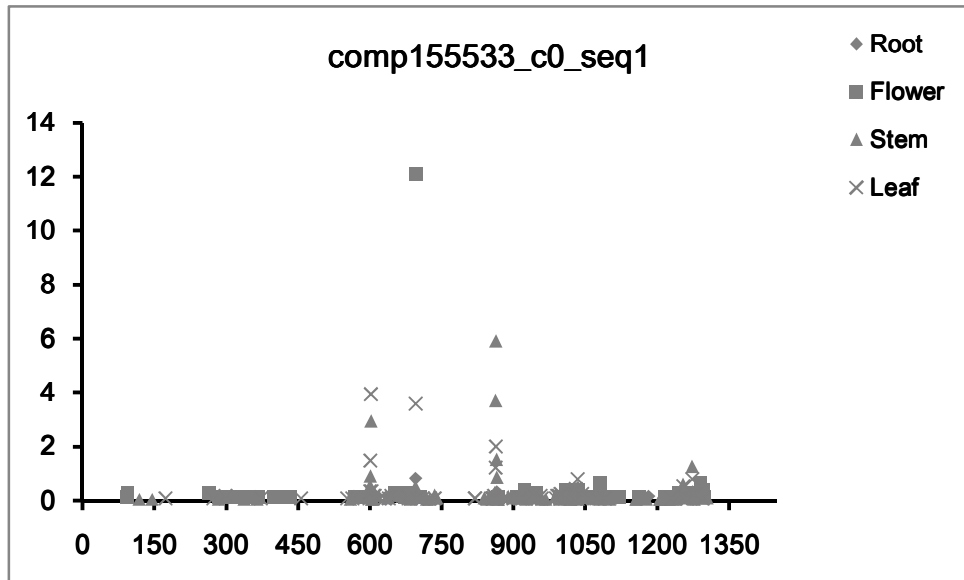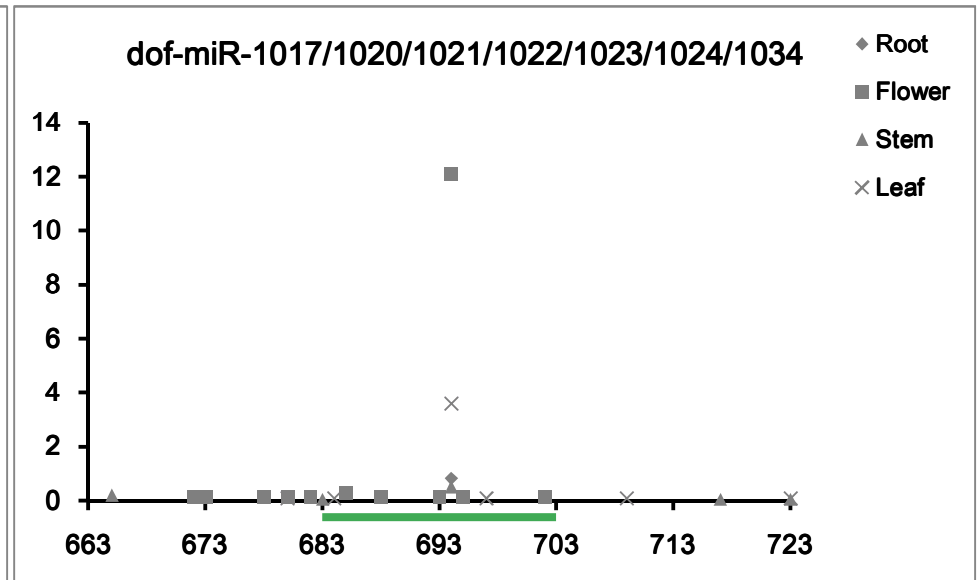

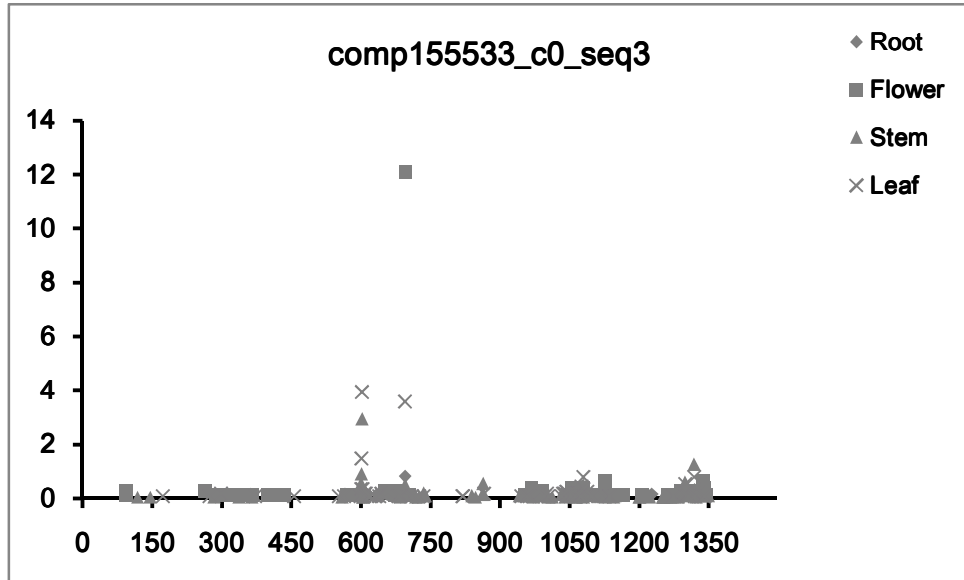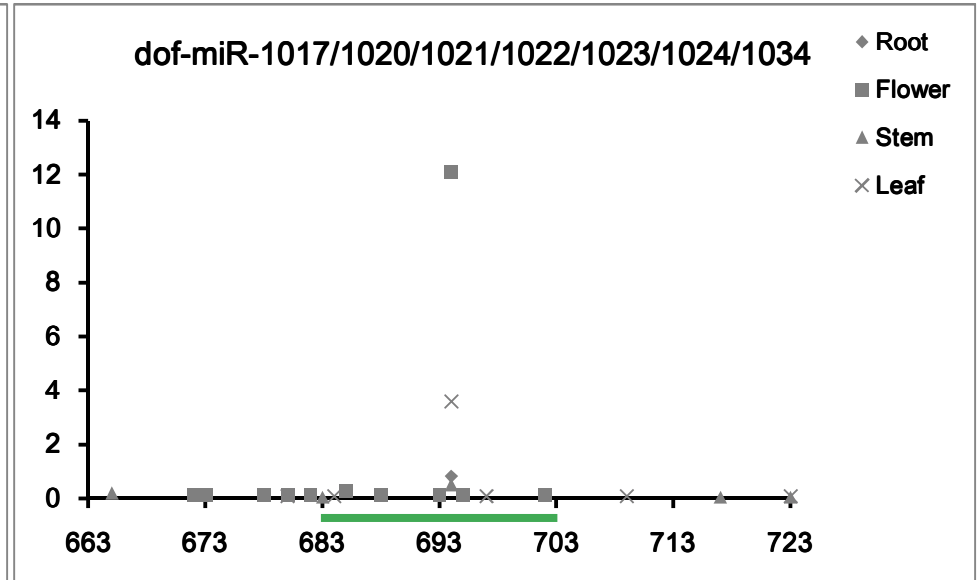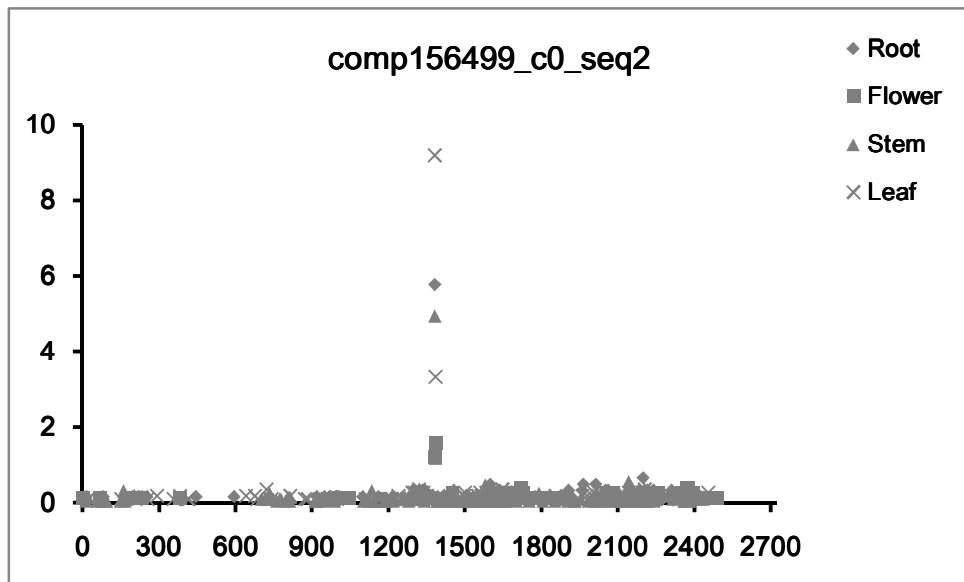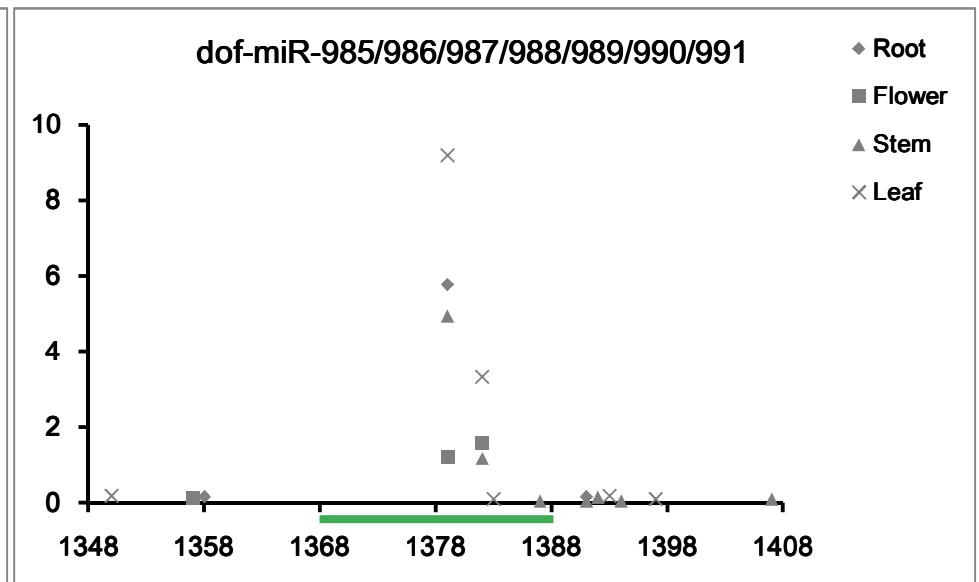

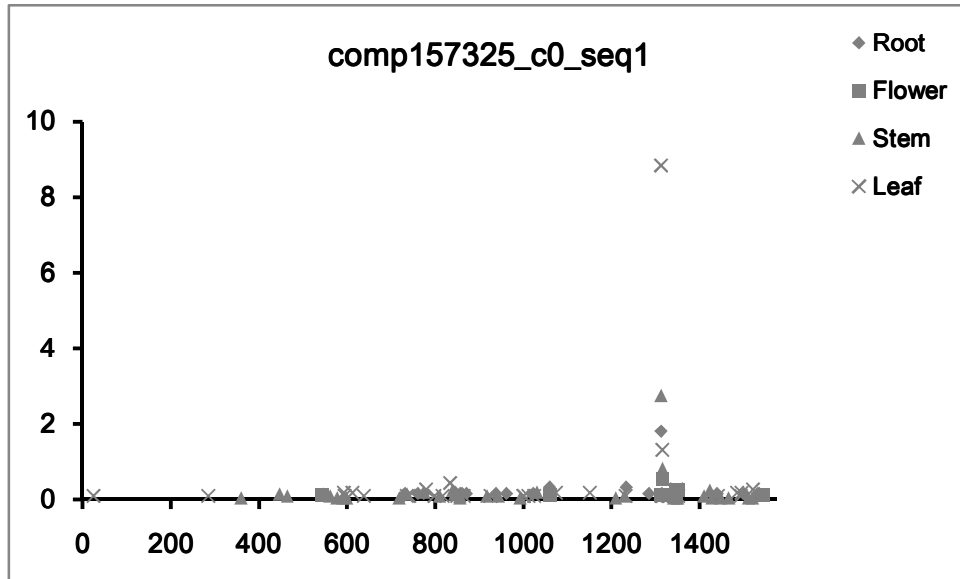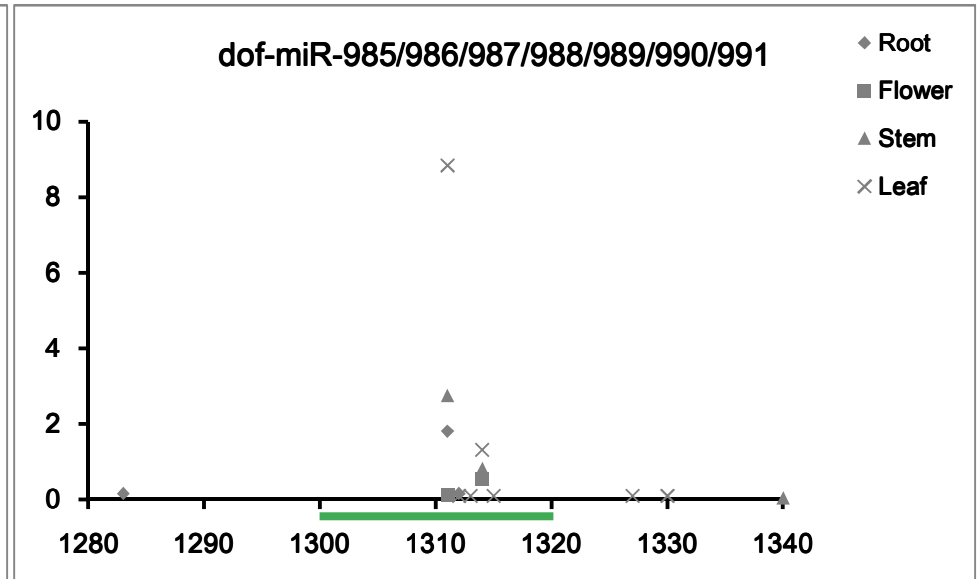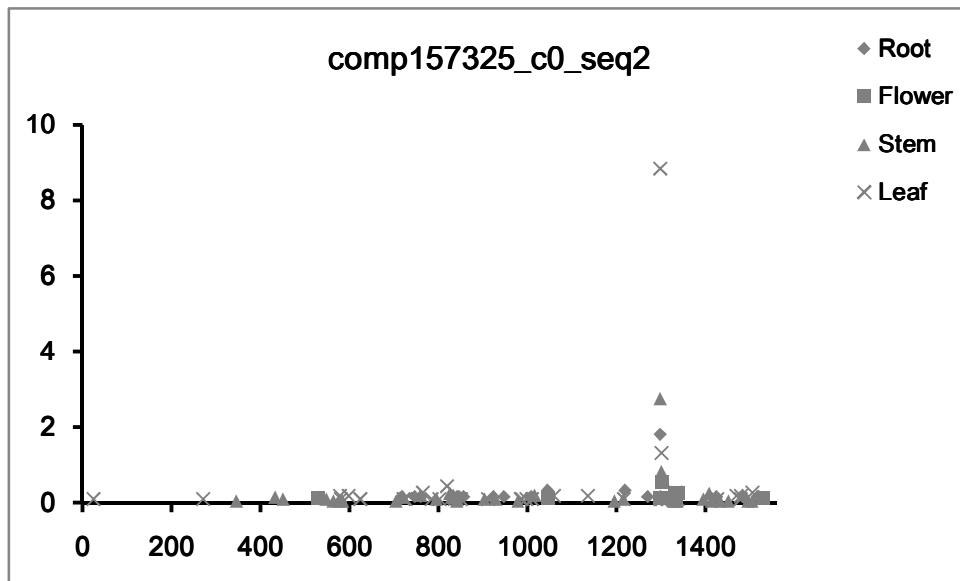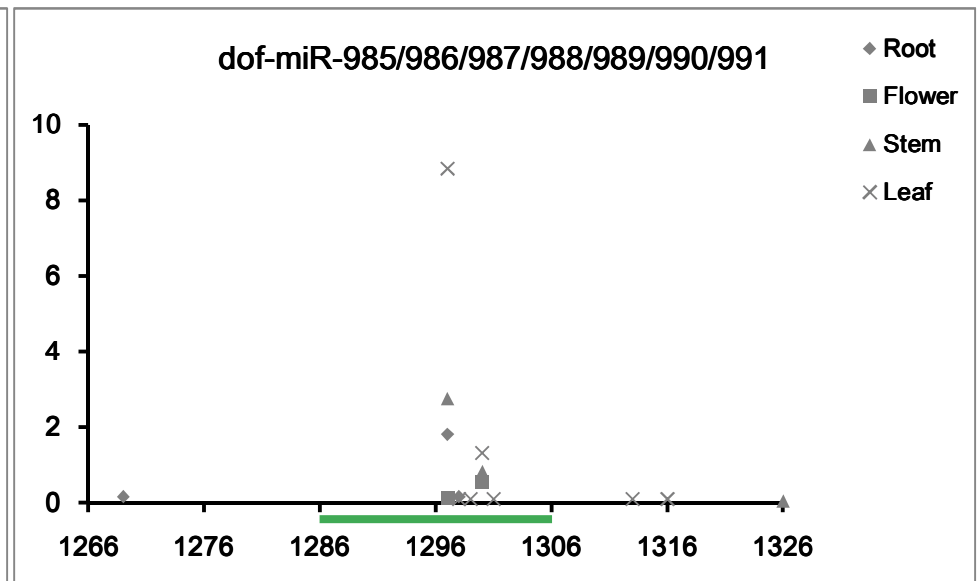

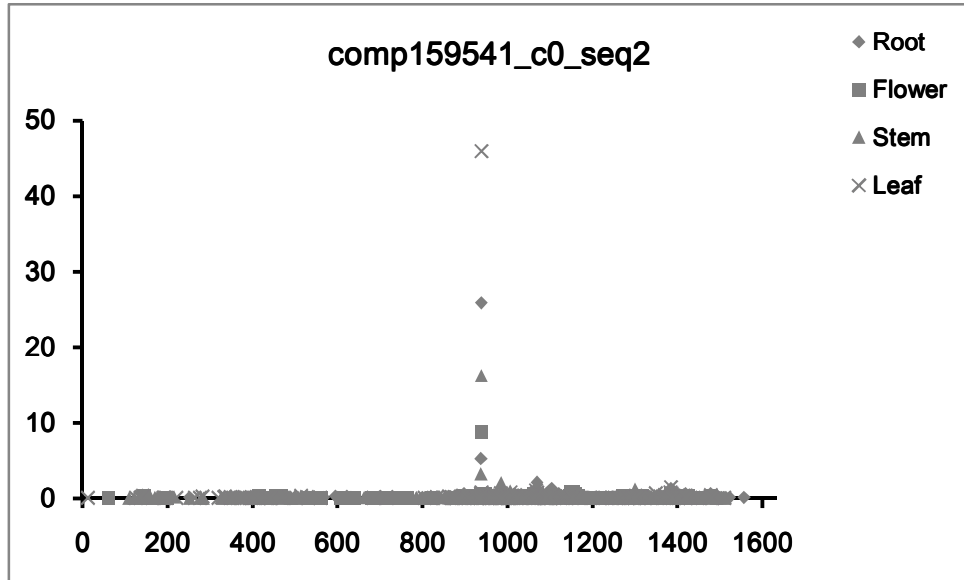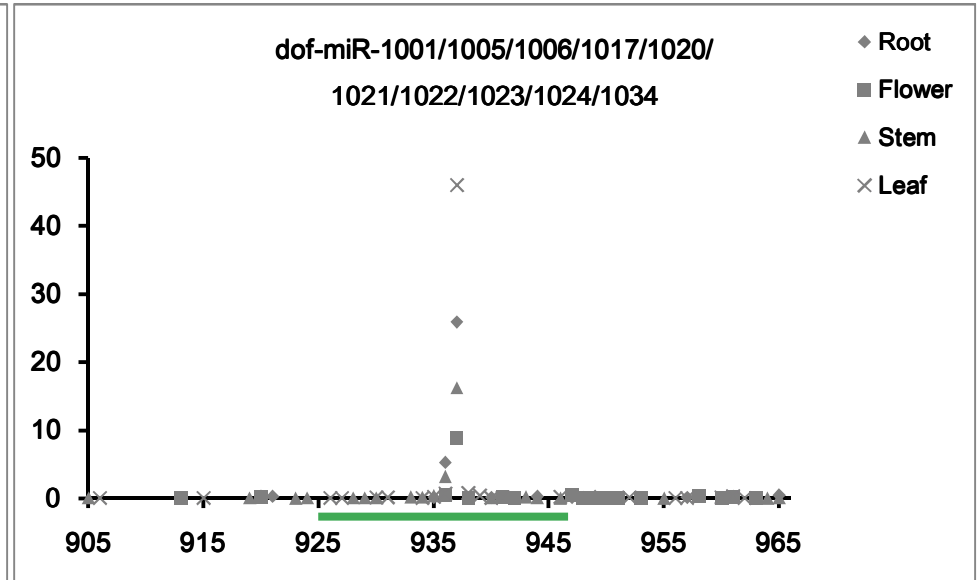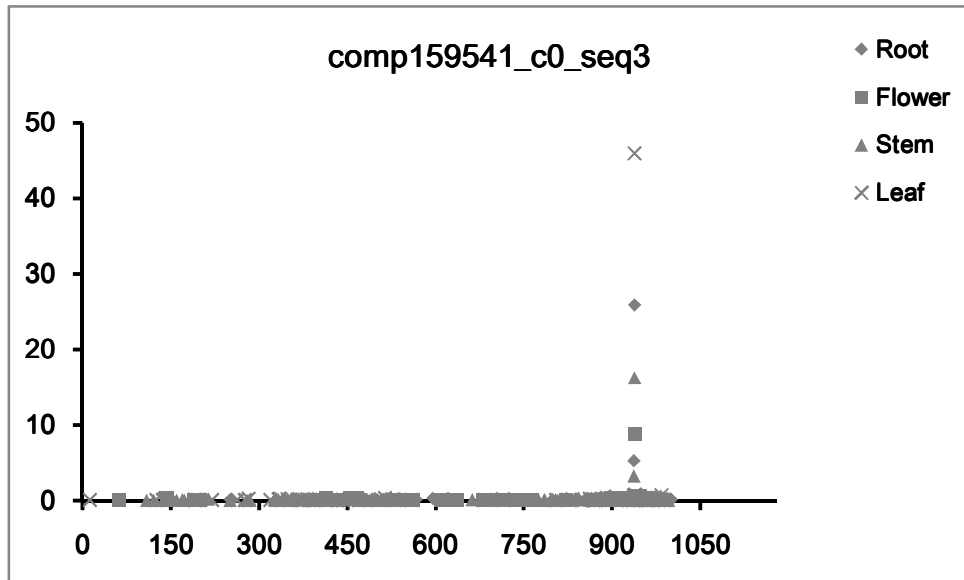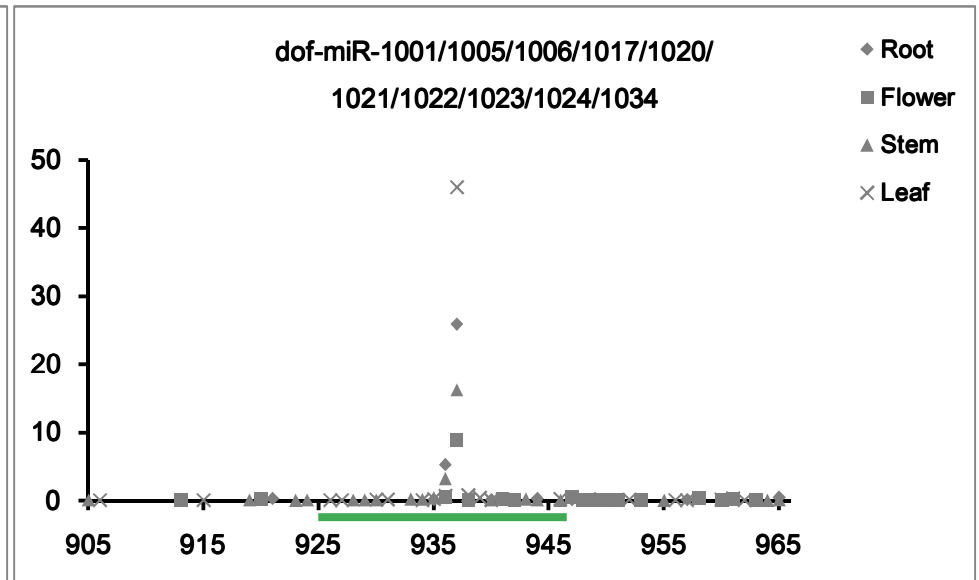

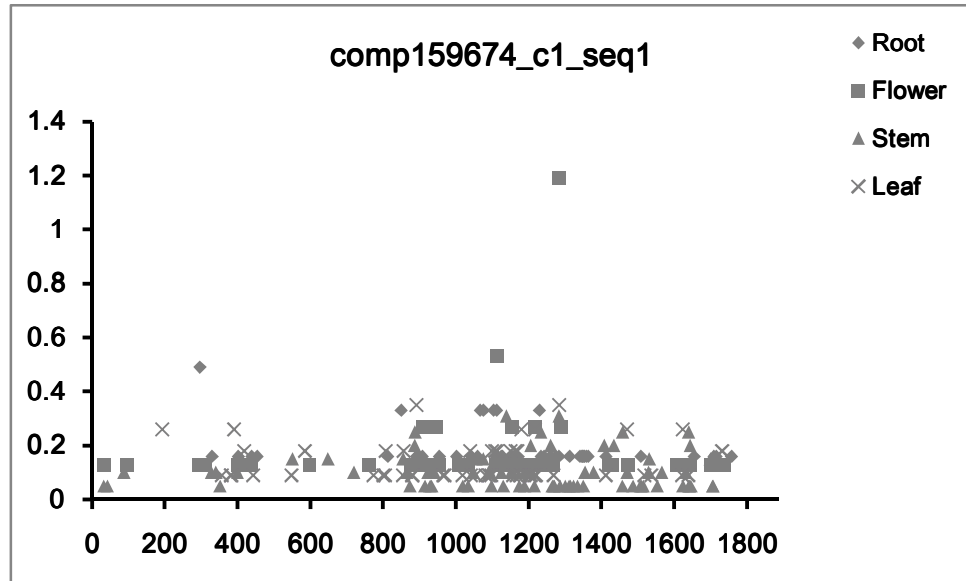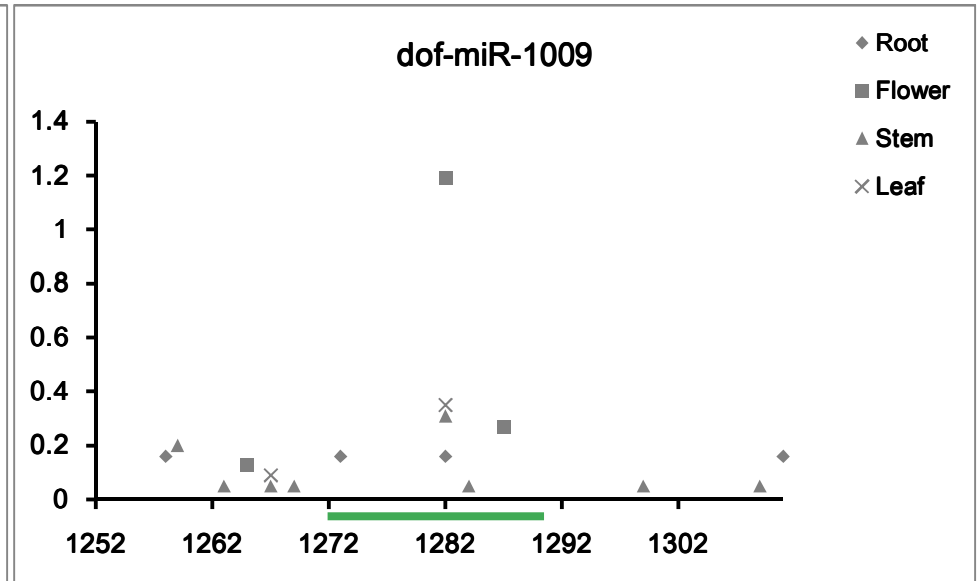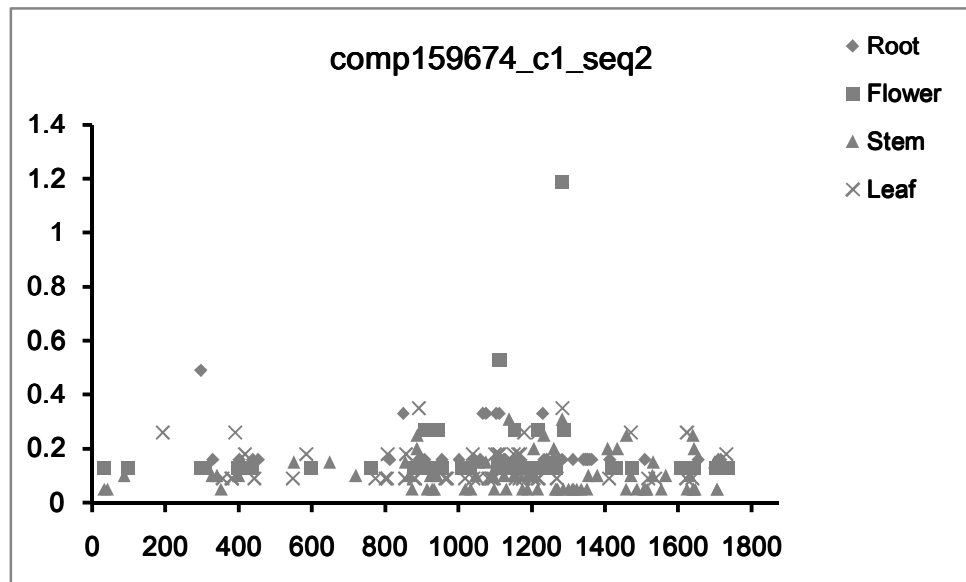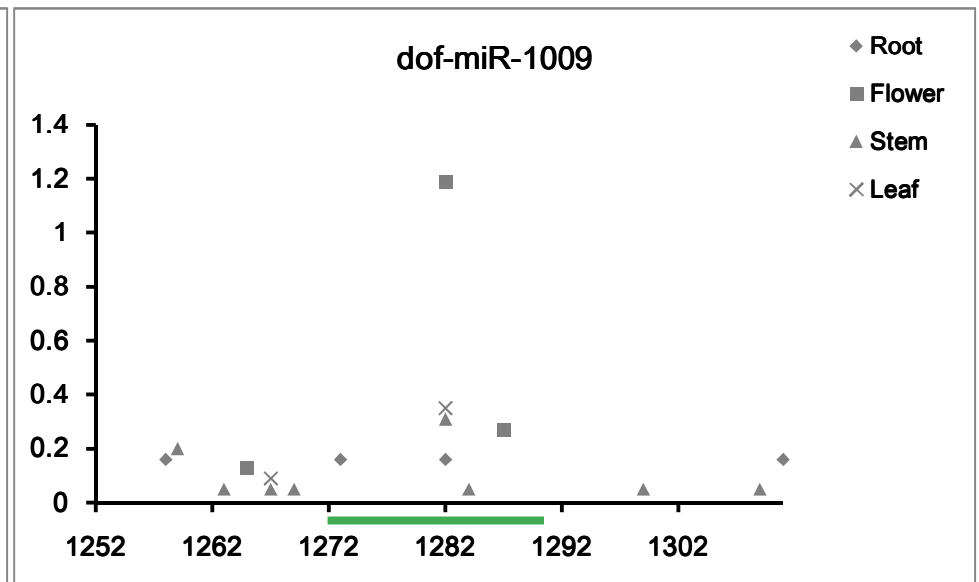

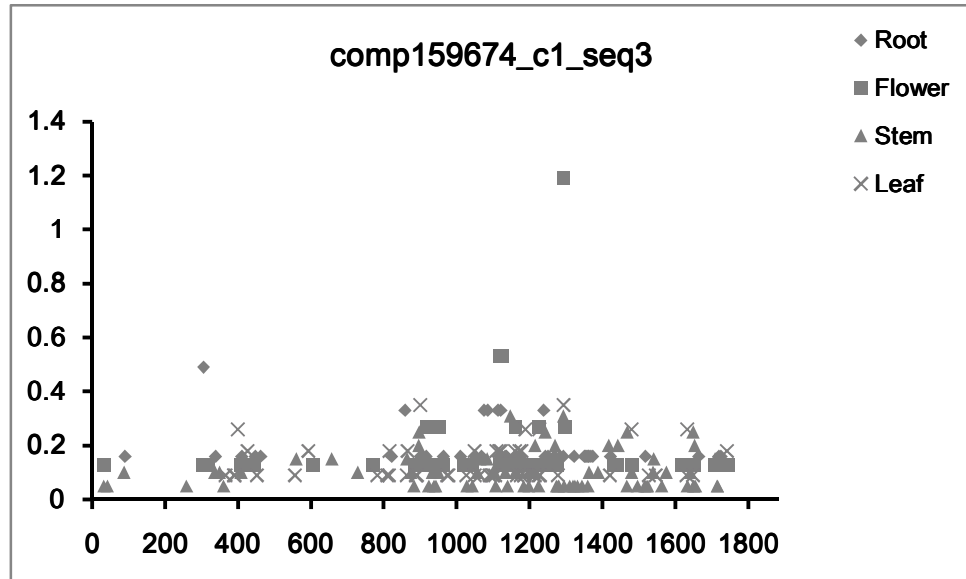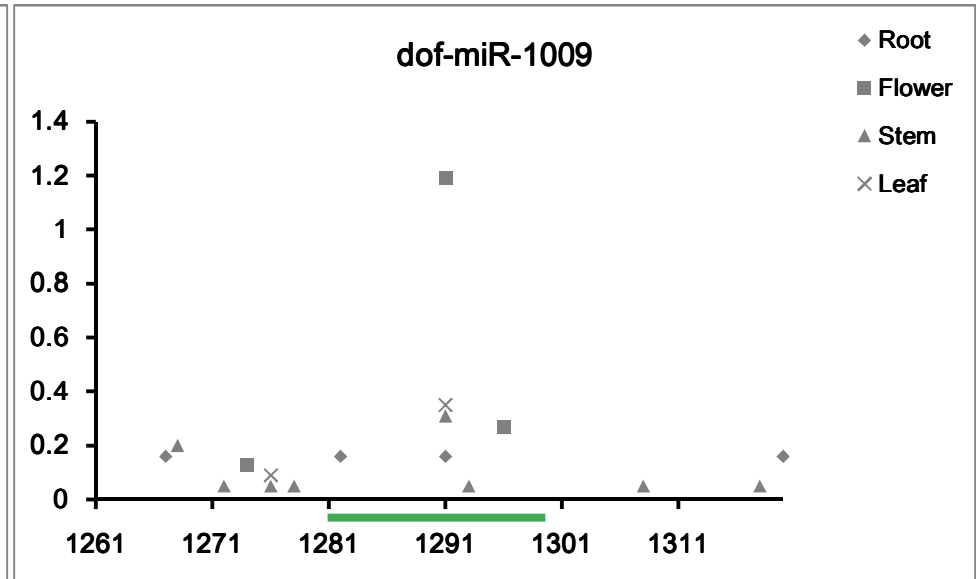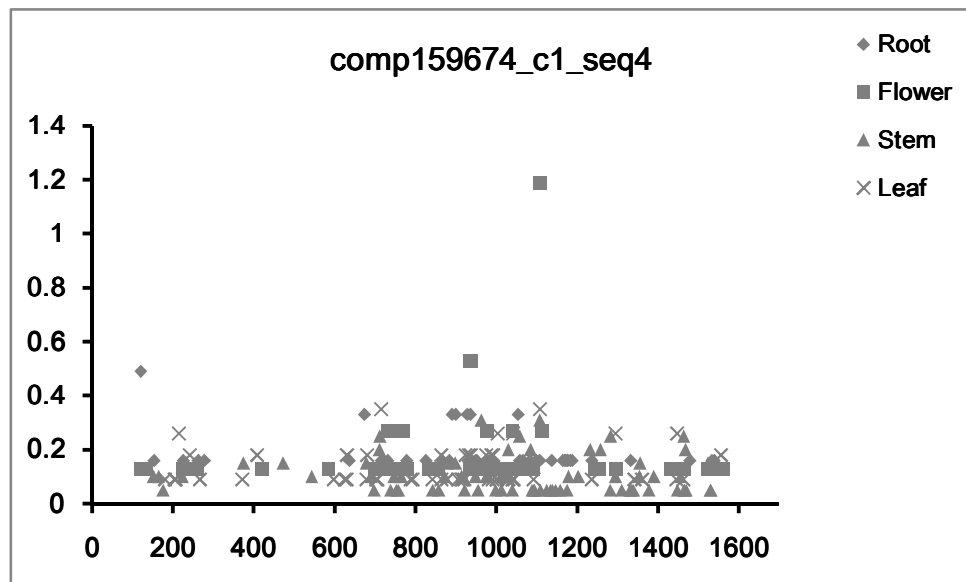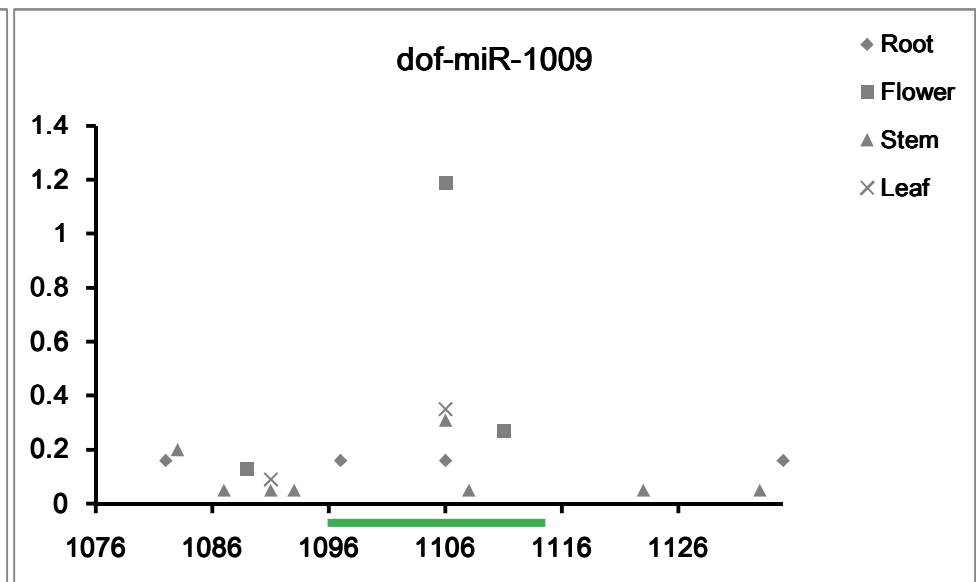

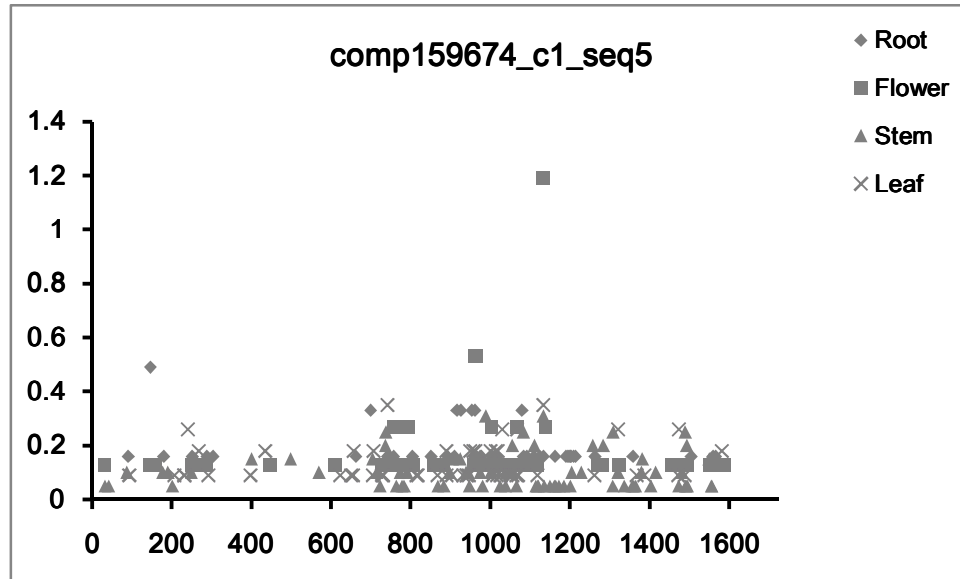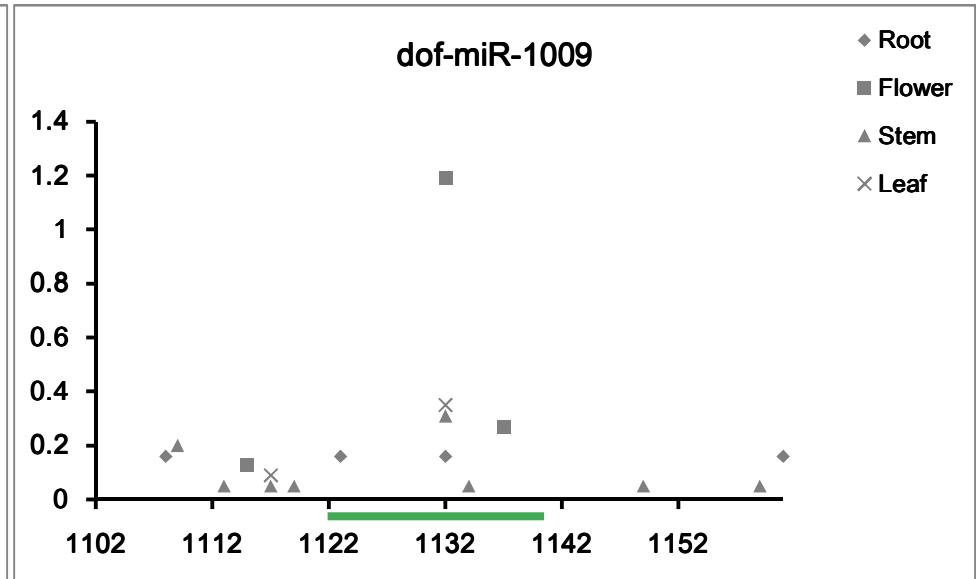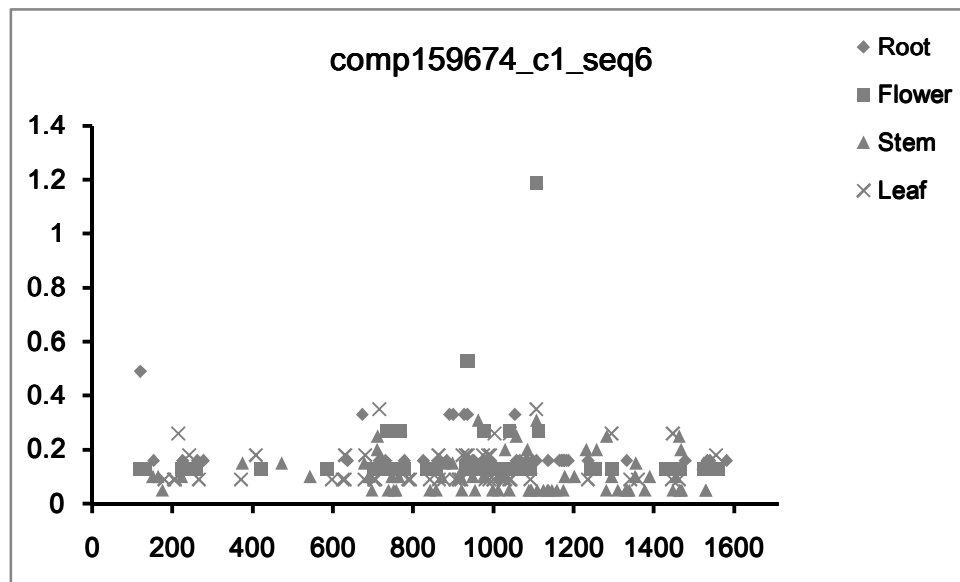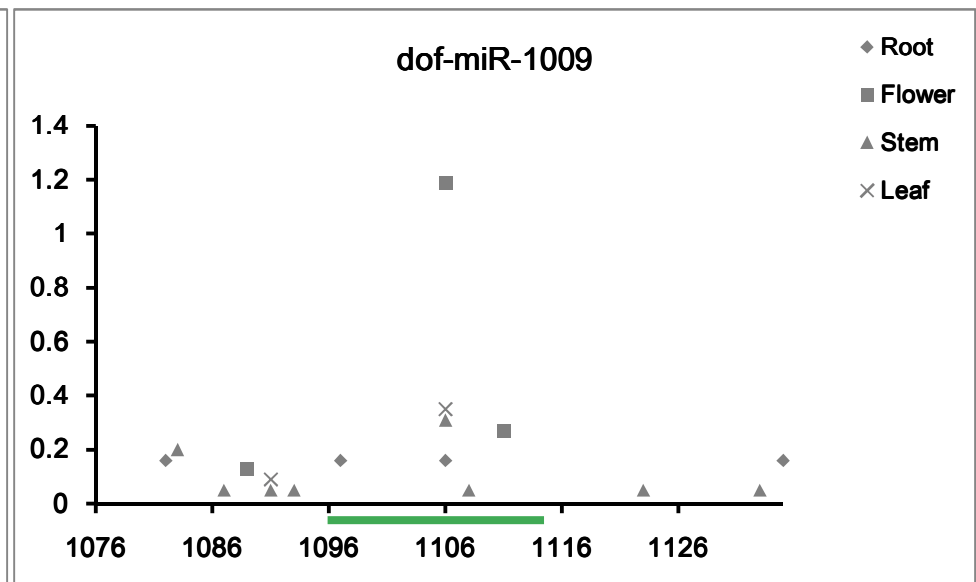

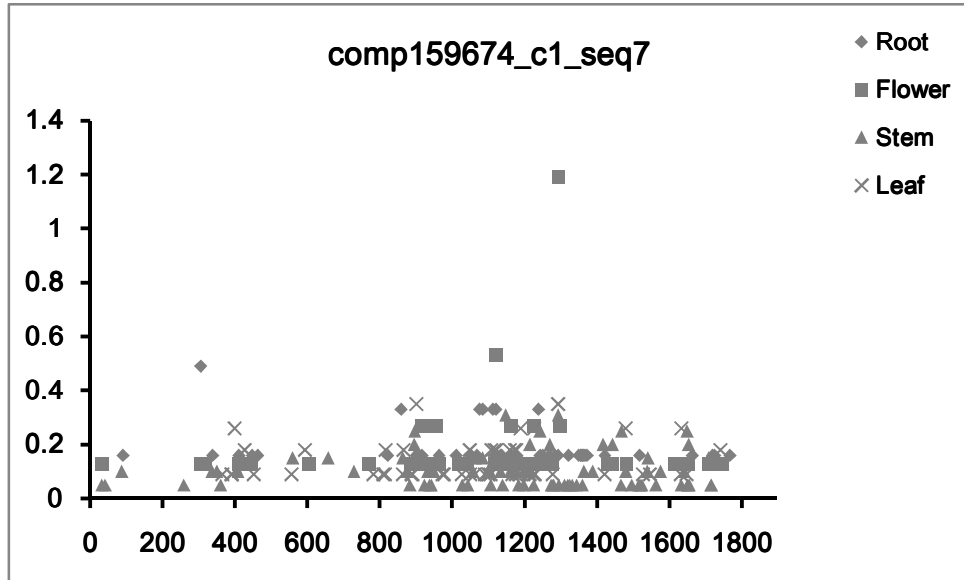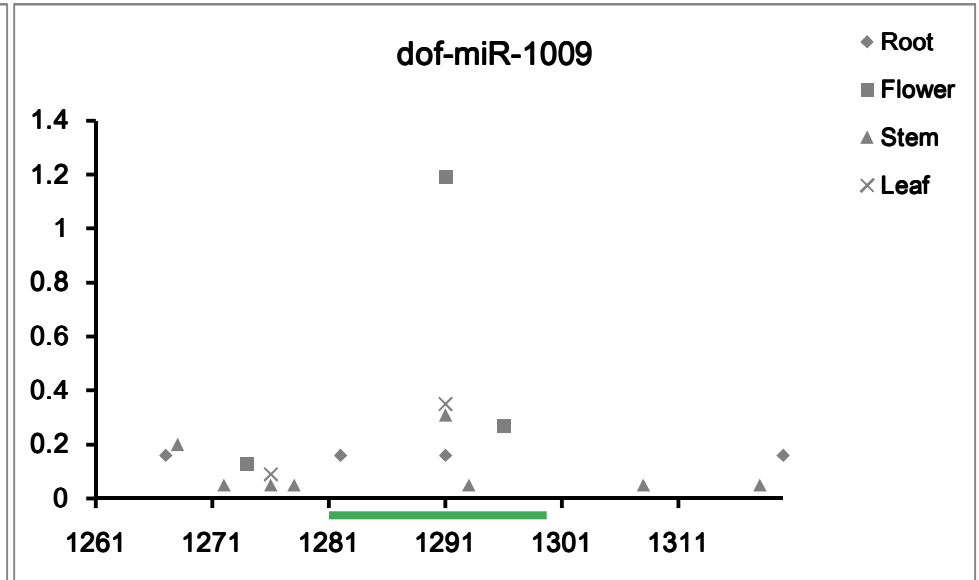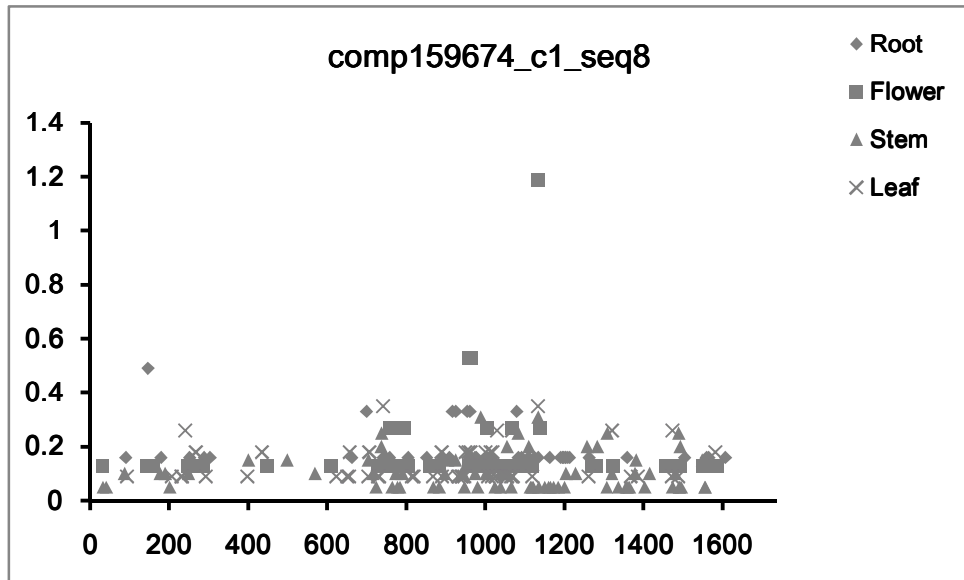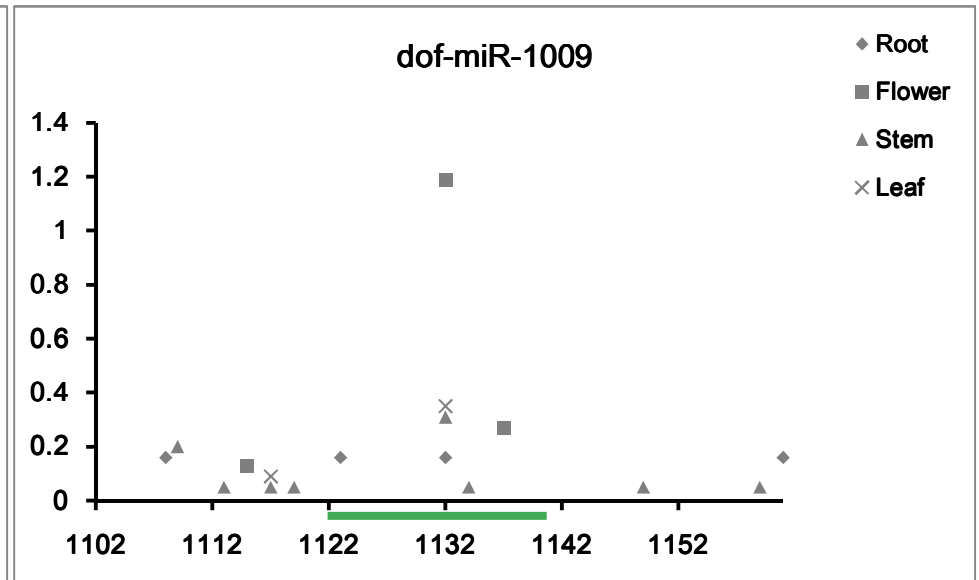





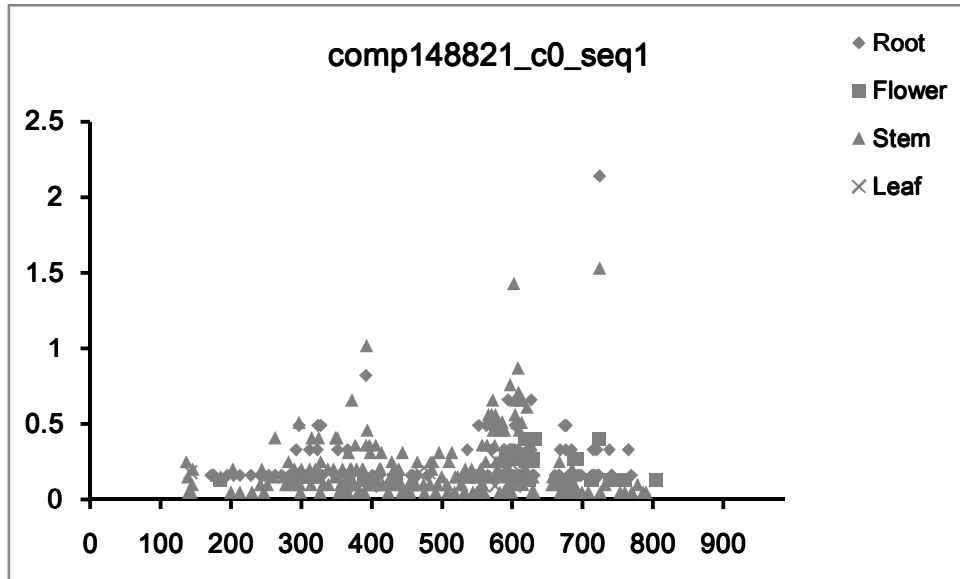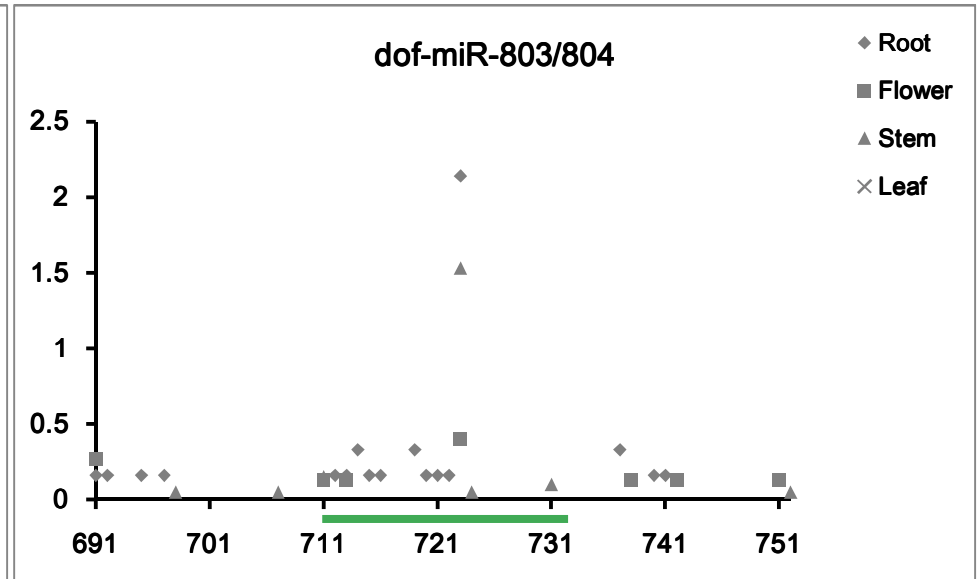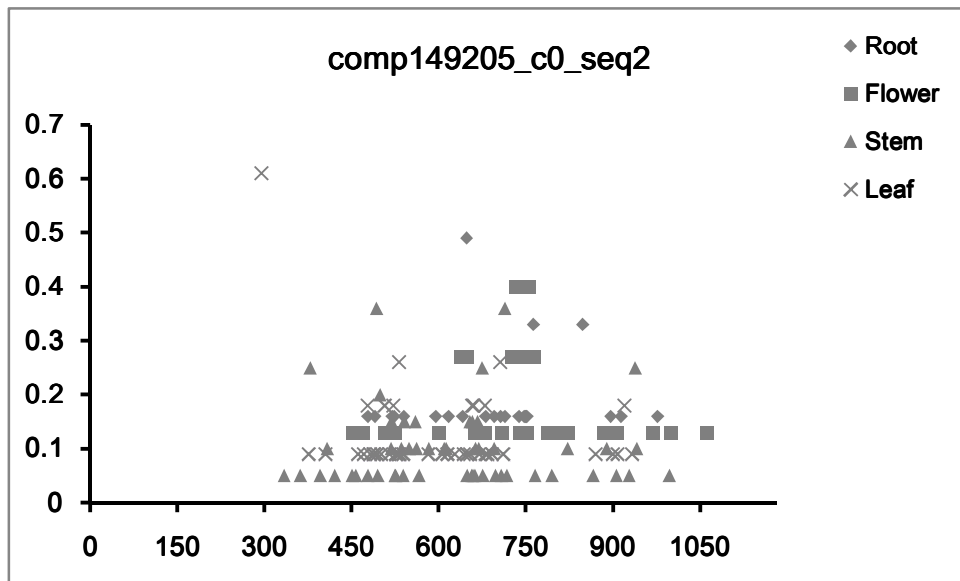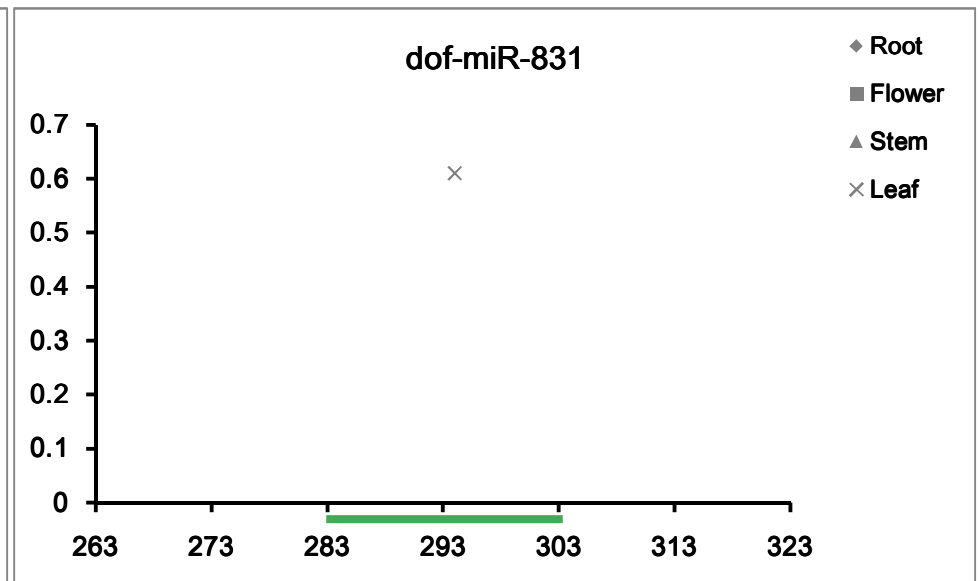

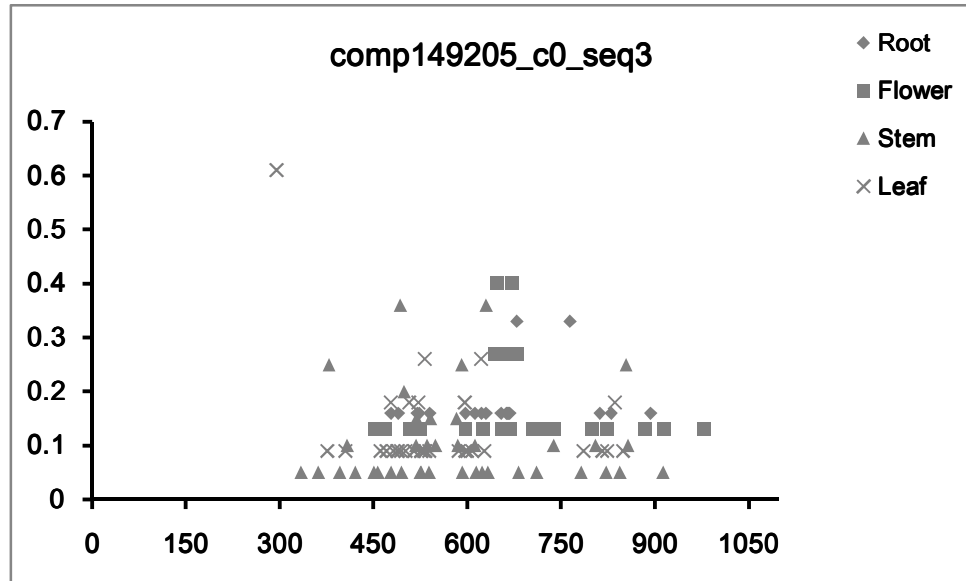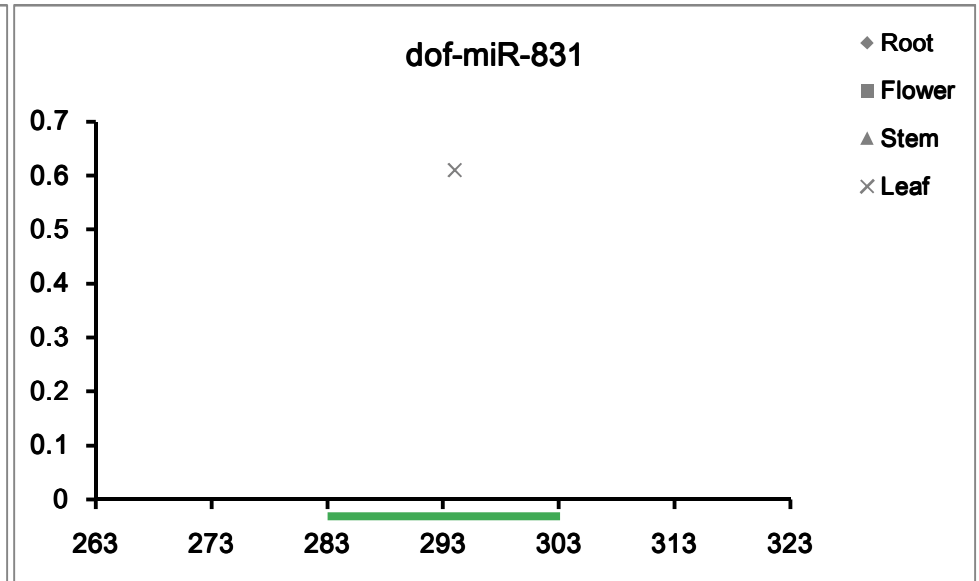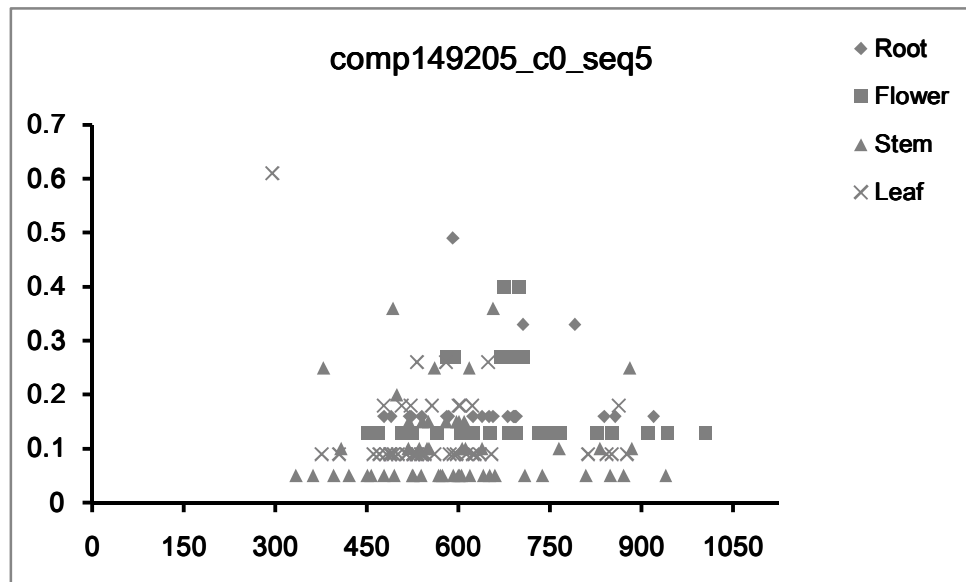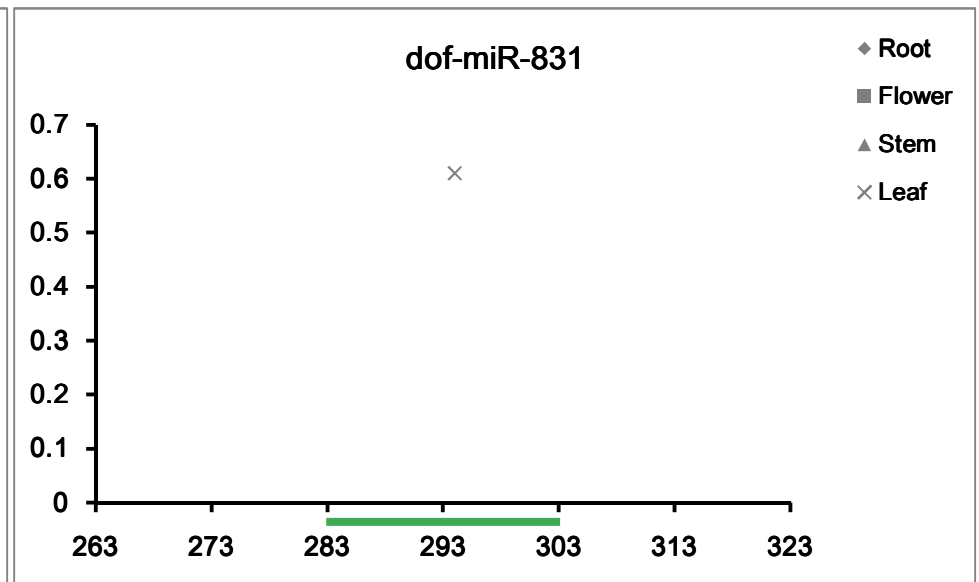

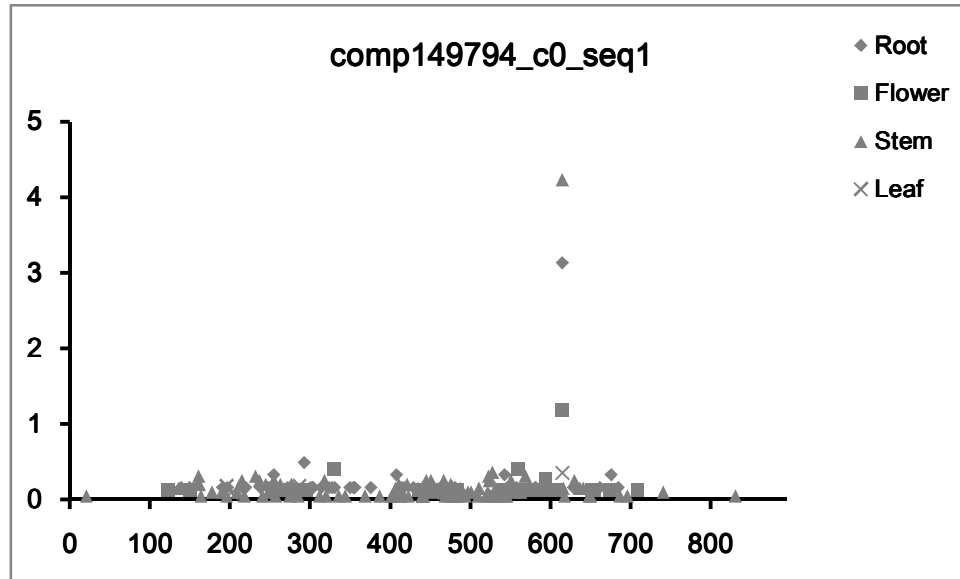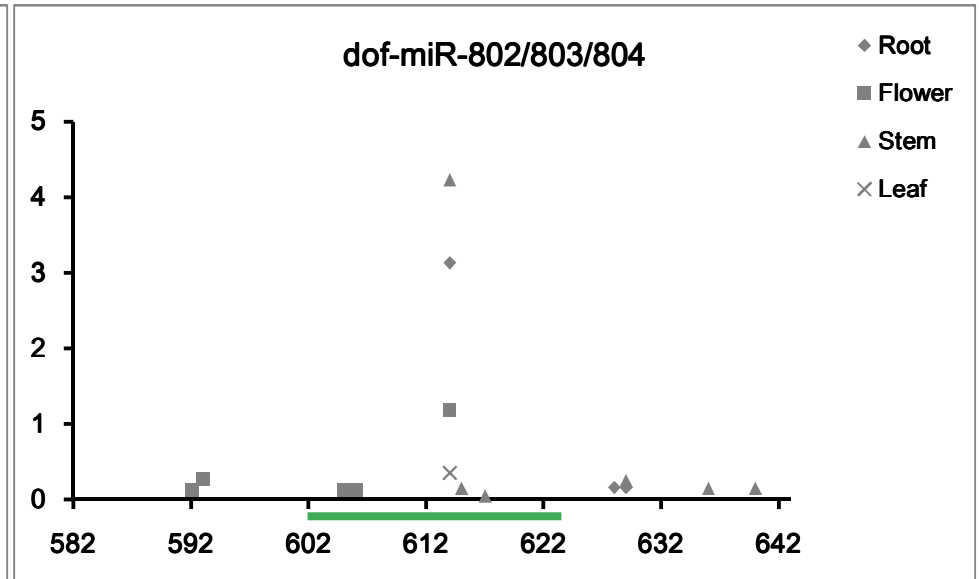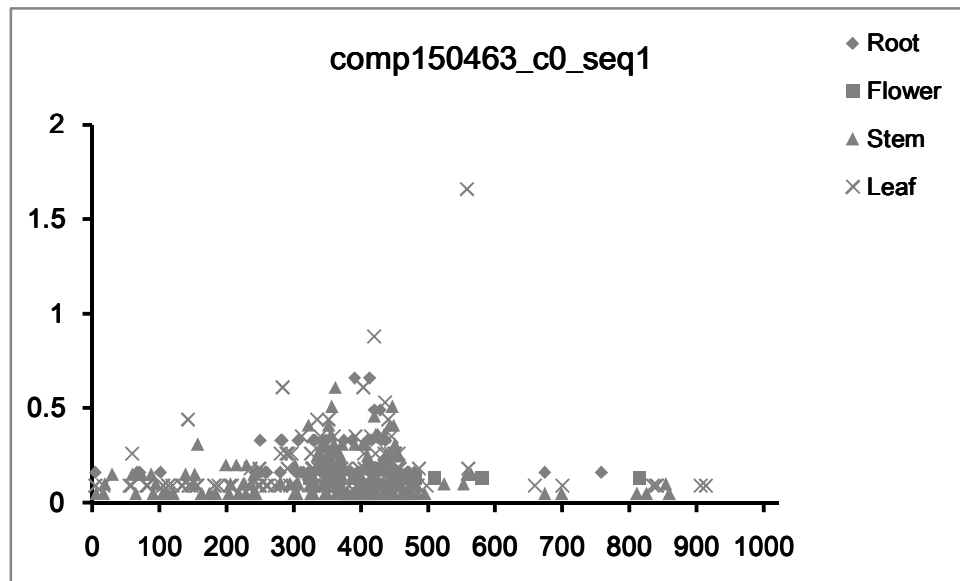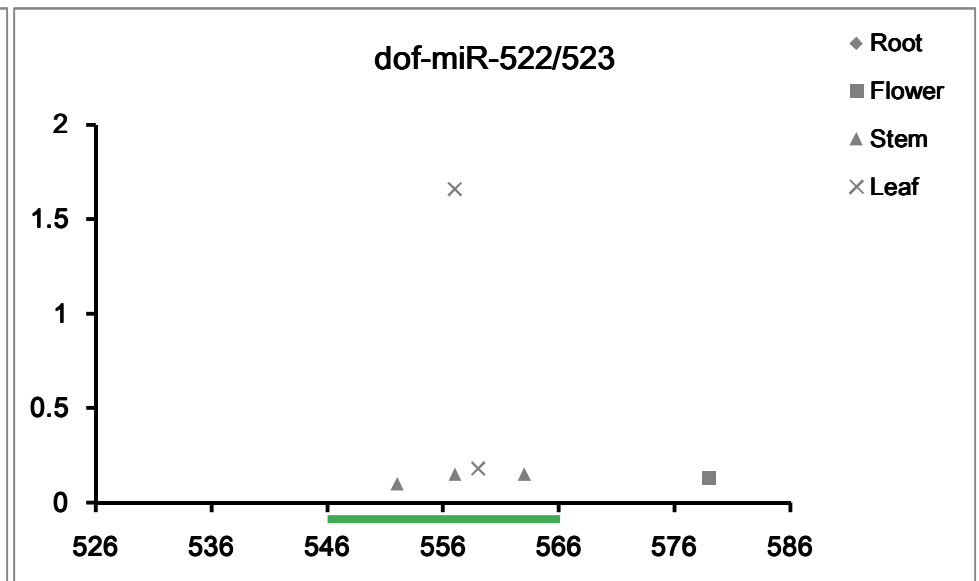

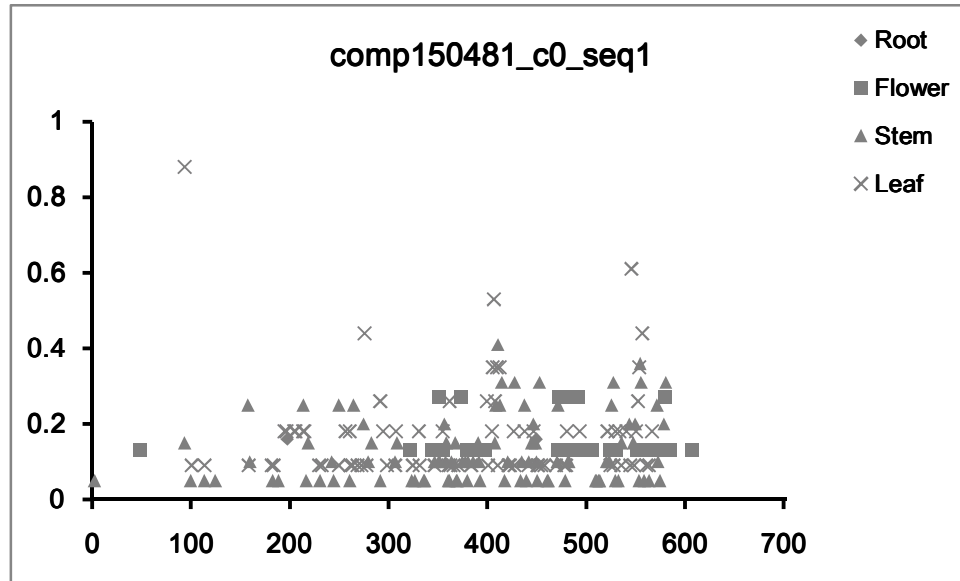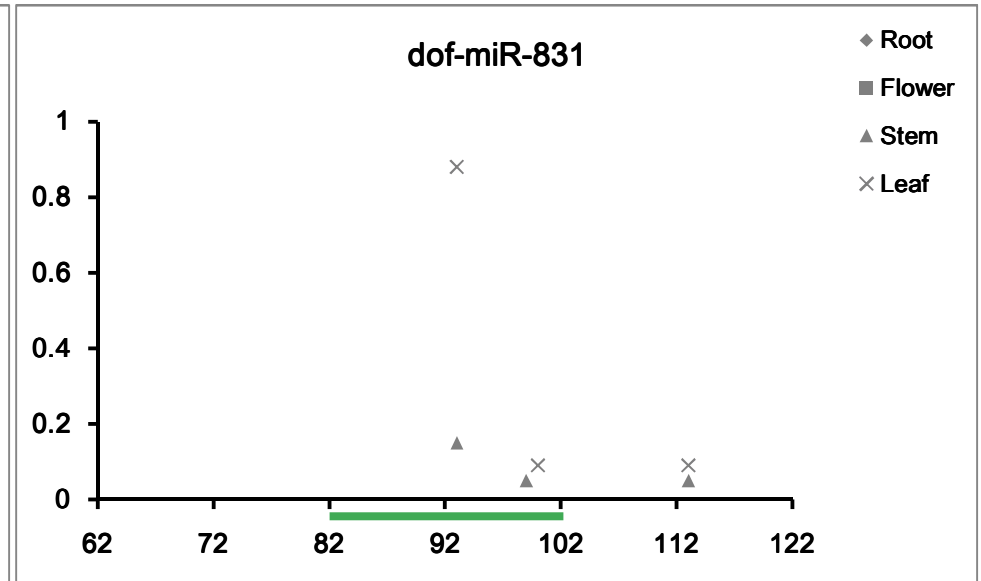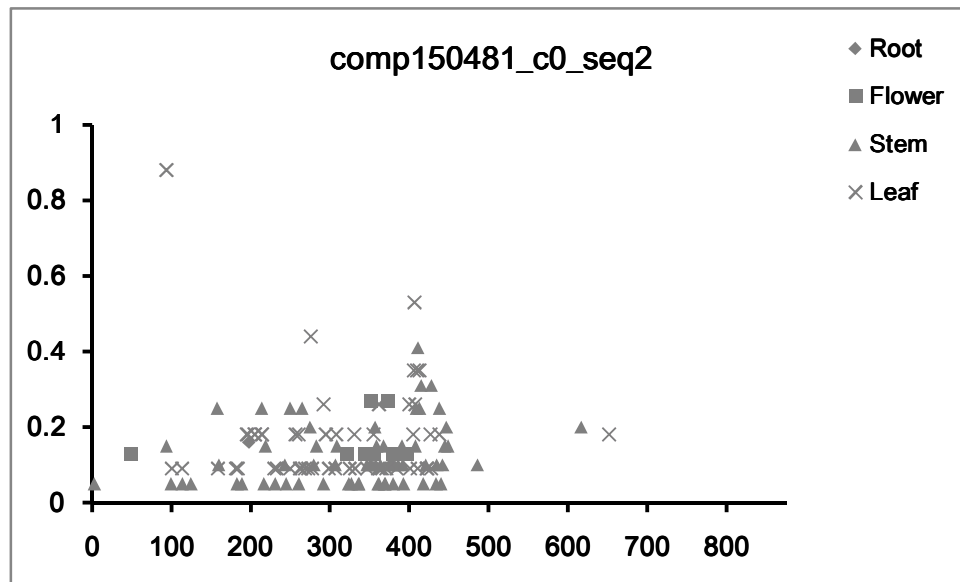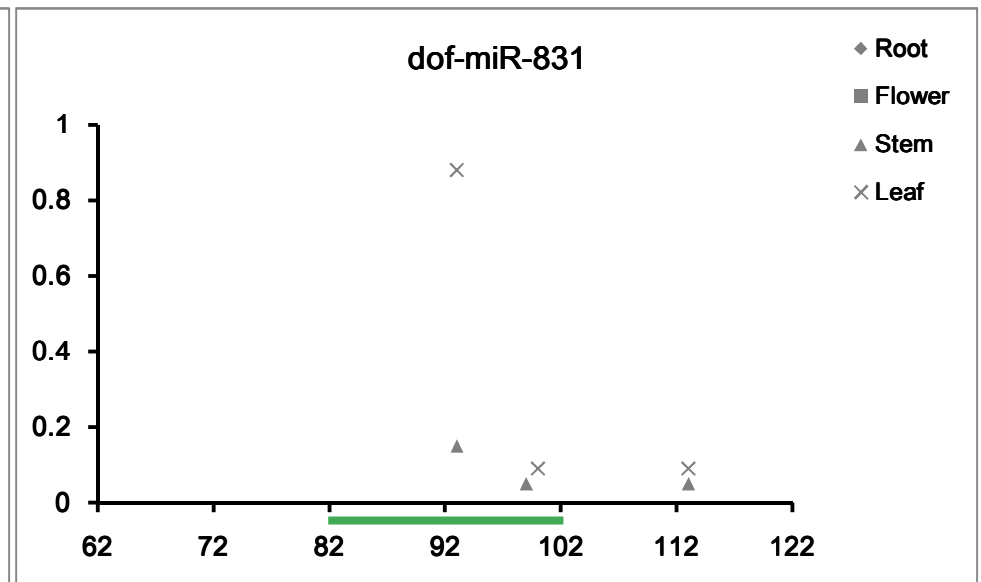

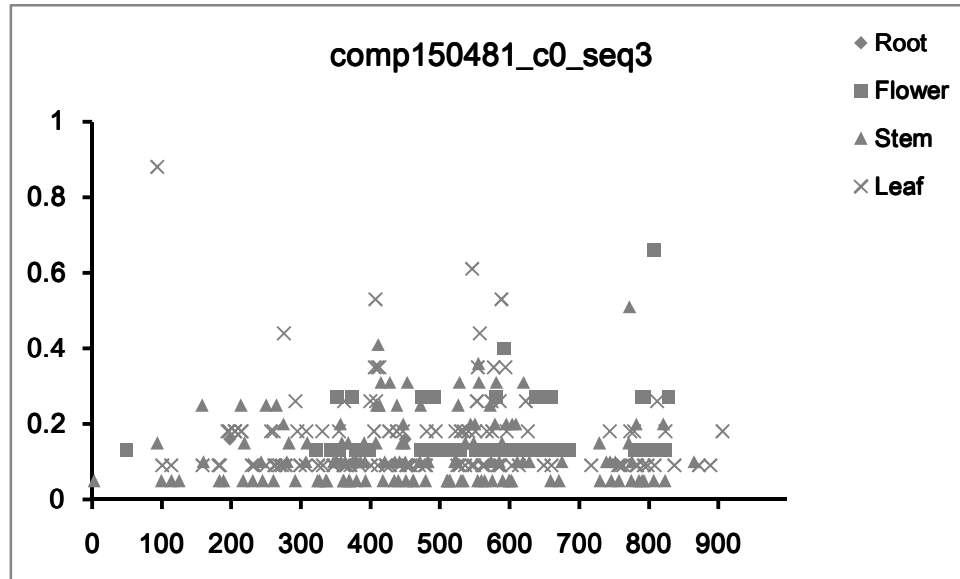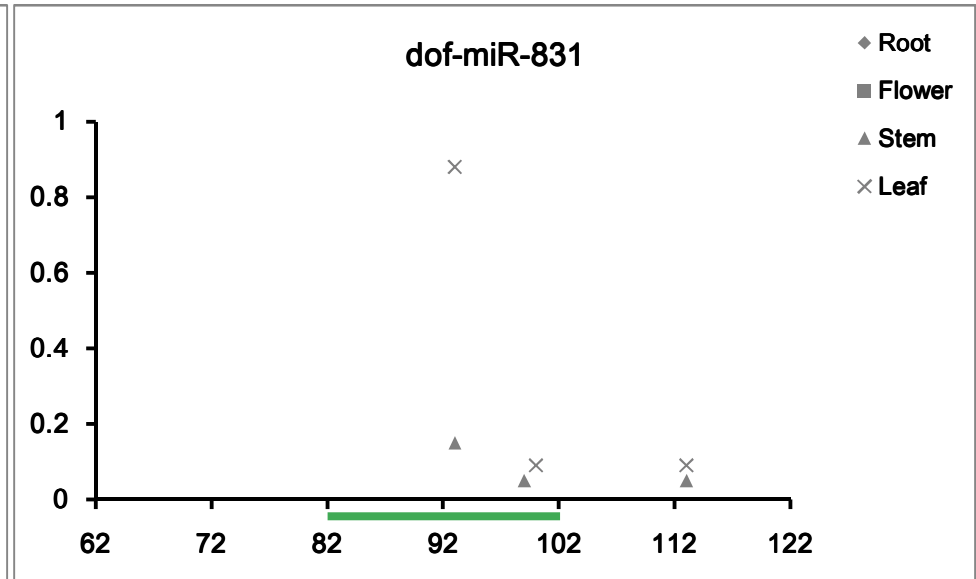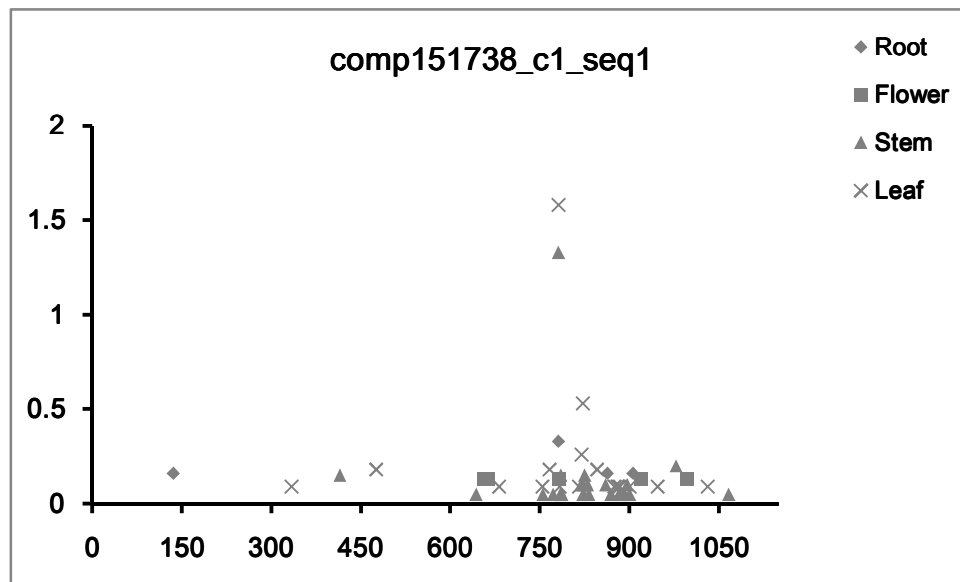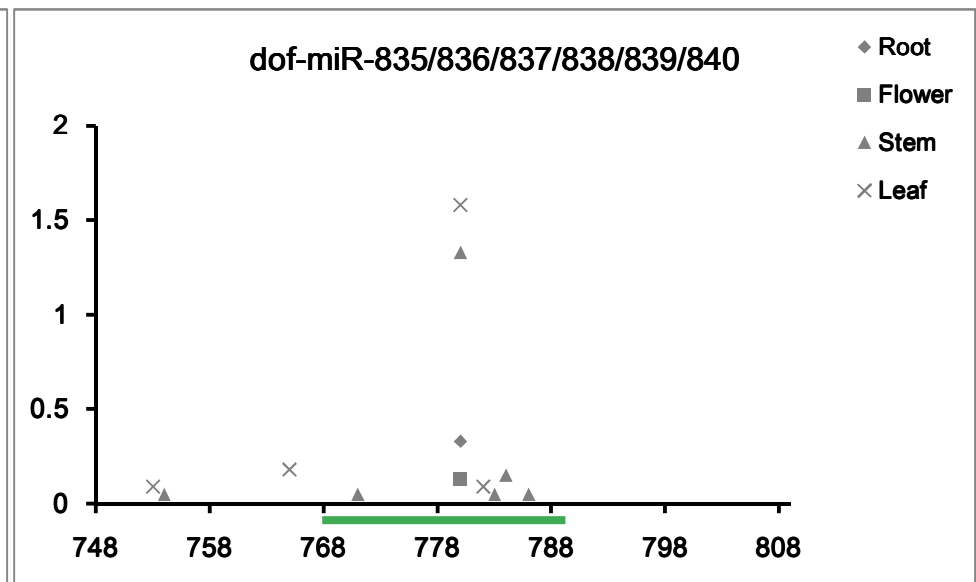

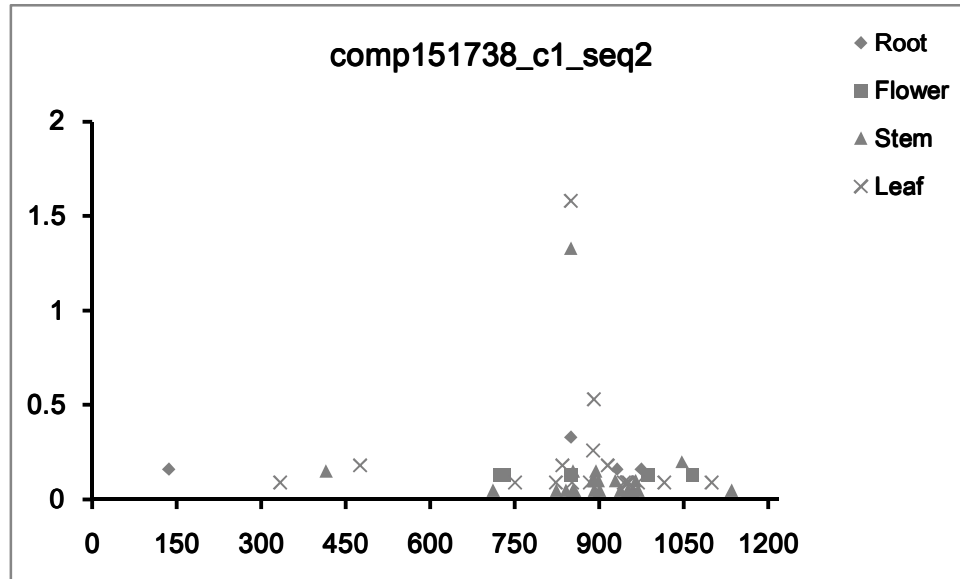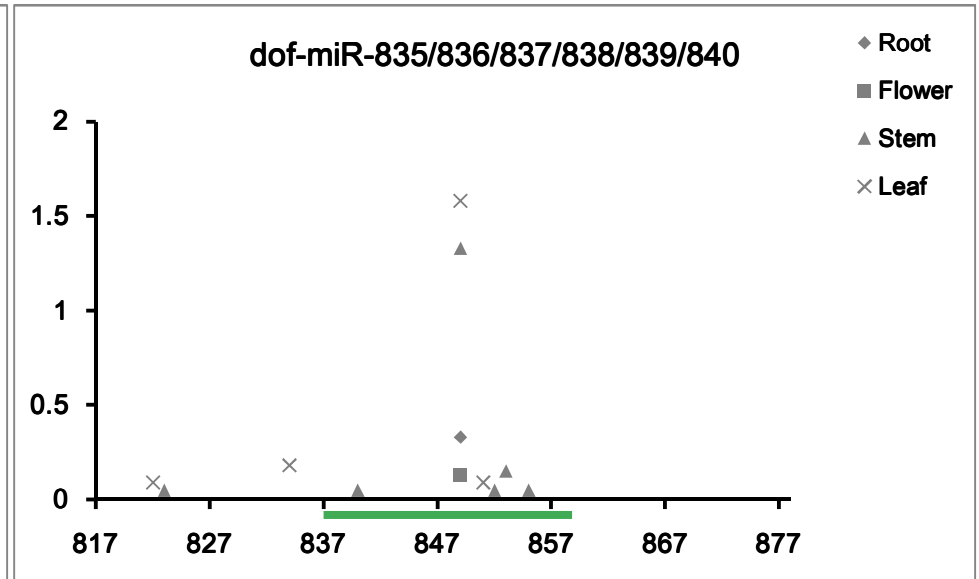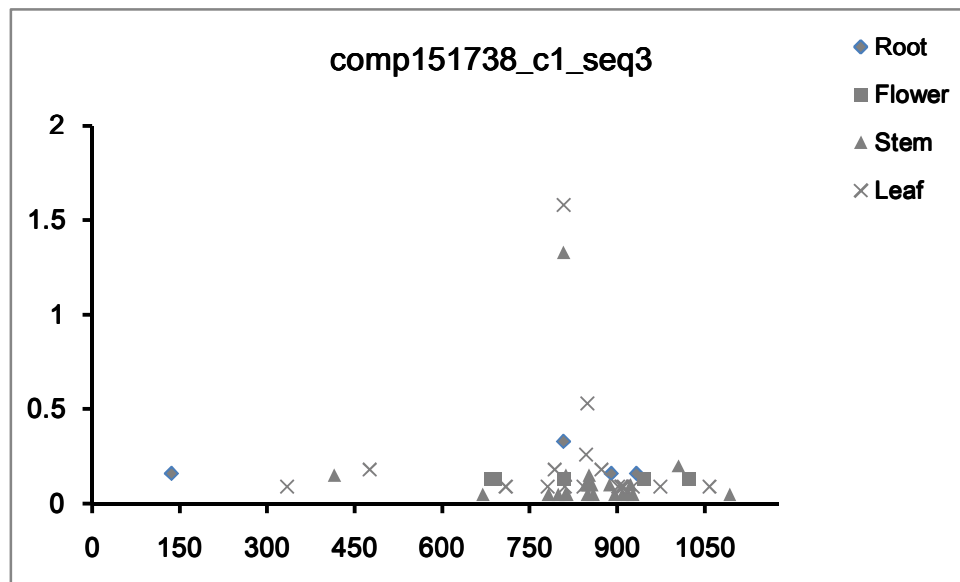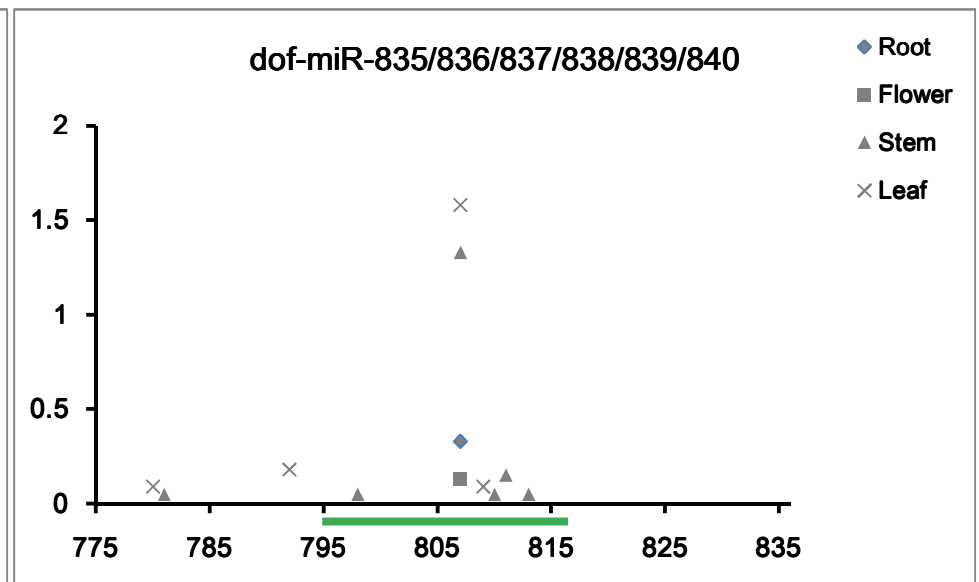

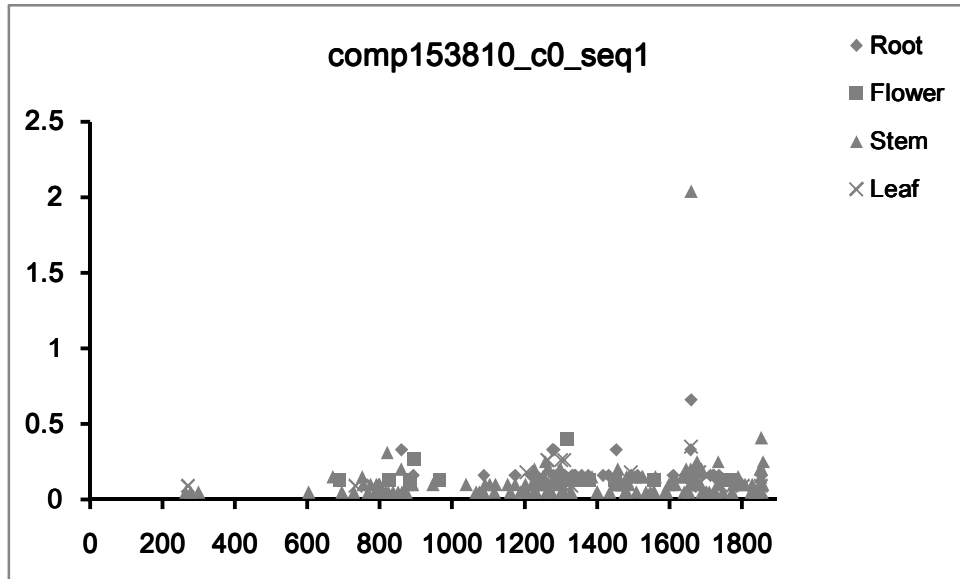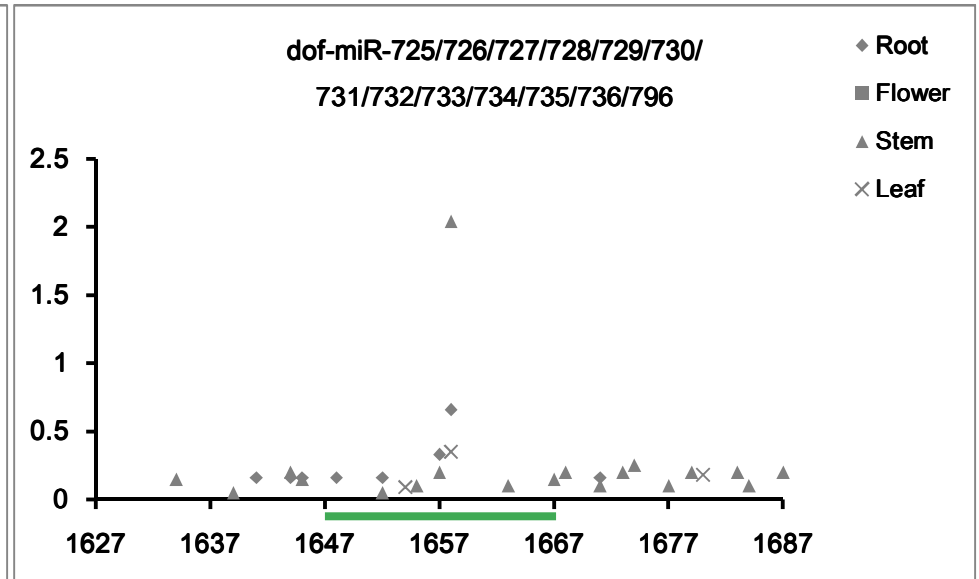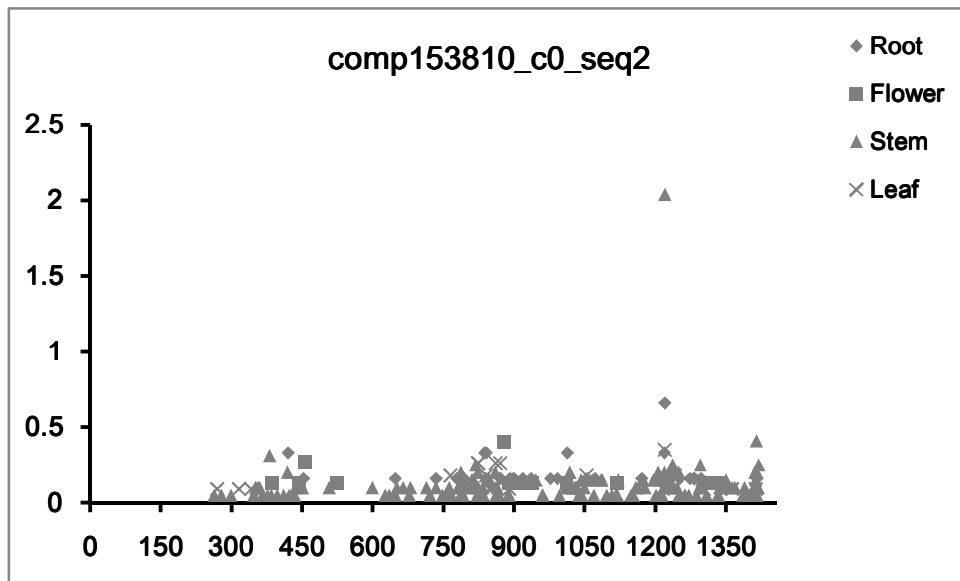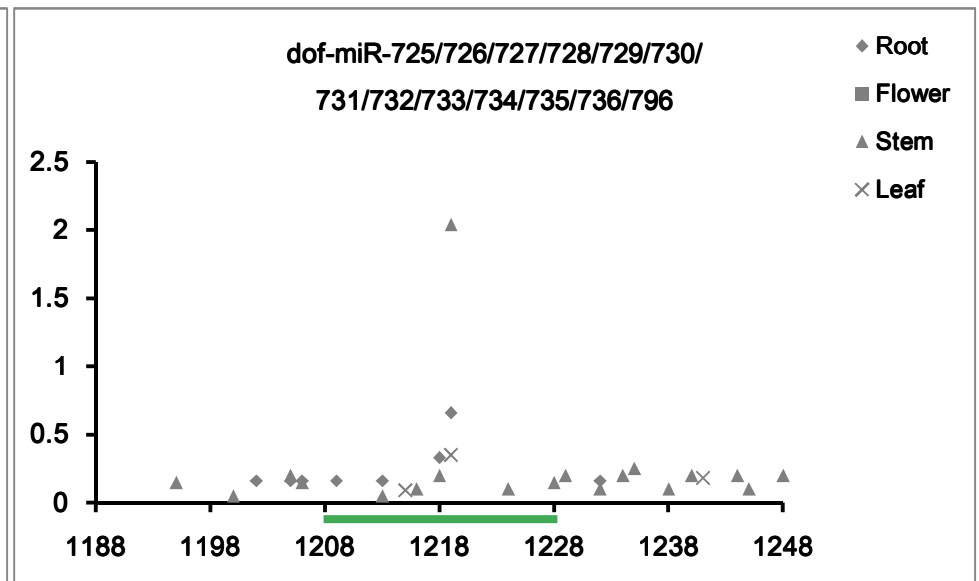



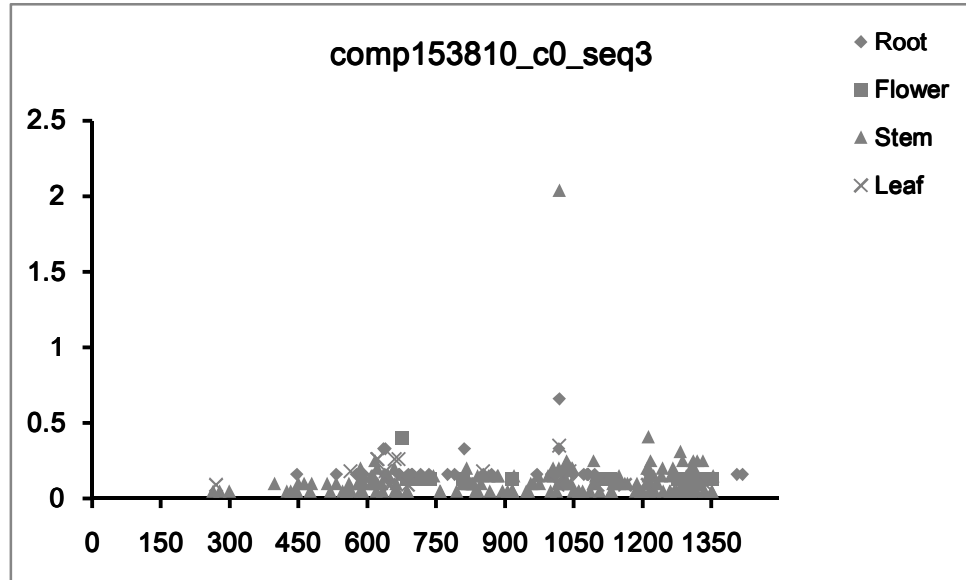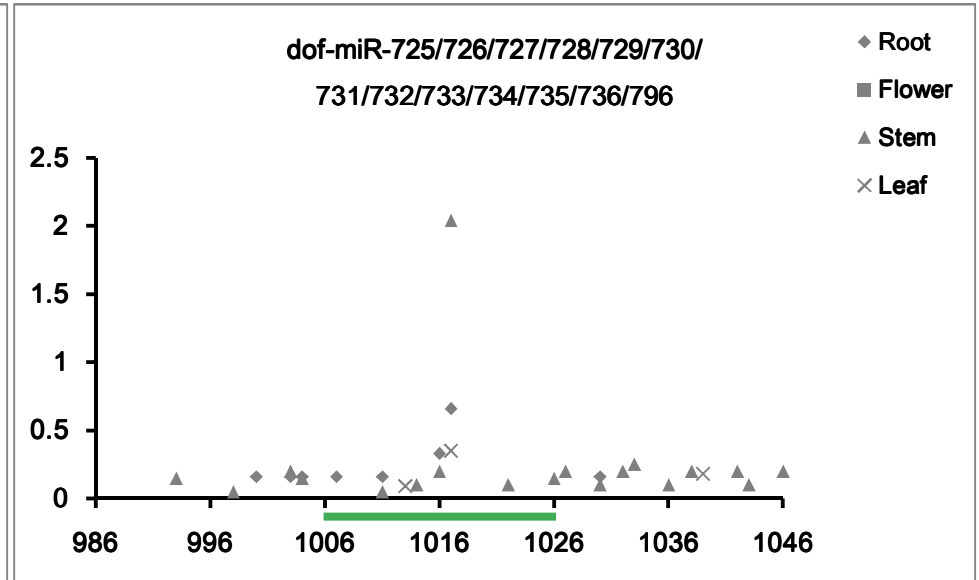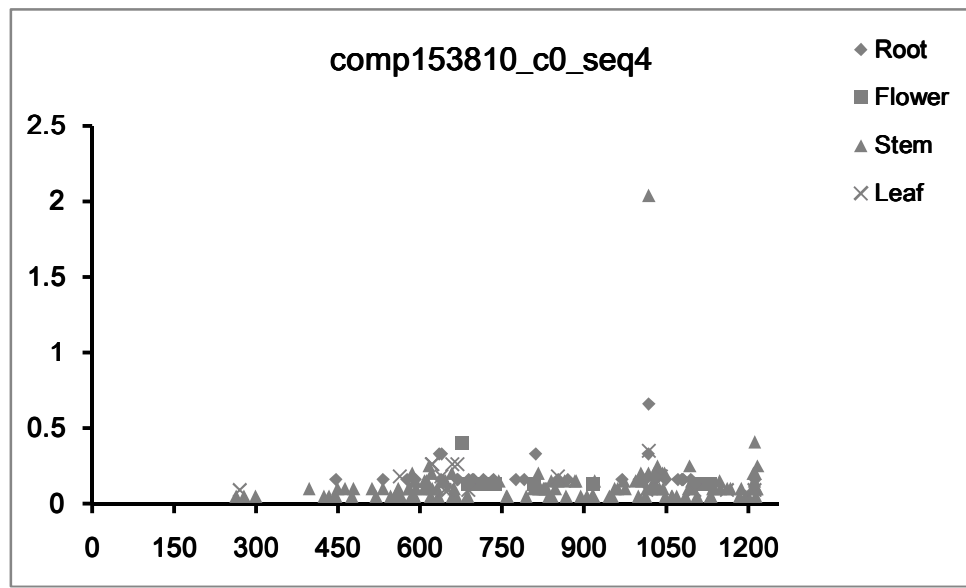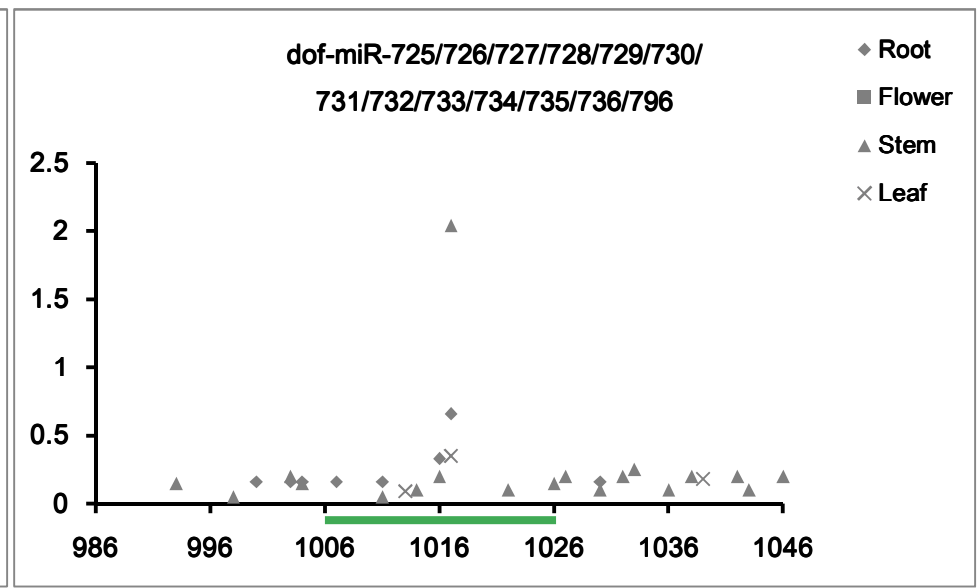

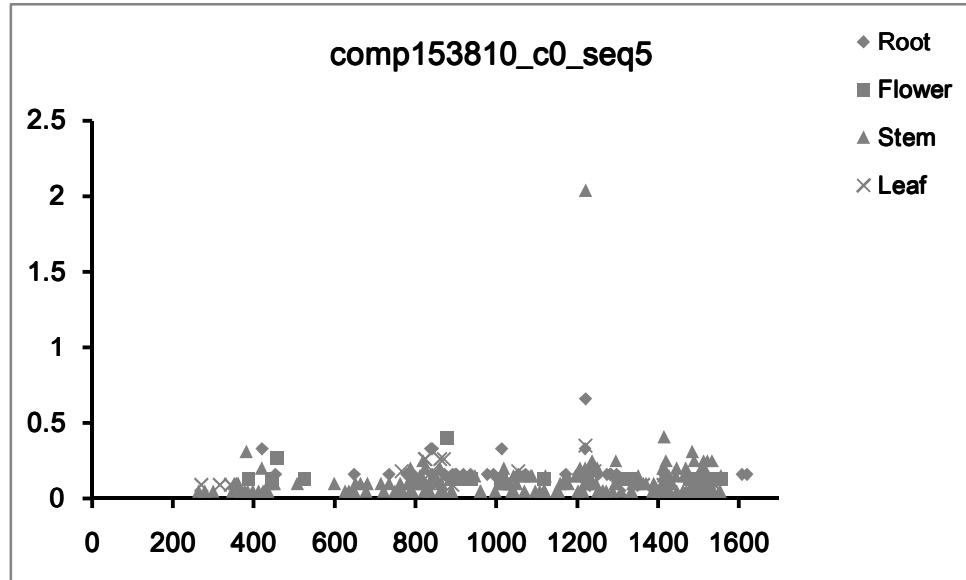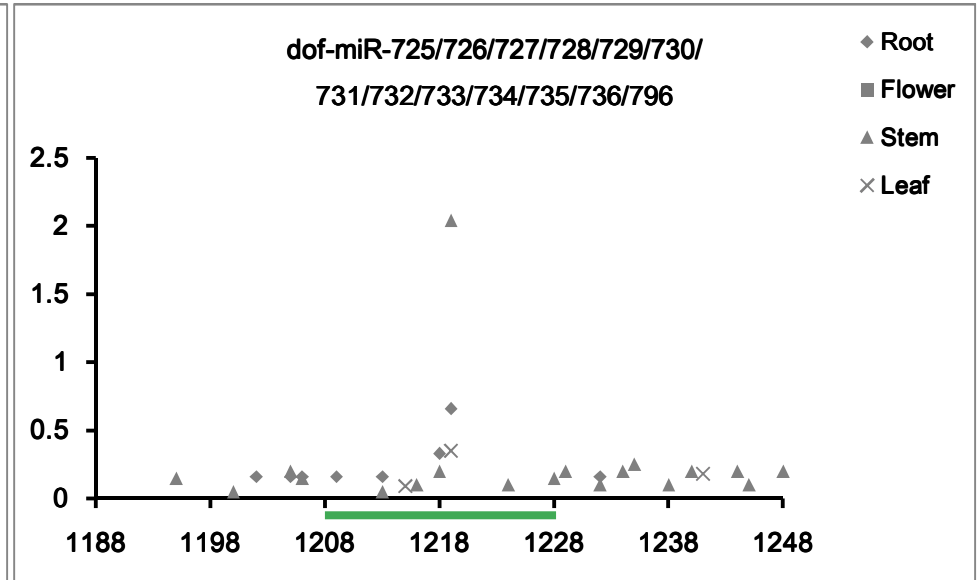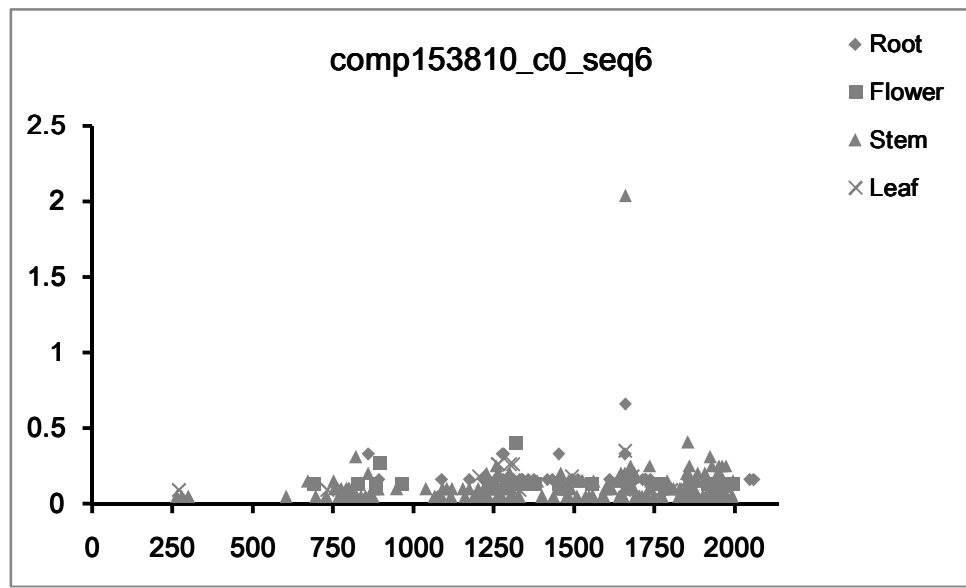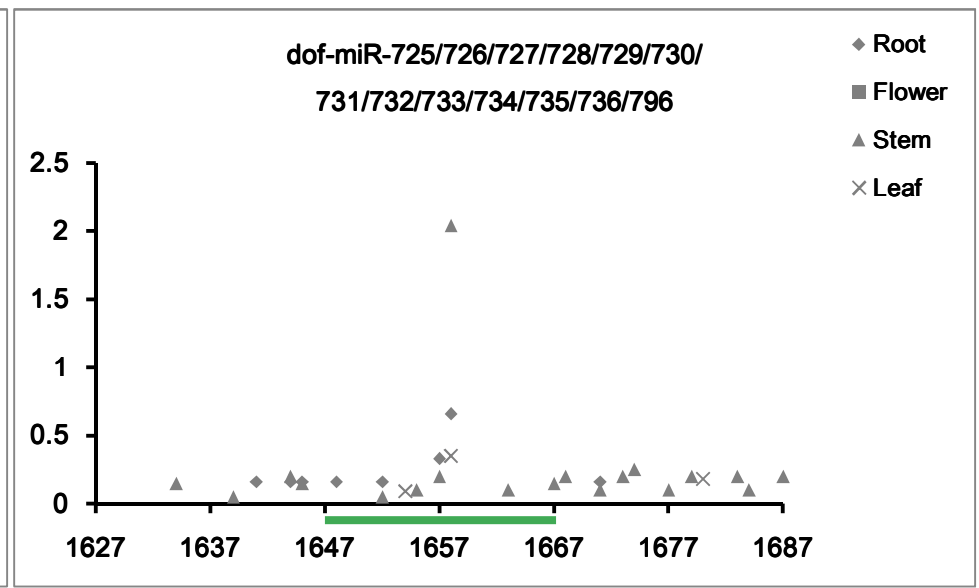



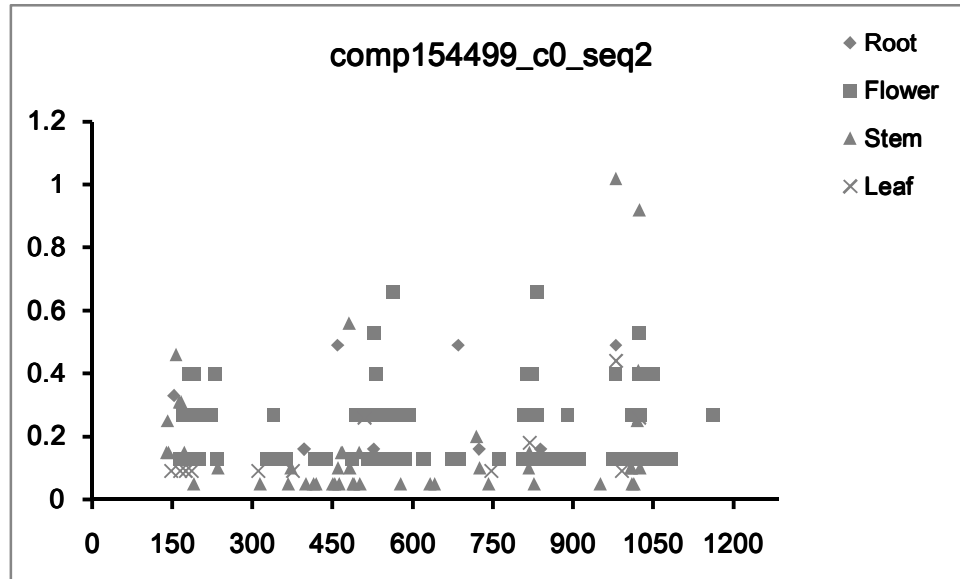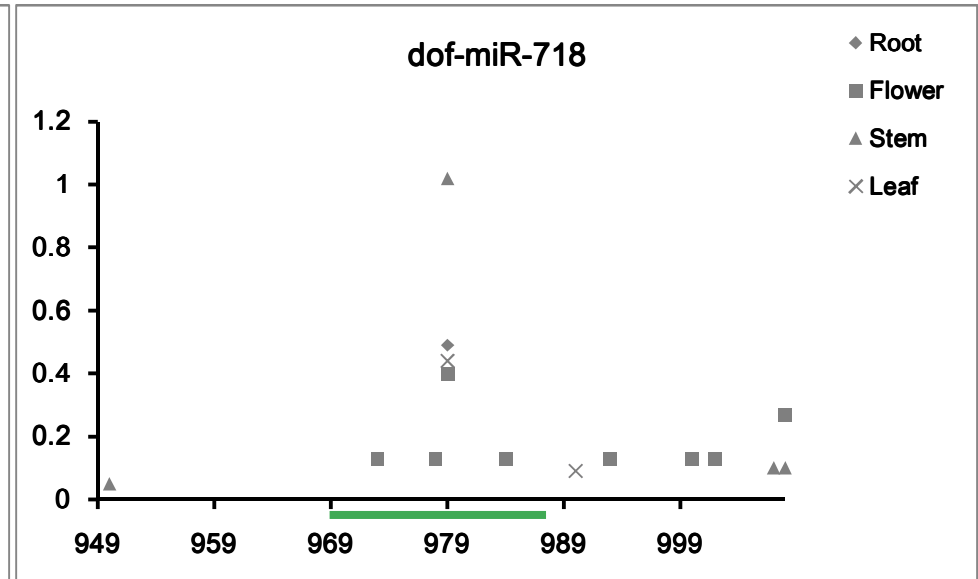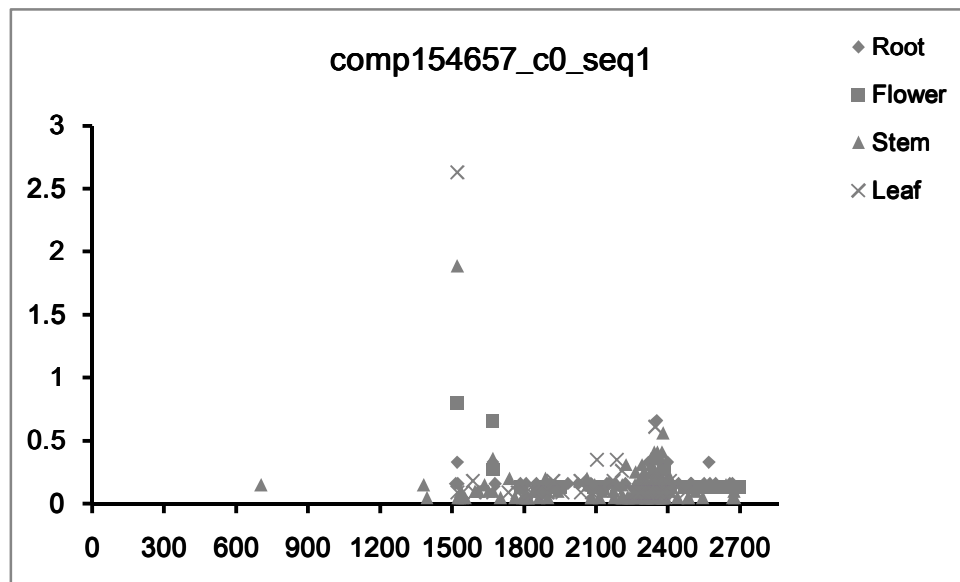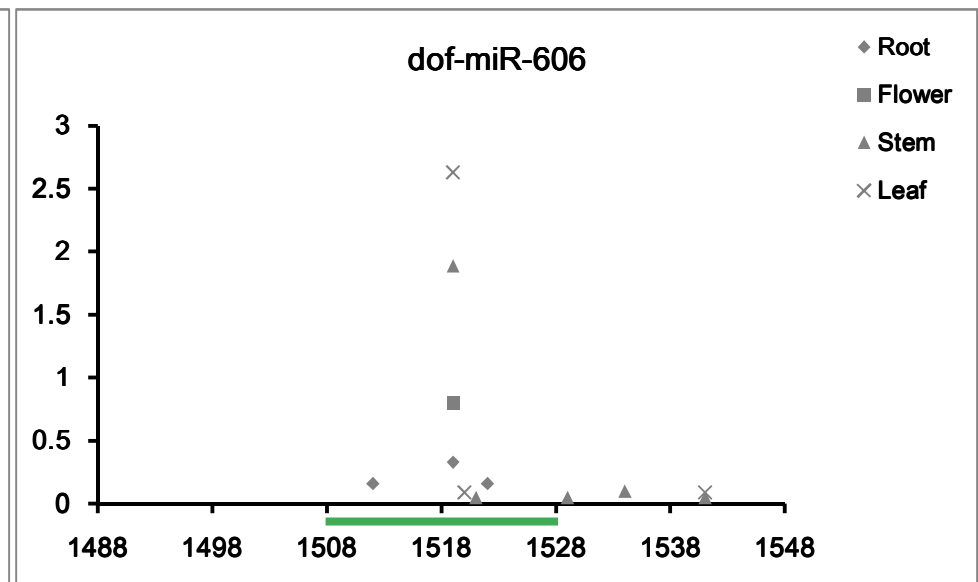

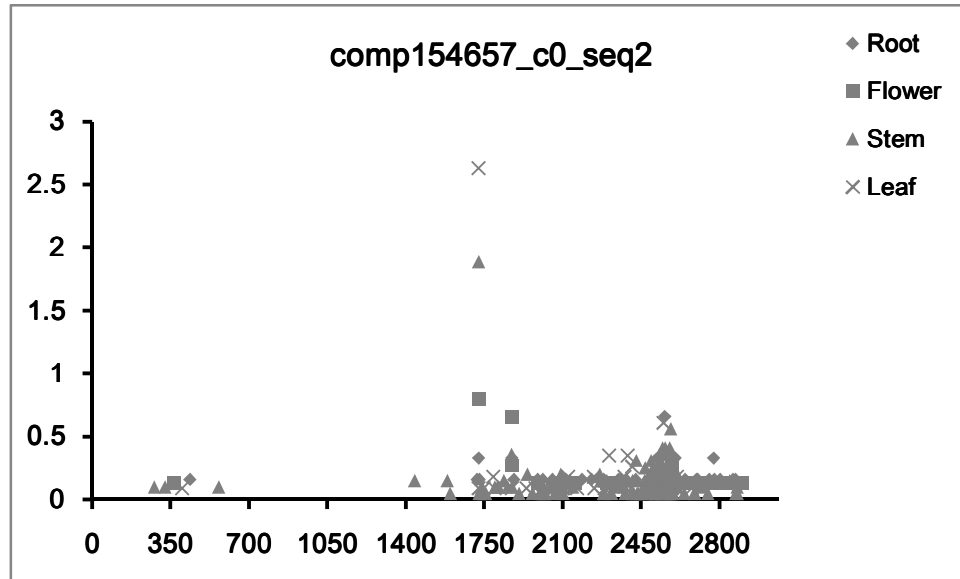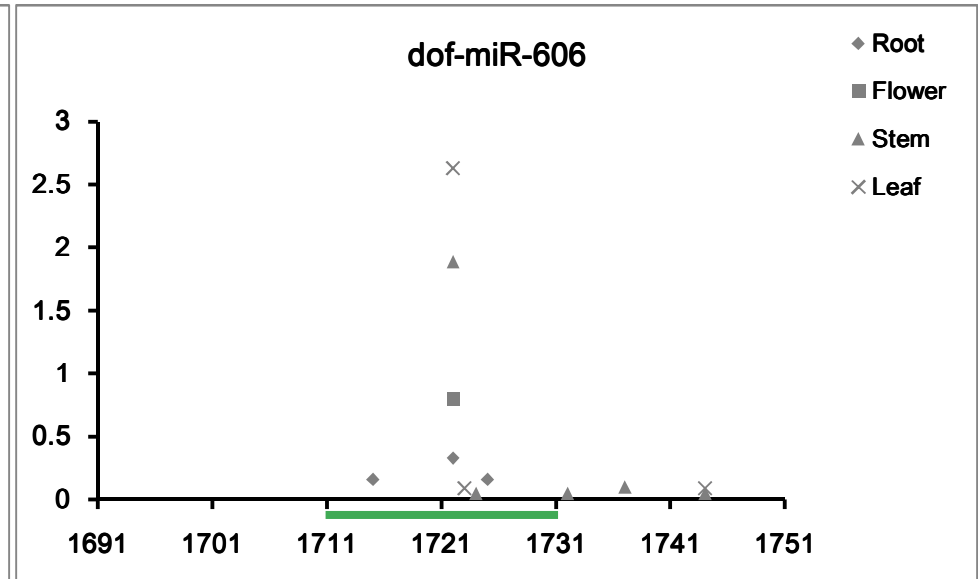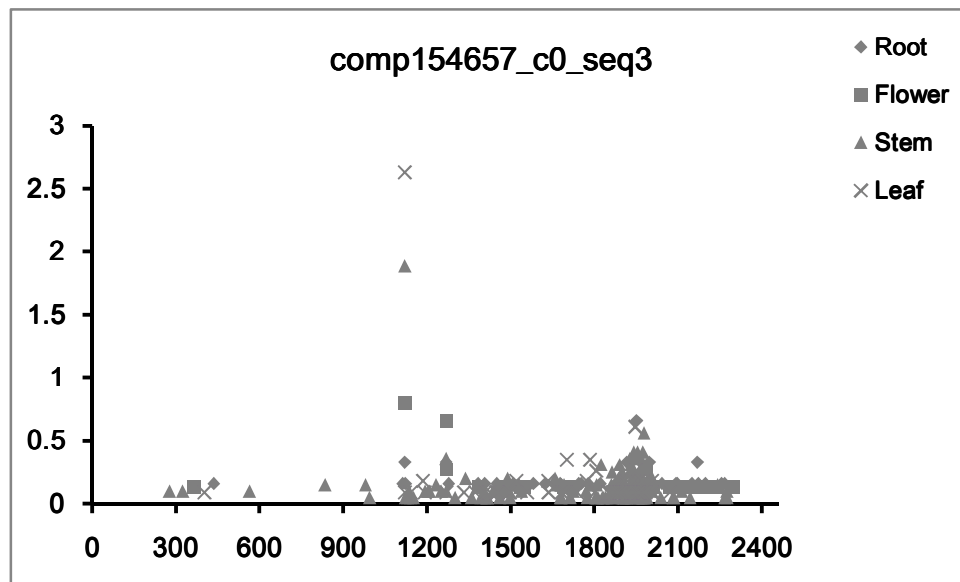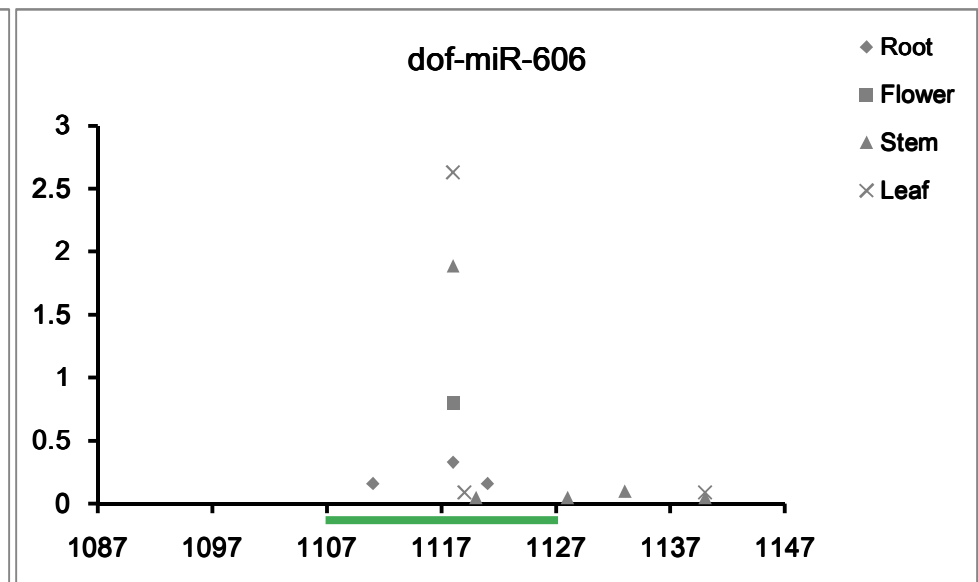

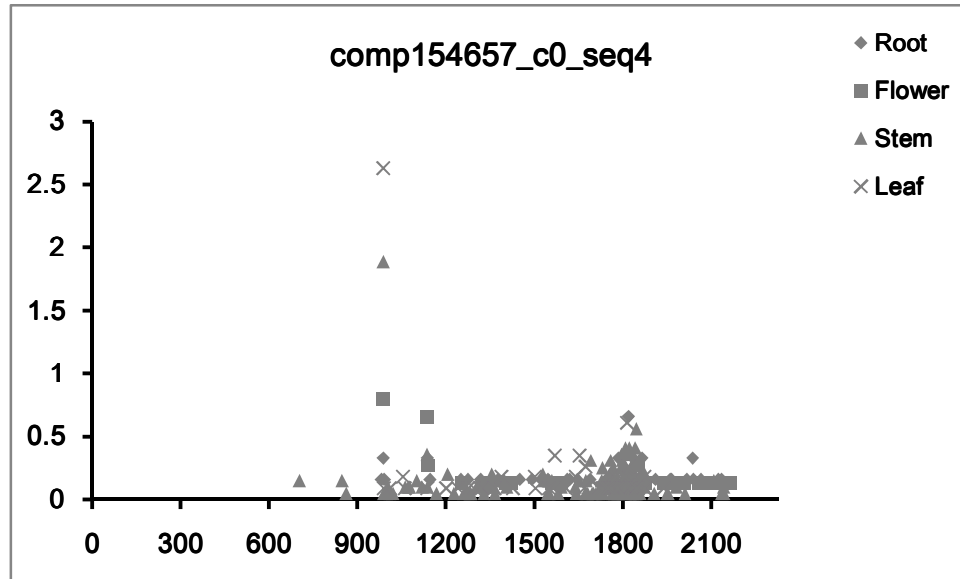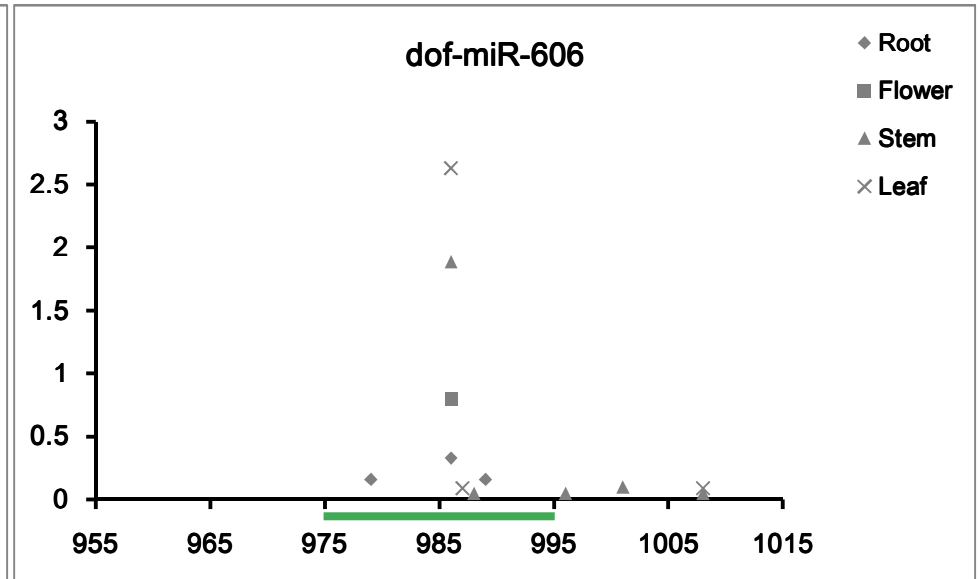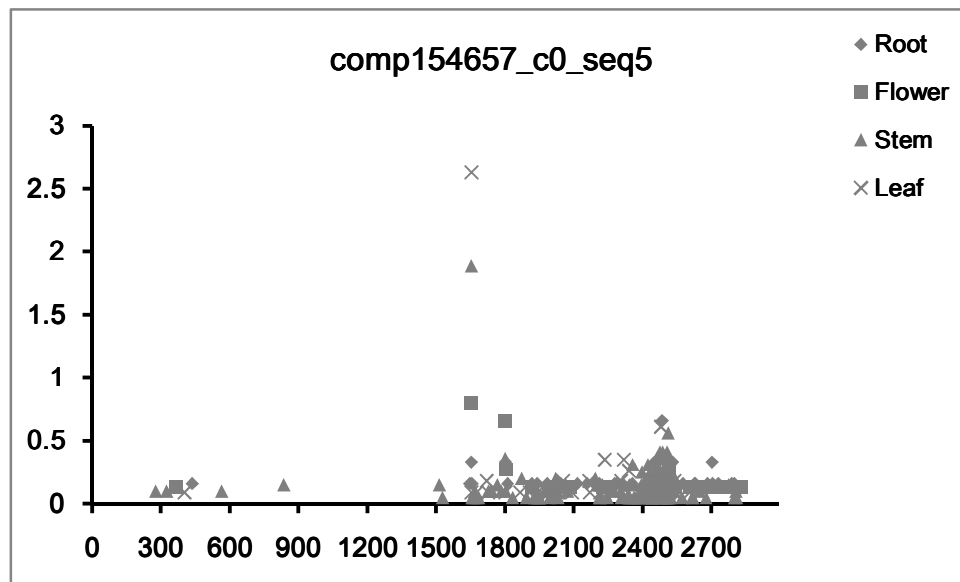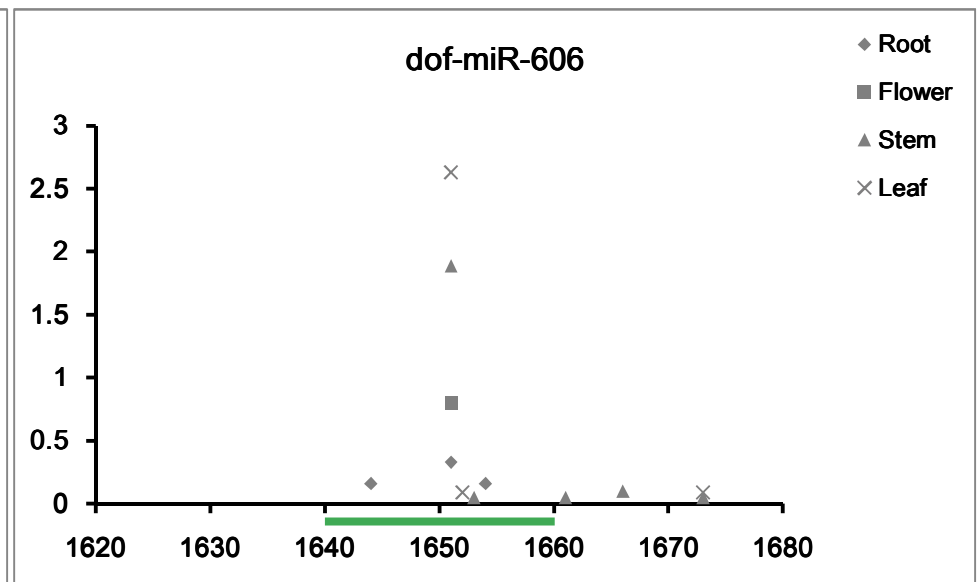

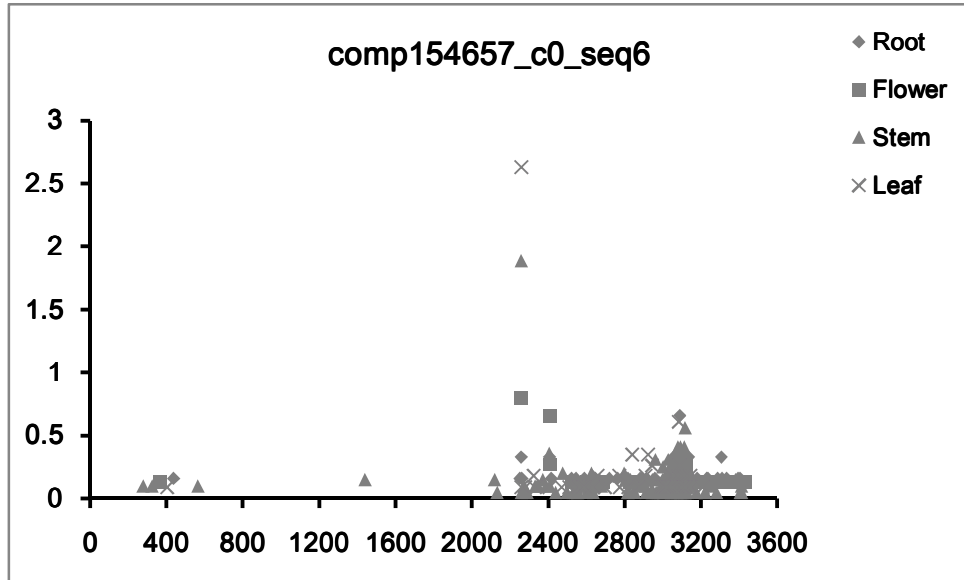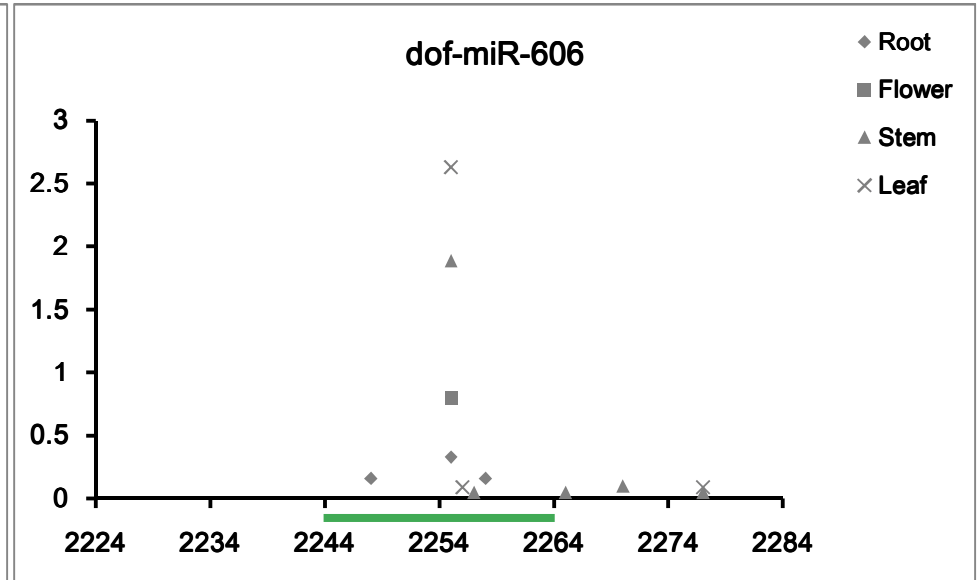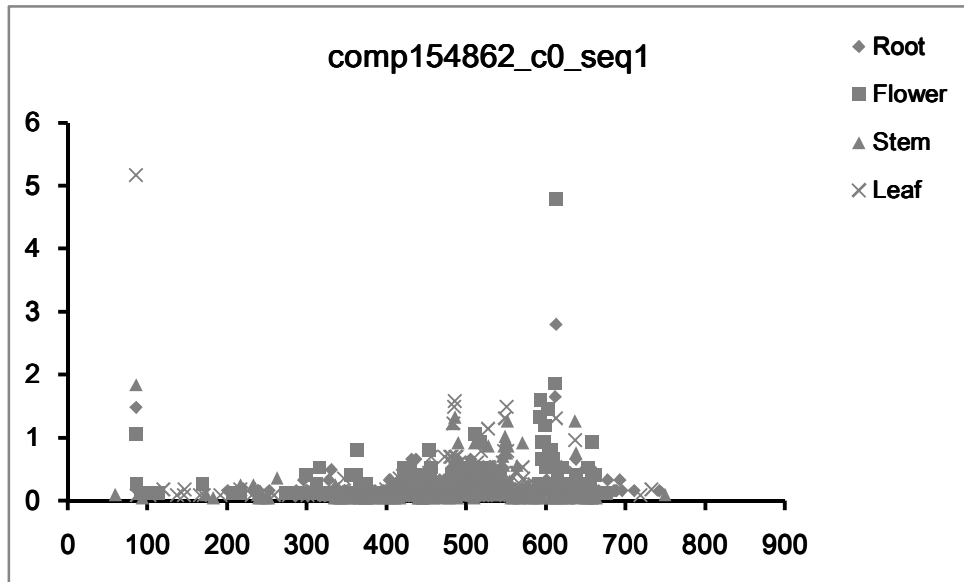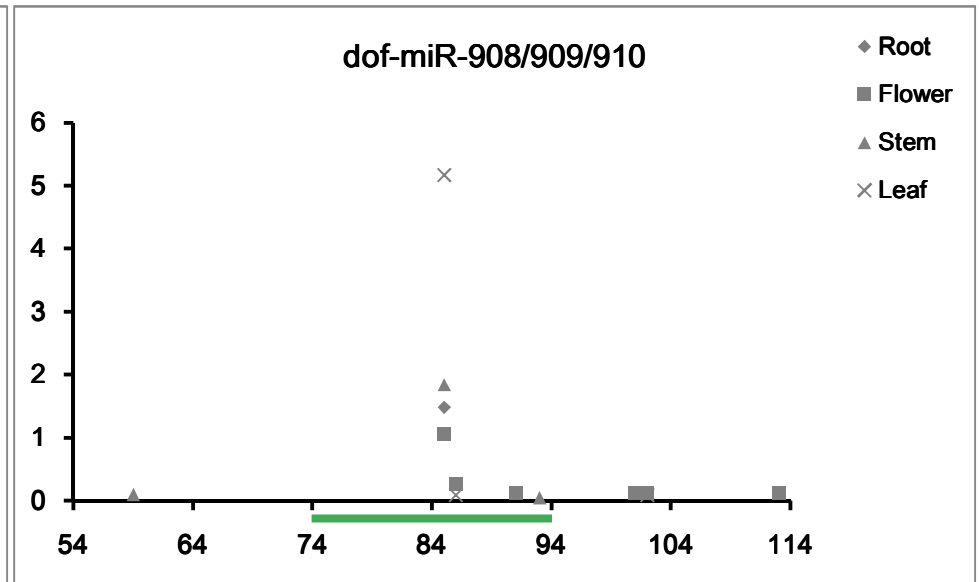

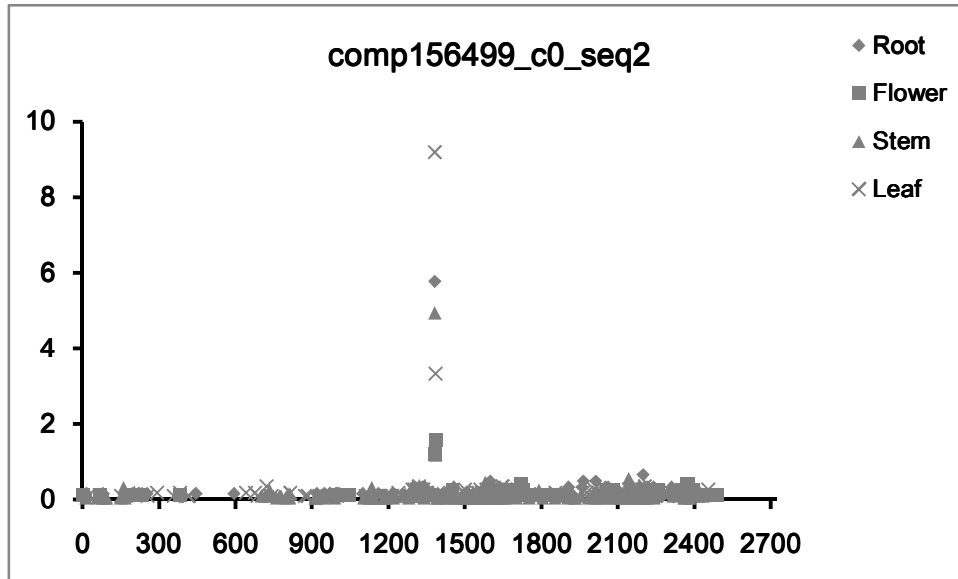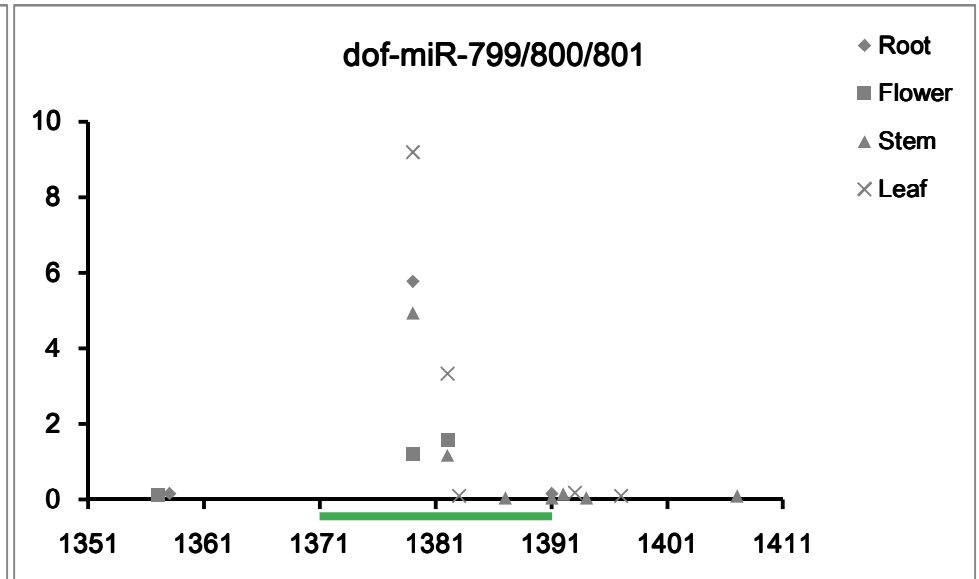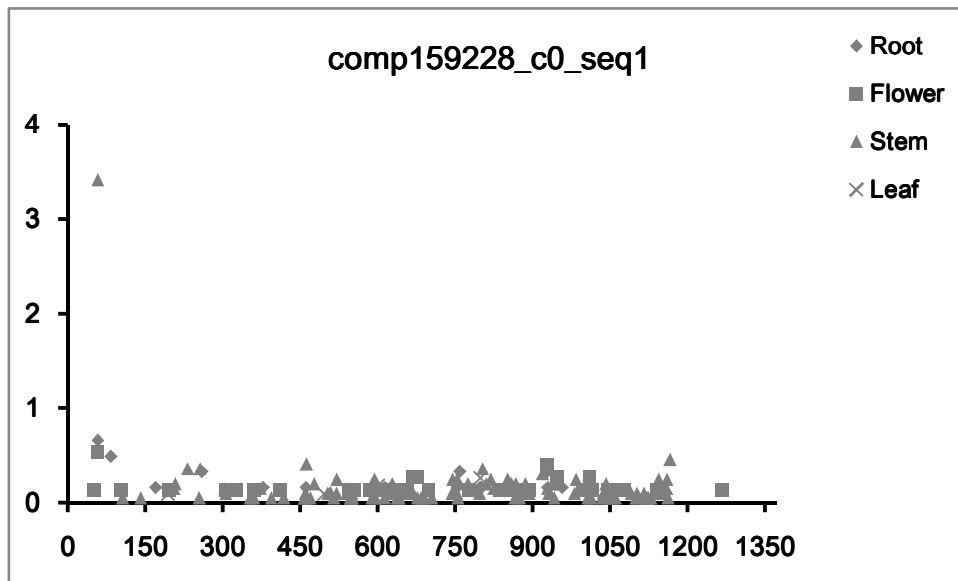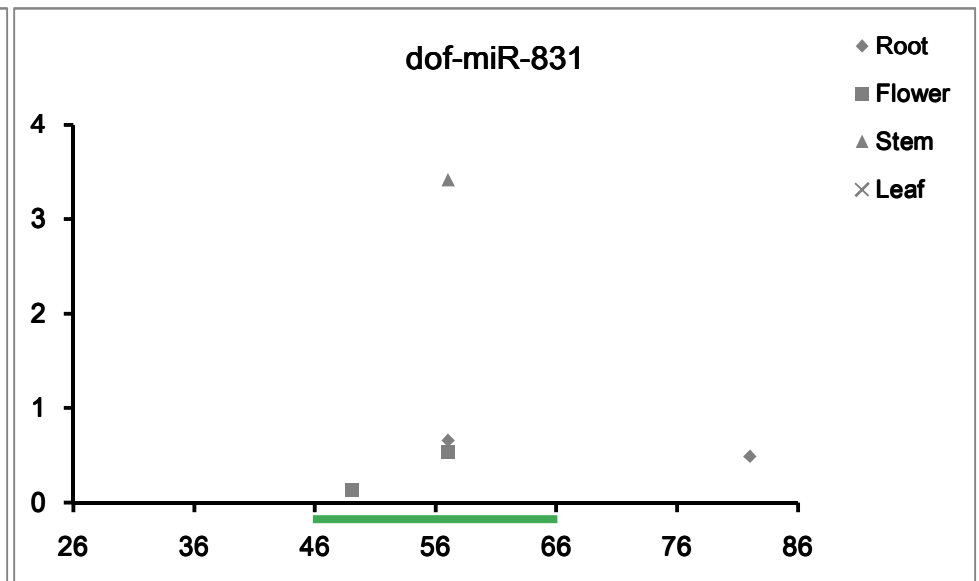



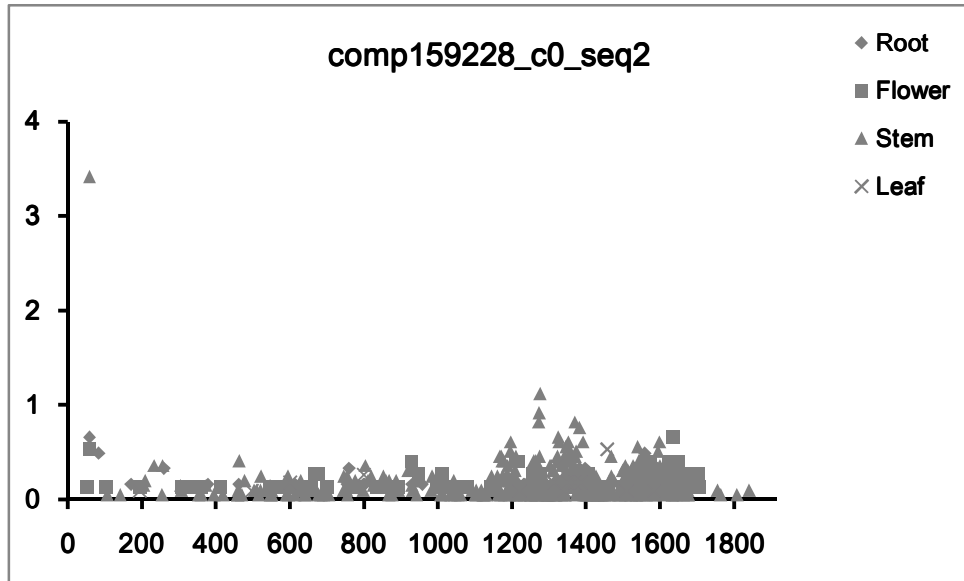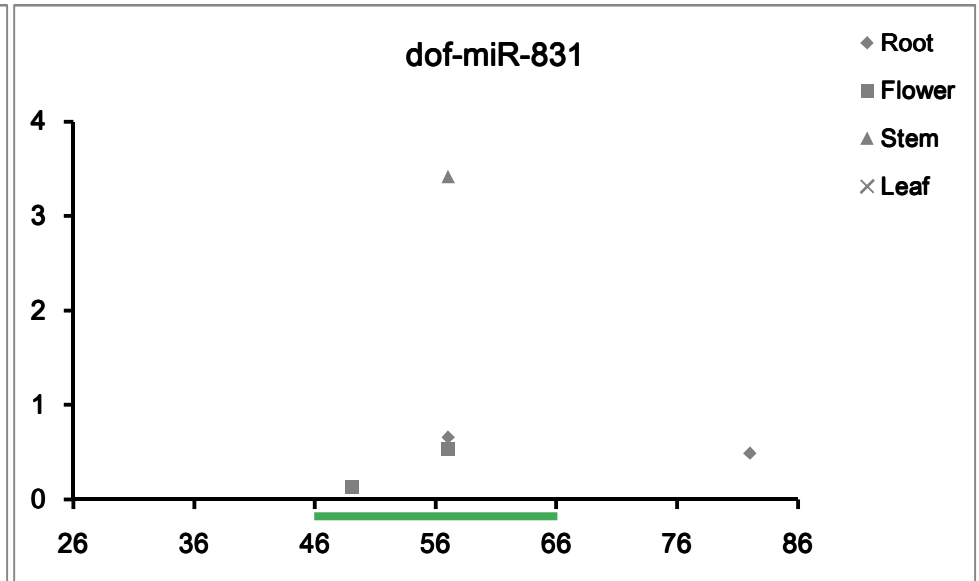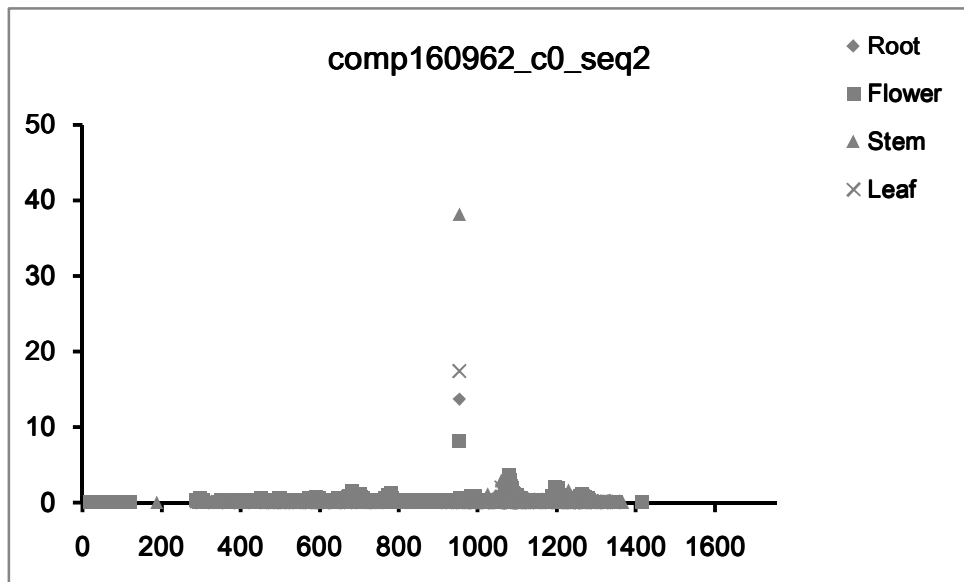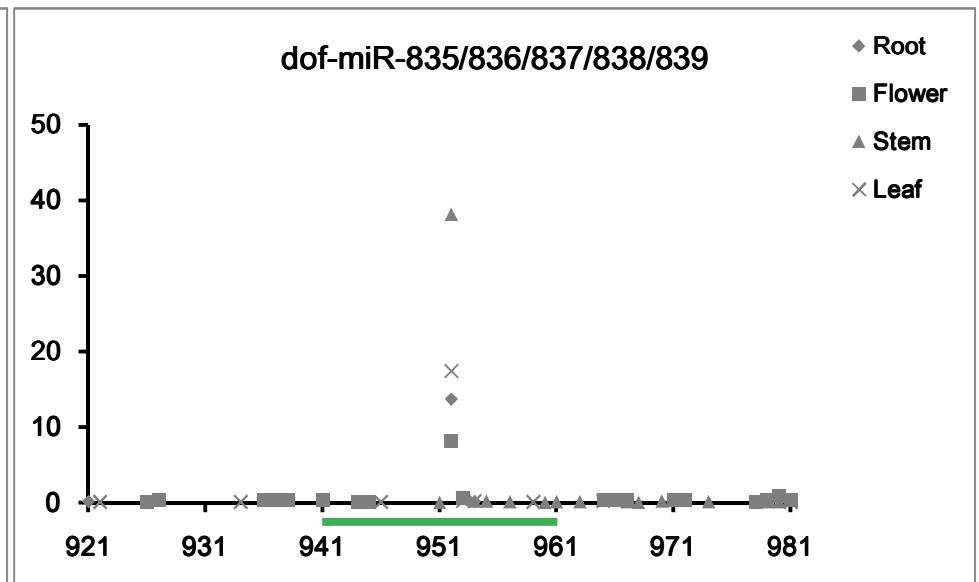

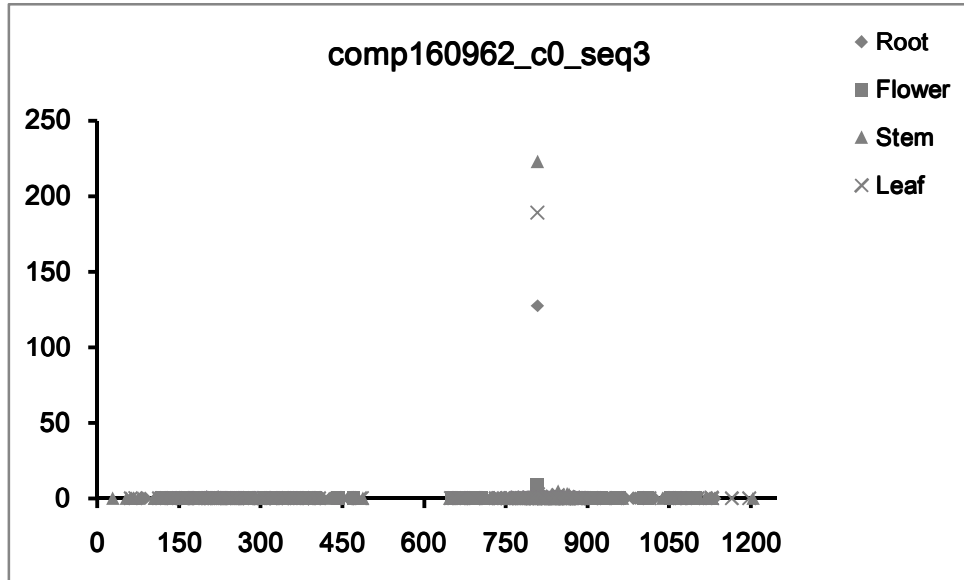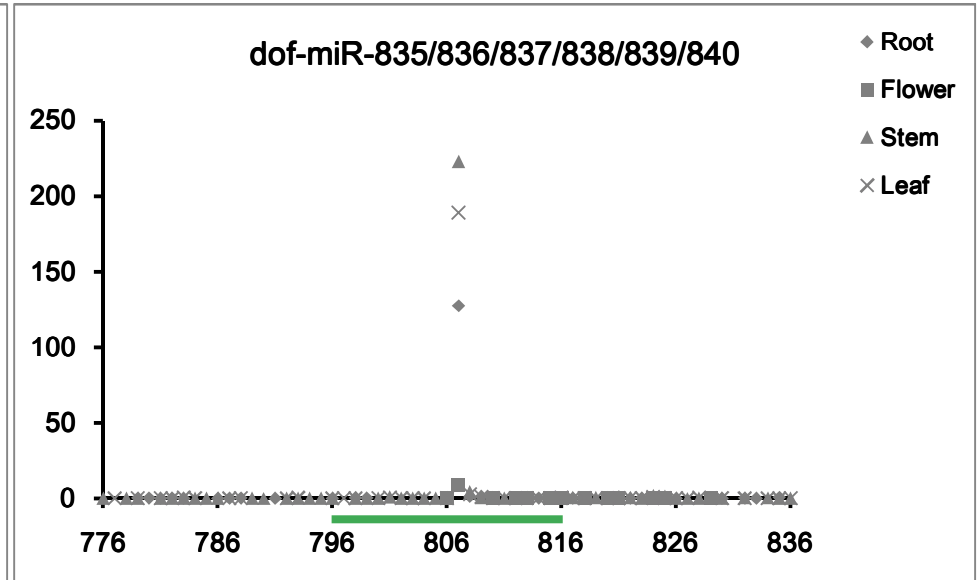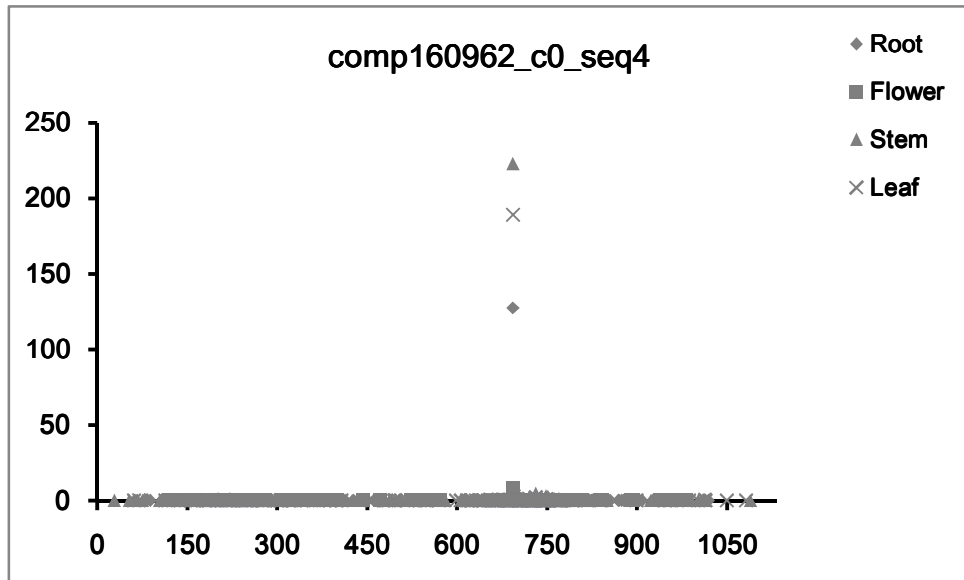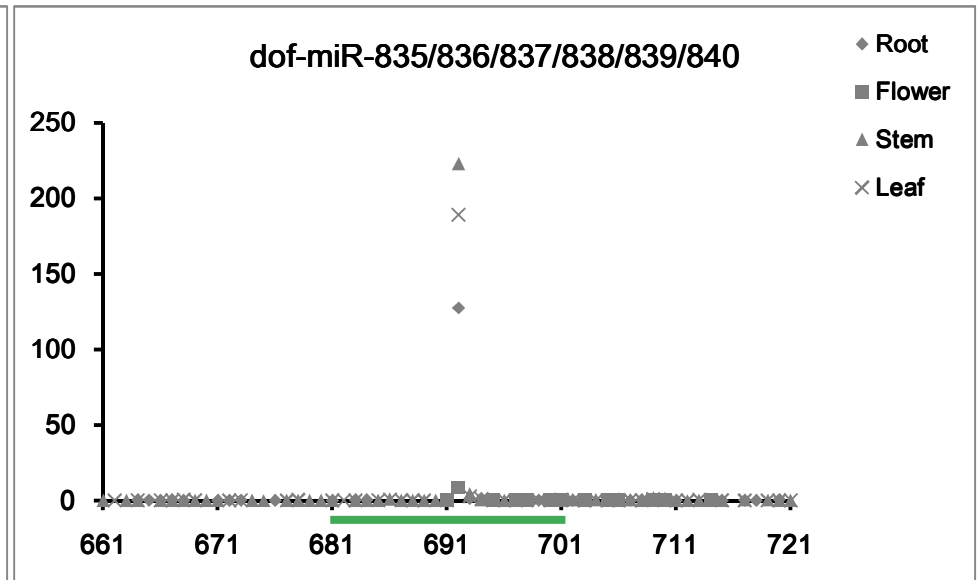

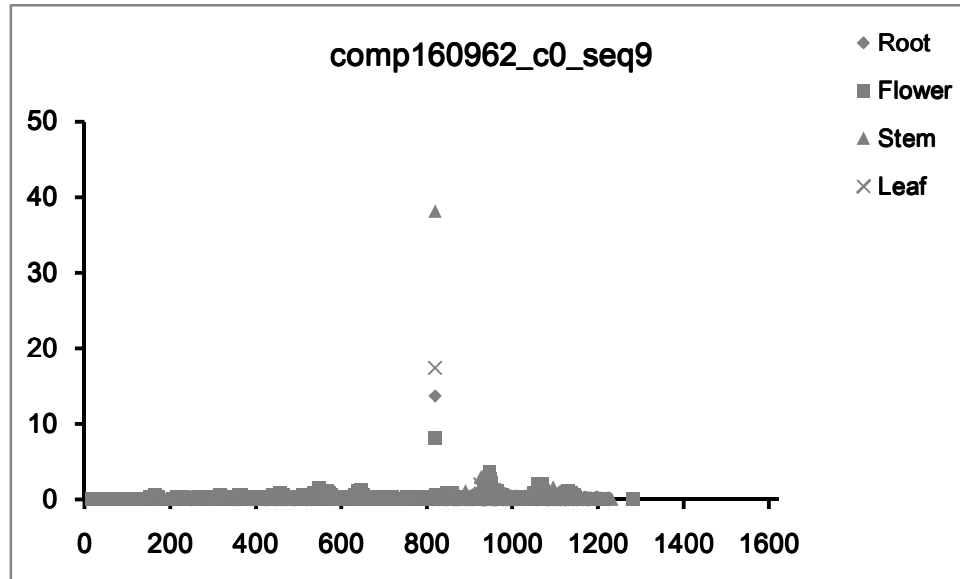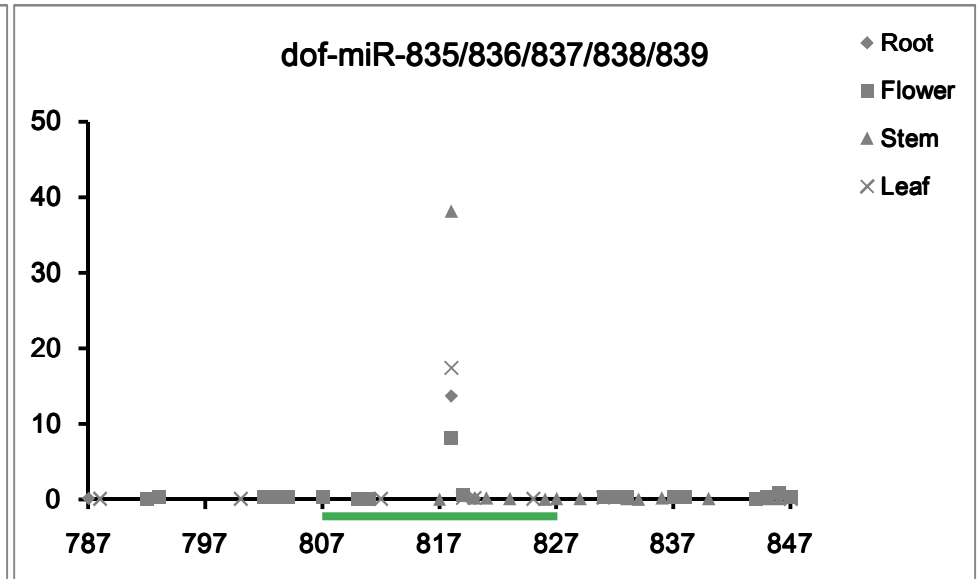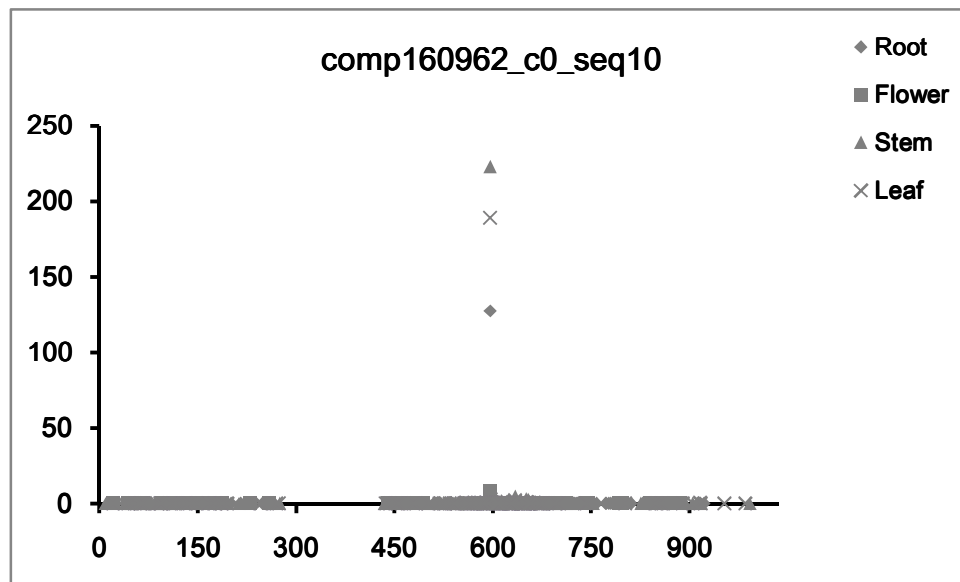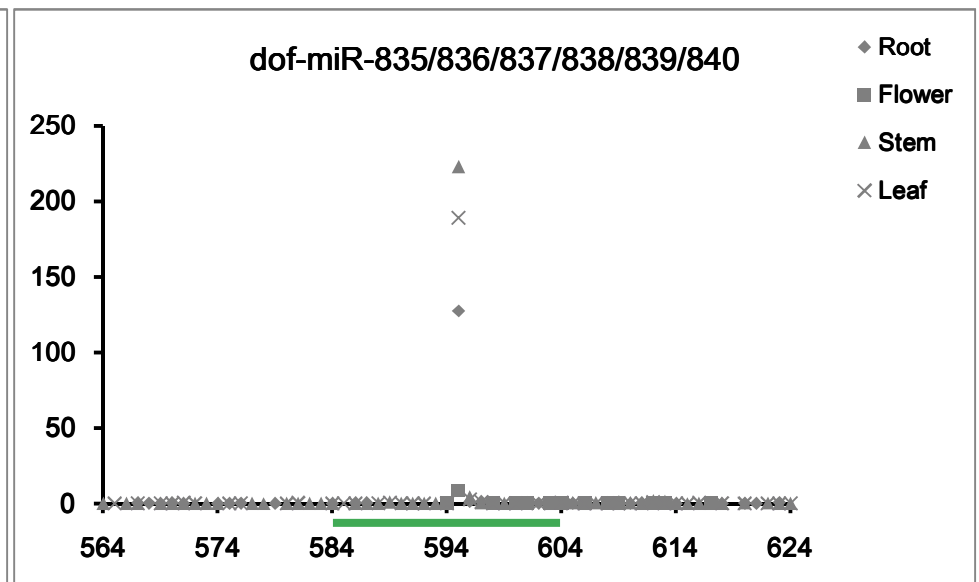

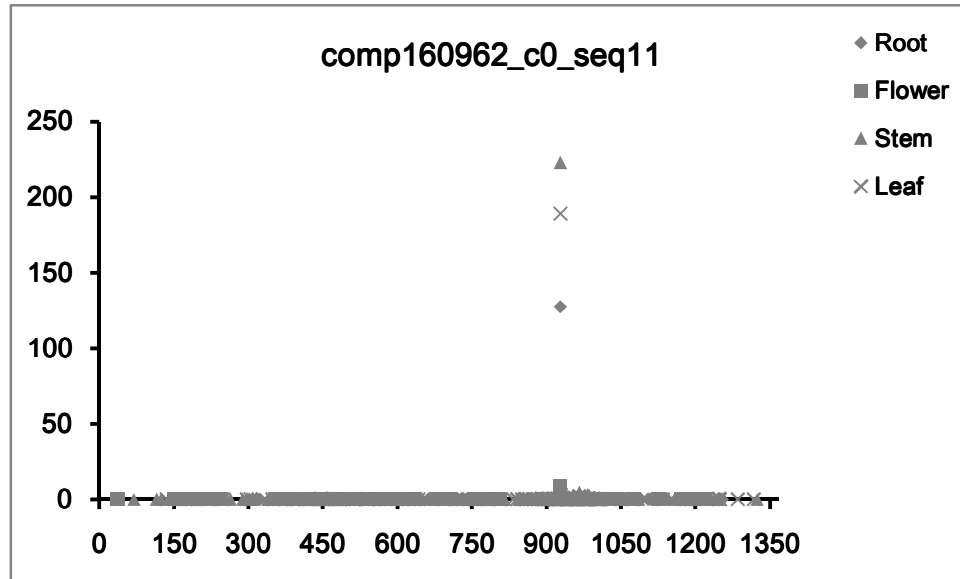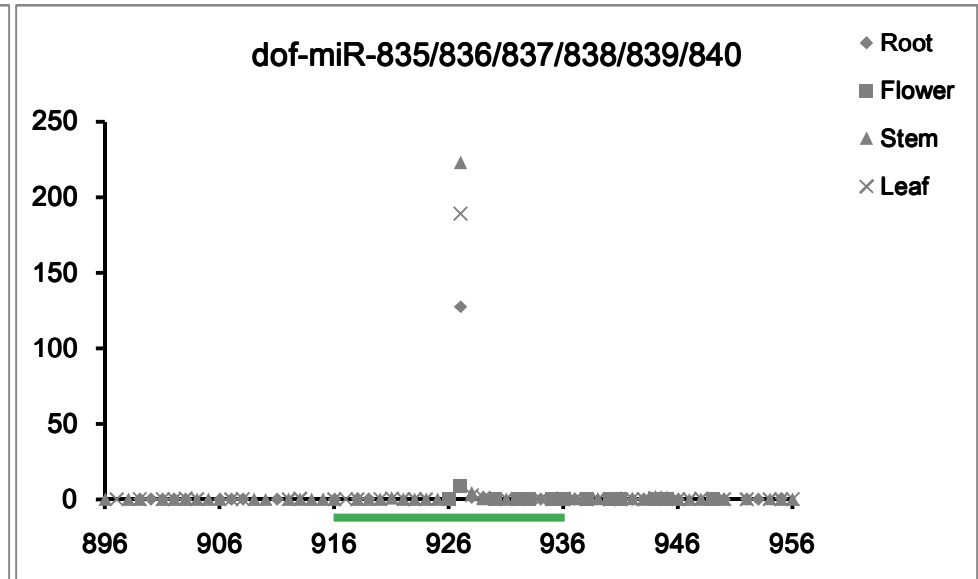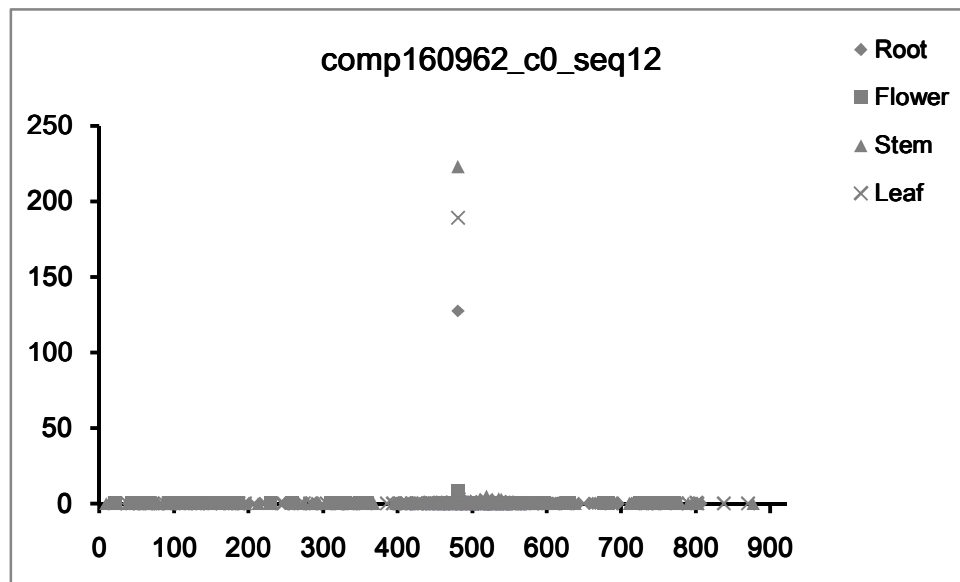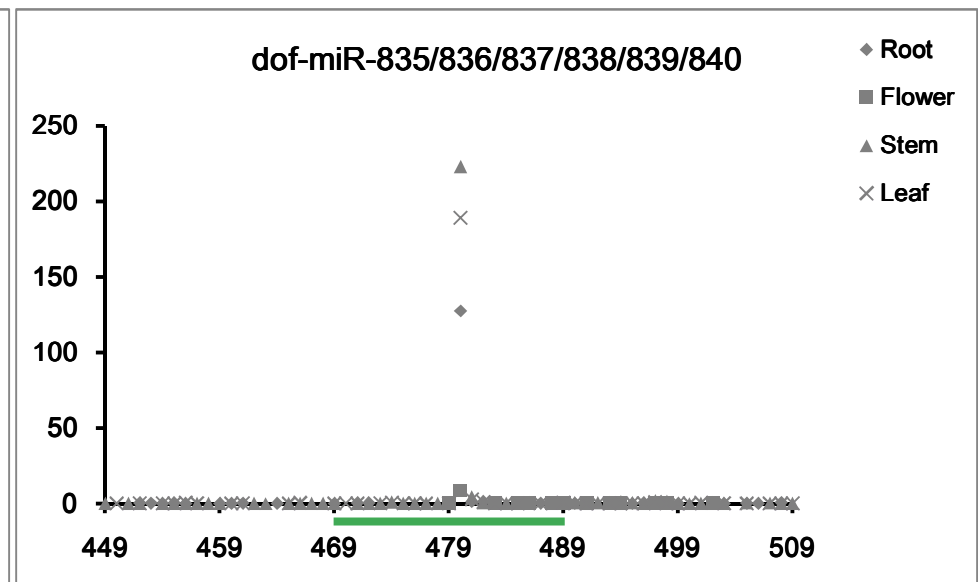

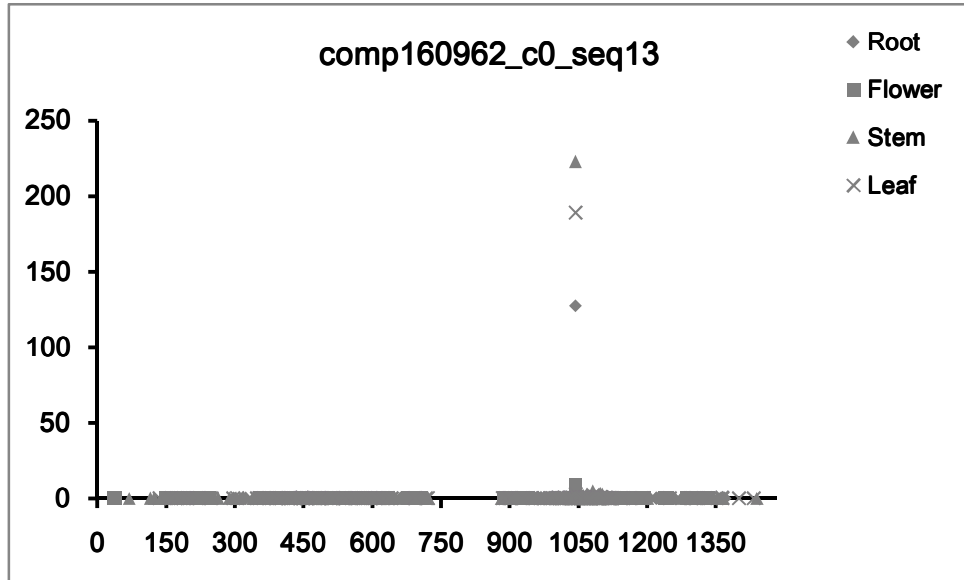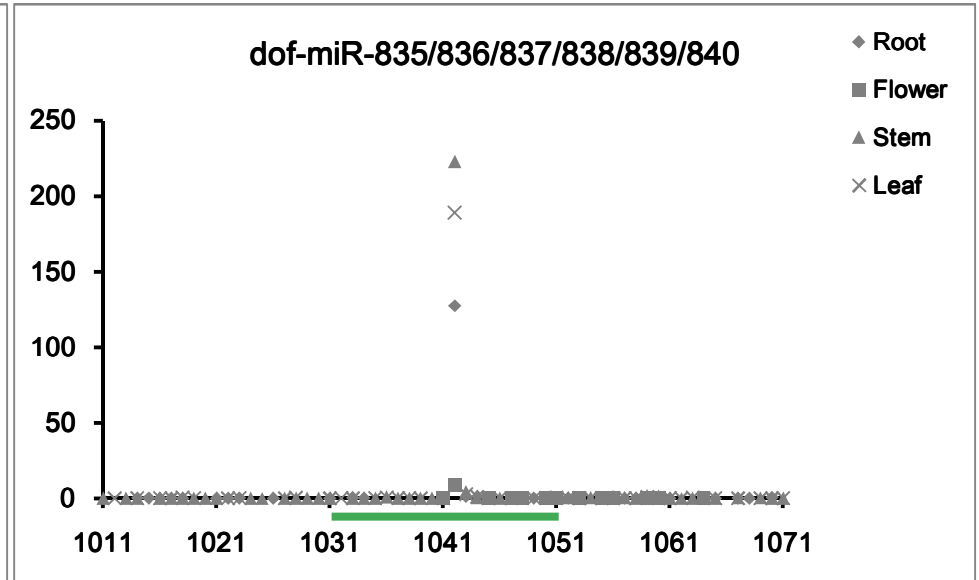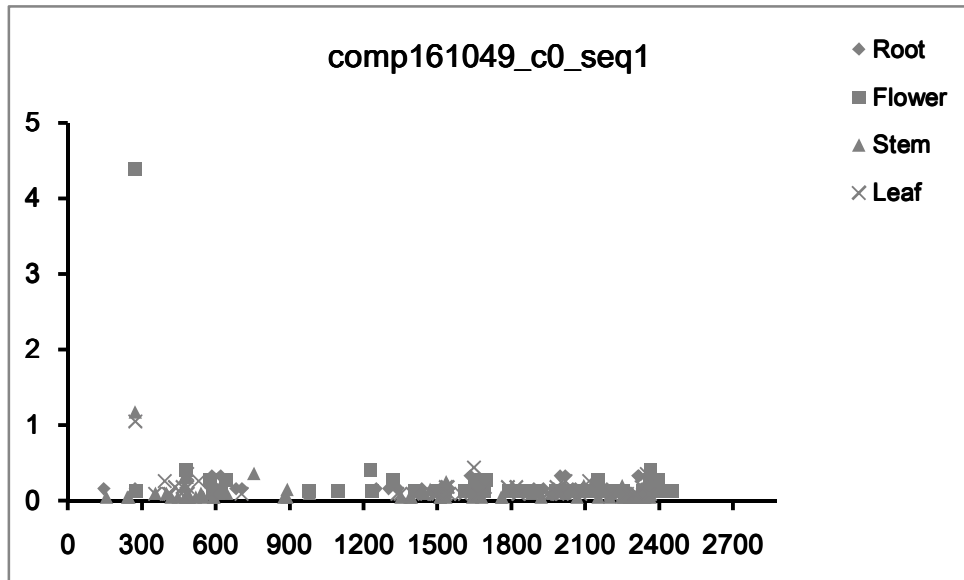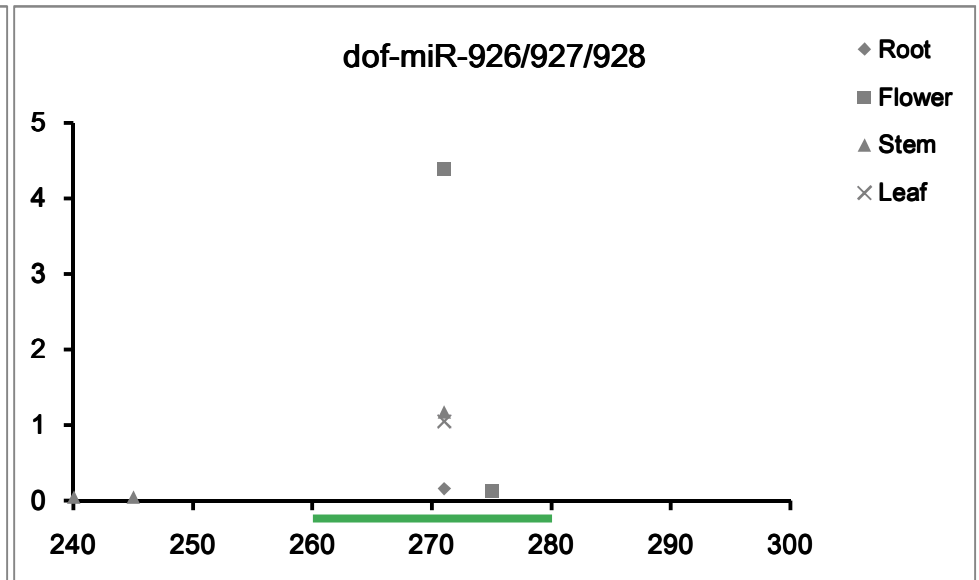

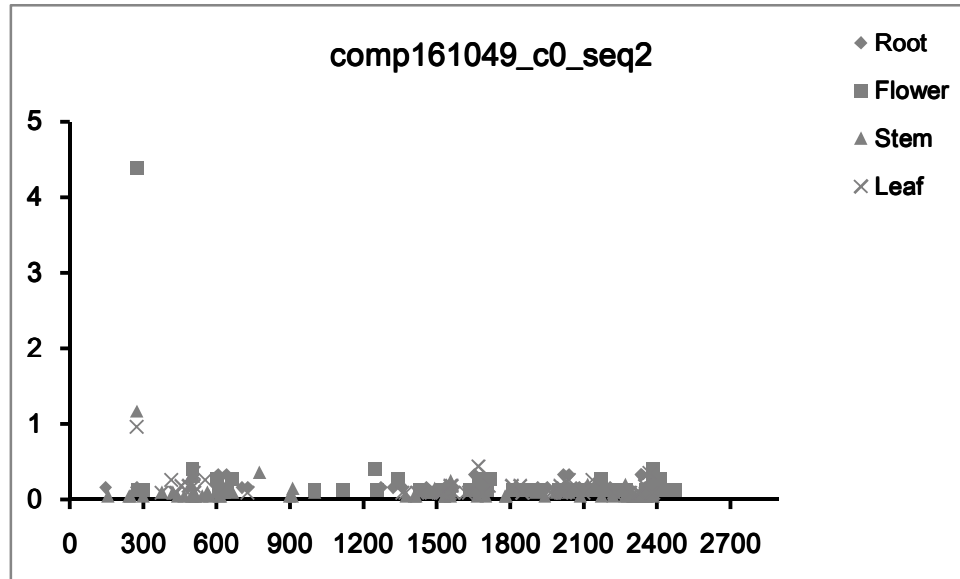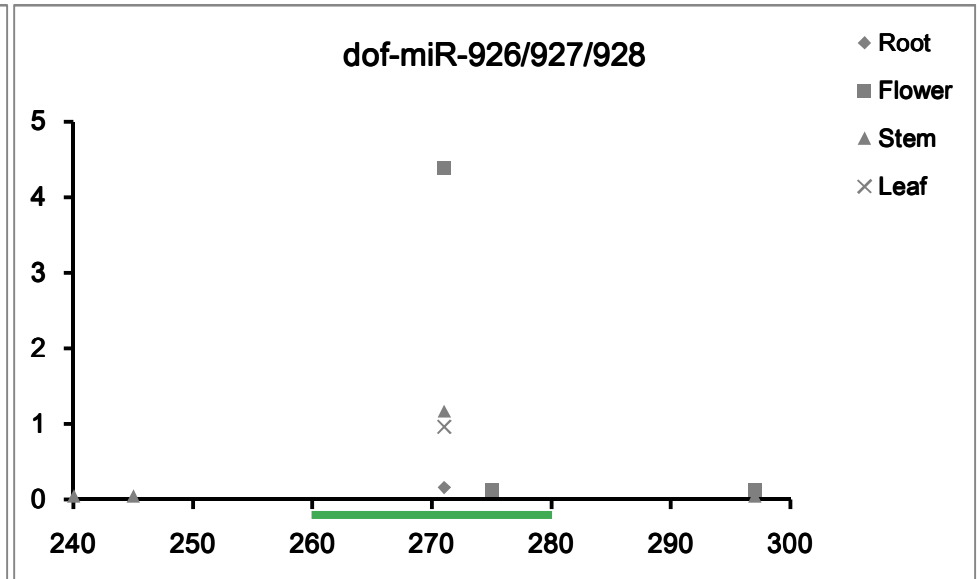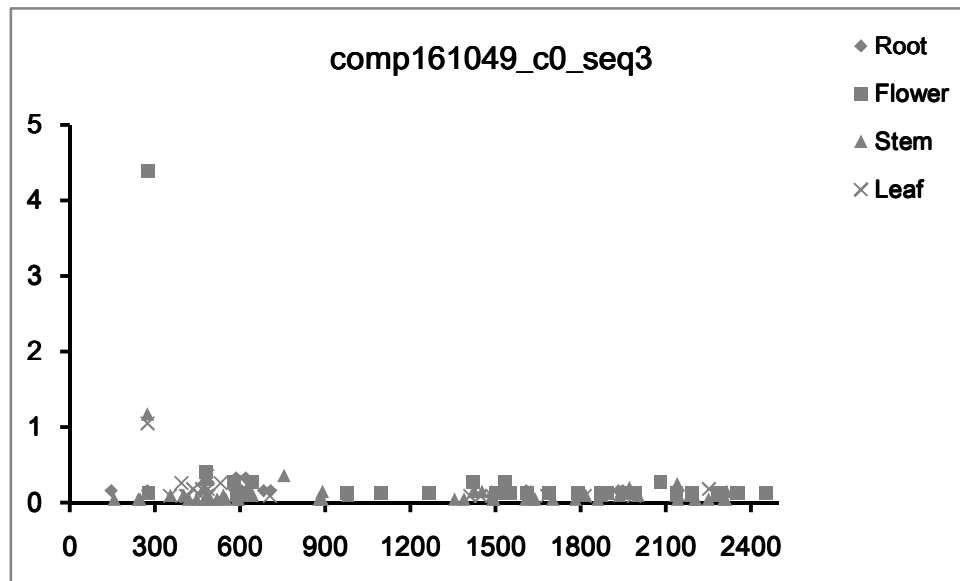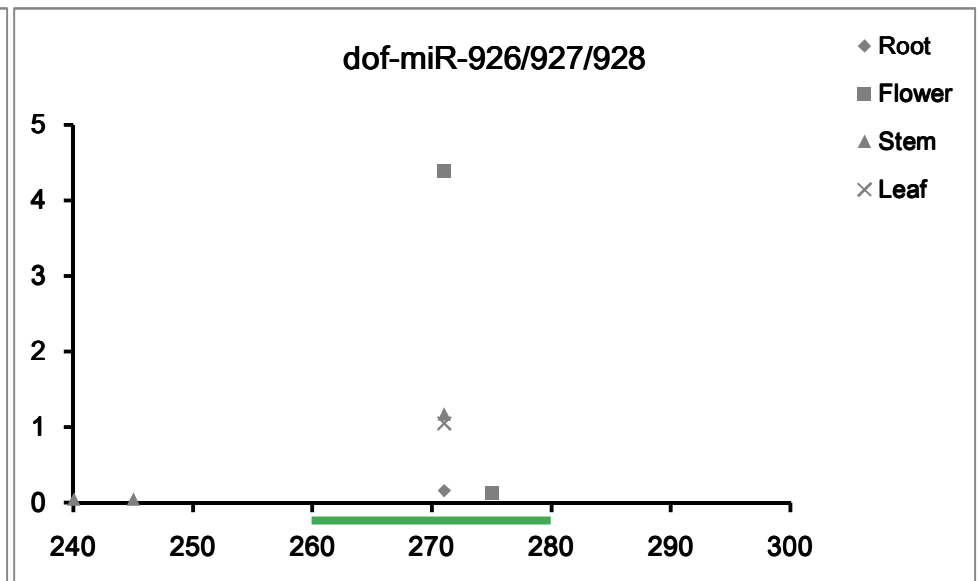

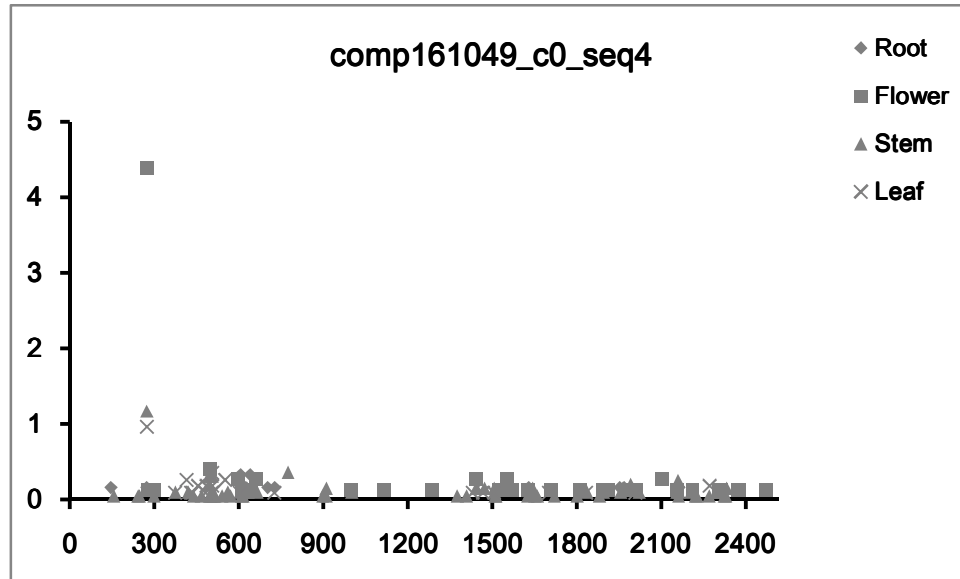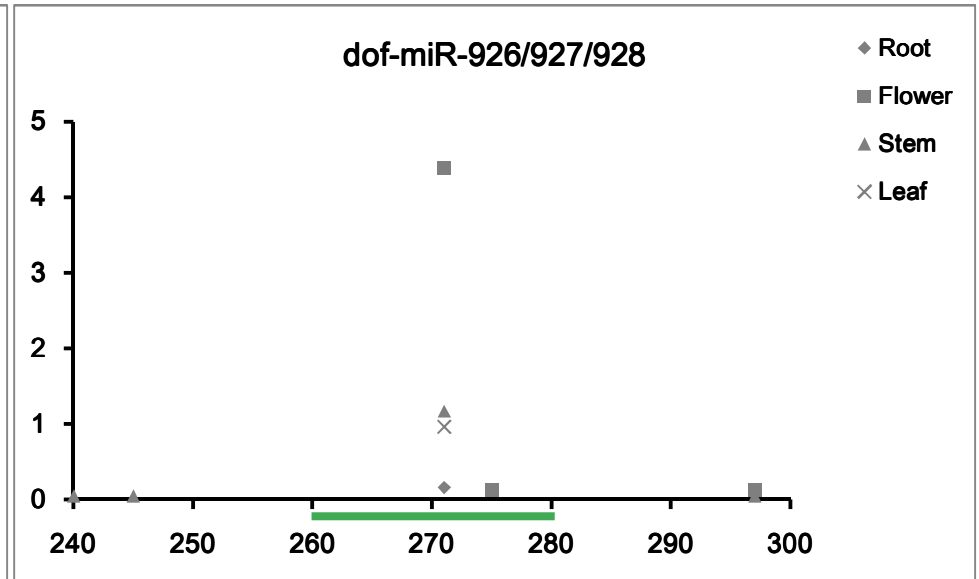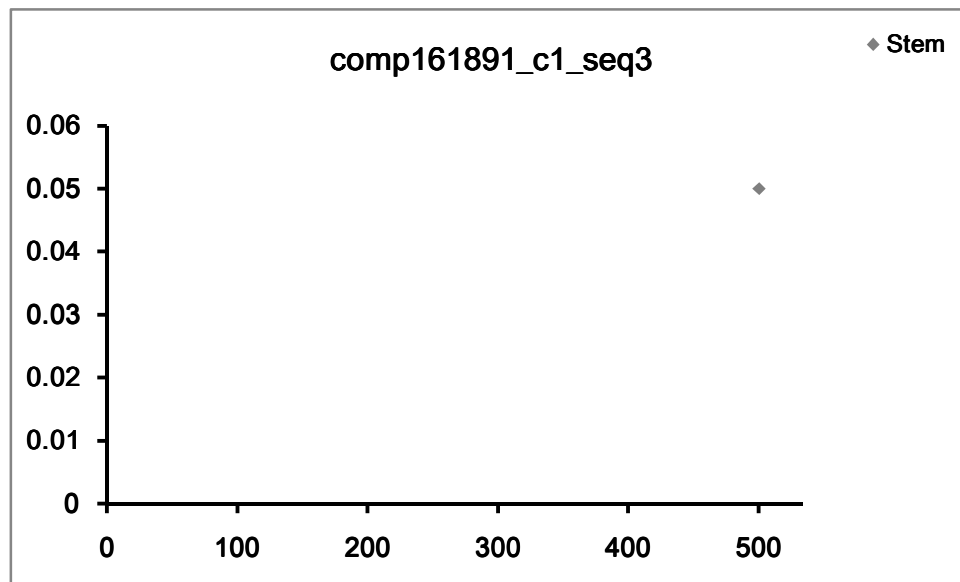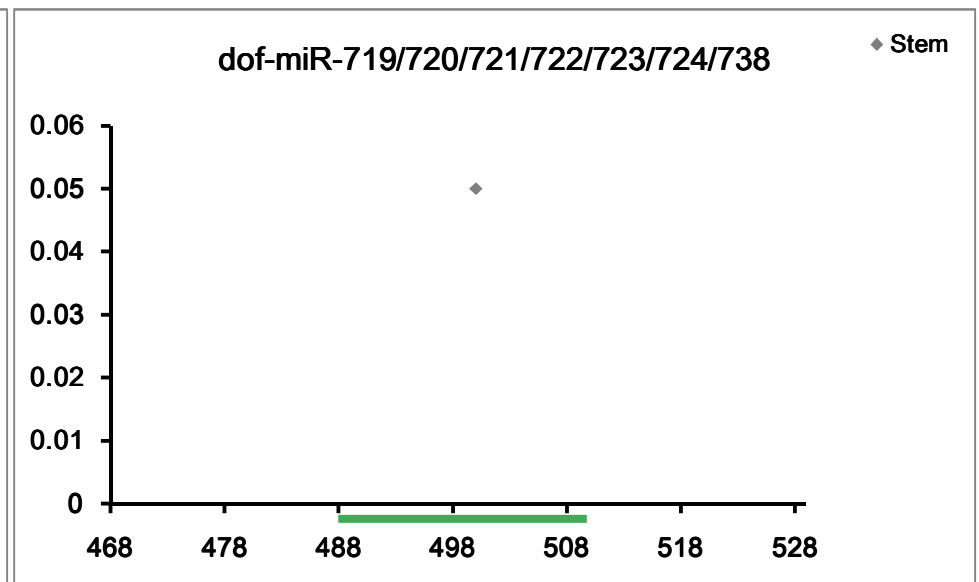

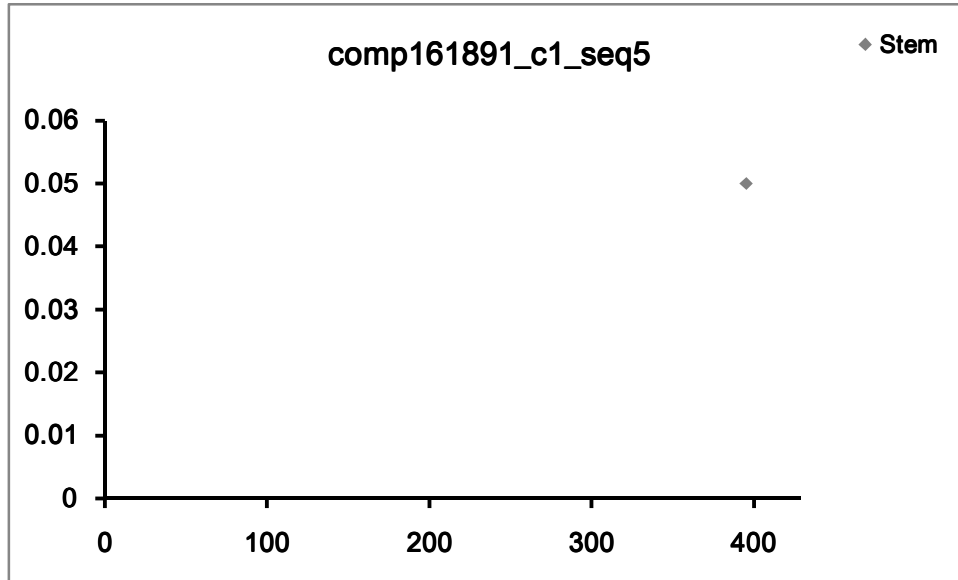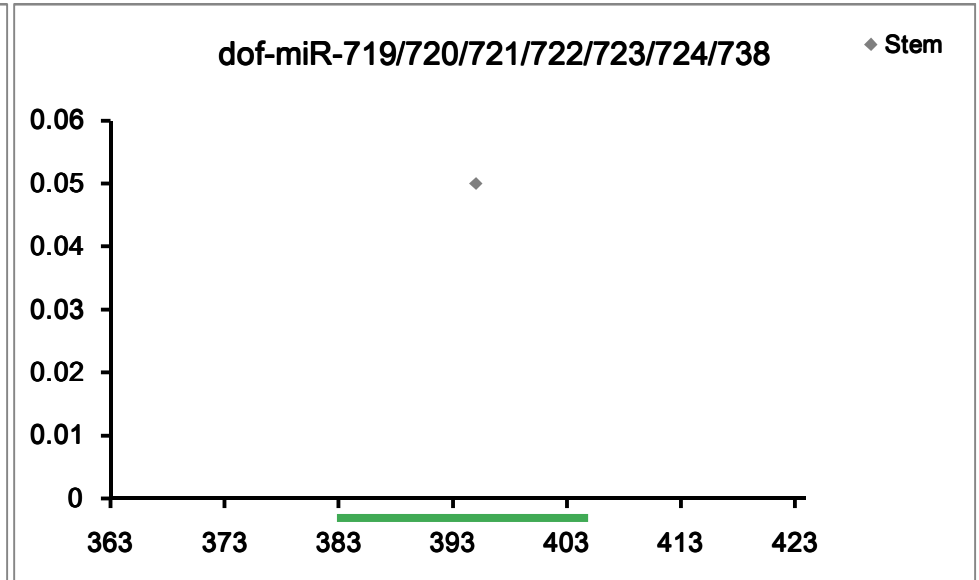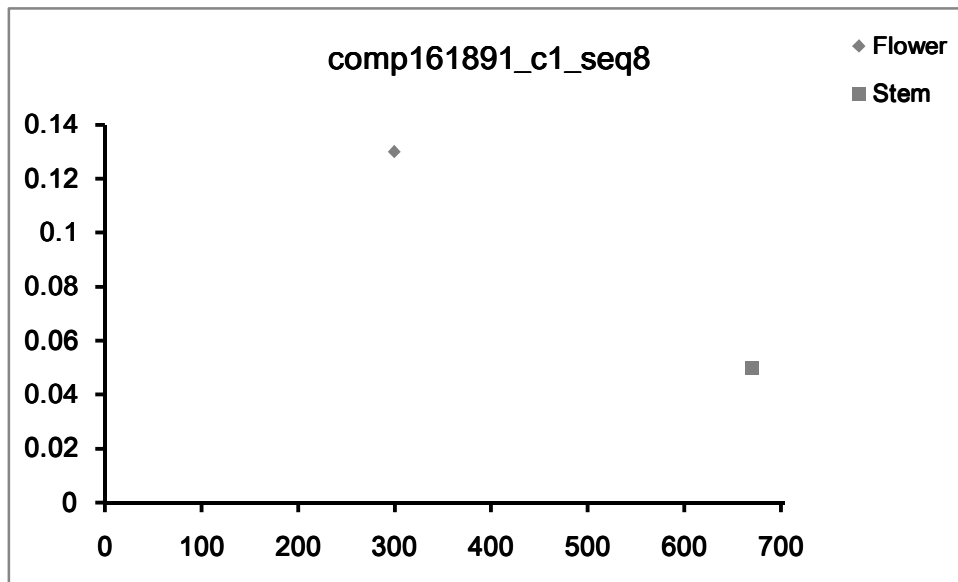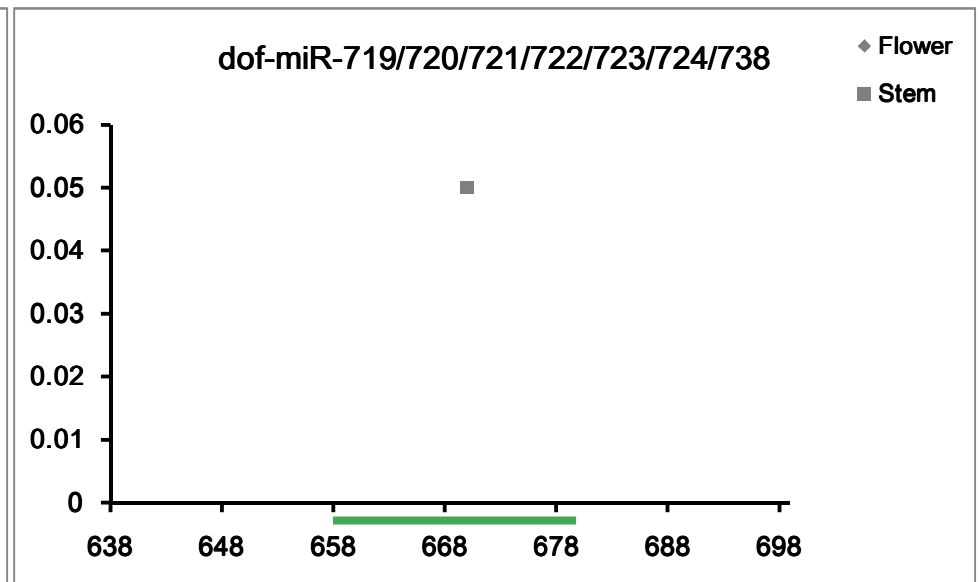



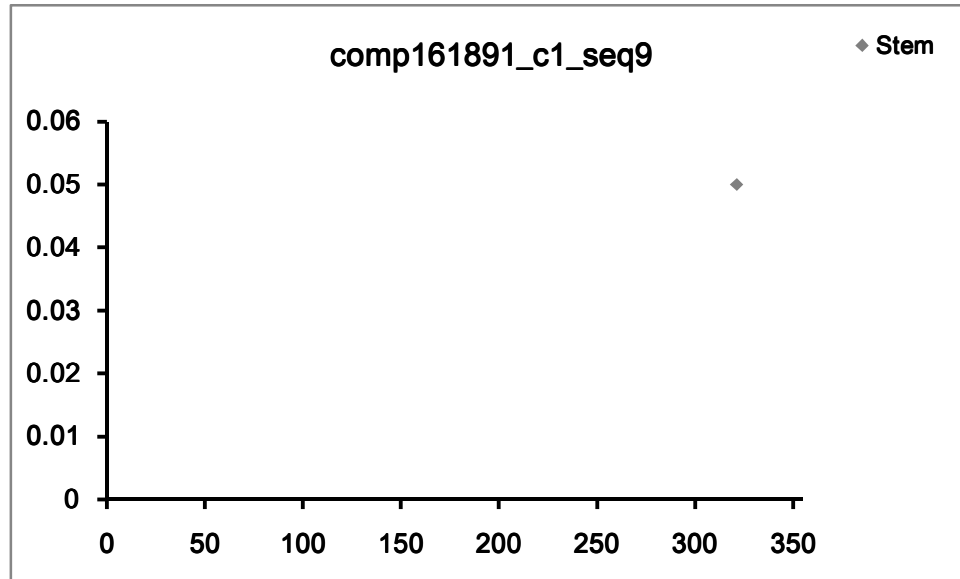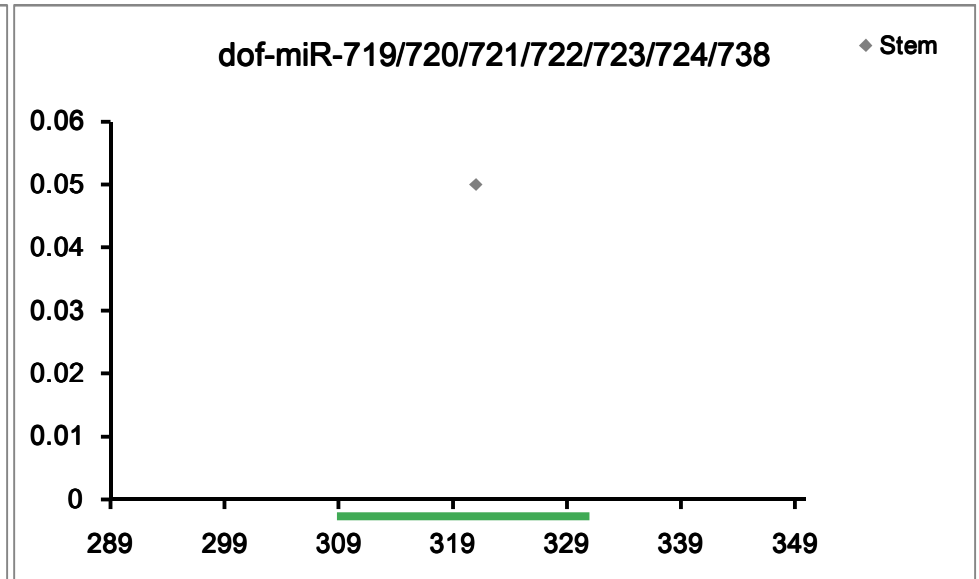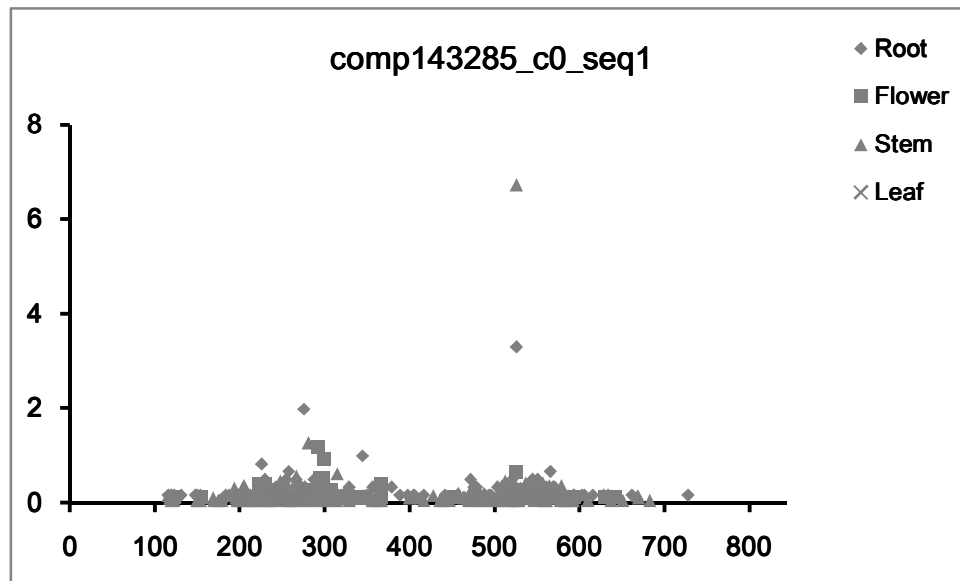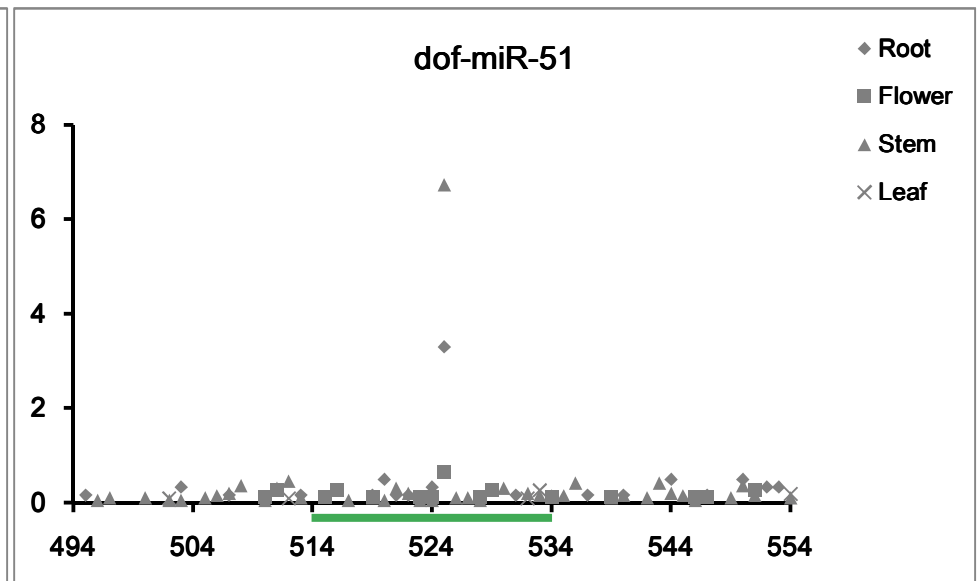

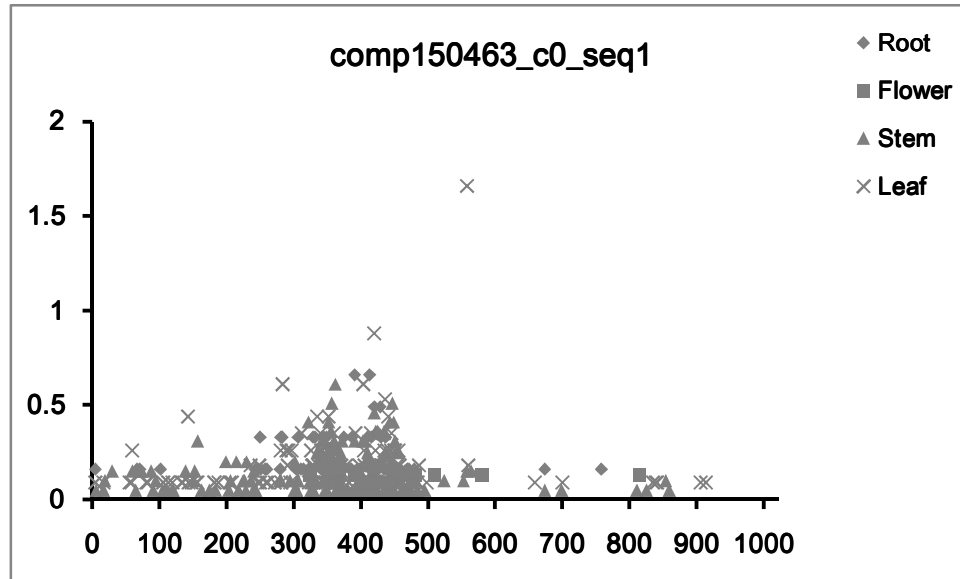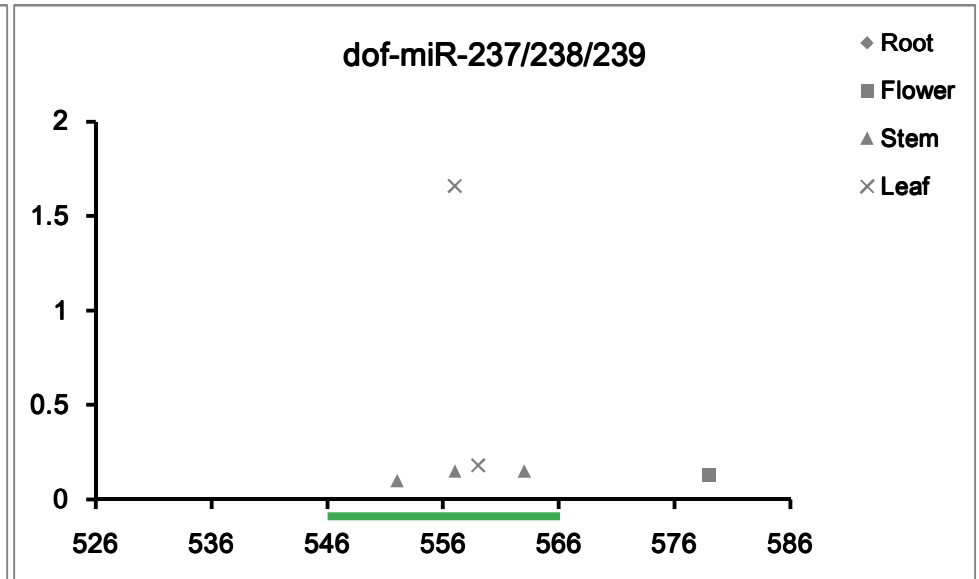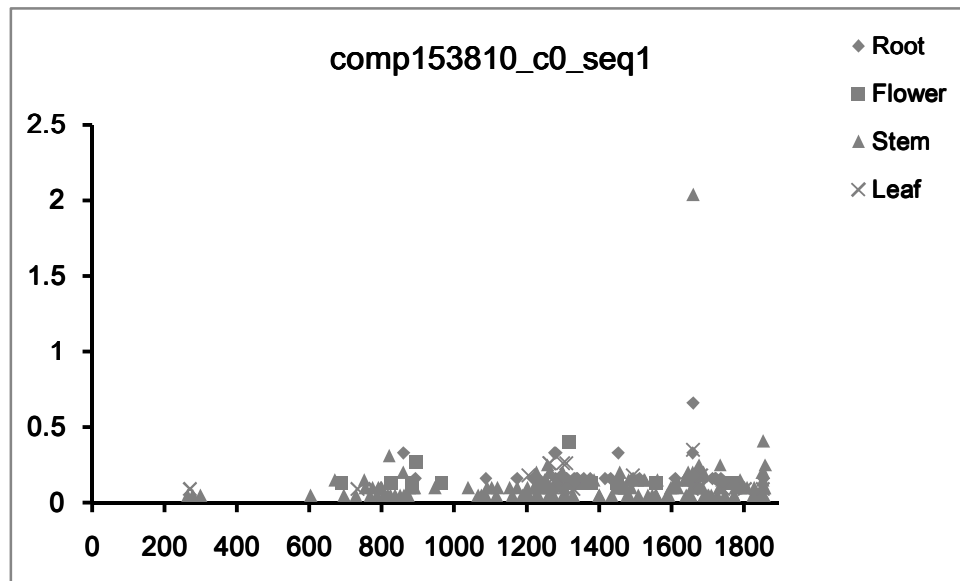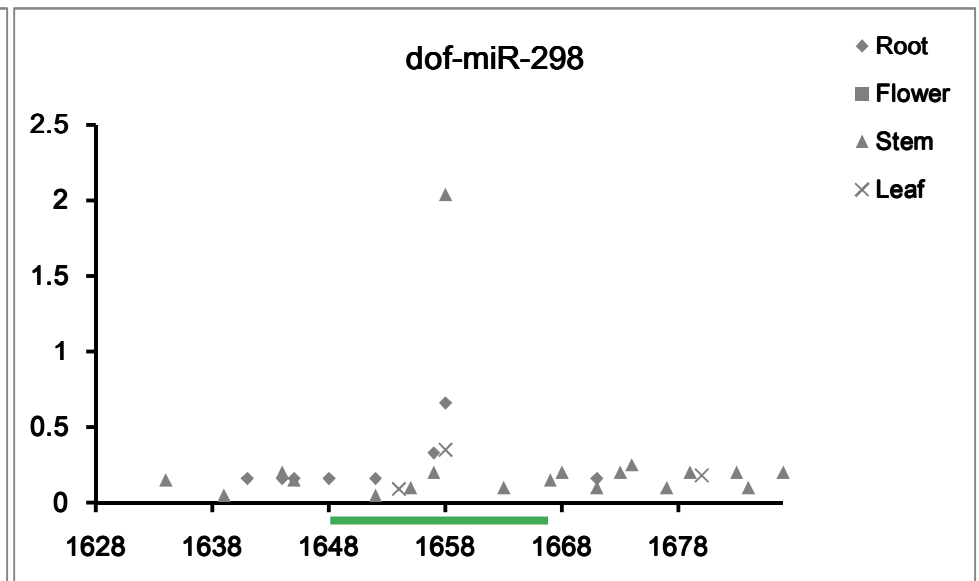

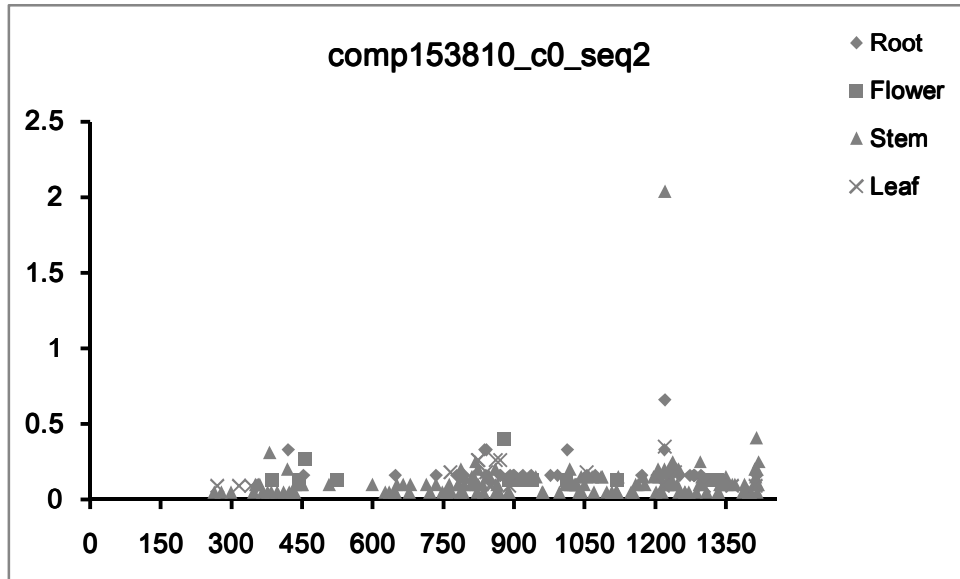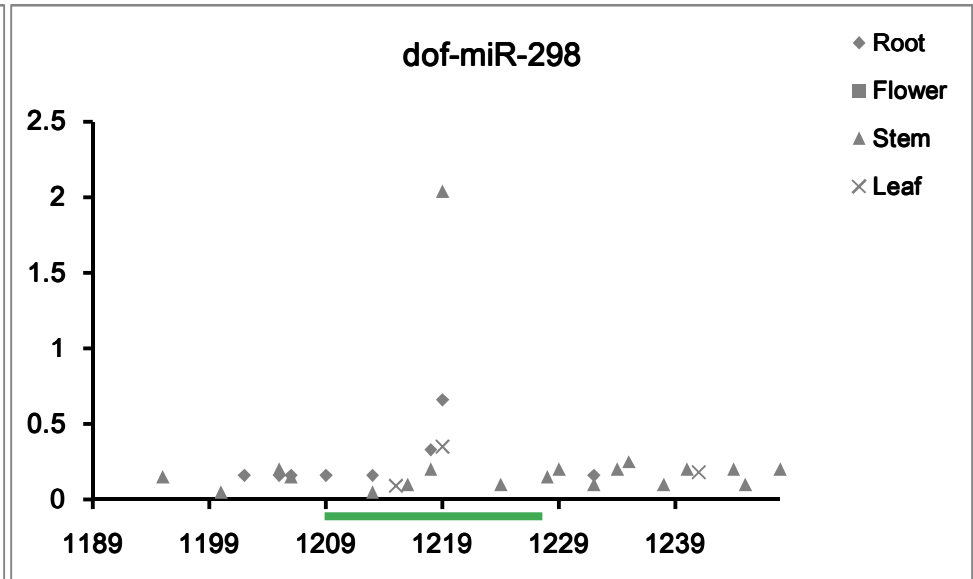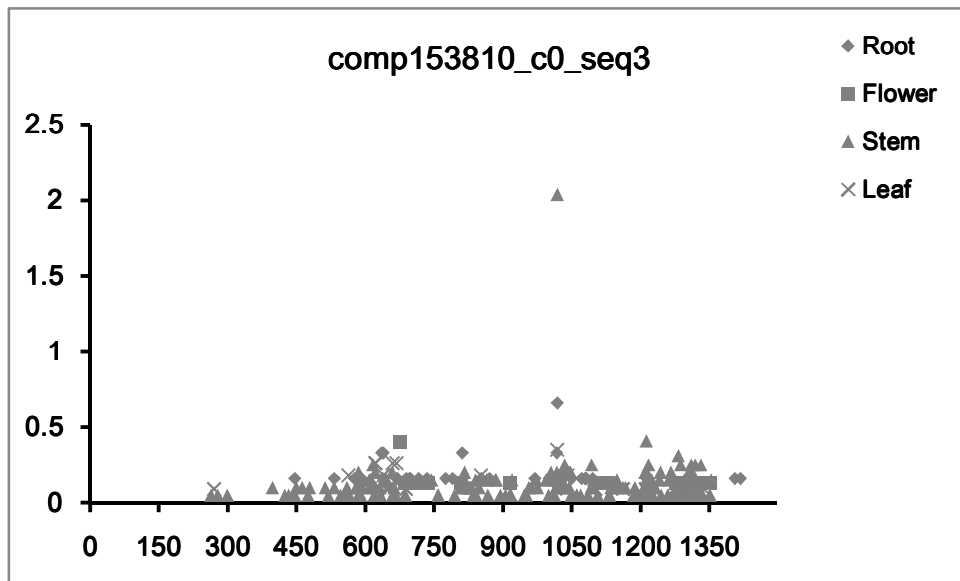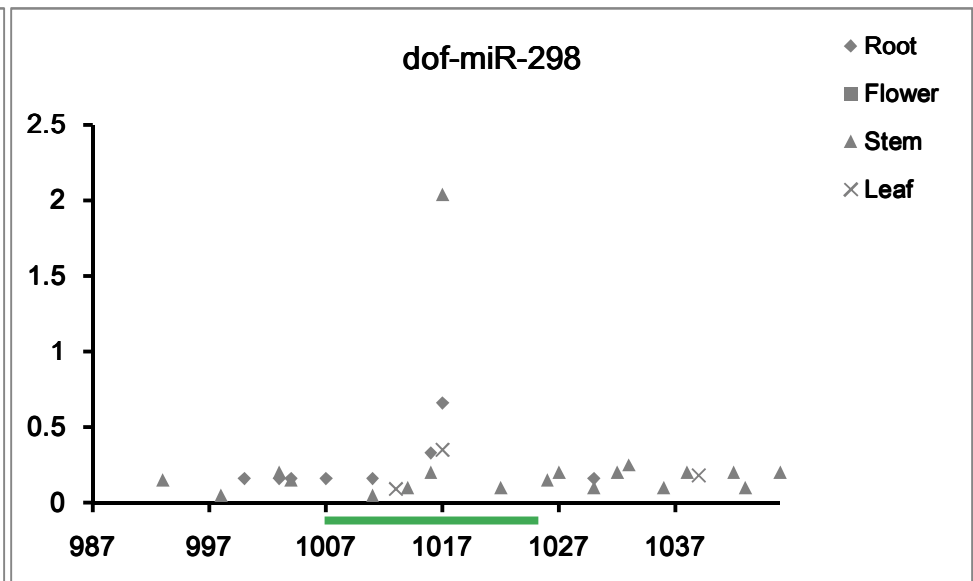

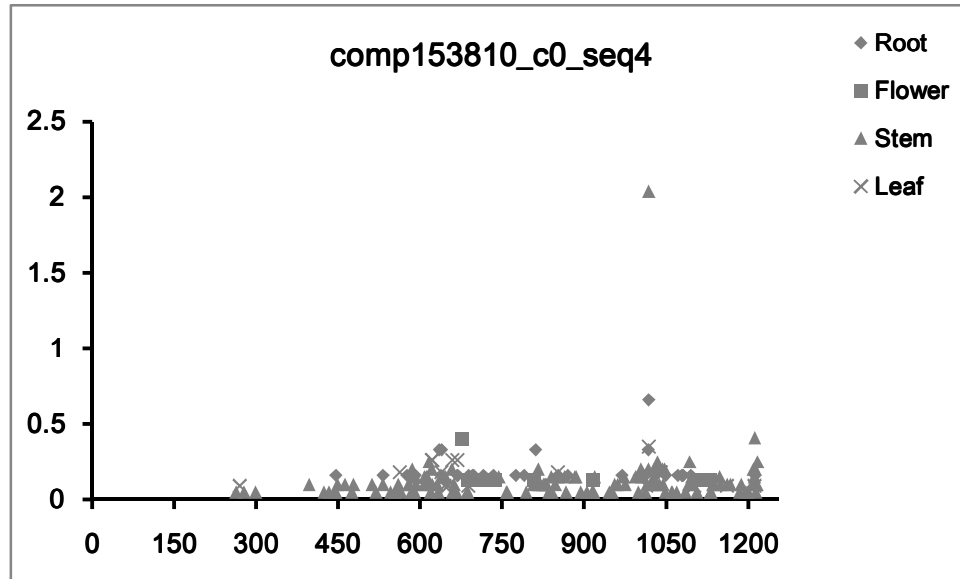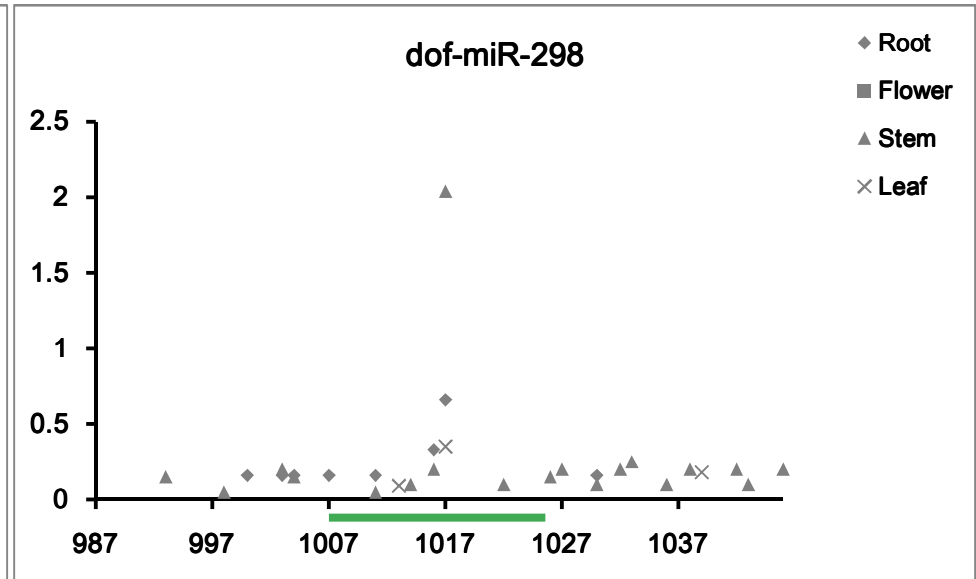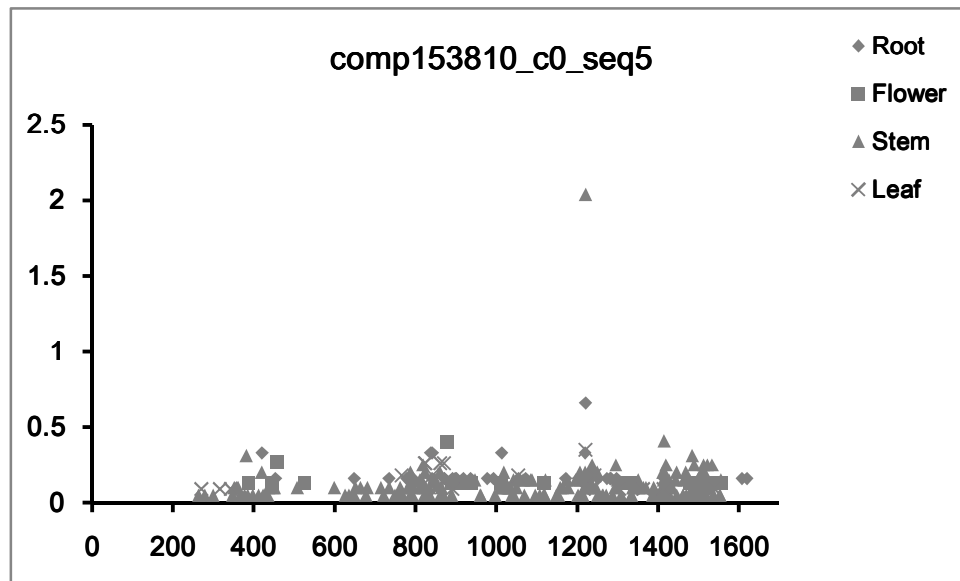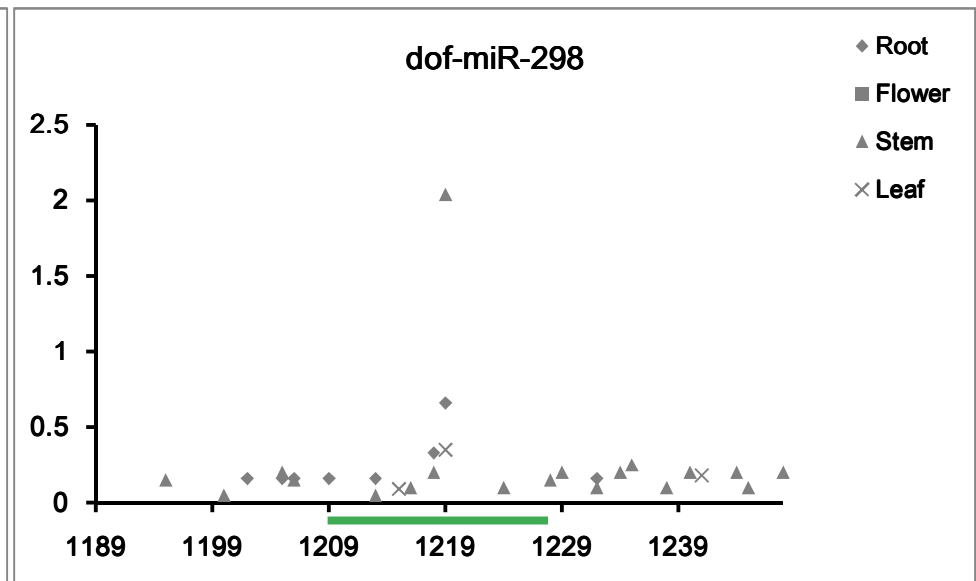

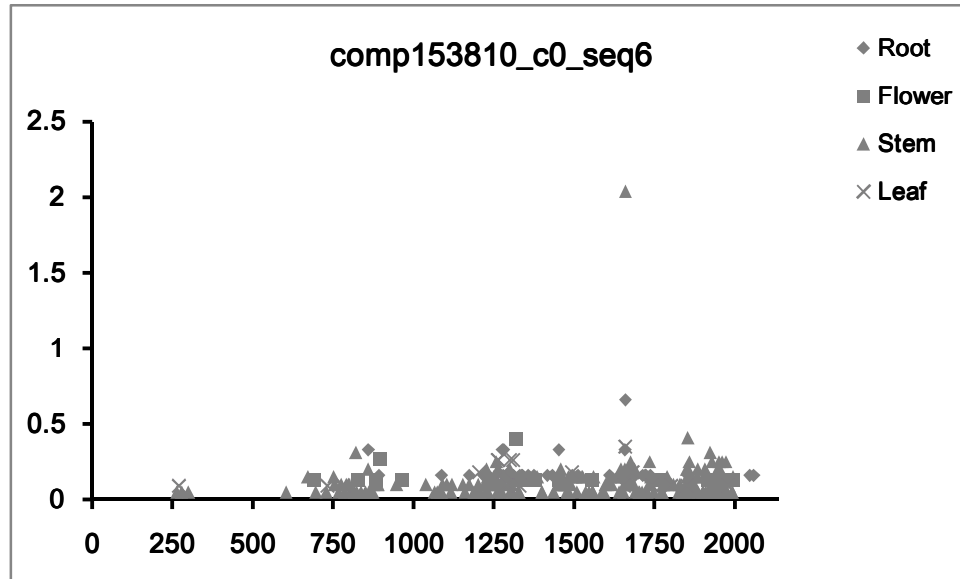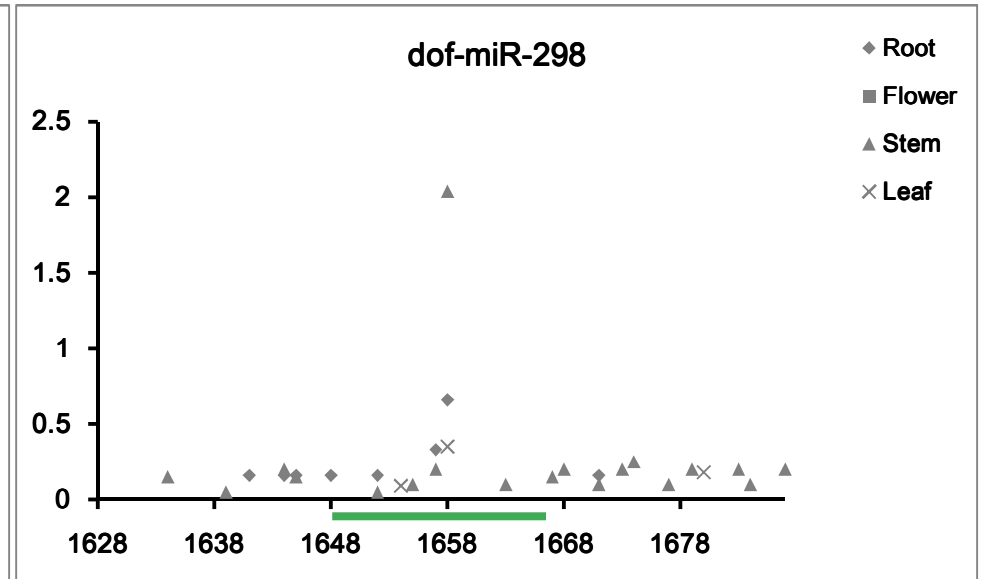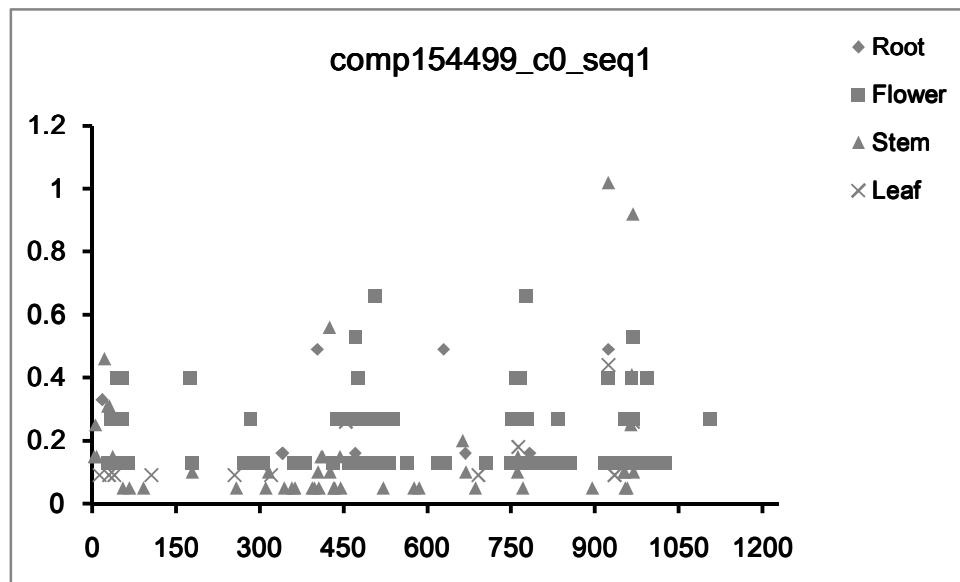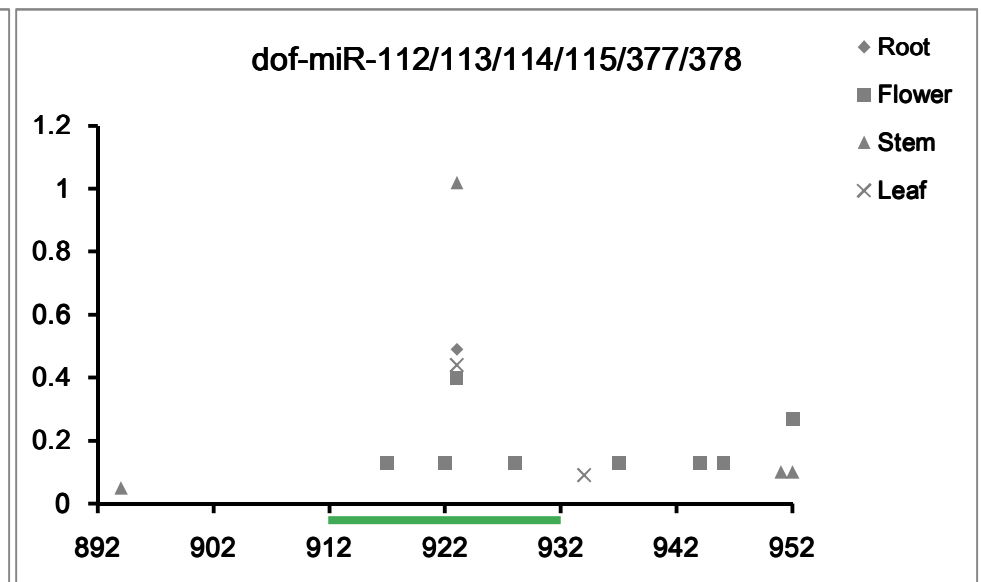

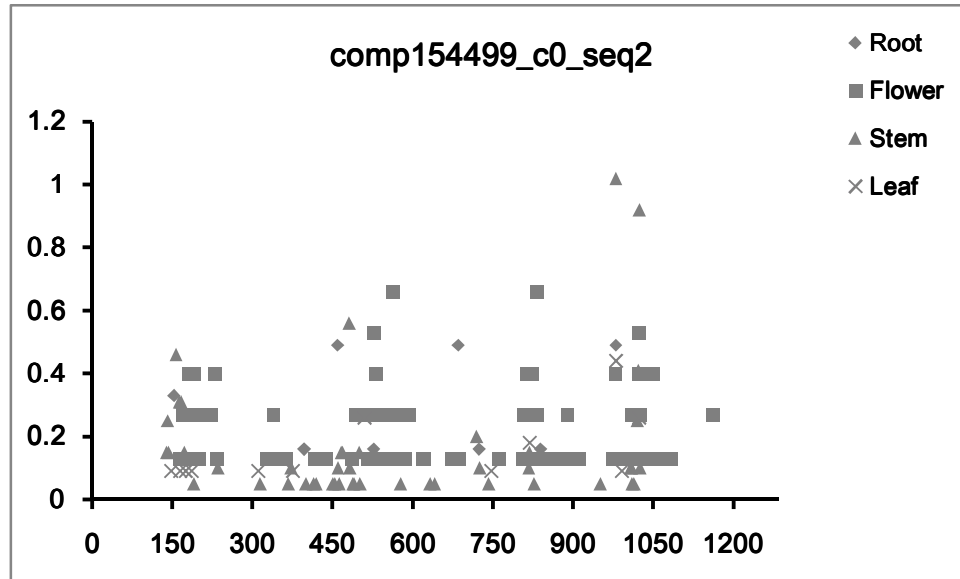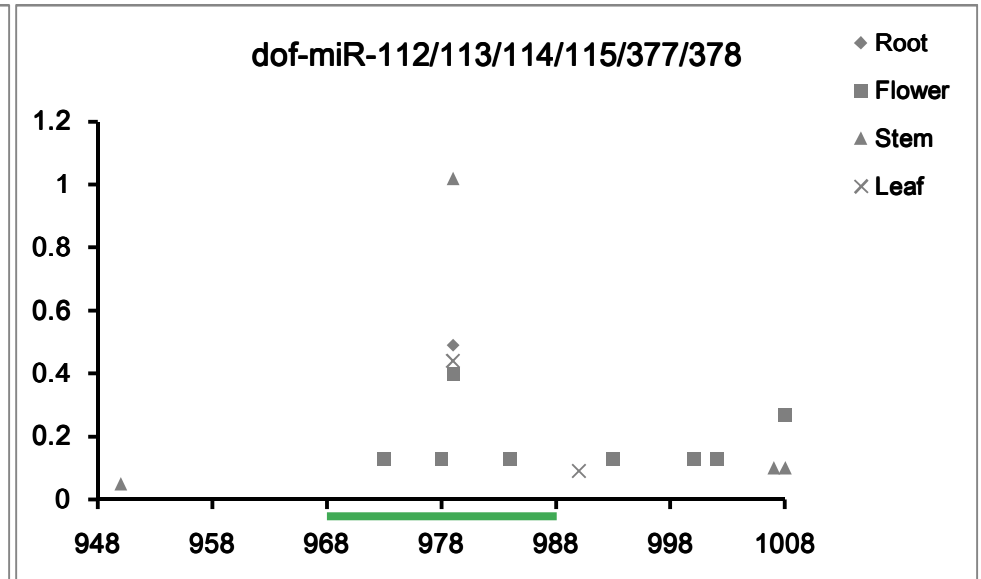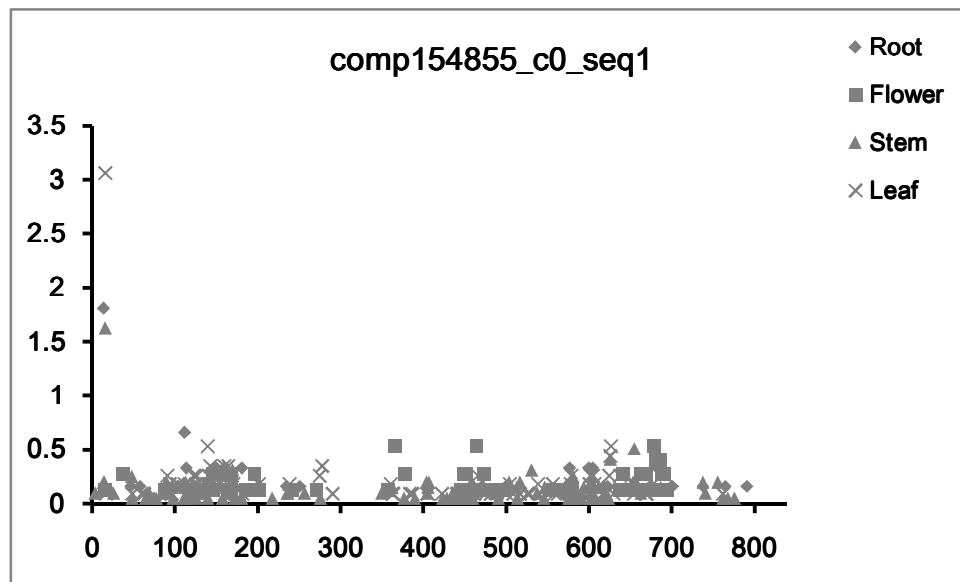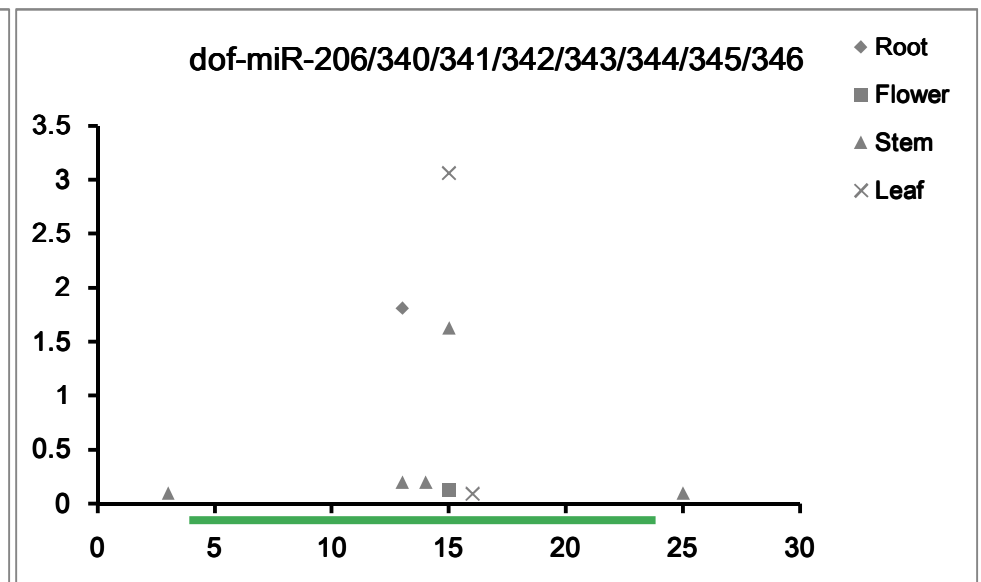

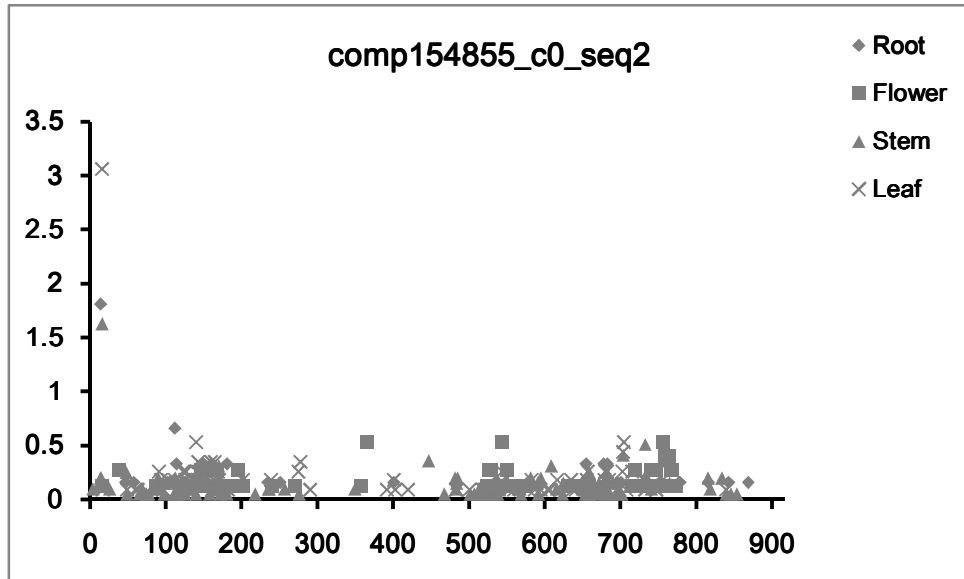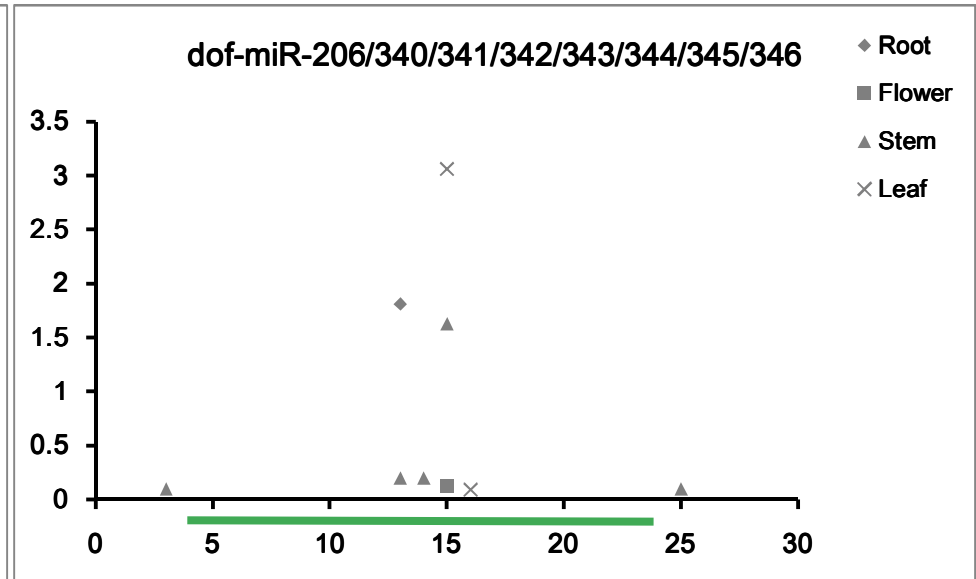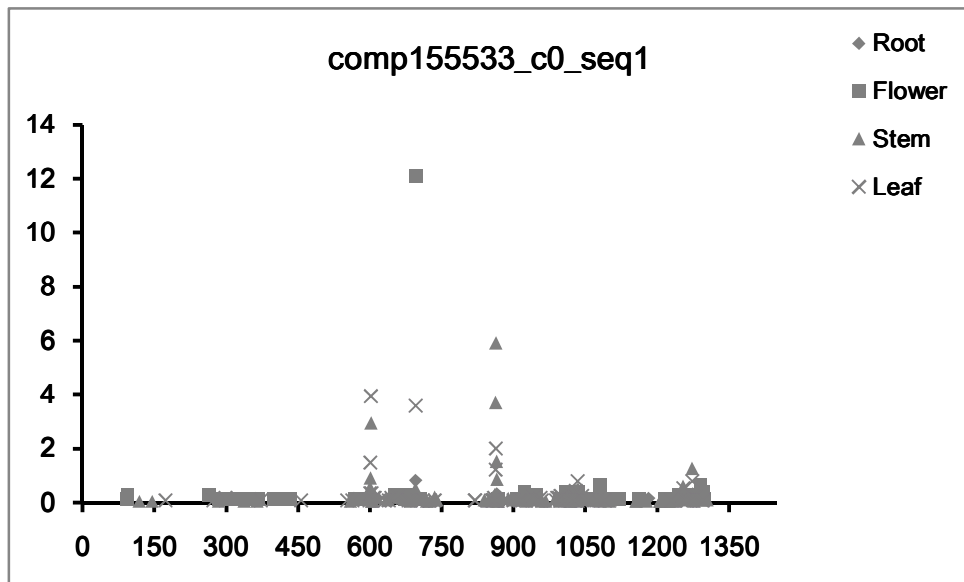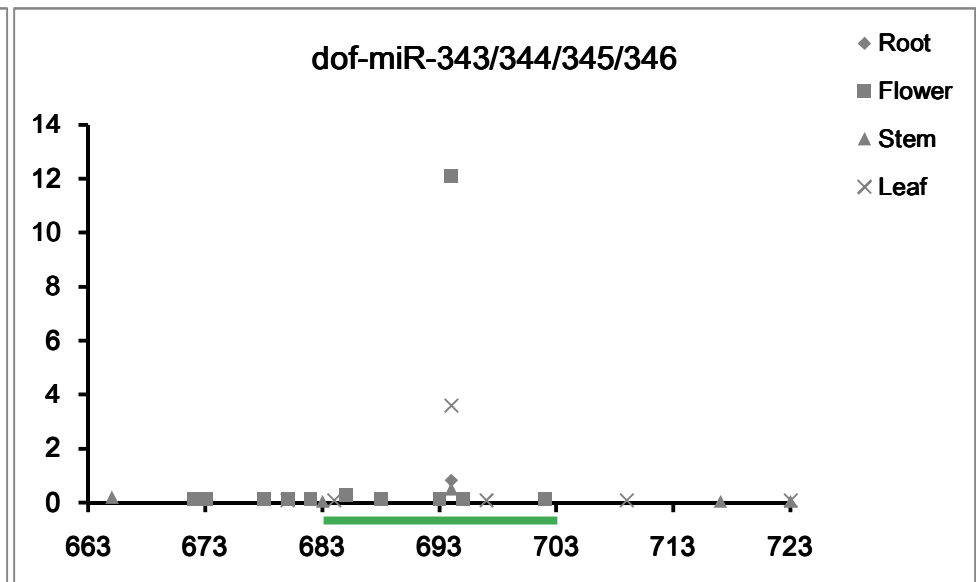

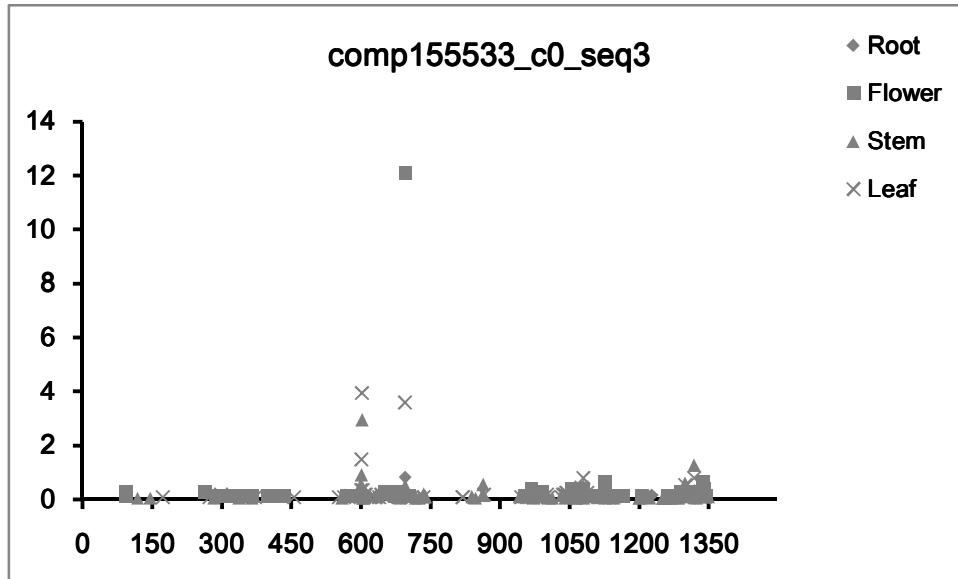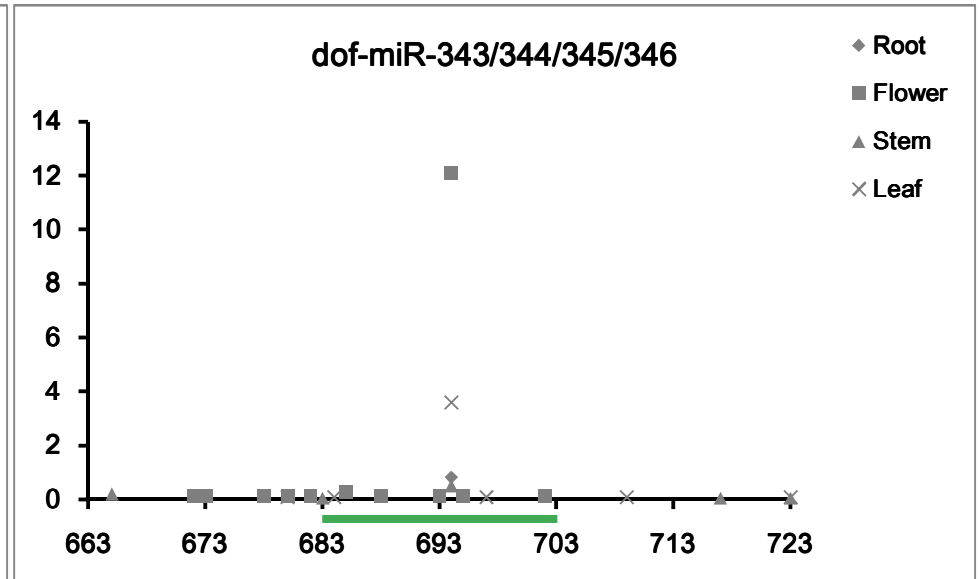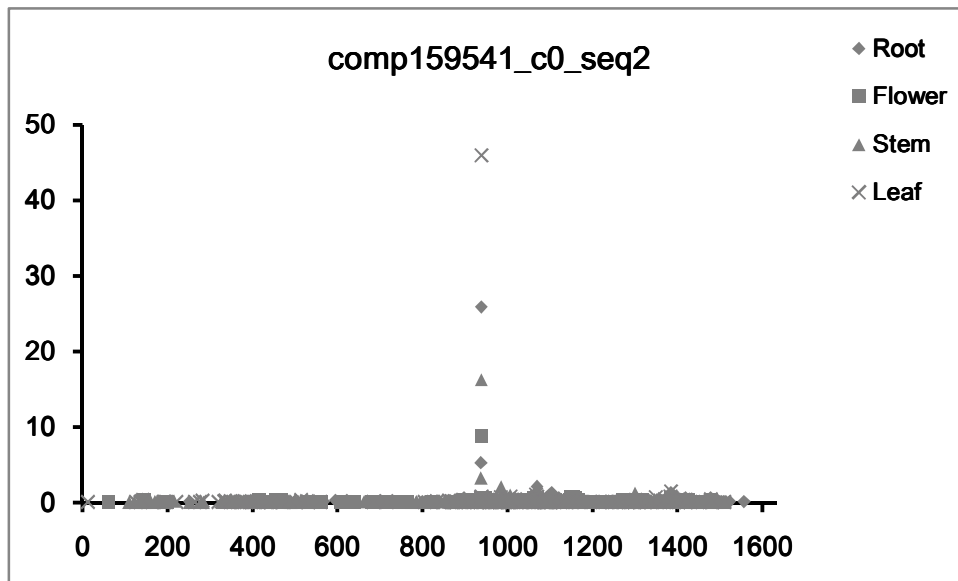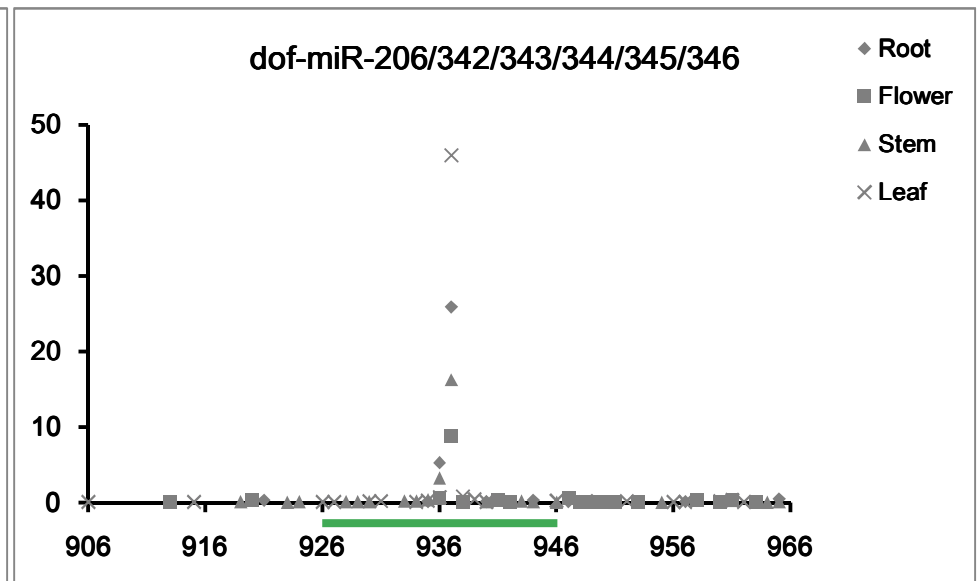



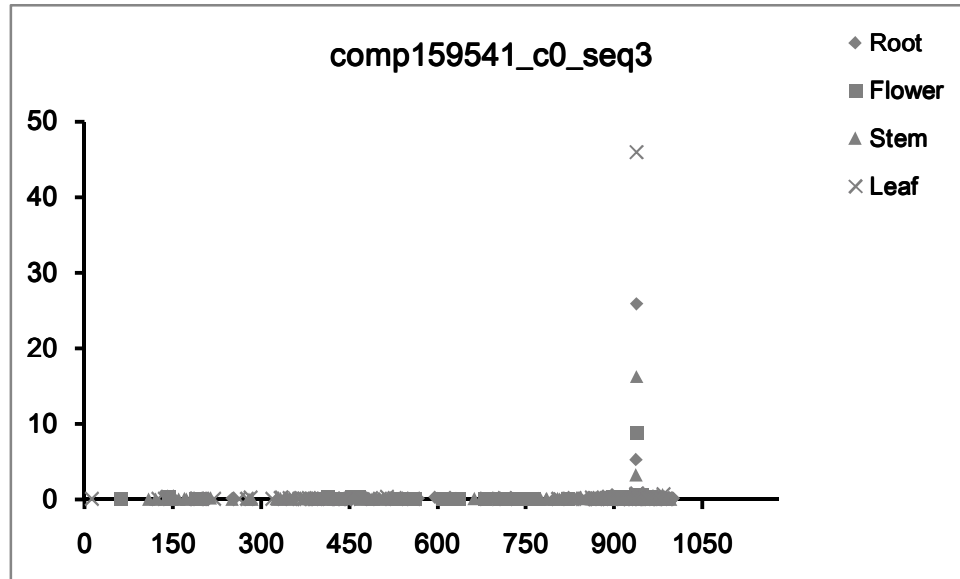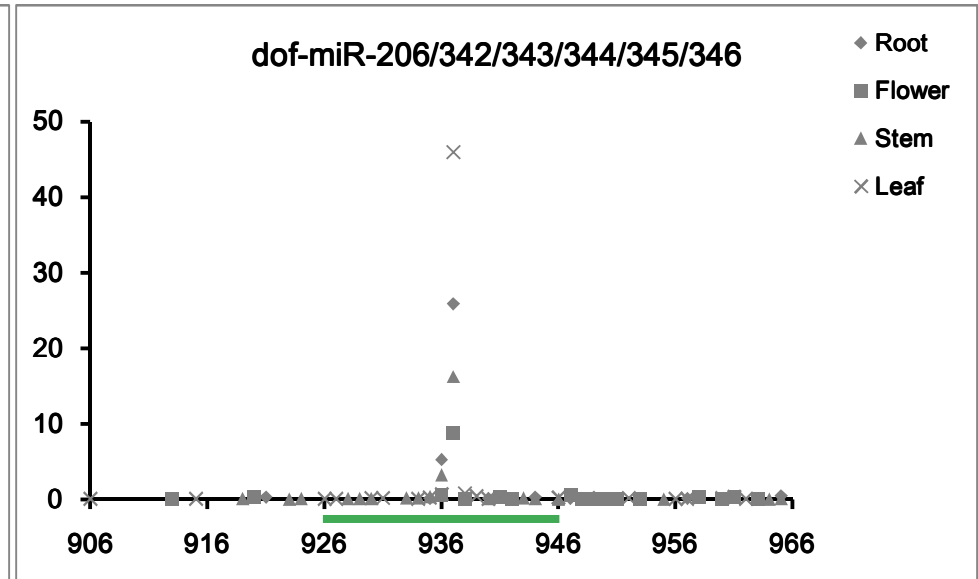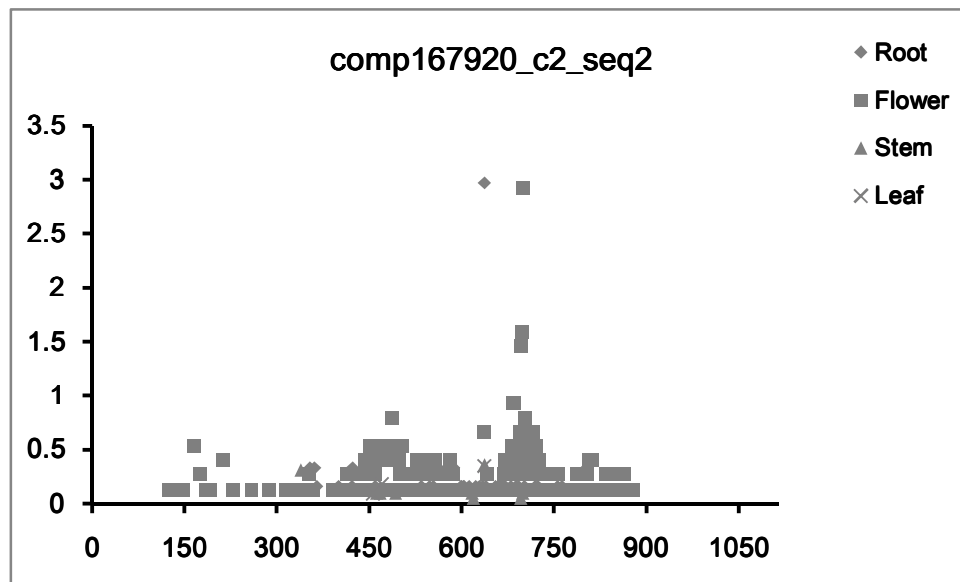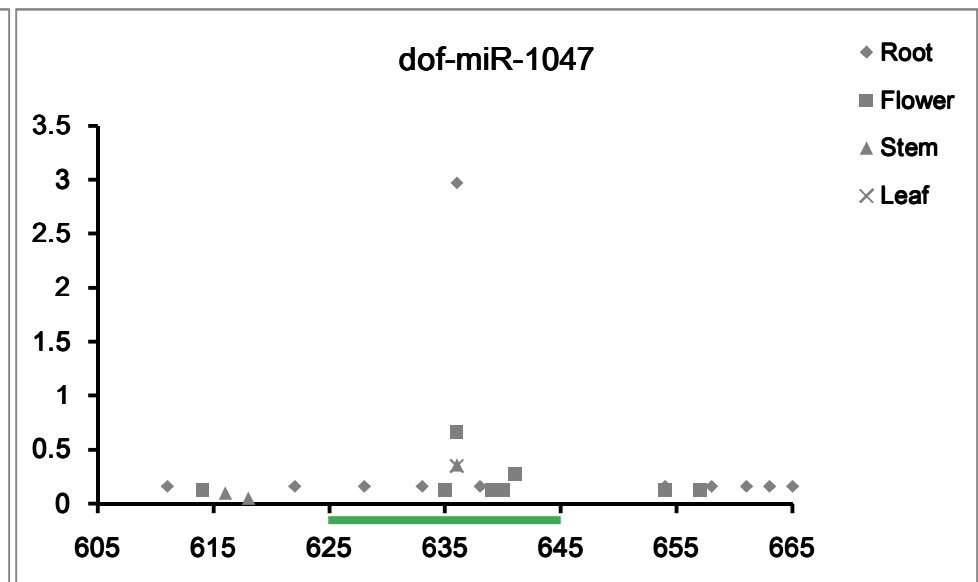

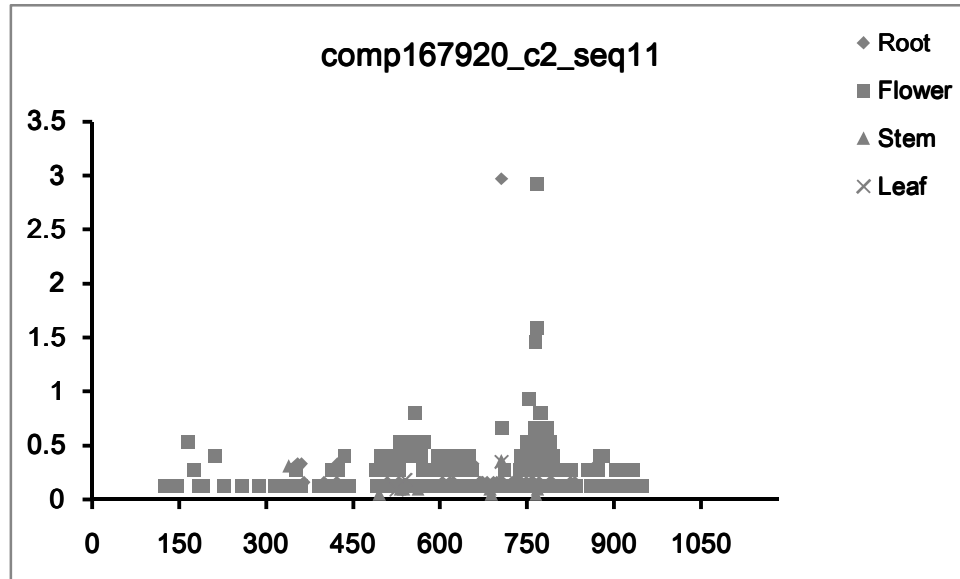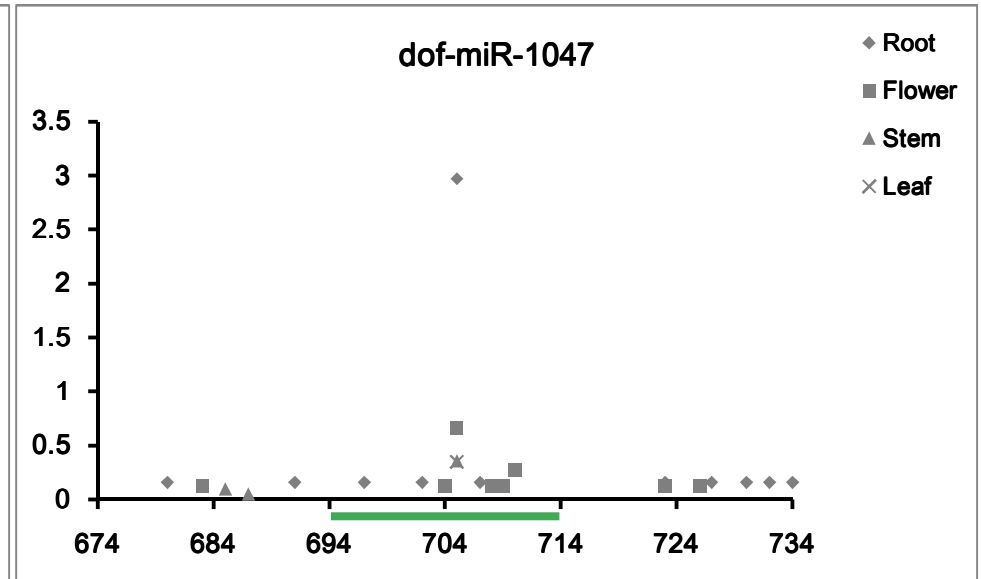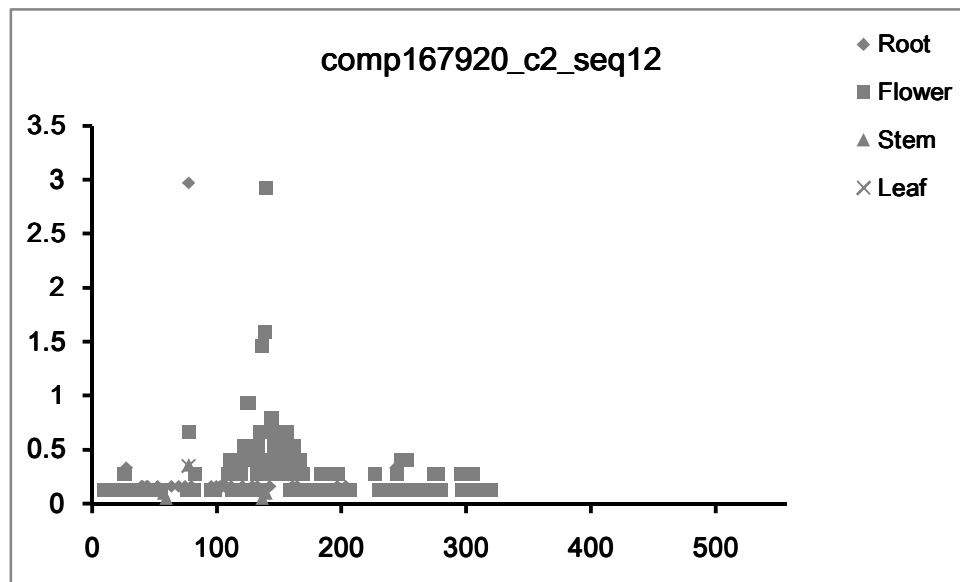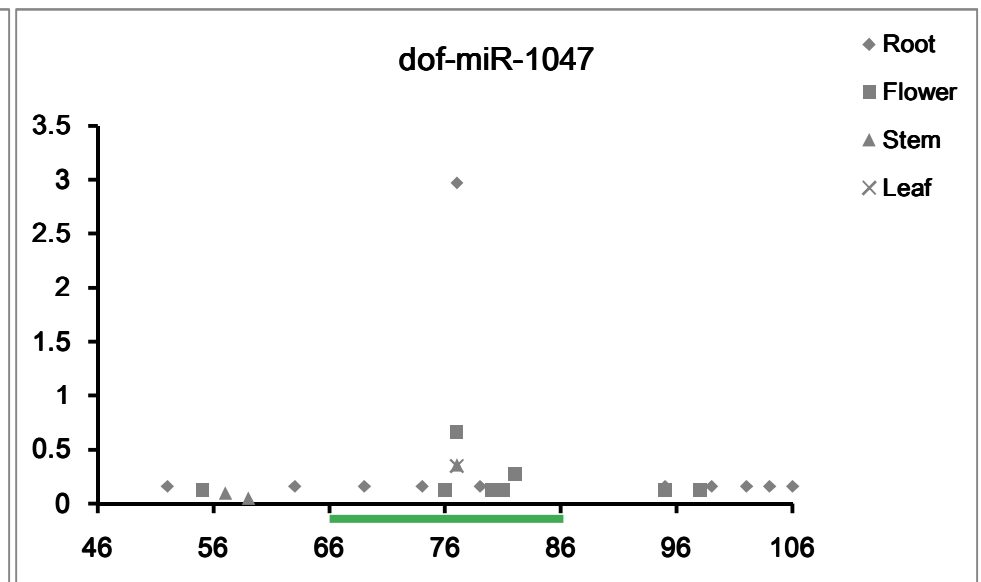

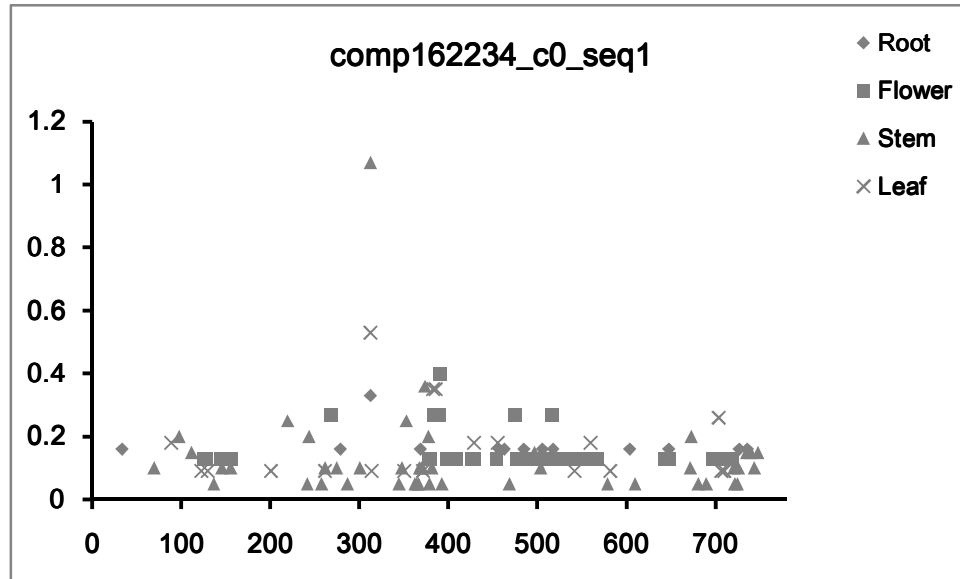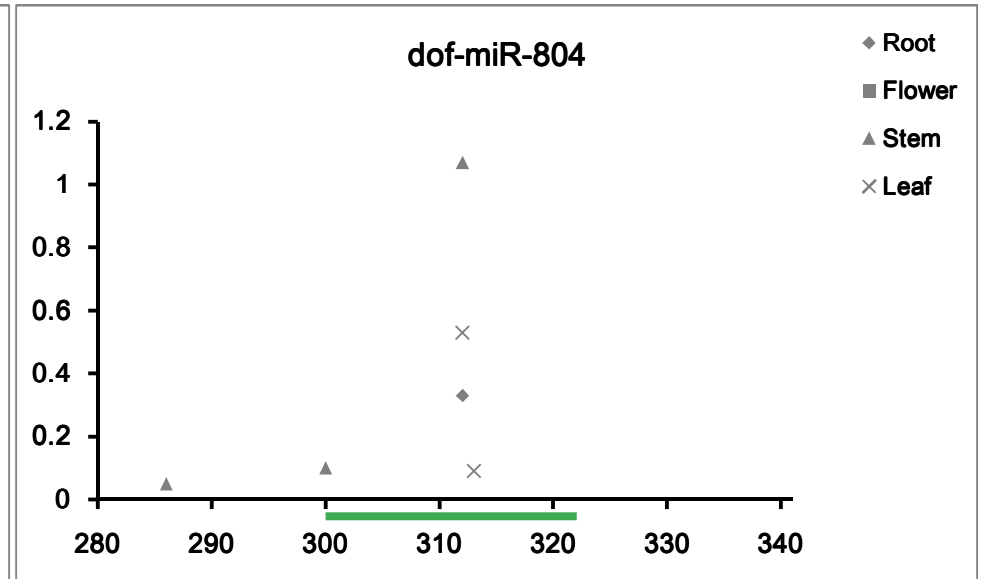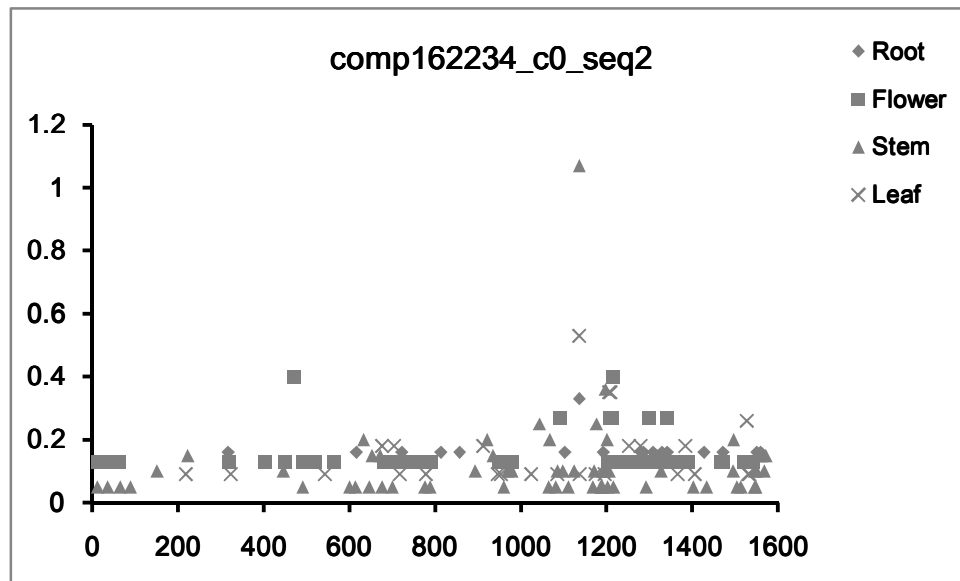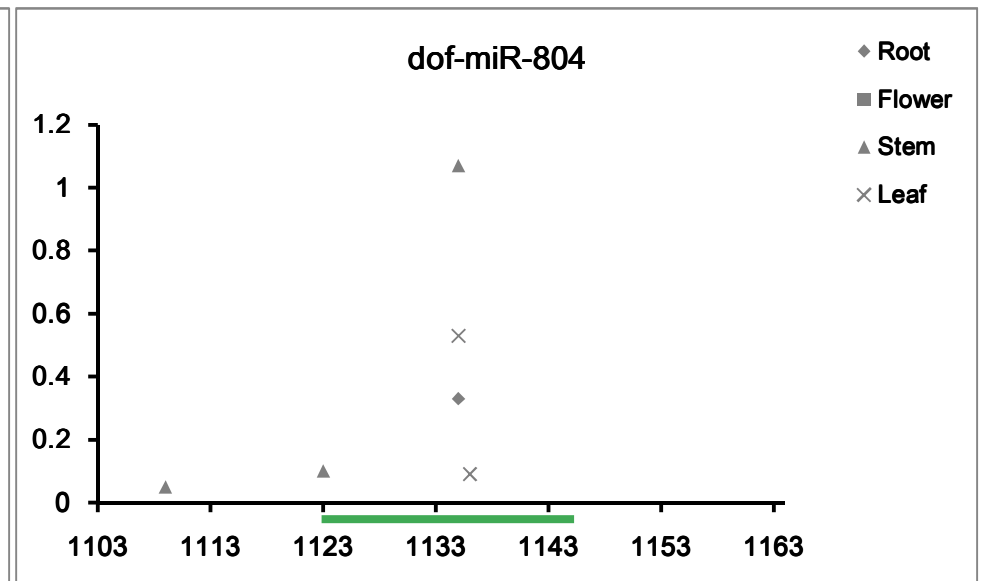

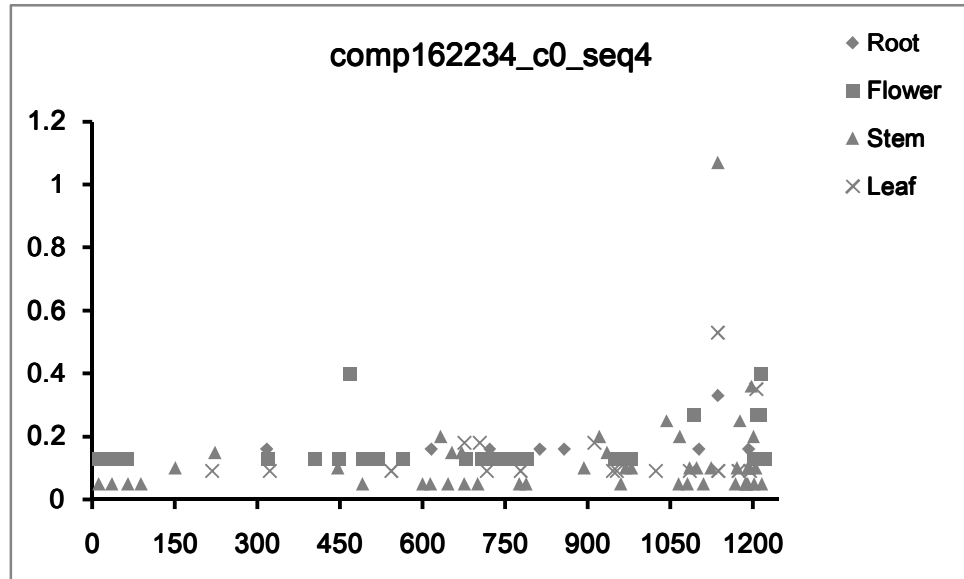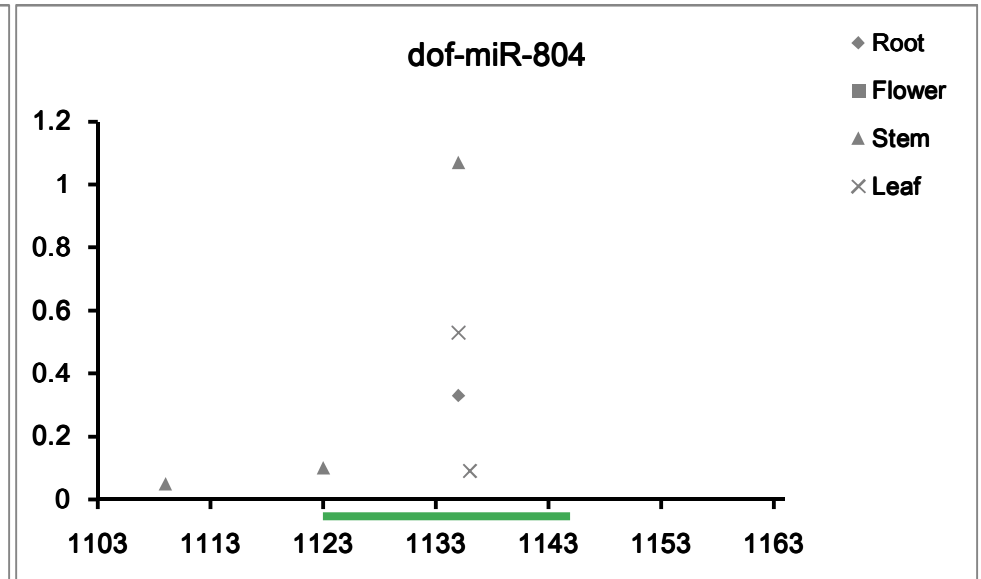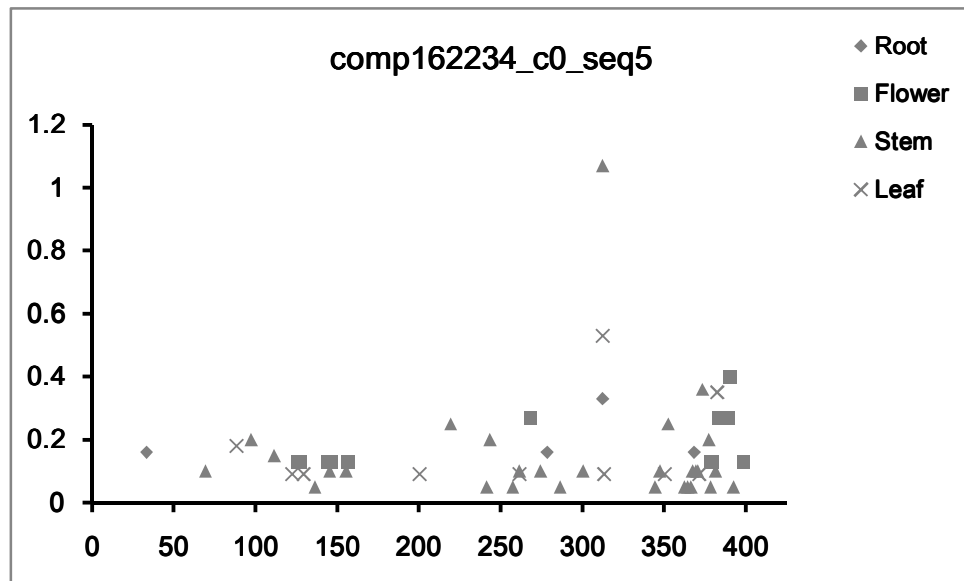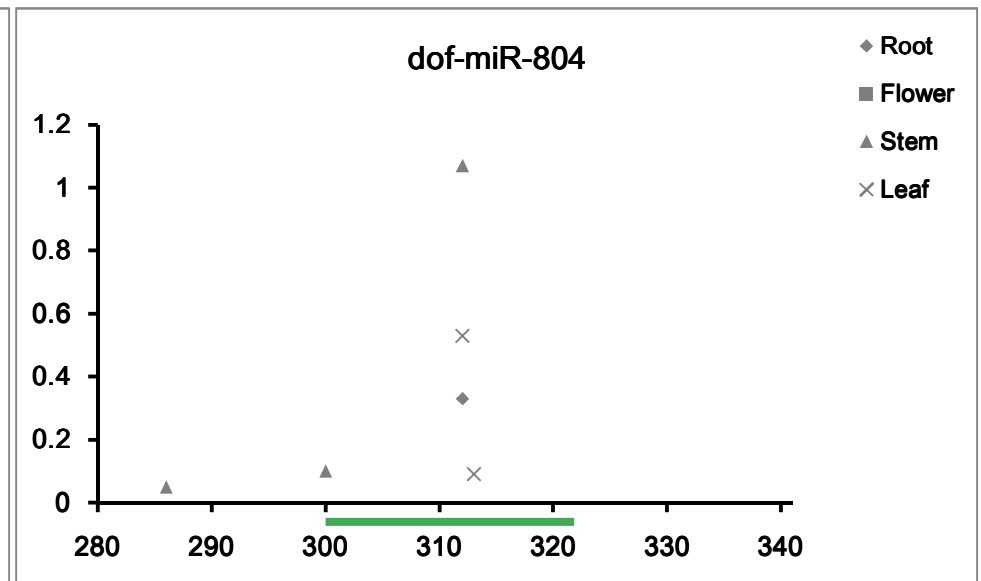

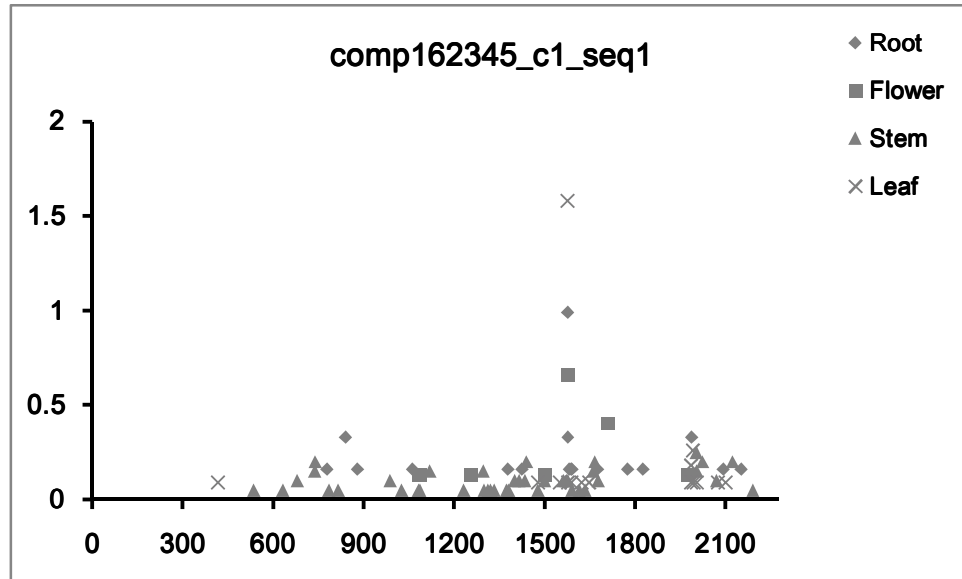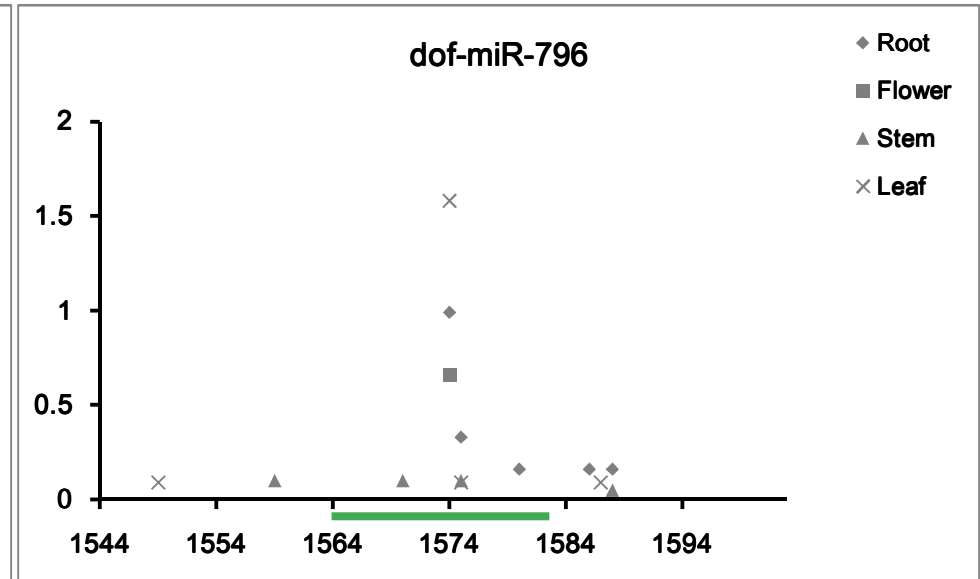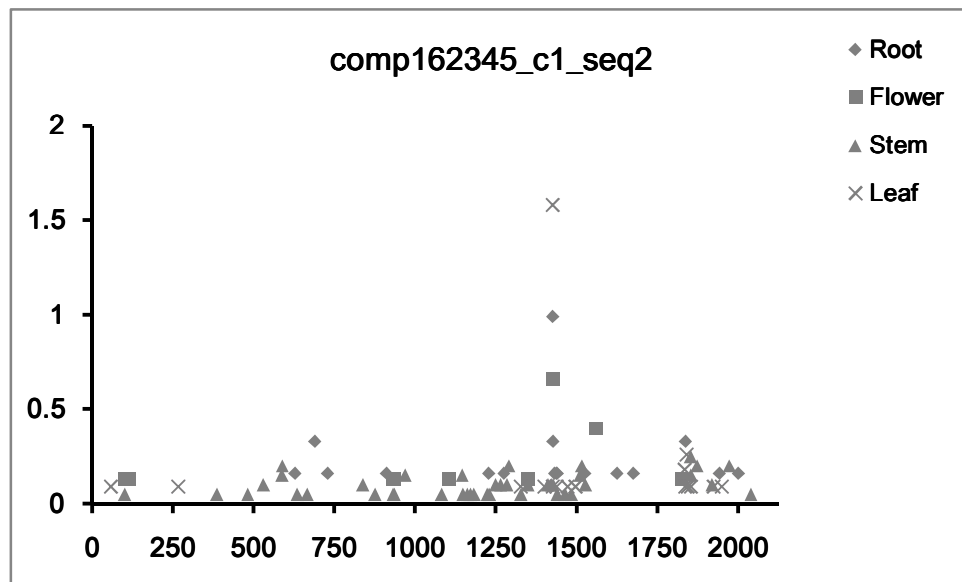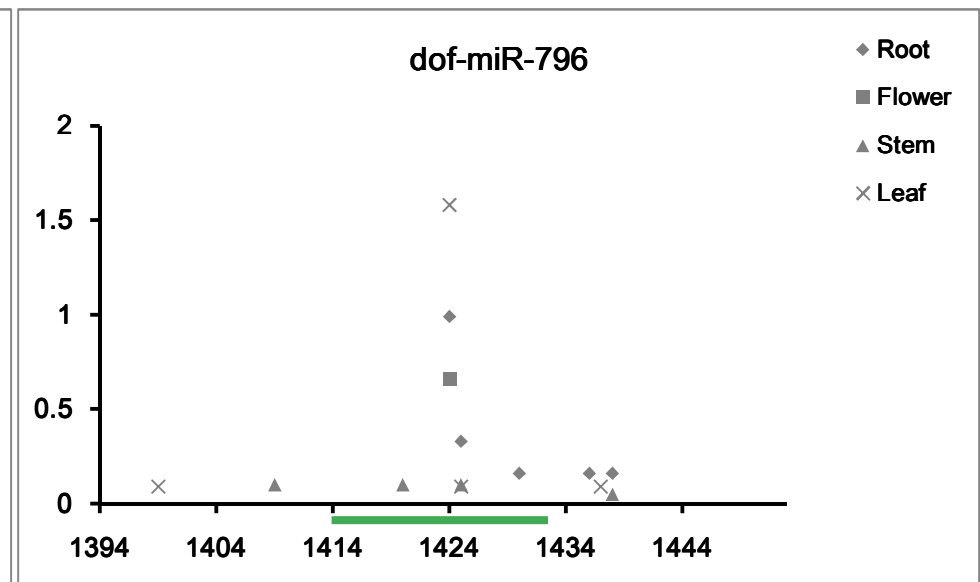

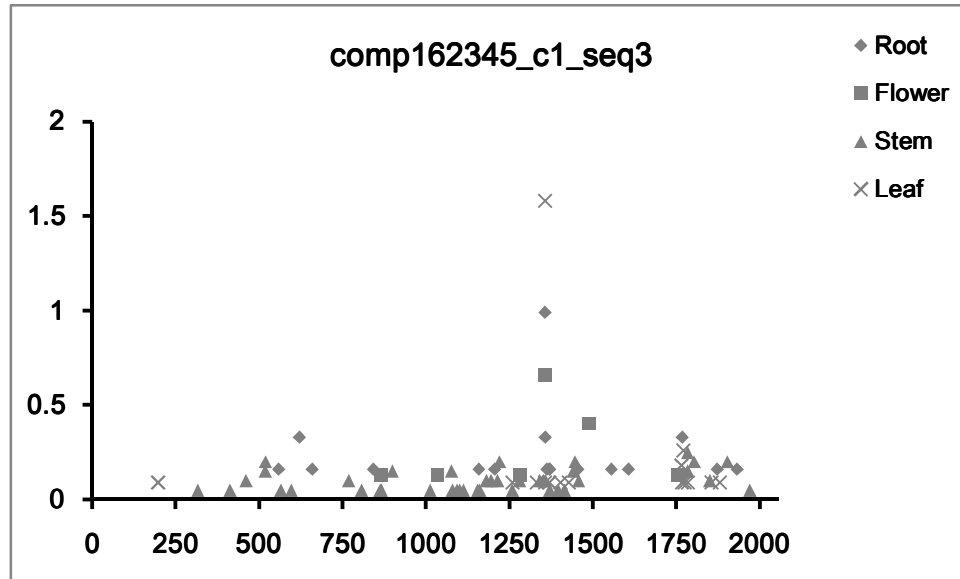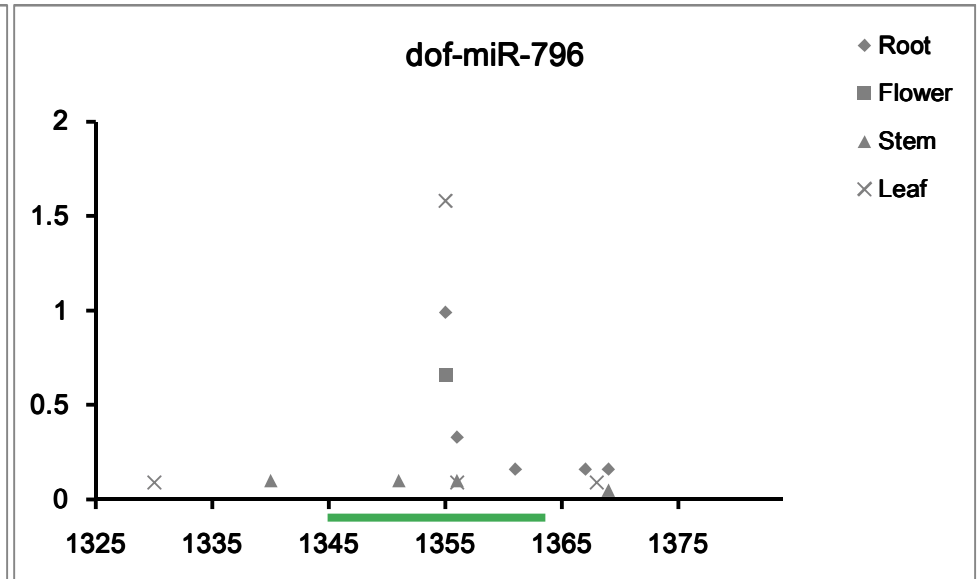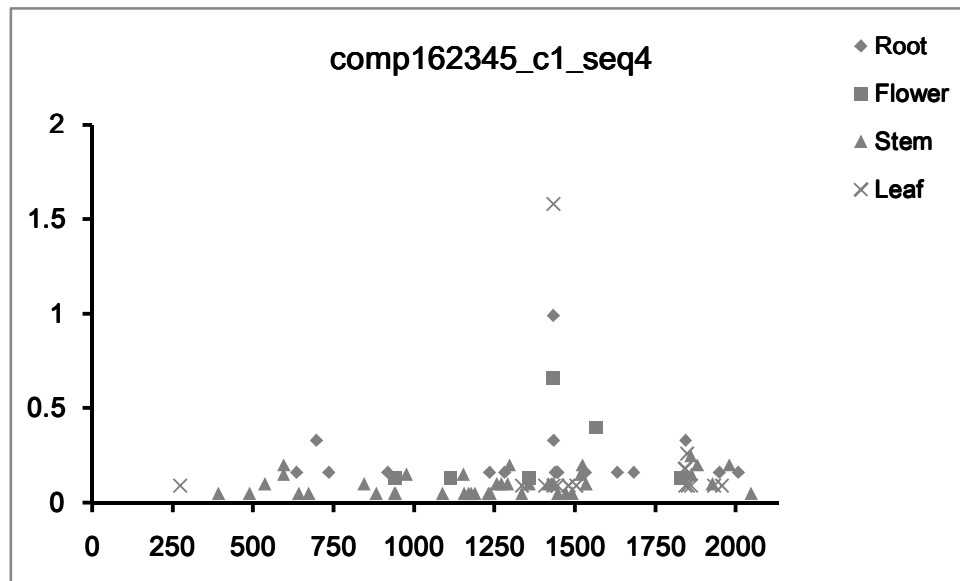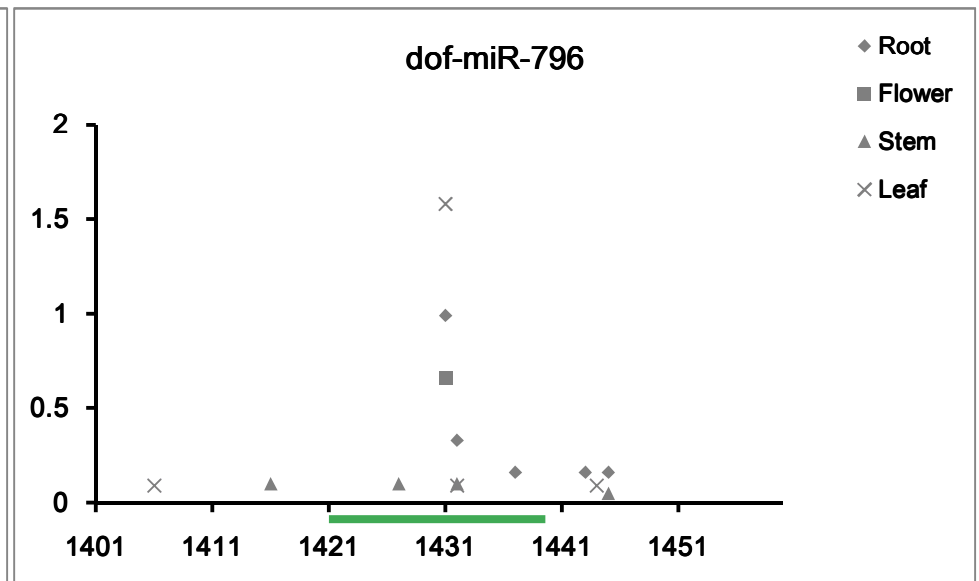

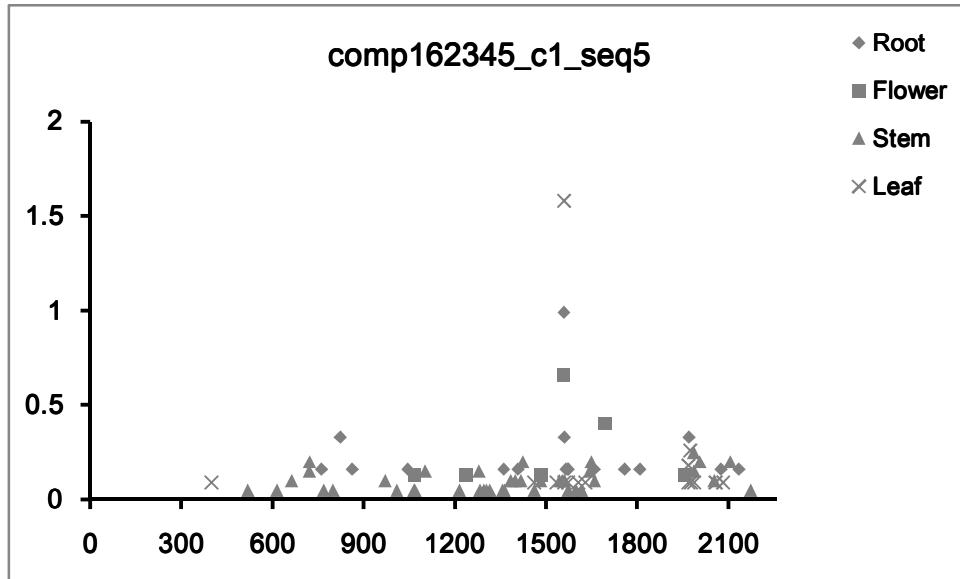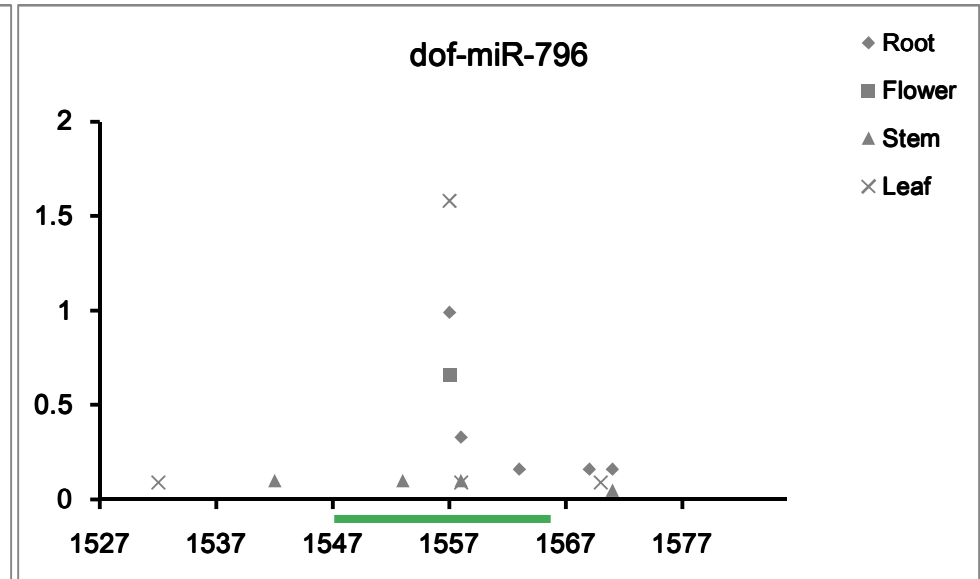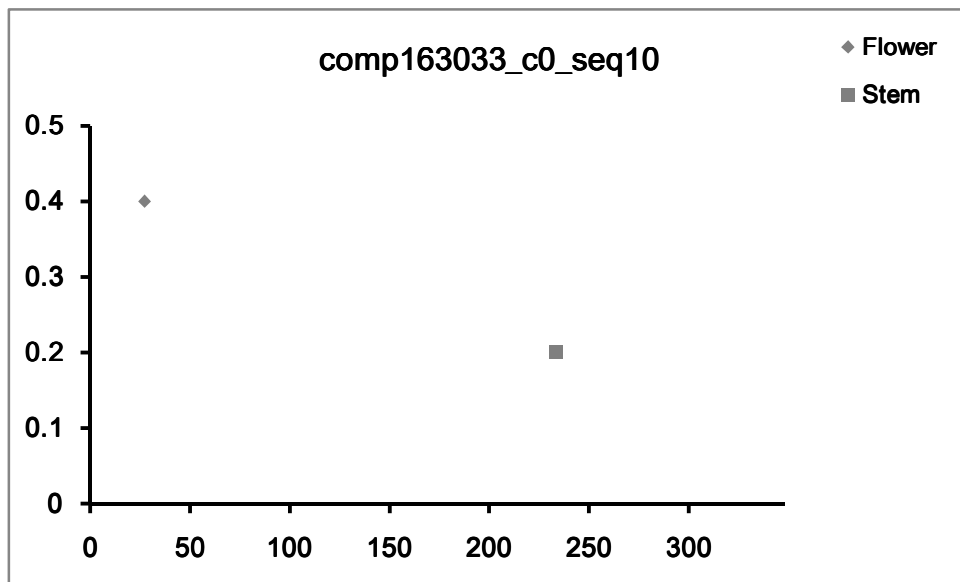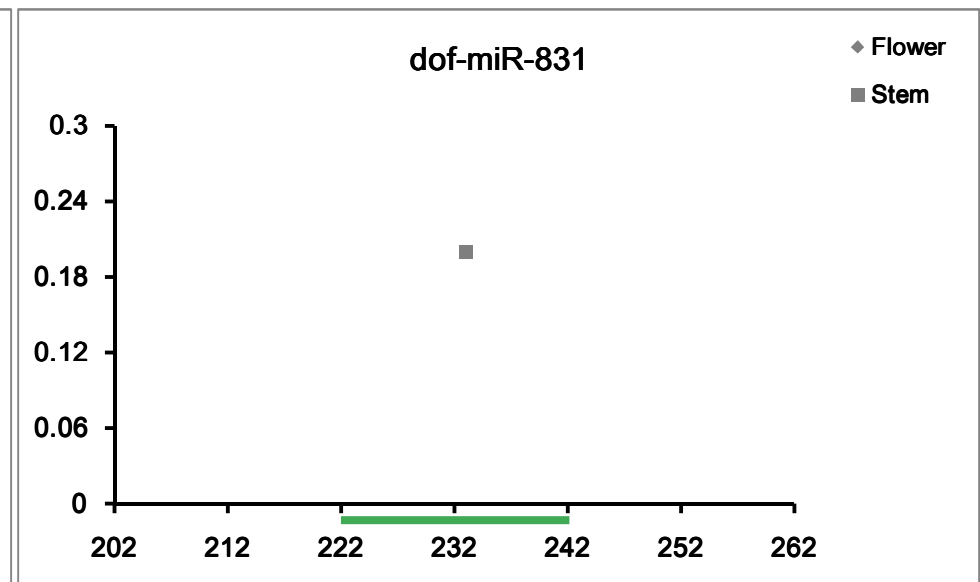

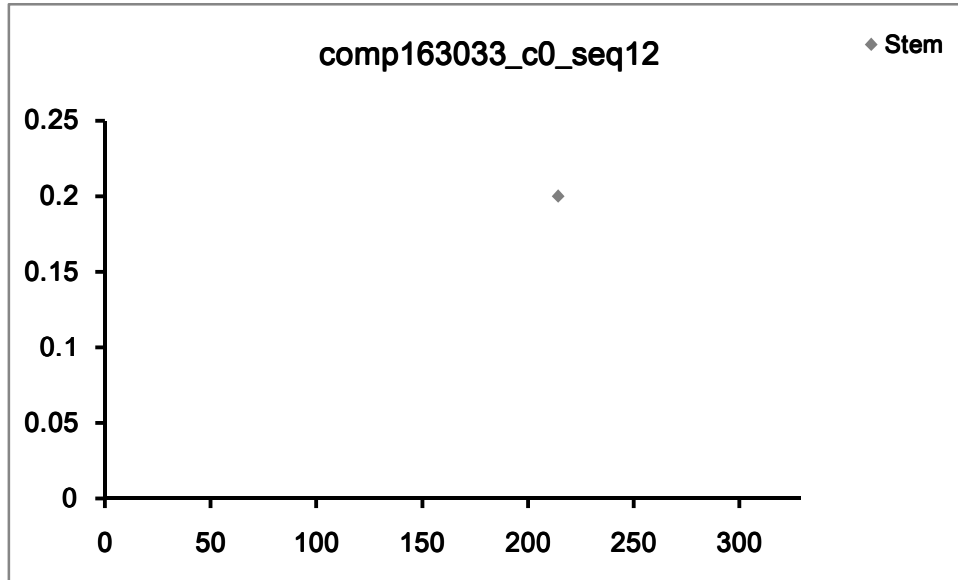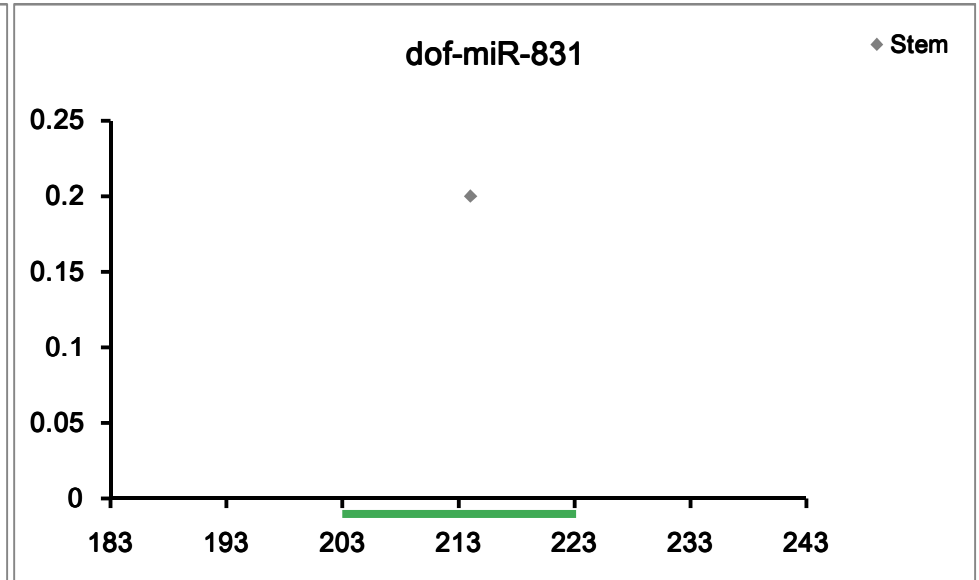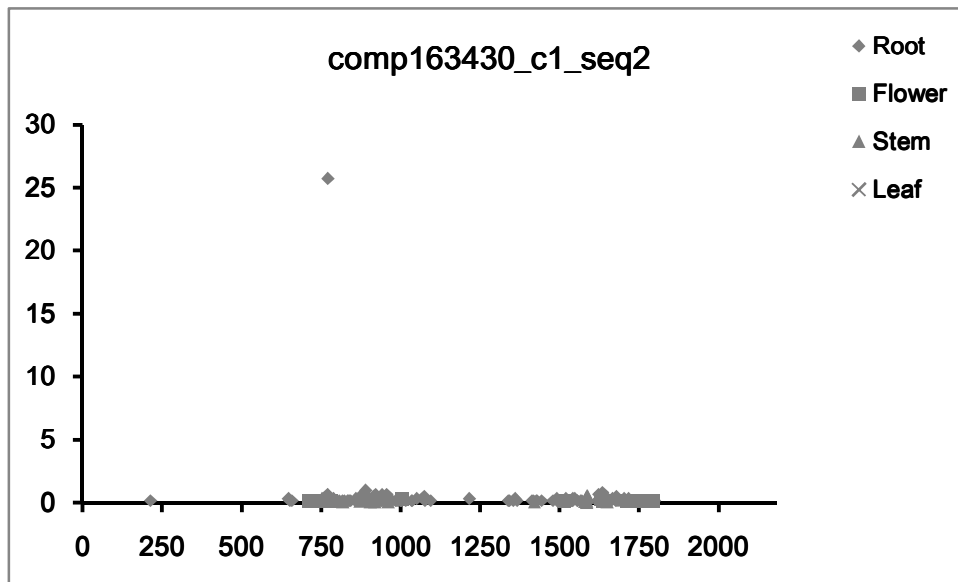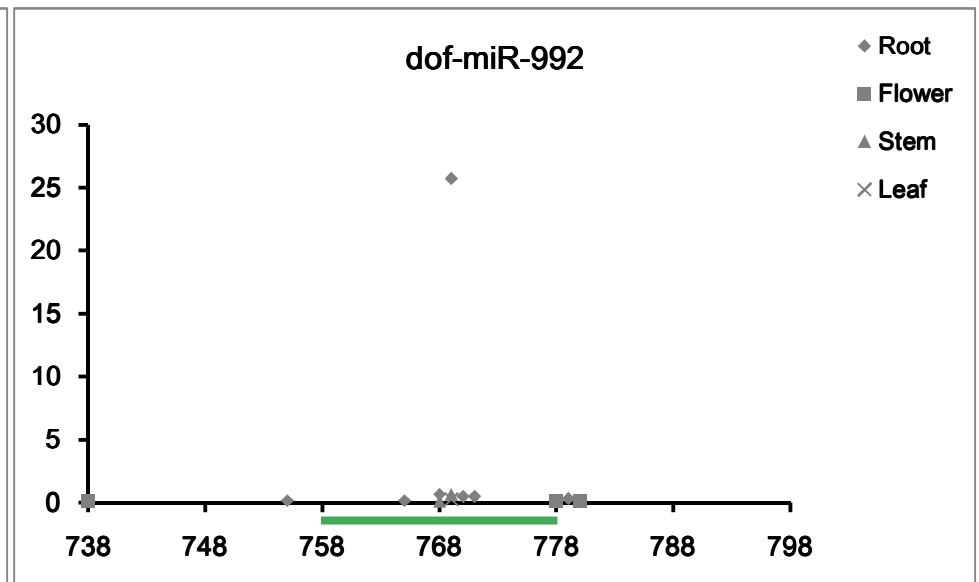



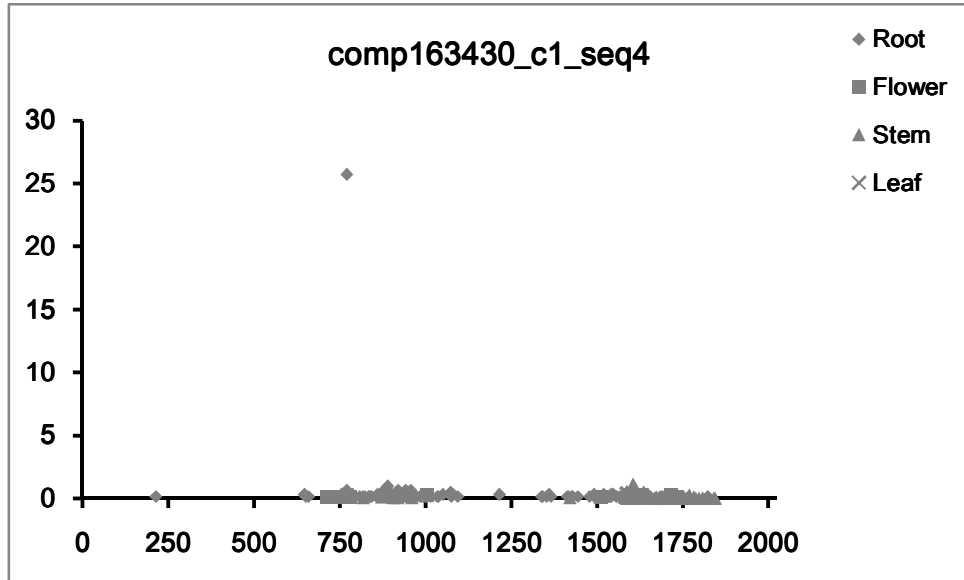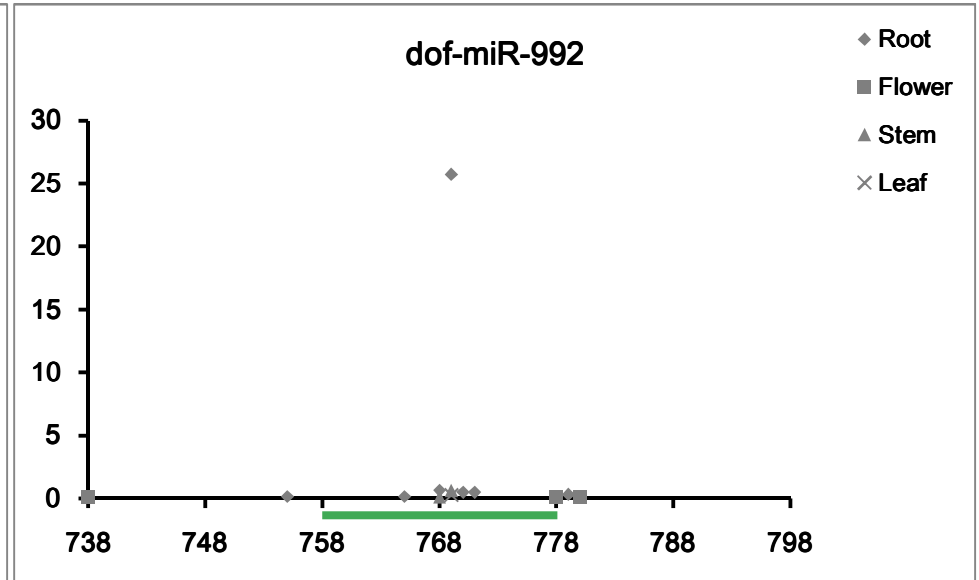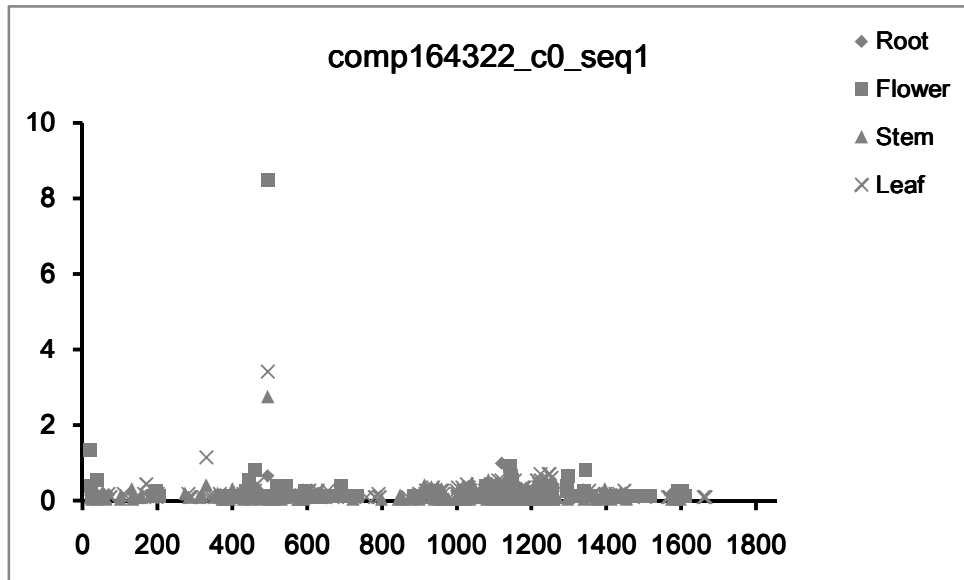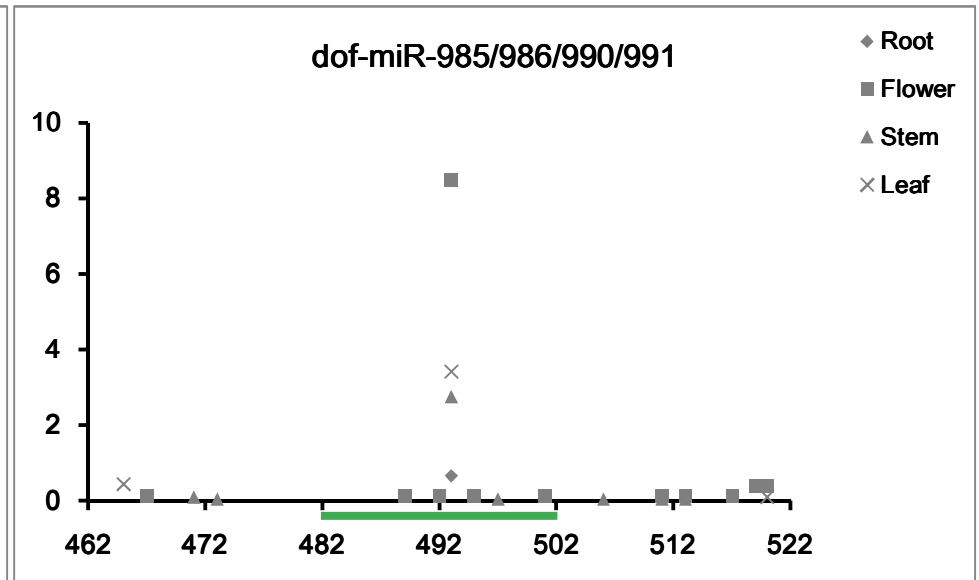

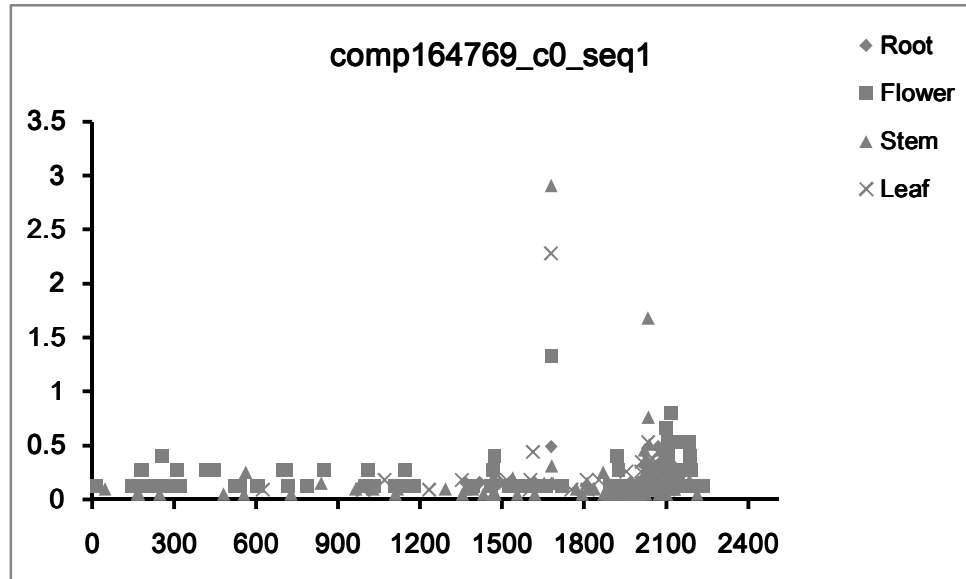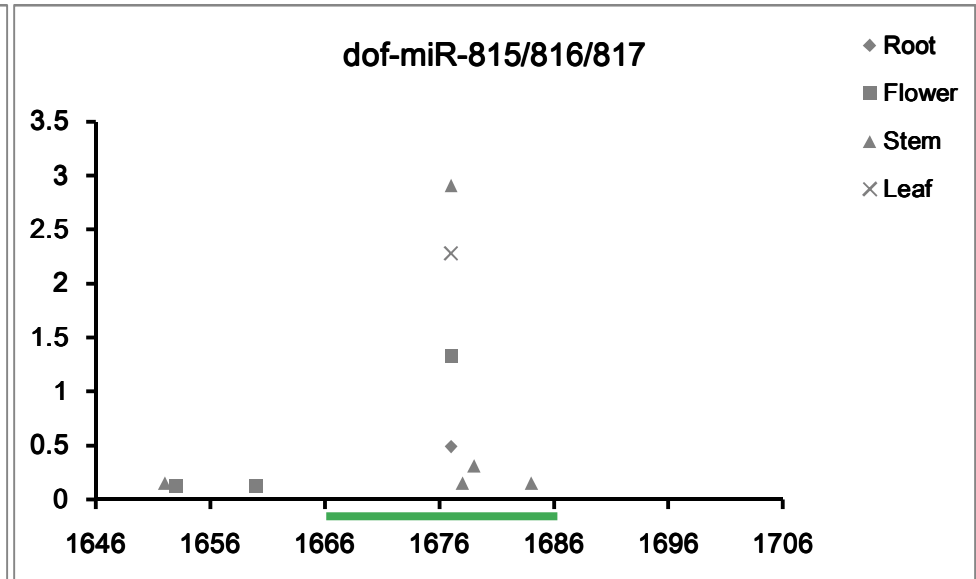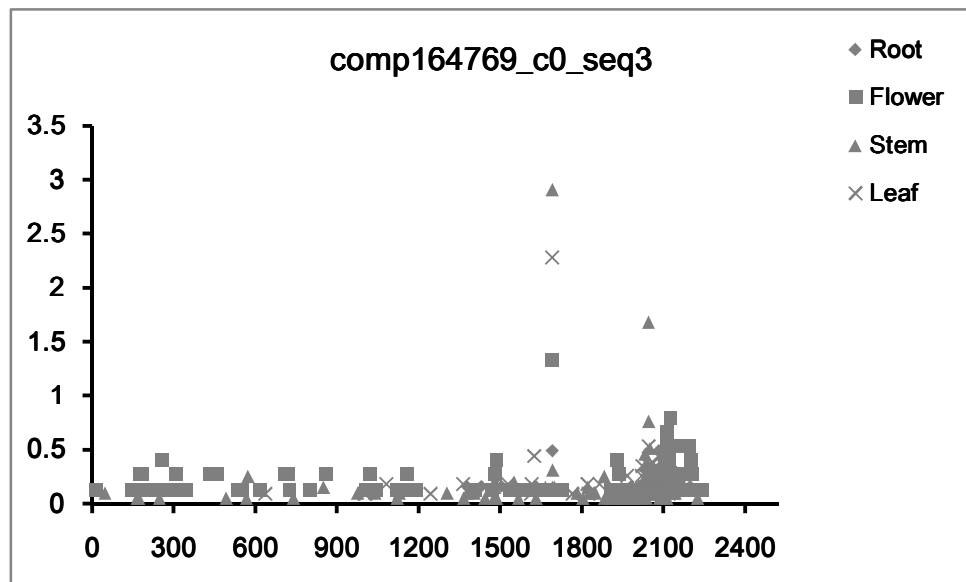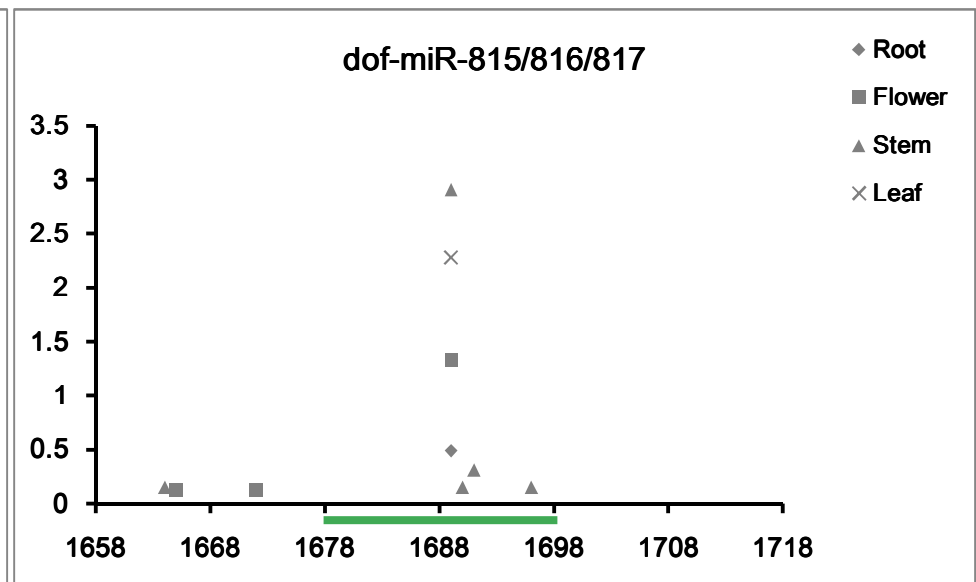

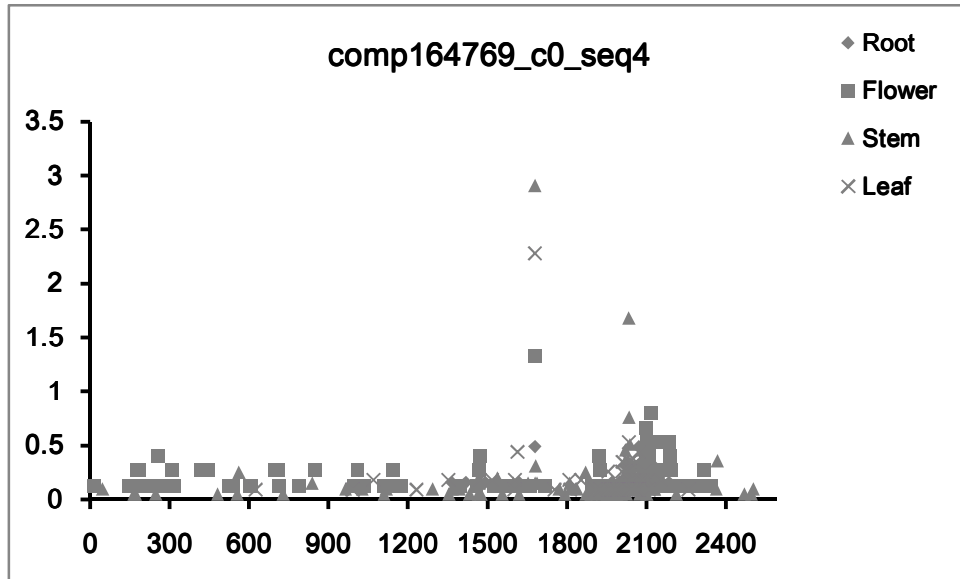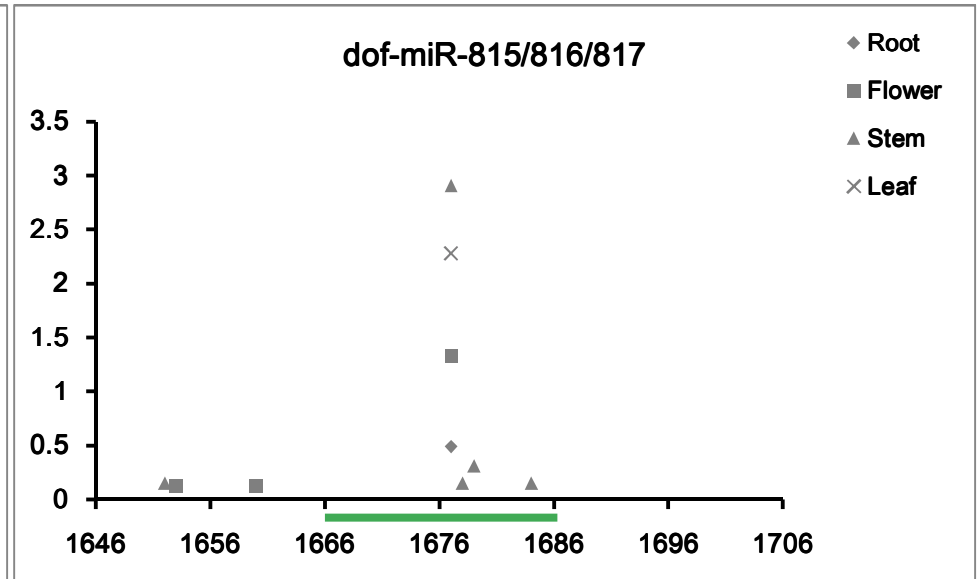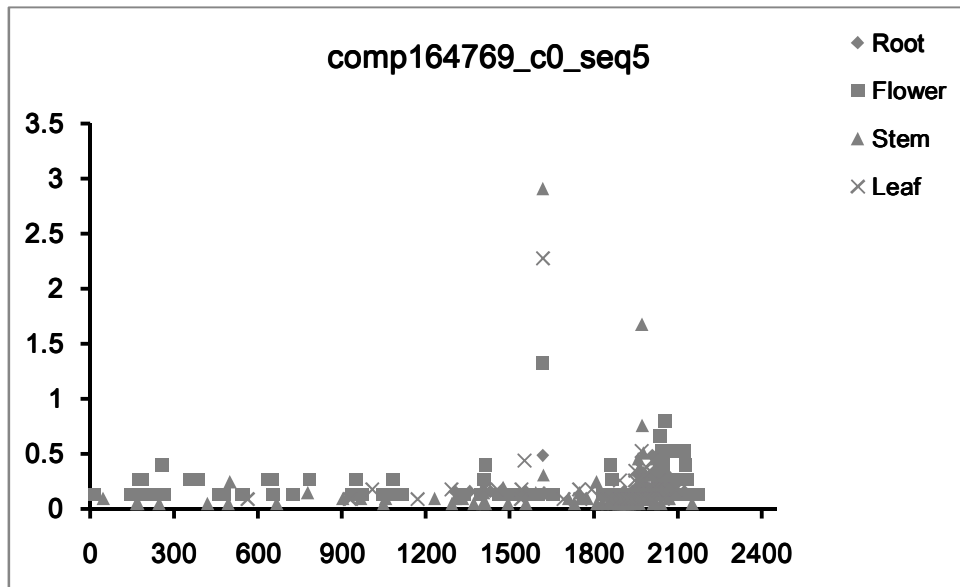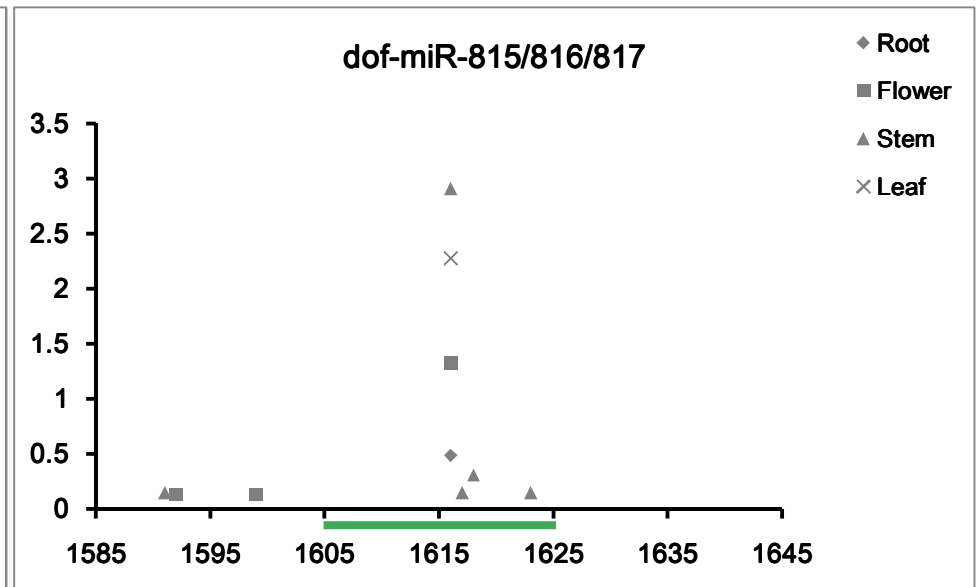

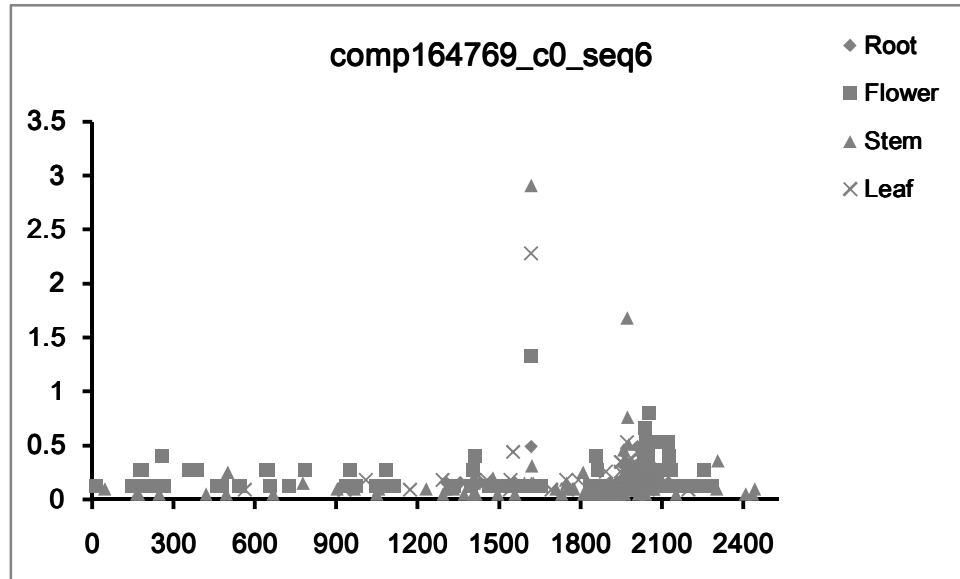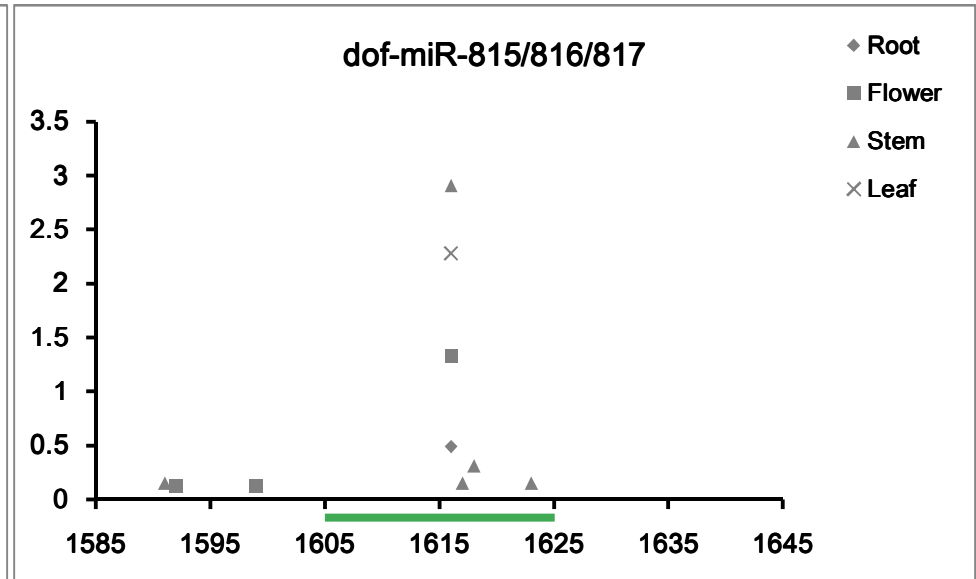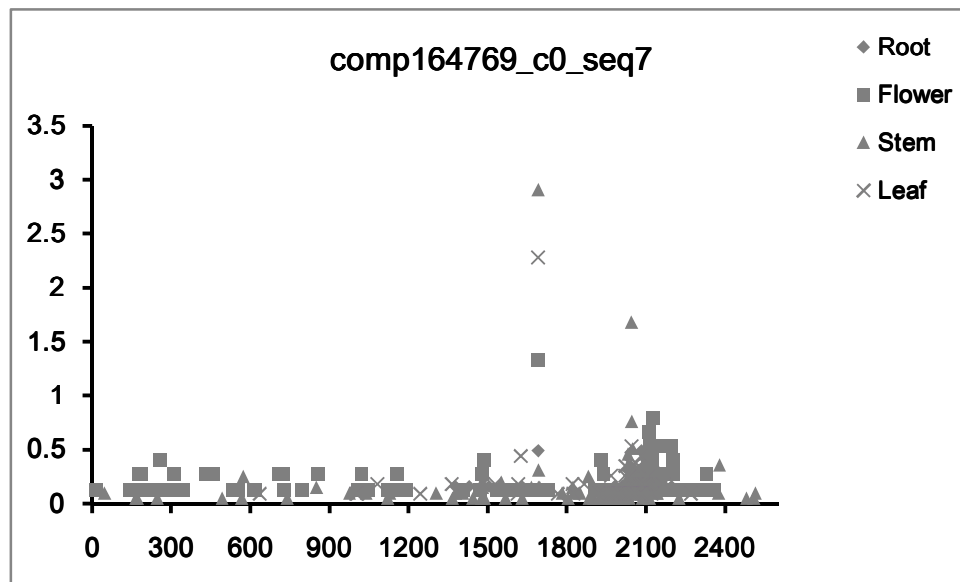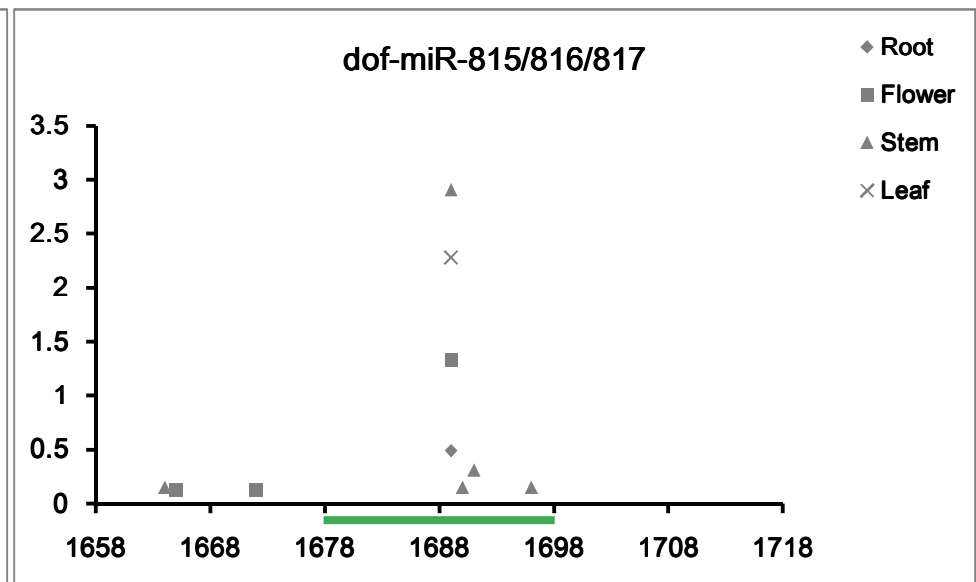

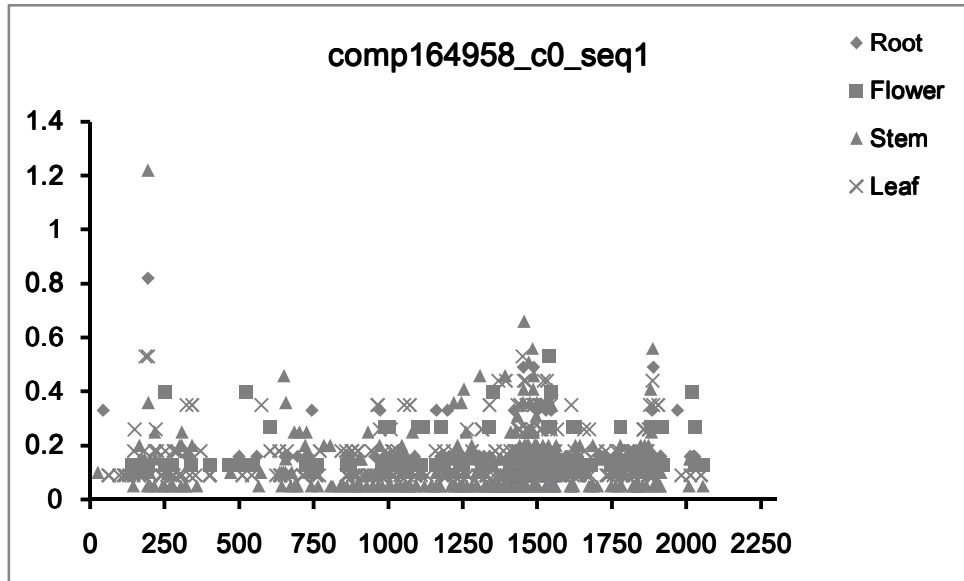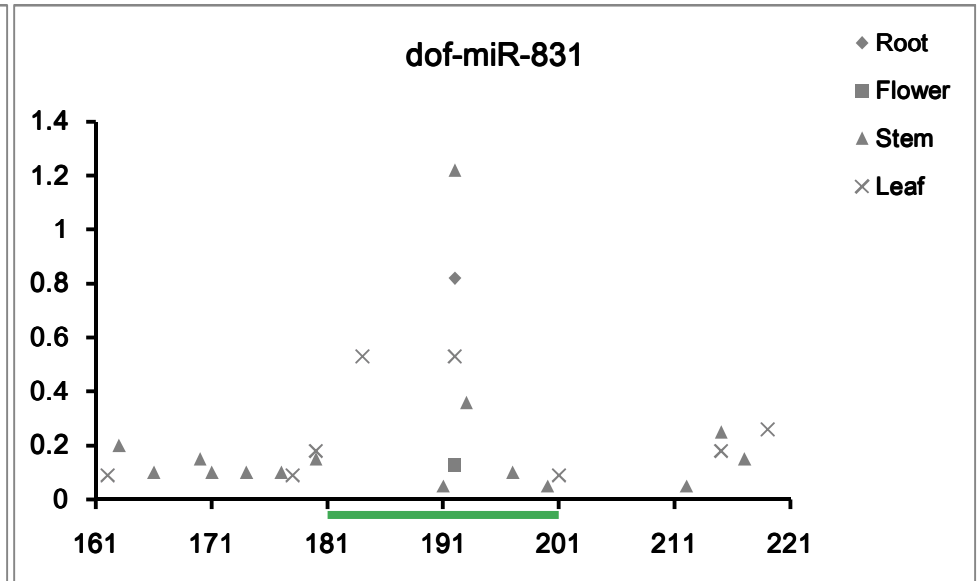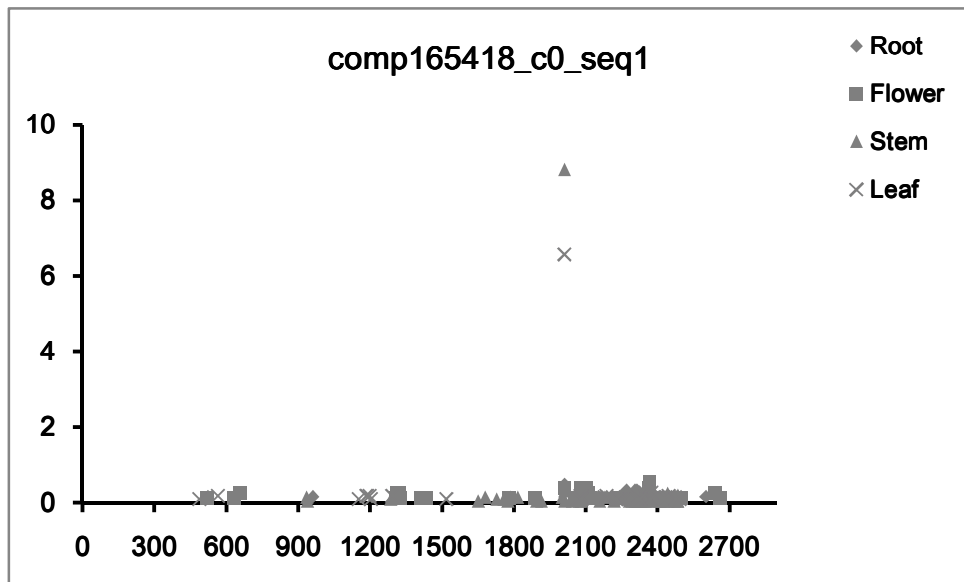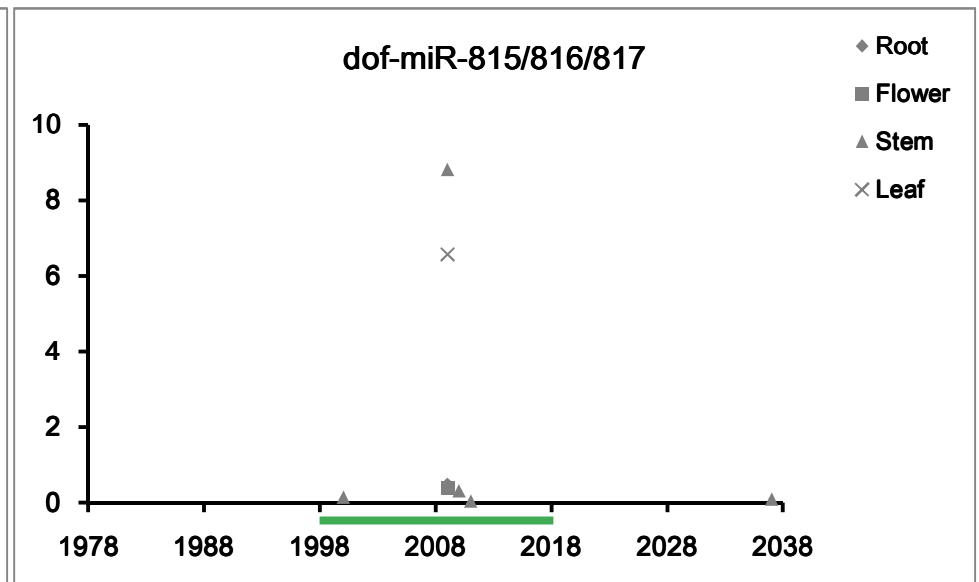

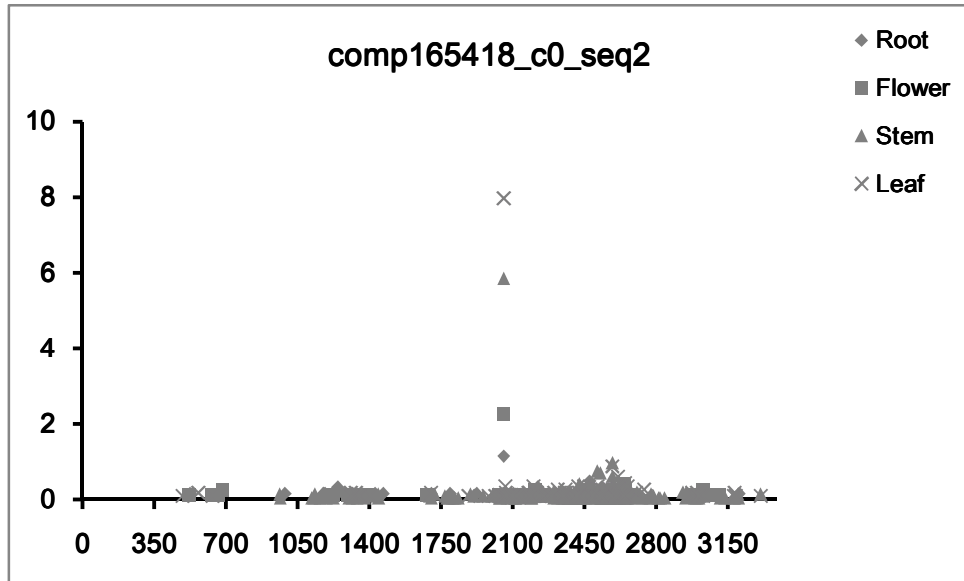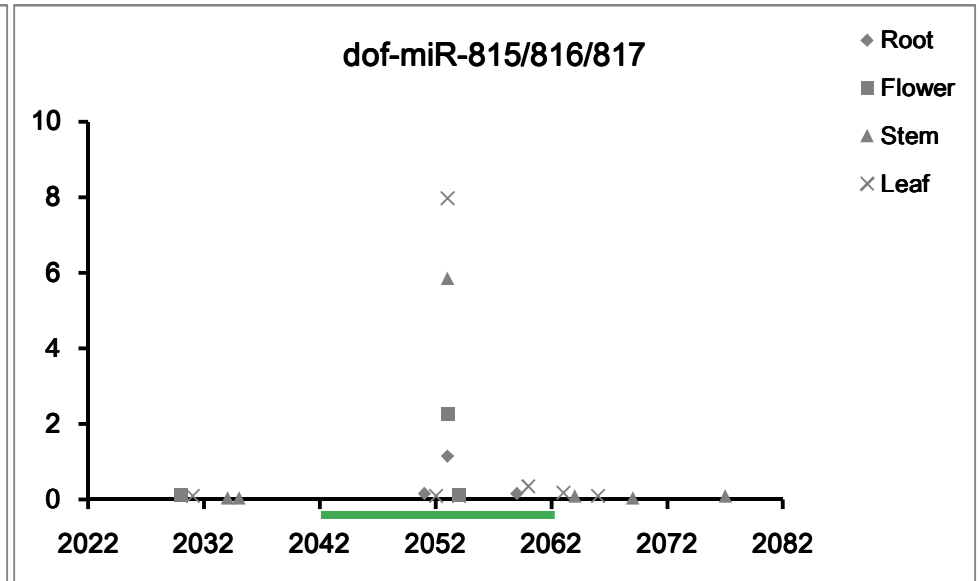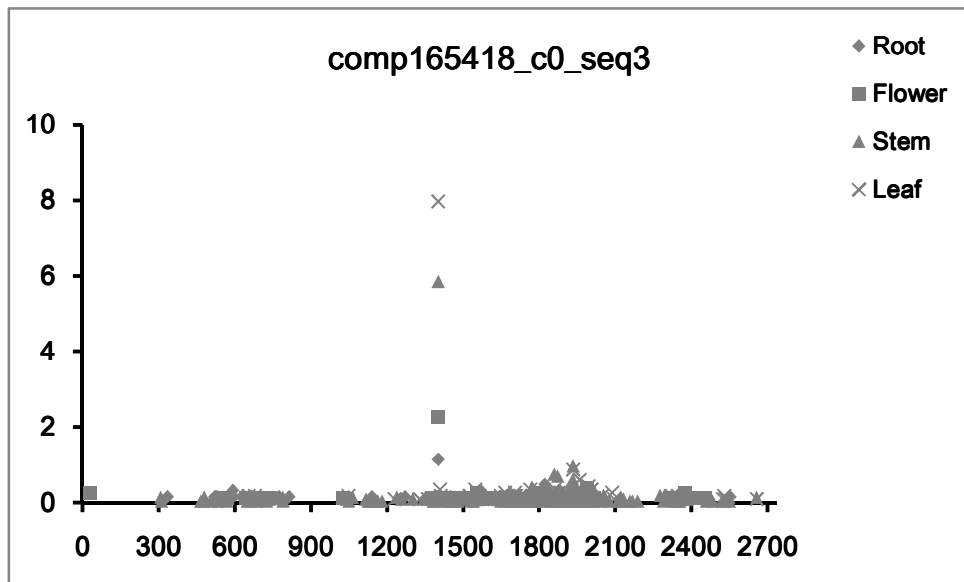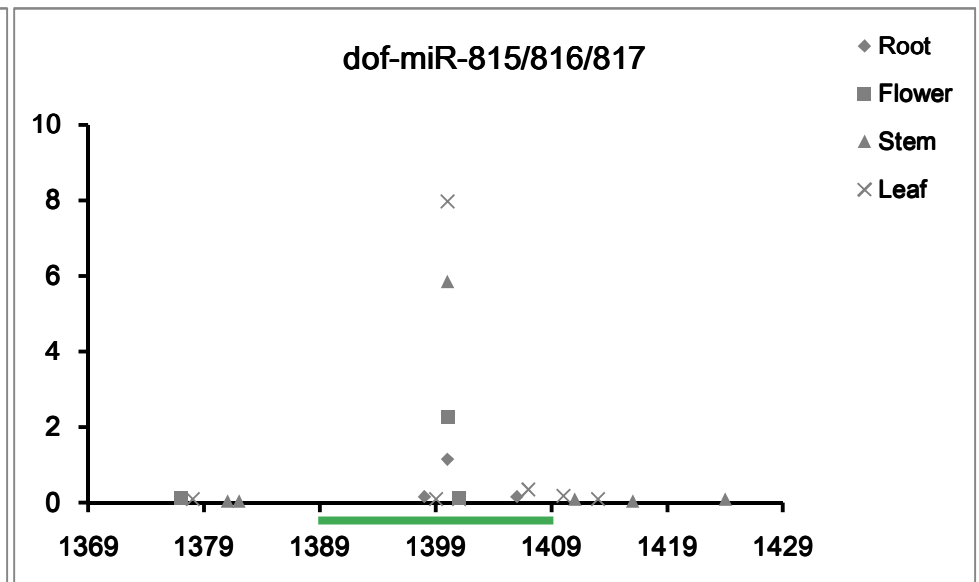

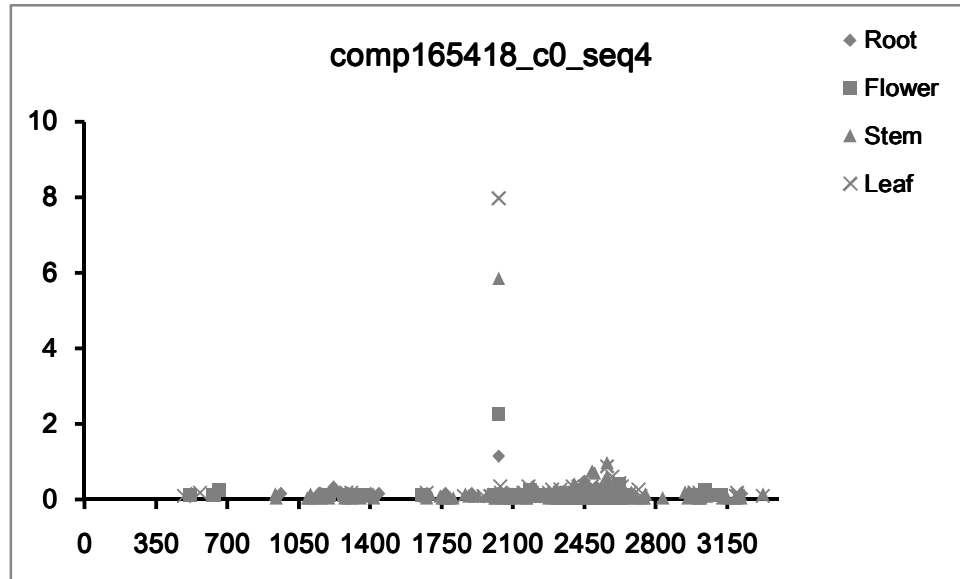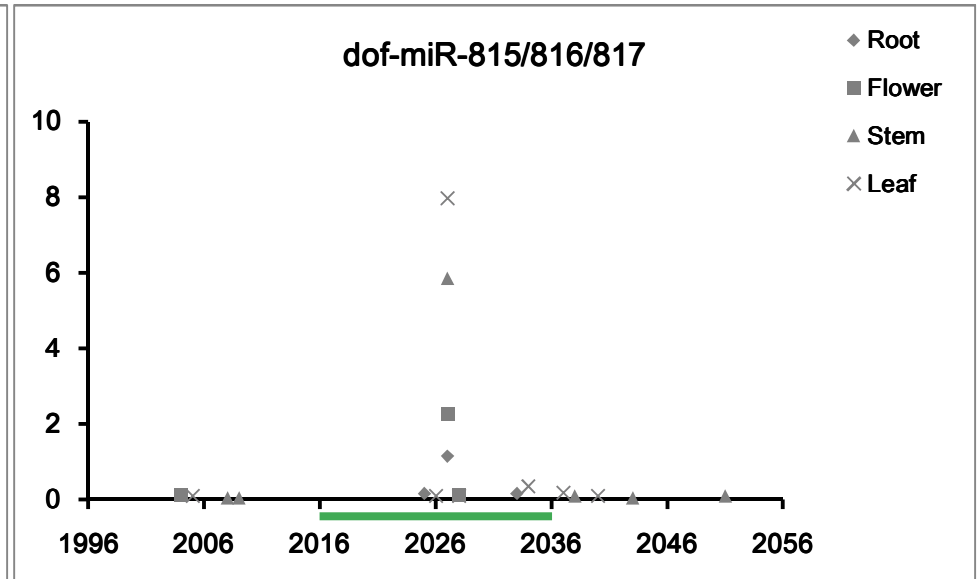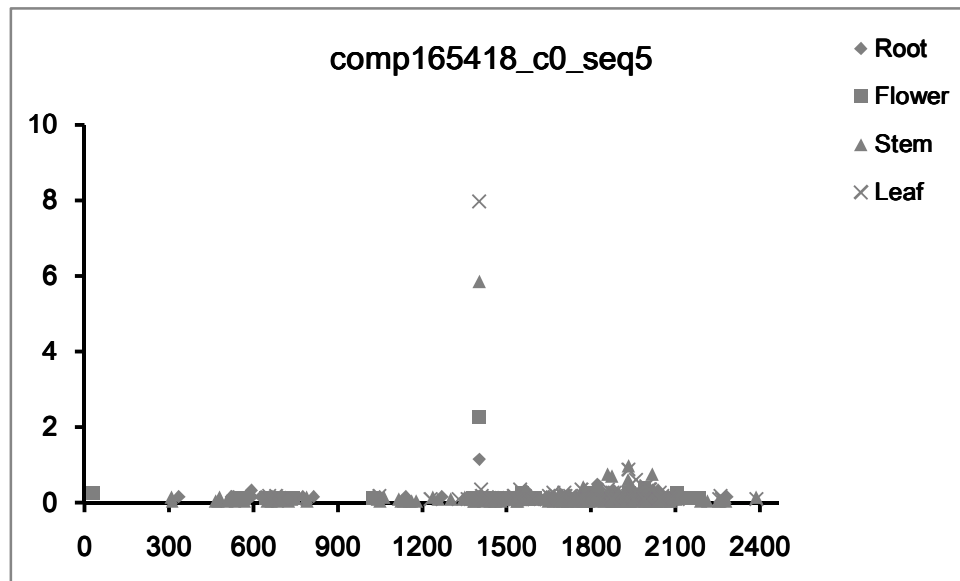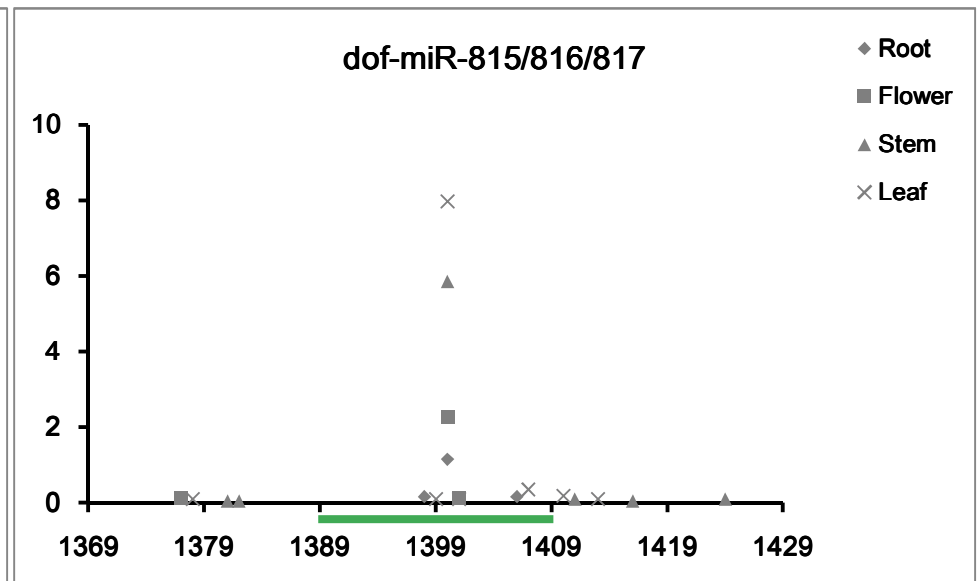

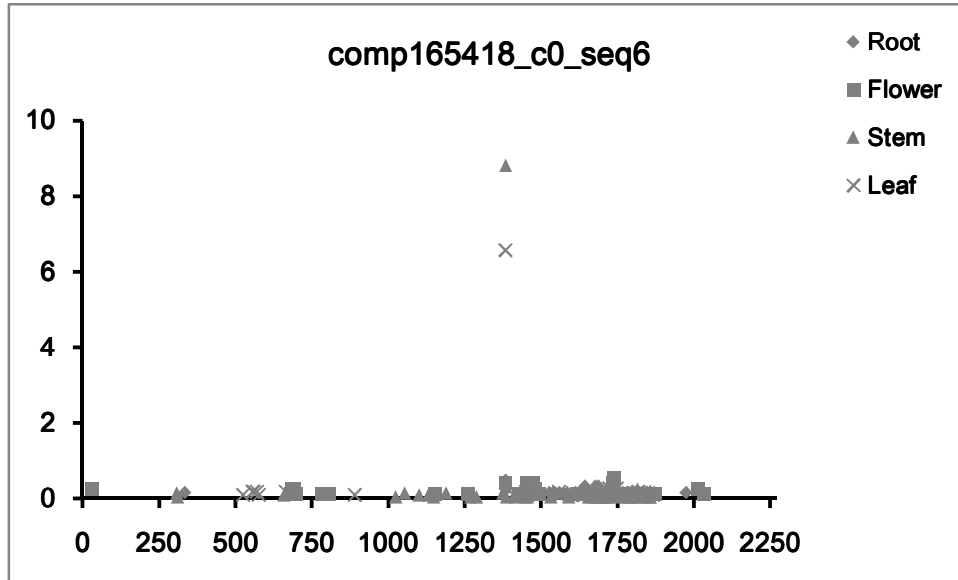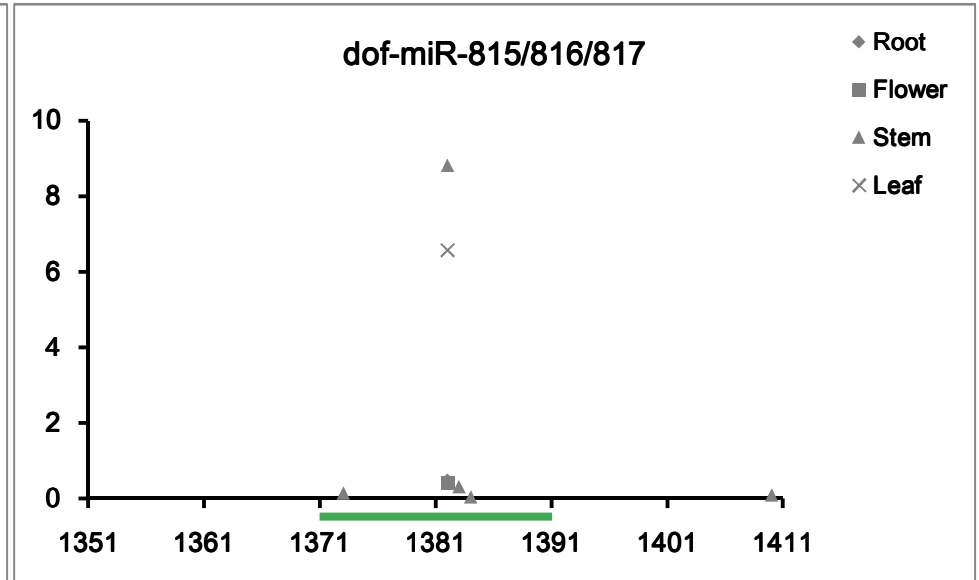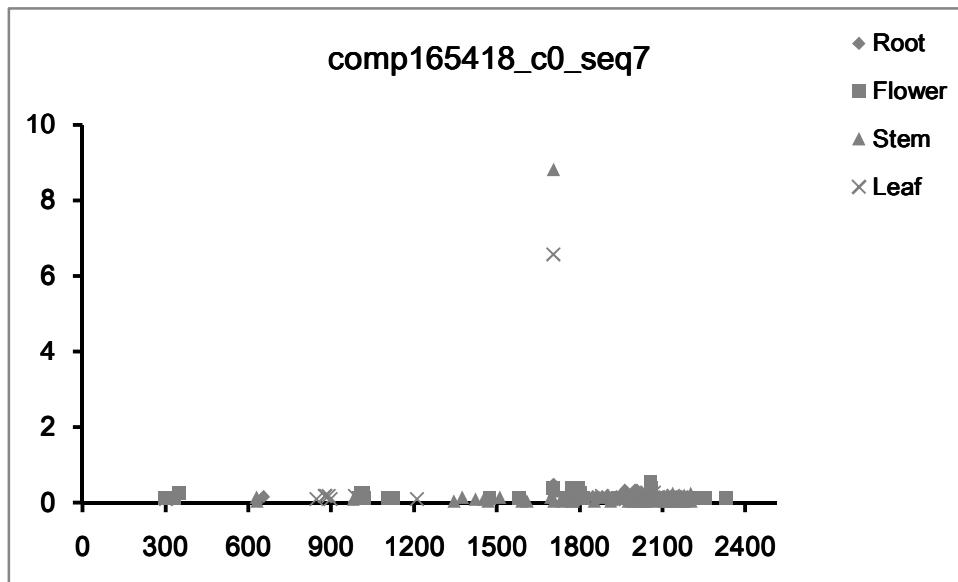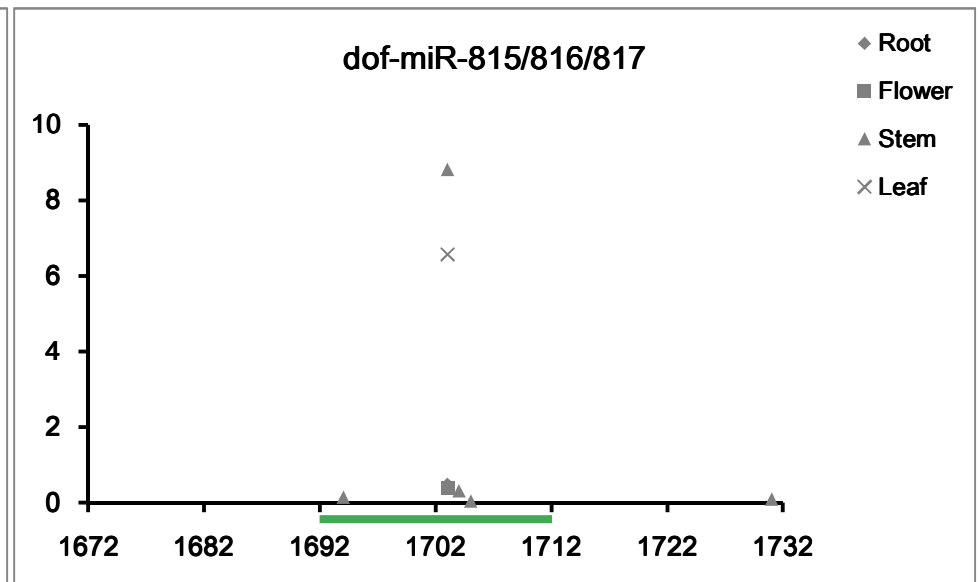



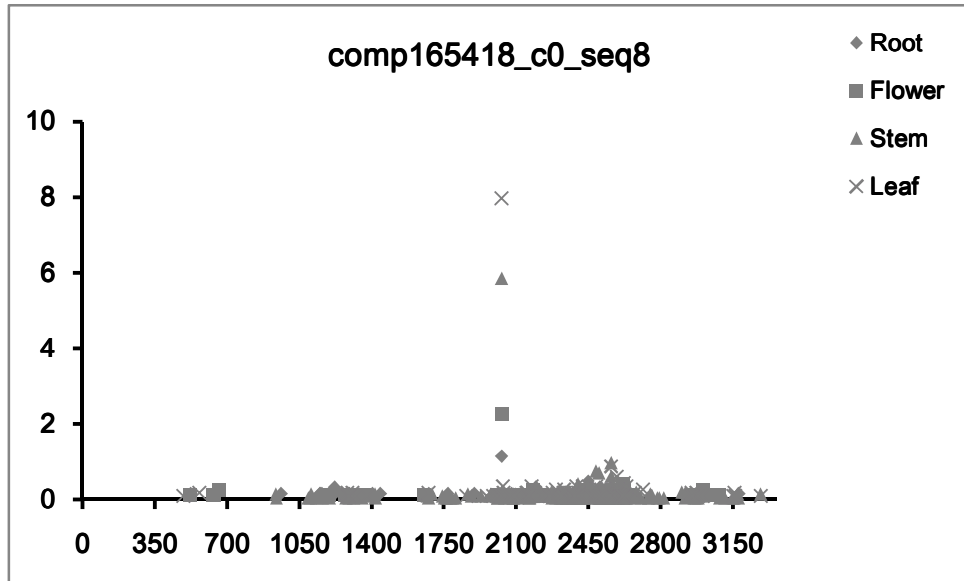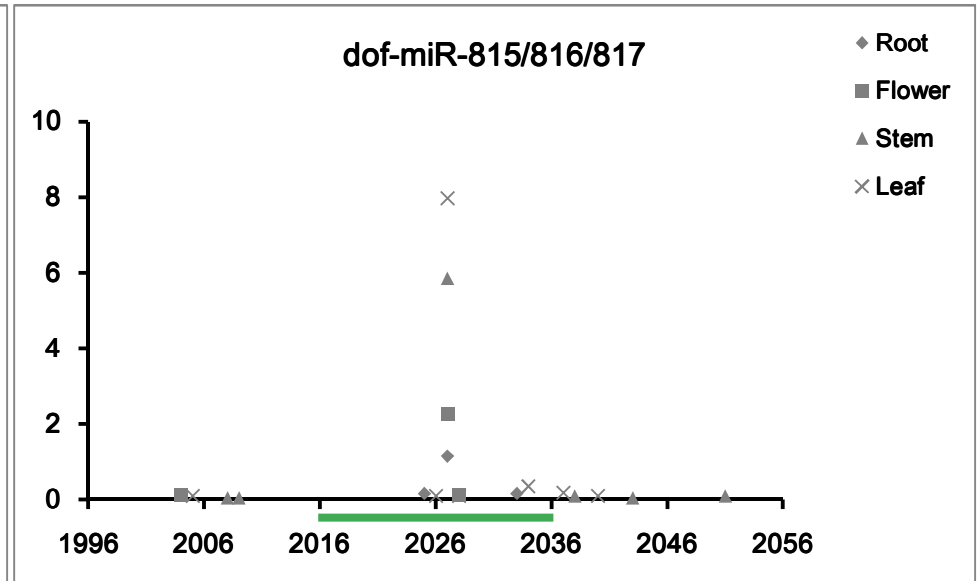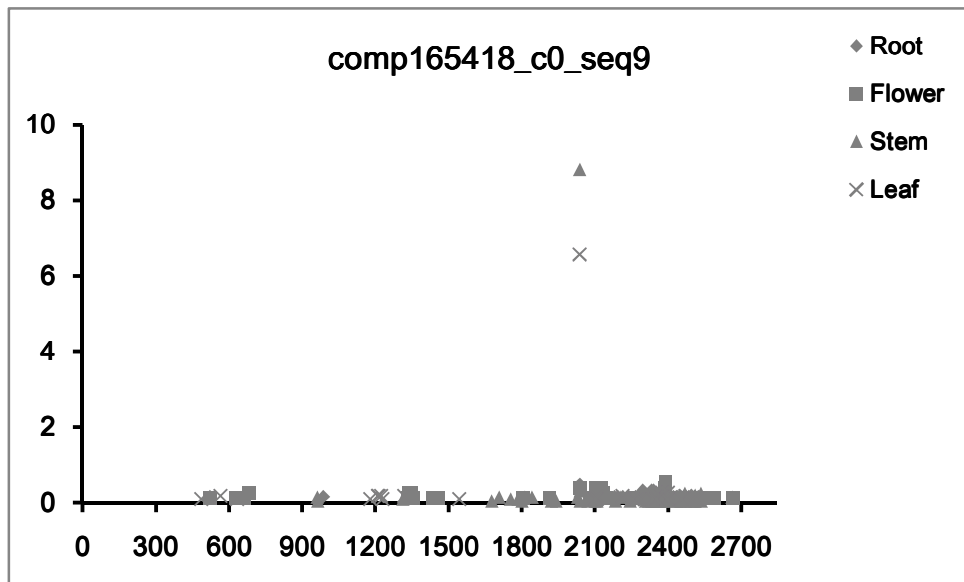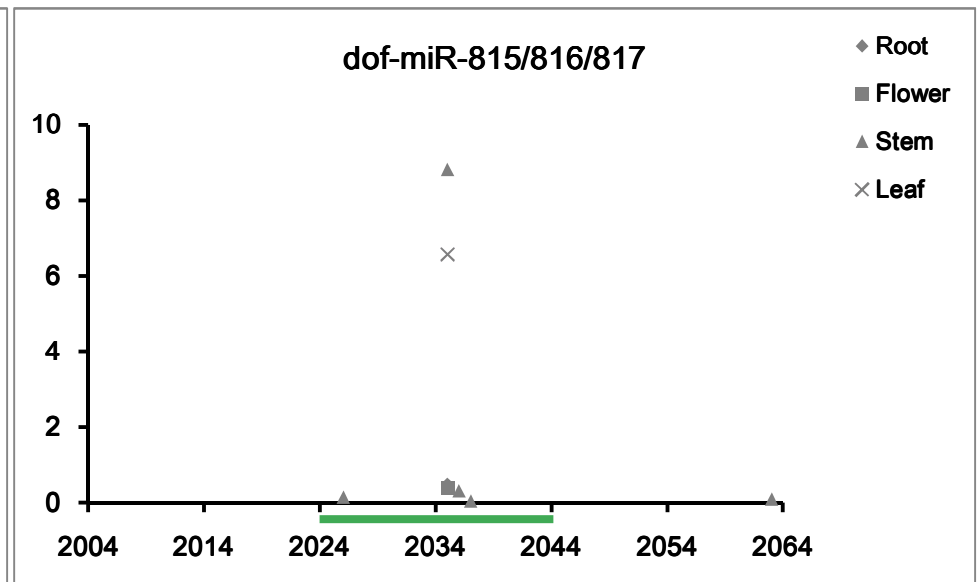

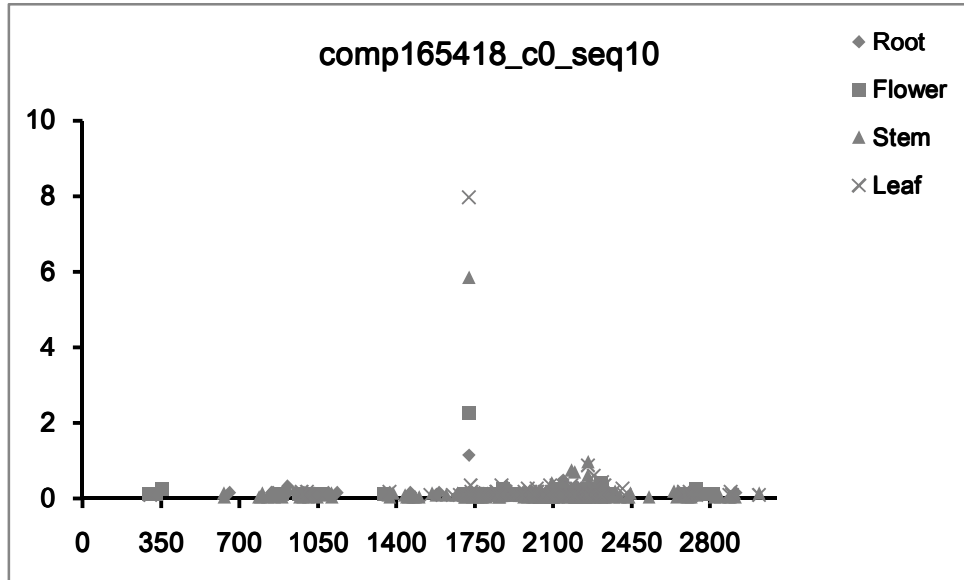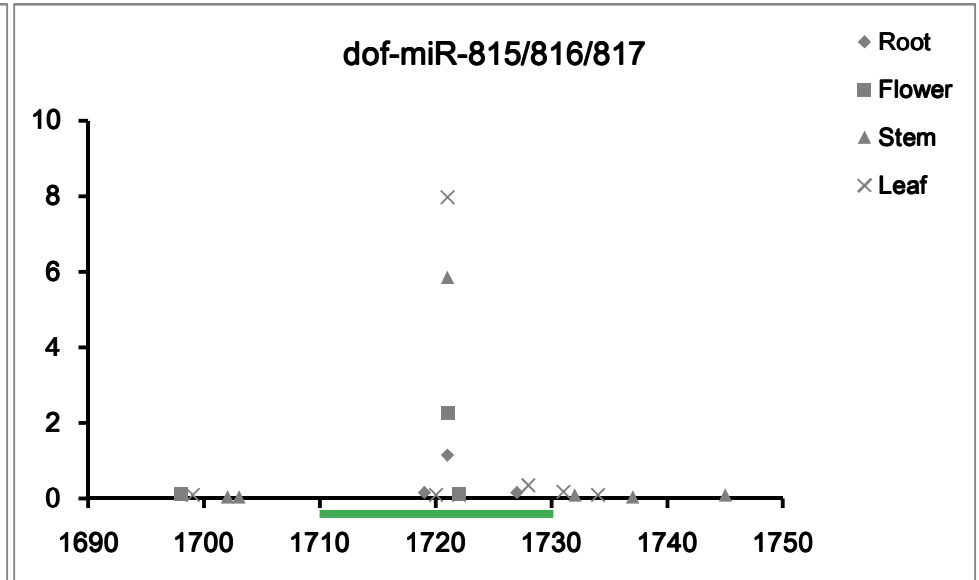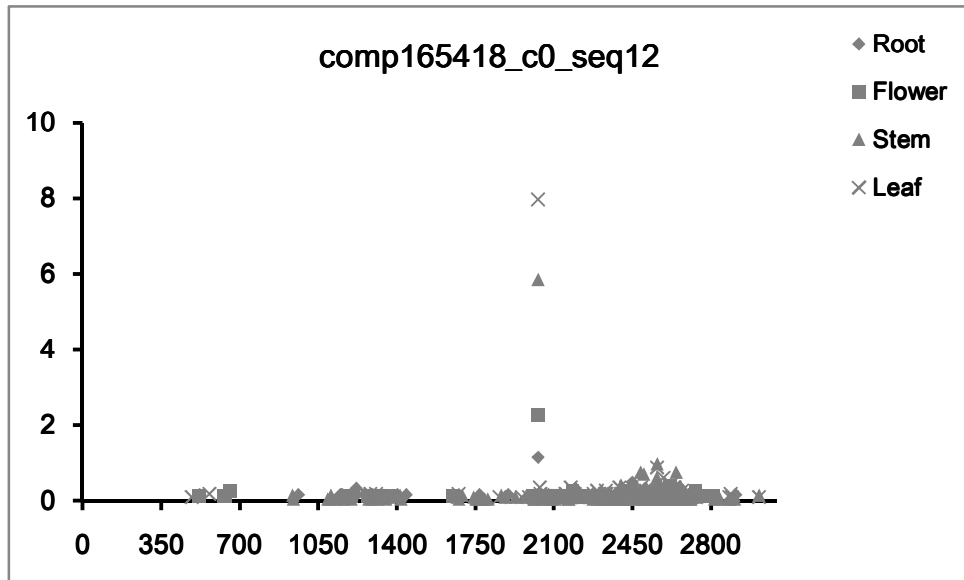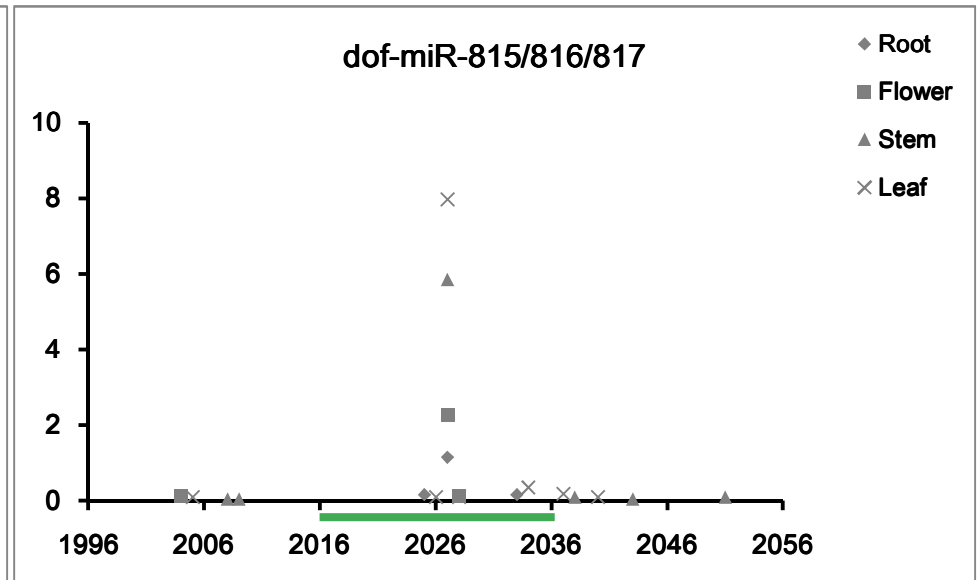

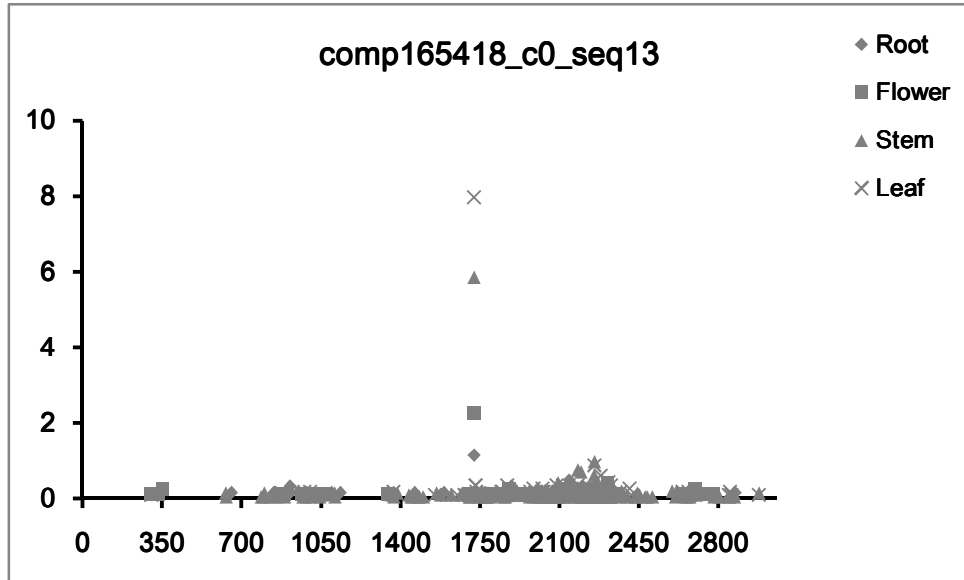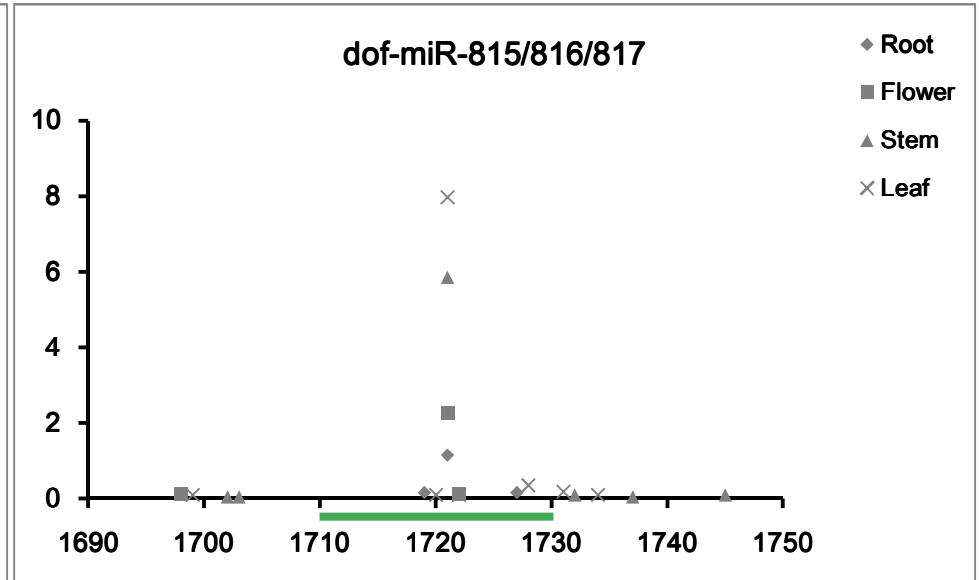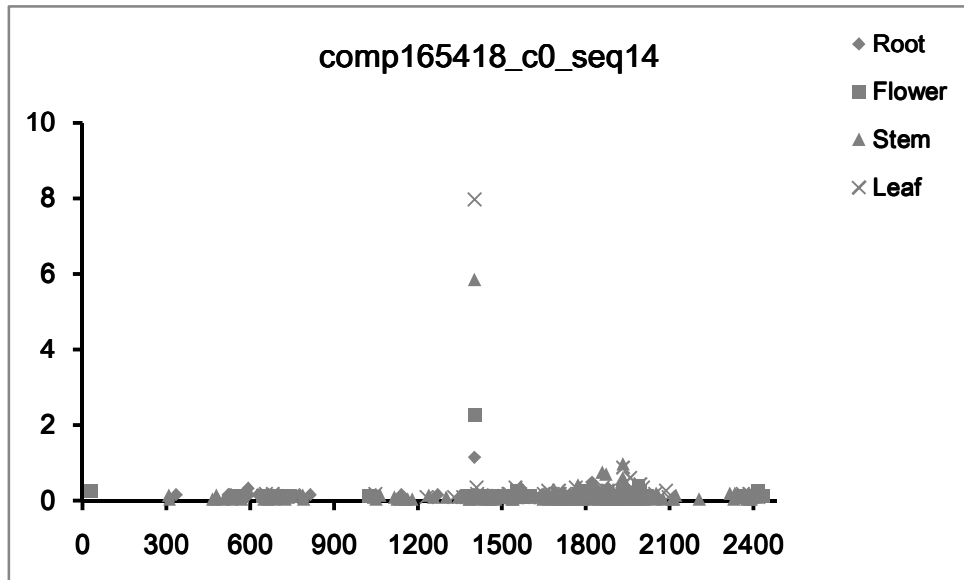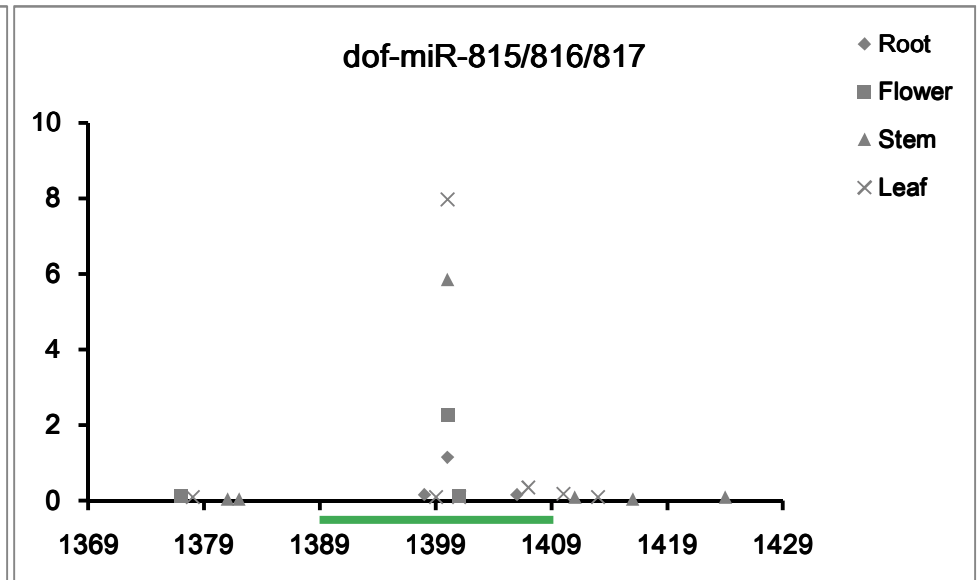

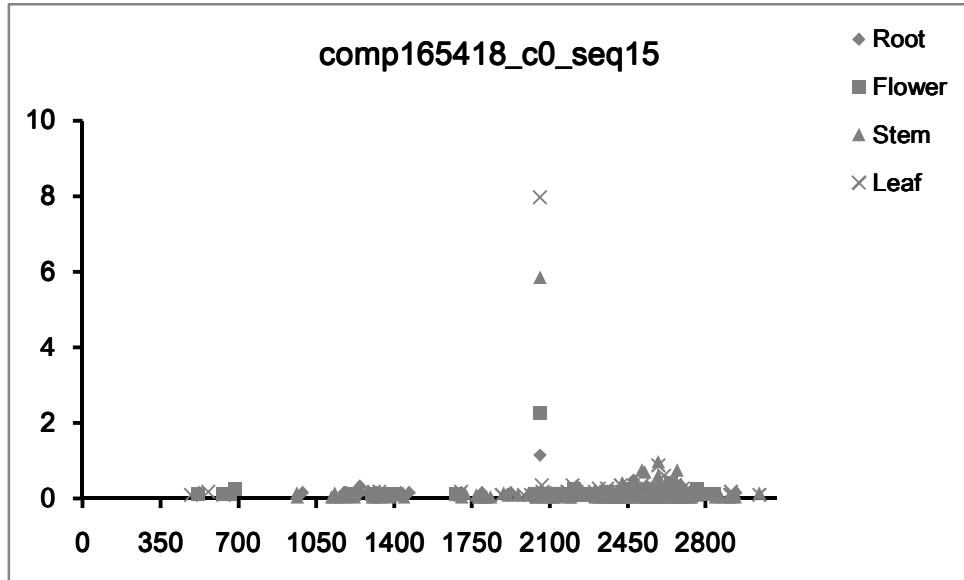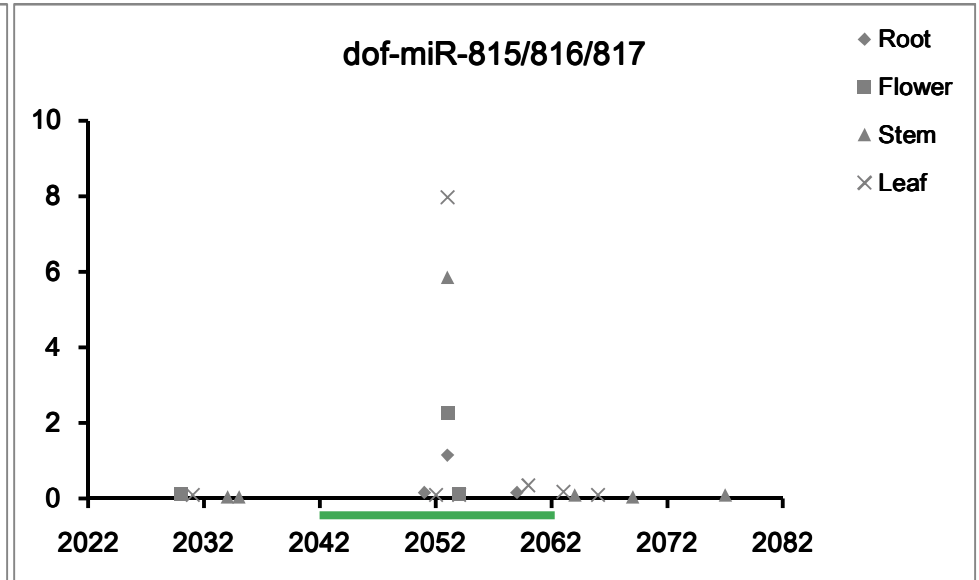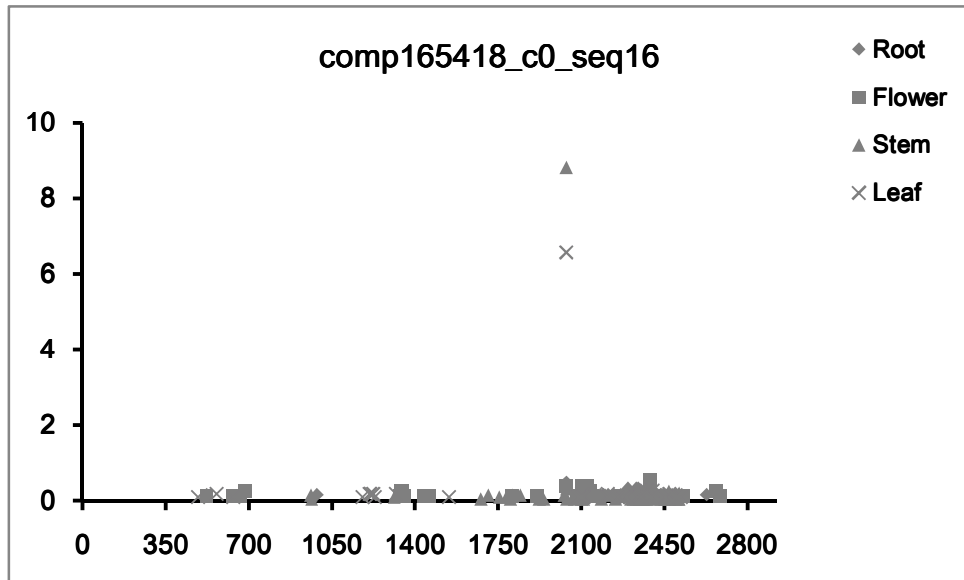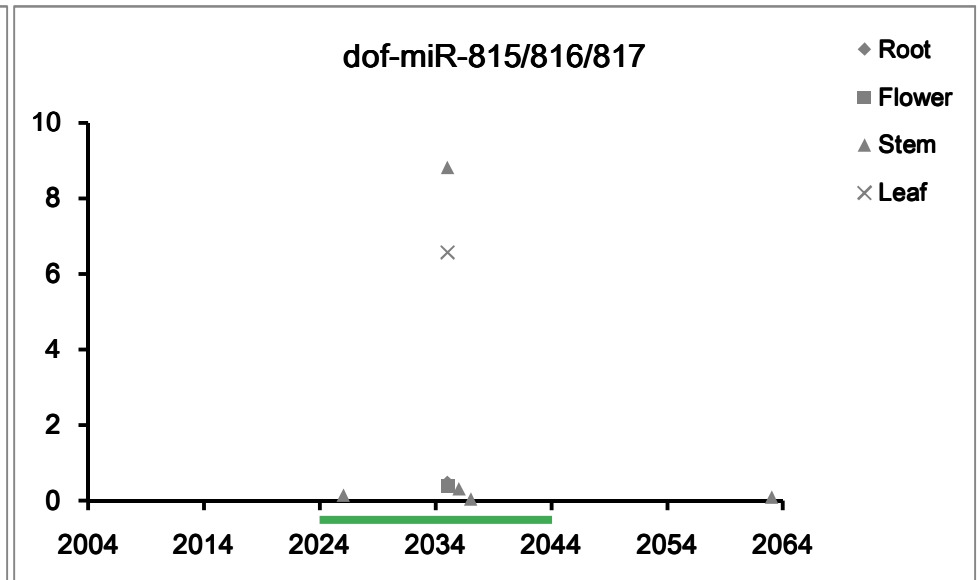

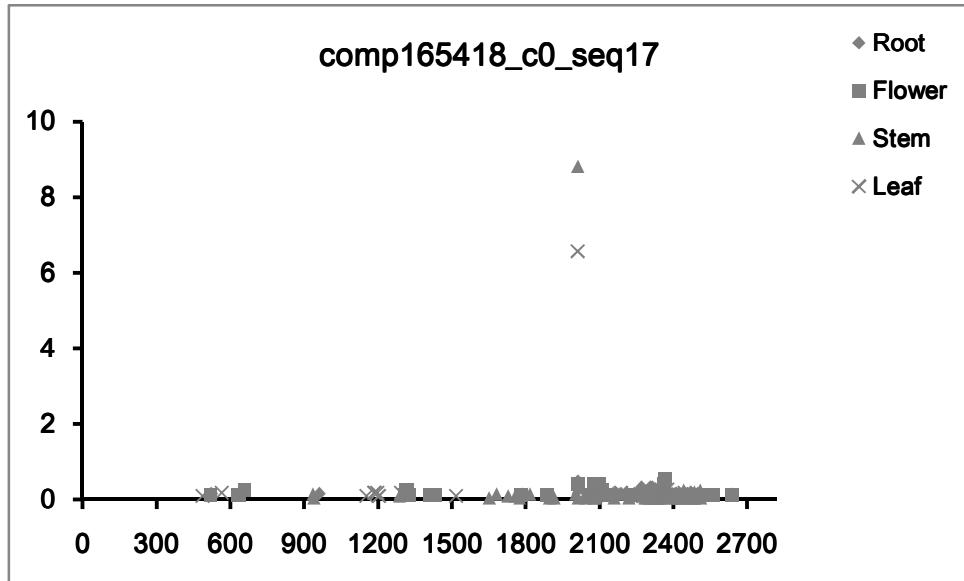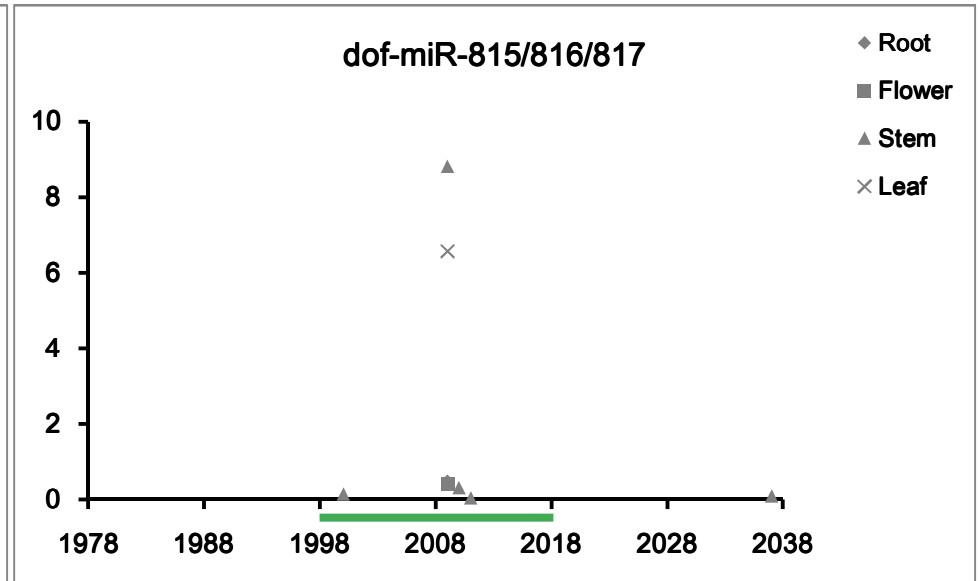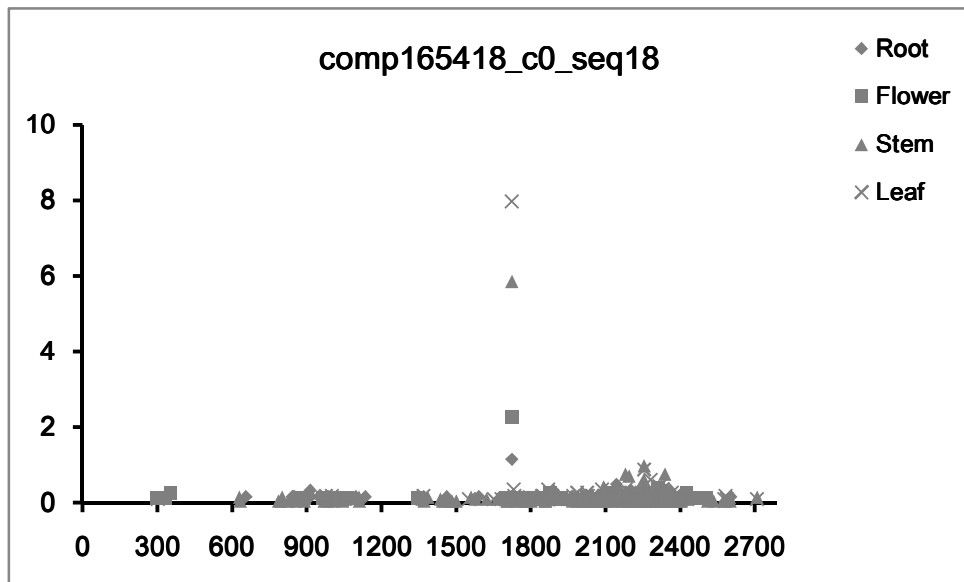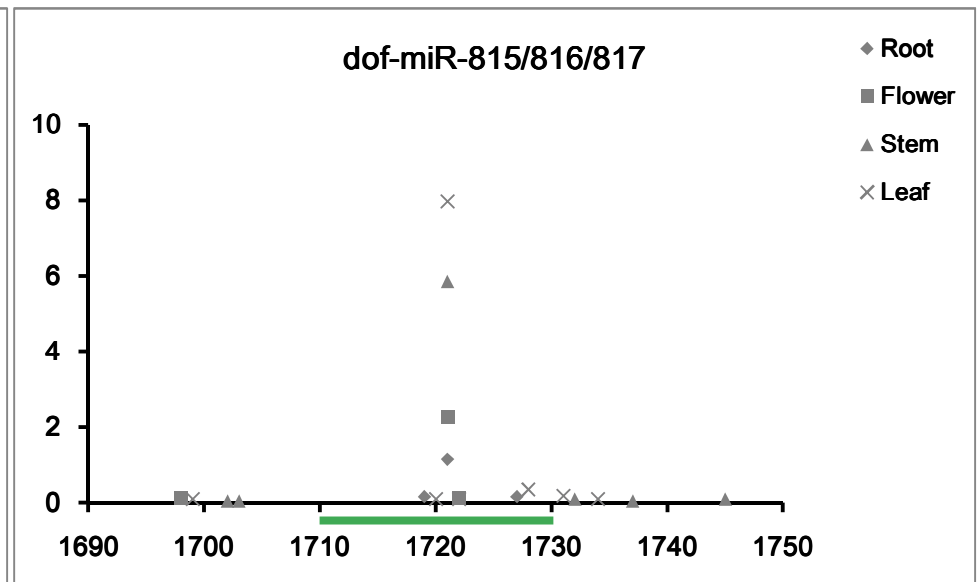

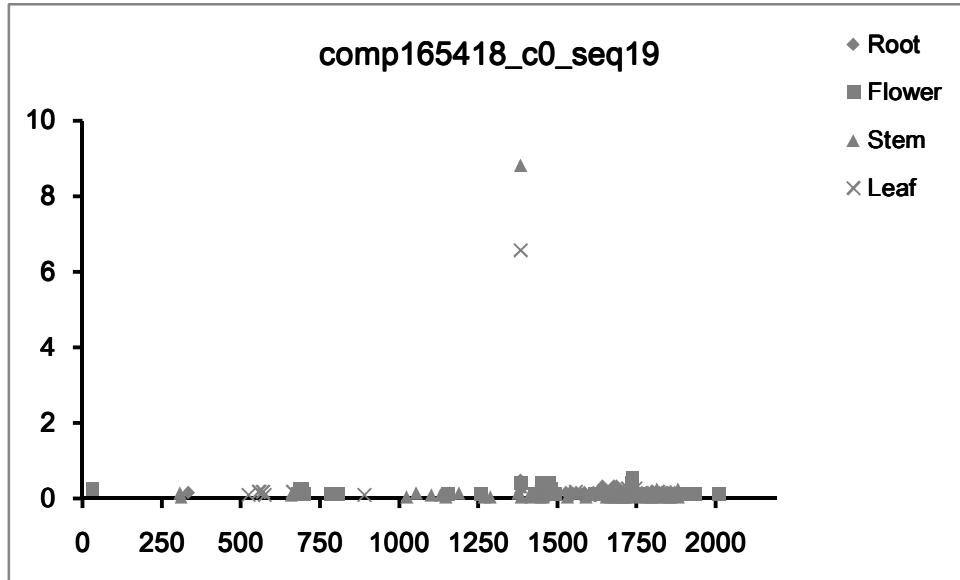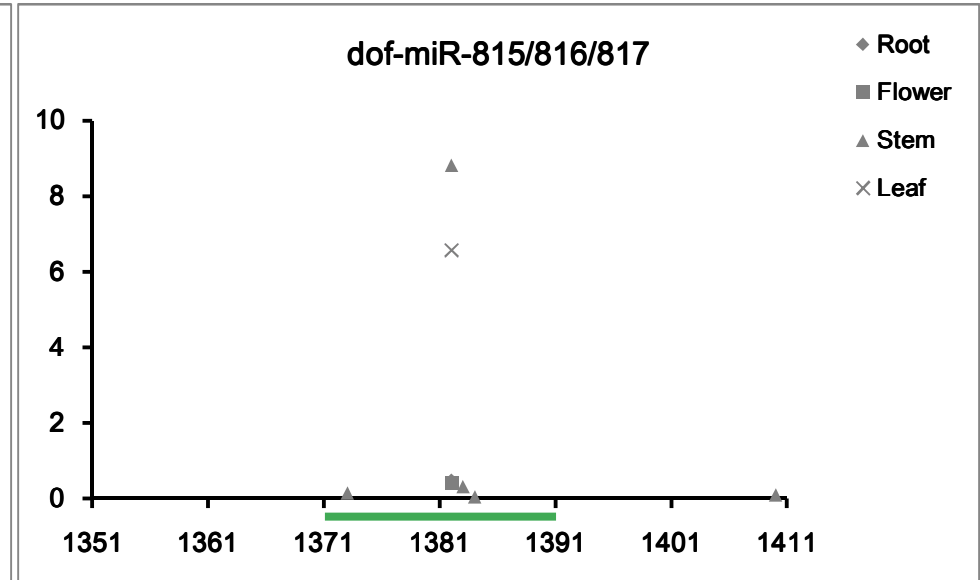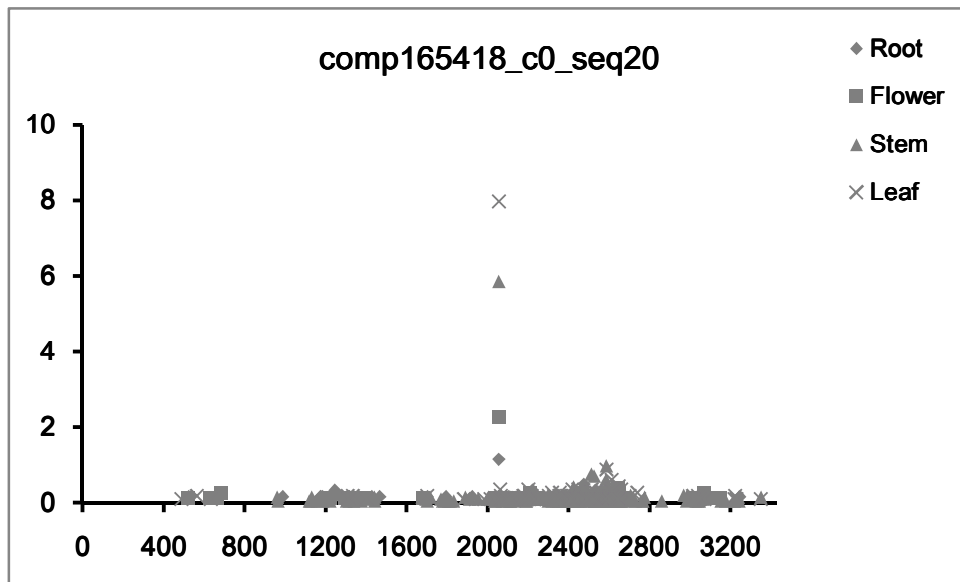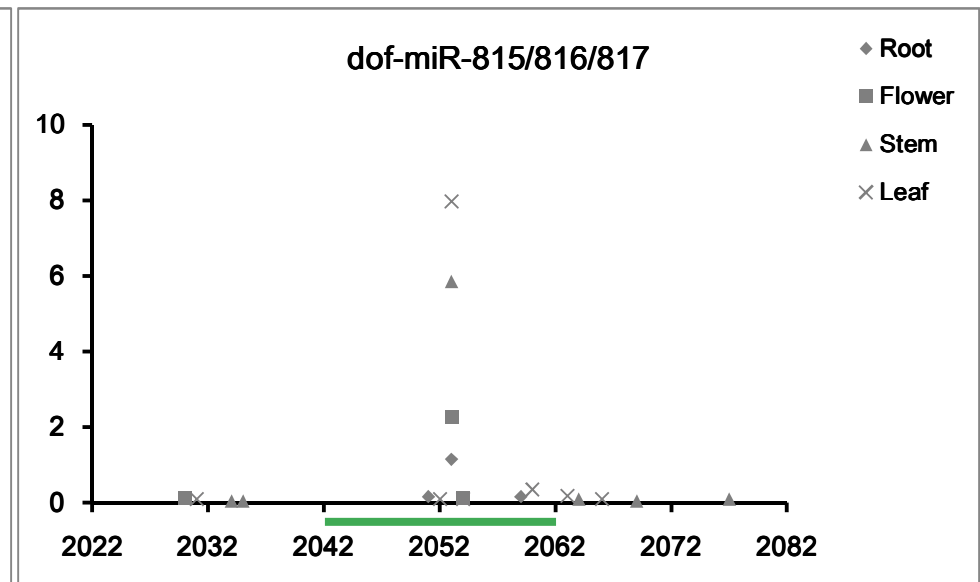

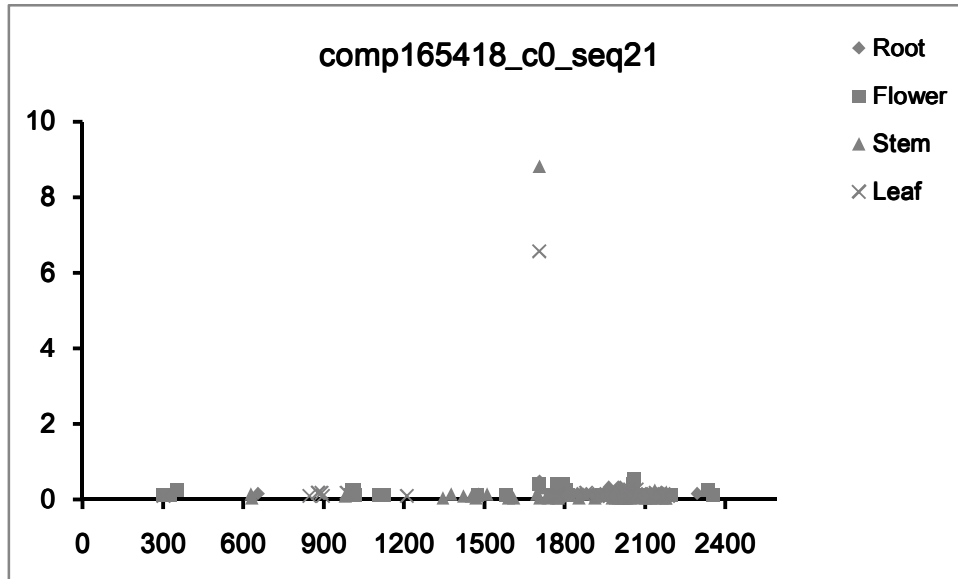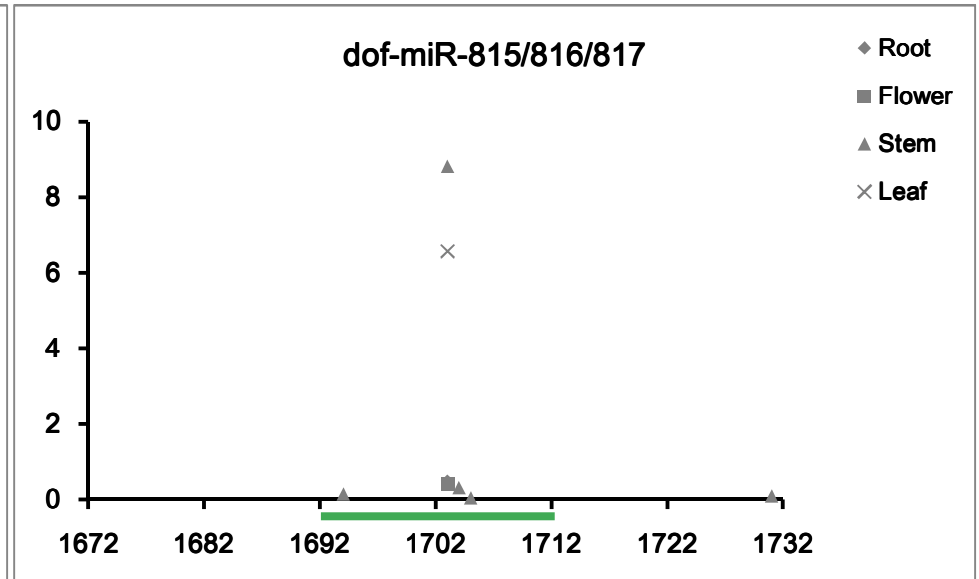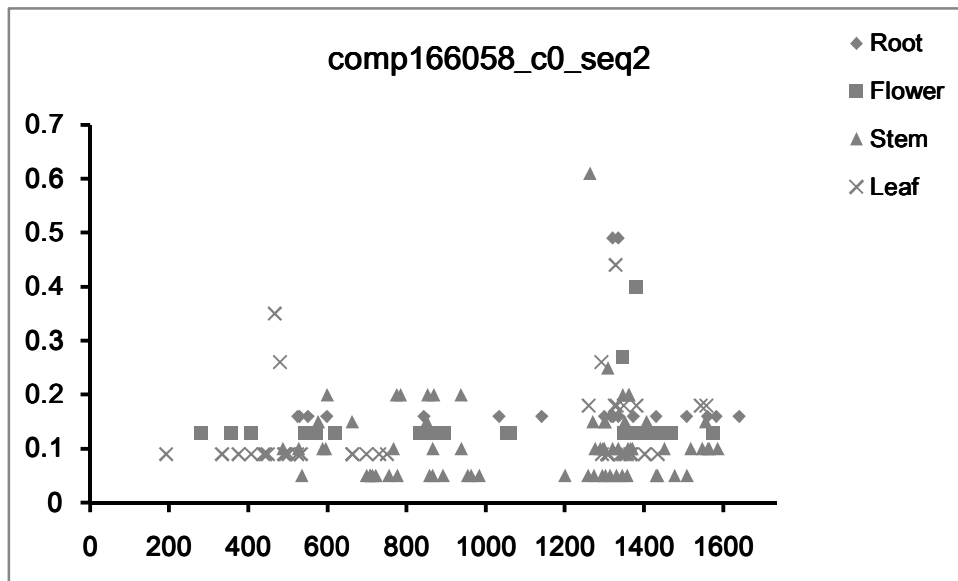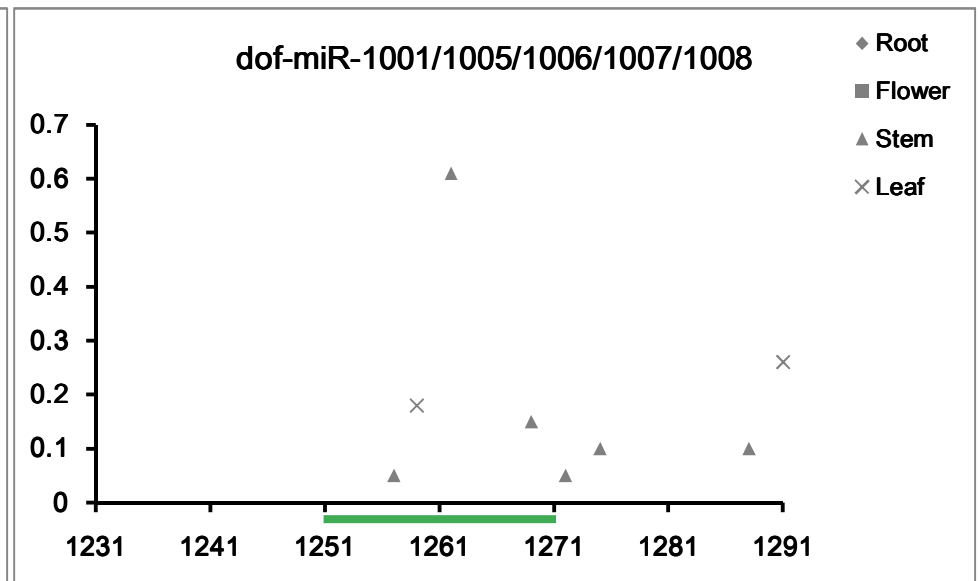

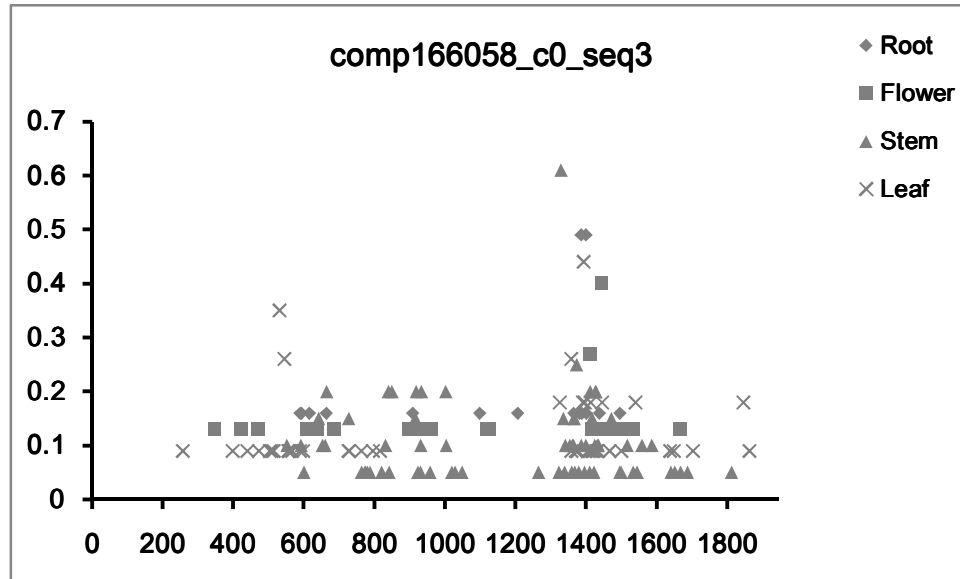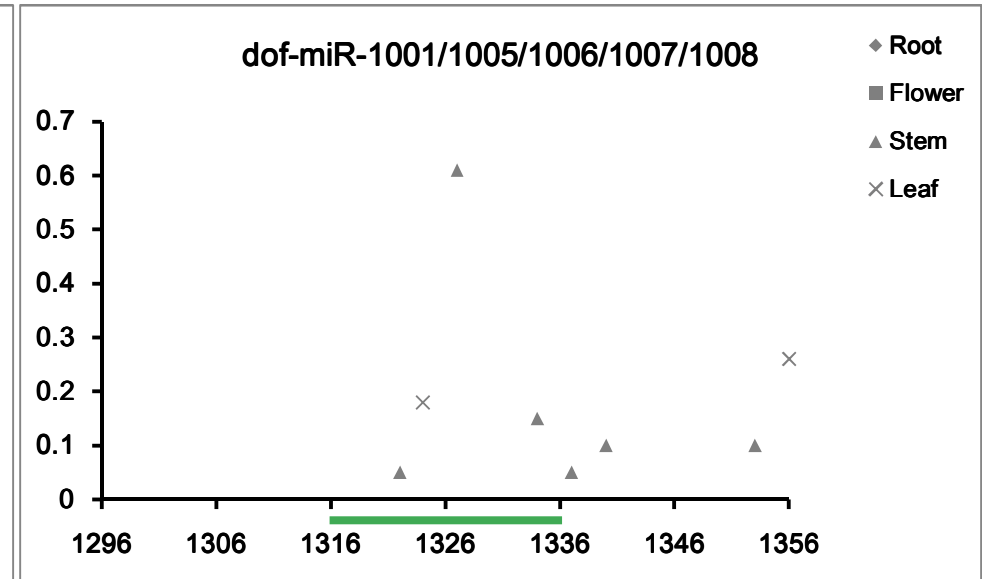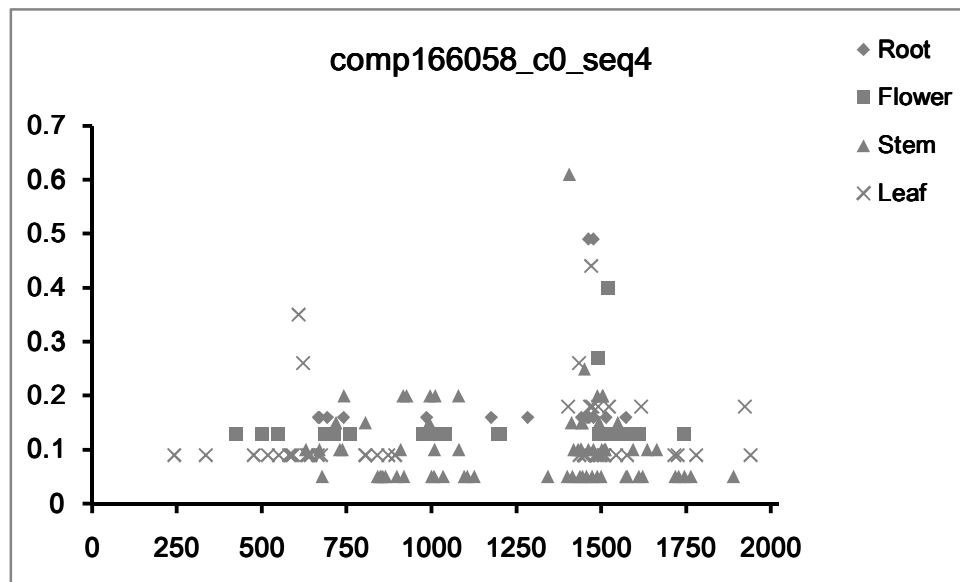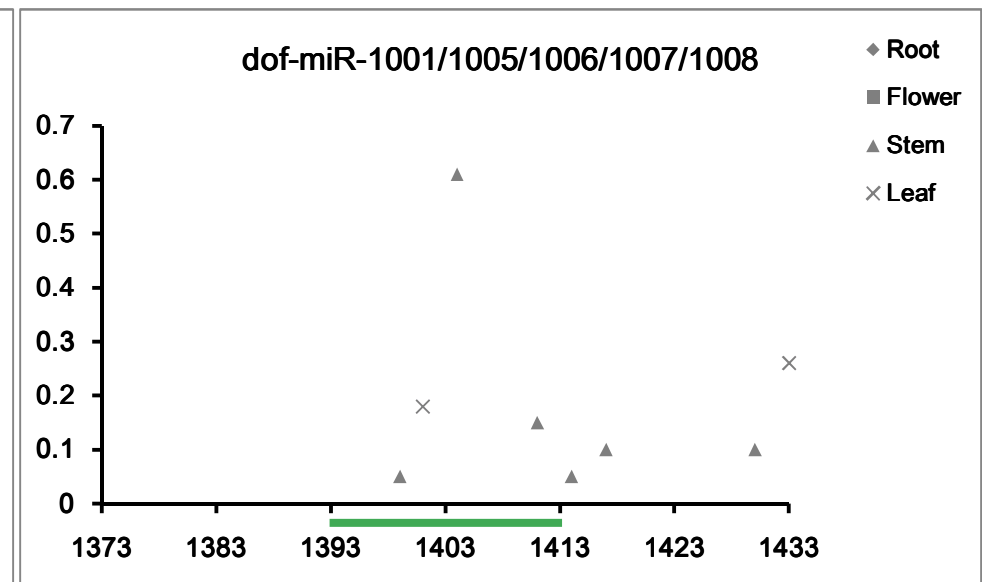



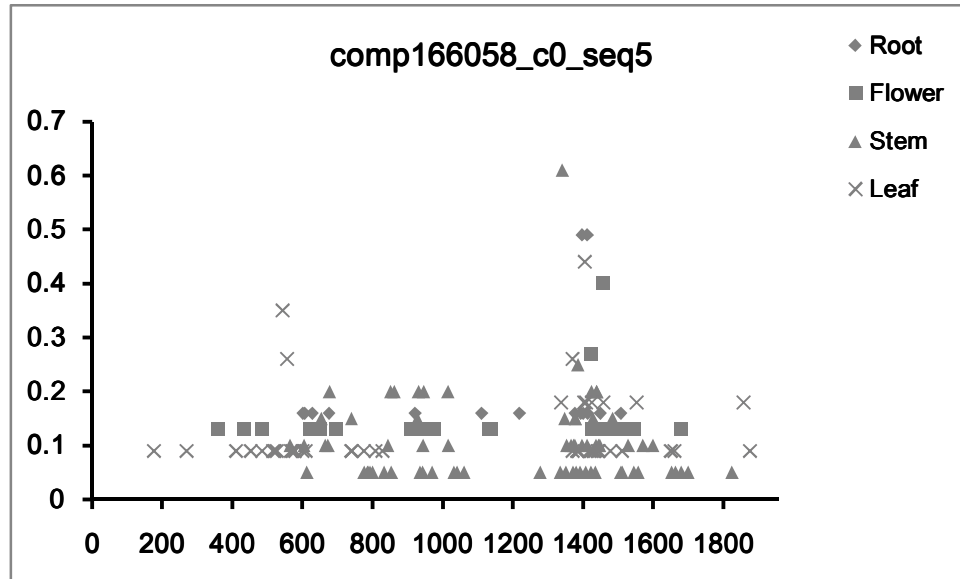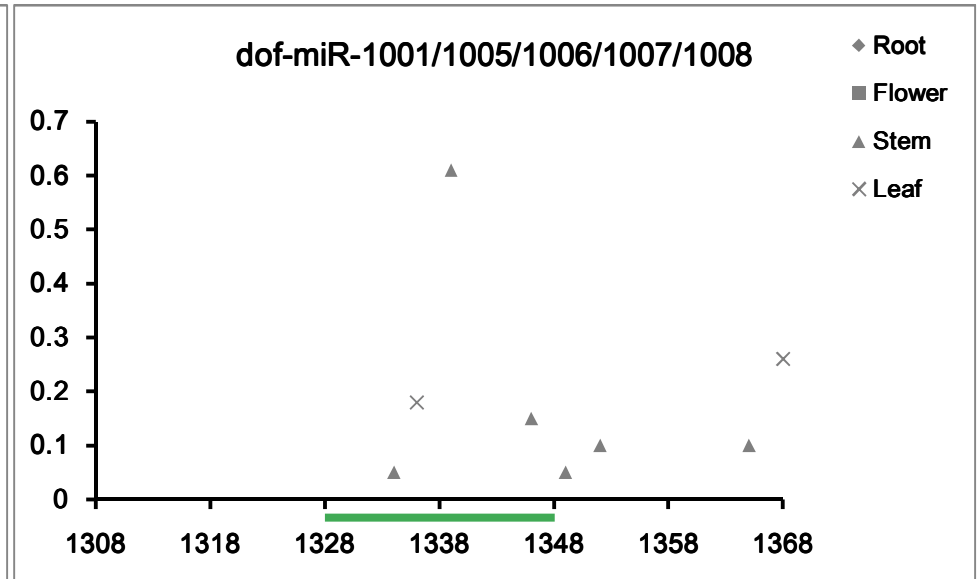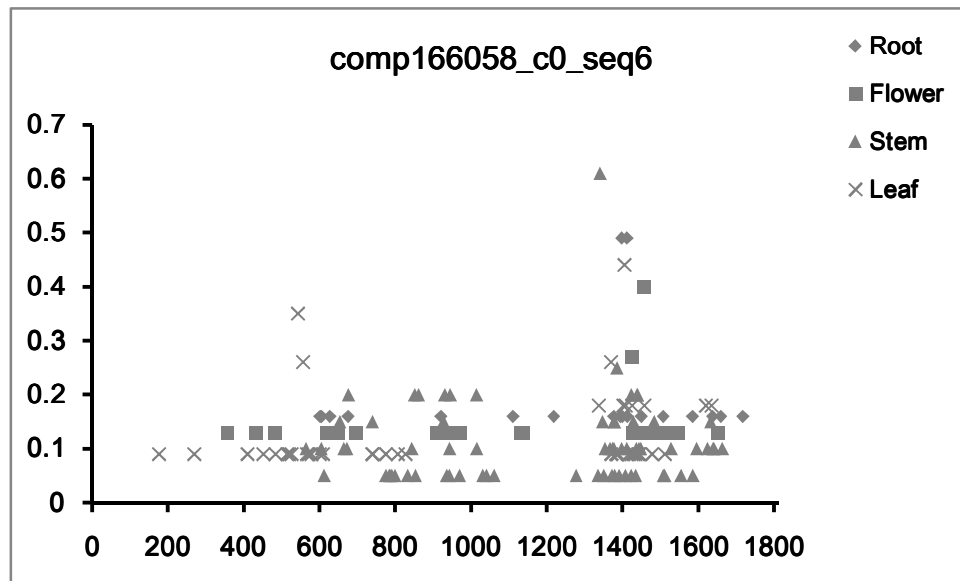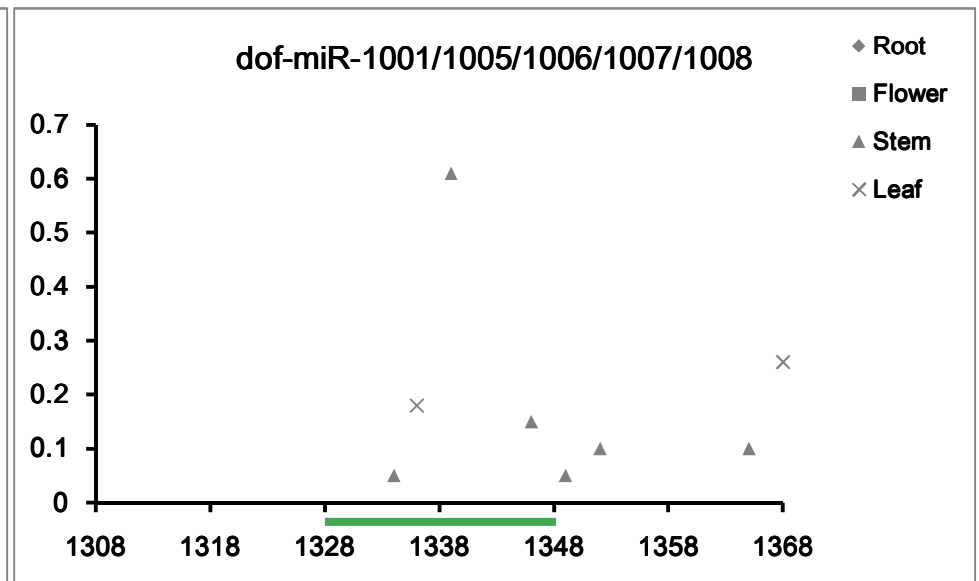

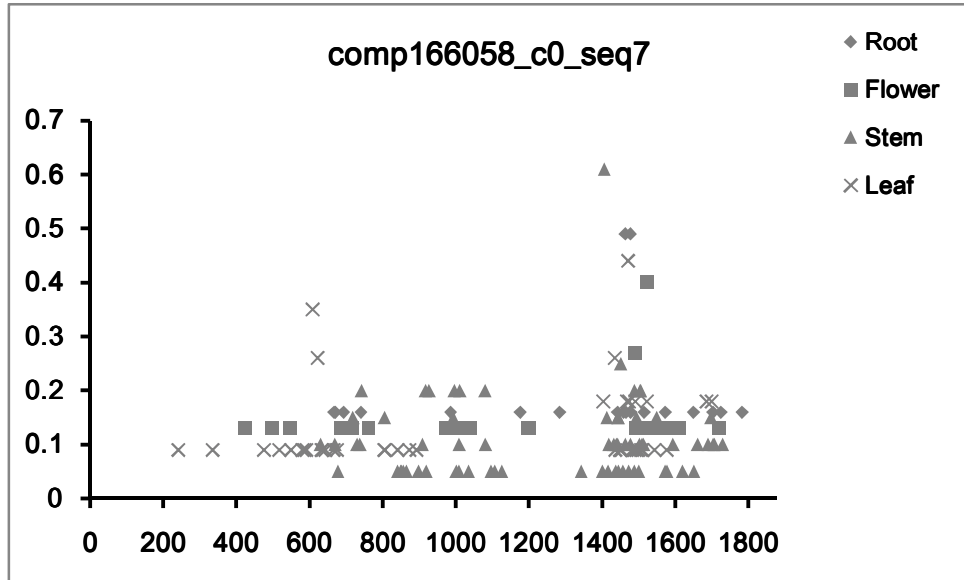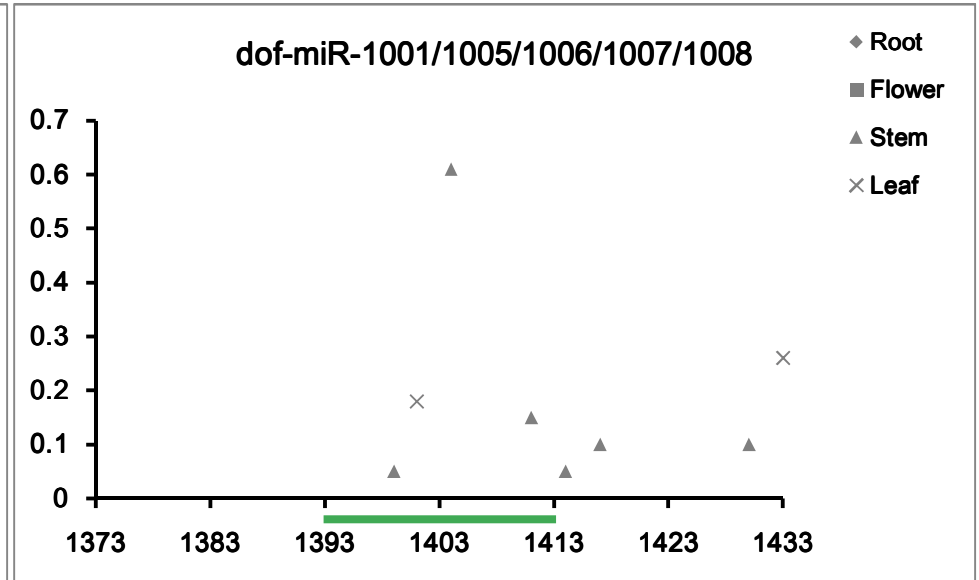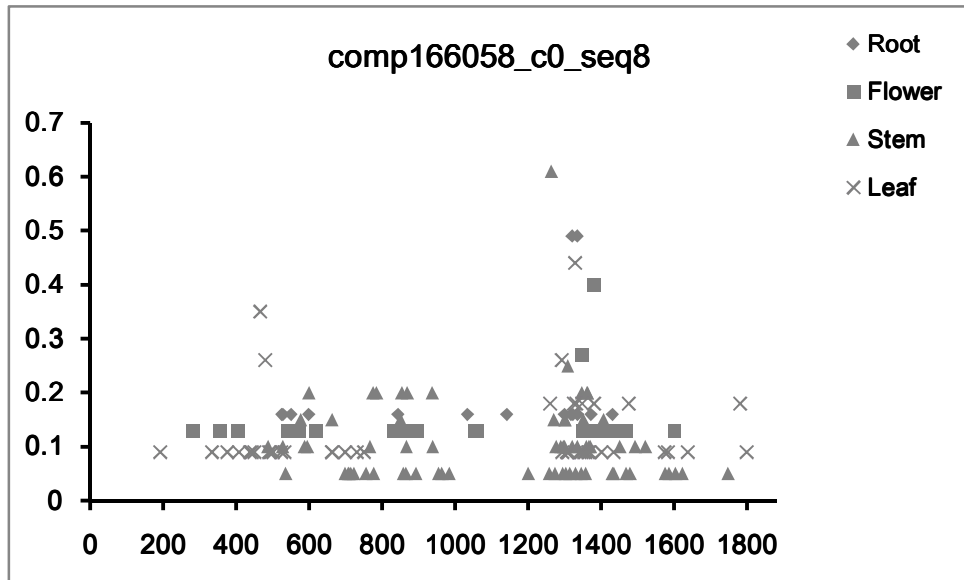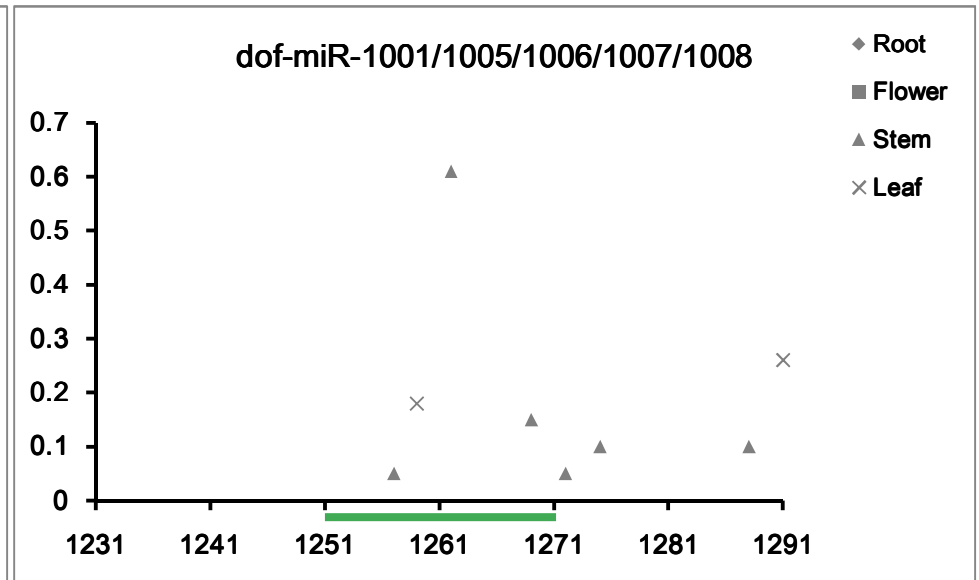

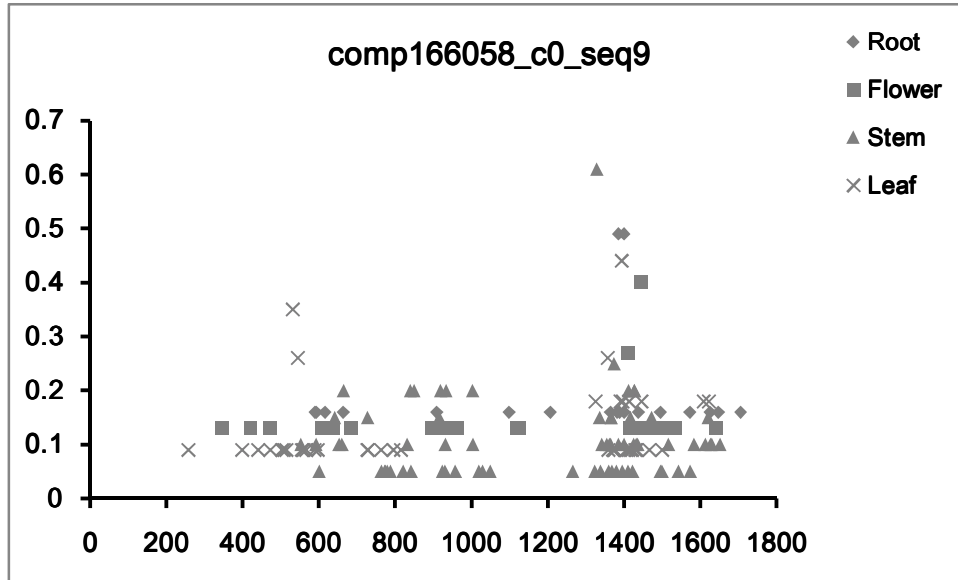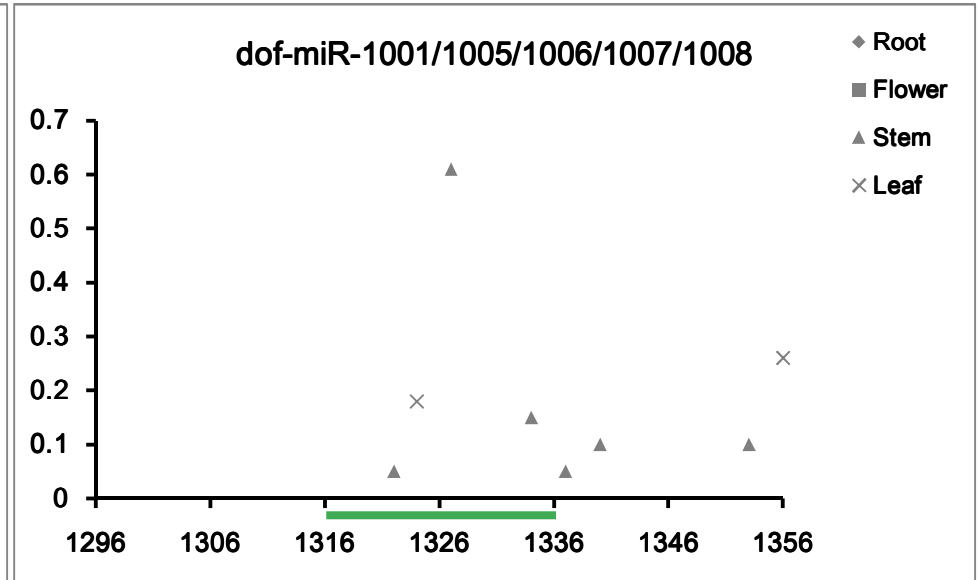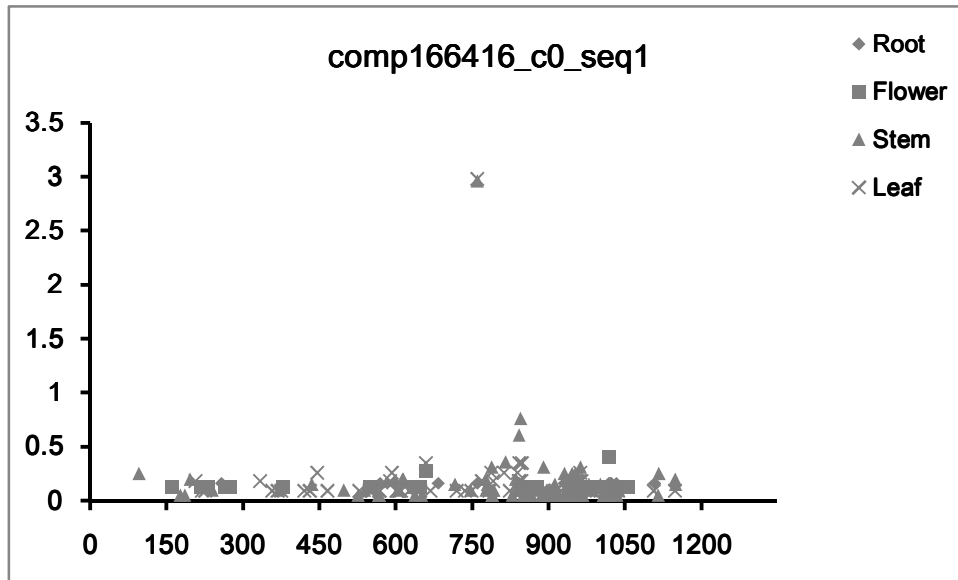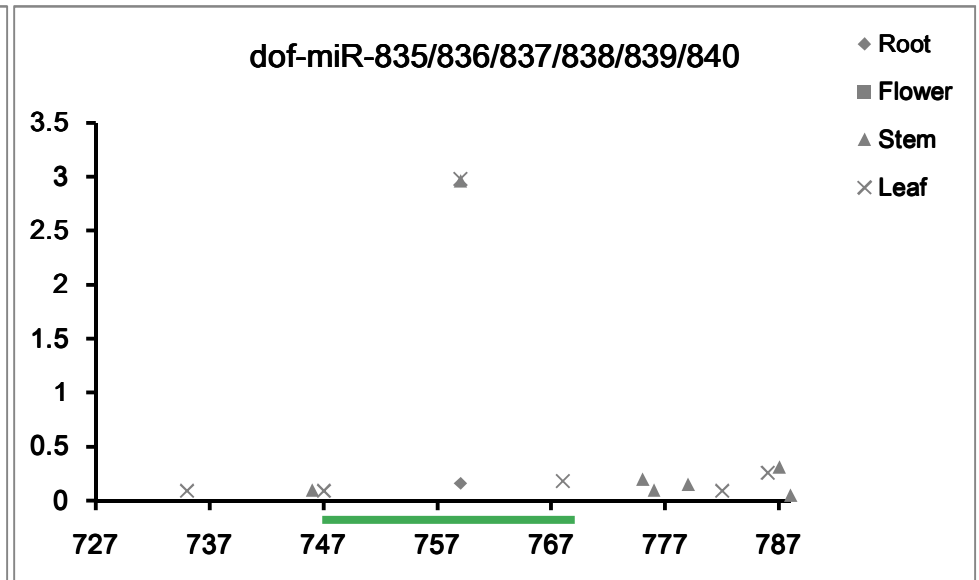

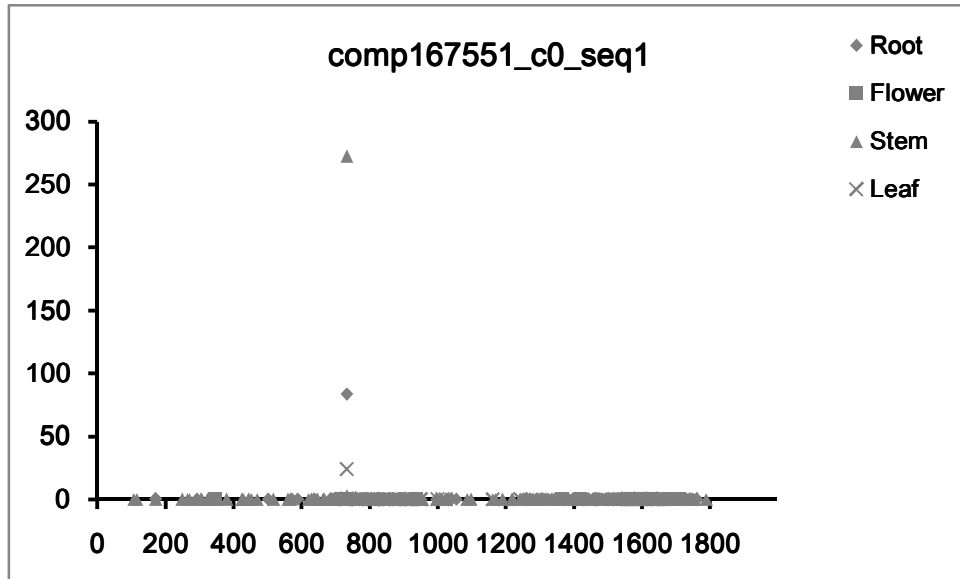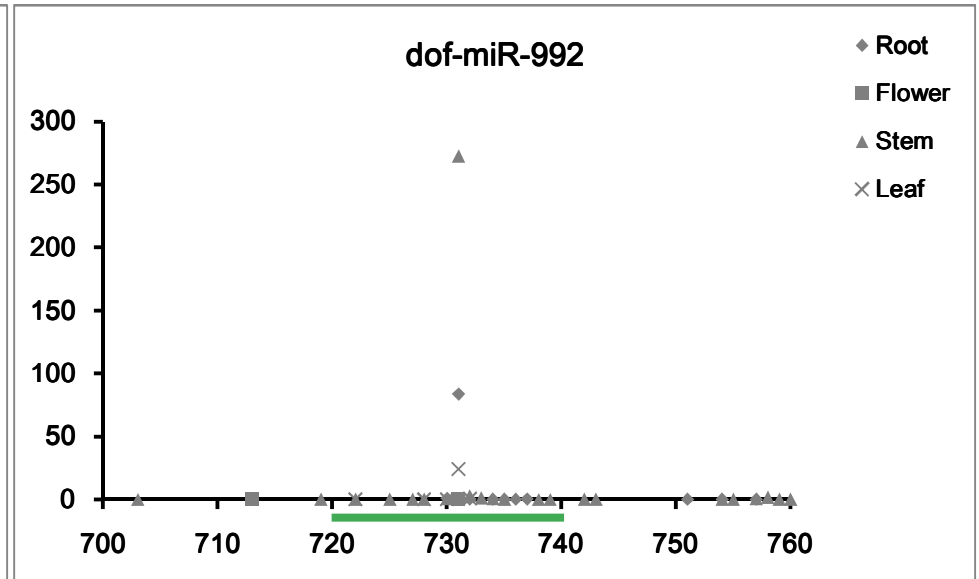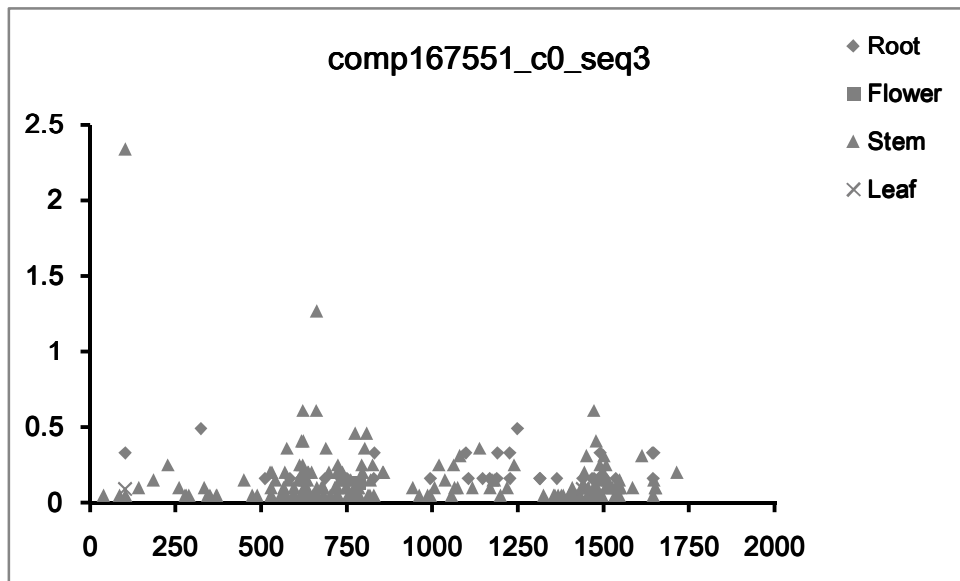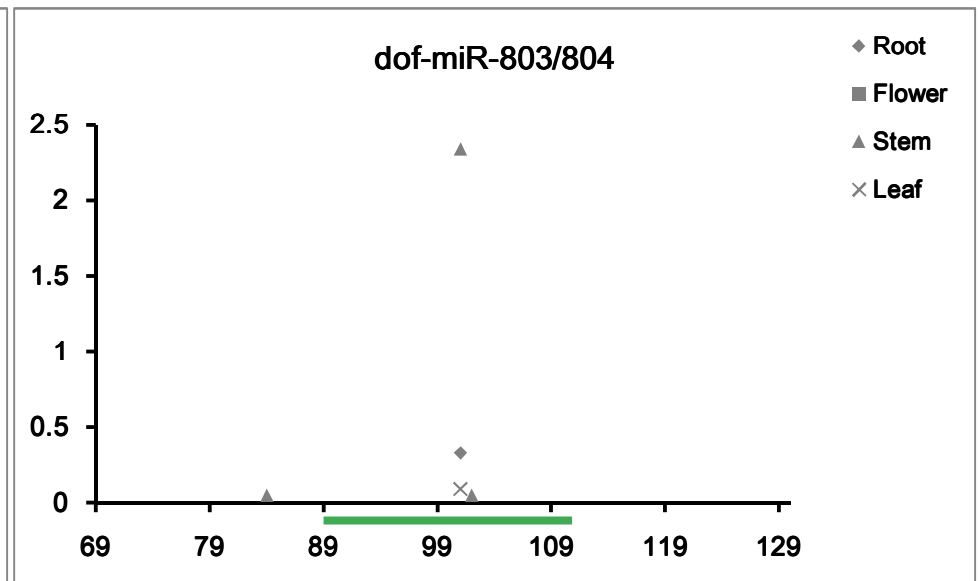

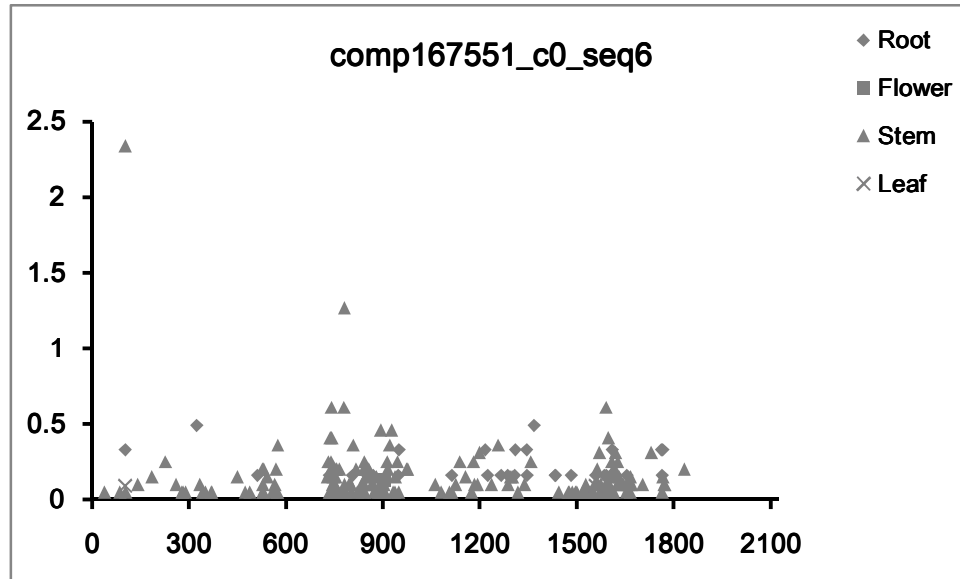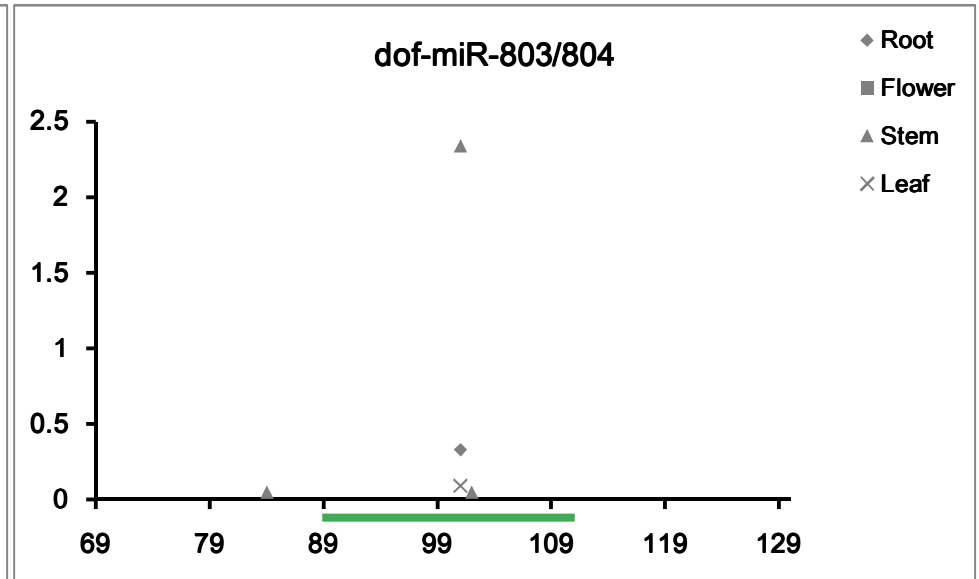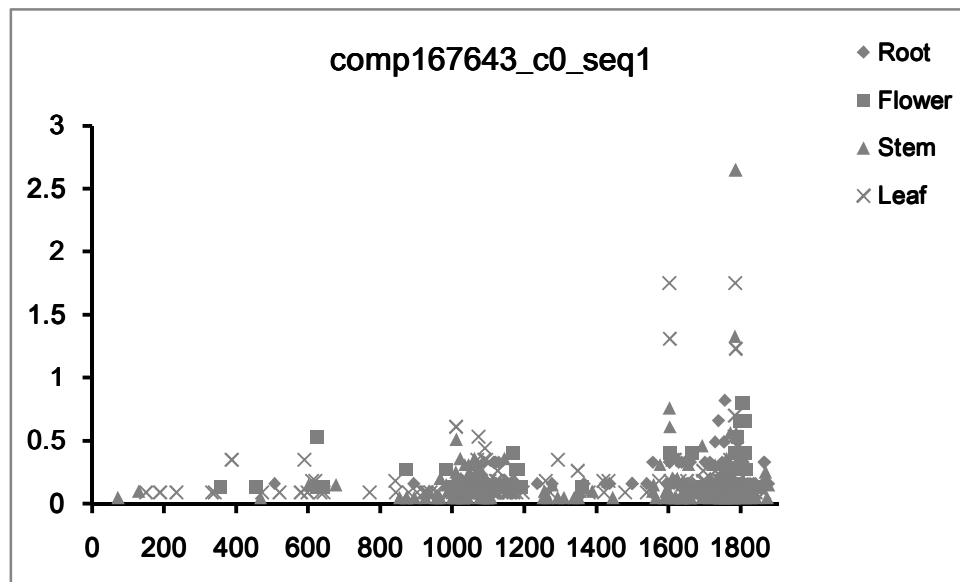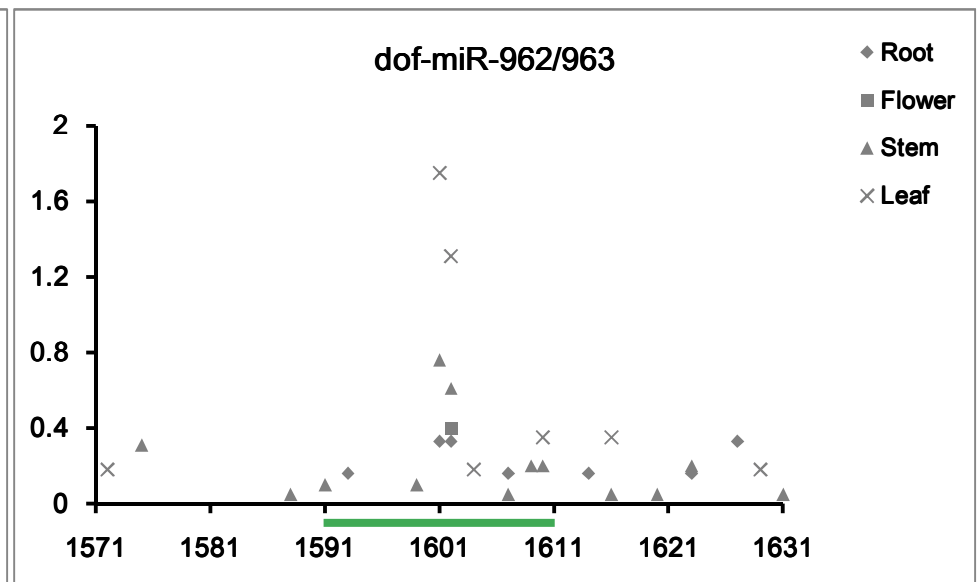

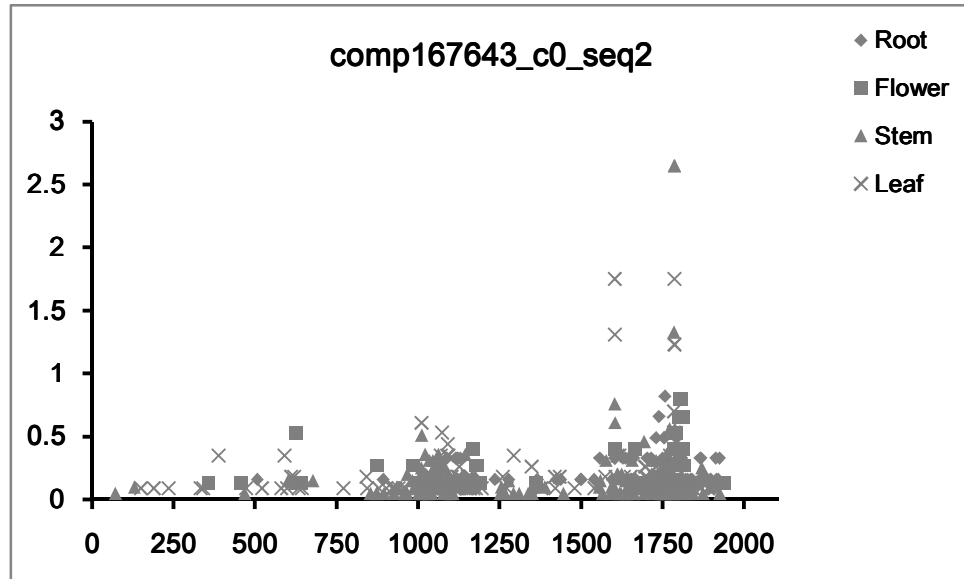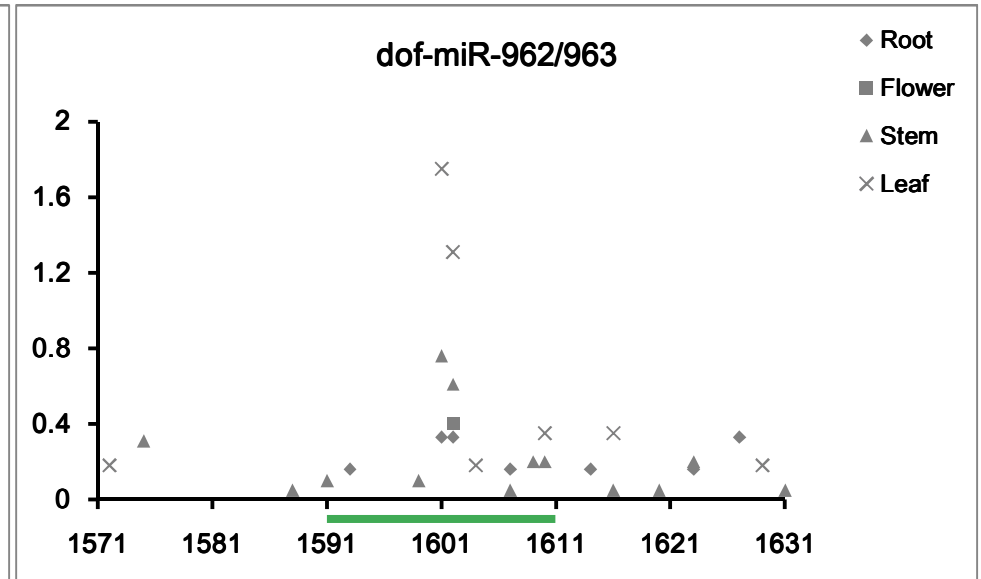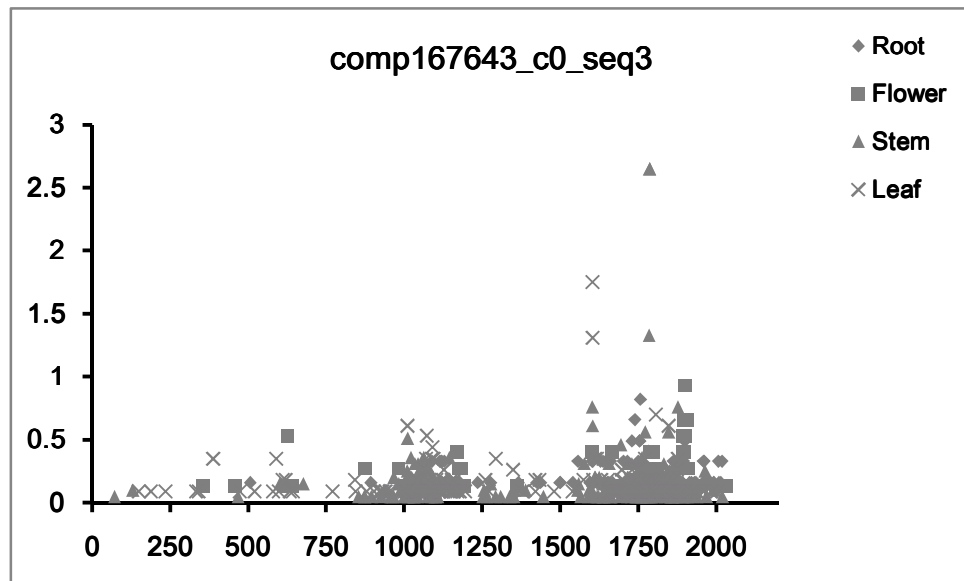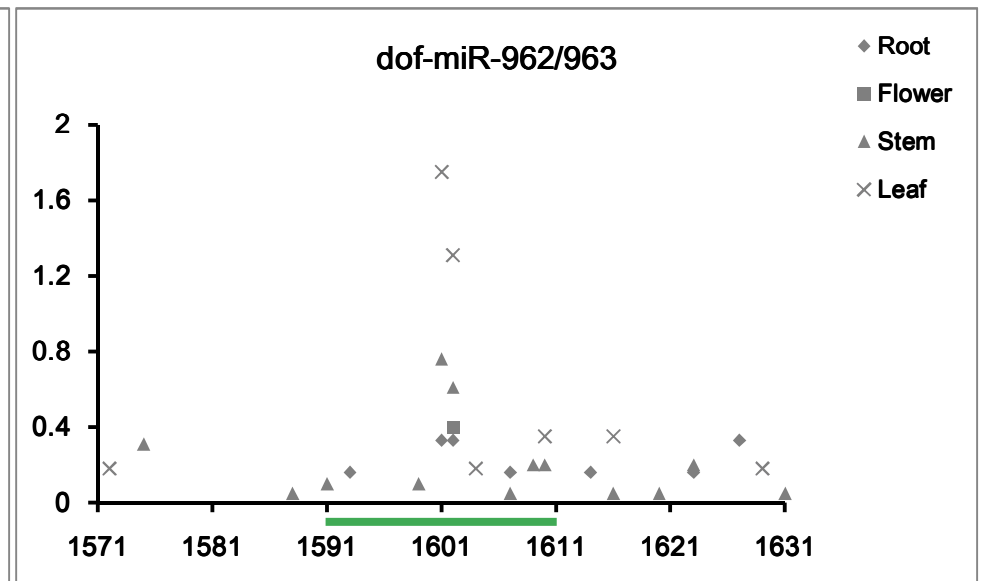

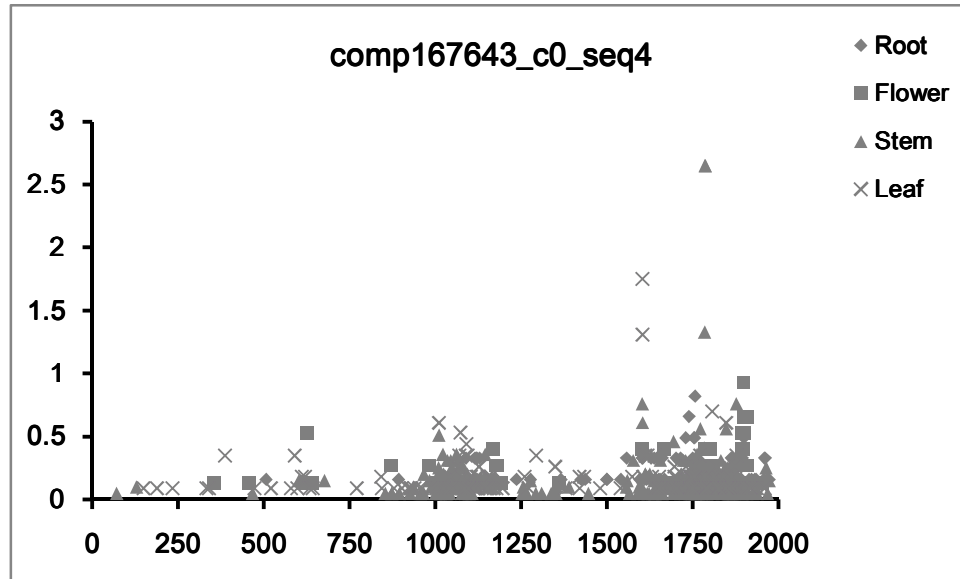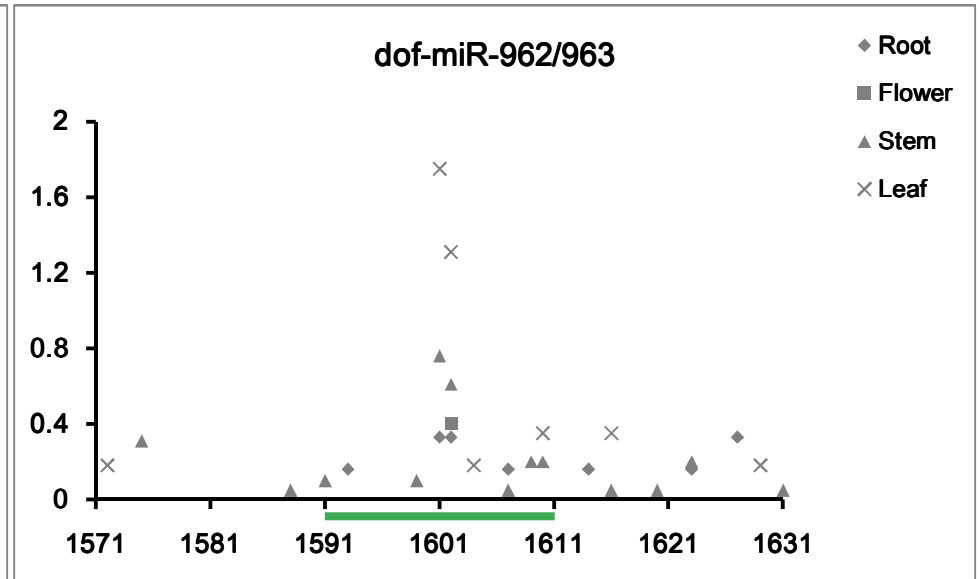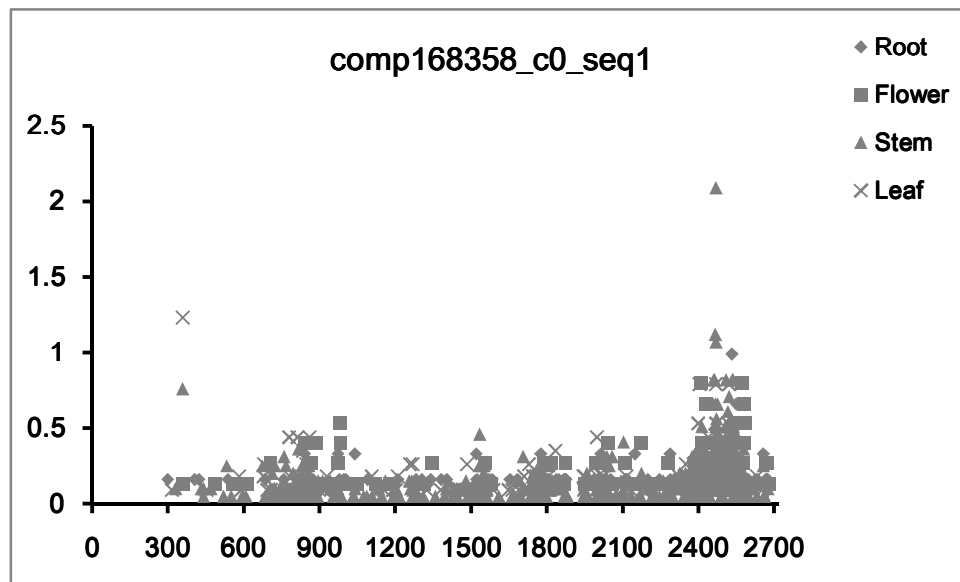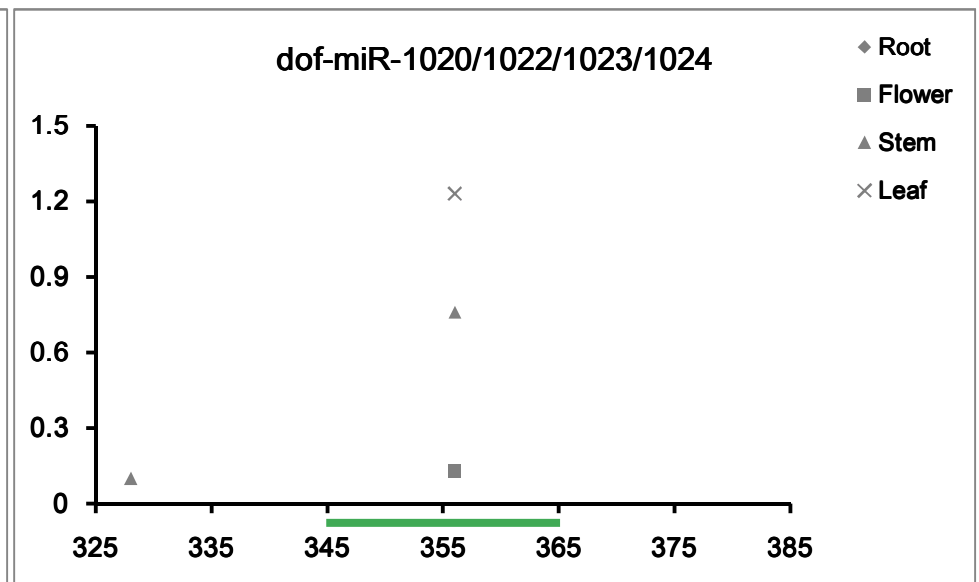

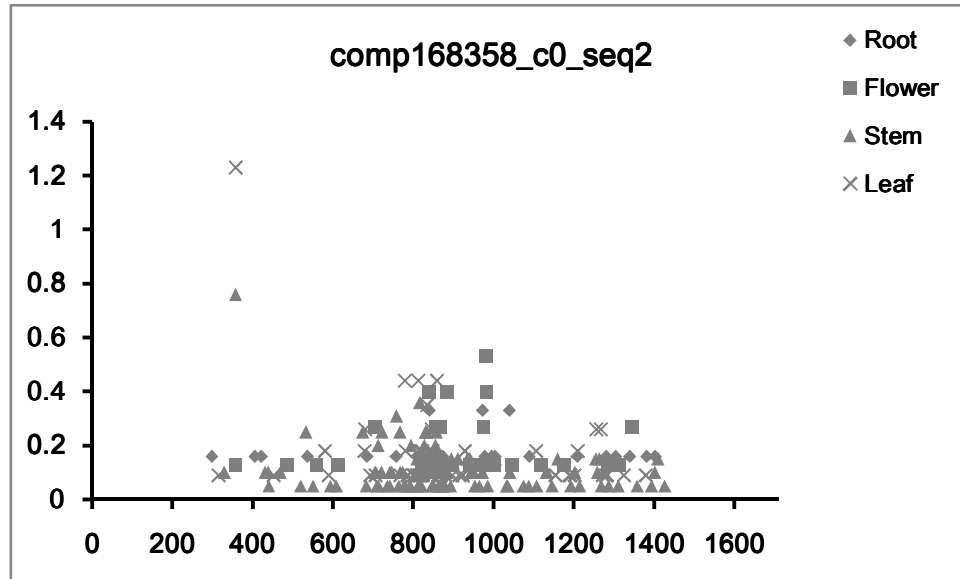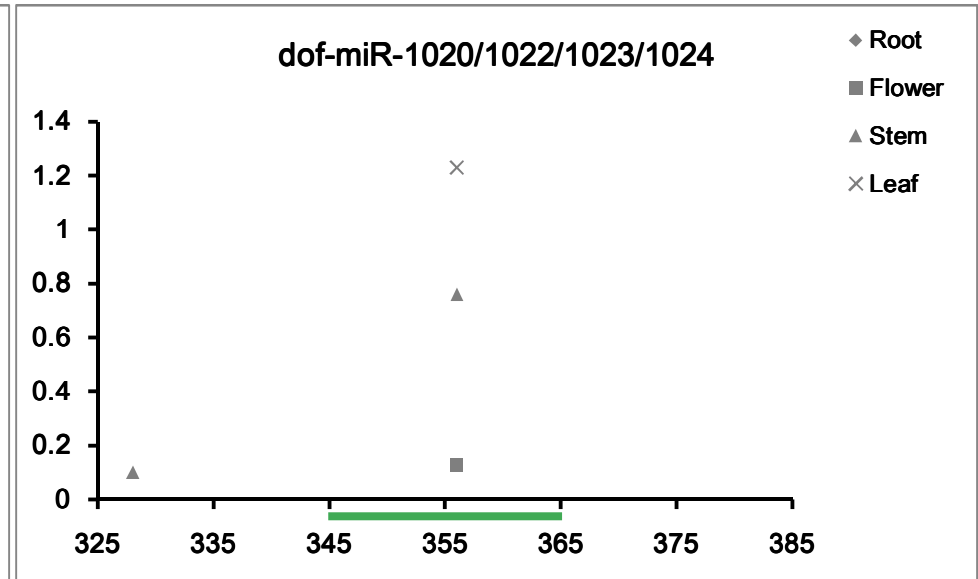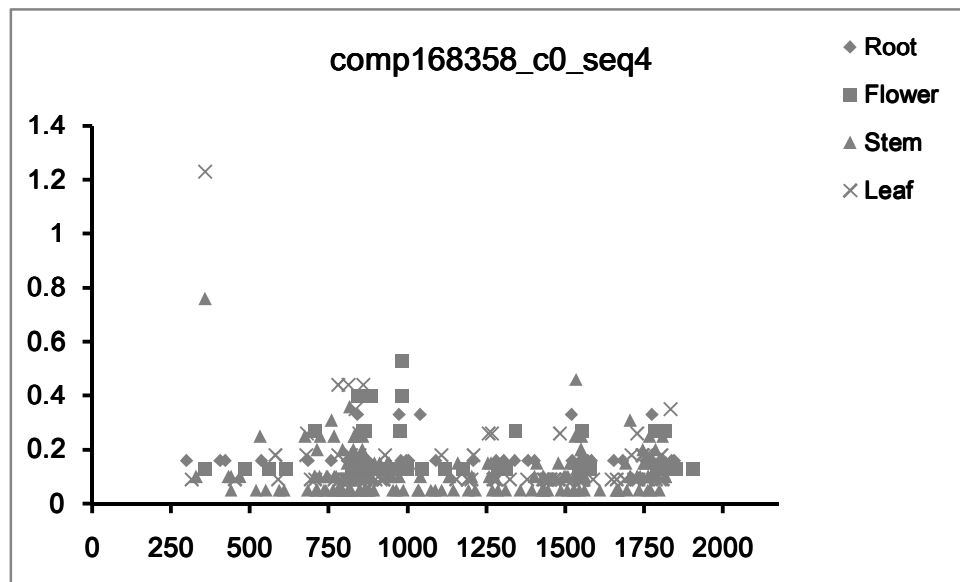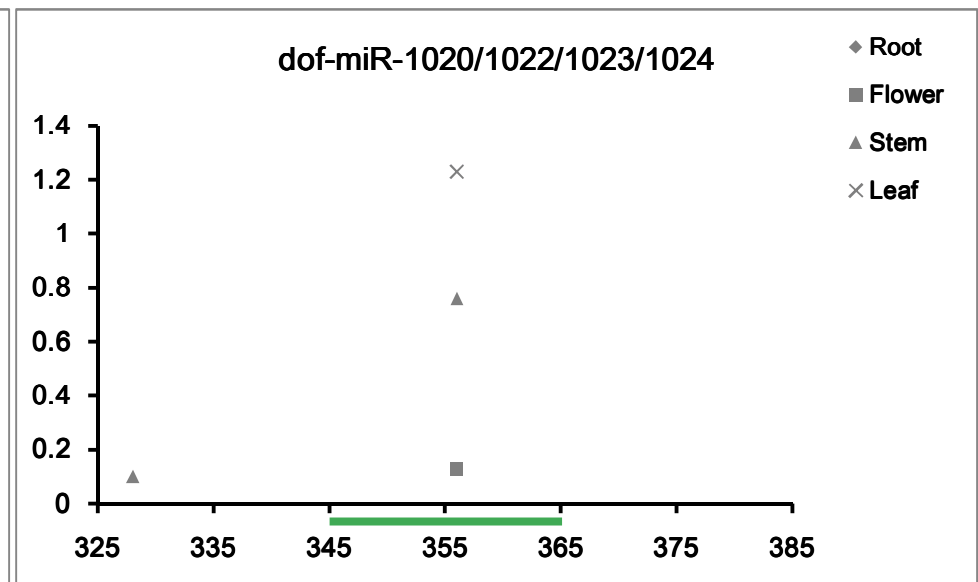



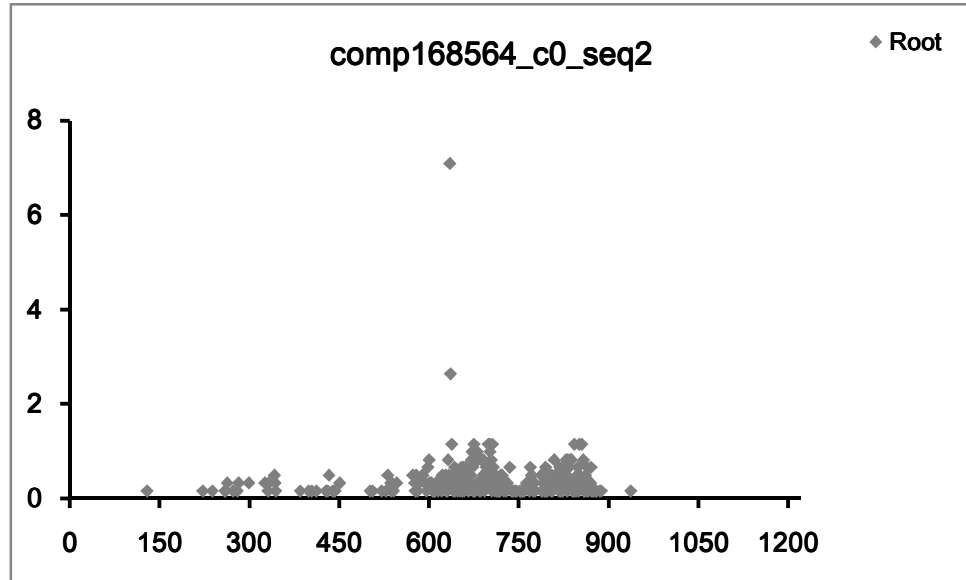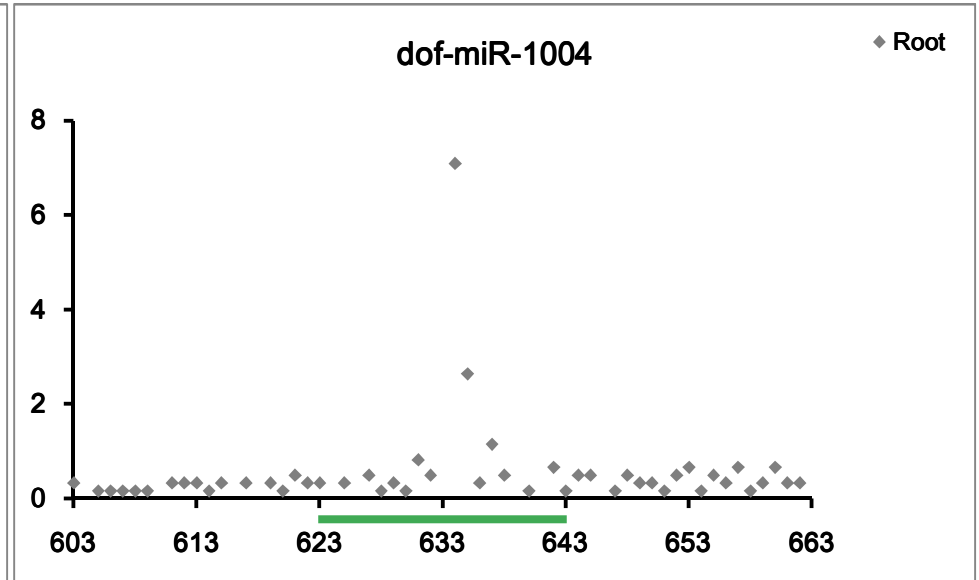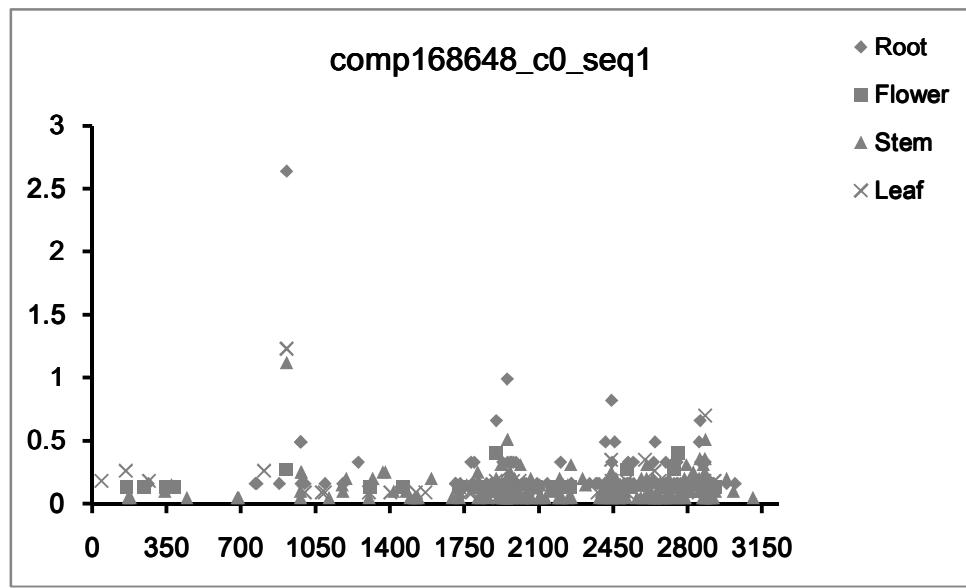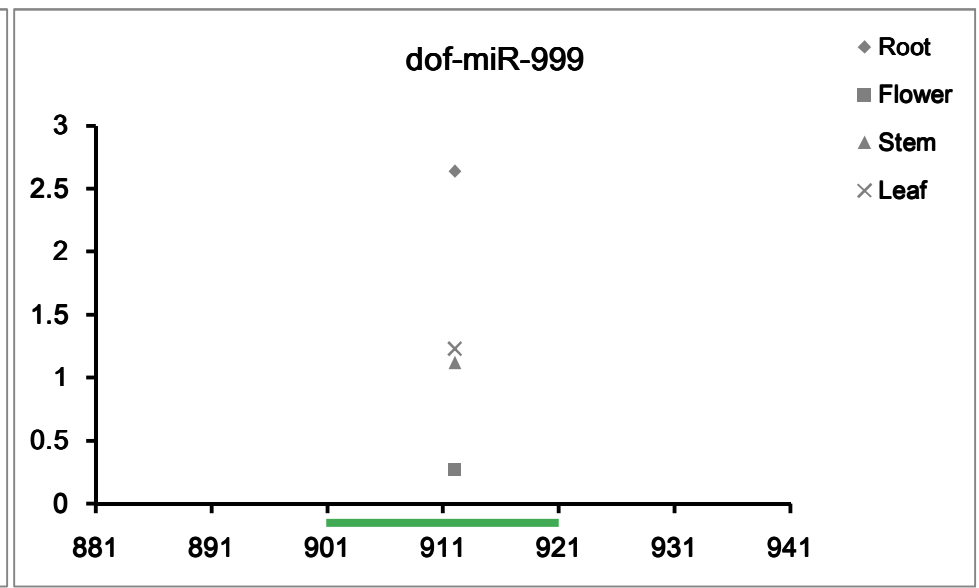

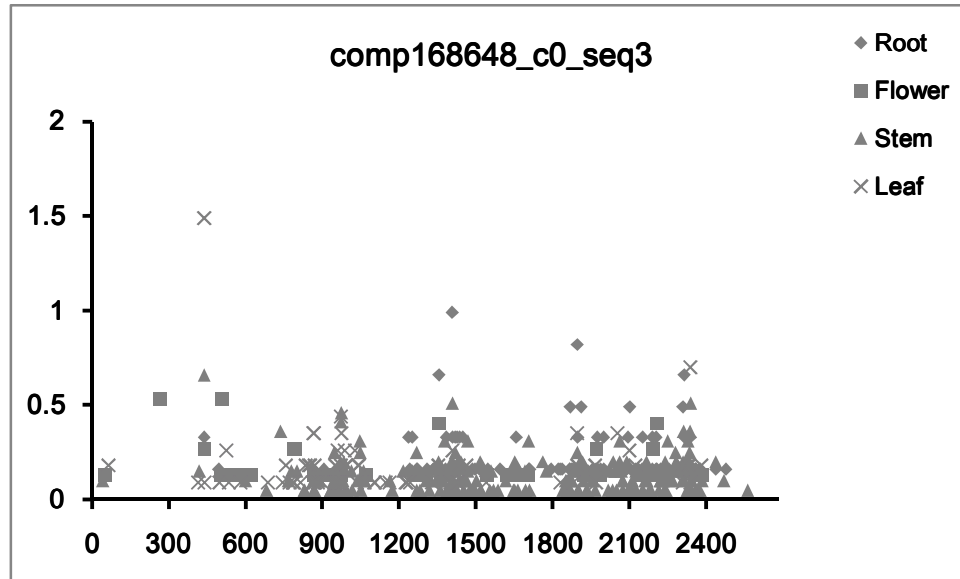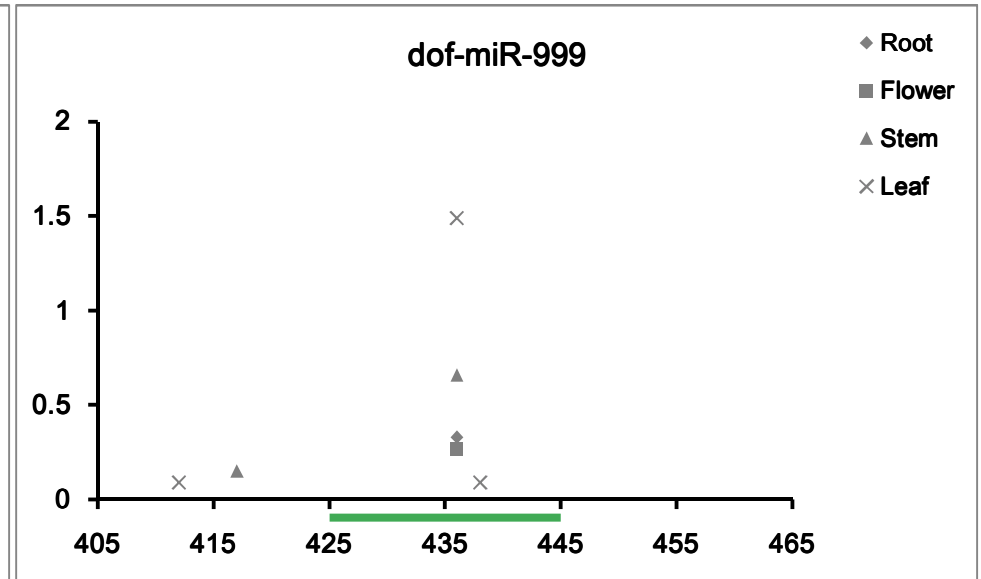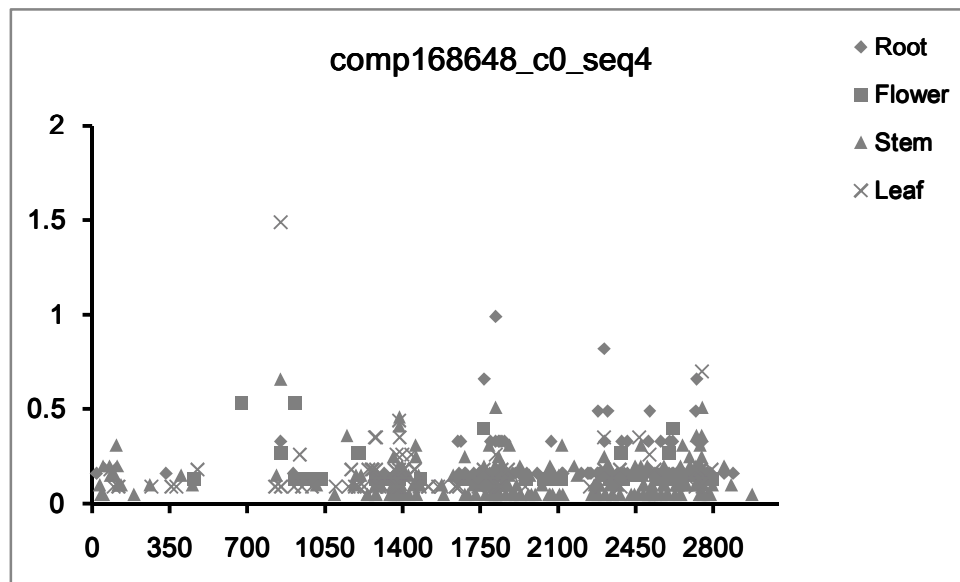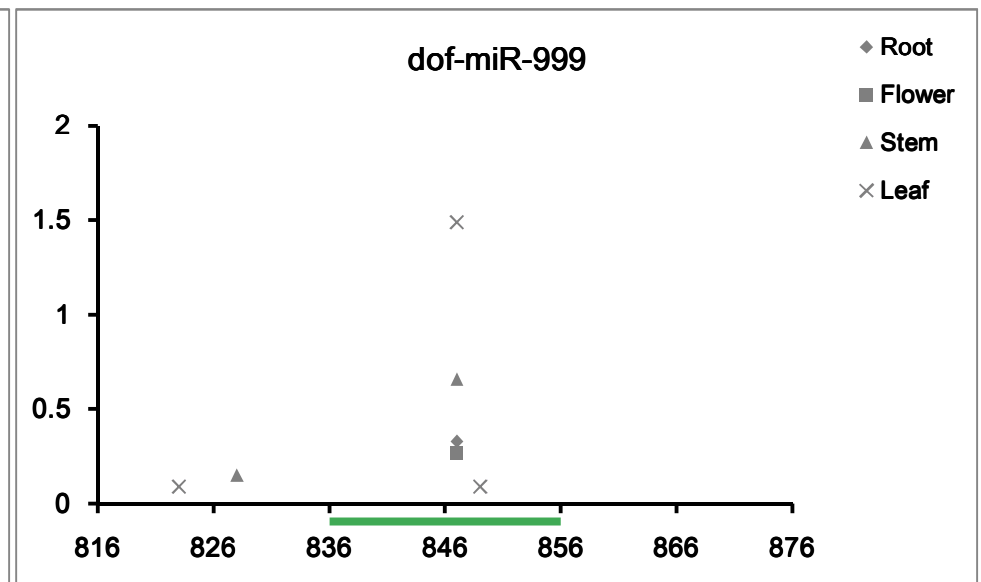

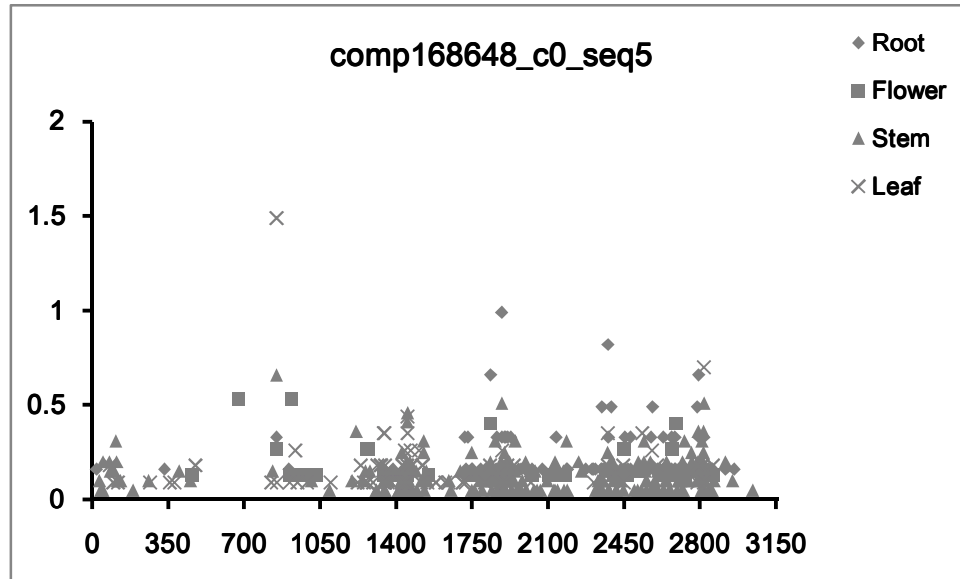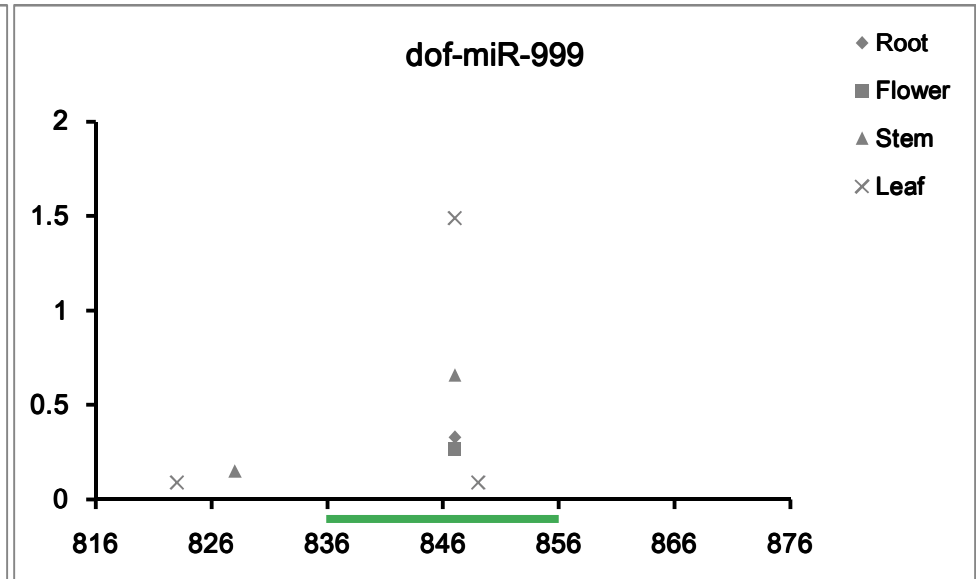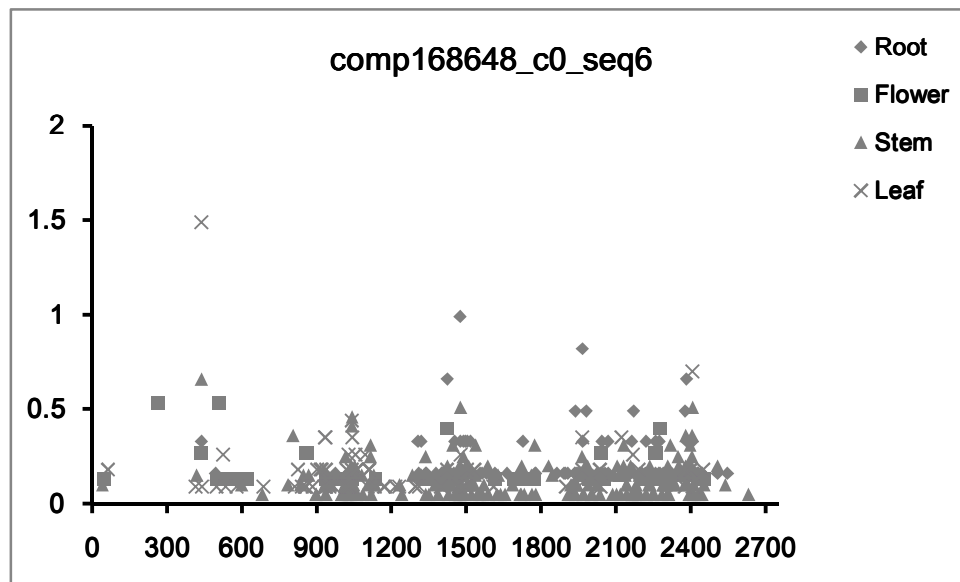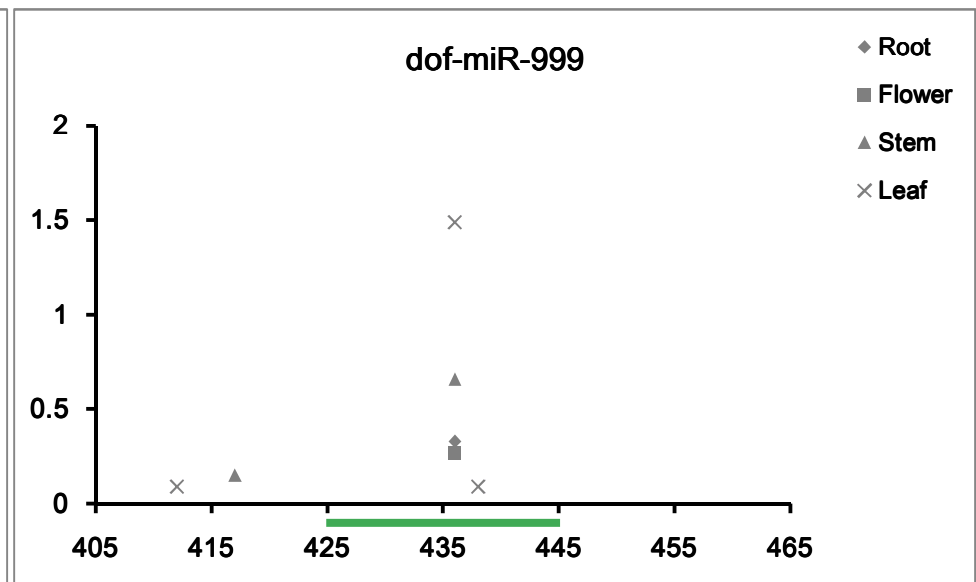

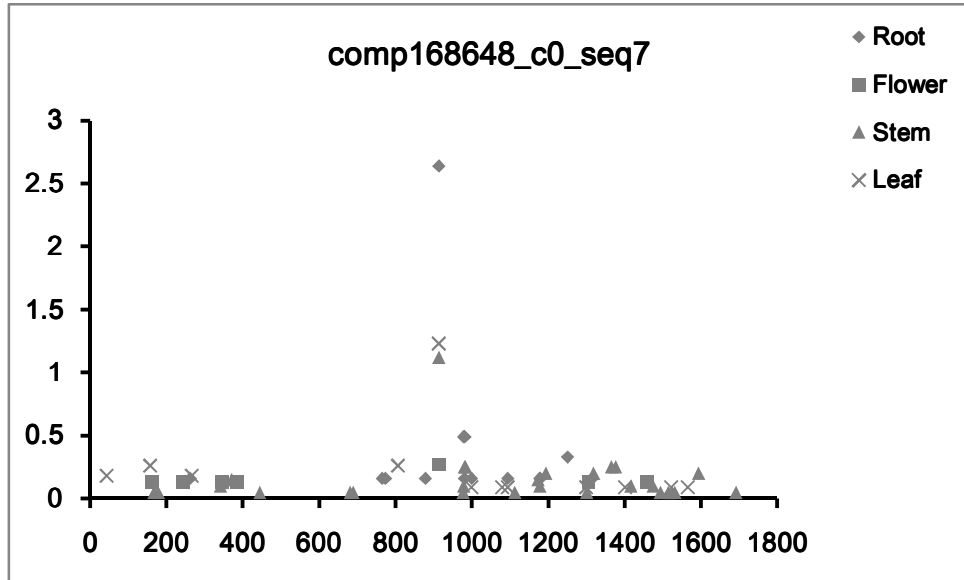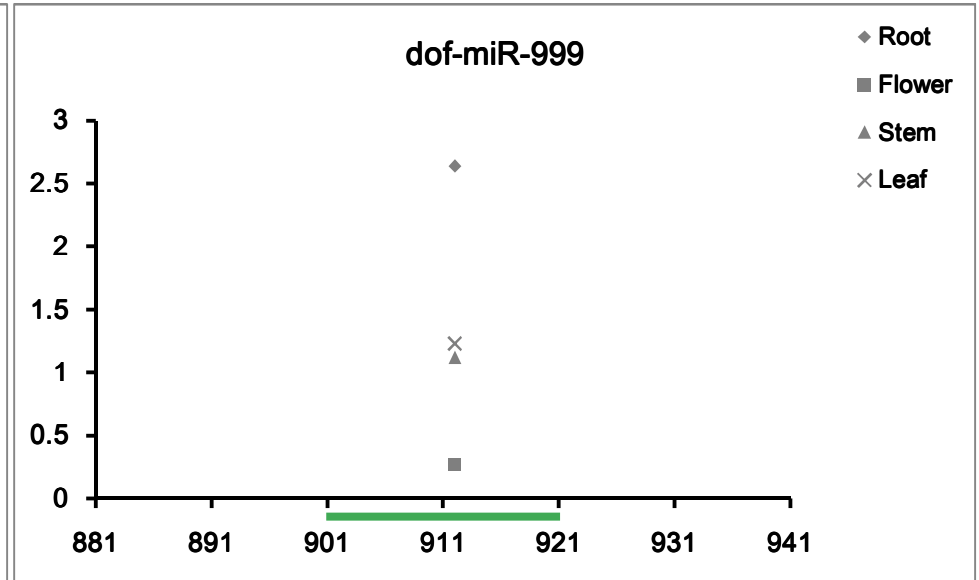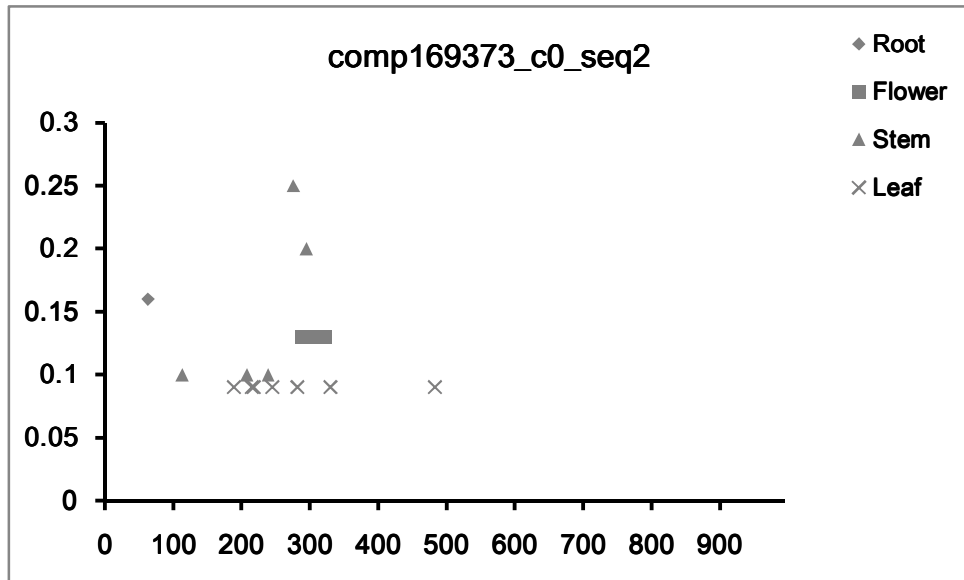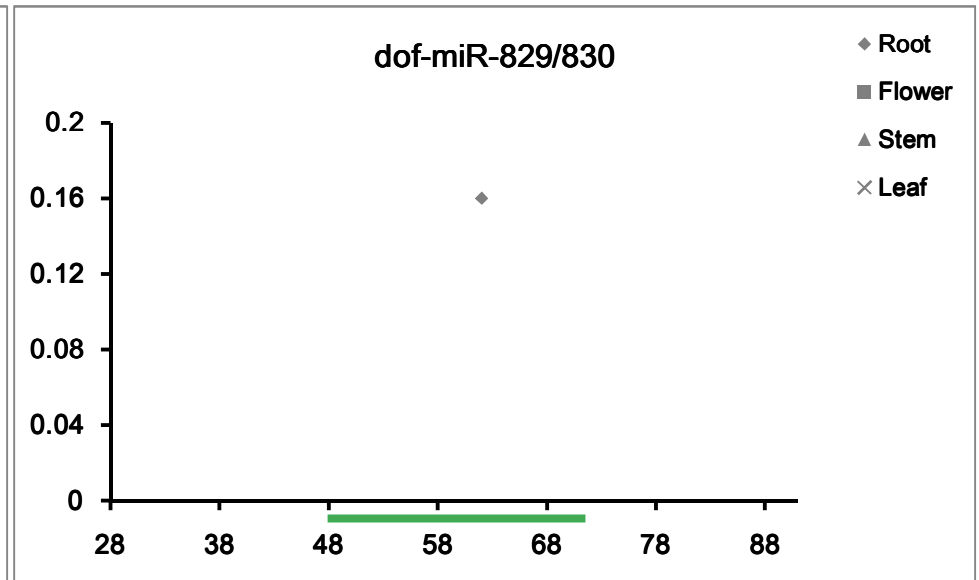

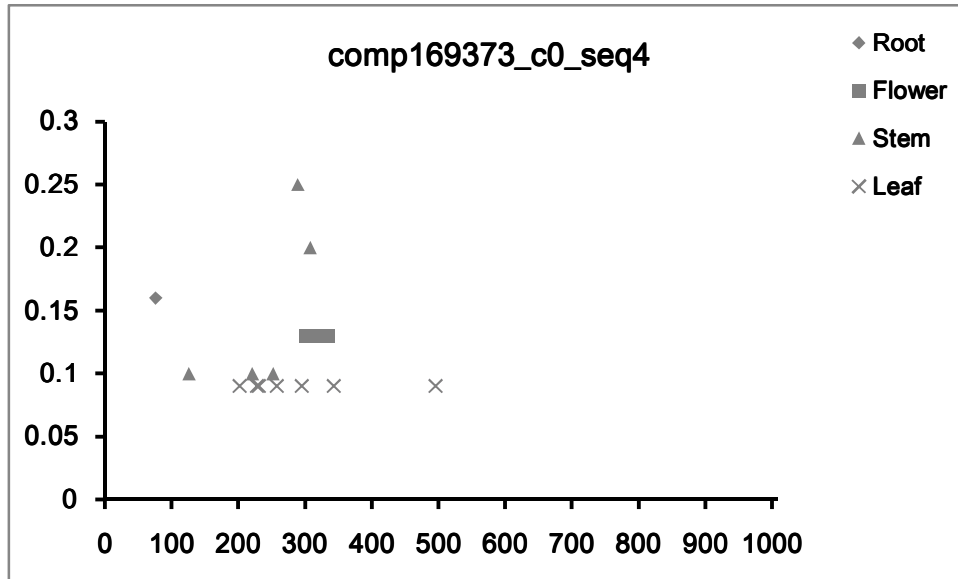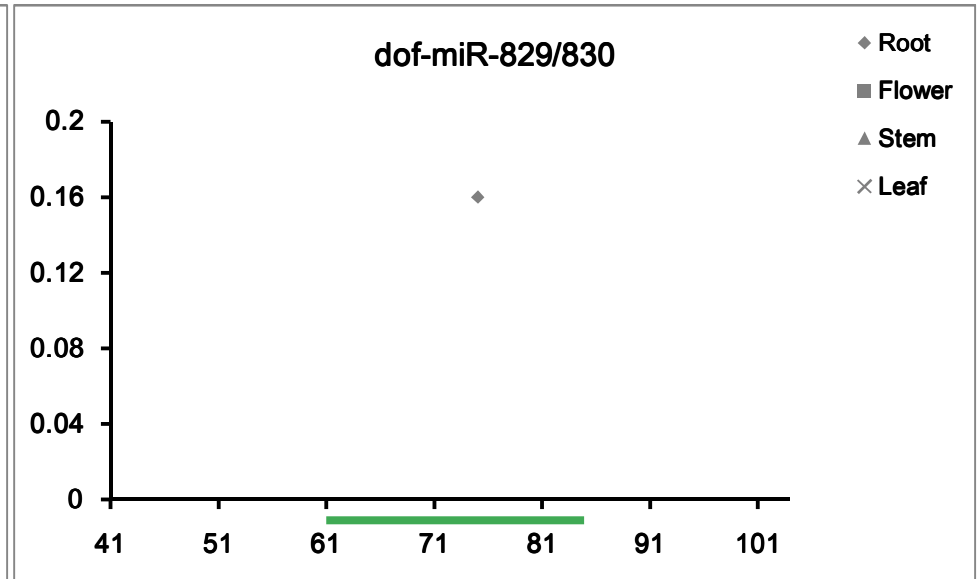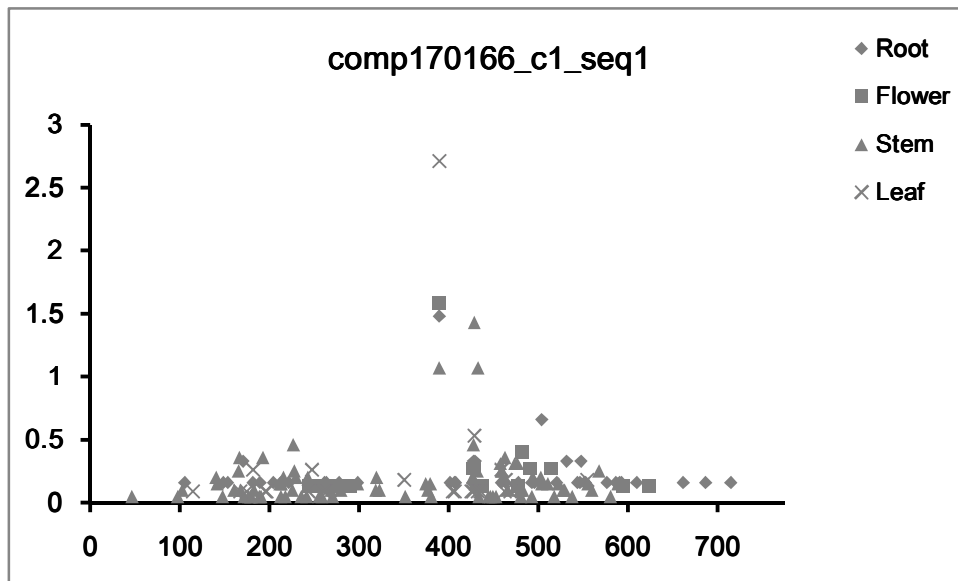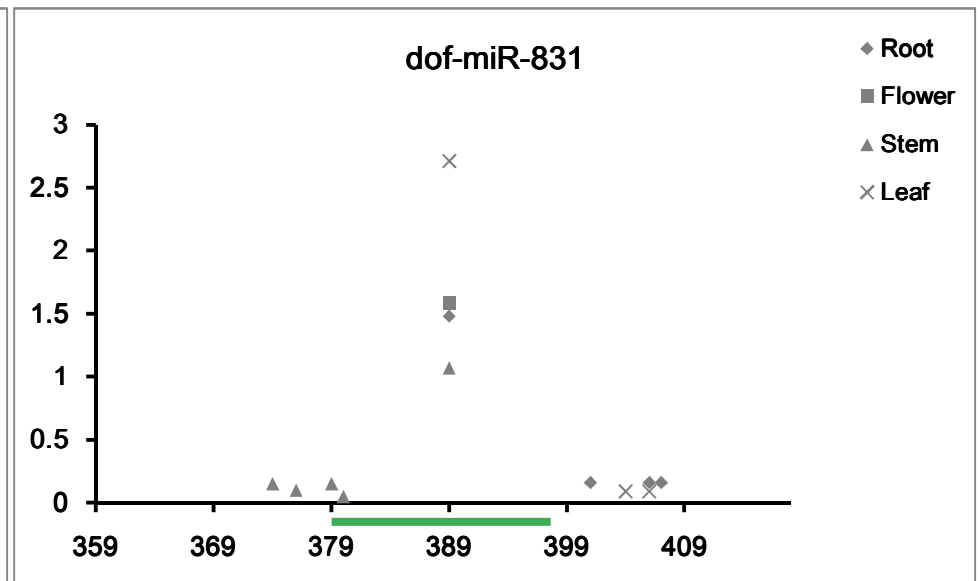

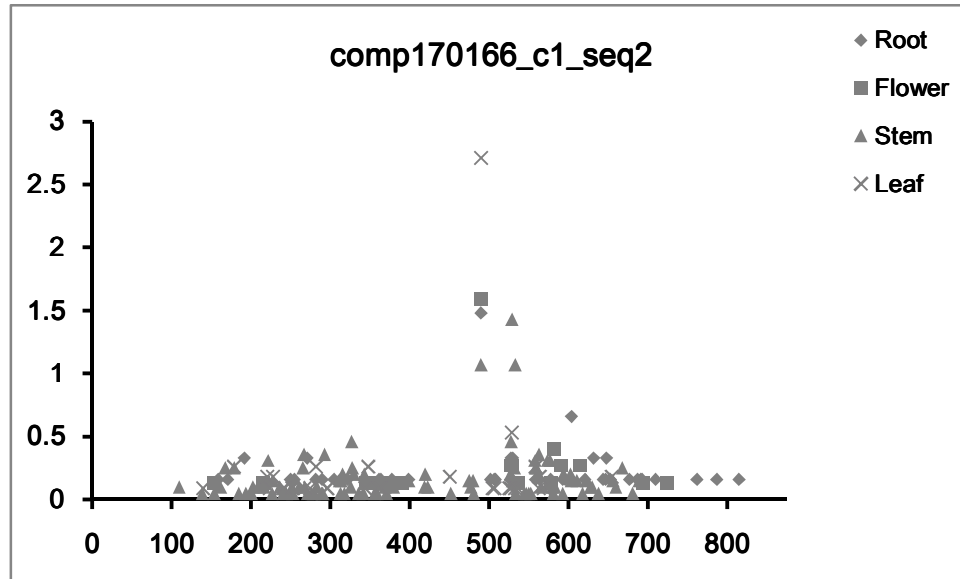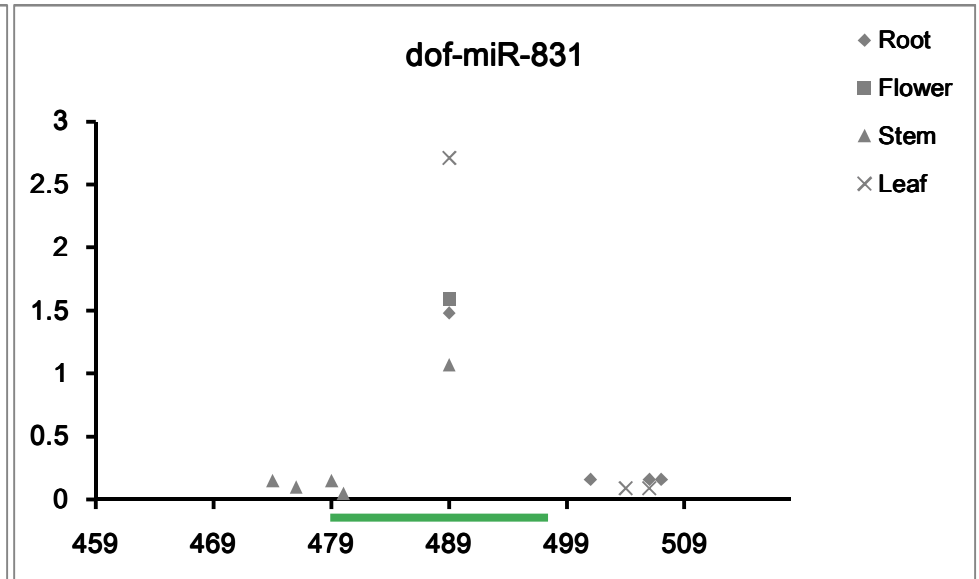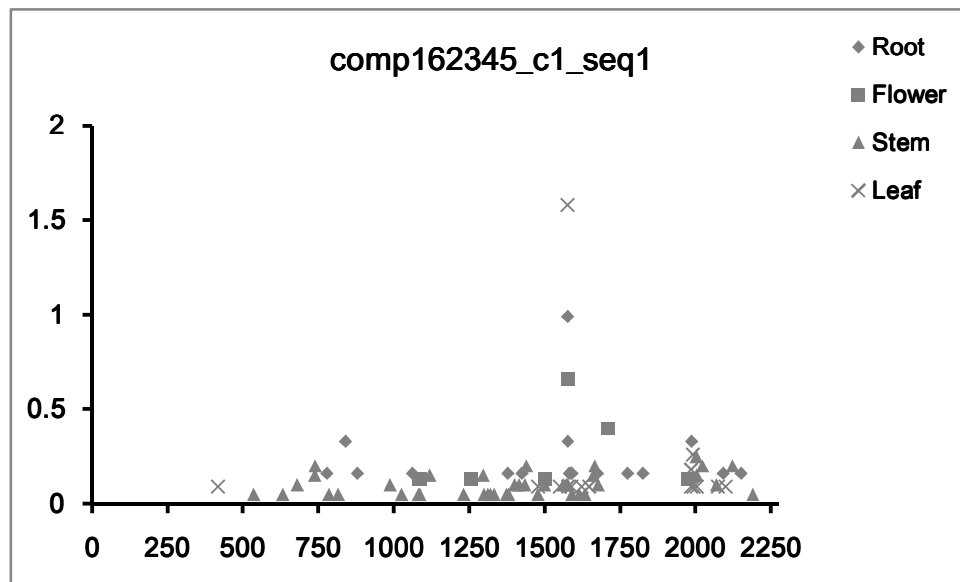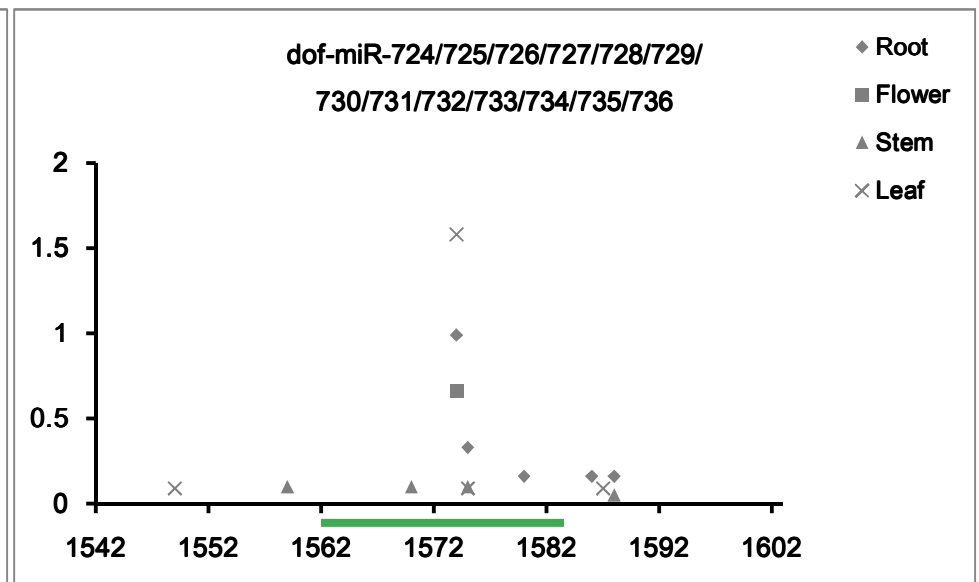

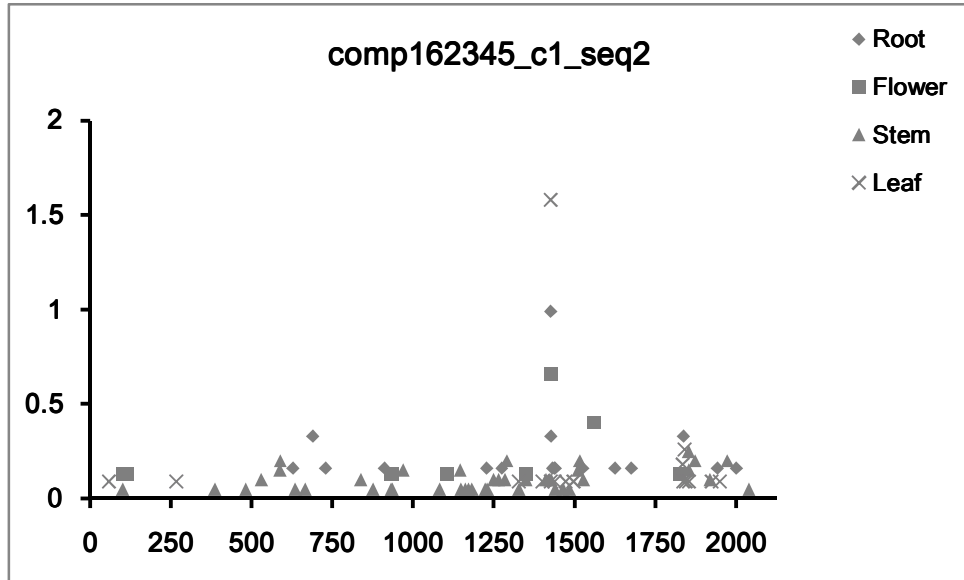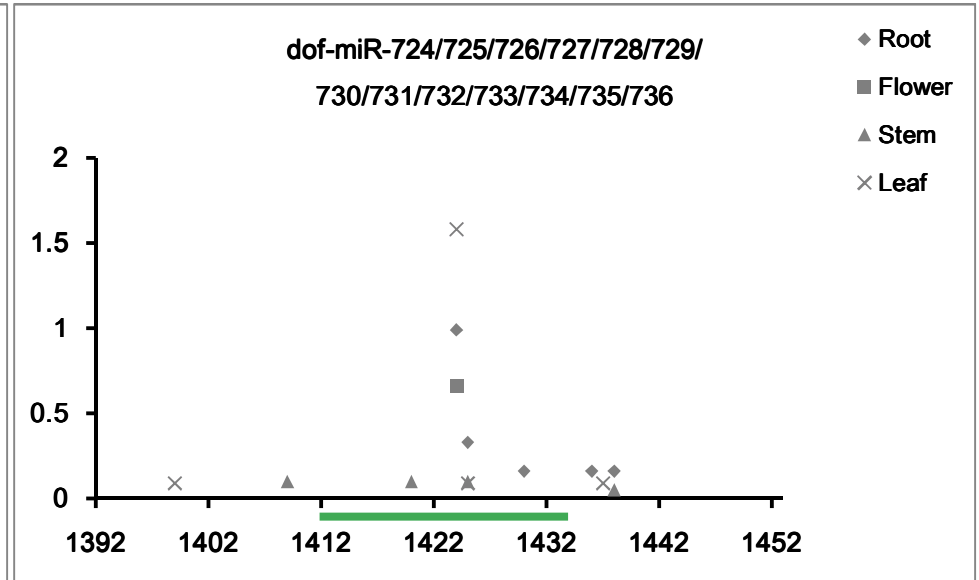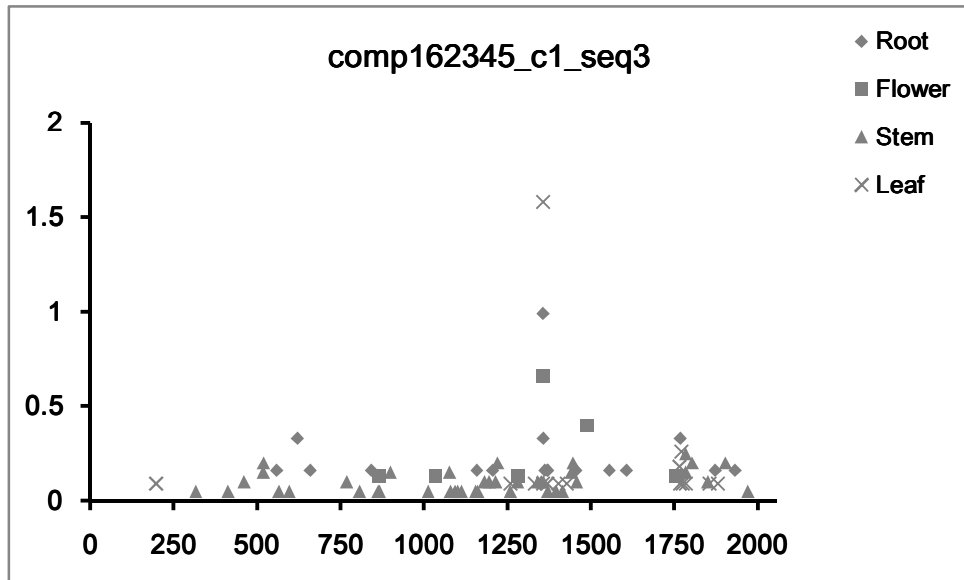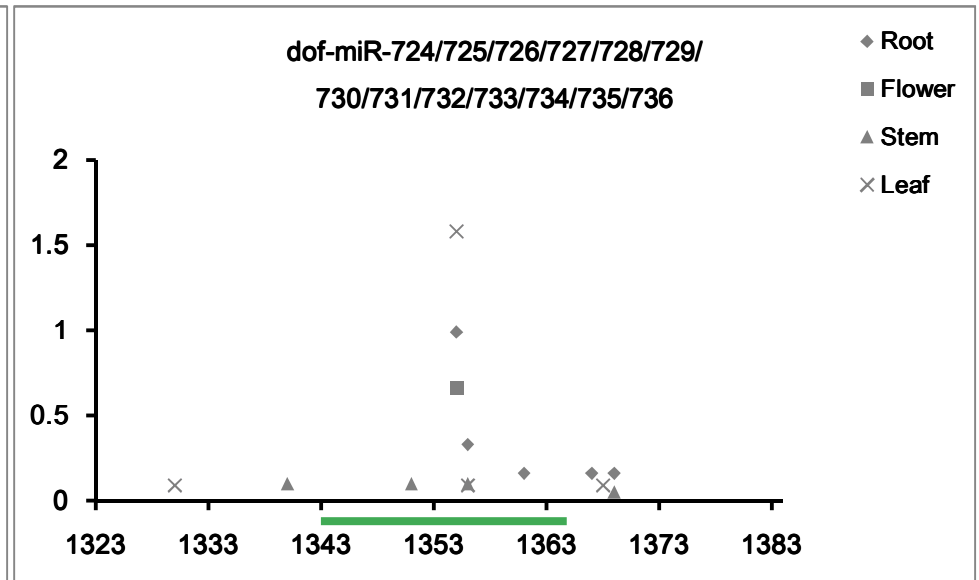

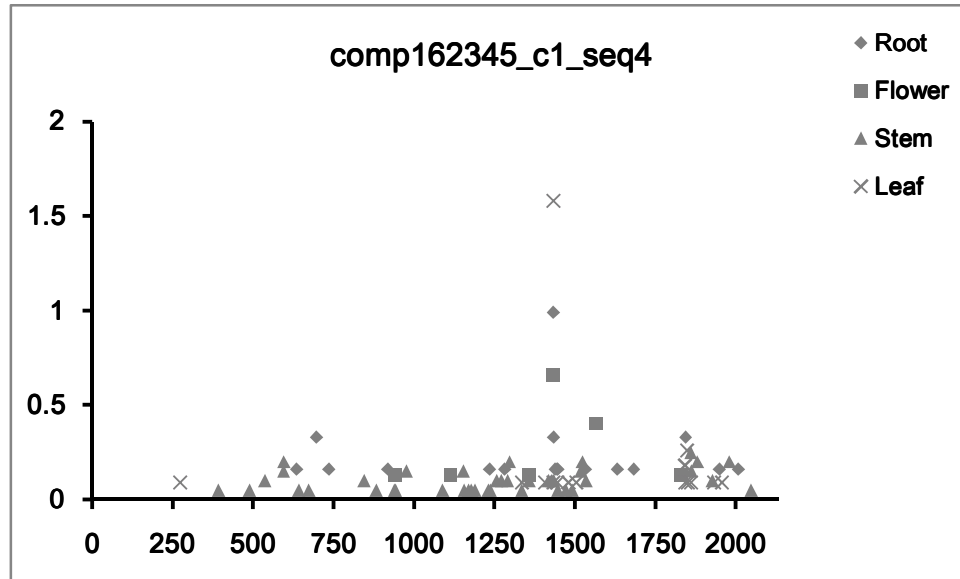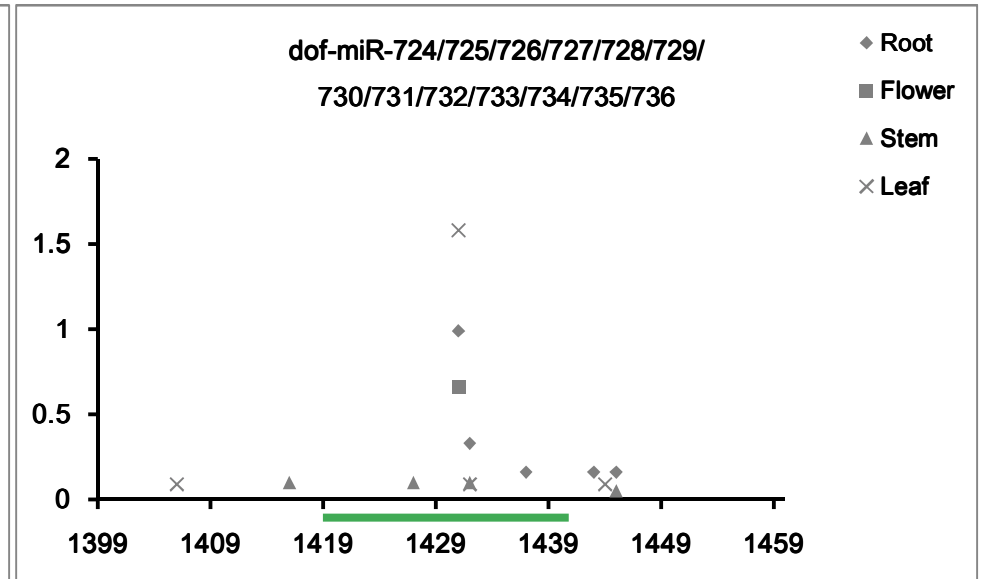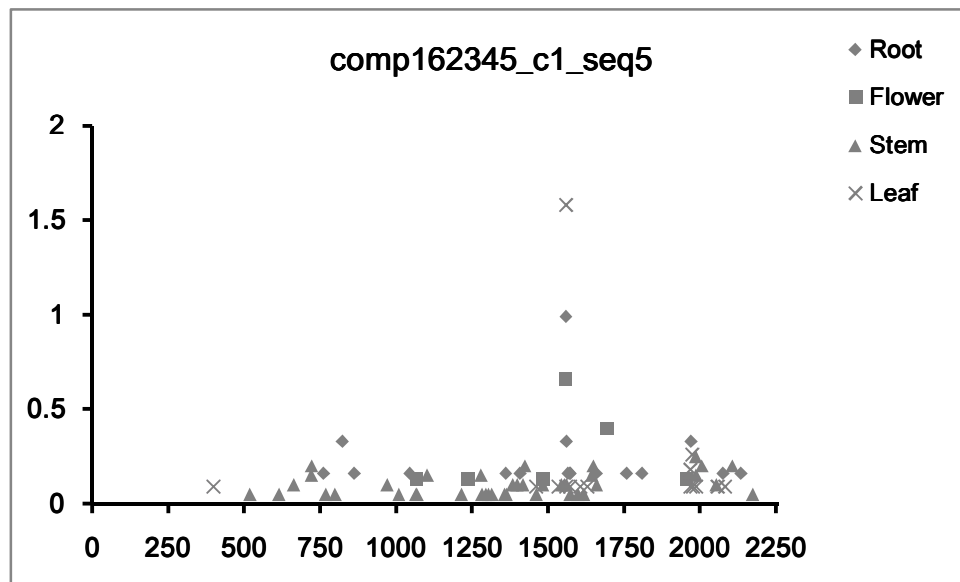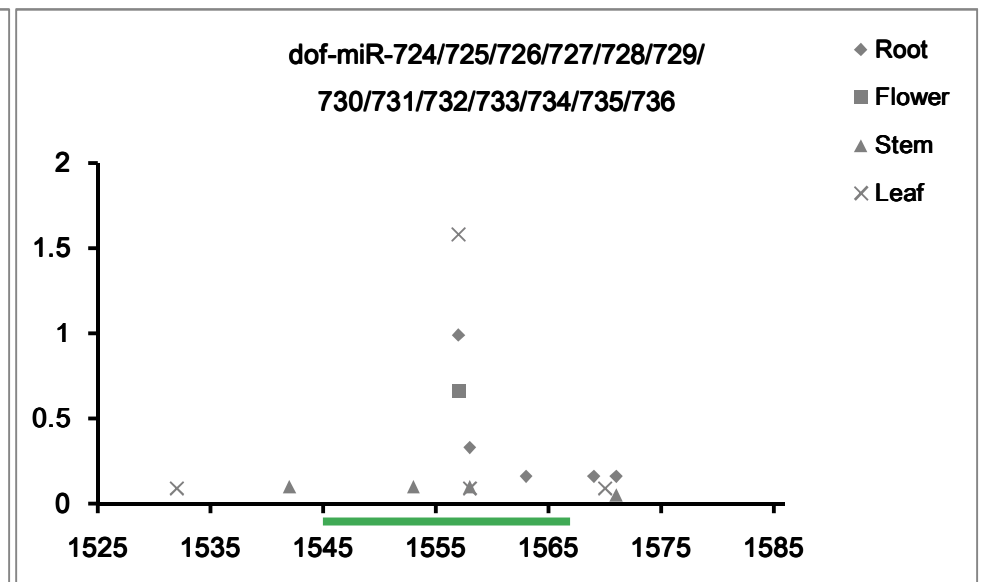



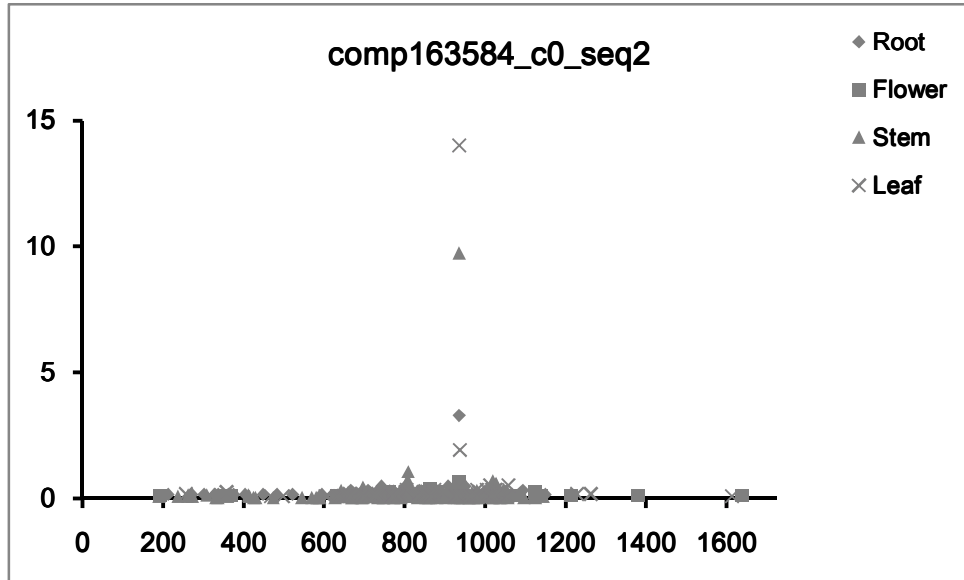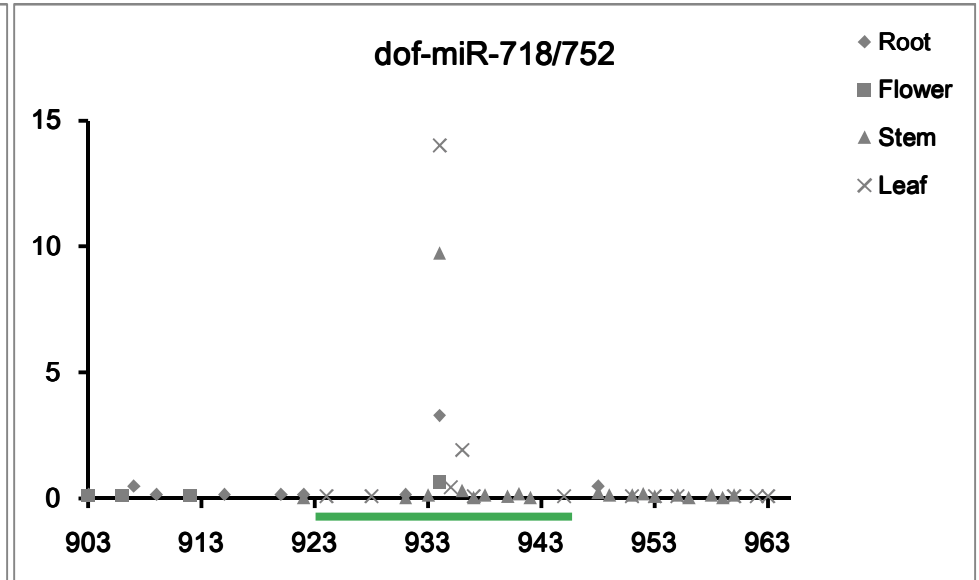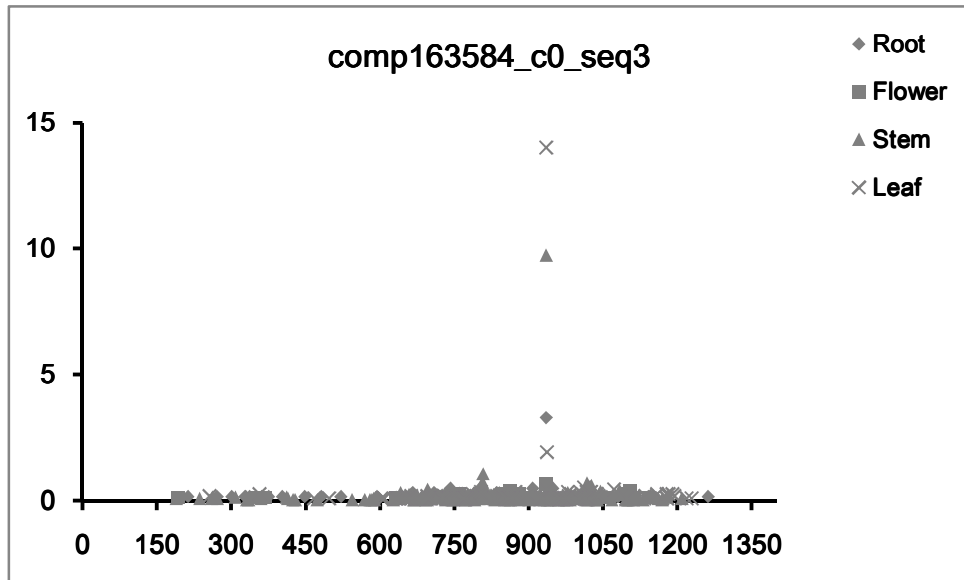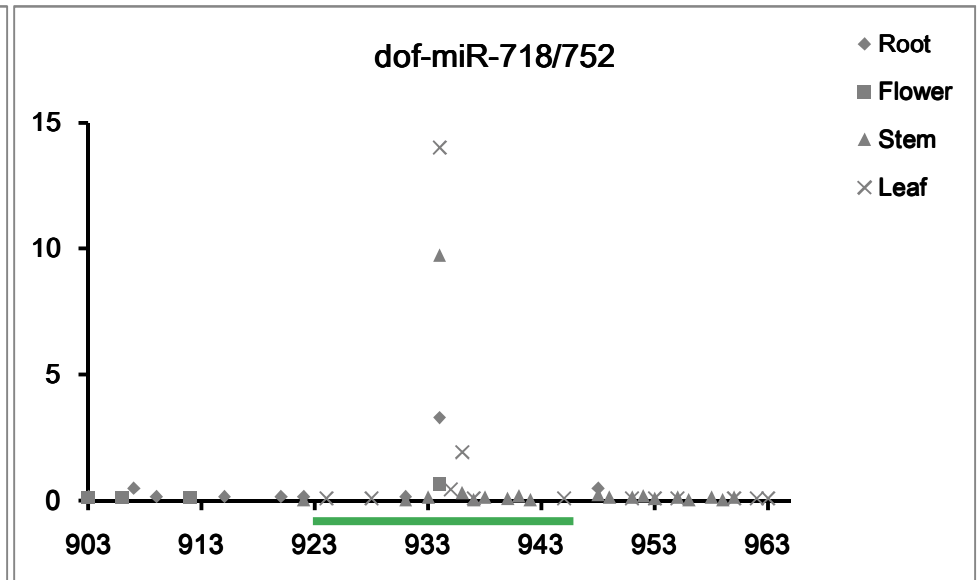

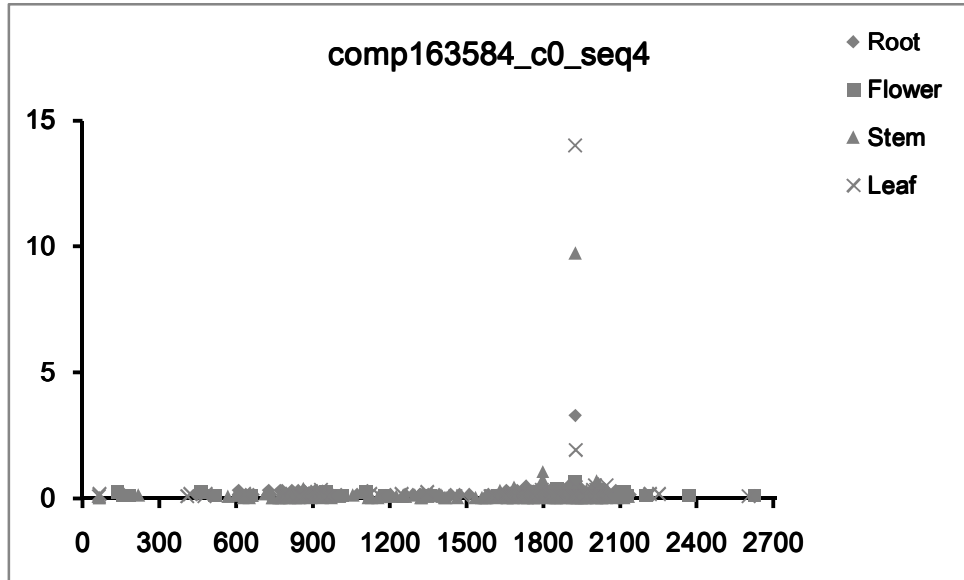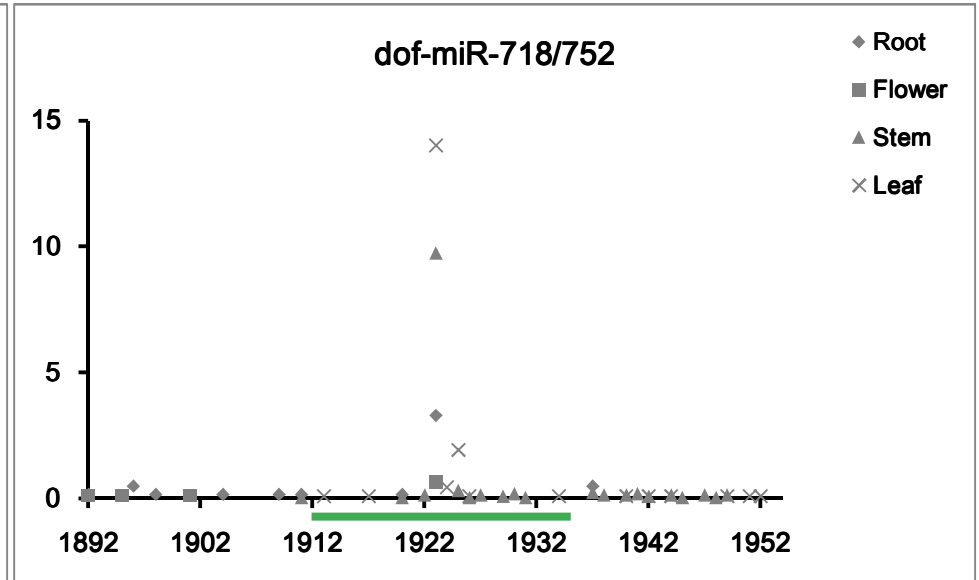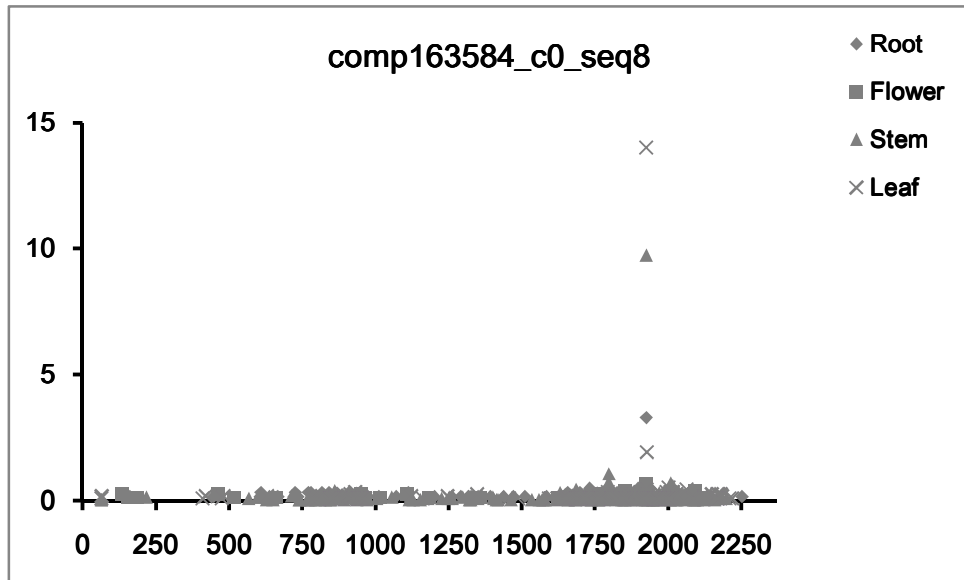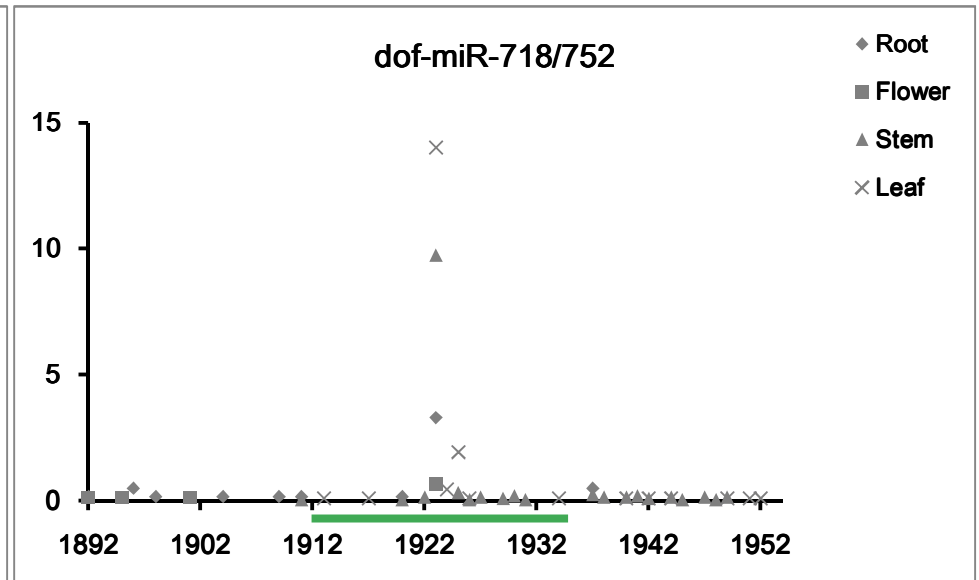

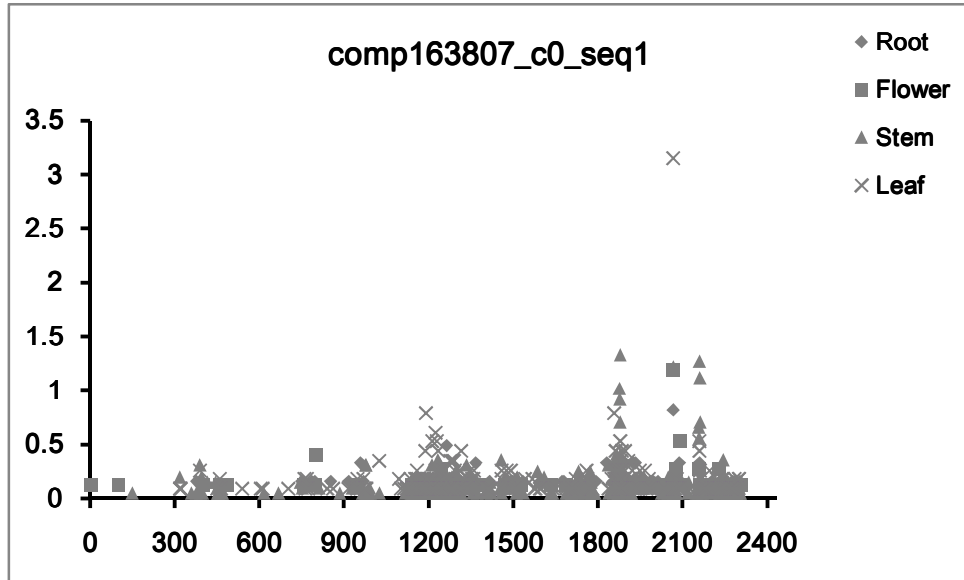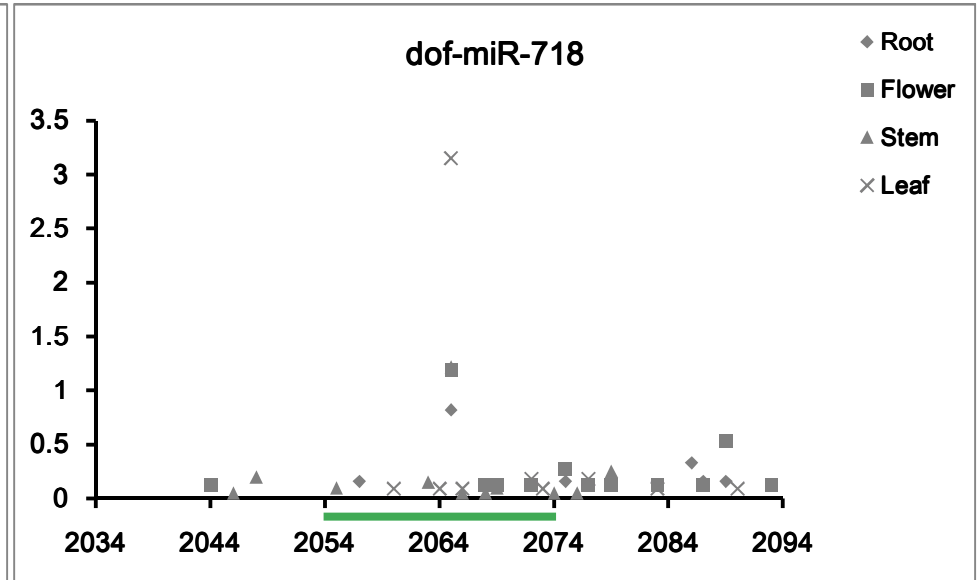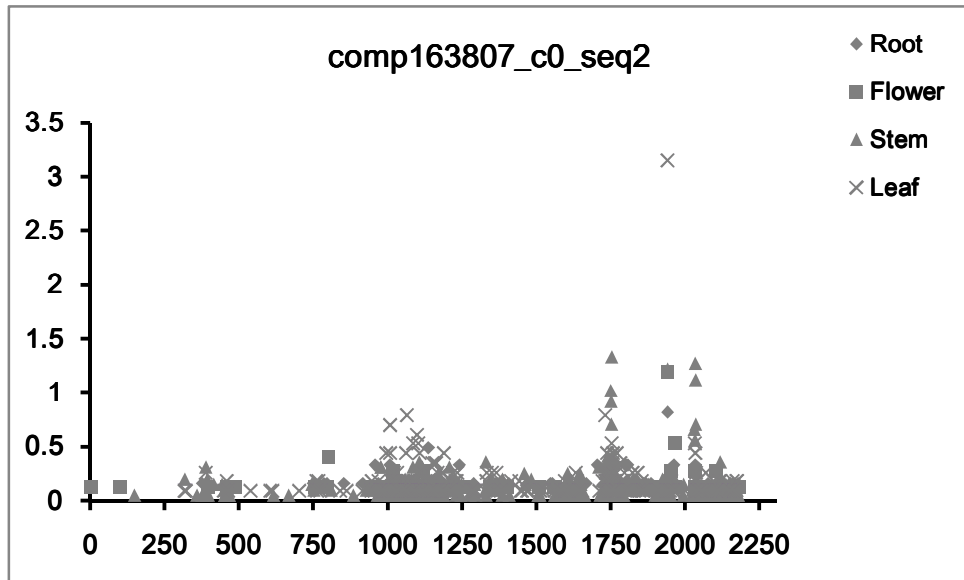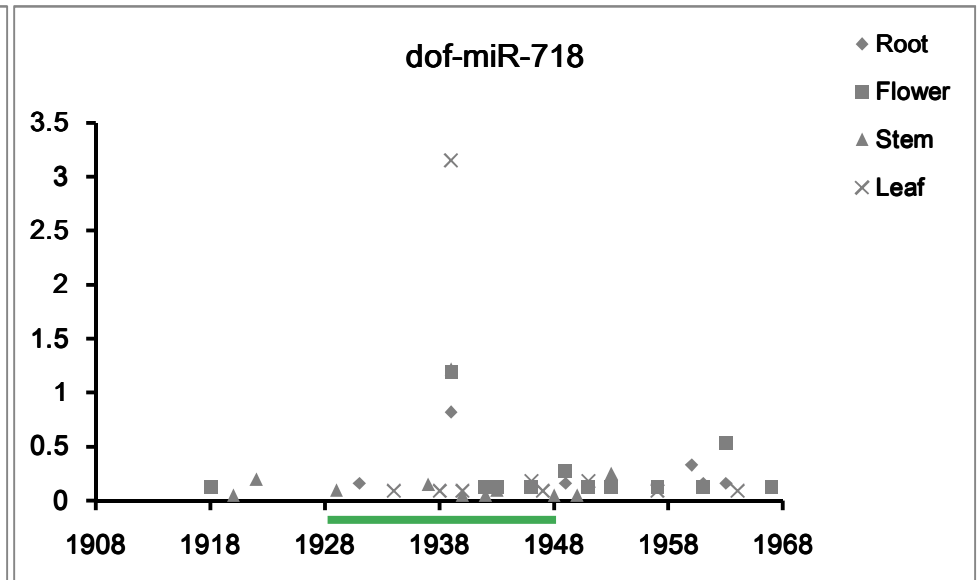

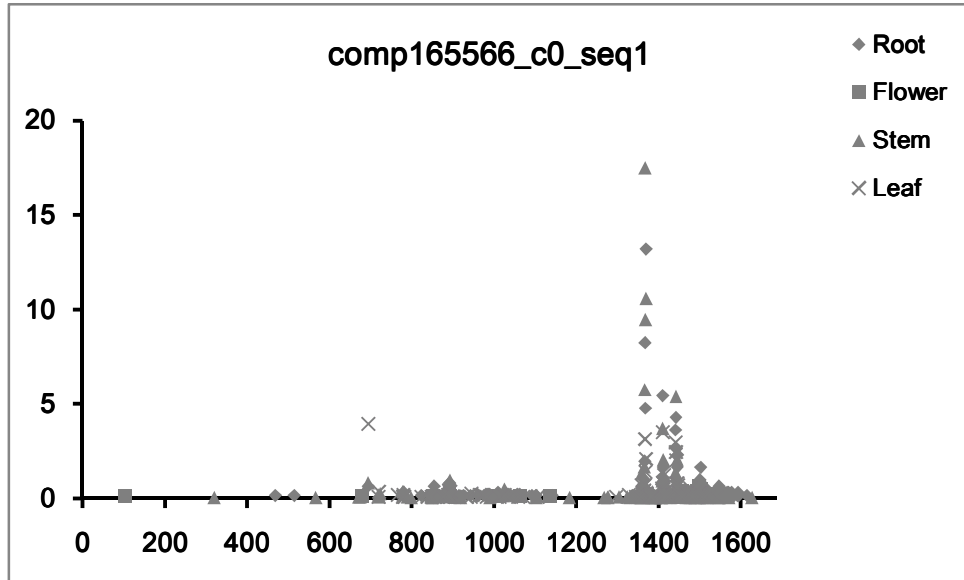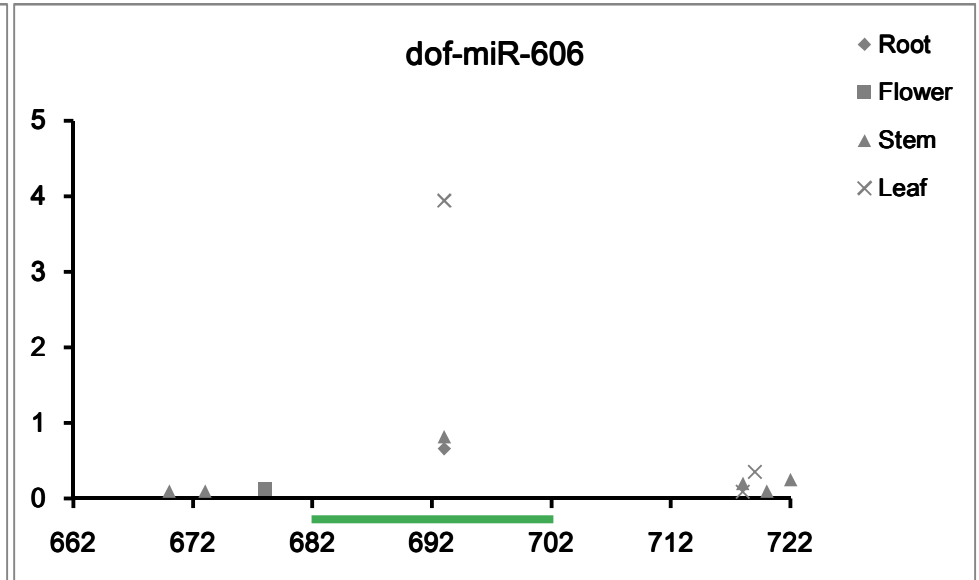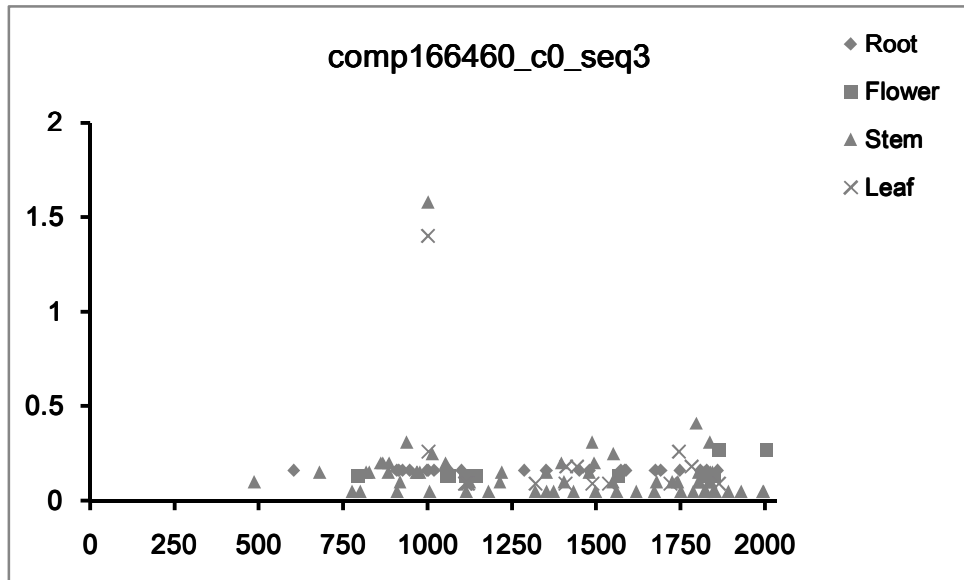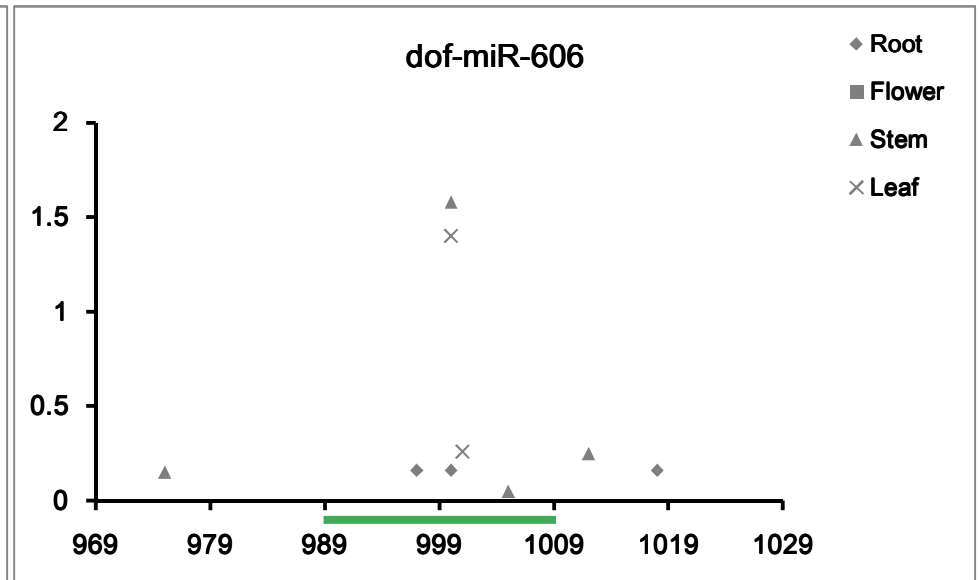

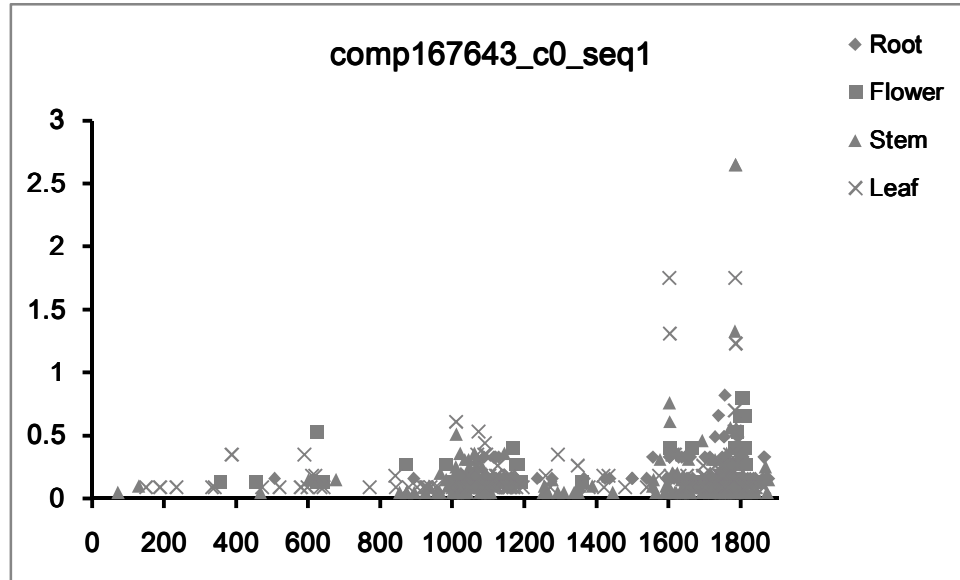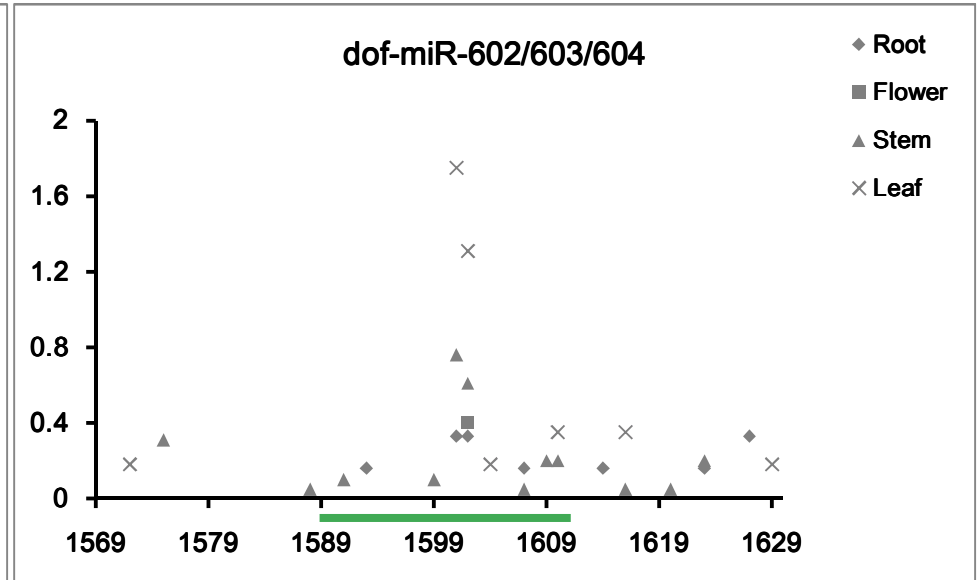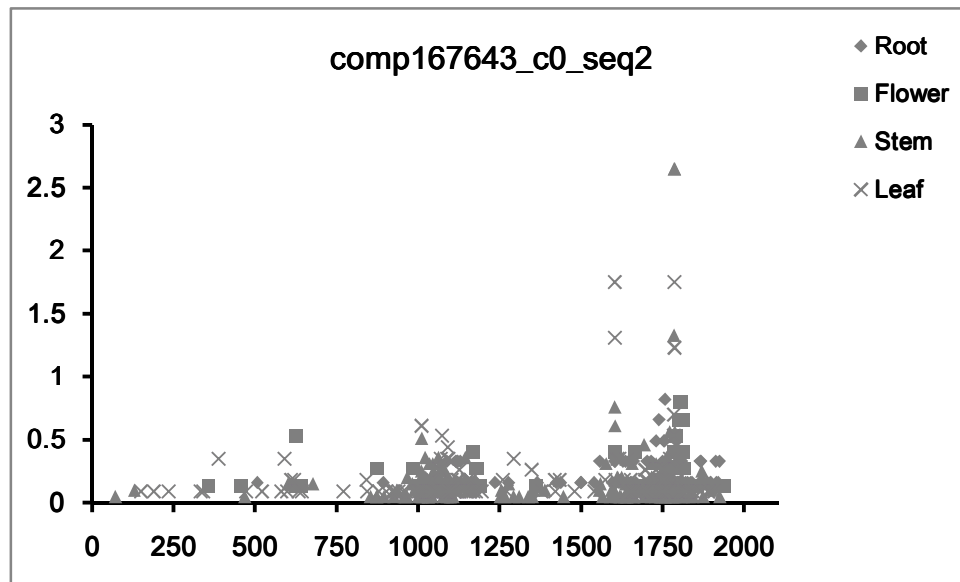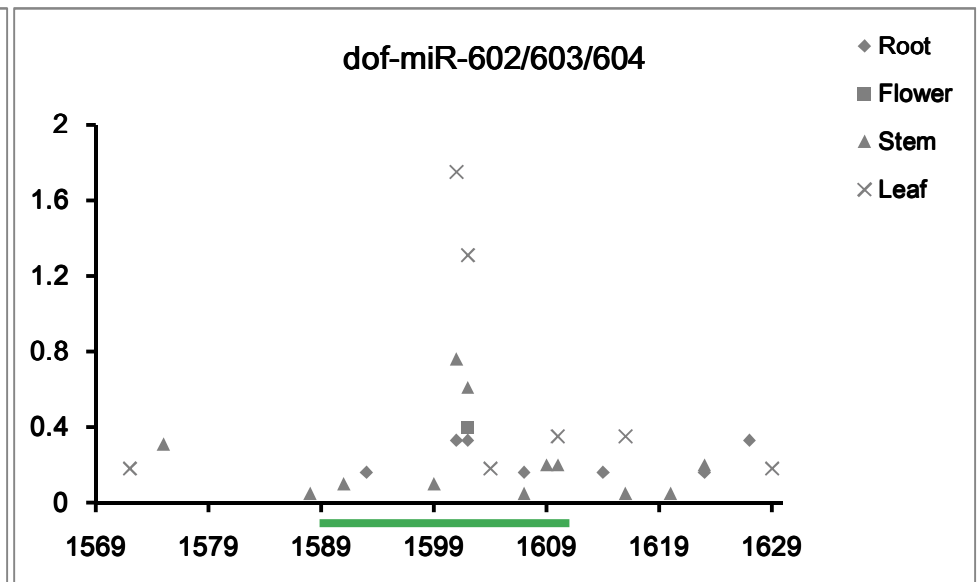

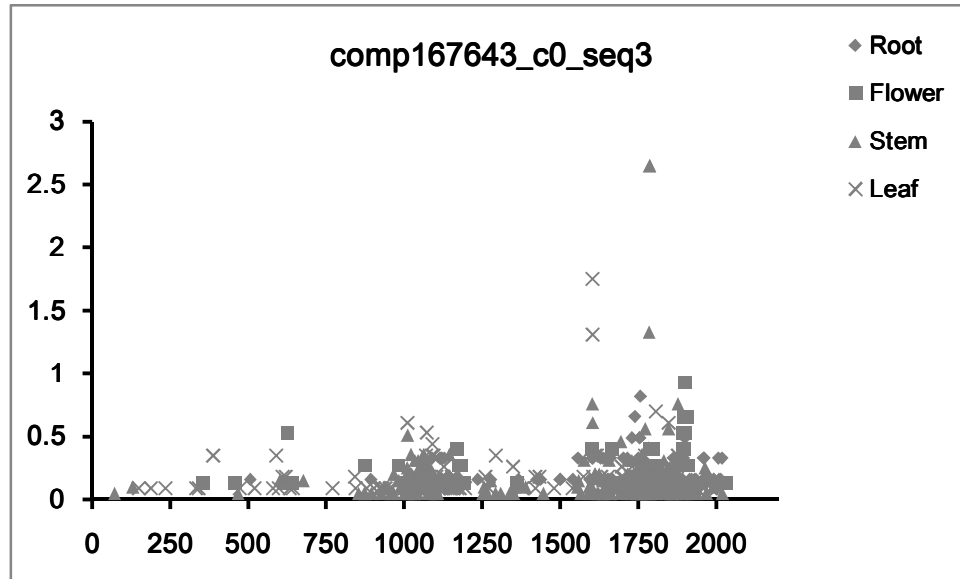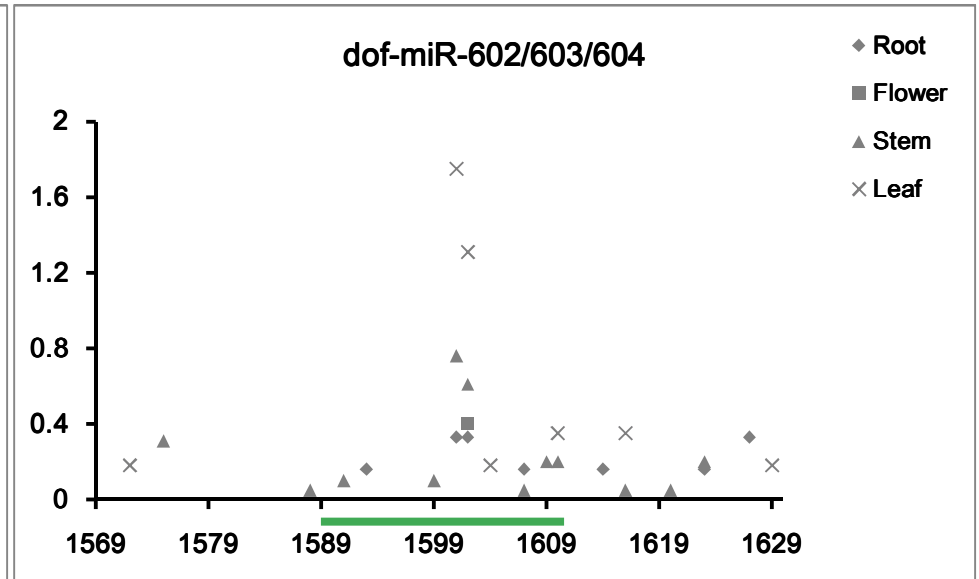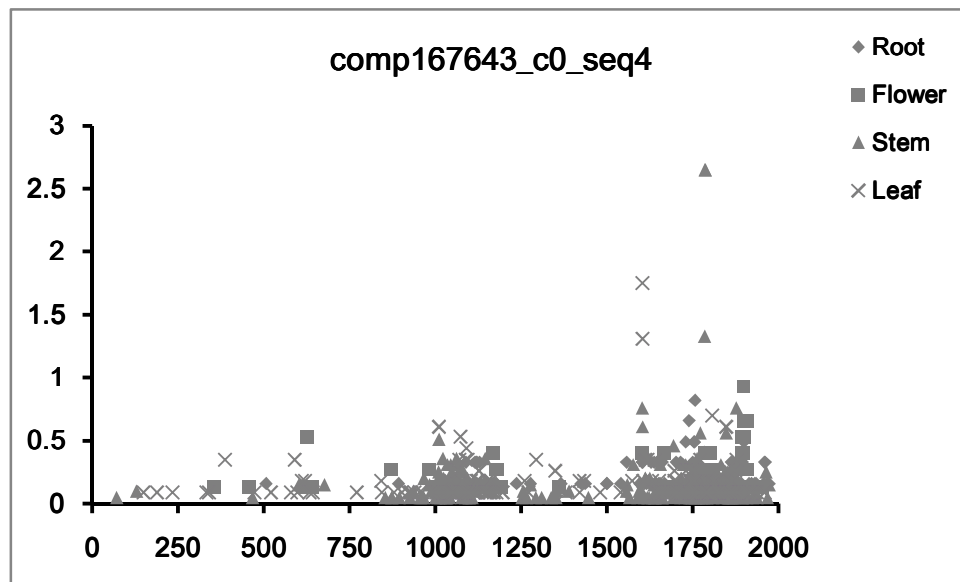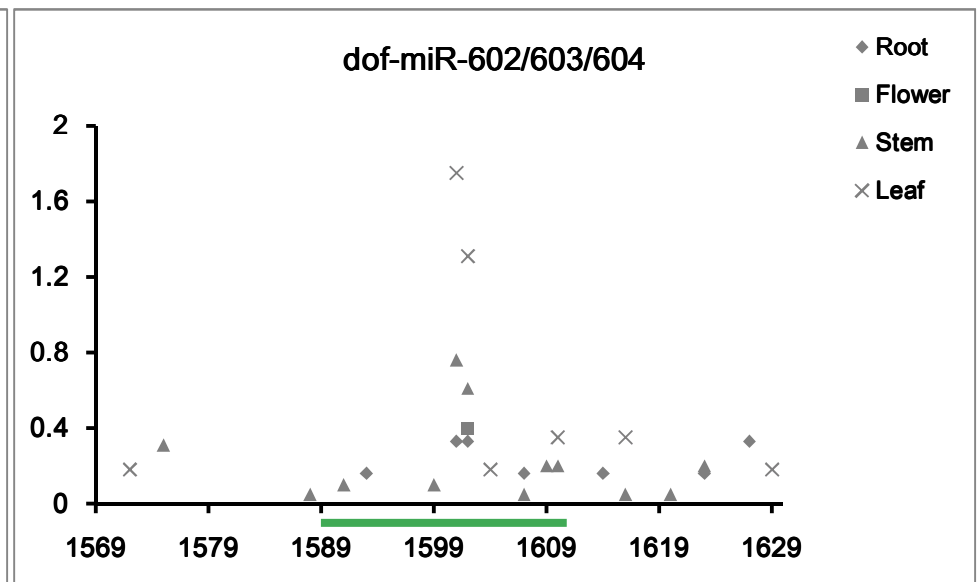

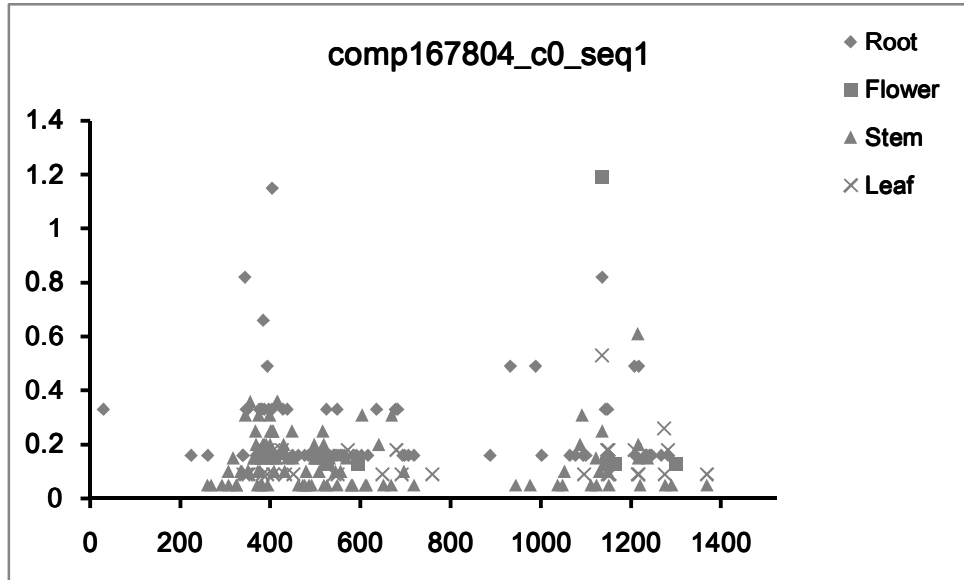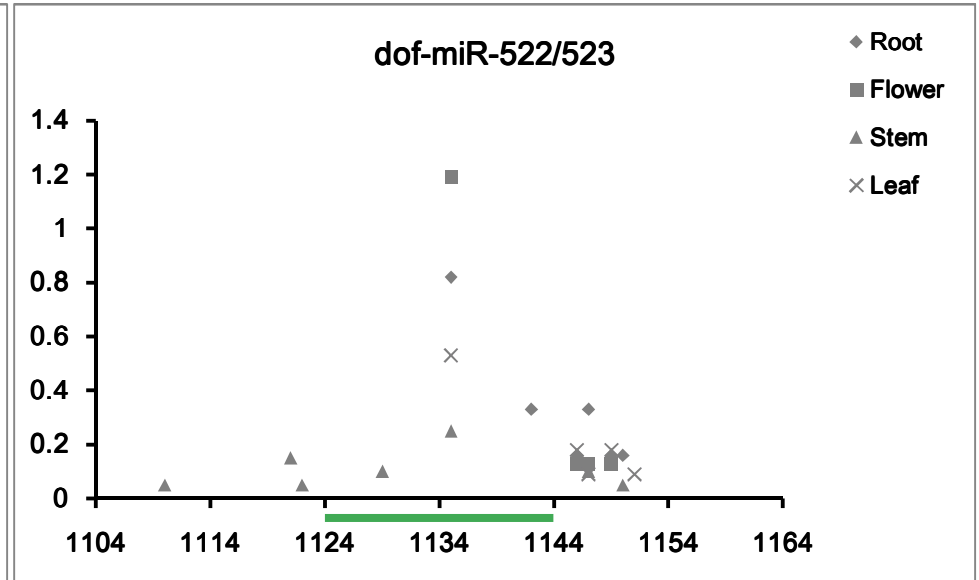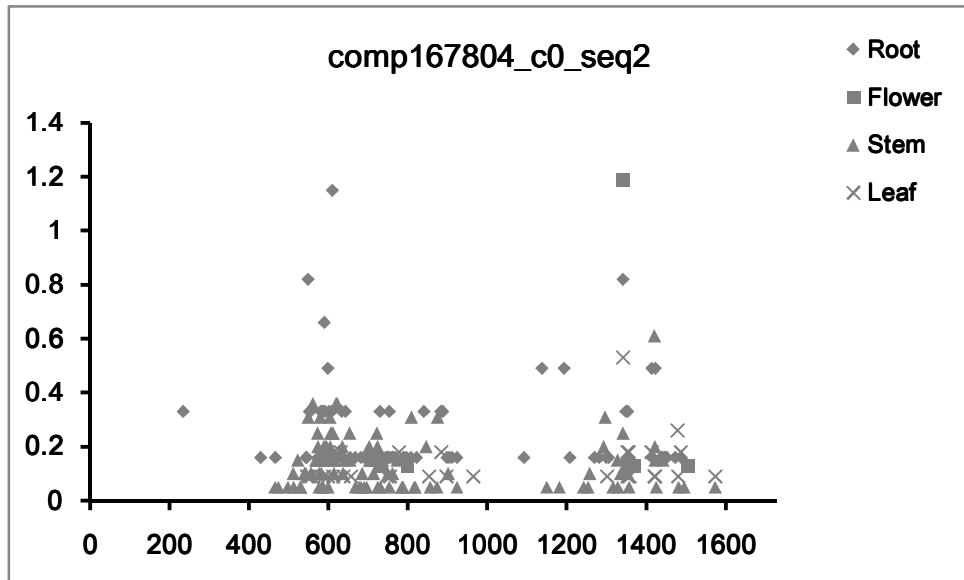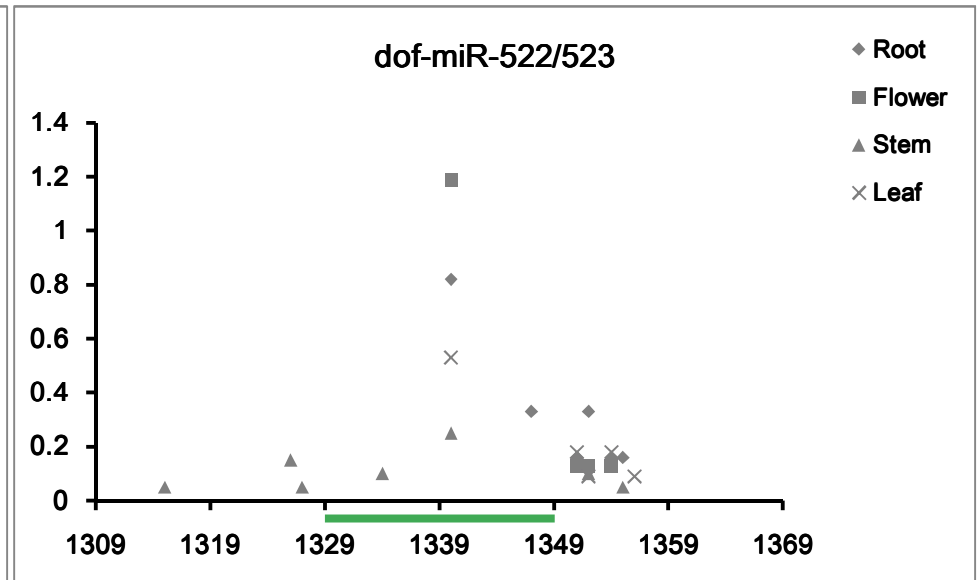

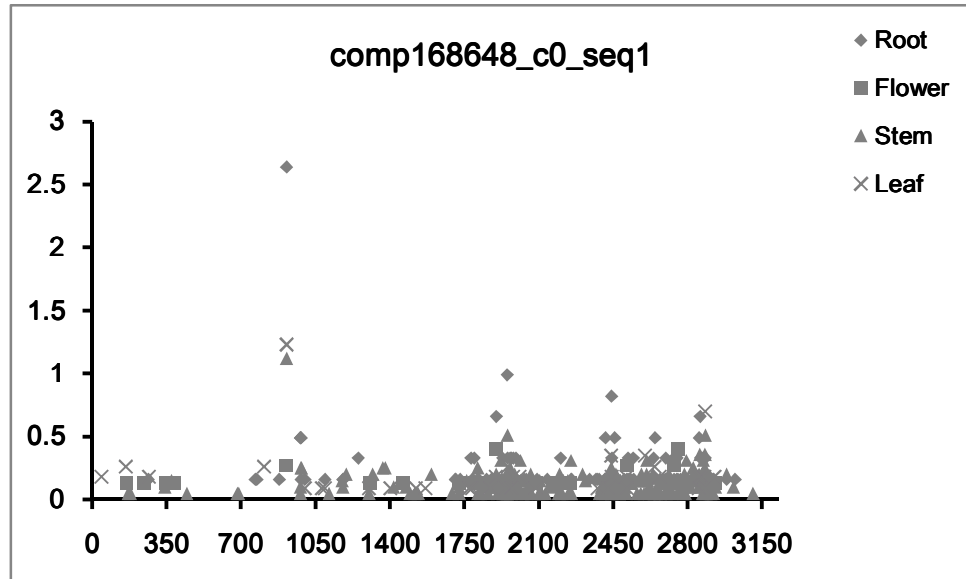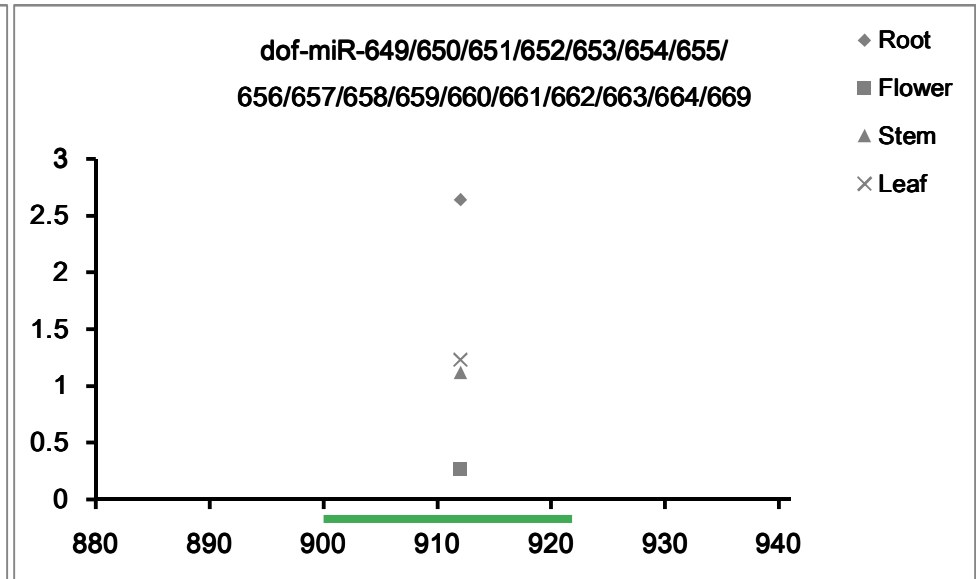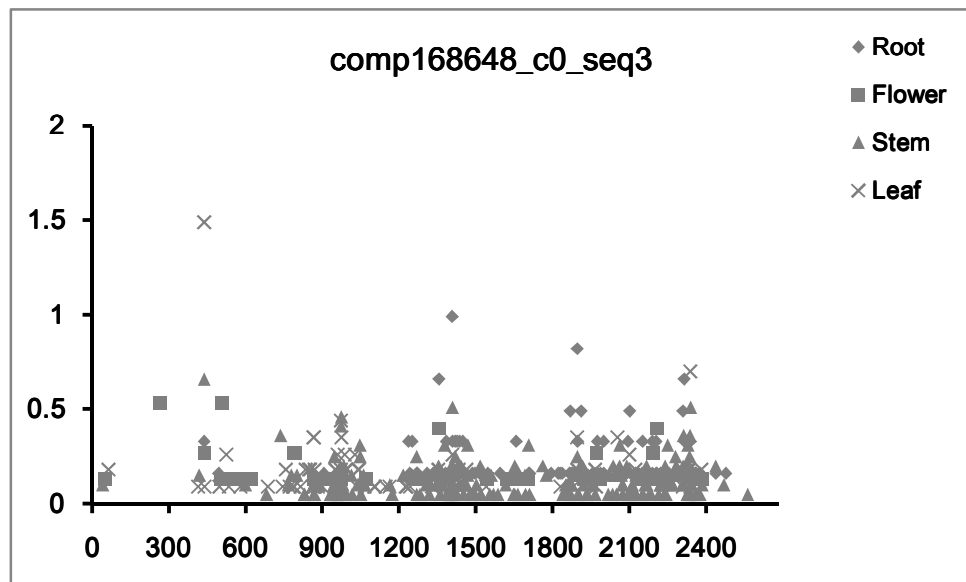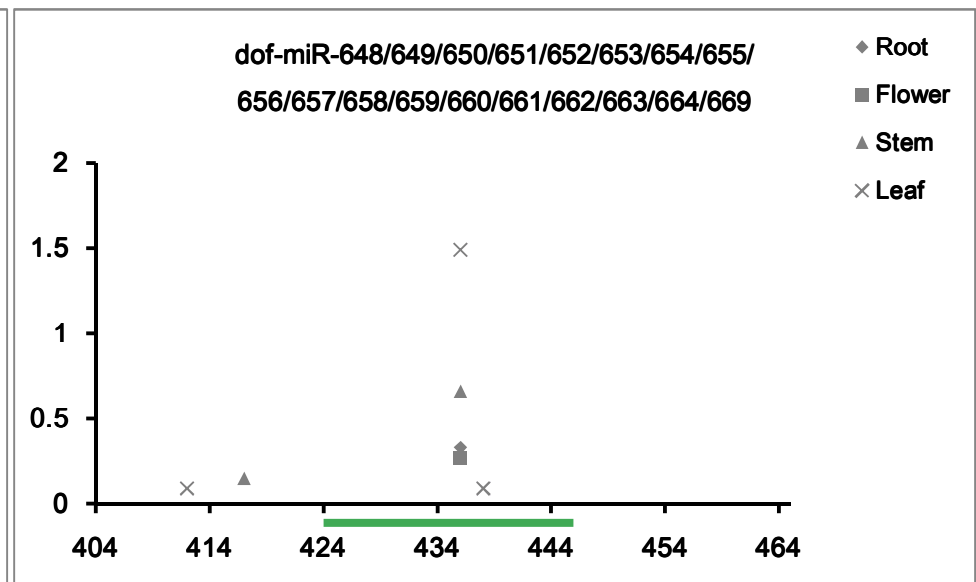



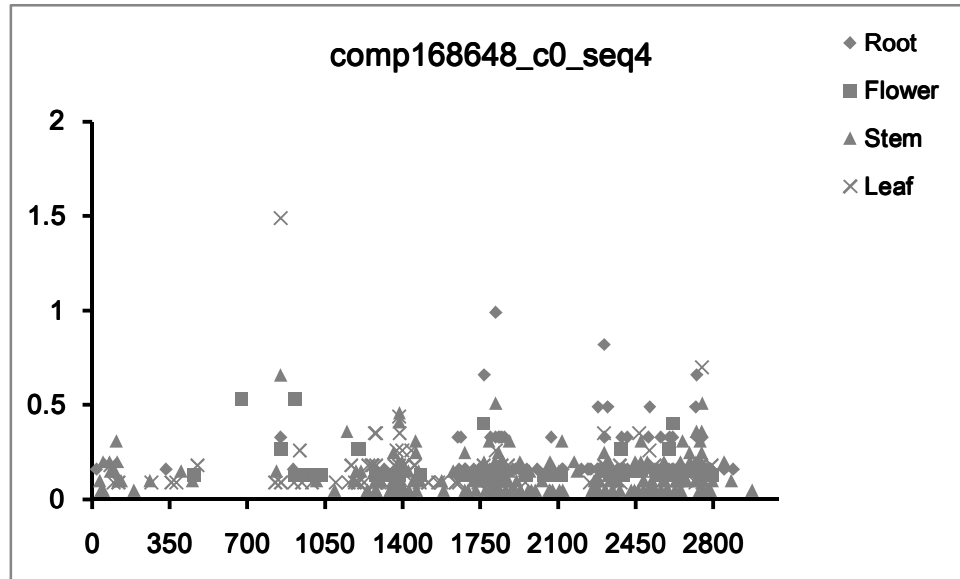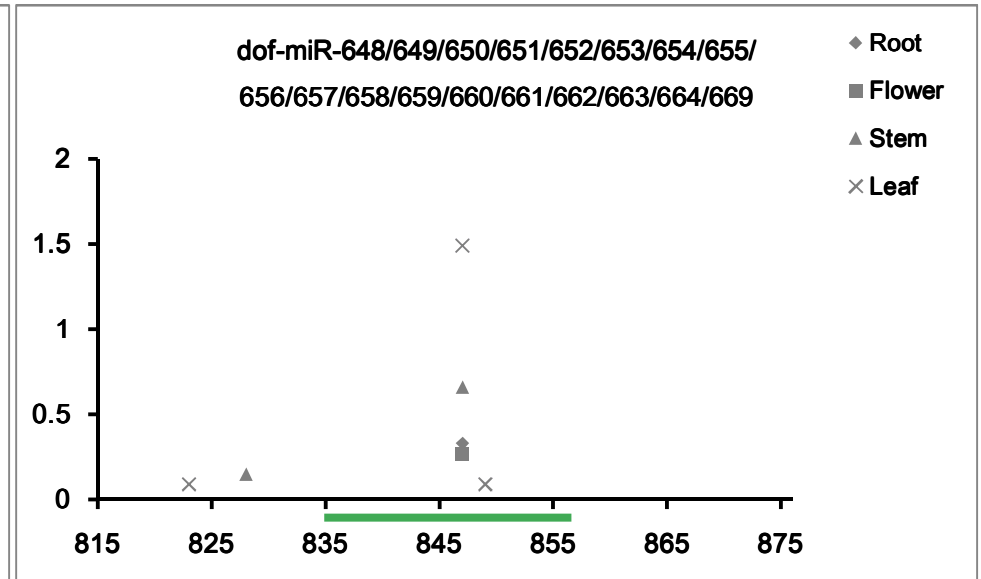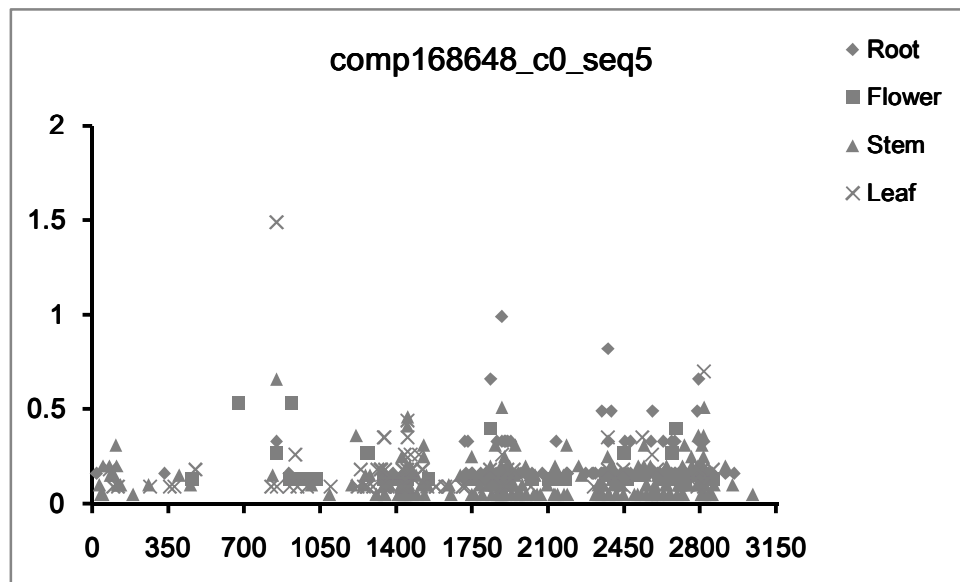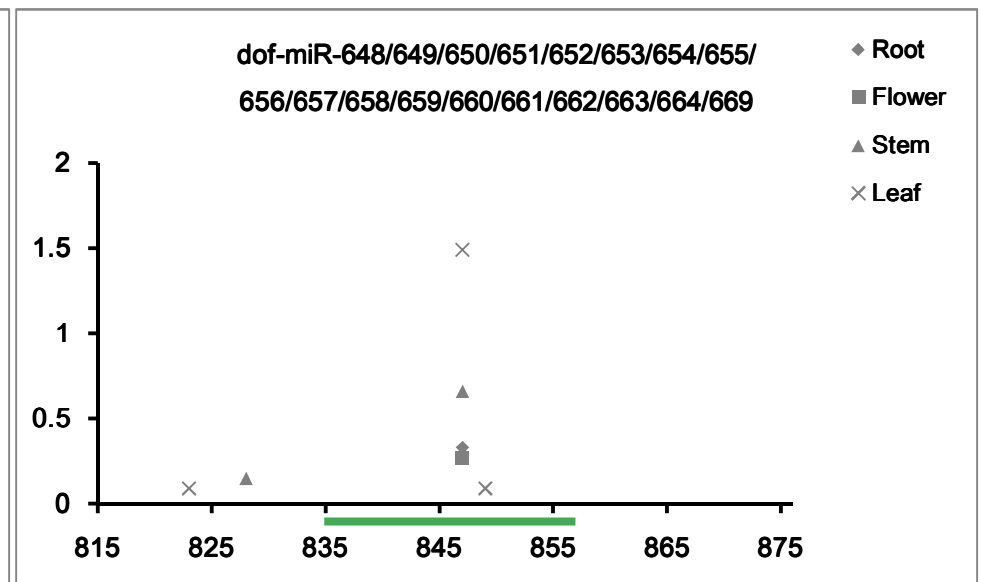

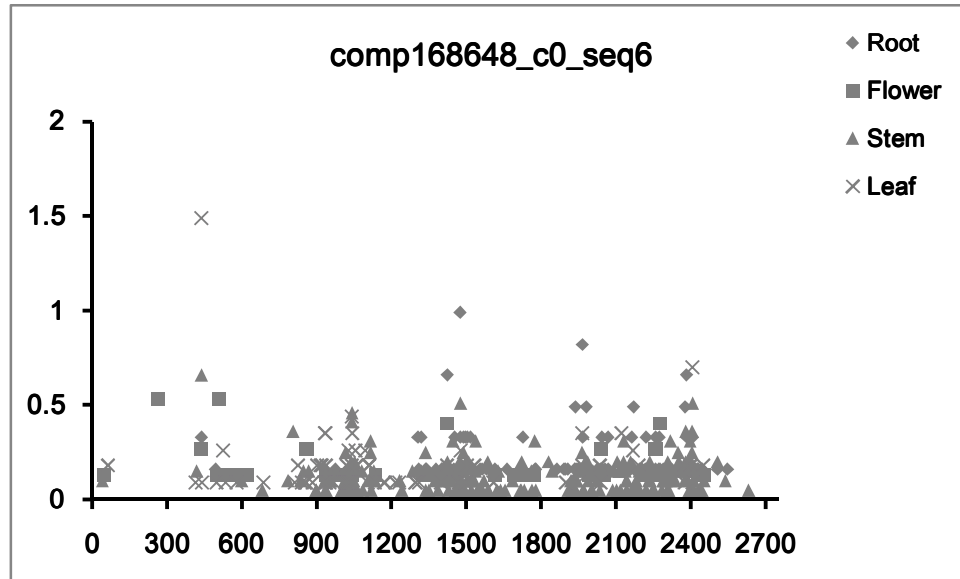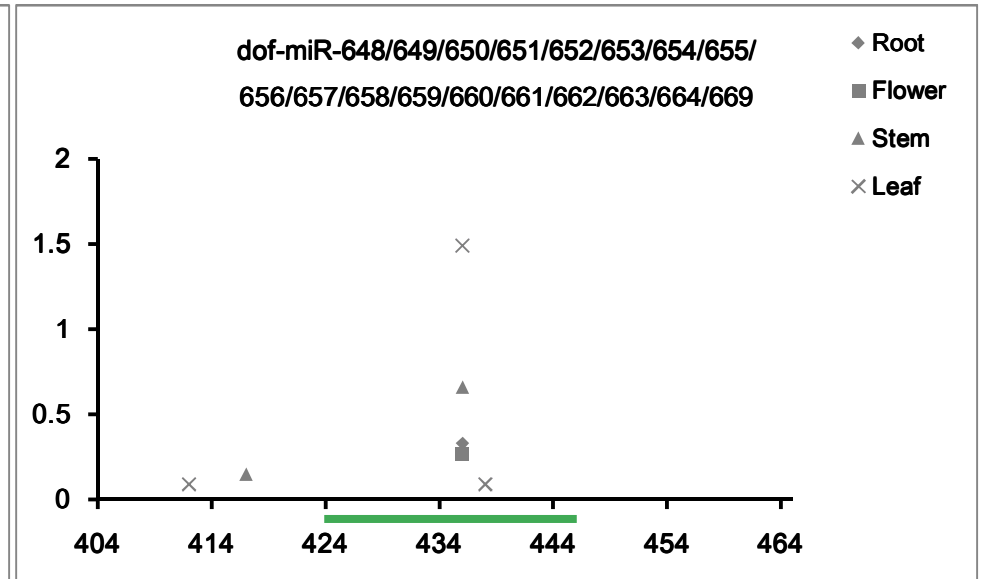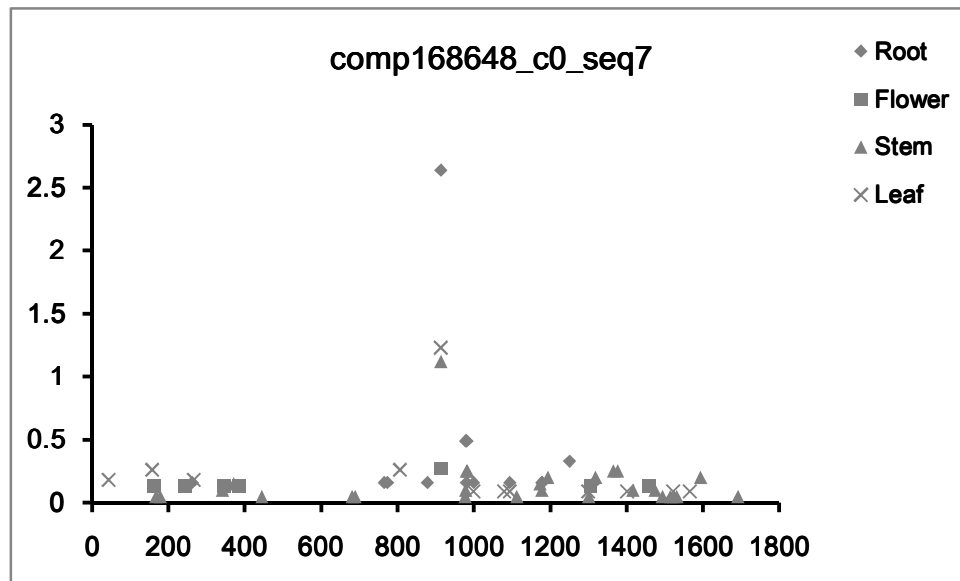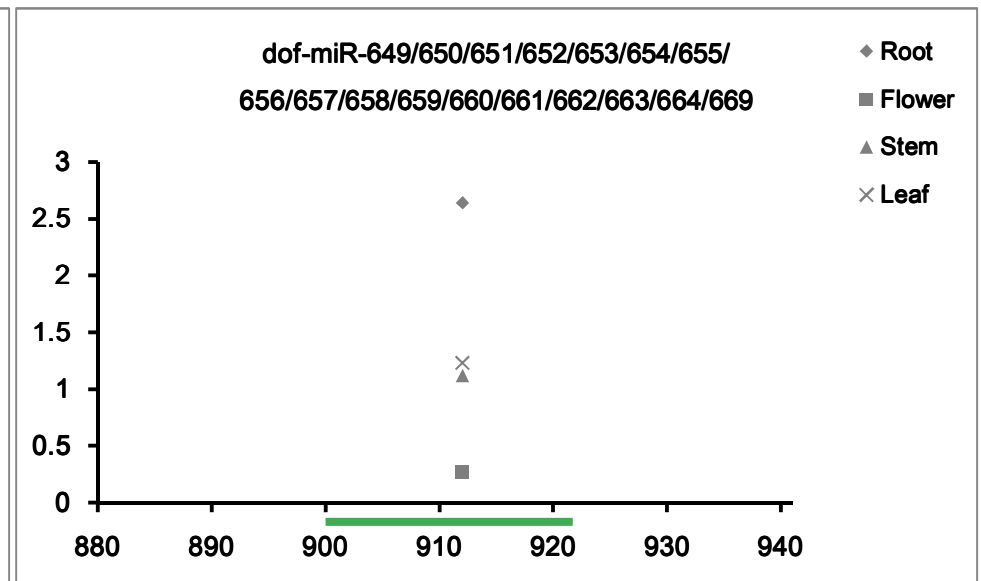

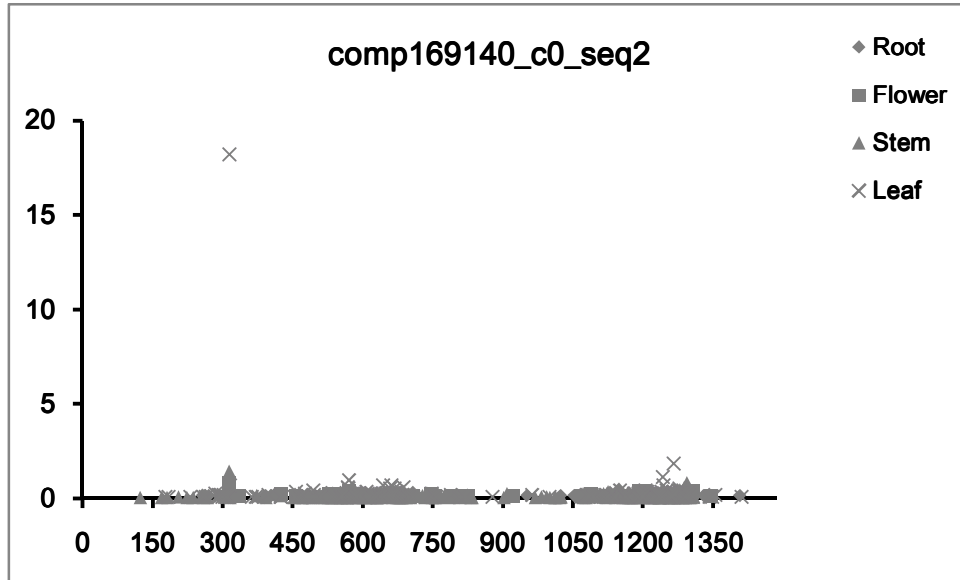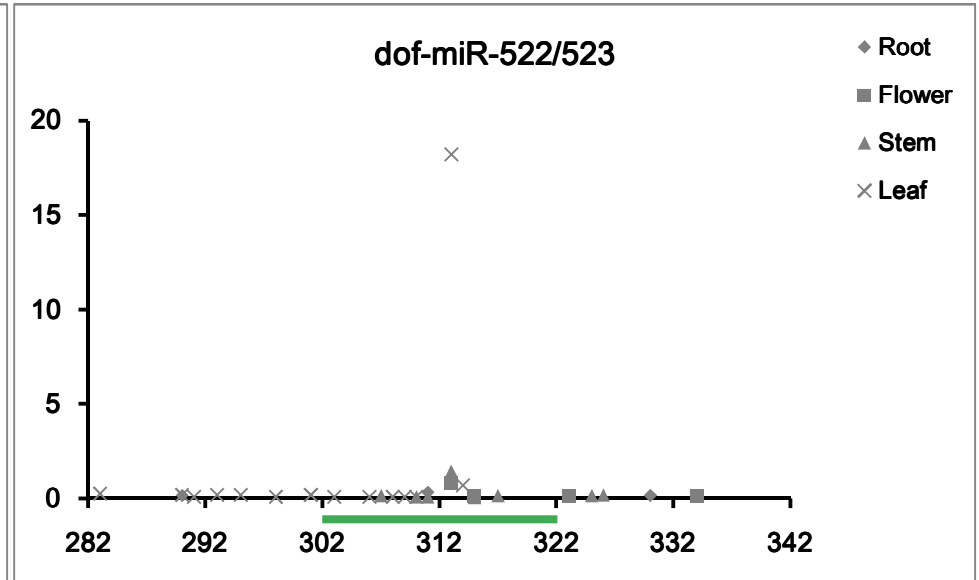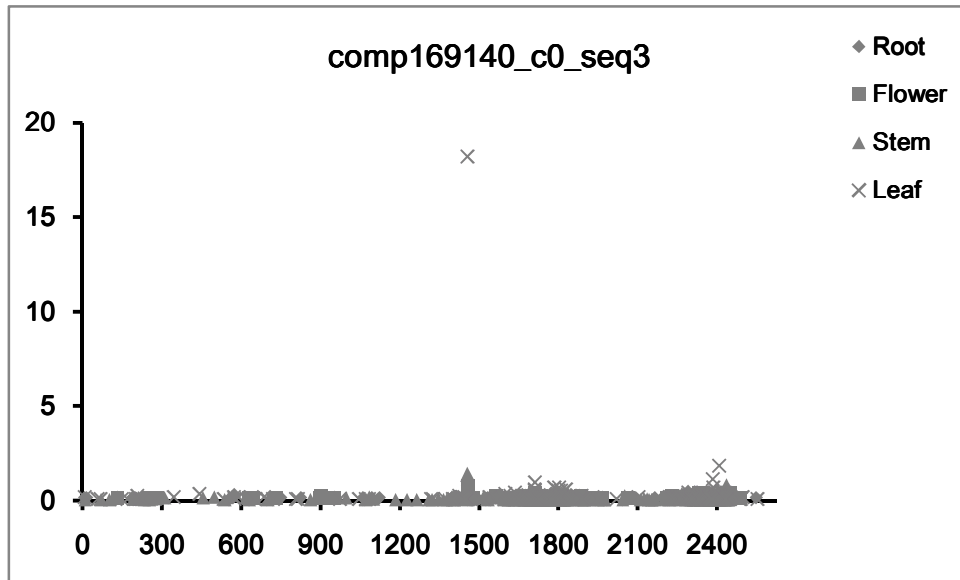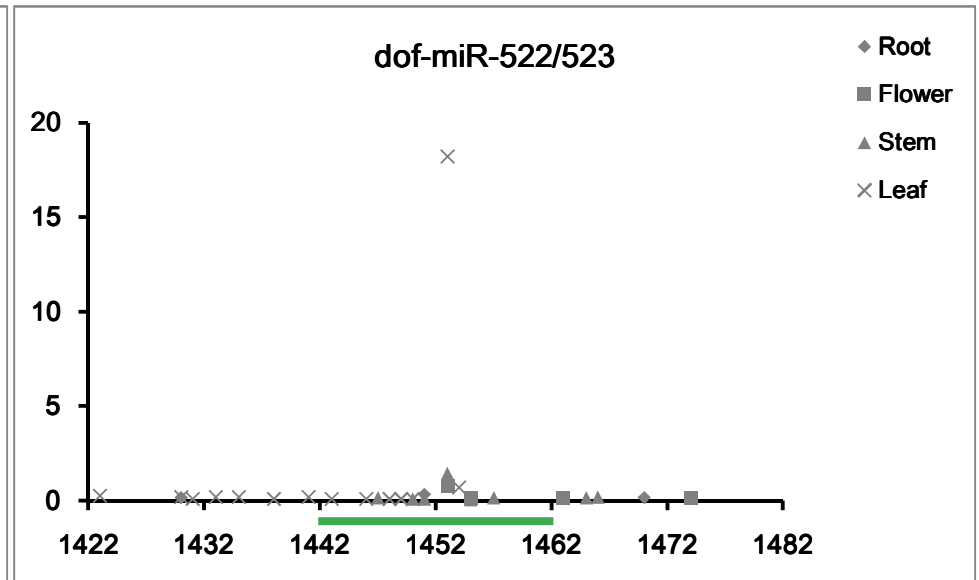

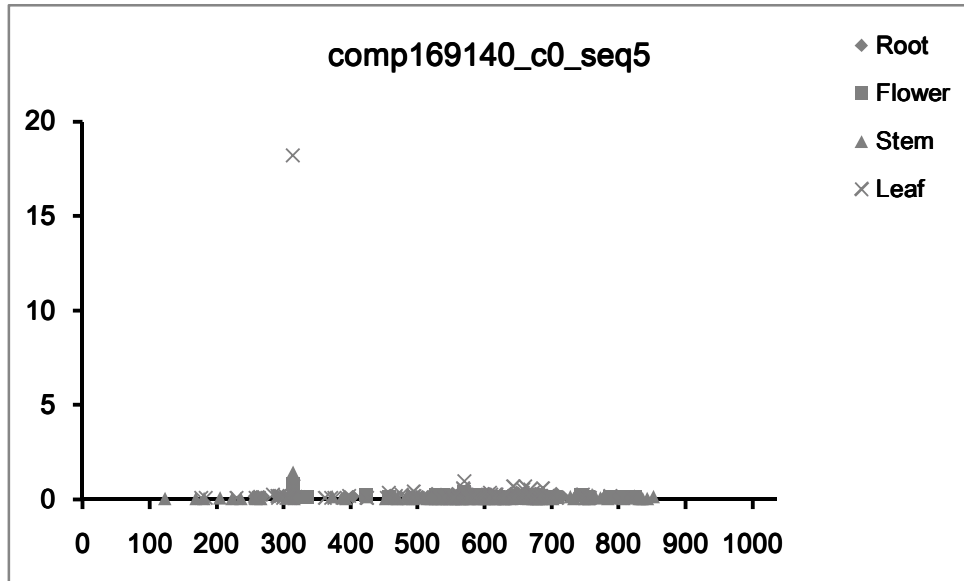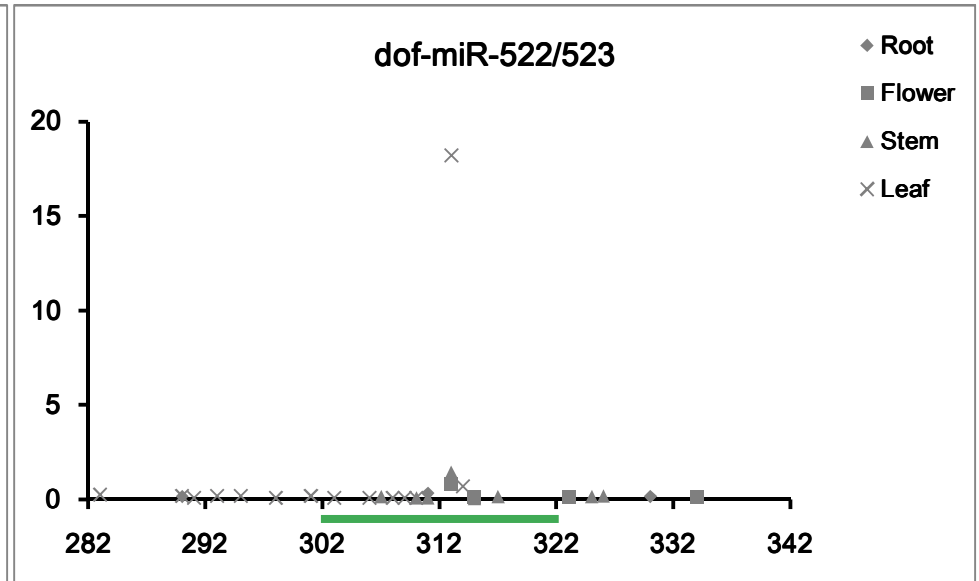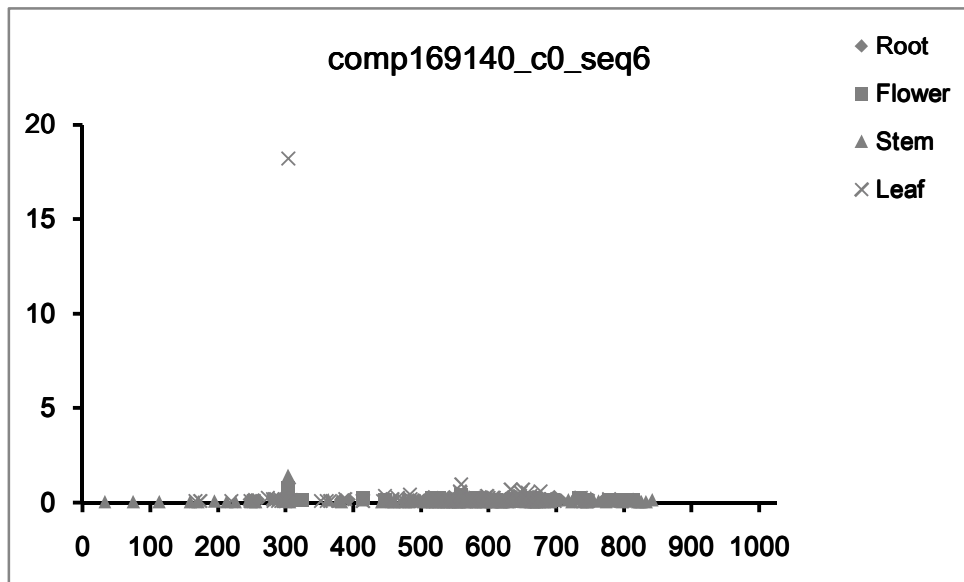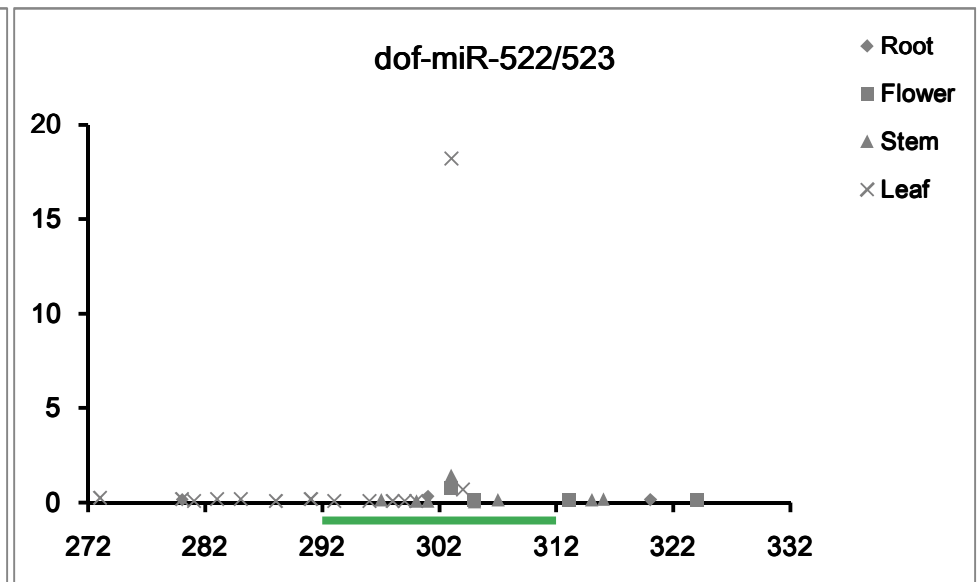

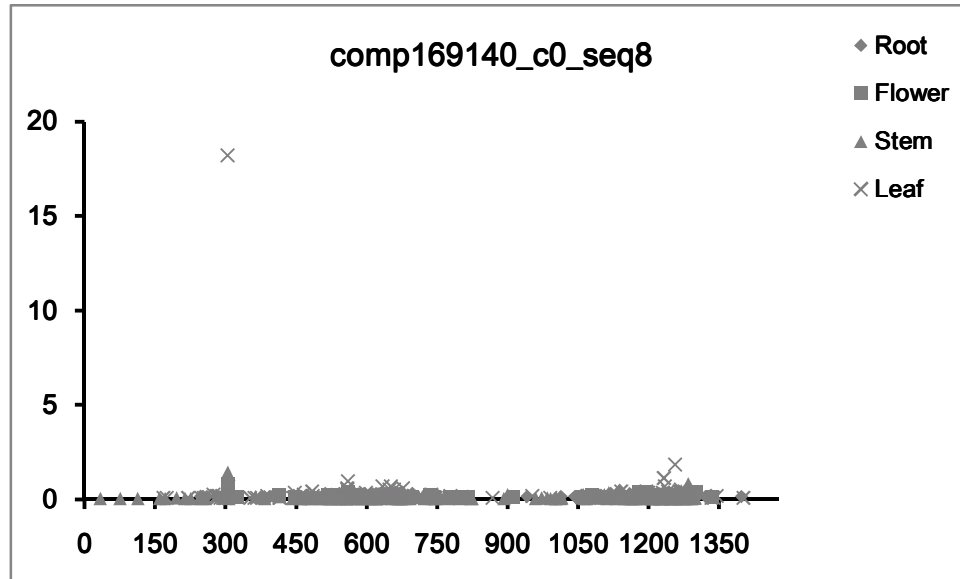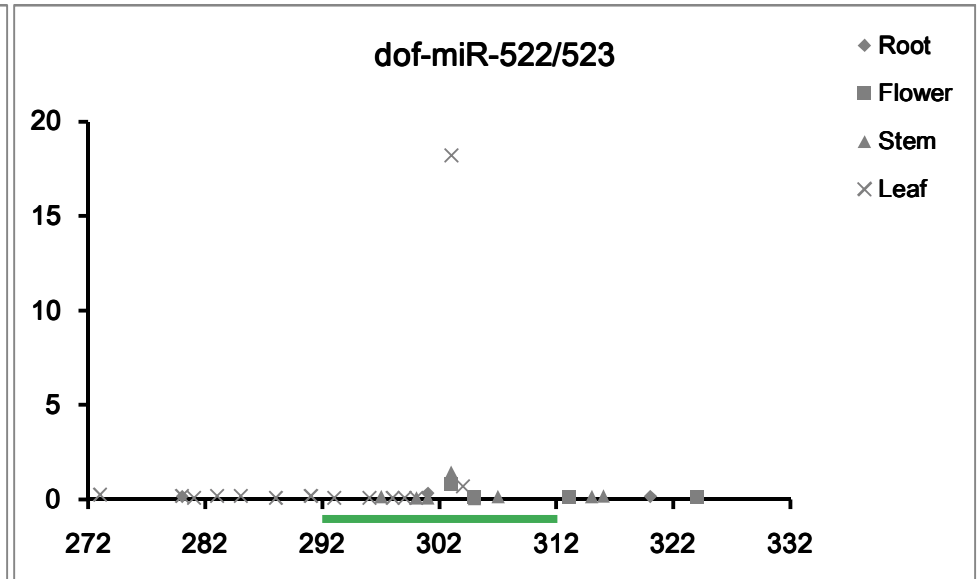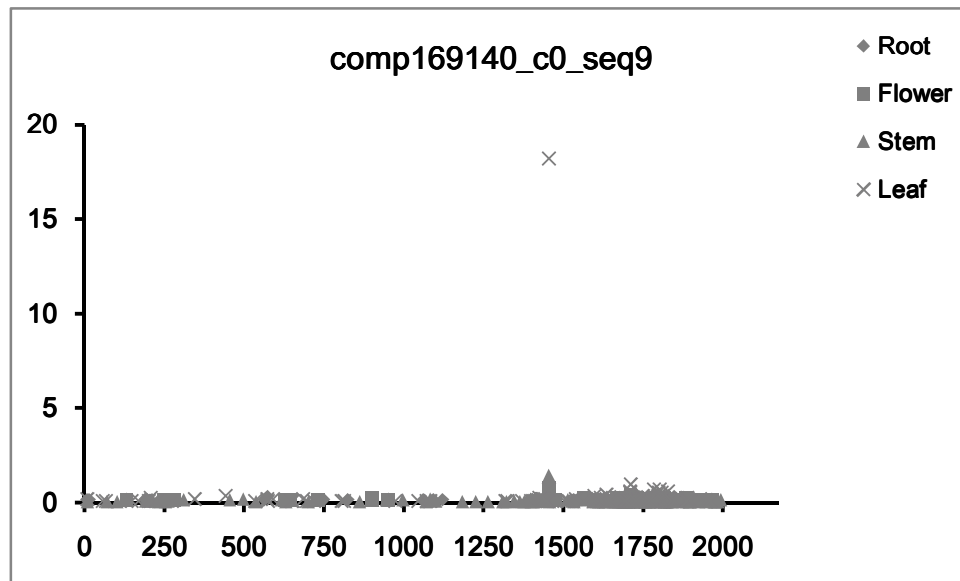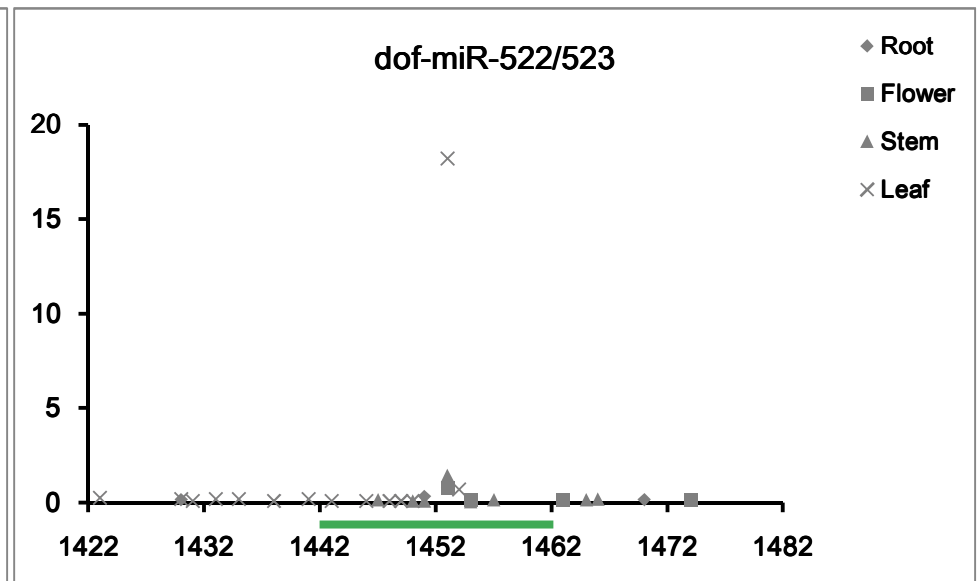

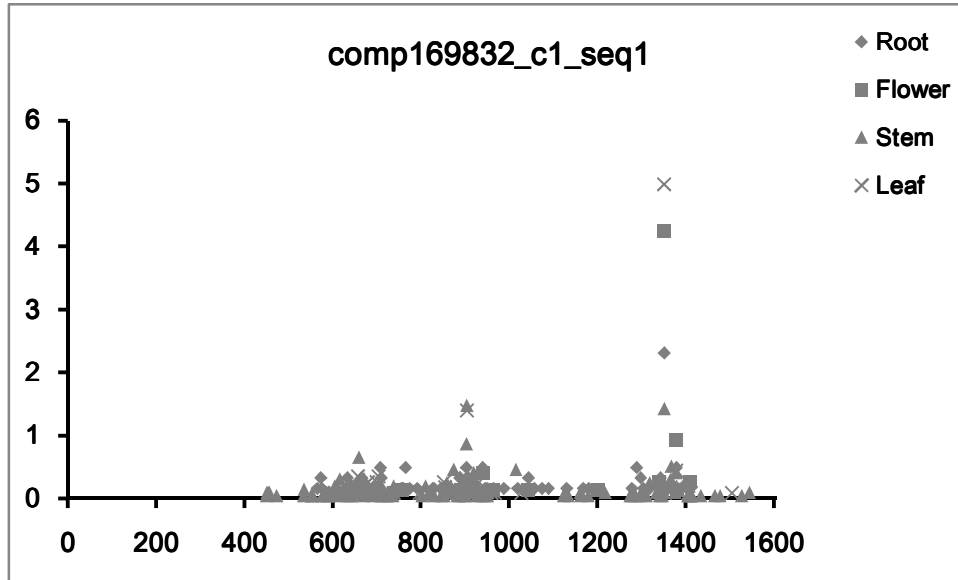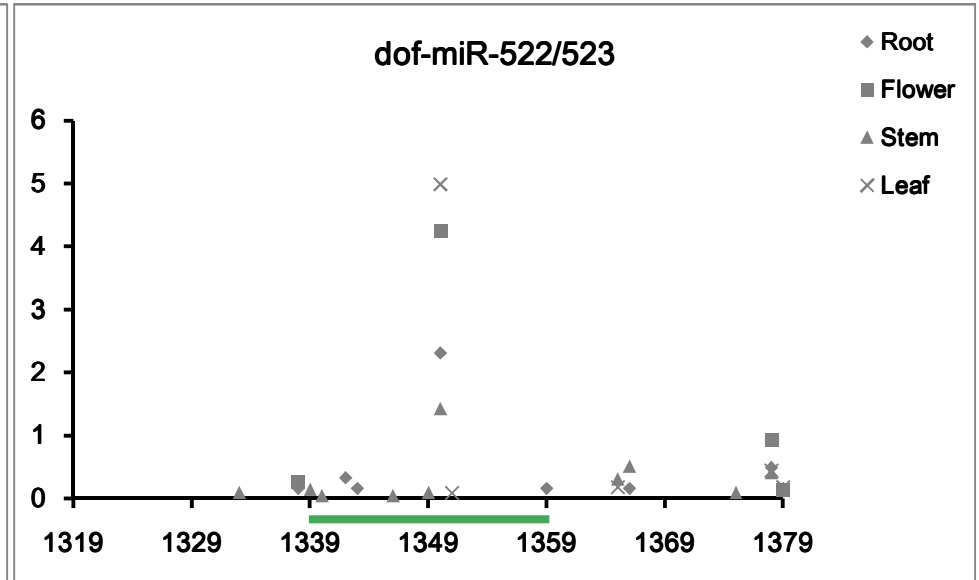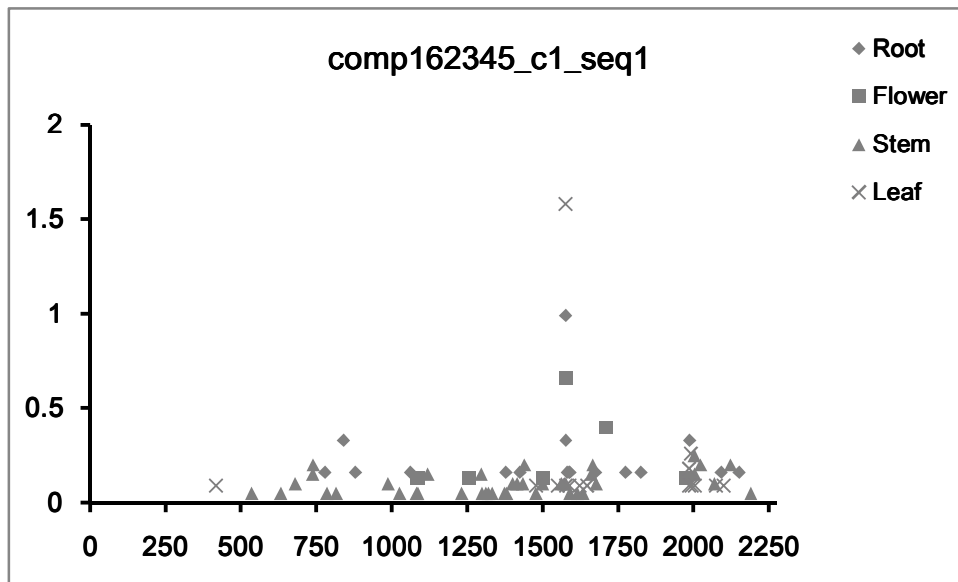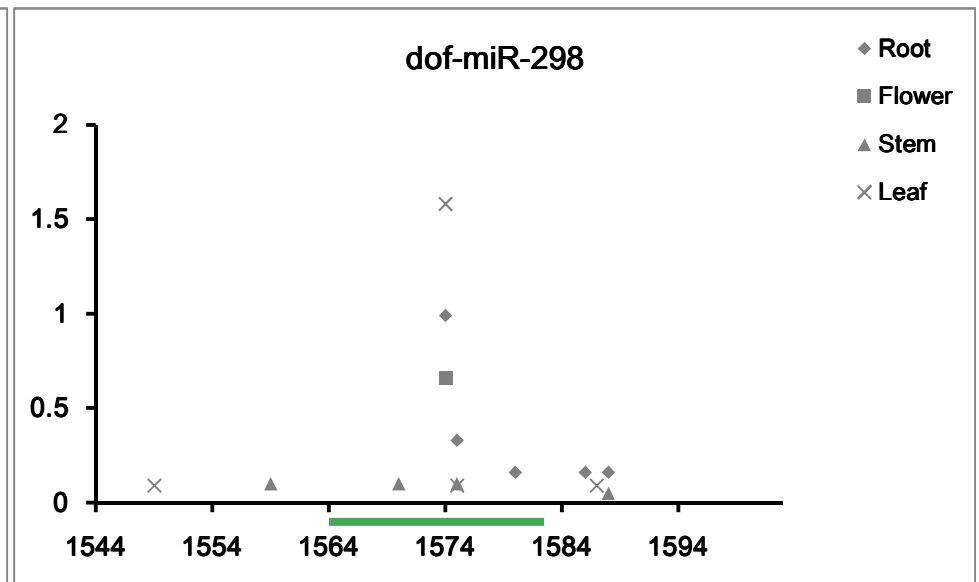

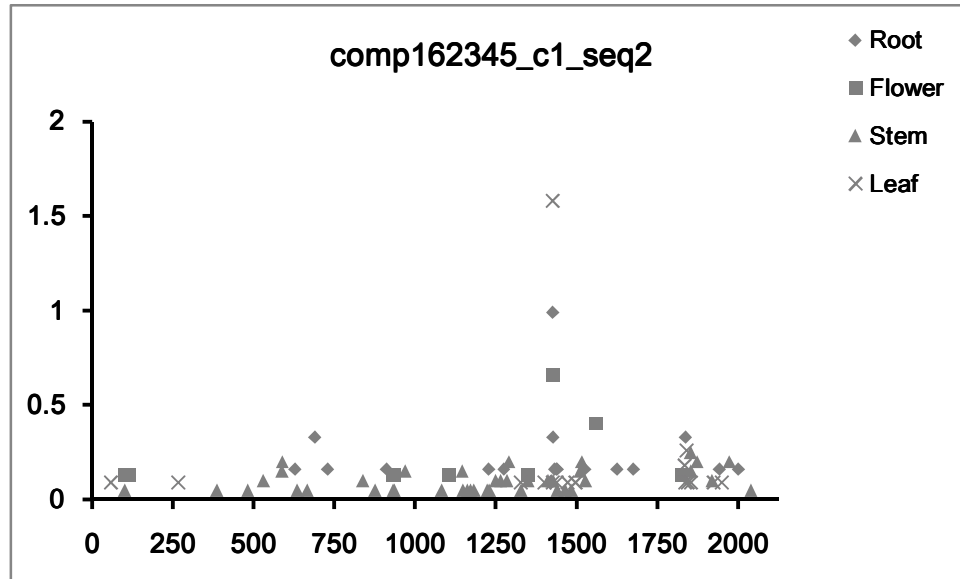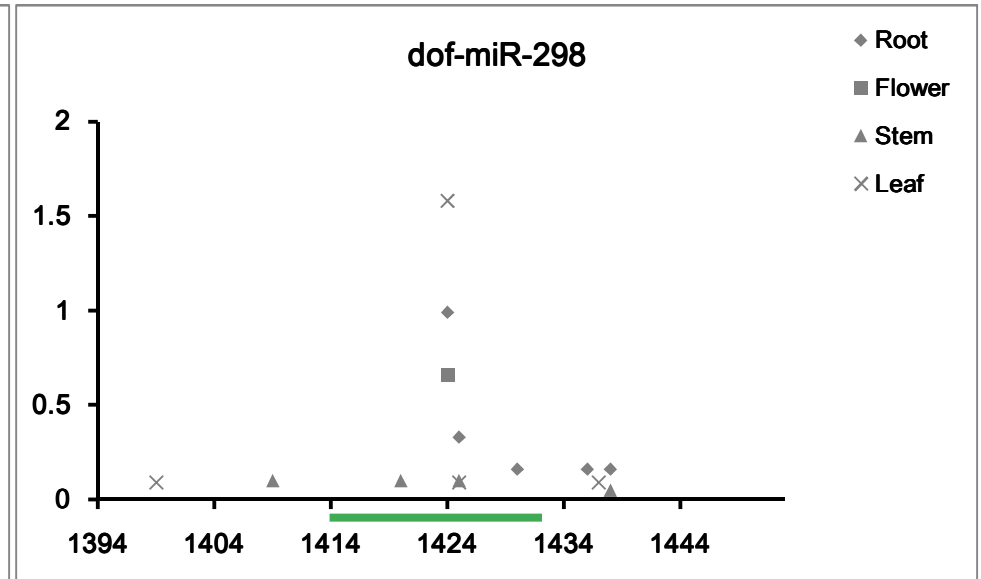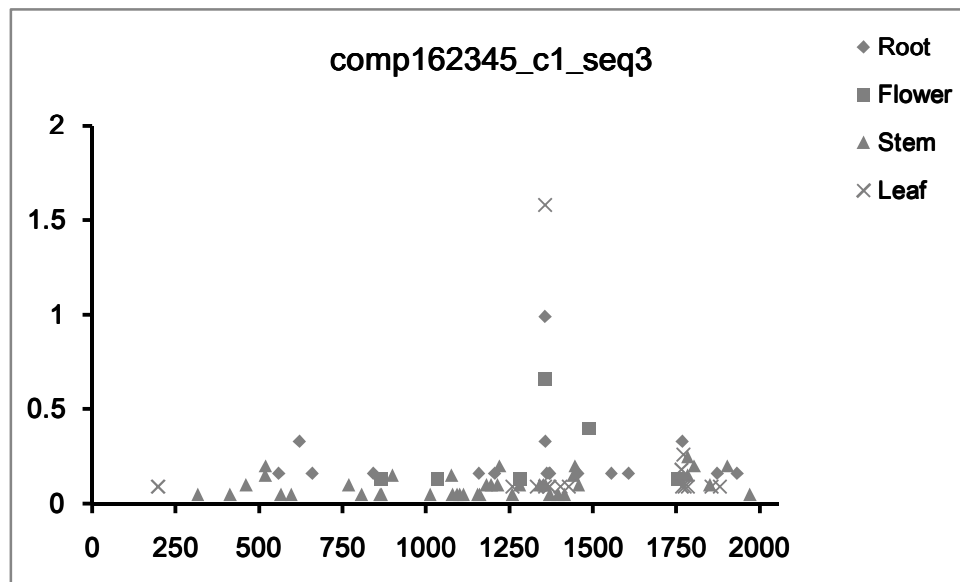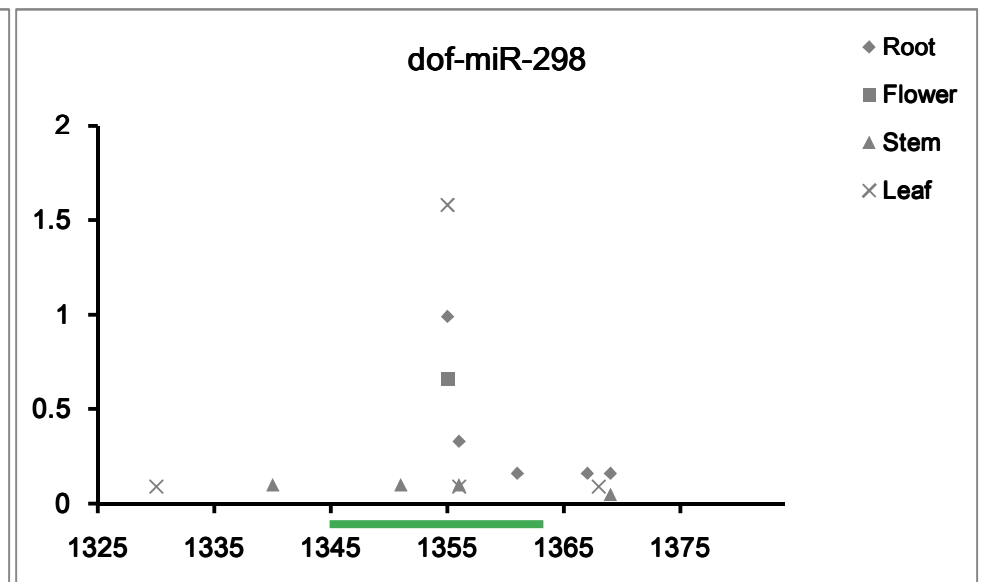

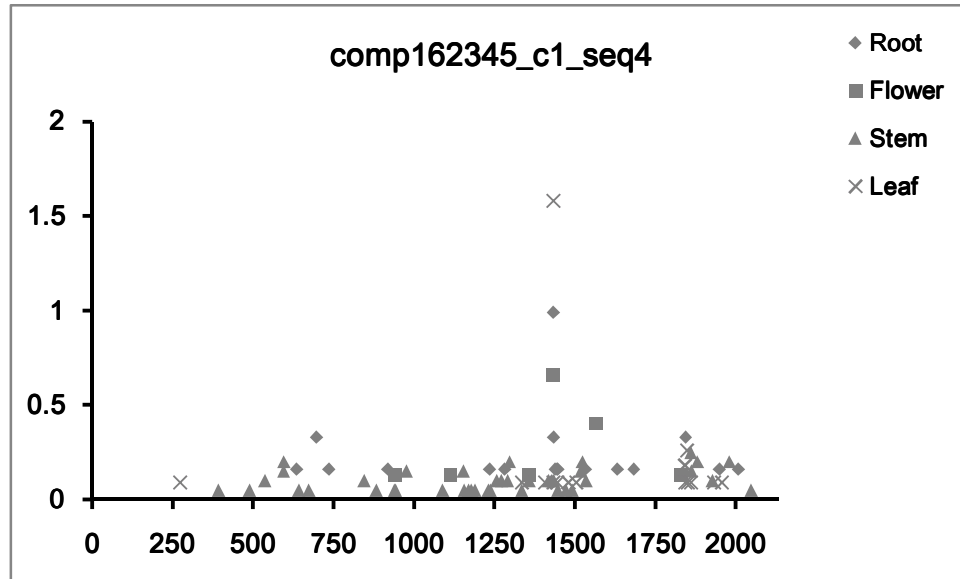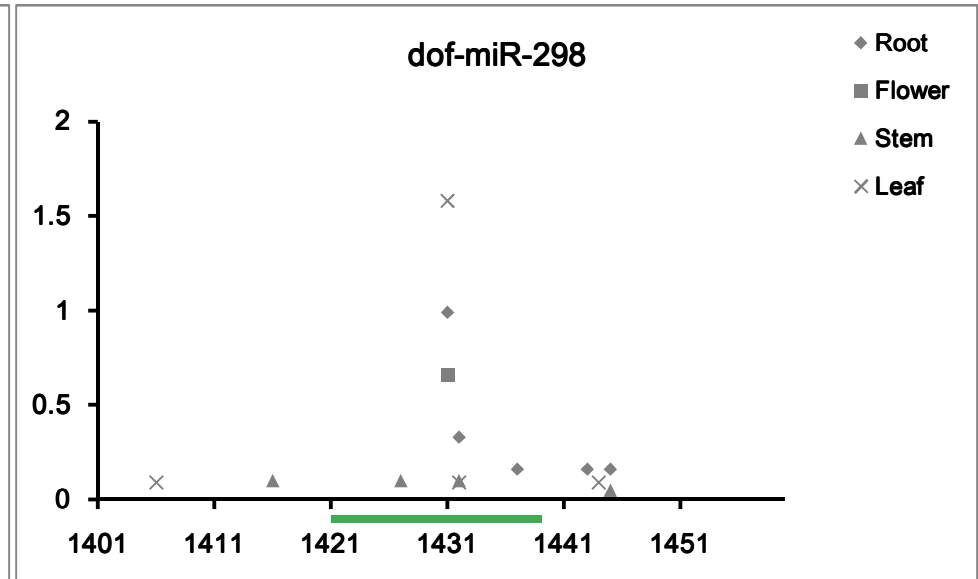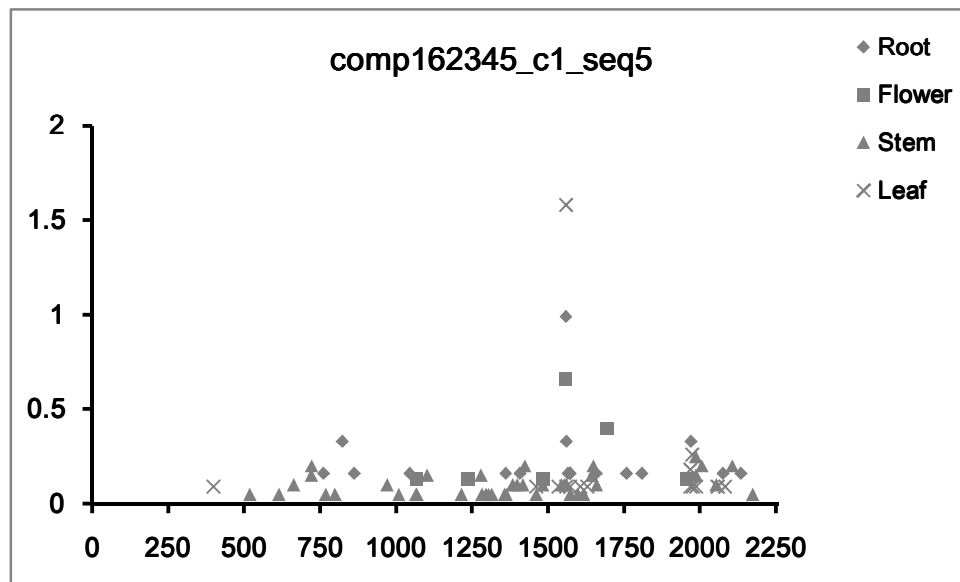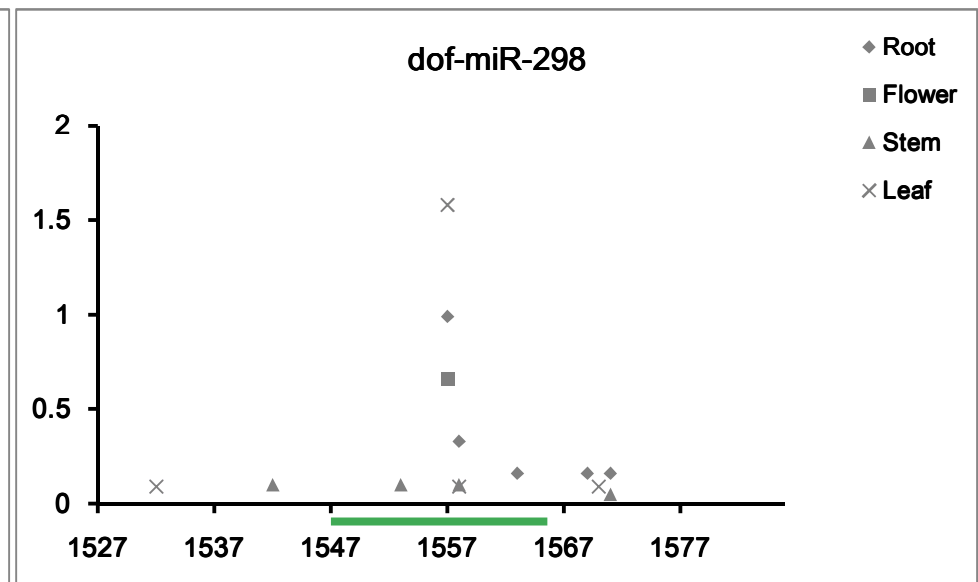



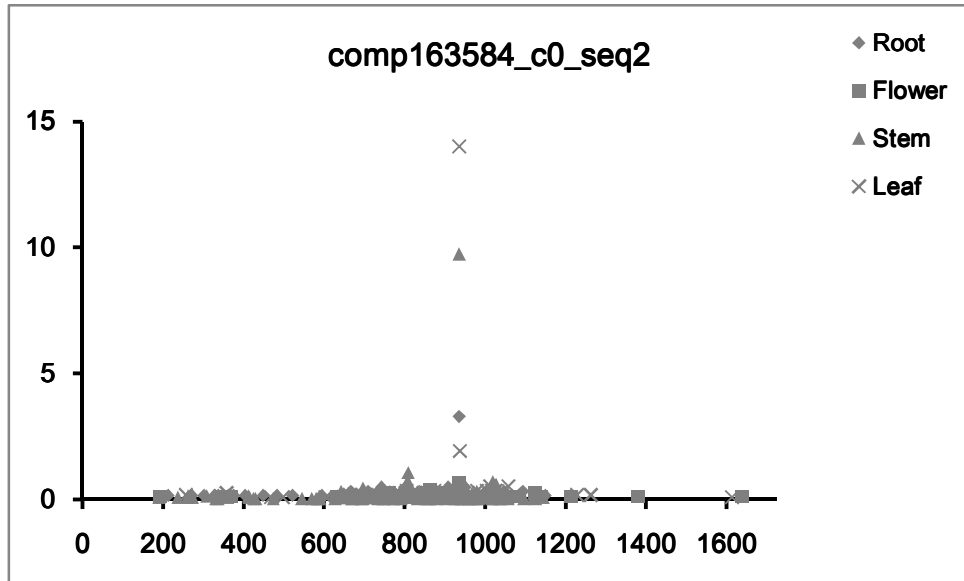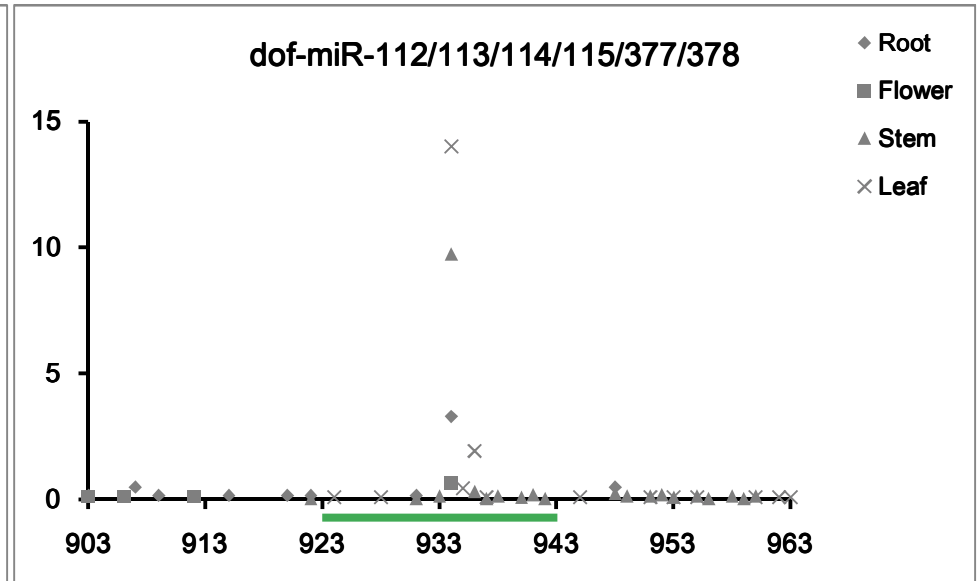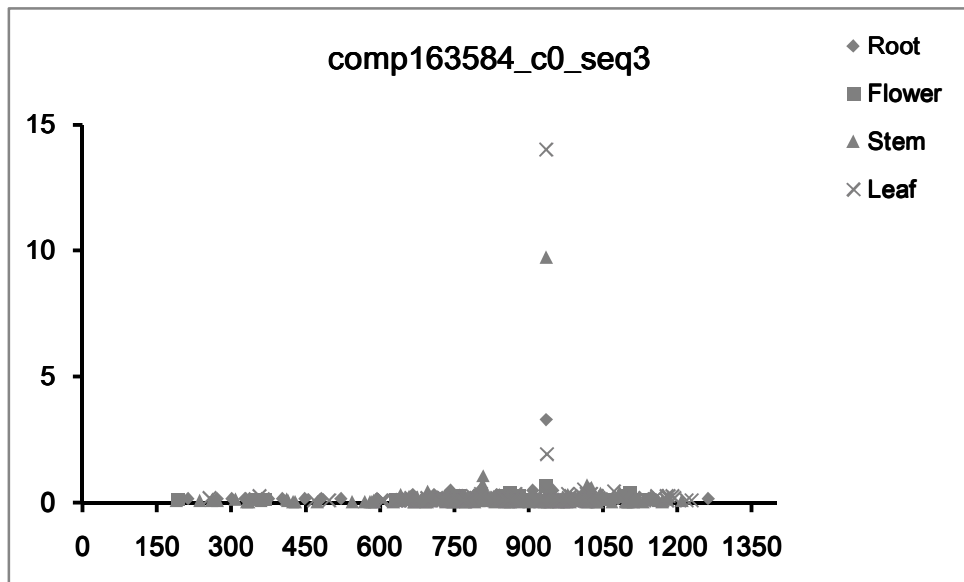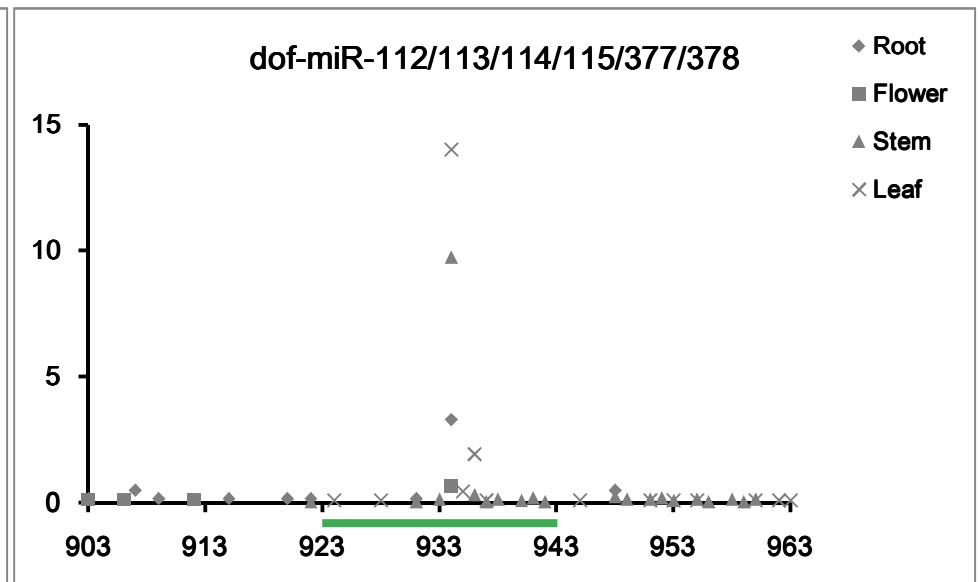

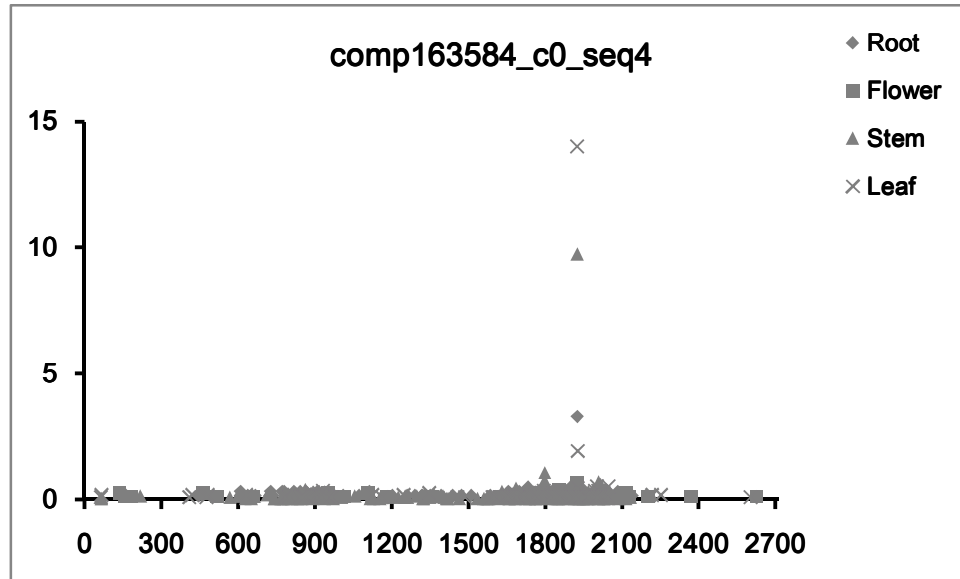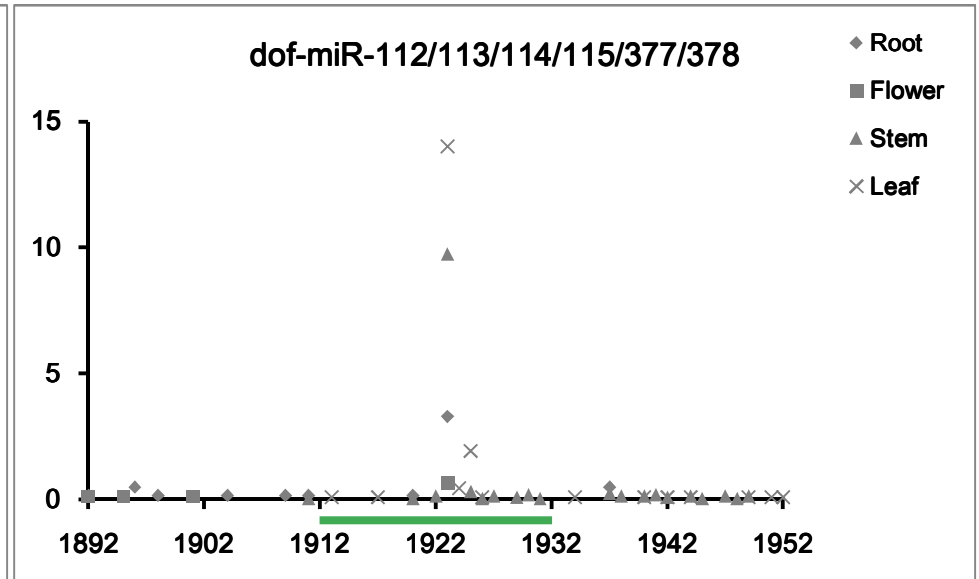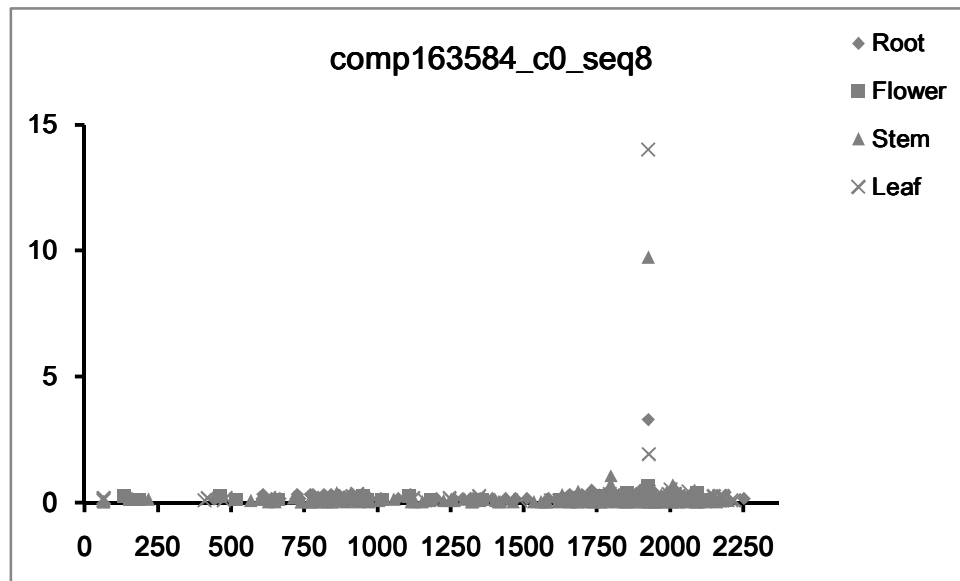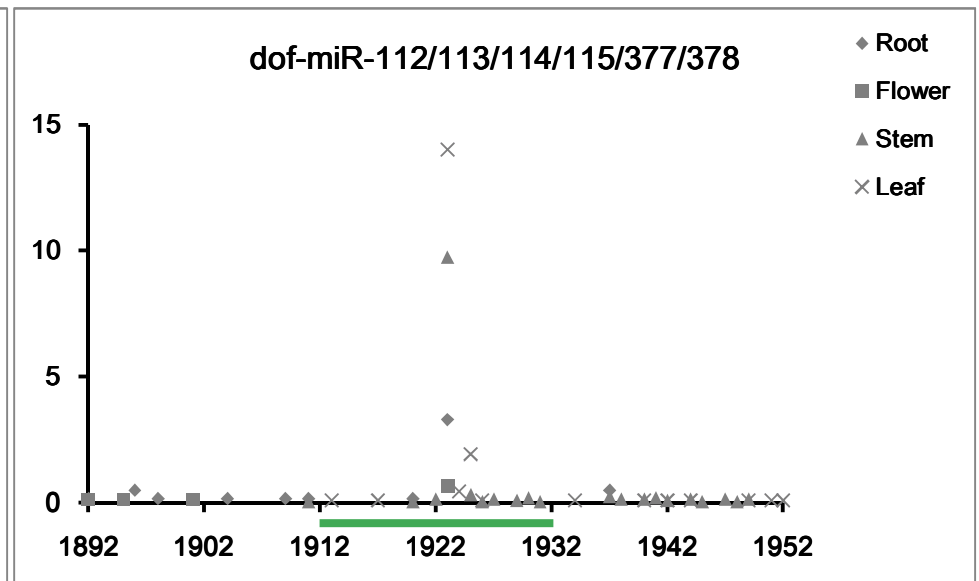

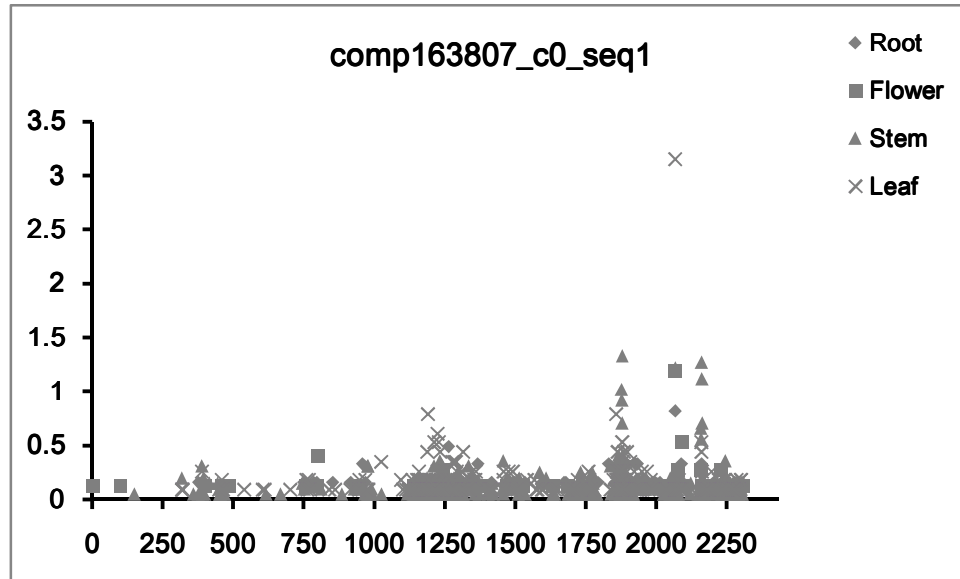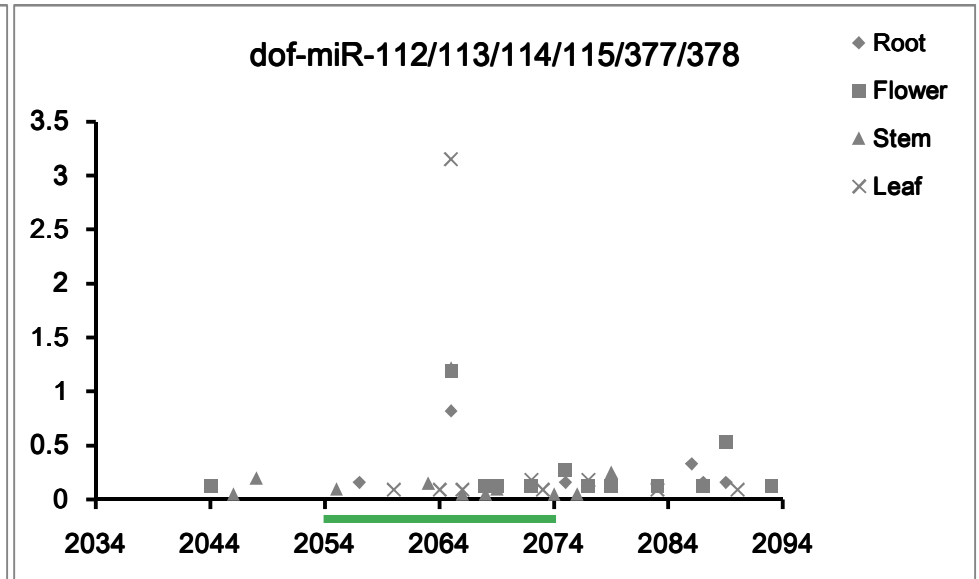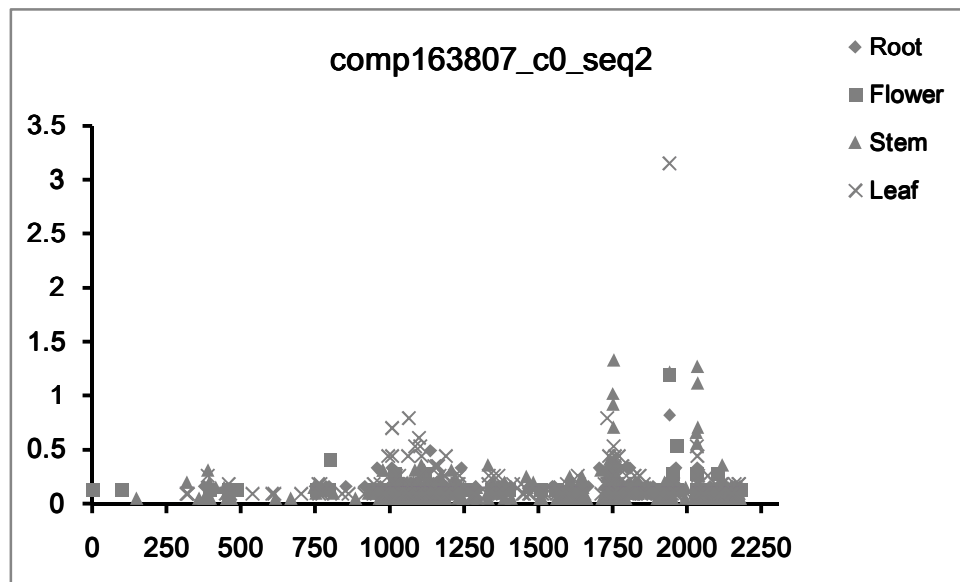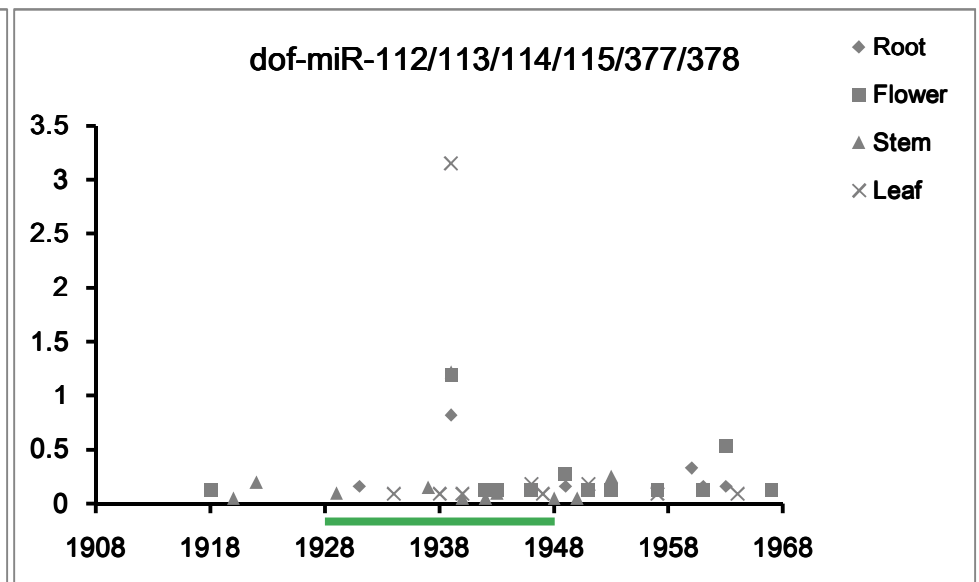

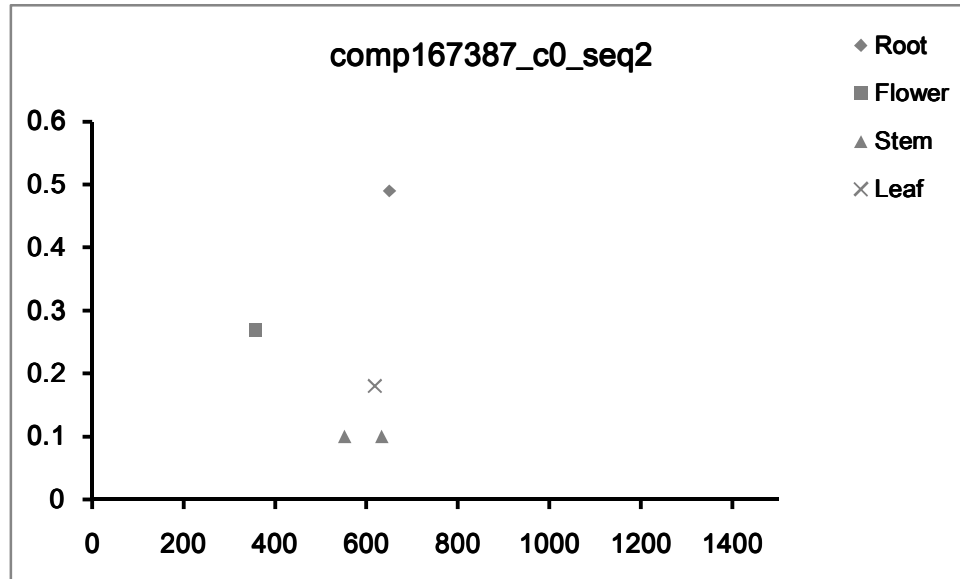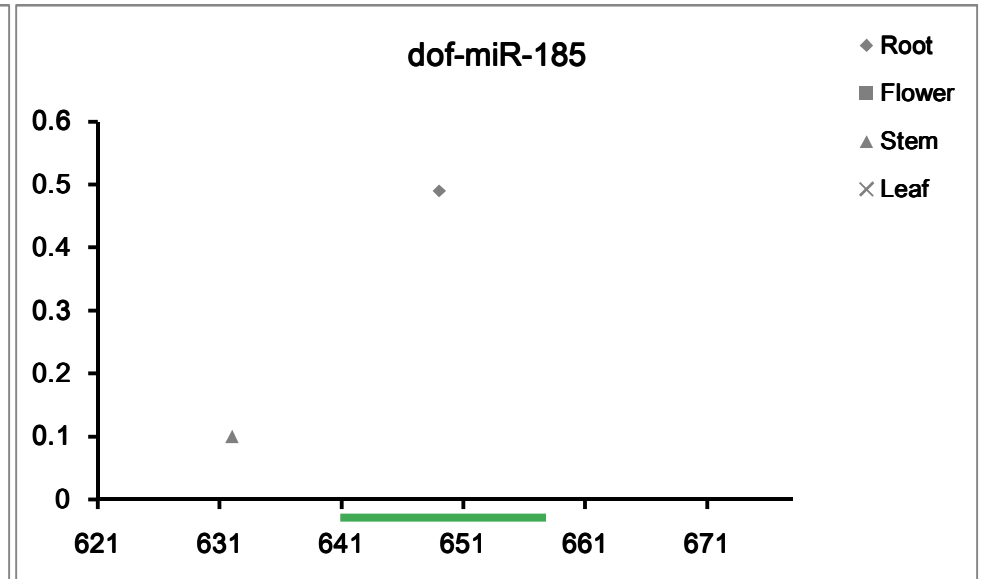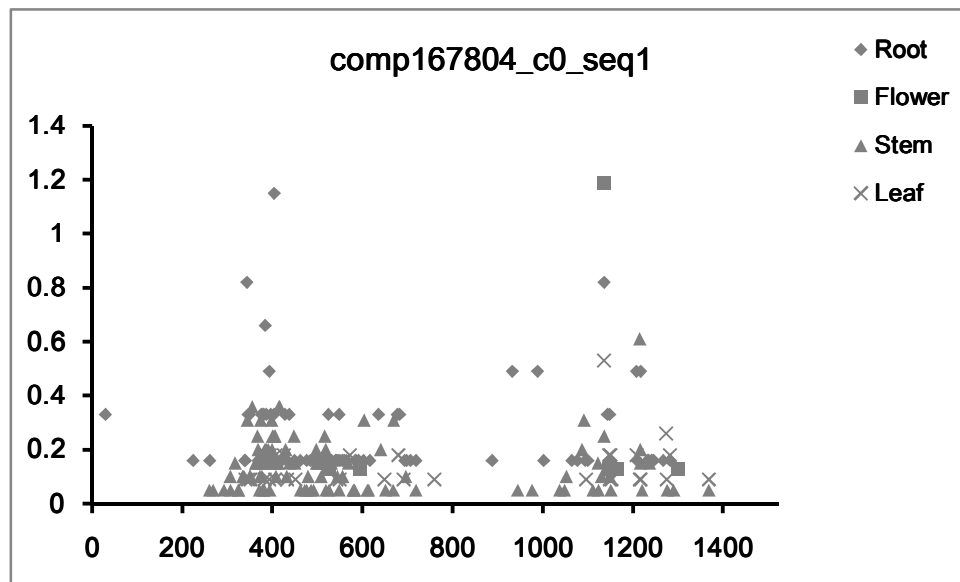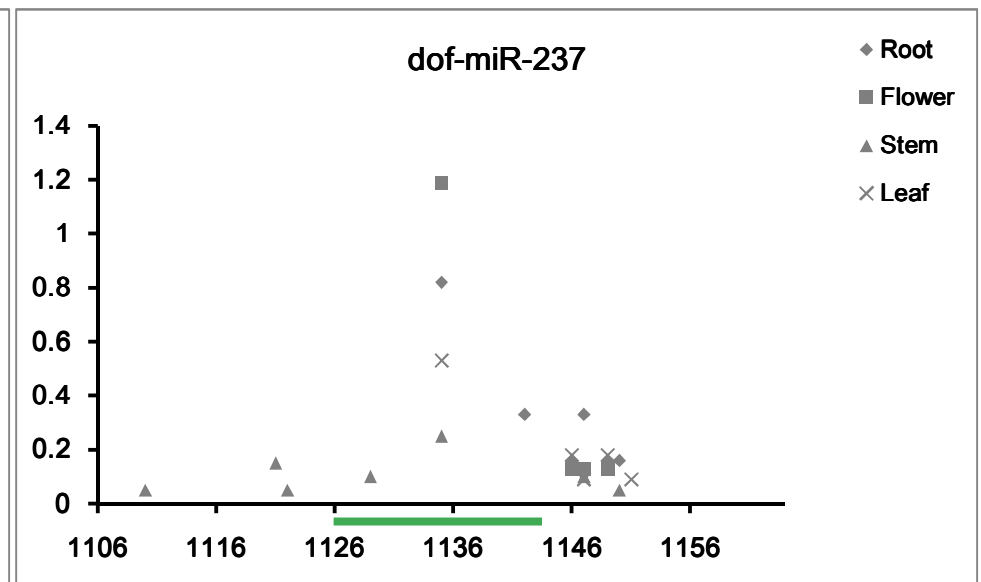

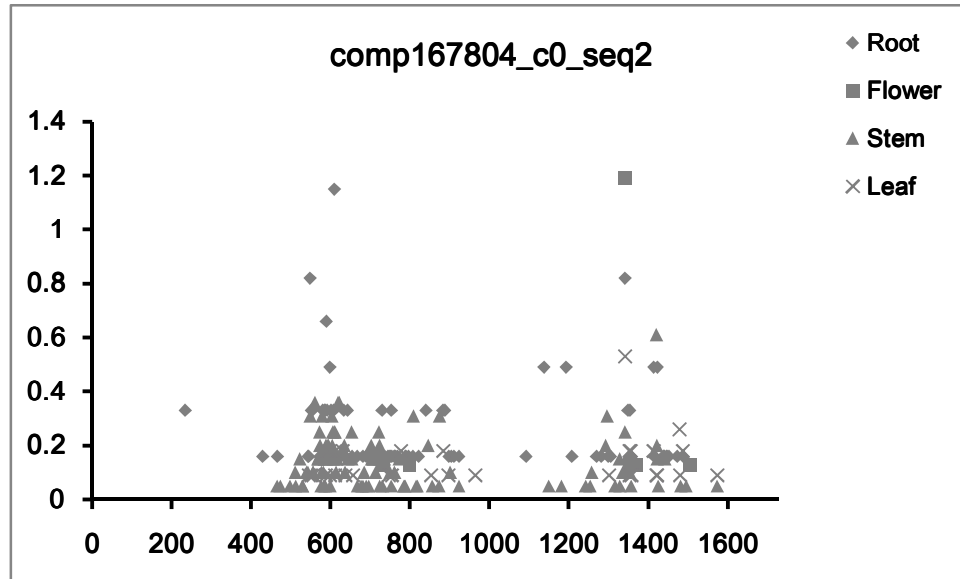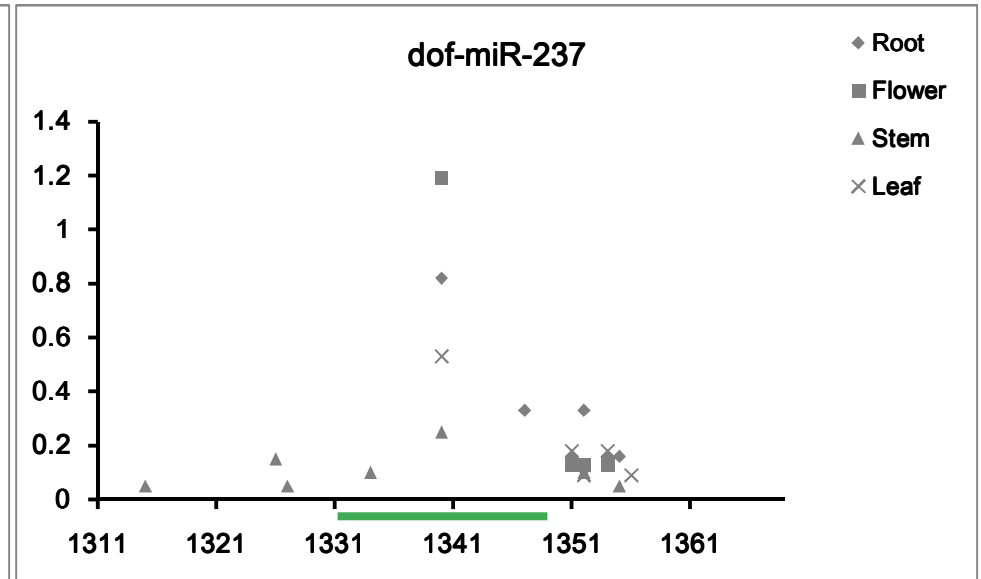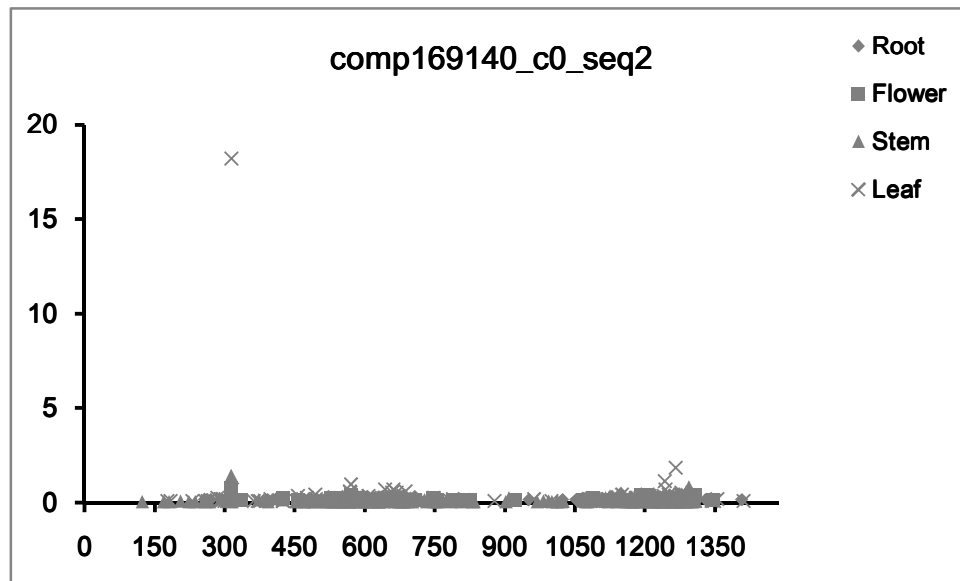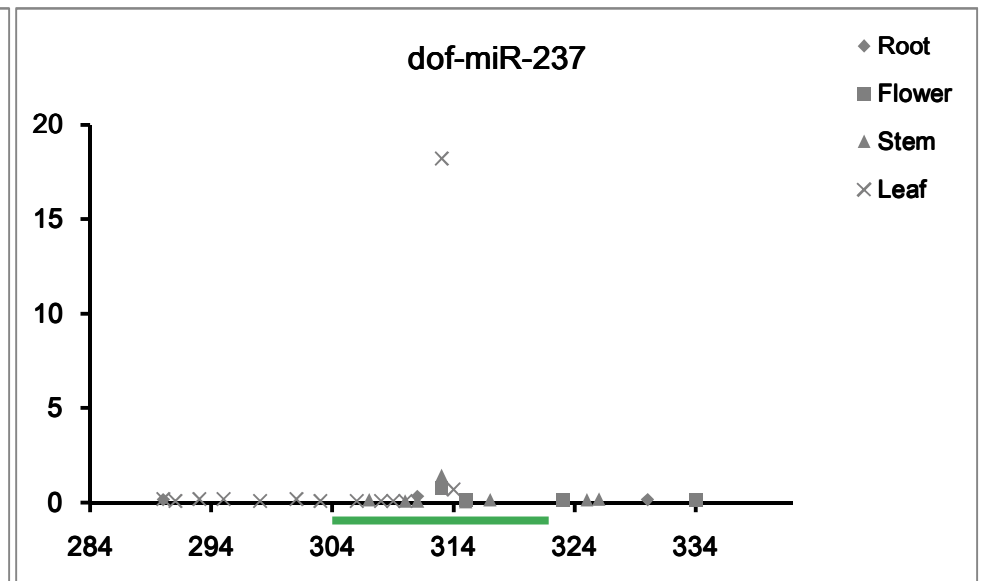

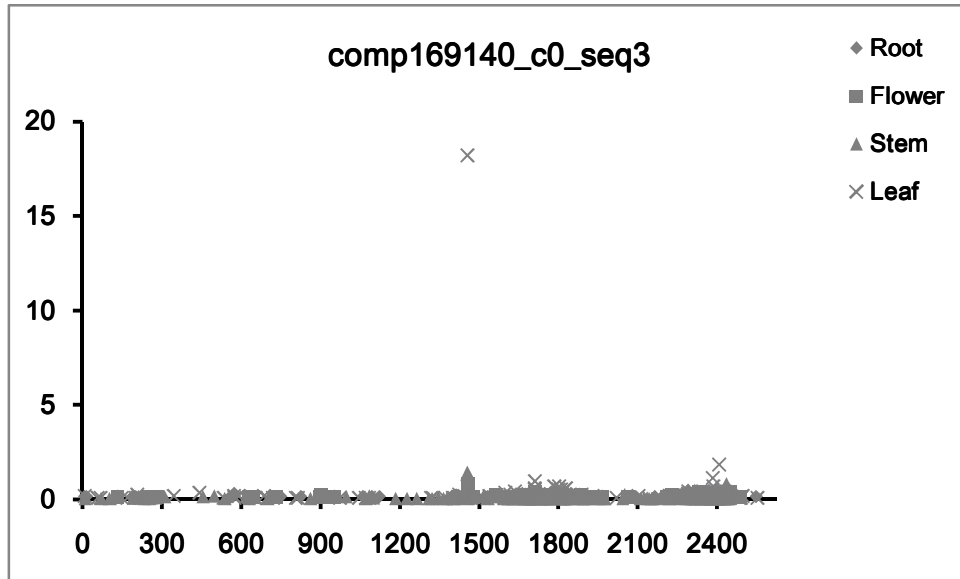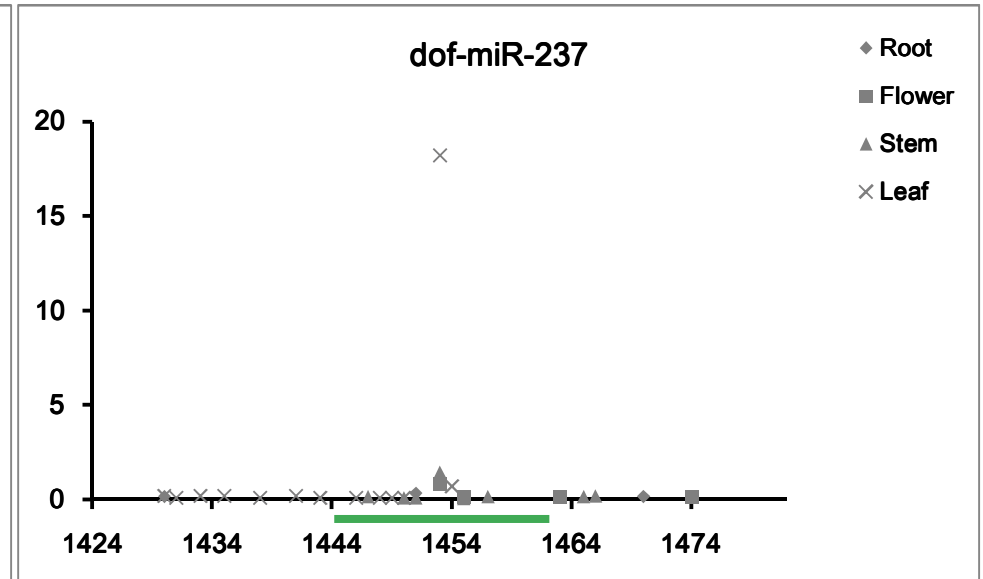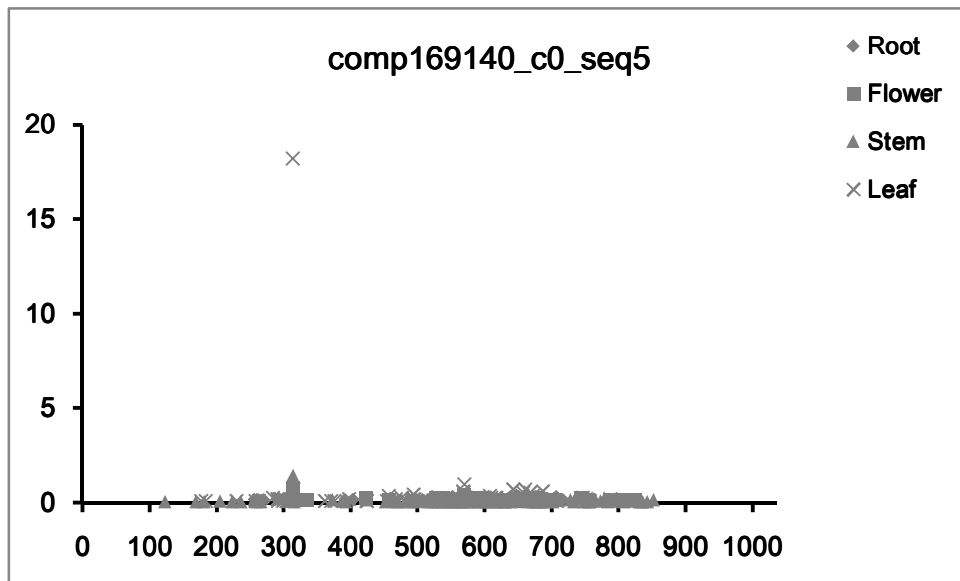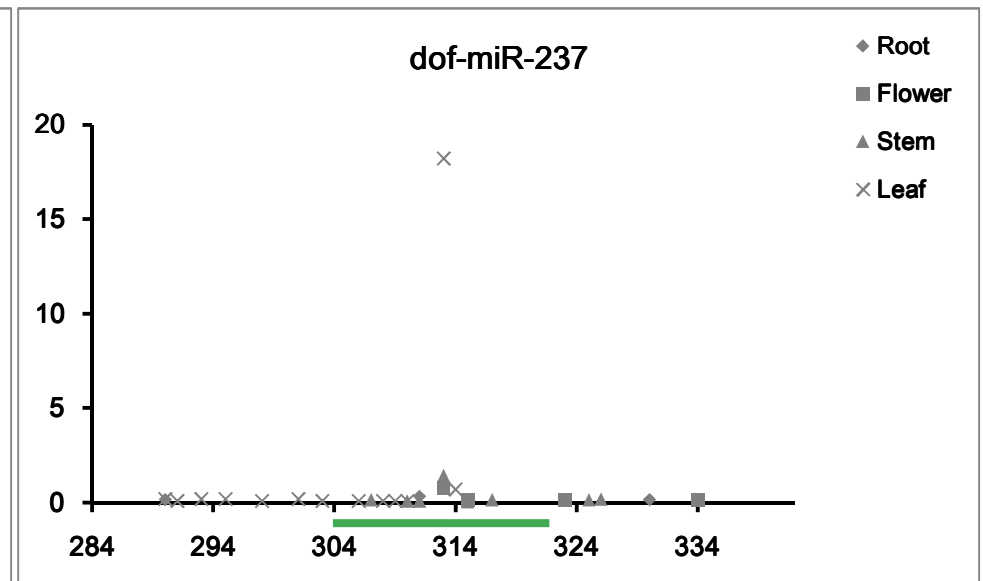

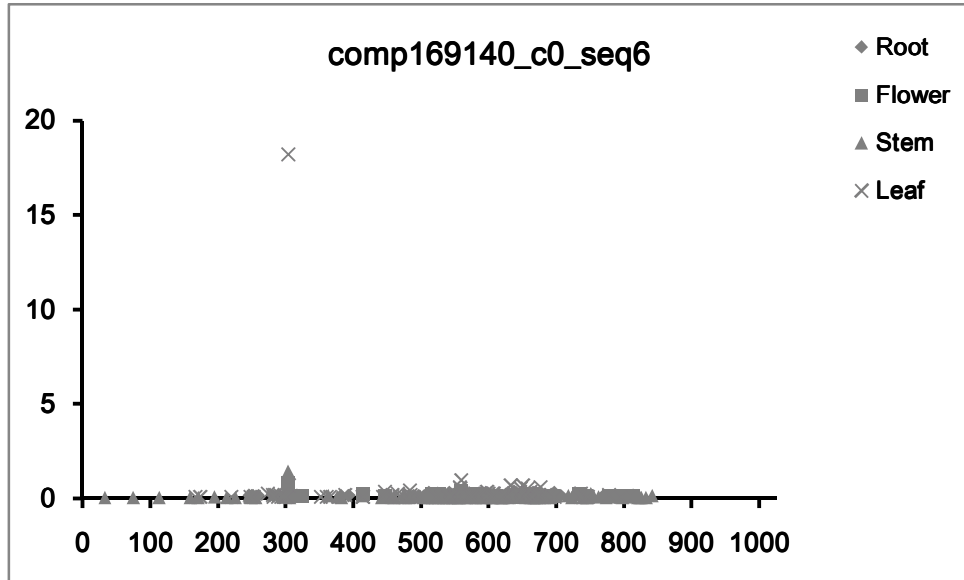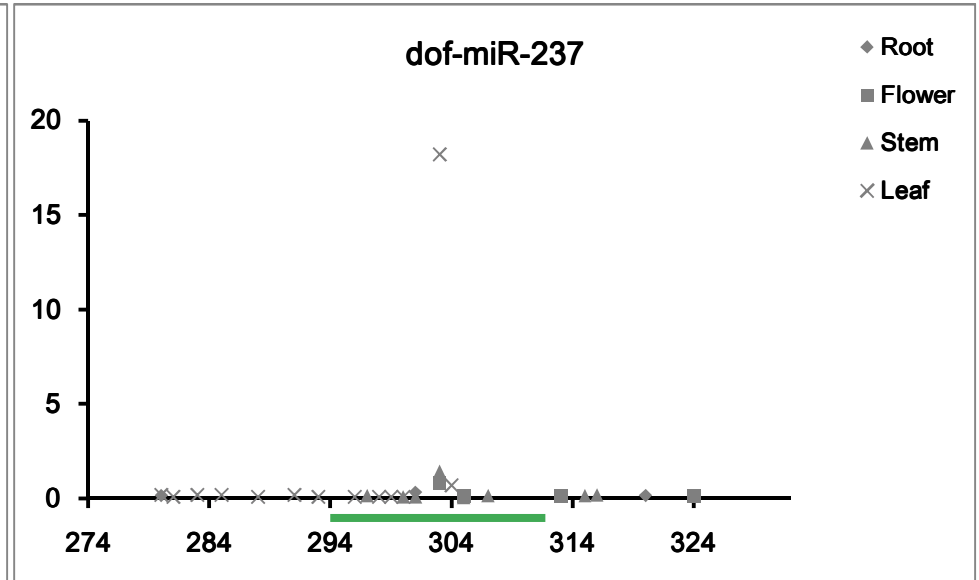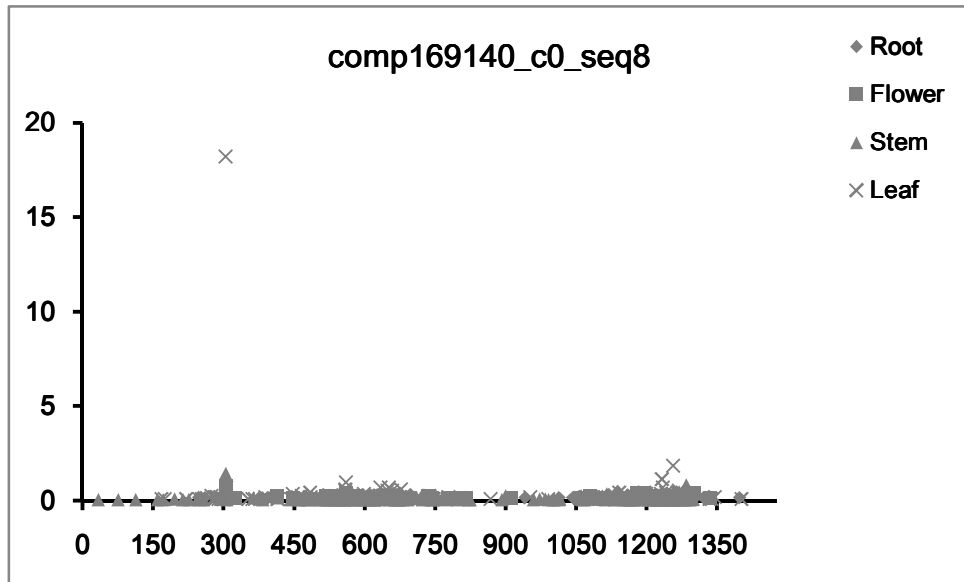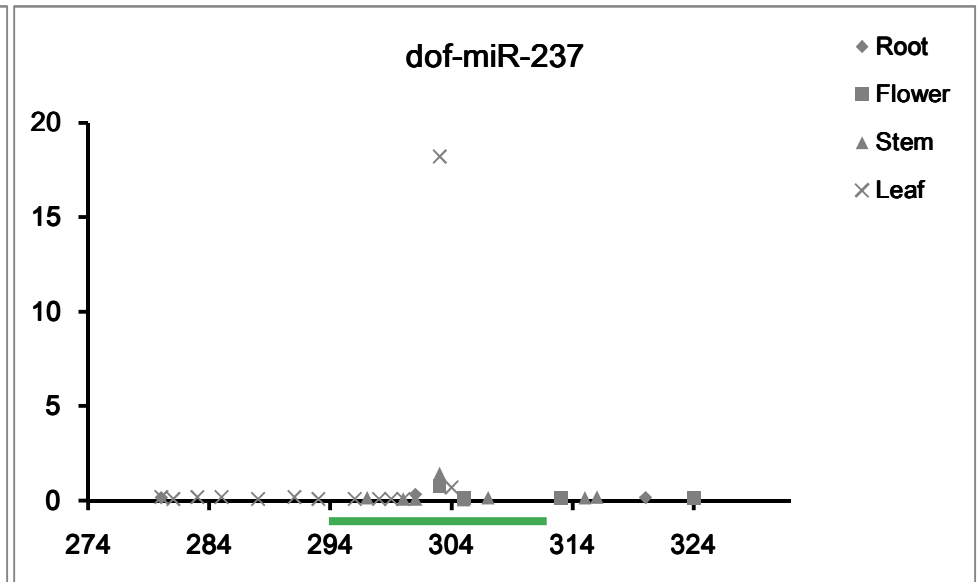

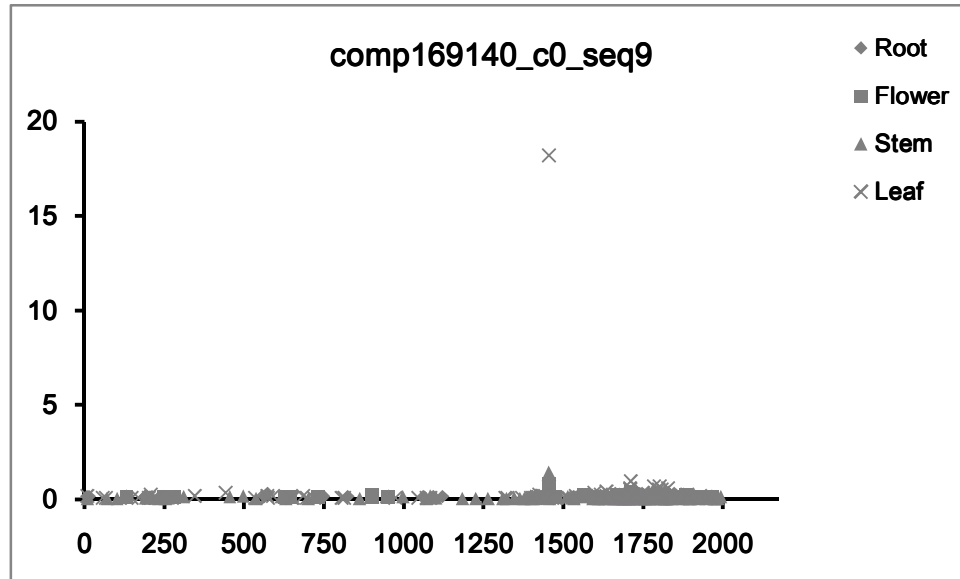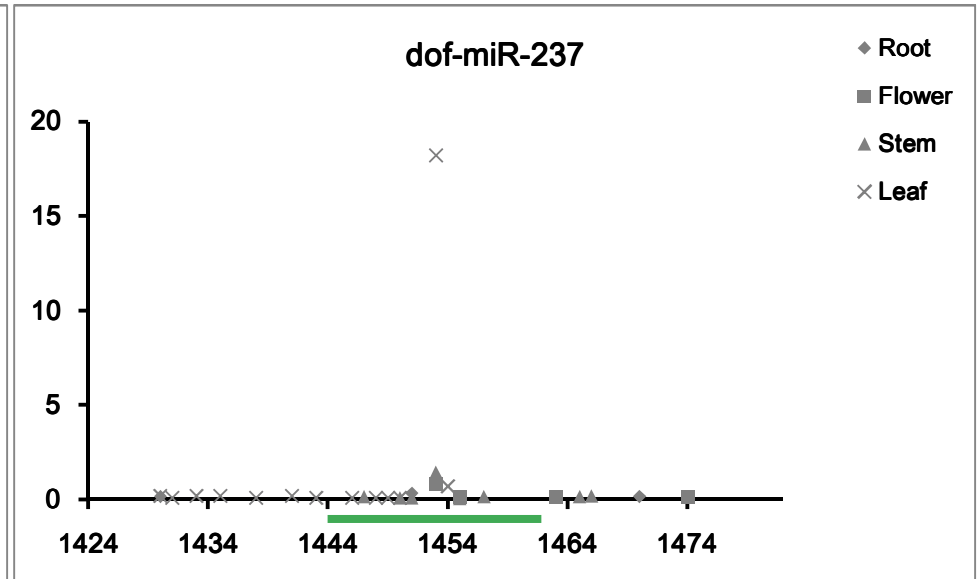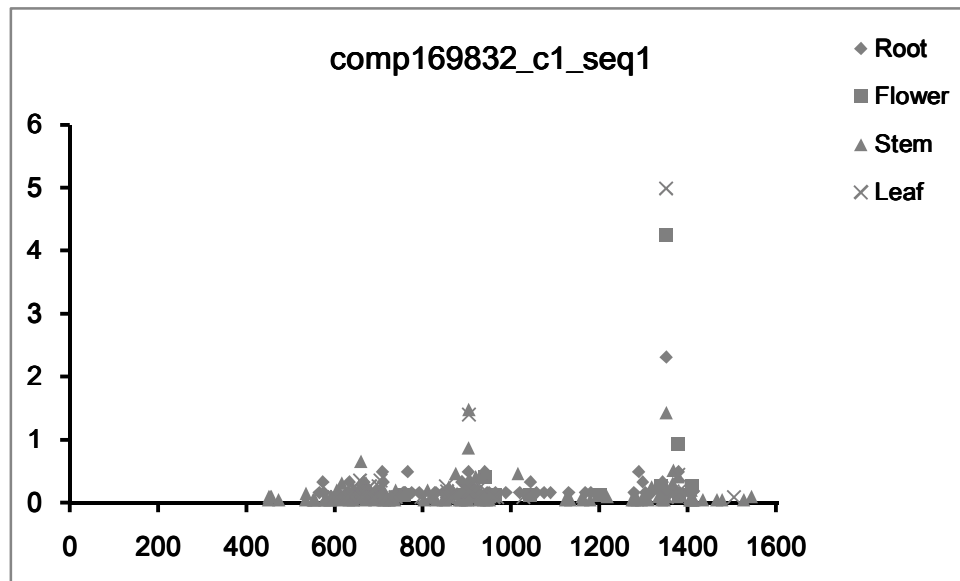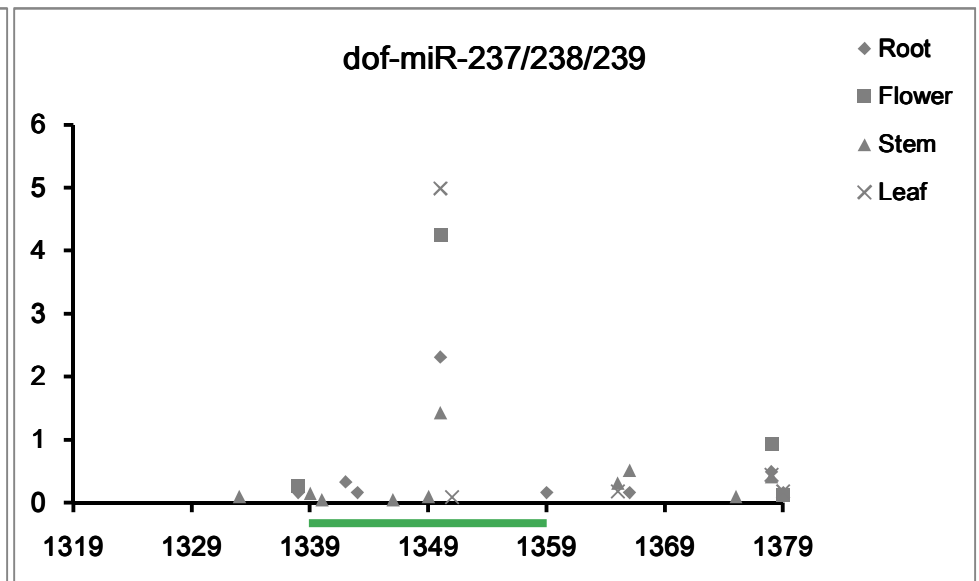



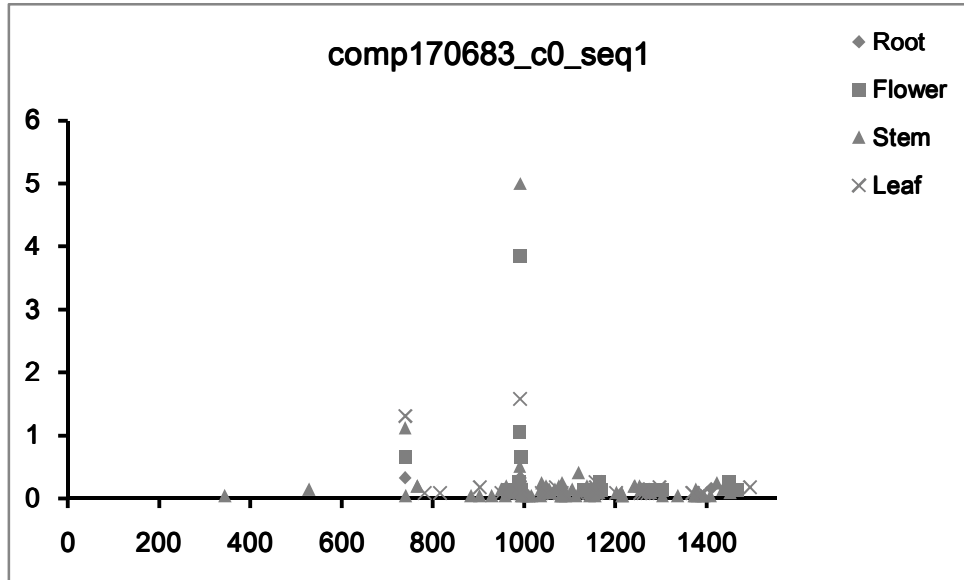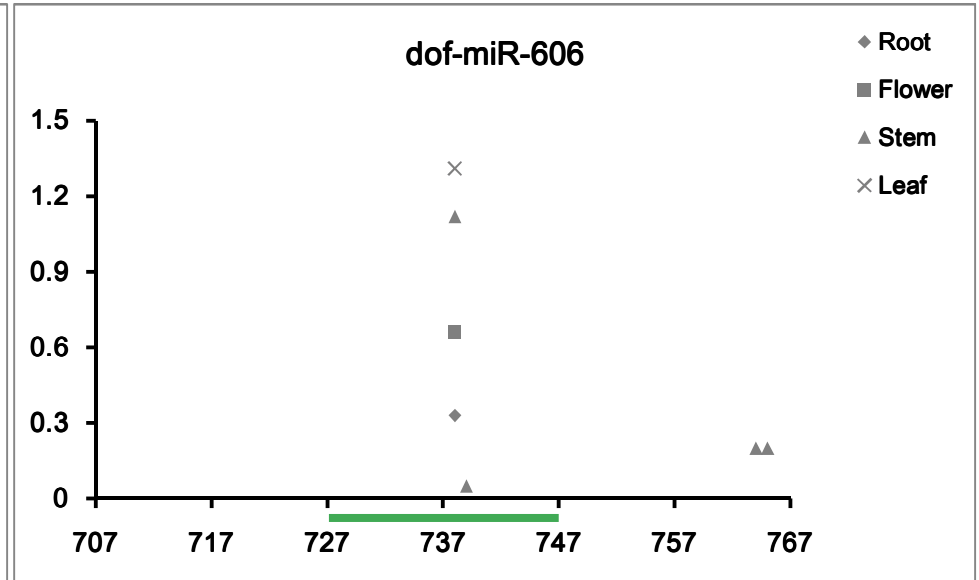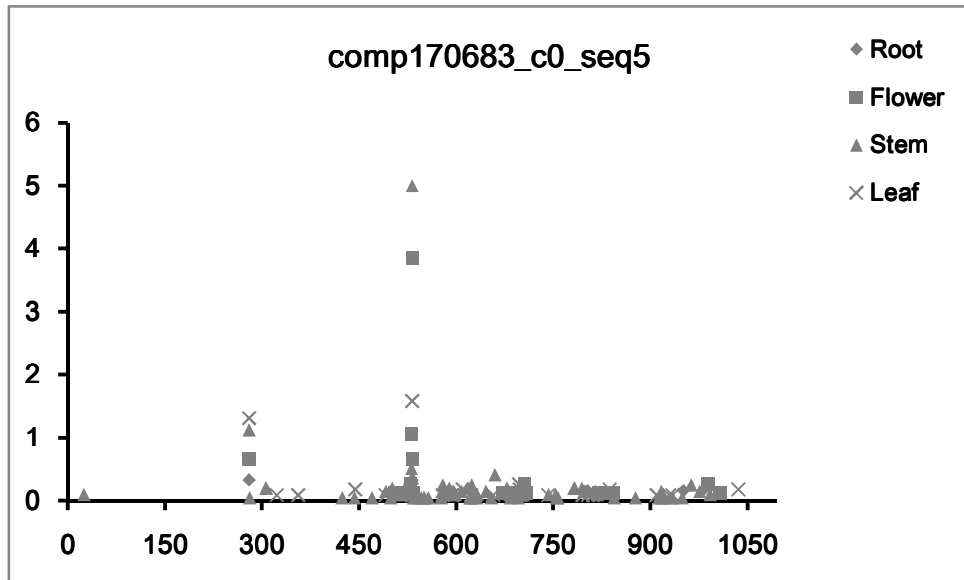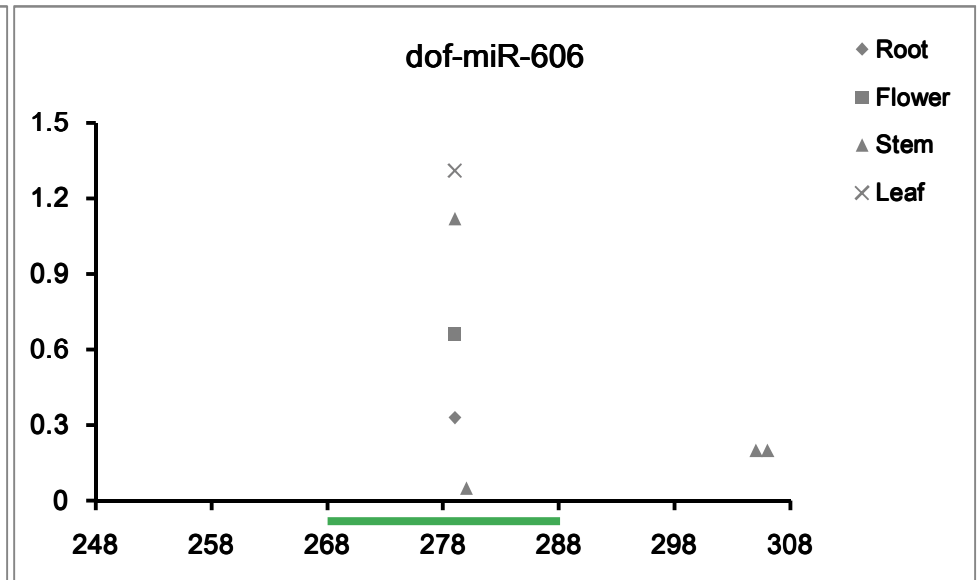

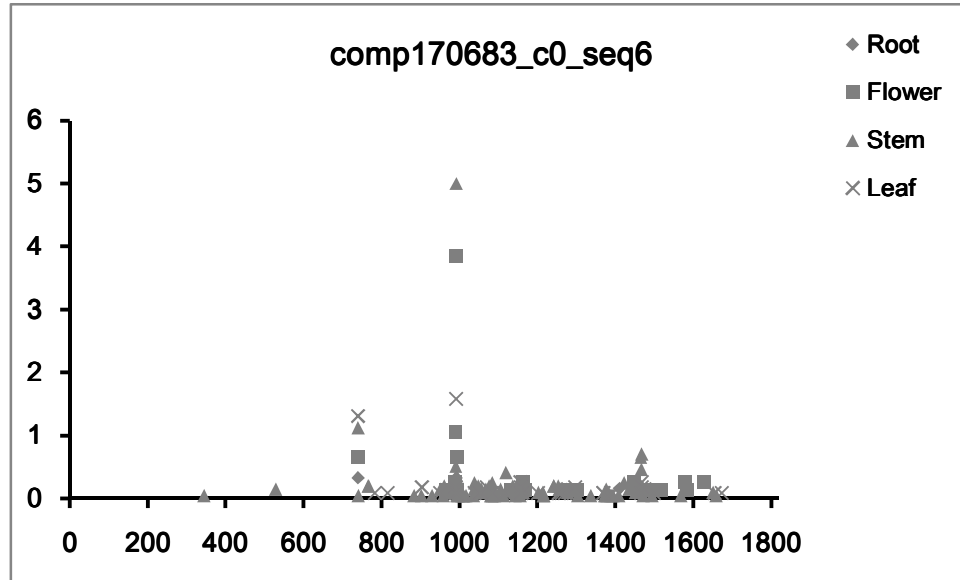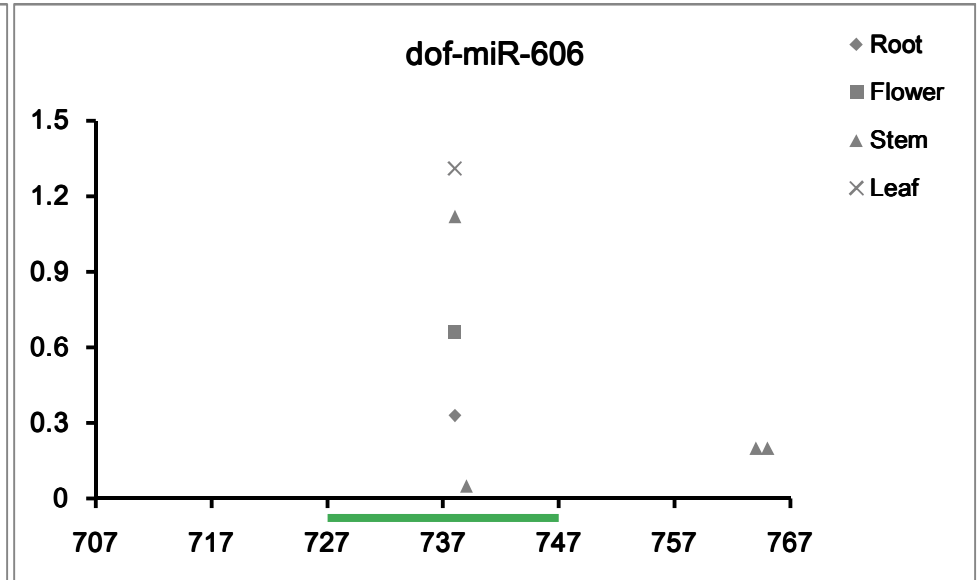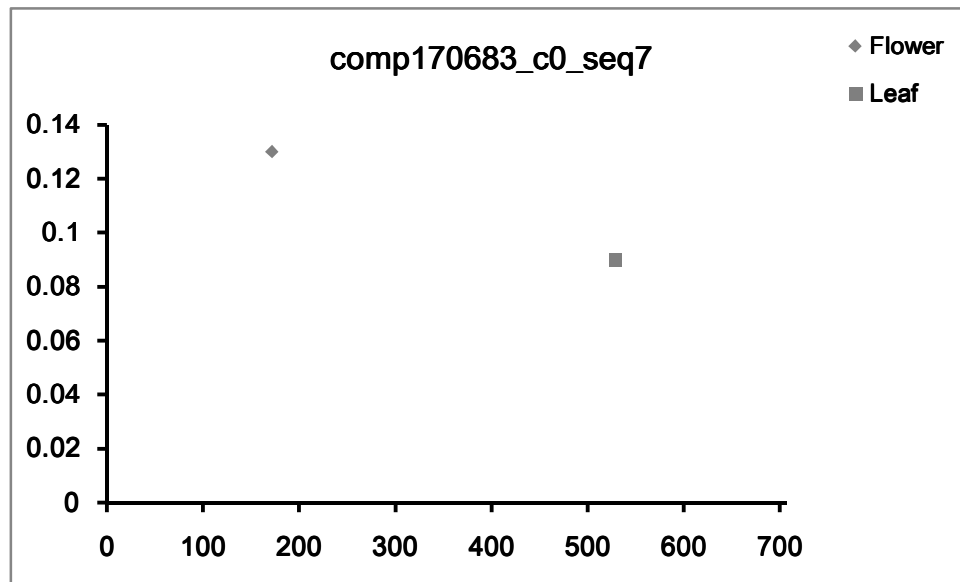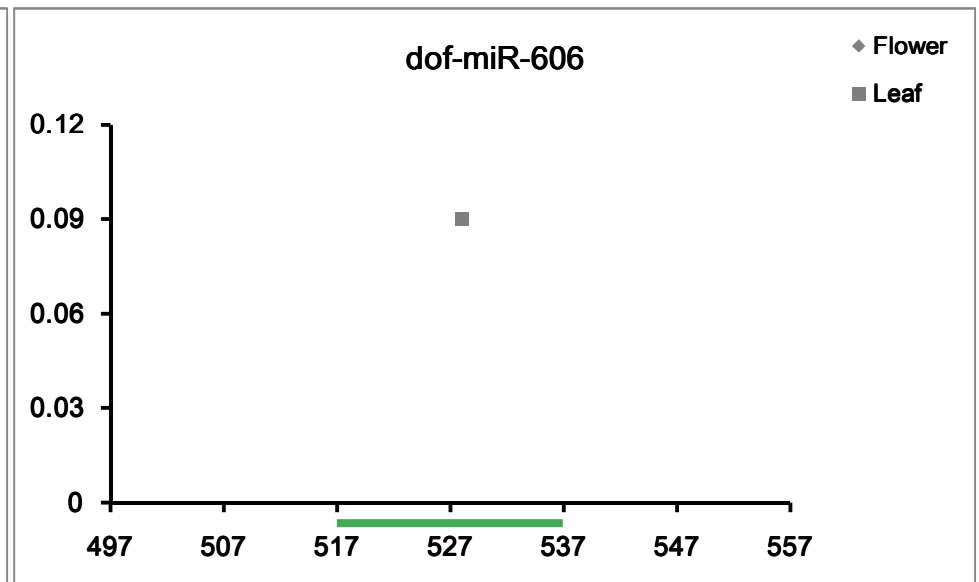

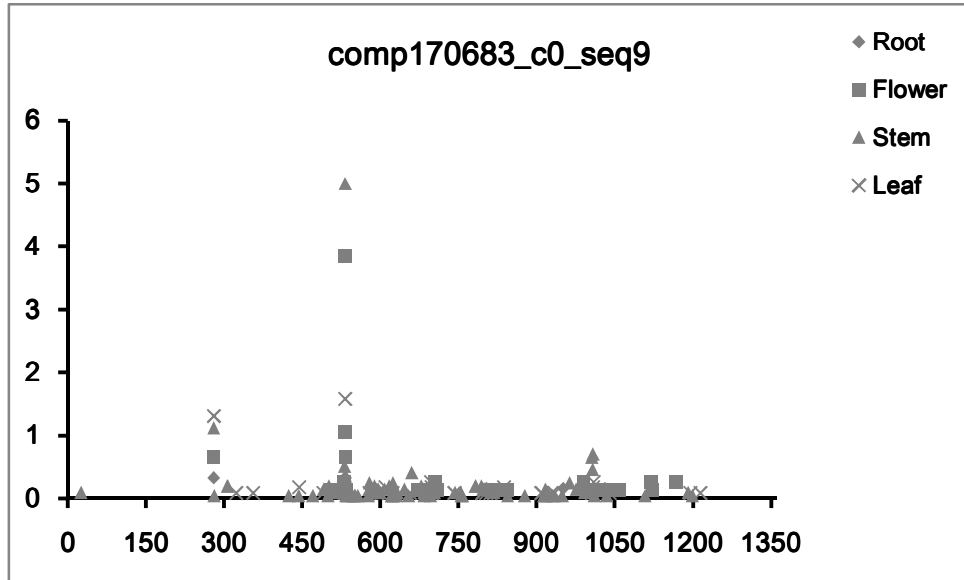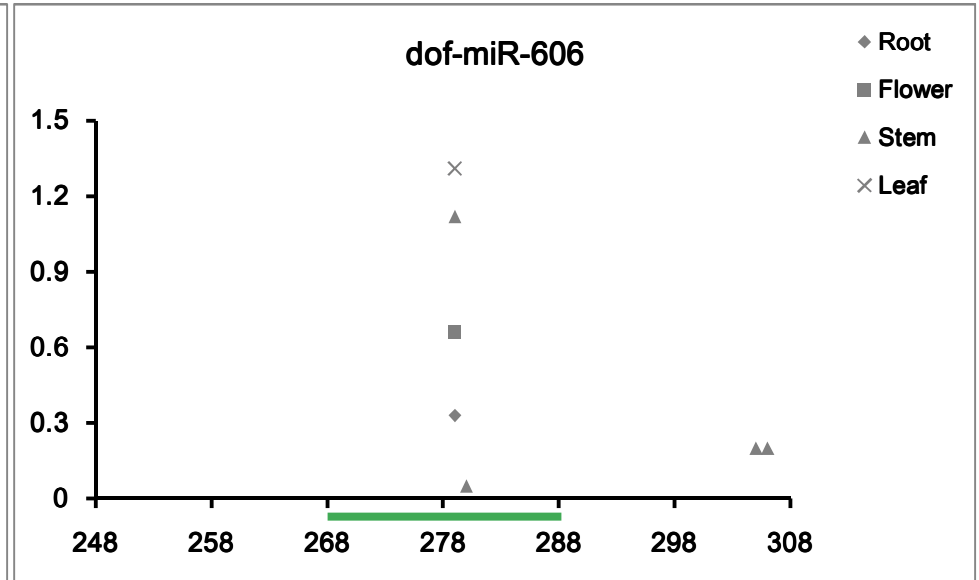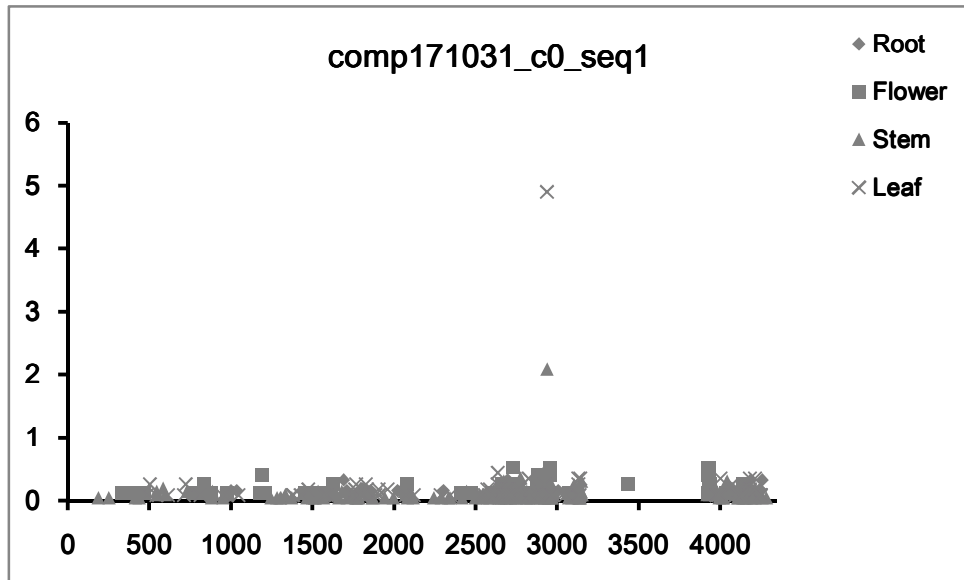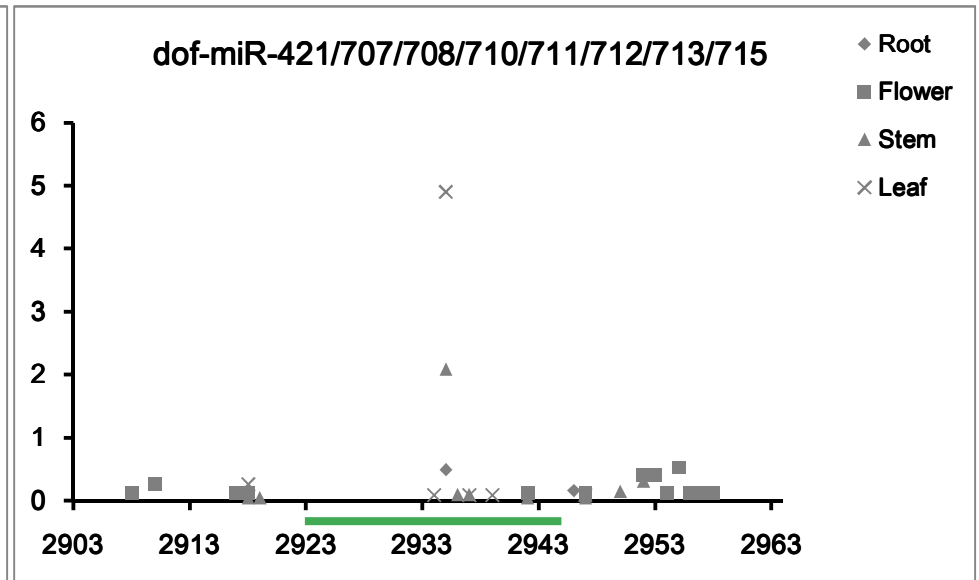

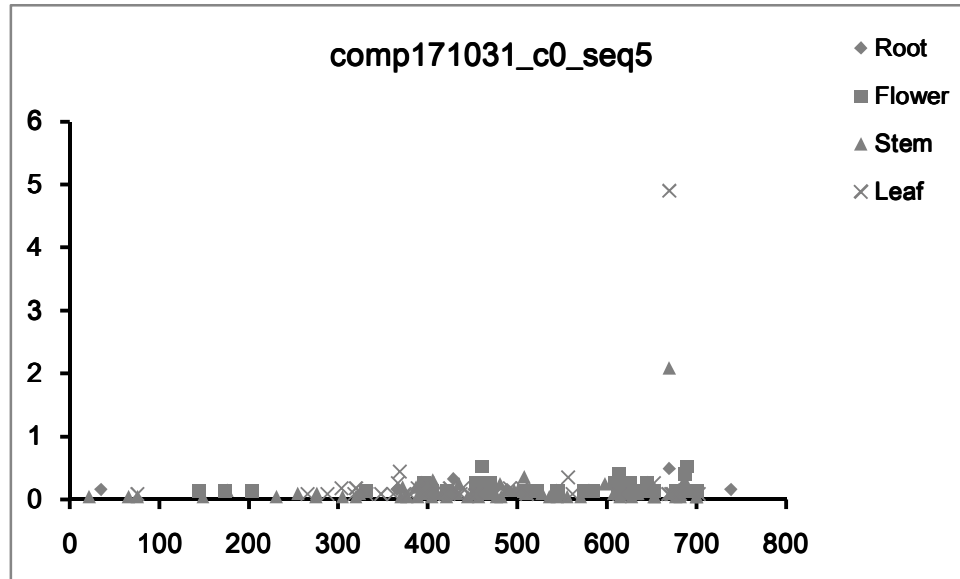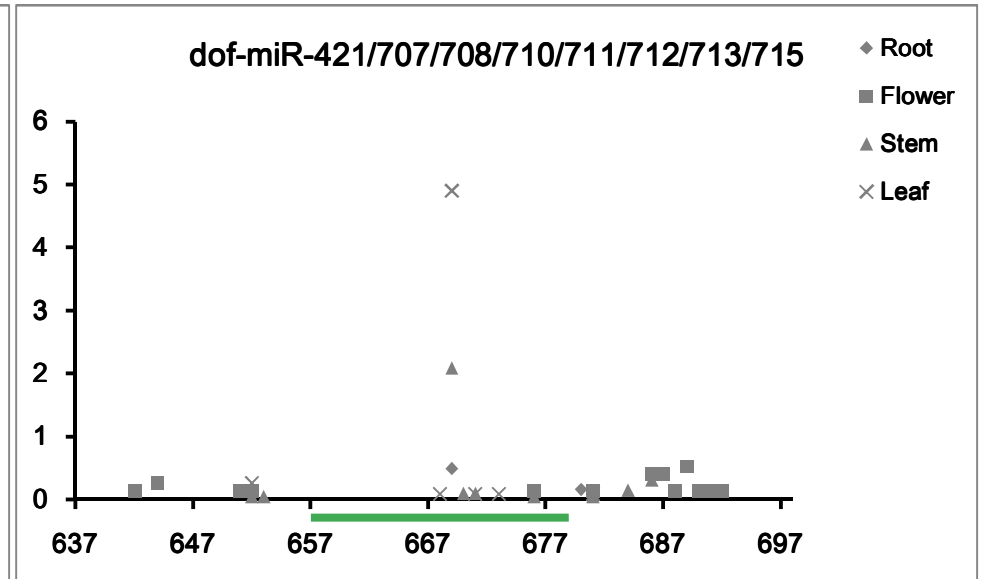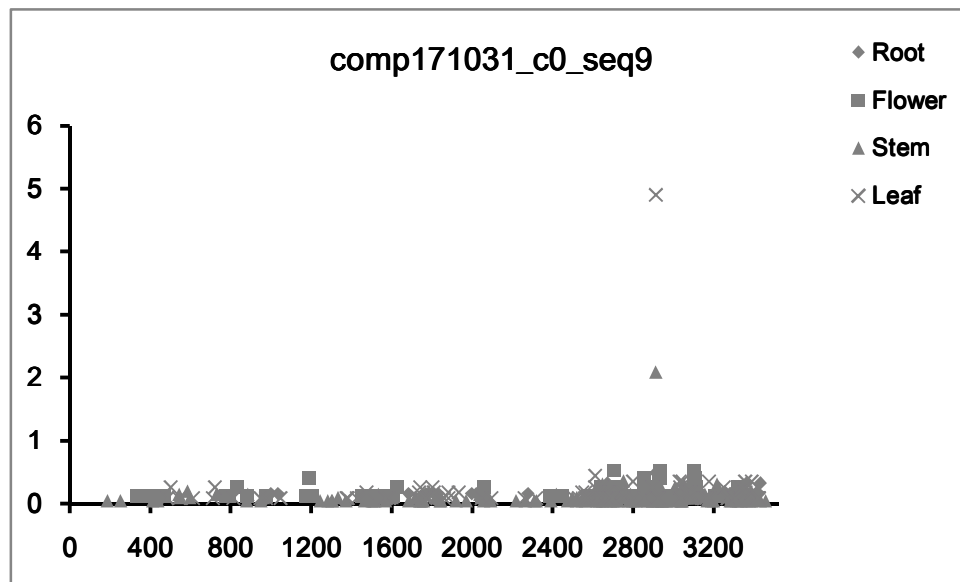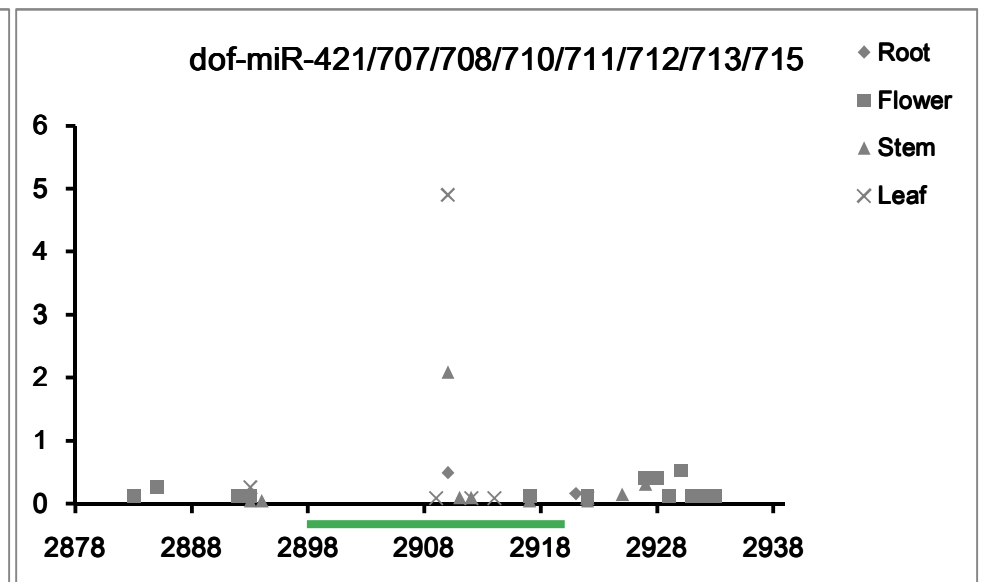

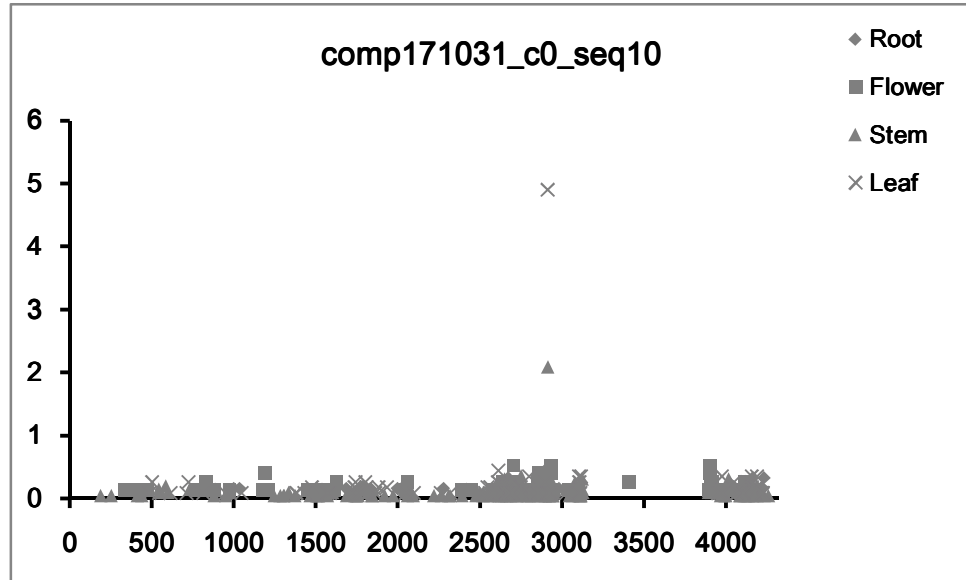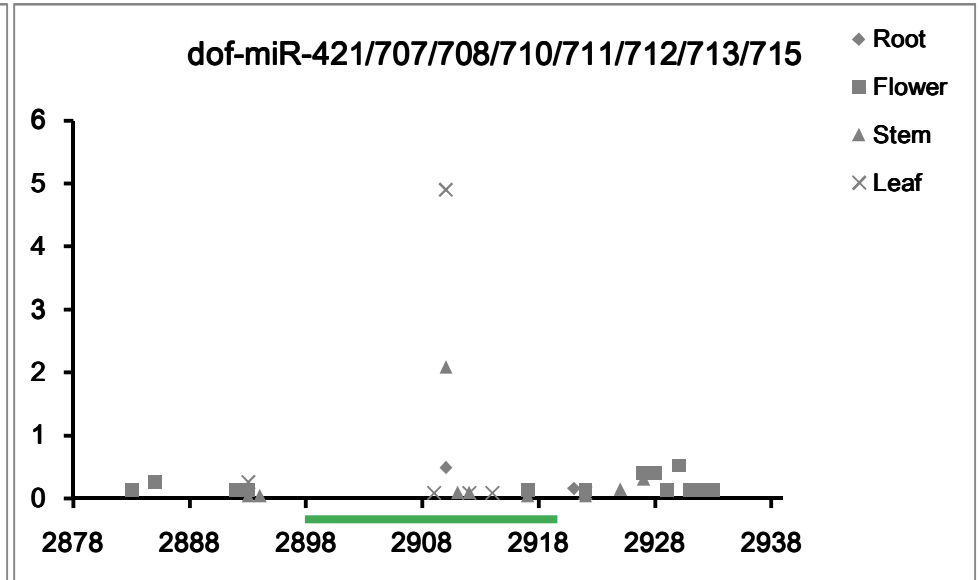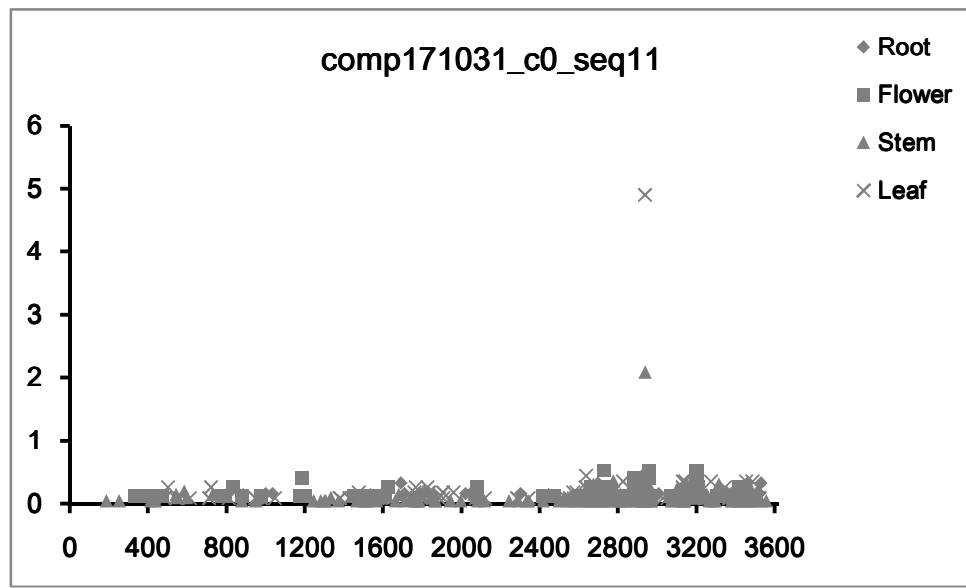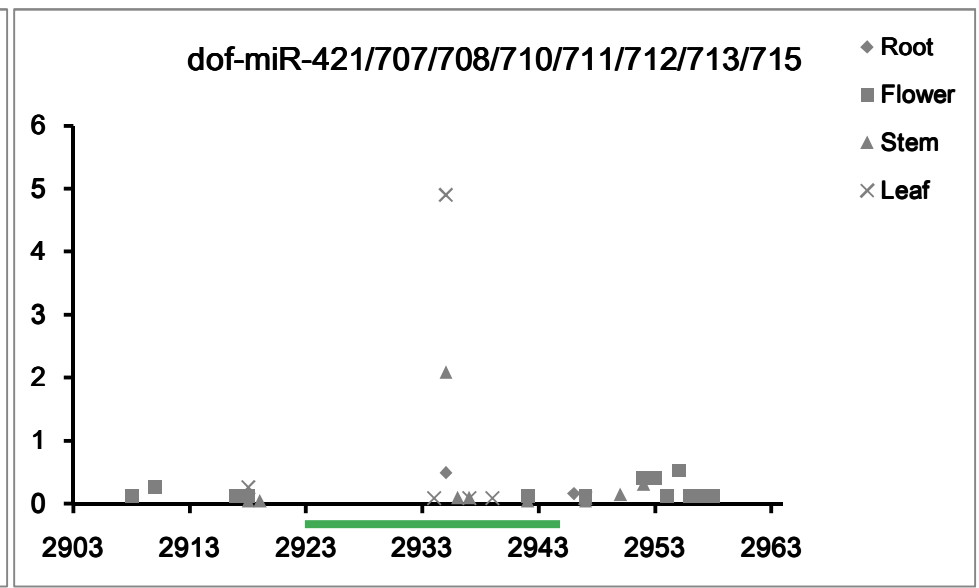

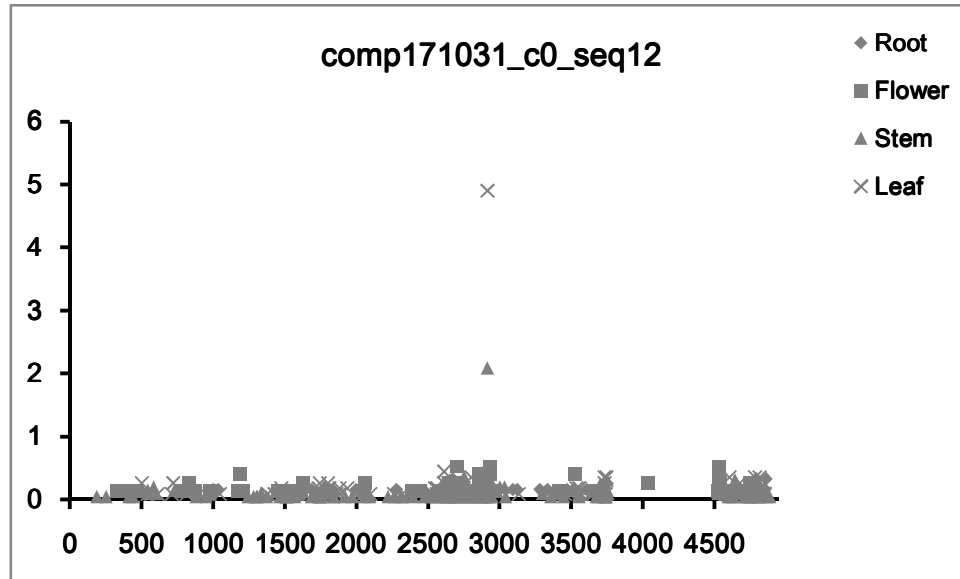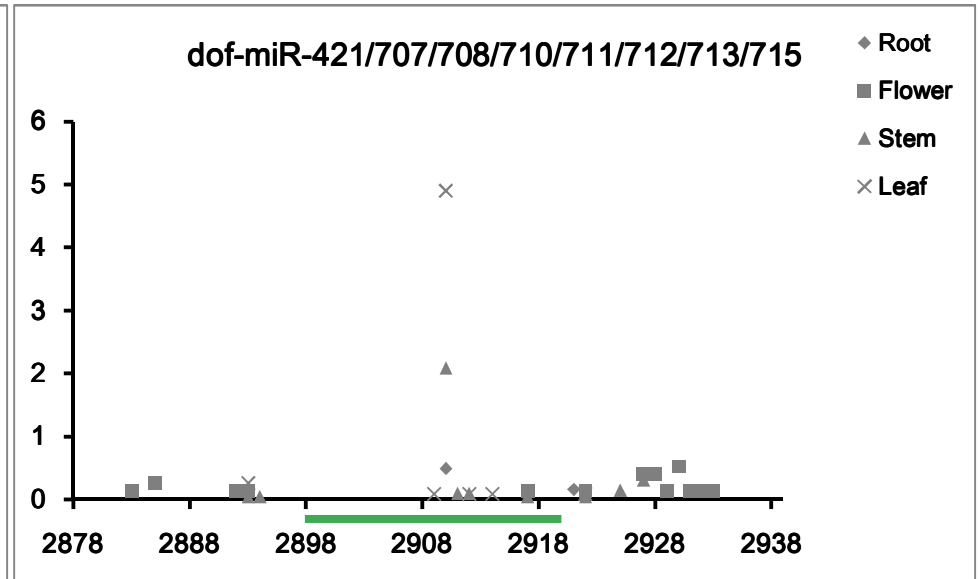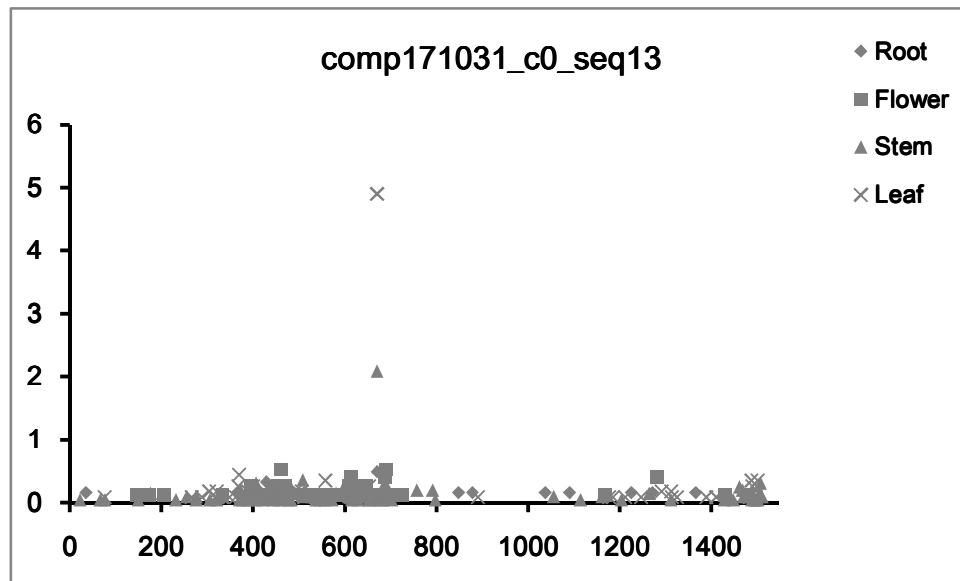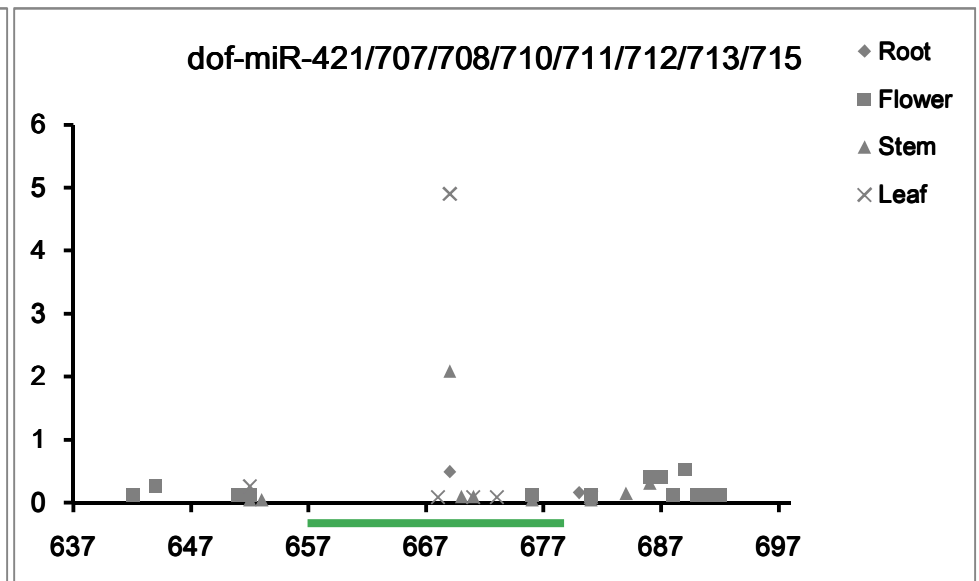

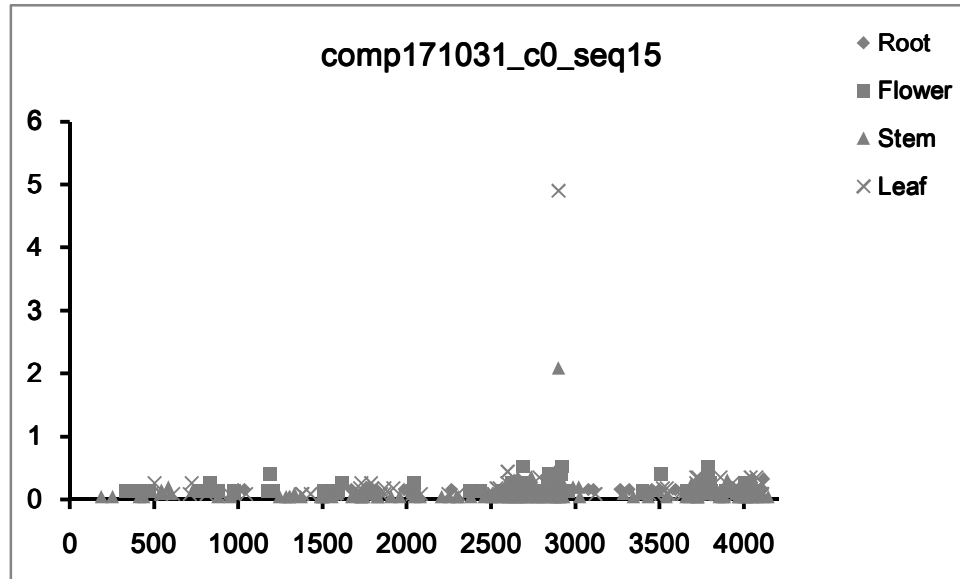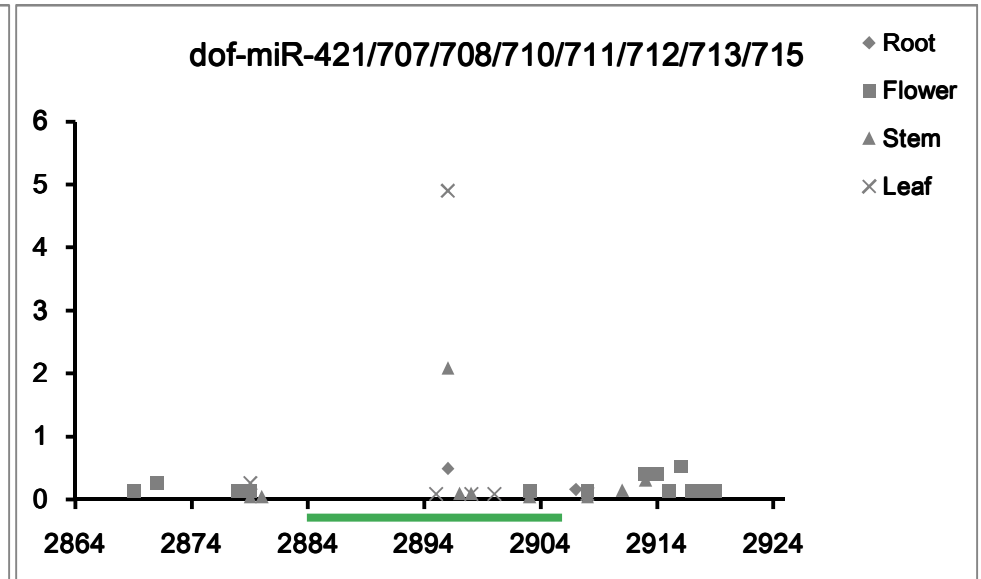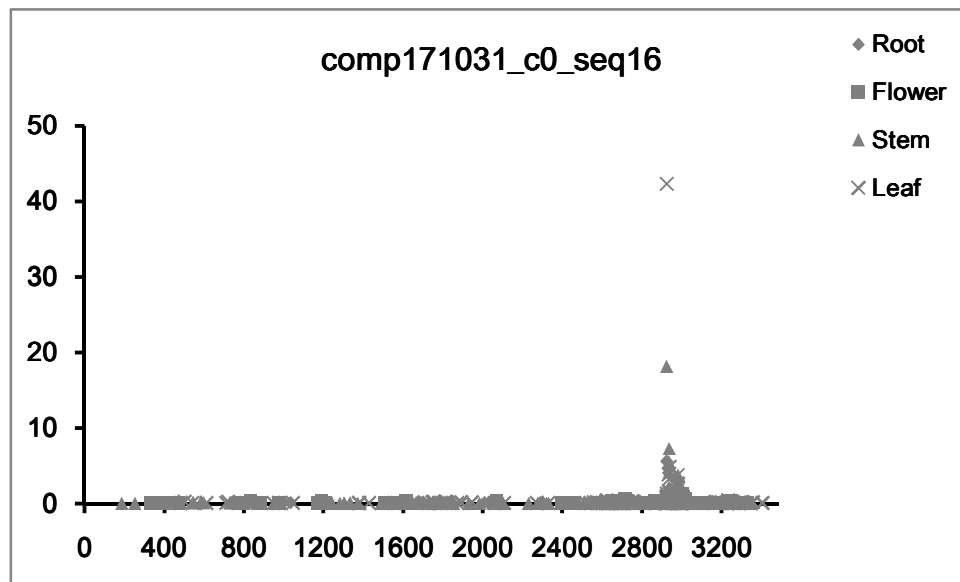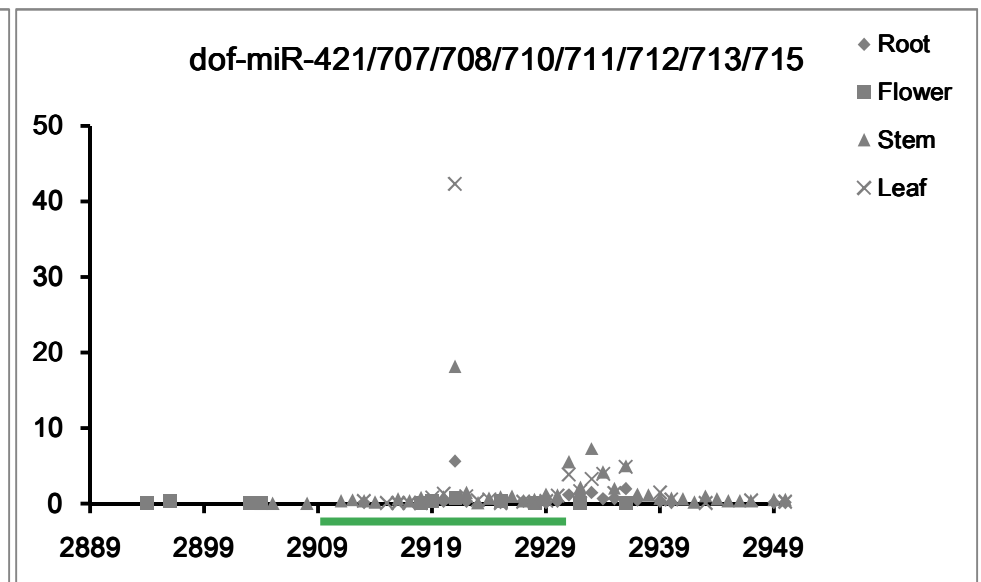

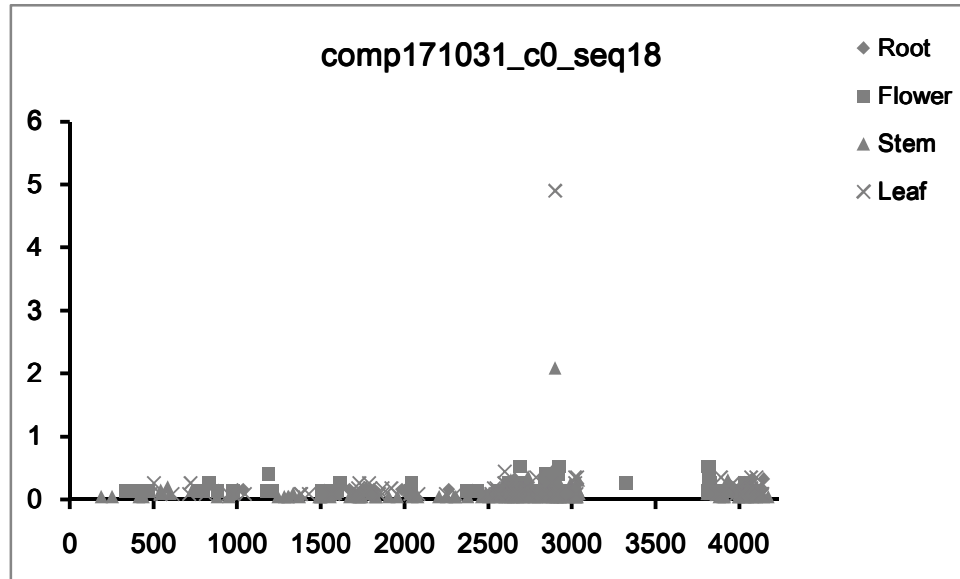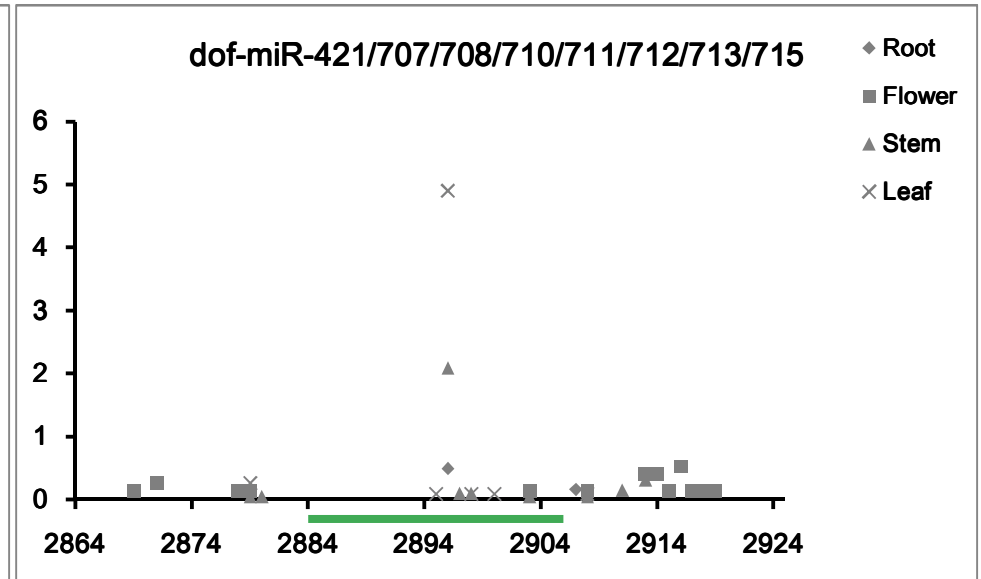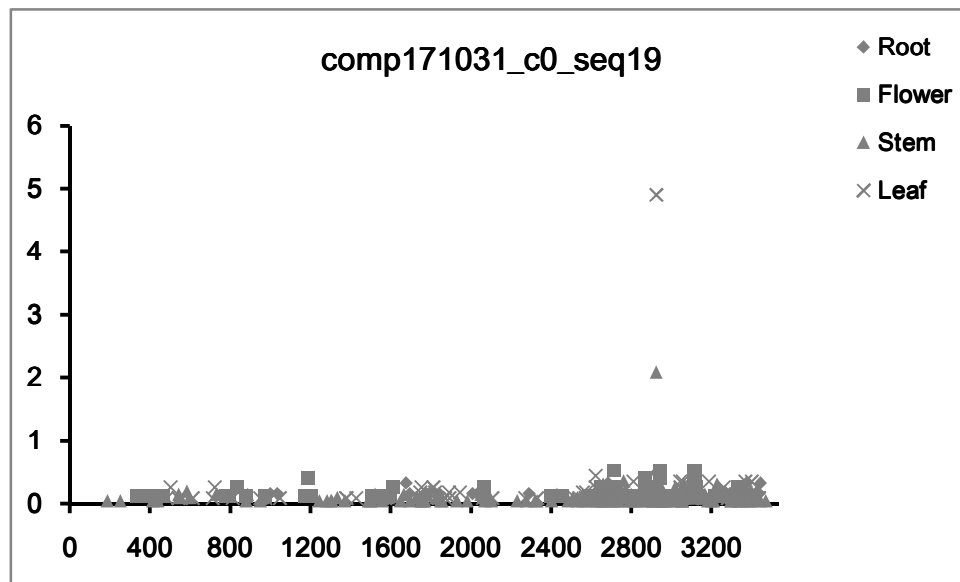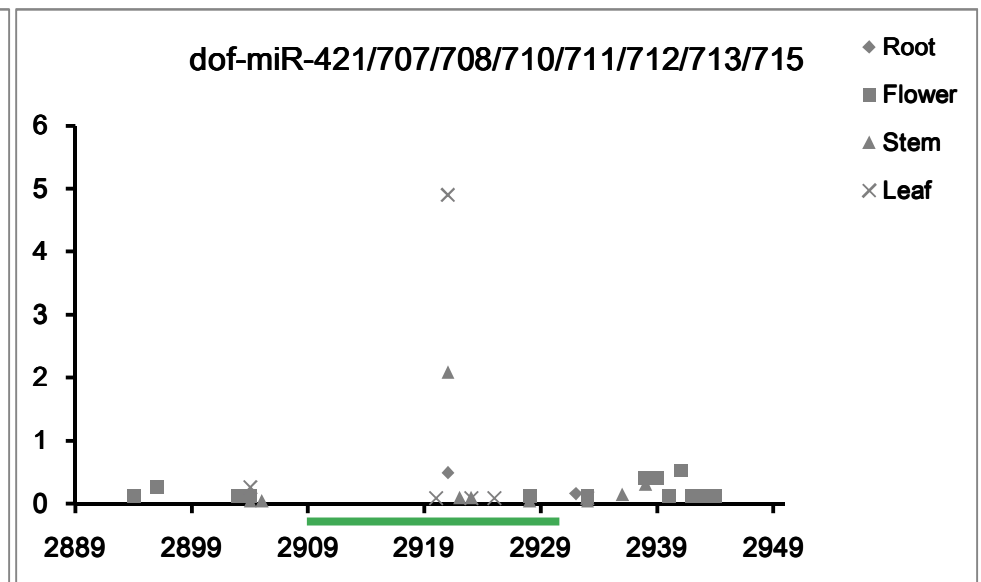



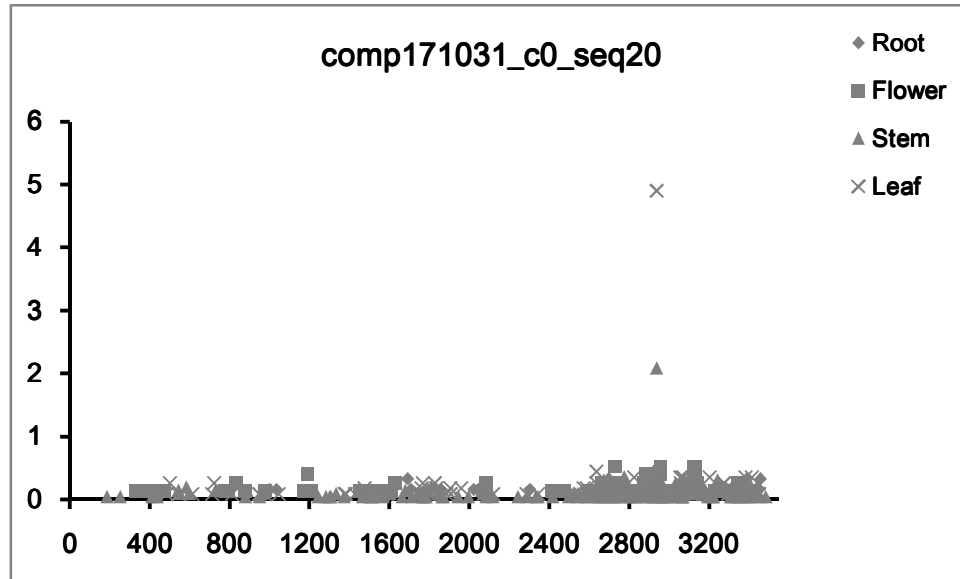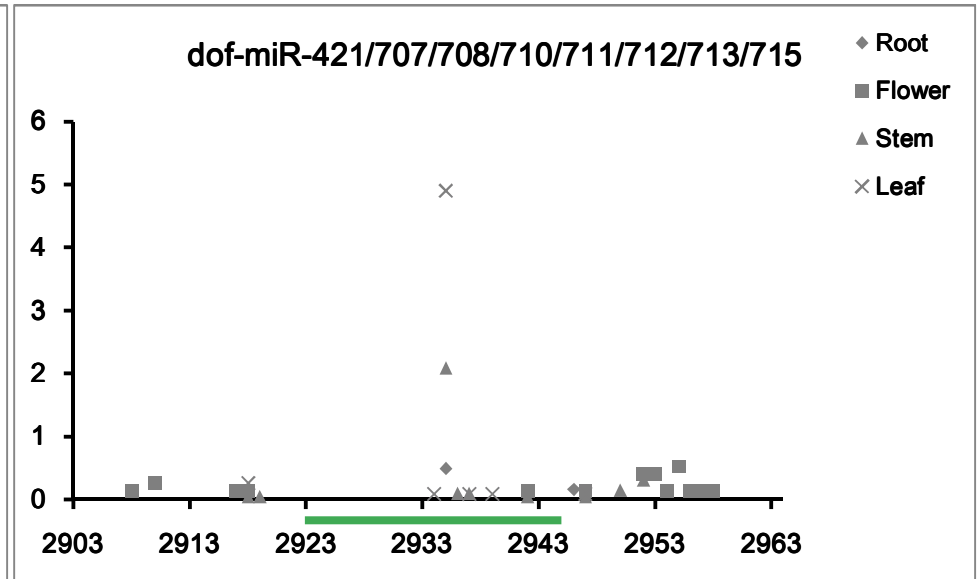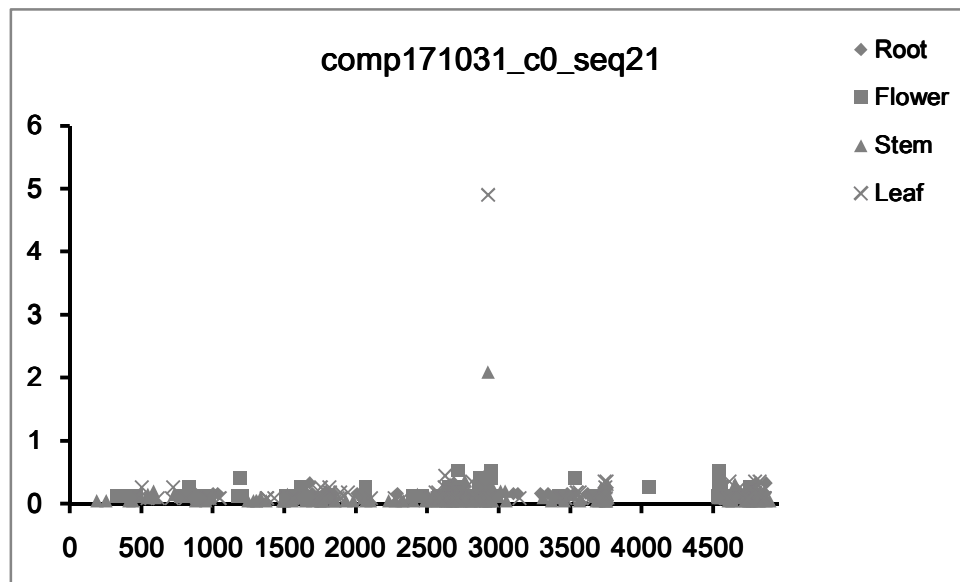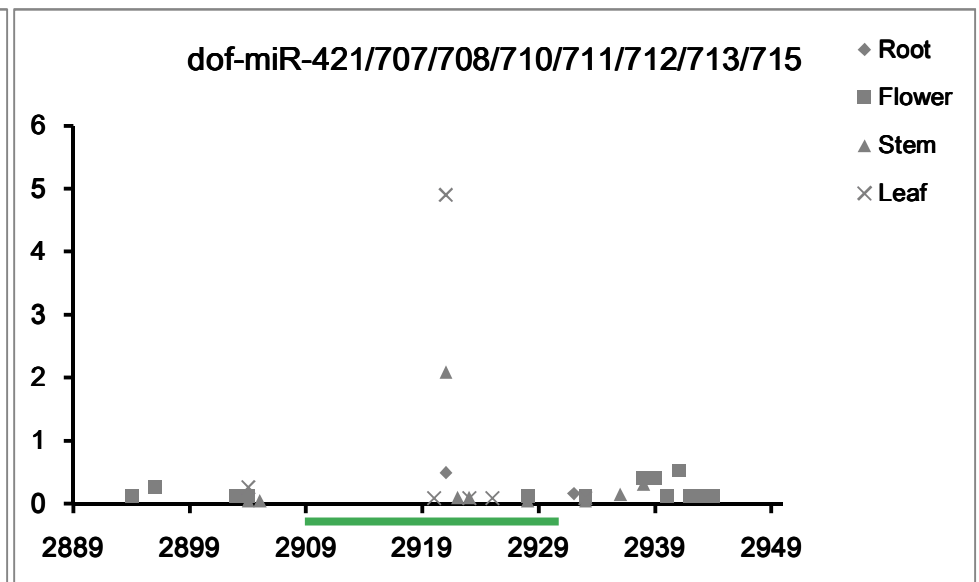

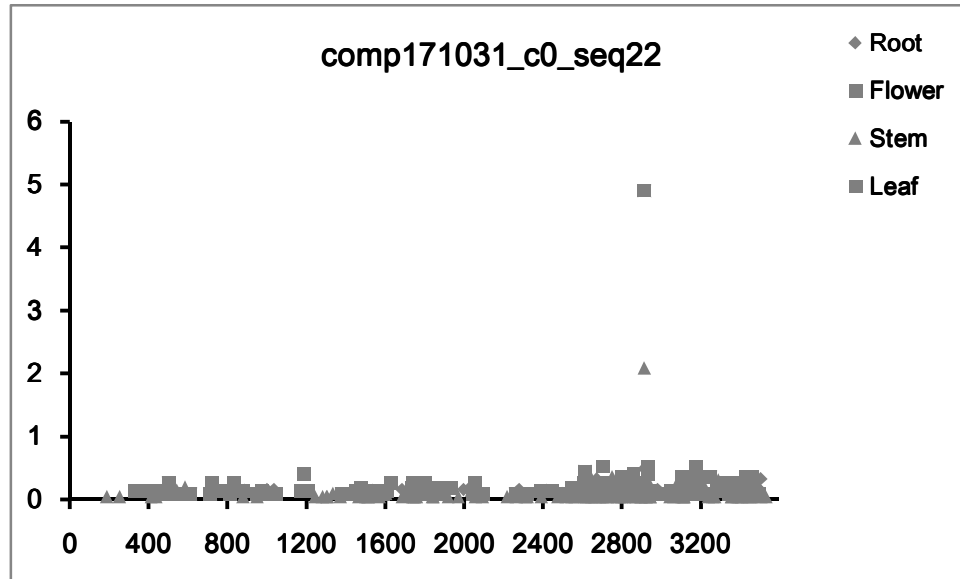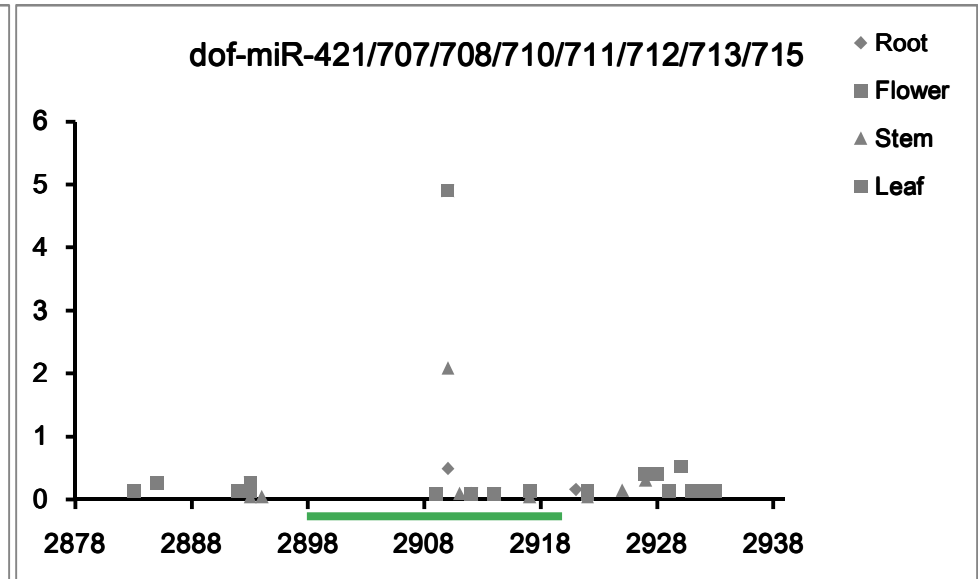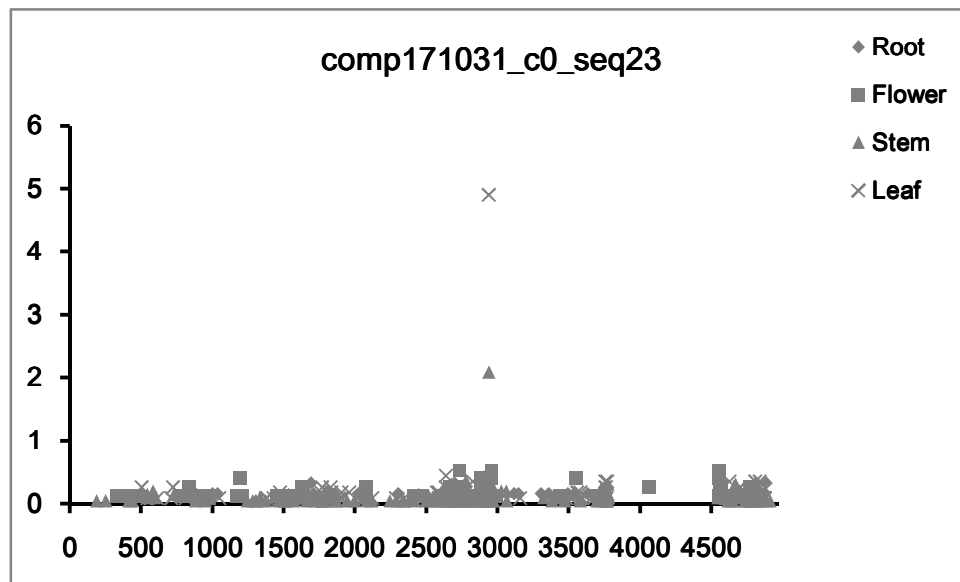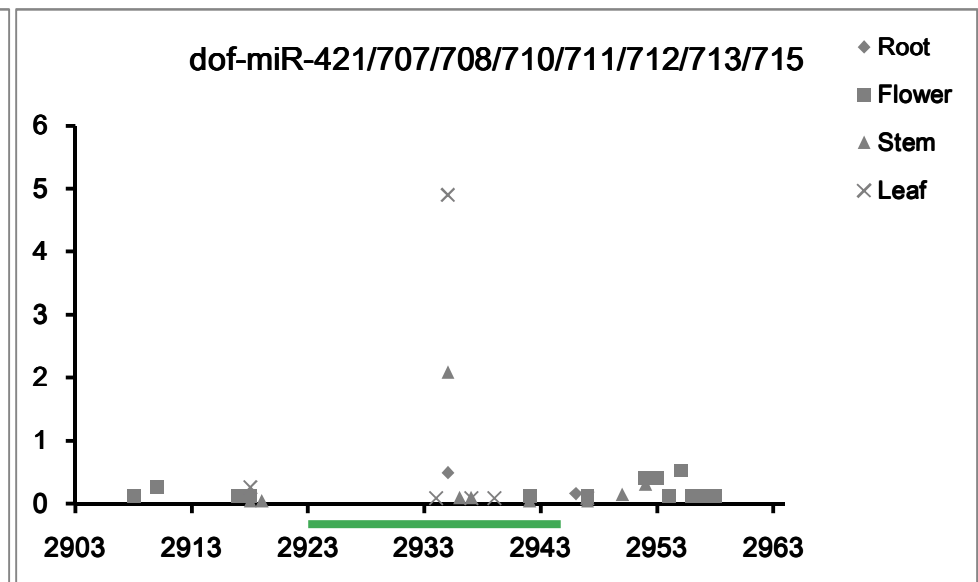

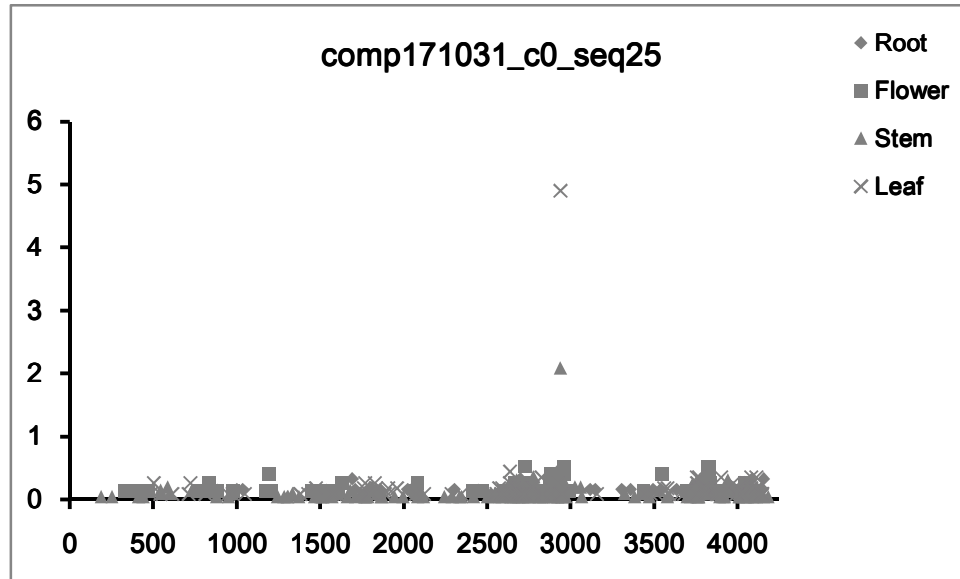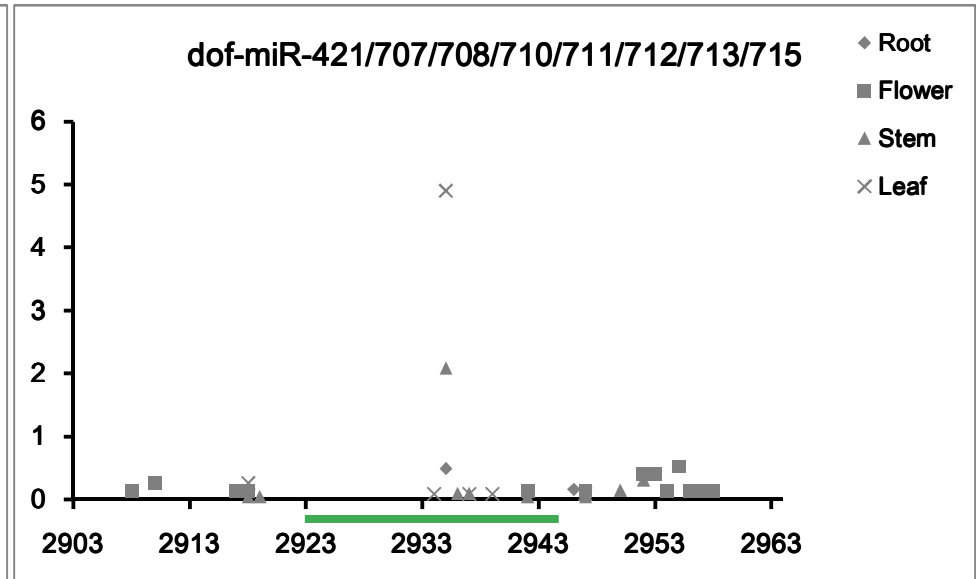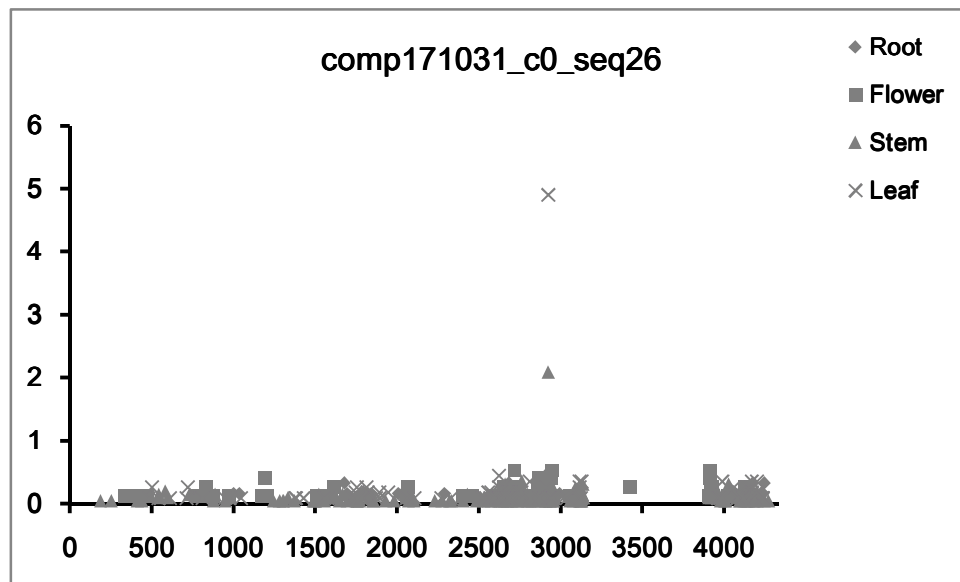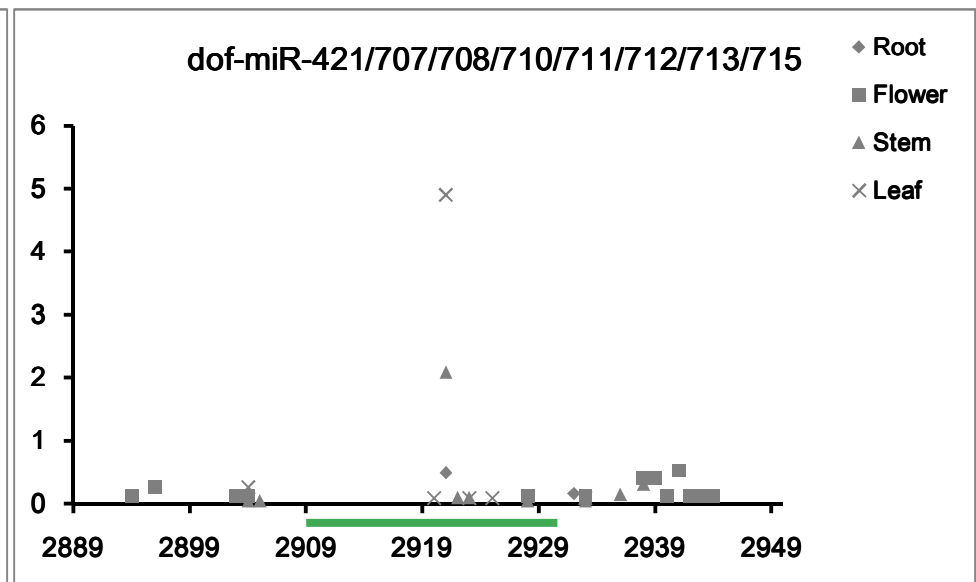

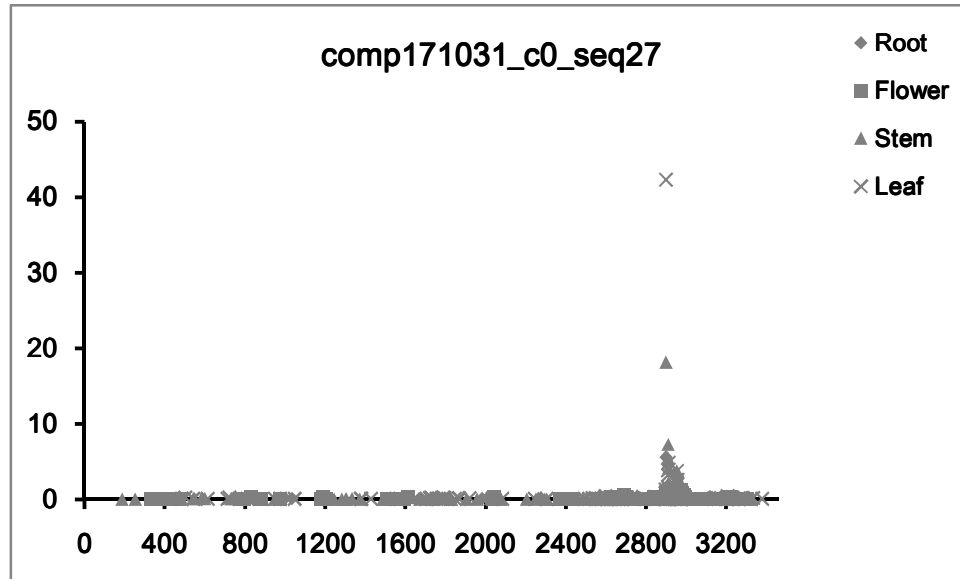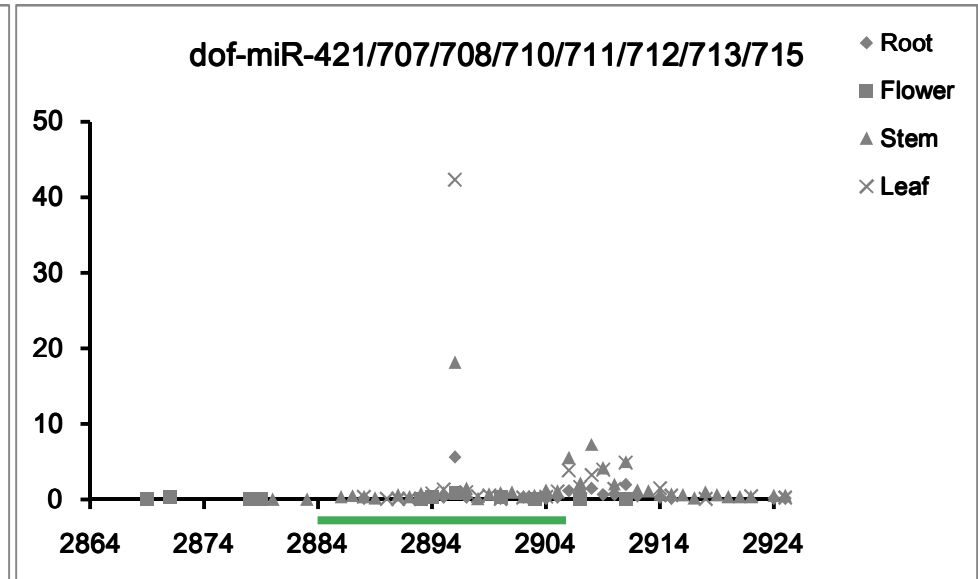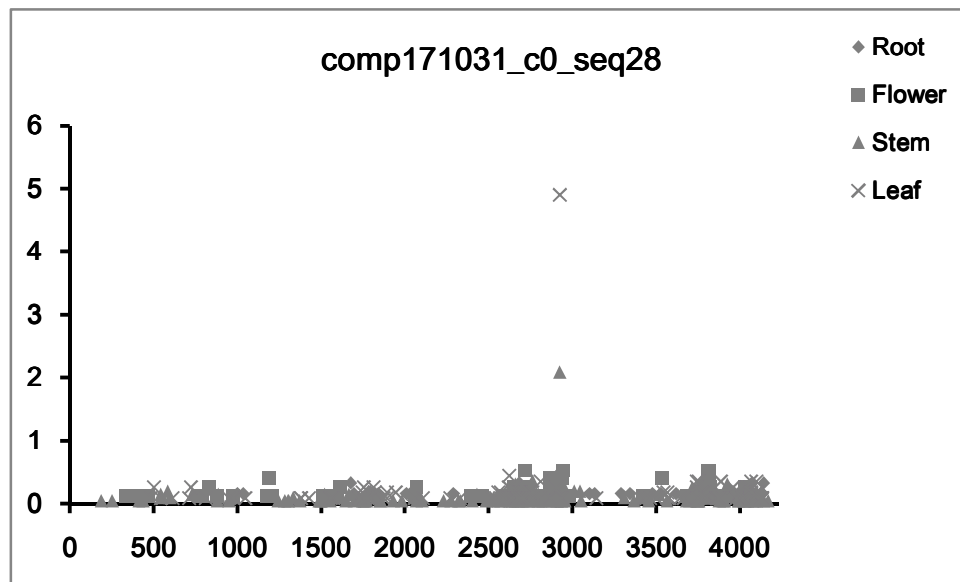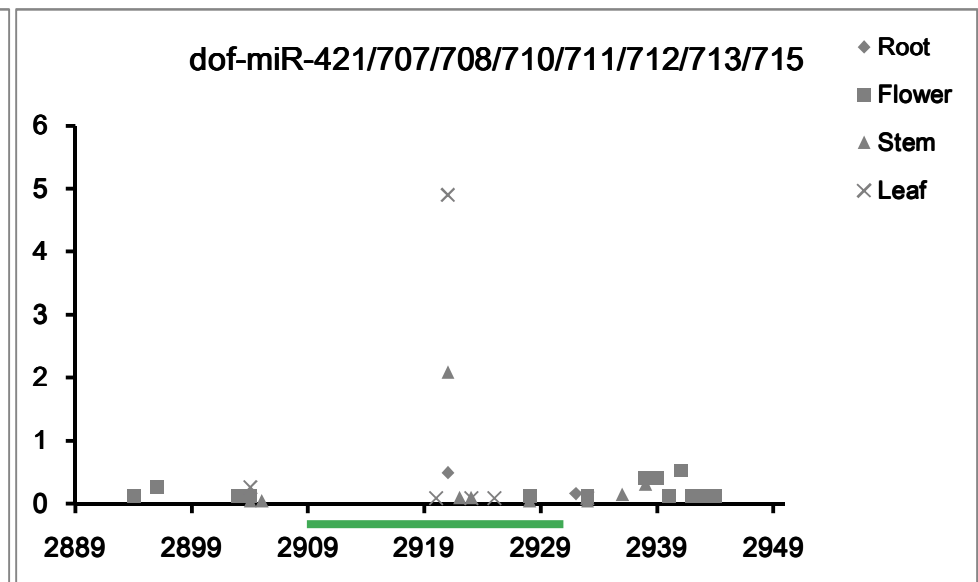

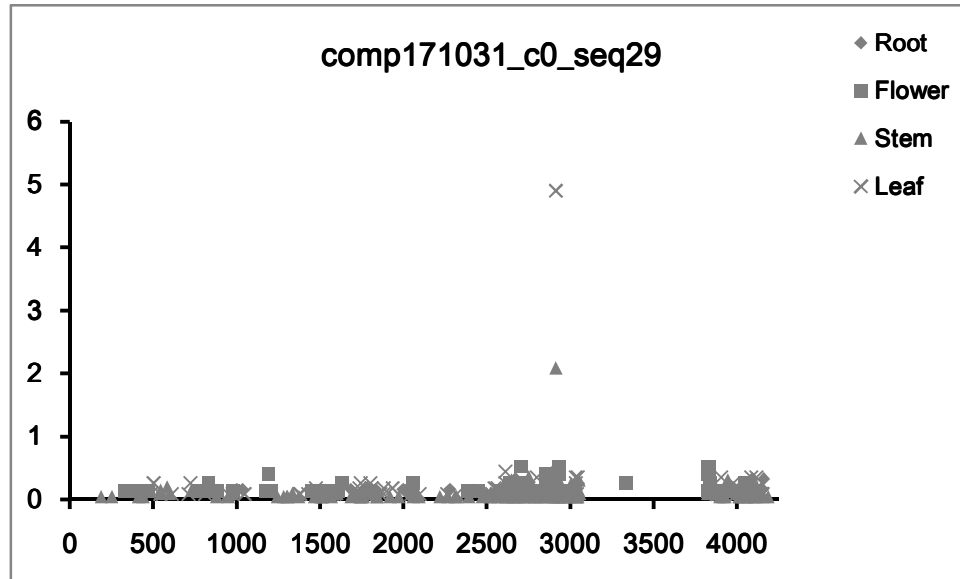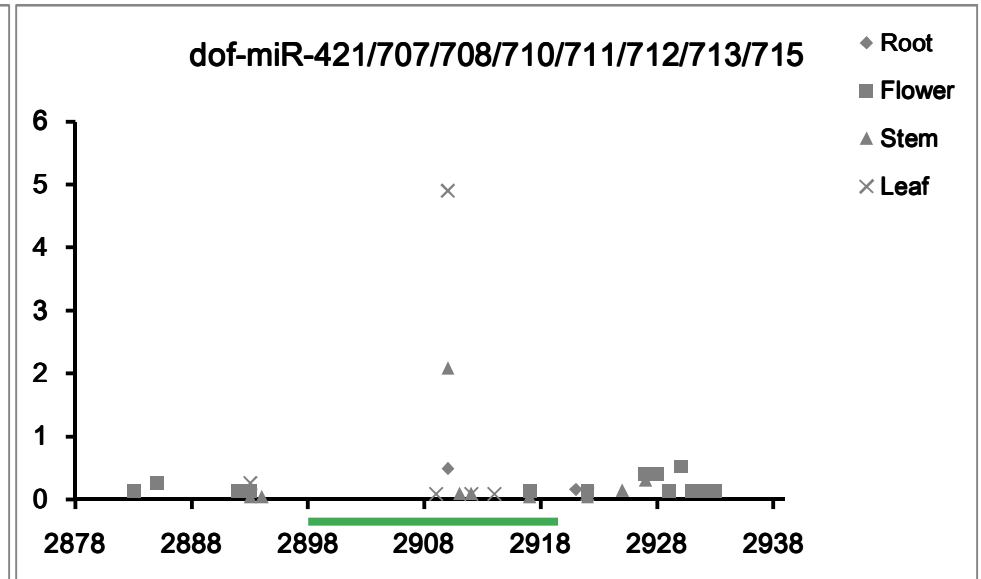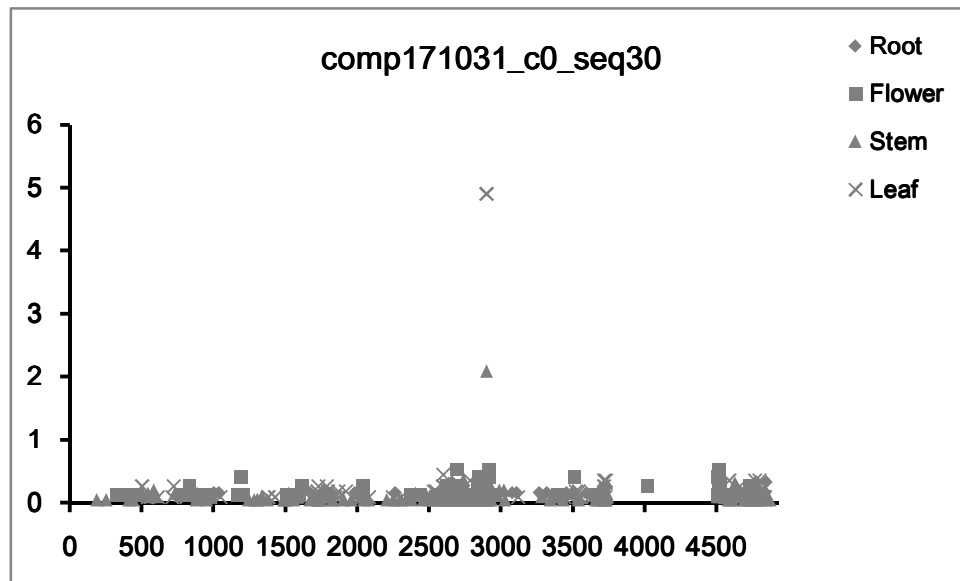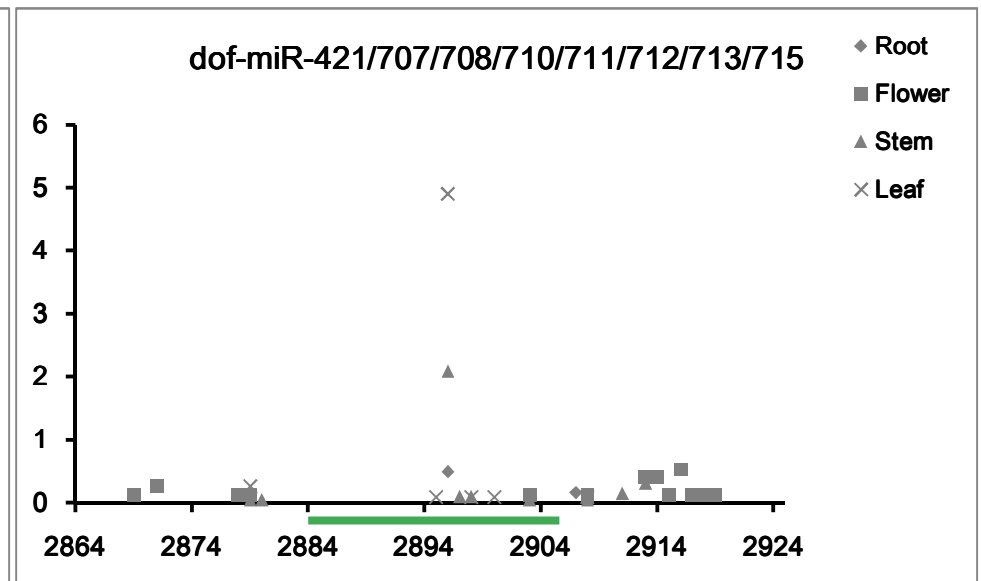

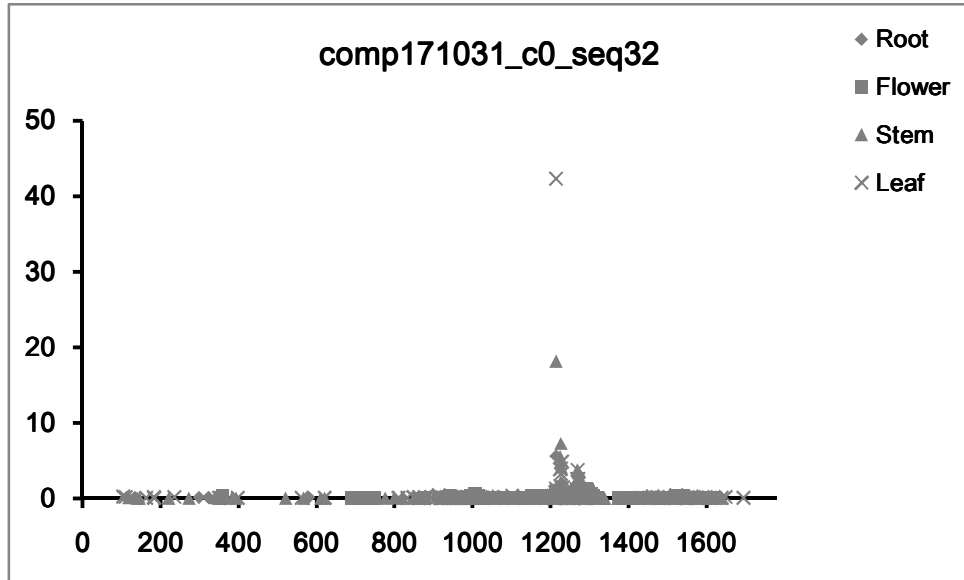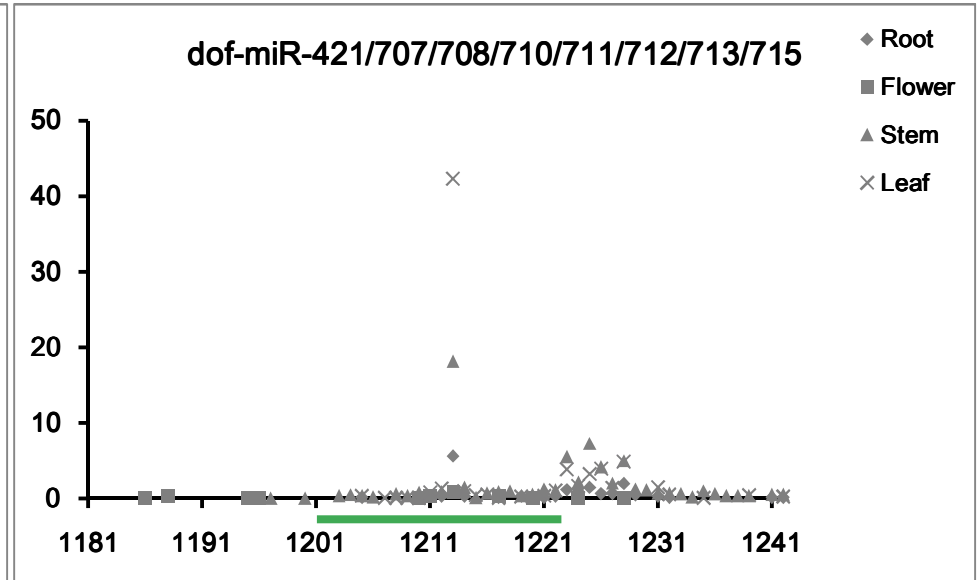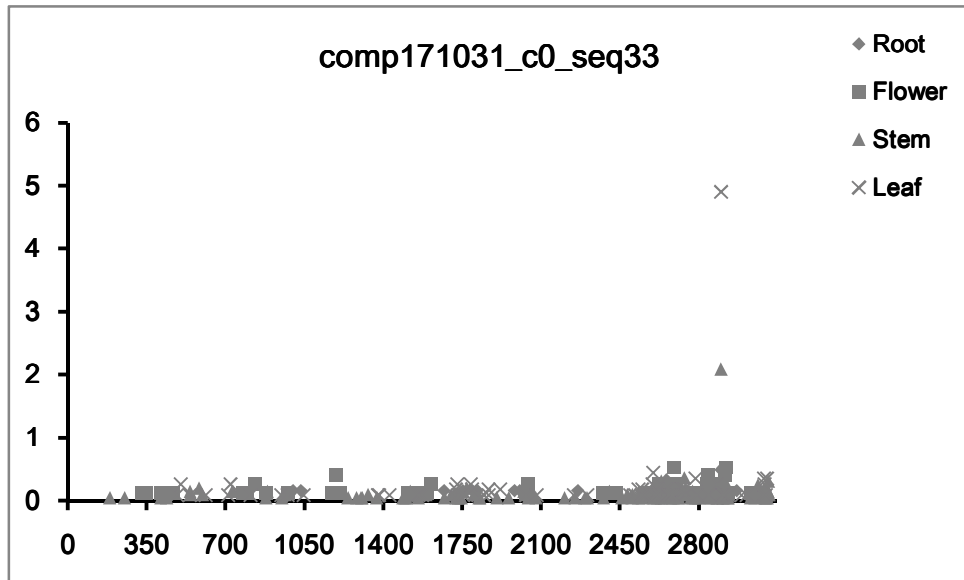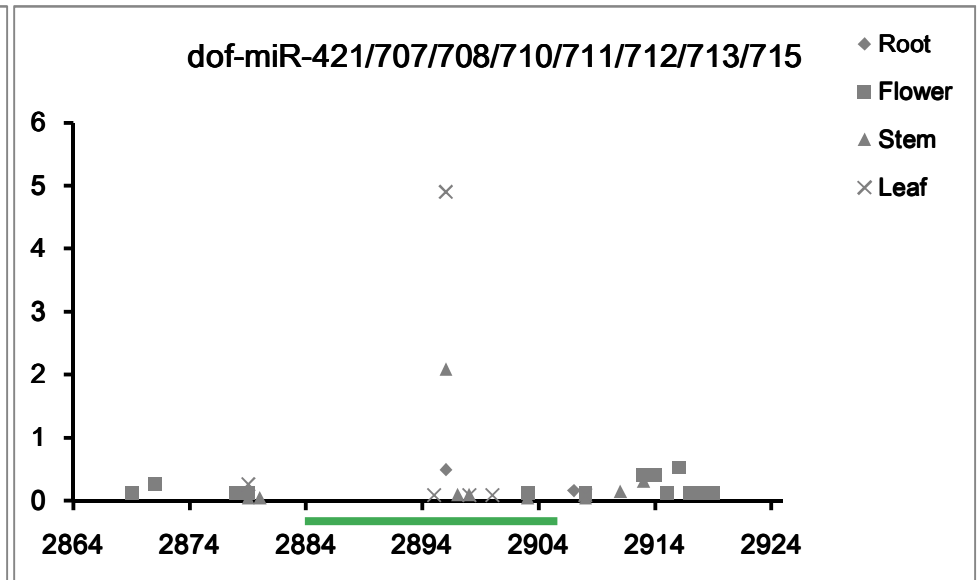

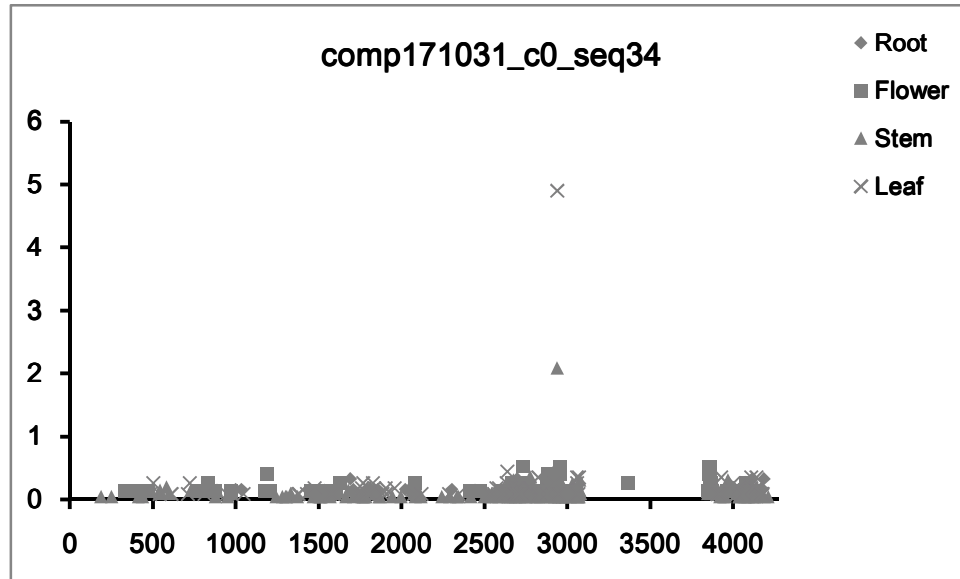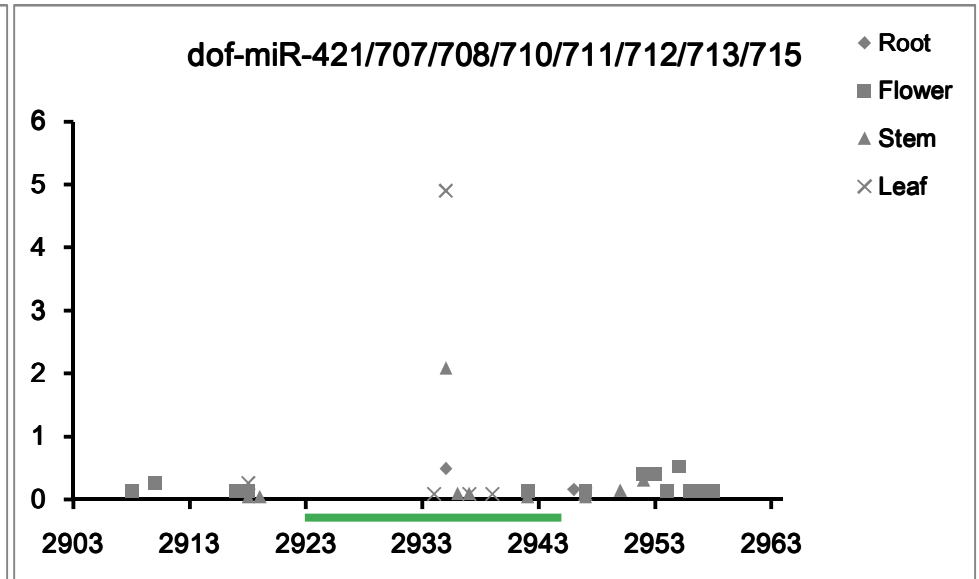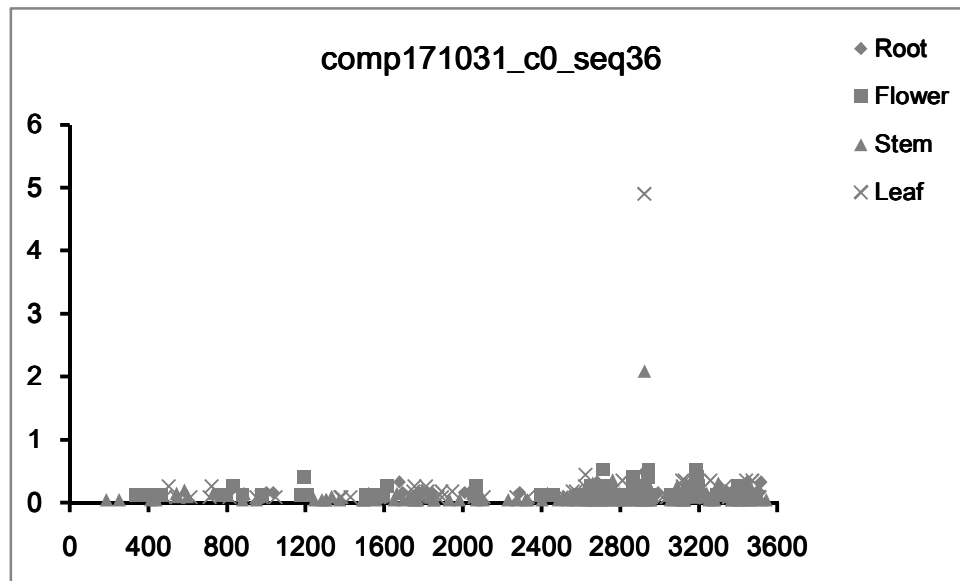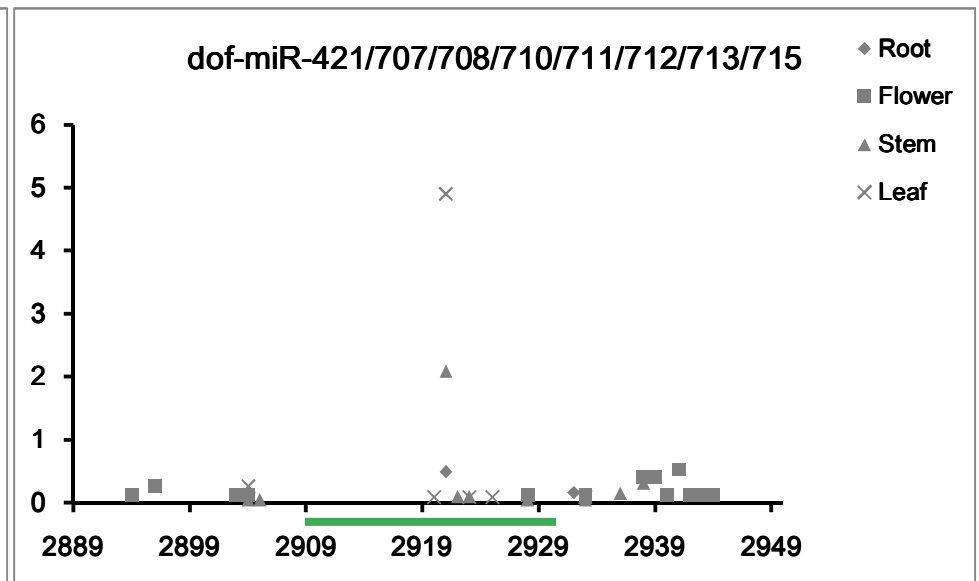

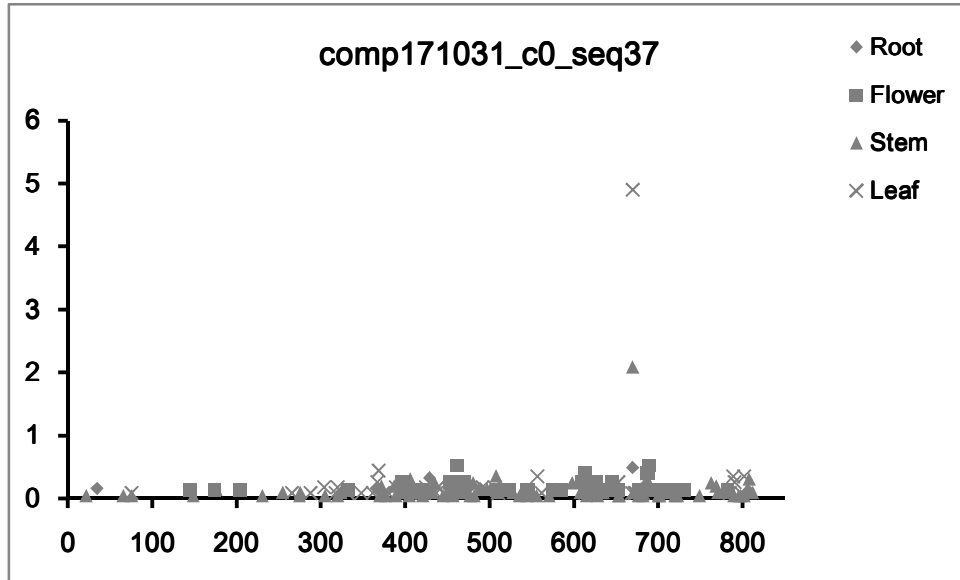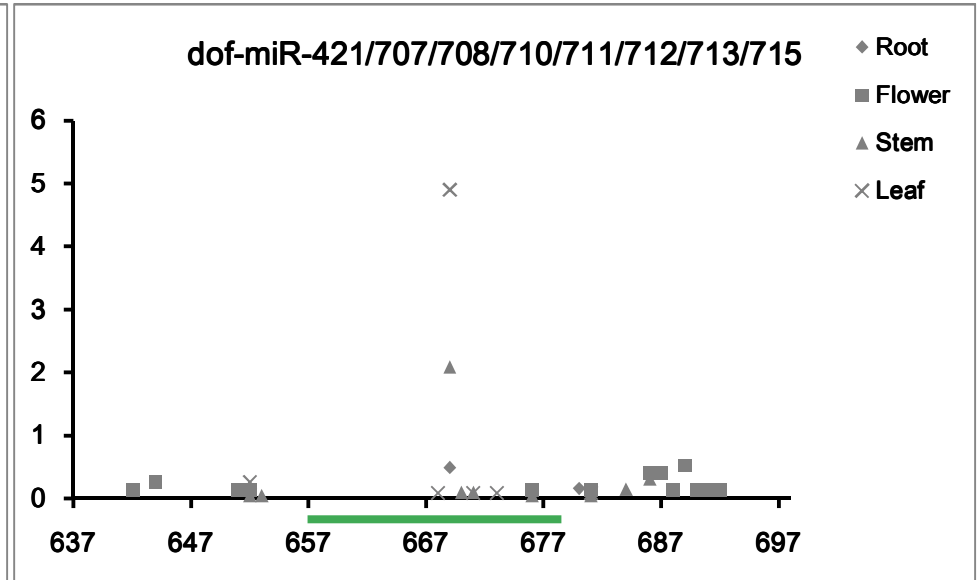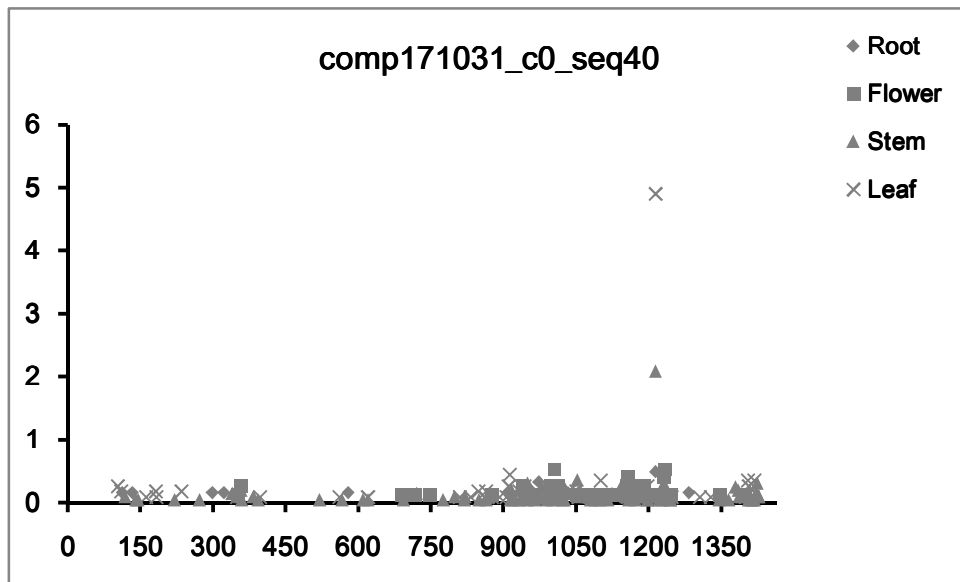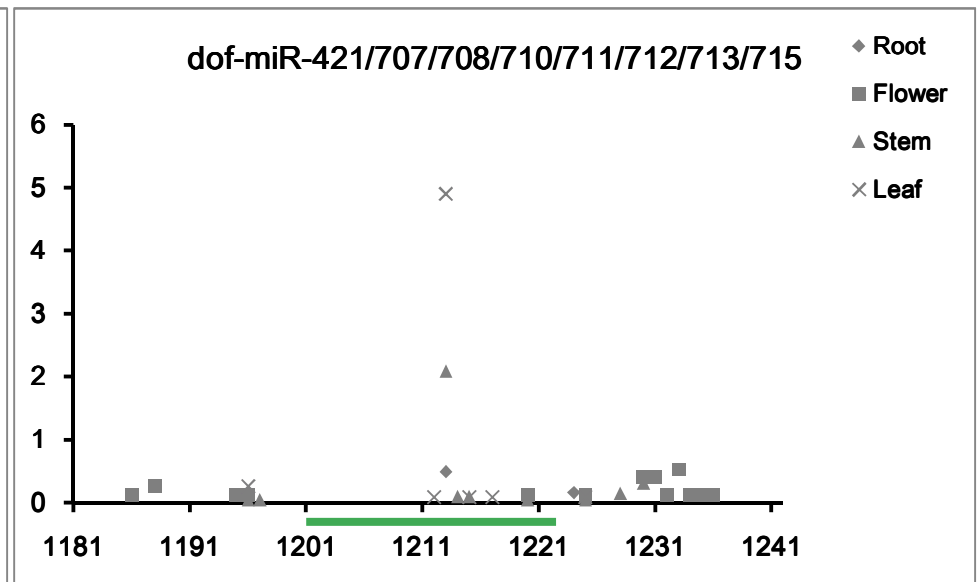



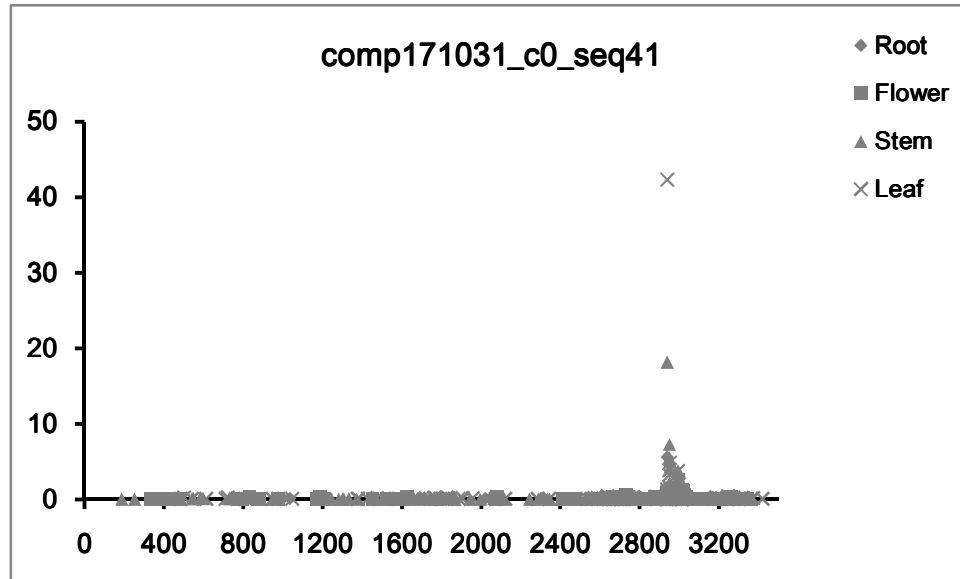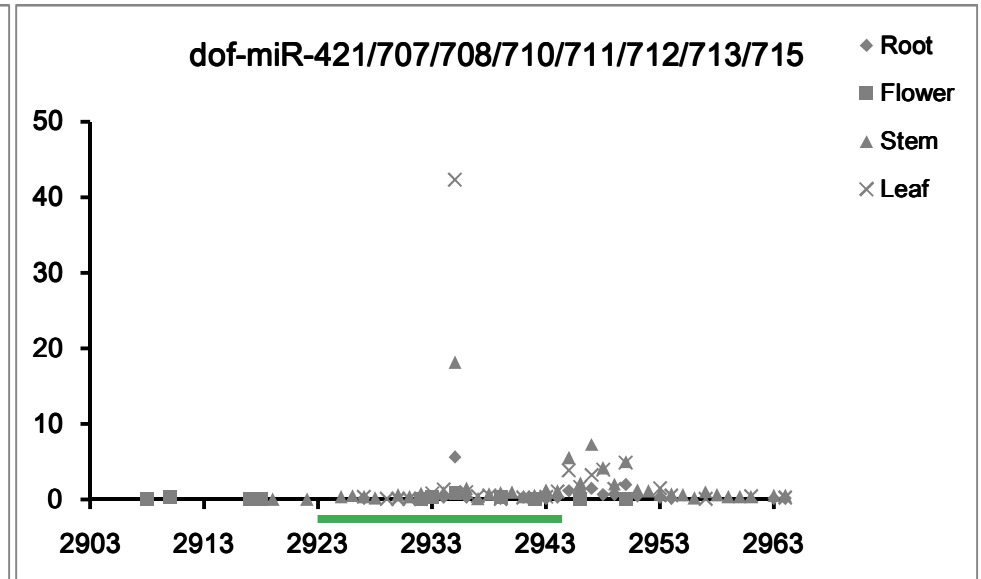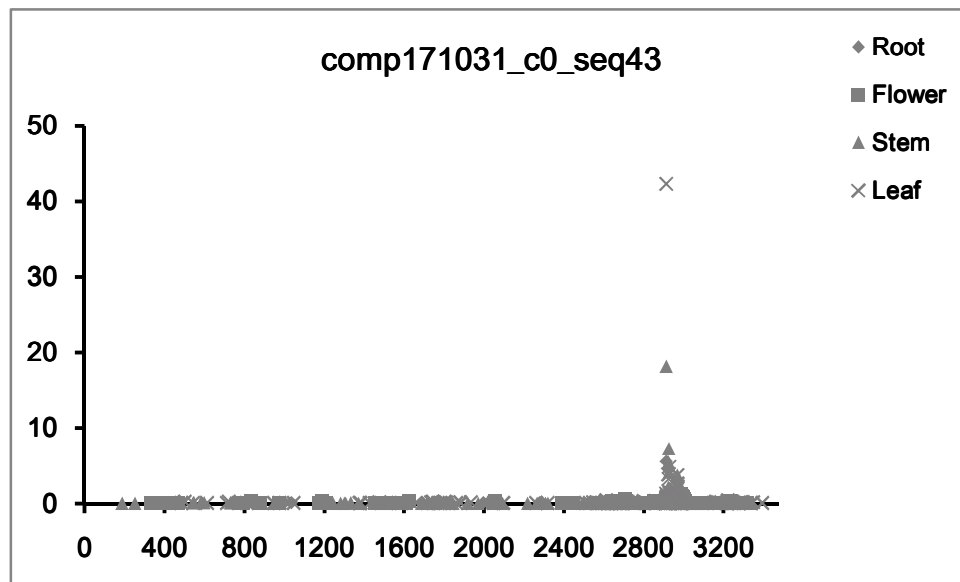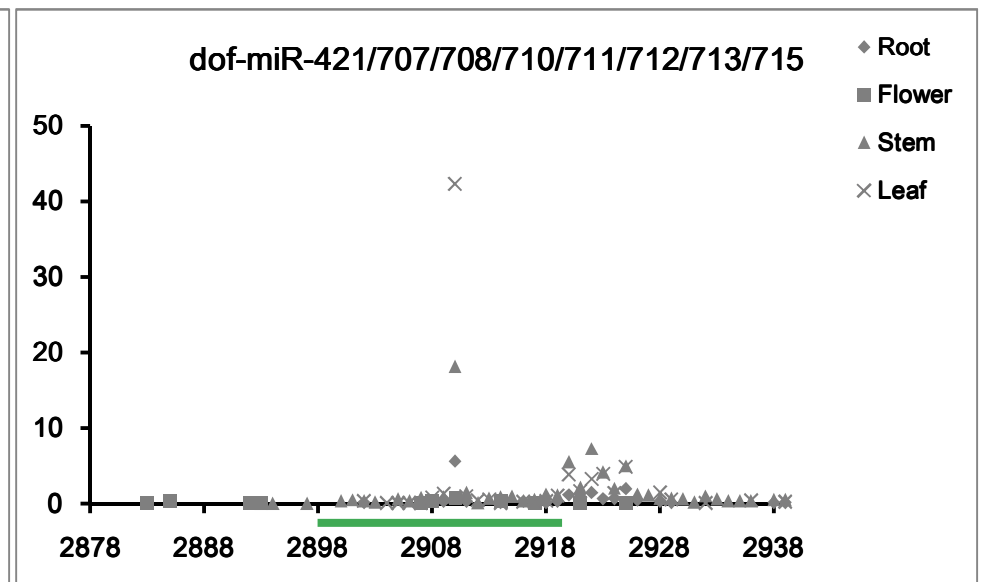

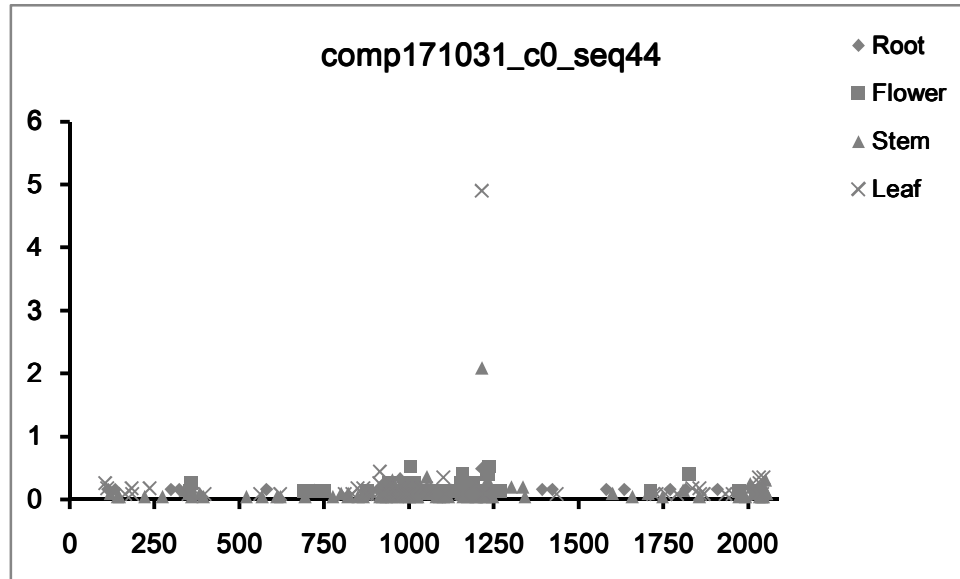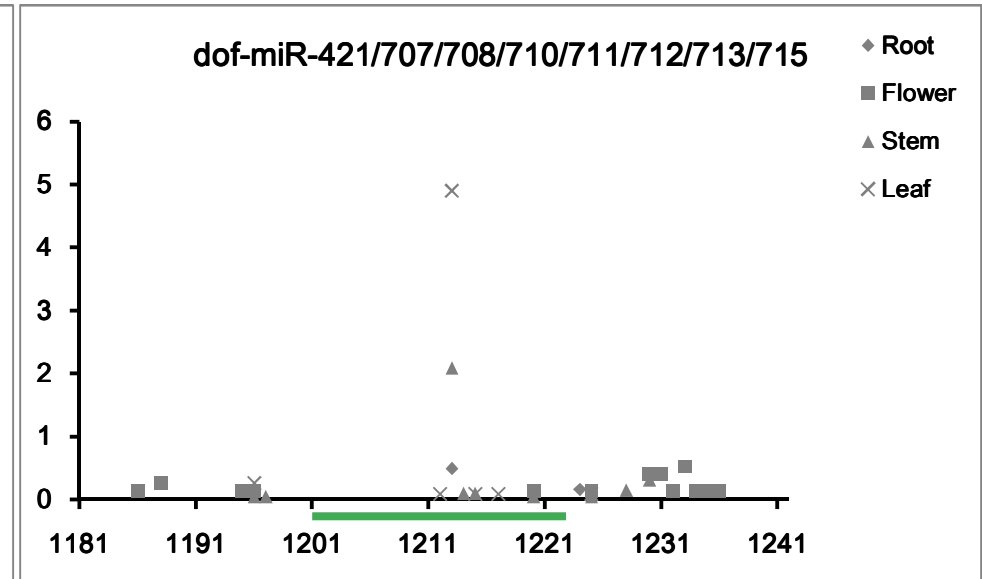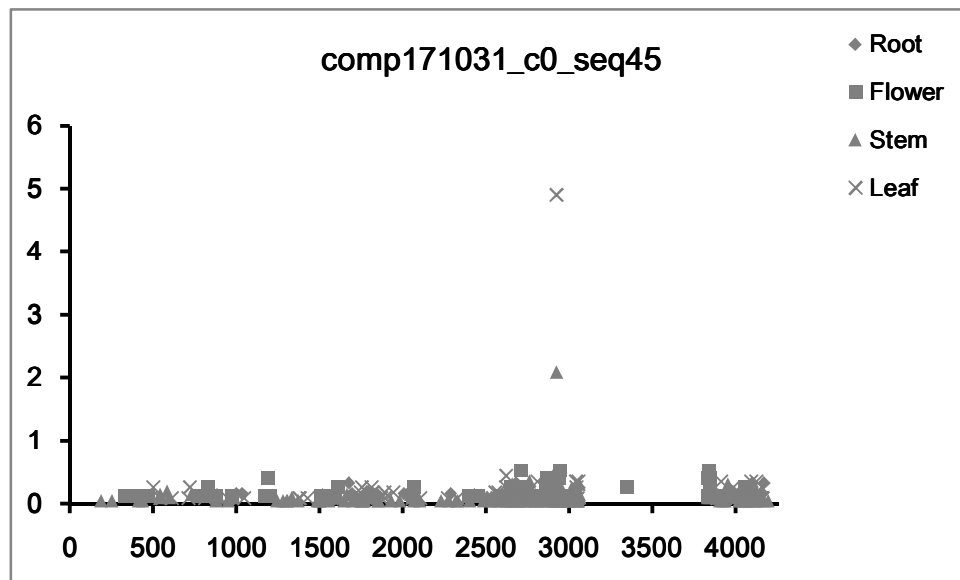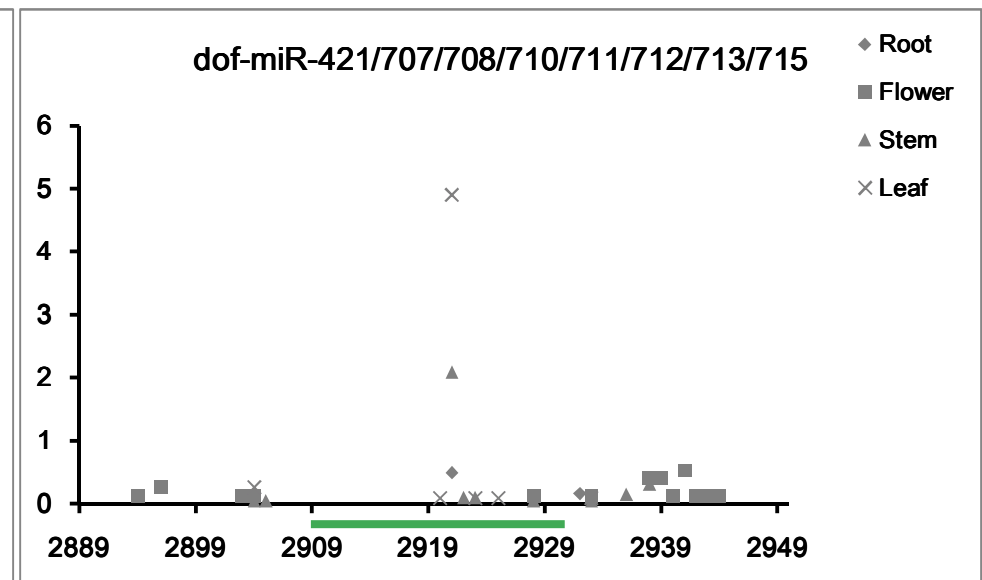

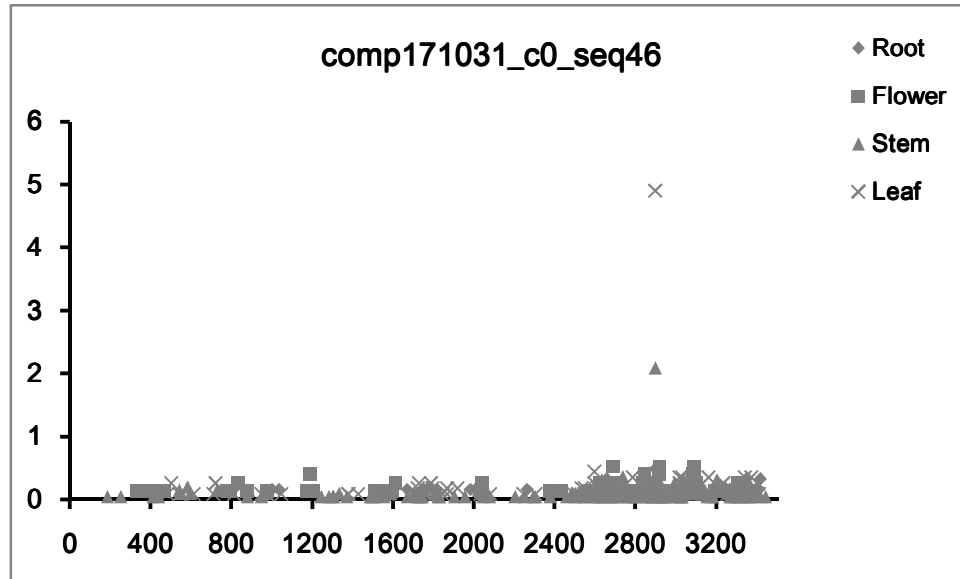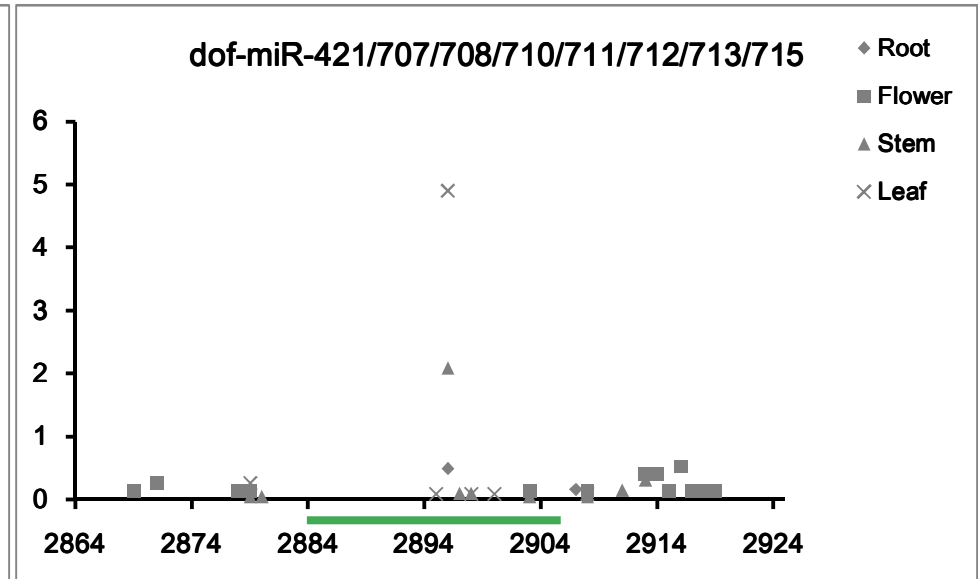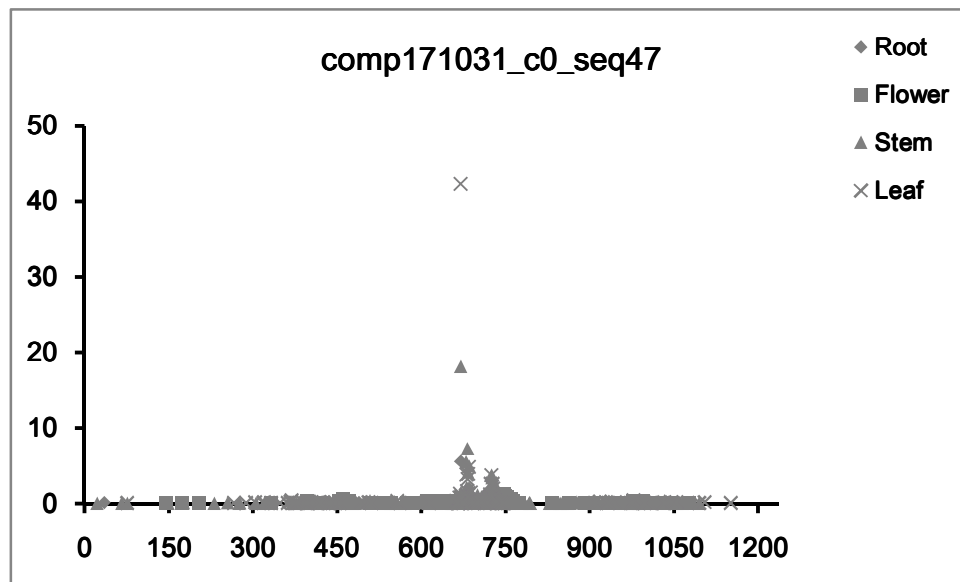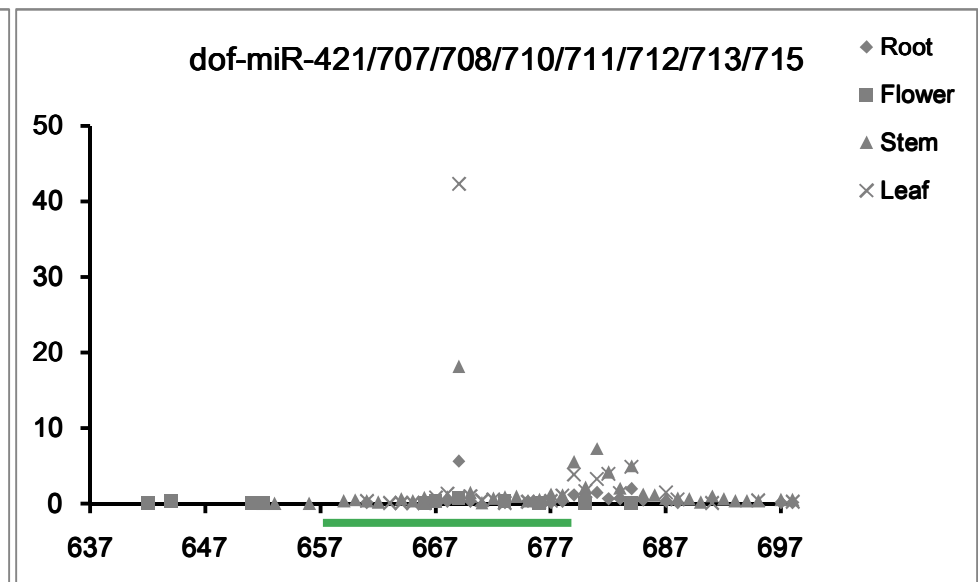

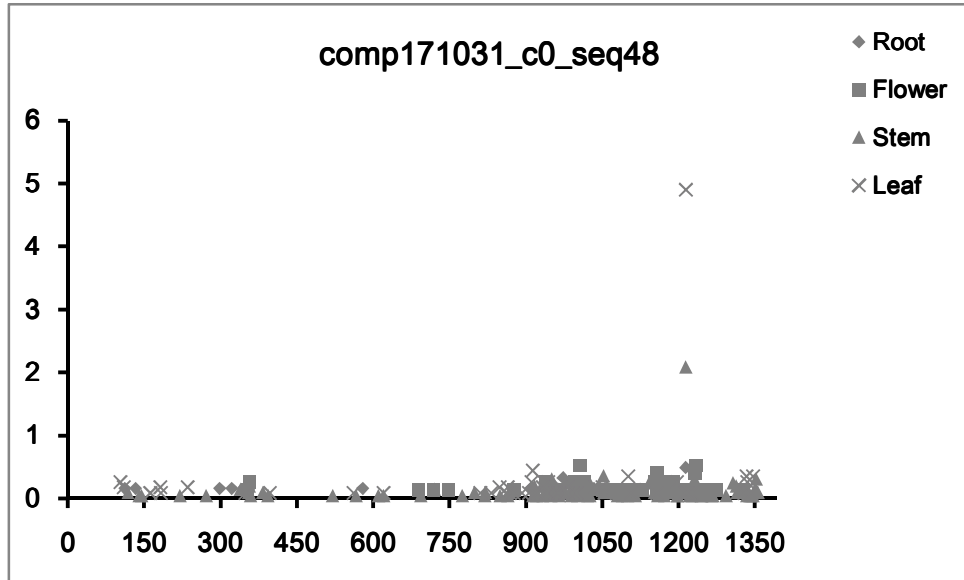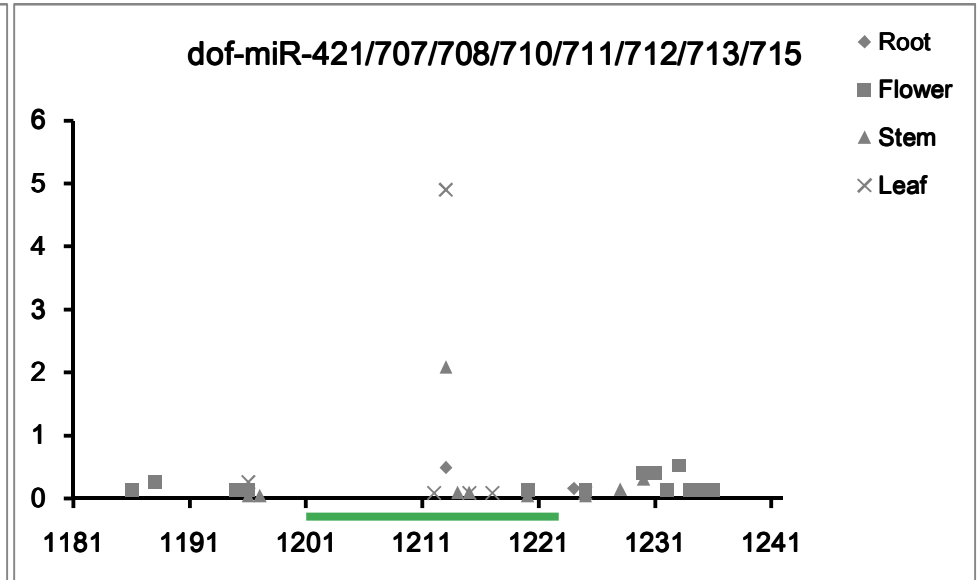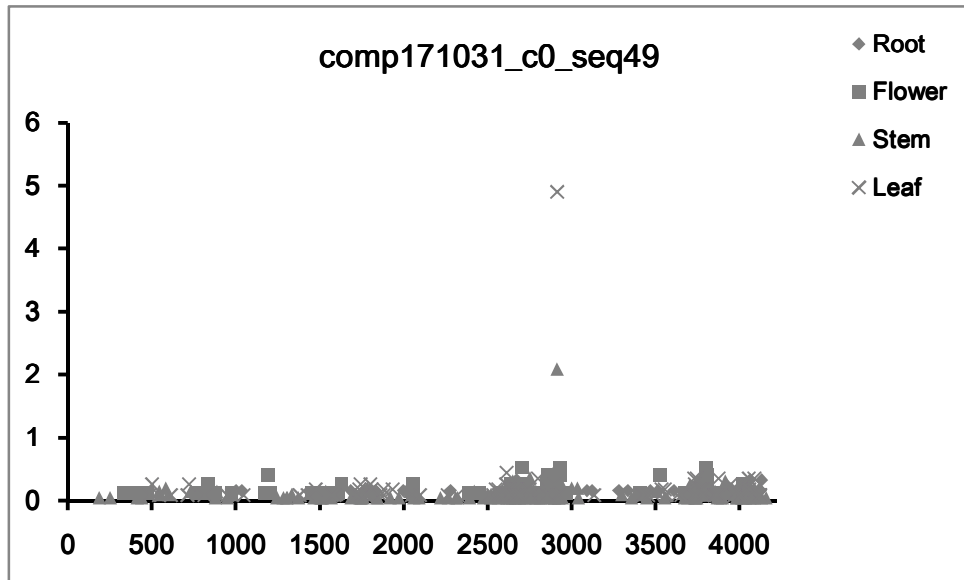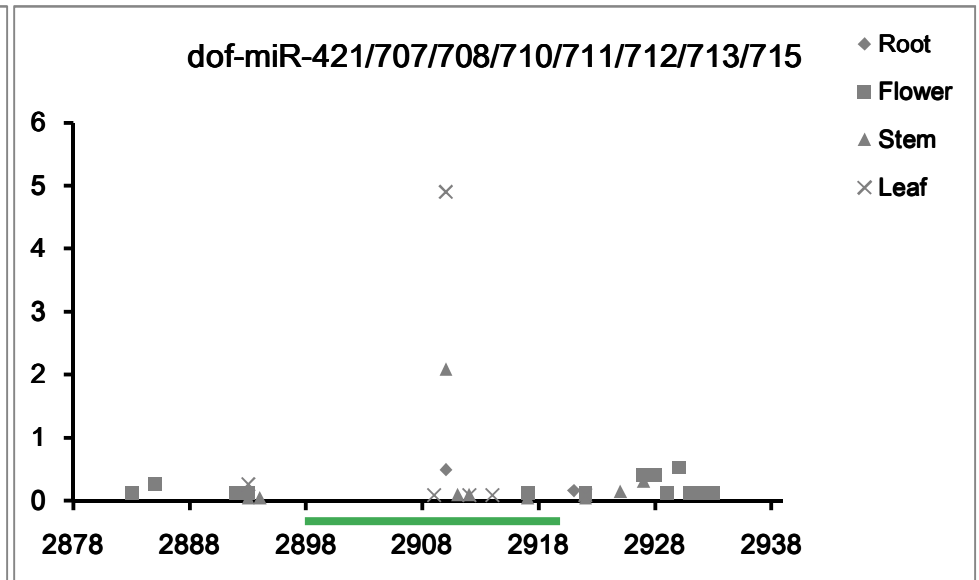

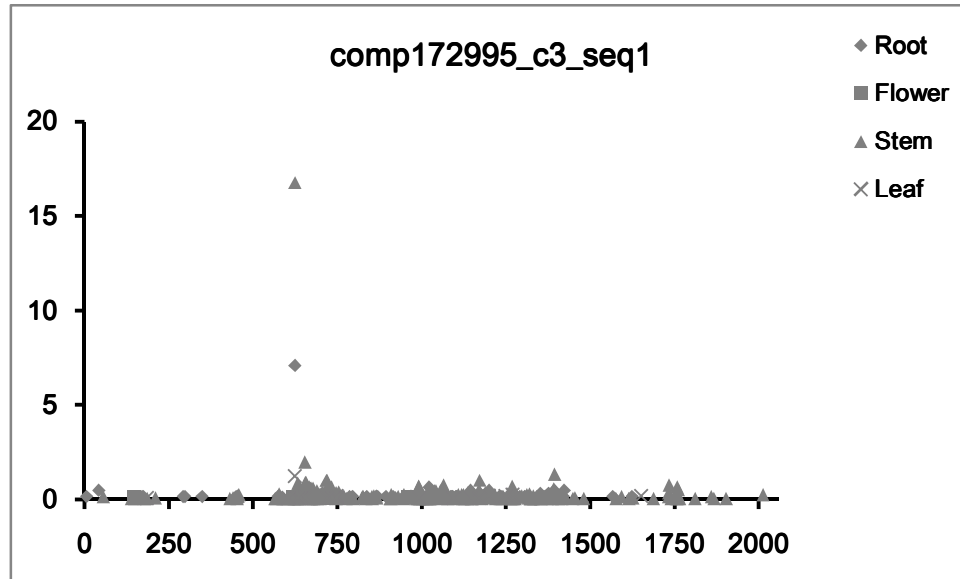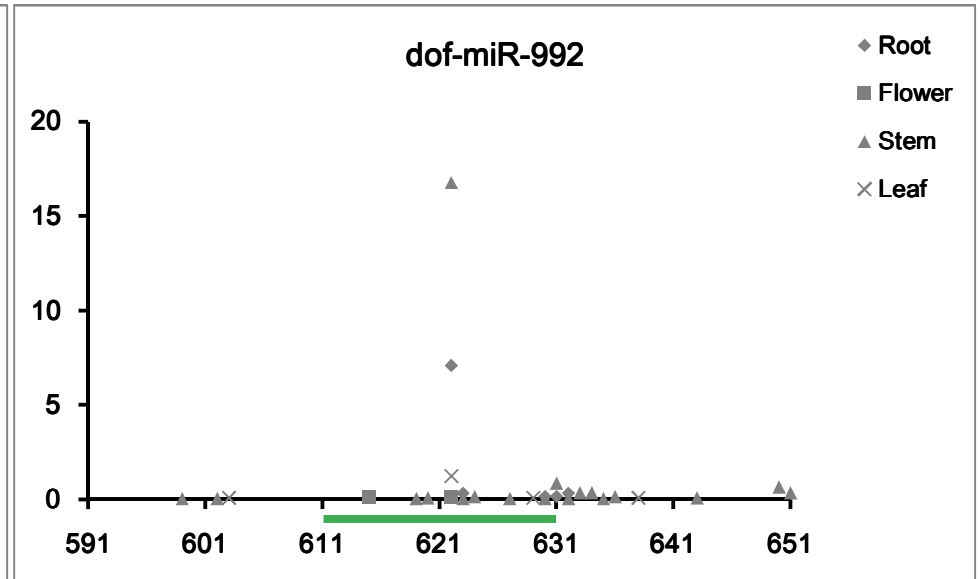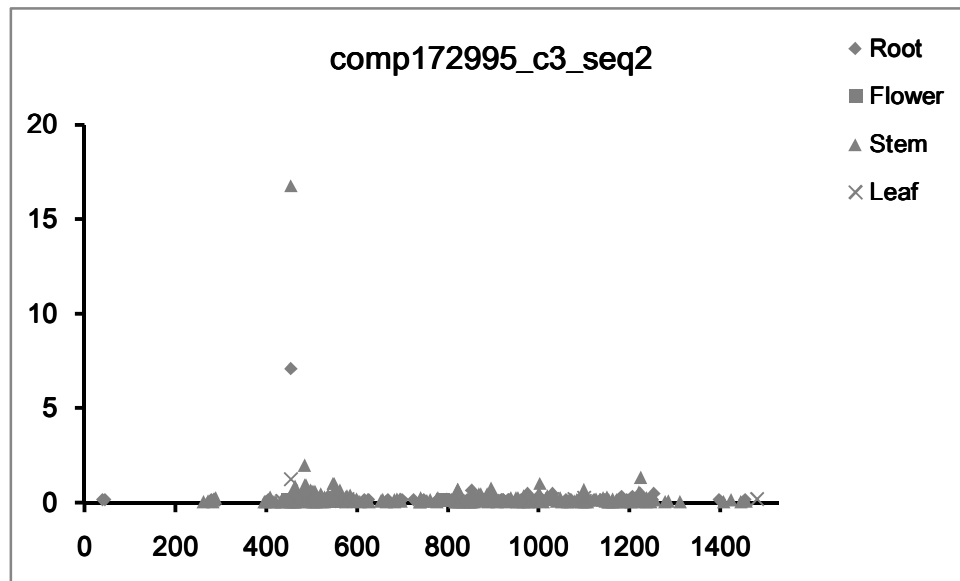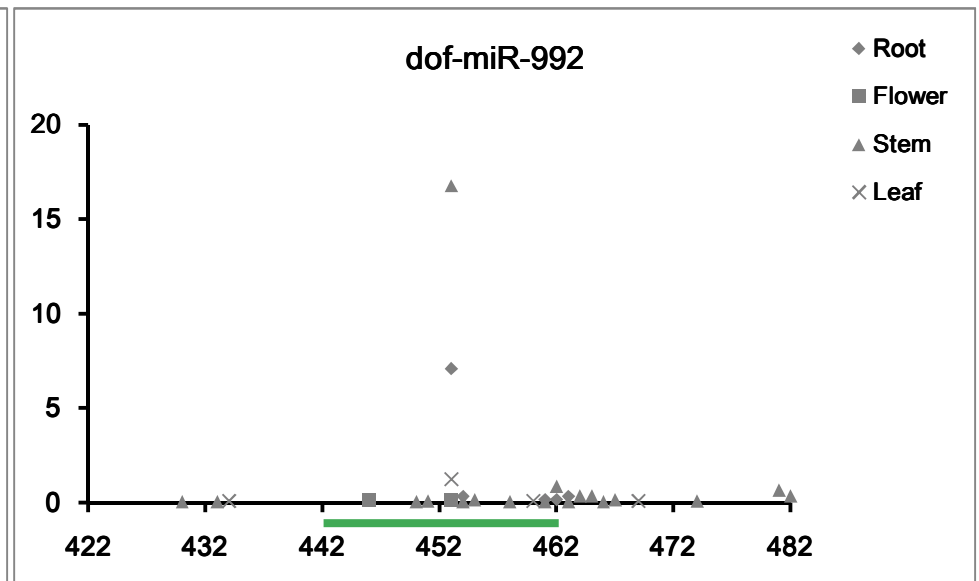

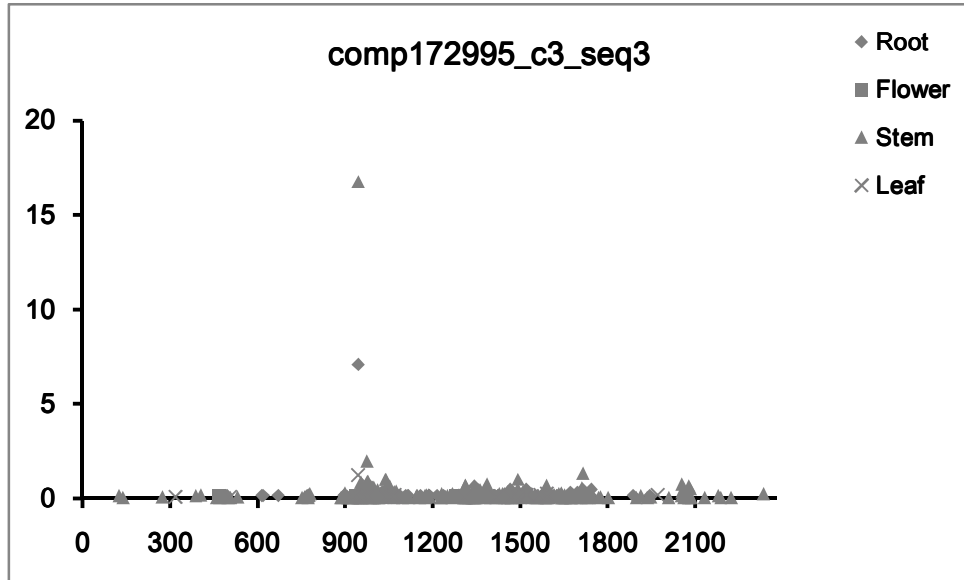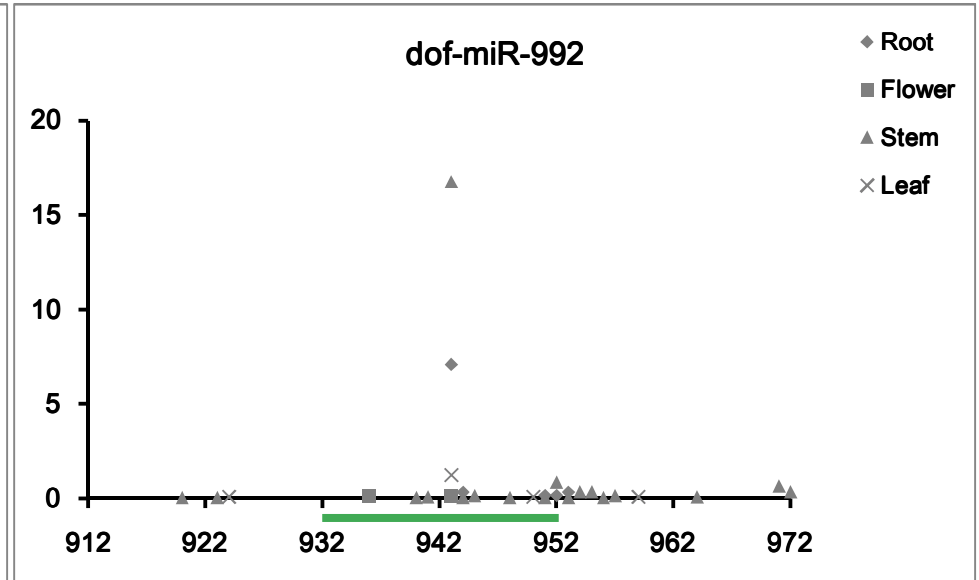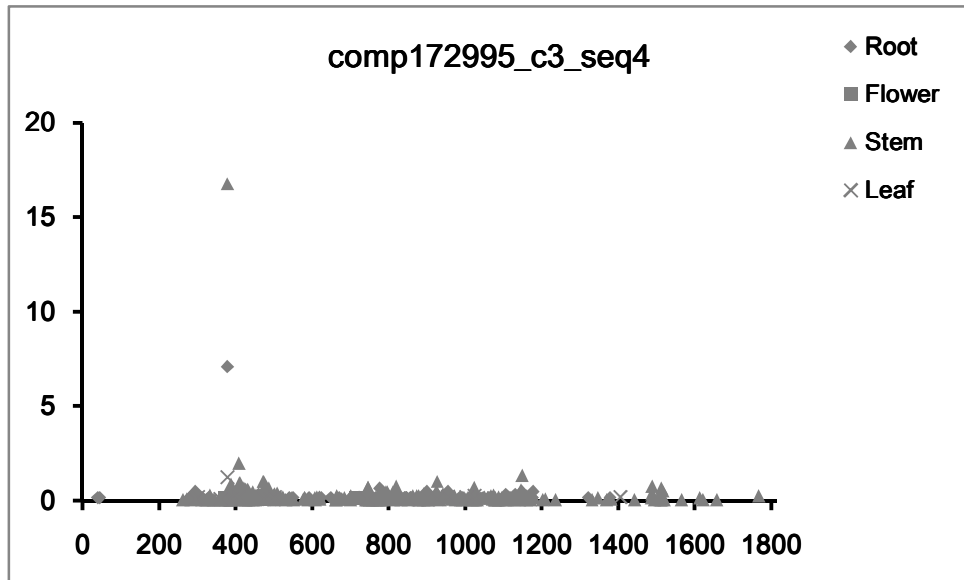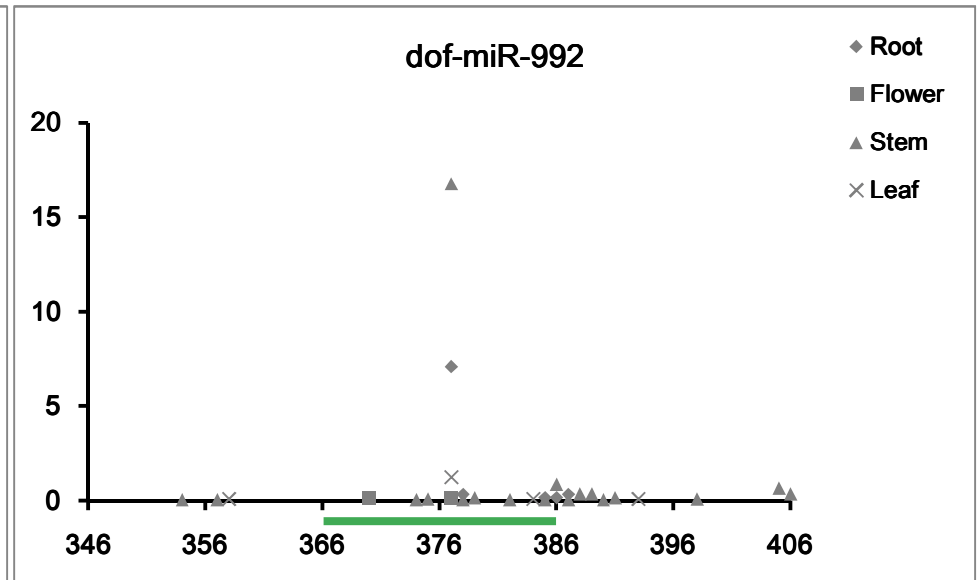

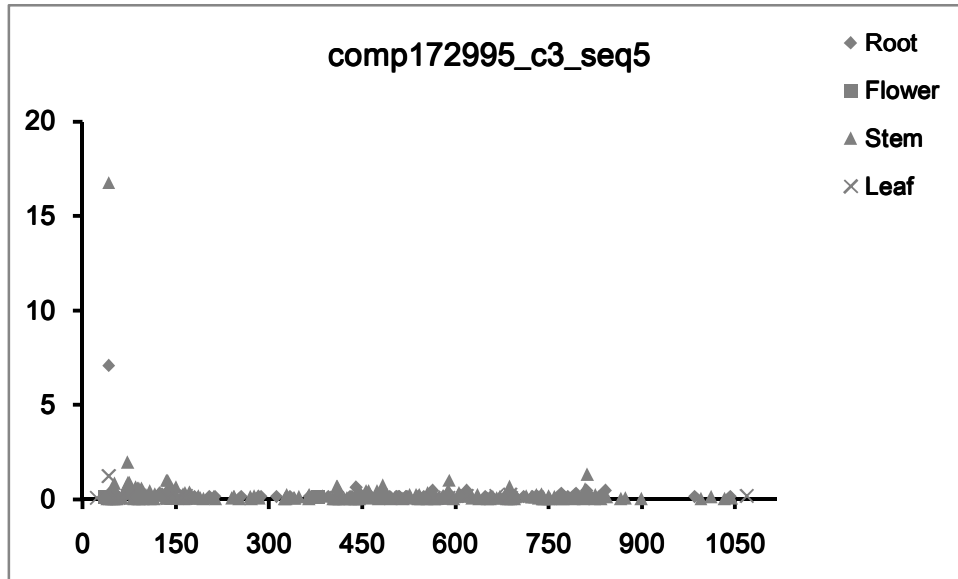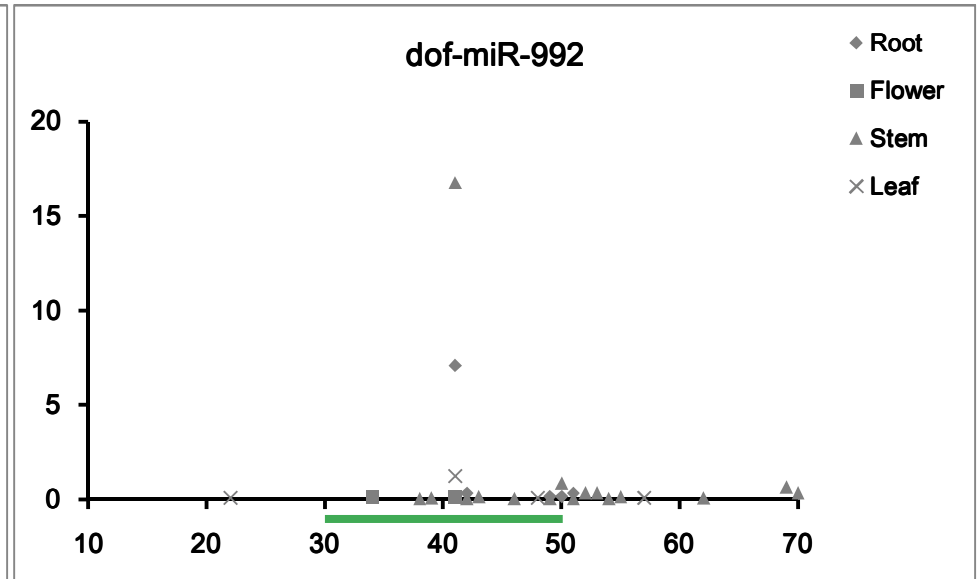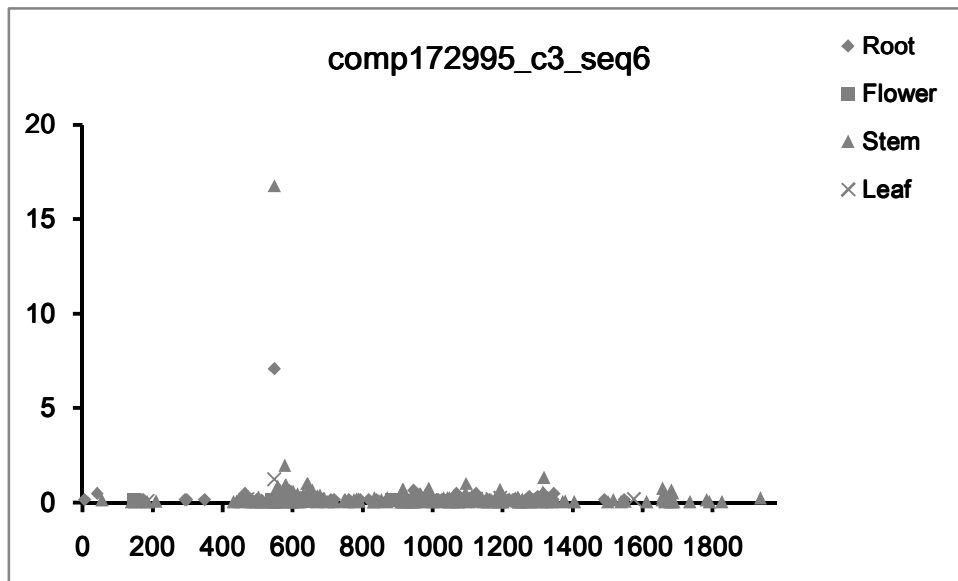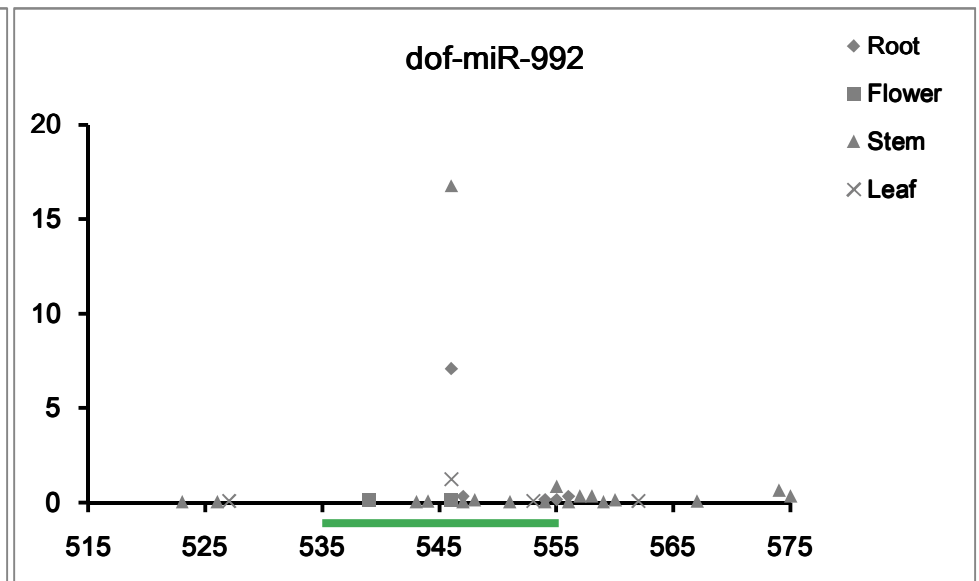

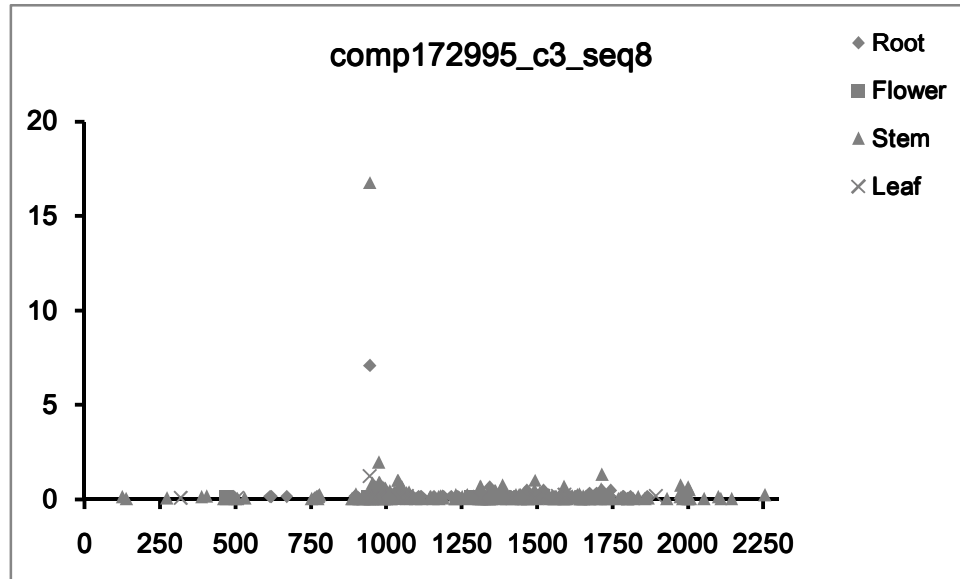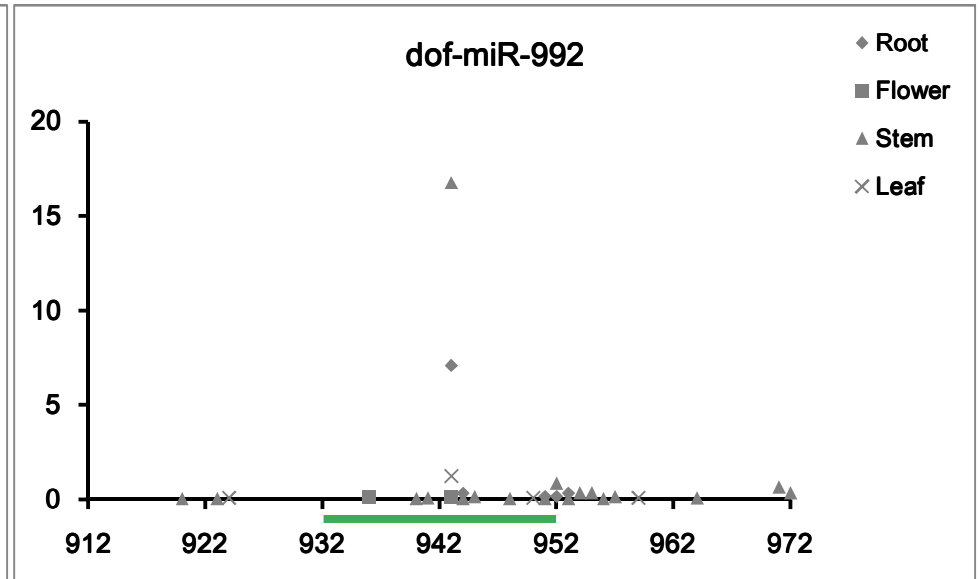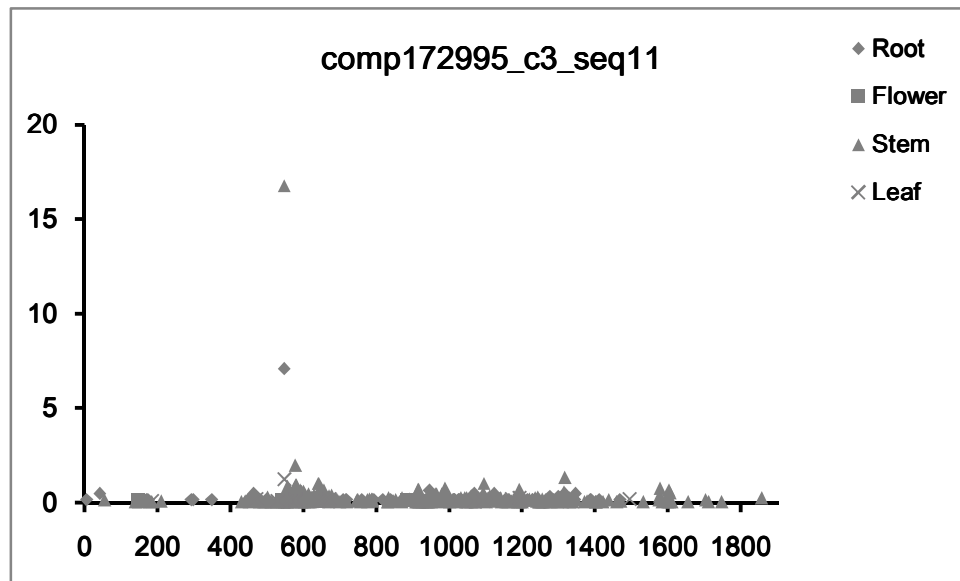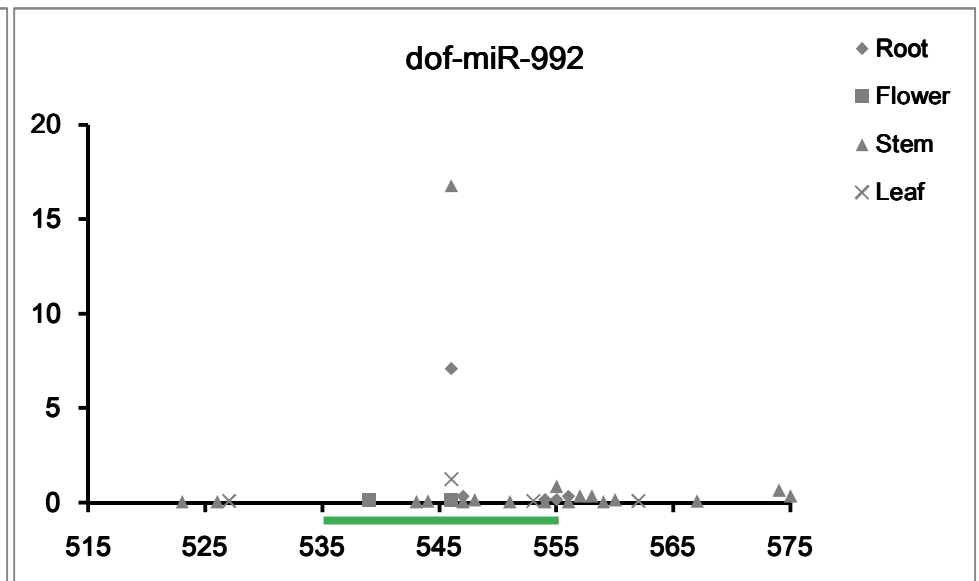



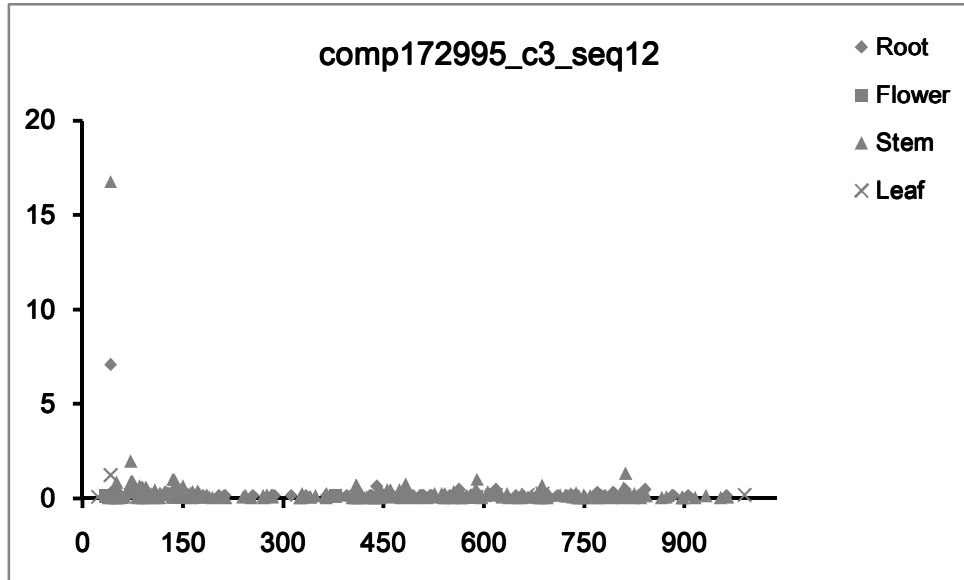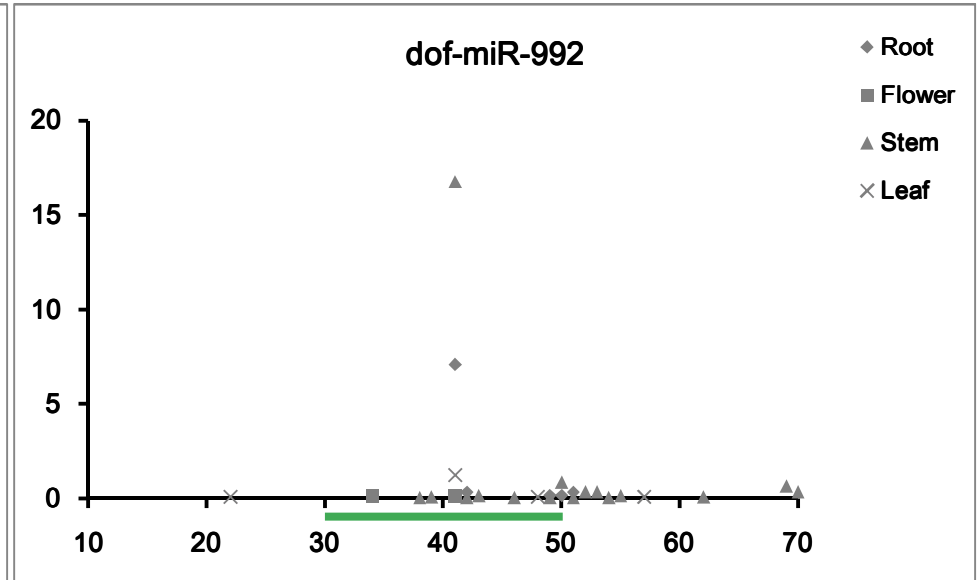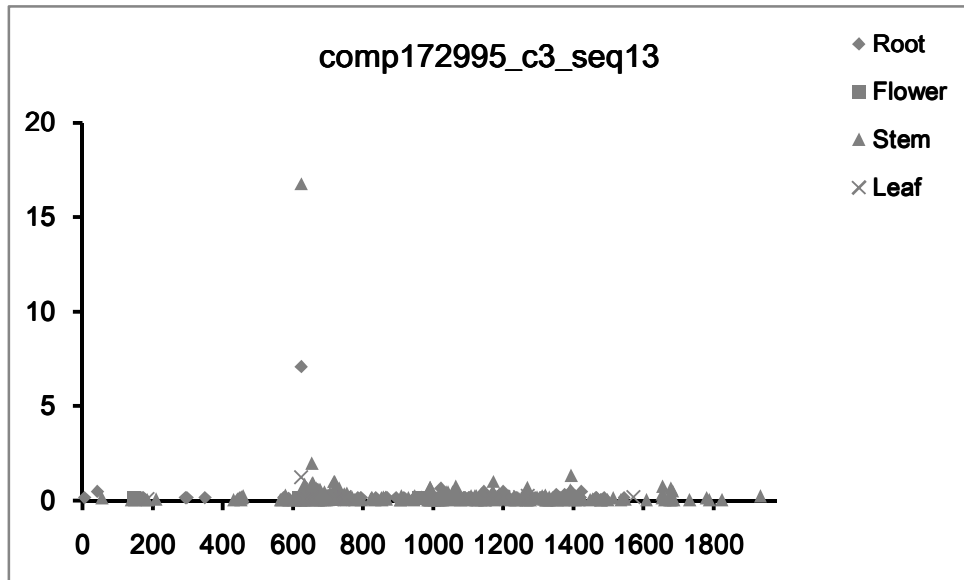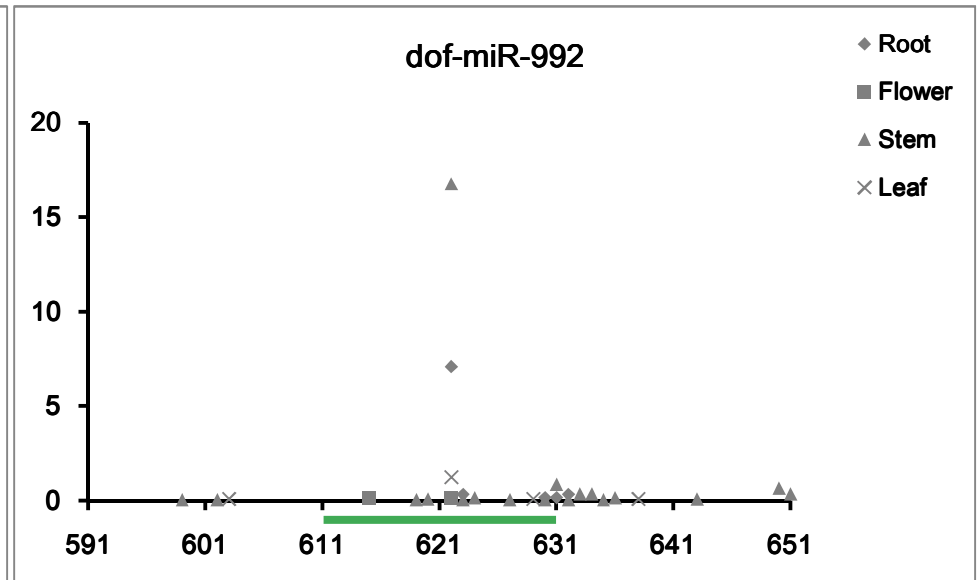

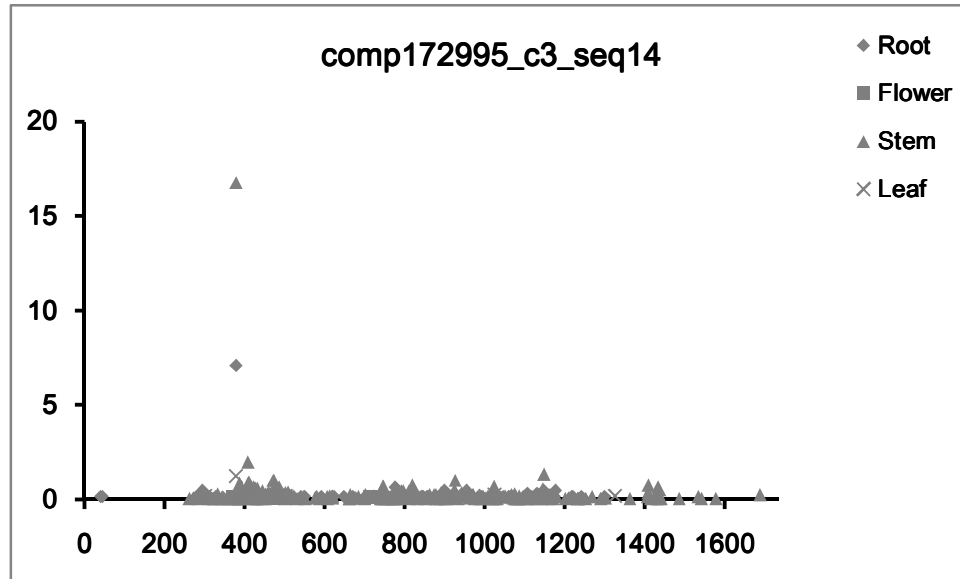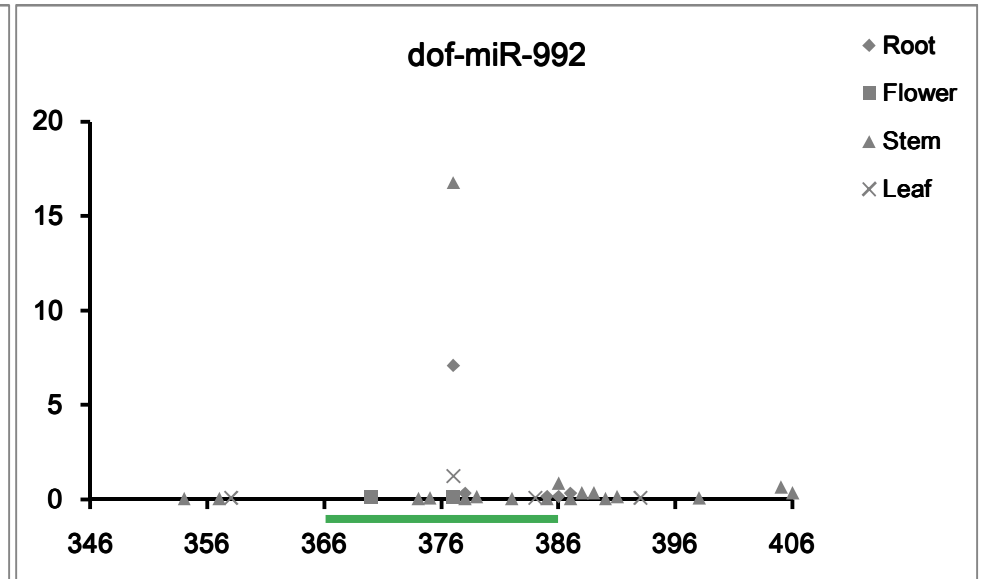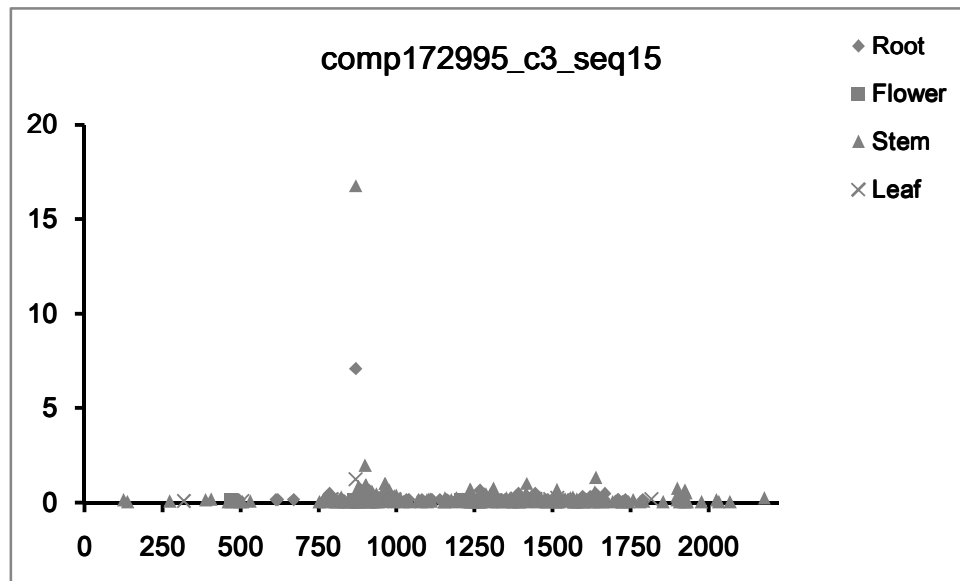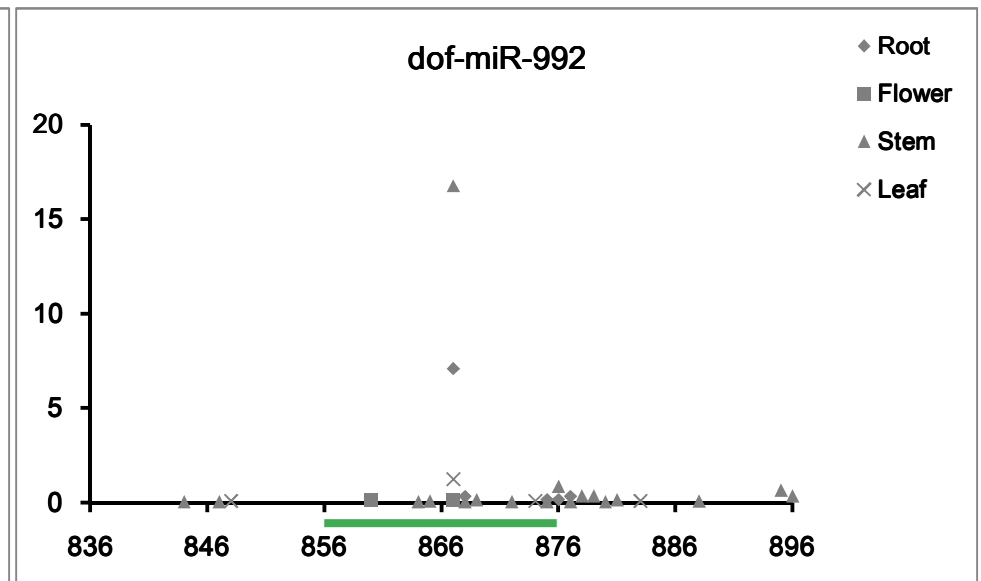

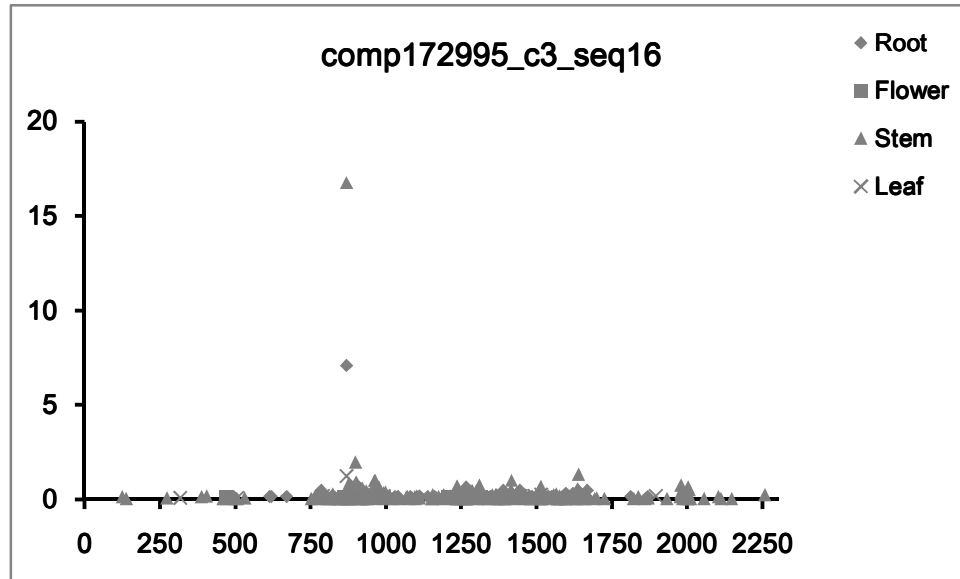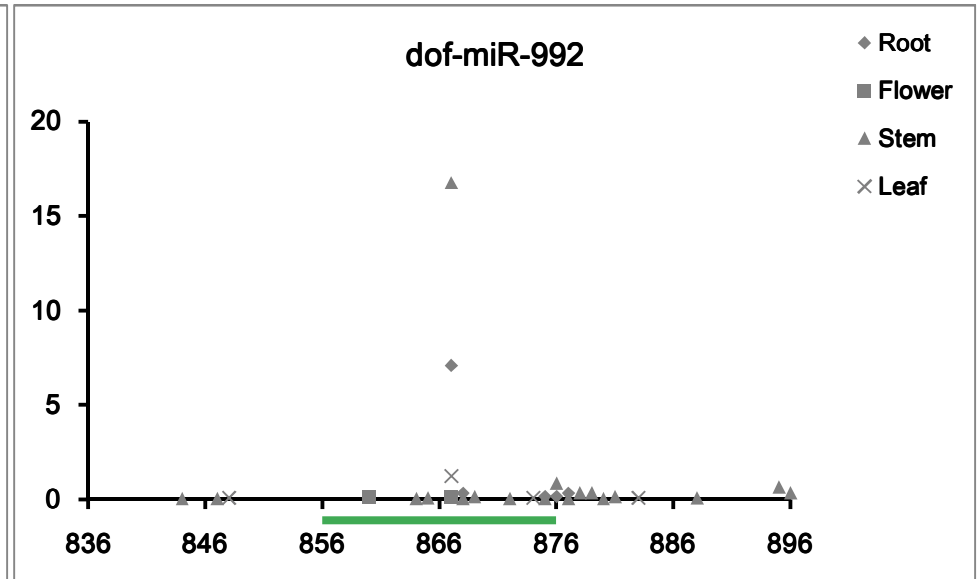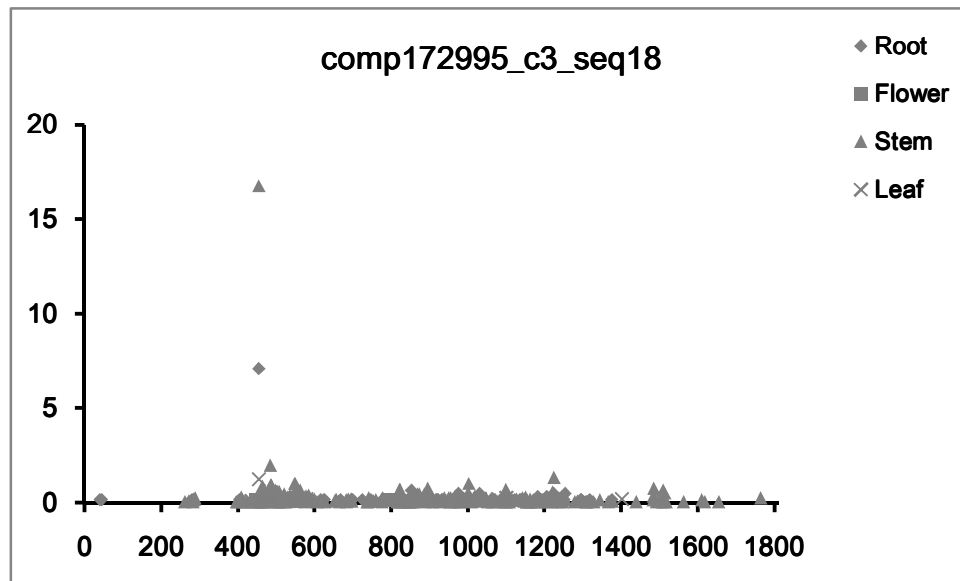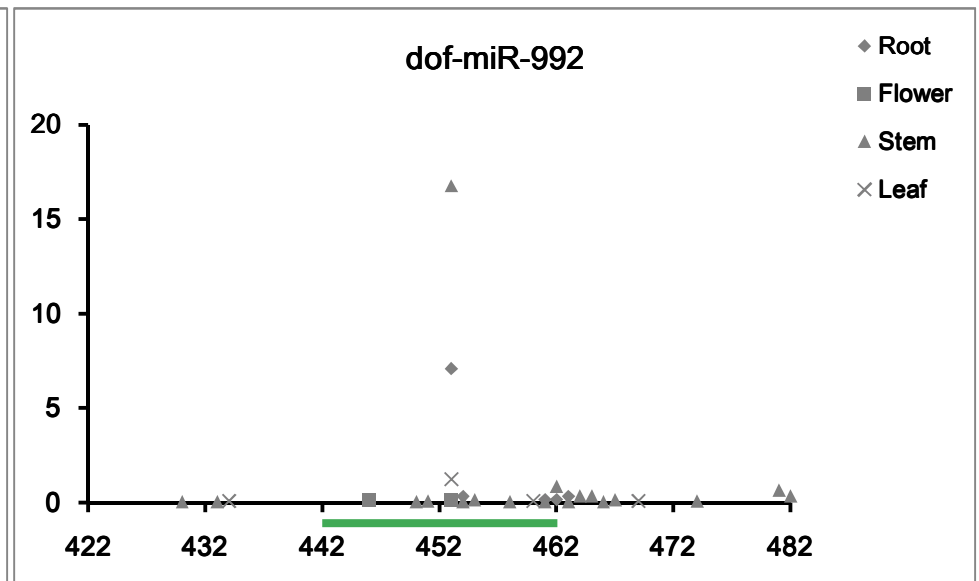

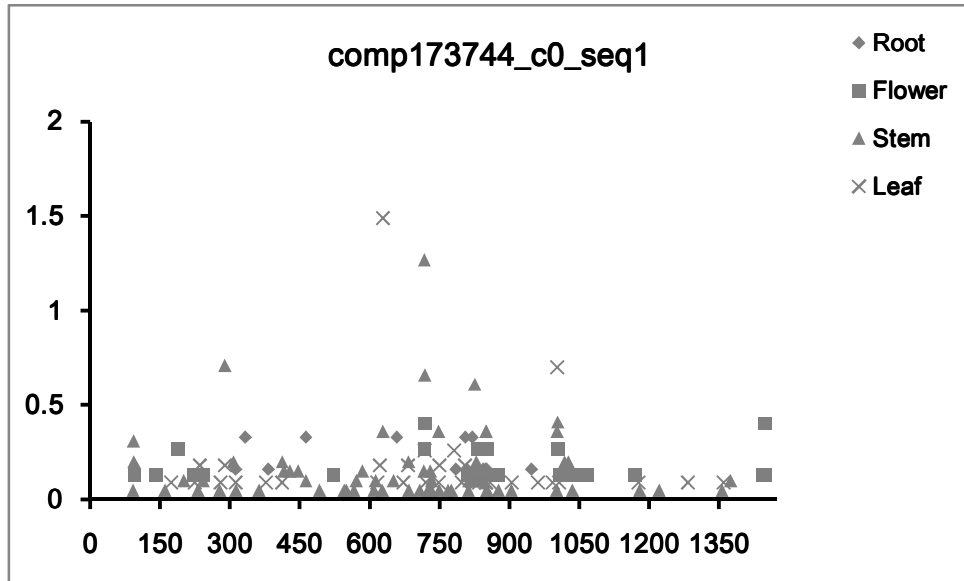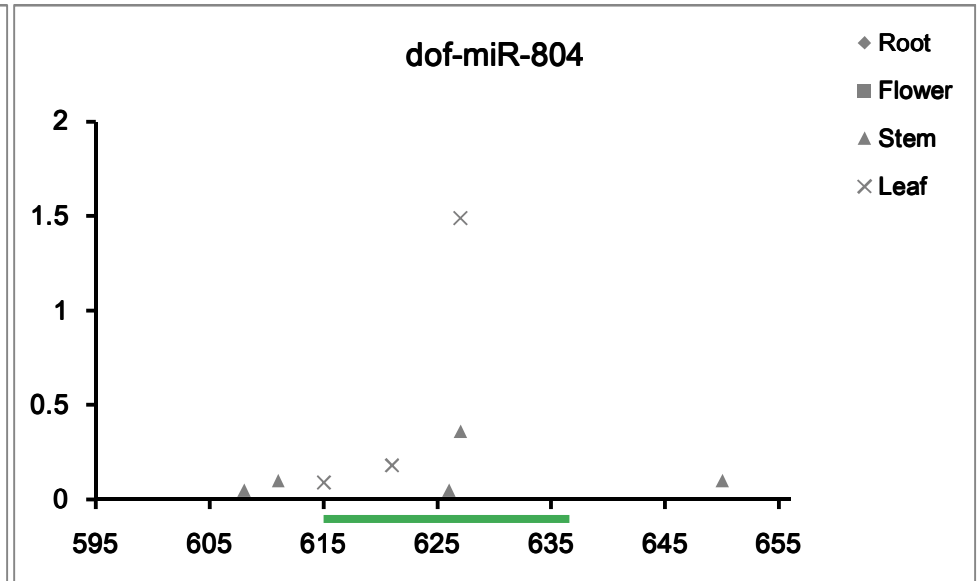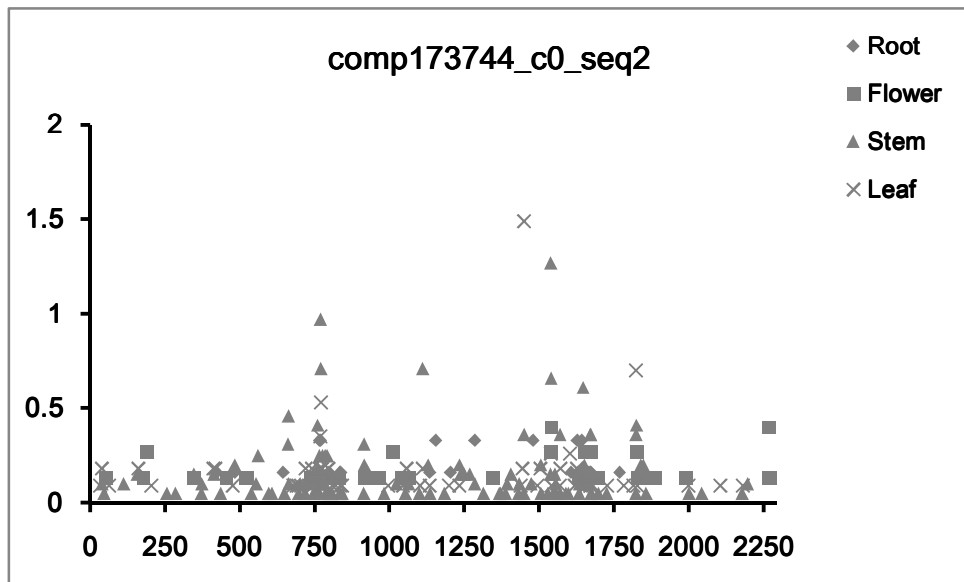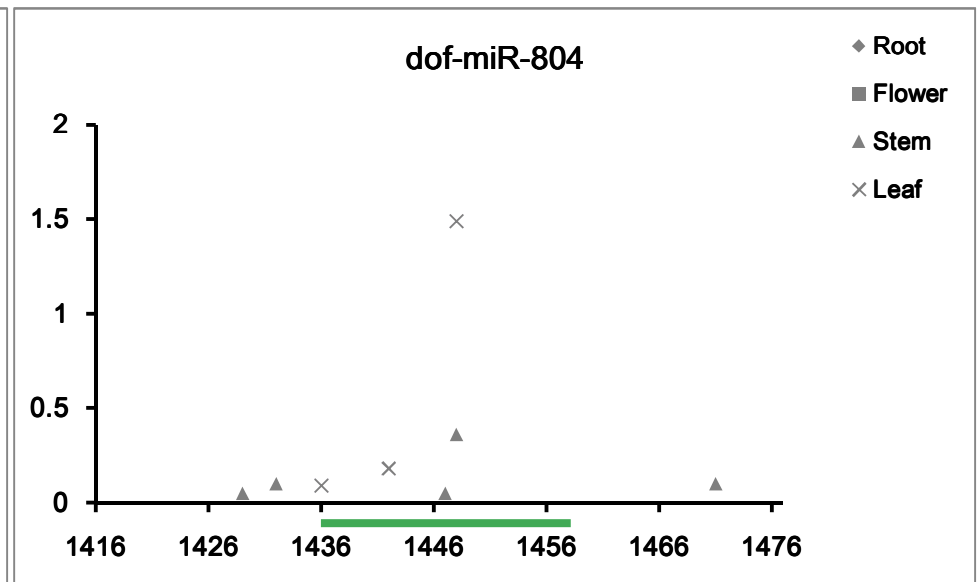

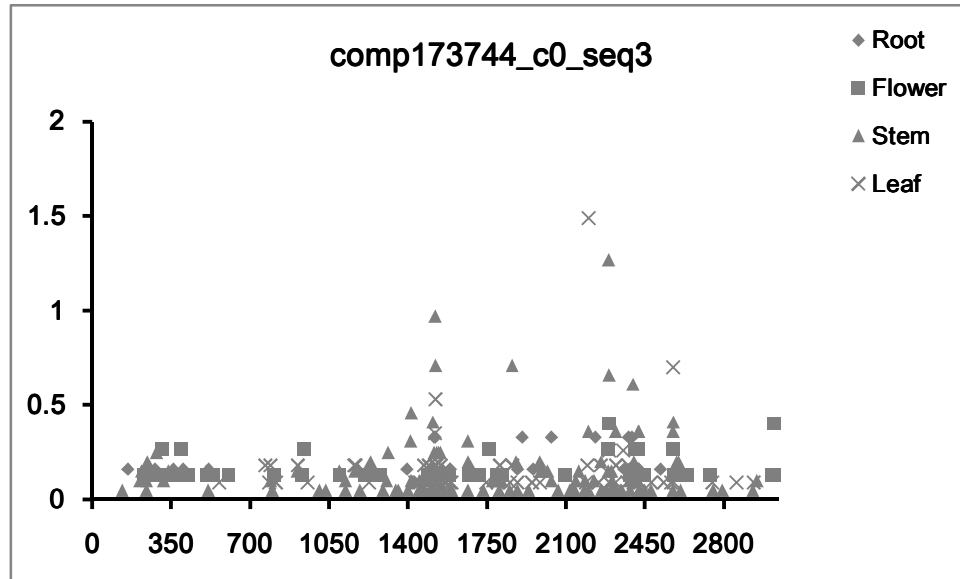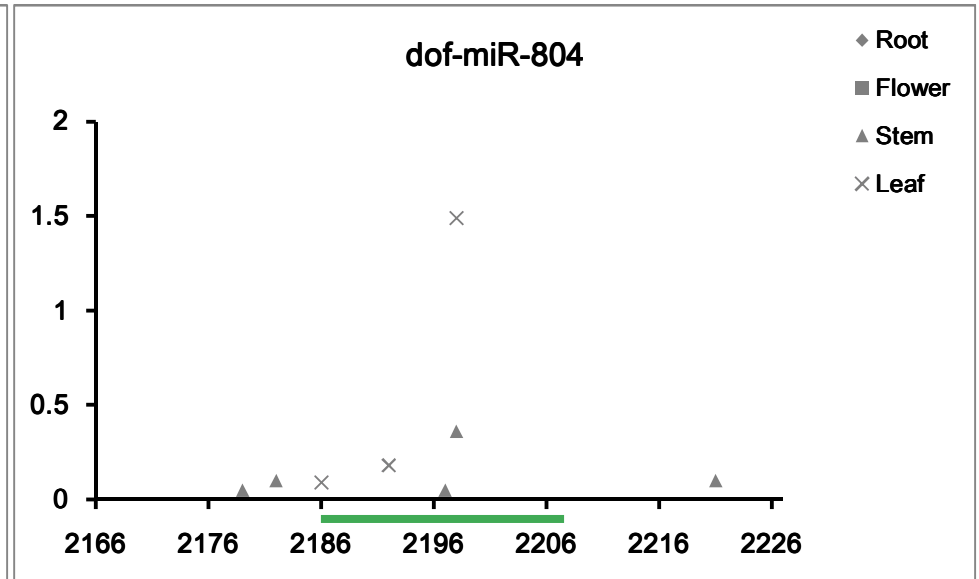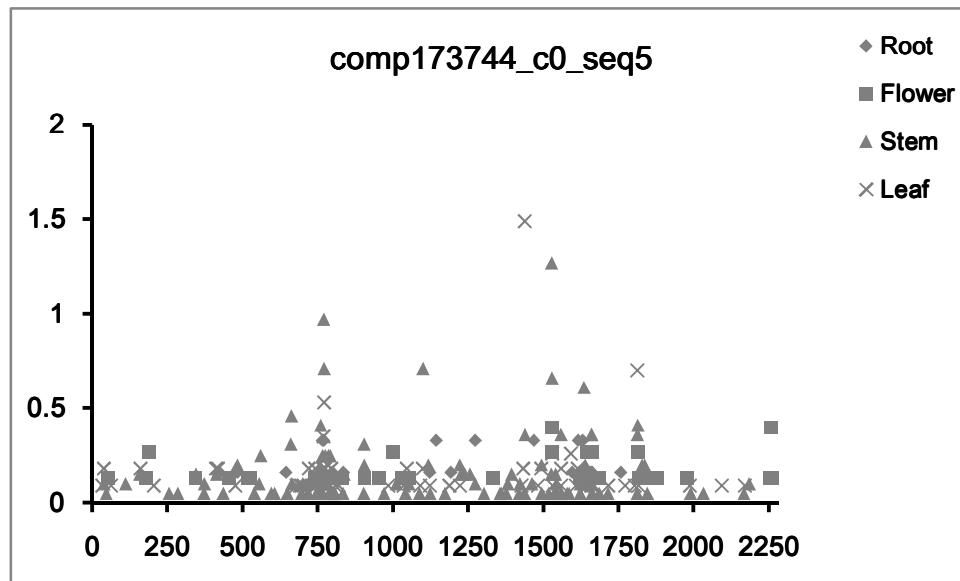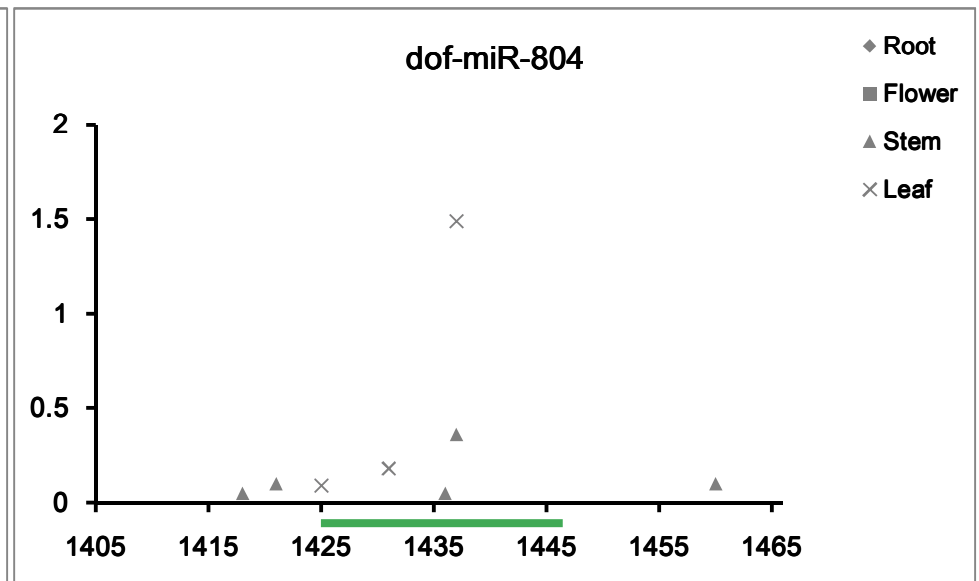

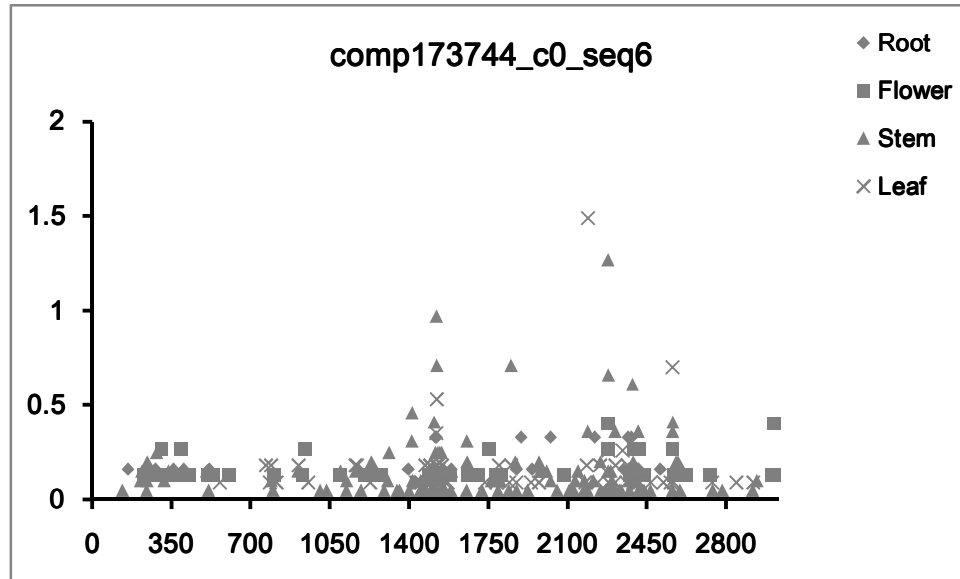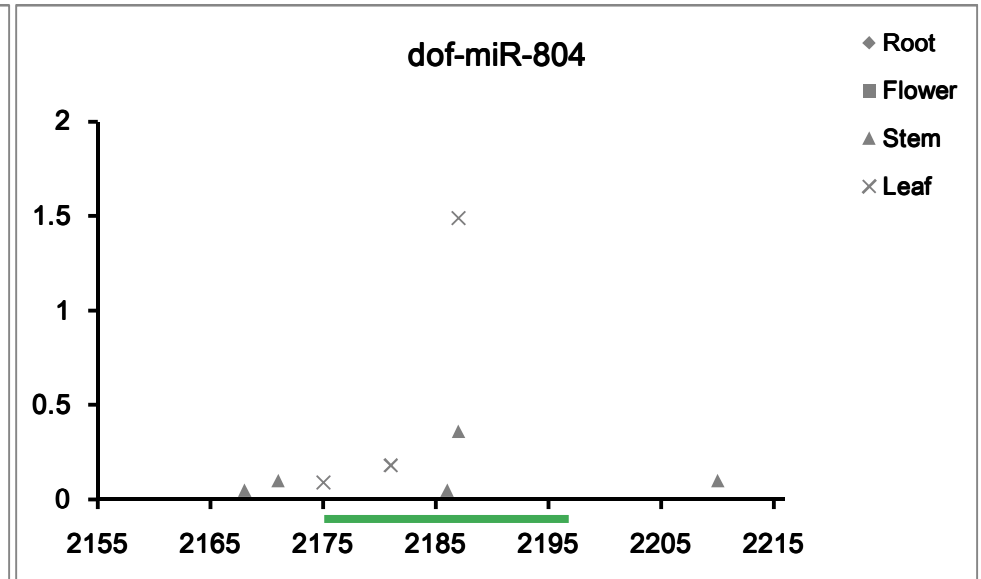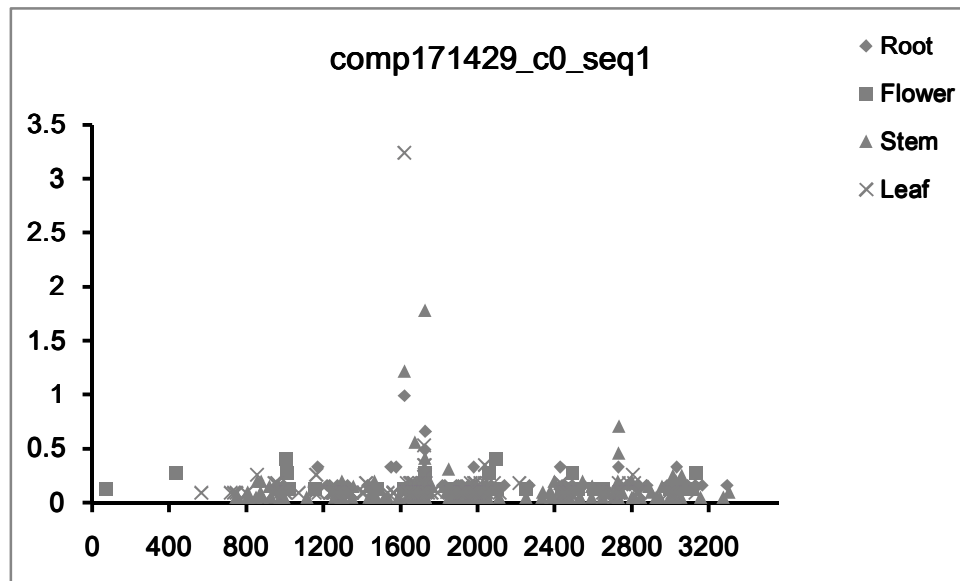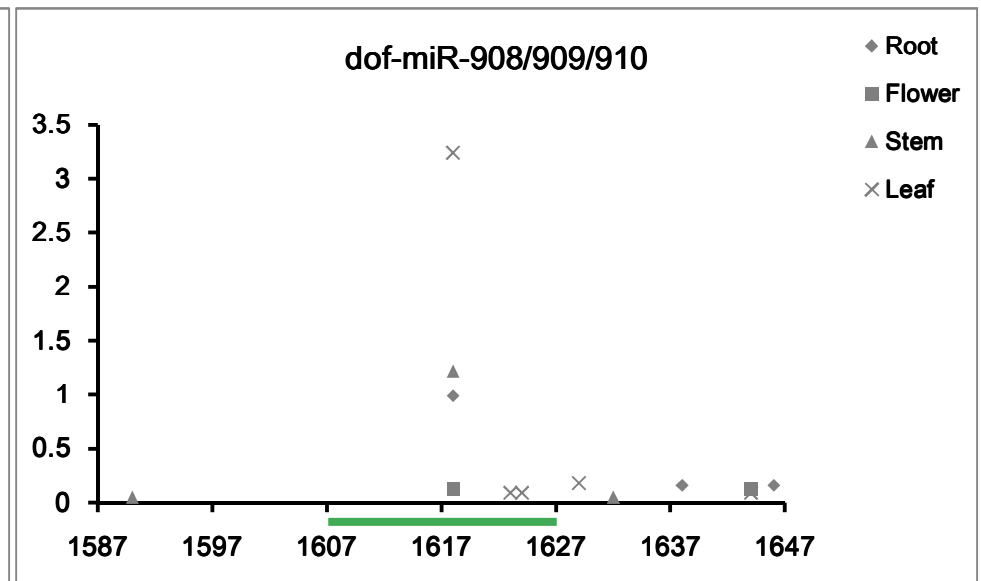

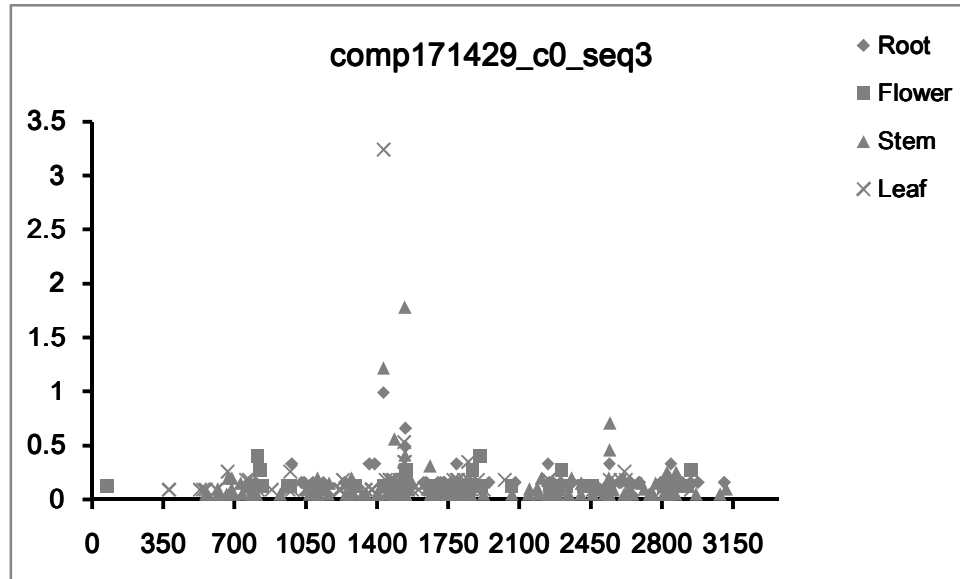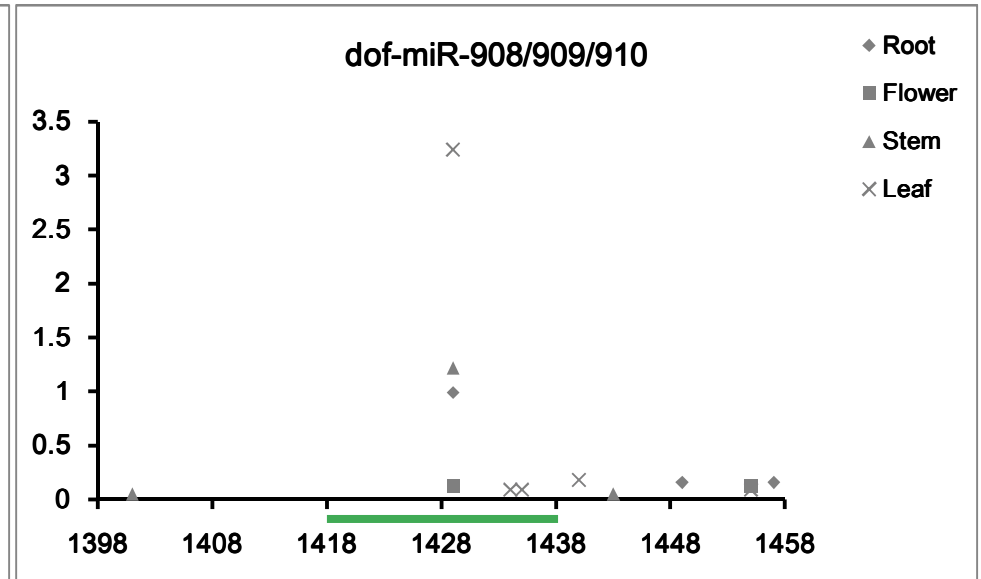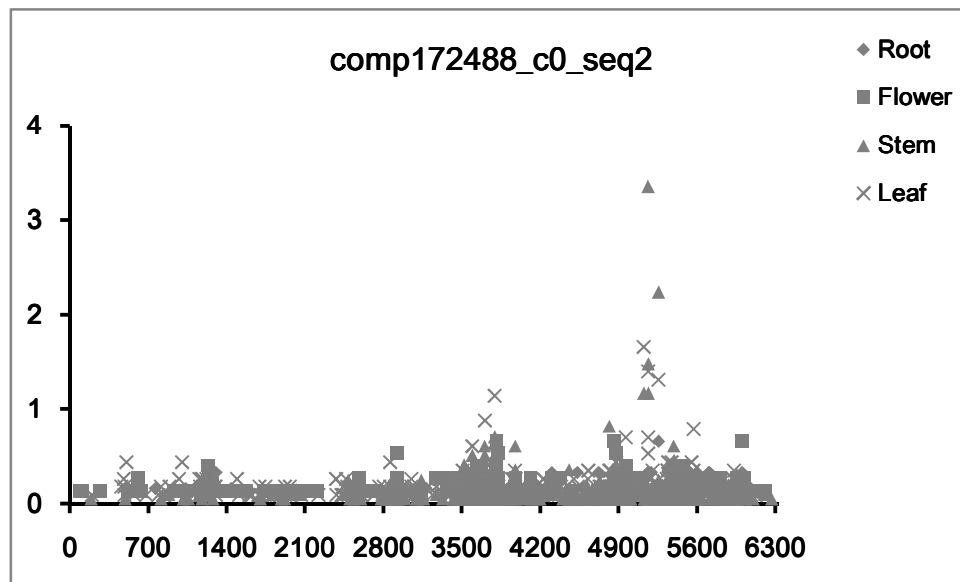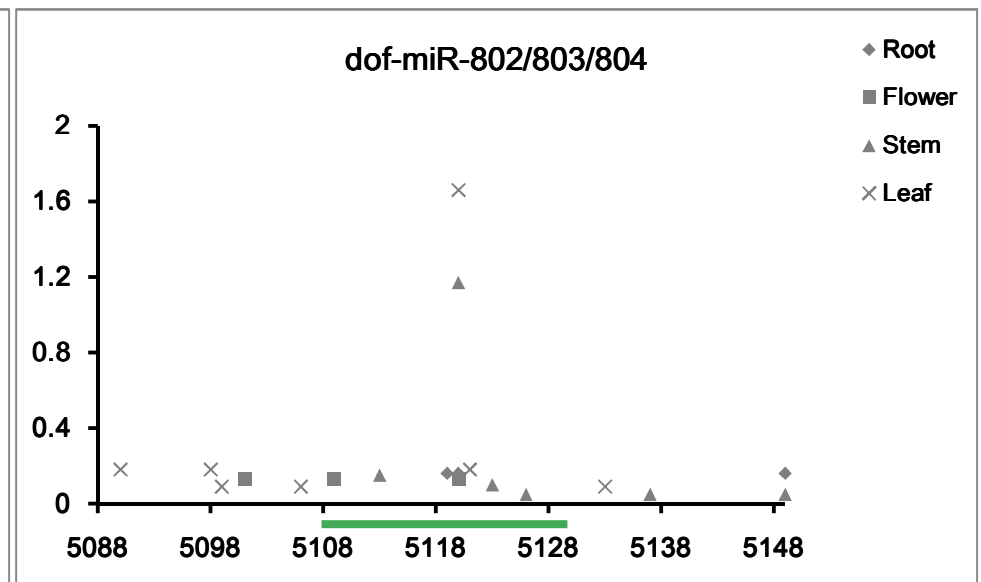

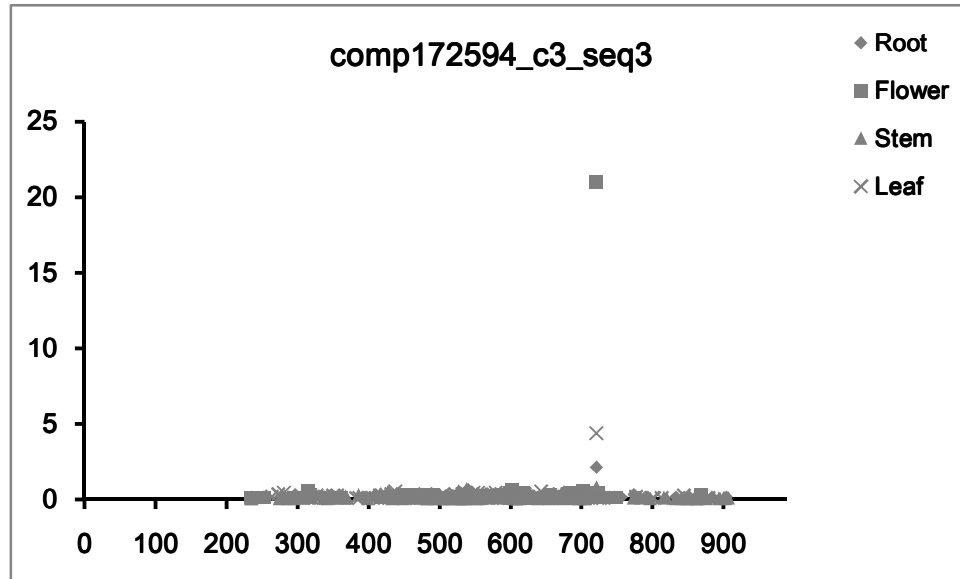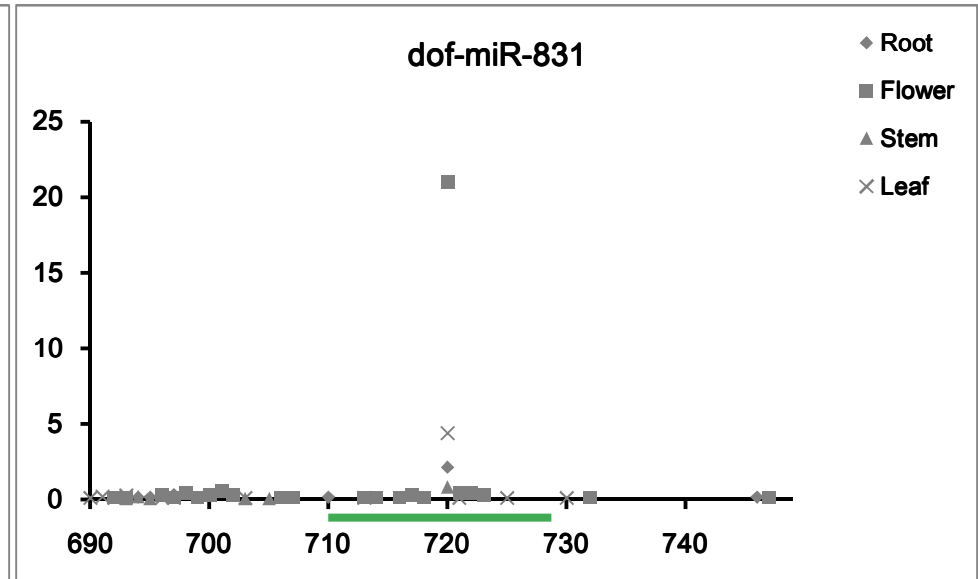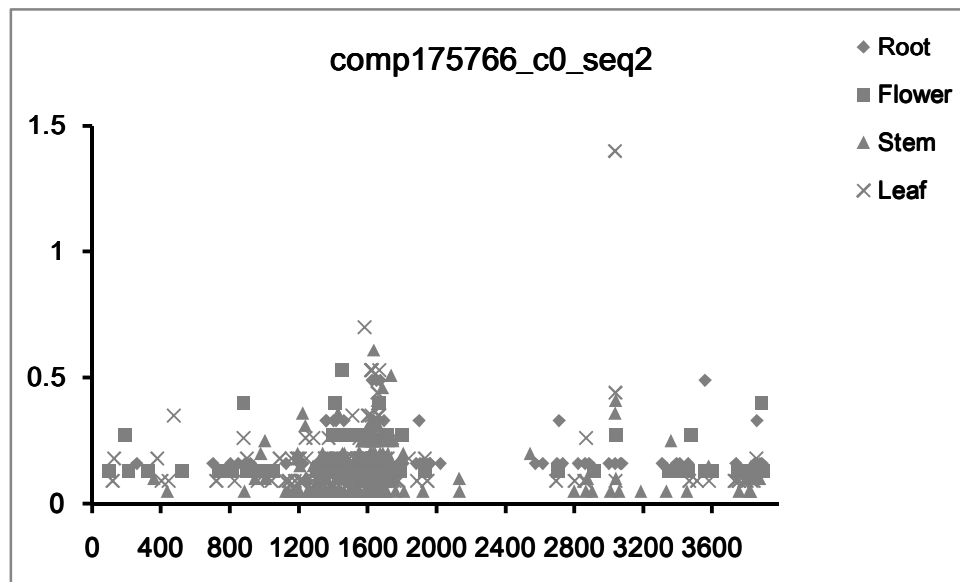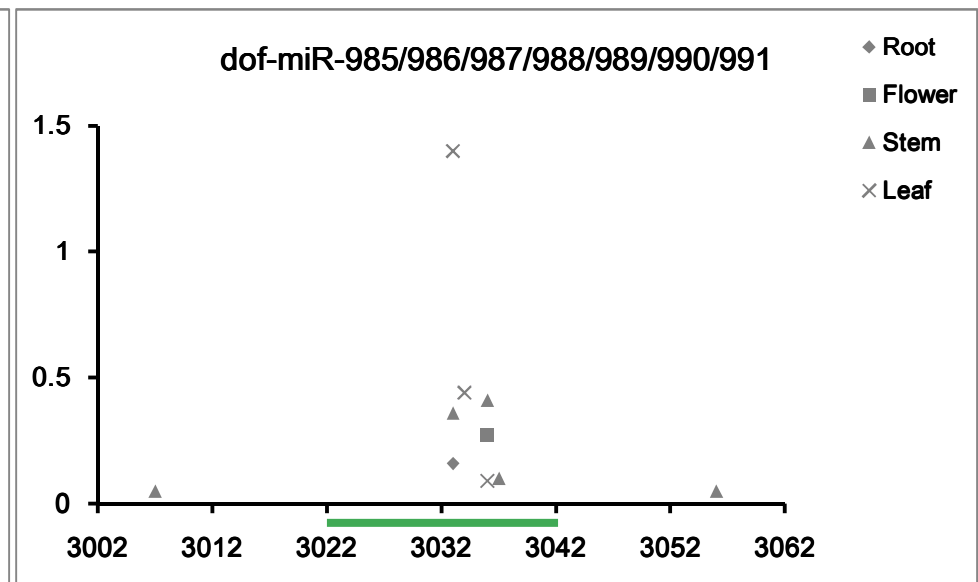



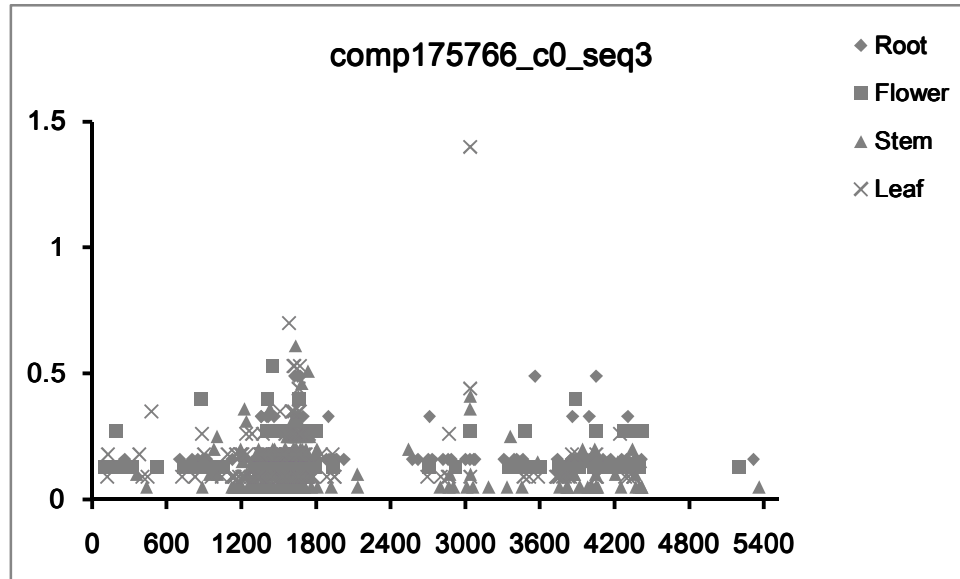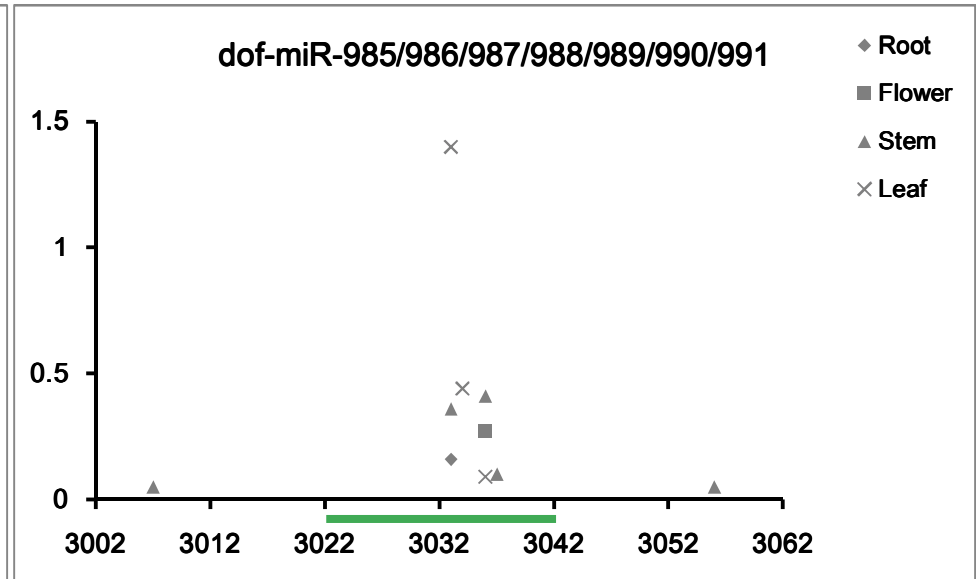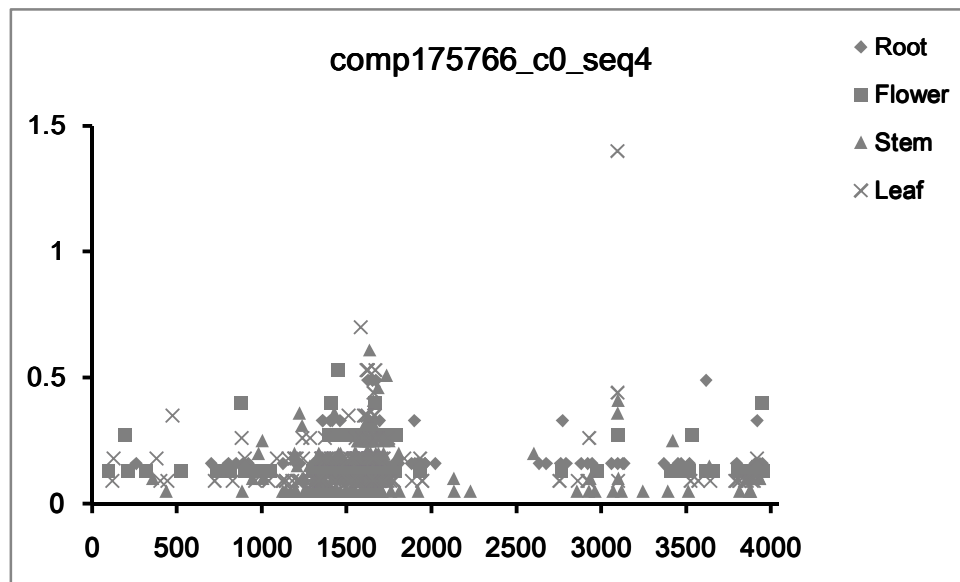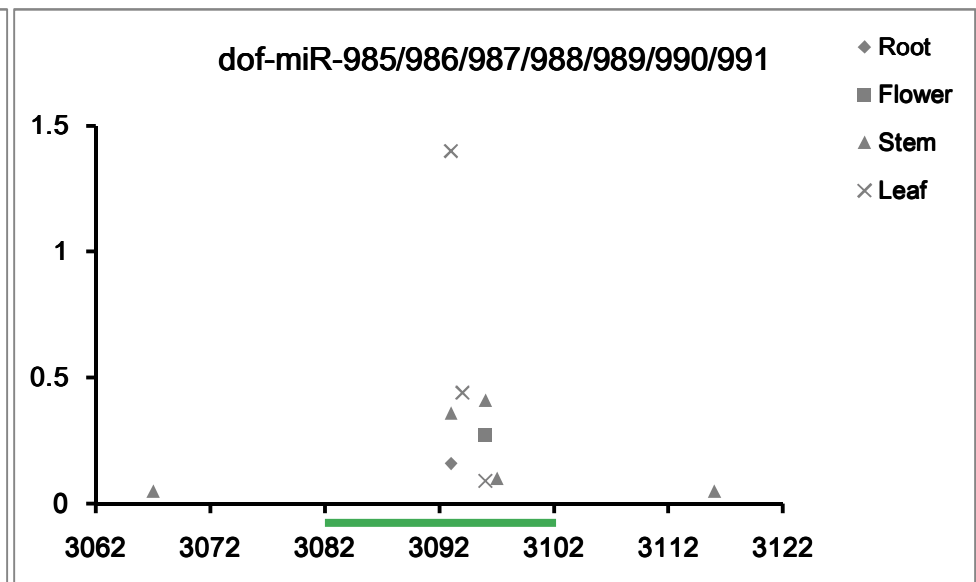

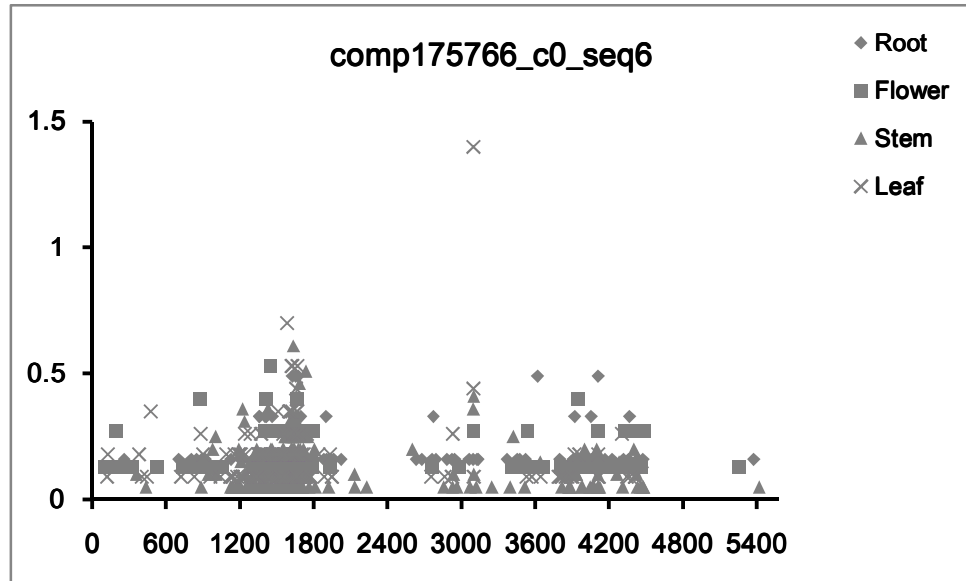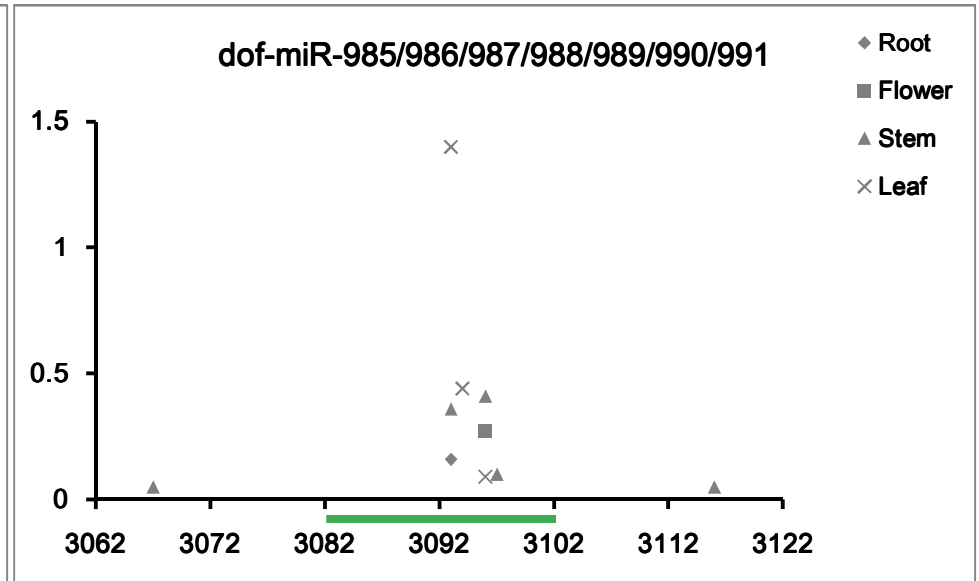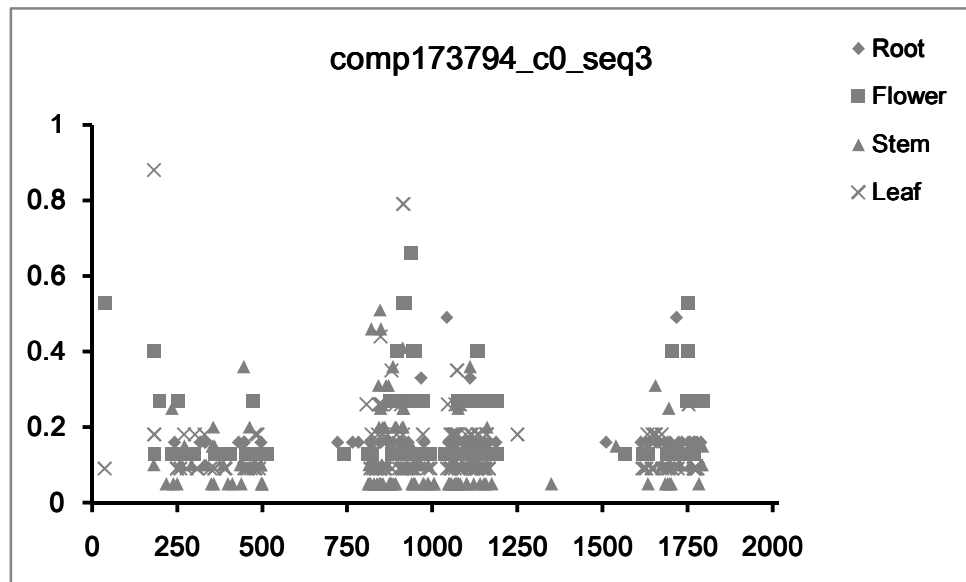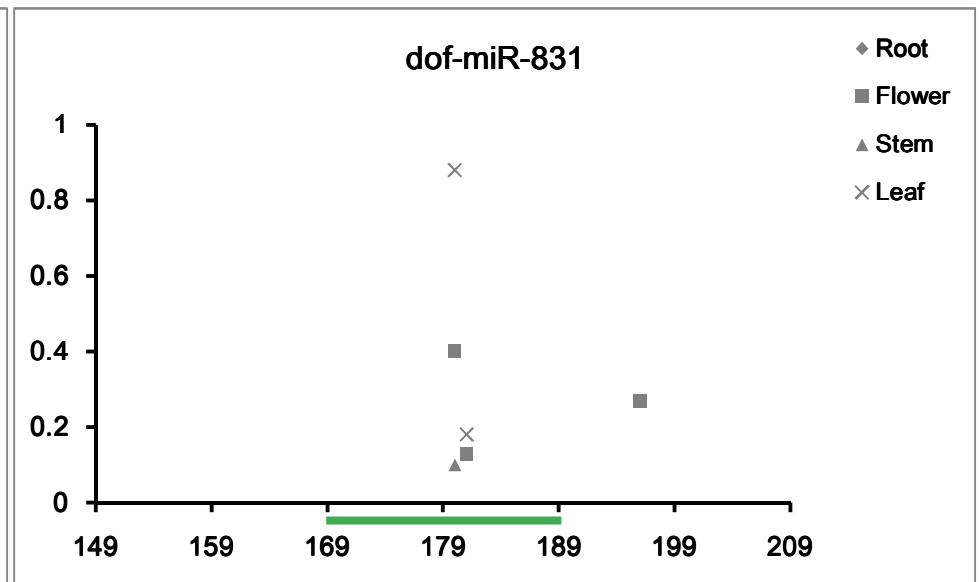

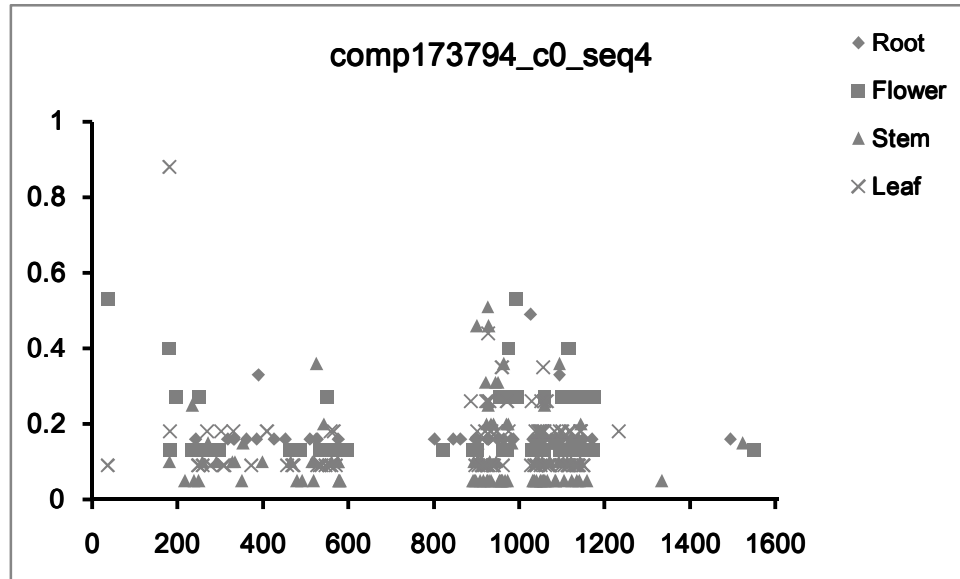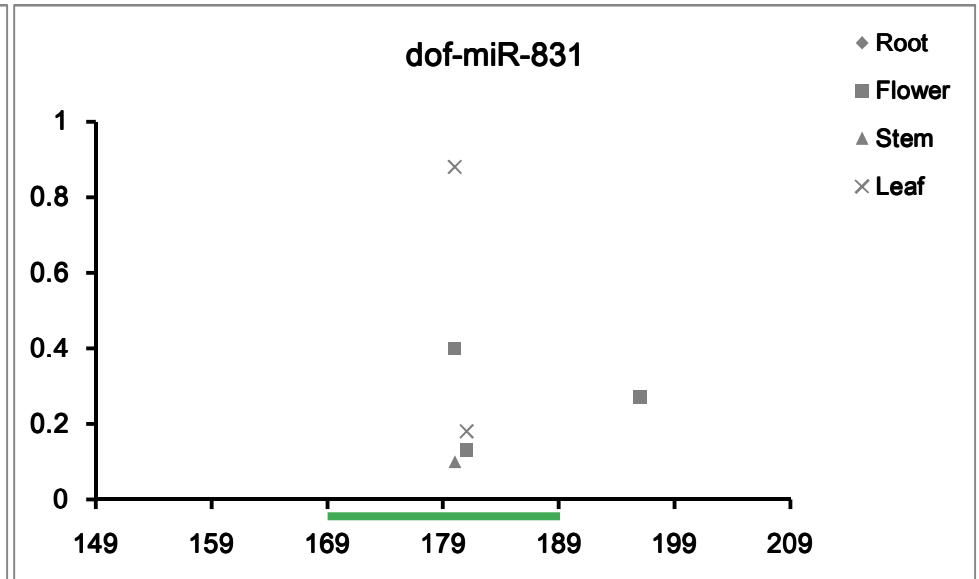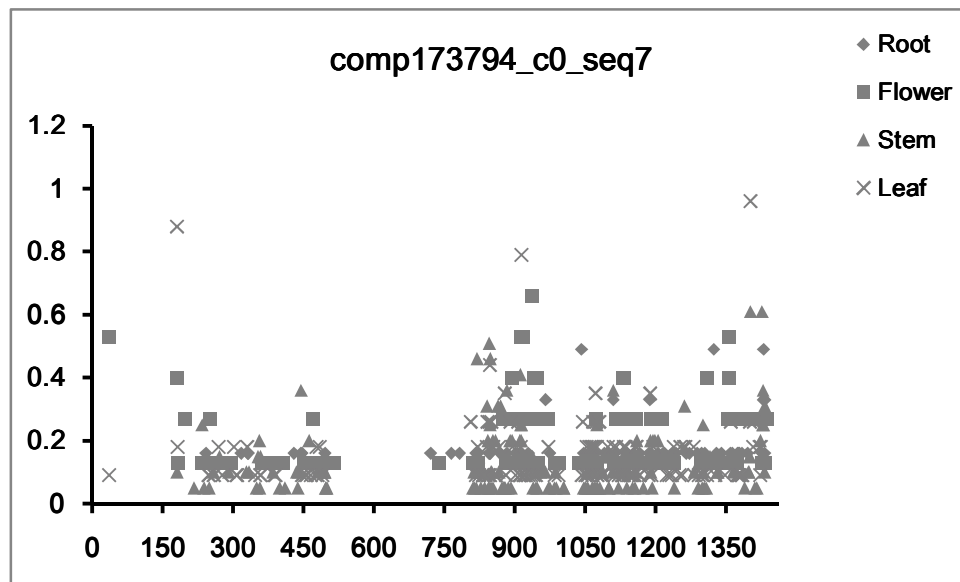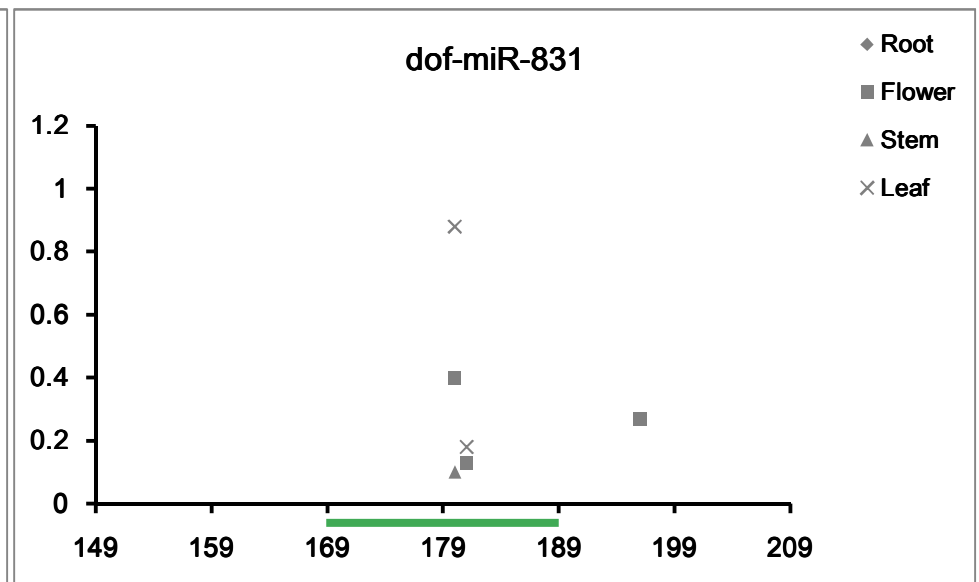

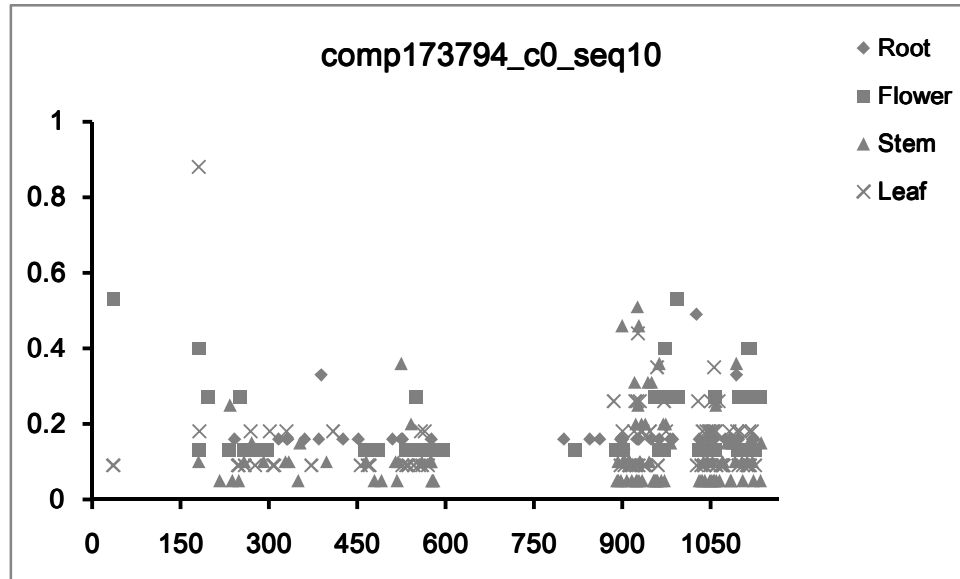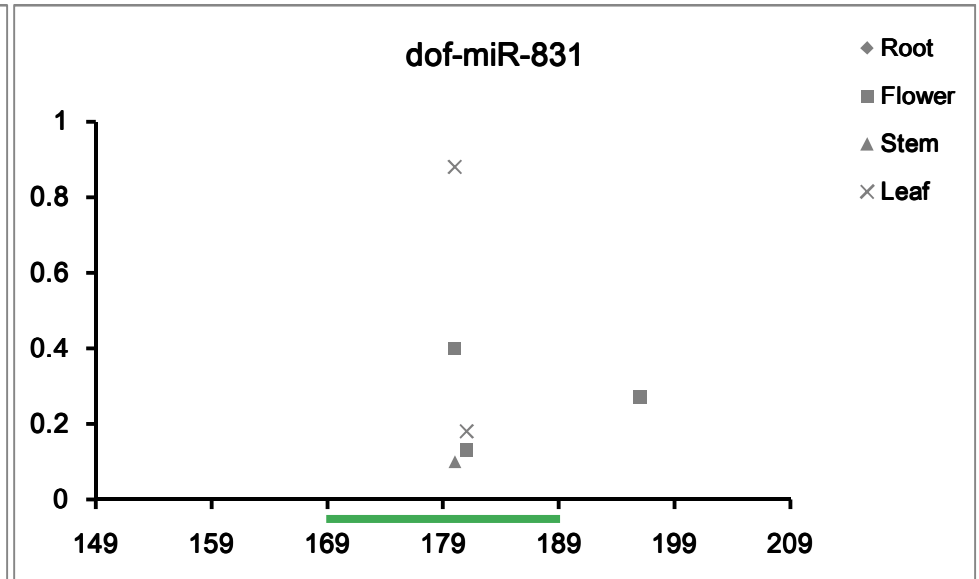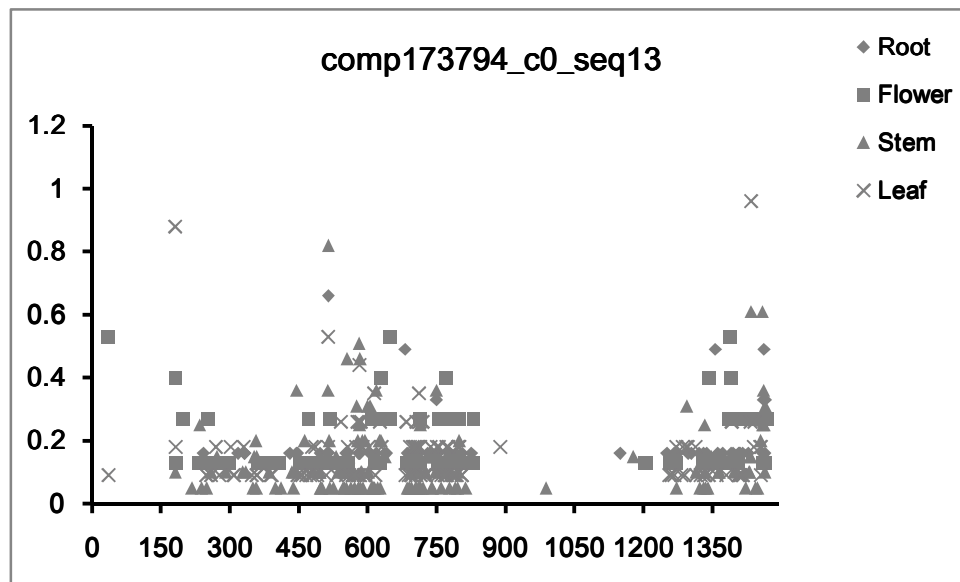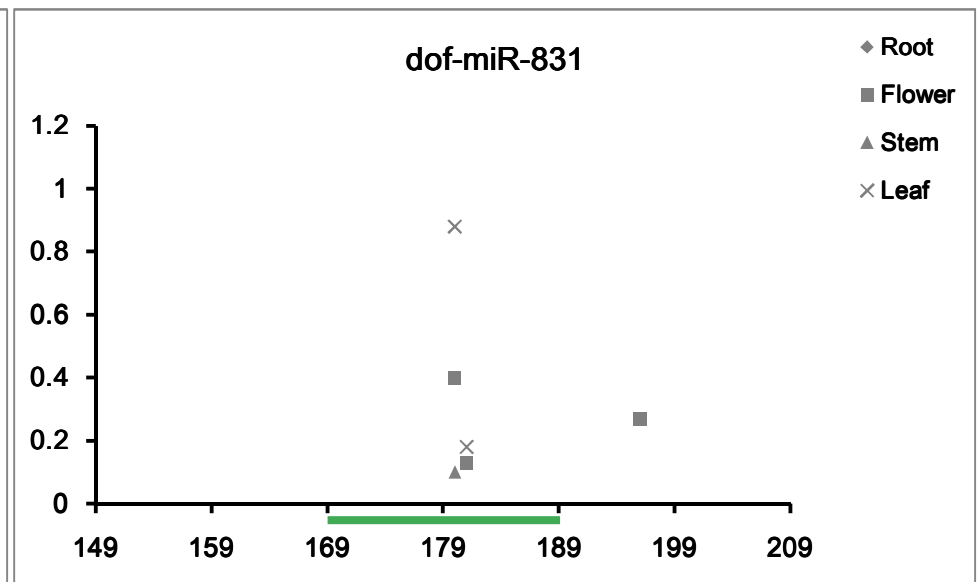

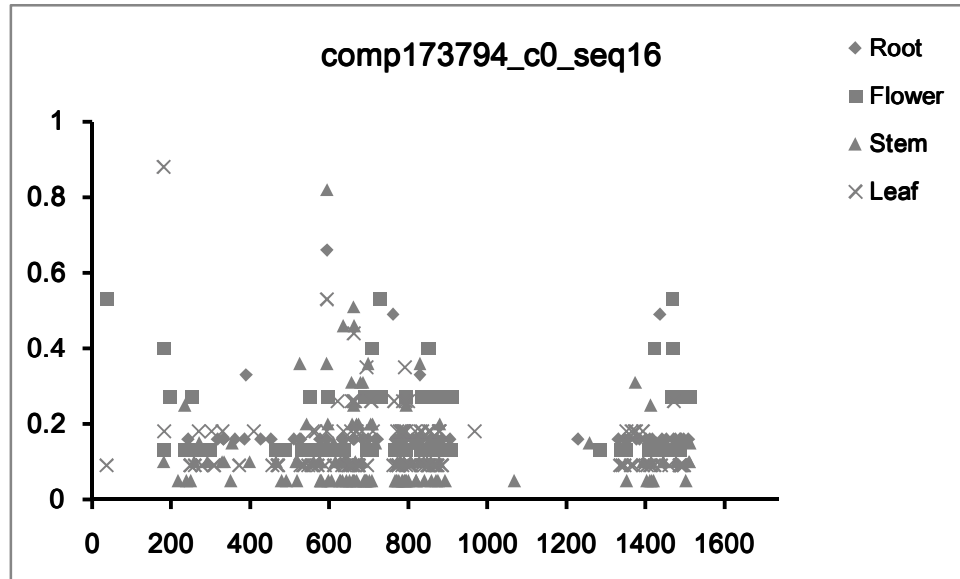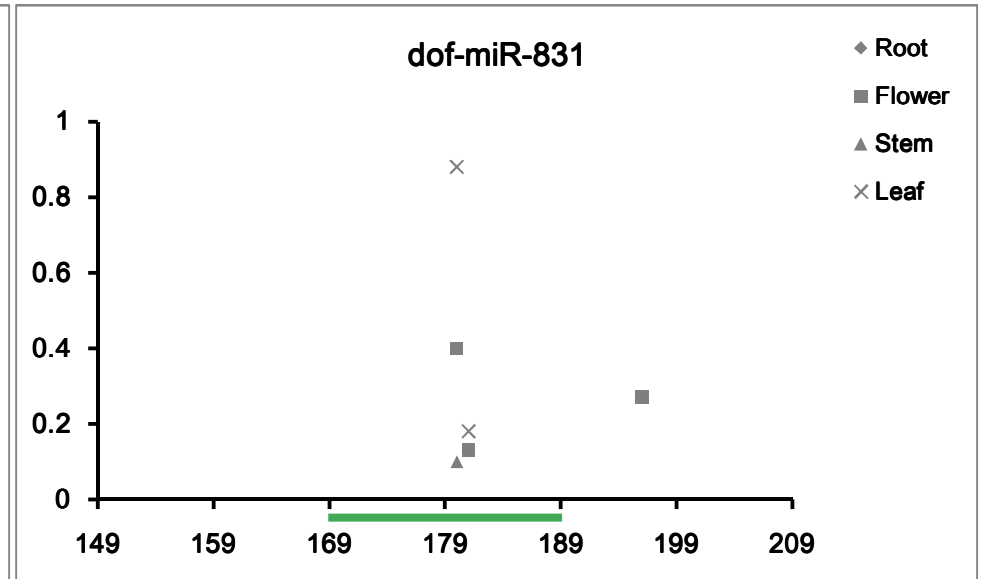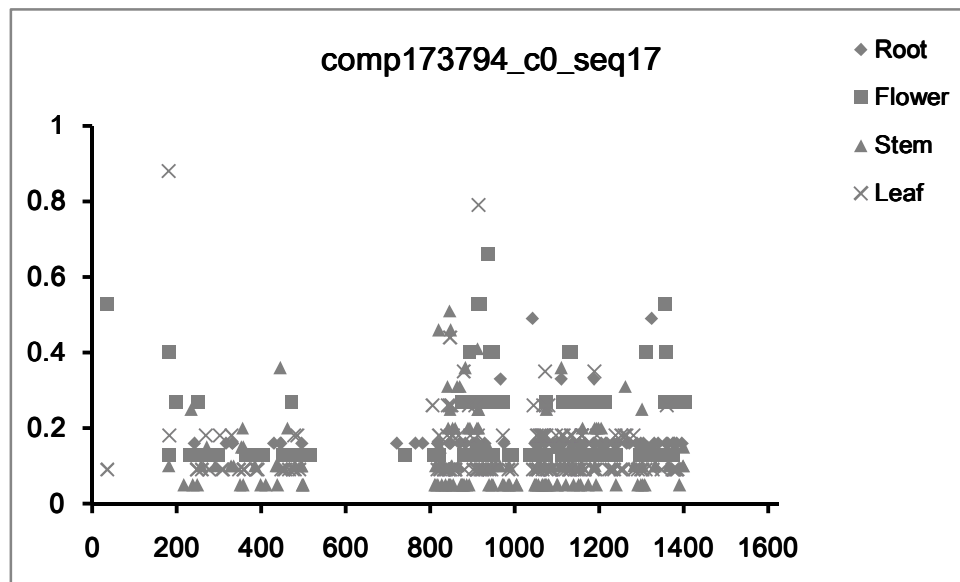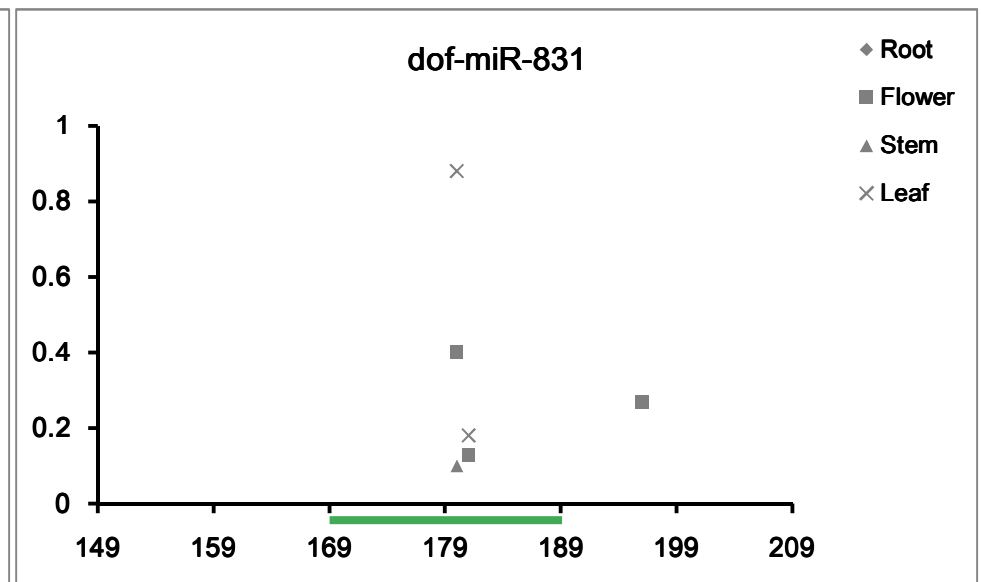

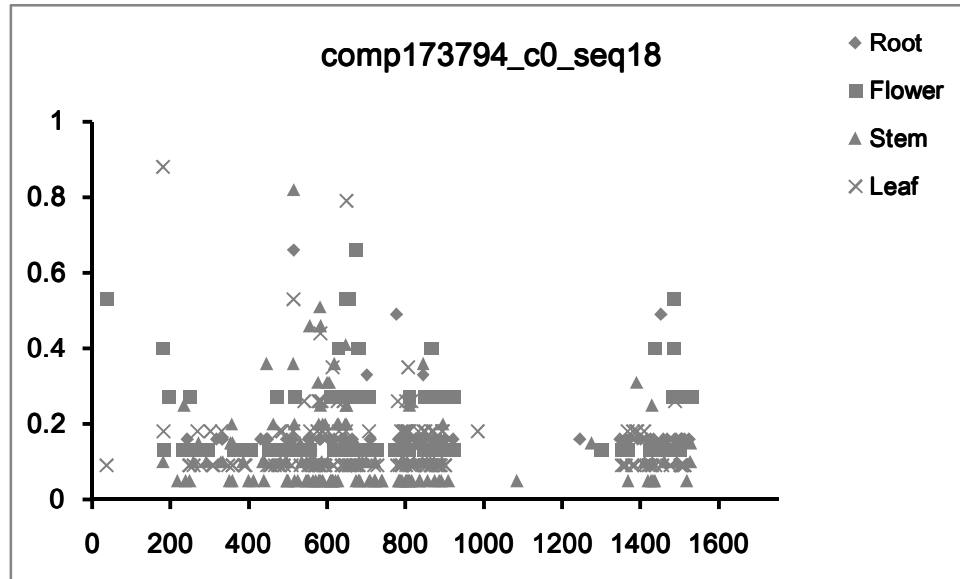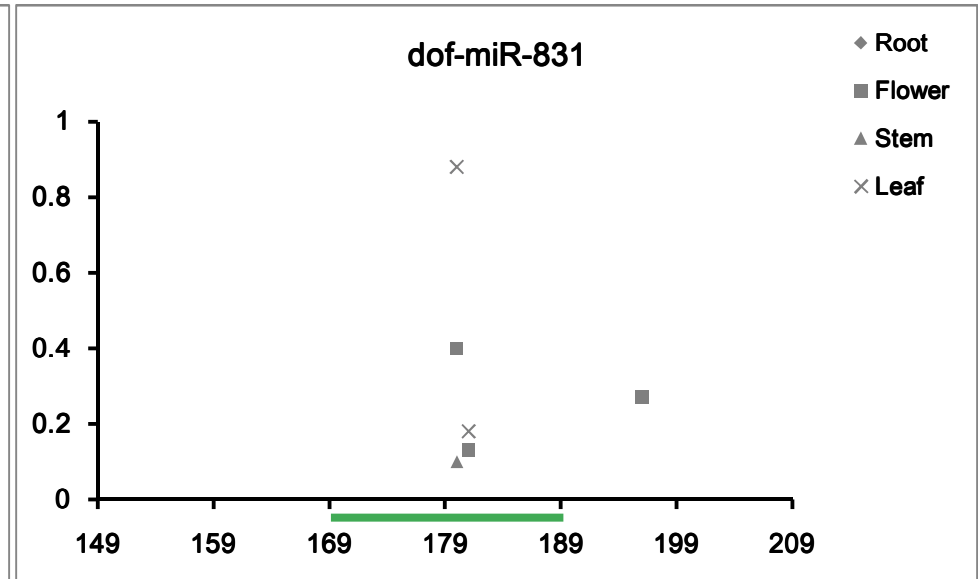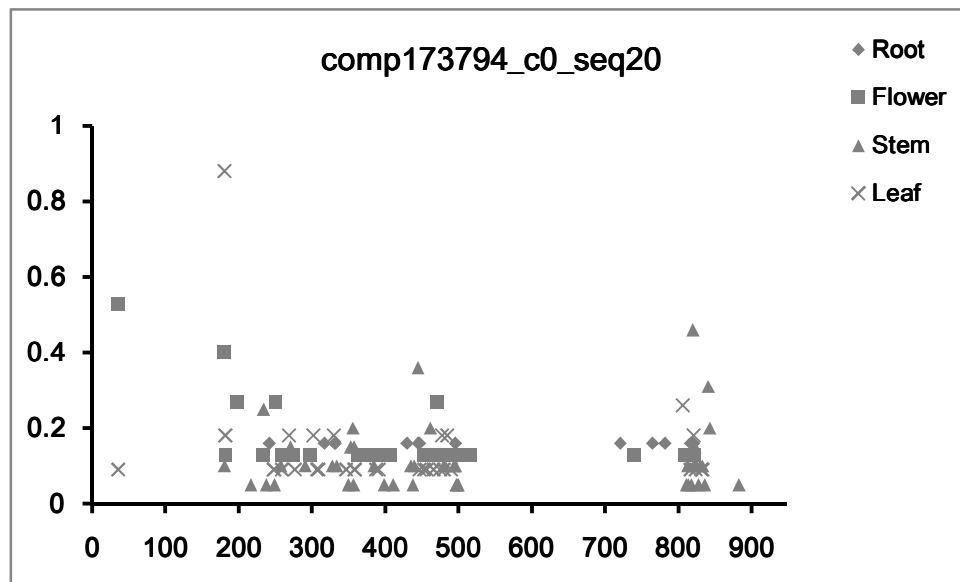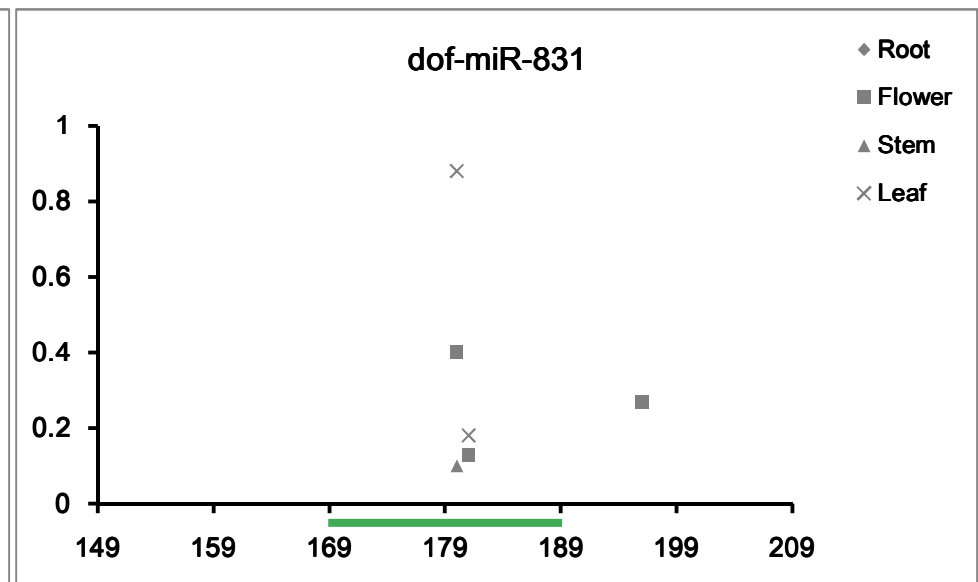

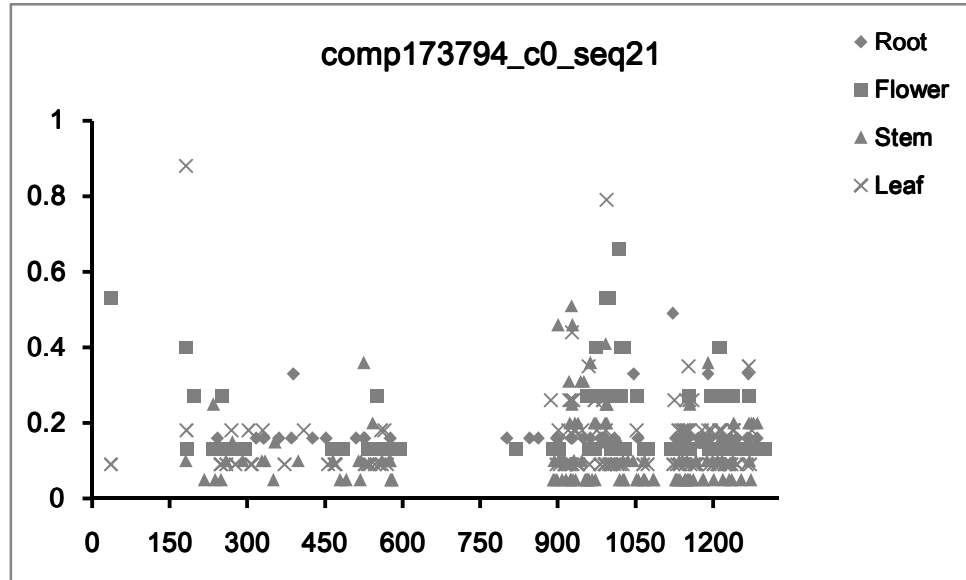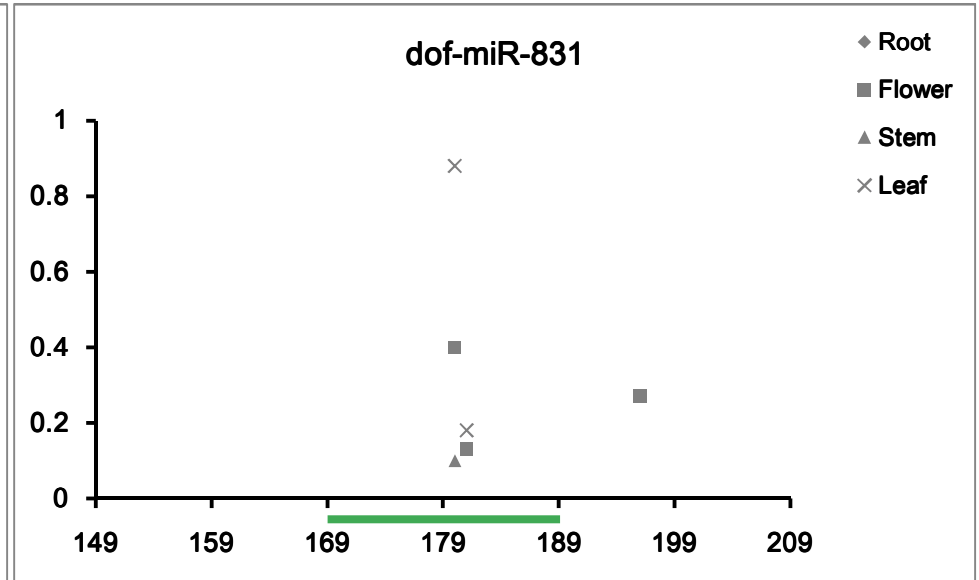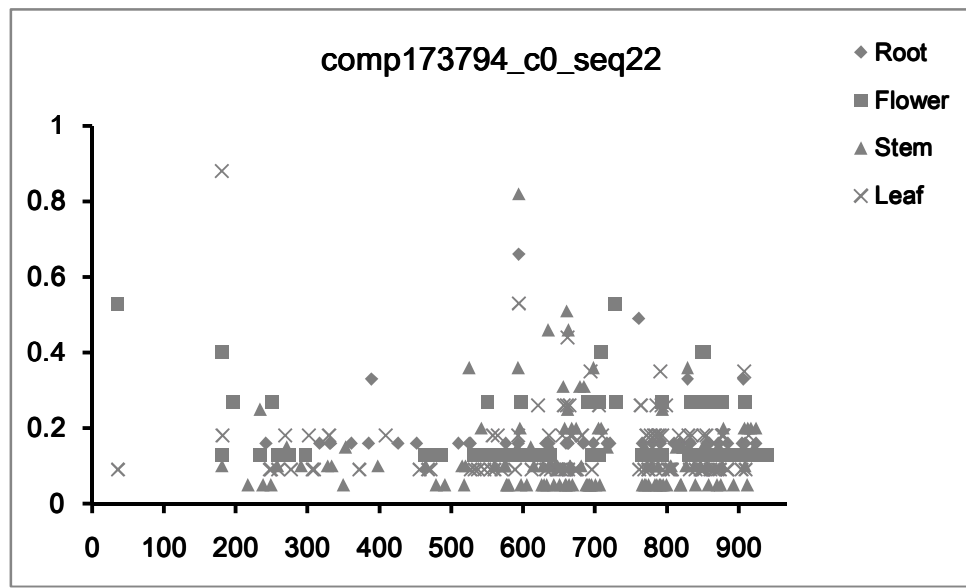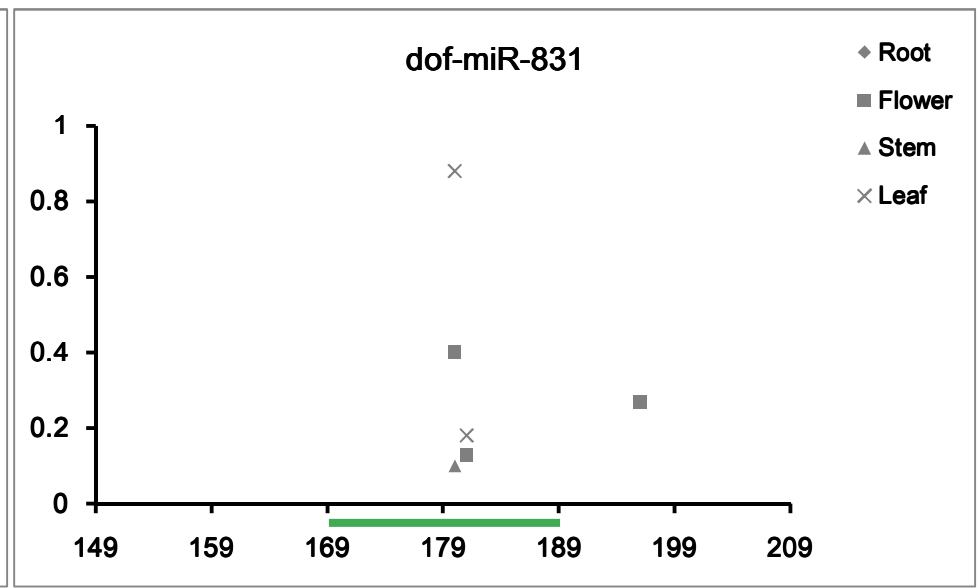

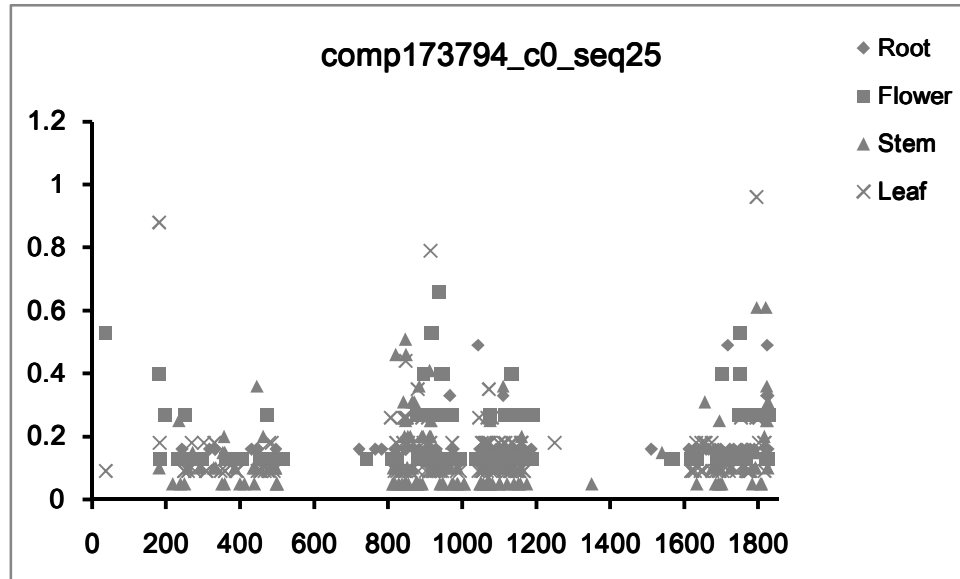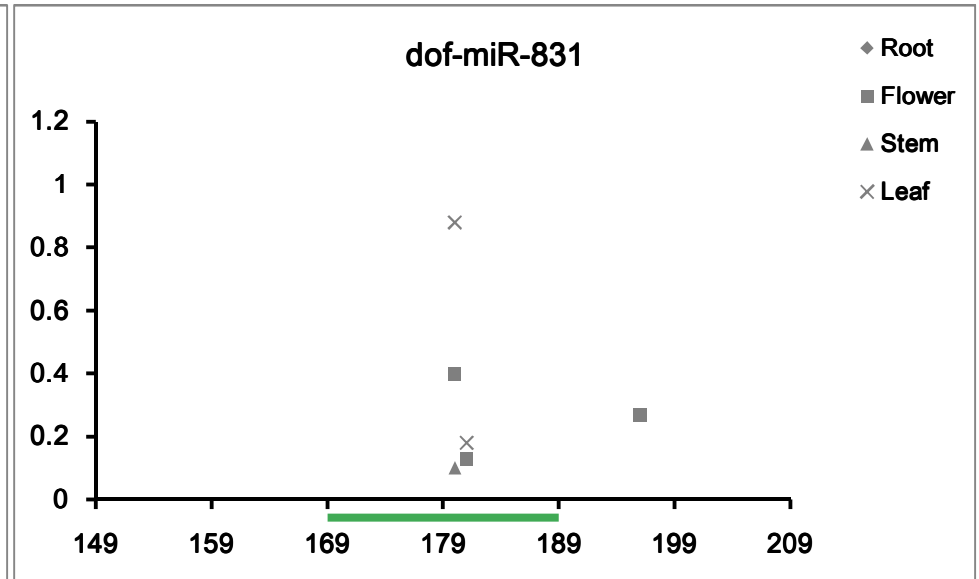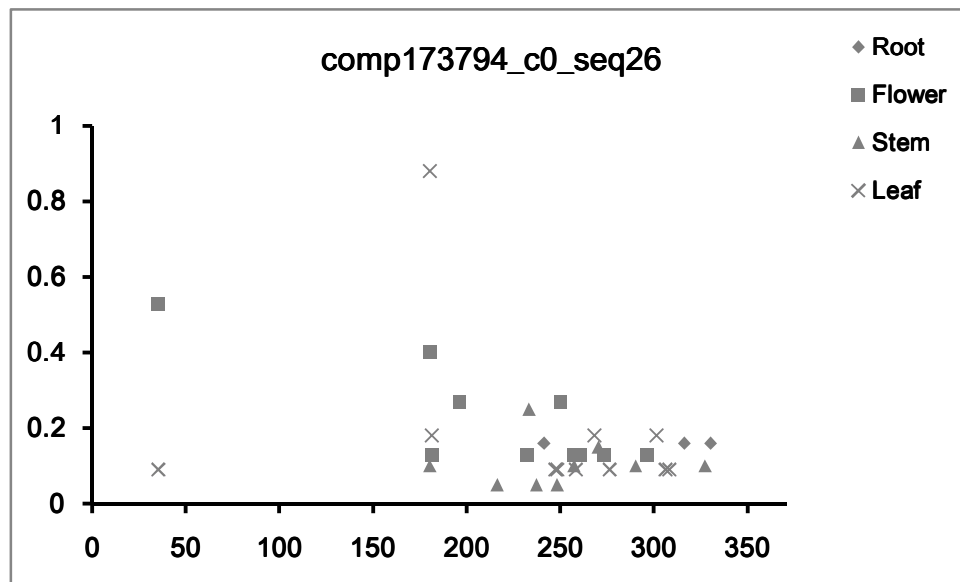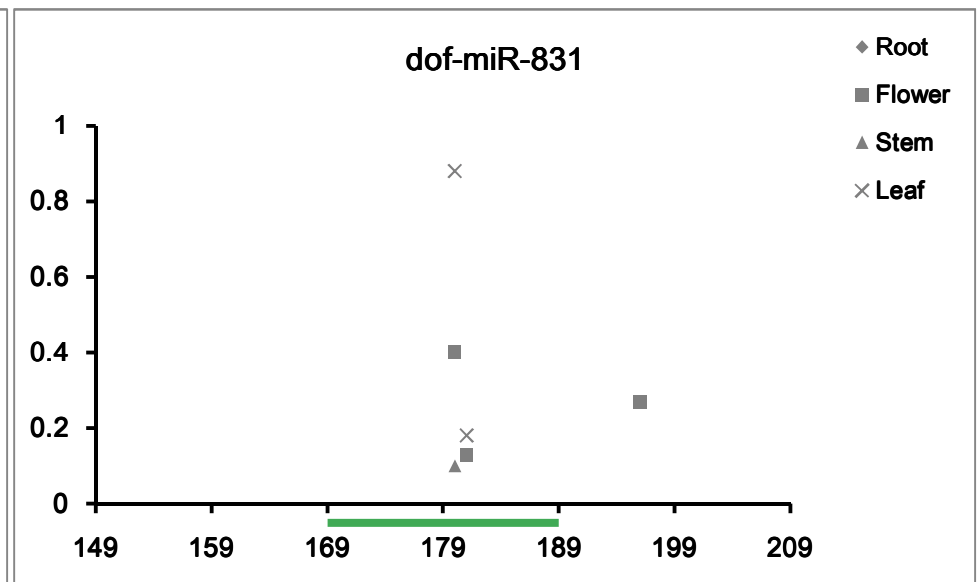



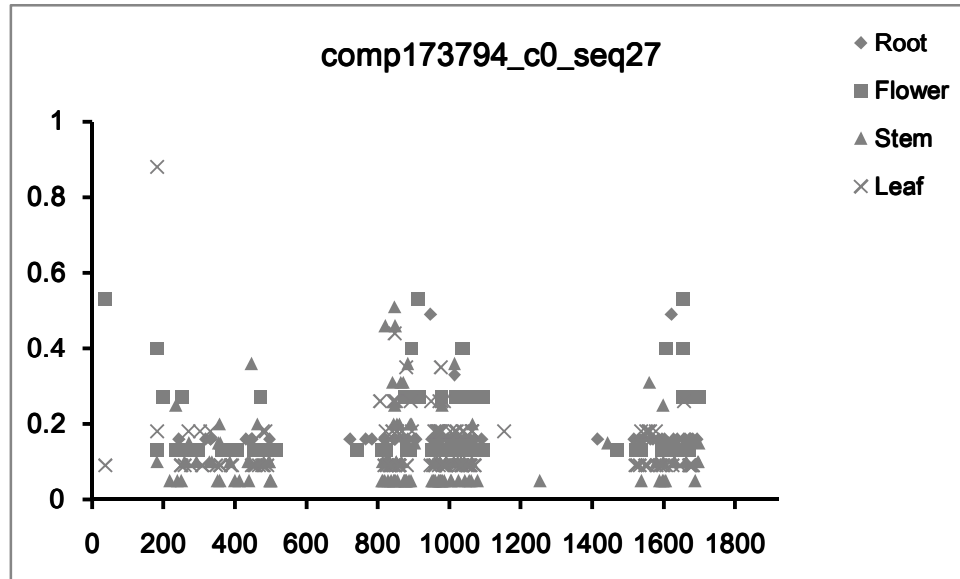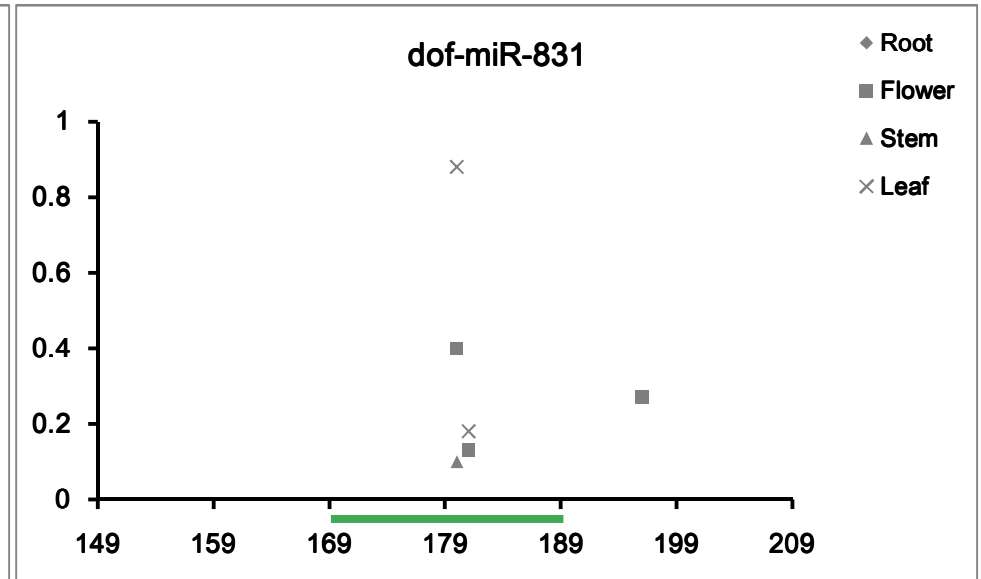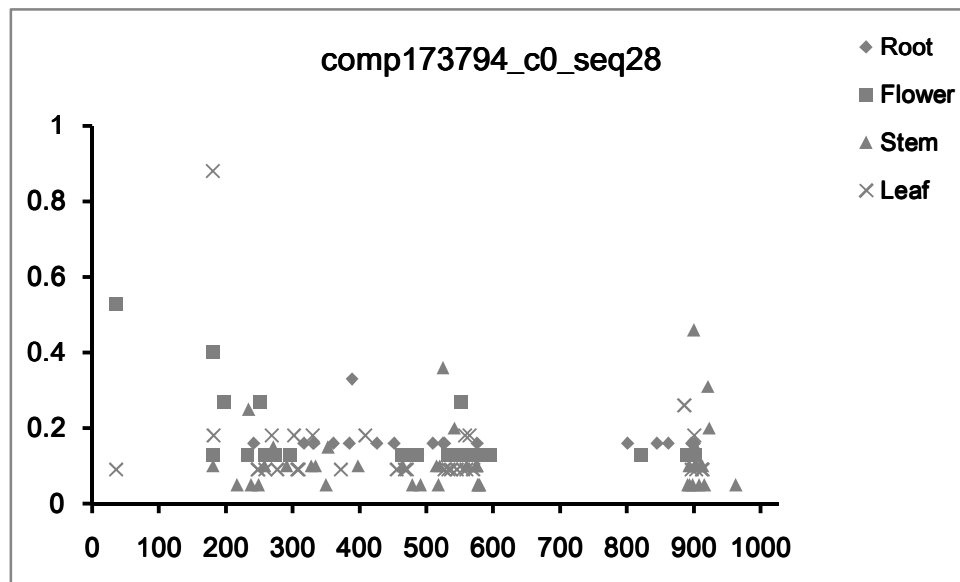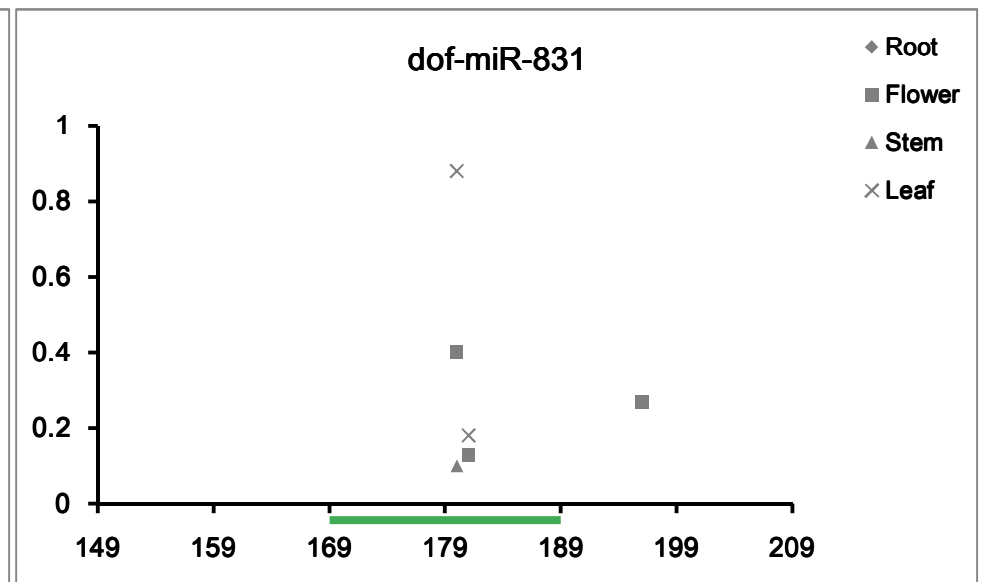

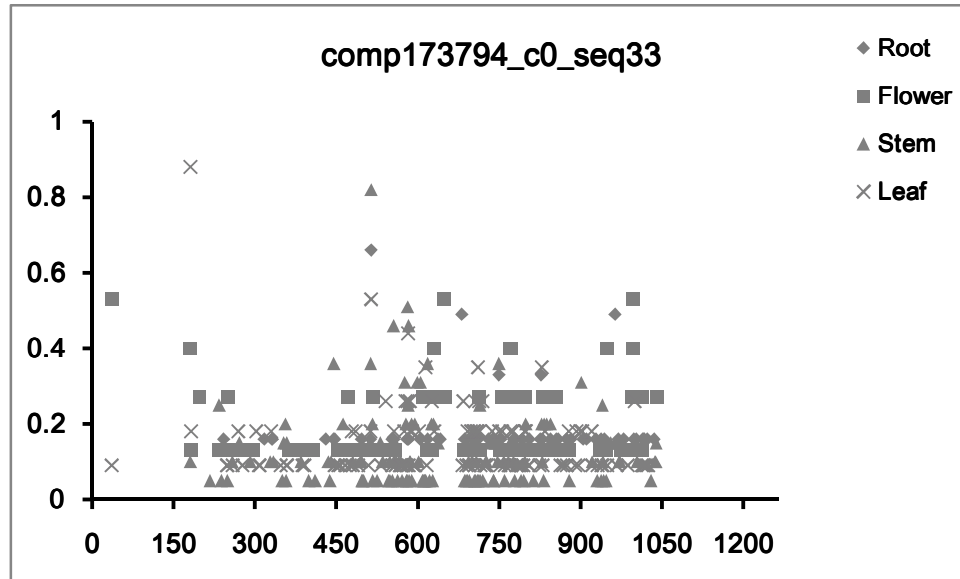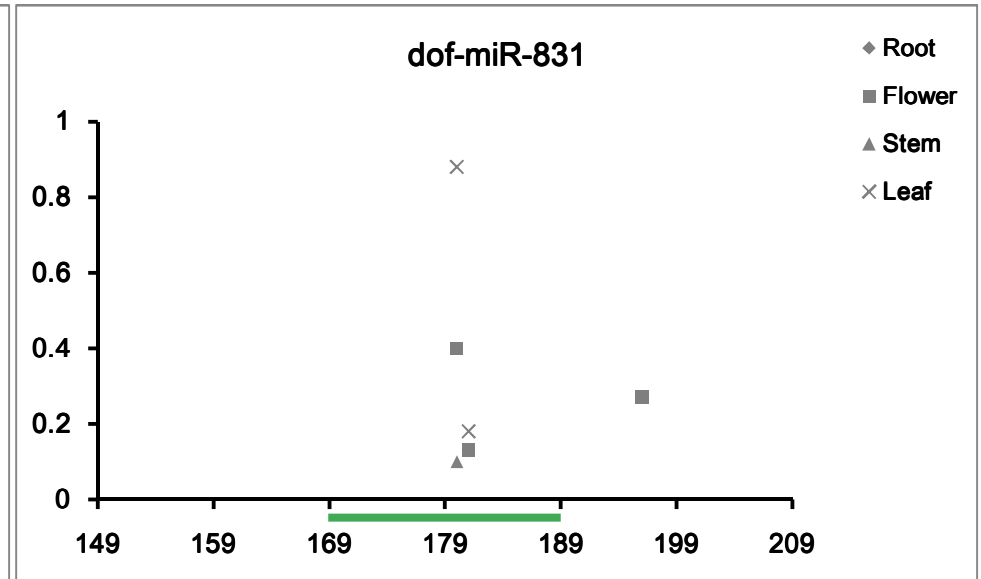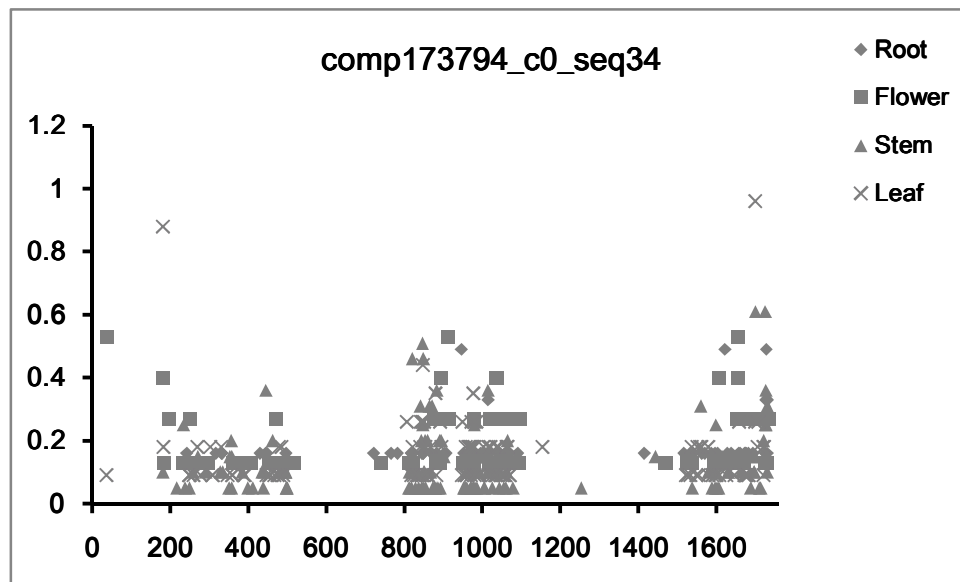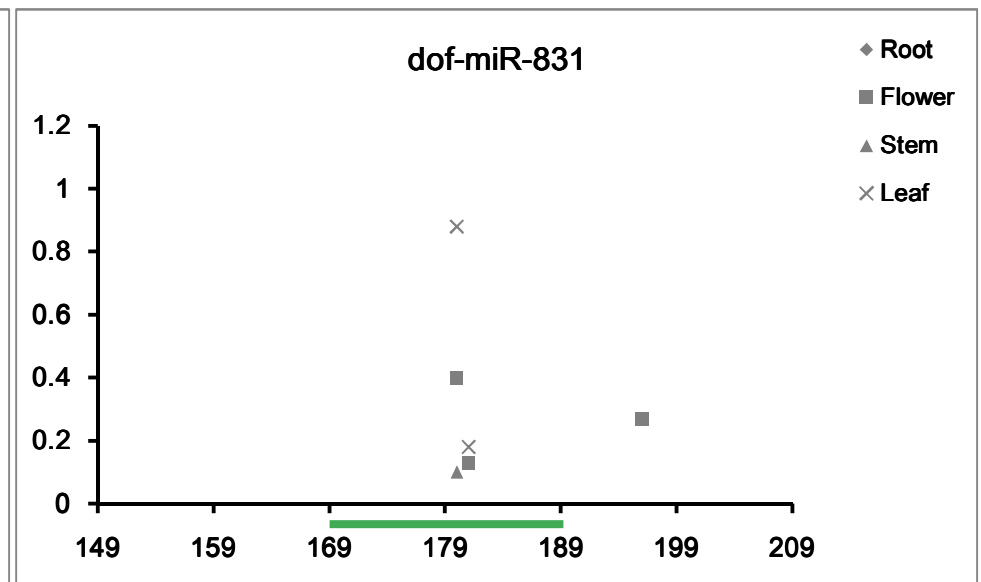

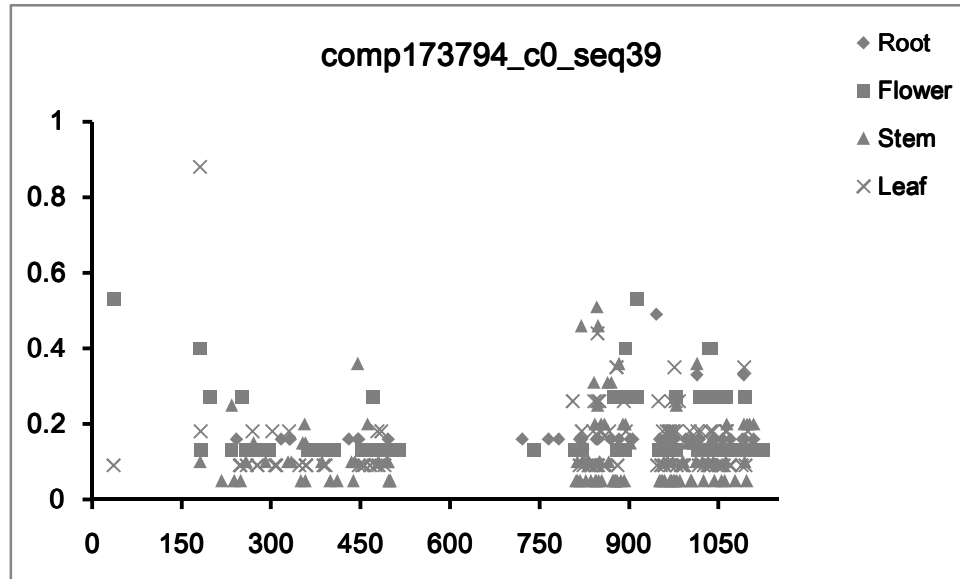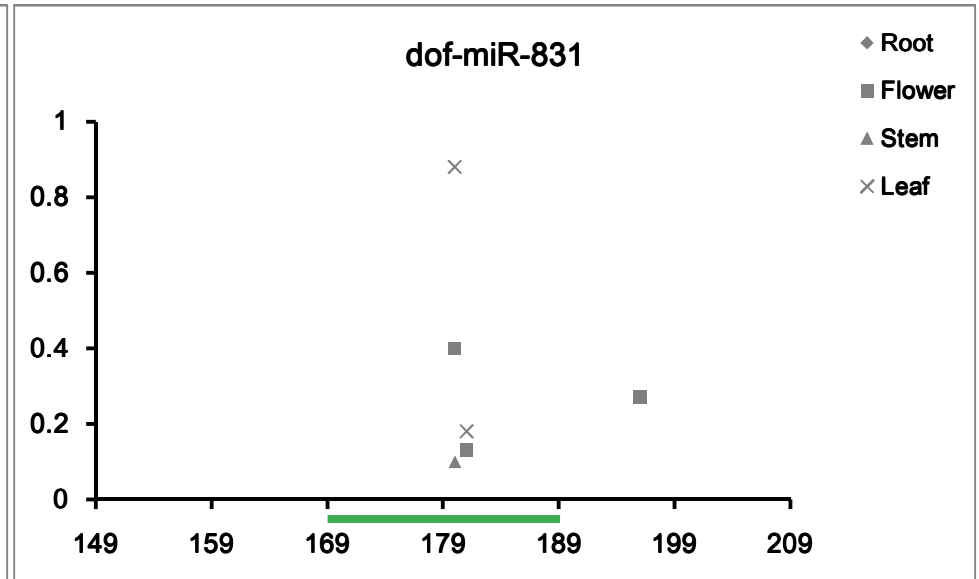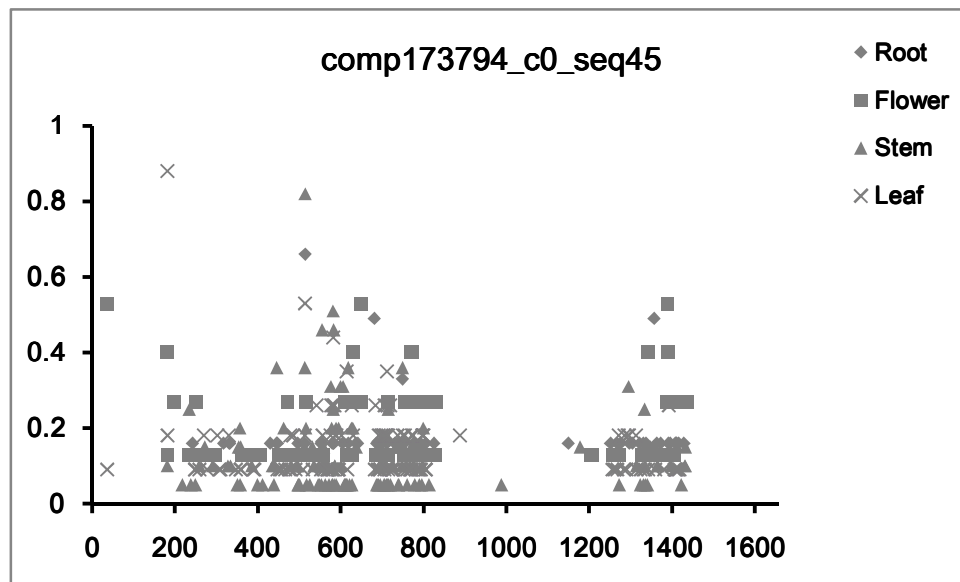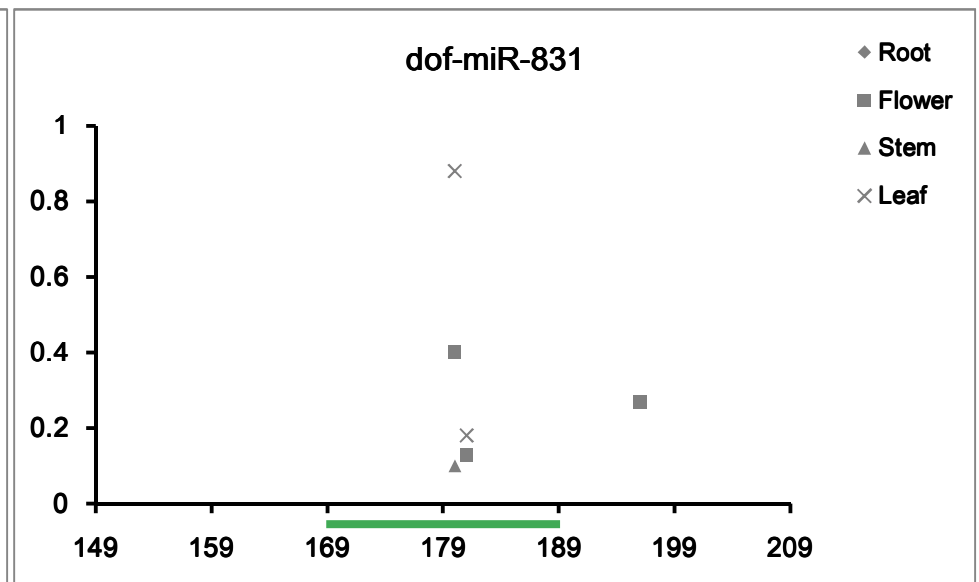

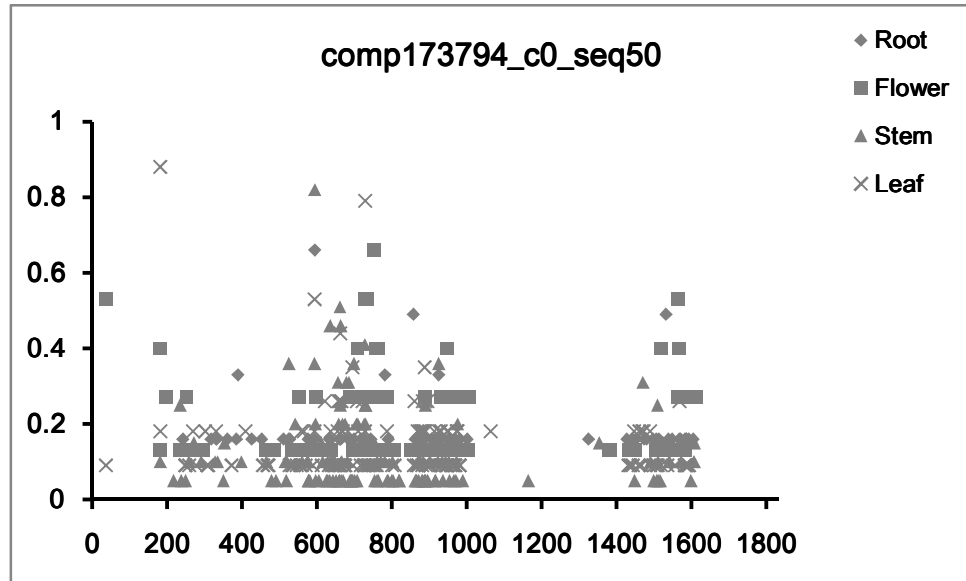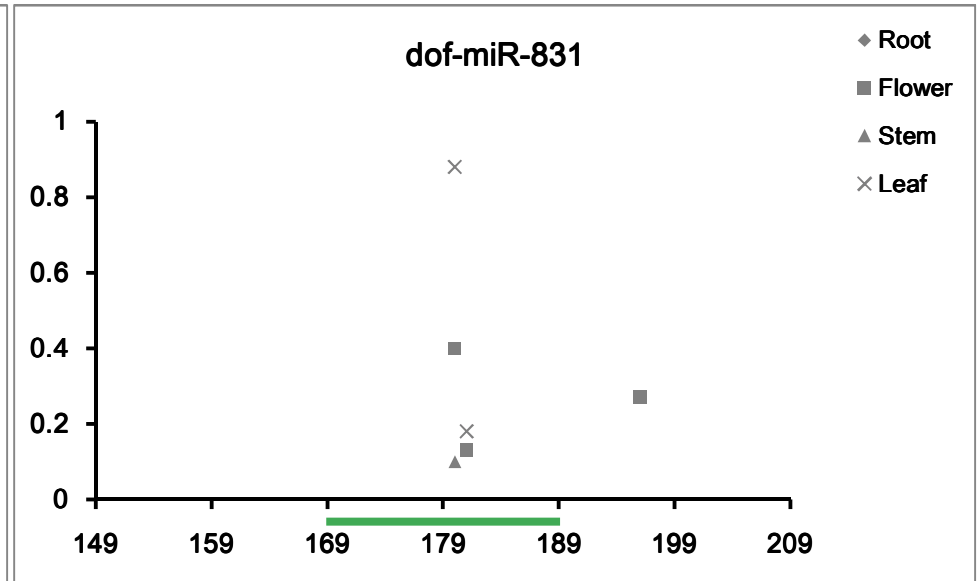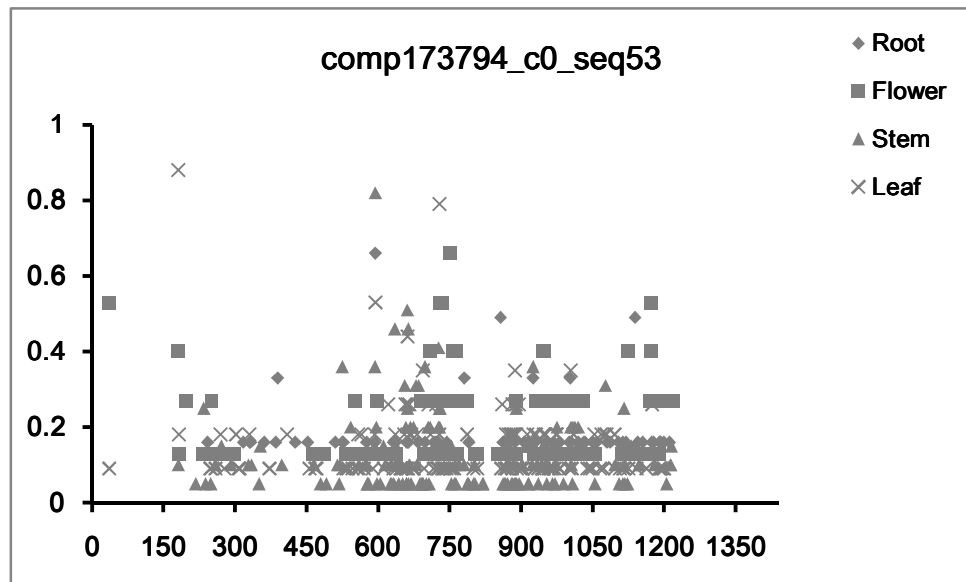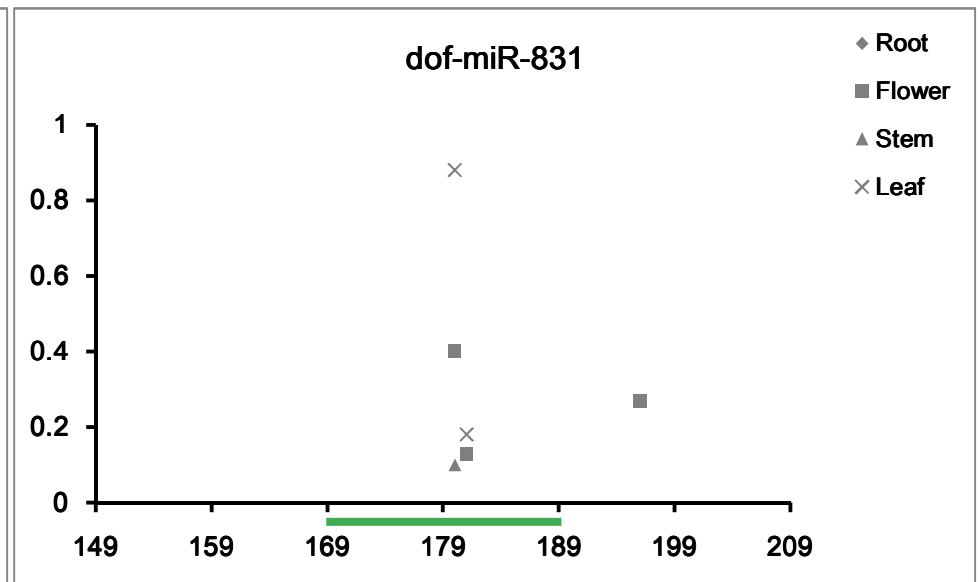

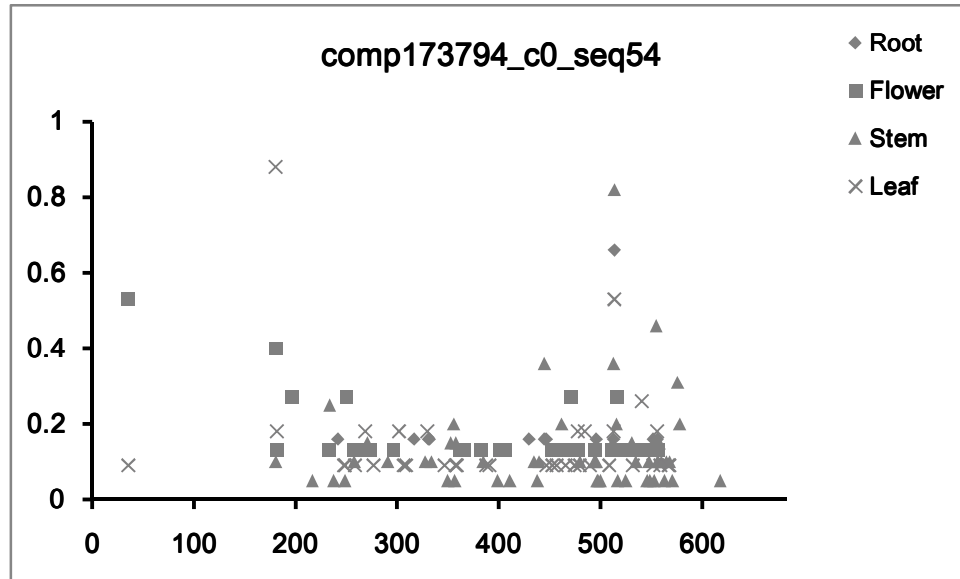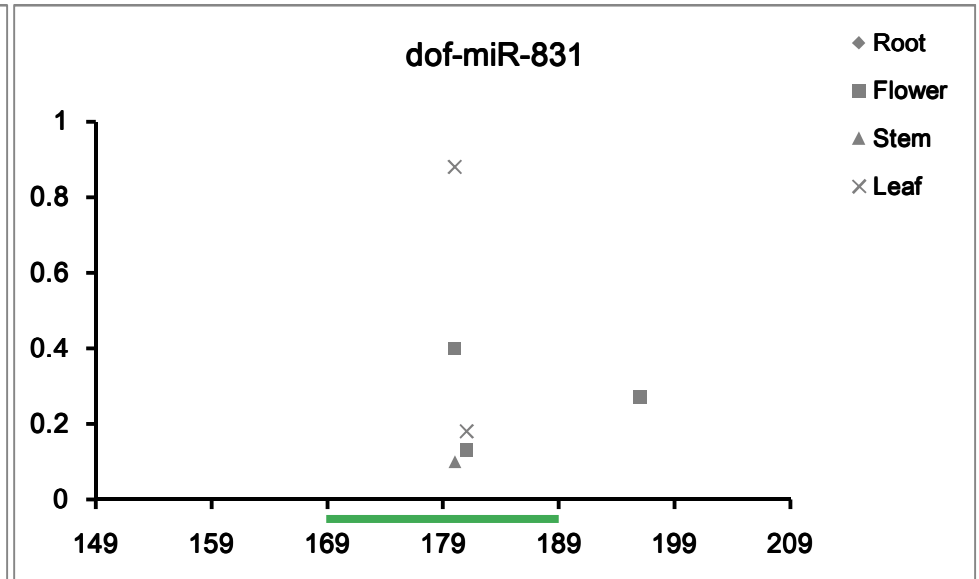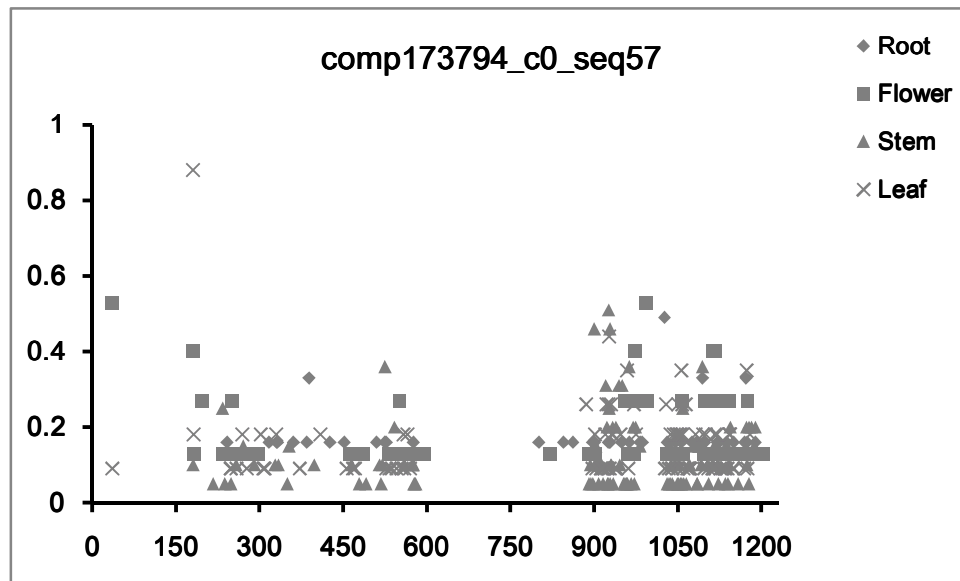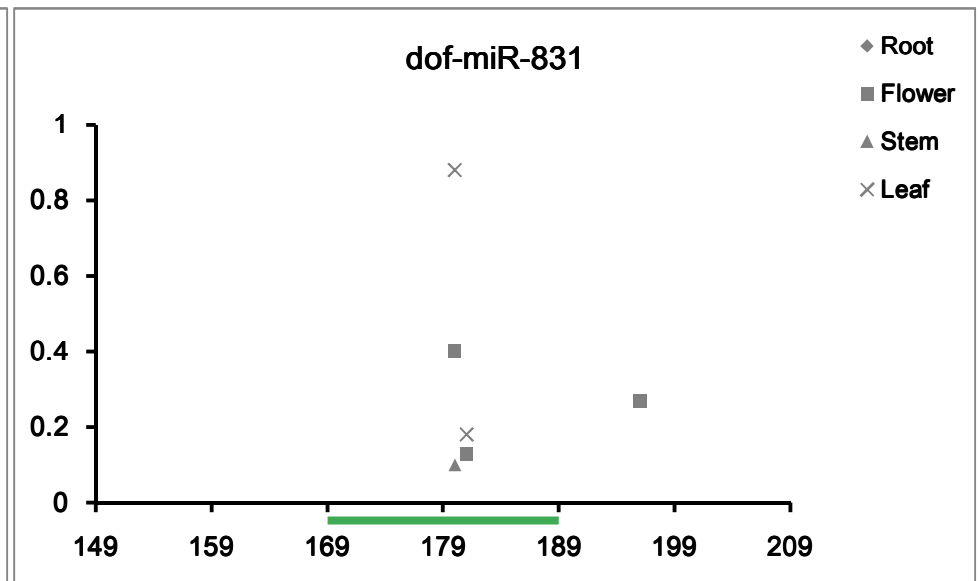

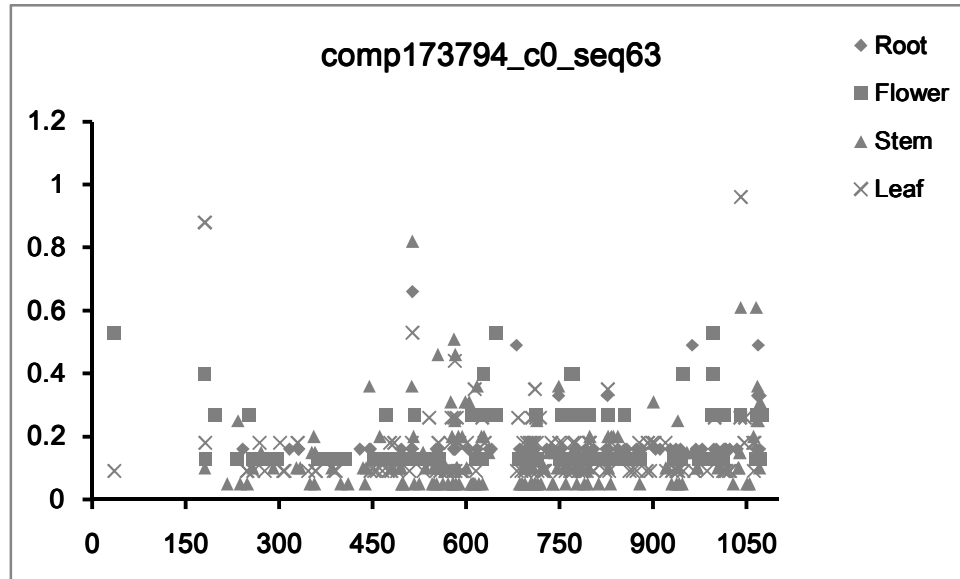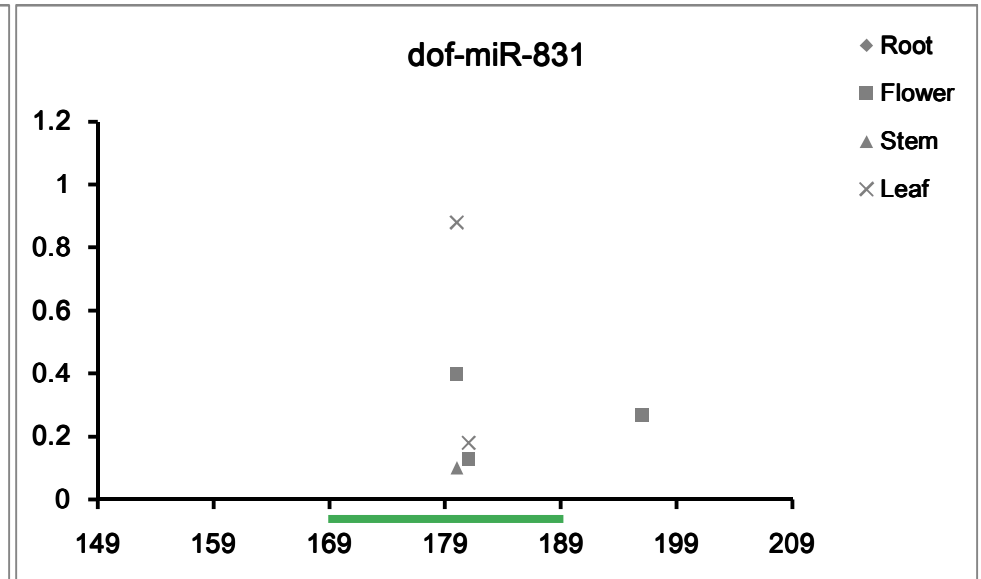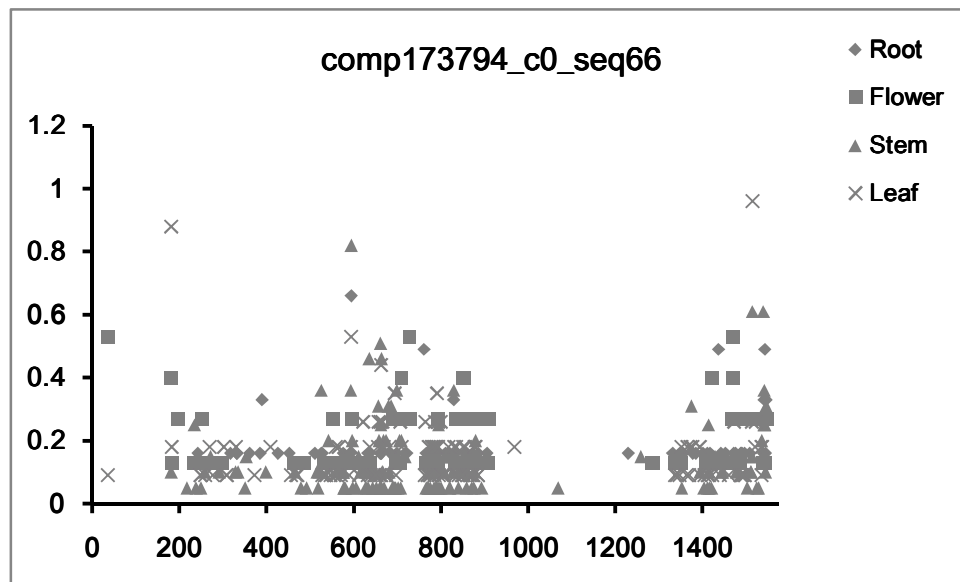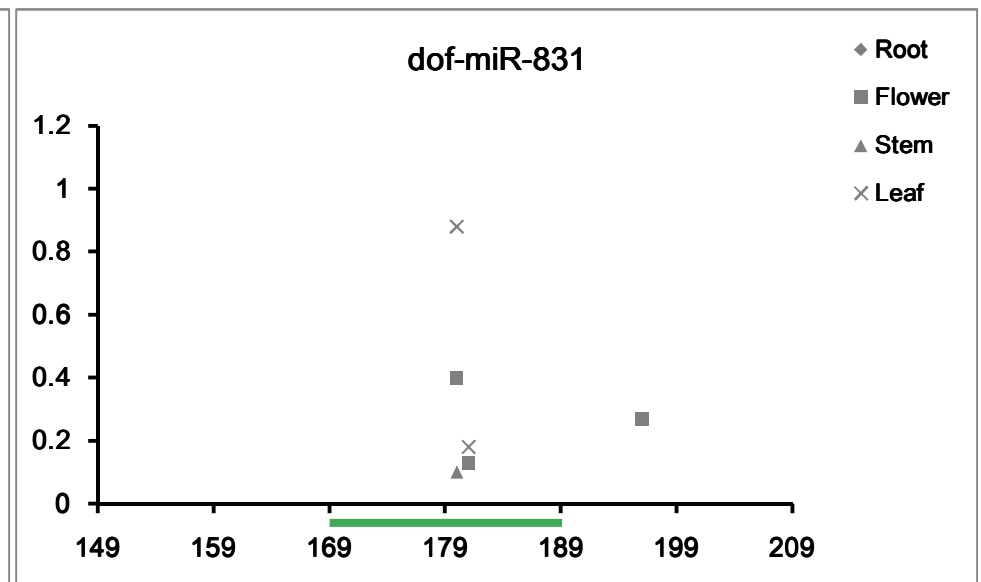

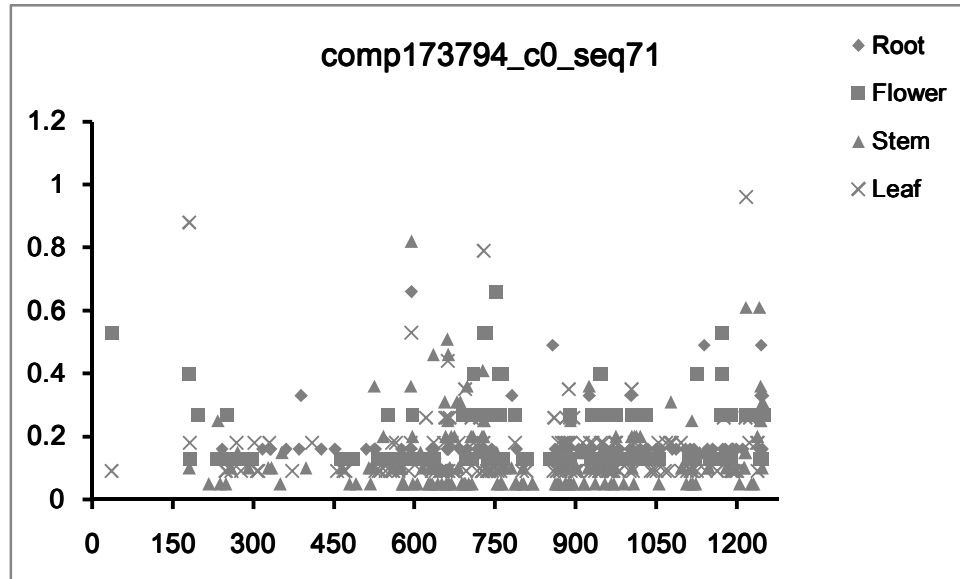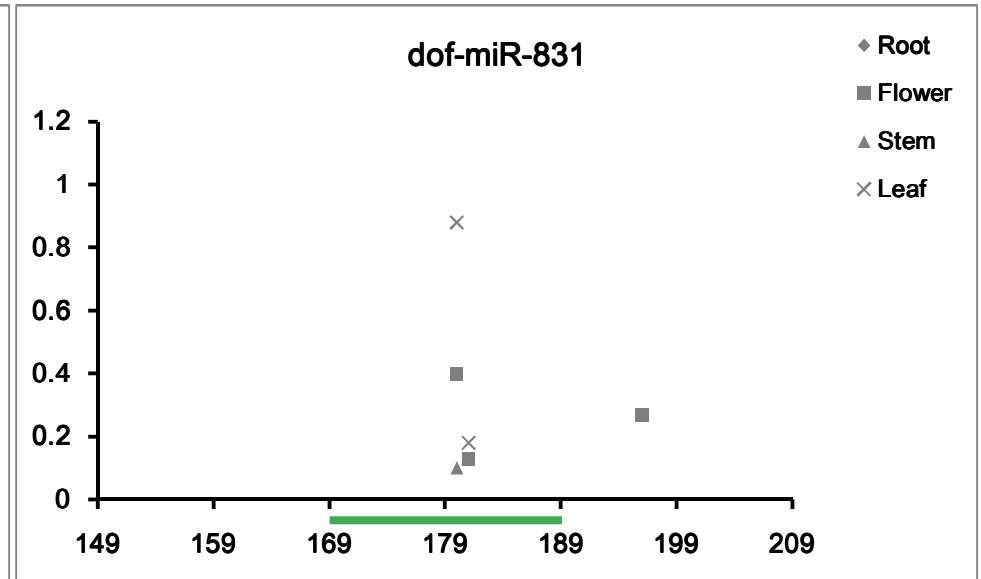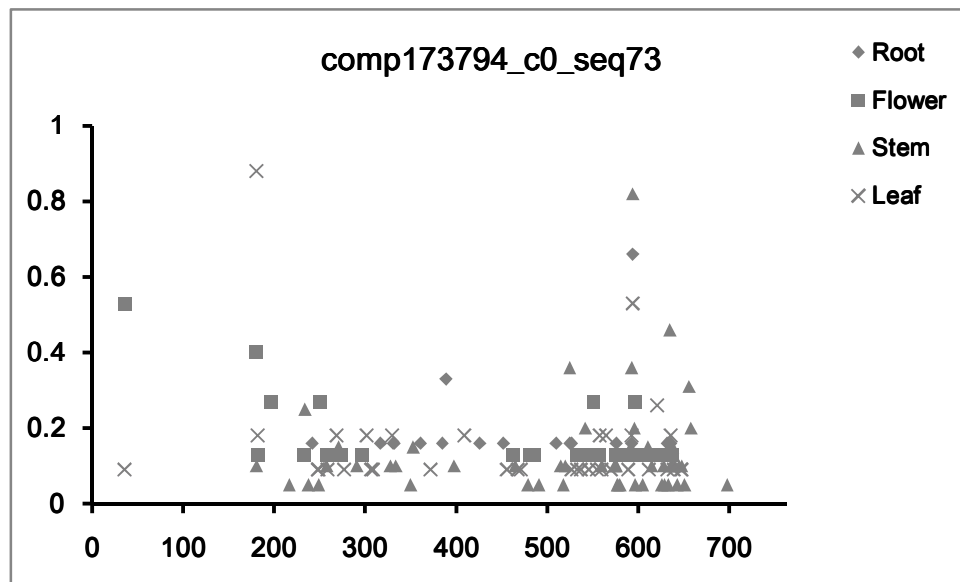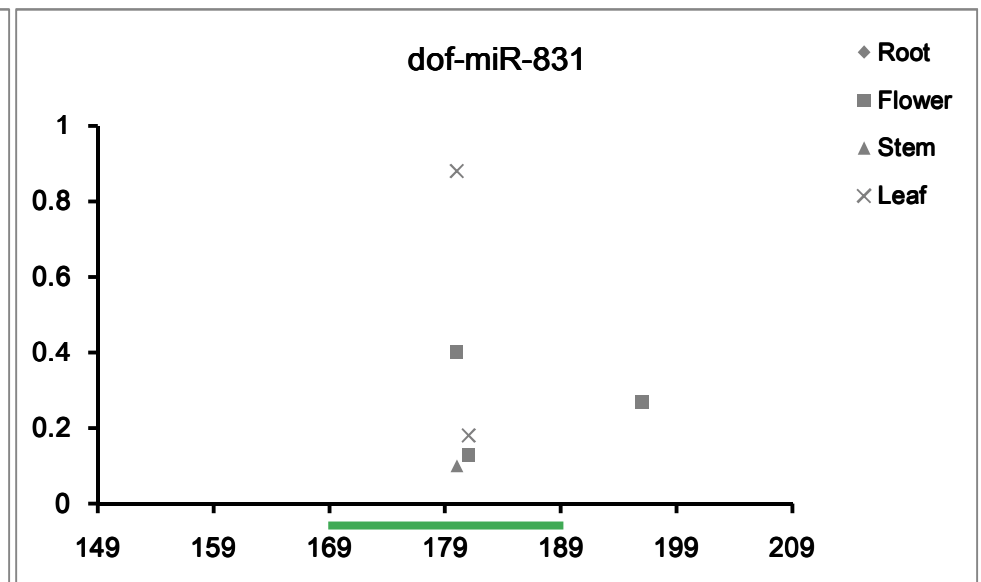

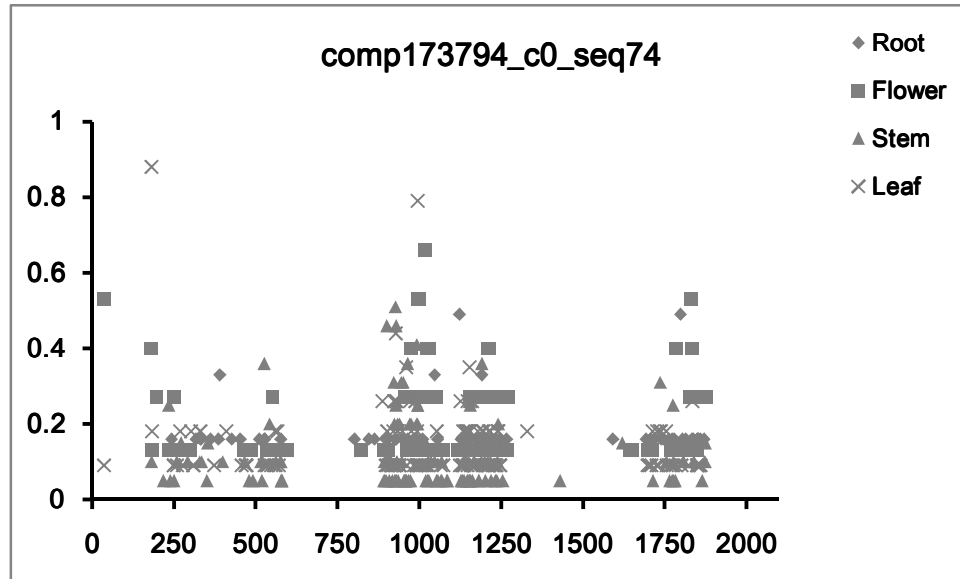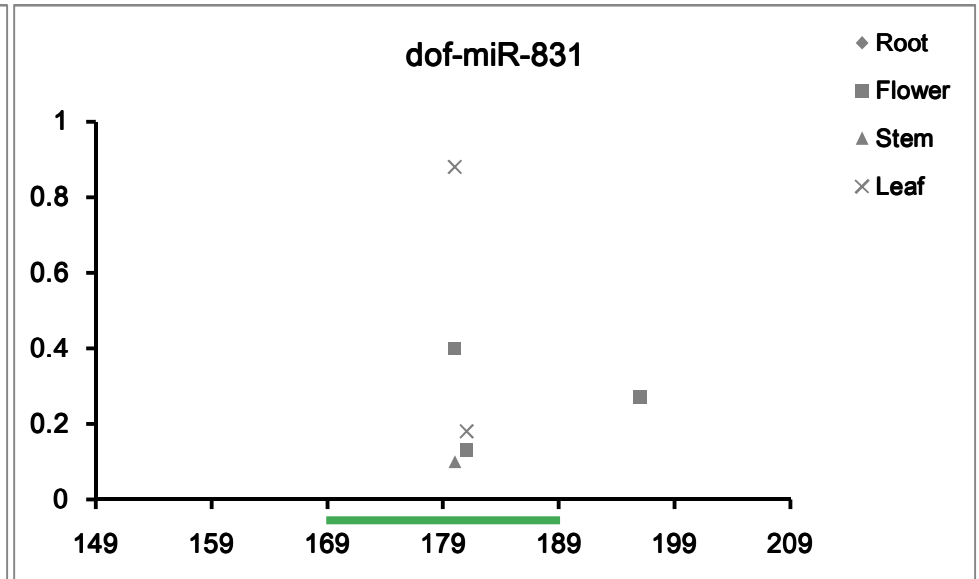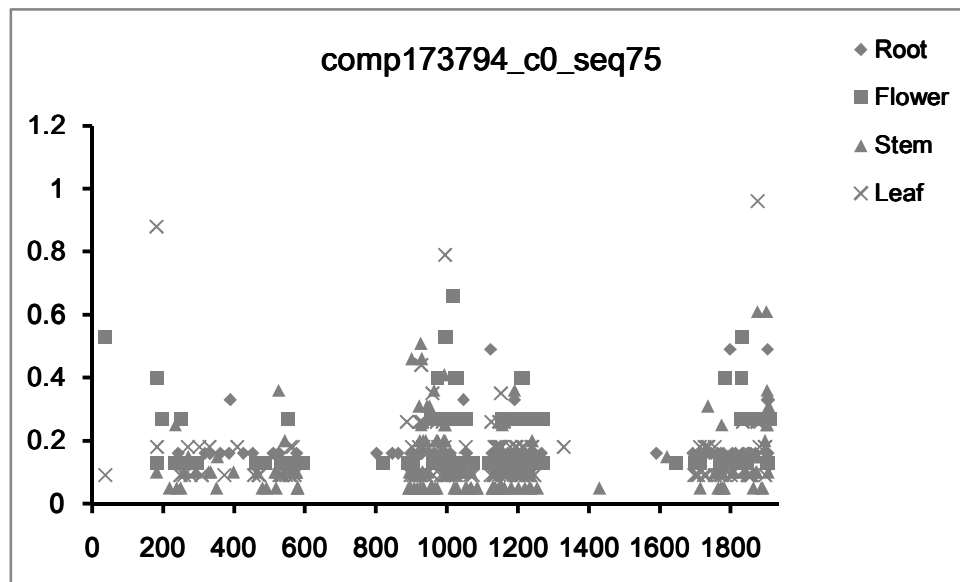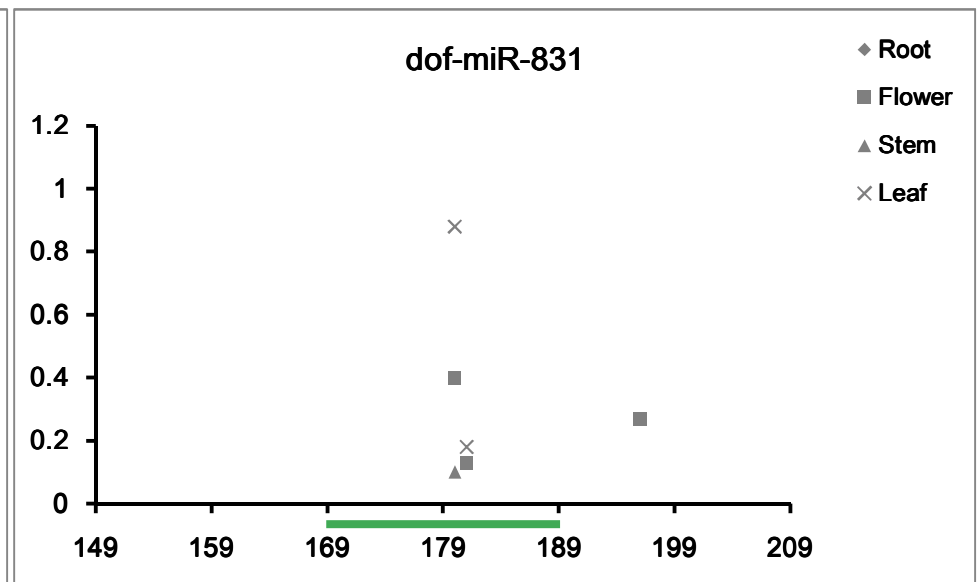



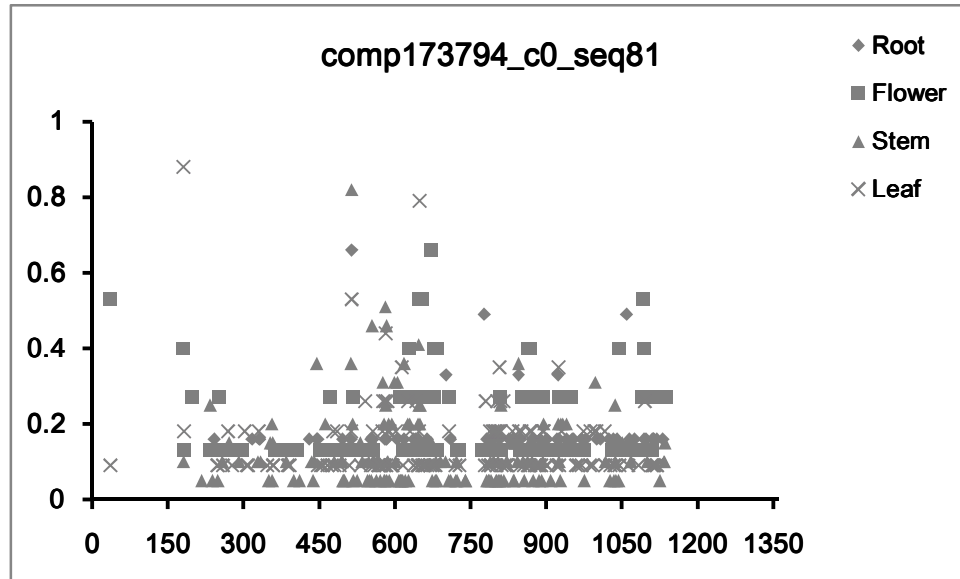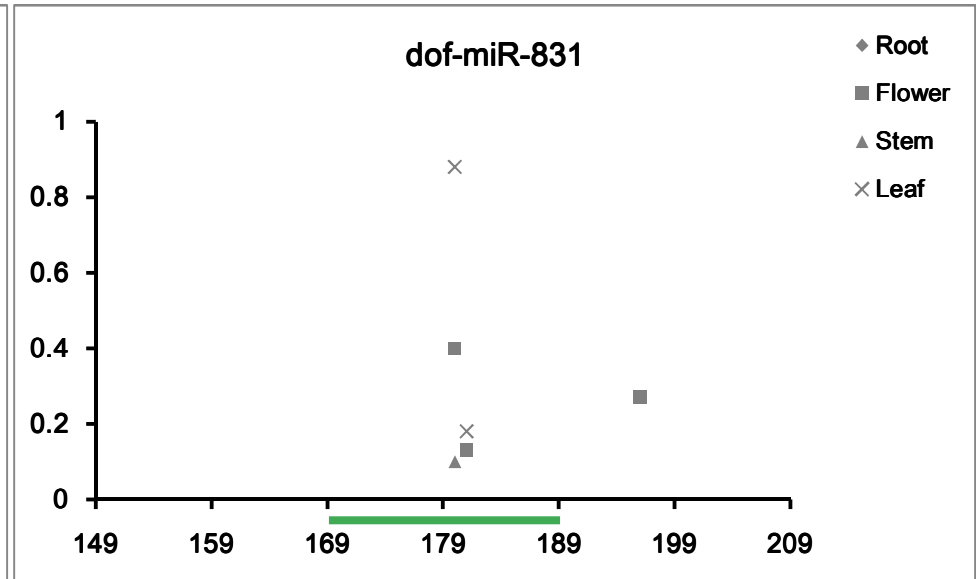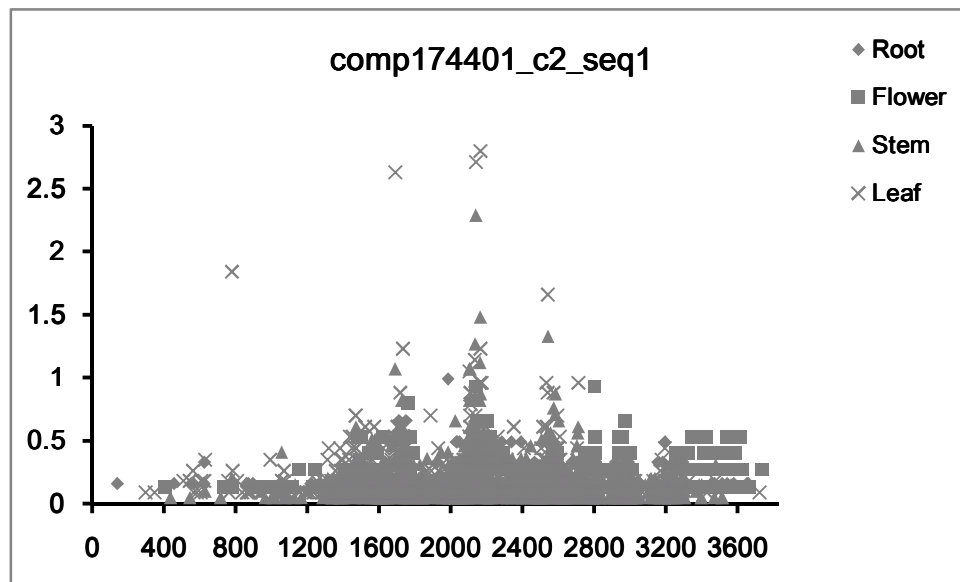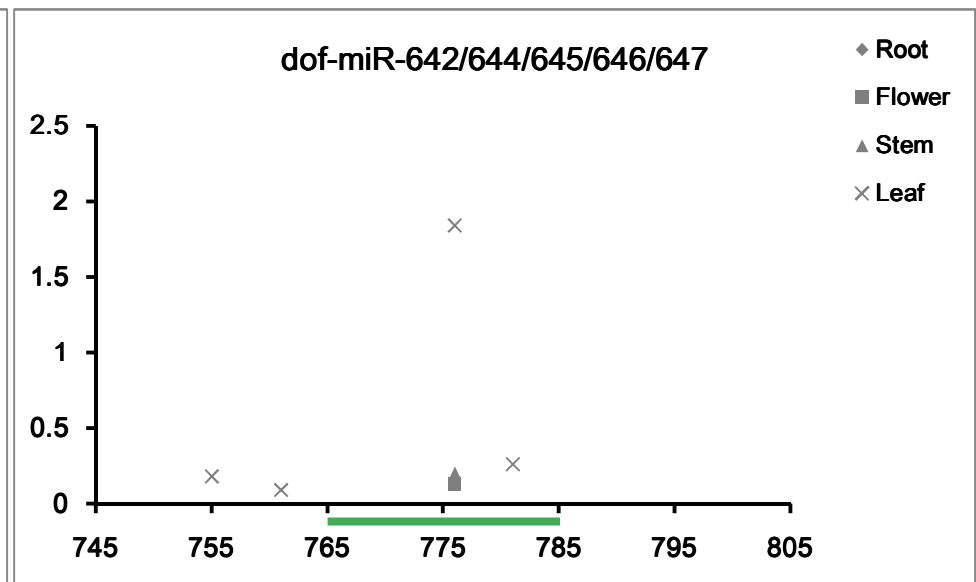

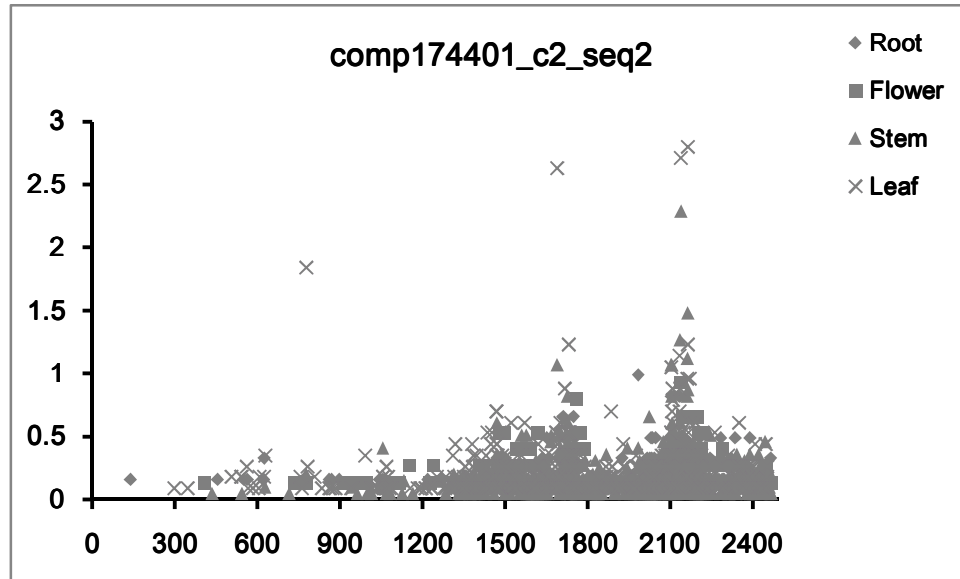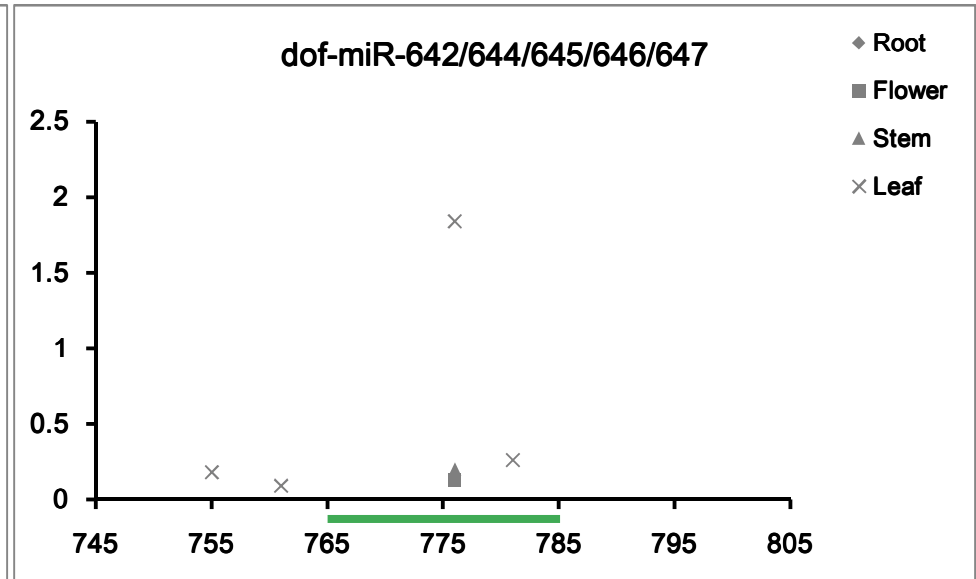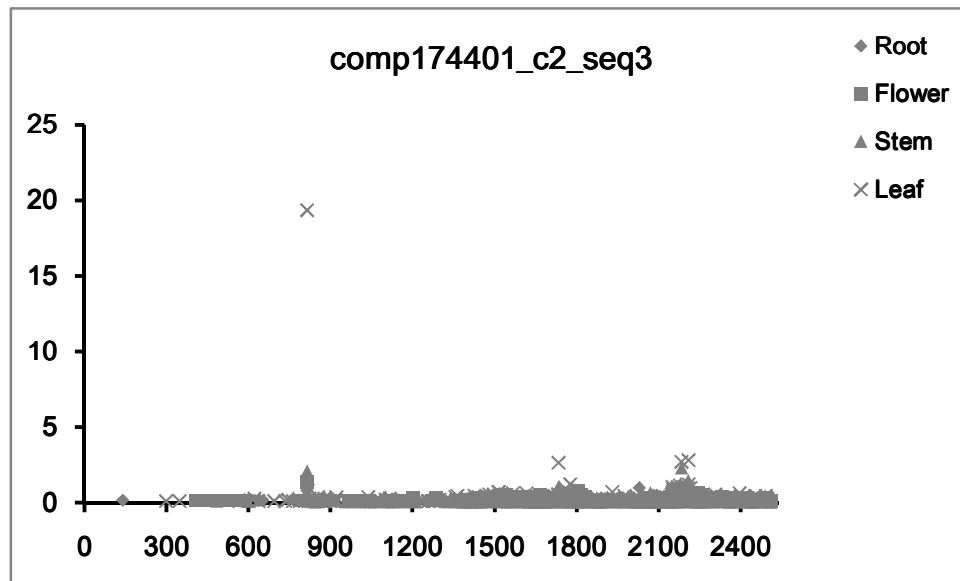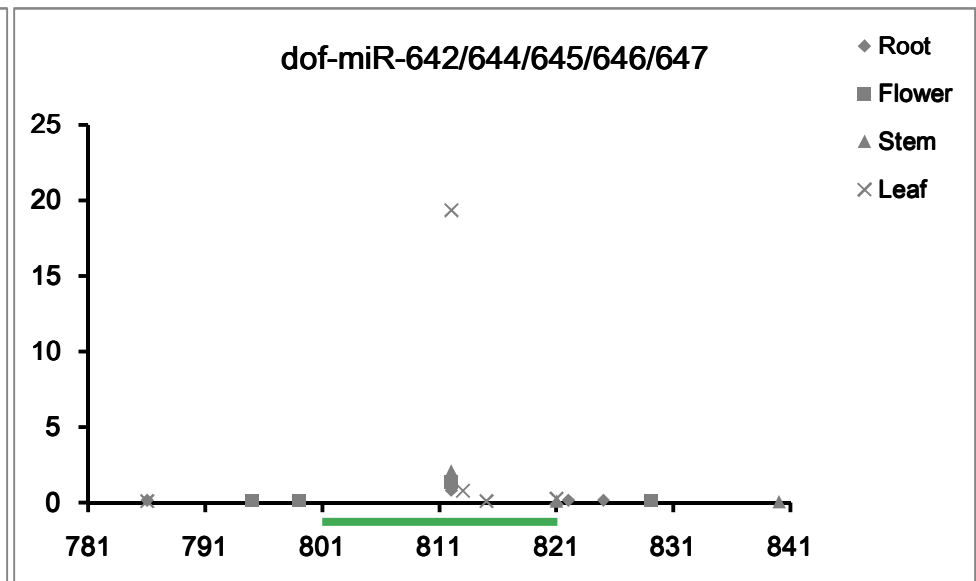

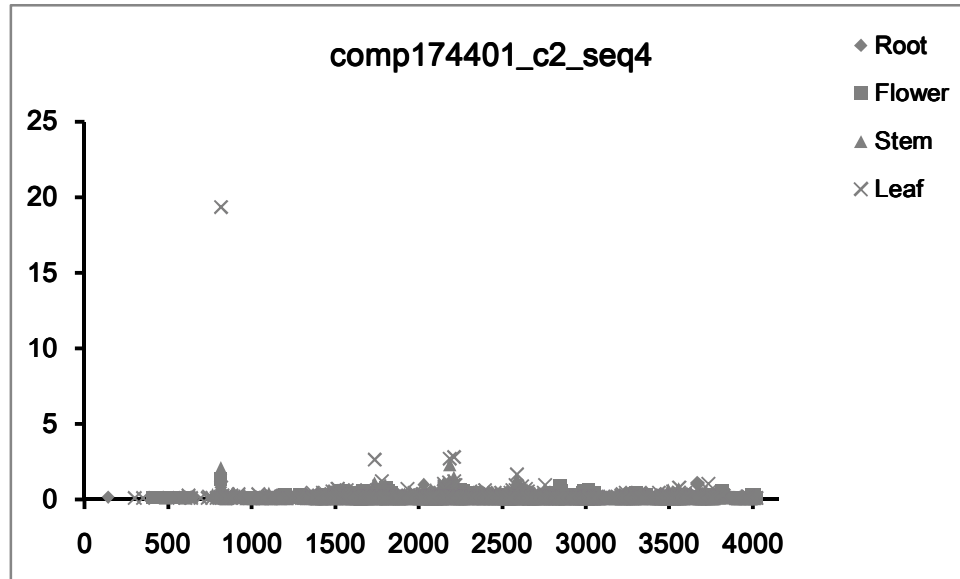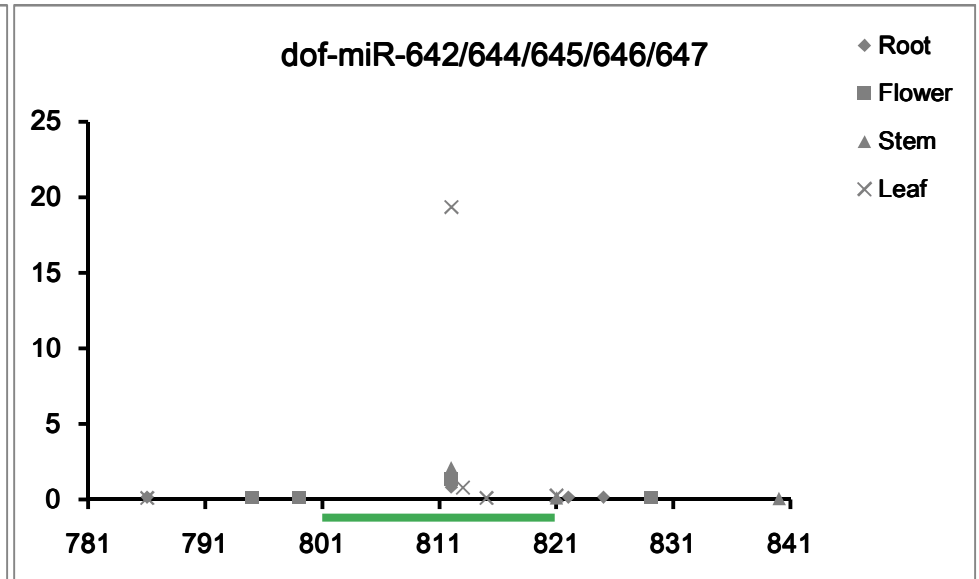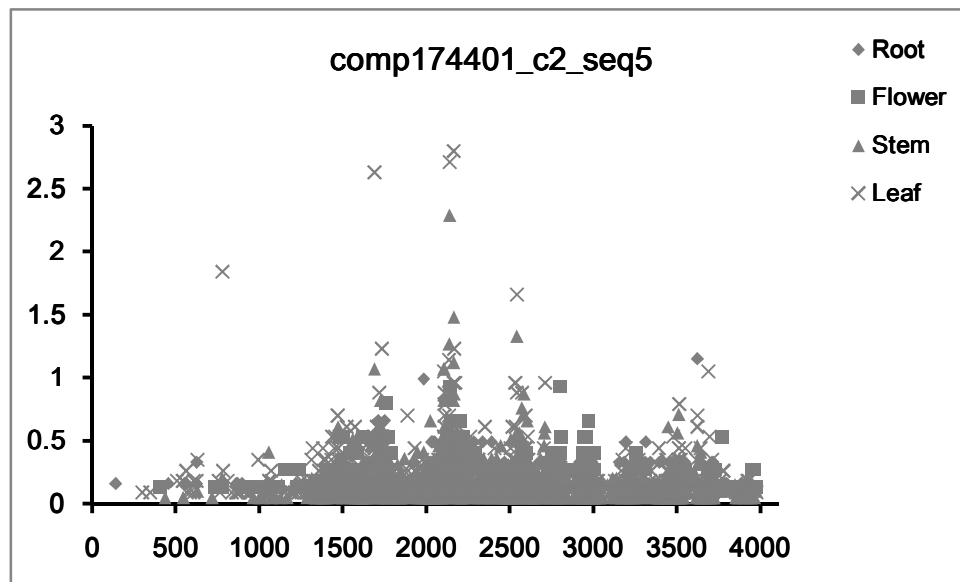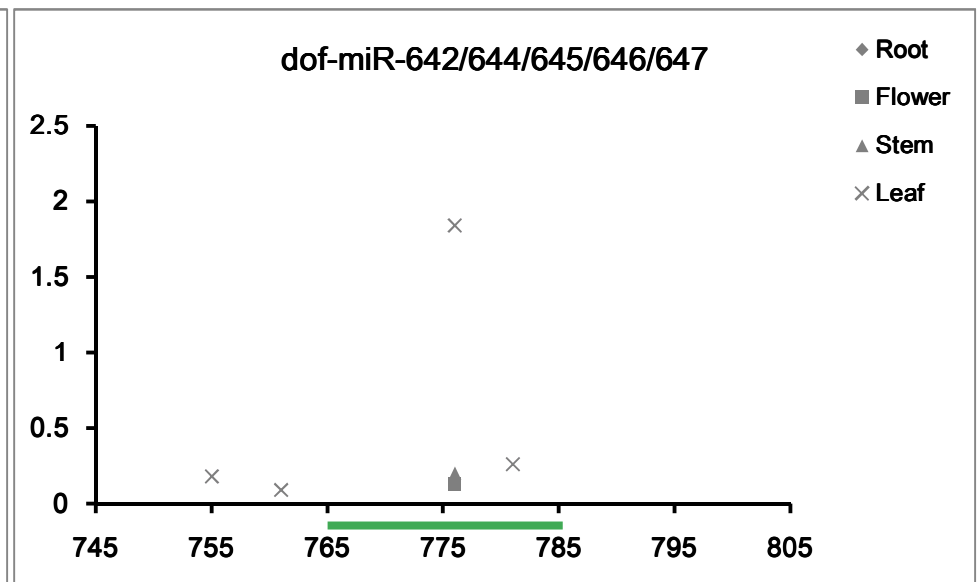

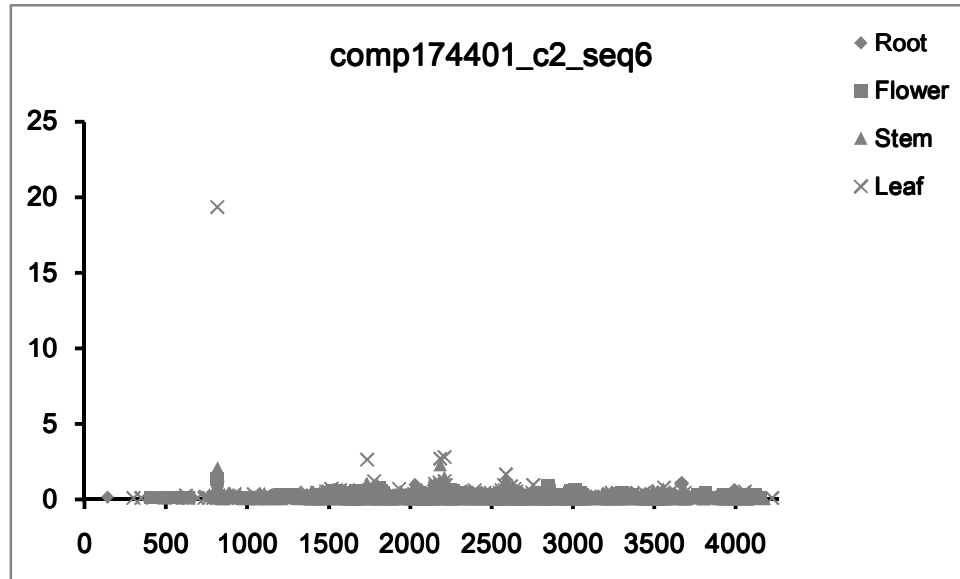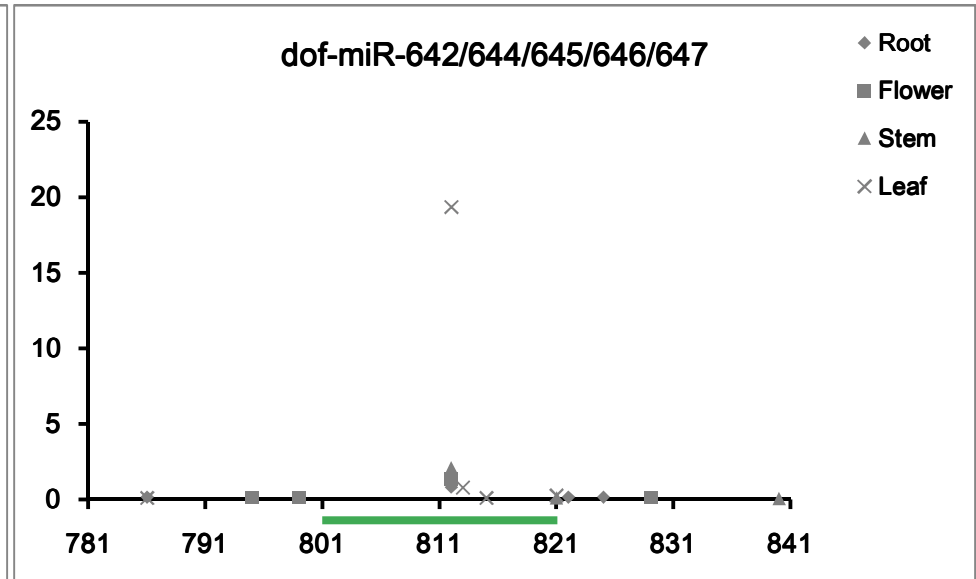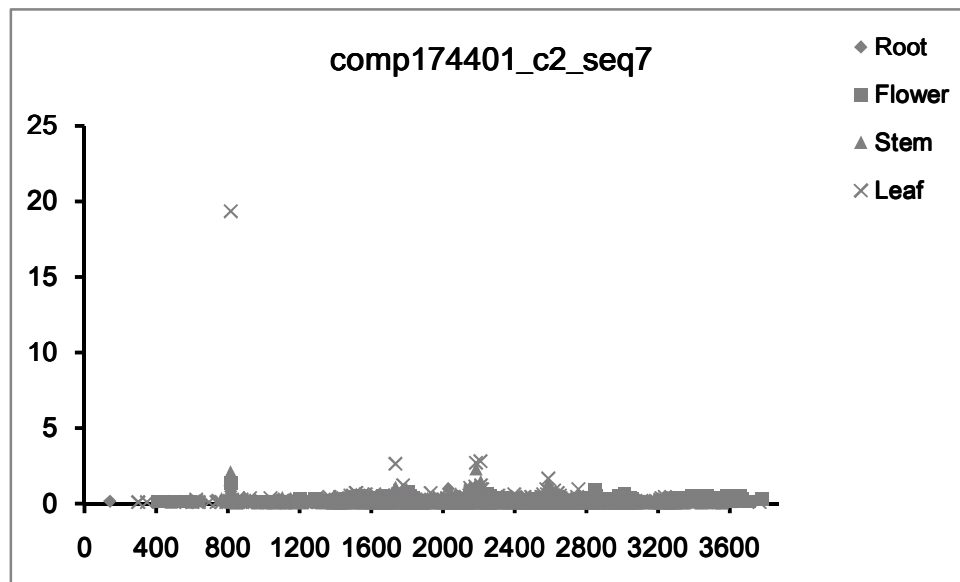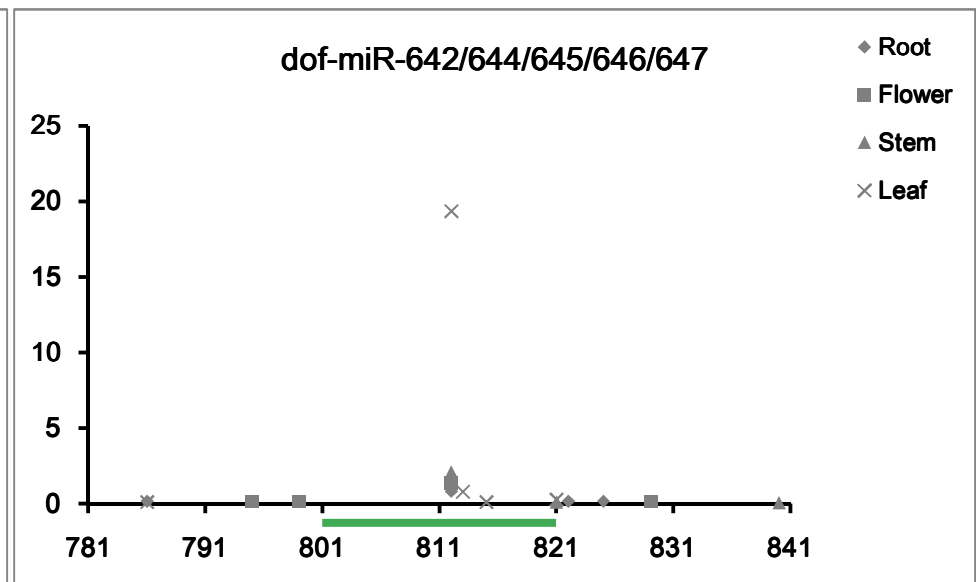

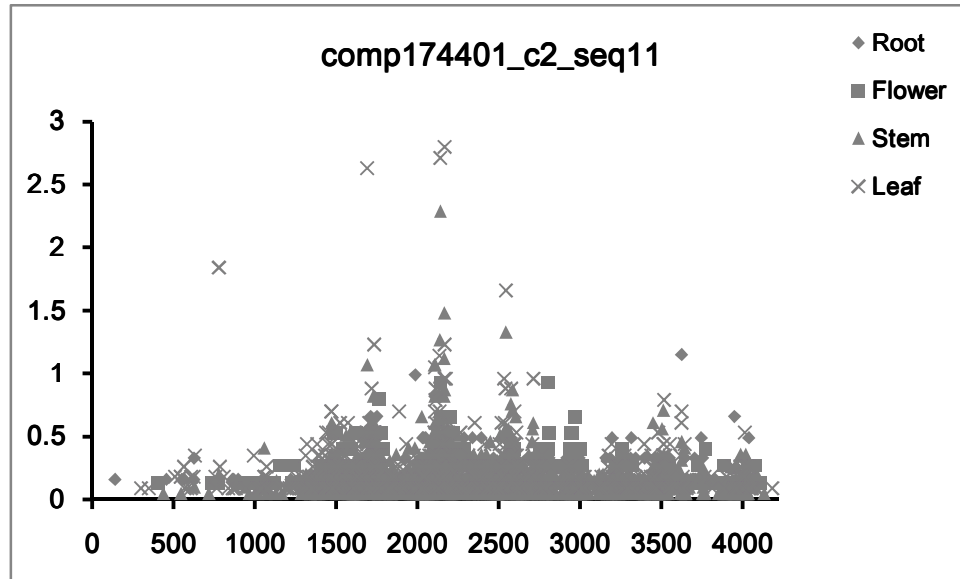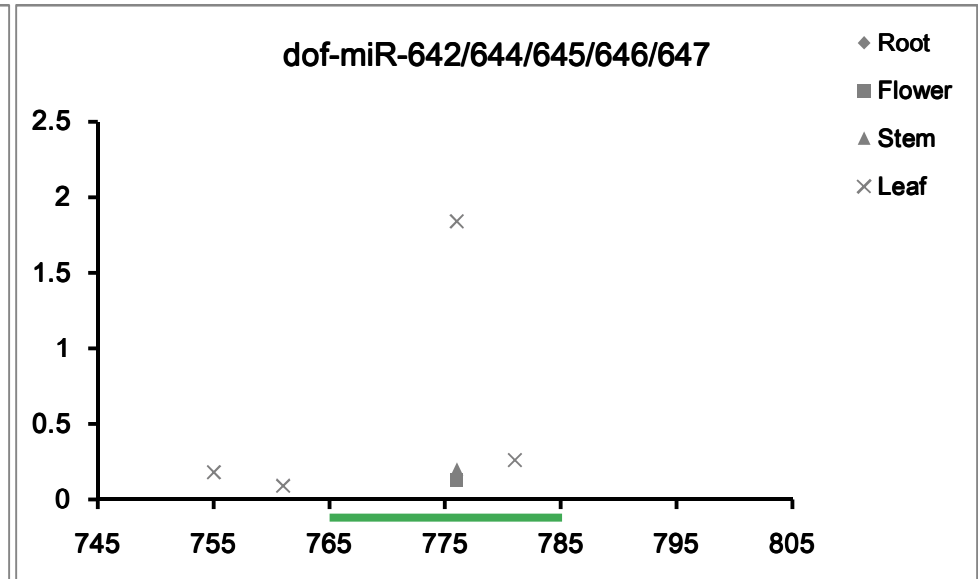

**Figure S6** Examples of miRNA--target pairs showing organ-specific regulation.

# Leaf-specific regulation

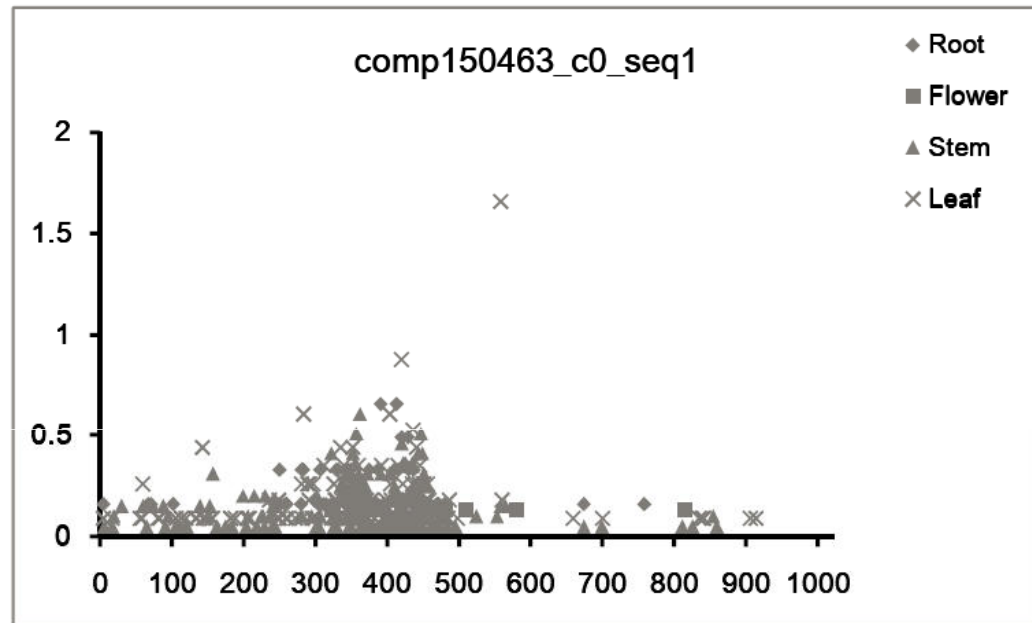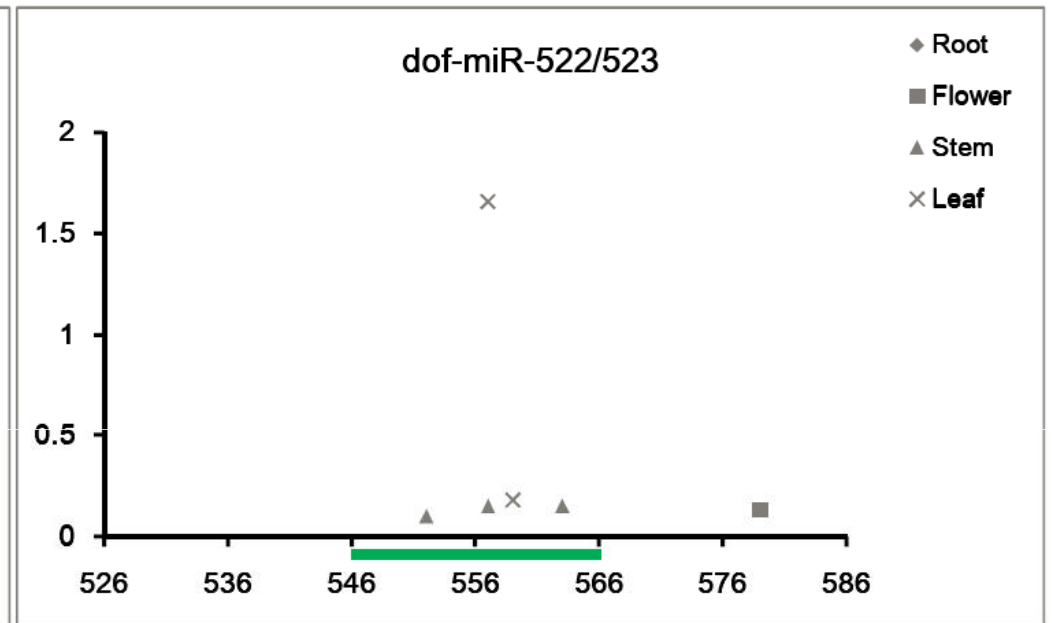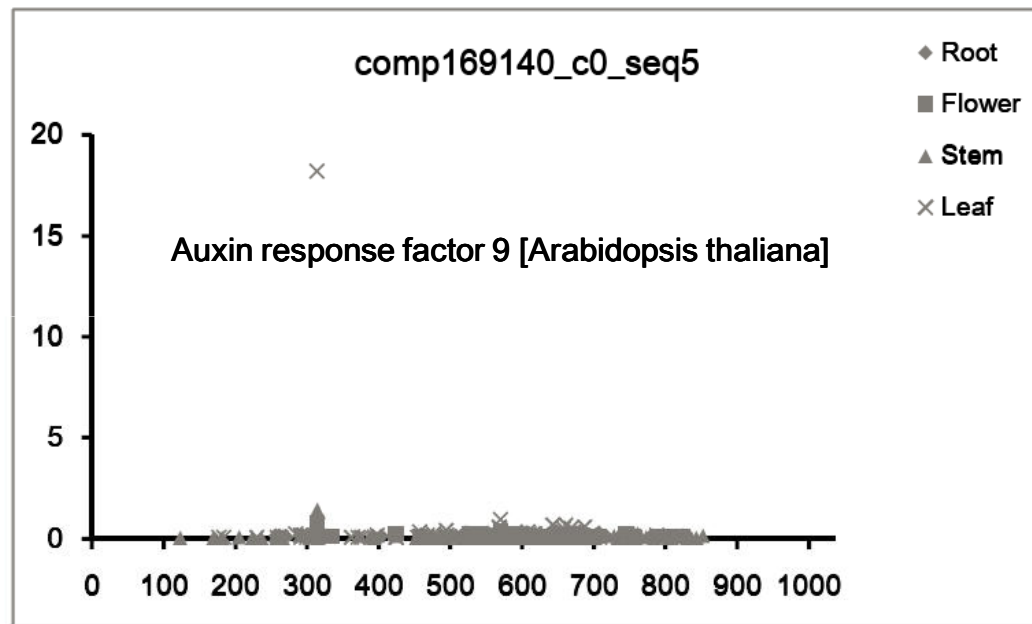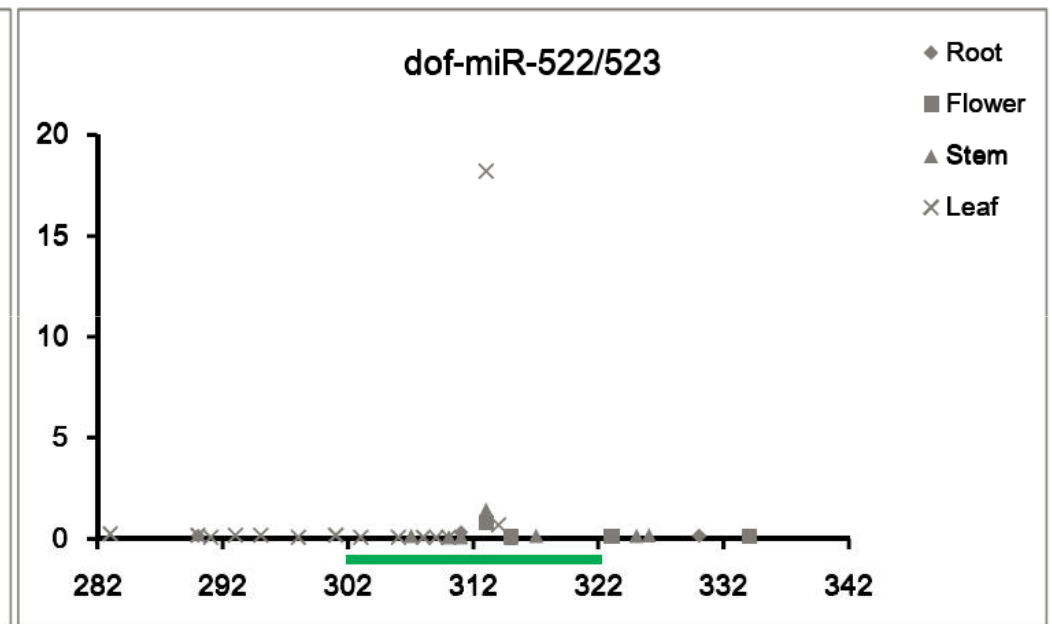

# Stem-specific regulation

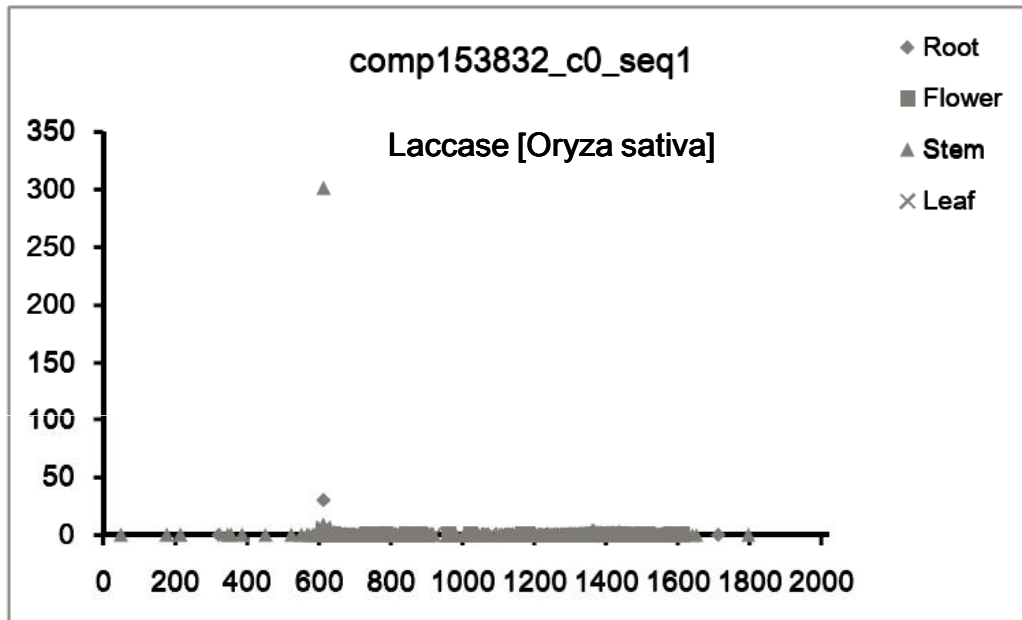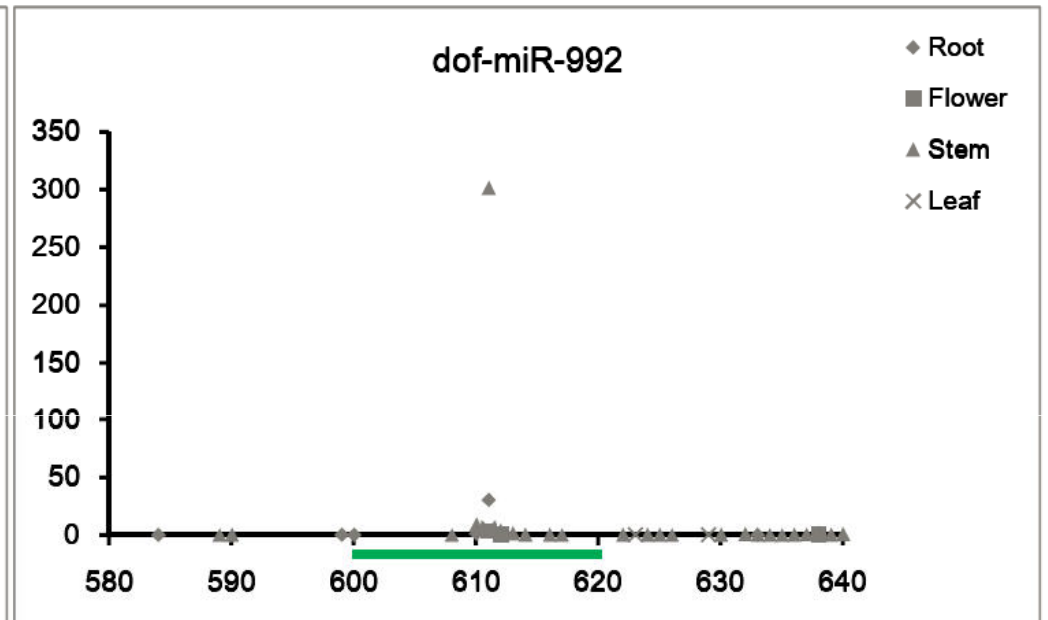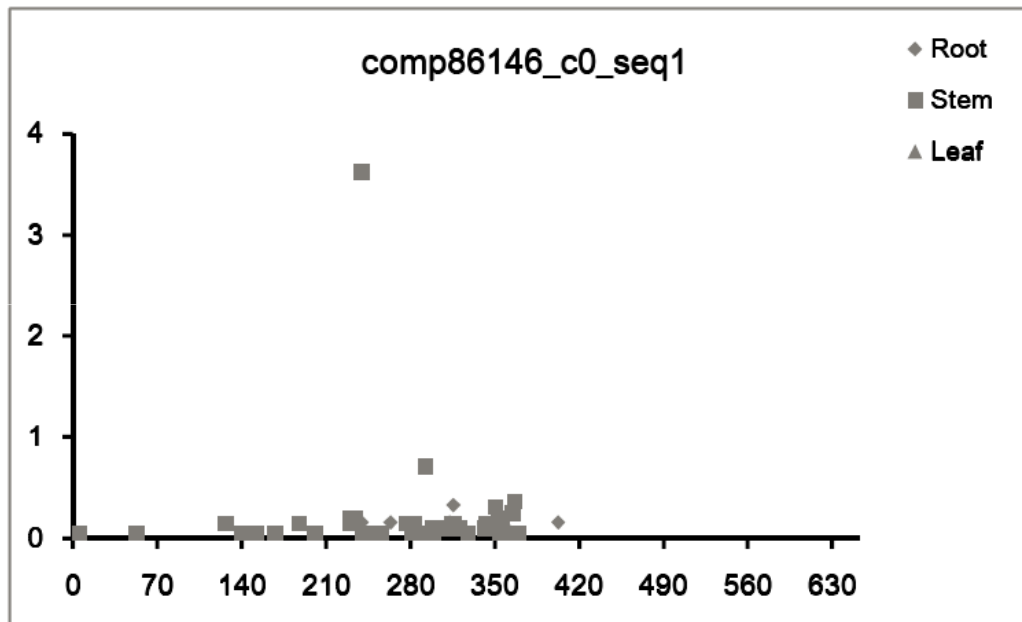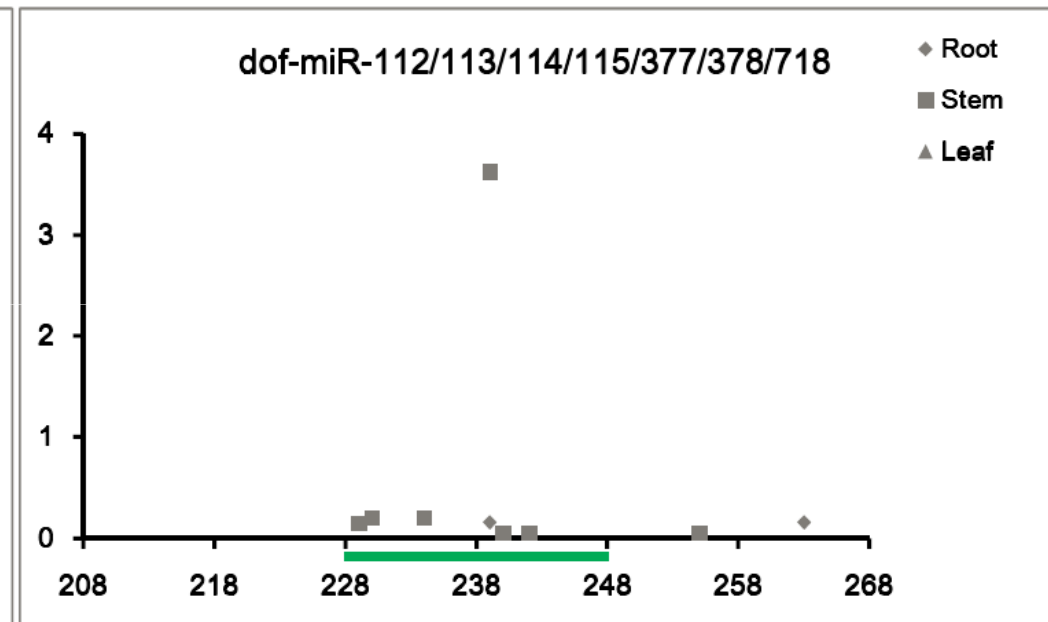



# Root-specific regulation

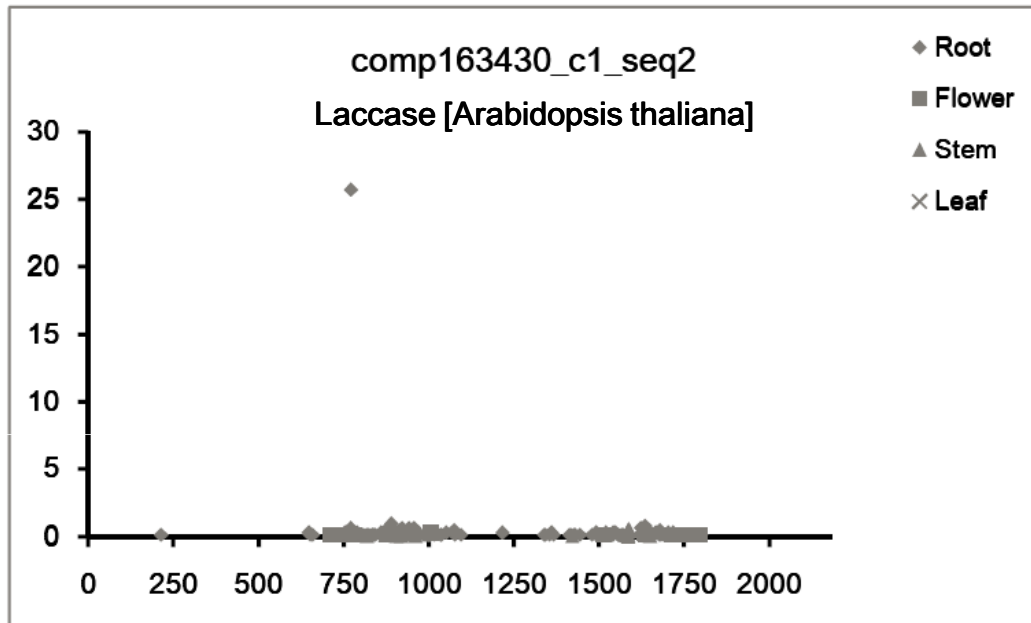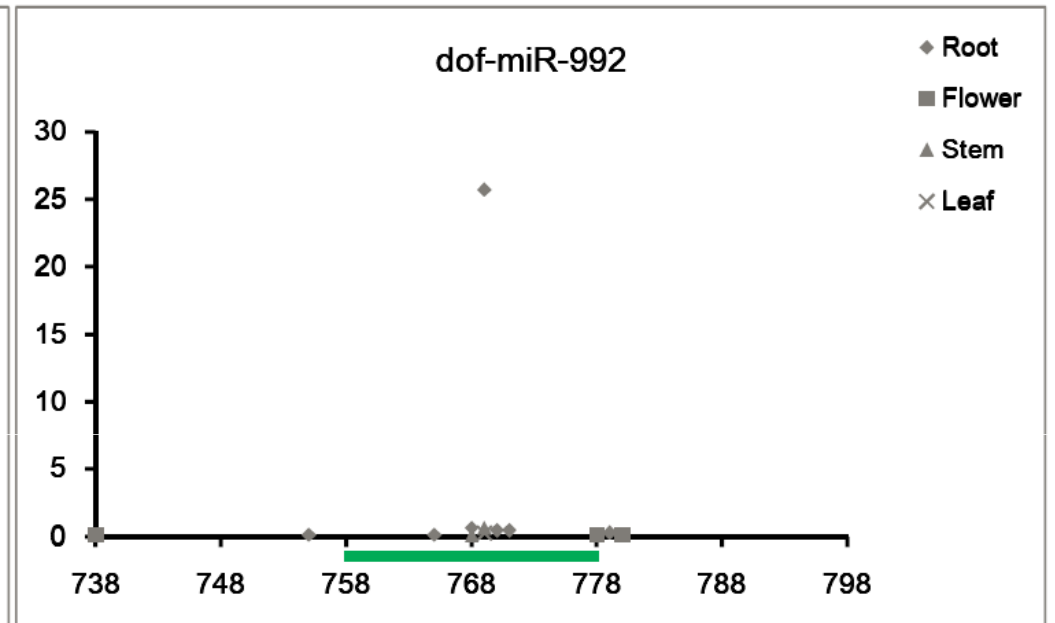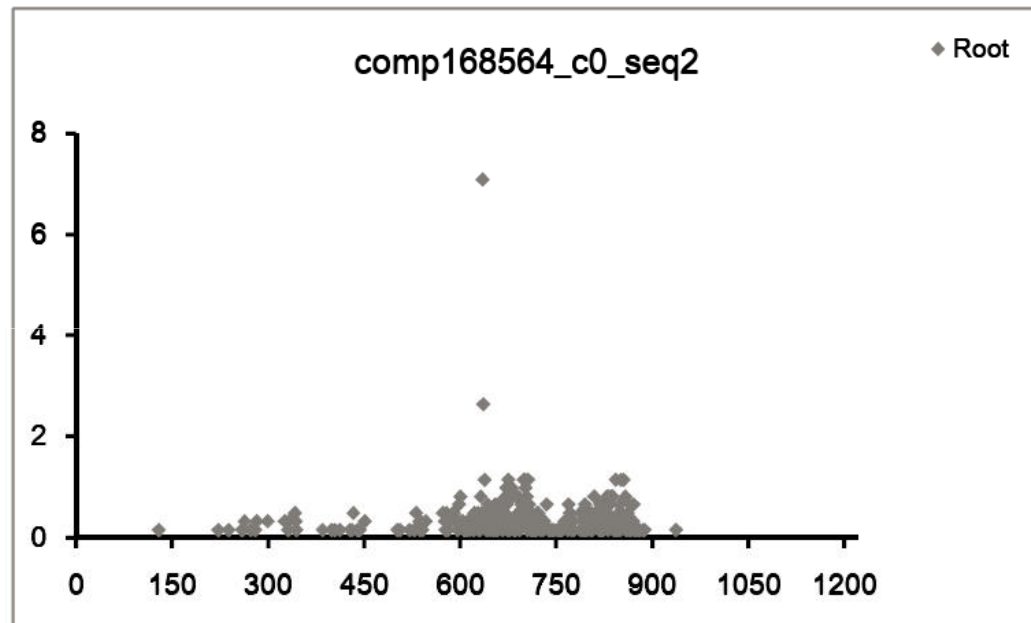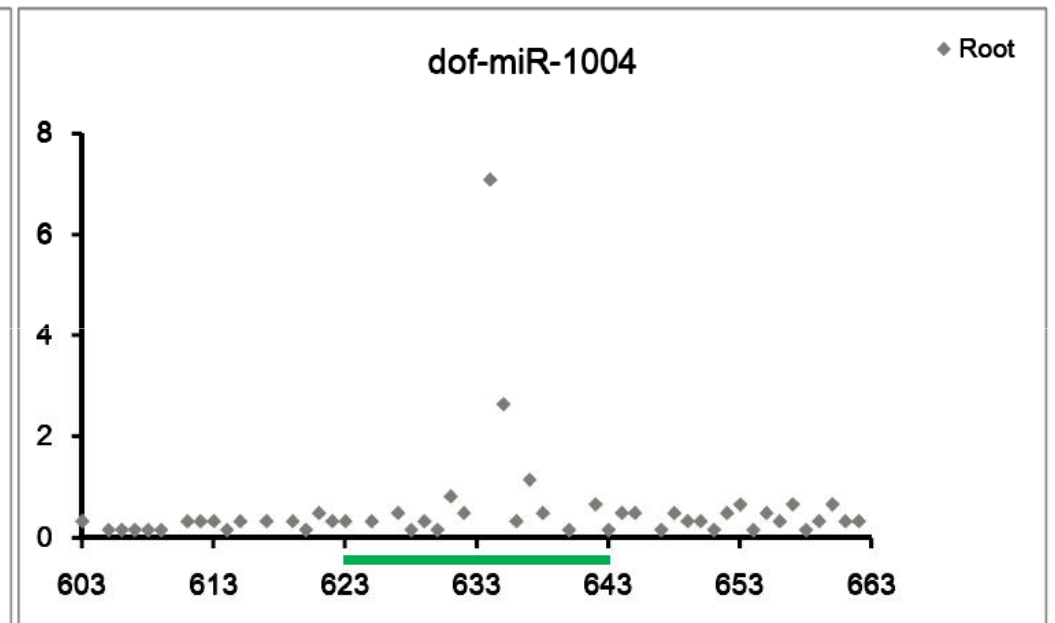

# Flower-specific regulation

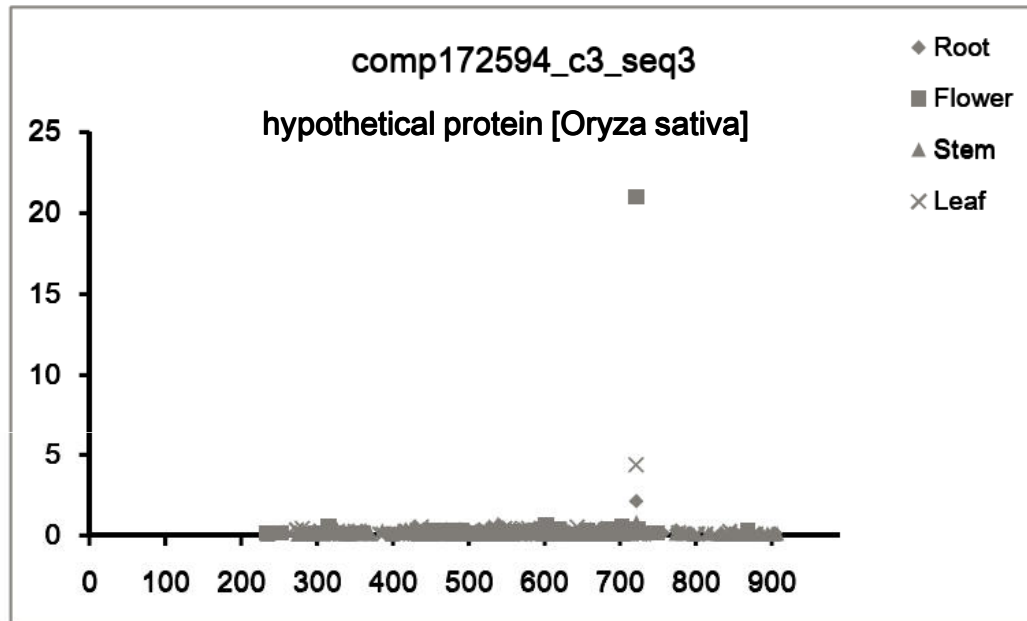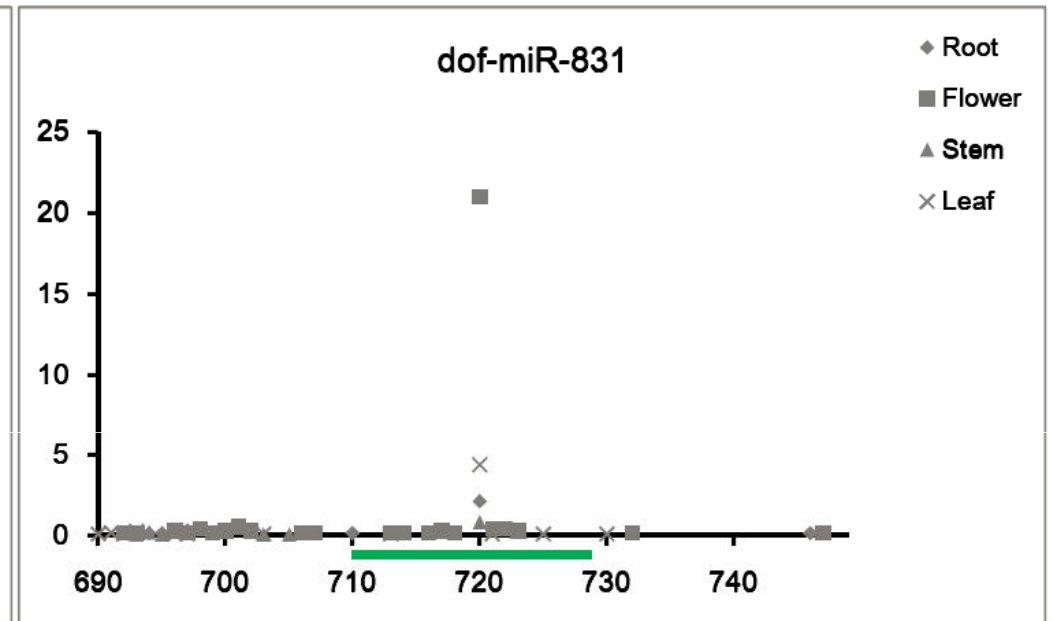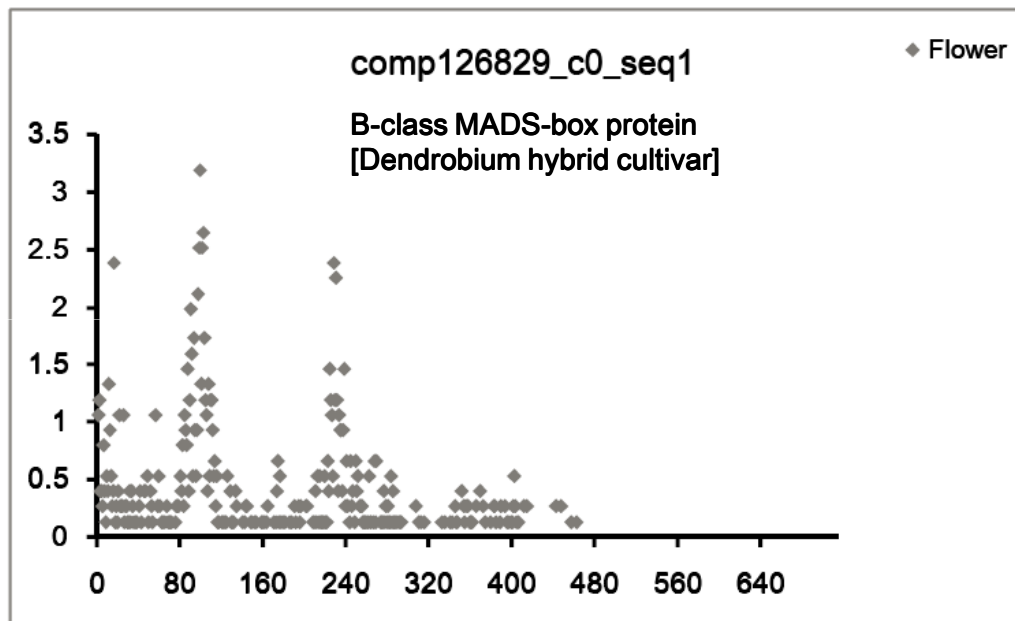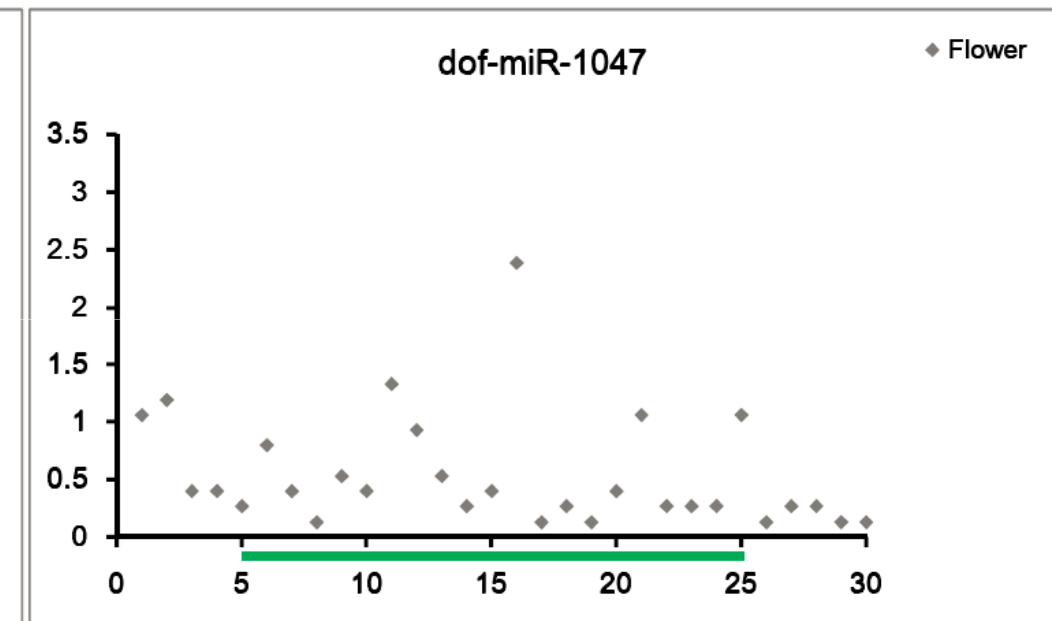

# Vegetative organ-specific regulation

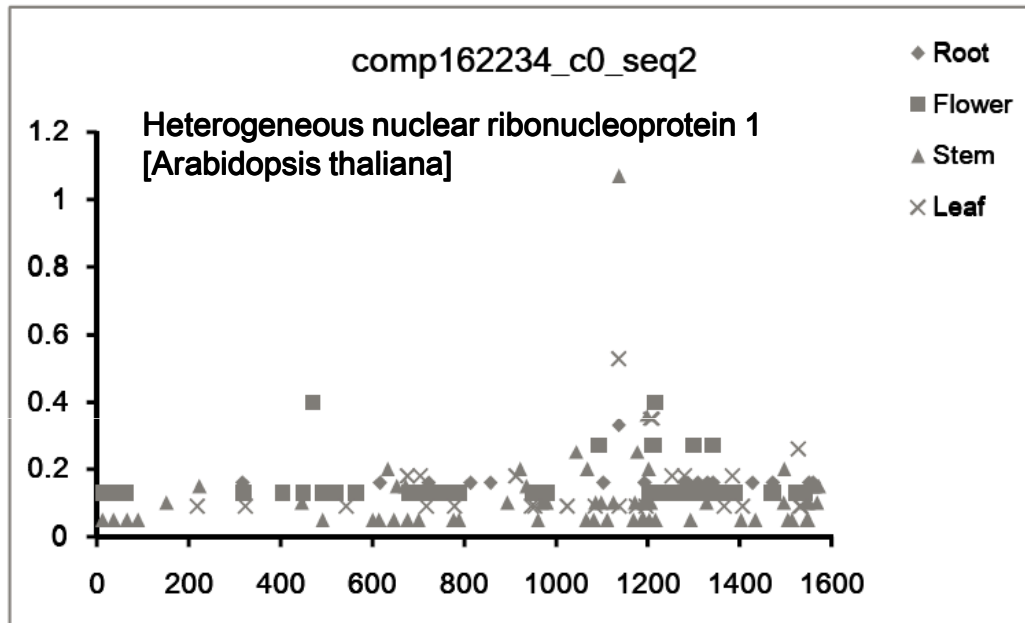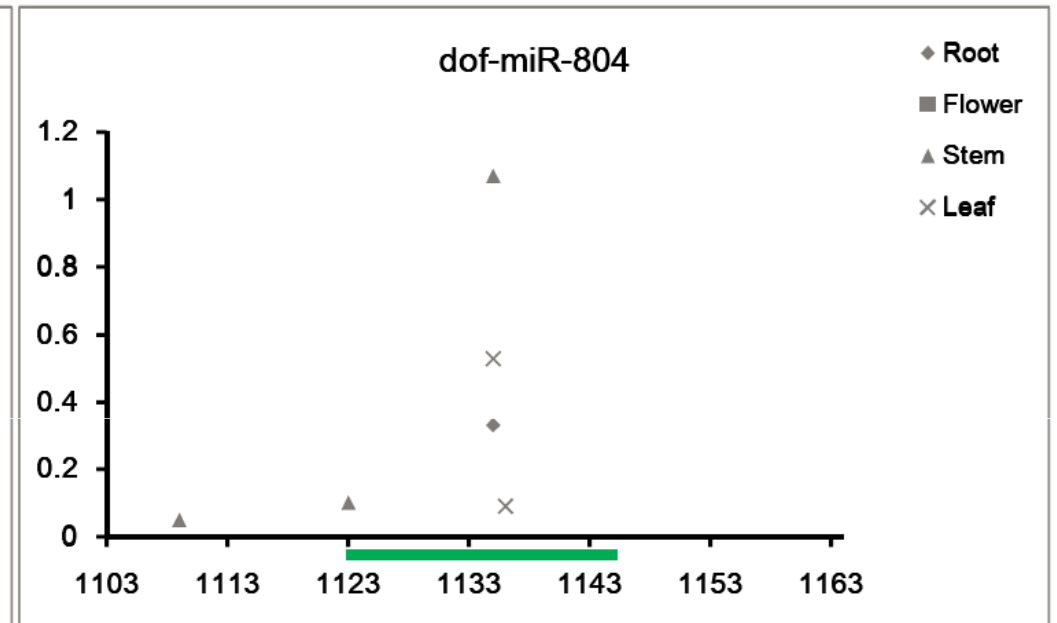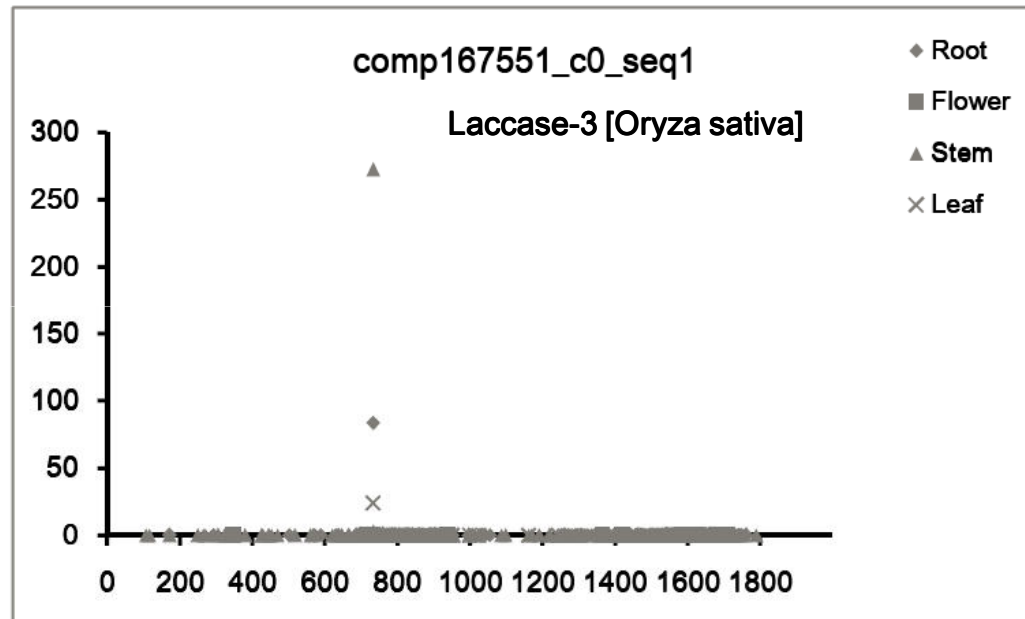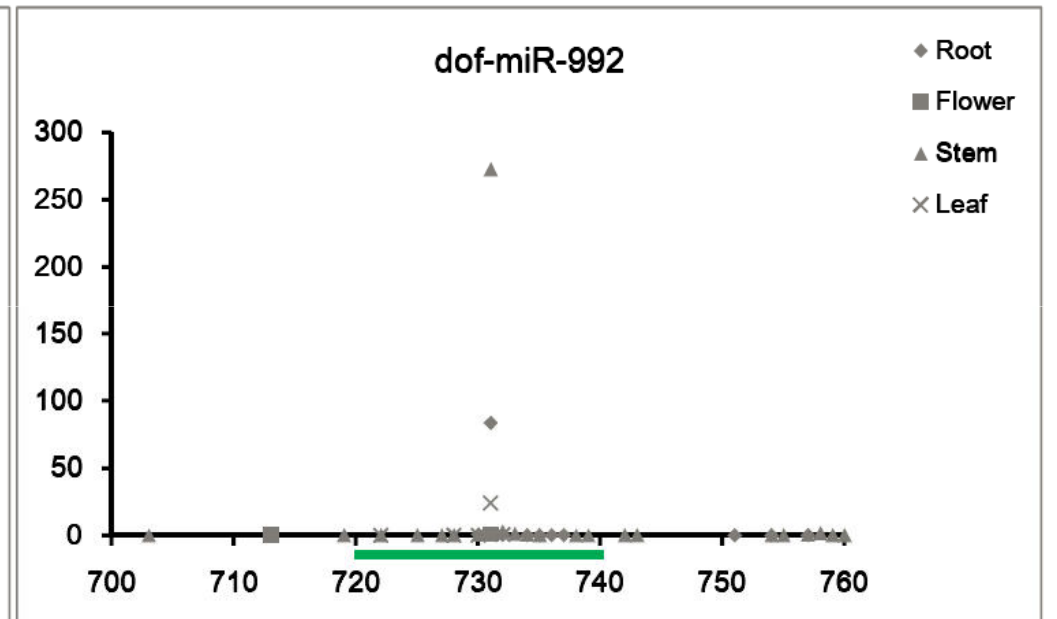

# Leaf-stem Homogeneity

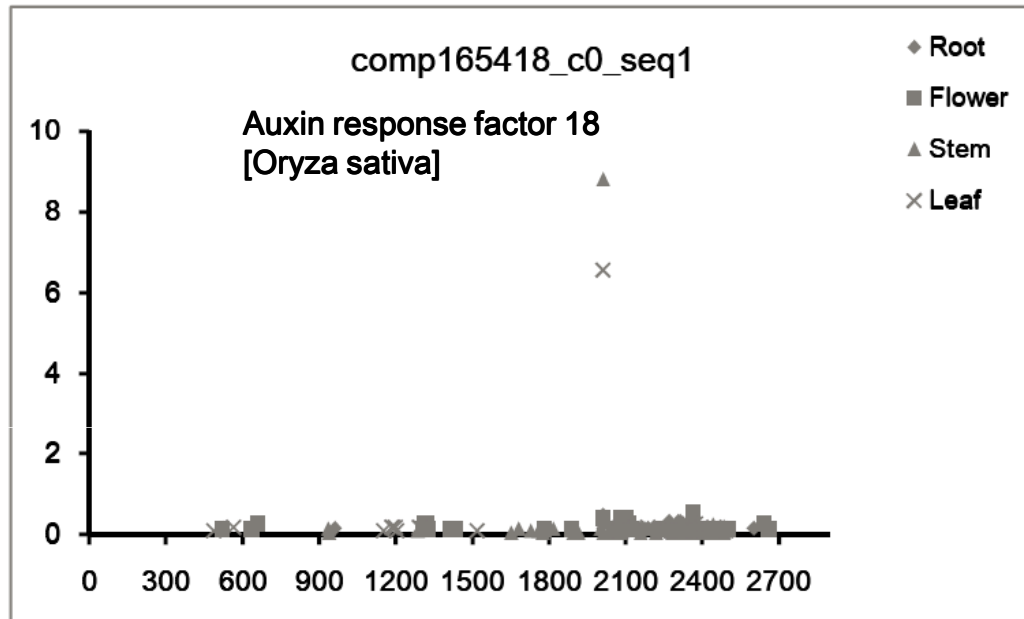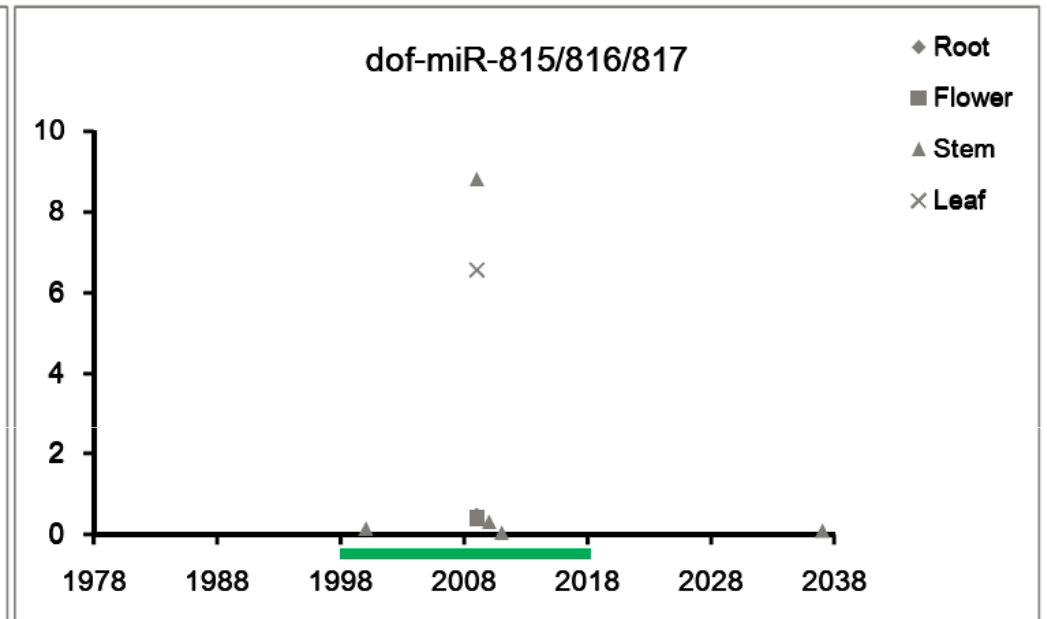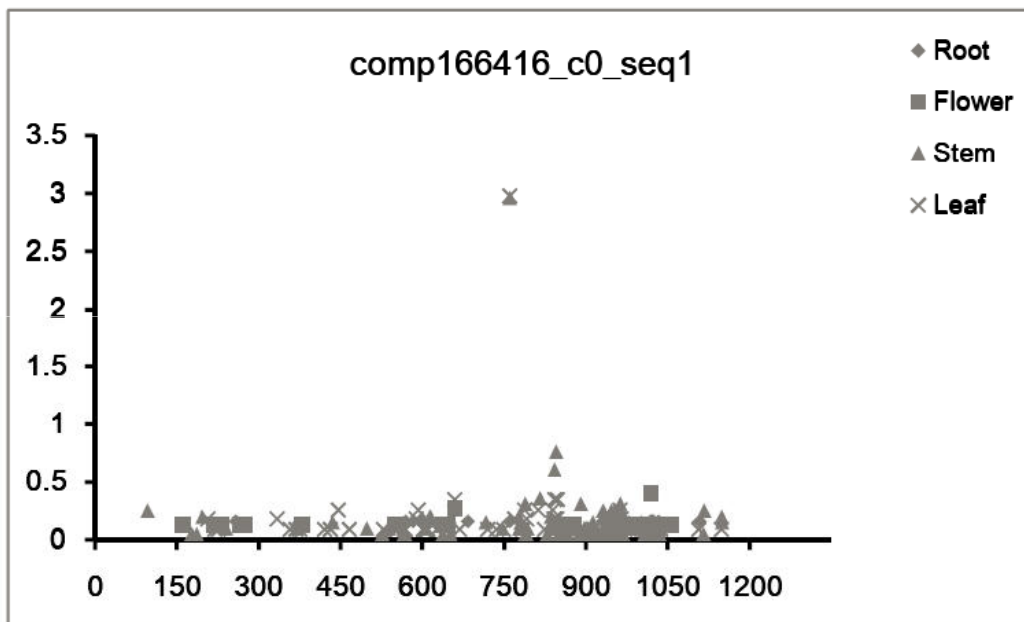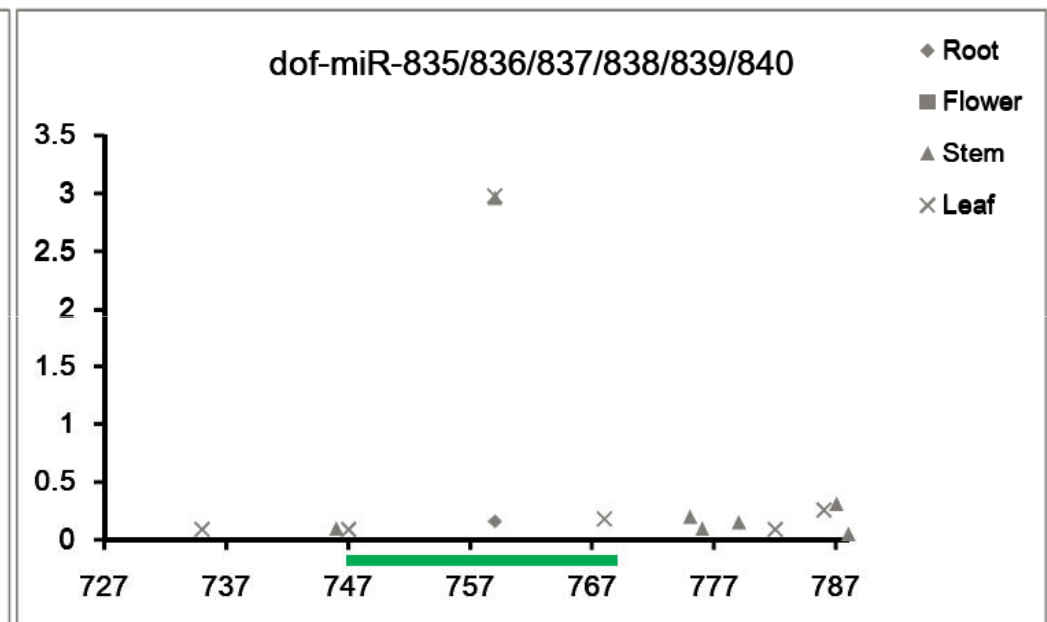

**Table S1-1 Statistical result of the raw RNA-seq data.**

| Samples  | Raw data   |               | Valid data |               | Valid read ratio |
|----------|------------|---------------|------------|---------------|------------------|
|          | Read       | Base          | Read       | Base          |                  |
| Root-1   | 54,469,054 | 5,446,905,400 | 54,433,348 | 5,443,334,800 | 99.93%           |
| Root-2   | 71,462,678 | 7,146,267,800 | 71,358,490 | 7,135,849,000 | 99.85%           |
| Stem-1   | 50,076,260 | 5,007,626,000 | 50,076,260 | 5,007,626,000 | 100%             |
| Stem-2   | 64,920,086 | 6,492,008,600 | 64,826,004 | 6,482,600,400 | 99.86%           |
| Leaf-1   | 73,647,052 | 7,364,705,200 | 73,534,024 | 7,353,402,400 | 99.85%           |
| Leaf-2   | 53,904,216 | 5,390,421,600 | 53,862,708 | 5,386,270,800 | 99.92%           |
| Flower-1 | 38,776,952 | 3,877,695,200 | 38,736,660 | 3,873,666,000 | 99.9%            |
| Flower-2 | 38,669,310 | 3,866,931,000 | 38,602,508 | 3,860,250,800 | 99.83%           |

**Table S1-2 Statistical result of the assembled transcripts and unique genes.**

|              | No. of transcripts<br>/unique genes | Minimum length | Median length | Mean length | N50   | Maximum length |
|--------------|-------------------------------------|----------------|---------------|-------------|-------|----------------|
| Transcripts  | 536,558                             | 201            | 463           | 931         | 1,731 | 21,555         |
| Unique genes | 299,107                             | 201            | 333           | 660         | 1,192 | 21,555         |

**Table S2** List of the transcripts highly accumulated in specific organs (root, flower, stem or leaf; highlighted) of *Dendrobium officinale*. The transcript IDs along with their expression levels (normalized in RPKM and rescaled by log10) in four organs are included in this table. For each organ, there are two biological replicates (“Root1” and “Root2”, for example). ND: not detected.

| Transcript ID      | Root1 (RPKM_log10) | Root2 (RPKM_log10) | Flower1 (RPKM_log10) | Flower2 (RPKM_log10) | Stem1 (RPKM_log10) | Stem2 (RPKM_log10) | Leaf1 (RPKM_log10) | Leaf2 (RPKM_log10) |
|--------------------|--------------------|--------------------|----------------------|----------------------|--------------------|--------------------|--------------------|--------------------|
| comp100062_c0_seq1 | ND                 | ND                 | 0.705608898          | 0.642922407          | ND                 | ND                 | ND                 | ND                 |
| comp100156_c0_seq1 | -0.894770946       | -0.983027335       | 0.307487518          | 0.279129056          | ND                 | ND                 | ND                 | ND                 |
| comp100311_c0_seq1 | ND                 | -1.327997686       | 0.171776788          | 0.2351887            | ND                 | ND                 | -1.098811249       | -0.381505255       |
| comp100722_c0_seq1 | ND                 | ND                 | 0.419671258          | 0.403162069          | -0.804156567       | -1.467773955       | -1.292565716       | -0.575259722       |
| comp100781_c1_seq1 | ND                 | ND                 | 0.463576743          | 0.50383223           | ND                 | ND                 | ND                 | ND                 |
| comp100850_c0_seq1 | ND                 | ND                 | 0.226271043          | 0.242582976          | ND                 | ND                 | ND                 | ND                 |
| comp101251_c0_seq1 | ND                 | ND                 | 0.72288165           | 0.66767523           | ND                 | ND                 | ND                 | ND                 |
| comp101378_c0_seq1 | ND                 | -0.998756835       | -0.002432554         | 0.087308297          | -0.582191244       | -1.120869895       | ND                 | -0.897362444       |
| comp101455_c0_seq1 | ND                 | ND                 | 0.100615056          | 0.093445894          | ND                 | ND                 | ND                 | ND                 |
| comp101476_c0_seq1 | ND                 | ND                 | 0.033821863          | 0.09359949           | ND                 | ND                 | ND                 | ND                 |
| comp101736_c0_seq1 | ND                 | ND                 | 0.254578547          | 0.317990459          | ND                 | ND                 | ND                 | ND                 |
| comp101775_c0_seq1 | -0.660261952       | -0.690526394       | 0.277769164          | 0.248323607          | -0.523838276       | -0.636548195       | -0.665459939       | -0.492221989       |
| comp102949_c0_seq1 | -0.290503443       | ND                 | 0.931958407          | 0.883396559          | ND                 | ND                 | -0.994671435       | ND                 |
| comp102949_c0_seq2 | -1.137679451       | ND                 | 0.639986809          | 0.708318409          | ND                 | ND                 | -1.297779398       | ND                 |
| comp103765_c0_seq1 | -0.716179162       | -0.707525538       | 0.464890002          | 0.45772084           | -0.445861907       | -0.507419303       | ND                 | -1.004071155       |
| comp103898_c0_seq2 | ND                 | ND                 | 0.351928215          | 0.364064208          | ND                 | ND                 | ND                 | ND                 |
| comp103965_c0_seq1 | -1.035948961       | -1.12420535        | 0.291248239          | 0.355434985          | ND                 | -0.769197155       | ND                 | -1.022810958       |
| comp104594_c0_seq1 | ND                 | ND                 | 0.100937672          | 0.048011019          | ND                 | ND                 | ND                 | ND                 |
| comp104812_c1_seq1 | ND                 | -0.97663382        | -0.008338262         | 0.02588526           | ND                 | -0.922655621       | -1.048477378       | ND                 |
| comp105124_c0_seq1 | ND                 | ND                 | 0.567198732          | 0.619423221          | ND                 | ND                 | ND                 | ND                 |
| comp105424_c0_seq1 | ND                 | ND                 | 0.069429724          | 0.027498455          | ND                 | ND                 | ND                 | ND                 |
| comp105470_c0_seq1 | ND                 | ND                 | 0.368938546          | 0.378802723          | ND                 | ND                 | ND                 | ND                 |
| comp105735_c0_seq1 | ND                 | ND                 | 0.593836759          | 0.576367639          | ND                 | ND                 | ND                 | ND                 |
| comp105857_c0_seq1 | ND                 | -0.664419657       | 0.206965887          | 0.141804778          | ND                 | ND                 | -0.736263216       | ND                 |
| comp105922_c0_seq1 | -0.341540231       | ND                 | 0.371007851          | 0.337509749          | -0.536109774       | -0.59766717        | -0.598550191       | ND                 |
| comp106085_c1_seq1 | ND                 | ND                 | 0.174694197          | 0.138561339          | ND                 | ND                 | ND                 | ND                 |

|                    |              |              |             |              |              |              |              |              |
|--------------------|--------------|--------------|-------------|--------------|--------------|--------------|--------------|--------------|
| comp106264_c0_seq1 | ND           | ND           | 0.716756259 | 0.780650452  | -1.090246213 | -0.549743618 | ND           | -0.627266162 |
| comp107141_c0_seq1 | ND           | ND           | 1.242317499 | 1.226505374  | ND           | ND           | ND           | ND           |
| comp107441_c0_seq1 | ND           | -1.367897949 | 0.641790293 | 0.618534311  | ND           | -0.614949746 | ND           | ND           |
| comp108850_c0_seq1 | ND           | ND           | 0.643267027 | 0.65957896   | ND           | -1.128382828 | ND           | ND           |
| comp109949_c0_seq1 | ND           | ND           | 1.219486763 | 1.168979584  | ND           | ND           | ND           | ND           |
| comp110240_c0_seq1 | ND           | ND           | 0.124648927 | 0.168632287  | ND           | ND           | ND           | ND           |
| comp110466_c0_seq1 | ND           | ND           | 0.076772011 | 0.023845358  | ND           | ND           | ND           | ND           |
| comp111039_c0_seq1 | -0.934870391 | -1.500248034 | 0.04783112  | 0.017180861  | -1.384712439 | -0.969148581 | -0.970031601 | -0.921732388 |
| comp111775_c0_seq1 | ND           | -0.953484861 | 0.696051934 | 0.702246733  | ND           | -1.501566653 | ND           | -1.153120465 |
| comp111971_c0_seq1 | -0.043446653 | -0.270005739 | 0.709013683 | 0.732513341  | ND           | -0.216027541 | ND           | ND           |
| comp111987_c0_seq1 | ND           | ND           | 0.056810362 | -0.008350747 | ND           | -1.061626979 | -0.710327481 | ND           |
| comp112394_c0_seq1 | ND           | -0.911574272 | 0.561871264 | 0.597736733  | ND           | -0.255536082 | ND           | -0.889361127 |
| comp112619_c0_seq1 | ND           | -1.302691821 | 1.592974099 | 1.569058979  | ND           | ND           | ND           | -0.599237439 |
| comp112628_c0_seq1 | ND           | ND           | 0.583068848 | 0.522214827  | ND           | ND           | -1.090538723 | ND           |
| comp112712_c0_seq1 | -0.782245724 | ND           | 1.025505907 | 1.018336744  | ND           | ND           | -0.305523573 | -0.702160932 |
| comp112712_c0_seq2 | -0.739047891 | -1.304425534 | 1.129252875 | 1.110019201  | -1.188889939 | -0.949417339 | -0.200177833 | -0.902001147 |
| comp112990_c0_seq1 | -1.247859188 | -0.595752887 | 0.661563759 | 0.584052211  | -0.304126033 | -0.098867534 | -0.036891273 | -0.632661194 |
| comp113103_c0_seq1 | ND           | -1.099266154 | 0.316187434 | 0.338981495  | ND           | ND           | -0.870079717 | ND           |
| comp113219_c0_seq1 | ND           | -0.638292982 | 1.106080817 | 1.066567098  | ND           | -1.128382828 | -1.254204585 | -0.15154771  |
| comp113411_c0_seq1 | ND           | ND           | 0.173464434 | 0.189776367  | ND           | -0.99612543  | ND           | -0.647679242 |
| comp113485_c0_seq2 | -0.708590027 | -0.574997666 | 0.317577178 | 0.330611401  | ND           | ND           | -0.567659978 | -1.172573279 |
| comp113635_c0_seq1 | -0.5119771   | -0.998173498 | 0.526424561 | 0.468102875  | -1.183667898 | -0.944195299 | -1.070017056 | ND           |
| comp114874_c0_seq1 | -0.922005609 | -1.487383252 | 0.759665906 | 0.716781192  | -1.070817661 | -1.433405053 | -1.082105556 | -1.084958865 |
| comp115195_c0_seq1 | ND           | ND           | 0.039974744 | 0.064990265  | ND           | -1.289315962 | ND           | ND           |
| comp115336_c0_seq4 | ND           | ND           | 0.826883116 | 0.869880563  | ND           | -1.078660318 | -1.204482075 | ND           |
| comp115519_c0_seq1 | -0.297619421 | ND           | 0.541991091 | 0.501821668  | ND           | ND           | -1.110931882 | ND           |
| comp116270_c0_seq1 | -0.642975163 | -0.634321539 | 0.179072059 | 0.196036576  | -0.615695957 | -0.80219209  | -0.560037062 | -0.629837161 |
| comp117054_c0_seq1 | ND           | ND           | 0.459400803 | 0.460504166  | ND           | ND           | -0.819620402 | -1.424533703 |
| comp117315_c0_seq2 | ND           | ND           | 0.249438908 | 0.272232968  | ND           | ND           | ND           | ND           |
| comp117397_c0_seq1 | ND           | ND           | 0.163480213 | 0.15631105   | ND           | ND           | ND           | ND           |
| comp117454_c0_seq2 | ND           | ND           | 0.652330546 | 0.597736733  | ND           | ND           | ND           | ND           |

|                    |              |              |             |             |              |              |              |              |
|--------------------|--------------|--------------|-------------|-------------|--------------|--------------|--------------|--------------|
| comp117552_c1_seq1 | ND           | ND           | 0.035030588 | 0.085853372 | ND           | ND           | ND           | ND           |
| comp117641_c0_seq1 | ND           | ND           | 1.233415884 | 1.262291825 | ND           | ND           | ND           | ND           |
| comp117912_c0_seq1 | -1.421261309 | -0.468125012 | 0.393276312 | 0.3437033   | -0.916860847 | ND           | ND           | ND           |
| comp117914_c0_seq2 | ND           | ND           | 0.250630388 | 0.197703735 | -0.90315957  | ND           | ND           | ND           |
| comp118193_c1_seq1 | ND           | 0.067007458  | 0.868609531 | 0.920923883 | -1.02157693  | ND           | -1.208956083 | ND           |
| comp118346_c0_seq1 | ND           | ND           | 0.725828565 | 0.707378392 | -1.320055996 | ND           | ND           | ND           |
| comp118699_c1_seq1 | ND           | -0.825136055 | 0.465378798 | 0.391262845 | -1.010630455 | ND           | ND           | -1.024771659 |
| comp118815_c0_seq1 | -1.058290855 | -1.146547244 | 0.326898292 | 0.370881652 | -0.553890394 | -1.092569045 | -0.519420798 | -1.045152853 |
| comp118843_c0_seq2 | ND           | ND           | 0.837911448 | 0.84146615  | ND           | ND           | ND           | ND           |
| comp119247_c0_seq2 | ND           | ND           | 0.186815322 | 0.241794066 | -0.682977979 | ND           | -0.967267146 | -0.617937937 |
| comp119829_c0_seq1 | ND           | ND           | 0.367415372 | 0.320737668 | -1.148102422 | ND           | -0.733421584 | -0.560183634 |
| comp119973_c0_seq1 | -0.992586683 | ND           | 0.188482482 | 0.222706004 | ND           | ND           | ND           | ND           |
| comp120258_c0_seq1 | -0.841801289 | 0.149123568  | 2.029906887 | 1.997679704 | ND           | -0.575049483 | -0.70087124  | -0.828663287 |
| comp120574_c0_seq4 | ND           | ND           | 0.418121476 | 0.402178389 | ND           | ND           | ND           | ND           |
| comp120574_c0_seq5 | ND           | ND           | 0.666121062 | 0.658951899 | ND           | ND           | ND           | ND           |
| comp120944_c0_seq1 | ND           | ND           | 0.300740186 | 0.293571024 | ND           | ND           | ND           | ND           |
| comp120967_c0_seq1 | 0.249246665  | 0.200498817  | 1.016581553 | 0.987418097 | 0.233060178  | 0.123198102  | 0.410380099  | 0.144285355  |
| comp120994_c0_seq1 | -1.403082728 | -1.014217862 | 1.831449041 | 1.807845153 | ND           | ND           | ND           | -0.435702217 |
| comp121694_c0_seq1 | ND           | ND           | 0.673429074 | 0.696223135 | ND           | ND           | ND           | ND           |
| comp121722_c0_seq1 | ND           | ND           | 0.114264655 | 0.16261282  | ND           | ND           | ND           | -0.794029196 |
| comp121773_c0_seq1 | ND           | ND           | 0.659885833 | 0.67315783  | -1.412982217 | -1.474539614 | ND           | ND           |
| comp121911_c0_seq1 | ND           | ND           | 0.3038759   | 0.274430343 | ND           | ND           | ND           | ND           |
| comp122050_c0_seq1 | -0.053284523 | -0.141540912 | 0.604905896 | 0.664683523 | -0.327035312 | 0.0093473    | ND           | -0.943236508 |
| comp122138_c0_seq1 | -0.226428547 | 0.241617565  | 0.918428445 | 0.871750741 | 0.14327334   | 0.216414518  | -0.006317253 | -0.009170562 |
| comp122268_c1_seq1 | ND           | -1.265534502 | 0.304821046 | 0.297651884 | ND           | ND           | ND           | ND           |
| comp122268_c2_seq1 | ND           | ND           | 0.152386136 | 0.186609659 | ND           | ND           | ND           | -0.71451503  |
| comp122426_c0_seq1 | -0.284473299 | -0.321577165 | 0.599169994 | 0.546641959 | -0.792307294 | -0.619781485 | -1.523754492 | -1.049486547 |
| comp122478_c0_seq1 | ND           | -1.413954335 | 1.615793702 | 1.577366845 | ND           | ND           | ND           | -1.312559944 |
| comp122568_c0_seq1 | ND           | ND           | 0.858210083 | 0.831146092 | ND           | ND           | ND           | ND           |
| comp122650_c0_seq1 | -1.591923816 | ND           | 1.76174828  | 1.734570264 | ND           | ND           | ND           | ND           |
| comp122670_c0_seq1 | ND           | ND           | 0.219999533 | 0.16707288  | ND           | ND           | -1.121169578 | ND           |



|                    |              |              |             |             |              |              |              |              |
|--------------------|--------------|--------------|-------------|-------------|--------------|--------------|--------------|--------------|
| comp122716_c0_seq1 | -0.925398551 | ND           | 0.209913122 | 0.151591437 | ND           | ND           | ND           | ND           |
| comp122990_c1_seq1 | -0.857888109 | ND           | 0.252599981 | 0.161109933 | -0.654517643 | ND           | ND           | -0.668658847 |
| comp123286_c0_seq1 | ND           | ND           | 0.270568718 | 0.298161662 | ND           | ND           | ND           | -0.97654369  |
| comp123968_c0_seq1 | ND           | -1.176593419 | 0.649034635 | 0.641865472 | -0.362087819 | -0.520555229 | -0.947406982 | ND           |
| comp124031_c0_seq1 | ND           | -0.720163514 | 0.093230083 | 0.116024144 | ND           | -0.791124052 | -0.792007073 | -0.919799119 |
| comp124166_c0_seq1 | -0.690106621 | -0.03800032  | 1.172203781 | 1.16953512  | 0.182270626  | 0.253338795  | -0.248146577 | -0.199847364 |
| comp124442_c0_seq2 | ND           | -0.978470163 | 0.069006641 | 0.061837478 | ND           | ND           | ND           | ND           |
| comp124473_c0_seq1 | -0.614109154 | -1.304425534 | 0.923941412 | 0.926213805 | ND           | -0.949417339 | ND           | -0.902001147 |
| comp124605_c0_seq1 | ND           | ND           | 0.424677905 | 0.433595562 | -1.453387923 | ND           | ND           | -1.166499131 |
| comp124609_c0_seq1 | ND           | -1.517005719 | 1.760494019 | 1.749256995 | -1.702500119 | -1.161997524 | ND           | -0.762398814 |
| comp124722_c0_seq2 | ND           | ND           | 0.291466642 | 0.319059586 | ND           | ND           | ND           | ND           |
| comp124826_c0_seq2 | ND           | ND           | 0.020991394 | 0.013822232 | ND           | ND           | ND           | -1.076358693 |
| comp125050_c0_seq4 | ND           | ND           | 0.210310919 | 0.148784094 | ND           | ND           | ND           | ND           |
| comp125616_c1_seq1 | -1.253452754 | ND           | 0.206370011 | 0.150896169 | ND           | -1.287730944 | -1.112522706 | ND           |
| comp125666_c0_seq1 | ND           | -1.166014681 | 0.249438908 | 0.300261692 | -1.050479086 | ND           | ND           | -0.587499035 |
| comp125713_c0_seq1 | -0.39149072  | -0.655838367 | 1.060645217 | 0.999893226 | 0.003765272  | 0.000199823  | 0.012680764  | -0.378352717 |
| comp125854_c0_seq2 | 0.339306629  | 0.160389176  | 1.765029322 | 1.710587084 | -0.040899491 | -0.102456888 | -0.079858813 | -0.372461107 |
| comp125902_c0_seq1 | -0.736444719 | -0.903882354 | 0.465813745 | 0.407492059 | ND           | ND           | ND           | -1.501457967 |
| comp125909_c1_seq1 | ND           | ND           | 0.644414437 | 0.617041889 | ND           | -1.214385594 | ND           | -0.865939406 |
| comp125914_c0_seq1 | ND           | ND           | 0.529941134 | 0.522771972 | ND           | ND           | ND           | -0.592232537 |
| comp125931_c0_seq2 | -0.640946694 | -1.331263074 | 1.278506594 | 1.311104558 | -0.516757474 | ND           | ND           | -1.229868683 |
| comp126018_c0_seq1 | ND           | ND           | 0.98476481  | 1.005624371 | -1.521207666 | ND           | ND           | ND           |
| comp126060_c0_seq1 | ND           | ND           | 1.231254938 | 1.178288697 | ND           | ND           | ND           | ND           |
| comp126086_c0_seq1 | ND           | -0.663474511 | 0.259063556 | 0.251894393 | ND           | ND           | ND           | ND           |
| comp126197_c0_seq1 | -0.213192815 | -0.000419208 | 0.702561906 | 0.717669138 | ND           | ND           | -0.917360807 | -1.045152853 |
| comp126304_c0_seq1 | ND           | ND           | 0.030455223 | 0.02328606  | ND           | ND           | ND           | ND           |
| comp126393_c0_seq1 | ND           | -0.640483748 | 1.124848404 | 1.179981126 | -1.303099403 | ND           | ND           | ND           |
| comp126446_c1_seq1 | ND           | -0.339675387 | 0.656648894 | 0.58102235  | -0.877352306 | -0.336849711 | -1.06473146  | -0.493553501 |
| comp126675_c0_seq1 | ND           | -0.528001103 | 1.075778201 | 1.015188655 | 0.078896186  | -0.432630219 | -0.395724679 | -0.385214027 |
| comp126694_c0_seq1 | -0.498489991 | -0.665927626 | 2.23055888  | 2.291710441 | ND           | -1.009889435 | ND           | -1.263503239 |
| comp126713_c0_seq1 | ND           | ND           | 0.470769315 | 0.443078485 | ND           | ND           | -0.905161903 | -1.032953949 |

|                    |              |              |             |             |              |              |              |              |
|--------------------|--------------|--------------|-------------|-------------|--------------|--------------|--------------|--------------|
| comp126829_c0_seq1 | ND           | ND           | 1.388789494 | 1.387327306 | -1.342492263 | ND           | ND           | -1.055603472 |
| comp126833_c0_seq2 | ND           | -0.714311527 | 0.468827878 | 0.472124149 | -0.820624681 | -0.317910647 | -0.281005107 | -0.834765886 |
| comp126969_c0_seq1 | -0.729867696 | -0.450147299 | 0.27511021  | 0.23408278  | -1.480739739 | -1.065175881 | -0.521990857 | -0.649782903 |
| comp127026_c0_seq1 | ND           | ND           | 0.122821222 | 0.068227409 | ND           | ND           | ND           | -1.507507938 |
| comp127121_c0_seq1 | -1.278893422 | ND           | 1.066528599 | 1.062323915 | ND           | ND           | ND           | ND           |
| comp127121_c0_seq2 | -1.38878603  | -1.477042419 | 0.941502247 | 0.949466828 | -1.361506823 | -1.42306422  | ND           | ND           |
| comp127189_c1_seq1 | ND           | -1.242211074 | 0.231234462 | 0.166073352 | ND           | ND           | ND           | ND           |
| comp127199_c0_seq2 | ND           | ND           | 0.102650348 | 0.141238676 | ND           | ND           | ND           | ND           |
| comp127398_c0_seq1 | -0.576792225 | -0.841139873 | 1.55122021  | 1.578624371 | ND           | -1.389221665 | -1.214013427 | -0.739745482 |
| comp127540_c0_seq2 | ND           | -1.40029615  | 0.522241917 | 0.485109531 | ND           | ND           | ND           | ND           |
| comp127585_c0_seq1 | ND           | ND           | 0.059939621 | 0.052770458 | ND           | -0.933558984 | -0.758350746 | -0.585112796 |
| comp127594_c0_seq3 | -0.975761755 | -0.25783817  | 0.319250762 | 0.223444112 | -0.744362566 | -0.277646185 | -0.931741719 | -0.339374462 |
| comp127720_c0_seq1 | ND           | -1.035889086 | 0.254625766 | 0.30544855  | -1.221383487 | ND           | -0.806702649 | -0.934494695 |
| comp127818_c0_seq1 | ND           | ND           | 1.039777023 | 0.998749593 | ND           | ND           | ND           | ND           |
| comp127884_c0_seq5 | ND           | -1.643928444 | 1.078715449 | 1.05756064  | -1.051271594 | -1.112828991 | ND           | -1.241504058 |
| comp127927_c0_seq1 | ND           | -1.092976985 | 1.039671428 | 1.01116421  | ND           | -0.641058778 | -1.164820544 | ND           |
| comp128139_c0_seq1 | -0.394370031 | -0.482626419 | 0.771975877 | 0.764806714 | -0.242152087 | -0.905769475 | ND           | -0.557323287 |
| comp128365_c0_seq1 | ND           | ND           | 1.065597151 | 1.072536242 | ND           | -1.175056069 | ND           | ND           |
| comp128479_c0_seq1 | ND           | ND           | 0.790950453 | 0.758597744 | -1.214097854 | ND           | ND           | ND           |
| comp128517_c0_seq1 | ND           | -0.962608021 | 0.452845568 | 0.445676405 | -0.670981167 | ND           | -0.557330325 | -0.560183634 |
| comp128706_c0_seq1 | -0.308440455 | -1.47587809  | 0.854145304 | 0.910129942 | ND           | -0.944778636 | ND           | -1.374483698 |
| comp128712_c0_seq1 | -0.793647213 | -0.404782347 | 0.365145557 | 0.334495299 | -1.067398002 | -0.952864139 | ND           | -1.382569202 |
| comp128791_c0_seq1 | -1.121846793 | -1.511133178 | 0.590701288 | 0.529174463 | -0.793537591 | ND           | -1.28194674  | -0.932617532 |
| comp128947_c0_seq1 | -0.337469962 | -0.726756347 | 0.531573822 | 0.46481897  | -0.912250747 | -0.496686889 | ND           | -0.625361955 |
| comp128947_c0_seq3 | -0.702280553 | -0.614445682 | 0.499977911 | 0.449343055 | -0.578091333 | -0.639648729 | -0.8623805   | -0.814081287 |
| comp129096_c0_seq1 | ND           | ND           | 0.2118487   | 0.183490238 | ND           | ND           | ND           | ND           |
| comp129096_c1_seq1 | ND           | ND           | 0.170919192 | 0.163750029 | ND           | ND           | ND           | ND           |
| comp129156_c0_seq1 | ND           | ND           | 0.502286765 | 0.434419762 | ND           | ND           | ND           | -1.027372233 |
| comp129275_c0_seq1 | ND           | ND           | 0.294535874 | 0.253508444 | -1.160284079 | ND           | -1.347663233 | -0.873395288 |
| comp129414_c0_seq1 | ND           | ND           | 0.027114479 | 0.04990854  | ND           | ND           | ND           | ND           |
| comp129509_c0_seq1 | -0.643864697 | -0.652939839 | 0.78762447  | 0.755344587 | -0.361312985 | -0.054893596 | -0.502934648 | -0.375454189 |

|                    |              |              |             |             |              |              |              |              |
|--------------------|--------------|--------------|-------------|-------------|--------------|--------------|--------------|--------------|
| comp129587_c0_seq1 | -1.367335029 | -1.455591418 | 0.569608991 | 0.573720839 | -1.641085818 | -0.526551955 | -0.828464972 | -1.354197026 |
| comp129590_c0_seq1 | -0.830595745 | -1.316792143 | 1.485287789 | 1.425371191 | ND           | ND           | -1.388635701 | -0.817457743 |
| comp129769_c0_seq1 | -0.788852568 | -0.223896443 | 0.925819207 | 0.881054032 | -0.498331927 | -0.186308661 | -0.279945734 | -0.599623307 |
| comp129799_c0_seq1 | ND           | ND           | 0.916007946 | 0.928143939 | ND           | ND           | ND           | -0.691255909 |
| comp129821_c0_seq1 | ND           | ND           | 0.544457989 | 0.555772232 | ND           | ND           | ND           | ND           |
| comp130001_c0_seq3 | ND           | ND           | 0.715640025 | 0.756775542 | ND           | ND           | ND           | ND           |
| comp130262_c1_seq2 | -0.544849206 | ND           | 0.30522674  | 0.298057577 | ND           | ND           | ND           | ND           |
| comp130375_c0_seq1 | ND           | ND           | 0.12628862  | 0.158627999 | ND           | ND           | ND           | ND           |
| comp130473_c0_seq2 | -0.472913077 | ND           | 0.854284123 | 0.825925661 | -0.922755126 | -0.382252531 | ND           | -0.93689633  |
| comp130561_c0_seq1 | ND           | ND           | 0.743064478 | 0.788885735 | -1.050875521 | -0.987494181 | ND           | ND           |
| comp130612_c0_seq1 | -0.573999904 | -0.705721987 | 0.598717186 | 0.55871417  | -1.391818738 | -1.152346138 | ND           | -0.979991209 |
| comp130642_c0_seq1 | -0.772543734 | -0.617762074 | 0.14888812  | 0.141718957 | -0.870203264 | -0.505791928 | -0.631613686 | -0.759405732 |
| comp130659_c0_seq1 | ND           | -1.446331056 | 0.203205738 | 0.262983365 | -1.029765465 | -1.091322862 | ND           | ND           |
| comp130670_c0_seq1 | -1.050759548 | -0.661894682 | 0.56167338  | 0.600261708 | ND           | ND           | ND           | -0.435561554 |
| comp130849_c0_seq2 | 0.39519155   | 0.349224223  | 1.101600058 | 1.042910171 | 0.210381844  | 0.473335539  | -0.232269814 | -0.758001869 |
| comp131128_c0_seq2 | -0.601825259 | ND           | 0.05636516  | 0.116142787 | ND           | ND           | -0.761925206 | -0.889717252 |
| comp131222_c0_seq1 | -1.029348614 | -1.418634998 | 1.441755162 | 1.402229963 | ND           | -0.519558759 | ND           | -1.016210611 |
| comp131256_c0_seq1 | ND           | -1.133921515 | 0.214585284 | 0.207416122 | ND           | ND           | ND           | ND           |
| comp131314_c0_seq2 | -0.991136616 | -0.426180491 | 0.512151843 | 0.449935114 | ND           | -0.548293552 | ND           | -1.27902861  |
| comp131320_c0_seq2 | -0.774342058 | -0.862598446 | 0.467424947 | 0.529891713 | -0.747062851 | ND           | -0.934442005 | -0.585112796 |
| comp131416_c0_seq1 | ND           | -0.974789679 | 0.28354049  | 0.338519234 | -0.762344071 | -0.619781485 | -1.347663233 | -0.873395288 |
| comp131454_c1_seq1 | ND           | ND           | 0.017786254 | 0.010617092 | ND           | ND           | ND           | ND           |
| comp131673_c0_seq1 | -0.132465769 | -0.016602175 | 0.650663387 | 0.674902688 | ND           | -0.564683968 | ND           | -0.642206512 |
| comp131861_c0_seq1 | ND           | ND           | 0.079203991 | 0.072034829 | ND           | -1.215324609 | ND           | ND           |
| comp132603_c0_seq1 | -0.356597281 | -0.282126372 | 2.462325344 | 2.440363964 | -0.592559509 | -0.955146901 | -0.353969931 | -0.685881959 |
| comp132723_c0_seq1 | ND           | ND           | 1.027867334 | 0.996224402 | ND           | ND           | ND           | ND           |
| comp132740_c0_seq1 | ND           | -1.276742724 | 2.023587111 | 2.018837422 | -0.860177133 | ND           | ND           | ND           |
| comp132749_c0_seq1 | -1.335009364 | -0.610352396 | 0.188482482 | 0.150644499 | -0.705670166 | -0.892166299 | -0.381165958 | -0.844750106 |
| comp132856_c0_seq2 | -1.20610444  | -0.449262789 | 0.921907995 | 0.865422653 | -0.365911877 | -0.587170116 | -1.065174391 | -1.317905174 |
| comp132936_c0_seq1 | ND           | ND           | 0.25811841  | 0.199796725 | ND           | ND           | ND           | ND           |
| comp133048_c0_seq2 | ND           | -0.488957355 | 0.449374979 | 0.398740123 | -0.628694265 | -0.787161674 | -0.259770917 | -1.040775477 |

|                    |              |              |             |             |              |              |              |              |
|--------------------|--------------|--------------|-------------|-------------|--------------|--------------|--------------|--------------|
| comp133216_c0_seq1 | ND           | ND           | 0.140558929 | 0.151118534 | -0.791382279 | ND           | ND           | -0.805523483 |
| comp133273_c0_seq2 | -1.314805978 | -0.734055585 | 0.246474429 | 0.268463495 | -0.650704673 | -0.747024176 | -0.537053831 | -0.737396545 |
| comp133298_c0_seq1 | ND           | ND           | 1.766235983 | 1.740355857 | ND           | -1.447370709 | ND           | ND           |
| comp133298_c0_seq2 | ND           | ND           | 0.629664148 | 0.596166046 | -1.231695986 | ND           | ND           | ND           |
| comp133517_c0_seq1 | -0.558827706 | -0.647084095 | 0.611246074 | 0.636261595 | ND           | -1.195165887 | ND           | ND           |
| comp133818_c0_seq2 | 0.684664072  | 0.284096677  | 1.702803423 | 1.636715324 | 0.597999926  | 0.38154057   | -0.163410495 | -0.416141278 |
| comp133870_c0_seq1 | -1.493645945 | -1.581902334 | 1.993633728 | 1.957634031 | -1.165336743 | -1.527924135 | ND           | -0.878447951 |
| comp133938_c0_seq1 | -1.076566812 | -1.1648232   | 1.210012537 | 1.18011856  | -1.350317601 | -1.110845002 | -1.236666759 | -1.063428809 |
| comp134180_c0_seq1 | -0.125013441 | -0.671907679 | 1.172894383 | 1.188217987 | -0.079250829 | -0.089655703 | ND           | -0.628505234 |
| comp134220_c0_seq2 | -0.233848474 | ND           | 0.826398521 | 0.873104739 | ND           | ND           | -0.938016465 | ND           |
| comp134281_c0_seq3 | ND           | ND           | 1.893517209 | 1.8591958   | ND           | ND           | ND           | ND           |
| comp134312_c0_seq3 | ND           | ND           | 0.074539129 | 0.067369967 | -0.857402079 | ND           | ND           | ND           |
| comp134389_c0_seq1 | -0.567260874 | -0.433668513 | 0.591531896 | 0.536058054 | -1.017102922 | -0.68072031  | -0.727360821 | -0.73021413  |
| comp134506_c0_seq1 | ND           | ND           | 0.914391596 | 0.863557933 | ND           | -1.361653598 | ND           | -1.615267402 |
| comp134506_c0_seq3 | ND           | -1.684708864 | 0.711721488 | 0.720462327 | ND           | -1.329700669 | -1.455522426 | -1.583314473 |
| comp134661_c0_seq3 | -0.848912703 | -0.217009788 | 0.712367704 | 0.657425759 | -0.309750135 | 0.127532973  | -0.707982654 | 0.067315287  |
| comp134723_c0_seq2 | -0.46268124  | -0.806210134 | 1.065175411 | 1.000014301 | -0.275701191 | -0.019838175 | -0.497842451 | -0.50069576  |
| comp134727_c0_seq1 | 0.650865994  | 0.667344955  | 1.516181906 | 1.56393063  | 0.502053941  | 0.756085261  | -0.425687902 | -0.20129743  |
| comp134807_c0_seq1 | -0.458299922 | -0.386855468 | 0.440624591 | 0.45155365  | ND           | -0.367639375 | -0.794491128 | -0.496314442 |
| comp134926_c0_seq1 | -0.163381602 | -0.21384943  | 0.675264882 | 0.668095719 | ND           | ND           | -1.063844239 | -1.191636285 |
| comp135074_c0_seq2 | ND           | ND           | 0.167920323 | 0.16075116  | ND           | ND           | ND           | -0.740373529 |
| comp135095_c0_seq1 | 0.183504576  | -0.237966492 | 2.150157772 | 2.132442593 | -1.236374249 | -0.25653896  | -0.645602152 | -0.209122768 |
| comp135147_c0_seq2 | ND           | ND           | 0.068507165 | 0.061338002 | ND           | ND           | ND           | ND           |
| comp135167_c0_seq1 | -0.369611597 | -0.245259893 | 0.672583053 | 0.652639602 | -0.621085991 | -0.779553401 | -0.604345163 | ND           |
| comp135203_c0_seq2 | 0.346365729  | 0.587627874  | 1.537619821 | 1.554234398 | 0.215576781  | 0.449720547  | 0.20780546   | 0.10716566   |
| comp135365_c0_seq2 | -0.848912703 | -0.937169091 | 0.493524464 | 0.542471243 | -1.122663492 | -0.142828203 | -1.00901265  | -1.136804696 |
| comp135675_c0_seq1 | ND           | ND           | 2.191412672 | 2.139180779 | -1.201676765 | ND           | ND           | ND           |
| comp135726_c0_seq1 | -0.776728297 | -0.864984686 | 0.501250881 | 0.494081718 | -0.573357831 | -0.157793973 | -0.936828244 | -0.28646904  |
| comp135759_c0_seq2 | ND           | -0.649603374 | 0.538052133 | 0.559846666 | -0.601014568 | -0.741753211 | ND           | -1.393307023 |
| comp135972_c0_seq3 | -1.058290855 | -1.447577239 | 0.236721662 | 0.305940845 | -0.854920389 | -1.092569045 | ND           | -0.346182848 |
| comp136186_c0_seq1 | ND           | ND           | 0.192234509 | 0.185065346 | ND           | ND           | ND           | ND           |

|                    |              |              |             |              |              |              |              |              |
|--------------------|--------------|--------------|-------------|--------------|--------------|--------------|--------------|--------------|
| comp136257_c0_seq1 | -1.402519806 | -1.490776195 | 0.176489367 | 0.133108032  | -0.773180608 | -0.737827992 | ND           | -0.787321812 |
| comp136458_c0_seq1 | -1.212694771 | ND           | 0.399738158 | 0.35914524   | ND           | ND           | -1.071764722 | ND           |
| comp136606_c0_seq1 | 0.092957966  | -0.559569853 | 0.723996139 | 0.640438631  | -0.921155512 | -0.079622922 | -0.02935342  | -0.333236725 |
| comp136658_c1_seq2 | ND           | ND           | 0.342052249 | 0.399823893  | ND           | ND           | ND           | ND           |
| comp136704_c0_seq2 | ND           | ND           | 0.032135281 | -0.033025829 | ND           | ND           | ND           | -0.737855873 |
| comp136738_c0_seq1 | -0.639860957 | -0.506268596 | 0.178030305 | 0.218285792  | -1.089703005 | -0.850230406 | -0.675022168 | -0.92775295  |
| comp136751_c0_seq1 | ND           | -1.35525752  | 0.50513264  | 0.536987585  | -0.813753193 | -1.47737058  | ND           | ND           |
| comp136787_c0_seq1 | -0.757260859 | -0.669425989 | 0.326898292 | 0.346058068  | ND           | -0.791539049 | -0.616330811 | -0.744122857 |
| comp136843_c0_seq1 | ND           | -1.24750338  | 0.383550009 | 0.376380847  | ND           | ND           | ND           | -1.322200248 |
| comp136986_c0_seq1 | ND           | -1.520701864 | 1.576961289 | 1.567205108  | ND           | -1.068783657 | ND           | -1.021367464 |
| comp137012_c0_seq1 | 0.38709846   | 0.102547426  | 1.677019541 | 1.624547885  | -0.149893764 | 0.038426313  | -0.38842544  | -0.21518749  |
| comp137022_c0_seq1 | -1.043095329 | -1.307442977 | 0.610242587 | 0.551310509  | ND           | ND           | -0.300105289 | -0.393135229 |
| comp137025_c0_seq1 | ND           | ND           | 1.920999245 | 1.860577886  | ND           | -1.745366562 | -1.269128327 | ND           |
| comp137082_c1_seq1 | ND           | ND           | 0.134124819 | 0.126955657  | ND           | ND           | ND           | ND           |
| comp137107_c0_seq1 | ND           | -0.743600903 | 1.769754239 | 1.731275642  | ND           | ND           | ND           | -0.563025266 |
| comp137129_c0_seq2 | -0.567003819 | -0.75217022  | 0.061223377 | 0.112046161  | ND           | ND           | ND           | -1.252835821 |
| comp137319_c0_seq1 | ND           | -1.767777109 | 0.293940134 | 0.351711778  | ND           | -1.71379891  | ND           | -1.189261463 |
| comp137324_c0_seq2 | ND           | ND           | 1.112195666 | 1.090628682  | -0.704352124 | -1.066939516 | ND           | -1.320553319 |
| comp137324_c0_seq3 | ND           | -1.645114502 | 1.119755389 | 1.086863904  | -1.228548911 | -0.892166299 | ND           | ND           |
| comp137324_c0_seq5 | -0.924129302 | -1.313415687 | 1.302262841 | 1.264711049  | -0.896850096 | -0.657377496 | ND           | -1.212021295 |
| comp137386_c0_seq1 | -0.639317069 | -0.028603453 | 0.620933341 | 0.555772232  | -0.913067858 | -0.27565525  | ND           | ND           |
| comp137441_c0_seq1 | ND           | -0.687019629 | 0.184365915 | 0.145012069  | -1.416582074 | ND           | ND           | ND           |
| comp137464_c0_seq1 | ND           | -0.471778179 | 1.181362741 | 1.132800893  | -1.055212588 | 0.263441258  | -0.242591741 | -0.370383787 |
| comp137530_c0_seq1 | ND           | -0.701326146 | 0.61721743  | 0.617735096  | ND           | ND           | -0.472139708 | -0.257509074 |
| comp137601_c0_seq3 | 0.256086089  | 0.495188635  | 1.288986676 | 1.278944552  | 0.255336572  | 0.397899158  | 0.067957419  | -0.194533201 |
| comp137654_c0_seq1 | -0.701573808 | -0.090860192 | 0.609829125 | 0.676446177  | -0.021082088 | -1.036881993 | 0.041416232  | ND           |
| comp137728_c0_seq1 | -0.796498795 | -0.759816447 | 1.62051944  | 1.628227661  | -0.433427487 | -0.040726512 | -1.433719997 | -0.716414003 |
| comp137750_c0_seq1 | -0.549425019 | -0.968674627 | 0.324784606 | 0.274458526  | -0.999267067 | -1.157734477 | -1.584586229 | -0.934227025 |
| comp137809_c0_seq2 | ND           | -0.830751079 | 0.604905896 | 0.644480137  | ND           | -1.253894135 | ND           | ND           |
| comp138007_c0_seq1 | ND           | -1.162430387 | 0.943641131 | 0.959064482  | 0.200259823  | 0.170301412  | -1.109335209 | -1.061035996 |
| comp138023_c0_seq5 | -0.874161528 | -0.661387921 | 0.482998896 | 0.492863072  | -0.846882321 | -0.829258471 | ND           | -0.71489549  |

|                    |              |              |             |              |              |              |              |              |
|--------------------|--------------|--------------|-------------|--------------|--------------|--------------|--------------|--------------|
| comp138159_c0_seq1 | ND           | -1.536195582 | 0.335189963 | 0.294162533  | ND           | -0.783247378 | -1.307009144 | -0.832741199 |
| comp138208_c0_seq1 | -0.388979782 | 0.08703526   | 1.201458853 | 1.190892324  | ND           | -0.997289239 | -0.521051005 | -0.437989686 |
| comp138323_c0_seq1 | -1.499091715 | ND           | 1.002123735 | 0.988675507  | ND           | ND           | ND           | -1.008832458 |
| comp138461_c0_seq2 | ND           | ND           | 0.664205041 | 0.612832216  | -0.105885347 | -0.167442744 | -0.089144518 | -0.393027823 |
| comp138484_c0_seq4 | ND           | -1.415296823 | 0.251968739 | 0.244799576  | ND           | ND           | -0.708989131 | -1.012872436 |
| comp138500_c0_seq2 | ND           | ND           | 0.004738258 | -0.002430904 | ND           | ND           | ND           | ND           |
| comp138501_c0_seq1 | ND           | -0.99904821  | 0.701641107 | 0.647819924  | ND           | ND           | ND           | -1.198683814 |
| comp138534_c0_seq2 | -0.976363271 | -1.365649655 | 0.158948403 | 0.197536731  | -1.25011406  | -0.533520206 | -0.835433222 | -1.264255264 |
| comp138541_c0_seq1 | ND           | -1.55651426  | 0.189932548 | 0.137005895  | -1.139948669 | -1.201506065 | -0.725267831 | ND           |
| comp138627_c0_seq1 | ND           | -0.82695809  | 0.141337468 | 0.16759206   | -0.632241249 | -0.517707386 | -1.296741657 | ND           |
| comp138670_c0_seq1 | 0.098454396  | 0.293129781  | 0.969538723 | 1.026203114  | 0.359816809  | -0.034955266 | 0.230429602  | -0.147239917 |
| comp138722_c0_seq1 | ND           | -0.912438641 | 1.830478142 | 1.826425193  | -1.164879831 | -0.557430447 | ND           | -1.355112294 |
| comp138756_c0_seq1 | ND           | ND           | 0.113341213 | 0.055019528  | -0.994691254 | -1.05624865  | ND           | ND           |
| comp138834_c0_seq2 | -1.57160769  | -0.705621569 | 0.670159315 | 0.681473558  | -1.243298488 | -0.82773463  | -1.430677642 | -0.859499683 |
| comp138837_c0_seq1 | ND           | ND           | 1.760816811 | 1.719027207  | ND           | ND           | -0.490297134 | ND           |
| comp138882_c0_seq4 | -0.844524147 | -1.108871795 | 0.230491625 | 0.232465841  | -1.595396191 | -0.811855548 | -1.180715354 | -1.3085074   |
| comp138887_c0_seq1 | 0.251715688  | 0.356065647  | 2.404082282 | 2.412907725  | -0.877352306 | -0.035819715 | -0.541852714 | -1.067584769 |
| comp138965_c0_seq1 | ND           | ND           | 0.442178599 | 0.393616751  | -1.05403404  | -0.638470182 | ND           | ND           |
| comp139069_c0_seq1 | ND           | ND           | 1.380818587 | 1.326692189  | ND           | ND           | ND           | ND           |
| comp139089_c0_seq2 | -1.558827706 | -1.346054099 | 1.496143056 | 1.488392897  | ND           | -1.115984641 | ND           | ND           |
| comp139089_c0_seq3 | -1.589550117 | -1.200685251 | 1.48361365  | 1.453581604  | -1.261240915 | -0.845677057 | ND           | -1.275382119 |
| comp139089_c0_seq4 | ND           | -1.589597174 | 1.699260064 | 1.672124705  | ND           | -1.058497721 | ND           | ND           |
| comp139123_c0_seq1 | -1.27362005  | -1.236937702 | 1.74419508  | 1.695464541  | -0.878364058 | -1.483989499 | -0.910841252 | -1.737603302 |
| comp139258_c0_seq1 | ND           | -0.856574848 | 1.125961149 | 1.121584886  | ND           | ND           | ND           | -0.755180457 |
| comp139258_c0_seq2 | ND           | -0.451030012 | 1.157888932 | 1.149298183  | ND           | ND           | ND           | -0.796793652 |
| comp139262_c1_seq1 | ND           | ND           | 0.754878405 | 0.698021458  | ND           | ND           | -1.455522426 | ND           |
| comp139287_c0_seq1 | -0.404299896 | -0.969677539 | 0.453462878 | 0.406422203  | -0.757231931 | ND           | -0.564399843 | ND           |
| comp139301_c0_seq1 | -1.096390404 | -0.620375362 | 0.660635949 | 0.714331696  | -0.944172461 | -1.005729857 | ND           | -0.518980971 |
| comp139349_c0_seq1 | ND           | ND           | 0.654879871 | 0.647710708  | ND           | ND           | ND           | ND           |
| comp139353_c0_seq1 | -0.352859595 | -0.299786831 | 0.622751236 | 0.604724146  | -0.962402486 | -1.501081137 | -0.626902894 | -0.75469494  |
| comp139353_c0_seq2 | -0.393987224 | -0.637145572 | 0.477278021 | 0.433125292  | -1.366708017 | -1.127235418 | ND           | -1.380849221 |

|                    |              |              |             |             |              |              |              |              |
|--------------------|--------------|--------------|-------------|-------------|--------------|--------------|--------------|--------------|
| comp139414_c0_seq1 | -1.480196349 | -1.091331483 | 1.398102158 | 1.413862956 | 0.219180715  | 0.571885292  | -0.436176314 | -0.320930311 |
| comp139428_c0_seq3 | ND           | ND           | 0.298662218 | 0.291493056 | ND           | ND           | ND           | ND           |
| comp139479_c0_seq1 | ND           | ND           | 0.713028386 | 0.748611204 | ND           | ND           | ND           | ND           |
| comp139640_c1_seq1 | -1.316869138 | -1.405125527 | 0.119472531 | 0.179250158 | -0.812468677 | -1.050117332 | -1.17593909  | -0.458633096 |
| comp139644_c0_seq1 | ND           | ND           | 0.658151408 | 0.633948906 | -0.366543854 | -0.574229286 | ND           | -0.271540588 |
| comp139728_c0_seq1 | ND           | -1.400989358 | 1.514249471 | 1.489555963 | -0.984423767 | -1.347011159 | -1.472832916 | ND           |
| comp139824_c0_seq1 | -0.342187948 | -0.068716501 | 0.914428178 | 0.921617165 | 0.216570175  | -0.121193633 | ND           | -1.329049946 |
| comp139845_c0_seq1 | ND           | ND           | 0.402856099 | 0.422015875 | ND           | ND           | ND           | ND           |
| comp139869_c0_seq2 | ND           | ND           | 0.259063556 | 0.299319043 | -0.832578495 | -1.070227151 | -1.196048908 | -1.022810958 |
| comp139899_c0_seq1 | -1.072370697 | -1.160627086 | 0.585819722 | 0.606679283 | ND           | -0.629527632 | ND           | ND           |
| comp140048_c0_seq2 | ND           | -1.640749697 | 0.467424947 | 0.529891713 | ND           | ND           | ND           | -1.539355305 |
| comp140067_c0_seq1 | -0.23700126  | ND           | 0.680021475 | 0.698659576 | ND           | ND           | ND           | ND           |
| comp140160_c0_seq1 | ND           | -0.950074791 | 0.319250762 | 0.249933692 | -0.466562411 | ND           | -0.595949617 | -1.325801655 |
| comp140224_c0_seq1 | ND           | ND           | 0.581093657 | 0.557534078 | ND           | ND           | ND           | ND           |
| comp140235_c0_seq1 | -0.393581531 | -0.297313493 | 0.454665804 | 0.508910942 | -0.216540004 | -0.658308642 | -0.227827898 | -0.569499764 |
| comp140250_c0_seq1 | ND           | -1.070589437 | 0.277917362 | 0.232959638 | ND           | -1.016611238 | ND           | -0.969195046 |
| comp140256_c0_seq1 | ND           | -1.245195927 | 0.065522311 | 0.096141709 | ND           | ND           | ND           | ND           |
| comp140264_c0_seq2 | ND           | ND           | 0.551660384 | 0.53112726  | ND           | ND           | ND           | ND           |
| comp140341_c0_seq1 | -0.501182409 | -0.564615214 | 0.44066391  | 0.455105896 | ND           | ND           | ND           | ND           |
| comp140438_c1_seq1 | -0.147669561 | 1.248373889  | 2.234455167 | 2.28838478  | -0.069237832 | -0.784007742 | 0.131563186  | 0.625136286  |
| comp140455_c0_seq1 | ND           | ND           | 2.107594772 | 2.057319728 | -0.547938916 | -0.785587571 | -1.036348065 | ND           |
| comp140493_c0_seq9 | ND           | ND           | 0.338399658 | 0.282538572 | ND           | -1.696491632 | ND           | -1.047015448 |
| comp140582_c0_seq1 | -0.12138584  | 0.360233079  | 1.180727017 | 1.24284586  | -1.240234669 | -0.699732074 | -1.126583827 | -1.254375873 |
| comp140610_c0_seq2 | -0.952687331 | -0.217034978 | 1.239811296 | 1.271721317 | ND           | -1.464086775 | ND           | ND           |
| comp140650_c0_seq1 | ND           | -1.543739972 | 2.128362651 | 2.11791708  | ND           | ND           | ND           | -1.442345581 |
| comp140680_c0_seq1 | -1.607132386 | ND           | 1.005300543 | 0.996519896 | ND           | ND           | ND           | -1.593994383 |
| comp140692_c0_seq3 | ND           | ND           | 0.141485919 | 0.192308703 | ND           | ND           | ND           | ND           |
| comp140756_c0_seq1 | -0.155378603 | 0.115386951  | 1.034898564 | 0.996245004 | -0.274227432 | -0.636814824 | -0.257486603 | -0.510217386 |
| comp140812_c0_seq1 | ND           | -1.352684678 | 1.355183224 | 1.388038208 | ND           | ND           | -1.123498241 | -0.510927597 |
| comp140820_c1_seq1 | 0.453945789  | 0.496457681  | 1.501382134 | 1.477945358 | -1.086976728 | -0.847504129 | -0.070235899 | -0.322966682 |
| comp140895_c0_seq1 | ND           | ND           | 1.619408339 | 1.639822697 | ND           | -0.381268851 | ND           | -0.845736019 |

|                     |              |              |             |             |              |              |              |              |
|---------------------|--------------|--------------|-------------|-------------|--------------|--------------|--------------|--------------|
| comp140916_c0_seq1  | ND           | -1.563716655 | 0.640107349 | 0.662227563 | ND           | ND           | ND           | -1.462322264 |
| comp140923_c0_seq1  | -0.505211794 | -0.181287735 | 1.376272616 | 1.343855298 | -0.858143829 | -0.715581243 | -1.142432996 | -0.872285033 |
| comp140923_c0_seq4  | -0.272186038 | -0.01365494  | 1.509735066 | 1.480225834 | -1.500179336 | -1.561736733 | -1.386528494 | -1.213290545 |
| comp140926_c0_seq1  | ND           | ND           | 0.78630542  | 0.838721947 | ND           | ND           | ND           | -1.214134655 |
| comp140927_c0_seq2  | -0.19124377  | -0.008433386 | 1.3784002   | 1.350633017 | -0.298663137 | -0.059190538 | -0.080276945 | -0.208068991 |
| comp140942_c0_seq2  | ND           | -1.788413248 | 0.748084034 | 0.70927159  | ND           | ND           | ND           | -1.084958865 |
| comp140942_c0_seq3  | ND           | ND           | 0.748360878 | 0.741191716 | ND           | -1.466986476 | ND           | -1.243479025 |
| comp140949_c0_seq1  | ND           | ND           | 1.269817513 | 1.243831205 | ND           | ND           | ND           | ND           |
| comp141002_c0_seq1  | -0.478623387 | -0.742971034 | 1.63996367  | 1.704727511 | -0.45134418  | -0.346570155 | -0.61069461  | -0.600183958 |
| comp141109_c0_seq1  | 0.245986684  | 0.657417378  | 1.425315187 | 1.385558657 | -0.045492872 | 0.175496322  | -0.011023276 | -0.059634076 |
| comp141112_c0_seq3  | 0.16331711   | 0.260392637  | 0.913722421 | 0.93576053  | -0.455667337 | -0.341133474 | ND           | -0.615936577 |
| comp141156_c0_seq1  | 0.108519445  | 0.248742385  | 1.112661364 | 1.134617827 | -0.434076657 | 0.331365765  | -0.46655385  | -0.293315901 |
| comp141267_c0_seq2  | ND           | -0.866963252 | 0.597338905 | 0.650465644 | -1.529578907 | ND           | ND           | -1.543720111 |
| comp141319_c1_seq1  | ND           | -1.209565356 | 0.466300378 | 0.467564383 | ND           | -1.456617153 | ND           | ND           |
| comp141400_c0_seq1  | -0.905516925 | -0.419742046 | 0.354733486 | 0.299791541 | -1.003176455 | -0.39572707  | -1.065616872 | -1.193408918 |
| comp141422_c0_seq1  | ND           | ND           | 0.269496197 | 0.262327034 | -0.560987371 | ND           | ND           | -0.575128575 |
| comp141491_c1_seq1  | ND           | -1.182361027 | 0.291084509 | 0.310244285 | -0.765795436 | -0.827352832 | ND           | -0.77993664  |
| comp141510_c0_seq1  | ND           | -1.648653363 | 2.152534139 | 2.091780859 | ND           | ND           | ND           | ND           |
| comp141602_c0_seq1  | ND           | ND           | 0.427020029 | 0.404056599 | ND           | ND           | ND           | ND           |
| comp141749_c0_seq1  | 0.123506647  | -0.354720821 | 1.804669918 | 1.831479784 | -0.736509867 | -0.342135307 | -0.865897073 | -1.118627856 |
| comp141777_c1_seq1  | 0.424347366  | 0.555585821  | 1.848342777 | 1.864466347 | 0.447696279  | 0.679199948  | 0.305284271  | 0.108165733  |
| comp142060_c1_seq1  | -0.880953413 | -0.890028556 | 0.254358261 | 0.301546761 | -0.552644211 | -0.468073572 | -0.325050016 | -1.566785415 |
| comp142111_c0_seq1  | ND           | ND           | 0.440182074 | 0.433012911 | -1.07533572  | -1.136893116 | ND           | ND           |
| comp142151_c0_seq2  | -0.563129623 | -0.873234761 | 0.149418459 | 0.115920357 | ND           | -0.995347821 | ND           | ND           |
| comp142153_c0_seq10 | ND           | ND           | 0.232100586 | 0.1949682   | ND           | ND           | ND           | ND           |
| comp142272_c0_seq1  | -1.076328123 | -0.749611164 | 0.34529029  | 0.402923248 | -0.571927662 | -0.663448281 | -1.032308087 | -0.483406524 |
| comp142309_c0_seq2  | -0.463522561 | -0.27095234  | 0.717546604 | 0.688101046 | -0.347302271 | -0.054893596 | -0.409742688 | -0.792807239 |
| comp142412_c0_seq1  | ND           | ND           | 0.658237835 | 0.673345067 | ND           | -1.738953108 | -1.563744869 | -1.39050692  |
| comp142512_c0_seq1  | ND           | ND           | 0.472806784 | 0.425520398 | -0.6104021   | ND           | ND           | ND           |
| comp142592_c0_seq1  | ND           | ND           | 0.130254569 | 0.123085406 | -1.385263225 | -1.446820621 | -1.271612383 | -1.399404429 |
| comp142676_c0_seq1  | -1.042450497 | -0.711577578 | 0.942246463 | 0.943526876 | -1.140110027 | -1.377758682 | ND           | -1.154251231 |



|                    |              |              |             |             |              |              |              |              |
|--------------------|--------------|--------------|-------------|-------------|--------------|--------------|--------------|--------------|
| comp142678_c0_seq1 | -1.312732969 | -0.923868103 | 0.667676745 | 0.617041889 | ND           | ND           | ND           | -0.998564971 |
| comp142726_c0_seq1 | ND           | -1.486246355 | 0.214442963 | 0.25303129  | -1.370710759 | -0.955146901 | ND           | -0.606700713 |
| comp142836_c1_seq1 | ND           | -0.983027335 | 0.553469947 | 0.580159052 | -0.867491739 | -0.531109127 | -0.577749638 | -0.705541684 |
| comp142957_c0_seq1 | ND           | ND           | 1.238170266 | 1.187844186 | ND           | -1.624560059 | ND           | -1.276113871 |
| comp142957_c0_seq2 | ND           | ND           | 1.012733591 | 1.019208309 | -1.591305475 | ND           | ND           | ND           |
| comp142988_c0_seq1 | ND           | 0.618432451  | 1.932469731 | 1.89019391  | -0.599387614 | -0.857239656 | ND           | -1.177800249 |
| comp143124_c0_seq1 | 0.306484823  | 0.472682287  | 1.176094463 | 1.203687407 | 0.341063268  | 0.584139991  | -1.323437141 | -0.5481392   |
| comp143130_c1_seq1 | ND           | -0.99773548  | 0.188044022 | 0.193839836 | -0.639161836 | -0.943757281 | ND           | ND           |
| comp143142_c0_seq1 | ND           | ND           | 1.255531808 | 1.319681271 | ND           | ND           | ND           | -1.460174059 |
| comp143205_c0_seq2 | -1.13716089  | 0.17252273   | 1.117626624 | 1.05792841  | -1.41091168  | -0.472469076 | -1.297260838 | -0.345871638 |
| comp143235_c0_seq1 | ND           | ND           | 0.094477459 | 0.02931635  | -0.962402486 | ND           | -0.848751644 | -0.97654369  |
| comp143259_c0_seq1 | ND           | -1.457420029 | 0.243269289 | 0.30988634  | -0.496786393 | -1.102411834 | ND           | -0.45293565  |
| comp143270_c0_seq1 | -0.697943486 | -0.699049699 | 1.555007686 | 1.50398524  | -0.022846797 | -0.841366145 | -0.469863262 | -0.147686299 |
| comp143284_c0_seq1 | -0.956898704 | -1.045155093 | 1.021207055 | 1.016341847 | ND           | -0.468298149 | ND           | ND           |
| comp143284_c0_seq2 | -1.331043176 | ND           | 0.566029332 | 0.606284819 | ND           | ND           | ND           | ND           |
| comp143389_c0_seq1 | 0.688654554  | 0.790729864  | 1.46356338  | 1.439471512 | 0.135063069  | 0.491649067  | 0.306705858  | 0.230066334  |
| comp143445_c0_seq1 | ND           | -1.506811804 | 0.063543745 | 0.056374582 | ND           | ND           | ND           | ND           |
| comp143544_c0_seq1 | 0.498901411  | 0.465610515  | 1.515610826 | 1.476063384 | 0.438647298  | 0.519588714  | -0.118116404 | -0.442203096 |
| comp143550_c0_seq1 | -1.487205019 | -0.534068723 | 1.063080003 | 1.019133443 | -1.459925812 | -0.822513205 | -1.34627497  | -0.57097703  |
| comp143651_c0_seq1 | -0.922431179 | -0.408627576 | 0.269361851 | 0.217610556 | -1.020090709 | -0.382678101 | -0.538463082 | -0.812383163 |
| comp143735_c0_seq1 | -0.883442213 | -1.448819857 | 0.411570303 | 0.466549047 | ND           | ND           | ND           | -1.04639547  |
| comp143892_c0_seq1 | ND           | ND           | 0.781186969 | 0.811624464 | ND           | -1.733013462 | ND           | -1.685597269 |
| comp143892_c0_seq3 | ND           | -1.755704212 | 0.794654708 | 0.726560266 | ND           | ND           | ND           | -1.353279825 |
| comp143893_c0_seq2 | ND           | ND           | 0.535145296 | 0.514296436 | -0.729234372 | ND           | -1.138462276 | -1.743375576 |
| comp143916_c0_seq1 | 0.881699746  | -0.653714674 | 1.958428194 | 1.923992251 | -1.237149083 | -0.453608439 | ND           | -0.950260291 |
| comp143946_c0_seq3 | ND           | ND           | 1.363875331 | 1.324306363 | ND           | -1.51985794  | ND           | -1.472441748 |
| comp143946_c0_seq4 | ND           | ND           | 1.51368663  | 1.478432081 | ND           | ND           | ND           | ND           |
| comp143947_c0_seq1 | ND           | ND           | 1.245817236 | 1.241706498 | ND           | -0.819256562 | -0.20471563  | -0.118627856 |
| comp143955_c0_seq1 | -1.438709447 | -1.049844581 | 0.365609008 | 0.358439845 | -0.809370249 | -0.359044284 | -0.820658143 | -0.823511453 |
| comp143965_c0_seq1 | -1.257797711 | -0.647084095 | 1.324671995 | 1.370184562 | -0.68645046  | -1.115984641 | ND           | -0.767538453 |
| comp144105_c1_seq4 | -0.619269149 | -0.707525538 | 0.446406597 | 0.508873362 | -0.224013157 | -1.130668594 | -0.65443036  | -0.48119241  |

|                    |              |              |             |             |              |              |              |              |
|--------------------|--------------|--------------|-------------|-------------|--------------|--------------|--------------|--------------|
| comp144216_c0_seq1 | -0.578360643 | -0.745798278 | 1.023214358 | 1.007719806 | -1.630262683 | -1.089760088 | -0.194392546 | -0.282676051 |
| comp144216_c0_seq2 | -1.201505548 | -0.687701946 | 0.95269147  | 0.905206322 | -1.174226342 | -1.110845002 | -0.307247833 | -0.551545448 |
| comp144228_c0_seq1 | ND           | -0.692920184 | 1.519899885 | 1.494548298 | ND           | ND           | ND           | -1.290495797 |
| comp144354_c1_seq1 | ND           | ND           | 0.993946116 | 1.033773516 | ND           | ND           | -0.766352303 | -0.593114354 |
| comp144364_c0_seq1 | -1.545660214 | -0.679674093 | 0.762513749 | 0.78660228  | -0.673282967 | -0.061424463 | -0.705760161 | -0.30207329  |
| comp144411_c0_seq1 | -0.241665086 | -0.305097891 | 0.809325702 | 0.766243984 | -0.541744814 | -0.251119692 | -0.289791274 | -0.504733495 |
| comp144418_c0_seq1 | -0.916003418 | -0.87932107  | 2.091896126 | 2.117535163 | ND           | -1.029462853 | -1.553224619 | -0.53488863  |
| comp144432_c0_seq2 | -1.641271886 | -1.25240702  | 0.31064929  | 0.256903985 | -0.383543758 | -0.675550076 | ND           | -1.026073892 |
| comp144446_c0_seq4 | ND           | ND           | 0.408379343 | 0.364487373 | ND           | -1.07413974  | ND           | -1.026723548 |
| comp144477_c0_seq3 | ND           | -0.909073186 | 0.263342354 | 0.256173191 | ND           | -0.679003728 | -0.679886749 | -0.631587536 |
| comp144581_c0_seq1 | -0.914562014 | ND           | 0.479581976 | 0.42566941  | ND           | ND           | -1.25075322  | ND           |
| comp144625_c0_seq1 | -0.750678139 | -0.139964524 | 1.49061655  | 1.490478752 | -1.024428928 | -0.646653631 | -0.813868073 | -0.862478873 |
| comp144672_c0_seq1 | ND           | -0.653908167 | 0.676115227 | 0.696384313 | -0.295334523 | -0.503019955 | ND           | -0.853543771 |
| comp144724_c1_seq1 | -1.046944345 | -0.290102694 | 1.855110563 | 1.818037149 | 0.442732859  | 0.731690822  | -0.303954305 | 0.007586342  |
| comp144747_c2_seq1 | ND           | -0.47555411  | 0.161748228 | 0.111113372 | -1.314261024 | -0.773758429 | -0.598550191 | ND           |
| comp144868_c0_seq2 | ND           | -1.468232898 | 1.114959876 | 1.061095221 | -1.352697303 | -1.414254699 | -1.239046461 | ND           |
| comp144876_c0_seq3 | 0.588008354  | 0.630085734  | 1.745885856 | 1.697919152 | 0.447796474  | 0.621916026  | 0.308722     | 0.371998368  |
| comp145011_c0_seq1 | -1.261060645 | -0.872195779 | 0.601249757 | 0.605979818 | -0.932751442 | -0.81821758  | -1.120130596 | -0.770801387 |
| comp145027_c0_seq2 | -0.815136129 | -0.692539152 | 0.666963032 | 0.657071011 | -0.991976905 | -0.548384323 | -0.623053558 | -0.801998126 |
| comp145077_c1_seq1 | ND           | -0.563444456 | 0.222510894 | 0.17583319  | ND           | -0.509466257 | -1.179356058 | -0.528996854 |
| comp145085_c0_seq1 | -0.813007096 | -0.822082239 | 1.666478449 | 1.620964294 | -0.370754541 | -0.76810404  | -0.76898706  | -1.197809102 |
| comp145154_c0_seq1 | -1.378788288 | ND           | 0.200220885 | 0.193051722 | ND           | -1.413066478 | -1.23785824  | ND           |
| comp145349_c0_seq1 | ND           | -0.810547693 | 0.206965887 | 0.257788672 | -1.393982102 | -0.677388248 | -0.803210005 | -0.366730621 |
| comp145373_c0_seq2 | ND           | ND           | 2.375066266 | 2.343661154 | ND           | ND           | ND           | ND           |
| comp145373_c0_seq3 | ND           | ND           | 1.436910663 | 1.472983157 | -1.46038906  | ND           | ND           | ND           |
| comp145409_c0_seq2 | ND           | ND           | 0.846059801 | 0.895209001 | ND           | ND           | ND           | ND           |
| comp145436_c1_seq1 | ND           | ND           | 0.770253266 | 0.702386263 | ND           | ND           | ND           | ND           |
| comp145442_c0_seq2 | -0.089496696 | 0.072124389  | 0.985519076 | 1.002317069 | -0.238308748 | 0.083350607  | -0.358741112 | -0.252449952 |
| comp145469_c0_seq2 | -0.921437532 | -1.486815175 | 0.273872072 | 0.293855155 | ND           | -0.955715722 | ND           | ND           |
| comp145495_c0_seq1 | 0.287616984  | 0.597300604  | 1.729635787 | 1.672721865 | 0.659391881  | 0.33631303   | 0.461547293  | 0.354439846  |
| comp145506_c1_seq1 | ND           | ND           | 1.24161357  | 1.26493373  | -0.953569073 | -0.714096474 | ND           | -1.268740273 |

|                    |              |              |             |             |              |              |              |              |
|--------------------|--------------|--------------|-------------|-------------|--------------|--------------|--------------|--------------|
| comp145556_c0_seq1 | ND           | -1.70855022  | 1.15295209  | 1.173742225 | -1.29198463  | -1.654572022 | ND           | -1.306125834 |
| comp145556_c0_seq3 | ND           | ND           | 1.106991748 | 1.045464923 | -1.556000733 | -1.617558129 | ND           | -1.269111941 |
| comp145556_c0_seq4 | ND           | -1.371248716 | 1.123386119 | 1.064093943 | ND           | -0.919330509 | -1.142062279 | -0.871914316 |
| comp145582_c0_seq2 | -0.01962725  | -0.195033815 | 1.474925652 | 1.460014849 | -0.141646126 | -0.289118151 | -0.505116539 | -0.445821942 |
| comp145597_c0_seq1 | -0.784978372 | -0.918992252 | 0.724470396 | 0.754409614 | -1.155639174 | -0.740075316 | -1.041988332 | -0.567720387 |
| comp145599_c0_seq2 | ND           | ND           | 1.35236222  | 1.364570002 | -0.744262232 | -1.282940883 | -0.806702649 | -0.758403436 |
| comp145634_c0_seq1 | ND           | -0.474515749 | 1.578713384 | 1.604985613 | 0.477765812  | 0.992202917  | -0.819360579 | -0.704114576 |
| comp145661_c0_seq2 | 0.319566713  | 0.200276091  | 1.209476636 | 1.254651179 | -0.130275335 | -0.177109475 | -0.575932504 | -0.70372455  |
| comp145779_c0_seq3 | ND           | -0.882475418 | 0.297626951 | 0.354126868 | -1.009977871 | -1.071535268 | -0.72023577  | -0.72308908  |
| comp145806_c0_seq1 | -0.492837236 | -0.176523037 | 1.166465334 | 1.167002486 | -0.465558029 | -0.193900746 | -1.465850539 | -0.748544545 |
| comp145827_c0_seq2 | 0.139038315  | 0.639053633  | 1.814957501 | 1.824403886 | 0.432019555  | 0.620799446  | 0.279968364  | 0.215228063  |
| comp145843_c0_seq1 | -1.392836774 | -0.401911917 | 0.80942169  | 0.814486983 | -0.175225869 | 0.158345766  | -1.251906725 | ND           |
| comp145874_c0_seq2 | -0.533333147 | -0.54240829  | 2.032089432 | 1.98789687  | -0.392110588 | -0.526218652 | ND           | -0.675097105 |
| comp145874_c0_seq3 | -0.935421177 | ND           | 1.499712441 | 1.467648528 | ND           | ND           | ND           | ND           |
| comp145893_c0_seq2 | -0.775006218 | -0.863262607 | 0.661335452 | 0.60900413  | -0.856871481 | -0.587435658 | -1.588318679 | -0.871012685 |
| comp145893_c0_seq3 | -1.065999515 | -1.154255903 | 0.652888745 | 0.609644217 | -1.163659045 | -0.748095186 | ND           | -0.809823464 |
| comp145893_c0_seq4 | -1.140777879 | -1.162087478 | 0.614322553 | 0.642360699 | -0.715558664 | -0.652177324 | -1.079029077 | -0.951548618 |
| comp145911_c0_seq1 | -1.074973069 | -0.52640736  | 0.778193954 | 0.794991947 | 0.0066638    | -0.224644677 | 0.190895716  | -0.141016312 |
| comp145934_c0_seq1 | 0.01915172   | -0.139685743 | 1.486901854 | 1.460223451 | 0.046430927  | 0.16096479   | 0.876085113  | 0.479447754  |
| comp145941_c1_seq1 | ND           | ND           | 0.227589084 | 0.287366711 | -1.005382119 | ND           | ND           | ND           |
| comp145944_c0_seq1 | ND           | ND           | 0.142724991 | 0.186708351 | ND           | ND           | -1.277625367 | ND           |
| comp145985_c0_seq2 | ND           | ND           | 0.820505696 | 0.769132871 | ND           | ND           | ND           | ND           |
| comp146092_c0_seq1 | -1.634556281 | -1.421782674 | 1.351673786 | 1.375667837 | -1.209337065 | -0.969864466 | ND           | -1.922448274 |
| comp146112_c0_seq1 | -0.49676617  | 0.001243165  | 2.016741454 | 2.038456857 | -0.314585004 | -0.421899891 | ND           | -1.152634949 |
| comp146147_c1_seq1 | 0.298697165  | 0.665447717  | 1.225969763 | 1.241408391 | -0.304728801 | 0.47313471   | 0.566869905  | 0.241797301  |
| comp146179_c1_seq1 | ND           | -0.687701946 | 1.238041261 | 1.187238301 | ND           | -0.633723747 | ND           | ND           |
| comp146180_c0_seq1 | -0.29677192  | -0.686058304 | 2.452865617 | 2.485386611 | -0.871552704 | -0.359078833 | -0.456871867 | -0.408572654 |
| comp146183_c0_seq1 | -0.169811871 | 0.267357675  | 0.867168203 | 0.903972978 | -0.469891598 | -0.589440942 | -0.782209489 | -1.086092794 |
| comp146216_c0_seq1 | -1.858216995 | -1.469352129 | 0.616582926 | 0.566103009 | -1.266666358 | -1.466526453 | -1.194408202 | -1.322200248 |
| comp146216_c0_seq2 | -1.271035409 | -1.213163762 | 0.785095019 | 0.840883691 | -1.398658162 | -1.402223612 | -1.431135356 | -1.002624901 |
| comp146311_c0_seq3 | -0.419910469 | -0.110226849 | 1.256008717 | 1.279843836 | -0.216540004 | -0.296580806 | -0.403919157 | -0.355619944 |

|                     |              |              |             |             |              |    |              |              |              |
|---------------------|--------------|--------------|-------------|-------------|--------------|----|--------------|--------------|--------------|
| comp146322_c2_seq3  | -1.481137399 | -0.791242538 | 0.962382855 | 0.923211524 | -1.152828197 | ND |              | -0.298814666 | -0.291908138 |
| comp146369_c0_seq2  | -0.350596222 | -0.347082237 | 0.787544742 | 0.802369873 | -0.298493431 |    | -0.314293337 | -0.293987059 | -0.56790714  |
| comp146470_c0_seq2  | ND           | -0.907996867 | 1.80066138  | 1.815808091 | -1.394521263 |    | -0.978957405 | ND           | -0.931541213 |
| comp146487_c0_seq1  | ND           | -1.70684107  | 1.241002862 | 1.204650179 | -0.989245484 |    | -1.351832876 | ND           | -1.304416684 |
| comp146487_c0_seq5  | ND           | -1.37714254  | 1.354581011 | 1.340619963 | -0.7175389   |    | -0.925224333 | ND           | -1.576778145 |
| comp146487_c0_seq7  | ND           | -1.496372851 | 0.922171815 | 0.902504107 | ND           |    | ND           | ND           | -1.093948464 |
| comp146487_c0_seq9  | ND           | ND           | 0.834050893 | 0.894407966 | ND           |    | ND           | ND           | -1.363264046 |
| comp146569_c0_seq1  | -1.035293422 | -0.278451771 | 0.708068607 | 0.740666571 | -0.610074207 |    | -0.140152686 | -0.894363373 | -0.721125424 |
| comp146585_c0_seq1  | -1.527035872 | -0.501348908 | 0.654033293 | 0.60110664  | -1.02263541  |    | -0.163374053 | -0.431863314 | -0.171475188 |
| comp146615_c0_seq2  | -0.758193156 | -0.272418277 | 1.118576529 | 1.102566461 | -0.730913949 |    | -0.917410082 | -0.617263107 | -0.949175136 |
| comp146616_c3_seq4  | ND           | ND           | 0.095937274 | 0.088768111 | ND           |    | ND           | ND           | ND           |
| comp146694_c1_seq1  | ND           | -0.561807665 | 2.524156833 | 2.503054052 | -1.145242074 |    | -0.393886114 | -0.554469978 | -0.205140769 |
| comp146729_c1_seq1  | ND           | ND           | 1.523035511 | 1.537646123 | ND           |    | ND           | ND           | ND           |
| comp146741_c1_seq1  | ND           | -1.022354504 | 1.005882941 | 1.050034404 | -0.651546404 |    | -0.463226327 | -1.492138071 | -0.443838858 |
| comp146788_c0_seq1  | 0.178615656  | 0.269173385  | 1.499920032 | 1.519777246 | 0.237493849  |    | 0.480759437  | 0.175053432  | -0.170794375 |
| comp146795_c0_seq1  | -1.368554958 | -1.456811347 | 2.126802867 | 2.110481363 | -1.341275751 |    | -0.925711893 | ND           | -1.05438696  |
| comp146864_c1_seq13 | -1.219615945 | -0.608902329 | 0.24020682  | 0.130375316 | -1.192336738 |    | -0.55492413  | -0.379715892 | ND           |
| comp146864_c1_seq7  | -0.937069355 | -1.326355739 | 0.30469765  | 0.316011893 | ND           |    | -1.272377541 | -1.097169302 | ND           |
| comp146864_c1_seq8  | ND           | -0.861400392 | 0.263242367 | 0.338608092 | -0.678918007 |    | -0.983513452 | -0.7113952   | -1.538157251 |
| comp146894_c0_seq2  | ND           | -0.738172152 | 2.064634938 | 2.000277477 | -1.467734596 |    | -1.529291993 | -1.354083754 | -1.180845805 |
| comp146939_c0_seq1  | -0.471800927 | -0.197509282 | 1.238519998 | 1.300366077 | 0.250655295  |    | 0.419994777  | -0.692598715 | -0.706447408 |
| comp146956_c0_seq3  | ND           | ND           | 0.612679053 | 0.576785739 | ND           |    | -1.699578315 | ND           | ND           |
| comp147016_c0_seq1  | ND           | -1.361876439 | 1.206302191 | 1.16391602  | ND           |    | ND           | ND           | -1.561512043 |
| comp147064_c0_seq1  | -1.18229529  | -0.571581674 | 0.347727423 | 0.285335469 | ND           |    | -1.392664739 | ND           | ND           |
| comp147077_c0_seq1  | ND           | ND           | 0.381842693 | 0.44267061  | -1.542799276 |    | ND           | -1.429148434 | ND           |
| comp147110_c0_seq1  | -0.493515448 | -0.296536108 | 0.490815688 | 0.445414127 | -0.121002583 |    | -0.383887062 | -0.569294509 | -0.171660621 |
| comp147131_c0_seq2  | ND           | ND           | 0.972096628 | 1.039561083 | ND           |    | ND           | ND           | ND           |
| comp147140_c0_seq2  | 0.377491499  | 0.430761985  | 2.553872121 | 2.496763211 | 0.226895894  |    | 0.265453651  | 0.055311008  | -0.115946732 |
| comp147166_c0_seq11 | ND           | ND           | 0.786846327 | 0.736797168 | ND           |    | -1.195656893 | -1.32147865  | -1.148240701 |
| comp147166_c0_seq13 | ND           | ND           | 0.756337512 | 0.77121849  | ND           |    | -1.441281076 | ND           | ND           |
| comp147199_c0_seq3  | ND           | -0.763374932 | 0.665173955 | 0.607925928 | -0.890877386 |    | -0.952434782 | -1.379286535 | -0.90501859  |

|                     |              |              |             |             |              |              |              |              |
|---------------------|--------------|--------------|-------------|-------------|--------------|--------------|--------------|--------------|
| comp147215_c0_seq1  | ND           | ND           | 0.484372838 | 0.492443642 | ND           | ND           | ND           | ND           |
| comp147269_c1_seq1  | -1.649323553 | -0.959428692 | 0.876137885 | 0.899324794 | ND           | -1.683601743 | ND           | -1.335155555 |
| comp147307_c0_seq1  | -1.333030798 | -1.120257191 | 0.228249609 | 0.272232968 | -1.305751591 | -0.765248996 | -0.891070753 | -0.620922791 |
| comp147413_c0_seq1  | -1.442664641 | -0.894098932 | 1.29390203  | 1.260580149 | 0.244213878  | 0.322397719  | -1.778855847 | -0.952405383 |
| comp147432_c1_seq4  | ND           | -0.710931786 | 0.224571258 | 0.265706775 | -0.858637626 | -0.619165027 | -1.523138034 | -1.65093008  |
| comp147557_c0_seq1  | ND           | -0.695388774 | 0.294096082 | 0.326435461 | ND           | -0.641410576 | ND           | -0.383141018 |
| comp147578_c0_seq2  | -0.425077753 | -0.101891663 | 0.746750755 | 0.710617896 | -0.500460889 | -0.562018285 | -1.562901306 | -1.690693352 |
| comp147603_c0_seq2  | ND           | -1.20305895  | 1.46246595  | 1.462217962 | ND           | ND           | ND           | -0.499604567 |
| comp147603_c1_seq1  | ND           | ND           | 0.966633732 | 0.923252397 | ND           | ND           | ND           | -1.20129743  |
| comp147671_c0_seq1  | 0.207598866  | 0.409907039  | 1.025490128 | 1.091360841 | 0.213688773  | 0.365206202  | 0.394286405  | 0.054864775  |
| comp147689_c0_seq1  | 0.461660326  | 0.656335711  | 1.431099906 | 1.407012816 | 0.421992743  | 0.496853901  | 0.155432343  | -0.118487739 |
| comp147774_c0_seq1  | 1.063645365  | 1.183905325  | 1.879589988 | 1.815375479 | 0.652432719  | 0.562230141  | 0.349258209  | 0.298632117  |
| comp147885_c0_seq2  | 0.119046587  | 0.131160743  | 1.407325721 | 1.459672644 | 0.171631659  | 0.243130889  | 0.697727198  | 0.149217929  |
| comp147889_c1_seq1  | ND           | -0.914768933 | 0.633310221 | 0.564871401 | -1.577384588 | -0.434822002 | ND           | ND           |
| comp147918_c0_seq1  | ND           | ND           | 1.335928559 | 1.272643455 | -1.415556585 | -0.632015941 | -0.301905743 | -0.429697789 |
| comp147935_c0_seq1  | 0.604509889  | 0.636486942  | 2.087170274 | 2.038234357 | 0.763230759  | 0.815403877  | 0.804833589  | 0.632371148  |
| comp147947_c1_seq2  | -0.359909902 | -0.295556128 | 0.71849692  | 0.693598991 | -0.196410949 | -0.241577929 | -0.293613472 | 0.007942955  |
| comp147947_c1_seq3  | -0.323492157 | -0.249021248 | 0.66437344  | 0.675302499 | -0.258424389 | -0.302253019 | -0.320864806 | -0.061712228 |
| comp147965_c0_seq1  | 0.240316374  | 0.56021916   | 1.547486009 | 1.531724409 | 0.586354344  | 0.40233283   | 0.28947605   | 0.142088447  |
| comp147966_c0_seq1  | -1.100361772 | -1.012526902 | 1.855953652 | 1.890442069 | -0.294931315 | -0.481427448 | -0.959431724 | -0.786193774 |
| comp148000_c0_seq2  | -0.723637955 | ND           | 0.286734983 | 0.27956582  | ND           | ND           | ND           | ND           |
| comp148044_c0_seq2  | ND           | ND           | 0.398810808 | 0.456582452 | -1.246340844 | -0.830776985 | ND           | -1.260482048 |
| comp148091_c0_seq2  | -0.609761826 | -0.3223546   | 1.536273714 | 1.469934057 | 0.690518653  | -0.003061958 | 0.807055183  | 0.60749616   |
| comp148130_c0_seq1  | -1.2943399   | -1.382596289 | 1.631022247 | 1.578530106 | -0.966030698 | ND           | -1.153409852 | ND           |
| comp148152_c1_seq10 | -1.409781491 | -1.020916625 | 0.202651438 | 0.241239766 | -1.382502284 | -0.841999689 | -1.268851442 | -1.396643488 |
| comp148157_c0_seq1  | 0.910697663  | -0.204616959 | 2.507915685 | 2.469038885 | -0.193816714 | -0.36734787  | -0.007615205 | -0.596138089 |
| comp148157_c0_seq2  | 0.279371865  | -0.746736617 | 1.357221542 | 1.352165739 | -1.108322277 | ND           | -0.994671435 | -0.821433485 |
| comp148188_c0_seq2  | -0.621613812 | -1.215020179 | 1.550958313 | 1.536813503 | -1.196394597 | ND           | -1.207682491 | -1.812595792 |
| comp148208_c0_seq1  | -0.369276789 | -0.264926831 | 0.603205557 | 0.597666019 | -0.212038044 | -0.019990095 | -0.907572687 | -0.558243478 |
| comp148323_c0_seq1  | ND           | -1.213316226 | 0.462549508 | 0.429051406 | -1.398810626 | -0.418975338 | ND           | -1.111921835 |
| comp148365_c0_seq1  | -1.494102377 | -1.582358765 | 1.52202289  | 1.573559387 | -1.46682317  | ND           | ND           | -0.878904383 |

|                    |              |              |             |              |              |              |              |              |
|--------------------|--------------|--------------|-------------|--------------|--------------|--------------|--------------|--------------|
| comp148438_c0_seq2 | -0.476163645 | -0.369845368 | 0.951703718 | 0.899489607  | -0.395638926 | -0.218957157 | -0.073712142 | -0.569480973 |
| comp148451_c1_seq1 | -1.491356565 | -0.676522966 | 0.738930623 | 0.799814733  | -0.464077358 | -0.411691402 | -1.350426516 | -0.779248558 |
| comp148474_c0_seq1 | -0.753929725 | -0.92136736  | 1.065628696 | 1.048359207  | ND           | -1.26532917  | ND           | ND           |
| comp148484_c0_seq1 | -1.74283787  | -0.600645338 | 0.848164417 | 0.867224778  | -0.761316154 | -0.822873551 | -0.999847831 | -0.826609881 |
| comp148569_c0_seq2 | ND           | ND           | 0.659324671 | 0.652155508  | ND           | -1.267829913 | ND           | ND           |
| comp148687_c0_seq2 | -1.595128956 | -1.382355349 | 0.91227607  | 0.873237272  | -0.337400828 | -0.04583056  | ND           | -1.017719523 |
| comp148687_c0_seq4 | -1.181827384 | -1.270083773 | 0.803153893 | 0.790262718  | -0.485541397 | -0.096629733 | -1.51801859  | -1.101742592 |
| comp148782_c0_seq3 | -0.055377513 | -0.222815147 | 0.631343995 | 0.595643744  | -0.982340816 | -0.780656777 | -0.94787122  | -1.075663266 |
| comp148788_c1_seq1 | ND           | -0.904317301 | 0.421913104 | 0.491377998  | -1.48775171  | ND           | ND           | -0.723741664 |
| comp148802_c0_seq1 | -0.101731152 | 0.078857771  | 1.229875167 | 1.213842544  | -0.266337472 | -0.106046119 | -0.261831099 | -0.535751181 |
| comp148865_c0_seq1 | -1.595731056 | -1.382957449 | 1.398919098 | 1.36064157   | ND           | -0.851857995 | ND           | -0.679503066 |
| comp148870_c0_seq4 | ND           | ND           | 0.350833929 | 0.311480083  | ND           | ND           | ND           | ND           |
| comp148870_c0_seq7 | ND           | ND           | 0.055890781 | 0.008292961  | ND           | ND           | ND           | ND           |
| comp148945_c1_seq1 | -0.80550004  | ND           | 0.028781639 | -0.029540046 | -0.778220833 | -0.839778229 | -0.965599987 | ND           |
| comp148978_c0_seq1 | -1.588450173 | -1.199585307 | 1.187011542 | 1.177626586  | ND           | ND           | -1.146490129 | -0.621069661 |
| comp149042_c1_seq1 | 0.459667905  | 0.415615179  | 1.672145534 | 1.674960592  | 0.564833888  | 0.980397746  | -1.147590073 | ND           |
| comp149131_c0_seq2 | ND           | ND           | 0.673955811 | 0.706295189  | ND           | ND           | ND           | ND           |
| comp149131_c0_seq3 | ND           | ND           | 2.752985704 | 2.731028212  | 0.232574118  | 0.69894813   | ND           | 0.412622395  |
| comp149131_c0_seq4 | ND           | ND           | 1.403022395 | 1.365815967  | 0.586059807  | 0.741552277  | ND           | 0.510504302  |
| comp149144_c0_seq2 | -0.656487395 | -0.443713788 | 1.070900049 | 1.072617017  | -1.670600874 | -0.690765585 | ND           | -1.684742078 |
| comp149174_c0_seq2 | -1.077460729 | -1.068807104 | 0.823767739 | 0.779936591  | -0.16087982  | -0.537707651 | -0.283318166 | -0.587201472 |
| comp149192_c0_seq4 | ND           | ND           | 0.460305206 | 0.506381555  | ND           | ND           | -0.719712996 | -1.546475047 |
| comp149192_c0_seq5 | ND           | -1.1212476   | 0.208775793 | 0.172317254  | ND           | -1.192208138 | -0.539878645 | -1.320883205 |
| comp149262_c1_seq1 | -0.364680034 | -0.045451096 | 0.561116625 | 0.531671068  | -0.990613342 | -0.540287377 | ND           | -0.828663287 |
| comp149276_c0_seq1 | -1.06015345  | -1.449439835 | 0.619226268 | 0.676039416  | -1.33390424  | -1.09443164  | -1.220253398 | -1.047015448 |
| comp149276_c0_seq3 | -0.469466596 | -0.427389216 | 1.850063163 | 1.832671077  | -1.743217385 | -1.327653527 | -0.851415293 | -1.280237334 |
| comp149276_c0_seq6 | -0.960030649 | -1.224378297 | 1.01807511  | 0.989601129  | ND           | ND           | ND           | ND           |
| comp149276_c0_seq8 | -1.116438324 | -1.204694713 | 1.091980448 | 1.028273289  | ND           | -1.150716514 | ND           | -0.802270326 |
| comp149284_c0_seq1 | -1.213275767 | -0.363680062 | 2.054390483 | 2.106027843  | -0.583936569 | -1.025705207 | -0.771315723 | -0.899107769 |
| comp149333_c0_seq3 | -1.335009364 | -0.578167712 | 0.684908892 | 0.638231188  | -0.830608902 | ND           | ND           | ND           |
| comp149400_c0_seq2 | -0.138462442 | -0.334352709 | 1.082069207 | 1.108395442  | 0.244515857  | 0.205701587  | -0.178952486 | -0.290950265 |

|                    |              |              |             |             |              |              |              |              |
|--------------------|--------------|--------------|-------------|-------------|--------------|--------------|--------------|--------------|
| comp149400_c0_seq4 | -0.373029858 | -0.195018357 | 1.119793168 | 1.10190014  | 0.20775895   | 0.046950324  | -0.533129805 | -0.473835207 |
| comp149420_c0_seq1 | ND           | ND           | 0.430018552 | 0.43724721  | -1.673161412 | ND           | ND           | ND           |
| comp149420_c0_seq2 | ND           | ND           | 0.560167606 | 0.496621977 | ND           | -1.715877588 | ND           | ND           |
| comp149430_c0_seq1 | ND           | -1.421287186 | 2.203106573 | 2.168228138 | ND           | ND           | -1.192100749 | ND           |
| comp149435_c1_seq2 | -0.434543521 | -0.30095116  | 0.570434385 | 0.623963063 | -0.407264314 | -0.205580276 | -0.071764722 | -0.597496777 |
| comp149499_c0_seq1 | -1.570078483 | -0.357304876 | 0.846519129 | 0.839349966 | ND           | -1.002296681 | ND           | -1.079819226 |
| comp149515_c0_seq1 | -1.103176393 | ND           | 1.865707338 | 1.866777309 | -1.376927182 | -1.26239332  | -0.610063826 | -0.993128378 |
| comp149551_c0_seq3 | -1.458959944 | -0.592973823 | 0.874397565 | 0.882257393 | -1.431680737 | -1.493238134 | ND           | -1.144791946 |
| comp149595_c1_seq1 | -1.104297154 | -0.891523547 | 1.579199131 | 1.541627546 | ND           | -1.439605339 | -0.963367105 | -1.392189147 |
| comp149595_c1_seq2 | ND           | -0.454980166 | 1.08541216  | 1.111810345 | -1.117595821 | -0.878123221 | -0.304974974 | -0.830707029 |
| comp149670_c0_seq2 | ND           | ND           | 0.358413432 | 0.409236216 | -0.941504562 | ND           | -0.526823724 | ND           |
| comp149690_c0_seq4 | -0.046683586 | 0.133905338  | 0.975668416 | 0.942170314 | 0.006402884  | 0.300724151  | -1.118828363 | -0.820651677 |
| comp149690_c0_seq5 | 0.019470547  | 0.178661326  | 0.916244673 | 0.898500862 | -0.04822576  | 0.245604502  | -1.110666177 | -0.812489491 |
| comp149690_c0_seq8 | -0.048956524 | 0.39021346   | 1.309725073 | 1.293347908 | 0.176690336  | 0.378374375  | -1.186780076 | ND           |
| comp149703_c0_seq1 | ND           | ND           | 1.647293529 | 1.61297212  | -0.34952146  | ND           | -1.190113128 | -1.317905174 |
| comp149799_c0_seq1 | -1.648365198 | -1.560530328 | 1.054495616 | 1.005541747 | -1.621085991 | -1.682643388 | ND           | -1.033167204 |
| comp149802_c0_seq1 | -1.314116074 | ND           | 2.242616705 | 2.229741536 | -0.985806871 | ND           | ND           | -1.47706933  |
| comp149812_c0_seq1 | -0.296422467 | -0.148589667 | 1.49684168  | 1.50756625  | 0.156825472  | -0.054494245 | ND           | -0.392428934 |
| comp150057_c0_seq4 | -0.560135823 | -0.727573458 | 0.567057961 | 0.516854166 | ND           | -1.673595259 | ND           | ND           |
| comp150057_c0_seq7 | -0.434543521 | -0.858592011 | 0.673974977 | 0.678491572 | ND           | ND           | ND           | ND           |
| comp150075_c0_seq1 | ND           | -0.97663382  | 0.715937607 | 0.762643825 | ND           | ND           | ND           | ND           |
| comp150076_c0_seq1 | -0.631227183 | -0.482122656 | 1.409907618 | 1.353760127 | -0.566159415 | -0.384678763 | -0.628599832 | -0.814383826 |
| comp150077_c0_seq2 | -0.377298426 | -0.13819588  | 2.195367376 | 2.177942323 | -0.077017947 | 0.223152492  | -0.48624585  | -0.337831485 |
| comp150083_c1_seq3 | ND           | ND           | 0.749149788 | 0.787738116 | ND           | ND           | ND           | ND           |
| comp150083_c1_seq4 | ND           | ND           | 0.726873393 | 0.730985241 | ND           | ND           | ND           | ND           |
| comp150083_c1_seq5 | ND           | ND           | 0.981356989 | 0.976375712 | ND           | ND           | ND           | ND           |
| comp150083_c1_seq8 | ND           | ND           | 0.831464086 | 0.844038982 | ND           | ND           | ND           | ND           |
| comp150083_c2_seq1 | ND           | ND           | 0.764312073 | 0.771267553 | ND           | ND           | ND           | -0.884344468 |
| comp150091_c0_seq3 | -0.424173792 | -0.100249733 | 1.793324638 | 1.813559764 | -0.630977792 | 0.328654111  | -0.172093291 | 0.095243694  |
| comp150093_c0_seq1 | 0.644913206  | 0.559189154  | 1.466887858 | 1.41832601  | 0.720229669  | 0.759655948  | -0.191880351 | -0.232522221 |
| comp150105_c0_seq1 | -1.543222633 | -1.631479022 | 1.223307261 | 1.219509095 | -0.913883435 | -1.577500823 | ND           | -1.052963376 |

|                     |              |              |             |             |              |              |              |              |
|---------------------|--------------|--------------|-------------|-------------|--------------|--------------|--------------|--------------|
| comp150149_c0_seq2  | -1.702139296 | -1.790395684 | 1.011684248 | 0.953203335 | ND           | ND           | ND           | -1.689001293 |
| comp150149_c0_seq3  | -0.975234744 | ND           | 0.629080294 | 0.630029022 | -0.771864278 | -1.31054293  | -0.959243432 | -1.087035478 |
| comp150171_c0_seq1  | -0.611602675 | -0.375347972 | 0.46032202  | 0.494545543 | -0.216346683 | -0.486180022 | -0.470672626 | -0.707609142 |
| comp150184_c0_seq2  | -0.74077471  | -0.669330256 | 0.042354446 | 0.05291405  | -0.927375323 | -0.729295409 | -0.813724481 | -1.204757962 |
| comp150184_c0_seq3  | -0.76083292  | -0.737115549 | 0.148828716 | 0.112037086 | -1.009760125 | -0.645348789 | -1.248291801 | -1.133045799 |
| comp150213_c0_seq2  | ND           | ND           | 0.840455923 | 0.880283323 | -0.556372083 | -0.918959475 | ND           | ND           |
| comp150225_c0_seq1  | -0.962106134 | -0.749332527 | 0.96972848  | 0.957389084 | -0.031736941 | 0.216690501  | 0.133066424  | 0.298186483  |
| comp150245_c0_seq1  | ND           | -1.228003913 | 0.518442895 | 0.552666418 | ND           | ND           | ND           | ND           |
| comp150255_c0_seq1  | ND           | -1.113372296 | 2.270564241 | 2.251332133 | ND           | -1.235485357 | ND           | -1.48909916  |
| comp150255_c0_seq3  | -1.541998693 | -1.630255081 | 2.054878199 | 2.050036808 | ND           | ND           | -1.401068644 | -1.051739435 |
| comp150295_c0_seq1  | -1.363962446 | -0.497976325 | 1.139326013 | 1.084095405 | -0.938743231 | -0.921119381 | -1.524062393 | -1.350824444 |
| comp150295_c0_seq2  | -1.028386885 | -0.307457789 | 1.429909361 | 1.416321304 | -0.411282143 | -0.655179748 | -0.887456836 | -1.015248882 |
| comp150300_c0_seq1  | ND           | -1.762385798 | 1.826462205 | 1.779665573 | -1.646850202 | -1.708407599 | ND           | -1.660991406 |
| comp150300_c0_seq2  | ND           | -1.657568244 | 1.536553305 | 1.488816916 | ND           | -1.603590045 | -1.428381806 | ND           |
| comp150300_c0_seq3  | -1.635380838 | ND           | 1.92061988  | 1.869743944 | -1.608101632 | ND           | ND           | -1.622242836 |
| comp150300_c0_seq4  | ND           | -1.607612983 | 1.730640182 | 1.685143129 | ND           | -1.553634784 | ND           | ND           |
| comp150366_c0_seq1  | -1.593922246 | -1.381148639 | 0.961895264 | 0.939813238 | ND           | -1.628200436 | ND           | -1.279754248 |
| comp150386_c0_seq2  | -1.360563468 | ND           | 0.200716938 | 0.244700298 | ND           | ND           | -0.918603424 | ND           |
| comp150408_c0_seq1  | ND           | -1.629027682 | 0.681690556 | 0.678451687 | ND           | ND           | ND           | -1.050512036 |
| comp150472_c0_seq11 | -1.149186307 | -0.760321441 | 0.463246622 | 0.400377309 | -1.121907101 | -0.37055114  | -1.008256259 | -1.738108296 |
| comp150478_c0_seq1  | -0.728983185 | -0.37790688  | 1.965303579 | 1.90128285  | -1.30376397  | ND           | ND           | -1.317905174 |
| comp150504_c0_seq1  | -0.775138928 | -0.863395317 | 1.174321649 | 1.208320788 | -0.571768463 | -0.587568369 | -1.41236013  | -1.239122181 |
| comp150504_c0_seq5  | ND           | ND           | 0.217825727 | 0.174444392 | -1.33390424  | ND           | -0.919223402 | -1.348045444 |
| comp150506_c0_seq1  | ND           | -1.589597174 | 0.604007665 | 0.564653819 | ND           | -1.23458898  | -0.281229491 | ND           |
| comp150513_c0_seq10 | ND           | -1.415966514 | 1.125200646 | 1.129491106 | 0.041991762  | -0.10671581  | -0.145387391 | -0.469474082 |
| comp150513_c0_seq3  | -1.127188736 | ND           | 1.399254159 | 1.45410217  | 0.155362976  | 0.190715592  | 0.269013818  | -0.034869488 |
| comp150513_c0_seq4  | -0.760154789 | -1.626562428 | 1.105161123 | 1.112715218 | -0.431845586 | -0.016281728 | -0.075156696 | -0.182745356 |
| comp150513_c0_seq9  | -1.161378703 | -0.705567048 | 0.133633814 | 0.126464651 | -1.435129492 | -0.651588849 | -0.622508646 | -0.671119446 |
| comp150524_c0_seq8  | -0.918585949 | -0.27984361  | 1.088558018 | 1.070448869 | ND           | -1.429985394 | -1.254777155 | -1.081539206 |
| comp150808_c0_seq5  | ND           | -0.850220398 | 1.036105497 | 1.035185283 | -1.132624811 | -1.194182207 | -1.018973969 | -0.845736019 |
| comp150877_c5_seq6  | ND           | -1.355000921 | 0.746833545 | 0.799250072 | -1.540495321 | -0.488109365 | ND           | -1.25360653  |



|                     |              |              |             |             |              |              |              |              |
|---------------------|--------------|--------------|-------------|-------------|--------------|--------------|--------------|--------------|
| comp150910_c0_seq9  | -0.304732683 | -0.171140323 | 0.565546648 | 0.568137323 | -0.231695986 | -0.214072137 | -1.118045144 | -0.291594681 |
| comp150937_c0_seq1  | -1.846487599 | -1.031654001 | 1.074944255 | 1.023768791 | -1.342087138 | ND           | -1.006587546 | -0.791956912 |
| comp150986_c0_seq1  | -0.128249285 | -0.517535669 | 0.450759888 | 0.471619449 | -0.402000074 | -0.338618734 | ND           | -0.893262533 |
| comp150988_c0_seq3  | ND           | -1.443199864 | 1.917440849 | 1.897413344 | ND           | -1.08819167  | -1.214013427 | -0.563654223 |
| comp150988_c1_seq3  | ND           | -1.256451513 | 1.406449244 | 1.465097365 | ND           | -1.50350331  | ND           | -1.456087117 |
| comp151026_c0_seq1  | ND           | -0.494222677 | 0.106096096 | 0.036779026 | -0.922755126 | -1.285342518 | -1.110134279 | ND           |
| comp151031_c0_seq4  | ND           | ND           | 0.384002293 | 0.318841183 | ND           | ND           | ND           | ND           |
| comp151095_c0_seq12 | -0.631688547 | -0.768249615 | 0.588690352 | 0.611762717 | -1.406041686 | -1.099622298 | -1.468482103 | -0.897304145 |
| comp151105_c1_seq1  | -1.234382114 | -0.720578512 | 1.566823105 | 1.608369536 | ND           | -0.72459226  | -0.695512057 | -1.045152853 |
| comp151167_c0_seq3  | -0.966593675 | -1.054850064 | 1.581298533 | 1.542907488 | -1.182352517 | -0.891727396 | ND           | ND           |
| comp151237_c0_seq2  | -0.985875919 | -1.773102312 | 1.083934206 | 1.019253777 | -1.657566717 | -1.242002859 | -0.844945871 | -1.194586666 |
| comp151256_c0_seq4  | -1.070358208 | -0.614546552 | 0.502821422 | 0.468405344 | -0.565957746 | -0.435629616 | -0.666186724 | -0.881128946 |
| comp151256_c0_seq6  | -1.203662706 | -0.638706581 | 0.635417855 | 0.583021152 | -0.54799457  | -0.271799163 | -0.664792649 | -0.947486655 |
| comp151256_c0_seq7  | -0.874034745 | -0.518593634 | 0.647258136 | 0.617464354 | -0.800998048 | -0.306252943 | -0.60816596  | -0.735958006 |
| comp151295_c0_seq1  | -0.606137438 | -0.292693669 | 0.292385136 | 0.277916735 | -0.317336777 | -0.554985433 | -0.428995217 | -0.875546026 |
| comp151303_c0_seq2  | -0.109142341 | -0.14909405  | 1.500442745 | 1.436368731 | 0.67891402   | 0.772258584  | -0.022569954 | -1.025423264 |
| comp151306_c0_seq1  | 0.516864528  | 0.437948166  | 1.360828332 | 1.334074135 | 0.600164301  | 0.614548859  | -0.30599325  | -0.609876555 |
| comp151352_c1_seq14 | -0.96184724  | -0.65216362  | 1.388013944 | 1.348773329 | ND           | -0.695095435 | -1.121947187 | -0.208346548 |
| comp151385_c0_seq1  | ND           | -1.766883192 | 0.226718231 | 0.194243203 | -0.372593996 | -0.712904993 | -1.236666759 | ND           |
| comp151451_c0_seq1  | ND           | -1.742655757 | 1.238477025 | 1.202547672 | ND           | ND           | ND           | ND           |
| comp151456_c0_seq2  | -0.344983614 | -0.609331262 | 0.438145541 | 0.416253122 | -0.539553157 | -0.513960378 | -0.601993575 | -0.808966867 |
| comp151463_c0_seq4  | ND           | ND           | 0.570783356 | 0.597037949 | ND           | ND           | ND           | ND           |
| comp151463_c1_seq3  | ND           | ND           | 0.993505878 | 0.976197084 | ND           | ND           | ND           | -1.288368636 |
| comp151480_c0_seq2  | ND           | -1.161229019 | 1.194456365 | 1.250146484 | -0.686671481 | -0.590621024 | -1.17508063  | -1.001842681 |
| comp151537_c1_seq1  | -0.626055138 | -1.015341523 | 0.701142062 | 0.644754876 | ND           | -0.961363324 | ND           | -0.612917136 |
| comp151593_c0_seq2  | 0.079326993  | 0.32790543   | 1.248006568 | 1.216424347 | 0.1066062    | 0.51762243   | -0.307169332 | -0.509594996 |
| comp151625_c1_seq2  | 0.097941745  | 0.204418726  | 1.266253679 | 1.226084257 | 0.095665708  | 0.216273719  | 0.233119465  | 0.099497875  |
| comp151626_c0_seq5  | -0.889602522 | -0.852920174 | 0.405409995 | 0.351244269 | -0.225501218 | -0.622850716 | -0.748672474 | ND           |
| comp151667_c0_seq2  | ND           | ND           | 1.464730567 | 1.407532542 | ND           | ND           | ND           | ND           |
| comp151748_c0_seq1  | ND           | ND           | 1.025854622 | 1.009034074 | ND           | ND           | ND           | ND           |
| comp151754_c0_seq1  | 0.118210984  | -0.43802328  | 2.117562211 | 2.057525873 | -0.748456417 | -0.685075077 | -1.713986821 | -0.841778867 |

|                     |              |              |             |             |              |              |              |              |
|---------------------|--------------|--------------|-------------|-------------|--------------|--------------|--------------|--------------|
| comp151757_c0_seq1  | ND           | ND           | 0.888626256 | 0.823213891 | -1.055800664 | -0.765175543 | -0.845239809 | -0.893850609 |
| comp151757_c0_seq2  | -1.40448685  | ND           | 0.890525667 | 0.862834837 | -0.833139599 | -0.961643785 | -1.263556802 | -0.993408839 |
| comp151763_c0_seq1  | -0.707576503 | -0.129655401 | 1.465523731 | 1.455530535 | -0.680297297 | -0.504493777 | ND           | ND           |
| comp151799_c0_seq1  | -1.474029311 | -0.78413445  | 1.709853632 | 1.655077228 | 0.044611589  | 0.029511594  | 0.378707966  | 0.528113307  |
| comp151805_c1_seq3  | -0.669661086 | -0.21384943  | 0.672776081 | 0.701519474 | -1.068350611 | -0.761931222 | -0.477578515 | -1.258583074 |
| comp151836_c0_seq14 | -0.581325122 | -0.643252572 | 0.641136728 | 0.680710968 | -0.226686981 | -0.138482057 | -0.56533381  | -0.693125856 |
| comp151836_c0_seq2  | -0.460687745 | -0.402816098 | 0.834324772 | 0.838693523 | -0.121654677 | 0.036512982  | -0.775689652 | -0.903481698 |
| comp151846_c0_seq1  | -0.327487009 | -0.512653411 | 0.3764609   | 0.369291738 | -0.476299062 | -0.391728423 | -1.36264822  | ND           |
| comp151847_c0_seq2  | -0.124380266 | -0.107901304 | 1.21873708  | 1.168745623 | 0.065626238  | 0.004068842  | -0.095423977 | -0.210626896 |
| comp151849_c0_seq1  | -0.253032221 | -0.173797522 | 2.744395236 | 2.74195725  | -0.3100739   | -1.040638077 | -0.138431111 | -0.51610063  |
| comp151890_c0_seq1  | -0.517168242 | 0.406809825  | 1.552401343 | 1.50072049  | -0.614827772 | -0.129372744 | 0.614354338  | 0.27926065   |
| comp151890_c0_seq5  | -0.700156859 | 0.314850194  | 1.488839674 | 1.439019131 | -0.672877652 | -0.257313794 | 0.463049584  | 0.204489258  |
| comp151914_c0_seq3  | -0.923365968 | -0.3988385   | 0.322161185 | 0.279917811 | -1.197116757 | -1.355584167 | -0.82819341  | -0.955985456 |
| comp151914_c0_seq4  | -0.91513915  | -0.423611942 | 0.355835126 | 0.352182537 | -1.285799952 | -1.104319299 | -0.929111061 | -0.822819901 |
| comp151928_c1_seq1  | ND           | -1.163628442 | 0.059939621 | 0.052770458 | ND           | ND           | ND           | ND           |
| comp151934_c0_seq5  | 0.023207584  | 0.019272081  | 1.099541398 | 1.085741657 | -0.141398735 | 0.12155496   | -0.504869148 | -0.632661194 |
| comp151955_c0_seq1  | -0.3689424   | -0.00722978  | 1.266278417 | 1.254926611 | -0.178935896 | -0.444613275 | -0.19022379  | -1.397197082 |
| comp152013_c0_seq1  | -0.975109171 | ND           | 1.274145855 | 1.270672838 | ND           | ND           | -1.612330373 | ND           |
| comp152041_c1_seq3  | -1.162114172 | -1.551400557 | 0.994386801 | 1.001902595 | ND           | -1.196392362 | -1.623244115 | -0.796793652 |
| comp152095_c0_seq4  | -0.427510258 | -0.072069147 | 1.334610517 | 1.359173601 | -0.313080875 | -0.269902921 | 0.303245326  | -0.254671412 |
| comp152173_c1_seq1  | -0.935008153 | -0.370052028 | 1.566726478 | 1.52892646  | -1.208758942 | -1.270316338 | -0.919016841 | -0.824960137 |
| comp152197_c0_seq1  | -1.614800706 | -0.447784589 | 1.566268459 | 1.579874784 | -0.63327899  | ND           | ND           | -0.756564663 |
| comp152251_c0_seq4  | -0.885916833 | -0.451294476 | 0.928620788 | 0.890043161 | -1.034728885 | -0.49422629  | -1.222108039 | -0.3085074   |
| comp152301_c0_seq1  | ND           | -0.233810532 | 0.423695193 | 0.375133345 | -0.294366196 | -0.355923592 | -0.657836608 | -0.387688646 |
| comp152326_c0_seq2  | -1.576163269 | -0.851506301 | 2.198579553 | 2.132143632 | -1.849914058 | -1.911471454 | -0.736263216 | -0.864055262 |
| comp152347_c0_seq1  | ND           | ND           | 0.766998758 | 0.799596722 | -1.25011406  | ND           | ND           | -0.963225268 |
| comp152389_c0_seq1  | -0.138401262 | -0.101718914 | 0.72281105  | 0.684302135 | -0.085567951 | -0.172679451 | 0.096798704  | -0.529833847 |
| comp152402_c0_seq10 | -0.722830466 | -0.37972309  | 0.922131688 | 0.86100266  | -0.440278754 | -0.526659734 | -0.377780434 | 0.285942731  |
| comp152510_c0_seq1  | -1.141394921 | -0.814677962 | 1.320252614 | 1.302484758 | -0.967987679 | -0.728515079 | -0.143132376 | -0.872984413 |
| comp152510_c0_seq3  | ND           | ND           | 1.17476445  | 1.181531065 | ND           | -0.770287526 | ND           | ND           |
| comp152510_c0_seq4  | -1.669584954 | -1.757841342 | 0.926457559 | 0.888130414 | ND           | -1.402833148 | ND           | ND           |

|                    |              |              |             |             |              |              |              |              |
|--------------------|--------------|--------------|-------------|-------------|--------------|--------------|--------------|--------------|
| comp152510_c0_seq5 | -0.350803631 | -0.791242538 | 0.63189788  | 0.701362774 | -0.976736938 | -0.640354326 | 0.040003891  | -0.291908138 |
| comp152510_c0_seq8 | -1.312732969 | -0.975020625 | 1.220518714 | 1.222894869 | -1.762575017 | -0.824132414 | -0.444804192 | -0.697534975 |
| comp152517_c0_seq2 | ND           | ND           | 1.560868386 | 1.516888436 | ND           | ND           | ND           | ND           |
| comp152527_c0_seq2 | 0.309943468  | 0.206447113  | 1.424813982 | 1.462354554 | 0.321982708  | -0.010641461 | 0.134603554  | -0.486104014 |
| comp152533_c0_seq1 | -1.24137706  | -0.93169344  | 1.352991868 | 1.319912768 | -1.515127849 | ND           | ND           | -1.529269054 |
| comp152550_c0_seq5 | -0.366723777 | -0.30885213  | 0.822945559 | 0.761418734 | -1.038414575 | -0.622850716 | -0.623733737 | -1.052555779 |
| comp152563_c0_seq1 | -1.359631839 | -1.271796968 | 0.932027036 | 0.934842094 | ND           | -1.393910028 | ND           | -1.170402577 |
| comp152567_c0_seq3 | 0.154397625  | 0.075901074  | 0.909498057 | 0.843207442 | -0.98465459  | -0.347241982 | ND           | -1.475917049 |
| comp152586_c0_seq6 | -1.218326599 | ND           | 0.99415103  | 1.008651847 | ND           | ND           | ND           | -1.205188596 |
| comp152619_c0_seq2 | -1.31732629  | -1.280643942 | 0.142496475 | 0.178793006 | -1.767168338 | -1.226665744 | -1.653517496 | -1.304188288 |
| comp152657_c0_seq1 | ND           | -1.174848094 | 0.909057975 | 0.869063671 | -0.382618889 | -0.191450969 | -1.547721648 | -0.374483698 |
| comp152680_c1_seq1 | -0.756371094 | -0.212604268 | 1.321539108 | 1.329826897 | 0.283142569  | -0.0675456   | -0.858479094 | -0.474387779 |
| comp152767_c0_seq1 | 0.08190894   | 0.437644388  | 0.970692588 | 1.051983296 | -0.246690517 | 0.102853541  | 0.215414971  | -0.032352393 |
| comp152767_c0_seq4 | -0.063240134 | 0.200685996  | 0.899584406 | 0.913433594 | -0.206657154 | -0.086794458 | 0.156871161  | -0.189764124 |
| comp152771_c0_seq5 | -1.177278114 | -1.140595766 | 0.730789779 | 0.777179208 | -0.083052117 | -0.387647563 | -1.036348065 | -1.164140111 |
| comp152784_c0_seq1 | -0.262358985 | 0.047324635  | 1.652108089 | 1.676836947 | -0.002507163 | -0.185486722 | -0.723488928 | -0.851280974 |
| comp152784_c0_seq3 | 0.044515789  | 0.174315161  | 1.719073312 | 1.733482931 | 0.062249677  | -0.019051777 | -0.574222007 | -0.760006001 |
| comp152807_c0_seq1 | -0.693001928 | -0.781258317 | 0.05626896  | 0.082958065 | -0.711480212 | -1.125220127 | -1.552071879 | -0.980893921 |
| comp152829_c0_seq6 | ND           | ND           | 0.106295725 | 0.150279085 | ND           | ND           | -0.535903382 | ND           |
| comp152867_c1_seq1 | -0.00288664  | 0.231076267  | 2.10493643  | 2.064220115 | -0.227419406 | 0.076778523  | -0.384835336 | -0.433446136 |
| comp152892_c0_seq5 | -0.705150052 | 0.456262187  | 1.63774766  | 1.5928527   | -0.837571688 | -0.163175514 | 0.572256646  | 0.219350463  |
| comp152921_c5_seq1 | ND           | -1.039088323 | 0.07533527  | 0.139522016 | -0.622522732 | -0.985110125 | -0.712991873 | ND           |
| comp152922_c0_seq1 | -0.158236858 | -0.708891245 | 1.226952289 | 1.230872098 | ND           | -1.35388305  | ND           | -1.306466858 |
| comp152922_c0_seq3 | -0.261178836 | -1.089797914 | 1.01837673  | 1.044514749 | ND           | -1.336849711 | ND           | -1.590463514 |
| comp152948_c0_seq1 | -0.009469513 | 0.146985731  | 2.235753974 | 2.204540808 | -0.70529399  | -0.532768181 | -0.834681197 | -1.263503239 |
| comp152990_c1_seq1 | ND           | ND           | 0.574096652 | 0.60471605  | ND           | -0.478523405 | ND           | -0.857075945 |
| comp152995_c0_seq1 | -0.297431882 | 0.069604547  | 1.107270632 | 1.109912188 | -0.296481614 | 0.000133872  | -0.646588065 | -0.639681537 |
| comp152995_c0_seq2 | -0.313791033 | -0.030436352 | 1.061710846 | 1.046300555 | -0.340869489 | -0.10139689  | -0.750097392 | -0.628011965 |
| comp153093_c1_seq1 | ND           | -1.066119815 | 0.244598424 | 0.196036576 | -0.649554224 | ND           | ND           | ND           |
| comp153169_c0_seq1 | 0.271459747  | 0.17234543   | 1.051899764 | 1.04741974  | 0.182645624  | 0.186029034  | -0.265646302 | -0.544706024 |
| comp153204_c0_seq1 | ND           | -1.716661793 | 0.642568872 | 0.700830635 | -1.601126198 | ND           | ND           | -0.712177415 |

|                     |              |              |              |             |              |              |              |              |
|---------------------|--------------|--------------|--------------|-------------|--------------|--------------|--------------|--------------|
| comp153395_c0_seq7  | ND           | ND           | 0.575482504  | 0.568313342 | -0.666443542 | -0.631090926 | ND           | -0.981614742 |
| comp153420_c0_seq1  | ND           | ND           | 1.517183904  | 1.519560059 | ND           | -1.43055721  | ND           | -0.684171014 |
| comp153449_c0_seq1  | ND           | ND           | 1.816106883  | 1.779023079 | ND           | ND           | ND           | ND           |
| comp153473_c0_seq3  | ND           | -1.253056676 | 0.688366736  | 0.690340952 | ND           | -1.199078477 | ND           | ND           |
| comp153488_c0_seq1  | ND           | ND           | 1.513815012  | 1.479797274 | -1.534291009 | ND           | ND           | -1.548432213 |
| comp153488_c1_seq2  | ND           | ND           | 1.550836296  | 1.522075523 | ND           | ND           | -1.543915875 | -0.893556671 |
| comp153489_c0_seq2  | ND           | -1.730340192 | 0.580378046  | 0.54041637  | -1.438713338 | -1.132293949 | -1.802183751 | -0.975733287 |
| comp153489_c0_seq3  | ND           | -1.338521646 | 0.504835174  | 0.536418601 | -1.524016047 | -1.108452189 | -0.808305213 | -1.237127255 |
| comp153489_c0_seq4  | ND           | ND           | 0.166930515  | 0.192761612 | -1.867673035 | -1.32717044  | -0.908924153 | -1.580784244 |
| comp153515_c0_seq1  | -0.270184322 | 0.047324635  | 1.172688214  | 1.192059769 | -0.037143186 | -0.037646617 | 0.365069011  | 0.163958993  |
| comp153535_c0_seq1  | -1.201878237 | -1.415073363 | 1.223468048  | 1.16444982  | -0.143190567 | 0.0702686    | -0.708765671 | -0.343642195 |
| comp153535_c0_seq10 | -1.181046419 | -1.269302808 | 1.290057357  | 1.260611799 | -0.023433444 | 0.04593826   | -0.363422761 | -0.126515732 |
| comp153535_c0_seq13 | -1.039731697 | -1.349836835 | 1.411783376  | 1.404147982 | -0.088173204 | 0.176410116  | -0.518590407 | -0.082111022 |
| comp153535_c0_seq6  | -1.159657749 | -1.151004125 | 1.365312128  | 1.355676777 | -0.132378543 | 0.123082162  | -0.541606446 | -0.146519747 |
| comp153540_c2_seq13 | ND           | ND           | 0.203205738  | 0.196036576 | ND           | -0.887202879 | ND           | ND           |
| comp153540_c2_seq5  | ND           | ND           | 0.211160072  | 0.15568623  | ND           | ND           | ND           | -0.536554686 |
| comp153548_c0_seq3  | ND           | -1.399601834 | 1.473949772  | 1.532800409 | ND           | -1.345623635 | -1.170415397 | -0.997177447 |
| comp153557_c0_seq6  | -0.369085148 | 0.024424623  | 1.240223346  | 1.189671    | 0.359956963  | 0.561641001  | -0.464244288 | -0.944218853 |
| comp153568_c0_seq1  | -0.774693798 | -1.248301068 | 1.897572211  | 1.890403048 | ND           | 0.259432167  | -1.864212671 | -1.293034713 |
| comp153568_c0_seq2  | -0.633525347 | -1.566879775 | 1.962755724  | 1.954711208 | ND           | 0.366003026  | -1.212754601 | -1.164455389 |
| comp153587_c0_seq1  | -0.779945935 | -0.935149113 | 1.33417644   | 1.398889284 | -1.597764768 | ND           | ND           | -0.912935968 |
| comp153587_c0_seq4  | -1.67952072  | -1.466747113 | 1.38803917   | 1.4176233   | -1.652241513 | -1.71379891  | ND           | -1.365352722 |
| comp153594_c1_seq1  | ND           | ND           | -0.018214924 | 0.03260786  | ND           | ND           | ND           | ND           |
| comp153662_c7_seq11 | -0.448277297 | ND           | 0.255670613  | 0.289894135 | ND           | ND           | -0.784468503 | ND           |
| comp153673_c1_seq3  | ND           | ND           | 0.527051754  | 0.481678239 | ND           | ND           | ND           | ND           |
| comp153690_c0_seq1  | -1.502684658 | -0.891971042 | 0.808718275  | 0.847306603 | -1.475405451 | -1.536962848 | ND           | -0.489546656 |
| comp153690_c0_seq2  | -0.588016095 | -0.149463445 | 1.469165894  | 1.401220112 | -0.371680652 | -0.132208053 | -0.585388745 | -0.713180791 |
| comp153762_c2_seq7  | ND           | ND           | 0.235936437  | 0.180462595 | ND           | -0.559194514 | ND           | ND           |
| comp153787_c0_seq2  | -0.293375337 | -0.557722985 | 1.216752547  | 1.189444621 | 0.377356546  | 0.328764127  | -0.726476556 | -0.478604988 |
| comp153797_c1_seq2  | ND           | ND           | 1.734989307  | 1.727435983 | ND           | ND           | ND           | -1.185374464 |
| comp153812_c2_seq2  | -0.822961466 | ND           | 0.136258949  | 0.129089786 | ND           | -0.857239656 | ND           | ND           |

|                     |              |              |             |             |              |              |              |              |
|---------------------|--------------|--------------|-------------|-------------|--------------|--------------|--------------|--------------|
| comp153816_c0_seq1  | ND           | -0.714311527 | 0.25398403  | 0.201057377 | ND           | ND           | ND           | ND           |
| comp153849_c0_seq1  | -0.288653259 | -0.304358981 | 1.165943276 | 1.204636748 | -0.649554224 | -0.887202879 | -0.8880859   | -1.015877946 |
| comp153849_c0_seq2  | -0.222680643 | -0.649755589 | 1.358494591 | 1.313733248 | -0.534219993 | -0.433050092 | ND           | -0.890783878 |
| comp153911_c0_seq2  | ND           | ND           | 0.867830096 | 0.934333085 | ND           | ND           | ND           | ND           |
| comp153912_c0_seq2  | -1.254245987 | -0.798434331 | 1.502588158 | 1.50736498  | -1.050875521 | -0.443426136 | -0.460103424 | -0.396009944 |
| comp153968_c0_seq1  | -0.544172207 | -0.410579846 | 1.652536092 | 1.624631238 | ND           | ND           | ND           | -1.00815546  |
| comp153971_c0_seq2  | 0.221575238  | 0.531258858  | 1.266179684 | 1.202381661 | -0.244061077 | 0.40759197   | 0.076715258  | 0.12997789   |
| comp153992_c0_seq2  | -0.579923417 | 0.12019061   | 1.527635188 | 1.493953336 | -0.318561005 | -0.255179665 | -0.682031417 | -0.508793468 |
| comp154072_c2_seq3  | -1.374903964 | -1.287069093 | 0.84557932  | 0.892417723 | ND           | -1.710212149 | -1.535003911 | -1.662795957 |
| comp154072_c2_seq8  | -1.538306039 | ND           | 0.827454556 | 0.842419839 | ND           | ND           | ND           | ND           |
| comp154080_c0_seq10 | 0.018821333  | -0.264009721 | 1.35959134  | 1.34398901  | ND           | -1.571759358 | ND           | -1.047221911 |
| comp154080_c0_seq11 | 0.016414561  | 0.092968421  | 1.459508649 | 1.510407565 | -1.547370839 | -1.30789824  | ND           | -1.084390789 |
| comp154080_c0_seq12 | -0.271974754 | -0.263321129 | 1.49361409  | 1.533707121 | -1.323876793 | ND           | ND           | -1.338017997 |
| comp154080_c0_seq13 | 0.032817897  | 0.049296859  | 1.459175346 | 1.453126943 | ND           | -0.866761719 | -1.168674735 | -0.898526773 |
| comp154080_c0_seq14 | 0.085225268  | -0.260595423 | 1.364117788 | 1.386911849 | -1.166249127 | ND           | ND           | -1.180390331 |
| comp154097_c0_seq16 | -0.162920847 | -0.091476393 | 0.867817921 | 0.907994994 | -1.08988415  | -0.628562801 | ND           | ND           |
| comp154097_c0_seq23 | -0.668365025 | -0.677440167 | 0.415794127 | 0.429814263 | ND           | -0.623461968 | ND           | -1.354197026 |
| comp154097_c0_seq25 | -0.605098851 | -0.099728416 | 0.682135049 | 0.619210654 | -1.089703005 | -0.639377041 | ND           | -1.705904201 |
| comp154097_c0_seq27 | -0.341881255 | 0.054536749  | 0.927790229 | 0.893709261 | ND           | -0.424464125 | -1.178674812 | ND           |
| comp154097_c0_seq8  | -0.17117287  | -0.009551785 | 0.777189617 | 0.770020455 | -0.876287423 | -0.460723565 | ND           | ND           |
| comp154131_c0_seq4  | -0.503230972 | -0.70063183  | 0.647874969 | 0.703198255 | -0.828134283 | -0.190721675 | -0.617573428 | -0.402942794 |
| comp154161_c0_seq3  | -0.560788407 | -0.535101443 | 0.724084479 | 0.688658556 | -0.931449209 | -1.294036601 | -1.419858358 | -1.07052915  |
| comp154169_c0_seq2  | -0.517391349 | -0.605647738 | 0.891278894 | 0.863634145 | -1.444354652 | -1.028790794 | -1.029673814 | ND           |
| comp154169_c1_seq6  | -0.680808694 | -0.592973823 | 0.98456031  | 0.986781664 | ND           | -0.590148147 | ND           | ND           |
| comp154172_c0_seq1  | -0.547029247 | -0.518780067 | 0.956259212 | 0.976820391 | -0.271965557 | -0.082466933 | -0.088678787 | -0.346804601 |
| comp154194_c0_seq1  | -0.615835973 | -0.499972379 | 0.870584561 | 0.867694196 | -0.317489994 | -0.05535341  | -0.395724679 | -0.548340308 |
| comp154196_c0_seq1  | ND           | ND           | 0.987603746 | 0.944900036 | -0.044181909 | ND           | ND           | -0.926085138 |
| comp154196_c0_seq2  | ND           | ND           | 0.966931977 | 0.968616236 | -0.045584043 | ND           | ND           | -0.912061696 |
| comp154220_c1_seq15 | -1.108197195 | -0.953415535 | 1.578021948 | 1.562632455 | -0.360758685 | -0.630592023 | -0.870357133 | -0.374899889 |
| comp154232_c0_seq9  | ND           | -0.116346928 | 0.675857371 | 0.606540301 | -0.109955802 | -0.414551247 | -0.142432996 | -0.492073791 |
| comp154239_c1_seq5  | 0.621669587  | 0.580837848  | 1.395513181 | 1.390896197 | 0.539326815  | 0.723868047  | 0.311414115  | -0.081195754 |

|                     |              |              |             |             |              |              |              |              |
|---------------------|--------------|--------------|-------------|-------------|--------------|--------------|--------------|--------------|
| comp154270_c0_seq3  | -0.033979368 | 0.117524582  | 0.879060061 | 0.916162894 | 0.205907931  | 0.190807936  | -0.995711661 | -0.998564971 |
| comp154281_c1_seq1  | -0.498740811 | -0.763088458 | 0.628452973 | 0.679958074 | -1.124674118 | -0.311170251 | -0.533902021 | -0.418656019 |
| comp154352_c0_seq1  | -0.47824052  | 0.093555029  | 0.945866693 | 0.899779464 | 0.181061901  | 0.126683089  | 0.072863994  | -0.043028829 |
| comp154352_c0_seq2  | -0.318981918 | 0.165532308  | 1.057866612 | 1.049492748 | 0.191667492  | 0.09119203   | 0.231072306  | -0.024119075 |
| comp154401_c1_seq4  | ND           | -1.542741593 | 0.188981958 | 0.224564776 | -0.649054748 | ND           | -0.836433901 | -0.839287211 |
| comp154423_c0_seq1  | ND           | -0.87807213  | 2.106420781 | 2.053633571 | ND           | -1.903275177 | ND           | -1.077707734 |
| comp154424_c0_seq1  | -0.423950447 | -0.658334871 | 1.535269968 | 1.595933007 | -0.542799276 | 0.319922614  | ND           | -0.954880489 |
| comp154424_c1_seq3  | ND           | -0.938175568 | 0.445093338 | 0.437924175 | ND           | ND           | ND           | ND           |
| comp154447_c0_seq1  | -0.331943465 | 0.153831414  | 1.298493885 | 1.303283524 | 0.529211077  | 0.599920078  | -0.17577345  | -0.318805463 |
| comp154464_c0_seq1  | -0.508763853 | ND           | 0.343246592 | 0.280560102 | ND           | ND           | -1.270923791 | ND           |
| comp154610_c0_seq10 | -1.508901659 | -1.421066788 | 0.184050867 | 0.24478194  | -0.828409938 | -0.844209844 | -0.30727377  | -0.842551142 |
| comp154610_c0_seq11 | -1.212112997 | -0.99933939  | 0.115084204 | 0.137878264 | -0.883803794 | -0.820422454 | -0.645214216 | -0.773006262 |
| comp154610_c0_seq2  | ND           | -0.84176792  | 0.197590993 | 0.222020817 | -0.534346798 | -0.96388098  | -0.663734005 | -0.580672686 |
| comp154610_c0_seq5  | -1.256617027 | -0.566722165 | 0.253510857 | 0.259705656 | -0.530367816 | -0.370076463 | -0.446680197 | -0.441846678 |
| comp154614_c0_seq13 | -0.544087508 | -0.359342625 | 0.720663404 | 0.713494241 | -0.215778306 | -0.420757845 | 0.036175234  | -0.303705724 |
| comp154655_c0_seq7  | ND           | -0.948114091 | 0.663634143 | 0.615072296 | ND           | ND           | ND           | ND           |
| comp154663_c1_seq6  | -1.00366349  | -1.216858615 | 1.623398857 | 1.602403782 | -0.87947427  | ND           | ND           | -1.291555483 |
| comp154760_c0_seq5  | 0.128591905  | 0.19712162   | 2.241074717 | 2.202264844 | 0.835535961  | 1.320296844  | 0.399155811  | 0.194975419  |
| comp154760_c0_seq6  | 0.086594563  | 0.310092036  | 2.388237659 | 2.359138291 | 1.143257547  | 1.414987303  | 0.445008556  | 0.53109633   |
| comp154760_c0_seq9  | 0.452117293  | 0.433898771  | 2.622803108 | 2.659591821 | 1.265615372  | 1.651786571  | 0.910065443  | 0.782273397  |
| comp154796_c0_seq2  | -0.650976682 | -0.599054367 | 2.141714651 | 2.123429483 | -1.343856778 | -1.530352911 | ND           | -1.960057974 |
| comp154796_c0_seq4  | ND           | -1.003395538 | 1.383201311 | 1.416368706 | ND           | -1.250447335 | ND           | -1.504061138 |
| comp154796_c0_seq5  | -0.988952398 | -0.813967352 | 1.716296445 | 1.667106299 | -1.739824442 | ND           | -1.325143604 | -1.45293565  |
| comp154821_c0_seq1  | -0.277017417 | -0.541365064 | 1.617962102 | 1.667120753 | -1.328919456 | -1.089446857 | -1.215268614 | ND           |
| comp154821_c1_seq1  | -0.252127473 | 0.146282711  | 1.80284329  | 1.839802866 | -0.446697016 | -0.617398882 | -1.287288683 | ND           |
| comp154823_c0_seq1  | -1.093244365 | -1.084590741 | 0.818203268 | 0.836530493 | -0.764935163 | -1.127522555 | -1.554374308 | -1.205045099 |
| comp154823_c0_seq2  | -1.145893303 | -1.535179688 | 0.742746037 | 0.754326311 | -0.817584101 | -0.879141497 | ND           | -1.734815292 |
| comp154839_c4_seq7  | -0.072077145 | 0.14622895   | 0.910624365 | 0.922377955 | 0.196646367  | 0.21639391   | -1.045090449 | -0.419554829 |
| comp154839_c4_seq8  | -0.001252862 | 0.216541547  | 0.982510494 | 1.004561536 | 0.23140698   | 0.275483165  | -0.794821264 | -0.922613311 |
| comp154856_c0_seq1  | -0.769126449 | -0.334504092 | 0.466300378 | 0.404773553 | -0.741847242 | -0.678465902 | ND           | ND           |
| comp154859_c0_seq3  | ND           | -0.759816447 | 0.861691624 | 0.824559238 | -0.945310848 | -0.705838249 | -0.354538751 | -0.959452052 |

|                     |              |              |              |             |              |              |              |              |
|---------------------|--------------|--------------|--------------|-------------|--------------|--------------|--------------|--------------|
| comp154859_c0_seq8  | -0.155615469 | -0.209109752 | 1.350250413  | 1.306924939 | -0.137479642 | -0.199037038 | -0.297986649 | -0.568446199 |
| comp154860_c0_seq2  | 0.174395619  | 0.452765176  | 1.488586969  | 1.475822953 | 0.374607566  | 0.457362969  | 0.291057093  | 0.306531165  |
| comp154895_c0_seq11 | -1.101602453 | -0.441670815 | 0.980379779  | 0.934428928 | -0.49453965  | -0.255067051 | -1.182521154 | -1.48640446  |
| comp154895_c0_seq18 | -0.859857702 | -0.620755156 | 0.930004837  | 0.882244024 | -0.589540447 | -0.541953374 | -0.923047636 | -1.749809686 |
| comp154895_c0_seq6  | -0.830735863 | -0.511506925 | 1.089817741  | 1.053563605 | -0.435479871 | -0.175803886 | -1.343018328 | -1.470810374 |
| comp154947_c0_seq26 | -1.82869972  | ND           | 0.373558744  | 0.308988109 | -0.847178004 | -0.501250074 | ND           | ND           |
| comp154947_c0_seq36 | -1.925736392 | ND           | 0.462158648  | 0.394291645 | -0.995367199 | -0.598286746 | -1.784806344 | -1.611568394 |
| comp154947_c1_seq1  | -1.517199141 | ND           | 1.364573741  | 1.329721768 | 0.309420615  | 0.473828534  | -1.075239097 | -1.504061138 |
| comp155004_c0_seq2  | 0.339441804  | 0.259785587  | 1.627947074  | 1.62168128  | 0.4336678    | 0.414629664  | 0.060155449  | -0.210727596 |
| comp155008_c0_seq1  | -0.536930382 | -0.120036793 | 1.09541338   | 1.158978906 | -1.083682443 | -1.048329827 | ND           | -1.097823647 |
| comp155061_c0_seq9  | -0.375803435 | -0.221021775 | 0.481959339  | 0.497066571 | -0.473462965 | -0.313171612 | -0.325050016 | -0.487604169 |
| comp155065_c0_seq2  | ND           | ND           | 1.89486946   | 1.860732521 | ND           | ND           | ND           | ND           |
| comp155065_c0_seq3  | ND           | ND           | 2.025665445  | 2.009244045 | ND           | -1.397316277 | ND           | ND           |
| comp155097_c0_seq4  | 0.394072315  | 0.562778296  | 1.208432709  | 1.195912828 | 0.413664693  | 0.374771282  | 0.284277487  | 0.294788139  |
| comp155153_c1_seq4  | -1.623522802 | -1.535687932 | 0.729272816  | 0.710245047 | -1.897273591 | ND           | ND           | -1.43429354  |
| comp155210_c1_seq5  | -1.479253256 | -0.789358394 | 0.178937164  | 0.141804778 | -1.150944053 | -0.735380195 | ND           | ND           |
| comp155222_c0_seq2  | ND           | ND           | 0.915101416  | 0.890488363 | ND           | -1.103019664 | ND           | ND           |
| comp155230_c0_seq1  | -1.656287608 | ND           | 1.367390796  | 1.301515973 | ND           | -1.389535802 | ND           | ND           |
| comp155230_c0_seq2  | ND           | ND           | 1.71459666   | 1.673206298 | ND           | -1.502051628 | ND           | ND           |
| comp155230_c0_seq3  | ND           | ND           | 1.669783696  | 1.697760462 | ND           | -1.564264157 | ND           | ND           |
| comp155230_c0_seq5  | ND           | -1.738854468 | 1.023231474  | 1.075970138 | ND           | ND           | ND           | ND           |
| comp155230_c0_seq7  | ND           | ND           | 0.461483754  | 0.528948209 | ND           | ND           | ND           | ND           |
| comp155230_c0_seq8  | ND           | ND           | 1.157480524  | 1.164128894 | ND           | -1.724384811 | ND           | ND           |
| comp155232_c0_seq12 | -1.005072394 | -0.653996089 | 0.079086757  | 0.071917594 | -0.977793188 | -0.942440571 | ND           | -1.593994383 |
| comp155232_c0_seq7  | -0.840041822 | -0.694215005 | 0.129397758  | 0.11200943  | -1.055800664 | -1.242296797 | ND           | ND           |
| comp155232_c0_seq9  | -0.857888109 | -0.512488937 | 0.159324253  | 0.186917196 | -0.897555692 | -0.834174352 | -1.5620561   | ND           |
| comp155255_c0_seq6  | -0.700156859 | -0.533140743 | 0.104161596  | 0.15498438  | -0.894726402 | -0.588307013 | -1.258196815 | -1.084958865 |
| comp155318_c1_seq9  | -0.670801466 | ND           | -0.012611046 | 0.025977281 | -1.120643514 | -0.705079655 | -0.705962676 | ND           |
| comp155352_c0_seq1  | -0.552891926 | -0.641148315 | 1.326422815  | 1.261986133 | -0.00819687  | -0.098149638 | -0.411961877 | -0.61893517  |
| comp155352_c0_seq3  | -0.627015967 | -0.532341672 | 1.348773549  | 1.297649484 | -0.115776081 | -0.085886361 | -0.465882533 | -0.760006001 |
| comp155354_c0_seq1  | -0.219209196 | 0.129784158  | 0.793696077  | 0.783147174 | -0.868623599 | -0.490848302 | -0.879911494 | -0.785854791 |

|                     |              |              |             |             |              |              |              |              |
|---------------------|--------------|--------------|-------------|-------------|--------------|--------------|--------------|--------------|
| comp155354_c0_seq3  | 0.001540278  | 0.271540555  | 1.056445615 | 0.993498812 | -0.868196354 | -0.503785019 | -1.009818018 | -1.234520077 |
| comp155387_c1_seq1  | ND           | ND           | 1.304188981 | 1.301792333 | ND           | ND           | ND           | ND           |
| comp155388_c0_seq6  | -1.046091951 | ND           | 0.775127254 | 0.781020564 | -1.194904004 | ND           | ND           | ND           |
| comp155396_c2_seq3  | -1.329713024 | -1.116939417 | 0.431139737 | 0.477655434 | -0.457335777 | -0.585839963 | -0.711661721 | -0.362332512 |
| comp155409_c0_seq7  | -1.177593391 | -1.742971034 | 1.272988718 | 1.207605178 | -1.326405443 | -1.688992836 | ND           | -1.340546648 |
| comp155442_c0_seq1  | -0.747953295 | -0.524455822 | 0.972191969 | 0.936491718 | -0.013103912 | -0.030183037 | -0.328269645 | -0.303451528 |
| comp155464_c1_seq3  | -1.091806778 | ND           | 0.680326993 | 0.626161268 | ND           | ND           | ND           | ND           |
| comp155485_c1_seq1  | -0.91398411  | -1.178331758 | 1.240212908 | 1.291997159 | -0.886704904 | -0.647232305 | -0.773054062 | -0.775907371 |
| comp155491_c0_seq10 | -0.909216069 | -0.851344421 | 0.915305772 | 0.923648776 | -0.325634361 | -0.244524254 | -0.263136042 | -0.339775565 |
| comp155491_c0_seq13 | -0.068538959 | 0.223415894  | 1.026344058 | 1.00845103  | 0.104868284  | 0.053530052  | 0.086631529  | -0.25376861  |
| comp155491_c0_seq2  | -0.824029842 | -0.400402869 | 0.561159305 | 0.553990143 | -0.658447937 | -0.557278036 | -0.243767099 | -0.713981826 |
| comp155491_c0_seq21 | -0.52157476  | -0.785922408 | 0.945801143 | 0.947892341 | -0.494295554 | -0.488906161 | -0.283734699 | -0.985558013 |
| comp155491_c0_seq25 | -0.68008862  | -0.530984093 | 0.57017757  | 0.552789242 | -0.791112111 | -0.477005894 | -0.580551256 | -1.106283311 |
| comp155491_c0_seq8  | -0.614580786 | -0.702837175 | 0.857534153 | 0.848340304 | -0.783596225 | -0.41149806  | -0.284594501 | -0.528892116 |
| comp155518_c0_seq13 | -1.271340284 | -0.882475418 | 0.500793488 | 0.555772232 | -1.244061077 | -1.004588478 | ND           | -1.258202281 |
| comp155531_c0_seq1  | -1.039645106 | -0.75992471  | 0.971798841 | 0.96248501  | -0.711335904 | -0.772893301 | -1.375836313 | -1.026507104 |
| comp155588_c0_seq2  | -1.066671372 | -0.950807778 | 0.440733654 | 0.399484701 | -0.960210919 | -0.384946218 | -0.846560077 | -0.548383391 |
| comp155610_c3_seq1  | ND           | ND           | 0.89874436  | 0.906188353 | ND           | ND           | -1.561350504 | -1.513051291 |
| comp155617_c0_seq3  | -1.60537054  | ND           | 0.895844911 | 0.869559458 | -0.799940083 | -1.639648729 | ND           | -1.115111282 |
| comp155617_c1_seq2  | -1.605723481 | -1.392949874 | 1.412934122 | 1.346327771 | -1.277414279 | -1.162880416 | ND           | -0.814434228 |
| comp155625_c0_seq2  | -0.321645402 | -0.034238177 | 0.875411868 | 0.940390688 | ND           | -0.259013579 | -0.384835336 | ND           |
| comp155697_c1_seq2  | ND           | ND           | 0.966633732 | 1.031467231 | ND           | ND           | ND           | ND           |
| comp155751_c0_seq2  | -1.661283143 | -1.14747954  | 0.325965996 | 0.305008549 | -0.788905896 | -0.917410082 | -0.82138309  | -0.502017104 |
| comp155751_c0_seq3  | -1.289739023 | -0.95202668  | 0.500568717 | 0.456257746 | -0.894483032 | -0.801138468 | -0.926960225 | -0.291324278 |
| comp155758_c0_seq1  | -0.054427404 | 0.143282456  | 0.958860272 | 0.985222444 | 0.085273982  | 0.280678954  | 0.086502644  | -0.104958481 |
| comp155759_c0_seq7  | -0.105844217 | 0.215702509  | 0.894768883 | 0.873190525 | 0.027599726  | -0.220642003 | 0.130657494  | 0.002865448  |
| comp155772_c0_seq2  | 0.652401509  | 1.123746673  | 1.989817874 | 2.003243494 | -1.02788946  | -1.390476853 | -0.738147359 | -0.388818151 |
| comp155793_c1_seq1  | -0.187871187 | -0.261887137 | 0.67141276  | 0.726391504 | -0.523769883 | 0.033123128  | -0.268789888 | -0.373100838 |
| comp155799_c0_seq5  | -0.962364874 | -1.226712522 | 0.690973043 | 0.656100349 | -1.111176926 | -1.172734323 | -1.122464821 | -0.949226871 |
| comp155819_c0_seq1  | ND           | ND           | 0.451167485 | 0.443998323 | ND           | ND           | ND           | ND           |
| comp155828_c0_seq1  | -1.229795188 | -1.054810142 | 0.881543626 | 0.819166077 | -0.638244551 | -1.741194632 | -1.168046385 | -0.880865083 |



|                     |              |              |             |             |              |              |              |              |
|---------------------|--------------|--------------|-------------|-------------|--------------|--------------|--------------|--------------|
| comp155852_c0_seq1  | 0.210338541  | 0.294569287  | 1.573676124 | 1.541502945 | 0.520320362  | 0.343694983  | -0.316543433 | -0.497580991 |
| comp155972_c0_seq3  | -0.365610201 | -0.152836594 | 1.134848969 | 1.18019688  | 0.227731344  | 0.388022697  | -1.266072837 | -0.995924875 |
| comp155972_c1_seq1  | ND           | -1.112924339 | 0.110643723 | 0.052322038 | ND           | ND           | ND           | ND           |
| comp155978_c1_seq1  | ND           | ND           | 1.613006821 | 1.631851091 | ND           | ND           | ND           | -0.706447408 |
| comp155984_c1_seq3  | 0.052736296  | -0.399601834 | 0.579417589 | 0.640705807 | -1.488186222 | -1.549743618 | -1.37453538  | -0.657229386 |
| comp155986_c0_seq3  | 0.086594563  | -0.090602909 | 0.980874171 | 1.042648558 | -0.442428731 | -0.337654706 | 0.063332576  | -0.428541212 |
| comp155987_c0_seq6  | -1.285580723 | -0.896715857 | 0.611491785 | 0.541531793 | -1.258301516 | -0.842737658 | ND           | -1.27244272  |
| comp155993_c1_seq13 | ND           | ND           | 0.541690489 | 0.566120312 | ND           | ND           | ND           | ND           |
| comp155993_c1_seq2  | ND           | ND           | 0.377802006 | 0.336774576 | ND           | ND           | ND           | ND           |
| comp156008_c1_seq2  | 0.182471771  | 0.175688425  | 1.239978727 | 1.216947423 | -0.744491532 | -0.609754283 | 0.04257521   | -0.700640789 |
| comp156008_c1_seq6  | 0.11643372   | 0.045210671  | 1.158439505 | 1.101908728 | -0.777105827 | -0.502871122 | -0.010242471 | -0.569398282 |
| comp156046_c0_seq2  | -0.918340655 | -0.509272402 | 0.352128921 | 0.397233042 | -0.435129492 | -0.518963283 | -0.367236141 | -0.796058183 |
| comp156046_c0_seq4  | -0.821430641 | -0.487613342 | 0.525264348 | 0.566176807 | -0.360495874 | -0.311640787 | -0.349507374 | -0.875239429 |
| comp156059_c0_seq1  | -1.227272657 | -1.08144584  | 0.856886494 | 0.868685171 | -2.045091491 | -0.744921051 | -1.028350662 | -1.281081444 |
| comp156059_c0_seq3  | -1.761964009 | -1.005122358 | 0.846428942 | 0.838447254 | -1.257563548 | -0.66590843  | -1.076965916 | -2.049856002 |
| comp156063_c0_seq1  | -0.110226181 | 0.250150147  | 1.327835469 | 1.382432584 | 0.119878538  | 0.214517572  | -0.048477378 | 0.13092088   |
| comp156071_c0_seq9  | -0.555869957 | -0.291943828 | 0.695237074 | 0.706166133 | -0.28552702  | -0.046080103 | -0.715969904 | -0.667670691 |
| comp156074_c0_seq6  | -1.058290855 | -0.845517248 | 0.150807033 | 0.129849586 | -1.031011648 | -1.092569045 | -0.616330811 | -0.823304103 |
| comp156101_c0_seq1  | -0.861165819 | -0.441266719 | 0.80022974  | 0.785002935 | -0.34097109  | -0.594414013 | -0.82938024  | -0.848027816 |
| comp156101_c0_seq3  | -1.490437422 | -0.335655762 | 0.8879123   | 0.853724295 | -0.195986487 | -0.348624353 | -0.609144684 | -0.824086906 |
| comp156111_c0_seq5  | ND           | ND           | 0.795590208 | 0.837639068 | ND           | ND           | ND           | -0.946372222 |
| comp156111_c0_seq6  | ND           | -1.028603453 | 1.497199306 | 1.443067952 | -1.214097854 | ND           | -1.100447012 | -0.751117803 |
| comp156111_c0_seq7  | ND           | ND           | 1.087742509 | 1.032447278 | -0.920353491 | -1.282940883 | ND           | -0.934494695 |
| comp156168_c0_seq1  | -0.111215946 | 0.019022773  | 1.36584299  | 1.370344631 | -0.653812047 | 0.525892347  | 0.347134515  | 0.395433728  |
| comp156190_c0_seq1  | ND           | ND           | 1.721725405 | 1.727643319 | ND           | ND           | -1.735885404 | -1.86367745  |
| comp156190_c0_seq10 | ND           | ND           | 0.855058957 | 0.801644606 | ND           | ND           | ND           | ND           |
| comp156190_c0_seq11 | ND           | ND           | 1.300309446 | 1.311467664 | ND           | ND           | ND           | ND           |
| comp156190_c0_seq2  | ND           | ND           | 1.709481474 | 1.694946753 | ND           | ND           | ND           | -1.202742671 |
| comp156190_c0_seq9  | ND           | ND           | 1.805700598 | 1.77754978  | ND           | -1.891375954 | ND           | -1.843959761 |
| comp156207_c0_seq3  | -1.155946865 | -0.767081999 | 0.347341594 | 0.360375818 | -1.128667659 | -0.7131038   | ND           | -0.841778867 |
| comp156209_c2_seq1  | -1.589000493 | -0.747837956 | 0.940373534 | 0.91935326  | -0.632302361 | -0.392829762 | -1.74910044  | -0.598138885 |

|                     |              |              |             |             |              |              |              |              |
|---------------------|--------------|--------------|-------------|-------------|--------------|--------------|--------------|--------------|
| comp156217_c1_seq1  | ND           | -1.887249182 | 0.62262562  | 0.630179714 | ND           | ND           | -1.18094149  | -0.882764804 |
| comp156256_c1_seq3  | -0.693722749 | -0.480949142 | 0.730384464 | 0.72937561  | -0.967473538 | -1.029030934 | ND           | -1.282644738 |
| comp156256_c1_seq5  | -1.054541527 | -0.21337899  | 0.711988367 | 0.699142071 | -0.726232325 | -0.611698462 | ND           | -1.041403524 |
| comp156256_c1_seq6  | 0.094339109  | 0.136042259  | 0.964159113 | 0.959053111 | -0.131638898 | -0.272377541 | -0.921078043 | -0.82702134  |
| comp156315_c0_seq1  | -1.828488538 | -1.314684936 | 1.801286946 | 1.773870237 | ND           | ND           | ND           | -1.815350536 |
| comp156316_c0_seq1  | 0.453658005  | 0.37107875   | 1.515089391 | 1.463582138 | 0.262881451  | 0.29189389   | 0.274079705  | 0.000955764  |
| comp156318_c0_seq3  | -1.471153178 | -1.559409567 | 0.333165276 | 0.374844681 | -0.32993062  | -0.391488016 | -1.33022313  | -0.281923917 |
| comp156329_c0_seq4  | -0.718226116 | -1.1075125   | 1.665943959 | 1.686761007 | ND           | -1.053534301 | -0.78141605  | -1.131056845 |
| comp156382_c0_seq6  | ND           | ND           | 0.504235734 | 0.444678502 | ND           | ND           | ND           | ND           |
| comp156382_c0_seq9  | ND           | -1.735981506 | 0.339524021 | 0.304326135 | ND           | -1.380973312 | ND           | ND           |
| comp156405_c0_seq1  | 0.374260597  | 0.51324799   | 1.661105977 | 1.651269149 | 0.582131564  | 0.656018312  | -0.249596643 | -0.418781374 |
| comp156445_c0_seq12 | -1.142831285 | -0.988049625 | 1.426516743 | 1.379860185 | -1.115552078 | -0.737776781 | -0.373512306 | -0.585625238 |
| comp156488_c0_seq1  | ND           | ND           | 0.560615227 | 0.595643744 | -1.283370811 | -0.742868216 | -1.169719969 | -0.820390761 |
| comp156510_c0_seq2  | -0.234118071 | -0.120729096 | 1.632692832 | 1.579630483 | -0.005193501 | 0.221689971  | 0.39689821   | 0.22898894   |
| comp156524_c0_seq3  | ND           | -0.813236831 | 0.570032074 | 0.625010818 | -0.220579981 | -0.282137378 | 0.018009597  | -1.012872436 |
| comp156530_c0_seq4  | -0.275530615 | -0.014151674 | 1.125095503 | 1.11861515  | -0.651943746 | -0.527864565 | -0.237262908 | -0.519956914 |
| comp156576_c0_seq1  | ND           | -0.904751812 | 1.376003202 | 1.317240654 | 0.324727135  | 0.004543592  | 0.632643205  | 0.257340419  |
| comp156588_c0_seq3  | 0.086289902  | 0.205946485  | 1.647887659 | 1.613556017 | 0.330822107  | 0.3492153    | -0.227624909 | -0.124968034 |
| comp156601_c0_seq1  | -0.131662835 | -0.219919224 | 0.768347414 | 0.746286696 | -0.732772559 | -0.743177433 | ND           | -1.172882495 |
| comp156630_c0_seq2  | ND           | -1.742655757 | 0.938289502 | 0.871683152 | ND           | -1.387647563 | ND           | -1.641261366 |
| comp156659_c0_seq7  | -0.4599481   | 0.644123969  | 1.702097827 | 1.64080861  | 0.16156576   | 0.713754113  | -0.620048047 | -0.388818151 |
| comp156682_c0_seq5  | ND           | -0.702941912 | 0.7424749   | 0.715561679 | ND           | -0.72814496  | -0.95087673  | -1.379698772 |
| comp156725_c0_seq12 | -1.329713024 | -0.514879426 | 0.690205231 | 0.670261781 | -0.825312563 | -0.761931222 | -0.109601729 | -0.71451503  |
| comp156725_c1_seq2  | ND           | -0.951051832 | 0.573546226 | 0.515224541 | -0.659424978 | -0.897073633 | ND           | ND           |
| comp156735_c0_seq7  | -0.36221478  | -0.149441173 | 0.994945644 | 0.940945332 | -0.732875582 | -0.041105312 | -0.283432638 | -0.110194689 |
| comp156769_c2_seq1  | -1.318239153 | -1.105465546 | 0.695338924 | 0.640990683 | ND           | -1.352517343 | -0.70018785  | -0.606131147 |
| comp156769_c3_seq2  | 0.195614966  | 0.138767042  | 1.673897327 | 1.615027636 | -0.148716897 | -0.161969614 | 0.302686748  | 0.208752969  |
| comp156769_c3_seq3  | 0.59759486   | 0.755113105  | 1.932411457 | 1.937214417 | 0.485609476  | 0.680499942  | 0.900290313  | 0.66824413   |
| comp156769_c3_seq5  | 0.686787765  | 0.725137273  | 2.110894979 | 2.085997049 | 0.406303594  | 0.714657482  | 0.803679573  | 0.679404101  |
| comp156769_c3_seq6  | 0.457936803  | 0.467503771  | 1.698310242 | 1.690342744 | 0.14096086   | 0.385454261  | 0.681841087  | 0.299531175  |
| comp156771_c1_seq2  | ND           | ND           | 0.420381469 | 0.413212307 | ND           | ND           | ND           | ND           |

|                     |              |              |             |             |              |              |              |              |
|---------------------|--------------|--------------|-------------|-------------|--------------|--------------|--------------|--------------|
| comp156809_c0_seq3  | -0.384462331 | -0.247409438 | 1.006121848 | 1.061743516 | 0.089974907  | 0.002863406  | -0.29904961  | -0.407536501 |
| comp156821_c0_seq2  | -0.948434719 | -1.191593068 | 1.259576073 | 1.228063264 | -0.966913003 | -0.941320224 | -1.80750467  | -1.458175462 |
| comp156821_c0_seq3  | -1.177088837 | -0.818187195 | 1.248009916 | 1.270043998 | -1.003681595 | -0.67988811  | -1.258007538 | -1.163950835 |
| comp156821_c0_seq6  | -1.203707224 | -0.876990265 | 1.305333564 | 1.32005286  | -1.574368026 | -0.823012066 | -1.76174718  | -1.287479235 |
| comp156825_c1_seq2  | ND           | ND           | 0.776600211 | 0.740785867 | ND           | ND           | ND           | ND           |
| comp156863_c0_seq1  | -0.991136616 | -0.477333014 | 0.884537747 | 0.938638241 | -0.662827414 | -0.481346762 | -0.975145304 | -0.801907355 |
| comp156883_c0_seq2  | ND           | -1.536702639 | 0.545536271 | 0.503605002 | -1.421167043 | -0.880664449 | -0.161388166 | -0.958186993 |
| comp156900_c0_seq1  | ND           | ND           | 0.445495648 | 0.438326486 | ND           | ND           | ND           | ND           |
| comp156907_c1_seq5  | ND           | ND           | 0.770503624 | 0.772289303 | ND           | ND           | ND           | ND           |
| comp156910_c0_seq1  | -0.367008187 | -0.310581781 | 1.473070115 | 1.462566195 | -0.32974476  | -0.278879977 | -0.461606585 | -0.811247381 |
| comp156910_c0_seq3  | -0.233135931 | -0.207448968 | 1.43648395  | 1.418849353 | -0.321250143 | -0.253173682 | -0.548137838 | -0.742876674 |
| comp156929_c0_seq18 | -0.452062939 | -0.257772737 | 0.435154815 | 0.390843844 | ND           | -0.662432387 | -1.390314136 | -0.518106182 |
| comp157049_c0_seq2  | -1.042880491 | -0.432166876 | 1.339130323 | 1.346745175 | 0.393768186  | 0.5918481    | ND           | -1.506863744 |
| comp157061_c1_seq11 | -0.389367026 | -0.15540412  | 1.003889743 | 1.058690825 | -0.215959784 | -0.081222535 | -0.771315723 | -0.774169032 |
| comp157061_c1_seq2  | -0.680561303 | -0.115605178 | 0.889673946 | 0.891278708 | -0.255342088 | -0.112779501 | -0.84066125  | -1.093392033 |
| comp157061_c1_seq6  | -0.77831187  | -0.365965908 | 0.889423867 | 0.90073811  | -0.206964619 | -0.085591332 | -0.570435032 | -0.765173868 |
| comp157077_c1_seq2  | ND           | -1.180638773 | 0.431109461 | 0.413956078 | ND           | -1.42769057  | ND           | ND           |
| comp157078_c0_seq1  | -0.024111222 | 0.478312835  | 1.103647314 | 1.142996894 | 0.017891241  | 0.070277197  | -0.605216482 | -0.774401213 |
| comp157186_c0_seq1  | -0.258670226 | -0.323445519 | 1.493525216 | 1.443503553 | 0.382568195  | 0.954888516  | 0.089385315  | -0.270355807 |
| comp157186_c0_seq18 | -0.664684541 | -0.305782898 | 1.510261539 | 1.444722727 | -0.132255356 | 0.61490449   | -0.018604514 | -0.748456551 |
| comp157282_c0_seq4  | -0.96648388  | -0.577619014 | 0.585653146 | 0.529635416 | -1.240234669 | -0.602822061 | -0.825553832 | -0.476224623 |
| comp157318_c0_seq4  | -1.005072394 | -0.634690934 | 0.996362455 | 0.972455403 | -0.465909827 | -0.71199165  | -0.725839648 | -0.71893312  |
| comp157318_c0_seq5  | -0.693426085 | -0.321935315 | 1.097927392 | 1.076747515 | -0.449437769 | -0.727704275 | -0.552496037 | -0.680288083 |
| comp157318_c0_seq6  | -0.880391462 | -0.491526596 | 0.887265007 | 0.873292136 | -0.55208226  | -0.68422073  | -0.625518061 | -0.753310107 |
| comp157331_c0_seq6  | -1.344340056 | -0.654445194 | 0.427793715 | 0.405517134 | -0.515428503 | -0.776558255 | -1.379501267 | -1.507293313 |
| comp157334_c0_seq4  | -0.722830466 | -0.731905608 | 1.062464752 | 1.042134143 | -1.093491268 | -1.45607866  | ND           | ND           |
| comp157357_c0_seq11 | -0.492579069 | -0.434707422 | 0.632972767 | 0.573415535 | -0.796293082 | -0.401918522 | -0.828770275 | -0.701289816 |
| comp157357_c0_seq13 | -0.57641496  | -0.460551366 | 0.31505367  | 0.302207375 | -1.248105758 | -0.672841057 | -1.134454916 | -1.262246962 |
| comp157357_c0_seq8  | -0.367001725 | -0.25361275  | 0.56154987  | 0.564846141 | -1.080085208 | -0.513253675 | -0.614251848 | -0.997316399 |
| comp157383_c0_seq1  | 0.317993194  | 0.305826974  | 1.555588787 | 1.504939697 | 0.289474973  | 0.435525887  | 0.37040197   | 0.121431336  |
| comp157421_c1_seq4  | ND           | -1.537714981 | 0.600842292 | 0.575699759 | -1.422179385 | -1.182706786 | -0.609558539 | -0.737350585 |

|                     |              |              |             |             |              |              |              |              |
|---------------------|--------------|--------------|-------------|-------------|--------------|--------------|--------------|--------------|
| comp157449_c0_seq1  | -0.283151245 | -0.058143181 | 1.149729893 | 1.123381897 | 0.057392414  | -0.035422676 | 0.523225774  | 0.289722434  |
| comp157450_c1_seq12 | ND           | -1.219671868 | 0.629437281 | 0.685937198 | -1.104136273 | ND           | ND           | ND           |
| comp157450_c1_seq2  | ND           | ND           | 1.153048266 | 1.103026604 | -1.17392796  | ND           | ND           | -1.188069164 |
| comp157450_c1_seq4  | ND           | ND           | 1.007788513 | 0.997634497 | ND           | -1.070881702 | ND           | -1.023465509 |
| comp157450_c1_seq7  | ND           | -1.446331056 | 1.188482482 | 1.151283235 | ND           | ND           | ND           | ND           |
| comp157487_c0_seq7  | ND           | ND           | 0.710892985 | 0.67315783  | -1.154704202 | ND           | -1.342083356 | -0.770905398 |
| comp157487_c1_seq1  | ND           | -1.571269793 | 0.96050685  | 0.948565172 | -0.853674206 | -1.216261599 | -1.04105336  | -0.624777362 |
| comp157561_c1_seq1  | 0.229262067  | 0.531436085  | 1.882878734 | 1.862554556 | -0.151864169 | -0.118635246 | -0.236023836 | -0.199005633 |
| comp157561_c1_seq10 | 0.237977299  | 0.303182423  | 1.345238944 | 1.345170122 | -0.214750438 | -0.111954978 | -0.385096252 | -0.465463648 |
| comp157561_c1_seq2  | -1.519786802 | -1.130921936 | 1.511928598 | 1.497968623 | -1.492507595 | ND           | -1.378856753 | ND           |
| comp157561_c1_seq4  | -1.156112468 | -0.298244238 | 1.873248471 | 1.899362378 | -1.003894525 | -0.889360663 | -0.751940985 | -1.222155712 |
| comp157617_c0_seq2  | -0.417830987 | -0.602997389 | 1.36746423  | 1.337373784 | -0.487461794 | -0.397751515 | -0.640078841 | -0.802632993 |
| comp157629_c0_seq4  | -0.05283471  | -0.111127875 | 0.615574874 | 0.678228634 | -0.268593552 | -0.119297583 | 0.038877316  | -0.583764752 |
| comp157675_c0_seq1  | -0.123407602 | 0.082735426  | 0.881570304 | 0.857288832 | -0.302888474 | -0.29598849  | -0.459598808 | -0.424663556 |
| comp157692_c0_seq3  | -0.28809825  | -0.447710547 | 1.118749958 | 1.072295771 | -1.177272992 | -0.799497695 | -0.147168201 | -0.752081502 |
| comp157705_c1_seq1  | -0.941253167 | -0.983752065 | 0.853775212 | 0.837112896 | -0.69212521  | -0.514800518 | -1.277444373 | ND           |
| comp157766_c0_seq3  | 0.105682625  | 0.234910181  | 1.08436552  | 1.059539678 | -0.213825654 | 0.141442302  | -0.401204808 | -0.638141323 |
| comp157771_c0_seq1  | -1.159780901 | -0.380275265 | 0.880126115 | 0.816892826 | -0.121777829 | -0.032691088 | -0.524000831 | -0.458668278 |
| comp157801_c0_seq1  | 0.334396402  | 0.631490894  | 1.294555832 | 1.25426297  | 0.231059739  | -0.109251259 | -0.207044292 | -0.061835066 |
| comp157827_c0_seq1  | -1.816712517 | -1.302908914 | 0.944140244 | 0.90496219  | -1.488403315 | -1.152020702 | -1.675782468 | -1.10460451  |
| comp157827_c0_seq10 | -0.080009058 | -0.484535409 | 1.109953819 | 1.168051388 | 0.041174651  | -0.622442736 | -0.146204502 | -0.415325701 |
| comp157827_c0_seq11 | ND           | ND           | 1.054717373 | 1.069037126 | -0.761830417 | -0.698449077 | -1.602422084 | -1.429184135 |
| comp157827_c0_seq13 | ND           | -0.608580351 | 0.456625219 | 0.466489396 | -0.794074752 | -0.281600881 | ND           | ND           |
| comp157827_c0_seq5  | -1.098664202 | -0.982800608 | 1.10934659  | 1.045582676 | -0.656411648 | -0.553158795 | -1.355674162 | -1.182436213 |
| comp157827_c0_seq8  | ND           | -1.127728262 | 1.274497061 | 1.296394744 | -0.296189323 | -0.082523988 | -1.296481834 | -1.42427388  |
| comp157827_c0_seq9  | -0.279233645 | -0.118848107 | 1.064562817 | 1.070757616 | -0.552984434 | 0.051635661  | -0.526483767 | -0.462390287 |
| comp157865_c0_seq1  | -0.085541133 | -0.474827518 | 0.776769268 | 0.7511167   | -0.395504095 | 0.013719585  | -0.865429839 | -0.868283148 |
| comp157939_c0_seq3  | 0.103280606  | 0.24841088   | 1.068033509 | 1.009883584 | -0.154079767 | 0.287497524  | 0.171659987  | -0.081070795 |
| comp157971_c1_seq1  | 0.610648666  | 0.783494326  | 1.520729303 | 1.51356014  | 0.51688418   | 0.68026661   | 0.638221851  | 0.444751029  |
| comp157978_c0_seq2  | 0.013741445  | 0.238635685  | 1.501134462 | 1.479144334 | 0.129658139  | 0.459307368  | 0.438995796  | 0.122147513  |
| comp158030_c0_seq11 | ND           | -2.178563012 | 0.258079876 | 0.229721414 | -1.585906162 | -1.823554817 | ND           | -2.077168621 |

|                     |              |              |             |             |              |              |              |              |
|---------------------|--------------|--------------|-------------|-------------|--------------|--------------|--------------|--------------|
| comp158030_c0_seq18 | -1.960134659 | -1.446331056 | 0.229534677 | 0.218086717 | ND           | -1.517291594 | ND           | ND           |
| comp158030_c0_seq24 | -2.060525013 | -1.370630151 | 0.332731756 | 0.358887657 | -1.431185815 | -1.316651952 | ND           | -1.570265756 |
| comp158030_c0_seq41 | -2.088801268 | -1.876027661 | 0.259585231 | 0.252416068 | -1.760492066 | -1.424109454 | ND           | -2.075663266 |
| comp158030_c0_seq48 | -1.670801466 | -2.06008785  | 0.200463779 | 0.146551213 | -1.467431    | -1.307139647 | ND           | ND           |
| comp158030_c0_seq49 | -2.084370843 | -1.57056724  | 0.252034359 | 0.223068067 | -1.756061641 | -1.817619037 | ND           | ND           |
| comp158030_c0_seq6  | ND           | -1.456963597 | 0.368664457 | 0.303503347 | -1.244517989 | -1.402985398 | ND           | ND           |
| comp158030_c0_seq69 | ND           | -1.868657639 | 0.242652719 | 0.229189323 | -2.054152039 | -1.513649444 | ND           | -1.767263247 |
| comp158085_c0_seq7  | -0.844863308 | -0.154968446 | 0.697933693 | 0.735576875 | 0.111834825  | -0.277081506 | -0.30599325  | -0.178512791 |
| comp158085_c2_seq1  | -0.077996197 | -0.2419733   | 0.875394674 | 0.907478811 | -0.846597008 | -0.130003154 | 0.183507783  | -0.031434439 |
| comp158087_c0_seq18 | -1.012548727 | -0.79977512  | 0.020457902 | 0.070431625 | -0.93951203  | -0.959676741 | -1.825861188 | -1.476531979 |
| comp158119_c0_seq1  | ND           | ND           | 1.707643174 | 1.729229183 | ND           | ND           | ND           | ND           |
| comp158162_c1_seq4  | -1.115166597 | -1.078484249 | 1.189754209 | 1.186378035 | -0.58728504  | -0.973353528 | -1.752387799 | -1.880179845 |
| comp158162_c1_seq5  | -1.287052909 | -1.278399285 | 1.110182158 | 1.095019619 | -1.016735654 | -1.14523984  | ND           | -1.398853643 |
| comp158171_c1_seq2  | -0.696832555 | -0.785088943 | 0.551183399 | 0.524990999 | -0.447704599 | -1.509261995 | -1.033023761 | -0.984724548 |
| comp158173_c0_seq2  | -0.70096711  | -0.272593703 | 0.405856026 | 0.360228612 | -0.564543434 | -0.237920659 | -0.259007066 | -0.491534462 |
| comp158194_c0_seq4  | -0.786144264 | -0.698309394 | 0.72432278  | 0.749483574 | -1.018502368 | -0.674294418 | -0.690971706 | -0.869916275 |
| comp158194_c0_seq5  | -0.103940124 | -0.245715768 | 0.795787152 | 0.73079787  | -0.614480012 | -0.073977417 | -0.44013133  | -0.514677864 |
| comp158236_c0_seq4  | -0.406498186 | -0.154216037 | 0.637043115 | 0.680710968 | -0.379218979 | -0.484242069 | -0.98572744  | -0.812489491 |
| comp158263_c0_seq8  | -1.066915426 | -0.854141819 | 0.068396248 | 0.061227085 | ND           | ND           | -0.925985378 | -0.752747428 |
| comp158302_c1_seq7  | ND           | -1.615714931 | 0.479685424 | 0.424592709 | -0.801209332 | -0.783585482 | ND           | -1.213290545 |
| comp158306_c0_seq4  | 0.169938194  | -0.12917156  | 2.161730882 | 2.14923448  | 0.514637812  | 0.523460381  | -0.363742416 | 0.069132844  |
| comp158306_c1_seq1  | -0.209733049 | 0.07236705   | 1.401460808 | 1.355373579 | -0.07891325  | -0.227620822 | -0.307685089 | -0.465440359 |
| comp158306_c1_seq2  | -0.423183819 | -0.453448261 | 1.684007207 | 1.716186672 | 0.915849248  | 0.738832636  | -0.386989121 | -0.233954558 |
| comp158332_c1_seq1  | 0.314806716  | 0.278579327  | 1.997308622 | 1.973135985 | 0.372575245  | 0.484648509  | 0.317434066  | 0.155783753  |
| comp158385_c1_seq5  | ND           | ND           | 0.193778821 | 0.145216974 | ND           | ND           | ND           | ND           |
| comp158391_c0_seq1  | -0.427510258 | 0.508855828  | 1.286100969 | 1.268181394 | 0.025737681  | 0.229882318  | -0.21963342  | -0.131825665 |
| comp158429_c0_seq9  | 0.079048156  | 0.141772306  | 0.875393378 | 0.868224215 | 0.031998619  | 0.112413299  | -0.34920056  | -0.45926384  |
| comp158429_c1_seq2  | -1.138714719 | -1.403062366 | 1.451159531 | 1.386079093 | ND           | -0.871962913 | -1.474905925 | -1.602697971 |
| comp158429_c1_seq8  | ND           | -1.351909844 | 1.371243486 | 1.325219895 | -1.236374249 | -1.172992908 | -1.599844661 | -1.125576716 |
| comp158462_c0_seq13 | -0.534581719 | -1.224898099 | 0.29969996  | 0.338288288 | -1.109362503 | ND           | ND           | -0.822473712 |
| comp158469_c0_seq1  | -0.216169145 | 0.27861122   | 2.096518684 | 2.061436862 | -0.454204382 | -0.151062703 | -1.01724715  | -0.571007928 |

|                     |              |              |             |             |              |              |              |              |
|---------------------|--------------|--------------|-------------|-------------|--------------|--------------|--------------|--------------|
| comp158513_c1_seq1  | -1.88892915  | -1.977185538 | 1.157836075 | 1.125076946 | ND           | ND           | ND           | -1.574761152 |
| comp158532_c1_seq19 | ND           | -0.899288917 | 0.02324915  | 0.103230163 | -0.783753321 | -0.544280722 | ND           | -0.49686453  |
| comp158640_c0_seq2  | -1.636368246 | -1.122564643 | 1.47564995  | 1.489354791 | ND           | ND           | ND           | ND           |
| comp158656_c1_seq12 | -0.818661486 | -0.781979138 | 0.528739101 | 0.531329775 | -0.490352283 | -0.48496289  | -0.677731437 | -0.981614742 |
| comp158679_c0_seq3  | ND           | -1.460450707 | 0.388658443 | 0.435174139 | -0.742855121 | -0.127718907 | -0.930234274 | -0.513958276 |
| comp158680_c1_seq1  | ND           | ND           | 2.413690541 | 2.368456637 | -1.275646696 | -0.638234088 | ND           | -0.590817896 |
| comp158685_c0_seq1  | 0.089298585  | 0.172112654  | 1.466934594 | 1.470117469 | 0.326277651  | 0.452960403  | 0.207163329  | -0.116923362 |
| comp158685_c0_seq2  | -0.02090407  | 0.172984193  | 1.392782782 | 1.38453059  | 0.203508998  | 0.325798326  | 0.071177411  | -0.056614635 |
| comp158685_c2_seq1  | ND           | ND           | 0.896407329 | 0.832510541 | ND           | -0.407076114 | ND           | -0.961719913 |
| comp158704_c1_seq1  | 0.671621215  | 0.890735     | 1.571021072 | 1.502267473 | 0.702082081  | 0.83218372   | 0.471404045  | 0.204432823  |
| comp158731_c0_seq11 | ND           | ND           | 0.391581795 | 0.358083694 | ND           | ND           | ND           | ND           |
| comp158743_c0_seq8  | -0.31102948  | -0.078950718 | 1.16310075  | 1.095635686 | -0.723082967 | -0.06448106  | 0.3199868    | -0.038254167 |
| comp158759_c1_seq2  | ND           | ND           | 0.810881048 | 0.758899541 | ND           | -1.589157737 | ND           | ND           |
| comp158777_c0_seq1  | -0.740487383 | -0.4405636   | 0.998222633 | 0.934014969 | -0.667450686 | -0.552916823 | -0.553799844 | -0.83649385  |
| comp158795_c0_seq13 | -0.35563758  | -0.360919734 | 0.421739247 | 0.402831681 | -0.376663053 | -0.270729362 | -0.414279886 | -0.241041937 |
| comp158795_c0_seq27 | -1.551495159 | -1.463660288 | 0.5909951   | 0.55942095  | -1.223185957 | -1.40968209  | ND           | -1.839387152 |
| comp158795_c0_seq30 | ND           | ND           | 0.619940668 | 0.605632257 | ND           | ND           | ND           | ND           |
| comp158830_c1_seq4  | ND           | -1.330856241 | 2.119025253 | 2.118256485 | ND           | -1.276878042 | ND           | -1.229461849 |
| comp158918_c1_seq7  | -1.275887912 | -0.58599305  | 0.396542947 | 0.41652603  | -0.248608705 | -0.611196097 | -1.134957863 | -1.262749909 |
| comp158921_c0_seq5  | -0.798200801 | -0.71036593  | 0.036080878 | 0.004088131 | -0.895860331 | -0.589440942 | ND           | -1.38712279  |
| comp158940_c0_seq2  | -0.265061218 | -0.164261371 | 0.861386996 | 0.814389369 | -0.37608471  | 0.114112767  | -0.104826014 | -0.51516465  |
| comp158944_c0_seq3  | -0.0373624   | 0.016487973  | 0.7363252   | 0.715829359 | -0.152491339 | -0.066995684 | -0.07252361  | -0.320609488 |
| comp158945_c0_seq6  | -0.585503295 | -1.275819675 | 0.561707602 | 0.47769841  | ND           | -0.443690226 | ND           | -0.697304029 |
| comp158970_c0_seq1  | -0.583432887 | -0.268669741 | 0.993527724 | 0.954410744 | -0.230300101 | -0.224910708 | -0.631559074 | -0.119502568 |
| comp158970_c0_seq2  | -0.852724968 | -0.861800111 | 0.220438799 | 0.224265021 | -0.621325779 | -0.506791916 | -0.808704932 | -0.58431446  |
| comp159055_c0_seq4  | ND           | ND           | 0.325083356 | 0.334304609 | -1.24367995  | ND           | ND           | -1.257821154 |
| comp159070_c0_seq10 | -1.522786381 | ND           | 0.813618821 | 0.781447389 | ND           | -1.256034575 | -1.080826337 | -1.208618383 |
| comp159070_c0_seq9  | -0.363654545 | -0.116118832 | 0.978782622 | 0.995882034 | -0.637405334 | -0.574023994 | -0.699845751 | -0.827637797 |
| comp159092_c0_seq3  | -0.156167655 | -0.150743001 | 0.69562827  | 0.639447026 | -0.35613223  | -0.460441607 | -1.270510112 | -1.398302158 |
| comp159094_c0_seq9  | ND           | ND           | 0.454236717 | 0.479252238 | -0.415556585 | ND           | -1.000875747 | -0.827637797 |
| comp159122_c0_seq1  | -0.425021457 | -1.513277846 | 1.195380401 | 1.249937807 | -1.397742251 | -1.158269652 | -1.284091409 | -1.110853459 |

|                     |    |              |              |             |             |    |              |              |    |              |              |
|---------------------|----|--------------|--------------|-------------|-------------|----|--------------|--------------|----|--------------|--------------|
| comp159139_c0_seq5  | ND |              | -0.702365543 | 0.956126095 | 0.974764196 | ND |              | -0.472296085 | ND | ND           |              |
| comp159218_c1_seq3  |    | 0.050619343  | -0.902938472 | 1.148142456 | 1.098922087 |    | -0.404186125 | -0.246900282 |    | -1.752933281 | -0.579695331 |
| comp159231_c0_seq1  | ND | ND           |              | 0.86735909  | 0.898381545 | ND |              | ND           | ND | ND           | ND           |
| comp159231_c0_seq10 |    | -1.38017423  | -0.866370628 | 1.36159843  | 1.360752138 |    | -0.926926291 | -0.988483688 |    | -0.373942756 | -0.501734802 |
| comp159231_c0_seq13 |    | -1.856107806 | -1.643334199 | 0.871504022 | 0.845422097 | ND |              | -1.890385996 | ND |              | -1.842969803 |
| comp159231_c0_seq15 |    | -1.561960592 | -1.650216981 | 0.846995277 | 0.899741139 | ND |              | ND           | ND |              | -1.54882259  |
| comp159231_c0_seq17 |    | -0.999154589 | -0.891116332 | 1.367820817 | 1.350836672 |    | -0.971875382 | -1.100379568 |    | -0.472873659 | -0.600665705 |
| comp159231_c0_seq2  |    | -1.005223078 | -0.984334997 | 1.372140732 | 1.348474844 |    | -0.781649226 | -0.884599308 |    | -0.563263033 | -0.79579043  |
| comp159231_c0_seq5  |    | -1.085034395 | -0.997199524 | 1.343189385 | 1.375920485 |    | -0.794513753 | -0.818282589 |    | -0.324315588 | -1.004949603 |
| comp159231_c0_seq8  |    | -1.850120195 | -1.938376584 | 0.836098948 | 0.866605234 | ND |              | ND           |    | -1.709190146 | -1.535952197 |
| comp159231_c3_seq2  |    | -0.67683343  | -0.844271065 | 1.361568231 | 1.36825018  |    | -1.126675478 | -0.21050927  |    | -0.615084628 | -0.663695428 |
| comp159250_c8_seq4  |    | -1.097528791 | -0.708663925 | 0.651742098 | 0.607850128 |    | -1.070249584 | -0.654685726 |    | -0.655568747 | ND           |
| comp159426_c0_seq1  |    | -1.634391181 | -1.421617574 | 1.760461283 | 1.693628346 | ND |              | ND           |    | -0.794491128 | -0.922283174 |
| comp159470_c1_seq3  |    | -0.26995276  | -0.067163374 | 0.585727063 | 0.548296295 |    | -0.630853725 | -0.30423095  |    | -0.626347353 | -0.997177447 |
| comp159479_c0_seq2  | ND | ND           |              | 0.121535692 | 0.165519052 |    | -0.935344253 | ND           | ND | ND           | ND           |
| comp159484_c2_seq1  |    | -0.354314519 | -0.141540912 | 0.736578015 | 0.729408853 |    | -0.327035312 | -0.250290011 |    | -0.21338447  | -0.290023994 |
| comp159508_c0_seq4  | ND | ND           |              | 1.297109163 | 1.249090976 | ND |              | ND           | ND | ND           | ND           |
| comp159508_c0_seq8  | ND | ND           |              | 1.165200193 | 1.150411634 | ND |              | ND           | ND |              | -1.364458805 |
| comp159519_c0_seq23 |    | -0.320966286 | -1.409222675 | 1.502567398 | 1.517575691 |    | 0.44667561   | 0.22453912   |    | 0.142183057  | -0.608858279 |
| comp159529_c1_seq2  |    | 0.856884615  | 0.923279077  | 2.145281407 | 2.131991148 |    | 0.41696973   | 0.186620313  |    | -0.126288087 | -0.254080133 |
| comp159616_c1_seq5  | ND | ND           |              | 0.80936933  | 0.802200168 | ND |              | ND           | ND | ND           | ND           |
| comp159631_c0_seq3  |    | -0.413092519 | -0.270899987 | 0.888550576 | 0.874750835 |    | -0.607662062 | 0.057779269  |    | 0.246351469  | -0.169505596 |
| comp159684_c1_seq10 |    | -1.37430328  | -0.293767648 | 1.327249418 | 1.304746701 |    | -0.802956029 | -0.159383112 |    | -0.932343235 | -1.008982759 |
| comp159684_c1_seq12 |    | -0.970005413 | -0.067035726 | 1.634309625 | 1.617529586 |    | -0.319476916 | 0.236265645  |    | -1.227015373 | -0.61444473  |
| comp159684_c1_seq13 |    | -0.699304465 | -0.185500863 | 1.543970508 | 1.523813559 |    | -0.672025259 | 0.129740205  |    | -1.558374417 | -0.841068423 |
| comp159700_c1_seq1  |    | -1.898742079 | -1.384938476 | 1.929318623 | 1.928756305 |    | -1.394341617 | -1.154869018 | ND |              | -0.563384781 |
| comp159705_c0_seq17 | ND | ND           |              | 0.925346908 | 0.903976115 | ND |              | ND           | ND | ND           | ND           |
| comp159720_c0_seq1  |    | -0.010249891 | 0.150345704  | 1.080011859 | 1.137474787 |    | 0.150085942  | 0.260579827  |    | -0.271376417 | -0.341176516 |
| comp159725_c1_seq1  |    | -1.185711281 | ND           | 1.413659175 | 1.373794994 |    | -0.857402079 | -1.219989471 |    | -1.044781233 | -0.695452024 |
| comp159725_c1_seq15 |    | -0.444419619 | -0.460125341 | 1.628744148 | 1.569472354 |    | -1.458533098 | -0.918030503 | ND |              | -0.627576262 |
| comp159725_c1_seq18 |    | -0.714122515 | -0.688435551 | 1.774870353 | 1.733241759 |    | -0.841745268 | -0.845310718 |    | -1.272162471 | -0.524893254 |

|                     |              |              |             |             |              |              |              |              |
|---------------------|--------------|--------------|-------------|-------------|--------------|--------------|--------------|--------------|
| comp159725_c1_seq2  | -0.659520455 | -0.596509169 | 1.72340083  | 1.702370029 | -1.01245249  | -0.927881851 | -1.597771653 | -0.54947244  |
| comp159725_c1_seq9  | -0.40969626  | -0.435804742 | 0.971296773 | 0.99268307  | -0.292240423 | -0.654827815 | -0.236581528 | -0.51050161  |
| comp159725_c2_seq2  | -1.105042724 | -0.629027682 | 0.640297871 | 0.681641135 | -0.952824781 | -1.616442168 | ND           | -1.26799598  |
| comp159755_c0_seq2  | -0.470350861 | -0.479426003 | 0.415440637 | 0.471940554 | -0.41504293  | -0.218322312 | -0.16308939  | -0.633304117 |
| comp159764_c1_seq4  | ND           | ND           | 0.08582014  | 0.078650977 | ND           | ND           | ND           | -0.860262273 |
| comp159767_c1_seq1  | -0.934870391 | -0.655149994 | 1.015822229 | 1.03025227  | -0.907591184 | -0.902201791 | -1.094970338 | -0.585940287 |
| comp159767_c1_seq4  | -1.122652286 | -0.858726156 | 1.074404984 | 1.059847888 | -0.85233503  | -0.758990467 | -0.583782228 | -0.410544279 |
| comp159784_c2_seq18 | -1.007527033 | -0.618662167 | 0.759002861 | 0.811057688 | -0.804156567 | -0.467773955 | -0.447467676 | -0.392329039 |
| comp159794_c0_seq12 | -0.092094677 | 0.062686983  | 0.8152941   | 0.776410524 | -0.098673737 | 0.003960902  | 0.037839988  | -0.149537748 |
| comp159794_c0_seq16 | -0.319093224 | 0.120924165  | 0.822208814 | 0.796814831 | -0.240661494 | -0.142518048 | -0.303101912 | -0.363947168 |
| comp159794_c0_seq7  | -0.170054471 | -0.133372123 | 0.867772346 | 0.874750835 | -0.122571878 | 0.075508036  | -0.008921036 | -0.303044504 |
| comp159796_c0_seq1  | ND           | -1.991467476 | 1.689477783 | 1.668281348 | -1.574901885 | -1.636459282 | ND           | -1.890073085 |
| comp159806_c2_seq6  | -0.765071382 | -0.289056341 | 0.518660124 | 0.544491221 | -0.515943426 | -0.072350844 | -1.101262589 | -1.229054635 |
| comp159808_c0_seq3  | -1.391105365 | ND           | 0.112183094 | 0.105013931 | -0.664856154 | -0.647232305 | ND           | -1.076937367 |
| comp159810_c2_seq2  | -0.716081447 | -0.327216581 | 0.737160973 | 0.688267476 | -1.53390028  | -0.896487673 | -0.306306086 | -0.84907148  |
| comp159812_c0_seq1  | 0.214173396  | 0.30925876   | 1.487743455 | 1.474505137 | 0.132308133  | 0.188581385  | -0.494403714 | -0.01244894  |
| comp159863_c0_seq3  | 0.055186099  | -0.158009026 | 0.691100123 | 0.644059449 | -0.289145764 | -0.089790388 | -0.451701334 | -0.75558464  |
| comp159863_c0_seq7  | -0.494242721 | -0.105377854 | 1.22221795  | 1.24966106  | 0.508998245  | 0.447440849  | -1.467256024 | -0.81689682  |
| comp159873_c3_seq1  | -0.735573516 | -0.34670865  | 0.445495648 | 0.423603229 | -1.185415564 | -1.246972961 | -0.770734727 | -1.199556768 |
| comp159897_c1_seq9  | ND           | -0.633105595 | 0.23827995  | 0.17311884  | ND           | ND           | ND           | -0.531711203 |
| comp159902_c0_seq4  | -0.874161528 | -0.962417916 | 0.332213502 | 0.33316223  | ND           | -1.607409722 | ND           | ND           |
| comp159904_c1_seq11 | -1.128381672 | -0.688364283 | 0.631040134 | 0.604826341 | -0.962799767 | -0.634386084 | -0.89054161  | -0.976940971 |
| comp159904_c1_seq12 | -0.405467041 | 0.001126592  | 0.628386992 | 0.605705663 | -0.327035312 | -0.087562713 | -0.690505725 | -0.596449022 |
| comp159904_c1_seq43 | -0.866101036 | -0.574146183 | 0.589125977 | 0.550008998 | -0.567755058 | -0.433017809 | -0.558839566 | -0.728024297 |
| comp159919_c1_seq4  | ND           | -1.418967409 | 1.1746406   | 1.182640423 | ND           | -1.188897951 | ND           | -1.016543022 |
| comp159946_c0_seq1  | 0.352915907  | 0.510172187  | 1.207927071 | 1.267178599 | 0.249426834  | 0.36785574   | 0.286237646  | -0.031886099 |
| comp159946_c0_seq2  | -0.724980443 | -0.512206836 | 0.923450139 | 0.89607759  | -0.133429806 | -0.157198641 | -0.459111657 | ND           |
| comp159949_c0_seq1  | ND           | -1.477623415 | 1.414951429 | 1.408815072 | ND           | -1.423645216 | -0.549466973 | -0.899107769 |
| comp159949_c0_seq5  | ND           | -1.63229307  | 0.991140923 | 0.939493488 | ND           | ND           | -1.403106632 | ND           |
| comp159954_c3_seq19 | -1.26054022  | ND           | 0.464596989 | 0.404721476 | -1.233261013 | -0.993788414 | -1.119610171 | -0.946372222 |
| comp159954_c3_seq22 | -1.144194848 | -0.755329982 | 0.398602153 | 0.337913734 | -1.2930069   | -0.752504305 | -0.276266071 | -0.528996854 |



|                     |              |              |             |             |              |              |              |              |
|---------------------|--------------|--------------|-------------|-------------|--------------|--------------|--------------|--------------|
| comp159954_c3_seq9  | -1.563518601 | -1.350744994 | 0.571793073 | 0.508008492 | -1.536239395 | -0.752698751 | -0.246497294 | -0.508987914 |
| comp159968_c0_seq1  | 0.288205892  | 0.553792806  | 1.533216336 | 1.506888874 | 0.374878751  | 0.582166667  | 0.520013989  | 0.347475616  |
| comp159979_c0_seq2  | 0.356287394  | 0.316335685  | 1.299902735 | 1.318438973 | -1.068731071 | -1.005349731 | -0.955080229 | ND           |
| comp159987_c0_seq13 | -0.400072009 | -0.421381608 | 0.593910512 | 0.618926032 | -0.673822798 | -0.25825894  | -0.338323207 | -0.085904011 |
| comp159987_c0_seq15 | -1.135601483 | -1.524887867 | 0.335502293 | 0.339328514 | -1.409352272 | -0.868849677 | -0.994671435 | -0.645342226 |
| comp160017_c0_seq1  | -0.497444699 | -0.132580109 | 1.715098086 | 1.716444774 | -0.229133426 | 0.246428362  | -0.41651258  | -0.444189473 |
| comp160038_c0_seq4  | -0.08461271  | 0.152010508  | 0.794023245 | 0.772566791 | -0.125449323 | -0.11194204  | 0.034777661  | -0.071474707 |
| comp160065_c0_seq8  | -0.075003773 | 0.001550087  | 0.944753065 | 0.937583902 | -0.082486673 | 0.043946413  | -0.394804563 | -0.397657872 |
| comp160065_c0_seq9  | -0.200339734 | 0.039586119  | 0.915878998 | 0.877524967 | -0.051638365 | 0.044872394  | -0.198588861 | -0.435525377 |
| comp160069_c0_seq1  | -0.171662795 | 0.03609001   | 1.492312793 | 1.457169635 | -0.208841578 | -0.124270939 | -0.289010762 | -0.416802808 |
| comp160089_c0_seq2  | 0.395490392  | 0.193290651  | 2.285655486 | 2.273837909 | -0.126902323 | 0.311102404  | 0.050866018  | -0.182436213 |
| comp160089_c1_seq2  | -0.684257448 | ND           | 1.383302441 | 1.400800162 | -0.958008238 | ND           | ND           | ND           |
| comp160091_c1_seq1  | -1.309255813 | -1.397512202 | 0.2867867   | 0.244855431 | ND           | ND           | ND           | -1.29611781  |
| comp160152_c0_seq1  | -0.74099008  | -0.43130646  | 0.315140348 | 0.288227127 | -0.678948767 | -0.599177011 | -0.378211282 | -1.10806332  |
| comp160152_c0_seq7  | -0.745217061 | -0.698774876 | 0.431885916 | 0.432613235 | -0.717937854 | -0.440676694 | -0.604287012 | -1.171411752 |
| comp160244_c0_seq2  | -1.023910973 | -1.316287345 | 0.784907983 | 0.809786423 | -1.297661762 | -1.007036641 | -0.973157555 | -1.369794914 |
| comp160254_c3_seq6  | -0.370085531 | -0.180377228 | 1.420467643 | 1.385564093 | 0.064027397  | -0.034252806 | 0.032722389  | -0.263043026 |
| comp160316_c2_seq1  | -1.012395076 | ND           | 0.071764075 | 0.115747435 | ND           | ND           | ND           | ND           |
| comp160397_c0_seq1  | ND           | -1.286768855 | 0.480867252 | 0.437785533 | ND           | ND           | ND           | ND           |
| comp160397_c0_seq3  | ND           | -1.897636558 | 0.841511011 | 0.86006417  | -1.304979708 | -1.190445845 | ND           | -1.398302158 |
| comp160422_c0_seq1  | -0.414090898 | 0.168067257  | 1.431876539 | 1.400109811 | -0.197755455 | -0.058398009 | -0.61558353  | -0.743375576 |
| comp160462_c0_seq3  | 0.262214019  | 0.368532295  | 1.110939126 | 1.097638645 | 0.194937118  | 0.188427288  | 0.314417504  | 0.124477551  |
| comp160462_c0_seq4  | -0.734075948 | -0.252457028 | 1.13845362  | 1.157018879 | -0.375803522 | -0.122090484 | -0.04030393  | -0.08891473  |
| comp160462_c0_seq5  | -0.099635055 | -0.037354289 | 1.387399323 | 1.370302997 | 0.086867486  | 0.121359261  | 0.282556785  | 0.046128513  |
| comp160501_c0_seq1  | ND           | ND           | 1.433438718 | 1.389239588 | ND           | -1.099971971 | ND           | -0.575434524 |
| comp160521_c0_seq38 | -1.675933959 | -1.065220344 | 0.449617877 | 0.40105603  | -0.949684748 | -1.233090894 | -0.932943919 | -0.817697917 |
| comp160634_c1_seq3  | -0.222609617 | -0.481562232 | 0.428281564 | 0.473082035 | -0.184606544 | -0.955857811 | -0.984769555 | -0.449803769 |
| comp160634_c1_seq8  | -0.726763995 | ND           | 0.725371941 | 0.677584928 | -0.046272275 | -0.636103449 | ND           | -0.491777243 |
| comp160654_c0_seq2  | 0.43780535   | 0.369910244  | 1.254358261 | 1.224065299 | 0.350445776  | 0.198711749  | 0.362638977  | 0.016791171  |
| comp160660_c0_seq3  | -1.461426132 | -0.77153127  | 0.321703024 | 0.355926547 | -0.95702567  | -0.796734317 | -0.718436092 | -0.749318125 |
| comp160709_c0_seq4  | ND           | -0.706155523 | 0.554396106 | 0.597393553 | ND           | -1.351147328 | -0.874909094 | ND           |

|                     |              |              |             |             |              |              |              |              |
|---------------------|--------------|--------------|-------------|-------------|--------------|--------------|--------------|--------------|
| comp160713_c0_seq12 | -0.253595236 | -1.154764982 | 0.569405432 | 0.562236269 | -1.817380637 | -0.975848046 | -1.101669803 | -1.530491845 |
| comp160713_c0_seq16 | -0.079828666 | -0.571104589 | 0.663671695 | 0.693598991 | -1.686017915 | -0.969424061 | -1.572367073 | -1.223037864 |
| comp160713_c0_seq2  | -0.037989503 | 0.174784104  | 0.945643971 | 0.998382635 | -0.253748345 | 0.294441079  | 0.251593557  | 0.248740247  |
| comp160713_c0_seq21 | -0.188766874 | -0.985538585 | 0.691272295 | 0.662819411 | ND           | -0.931560386 | ND           | -1.537356708 |
| comp160713_c0_seq35 | 0.023001416  | -0.702077071 | 0.81848101  | 0.827251048 | -1.665722721 | -0.727280118 | -0.950011888 | -1.077803934 |
| comp160713_c0_seq40 | -0.109777112 | -0.965719317 | 0.780727491 | 0.793761714 | -1.394251766 | -0.642895806 | -1.104509665 | -1.107362975 |
| comp160732_c0_seq14 | ND           | ND           | 0.245520983 | 0.203589714 | ND           | ND           | ND           | ND           |
| comp160732_c0_seq8  | -1.558827706 | -1.346054099 | 0.910043188 | 0.898373524 | -0.929488508 | -1.593105896 | -0.940776403 | -0.700591664 |
| comp160772_c0_seq6  | -0.817218645 | -0.127323784 | 1.120993389 | 1.133624555 | ND           | -1.027588094 | ND           | ND           |
| comp160776_c1_seq34 | 0.131130409  | 0.302205382  | 1.029142949 | 1.00522206  | 0.014721443  | 0.302498722  | 0.000585705  | -0.11592533  |
| comp160796_c0_seq18 | -0.271035409 | -0.04966163  | 1.01178083  | 0.976216295 | -0.319476916 | -0.02201237  | -0.272772864 | -0.479746156 |
| comp160796_c0_seq2  | -1.673224314 | -1.460450707 | 0.753357518 | 0.763126777 | ND           | -1.105442513 | -0.930234274 | -1.660086312 |
| comp160796_c0_seq7  | -0.705797126 | -0.510056859 | 0.88246677  | 0.825451234 | -0.67851792  | -0.422654904 | -0.356591135 | -0.576153555 |
| comp160796_c0_seq9  | -0.368877308 | -0.064333327 | 1.348155783 | 1.312561099 | -0.492865776 | 0.151725416  | -0.254276198 | -0.68309824  |
| comp160804_c0_seq3  | 0.599552011  | 0.848018403  | 1.614197463 | 1.561299012 | 0.631991212  | 0.669390782  | 0.945034391  | 0.759558955  |
| comp160824_c1_seq9  | 0.917866556  | 0.997654784  | 2.439351094 | 2.408496398 | 1.667159366  | 1.462044858  | 0.880812991  | 1.383968155  |
| comp160866_c0_seq1  | -0.119417024 | 0.030412536  | 0.784755825 | 0.774970422 | -0.31169477  | -0.271794526 | -0.476797529 | -0.604589575 |
| comp160902_c0_seq7  | ND           | ND           | 0.60846085  | 0.558539707 | ND           | ND           | ND           | ND           |
| comp160916_c0_seq5  | 0.534389211  | 0.586100549  | 1.676779182 | 1.692404316 | 0.599711771  | 0.570539147  | -0.999847831 | -0.650518622 |
| comp160945_c0_seq3  | ND           | ND           | 0.470377467 | 0.426485497 | ND           | -1.313171612 | -0.836933377 | -0.964725424 |
| comp160945_c1_seq3  | ND           | -1.233131416 | 0.784382164 | 0.807176225 | ND           | -1.179153217 | ND           | ND           |
| comp160999_c0_seq15 | -0.617555954 | -0.529721083 | 2.317172858 | 2.272848212 | -0.988216756 | -0.697591634 | -0.272505922 | -0.458289916 |
| comp161031_c0_seq3  | 0.054146751  | 0.187739112  | 1.151270879 | 1.167414709 | 0.186161308  | 0.249542648  | 0.038290695  | -0.150199191 |
| comp161059_c0_seq12 | ND           | ND           | 1.175826648 | 1.233598292 | 0.508398601  | ND           | ND           | 0.527257657  |
| comp161068_c1_seq2  | -0.680313771 | 0.288969161  | 1.35808789  | 1.407841215 | -0.079003297 | -0.451350526 | 0.471340143  | 0.059822959  |
| comp161130_c0_seq3  | 0.206598082  | 0.215251706  | 1.148233322 | 1.167181917 | 0.033873872  | 0.452160589  | -0.877781151 | -0.449270696 |
| comp161132_c0_seq13 | -0.610828531 | -0.352297434 | 0.408389813 | 0.421742318 | -0.496399149 | -0.201409222 | -0.220021009 | -0.405805003 |
| comp161132_c1_seq5  | -0.838373533 | -1.403751176 | 0.843297982 | 0.792903666 | -0.032943076 | 0.112625021  | -0.271474752 | -0.098236802 |
| comp161170_c0_seq13 | 0.038962137  | 0.297936167  | 0.899051079 | 0.91711774  | -0.146833481 | 0.305713943  | -0.047905896 | 0.034001918  |
| comp161261_c1_seq1  | ND           | ND           | 1.216725725 | 1.199796725 | -0.590276747 | -0.174712889 | ND           | -0.905447947 |
| comp161264_c2_seq1  | -0.35849046  | -1.224898099 | 0.29969996  | 0.267707213 | -0.808332508 | -1.1709199   | ND           | -1.123503707 |

|                     |              |              |             |             |              |              |              |              |
|---------------------|--------------|--------------|-------------|-------------|--------------|--------------|--------------|--------------|
| comp161275_c0_seq1  | -0.157929948 | -0.1212476   | 1.525566336 | 1.523825925 | -0.063703952 | 0.108821857  | 0.213449022  | -0.159515203 |
| comp161275_c0_seq3  | -0.375803435 | -0.163029828 | 1.30586808  | 1.317048967 | -0.245861886 | 0.090520726  | 0.012281229  | -0.123783343 |
| comp161297_c0_seq1  | 0.042404795  | 0.004901944  | 1.376469459 | 1.316504393 | 0.00808793   | 0.153227939  | 0.207759443  | -0.068201181 |
| comp161305_c0_seq1  | 0.069296168  | 0.135941739  | 1.364838635 | 1.369167712 | 0.205719844  | 0.208805282  | 0.118455843  | -0.044808521 |
| comp161305_c0_seq5  | 0.197816608  | 0.159118999  | 1.447601585 | 1.41785573  | 0.210537095  | 0.200132221  | 0.243028125  | -0.049116777 |
| comp161305_c1_seq4  | 0.117257415  | 0.405629383  | 1.716814604 | 1.702587413 | 0.207092126  | 0.321625988  | 0.310019102  | 0.142459929  |
| comp161322_c1_seq2  | -0.891433703 | -0.757841342 | 0.470525603 | 0.491086782 | -1.040245756 | -0.858765103 | -0.829684901 | -0.878295701 |
| comp161332_c1_seq3  | ND           | ND           | 1.015239065 | 0.971173667 | ND           | ND           | ND           | ND           |
| comp161332_c1_seq4  | ND           | ND           | 0.489512477 | 0.465309975 | ND           | ND           | ND           | ND           |
| comp161344_c3_seq1  | -1.148428596 | -0.634624994 | 1.051756859 | 1.091797331 | -1.422179385 | -0.580646795 | -0.132437284 | -0.394927904 |
| comp161365_c0_seq3  | -1.103923888 | -0.669301532 | 0.461359261 | 0.401290913 | -0.854795932 | -0.978501235 | -1.218266345 | -1.56790714  |
| comp161365_c0_seq6  | -0.910135952 | -0.725391069 | 0.049084463 | 0.10886209  | -0.831704223 | -0.505081448 | -0.769205904 | -1.198027945 |
| comp161365_c0_seq8  | -0.95358161  | -0.757841342 | 0.414574198 | 0.396409651 | -0.625272408 | -0.925711893 | -1.023504927 | -1.753356964 |
| comp161371_c0_seq7  | ND           | -1.047766613 | 0.17580145  | 0.117479765 | ND           | -0.993788414 | -0.818580175 | ND           |
| comp161375_c0_seq1  | -1.536447871 | -1.448613001 | 0.896259514 | 0.841572113 | -1.111228656 | -0.871756057 | -1.696547818 | -0.921249877 |
| comp161375_c1_seq1  | ND           | ND           | 0.911785064 | 0.936800585 | ND           | ND           | ND           | -0.972149442 |
| comp161439_c0_seq16 | -0.890213774 | -0.744386957 | 1.129704481 | 1.136398526 | -1.282063875 | -1.945681263 | -1.117260511 | -1.722173812 |
| comp161439_c0_seq17 | -0.628907382 | -0.637982525 | 0.664431551 | 0.648796341 | -1.057560131 | -0.850272215 | -0.145554653 | -0.555071539 |
| comp161439_c0_seq27 | -0.547450645 | -0.60574381  | 1.082619127 | 1.073237933 | -1.240330742 | -1.204978125 | -0.853678628 | -1.04361858  |
| comp161439_c0_seq28 | -0.714671907 | -0.65680026  | 1.697611905 | 1.665784139 | -1.386362705 | -1.748950097 | -1.272711863 | -1.0025639   |
| comp161439_c0_seq29 | -0.602148756 | -0.430767834 | 1.290344155 | 1.244688321 | -1.014202243 | -1.075759639 | -0.38866804  | -0.516460086 |
| comp161439_c0_seq30 | -0.517729691 | -0.596226242 | 1.114707177 | 1.100144091 | -1.288805121 | -1.417309307 | -0.978859634 | -1.545984374 |
| comp161439_c0_seq33 | -0.464568298 | -0.579153625 | 1.784249812 | 1.806446043 | -0.889586762 | -1.729295409 | -1.253057175 | -1.681879217 |
| comp161439_c0_seq4  | -0.848336524 | -0.827448443 | 1.366156396 | 1.375058386 | -1.365125362 | -1.426682758 | -0.552504516 | -1.282356553 |
| comp161439_c0_seq40 | -0.664598974 | -0.928946622 | 1.115199919 | 1.1179459   | -1.494652264 | -1.653119673 | -0.966028074 | -1.730642218 |
| comp161447_c0_seq1  | -0.736879666 | -0.649044796 | 0.776627958 | 0.715773937 | -1.010630455 | -0.373217847 | ND           | -0.422711668 |
| comp161448_c0_seq5  | -0.319052592 | -0.106278985 | 0.982277047 | 0.962380396 | -0.057690179 | 0.095301936  | -0.655243798 | -0.849982633 |
| comp161536_c1_seq1  | ND           | ND           | 0.136972662 | 0.17556099  | ND           | ND           | ND           | -0.985201009 |
| comp161576_c1_seq16 | ND           | -0.082157125 | 0.488198423 | 0.553579928 | -1.008014215 | -0.46751162  | -0.593333378 | ND           |
| comp161633_c0_seq2  | 0.661304947  | -0.191738731 | 2.03792785  | 1.993284605 | -0.515535829 | 0.640390718  | ND           | -1.131737025 |
| comp161644_c0_seq1  | 0.184317101  | 0.066676935  | 1.026198568 | 0.988749525 | 0.261393776  | 0.084442961  | -0.185622688 | -0.451717432 |

|                     |              |              |             |             |              |              |              |    |              |
|---------------------|--------------|--------------|-------------|-------------|--------------|--------------|--------------|----|--------------|
| comp161798_c0_seq2  | -0.519786802 | -0.219863019 | 1.189913437 | 1.156236724 | -0.492507595 | -0.554064992 | -1.333099263 | ND |              |
| comp161798_c0_seq5  | -0.805818087 | -0.182870015 | 1.239422998 | 1.195081732 | -0.544455675 | -0.907043067 | ND           |    | -1.637778125 |
| comp161812_c1_seq1  | ND           | ND           | 0.314494876 | 0.353083204 | ND           | ND           | ND           | ND | ND           |
| comp161816_c1_seq2  | -0.577778749 | -0.210103182 | 0.830074383 | 0.871597144 | -0.550499542 | -0.156124983 | -0.4368487   |    | -0.807678795 |
| comp161823_c4_seq6  | -1.353369373 | -0.964504507 | 1.367403031 | 1.316074967 | -0.928150157 | -0.989707554 | -0.911409328 |    | -0.863110116 |
| comp161860_c0_seq5  | -0.173970248 | 0.49285931   | 1.745277845 | 1.719375344 | 0.898766833  | 1.127313208  | 0.597983488  |    | 0.385369928  |
| comp161913_c0_seq1  | -0.053536215 | 0.238418638  | 1.147894232 | 1.087911763 | 0.247900841  | 0.157698263  | 0.332906501  |    | 0.093140696  |
| comp161913_c0_seq2  | 0.127103171  | 0.335760212  | 1.083583549 | 1.06527802  | 0.384349018  | 0.322791621  | 0.395015699  |    | 0.194116555  |
| comp161924_c1_seq7  | -0.359607924 | -0.141301829 | 0.730083716 | 0.700348725 | -0.476235293 | -0.192559032 | -0.137644625 |    | -0.205140769 |
| comp161932_c0_seq2  | -0.062302628 | -0.191303985 | 1.15660911  | 1.155340779 | 0.147501947  | 0.016863632  | 0.127613881  |    | -0.082847739 |
| comp161933_c0_seq1  | ND           | ND           | 0.756294629 | 0.740692299 | ND           | ND           | ND           | ND | ND           |
| comp161933_c0_seq15 | ND           | ND           | 1.095512951 | 1.031550999 | ND           | ND           | -1.435987859 | ND | ND           |
| comp161933_c0_seq16 | -1.317212047 | ND           | 0.810800388 | 0.865288126 | -0.988902845 | ND           | ND           |    | -0.906134036 |
| comp161933_c0_seq3  | -1.725248443 | ND           | 0.798243402 | 0.802759998 | -1.396939241 | -1.759526633 | ND           |    | -0.632929194 |
| comp161933_c0_seq5  | ND           | -1.775740626 | 0.834029042 | 0.771973073 | ND           | ND           | -1.069432934 | ND | ND           |
| comp161933_c0_seq9  | ND           | -1.628617777 | 0.783722577 | 0.788874651 | ND           | ND           | ND           | ND | ND           |
| comp161938_c1_seq1  | ND           | ND           | 0.228911139 | 0.191778753 | ND           | ND           | ND           | ND | ND           |
| comp161940_c2_seq11 | -0.419846039 | -0.106045852 | 0.92044646  | 0.916134508 | -0.081317671 | -0.06034018  | -0.370686363 |    | -0.649746085 |
| comp161940_c2_seq2  | -0.71289915  | -0.476644447 | 0.636143384 | 0.657514783 | -0.5259191   | -0.286446501 | -0.651150347 |    | -0.913640967 |
| comp161940_c2_seq9  | -0.818970043 | -0.606196436 | 0.669289426 | 0.654406126 | -0.432668894 | -0.228524257 | -0.648076771 |    | -0.65093008  |
| comp161963_c0_seq1  | -1.056420237 | -0.792494108 | 0.662468023 | 0.694396721 | -0.552019776 | -0.738515909 | ND           | ND | ND           |
| comp161963_c0_seq13 | -0.633755597 | -0.493532657 | 0.824305322 | 0.868680822 | -0.875321703 | -0.459757844 | ND           |    | -1.734560947 |
| comp162027_c0_seq7  | -0.021039315 | -0.152047684 | 0.895429119 | 0.933268017 | -0.294790104 | -0.083346229 | -0.106505644 |    | -0.471658606 |
| comp162029_c0_seq1  | -0.258125109 | 0.269042455  | 0.913800676 | 0.963698445 | 0.079138936  | -0.04936525  | 0.155806211  |    | 0.244033371  |
| comp162056_c0_seq2  | -1.323676401 | -0.56683475  | 1.064218639 | 1.023409869 | -0.857064501 | -0.813886547 | -0.423078508 |    | -0.736507131 |
| comp162110_c3_seq3  | ND           | ND           | 0.587610711 | 0.587503403 | ND           | ND           | ND           | ND | ND           |
| comp162111_c0_seq1  | ND           | -1.040281987 | 0.814504295 | 0.86036366  | -1.225776388 | -0.986303789 | ND           |    | -0.695849548 |
| comp162111_c1_seq1  | -1.218326599 | -1.607612983 | 0.775655922 | 0.715241248 | ND           | -1.252604789 | ND           |    | -0.807248588 |
| comp162134_c0_seq1  | -0.51498261  | -0.411353473 | 0.550693135 | 0.613159901 | -0.487703404 | -0.424322064 | -0.152203812 |    | -0.309959082 |
| comp162134_c0_seq22 | ND           | -1.408202006 | 2.192145718 | 2.169399903 | ND           | -0.956283798 | -1.179015569 |    | -0.82968636  |
| comp162166_c1_seq4  | ND           | ND           | 0.625109282 | 0.617940119 | ND           | ND           | ND           | ND | ND           |

|                     |              |              |             |             |              |              |              |              |
|---------------------|--------------|--------------|-------------|-------------|--------------|--------------|--------------|--------------|
| comp162305_c0_seq4  | ND           | ND           | 0.109301236 | 0.044140126 | ND           | ND           | ND           | ND           |
| comp162324_c2_seq12 | ND           | ND           | 0.85418881  | 0.866042884 | ND           | ND           | ND           | ND           |
| comp162329_c1_seq3  | ND           | ND           | 1.298736261 | 1.246670449 | ND           | ND           | ND           | ND           |
| comp162329_c2_seq1  | ND           | -1.491901311 | 1.117868357 | 1.053556308 | ND           | -1.437923112 | ND           | -0.913385665 |
| comp162372_c1_seq1  | -0.205107208 | 0.070718145  | 0.711361227 | 0.683750904 | -0.603796733 | -0.012141616 | -0.013024637 | -0.617937937 |
| comp162397_c1_seq11 | ND           | -1.058566677 | 0.252151562 | 0.333923482 | -0.398963037 | -0.828497219 | -0.653288981 | -0.303959772 |
| comp162408_c0_seq3  | 0.158837693  | 0.152573527  | 1.477491119 | 1.478059241 | 0.367812036  | 0.146553797  | -0.224995148 | -0.413485034 |
| comp162437_c0_seq1  | -0.55863749  | -0.691097541 | 1.659215059 | 1.62400001  | -0.379267301 | -0.251768461 | -0.285819845 | -0.638921173 |
| comp162444_c0_seq1  | -0.387964475 | 0.09610394   | 1.827355561 | 1.80797555  | -0.279380328 | -0.29096375  | -0.523240838 | -0.675856468 |
| comp162460_c0_seq1  | -0.108717921 | -0.124423643 | 1.481720714 | 1.480661304 | -0.115652815 | 0.082782932  | -0.071328465 | -0.129794019 |
| comp162502_c0_seq1  | -0.465298819 | -0.594947893 | 1.089351009 | 1.032696483 | -0.701261047 | -0.364878435 | -0.365761455 | -1.192523506 |
| comp162502_c0_seq5  | 0.208782031  | 0.116447729  | 1.383308028 | 1.345409743 | 0.057935808  | 0.259063415  | 0.139872237  | -0.091460401 |
| comp162537_c0_seq4  | -0.7730177   | 0.152228382  | 0.964988435 | 0.914520391 | -0.007458755 | -0.122261663 | -0.632087651 | 0.051271813  |
| comp162582_c0_seq13 | -0.554631592 | -0.267224366 | 0.729813628 | 0.739430883 | -0.585344332 | -0.201965157 | -0.202848178 | -0.666432326 |
| comp162582_c0_seq16 | -0.549391549 | -0.273566196 | 0.830678154 | 0.785876455 | -0.550141066 | -0.44536704  | -0.382132561 | -0.509924607 |
| comp162582_c0_seq23 | -0.775006218 | -0.45577728  | 0.906665297 | 0.861291782 | -0.660576836 | -0.383315676 | -0.226590843 | -0.602167373 |
| comp162582_c0_seq25 | -1.071940234 | -0.829203403 | 0.096539803 | 0.056202277 | -0.889759067 | -0.650286468 | -0.873018238 | -0.903900271 |
| comp162582_c0_seq28 | -0.894688514 | -0.769065082 | 0.008415959 | 0.023148638 | -1.306742001 | -0.928966703 | -0.892061163 | -0.84376195  |
| comp162593_c0_seq8  | ND           | ND           | 0.995278913 | 0.965068447 | ND           | ND           | ND           | ND           |
| comp162666_c0_seq8  | ND           | -1.181213617 | 0.880503626 | 0.926040814 | ND           | ND           | ND           | -1.079819226 |
| comp162700_c1_seq7  | -1.474029311 | ND           | 0.897371551 | 0.861238693 | ND           | ND           | ND           | ND           |
| comp162736_c0_seq11 | -1.65281954  | ND           | 1.254976834 | 1.294135156 | -1.625540333 | -1.386067734 | -1.210859495 | -1.162560282 |
| comp162736_c0_seq3  | ND           | -1.45620181  | 1.231425034 | 1.249999376 | -1.164574956 | -1.703253607 | ND           | -1.17871616  |
| comp162777_c0_seq2  | -0.97736395  | -1.065620339 | 0.80936933  | 0.76863282  | -0.950084743 | -0.488763394 | -1.01252516  | -0.964225947 |
| comp162784_c1_seq2  | -1.598250798 | -0.043054511 | 2.604255763 | 2.545111711 | 0.546299704  | 0.453830842  | -0.855260759 | 0.637603675  |
| comp162786_c0_seq7  | -0.168677942 | 0.405823501  | 0.91548121  | 0.987493293 | -0.363247485 | -0.056828096 | 0.118380142  | -0.155539939 |
| comp162815_c0_seq4  | ND           | -1.060846443 | 0.50404621  | 0.456582452 | ND           | ND           | -1.433719997 | ND           |
| comp162815_c0_seq5  | -1.509562518 | -0.995758915 | 0.463898336 | 0.467111209 | -1.783313307 | -1.367749449 | ND           | -1.496424515 |
| comp162853_c0_seq2  | -0.19278198  | -0.085641954 | 1.14897394  | 1.130756946 | -0.553682945 | -0.05759949  | 0.037089152  | -0.12412665  |
| comp162868_c0_seq2  | -0.413092519 | 0.177877038  | 0.847157891 | 0.815165145 | -0.385813313 | 0.189451388  | 0.052348621  | 0.043742982  |
| comp162907_c0_seq1  | -0.381080797 | -0.556487361 | 1.421353514 | 1.378536231 | -0.654831586 | -0.553661685 | -0.45223966  | -0.649667635 |

|                     |              |              |             |             |              |              |              |              |
|---------------------|--------------|--------------|-------------|-------------|--------------|--------------|--------------|--------------|
| comp162908_c0_seq2  | ND           | ND           | 0.589448945 | 0.649226572 | -1.120643514 | ND           | -1.006992672 | -0.833754722 |
| comp162909_c1_seq4  | ND           | ND           | 0.138403617 | 0.198181244 | ND           | ND           | -0.679886749 | ND           |
| comp162915_c1_seq11 | ND           | ND           | 0.103972402 | 0.096803239 | ND           | -0.764587466 | -0.890409223 | -0.541080015 |
| comp162920_c1_seq1  | ND           | ND           | 0.65009157  | 0.715473075 | ND           | ND           | ND           | ND           |
| comp162920_c1_seq4  | -1.526189294 | ND           | 2.254217004 | 2.242103259 | ND           | ND           | ND           | -1.513051291 |
| comp162923_c0_seq3  | -1.741549544 | -0.71586258  | 0.825125894 | 0.784532976 | -1.413240342 | -1.298706479 | -0.370170574 | -1.728411542 |
| comp162923_c0_seq9  | -0.618889023 | -0.360357925 | 0.945396894 | 0.921952497 | -0.846882321 | -0.218243638 | -0.228081501 | -1.162053521 |
| comp162932_c1_seq10 | -0.870533635 | -0.958790023 | 0.500867228 | 0.449494403 | -0.843254428 | -0.904811824 | -1.030633582 | -0.556365636 |
| comp162938_c0_seq1  | -0.355885206 | 0.144130112  | 0.851512897 | 0.809794466 | -0.210506687 | 0.218629978  | 0.160708457  | 0.032916411  |
| comp162967_c1_seq10 | -0.761641937 | -0.557301498 | 0.280915683 | 0.264456445 | -0.433332735 | -0.447465482 | -0.756931636 | -0.801749447 |
| comp162967_c1_seq19 | -0.764527835 | -0.585177983 | 0.25469051  | 0.265810133 | -0.496514534 | -0.417256432 | -1.05496155  | -0.840330916 |
| comp162967_c1_seq23 | -0.876743451 | -0.674435278 | 0.27214103  | 0.255970623 | -0.518471025 | -0.52567076  | -0.802760192 | -1.009733484 |
| comp162967_c1_seq3  | -0.905782197 | -0.554705891 | 0.248414821 | 0.24584141  | -0.588468379 | -0.500727693 | -0.951938791 | -0.963225268 |
| comp162967_c1_seq30 | -0.922364011 | -0.483194027 | 0.258705153 | 0.251535991 | -0.582773799 | -0.57263797  | -0.981006318 | -0.957530688 |
| comp162967_c1_seq32 | -0.823147459 | -0.671071693 | 0.27494747  | 0.249096094 | -0.458626084 | -0.419812936 | -0.897817211 | -0.870707297 |
| comp162967_c1_seq4  | -0.932567902 | -0.560093452 | 0.258046581 | 0.306205881 | -0.497803369 | -0.429726907 | -0.791637853 | -0.970582422 |
| comp162967_c1_seq41 | -1.148658345 | -0.579337415 | 0.234056183 | 0.231822238 | -0.455201648 | -0.53413314  | -0.706698301 | -0.875883032 |
| comp162977_c0_seq1  | -0.699019962 | -0.282126372 | 0.436291712 | 0.500185905 | -0.467620773 | -0.955146901 | -0.411961877 | -0.606700713 |
| comp163039_c0_seq2  | -0.884681286 | -0.370877683 | 0.57514148  | 0.519667638 | -0.255342088 | -0.918959475 | -0.743751237 | -0.026445243 |
| comp163057_c1_seq1  | 0.430057549  | 0.499938103  | 1.878408126 | 1.863716609 | -0.094925768 | 0.019608095  | 0.265879689  | 0.076569605  |
| comp163057_c2_seq4  | -0.234145022 | -0.32240141  | 1.205629824 | 1.216872819 | -0.808925806 | -0.436827642 | -0.142432996 | -0.034696595 |
| comp163077_c0_seq1  | 0.336303411  | 0.502381526  | 1.562201455 | 1.518968904 | 0.328468998  | 0.62764449   | 0.256787924  | 0.060880058  |
| comp163081_c2_seq1  | -0.868290869 | -0.111449218 | 1.10981489  | 1.102645727 | -0.318132917 | -0.338297629 | -0.426330825 | -0.332274122 |
| comp163085_c0_seq1  | -0.169028745 | -0.191467849 | 0.621925748 | 0.624344049 | -0.840719543 | -0.236099448 | -0.306063388 | -0.433855434 |
| comp163085_c0_seq11 | 1.289946214  | 1.362904814  | 2.087260149 | 2.107142014 | 0.822498621  | 1.163172109  | 1.514471607  | 1.199467779  |
| comp163085_c0_seq7  | 0.3087419    | 0.48777823   | 1.344085795 | 1.370931431 | 0.02134723   | 0.333014954  | 0.525482198  | 0.256794643  |
| comp163085_c0_seq9  | 1.329676087  | 1.457227363  | 2.207099016 | 2.202111146 | 0.918491189  | 1.251520159  | 1.533998481  | 1.259175813  |
| comp163157_c0_seq4  | 1.296966982  | 0.847103044  | 2.533206863 | 2.475057315 | ND           | ND           | ND           | -1.247402217 |
| comp163176_c0_seq3  | -0.169732238 | 0.512172749  | 1.339015078 | 1.329606454 | -1.64760301  | -1.408130411 | -0.579709658 | -0.883592964 |
| comp163180_c0_seq7  | ND           | ND           | 0.019340083 | 0.01217092  | -0.979547915 | ND           | ND           | ND           |
| comp163227_c0_seq12 | ND           | ND           | 1.207665798 | 1.255799444 | ND           | -1.217196571 | -1.041988332 | ND           |

|                     |              |              |             |             |              |              |              |              |
|---------------------|--------------|--------------|-------------|-------------|--------------|--------------|--------------|--------------|
| comp163228_c0_seq1  | ND           | ND           | 0.907655872 | 0.84809864  | ND           | ND           | ND           | ND           |
| comp163234_c0_seq17 | -0.650279798 | -0.960384937 | 0.485031875 | 0.496748057 | -1.020940601 | -0.538429953 | -0.50934975  | -0.637141796 |
| comp163234_c0_seq25 | -1.162195814 | -0.949422207 | 0.046902074 | 0.011704187 | ND           | -0.828497219 | ND           | -1.626179067 |
| comp163267_c0_seq2  | -0.066354557 | 0.149343603  | 1.339604484 | 1.329980683 | 0.270669878  | 0.434969251  | 0.681014961  | 0.52315593   |
| comp163320_c0_seq1  | 0.333974084  | 0.582220009  | 1.396221436 | 1.358546386 | 0.433448416  | 0.590204109  | 0.539202777  | 0.303403158  |
| comp163349_c0_seq1  | 0.266626305  | 0.55974705   | 1.232335765 | 1.202017644 | -0.156063497 | -0.003741074 | -0.402564103 | -0.319502784 |
| comp163391_c0_seq10 | -1.941162642 | ND           | 1.212572115 | 1.148664572 | ND           | ND           | ND           | -1.928024639 |
| comp163391_c0_seq15 | ND           | ND           | 1.452399903 | 1.404469827 | ND           | ND           | ND           | ND           |
| comp163391_c0_seq2  | ND           | ND           | 0.329351089 | 0.30694196  | ND           | ND           | ND           | ND           |
| comp163391_c0_seq24 | ND           | ND           | 0.95414802  | 0.928495452 | ND           | ND           | ND           | ND           |
| comp163391_c0_seq27 | ND           | ND           | 1.275707391 | 1.222836779 | ND           | -1.874643115 | ND           | -1.827226923 |
| comp163391_c0_seq28 | ND           | ND           | 1.400975727 | 1.385878048 | ND           | ND           | ND           | -1.764778515 |
| comp163391_c0_seq29 | ND           | ND           | 0.939428316 | 0.924141263 | ND           | ND           | ND           | -2.002289291 |
| comp163391_c0_seq31 | ND           | ND           | 1.053258846 | 1.021779754 | ND           | ND           | ND           | ND           |
| comp163391_c0_seq5  | ND           | ND           | 1.099568825 | 1.090172506 | ND           | ND           | ND           | ND           |
| comp163411_c0_seq22 | ND           | ND           | 0.006911093 | 0.057733878 | ND           | ND           | ND           | ND           |
| comp163418_c0_seq15 | -1.150086624 | -0.937313017 | 0.353201836 | 0.390902943 | -1.268935453 | -0.799013932 | -0.775073369 | -0.902865415 |
| comp163418_c0_seq16 | -1.05968855  | -0.937091573 | 0.448739549 | 0.387212724 | -1.032409343 | -0.792936744 | -0.918758501 | -1.046550547 |
| comp163418_c0_seq17 | -1.171723385 | -0.958949778 | 0.432591653 | 0.419925018 | -1.320535438 | -0.808061567 | -0.963846547 | -1.091638593 |
| comp163418_c0_seq18 | -1.128954881 | -0.967333797 | 0.26222463  | 0.260964327 | -0.941974832 | -0.913355598 | -0.766176083 | -0.990878142 |
| comp163418_c0_seq24 | -1.284251475 | -0.691266626 | 0.433376132 | 0.381010221 | -1.478821018 | -0.813379687 | -0.666200172 | -1.06699349  |
| comp163418_c0_seq33 | -1.211821817 | -0.914727324 | 0.23809266  | 0.266199258 | -1.075398141 | -0.915106788 | -0.915989808 | -1.002389169 |
| comp163418_c0_seq39 | -1.365743981 | -0.755030365 | 0.359393228 | 0.334495299 | -0.996042093 | -0.667628411 | -1.020693949 | -0.972394736 |
| comp163423_c1_seq10 | -0.067727951 | 0.115082432  | 1.202067777 | 1.245000848 | 0.333688349  | 0.56700064   | 0.229549298  | 0.070348788  |
| comp163426_c4_seq1  | -0.73948024  | 0.126505881  | 0.803316761 | 0.857665636 | ND           | -0.229690385 | -0.899580187 | -0.550250978 |
| comp163446_c0_seq4  | -1.330378609 | ND           | 0.129444156 | 0.144551388 | ND           | -1.364656799 | ND           | -0.840119352 |
| comp163446_c0_seq6  | -1.323676401 | -0.934811535 | 0.319790761 | 0.248163609 | ND           | -0.7558946   | ND           | -0.708478407 |
| comp163446_c0_seq9  | ND           | ND           | 0.656555607 | 0.713055525 | ND           | ND           | ND           | ND           |
| comp163465_c1_seq2  | -0.031279083 | 0.000439846  | 0.702237058 | 0.759239631 | -0.103384508 | 0.117064854  | -0.002322794 | -0.170232063 |
| comp163479_c1_seq2  | 0.070785164  | 0.272834906  | 1.05819978  | 1.047709037 | -0.774356797 | -0.497095636 | -1.224977385 | -0.75070944  |
| comp163500_c0_seq2  | -0.172521281 | -0.087326507 | 0.838728134 | 0.864160404 | -0.107453514 | -0.002679488 | -0.118741408 | -0.331544244 |

|                     |              |              |             |             |              |              |              |              |
|---------------------|--------------|--------------|-------------|-------------|--------------|--------------|--------------|--------------|
| comp163500_c0_seq3  | -0.274672483 | -0.046293803 | 0.838919941 | 0.887416558 | -0.152606957 | -0.002656437 | -0.093313777 | -0.427160306 |
| comp163512_c1_seq2  | 0.408235184  | 0.421005375  | 1.314359921 | 1.299330011 | 0.279626518  | 0.246714303  | 0.461631912  | 0.113394331  |
| comp163512_c1_seq5  | 0.323721579  | 0.322615366  | 1.196461509 | 1.16576581  | 0.252075481  | 0.148114236  | 0.312041464  | 0.043798515  |
| comp163540_c1_seq4  | ND           | -1.366400381 | 0.380046427 | 0.400905988 | ND           | ND           | -1.137213943 | -1.265005989 |
| comp163541_c0_seq2  | ND           | ND           | 0.679500395 | 0.662625924 | ND           | ND           | ND           | -1.746109342 |
| comp163542_c0_seq3  | -0.550895166 | -0.338121559 | 0.283386512 | 0.276217349 | ND           | ND           | ND           | ND           |
| comp163570_c1_seq5  | -0.617899134 | -0.214793829 | 1.727820247 | 1.742392084 | -0.386499945 | -0.271966082 | -1.476969085 | -1.00270114  |
| comp163619_c0_seq13 | -0.533888511 | -0.430259373 | 0.757396133 | 0.723195479 | -0.381670568 | -0.408465858 | -1.046170976 | -0.571903031 |
| comp163619_c0_seq2  | -0.613951829 | -0.513151982 | 1.150006746 | 1.108505089 | -0.349311707 | -0.14555466  | -0.560171957 | -0.739116525 |
| comp163619_c0_seq5  | -0.279127354 | -0.132171031 | 1.317436834 | 1.281160128 | -0.177214529 | 0.073539081  | -0.151985589 | -0.373199321 |
| comp163619_c0_seq9  | -0.420103704 | -0.40897546  | 1.145805107 | 1.08652323  | -0.220889198 | -0.029966989 | -0.443030458 | -0.65000375  |
| comp163696_c0_seq1  | -1.421261309 | -0.907457706 | 1.71017271  | 1.690156585 | -0.439739592 | -0.075328257 | -0.678271269 | -0.931002051 |
| comp163696_c0_seq11 | -0.879265374 | -1.122423722 | 1.489042411 | 1.424002224 | -0.025911364 | -0.290294273 | -0.960184075 | -1.389006116 |
| comp163696_c0_seq24 | -0.735573516 | -1.159622007 | 1.559181946 | 1.518064163 | 0.05857593   | -0.112943047 | -0.86348878  | -1.137408862 |
| comp163696_c0_seq28 | -0.587913292 | -0.748720347 | 1.656171501 | 1.604303048 | 0.103573813  | -0.028564658 | -0.861956591 | -0.910567391 |
| comp163696_c0_seq4  | -0.565167884 | -0.711141622 | 1.388589635 | 1.367454816 | 0.115323836  | -0.298416078 | -1.327327823 | ND           |
| comp163696_c0_seq7  | -0.480196349 | -0.665362751 | 1.749573513 | 1.68581514  | 0.257482324  | 0.195924927  | -0.737206309 | -0.944179601 |
| comp163702_c1_seq7  | -0.444884354 | 0.040890525  | 0.985383168 | 1.019050259 | 0.021727547  | -0.03982985  | -0.604984301 | -0.033806343 |
| comp163727_c0_seq2  | -1.337633508 | -0.647738646 | 0.185858338 | 0.251239842 | -1.009324305 | -0.330519012 | ND           | -0.84737425  |
| comp163731_c2_seq11 | -1.10597289  | -1.79628927  | 1.537494272 | 1.545771588 | -1.078693684 | ND           | -0.612860323 | -0.74065237  |
| comp163769_c0_seq4  | 1.78489796   | 1.196927803  | 2.690456923 | 2.704884252 | 0.144724214  | 0.763113585  | 0.367519525  | 0.239727479  |
| comp163822_c2_seq9  | -1.044382128 | ND           | 0.516898278 | 0.518683958 | -1.017102922 | ND           | ND           | ND           |
| comp163885_c0_seq2  | -0.485114269 | -0.573370657 | 2.189935459 | 2.149871379 | -0.758865058 | -0.308539093 | -0.946244211 | -0.333673568 |
| comp163926_c0_seq3  | ND           | ND           | 1.469521028 | 1.415643775 | ND           | ND           | ND           | ND           |
| comp163937_c0_seq3  | ND           | -1.332075599 | 1.575739211 | 1.522257549 | ND           | ND           | ND           | ND           |
| comp163961_c0_seq3  | -0.614800706 | -0.799967108 | 1.243875411 | 1.27510264  | -0.888551495 | -1.3480489   | -0.359927305 | -0.560270018 |
| comp163961_c0_seq6  | ND           | -1.342502375 | 1.215742784 | 1.256113749 | ND           | -1.112432917 | -0.937224679 | -1.54213798  |
| comp163963_c0_seq1  | -1.115712079 | -0.796483141 | 1.00929106  | 1.065840887 | 0.018022459  | 0.452069723  | 0.428910307  | 0.178711861  |
| comp163977_c0_seq10 | -1.091086197 | -0.906341313 | 1.20808228  | 1.173160049 | -1.267926973 | -0.949273127 | -0.552216139 | -0.389973574 |
| comp163977_c0_seq7  | -0.015475767 | 0.074058888  | 2.017427066 | 2.004688558 | -0.091540683 | 0.110732229  | -0.004624094 | -0.118843333 |
| comp163984_c1_seq2  | ND           | ND           | 1.938417483 | 1.926723257 | ND           | ND           | ND           | ND           |



|                     |              |              |             |             |              |              |              |              |
|---------------------|--------------|--------------|-------------|-------------|--------------|--------------|--------------|--------------|
| comp163984_c3_seq2  | ND           | -1.552134783 | 1.813753209 | 1.789926076 | ND           | ND           | ND           | ND           |
| comp163984_c3_seq3  | ND           | ND           | 2.053489171 | 2.006239468 | ND           | ND           | ND           | ND           |
| comp163991_c0_seq5  | ND           | -0.885209705 | 1.220439964 | 1.206893382 | ND           | ND           | ND           | ND           |
| comp164043_c0_seq8  | -0.706497037 | -0.220722158 | 0.986455488 | 0.972552943 | -0.980247826 | -1.342835218 | -1.16762698  | ND           |
| comp164106_c0_seq1  | -0.452016403 | -0.716364051 | 0.354593849 | 0.38394152  | -0.555070965 | -0.349456633 | -0.295292087 | -0.490030923 |
| comp164106_c0_seq11 | -0.492273765 | -0.677440167 | 0.340073413 | 0.344384068 | -0.540715273 | -0.43313027  | -0.406861045 | -0.534653091 |
| comp164106_c0_seq18 | -0.475301504 | -0.660467906 | 0.45653311  | 0.444193714 | -0.54493231  | -0.305459711 | -0.29297877  | -0.305816301 |
| comp164106_c0_seq28 | -1.107642186 | -0.593838583 | 0.535824977 | 0.528655814 | -0.779332983 | ND           | -0.06362215  | -0.395534179 |
| comp164106_c0_seq3  | -0.620168124 | -0.540020082 | 0.286468814 | 0.335676117 | -0.491431276 | -0.470801917 | -0.310833645 | -0.524055886 |
| comp164106_c0_seq41 | -0.594991216 | -0.449164398 | 0.400579221 | 0.408977836 | -0.45856754  | -0.446338722 | -0.361307114 | -0.456914477 |
| comp164106_c0_seq50 | -0.461816036 | -0.535349168 | 0.286238908 | 0.314143957 | -0.595904832 | -0.481370969 | -0.351920222 | -0.53086479  |
| comp164106_c0_seq8  | -1.160887698 | -0.896961568 | 0.250630388 | 0.203344002 | -0.890570442 | -0.718044633 | -0.475889605 | -1.050839682 |
| comp164106_c0_seq9  | -0.637249817 | -0.541861808 | 0.340612708 | 0.329778592 | -0.526996375 | -0.671528006 | -0.312675371 | -0.541137579 |
| comp164139_c0_seq2  | -0.383962922 | -0.354119999 | 1.963314268 | 1.950368092 | -0.218381017 | -0.159963097 | 0.561447316  | 0.124025102  |
| comp164139_c1_seq1  | -0.621996282 | -0.756010161 | 1.73313269  | 1.757919597 | -0.515535829 | -0.334055177 | 0.109998374  | -0.146460282 |
| comp164179_c0_seq7  | -0.846892725 | -0.759057854 | 0.495544442 | 0.517338975 | -1.120643514 | -0.483230906 | ND           | ND           |
| comp164205_c0_seq3  | ND           | -0.771039152 | 1.486547998 | 1.479378836 | ND           | ND           | ND           | ND           |
| comp164205_c1_seq3  | -0.271816223 | -0.02012455  | 1.802390269 | 1.734991676 | ND           | ND           | ND           | ND           |
| comp164237_c3_seq12 | ND           | ND           | 0.532683334 | 0.511273733 | ND           | -1.174025714 | ND           | -1.126609522 |
| comp164244_c1_seq28 | -0.237571371 | 0.205168876  | 2.03579462  | 1.99795179  | -0.519594686 | -0.240250575 | -0.616797209 | -0.834765886 |
| comp164244_c1_seq42 | -0.242916311 | 0.135090628  | 2.011667549 | 1.9812775   | -0.550090855 | -0.328347023 | -0.630260039 | -0.786080809 |
| comp164261_c0_seq12 | -1.356824899 | -0.967960033 | 0.505485503 | 0.557437793 | -0.551394442 | -0.215011829 | -0.613834859 | -0.741626905 |
| comp164261_c0_seq15 | ND           | ND           | 0.090746028 | 0.040111171 | ND           | ND           | -0.794491128 | -1.399404429 |
| comp164268_c0_seq9  | -1.318922544 | -0.930057678 | 0.694655533 | 0.718300318 | -0.337400828 | -0.450110747 | -0.8769625   | -0.527633291 |
| comp164342_c0_seq6  | -0.119746879 | 0.200932125  | 0.972684798 | 1.015756731 | 0.064655747  | 0.284294101  | -0.051367498 | -0.493553501 |
| comp164342_c0_seq7  | -0.617899134 | 0.106757834  | 0.979810538 | 0.952200215 | -0.192679919 | 0.292305348  | -0.115241249 | -0.458633096 |
| comp164344_c1_seq4  | -1.536240916 | -0.925527301 | 0.752038218 | 0.727564197 | -0.605871723 | -0.456575754 | -0.140038363 | -0.200883619 |
| comp164354_c0_seq14 | -0.210899773 | -0.186116648 | 0.871789684 | 0.863145835 | 0.019029722  | 0.216004091  | -0.094103404 | -0.303565496 |
| comp164359_c2_seq5  | -1.090653273 | -1.002818403 | 0.505389239 | 0.545644727 | -0.887282807 | -0.647810208 | -0.949723224 | -1.378545266 |
| comp164459_c0_seq1  | -0.41062115  | -0.456125558 | 1.148783251 | 1.128250127 | -1.544709946 | -1.208327333 | -1.033119095 | -1.859881145 |
| comp164459_c0_seq2  | 0.544302777  | 0.601308864  | 1.647520293 | 1.595377401 | 0.568544947  | 0.745869639  | 0.721505523  | 0.411312744  |

|                     |              |              |             |             |              |              |              |              |
|---------------------|--------------|--------------|-------------|-------------|--------------|--------------|--------------|--------------|
| comp164459_c0_seq6  | -0.116106928 | -0.044299503 | 1.34072413  | 1.29594831  | -0.149525562 | -0.042290938 | -0.100115616 | -0.359186577 |
| comp164473_c1_seq2  | ND           | -0.196638429 | 0.606289735 | 0.63954923  | -1.160284079 | -0.045750217 | -0.005240552 | -0.572365292 |
| comp164513_c0_seq2  | ND           | -1.486246355 | 1.635559192 | 1.621628054 | ND           | -1.256176897 | -1.080968658 | -1.083821968 |
| comp164513_c0_seq5  | -1.608186073 | -1.09438247  | 1.317176075 | 1.294067711 | ND           | ND           | ND           | -1.117926816 |
| comp164565_c0_seq17 | -0.231990447 | -0.234332207 | 1.058825955 | 1.01882294  | 0.244381291  | 0.392934241  | 0.390561358  | 0.200276863  |
| comp164611_c0_seq14 | -0.984796438 | -0.772022831 | 0.150515235 | 0.126955657 | -0.832578495 | -0.894135892 | ND           | ND           |
| comp164612_c0_seq3  | ND           | -1.936160277 | 0.51643512  | 0.566545362 | -1.644533422 | -1.882182078 | -1.706973839 | -1.834765886 |
| comp164612_c0_seq5  | ND           | -2.230472671 | 0.556048781 | 0.556728527 | -1.512877084 | ND           | -2.001286233 | ND           |
| comp164646_c0_seq1  | -1.436631479 | -0.334556169 | 0.733442301 | 0.754301862 | -0.330171026 | -0.625811629 | -0.994671435 | -1.423493476 |
| comp164646_c0_seq2  | ND           | -0.677963414 | 0.494452127 | 0.538435486 | -0.930404604 | -0.92501521  | -1.594905012 | -0.944545808 |
| comp164646_c0_seq4  | -1.004485906 | -0.528470864 | 0.574523267 | 0.64653535  | -0.340384602 | -0.816915346 | -1.340677112 | -0.565379171 |
| comp164670_c0_seq1  | 0.999680867  | 1.088381729  | 1.804988885 | 1.851231526 | 0.723321695  | 1.073099979  | 0.872136954  | 0.785737593  |
| comp164672_c0_seq14 | -1.125273197 | -0.657227085 | 0.390249718 | 0.345291995 | -0.4747447   | -0.516098711 | -0.838215113 | -1.811105199 |
| comp164672_c0_seq19 | ND           | ND           | 1.184218687 | 1.1705743   | ND           | ND           | ND           | -1.658573616 |
| comp164672_c0_seq26 | -1.836027108 | -0.669010992 | 0.382468554 | 0.333508088 | -0.553475397 | -0.527882617 | -0.916945809 | -1.52185911  |
| comp164690_c0_seq2  | ND           | -1.293917897 | 0.121535692 | 0.172358476 | ND           | ND           | -1.06473146  | -0.89149351  |
| comp164701_c1_seq2  | -0.662174719 | -1.000308581 | 2.046846404 | 1.993526092 | -0.215766205 | 0.090653184  | ND           | -0.649036717 |
| comp164701_c3_seq1  | -0.773697362 | -1.498775848 | 1.683303009 | 1.635342456 | -0.684270249 | -0.278466228 | ND           | -1.029404672 |
| comp164701_c3_seq2  | -0.869573867 | -1.258860252 | 1.715986915 | 1.670375344 | -0.49987198  | -0.31278745  | ND           | -0.902193355 |
| comp164701_c3_seq6  | -1.351789544 | ND           | 1.3192381   | 1.297781646 | -0.847389083 | -0.908946479 | ND           | -0.560500291 |
| comp164708_c0_seq10 | 0.214142694  | 0.167850807  | 1.687660564 | 1.688442823 | 0.609398686  | 0.61285702   | -0.182746352 | -0.13444714  |
| comp164708_c0_seq11 | 0.460071923  | 0.414313764  | 1.874445654 | 1.859860652 | 0.81014987   | 0.780225321  | 0.062979887  | 0.134022228  |
| comp164708_c0_seq12 | 0.071988813  | 0.074302259  | 1.525807411 | 1.532846182 | 0.495947375  | 0.461312622  | -0.163532232 | -0.151662284 |
| comp164708_c0_seq13 | -0.245439714 | -0.198033501 | 1.416594044 | 1.385332197 | 0.21853209   | 0.272544619  | -0.435502884 | -0.430669365 |
| comp164708_c0_seq15 | 0.444908032  | 0.386614866  | 1.43709718  | 1.451544982 | 0.616093814  | 0.498132386  | 0.104821782  | -0.000107381 |
| comp164708_c0_seq16 | 0.290328678  | 0.285919829  | 1.284929412 | 1.256231042 | 0.488304112  | 0.437470581  | 0.010618828  | -0.030987071 |
| comp164708_c0_seq2  | 0.656276536  | 0.628472693  | 1.752944234 | 1.727589392 | 0.933785585  | 0.744107793  | 0.36556072   | 0.115362274  |
| comp164722_c0_seq10 | -0.171549321 | -0.112752659 | 1.053848946 | 1.0144951   | 0.007378688  | 0.098431455  | 0.16861179   | -0.076001102 |
| comp164722_c0_seq5  | 0.020877292  | -0.245762152 | 1.03175788  | 0.965241716 | -0.054505843 | 0.098780609  | 0.184083736  | -0.024630218 |
| comp164734_c1_seq6  | ND           | ND           | 1.304466376 | 1.261969251 | ND           | ND           | ND           | ND           |
| comp164741_c0_seq11 | -1.242192637 | -0.853327771 | 0.808108247 | 0.800939084 | -0.068785395 | -0.276470827 | -0.323111338 | -0.75193338  |

|                     |              |              |             |             |              |              |              |              |
|---------------------|--------------|--------------|-------------|-------------|--------------|--------------|--------------|--------------|
| comp164753_c0_seq3  | -0.502237162 | -0.089891201 | 0.693072441 | 0.768572852 | -0.139165854 | -0.314666603 | 0.036632895  | -0.966220415 |
| comp164756_c1_seq4  | 0.101824985  | 0.213492464  | 1.695806784 | 1.693771186 | 0.436764766  | 0.337418809  | 0.364340128  | 0.215863483  |
| comp164770_c0_seq1  | -0.878136358 | -0.422324702 | 0.545970855 | 0.526212565 | -0.306789107 | -0.611384552 | -0.339266301 | -0.864998355 |
| comp164786_c2_seq11 | -1.018574865 | -0.277527481 | 0.854900535 | 0.867132366 | -1.292325654 | -1.35388305  | -0.634606768 | -0.762398814 |
| comp164786_c2_seq14 | -0.796323853 | -0.28252025  | 0.901229834 | 0.847964021 | -0.314786275 | 0.009697114  | -0.593245898 | -0.317345606 |
| comp164786_c2_seq8  | -1.052969703 | -0.597158047 | 0.707883058 | 0.717527394 | -0.451659229 | -0.045855208 | -0.611009659 | -0.52794834  |
| comp164815_c0_seq1  | -0.593438622 | -1.158816265 | 0.826512631 | 0.843702815 | -1.04328067  | -0.104838067 | -0.452508573 | ND           |
| comp164882_c1_seq1  | 0.427044023  | 0.710565709  | 1.764615743 | 1.732019543 | 0.412261885  | 0.085002455  | 0.246422409  | -0.168611348 |
| comp164895_c0_seq1  | -0.005003885 | 0.258295105  | 0.883967105 | 0.886631445 | -0.688124144 | -0.603553505 | -0.796322052 | -0.463383259 |
| comp164907_c0_seq16 | ND           | ND           | 1.419090296 | 1.361438302 | ND           | ND           | ND           | -1.611568394 |
| comp164907_c0_seq18 | ND           | ND           | 1.2807504   | 1.272523272 | ND           | ND           | ND           | ND           |
| comp164907_c0_seq19 | ND           | ND           | 1.494952563 | 1.43292087  | ND           | ND           | ND           | ND           |
| comp164907_c0_seq21 | ND           | ND           | 1.489125233 | 1.451466748 | ND           | ND           | -1.600619496 | -1.728411542 |
| comp164907_c0_seq22 | ND           | ND           | 1.089225752 | 1.147466052 | ND           | ND           | ND           | ND           |
| comp164907_c0_seq5  | -1.76023719  | ND           | 1.553091664 | 1.497881499 | ND           | -1.794515379 | ND           | ND           |
| comp164919_c0_seq3  | -0.014835237 | -0.040943719 | 0.866316082 | 0.807299637 | -0.022318137 | 0.071629195  | 0.103231928  | -0.048693797 |
| comp165001_c0_seq9  | ND           | ND           | 0.869723719 | 0.831885737 | ND           | ND           | ND           | ND           |
| comp165048_c1_seq1  | ND           | -1.60502275  | 1.468442236 | 1.483208443 | ND           | -0.94898456  | ND           | -0.725477108 |
| comp165048_c1_seq6  | ND           | -1.304425534 | 1.218964472 | 1.159127981 | ND           | -1.250447335 | ND           | -0.658963098 |
| comp165048_c1_seq8  | -1.636368246 | ND           | 1.521509256 | 1.482507664 | ND           | -1.36961644  | -1.194408202 | -1.322200248 |
| comp165055_c1_seq10 | -0.113685479 | -0.032010917 | 2.01978726  | 2.029551671 | -0.138324071 | 0.094199668  | -0.011100422 | -0.16647599  |
| comp165062_c1_seq1  | ND           | -1.099266154 | 0.829658711 | 0.867612569 | ND           | -1.52240921  | ND           | -0.997871763 |
| comp165062_c1_seq10 | ND           | -1.67116466  | 1.436380115 | 1.486966463 | ND           | ND           | ND           | ND           |
| comp165062_c1_seq13 | ND           | -1.699239859 | 1.03990771  | 1.086662998 | ND           | ND           | ND           | -1.296815472 |
| comp165062_c1_seq14 | ND           | ND           | 1.337668942 | 1.323089836 | -1.542032648 | ND           | -1.428381806 | -1.255143857 |
| comp165062_c1_seq5  | ND           | -1.252081828 | 1.083569651 | 1.072656547 | ND           | ND           | ND           | -1.150687437 |
| comp165062_c1_seq8  | ND           | ND           | 1.197551148 | 1.232731384 | ND           | -1.587170116 | ND           | ND           |
| comp165086_c2_seq6  | -0.58457828  | -0.797773405 | 0.316650188 | 0.367472973 | ND           | -0.521946456 | -0.346738218 | -0.474530264 |
| comp165090_c1_seq4  | ND           | ND           | 0.817941589 | 0.780487622 | ND           | ND           | ND           | -1.158425628 |
| comp165090_c1_seq8  | ND           | ND           | 0.213306065 | 0.251894393 | ND           | ND           | ND           | ND           |
| comp165090_c1_seq9  | ND           | ND           | 1.009059632 | 1.00474768  | ND           | ND           | -1.211492117 | ND           |

|                     |              |              |             |             |              |              |              |              |
|---------------------|--------------|--------------|-------------|-------------|--------------|--------------|--------------|--------------|
| comp165091_c1_seq5  | ND           | ND           | 1.768266078 | 1.723308355 | ND           | ND           | ND           | ND           |
| comp165104_c1_seq1  | -0.483948377 | 0.676993592  | 1.543767116 | 1.469908676 | 0.584723515  | 0.34211144   | 0.810796536  | 0.667492324  |
| comp165108_c0_seq5  | -0.728651029 | -0.28863364  | 0.536099883 | 0.501200378 | -0.525280563 | -0.234655441 | -0.212057366 | -0.363330508 |
| comp165152_c0_seq5  | ND           | ND           | 0.446993217 | 0.387117704 | ND           | ND           | ND           | ND           |
| comp165211_c2_seq15 | ND           | ND           | 0.596562122 | 0.651540866 | ND           | ND           | ND           | ND           |
| comp165211_c2_seq16 | -0.849919179 | -0.637145572 | 0.609903586 | 0.676163341 | -0.822639973 | -0.70810611  | -0.612079118 | ND           |
| comp165211_c2_seq22 | ND           | ND           | 1.111746521 | 1.073457558 | ND           | ND           | ND           | ND           |
| comp165215_c2_seq21 | -0.593136083 | -0.29817572  | 0.383813099 | 0.334091585 | -0.690795613 | -0.326384277 | -0.686289241 | ND           |
| comp165215_c2_seq3  | -1.111787567 | -0.523350346 | 0.312319646 | 0.286127246 | -1.08450836  | -0.845035761 | -1.57291751  | -1.223588301 |
| comp165215_c2_seq7  | -1.030676732 | -0.554661691 | 0.258731907 | 0.210170059 | -0.827306267 | -0.843106173 | -1.366867939 | -1.318568726 |
| comp165268_c0_seq6  | ND           | ND           | 0.37371712  | 0.366547957 | ND           | ND           | ND           | ND           |
| comp165283_c0_seq1  | ND           | -1.249798637 | 0.807223484 | 0.75795297  | -0.289165002 | -0.019729179 | -1.497733455 | -0.28310282  |
| comp165311_c1_seq15 | -1.527035872 | -1.314262265 | 0.131154547 | 0.178343047 | -0.596666678 | -0.658224075 | -0.784045832 | -1.513897869 |
| comp165311_c1_seq19 | ND           | -1.649044796 | 0.211345365 | 0.144590512 | -1.232479205 | -0.595066597 | -1.419858358 | -1.246620409 |
| comp165315_c1_seq14 | -0.968783768 | -0.102797647 | 0.803350003 | 0.807176225 | -0.941504562 | -0.702031962 | 0.01724432   | 0.158297587  |
| comp165329_c0_seq8  | ND           | ND           | 0.207938068 | 0.175214801 | ND           | ND           | -0.774209101 | ND           |
| comp165378_c0_seq2  | -1.67683343  | ND           | 2.261403926 | 2.220358018 | ND           | -1.109051629 | -1.535903382 | ND           |
| comp165378_c0_seq5  | ND           | -1.502446998 | 2.389817524 | 2.35133043  | ND           | -0.971347545 | ND           | ND           |
| comp165378_c1_seq1  | ND           | -1.399601834 | 2.317501728 | 2.306599352 | ND           | -0.743563644 | ND           | ND           |
| comp165383_c0_seq8  | ND           | -1.232110747 | 0.398942642 | 0.362484104 | -1.417605147 | -1.002041289 | -1.303954305 | -0.390353666 |
| comp165431_c1_seq3  | ND           | ND           | 1.511547184 | 1.444923052 | ND           | -0.547566699 | ND           | ND           |
| comp165431_c1_seq4  | ND           | ND           | 1.168511401 | 1.231923312 | ND           | ND           | ND           | ND           |
| comp165431_c1_seq8  | ND           | ND           | 1.333307551 | 1.323684741 | ND           | -0.390875471 | ND           | -0.907730709 |
| comp165462_c0_seq5  | 0.129329429  | 0.76651794   | 1.522966657 | 1.463311903 | 0.368415447  | 0.920199052  | 0.027221429  | -0.059177932 |
| comp165473_c1_seq3  | -1.264815189 | -1.052041582 | 0.991800937 | 0.960237336 | -0.839595973 | -0.219912133 | -0.521825149 | -0.43876383  |
| comp165498_c1_seq6  | -0.730309276 | -0.420625656 | 0.701992416 | 0.726137316 | -0.879121329 | -0.843768712 | -0.464440491 | -0.893262533 |
| comp165531_c5_seq7  | ND           | -1.596275335 | 0.846236487 | 0.844858003 | ND           | ND           | ND           | ND           |
| comp165552_c1_seq1  | -0.870533635 | -0.782698764 | 0.632754825 | 0.645789048 | -0.542224432 | -1.20584182  | -0.331663577 | -0.255335641 |
| comp165554_c0_seq15 | ND           | ND           | 0.456576419 | 0.479896579 | ND           | ND           | ND           | ND           |
| comp165554_c0_seq19 | ND           | ND           | 1.239635004 | 1.1929573   | ND           | ND           | ND           | ND           |
| comp165554_c0_seq24 | ND           | ND           | 0.783526963 | 0.727272366 | ND           | ND           | ND           | ND           |

|                     |              |              |              |             |              |              |              |              |
|---------------------|--------------|--------------|--------------|-------------|--------------|--------------|--------------|--------------|
| comp165554_c0_seq27 | ND           | ND           | 0.72016552   | 0.781852137 | ND           | ND           | ND           | ND           |
| comp165554_c0_seq44 | -1.795588324 | ND           | 0.886540102  | 0.894185521 | ND           | ND           | ND           | ND           |
| comp165587_c0_seq2  | ND           | ND           | 0.328858188  | 0.351652249 | ND           | ND           | ND           | ND           |
| comp165589_c1_seq1  | 0.824482634  | 1.22227932   | 2.412158329  | 2.398752396 | 1.554773911  | 1.755583319  | 0.993793775  | 1.102806142  |
| comp165672_c0_seq1  | -1.025473941 | -1.335579079 | 0.797069334  | 0.818671914 | -1.396134743 | ND           | -0.805362646 | -1.234184688 |
| comp165672_c0_seq11 | -1.123456287 | -0.637681408 | 0.984469587  | 0.960267085 | -0.698237071 | -0.645851116 | -0.186646221 | -0.481929354 |
| comp165672_c0_seq8  | -0.918340655 | -0.550665088 | 1.050087762  | 1.023245164 | -0.590031452 | -0.47549759  | -0.191144882 | -0.258938998 |
| comp165672_c0_seq9  | -1.125059837 | -0.611256235 | 1.033732932  | 0.977236017 | -0.796750635 | -0.496580196 | -0.139031749 | -0.412951831 |
| comp165683_c0_seq2  | -0.466247405 | -0.302691821 | 1.230979239  | 1.222390039 | -1.187156226 | -0.345623635 | -1.471445393 | -0.395117456 |
| comp165708_c0_seq3  | ND           | ND           | 0.132890443  | 0.190662087 | ND           | -1.096697351 | -1.097580371 | -0.681304373 |
| comp165727_c0_seq6  | -0.732071122 | -0.882475418 | 1.702497585  | 1.69790489  | -0.55866388  | -0.863259325 | -0.812989823 | -0.664575458 |
| comp165731_c0_seq1  | ND           | ND           | 0.84225214   | 0.867267661 | ND           | ND           | ND           | ND           |
| comp165792_c0_seq1  | -1.692135361 | -1.780391749 | 1.3188805    | 1.346868616 | -1.664856154 | -1.726413551 | -1.551205312 | -1.377967363 |
| comp165792_c0_seq2  | ND           | -1.738217673 | 1.143891737  | 1.147188008 | -1.020622086 | -1.082179482 | -1.20800124  | -1.636823282 |
| comp165792_c3_seq2  | -1.758503477 | -1.369638611 | 1.511056158  | 1.471920249 | -1.430194275 | -1.315660412 | -0.918603424 | -1.143305483 |
| comp165807_c1_seq10 | 0.696678013  | 0.86150762   | 1.645552667  | 1.663602441 | 0.415503206  | 0.418747931  | 0.121113712  | -0.30770833  |
| comp165807_c1_seq5  | 0.865100484  | 1.026167268  | 1.749987232  | 1.767519903 | 0.480937212  | 0.659140154  | 0.446168222  | 0.198766272  |
| comp165808_c1_seq4  | -0.577420272 | ND           | 3.605228777  | 3.575673888 | -0.300263592 | 0.115300266  | 1.32693777   | 1.137573423  |
| comp165826_c0_seq17 | 0.508463625  | 0.732288578  | 1.675426647  | 1.659851523 | 0.540197173  | 0.630428501  | 0.666943313  | 0.312981144  |
| comp165830_c0_seq1  | -0.800272012 | ND           | 0.107795881  | 0.126955657 | ND           | ND           | -1.136463218 | ND           |
| comp165849_c0_seq4  | ND           | ND           | -0.011089873 | 0.048687754 | -0.943031082 | -0.703558482 | ND           | ND           |
| comp165866_c2_seq1  | -1.575785457 | -1.119973801 | 1.780795521  | 1.730534343 | ND           | -1.212123638 | ND           | -1.562647454 |
| comp165866_c2_seq2  | ND           | -1.733733766 | 1.687880131  | 1.663555275 | ND           | -0.565812215 | ND           | -1.030279384 |
| comp165886_c0_seq5  | -1.842006097 | -1.231292481 | 1.584822424  | 1.615873189 | ND           | ND           | ND           | -1.828868094 |
| comp165886_c0_seq6  | -0.330156861 | -0.032211644 | 0.996005072  | 0.996031485 | -0.024124053 | 0.039257287  | -1.365318071 | -1.794140113 |
| comp165906_c0_seq6  | -0.15454157  | 0.117817727  | 1.128517133  | 1.059588347 | -0.078957683 | 0.065031159  | 0.300007602  | -0.010124653 |
| comp165912_c1_seq3  | -1.429279281 | -1.216505674 | 0.944914482  | 0.972507426 | -1.100970078 | -0.861497479 | -1.288349232 | ND           |
| comp165969_c0_seq3  | -0.818481392 | -0.906737781 | 0.096319883  | 0.115086454 | -0.791202186 | -0.890548143 | -0.97858134  | -0.80534339  |
| comp165969_c0_seq4  | -0.523781655 | -0.318307286 | 0.359143203  | 0.296848734 | -0.611895867 | -0.530031121 | -0.780791615 | -0.686734911 |
| comp165985_c1_seq2  | -0.860699086 | -0.31693226  | 0.253423289  | 0.319361224 | -1.076457928 | -0.359864074 | -0.962807086 | -1.215537869 |
| comp165985_c1_seq20 | -0.882199596 | -0.42638794  | 0.313110008  | 0.346058068 | -0.67882913  | -0.439356531 | -0.820450794 | -1.170091589 |

|                     |              |              |             |             |              |              |              |              |
|---------------------|--------------|--------------|-------------|-------------|--------------|--------------|--------------|--------------|
| comp165985_c1_seq25 | -1.196404967 | -0.615654575 | 0.352640982 | 0.386864505 | -1.044187024 | -0.59386106  | ND           | -1.66038822  |
| comp165985_c1_seq3  | -0.512253516 | -0.675143523 | 0.241320397 | 0.234151234 | -0.684546664 | -0.679157271 | -0.804979028 | -1.175809123 |
| comp166029_c0_seq1  | ND           | ND           | 1.29229635  | 1.308821853 | ND           | ND           | ND           | ND           |
| comp166083_c0_seq3  | -1.834987877 | -0.279791589 | 1.048511824 | 1.056582628 | -0.962610631 | -0.437902303 | -1.216936574 | -1.043698624 |
| comp166110_c0_seq5  | 0.411427474  | 0.698386279  | 1.45488528  | 1.400201533 | 0.354385794  | 0.640390718  | 0.224998588  | 0.018025296  |
| comp166155_c0_seq3  | -1.29482138  | -1.161229019 | 0.46982437  | 0.466415357 | -0.899565388 | -0.764828139 | -1.153891331 | -0.758804632 |
| comp166155_c0_seq6  | -1.198512466 | -0.742700811 | 0.541864709 | 0.506866452 | -0.819050742 | -0.720907295 | -0.814544369 | -1.088464451 |
| comp166177_c3_seq3  | ND           | ND           | 0.145447849 | 0.08028674  | ND           | ND           | ND           | ND           |
| comp166194_c0_seq2  | 0.731206905  | 0.735264778  | 1.584536008 | 1.616099672 | 0.57081298   | 0.708209726  | 0.898017473  | 0.556671776  |
| comp166210_c1_seq1  | -1.272861457 | ND           | 0.482238975 | 0.508493568 | -1.546612246 | -1.608169642 | -1.131931408 | -1.259723454 |
| comp166210_c1_seq2  | ND           | -1.635130281 | 0.629830467 | 0.68772395  | -1.519594686 | -1.280122087 | -1.104913848 | -1.53373589  |
| comp166247_c1_seq1  | -1.777679134 | -1.263875531 | 1.420005578 | 1.454267099 | ND           | -1.811957323 | ND           | -1.764541131 |
| comp166269_c1_seq1  | -1.708868331 | -1.01897347  | 0.028503334 | 0.021334171 | -0.640196439 | -0.788904012 | -0.965878291 | ND           |
| comp166269_c1_seq20 | -1.299980834 | -1.002886341 | 0.630382841 | 0.567897227 | -0.795580372 | -0.588292456 | -1.049906315 | -1.830910875 |
| comp166269_c1_seq25 | -1.515682521 | -0.950726396 | 0.19686556  | 0.170100842 | -0.675489958 | -0.771809461 | -0.976812464 | -1.32645326  |
| comp166269_c1_seq64 | ND           | -0.99933939  | 0.269986164 | 0.269995586 | -0.96298504  | -0.644331195 | -0.946244211 | ND           |
| comp166298_c0_seq3  | 0.854471562  | 0.997179884  | 1.879697716 | 1.879382697 | 0.781676232  | 0.969132385  | 0.444981292  | 0.258918994  |
| comp166298_c0_seq8  | -0.693362488 | -0.643316179 | 0.103130629 | 0.157231123 | -1.092052014 | -0.630730665 | ND           | -1.106193218 |
| comp166301_c1_seq15 | -0.932660236 | -1.020916625 | 1.368434162 | 1.321625713 | -0.192170586 | 0.010785179  | -0.393790179 | -0.583730132 |
| comp166301_c1_seq17 | -0.482148563 | -0.605167058 | 1.469772613 | 1.447626295 | -0.012510208 | 0.140481907  | -0.09343403  | -0.737855873 |
| comp166301_c1_seq19 | -0.926411287 | -0.567509644 | 1.411812318 | 1.407055908 | -0.12098083  | 0.209572239  | -0.254002321 | -0.767145249 |
| comp166301_c1_seq2  | -1.00766688  | -0.949795233 | 1.215583879 | 1.223137974 | -0.264384329 | -0.016639204 | -0.611464326 | -1.09143889  |
| comp166301_c1_seq7  | ND           | ND           | 0.611946549 | 0.573963439 | -1.104136273 | ND           | ND           | ND           |
| comp166313_c4_seq1  | -0.948434719 | -1.036691108 | 0.639174626 | 0.680310143 | -0.921155512 | 0.017287091  | -0.330383416 | -0.537356708 |
| comp166341_c0_seq3  | ND           | -1.464658438 | 0.417450972 | 0.38856256  | ND           | -0.565582199 | -0.45732075  | -0.585112796 |
| comp166344_c0_seq1  | -0.614109154 | -0.827304279 | 0.442021274 | 0.389094621 | ND           | -0.347357348 | -1.075239097 | -0.725909888 |
| comp166351_c1_seq1  | 0.138266661  | 0.200165798  | 1.507836343 | 1.450812542 | 0.26621603   | 0.505688629  | 0.598710111  | 0.369460425  |
| comp166356_c0_seq2  | -1.020615406 | -0.63175054  | 1.177487097 | 1.121767544 | 0.0066638    | 0.059049756  | ND           | -1.007477404 |
| comp166361_c1_seq2  | -1.258975193 | -1.046201586 | 0.177366477 | 0.170197314 | -1.231695986 | -1.293253383 | -1.118045144 | -0.944807195 |
| comp166386_c0_seq14 | 0.752742536  | 0.532729461  | 1.342178486 | 1.38721724  | 0.213035963  | 0.564141832  | 0.545530045  | 0.435466766  |
| comp166388_c0_seq3  | ND           | ND           | 0.690631742 | 0.742899767 | ND           | ND           | -1.224568637 | ND           |

|                     |    |              |              |             |             |              |              |              |              |
|---------------------|----|--------------|--------------|-------------|-------------|--------------|--------------|--------------|--------------|
| comp166401_c0_seq8  | ND |              | -0.763088458 | 0.566934935 | 0.513308371 | -0.311760761 | -0.256812589 | -0.466955232 | -0.439845318 |
| comp166419_c0_seq4  |    | -0.355100572 | -0.142326965 | 0.767976645 | 0.790770706 | -0.452760102 | -0.088348767 | 0.058830748  | -0.245052557 |
| comp166425_c0_seq2  |    | -0.14584908  | 0.152354722  | 0.940663977 | 0.873148962 | 0.011063985  | 0.27768883   | 0.213136729  | 0.107621078  |
| comp166439_c1_seq3  |    | 0.015579411  | 0.019093396  | 0.970521028 | 1.004353471 | 0.002741395  | -0.103019664 | -0.333576772 | -0.724610253 |
| comp166457_c0_seq4  |    | 0.181868813  | -0.007414154 | 0.86911103  | 0.90795475  | -0.284678928 | -0.535292561 | -0.146204502 | -0.131329045 |
| comp166464_c1_seq4  |    | -0.731191093 | -0.819447481 | 0.419914848 | 0.396951419 | ND           | -0.640530546 | ND           | -0.496204341 |
| comp166472_c0_seq18 |    | -1.632073172 | -0.817239574 | 0.478414918 | 0.433921432 | -0.759695926 | -0.967381358 | -1.491143124 | -1.016875178 |
| comp166472_c0_seq2  |    | -0.738506848 | -0.451099623 | 0.94601251  | 0.900590051 | -1.614317629 | -0.721632516 | -1.801696782 | -1.327428837 |
| comp166472_c0_seq29 |    | -1.122061737 | -0.654015625 | 0.79620007  | 0.762801383 | ND           | -0.813917246 | ND           | -1.330772484 |
| comp166472_c0_seq3  |    | -1.32468835  | -0.713974734 | 0.507173854 | 0.548181656 | -1.297409143 | -0.580815289 | -1.484788297 | -1.436489084 |
| comp166504_c0_seq3  | ND | ND           |              | 1.169308474 | 1.205173943 | ND           | ND           | ND           | ND           |
| comp166504_c1_seq8  |    | -0.633399263 | ND           | 0.89791792  | 0.965382375 | ND           | ND           | ND           | ND           |
| comp166504_c1_seq9  | ND | ND           |              | 0.765919998 | 0.833384454 | ND           | ND           | ND           | ND           |
| comp166516_c0_seq15 |    | -0.606332433 | -0.258860252 | 1.380916706 | 1.336407402 | -0.319415915 | 0.016966697  | -0.807825065 | -0.355833514 |
| comp166547_c0_seq1  |    | -0.992586683 | ND           | 1.086109573 | 1.105592605 | -0.488186222 | -0.213951516 | 0.102585875  | -0.581508672 |
| comp166547_c0_seq10 | ND | ND           |              | 0.977015768 | 1.024405376 | -0.979547915 | -0.300742622 | -0.321829029 | -1.294719115 |
| comp166547_c1_seq1  | ND |              | -1.394006981 | 0.924536595 | 0.947330656 | ND           | -0.737968791 | -0.386669293 | -0.991582594 |
| comp166555_c0_seq5  | ND |              | -0.780969653 | 0.369169492 | 0.350418457 | -1.364404062 | -0.823901467 | ND           | ND           |
| comp166555_c1_seq4  |    | -0.51763149  | -0.36284983  | 0.441588925 | 0.443374605 | -1.092412275 | -0.55190968  | -0.802670174 | -0.93046222  |
| comp166570_c2_seq8  | ND | ND           |              | 1.325028465 | 1.289943221 | ND           | ND           | ND           | ND           |
| comp166573_c0_seq1  |    | -1.188947125 | -0.976173518 | 0.446966899 | 0.408198751 | -1.462697914 | -0.825285306 | -0.394804563 | -0.698687868 |
| comp166609_c0_seq1  | ND | ND           |              | 0.423393704 | 0.386261318 | ND           | ND           | ND           | ND           |
| comp166627_c3_seq20 |    | 0.474892926  | 0.775621703  | 1.406675093 | 1.370216554 | 0.536251922  | 0.72354651   | 0.817721497  | 0.441287525  |
| comp166629_c0_seq4  |    | -0.557984688 | -0.491339117 | 0.334288937 | 0.314885318 | -0.773743531 | -0.835300927 | -0.563182676 | -0.486854739 |
| comp166633_c2_seq1  |    | -1.021067561 | -0.331172699 | 0.591365368 | 0.629953695 | -0.356966257 | -0.833497001 | -0.45416878  | -0.162831519 |
| comp166651_c1_seq17 | ND |              | -0.957830256 | 0.156593337 | 0.149424175 | ND           | ND           | ND           | ND           |
| comp166657_c0_seq2  | ND | ND           |              | 0.695197819 | 0.636876133 | ND           | ND           | ND           | ND           |
| comp166709_c3_seq7  | ND | ND           |              | 0.08582014  | 0.027498455 | ND           | ND           | ND           | ND           |
| comp166713_c0_seq6  | ND | ND           |              | 0.665603736 | 0.721486319 | ND           | ND           | ND           | ND           |
| comp166713_c0_seq8  | ND | ND           |              | 0.948994984 | 0.950734738 | ND           | ND           | ND           | ND           |
| comp166729_c1_seq1  | ND | ND           |              | 0.73831894  | 0.760308006 | ND           | ND           | ND           | ND           |

|                     |              |              |             |             |              |              |              |              |
|---------------------|--------------|--------------|-------------|-------------|--------------|--------------|--------------|--------------|
| comp166775_c1_seq3  | -0.114255935 | -0.248269814 | 0.536635246 | 0.536765322 | -0.346614039 | -0.546474133 | -0.973325886 | -1.101117932 |
| comp166781_c0_seq10 | -0.880953413 | -0.492088547 | 1.462480986 | 1.420051387 | -1.029765465 | -0.790292866 | -1.217144619 | ND           |
| comp166781_c0_seq20 | 0.206000811  | -0.113959082 | 0.997402493 | 0.943792449 | -0.5533044   | -0.590038213 | -0.126034435 | -0.567445604 |
| comp166781_c0_seq22 | -1.240355431 | -1.231701807 | 0.924114472 | 0.884152796 | -1.51410622  | -1.876693612 | -1.400455378 | -1.051126169 |
| comp166806_c1_seq1  | -0.218517855 | 0.114646861  | 1.343264917 | 1.289500665 | -1.048571145 | -1.50806855  | -1.633890307 | -0.858592366 |
| comp166839_c2_seq1  | 0.615627892  | 0.737646504  | 1.613866545 | 1.567679145 | 0.500072591  | 0.695639705  | 0.860326163  | 0.591113926  |
| comp166894_c0_seq10 | -0.523213206 | -0.746168169 | 0.163005937 | 0.182165713 | -0.768935272 | -0.779340146 | -0.516981731 | -0.731923953 |
| comp166902_c1_seq5  | -1.498414717 | -0.44054307  | 0.464409822 | 0.523674402 | -0.429742825 | -0.418749554 | -0.211356632 | -1.00815546  |
| comp166944_c0_seq9  | 0.319101381  | 0.618512116  | 1.858204332 | 1.865626502 | -0.540110138 | -0.139269536 | -0.046248054 | 0.201623514  |
| comp166954_c0_seq10 | -0.513288509 | -0.487601545 | 0.871900638 | 0.812899837 | ND           | -0.547566699 | -1.37235846  | -1.023029252 |
| comp166954_c0_seq4  | -0.503727025 | -0.591983414 | 0.552403403 | 0.590991731 | -0.652539077 | -1.316156465 | -0.839918231 | -0.791619018 |
| comp166955_c1_seq1  | -0.363859837 | -0.08413944  | 0.959181404 | 0.958231361 | 0.018807028  | -0.21250145  | 0.145046997  | -0.146601852 |
| comp166961_c1_seq12 | -0.946024198 | -0.357586977 | 0.84517258  | 0.827212937 | -1.043683728 | -0.804211128 | -1.106124145 | ND           |
| comp166961_c1_seq13 | -0.060398314 | 0.126361861  | 0.942047255 | 0.891652938 | -0.110285062 | -0.184076915 | -0.853966717 | -0.835630727 |
| comp166972_c0_seq19 | -1.244468137 | -0.990301845 | 0.819694386 | 0.792754725 | -1.217188931 | -1.132618292 | -0.761115408 | -1.453178885 |
| comp166972_c0_seq4  | -1.666375302 | -1.101419177 | 0.696537451 | 0.695045421 | -0.898733406 | -1.302713483 | -0.712531897 | -1.176116045 |
| comp166980_c0_seq7  | ND           | ND           | 0.730454169 | 0.763402229 | ND           | ND           | ND           | ND           |
| comp167025_c0_seq14 | -0.790302181 | -0.786788196 | 0.450352674 | 0.401122166 | -0.714718295 | -0.975848046 | -0.925578544 | -1.0076131   |
| comp167025_c0_seq17 | -0.972590054 | -1.060846443 | 0.330694988 | 0.331643716 | -1.070249584 | -1.608928236 | -0.831660006 | -1.260482048 |
| comp167025_c0_seq18 | -0.895073064 | -0.615352667 | 0.179942708 | 0.123924978 | -0.566763862 | -1.105442513 | -0.49090158  | -0.881935061 |
| comp167025_c0_seq21 | -1.265973823 | -0.986253426 | 0.406457035 | 0.417576658 | -0.937664621 | -1.476343272 | -1.000105038 | -1.252835821 |
| comp167025_c0_seq27 | -1.406724045 | -1.097040425 | 0.506738879 | 0.507538646 | -0.902323584 | -1.043062226 | -1.390732733 | -1.150547994 |
| comp167025_c0_seq28 | -0.729381438 | -0.796448527 | 0.299876844 | 0.307841424 | -0.799012244 | -0.985508377 | -0.986391398 | -1.41521344  |
| comp167025_c0_seq31 | -1.06446869  | -0.70902758  | 0.494796425 | 0.442990532 | -1.037189484 | -1.011596704 | -0.974691164 | -1.306603193 |
| comp167025_c0_seq38 | -0.925918198 | -0.680959908 | 0.431242226 | 0.3770765   | -1.012582344 | -1.032747055 | -0.784988149 | -1.123633561 |
| comp167025_c0_seq4  | -1.146655446 | -0.882729317 | 0.419125461 | 0.411956298 | -1.244314976 | -0.937895587 | -1.607785389 | ND           |
| comp167025_c0_seq5  | -1.744891276 | -1.833147665 | 0.533087901 | 0.575136761 | -1.416582074 | -1.177109475 | -1.603961227 | -1.430723278 |
| comp167033_c0_seq28 | -1.292892251 | ND           | 0.53162959  | 0.579977756 | -1.265613044 | ND           | ND           | ND           |
| comp167037_c3_seq4  | 0.206734417  | 0.282334831  | 1.171945195 | 1.114366529 | 0.057922364  | 0.499815161  | 0.32918106   | 0.015752437  |
| comp167055_c2_seq1  | ND           | ND           | 0.445982662 | 0.407405035 | ND           | ND           | ND           | -1.05438696  |
| comp167080_c4_seq12 | ND           | ND           | 0.649156885 | 0.692292841 | ND           | ND           | ND           | -1.274649132 |



|                     |    |              |              |             |             |              |              |    |              |              |
|---------------------|----|--------------|--------------|-------------|-------------|--------------|--------------|----|--------------|--------------|
| comp167116_c1_seq1  | ND |              | 0.280736059  | 2.044197138 | 2.066692349 | -1.768081202 | -1.227578607 | ND |              | -0.879132419 |
| comp167151_c0_seq3  |    | -0.00549083  | 0.39021346   | 1.008695077 | 0.956779587 | -0.124339659 | -0.03976902  |    | 0.155642604  | 0.241730378  |
| comp167216_c0_seq5  |    | -0.71861492  | -0.748879362 | 1.513606767 | 1.453108163 | -1.360342494 | -0.75289311  |    | -0.609869555 | -0.675513694 |
| comp167224_c0_seq19 |    | -0.698986479 | -0.695472494 | 1.091739859 | 1.036856291 | -0.370677276 | -0.2233509   |    | -0.466286057 | -0.573874717 |
| comp167224_c0_seq38 |    | -0.738181899 | -0.583400239 | 1.003690267 | 0.956692641 | -0.346820951 | -0.244186312 |    | -0.421160592 | -0.783035844 |
| comp167260_c1_seq6  | ND |              | -1.324156775 | 1.425175721 | 1.43722834  | ND           | -1.747299831 | ND |              | -1.398853643 |
| comp167260_c1_seq7  | ND |              | -1.764190348 | 1.506436138 | 1.536188681 |              | -1.648654753 | ND |              | -0.884644706 |
| comp167265_c0_seq16 | ND | ND           |              | 0.511206755 | 0.486419487 | ND           | ND           |    | -2.043480114 | -1.694150905 |
| comp167265_c0_seq18 |    | -1.896038431 | -1.808203561 | 0.48506     | 0.483336607 | ND           | -2.231346617 | ND |              | -2.183930424 |
| comp167272_c3_seq3  | ND | ND           |              | 0.497228572 | 0.54393479  | ND           | -0.965273397 | ND |              | ND           |
| comp167280_c0_seq13 |    | -0.450972694 | -0.212893222 | 0.721322546 | 0.749868936 | -0.208849639 | -0.127316037 |    | -0.561854618 | -0.344413006 |
| comp167280_c0_seq15 |    | -0.573131532 | -0.707145411 | 0.511027619 | 0.452026818 | -0.846882321 | -1.130288467 |    | -0.830141492 | -1.258963534 |
| comp167280_c0_seq5  |    | -0.284952162 | -0.48235302  | 0.345566831 | 0.376662168 | -0.68903672  | -0.546474133 |    | -0.621143368 | -1.101117932 |
| comp167280_c0_seq9  |    | -0.843028688 | -0.727165094 | 0.338040476 | 0.275353986 | -0.736568236 | -1.275246887 |    | -1.401068644 | -1.051739435 |
| comp167290_c1_seq1  |    | 1.432852099  | 1.501788368  | 2.248926948 | 2.258836318 | 1.419513454  | 1.397976941  |    | 1.357073037  | 1.133474961  |
| comp167315_c0_seq1  | ND | ND           |              | 0.999098847 | 0.958809525 | ND           | -1.672614541 | ND |              | -1.625198349 |
| comp167325_c0_seq3  | ND |              | -1.651386011 | 2.058848624 | 1.996019061 | ND           | -1.296377817 |    | -1.121169578 | -1.54999162  |
| comp167325_c0_seq8  | ND | ND           |              | 1.220590373 | 1.188773776 | ND           | ND           | ND |              | ND           |
| comp167347_c0_seq2  |    | -0.199984375 | -0.15354219  | 1.109953819 | 1.114366529 | 0.024784235  | -0.028500635 |    | 0.00221533   | -0.228239058 |
| comp167347_c0_seq5  |    | -0.034237339 | 0.17425747   | 1.232353249 | 1.232121846 | 0.204549784  | 0.158412746  |    | 0.403443907  | -0.047428275 |
| comp167422_c0_seq1  |    | 0.081143096  | 0.094344349  | 0.891943679 | 0.898841964 | -0.142302574 | -0.386790654 |    | 0.010266334  | -0.319171076 |
| comp167422_c0_seq3  |    | -0.135662742 | -0.153338056 | 1.275103319 | 1.255721204 | -0.409413531 | -0.470970927 |    | -0.079053579 | -0.273792415 |
| comp167426_c0_seq13 | ND | ND           |              | 0.162396913 | 0.213219698 | ND           | ND           | ND |              | ND           |
| comp167433_c1_seq2  |    | -0.466626261 | -0.05220729  | 0.978401588 | 0.903927159 | -0.201986138 | 0.156672869  |    | 0.151425042  | -0.264432022 |
| comp167435_c1_seq11 |    | -0.701573808 | -0.391890188 | 0.35455662  | 0.317424234 | -0.674294601 | ND           | ND |              | ND           |
| comp167435_c1_seq19 |    | -0.340360082 | -0.147789861 | 0.515319741 | 0.464245093 | -1.053443565 | -1.115000961 |    | -0.939792723 | ND           |
| comp167461_c1_seq2  |    | -0.704193082 | -0.382275006 | 1.234922415 | 1.173612142 | -0.37588388  | -0.407478053 |    | -0.563263033 | -0.58191061  |
| comp167465_c0_seq1  | ND | ND           |              | 0.47333658  | 0.50451241  | ND           | ND           | ND |              | -1.507507938 |
| comp167465_c1_seq1  | ND | ND           |              | 0.516933482 | 0.532932184 | ND           | -1.260706737 | ND |              | -1.213290545 |
| comp167541_c0_seq10 |    | -0.081313247 | -0.391418385 | 1.658464488 | 1.691741756 | -1.230125299 | -0.513531445 |    | -1.116474457 | -1.244266503 |
| comp167541_c0_seq6  | ND | ND           |              | 1.252851848 | 1.281806218 | ND           | ND           | ND |              | ND           |

|                     |              |              |             |              |              |              |              |              |
|---------------------|--------------|--------------|-------------|--------------|--------------|--------------|--------------|--------------|
| comp167549_c0_seq13 | -1.151060862 | -0.625358036 | 0.25474274  | 0.198930399  | -1.078024165 | -1.025638209 | -0.584162081 | -1.092165369 |
| comp167549_c0_seq17 | -1.141120788 | -0.581559695 | 0.278830465 | 0.202388345  | -1.068084091 | -0.549857891 | -0.612010568 | -1.003044049 |
| comp167549_c0_seq20 | -1.020162781 | -0.807389174 | 0.373981209 | 0.320068643  | -0.729642139 | -0.628472238 | -0.426935061 | -0.882086042 |
| comp167549_c0_seq27 | -1.218584774 | -1.10272118  | 0.886763676 | 0.88371108   | -1.191305568 | -0.910440283 | -1.299503475 | -1.603386781 |
| comp167549_c0_seq3  | -1.098916113 | -0.819195716 | 0.353219824 | 0.332928984  | -0.849788157 | -0.656073048 | -0.766100538 | -0.863929361 |
| comp167549_c0_seq34 | -1.000541255 | -0.829160334 | 0.372131334 | 0.313809649  | -1.236503484 | -0.696000889 | -0.578784597 | -1.028795938 |
| comp167549_c0_seq39 | -0.888009229 | -0.697512017 | 0.173873528 | 0.130988813  | -0.714601987 | -0.968044909 | -0.446049185 | -0.971781239 |
| comp167568_c0_seq2  | ND           | ND           | 1.172014367 | 1.152070916  | ND           | -0.882182078 | ND           | ND           |
| comp167584_c1_seq1  | ND           | -0.968272812 | 0.672120603 | 0.67409482   | -0.551707221 | -0.738203354 | -0.438056379 | -0.213665907 |
| comp167604_c0_seq2  | -0.09910011  | 0.123581786  | 1.16281746  | 1.122224542  | -0.340666215 | 0.365462205  | -1.771083418 | -1.597845468 |
| comp167604_c0_seq28 | -1.291439759 | -0.953727416 | 0.882330166 | 0.815272111  | -1.042311803 | -0.802839204 | ND           | -1.755423012 |
| comp167604_c0_seq29 | -0.155045291 | 0.096646382  | 1.14875159  | 1.090046083  | -0.310696768 | 0.250009213  | ND           | -1.102989222 |
| comp167604_c0_seq3  | ND           | ND           | 0.965268025 | 0.941839951  | ND           | ND           | ND           | ND           |
| comp167604_c0_seq34 | -0.93438788  | -1.448613001 | 0.776560589 | 0.725588219  | -0.96510062  | -0.96866607  | ND           | ND           |
| comp167604_c0_seq43 | -1.520645941 | -0.955689816 | 0.852153617 | 0.800930385  | -0.753004045 | -0.70982609  | ND           | ND           |
| comp167607_c0_seq4  | -0.330339486 | -0.535101443 | 0.549699683 | 0.557594267  | -1.5335092   | -0.640824087 | -0.305915006 | -0.401522369 |
| comp167644_c1_seq1  | ND           | ND           | 1.511052155 | 1.496821138  | ND           | ND           | ND           | -0.750300692 |
| comp167644_c1_seq2  | ND           | -0.823829905 | 1.727664427 | 1.73168904   | ND           | ND           | ND           | 0.180654473  |
| comp167644_c1_seq3  | ND           | ND           | 1.439323372 | 1.432154209  | ND           | ND           | ND           | -0.553755603 |
| comp167644_c1_seq7  | ND           | -1.645114502 | 1.68866904  | 1.647236674  | ND           | -1.591136303 | ND           | -1.543720111 |
| comp167649_c1_seq5  | 0.491446566  | 0.68474182   | 2.023850845 | 1.964850044  | 0.950371638  | 1.218489419  | 0.395015699  | 0.447679717  |
| comp167655_c1_seq3  | -1.203440048 | -0.893756428 | 0.038326957 | -0.029540046 | ND           | -0.936688242 | ND           | -0.792362037 |
| comp167684_c0_seq20 | -0.890213774 | -0.715228728 | 0.820200178 | 0.781996781  | -0.862934568 | -0.799553227 | -1.527434976 | -0.956257018 |
| comp167684_c0_seq21 | -0.770737933 | -0.528001103 | 0.800761638 | 0.762184011  | -1.111435512 | -0.394841658 | -0.77593592  | -1.602697971 |
| comp167691_c0_seq5  | -0.819201317 | -0.555275188 | 0.32800958  | 0.28411761   | -0.548884062 | -0.455539498 | -0.50218001  | -0.32894206  |
| comp167709_c0_seq2  | -1.284842754 | -0.674129139 | 0.218445705 | 0.231479928  | -0.780442293 | -0.841999689 | -0.84288271  | -0.970674756 |
| comp167721_c0_seq1  | -1.161869154 | -0.773004288 | 0.550678927 | 0.580232572  | ND           | ND           | -1.020939106 | ND           |
| comp167727_c0_seq3  | -1.084839338 | -0.872065731 | 0.867081838 | 0.84493552   | ND           | -1.119117528 | ND           | ND           |
| comp167727_c0_seq9  | 0.273780941  | 0.343977063  | 1.545229252 | 1.503845988  | 0.160727084  | 0.340284658  | -0.249995811 | -0.348824161 |
| comp167738_c0_seq5  | -0.142216282 | 0.103981081  | 1.651848539 | 1.6545192    | -0.609787097 | -0.51373664  | -1.223134983 | -1.350927029 |
| comp167775_c1_seq2  | ND           | ND           | 1.149458374 | 1.188046702  | ND           | ND           | ND           | ND           |

|                     |              |              |             |             |              |              |              |              |
|---------------------|--------------|--------------|-------------|-------------|--------------|--------------|--------------|--------------|
| comp167784_c1_seq12 | -1.132203435 | -0.646428556 | 0.764869073 | 0.71609838  | -0.292010872 | -0.68936037  | -0.894363373 | -0.108341567 |
| comp167788_c0_seq4  | -0.981096094 | -1.245443742 | 0.474900264 | 0.497438028 | -0.886870098 | -0.471306239 | -0.53913605  | -0.423890047 |
| comp167802_c0_seq4  | -1.122652286 | -1.210908674 | 2.418110102 | 2.401592664 | -1.69743307  | -0.190788743 | -1.583782228 | -1.711574274 |
| comp167814_c0_seq1  | 0.119703234  | 0.196963455  | 1.036634586 | 1.079886195 | 0.260581251  | 0.017731402  | 0.182346567  | 0.158906727  |
| comp167820_c0_seq2  | -1.280388413 | -1.067614806 | 0.581921989 | 0.526980045 | -1.253109206 | ND           | -0.537398373 | ND           |
| comp167820_c2_seq1  | -0.935421177 | -0.479609521 | 0.342558001 | 0.335388838 | -0.607111974 | -0.668669371 | ND           | -1.22331317  |
| comp167893_c1_seq11 | ND           | ND           | 0.520072669 | 0.508707392 | -1.173629373 | ND           | ND           | -1.664891832 |
| comp167898_c1_seq11 | ND           | ND           | 0.504036104 | 0.535619531 | ND           | -0.984312522 | ND           | -1.538956321 |
| comp167898_c1_seq9  | ND           | -1.398558275 | 0.590926582 | 0.595991876 | ND           | -1.645610071 | ND           | -1.598193879 |
| comp167920_c1_seq10 | 0.036021486  | 0.120222072  | 1.097189355 | 1.079153208 | -0.517569999 | -0.438948692 | -0.646957206 | -0.950840511 |
| comp167920_c1_seq9  | -0.204047029 | 0.046515139  | 1.00008744  | 0.998498155 | -0.196971208 | -0.501566653 | -1.104509665 | -1.533331707 |
| comp167920_c2_seq2  | 0.612961636  | 0.687070482  | 1.710309241 | 1.662694295 | 0.163119588  | 0.046044864  | -0.276071538 | -0.851021616 |
| comp167920_c2_seq9  | 0.067080547  | -0.091213708 | 1.267133346 | 1.20032646  | -0.463794752 | -0.736205514 | -0.862027271 | -1.290849313 |
| comp167926_c1_seq16 | -0.691556687 | -0.353844344 | 0.283457995 | 0.276288832 | -0.577127305 | -0.424804881 | -0.659771108 | -0.518717842 |
| comp167926_c1_seq23 | -0.375014525 | -0.310660751 | 0.372399078 | 0.395193139 | -0.848337669 | -0.290106307 | -0.336746819 | -0.561448878 |
| comp167926_c1_seq25 | -0.74077471  | -0.421545772 | 0.285392495 | 0.249734794 | -0.822639973 | -0.314322061 | -0.599844661 | -0.903727966 |
| comp167985_c1_seq8  | -0.076797676 | -0.112347714 | 1.156977839 | 1.118958232 | -0.611461238 | -0.64819505  | 0.071081232  | -0.424687599 |
| comp167989_c0_seq3  | -0.279392324 | -0.543739972 | 1.368050102 | 1.302747643 | -0.428204377 | -0.887701782 | -0.035799934 | -0.840285589 |
| comp168003_c2_seq1  | -0.104297154 | -0.016462283 | 1.522376214 | 1.489558597 | -0.474957956 | -1.138575344 | ND           | ND           |
| comp168021_c0_seq4  | ND           | ND           | 0.326483691 | 0.354076635 | ND           | ND           | ND           | ND           |
| comp168045_c0_seq4  | -1.106530035 | ND           | 0.472479138 | 0.498733731 | -0.602129574 | -0.66368697  | -0.363539995 | -0.616270778 |
| comp168056_c1_seq4  | -0.769875382 | -0.472780889 | 1.098212859 | 1.05654723  | -0.774780859 | -0.671528006 | -0.59898211  | -0.58064612  |
| comp168095_c0_seq7  | -0.802146398 | -0.346334742 | 1.146078633 | 1.14627057  | -0.146478261 | -0.438484579 | -0.564306336 | -0.010857145 |
| comp168095_c0_seq9  | -0.215129748 | -0.002356141 | 1.283166765 | 1.232003088 | -0.154426786 | -0.392075442 | -0.241690787 | -0.094781776 |
| comp168111_c0_seq2  | -0.596134349 | -0.075990569 | 1.019127869 | 1.069127346 | 0.140215188  | 0.042228526  | -0.117451498 | 0.067368324  |
| comp168121_c0_seq5  | ND           | -1.712624944 | 1.438085265 | 1.427478398 | ND           | -0.880495495 | ND           | -1.611230553 |
| comp168121_c0_seq7  | -1.344125325 | ND           | 1.52491846  | 1.491114017 | -1.015816122 | -0.776343523 | ND           | -1.632017318 |
| comp168207_c2_seq8  | 0.449050746  | 0.114811928  | 1.126376176 | 1.155119569 | -0.031173931 | 0.022662091  | -0.000497324 | -0.17659405  |
| comp168213_c0_seq1  | -1.575785457 | -1.186920591 | 1.505650836 | 1.516144882 | ND           | -1.309033651 | -1.133825413 | ND           |
| comp168213_c0_seq12 | ND           | -1.538220268 | 1.280108547 | 1.296807725 | ND           | ND           | ND           | ND           |
| comp168230_c0_seq3  | -1.937891105 | -0.594783729 | 1.386817295 | 1.359206972 | -1.308551907 | -1.49504804  | -1.796961056 | -1.924753102 |

|                     |              |              |             |             |              |              |              |              |
|---------------------|--------------|--------------|-------------|-------------|--------------|--------------|--------------|--------------|
| comp168247_c1_seq7  | 0.156093187  | 0.117524582  | 0.919018956 | 0.93533089  | 0.096222218  | -0.095668947 | -0.075362669 | -0.235339398 |
| comp168247_c2_seq1  | ND           | -0.315529046 | 0.703919034 | 0.751107534 | 0.127365484  | -0.562580843 | -0.211281345 | -0.075831957 |
| comp168270_c4_seq1  | -0.092382384 | -0.098452017 | 1.17385839  | 1.19266807  | -0.366133173 | -0.126660574 | -0.101214656 | -0.614357583 |
| comp168270_c4_seq10 | -0.465230635 | -0.521302341 | 1.05826121  | 1.03877081  | -0.706796741 | -0.383003256 | -0.961122684 | -0.867065981 |
| comp168270_c4_seq15 | -0.077142418 | -0.451705545 | 1.199035951 | 1.174689061 | -0.470868524 | -0.573818605 | -0.620459116 | -0.572159904 |
| comp168270_c4_seq5  | -0.854253824 | -1.118601472 | 1.01553171  | 1.060008867 | -1.605125868 | -1.18956201  | -1.491475026 | -1.318237077 |
| comp168272_c0_seq3  | 0.51076137   | 0.729333387  | 1.365317184 | 1.318238415 | 0.518947635  | 0.688412864  | 0.454060482  | 0.193905681  |
| comp168321_c0_seq6  | ND           | ND           | 0.616684095 | 0.631234182 | -0.526110478 | -1.189727866 | -1.315549623 | -1.142311674 |
| comp168363_c1_seq3  | ND           | ND           | 0.311015148 | 0.354998508 | ND           | -1.108452189 | ND           | -0.760006001 |
| comp168368_c0_seq6  | -0.481393696 | -0.355770265 | 0.622070611 | 0.610155013 | -0.216753574 | 0.011137153  | -0.235728297 | -0.430467133 |
| comp168374_c0_seq15 | -0.356824899 | -0.445081287 | 0.451610122 | 0.468353117 | -0.824395714 | -0.466823802 | -0.710744872 | -1.741626905 |
| comp168387_c2_seq11 | 0.295957601  | 0.544536039  | 1.766364834 | 1.786548552 | 0.108121441  | 0.154469442  | 0.210491272  | 0.02142957   |
| comp168388_c0_seq13 | -0.894468618 | -0.614748221 | 1.087088506 | 1.068894576 | -0.35530605  | -0.283652184 | -0.054568565 | -0.369447254 |
| comp168388_c0_seq18 | -0.5358881   | -0.499205752 | 1.004102465 | 0.986244629 | -0.36018906  | -0.388746197 | -0.224261824 | -0.592386025 |
| comp168388_c0_seq35 | -0.579767393 | -0.571113768 | 1.076003552 | 1.071253864 | -0.42754945  | -0.371007534 | 0.056012677  | -0.323591342 |
| comp168388_c0_seq8  | -0.842597221 | -0.532913601 | 1.039848018 | 1.042172008 | -0.417378006 | -0.478935402 | -0.111841638 | -0.377161548 |
| comp168433_c1_seq1  | -0.526189294 | -0.262263164 | 0.801007907 | 0.844991266 | ND           | -0.208284965 | -0.142221196 | -0.513051291 |
| comp168447_c0_seq1  | -0.944140054 | -0.448819857 | 1.129023713 | 1.062268861 | -1.217890843 | -1.05759949  | -0.405269997 | -1.10709331  |
| comp168447_c0_seq4  | -0.922856333 | -0.533991467 | 1.215660481 | 1.173596136 | -1.196607122 | -0.890187733 | -0.162137526 | -0.733627071 |
| comp168465_c0_seq5  | ND           | ND           | 0.503851912 | 0.553978153 | ND           | ND           | ND           | ND           |
| comp168465_c0_seq6  | ND           | ND           | 0.51573176  | 0.495198635 | ND           | ND           | -0.644981288 | -0.772773334 |
| comp168470_c0_seq4  | 0.43149381   | 0.43844097   | 1.459178997 | 1.409372795 | 0.328119796  | 0.530065221  | 0.28398299   | 0.048815497  |
| comp168470_c1_seq2  | 0.318704471  | 0.293916703  | 1.508287346 | 1.444636828 | 0.250174539  | 0.55462612   | 0.268972015  | -0.028125301 |
| comp168479_c0_seq2  | ND           | -0.661170556 | 1.235813406 | 1.175843543 | -0.691762997 | -0.276199138 | 0.241431781  | -0.325692959 |
| comp168515_c0_seq3  | ND           | -0.857544256 | 1.696888327 | 1.661810561 | -0.96385741  | -0.657438021 | -0.482229783 | -1.455119869 |
| comp168537_c3_seq1  | -1.528443179 | -0.646662791 | 0.695332725 | 0.658294048 | -0.774165244 | -0.717623328 | -1.262574393 | -1.992426431 |
| comp168537_c3_seq16 | -1.217177291 | -0.879464947 | 0.661411812 | 0.622616257 | -0.821921299 | -0.853515472 | -1.076247242 | -1.681160543 |
| comp168537_c3_seq25 | -0.814941596 | -0.469542423 | 0.41865662  | 0.453379619 | -0.354006828 | -0.351895145 | -0.674011547 | -0.947931629 |
| comp168537_c3_seq9  | -1.035730558 | -0.726046938 | 0.362822551 | 0.333146047 | -0.640474566 | -0.505737317 | -0.526823724 | -0.846501296 |
| comp168554_c3_seq1  | 0.553382921  | 0.557799493  | 1.330140895 | 1.277926784 | 0.111892948  | 0.119051364  | 0.023898426  | -0.124097006 |
| comp168565_c4_seq3  | -0.508732046 | -0.06747911  | 1.14045713  | 1.131008201 | -0.391276209 | -0.295225752 | -1.180715354 | -1.3085074   |

|                     |              |              |             |             |              |              |              |              |
|---------------------|--------------|--------------|-------------|-------------|--------------|--------------|--------------|--------------|
| comp168569_c0_seq11 | -0.973347325 | -1.404026394 | 0.351020585 | 0.34100358  | ND           | ND           | ND           | ND           |
| comp168569_c0_seq30 | -1.157081164 | -1.136193083 | 0.315610528 | 0.324009142 | ND           | ND           | ND           | ND           |
| comp168569_c0_seq41 | ND           | -0.94217831  | 0.441090595 | 0.38692487  | ND           | ND           | ND           | ND           |
| comp168569_c0_seq43 | -1.157364277 | -1.391748701 | 0.366127569 | 0.329800177 | ND           | ND           | ND           | ND           |
| comp168569_c0_seq48 | -0.779945935 | -0.509180381 | 0.577214489 | 0.553177401 | ND           | -1.358292169 | ND           | -1.310875977 |
| comp168569_c0_seq71 | -0.81066588  | -0.864160163 | 0.148554535 | 0.116561788 | -1.084416669 | -0.924125316 | ND           | -1.177739119 |
| comp168569_c0_seq73 | -0.969929161 | -0.815147501 | 0.114229991 | 0.170112574 | -1.845739941 | -0.953054828 | ND           | -1.55885115  |
| comp168569_c0_seq76 | -1.385576584 | -1.075892964 | 0.333311676 | 0.344625919 | ND           | ND           | ND           | ND           |
| comp168574_c4_seq1  | ND           | 0.004167718  | 1.429840472 | 1.479398934 | -0.005235423 | -0.418975338 | -0.06767584  | -0.973619137 |
| comp168604_c2_seq2  | -0.517871498 | -0.41424236  | 0.939404079 | 0.939832098 | -0.365653555 | -0.904332206 | -0.486085919 | -0.458976005 |
| comp168604_c2_seq3  | 0.282982867  | 0.160646689  | 2.230997738 | 2.213475923 | 0.142288705  | -0.013173195 | -0.069914033 | 0.140046724  |
| comp168617_c0_seq3  | ND           | -1.60502275  | 1.71429566  | 1.648802648 | ND           | ND           | ND           | -0.725477108 |
| comp168617_c0_seq4  | ND           | ND           | 1.455518231 | 1.457322414 | ND           | ND           | ND           | ND           |
| comp168617_c1_seq1  | -1.326705201 | ND           | 1.920316944 | 1.879813562 | ND           | ND           | -1.486805148 | -1.012537203 |
| comp168634_c0_seq3  | 1.13834917   | 0.952361537  | 1.79962808  | 1.737739041 | 0.687411801  | 0.77712208   | 0.743070696  | 0.609601517  |
| comp168688_c0_seq10 | -1.831015963 | -1.220302347 | 0.600473204 | 0.560367983 | -0.599616773 | -0.719166117 | -0.19872422  | -0.29936402  |
| comp168716_c0_seq10 | -1.30610239  | -1.269420042 | 0.766132405 | 0.78337331  | -0.40376192  | -0.114210457 | -1.943323592 | -1.116873129 |
| comp168716_c0_seq5  | -1.603365102 | -1.323644705 | 0.781824045 | 0.750469498 | -0.496904649 | -0.132493313 | -1.337496317 | -1.025955669 |
| comp168744_c0_seq1  | -0.309707369 | -0.031815584 | 1.48539005  | 1.42543436  | -0.245705355 | 0.200082485  | -0.23785824  | -0.271745783 |
| comp168750_c1_seq1  | -0.808827983 | -1.198114367 | 1.261542884 | 1.278885871 | -0.781548776 | ND           | -0.96892793  | -0.79568998  |
| comp168765_c0_seq2  | ND           | ND           | 0.18727778  | 0.180108618 | ND           | ND           | ND           | ND           |
| comp168783_c0_seq3  | -1.223035604 | -0.466193953 | 0.259063556 | 0.273083692 | -0.797816389 | -0.956283798 | -0.538037511 | -0.811957593 |
| comp168819_c3_seq1  | -0.636039359 | -0.032624982 | 0.773344597 | 0.709099399 | -0.733698889 | 0.021353216  | ND           | -1.003112599 |
| comp168851_c2_seq8  | -0.268473643 | -0.463940001 | 0.936362243 | 0.993562447 | 0.128716849  | 0.037196229  | -0.486565537 | -0.079244382 |
| comp168880_c1_seq16 | -1.644187712 | -1.431414106 | 0.068360369 | 0.097914013 | -1.616908506 | -1.377435907 | -1.202227668 | -1.330019714 |
| comp168880_c1_seq18 | ND           | ND           | 0.103158354 | 0.167682416 | ND           | ND           | ND           | ND           |
| comp168880_c1_seq39 | ND           | -1.68686596  | 0.073821287 | 0.052411685 | ND           | ND           | ND           | ND           |
| comp168880_c1_seq7  | ND           | -1.21438198  | 0.397366254 | 0.462747759 | ND           | ND           | ND           | ND           |
| comp168880_c1_seq8  | ND           | ND           | 0.219767759 | 0.20325857  | -1.305090061 | -0.713434944 | ND           | -1.319231265 |
| comp168899_c0_seq2  | -0.911664775 | -0.086107312 | 0.489512477 | 0.531748171 | -0.680265586 | -0.414464048 | -0.323576695 | -0.296466781 |
| comp168909_c0_seq1  | 0.338239788  | 0.515764576  | 1.7892485   | 1.771928844 | 0.20321602   | 0.421838481  | -0.375369759 | -0.470977122 |

|                     |              |              |             |             |              |              |              |              |
|---------------------|--------------|--------------|-------------|-------------|--------------|--------------|--------------|--------------|
| comp168909_c0_seq3  | -0.038982373 | -0.025249223 | 1.285469016 | 1.224614994 | -0.066060828 | -0.157581448 | -0.730561237 | -0.603080778 |
| comp168924_c3_seq5  | ND           | 0.02375377   | 1.616385714 | 1.608129455 | ND           | -0.297931645 | ND           | ND           |
| comp168948_c1_seq1  | 0.564134617  | 0.848316982  | 1.809451218 | 1.789613281 | 0.744217738  | 0.84207798   | -0.487014699 | -0.165714214 |
| comp168948_c1_seq11 | 0.597238852  | 0.929095451  | 1.965739201 | 1.937117621 | 0.814182125  | 0.910522983  | -0.200833642 | 0.015156288  |
| comp168948_c1_seq13 | 0.485354769  | 0.363018591  | 1.444575184 | 1.412100156 | 0.829750792  | 0.519192399  | -1.097991052 | -0.380685058 |
| comp168948_c1_seq6  | ND           | -0.375624118 | 0.780997155 | 0.777830735 | ND           | -0.76880395  | ND           | ND           |
| comp168960_c0_seq12 | 0.038788882  | -0.161441267 | 2.33349759  | 2.287571786 | -0.674294601 | -0.735851998 | ND           | 0.051926884  |
| comp168960_c0_seq18 | -0.426623037 | -0.353511423 | 0.5837499   | 0.544890695 | -0.700373826 | -0.284809968 | -0.180182804 | -0.484066109 |
| comp168960_c0_seq19 | -0.491544866 | -0.25705201  | 0.529823455 | 0.467867486 | -0.402117753 | -0.35345967  | -0.278921593 | -0.638107707 |
| comp168960_c0_seq21 | -0.358074668 | -0.30645197  | 0.593846508 | 0.599728913 | -0.473462965 | -0.258813949 | -0.336331027 | -0.645966661 |
| comp168960_c0_seq42 | -0.359770719 | -0.379762276 | 0.629207531 | 0.614787875 | -0.424805773 | -0.35857659  | -0.492998519 | -0.571572543 |
| comp168960_c0_seq65 | -0.502720921 | -0.44317569  | 0.644172625 | 0.599907005 | -0.463859842 | -0.406230831 | -0.306743306 | -0.756754647 |
| comp168960_c0_seq72 | -0.383757116 | -0.43062082  | 0.478553286 | 0.427632615 | -0.51137987  | -0.376642621 | -0.385494571 | -0.65461577  |
| comp168960_c0_seq74 | -0.485114269 | -0.330332609 | 0.608632347 | 0.580084195 | -0.524781852 | -0.285309252 | -0.429614415 | -0.538923056 |
| comp168960_c0_seq95 | -0.426089833 | -0.3480148   | 0.525012692 | 0.527566946 | -0.483821416 | -0.423384457 | -0.304903843 | -0.651190996 |
| comp168966_c0_seq10 | ND           | -0.820327511 | 0.823135136 | 0.757099314 | ND           | ND           | -0.591141074 | -0.895024379 |
| comp168966_c0_seq12 | -0.499992742 | -1.065370385 | 0.824611648 | 0.835275263 | -1.250864785 | -0.572059492 | -0.076516103 | -0.452092633 |
| comp168968_c1_seq8  | -0.443348838 | -0.553881622 | 1.435385489 | 1.4329817   | -0.717099628 | -0.875567037 | -0.904478781 | ND           |
| comp168972_c1_seq3  | -0.918776638 | -1.007033027 | 0.719669723 | 0.691815961 | -1.067588691 | -1.606267342 | -1.130029108 | -0.956791158 |
| comp168976_c0_seq12 | -0.275729149 | 0.029358719  | 0.66001017  | 0.694964213 | -0.129263535 | -0.190820931 | -0.267424666 | -0.240314752 |
| comp168985_c0_seq6  | -1.034167334 | -0.926129077 | 0.466156647 | 0.506822233 | -0.772804921 | -0.959301054 | -1.437305329 | -0.911884862 |
| comp169014_c2_seq12 | 0.52771464   | 0.309318321  | 1.335344123 | 1.291883108 | -0.348096141 | 0.000520928  | -0.301392089 | -0.508365381 |
| comp169016_c0_seq2  | -1.829438047 | -1.440573181 | 0.693065642 | 0.705244645 | -1.80215884  | -1.863716237 | ND           | -1.640208785 |
| comp169016_c0_seq3  | -2.117090908 | -1.728226042 | 0.697446712 | 0.668532402 | ND           | -1.850339102 | -1.976160859 | -1.404982901 |
| comp169077_c0_seq14 | ND           | -0.281118168 | 0.666655722 | 0.689916515 | -1.103434666 | -0.411664396 | -1.466905079 | -0.895727121 |
| comp169106_c2_seq2  | -1.217464903 | -0.953538774 | 1.03823788  | 0.970325159 | -1.014094437 | -1.251743093 | -0.637202161 | -0.42617565  |
| comp169130_c1_seq10 | ND           | ND           | 0.584068585 | 0.557594267 | ND           | -0.993006605 | ND           | ND           |
| comp169130_c1_seq2  | -1.567774528 | ND           | 0.303490717 | 0.278223332 | -1.540495321 | -1.602052718 | ND           | -1.25360653  |
| comp169145_c0_seq15 | ND           | ND           | 0.241118083 | 0.220584959 | ND           | ND           | ND           | ND           |
| comp169145_c0_seq25 | -0.410575558 | -0.508377265 | 0.44817989  | 0.416536958 | -0.412585728 | -0.215516977 | -0.65364974  | -1.060195387 |
| comp169145_c0_seq41 | -1.094677208 | -0.784993588 | 0.563513211 | 0.549044809 | -0.590276747 | -0.253894135 | -1.254777155 | -0.905447947 |

|                     |              |              |             |             |              |              |              |              |
|---------------------|--------------|--------------|-------------|-------------|--------------|--------------|--------------|--------------|
| comp169145_c0_seq69 | -0.308634727 | -0.008710944 | 0.590289786 | 0.554475442 | -0.332508042 | -0.15102739  | -1.121947187 | ND           |
| comp169145_c0_seq70 | -0.514347233 | -0.39079681  | 0.499230845 | 0.495695967 | -0.349894833 | -0.217632203 | -0.803541876 | -0.814828353 |
| comp169145_c0_seq9  | ND           | ND           | 0.390902679 | 0.357404578 | ND           | ND           | ND           | ND           |
| comp169153_c1_seq1  | 0.714573255  | 0.858726488  | 1.598035077 | 1.61445665  | 0.731224035  | 0.901379548  | 0.836978396  | 0.474533577  |
| comp169153_c1_seq3  | 0.497680694  | 0.711449248  | 1.552480969 | 1.565866265 | 0.62425397   | 0.828237388  | 0.663766229  | 0.30908277   |
| comp169175_c0_seq4  | -0.223602939 | -0.487950586 | 0.988200843 | 0.950297063 | -1.372414991 | -1.132942392 | ND           | ND           |
| comp169186_c0_seq3  | -0.667906666 | -0.332917181 | 0.379449837 | 0.403620427 | -0.765566196 | -0.304244847 | -1.225946622 | -1.177647409 |
| comp169186_c0_seq5  | -0.508113608 | -0.463744432 | 0.424454612 | 0.411752961 | -0.585569752 | -0.281979653 | -1.513311595 | -1.641103641 |
| comp169212_c1_seq10 | -1.128954881 | -0.518241266 | 0.639451018 | 0.609216551 | -0.198585688 | -0.385081821 | -0.385964841 | -1.291908138 |
| comp169215_c1_seq1  | -1.811252368 | -1.054410717 | 1.673876262 | 1.607913473 | -1.783973162 | -1.243470567 | -0.591141074 | -1.099144362 |
| comp169228_c0_seq3  | ND           | -1.031045603 | 1.124770675 | 1.066801359 | -0.175147318 | -0.323854891 | 0.312084186  | -0.116737855 |
| comp169244_c0_seq3  | ND           | -0.617401514 | 0.845048637 | 0.864862964 | 0.003284059  | -0.221000634 | -1.087185081 | -0.612917136 |
| comp169257_c0_seq12 | -1.879828783 | -0.968085171 | 0.549213648 | 0.568229068 | -0.852549576 | -0.499133625 | ND           | ND           |
| comp169257_c0_seq13 | -1.66205853  | -1.273193664 | 0.693651827 | 0.646974123 | -0.935809319 | -0.599426707 | -1.822158477 | -1.472829269 |
| comp169257_c0_seq20 | -1.131064818 | -0.234044464 | 0.481368111 | 0.524755321 | -0.539514181 | -0.074262539 | ND           | -1.59504807  |
| comp169257_c0_seq6  | -1.012987431 | -0.800213824 | 0.566021742 | 0.55885258  | -0.432866255 | -0.530635825 | ND           | -1.844947468 |
| comp169272_c0_seq1  | 1.052658849  | 1.188458556  | 1.978245226 | 1.91917566  | 1.015657068  | 0.88992385   | 0.650901759  | 0.433378284  |
| comp169311_c1_seq1  | ND           | ND           | 0.066410386 | 0.059241223 | -1.366133173 | -0.825630578 | -0.775361076 | -1.079244382 |
| comp169319_c0_seq5  | ND           | -1.348796608 | 0.367686976 | 0.344723546 | -0.534291009 | -1.29481841  | ND           | -1.247402217 |
| comp169341_c0_seq1  | -0.619269149 | -0.477076616 | 1.557215814 | 1.536902086 | -1.194049934 | -0.592849499 | ND           | -1.430039888 |
| comp169349_c0_seq14 | -1.244630218 | -1.031856611 | 0.668832706 | 0.7181449   | -0.819411003 | -0.880968399 | -1.103700169 | -1.231492215 |
| comp169356_c0_seq2  | -1.168540049 | -0.897774495 | 0.481298296 | 0.488641516 | -0.262083013 | -0.468132682 | -0.696616781 | -0.569136322 |
| comp169356_c0_seq3  | -1.098286062 | -0.910336038 | 0.571020363 | 0.536344779 | -0.199174562 | -0.387836756 | -0.656326017 | -0.576992571 |
| comp169362_c3_seq5  | -0.159329174 | -0.109282864 | 1.796864787 | 1.763404646 | -0.211231213 | -0.343369684 | -0.222519108 | -0.681304373 |
| comp169368_c0_seq15 | -0.746552549 | -0.322925576 | 0.860824508 | 0.8516164   | -0.66812082  | -0.507829466 | -0.6056225   | -0.937534529 |
| comp169368_c0_seq8  | -0.789161016 | -0.462444057 | 0.851300636 | 0.804694734 | -0.647938457 | -0.592990285 | -0.949260963 | -1.173963022 |
| comp169380_c0_seq2  | 0.52329607   | 0.59984993   | 1.58868122  | 1.583686797 | 0.550575276  | 0.47198454   | 0.575588631  | 0.351909645  |
| comp169398_c0_seq7  | -0.045082415 | 0.053155215  | 1.57316056  | 1.536748994 | 0.058075402  | 0.221669391  | 0.382834552  | 0.157111823  |
| comp169398_c0_seq8  | -0.130918304 | 0.039267859  | 1.584288589 | 1.526576831 | 0.098687512  | 0.111290561  | 0.320483296  | 0.178450811  |
| comp169490_c0_seq21 | ND           | ND           | 0.738955439 | 0.731786276 | -0.204884993 | 0.101534396  | ND           | -0.343964934 |
| comp169524_c1_seq1  | -1.198512466 | ND           | 0.186676681 | 0.205836457 | -1.17123326  | -0.931760661 | ND           | ND           |

|                     |              |              |             |             |              |              |              |              |
|---------------------|--------------|--------------|-------------|-------------|--------------|--------------|--------------|--------------|
| comp169529_c0_seq8  | -0.929100425 | -0.674934133 | 0.834032102 | 0.79134224  | -0.021007626 | -0.300620783 | 0.175617451  | -0.167774396 |
| comp169546_c0_seq7  | -0.342167069 | -0.330720545 | 1.356566143 | 1.331153931 | -0.72706831  | -0.160236777 | -0.391568719 | -1.343269506 |
| comp169563_c1_seq1  | ND           | ND           | 0.532802379 | 0.5578179   | ND           | -0.796488328 | ND           | -1.050102131 |
| comp169568_c1_seq5  | -0.689622187 | -0.409901791 | 0.412265731 | 0.356110108 | -0.575192805 | -0.564199534 | -0.423753402 | -0.329696699 |
| comp169586_c1_seq6  | -1.089496696 | -0.70063183  | 0.237700504 | 0.260494565 | -1.062217489 | -0.521714894 | -0.948566647 | ND           |
| comp169623_c1_seq8  | ND           | ND           | 0.851614061 | 0.807928064 | ND           | ND           | ND           | ND           |
| comp169679_c0_seq3  | -0.27770952  | 0.194129581  | 0.955019817 | 0.90299419  | -0.250430313 | -0.289711315 | 0.015830692  | -0.221105823 |
| comp169679_c1_seq3  | ND           | ND           | 1.077921063 | 1.054010426 | -1.452445852 | -0.610913261 | ND           | -0.989465801 |
| comp169703_c0_seq5  | -0.67458125  | -1.063867634 | 1.124536011 | 1.101378743 | -0.77224078  | -1.009889435 | -0.436741188 | -0.86556323  |
| comp169809_c0_seq3  | -0.201654662 | -0.745843007 | 0.871509105 | 0.844401612 | -0.998284197 | -0.423019496 | -0.320361924 | -0.711395405 |
| comp169848_c0_seq1  | 0.178656997  | 0.116207872  | 1.127411979 | 1.093724683 | 0.354589215  | 0.323414447  | -0.592457784 | -0.352273044 |
| comp169848_c0_seq3  | -1.08833703  | -1.176593419 | 0.17191338  | 0.164744218 | ND           | -0.821585225 | ND           | -1.075199028 |
| comp169851_c0_seq1  | 0.470448111  | 0.704183697  | 2.628386019 | 2.635428068 | ND           | -0.677773432 | 0.014064603  | 0.557968476  |
| comp169912_c1_seq10 | ND           | ND           | 0.215012529 | 0.207843366 | -0.893019938 | ND           | ND           | -0.907161142 |
| comp169912_c1_seq5  | -1.155200868 | ND           | 0.927598988 | 0.946838841 | -0.332041644 | -0.83729654  | -0.917360807 | -1.443092861 |
| comp169932_c1_seq13 | ND           | ND           | 0.172494376 | 0.216477736 | ND           | ND           | ND           | ND           |
| comp169932_c1_seq6  | ND           | ND           | 1.171967394 | 1.160739374 | ND           | ND           | ND           | ND           |
| comp169982_c1_seq16 | ND           | ND           | 0.119766669 | 0.14256073  | -0.879121329 | -0.940678725 | ND           | -0.717171274 |
| comp170023_c1_seq1  | -1.173953809 | -0.484058948 | 1.770917579 | 1.743455957 | -0.406311913 | -1.03214074  | 0.197425161  | -0.119423122 |
| comp170064_c0_seq10 | ND           | -0.985738859 | 0.86337029  | 0.844619255 | ND           | ND           | ND           | ND           |
| comp170081_c0_seq2  | 0.115702876  | 0.289324359  | 1.05604904  | 1.045214923 | 0.209500785  | 0.285544669  | 0.086490998  | -0.15746586  |
| comp170090_c0_seq13 | -1.094562755 | -0.978699161 | 0.909980639 | 0.844260232 | -0.56213357  | -0.526780953 | -0.237629362 | -0.780394757 |
| comp170090_c0_seq19 | 0.235960829  | 0.320831221  | 1.16220042  | 1.113239954 | 0.368923973  | 0.406356216  | 0.402698141  | 0.270709981  |
| comp170090_c0_seq23 | -0.111739027 | -0.140409726 | 0.81200907  | 0.795499881 | -0.059636237 | 0.046779736  | 0.13118056   | -0.152958687 |
| comp170090_c0_seq3  | -0.93022993  | -0.807632954 | 0.811642236 | 0.817701339 | -0.851798201 | -0.469658099 | -0.29444986  | -0.519151919 |
| comp170090_c0_seq6  | 0.01114119   | 0.030790198  | 0.999085756 | 0.998810301 | 0.119453647  | 0.163949643  | -0.058782127 | -0.151812067 |
| comp170118_c1_seq3  | -0.347974341 | 0.254770345  | 1.196535855 | 1.135749321 | -0.171756121 | -0.144891615 | -1.549466973 | -1.200137764 |
| comp170118_c1_seq5  | 0.482728771  | 0.545740058  | 1.730744725 | 1.676091253 | 0.929137285  | 0.670299331  | -0.279431167 | -0.185374464 |
| comp170173_c2_seq1  | -0.838201433 | -0.715604456 | 1.392570188 | 1.361004434 | -0.868914173 | -0.775569609 | 0.71139249   | 0.395698224  |
| comp170173_c2_seq5  | -0.540771293 | -0.072725181 | 0.740668416 | 0.7914912   | -0.735340836 | -0.972989492 | -0.019630003 | -0.226603295 |
| comp170177_c0_seq1  | -0.214435432 | 0.215047284  | 0.885403923 | 0.839605358 | -0.287271379 | -0.275042561 | -0.400864318 | -0.556685088 |



|                     |              |              |             |             |              |              |              |              |
|---------------------|--------------|--------------|-------------|-------------|--------------|--------------|--------------|--------------|
| comp170185_c2_seq3  | ND           | ND           | 1.052940724 | 1.058785104 | -1.043683728 | -1.281332383 | ND           | ND           |
| comp170185_c2_seq6  | -1.842824363 | -1.931080751 | 1.120717426 | 1.153897285 | -1.116575152 | -1.576072557 | ND           | -1.528656364 |
| comp170185_c2_seq7  | ND           | ND           | 1.164484553 | 1.150049458 | -1.208758942 | -0.969286343 | -1.220046837 | -1.222900146 |
| comp170185_c3_seq1  | -0.635490661 | -0.802928296 | 1.421603795 | 1.486169722 | -0.541264665 | -0.049980093 | ND           | -1.400503909 |
| comp170187_c3_seq5  | -1.527035872 | -1.138171006 | 0.649668487 | 0.60110664  | ND           | -0.482132816 | -0.483015836 | 0.017581048  |
| comp170215_c0_seq1  | -0.224735389 | -0.659779264 | 0.536117372 | 0.48064353  | -0.457093493 | -0.281289974 | -0.154386415 | -0.512627382 |
| comp170235_c0_seq9  | -0.565577368 | -1.068807104 | 0.705668427 | 0.679070713 | -0.220877749 | ND           | -0.584348162 | -0.520254682 |
| comp170256_c0_seq1  | -1.265201744 | -0.575306882 | 1.350436325 | 1.358947366 | -0.538952533 | -0.396389947 | -0.823241699 | -0.553093737 |
| comp170275_c0_seq11 | ND           | ND           | 1.632241145 | 1.608236755 | -0.941504562 | ND           | ND           | ND           |
| comp170281_c0_seq6  | -0.977263986 | -1.162430387 | 0.921475682 | 0.915967303 | -1.046894792 | -1.409482184 | -0.632213954 | -1.663095988 |
| comp170295_c0_seq1  | -0.073529775 | 0.114731682  | 1.165928375 | 1.155039323 | -0.005821911 | 0.182498165  | 0.056676408  | -0.005722676 |
| comp170303_c0_seq4  | -0.651279326 | -0.584633755 | 0.477083488 | 0.455673886 | -0.991976905 | ND           | -0.753387326 | -1.182209368 |
| comp170307_c1_seq4  | ND           | ND           | 0.816456301 | 0.802108554 | ND           | ND           | ND           | ND           |
| comp170326_c1_seq10 | -0.0893914   | 0.428342497  | 1.002593089 | 1.054263278 | -0.094904706 | -0.182791042 | -0.144755996 | -0.401642739 |
| comp170393_c1_seq7  | ND           | ND           | 0.373585136 | 0.325798122 | ND           | ND           | ND           | ND           |
| comp170393_c1_seq9  | ND           | ND           | 0.135630174 | 0.102132073 | ND           | ND           | -0.833927867 | -1.262749909 |
| comp170406_c2_seq3  | -1.144620085 | -1.35781521  | 1.373408865 | 1.315960886 | -1.020430865 | -1.303837011 | -1.128628773 | -0.955390823 |
| comp170406_c2_seq4  | ND           | -1.816708002 | 1.47131805  | 1.455324023 | -0.746929897 | -0.762729803 | -1.286491569 | -0.93716236  |
| comp170419_c0_seq2  | -0.082900975 | 0.262994817  | 0.921131784 | 0.90680769  | -0.065167087 | -0.072366821 | -1.303698763 | -0.431490809 |
| comp170424_c2_seq2  | -0.452314145 | -0.053903961 | 1.519274747 | 1.475424158 | -0.010061591 | -0.049899737 | 0.193765882  | -0.314237406 |
| comp170433_c0_seq11 | -0.765697709 | -0.763777467 | 0.70626182  | 0.679865214 | -0.676270595 | -0.591699956 | -0.340771004 | -0.611230553 |
| comp170433_c0_seq18 | -0.372127199 | -0.460383588 | 0.705957804 | 0.646870842 | -1.299090502 | -0.883526644 | -0.884409665 | ND           |
| comp170433_c0_seq21 | -0.753511531 | -0.493313274 | 0.799335707 | 0.796403598 | -0.609726756 | -0.646460568 | -0.40430554  | -0.678225622 |
| comp170433_c0_seq4  | -0.698960043 | -0.743750737 | 0.959230377 | 0.90883606  | -0.671680836 | -0.669569153 | -0.535753599 | -0.760455658 |
| comp170436_c1_seq2  | -0.922572943 | -0.357616818 | 0.703061442 | 0.634543811 | -0.559501635 | -0.243640689 | -0.217371464 | -0.386556195 |
| comp170436_c1_seq6  | -0.666339899 | -0.277475033 | 0.588306634 | 0.624065672 | -0.673822798 | -0.434350199 | -0.147991509 | -0.488391648 |
| comp170445_c0_seq4  | 0.461394768  | 0.607761417  | 1.396363165 | 1.327514511 | 0.521937651  | 0.641116419  | 0.59907166   | 0.3699938    |
| comp170454_c0_seq12 | -0.772743916 | -0.639151555 | 0.01038524  | 0.0543686   | -1.046494705 | -1.28414336  | -1.409965118 | -1.236727168 |
| comp170454_c0_seq8  | -0.674957425 | -0.763213814 | 0.0179951   | 0.043010621 | -0.772616955 | ND           | -1.437117364 | -1.263879414 |
| comp170457_c1_seq4  | ND           | ND           | 1.443754987 | 1.403704598 | ND           | ND           | ND           | -0.706447408 |
| comp170483_c0_seq3  | -1.55448275  | -1.642739139 | 1.333304197 | 1.348582041 | ND           | ND           | ND           | -1.541344748 |

|                     |              |              |             |             |              |    |              |              |              |
|---------------------|--------------|--------------|-------------|-------------|--------------|----|--------------|--------------|--------------|
| comp170483_c0_seq5  | -1.856107806 | -1.643334199 | 1.726706441 | 1.756334545 | -1.828828599 | ND |              | -1.715177757 | -1.143999799 |
| comp170496_c2_seq14 | 0.628237343  | 0.537492154  | 1.64869476  | 1.600491981 | 0.564766845  |    | 0.647586295  | 0.169582019  | 0.000397288  |
| comp170496_c2_seq20 | 0.368029003  | 0.325052596  | 1.710630706 | 1.695157381 | 0.473693315  |    | 0.653463022  | 0.10622016   | -0.021571886 |
| comp170496_c2_seq21 | -0.287420177 | -0.472586579 | 1.121535692 | 1.078210218 | -0.084049711 |    | -0.104214423 | -0.970398869 | -0.429184135 |
| comp170509_c0_seq4  | -0.375572979 | -0.146408955 | 1.119687628 | 1.102684962 | -0.300869122 |    | -0.233759909 | -0.131102338 | -0.415680488 |
| comp170509_c0_seq5  | -0.472871058 | -0.172428095 | 1.033130055 | 1.024877864 | -0.627435439 |    | -0.453464389 | -0.20415443  | -0.624543304 |
| comp170509_c0_seq9  | -0.7555152   | -0.258310859 | 0.956393743 | 0.934920175 | -0.566867991 |    | -0.860374464 | -1.01252516  | -2.043407193 |
| comp170513_c0_seq1  | -0.289982394 | 0.700942463  | 1.495852655 | 1.449174951 | 0.619536661  |    | 0.592193365  | 0.538922275  | 0.098819223  |
| comp170513_c0_seq4  | 0.806359233  | 0.653343941  | 1.694961708 | 1.751779906 | 0.739539404  |    | 0.71166512   | 0.884707297  | 0.688881366  |
| comp170526_c0_seq10 | -0.787307035 | -1.176593419 | 0.39376213  | 0.364316572 | ND           |    | -1.12261522  | ND           | -0.598077773 |
| comp170557_c2_seq16 | -1.494102377 | -0.883388761 | 0.686966788 | 0.638839018 | -0.767853166 |    | -1.051259312 | -0.575021078 | -1.003843119 |
| comp170577_c1_seq6  | -0.918585949 | -0.705812342 | 0.376426567 | 0.416682055 | -0.414185488 |    | -0.77677288  | -0.233587856 | -0.428326692 |
| comp170600_c0_seq5  | -0.85936614  | -0.248652525 | 0.764966012 | 0.721074042 | -0.589048885 |    | -0.153281641 | -0.475398043 | -0.603190089 |
| comp170602_c1_seq2  | -0.130686866 | 0.52444589   | 1.502286765 | 1.532414157 | 0.214012753  |    | 0.645370878  | -0.802670174 | -0.754370961 |
| comp170619_c0_seq6  | ND           | ND           | 1.626425432 | 1.57619     | ND           | ND | ND           | ND           | ND           |
| comp170653_c4_seq14 | ND           | ND           | 0.550270641 | 0.524618072 | ND           | ND | ND           | ND           | ND           |
| comp170654_c0_seq3  | -1.636532596 | -2.02581898  | 1.571886177 | 1.532783205 | -0.071434294 |    | -0.07421369  | 0.705794577  | 0.540958263  |
| comp170683_c0_seq9  | -0.158280842 | 0.125423936  | 0.962790393 | 0.920456813 | 0.058877908  |    | 0.298350507  | -0.304592504 | -0.205140769 |
| comp170719_c1_seq2  | -1.209631724 | -1.297888113 | 0.960442056 | 0.920916857 | ND           | ND |              | -1.369731671 | -0.895463726 |
| comp170735_c0_seq1  | -0.904631513 | ND           | 1.612897386 | 1.576764527 | ND           | ND |              | -0.763701464 | ND           |
| comp170748_c1_seq8  | -1.522359136 | -1.008555533 | 0.330807886 | 0.367544209 | -1.017958675 |    | -1.079516071 | -1.381429088 | -1.509221134 |
| comp170750_c0_seq1  | -1.081313247 | ND           | 1.125061783 | 1.12601051  | -1.05403404  | ND |              | -0.940383198 | ND           |
| comp170779_c0_seq3  | ND           | -0.844271065 | 0.58642249  | 0.63536927  | -0.72873547  |    | -0.790292866 | ND           | -0.19880863  |
| comp170816_c0_seq14 | -0.269813764 | -0.255407811 | 0.567673054 | 0.527335528 | -0.228294118 |    | -0.237145164 | -0.174641206 | -0.353585774 |
| comp170816_c2_seq10 | -0.514015362 | -0.4975364   | 0.938120575 | 0.923843324 | -0.625038853 |    | -0.651834143 | -0.511388011 | -0.740637698 |
| comp170816_c2_seq9  | -0.6932904   | -0.334388757 | 0.733291432 | 0.70071769  | -0.063951202 |    | -0.125508599 | -0.251330356 | -0.299941156 |
| comp170849_c0_seq6  | -0.711167449 | -0.354487267 | 0.376852123 | 0.361927496 | -0.487593598 |    | -0.661124754 | -0.394146142 | -0.698029447 |
| comp170861_c0_seq1  | ND           | ND           | 0.625931032 | 0.558064029 | ND           | ND | ND           | ND           | ND           |
| comp170861_c0_seq2  | ND           | ND           | 0.78574359  | 0.753750844 | ND           | ND | ND           | ND           | ND           |
| comp170869_c0_seq4  | ND           | ND           | 0.153720375 | 0.121727629 | -1.255342088 | ND | ND           | ND           | -0.570513287 |
| comp170938_c1_seq4  | -1.317143487 | -1.405399876 | 1.132971387 | 1.136423459 | -1.687804289 |    | -1.272240431 | -1.176213439 | -0.798855506 |

|                     |              |              |              |             |              |              |              |              |
|---------------------|--------------|--------------|--------------|-------------|--------------|--------------|--------------|--------------|
| comp170938_c1_seq6  | -1.529004827 | -1.24928443  | 1.048263685  | 1.068686988 | -1.50172562  | -0.999011586 | ND           | -0.714234478 |
| comp170946_c0_seq1  | 0.239822939  | 0.163148423  | 1.578438713  | 1.592466627 | 0.518444357  | 0.348306144  | 0.356619308  | 0.031112192  |
| comp170963_c0_seq1  | -0.63107594  | -0.719332329 | 0.203205738  | 0.196036576 | ND           | ND           | ND           | -0.918967933 |
| comp170995_c0_seq4  | 2.109412567  | 2.078546829  | 3.025088314  | 2.989247618 | 2.165898808  | 2.193845064  | 1.498227155  | 1.396163216  |
| comp170995_c0_seq9  | 2.0351967    | 1.953717739  | 2.927193014  | 2.878307943 | 2.147224846  | 2.147566271  | 1.47043806   | 1.318957171  |
| comp171042_c2_seq4  | 0.308443313  | 0.058818922  | 1.1309182    | 1.07302376  | 0.049415781  | 0.316917103  | 0.06615661   | -0.02687333  |
| comp171068_c0_seq1  | ND           | -0.967333797 | 0.603021752  | 0.573576195 | ND           | -0.913355598 | ND           | -0.865939406 |
| comp171068_c1_seq11 | -0.725936828 | -0.316868576 | 0.596806031  | 0.613588999 | -0.589513152 | -0.544615218 | -0.283976784 | -0.460986853 |
| comp171068_c1_seq16 | -1.526612789 | -0.453501175 | 1.151386024  | 1.153792245 | -1.499333582 | -1.16295097  | -0.195351042 | -0.70056143  |
| comp171068_c1_seq9  | -1.827219289 | -1.313415687 | 0.546974474  | 0.516942428 | -1.498910087 | -1.384376224 | -0.572345888 | -1.035930036 |
| comp171077_c0_seq1  | 0.231122003  | 0.399990124  | 1.08000319   | 1.035371636 | -0.457602134 | 0.10408976   | -0.741891301 | -1.170713342 |
| comp171084_c0_seq31 | -1.551295253 | -1.162430387 | -0.008498253 | 0.020544757 | -1.524016047 | -0.983513452 | -1.109335209 | ND           |
| comp171098_c2_seq5  | ND           | -1.676339293 | 2.080407471  | 2.06163351  | ND           | ND           | ND           | -0.671854915 |
| comp171123_c1_seq2  | -0.057460464 | -0.446746848 | 0.725668692  | 0.680710968 | -0.206272516 | -0.024791864 | 0.083469585  | -0.123503707 |
| comp171129_c1_seq1  | ND           | -1.10301605  | 1.549611821  | 1.537278573 | -0.878335986 | -0.894135892 | 0.119921437  | -0.014210787 |
| comp171129_c1_seq12 | ND           | -1.631886236 | 1.519109225  | 1.54434874  | -0.641289378 | -0.577908037 | 0.260058033  | -0.123951665 |
| comp171129_c1_seq3  | ND           | ND           | 1.524887129  | 1.483338262 | -1.30376397  | -0.763261375 | -0.148720443 | -0.61893517  |
| comp171184_c1_seq12 | -0.642300059 | -0.38649182  | 1.214700126  | 1.154849233 | -0.404167487 | -0.181728227 | -0.049072339 | -0.269010609 |
| comp171184_c1_seq14 | -0.475036771 | -0.363720805 | 1.195052871  | 1.130226995 | -0.350847551 | -0.393519604 | -0.003918498 | -0.232871434 |
| comp171184_c1_seq2  | -0.43851847  | -0.32122862  | 1.217762959  | 1.180083603 | -0.36777357  | -0.289152263 | -0.187175938 | -0.264801375 |
| comp171184_c1_seq6  | -0.603465139 | -0.321365041 | 1.198460503  | 1.180357475 | -0.300963201 | -0.253376128 | -0.020175942 | -0.096815466 |
| comp171201_c0_seq5  | ND           | ND           | 0.756996879  | 0.787616277 | ND           | ND           | ND           | ND           |
| comp171257_c0_seq3  | -1.163500003 | -1.029907642 | 1.554127604  | 1.572296066 | ND           | -1.072839456 | -1.022569954 | -0.397034334 |
| comp171257_c0_seq8  | ND           | -1.06461966  | 0.872158846  | 0.825925661 | -1.25011406  | -0.709611465 | -1.136463218 | -0.486104014 |
| comp171279_c2_seq10 | -0.47167753  | -0.10301605  | 1.236200673  | 1.193584165 | -0.46460171  | -0.132375057 | 0.051105707  | -0.147749695 |
| comp171298_c0_seq3  | 0.188544801  | 0.71873882   | 1.639934399  | 1.584460556 | 0.454063173  | 0.839663808  | 0.402346622  | 0.103727556  |
| comp171322_c0_seq1  | -0.947097193 | -0.245303108 | 1.21245683   | 1.190590637 | -0.250811205 | -0.55540665  | -0.186378386 | -0.193596501 |
| comp171339_c0_seq1  | ND           | -1.20505738  | 0.199930775  | 0.159761352 | -1.265613044 | -1.32717044  | -1.452992198 | -1.580784244 |
| comp171404_c2_seq5  | ND           | -1.414626097 | 1.641095917  | 1.583528177 | -0.600120498 | -1.18455664  | -0.18543966  | -0.711171715 |
| comp171426_c2_seq10 | -0.349474496 | -0.221021775 | 0.823862218  | 0.832022688 | -0.251614215 | 0.149226386  | -0.26290211  | -0.151812067 |
| comp171448_c1_seq17 | -1.853921922 | -1.641148315 | 0.937807406  | 0.902041443 | -1.826642715 | -1.587170116 | -1.411961877 | -1.539753924 |

|                     |              |              |             |             |              |              |              |              |
|---------------------|--------------|--------------|-------------|-------------|--------------|--------------|--------------|--------------|
| comp171448_c1_seq4  | -1.569503639 | -1.958790023 | 0.941979299 | 0.894430974 | -1.542224432 | -1.603781829 | -1.127543595 | -1.255335641 |
| comp171448_c1_seq5  | -1.859857702 | -1.647084095 | 0.897552813 | 0.907328367 | -1.355457241 | -1.049037852 | -1.417897658 | -1.068568449 |
| comp171453_c0_seq6  | ND           | -1.258283372 | 1.958279789 | 1.945781793 | -1.540687785 | -1.301215186 | -1.728066939 | -1.077707734 |
| comp171466_c0_seq4  | -0.902966484 | -0.703981161 | 0.651474498 | 0.604632631 | -1.23470922  | -0.965273397 | -0.886975172 | -1.315797213 |
| comp171482_c0_seq19 | ND           | ND           | 1.876519697 | 1.89305997  | ND           | -1.152074959 | -1.578926711 | -1.405688762 |
| comp171482_c0_seq20 | ND           | ND           | 1.187636728 | 1.221629304 | ND           | -1.561736733 | -1.085498499 | ND           |
| comp171497_c0_seq2  | -0.088046629 | 0.16776161   | 0.891788241 | 0.923126075 | 0.064171314  | -0.040138063 | 0.070612186  | -0.040146521 |
| comp171517_c1_seq2  | -0.869253473 | -0.781418603 | 0.396987301 | 0.365344369 | -0.841974266 | -0.982712909 | -1.02935342  | -1.634266721 |
| comp171521_c3_seq1  | -0.417876299 | -0.388033376 | 1.854199968 | 1.794693529 | ND           | -0.656274472 | ND           | -0.404738297 |
| comp171522_c3_seq1  | -1.747189811 | -0.794053515 | 1.706185197 | 1.715853026 | -1.117850614 | -0.605376742 | -0.907289759 | -0.271653811 |
| comp171544_c1_seq16 | -1.325473794 | -1.890851438 | 1.493418531 | 1.427065418 | -1.076345838 | -1.836873239 | -0.457545018 | -1.488427051 |
| comp171544_c1_seq9  | ND           | ND           | 1.590970118 | 1.525809008 | -1.056974434 | ND           | ND           | ND           |
| comp171550_c1_seq2  | -0.342813511 | -0.292120449 | 0.650621004 | 0.617465487 | -0.30847245  | 0.073106911  | -0.095118695 | -0.344153332 |
| comp171581_c0_seq4  | ND           | ND           | 0.551130433 | 0.550800695 | -0.498910087 | -0.46355747  | ND           | -0.637990028 |
| comp171605_c1_seq2  | -0.538031256 | -0.450196386 | 1.163739734 | 1.19816161  | ND           | -0.447370709 | -0.397101207 | -0.700984513 |
| comp171624_c1_seq2  | ND           | -1.0865954   | 0.224122838 | 0.17556099  | ND           | ND           | ND           | ND           |
| comp171624_c2_seq10 | ND           | ND           | 0.250630388 | 0.192308703 | ND           | ND           | ND           | ND           |
| comp171646_c0_seq11 | -1.024369055 | -0.987686708 | 0.834914892 | 0.895992154 | -1.349272367 | -0.933708509 | ND           | -1.965473562 |
| comp171646_c0_seq7  | -1.266128074 | -0.907226432 | 0.881552077 | 0.919765042 | -1.238848868 | -0.768927347 | -1.125198026 | -1.474838821 |
| comp171667_c3_seq13 | ND           | ND           | 0.604905896 | 0.543379071 | -0.779332983 | -0.10052769  | -0.966712137 | ND           |
| comp171675_c0_seq9  | 0.158198711  | -0.13417766  | 0.933107537 | 0.97307677  | -0.212462091 | 0.354369442  | -0.047658727 | -0.226603295 |
| comp171709_c0_seq1  | 0.187252924  | 0.232335814  | 1.033433825 | 0.983107746 | -0.477704491 | -1.051145249 | -0.398815756 | -0.491845695 |
| comp171731_c0_seq2  | -1.229375782 | -0.919692162 | 0.559148405 | 0.597736733 | -1.503126571 | -1.564683968 | ND           | -0.286818854 |
| comp171731_c0_seq5  | -1.166258468 | -0.777393602 | 0.293564298 | 0.319395395 | -0.661858006 | -0.598476666 | -0.548207164 | -0.675999211 |
| comp171732_c0_seq8  | -1.439615441 | -1.430961816 | 1.205719658 | 1.162419355 | -1.111306238 | -0.899862363 | ND           | ND           |
| comp171744_c0_seq15 | -0.053445881 | 0.11542224   | 1.119190116 | 1.121010552 | 0.456487069  | 0.370429345  | -0.299460457 | -0.224832305 |
| comp171747_c0_seq2  | -0.215399461 | -0.172726749 | 1.108337207 | 1.069962204 | -0.135184179 | -0.042552158 | -0.288349232 | -0.42950524  |
| comp171748_c3_seq1  | 0.256107196  | 0.474557935  | 1.510605277 | 1.516741581 | 0.481754056  | 0.803413411  | -0.141353667 | 0.233529646  |
| comp171755_c1_seq10 | ND           | ND           | 1.032667179 | 1.089167096 | ND           | ND           | ND           | -0.510927597 |
| comp171755_c1_seq2  | ND           | ND           | 1.055795967 | 0.991130911 | ND           | -1.557491396 | ND           | ND           |
| comp171755_c1_seq7  | ND           | ND           | 1.010225992 | 1.044586106 | ND           | -1.666019206 | ND           | -1.618603013 |

|                     |              |              |             |             |              |              |              |              |
|---------------------|--------------|--------------|-------------|-------------|--------------|--------------|--------------|--------------|
| comp171755_c1_seq8  | ND           | -1.557964326 | 1.065469666 | 1.038645815 | ND           | ND           | -1.027747893 | -0.97944868  |
| comp171756_c0_seq2  | -0.668517703 | -0.513736043 | 1.303188423 | 1.334686071 | ND           | -1.003825889 | ND           | -1.257439692 |
| comp171757_c0_seq2  | 0.254567932  | 0.597371711  | 1.348850956 | 1.357404578 | 0.220329101  | 0.504614044  | -0.073505384 | 0.206187897  |
| comp171761_c0_seq6  | ND           | ND           | 1.292880516 | 1.301028111 | ND           | ND           | ND           | -1.642206512 |
| comp171775_c0_seq1  | -0.837167398 | -0.381355742 | 0.354625632 | 0.397430445 | -0.566850142 | -0.359562226 | -0.219116094 | -0.580991346 |
| comp171786_c0_seq8  | -1.39341238  | -0.741306079 | 1.250054783 | 1.27741727  | -0.968193164 | -0.825630578 | -0.252482331 | -0.727061864 |
| comp171798_c0_seq11 | 0.276382114  | 0.225373783  | 1.101198492 | 1.121136961 | -0.568170973 | 0.156391811  | -0.028551399 | -0.281282181 |
| comp171798_c0_seq17 | -0.048682684 | -0.064388406 | 1.050035187 | 1.085990694 | -1.062796163 | -0.311440203 | -1.250175317 | -1.377967363 |
| comp171805_c0_seq6  | -0.089959696 | 0.278149948  | 1.300624483 | 1.217479214 | 0.458457594  | 0.636184597  | -0.103931608 | 0.2616348    |
| comp171820_c0_seq4  | -1.43611043  | -1.047245564 | 1.119707081 | 1.08997209  | -0.107801227 | 0.3988431    | -1.295180381 | -0.276844391 |
| comp171851_c0_seq10 | -0.663223089 | -0.230892529 | 0.702985464 | 0.615738678 | -0.552969647 | -0.06776986  | -0.037618647 | -0.24759745  |
| comp171851_c0_seq5  | -0.784978372 | -1.174264757 | 1.477077839 | 1.443917491 | -1.058729161 | -0.819256562 | -0.246108315 | -1.072870366 |
| comp171886_c1_seq1  | -0.456313816 | -0.544570204 | 1.0592091   | 1.125826151 | -0.14272787  | 0.111467986  | -0.12974719  | -0.540085826 |
| comp171886_c1_seq3  | -0.887148874 | ND           | 0.335312975 | 0.286751127 | -1.035960927 | -0.44430581  | -0.524370076 | -0.874010872 |
| comp171917_c1_seq4  | -1.533749737 | ND           | 1.337515508 | 1.313171172 | ND           | ND           | ND           | ND           |
| comp171922_c0_seq12 | ND           | -1.658334871 | 0.82583453  | 0.870993248 | -1.24176928  | ND           | ND           | -1.55694048  |
| comp171927_c0_seq13 | -0.76078824  | -0.640768687 | 0.464700064 | 0.469430124 | -1.069301136 | -0.829828537 | -1.733801544 | -1.384472336 |
| comp171927_c0_seq15 | -1.442835791 | -1.105123448 | 0.431373834 | 0.460768832 | -1.193707835 | -0.87505399  | ND           | -1.429697789 |
| comp171927_c0_seq16 | -0.311731314 | -0.354230212 | 0.832863344 | 0.828310421 | -0.124751264 | -0.35824396  | -0.208589826 | -0.392497814 |
| comp171927_c0_seq21 | -1.905339987 | -0.73832387  | 0.52614918  | 0.501556126 | -1.03296274  | -1.094520136 | -1.764409938 | ND           |
| comp171927_c0_seq6  | -0.635124477 | -0.547289607 | 0.380577294 | 0.444871022 | -0.960027789 | -0.970432663 | -0.795224424 | -1.03216094  |
| comp171950_c0_seq1  | ND           | -1.242211074 | 0.458478244 | 0.467103348 | ND           | -1.489262871 | -0.615084628 | -0.964725424 |
| comp171971_c0_seq1  | 0.515550631  | 0.554069322  | 1.272120758 | 1.324001904 | 0.428395479  | 0.624234282  | 0.560795757  | 0.341413207  |
| comp171983_c0_seq13 | -1.563907232 | -0.87401237  | 0.506463635 | 0.470330777 | -0.723714668 | -0.668766496 | -0.577879143 | -0.737855873 |
| comp171983_c0_seq16 | ND           | -1.91164552  | 1.090073793 | 1.031752107 | -1.495079929 | ND           | ND           | -1.810251129 |
| comp171983_c0_seq17 | ND           | -1.677256882 | 0.602792537 | 0.608151968 | -1.862751282 | ND           | -1.74910044  | -1.876892486 |
| comp171983_c0_seq18 | ND           | -1.575461408 | 1.134773228 | 1.084634991 | ND           | -1.822513205 | ND           | -1.474067017 |
| comp171983_c0_seq2  | ND           | ND           | 0.732550526 | 0.699827259 | ND           | ND           | -0.851656634 | -0.377388689 |
| comp171983_c0_seq24 | ND           | ND           | 0.617680184 | 0.578663654 | -1.832774964 | -1.894332361 | ND           | -1.545886173 |
| comp171983_c0_seq9  | ND           | ND           | 0.613287197 | 0.573448917 | ND           | -1.918030503 | -1.742822264 | -1.569584315 |
| comp171983_c2_seq2  | ND           | -0.914768933 | 1.312004269 | 1.315870406 | -0.431256553 | -0.38366948  | -0.317605711 | -0.813374542 |

|                     |              |              |             |             |              |              |              |              |
|---------------------|--------------|--------------|-------------|-------------|--------------|--------------|--------------|--------------|
| comp172025_c0_seq4  | ND           | -1.240209713 | 1.429653829 | 1.451698957 | ND           | -1.186231514 | ND           | -0.740875313 |
| comp172029_c0_seq2  | ND           | ND           | 1.314877118 | 1.275120588 | -1.661080919 | ND           | ND           | -0.720979614 |
| comp172029_c0_seq7  | ND           | ND           | 1.001296696 | 0.988137169 | ND           | -1.077373519 | ND           | -0.485889282 |
| comp172088_c3_seq2  | -0.254949868 | -0.256056081 | 0.980476959 | 0.973307797 | -0.482943166 | -1.243470567 | -0.767232333 | -1.196054375 |
| comp172110_c0_seq9  | ND           | ND           | 0.729844633 | 0.664683523 | ND           | ND           | ND           | ND           |
| comp172150_c1_seq2  | -0.716862552 | -0.805118941 | 0.531153402 | 0.523984239 | -1.166704601 | ND           | -0.575932504 | -0.879815809 |
| comp172157_c0_seq4  | 0.486386577  | 0.645110422  | 1.368269886 | 1.314524582 | 0.494780439  | 0.748493478  | 0.703406794  | 0.289824719  |
| comp172163_c0_seq11 | 0.064977598  | 0.254685901  | 1.029161433 | 1.043651331 | -1.370141193 | ND           | ND           | -0.907161142 |
| comp172182_c0_seq1  | 0.133425712  | 0.137226833  | 1.760358437 | 1.818466056 | 0.043735112  | -0.076943737 | -0.151612972 | -0.368346101 |
| comp172227_c1_seq6  | -0.430337246 | -0.372465599 | 0.98118084  | 0.998835261 | 0.102091939  | 0.3549285    | -0.034134692 | -0.161926738 |
| comp172231_c2_seq19 | ND           | -1.40029615  | 0.877629575 | 0.92631823  | -0.983730559 | ND           | -0.870079717 | -0.821780504 |
| comp172231_c2_seq20 | -1.268281859 | ND           | 0.770119802 | 0.829897429 | ND           | ND           | ND           | ND           |
| comp172231_c2_seq24 | -1.869573867 | ND           | 0.98910225  | 0.944807571 | ND           | ND           | -1.728643819 | ND           |
| comp172231_c2_seq30 | ND           | -1.880413346 | 0.812158081 | 0.793362751 | -1.76487775  | ND           | -1.350196913 | ND           |
| comp172231_c3_seq7  | -1.109305089 | -1.197561478 | 1.105187831 | 1.044598284 | -1.082025883 | ND           | -0.570435032 | -0.920075828 |
| comp172234_c0_seq1  | 0.122806736  | 0.219327785  | 1.150849945 | 1.10995741  | 0.308265612  | 0.132307471  | 0.148915182  | -0.077935082 |
| comp172256_c0_seq3  | -0.665966024 | -0.833403659 | 0.979989938 | 0.96150711  | -1.416838068 | -1.77942546  | -0.3737683   | -0.732009268 |
| comp172258_c1_seq5  | -0.472380527 | -0.083515661 | 0.573990063 | 0.560190322 | -0.445101321 | -0.381719981 | -0.055244067 | -0.334303788 |
| comp172262_c0_seq17 | -0.754764907 | -1.144051292 | 0.851593874 | 0.825675275 | -1.630575688 | ND           | -1.21589485  | -1.644716892 |
| comp172262_c0_seq21 | -0.885145028 | -0.730363368 | 0.92812827  | 0.88535207  | -1.061985804 | -1.220453213 | -0.948334962 | -1.297975757 |
| comp172262_c0_seq34 | -1.333691322 | -0.944826456 | 0.679886755 | 0.629083796 | -1.306412115 | -0.714756998 | -0.648693229 | -1.14446206  |
| comp172314_c1_seq20 | -1.458712553 | -0.893756428 | 0.290558335 | 0.240232256 | -1.732463342 | -0.538748234 | ND           | ND           |
| comp172314_c1_seq26 | -1.134297686 | -0.921524079 | 0.295969836 | 0.236882874 | -0.408048475 | -0.503464139 | ND           | -1.547128416 |
| comp172314_c1_seq3  | -0.983997368 | -0.251067874 | 0.556432899 | 0.506920735 | -0.206595635 | -0.197089676 | ND           | ND           |
| comp172319_c0_seq8  | -0.630520931 | -0.567509644 | 0.270707537 | 0.256589514 | -0.641030285 | -0.702587682 | -0.364652146 | -0.582620822 |
| comp172341_c3_seq11 | -1.146401547 | -0.836717927 | 0.870358189 | 0.837058169 | -0.943031082 | -0.527467223 | -1.005471499 | ND           |
| comp172369_c0_seq4  | -1.201654662 | -0.988881055 | 1.369465999 | 1.365820543 | -0.998284197 | -1.059841593 | -0.282573363 | -0.644448616 |
| comp172373_c0_seq1  | -0.001876759 | 0.037730142  | 0.901025293 | 0.884854886 | 0.06286484   | 0.103213504  | 0.207673663  | -0.084671728 |
| comp172381_c2_seq10 | -0.723805993 | -0.392933074 | 1.004422293 | 0.960303786 | -0.423525514 | -0.848260813 | 0.132082165  | -0.08871317  |
| comp172381_c2_seq8  | -0.520741296 | -0.307967689 | 0.908846047 | 0.940711628 | -0.157669987 | ND           | 0.228239108  | -0.100117967 |
| comp172388_c0_seq1  | ND           | ND           | 1.246069114 | 1.257834706 | ND           | ND           | ND           | -1.670824909 |

|                     |              |              |             |             |              |              |              |              |
|---------------------|--------------|--------------|-------------|-------------|--------------|--------------|--------------|--------------|
| comp172451_c1_seq11 | -0.300320365 | -0.008365512 | 0.897782139 | 0.852824415 | -0.335189065 | 0.102094043  | 0.095882189  | -0.048300273 |
| comp172451_c1_seq2  | -0.203192516 | -0.069600155 | 0.808963974 | 0.879787836 | -0.476943305 | 0.160469302  | 0.213943944  | -0.030353671 |
| comp172461_c1_seq8  | -0.358170655 | -0.238151101 | 0.848834244 | 0.825637635 | 0.002323231  | 0.02508672   | -0.1550927   | -0.13675671  |
| comp172485_c0_seq16 | -0.618215675 | -0.373257385 | 0.440136213 | 0.46704684  | -0.500759838 | -0.404709381 | -0.591228979 | -0.815931038 |
| comp172485_c0_seq60 | -0.959510224 | -0.483495182 | 0.515289697 | 0.536609072 | -0.865284228 | -0.3405759   | -0.818580175 | -1.025553468 |
| comp172494_c1_seq6  | -1.049491534 | -0.739807914 | 1.058434339 | 1.088196295 | ND           | 0.030173628  | ND           | -1.337383527 |
| comp172502_c1_seq1  | -0.83283222  | -0.108175252 | 1.15891742  | 1.183573011 | -0.88473426  | -0.992049147 | 0.424816235  | 0.096759731  |
| comp172512_c0_seq2  | ND           | -1.213468637 | 1.494060105 | 1.509370865 | ND           | -1.527467223 | ND           | -1.002929776 |
| comp172525_c0_seq2  | 0.056081108  | 0.215918639  | 0.849760446 | 0.89643771  | 0.046218506  | 0.214196688  | 0.045149777  | 0.024251964  |
| comp172530_c0_seq12 | -1.070559877 | -0.85778627  | 0.629023228 | 0.58046138  | ND           | -0.627716812 | ND           | -0.756391879 |
| comp172540_c0_seq1  | 0.033406325  | 0.287572617  | 1.454311024 | 1.397237569 | 0.072919988  | 0.423543039  | -0.165611688 | -0.155101036 |
| comp172550_c0_seq21 | -1.11657436  | -0.375526976 | 0.495858569 | 0.465989516 | -0.412601543 | -0.337939193 | -0.517006462 | -0.393742487 |
| comp172550_c0_seq36 | -0.932861625 | -0.399752867 | 0.469265944 | 0.437691795 | -0.344915112 | -0.300962324 | -0.754143015 | -0.392914583 |
| comp172550_c0_seq47 | -0.966553753 | -0.591052849 | 0.525305244 | 0.525789046 | -0.367883375 | -0.242884079 | -0.486805148 | -0.563444672 |
| comp172550_c0_seq54 | -0.899679412 | -0.766087051 | 0.508990831 | 0.469197193 | -0.464914879 | -0.254731656 | -0.457719368 | -0.363662665 |
| comp172550_c0_seq59 | -0.912100595 | -0.436085553 | 0.540035342 | 0.525040841 | -0.372938028 | -0.122470044 | -0.294049292 | -0.409942115 |
| comp172550_c0_seq67 | -0.884681286 | -0.405639789 | 0.502590813 | 0.47412844  | -0.358561575 | -0.194053737 | -0.477483348 | -0.394422028 |
| comp172550_c0_seq86 | -1.185446063 | -0.45604266  | 0.546724408 | 0.512571756 | -0.369796441 | -0.279492458 | -0.442456023 | -0.449204377 |
| comp172590_c1_seq4  | ND           | -1.168387881 | 0.920481608 | 0.926277422 | ND           | ND           | ND           | -1.06699349  |
| comp172590_c2_seq2  | ND           | -1.938979073 | 1.128306124 | 1.165786557 | ND           | -1.583970879 | -1.709792636 | -0.758403436 |
| comp172608_c0_seq1  | ND           | -1.076478266 | 0.75315253  | 0.776742731 | -1.438063926 | -1.499621322 | -1.324413084 | ND           |
| comp172676_c0_seq1  | 0.307924287  | 0.279603001  | 1.162704329 | 1.1378408   | 0.290094688  | 0.366250317  | 0.252837817  | 0.086700779  |
| comp172694_c0_seq4  | -0.642029723 | -0.467044677 | 0.459858195 | 0.425816886 | -0.351509082 | -0.250339181 | -0.376160938 | -0.293099619 |
| comp172728_c0_seq13 | -0.493726527 | -0.164071826 | 1.078069998 | 1.052868926 | 0.160436255  | 0.202967456  | 0.333208549  | -0.053026049 |
| comp172728_c0_seq3  | -0.423675403 | -0.107361204 | 1.090091115 | 1.066033526 | 0.242988118  | 0.25633317   | 0.472543013  | 0.062855982  |
| comp172728_c0_seq9  | -0.440142238 | -0.642341979 | 1.950854181 | 1.89351     | -0.03544469  | 0.03488551   | 0.177909066  | -0.198524907 |
| comp172729_c0_seq3  | -1.070156445 | -1.033474097 | 0.939142834 | 0.900780152 | -1.042877238 | ND           | -1.406347651 | ND           |
| comp172760_c0_seq14 | 0.135581024  | 0.376383354  | 1.094801439 | 1.072909019 | 0.217217893  | 0.443725515  | 0.0035098    | 0.014020452  |
| comp172761_c0_seq6  | -0.637681306 | -0.549846436 | 0.584780543 | 0.536218695 | -0.171069406 | -0.232626802 | -0.019630003 | -0.323513308 |
| comp172800_c1_seq2  | 0.28667993   | 0.389338576  | 1.382554864 | 1.369288295 | 0.546531751  | 0.133453367  | 0.59762709   | 0.276588091  |
| comp172800_c1_seq3  | 0.204965394  | 0.299639689  | 1.32922276  | 1.305844459 | 0.447844401  | 0.103740415  | 0.515037842  | 0.174637703  |

|                     |              |              |             |             |              |              |              |              |
|---------------------|--------------|--------------|-------------|-------------|--------------|--------------|--------------|--------------|
| comp172823_c0_seq8  | -0.349795285 | -0.646327616 | 1.626657277 | 1.605175894 | -0.54782536  | -0.776873844 | -0.141918447 | -0.561966564 |
| comp172840_c0_seq10 | -0.245885119 | -0.115852569 | 0.963489655 | 0.900576635 | 0.116503873  | 0.046673951  | -0.238848649 | -0.475785165 |
| comp172840_c0_seq16 | -0.075222477 | -0.152755    | 2.084369573 | 2.056763373 | 0.816122609  | 0.523967789  | 0.107100257  | -0.051360609 |
| comp172840_c0_seq18 | -0.242722588 | -0.31077559  | 2.018847083 | 2.006028669 | 0.718413334  | 0.44870348   | 0.012680764  | -0.177666786 |
| comp172840_c0_seq19 | -0.338287073 | -0.142546806 | 2.003804363 | 1.991940706 | 0.717281773  | 0.467733894  | -0.021265766 | -0.177829554 |
| comp172840_c0_seq22 | 0.674210746  | 0.685500768  | 2.118835603 | 2.095802358 | 0.966484624  | 0.803992728  | 0.596332626  | 0.32876248   |
| comp172840_c0_seq8  | -0.078060691 | -0.018090999 | 1.073308061 | 1.020468976 | 0.315087071  | 0.05632836   | -0.310042645 | -0.373376702 |
| comp172869_c0_seq5  | -0.836205013 | -0.924461402 | 0.778519713 | 0.820976552 | ND           | -1.238459988 | -1.239343009 | -1.066105059 |
| comp172869_c1_seq1  | -1.122383954 | -1.210640343 | 0.563835189 | 0.528637302 | ND           | -1.45769214  | ND           | ND           |
| comp172872_c1_seq6  | -0.423055916 | -0.511312305 | 0.442259996 | 0.379233015 | -0.872897964 | -1.235485357 | -0.884185859 | -0.53485665  |
| comp172895_c1_seq5  | ND           | -0.681349235 | 0.043908274 | 0.078131796 | ND           | ND           | -0.519109587 | -1.124022888 |
| comp172930_c0_seq5  | 0.400717171  | 0.522300625  | 1.23572937  | 1.197553006 | 0.328611746  | 0.598047568  | 0.438106628  | 0.314470541  |
| comp172975_c0_seq13 | 0.909201071  | 1.048622975  | 2.334201665 | 2.274818885 | 0.529646556  | 0.953451543  | 0.612263164  | 0.324174126  |
| comp172977_c1_seq13 | -0.278212175 | -0.310951236 | 0.687539107 | 0.714633148 | -0.690265663 | -0.063848439 | -0.224432302 | -0.653254344 |
| comp172996_c1_seq11 | -1.280388413 | -0.404856974 | 0.416554595 | 0.395938709 | -0.629859916 | -0.273273917 | -0.282125868 | -0.623797734 |
| comp172996_c1_seq16 | ND           | ND           | 0.756981261 | 0.726949215 | ND           | ND           | -0.874222462 | -0.700984513 |
| comp173008_c0_seq1  | -0.981838689 | -0.592973823 | 0.892370936 | 0.902460779 | -0.52859075  | -1.016116879 | ND           | -1.445821942 |
| comp173008_c0_seq6  | -0.728244715 | -0.491990012 | 0.8310204   | 0.815695233 | -0.223844253 | -0.762522904 | ND           | -1.669349221 |
| comp173008_c0_seq7  | -1.110226181 | -0.420331319 | 0.803236744 | 0.765529514 | -0.38397697  | -0.58023294  | ND           | ND           |
| comp173015_c2_seq2  | -1.130362644 | -0.373520993 | 1.184245429 | 1.183416444 | 0.219135857  | -1.164640834 | 0.124510757  | 0.462558955  |
| comp173030_c0_seq24 | -0.542361701 | -0.232678081 | 0.628947626 | 0.619303844 | -0.25184106  | -0.061060385 | -0.615311473 | -0.529223699 |
| comp173030_c0_seq25 | -0.416298645 | -0.537555294 | 0.761581072 | 0.72115885  | -0.120989703 | -0.109118182 | -0.331849953 | -0.392695209 |
| comp173042_c0_seq12 | -0.502734351 | -0.183505413 | 0.543636239 | 0.480351135 | -0.350516408 | -0.537012541 | -0.617076808 | -0.744868854 |
| comp173173_c0_seq2  | -0.360563468 | -0.361669681 | 1.257198294 | 1.209342043 | -0.986496775 | -0.747024176 | -0.21963342  | -1.301667975 |
| comp173190_c0_seq10 | -0.012649041 | 0.244328228  | 0.986753762 | 0.946726069 | -0.295354673 | -0.008769529 | 0.006286651  | -0.528339117 |
| comp173190_c0_seq7  | -0.03295457  | 0.142030476  | 0.917327757 | 0.930995905 | -0.174588038 | 0.068429842  | -0.040087057 | -0.468909099 |
| comp173196_c0_seq8  | ND           | ND           | 0.157993159 | 0.223374664 | -0.435129492 | ND           | ND           | -0.574209433 |
| comp173249_c0_seq1  | ND           | ND           | 0.588437782 | 0.569034162 | ND           | ND           | ND           | -0.53373589  |
| comp173266_c0_seq4  | -0.497736661 | -0.006209453 | 0.957490353 | 0.916712589 | -0.324329419 | -0.452833605 | 0.266442678  | 0.046880258  |
| comp173275_c0_seq11 | ND           | -1.759361451 | 1.585145957 | 1.56949349  | -1.643825855 | -1.404353256 | -1.053053759 | -0.958997055 |
| comp173289_c0_seq13 | ND           | ND           | 0.55488456  | 0.587586909 | -1.013878746 | -0.097712537 | ND           | ND           |



|                     |              |              |             |             |              |              |              |              |
|---------------------|--------------|--------------|-------------|-------------|--------------|--------------|--------------|--------------|
| comp173306_c0_seq1  | ND           | ND           | 0.422565688 | 0.369639034 | -0.254103016 | -1.093811662 | ND           | -0.444335479 |
| comp173320_c0_seq4  | -1.284103529 | -0.770299927 | 1.195818712 | 1.153432541 | -1.557854318 | ND           | ND           | ND           |
| comp173320_c2_seq1  | -0.828845862 | -0.117231751 | 1.97856367  | 1.953086189 | 0.339762497  | 0.740603099  | -1.023707916 | -0.725531229 |
| comp173320_c2_seq3  | -1.307156077 | -0.918291211 | 0.979990607 | 1.035044939 | -1.45596813  | -1.517525526 | -1.643347283 | ND           |
| comp173320_c2_seq4  | -0.891433703 | -0.979690092 | 2.192604794 | 2.208351111 | -0.973298966 | -1.034856363 | -0.558618128 | -0.98744017  |
| comp173320_c2_seq6  | -0.97905983  | -0.487532622 | 0.395133933 | 0.425289093 | -0.446630645 | -0.369885344 | -0.361008527 | -0.710649323 |
| comp173381_c0_seq11 | -1.536861485 | -1.023057882 | 1.550542721 | 1.544987039 | ND           | ND           | -1.696961432 | -1.523723482 |
| comp173384_c3_seq11 | ND           | -0.717108024 | 0.464262359 | 0.499290876 | ND           | -0.839221084 | ND           | -0.791804892 |
| comp173429_c0_seq4  | ND           | -1.128766624 | 0.602956927 | 0.564753531 | -1.013231029 | ND           | ND           | -1.027372233 |
| comp173440_c2_seq5  | 0.604778187  | 0.890193233  | 1.642917514 | 1.618347477 | 0.602768018  | 0.602347365  | 0.995438165  | 0.813996209  |
| comp173441_c2_seq50 | ND           | ND           | 0.257848745 | 0.229490284 | ND           | -0.677657912 | ND           | -0.755180457 |
| comp173443_c0_seq7  | 0.096945177  | 0.096576306  | 1.098663821 | 1.06493563  | 0.128264361  | 0.234680334  | 0.053589488  | -0.061968102 |
| comp173449_c2_seq5  | ND           | ND           | 0.062339044 | 0.055169881 | ND           | ND           | ND           | ND           |
| comp173456_c1_seq14 | -0.99654958  | -0.142797916 | 0.932707612 | 0.955501672 | ND           | -0.678645252 | -0.503437013 | -0.983411577 |
| comp173456_c1_seq5  | -1.021067561 | -0.244022524 | 0.861857296 | 0.871610838 | -1.470909609 | -0.578224496 | ND           | ND           |
| comp173456_c2_seq1  | ND           | ND           | 0.324979379 | 0.317810216 | ND           | ND           | ND           | ND           |
| comp173493_c1_seq13 | -0.649004337 | -0.574533428 | 0.743525174 | 0.753015924 | -0.62172513  | -0.683282526 | -0.403338937 | -0.563315667 |
| comp173493_c1_seq8  | -0.538129413 | -0.542064916 | 0.711655564 | 0.653995409 | -0.753888255 | -0.542444379 | -0.288054895 | -0.716876937 |
| comp173522_c3_seq13 | ND           | ND           | 0.036821957 | 0.061837478 | -1.355850089 | -1.417407486 | -1.117260511 | -0.642992566 |
| comp173522_c3_seq14 | ND           | ND           | 0.187619073 | 0.146766797 | -1.491215692 | -1.376681829 | -0.900443595 | -0.484167597 |
| comp173522_c3_seq2  | -1.707754041 | -1.494980434 | 0.163511204 | 0.128903793 | -1.379444838 | -1.742032231 | -1.089702737 | -0.740373529 |
| comp173522_c3_seq4  | -1.525977391 | -1.438142521 | 0.132213028 | 0.117744627 | ND           | ND           | -0.987107334 | -0.583420463 |
| comp173556_c0_seq5  | -0.50802922  | -0.305474779 | 0.754738846 | 0.68561484  | -0.065000447 | -0.272685879 | -0.155469587 | -0.438163593 |
| comp173559_c3_seq13 | -0.832334005 | -0.221620389 | 1.319214868 | 1.271714217 | -0.650152838 | -0.16764219  | 0.065557995  | -0.132815125 |
| comp173562_c0_seq7  | 0.044160226  | 0.433025092  | 1.649556175 | 1.616000236 | 0.663133908  | 0.82967421   | 0.639791352  | 0.583442361  |
| comp173598_c2_seq1  | ND           | -0.720993112 | 1.460820202 | 1.398495774 | ND           | ND           | -1.093866667 | -0.443507462 |
| comp173614_c0_seq3  | -0.708769598 | -0.697323074 | 0.852510808 | 0.8304976   | -0.681490392 | -0.449079647 | -0.627837479 | -0.724595292 |
| comp173677_c1_seq6  | -0.598944929 | -0.622260511 | 1.073937613 | 1.017586542 | -0.299599423 | -0.305040877 | -0.098118226 | -0.142670169 |
| comp173752_c3_seq2  | -0.636696883 | -0.369565614 | 1.219539371 | 1.165251292 | -0.6393809   | -0.73312298  | -0.256884746 | -0.457227459 |
| comp173752_c3_seq3  | -0.108501253 | 0.063929112  | 1.522220461 | 1.494421297 | -0.220401223 | -0.142779443 | -0.126494439 | -0.215657083 |
| comp173785_c0_seq3  | 0.025896723  | -0.751569833 | 1.229094202 | 1.263914224 | -0.988216756 | -1.049774152 | 0.014735789  | -0.490474599 |

|                     |    |              |              |             |             |              |              |    |              |              |
|---------------------|----|--------------|--------------|-------------|-------------|--------------|--------------|----|--------------|--------------|
| comp173828_c1_seq1  | ND |              | -0.630663445 | 0.08582014  | 0.136642924 | -0.913067858 | -0.798533996 | ND |              | -0.751117803 |
| comp173930_c0_seq7  |    | -0.8149243   | -0.928004272 | 0.699704085 | 0.729015648 | -0.681189762 | -0.706534986 |    | -0.514293408 | -0.594660804 |
| comp173983_c0_seq2  | ND |              | -0.95202668  | 1.099054248 | 1.073557704 | -1.13752108  | -0.721957222 | ND |              | -0.373511034 |
| comp174001_c1_seq1  | ND | ND           |              | 1.218189408 | 1.252086516 | ND           | ND           | ND |              | ND           |
| comp174071_c1_seq20 | ND |              | -0.788058287 | 0.231389793 | 0.204476572 | -0.973552687 | -0.938200071 |    | -1.461961837 | -1.112632628 |
| comp174080_c0_seq19 | ND |              | -0.791242538 | 0.467087631 | 0.425156362 | ND           | -0.640354326 |    | -0.686994837 | ND           |
| comp174080_c0_seq7  |    | -1.162848398 | -0.406006747 | 0.631004623 | 0.567354104 | -1.135569192 | -0.720005333 |    | -0.544797095 | -0.672589141 |
| comp174114_c0_seq8  |    | 0.780904326  | 0.679846752  | 1.772105573 | 1.737586105 | 0.762626224  | 0.718717533  |    | 0.920932413  | 0.605149884  |
| comp174165_c1_seq10 |    | -0.702473102 | -0.53109218  | 0.783556352 | 0.74600456  | -0.675193895 | -0.778143977 |    | 0.137426951  | -0.500278863 |
| comp174165_c1_seq5  |    | -1.123456287 | -1.211712675 | 0.26173286  | 0.240775413 | -1.397207076 | ND           |    | -1.283556234 | -1.110318284 |
| comp174168_c0_seq2  |    | -1.709285454 | -2.098571839 | 0.719756977 | 0.684722636 | ND           | -2.04459364  | ND |              | ND           |
| comp174176_c0_seq5  |    | -0.565974074 | -0.478139204 | 0.600371833 | 0.607925928 | -0.362603609 | -0.475313528 |    | -1.203195276 | -1.330987322 |
| comp174183_c0_seq14 | ND |              | -0.70063183  | 0.42602622  | 0.475338413 | ND           | -1.345623635 | ND |              | -0.520056193 |
| comp174209_c0_seq11 |    | -0.161215096 | -0.182524695 | 1.300887435 | 1.307885358 | -0.707967157 | -0.827516501 |    | 0.585379068  | 0.046899509  |
| comp174209_c0_seq5  |    | -0.657035789 | -0.13495966  | 1.243237135 | 1.241140083 | -0.743699934 | -1.02710608  |    | 0.452736278  | 0.171577787  |
| comp174219_c0_seq8  | ND | ND           |              | 0.611246074 | 0.621805678 | ND           | -0.285342518 | ND |              | ND           |
| comp174305_c0_seq8  |    | -1.407560031 | ND           | 0.188482482 | 0.16427998  | -1.380280824 | -1.441838221 | ND |              | ND           |
| comp174354_c0_seq1  |    | 0.111666127  | 0.572949856  | 1.382285083 | 1.342110158 | -0.043618392 | -0.064138937 |    | -0.373230538 | -0.824328974 |
| comp174354_c0_seq4  |    | 0.143047367  | 0.617189438  | 1.415960321 | 1.370548552 | 0.03234498   | -0.119117528 |    | -0.466788034 | -0.957757983 |
| comp174354_c0_seq6  |    | 0.218082073  | 0.656455027  | 1.432821122 | 1.373421591 | 0.02129107   | -0.029270942 |    | -0.456122695 | -0.718613315 |
| comp174362_c1_seq1  | ND |              | -1.519649029 | 0.497864552 | 0.534899051 | -1.404113433 | ND           | ND |              | ND           |
| comp174362_c1_seq3  |    | -1.419639796 | ND           | 0.501792058 | 0.486653965 | -0.915239335 | -1.453917986 |    | -1.278709748 | -0.929380539 |
| comp174362_c1_seq7  | ND |              | -1.557481509 | 0.609471136 | 0.585488474 | -0.964824659 | -1.202473314 |    | -1.328295071 | -1.456087117 |
| comp174362_c2_seq1  | ND | ND           |              | 0.291084509 | 0.255886623 | ND           | ND           | ND |              | -0.77993664  |
| comp174384_c1_seq1  |    | -0.585297906 | -0.481668768 | 0.590918756 | 0.531986678 | -1.512261209 | -0.494637359 |    | -1.398610367 | -1.225372417 |
| comp174384_c1_seq6  |    | -0.810421276 | -0.738976822 | 1.408516867 | 1.427520525 | -1.260263324 | -1.321820721 |    | -1.021673746 | -1.149465792 |
| comp174399_c0_seq2  |    | -0.028887932 | 0.243128591  | 0.957315972 | 0.937403759 | 0.163201523  | 0.266935321  |    | 0.07728001   | -0.205413996 |
| comp174399_c4_seq2  | ND | ND           |              | 0.768381906 | 0.738695675 | -2.062101662 | -1.424689054 | ND |              | -1.231144826 |
| comp174415_c2_seq5  |    | 0.102230341  | 0.183725033  | 0.993453676 | 0.98873125  | 0.204474309  | 0.067952151  |    | 0.363352691  | 0.102594055  |
| comp174482_c0_seq13 | ND |              | -1.497760818 | 0.861469847 | 0.913614686 | -1.382225222 | -1.142752623 |    | -1.569604376 | -1.095336431 |
| comp174482_c0_seq17 | ND | ND           |              | 0.699231914 | 0.742268066 | ND           | ND           |    | -1.65053737  | ND           |

|                     |              |              |             |             |              |              |              |              |
|---------------------|--------------|--------------|-------------|-------------|--------------|--------------|--------------|--------------|
| comp174482_c0_seq2  | ND           | -1.829031099 | 0.824109821 | 0.8833744   | ND           | -1.076082895 | -1.599844661 | -1.125576716 |
| comp174482_c0_seq21 | ND           | -0.860370851 | 0.900316396 | 0.929599503 | ND           | -1.651490692 | -1.175252458 | -0.700984513 |
| comp174482_c0_seq29 | ND           | -1.537462116 | 0.773256122 | 0.783499761 | -0.877858477 | -1.085543909 | ND           | -1.737097721 |
| comp174482_c0_seq31 | ND           | -1.917799809 | 1.259474266 | 1.257109886 | ND           | -1.86382161  | ND           | -1.117435413 |
| comp174482_c0_seq32 | ND           | ND           | 0.691740552 | 0.699678807 | -1.515127849 | ND           | ND           | -1.529269054 |
| comp174482_c0_seq35 | ND           | -1.641745557 | 1.262560796 | 1.237411175 | ND           | -1.411676099 | ND           | -1.364259907 |
| comp174482_c0_seq8  | ND           | ND           | 0.753204525 | 0.77766821  | -1.752767951 | -1.513295352 | ND           | ND           |
| comp174482_c0_seq9  | ND           | -0.969677539 | 0.91243187  | 0.872262448 | -1.456201936 | ND           | -0.643581089 | -1.169313144 |
| comp174500_c0_seq16 | -0.688651697 | -1.378968077 | 0.452650341 | 0.381498868 | -1.564462477 | -0.780921833 | -0.848751644 | ND           |
| comp174557_c2_seq2  | -0.529004827 | -0.395412466 | 0.546010945 | 0.519956438 | -0.735808826 | -0.43834428  | -0.14503673  | -0.272828776 |
| comp174560_c3_seq1  | -0.831435774 | -0.919692162 | 0.44071386  | 0.421645474 | -0.67921783  | -0.342835218 | -0.866596984 | -0.99438903  |
| comp174583_c3_seq4  | 0.397556088  | 0.659379092  | 1.344002215 | 1.301395211 | 0.29355638   | 0.551778415  | 0.443930029  | 0.162909607  |
| comp174583_c3_seq5  | -1.075671051 | -1.16392744  | 0.578885083 | 0.560626949 | -1.650451836 | -0.632827986 | -0.758649743 | -1.062533049 |
| comp174606_c2_seq11 | ND           | ND           | 0.92396932  | 0.872596495 | ND           | ND           | ND           | ND           |
| comp174606_c2_seq14 | -1.974103277 | -0.506057165 | 1.492973009 | 1.502127653 | -0.624604776 | -0.42859787  | ND           | -1.006722765 |
| comp174606_c2_seq7  | ND           | -0.557822377 | 1.374816017 | 1.383441122 | -0.769645716 | -0.516809155 | ND           | -1.084816916 |
| comp174639_c0_seq5  | 1.971250006  | 1.911723324  | 2.948552374 | 2.93849999  | 2.024651623  | 2.058395861  | 1.355587147  | 1.242092369  |
| comp174639_c0_seq7  | 2.024422929  | 1.95735245   | 3.02146107  | 3.003568721 | 2.077876117  | 2.122642904  | 1.41877074   | 1.313423849  |
| comp174673_c0_seq2  | 0.717107187  | 0.628850798  | 1.412497293 | 1.4514096   | 0.410356138  | 0.848196391  | 0.567472673  | 0.117461333  |
| comp174677_c0_seq3  | -0.086785977 | 0.250926367  | 0.939381228 | 0.990204012 | 0.195765735  | 0.165242572  | -0.008003835 | -0.295496724 |
| comp174680_c0_seq2  | -0.68838664  | -0.450058929 | 0.658115715 | 0.66335581  | -0.340772283 | -0.684876269 | -0.486186935 | -0.892732582 |
| comp174680_c0_seq4  | -0.685460296 | -0.333189232 | 0.701370798 | 0.735594321 | -0.460691686 | -0.615003135 | -0.631680423 | -0.713714979 |
| comp174680_c0_seq7  | -0.582109468 | -0.396658988 | 0.677257332 | 0.678844403 | -0.375222429 | -0.595703059 | -0.622599512 | -0.750391558 |
| comp174680_c0_seq8  | -0.613676374 | -0.400902767 | 0.687143414 | 0.71858612  | -0.396065469 | -0.596802042 | -0.556292377 | -0.787625015 |
| comp174694_c0_seq1  | ND           | -1.1075125   | 1.514822012 | 1.517987207 | -1.058923694 | -0.898632341 | -1.246302848 | -0.319737232 |
| comp174707_c0_seq2  | -0.556858113 | -0.946144498 | 0.226271043 | 0.161109933 | ND           | -0.892166299 | ND           | ND           |
| comp174712_c0_seq3  | ND           | ND           | 0.880153247 | 0.834525833 | -1.044488722 | ND           | ND           | ND           |
| comp174720_c1_seq5  | -1.698450395 | -0.640578748 | 0.327716809 | 0.373076698 | -0.415898683 | -0.954577335 | -0.712422307 | -1.685312393 |
| comp174721_c0_seq4  | -0.382529542 | -0.545419549 | 0.71011772  | 0.679934194 | -0.253792694 | -0.353138652 | -0.140141852 | 0.092217549  |
| comp174727_c1_seq1  | -1.061125917 | -1.994480346 | 0.923205219 | 0.938848888 | -1.87894475  | -1.940502147 | ND           | -0.746957919 |
| comp174730_c0_seq8  | -1.207430531 | -0.596716915 | 0.119766669 | 0.14256073  | -0.70303007  | -0.940678725 | ND           | ND           |

|                     |              |              |             |             |              |              |              |              |
|---------------------|--------------|--------------|-------------|-------------|--------------|--------------|--------------|--------------|
| comp174780_c0_seq7  | -0.326705201 | -0.113931594 | 1.144398575 | 1.164212902 | -0.424364731 | -0.485922127 | -0.009683893 | ND           |
| comp174815_c1_seq2  | ND           | ND           | 1.783060316 | 1.801856716 | ND           | ND           | ND           | ND           |
| comp174832_c0_seq7  | ND           | -0.522799909 | 0.731802387 | 0.767385205 | ND           | -0.042852978 | -0.469704731 | ND           |
| comp174870_c2_seq2  | -1.699872914 | -1.186069311 | 1.327533363 | 1.289604837 | -1.371563711 | -1.433121108 | -1.558942865 | ND           |
| comp174870_c2_seq20 | -0.688651697 | -1.077938081 | 1.491330372 | 1.443094939 | -1.263432481 | ND           | ND           | ND           |
| comp174870_c2_seq5  | ND           | ND           | 0.742030047 | 0.724876663 | ND           | ND           | ND           | ND           |
| comp174870_c2_seq7  | ND           | -1.314684936 | 1.283020221 | 1.230772683 | ND           | ND           | ND           | ND           |
| comp174878_c0_seq13 | ND           | -0.639818162 | 0.532597378 | 0.525428215 | ND           | ND           | ND           | -0.71451503  |
| comp174882_c1_seq1  | -0.487050493 | -0.207330097 | 1.260259694 | 1.230917553 | -0.459771287 | -0.185536581 | -0.010328343 | -1.252063741 |
| comp174894_c0_seq11 | ND           | ND           | 0.797762569 | 0.829289043 | ND           | -1.562158993 | ND           | -1.5147428   |
| comp174894_c0_seq16 | ND           | ND           | 0.850455409 | 0.807419346 | -1.819208393 | -1.403644534 | ND           | -0.988251557 |
| comp174894_c0_seq2  | ND           | ND           | 0.712290199 | 0.661215551 | ND           | ND           | ND           | ND           |
| comp174894_c0_seq5  | ND           | ND           | 0.840588512 | 0.852210394 | ND           | -1.843106173 | -1.366867939 | ND           |
| comp174894_c0_seq6  | ND           | ND           | 0.812342928 | 0.758661636 | ND           | ND           | ND           | ND           |
| comp174905_c0_seq2  | -0.783878196 | -0.872134584 | 0.70330049  | 0.671456246 | -0.572074563 | -0.061833573 | -1.396275814 | -0.887245762 |
| comp174905_c0_seq22 | -1.067321879 | -0.905700794 | 0.693530882 | 0.692665089 | -0.313043944 | -0.002764134 | -1.278574348 | -1.054183876 |
| comp174905_c0_seq27 | -0.984215442 | -1.113864516 | 0.676599121 | 0.661509474 | -0.466850004 | -0.055564944 | -1.282618088 | -1.167372085 |
| comp174915_c0_seq27 | -1.418826764 | -1.067750459 | 0.813394923 | 0.788496993 | -0.380823692 | -0.072893713 | -1.578926711 | -1.530627499 |
| comp174915_c0_seq29 | -1.536516834 | -1.323743227 | 0.792743527 | 0.824903889 | -0.454879965 | -0.13943126  | -1.87270804  | -1.523378832 |
| comp174915_c0_seq34 | -0.930299557 | -1.097737192 | 0.798954218 | 0.751006504 | -0.425899096 | -0.052532917 | -1.3914295   | -1.394282809 |
| comp174915_c0_seq6  | -0.811444637 | -0.825067408 | 0.937826251 | 0.949323857 | -0.49692372  | -0.020459032 | -1.573604576 | -1.701396622 |
| comp174926_c0_seq33 | 0.338406536  | 0.467741074  | 1.301143525 | 1.328197307 | 0.55908186   | 0.289770196  | 0.627477576  | 0.303032112  |
| comp174926_c0_seq4  | 0.477311768  | 0.516683255  | 1.420970969 | 1.45764456  | 0.603116468  | 0.318993073  | 0.690169542  | 0.426638695  |
| comp174928_c0_seq23 | 0.054494877  | 0.155994072  | 1.157571017 | 1.102264662 | 0.364579259  | 0.20611185   | 0.32773726   | 0.096404622  |
| comp174933_c0_seq26 | ND           | -0.230404283 | 1.277803359 | 1.325482864 | 0.061222571  | ND           | -0.779369096 | ND           |
| comp174933_c0_seq8  | 1.296386414  | 1.49172638   | 2.697458201 | 2.653487928 | 1.799674013  | 1.836528321  | 1.124456703  | 1.074129322  |
| comp174970_c0_seq10 | -0.73948024  | -1.128766624 | 0.043648916 | 0.036479754 | ND           | -1.074788425 | -0.899580187 | -1.027372233 |
| comp174975_c0_seq1  | ND           | ND           | 0.454305169 | 0.47516473  | ND           | ND           | ND           | ND           |
| comp175009_c1_seq12 | -0.673224314 | -0.615352667 | 0.800100922 | 0.792931759 | -1.344915112 | ND           | ND           | -0.756996325 |
| comp175009_c1_seq2  | -0.55182813  | -0.40120243  | 0.984628692 | 0.97745953  | ND           | -1.762197579 | ND           | ND           |
| comp175020_c0_seq5  | 0.017963499  | 0.144550959  | 1.654790867 | 1.621292766 | -0.875576048 | -0.183805778 | 0.175926887  | -0.162718524 |

|                     |              |              |             |             |              |              |              |              |
|---------------------|--------------|--------------|-------------|-------------|--------------|--------------|--------------|--------------|
| comp175057_c0_seq7  | -1.165772951 | -0.555059336 | 0.82820957  | 0.771555044 | -0.059312499 | -0.086107789 | -0.179744863 | -0.249544962 |
| comp175089_c0_seq14 | 0.758845389  | 0.753720037  | 1.587154516 | 1.556784089 | 0.763164213  | 0.699319044  | 0.936420246  | 0.611480231  |
| comp175107_c1_seq1  | ND           | -0.582358765 | 0.243269289 | 0.184947604 | -0.864763179 | -0.44919932  | -1.052142332 | -0.878904383 |
| comp175115_c1_seq2  | -0.900714111 | -0.909789253 | 0.622777735 | 0.681425857 | -0.970344917 | -0.730872318 | -0.458754066 | -0.887576108 |
| comp175177_c0_seq5  | -0.129211178 | -0.781738997 | 1.275283125 | 1.28204974  | ND           | ND           | -0.427613823 | -0.37931461  |
| comp175197_c0_seq10 | -0.607132386 | -0.459299586 | 1.181391802 | 1.206364768 | -0.211876394 | 0.035283034  | -0.35040698  | -0.372145634 |
| comp175197_c0_seq16 | ND           | ND           | 0.380233987 | 0.390793591 | -1.153767213 | ND           | ND           | ND           |
| comp175197_c0_seq17 | -0.615742807 | -0.494049669 | 1.180679167 | 1.194075453 | -0.259038233 | -0.014102738 | -0.474812758 | -0.331957438 |
| comp175197_c0_seq19 | -0.889248246 | -0.676474639 | 1.177420174 | 1.186597356 | -0.181681248 | -0.011948338 | -0.373859284 | -0.369534009 |
| comp175197_c0_seq31 | -0.715342444 | -0.716448657 | 1.19000259  | 1.229136857 | -0.179907749 | -0.080613853 | -0.306806155 | -0.470810374 |
| comp175208_c0_seq3  | ND           | ND           | 0.204359244 | 0.197190081 | ND           | ND           | ND           | ND           |
| comp175244_c0_seq1  | -0.994608676 | -1.003683819 | 1.060362086 | 1.039029892 | -0.387545873 | -0.125796879 | -0.707550592 | -0.805379415 |
| comp175244_c0_seq13 | -0.82476795  | -0.629027682 | 1.127153226 | 1.107927527 | -0.195428752 | -0.0139481   | -0.593661271 | -0.811629947 |
| comp175244_c0_seq14 | -0.859661144 | -0.771826274 | 1.084086584 | 1.117695973 | -0.252598341 | -0.081025977 | -0.376308415 | -0.805130456 |
| comp175244_c0_seq15 | -0.720602098 | -0.734224868 | 1.182689531 | 1.203420431 | -0.064933961 | 0.141370275  | -0.482762036 | -0.610554082 |
| comp175244_c0_seq3  | -0.806241789 | -1.029196752 | 1.110426275 | 1.112211955 | -0.176902592 | -0.034340005 | -0.562649399 | -0.82306701  |
| comp175244_c0_seq7  | -0.699778224 | -0.884944626 | 1.022037405 | 1.008993638 | -0.526370982 | -0.219951593 | -0.956788184 | -0.632282559 |
| comp175265_c0_seq37 | -0.246107292 | 0.089238319  | 1.594836753 | 1.581424629 | 0.010508686  | -0.194955286 | 0.601280783  | -0.364248204 |
| comp175299_c0_seq2  | -0.471592081 | -0.459178308 | 1.007665447 | 1.016358426 | -0.52728711  | -0.405200109 | -0.650997184 | -0.865939406 |
| comp175299_c0_seq6  | -0.409559855 | -0.617002652 | 1.230901797 | 1.219489668 | -0.666277305 | -0.563024453 | -0.552626463 | -0.840119352 |
| comp175316_c0_seq1  | -1.112794892 | -1.979202531 | 0.789810104 | 0.75424557  | -1.56263694  | -1.226254328 | -1.750016094 | -1.576778145 |
| comp175356_c1_seq7  | -1.457969534 | -1.546225923 | 0.667582302 | 0.715930467 | -1.430690328 | -0.79327772  | -1.317039486 | -1.143801536 |
| comp175418_c1_seq7  | -1.431129032 | ND           | 1.458785771 | 1.447778929 | -1.704879821 | -0.812194708 | -1.290198983 | -0.940869774 |
| comp175421_c1_seq11 | -0.973131097 | -0.526274284 | 1.91950429  | 1.906021537 | ND           | -1.551477331 | ND           | ND           |
| comp175421_c1_seq12 | -1.271340284 | -0.803294172 | 1.71658691  | 1.676346163 | ND           | -1.402528487 | ND           | ND           |
| comp175421_c1_seq15 | -1.232511496 | -0.524887867 | 1.917274046 | 1.889434514 | ND           | -1.391728423 | ND           | ND           |
| comp175421_c1_seq16 | -1.262099627 | -0.770572419 | 1.714293302 | 1.682210506 | -1.933790425 | -1.995347821 | ND           | ND           |
| comp175421_c1_seq3  | -0.926453433 | -0.575377128 | 1.512294306 | 1.489242    | -1.802264213 | -1.86382161  | ND           | ND           |
| comp175421_c1_seq6  | -0.923196156 | -0.732698944 | 1.688914954 | 1.647077573 | -1.594886954 | -1.65644435  | ND           | ND           |
| comp175528_c1_seq4  | -0.60537054  | -1.061603714 | 1.570078632 | 1.506620113 | -0.344008127 | -0.254297848 | -0.610568527 | -0.437330577 |
| comp175543_c0_seq5  | -0.222562259 | -0.419963117 | 2.014352243 | 1.954223431 | 0.682983351  | 0.368700639  | -0.558753465 | -0.686545511 |

|                     |              |              |             |             |              |              |              |              |
|---------------------|--------------|--------------|-------------|-------------|--------------|--------------|--------------|--------------|
| comp175570_c0_seq3  | -0.538946524 | -0.076295444 | 1.113577344 | 1.108034755 | -0.050936479 | -0.043167384 | -0.507160945 | 0.03183233   |
| comp175570_c0_seq5  | ND           | -0.092272533 | 1.150180873 | 1.146692195 | -1.374676947 | -0.959113088 | -0.5620561   | 0.129695789  |
| comp175588_c0_seq3  | ND           | ND           | 1.184950307 | 1.1435829   | -1.621085991 | -0.983673384 | -1.50743515  | -0.790129156 |
| comp175588_c0_seq5  | -1.754138671 | -1.541365064 | 1.279105397 | 1.223218446 | -1.24973821  | -1.135204347 | -1.613208623 | -0.928087312 |
| comp175617_c1_seq7  | -0.810372339 | -0.694508745 | 0.993946116 | 0.980528004 | -0.159843842 | -0.128647185 | -0.113139789 | -0.320113082 |
| comp175668_c0_seq12 | ND           | ND           | 0.789665995 | 0.79546181  | ND           | ND           | ND           | ND           |
| comp175685_c0_seq2  | ND           | ND           | 0.311495297 | 0.274362911 | ND           | ND           | ND           | -1.032527124 |
| comp175719_c0_seq1  | ND           | ND           | 0.394536964 | 0.387367801 | ND           | ND           | ND           | ND           |
| comp175753_c0_seq14 | ND           | -1.474125722 | 0.145447849 | 0.101897889 | -1.756530135 | -1.818087532 | -1.642879294 | -1.77067134  |
| comp175764_c0_seq11 | -0.802258604 | -1.077601636 | 0.347293509 | 0.342453009 | -0.774979397 | -1.096174104 | -0.457208573 | -0.767931302 |
| comp175776_c0_seq9  | -0.776728297 | -0.864984686 | 1.576797842 | 1.551747822 | -1.050479086 | -0.935945223 | -1.23785824  | -0.086896685 |
| comp175941_c0_seq1  | 1.252962405  | 1.343520134  | 2.086940487 | 2.057335057 | 1.131922931  | 1.017287091  | 1.084589932  | 0.797097043  |
| comp176003_c0_seq1  | ND           | ND           | 0.94633347  | 0.979829734 | ND           | ND           | ND           | ND           |
| comp176013_c0_seq1  | ND           | ND           | 0.670456239 | 0.719768432 | -0.194538179 | ND           | ND           | -1.053777424 |
| comp176031_c0_seq1  | -0.366723777 | -0.93210142  | 0.698951969 | 0.710266212 | ND           | ND           | ND           | ND           |
| comp176071_c0_seq1  | ND           | ND           | 0.835064417 | 0.816614243 | ND           | ND           | ND           | ND           |
| comp176083_c0_seq1  | -0.562740296 | -0.474905425 | 0.940548164 | 0.878331435 | -0.35936983  | -0.898048481 | ND           | -0.850632289 |
| comp176354_c0_seq1  | -1.060772545 | -0.370877683 | 0.905626455 | 0.94563637  | ND           | -1.095050734 | ND           | -0.746604546 |
| comp176383_c0_seq1  | ND           | ND           | 0.32202139  | 0.288523289 | ND           | ND           | ND           | ND           |
| comp176394_c0_seq1  | ND           | ND           | 0.939440994 | 0.982681335 | ND           | ND           | ND           | ND           |
| comp176401_c0_seq1  | ND           | ND           | 0.536734706 | 0.519581323 | ND           | ND           | ND           | ND           |
| comp176496_c0_seq1  | -0.54122629  | 0.007339419  | 0.630083037 | 0.592245054 | -0.322061557 | -0.131806981 | -0.877417496 | -0.783360793 |
| comp176528_c0_seq1  | ND           | ND           | 0.43776059  | 0.384015285 | ND           | ND           | ND           | ND           |
| comp176585_c0_seq1  | ND           | ND           | 0.844700506 | 0.778825683 | ND           | ND           | ND           | ND           |
| comp176628_c0_seq1  | -1.114255935 | -0.600452332 | 0.598292147 | 0.603712111 | ND           | -0.303436085 | ND           | ND           |
| comp176643_c0_seq1  | ND           | ND           | 0.60345583  | 0.612677083 | ND           | ND           | ND           | ND           |
| comp176883_c0_seq1  | ND           | ND           | 0.806765885 | 0.810320588 | ND           | -1.010641461 | ND           | ND           |
| comp176960_c0_seq1  | -1.028683028 | -0.690970685 | 0.446116893 | 0.513193759 | -0.478525076 | -0.363991214 | -0.364874234 | -0.793696276 |
| comp177100_c0_seq1  | ND           | ND           | 0.419474611 | 0.46345797  | ND           | -0.999992726 | ND           | ND           |
| comp177104_c0_seq1  | ND           | ND           | 0.75923604  | 0.724914631 | -0.913067858 | ND           | ND           | ND           |
| comp177105_c0_seq1  | ND           | ND           | 0.58921539  | 0.535049665 | ND           | ND           | ND           | ND           |

|                    |              |              |             |             |              |              |              |              |
|--------------------|--------------|--------------|-------------|-------------|--------------|--------------|--------------|--------------|
| comp177186_c0_seq1 | ND           | ND           | 0.486578044 | 0.534631672 | -1.13703393  | ND           | ND           | -1.151175134 |
| comp177284_c0_seq1 | ND           | ND           | 1.04423859  | 0.99856243  | ND           | ND           | ND           | ND           |
| comp177362_c0_seq1 | ND           | ND           | 0.906420325 | 0.884143744 | ND           | ND           | ND           | ND           |
| comp177375_c0_seq1 | ND           | ND           | 0.3849495   | 0.412542444 | ND           | ND           | ND           | ND           |
| comp177518_c0_seq1 | ND           | -1.417969413 | 0.382835058 | 0.321308233 | ND           | ND           | ND           | ND           |
| comp177555_c0_seq1 | ND           | ND           | 0.711361227 | 0.662799379 | ND           | ND           | ND           | ND           |
| comp177681_c0_seq1 | ND           | -0.734055585 | 0.464688894 | 0.457519731 | -0.61851999  | -0.680077386 | -0.504869148 | -0.632661194 |
| comp177992_c0_seq1 | ND           | ND           | 0.4274485   | 0.438762743 | ND           | ND           | ND           | ND           |
| comp178070_c0_seq1 | ND           | ND           | 0.672120603 | 0.626322038 | -0.676645958 | ND           | -0.739086375 | ND           |
| comp178133_c0_seq1 | ND           | ND           | 0.65036377  | 0.68739827  | ND           | ND           | ND           | ND           |
| comp178295_c0_seq1 | -1.166743442 | -0.777878576 | 0.128269075 | 0.153284595 | ND           | -0.899991636 | ND           | ND           |
| comp178399_c0_seq1 | -0.792182474 | ND           | 0.190519036 | 0.190903011 | ND           | ND           | ND           | ND           |
| comp178466_c0_seq1 | ND           | ND           | 0.698586939 | 0.740404237 | ND           | ND           | ND           | ND           |
| comp178507_c0_seq1 | -1.309953475 | -1.222118604 | 0.587119033 | 0.638463493 | -0.805553013 | -1.168140406 | -0.691902171 | -0.819694218 |
| comp178560_c0_seq1 | ND           | ND           | 0.737132018 | 0.678810333 | ND           | ND           | ND           | ND           |
| comp178591_c0_seq1 | ND           | ND           | 0.39759441  | 0.420388471 | -0.504383575 | ND           | -0.788672742 | ND           |
| comp178603_c0_seq1 | ND           | ND           | 0.629888184 | 0.606924754 | ND           | ND           | ND           | ND           |
| comp178701_c0_seq1 | ND           | ND           | 0.748054467 | 0.783919937 | ND           | ND           | ND           | ND           |
| comp178704_c0_seq1 | -1.081313247 | ND           | 0.562153916 | 0.539744786 | ND           | ND           | ND           | ND           |
| comp178728_c0_seq1 | ND           | ND           | 0.595908238 | 0.604533343 | ND           | -1.05080288  | ND           | ND           |
| comp178857_c0_seq1 | ND           | ND           | 0.098871707 | 0.033710598 | ND           | ND           | ND           | -0.972149442 |
| comp178916_c0_seq1 | ND           | ND           | 0.524401589 | 0.49375133  | ND           | ND           | ND           | ND           |
| comp179104_c0_seq1 | ND           | ND           | 0.556325246 | 0.498003561 | ND           | ND           | ND           | ND           |
| comp179128_c0_seq1 | -1.127188736 | ND           | 0.572394368 | 0.538072959 | -0.25481149  | -0.559406935 | -0.685228692 | ND           |
| comp179262_c0_seq1 | -0.235248556 | ND           | 0.359272783 | 0.409142121 | ND           | ND           | -0.737771184 | ND           |
| comp179364_c0_seq1 | ND           | ND           | 0.343384442 | 0.398363186 | ND           | ND           | -0.810698027 | ND           |
| comp179718_c0_seq1 | -0.670801466 | -0.935149113 | 0.355365739 | 0.406188523 | -1.120643514 | -0.705079655 | ND           | -0.657663463 |
| comp180007_c0_seq1 | ND           | ND           | 0.103852049 | 0.169233553 | ND           | ND           | ND           | ND           |
| comp180254_c0_seq1 | ND           | ND           | 0.115931814 | 0.108762652 | ND           | -0.839778229 | -0.664569991 | -0.792362037 |
| comp180524_c0_seq1 | ND           | ND           | 0.140558929 | 0.174782452 | ND           | ND           | ND           | ND           |
| comp180603_c0_seq1 | ND           | ND           | 0.678736752 | 0.671567589 | ND           | ND           | ND           | ND           |

|                    |              |              |              |             |              |              |              |              |
|--------------------|--------------|--------------|--------------|-------------|--------------|--------------|--------------|--------------|
| comp180659_c0_seq1 | ND           | -0.67498998  | 0.469396836  | 0.442483615 | ND           | -0.621011781 | ND           | ND           |
| comp180717_c0_seq1 | -0.851925162 | -0.639151555 | 0.505235262  | 0.468102875 | ND           | ND           | ND           | -0.537757164 |
| comp180921_c0_seq1 | -0.738181899 | -1.127468284 | 0.503585106  | 0.532628116 | -1.011932688 | -0.772460089 | ND           | -0.424013901 |
| comp180953_c0_seq1 | ND           | -1.003395538 | 0.396263783  | 0.462880835 | -0.489919934 | -0.949417339 | ND           | -0.299941156 |
| comp181080_c0_seq1 | ND           | ND           | 0.462914709  | 0.407440867 | ND           | ND           | ND           | ND           |
| comp181102_c0_seq1 | ND           | -1.204694713 | 0.479604189  | 0.43767292  | ND           | ND           | ND           | ND           |
| comp181186_c0_seq1 | -0.554879547 | ND           | 0.279402131  | 0.272232968 | -0.828630336 | -0.413066478 | ND           | -0.842771541 |
| comp181429_c0_seq1 | ND           | ND           | 0.302425834  | 0.260494565 | ND           | -0.725834877 | ND           | ND           |
| comp181709_c0_seq1 | -1.349886132 | ND           | 0.262546797  | 0.271171901 | ND           | ND           | -1.208956083 | ND           |
| comp181871_c0_seq1 | ND           | ND           | -0.009945487 | 0.034037873 | ND           | ND           | ND           | ND           |
| comp182114_c0_seq1 | ND           | ND           | 0.469601644  | 0.478226748 | ND           | ND           | ND           | ND           |
| comp182157_c0_seq1 | ND           | ND           | 0.39912301   | 0.440258527 | ND           | ND           | ND           | ND           |
| comp182374_c0_seq1 | ND           | ND           | 0.362689597  | 0.316011893 | ND           | ND           | ND           | ND           |
| comp182379_c0_seq1 | ND           | ND           | 0.311721433  | 0.329375854 | ND           | ND           | ND           | ND           |
| comp182771_c0_seq1 | ND           | ND           | 0.132303875  | 0.155097936 | ND           | ND           | ND           | ND           |
| comp182787_c0_seq1 | ND           | ND           | 0.461483754  | 0.477795687 | ND           | ND           | ND           | ND           |
| comp182846_c0_seq1 | -0.990409764 | -0.601544898 | 0.36675066   | 0.329618274 | ND           | ND           | -1.150509711 | ND           |
| comp182858_c0_seq1 | ND           | -0.917589037 | 0.351736516  | 0.344567353 | ND           | ND           | ND           | -1.117224642 |
| comp183049_c0_seq1 | ND           | ND           | 0.547504424  | 0.521851856 | ND           | ND           | ND           | ND           |
| comp183071_c0_seq1 | -1.489055052 | -1.57731144  | 0.236082157  | 0.241147451 | ND           | -1.523333241 | ND           | -1.475917049 |
| comp183200_c0_seq1 | ND           | ND           | 0.44958453   | 0.502413297 | ND           | ND           | ND           | ND           |
| comp183289_c0_seq1 | ND           | ND           | 0.599965064  | 0.615072296 | ND           | ND           | ND           | ND           |
| comp183501_c0_seq1 | ND           | ND           | 0.269245859  | 0.220684011 | ND           | -0.987494181 | ND           | ND           |
| comp183579_c0_seq1 | ND           | ND           | 0.161964349  | 0.103642664 | ND           | ND           | -0.832417276 | ND           |
| comp183683_c0_seq1 | -0.945217708 | -1.033474097 | 0.332761469  | 0.359016062 | -1.218968497 | -0.678465902 | ND           | -0.755988447 |
| comp184055_c0_seq1 | ND           | ND           | 0.202055289  | 0.16012402  | -1.065678021 | ND           | ND           | -1.079819226 |
| comp184314_c0_seq1 | -0.555672056 | -0.740838457 | 0.193598833  | 0.231011803 | -0.829422845 | -1.112828991 | -1.414742007 | -0.843564049 |
| comp184322_c0_seq1 | ND           | ND           | 0.253588137  | 0.220090036 | -1.130650742 | ND           | ND           | ND           |
| comp184332_c0_seq1 | ND           | ND           | 0.423521231  | 0.448536752 | ND           | -0.604739479 | ND           | ND           |
| comp184345_c0_seq1 | ND           | ND           | 0.231034832  | 0.178108179 | ND           | ND           | ND           | ND           |
| comp184400_c0_seq1 | -1.213565974 | -0.699762371 | 0.222775696  | 0.164454011 | -0.709165512 | -1.247844164 | ND           | ND           |



|                     |              |              |             |             |              |              |              |              |
|---------------------|--------------|--------------|-------------|-------------|--------------|--------------|--------------|--------------|
| comp184709_c0_seq1  | ND           | ND           | 0.580804113 | 0.573634951 | ND           | ND           | ND           | ND           |
| comp184889_c0_seq1  | ND           | ND           | 0.135724432 | 0.12855527  | ND           | ND           | ND           | ND           |
| comp184935_c0_seq1  | ND           | -1.046201586 | 0.264516652 | 0.215954805 | -0.328605999 | -0.691193391 | -0.817015149 | -0.643777199 |
| comp185586_c0_seq1  | ND           | -0.652939839 | 0.190416981 | 0.121099912 | -0.537404244 | -1.201021632 | -0.724783398 | -0.551545448 |
| comp185706_c0_seq1  | ND           | ND           | 0.312216517 | 0.379680973 | ND           | ND           | ND           | ND           |
| comp186926_c0_seq1  | -0.743352133 | -0.752427275 | 0.081169708 | 0.093305701 | -0.716072926 | -0.698449077 | -1.301392089 | -1.128154139 |
| comp187049_c0_seq1  | ND           | ND           | 0.184365915 | 0.2351887   | ND           | ND           | ND           | ND           |
| comp188082_c0_seq1  | -0.985287444 | ND           | 0.15002423  | 0.142855067 | ND           | ND           | ND           | ND           |
| comp188135_c0_seq1  | ND           | ND           | 0.310727314 | 0.285829384 | ND           | -1.302560049 | ND           | -0.653083866 |
| comp188323_c0_seq1  | ND           | ND           | 0.492074694 | 0.430547869 | -0.716072926 | -0.652691586 | -1.079543339 | -0.304245398 |
| comp188543_c0_seq1  | ND           | ND           | 0.285392495 | 0.22497782  | ND           | ND           | ND           | ND           |
| comp188635_c0_seq1  | ND           | -0.497206163 | 0.284002751 | 0.242071482 | -0.983730559 | -1.045287956 | ND           | ND           |
| comp188863_c0_seq1  | ND           | -0.673143226 | 0.295152332 | 0.354929959 | ND           | -0.619165027 | -0.921078043 | -1.349900085 |
| comp189107_c0_seq1  | ND           | -1.063114305 | 0.461483754 | 0.429491007 | ND           | ND           | ND           | -0.961719913 |
| comp189167_c0_seq1  | ND           | ND           | 0.233793397 | 0.238523457 | ND           | ND           | ND           | ND           |
| comp189551_c0_seq1  | ND           | ND           | 0.49436498  | 0.449407257 | ND           | -1.101193616 | -0.925985378 | -1.053777424 |
| comp189658_c0_seq1  | ND           | -0.876723089 | 0.346844974 | 0.406622601 | -1.062217489 | -0.646653631 | ND           | -1.076358693 |
| comp189788_c0_seq1  | ND           | ND           | 0.147783004 | 0.162890236 | ND           | ND           | ND           | ND           |
| comp189811_c0_seq1  | -0.540771293 | -0.930057678 | 0.485395911 | 0.478226748 | ND           | -0.398958224 | ND           | ND           |
| comp190076_c0_seq1  | ND           | ND           | 0.32061379  | 0.383080555 | ND           | ND           | ND           | ND           |
| comp190114_c0_seq1  | ND           | -1.566564498 | 0.282544652 | 0.329060348 | ND           | ND           | ND           | -0.687018856 |
| comp1911751_c0_seq1 | -1.122920451 | -1.21117684  | 0.400571394 | 0.362733412 | ND           | ND           | ND           | -1.109782449 |
| comp191943_c0_seq1  | ND           | ND           | 0.135546406 | 0.128377244 | ND           | ND           | ND           | -0.986627265 |
| comp192160_c0_seq1  | -0.864742956 | ND           | 0.161424249 | 0.154255086 | ND           | ND           | ND           | ND           |
| comp192507_c0_seq1  | ND           | ND           | 0.250630388 | 0.310408015 | ND           | ND           | ND           | -0.695452024 |
| comp194028_c0_seq1  | ND           | ND           | 0.181303897 | 0.208896841 | ND           | ND           | ND           | ND           |
| comp194082_c0_seq1  | ND           | ND           | 0.392261975 | 0.409916396 | ND           | -1.053534301 | ND           | ND           |
| comp194397_c0_seq1  | ND           | ND           | 0.281389752 | 0.223068067 | ND           | -0.888200112 | ND           | ND           |
| comp194534_c0_seq1  | ND           | ND           | 0.494533279 | 0.502087373 | ND           | ND           | ND           | ND           |
| comp194603_c0_seq1  | ND           | ND           | 0.171702301 | 0.123140454 | ND           | ND           | -0.608799504 | -0.73659155  |
| comp194936_c0_seq1  | ND           | ND           | 0.229794749 | 0.197802003 | ND           | ND           | ND           | ND           |

|                    |              |              |              |             |              |              |              |              |
|--------------------|--------------|--------------|--------------|-------------|--------------|--------------|--------------|--------------|
| comp195001_c0_seq1 | ND           | -0.533140743 | 0.134124819  | 0.081198166 | -1.019665139 | ND           | -0.906014297 | -0.556685088 |
| comp195074_c0_seq1 | ND           | ND           | 0.250630388  | 0.243461226 | ND           | ND           | ND           | ND           |
| comp195219_c0_seq1 | -1.17490621  | -1.263162599 | 0.167530957  | 0.12932756  | -1.448656999 | ND           | ND           | -1.462798203 |
| comp195787_c0_seq1 | ND           | ND           | 0.336545017  | 0.357404578 | ND           | ND           | ND           | ND           |
| comp195918_c0_seq1 | ND           | ND           | 0.476629917  | 0.476409614 | ND           | -1.531109127 | ND           | -1.00657168  |
| comp195985_c0_seq1 | ND           | -0.950074791 | 0.194312025  | 0.157179639 | ND           | ND           | ND           | ND           |
| comp196742_c0_seq1 | ND           | ND           | 0.012391223  | 0.07216885  | ND           | ND           | ND           | ND           |
| comp197043_c0_seq1 | ND           | -0.455998441 | 0.149119214  | 0.232126681 | ND           | -0.481201489 | ND           | -0.433785296 |
| comp197203_c0_seq1 | ND           | ND           | 0.459790596  | 0.424592709 | ND           | ND           | ND           | ND           |
| comp197461_c0_seq1 | ND           | -1.192553542 | 0.076772011  | 0.023845358 | ND           | -0.837545348 | ND           | -0.790129156 |
| comp197542_c0_seq1 | ND           | ND           | 0.267663728  | 0.290457788 | ND           | ND           | ND           | -1.04639547  |
| comp198170_c0_seq1 | -0.640946694 | -1.030233078 | 0.142182462  | 0.186165822 | -0.437576228 | -0.675224884 | -0.500016645 | -0.627808691 |
| comp199524_c0_seq1 | ND           | ND           | 0.327388786  | 0.264103681 | -1.043885116 | ND           | ND           | -1.359056316 |
| comp199899_c0_seq1 | ND           | ND           | 0.282012754  | 0.34947721  | ND           | ND           | ND           | ND           |
| comp200257_c0_seq1 | ND           | -1.016182364 | 0.182562115  | 0.12103529  | -1.201676765 | -1.263234161 | ND           | ND           |
| comp200344_c0_seq1 | ND           | ND           | 0.151297527  | 0.163433519 | ND           | ND           | ND           | -1.359056316 |
| comp201028_c0_seq1 | ND           | ND           | 0.332248076  | 0.325078913 | ND           | ND           | ND           | ND           |
| comp201667_c0_seq1 | ND           | ND           | 0.414574198  | 0.477442902 | ND           | ND           | ND           | ND           |
| comp201730_c0_seq1 | ND           | ND           | 0.108096534  | 0.142320057 | ND           | ND           | ND           | ND           |
| comp202092_c0_seq1 | ND           | ND           | 0.181303897  | 0.215527419 | ND           | ND           | ND           | ND           |
| comp202276_c0_seq1 | ND           | -1.128766624 | -0.014343031 | 0.036479754 | ND           | ND           | ND           | ND           |
| comp202787_c0_seq1 | ND           | -0.85778627  | 0.189690534  | 0.103340125 | -1.04328067  | -0.405868062 | -0.929629828 | ND           |
| comp203281_c0_seq1 | ND           | -0.705812342 | 0.216725725  | 0.209556562 | -0.891306743 | ND           | ND           | ND           |
| comp204930_c0_seq1 | ND           | ND           | 0.343384442  | 0.336215279 | ND           | ND           | ND           | ND           |
| comp20562_c0_seq1  | ND           | ND           | -0.018643011 | 0.041134616 | ND           | -1.012141616 | ND           | ND           |
| comp206292_c0_seq1 | ND           | -0.629027682 | 0.163176616  | 0.110249963 | ND           | -1.052170738 | ND           | -1.004754546 |
| comp207370_c0_seq1 | ND           | -0.798236159 | 0.124301908  | 0.117132746 | -0.983730559 | -0.74425796  | -0.870079717 | ND           |
| comp207730_c0_seq1 | -0.649801939 | -0.738058328 | 0.207960835  | 0.264460752 | ND           | -0.684080129 | -0.633810627 | -0.636663937 |
| comp209081_c0_seq1 | ND           | ND           | 0.175517504  | 0.168348342 | ND           | ND           | ND           | ND           |
| comp209106_c0_seq1 | ND           | -1.292141639 | 0.153275173  | 0.146106011 | ND           | ND           | ND           | ND           |
| comp209239_c0_seq1 | ND           | ND           | 0.029389469  | 0.022220306 | ND           | ND           | ND           | -1.179934378 |

|                    |              |              |              |             |              |              |              |              |
|--------------------|--------------|--------------|--------------|-------------|--------------|--------------|--------------|--------------|
| comp209722_c0_seq1 | ND           | ND           | 0.154675919  | 0.147506756 | ND           | ND           | ND           | ND           |
| comp210735_c0_seq1 | ND           | ND           | 0.110307712  | 0.170085339 | ND           | ND           | ND           | -0.8357747   |
| comp210794_c0_seq1 | ND           | ND           | 0.11172071   | 0.074588324 | ND           | ND           | ND           | ND           |
| comp211110_c0_seq1 | ND           | ND           | 0.161498992  | 0.186514513 | ND           | ND           | ND           | ND           |
| comp211232_c0_seq1 | ND           | ND           | 0.234239972  | 0.189282249 | ND           | ND           | ND           | ND           |
| comp211243_c0_seq1 | -1.163825439 | -0.774960573 | 0.221363708  | 0.214194545 | -0.835516237 | -0.499133625 | ND           | ND           |
| comp211843_c0_seq1 | ND           | ND           | 0.250630388  | 0.243461226 | ND           | ND           | ND           | ND           |
| comp211976_c0_seq1 | ND           | ND           | 0.090127228  | 0.024966118 | ND           | ND           | -0.853101875 | ND           |
| comp212072_c0_seq1 | ND           | ND           | -0.003713144 | 0.030510378 | ND           | ND           | ND           | ND           |
| comp212105_c0_seq1 | ND           | ND           | 0.194086359  | 0.186917196 | ND           | ND           | ND           | ND           |
| comp212536_c0_seq1 | ND           | ND           | 0.21160628   | 0.153284595 | ND           | ND           | ND           | ND           |
| comp212665_c0_seq1 | ND           | ND           | 0.207309339  | 0.200140176 | ND           | -1.049430701 | ND           | -1.002014508 |
| comp213505_c0_seq1 | ND           | ND           | 0.385095408  | 0.343164139 | ND           | ND           | ND           | ND           |
| comp213538_c0_seq1 | ND           | -1.123549811 | 0.291903778  | 0.342726563 | -0.70698422  | ND           | ND           | ND           |
| comp214019_c0_seq1 | ND           | -0.757536681 | 0.210758876  | 0.157832223 | -0.545091073 | ND           | ND           | -0.957172286 |
| comp215026_c0_seq1 | ND           | ND           | 0.233294826  | 0.226125663 | ND           | -0.911471454 | ND           | ND           |
| comp215728_c0_seq1 | ND           | ND           | 0.234239972  | 0.181313319 | ND           | ND           | ND           | ND           |
| comp216291_c0_seq1 | ND           | ND           | 0.236929111  | 0.191971387 | ND           | ND           | -0.405269997 | -1.010183297 |
| comp216363_c0_seq1 | ND           | -1.161229019 | 0.108096534  | 0.055169881 | ND           | ND           | ND           | -1.059834628 |
| comp216727_c0_seq1 | ND           | ND           | 0.069923842  | 0.129701469 | ND           | ND           | ND           | ND           |
| comp217051_c0_seq1 | ND           | -0.439412388 | 0.269245859  | 0.220684011 | -0.624906789 | -0.510372926 | -0.511255947 | -0.462956734 |
| comp218857_c0_seq1 | -1.255828118 | -1.344084506 | 0.323181056  | 0.260494565 | ND           | -0.591136303 | -0.813868073 | ND           |
| comp219237_c0_seq1 | ND           | ND           | 0.078267002  | 0.071097839 | ND           | ND           | ND           | -0.867815411 |
| comp219553_c0_seq1 | ND           | ND           | 0.235246449  | 0.200048563 | ND           | ND           | ND           | ND           |
| comp219612_c0_seq1 | ND           | -0.675603824 | 0.395354075  | 0.313551294 | -0.435129492 | ND           | ND           | -0.750300692 |
| comp220201_c0_seq1 | ND           | ND           | 0.172245283  | 0.16507612  | ND           | ND           | ND           | ND           |
| comp220327_c0_seq1 | ND           | ND           | 0.152978625  | 0.09465694  | ND           | ND           | ND           | ND           |
| comp220756_c0_seq1 | ND           | ND           | 0.326309241  | 0.270835398 | ND           | ND           | ND           | ND           |
| comp220894_c0_seq1 | -0.910791821 | -1.300078206 | 0.224519853  | 0.263108181 | -0.33944457  | -0.945070011 | ND           | -0.897653819 |
| comp222020_c0_seq1 | ND           | -0.765089819 | 0.048303778  | 0.099126563 | ND           | ND           | -0.836933377 | ND           |
| comp222293_c0_seq1 | ND           | ND           | 0.127212825  | 0.120043662 | -1.067969818 | -0.65240596  | ND           | -0.781081027 |

|                    |              |              |              |             |              |              |              |              |
|--------------------|--------------|--------------|--------------|-------------|--------------|--------------|--------------|--------------|
| comp222585_c0_seq1 | ND           | ND           | 0.128484552  | 0.121315389 | ND           | ND           | ND           | -0.99368912  |
| comp222756_c0_seq1 | ND           | ND           | 0.00759234   | 0.000423177 | -0.924348869 | ND           | ND           | ND           |
| comp223099_c0_seq1 | ND           | ND           | 0.279774118  | 0.214613008 | -1.078135823 | -0.838663224 | ND           | -1.092277027 |
| comp223248_c0_seq1 | ND           | ND           | 0.137622512  | 0.130453349 | ND           | ND           | ND           | ND           |
| comp223568_c0_seq1 | ND           | -0.876723089 | -0.005337544 | 0.038645815 | -1.062217489 | ND           | ND           | ND           |
| comp223673_c0_seq1 | ND           | ND           | 0.438359955  | 0.431190792 | ND           | ND           | ND           | ND           |
| comp224554_c0_seq1 | -0.846892725 | -0.935149113 | 0.147089796  | 0.139920634 | -1.120643514 | -1.18220091  | -1.006992672 | ND           |
| comp225557_c0_seq1 | ND           | ND           | -0.030461277 | 0.02931635  | ND           | ND           | ND           | ND           |
| comp227310_c0_seq1 | ND           | ND           | 0.293217832  | 0.253863986 | ND           | ND           | ND           | ND           |
| comp227389_c0_seq1 | ND           | ND           | 0.123448887  | 0.178427631 | -1.144284424 | ND           | -0.553512327 | ND           |
| comp230378_c0_seq1 | ND           | ND           | 0.33706732   | 0.36208284  | ND           | ND           | ND           | ND           |
| comp230697_c0_seq1 | ND           | ND           | 0.09908207   | 0.149904855 | ND           | ND           | ND           | ND           |
| comp230949_c0_seq1 | ND           | ND           | 0.359774858  | 0.398363186 | ND           | ND           | ND           | ND           |
| comp231688_c0_seq1 | ND           | ND           | 0.055718408  | 0.00715656  | ND           | ND           | ND           | ND           |
| comp232025_c0_seq1 | ND           | ND           | 0.171021055  | 0.129089786 | ND           | ND           | ND           | ND           |
| comp232800_c0_seq1 | ND           | ND           | 0.316326209  | 0.286880651 | ND           | ND           | ND           | ND           |
| comp233071_c0_seq1 | ND           | ND           | -0.012611046 | 0.047166581 | ND           | ND           | ND           | ND           |
| comp235381_c0_seq1 | ND           | ND           | 0.235390422  | 0.286213206 | ND           | ND           | ND           | ND           |
| comp235815_c0_seq1 | ND           | ND           | 0.237174406  | 0.230005243 | ND           | ND           | ND           | ND           |
| comp236054_c0_seq1 | ND           | ND           | 0.106295725  | 0.150279085 | ND           | ND           | ND           | ND           |
| comp237304_c0_seq1 | ND           | ND           | 0.213306065  | 0.206136903 | ND           | ND           | ND           | ND           |
| comp239110_c0_seq1 | ND           | ND           | 0.104800734  | 0.039639625 | ND           | ND           | ND           | ND           |
| comp239898_c0_seq1 | ND           | ND           | 0.050472336  | 0.089060664 | ND           | ND           | ND           | ND           |
| comp240457_c0_seq1 | ND           | ND           | 0.197625861  | 0.190456698 | ND           | ND           | ND           | ND           |
| comp240638_c0_seq1 | ND           | ND           | 0.121535692  | 0.146551213 | -1.146197618 | -1.207755015 | ND           | -0.859308827 |
| comp241426_c0_seq1 | ND           | ND           | 0.029259148  | 0.052053209 | ND           | ND           | ND           | ND           |
| comp242396_c0_seq1 | ND           | ND           | 0.006911093  | 0.057733878 | -0.991976905 | ND           | ND           | -1.006118109 |
| comp242444_c0_seq1 | ND           | ND           | 0.478083016  | 0.440950629 | ND           | ND           | ND           | ND           |
| comp243548_c0_seq1 | ND           | ND           | 0.392157262  | 0.417172783 | ND           | ND           | ND           | ND           |
| comp243615_c0_seq1 | -0.645799197 | ND           | 0.188482482  | 0.181313319 | ND           | ND           | -0.805899144 | ND           |
| comp243716_c0_seq1 | ND           | ND           | 0.284101871  | 0.306895932 | ND           | ND           | ND           | ND           |

|                    |    |              |             |              |              |              |              |              |
|--------------------|----|--------------|-------------|--------------|--------------|--------------|--------------|--------------|
| comp244082_c0_seq1 | ND | ND           | 0.045467681 | -0.007458972 | ND           | ND           | ND           | ND           |
| comp244701_c0_seq1 | ND | ND           | 0.164544474 | 0.111617821  | ND           | ND           | ND           | ND           |
| comp246127_c0_seq1 | ND | ND           | 0.167920323 | 0.180056315  | ND           | ND           | ND           | ND           |
| comp246716_c0_seq1 | ND | ND           | 0.352339284 | 0.312985438  | ND           | ND           | ND           | ND           |
| comp246939_c0_seq1 | ND | ND           | 0.160453758 | 0.095292648  | ND           | ND           | ND           | ND           |
| comp247004_c0_seq1 | ND | ND           | 0.130490535 | 0.123321372  | ND           | ND           | ND           | ND           |
| comp247984_c0_seq1 | ND | ND           | 0.125691652 | 0.067369967  | ND           | -0.742868216 | -0.567659978 | ND           |
| comp248263_c0_seq1 | ND | ND           | 0.011014694 | 0.003845531  | ND           | ND           | ND           | ND           |
| comp249521_c0_seq1 | ND | ND           | 0.118004823 | 0.11083566   | ND           | ND           | ND           | ND           |
| comp249977_c0_seq1 | ND | ND           | 0.061377683 | 0.054208521  | ND           | ND           | ND           | ND           |
| comp253523_c0_seq1 | ND | ND           | 0.058148713 | 0.11792634   | ND           | ND           | ND           | ND           |
| comp255331_c0_seq1 | ND | ND           | 0.228429926 | 0.29381143   | ND           | ND           | -0.853101875 | ND           |
| comp255941_c0_seq1 | ND | -0.548204489 | 0.198242319 | 0.236830647  | ND           | -0.670317549 | ND           | -0.622901357 |
| comp256002_c0_seq1 | ND | ND           | 0.107962885 | 0.146551213  | ND           | ND           | ND           | ND           |
| comp256294_c0_seq1 | ND | ND           | 0.29085539  | 0.283686228  | ND           | ND           | ND           | ND           |
| comp257685_c0_seq1 | ND | ND           | 0.166527906 | 0.159358743  | ND           | ND           | ND           | ND           |
| comp258594_c0_seq1 | ND | ND           | 0.170257662 | 0.163088499  | ND           | ND           | ND           | ND           |
| comp261540_c0_seq1 | ND | ND           | 0.267663728 | 0.320492495  | -0.84036874  | -0.533949351 | ND           | -1.331631198 |
| comp265258_c0_seq1 | ND | -1.072069147 | 0.100346393 | 0.09317723   | ND           | ND           | ND           | ND           |
| comp269052_c0_seq1 | ND | ND           | 0.130490535 | 0.181313319  | ND           | ND           | ND           | ND           |
| comp271609_c0_seq1 | ND | ND           | 0.240994299 | 0.268587243  | ND           | ND           | ND           | ND           |
| comp27294_c0_seq1  | ND | ND           | 0.519475701 | 0.485977599  | ND           | ND           | ND           | ND           |
| comp274339_c0_seq1 | ND | ND           | 0.069006641 | 0.016079987  | ND           | ND           | ND           | ND           |
| comp276418_c0_seq1 | ND | ND           | 0.043834156 | 0.09465694   | ND           | ND           | ND           | ND           |
| comp276822_c0_seq1 | ND | ND           | 0.148737975 | 0.192721335  | ND           | -0.668669371 | ND           | ND           |
| comp277535_c0_seq1 | ND | ND           | 0.170257662 | 0.163088499  | ND           | ND           | ND           | ND           |
| comp281084_c0_seq1 | ND | ND           | 0.045318925 | 0.038149762  | ND           | ND           | ND           | ND           |
| comp284697_c0_seq1 | ND | ND           | 0.130490535 | 0.181313319  | -0.868397463 | ND           | ND           | ND           |
| comp284947_c0_seq1 | ND | ND           | 0.05281988  | -0.005501806 | ND           | ND           | ND           | ND           |
| comp286910_c0_seq1 | ND | ND           | 0.244411268 | 0.179250158  | ND           | ND           | ND           | ND           |
| comp288191_c0_seq1 | ND | ND           | 0.227853174 | 0.220684011  | ND           | ND           | ND           | ND           |

|                    |              |              |             |             |              |              |              |              |
|--------------------|--------------|--------------|-------------|-------------|--------------|--------------|--------------|--------------|
| comp288554_c0_seq1 | ND           | ND           | 0.068222007 | 0.119044792 | ND           | ND           | ND           | ND           |
| comp288766_c0_seq1 | ND           | ND           | 0.098871707 | 0.033710598 | ND           | ND           | ND           | ND           |
| comp290626_c0_seq1 | ND           | ND           | 0.131808577 | 0.162427975 | ND           | ND           | ND           | ND           |
| comp290629_c0_seq1 | ND           | -1.079393005 | 0.093022535 | 0.085853372 | -0.96385741  | ND           | ND           | -0.977998614 |
| comp292782_c0_seq1 | ND           | ND           | 0.08582014  | 0.078650977 | ND           | ND           | ND           | ND           |
| comp293379_c0_seq1 | ND           | ND           | 0.05070652  | 0.043537358 | ND           | ND           | ND           | ND           |
| comp294051_c0_seq1 | ND           | ND           | 0.02215106  | 0.081928687 | ND           | ND           | ND           | ND           |
| comp300579_c0_seq1 | ND           | ND           | 0.025453695 | 0.085231322 | ND           | ND           | ND           | ND           |
| comp300676_c0_seq1 | -0.857888109 | ND           | 0.02215106  | 0.014981897 | -0.830608902 | ND           | ND           | ND           |
| comp304254_c0_seq1 | ND           | ND           | 0.109301236 | 0.102132073 | ND           | ND           | ND           | ND           |
| comp311451_c0_seq1 | -0.976363271 | -1.06461966  | 0.107795881 | 0.042634771 | ND           | ND           | ND           | ND           |
| comp313183_c0_seq1 | ND           | ND           | 0.036194137 | 0.029024975 | ND           | ND           | ND           | ND           |
| comp314912_c0_seq1 | ND           | ND           | 0.227149293 | 0.168827607 | ND           | ND           | ND           | ND           |
| comp319596_c0_seq1 | ND           | ND           | 0.270152528 | 0.292946589 | ND           | ND           | ND           | ND           |
| comp320584_c0_seq1 | ND           | ND           | 0.209913122 | 0.151591437 | ND           | ND           | ND           | ND           |
| comp329865_c0_seq1 | ND           | ND           | 0.172688214 | 0.165519052 | ND           | ND           | ND           | ND           |
| comp33706_c0_seq1  | ND           | ND           | 0.32090924  | 0.34592476  | -0.946824071 | ND           | ND           | -0.960965275 |
| comp341963_c0_seq1 | ND           | ND           | 0.098708162 | 0.091538999 | ND           | ND           | ND           | ND           |
| comp341983_c0_seq1 | ND           | ND           | 0.205350407 | 0.198181244 | ND           | ND           | ND           | ND           |
| comp34844_c0_seq1  | ND           | ND           | 0.263055785 | 0.225923399 | ND           | ND           | ND           | ND           |
| comp35333_c0_seq1  | -0.957160564 | ND           | 0.479181106 | 0.459777487 | -1.230911353 | -0.991438754 | -0.33910926  | -0.642992566 |
| comp35479_c0_seq1  | -0.635216052 | -0.723472441 | 0.317930215 | 0.265682678 | -1.0850581   | -1.447645492 | -0.795315999 | -0.701259296 |
| comp35777_c0_seq1  | ND           | -0.486436044 | 0.467136256 | 0.516083036 | -0.370900449 | -0.9095791   | ND           | -0.862162908 |
| comp36213_c0_seq1  | -0.76588543  | -1.155171815 | 0.091877344 | 0.167682416 | -0.562514965 | -1.101193616 | -1.227015373 | ND           |
| comp36740_c0_seq1  | -0.753511531 | ND           | 0.080770147 | 0.048777401 | ND           | -1.088819717 | ND           | -0.740373529 |
| comp37100_c0_seq1  | -1.0233213   | -0.208487702 | 0.361867847 | 0.405851207 | -0.695012098 | -0.455539498 | -0.405269997 | -0.709153302 |
| comp37137_c0_seq1  | ND           | ND           | 0.526484951 | 0.46345797  | ND           | -0.753320393 | ND           | -1.103844209 |
| comp37335_c0_seq1  | -0.849631852 | -0.55253736  | 0.066122869 | 0.081230101 | -0.764360699 | -0.729008082 | -1.252769848 | -1.380561894 |
| comp37469_c0_seq2  | ND           | ND           | 0.204569302 | 0.156007454 | ND           | -1.052170738 | ND           | ND           |
| comp37832_c0_seq1  | -0.658480228 | -0.968585367 | 0.203830173 | 0.178177605 | -1.330171026 | -0.546630383 | ND           | ND           |
| comp37887_c0_seq1  | ND           | -1.011112721 | 0.258212832 | 0.205286179 | -0.895577126 | ND           | ND           | -0.90971833  |

|                   |              |              |             |             |              |              |              |              |
|-------------------|--------------|--------------|-------------|-------------|--------------|--------------|--------------|--------------|
| comp38330_c0_seq1 | ND           | ND           | 0.22038886  | 0.155227751 | ND           | ND           | ND           | ND           |
| comp38521_c0_seq1 | -0.585503295 | -0.974789679 | 0.2239548   | 0.190456698 | ND           | ND           | ND           | ND           |
| comp38865_c0_seq1 | ND           | ND           | 0.18727778  | 0.142320057 | ND           | ND           | ND           | ND           |
| comp38946_c0_seq1 | ND           | ND           | 0.174242043 | 0.16707288  | -0.67851792  | -0.916166575 | ND           | -0.692659124 |
| comp39327_c0_seq1 | -1.07357373  | -1.462860114 | 0.459677953 | 0.489492356 | ND           | ND           | ND           | -1.060435727 |
| comp39539_c0_seq1 | -0.757882613 | -0.749228988 | 0.122156556 | 0.069229903 | -0.855542143 | -1.093190798 | ND           | ND           |
| comp39982_c0_seq1 | ND           | ND           | 0.076399066 | 0.136176693 | ND           | ND           | ND           | ND           |
| comp40354_c0_seq1 | ND           | ND           | 0.281959319 | 0.253600857 | ND           | ND           | ND           | ND           |
| comp40804_c0_seq1 | ND           | -1.15026448  | 0.073303582 | 0.11189191  | -0.733698889 | -0.619165027 | ND           | ND           |
| comp42048_c0_seq1 | -0.985287444 | ND           | 0.362113142 | 0.364703817 | ND           | ND           | ND           | ND           |
| comp43123_c0_seq1 | ND           | ND           | 0.211345365 | 0.169414096 | ND           | ND           | ND           | -1.371559145 |
| comp43223_c0_seq2 | ND           | ND           | 0.13157763  | 0.152437191 | -1.198303587 | ND           | ND           | ND           |
| comp43498_c0_seq1 | ND           | -1.184456771 | 0.649140213 | 0.61130223  | -1.54604243  | -1.908629822 | ND           | ND           |
| comp43612_c0_seq2 | -0.714122515 | -0.559340855 | 0.628314652 | 0.590111255 | -0.686843308 | -0.651490692 | -0.272162471 | -0.524893254 |
| comp43651_c0_seq1 | ND           | ND           | 0.419034819 | 0.379680973 | ND           | ND           | ND           | ND           |
| comp43858_c0_seq1 | -1.320966286 | -0.454980166 | 0.732259151 | 0.69491852  | -0.390597093 | -0.355244476 | -1.003944979 | -0.330104679 |
| comp43953_c0_seq1 | -0.506691504 | -1.072069147 | 0.85046892  | 0.8028711   | 0.043466448  | -0.540969694 | -0.541852714 | 0.029325244  |
| comp44032_c0_seq1 | ND           | -0.531434279 | 0.603192701 | 0.554630853 | -0.591989942 | -0.954577335 | -0.302247841 | ND           |
| comp44145_c0_seq1 | ND           | ND           | 0.733247069 | 0.6913158   | -1.136546233 | -1.198103629 | ND           | ND           |
| comp44347_c0_seq1 | ND           | -0.850056234 | 1.032053176 | 1.031888915 | ND           | -1.27319929  | ND           | ND           |
| comp44373_c0_seq1 | ND           | ND           | 0.29556379  | 0.334152118 | ND           | ND           | ND           | ND           |
| comp44373_c1_seq1 | ND           | ND           | 0.880677084 | 0.920084063 | ND           | ND           | ND           | ND           |
| comp44471_c0_seq1 | ND           | ND           | 1.701715482 | 1.684024539 | ND           | ND           | ND           | -0.56428227  |
| comp44584_c0_seq1 | ND           | ND           | 0.64974712  | 0.598997386 | ND           | ND           | -1.689245073 | ND           |
| comp44605_c0_seq1 | ND           | -1.511670338 | 1.827323312 | 1.780275523 | ND           | -0.855632148 | ND           | ND           |
| comp44780_c0_seq1 | -0.330600245 | -1.373099143 | 1.010169763 | 1.065148507 | -0.780442293 | -1.018090948 | -0.365761455 | -0.970674756 |
| comp44867_c0_seq2 | ND           | ND           | 0.43152053  | 0.403162069 | ND           | -0.503986127 | ND           | ND           |
| comp44971_c0_seq1 | ND           | -0.630391245 | 0.183002352 | 0.084062816 | -0.690946909 | ND           | -0.480386054 | -1.006118109 |
| comp45067_c0_seq1 | ND           | ND           | 0.309152933 | 0.325464867 | -1.09990953  | ND           | ND           | ND           |
| comp45264_c0_seq1 | -0.507429473 | -0.470747125 | 0.734337532 | 0.780413882 | -0.480150266 | -0.319858913 | -0.66752942  | ND           |
| comp45280_c0_seq1 | ND           | ND           | 0.919443547 | 0.941481656 | ND           | ND           | ND           | ND           |

|                   |              |              |              |              |              |              |              |              |
|-------------------|--------------|--------------|--------------|--------------|--------------|--------------|--------------|--------------|
| comp45380_c0_seq1 | -1.003310548 | -0.614445682 | 0.539486452  | 0.593835327  | ND           | -1.037588738 | ND           | ND           |
| comp45785_c0_seq1 | ND           | -1.090860192 | 0.540193197  | 0.602659962  | ND           | ND           | ND           | ND           |
| comp46021_c0_seq2 | -1.001186855 | -0.487383252 | 0.259063556  | 0.172713147  | -0.973907648 | ND           | -0.383135551 | -0.988048852 |
| comp46066_c0_seq2 | ND           | ND           | -0.000573755 | 0.06480775   | ND           | ND           | ND           | ND           |
| comp46120_c0_seq1 | -1.104297154 | -0.648485498 | 0.366806622  | 0.348356449  | -1.378047943 | -1.138575344 | -0.787275846 | -0.437946637 |
| comp46163_c0_seq1 | ND           | ND           | 0.491745359  | 0.532000846  | -1.077017947 | ND           | ND           | ND           |
| comp46238_c0_seq1 | ND           | -1.25402934  | 0.65874889   | 0.680224908  | -1.138493745 | -0.421899891 | ND           | -0.249544962 |
| comp46386_c0_seq1 | ND           | -0.344084506 | 0.430391025  | 0.486273608  | -0.751427656 | -0.812985053 | ND           | -0.941660119 |
| comp46511_c0_seq1 | -0.601825259 | -0.991111643 | 1.026401937  | 1.083958104  | ND           | 0.208994591  | ND           | -0.889717252 |
| comp46570_c0_seq1 | ND           | ND           | 0.486216109  | 0.466457819  | ND           | ND           | ND           | ND           |
| comp46902_c0_seq1 | ND           | ND           | 0.525425033  | 0.507790437  | ND           | -1.313171612 | ND           | ND           |
| comp46927_c0_seq1 | -0.529705867 | -1.396113506 | 0.391725987  | 0.445826481  | -1.280577911 | -0.43904532  | -0.865897073 | -0.99368912  |
| comp47203_c0_seq1 | ND           | ND           | 0.062709365  | 0.087724886  | ND           | ND           | ND           | ND           |
| comp48093_c0_seq1 | ND           | ND           | 0.310216078  | 0.348804406  | ND           | ND           | ND           | ND           |
| comp48457_c0_seq1 | ND           | ND           | 0.158197678  | 0.185790621  | ND           | ND           | ND           | ND           |
| comp48859_c0_seq1 | -0.660817245 | ND           | 0.14864085   | 0.115142748  | ND           | ND           | ND           | ND           |
| comp49317_c0_seq1 | ND           | -1.1075125   | 0.06490304   | -0.000258069 | ND           | ND           | ND           | ND           |
| comp51452_c0_seq1 | ND           | ND           | 0.021254683  | 0.051874081  | -1.17392796  | ND           | ND           | ND           |
| comp51937_c0_seq1 | ND           | ND           | 0.2118487    | 0.172494854  | ND           | ND           | ND           | ND           |
| comp52243_c0_seq1 | ND           | ND           | 1.460963329  | 1.447499933  | ND           | ND           | ND           | ND           |
| comp53850_c0_seq1 | -0.829332649 | ND           | 0.254826503  | 0.189665393  | ND           | ND           | ND           | ND           |
| comp5422_c0_seq1  | ND           | ND           | 0.005551798  | -0.001617365 | ND           | ND           | ND           | ND           |
| comp55077_c0_seq1 | ND           | ND           | 0.946877534  | 0.898179094  | -1.107279552 | 0.233424434  | -1.118567447 | -1.246359493 |
| comp55285_c0_seq1 | ND           | ND           | 0.257102855  | 0.282118376  | ND           | ND           | ND           | ND           |
| comp55545_c0_seq1 | ND           | ND           | 0.092400485  | 0.085231322  | -0.906487513 | ND           | ND           | ND           |
| comp55721_c0_seq1 | ND           | -0.938175568 | 0.331149985  | 0.278223332  | ND           | -0.884197369 | -1.010019126 | -0.836781177 |
| comp55757_c0_seq1 | ND           | ND           | 0.177758616  | 0.112597507  | ND           | ND           | ND           | ND           |
| comp55968_c0_seq1 | ND           | 0.076888178  | 0.981514656  | 0.969749742  | 0.172220388  | 0.250841694  | 0.194100856  | 0.158079184  |
| comp57465_c0_seq1 | ND           | ND           | 0.194964609  | 0.187795446  | ND           | ND           | ND           | ND           |
| comp58363_c0_seq1 | -0.735573516 | -0.647738646 | 0.694694006  | 0.642446468  | -0.70829431  | -1.070881702 | ND           | ND           |
| comp58377_c0_seq1 | ND           | ND           | 0.824661656  | 0.802769237  | ND           | ND           | ND           | ND           |



|                   |              |              |              |             |              |              |              |              |
|-------------------|--------------|--------------|--------------|-------------|--------------|--------------|--------------|--------------|
| comp59112_c0_seq1 | ND           | ND           | 0.1587606    | 0.20274396  | ND           | ND           | ND           | ND           |
| comp59230_c0_seq1 | ND           | ND           | -0.016767006 | 0.027216354 | -1.073646951 | ND           | ND           | ND           |
| comp60219_c0_seq1 | -0.909917109 | ND           | 0.116250096  | 0.109080933 | -0.882637902 | ND           | ND           | ND           |
| comp62085_c0_seq1 | ND           | ND           | 0.186076412  | 0.178907249 | -1.046894792 | ND           | ND           | ND           |
| comp62352_c0_seq1 | ND           | -1.004259806 | 0.043216997  | 0.070809941 | ND           | -0.950281607 | ND           | -0.726774156 |
| comp65439_c0_seq1 | -1.097528791 | ND           | 0.197483726  | 0.155552457 | ND           | ND           | ND           | ND           |
| comp69105_c0_seq1 | ND           | ND           | 0.140558929  | 0.133389767 | ND           | -0.977878412 | ND           | ND           |
| comp71041_c0_seq1 | -1.076566812 | ND           | 0.058744862  | 0.09733319  | ND           | ND           | ND           | ND           |
| comp72792_c0_seq1 | ND           | ND           | 0.414157639  | 0.358683797 | ND           | -0.778913321 | ND           | -0.731497128 |
| comp73791_c0_seq1 | 0.616206691  | 0.36824946   | 2.220731787  | 2.23105612  | ND           | 0.902021503  | ND           | -1.262749909 |
| comp7462_c0_seq2  | ND           | ND           | 0.080143007  | 0.014981897 | -0.976736938 | ND           | ND           | ND           |
| comp74827_c0_seq1 | -0.825095596 | -0.913351984 | 0.397366254  | 0.390197091 | -0.496786393 | ND           | ND           | -0.510927597 |
| comp74918_c0_seq1 | ND           | ND           | 0.263342354  | 0.307325714 | -0.793537591 | ND           | ND           | ND           |
| comp75317_c0_seq1 | ND           | ND           | 0.452528911  | 0.512306538 | ND           | ND           | ND           | ND           |
| comp75575_c0_seq1 | ND           | ND           | 0.285392495  | 0.33374066  | ND           | ND           | ND           | ND           |
| comp76010_c0_seq1 | ND           | ND           | 0.057077703  | 0.04990854  | ND           | ND           | ND           | ND           |
| comp76255_c0_seq1 | ND           | ND           | 0.382713966  | 0.334152118 | ND           | ND           | ND           | ND           |
| comp77092_c0_seq1 | -1.277393267 | ND           | 0.107795881  | 0.100626718 | ND           | -1.311671456 | ND           | ND           |
| comp77199_c0_seq1 | ND           | ND           | 0.185391405  | 0.146037559 | ND           | ND           | ND           | ND           |
| comp77380_c0_seq1 | ND           | -0.669114778 | 0.228599705  | 0.269735222 | ND           | ND           | ND           | ND           |
| comp77842_c0_seq1 | ND           | ND           | 0.137499308  | 0.193999225 | -0.817922996 | ND           | ND           | ND           |
| comp79793_c0_seq1 | ND           | ND           | 0.381173003  | 0.37400384  | ND           | ND           | ND           | ND           |
| comp80101_c0_seq1 | ND           | ND           | 1.008831412  | 0.985271833 | ND           | ND           | -0.286580209 | ND           |
| comp80328_c0_seq1 | -1.035293422 | ND           | 0.020837006  | 0.068025506 | ND           | ND           | ND           | ND           |
| comp80464_c0_seq1 | ND           | -0.594947893 | 0.289801614  | 0.241239766 | -0.604351034 | -0.598961641 | -0.967821447 | ND           |
| comp80557_c0_seq1 | ND           | ND           | 0.156768068  | 0.149598906 | ND           | ND           | ND           | ND           |
| comp81384_c0_seq1 | -1.427687485 | ND           | 0.37663097   | 0.399425031 | ND           | -1.461965675 | -0.809636181 | -0.937428227 |
| comp82426_c0_seq1 | ND           | ND           | 0.498152132  | 0.52877153  | ND           | ND           | ND           | ND           |
| comp82565_c0_seq1 | -0.758503477 | -1.214736651 | 0.434800144  | 0.433621345 | -1.275292315 | -1.637879707 | -1.462671468 | -1.11334226  |
| comp82702_c0_seq1 | ND           | -1.499144363 | 0.150392432  | 0.160952036 | -0.781548776 | -1.445166164 | ND           | -0.920628717 |
| comp83719_c1_seq1 | -0.865228472 | -1.254514856 | 0.270083202  | 0.30867153  | -0.53691927  | -0.656468613 | -0.481260375 | -0.675999211 |

|                   |              |              |             |             |              |              |              |              |
|-------------------|--------------|--------------|-------------|-------------|--------------|--------------|--------------|--------------|
| comp83815_c0_seq1 | ND           | ND           | 0.367086541 | 0.342884039 | ND           | ND           | ND           | ND           |
| comp84895_c0_seq1 | -1.049491534 | -1.137747923 | 0.546550978 | 0.555772232 | ND           | ND           | -0.60753149  | ND           |
| comp84939_c0_seq1 | -1.050759548 | ND           | 0.635459595 | 0.70292405  | -0.069237832 | ND           | ND           | -0.73659155  |
| comp85962_c0_seq1 | -0.895073064 | -0.381269461 | 0.846301344 | 0.827011549 | -1.344915112 | ND           | -0.930234274 | -0.881935061 |
| comp86482_c0_seq1 | ND           | -1.557481509 | 0.698615779 | 0.695900958 | -1.441945913 | ND           | -1.027265076 | ND           |
| comp86896_c0_seq1 | ND           | -1.336115577 | 0.768900548 | 0.809702249 | -1.521609977 | -0.805016123 | ND           | ND           |
| comp86916_c0_seq1 | -1.235624732 | ND           | 0.790542473 | 0.813336534 | ND           | ND           | ND           | ND           |
| comp87567_c0_seq1 | ND           | ND           | 0.361482664 | 0.412305448 | ND           | ND           | ND           | -0.952576534 |
| comp87746_c0_seq1 | -1.51763149  | ND           | 0.395831434 | 0.462448486 | ND           | -0.648819693 | -1.376701441 | -0.726342237 |
| comp87753_c0_seq1 | ND           | ND           | 0.430917762 | 0.458510706 | ND           | ND           | ND           | ND           |
| comp87963_c0_seq1 | -0.69386677  | -0.702941912 | 0.319711308 | 0.337365729 | -1.064527572 | -0.582016924 | ND           | ND           |
| comp88225_c0_seq2 | 0.013895445  | 0.293615841  | 1.175220551 | 1.202035886 | 0.317381063  | 0.326404741  | -0.322295761 | -0.325149071 |
| comp88594_c0_seq1 | ND           | -0.175112988 | 0.515217878 | 0.589718761 | -0.197880091 | -0.68540622  | -0.209167986 | -0.637990028 |
| comp89261_c0_seq1 | -1.176014711 | -0.699999669 | 0.472415871 | 0.407254762 | -0.847705508 | -0.131111654 | -1.512205917 | -0.794899923 |
| comp89365_c0_seq1 | -0.817940665 | -1.082288312 | 0.164760846 | 0.221260763 | -0.665722721 | -0.551188859 | -0.853101875 | -0.804802662 |
| comp89680_c0_seq1 | 0.014303808  | -0.007005791 | 1.814582285 | 1.800987667 | -0.669621446 | -0.731178842 | ND           | -0.625770703 |
| comp91915_c1_seq1 | ND           | ND           | 1.37847235  | 1.340606565 | ND           | ND           | ND           | -1.370383787 |
| comp9193_c0_seq1  | ND           | ND           | 0.109301236 | 0.044140126 | ND           | ND           | ND           | ND           |
| comp92090_c0_seq1 | -0.463878394 | -0.649044796 | 0.986703715 | 1.028084943 | -0.094176506 | -0.352028548 | -0.06767584  | -0.304612356 |
| comp92236_c0_seq1 | 0.559499333  | 0.256399097  | 1.184689493 | 1.19616244  | 0.530297184  | 0.430951227  | 0.129038211  | -0.739116525 |
| comp92267_c0_seq1 | ND           | ND           | 0.045318925 | 0.096141709 | ND           | ND           | ND           | -0.666680281 |
| comp92347_c0_seq1 | -0.490130609 | -0.578386998 | 1.00620899  | 1.012828112 | ND           | -1.001530053 | -0.525291819 | -0.954113861 |
| comp92582_c1_seq1 | ND           | ND           | 0.103886987 | 0.082477385 | ND           | ND           | ND           | ND           |
| comp93169_c0_seq1 | ND           | -0.671907679 | 0.266424656 | 0.154520142 | ND           | -0.492990743 | -0.442721241 | ND           |
| comp93480_c0_seq2 | ND           | ND           | 0.987567639 | 0.942278013 | ND           | ND           | ND           | ND           |
| comp93636_c0_seq1 | -1.144364993 | -1.533651377 | 1.960207239 | 1.940958975 | ND           | -1.178643182 | ND           | -1.13122699  |
| comp93899_c0_seq2 | ND           | -0.897084372 | 1.191785117 | 1.240133282 | ND           | ND           | ND           | ND           |
| comp94271_c0_seq1 | ND           | -1.039884464 | 0.00759234  | 0.067369967 | ND           | ND           | ND           | -0.938490073 |
| comp94830_c0_seq1 | ND           | ND           | 0.157993159 | 0.109431312 | ND           | ND           | ND           | ND           |
| comp95249_c0_seq1 | ND           | ND           | 0.225394565 | 0.16707288  | ND           | ND           | -0.76898706  | ND           |
| comp95357_c1_seq1 | ND           | ND           | 0.009186083 | 0.00201692  | ND           | ND           | ND           | ND           |

|                      |                           |                           |                             |                             |                           |                           |                           |                           |
|----------------------|---------------------------|---------------------------|-----------------------------|-----------------------------|---------------------------|---------------------------|---------------------------|---------------------------|
| comp96501_c0_seq1    | ND                        | ND                        | 0.633889323                 | 0.613356199                 | ND                        | ND                        | ND                        | ND                        |
| comp96779_c0_seq1    | ND                        | ND                        | 0.187168428                 | 0.13860658                  | ND                        | ND                        | ND                        | ND                        |
| comp96950_c0_seq2    | ND                        | ND                        | 0.036485512                 | 0.02931635                  | -0.962402486              | ND                        | ND                        | -0.97654369               |
| comp97048_c0_seq2    | ND                        | -1.191432782              | 0.308341693                 | 0.371753604                 | -1.075897187              | -0.836424587              | ND                        | -1.090038391              |
| comp97095_c0_seq1    | ND                        | ND                        | 0.38168605                  | 0.412305448                 | ND                        | ND                        | ND                        | ND                        |
| comp97533_c0_seq1    | ND                        | ND                        | 0.164544474                 | 0.157375311                 | ND                        | ND                        | ND                        | ND                        |
| comp97568_c0_seq1    | ND                        | ND                        | 0.457957663                 | 0.431483345                 | -0.756530135              | ND                        | ND                        | ND                        |
| comp97654_c0_seq2    | ND                        | ND                        | 0.138134954                 | 0.205599409                 | ND                        | ND                        | ND                        | ND                        |
| comp97720_c0_seq1    | ND                        | -0.63175054               | 0.27439711                  | 0.267227948                 | -0.9933362                | -0.577772342              | ND                        | ND                        |
| comp97877_c0_seq1    | -0.941162642              | -1.02941903               | 0.401274525                 | 0.443590726                 | -1.214913431              | ND                        | ND                        | -0.75193338               |
| comp98234_c0_seq2    | -1.193983807              | -0.680180205              | 0.19120534                  | 0.258669796                 | -1.166704601              | -0.751140742              | -1.053053759              | ND                        |
| comp98652_c0_seq1    | ND                        | -0.751088925              | 0.363334669                 | 0.403162069                 | -0.220579981              | -0.61792948               | ND                        | -1.047634542              |
| comp98851_c0_seq1    | ND                        | ND                        | 0.77226547                  | 0.795440323                 | ND                        | ND                        | ND                        | ND                        |
| comp99075_c0_seq2    | ND                        | -0.959747674              | 0.154675919                 | 0.205498703                 | ND                        | -0.905769475              | -0.730561237              | ND                        |
| comp99153_c0_seq1    | ND                        | ND                        | 0.333569459                 | 0.359824052                 | ND                        | ND                        | ND                        | ND                        |
| <b>Transcript ID</b> | <b>Root1 (RPKM_log10)</b> | <b>Root2 (RPKM_log10)</b> | <b>Flower1 (RPKM_log10)</b> | <b>Flower2 (RPKM_log10)</b> | <b>Stem1 (RPKM_log10)</b> | <b>Stem2 (RPKM_log10)</b> | <b>Leaf1 (RPKM_log10)</b> | <b>Leaf2 (RPKM_log10)</b> |
| comp103083_c0_seq1   | 0.229262067               | 0.17963508                | ND                          | ND                          | -0.899805928              | -0.961363324              | ND                        | -1.090038391              |
| comp105867_c0_seq1   | 0.249848598               | 0.258502222               | -1.250323475                | -1.257492638                | -1.404113433              | ND                        | ND                        | -0.941133383              |
| comp107869_c0_seq1   | 0.326746924               | 0.314211249               | ND                          | ND                          | -0.968193164              | -0.853659302              | -1.155572318              | ND                        |
| comp110337_c0_seq1   | 0.19384541                | 0.197359394               | ND                          | ND                          | ND                        | ND                        | ND                        | -1.023465509              |
| comp112828_c0_seq1   | 0.280414589               | 0.317096937               | ND                          | ND                          | ND                        | ND                        | ND                        | ND                        |
| comp113024_c0_seq1   | 0.578400179               | 0.613670186               | -1.127021382                | -1.310281804                | -0.643989242              | ND                        | -0.343251757              | -0.926975759              |
| comp114042_c0_seq1   | 0.335931917               | 0.326856774               | -0.579908931                | ND                          | ND                        | ND                        | ND                        | ND                        |
| comp119682_c0_seq1   | 0.887022208               | 0.833527926               | -0.710059878                | -1.018259036                | -0.386728581              | -0.185044542              | -0.750198994              | ND                        |
| comp121651_c0_seq1   | 0.57819953                | 0.561825149               | ND                          | ND                          | ND                        | -1.155048664              | ND                        | -0.806602476              |
| comp126715_c0_seq1   | 0.747776007               | 0.774474134               | ND                          | ND                          | 0.052421291               | -0.805016123              | ND                        | ND                        |
| comp126871_c0_seq1   | 0.505921322               | 0.460593134               | ND                          | ND                          | -1.177198937              | -0.812787601              | -0.762518099              | -0.668461396              |
| comp127710_c0_seq1   | 0.268985127               | 0.296893551               | ND                          | -1.432176134                | -1.277766934              | -1.33932433               | -0.686994837              | -0.893968129              |
| comp128204_c0_seq1   | 1.421652971               | 1.422687198               | ND                          | -0.544326114                | -0.991976905              | -0.354564297              | 0.200855183               | 0.224330813               |
| comp130216_c0_seq1   | 0.261747821               | 0.304259712               | ND                          | ND                          | ND                        | ND                        | -0.864493859              | ND                        |
| comp134099_c0_seq1   | 0.680677921               | 0.669833756               | ND                          | ND                          | ND                        | -0.66535413               | ND                        | ND                        |

|                    |              |             |              |              |              |              |              |              |
|--------------------|--------------|-------------|--------------|--------------|--------------|--------------|--------------|--------------|
| comp136124_c0_seq2 | 0.602105749  | 0.581344849 | -1.269903529 | -1.277072692 | -0.309750135 | -0.443858199 | -0.611072641 | -0.8357747   |
| comp137919_c0_seq1 | 0.709843854  | 0.717669461 | ND           | ND           | -1.284066239 | ND           | 0.005675862  | -0.184264091 |
| comp139894_c0_seq1 | 0.450029521  | 0.393957815 | ND           | ND           | ND           | -0.823130758 | ND           | -0.553865816 |
| comp140803_c0_seq1 | 0.152535459  | 0.246619279 | -0.426063221 | ND           | ND           | -0.942440571 | -0.369292324 | -0.71893312  |
| comp140936_c0_seq1 | 1.291390299  | 1.315421454 | 0.321703024  | 0.58170559   | 0.552624809  | 0.407385665  | 0.210982834  | 0.195164547  |
| comp141131_c0_seq1 | 0.714012279  | 0.777404693 | 0.148187887  | -0.762071263 | -1.385813313 | -0.845310718 | ND           | -1.098924521 |
| comp141320_c0_seq1 | 0.664990636  | 0.604762971 | -0.066790023 | -0.212261884 | -0.483821416 | -0.244348817 | -0.245231838 | -0.373023884 |
| comp141628_c0_seq1 | 0.534374767  | 0.578984483 | -1.262279674 | ND           | -0.938948377 | -0.632528988 | ND           | ND           |
| comp141900_c0_seq1 | -0.001186855 | 0.044095665 | ND           | ND           | ND           | ND           | ND           | ND           |
| comp142076_c0_seq3 | 0.013053584  | 0.024500109 | ND           | ND           | ND           | -1.512586299 | -0.860256806 | ND           |
| comp142575_c0_seq1 | 0.56860736   | 0.61388988  | ND           | ND           | -0.199993451 | ND           | ND           | -0.816194646 |
| comp143634_c0_seq1 | 2.55453748   | 2.580901599 | -0.455518201 | -0.161657368 | 0.89584182   | 0.580366972  | 1.478239881  | 1.347362248  |
| comp144100_c0_seq2 | 0.153285961  | 0.156799945 | ND           | ND           | ND           | ND           | ND           | -1.365054954 |
| comp144453_c0_seq3 | 0.803069989  | 0.801963776 | -0.44722461  | -0.086416988 | ND           | -0.838663224 | -0.36242499  | ND           |
| comp144543_c0_seq2 | 0.225259324  | 0.196124388 | ND           | ND           | ND           | -1.490260103 | -1.014021869 | -0.965722656 |
| comp144748_c0_seq1 | 0.810940865  | 0.868393106 | -0.576191695 | -0.884390853 | -0.377799135 | -0.11484544  | -0.264148293 | -0.647212844 |
| comp144830_c0_seq1 | 0.803433633  | 0.829896816 | -0.084694228 | -0.230166088 | -0.279876871 | -0.496336227 | -0.865196033 | -0.515866824 |
| comp145028_c0_seq2 | 0.797340866  | 0.853628939 | -0.314399635 | -0.145477539 | -0.028856899 | -0.286708941 | -0.027179817 | -0.084390789 |
| comp145150_c1_seq2 | 0.918855378  | 0.880370607 | 0.243831119  | 0.122718604  | -0.4218422   | -0.659490856 | 0.3115974    | -0.236411049 |
| comp145217_c1_seq1 | -0.02466795  | 0.033203697 | ND           | ND           | ND           | ND           | -1.184767898 | ND           |
| comp145313_c0_seq1 | 1.263133779  | 1.28501567  | ND           | -0.151797944 | -1.29841874  | -0.882854881 | 0.195443344  | 0.192590035  |
| comp145539_c0_seq1 | 0.466622983  | 0.465100978 | ND           | ND           | ND           | -1.545378813 | ND           | -1.49796262  |
| comp145539_c0_seq2 | 0.088107786  | 0.129485255 | ND           | ND           | ND           | -1.30789824  | ND           | -0.959452052 |
| comp145854_c0_seq1 | 0.266478811  | 0.271339447 | ND           | -0.921349023 | -1.368999814 | -1.129527215 | -0.410250932 | -0.781081027 |
| comp146819_c0_seq4 | 0.476394946  | 0.544212703 | -0.813827601 | -0.616876781 | -0.967617559 | -0.046903722 | -0.552936721 | -0.726486258 |
| comp146858_c0_seq1 | 0.431537909  | 0.463575352 | ND           | ND           | -0.736159488 | -0.973808143 | ND           | ND           |
| comp147826_c0_seq1 | 0.342115307  | 0.408760879 | ND           | ND           | ND           | -0.537260922 | ND           | -0.966965985 |
| comp148295_c0_seq2 | 1.09056075   | 1.119597184 | -0.341859538 | -0.622029973 | -0.080676148 | -0.043102072 | -0.257059918 | -0.208760705 |
| comp148808_c0_seq1 | 1.26446017   | 1.30160825  | -1.222856582 | -0.832085736 | 0.446175106  | 0.541799436  | -0.149052345 | -0.200456046 |
| comp148876_c0_seq2 | 0.190416571  | 0.22134659  | ND           | -0.914437029 | ND           | ND           | -0.947406982 | -0.376229024 |
| comp149025_c0_seq1 | 1.233235511  | 1.209682546 | 0.517341571  | 0.369993705  | 0.489425322  | 0.401889083  | 0.347242917  | 0.209231706  |

|                     |              |             |    |              |              |              |              |              |              |
|---------------------|--------------|-------------|----|--------------|--------------|--------------|--------------|--------------|--------------|
| comp149137_c0_seq2  | 2.399350431  | 2.39423903  |    | 1.015914929  | 0.916743088  | 0.406193016  | 0.975340792  | 0.256602423  | 0.253749114  |
| comp149327_c1_seq1  | 1.449215321  | 1.39370076  |    | -0.960222977 | -1.092330876 | -0.017102922 | -0.114872491 | -0.155264053 | -0.474941625 |
| comp149351_c0_seq3  | 1.268136474  | 1.323513762 | ND |              | -0.909179869 | -0.754770669 | -0.941266802 | ND           | ND           |
| comp149365_c0_seq1  | 0.947085877  | 0.922846793 |    | -1.10229388  | ND           | -0.955053842 | -1.317641234 | -0.443462991 | ND           |
| comp149463_c0_seq1  | 0.298303681  | 0.29657527  |    | -0.478302839 | -0.631600038 | -1.000069583 | -0.66368697  | -1.06251     | -0.792362037 |
| comp149637_c0_seq2  | -0.011153279 | 0.050976191 | ND |              | ND           | ND           | -1.030708212 | ND           | ND           |
| comp150067_c0_seq2  | 0.543837927  | 0.531476808 |    | -1.272915989 | -0.802963897 | -1.125675951 | -1.090323334 | -1.313055105 | -1.264755892 |
| comp150104_c0_seq1  | 0.583441345  | 0.584863256 | ND |              | ND           | ND           | ND           | ND           | ND           |
| comp150374_c0_seq1  | 0.621918128  | 0.626132588 | ND |              | ND           | -0.644533422 | -0.706090819 | -1.008003835 | -0.658674627 |
| comp150689_c0_seq2  | 0.625376027  | 0.560857486 | ND |              | ND           | ND           | ND           | ND           | -1.310875977 |
| comp150837_c0_seq1  | 0.116922893  | 0.159945419 |    | -0.807518127 | -0.939626026 | -0.961308085 | -0.721835486 | ND           | -1.100388026 |
| comp150989_c0_seq2  | 0.081303318  | 0.033164152 |    | -1.052897953 | ND           | -0.984839161 | -1.046396557 | -0.871188319 | -0.919799119 |
| comp151041_c0_seq1  | 0.918669398  | 0.892773754 | ND |              | ND           | -0.789650295 | -0.271424094 | -1.374969457 | -0.29864152  |
| comp151122_c0_seq2  | 2.086723338  | 2.088289356 |    | -1.260223838 | ND           | 0.549774031  | 1.101920607  | -1.300362954 | ND           |
| comp151614_c0_seq3  | 0.225657942  | 0.198099394 | ND |              | ND           | ND           | ND           | ND           | ND           |
| comp151954_c0_seq3  | 0.252264707  | 0.235364226 |    | -0.837732901 | -0.623053314 | ND           | -1.53020151  | -1.354993272 | -1.005664063 |
| comp152682_c0_seq4  | 1.015028784  | 1.063862319 |    | -1.317119651 | -1.148197555 | -0.072969601 | -0.055345751 | -1.658288763 | -1.007929559 |
| comp152707_c0_seq2  | 1.106496461  | 1.097609773 |    | -0.995735604 | -0.826813507 | -0.246435575 | -0.432931708 | -0.257723469 | 0.267696998  |
| comp152707_c1_seq1  | 1.359798824  | 1.301343275 |    | -1.187485793 | -1.194654956 | 0.215026749  | -0.361440463 | -0.148443663 | 0.579081496  |
| comp152730_c0_seq8  | 0.83883166   | 0.801267979 |    | -0.320047237 | -0.593484289 | -0.285846713 | -0.535394592 | -0.48512509  | -0.082859806 |
| comp152897_c0_seq2  | 1.524681604  | 1.588453191 |    | 0.538802888  | 0.674843758  | 0.743185812  | 0.666494673  | -0.462418161 | -0.435308248 |
| comp153510_c0_seq1  | 1.774774087  | 1.771887859 |    | 0.503825635  | 0.361687395  | 0.918880087  | 0.618280019  | 0.436054231  | 0.271912163  |
| comp153574_c0_seq8  | 0.445087944  | 0.460803423 |    | -1.460202722 | ND           | -1.312962684 | -0.634157391 | -0.655243798 | -0.628133884 |
| comp154252_c0_seq1  | 1.905723878  | 1.913415273 |    | 0.887452486  | 0.820285394  | 0.894132442  | 0.593323973  | 0.768532211  | 0.280688681  |
| comp154416_c0_seq1  | 0.702838041  | 0.670193897 |    | -1.378543885 | ND           | -0.687235802 | -0.271671944 | -0.941561746 | -0.768323796 |
| comp154428_c0_seq7  | 1.078269174  | 1.143745715 | ND |              | ND           | -0.748991215 | -0.845310718 | -1.272162471 | -1.27501578  |
| comp154478_c0_seq1  | 0.822589645  | 0.837732315 | ND |              | ND           | -1.595735351 | -1.657292748 | ND           | -1.609876555 |
| comp154629_c1_seq16 | 0.763894588  | 0.736774943 |    | -0.512413444 | -0.996703861 | -0.101931971 | -0.301792066 | ND           | ND           |
| comp154629_c1_seq3  | 0.560255286  | 0.528903748 | ND |              | ND           | -0.333284262 | -0.218750399 | ND           | ND           |
| comp154664_c1_seq1  | 0.177845936  | 0.218073565 | ND |              | -0.956462642 | -1.103083438 | ND           | -0.767583846 | -0.749247856 |
| comp154832_c0_seq1  | 1.450942126  | 1.454094409 |    | -0.745173497 | -1.053372655 | 0.257383746  | 0.26992807   | -0.132100099 | -0.412502308 |

|                     |             |             |              |              |              |              |              |              |
|---------------------|-------------|-------------|--------------|--------------|--------------|--------------|--------------|--------------|
| comp154993_c0_seq4  | 1.361630005 | 1.358236787 | -0.050956038 | -0.256492855 | -0.176717273 | -0.224910708 | -0.966156418 | -1.39497846  |
| comp154993_c1_seq3  | 0.825901125 | 0.875603983 | ND           | -1.060896713 | ND           | -1.269074905 | ND           | ND           |
| comp155459_c0_seq1  | 0.779255094 | 0.795409673 | -0.32146638  | -0.182507507 | -0.372593996 | -0.434151392 | -1.0605755   | -0.012276287 |
| comp155724_c0_seq1  | 1.367157279 | 1.418807421 | 0.318093029  | 0.208618821  | 0.277007351  | 0.143650662  | -0.785433066 | -0.281201898 |
| comp155724_c0_seq4  | 1.330212058 | 1.394714283 | -0.046359629 | -0.007771302 | -0.02945336  | -0.2780974   | ND           | -0.645654556 |
| comp156337_c1_seq3  | 0.645454566 | 0.703041523 | ND           | ND           | -1.364692726 | ND           | 0.081396576  | -0.281923917 |
| comp156389_c2_seq15 | 0.683955525 | 0.684168856 | -1.036251956 | -0.821572369 | -0.065103178 | -0.366992729 | -0.708414287 | -0.778214386 |
| comp156389_c2_seq3  | 0.625806377 | 0.617352099 | -1.259450384 | -0.722551502 | -0.267112306 | -0.28446604  | -0.901649491 | -1.12635155  |
| comp156437_c0_seq2  | 1.187896545 | 1.22441079  | -0.538176821 | -0.334492619 | -0.038754265 | -0.179492908 | -0.101194682 | 0.242060379  |
| comp156804_c0_seq3  | 2.409249023 | 2.464112247 | -0.710059878 | -0.541137781 | 0.17754285   | -0.226437228 | -0.051228989 | -0.179021035 |
| comp156899_c1_seq1  | 1.008011931 | 1.028700566 | -0.893704275 | ND           | 0.128597027  | -0.455839115 | ND           | -1.061635437 |
| comp157125_c0_seq7  | 0.109841759 | 0.065364295 | -1.528633012 | ND           | -0.779332983 | -0.965829116 | ND           | -1.696564174 |
| comp157483_c1_seq3  | 0.857867441 | 0.826993976 | -0.434306995 | -0.126205722 | -0.287066957 | -0.109742264 | 0.08185639   | -0.062326072 |
| comp157807_c0_seq1  | 0.81605389  | 0.762370825 | -0.222821489 | -0.063042772 | -0.125886569 | 0.218049181  | ND           | -1.117751379 |
| comp157887_c0_seq1  | 1.418524653 | 1.443291721 | ND           | ND           | 0.219954746  | 0.072685236  | ND           | ND           |
| comp157887_c0_seq2  | 1.114570165 | 1.160613732 | ND           | ND           | -0.351509082 | -0.781043263 | ND           | -1.210748326 |
| comp158132_c0_seq5  | 0.414315561 | 0.438032931 | ND           | ND           | -0.663915418 | -0.587170116 | -0.608256523 | -0.501965363 |
| comp158132_c0_seq7  | 0.252011227 | 0.27847441  | -1.501418059 | ND           | -0.956238013 | -0.637584168 | -0.696459135 | -0.627956536 |
| comp158325_c2_seq4  | 1.864745814 | 1.915668601 | -0.074758953 | -0.354929388 | 0.481850555  | 1.054940517  | ND           | -0.816721383 |
| comp158648_c0_seq1  | 1.28539699  | 1.30352413  | ND           | -0.358598766 | 0.038848484  | -0.022708913 | ND           | -0.218330769 |
| comp158648_c0_seq4  | 0.746500545 | 0.706548836 | ND           | -1.009018379 | -0.67851792  | -0.740075316 | -0.740958337 | -0.692659124 |
| comp158912_c0_seq3  | 2.98419024  | 3.026926854 | 1.239469527  | 1.142937782  | 1.86614178   | 1.742385818  | 1.841517361  | 1.567446352  |
| comp159033_c0_seq1  | 1.232403773 | 1.249376057 | -0.268300198 | -0.301798299 | 0.607532311  | 0.375808638  | -0.061766981 | -0.520552246 |
| comp159051_c1_seq14 | 1.094729349 | 1.15131989  | -0.205823242 | -0.186663466 | -0.449789831 | -0.282867899 | -0.088354505 | -1.276844391 |
| comp159078_c0_seq3  | 0.858993485 | 0.917609743 | -0.704230334 | -0.448158062 | -0.556990296 | -0.794638952 | -0.408577348 | -1.349282751 |
| comp159078_c0_seq4  | 0.912234253 | 0.910184741 | -0.449729359 | -0.088921737 | -0.728458054 | -0.465504359 | -0.392958462 | -0.918690517 |
| comp159155_c0_seq4  | 1.019755686 | 1.04544265  | -0.491896204 | -0.800095363 | -0.212030601 | -0.649251612 | ND           | ND           |
| comp159160_c0_seq4  | 0.688595671 | 0.704548534 | -1.123035926 | -1.607326343 | -0.373735897 | -0.259202034 | -0.121782356 | -0.489334741 |
| comp159173_c2_seq1  | 0.055237896 | 0.091920244 | ND           | -1.060896713 | -1.508547504 | -1.269074905 | -0.792836671 | -1.221658713 |
| comp159194_c0_seq10 | 0.243781621 | 0.271509126 | ND           | ND           | -1.419135253 | ND           | ND           | -1.433276457 |
| comp159260_c0_seq1  | 1.665714513 | 1.658623833 | 0.89486983   | 0.828046666  | 0.981121627  | 0.856387189  | 0.931193971  | 0.724610006  |

|                     |             |             |    |              |              |              |              |              |              |              |              |
|---------------------|-------------|-------------|----|--------------|--------------|--------------|--------------|--------------|--------------|--------------|--------------|
| comp159366_c2_seq5  | 0.952591417 | 0.997873937 | ND |              | -1.312841275 | -0.380280824 | -0.479626782 | -0.500713188 | -0.519360765 |              |              |
| comp159366_c2_seq6  | 0.619233146 | 0.645931273 |    | -1.019241625 | ND           |              | -0.872001588 | -0.632528988 | -0.281229491 | ND           |              |
| comp159408_c0_seq3  | 1.073699583 | 1.040034097 |    | -0.284043021 |              | -0.615723276 | -0.336375339 | -0.499390376 | -1.301905743 | -1.128667793 |              |
| comp159539_c0_seq3  | 0.07733984  | 0.105589021 | ND |              | ND           | ND           | ND           |              | -1.196703459 | -1.023465509 |              |
| comp159783_c0_seq3  | 0.263197058 | 0.266711042 | ND |              | ND           |              | -0.939972657 | ND           | ND           | ND           |              |
| comp159874_c0_seq1  | 1.162509404 | 1.150100512 |    | -0.939270034 |              | -0.645409201 | 0.088783596  | 0.24332262   | -0.044910699 | -0.483951906 |              |
| comp159962_c2_seq1  | 3.567268996 | 3.515555363 |    | 0.695380126  |              | 0.568473421  | ND           | 0.373868036  | -0.962807086 | 0.02334422   |              |
| comp159962_c2_seq10 | 3.446976392 | 3.408219564 |    | 0.381947837  |              | 0.348449735  |              | -0.634314257 | 0.082279597  | -0.666791451 | -0.095613493 |
| comp160072_c0_seq1  | 2.390567405 | 2.359660917 |    | 0.749603833  |              | 0.788566392  | 1.179715897  | 0.816151464  | 1.623643677  | 1.099278045  |              |
| comp160072_c0_seq2  | 2.103052748 | 2.067024232 |    | 0.361308353  |              | 0.442776678  | 0.412661451  | 0.679363704  | 1.471375185  | 0.82128384   |              |
| comp160108_c0_seq2  | 0.717567488 | 0.689368388 |    | -0.775305346 |              | -1.180414517 | -0.782967268 | -0.309411463 | -1.514414466 | -1.341176516 |              |
| comp160108_c0_seq5  | 0.63494224  | 0.579171606 |    | -1.020734561 |              | -1.027903723 | -0.697403264 | -0.332991928 | ND           | -1.364756982 |              |
| comp160218_c0_seq1  | 0.459738252 | 0.488996582 |    | -0.376716929 |              | -0.660092503 | -0.614827772 | -0.480090524 | -1.170183711 | -0.599005753 |              |
| comp160423_c0_seq2  | 1.238743123 | 1.237467865 |    | 0.158549419  |              | 0.130530117  | 0.17170734   | 0.349209695  | -0.646376986 | -0.400588369 |              |
| comp160643_c0_seq7  | 0.007413317 | 0.074058888 | ND |              | ND           | ND           | ND           | ND           | ND           | ND           |              |
| comp160757_c1_seq8  | 1.46190209  | 1.421134437 |    | 0.236585931  |              | 0.142266592  | -0.055506726 | 0.729582207  | -0.543915875 | -0.717465412 |              |
| comp160822_c0_seq1  | 0.840173385 | 0.847648462 |    | -0.147843808 |              | -0.439009627 | -0.027475917 | -0.137881881 | ND           | ND           |              |
| comp160860_c0_seq1  | 1.623415174 | 1.619281972 |    | 0.9329786    |              | 0.727277309  | 0.791509879  | 0.860173754  | 0.928801631  | 0.693914645  |              |
| comp160964_c0_seq1  | 1.522143709 | 1.575051937 |    | -0.639209807 |              | -0.64637897  | 0.24839292   | -0.177863552 | -1.281408914 | -1.108170965 |              |
| comp161912_c1_seq3  | 0.873222987 | 0.817002831 |    | -0.265854134 |              | -0.126895261 | -0.097424797 | -0.202447888 | -0.46089521  | -0.319841944 |              |
| comp162206_c0_seq1  | 1.358950811 | 1.367914167 |    | -0.208684761 |              | -0.312763937 | 0.287508825  | 0.39551182   | 0.093598804  | -0.251677186 |              |
| comp162382_c2_seq6  | 1.512383501 | 1.551084262 |    | 0.239954456  |              | 0.232785293  | -0.366133173 | 0.593498729  | 0.34957766   | 0.163793667  |              |
| comp162514_c0_seq2  | 0.985694067 | 1.027485821 |    | -1.061123473 |              | -1.068292635 | 0.040359075  | 0.170687204  | 0.40388739   | -0.18766195  |              |
| comp162536_c0_seq1  | 0.552428093 | 0.612476659 |    | -0.523963134 |              | -0.531132297 | -0.719145777 | -1.178643182 | -1.003434944 | -1.432256986 |              |
| comp162543_c0_seq11 | 0.473338684 | 0.503049863 | ND |              |              | -1.548660967 | -1.695281762 | -1.279717904 | -1.280600924 | -1.40839297  |              |
| comp162543_c0_seq18 | 0.400738038 | 0.364869719 |    | -1.611317396 |              | -1.618486558 | -1.765107354 | ND           | ND           | ND           |              |
| comp162543_c0_seq4  | 0.534592043 | 0.471278076 |    | -1.114713576 |              | -1.121882738 | -1.745624788 | -1.807182185 | ND           | ND           |              |
| comp162543_c0_seq6  | 0.455177323 | 0.510609107 |    | -1.548444943 |              | -1.555614106 | -1.702234901 | -1.763792297 | ND           | ND           |              |
| comp162802_c0_seq2  | 0.697092034 | 0.658151824 |    | -0.206552536 |              | -0.137333353 | -0.328157811 | 0.136254615  | -0.199267002 | -0.510703445 |              |
| comp162802_c1_seq1  | 0.678139227 | 0.663281117 |    | -0.277374326 |              | -0.390998819 | -0.450469439 | -0.009351476 | -0.26426793  | -0.630942065 |              |
| comp163485_c2_seq1  | 2.468156772 | 2.524761401 |    | 0.766432222  |              | 0.715523536  | 1.315753368  | 1.237924426  | 1.388371999  | 1.090951947  |              |

|                     |              |             |              |              |              |              |              |              |
|---------------------|--------------|-------------|--------------|--------------|--------------|--------------|--------------|--------------|
| comp163485_c2_seq14 | 2.718230045  | 2.736956457 | 0.732061731  | 0.742151574  | 1.683551746  | 1.449571915  | 1.567765687  | 1.212094747  |
| comp163560_c1_seq3  | 0.379776412  | 0.316343607 | -0.368573349 | -0.579862494 | -0.881385249 | -0.884950699 | -0.913862443 | -1.740624494 |
| comp163696_c0_seq8  | 0.584758421  | 0.538427921 | ND           | -1.110573297 | -1.558224088 | ND           | ND           | -1.271335297 |
| comp163697_c0_seq6  | 2.133984506  | 2.091305084 | 0.664091392  | 0.585746638  | 0.617195668  | 0.731729531  | 0.312703115  | -0.076610385 |
| comp163821_c1_seq2  | 0.52512306   | 0.541200702 | -0.814197721 | -0.821366883 | -0.699142366 | -0.55242382  | -0.79634489  | -0.681098887 |
| comp163922_c2_seq11 | 0.50847929   | 0.463962426 | -1.188398497 | -1.195567659 | -0.64321845  | -0.449503342 | ND           | ND           |
| comp163922_c2_seq12 | 0.564491047  | 0.61679474  | -0.408946755 | -0.980387349 | -0.303099403 | -0.323264114 | ND           | ND           |
| comp163922_c2_seq13 | 0.585443976  | 0.604397557 | -0.710608114 | -0.81468729  | -0.48418683  | -0.323895477 | ND           | ND           |
| comp163922_c2_seq2  | 0.686179935  | 0.691436193 | -0.116151638 | -1.026410788 | -0.474061579 | -0.49422629  | ND           | -1.488202783 |
| comp163922_c2_seq3  | 0.404027235  | 0.385554318 | -1.452330099 | -1.459499261 | -0.492176704 | -0.553734101 | ND           | ND           |
| comp164037_c2_seq3  | 1.542346027  | 1.555775388 | -0.891903466 | -0.694952646 | 0.43718016   | 0.446632207  | -0.55183134  | -0.582713373 |
| comp164086_c0_seq5  | 0.9078094    | 0.912974696 | ND           | ND           | -0.939972657 | -0.098440067 | 0.127920694  | -0.476992606 |
| comp164110_c0_seq8  | 1.78433369   | 1.795200389 | -0.757642138 | ND           | -1.212462091 | ND           | ND           | ND           |
| comp164303_c0_seq3  | 1.495745687  | 1.446015076 | 0.287205835  | 0.020399362  | 0.370204977  | 0.255128325  | -0.076239671 | -0.160566023 |
| comp164303_c0_seq6  | 1.489572847  | 1.497925818 | -0.01210458  | -0.098454989 | 0.448064676  | 0.25763825   | -0.006486206 | -0.156554647 |
| comp164303_c1_seq4  | 1.577935115  | 1.566356828 | 0.758122463  | 0.678081529  | 0.458910066  | 0.28217377   | -0.71870925  | -1.022592555 |
| comp164303_c1_seq5  | 1.782524632  | 1.799419386 | 1.014314707  | 0.895171784  | 0.683197943  | 0.535725917  | -0.572367073 | -0.922007869 |
| comp164320_c1_seq3  | 0.2002028    | 0.141401391 | -1.374602891 | -1.381772054 | -1.528392849 | -1.28892025  | -1.715772003 | -1.542534053 |
| comp164320_c1_seq4  | 0.62114004   | 0.633959591 | ND           | ND           | -1.270658846 | -1.089178193 | -1.060097991 | -1.28480005  |
| comp164320_c5_seq2  | -0.009155784 | 0.027526564 | ND           | ND           | ND           | ND           | ND           | ND           |
| comp164974_c0_seq2  | 2.61269226   | 2.644480622 | 0.975557905  | 0.799596722  | 0.412643772  | 1.106629835  | 0.164566778  | -0.118127228 |
| comp165178_c2_seq7  | 0.972255258  | 0.910630628 | -0.320377173 | -0.279241656 | 0.18747855   | -0.010298593 | -0.03466271  | -0.488308335 |
| comp165178_c2_seq9  | 1.346633175  | 1.391897156 | 0.397053294  | 0.207358762  | 0.634336886  | 0.413655016  | 0.448684552  | -0.016050046 |
| comp165223_c0_seq2  | 0.510788712  | 0.491914871 | -1.411945844 | ND           | ND           | -1.451201939 | ND           | ND           |
| comp165249_c2_seq8  | 1.382512179  | 1.440827622 | 0.321390148  | 0.356510047  | 0.369245554  | 0.360217208  | 0.454039656  | 0.101070916  |
| comp165358_c2_seq2  | 2.174486115  | 2.235260012 | -0.487389822 | -0.654259828 | 1.255176824  | 0.771030436  | 0.030625567  | -0.250750397 |
| comp165793_c0_seq10 | 2.250378369  | 2.285415037 | 1.304386535  | 1.081198166  | 0.855396125  | 1.166750731  | 1.098307077  | 0.835425377  |
| comp165793_c0_seq4  | 1.771615224  | 1.790877449 | 0.743813251  | 0.704192064  | 0.061315004  | 0.669601986  | 0.541262573  | 0.392785928  |
| comp165793_c0_seq5  | 1.228369375  | 1.249078697 | 0.045021565  | 0.050086858  | -0.538893085 | 0.160667429  | 0.017116905  | -0.161827663 |
| comp165793_c0_seq6  | 2.825787415  | 2.858971504 | 1.947433408  | 1.938538798  | 1.755510348  | 1.838196843  | 1.652297224  | 1.409569435  |
| comp165793_c0_seq7  | 1.62461517   | 1.683336325 | 0.679905348  | 0.710779539  | -0.035108347 | 0.628239995  | 0.416896813  | 0.234747105  |



|                     |             |             |              |              |              |              |              |              |
|---------------------|-------------|-------------|--------------|--------------|--------------|--------------|--------------|--------------|
| comp165793_c0_seq8  | 1.458205633 | 1.47274144  | -0.032206602 | 0.164744218  | -0.458997832 | 0.408863697  | 0.131774264  | -0.097475423 |
| comp165793_c0_seq9  | 1.331985035 | 1.308487549 | 0.11729111   | -0.11627443  | -0.587406317 | 0.277607369  | 0.034400013  | -0.093392033 |
| comp166193_c0_seq3  | 2.096585347 | 2.152922383 | 0.634483936  | 0.969737454  | 1.057199865  | 0.809566988  | 0.925338039  | 0.502268326  |
| comp166272_c1_seq5  | 0.145083131 | 0.153736755 | ND           | ND           | ND           | ND           | ND           | -1.142808863 |
| comp166482_c1_seq5  | 1.060544406 | 1.110447123 | -0.294629137 | -0.602828295 | 0.02870216   | -0.413066478 | 0.177115108  | -0.110377781 |
| comp166482_c1_seq8  | 1.42078547  | 1.393567011 | -0.036928164 | -0.027391633 | 0.740200959  | 0.314312155  | 0.470635049  | 0.277902196  |
| comp166736_c1_seq1  | 2.090542722 | 2.091663894 | 1.006400859  | 1.033993802  | 0.852610901  | 1.308469354  | 0.285020506  | 0.060318446  |
| comp166873_c0_seq1  | 0.77580473  | 0.814947677 | ND           | ND           | -0.84036874  | -0.424804881 | ND           | -0.076358693 |
| comp167159_c0_seq1  | 0.4759344   | 0.481099697 | ND           | ND           | ND           | ND           | ND           | ND           |
| comp167541_c0_seq11 | 2.35683211  | 2.381931172 | -0.381281454 | -1.087420622 | 0.2974375    | 1.064236669  | -0.120390575 | 0.052847375  |
| comp167607_c0_seq5  | 1.336066722 | 1.329115273 | -0.160471066 | -0.440641501 | -0.677438927 | -0.59766717  | -0.398977836 | -0.575074562 |
| comp167661_c0_seq2  | 1.097219156 | 1.134043315 | -0.243929038 | -0.150428039 | -0.069250752 | -0.488565769 | -0.344765994 | -0.205386312 |
| comp167806_c0_seq1  | 1.221137112 | 1.18802024  | -0.602974236 | -0.434052139 | 0.347039528  | -0.0259299   | 0.195735739  | 0.378313715  |
| comp167806_c0_seq5  | 1.150199789 | 1.221918662 | -0.640078272 | -0.148406931 | 0.375489646  | -0.100137259 | -0.140948227 | 0.37690029   |
| comp167841_c2_seq4  | 1.83094523  | 1.842034916 | 0.522852521  | 0.268703124  | 0.563927823  | 0.623955522  | 1.002968007  | 0.559694908  |
| comp167848_c0_seq10 | 1.225017249 | 1.214790861 | -0.186480425 | -0.330487547 | -0.704352124 | -0.739580582 | -0.949723224 | -1.320553319 |
| comp167848_c0_seq13 | 1.216965138 | 1.173545148 | -0.639085599 | -0.481444513 | -0.702698926 | -1.065286318 | -1.316046812 | -1.619930117 |
| comp167848_c0_seq14 | 0.959975768 | 0.932856123 | -0.793453518 | -0.97671394  | -0.998395999 | -1.184892132 | -1.185775152 | -1.438505935 |
| comp167848_c0_seq2  | 1.258724803 | 1.242099846 | -0.312965623 | -0.304340518 | -0.57590005  | -0.880495495 | -1.006317253 | -1.134109299 |
| comp167848_c0_seq3  | 1.239651654 | 1.240592652 | -0.416326218 | -0.44468468  | -0.591305475 | -1.05080288  | -1.079714624 | -1.304416684 |
| comp167848_c0_seq34 | 1.226510456 | 1.216616662 | -0.328510285 | -0.408230115 | -0.482300243 | -0.703558482 | -1.181562758 | -1.066316755 |
| comp167848_c0_seq37 | 1.23623542  | 1.219500564 | -0.561940194 | -0.514751695 | -0.850428726 | -0.953378808 | -1.000019319 | -1.428841361 |
| comp167848_c0_seq4  | 1.082841799 | 1.033870434 | -0.566035733 | -0.494023649 | -0.781973597 | -0.843530994 | -0.937168068 | -1.211088149 |
| comp167848_c0_seq47 | 1.200197919 | 1.193530587 | -0.716904497 | -0.72407366  | -0.957844631 | -0.718372031 | -1.196376307 | -1.22725834  |
| comp167848_c0_seq5  | 1.213861322 | 1.194545752 | -0.446905511 | -0.521021463 | -0.746823504 | -0.808380901 | -0.809263921 | -1.238085963 |
| comp167848_c0_seq52 | 1.048291661 | 0.998155736 | -0.711155659 | -0.4878759   | -0.864945617 | -1.227533009 | -0.973143525 | -1.180116817 |
| comp167848_c0_seq58 | 1.055144193 | 1.046894206 | -0.543743694 | -0.713640154 | -0.901653635 | -1.118112991 | -1.089032788 | -1.313734847 |
| comp167848_c0_seq59 | 0.960597861 | 0.991951376 | -0.471116831 | -0.60322473  | -0.527996776 | -0.589554172 | -1.113315938 | ND           |
| comp168033_c0_seq2  | 0.091837619 | 0.117524582 | ND           | ND           | ND           | ND           | ND           | ND           |
| comp168033_c1_seq4  | 0.357329289 | 0.388932111 | -1.572191257 | ND           | -1.725981215 | -0.372565263 | -1.010270382 | -0.837032432 |
| comp168097_c0_seq2  | 0.764375268 | 0.825980615 | 0.027795726  | -0.13146442  | -0.728054223 | -0.600555384 | 0.263282026  | -0.203804516 |

|                     |             |             |              |    |              |              |              |              |              |
|---------------------|-------------|-------------|--------------|----|--------------|--------------|--------------|--------------|--------------|
| comp168471_c0_seq12 | 2.67044393  | 2.729876222 | 0.365409726  |    | 0.292220764  | 1.715550063  | 1.592622536  | 0.497633997  | 0.501283614  |
| comp168564_c1_seq1  | 1.299569791 | 1.308621668 | -1.459877529 | ND |              | -1.312637492 | -1.073164892 | -0.721865395 | -0.627808691 |
| comp168609_c1_seq1  | 0.045201878 | 0.031579108 | ND           | ND |              | -1.131638898 | -1.193196294 | ND           | -0.844750106 |
| comp169022_c0_seq15 | 0.769377806 | 0.742535719 | ND           |    | -0.954349283 | -0.402000074 | -0.259437488 | ND           | -1.11511282  |
| comp169124_c1_seq1  | 1.200920482 | 1.193435747 | -0.819407478 |    | -0.173364127 | -0.67216744  | -0.432694841 | 0.094695915  | -0.811247381 |
| comp169129_c1_seq2  | 0.65707528  | 0.721988867 | -0.26093163  |    | -0.150001481 | -0.664599061 | -0.566455615 | -0.426009483 | -0.632982775 |
| comp169282_c0_seq3  | 1.221986345 | 1.216704191 | ND           | ND |              | -1.108669296 | ND           | -0.995018454 | -1.1228105   |
| comp169409_c1_seq10 | 0.674054244 | 0.611698425 | -0.619578372 |    | -0.802838794 | -1.852549576 | -1.312046981 | -0.835808747 | -1.167720776 |
| comp169409_c1_seq11 | 0.733468702 | 0.678136725 | -0.593732805 |    | -0.71484532  | -1.560436119 | -1.32096352  | -0.492542768 | -0.972517332 |
| comp169409_c1_seq14 | 0.659000273 | 0.616501375 | -0.570105028 |    | -0.64422098  | -1.870023022 | -1.454459163 | -0.853282193 | -1.185194221 |
| comp169562_c0_seq20 | 0.789556797 | 0.754655081 | -0.067937434 |    | -0.142053386 | -1.066825432 | -0.429412824 | -0.95317459  | -1.381996631 |
| comp169562_c2_seq10 | 0.193440705 | 0.258272936 | -1.072648162 |    | -1.38084732  | -1.305619366 | -1.221048726 | -1.589908532 | -1.541609319 |
| comp169562_c2_seq22 | 0.072811818 | 0.123663122 | -0.959193843 |    | -1.744514256 | -1.414013796 | -0.998449938 | ND           | -1.604246259 |
| comp169699_c0_seq8  | 1.394357941 | 1.408605819 | 0.398584472  |    | 0.245287274  | 0.074307133  | 0.685912477  | -0.448864123 | -0.61444473  |
| comp169922_c0_seq2  | 0.364015026 | 0.371950214 | -1.53770118  | ND | ND           | ND           | ND           | -1.577840296 | -1.404602346 |
| comp170116_c0_seq1  | 0.562980349 | 0.595966551 | -0.181704458 |    | -0.732941666 | -0.226349947 | -0.463998602 | -0.413729101 | -0.717612406 |
| comp170419_c0_seq3  | 0.677904318 | 0.648539969 | 0.045158164  |    | -0.451031476 | -0.229675486 | 0.02503708   | -1.563182676 | -0.845876682 |
| comp170544_c0_seq3  | 0.196093703 | 0.192158201 | ND           | ND |              | -0.922755126 | ND           | ND           | -0.93689633  |
| comp170858_c0_seq13 | 0.508572813 | 0.568176444 | -0.511451551 |    | -0.569773236 | -1.017424027 | -0.35882212  | -0.391889824 | -0.679382713 |
| comp170858_c0_seq27 | 0.725570814 | 0.69425334  | -0.414932564 |    | -0.584829024 | -0.28148081  | -0.162302043 | -0.102889162 | -0.3890437   |
| comp170951_c1_seq3  | 1.055412612 | 1.025391541 | -0.634701831 | ND |              | -0.186431798 | -0.424080453 | -1.151962202 | ND           |
| comp171097_c0_seq9  | 1.035217657 | 1.043197434 | ND           | ND |              | -0.446032855 | -0.155407734 | ND           | -0.761204055 |
| comp171539_c0_seq3  | 0.381353049 | 0.413071978 | -0.780000467 |    | -0.78716963  | -0.933790425 | -0.995347821 | ND           | ND           |
| comp171587_c0_seq20 | 1.117315057 | 1.103506413 | 0.20847911   |    | -0.020538802 | -0.132397491 | 0.260303484  | 0.013438034  | -0.658422056 |
| comp171587_c0_seq9  | 1.095745078 | 1.052070822 | 0.0939634    |    | 0.111617821  | 0.141088285  | 0.125288379  | -0.062681285 | -0.605446679 |
| comp171735_c0_seq4  | 1.268285184 | 1.216046205 | 0.30703442   |    | 0.30466414   | 0.405827828  | 0.549064262  | -0.043894529 | -0.051711258 |
| comp171802_c0_seq6  | 0.150655665 | 0.120391223 | -0.990494466 |    | -0.742391123 | -0.940164441 | -0.603781829 | -1.252482331 | -1.857395632 |
| comp171996_c0_seq1  | 1.114039799 | 1.130891656 | 0.292691733  |    | 0.251937187  | 0.408523307  | 0.290213036  | 0.457933253  | 0.168899069  |
| comp172652_c5_seq1  | 1.260698201 | 1.257231193 | -0.595659132 |    | -0.204888286 | ND           | 0.064054777  | ND           | -0.587499035 |
| comp172717_c0_seq1  | 1.076841796 | 1.023225126 | -0.021904485 |    | -0.00932959  | -0.229379302 | -0.666600313 | -0.416758456 | -0.709360751 |
| comp173318_c0_seq10 | 0.721922347 | 0.711861291 | -0.486174573 |    | -0.067375004 | -0.573017742 | -0.576583191 | -0.263072254 | -0.35307574  |

| comp173318_c0_seq9  | 0.209405146        | 0.304793154        | -0.88827929          | -0.497508444         | -1.343099244       | -0.62650539        | -0.384350362       | -0.658270444       |
|---------------------|--------------------|--------------------|----------------------|----------------------|--------------------|--------------------|--------------------|--------------------|
| comp173544_c0_seq3  | 0.09479084         | 0.12192787         | -0.733685313         | -0.849998945         | -1.364596526       | -0.789331825       | -0.773824429       | -0.776677739       |
| comp173681_c0_seq1  | 3.671916577        | 3.648263839        | 0.631772957          | 0.619071306          | ND                 | 0.120858503        | -1.30599325        | -0.091362616       |
| comp173797_c2_seq1  | 0.215805138        | 0.292623168        | ND                   | -1.149370959         | -0.614750516       | -1.454459163       | -0.927068407       | -1.407042971       |
| comp173797_c2_seq3  | 0.204493478        | 0.211808751        | ND                   | -1.911641132         | -0.643288579       | -1.517759332       | -1.342551094       | -1.771373135       |
| comp174253_c1_seq11 | 2.082063439        | 2.095561644        | -0.202844765         | -0.306923941         | -0.328605999       | 0.878473071        | 0.171989467        | -0.015388269       |
| comp174253_c1_seq3  | 1.94222411         | 1.948466039        | -0.236036184         | -0.516206619         | -0.021849357       | 0.896271669        | 0.024854696        | -0.088696911       |
| comp174253_c1_seq5  | 2.02793016         | 2.040514078        | -0.148487103         | -0.130832682         | -0.070327984       | 0.96081107         | 0.137227361        | -0.055505492       |
| comp174780_c0_seq9  | 2.581584282        | 2.5978437          | ND                   | ND                   | -0.457835062       | -0.644331195       | -0.946244211       | -1.074036257       |
| comp174805_c1_seq1  | 2.828872255        | 2.766992974        | -0.793788751         | -0.289074553         | ND                 | -0.532014851       | -0.833927867       | -1.08665865        |
| comp175298_c0_seq1  | 1.287641003        | 1.331445963        | 0.613608741          | 0.565805192          | 0.088455669        | -0.085659137       | 0.425143482        | 0.155474277        |
| comp176191_c0_seq1  | 0.036601706        | -0.030465383       | ND                   | -1.090528288         | ND                 | -0.997676484       | -0.646376986       | -0.950260291       |
| comp177866_c0_seq1  | 0.075165101        | 0.138176388        | ND                   | ND                   | -0.976736938       | -0.737264339       | -0.863086096       | ND                 |
| comp182035_c0_seq1  | 0.126418353        | 0.058365351        | ND                   | ND                   | ND                 | ND                 | ND                 | -1.182662939       |
| comp187502_c0_seq1  | 0.18592405         | 0.222606398        | ND                   | ND                   | ND                 | -1.279717904       | -1.104509665       | -0.931271716       |
| comp188802_c0_seq1  | 0.029689712        | 0.079736021        | ND                   | ND                   | -0.846121069       | ND                 | ND                 | ND                 |
| comp189731_c0_seq1  | 0.292557817        | 0.263887118        | ND                   | ND                   | -0.734520639       | ND                 | ND                 | ND                 |
| comp35841_c0_seq1   | 0.026436554        | 0.047324635        | ND                   | ND                   | ND                 | ND                 | ND                 | ND                 |
| comp36142_c0_seq1   | 0.122806736        | 0.072338908        | ND                   | ND                   | ND                 | ND                 | ND                 | ND                 |
| comp44516_c0_seq1   | 0.55703589         | 0.570010888        | ND                   | -1.172154095         | ND                 | -0.778272295       | ND                 | ND                 |
| comp88516_c0_seq1   | 0.067709219        | 0.025210321        | ND                   | ND                   | -0.859254084       | ND                 | ND                 | -0.873395288       |
| comp89759_c0_seq1   | 0.456210911        | 0.421200035        | ND                   | ND                   | -0.702146459       | ND                 | ND                 | ND                 |
| comp92950_c0_seq1   | 0.713641894        | 0.6730583          | -0.28378627          | -0.328743994         | -1.03963622        | -0.976254879       | -1.403106632       | -0.752747428       |
| comp93984_c0_seq1   | 3.069188812        | 3.132496776        | 1.488541986          | 1.29495829           | 0.974479117        | 1.720144419        | 0.354397848        | 0.80063707         |
| Transcript ID       | Root1 (RPKM_log10) | Root2 (RPKM_log10) | Flower1 (RPKM_log10) | Flower2 (RPKM_log10) | Stem1 (RPKM_log10) | Stem2 (RPKM_log10) | Leaf1 (RPKM_log10) | Leaf2 (RPKM_log10) |
| comp101679_c0_seq1  | ND                 | -0.648392212       | ND                   | ND                   | -1.311007867       | -0.895444009       | 0.103672971        | 0.072790938        |
| comp110908_c0_seq1  | ND                 | -1.326355739       | ND                   | ND                   | -1.210820144       | -0.369287554       | 0.28304194         | 0.222196683        |
| comp122712_c0_seq1  | -0.689379768       | -0.777636157       | ND                   | -1.117539757         | -0.963130557       | -1.325717949       | 0.150520285        | 0.101909485        |
| comp132035_c0_seq1  | ND                 | -0.359596673       | ND                   | ND                   | ND                 | ND                 | 0.381473126        | 0.440767723        |
| comp132667_c0_seq1  | ND                 | ND                 | -0.890698764         | ND                   | -0.743458727       | -1.106046119       | 0.324434625        | 0.321581315        |
| comp136368_c0_seq1  | -0.900177171       | -0.590493551       | ND                   | ND                   | -1.17392796        | ND                 | 0.229757493        | 0.192142077        |

|                     |              |              |              |              |    |              |              |              |             |
|---------------------|--------------|--------------|--------------|--------------|----|--------------|--------------|--------------|-------------|
| comp137559_c0_seq1  | ND           | ND           | ND           | ND           |    | -1.087523355 | ND           | 0.172255523  | 0.199365437 |
| comp142015_c0_seq1  | ND           | -1.310439599 | ND           | ND           |    | -1.194904004 | ND           | 0.094838097  | 0.046227297 |
| comp149196_c1_seq12 | ND           | ND           | ND           | ND           |    | -1.527203544 | ND           | 0.166230895  | 0.174658596 |
| comp149468_c0_seq2  | ND           | -1.352684678 | ND           | ND           |    | ND           | ND           | 0.052593018  | 0.110437549 |
| comp152503_c0_seq5  | ND           | -0.640151082 | ND           | ND           |    | ND           | -0.71111162  | 0.06615661   | 0.005311353 |
| comp153325_c0_seq1  | ND           | -1.184076478 | -0.43762967  | -1.222950083 |    | -0.767510887 | -0.476885765 | 0.124291205  | 0.172590418 |
| comp153359_c0_seq4  | ND           | ND           | ND           | ND           |    | ND           | ND           | 0.142183057  | 0.169292971 |
| comp155876_c1_seq1  | -1.151953325 | -1.240209713 | -0.97088416  | ND           |    | -1.124674118 | -0.885201519 | 0.030369409  | 0.091633599 |
| comp156118_c0_seq20 | -0.968783768 | -0.534161412 | -0.662775867 | ND           |    | -1.117595821 | -0.525940703 | 0.251327526  | 0.200701435 |
| comp157728_c0_seq1  | -0.636039359 | ND           | ND           | ND           |    | ND           | ND           | 0.06916212   | 0.13042631  |
| comp158397_c0_seq5  | -1.815843493 | -1.205129877 | -0.458683069 | -0.437823509 |    | -1.788564286 | -0.736178331 | 0.249365842  | 0.25799235  |
| comp160156_c0_seq11 | ND           | ND           | -1.10155213  | -1.108721292 |    | -1.255342088 | ND           | 0.113581259  | 0.092244544 |
| comp160968_c0_seq11 | -1.22132914  | -1.610615525 | 0.226911752  | 0.156690844  |    | 0.663282563  | 0.771742278  | 1.467375614  | 1.491212944 |
| comp160968_c0_seq6  | -0.867923601 | -1.324156775 | 0.28096088   | 0.305976401  |    | 0.885966397  | 0.920153122  | 1.641957087  | 1.611234204 |
| comp160968_c0_seq9  | -1.172521281 | -1.26077767  | -0.037209607 | 0.205498703  |    | 0.729819189  | 0.797521903  | 1.549333743  | 1.524563852 |
| comp162420_c0_seq5  | 0.485522728  | 0.505862111  | ND           | ND           |    | -0.954559483 | -1.016116879 | 1.27966529   | 1.284960334 |
| comp162798_c0_seq18 | ND           | ND           | ND           | -1.099340917 |    | -1.546991708 | -1.006489113 | 0.256855214  | 0.194741943 |
| comp163815_c1_seq1  | ND           | -0.311291993 | ND           | ND           |    | -0.718635143 | -0.215921109 | 0.530678301  | 0.471343636 |
| comp164089_c0_seq9  | -1.040510235 | -0.651645369 | ND           | ND           |    | -1.013231029 | ND           | 0.100419813  | 0.08657112  |
| comp164945_c0_seq24 | -1.165772951 | -1.25402934  | -1.160795046 | -0.991872949 |    | -1.314585004 | -1.075112404 | 0.141488519  | 0.110606486 |
| comp168953_c0_seq2  | -0.92960279  | -0.84176792  | -0.572442367 | -1.056732784 |    | -0.726232325 | -0.565940971 | 0.642691022  | 0.615014129 |
| comp169017_c1_seq13 | ND           | ND           | ND           | ND           |    | ND           | ND           | -0.008003835 | 0.010332154 |
| comp169903_c0_seq2  | -0.278477231 | -0.525096112 | 0.666435718  | 0.584632937  |    | 0.084594077  | 0.231312623  | 1.416403234  | 1.362197307 |
| comp169903_c0_seq3  | -0.95637451  | -1.220722158 | -0.298184091 | -0.356505776 |    | -0.503126571 | -0.467773955 | 0.78661553   | 0.789157252 |
| comp170376_c0_seq5  | -0.166258468 | 0.164614451  | -0.189309286 | -0.594418457 |    | -0.087826739 | 0.175126956  | 0.770551598  | 0.795047896 |
| comp171332_c1_seq2  | -1.586610719 | -0.528739072 | -0.627390304 | -0.333529471 |    | -0.127967748 | 0.259924684  | 1.193805819  | 1.129818662 |
| comp171332_c1_seq4  | ND           | -0.683419773 | -0.51882957  | -0.488210172 |    | -0.299038865 | 0.056939303  | 0.980563605  | 0.9402325   |
| comp174367_c3_seq1  | ND           | -0.906917874 | -0.637592321 | ND           |    | ND           | ND           | 0.167366603  | 0.194476517 |
| comp174889_c2_seq12 | 0.006509478  | 0.075860943  | 0.731646687  | 0.407653261  |    | -1.170331298 | ND           | 1.693827939  | 1.745967093 |
| comp174889_c2_seq13 | 0.174508512  | 0.444009743  | 1.003142588  | 1.011605248  |    | -0.317737385 | -0.590148147 | 1.950548076  | 1.901312841 |
| comp174889_c2_seq15 | 0.106050149  | 0.110547814  | 0.078843372  | 0.161850839  | ND |              | -1.250447335 | 0.849040189  | 0.900772578 |

| comp175125_c4_seq34 | ND                 | -1.387625396       | -1.118299843         | ND                   | -1.272089801       | -1.032617202       | 0.072009963        | 0.128742343        |
|---------------------|--------------------|--------------------|----------------------|----------------------|--------------------|--------------------|--------------------|--------------------|
| comp175269_c0_seq7  | -1.081313247       | ND                 | -0.900244082         | ND                   | -0.208936          | -0.416621432       | 0.56476678         | 0.613065993        |
| comp175639_c2_seq1  | ND                 | ND                 | ND                   | ND                   | -0.866584122       | ND                 | 0.288459405        | 0.295365932        |
| comp185013_c0_seq1  | ND                 | ND                 | ND                   | -0.741239148         | ND                 | -0.949417339       | 0.128880886        | 0.177180099        |
| comp99245_c0_seq1   | ND                 | -1.266479649       | ND                   | ND                   | -0.849914058       | -0.911471454       | 0.041888035        | -0.018957222       |
| Transcript ID       | Root1 (RPKM_log10) | Root2 (RPKM_log10) | Flower1 (RPKM_log10) | Flower2 (RPKM_log10) | Stem1 (RPKM_log10) | Stem2 (RPKM_log10) | Leaf1 (RPKM_log10) | Leaf2 (RPKM_log10) |
| comp10084_c0_seq1   | 0.03737654         | -0.31972516        | ND                   | -0.90266681          | 1.471850479        | 1.525642895        | ND                 | -0.762398814       |
| comp127509_c0_seq1  | 0.769506076        | 0.31066843         | -0.920608368         | -0.25877075          | 1.604423437        | 1.53675772         | ND                 | -0.486479539       |
| comp127993_c0_seq1  | -0.994031924       | -0.684348304       | -1.113992755         | ND                   | 0.054436582        | 0.013082572        | -0.853101875       | -0.679863926       |
| comp134280_c0_seq1  | -1.238099351       | -0.849234485       | -1.057030186         | -0.763169353         | 0.28054155         | 0.204743714        | -0.620048047       | -0.923931353       |
| comp139268_c0_seq2  | ND                 | ND                 | ND                   | -0.596032937         | 0.724707685        | 0.760060302        | -1.106124145       | -0.279673681       |
| comp139707_c0_seq3  | -0.579173988       | -0.667430376       | -0.19398484          | -0.627122735         | 1.731406448        | 1.741807728        | -0.292115903       | -0.151062637       |
| comp144837_c0_seq1  | 0.350415444        | 0.013158059        | 0.046394424          | -0.102103892         | 1.015729862        | 1.048531014        | -0.294774688       | -0.473719256       |
| comp146627_c0_seq1  | -0.154192329       | 0.037391979        | 0.167055539          | -0.098391639         | 1.830762563        | 1.774642414        | -0.08020907        | 0.336066928        |
| comp146710_c0_seq1  | -0.28970157        | -0.491901311       | -0.620515766         | -0.530774916         | 0.596762138        | 0.539800493        | -0.058594891       | -0.788446928       |
| comp147072_c0_seq2  | -0.007903441       | -1.210103182       | -0.940777629         | ND                   | 0.676284425        | 0.629204852        | ND                 | ND                 |
| comp147072_c0_seq3  | 0.027546006        | 0.010982842        | -0.683479432         | -0.690648595         | 0.89512437         | 0.839953772        | -1.422588553       | -0.508987914       |
| comp150249_c0_seq1  | 0.321620119        | 0.424178246        | 0.319044886          | 0.280276738          | 1.11353059         | 1.173248794        | -0.874909094       | -0.650518622       |
| comp150605_c0_seq1  | -0.672454873       | -0.310742253       | -1.231748398         | -1.539947556         | 0.257914321        | 0.316332241        | -1.271887514       | -1.700709556       |
| comp150605_c0_seq5  | -0.542134856       | -0.32936125        | -1.382254991         | -1.213332895         | 0.356049654        | 0.300024746        | -1.024454098       | -1.374094894       |
| comp152562_c0_seq1  | ND                 | ND                 | -0.686578782         | ND                   | 0.822389092        | 0.830467624        | -0.249596643       | -0.155539939       |
| comp153090_c0_seq3  | -0.298286557       | 0.159198683        | -0.782329129         | -0.914437029         | 0.768245949        | 0.815236873        | -0.880460192       | -1.251290287       |
| comp153459_c0_seq2  | 0.077994391        | 0.114676739        | 0.48809089           | 0.275375489          | 1.596245965        | 1.640313297        | 0.253686546        | 0.14761375         |
| comp154068_c0_seq4  | -0.880328978       | -1.269615362       | -0.273291081         | -0.308488968         | 1.136696594        | 1.092571417        | 0.154547678        | 0.506946118        |
| comp155674_c1_seq1  | -0.034841491       | 0.303759889        | 0.247388563          | 0.198826715          | 1.146127657        | 1.201692746        | 0.146833525        | 0.184192752        |
| comp158300_c0_seq4  | -0.904631513       | -0.992887901       | ND                   | -0.730731511         | 1.474830212        | 1.419025145        | -0.763701464       | 0.387260091        |
| comp159808_c1_seq1  | 0.387624559        | 0.466859257        | -0.008542684         | -0.367894365         | 1.392627371        | 1.364277882        | -0.249596643       | -0.461709575       |
| comp159808_c1_seq6  | 0.411067809        | 0.475579251        | -0.337281952         | -0.423632361         | 1.407470449        | 1.389378747        | -0.280511055       | -0.380274377       |
| comp160155_c0_seq3  | 0.564802914        | 0.846903012        | 0.685487318          | 0.602483168          | 1.609276042        | 1.606036592        | 0.477574739        | 0.458534668        |
| comp161190_c0_seq1  | -0.445060503       | -0.533316891       | 0.124869013          | -0.034588494         | 1.108825322        | 1.063443822        | 0.065980461        | 0.074162451        |
| comp161575_c0_seq6  | 0.071062861        | 0.294831852        | -0.121448637         | 0.09323095           | 0.890194596        | 0.919207034        | -0.299890451       | -0.446165903       |

|                     |              |              |              |              |             |             |              |              |
|---------------------|--------------|--------------|--------------|--------------|-------------|-------------|--------------|--------------|
| comp162571_c1_seq1  | 1.12251376   | 1.471395989  | 0.481915296  | 0.390425247  | 2.29419802  | 2.24260758  | -0.135460228 | -0.071366748 |
| comp162571_c1_seq2  | 0.698879126  | 1.002272657  | 0.226735777  | 0.010306992  | 1.629602991 | 1.697130161 | 0.278367035  | -0.296583043 |
| comp163445_c1_seq16 | -0.430948576 | -0.065564806 | -0.148421771 | -0.305353254 | 0.967884553 | 0.920661609 | -0.527379443 | -0.37434488  |
| comp163930_c0_seq1  | 1.356444332  | 1.577149311  | 0.606153732  | 0.564589731  | 2.15880861  | 2.206795176 | 1.384823082  | 1.300608244  |
| comp164910_c0_seq13 | -0.059285233 | 0.391534477  | 0.121783931  | 0.186496776  | 0.957443791 | 0.925968261 | -0.362052684 | -0.082359403 |
| comp165301_c0_seq2  | 0.545709814  | 1.109148562  | 1.187359983  | 1.082268072  | 2.130911421 | 2.142037338 | 0.736275008  | 0.802719711  |
| comp165358_c0_seq1  | 1.437109922  | 1.547393949  | 1.582792545  | 1.521806949  | 2.249397803 | 2.270222623 | 0.381909862  | 0.69672822   |
| comp166591_c0_seq22 | -1.21406302  | -1.068236203 | -0.673971913 | -0.771317706 | 0.339186008 | 0.329806624 | -0.441109757 | -0.665811816 |
| comp166591_c0_seq42 | -1.278393946 | -1.299703545 | -0.796294785 | -0.678525211 | 0.361669118 | 0.38774311  | -0.453217149 | -0.566285939 |
| comp166591_c0_seq46 | -1.368311246 | -1.252447652 | -1.041114046 | -0.893381249 | 0.371617662 | 0.36530818  | -0.463953204 | -0.452083257 |
| comp167462_c1_seq2  | 0.912649088  | 0.410094771  | 1.613714689  | 1.496817426  | 2.368277421 | 2.355041289 | 1.147436696  | 1.275521812  |
| comp168568_c0_seq1  | 0.772459327  | 0.761076892  | 0.659965061  | 0.597614929  | 1.577261737 | 1.545066581 | 0.507852186  | 0.170800517  |
| comp168857_c0_seq53 | -0.541012234 | -0.291515819 | 0.011668001  | -0.029359429 | 0.904178063 | 0.929859555 | 0.01292157   | 0.019828098  |
| comp169360_c0_seq3  | 0.461385613  | 0.684942257  | 0.553954602  | 0.651945528  | 1.34841679  | 1.36092826  | 0.590011879  | 0.304455955  |
| comp170838_c1_seq1  | -0.034384116 | 0.081479478  | 0.498124548  | 0.554489234  | 2.655841705 | 2.616886523 | 1.035571654  | 0.827653215  |
| comp171899_c0_seq2  | -0.264428289 | 0.698467844  | 0.539890165  | 0.440950629  | 1.740574522 | 1.749929509 | 0.247569621  | 0.515865579  |
| comp171899_c0_seq4  | -0.596452475 | -0.082648872 | 0.324979379  | 0.121515571  | 0.993119596 | 0.960333942 | -0.154492431 | -0.407223214 |
| comp174020_c0_seq7  | -0.418555415 | -0.506811804 | 0.415726263  | 0.278223332  | 1.169029035 | 1.205177792 | 0.058166735  | -0.069625311 |
| comp176711_c0_seq1  | 0.569210128  | -0.322751615 | -0.19172876  | -0.25688987  | 1.528092479 | 1.568929778 | ND           | -0.660689918 |
| comp184226_c0_seq1  | ND           | 0.165829262  | -1.027243183 | -1.034412346 | 1.188182717 | 1.141224829 | ND           | -0.71805309  |
| comp199478_c0_seq1  | -0.341540231 | ND           | -0.637592321 | ND           | 0.287798967 | 0.18845301  | ND           | -0.504493487 |
| comp226042_c0_seq1  | ND           | ND           | ND           | -0.695673865 | 1.707933692 | 1.761728934 | -0.427613823 | ND           |
| comp231923_c0_seq1  | -0.834571487 | -0.922827876 | -0.255562314 | -0.007458972 | 0.904514948 | 0.920025438 | ND           | ND           |
| comp35910_c0_seq1   | -0.954798122 | 0.118313492  | -0.074758953 | -0.303776865 | 0.929813581 | 0.862182037 | -0.637776814 | -0.397592075 |
| comp43805_c0_seq1   | 0.052527885  | -0.132638517 | 0.090929546  | 0.083760383  | 0.880524169 | 0.860858934 | 0.025966846  | 0.199204795  |
| comp45349_c0_seq1   | -1.228955971 | -0.618242356 | -0.746856811 | -0.356085965 | 0.877504481 | 0.8123128   | -0.008844677 | -0.516847964 |
| comp58595_c0_seq2   | ND           | -0.249446309 | -0.014882862 | -0.800203275 | 0.492508623 | 0.577079263 | ND           | -0.220602585 |
| comp74633_c0_seq1   | ND           | -0.035085581 | ND           | -0.4496228   | 0.915639766 | 0.913325285 | ND           | ND           |
| comp97270_c0_seq1   | 0.129346544  | -0.102331987 | -0.115553024 | -0.055775397 | 0.83331936  | 0.830467624 | -0.331783399 | -0.408422923 |

**Table S3** List of organ-specific transcripts potentially involved in specific organ-related biological functions.

| Transcript IDs     | Length | Functional annotations                            | GO/KOG annotations <sup>a</sup> | Root1 <sup>b</sup> | Root2 <sup>b</sup> | Flower1 <sup>b</sup> | Flower2 <sup>b</sup> | Stem1 <sup>b</sup> | Stem2 <sup>b</sup> | Leaf1 <sup>b</sup> | Leaf2 <sup>b</sup> | Root_<br>average <sup>c</sup> | Flower_<br>average <sup>c</sup> | Stem_<br>average <sup>c</sup> | Leaf_<br>average <sup>c</sup> |
|--------------------|--------|---------------------------------------------------|---------------------------------|--------------------|--------------------|----------------------|----------------------|--------------------|--------------------|--------------------|--------------------|-------------------------------|---------------------------------|-------------------------------|-------------------------------|
| comp133870_c0_seq1 | 951    | DROOPING LEAF                                     | GO:0048440 (carpel development) | 0.03               | 0.03               | 98.54                | 90.71                | 0.07               | 0.03               | 0.00               | 0.13               | 0.03                          | 94.63                           | 0.05                          | 0.07                          |
| comp137025_c0_seq1 | 1569   | Cytochrome P450 71A1                              | GO:0009835 (ripening)           | 0.00               | 0.00               | 83.37                | 72.54                | 0.00               | 0.02               | 0.05               | 0.00               | 0.00                          | 77.95                           | 0.01                          | 0.03                          |
| comp138834_c0_seq2 | 1138   | LOB domain-containing protein 6                   | GO:0048441 (petal development)  | 0.03               | 0.20               | 4.68                 | 4.80                 | 0.06               | 0.15               | 0.04               | 0.14               | 0.11                          | 4.74                            | 0.10                          | 0.09                          |
| comp139349_c0_seq1 | 902    | DROOPING LEAF                                     | GO:0048440 (carpel development) | 0.00               | 0.00               | 4.52                 | 4.44                 | 0.00               | 0.00               | 0.00               | 0.00               | 0.00                          | 4.48                            | 0.00                          | 0.00                          |
| comp139414_c0_seq1 | 922    | DROOPING LEAF                                     | GO:0048440 (carpel development) | 0.03               | 0.08               | 25.01                | 25.93                | 1.66               | 3.73               | 0.37               | 0.48               | 0.06                          | 25.47                           | 2.69                          | 0.42                          |
| comp140455_c0_seq1 | 1377   | Floral homeotic protein AGAMOUS                   |                                 | 0.00               | 0.00               | 128.11               | 114.11               | 0.28               | 0.16               | 0.09               | 0.00               | 0.00                          | 121.11                          | 0.22                          | 0.05                          |
| comp140923_c0_seq1 | 1172   | MADS-box transcription factor 16                  | GO:0009908 (flower development) | 0.31               | 0.66               | 23.78                | 22.07                | 0.14               | 0.19               | 0.07               | 0.13               | 0.49                          | 22.93                           | 0.17                          | 0.10                          |
| comp140923_c0_seq4 | 1028   | MADS-box transcription factor 16                  | GO:0009908 (flower development) | 0.53               | 0.97               | 32.34                | 30.22                | 0.03               | 0.03               | 0.04               | 0.06               | 0.75                          | 31.28                           | 0.03                          | 0.05                          |
| comp142957_c0_seq1 | 1188   | Floral homeotic protein AGAMOUS                   |                                 | 0.00               | 0.00               | 17.30                | 15.41                | 0.00               | 0.02               | 0.00               | 0.05               | 0.00                          | 16.36                           | 0.01                          | 0.03                          |
| comp142957_c0_seq2 | 1268   | Floral homeotic protein AGAMOUS                   |                                 | 0.00               | 0.00               | 10.30                | 10.45                | 0.03               | 0.00               | 0.00               | 0.00               | 0.00                          | 10.37                           | 0.01                          | 0.00                          |
| comp145011_c0_seq1 | 1670   | AP2-like ethylene-responsive transcription factor | GO:0009908 (flower development) | 0.05               | 0.13               | 3.99                 | 4.04                 | 0.12               | 0.15               | 0.08               | 0.17               | 0.09                          | 4.01                            | 0.13                          | 0.12                          |
| comp145893_c0_seq2 | 1636   | AP2-like ethylene-responsive transcription factor | GO:0009908 (flower development) | 0.17               | 0.14               | 4.58                 | 4.06                 | 0.14               | 0.26               | 0.03               | 0.13               | 0.15                          | 4.32                            | 0.20                          | 0.08                          |
| comp145893_c0_seq3 | 1421   | AP2-like ethylene-responsive transcription factor | GO:0009908 (flower development) | 0.09               | 0.07               | 4.50                 | 4.07                 | 0.07               | 0.18               | 0.00               | 0.15               | 0.08                          | 4.28                            | 0.12                          | 0.08                          |
| comp145893_c0_seq4 | 2532   | AP2-like ethylene-responsive transcription factor | GO:0009908 (flower development) | 0.07               | 0.07               | 4.11                 | 4.39                 | 0.19               | 0.22               | 0.08               | 0.11               | 0.07                          | 4.25                            | 0.21                          | 0.10                          |
| comp146369_c0_seq2 | 1163   | LOB domain-containing protein 6                   | GO:0048441 (petal development)  | 0.45               | 0.45               | 6.13                 | 6.34                 | 0.50               | 0.48               | 0.51               | 0.27               | 0.45                          | 6.24                            | 0.49                          | 0.39                          |
| comp146487_c0_seq1 | 1268   | MADS-box transcription factor 16                  | GO:0009908 (flower development) | 0.00               | 0.02               | 17.42                | 16.02                | 0.10               | 0.04               | 0.00               | 0.05               | 0.01                          | 16.72                           | 0.07                          | 0.02                          |
| comp146487_c0_seq5 | 1187   | MADS-box transcription                            | GO:0009908 (flower development) | 0.00               | 0.04               | 22.62                | 21.91                | 0.19               | 0.12               | 0.00               | 0.03               | 0.02                          | 22.27                           | 0.16                          | 0.01                          |

|                     |      |                                                 |                                                                                                                     |      |      |       |       |      |      |      |      |      |       |      |      |
|---------------------|------|-------------------------------------------------|---------------------------------------------------------------------------------------------------------------------|------|------|-------|-------|------|------|------|------|------|-------|------|------|
|                     |      | factor 16                                       |                                                                                                                     |      |      |       |       |      |      |      |      |      |       |      |      |
| comp146487_c0_seq7  | 781  | MADS-box transcription factor 16                | GO:0009908 (flower development)                                                                                     | 0.00 | 0.03 | 8.36  | 7.99  | 0.00 | 0.00 | 0.00 | 0.08 | 0.02 | 8.17  | 0.00 | 0.04 |
| comp152995_c0_seq1  | 2058 | Floral homeotic protein APETALA 2               | GO:0010093 (specification of floral organ identity)                                                                 | 0.50 | 1.17 | 12.80 | 12.88 | 0.51 | 1.00 | 0.23 | 0.23 | 0.84 | 12.84 | 0.75 | 0.23 |
| comp152995_c0_seq2  | 2137 | Floral homeotic protein APETALA 2               | GO:0010093 (specification of floral organ identity)                                                                 | 0.49 | 0.93 | 11.53 | 11.13 | 0.46 | 0.79 | 0.18 | 0.24 | 0.71 | 11.33 | 0.62 | 0.21 |
| comp154859_c0_seq3  | 573  | Protein CCA1                                    | GO:0048574 (long-day photoperiodism, flowering)                                                                     | 0.00 | 0.17 | 7.27  | 6.68  | 0.11 | 0.20 | 0.44 | 0.11 | 0.09 | 6.97  | 0.16 | 0.28 |
| comp154859_c0_seq8  | 2096 | Protein CCA1                                    | GO:0048574 (long-day photoperiodism, flowering)                                                                     | 0.70 | 0.62 | 22.40 | 20.27 | 0.73 | 0.63 | 0.50 | 0.27 | 0.66 | 21.34 | 0.68 | 0.39 |
| comp155097_c0_seq4  | 702  | Probable histone-arginine methyltransferase 1.3 | GO:0009909 (regulation of flower development); GO:0010228 (vegetative to reproductive phase transition of meristem) | 2.48 | 3.65 | 16.16 | 15.70 | 2.59 | 2.37 | 1.92 | 1.97 | 3.07 | 15.93 | 2.48 | 1.95 |
| comp157450_c1_seq12 | 413  | Floral homeotic protein AGAMOUS                 |                                                                                                                     | 0.00 | 0.06 | 4.26  | 4.85  | 0.08 | 0.00 | 0.00 | 0.00 | 0.03 | 4.56  | 0.04 | 0.00 |
| comp157450_c1_seq7  | 1392 | Floral homeotic protein AGAMOUS                 |                                                                                                                     | 0.00 | 0.04 | 15.43 | 14.17 | 0.00 | 0.00 | 0.00 | 0.00 | 0.02 | 14.80 | 0.00 | 0.00 |
| comp157771_c0_seq1  | 3527 | Leucine-rich repeat receptor protein kinase     | GO:0007126 (meiosis); GO:0009556 (microsporogenesis); GO:0010234 (tapetal cell fate specification)                  | 0.07 | 0.42 | 7.59  | 6.56  | 0.76 | 0.93 | 0.30 | 0.35 | 0.24 | 7.07  | 0.84 | 0.32 |
| comp163320_c0_seq1  | 2659 | Probable lysine-specific demethylase            | GO:0009910 (negative regulation of flower development); GO:0048573 (photoperiodism, flowering)                      | 2.16 | 3.82 | 24.90 | 22.83 | 2.71 | 3.89 | 3.46 | 2.01 | 2.99 | 23.87 | 3.30 | 2.74 |
| comp164722_c0_seq10 | 3035 | Protein LHY                                     | GO:0048574 (long-day photoperiodism, flowering)                                                                     | 0.67 | 0.77 | 11.32 | 10.34 | 1.02 | 1.25 | 1.47 | 0.84 | 0.72 | 10.83 | 1.14 | 1.16 |
| comp164722_c0_seq5  | 2763 | Protein LHY                                     | GO:0048574 (long-day photoperiodism, flowering)                                                                     | 1.05 | 0.57 | 10.76 | 9.23  | 0.88 | 1.26 | 1.53 | 0.94 | 0.81 | 9.99  | 1.07 | 1.24 |
| comp166210_c1_seq1  | 1144 | B3 domain-containing protein                    | GO:0009908 (flower development); GO:0048573 (photoperiodism, flowering)                                             | 0.05 | 0.00 | 3.04  | 3.22  | 0.03 | 0.02 | 0.07 | 0.05 | 0.03 | 3.13  | 0.03 | 0.06 |
| comp166210_c1_seq2  | 1075 | B3 domain-containing protein                    | GO:0009908 (flower development); GO:0048573 (photoperiodism, flowering)                                             | 0.00 | 0.02 | 4.26  | 4.87  | 0.03 | 0.05 | 0.08 | 0.03 | 0.01 | 4.57  | 0.04 | 0.05 |
| comp167920_c1_seq10 | 2247 | MADS-box transcription factor 16                | GO:0009908 (flower development)                                                                                     | 1.09 | 1.32 | 12.51 | 12.00 | 0.30 | 0.36 | 0.23 | 0.11 | 1.20 | 12.25 | 0.33 | 0.17 |



|                     |      |                                                    |                                                                                                |       |       |       |       |      |      |       |       |       |       |      |       |
|---------------------|------|----------------------------------------------------|------------------------------------------------------------------------------------------------|-------|-------|-------|-------|------|------|-------|-------|-------|-------|------|-------|
| comp167920_c1_seq9  | 1074 | MADS-box transcription factor 16                   | GO:0009908 (flower development)                                                                | 0.63  | 1.11  | 10.00 | 9.97  | 0.64 | 0.32 | 0.08  | 0.03  | 0.87  | 9.98  | 0.48 | 0.05  |
| comp167920_c2_seq2  | 1116 | MADS-box transcription factor 16                   | GO:0009908 (flower development)                                                                | 4.10  | 4.86  | 51.32 | 45.99 | 1.46 | 1.11 | 0.53  | 0.14  | 4.48  | 48.66 | 1.28 | 0.34  |
| comp169398_c0_seq7  | 3724 | Protein LHY                                        | GO:0048574 (long-day photoperiodism, flowering)                                                | 0.90  | 1.13  | 37.42 | 34.42 | 1.14 | 1.67 | 2.41  | 1.44  | 1.02  | 35.92 | 1.40 | 1.93  |
| comp169398_c0_seq8  | 3754 | Protein LHY                                        | GO:0048574 (long-day photoperiodism, flowering)                                                | 0.74  | 1.09  | 38.40 | 33.62 | 1.26 | 1.29 | 2.09  | 1.51  | 0.92  | 36.01 | 1.27 | 1.80  |
| comp170023_c1_seq1  | 911  | LOB domain-containing protein 6                    | GO:0048441 (petal development)                                                                 | 0.07  | 0.33  | 59.01 | 55.39 | 0.39 | 0.09 | 1.58  | 0.76  | 0.20  | 57.20 | 0.24 | 1.17  |
| comp170445_c0_seq4  | 4240 | Probable lysine-specific demethylase               | GO:0009910 (negative regulation of flower development); GO:0048573 (photoperiodism, flowering) | 2.89  | 4.05  | 24.91 | 21.26 | 3.33 | 4.38 | 3.97  | 2.34  | 3.47  | 23.08 | 3.85 | 3.16  |
| comp171184_c1_seq12 | 3214 | Protein LHY                                        | GO:0048574 (long-day photoperiodism, flowering)                                                | 0.23  | 0.41  | 16.39 | 14.28 | 0.39 | 0.66 | 0.89  | 0.54  | 0.32  | 15.34 | 0.53 | 0.72  |
| comp171184_c1_seq14 | 3280 | Protein LHY                                        | GO:0048574 (long-day photoperiodism, flowering)                                                | 0.33  | 0.43  | 15.67 | 13.50 | 0.45 | 0.40 | 0.99  | 0.58  | 0.38  | 14.58 | 0.42 | 0.79  |
| comp171184_c1_seq2  | 3183 | Protein LHY                                        | GO:0048574 (long-day photoperiodism, flowering)                                                | 0.36  | 0.48  | 16.51 | 15.14 | 0.43 | 0.51 | 0.65  | 0.54  | 0.42  | 15.82 | 0.47 | 0.60  |
| comp171184_c1_seq6  | 3184 | Protein LHY                                        | GO:0048574 (long-day photoperiodism, flowering)                                                | 0.25  | 0.48  | 15.79 | 15.15 | 0.50 | 0.56 | 0.95  | 0.80  | 0.36  | 15.47 | 0.53 | 0.88  |
| comp172256_c0_seq3  | 1697 | Protein kinase PINOID                              | GO:0009908 (flower development)                                                                | 0.22  | 0.15  | 9.55  | 9.15  | 0.04 | 0.02 | 0.42  | 0.19  | 0.18  | 9.35  | 0.03 | 0.30  |
| comp172388_c0_seq1  | 1474 | Polygalacturonase                                  | GO:0009835 (ripening)                                                                          | 0.00  | 0.00  | 17.62 | 18.11 | 0.00 | 0.00 | 0.00  | 0.02  | 0.00  | 17.86 | 0.00 | 0.01  |
| comp76010_c0_seq1   | 203  | 60S ribosomal protein L8                           | GO:0000003 (reproduction)                                                                      | 0.00  | 0.00  | 1.14  | 1.12  | 0.00 | 0.00 | 0.00  | 0.00  | 0.00  | 1.13  | 0.00 | 0.00  |
| comp156118_c0_seq20 | 852  | Protein SPA1-RELATED 4                             | GO:0009585 (red, far-red light phototransduction)                                              | 0.03  | 0.30  | 0.24  | 0.46  | 0.74 | 1.82 | 15.62 | 13.48 | 0.16  | 0.35  | 1.28 | 14.55 |
| comp158397_c0_seq5  | 1997 | Receptor-like serine/threonine-protein kinase ALE2 | GO:0048367 (shoot development)                                                                 | 0.00  | 0.21  | 0.30  | 0.32  | 0.50 | 1.14 | 9.56  | 8.71  | 0.10  | 0.31  | 0.82 | 9.14  |
| comp171332_c1_seq2  | 1178 | Phototropin-2                                      | GO:0009882 (blue light photoreceptor activity)                                                 | 0.02  | 0.06  | 0.35  | 0.36  | 0.02 | 0.18 | 1.78  | 1.81  | 0.04  | 0.36  | 0.10 | 1.79  |
| comp171332_c1_seq4  | 1682 | Phototropin-2                                      | GO:0009882 (blue light photoreceptor activity)                                                 | 0.11  | 0.29  | 0.22  | 0.00  | 0.08 | 0.30 | 1.78  | 1.59  | 0.20  | 0.11  | 0.19 | 1.69  |
| comp148295_c0_seq2  | 1526 | Protein SHORT-ROOT                                 | GO:0009956 (radial pattern formation)                                                          | 12.32 | 13.17 | 0.46  | 0.24  | 0.83 | 0.91 | 0.55  | 0.62  | 12.74 | 0.35  | 0.87 | 0.59  |
| comp149327_c1_seq1  | 1690 | Patatin-05                                         | GO:0006952 (defense response)                                                                  | 28.13 | 24.76 | 0.11  | 0.08  | 0.96 | 0.77 | 0.70  | 0.34  | 26.45 | 0.10  | 0.86 | 0.52  |
| comp153574_c0_seq8  | 1336 | Triacylglycerol lipase 2                           | GO:0002213 (defense response to insect)                                                        | 2.79  | 2.89  | 0.03  | 0.00  | 0.05 | 0.23 | 0.22  | 0.24  | 2.84  | 0.02  | 0.14 | 0.23  |

|                     |      |                                            |                                                                  |         |         |      |      |      |       |       |      |         |      |      |       |
|---------------------|------|--------------------------------------------|------------------------------------------------------------------|---------|---------|------|------|------|-------|-------|------|---------|------|------|-------|
| comp156437_c0_seq2  | 1279 | Ethylene-responsive transcription factor 5 | GO:0006952 (defense response)                                    | 15.41   | 16.77   | 0.29 | 0.46 | 0.91 | 0.66  | 0.79  | 1.75 | 16.09   | 0.38 | 0.79 | 1.27  |
| comp158132_c0_seq5  | 1199 | Triacylglycerol lipase 2                   | GO:0002213 (defense response to insect)                          | 2.60    | 2.74    | 0.00 | 0.00 | 0.22 | 0.26  | 0.25  | 0.31 | 2.67    | 0.00 | 0.24 | 0.28  |
| comp158132_c0_seq7  | 1469 | Triacylglycerol lipase 2                   | GO:0002213 (defense response to insect)                          | 1.79    | 1.90    | 0.03 | 0.00 | 0.11 | 0.23  | 0.20  | 0.24 | 1.84    | 0.02 | 0.17 | 0.22  |
| comp159962_c2_seq10 | 980  | Mannose-specific lectin                    | GO:0006952 (defense response)                                    | 2798.83 | 2559.88 | 2.41 | 2.23 | 0.23 | 1.21  | 0.22  | 0.80 | 2679.35 | 2.32 | 0.72 | 0.51  |
| comp167541_c0_seq11 | 557  | Glutathione S-transferase U17              | GO:0048527 (lateral root development)                            | 227.42  | 240.95  | 0.42 | 0.08 | 1.98 | 11.59 | 0.76  | 1.13 | 234.19  | 0.25 | 6.79 | 0.94  |
| comp167806_c0_seq1  | 1856 | Transcription factor MYC2                  | GO:2000068 (regulation of defense response to insect)            | 16.64   | 15.42   | 0.25 | 0.37 | 2.22 | 0.94  | 1.57  | 2.39 | 16.03   | 0.31 | 1.58 | 1.98  |
| comp167806_c0_seq5  | 2628 | Transcription factor MYC4                  | GO:0006952 (defense response)                                    | 14.13   | 16.67   | 0.23 | 0.71 | 2.37 | 0.79  | 0.72  | 2.38 | 15.40   | 0.47 | 1.58 | 1.55  |
| comp169022_c0_seq15 | 410  | Putative disease resistance protein RGA1   | GO:0006952 (defense response)                                    | 5.88    | 5.53    | 0.00 | 0.11 | 0.40 | 0.55  | 0.00  | 0.08 | 5.70    | 0.06 | 0.47 | 0.04  |
| comp173681_c0_seq1  | 854  | Mannose-specific lectin                    | GO:0006952 (defense response)                                    | 4698.04 | 4449.01 | 4.28 | 4.16 | 0.00 | 1.32  | 0.05  | 0.81 | 4573.53 | 4.22 | 0.66 | 0.43  |
| comp134280_c0_seq1  | 528  | ABC transporter B family member 14         | [Q] Secondary metabolites biosynthesis, transport and catabolism | 0.00    | 0.06    | 0.14 | 0.09 | 0.17 | 1.91  | 1.60  | 0.24 | 0.12    | 0.10 | 0.13 | 1.76  |
| comp161190_c0_seq1  | 2466 | ABC transporter B family member 13         | [Q] Secondary metabolites biosynthesis, transport and catabolism | 0.00    | 0.36    | 0.29 | 1.33 | 0.92 | 12.85 | 11.57 | 1.16 | 1.19    | 0.33 | 1.13 | 12.21 |
| comp166591_c0_seq22 | 3497 | ABC transporter B family member 13         | [Q] Secondary metabolites biosynthesis, transport and catabolism | 0.00    | 0.06    | 0.09 | 0.21 | 0.17 | 2.18  | 2.14  | 0.36 | 0.22    | 0.07 | 0.19 | 2.16  |
| comp166591_c0_seq42 | 3476 | ABC transporter B family member 13         | [Q] Secondary metabolites biosynthesis, transport and catabolism | 0.00    | 0.05    | 0.05 | 0.16 | 0.21 | 2.30  | 2.44  | 0.35 | 0.27    | 0.05 | 0.18 | 2.37  |
| comp166591_c0_seq46 | 3563 | ABC transporter B family member 13         | [Q] Secondary metabolites biosynthesis, transport and catabolism | 0.00    | 0.04    | 0.06 | 0.09 | 0.13 | 2.35  | 2.32  | 0.34 | 0.35    | 0.05 | 0.11 | 2.34  |
| comp168857_c0_seq53 | 1803 | Pleiotropic drug resistance protein 6      | [Q] Secondary metabolites biosynthesis, transport and catabolism | 0.00    | 0.29    | 0.51 | 1.03 | 0.93 | 8.02  | 8.51  | 1.03 | 1.05    | 0.40 | 0.98 | 8.26  |
| comp231923_c0_seq1  | 417  | ABC transporter G family member 11         | [Q] Secondary metabolites biosynthesis, transport and catabolism | 0.00    | 0.15    | 0.12 | 0.56 | 0.98 | 8.03  | 8.32  | 0.00 | 0.00    | 0.13 | 0.77 | 8.17  |
| comp35910_c0_seq1   | 550  | Hydroquinone                               | [G] Carbohydrate transport and                                   | 0.00    | 0.11    | 1.31 | 0.84 | 0.50 | 8.51  | 7.28  | 0.23 | 0.40    | 0.71 | 0.67 | 7.89  |

|  |  |                     |                                                  |  |  |  |  |  |  |  |  |  |  |  |  |
|--|--|---------------------|--------------------------------------------------|--|--|--|--|--|--|--|--|--|--|--|--|
|  |  | glucosyltransferase | metabolism; [C] Energy production and conversion |  |  |  |  |  |  |  |  |  |  |  |  |
|--|--|---------------------|--------------------------------------------------|--|--|--|--|--|--|--|--|--|--|--|--|

**a:** GO: Gene Ontology; KOG: eukaryotic orthologous group.

**b:** The expression levels (in RPKM) of each transcript in eight RNA-seq data sets (“Root1”, “Root2”, “Flower1”, “Flower2”, “Stem1”, “Stem2”, “Leaf1” and “Leaf2”) are provided in the table.

**c:** The average expression levels (in RPKM) of each transcript in each organ (two biological replicates for each organ) are also provided in this table.

**Table S4** Organ-specific sRNAs identified in *Dendrobium officinale*. The sRNA sequences along with their accumulation levels (normalized in RPM) in sRNA-seq libraries prepared from specific organs were included in this table. Seven miRNAs were identified to be specifically accumulated in the floral organ.

**Flower-specific sRNAs:**

| sRNA sequence            | sRNA count (RPM) | sRNA HTS datasets | miRNA ID    | Homologous miRNA ID                                                                                                                                                                                                            | Species                                                                                                                                                                                                                                                                                                        |
|--------------------------|------------------|-------------------|-------------|--------------------------------------------------------------------------------------------------------------------------------------------------------------------------------------------------------------------------------|----------------------------------------------------------------------------------------------------------------------------------------------------------------------------------------------------------------------------------------------------------------------------------------------------------------|
| GCTCTCTATGCTTCTGTCATC    | 40.72            | Flower_2          | dof-miR-376 | aly-miR157d-3p                                                                                                                                                                                                                 | Arabidopsis lyrata                                                                                                                                                                                                                                                                                             |
| GCTCAAGAAAGCTGTGGGAGA    | 36.76            | Flower_2          | dof-miR-372 | gma-miR396b-3p/gma-miR396k-3p/mtr-miR396a-3p                                                                                                                                                                                   | Glycine max/Glycine max/Medicago truncatula                                                                                                                                                                                                                                                                    |
| TCATTGAGTGCAGCGTTGATG    | 30.63            | Flower_2          | dof-miR-600 | aly-miR397a-5p/aly-miR397b-5p/ath-miR397a/bdi-miR397a/cme-miR397/csi-miR397/gma-miR397a/gma-miR397b-5p/lus-miR397b/mtr-miR397-5p/osa-miR397a/ppe-miR397/ptc-miR397a/rco-miR397/sbi-miR397-5p/ssl-miR397/tcc-miR397/vvi-miR397a | Arabidopsis lyrata/Arabidopsis lyrata/Arabidopsis thaliana/Brachypodium distachyon/Cucumis melo/Citrus sinensis/Glycine max/Glycine max/Linum usitatissimum/Medicago truncatula/Oryza sativa/Prunus persica/Populus trichocarpa/Ricinus communis/Sorghum bicolor/Salvia sclarea/Theobroma cacao/Vitis vinifera |
| ATGCACTGCCTCTCCCTGGC     | 27.03            | Flower_2          | dof-miR-197 | ahy-miR408-3p/aly-miR408-3p/ath-miR408-3p/cme-miR408/csi-miR408/gma-miR408a-3p/gma-miR408b-3p/gma-miR408c-3p/lus-miR408a/mdm-miR408a/mes-miR408/mtr-miR408-3p/pta-miR408/ptc-miR408-3p/vun-miR408/vvi-miR408                   | Arachis hypogaea/Arabidopsis lyrata/Arabidopsis thaliana/Cucumis melo/Citrus sinensis/Glycine max/Glycine max/Glycine max/Linum usitatissimum/Malus domestica/Manihot esculenta/Medicago truncatula/Pinus taeda/Populus trichocarpa/Vigna unguiculata/Vitis vinifera                                           |
| TATTGGCCTGGTTCACCTCAGA   | 22.7             | Flower_2          | dof-miR-568 | aly-miR170-5p/aly-miR171a-5p/ath-miR170-5p/ath-miR171a-5p/gma-miR171j-5p/stu-miR171a-5p/stu-miR171c-5p                                                                                                                         | Arabidopsis lyrata/Arabidopsis lyrata/Arabidopsis thaliana/Arabidopsis thaliana/Glycine max/Solanum tuberosum/Solanum tuberosum                                                                                                                                                                                |
| CGCCAAAGGAGAGTTGCCCTG    | 23.06            | Flower_2          | dof-miR-301 | tcc-miR399a/vvi-miR399i                                                                                                                                                                                                        | Theobroma cacao/Vitis vinifera                                                                                                                                                                                                                                                                                 |
| TTAGATGACCATCAACGAACA    | 19.1             | Flower_2          | dof-miR-927 | mdm-miR827                                                                                                                                                                                                                     | Malus domestica                                                                                                                                                                                                                                                                                                |
| TCTAAGCATATTCTGTAGCGGACT | 448.3            | Flower_1          | -           | -                                                                                                                                                                                                                              | -                                                                                                                                                                                                                                                                                                              |
| GCTCCCTATCATCGAAACCT     | 319.14           | Flower_1          | -           | -                                                                                                                                                                                                                              | -                                                                                                                                                                                                                                                                                                              |
| TTTTCGTGTGCGTCATTT       | 112.81           | Flower_1          | -           | -                                                                                                                                                                                                                              | -                                                                                                                                                                                                                                                                                                              |
| GTTTTCGTGTGCGTCATT       | 87.09            | Flower_1          | -           | -                                                                                                                                                                                                                              | -                                                                                                                                                                                                                                                                                                              |
| CAGAAGGATAAGAGTGAACCTT   | 85.25            | Flower_1          | -           | -                                                                                                                                                                                                                              | -                                                                                                                                                                                                                                                                                                              |
| TCGGAATTAAGTTCGGAGTGAC   | 77.53            | Flower_1          | -           | -                                                                                                                                                                                                                              | -                                                                                                                                                                                                                                                                                                              |
| GTGGAAGAAAAGCTAAAGAGC    | 75.14            | Flower_1          | -           | -                                                                                                                                                                                                                              | -                                                                                                                                                                                                                                                                                                              |
| TGTATTAAGCCAAGTAGTTCT    | 70.55            | Flower_1          | -           | -                                                                                                                                                                                                                              | -                                                                                                                                                                                                                                                                                                              |
| TCTTACTGTACGAAAGCATG     | 65.59            | Flower_1          | -           | -                                                                                                                                                                                                                              | -                                                                                                                                                                                                                                                                                                              |
| TGTTGGCGTGAAGAAAAGCT     | 63.39            | Flower_1          | -           | -                                                                                                                                                                                                                              | -                                                                                                                                                                                                                                                                                                              |
| TGAATGACAATGGACTTGGCAT   | 62.28            | Flower_1          | -           | -                                                                                                                                                                                                                              | -                                                                                                                                                                                                                                                                                                              |
| ATCAAATGGAACCTGGCATAAC   | 59.9             | Flower_1          | -           | -                                                                                                                                                                                                                              | -                                                                                                                                                                                                                                                                                                              |

|                           |       |          |   |   |   |
|---------------------------|-------|----------|---|---|---|
| TAAGCATATTCTGTAGCGGACT    | 59.9  | Flower_1 | - | - | - |
| TTCTTACTGTACGAAAGCATG     | 53.1  | Flower_1 | - | - | - |
| AGGTGGAGAGATATGTGGGGT     | 49.79 | Flower_1 | - | - | - |
| CGTGAAGAAAAGCTAAAGAGC     | 46.85 | Flower_1 | - | - | - |
| TCGAGGATGATGACCTGGACGT    | 45.01 | Flower_1 | - | - | - |
| GACCGGATGCAGAGAAACATTC    | 45.75 | Flower_1 | - | - | - |
| CACGCCTGGAGAATTCATTGCT    | 45.75 | Flower_1 | - | - | - |
| ATCGGAATTAAGTTCGGAGTGAC   | 42.99 | Flower_1 | - | - | - |
| TTCCATCGTCGCCGAGAACA      | 41.71 | Flower_1 | - | - | - |
| CAAGATCCATCCCATAAGCT      | 40.05 | Flower_1 | - | - | - |
| TTACTGTACGAAAGCATGGGA     | 40.6  | Flower_1 | - | - | - |
| AGAAATGTGGCGTGAAGAA       | 39.13 | Flower_1 | - | - | - |
| TATTGGCTTCCAGATGATGATC    | 39.32 | Flower_1 | - | - | - |
| TTGTCACCATCCAGGAGAACTC    | 37.11 | Flower_1 | - | - | - |
| AAATGAACTGGAAGCGATTGG     | 37.11 | Flower_1 | - | - | - |
| CGAATGGACTCGAAAAGATAGAACT | 35.83 | Flower_1 | - | - | - |
| TAAGTTCAGAACTATGAAGCCT    | 37.66 | Flower_1 | - | - | - |
| ATGAAATGAACTGGAAGCGAT     | 36.19 | Flower_1 | - | - | - |
| TAGAAGTCCAAAGCAGAACCTT    | 34.17 | Flower_1 | - | - | - |
| TGGAAGCGATTGGATGTAGTT     | 32.52 | Flower_1 | - | - | - |
| GAAACATGAGACCTTTGGCTTT    | 32.52 | Flower_1 | - | - | - |
| TTGGCCTCGTCGGCTTGATACC    | 32.7  | Flower_1 | - | - | - |
| GAAGAAAAGCTAAAGAGCACTGGC  | 31.23 | Flower_1 | - | - | - |
| TCTTACTGTACGAAAGCATGG     | 31.78 | Flower_1 | - | - | - |
| TTGGAACCTGGCATACTGATAT    | 33.07 | Flower_1 | - | - | - |
| AATTCTTGACTTTGATATG       | 30.13 | Flower_1 | - | - | - |
| ATGTTGGCGTGAAGAAAAGC      | 29.95 | Flower_1 | - | - | - |
| ATGGTTGGCTGAAAATTTGCT     | 29.4  | Flower_1 | - | - | - |
| ACGCCTGGAGAATTCATTGCTT    | 28.85 | Flower_1 | - | - | - |
| TGGGACAAGGAGATCTTTTCT     | 29.76 | Flower_1 | - | - | - |
| AAAGAGATGGGAGACGTGAAATGT  | 27.56 | Flower_1 | - | - | - |

|                          |       |          |   |   |   |
|--------------------------|-------|----------|---|---|---|
| TAGTTCTGAACTTATCACGCCT   | 28.48 | Flower_1 | - | - | - |
| TCAACAAGAACGTCAAGAACCT   | 28.11 | Flower_1 | - | - | - |
| CGGCTTGGTGAACCTGGTTGCC   | 27.74 | Flower_1 | - | - | - |
| AGAGATGGGAGACGTGAAATGT   | 27.93 | Flower_1 | - | - | - |
| ACATGATCAGATGATTTAGGCT   | 27.93 | Flower_1 | - | - | - |
| GTCCCTCTTAATCATTACTCC    | 27.19 | Flower_1 | - | - | - |
| ATCTCTTTAATGACCAGTAGCCT  | 27.19 | Flower_1 | - | - | - |
| TGTTCAATTTGTTTTCGGCACT   | 27.19 | Flower_1 | - | - | - |
| TGGAGGATGATGACCTGGACGT   | 27.38 | Flower_1 | - | - | - |
| AATTTCCAGAAGTGAAGAGCTC   | 27.56 | Flower_1 | - | - | - |
| TTAGATGATATGCACATAATT    | 27.01 | Flower_1 | - | - | - |
| TTGCAGAGACATGAACCAAGCA   | 27.38 | Flower_1 | - | - | - |
| CAAATGGTTGGCTGAAAATTTGCT | 26.46 | Flower_1 | - | - | - |
| AATGAGAATCGTGGGATTTGTCC  | 26.09 | Flower_1 | - | - | - |
| TGAAATGAACTGGAAGCGATT    | 26.27 | Flower_1 | - | - | - |
| GAAAAGCTAAAGAGCACTGGC    | 26.46 | Flower_1 | - | - | - |
| GAGAATCGTGGGATTTGTCC     | 25.91 | Flower_1 | - | - | - |
| TTCTCTGCGAATGGACTCGAAA   | 25.54 | Flower_1 | - | - | - |
| TTCAGTTAAGTCTGCCTGAACT   | 26.09 | Flower_1 | - | - | - |
| CCACGCCTGGAGAATTCATTGC   | 25.91 | Flower_1 | - | - | - |
| ACAAAGTCAATGTTGAACACTT   | 25.35 | Flower_1 | - | - | - |
| ATCAACGGAAGGAAGACGAAT    | 24.62 | Flower_1 | - | - | - |
| AGGAACGTGAATGACAATGGAC   | 24.44 | Flower_1 | - | - | - |
| CCGCAGAACAACCTAAACCT     | 24.44 | Flower_1 | - | - | - |
| GAAAGATAGAACTTTATTGGGACT | 23.88 | Flower_1 | - | - | - |
| GAACGTGAATGACAATGGACTT   | 24.25 | Flower_1 | - | - | - |
| ATCGGAAATGAGAATCGTGGGGAT | 23.88 | Flower_1 | - | - | - |
| CGACGAGAGCTCAGCCATTGCC   | 24.99 | Flower_1 | - | - | - |
| AAATGAACTGGAAGCGATTG     | 24.07 | Flower_1 | - | - | - |
| CATCCGCAGGACGAAAATTTTC   | 22.97 | Flower_1 | - | - | - |
| TCCTGAACTGCAGTGAGAGTGC   | 22.78 | Flower_1 | - | - | - |

|                         |       |          |   |   |   |
|-------------------------|-------|----------|---|---|---|
| TTCCAAGGATTATGAACCTGCT  | 24.62 | Flower_1 | - | - | - |
| TGGATTACAAAGACTTGGATCT  | 23.7  | Flower_1 | - | - | - |
| AGGAAAAGAAAGATTGGGCCGAA | 22.41 | Flower_1 | - | - | - |
| CAGAAGGAAAAAAGTGAGCTTT  | 23.52 | Flower_1 | - | - | - |
| TCGAGGATGATGACCTGGACGTC | 22.6  | Flower_1 | - | - | - |
| AACGGAAGGAAGACGAATAGGC  | 22.6  | Flower_1 | - | - | - |
| AGAGGATTCAGCTGATGGAGAGT | 21.86 | Flower_1 | - | - | - |
| TCACCATCCAGGAGAACTCTCT  | 22.23 | Flower_1 | - | - | - |
| TTAGCGACGGTGCTCTATACT   | 21.68 | Flower_1 | - | - | - |
| GATTCATCCATAAGCTGCC     | 21.31 | Flower_1 | - | - | - |
| CATATTGATATGTATTAAGCC   | 21.86 | Flower_1 | - | - | - |
| ACAAATTTGAGCATCTGGGAT   | 22.23 | Flower_1 | - | - | - |
| TCAAATTGGAACCTGGCATACT  | 21.5  | Flower_1 | - | - | - |
| GGTTTAGGGTTGTTCTGCGGC   | 20.95 | Flower_1 | - | - | - |
| ATGAACTGGAAGCGATTGGATGT | 20.95 | Flower_1 | - | - | - |
| AACCGCAATGCAGACTGTCCTC  | 20.58 | Flower_1 | - | - | - |
| AAGCGATTGGATGTAGTTATC   | 20.03 | Flower_1 | - | - | - |
| TAATCGACGGTGGAGGTTCCGC  | 20.21 | Flower_1 | - | - | - |
| TTCTTGGACAGTGACATCTGAC  | 20.58 | Flower_1 | - | - | - |
| CTTGGTTAGAACAGCGAGTTGC  | 20.03 | Flower_1 | - | - | - |
| CAAATTGGAACCTGGCATACTG  | 19.84 | Flower_1 | - | - | - |
| CGGAGCTATGTCTTTGATCCCT  | 19.66 | Flower_1 | - | - | - |
| TCTTTAATCAGGTTGCTGACC   | 19.48 | Flower_1 | - | - | - |
| AGGCGAGTGATTGAGGAACCT   | 20.03 | Flower_1 | - | - | - |
| TCAGTCTTTGTAGTTTCGGCCT  | 19.66 | Flower_1 | - | - | - |
| CATCTTCGGATGGAGAAGCGCC  | 19.48 | Flower_1 | - | - | - |
| GGGCGATGACGAGGATGATGAT  | 19.48 | Flower_1 | - | - | - |
| TTATCGGCATCGAAATGAGAA   | 19.48 | Flower_1 | - | - | - |
| GCTGTTGTTGCTGTAGATGCCT  | 20.21 | Flower_1 | - | - | - |
| CTTGGCTTAATACATATCAAT   | 19.29 | Flower_1 | - | - | - |
| ATCGCGATTGGCGCATTGGCTC  | 19.48 | Flower_1 | - | - | - |

|                          |       |          |   |   |   |
|--------------------------|-------|----------|---|---|---|
| ATTGGGGATTGCTACCTTGA     | 19.48 | Flower_1 | - | - | - |
| AAGATAGAACTTATTTGGGACT   | 19.29 | Flower_1 | - | - | - |
| ATTCCATTGTCGAGGAGTCGGA   | 19.11 | Flower_1 | - | - | - |
| CCTGAGTTGTTCCAGTTATCGTC  | 18.56 | Flower_1 | - | - | - |
| TTCCAACATCTAGAACATGAGA   | 19.11 | Flower_1 | - | - | - |
| TCATAGAGCTCCAATTCACCT    | 18.56 | Flower_1 | - | - | - |
| CGGAAATGAGAATCGTGGGGAT   | 19.84 | Flower_1 | - | - | - |
| TGAGACATCTGGAGAACCTTGA   | 18.56 | Flower_1 | - | - | - |
| TGCGGCCGAGGATTAGCATCAG   | 19.48 | Flower_1 | - | - | - |
| TAAACTCGGGAGTACCAATAAC   | 18.19 | Flower_1 | - | - | - |
| GGAAGCGATTGGATGTAGTT     | 19.48 | Flower_1 | - | - | - |
| ATACATGAGGAATTCATGATC    | 18.01 | Flower_1 | - | - | - |
| TATGGATACCAAATTTGAAAA    | 18.19 | Flower_1 | - | - | - |
| CTAGGAGTACAACCTGGGCAGT   | 18.74 | Flower_1 | - | - | - |
| TGATACGTTGATGCTCTGCCCC   | 18.19 | Flower_1 | - | - | - |
| TAGAGGGGAACGCGTGAGGCTGGT | 17.64 | Flower_1 | - | - | - |
| TTGGCTGAAAATTTGCTGTGC    | 18.01 | Flower_1 | - | - | - |
| CGAGGATGATGACCTGGACGTC   | 18.37 | Flower_1 | - | - | - |
| TTGATATGTATTAAGCCAAGTA   | 17.82 | Flower_1 | - | - | - |
| AAGATATAGGTCGGATGGCTCC   | 18.01 | Flower_1 | - | - | - |
| TGGATTGATTTGTTGACTGGCT   | 18.56 | Flower_1 | - | - | - |
| CTTCCAACATCTAGAACATGA    | 17.64 | Flower_1 | - | - | - |
| TGCTCATGAGAATGATAGGAAC   | 18.01 | Flower_1 | - | - | - |
| TGAGGATAGAAGGATGAACACC   | 18.19 | Flower_1 | - | - | - |
| ATGAACTGGAAGCGATTGGAT    | 16.9  | Flower_1 | - | - | - |
| TTCAGTGAAGGCTTCTTGAAC    | 17.82 | Flower_1 | - | - | - |
| AAATTGGAACCTGGCATACTGA   | 16.54 | Flower_1 | - | - | - |
| CTGTAGATGCCTGTTCTTTGAC   | 17.27 | Flower_1 | - | - | - |
| CGGCAGACGAGGCCACATTGC    | 17.27 | Flower_1 | - | - | - |
| ATTGTGAGAATCGTCTATGTGA   | 16.72 | Flower_1 | - | - | - |
| TGGAGAGTGTGGACAAGTCC     | 16.17 | Flower_1 | - | - | - |



|                           |       |          |   |   |   |
|---------------------------|-------|----------|---|---|---|
| ATATTGATATGTATTAAGCCAAG   | 15.98 | Flower_1 | - | - | - |
| AAGCGATTGGATGTAGTTATCA    | 16.35 | Flower_1 | - | - | - |
| TTTCCGAGACCGGTTGGCTGCC    | 16.54 | Flower_1 | - | - | - |
| TTAAAGTTAGTGATGTTGAGCT    | 16.72 | Flower_1 | - | - | - |
| TGATATGTATTAAGCCAAGTA     | 16.17 | Flower_1 | - | - | - |
| TGGGAGACGTGAAATGTATTTT    | 16.17 | Flower_1 | - | - | - |
| CTTCTCGTAGGATAGTGATGCC    | 15.8  | Flower_1 | - | - | - |
| GAAAGTCGAGCAAGAATGGTCAGC  | 15.62 | Flower_1 | - | - | - |
| CTGCGAATGGACTCGAAAGATAG   | 15.62 | Flower_1 | - | - | - |
| GCGATTGGATGTAGTTATCAT     | 15.62 | Flower_1 | - | - | - |
| GAAATGTTGGCGTGAAGAAA      | 15.98 | Flower_1 | - | - | - |
| TTAGAAATGTTGGCGTGAAG      | 15.98 | Flower_1 | - | - | - |
| ATCGAGAATCAGATGTAGATGG    | 16.54 | Flower_1 | - | - | - |
| CTTGGACCCCGACATATCTAC     | 16.17 | Flower_1 | - | - | - |
| TGACCAGTAGCCTTTCCTTGATAC  | 15.62 | Flower_1 | - | - | - |
| TTCCGTGAGACTGTTCTTGAGAA   | 15.98 | Flower_1 | - | - | - |
| TACTGTACGAAAGCATGGGAG     | 16.72 | Flower_1 | - | - | - |
| TATAAGGATATGAAATCTGCCT    | 15.25 | Flower_1 | - | - | - |
| CTGAATTGATTGACATTCTGACGAA | 15.62 | Flower_1 | - | - | - |
| TTCCATGGCAACAGATTTGATC    | 15.43 | Flower_1 | - | - | - |
| ATACGGAAGGAAAGTATCATGC    | 15.43 | Flower_1 | - | - | - |
| TTCTGCTAGATACCTTGCATC     | 16.35 | Flower_1 | - | - | - |
| CACGGGATCAGACACTCTCTGT    | 15.07 | Flower_1 | - | - | - |
| TCTTCTCTGCGAATGGACTCGAAA  | 14.88 | Flower_1 | - | - | - |
| GTTGGCGTGAAGAAAAGCT       | 15.07 | Flower_1 | - | - | - |
| AAGAGGATTCAGCTGATGGA      | 15.25 | Flower_1 | - | - | - |
| ACACAGTTTGCGGTAGACTCCT    | 15.62 | Flower_1 | - | - | - |
| AATTGGAACCTGGCATACTGAT    | 15.25 | Flower_1 | - | - | - |
| TCCCTACAGAATCAGGAACGCC    | 14.88 | Flower_1 | - | - | - |
| TGAGAATCGTGGGGATTGTCC     | 14.88 | Flower_1 | - | - | - |
| TCGAGAATCAGATGTAGATGGT    | 14.88 | Flower_1 | - | - | - |

|                          |       |          |   |   |   |
|--------------------------|-------|----------|---|---|---|
| ATCGAGATTTGTGCACTAATAG   | 15.25 | Flower_1 | - | - | - |
| CAAGTCATCGGGTTATAATGCT   | 15.07 | Flower_1 | - | - | - |
| TTCGTACAGTAAGAAGCAGCC    | 15.25 | Flower_1 | - | - | - |
| CATTCCATATTGTCGGATGCT    | 14.7  | Flower_1 | - | - | - |
| ACCTCCATCGTCGCCGAGA      | 14.51 | Flower_1 | - | - | - |
| CTGTTGAATCCATGAAGCTTT    | 14.33 | Flower_1 | - | - | - |
| CTCGTCGCACAGCAAATTTTCAGC | 14.33 | Flower_1 | - | - | - |
| AACCAGCTGATTTGTGGATCTC   | 15.25 | Flower_1 | - | - | - |
| GTTGGTTATACTATTGAACGAGT  | 14.7  | Flower_1 | - | - | - |
| GAAGAGGATTCAGCTGATGGA    | 14.88 | Flower_1 | - | - | - |
| TAAATTTGCCGACTTGGTTGCC   | 14.7  | Flower_1 | - | - | - |
| ATTTTCCGATGCTGAGGAGG     | 14.33 | Flower_1 | - | - | - |
| TATTAGGATGCCAATTATTGAT   | 14.33 | Flower_1 | - | - | - |
| CGACGAGCAGGAGAAGTTTTT    | 14.33 | Flower_1 | - | - | - |
| TTATCGTCATAATGGGAGAAAGCT | 13.96 | Flower_1 | - | - | - |
| CAAATGGTTGGCTGAAAATT     | 14.51 | Flower_1 | - | - | - |
| TTGTATGGTTCCAGACTCAATC   | 14.51 | Flower_1 | - | - | - |
| ATGATGTCGCGAGAATTCTGAT   | 14.88 | Flower_1 | - | - | - |
| GTTGGTTATACTATTGAACGAGTT | 13.78 | Flower_1 | - | - | - |
| TGATTCATCGTTTGATTATGCT   | 14.51 | Flower_1 | - | - | - |
| TTGGCTTCCAGATGATGATCAC   | 14.88 | Flower_1 | - | - | - |
| TTACGTTGGATGCCCTGGTGAC   | 14.15 | Flower_1 | - | - | - |
| GCGAATGGACTCGAAAGATAGAAC | 13.78 | Flower_1 | - | - | - |
| CAAAGGAATGGAGGCAGAGCCT   | 14.51 | Flower_1 | - | - | - |
| TTAGTTGGGCTCTAAAGGCATC   | 14.15 | Flower_1 | - | - | - |
| TAAAATCTATTGATCTGTGCGAA  | 13.96 | Flower_1 | - | - | - |
| TGAAAGCTATTGATTGGACGGC   | 13.41 | Flower_1 | - | - | - |
| CATCACCATGAAATGAACTGG    | 13.78 | Flower_1 | - | - | - |
| CGCCTGGAGAATTCATTGCTTC   | 14.51 | Flower_1 | - | - | - |
| TGGTACAAAAGGATGTTCCGGCC  | 13.96 | Flower_1 | - | - | - |
| GTTATCGGCATCGGAAATGAGAAT | 13.41 | Flower_1 | - | - | - |

|                          |       |          |   |   |   |
|--------------------------|-------|----------|---|---|---|
| TTGGGAAGAGGATTCAGCTGAT   | 13.23 | Flower_1 | - | - | - |
| TCGGCATCGAAATGAGAATCG    | 13.96 | Flower_1 | - | - | - |
| CTTCTCTGCTCGTCGCACAG     | 13.78 | Flower_1 | - | - | - |
| AAAAGCTAAAGAGCACTGGCT    | 13.96 | Flower_1 | - | - | - |
| TCACTATCGAGATTTGTGCACT   | 13.6  | Flower_1 | - | - | - |
| TATACTATTGAACGAGTTGGAGC  | 13.41 | Flower_1 | - | - | - |
| AACTGTTGACGAAAGCTTTGGCC  | 13.23 | Flower_1 | - | - | - |
| TGGAAGGTAAAGAGGAGGAAG    | 13.6  | Flower_1 | - | - | - |
| TGGTGATGGCTTATGATTAA     | 13.41 | Flower_1 | - | - | - |
| TACCTGAAGTTGGCTTGACCC    | 13.96 | Flower_1 | - | - | - |
| ATCTGGCTTTGAGGATCTCTT    | 13.78 | Flower_1 | - | - | - |
| ATACAGGACATTATCAGAACTAA  | 13.41 | Flower_1 | - | - | - |
| CGAGGATACCAATTGTGATCAT   | 13.6  | Flower_1 | - | - | - |
| ACAAGATCCTTGAACTTTGTTC   | 12.86 | Flower_1 | - | - | - |
| ATTGAGCATCTGGAGATTGTAC   | 13.41 | Flower_1 | - | - | - |
| GCCAAGGCCTTGAAGCACTCATGA | 13.04 | Flower_1 | - | - | - |
| GAATGGACTCGAAAGATAGAACT  | 13.23 | Flower_1 | - | - | - |
| ACTGAGGTCCTGGAAGAAGCTCC  | 13.23 | Flower_1 | - | - | - |
| CTTGGCTTAATACATATCAATA   | 13.23 | Flower_1 | - | - | - |
| GACGATGGAAGGTAAAGAGGA    | 12.86 | Flower_1 | - | - | - |
| GACCACGGGATCAGACACTCTC   | 13.6  | Flower_1 | - | - | - |
| ATATGTATTAAGCCAAGTAGTTCT | 12.86 | Flower_1 | - | - | - |
| GGAGGTTTAGGGTTGTTCTGC    | 13.6  | Flower_1 | - | - | - |
| GGAAGCGATTGGATGTAGTTA    | 12.86 | Flower_1 | - | - | - |
| ATATGTCGAGCATTGAACCTGC   | 13.41 | Flower_1 | - | - | - |
| AGATTCCATCCATAAGCTGC     | 13.41 | Flower_1 | - | - | - |
| GAACGGAAGCGATTGGATGT     | 12.86 | Flower_1 | - | - | - |
| AAGAATTAGAAATGTTGGCGT    | 12.68 | Flower_1 | - | - | - |
| TAAAGAAACGCTGGCCAGCCT    | 13.23 | Flower_1 | - | - | - |
| TTGAAAATACAAACCTGGAAC    | 12.49 | Flower_1 | - | - | - |
| ATATTGGCTTCCAGATGATGAT   | 13.41 | Flower_1 | - | - | - |

|                          |       |          |   |   |   |
|--------------------------|-------|----------|---|---|---|
| CCTGGCATGTGATCTCTTTGC    | 13.04 | Flower_1 | - | - | - |
| TCCATGTTCCGGCGGCCCTCA    | 12.68 | Flower_1 | - | - | - |
| TGGGAAGACTCTACTTTTGCCCT  | 12.68 | Flower_1 | - | - | - |
| GTGTTCCAAGGATTATGAACCT   | 12.86 | Flower_1 | - | - | - |
| ACTGGAAGCGATTGGATGTAG    | 12.31 | Flower_1 | - | - | - |
| CGGATTTGTCAAGTTCAGTTCT   | 12.86 | Flower_1 | - | - | - |
| CTTTCGTACAGTAAGAAGCAGC   | 12.68 | Flower_1 | - | - | - |
| ATCAAGTTGTACTGCTACACCT   | 13.6  | Flower_1 | - | - | - |
| TACAGACCAGTAAGACAACCTAC  | 13.41 | Flower_1 | - | - | - |
| ACTGGAAGCGATTGGATGTA     | 13.04 | Flower_1 | - | - | - |
| ACAATCAAATTGGAACCTGGCA   | 12.49 | Flower_1 | - | - | - |
| CGCAGAGAAGAAGTCGAAATAC   | 13.04 | Flower_1 | - | - | - |
| TTCCAGTTATCGTCATAATG     | 12.49 | Flower_1 | - | - | - |
| ATCAACAGTGAATTTATGAAGC   | 12.49 | Flower_1 | - | - | - |
| TAAAAGCGCATGGATTCCGGAC   | 12.31 | Flower_1 | - | - | - |
| CTTCCTGCTAGATACCTTGCATC  | 11.94 | Flower_1 | - | - | - |
| CTCAAATGAGAATGACGACGGC   | 12.31 | Flower_1 | - | - | - |
| GAGAATGGCTTTGATTGTATCA   | 12.13 | Flower_1 | - | - | - |
| ATTCCATTGTCGAGGAGTCGGAA  | 11.94 | Flower_1 | - | - | - |
| TTCGCATTGAGGATCACTTAAC   | 12.31 | Flower_1 | - | - | - |
| AGAGGATTCAGCTGATGGAGA    | 12.68 | Flower_1 | - | - | - |
| GGAATCCTGATGATGCTGCAT    | 12.13 | Flower_1 | - | - | - |
| TTCTTCATGGACGCTGTCGCCT   | 12.13 | Flower_1 | - | - | - |
| TCGTCTCCTCCGTTGATCT      | 11.94 | Flower_1 | - | - | - |
| TTCTTACTGTACGAAAGCATGG   | 12.31 | Flower_1 | - | - | - |
| TATCAAGTTGTTACCTGTACTION | 12.31 | Flower_1 | - | - | - |
| TTGAGCATCTGGAGATTGTACA   | 11.76 | Flower_1 | - | - | - |
| CTTGTACCAAGAGAGTTTTGAT   | 11.94 | Flower_1 | - | - | - |
| TGAGATGAAGCACTGTAGCACT   | 11.94 | Flower_1 | - | - | - |
| ATGCTCATGAGAATGATAGGAAC  | 11.94 | Flower_1 | - | - | - |
| TTGGAGTTCTAGTCATATCTGC   | 11.76 | Flower_1 | - | - | - |

|                          |       |          |   |   |   |
|--------------------------|-------|----------|---|---|---|
| AAGCGATTGGATGTAGTTATCATC | 11.57 | Flower_1 | - | - | - |
| TAATTCGAGATCTGCTATCTGC   | 11.76 | Flower_1 | - | - | - |
| TTCAGAAGGATAAGAGTGAACCT  | 12.31 | Flower_1 | - | - | - |
| CACACAGTTTGCCTGACTCC     | 11.94 | Flower_1 | - | - | - |
| TGACATTCTGACGATCTGTGGAGT | 11.39 | Flower_1 | - | - | - |
| GGCTGCTTCTTACTGTACGAA    | 11.94 | Flower_1 | - | - | - |
| TCCAGGATAGGTACTTAAATGC   | 13.04 | Flower_1 | - | - | - |
| GTTTCAGAACTATGAAGCCACCT  | 11.57 | Flower_1 | - | - | - |
| CAGAGGATGATGCAAGTGCTTG   | 11.39 | Flower_1 | - | - | - |
| TTTGATAATGCTGGACTGGCCT   | 11.94 | Flower_1 | - | - | - |
| GTCCATCGAGATCTCTGGCTTA   | 11.76 | Flower_1 | - | - | - |
| TTGAACGCGGGCATGAGGAGGC   | 11.39 | Flower_1 | - | - | - |
| TTCACAAACTGTTGGAAAATCT   | 11.57 | Flower_1 | - | - | - |
| ATGTTGGCGTGGAAGAAAAGCT   | 11.57 | Flower_1 | - | - | - |
| TATCATTGATCGTTGTACGCT    | 11.57 | Flower_1 | - | - | - |
| TTCTGTGATGCCTTTAGAGCC    | 11.57 | Flower_1 | - | - | - |
| ACTTTCGTTGAGGACAGTACCT   | 11.21 | Flower_1 | - | - | - |
| TTATCAGAACTAGTCAACCAGAA  | 11.39 | Flower_1 | - | - | - |
| ATTGACTCAAAGAATTTTGCCT   | 11.02 | Flower_1 | - | - | - |
| CTGAGGTCCTGGAAGAACTCCA   | 11.21 | Flower_1 | - | - | - |
| CATATCATTGATCGTTGTACGC   | 11.94 | Flower_1 | - | - | - |
| TTTTTCAGACAGTCGGAAGCGGC  | 11.76 | Flower_1 | - | - | - |
| TAGTTTATGACTAAAGAAACCT   | 11.39 | Flower_1 | - | - | - |
| ATCGAGAAGCTCTAGAATTTGC   | 10.66 | Flower_1 | - | - | - |
| AGAATGACTGTGATTGCAACAC   | 11.02 | Flower_1 | - | - | - |
| CAGCATCGGAAAAATACCCCA    | 10.84 | Flower_1 | - | - | - |
| CGATTGGATGTAGTTATCATC    | 10.66 | Flower_1 | - | - | - |
| TGGAAGCGATTGGATGTAGTTATC | 10.66 | Flower_1 | - | - | - |
| TGAATGACAATGGACTTGCATT   | 10.47 | Flower_1 | - | - | - |
| CTTCACATCATCTTGTATCTGGA  | 10.84 | Flower_1 | - | - | - |
| TTCGCCGTTGGCTTGACATGGGA  | 11.02 | Flower_1 | - | - | - |

|                          |       |          |   |   |   |
|--------------------------|-------|----------|---|---|---|
| TCAAGGAAGTATTACAAGATT    | 10.84 | Flower_1 | - | - | - |
| TTTTCCGATGCTGAGGAGGTT    | 11.21 | Flower_1 | - | - | - |
| AGAGAGTTGGTTATACTATTGAAC | 10.66 | Flower_1 | - | - | - |
| ATTCTTAAACATCTGAGACTGT   | 11.21 | Flower_1 | - | - | - |
| GAATGGACTCGAAAGATAGAACTT | 10.66 | Flower_1 | - | - | - |
| CGATACGTTGATGCTCTGGCCC   | 11.02 | Flower_1 | - | - | - |
| TATTCGGATGCCAATTATTGAT   | 11.57 | Flower_1 | - | - | - |
| ATGAAATGAACTGGAAGCGA     | 11.21 | Flower_1 | - | - | - |
| ACTAGAACTCCAACGTCAGCTT   | 10.47 | Flower_1 | - | - | - |
| TGATATGCATTGAGAATTTTGC   | 10.84 | Flower_1 | - | - | - |
| TGAGGAATCCATGATCTTGT     | 10.29 | Flower_1 | - | - | - |
| ATAGAAGTCCAAGCAGAACCT    | 10.47 | Flower_1 | - | - | - |
| AGCGATTGGATGTAGTTATCA    | 10.47 | Flower_1 | - | - | - |
| AGAAATGTTGGCGTGAAGA      | 11.21 | Flower_1 | - | - | - |
| GATTGGATGTAGTTATCATC     | 11.02 | Flower_1 | - | - | - |
| TAACAATGTTTGAGCTGAACAT   | 10.47 | Flower_1 | - | - | - |
| CAGAAAGATAAGAGTGAACTTT   | 10.66 | Flower_1 | - | - | - |
| ATCGCCAAGTATGTCTGAGCT    | 10.47 | Flower_1 | - | - | - |
| AACGGCGCGGCAGTGAACCTGC   | 10.11 | Flower_1 | - | - | - |
| GAAATGAACTGGAAGCGATT     | 10.84 | Flower_1 | - | - | - |
| TGTACGAAAGCATGGGAGGGC    | 10.47 | Flower_1 | - | - | - |
| ATCGGAAACCTCCTCAGCATC    | 10.66 | Flower_1 | - | - | - |
| GGGACAATGAAAACTCTTCTT    | 10.84 | Flower_1 | - | - | - |
| TTGTTCTGCGGCGACGATGGA    | 10.29 | Flower_1 | - | - | - |
| CATCAACATCGTCGTAGGCATC   | 10.29 | Flower_1 | - | - | - |
| CGATCACCACATTGTAGAACCT   | 10.11 | Flower_1 | - | - | - |
| TTTGGAAGAGGATTCAGCTGA    | 10.11 | Flower_1 | - | - | - |
| GAGATGGGAGACGTGAAATGT    | 10.11 | Flower_1 | - | - | - |
| ATGGACGTCCAAATTACATTTT   | 10.29 | Flower_1 | - | - | - |
| TCTCCAAAAATATGGCCCACT    | 10.47 | Flower_1 | - | - | - |
| AGCGATTGGATGTAGTTATCAT   | 10.66 | Flower_1 | - | - | - |

|                            |        |          |   |   |   |
|----------------------------|--------|----------|---|---|---|
| GAAATGTTGGCGTGGAAGAA       | 10.84  | Flower_1 | - | - | - |
| TTCCGATGCTGAGGAGTTT        | 10.47  | Flower_1 | - | - | - |
| ATGGTTCAGACTCAATCTTTC      | 10.47  | Flower_1 | - | - | - |
| AGGGTTGTTCTGCGGCGACGA      | 10.29  | Flower_1 | - | - | - |
| ATGTACAAAATAGTGTAGAGTCT    | 10.29  | Flower_1 | - | - | - |
| CATGGCCTTGAGATTCCTCGTA     | 10.29  | Flower_1 | - | - | - |
| GATACAAGTAGTCTGCAGCGCC     | 10.47  | Flower_1 | - | - | - |
| CTCGAATAGATCGTCCATGGAGA    | 10.29  | Flower_1 | - | - | - |
| ACCATTTGCGACCGAACGCTCT     | 10.66  | Flower_1 | - | - | - |
| AAGCTAAAGAGCACTGGCTGC      | 10.29  | Flower_1 | - | - | - |
| TCCCATACAGAATTCCTAGAA      | 10.29  | Flower_1 | - | - | - |
| CTAAGGTCAGTTGAGATTCGAC     | 10.47  | Flower_1 | - | - | - |
| ATAAGAGAGTAGATCTCATGCT     | 10.11  | Flower_1 | - | - | - |
| TTGGGAGAGAAAAGCTGAGCCT     | 10.66  | Flower_1 | - | - | - |
| TTGGCATAGGTAGAATGCTATC     | 10.11  | Flower_1 | - | - | - |
| ATACGGACACATCCTTTGAGGA     | 10.29  | Flower_1 | - | - | - |
| TATCCGGTTACGATGCTCAGT      | 10.11  | Flower_1 | - | - | - |
| AGAAAAGCTAAAGAGCACTGGC     | 10.29  | Flower_1 | - | - | - |
| ATTCATTGTGATTATGGAGCT      | 2195   | Flower_2 | - | - | - |
| TGTGGGTGGGTAGGGAAGATA      | 989.03 | Flower_2 | - | - | - |
| TGAAGGTCCAAGGTTGAGGCC      | 912.27 | Flower_2 | - | - | - |
| TTGTCGCAGGAGCGGTGGCACC     | 724.34 | Flower_2 | - | - | - |
| AGCCCTATGTCGCTCCGATTCGT    | 569.56 | Flower_2 | - | - | - |
| CCAGTCCGAACCCGTCGGC        | 432.26 | Flower_2 | - | - | - |
| GCGACCCAGGTCAGGCGGGACT     | 401.63 | Flower_2 | - | - | - |
| TATGTCGCTCCGATTCGT         | 389.2  | Flower_2 | - | - | - |
| ACTGGCTCTGATACCATGTTAGAT   | 353.34 | Flower_2 | - | - | - |
| TTGGCTGGATCCCTAGTTGGT      | 320.01 | Flower_2 | - | - | - |
| TCAGCCCCTATGTCGCTCCGATTCGT | 300.55 | Flower_2 | - | - | - |
| TGCATTTGCACCTGCACCTCT      | 259.83 | Flower_2 | - | - | - |
| GCTCCCTATCATCGGAAACCT      | 257.3  | Flower_2 | - | - | - |

|                           |        |          |   |   |   |
|---------------------------|--------|----------|---|---|---|
| TTCCGAAGCTATAATTCTTGC     | 238.92 | Flower_2 | - | - | - |
| ACCGTATCATTAACCTATTCTTT   | 224.15 | Flower_2 | - | - | - |
| CAATGAGTCTACAGTACCTGCTAC  | 207.03 | Flower_2 | - | - | - |
| TGGTCCAGACGGAGCTCCGAGGA   | 207.93 | Flower_2 | - | - | - |
| AAGTCCTCGTGTGCACCCCC      | 202.89 | Flower_2 | - | - | - |
| TCCCGAAGCTATAATTCTTGC     | 204.51 | Flower_2 | - | - | - |
| TGGGAAGTCCTCGTGTGCACCCCC  | 190.63 | Flower_2 | - | - | - |
| CCCAGTCCCGAACCCGTCGGCT    | 173.52 | Flower_2 | - | - | - |
| CGGCGGACTGCTCGAGCTGCT     | 163.61 | Flower_2 | - | - | - |
| ATAATTGTCAGAACACGCACC     | 163.61 | Flower_2 | - | - | - |
| TGTGGGAGGATTGGACAGAAC     | 159.1  | Flower_2 | - | - | - |
| TCCTACTCCACCCATGCATA      | 158.56 | Flower_2 | - | - | - |
| TTCCCAACACCTCCCATACCGT    | 151.53 | Flower_2 | - | - | - |
| TCCTCGTGTGCACCCCC         | 156.58 | Flower_2 | - | - | - |
| TCGTGCTGCTAGGCCGAAGCGG    | 148.83 | Flower_2 | - | - | - |
| TGAGAGACAAAAACCGTGCT      | 140.9  | Flower_2 | - | - | - |
| GGCAGTTCGACCGCAAATT       | 145.59 | Flower_2 | - | - | - |
| GTTATTCTATTCCACCTCTTAG    | 134.06 | Flower_2 | - | - | - |
| TTCAAATCTGGTTCCTGGCACCA   | 126.49 | Flower_2 | - | - | - |
| CAACGAGTCCACAGTATCTGCTAC  | 121.44 | Flower_2 | - | - | - |
| CCTCGTGTGCACCCCC          | 129.91 | Flower_2 | - | - | - |
| TGAGTTAGATGGTTAGAAAG      | 117.3  | Flower_2 | - | - | - |
| TCATGTTGACATCAGGATTACT    | 117.48 | Flower_2 | - | - | - |
| TTAGCCTGTGAACCAATTTTT     | 116.76 | Flower_2 | - | - | - |
| CCGATGCGGATCGCGCGGCG      | 115.32 | Flower_2 | - | - | - |
| AGGGTCCAGGTATTTCTTTGAAGC  | 109.19 | Flower_2 | - | - | - |
| ATTCATTGATGATTATGGAGCTAGT | 105.95 | Flower_2 | - | - | - |
| TTTTGGACCAAGGCTCGTCT      | 109.19 | Flower_2 | - | - | - |
| CCTATGTCGCTCCGATTCGTA     | 104.87 | Flower_2 | - | - | - |
| TGAGATTCCAGCTTTGACAAAT    | 101.26 | Flower_2 | - | - | - |
| GTCCTCGTGTGCACCCCC        | 100.54 | Flower_2 | - | - | - |



|                          |        |          |   |   |   |
|--------------------------|--------|----------|---|---|---|
| TTGTCCAACACTTCTTTCGTC    | 100.72 | Flower_2 | - | - | - |
| CCACGATCCACTGAGATTACAG   | 101.08 | Flower_2 | - | - | - |
| TTGTCCGACGAGAGATGGCAC    | 98.92  | Flower_2 | - | - | - |
| TCAGCTAGTAGCATTGTCTCT    | 98.02  | Flower_2 | - | - | - |
| CCCTATGTCGCTCCGATTCGTA   | 98.2   | Flower_2 | - | - | - |
| GCCGGCCGGGGACGGACTGG     | 95.14  | Flower_2 | - | - | - |
| GGCGGACTGCTCGAGCTGC      | 96.76  | Flower_2 | - | - | - |
| CGGGGGACGGACTGGGA        | 98.2   | Flower_2 | - | - | - |
| GACTGACTTGAGCATCGGAGGGTT | 90.45  | Flower_2 | - | - | - |
| GCGACCCAGGTCAGGCGGGAC    | 104.69 | Flower_2 | - | - | - |
| GGTATGAGAGGGTTGGGTT      | 93.34  | Flower_2 | - | - | - |
| TTTGGCAGCAATGAATCTTGG    | 93.34  | Flower_2 | - | - | - |
| TTGGCTGGATCCCTAGTTGGTC   | 87.21  | Flower_2 | - | - | - |
| TTTCAAAGGATTATGAATCT     | 88.65  | Flower_2 | - | - | - |
| TGAGATTCCAGCTCTGCCAAC    | 87.75  | Flower_2 | - | - | - |
| CATAGATGTACAAGTTCTCTCT   | 85.95  | Flower_2 | - | - | - |
| TGAGGTTAGATGGTTAGAAGG    | 88.65  | Flower_2 | - | - | - |
| TCAACTGGGTACTTGGTAGAGGAT | 84.15  | Flower_2 | - | - | - |
| TAGATATGTTGGCAGAGCTGG    | 86.13  | Flower_2 | - | - | - |
| AGGATCTTTGCTCTTGAACCGCCT | 81.98  | Flower_2 | - | - | - |
| AGTTACTAATTTATGATCTGGC   | 83.97  | Flower_2 | - | - | - |
| CAACTAGGGATCCAGCCAATC    | 84.87  | Flower_2 | - | - | - |
| CTATGTCGCTCCGATTCGTA     | 83.97  | Flower_2 | - | - | - |
| GCGACCCAGGTCAGGCGGGACTA  | 78.92  | Flower_2 | - | - | - |
| ACCCGAATAGCACTGTAGCACTGT | 78.2   | Flower_2 | - | - | - |
| TGTTAGTCAAAGCATGTGGGCACC | 76.58  | Flower_2 | - | - | - |
| CGGATTCTGACTTAGAGGCGT    | 80     | Flower_2 | - | - | - |
| TCTTCTCGTCTTTTGTGCTTGACT | 75.14  | Flower_2 | - | - | - |
| GCCCTATGTCGCTCCGATTCGTA  | 75.5   | Flower_2 | - | - | - |
| CCTGCCTGGGCGTCACGC       | 77.3   | Flower_2 | - | - | - |
| GTTACTAATTCATGATCTGGCC   | 76.58  | Flower_2 | - | - | - |

|                           |       |          |   |   |   |
|---------------------------|-------|----------|---|---|---|
| CATTTCTGTAATTTGTGTGC      | 75.68 | Flower_2 | - | - | - |
| CGTTTCCCGCAATGGAACCA      | 74.96 | Flower_2 | - | - | - |
| TACGTAGATGCAAACCTTTGGAGGT | 71.71 | Flower_2 | - | - | - |
| AGCCCTATGTCGCTCCGATTGTA   | 71.53 | Flower_2 | - | - | - |
| TTGTCGCAGGAGCGGTGGCAC     | 71.17 | Flower_2 | - | - | - |
| GGTATGAGAGGGTTGGGTTC      | 71.17 | Flower_2 | - | - | - |
| TTGACAAGGTTGTTGGTTGAGCCT  | 67.93 | Flower_2 | - | - | - |
| CCTCAACCTTGGACCTTCATT     | 69.55 | Flower_2 | - | - | - |
| GTTTCGTTTCCCGCAACGGAACCA  | 68.11 | Flower_2 | - | - | - |
| GTGTTCCGGATCGCGGCACGCGGGC | 67.93 | Flower_2 | - | - | - |
| TATGTCGCTCCGATTGTA        | 71.17 | Flower_2 | - | - | - |
| TGTTAACGGCTGCCACCC        | 72.79 | Flower_2 | - | - | - |
| GATGATTGTAGCTGGTTGTGT     | 68.29 | Flower_2 | - | - | - |
| AAAACGACTCTCGGCAAC        | 71.35 | Flower_2 | - | - | - |
| GGAAGTCCTCGTGTGCACCCCC    | 66.31 | Flower_2 | - | - | - |
| TGTGGGACCCAGGGCTACGGTGCC  | 64.87 | Flower_2 | - | - | - |
| TAGTATCTGGTTGGAAGTCCC     | 64.69 | Flower_2 | - | - | - |
| ACCGGATTGGACTATTTTAGTCTT  | 62.88 | Flower_2 | - | - | - |
| TCGGCACCGCTAGGCTCAGACGCC  | 63.42 | Flower_2 | - | - | - |
| TACTGGAAGTCTTTGTGAGGA     | 64.87 | Flower_2 | - | - | - |
| TTTTCCGTTTTTCTGAAAAC      | 63.79 | Flower_2 | - | - | - |
| ATCTGTATTGAATCCTTGGTGT    | 62.34 | Flower_2 | - | - | - |
| TCCACACATCATCTAAGACAAG    | 64.33 | Flower_2 | - | - | - |
| TTGGATTGCACGTGACGGTCACG   | 61.44 | Flower_2 | - | - | - |
| TAGCGGGACCGCGGAGCTT       | 61.8  | Flower_2 | - | - | - |
| GGAGCGACCCGAGATCACATG     | 63.06 | Flower_2 | - | - | - |
| CCCCGGCGTCGAACGGTCA       | 61.44 | Flower_2 | - | - | - |
| GTGTGGGTGGGTAGGGAAGAT     | 60.36 | Flower_2 | - | - | - |
| CATTTCTGTAATTTGTGTGCA     | 60.54 | Flower_2 | - | - | - |
| CAGTCCCGAACCCGTCGGC       | 61.08 | Flower_2 | - | - | - |
| TTGAGCAAGATGTAATGAGCA     | 59.64 | Flower_2 | - | - | - |

|                           |       |          |   |   |   |
|---------------------------|-------|----------|---|---|---|
| ATAGTAGTGATGTTGTTTCTC     | 58.02 | Flower_2 | - | - | - |
| CCGGAATCATTCTCCTGCATG     | 57.12 | Flower_2 | - | - | - |
| ACTTTGATGTCTTGAGAGCAGA    | 58.38 | Flower_2 | - | - | - |
| TCTCCCTACTCCACCCATGCCT    | 58.02 | Flower_2 | - | - | - |
| TAGGGTTGGGCCGGGAGGGTC     | 58.56 | Flower_2 | - | - | - |
| ACTTTATGGACCTTGAGAGGCACC  | 55.32 | Flower_2 | - | - | - |
| CTTTTTGGACCCAAGGCTCGTC    | 58.02 | Flower_2 | - | - | - |
| TCCAGTGTATGATGATTTCAGAAC  | 53.51 | Flower_2 | - | - | - |
| GCGACCCAGGTCAGGCGGGACTAC  | 53.15 | Flower_2 | - | - | - |
| TGTGGGTGGGTAGGGAAGATT     | 52.97 | Flower_2 | - | - | - |
| TGCACATCCAAATTTGGACTT     | 53.15 | Flower_2 | - | - | - |
| TCCGAGGACGTAGGCATTTTCGC   | 51.35 | Flower_2 | - | - | - |
| CGGCACTCGGTCTCCGGATT      | 52.43 | Flower_2 | - | - | - |
| GAAGGACGAGATACATACACGTTA  | 51.17 | Flower_2 | - | - | - |
| CCCAGTCCCGAACCCGTCGG      | 55.86 | Flower_2 | - | - | - |
| GCGAGAAGTCCACTGAACCTT     | 51.89 | Flower_2 | - | - | - |
| AAGTGCCGTCTGAGCTCT        | 53.15 | Flower_2 | - | - | - |
| CTTTTTGGACCCAAGGCTCGTCT   | 49.91 | Flower_2 | - | - | - |
| TGCATCAGGTAATACATGGAC     | 50.27 | Flower_2 | - | - | - |
| TTCAGCCTCTGTAGTGGATAGAGC  | 49.55 | Flower_2 | - | - | - |
| TTCTGAAAACCCCCGTTCTCT     | 50.45 | Flower_2 | - | - | - |
| CAATTACCAGACTCGATGAGCC    | 50.09 | Flower_2 | - | - | - |
| ACTGGAAGTCTTTGTGAGGAAC    | 49.91 | Flower_2 | - | - | - |
| GTGGATTTGAGGTTGGGTTT      | 49.01 | Flower_2 | - | - | - |
| GGGCTTTCTTTAGAATACTTGACT  | 48.47 | Flower_2 | - | - | - |
| CATCATTGTATACCTGTTGAG     | 51.35 | Flower_2 | - | - | - |
| TTGGATGTGCACCATTACCCT     | 49.37 | Flower_2 | - | - | - |
| AGTTACTAATTCATGATCTGGCCC  | 48.29 | Flower_2 | - | - | - |
| AGCGTCGTGCTGCTAGGCGAAGCGG | 48.11 | Flower_2 | - | - | - |
| TTAGGTACCCTTGATGATCAA     | 48.29 | Flower_2 | - | - | - |
| TGGTTTGCCAAGAACCCTGCCT    | 49.37 | Flower_2 | - | - | - |

|                           |       |          |   |   |   |
|---------------------------|-------|----------|---|---|---|
| TAATTGTCAGAACACGCACCA     | 48.65 | Flower_2 | - | - | - |
| CCTGGCATCGGCCTGCGAGCT     | 48.29 | Flower_2 | - | - | - |
| TCGTTTCCCGCAATGGAACCA     | 48.47 | Flower_2 | - | - | - |
| ACCGTATCATTAACTATTCTTTA   | 47.57 | Flower_2 | - | - | - |
| GCCGCACTAGAATTCACCACCAGG  | 46.49 | Flower_2 | - | - | - |
| ATACTGAGAAGTGAATGACATGTT  | 46.13 | Flower_2 | - | - | - |
| CCGAACCGGGACGTGGCGGCT     | 49.55 | Flower_2 | - | - | - |
| CTAATCGAACCGTCTAGTAGCT    | 48.47 | Flower_2 | - | - | - |
| ATGTTCCCTCTGAATGTTATTACT  | 45.77 | Flower_2 | - | - | - |
| TGCACTGTAGCGAACTGTAGCTGG  | 46.85 | Flower_2 | - | - | - |
| CATCATTCAATGTTCTGTTTA     | 46.13 | Flower_2 | - | - | - |
| CCACCCTGGAAACGGCTCAGC     | 45.95 | Flower_2 | - | - | - |
| GTTACTAATTCATGATCTGGCAT   | 45.05 | Flower_2 | - | - | - |
| ATCATCTTAGTTGGTGAATGGACC  | 45.41 | Flower_2 | - | - | - |
| CGCGCCCGGACCCTGTCGCACC    | 47.21 | Flower_2 | - | - | - |
| TAGATGTACAAGTTCTCCTCT     | 45.41 | Flower_2 | - | - | - |
| CAGTTGGGCACCGTAACCCGG     | 46.31 | Flower_2 | - | - | - |
| GTTTCGTTTCCCGCAATGGAACCA  | 43.96 | Flower_2 | - | - | - |
| CTCCTGGCATCGGCCTGCGAGCTCC | 43.42 | Flower_2 | - | - | - |
| CAGCCCTATGTCGCTCCGATTCTGA | 43.42 | Flower_2 | - | - | - |
| ATGTCGTTTTATAAATGGAAGTCT  | 43.42 | Flower_2 | - | - | - |
| AGGGAATGATGTTGTCTGGAACAA  | 43.6  | Flower_2 | - | - | - |
| TACTAAGGCCAAGTCCCTTGAACT  | 43.42 | Flower_2 | - | - | - |
| CCCTATGTCGCTCCGATTCTGTT   | 43.96 | Flower_2 | - | - | - |
| TCCCAGTCCCGAACCCGTCGGC    | 45.23 | Flower_2 | - | - | - |
| TAATGAAGGTCCAAGTTGAGGCT   | 43.24 | Flower_2 | - | - | - |
| GCCGGCCGGGGACGGACT        | 44.51 | Flower_2 | - | - | - |
| ATTTGTTTGTCTCAGATTC       | 42.7  | Flower_2 | - | - | - |
| TTTTGGACCAAGGCTCGTC       | 43.96 | Flower_2 | - | - | - |
| TTGGTAACTTGTTATGCTCGA     | 44.33 | Flower_2 | - | - | - |
| TGTTGAATAAGACCTTCTGCC     | 42.34 | Flower_2 | - | - | - |

|                           |       |          |   |   |   |
|---------------------------|-------|----------|---|---|---|
| TTACTAATTCATGATCTGGC      | 44.87 | Flower_2 | - | - | - |
| CAACTTAATGTTTAGGACTTT     | 42.52 | Flower_2 | - | - | - |
| TGGTAATATATATGGTTGGTT     | 41.98 | Flower_2 | - | - | - |
| ACTCGAACTCGGCCCTTGGATGGC  | 40.9  | Flower_2 | - | - | - |
| TGTGCACCATTACCCTTACCC     | 41.62 | Flower_2 | - | - | - |
| CCCGGGCGTCGAACGGTCGACT    | 42.52 | Flower_2 | - | - | - |
| GCGGACCGATGCGGATGCGCGCGGC | 40.54 | Flower_2 | - | - | - |
| TTATTCGGTACCATAATAATT     | 41.98 | Flower_2 | - | - | - |
| GAC TTCATGCAGACAAGCTG     | 40.9  | Flower_2 | - | - | - |
| CCTGTTGGCTAGGTCTAAAGGACC  | 40    | Flower_2 | - | - | - |
| GTTGTATTACTTATTATTACT     | 40.36 | Flower_2 | - | - | - |
| CAAGTGTATCTTTCCAAC        | 41.08 | Flower_2 | - | - | - |
| TCCATGGGCTGTGTCGGACCG     | 42.16 | Flower_2 | - | - | - |
| AACAAACGTGTAGAAGAATGCATT  | 39.82 | Flower_2 | - | - | - |
| CGAGTCATGGAAGTCTTTC       | 41.44 | Flower_2 | - | - | - |
| TTTTATTCACTGATTGTCGGCT    | 39.64 | Flower_2 | - | - | - |
| TGCAGAGATTCAACATGGACGACG  | 39.64 | Flower_2 | - | - | - |
| TAGCTCGACGCCAGGATAC       | 41.98 | Flower_2 | - | - | - |
| TCGAATGAATTCTAGGACATATT   | 39.28 | Flower_2 | - | - | - |
| CTGTTTAACGGCCTGCCACCC     | 44.69 | Flower_2 | - | - | - |
| CGCGCCACGGAATCGAGAGCT     | 39.64 | Flower_2 | - | - | - |
| TCCCGGGCGTCGAACGGTCGA     | 39.28 | Flower_2 | - | - | - |
| TAAGGAATGGAGAATGTCCTTGCT  | 38.56 | Flower_2 | - | - | - |
| TTTCAATGAGTCTACAGTACCTGC  | 38.92 | Flower_2 | - | - | - |
| TGTGCTTCTTGGGAAGCTGAGCT   | 38.92 | Flower_2 | - | - | - |
| CAGTCCCGAACCCGTCGGCT      | 40.72 | Flower_2 | - | - | - |
| GGAATAGTTGAGTAGAGCTGG     | 40.9  | Flower_2 | - | - | - |
| TCTTACAAGGTCAAGAAGACT     | 40    | Flower_2 | - | - | - |
| CTACCCGAATAGCACTGTAGCACT  | 37.84 | Flower_2 | - | - | - |
| TTTTTGACCCAAGGCTCGTCT     | 40.36 | Flower_2 | - | - | - |
| TTGTGAGCCATTGACGATTGCCTT  | 37.84 | Flower_2 | - | - | - |

|                          |       |          |   |   |   |
|--------------------------|-------|----------|---|---|---|
| TCTTTAATCAGGTTGCTGACC    | 38.38 | Flower_2 | - | - | - |
| CGGCTGCAGTAGCAGTAGAGCACC | 38.02 | Flower_2 | - | - | - |
| CCCCGGGCGTCGAACGGTCGACT  | 38.02 | Flower_2 | - | - | - |
| TCATGGTTTTGCGATTTTAGG    | 38.92 | Flower_2 | - | - | - |
| TGGCACCCTCAATTGTAAACATT  | 37.84 | Flower_2 | - | - | - |
| ATGTCGCTCCGATTCGTAA      | 40.36 | Flower_2 | - | - | - |
| TAAACAGATGCATTCTGTAGGCCT | 37.3  | Flower_2 | - | - | - |
| TTCGTTTCCCGGCAATGGAACCA  | 37.84 | Flower_2 | - | - | - |
| CATGTGCCCGTCTTCCCCATC    | 38.74 | Flower_2 | - | - | - |
| GAAGTCGATCACCGAAGAAGCACC | 37.12 | Flower_2 | - | - | - |
| TGTGGTGGGTAGGGAAGAT      | 38.2  | Flower_2 | - | - | - |
| CCGTTTCTGATTGTTAATGACATT | 36.4  | Flower_2 | - | - | - |
| AGTTACTAATTCATGATCTGGCCA | 36.04 | Flower_2 | - | - | - |
| CTCTTATCATGAGTTTGACT     | 38.74 | Flower_2 | - | - | - |
| CCCGGTGCAGGGTAAACTCGTCC  | 36.04 | Flower_2 | - | - | - |
| TTCCCTACTCCACCCATGCCAT   | 35.86 | Flower_2 | - | - | - |
| TCATGTGTTCTCAGGTCGCC     | 36.4  | Flower_2 | - | - | - |
| CAAATTTGGACTTCGTTTGCA    | 36.4  | Flower_2 | - | - | - |
| CAGTACTAATTCATGATCTGGC   | 36.4  | Flower_2 | - | - | - |
| TTGTCAGAGTTGTGATTCTCT    | 36.04 | Flower_2 | - | - | - |
| ATGGGACTGAGATCTCAAGGATCT | 35.32 | Flower_2 | - | - | - |
| CCAGCCGGCGCACTGTGTGGGACC | 34.96 | Flower_2 | - | - | - |
| CACCATATAGTGCATAGCACA    | 37.3  | Flower_2 | - | - | - |
| CGGACACCGCGCAGCTGCGG     | 36.58 | Flower_2 | - | - | - |
| ATTTATGGCCTGAGTCTTACT    | 36.22 | Flower_2 | - | - | - |
| AGTTACTAATTCATGATC       | 57.84 | Flower_2 | - | - | - |
| TTCTGTTTAAACGGCTGCCACCC  | 36.04 | Flower_2 | - | - | - |
| AGGGATGTAGCGCAGCTT       | 36.58 | Flower_2 | - | - | - |
| GGTCCAGACGGAGCTCCGAGGAC  | 34.23 | Flower_2 | - | - | - |
| CTTTGATGTCTTGAGAGCAGA    | 36.22 | Flower_2 | - | - | - |
| TCCCAGTCCGAACCCGTCGGCT   | 35.86 | Flower_2 | - | - | - |

|                            |       |          |   |   |   |
|----------------------------|-------|----------|---|---|---|
| CGAGACATTCTTGCAAGATCATGC   | 34.78 | Flower_2 | - | - | - |
| TCATATCCAATTTGTATCTCAAT    | 34.05 | Flower_2 | - | - | - |
| AGTTACTAATTCATAATCTGGC     | 35.32 | Flower_2 | - | - | - |
| TTATAGTTGTTTGTATGGTAACT    | 34.96 | Flower_2 | - | - | - |
| ATGGACCTTGAGAGGCACCGAGTG   | 33.87 | Flower_2 | - | - | - |
| AACTTCATCTAGTTTTGTTGGTCT   | 34.23 | Flower_2 | - | - | - |
| CGCCTGCCTGGGCGTCACGC       | 35.14 | Flower_2 | - | - | - |
| TGTCGCTCCGATTCGTA          | 36.76 | Flower_2 | - | - | - |
| TGAGGTTAGATGGTTAGAAAGCCT   | 33.69 | Flower_2 | - | - | - |
| GCGGTCCGGATATCTACTCTCATA   | 33.15 | Flower_2 | - | - | - |
| CGAGGTCATGGAAGTTCTTTCT     | 33.87 | Flower_2 | - | - | - |
| CATTAGGATAGTCTGTAAGCCT     | 34.6  | Flower_2 | - | - | - |
| TGAAGGTCCAAGGTTGAGGCTT     | 35.14 | Flower_2 | - | - | - |
| TCGTGCTAAAGAGCGTGGAG       | 34.6  | Flower_2 | - | - | - |
| CCCCGGGCGTCGAACGGTCGAC     | 34.78 | Flower_2 | - | - | - |
| AGAGGGATTGGGTGAGTTTGGAGT   | 32.97 | Flower_2 | - | - | - |
| AATCGAACCGTCTAGTAGCTGGT    | 33.51 | Flower_2 | - | - | - |
| GCATCGGCTGCGAGCTCCCC       | 35.68 | Flower_2 | - | - | - |
| CTGAGATTCCCATCTCTGATGAGC   | 32.79 | Flower_2 | - | - | - |
| CGGTGTCCTTCAGCTAGTAGC      | 34.78 | Flower_2 | - | - | - |
| CACTTTCAGCAACTTCTTGC       | 34.42 | Flower_2 | - | - | - |
| CCGGCTTAGCTCAGTTGGC        | 33.69 | Flower_2 | - | - | - |
| TATAGTTTGTGTTGATGGTAACTACT | 32.79 | Flower_2 | - | - | - |
| CTAGGGTTGGGCCGGGAGGGTC     | 33.33 | Flower_2 | - | - | - |
| TCCTGGCATCGGCTGCGAGCT      | 33.69 | Flower_2 | - | - | - |
| CCAGTCCCGAACCCGTCGGCTG     | 33.69 | Flower_2 | - | - | - |
| GTTATCTTTCTAACGGCACTG      | 33.15 | Flower_2 | - | - | - |
| ATTGGCTCTGAGGGCTGGGCAC     | 33.33 | Flower_2 | - | - | - |
| AAAACGACTCTCGGCAACGGATA    | 32.61 | Flower_2 | - | - | - |
| CGGTTTTGTGICTCTCATGAC      | 33.87 | Flower_2 | - | - | - |
| AACGACTCTCGGCAACGGAT       | 34.05 | Flower_2 | - | - | - |

|                            |       |          |   |   |   |
|----------------------------|-------|----------|---|---|---|
| TTCTGGATCTGGATTTATGATC     | 32.97 | Flower_2 | - | - | - |
| GATTCGGTCCTATCTGTTGGC      | 32.97 | Flower_2 | - | - | - |
| TGAAGGGAGACTTTAGGATTT      | 32.79 | Flower_2 | - | - | - |
| TCATATGCATGGTTCGTGAAC      | 32.97 | Flower_2 | - | - | - |
| ATTTGTGGATGAAATCTCTGGGA    | 30.99 | Flower_2 | - | - | - |
| CGTGTCCGGGCGACGCCACCA      | 31.71 | Flower_2 | - | - | - |
| TTAGACCTTCGGAATTTGAAGCT    | 32.07 | Flower_2 | - | - | - |
| CCTGGCATCGGCCTGCGAGC       | 33.33 | Flower_2 | - | - | - |
| CTGGCATCGGCCTGCGAGCT       | 32.61 | Flower_2 | - | - | - |
| ACCTGAGTCTGATTTTACCTACTA   | 30.99 | Flower_2 | - | - | - |
| AGTCCCGAACCCGTCGGCTGTCGG   | 31.71 | Flower_2 | - | - | - |
| TCCTATTCTGTTGGCCTTCGGGATC  | 30.45 | Flower_2 | - | - | - |
| GGGGATTAGGGCTTGTGCAAAGC    | 30.99 | Flower_2 | - | - | - |
| CGCAACCGAGTTACCTGGGAT      | 31.89 | Flower_2 | - | - | - |
| GAGGGTTTGTGTATTATTGTATT    | 31.53 | Flower_2 | - | - | - |
| AAGTCCACTGAACCTTATCATT     | 32.07 | Flower_2 | - | - | - |
| ACAACGAGAGAGACACGCTT       | 31.89 | Flower_2 | - | - | - |
| TCGCACCACGAGGGCTGTCT       | 31.17 | Flower_2 | - | - | - |
| CCTTGGACCTTCATTATTCATTGT   | 30.63 | Flower_2 | - | - | - |
| ACTGCATCAACTGGGTACTIONGGTA | 29.91 | Flower_2 | - | - | - |
| CAAGGGACGTTTGAACATTGCACC   | 30.63 | Flower_2 | - | - | - |
| TTTTCCGAAGGATTATGAAT       | 30.63 | Flower_2 | - | - | - |
| CATGTGTTCTCAGGTCGCCCC      | 31.53 | Flower_2 | - | - | - |
| TCGCAAGAGGCTGGTTTGAGG      | 31.53 | Flower_2 | - | - | - |
| ACTGCACGGGCTGGCGCACCCAC    | 29.73 | Flower_2 | - | - | - |
| ATTTCACTCGACCACTGTAGCATT   | 29.73 | Flower_2 | - | - | - |
| TTCCAATGACAGTATCTTGTATC    | 29.73 | Flower_2 | - | - | - |
| TACCGGGCTCATCGAGTCTGGTAAT  | 29.91 | Flower_2 | - | - | - |
| TATCGGCACCAATCCGAGTAGGAC   | 30.27 | Flower_2 | - | - | - |
| GGGAAGTCTCTGTTGCACCC       | 30.09 | Flower_2 | - | - | - |
| CTCTTATCATGAGTTGGACT       | 31.35 | Flower_2 | - | - | - |



|                           |       |          |   |   |   |
|---------------------------|-------|----------|---|---|---|
| ATGAAGGTCCAAGGTTGAGGCT    | 32.43 | Flower_2 | - | - | - |
| CTAAAGTCTCCCTTCATGGCT     | 32.43 | Flower_2 | - | - | - |
| CGCTGGATTATGACTGAACGCCT   | 29.73 | Flower_2 | - | - | - |
| ATGGGATCCGTTGAATATTGT     | 30.45 | Flower_2 | - | - | - |
| TCAAACAAGGAAAGGCTT        | 32.25 | Flower_2 | - | - | - |
| AGTGTTATTTGGTTTAAAGACTTT  | 29.73 | Flower_2 | - | - | - |
| ATCTTTCTGTTTAACGGCCT      | 30.63 | Flower_2 | - | - | - |
| AGACTTGCTCATCGACCTTGCTCC  | 29.55 | Flower_2 | - | - | - |
| GAAAGTCATGAGAGAATTCCAAAT  | 29.01 | Flower_2 | - | - | - |
| AGACCGGTAGACTTGAAC        | 30.99 | Flower_2 | - | - | - |
| GCATCGGCCTGCGAGCTCCC      | 31.17 | Flower_2 | - | - | - |
| TCGGTCCATCGTCGATGACGTAAG  | 30.09 | Flower_2 | - | - | - |
| GCGAGTCGACGGGCCAGTAAACCC  | 29.73 | Flower_2 | - | - | - |
| CAGACCGGTAGACTTGAAC       | 30.63 | Flower_2 | - | - | - |
| TGATCGGAGAAGATGATGAATAGT  | 28.83 | Flower_2 | - | - | - |
| TAAGCCAAGTCCCTTGAAC       | 28.47 | Flower_2 | - | - | - |
| CAGGATTACTCAATGCATAGCCGT  | 28.47 | Flower_2 | - | - | - |
| AGTCCGAACCCGTCGGCTGTC     | 29.19 | Flower_2 | - | - | - |
| GTAGCATATGGGATGGCGTAG     | 29.19 | Flower_2 | - | - | - |
| CGGACCCTGTGCGACCACGAGG    | 30.27 | Flower_2 | - | - | - |
| TTGGCTCTGAGGGCTGGGCACGG   | 29.19 | Flower_2 | - | - | - |
| CTCTTTCTGTATAATTGGTGACC   | 28.47 | Flower_2 | - | - | - |
| AGAGGATTCATCTCTGGAAAAGTGC | 28.29 | Flower_2 | - | - | - |
| CGGCACTGCATCAACTGGGTA     | 28.47 | Flower_2 | - | - | - |
| CCTGGCATCGGCCTGCGAGCTCC   | 28.29 | Flower_2 | - | - | - |
| GCGGACCGATGCGGATCGCGGCG   | 28.83 | Flower_2 | - | - | - |
| TAGCCTTGGACGGAATTTACC     | 29.19 | Flower_2 | - | - | - |
| CTATTCTGTTGGCCTTCGGGATC   | 28.65 | Flower_2 | - | - | - |
| CCATCCACTGTCAATGCTTTTGAG  | 27.93 | Flower_2 | - | - | - |
| CTAGGGTTGGGCCGGGAGGGT     | 29.19 | Flower_2 | - | - | - |
| GCTCGACGCCAGGATAC         | 30.63 | Flower_2 | - | - | - |

|                           |       |          |   |   |   |
|---------------------------|-------|----------|---|---|---|
| GTCCCGAACCCGTCGGCTGTCGGC  | 28.29 | Flower_2 | - | - | - |
| TAGGGTTGGGCCGGGAGGGT      | 29.91 | Flower_2 | - | - | - |
| TTGGCTCTGAGGGCTGGGCACGGG  | 28.29 | Flower_2 | - | - | - |
| TGTAGCAGGTACTGTAGACTCGTT  | 27.75 | Flower_2 | - | - | - |
| GTGCTGCTAGGCGAAGCGG       | 30.27 | Flower_2 | - | - | - |
| CGAGGCGCGGACCGATGCG       | 29.01 | Flower_2 | - | - | - |
| TGAACAGTAATCGGTAATAGTAAC  | 27.93 | Flower_2 | - | - | - |
| ACAACACTGACTCTTTTAGTTCCT  | 27.39 | Flower_2 | - | - | - |
| CCGGGCGTCGAACGGTCGACT     | 28.11 | Flower_2 | - | - | - |
| AGCTCGACGCCAGGATAC        | 29.01 | Flower_2 | - | - | - |
| TTTCTCAGTCATGTGGTGCCT     | 28.65 | Flower_2 | - | - | - |
| TTGGGTTTTAGTCTGATGCC      | 28.29 | Flower_2 | - | - | - |
| TCCTGGCATCGGCCTGCGAGCTCC  | 27.39 | Flower_2 | - | - | - |
| TTTGGTAGTAGCTGAGATTCC     | 28.29 | Flower_2 | - | - | - |
| TGGGCAGATGAACGGCGACGAGAA  | 27.39 | Flower_2 | - | - | - |
| CCTCTTTTGGACCCAAGGCT      | 29.01 | Flower_2 | - | - | - |
| TTTAGACCTTCGGAATTTGAAGCT  | 27.93 | Flower_2 | - | - | - |
| GATTGGCTCTGAGGGCTGGGC     | 28.65 | Flower_2 | - | - | - |
| CCATTGGGCTGGATCCATGTTGGCA | 27.21 | Flower_2 | - | - | - |
| TGCTCCTAGAACTCCTCAACAAA   | 27.21 | Flower_2 | - | - | - |
| CATGTTGACATCAGGATTACT     | 27.57 | Flower_2 | - | - | - |
| CCCGAACCCGTCGGCTGTCGGC    | 29.73 | Flower_2 | - | - | - |
| CAACGGATCCCATTTGTTAATG    | 29.01 | Flower_2 | - | - | - |
| GTTGTATTACTTATTATTACTATA  | 26.67 | Flower_2 | - | - | - |
| CGGGGACGGACTGGGAACGGCCCC  | 26.85 | Flower_2 | - | - | - |
| CCCGGGCGTCGAACGGTCGAC     | 27.93 | Flower_2 | - | - | - |
| TTAGCCTGTGAACCAATATT      | 27.21 | Flower_2 | - | - | - |
| AGGGTTGTTCTGCGGCGACGA     | 27.57 | Flower_2 | - | - | - |
| GTCCCGAACCCGTCGGCTGTCGGC  | 27.03 | Flower_2 | - | - | - |
| GAAACAAGTCGGGAAAATCCTCT   | 26.67 | Flower_2 | - | - | - |
| CTTTTGGACCCAAGGCTCGT      | 27.57 | Flower_2 | - | - | - |

|                           |       |          |   |   |   |
|---------------------------|-------|----------|---|---|---|
| TGTCCTGGATTGGTCCATTTGAGC  | 26.67 | Flower_2 | - | - | - |
| CTTGGTATTTTCGGATACTGACCT  | 26.31 | Flower_2 | - | - | - |
| CAAATTGGTGTTCATTGGAGATG   | 26.85 | Flower_2 | - | - | - |
| CTTCGTTACTCGGATGTGGCCATT  | 26.49 | Flower_2 | - | - | - |
| CTGCACGGGCCTGGCGCACCCAC   | 26.49 | Flower_2 | - | - | - |
| CTCCACTGTAGCCATAGCCATAGG  | 27.21 | Flower_2 | - | - | - |
| ATGAGAGACACAAAACCGTGC     | 26.67 | Flower_2 | - | - | - |
| AGTCCCGAACCCGTCGGCTGTCGGC | 26.49 | Flower_2 | - | - | - |
| TGCTGCTGTTACATGGAACCT     | 27.03 | Flower_2 | - | - | - |
| AGAGTCTGAAATGACGACCTGAGA  | 25.95 | Flower_2 | - | - | - |
| AGTTACTAATTCATGATCTGGCCT  | 26.13 | Flower_2 | - | - | - |
| TCCGTGAATCGGAAGCGGGCAC    | 27.21 | Flower_2 | - | - | - |
| TCCCCGGGCGTCGAACGGTCGAC   | 26.67 | Flower_2 | - | - | - |
| CGGGCTAGAGCGACGCTGCGCC    | 26.49 | Flower_2 | - | - | - |
| ACCCAGAAGTCAAACCTGAACAAC  | 25.59 | Flower_2 | - | - | - |
| GATCATGCGGCAGTTTCACC      | 28.11 | Flower_2 | - | - | - |
| AGGATTCGATTCAACTCCGAAAT   | 26.31 | Flower_2 | - | - | - |
| GTCCCGAACCCGTCGGCTGTCGG   | 26.67 | Flower_2 | - | - | - |
| ATGAAGGGAGACTTTAGGATT     | 26.67 | Flower_2 | - | - | - |
| TCGAACCGTCTAGTAGCTGGT     | 27.21 | Flower_2 | - | - | - |
| CCGCAGAACAACCCTAAACCT     | 25.95 | Flower_2 | - | - | - |
| TTTCGGTCCTATTCTGTTGGC     | 25.95 | Flower_2 | - | - | - |
| TGAAGGTCCAAGGTTGAGGC      | 31.17 | Flower_2 | - | - | - |
| TGCACGGGCCTGGCGCACCCAC    | 26.31 | Flower_2 | - | - | - |
| ATAGCGCGGACCGCGGAGCT      | 25.95 | Flower_2 | - | - | - |
| GAGGCGCGGACCGATGC         | 27.75 | Flower_2 | - | - | - |
| CTAGCCGACGTGGACGGTTGAGCT  | 25.05 | Flower_2 | - | - | - |
| CAGGAATCTGCAGACAAAAGAGTC  | 25.41 | Flower_2 | - | - | - |
| ATCTGCTCTGATACCATGTTGAAA  | 25.05 | Flower_2 | - | - | - |
| TCGACGACACTGTAGCATCGACGG  | 25.05 | Flower_2 | - | - | - |
| TAGCCTGTGAACCAATTTTTT     | 26.31 | Flower_2 | - | - | - |

|                           |       |          |   |   |   |
|---------------------------|-------|----------|---|---|---|
| TTCGTGTCCGGGCGACGCCACCA   | 25.59 | Flower_2 | - | - | - |
| TCTTTCTAACGGCACTGCATC     | 26.13 | Flower_2 | - | - | - |
| CGACCTTGATCTTCTGAGAA      | 26.31 | Flower_2 | - | - | - |
| TCCCGGGCGTCGAACGGTCGACT   | 25.23 | Flower_2 | - | - | - |
| TTCCCGGGCGTCGAACGGTCGA    | 25.77 | Flower_2 | - | - | - |
| CTAGACTTGCTCATCGACCTTGCT  | 24.87 | Flower_2 | - | - | - |
| ACGGTTTGTGTCTCTCATGA      | 25.41 | Flower_2 | - | - | - |
| TTTTCGGATCCTGTGAACAGGCTC  | 24.87 | Flower_2 | - | - | - |
| GAAATAGGGCTGTACCTGTGGCT   | 24.69 | Flower_2 | - | - | - |
| TCGGCTCCCGGTAGGACCTCCA    | 25.59 | Flower_2 | - | - | - |
| TTGGATGTGCACCATTACCCT     | 25.77 | Flower_2 | - | - | - |
| CCTGTCGCACCACGAGGCGTGTCT  | 24.51 | Flower_2 | - | - | - |
| TCCAGGTTGGTGTATGATCTAGC   | 24.14 | Flower_2 | - | - | - |
| GTCCAACAAGGACTTATTGAGCCC  | 24.51 | Flower_2 | - | - | - |
| TTACGGATAAGTTCTTCGGGCTCC  | 24.69 | Flower_2 | - | - | - |
| AGAATGCATCTGTTAAGGACTGT   | 24.32 | Flower_2 | - | - | - |
| TAGTAGTGATGTTGTTCTCT      | 25.23 | Flower_2 | - | - | - |
| ATCTTCTAGGTGATTGGTCCCGGT  | 24.14 | Flower_2 | - | - | - |
| CCCCGAAAATGGATGGCGCTG     | 24.51 | Flower_2 | - | - | - |
| ATGATTGATGTAACATCGTAACCT  | 24.14 | Flower_2 | - | - | - |
| TAGACCTTCGGAATTTGAAGCT    | 24.32 | Flower_2 | - | - | - |
| TCATGTTGGTACCTGGGTTT      | 24.51 | Flower_2 | - | - | - |
| TTGAGATTCTCCTTTAGAAA      | 25.23 | Flower_2 | - | - | - |
| TCGCACCACGAGGCGTGTCTG     | 24.87 | Flower_2 | - | - | - |
| TTTTAATGTTAAGATTTGGGAGT   | 23.96 | Flower_2 | - | - | - |
| GAGGATGTAAGCAATCAGGAGC    | 25.23 | Flower_2 | - | - | - |
| TTTCCGAAGGATTATGAATT      | 25.05 | Flower_2 | - | - | - |
| CTCGAGGCGCGGACCGATGCGGATC | 23.42 | Flower_2 | - | - | - |
| CTGGCATCGGCCTGCGAGC       | 25.59 | Flower_2 | - | - | - |
| CGGCCTGCGAGCTCCCCATTCGG   | 23.96 | Flower_2 | - | - | - |
| AGACCGGTAGACTTGAA         | 25.23 | Flower_2 | - | - | - |

|                           |       |          |   |   |   |
|---------------------------|-------|----------|---|---|---|
| TGGGATATGATTGTAAAGAAT     | 23.96 | Flower_2 | - | - | - |
| CCCGAACCCGTCGGCTGTCCGG    | 25.77 | Flower_2 | - | - | - |
| CGAGTCGACGGGCCAGTAAACCC   | 23.78 | Flower_2 | - | - | - |
| GTTAATTGTATCACTGTTCCAGACT | 23.6  | Flower_2 | - | - | - |
| AACAAACTTGTTCCTTTGAAACC   | 23.96 | Flower_2 | - | - | - |
| TCGCGAGAAGTCCACTGAACCTT   | 23.78 | Flower_2 | - | - | - |
| TCCATAGATGTACAAGTTCTC     | 23.96 | Flower_2 | - | - | - |
| AGGATTATATCAATGTTTTGGGCC  | 23.24 | Flower_2 | - | - | - |
| TGGTGACGTTTGATTGATCA      | 23.6  | Flower_2 | - | - | - |
| TGATGACAGCGTCGTAATAGT     | 23.96 | Flower_2 | - | - | - |
| CGAGGCGCGGACCGATGCGGATC   | 24.51 | Flower_2 | - | - | - |
| ACTTTTGATTGGTTGAAATCACT   | 23.42 | Flower_2 | - | - | - |
| CTCCTGGCATCGGCCTGCGAGCT   | 23.6  | Flower_2 | - | - | - |
| CTCTGAGGGCTGGGCACGGGG     | 23.78 | Flower_2 | - | - | - |
| CGAGCTTTCCTGTAGCTGGGACT   | 23.24 | Flower_2 | - | - | - |
| CGAGAGGAACCGTTGATTCCGC    | 23.96 | Flower_2 | - | - | - |
| TTCCCCGGGCGTCGAACGGTCG    | 23.78 | Flower_2 | - | - | - |
| ACCGGTAGACTTGAACCT        | 25.95 | Flower_2 | - | - | - |
| GGCCTGAGTTGCTGTAGTAACAGC  | 22.88 | Flower_2 | - | - | - |
| AGCCCGGGGCGAGTTCTATC      | 23.96 | Flower_2 | - | - | - |
| CTATTCTGTTGGCCTTCGGGA     | 23.42 | Flower_2 | - | - | - |
| GCGGACCGATGCGGATGCGGGC    | 25.41 | Flower_2 | - | - | - |
| ACCGTTCGACTTTATCTGCAGAGT  | 23.42 | Flower_2 | - | - | - |
| AGTTATTAATTCATGATCTGGC    | 23.6  | Flower_2 | - | - | - |
| CAGTCCCGAACCCGTCGGCTGTC   | 23.6  | Flower_2 | - | - | - |
| ACAAGTCTAGCCGACGTAGACGGC  | 22.88 | Flower_2 | - | - | - |
| TGGAAGAAATAGGGCTGTACCTGT  | 22.52 | Flower_2 | - | - | - |
| GGGGATTAGGACTTGTTCGAAAGC  | 22.88 | Flower_2 | - | - | - |
| CATTCTGTTTTCTAGGACATGCT   | 22.7  | Flower_2 | - | - | - |
| CGGGGGACGGACTGGGAACGGCCC  | 22.7  | Flower_2 | - | - | - |
| CCAAAGACAAGACTCCAGAGT     | 23.24 | Flower_2 | - | - | - |

|                           |       |          |   |   |   |
|---------------------------|-------|----------|---|---|---|
| CGGGCGTCGAACGGTCGACT      | 23.96 | Flower_2 | - | - | - |
| AACTCCGAAATTGCTGACTTGAGC  | 22.7  | Flower_2 | - | - | - |
| CCCACGTTTCGAATTGTAGTC     | 23.42 | Flower_2 | - | - | - |
| ATGTTCCCTCTGAATGTTATTACT  | 22.88 | Flower_2 | - | - | - |
| CAGACGAGCAGTAGCGACAGCCAC  | 22.52 | Flower_2 | - | - | - |
| GAACAGTGACTGAATATTGAGAAC  | 22.52 | Flower_2 | - | - | - |
| CCCGGGCGTCGAACGGTCGA      | 24.14 | Flower_2 | - | - | - |
| TGCTCACTTCTCTCTGTGCAGC    | 23.06 | Flower_2 | - | - | - |
| ACGGGTTTACCCTGCACTTGGGGC  | 22.34 | Flower_2 | - | - | - |
| TCACCTTGCACGTTAGAACCAAAAC | 22.16 | Flower_2 | - | - | - |
| TTCAACGGATCCCATTGTAA      | 22.7  | Flower_2 | - | - | - |
| CTGTGCGACCACGAGCGCTGTCT   | 21.8  | Flower_2 | - | - | - |
| CGGTTTTGTGTCTCTCATGACT    | 22.7  | Flower_2 | - | - | - |
| CGAAATTGCTGACTTGAGCCT     | 22.16 | Flower_2 | - | - | - |
| GCAGGCTGTATTCATGATCTACT   | 21.98 | Flower_2 | - | - | - |
| CTTCCCTACTCCACCCATGCC     | 23.06 | Flower_2 | - | - | - |
| AAGTGCCGCTGAGCTC          | 23.78 | Flower_2 | - | - | - |
| TCCGGAGGACCGAGTGCCGTC     | 22.34 | Flower_2 | - | - | - |
| AGGTGGAGAGATATGTGGGGT     | 21.98 | Flower_2 | - | - | - |
| TTTTCTGTTTAAACGGCCTGCC    | 21.98 | Flower_2 | - | - | - |
| ATAGTTTGTGTTGATGGTAACT    | 22.16 | Flower_2 | - | - | - |
| CTTACCCGATAGAACTCGCC      | 22.7  | Flower_2 | - | - | - |
| CGGAGCTCCGAGGACGTAGGCATT  | 21.62 | Flower_2 | - | - | - |
| CCGGCCGGGGACGGACTGGGA     | 22.16 | Flower_2 | - | - | - |
| GTCCCAATTTTCTCTGTAGAATT   | 21.8  | Flower_2 | - | - | - |
| AAATCCGGAGGACCGAGTGCC     | 22.16 | Flower_2 | - | - | - |
| GAAATTCGAGATTGGAAGTGAGCT  | 21.44 | Flower_2 | - | - | - |
| CGATCCACTGAGATTCAGCCCT    | 22.34 | Flower_2 | - | - | - |
| TCCTGGCATCGGCCTGCGAGC     | 22.88 | Flower_2 | - | - | - |
| ATTCTATGTACGGTCCTGTAGACT  | 21.26 | Flower_2 | - | - | - |
| TCTATCGTGGTGAAAGACTCCATA  | 21.26 | Flower_2 | - | - | - |

|                           |       |          |   |   |   |
|---------------------------|-------|----------|---|---|---|
| TTTCTGTTTAACGGCCTGCC      | 22.7  | Flower_2 | - | - | - |
| CCGATGCGGATCGCGGGCGCGCC   | 21.62 | Flower_2 | - | - | - |
| GAGGCGCGGACCGATGCGGATC    | 22.16 | Flower_2 | - | - | - |
| TTTTACATGGAACTAATCAACA    | 21.08 | Flower_2 | - | - | - |
| CCCTGATGGTTGCGTCTTTAGAGA  | 21.62 | Flower_2 | - | - | - |
| GACGAACTGCCAAACGAGGACTT   | 21.08 | Flower_2 | - | - | - |
| CCTGATGATCTCCAACAGGAACT   | 21.62 | Flower_2 | - | - | - |
| TTCCCCGGGCGTGAACGGTCGACT  | 21.8  | Flower_2 | - | - | - |
| TCGTGTCGGGCGACGCCACCA     | 21.62 | Flower_2 | - | - | - |
| TTTTACCGACTCCTCCCATGCC    | 22.52 | Flower_2 | - | - | - |
| GAGGTTACGGTAGGTAGACATGAC  | 21.44 | Flower_2 | - | - | - |
| CCTATTCTGTGGCCTTCGGGATC   | 21.26 | Flower_2 | - | - | - |
| GTTATTCTATTCCACCTCTTAGA   | 20.9  | Flower_2 | - | - | - |
| ATTCTGTGGCCTTCGGGATC      | 21.8  | Flower_2 | - | - | - |
| CGTGCACCGAACCCCGACTTC     | 22.16 | Flower_2 | - | - | - |
| ACGACTCTCGGCAACGGATAT     | 21.44 | Flower_2 | - | - | - |
| CTCGAGGCGCGGACCGATGCG     | 21.62 | Flower_2 | - | - | - |
| GGCATCGGCCTGCGAGCTCC      | 21.62 | Flower_2 | - | - | - |
| GTTCCCGCAATGGAACCA        | 22.52 | Flower_2 | - | - | - |
| GCCGAGGAATTGTCGAACTTGATC  | 20.72 | Flower_2 | - | - | - |
| CACTGTCCCTGGGATTGGCTT     | 21.98 | Flower_2 | - | - | - |
| TGAGAAITCTGTTTGTGTGTTGAC  | 21.44 | Flower_2 | - | - | - |
| CCGCGCCACGGAATCGAGAGCT    | 21.44 | Flower_2 | - | - | - |
| GGCAGTTCGACCGCAAATTT      | 22.16 | Flower_2 | - | - | - |
| CACCTGCGCGCTCCTGGCATC     | 21.08 | Flower_2 | - | - | - |
| TGGGATAACATCATAGGATTT     | 22.16 | Flower_2 | - | - | - |
| CAAGTCCGCTCTGAGCTCT       | 22.16 | Flower_2 | - | - | - |
| TTTGTGTTCTCAGATTTCT       | 20.9  | Flower_2 | - | - | - |
| CTACTTCTGGTACTCCAGCC      | 20.9  | Flower_2 | - | - | - |
| CGCTGGATTATGACTGAACGCC    | 21.8  | Flower_2 | - | - | - |
| AGGATTGGCTCTGAGGGCTGGGCAC | 20.72 | Flower_2 | - | - | - |

|                            |       |          |   |   |   |
|----------------------------|-------|----------|---|---|---|
| TTCTCGTGATGCTCCTGATTGC     | 21.26 | Flower_2 | - | - | - |
| ATTCATGGITTCAGGAATCTG      | 21.08 | Flower_2 | - | - | - |
| TGTTACAGGTTTGACTTCTGGGTCT  | 20.9  | Flower_2 | - | - | - |
| CCAAATTGGACTTCGTTTGC       | 20.72 | Flower_2 | - | - | - |
| CGGCGGACTGCTCGAGCTGCTCC    | 20.54 | Flower_2 | - | - | - |
| CTTCCCCGGGCGTCGAACGGTCGA   | 20.72 | Flower_2 | - | - | - |
| CCGCCGAGACGAGCCTGGGTC      | 20.54 | Flower_2 | - | - | - |
| TCCCGAACCCGTCGGCTGTCGGCG   | 20.54 | Flower_2 | - | - | - |
| TGGTATTTTCGGATACTGACCT     | 21.08 | Flower_2 | - | - | - |
| TAGCTGAGATTCCAGCTCTGC      | 20.72 | Flower_2 | - | - | - |
| CAAAGCCGGGCTTTTCGTAC       | 20.54 | Flower_2 | - | - | - |
| CAGTTTTGTGTATGTATGCTT      | 20.9  | Flower_2 | - | - | - |
| CGCCCGGATCGTGGATGGCAGC     | 21.08 | Flower_2 | - | - | - |
| CGAGGCGGGACCGATGC          | 21.44 | Flower_2 | - | - | - |
| CTAAGCCAAGTCCCTTGAACCT     | 21.44 | Flower_2 | - | - | - |
| GCCTGCGACGTCGCGAGAA        | 20.72 | Flower_2 | - | - | - |
| TTCAATTGACTATTCATCTATT     | 20.72 | Flower_2 | - | - | - |
| GCCTGCGACGTCGCGAGAAGTC     | 20.54 | Flower_2 | - | - | - |
| CTCCAAC TAGGA ACTGAGCGTGGT | 20    | Flower_2 | - | - | - |
| AAGGACTTATTGAGCCACAACCT    | 20    | Flower_2 | - | - | - |
| ATTGGCTCTGAGGGCTGGGCA      | 20.18 | Flower_2 | - | - | - |
| TGAGGGAGCTCCATCATGACGGGC   | 19.82 | Flower_2 | - | - | - |
| AGGACATAACTCTTGGCCCTGAAA   | 19.82 | Flower_2 | - | - | - |
| AACCGTCTAGTAGCTGGTCCCT     | 20.9  | Flower_2 | - | - | - |
| AATCTTGGATGGGACGGTCTCATT   | 20    | Flower_2 | - | - | - |
| CGGAATCGAGAGCTCCAAGTGGGC   | 19.64 | Flower_2 | - | - | - |
| TACCCTTTCAACCAAGACTG       | 20.36 | Flower_2 | - | - | - |
| CCGAACCCGTCGGCTGTCGGC      | 20.54 | Flower_2 | - | - | - |
| AGGGATGTAGCGCAGCTTGG       | 20.54 | Flower_2 | - | - | - |
| TGGCATCGGCCGTCGAGCTCCC     | 20.18 | Flower_2 | - | - | - |
| CCGAGGACGTAGGCATTTTCGCC    | 19.46 | Flower_2 | - | - | - |



|                          |       |          |   |   |   |
|--------------------------|-------|----------|---|---|---|
| CCCGGGCGTCGAACGGTCGACTC  | 19.46 | Flower_2 | - | - | - |
| CGGCGGACCGGGCCCAAGTCCCC  | 21.08 | Flower_2 | - | - | - |
| ATCAAGTGCCGTCTGAGCTCT    | 20.72 | Flower_2 | - | - | - |
| TTGGACCAAGGCTCGTCTCGGCG  | 20    | Flower_2 | - | - | - |
| TGTAGCAGGTACTGTAGACTCGT  | 19.46 | Flower_2 | - | - | - |
| GAGAGCATGCCTGTCGGGACCC   | 19.64 | Flower_2 | - | - | - |
| TTGGTCCAGACCCATACTGAT    | 20.54 | Flower_2 | - | - | - |
| TGAAGGGCCAAGTTGAGGCT     | 24.14 | Flower_2 | - | - | - |
| CCAGTCCGAACCCGTCGGTGTGC  | 19.64 | Flower_2 | - | - | - |
| GGAATGAAACGGTCTCGTCAGATC | 19.46 | Flower_2 | - | - | - |
| TGCCTGATTTCCTTCTCGTGAAT  | 19.28 | Flower_2 | - | - | - |
| CCGACCTTGATCTTCTGAGAA    | 20    | Flower_2 | - | - | - |
| TCGAGGCGGGACCGATGCGGATC  | 19.64 | Flower_2 | - | - | - |
| ATTCGTTGGAGTTAA          | 20.36 | Flower_2 | - | - | - |
| GTATGGATTCTTGATGCTGAAATC | 19.1  | Flower_2 | - | - | - |
| GGGAATATGCGACTCCACTGG    | 19.64 | Flower_2 | - | - | - |
| TTTAACGGCCTGCCACCC       | 26.85 | Flower_2 | - | - | - |
| TCATGTTGACATCAGGATTAC    | 20.9  | Flower_2 | - | - | - |
| CCCCGACGTTTGAATGTAGTC    | 20.18 | Flower_2 | - | - | - |
| TTCCCCGGGCGTCGAACGGTCGAC | 19.46 | Flower_2 | - | - | - |
| ACCTAGGAGGAACAAGCTGACACT | 19.46 | Flower_2 | - | - | - |
| GCGTGTCTGACAATTATCCT     | 20    | Flower_2 | - | - | - |
| TGGCTCTGAGGGCTGGGCACGG   | 19.46 | Flower_2 | - | - | - |
| TACCCGAATAGCACTGTAGCACTG | 19.1  | Flower_2 | - | - | - |
| CGGGTAGAATCCTTGCAGAC     | 19.82 | Flower_2 | - | - | - |
| CTACTTCCTGGTGTCCAGCC     | 19.64 | Flower_2 | - | - | - |
| CCTATGTCGCTCCGATTCTGAA   | 19.64 | Flower_2 | - | - | - |
| CCCCGACGTTTGAATGTAGT     | 19.82 | Flower_2 | - | - | - |
| GCAACCGTAGATATTACCACC    | 19.82 | Flower_2 | - | - | - |
| CCAGGAAGTAGGATAATTGTC    | 19.82 | Flower_2 | - | - | - |
| TGCCGGCCGGGGACGGACT      | 19.46 | Flower_2 | - | - | - |

|                           |       |          |   |   |   |
|---------------------------|-------|----------|---|---|---|
| AAACCATCAGAACTCCTACTC     | 19.64 | Flower_2 | - | - | - |
| TGGCATCGGCCCTGCGAGCTCC    | 19.64 | Flower_2 | - | - | - |
| TGCGATTGAAACAAATCTGGCACT  | 18.92 | Flower_2 | - | - | - |
| CGGCTCCGTGATTGTCTTGGCATC  | 18.92 | Flower_2 | - | - | - |
| TTGCCACCGTTGAGTTTGGAAACCC | 18.74 | Flower_2 | - | - | - |
| CGAGAAGTCCACTGAACCT       | 19.82 | Flower_2 | - | - | - |
| CCGGGCTAGAGCGACGCGTGCGCC  | 18.74 | Flower_2 | - | - | - |
| CTTCTGACTTAGCTGCAGCGAGCT  | 18.92 | Flower_2 | - | - | - |
| TGAGAATCGATCGTCCCGAC      | 19.28 | Flower_2 | - | - | - |
| TCGGAGGACTTATCCGTAGCGGGA  | 19.1  | Flower_2 | - | - | - |
| CACGGAATCGAGAGCTCCAAGT    | 19.1  | Flower_2 | - | - | - |
| AGGATCCAGGTATTTCTTTGAAGC  | 18.92 | Flower_2 | - | - | - |
| CATTTGGTAGTAGCTGAGATT     | 18.92 | Flower_2 | - | - | - |
| CCCCGGGCGTCGAACGGTCGACTC  | 18.92 | Flower_2 | - | - | - |
| CCTGTCGGGACCCGAAAGATGG    | 19.28 | Flower_2 | - | - | - |
| AAGGCTTTCGATTTGCATGGGACT  | 18.74 | Flower_2 | - | - | - |
| GTGACAGAGGATGAAGAAACATAT  | 18.74 | Flower_2 | - | - | - |
| AGCGTCTTGGTGGTGAATCTAGT   | 18.56 | Flower_2 | - | - | - |
| TCCCCGGGCGTCGAACGGTCGACTC | 18.38 | Flower_2 | - | - | - |
| CGTGGCGGCTGACGGCAACGTTA   | 18.74 | Flower_2 | - | - | - |
| CAGTCCCGAACCCGTGCGGTGTCGG | 19.1  | Flower_2 | - | - | - |
| TGGCTCTGAGGGCTGGGCACG     | 19.64 | Flower_2 | - | - | - |
| AATCCGGAGGACCGAGTGCCGTC   | 18.38 | Flower_2 | - | - | - |
| TAAATATATTGTCAAAGCTGG     | 19.28 | Flower_2 | - | - | - |
| GTCCCCGACGTTCGAATTGTAGTC  | 18.38 | Flower_2 | - | - | - |
| GATGGTTGCGTCTTTAGAGACTTA  | 19.1  | Flower_2 | - | - | - |
| TATCTGTTGGCCTTCGGGATC     | 19.64 | Flower_2 | - | - | - |
| GGTAGGAGATGCACTGTAGCAATT  | 18.38 | Flower_2 | - | - | - |
| TCAGGCTTTGTATCTCTAGAACC   | 18.38 | Flower_2 | - | - | - |
| GCCGAGAAGATGATAAATAGTAT   | 18.38 | Flower_2 | - | - | - |
| TTCTGTTGGCCTTCGGGATC      | 19.64 | Flower_2 | - | - | - |

|                          |       |          |   |   |   |
|--------------------------|-------|----------|---|---|---|
| GGGACGGACTGGGAACGGCCCCT  | 18.56 | Flower_2 | - | - | - |
| AGTGCCGTCTGAGCTCT        | 19.82 | Flower_2 | - | - | - |
| CTTGCGTGGAGGGACTGCCCGAGA | 18.56 | Flower_2 | - | - | - |
| GGCATCGGCCTGCGAGCTCCC    | 19.1  | Flower_2 | - | - | - |
| TTTGACCCAAAGGCTCGTCT     | 20.18 | Flower_2 | - | - | - |
| TTGAATAAGACCTTCTGCCATC   | 18.92 | Flower_2 | - | - | - |
| AGGCGCGGACCGATGCGGATC    | 19.28 | Flower_2 | - | - | - |
| GCGGTCCGGATATCTACTCTCATT | 18.2  | Flower_2 | - | - | - |
| TTTCTAAATATTCTGAACGTATT  | 18.2  | Flower_2 | - | - | - |
| TCTAACCTTGTTGCAGGACC     | 19.82 | Flower_2 | - | - | - |
| ATTCTGTTGGCCTTCGGGATCGGA | 18.56 | Flower_2 | - | - | - |
| CGCAAGCGACTGTTATTGGGGAGC | 18.02 | Flower_2 | - | - | - |
| GCTACGTAGATGCAAACCTTGGAG | 18.38 | Flower_2 | - | - | - |
| TAATGAAGTCCAAGTTGAGGC    | 18.38 | Flower_2 | - | - | - |
| AGAGGAACCGTTGATTCGCAC    | 19.1  | Flower_2 | - | - | - |
| GGTAGAATCCTTTCAGAC       | 19.64 | Flower_2 | - | - | - |
| AAATCGGGCGTAAATTCGGTC    | 18.74 | Flower_2 | - | - | - |
| TTCTGAACCAAAGATTGTTCTCTT | 18.2  | Flower_2 | - | - | - |
| TCAAACAAGGAAAGGCT        | 20.54 | Flower_2 | - | - | - |
| CGGGTCCGGCGACGCCACCA     | 19.64 | Flower_2 | - | - | - |
| GGGGACGGACTGGGAACGGCCC   | 18.2  | Flower_2 | - | - | - |
| CCGTCTAGTAGCTGGTTCCTT    | 19.64 | Flower_2 | - | - | - |
| TAGGAGTTCTGATGGTTTTGT    | 18.38 | Flower_2 | - | - | - |
| TGAAGTCCAAGGGTGAGGCT     | 24.32 | Flower_2 | - | - | - |
| TTGCAAGTCCGAGAATATAGT    | 18.74 | Flower_2 | - | - | - |
| TCCCCGACGTTCGAATTGTAGTC  | 18.2  | Flower_2 | - | - | - |
| GAGAAGTCCACTGAACCTT      | 19.64 | Flower_2 | - | - | - |
| CAATTCCTACTGGATGCACCA    | 18.38 | Flower_2 | - | - | - |
| TACTGAGAACTGAATGACATGTT  | 18.38 | Flower_2 | - | - | - |
| ATATCAAGTGCCGTCTGAGCTCT  | 17.84 | Flower_2 | - | - | - |
| TCCCGTGAACCATCGAGTCTT    | 18.92 | Flower_2 | - | - | - |

|                          |       |          |   |   |   |
|--------------------------|-------|----------|---|---|---|
| TTTTCCGAAGCTATAATTCT     | 18.74 | Flower_2 | - | - | - |
| CGTTTGATTCTGATTTTCAGT    | 18.92 | Flower_2 | - | - | - |
| CGCCACGGAATCGAGAGCTCC    | 18.74 | Flower_2 | - | - | - |
| GGGCTGAGTTGCTGTAGTAACAG  | 17.84 | Flower_2 | - | - | - |
| TCGCCGCGATCGTGGATGGCAGC  | 17.84 | Flower_2 | - | - | - |
| CGGGCGTGGACGGCACTCGGT    | 18.38 | Flower_2 | - | - | - |
| CGATGATTGTAGCTGGTTGTG    | 18.56 | Flower_2 | - | - | - |
| ACCGGGACGTGGCGGCTGACGGCA | 17.84 | Flower_2 | - | - | - |
| ATTCTAACCTTGTGTCAGGACC   | 18.56 | Flower_2 | - | - | - |
| CGGATGGGGGCTGGCGATGCGCC  | 17.84 | Flower_2 | - | - | - |
| GAAGTCCACTGAACCTTATCAIT  | 18.38 | Flower_2 | - | - | - |
| ACCGGGACGTGGCGGCTGACGGC  | 17.84 | Flower_2 | - | - | - |
| TGACCTCTTGAACGTTGAGCCT   | 18.56 | Flower_2 | - | - | - |
| GGGATTTAACCTGGATGTTAT    | 18.56 | Flower_2 | - | - | - |
| CCAGTAAAGCTACTAGCTCAGAAC | 17.84 | Flower_2 | - | - | - |
| TTGCAGGAACACATTAGAGACATG | 17.66 | Flower_2 | - | - | - |
| AACCGGGACGTGGCGGCTGACGGC | 17.84 | Flower_2 | - | - | - |
| GATTTGGGCCTGAGTTGCTGAGT  | 17.84 | Flower_2 | - | - | - |
| CTTGGCTTTTGGTTGGTAGCATC  | 17.84 | Flower_2 | - | - | - |
| ATCTTTCTAACGGCACTGCATC   | 18.2  | Flower_2 | - | - | - |
| ATAACCGTAGATATTAACCTC    | 18.38 | Flower_2 | - | - | - |
| GTCCGAACCCGTCGGCT        | 19.46 | Flower_2 | - | - | - |
| GATGACAGCGTCGTAATAGT     | 18.56 | Flower_2 | - | - | - |
| GGGCAGCCTGCCTGGGCGTCACGC | 17.48 | Flower_2 | - | - | - |
| TGCTCAACGGGTACAATGATGAAT | 17.3  | Flower_2 | - | - | - |
| GCAACCGAGGCCTGTAATAACTAC | 17.66 | Flower_2 | - | - | - |
| ATGGTCCCTGCGGATGCTCAC    | 17.66 | Flower_2 | - | - | - |
| TTTGTTTGATGGTAACTACT     | 18.2  | Flower_2 | - | - | - |
| TGCTCTTTCAGATCACTCTC     | 18.38 | Flower_2 | - | - | - |
| TGGGTTTCGTTTATGTGTTGCA   | 18.2  | Flower_2 | - | - | - |
| CCGAACCCGTCGGCTGTCGGCG   | 19.1  | Flower_2 | - | - | - |

|                           |       |          |   |   |   |
|---------------------------|-------|----------|---|---|---|
| TTTGGACCCAAGGCTCGTCTCGGCG | 17.66 | Flower_2 | - | - | - |
| CTTTAGAGACTTATGGGACTGAGA  | 17.3  | Flower_2 | - | - | - |
| TTTGGACCCAAGGCTCGTCTC     | 19.1  | Flower_2 | - | - | - |
| TGTTAAGAACCGGTCGTTTGT     | 18.56 | Flower_2 | - | - | - |
| TGGCATCGGCCTGCGAGC        | 18.38 | Flower_2 | - | - | - |
| CCCACCCTGGAAACGGCTCAGC    | 17.48 | Flower_2 | - | - | - |
| TCTGTACGAGACCAGACATTGGCC  | 17.84 | Flower_2 | - | - | - |
| CTTCCCCGGGCGTCGAACGGTCG   | 17.48 | Flower_2 | - | - | - |
| CTGATGACAGCGTCGTAATAGT    | 17.84 | Flower_2 | - | - | - |
| AGTTACTAATTCATGATCTGGCATG | 17.12 | Flower_2 | - | - | - |
| CTAATCGTAGTTTATGTGTTGGCT  | 17.12 | Flower_2 | - | - | - |
| GGCAGTTCGACCGGAAATTTTGG   | 17.3  | Flower_2 | - | - | - |
| ATCCGGAGGACCGAGTGCCGTC    | 18.2  | Flower_2 | - | - | - |
| ATTCCGTACCATAATAATTGA     | 18.02 | Flower_2 | - | - | - |
| CCCTGGGATTGGCTTTGGGCTT    | 17.48 | Flower_2 | - | - | - |
| AAAACGACTCTCGGCAACGGATAT  | 17.3  | Flower_2 | - | - | - |
| CCAAGGGCAAGAGCATTGAGGGCT  | 17.12 | Flower_2 | - | - | - |
| ATCGGAGTAATGATTAAC        | 18.74 | Flower_2 | - | - | - |
| CGCGTCGTTGCTCGGCTTGCACC   | 17.48 | Flower_2 | - | - | - |
| CCCGATCGTATCCAATTTTCGAAT  | 16.94 | Flower_2 | - | - | - |
| GAAGTCCACTGAACCTTATCAT    | 18.2  | Flower_2 | - | - | - |
| TGGTGACGTTTGATGTGATTA     | 17.66 | Flower_2 | - | - | - |
| CCCGACGGCGGTCACGTAGCAGC   | 17.66 | Flower_2 | - | - | - |
| TCCCTGGGATTGGCTTTGGGCT    | 17.48 | Flower_2 | - | - | - |
| GCTGGATTATGACTGAACGCCT    | 17.3  | Flower_2 | - | - | - |
| TCTGGAGTCTTGTCTTTGGGC     | 19.1  | Flower_2 | - | - | - |
| CGGCCGAGTCTGATTCTGATAAT   | 16.94 | Flower_2 | - | - | - |
| CCGTCCGTGCAGATCTGGTG      | 17.84 | Flower_2 | - | - | - |
| GTGAGAGCATGCCTGTCGGGACCC  | 16.94 | Flower_2 | - | - | - |
| CCCCGACGTTCGAATTGTAGTCT   | 17.66 | Flower_2 | - | - | - |
| TGGTGGTTGAGAGTGACATGAAGG  | 17.3  | Flower_2 | - | - | - |

|                           |       |          |   |   |   |
|---------------------------|-------|----------|---|---|---|
| TCGGCCTGCGAGCTCCCCATTCCG  | 17.48 | Flower_2 | - | - | - |
| AGACCTTCGGAATTTGAAGCT     | 17.84 | Flower_2 | - | - | - |
| CTTGGGAGGCTCTGGATAACATGTC | 16.94 | Flower_2 | - | - | - |
| TAAACTCGTCCAGGATCGCACCCC  | 17.48 | Flower_2 | - | - | - |
| TGATGTGGCTCTGTGGCTAAGGCT  | 17.48 | Flower_2 | - | - | - |
| TCAGTGTAAATTTTCGATCTAAC   | 17.3  | Flower_2 | - | - | - |
| CGGCCTGCGAGCTCCCCATTCCGC  | 16.94 | Flower_2 | - | - | - |
| TCCTATTCTGTTGGCCTTCGGGA   | 16.94 | Flower_2 | - | - | - |
| CACCATATAGTGCACCGCACA     | 18.38 | Flower_2 | - | - | - |
| TTCATCGTGGTGAAAGACTCCATA  | 16.76 | Flower_2 | - | - | - |
| TATAGTTTGTGGTGAAC         | 16.94 | Flower_2 | - | - | - |
| ATCCAGATTTTCAGATTTAGTTAC  | 16.76 | Flower_2 | - | - | - |
| GCCCCATCGTCTAGTGGTTCAGG   | 17.66 | Flower_2 | - | - | - |
| TCTCCCTACTCCACCCATGC      | 18.2  | Flower_2 | - | - | - |
| AGTGATAGGGTTCGAGTCTCACC   | 17.12 | Flower_2 | - | - | - |
| CGAGAAGTCCACTGAACCTT      | 17.48 | Flower_2 | - | - | - |
| GATAGCACCCATGAGGGATTGAAC  | 16.76 | Flower_2 | - | - | - |
| CTGGCATCGGCCTGCGAGCTCC    | 16.76 | Flower_2 | - | - | - |
| TTAAAGATGAAAGTGTGGCTC     | 16.94 | Flower_2 | - | - | - |
| TGCCGGCCGGGGACGGACTGGGA   | 16.58 | Flower_2 | - | - | - |
| GCACCTTATGGACATAAATTGACC  | 16.76 | Flower_2 | - | - | - |
| TGGACCAAGGCTCGTCTCGGCG    | 17.3  | Flower_2 | - | - | - |
| TGTGTTCTCAGGTCGCCCC       | 17.48 | Flower_2 | - | - | - |
| TAAGAAGAATGCTTGGCTGATA    | 17.3  | Flower_2 | - | - | - |
| GTCCGAACCCGTCGGCTGTC      | 16.76 | Flower_2 | - | - | - |
| GCTCGAGGCGGGACCGATGCG     | 18.38 | Flower_2 | - | - | - |
| GCAACCGAGGCTGTAAATAGCTAC  | 16.76 | Flower_2 | - | - | - |
| GGCTTTACCCGATAGAACTCGCC   | 16.94 | Flower_2 | - | - | - |
| TCCAGACTACAATTCGAACGTC    | 16.94 | Flower_2 | - | - | - |
| ATCAACTGGGTACTTGGTAGAGGA  | 16.58 | Flower_2 | - | - | - |
| AACTTTACGTCGAGTTTACAGCCT  | 16.4  | Flower_2 | - | - | - |

|                           |       |          |   |   |   |
|---------------------------|-------|----------|---|---|---|
| CTCGTTTGATTCTGATTTTCAGT   | 16.58 | Flower_2 | - | - | - |
| AGTGCCGGCGCTGGGGTAGGGCCC  | 16.58 | Flower_2 | - | - | - |
| GCAATGACTATTTCATGATTCC    | 16.76 | Flower_2 | - | - | - |
| ACTGCTCGGGCCTGGCGCACCCAC  | 16.4  | Flower_2 | - | - | - |
| CTTCCCTACTCCACCCATGCCA    | 16.94 | Flower_2 | - | - | - |
| TATCTTTCTTCTTAAATGTAGACT  | 16.76 | Flower_2 | - | - | - |
| ACCGGATGAGTCAGATATCTACTC  | 16.4  | Flower_2 | - | - | - |
| ATGTCGCTCCGATTCGTG        | 17.84 | Flower_2 | - | - | - |
| GATAGCGCGGACCGCGGAGCT     | 16.94 | Flower_2 | - | - | - |
| GGGGGACGGACTGGGAACGGCCCC  | 16.22 | Flower_2 | - | - | - |
| TGAGTCTACAGTACCTGTACAGT   | 16.58 | Flower_2 | - | - | - |
| TGGCTCTGAGGGCTGGGCAC      | 17.48 | Flower_2 | - | - | - |
| CATGCCTGTCGGGACCCGAA      | 17.48 | Flower_2 | - | - | - |
| TGCGTGTCTGACAATTATCC      | 17.3  | Flower_2 | - | - | - |
| CCGGACACCGCGGACGTGCG      | 16.76 | Flower_2 | - | - | - |
| GATGGGGCTGGCGATGCGCC      | 17.66 | Flower_2 | - | - | - |
| TTTAGCCTTGACGGAATTTAC     | 16.76 | Flower_2 | - | - | - |
| GCAATATGGGACGGAGCAATGCTC  | 16.4  | Flower_2 | - | - | - |
| GTCCCAGTCCGAACCCGTCGGCT   | 16.22 | Flower_2 | - | - | - |
| ACTAATCGAACCGTCTAGTAGCT   | 16.58 | Flower_2 | - | - | - |
| CGTGCTTGGGCGAGAGCAGTACT   | 16.58 | Flower_2 | - | - | - |
| TGCAACCGAGTTACCTGGGAT     | 16.58 | Flower_2 | - | - | - |
| GGAGCGACCCGAGATCACAT      | 17.66 | Flower_2 | - | - | - |
| GCGCCACGGAATCGAGAGCTC     | 16.76 | Flower_2 | - | - | - |
| TTTCCAGAAGGTCTGAGCCTTAGC  | 16.22 | Flower_2 | - | - | - |
| ATTTGAAACGGGACCCTGAGGGCT  | 16.4  | Flower_2 | - | - | - |
| GCGAGAAGTCCACTGAACC       | 17.48 | Flower_2 | - | - | - |
| AGGACCACGCGAGCCATTTAATGA  | 16.22 | Flower_2 | - | - | - |
| TTCTAACCTTGTGTCAGGACC     | 16.76 | Flower_2 | - | - | - |
| AGTTACTAATTCATGATCTTGC    | 17.66 | Flower_2 | - | - | - |
| CGGCAACGGATATCTCGGCTCTCGC | 16.22 | Flower_2 | - | - | - |

|                           |       |          |   |   |   |
|---------------------------|-------|----------|---|---|---|
| CCTGGCATCGGCCTGCGAGCTCCC  | 16.4  | Flower_2 | - | - | - |
| CAGAATTCCTTTACTATTGCTAGT  | 16.04 | Flower_2 | - | - | - |
| CCTGGAGAAAGATCCGTGCTT     | 16.58 | Flower_2 | - | - | - |
| ACCGGACGGACCAGATGTCTACTC  | 16.22 | Flower_2 | - | - | - |
| CCTGGCATCGGCCTGCGAGCTC    | 16.4  | Flower_2 | - | - | - |
| CCGGGCGTCGAACGGTCGACTC    | 16.22 | Flower_2 | - | - | - |
| AGCAGGTCCGGAGACATAGGCACA  | 16.04 | Flower_2 | - | - | - |
| AATCCTGAGTGTCTTGTGGACTCC  | 16.04 | Flower_2 | - | - | - |
| CCAAGTCCCTTGAAGTGTGCACC   | 16.04 | Flower_2 | - | - | - |
| TCCAGCGCCCGAAGAGCACC      | 16.76 | Flower_2 | - | - | - |
| ACAACCAGCTACAATCATCGC     | 16.58 | Flower_2 | - | - | - |
| TTGTTTGATGGTAACTACTACT    | 16.94 | Flower_2 | - | - | - |
| GTTGAGAACATTCGGGAAGCTGGA  | 15.68 | Flower_2 | - | - | - |
| GCAATGACTATTTCATGATTC     | 17.12 | Flower_2 | - | - | - |
| GTTGTATTACTTATTATTACTA    | 16.4  | Flower_2 | - | - | - |
| CTAATCGAACCGTCTAGTAGCTGGT | 16.04 | Flower_2 | - | - | - |
| GCGCGGACCGATGCGGATC       | 16.58 | Flower_2 | - | - | - |
| GTTCCTGGGATTGGCTTTGGGCT   | 16.04 | Flower_2 | - | - | - |
| TATTCAACGAGTCTATAGCCT     | 16.4  | Flower_2 | - | - | - |
| ACTGGCTCTGATACCATGTTAGA   | 16.4  | Flower_2 | - | - | - |
| CAACAGTCGTCATCTGATAGT     | 16.76 | Flower_2 | - | - | - |
| CTGTTGGCCTTCGGGATCGGAGT   | 15.86 | Flower_2 | - | - | - |
| AGCTCAGCTGGTAGATGGACGAGC  | 15.68 | Flower_2 | - | - | - |
| TGCTCTTTCAGATCACTCTCC     | 16.76 | Flower_2 | - | - | - |
| AGAAATGAAATGGATCGTCCCAC   | 16.04 | Flower_2 | - | - | - |
| GACCGGATGCAGAGAAACATTC    | 16.4  | Flower_2 | - | - | - |
| GACCGGTAGACTTGAAC         | 16.76 | Flower_2 | - | - | - |
| CCCAGTCCCGAACCCGTCGGCTGTC | 16.04 | Flower_2 | - | - | - |
| TTTGAATCCATGAGTTTAGGGACT  | 15.68 | Flower_2 | - | - | - |
| GTTCGGATCGCGGCGACGCGGGC   | 15.86 | Flower_2 | - | - | - |
| GGCGCGGACCGATGCGGATC      | 16.94 | Flower_2 | - | - | - |



|                           |       |          |   |   |   |
|---------------------------|-------|----------|---|---|---|
| TGGCTCTGAGGGCTGGGCACGGGGG | 16.04 | Flower_2 | - | - | - |
| ATACCCGGCCGTCGGGGCAAGCGCC | 15.5  | Flower_2 | - | - | - |
| ACCGTATCATTAACTATTTCTT    | 17.48 | Flower_2 | - | - | - |
| ATTTCACTCGATCACTGTAGCATT  | 15.5  | Flower_2 | - | - | - |
| TGCTGAAGGATTAAGGGGCACC    | 15.5  | Flower_2 | - | - | - |
| CCGGGCTAGAGCGACGCGTGC GCC | 15.5  | Flower_2 | - | - | - |
| ACTCGAACTCGGCCCTGAATGGC   | 16.04 | Flower_2 | - | - | - |
| ATTCTCATATGTAGAGAGAGGACT  | 15.5  | Flower_2 | - | - | - |
| TCCCGAACCCTCGGCTGTC       | 16.94 | Flower_2 | - | - | - |
| CAGGCACAGAAGACTCCTTTTGA   | 15.86 | Flower_2 | - | - | - |
| CCTGCTAACTAGCTATGCGGAGGGT | 16.76 | Flower_2 | - | - | - |
| TGAGAGCAGATTGGCTGGATC     | 16.76 | Flower_2 | - | - | - |
| TATCTTTTCTGTTTAACGGCCT    | 16.94 | Flower_2 | - | - | - |
| GGCCGTCGGTGCAGATCTTGGTG   | 15.68 | Flower_2 | - | - | - |
| GTTGTATTACTTATTATTACTATT  | 16.04 | Flower_2 | - | - | - |
| ACCCGAAACCGAACTGAAGGCATC  | 15.32 | Flower_2 | - | - | - |
| CGGCGGACTGCTCGAGCTG       | 16.04 | Flower_2 | - | - | - |
| ATTTTACAAGTTTACCTGGAGCCT  | 15.32 | Flower_2 | - | - | - |
| GCCTATCGATCCTTAGACCT      | 16.4  | Flower_2 | - | - | - |
| TGGACCCAAGGCTCGTCTCGGC    | 16.58 | Flower_2 | - | - | - |
| TTTATGGCTGAGTCTTACTG      | 16.22 | Flower_2 | - | - | - |
| AAACGACTCTCGGCAAC         | 16.22 | Flower_2 | - | - | - |
| TCGGGATCGGAGTAATGATTAAC   | 15.5  | Flower_2 | - | - | - |
| GCTGGATTATGACTGAACGCC     | 16.22 | Flower_2 | - | - | - |
| GATATCAAGTGCCGCTGAGCTCT   | 15.32 | Flower_2 | - | - | - |
| TTTTCCGAAGGATTATGAATT     | 15.86 | Flower_2 | - | - | - |
| CCCTTGGACATGTCATCGACGACA  | 15.32 | Flower_2 | - | - | - |
| ACAAGGGGAATCCGACTGTTT     | 15.68 | Flower_2 | - | - | - |
| GCTCTGAGGGCTGGGCACGGGGG   | 15.86 | Flower_2 | - | - | - |
| TCCGGGCTAGAGCGACGCGTGC GC | 15.32 | Flower_2 | - | - | - |
| CGTTCCTGCATGGGGCACCA      | 16.4  | Flower_2 | - | - | - |

|                           |       |          |   |   |   |
|---------------------------|-------|----------|---|---|---|
| TCCGTTGTTTGAACCTGTTGGACC  | 15.14 | Flower_2 | - | - | - |
| CCGGATCGACGACACTGTAGCATC  | 15.32 | Flower_2 | - | - | - |
| CCTTCCCGGGCGTCGAACGGTCGA  | 15.32 | Flower_2 | - | - | - |
| ACCGATGCGGATCGCGGCGGGCC   | 15.32 | Flower_2 | - | - | - |
| CACGGTTTTGTGTCTCTCATG     | 15.86 | Flower_2 | - | - | - |
| ACCACACGAGTTACCTGGGCT     | 15.68 | Flower_2 | - | - | - |
| TCGGACCGACGACACTGTAGCACT  | 15.5  | Flower_2 | - | - | - |
| TTGAGAATCGATCGTCCCGCA     | 15.86 | Flower_2 | - | - | - |
| TGGCATCGGCCTGCGAGCTCCCC   | 16.22 | Flower_2 | - | - | - |
| CATCGGGGCTGGCGTTGCC       | 16.22 | Flower_2 | - | - | - |
| AACTCTACCCAACTATTTCTT     | 15.86 | Flower_2 | - | - | - |
| ACCTTGTGTCAGGACCTACGGGCC  | 15.32 | Flower_2 | - | - | - |
| TTCCCTGGGATTGGCTTTGGGCT   | 15.32 | Flower_2 | - | - | - |
| CCGCGATCGTGGATGGCAGC      | 16.04 | Flower_2 | - | - | - |
| TGGCATCGGCCTGCGAGCT       | 16.76 | Flower_2 | - | - | - |
| GGGCGACTCAACTCAAACTCAGT   | 16.04 | Flower_2 | - | - | - |
| AGAAGTCCACTGAACCTTATC     | 15.14 | Flower_2 | - | - | - |
| TGCTTGGGCGAGAGCAGTACT     | 15.68 | Flower_2 | - | - | - |
| GCTCTGAGGGCTGGGCACGGGG    | 16.04 | Flower_2 | - | - | - |
| AGTCCCGAACCCGTCGGGTGTCG   | 15.32 | Flower_2 | - | - | - |
| TATCAAGTGCCGTCTGAGCTCT    | 15.86 | Flower_2 | - | - | - |
| TGAATAAGATTGTTTGCATT      | 16.04 | Flower_2 | - | - | - |
| GGTCCCAGTCCCGAACCCGTCGGC  | 14.96 | Flower_2 | - | - | - |
| TCGAACGGTCGACTCAGAACT     | 15.5  | Flower_2 | - | - | - |
| AGAGTCCAGGTATTTCTTGAAGC   | 15.14 | Flower_2 | - | - | - |
| GTGCTCCCCCTCGTTGCATA      | 15.86 | Flower_2 | - | - | - |
| TAGGCACCTCCATTCTTIGACCAA  | 14.96 | Flower_2 | - | - | - |
| GCGAGTCGACGGGCCAGTAAACCCG | 15.68 | Flower_2 | - | - | - |
| ATTCGGTCCCTATTCTGTTGGCCT  | 15.14 | Flower_2 | - | - | - |
| CTGAGATTCCAGCTTGCCAAC     | 16.04 | Flower_2 | - | - | - |
| CCGGGCTAGAGCGACGCGTGCGC   | 15.14 | Flower_2 | - | - | - |

|                           |       |          |   |   |   |
|---------------------------|-------|----------|---|---|---|
| TTGTCGGACGAGAGATGGCACT    | 15.14 | Flower_2 | - | - | - |
| TAAGAAGAATGCTTGGCTGAT     | 14.96 | Flower_2 | - | - | - |
| AACCGGTAACAGTCATGTAGGACC  | 14.96 | Flower_2 | - | - | - |
| GCGGATATAGTCGAATGGTA      | 15.68 | Flower_2 | - | - | - |
| CGATTATGAAGCCTTTGATGCC    | 15.14 | Flower_2 | - | - | - |
| TGATCGGAGAAGACGATGAACAGT  | 15.14 | Flower_2 | - | - | - |
| AATAGCTCGACGCCAGGATAC     | 15.86 | Flower_2 | - | - | - |
| CGATAGCGCGGACCGCGGAGCT    | 14.96 | Flower_2 | - | - | - |
| CCCGCCTTGCATCAACTGAATT    | 16.22 | Flower_2 | - | - | - |
| GCCGTCTTAGCTCAGTGGTAGA    | 16.22 | Flower_2 | - | - | - |
| CCTGATCCAGGTCTGCCAGAGGAC  | 15.14 | Flower_2 | - | - | - |
| CGAACCGTCTAGTAGCTGGT      | 15.5  | Flower_2 | - | - | - |
| TGGTAACTTGTATGCTCGAA      | 15.14 | Flower_2 | - | - | - |
| TTGTTAATGGGAATATGCAACT    | 15.5  | Flower_2 | - | - | - |
| GCTGAATCTTTCTGTAGTTGCCT   | 14.78 | Flower_2 | - | - | - |
| GACAGAGGATGAAGAAACATATGT  | 14.78 | Flower_2 | - | - | - |
| GTCCCAGTCCCGAACCCGTCGGCTG | 14.96 | Flower_2 | - | - | - |
| CCACGATCCACTGAGATTACGC    | 15.14 | Flower_2 | - | - | - |
| TTTTATTGGATGGACGTACGGATG  | 15.32 | Flower_2 | - | - | - |
| CGGATGGGGGCTGGCGATGCGCCT  | 14.59 | Flower_2 | - | - | - |
| TGAGCTGTTCCAACCCGAGTA     | 15.32 | Flower_2 | - | - | - |
| GCCCCATCGTCTAGTGGTTCAG    | 14.59 | Flower_2 | - | - | - |
| AACCTACCCGAATAGCACTGTAGC  | 14.96 | Flower_2 | - | - | - |
| TATGGCGATTTGGTAGTAGCT     | 15.68 | Flower_2 | - | - | - |
| CAGTACTAGGATGGGTGACCT     | 14.78 | Flower_2 | - | - | - |
| TCCCTAATTTGATCATTTGGACT   | 14.59 | Flower_2 | - | - | - |
| ACTGAGAACTGAATGACATGTTT   | 14.78 | Flower_2 | - | - | - |
| TGGTTGAGAGTGACATGAAGGATA  | 14.78 | Flower_2 | - | - | - |
| ATCCGGGCTAGAGCGACGCGTGC   | 15.14 | Flower_2 | - | - | - |
| TGATATCAAGTGCCGCTGAGCTCT  | 14.78 | Flower_2 | - | - | - |
| GAATACAATGTATCGTCAATCAT   | 14.96 | Flower_2 | - | - | - |

|                           |       |          |   |   |   |
|---------------------------|-------|----------|---|---|---|
| TGCCAGATTCCTAAACTTAGAATT  | 15.14 | Flower_2 | - | - | - |
| TGCCGTAACATGTAACTCTT      | 14.96 | Flower_2 | - | - | - |
| GATCATTACTGAACATGCCGGGAA  | 14.78 | Flower_2 | - | - | - |
| TCGTGCACCTGCGCGCTCCTGGCA  | 14.59 | Flower_2 | - | - | - |
| CCCCTTCTTGGTTCTAGTGGCTCC  | 14.78 | Flower_2 | - | - | - |
| GGCAACCTTCTTTGATTTTGGACT  | 14.59 | Flower_2 | - | - | - |
| CTCGAGGCGCGGACCGATGC      | 14.96 | Flower_2 | - | - | - |
| TGCGAGTCGACGGGCCAGTAAACCC | 14.78 | Flower_2 | - | - | - |
| TCATCGAGTCTGGTAATTGGA     | 14.96 | Flower_2 | - | - | - |
| TCTCTAATTCGCTTGGTGCAG     | 15.14 | Flower_2 | - | - | - |
| CACGTGCCGTTGGTGAAGCTCG    | 15.14 | Flower_2 | - | - | - |
| TTTTATGCGATGATGTAGCT      | 15.14 | Flower_2 | - | - | - |
| CACGGATCTTCTCCAGGCAA      | 14.59 | Flower_2 | - | - | - |
| CGAGGCGCGGACCGATGCGGAT    | 15.14 | Flower_2 | - | - | - |
| CTACGTAGATGCAAACCTTGGAGG  | 14.78 | Flower_2 | - | - | - |
| ATAGTTTGTTTGATGGTAACTACT  | 14.59 | Flower_2 | - | - | - |
| CGCACTGTAGCAATGGTGCCACT   | 15.14 | Flower_2 | - | - | - |
| CAAGGAAAACCCGTCTTTGGACC   | 14.78 | Flower_2 | - | - | - |
| CTTCTGCCGCGGATGCGCTCC     | 15.32 | Flower_2 | - | - | - |
| GCGCCCGGACCCTGTCGACCACGA  | 14.41 | Flower_2 | - | - | - |
| GCTCTGAGGGCTGGGCACGG      | 15.86 | Flower_2 | - | - | - |
| CGCGCCACGGAATCGAGAGCTC    | 14.96 | Flower_2 | - | - | - |
| GTCCCAGTCCCGAACCCGTCGGC   | 15.14 | Flower_2 | - | - | - |
| TCCTCAGCGGCGGACCGGGCC     | 14.78 | Flower_2 | - | - | - |
| TGGAGAAAAGATCCGTGCTTGT    | 14.78 | Flower_2 | - | - | - |
| CAAAGGAGTTTGACATGAAGGACT  | 14.41 | Flower_2 | - | - | - |
| CTATCGATCCITTAGACCT       | 14.96 | Flower_2 | - | - | - |
| ACCGGATGGACCAGATATCTACTC  | 14.78 | Flower_2 | - | - | - |
| TGGCAGGCTGTATTCCATGATCTA  | 14.41 | Flower_2 | - | - | - |
| TCCGTGAATCGGAAGCGGGGC     | 14.59 | Flower_2 | - | - | - |
| ATTTTGATGGAAATTGTATGTAGT  | 14.23 | Flower_2 | - | - | - |

|                           |       |          |   |   |   |
|---------------------------|-------|----------|---|---|---|
| TCTTTTGGACCCAAGGCTCGTCT   | 14.41 | Flower_2 | - | - | - |
| CCTTTTTTGGACCCAAGGCTC     | 15.14 | Flower_2 | - | - | - |
| GGGTCCAGGTATTTCTTTGAAGCT  | 14.59 | Flower_2 | - | - | - |
| CGTATTTAGCCTTGACGGAAT     | 14.78 | Flower_2 | - | - | - |
| CGTTTCCCGCAACGGAACCA      | 14.59 | Flower_2 | - | - | - |
| TCATGCGATCCCTTAGGAATT     | 14.59 | Flower_2 | - | - | - |
| CCGGGGGACGGACTGGGAACGGCCC | 14.41 | Flower_2 | - | - | - |
| ATGTCGCTCCGATTCGTC        | 16.4  | Flower_2 | - | - | - |
| TGGAAAATTAGATTTATGGCC     | 15.14 | Flower_2 | - | - | - |
| TATGTGATAACACTTGGCTCC     | 14.96 | Flower_2 | - | - | - |
| TGACTGACTTGAGCATCGGAGGGT  | 14.59 | Flower_2 | - | - | - |
| TGCTAACTAGCTATGCGGAGGGT   | 14.59 | Flower_2 | - | - | - |
| TTCAACGGATCCCATTGTTAAT    | 15.14 | Flower_2 | - | - | - |
| TTGCCTGATTTCCTTTCTCGTGAA  | 14.41 | Flower_2 | - | - | - |
| CCTATACCCGGCCGTCGGGGC     | 15.5  | Flower_2 | - | - | - |
| GTGAGAGCATGCCTGTCGGGACC   | 14.41 | Flower_2 | - | - | - |
| GATTCGGTCCTATTCTGTTGGCC   | 14.41 | Flower_2 | - | - | - |
| TGAGGGTTTGTGATTATTGTATT   | 14.23 | Flower_2 | - | - | - |
| GACCCTGCAGAAATTCACGAGAAA  | 14.41 | Flower_2 | - | - | - |
| CTAGCCCGGATTCTGACTTAG     | 14.41 | Flower_2 | - | - | - |
| TCGCACCACGAGGCGCTGTCTGC   | 14.05 | Flower_2 | - | - | - |
| TGGGACTAGATATCCGAGTCGTGC  | 14.05 | Flower_2 | - | - | - |
| AACCGGGACGTGGCGGCTGACGGCA | 14.96 | Flower_2 | - | - | - |
| CGTGCCCGCCGGGGACGGACT     | 14.59 | Flower_2 | - | - | - |
| GTGGGTGGGTAGGGAAGATA      | 14.23 | Flower_2 | - | - | - |
| TTGAGAATCGATCGTCCCGAC     | 14.41 | Flower_2 | - | - | - |
| GCCCGTCGCTCTGACGATTCATGA  | 14.05 | Flower_2 | - | - | - |
| TTGTTTGATGGTAACTACT       | 14.96 | Flower_2 | - | - | - |
| AGAGCATGCCTGTCGGGACCCGA   | 14.23 | Flower_2 | - | - | - |
| TCGAGAACGCATCGACAGGAAAGA  | 13.87 | Flower_2 | - | - | - |
| ACCAGGCTCTGATACCA         | 15.32 | Flower_2 | - | - | - |

|                          |       |          |   |   |   |
|--------------------------|-------|----------|---|---|---|
| CACGATCCACTGAGATTCAGC    | 14.23 | Flower_2 | - | - | - |
| ATCGGTTAAAATTCAGTACCTGC  | 14.05 | Flower_2 | - | - | - |
| GCCACGATCCACTGAGATTCAG   | 14.59 | Flower_2 | - | - | - |
| CGCTCTAGCCCGGATTCTGAC    | 14.59 | Flower_2 | - | - | - |
| TTGTCGTTCTTGAGTGTTAGTACT | 14.59 | Flower_2 | - | - | - |
| CGGACCGATGCGGATCGCGGC    | 14.59 | Flower_2 | - | - | - |
| CTGGCATCGGCCTGCGAGCTCCC  | 14.05 | Flower_2 | - | - | - |
| TAATTTCTACTCTACCTTCCCGG  | 14.05 | Flower_2 | - | - | - |
| CCCGACGTTCAATTGTAGT      | 14.59 | Flower_2 | - | - | - |
| ATGGTCCCTGCGGATGCTCACGC  | 14.23 | Flower_2 | - | - | - |
| ACAGTGACTGAATACTGAGAACT  | 14.05 | Flower_2 | - | - | - |
| GGGACGGACTGGGAACGGCCC    | 14.78 | Flower_2 | - | - | - |
| TGAGATGAAGCACTGTAGCACT   | 16.58 | Flower_2 | - | - | - |
| ATTCCAAGTTTACTGTAAGGATT  | 14.05 | Flower_2 | - | - | - |
| GGGGACGGACTGGGAACGGCC    | 14.41 | Flower_2 | - | - | - |
| CAGTCCCGAACCCGTCGGCTGT   | 15.68 | Flower_2 | - | - | - |
| CCTGGTTICTCAATTGTTCTGAT  | 14.05 | Flower_2 | - | - | - |
| ACCTCAGCTGGTAGATGGACGAGC | 13.87 | Flower_2 | - | - | - |
| TGACCTCGGGAGAATACACTTAAT | 14.41 | Flower_2 | - | - | - |
| CTTGAGAATCGATCGTCCCGAC   | 15.14 | Flower_2 | - | - | - |
| TCGTTTCCCGCAACGGAACCA    | 14.05 | Flower_2 | - | - | - |
| GGTAGAATCCTTTGCAGACGA    | 14.05 | Flower_2 | - | - | - |
| TCATGGTTTTGCGATTCAGG     | 14.41 | Flower_2 | - | - | - |
| CTCCACTGGTGCGTGTCTGA     | 14.78 | Flower_2 | - | - | - |
| TTGTGATTTAAAATTTTATGC    | 15.5  | Flower_2 | - | - | - |
| CGACTCCCGGTAGGACCTCCA    | 14.96 | Flower_2 | - | - | - |
| AAAACAAGTCGGGAAAATCTCT   | 13.87 | Flower_2 | - | - | - |
| CAGGAGTGATCTGTCCATTGGATA | 13.87 | Flower_2 | - | - | - |
| GAACCCGTCGGCTGTCCGC      | 14.59 | Flower_2 | - | - | - |
| ATCTGGTAGGGACAATGTGACAT  | 14.05 | Flower_2 | - | - | - |
| GTGCAGATCTGGTGGTAGTAGC   | 14.05 | Flower_2 | - | - | - |

|                          |       |          |   |   |   |
|--------------------------|-------|----------|---|---|---|
| CTGAGGGCTGGGCACGGGGT     | 14.23 | Flower_2 | - | - | - |
| CTGCTCGGGCCTGGCGCACCCAC  | 14.23 | Flower_2 | - | - | - |
| CGGTCCCGTAAAACCCGGGG     | 14.05 | Flower_2 | - | - | - |
| CGAACCCGTCGGCTGTCGGC     | 15.86 | Flower_2 | - | - | - |
| CTCCCCGGGCGTCGAACGGTCGAC | 13.87 | Flower_2 | - | - | - |
| GCATCTGAGGAACCAGGCAGG    | 14.96 | Flower_2 | - | - | - |
| CTTATGGATGGCAGAAGGTCT    | 14.23 | Flower_2 | - | - | - |
| TTTCGGTCTATTCTGTGGCCT    | 14.23 | Flower_2 | - | - | - |
| CGAGAAGTCCACTGAACCTTAT   | 13.87 | Flower_2 | - | - | - |
| CGCGCCACGGAATCGAGAGCTCC  | 14.05 | Flower_2 | - | - | - |
| GAGATTCAGCTTTGACAAT      | 14.96 | Flower_2 | - | - | - |
| GAAACGGGACCCTGAGGGCT     | 15.5  | Flower_2 | - | - | - |
| AAGAGATTTGAGGTTAATTTGATT | 13.69 | Flower_2 | - | - | - |
| GATTGAAACGGGACCCTGAGGGCT | 13.51 | Flower_2 | - | - | - |
| CTGGCATCGGCCTGCGAGCTCCCC | 13.51 | Flower_2 | - | - | - |
| GAGAGCATGCCTGTCTGGGACC   | 14.05 | Flower_2 | - | - | - |
| TTATCTTTTCTGTTAACGGCCT   | 13.69 | Flower_2 | - | - | - |
| AGAAGTCCACTGAACCTTAT     | 15.14 | Flower_2 | - | - | - |
| GCTCGTTGATTCTGATTTTCAGT  | 13.51 | Flower_2 | - | - | - |
| CCAGGTGTCAACTGTCTATGGAGT | 13.51 | Flower_2 | - | - | - |
| CTTGGCCTGCAATTGTGACTTATT | 13.69 | Flower_2 | - | - | - |
| TTCTGCCGGGATGCGCTCCT     | 13.69 | Flower_2 | - | - | - |
| CGGGCTAGAGCGACGCGTGCGC   | 13.87 | Flower_2 | - | - | - |
| CACCACGAGGCGCTGTCTGCGA   | 13.51 | Flower_2 | - | - | - |
| GAACGAAGGAGATATAGTCCTCTT | 13.51 | Flower_2 | - | - | - |
| CGGACCCTGTGACACCACGAG    | 14.78 | Flower_2 | - | - | - |
| CGCGAGAAGTCCACTGAACC     | 14.78 | Flower_2 | - | - | - |
| CCTCTAAGTCAGAATCCGGGCT   | 14.23 | Flower_2 | - | - | - |
| AGTCCCGAACCCGTCGGC       | 14.05 | Flower_2 | - | - | - |
| CACTGTTCCCTGGGATTGGCT    | 14.05 | Flower_2 | - | - | - |
| TTTGTTTGATGGTAACTACTACT  | 13.87 | Flower_2 | - | - | - |

|                           |       |          |   |   |   |
|---------------------------|-------|----------|---|---|---|
| TGTGGGAGGATTGGACAGAACT    | 15.14 | Flower_2 | - | - | - |
| TTAAGAGGATTAAATGTAATTGT   | 13.51 | Flower_2 | - | - | - |
| TTAACGGCCTGCCACCC         | 20.9  | Flower_2 | - | - | - |
| TTTCGATCTGTAATCCTAAGGCC   | 13.69 | Flower_2 | - | - | - |
| CTTTAGACCTTCGGAATTGAAGC   | 13.51 | Flower_2 | - | - | - |
| TATAGAACCGTTGCTGGACCT     | 14.23 | Flower_2 | - | - | - |
| TCTTCGTGACCATGTTTGAAATA   | 13.51 | Flower_2 | - | - | - |
| ATCGGCCTGCGAGCTCCCCATTCCG | 13.87 | Flower_2 | - | - | - |
| TTTGTTCCTGTTTCTGAA        | 13.69 | Flower_2 | - | - | - |
| TCTGGTCTGTTTAGGAATAGCCT   | 13.51 | Flower_2 | - | - | - |
| CGCCCGTCGCTCTGACGATTCATG  | 13.33 | Flower_2 | - | - | - |
| TTTGGACCCAAGGCTCGTCTC     | 14.41 | Flower_2 | - | - | - |
| CGCTCTAGCCCGGATTCTGACT    | 13.87 | Flower_2 | - | - | - |
| ATGTCCTTGGTGTGACACTGTAGC  | 13.51 | Flower_2 | - | - | - |
| CAACATATCTGTTGGATTCTTGCT  | 13.51 | Flower_2 | - | - | - |
| CTCGTGACCTGCGCGCTCCTGGCA  | 13.33 | Flower_2 | - | - | - |
| TGCCACCGTTGAGTTGGAACC     | 13.69 | Flower_2 | - | - | - |
| AGGAACCGTTGATTCCGAC       | 14.23 | Flower_2 | - | - | - |
| CCCGTTCCTGTCCAACATC       | 13.69 | Flower_2 | - | - | - |
| TCACTGTCCCTGGGATTGGCT     | 14.23 | Flower_2 | - | - | - |
| CACTGTCTTTGTCAACATATCTGT  | 13.33 | Flower_2 | - | - | - |
| TAATCGAACCGTCTAGTAGCTGGTT | 13.51 | Flower_2 | - | - | - |
| TTTGGACCCAAGGCTCGTCTCGGC  | 13.69 | Flower_2 | - | - | - |
| GCGACCCAGGTCAGGCGGGA      | 14.05 | Flower_2 | - | - | - |
| TACTTGGATGGAAGGATATGGGCC  | 13.15 | Flower_2 | - | - | - |
| CTGGCATCGGCCTGCGAGCTC     | 13.33 | Flower_2 | - | - | - |
| AGCCTTGTGCTTGTGGAAGCATG   | 13.51 | Flower_2 | - | - | - |
| CCGATCGGCTCGAGGCGGGACC    | 13.69 | Flower_2 | - | - | - |
| TTAGATTCTAAGACTGTAGCGCT   | 13.15 | Flower_2 | - | - | - |
| TTGGCCCTGAGTTGCTGTAGTAAC  | 13.33 | Flower_2 | - | - | - |
| TCCTATTCTGTTGGCCTTCGGAT   | 13.15 | Flower_2 | - | - | - |



|                           |       |          |   |   |   |
|---------------------------|-------|----------|---|---|---|
| CGGCTTGAGACTGATGTGGCGACT  | 13.33 | Flower_2 | - | - | - |
| TTCGGGTCCGGGCGACGCCACCA   | 13.51 | Flower_2 | - | - | - |
| CGCCCGTCGCTCTGACGATTCATGA | 13.15 | Flower_2 | - | - | - |
| TAAAGGACTGCAGGTAC         | 14.78 | Flower_2 | - | - | - |
| TTCGTCTCCCGGTAGGACCTCCA   | 14.05 | Flower_2 | - | - | - |
| TGGTTCACGGGATTCTGCAAT     | 13.33 | Flower_2 | - | - | - |
| TGGACCTTGGGTTGGGTGGCC     | 13.87 | Flower_2 | - | - | - |
| GACTCTCGGCAACGGATATCTCGG  | 13.51 | Flower_2 | - | - | - |
| CGGCCGTCGGTGCAGATCT       | 13.87 | Flower_2 | - | - | - |
| CAAGTGGCAAGCCTCTGCACT     | 13.33 | Flower_2 | - | - | - |
| CGAAGTTAAGCGTGTGGGC       | 13.33 | Flower_2 | - | - | - |
| CTTGACATGGGTTAGTCGATC     | 13.69 | Flower_2 | - | - | - |
| GTATGAACTAATTCGGACT       | 14.23 | Flower_2 | - | - | - |
| CTCCCTTCATGGCTGGAGCACC    | 13.87 | Flower_2 | - | - | - |
| CGGACTGGGAACGGCCCTCCGGGG  | 12.97 | Flower_2 | - | - | - |
| TGAAACGGGACCCTGAGGGCT     | 13.51 | Flower_2 | - | - | - |
| TTGGGCTTTTCCTGCGCAGCTTAGG | 13.69 | Flower_2 | - | - | - |
| TCTTGGTACCCCTTCTAGAACT    | 12.97 | Flower_2 | - | - | - |
| TTGGGTATAGGGCGAAAGACT     | 13.33 | Flower_2 | - | - | - |
| TTGCATATCTCTGGAGCTTC      | 14.05 | Flower_2 | - | - | - |
| TTGGACCTGATTGACAAAGTTACT  | 13.51 | Flower_2 | - | - | - |
| CCTGGCATCGGCCTGCGAGCTCCCC | 12.97 | Flower_2 | - | - | - |
| TTGGTAAATTGTTATGCTCGA     | 13.69 | Flower_2 | - | - | - |
| TAACGGCACTGCATCAACTGG     | 13.69 | Flower_2 | - | - | - |
| GCGTCTGTAGTCCAACGGTTAGGA  | 13.15 | Flower_2 | - | - | - |
| AGGTCCATTTTGATTCTGAATCGA  | 13.15 | Flower_2 | - | - | - |
| GGCGGACTGCTCGAGCTGTCC     | 13.69 | Flower_2 | - | - | - |
| AGTGCGGCAGTTTTCCTTTGAAAC  | 13.15 | Flower_2 | - | - | - |
| TCCGATAGCGGGACCGCGGAGCT   | 13.15 | Flower_2 | - | - | - |
| ATGAGAGACACAAAACCGTGTCT   | 13.15 | Flower_2 | - | - | - |
| GGACGGACTGGGAACGGCCCT     | 13.87 | Flower_2 | - | - | - |

|                           |       |          |   |   |   |
|---------------------------|-------|----------|---|---|---|
| CACGCCTGCCTGGGCGTCACGC    | 13.33 | Flower_2 | - | - | - |
| TCCGGGCTAGAGCGACGCGTGCGCC | 12.97 | Flower_2 | - | - | - |
| CTTGATATCTCTGGAGCTTC      | 13.69 | Flower_2 | - | - | - |
| GCTCTCTATGCTTCTGTCATCC    | 13.33 | Flower_2 | - | - | - |
| TGGATGAGGAGATATACATGCACC  | 13.15 | Flower_2 | - | - | - |
| CCGGGGGACGGACTGGGAACGGCC  | 12.79 | Flower_2 | - | - | - |
| TTGTTTGGGTAGGATCTTGA      | 13.33 | Flower_2 | - | - | - |
| AGCCGTTTTGACTCGAAATTGAGC  | 13.15 | Flower_2 | - | - | - |
| TTATCTTTTCTGTTAACGGCC     | 13.51 | Flower_2 | - | - | - |
| CACACGGTTGCTGACAGAC       | 14.23 | Flower_2 | - | - | - |
| CTTTTCTGTTAACGGCCTGCC     | 14.41 | Flower_2 | - | - | - |
| AATCGAACCGTCTAGTAGCTGGTT  | 13.33 | Flower_2 | - | - | - |
| GCTTGTCCCGACATGTGATTGATT  | 12.79 | Flower_2 | - | - | - |
| GATGGGGGCTGGCGATGCGCCT    | 13.33 | Flower_2 | - | - | - |
| CAGCCAGATGGACAGGACTGTC    | 12.97 | Flower_2 | - | - | - |
| TTCATTATATCCTTTCTAAGACC   | 13.33 | Flower_2 | - | - | - |
| ATTACTAATTCATGATCTGGC     | 13.87 | Flower_2 | - | - | - |
| AGAATTACAATTCTGACAAAT     | 12.97 | Flower_2 | - | - | - |
| GCACGTGCCGTTGGTGAAGCTC    | 13.69 | Flower_2 | - | - | - |
| CCGGACCCTGTCGCACCACGAGGC  | 12.79 | Flower_2 | - | - | - |
| GGACCGCAGCTGTAGATTAACCGC  | 12.79 | Flower_2 | - | - | - |
| GCGGGTGTAGCATCATCAAGA     | 13.33 | Flower_2 | - | - | - |
| TGTTCCCTGGGATTGGCTTTGGGCT | 12.61 | Flower_2 | - | - | - |
| CAAGTTTGTGTGACGATTGGACT   | 12.97 | Flower_2 | - | - | - |
| CGATCCACTGAGATTCAGCCC     | 13.51 | Flower_2 | - | - | - |
| TGCACCGGATTGGACTATTTTAGT  | 12.61 | Flower_2 | - | - | - |
| ACCATCCGAGTTACCTGGGCT     | 14.05 | Flower_2 | - | - | - |
| ATGTCAACGGTCACTGGTTACTGT  | 12.97 | Flower_2 | - | - | - |
| GTAGGATTCGAACCGCTGACTTGG  | 12.79 | Flower_2 | - | - | - |
| TCAAGTGCCGCTGAGCTCT       | 13.51 | Flower_2 | - | - | - |
| GAGGCGCGGACCGATGCG        | 13.87 | Flower_2 | - | - | - |

|                           |       |          |   |   |   |
|---------------------------|-------|----------|---|---|---|
| CCCAGTCCCGAACCCGTCGGCTG   | 13.51 | Flower_2 | - | - | - |
| TTTGAAATTCATCGTGATGG      | 13.33 | Flower_2 | - | - | - |
| TCCCTGGGATTGGCTTTGGGCTT   | 12.61 | Flower_2 | - | - | - |
| CATGCCTGTCGGGACCCG        | 14.05 | Flower_2 | - | - | - |
| GACGTGAGTGGTCCAAAGACGGGT  | 12.61 | Flower_2 | - | - | - |
| CGGGTAGAATCCTTTGCAGACG    | 13.15 | Flower_2 | - | - | - |
| TACTGAGAACTGAATGACATGTTT  | 12.79 | Flower_2 | - | - | - |
| CTAATTTCCAGAAGGTCTGAGCCT  | 12.97 | Flower_2 | - | - | - |
| AGAGGGACTATGGCCGCTTAGGC   | 13.15 | Flower_2 | - | - | - |
| TTGACCTTGTAAGACCCCGTG     | 12.97 | Flower_2 | - | - | - |
| GGGCGTCGAACGGTCGACT       | 13.51 | Flower_2 | - | - | - |
| GTTTGTTTGATGGTAACTACTACT  | 12.79 | Flower_2 | - | - | - |
| GAGCGGCCGTCGGTGCAGATCT    | 13.51 | Flower_2 | - | - | - |
| TGCCTGCGACGTCGCGAGAAGTC   | 13.15 | Flower_2 | - | - | - |
| CGATGGTAGGATAGAGGCCT      | 13.87 | Flower_2 | - | - | - |
| ACTCTCACATATGGAGAGAGGGCT  | 13.15 | Flower_2 | - | - | - |
| GCCTGCGACGTCGCGAGAAGTCC   | 12.97 | Flower_2 | - | - | - |
| GGGTAGAATCCTTTGCAGACG     | 13.15 | Flower_2 | - | - | - |
| CCCGGACCCTGTCGCACCACGAGGC | 12.97 | Flower_2 | - | - | - |
| ATCGAACCGTCTAGTAGCTGGTT   | 12.97 | Flower_2 | - | - | - |
| GGCTTTACCCGATAGAACTCGC    | 13.69 | Flower_2 | - | - | - |
| TCGCCACATGATCTCTACATC     | 13.51 | Flower_2 | - | - | - |
| AAGGTCCAGGTATTTCTTTGAAGC  | 13.15 | Flower_2 | - | - | - |
| AATGGAACCCAGGAATAATTCAC   | 12.43 | Flower_2 | - | - | - |
| TCCCCGACGTTCGAATTGTAGTCT  | 12.43 | Flower_2 | - | - | - |
| CTGGAAGTCTTTGTGAGGAACT    | 12.43 | Flower_2 | - | - | - |
| GAGATTTAAGTAACCGTGTGCAAC  | 12.43 | Flower_2 | - | - | - |
| TTGGATTGAAGGGAGCTCTA      | 13.15 | Flower_2 | - | - | - |
| CGCCCGGACCCTGTCGCACCACGA  | 12.79 | Flower_2 | - | - | - |
| CAATAAGAATGCTAGTTCTTACTG  | 12.97 | Flower_2 | - | - | - |
| AAACGGGACCCTGAGGGCT       | 13.87 | Flower_2 | - | - | - |

|                           |       |          |   |   |   |
|---------------------------|-------|----------|---|---|---|
| CGAGGATTGTGGCTACGATA      | 12.97 | Flower_2 | - | - | - |
| AAAGGTCGACGCGGGCTTCGCC    | 13.87 | Flower_2 | - | - | - |
| TACGGACAAGGGGAATCCGACTGTT | 12.43 | Flower_2 | - | - | - |
| CAATGCTGCTGTTTCTCTGGCAT   | 12.61 | Flower_2 | - | - | - |
| TACCCGGCCGTCGGGGCAAGCGCC  | 12.61 | Flower_2 | - | - | - |
| ACTCGAACTTGGTCCTGGATGGCC  | 12.79 | Flower_2 | - | - | - |
| CCCCGAAAATGGATGGCGCTGAAGC | 12.43 | Flower_2 | - | - | - |
| CCGCGCCACGGAATCGAGAGC     | 13.51 | Flower_2 | - | - | - |
| CTCTGACGATTCATGATAACT     | 12.79 | Flower_2 | - | - | - |
| GTCTTGCACTGTAGTTCATTTAGT  | 12.43 | Flower_2 | - | - | - |
| CCTGGGATTGGCTTTGGGCT      | 12.79 | Flower_2 | - | - | - |
| ACTCGAACTCGGCTCTGGATGGC   | 12.43 | Flower_2 | - | - | - |
| CTCTTTTGGACCCAAGGCTC      | 13.33 | Flower_2 | - | - | - |
| CACCTGGAAACGGCTCAGC       | 13.15 | Flower_2 | - | - | - |
| CGTCCCCGACGTTTCAATTTGTA   | 12.79 | Flower_2 | - | - | - |
| AACCTTGTGTCAGGACCTACGGGCC | 12.43 | Flower_2 | - | - | - |
| GAGCATGCCTGTCGGGACCCG     | 12.79 | Flower_2 | - | - | - |
| AGGATTGGCTCTGAGGGCTGGGCA  | 12.43 | Flower_2 | - | - | - |
| ACTTGTCACACTTGCACTTGAAT   | 12.61 | Flower_2 | - | - | - |
| AAGATGACTGAGTTGAAGAAACT   | 12.79 | Flower_2 | - | - | - |
| GCGCCCGGACCCTGTCGCACC     | 13.87 | Flower_2 | - | - | - |
| TAATACTACGCGAGCCACACT     | 13.87 | Flower_2 | - | - | - |
| TCAACGGATCCCATTGTTAAT     | 13.33 | Flower_2 | - | - | - |
| CGCGGGTAGAGCAGTTT         | 12.97 | Flower_2 | - | - | - |
| TAAAGTCTTCAAGTCTCTGCACC   | 12.43 | Flower_2 | - | - | - |
| TCCCTTCATGGCTGGAGCACC     | 12.97 | Flower_2 | - | - | - |
| CACCACGAGGCGCTGTCTG       | 12.25 | Flower_2 | - | - | - |
| CCTTGAGAGTCTACATTGGACAGT  | 12.25 | Flower_2 | - | - | - |
| AATCTCAGTCATTGGATGCAATCT  | 12.43 | Flower_2 | - | - | - |
| CTGGGAATCTTTGAATTTCCACT   | 12.61 | Flower_2 | - | - | - |
| CGAGAATATAGTACTTAGGT      | 12.61 | Flower_2 | - | - | - |

|                           |       |          |   |   |   |
|---------------------------|-------|----------|---|---|---|
| AGTCCCGAACCCGTCGGCTGT     | 12.97 | Flower_2 | - | - | - |
| GTCCTATCTGTTGGCCITCGGGA   | 12.25 | Flower_2 | - | - | - |
| TCGGCACTGTTAGGCTCAGACGCC  | 12.61 | Flower_2 | - | - | - |
| TATCATGGTTACTTGTCTGTACA   | 12.43 | Flower_2 | - | - | - |
| TCTTGACCTTGTAAGACCCCG     | 12.61 | Flower_2 | - | - | - |
| GCCTGTCGGGACCCGAAAG       | 13.69 | Flower_2 | - | - | - |
| TCGTGCACCTGCGCGCTCCTGGC   | 12.43 | Flower_2 | - | - | - |
| CGCCGAGACGAGCCTTGGGTC     | 12.25 | Flower_2 | - | - | - |
| CCATCGTCTACGCATCTACGCGGC  | 12.25 | Flower_2 | - | - | - |
| TATTATGTTTCAGATTTAGTACT   | 12.61 | Flower_2 | - | - | - |
| CAGCTTGAGAATCGATCGTCCC    | 12.97 | Flower_2 | - | - | - |
| CGGCAACGGATATCTCGGCTCTCG  | 12.25 | Flower_2 | - | - | - |
| TTGGACTCAACCACACATCGCCTG  | 12.07 | Flower_2 | - | - | - |
| CAAACCATAGATATTAGCACC     | 12.79 | Flower_2 | - | - | - |
| AGTTTGTGATGGTAACT         | 13.15 | Flower_2 | - | - | - |
| CTGATGGTTGCGTCTTTAGAGACT  | 12.07 | Flower_2 | - | - | - |
| ACCTATACCCGGCCGTCGGGGC    | 13.51 | Flower_2 | - | - | - |
| AGAGCATGCCTGTCGGGACCCG    | 12.61 | Flower_2 | - | - | - |
| CTCTGAGGGCTGGGCACGGG      | 13.33 | Flower_2 | - | - | - |
| TTACTGGAGAGAACCATT        | 15.5  | Flower_2 | - | - | - |
| CGTCCCCGACGTTTCGAATTGTAGT | 12.07 | Flower_2 | - | - | - |
| TCCATTGTCGTCCAGCGTTAGG    | 12.97 | Flower_2 | - | - | - |
| TTGCGATGGTCCCTGCGGATGCT   | 12.25 | Flower_2 | - | - | - |
| CTGGAGCCCGGGCGAGTTCTATC   | 12.25 | Flower_2 | - | - | - |
| GGGGAGAATGTCACGACCTGCACG  | 12.07 | Flower_2 | - | - | - |
| GCCGATCCGGGCGGAAGACATTGTC | 12.07 | Flower_2 | - | - | - |
| AGAAGTCCACTGAACCT         | 13.51 | Flower_2 | - | - | - |
| GTTGCCACCGTTGAGTTTGAACCC  | 12.43 | Flower_2 | - | - | - |
| TTTGCCTATACCTCCCATGCC     | 13.33 | Flower_2 | - | - | - |
| TTTCGGCAAATGTAGACTAGC     | 12.07 | Flower_2 | - | - | - |
| GTGGATATTTGTGGTTGTGGCACT  | 12.25 | Flower_2 | - | - | - |

|                           |       |          |   |   |   |
|---------------------------|-------|----------|---|---|---|
| CATTGCGATGGTCCCTGCGGATGCT | 12.07 | Flower_2 | - | - | - |
| GGTAGAATCCTTTGCAGA        | 12.61 | Flower_2 | - | - | - |
| CGGCCGTCGGTGCAGATCTT      | 13.15 | Flower_2 | - | - | - |
| TCTTTTGGACCCAAGGCTCGTC    | 12.79 | Flower_2 | - | - | - |
| ATCGAACCGTCTAGTAGCTGG     | 12.43 | Flower_2 | - | - | - |
| ATTAGTTTGGATCCAATTATCACT  | 12.25 | Flower_2 | - | - | - |
| ATTGACTCGGAGTTCAAGATATCT  | 12.43 | Flower_2 | - | - | - |
| CCCTGTTCGACCACGAGGCGCTGTC | 12.07 | Flower_2 | - | - | - |
| TCTGGTTCCTGGCACCA         | 12.97 | Flower_2 | - | - | - |
| TACACTTGGCGAAGAATTCAGCAT  | 12.61 | Flower_2 | - | - | - |
| GATGACAGCGTCGTAATAGTA     | 12.25 | Flower_2 | - | - | - |
| TCGCGAGAAGTCCACTGA        | 12.61 | Flower_2 | - | - | - |
| TCGCAGGAGAGATGGCACTAGC    | 12.61 | Flower_2 | - | - | - |
| TGTTCCGATCGCGGCGACGCGGGC  | 12.07 | Flower_2 | - | - | - |
| AGCTCGTTGATTCTGATTTTCAGT  | 12.25 | Flower_2 | - | - | - |
| TTGCGCTCAGGGATCACGTAGACC  | 12.43 | Flower_2 | - | - | - |
| CTATGTCGCTCCGATTTCGTAA    | 12.61 | Flower_2 | - | - | - |
| TTTTCCCTACTCCACCCATGCC    | 12.79 | Flower_2 | - | - | - |
| ATAGCTCGACGCCAGGATC       | 12.97 | Flower_2 | - | - | - |
| ACCTGACTAATTGATCTTTTCCTT  | 11.89 | Flower_2 | - | - | - |
| TGGAGAAAGATCCGTGCTTGT     | 12.25 | Flower_2 | - | - | - |
| GCGAGAAGTCCACTGAACCTTAT   | 12.25 | Flower_2 | - | - | - |
| AGTACAAGTGAAGAGTCTCAGCCT  | 12.07 | Flower_2 | - | - | - |
| GGGACGGACTGGGAACGGCC      | 12.25 | Flower_2 | - | - | - |
| TTCGGTCTATTCTGTTGGC       | 12.97 | Flower_2 | - | - | - |
| TCGACGGATCGCACGGCCACCGTG  | 12.07 | Flower_2 | - | - | - |
| TAGAGGGACTATGGCCGCTTAGGC  | 12.25 | Flower_2 | - | - | - |
| GCCTGCCTGGGGCTCACGC       | 12.25 | Flower_2 | - | - | - |
| TTACGCTATGGACTTGAGTTCAAG  | 12.07 | Flower_2 | - | - | - |
| TAAGGCCAGAAAGATAGTAGAAAC  | 12.07 | Flower_2 | - | - | - |
| GGGGACGGACTGGGAA          | 12.61 | Flower_2 | - | - | - |

|                            |       |          |   |   |   |
|----------------------------|-------|----------|---|---|---|
| CTGCCTGCGACGTCGCGAGAA      | 12.07 | Flower_2 | - | - | - |
| GGTCCCAGTCCCGAACCCGTCGGCT  | 11.89 | Flower_2 | - | - | - |
| CGTCCCCGACGTTTCGAATTGTAGTC | 12.07 | Flower_2 | - | - | - |
| AAGGTTGGTCCAGTGATATGTCTC   | 12.07 | Flower_2 | - | - | - |
| TTGGACCCAAGGCTCGTCTCGGC    | 12.79 | Flower_2 | - | - | - |
| GGGTAGAATCCTTTGCAGACGACTT  | 12.07 | Flower_2 | - | - | - |
| TAGGCTTGCTTTGAGCACTCT      | 12.25 | Flower_2 | - | - | - |
| GTCCACTGAACCTTATCATTTA     | 12.07 | Flower_2 | - | - | - |
| ATAGCGCGGACCGCGGAGCCTT     | 12.43 | Flower_2 | - | - | - |
| AATCGGAAAGCGGGCACC GCCCC   | 11.71 | Flower_2 | - | - | - |
| GAGGGACTATGGCCGCTTAGGC     | 12.43 | Flower_2 | - | - | - |
| CTAATCGAACCGTCTAGTAGC      | 12.25 | Flower_2 | - | - | - |
| AGATCATGCGGCAGTTTCACC      | 11.89 | Flower_2 | - | - | - |
| CCCTGTGCGACCACGAGGCGCT     | 11.89 | Flower_2 | - | - | - |
| CCCGAAAATGGATGGCGCTG       | 12.43 | Flower_2 | - | - | - |
| TAGTTTGTGGTATGGTAACTACT    | 12.07 | Flower_2 | - | - | - |
| TTTTTGACCCAAGGCTCGTCTC     | 11.89 | Flower_2 | - | - | - |
| ACCCTGTGCGACCACGAGGCGCT    | 12.07 | Flower_2 | - | - | - |
| CAACATTTAATTGCCCTGGACT     | 11.71 | Flower_2 | - | - | - |
| TGTCGGCGGACTGCTCGAGCT      | 12.25 | Flower_2 | - | - | - |
| TTAAGGAGAATGCATGAATTA      | 11.71 | Flower_2 | - | - | - |
| TGCGCCCGTCGCCCGTTTGCC      | 12.07 | Flower_2 | - | - | - |
| CCGATGCGGATCGCGGCGGC       | 14.59 | Flower_2 | - | - | - |
| CTGTTGGCCTTCGGGATCGGAGTA   | 11.89 | Flower_2 | - | - | - |
| GAGAAGTCCACTGAACCTTA       | 12.79 | Flower_2 | - | - | - |
| TTGGGGTACTTGTTTCATCAGAACT  | 12.43 | Flower_2 | - | - | - |
| TTTCTGGCACACTTTTCGAA       | 12.07 | Flower_2 | - | - | - |
| CACACGGCTATGCATTGAGTA      | 12.07 | Flower_2 | - | - | - |
| GAATCTCAGTGGATCGTGGCAGC    | 11.89 | Flower_2 | - | - | - |
| GCAACCGAGGCTTGTAATAACTAC   | 11.89 | Flower_2 | - | - | - |
| GGACAATTGGCAGGATGG         | 16.4  | Flower_2 | - | - | - |

|                          |       |          |   |   |   |
|--------------------------|-------|----------|---|---|---|
| GACGGACTGGGAACGGCCCCT    | 12.43 | Flower_2 | - | - | - |
| AGAGATCACATTGCTGAACAACCT | 11.89 | Flower_2 | - | - | - |
| CGAGTCGACGGGCCAGTAAACCCG | 12.07 | Flower_2 | - | - | - |
| CGGGGGACGGACTGGGAACGGCC  | 12.43 | Flower_2 | - | - | - |
| CGGCCGGGGACGGACT         | 12.43 | Flower_2 | - | - | - |
| AGAATTCAGAGAATTGTATTGCT  | 11.89 | Flower_2 | - | - | - |
| GCGAGAAGTCCACTGAACCTTATC | 11.53 | Flower_2 | - | - | - |
| CCGACGTTCAATTGTAGTCT     | 11.89 | Flower_2 | - | - | - |
| GAGGATCCTGCACATCAGAACGGT | 11.53 | Flower_2 | - | - | - |
| TTTGAAACGGGACCCTGAGGGCT  | 11.89 | Flower_2 | - | - | - |
| TTGCCACCGTTGAGTTTGAACCT  | 11.53 | Flower_2 | - | - | - |
| CGGCGATGCGCTCCTGGCCTTAAC | 11.53 | Flower_2 | - | - | - |
| TACCGGATCTTCTTCTCATC     | 11.89 | Flower_2 | - | - | - |
| TCGGCATGAAGTAGTCTTGACC   | 11.71 | Flower_2 | - | - | - |
| AGGTTTGGTAGAGAATTAGCGAGC | 12.07 | Flower_2 | - | - | - |
| GATAGCGCGACCGCGGAGCTT    | 12.07 | Flower_2 | - | - | - |
| TGGTGTGTATTTGTCTGC       | 11.53 | Flower_2 | - | - | - |
| TCCATTGGTTCCAGGAATCTG    | 12.43 | Flower_2 | - | - | - |
| CGCCCGGACCCGTGTCGACCACG  | 12.07 | Flower_2 | - | - | - |
| TTGAATTCTGCTCATTTTAG     | 12.25 | Flower_2 | - | - | - |
| GGTATGAGAGGGTTGGTTCT     | 11.53 | Flower_2 | - | - | - |
| GGGTAGAATCCTTTGCAGACGA   | 12.61 | Flower_2 | - | - | - |
| CGGGATCGGAGTAATGATTAAC   | 11.89 | Flower_2 | - | - | - |
| CCGATCGGATCGCGGC         | 12.79 | Flower_2 | - | - | - |
| TATTTTCGGCATCGGACACTCGGT | 11.53 | Flower_2 | - | - | - |
| TCTCGAACCTGGCACTTGACC    | 12.61 | Flower_2 | - | - | - |
| AGCTTCACTGTTCCCTGGGATT   | 11.89 | Flower_2 | - | - | - |
| TTTTGGCATGCTAGAACTAGTAAT | 11.53 | Flower_2 | - | - | - |
| CCGTCCAAGGCTAAATACGGGC   | 11.89 | Flower_2 | - | - | - |
| TCCTAAGGCCCAGAAGATAGTAGA | 11.89 | Flower_2 | - | - | - |
| CAGCCGTCCGGACATGGTACAACA | 11.53 | Flower_2 | - | - | - |



|                           |       |          |   |   |   |
|---------------------------|-------|----------|---|---|---|
| TTGGATTGGTAGGTGAGATTAAT   | 11.71 | Flower_2 | - | - | - |
| GCCCATAGGATTAATGTGGACCC   | 11.71 | Flower_2 | - | - | - |
| CGGC CGGCTGCTCCGTTGAGC    | 12.43 | Flower_2 | - | - | - |
| GTTATAGTTTGGTTGATGGTAACT  | 11.53 | Flower_2 | - | - | - |
| TTGGACCTGGGTTGGGTCGGCC    | 11.89 | Flower_2 | - | - | - |
| TTCCCTGGGATTGGCTTTGGGCTT  | 11.89 | Flower_2 | - | - | - |
| CTCTTTAGAAGACAATGAGCT     | 12.07 | Flower_2 | - | - | - |
| TGCCAGATTCCAAAACCTCAGAATC | 11.89 | Flower_2 | - | - | - |
| AACTCGACGGATCGCACGGCCACCG | 11.53 | Flower_2 | - | - | - |
| AATGATCCACCGGATATGTTCCGGG | 11.89 | Flower_2 | - | - | - |
| CCCGGCCGTCGGGGCAAGCGCC    | 12.61 | Flower_2 | - | - | - |
| CGCTCTGACGATTCATGATAACT   | 11.53 | Flower_2 | - | - | - |
| TAATCGAACCGTCTAGTAGC      | 12.25 | Flower_2 | - | - | - |
| GAACCGTCGGCTGTCGGCG       | 12.25 | Flower_2 | - | - | - |
| TTCCAACCTCGTTGGAACCAACGT  | 11.35 | Flower_2 | - | - | - |
| GTCCCCGACGTTCGAATTGTAGT   | 11.53 | Flower_2 | - | - | - |
| GCTCGAGGCGCGGACCGATCGGGAT | 11.35 | Flower_2 | - | - | - |
| TACCCGGCCGTCGGGGC         | 12.07 | Flower_2 | - | - | - |
| TCGTCTCCCGTAGGACCTCCA     | 11.53 | Flower_2 | - | - | - |
| TTGAAACGGGACCCTGAGGGCT    | 11.89 | Flower_2 | - | - | - |
| TCTTTCTTTAAATGTAGACT      | 11.53 | Flower_2 | - | - | - |
| GCTAAATACGGGCGAGAGACCGAT  | 12.07 | Flower_2 | - | - | - |
| AGGATCCCGTGGAGCGAACCCATT  | 11.35 | Flower_2 | - | - | - |
| TAGCGCGGACCGCGGAGCT       | 12.25 | Flower_2 | - | - | - |
| AAAAGGTCGACGCGGGCTTCGCC   | 11.71 | Flower_2 | - | - | - |
| TCCCTACTCCACCCATGCCAT     | 12.43 | Flower_2 | - | - | - |
| CAAACCTCGTAGCACCACTGTT    | 11.35 | Flower_2 | - | - | - |
| TCTCGTGATGCTCCTGATTGC     | 11.71 | Flower_2 | - | - | - |
| CGCACACGAGGCGCTGTCTGC     | 11.71 | Flower_2 | - | - | - |
| TTGTAATCCAAGACTTTATGGAT   | 11.53 | Flower_2 | - | - | - |
| GTCCCCGACGTTCGAATTGTAGTCT | 11.71 | Flower_2 | - | - | - |

|                           |       |          |   |   |   |
|---------------------------|-------|----------|---|---|---|
| GAGGCGCGGACCGATGCGGATCG   | 11.89 | Flower_2 | - | - | - |
| TTATAGTTTGTGGATGTAAC      | 11.71 | Flower_2 | - | - | - |
| TTCGAGGTCCATATGAGAGAGGTG  | 11.35 | Flower_2 | - | - | - |
| CATGGGCCGAATGATAATCTGGGT  | 11.35 | Flower_2 | - | - | - |
| GCGTCCTCAGCGGGGACCGGGCCC  | 11.35 | Flower_2 | - | - | - |
| ACCGTTTGGATTGTATAGTTCAGA  | 11.35 | Flower_2 | - | - | - |
| CAAGCTCACTGTAGAGCCTGCC    | 11.53 | Flower_2 | - | - | - |
| CTGGGAACGGCCCTCCGGGGGC    | 11.35 | Flower_2 | - | - | - |
| AGTTCTTCGGGCTCCTAGGGTATC  | 11.35 | Flower_2 | - | - | - |
| GCATCGGCTGCGAGCT          | 12.25 | Flower_2 | - | - | - |
| ATTGTCAGAACACGCACCAGT     | 12.07 | Flower_2 | - | - | - |
| TCTAAGTATAGGTGTTAGGCT     | 12.79 | Flower_2 | - | - | - |
| TTTATGGATGGCAGAAGGTCT     | 11.35 | Flower_2 | - | - | - |
| GATACACTGGCGAAGAATTCAGC   | 11.35 | Flower_2 | - | - | - |
| TTCCAGACGGAGCTCCGAGGA     | 12.07 | Flower_2 | - | - | - |
| GCCGCTATGGTAAAATCGGTAGA   | 11.35 | Flower_2 | - | - | - |
| TGGCAGAGTTTGTAAACGATGGAGT | 11.35 | Flower_2 | - | - | - |
| CCCAGATGATCGTTACAAAAACAGC | 11.53 | Flower_2 | - | - | - |
| CGGGCGTCGAACGGTCGACTC     | 11.89 | Flower_2 | - | - | - |
| CCGGAGGACCGAGTGCCGTC      | 12.07 | Flower_2 | - | - | - |
| AGTCAGAATCCGGGCTAGAGC     | 11.89 | Flower_2 | - | - | - |
| AATCTGTCGAAATTAC          | 12.61 | Flower_2 | - | - | - |
| CGTATTTAGCCTTGGACGGAATT   | 12.79 | Flower_2 | - | - | - |
| TCAACATGTGCAGCCTGATGT     | 11.35 | Flower_2 | - | - | - |
| GCAGCAGTTCAAGGACCTGGCCT   | 11.17 | Flower_2 | - | - | - |
| ATGTCGCTCCGATTCGTCC       | 12.07 | Flower_2 | - | - | - |
| ACCAAGGAGTCTGACATGTGT     | 11.71 | Flower_2 | - | - | - |
| GTTGTCTTTACGCTGCATAACCCT  | 11.17 | Flower_2 | - | - | - |
| GGCAGAGGATGAAGAAACATATGT  | 11.35 | Flower_2 | - | - | - |
| CCGCGGGCGAGTTCTATCGGGT    | 11.53 | Flower_2 | - | - | - |
| GAAGATTGAAGACACATGGCCC    | 12.07 | Flower_2 | - | - | - |

|                          |       |          |   |   |   |
|--------------------------|-------|----------|---|---|---|
| CTGAGACTAGCTCCATAATCACAA | 11.17 | Flower_2 | - | - | - |
| GGCATCGGCCTGCGAGC        | 12.07 | Flower_2 | - | - | - |
| GTGGCAGAGGATGAAGAAACATAT | 11.17 | Flower_2 | - | - | - |
| CGCCCGGACCCGTGTCGACCA    | 11.89 | Flower_2 | - | - | - |
| GGGACGGACTGGGAACGGCCCTCC | 11.53 | Flower_2 | - | - | - |
| TTTGGGCTTTTCTGCGCAGCT    | 11.35 | Flower_2 | - | - | - |
| CCCGAACCCGTCGGCTGTC      | 12.25 | Flower_2 | - | - | - |
| TGATGACAGCGTCGTAATAGTA   | 11.53 | Flower_2 | - | - | - |
| CTTTTGGACCCAAGGCTCGTCTC  | 11.53 | Flower_2 | - | - | - |
| CATTCCAATTACCAGACTCGAT   | 11.89 | Flower_2 | - | - | - |
| CTACTACTCGGATAACCGTAGT   | 11.53 | Flower_2 | - | - | - |
| GCACCACGAGGCGCTGTCTG     | 12.25 | Flower_2 | - | - | - |
| GGAGAGACTGCAGTTGGAACAAC  | 10.99 | Flower_2 | - | - | - |
| CACCGAGAAGTCGATGCAAGTGCT | 10.99 | Flower_2 | - | - | - |
| ATGGTGTGAATTGCAGAATCCC   | 11.53 | Flower_2 | - | - | - |
| TGTTTAACGGCCTGCCACCCT    | 11.71 | Flower_2 | - | - | - |
| CTCTGGAGTCTTGCTTTGGGC    | 11.17 | Flower_2 | - | - | - |
| TCGACTCCCGGTAGGACCTCCA   | 11.17 | Flower_2 | - | - | - |
| ATCCCTTCGGATATATTGACTCGG | 11.17 | Flower_2 | - | - | - |
| ATTCTGATGGCGACACATGGCTGT | 10.99 | Flower_2 | - | - | - |
| TGGGAATATGCAACTCCACTG    | 11.17 | Flower_2 | - | - | - |
| GCTCGAGGCGGGACCGATG      | 12.61 | Flower_2 | - | - | - |
| TTAATTATGTTTTGGGCCTTGAT  | 11.35 | Flower_2 | - | - | - |
| GTC AAGGCACTGTAGCGGCACT  | 10.99 | Flower_2 | - | - | - |
| GTTCGGCTCCCGGTAGGACCTCCA | 11.17 | Flower_2 | - | - | - |
| CTGTTTAACGGCCTGCCACC     | 11.35 | Flower_2 | - | - | - |
| GAGCCCGGGGCGAGTCTATC     | 11.71 | Flower_2 | - | - | - |
| CCGAGAGAGTGTGCACATGGGTGT | 11.35 | Flower_2 | - | - | - |
| TGCACCGAACCCGACTTC       | 15.14 | Flower_2 | - | - | - |
| CTCCAAGAGGCTTGACTTAGACTC | 11.17 | Flower_2 | - | - | - |
| TTTCCTACTCCACCCATGCC     | 11.35 | Flower_2 | - | - | - |

|                          |       |          |   |   |   |
|--------------------------|-------|----------|---|---|---|
| CCGTGAATCGGAAGCGGGGCAC   | 11.17 | Flower_2 | - | - | - |
| CAACCCGACTCGGTCTAAAACCT  | 11.17 | Flower_2 | - | - | - |
| CTTCCAGTGCTGCTGACATGGCTT | 11.35 | Flower_2 | - | - | - |
| CGTGCACCTGCGCGCTCCTGGC   | 12.07 | Flower_2 | - | - | - |
| CTCGTGCACCTGCGCGCTCCTGGC | 11.53 | Flower_2 | - | - | - |
| TCACTGTTCCTGGGATTGG      | 11.17 | Flower_2 | - | - | - |
| TCTTTTGGACCCAAGGCTCGT    | 11.35 | Flower_2 | - | - | - |
| ACTCTTCCTCAAGGGCTTCCT    | 11.35 | Flower_2 | - | - | - |
| CCTATCGATCCTTTAGACCT     | 11.35 | Flower_2 | - | - | - |
| ATCAACGGAAGGAAGACGAAT    | 11.71 | Flower_2 | - | - | - |
| ATTCTGTGGCCTTCGGGATCGG   | 11.35 | Flower_2 | - | - | - |
| GGCATCGGCCTGCGAGCTCCCC   | 12.25 | Flower_2 | - | - | - |
| TCGCCCCTCGCTCTGACGA      | 11.35 | Flower_2 | - | - | - |
| GCAGTAGAACTACTAGGCGACGCC | 11.71 | Flower_2 | - | - | - |
| GATGGTCCCTGCGGATGCTCACGC | 11.17 | Flower_2 | - | - | - |
| TTTTCCGAAGGATTATGAAT     | 11.71 | Flower_2 | - | - | - |
| TGAGATGCAATTCATGTTGGGGAT | 10.99 | Flower_2 | - | - | - |
| CAAAAAGCAAGGCGGTCTGGGACT | 10.99 | Flower_2 | - | - | - |
| ACACGGTTGTCTGACAGAC      | 12.61 | Flower_2 | - | - | - |
| ACTTCCATGTGTTTTCAACTTT   | 11.17 | Flower_2 | - | - | - |
| CTTGACTGAGGGCCATTGAACATC | 10.99 | Flower_2 | - | - | - |
| CTTGTTGCACCGTTGGATTGAGCT | 11.17 | Flower_2 | - | - | - |
| ATTGGACCGTGGGCTTAATGAGCC | 10.99 | Flower_2 | - | - | - |
| AATGAATGACTAAGATTTAATCTC | 10.81 | Flower_2 | - | - | - |
| TTGGACAGAGAAATCACGGTC    | 10.99 | Flower_2 | - | - | - |
| CAGATCCAAGTCAGCTGCTCT    | 10.99 | Flower_2 | - | - | - |
| GCTCGAGGCGCGGACCGATGCGG  | 11.53 | Flower_2 | - | - | - |
| CCGGCCGGGGACGGACT        | 11.71 | Flower_2 | - | - | - |
| CCTATGTCGCTCCGATTCGTT    | 10.81 | Flower_2 | - | - | - |
| TCGAGTGAGAGCATGCCTGTC    | 10.99 | Flower_2 | - | - | - |
| CGACCTCGGCACCGCTAGGCTC   | 11.71 | Flower_2 | - | - | - |

|                           |       |          |   |   |   |
|---------------------------|-------|----------|---|---|---|
| TGAGAATCAACTATTTATTG      | 11.35 | Flower_2 | - | - | - |
| TAATTTCTACTCTACCTCCCGGAG  | 11.35 | Flower_2 | - | - | - |
| ACCCGGCCGTCGGGGCAAGCGCC   | 10.99 | Flower_2 | - | - | - |
| CGGGCCGCTTGAAACGTAATT     | 11.17 | Flower_2 | - | - | - |
| GCGTGCCGGCCGGGGACGGACT    | 10.99 | Flower_2 | - | - | - |
| TCCGGGCTAGAGCGACGCGTG     | 11.53 | Flower_2 | - | - | - |
| TGCGCTGGATTATGACTGAACGC   | 10.99 | Flower_2 | - | - | - |
| AAAACGACTCTCGGCAACGGAT    | 11.17 | Flower_2 | - | - | - |
| GTTCTGTCCGGGCGACGCCACCA   | 10.99 | Flower_2 | - | - | - |
| CGGGTAGAATCCTTTGCAGACGA   | 10.99 | Flower_2 | - | - | - |
| ATCCGGGCTAGAGCGACGCGTGCG  | 10.81 | Flower_2 | - | - | - |
| TCTGCTTACGTAGCCTTGACT     | 10.99 | Flower_2 | - | - | - |
| TAAATCAGGCACCAACCCAAC     | 10.99 | Flower_2 | - | - | - |
| ACTGATGACAGCGTCGTAATAGT   | 11.17 | Flower_2 | - | - | - |
| ATGAGAATCAACTATTTATT      | 11.71 | Flower_2 | - | - | - |
| GCGACCCAGGTCAGGCG         | 11.35 | Flower_2 | - | - | - |
| GTTACTAATTCATGATCTGGCATA  | 10.81 | Flower_2 | - | - | - |
| CTTGGTTGAAGAGGGTATTGCC    | 10.99 | Flower_2 | - | - | - |
| TTTTGGACCAAGGCTCGTCTCGGC  | 11.35 | Flower_2 | - | - | - |
| TTTTACCGATACCTTCCATACC    | 10.99 | Flower_2 | - | - | - |
| CCCCGAAAATGGATGGCGCTGA    | 10.81 | Flower_2 | - | - | - |
| GGTAGAATCCTTTGCAGACGACTTA | 10.99 | Flower_2 | - | - | - |
| ACCACGGGAGCCATTTAATGAAAC  | 10.99 | Flower_2 | - | - | - |
| TTCGACTCCCGGTAGGACCTCCA   | 10.81 | Flower_2 | - | - | - |
| GAACCGGGACGTGGCGGCTGACGGC | 11.35 | Flower_2 | - | - | - |
| TAATTGAGCACGGAGAAGTCGAAT  | 10.99 | Flower_2 | - | - | - |
| ATGGGGCTGGCGATGCGCCT      | 11.53 | Flower_2 | - | - | - |
| GGACGGACTGGGAACGGCC       | 11.71 | Flower_2 | - | - | - |
| GAGAATGATGACAGTTTGACAATT  | 10.99 | Flower_2 | - | - | - |
| CTGAGATTCCAGCTTTGACAAT    | 12.43 | Flower_2 | - | - | - |
| CGCGCCCGACCCTGTCGCACCA    | 10.63 | Flower_2 | - | - | - |

|                           |       |          |   |   |   |
|---------------------------|-------|----------|---|---|---|
| TTTACTGGAGAGAACCATT       | 11.89 | Flower_2 | - | - | - |
| TGTGCACCGTCTCTCGTCC       | 10.81 | Flower_2 | - | - | - |
| GCCCGGACCCTGTCGCACCACGA   | 10.63 | Flower_2 | - | - | - |
| TACCCGAAGTGTACCTGACTAATT  | 10.63 | Flower_2 | - | - | - |
| AATCCGGGCTAGAGCGACGCGTGC  | 10.81 | Flower_2 | - | - | - |
| GGCGCGGCTGCTCCGTTGAGC     | 11.17 | Flower_2 | - | - | - |
| CGATGGTCCCTGCGGATGCTCACGC | 10.63 | Flower_2 | - | - | - |
| TCTGAACTATAACAATCCAAACGGT | 10.63 | Flower_2 | - | - | - |
| GGACGGACTGGGAACGGCCCC     | 11.35 | Flower_2 | - | - | - |
| ATAGCACTGTTAGGCTTTCGGCCT  | 11.17 | Flower_2 | - | - | - |
| TCCCGACGTTTGAATTGTAG      | 11.53 | Flower_2 | - | - | - |
| CTATGTCGCTCCGATTTCGTTT    | 10.63 | Flower_2 | - | - | - |
| TTTTCTGTTTAACGGCCTGCCC    | 11.17 | Flower_2 | - | - | - |
| TCTTTGAACGCAAGTTGCGCCCC   | 10.81 | Flower_2 | - | - | - |
| TTCTGATTTTTCCATGTAGAGACA  | 10.81 | Flower_2 | - | - | - |
| TGGATGGCAGAAGGTCTTATT     | 11.17 | Flower_2 | - | - | - |
| CACCACGAGGCGCTGTCTGC      | 11.89 | Flower_2 | - | - | - |
| CCCTCTTTTTGGACCCAAGGCT    | 11.35 | Flower_2 | - | - | - |
| GAGCTTCAAAGAAATACCTGGACC  | 10.63 | Flower_2 | - | - | - |
| GCTGAGATTCCAACCTACCC      | 10.81 | Flower_2 | - | - | - |
| CATCATTCAATGTTCTGCATA     | 10.99 | Flower_2 | - | - | - |
| CGAGAAGTCCACTGAACC        | 10.99 | Flower_2 | - | - | - |
| GAAATAGTTGGGTAGAGTTGG     | 11.89 | Flower_2 | - | - | - |
| AATGAAGTCCAAGGTTGAGGCT    | 11.17 | Flower_2 | - | - | - |
| GCCCGTCGCTCTGACGATTCATG   | 10.81 | Flower_2 | - | - | - |
| GCTAACTAGCTATGCGGAGGGT    | 10.63 | Flower_2 | - | - | - |
| TCTTAAAAGATGTCAAAGCTT     | 11.17 | Flower_2 | - | - | - |
| CAGGTTCTGAGCTAGTAGCTTT    | 10.99 | Flower_2 | - | - | - |
| TAAGTATGAACTAATTCGGACT    | 11.17 | Flower_2 | - | - | - |
| GTAGAATCCTTTCAGACGACTT    | 11.35 | Flower_2 | - | - | - |
| TGAACTGGAGGGAGTATCTGAAGG  | 10.99 | Flower_2 | - | - | - |

|                           |       |          |   |   |   |
|---------------------------|-------|----------|---|---|---|
| TGATGATCCATGTTAGTAGAAAATT | 10.63 | Flower_2 | - | - | - |
| TTGAATGATGACATAGGAGGAG    | 11.35 | Flower_2 | - | - | - |
| TCCGGGCTAGAGCGACGCGTGCG   | 10.63 | Flower_2 | - | - | - |
| CTTGGACGGAATTTACTGCC      | 10.99 | Flower_2 | - | - | - |
| TAGACCTTCGGAATTTGAAGC     | 10.63 | Flower_2 | - | - | - |
| TCTGGAGAAGCGTCCTCAGCGGC   | 11.35 | Flower_2 | - | - | - |
| CAAAACTCTATAATACTTCTTGTT  | 10.81 | Flower_2 | - | - | - |
| GCTCTGAGGGCTGGGCACGGGGGTC | 10.63 | Flower_2 | - | - | - |
| GAAGTCCACTGAACCTTATCATT   | 10.81 | Flower_2 | - | - | - |
| TATCCATCGATTCACTGTTTGACT  | 10.63 | Flower_2 | - | - | - |
| TGCTCGGGCCTGGCGACCCAC     | 10.63 | Flower_2 | - | - | - |
| TTTGACTCAACCACACATCGCCT   | 10.63 | Flower_2 | - | - | - |
| TTCCATCGTCGCCGAGAACA      | 10.99 | Flower_2 | - | - | - |
| CGAGTTGGGTGATATTAGTAGGCT  | 10.45 | Flower_2 | - | - | - |
| ATTCTCGTCGCCGTTTATCTGCC   | 10.45 | Flower_2 | - | - | - |
| CGCTTCTTAGAGGGACTATGGCC   | 10.63 | Flower_2 | - | - | - |
| TTAGCTGCAGCGAGCTTTGCCT    | 11.17 | Flower_2 | - | - | - |
| GACGGATCGCACGGCCACCGTG    | 10.99 | Flower_2 | - | - | - |
| ATGCACCTACCTAGATTCTAAAT   | 10.45 | Flower_2 | - | - | - |
| TCTTTGGTGCGACTGTAGCGGC    | 10.99 | Flower_2 | - | - | - |
| TTCGGAGTATTATCTTTGAGT     | 10.63 | Flower_2 | - | - | - |
| ACGAATTGTTCTAACGTTGACTGT  | 10.45 | Flower_2 | - | - | - |
| TGTAGTTTCTCTTATTTTCT      | 11.35 | Flower_2 | - | - | - |
| CGCCACGGAATCGAGAGCT       | 10.99 | Flower_2 | - | - | - |
| TAGCTGGTTGTGTTACGAAC      | 10.81 | Flower_2 | - | - | - |
| AATACTGAGAACTGAATGACATGT  | 10.99 | Flower_2 | - | - | - |
| GCTGAGATTCCAGCTCTACTC     | 11.17 | Flower_2 | - | - | - |
| ACCCTGCAGAAATTCACGAGAAAG  | 10.99 | Flower_2 | - | - | - |
| GAGGATGAAGAAACATATGTGAAT  | 10.45 | Flower_2 | - | - | - |
| GGCACGTGCCGTTGGTGAAGCTC   | 10.99 | Flower_2 | - | - | - |
| CTTGGTCGGGATCCCTTTTCAGA   | 10.45 | Flower_2 | - | - | - |

|                          |       |          |   |   |   |
|--------------------------|-------|----------|---|---|---|
| ATGGGGCTGGCGATGCGCC      | 10.45 | Flower_2 | - | - | - |
| CACGGGCTGGCGCACCCAC      | 10.99 | Flower_2 | - | - | - |
| CATCACTAGTTTACGCTCTGA    | 10.81 | Flower_2 | - | - | - |
| CCGAGACTGCACAAAATGGAGAA  | 10.45 | Flower_2 | - | - | - |
| AGACCCTGCAGAAAATCACGAGAA | 10.63 | Flower_2 | - | - | - |
| TCACCTAGAAGATACTCTGAAG   | 10.63 | Flower_2 | - | - | - |
| TTCACTGTTCCCTGGGATTGG    | 10.45 | Flower_2 | - | - | - |
| CTCGAGGCGGGACCGATGCGG    | 10.81 | Flower_2 | - | - | - |
| ATAGCTCGACGCCAGGATGC     | 11.53 | Flower_2 | - | - | - |
| TTCTCTGGATTTTTTGATGCCCT  | 10.27 | Flower_2 | - | - | - |
| ATGTCGCTCCGATTCGTAG      | 11.53 | Flower_2 | - | - | - |
| CTTCTGGCCGAGGGCACGCCT    | 10.63 | Flower_2 | - | - | - |
| TCTAATACCAATTGTTGGACT    | 11.17 | Flower_2 | - | - | - |
| GCGAGGCAAGTTGGGAACCCGAAC | 10.27 | Flower_2 | - | - | - |
| ATACATCTGAATAGTCTGTAACT  | 10.63 | Flower_2 | - | - | - |
| GCAACTGAGGCCTGTACTAACTAC | 10.27 | Flower_2 | - | - | - |
| CGGCCGTCGGTGCAGATCTGGT   | 10.63 | Flower_2 | - | - | - |
| AGCGGGGACCGGGCCCAAGTCCCC | 10.81 | Flower_2 | - | - | - |
| GTCGGGATAGCTCAGCC        | 11.35 | Flower_2 | - | - | - |
| CCAAGCCCGGGCTTTTCGTACT   | 11.17 | Flower_2 | - | - | - |
| GAAGTCCACTGAACCTTATCA    | 11.53 | Flower_2 | - | - | - |
| CCGGAGGCTAAGTAGTGAGAATT  | 10.45 | Flower_2 | - | - | - |
| GAATCGATCGTCCCCGACGTT    | 10.27 | Flower_2 | - | - | - |
| CCTGGGATTGGCTTTGGGCTTTT  | 10.99 | Flower_2 | - | - | - |
| CCCTACTCCACCCATGCCATA    | 10.27 | Flower_2 | - | - | - |
| ATCTTGGTAACTTGTATGCT     | 10.45 | Flower_2 | - | - | - |
| ATCCGGTGTGGGCGTTAGAGC    | 10.99 | Flower_2 | - | - | - |
| AGCGGGACCGCGGAGCT        | 10.81 | Flower_2 | - | - | - |
| TTAACGGCCTGCCACCCCTGGA   | 10.45 | Flower_2 | - | - | - |
| CATGGGATAACATCATAGGATTT  | 10.45 | Flower_2 | - | - | - |
| TTAGATGATGTGTGGAGCAAG    | 10.81 | Flower_2 | - | - | - |



|                           |       |          |   |   |   |
|---------------------------|-------|----------|---|---|---|
| ATATCTGTTGGATTCTTGCTTCCT  | 10.45 | Flower_2 | - | - | - |
| ACGGATCGCACGGCCACCGTG     | 10.45 | Flower_2 | - | - | - |
| ATAAAAGTACAAGTTCCTCT      | 11.17 | Flower_2 | - | - | - |
| CGGGCTAGAGCGACGCTGCGCCC   | 10.45 | Flower_2 | - | - | - |
| CGACGTCGCGAGAAGTCCACTGA   | 10.99 | Flower_2 | - | - | - |
| GGTTACTAATTCATGATCTGGC    | 11.35 | Flower_2 | - | - | - |
| GGACCCACGCTGATGTGTTGACT   | 10.27 | Flower_2 | - | - | - |
| CCAGGATTCCCCTAGTAACGGC    | 12.07 | Flower_2 | - | - | - |
| TTCCCGCATGTTCAAGTAATGATC  | 10.63 | Flower_2 | - | - | - |
| CTGTGCGGCGACTGCTCGAGCT    | 11.35 | Flower_2 | - | - | - |
| GCGAGTTCTATCGGGTAAAG      | 10.63 | Flower_2 | - | - | - |
| CCCTATGTCGCTCCGATTCGTAA   | 11.17 | Flower_2 | - | - | - |
| TTGGCAGCAATGAATCTTGGT     | 10.45 | Flower_2 | - | - | - |
| CGACGTTCGAATTGTAGTC       | 10.99 | Flower_2 | - | - | - |
| CCCAGATAATTGTCAGTGTAGAAC  | 10.09 | Flower_2 | - | - | - |
| ACCCAACCTCAAAATCCACCC     | 10.45 | Flower_2 | - | - | - |
| AGTTACTAATTCATGATCTGGT    | 10.63 | Flower_2 | - | - | - |
| CCGGGGGACGGACTGGGA        | 10.99 | Flower_2 | - | - | - |
| AGGTCATGGAAGTTCCTTCTT     | 10.81 | Flower_2 | - | - | - |
| CCTGCGACGTCGCGAGAAGTC     | 10.27 | Flower_2 | - | - | - |
| AGCTTACTCAACTATTCCT       | 10.63 | Flower_2 | - | - | - |
| GCTCTGAGGGCTGGGCACGGG     | 10.81 | Flower_2 | - | - | - |
| GTAGCTCAGCTGGTAGATGGACGA  | 10.09 | Flower_2 | - | - | - |
| CCGGCGATGCGCTCCTGGCCTTAAC | 10.09 | Flower_2 | - | - | - |
| TCCGATAGCGCGGACCGCGGAGC   | 10.27 | Flower_2 | - | - | - |
| CGAGGTCTGATACCCATGAAATAT  | 10.09 | Flower_2 | - | - | - |
| CGAGTCCGGGCGACGCCACCA     | 10.27 | Flower_2 | - | - | - |
| TAGCTCGACGCCAGGATC        | 10.99 | Flower_2 | - | - | - |
| TTCCTTGTCTTCAGTTCTGAGC    | 10.09 | Flower_2 | - | - | - |
| ATTCTGTTGGCCTTCGGGA       | 10.45 | Flower_2 | - | - | - |
| GAACCTTACATTACAGCGGACGGC  | 10.63 | Flower_2 | - | - | - |

|                           |       |          |   |   |   |
|---------------------------|-------|----------|---|---|---|
| CCCTCAAAGGCTCCAGTATT      | 10.45 | Flower_2 | - | - | - |
| CGTGCGAACTGGTGTAGAGAAGC   | 10.09 | Flower_2 | - | - | - |
| CTAACTAGCTATGCGGAGGGT     | 10.63 | Flower_2 | - | - | - |
| TCTGGGCAAAGAGAACAAAGTCAT  | 10.09 | Flower_2 | - | - | - |
| TCGGCCTGCGAGCTCCCCATTCCGC | 10.09 | Flower_2 | - | - | - |
| TCAACGAGTCTATAGCCTTGGC    | 10.81 | Flower_2 | - | - | - |
| TCAATAACAGTGAATGATGAC     | 10.45 | Flower_2 | - | - | - |
| GCTTGTCTGCATGAAGTCAA      | 11.17 | Flower_2 | - | - | - |
| TTATGCAAGCCGGCAGGACCC     | 11.17 | Flower_2 | - | - | - |
| TACGAGAGGAACCGTTGATTCCG   | 10.27 | Flower_2 | - | - | - |
| GAACAGTGAATACTGAGAAC      | 10.27 | Flower_2 | - | - | - |
| CGTGCACCTGCGCGCTCCTGGCA   | 10.27 | Flower_2 | - | - | - |
| GCATCGGCCTGCGAGCTCC       | 10.99 | Flower_2 | - | - | - |
| CAATTACCAGACTCGATGAGC     | 10.45 | Flower_2 | - | - | - |
| GGAAGACTGGACGATGAAGAAGTC  | 10.09 | Flower_2 | - | - | - |
| TTTTGCGACGAAAGAAGTTGAACT  | 10.45 | Flower_2 | - | - | - |
| GGAATATGCAACTCCACTGG      | 10.45 | Flower_2 | - | - | - |
| AACCCGTCGGCTGTCGGC        | 11.17 | Flower_2 | - | - | - |
| ATCATGCGGCAGTTTCACCT      | 11.17 | Flower_2 | - | - | - |
| GCAGATGATGTGGCTCTGTGGCTA  | 10.27 | Flower_2 | - | - | - |
| CCACTGGACTGTTCTCTTCT      | 10.45 | Flower_2 | - | - | - |
| AAAAGCTCGTTTGATTCTGAT     | 10.45 | Flower_2 | - | - | - |
| TGACCCTAATTGAACCATCACCTTT | 10.09 | Flower_2 | - | - | - |
| CTCTTTTGGACCAAGGCTCGTC    | 10.27 | Flower_2 | - | - | - |
| TAACCCTGGCTGTCTGAGACA     | 10.45 | Flower_2 | - | - | - |
| CCGTCGCGCCCGGACCCTGTC     | 10.45 | Flower_2 | - | - | - |
| TCACTGTCCCTGGGATTGGCIT    | 10.45 | Flower_2 | - | - | - |
| CAACGAGTCTATAGCCTTGGC     | 10.27 | Flower_2 | - | - | - |
| AGGCGGGACCGATGCGGAT       | 10.81 | Flower_2 | - | - | - |
| TACTAGCTGAAGGACACCGGT     | 10.45 | Flower_2 | - | - | - |
| CTAACCTTGTGTCAGGACC       | 11.35 | Flower_2 | - | - | - |

|                          |       |          |   |   |   |
|--------------------------|-------|----------|---|---|---|
| CCTCAGGATAGCTGGAGCCCG    | 10.45 | Flower_2 | - | - | - |
| CTTTGGACCACTCACGTATTGGG  | 10.27 | Flower_2 | - | - | - |
| TTCCCCGGGCGTCGAACGG      | 11.17 | Flower_2 | - | - | - |
| TTTAGACCTTCGGAATTTGAAGC  | 10.45 | Flower_2 | - | - | - |
| TTATCTTTCTAACGGCACTGCATC | 10.09 | Flower_2 | - | - | - |
| GTTAGGGAGTCCGGAGACGTCGGC | 10.09 | Flower_2 | - | - | - |
| AGGAGATGCACTGTAGCAATTACT | 10.09 | Flower_2 | - | - | - |
| CATCAAGGGGAATTGAATTCTGCT | 10.09 | Flower_2 | - | - | - |
| TTAGTTGCCACCGTTGAGTT     | 12.97 | Flower_2 | - | - | - |
| TCTGACGATTCATGATAACT     | 10.63 | Flower_2 | - | - | - |
| TGCACCGGTCGTCTCGTCCCT    | 10.81 | Flower_2 | - | - | - |
| TGAAGGGAGACTTTAGGATTTT   | 10.45 | Flower_2 | - | - | - |
| TGAATTGCAGAATCCCGTGAAC   | 10.09 | Flower_2 | - | - | - |
| AATCCGGAGGACCGAGTGCCGT   | 10.27 | Flower_2 | - | - | - |
| CCGGACCTGTGCGACCAACGAG   | 10.81 | Flower_2 | - | - | - |
| GTGCGCTGGATTATGACTG      | 10.63 | Flower_2 | - | - | - |
| TGGACCAATTCGGGACAAACCGCT | 10.09 | Flower_2 | - | - | - |
| CTTCGGAATTTGAAGCT        | 11.53 | Flower_2 | - | - | - |
| GAGATGGGCACCACAGAACACC   | 10.45 | Flower_2 | - | - | - |
| TCCATGGGCTGTGTCGAACCG    | 10.27 | Flower_2 | - | - | - |
| TTCCCGAAGGATTATGAATTC    | 10.63 | Flower_2 | - | - | - |
| CGGACCGATGCGGATCGCGCGGC  | 10.09 | Flower_2 | - | - | - |
| GGTAGAATCCTTTGCAGACG     | 10.09 | Flower_2 | - | - | - |
| CGACGTTCGAATTGTAGTCT     | 10.99 | Flower_2 | - | - | - |
| CATCAAATTTGGACTTCGTT     | 10.81 | Flower_2 | - | - | - |
| TCGGAGTAATGATTAACA       | 10.09 | Flower_2 | - | - | - |
| ATTTATGCGATGATTGTAGC     | 10.09 | Flower_2 | - | - | - |
| TACTCTCATGATCGAGAAGGGGCT | 10.09 | Flower_2 | - | - | - |
| ATCGGAAGCGGGCACCGCCCC    | 10.27 | Flower_2 | - | - | - |
| TCCCGAACCCGTCGGCTGTGCG   | 10.27 | Flower_2 | - | - | - |
| CCTTGGACGGAATTTACCGCC    | 10.27 | Flower_2 | - | - | - |

|                          |       |          |   |   |   |
|--------------------------|-------|----------|---|---|---|
| CGGTCTGTAGTCCAACGGTTAGG  | 10.09 | Flower_2 | - | - | - |
| TTCCAACCAGATACTATGGGC    | 10.63 | Flower_2 | - | - | - |
| CGGCCGTCGGTGCAGATCTTGG   | 10.27 | Flower_2 | - | - | - |
| TAAAGGTCCAAGGTTGAGGCT    | 10.09 | Flower_2 | - | - | - |
| CTACGCTTCTTAGAGGGACT     | 10.81 | Flower_2 | - | - | - |
| TTTGAGATTGATGTTATTGATA   | 10.27 | Flower_2 | - | - | - |
| AAAATCAGGCACCAACCCACC    | 10.09 | Flower_2 | - | - | - |
| AACGGTCGACTCAGAACT       | 10.09 | Flower_2 | - | - | - |
| ACTCCCGGTAGGACCTCCA      | 10.99 | Flower_2 | - | - | - |
| AACCGTCTAGTAGCTGGT       | 10.09 | Flower_2 | - | - | - |
| TCGCTCTAGCCCGGATTCTGA    | 10.09 | Flower_2 | - | - | - |
| AATTCTTGCCTCGCACGAGTTCTT | 10.09 | Flower_2 | - | - | - |
| ATTCCGAAGGTCTAAAGGATC    | 10.27 | Flower_2 | - | - | - |
| CGGGCGAGAGACCGATAGCAAAC  | 10.09 | Flower_2 | - | - | - |
| GGGTAGAATCCTTTGCAGA      | 10.81 | Flower_2 | - | - | - |
| TGCCTCGTGCACCTGCGCGCTC   | 10.09 | Flower_2 | - | - | - |
| TCGAACCGTCTAGTAGCT       | 10.09 | Flower_2 | - | - | - |
| GGCTCTGAGGGCTGGGCACGGGG  | 10.45 | Flower_2 | - | - | - |
| TGGCCTATCGATCCTTTAGAC    | 10.09 | Flower_2 | - | - | - |
| CAATACCGGGCTCATCGAGTCTG  | 10.09 | Flower_2 | - | - | - |
| AATTCTAACCTTGTGTCAGGACC  | 10.45 | Flower_2 | - | - | - |
| GAGTCGACGGGCCAGTAAACCC   | 10.09 | Flower_2 | - | - | - |
| TCTGAGGGCTGGGCACGGGGGT   | 10.27 | Flower_2 | - | - | - |
| ACCCGGATCCTAGCAACTGTGAGT | 10.09 | Flower_2 | - | - | - |
| CAGGATTCCCCTAGTAACGGC    | 10.63 | Flower_2 | - | - | - |
| CCGTCCAAGGCTAAATACG      | 10.09 | Flower_2 | - | - | - |
| ATCCGGAGGACCGAGTGCC      | 10.81 | Flower_2 | - | - | - |
| CATTTTAGGCTTTATGAACACC   | 10.09 | Flower_2 | - | - | - |
| GCCCTATGTCGCTCCGATTCTG   | 11.89 | Flower_2 | - | - | - |
| AGATGATGTGGCTCTGTGGCTA   | 10.09 | Flower_2 | - | - | - |
| CAGGCATCGCCTAGTAGCTCCT   | 10.27 | Flower_2 | - | - | - |

|                          |       |          |   |   |   |
|--------------------------|-------|----------|---|---|---|
| CTCTTTTGGACCCAAGGCT      | 10.09 | Flower_2 | - | - | - |
| AATATTCAAATGAGAACTTT     | 10.27 | Flower_2 | - | - | - |
| CGGCCTGCGAGCTCCCC        | 10.81 | Flower_2 | - | - | - |
| TCAAGCACAGAAGATGAGAAGAAC | 10.09 | Flower_2 | - | - | - |
| CAGCTTGAGAATCGATCGTCC    | 10.09 | Flower_2 | - | - | - |
| CGCGGGCGAGTTCTATCGGGT    | 10.81 | Flower_2 | - | - | - |
| GATGGTAGGATAGAGGCCT      | 10.63 | Flower_2 | - | - | - |
| CGAACCGGGACGTGGCGGCT     | 10.63 | Flower_2 | - | - | - |
| TCCACTGAACCTTATCATT      | 10.09 | Flower_2 | - | - | - |
| CACCCTGGAAACGGCTCAGCC    | 10.09 | Flower_2 | - | - | - |
| GCACGGGCTGGCGCACCCAC     | 10.09 | Flower_2 | - | - | - |
| GTGAATTGCAGAATCCCGTGA    | 10.45 | Flower_2 | - | - | - |
| CATCGGCCTGCGAGCTCCC      | 10.09 | Flower_2 | - | - | - |
| TACTGGAGAGAACCATT        | 13.69 | Flower_2 | - | - | - |
| TGGCTGTATCTTTCATCCACT    | 10.27 | Flower_2 | - | - | - |
| TTTTGGACCCAAGGCTCGTC     | 10.27 | Flower_2 | - | - | - |
| TTACAATACCCCGTCGCGTAT    | 10.09 | Flower_2 | - | - | - |
| ACTCAACCCCATGTGCAAT      | 10.09 | Flower_2 | - | - | - |
| GCCTGCGACGTGCGGAGA       | 10.63 | Flower_2 | - | - | - |
| ACGTGCACCGAACCCCGACTTC   | 10.81 | Flower_2 | - | - | - |
| AACAGACCGGTAGACTTGAACT   | 10.09 | Flower_2 | - | - | - |
| AATCTCAGTGGATCGTGGCAGC   | 10.27 | Flower_2 | - | - | - |
| ACTGGGAACGGCCCTCCGGGGG   | 10.09 | Flower_2 | - | - | - |
| GTGTTCGGATCGCGGCGACGGGG  | 10.09 | Flower_2 | - | - | - |
| GTCTCAGCGGCGGACCGGGCC    | 10.45 | Flower_2 | - | - | - |
| TTTTGGACCCAAGGCTCGT      | 10.45 | Flower_2 | - | - | - |
| TGGGAACGGCCCTCCGGGGG     | 10.09 | Flower_2 | - | - | - |
| TCCCGAACCCGTCGGCT        | 10.63 | Flower_2 | - | - | - |
| TTCCACAGCTTGAACTT        | 10.09 | Flower_2 | - | - | - |
| TGCTTAGTTGCCACCGTTGAGTT  | 10.81 | Flower_2 | - | - | - |
| CGATCGGCTCGAGGCGGGACC    | 10.27 | Flower_2 | - | - | - |

|                      |       |          |   |   |   |
|----------------------|-------|----------|---|---|---|
| TAGAATCCTTTGCAGAC    | 10.09 | Flower_2 | - | - | - |
| GCGACCCAGGTCAGGCGGG  | 15.14 | Flower_2 | - | - | - |
| TAACGGCCTGCCACCC     | 15.14 | Flower_2 | - | - | - |
| CCGAACCGGGACGTGGCGGC | 10.09 | Flower_2 | - | - | - |

### Leaf-specific sRNAs:

| sRNA sequence             | sRNA count (RPM) | sRNA HTS datasets |
|---------------------------|------------------|-------------------|
| ATCGGGTTTCGTAGGCTTGGTGCC  | 61.44            | Leaf_1            |
| CTATTTACGTTGTATGTAGCCT    | 49.75            | Leaf_1            |
| ATCCAAGAACATTCTTTGAACACT  | 43.74            | Leaf_1            |
| TATTTACGTTGTATGTAGCCT     | 27.21            | Leaf_1            |
| GTATTTTCGGATGTCGAAGCCT    | 25.04            | Leaf_1            |
| AACACTGTGACCAATTATTAAT    | 17.2             | Leaf_1            |
| CGCACTGAGAGGAGTTGGCATC    | 16.36            | Leaf_1            |
| AGGACAACGTCTTTCTTTGGCACC  | 15.53            | Leaf_1            |
| AATGACATCAGGGACCATCTGA    | 13.02            | Leaf_1            |
| TGATTGTGGAGGGTGGCACTCGATT | 12.35            | Leaf_1            |
| AAAAGAGTTAGACTGCCT        | 12.02            | Leaf_1            |
| TTCGAGACAGATGACATGCATC    | 10.18            | Leaf_1            |
| ACCGAGACAACAGGTAGAGAACT   | 10.02            | Leaf_1            |
| CGGGTAGGATATCTGGCT        | 26.48            | Leaf_2            |
| CGATAGTAGTACTGGGA         | 25.08            | Leaf_2            |
| GCTTTAGTTTAGTGGTTAGAATCC  | 13.73            | Leaf_2            |
| AAGGGGAACATAAAATAGCCT     | 14.29            | Leaf_2            |
| GCTTTAGTTTAGTGGTTAGAAT    | 12.61            | Leaf_2            |
| GTAGTTTAGTGGTAAGAAT       | 11.63            | Leaf_2            |
| AGGTATGTAGCGCAGTTTGGTAGC  | 10.79            | Leaf_2            |
| GGTGAGGATATCTGGCT         | 10.09            | Leaf_2            |

### Root-specific sRNAs:

| sRNA sequence             | sRNA count (RPM) | sRNA HTS datasets |
|---------------------------|------------------|-------------------|
| TAAAAGCGCAGGGAATTCGGAC    | 12.08            | Root_1            |
| CTTCTACAGTCCGACGATCCGGGGC | 11.71            | Root_2            |

**Stem-specific sRNAs:**

| sRNA sequence            | Srna count (RPM) | sRNA HTS datasets |
|--------------------------|------------------|-------------------|
| TACTAACTTGGCATTGGTGAGAGC | 27.23            | Stem_1            |
| GAAAATCGAGAAGACTGTCCT    | 18.19            | Stem_1            |
| CCACGGACGAACTATTAAGGCGCC | 17.72            | Stem_1            |
| GTTTGTGATGACTTACA        | 16.88            | Stem_1            |
| TGTGACGGAGGAACITTCATG    | 14.92            | Stem_1            |
| TCGGCAAGGCTGAAACTTAA     | 17.81            | Stem_1            |
| GGGAGAAGGATTGGCTCTGAGGGT | 13.71            | Stem_1            |
| TGTACGACAGTCTTTGGACC     | 14.18            | Stem_1            |
| GACCACGACTCTCGGCAA       | 17.44            | Stem_1            |
| AACTTGTGACGCGAATTTGTGCC  | 12.31            | Stem_1            |
| TTGTCTAAGAAATGGTAGATGCCT | 11.75            | Stem_1            |
| TCGTACCGAGACTACAGGCCT    | 11.75            | Stem_1            |
| AAATGGGTTATCTCTGAAAAGCCT | 11.66            | Stem_1            |
| ATTTAATTCAGTAGATCTAGCCT  | 10.07            | Stem_1            |
| TGACACGGACTCTCGGCAA      | 14.27            | Stem_1            |
| TTCGTAGGCTCATAAAGTGCT    | 33.49            | Stem_2            |
| TTGGGACTGAAGGGAGCTCCCT   | 17.22            | Stem_2            |
| TAAACCTGTAGAAATAGCAAT    | 14.4             | Stem_2            |
| TGACTAGAGACACAATGTATTCAT | 14.4             | Stem_2            |
| TGTACGACAGTCTTTGGACC     | 14.29            | Stem_2            |
| TTGTCTAAGAAATGGTAGATGCCT | 11.58            | Stem_2            |
| TGAAGAGATAAGGTCGTCCACC   | 12.1             | Stem_2            |
| TAGTTATGCTCGGTATTGCT     | 10.02            | Stem_2            |
| CCGAGGCCATTGATATAATCTG   | 10.02            | Stem_2            |

**Table S5** List of 1,047 miRNA candidates identified from *Dendrobium officinale*. The miRNA candidates from *Dendrobium officinale* along with the homologous miRNAs from other species sharing identical sequences according to miRBase (release 21) are provided. The accumulation levels of the miRNA candidates in the sRNA-seq libraries prepared from four organs are also included in this table. For each organ, there are two biological replicates (“Root1” and “Root2”, for example).

| miRNA ID  | Homologous miRNA ID | Species            | sRNA_sequence           | Root1 | Root2 | Flower1 | Flower2 | Stem1 | Stem2 | Leaf1 | Leaf2 |
|-----------|---------------------|--------------------|-------------------------|-------|-------|---------|---------|-------|-------|-------|-------|
| dof-miR-1 | hsa-miR-320a        | Homo sapiens       | AAAAGCTGGGTTGAGAGGGCGA  | 0     | 0     | 0       | 0.36    | 2.7   | 0.63  | 0     | 0     |
|           | mmu-miR-320-3p      | Mus musculus       |                         | 0     | 0     | 0       | 0.36    | 2.7   | 0.63  | 0     | 0     |
|           | rno-miR-320-3p      | Rattus norvegicus  |                         | 0     | 0     | 0       | 0.36    | 2.7   | 0.63  | 0     | 0     |
|           | bta-miR-320a        | Bos taurus         |                         | 0     | 0     | 0       | 0.36    | 2.7   | 0.63  | 0     | 0     |
|           | chi-miR-320-3p      | Capra hircus       |                         | 0     | 0     | 0       | 0.36    | 2.7   | 0.63  | 0     | 0     |
|           | cgr-miR-320a        | Cricetulus griseus |                         | 0     | 0     | 0       | 0.36    | 2.7   | 0.63  | 0     | 0     |
|           | ggo-miR-320a        | Gorilla gorilla    |                         | 0     | 0     | 0       | 0.36    | 2.7   | 0.63  | 0     | 0     |
|           | ppy-miR-320a        | Pongo pygmaeus     |                         | 0     | 0     | 0       | 0.36    | 2.7   | 0.63  | 0     | 0     |
|           | mml-miR-320a        | Macaca mulatta     |                         | 0     | 0     | 0       | 0.36    | 2.7   | 0.63  | 0     | 0     |
|           | cfa-miR-320         | Canis familiaris   |                         | 0     | 0     | 0       | 0.36    | 2.7   | 0.63  | 0     | 0     |
|           | ptr-miR-320a        | Pan troglodytes    |                         | 0     | 0     | 0       | 0.36    | 2.7   | 0.63  | 0     | 0     |
| dof-miR-2 | ssc-miR-320         | Sus scrofa         | AAAAGCTGGGTTGAGAGGGCGAA | 0     | 0     | 0.37    | 0.36    | 0.37  | 0.21  | 0     | 0     |
| dof-miR-3 | hsa-miR-548k        | Homo sapiens       | AAAAGTACTTGCGGATTTTGCT  | 0     | 0     | 0       | 0       | 0.19  | 0     | 0     | 0     |
|           | ptr-miR-548k        | Pan troglodytes    |                         | 0     | 0     | 0       | 0       | 0.19  | 0     | 0     | 0     |
| dof-miR-4 | dre-miR-93          | Danio rerio        | AAAAGTGCTGTTTGTGCAGGTA  | 0     | 0     | 0.37    | 0.18    | 0     | 0     | 0     | 0     |
| dof-miR-5 | ssa-miR-93a-5p      | Salmo salar        | AAAAGTGCTGTTTGTGCAGGTAG | 0     | 0     | 0.18    | 0.36    | 0     | 0     | 0.17  | 0     |
|           | ccr-miR-93          | Cyprinus carpio    |                         | 0     | 0     | 0.18    | 0.36    | 0     | 0     | 0.17  | 0     |
| dof-miR-6 | hsa-miR-495-3p      | Homo sapiens       | AAACAAACATGGTGCACTTCTT  | 0.2   | 0     | 0       | 0.18    | 0     | 0     | 0.17  | 0     |
|           | mmu-miR-495-3p      | Mus musculus       |                         | 0.2   | 0     | 0       | 0.18    | 0     | 0     | 0.17  | 0     |
|           | rno-miR-495         | Rattus norvegicus  |                         | 0.2   | 0     | 0       | 0.18    | 0     | 0     | 0.17  | 0     |
|           | chi-miR-495-3p      | Capra hircus       |                         | 0.2   | 0     | 0       | 0.18    | 0     | 0     | 0.17  | 0     |
|           | oar-miR-495-3p      | Ovis aries         |                         | 0.2   | 0     | 0       | 0.18    | 0     | 0     | 0.17  | 0     |
|           | ppy-miR-495         | Pongo pygmaeus     |                         | 0.2   | 0     | 0       | 0.18    | 0     | 0     | 0.17  | 0     |
|           | eca-miR-495         | Equus caballus     |                         | 0.2   | 0     | 0       | 0.18    | 0     | 0     | 0.17  | 0     |
|           | mml-miR-495-3p      | Macaca mulatta     |                         | 0.2   | 0     | 0       | 0.18    | 0     | 0     | 0.17  | 0     |
|           | cfa-miR-495         | Canis familiaris   |                         | 0.2   | 0     | 0       | 0.18    | 0     | 0     | 0.17  | 0     |
|           | ptr-miR-495         | Pan troglodytes    |                         | 0.2   | 0     | 0       | 0.18    | 0     | 0     | 0.17  | 0     |
|           | bta-miR-495         | Bos taurus         |                         | 0.2   | 0     | 0       | 0.18    | 0     | 0     | 0.17  | 0     |



|             |                  |                          |                         |      |       |      |      |      |      |      |      |
|-------------|------------------|--------------------------|-------------------------|------|-------|------|------|------|------|------|------|
| dof-miR-7   | efu-miR-495      | Eptesicus fuscus         | AAACAAACATGGTGCACCTCTTT | 0    | 0     | 0    | 0.36 | 0    | 0    | 0    | 0    |
| dof-miR-8   | rno-miR-322-3p   | Rattus norvegicus        | AAACATGAAGCGCTGCAACA    | 0    | 0     | 0    | 0    | 0.09 | 0    | 0    | 0    |
| dof-miR-9   | rno-miR-543-3p   | Rattus norvegicus        | AAACATTCGCGGTGCACCTCT   | 0    | 0     | 0    | 0.18 | 0    | 0    | 0    | 0    |
|             | chi-miR-543-3p   | Capra hircus             |                         | 0    | 0     | 0    | 0.18 | 0    | 0    | 0    | 0    |
|             | ggo-miR-543      | Gorilla gorilla          |                         | 0    | 0     | 0    | 0.18 | 0    | 0    | 0    | 0    |
| dof-miR-10  | oar-miR-543-3p   | Ovis aries               | AAACATTCGCGGTGCACCTCTTT | 0    | 0     | 0.18 | 0    | 0.09 | 0    | 0    | 0    |
| dof-miR-11  | chi-miR-451-5p   | Capra hircus             | AAACCGTTACCATTACTGA     | 0.79 | 2.04  | 0    | 0    | 0.65 | 0.42 | 0    | 0.84 |
| dof-miR-12  | hsa-miR-451a     | Homo sapiens             | AAACCGTTACCATTACTGAGTT  | 2.18 | 11.2  | 0    | 0.18 | 5.5  | 2.3  | 3.34 | 4.06 |
|             | mmu-miR-451a     | Mus musculus             |                         | 2.18 | 11.2  | 0    | 0.18 | 5.5  | 2.3  | 3.34 | 4.06 |
|             | rno-miR-451-5p   | Rattus norvegicus        |                         | 2.18 | 11.2  | 0    | 0.18 | 5.5  | 2.3  | 3.34 | 4.06 |
|             | dre-miR-451      | Danio rerio              |                         | 2.18 | 11.2  | 0    | 0.18 | 5.5  | 2.3  | 3.34 | 4.06 |
|             | xtr-miR-451      | Xenopus tropicalis       |                         | 2.18 | 11.2  | 0    | 0.18 | 5.5  | 2.3  | 3.34 | 4.06 |
|             | aca-miR-451-5p   | Anolis carolinensis      |                         | 2.18 | 11.2  | 0    | 0.18 | 5.5  | 2.3  | 3.34 | 4.06 |
|             | ppy-miR-451      | Pongo pygmaeus           |                         | 2.18 | 11.2  | 0    | 0.18 | 5.5  | 2.3  | 3.34 | 4.06 |
|             | ssc-miR-451      | Sus scrofa               |                         | 2.18 | 11.2  | 0    | 0.18 | 5.5  | 2.3  | 3.34 | 4.06 |
|             | mml-miR-451      | Macaca mulatta           |                         | 2.18 | 11.2  | 0    | 0.18 | 5.5  | 2.3  | 3.34 | 4.06 |
|             | ptr-miR-451      | Pan troglodytes          |                         | 2.18 | 11.2  | 0    | 0.18 | 5.5  | 2.3  | 3.34 | 4.06 |
| cfa-miR-451 | Canis familiaris | 2.18                     | 11.2                    | 0    | 0.18  | 5.5  | 2.3  | 3.34 | 4.06 |      |      |
| dof-miR-13  | gga-miR-451      | Gallus gallus            | AAACCGTTACCATTACTGAGTTT | 2.97 | 21.13 | 0.18 | 0    | 1.49 | 0.83 | 6.68 | 8.27 |
|             | oan-miR-451      | Ornithorhynchus anatinus |                         | 2.97 | 21.13 | 0.18 | 0    | 1.49 | 0.83 | 6.68 | 8.27 |
|             | oha-miR-451-??   | Ophiophagus hannah       |                         | 2.97 | 21.13 | 0.18 | 0    | 1.49 | 0.83 | 6.68 | 8.27 |
|             | tgu-miR-451      | Taeniopygia guttata      |                         | 2.97 | 21.13 | 0.18 | 0    | 1.49 | 0.83 | 6.68 | 8.27 |
|             | bta-miR-451      | Bos taurus               |                         | 2.97 | 21.13 | 0.18 | 0    | 1.49 | 0.83 | 6.68 | 8.27 |
| dof-miR-14  | rgl-miR5139      | Rehmannia glutinosa      | AAACCTGGCTCTGATACCA     | 8.52 | 4.07  | 13.6 | 5.77 | 5.69 | 2.3  | 2.17 | 9.81 |
| dof-miR-15  | cfa-miR-106a     | Canis familiaris         | AAAGTGCTTACAGTGCAGGTAG  | 0    | 0     | 0    | 0    | 0    | 0.1  | 0    | 0    |
| dof-miR-16  | hsa-miR-148a-5p  | Homo sapiens             | AAAGTTCTGAGACACTCCGACT  | 0    | 0     | 0    | 0    | 0.09 | 0    | 0    | 0    |
|             | mmu-miR-148a-5p  | Mus musculus             |                         | 0    | 0     | 0    | 0    | 0.09 | 0    | 0    | 0    |
|             | ssc-miR-148a-5p  | Sus scrofa               |                         | 0    | 0     | 0    | 0    | 0.09 | 0    | 0    | 0    |
|             | chi-miR-148a-5p  | Capra hircus             |                         | 0    | 0     | 0    | 0    | 0.09 | 0    | 0    | 0    |
|             | mml-miR-148a-5p  | Macaca mulatta           |                         | 0    | 0     | 0    | 0    | 0.09 | 0    | 0    | 0    |
| dof-miR-17  | fru-miR-216a     | Fugu rubripes            | AAATCTCAGCTGGCAACTGTGA  | 0.4  | 0     | 0    | 0    | 0    | 0    | 0.33 | 0.28 |
|             | tni-miR-216a     | Tetraodon nigroviridis   |                         | 0.4  | 0     | 0    | 0    | 0    | 0    | 0.33 | 0.28 |
| dof-miR-18  | mmu-miR-216b-5p  | Mus musculus             | AAATCTCTGCAGGCAAATGTGA  | 0    | 0     | 0.18 | 0    | 0    | 0    | 0    | 0    |
|             | hsa-miR-216b-5p  | Homo sapiens             |                         | 0    | 0     | 0.18 | 0    | 0    | 0    | 0    | 0    |

|            |                 |                     |                         |   |   |      |   |      |     |      |      |      |
|------------|-----------------|---------------------|-------------------------|---|---|------|---|------|-----|------|------|------|
|            | aca-miR-216b-5p | Anolis carolinensis |                         | 0 | 0 | 0.18 | 0 | 0    | 0   | 0    | 0    |      |
|            | ppy-miR-216b    | Pongo pygmaeus      |                         | 0 | 0 | 0.18 | 0 | 0    | 0   | 0    | 0    |      |
|            | rno-miR-216b-5p | Rattus norvegicus   |                         | 0 | 0 | 0.18 | 0 | 0    | 0   | 0    | 0    |      |
|            | eca-miR-216b    | Equus caballus      |                         | 0 | 0 | 0.18 | 0 | 0    | 0   | 0    | 0    |      |
|            | mml-miR-216b    | Macaca mulatta      |                         | 0 | 0 | 0.18 | 0 | 0    | 0   | 0    | 0    |      |
|            | cfa-miR-216b    | Canis familiaris    |                         | 0 | 0 | 0.18 | 0 | 0    | 0   | 0    | 0    |      |
|            | gga-miR-216b    | Gallus gallus       |                         | 0 | 0 | 0.18 | 0 | 0    | 0   | 0    | 0    |      |
|            | ptr-miR-216b    | Pan troglodytes     |                         | 0 | 0 | 0.18 | 0 | 0    | 0   | 0    | 0    |      |
|            | bta-miR-216b    | Bos taurus          |                         | 0 | 0 | 0.18 | 0 | 0    | 0   | 0    | 0    |      |
| dof-miR-19 | chi-miR-338-5p  | Capra hircus        | AACAATATCCTGGTGCTGAGT   | 0 | 0 | 0    | 0 | 0    | 0.1 | 0    | 0    |      |
| dof-miR-20 | bta-miR-21-3p   | Bos taurus          | AACAGCAGTCGATGGGCTGTCT  | 0 | 0 | 0    | 0 | 0    | 0   | 0.17 | 0    |      |
| dof-miR-21 | dre-miR-2184    | Danio rerio         | AACAGTAAGAGTTTATGTGCT   | 0 | 0 | 0    | 0 | 0    | 0   | 0.17 | 0    |      |
| dof-miR-22 | hsa-miR-376c-3p | Homo sapiens        | AACATAGAGGAAATTCACGT    | 0 | 0 | 0    | 0 | 0    | 0   | 0    | 0.14 |      |
|            | chi-miR-376c-3p | Capra hircus        |                         | 0 | 0 | 0    | 0 | 0    | 0   | 0    | 0    | 0.14 |
|            | tch-miR-376c-3p | Tupaia chinensis    |                         | 0 | 0 | 0    | 0 | 0    | 0   | 0    | 0    | 0.14 |
|            | oar-miR-376c-3p | Ovis aries          |                         | 0 | 0 | 0    | 0 | 0    | 0   | 0    | 0    | 0.14 |
|            | ppy-miR-376c    | Pongo pygmaeus      |                         | 0 | 0 | 0    | 0 | 0    | 0   | 0    | 0    | 0.14 |
|            | eca-miR-376c    | Equus caballus      |                         | 0 | 0 | 0    | 0 | 0    | 0   | 0    | 0    | 0.14 |
|            | mml-miR-376c-3p | Macaca mulatta      |                         | 0 | 0 | 0    | 0 | 0    | 0   | 0    | 0    | 0.14 |
|            | ptr-miR-376c    | Pan troglodytes     |                         | 0 | 0 | 0    | 0 | 0    | 0   | 0    | 0    | 0.14 |
| dof-miR-23 | chi-miR-181c-5p | Capra hircus        | AACATTCAACCTGTCGGTGAG   | 0 | 0 | 0    | 0 | 0.09 | 0   | 0    | 0    |      |
| dof-miR-24 | hsa-miR-181c-5p | Homo sapiens        | AACATTCAACCTGTCGGTGAGT  | 0 | 0 | 0    | 0 | 0.19 | 0   | 0    | 0    |      |
|            | mmu-miR-181c-5p | Mus musculus        |                         | 0 | 0 | 0    | 0 | 0.19 | 0   | 0    | 0    |      |
|            | rno-miR-181c-5p | Rattus norvegicus   |                         | 0 | 0 | 0    | 0 | 0.19 | 0   | 0    | 0    |      |
|            | ssc-miR-181c    | Sus scrofa          |                         | 0 | 0 | 0    | 0 | 0.19 | 0   | 0    | 0    |      |
|            | mml-miR-181c-5p | Macaca mulatta      |                         | 0 | 0 | 0    | 0 | 0.19 | 0   | 0    | 0    |      |
|            | ptr-miR-181c    | Pan troglodytes     |                         | 0 | 0 | 0    | 0 | 0.19 | 0   | 0    | 0    |      |
|            | ggo-miR-181c    | Gorilla gorilla     |                         | 0 | 0 | 0    | 0 | 0.19 | 0   | 0    | 0    |      |
|            | ppa-miR-181c    | Pan paniscus        |                         | 0 | 0 | 0    | 0 | 0.19 | 0   | 0    | 0    |      |
|            | tch-miR-181c-5p | Tupaia chinensis    |                         | 0 | 0 | 0    | 0 | 0.19 | 0   | 0    | 0    |      |
|            | cgr-miR-181c-5p | Cricetulus griseus  |                         | 0 | 0 | 0    | 0 | 0.19 | 0   | 0    | 0    |      |
|            | ppy-miR-181c    | Pongo pygmaeus      |                         | 0 | 0 | 0    | 0 | 0.19 | 0   | 0    | 0    |      |
| dof-miR-25 | cfa-miR-181c    | Canis familiaris    | AACATTCAACCTGTCGGTGAGTT | 0 | 0 | 0.18 | 0 | 0.56 | 0   | 0    | 0    |      |
| dof-miR-26 | ola-miR-181a-5p | Oryzias latipes     | AACATTCAACGCTGTCGGT     | 0 | 0 | 0.18 | 0 | 0    | 0   | 0    | 0    |      |



|                 |                     |                           |                           |      |      |      |      |      |      |      |      |
|-----------------|---------------------|---------------------------|---------------------------|------|------|------|------|------|------|------|------|
| dof-miR-32      | oan-miR-181b-5p     | Ornithorhynchus anatinus  | AACATTCATTGCTGTCGGTGG     | 0    | 0    | 0    | 0.18 | 0    | 0    | 0    | 0    |
|                 | ccr-miR-181b        | Cyprinus carpio           |                           | 0    | 0    | 0    | 0.18 | 0    | 0    | 0    | 0    |
|                 | cgr-miR-181b-5p     | Cricetulus griseus        |                           | 0    | 0    | 0    | 0.18 | 0    | 0    | 0    | 0    |
| dof-miR-33      | gga-miR-181b-5p     | Gallus gallus             | AACATTCATTGCTGTCGGTGGG    | 0.2  | 0.25 | 0    | 0    | 0.09 | 0    | 0.17 | 0    |
|                 | dre-miR-181b-5p     | Danio rerio               |                           | 0.2  | 0.25 | 0    | 0    | 0.09 | 0    | 0.17 | 0    |
|                 | fru-miR-181b        | Fugu rubripes             |                           | 0.2  | 0.25 | 0    | 0    | 0.09 | 0    | 0.17 | 0    |
|                 | tmi-miR-181b        | Tetraodon nigroviridis    |                           | 0.2  | 0.25 | 0    | 0    | 0.09 | 0    | 0.17 | 0    |
|                 | xtr-miR-181b        | Xenopus tropicalis        |                           | 0.2  | 0.25 | 0    | 0    | 0.09 | 0    | 0.17 | 0    |
|                 | ssa-miR-181c-5p     | Salmo salar               |                           | 0.2  | 0.25 | 0    | 0    | 0.09 | 0    | 0.17 | 0    |
|                 | ipu-miR-181b        | Ictalurus punctatus       |                           | 0.2  | 0.25 | 0    | 0    | 0.09 | 0    | 0.17 | 0    |
| aca-miR-181b    | Anolis carolinensis | 0.2                       | 0.25                      | 0    | 0    | 0.09 | 0    | 0.17 | 0    |      |      |
| dof-miR-34      | hsa-miR-181b-5p     | Homo sapiens              | AACATTCATTGCTGTCGGTGGGT   | 0    | 0.25 | 0.18 | 1.44 | 0.28 | 0    | 0.5  | 0    |
|                 | mmu-miR-181b-5p     | Mus musculus              |                           | 0    | 0.25 | 0.18 | 1.44 | 0.28 | 0    | 0.5  | 0    |
|                 | rno-miR-181b-5p     | Rattus norvegicus         |                           | 0    | 0.25 | 0.18 | 1.44 | 0.28 | 0    | 0.5  | 0    |
|                 | ptr-miR-181b        | Pan troglodytes           |                           | 0    | 0.25 | 0.18 | 1.44 | 0.28 | 0    | 0.5  | 0    |
|                 | ppy-miR-181b        | Pongo pygmaeus            |                           | 0    | 0.25 | 0.18 | 1.44 | 0.28 | 0    | 0.5  | 0    |
|                 | mdo-miR-181b-5p     | Monodelphis domestica     |                           | 0    | 0.25 | 0.18 | 1.44 | 0.28 | 0    | 0.5  | 0    |
|                 | chi-miR-181b-5p     | Capra hircus              |                           | 0    | 0.25 | 0.18 | 1.44 | 0.28 | 0    | 0.5  | 0    |
|                 | tch-miR-181b-5p     | Tupaia chinensis          |                           | 0    | 0.25 | 0.18 | 1.44 | 0.28 | 0    | 0.5  | 0    |
|                 | oha-miR-181b-5p     | Ophiophagus hannah        |                           | 0    | 0.25 | 0.18 | 1.44 | 0.28 | 0    | 0.5  | 0    |
| eca-miR-181b    | Equus caballus      | 0                         | 0.25                      | 0.18 | 1.44 | 0.28 | 0    | 0.5  | 0    |      |      |
| dof-miR-35      | ssc-miR-181b        | Sus scrofa                | AACATTCATTGCTGTCGGTGGGTT  | 0    | 0    | 0.18 | 0.72 | 0.28 | 0.1  | 0.33 | 0.14 |
|                 | mml-miR-181b-5p     | Macaca mulatta            |                           | 0    | 0    | 0.18 | 0.72 | 0.28 | 0.1  | 0.33 | 0.14 |
|                 | ggo-miR-181b        | Gorilla gorilla           |                           | 0    | 0    | 0.18 | 0.72 | 0.28 | 0.1  | 0.33 | 0.14 |
|                 | lla-miR-181b        | Lagothrix lagotricha      |                           | 0    | 0    | 0.18 | 0.72 | 0.28 | 0.1  | 0.33 | 0.14 |
|                 | mne-miR-181b        | Macaca nemestrina         |                           | 0    | 0    | 0.18 | 0.72 | 0.28 | 0.1  | 0.33 | 0.14 |
|                 | ppa-miR-181b        | Pan paniscus              |                           | 0    | 0    | 0.18 | 0.72 | 0.28 | 0.1  | 0.33 | 0.14 |
|                 | bta-miR-181b        | Bos taurus                |                           | 0    | 0    | 0.18 | 0.72 | 0.28 | 0.1  | 0.33 | 0.14 |
|                 | hhi-miR-181b        | Hippoglossus hippoglossus |                           | 0    | 0    | 0.18 | 0.72 | 0.28 | 0.1  | 0.33 | 0.14 |
|                 | ola-miR-181b-5p     | Oryzias latipes           |                           | 0    | 0    | 0.18 | 0.72 | 0.28 | 0.1  | 0.33 | 0.14 |
| tgu-miR-181b-5p | Taeniopygia guttata | 0                         | 0                         | 0.18 | 0.72 | 0.28 | 0.1  | 0.33 | 0.14 |      |      |
| dof-miR-36      | efu-miR-181e        | Eptesicus fuscus          | AACATTCATTGCTGTCGGTGGGTTT | 0    | 0.25 | 0    | 0    | 0.09 | 0    | 0    | 0    |
| dof-miR-37      | lva-miR-2003-5p     | Lytechinus variegatus     | AACCCGTAAGGTCTTAACCTTGT   | 0    | 0    | 0    | 0    | 0    | 0    | 0.17 | 0    |
| dof-miR-38      | mdo-miR-100-5p      | Monodelphis domestica     | AACCCGTAGATCCGAACCTTGT    | 2.77 | 5.09 | 4.41 | 9.73 | 3.17 | 4.07 | 6.68 | 1.82 |

|            |                 |                          |                        |      |      |      |       |       |       |      |      |
|------------|-----------------|--------------------------|------------------------|------|------|------|-------|-------|-------|------|------|
|            | chi-miR-100-5p  | Capra hircus             |                        | 2.77 | 5.09 | 4.41 | 9.73  | 3.17  | 4.07  | 6.68 | 1.82 |
|            | pmi-miR-100-5p  | Patiria miniata          |                        | 2.77 | 5.09 | 4.41 | 9.73  | 3.17  | 4.07  | 6.68 | 1.82 |
|            | ccr-miR-100     | Cyprinus carpio          |                        | 2.77 | 5.09 | 4.41 | 9.73  | 3.17  | 4.07  | 6.68 | 1.82 |
|            | sha-miR-100     | Sarcophilus harrisii     |                        | 2.77 | 5.09 | 4.41 | 9.73  | 3.17  | 4.07  | 6.68 | 1.82 |
|            | cgr-miR-100-5p  | Cricetulus griseus       |                        | 2.77 | 5.09 | 4.41 | 9.73  | 3.17  | 4.07  | 6.68 | 1.82 |
|            | tgu-miR-100-5p  | Taeniopygia guttata      |                        | 2.77 | 5.09 | 4.41 | 9.73  | 3.17  | 4.07  | 6.68 | 1.82 |
| dof-miR-39 | hsa-miR-100-5p  | Homo sapiens             | AACCCGTAGATCCGAACITGTG | 5.15 | 4.58 | 7.53 | 10.99 | 14.55 | 24.21 | 9.85 | 2.38 |
|            | mmu-miR-100-5p  | Mus musculus             |                        | 5.15 | 4.58 | 7.53 | 10.99 | 14.55 | 24.21 | 9.85 | 2.38 |
|            | rno-miR-100-5p  | Rattus norvegicus        |                        | 5.15 | 4.58 | 7.53 | 10.99 | 14.55 | 24.21 | 9.85 | 2.38 |
|            | gga-miR-100-5p  | Gallus gallus            |                        | 5.15 | 4.58 | 7.53 | 10.99 | 14.55 | 24.21 | 9.85 | 2.38 |
|            | aga-miR-100     | Anopheles gambiae        |                        | 5.15 | 4.58 | 7.53 | 10.99 | 14.55 | 24.21 | 9.85 | 2.38 |
|            | dre-miR-100-5p  | Danio rerio              |                        | 5.15 | 4.58 | 7.53 | 10.99 | 14.55 | 24.21 | 9.85 | 2.38 |
|            | ggo-miR-100     | Gorilla gorilla          |                        | 5.15 | 4.58 | 7.53 | 10.99 | 14.55 | 24.21 | 9.85 | 2.38 |
|            | age-miR-100     | Ateles geoffroyi         |                        | 5.15 | 4.58 | 7.53 | 10.99 | 14.55 | 24.21 | 9.85 | 2.38 |
|            | ppa-miR-100     | Pan paniscus             |                        | 5.15 | 4.58 | 7.53 | 10.99 | 14.55 | 24.21 | 9.85 | 2.38 |
|            | ppy-miR-100     | Pongo pygmaeus           |                        | 5.15 | 4.58 | 7.53 | 10.99 | 14.55 | 24.21 | 9.85 | 2.38 |
|            | ptr-miR-100     | Pan troglodytes          |                        | 5.15 | 4.58 | 7.53 | 10.99 | 14.55 | 24.21 | 9.85 | 2.38 |
|            | mml-miR-100-5p  | Macaca mulatta           |                        | 5.15 | 4.58 | 7.53 | 10.99 | 14.55 | 24.21 | 9.85 | 2.38 |
|            | sla-miR-100     | Saguinus labiatus        |                        | 5.15 | 4.58 | 7.53 | 10.99 | 14.55 | 24.21 | 9.85 | 2.38 |
|            | lla-miR-100     | Lagothrix lagotricha     |                        | 5.15 | 4.58 | 7.53 | 10.99 | 14.55 | 24.21 | 9.85 | 2.38 |
|            | fru-miR-100     | Fugu rubripes            |                        | 5.15 | 4.58 | 7.53 | 10.99 | 14.55 | 24.21 | 9.85 | 2.38 |
|            | tmi-miR-100     | Tetraodon nigroviridis   |                        | 5.15 | 4.58 | 7.53 | 10.99 | 14.55 | 24.21 | 9.85 | 2.38 |
|            | xtr-miR-100     | Xenopus tropicalis       |                        | 5.15 | 4.58 | 7.53 | 10.99 | 14.55 | 24.21 | 9.85 | 2.38 |
|            | ame-miR-100     | Apis mellifera           |                        | 5.15 | 4.58 | 7.53 | 10.99 | 14.55 | 24.21 | 9.85 | 2.38 |
|            | oan-miR-100-5p  | Ornithorhynchus anatinus |                        | 5.15 | 4.58 | 7.53 | 10.99 | 14.55 | 24.21 | 9.85 | 2.38 |
|            | tch-miR-100-5p  | Tupaia chinensis         |                        | 5.15 | 4.58 | 7.53 | 10.99 | 14.55 | 24.21 | 9.85 | 2.38 |
|            | bbe-miR-100-5p  | Branchiostoma belcheri   |                        | 5.15 | 4.58 | 7.53 | 10.99 | 14.55 | 24.21 | 9.85 | 2.38 |
|            | ssa-miR-100a-5p | Salmo salar              |                        | 5.15 | 4.58 | 7.53 | 10.99 | 14.55 | 24.21 | 9.85 | 2.38 |
|            | ipu-miR-100     | Ictalurus punctatus      |                        | 5.15 | 4.58 | 7.53 | 10.99 | 14.55 | 24.21 | 9.85 | 2.38 |
|            | mse-miR-100     | Manduca sexta            |                        | 5.15 | 4.58 | 7.53 | 10.99 | 14.55 | 24.21 | 9.85 | 2.38 |
|            | pma-miR-100a-5p | Petromyzon marinus       |                        | 5.15 | 4.58 | 7.53 | 10.99 | 14.55 | 24.21 | 9.85 | 2.38 |
|            | aca-miR-100     | Anolis carolinensis      |                        | 5.15 | 4.58 | 7.53 | 10.99 | 14.55 | 24.21 | 9.85 | 2.38 |
|            | nvi-miR-100     | Nasonia vitripennis      |                        | 5.15 | 4.58 | 7.53 | 10.99 | 14.55 | 24.21 | 9.85 | 2.38 |
|            | bmo-miR-100     | Bombyx mori              |                        | 5.15 | 4.58 | 7.53 | 10.99 | 14.55 | 24.21 | 9.85 | 2.38 |

|            |                 |                          |                           |      |      |       |       |       |       |      |      |
|------------|-----------------|--------------------------|---------------------------|------|------|-------|-------|-------|-------|------|------|
|            | eca-miR-100     | Equus caballus           |                           | 5.15 | 4.58 | 7.53  | 10.99 | 14.55 | 24.21 | 9.85 | 2.38 |
|            | ssc-miR-100     | Sus scrofa               |                           | 5.15 | 4.58 | 7.53  | 10.99 | 14.55 | 24.21 | 9.85 | 2.38 |
|            | bma-miR-100b    | Brugia malayi            |                           | 5.15 | 4.58 | 7.53  | 10.99 | 14.55 | 24.21 | 9.85 | 2.38 |
|            | aae-miR-100     | Aedes aegypti            |                           | 5.15 | 4.58 | 7.53  | 10.99 | 14.55 | 24.21 | 9.85 | 2.38 |
|            | cqu-miR-100-5p  | Culex quinquefasciatus   |                           | 5.15 | 4.58 | 7.53  | 10.99 | 14.55 | 24.21 | 9.85 | 2.38 |
|            | bta-miR-100     | Bos taurus               |                           | 5.15 | 4.58 | 7.53  | 10.99 | 14.55 | 24.21 | 9.85 | 2.38 |
|            | lgi-miR-100     | Lottia gigantea          |                           | 5.15 | 4.58 | 7.53  | 10.99 | 14.55 | 24.21 | 9.85 | 2.38 |
|            | sko-miR-100     | Saccoglossus kowalevskii |                           | 5.15 | 4.58 | 7.53  | 10.99 | 14.55 | 24.21 | 9.85 | 2.38 |
| dof-miR-40 | isc-miR-100     | Ixodes scapularis        | AACCCGTAGATCCGAACCTTGTGT  | 0    | 0.51 | 1.65  | 3.6   | 0.75  | 1.88  | 1.5  | 0.42 |
|            | bfl-miR-100-5p  | Branchiostoma floridae   |                           | 0    | 0.51 | 1.65  | 3.6   | 0.75  | 1.88  | 1.5  | 0.42 |
|            | dpu-miR-100     | Daphnia pulex            |                           | 0    | 0.51 | 1.65  | 3.6   | 0.75  | 1.88  | 1.5  | 0.42 |
| dof-miR-41 | prd-miR-100-5p  | Panagrellus redivivus    | AACCCGTAGATCCGAACCTTGTGTT | 0    | 0    | 0.18  | 0     | 0     | 0     | 0    | 0    |
|            | asu-miR-100a-5p | Ascaris suum             |                           | 0    | 0    | 0.18  | 0     | 0     | 0     | 0    | 0    |
| dof-miR-42 | oar-miR-99a     | Ovis aries               | AACCCGTAGATCCGATCTTG      | 0    | 0    | 0.18  | 0.72  | 0.19  | 0     | 0    | 0.28 |
| dof-miR-43 | bta-miR-99a-5p  | Bos taurus               | AACCCGTAGATCCGATCTTGT     | 4.16 | 1.02 | 11.39 | 17.66 | 1.31  | 0.21  | 2.84 | 2.1  |
|            | oan-miR-99-5p   | Ornithorhynchus anatinus |                           | 4.16 | 1.02 | 11.39 | 17.66 | 1.31  | 0.21  | 2.84 | 2.1  |
|            | chi-miR-99a-5p  | Capra hircus             |                           | 4.16 | 1.02 | 11.39 | 17.66 | 1.31  | 0.21  | 2.84 | 2.1  |
|            | ccr-miR-99      | Cyprinus carpio          |                           | 4.16 | 1.02 | 11.39 | 17.66 | 1.31  | 0.21  | 2.84 | 2.1  |
|            | cgr-miR-99a-5p  | Cricetulus griseus       |                           | 4.16 | 1.02 | 11.39 | 17.66 | 1.31  | 0.21  | 2.84 | 2.1  |
|            | tgu-miR-99-5p   | Taeniopygia guttata      |                           | 4.16 | 1.02 | 11.39 | 17.66 | 1.31  | 0.21  | 2.84 | 2.1  |
|            | cfa-miR-99a     | Canis familiaris         |                           | 4.16 | 1.02 | 11.39 | 17.66 | 1.31  | 0.21  | 2.84 | 2.1  |
| dof-miR-44 | hsa-miR-99a-5p  | Homo sapiens             | AACCCGTAGATCCGATCTTGTG    | 0.4  | 0.51 | 4.04  | 5.77  | 0.19  | 0     | 2.17 | 0.14 |
|            | mmu-miR-99a-5p  | Mus musculus             |                           | 0.4  | 0.51 | 4.04  | 5.77  | 0.19  | 0     | 2.17 | 0.14 |
|            | rno-miR-99a-5p  | Rattus norvegicus        |                           | 0.4  | 0.51 | 4.04  | 5.77  | 0.19  | 0     | 2.17 | 0.14 |
|            | gga-miR-99a-5p  | Gallus gallus            |                           | 0.4  | 0.51 | 4.04  | 5.77  | 0.19  | 0     | 2.17 | 0.14 |
|            | dre-miR-99      | Danio rerio              |                           | 0.4  | 0.51 | 4.04  | 5.77  | 0.19  | 0     | 2.17 | 0.14 |
|            | mml-miR-99a-5p  | Macaca mulatta           |                           | 0.4  | 0.51 | 4.04  | 5.77  | 0.19  | 0     | 2.17 | 0.14 |
|            | ptr-miR-99a     | Pan troglodytes          |                           | 0.4  | 0.51 | 4.04  | 5.77  | 0.19  | 0     | 2.17 | 0.14 |
|            | ggo-miR-99a     | Gorilla gorilla          |                           | 0.4  | 0.51 | 4.04  | 5.77  | 0.19  | 0     | 2.17 | 0.14 |
|            | ppy-miR-99a     | Pongo pygmaeus           |                           | 0.4  | 0.51 | 4.04  | 5.77  | 0.19  | 0     | 2.17 | 0.14 |
|            | lla-miR-99a     | Lagothrix lagotricha     |                           | 0.4  | 0.51 | 4.04  | 5.77  | 0.19  | 0     | 2.17 | 0.14 |
|            | mne-miR-99a     | Macaca nemestrina        |                           | 0.4  | 0.51 | 4.04  | 5.77  | 0.19  | 0     | 2.17 | 0.14 |
|            | ppa-miR-99a     | Pan paniscus             |                           | 0.4  | 0.51 | 4.04  | 5.77  | 0.19  | 0     | 2.17 | 0.14 |
|            | xtr-miR-99      | Xenopus tropicalis       |                           | 0.4  | 0.51 | 4.04  | 5.77  | 0.19  | 0     | 2.17 | 0.14 |



|             |                 |                       |                       |        |       |       |       |       |       |       |       |      |
|-------------|-----------------|-----------------------|-----------------------|--------|-------|-------|-------|-------|-------|-------|-------|------|
|             | stu-miR390-5p   | Solanum tuberosum     |                       | 0      | 0     | 0     | 0     | 0     | 0     | 0     | 0     | 0.28 |
|             | nta-miR390a     | Nicotiana tabacum     |                       | 0      | 0     | 0     | 0     | 0     | 0     | 0     | 0     | 0.28 |
|             | gma-miR390d     | Glycine max           |                       | 0      | 0     | 0     | 0     | 0     | 0     | 0     | 0     | 0.28 |
|             | gma-miR390b-5p  | Glycine max           |                       | 0      | 0     | 0     | 0     | 0     | 0     | 0     | 0     | 0.28 |
| dof-miR-52  | ath-miR390a-5p  | Arabidopsis thaliana  | AAGCTCAGGAGGGATAGCGCC | 220.63 | 3.56  | 31.05 | 40.36 | 1.68  | 4.28  | 27.71 | 32.09 |      |
|             | ath-miR390b-5p  | Arabidopsis thaliana  |                       | 220.63 | 3.56  | 31.05 | 40.36 | 1.68  | 4.28  | 27.71 | 32.09 |      |
|             | osa-miR390-5p   | Oryza sativa          |                       | 220.63 | 3.56  | 31.05 | 40.36 | 1.68  | 4.28  | 27.71 | 32.09 |      |
|             | ptc-miR390a     | Populus trichocarpa   |                       | 220.63 | 3.56  | 31.05 | 40.36 | 1.68  | 4.28  | 27.71 | 32.09 |      |
|             | ptc-miR390b     | Populus trichocarpa   |                       | 220.63 | 3.56  | 31.05 | 40.36 | 1.68  | 4.28  | 27.71 | 32.09 |      |
|             | ptc-miR390c     | Populus trichocarpa   |                       | 220.63 | 3.56  | 31.05 | 40.36 | 1.68  | 4.28  | 27.71 | 32.09 |      |
|             | ptc-miR390d-5p  | Populus trichocarpa   |                       | 220.63 | 3.56  | 31.05 | 40.36 | 1.68  | 4.28  | 27.71 | 32.09 |      |
|             | ppt-miR390a     | Physcomitrella patens |                       | 220.63 | 3.56  | 31.05 | 40.36 | 1.68  | 4.28  | 27.71 | 32.09 |      |
|             | ppt-miR390b     | Physcomitrella patens |                       | 220.63 | 3.56  | 31.05 | 40.36 | 1.68  | 4.28  | 27.71 | 32.09 |      |
|             | mtr-miR390      | Medicago truncatula   |                       | 220.63 | 3.56  | 31.05 | 40.36 | 1.68  | 4.28  | 27.71 | 32.09 |      |
|             | ghr-miR390a     | Gossypium hirsutum    |                       | 220.63 | 3.56  | 31.05 | 40.36 | 1.68  | 4.28  | 27.71 | 32.09 |      |
|             | ghr-miR390b     | Gossypium hirsutum    |                       | 220.63 | 3.56  | 31.05 | 40.36 | 1.68  | 4.28  | 27.71 | 32.09 |      |
|             | ghr-miR390c     | Gossypium hirsutum    |                       | 220.63 | 3.56  | 31.05 | 40.36 | 1.68  | 4.28  | 27.71 | 32.09 |      |
|             | bna-miR390a     | Brassica napus        |                       | 220.63 | 3.56  | 31.05 | 40.36 | 1.68  | 4.28  | 27.71 | 32.09 |      |
|             | bna-miR390b     | Brassica napus        |                       | 220.63 | 3.56  | 31.05 | 40.36 | 1.68  | 4.28  | 27.71 | 32.09 |      |
|             | bna-miR390c     | Brassica napus        |                       | 220.63 | 3.56  | 31.05 | 40.36 | 1.68  | 4.28  | 27.71 | 32.09 |      |
|             | vvi-miR390      | Vitis vinifera        |                       | 220.63 | 3.56  | 31.05 | 40.36 | 1.68  | 4.28  | 27.71 | 32.09 |      |
|             | sly-miR390b-5p  | Solanum lycopersicum  |                       | 220.63 | 3.56  | 31.05 | 40.36 | 1.68  | 4.28  | 27.71 | 32.09 |      |
|             | bra-miR390-5p   | Brassica rapa         |                       | 220.63 | 3.56  | 31.05 | 40.36 | 1.68  | 4.28  | 27.71 | 32.09 |      |
|             | ata-miR390-5p   | Aegilops tauschii     |                       | 220.63 | 3.56  | 31.05 | 40.36 | 1.68  | 4.28  | 27.71 | 32.09 |      |
|             | ppe-miR390      | Prunus persica        |                       | 220.63 | 3.56  | 31.05 | 40.36 | 1.68  | 4.28  | 27.71 | 32.09 |      |
|             | cpa-miR390a     | Carica papaya         |                       | 220.63 | 3.56  | 31.05 | 40.36 | 1.68  | 4.28  | 27.71 | 32.09 |      |
|             | cpa-miR390b     | Carica papaya         |                       | 220.63 | 3.56  | 31.05 | 40.36 | 1.68  | 4.28  | 27.71 | 32.09 |      |
|             | atr-miR390.2    | Amborella trichopoda  |                       | 220.63 | 3.56  | 31.05 | 40.36 | 1.68  | 4.28  | 27.71 | 32.09 |      |
|             | lja-miR390a-5p  | Lotus japonicus       |                       | 220.63 | 3.56  | 31.05 | 40.36 | 1.68  | 4.28  | 27.71 | 32.09 |      |
|             | lja-miR390b-5p  | Lotus japonicus       |                       | 220.63 | 3.56  | 31.05 | 40.36 | 1.68  | 4.28  | 27.71 | 32.09 |      |
|             | hex-miR390a     | Helianthus exilis     |                       | 220.63 | 3.56  | 31.05 | 40.36 | 1.68  | 4.28  | 27.71 | 32.09 |      |
|             | hex-miR390b     | Helianthus exilis     |                       | 220.63 | 3.56  | 31.05 | 40.36 | 1.68  | 4.28  | 27.71 | 32.09 |      |
| mdm-miR390a | Malus domestica | 220.63                | 3.56                  | 31.05  | 40.36 | 1.68  | 4.28  | 27.71 | 32.09 |       |       |      |
| mdm-miR390b | Malus domestica | 220.63                | 3.56                  | 31.05  | 40.36 | 1.68  | 4.28  | 27.71 | 32.09 |       |       |      |



|            |                |                         |                         |        |      |       |       |      |      |       |       |
|------------|----------------|-------------------------|-------------------------|--------|------|-------|-------|------|------|-------|-------|
|            | mdm-miR390c    | Malus domestica         |                         | 220.63 | 3.56 | 31.05 | 40.36 | 1.68 | 4.28 | 27.71 | 32.09 |
|            | mdm-miR390d    | Malus domestica         |                         | 220.63 | 3.56 | 31.05 | 40.36 | 1.68 | 4.28 | 27.71 | 32.09 |
|            | mdm-miR390e    | Malus domestica         |                         | 220.63 | 3.56 | 31.05 | 40.36 | 1.68 | 4.28 | 27.71 | 32.09 |
|            | mdm-miR390f    | Malus domestica         |                         | 220.63 | 3.56 | 31.05 | 40.36 | 1.68 | 4.28 | 27.71 | 32.09 |
|            | cme-miR390d    | Cucumis melo            |                         | 220.63 | 3.56 | 31.05 | 40.36 | 1.68 | 4.28 | 27.71 | 32.09 |
|            | cme-miR390a    | Cucumis melo            |                         | 220.63 | 3.56 | 31.05 | 40.36 | 1.68 | 4.28 | 27.71 | 32.09 |
|            | cme-miR390c    | Cucumis melo            |                         | 220.63 | 3.56 | 31.05 | 40.36 | 1.68 | 4.28 | 27.71 | 32.09 |
|            | lus-miR390a    | Linum usitatissimum     |                         | 220.63 | 3.56 | 31.05 | 40.36 | 1.68 | 4.28 | 27.71 | 32.09 |
|            | lus-miR390b    | Linum usitatissimum     |                         | 220.63 | 3.56 | 31.05 | 40.36 | 1.68 | 4.28 | 27.71 | 32.09 |
|            | lus-miR390c    | Linum usitatissimum     |                         | 220.63 | 3.56 | 31.05 | 40.36 | 1.68 | 4.28 | 27.71 | 32.09 |
|            | lus-miR390d    | Linum usitatissimum     |                         | 220.63 | 3.56 | 31.05 | 40.36 | 1.68 | 4.28 | 27.71 | 32.09 |
|            | nta-miR390b    | Nicotiana tabacum       |                         | 220.63 | 3.56 | 31.05 | 40.36 | 1.68 | 4.28 | 27.71 | 32.09 |
|            | nta-miR390c    | Nicotiana tabacum       |                         | 220.63 | 3.56 | 31.05 | 40.36 | 1.68 | 4.28 | 27.71 | 32.09 |
|            | gma-miR390f    | Glycine max             |                         | 220.63 | 3.56 | 31.05 | 40.36 | 1.68 | 4.28 | 27.71 | 32.09 |
|            | gma-miR390g    | Glycine max             |                         | 220.63 | 3.56 | 31.05 | 40.36 | 1.68 | 4.28 | 27.71 | 32.09 |
|            | tcc-miR390a    | Theobroma cacao         |                         | 220.63 | 3.56 | 31.05 | 40.36 | 1.68 | 4.28 | 27.71 | 32.09 |
|            | tcc-miR390b    | Theobroma cacao         |                         | 220.63 | 3.56 | 31.05 | 40.36 | 1.68 | 4.28 | 27.71 | 32.09 |
|            | bdi-miR390a-5p | Brachypodium distachyon |                         | 220.63 | 3.56 | 31.05 | 40.36 | 1.68 | 4.28 | 27.71 | 32.09 |
|            | cme-miR390b    | Cucumis melo            |                         | 220.63 | 3.56 | 31.05 | 40.36 | 1.68 | 4.28 | 27.71 | 32.09 |
|            | zma-miR390a-5p | Zea mays                |                         | 220.63 | 3.56 | 31.05 | 40.36 | 1.68 | 4.28 | 27.71 | 32.09 |
|            | zma-miR390b-5p | Zea mays                |                         | 220.63 | 3.56 | 31.05 | 40.36 | 1.68 | 4.28 | 27.71 | 32.09 |
|            | csi-miR390     | Citrus sinensis         |                         | 220.63 | 3.56 | 31.05 | 40.36 | 1.68 | 4.28 | 27.71 | 32.09 |
|            | rco-miR390a    | Ricinus communis        |                         | 220.63 | 3.56 | 31.05 | 40.36 | 1.68 | 4.28 | 27.71 | 32.09 |
|            | rco-miR390b    | Ricinus communis        |                         | 220.63 | 3.56 | 31.05 | 40.36 | 1.68 | 4.28 | 27.71 | 32.09 |
|            | aly-miR390a-5p | Arabidopsis lyrata      |                         | 220.63 | 3.56 | 31.05 | 40.36 | 1.68 | 4.28 | 27.71 | 32.09 |
|            | aly-miR390b-5p | Arabidopsis lyrata      |                         | 220.63 | 3.56 | 31.05 | 40.36 | 1.68 | 4.28 | 27.71 | 32.09 |
|            | gma-miR390a-5p | Glycine max             |                         | 220.63 | 3.56 | 31.05 | 40.36 | 1.68 | 4.28 | 27.71 | 32.09 |
|            | sbi-miR390     | Sorghum bicolor         |                         | 220.63 | 3.56 | 31.05 | 40.36 | 1.68 | 4.28 | 27.71 | 32.09 |
| dof-miR-53 | cca-miR390     | Cynara cardunculus      | AAGCTCAGGAGGGATAGCGTC   | 0.2    | 0    | 0     | 0     | 0    | 0    | 0     | 0     |
| dof-miR-54 | bta-miR-423-3p | Bos taurus              | AAGCTCGGTCTGAGGCCCTCAGT | 0      | 0    | 0     | 0     | 0.09 | 0    | 0     | 0     |
| dof-miR-55 | ola-miR-22     | Oryzias latipes         | AAGCTGCCAGCTGAAGAACTG   | 0.2    | 0    | 0.18  | 0     | 0    | 0    | 0     | 0.14  |
| dof-miR-56 | dre-miR-22a-3p | Danio rerio             | AAGCTGCCAGCTGAAGAACTGT  | 0.59   | 1.02 | 0.73  | 3.06  | 0    | 0    | 1.5   | 0.56  |
|            | fru-miR-22a    | Fugu rubripes           |                         | 0.59   | 1.02 | 0.73  | 3.06  | 0    | 0    | 1.5   | 0.56  |
|            | tmi-miR-22a    | Tetraodon nigroviridis  |                         | 0.59   | 1.02 | 0.73  | 3.06  | 0    | 0    | 1.5   | 0.56  |

|            |                  |                          |                         |      |      |      |       |       |      |      |      |
|------------|------------------|--------------------------|-------------------------|------|------|------|-------|-------|------|------|------|
|            | ssa-miR-22a-3p   | Salmo salar              |                         | 0.59 | 1.02 | 0.73 | 3.06  | 0     | 0    | 1.5  | 0.56 |
|            | ipu-miR-22a      | Ictalurus punctatus      |                         | 0.59 | 1.02 | 0.73 | 3.06  | 0     | 0    | 1.5  | 0.56 |
|            | pol-miR-22-3p    | Paralichthys olivaceus   |                         | 0.59 | 1.02 | 0.73 | 3.06  | 0     | 0    | 1.5  | 0.56 |
|            | ccr-miR-22a      | Cyprinus carpio          |                         | 0.59 | 1.02 | 0.73 | 3.06  | 0     | 0    | 1.5  | 0.56 |
| dof-miR-57 | chi-miR-22-3p    | Capra hircus             | AAGCTGCCAGTTGAAGAAC     | 0.59 | 0    | 0    | 0     | 0.19  | 0.21 | 0    | 0.7  |
| dof-miR-58 | bta-miR-22-3p    | Bos taurus               |                         | 0    | 0    | 0    | 0     | 0.09  | 0    | 0    | 0    |
|            | oar-miR-22-3p    | Ovis aries               | AAGCTGCCAGTTGAAGAACTG   | 0    | 0    | 0    | 0     | 0.09  | 0    | 0    | 0    |
|            | ggo-miR-22       | Gorilla gorilla          |                         | 0    | 0    | 0    | 0     | 0.09  | 0    | 0    | 0    |
| dof-miR-59 | hsa-miR-22-3p    | Homo sapiens             |                         | 0.4  | 1.02 | 0.18 | 1.98  | 15.11 | 3.34 | 1.34 | 1.4  |
|            | mmu-miR-22-3p    | Mus musculus             |                         | 0.4  | 1.02 | 0.18 | 1.98  | 15.11 | 3.34 | 1.34 | 1.4  |
|            | rno-miR-22-3p    | Rattus norvegicus        |                         | 0.4  | 1.02 | 0.18 | 1.98  | 15.11 | 3.34 | 1.34 | 1.4  |
|            | age-miR-22       | Ateles geoffroyi         |                         | 0.4  | 1.02 | 0.18 | 1.98  | 15.11 | 3.34 | 1.34 | 1.4  |
|            | ppa-miR-22       | Pan paniscus             |                         | 0.4  | 1.02 | 0.18 | 1.98  | 15.11 | 3.34 | 1.34 | 1.4  |
|            | lca-miR-22       | Lemur catta              |                         | 0.4  | 1.02 | 0.18 | 1.98  | 15.11 | 3.34 | 1.34 | 1.4  |
|            | mml-miR-22       | Macaca mulatta           |                         | 0.4  | 1.02 | 0.18 | 1.98  | 15.11 | 3.34 | 1.34 | 1.4  |
|            | ppy-miR-22       | Pongo pygmaeus           |                         | 0.4  | 1.02 | 0.18 | 1.98  | 15.11 | 3.34 | 1.34 | 1.4  |
|            | ptr-miR-22       | Pan troglodytes          |                         | 0.4  | 1.02 | 0.18 | 1.98  | 15.11 | 3.34 | 1.34 | 1.4  |
|            | sla-miR-22       | Saguinus labiatus        |                         | 0.4  | 1.02 | 0.18 | 1.98  | 15.11 | 3.34 | 1.34 | 1.4  |
|            | lla-miR-22       | Lagothrix lagotricha     |                         | 0.4  | 1.02 | 0.18 | 1.98  | 15.11 | 3.34 | 1.34 | 1.4  |
|            | mne-miR-22       | Macaca nemestrina        |                         | 0.4  | 1.02 | 0.18 | 1.98  | 15.11 | 3.34 | 1.34 | 1.4  |
|            | xtr-miR-22-3p    | Xenopus tropicalis       |                         | 0.4  | 1.02 | 0.18 | 1.98  | 15.11 | 3.34 | 1.34 | 1.4  |
|            | oan-miR-22-3p    | Ornithorhynchus anatinus |                         | 0.4  | 1.02 | 0.18 | 1.98  | 15.11 | 3.34 | 1.34 | 1.4  |
|            | gga-miR-22-3p    | Gallus gallus            |                         | 0.4  | 1.02 | 0.18 | 1.98  | 15.11 | 3.34 | 1.34 | 1.4  |
|            | tch-miR-22-3p    | Tupaia chinensis         |                         | 0.4  | 1.02 | 0.18 | 1.98  | 15.11 | 3.34 | 1.34 | 1.4  |
|            | oha-miR-22a      | Ophiophagus hannah       |                         | 0.4  | 1.02 | 0.18 | 1.98  | 15.11 | 3.34 | 1.34 | 1.4  |
|            | aja-miR-22       | Artibeus jamaicensis     |                         | 0.4  | 1.02 | 0.18 | 1.98  | 15.11 | 3.34 | 1.34 | 1.4  |
|            | cgr-miR-22-3p    | Cricetulus griseus       |                         | 0.4  | 1.02 | 0.18 | 1.98  | 15.11 | 3.34 | 1.34 | 1.4  |
|            | ssc-miR-22-3p    | Sus scrofa               |                         | 0.4  | 1.02 | 0.18 | 1.98  | 15.11 | 3.34 | 1.34 | 1.4  |
| eca-miR-22 | Equus caballus   |                          | 0.4                     | 1.02 | 0.18 | 1.98 | 15.11 | 3.34  | 1.34 | 1.4  |      |
| cfa-miR-22 | Canis familiaris |                          | 0.4                     | 1.02 | 0.18 | 1.98 | 15.11 | 3.34  | 1.34 | 1.4  |      |
| dof-miR-60 | chi-miR-28-5p    | Capra hircus             |                         | 0    | 0    | 0.37 | 1.26  | 0.47  | 0.21 | 0    | 0    |
|            | cgr-miR-28-5p    | Cricetulus griseus       | AAGGAGCTCACAGTCTATTGA   | 0    | 0    | 0.37 | 1.26  | 0.47  | 0.21 | 0    | 0    |
| dof-miR-61 | cgr-miR-1839-5p  | Cricetulus griseus       | AAGGTAGATAGAACAGGTCTTGT | 0    | 0    | 0    | 0     | 0.28  | 0    | 0    | 0    |
| dof-miR-62 | ipu-miR-2188     | Ictalurus punctatus      | AAGGTCCAACCTCACATGTCC   | 1.58 | 0.51 | 0    | 0     | 0     | 0    | 1.5  | 0.28 |

|             |                 |                     |                        |      |      |   |      |      |     |      |      |
|-------------|-----------------|---------------------|------------------------|------|------|---|------|------|-----|------|------|
|             | dre-miR-2188-5p | Danio rerio         |                        | 1.58 | 0.51 | 0 | 0    | 0    | 0   | 1.5  | 0.28 |
| dof-miR-63  | ssa-miR-2188-5p | Salmo salar         | AAGGTCCAACCTCACATGTCCT | 1.19 | 0.51 | 0 | 0    | 0    | 0   | 3.51 | 0.42 |
|             | gga-miR-2188-5p | Gallus gallus       |                        | 1.19 | 0.51 | 0 | 0    | 0    | 0   | 3.51 | 0.42 |
|             | tgu-miR-2188-5p | Taeniopygia guttata |                        | 1.19 | 0.51 | 0 | 0    | 0    | 0   | 3.51 | 0.42 |
|             |                 |                     |                        |      |      |   |      |      |     |      |      |
| dof-miR-64  | hsa-miR-369-3p  | Homo sapiens        | AATAATACATGGTTGATCTTT  | 0    | 0    | 0 | 0.18 | 0    | 0   | 0.17 | 0    |
|             | mmu-miR-369-3p  | Mus musculus        |                        | 0    | 0    | 0 | 0.18 | 0    | 0   | 0.17 | 0    |
|             | rno-miR-369-3p  | Rattus norvegicus   |                        | 0    | 0    | 0 | 0.18 | 0    | 0   | 0.17 | 0    |
|             | bta-miR-369-3p  | Bos taurus          |                        | 0    | 0    | 0 | 0.18 | 0    | 0   | 0.17 | 0    |
|             | chi-miR-369-3p  | Capra hircus        |                        | 0    | 0    | 0 | 0.18 | 0    | 0   | 0.17 | 0    |
|             | tch-miR-369-3p  | Tupaia chinensis    |                        | 0    | 0    | 0 | 0.18 | 0    | 0   | 0.17 | 0    |
|             | cgr-miR-369-3p  | Cricetulus griseus  |                        | 0    | 0    | 0 | 0.18 | 0    | 0   | 0.17 | 0    |
|             | oar-miR-369-3p  | Ovis aries          |                        | 0    | 0    | 0 | 0.18 | 0    | 0   | 0.17 | 0    |
|             | ssc-miR-369     | Sus scrofa          |                        | 0    | 0    | 0 | 0.18 | 0    | 0   | 0.17 | 0    |
|             | ppy-miR-369-3p  | Pongo pygmaeus      |                        | 0    | 0    | 0 | 0.18 | 0    | 0   | 0.17 | 0    |
|             | eca-miR-369-3p  | Equus caballus      |                        | 0    | 0    | 0 | 0.18 | 0    | 0   | 0.17 | 0    |
|             | mml-miR-369-3p  | Macaca mulatta      |                        | 0    | 0    | 0 | 0.18 | 0    | 0   | 0.17 | 0    |
|             | ptr-miR-369     | Pan troglodytes     |                        | 0    | 0    | 0 | 0.18 | 0    | 0   | 0.17 | 0    |
| dof-miR-65  | mmu-miR-410-3p  | Mus musculus        | AATATAACACAGATGGCCTGT  | 0    | 0    | 0 | 0.36 | 0    | 0.1 | 0    | 0    |
|             | hsa-miR-410-3p  | Homo sapiens        |                        | 0    | 0    | 0 | 0.36 | 0    | 0.1 | 0    | 0    |
|             | rno-miR-410-3p  | Rattus norvegicus   |                        | 0    | 0    | 0 | 0.36 | 0    | 0.1 | 0    | 0    |
|             | chi-miR-410-3p  | Capra hircus        |                        | 0    | 0    | 0 | 0.36 | 0    | 0.1 | 0    | 0    |
|             | cgr-miR-410-3p  | Cricetulus griseus  |                        | 0    | 0    | 0 | 0.36 | 0    | 0.1 | 0    | 0    |
|             | oar-miR-410-3p  | Ovis aries          |                        | 0    | 0    | 0 | 0.36 | 0    | 0.1 | 0    | 0    |
|             | ppy-miR-410     | Pongo pygmaeus      |                        | 0    | 0    | 0 | 0.36 | 0    | 0.1 | 0    | 0    |
|             | eca-miR-410     | Equus caballus      |                        | 0    | 0    | 0 | 0.36 | 0    | 0.1 | 0    | 0    |
|             | mml-miR-410-3p  | Macaca mulatta      |                        | 0    | 0    | 0 | 0.36 | 0    | 0.1 | 0    | 0    |
|             | cfa-miR-410     | Canis familiaris    |                        | 0    | 0    | 0 | 0.36 | 0    | 0.1 | 0    | 0    |
|             | ptr-miR-410     | Pan troglodytes     |                        | 0    | 0    | 0 | 0.36 | 0    | 0.1 | 0    | 0    |
| bta-miR-410 | Bos taurus      | 0                   | 0                      | 0    | 0.36 | 0 | 0.1  | 0    | 0   |      |      |
| dof-miR-66  | chi-miR-34b-3p  | Capra hircus        | AATCACTAGTTCCTGCCCATC  | 0    | 0    | 0 | 0.36 | 0    | 0   | 0    | 0    |
| dof-miR-67  | mmu-miR-154-3p  | Mus musculus        | AATCATAACGGTTGACCTATT  | 0    | 0    | 0 | 0    | 0.09 | 0   | 0    | 0    |
|             | hsa-miR-154-3p  | Homo sapiens        |                        | 0    | 0    | 0 | 0    | 0.09 | 0   | 0    | 0    |
|             | rno-miR-154-3p  | Rattus norvegicus   |                        | 0    | 0    | 0 | 0    | 0.09 | 0   | 0    | 0    |
|             | cgr-miR-154-3p  | Cricetulus griseus  |                        | 0    | 0    | 0 | 0    | 0.09 | 0   | 0    | 0    |

|            |                 |                          |                          |   |   |   |      |      |   |      |      |
|------------|-----------------|--------------------------|--------------------------|---|---|---|------|------|---|------|------|
|            | mml-miR-154-3p  | Macaca mulatta           |                          | 0 | 0 | 0 | 0    | 0.09 | 0 | 0    | 0    |
| dof-miR-68 | hsa-miR-362-5p  | Homo sapiens             | AATCCTTGGAACCTAGGTGTGAGT | 0 | 0 | 0 | 0.54 | 0.09 | 0 | 0    | 0    |
|            | chi-miR-362-5p  | Capra hircus             |                          | 0 | 0 | 0 | 0.54 | 0.09 | 0 | 0    | 0    |
|            | oar-miR-362     | Ovis aries               |                          | 0 | 0 | 0 | 0.54 | 0.09 | 0 | 0    | 0    |
|            | ppy-miR-362-5p  | Pongo pygmaeus           |                          | 0 | 0 | 0 | 0.54 | 0.09 | 0 | 0    | 0    |
|            | eca-miR-362-5p  | Equus caballus           |                          | 0 | 0 | 0 | 0.54 | 0.09 | 0 | 0    | 0    |
|            | mml-miR-362-5p  | Macaca mulatta           |                          | 0 | 0 | 0 | 0.54 | 0.09 | 0 | 0    | 0    |
|            | bta-miR-362-5p  | Bos taurus               |                          | 0 | 0 | 0 | 0.54 | 0.09 | 0 | 0    | 0    |
|            | cfa-miR-362     | Canis familiaris         |                          | 0 | 0 | 0 | 0.54 | 0.09 | 0 | 0    | 0    |
| dof-miR-69 | ggo-miR-487b    | Gorilla gorilla          | AATCGTACAGGGTCATCCACT    | 0 | 0 | 0 | 0    | 0    | 0 | 0    | 0.14 |
| dof-miR-70 | hsa-miR-487b-3p | Homo sapiens             | AATCGTACAGGGTCATCCACTT   | 0 | 0 | 0 | 0    | 0.09 | 0 | 0    | 0    |
|            | mmu-miR-487b-3p | Mus musculus             |                          | 0 | 0 | 0 | 0    | 0.09 | 0 | 0    | 0    |
|            | rno-miR-487b-3p | Rattus norvegicus        |                          | 0 | 0 | 0 | 0    | 0.09 | 0 | 0    | 0    |
|            | bta-miR-487b    | Bos taurus               |                          | 0 | 0 | 0 | 0    | 0.09 | 0 | 0    | 0    |
|            | chi-miR-487b-3p | Capra hircus             |                          | 0 | 0 | 0 | 0    | 0.09 | 0 | 0    | 0    |
|            | oar-miR-487b-3p | Ovis aries               |                          | 0 | 0 | 0 | 0    | 0.09 | 0 | 0    | 0    |
|            | ppy-miR-487b    | Pongo pygmaeus           |                          | 0 | 0 | 0 | 0    | 0.09 | 0 | 0    | 0    |
|            | eca-miR-487b    | Equus caballus           |                          | 0 | 0 | 0 | 0    | 0.09 | 0 | 0    | 0    |
|            | mml-miR-487b-3p | Macaca mulatta           |                          | 0 | 0 | 0 | 0    | 0.09 | 0 | 0    | 0    |
|            | cfa-miR-487b    | Canis familiaris         |                          | 0 | 0 | 0 | 0    | 0.09 | 0 | 0    | 0    |
|            | ptr-miR-487b    | Pan troglodytes          |                          | 0 | 0 | 0 | 0    | 0.09 | 0 | 0    | 0    |
| dof-miR-71 | mmu-miR-425-5p  | Mus musculus             | AATGACACGATCACTCCCGTTGA  | 0 | 0 | 0 | 0    | 0.37 | 0 | 0.17 | 0    |
|            | hsa-miR-425-5p  | Homo sapiens             |                          | 0 | 0 | 0 | 0    | 0.37 | 0 | 0.17 | 0    |
|            | xtr-miR-425-5p  | Xenopus tropicalis       |                          | 0 | 0 | 0 | 0    | 0.37 | 0 | 0.17 | 0    |
|            | mdo-miR-425-5p  | Monodelphis domestica    |                          | 0 | 0 | 0 | 0    | 0.37 | 0 | 0.17 | 0    |
|            | rno-miR-425-5p  | Rattus norvegicus        |                          | 0 | 0 | 0 | 0    | 0.37 | 0 | 0.17 | 0    |
|            | oan-miR-425-5p  | Ornithorhynchus anatinus |                          | 0 | 0 | 0 | 0    | 0.37 | 0 | 0.17 | 0    |
|            | chi-miR-425-5p  | Capra hircus             |                          | 0 | 0 | 0 | 0    | 0.37 | 0 | 0.17 | 0    |
|            | tch-miR-425-5p  | Tupaia chinensis         |                          | 0 | 0 | 0 | 0    | 0.37 | 0 | 0.17 | 0    |
|            | cgr-miR-425-5p  | Cricetulus griseus       |                          | 0 | 0 | 0 | 0    | 0.37 | 0 | 0.17 | 0    |
|            | ppy-miR-425     | Pongo pygmaeus           |                          | 0 | 0 | 0 | 0    | 0.37 | 0 | 0.17 | 0    |
|            | ssc-miR-425-5p  | Sus scrofa               |                          | 0 | 0 | 0 | 0    | 0.37 | 0 | 0.17 | 0    |
|            | mml-miR-425     | Macaca mulatta           |                          | 0 | 0 | 0 | 0    | 0.37 | 0 | 0.17 | 0    |
|            | cfa-miR-425     | Canis familiaris         |                          | 0 | 0 | 0 | 0    | 0.37 | 0 | 0.17 | 0    |

|            |                 |                          |                          |     |   |      |      |      |     |      |      |
|------------|-----------------|--------------------------|--------------------------|-----|---|------|------|------|-----|------|------|
|            | ptr-miR-425     | Pan troglodytes          |                          | 0   | 0 | 0    | 0    | 0.37 | 0   | 0.17 | 0    |
| dof-miR-72 | ssa-miR-731-5p  | Salmo salar              | AATGACACGTTTTCTCCCGGATT  | 0.2 | 0 | 0    | 0.36 | 0    | 0   | 0.5  | 0.14 |
| dof-miR-73 | hsa-miR-501-3p  | Homo sapiens             | AATGCACCCGGGAAGGATTCT    | 0   | 0 | 0    | 0    | 0.47 | 0   | 0    | 0    |
|            | ptr-miR-501     | Pan troglodytes          |                          | 0   | 0 | 0    | 0    | 0.47 | 0   | 0    | 0    |
| dof-miR-74 | hsa-miR-502-3p  | Homo sapiens             | AATGCACCTGGGAAGGATTCA    | 0   | 0 | 0    | 0    | 0.28 | 0   | 0    | 0    |
|            | ggo-miR-502a    | Gorilla gorilla          |                          | 0   | 0 | 0    | 0    | 0.28 | 0   | 0    | 0    |
|            | ppy-miR-501-3p  | Pongo pygmaeus           |                          | 0   | 0 | 0    | 0    | 0.28 | 0   | 0    | 0    |
|            | ppy-miR-502-3p  | Pongo pygmaeus           |                          | 0   | 0 | 0    | 0    | 0.28 | 0   | 0    | 0    |
|            | eca-miR-502-3p  | Equus caballus           |                          | 0   | 0 | 0    | 0    | 0.28 | 0   | 0    | 0    |
|            | mml-miR-502-3p  | Macaca mulatta           |                          | 0   | 0 | 0    | 0    | 0.28 | 0   | 0    | 0    |
|            | cfa-miR-502     | Canis familiaris         |                          | 0   | 0 | 0    | 0    | 0.28 | 0   | 0    | 0    |
|            | bta-miR-502a    | Bos taurus               |                          | 0   | 0 | 0    | 0    | 0.28 | 0   | 0    | 0    |
| dof-miR-75 | hme-miR-263a    | Heliconius melpomene     | AATGGCACTGGAAGAATTCACGG  | 0   | 0 | 0    | 0    | 0    | 0   | 0.33 | 0    |
|            | aae-miR-263a-5p | Aedes aegypti            |                          | 0   | 0 | 0    | 0    | 0    | 0   | 0.33 | 0    |
|            | cqu-miR-263     | Culex quinquefasciatus   |                          | 0   | 0 | 0    | 0    | 0    | 0   | 0.33 | 0    |
| dof-miR-76 | dme-miR-263a-5p | Drosophila melanogaster  | AATGGCACTGGAAGAATTCACGGG | 0   | 0 | 0    | 0    | 0    | 0   | 0.5  | 0    |
|            | mse-miR-263a    | Manduca sexta            |                          | 0   | 0 | 0    | 0    | 0    | 0   | 0.5  | 0    |
|            | dvi-miR-263a-5p | Drosophila virilis       |                          | 0   | 0 | 0    | 0    | 0    | 0   | 0.5  | 0    |
|            | tca-miR-263a-5p | Tribolium castaneum      |                          | 0   | 0 | 0    | 0    | 0    | 0   | 0.5  | 0    |
| dof-miR-77 | ptc-miR475a-5p  | Populus trichocarpa      | AATGGCCATTGTAAGAGTAGA    | 0   | 0 | 0.18 | 0    | 0    | 0   | 0    | 0    |
|            | ptc-miR475b-5p  | Populus trichocarpa      |                          | 0   | 0 | 0.18 | 0    | 0    | 0   | 0    | 0    |
|            | ptc-miR475d-5p  | Populus trichocarpa      |                          | 0   | 0 | 0.18 | 0    | 0    | 0   | 0    | 0    |
| dof-miR-78 | rno-miR-409a-3p | Rattus norvegicus        | AATGTTGCTCGGTGAACCCC     | 0   | 0 | 0    | 0    | 0    | 0.1 | 0    | 0    |
| dof-miR-79 | rno-miR-363-3p  | Rattus norvegicus        | AATTGCACGGTATCCATCTGT    | 0   | 0 | 0    | 0    | 0.84 | 0   | 0.17 | 0    |
|            | xtr-miR-363-3p  | Xenopus tropicalis       |                          | 0   | 0 | 0    | 0    | 0.84 | 0   | 0.17 | 0    |
|            | oan-miR-363-3p  | Ornithorhynchus anatinus |                          | 0   | 0 | 0    | 0    | 0.84 | 0   | 0.17 | 0    |
|            | aca-miR-363-3p  | Anolis carolinensis      |                          | 0   | 0 | 0    | 0    | 0.84 | 0   | 0.17 | 0    |
|            | tgu-miR-363-3p  | Taeniopygia guttata      |                          | 0   | 0 | 0    | 0    | 0.84 | 0   | 0.17 | 0    |
| dof-miR-80 | hsa-miR-363-3p  | Homo sapiens             | AATTGCACGGTATCCATCTGTA   | 0   | 0 | 0    | 0.18 | 0.47 | 0.1 | 0    | 0.14 |
|            | mmu-miR-363-3p  | Mus musculus             |                          | 0   | 0 | 0    | 0.18 | 0.47 | 0.1 | 0    | 0.14 |
|            | dre-miR-363-3p  | Danio rerio              |                          | 0   | 0 | 0    | 0.18 | 0.47 | 0.1 | 0    | 0.14 |
|            | tch-miR-363-3p  | Tupaia chinensis         |                          | 0   | 0 | 0    | 0.18 | 0.47 | 0.1 | 0    | 0.14 |
|            | ccr-miR-363     | Cyprinus carpio          |                          | 0   | 0 | 0    | 0.18 | 0.47 | 0.1 | 0    | 0.14 |
|            | ppy-miR-363     | Pongo pygmaeus           |                          | 0   | 0 | 0    | 0.18 | 0.47 | 0.1 | 0    | 0.14 |

|            |                   |                          |                         |      |      |      |       |      |      |      |      |
|------------|-------------------|--------------------------|-------------------------|------|------|------|-------|------|------|------|------|
|            | eca-miR-363       | Equus caballus           |                         | 0    | 0    | 0    | 0.18  | 0.47 | 0.1  | 0    | 0.14 |
|            | mml-miR-363-3p    | Macaca mulatta           |                         | 0    | 0    | 0    | 0.18  | 0.47 | 0.1  | 0    | 0.14 |
| dof-miR-81 | oha-miR-363-3p    | Ophiophagus hannah       | AATTGCACGGTATCCATCTGTAA | 0    | 0.25 | 0    | 0.18  | 0.19 | 0    | 0.17 | 0    |
|            | ipu-miR-363       | Ictalurus punctatus      |                         | 0    | 0.25 | 0    | 0.18  | 0.19 | 0    | 0.17 | 0    |
|            | ggo-miR-363       | Gorilla gorilla          |                         | 0    | 0.25 | 0    | 0.18  | 0.19 | 0    | 0.17 | 0    |
|            | ssc-miR-363       | Sus scrofa               |                         | 0    | 0.25 | 0    | 0.18  | 0.19 | 0    | 0.17 | 0    |
|            | cfa-miR-363       | Canis familiaris         |                         | 0    | 0.25 | 0    | 0.18  | 0.19 | 0    | 0.17 | 0    |
| dof-miR-82 | chi-miR-125b-3p   | Capra hircus             | ACAAGTCAGGCTCTGGGACC    | 0    | 0    | 0    | 0     | 0.09 | 0    | 0    | 0    |
| dof-miR-83 | rno-miR-125b-2-3p | Rattus norvegicus        | ACAAGTCAGGCTCTGGGACCT   | 0    | 0.25 | 0    | 0     | 0    | 0    | 0    | 0.14 |
|            | gga-miR-125b-3p   | Gallus gallus            |                         | 0    | 0.25 | 0    | 0     | 0    | 0    | 0    | 0.14 |
|            | mml-miR-125b-2-3p | Macaca mulatta           |                         | 0    | 0.25 | 0    | 0     | 0    | 0    | 0    | 0.14 |
|            | tgu-miR-125-1-3p  | Taeniopygia guttata      |                         | 0    | 0.25 | 0    | 0     | 0    | 0    | 0    | 0.14 |
| dof-miR-84 | hsa-miR-214-3p    | Homo sapiens             | ACAGCAGGCACAGACAGGCAGT  | 0    | 0    | 0.55 | 0.72  | 0    | 0    | 0.33 | 0.14 |
|            | mmu-miR-214-3p    | Mus musculus             |                         | 0    | 0    | 0.55 | 0.72  | 0    | 0    | 0.33 | 0.14 |
|            | bta-miR-214       | Bos taurus               |                         | 0    | 0    | 0.55 | 0.72  | 0    | 0    | 0.33 | 0.14 |
|            | oan-miR-214-3p    | Ornithorhynchus anatinus |                         | 0    | 0    | 0.55 | 0.72  | 0    | 0    | 0.33 | 0.14 |
|            | aja-miR-214       | Artibeus jamaicensis     |                         | 0    | 0    | 0.55 | 0.72  | 0    | 0    | 0.33 | 0.14 |
|            | aca-miR-214-3p    | Anolis carolinensis      |                         | 0    | 0    | 0.55 | 0.72  | 0    | 0    | 0.33 | 0.14 |
|            | eca-miR-214       | Equus caballus           |                         | 0    | 0    | 0.55 | 0.72  | 0    | 0    | 0.33 | 0.14 |
|            | tgu-miR-214-3p    | Taeniopygia guttata      |                         | 0    | 0    | 0.55 | 0.72  | 0    | 0    | 0.33 | 0.14 |
|            | cfa-miR-214       | Canis familiaris         |                         | 0    | 0    | 0.55 | 0.72  | 0    | 0    | 0.33 | 0.14 |
| dof-miR-85 | mdo-miR-199b-3p   | Monodelphis domestica    | ACAGTAGTCTGCACATTGGTT   | 0.59 | 0.25 | 8.08 | 11.17 | 1.87 | 0.52 | 1.34 | 0.42 |
|            | oan-miR-199-3p    | Ornithorhynchus anatinus |                         | 0.59 | 0.25 | 8.08 | 11.17 | 1.87 | 0.52 | 1.34 | 0.42 |
|            | chi-miR-199a-3p   | Capra hircus             |                         | 0.59 | 0.25 | 8.08 | 11.17 | 1.87 | 0.52 | 1.34 | 0.42 |
|            | chi-miR-199b-3p   | Capra hircus             |                         | 0.59 | 0.25 | 8.08 | 11.17 | 1.87 | 0.52 | 1.34 | 0.42 |
|            | chi-miR-199c-3p   | Capra hircus             |                         | 0.59 | 0.25 | 8.08 | 11.17 | 1.87 | 0.52 | 1.34 | 0.42 |
|            | tch-miR-199b-3p   | Tupaia chinensis         |                         | 0.59 | 0.25 | 8.08 | 11.17 | 1.87 | 0.52 | 1.34 | 0.42 |
|            | tch-miR-199a-3p   | Tupaia chinensis         |                         | 0.59 | 0.25 | 8.08 | 11.17 | 1.87 | 0.52 | 1.34 | 0.42 |
|            | ssa-miR-199a-3p   | Salmo salar              |                         | 0.59 | 0.25 | 8.08 | 11.17 | 1.87 | 0.52 | 1.34 | 0.42 |
|            | ipu-miR-199a-3p   | Ictalurus punctatus      |                         | 0.59 | 0.25 | 8.08 | 11.17 | 1.87 | 0.52 | 1.34 | 0.42 |
|            | oar-miR-199a-3p   | Ovis aries               |                         | 0.59 | 0.25 | 8.08 | 11.17 | 1.87 | 0.52 | 1.34 | 0.42 |
|            | ccr-miR-199-3p    | Cyprinus carpio          |                         | 0.59 | 0.25 | 8.08 | 11.17 | 1.87 | 0.52 | 1.34 | 0.42 |
|            | sha-miR-199a      | Sarcophilus harrisii     |                         | 0.59 | 0.25 | 8.08 | 11.17 | 1.87 | 0.52 | 1.34 | 0.42 |
|            | cgr-miR-199a-3p   | Cricetulus griseus       |                         | 0.59 | 0.25 | 8.08 | 11.17 | 1.87 | 0.52 | 1.34 | 0.42 |

|              |                   |                        |                        |      |      |      |       |      |      |      |      |
|--------------|-------------------|------------------------|------------------------|------|------|------|-------|------|------|------|------|
|              | tgu-miR-199-3p    | Taeniopygia guttata    |                        | 0.59 | 0.25 | 8.08 | 11.17 | 1.87 | 0.52 | 1.34 | 0.42 |
|              | cfa-miR-199       | Canis familiaris       |                        | 0.59 | 0.25 | 8.08 | 11.17 | 1.87 | 0.52 | 1.34 | 0.42 |
| dof-miR-86   | mmu-miR-199a-3p   | Mus musculus           | ACAGTAGTCTGCACATTGGTTA | 0.4  | 0    | 1.84 | 5.41  | 1.03 | 0    | 0.33 | 0    |
|              | hsa-miR-199a-3p   | Homo sapiens           |                        | 0.4  | 0    | 1.84 | 5.41  | 1.03 | 0    | 0.33 | 0    |
|              | hsa-miR-199b-3p   | Homo sapiens           |                        | 0.4  | 0    | 1.84 | 5.41  | 1.03 | 0    | 0.33 | 0    |
|              | mmu-miR-199b-3p   | Mus musculus           |                        | 0.4  | 0    | 1.84 | 5.41  | 1.03 | 0    | 0.33 | 0    |
|              | rno-miR-199a-3p   | Rattus norvegicus      |                        | 0.4  | 0    | 1.84 | 5.41  | 1.03 | 0    | 0.33 | 0    |
|              | bta-miR-199a-3p   | Bos taurus             |                        | 0.4  | 0    | 1.84 | 5.41  | 1.03 | 0    | 0.33 | 0    |
|              | oha-miR-199a-3p   | Ophiophagus hannah     |                        | 0.4  | 0    | 1.84 | 5.41  | 1.03 | 0    | 0.33 | 0    |
|              | pol-miR-199a-3p   | Paralichthys olivaceus |                        | 0.4  | 0    | 1.84 | 5.41  | 1.03 | 0    | 0.33 | 0    |
|              | ola-miR-199a-3p   | Oryzias latipes        |                        | 0.4  | 0    | 1.84 | 5.41  | 1.03 | 0    | 0.33 | 0    |
|              | ppy-miR-199a-3p   | Pongo pygmaeus         |                        | 0.4  | 0    | 1.84 | 5.41  | 1.03 | 0    | 0.33 | 0    |
|              | eca-miR-199a-3p   | Equus caballus         |                        | 0.4  | 0    | 1.84 | 5.41  | 1.03 | 0    | 0.33 | 0    |
|              | eca-miR-199b-3p   | Equus caballus         |                        | 0.4  | 0    | 1.84 | 5.41  | 1.03 | 0    | 0.33 | 0    |
|              | ssc-miR-199a-3p   | Sus scrofa             |                        | 0.4  | 0    | 1.84 | 5.41  | 1.03 | 0    | 0.33 | 0    |
|              | mml-miR-199a-3p   | Macaca mulatta         |                        | 0.4  | 0    | 1.84 | 5.41  | 1.03 | 0    | 0.33 | 0    |
|              | ptr-miR-199a-3p   | Pan troglodytes        |                        | 0.4  | 0    | 1.84 | 5.41  | 1.03 | 0    | 0.33 | 0    |
| ptr-miR-199b | Pan troglodytes   | 0.4                    | 0                      | 1.84 | 5.41 | 1.03 | 0     | 0.33 | 0    |      |      |
| dof-miR-87   | mmu-miR-669a-3p   | Mus musculus           | ACATAACATACACACACAGTAT | 0    | 0    | 0    | 0     | 0    | 0    | 0.33 | 0    |
|              | mmu-miR-669o-3p   | Mus musculus           |                        | 0    | 0    | 0    | 0     | 0    | 0    | 0.33 | 0    |
| dof-miR-88   | ola-miR-140-3p    | Oryzias latipes        | ACCACAGGGTAGAACCACGG   | 0    | 0    | 0.18 | 0     | 0    | 0    | 0    | 0    |
| dof-miR-89   | sha-miR-140       | Sarcophilus harrisii   | ACCACAGGGTAGAACCACGGA  | 0    | 0    | 0.18 | 0.36  | 0.09 | 0    | 0.17 | 0    |
|              | cfa-miR-140       | Canis familiaris       |                        | 0    | 0    | 0.18 | 0.36  | 0.09 | 0    | 0.17 | 0    |
| dof-miR-90   | chi-miR-140-3p    | Capra hircus           | ACCACAGGGTAGAACCACGGAC | 0    | 0.51 | 1.65 | 2.88  | 1.49 | 0.52 | 0.67 | 0.14 |
|              | ipu-miR-140       | Ictalurus punctatus    |                        | 0    | 0.51 | 1.65 | 2.88  | 1.49 | 0.52 | 0.67 | 0.14 |
|              | pol-miR-140-3p    | Paralichthys olivaceus |                        | 0    | 0.51 | 1.65 | 2.88  | 1.49 | 0.52 | 0.67 | 0.14 |
|              | cgr-miR-140-3p    | Cricetulus griseus     |                        | 0    | 0.51 | 1.65 | 2.88  | 1.49 | 0.52 | 0.67 | 0.14 |
|              | ggo-miR-140       | Gorilla gorilla        |                        | 0    | 0.51 | 1.65 | 2.88  | 1.49 | 0.52 | 0.67 | 0.14 |
| dof-miR-91   | hsa-miR-181a-2-3p | Homo sapiens           | ACCACTGACCGTTGACTGTACC | 0    | 0    | 0    | 0     | 0.09 | 0    | 0    | 0    |
| dof-miR-92   | mmu-miR-181c-3p   | Mus musculus           | ACCATCGACCGTTGAGTGGACC | 0    | 0    | 0    | 0.18  | 0.09 | 0    | 0    | 0    |
|              | rno-miR-181c-3p   | Rattus norvegicus      |                        | 0    | 0    | 0    | 0.18  | 0.09 | 0    | 0    | 0    |
|              | chi-miR-181c-3p   | Capra hircus           |                        | 0    | 0    | 0    | 0.18  | 0.09 | 0    | 0    | 0    |
|              | cgr-miR-181c-3p   | Cricetulus griseus     |                        | 0    | 0    | 0    | 0.18  | 0.09 | 0    | 0    | 0    |
| dof-miR-93   | hsa-miR-181a-3p   | Homo sapiens           | ACCATCGACCGTTGATTGTACC | 0    | 0    | 0    | 0     | 0.19 | 0    | 0    | 0.14 |







|                |                   |                      |                       |      |       |      |       |       |       |       |      |
|----------------|-------------------|----------------------|-----------------------|------|-------|------|-------|-------|-------|-------|------|
| dof-miR-111    | hsa-miR-605-3p    | Homo sapiens         | AGAAGGCACTATGAGATTAGA | 0    | 0     | 0    | 0     | 0.09  | 0     | 0     | 0    |
| dof-miR-112    | tcc-miR172d       | Theobroma cacao      | AGAATCCTGATGATGCTGCAT | 0    | 0     | 0.18 | 1.08  | 0     | 0     | 0.17  | 0    |
| dof-miR-113    | stu-miR172c-3p    | Solanum tuberosum    | AGAATCTTGATGATGCTGC   | 0    | 0     | 0    | 0     | 0.09  | 0     | 0     | 0    |
| dof-miR-114    | zma-miR172a       | Zea mays             | AGAATCTTGATGATGCTGCA  | 0    | 1.27  | 0    | 0     | 0     | 0.21  | 0     | 0.14 |
|                | zma-miR172d-3p    | Zea mays             |                       | 0    | 1.27  | 0    | 0     | 0     | 0.21  | 0     | 0.14 |
|                | zma-miR172b-3p    | Zea mays             |                       | 0    | 1.27  | 0    | 0     | 0     | 0.21  | 0     | 0.14 |
|                | zma-miR172c-3p    | Zea mays             |                       | 0    | 1.27  | 0    | 0     | 0     | 0.21  | 0     | 0.14 |
|                | sbi-miR172c       | Sorghum bicolor      |                       | 0    | 1.27  | 0    | 0     | 0     | 0.21  | 0     | 0.14 |
|                | sbi-miR172a       | Sorghum bicolor      |                       | 0    | 1.27  | 0    | 0     | 0     | 0.21  | 0     | 0.14 |
|                | lja-miR172b       | Lotus japonicus      |                       | 0    | 1.27  | 0    | 0     | 0     | 0.21  | 0     | 0.14 |
|                | lja-miR172c       | Lotus japonicus      |                       | 0    | 1.27  | 0    | 0     | 0     | 0.21  | 0     | 0.14 |
|                | mtr-miR172d-3p    | Medicago truncatula  |                       | 0    | 1.27  | 0    | 0     | 0     | 0.21  | 0     | 0.14 |
|                | mdm-miR172a       | Malus domestica      |                       | 0    | 1.27  | 0    | 0     | 0     | 0.21  | 0     | 0.14 |
|                | mdm-miR172b       | Malus domestica      |                       | 0    | 1.27  | 0    | 0     | 0     | 0.21  | 0     | 0.14 |
|                | mdm-miR172c       | Malus domestica      |                       | 0    | 1.27  | 0    | 0     | 0     | 0.21  | 0     | 0.14 |
|                | gma-miR172f       | Glycine max          |                       | 0    | 1.27  | 0    | 0     | 0     | 0.21  | 0     | 0.14 |
| dof-miR-115    | csi-miR172a-3p    | Citrus sinensis      | AGAATCTTGATGATGCTGCAT | 0    | 1.27  | 0    | 0     | 0     | 0.21  | 0     | 0.14 |
|                | sbi-miR172d       | Sorghum bicolor      |                       | 0    | 1.27  | 0    | 0     | 0     | 0.21  | 0     | 0.14 |
|                | ath-miR172a       | Arabidopsis thaliana |                       | 6.14 | 13.75 | 2.02 | 74.78 | 6.25  | 15.02 | 10.35 | 3.5  |
|                | ath-miR172b-3p    | Arabidopsis thaliana |                       | 6.14 | 13.75 | 2.02 | 74.78 | 6.25  | 15.02 | 10.35 | 3.5  |
|                | osa-miR172a       | Oryza sativa         |                       | 6.14 | 13.75 | 2.02 | 74.78 | 6.25  | 15.02 | 10.35 | 3.5  |
|                | osa-miR172d-3p    | Oryza sativa         |                       | 6.14 | 13.75 | 2.02 | 74.78 | 6.25  | 15.02 | 10.35 | 3.5  |
|                | gma-miR172a       | Glycine max          |                       | 6.14 | 13.75 | 2.02 | 74.78 | 6.25  | 15.02 | 10.35 | 3.5  |
|                | gma-miR172b-3p    | Glycine max          |                       | 6.14 | 13.75 | 2.02 | 74.78 | 6.25  | 15.02 | 10.35 | 3.5  |
|                | ptc-miR172a       | Populus trichocarpa  |                       | 6.14 | 13.75 | 2.02 | 74.78 | 6.25  | 15.02 | 10.35 | 3.5  |
|                | ptc-miR172b-3p    | Populus trichocarpa  |                       | 6.14 | 13.75 | 2.02 | 74.78 | 6.25  | 15.02 | 10.35 | 3.5  |
|                | ptc-miR172c       | Populus trichocarpa  |                       | 6.14 | 13.75 | 2.02 | 74.78 | 6.25  | 15.02 | 10.35 | 3.5  |
|                | ptc-miR172f       | Populus trichocarpa  |                       | 6.14 | 13.75 | 2.02 | 74.78 | 6.25  | 15.02 | 10.35 | 3.5  |
|                | ata-miR172b-3p    | Aegilops tauschii    |                       | 6.14 | 13.75 | 2.02 | 74.78 | 6.25  | 15.02 | 10.35 | 3.5  |
|                | ppe-miR172a-3p    | Prunus persica       |                       | 6.14 | 13.75 | 2.02 | 74.78 | 6.25  | 15.02 | 10.35 | 3.5  |
|                | ppe-miR172b       | Prunus persica       |                       | 6.14 | 13.75 | 2.02 | 74.78 | 6.25  | 15.02 | 10.35 | 3.5  |
| mes-miR172b    | Manihot esculenta | 6.14                 | 13.75                 | 2.02 | 74.78 | 6.25 | 15.02 | 10.35 | 3.5   |       |      |
| mes-miR172d    | Manihot esculenta | 6.14                 | 13.75                 | 2.02 | 74.78 | 6.25 | 15.02 | 10.35 | 3.5   |       |      |
| stu-miR172b-3p | Solanum tuberosum | 6.14                 | 13.75                 | 2.02 | 74.78 | 6.25 | 15.02 | 10.35 | 3.5   |       |      |



|             |                        |                                    |                        |      |       |      |       |      |       |       |     |
|-------------|------------------------|------------------------------------|------------------------|------|-------|------|-------|------|-------|-------|-----|
|             | bdi-miR172a-3p         | Brachypodium distachyon            |                        | 6.14 | 13.75 | 2.02 | 74.78 | 6.25 | 15.02 | 10.35 | 3.5 |
|             | mtr-miR172b            | Medicago truncatula                |                        | 6.14 | 13.75 | 2.02 | 74.78 | 6.25 | 15.02 | 10.35 | 3.5 |
|             | mtr-miR172c-3p         | Medicago truncatula                |                        | 6.14 | 13.75 | 2.02 | 74.78 | 6.25 | 15.02 | 10.35 | 3.5 |
|             | gma-miR172h-3p         | Glycine max                        |                        | 6.14 | 13.75 | 2.02 | 74.78 | 6.25 | 15.02 | 10.35 | 3.5 |
|             | aly-miR172a-3p         | Arabidopsis lyrata                 |                        | 6.14 | 13.75 | 2.02 | 74.78 | 6.25 | 15.02 | 10.35 | 3.5 |
|             | aly-miR172b-3p         | Arabidopsis lyrata                 |                        | 6.14 | 13.75 | 2.02 | 74.78 | 6.25 | 15.02 | 10.35 | 3.5 |
|             | sly-miR172a            | Solanum lycopersicum               |                        | 6.14 | 13.75 | 2.02 | 74.78 | 6.25 | 15.02 | 10.35 | 3.5 |
|             | sly-miR172b            | Solanum lycopersicum               |                        | 6.14 | 13.75 | 2.02 | 74.78 | 6.25 | 15.02 | 10.35 | 3.5 |
|             | bra-miR172a            | Brassica rapa                      |                        | 6.14 | 13.75 | 2.02 | 74.78 | 6.25 | 15.02 | 10.35 | 3.5 |
|             | bra-miR172b-3p         | Brassica rapa                      |                        | 6.14 | 13.75 | 2.02 | 74.78 | 6.25 | 15.02 | 10.35 | 3.5 |
|             | bol-miR172a            | Brassica oleracea                  |                        | 6.14 | 13.75 | 2.02 | 74.78 | 6.25 | 15.02 | 10.35 | 3.5 |
|             | bol-miR172b            | Brassica oleracea                  |                        | 6.14 | 13.75 | 2.02 | 74.78 | 6.25 | 15.02 | 10.35 | 3.5 |
|             | aqc-miR172a            | Aquilegia caerulea                 |                        | 6.14 | 13.75 | 2.02 | 74.78 | 6.25 | 15.02 | 10.35 | 3.5 |
| dof-miR-116 | osa-miR5083            | Oryza sativa                       | AGACTACAATTATCTGATCA   | 0    | 0     | 0    | 0     | 0.09 | 0     | 0     | 0   |
| dof-miR-117 | mtr-miR319a-5p         | Medicago truncatula                | AGAGCTTCCTCAGTCCACTC   | 0.2  | 0     | 0.73 | 0     | 3.54 | 4.07  | 0.5   | 0.7 |
| dof-miR-118 | oar-let-7d             | Ovis aries let-7d                  | AGAGGTAGTAGGTTGCATAG   | 0    | 0     | 0.18 | 0     | 0.19 | 0.1   | 0     | 0   |
| dof-miR-119 | mdo-let-7d             | Monodelphis domestica let-7d       | AGAGGTAGTAGGTTGCATAGT  | 0    | 0     | 0    | 0.18  | 0.28 | 0.1   | 0     | 0   |
|             | aca-let-7d-5p          | Anolis carolinensis let-7d-5p      |                        | 0    | 0     | 0    | 0.18  | 0.28 | 0.1   | 0     | 0   |
| dof-miR-120 | hsa-let-7d-5p          | Homo sapiens let-7d-5p             | AGAGGTAGTAGGTTGCATAGTT | 0.2  | 0.25  | 0.92 | 1.44  | 1.49 | 0.1   | 0     | 0   |
|             | mmu-let-7d-5p          | Mus musculus let-7d-5p             |                        | 0.2  | 0.25  | 0.92 | 1.44  | 1.49 | 0.1   | 0     | 0   |
|             | rno-let-7d-5p          | Rattus norvegicus let-7d-5p        |                        | 0.2  | 0.25  | 0.92 | 1.44  | 1.49 | 0.1   | 0     | 0   |
|             | bta-let-7d             | Bos taurus let-7d                  |                        | 0.2  | 0.25  | 0.92 | 1.44  | 1.49 | 0.1   | 0     | 0   |
|             | oan-let-7d-5p          | Ornithorhynchus anatinus let-7d-5p |                        | 0.2  | 0.25  | 0.92 | 1.44  | 1.49 | 0.1   | 0     | 0   |
|             | chi-let-7d-5p          | Capra hircus let-7d-5p             |                        | 0.2  | 0.25  | 0.92 | 1.44  | 1.49 | 0.1   | 0     | 0   |
|             | oha-let-7d-5p          | Ophiophagus hannah let-7d-5p       |                        | 0.2  | 0.25  | 0.92 | 1.44  | 1.49 | 0.1   | 0     | 0   |
|             | ssc-let-7d-5p          | Sus scrofa let-7d-5p               |                        | 0.2  | 0.25  | 0.92 | 1.44  | 1.49 | 0.1   | 0     | 0   |
|             | cgr-let-7d-5p          | Cricetulus griseus let-7d-5p       |                        | 0.2  | 0.25  | 0.92 | 1.44  | 1.49 | 0.1   | 0     | 0   |
|             | ppy-let-7d             | Pongo pygmaeus let-7d              |                        | 0.2  | 0.25  | 0.92 | 1.44  | 1.49 | 0.1   | 0     | 0   |
|             | eca-let-7d             | Equus caballus let-7d              |                        | 0.2  | 0.25  | 0.92 | 1.44  | 1.49 | 0.1   | 0     | 0   |
|             | tgu-let-7d-5p          | Taeniopygia guttata let-7d-5p      |                        | 0.2  | 0.25  | 0.92 | 1.44  | 1.49 | 0.1   | 0     | 0   |
|             | mml-let-7d             | Macaca mulatta let-7d              |                        | 0.2  | 0.25  | 0.92 | 1.44  | 1.49 | 0.1   | 0     | 0   |
| ptr-let-7d  | Pan troglodytes let-7d | 0.2                                | 0.25                   | 0.92 | 1.44  | 1.49 | 0.1   | 0    | 0     |       |     |
| dof-miR-121 | hsa-miR-377-5p         | Homo sapiens                       | AGAGGTTGCCCTTGGTGAATTC | 0    | 0     | 0    | 0.18  | 0    | 0     | 0     | 0   |
|             | mmu-miR-377-5p         | Mus musculus                       |                        | 0    | 0     | 0    | 0.18  | 0    | 0     | 0     | 0   |

|             |                 |                          |                         |     |      |      |      |      |      |      |      |
|-------------|-----------------|--------------------------|-------------------------|-----|------|------|------|------|------|------|------|
|             | rno-miR-377-5p  | Rattus norvegicus        |                         | 0   | 0    | 0    | 0.18 | 0    | 0    | 0    | 0    |
|             | mml-miR-377-5p  | Macaca mulatta           |                         | 0   | 0    | 0    | 0.18 | 0    | 0    | 0    | 0    |
|             | cfa-miR-377     | Canis familiaris         |                         | 0   | 0    | 0    | 0.18 | 0    | 0    | 0    | 0    |
| dof-miR-122 | tur-miR-190-5p  | Tetranychus urticae      | AGATATGTTTGATATTCTTGTT  | 0   | 0    | 0    | 0    | 0    | 0.1  | 0    | 0    |
|             | bmo-miR-190-5p  | Bombyx mori              |                         | 0   | 0    | 0    | 0    | 0    | 0.1  | 0    | 0    |
| dof-miR-123 | dme-miR-190-5p  | Drosophila melanogaster  | AGATATGTTTGATATTCTTGTTG | 0   | 0    | 0    | 0    | 0.09 | 0.42 | 0    | 0    |
|             | dvi-miR-190-5p  | Drosophila virilis       |                         | 0   | 0    | 0    | 0    | 0.09 | 0.42 | 0    | 0    |
|             | mse-miR-190     | Manduca sexta            |                         | 0   | 0    | 0    | 0    | 0.09 | 0.42 | 0    | 0    |
|             | api-miR-190     | Acyrtosiphon pisum       |                         | 0   | 0    | 0    | 0    | 0.09 | 0.42 | 0    | 0    |
|             | aae-miR-190     | Aedes aegypti            |                         | 0   | 0    | 0    | 0    | 0.09 | 0.42 | 0    | 0    |
|             | cqu-miR-190     | Culex quinquefasciatus   |                         | 0   | 0    | 0    | 0    | 0.09 | 0.42 | 0    | 0    |
|             | aga-miR-190     | Anopheles gambiae        |                         | 0   | 0    | 0    | 0    | 0.09 | 0.42 | 0    | 0    |
|             | dps-miR-190-5p  | Drosophila pseudoobscura |                         | 0   | 0    | 0    | 0    | 0.09 | 0.42 | 0    | 0    |
|             | dsi-miR-190-5p  | Drosophila simulans      |                         | 0   | 0    | 0    | 0    | 0.09 | 0.42 | 0    | 0    |
| dof-miR-124 | chi-miR-3958-3p | Capra hircus             | AGATATTGCACGGTTGATCTCT  | 0   | 0    | 0.18 | 0.9  | 0    | 0    | 0    | 0.14 |
|             | bta-miR-154c    | Bos taurus               |                         | 0   | 0    | 0.18 | 0.9  | 0    | 0    | 0    | 0.14 |
|             | oar-miR-3958-3p | Ovis aries               |                         | 0   | 0    | 0.18 | 0.9  | 0    | 0    | 0    | 0.14 |
| dof-miR-125 | ptc-miR167f-3p  | Populus trichocarpa      | AGATCATGTGGCAGTTTCACC   | 0   | 0    | 0.18 | 5.05 | 0    | 0    | 0    | 0    |
|             | ptc-miR167g-3p  | Populus trichocarpa      |                         | 0   | 0    | 0.18 | 5.05 | 0    | 0    | 0    | 0    |
|             | ptc-miR167h-3p  | Populus trichocarpa      |                         | 0   | 0    | 0.18 | 5.05 | 0    | 0    | 0    | 0    |
|             | ahy-miR167-3p   | Arachis hypogaea         |                         | 0   | 0    | 0.18 | 5.05 | 0    | 0    | 0    | 0    |
| dof-miR-126 | hsa-miR-369-5p  | Homo sapiens             | AGATCGACCGTGTATATTCGC   | 0   | 0    | 0    | 0    | 0    | 0.1  | 0    | 0    |
|             | mmu-miR-369-5p  | Mus musculus             |                         | 0   | 0    | 0    | 0    | 0    | 0.1  | 0    | 0    |
|             | rno-miR-369-5p  | Rattus norvegicus        |                         | 0   | 0    | 0    | 0    | 0    | 0.1  | 0    | 0    |
|             | cgr-miR-369-5p  | Cricetulus griseus       |                         | 0   | 0    | 0    | 0    | 0    | 0.1  | 0    | 0    |
|             | ppy-miR-369-5p  | Pongo pygmaeus           |                         | 0   | 0    | 0    | 0    | 0    | 0.1  | 0    | 0    |
|             | mml-miR-369-5p  | Macaca mulatta           |                         | 0   | 0    | 0    | 0    | 0    | 0.1  | 0    | 0    |
| dof-miR-127 | oan-miR-10b-3p  | Ornithorhynchus anatinus | AGATTCGATTCTAGGGGAAT    | 0   | 0.25 | 0    | 0    | 0    | 0    | 0    | 0    |
|             | aca-miR-10b-3p  | Anolis carolinensis      |                         | 0   | 0.25 | 0    | 0    | 0    | 0    | 0    | 0    |
|             | tgu-miR-10a-3p  | Taeniopygia guttata      |                         | 0   | 0.25 | 0    | 0    | 0    | 0    | 0    | 0    |
| dof-miR-128 | ipu-miR-107b    | Ictalurus punctatus      | AGCAGCATTGTACAGGGCT     | 0.2 | 0    | 0.55 | 0    | 0.84 | 0.63 | 0    | 0.28 |
| dof-miR-129 | chi-miR-107-3p  | Capra hircus             | AGCAGCATTGTACAGGGCTAT   | 0   | 0    | 0.55 | 0.36 | 0.47 | 0.21 | 0.33 | 0    |
|             | tch-miR-107     | Tupaia chinensis         |                         | 0   | 0    | 0.55 | 0.36 | 0.47 | 0.21 | 0.33 | 0    |
|             | ola-miR-103     | Oryzias latipes          |                         | 0   | 0    | 0.55 | 0.36 | 0.47 | 0.21 | 0.33 | 0    |

|             |                     |                          |                         |   |      |      |      |      |      |      |      |
|-------------|---------------------|--------------------------|-------------------------|---|------|------|------|------|------|------|------|
|             | ola-miR-107         | Oryzias latipes          |                         | 0 | 0    | 0.55 | 0.36 | 0.47 | 0.21 | 0.33 | 0    |
|             | cfa-miR-107         | Canis familiaris         |                         | 0 | 0    | 0.55 | 0.36 | 0.47 | 0.21 | 0.33 | 0    |
| dof-miR-130 | bta-miR-107         | Bos taurus               | AGCAGCATTGTACAGGGCTATC  | 0 | 0    | 0    | 0    | 0.09 | 0    | 0    | 0    |
|             | oan-miR-107-3p      | Ornithorhynchus anatinus |                         | 0 | 0    | 0    | 0    | 0.09 | 0    | 0    | 0    |
|             | ssa-miR-107-3p      | Salmo salar              |                         | 0 | 0    | 0    | 0    | 0.09 | 0    | 0    | 0    |
|             | ipu-miR-107a        | Ictalurus punctatus      |                         | 0 | 0    | 0    | 0    | 0.09 | 0    | 0    | 0    |
|             | oar-miR-107         | Ovis aries               |                         | 0 | 0    | 0    | 0    | 0.09 | 0    | 0    | 0    |
|             | ccr-miR-107         | Cyprinus carpio          |                         | 0 | 0    | 0    | 0    | 0.09 | 0    | 0    | 0    |
|             | cgr-miR-107         | Cricetulus griseus       |                         | 0 | 0    | 0    | 0    | 0.09 | 0    | 0    | 0    |
|             | aca-miR-107-3p      | Anolis carolinensis      |                         | 0 | 0    | 0    | 0    | 0.09 | 0    | 0    | 0    |
| dof-miR-131 | hsa-miR-107         | Homo sapiens             | AGCAGCATTGTACAGGGCTATCA | 0 | 0.25 | 0    | 0    | 0.19 | 0    | 0    | 0    |
|             | mmu-miR-107-3p      | Mus musculus             |                         | 0 | 0.25 | 0    | 0    | 0.19 | 0    | 0    | 0    |
|             | rno-miR-107-3p      | Rattus norvegicus        |                         | 0 | 0.25 | 0    | 0    | 0.19 | 0    | 0    | 0    |
|             | gga-miR-107-3p      | Gallus gallus            |                         | 0 | 0.25 | 0    | 0    | 0.19 | 0    | 0    | 0    |
|             | dre-miR-107a-3p     | Danio rerio              |                         | 0 | 0.25 | 0    | 0    | 0.19 | 0    | 0    | 0    |
|             | ssc-miR-107         | Sus scrofa               |                         | 0 | 0.25 | 0    | 0    | 0.19 | 0    | 0    | 0    |
|             | mml-miR-107-3p      | Macaca mulatta           |                         | 0 | 0.25 | 0    | 0    | 0.19 | 0    | 0    | 0    |
|             | ptr-miR-107         | Pan troglodytes          |                         | 0 | 0.25 | 0    | 0    | 0.19 | 0    | 0    | 0    |
|             | ggo-miR-107         | Gorilla gorilla          |                         | 0 | 0.25 | 0    | 0    | 0.19 | 0    | 0    | 0    |
|             | ppy-miR-107         | Pongo pygmaeus           |                         | 0 | 0.25 | 0    | 0    | 0.19 | 0    | 0    | 0    |
|             | lla-miR-107         | Lagothrix lagotricha     |                         | 0 | 0.25 | 0    | 0    | 0.19 | 0    | 0    | 0    |
|             | mne-miR-107         | Macaca nemestrina        |                         | 0 | 0.25 | 0    | 0    | 0.19 | 0    | 0    | 0    |
|             | ppa-miR-107         | Pan paniscus             |                         | 0 | 0.25 | 0    | 0    | 0.19 | 0    | 0    | 0    |
|             | tni-miR-107         | Tetraodon nigroviridis   |                         | 0 | 0.25 | 0    | 0    | 0.19 | 0    | 0    | 0    |
|             | xtr-miR-107         | Xenopus tropicalis       |                         | 0 | 0.25 | 0    | 0    | 0.19 | 0    | 0    | 0    |
|             | mdo-miR-107         | Monodelphis domestica    |                         | 0 | 0.25 | 0    | 0    | 0.19 | 0    | 0    | 0    |
|             | oha-miR-107-3p      | Ophiophagus hannah       |                         | 0 | 0.25 | 0    | 0    | 0.19 | 0    | 0    | 0    |
|             | eca-miR-107b        | Equus caballus           |                         | 0 | 0.25 | 0    | 0    | 0.19 | 0    | 0    | 0    |
| tgu-miR-107 | Taeniopygia guttata | 0                        | 0.25                    | 0 | 0    | 0.19 | 0    | 0    | 0    |      |      |
| dof-miR-132 | oar-miR-103         | Ovis aries               | AGCAGCATTGTACAGGGCTATG  | 0 | 0    | 0.37 | 1.26 | 0.56 | 0.1  | 0    | 0    |
|             | aca-miR-103-3p      | Anolis carolinensis      |                         | 0 | 0    | 0.37 | 1.26 | 0.56 | 0.1  | 0    | 0    |
| dof-miR-133 | hsa-miR-103a-3p     | Homo sapiens             | AGCAGCATTGTACAGGGCTATGA | 0 | 0    | 3.67 | 5.59 | 9.05 | 0.94 | 0.5  | 0.42 |
|             | mmu-miR-103-3p      | Mus musculus             |                         | 0 | 0    | 3.67 | 5.59 | 9.05 | 0.94 | 0.5  | 0.42 |
|             | rno-miR-103-3p      | Rattus norvegicus        |                         | 0 | 0    | 3.67 | 5.59 | 9.05 | 0.94 | 0.5  | 0.42 |

|             |                 |                          |                       |      |       |      |      |      |      |      |      |
|-------------|-----------------|--------------------------|-----------------------|------|-------|------|------|------|------|------|------|
|             | gga-miR-103-3p  | Gallus gallus            |                       | 0    | 0     | 3.67 | 5.59 | 9.05 | 0.94 | 0.5  | 0.42 |
|             | dre-miR-103     | Danio rerio              |                       | 0    | 0     | 3.67 | 5.59 | 9.05 | 0.94 | 0.5  | 0.42 |
|             | ssc-miR-103     | Sus scrofa               |                       | 0    | 0     | 3.67 | 5.59 | 9.05 | 0.94 | 0.5  | 0.42 |
|             | age-miR-103     | Ateles geoffroyi         |                       | 0    | 0     | 3.67 | 5.59 | 9.05 | 0.94 | 0.5  | 0.42 |
|             | ggo-miR-103     | Gorilla gorilla          |                       | 0    | 0     | 3.67 | 5.59 | 9.05 | 0.94 | 0.5  | 0.42 |
|             | ppa-miR-103     | Pan paniscus             |                       | 0    | 0     | 3.67 | 5.59 | 9.05 | 0.94 | 0.5  | 0.42 |
|             | ppy-miR-103     | Pongo pygmaeus           |                       | 0    | 0     | 3.67 | 5.59 | 9.05 | 0.94 | 0.5  | 0.42 |
|             | ptr-miR-103     | Pan troglodytes          |                       | 0    | 0     | 3.67 | 5.59 | 9.05 | 0.94 | 0.5  | 0.42 |
|             | mml-miR-103-3p  | Macaca mulatta           |                       | 0    | 0     | 3.67 | 5.59 | 9.05 | 0.94 | 0.5  | 0.42 |
|             | lla-miR-103     | Lagothrix lagotricha     |                       | 0    | 0     | 3.67 | 5.59 | 9.05 | 0.94 | 0.5  | 0.42 |
|             | mne-miR-103     | Macaca nemestrina        |                       | 0    | 0     | 3.67 | 5.59 | 9.05 | 0.94 | 0.5  | 0.42 |
|             | fru-miR-103     | Fugu rubripes            |                       | 0    | 0     | 3.67 | 5.59 | 9.05 | 0.94 | 0.5  | 0.42 |
|             | tmi-miR-103     | Tetraodon nigroviridis   |                       | 0    | 0     | 3.67 | 5.59 | 9.05 | 0.94 | 0.5  | 0.42 |
|             | fru-miR-107     | Fugu rubripes            |                       | 0    | 0     | 3.67 | 5.59 | 9.05 | 0.94 | 0.5  | 0.42 |
|             | bta-miR-103     | Bos taurus               |                       | 0    | 0     | 3.67 | 5.59 | 9.05 | 0.94 | 0.5  | 0.42 |
|             | xtr-miR-103     | Xenopus tropicalis       |                       | 0    | 0     | 3.67 | 5.59 | 9.05 | 0.94 | 0.5  | 0.42 |
|             | mdo-miR-103-3p  | Monodelphis domestica    |                       | 0    | 0     | 3.67 | 5.59 | 9.05 | 0.94 | 0.5  | 0.42 |
|             | oan-miR-103-3p  | Ornithorhynchus anatinus |                       | 0    | 0     | 3.67 | 5.59 | 9.05 | 0.94 | 0.5  | 0.42 |
|             | chi-miR-103-3p  | Capra hircus             |                       | 0    | 0     | 3.67 | 5.59 | 9.05 | 0.94 | 0.5  | 0.42 |
|             | tch-miR-103a-3p | Tupaia chinensis         |                       | 0    | 0     | 3.67 | 5.59 | 9.05 | 0.94 | 0.5  | 0.42 |
|             | oha-miR-103a-3p | Ophiophagus hannah       |                       | 0    | 0     | 3.67 | 5.59 | 9.05 | 0.94 | 0.5  | 0.42 |
|             | oha-miR-103b-3p | Ophiophagus hannah       |                       | 0    | 0     | 3.67 | 5.59 | 9.05 | 0.94 | 0.5  | 0.42 |
|             | ssa-miR-103-3p  | Salmo salar              |                       | 0    | 0     | 3.67 | 5.59 | 9.05 | 0.94 | 0.5  | 0.42 |
|             | ipu-miR-103     | Ictalurus punctatus      |                       | 0    | 0     | 3.67 | 5.59 | 9.05 | 0.94 | 0.5  | 0.42 |
|             | ccr-miR-103     | Cyprinus carpio          |                       | 0    | 0     | 3.67 | 5.59 | 9.05 | 0.94 | 0.5  | 0.42 |
|             | cgr-miR-103-3p  | Cricetulus griseus       |                       | 0    | 0     | 3.67 | 5.59 | 9.05 | 0.94 | 0.5  | 0.42 |
|             | pma-miR-103b-3p | Petromyzon marinus       |                       | 0    | 0     | 3.67 | 5.59 | 9.05 | 0.94 | 0.5  | 0.42 |
|             | eca-miR-107a    | Equus caballus           |                       | 0    | 0     | 3.67 | 5.59 | 9.05 | 0.94 | 0.5  | 0.42 |
|             | eca-miR-103     | Equus caballus           |                       | 0    | 0     | 3.67 | 5.59 | 9.05 | 0.94 | 0.5  | 0.42 |
|             | tgu-miR-103-3p  | Taeniopygia guttata      |                       | 0    | 0     | 3.67 | 5.59 | 9.05 | 0.94 | 0.5  | 0.42 |
|             | cfa-miR-103     | Canis familiaris         |                       | 0    | 0     | 3.67 | 5.59 | 9.05 | 0.94 | 0.5  | 0.42 |
| dof-miR-134 | hbr-miR6173     | Hevea brasiliensis       | AGCCGTAAACGATGGATACT  | 1.58 | 15.53 | 0    | 3.24 | 1.03 | 0.42 | 2    | 1.54 |
| dof-miR-135 | ccr-miR-222     | Cyprinus carpio          | AGCTACATCTGGCTACTGGG  | 0    | 0     | 0    | 0    | 0    | 0.1  | 0    | 0    |
| dof-miR-136 | hsa-miR-222-3p  | Homo sapiens             | AGCTACATCTGGCTACTGGGT | 0    | 0     | 0    | 0    | 0.47 | 0    | 0.17 | 0    |

|             |                 |                          |                           |   |   |      |      |      |      |      |      |
|-------------|-----------------|--------------------------|---------------------------|---|---|------|------|------|------|------|------|
|             | mmu-miR-222-3p  | Mus musculus             |                           | 0 | 0 | 0    | 0    | 0.47 | 0    | 0.17 | 0    |
|             | rno-miR-222-3p  | Rattus norvegicus        |                           | 0 | 0 | 0    | 0    | 0.47 | 0    | 0.17 | 0    |
|             | bta-miR-222     | Bos taurus               |                           | 0 | 0 | 0    | 0    | 0.47 | 0    | 0.17 | 0    |
|             | oan-miR-222a-3p | Ornithorhynchus anatinus |                           | 0 | 0 | 0    | 0    | 0.47 | 0    | 0.17 | 0    |
|             | tch-miR-222-3p  | Tupaia chinensis         |                           | 0 | 0 | 0    | 0    | 0.47 | 0    | 0.17 | 0    |
|             | sha-miR-222     | Sarcophilus harrisii     |                           | 0 | 0 | 0    | 0    | 0.47 | 0    | 0.17 | 0    |
|             | ppy-miR-222     | Pongo pygmaeus           |                           | 0 | 0 | 0    | 0    | 0.47 | 0    | 0.17 | 0    |
|             | eca-miR-222     | Equus caballus           |                           | 0 | 0 | 0    | 0    | 0.47 | 0    | 0.17 | 0    |
|             | mml-miR-222-3p  | Macaca mulatta           |                           | 0 | 0 | 0    | 0    | 0.47 | 0    | 0.17 | 0    |
|             | cfa-miR-222     | Canis familiaris         |                           | 0 | 0 | 0    | 0    | 0.47 | 0    | 0.17 | 0    |
| dof-miR-137 | ssa-miR-222b-3p | Salmo salar              | AGCTACATCTGGCTACTGGGTC    | 0 | 0 | 0    | 0    | 0.19 | 0    | 0    | 0    |
|             | ptr-miR-222     | Pan troglodytes          |                           | 0 | 0 | 0    | 0    | 0.19 | 0    | 0    | 0    |
|             | ggo-miR-222     | Gorilla gorilla          |                           | 0 | 0 | 0    | 0    | 0.19 | 0    | 0    | 0    |
|             | aca-miR-222a-3p | Anolis carolinensis      |                           | 0 | 0 | 0    | 0    | 0.19 | 0    | 0    | 0    |
| dof-miR-138 | gga-miR-222a    | Gallus gallus            | AGCTACATCTGGCTACTGGGTCTC  | 0 | 0 | 0    | 0.18 | 0.37 | 0    | 0.17 | 0.14 |
|             | dre-miR-222a-3p | Danio rerio              |                           | 0 | 0 | 0    | 0.18 | 0.37 | 0    | 0.17 | 0.14 |
|             | age-miR-222     | Ateles geoffroyi         |                           | 0 | 0 | 0    | 0.18 | 0.37 | 0    | 0.17 | 0.14 |
|             | fru-miR-222     | Fugu rubripes            |                           | 0 | 0 | 0    | 0.18 | 0.37 | 0    | 0.17 | 0.14 |
|             | tmi-miR-222     | Tetraodon nigroviridis   |                           | 0 | 0 | 0    | 0.18 | 0.37 | 0    | 0.17 | 0.14 |
|             | xtr-miR-222     | Xenopus tropicalis       |                           | 0 | 0 | 0    | 0.18 | 0.37 | 0    | 0.17 | 0.14 |
|             | mdo-miR-222a    | Monodelphis domestica    |                           | 0 | 0 | 0    | 0.18 | 0.37 | 0    | 0.17 | 0.14 |
|             | chi-miR-222-3p  | Capra hircus             |                           | 0 | 0 | 0    | 0.18 | 0.37 | 0    | 0.17 | 0.14 |
|             | oha-miR-222a-3p | Ophiophagus hannah       |                           | 0 | 0 | 0    | 0.18 | 0.37 | 0    | 0.17 | 0.14 |
|             | ssa-miR-222a-3p | Salmo salar              |                           | 0 | 0 | 0    | 0.18 | 0.37 | 0    | 0.17 | 0.14 |
|             | ssc-miR-222     | Sus scrofa               |                           | 0 | 0 | 0    | 0.18 | 0.37 | 0    | 0.17 | 0.14 |
|             | tgu-miR-222-3p  | Taeniopygia guttata      |                           | 0 | 0 | 0    | 0.18 | 0.37 | 0    | 0.17 | 0.14 |
| dof-miR-139 | cgr-miR-222-3p  | Cricetulus griseus       | AGCTACATCTGGCTACTGGGTCTCT | 0 | 0 | 0    | 0.18 | 0.56 | 0.1  | 0.17 | 0    |
| dof-miR-140 | tch-miR-221-3p  | Tupaia chinensis         | AGCTACATTGTCTGCTGGGTT     | 0 | 0 | 0    | 0    | 0.28 | 0.31 | 0.17 | 0.14 |
|             | sha-miR-221     | Sarcophilus harrisii     |                           | 0 | 0 | 0    | 0    | 0.28 | 0.31 | 0.17 | 0.14 |
| dof-miR-141 | bta-miR-221     | Bos taurus               | AGCTACATTGTCTGCTGGGTTT    | 0 | 0 | 0.37 | 0    | 0.65 | 0.31 | 0.67 | 0.14 |
|             | oan-miR-221-3p  | Ornithorhynchus anatinus |                           | 0 | 0 | 0.37 | 0    | 0.65 | 0.31 | 0.67 | 0.14 |
|             | chi-miR-221-3p  | Capra hircus             |                           | 0 | 0 | 0.37 | 0    | 0.65 | 0.31 | 0.67 | 0.14 |
|             | ssa-miR-221-5p  | Salmo salar              |                           | 0 | 0 | 0.37 | 0    | 0.65 | 0.31 | 0.67 | 0.14 |
|             | ipu-miR-221     | Ictalurus punctatus      |                           | 0 | 0 | 0.37 | 0    | 0.65 | 0.31 | 0.67 | 0.14 |



|                |                     |                        |                         |      |      |      |      |      |      |      |      |
|----------------|---------------------|------------------------|-------------------------|------|------|------|------|------|------|------|------|
|                | oar-miR-221         | Ovis aries             |                         | 0    | 0    | 0.37 | 0    | 0.65 | 0.31 | 0.67 | 0.14 |
|                | pol-miR-221-3p      | Paralichthys olivaceus |                         | 0    | 0    | 0.37 | 0    | 0.65 | 0.31 | 0.67 | 0.14 |
|                | aca-miR-221-3p      | Anolis carolinensis    |                         | 0    | 0    | 0.37 | 0    | 0.65 | 0.31 | 0.67 | 0.14 |
|                | cfa-miR-221         | Canis familiaris       |                         | 0    | 0    | 0.37 | 0    | 0.65 | 0.31 | 0.67 | 0.14 |
|                | ssc-miR-221-3p      | Sus scrofa             |                         | 0    | 0    | 0.37 | 0    | 0.65 | 0.31 | 0.67 | 0.14 |
| dof-miR-142    | hsa-miR-221-3p      | Homo sapiens           | AGCTACATTGTCTGCTGGGTTTC | 0.2  | 0.25 | 0.18 | 0    | 2.33 | 0.1  | 0    | 0    |
|                | mmu-miR-221-3p      | Mus musculus           |                         | 0.2  | 0.25 | 0.18 | 0    | 2.33 | 0.1  | 0    | 0    |
|                | rno-miR-221-3p      | Rattus norvegicus      |                         | 0.2  | 0.25 | 0.18 | 0    | 2.33 | 0.1  | 0    | 0    |
|                | gga-miR-221-3p      | Gallus gallus          |                         | 0.2  | 0.25 | 0.18 | 0    | 2.33 | 0.1  | 0    | 0    |
|                | dre-miR-221-3p      | Danio rerio            |                         | 0.2  | 0.25 | 0.18 | 0    | 2.33 | 0.1  | 0    | 0    |
|                | mml-miR-221-3p      | Macaca mulatta         |                         | 0.2  | 0.25 | 0.18 | 0    | 2.33 | 0.1  | 0    | 0    |
|                | ggo-miR-221         | Gorilla gorilla        |                         | 0.2  | 0.25 | 0.18 | 0    | 2.33 | 0.1  | 0    | 0    |
|                | ppy-miR-221         | Pongo pygmaeus         |                         | 0.2  | 0.25 | 0.18 | 0    | 2.33 | 0.1  | 0    | 0    |
|                | ppa-miR-221         | Pan paniscus           |                         | 0.2  | 0.25 | 0.18 | 0    | 2.33 | 0.1  | 0    | 0    |
|                | fru-miR-221         | Fugu rubripes          |                         | 0.2  | 0.25 | 0.18 | 0    | 2.33 | 0.1  | 0    | 0    |
|                | tni-miR-221         | Tetraodon nigroviridis |                         | 0.2  | 0.25 | 0.18 | 0    | 2.33 | 0.1  | 0    | 0    |
|                | xtr-miR-221         | Xenopus tropicalis     |                         | 0.2  | 0.25 | 0.18 | 0    | 2.33 | 0.1  | 0    | 0    |
|                | mdo-miR-221-3p      | Monodelphis domestica  |                         | 0.2  | 0.25 | 0.18 | 0    | 2.33 | 0.1  | 0    | 0    |
|                | oha-miR-221-3p      | Ophiophagus hannah     |                         | 0.2  | 0.25 | 0.18 | 0    | 2.33 | 0.1  | 0    | 0    |
|                | ola-miR-221         | Oryzias latipes        |                         | 0.2  | 0.25 | 0.18 | 0    | 2.33 | 0.1  | 0    | 0    |
|                | cgr-miR-221-3p      | Cricetulus griseus     |                         | 0.2  | 0.25 | 0.18 | 0    | 2.33 | 0.1  | 0    | 0    |
|                | eca-miR-221         | Equus caballus         |                         | 0.2  | 0.25 | 0.18 | 0    | 2.33 | 0.1  | 0    | 0    |
| tgu-miR-221-3p | Taeniopygia guttata | 0.2                    | 0.25                    | 0.18 | 0    | 2.33 | 0.1  | 0    | 0    |      |      |
| ptr-miR-221    | Pan troglodytes     | 0.2                    | 0.25                    | 0.18 | 0    | 2.33 | 0.1  | 0    | 0    |      |      |
| dof-miR-143    | gma-miR390e         | Glycine max            | AGCTCAGGAGGGATAGCGCC    | 1.58 | 0    | 0.37 | 1.26 | 0    | 0    | 0    | 0.7  |
| dof-miR-144    | hsa-miR-423-3p      | Homo sapiens           | AGCTCGGTCTGAGGCCCTCAGT  | 0.2  | 0.51 | 0.18 | 1.44 | 1.4  | 0.31 | 0.17 | 0.14 |
|                | mmu-miR-423-3p      | Mus musculus           |                         | 0.2  | 0.51 | 0.18 | 1.44 | 1.4  | 0.31 | 0.17 | 0.14 |
|                | rno-miR-423-3p      | Rattus norvegicus      |                         | 0.2  | 0.51 | 0.18 | 1.44 | 1.4  | 0.31 | 0.17 | 0.14 |
|                | chi-miR-423-3p      | Capra hircus           |                         | 0.2  | 0.51 | 0.18 | 1.44 | 1.4  | 0.31 | 0.17 | 0.14 |
|                | tch-miR-423-3p      | Tupaia chinensis       |                         | 0.2  | 0.51 | 0.18 | 1.44 | 1.4  | 0.31 | 0.17 | 0.14 |
|                | cgr-miR-423-3p      | Cricetulus griseus     |                         | 0.2  | 0.51 | 0.18 | 1.44 | 1.4  | 0.31 | 0.17 | 0.14 |
|                | ppy-miR-423-3p      | Pongo pygmaeus         |                         | 0.2  | 0.51 | 0.18 | 1.44 | 1.4  | 0.31 | 0.17 | 0.14 |
|                | eca-miR-423-3p      | Equus caballus         |                         | 0.2  | 0.51 | 0.18 | 1.44 | 1.4  | 0.31 | 0.17 | 0.14 |
| ssc-miR-423-3p | Sus scrofa          | 0.2                    | 0.51                    | 0.18 | 1.44 | 1.4  | 0.31 | 0.17 | 0.14 |      |      |

|             |                 |                               |                         |     |      |      |      |      |      |      |      |
|-------------|-----------------|-------------------------------|-------------------------|-----|------|------|------|------|------|------|------|
|             | mml-miR-423-3p  | Macaca mulatta                |                         | 0.2 | 0.51 | 0.18 | 1.44 | 1.4  | 0.31 | 0.17 | 0.14 |
|             | ptr-miR-423     | Pan troglodytes               |                         | 0.2 | 0.51 | 0.18 | 1.44 | 1.4  | 0.31 | 0.17 | 0.14 |
| dof-miR-145 | ola-miR-1388-5p | Oryzias latipes               | AGGACTGTCCAACCTGAGAATG  | 0   | 0    | 0    | 0    | 0.09 | 0    | 0    | 0    |
|             | dre-miR-1388-5p | Danio rerio                   |                         | 0   | 0    | 0    | 0    | 0.09 | 0    | 0    | 0    |
| dof-miR-146 | ola-miR-144     | Oryzias latipes               | AGGATATCATCTTATACTGTAA  | 0   | 0.25 | 0    | 0    | 0    | 0    | 0    | 0    |
| dof-miR-147 | hsa-miR-31-5p   | Homo sapiens                  |                         | 0   | 0    | 0    | 0    | 0.09 | 0    | 0    | 0    |
|             | bta-miR-31      | Bos taurus                    | AGGCAAGATGCTGGCATAGCT   | 0   | 0    | 0    | 0    | 0.09 | 0    | 0    | 0    |
|             | eca-miR-31      | Equus caballus                |                         | 0   | 0    | 0    | 0    | 0.09 | 0    | 0    | 0    |
| dof-miR-148 | pml-miR-31-5p   | Patiria miniata               |                         | 0   | 0    | 0    | 0    | 0    | 0    | 0.17 | 0    |
|             | lva-miR-31-5p   | Lytechinus variegatus         |                         | 0   | 0    | 0    | 0    | 0    | 0    | 0.17 | 0    |
|             | aca-miR-31-5p   | Anolis carolinensis           | AGGCAAGATGTTGGCATAGCT   | 0   | 0    | 0    | 0    | 0    | 0    | 0.17 | 0    |
|             | cte-miR-31      | Capitella teleta              |                         | 0   | 0    | 0    | 0    | 0    | 0    | 0.17 | 0    |
|             | lgi-miR-31      | Lottia gigantea               |                         | 0   | 0    | 0    | 0    | 0    | 0    | 0.17 | 0    |
|             | spu-miR-31      | Strongylocentrotus purpuratus |                         | 0   | 0    | 0    | 0    | 0    | 0    | 0.17 | 0    |
| dof-miR-149 | gma-miR4995     | Glycine max                   | AGGCAGTGGCTTGGTTAAGGG   | 0   | 1.02 | 0    | 0    | 0    | 0    | 0    | 0.14 |
| dof-miR-150 | mmu-miR-34c-5p  | Mus musculus                  |                         | 0   | 0    | 2.2  | 1.44 | 0    | 0    | 0.17 | 0    |
|             | hsa-miR-34c-5p  | Homo sapiens                  |                         | 0   | 0    | 2.2  | 1.44 | 0    | 0    | 0.17 | 0    |
|             | rno-miR-34c-5p  | Rattus norvegicus             |                         | 0   | 0    | 2.2  | 1.44 | 0    | 0    | 0.17 | 0    |
|             | gga-miR-34c-5p  | Gallus gallus                 |                         | 0   | 0    | 2.2  | 1.44 | 0    | 0    | 0.17 | 0    |
|             | oan-miR-34a-5p  | Ornithorhynchus anatinus      |                         | 0   | 0    | 2.2  | 1.44 | 0    | 0    | 0.17 | 0    |
|             | chi-miR-34c-5p  | Capra hircus                  |                         | 0   | 0    | 2.2  | 1.44 | 0    | 0    | 0.17 | 0    |
|             | tch-miR-34c-5p  | Tupaia chinensis              |                         | 0   | 0    | 2.2  | 1.44 | 0    | 0    | 0.17 | 0    |
|             | mdo-miR-34c-5p  | Monodelphis domestica         | AGGCAGTGTAGTTAGCTGATTGC | 0   | 0    | 2.2  | 1.44 | 0    | 0    | 0.17 | 0    |
|             | cgr-miR-34c-5p  | Cricetulus griseus            |                         | 0   | 0    | 2.2  | 1.44 | 0    | 0    | 0.17 | 0    |
|             | ppy-miR-34c-5p  | Pongo pygmaeus                |                         | 0   | 0    | 2.2  | 1.44 | 0    | 0    | 0.17 | 0    |
|             | eca-miR-34c     | Equus caballus                |                         | 0   | 0    | 2.2  | 1.44 | 0    | 0    | 0.17 | 0    |
|             | ssc-miR-34c     | Sus scrofa                    |                         | 0   | 0    | 2.2  | 1.44 | 0    | 0    | 0.17 | 0    |
|             | tgu-miR-34b     | Taeniopygia guttata           |                         | 0   | 0    | 2.2  | 1.44 | 0    | 0    | 0.17 | 0    |
|             | mml-miR-34c-5p  | Macaca mulatta                |                         | 0   | 0    | 2.2  | 1.44 | 0    | 0    | 0.17 | 0    |
|             | cfa-miR-34c     | Canis familiaris              |                         | 0   | 0    | 2.2  | 1.44 | 0    | 0    | 0.17 | 0    |
| dof-miR-151 | chi-miR-25-5p   | Capra hircus                  | AGGCGGAGACTTGGGCAATTGCT | 0   | 0    | 0.18 | 0.18 | 0    | 0    | 0    | 0    |
|             | cgr-miR-25-5p   | Cricetulus griseus            |                         | 0   | 0    | 0.18 | 0.18 | 0    | 0    | 0    | 0    |
| dof-miR-152 | mmu-miR-185-3p  | Mus musculus                  | AGGGGCTGGCTTTCCTCTGGT   | 0   | 0    | 0    | 0    | 0.09 | 0    | 0    | 0    |
|             | cgr-miR-185-3p  | Cricetulus griseus            |                         | 0   | 0    | 0    | 0    | 0.09 | 0    | 0    | 0    |

|              |                 |                          |                          |       |      |      |      |      |      |      |       |
|--------------|-----------------|--------------------------|--------------------------|-------|------|------|------|------|------|------|-------|
|              | mml-miR-185-3p  | Macaca mulatta           |                          | 0     | 0    | 0    | 0    | 0.09 | 0    | 0    | 0     |
| dof-miR-153  | ssc-miR-296-3p  | Sus scrofa               | AGGGTTGGGCGGAGGCTTTCC    | 0     | 0    | 0    | 0.54 | 0    | 0    | 0    | 0     |
| dof-miR-154  | osa-miR171i-5p  | Oryza sativa             | AGGTATTGGCGTGCTCAATC     | 22.78 | 3.82 | 0.92 | 0.18 | 0.09 | 0.42 | 20.2 | 15.83 |
| dof-miR-155  | ggo-miR-409     | Gorilla gorilla          | AGGTTACCCGAGCAACTTTGCA   | 0     | 0    | 0    | 0    | 0    | 0    | 0.17 | 0     |
| dof-miR-156  | mmu-miR-409-5p  | Mus musculus             | AGGTTACCCGAGCAACTTTGCAT  | 0     | 0.25 | 0.37 | 0.54 | 0.09 | 0    | 0.33 | 0     |
|              | hsa-miR-409-5p  | Homo sapiens             |                          | 0     | 0.25 | 0.37 | 0.54 | 0.09 | 0    | 0.33 | 0     |
|              | rno-miR-409a-5p | Rattus norvegicus        |                          | 0     | 0.25 | 0.37 | 0.54 | 0.09 | 0    | 0.33 | 0     |
|              | chi-miR-409-5p  | Capra hircus             |                          | 0     | 0.25 | 0.37 | 0.54 | 0.09 | 0    | 0.33 | 0     |
|              | oar-miR-409-5p  | Ovis aries               |                          | 0     | 0.25 | 0.37 | 0.54 | 0.09 | 0    | 0.33 | 0     |
|              | ppy-miR-409-5p  | Pongo pygmaeus           |                          | 0     | 0.25 | 0.37 | 0.54 | 0.09 | 0    | 0.33 | 0     |
|              | eca-miR-409-5p  | Equus caballus           |                          | 0     | 0.25 | 0.37 | 0.54 | 0.09 | 0    | 0.33 | 0     |
|              | mml-miR-409-5p  | Macaca mulatta           |                          | 0     | 0.25 | 0.37 | 0.54 | 0.09 | 0    | 0.33 | 0     |
| bta-miR-409a | Bos taurus      | 0                        | 0.25                     | 0.37  | 0.54 | 0.09 | 0    | 0.33 | 0    |      |       |
| dof-miR-157  | cgr-miR-409-5p  | Cricetulus griseus       | AGGTTACCCGAGCAACTTTGCATC | 0     | 0    | 0    | 0    | 0    | 0    | 0.33 | 0     |
| dof-miR-158  | chi-miR-485-3p  | Capra hircus             | AGTCATACACGGCTCTCTCTCT   | 0     | 0    | 0    | 0.18 | 0    | 0    | 0    | 0     |
| dof-miR-159  | bta-miR-142-3p  | Bos taurus               | AGTGTTCCTACTTTATGGATG    | 0     | 0    | 0    | 0    | 0.28 | 0    | 0    | 0     |
|              | ssa-miR-142a-3p | Salmo salar              |                          | 0     | 0    | 0    | 0    | 0.28 | 0    | 0    | 0     |
| dof-miR-160  | mmu-miR-669b-5p | Mus musculus             | AGTTTTGTGTGCATGTGCATGT   | 0     | 0    | 0    | 0    | 0    | 0    | 0.17 | 0     |
| dof-miR-161  | mmu-miR-9-3p    | Mus musculus             | ATAAAGCTAGATAACCGAAAGT   | 0     | 0    | 0    | 0    | 0.09 | 0    | 0    | 0     |
|              | hsa-miR-9-3p    | Homo sapiens             |                          | 0     | 0    | 0    | 0    | 0.09 | 0    | 0    | 0     |
|              | rno-miR-9a-3p   | Rattus norvegicus        |                          | 0     | 0    | 0    | 0    | 0.09 | 0    | 0    | 0     |
|              | mdo-miR-9a-3p   | Monodelphis domestica    |                          | 0     | 0    | 0    | 0    | 0.09 | 0    | 0    | 0     |
|              | ssa-miR-9a-4-3p | Salmo salar              |                          | 0     | 0    | 0    | 0    | 0.09 | 0    | 0    | 0     |
|              | ssa-miR-9a-5-3p | Salmo salar              |                          | 0     | 0    | 0    | 0    | 0.09 | 0    | 0    | 0     |
|              | tgu-miR-9-3p    | Taeniopygia guttata      |                          | 0     | 0    | 0    | 0    | 0.09 | 0    | 0    | 0     |
| dof-miR-162  | chi-miR-655     | Capra hircus             | ATAATACATGGTTAACCTCTCT   | 0     | 0    | 0    | 0.18 | 0    | 0    | 0    | 0     |
|              | oar-miR-655-3p  | Ovis aries               |                          | 0     | 0    | 0    | 0.18 | 0    | 0    | 0    | 0     |
|              | bta-miR-655     | Bos taurus               |                          | 0     | 0    | 0    | 0.18 | 0    | 0    | 0    | 0     |
| dof-miR-163  | fru-miR-458     | Fugu rubripes            | ATAGCTCTTTAAATGGTACTGC   | 0.2   | 0    | 0    | 0    | 0    | 0    | 0    | 0.14  |
| dof-miR-164  | dre-miR-458-3p  | Danio rerio              | ATAGCTCTTTGAATGGTACTGC   | 0     | 0    | 0    | 0.18 | 0    | 0    | 0    | 0     |
|              | oan-miR-458-3p  | Ornithorhynchus anatinus |                          | 0     | 0    | 0    | 0.18 | 0    | 0    | 0    | 0     |
|              | oha-miR-458-3p  | Ophiophagus hannah       |                          | 0     | 0    | 0    | 0.18 | 0    | 0    | 0    | 0     |
|              | ssa-miR-458-3p  | Salmo salar              |                          | 0     | 0    | 0    | 0.18 | 0    | 0    | 0    | 0     |
|              | ipu-miR-458     | Ictalurus punctatus      |                          | 0     | 0    | 0    | 0.18 | 0    | 0    | 0    | 0     |

|             |                 |                      |                         |     |   |      |      |      |     |      |      |
|-------------|-----------------|----------------------|-------------------------|-----|---|------|------|------|-----|------|------|
|             | aca-miR-458     | Anolis carolinensis  |                         | 0   | 0 | 0    | 0.18 | 0    | 0   | 0    | 0    |
|             | gga-miR-458a-3p | Gallus gallus        |                         | 0   | 0 | 0    | 0.18 | 0    | 0   | 0    | 0    |
| dof-miR-165 | chi-miR-411a-5p | Capra hircus         | ATAGTAGACCGTATAGCGTAC   | 0   | 0 | 0.18 | 0.18 | 0    | 0   | 0    | 0    |
| dof-miR-166 | ggo-miR-411     | Gorilla gorilla      | ATAGTAGACCGTATAGCGTACC  | 0   | 0 | 0.18 | 0.54 | 0    | 0   | 0.17 | 0    |
|             | oar-miR-411a-5p | Ovis aries           |                         | 0   | 0 | 0.18 | 0.54 | 0    | 0   | 0.17 | 0    |
|             | cfa-miR-411     | Canis familiaris     |                         | 0   | 0 | 0.18 | 0.54 | 0    | 0   | 0.17 | 0    |
|             | bta-miR-411a    | Bos taurus           |                         | 0   | 0 | 0.18 | 0.54 | 0    | 0   | 0.17 | 0    |
| dof-miR-167 | oar-miR-374b    | Ovis aries           | ATATAATACAACCTGCTAAGT   | 0   | 0 | 0.18 | 0.54 | 0.37 | 0   | 0    | 0    |
| dof-miR-168 | rno-miR-374-5p  | Rattus norvegicus    | ATATAATACAACCTGCTAAGTG  | 0   | 0 | 0.18 | 0    | 0.09 | 0.1 | 0    | 0    |
|             | mmu-miR-374b-5p | Mus musculus         |                         | 0   | 0 | 0.18 | 0    | 0.09 | 0.1 | 0    | 0    |
|             | hsa-miR-374b-5p | Homo sapiens         |                         | 0   | 0 | 0.18 | 0    | 0.09 | 0.1 | 0    | 0    |
|             | chi-miR-374b-5p | Capra hircus         |                         | 0   | 0 | 0.18 | 0    | 0.09 | 0.1 | 0    | 0    |
|             | cgr-miR-374-5p  | Cricetulus griseus   |                         | 0   | 0 | 0.18 | 0    | 0.09 | 0.1 | 0    | 0    |
|             | ggo-miR-374b    | Gorilla gorilla      |                         | 0   | 0 | 0.18 | 0    | 0.09 | 0.1 | 0    | 0    |
|             | eca-miR-374b    | Equus caballus       |                         | 0   | 0 | 0.18 | 0    | 0.09 | 0.1 | 0    | 0    |
|             | ssc-miR-374b-5p | Sus scrofa           |                         | 0   | 0 | 0.18 | 0    | 0.09 | 0.1 | 0    | 0    |
|             | mml-miR-374b-5p | Macaca mulatta       |                         | 0   | 0 | 0.18 | 0    | 0.09 | 0.1 | 0    | 0    |
|             | cfa-miR-374b    | Canis familiaris     |                         | 0   | 0 | 0.18 | 0    | 0.09 | 0.1 | 0    | 0    |
|             | ptr-miR-374b    | Pan troglodytes      |                         | 0   | 0 | 0.18 | 0    | 0.09 | 0.1 | 0    | 0    |
|             | bta-miR-374b    | Bos taurus           |                         | 0   | 0 | 0.18 | 0    | 0.09 | 0.1 | 0    | 0    |
| dof-miR-169 | tch-miR-374b-5p | Tupaia chinensis     | ATATAATACAACCTGCTAAGTGT | 0   | 0 | 0.18 | 0    | 0    | 0   | 0    | 0    |
| dof-miR-170 | mmu-miR-467e-3p | Mus musculus         | ATATACATACACACACATAT    | 0   | 0 | 0.18 | 0    | 0    | 0   | 0    | 0    |
| dof-miR-171 | ggo-miR-421     | Gorilla gorilla      | ATCAACAGACATTAATTGGGCG  | 0   | 0 | 0    | 0.18 | 0    | 0   | 0    | 0    |
|             | cfa-miR-421     | Canis familiaris     |                         | 0   | 0 | 0    | 0.18 | 0    | 0   | 0    | 0    |
| dof-miR-172 | hsa-miR-421     | Homo sapiens         | ATCAACAGACATTAATTGGGCG  | 0   | 0 | 0.18 | 0    | 0    | 0   | 0    | 0    |
|             | mmu-miR-421-3p  | Mus musculus         |                         | 0   | 0 | 0.18 | 0    | 0    | 0   | 0    | 0    |
|             | chi-miR-421-3p  | Capra hircus         |                         | 0   | 0 | 0.18 | 0    | 0    | 0   | 0    | 0    |
|             | ppy-miR-421     | Pongo pygmaeus       |                         | 0   | 0 | 0.18 | 0    | 0    | 0   | 0    | 0    |
|             | ssc-miR-421-3p  | Sus scrofa           |                         | 0   | 0 | 0.18 | 0    | 0    | 0   | 0    | 0    |
|             | mml-miR-421     | Macaca mulatta       |                         | 0   | 0 | 0.18 | 0    | 0    | 0   | 0    | 0    |
|             | ptr-miR-421     | Pan troglodytes      |                         | 0   | 0 | 0.18 | 0    | 0    | 0   | 0    | 0    |
|             | bta-miR-421     | Bos taurus           |                         | 0   | 0 | 0.18 | 0    | 0    | 0   | 0    | 0    |
| dof-miR-173 | oar-miR-23b     | Ovis aries           | ATCACATTGCCAGGGATT      | 0.2 | 0 | 0    | 0.18 | 0.09 | 0   | 0    | 1.4  |
| dof-miR-174 | sha-miR-23b     | Sarcophilus harrisii | ATCACATTGCCAGGGATTA     | 0   | 0 | 0    | 0.18 | 0    | 0   | 0    | 0.14 |

|             |                |                        |                          |      |      |      |      |      |      |      |      |
|-------------|----------------|------------------------|--------------------------|------|------|------|------|------|------|------|------|
|             | cfa-miR-23b    | Canis familiaris       |                          | 0    | 0    | 0    | 0.18 | 0    | 0    | 0    | 0.14 |
| dof-miR-175 | mmu-miR-23b-3p | Mus musculus           | ATCACATTGCCAGGGATTACC    | 0.2  | 0    | 0.92 | 0.9  | 0.37 | 0    | 0.67 | 0.28 |
|             | hsa-miR-23b-3p | Homo sapiens           |                          | 0.2  | 0    | 0.92 | 0.9  | 0.37 | 0    | 0.67 | 0.28 |
|             | rno-miR-23b-3p | Rattus norvegicus      |                          | 0.2  | 0    | 0.92 | 0.9  | 0.37 | 0    | 0.67 | 0.28 |
|             | gga-miR-23b-3p | Gallus gallus          |                          | 0.2  | 0    | 0.92 | 0.9  | 0.37 | 0    | 0.67 | 0.28 |
|             | xtr-miR-23b    | Xenopus tropicalis     |                          | 0.2  | 0    | 0.92 | 0.9  | 0.37 | 0    | 0.67 | 0.28 |
|             | mdo-miR-23b-3p | Monodelphis domestica  |                          | 0.2  | 0    | 0.92 | 0.9  | 0.37 | 0    | 0.67 | 0.28 |
|             | chi-miR-23b-3p | Capra hircus           |                          | 0.2  | 0    | 0.92 | 0.9  | 0.37 | 0    | 0.67 | 0.28 |
|             | ipu-miR-23b    | Ictalurus punctatus    |                          | 0.2  | 0    | 0.92 | 0.9  | 0.37 | 0    | 0.67 | 0.28 |
|             | ccr-miR-23b    | Cyprinus carpio        |                          | 0.2  | 0    | 0.92 | 0.9  | 0.37 | 0    | 0.67 | 0.28 |
|             | cgr-miR-23b-3p | Cricetulus griseus     |                          | 0.2  | 0    | 0.92 | 0.9  | 0.37 | 0    | 0.67 | 0.28 |
|             | aca-miR-23b-3p | Anolis carolinensis    |                          | 0.2  | 0    | 0.92 | 0.9  | 0.37 | 0    | 0.67 | 0.28 |
|             | eca-miR-23b    | Equus caballus         |                          | 0.2  | 0    | 0.92 | 0.9  | 0.37 | 0    | 0.67 | 0.28 |
|             | tgu-miR-23-3p  | Taeniopygia guttata    |                          | 0.2  | 0    | 0.92 | 0.9  | 0.37 | 0    | 0.67 | 0.28 |
|             | mml-miR-23b-3p | Macaca mulatta         |                          | 0.2  | 0    | 0.92 | 0.9  | 0.37 | 0    | 0.67 | 0.28 |
| dof-miR-176 | dre-miR-23b    | Danio rerio            | ATCACATTGCCAGGGATTACCA   | 0    | 0.25 | 0.18 | 0.36 | 0.37 | 0    | 0.17 | 0    |
|             | fru-miR-23b    | Fugu rubripes          |                          | 0    | 0.25 | 0.18 | 0.36 | 0.37 | 0    | 0.17 | 0    |
|             | tmi-miR-23b    | Tetraodon nigroviridis |                          | 0    | 0.25 | 0.18 | 0.36 | 0.37 | 0    | 0.17 | 0    |
|             | ggo-miR-23b    | Gorilla gorilla        |                          | 0    | 0.25 | 0.18 | 0.36 | 0.37 | 0    | 0.17 | 0    |
|             | ssc-miR-23b    | Sus scrofa             |                          | 0    | 0.25 | 0.18 | 0.36 | 0.37 | 0    | 0.17 | 0    |
| dof-miR-177 | ptr-miR-23b    | Pan troglodytes        | ATCACATTGCCAGGGATTACCAC  | 0    | 0    | 0    | 0    | 0.28 | 0    | 0    | 0    |
|             | ppy-miR-23b    | Pongo pygmaeus         |                          | 0    | 0    | 0    | 0    | 0.28 | 0    | 0    | 0    |
|             | ppa-miR-23b    | Pan paniscus           |                          | 0    | 0    | 0    | 0    | 0.28 | 0    | 0    | 0    |
|             | bta-miR-23b-3p | Bos taurus             |                          | 0    | 0    | 0    | 0    | 0.28 | 0    | 0    | 0    |
|             | oha-miR-23b-3p | Ophiophagus hannah     |                          | 0    | 0    | 0    | 0    | 0.28 | 0    | 0    | 0    |
|             | ola-miR-23b    | Oryzias latipes        |                          | 0    | 0    | 0    | 0    | 0.28 | 0    | 0    | 0    |
|             | pma-miR-23b    | Petromyzon marinus     |                          | 0    | 0    | 0    | 0    | 0.28 | 0    | 0    | 0    |
| dof-miR-178 | ssa-miR-23b-3p | Salmo salar            | ATCACATTGCCAGGGATTACCACC | 0    | 0.25 | 0    | 0    | 0    | 0    | 0    |      |
| dof-miR-179 | sha-miR-23a    | Sarcophilus harrisii   | ATCACATTGCCAGGGATT       | 0    | 0    | 0    | 0    | 0.37 | 0    | 0    | 0.14 |
|             | cfa-miR-23a    | Canis familiaris       |                          | 0    | 0    | 0    | 0    | 0.37 | 0    | 0    | 0.14 |
| dof-miR-180 | mdo-miR-23a-3p | Monodelphis domestica  | ATCACATTGCCAGGGATTTC     | 0    | 0    | 0.18 | 0    | 0.28 | 0    | 0    |      |
| dof-miR-181 | hsa-miR-23a-3p | Homo sapiens           | ATCACATTGCCAGGGATTCC     | 0.59 | 0.51 | 1.1  | 0.18 | 1.03 | 0.21 | 0.83 | 0.28 |
|             | mmu-miR-23a-3p | Mus musculus           |                          | 0.59 | 0.51 | 1.1  | 0.18 | 1.03 | 0.21 | 0.83 | 0.28 |
|             | rno-miR-23a-3p | Rattus norvegicus      |                          | 0.59 | 0.51 | 1.1  | 0.18 | 1.03 | 0.21 | 0.83 | 0.28 |



|             |                 |                          |                          |      |      |      |      |      |      |      |      |      |   |
|-------------|-----------------|--------------------------|--------------------------|------|------|------|------|------|------|------|------|------|---|
|             | ppy-miR-1260b   | Pongo pygmaeus           |                          | 0    | 0    | 0    | 0    | 0    | 0    | 0.17 | 0    |      |   |
|             | bta-miR-1260b   | Bos taurus               |                          | 0    | 0    | 0    | 0    | 0    | 0    | 0.17 | 0    |      |   |
| dof-miR-186 | cgr-miR-1260    | Cricetulus griseus       | ATCCCACCGTGCCACCA        | 0    | 0    | 0    | 0.18 | 0.09 | 0    | 0    | 0    |      |   |
| dof-miR-187 | ipu-miR-7550    | Ictalurus punctatus      | ATCCGGCTCGAAGGACCA       | 0    | 0    | 0    | 0    | 0    | 0    | 0    | 0.14 |      |   |
|             | mse-miR-2779    | Manduca sexta            |                          | 0    | 0    | 0    | 0    | 0    | 0    | 0    | 0    | 0.14 |   |
| dof-miR-188 | oan-miR-1388-3p | Ornithorhynchus anatinus | ATCTCAGGTTTCGTCAGCCCATG  | 0    | 0    | 0    | 0    | 0    | 0    | 0    | 0.17 | 0    |   |
|             | ssa-miR-1338-3p | Salmo salar              |                          | 0    | 0    | 0    | 0    | 0    | 0    | 0    | 0    | 0.17 | 0 |
|             | tgu-miR-1388-3p | Taeniopygia guttata      |                          | 0    | 0    | 0    | 0    | 0    | 0    | 0    | 0    | 0.17 | 0 |
|             | dre-miR-1388-3p | Danio rerio              |                          | 0    | 0    | 0    | 0    | 0    | 0    | 0    | 0    | 0.17 | 0 |
| dof-miR-189 | ipu-miR-1388    | Ictalurus punctatus      | ATCTCAGGTTTCGTCAGCCCATGA | 0    | 0    | 0    | 0    | 0    | 0    | 0.33 | 0    |      |   |
| dof-miR-190 | mtr-miR395a     | Medicago truncatula      | ATGAAGTGTTGGGGGAAGTC     | 0    | 1.02 | 0.18 | 0    | 1.87 | 3.65 | 0.5  | 0    |      |   |
|             | sbi-miR395f     | Sorghum bicolor          |                          | 0    | 1.02 | 0.18 | 0    | 1.87 | 3.65 | 0.5  | 0    |      |   |
|             | mtr-miR395c     | Medicago truncatula      |                          | 0    | 1.02 | 0.18 | 0    | 1.87 | 3.65 | 0.5  | 0    |      |   |
|             | mtr-miR395d     | Medicago truncatula      |                          | 0    | 1.02 | 0.18 | 0    | 1.87 | 3.65 | 0.5  | 0    |      |   |
|             | mtr-miR395e     | Medicago truncatula      |                          | 0    | 1.02 | 0.18 | 0    | 1.87 | 3.65 | 0.5  | 0    |      |   |
|             | mtr-miR395f     | Medicago truncatula      |                          | 0    | 1.02 | 0.18 | 0    | 1.87 | 3.65 | 0.5  | 0    |      |   |
|             | mtr-miR395i     | Medicago truncatula      |                          | 0    | 1.02 | 0.18 | 0    | 1.87 | 3.65 | 0.5  | 0    |      |   |
|             | mtr-miR395j     | Medicago truncatula      |                          | 0    | 1.02 | 0.18 | 0    | 1.87 | 3.65 | 0.5  | 0    |      |   |
|             | mtr-miR395l     | Medicago truncatula      |                          | 0    | 1.02 | 0.18 | 0    | 1.87 | 3.65 | 0.5  | 0    |      |   |
|             | mtr-miR395m     | Medicago truncatula      |                          | 0    | 1.02 | 0.18 | 0    | 1.87 | 3.65 | 0.5  | 0    |      |   |
|             | mtr-miR395n     | Medicago truncatula      |                          | 0    | 1.02 | 0.18 | 0    | 1.87 | 3.65 | 0.5  | 0    |      |   |
|             | mtr-miR395o     | Medicago truncatula      |                          | 0    | 1.02 | 0.18 | 0    | 1.87 | 3.65 | 0.5  | 0    |      |   |
|             | gma-miR395i     | Glycine max              |                          | 0    | 1.02 | 0.18 | 0    | 1.87 | 3.65 | 0.5  | 0    |      |   |
|             | gma-miR395j     | Glycine max              |                          | 0    | 1.02 | 0.18 | 0    | 1.87 | 3.65 | 0.5  | 0    |      |   |
|             | gma-miR395k     | Glycine max              |                          | 0    | 1.02 | 0.18 | 0    | 1.87 | 3.65 | 0.5  | 0    |      |   |
|             | gma-miR395l     | Glycine max              |                          | 0    | 1.02 | 0.18 | 0    | 1.87 | 3.65 | 0.5  | 0    |      |   |
| gma-miR395m | Glycine max     | 0                        | 1.02                     | 0.18 | 0    | 1.87 | 3.65 | 0.5  | 0    |      |      |      |   |
| dof-miR-191 | hsa-miR-215-5p  | Homo sapiens             | ATGACCTATGAATTGACAGAC    | 0.79 | 1.53 | 0    | 0    | 0    | 0    | 2.5  | 1.96 |      |   |
|             | gga-miR-215-5p  | Gallus gallus            |                          | 0.79 | 1.53 | 0    | 0    | 0    | 0    | 2.5  | 1.96 |      |   |
|             | mml-miR-215-5p  | Macaca mulatta           |                          | 0.79 | 1.53 | 0    | 0    | 0    | 0    | 2.5  | 1.96 |      |   |
|             | ptr-miR-215     | Pan troglodytes          |                          | 0.79 | 1.53 | 0    | 0    | 0    | 0    | 2.5  | 1.96 |      |   |
|             | ppy-miR-215     | Pongo pygmaeus           |                          | 0.79 | 1.53 | 0    | 0    | 0    | 0    | 2.5  | 1.96 |      |   |
|             | ggo-miR-215     | Gorilla gorilla          |                          | 0.79 | 1.53 | 0    | 0    | 0    | 0    | 2.5  | 1.96 |      |   |
|             | mne-miR-215     | Macaca nemestrina        |                          | 0.79 | 1.53 | 0    | 0    | 0    | 0    | 2.5  | 1.96 |      |   |

|             |                 |                          |                         |      |      |      |       |      |   |       |      |
|-------------|-----------------|--------------------------|-------------------------|------|------|------|-------|------|---|-------|------|
|             | oan-miR-215-5p  | Ornithorhynchus anatinus |                         | 0.79 | 1.53 | 0    | 0     | 0    | 0 | 2.5   | 1.96 |
|             | chi-miR-215-5p  | Capra hircus             |                         | 0.79 | 1.53 | 0    | 0     | 0    | 0 | 2.5   | 1.96 |
|             | eca-miR-215     | Equus caballus           |                         | 0.79 | 1.53 | 0    | 0     | 0    | 0 | 2.5   | 1.96 |
|             | tgu-miR-215-5p  | Taeniopygia guttata      |                         | 0.79 | 1.53 | 0    | 0     | 0    | 0 | 2.5   | 1.96 |
|             | ssc-miR-215     | Sus scrofa               |                         | 0.79 | 1.53 | 0    | 0     | 0    | 0 | 2.5   | 1.96 |
| dof-miR-192 | bta-miR-215     | Bos taurus               | ATGACCTATGAATTGACAGACA  | 1.39 | 2.55 | 0    | 0.18  | 0    | 0 | 12.86 | 7.29 |
|             | cgr-miR-215-5p  | Cricetulus griseus       |                         | 1.39 | 2.55 | 0    | 0.18  | 0    | 0 | 12.86 | 7.29 |
|             | mdo-miR-215     | Monodelphis domestica    |                         | 1.39 | 2.55 | 0    | 0.18  | 0    | 0 | 12.86 | 7.29 |
| dof-miR-193 | dre-miR-192     | Danio rerio              | ATGACCTATGAATTGACAGCC   | 0.4  | 0.76 | 0.18 | 0     | 0.09 | 0 | 0.33  | 0    |
|             | fru-miR-192     | Fugu rubripes            |                         | 0.4  | 0.76 | 0.18 | 0     | 0.09 | 0 | 0.33  | 0    |
|             | tmi-miR-192     | Tetraodon nigroviridis   |                         | 0.4  | 0.76 | 0.18 | 0     | 0.09 | 0 | 0.33  | 0    |
|             | xtr-miR-192     | Xenopus tropicalis       |                         | 0.4  | 0.76 | 0.18 | 0     | 0.09 | 0 | 0.33  | 0    |
|             | ssa-miR-192a-5p | Salmo salar              |                         | 0.4  | 0.76 | 0.18 | 0     | 0.09 | 0 | 0.33  | 0    |
|             | ipu-miR-192     | Ictalurus punctatus      |                         | 0.4  | 0.76 | 0.18 | 0     | 0.09 | 0 | 0.33  | 0    |
|             | ccr-miR-192     | Cyprinus carpio          |                         | 0.4  | 0.76 | 0.18 | 0     | 0.09 | 0 | 0.33  | 0    |
| dof-miR-194 | chi-miR-500-3p  | Capra hircus             | ATGCACCTGGGCAAGGATTCT   | 0    | 0    | 0    | 0     | 0.09 | 0 | 0     | 0    |
|             | ssc-miR-500     | Sus scrofa               |                         | 0    | 0    | 0    | 0     | 0.09 | 0 | 0     | 0    |
|             | cfa-miR-500     | Canis familiaris         |                         | 0    | 0    | 0    | 0     | 0.09 | 0 | 0     | 0    |
| dof-miR-195 | hsa-miR-500a-3p | Homo sapiens             | ATGCACCTGGGCAAGGATTCTG  | 0    | 0    | 0    | 0.36  | 0    | 0 | 0     | 0    |
| dof-miR-196 | ggo-miR-502b    | Gorilla gorilla          | ATGCACCTGGGCAAGGATTCTGA | 0    | 0    | 0    | 0.36  | 0.28 | 0 | 0.33  | 0    |
|             | mml-miR-500a-3p | Macaca mulatta           |                         | 0    | 0    | 0    | 0.36  | 0.28 | 0 | 0.33  | 0    |
| dof-miR-197 | ath-miR408-3p   | Arabidopsis thaliana     | ATGCACTGCCTCTTCCCTGGC   | 0    | 0    | 0    | 27.03 | 0    | 0 | 0     | 0    |
|             | ptc-miR408-3p   | Populus trichocarpa      |                         | 0    | 0    | 0    | 27.03 | 0    | 0 | 0     | 0    |
|             | pta-miR408      | Pinus taeda              |                         | 0    | 0    | 0    | 27.03 | 0    | 0 | 0     | 0    |
|             | vvi-miR408      | Vitis vinifera           |                         | 0    | 0    | 0    | 27.03 | 0    | 0 | 0     | 0    |
|             | mdm-miR408a     | Malus domestica          |                         | 0    | 0    | 0    | 27.03 | 0    | 0 | 0     | 0    |
|             | cme-miR408      | Cucumis melo             |                         | 0    | 0    | 0    | 27.03 | 0    | 0 | 0     | 0    |
|             | mtr-miR408-3p   | Medicago truncatula      |                         | 0    | 0    | 0    | 27.03 | 0    | 0 | 0     | 0    |
|             | vun-miR408      | Vigna unguiculata        |                         | 0    | 0    | 0    | 27.03 | 0    | 0 | 0     | 0    |
|             | mes-miR408      | Manihot esculenta        |                         | 0    | 0    | 0    | 27.03 | 0    | 0 | 0     | 0    |
|             | lus-miR408a     | Linum usitatissimum      |                         | 0    | 0    | 0    | 27.03 | 0    | 0 | 0     | 0    |
|             | gma-miR408a-3p  | Glycine max              |                         | 0    | 0    | 0    | 27.03 | 0    | 0 | 0     | 0    |
|             | gma-miR408b-3p  | Glycine max              |                         | 0    | 0    | 0    | 27.03 | 0    | 0 | 0     | 0    |
|             | gma-miR408c-3p  | Glycine max              |                         | 0    | 0    | 0    | 27.03 | 0    | 0 | 0     | 0    |



|             |                 |                          |                         |     |      |      |       |      |      |      |      |
|-------------|-----------------|--------------------------|-------------------------|-----|------|------|-------|------|------|------|------|
|             | ahy-miR408-3p   | Arachis hypogaea         |                         | 0   | 0    | 0    | 27.03 | 0    | 0    | 0    | 0    |
|             | csi-miR408      | Citrus sinensis          |                         | 0   | 0    | 0    | 27.03 | 0    | 0    | 0    | 0    |
|             | aly-miR408-3p   | Arabidopsis lyrata       |                         | 0   | 0    | 0    | 27.03 | 0    | 0    | 0    | 0    |
| dof-miR-198 | ssc-miR-7134-3p | Sus scrofa               | ATGCGGAACCTGCGGATACGG   | 0.2 | 0    | 0.37 | 0     | 0    | 0    | 0    | 0    |
| dof-miR-199 | mmu-miR-297b-5p | Mus musculus             | ATGTATGTGTGCATGAACATGT  | 0   | 0    | 0    | 0.18  | 0    | 0    | 0    | 0    |
| dof-miR-200 | oan-miR-145-3p  | Ornithorhynchus anatinus | ATTCCTGGAAATACTGTCTT    | 0   | 0.25 | 0.55 | 0.54  | 0    | 0    | 0    | 0    |
|             | chi-miR-145-3p  | Capra hircus             |                         | 0   | 0.25 | 0.55 | 0.54  | 0    | 0    | 0    | 0    |
|             | ssa-miR-145-3p  | Salmo salar              |                         | 0   | 0.25 | 0.55 | 0.54  | 0    | 0    | 0    | 0    |
| dof-miR-201 | hsa-miR-576-5p  | Homo sapiens             | ATTCTAATTCTCCACGTCTTT   | 0   | 0    | 0    | 0     | 0.09 | 0    | 0    | 0    |
| dof-miR-202 | sly-miR397      | Solanum lycopersicum     | ATTGAGTGCAGCGTTGATGA    | 0   | 0    | 0    | 0.9   | 0    | 0    | 0    | 0    |
| dof-miR-203 | bdi-miR397b-5p  | Brachypodium distachyon  | ATTGAGTGCAGCGTTGATGAA   | 0   | 0    | 0    | 2.16  | 0    | 0    | 0    | 0    |
|             | lus-miR397a     | Linum usitatissimum      |                         | 0   | 0    | 0    | 2.16  | 0    | 0    | 0    | 0    |
| dof-miR-204 | tca-miR-92b-3p  | Tribolium castaneum      | ATTGCACTTGTCGGCCTG      | 0   | 0    | 0    | 0     | 0.09 | 0    | 0    | 0    |
| dof-miR-205 | oar-miR-25      | Ovis aries               | ATTGCACTTGTCGGTCTGA     | 0   | 0.25 | 0    | 0.18  | 0    | 0.1  | 0    | 0    |
| dof-miR-206 | cpa-miR319      | Carica papaya            | ATTGGACTGAAGGGAGCTCC    | 0   | 0    | 0.37 | 0.36  | 0    | 0    | 0    | 0    |
| dof-miR-207 | mmu-miR-186-5p  | Mus musculus             | CAAAGAATTCTCCTTTTGGGCT  | 0.2 | 2.55 | 0.37 | 1.08  | 2.24 | 0.31 | 0.5  | 0.84 |
|             | hsa-miR-186-5p  | Homo sapiens             |                         | 0.2 | 2.55 | 0.37 | 1.08  | 2.24 | 0.31 | 0.5  | 0.84 |
|             | rno-miR-186-5p  | Rattus norvegicus        |                         | 0.2 | 2.55 | 0.37 | 1.08  | 2.24 | 0.31 | 0.5  | 0.84 |
|             | bta-miR-186     | Bos taurus               |                         | 0.2 | 2.55 | 0.37 | 1.08  | 2.24 | 0.31 | 0.5  | 0.84 |
|             | oan-miR-186-5p  | Ornithorhynchus anatinus |                         | 0.2 | 2.55 | 0.37 | 1.08  | 2.24 | 0.31 | 0.5  | 0.84 |
|             | chi-miR-186-5p  | Capra hircus             |                         | 0.2 | 2.55 | 0.37 | 1.08  | 2.24 | 0.31 | 0.5  | 0.84 |
|             | tch-miR-186-5p  | Tupaia chinensis         |                         | 0.2 | 2.55 | 0.37 | 1.08  | 2.24 | 0.31 | 0.5  | 0.84 |
|             | ppy-miR-186     | Pongo pygmaeus           |                         | 0.2 | 2.55 | 0.37 | 1.08  | 2.24 | 0.31 | 0.5  | 0.84 |
|             | eca-miR-186     | Equus caballus           |                         | 0.2 | 2.55 | 0.37 | 1.08  | 2.24 | 0.31 | 0.5  | 0.84 |
|             | mml-miR-186-5p  | Macaca mulatta           |                         | 0.2 | 2.55 | 0.37 | 1.08  | 2.24 | 0.31 | 0.5  | 0.84 |
| dof-miR-208 | ssc-miR-186     | Sus scrofa               | CAAAGAATTCTCCTTTTGGGCTT | 0   | 0.51 | 0    | 0.72  | 1.59 | 0    | 0    | 0    |
|             | ptr-miR-186     | Pan troglodytes          |                         | 0   | 0.51 | 0    | 0.72  | 1.59 | 0    | 0    | 0    |
|             | ggo-miR-186     | Gorilla gorilla          |                         | 0   | 0.51 | 0    | 0.72  | 1.59 | 0    | 0    | 0    |
|             | ppa-miR-186     | Pan paniscus             |                         | 0   | 0.51 | 0    | 0.72  | 1.59 | 0    | 0    | 0    |
|             | mdo-miR-186-5p  | Monodelphis domestica    |                         | 0   | 0.51 | 0    | 0.72  | 1.59 | 0    | 0    | 0    |
|             | cgr-miR-186-5p  | Cricetulus griseus       |                         | 0   | 0.51 | 0    | 0.72  | 1.59 | 0    | 0    | 0    |
| dof-miR-209 | chi-miR-330-3p  | Capra hircus             | CAAAGCACACGGCCTGCAGAGA  | 0   | 0    | 0.18 | 0     | 0.09 | 0    | 0    | 0    |
| dof-miR-210 | sha-miR-93      | Sarcophilus harrisii     | CAAAGTGTCTTCTGCAGGT     | 0   | 1.27 | 0.37 | 0     | 0.09 | 0.31 | 0.33 | 0.42 |

|             |                |                          |                          |   |      |      |      |      |      |      |   |
|-------------|----------------|--------------------------|--------------------------|---|------|------|------|------|------|------|---|
| dof-miR-211 | bta-miR-93     | Bos taurus               | CAAAGTGCTGTTCTGCAGGTA    | 0 | 0    | 0    | 0    | 0.75 | 0.31 | 0.17 | 0 |
| dof-miR-212 | hsa-miR-93-5p  | Homo sapiens             | CAAAGTGCTGTTCTGCAGGTAG   | 0 | 0.25 | 0.18 | 0.36 | 0.19 | 0.31 | 0    | 0 |
|             | mmu-miR-93-5p  | Mus musculus             |                          | 0 | 0.25 | 0.18 | 0.36 | 0.19 | 0.31 | 0    | 0 |
|             | rno-miR-93-5p  | Rattus norvegicus        |                          | 0 | 0.25 | 0.18 | 0.36 | 0.19 | 0.31 | 0    | 0 |
|             | chi-miR-93-5p  | Capra hircus             |                          | 0 | 0.25 | 0.18 | 0.36 | 0.19 | 0.31 | 0    | 0 |
|             | tch-miR-93-5p  | Tupaia chinensis         |                          | 0 | 0.25 | 0.18 | 0.36 | 0.19 | 0.31 | 0    | 0 |
|             | cgr-miR-93-5p  | Cricetulus griseus       |                          | 0 | 0.25 | 0.18 | 0.36 | 0.19 | 0.31 | 0    | 0 |
|             | eca-miR-93     | Equus caballus           |                          | 0 | 0.25 | 0.18 | 0.36 | 0.19 | 0.31 | 0    | 0 |
|             | cfa-miR-93     | Canis familiaris         |                          | 0 | 0.25 | 0.18 | 0.36 | 0.19 | 0.31 | 0    | 0 |
| dof-miR-213 | dre-miR-17a-5p | Danio rerio              | CAAAGTGCTTACAGTGCAGGTA   | 0 | 0.25 | 0.18 | 0.36 | 0    | 0    | 0    | 0 |
|             | fru-miR-17     | Fugu rubripes            |                          | 0 | 0.25 | 0.18 | 0.36 | 0    | 0    | 0    | 0 |
|             | tui-miR-17     | Tetraodon nigroviridis   |                          | 0 | 0.25 | 0.18 | 0.36 | 0    | 0    | 0    | 0 |
|             | oar-miR-17-5p  | Ovis aries               |                          | 0 | 0.25 | 0.18 | 0.36 | 0    | 0    | 0    | 0 |
| dof-miR-214 | hsa-miR-17-5p  | Homo sapiens             | CAAAGTGCTTACAGTGCAGGTA   | 0 | 0    | 0.37 | 0.54 | 0.56 | 0.21 | 0.33 | 0 |
|             | mmu-miR-17-5p  | Mus musculus             |                          | 0 | 0    | 0.37 | 0.54 | 0.56 | 0.21 | 0.33 | 0 |
|             | rno-miR-17-5p  | Rattus norvegicus        |                          | 0 | 0    | 0.37 | 0.54 | 0.56 | 0.21 | 0.33 | 0 |
|             | oan-miR-17-5p  | Ornithorhynchus anatinus |                          | 0 | 0    | 0.37 | 0.54 | 0.56 | 0.21 | 0.33 | 0 |
|             | tch-miR-17-5p  | Tupaia chinensis         |                          | 0 | 0    | 0.37 | 0.54 | 0.56 | 0.21 | 0.33 | 0 |
|             | ssa-miR-17-5p  | Salmo salar              |                          | 0 | 0    | 0.37 | 0.54 | 0.56 | 0.21 | 0.33 | 0 |
|             | ccr-miR-17-5p  | Cyprinus carpio          |                          | 0 | 0    | 0.37 | 0.54 | 0.56 | 0.21 | 0.33 | 0 |
|             | cgr-miR-17-5p  | Cricetulus griseus       |                          | 0 | 0    | 0.37 | 0.54 | 0.56 | 0.21 | 0.33 | 0 |
|             | aca-miR-17-5p  | Anolis carolinensis      |                          | 0 | 0    | 0.37 | 0.54 | 0.56 | 0.21 | 0.33 | 0 |
|             | eca-miR-17     | Equus caballus           |                          | 0 | 0    | 0.37 | 0.54 | 0.56 | 0.21 | 0.33 | 0 |
|             | eca-miR-106a   | Equus caballus           |                          | 0 | 0    | 0.37 | 0.54 | 0.56 | 0.21 | 0.33 | 0 |
|             | tgu-miR-17a-5p | Taeniopygia guttata      |                          | 0 | 0    | 0.37 | 0.54 | 0.56 | 0.21 | 0.33 | 0 |
|             | ssc-miR-17-5p  | Sus scrofa               |                          | 0 | 0    | 0.37 | 0.54 | 0.56 | 0.21 | 0.33 | 0 |
| dof-miR-215 | gga-miR-17-5p  | Gallus gallus            | CAAAGTGCTTACAGTGCAGGTAGT | 0 | 0    | 0    | 0    | 0.19 | 0.21 | 0.17 | 0 |
|             | ggo-miR-17-5p  | Gorilla gorilla          |                          | 0 | 0    | 0    | 0    | 0.19 | 0.21 | 0.17 | 0 |
|             | lca-miR-17-5p  | Lemur catta              |                          | 0 | 0    | 0    | 0    | 0.19 | 0.21 | 0.17 | 0 |
|             | age-miR-17-5p  | Ateles geoffroyi         |                          | 0 | 0    | 0    | 0    | 0.19 | 0.21 | 0.17 | 0 |
|             | ppa-miR-17-5p  | Pan paniscus             |                          | 0 | 0    | 0    | 0    | 0.19 | 0.21 | 0.17 | 0 |
|             | ppy-miR-17-5p  | Pongo pygmaeus           |                          | 0 | 0    | 0    | 0    | 0.19 | 0.21 | 0.17 | 0 |
|             | ptr-miR-17-5p  | Pan troglodytes          |                          | 0 | 0    | 0    | 0    | 0.19 | 0.21 | 0.17 | 0 |
|             | mml-miR-17-5p  | Macaca mulatta           |                          | 0 | 0    | 0    | 0    | 0.19 | 0.21 | 0.17 | 0 |

|             |                 |                          |                         |                |      |      |      |      |      |      |      |
|-------------|-----------------|--------------------------|-------------------------|----------------|------|------|------|------|------|------|------|
|             | sla-miR-17-5p   | Saguinus labiatus        |                         | 0              | 0    | 0    | 0    | 0.19 | 0.21 | 0.17 | 0    |
|             | lla-miR-17-5p   | Lagothrix lagotricha     |                         | 0              | 0    | 0    | 0    | 0.19 | 0.21 | 0.17 | 0    |
|             | mne-miR-17-5p   | Macaca nemestrina        |                         | 0              | 0    | 0    | 0    | 0.19 | 0.21 | 0.17 | 0    |
|             | xtr-miR-17-5p   | Xenopus tropicalis       |                         | 0              | 0    | 0    | 0    | 0.19 | 0.21 | 0.17 | 0    |
|             | bta-miR-17-5p   | Bos taurus               |                         | 0              | 0    | 0    | 0    | 0.19 | 0.21 | 0.17 | 0    |
|             | mdo-miR-17-5p   | Monodelphis domestica    |                         | 0              | 0    | 0    | 0    | 0.19 | 0.21 | 0.17 | 0    |
|             | chi-miR-17-5p   | Capra hircus             |                         | 0              | 0    | 0    | 0    | 0.19 | 0.21 | 0.17 | 0    |
|             | oha-miR-17-5p   | Ophiophagus hannah       |                         | 0              | 0    | 0    | 0    | 0.19 | 0.21 | 0.17 | 0    |
| dof-miR-216 | hsa-miR-21-3p   | Homo sapiens             | CAACACCAGTCGATGGGCTGT   | 0              | 0    | 0    | 0    | 0.47 | 0    | 0    | 0    |
| dof-miR-217 | chi-miR-21-3p   | Capra hircus             | CAACAGCAGTCGATGGGCTGT   | 0              | 0    | 0    | 0    | 0    | 0    | 0.17 | 0    |
| dof-miR-218 | gma-miR9757     | Glycine max              | CAACCTCCTCAGTTAGATCTC   | 0              | 0    | 0.18 | 0    | 0    | 0    | 0    | 0    |
| dof-miR-219 | ggo-miR-191     | Gorilla gorilla          | CAACGGAATCCCAAAAGCAGC   | 0.2            | 0    | 0    | 0    | 0.65 | 0.1  | 0.17 | 0.14 |
| dof-miR-220 | xtr-miR-191     | Xenopus tropicalis       | CAACGGAATCCCAAAAGCAGCT  | 0.99           | 6.11 | 1.29 | 3.06 | 9.33 | 0.63 | 2.67 | 2.24 |
|             | mdo-miR-191-5p  | Monodelphis domestica    |                         | 0.99           | 6.11 | 1.29 | 3.06 | 9.33 | 0.63 | 2.67 | 2.24 |
|             | oan-miR-191-5p  | Ornithorhynchus anatinus |                         | 0.99           | 6.11 | 1.29 | 3.06 | 9.33 | 0.63 | 2.67 | 2.24 |
|             | chi-miR-191-5p  | Capra hircus             |                         | 0.99           | 6.11 | 1.29 | 3.06 | 9.33 | 0.63 | 2.67 | 2.24 |
|             | tch-miR-191-5p  | Tupaia chinensis         |                         | 0.99           | 6.11 | 1.29 | 3.06 | 9.33 | 0.63 | 2.67 | 2.24 |
|             | oar-miR-191     | Ovis aries               |                         | 0.99           | 6.11 | 1.29 | 3.06 | 9.33 | 0.63 | 2.67 | 2.24 |
|             | cfa-miR-191     | Canis familiaris         |                         | 0.99           | 6.11 | 1.29 | 3.06 | 9.33 | 0.63 | 2.67 | 2.24 |
| dof-miR-221 | mmu-miR-191-5p  | Mus musculus             | CAACGGAATCCCAAAAGCAGCTG | 0              | 2.29 | 0.55 | 2.52 | 3.64 | 0.83 | 0.67 | 0.28 |
|             | hsa-miR-191-5p  | Homo sapiens             |                         | 0              | 2.29 | 0.55 | 2.52 | 3.64 | 0.83 | 0.67 | 0.28 |
|             | rno-miR-191a-5p | Rattus norvegicus        |                         | 0              | 2.29 | 0.55 | 2.52 | 3.64 | 0.83 | 0.67 | 0.28 |
|             | bta-miR-191     | Bos taurus               |                         | 0              | 2.29 | 0.55 | 2.52 | 3.64 | 0.83 | 0.67 | 0.28 |
|             | ocu-miR-191-5p  | Oryctolagus cuniculus    |                         | 0              | 2.29 | 0.55 | 2.52 | 3.64 | 0.83 | 0.67 | 0.28 |
|             | oha-miR-191-5p  | Ophiophagus hannah       |                         | 0              | 2.29 | 0.55 | 2.52 | 3.64 | 0.83 | 0.67 | 0.28 |
|             | cgr-miR-191-5p  | Cricetulus griseus       |                         | 0              | 2.29 | 0.55 | 2.52 | 3.64 | 0.83 | 0.67 | 0.28 |
|             | aca-miR-191-5p  | Anolis carolinensis      |                         | 0              | 2.29 | 0.55 | 2.52 | 3.64 | 0.83 | 0.67 | 0.28 |
|             | ppy-miR-191     | Pongo pygmaeus           |                         | 0              | 2.29 | 0.55 | 2.52 | 3.64 | 0.83 | 0.67 | 0.28 |
|             | eca-miR-191a    | Equus caballus           |                         | 0              | 2.29 | 0.55 | 2.52 | 3.64 | 0.83 | 0.67 | 0.28 |
|             | ssc-miR-191     | Sus scrofa               |                         | 0              | 2.29 | 0.55 | 2.52 | 3.64 | 0.83 | 0.67 | 0.28 |
|             |                 | mml-miR-191-5p           |                         | Macaca mulatta |      | 0    | 2.29 | 0.55 | 2.52 | 3.64 | 0.83 |
|             | ptr-miR-191     | Pan troglodytes          |                         | 0              | 2.29 | 0.55 | 2.52 | 3.64 | 0.83 | 0.67 | 0.28 |
| dof-miR-222 | chi-miR-99a-3p  | Capra hircus             | CAAGCTCGCTTCTATGGGTCTGT | 0.2            | 0    | 0    | 0    | 0    | 0    | 0    | 0    |
| dof-miR-223 | rno-miR-224-5p  | Rattus norvegicus        | CAAGTCACTAGTGGTCCGTTT   | 0              | 0    | 0.37 | 0.54 | 0.09 | 0.1  | 0    | 0    |

|             |                 |                    |                         |      |      |      |      |      |      |      |      |
|-------------|-----------------|--------------------|-------------------------|------|------|------|------|------|------|------|------|
|             | chi-miR-224-5p  | Capra hircus       |                         | 0    | 0    | 0.37 | 0.54 | 0.09 | 0.1  | 0    | 0    |
|             | cfa-miR-224     | Canis familiaris   |                         | 0    | 0    | 0.37 | 0.54 | 0.09 | 0.1  | 0    | 0    |
| dof-miR-224 | ssa-miR-33a-3p  | Salmo salar        | CAATGTGTCTGCAGTGAGTA    | 0.2  | 0    | 0    | 0    | 0    | 0    | 0    | 0    |
| dof-miR-225 | gga-miR-219b    | Gallus gallus      | CACAAGAATTGCGTTTGACAA   | 0    | 0    | 0.18 | 0    | 0    | 0    | 0    | 0    |
| dof-miR-226 | hbr-miR396a     | Hevea brasiliensis | CACAGCTTTCTTGAACCTTCT   | 0    | 0    | 0    | 0.9  | 0    | 0.1  | 0    | 0    |
| dof-miR-227 | rno-miR-323-3p  | Rattus norvegicus  | CACATTACACGGTCGACCTCT   | 0    | 0    | 0    | 0.9  | 0    | 0    | 0    | 0    |
|             | mmu-miR-323-3p  | Mus musculus       |                         | 0    | 0    | 0    | 0.9  | 0    | 0    | 0    | 0    |
|             | hsa-miR-323a-3p | Homo sapiens       |                         | 0    | 0    | 0    | 0.9  | 0    | 0    | 0    | 0    |
|             | chi-miR-323a-3p | Capra hircus       |                         | 0    | 0    | 0    | 0.9  | 0    | 0    | 0    | 0    |
|             | oar-miR-323a-3p | Ovis aries         |                         | 0    | 0    | 0    | 0.9  | 0    | 0    | 0    | 0    |
|             | ppy-miR-323-3p  | Pongo pygmaeus     |                         | 0    | 0    | 0    | 0.9  | 0    | 0    | 0    | 0    |
|             | eca-miR-323-3p  | Equus caballus     |                         | 0    | 0    | 0    | 0.9  | 0    | 0    | 0    | 0    |
|             | mml-miR-323a-3p | Macaca mulatta     |                         | 0    | 0    | 0    | 0.9  | 0    | 0    | 0    | 0    |
|             | cfa-miR-323     | Canis familiaris   |                         | 0    | 0    | 0    | 0.9  | 0    | 0    | 0    | 0    |
| ptr-miR-323 | Pan troglodytes | 0                  | 0                       | 0    | 0.9  | 0    | 0    | 0    | 0    |      |      |
| dof-miR-228 | hsa-miR-941     | Homo sapiens       | CACCCGGCTGTGTGCACATGTGC | 0    | 0    | 0    | 0    | 0.28 | 0    | 0    | 0    |
| dof-miR-229 | mmu-miR-99b-5p  | Mus musculus       | CACCCGTAGAACCACCTTGCG   | 0.2  | 0    | 4.59 | 5.77 | 0.84 | 0.21 | 0.5  | 0.14 |
|             | hsa-miR-99b-5p  | Homo sapiens       |                         | 0.2  | 0    | 4.59 | 5.77 | 0.84 | 0.21 | 0.5  | 0.14 |
|             | rno-miR-99b-5p  | Rattus norvegicus  |                         | 0.2  | 0    | 4.59 | 5.77 | 0.84 | 0.21 | 0.5  | 0.14 |
|             | bta-miR-99b     | Bos taurus         |                         | 0.2  | 0    | 4.59 | 5.77 | 0.84 | 0.21 | 0.5  | 0.14 |
|             | ssc-miR-99b     | Sus scrofa         |                         | 0.2  | 0    | 4.59 | 5.77 | 0.84 | 0.21 | 0.5  | 0.14 |
|             | chi-miR-99b-5p  | Capra hircus       |                         | 0.2  | 0    | 4.59 | 5.77 | 0.84 | 0.21 | 0.5  | 0.14 |
|             | tch-miR-99b-5p  | Tupaia chinensis   |                         | 0.2  | 0    | 4.59 | 5.77 | 0.84 | 0.21 | 0.5  | 0.14 |
|             | eca-miR-99b     | Equus caballus     |                         | 0.2  | 0    | 4.59 | 5.77 | 0.84 | 0.21 | 0.5  | 0.14 |
|             | mml-miR-99b-5p  | Macaca mulatta     |                         | 0.2  | 0    | 4.59 | 5.77 | 0.84 | 0.21 | 0.5  | 0.14 |
|             | cfa-miR-99b     | Canis familiaris   |                         | 0.2  | 0    | 4.59 | 5.77 | 0.84 | 0.21 | 0.5  | 0.14 |
| ptr-miR-99b | Pan troglodytes | 0.2                | 0                       | 4.59 | 5.77 | 0.84 | 0.21 | 0.5  | 0.14 |      |      |
| dof-miR-230 | ssa-miR-10d-5p  | Salmo salar        | CACCCGTAGAACCGAATTTGT   | 0    | 0    | 0.55 | 0.72 | 0    | 0    | 0.17 | 0    |
| dof-miR-231 | hsa-miR-574-3p  | Homo sapiens       | CACGCTCATGCACACCCACA    | 0    | 0    | 0    | 0    | 0.09 | 0    | 0    | 0    |
|             | mmu-miR-574-3p  | Mus musculus       |                         | 0    | 0    | 0    | 0    | 0.09 | 0    | 0    | 0    |
|             | ggo-miR-574     | Gorilla gorilla    |                         | 0    | 0    | 0    | 0    | 0.09 | 0    | 0    | 0    |
|             | ssc-miR-574     | Sus scrofa         |                         | 0    | 0    | 0    | 0    | 0.09 | 0    | 0    | 0    |
|             | cfa-miR-574     | Canis familiaris   |                         | 0    | 0    | 0    | 0    | 0.09 | 0    | 0    | 0    |
| dof-miR-232 | hsa-miR-28-3p   | Homo sapiens       | CACTAGATTGTGAGCTCCTGGA  | 0    | 0    | 0    | 0.36 | 0.28 | 0    | 0.17 | 0    |

|             |                |                       |                         |      |      |      |      |      |      |      |      |
|-------------|----------------|-----------------------|-------------------------|------|------|------|------|------|------|------|------|
|             | rno-miR-28-3p  | Rattus norvegicus     |                         | 0    | 0    | 0    | 0.36 | 0.28 | 0    | 0.17 | 0    |
|             | ssc-miR-28-3p  | Sus scrofa            |                         | 0    | 0    | 0    | 0.36 | 0.28 | 0    | 0.17 | 0    |
|             | mml-miR-28-3p  | Macaca mulatta        |                         | 0    | 0    | 0    | 0.36 | 0.28 | 0    | 0.17 | 0    |
|             | cgr-miR-28-3p  | Cricetulus griseus    |                         | 0    | 0    | 0    | 0.36 | 0.28 | 0    | 0.17 | 0    |
|             | eca-miR-28-3p  | Equus caballus        |                         | 0    | 0    | 0    | 0.36 | 0.28 | 0    | 0.17 | 0    |
|             | cfa-miR-28     | Canis familiaris      |                         | 0    | 0    | 0    | 0.36 | 0.28 | 0    | 0.17 | 0    |
| dof-miR-233 | ptc-miR1447    | Populus trichocarpa   | CAGAATTGCAGTGCCTTGATT   | 0    | 0    | 1.1  | 0    | 0    | 0    | 0.5  | 0    |
| dof-miR-234 | cfa-miR-3958   | Canis familiaris      | CAGATATTGCACGGTTGATCTCT | 0    | 0    | 0.18 | 0    | 0    | 0    | 0    | 0    |
| dof-miR-235 | chi-miR-424-5p | Capra hircus          | CAGCAGCAATTCATGTTTTGA   | 0    | 0    | 0.73 | 0.9  | 0    | 0    | 0    | 0    |
|             | tch-miR-424-5p | Tupaia chinensis      |                         | 0    | 0    | 0.73 | 0.9  | 0    | 0    | 0    | 0    |
|             | ggo-miR-424    | Gorilla gorilla       |                         | 0    | 0    | 0.73 | 0.9  | 0    | 0    | 0    | 0    |
|             | bta-miR-424-5p | Bos taurus            |                         | 0    | 0    | 0.73 | 0.9  | 0    | 0    | 0    | 0    |
| dof-miR-236 | hsa-miR-497-5p | Homo sapiens          | CAGCAGCACACTGTGGTTTGT   | 0    | 0    | 0.37 | 0    | 0    | 0    | 0    | 0    |
|             | sha-miR-497    | Sarcophilus harrisii  |                         | 0    | 0    | 0.37 | 0    | 0    | 0    | 0    | 0    |
|             | ppy-miR-497    | Pongo pygmaeus        |                         | 0    | 0    | 0.37 | 0    | 0    | 0    | 0    | 0    |
|             | mdo-miR-497-5p | Monodelphis domestica |                         | 0    | 0    | 0.37 | 0    | 0    | 0    | 0    | 0    |
|             | eca-miR-497    | Equus caballus        |                         | 0    | 0    | 0.37 | 0    | 0    | 0    | 0    | 0    |
|             | ssc-miR-497    | Sus scrofa            |                         | 0    | 0    | 0.37 | 0    | 0    | 0    | 0    | 0    |
|             | mml-miR-497-5p | Macaca mulatta        |                         | 0    | 0    | 0.37 | 0    | 0    | 0    | 0    | 0    |
|             | cfa-miR-497    | Canis familiaris      |                         | 0    | 0    | 0.37 | 0    | 0    | 0    | 0    | 0    |
| dof-miR-237 | gma-miR169v    | Glycine max           | CAGCCAAGGATGACTTGCC     | 0.2  | 0.25 | 0    | 0.18 | 0    | 0    | 0    | 0    |
| dof-miR-238 | ath-miR169a-5p | Arabidopsis thaliana  | CAGCCAAGGATGACTTGCCGA   | 0.99 | 8.15 | 4.59 | 1.08 | 1.12 | 1.25 | 3.34 | 0.28 |
|             | osa-miR169a    | Oryza sativa          |                         | 0.99 | 8.15 | 4.59 | 1.08 | 1.12 | 1.25 | 3.34 | 0.28 |
|             | zma-miR169a-5p | Zea mays              |                         | 0.99 | 8.15 | 4.59 | 1.08 | 1.12 | 1.25 | 3.34 | 0.28 |
|             | zma-miR169b-5p | Zea mays              |                         | 0.99 | 8.15 | 4.59 | 1.08 | 1.12 | 1.25 | 3.34 | 0.28 |
|             | sbi-miR169a    | Sorghum bicolor       |                         | 0.99 | 8.15 | 4.59 | 1.08 | 1.12 | 1.25 | 3.34 | 0.28 |
|             | mtr-miR169a    | Medicago truncatula   |                         | 0.99 | 8.15 | 4.59 | 1.08 | 1.12 | 1.25 | 3.34 | 0.28 |
|             | ptc-miR169a    | Populus trichocarpa   |                         | 0.99 | 8.15 | 4.59 | 1.08 | 1.12 | 1.25 | 3.34 | 0.28 |
|             | ptc-miR169b-5p | Populus trichocarpa   |                         | 0.99 | 8.15 | 4.59 | 1.08 | 1.12 | 1.25 | 3.34 | 0.28 |
|             | ptc-miR169c    | Populus trichocarpa   |                         | 0.99 | 8.15 | 4.59 | 1.08 | 1.12 | 1.25 | 3.34 | 0.28 |
|             | bna-miR169a    | Brassica napus        |                         | 0.99 | 8.15 | 4.59 | 1.08 | 1.12 | 1.25 | 3.34 | 0.28 |
|             | bna-miR169b    | Brassica napus        |                         | 0.99 | 8.15 | 4.59 | 1.08 | 1.12 | 1.25 | 3.34 | 0.28 |
|             | vvi-miR169f    | Vitis vinifera        |                         | 0.99 | 8.15 | 4.59 | 1.08 | 1.12 | 1.25 | 3.34 | 0.28 |
|             | vvi-miR169g    | Vitis vinifera        |                         | 0.99 | 8.15 | 4.59 | 1.08 | 1.12 | 1.25 | 3.34 | 0.28 |

|             |                |                         |                       |      |      |      |      |      |      |      |      |
|-------------|----------------|-------------------------|-----------------------|------|------|------|------|------|------|------|------|
|             | ata-miR169g-5p | Aegilops tauschii       |                       | 0.99 | 8.15 | 4.59 | 1.08 | 1.12 | 1.25 | 3.34 | 0.28 |
|             | ata-miR169e-5p | Aegilops tauschii       |                       | 0.99 | 8.15 | 4.59 | 1.08 | 1.12 | 1.25 | 3.34 | 0.28 |
|             | ata-miR169f-5p | Aegilops tauschii       |                       | 0.99 | 8.15 | 4.59 | 1.08 | 1.12 | 1.25 | 3.34 | 0.28 |
|             | mes-miR169g    | Manihot esculenta       |                       | 0.99 | 8.15 | 4.59 | 1.08 | 1.12 | 1.25 | 3.34 | 0.28 |
|             | lus-miR169g    | Linum usitatissimum     |                       | 0.99 | 8.15 | 4.59 | 1.08 | 1.12 | 1.25 | 3.34 | 0.28 |
|             | lus-miR169l    | Linum usitatissimum     |                       | 0.99 | 8.15 | 4.59 | 1.08 | 1.12 | 1.25 | 3.34 | 0.28 |
|             | nta-miR169a    | Nicotiana tabacum       |                       | 0.99 | 8.15 | 4.59 | 1.08 | 1.12 | 1.25 | 3.34 | 0.28 |
|             | nta-miR169b    | Nicotiana tabacum       |                       | 0.99 | 8.15 | 4.59 | 1.08 | 1.12 | 1.25 | 3.34 | 0.28 |
|             | nta-miR169c    | Nicotiana tabacum       |                       | 0.99 | 8.15 | 4.59 | 1.08 | 1.12 | 1.25 | 3.34 | 0.28 |
|             | nta-miR169d    | Nicotiana tabacum       |                       | 0.99 | 8.15 | 4.59 | 1.08 | 1.12 | 1.25 | 3.34 | 0.28 |
|             | nta-miR169e    | Nicotiana tabacum       |                       | 0.99 | 8.15 | 4.59 | 1.08 | 1.12 | 1.25 | 3.34 | 0.28 |
|             | nta-miR169f    | Nicotiana tabacum       |                       | 0.99 | 8.15 | 4.59 | 1.08 | 1.12 | 1.25 | 3.34 | 0.28 |
|             | nta-miR169g    | Nicotiana tabacum       |                       | 0.99 | 8.15 | 4.59 | 1.08 | 1.12 | 1.25 | 3.34 | 0.28 |
|             | nta-miR169h    | Nicotiana tabacum       |                       | 0.99 | 8.15 | 4.59 | 1.08 | 1.12 | 1.25 | 3.34 | 0.28 |
|             | nta-miR169i    | Nicotiana tabacum       |                       | 0.99 | 8.15 | 4.59 | 1.08 | 1.12 | 1.25 | 3.34 | 0.28 |
|             | nta-miR169j    | Nicotiana tabacum       |                       | 0.99 | 8.15 | 4.59 | 1.08 | 1.12 | 1.25 | 3.34 | 0.28 |
|             | nta-miR169k    | Nicotiana tabacum       |                       | 0.99 | 8.15 | 4.59 | 1.08 | 1.12 | 1.25 | 3.34 | 0.28 |
|             | nta-miR169l    | Nicotiana tabacum       |                       | 0.99 | 8.15 | 4.59 | 1.08 | 1.12 | 1.25 | 3.34 | 0.28 |
|             | nta-miR169m    | Nicotiana tabacum       |                       | 0.99 | 8.15 | 4.59 | 1.08 | 1.12 | 1.25 | 3.34 | 0.28 |
|             | nta-miR169o    | Nicotiana tabacum       |                       | 0.99 | 8.15 | 4.59 | 1.08 | 1.12 | 1.25 | 3.34 | 0.28 |
|             | nta-miR169p    | Nicotiana tabacum       |                       | 0.99 | 8.15 | 4.59 | 1.08 | 1.12 | 1.25 | 3.34 | 0.28 |
|             | tcc-miR169a    | Theobroma cacao         |                       | 0.99 | 8.15 | 4.59 | 1.08 | 1.12 | 1.25 | 3.34 | 0.28 |
|             | tcc-miR169c    | Theobroma cacao         |                       | 0.99 | 8.15 | 4.59 | 1.08 | 1.12 | 1.25 | 3.34 | 0.28 |
|             | tcc-miR169e    | Theobroma cacao         |                       | 0.99 | 8.15 | 4.59 | 1.08 | 1.12 | 1.25 | 3.34 | 0.28 |
|             | bdi-miR169a-5p | Brachypodium distachyon |                       | 0.99 | 8.15 | 4.59 | 1.08 | 1.12 | 1.25 | 3.34 | 0.28 |
|             | aly-miR169a-5p | Arabidopsis lyrata      |                       | 0.99 | 8.15 | 4.59 | 1.08 | 1.12 | 1.25 | 3.34 | 0.28 |
|             | gma-miR169b    | Glycine max             |                       | 0.99 | 8.15 | 4.59 | 1.08 | 1.12 | 1.25 | 3.34 | 0.28 |
|             | sly-miR169c    | Solanum lycopersicum    |                       | 0.99 | 8.15 | 4.59 | 1.08 | 1.12 | 1.25 | 3.34 | 0.28 |
| dof-miR-239 | ath-miR169b-5p | Arabidopsis thaliana    | CAGCCAAGGATGACTTGCCGG | 0.4  | 0    | 0    | 0.18 | 0    | 0.1  | 0    | 0.14 |
|             | ath-miR169c    | Arabidopsis thaliana    |                       | 0.4  | 0    | 0    | 0.18 | 0    | 0.1  | 0    | 0.14 |
|             | osa-miR169b    | Oryza sativa            |                       | 0.4  | 0    | 0    | 0.18 | 0    | 0.1  | 0    | 0.14 |
|             | osa-miR169c    | Oryza sativa            |                       | 0.4  | 0    | 0    | 0.18 | 0    | 0.1  | 0    | 0.14 |
|             | sbi-miR169b    | Sorghum bicolor         |                       | 0.4  | 0    | 0    | 0.18 | 0    | 0.1  | 0    | 0.14 |
|             | gma-miR169a    | Glycine max             |                       | 0.4  | 0    | 0    | 0.18 | 0    | 0.1  | 0    | 0.14 |



|             |                |                         |                          |     |      |      |      |   |     |   |      |
|-------------|----------------|-------------------------|--------------------------|-----|------|------|------|---|-----|---|------|
|             | nta-miR169s    | Nicotiana tabacum       |                          | 0.4 | 0    | 0    | 0.18 | 0 | 0.1 | 0 | 0.14 |
|             | tcc-miR169b    | Theobroma cacao         |                          | 0.4 | 0    | 0    | 0.18 | 0 | 0.1 | 0 | 0.14 |
|             | tcc-miR169k    | Theobroma cacao         |                          | 0.4 | 0    | 0    | 0.18 | 0 | 0.1 | 0 | 0.14 |
|             | tcc-miR169l    | Theobroma cacao         |                          | 0.4 | 0    | 0    | 0.18 | 0 | 0.1 | 0 | 0.14 |
|             | gma-miR169f    | Glycine max             |                          | 0.4 | 0    | 0    | 0.18 | 0 | 0.1 | 0 | 0.14 |
|             | gma-miR169g    | Glycine max             |                          | 0.4 | 0    | 0    | 0.18 | 0 | 0.1 | 0 | 0.14 |
|             | bdi-miR169c-5p | Brachypodium distachyon |                          | 0.4 | 0    | 0    | 0.18 | 0 | 0.1 | 0 | 0.14 |
|             | bdi-miR169f    | Brachypodium distachyon |                          | 0.4 | 0    | 0    | 0.18 | 0 | 0.1 | 0 | 0.14 |
|             | gma-miR169m    | Glycine max             |                          | 0.4 | 0    | 0    | 0.18 | 0 | 0.1 | 0 | 0.14 |
|             | zma-miR169r-5p | Zea mays                |                          | 0.4 | 0    | 0    | 0.18 | 0 | 0.1 | 0 | 0.14 |
|             | rco-miR169a    | Ricinus communis        |                          | 0.4 | 0    | 0    | 0.18 | 0 | 0.1 | 0 | 0.14 |
|             | rco-miR169b    | Ricinus communis        |                          | 0.4 | 0    | 0    | 0.18 | 0 | 0.1 | 0 | 0.14 |
|             | aly-miR169b-5p | Arabidopsis lyrata      |                          | 0.4 | 0    | 0    | 0.18 | 0 | 0.1 | 0 | 0.14 |
|             | aly-miR169c-5p | Arabidopsis lyrata      |                          | 0.4 | 0    | 0    | 0.18 | 0 | 0.1 | 0 | 0.14 |
|             | vvi-miR169w    | Vitis vinifera          |                          | 0.4 | 0    | 0    | 0.18 | 0 | 0.1 | 0 | 0.14 |
|             | sly-miR169a    | Solanum lycopersicum    |                          | 0.4 | 0    | 0    | 0.18 | 0 | 0.1 | 0 | 0.14 |
|             | sbi-miR169k    | Sorghum bicolor         |                          | 0.4 | 0    | 0    | 0.18 | 0 | 0.1 | 0 | 0.14 |
|             | aqc-miR169c    | Aquilegia caerulea      |                          | 0.4 | 0    | 0    | 0.18 | 0 | 0.1 | 0 | 0.14 |
| dof-miR-240 | gga-miR-34b-5p | Gallus gallus           | CAGGCAGTGTAGTTAGCTGATTG  | 0   | 0    | 0    | 0.18 | 0 | 0   | 0 | 0    |
|             | xtr-miR-34b    | Xenopus tropicalis      |                          | 0   | 0    | 0    | 0.18 | 0 | 0   | 0 | 0    |
| dof-miR-241 | dre-miR-456    | Danio rerio             | CAGGCTGGTTAGATGGTTGTCA   | 0   | 0    | 0    | 0.18 | 0 | 0   | 0 | 0    |
|             | gga-miR-456-3p | Gallus gallus           |                          | 0   | 0    | 0    | 0.18 | 0 | 0   | 0 | 0    |
|             | oha-miR-456    | Ophiophagus hannah      |                          | 0   | 0    | 0    | 0.18 | 0 | 0   | 0 | 0    |
|             | ssa-miR-456-3p | Salmo salar             |                          | 0   | 0    | 0    | 0.18 | 0 | 0   | 0 | 0    |
|             | ipu-miR-456    | Ictalurus punctatus     |                          | 0   | 0    | 0    | 0.18 | 0 | 0   | 0 | 0    |
|             | pma-miR-456    | Petromyzon marinus      |                          | 0   | 0    | 0    | 0.18 | 0 | 0   | 0 | 0    |
| dof-miR-242 | rno-miR-370-5p | Rattus norvegicus       | CAGGTCACGTCTCTGCAGTTACAC | 0   | 0    | 0    | 0.18 | 0 | 0   | 0 | 0    |
| dof-miR-243 | mmu-miR-431-3p | Mus musculus            | CAGGTCGTCTTGCAAGGCTTCT   | 0   | 0    | 0.37 | 0    | 0 | 0   | 0 | 0    |
|             | hsa-miR-431-3p | Homo sapiens            |                          | 0   | 0    | 0.37 | 0    | 0 | 0   | 0 | 0    |
| dof-miR-244 | hsa-miR-802    | Homo sapiens            | CAGTAACAAAGATTCATCCTTGT  | 0   | 0.25 | 0    | 0    | 0 | 0   | 0 | 0    |
|             | ppy-miR-802    | Pongo pygmaeus          |                          | 0   | 0.25 | 0    | 0    | 0 | 0   | 0 | 0    |
|             | eca-miR-802    | Equus caballus          |                          | 0   | 0.25 | 0    | 0    | 0 | 0   | 0 | 0    |
|             | mml-miR-802    | Macaca mulatta          |                          | 0   | 0.25 | 0    | 0    | 0 | 0   | 0 | 0    |
|             | ptr-miR-802    | Pan troglodytes         |                          | 0   | 0.25 | 0    | 0    | 0 | 0   | 0 | 0    |



|              |                  |                           |                          |      |      |      |      |      |   |   |   |
|--------------|------------------|---------------------------|--------------------------|------|------|------|------|------|---|---|---|
|              | cfa-miR-802      | Canis familiaris          |                          | 0    | 0.25 | 0    | 0    | 0    | 0 | 0 | 0 |
| dof-miR-245  | pma-miR-199a-3p  | Petromyzon marinus        | CAGTAGTCTGCACATTGGTTA    | 0    | 0    | 0    | 0.36 | 0.09 | 0 | 0 | 0 |
|              | pma-miR-199b-3p  | Petromyzon marinus        |                          | 0    | 0    | 0    | 0.36 | 0.09 | 0 | 0 | 0 |
| dof-miR-246  | dre-miR-130b     | Danio rerio               | CAGTGCAATAATGAAAGGGCAT   | 0    | 0    | 0    | 0.18 | 0    | 0 | 0 | 0 |
|              | oha-miR-130d     | Ophiophagus hannah        |                          | 0    | 0    | 0    | 0.18 | 0    | 0 | 0 | 0 |
|              | ccr-miR-130b     | Cyprinus carpio           |                          | 0    | 0    | 0    | 0.18 | 0    | 0 | 0 | 0 |
| dof-miR-247  | mmu-miR-301a-3p  | Mus musculus              | CAGTGCAATAGTATTGTCAAAGC  | 0    | 0    | 0.18 | 0.36 | 0.19 | 0 | 0 | 0 |
|              | rno-miR-301a-3p  | Rattus norvegicus         |                          | 0    | 0    | 0.18 | 0.36 | 0.19 | 0 | 0 | 0 |
|              | hsa-miR-301a-3p  | Homo sapiens              |                          | 0    | 0    | 0.18 | 0.36 | 0.19 | 0 | 0 | 0 |
|              | xtr-miR-301      | Xenopus tropicalis        |                          | 0    | 0    | 0.18 | 0.36 | 0.19 | 0 | 0 | 0 |
|              | oan-miR-301-3p   | Ornithorhynchus anatinus  |                          | 0    | 0    | 0.18 | 0.36 | 0.19 | 0 | 0 | 0 |
|              | chi-miR-301a-3p  | Capra hircus              |                          | 0    | 0    | 0.18 | 0.36 | 0.19 | 0 | 0 | 0 |
|              | ssa-miR-301d-3p  | Salmo salar               |                          | 0    | 0    | 0.18 | 0.36 | 0.19 | 0 | 0 | 0 |
|              | ipu-miR-301a     | Ictalurus punctatus       |                          | 0    | 0    | 0.18 | 0.36 | 0.19 | 0 | 0 | 0 |
|              | ccr-miR-301a     | Cyprinus carpio           |                          | 0    | 0    | 0.18 | 0.36 | 0.19 | 0 | 0 | 0 |
|              | cgr-miR-301a-3p  | Cricetulus griseus        |                          | 0    | 0    | 0.18 | 0.36 | 0.19 | 0 | 0 | 0 |
|              | aca-miR-301a-3p  | Anolis carolinensis       |                          | 0    | 0    | 0.18 | 0.36 | 0.19 | 0 | 0 | 0 |
|              | mdo-miR-301-3p   | Monodelphis domestica     |                          | 0    | 0    | 0.18 | 0.36 | 0.19 | 0 | 0 | 0 |
|              | eca-miR-301a     | Equus caballus            |                          | 0    | 0    | 0.18 | 0.36 | 0.19 | 0 | 0 | 0 |
|              | tgu-miR-301-3p   | Taeniopygia guttata       |                          | 0    | 0    | 0.18 | 0.36 | 0.19 | 0 | 0 | 0 |
|              | mml-miR-301a-3p  | Macaca mulatta            |                          | 0    | 0    | 0.18 | 0.36 | 0.19 | 0 | 0 | 0 |
| ptr-miR-301a | Pan troglodytes  | 0                         | 0                        | 0.18 | 0.36 | 0.19 | 0    | 0    | 0 |   |   |
| cfa-miR-301a | Canis familiaris | 0                         | 0                        | 0.18 | 0.36 | 0.19 | 0    | 0    | 0 |   |   |
| dof-miR-248  | oha-miR-301a-3p  | Ophiophagus hannah        | CAGTGCAATAGTATTGTCAAAGCA | 0    | 0    | 0.18 | 0    | 0    | 0 | 0 | 0 |
|              | hhi-miR-301      | Hippoglossus hippoglossus |                          | 0    | 0    | 0.18 | 0    | 0    | 0 | 0 | 0 |
| dof-miR-249  | hsa-miR-301b-3p  | Homo sapiens              | CAGTGCAATGATATTGTCAAAGC  | 0    | 0    | 0    | 0    | 0.19 | 0 | 0 | 0 |
|              | chi-miR-301b     | Capra hircus              |                          | 0    | 0    | 0    | 0    | 0.19 | 0 | 0 | 0 |
|              | ppy-miR-301b     | Pongo pygmaeus            |                          | 0    | 0    | 0    | 0    | 0.19 | 0 | 0 | 0 |
|              | eca-miR-301b-3p  | Equus caballus            |                          | 0    | 0    | 0    | 0    | 0.19 | 0 | 0 | 0 |
|              | mml-miR-301b     | Macaca mulatta            |                          | 0    | 0    | 0    | 0    | 0.19 | 0 | 0 | 0 |
|              | ptr-miR-301b     | Pan troglodytes           |                          | 0    | 0    | 0    | 0    | 0.19 | 0 | 0 | 0 |
|              | cfa-miR-301b     | Canis familiaris          |                          | 0    | 0    | 0    | 0    | 0.19 | 0 | 0 | 0 |
| dof-miR-250  | mmu-miR-130b-3p  | Mus musculus              | CAGTGCAATGATGAAAGGGCAT   | 0.2  | 0    | 0    | 0    | 0    | 0 | 0 | 0 |
|              | hsa-miR-130b-3p  | Homo sapiens              |                          | 0.2  | 0    | 0    | 0    | 0    | 0 | 0 | 0 |

|             |                 |                          |                       |     |   |      |      |      |   |   |   |      |
|-------------|-----------------|--------------------------|-----------------------|-----|---|------|------|------|---|---|---|------|
|             | rno-miR-130b-3p | Rattus norvegicus        |                       | 0.2 | 0 | 0    | 0    | 0    | 0 | 0 | 0 | 0    |
|             | xtr-miR-130b    | Xenopus tropicalis       |                       | 0.2 | 0 | 0    | 0    | 0    | 0 | 0 | 0 | 0    |
|             | chi-miR-130b-3p | Capra hircus             |                       | 0.2 | 0 | 0    | 0    | 0    | 0 | 0 | 0 | 0    |
|             | cgr-miR-130b-3p | Cricetulus griseus       |                       | 0.2 | 0 | 0    | 0    | 0    | 0 | 0 | 0 | 0    |
|             | ppy-miR-130b    | Pongo pygmaeus           |                       | 0.2 | 0 | 0    | 0    | 0    | 0 | 0 | 0 | 0    |
|             | eca-miR-130b    | Equus caballus           |                       | 0.2 | 0 | 0    | 0    | 0    | 0 | 0 | 0 | 0    |
|             | ssc-miR-130b    | Sus scrofa               |                       | 0.2 | 0 | 0    | 0    | 0    | 0 | 0 | 0 | 0    |
|             | mml-miR-130b-3p | Macaca mulatta           |                       | 0.2 | 0 | 0    | 0    | 0    | 0 | 0 | 0 | 0    |
|             | cfa-miR-130b    | Canis familiaris         |                       | 0.2 | 0 | 0    | 0    | 0    | 0 | 0 | 0 | 0    |
|             | ptr-miR-130b    | Pan troglodytes          |                       | 0.2 | 0 | 0    | 0    | 0    | 0 | 0 | 0 | 0    |
|             | bta-miR-130b    | Bos taurus               |                       | 0.2 | 0 | 0    | 0    | 0    | 0 | 0 | 0 | 0    |
| dof-miR-251 | mml-miR-130a-3p | Macaca mulatta           | CAGTGCAATGTAAAAGGGC   | 0   | 0 | 0.18 | 0.18 | 0    | 0 | 0 | 0 | 0.14 |
|             | ggo-miR-130a    | Gorilla gorilla          |                       | 0   | 0 | 0.18 | 0.18 | 0    | 0 | 0 | 0 | 0.14 |
|             | mne-miR-130a    | Macaca nemestrina        |                       | 0   | 0 | 0.18 | 0.18 | 0    | 0 | 0 | 0 | 0.14 |
|             | ppa-miR-130a    | Pan paniscus             |                       | 0   | 0 | 0.18 | 0.18 | 0    | 0 | 0 | 0 | 0.14 |
| dof-miR-252 | chi-miR-130a-3p | Capra hircus             | CAGTGCAATGTAAAAGGGCA  | 0   | 0 | 0    | 0.36 | 0    | 0 | 0 | 0 | 0    |
|             | ssa-miR-130b-3p | Salmo salar              |                       | 0   | 0 | 0    | 0.36 | 0    | 0 | 0 | 0 | 0    |
|             | aca-miR-130a-3p | Anolis carolinensis      |                       | 0   | 0 | 0    | 0.36 | 0    | 0 | 0 | 0 | 0    |
| dof-miR-253 | mmu-miR-130a-3p | Mus musculus             | CAGTGCAATGTAAAAGGGCAT | 0   | 0 | 0.55 | 0    | 0.09 | 0 | 0 | 0 | 0.28 |
|             | hsa-miR-130a-3p | Homo sapiens             |                       | 0   | 0 | 0.55 | 0    | 0.09 | 0 | 0 | 0 | 0.28 |
|             | rno-miR-130a-3p | Rattus norvegicus        |                       | 0   | 0 | 0.55 | 0    | 0.09 | 0 | 0 | 0 | 0.28 |
|             | dre-miR-130a    | Danio rerio              |                       | 0   | 0 | 0.55 | 0    | 0.09 | 0 | 0 | 0 | 0.28 |
|             | xtr-miR-130a    | Xenopus tropicalis       |                       | 0   | 0 | 0.55 | 0    | 0.09 | 0 | 0 | 0 | 0.28 |
|             | oan-miR-130b-3p | Ornithorhynchus anatinus |                       | 0   | 0 | 0.55 | 0    | 0.09 | 0 | 0 | 0 | 0.28 |
|             | tch-miR-130a-3p | Tupaia chinensis         |                       | 0   | 0 | 0.55 | 0    | 0.09 | 0 | 0 | 0 | 0.28 |
|             | oha-miR-130b-3p | Ophiophagus hannah       |                       | 0   | 0 | 0.55 | 0    | 0.09 | 0 | 0 | 0 | 0.28 |
|             | ccr-miR-130a    | Cyprinus carpio          |                       | 0   | 0 | 0.55 | 0    | 0.09 | 0 | 0 | 0 | 0.28 |
|             | mdo-miR-130c-3p | Monodelphis domestica    |                       | 0   | 0 | 0.55 | 0    | 0.09 | 0 | 0 | 0 | 0.28 |
|             | cgr-miR-130a-3p | Cricetulus griseus       |                       | 0   | 0 | 0.55 | 0    | 0.09 | 0 | 0 | 0 | 0.28 |
|             | ppy-miR-130a    | Pongo pygmaeus           |                       | 0   | 0 | 0.55 | 0    | 0.09 | 0 | 0 | 0 | 0.28 |
|             | eca-miR-130a    | Equus caballus           |                       | 0   | 0 | 0.55 | 0    | 0.09 | 0 | 0 | 0 | 0.28 |
|             | tgu-miR-130c-3p | Taeniopygia guttata      |                       | 0   | 0 | 0.55 | 0    | 0.09 | 0 | 0 | 0 | 0.28 |
|             | gga-miR-130c-3p | Gallus gallus            |                       | 0   | 0 | 0.55 | 0    | 0.09 | 0 | 0 | 0 | 0.28 |
|             | cfa-miR-130a    | Canis familiaris         |                       | 0   | 0 | 0.55 | 0    | 0.09 | 0 | 0 | 0 | 0.28 |



|                 |                         |                                 |                        |      |      |      |      |      |      |      |      |   |   |
|-----------------|-------------------------|---------------------------------|------------------------|------|------|------|------|------|------|------|------|---|---|
|                 | dvi-miR-8-5p            | <i>Drosophila virilis</i>       |                        | 0    | 0    | 0    | 0    | 0    | 0    | 0    | 0.17 | 0 |   |
|                 | lmi-miR-8-5p            | <i>Locusta migratoria</i>       |                        | 0    | 0    | 0    | 0    | 0    | 0    | 0    | 0.17 | 0 |   |
| dof-miR-264     | hsa-miR-532-5p          | <i>Homo sapiens</i>             | CATGCCTTGAGTGTAGGACCGT | 0    | 0    | 0.73 | 0.72 | 0.37 | 0    | 0    | 0    | 0 |   |
|                 | mmu-miR-532-5p          | <i>Mus musculus</i>             |                        | 0    | 0    | 0.73 | 0.72 | 0.37 | 0    | 0    | 0    | 0 | 0 |
|                 | bta-miR-532             | <i>Bos taurus</i>               |                        | 0    | 0    | 0.73 | 0.72 | 0.37 | 0    | 0    | 0    | 0 | 0 |
|                 | chi-miR-532-5p          | <i>Capra hircus</i>             |                        | 0    | 0    | 0.73 | 0.72 | 0.37 | 0    | 0    | 0    | 0 | 0 |
|                 | tch-miR-532-5p          | <i>Tupaia chinensis</i>         |                        | 0    | 0    | 0.73 | 0.72 | 0.37 | 0    | 0    | 0    | 0 | 0 |
|                 | cgr-miR-532-5p          | <i>Cricetulus griseus</i>       |                        | 0    | 0    | 0.73 | 0.72 | 0.37 | 0    | 0    | 0    | 0 | 0 |
|                 | ppy-miR-532-5p          | <i>Pongo pygmaeus</i>           |                        | 0    | 0    | 0.73 | 0.72 | 0.37 | 0    | 0    | 0    | 0 | 0 |
|                 | eca-miR-532-5p          | <i>Equus caballus</i>           |                        | 0    | 0    | 0.73 | 0.72 | 0.37 | 0    | 0    | 0    | 0 | 0 |
|                 | ssc-miR-532-5p          | <i>Sus scrofa</i>               |                        | 0    | 0    | 0.73 | 0.72 | 0.37 | 0    | 0    | 0    | 0 | 0 |
|                 | mml-miR-532-5p          | <i>Macaca mulatta</i>           |                        | 0    | 0    | 0.73 | 0.72 | 0.37 | 0    | 0    | 0    | 0 | 0 |
| cfa-miR-532     | <i>Canis familiaris</i> | 0                               | 0                      | 0.73 | 0.72 | 0.37 | 0    | 0    | 0    | 0    | 0    |   |   |
| dof-miR-265     | tgu-miR-126-5p          | <i>Taeniopygia guttata</i>      | CATTATTACTTTTGGTACGC   | 0    | 0    | 0    | 0.36 | 0.19 | 0    | 0    | 0    | 0 |   |
| dof-miR-266     | mmu-miR-126a-5p         | <i>Mus musculus</i>             | CATTATTACTTTTGGTACGCG  | 0.2  | 0.51 | 1.1  | 2.34 | 6.53 | 1.25 | 0.17 | 0    | 0 |   |
|                 | hsa-miR-126-5p          | <i>Homo sapiens</i>             |                        | 0.2  | 0.51 | 1.1  | 2.34 | 6.53 | 1.25 | 0.17 | 0    | 0 |   |
|                 | rno-miR-126a-5p         | <i>Rattus norvegicus</i>        |                        | 0.2  | 0.51 | 1.1  | 2.34 | 6.53 | 1.25 | 0.17 | 0    | 0 |   |
|                 | gga-miR-126-5p          | <i>Gallus gallus</i>            |                        | 0.2  | 0.51 | 1.1  | 2.34 | 6.53 | 1.25 | 0.17 | 0    | 0 |   |
|                 | dre-miR-126a-5p         | <i>Danio rerio</i>              |                        | 0.2  | 0.51 | 1.1  | 2.34 | 6.53 | 1.25 | 0.17 | 0    | 0 |   |
|                 | bta-miR-126-5p          | <i>Bos taurus</i>               |                        | 0.2  | 0.51 | 1.1  | 2.34 | 6.53 | 1.25 | 0.17 | 0    | 0 |   |
|                 | xtr-miR-126-5p          | <i>Xenopus tropicalis</i>       |                        | 0.2  | 0.51 | 1.1  | 2.34 | 6.53 | 1.25 | 0.17 | 0    | 0 |   |
|                 | oan-miR-126-5p          | <i>Ornithorhynchus anatinus</i> |                        | 0.2  | 0.51 | 1.1  | 2.34 | 6.53 | 1.25 | 0.17 | 0    | 0 |   |
|                 | ssa-miR-126-5p          | <i>Salmo salar</i>              |                        | 0.2  | 0.51 | 1.1  | 2.34 | 6.53 | 1.25 | 0.17 | 0    | 0 |   |
|                 | ipu-miR-126b            | <i>Ictalurus punctatus</i>      |                        | 0.2  | 0.51 | 1.1  | 2.34 | 6.53 | 1.25 | 0.17 | 0    | 0 |   |
|                 | ccr-miR-126-5p          | <i>Cyprinus carpio</i>          |                        | 0.2  | 0.51 | 1.1  | 2.34 | 6.53 | 1.25 | 0.17 | 0    | 0 |   |
|                 | ola-miR-126-5p          | <i>Oryzias latipes</i>          |                        | 0.2  | 0.51 | 1.1  | 2.34 | 6.53 | 1.25 | 0.17 | 0    | 0 |   |
|                 | aca-miR-126-5p          | <i>Anolis carolinensis</i>      |                        | 0.2  | 0.51 | 1.1  | 2.34 | 6.53 | 1.25 | 0.17 | 0    | 0 |   |
|                 | ssc-miR-126-5p          | <i>Sus scrofa</i>               |                        | 0.2  | 0.51 | 1.1  | 2.34 | 6.53 | 1.25 | 0.17 | 0    | 0 |   |
|                 | mdo-miR-126-5p          | <i>Monodelphis domestica</i>    |                        | 0.2  | 0.51 | 1.1  | 2.34 | 6.53 | 1.25 | 0.17 | 0    | 0 |   |
|                 | eca-miR-126-5p          | <i>Equus caballus</i>           |                        | 0.2  | 0.51 | 1.1  | 2.34 | 6.53 | 1.25 | 0.17 | 0    | 0 |   |
| cfa-miR-126     | <i>Canis familiaris</i> | 0.2                             | 0.51                   | 1.1  | 2.34 | 6.53 | 1.25 | 0.17 | 0    | 0    |      |   |   |
| dre-miR-126b-5p | <i>Danio rerio</i>      | 0.2                             | 0.51                   | 1.1  | 2.34 | 6.53 | 1.25 | 0.17 | 0    | 0    |      |   |   |
| dof-miR-267     | chi-miR-126-5p          | <i>Capra hircus</i>             | CATTATTACTTTTGGTACGCGC | 0    | 0    | 0    | 0    | 0.28 | 0    | 0.17 | 0    |   |   |
| dof-miR-268     | sha-miR-25              | <i>Sarcophilus harrisii</i>     | CATTGCACTTGCTCGGTC     | 0.2  | 0.76 | 0    | 0    | 0.09 | 0.1  | 0    | 0    |   |   |

|               |                    |                        |                        |      |      |      |      |      |      |      |      |
|---------------|--------------------|------------------------|------------------------|------|------|------|------|------|------|------|------|
| dof-miR-269   | hsa-miR-25-3p      | Homo sapiens           | CATTGCACTGTCTCGGTCTGA  | 0.2  | 4.07 | 1.84 | 3.24 | 5.88 | 1.67 | 1.84 | 1.82 |
|               | mmu-miR-25-3p      | Mus musculus           |                        | 0.2  | 4.07 | 1.84 | 3.24 | 5.88 | 1.67 | 1.84 | 1.82 |
|               | rno-miR-25-3p      | Rattus norvegicus      |                        | 0.2  | 4.07 | 1.84 | 3.24 | 5.88 | 1.67 | 1.84 | 1.82 |
|               | dre-miR-25-3p      | Danio rerio            |                        | 0.2  | 4.07 | 1.84 | 3.24 | 5.88 | 1.67 | 1.84 | 1.82 |
|               | ggo-miR-25         | Gorilla gorilla        |                        | 0.2  | 4.07 | 1.84 | 3.24 | 5.88 | 1.67 | 1.84 | 1.82 |
|               | ppa-miR-25         | Pan paniscus           |                        | 0.2  | 4.07 | 1.84 | 3.24 | 5.88 | 1.67 | 1.84 | 1.82 |
|               | ppy-miR-25         | Pongo pygmaeus         |                        | 0.2  | 4.07 | 1.84 | 3.24 | 5.88 | 1.67 | 1.84 | 1.82 |
|               | mml-miR-25         | Macaca mulatta         |                        | 0.2  | 4.07 | 1.84 | 3.24 | 5.88 | 1.67 | 1.84 | 1.82 |
|               | lla-miR-25         | Lagothrix lagotricha   |                        | 0.2  | 4.07 | 1.84 | 3.24 | 5.88 | 1.67 | 1.84 | 1.82 |
|               | mne-miR-25         | Macaca nemestrina      |                        | 0.2  | 4.07 | 1.84 | 3.24 | 5.88 | 1.67 | 1.84 | 1.82 |
|               | fru-miR-25         | Fugu rubripes          |                        | 0.2  | 4.07 | 1.84 | 3.24 | 5.88 | 1.67 | 1.84 | 1.82 |
|               | tui-miR-25         | Tetraodon nigroviridis |                        | 0.2  | 4.07 | 1.84 | 3.24 | 5.88 | 1.67 | 1.84 | 1.82 |
|               | xtr-miR-25         | Xenopus tropicalis     |                        | 0.2  | 4.07 | 1.84 | 3.24 | 5.88 | 1.67 | 1.84 | 1.82 |
|               | bta-miR-25         | Bos taurus             |                        | 0.2  | 4.07 | 1.84 | 3.24 | 5.88 | 1.67 | 1.84 | 1.82 |
|               | mdo-miR-25         | Monodelphis domestica  |                        | 0.2  | 4.07 | 1.84 | 3.24 | 5.88 | 1.67 | 1.84 | 1.82 |
|               | chi-miR-25-3p      | Capra hircus           |                        | 0.2  | 4.07 | 1.84 | 3.24 | 5.88 | 1.67 | 1.84 | 1.82 |
|               | tch-miR-25-3p      | Tupaia chinensis       |                        | 0.2  | 4.07 | 1.84 | 3.24 | 5.88 | 1.67 | 1.84 | 1.82 |
|               | ssa-miR-25-3p      | Salmo salar            |                        | 0.2  | 4.07 | 1.84 | 3.24 | 5.88 | 1.67 | 1.84 | 1.82 |
|               | aja-miR-25         | Artibeus jamaicensis   |                        | 0.2  | 4.07 | 1.84 | 3.24 | 5.88 | 1.67 | 1.84 | 1.82 |
|               | ipu-miR-25         | Ictalurus punctatus    |                        | 0.2  | 4.07 | 1.84 | 3.24 | 5.88 | 1.67 | 1.84 | 1.82 |
| ccr-miR-25    | Cyprinus carpio    | 0.2                    | 4.07                   | 1.84 | 3.24 | 5.88 | 1.67 | 1.84 | 1.82 |      |      |
| cgr-miR-25-3p | Cricetulus griseus | 0.2                    | 4.07                   | 1.84 | 3.24 | 5.88 | 1.67 | 1.84 | 1.82 |      |      |
| eca-miR-25    | Equus caballus     | 0.2                    | 4.07                   | 1.84 | 3.24 | 5.88 | 1.67 | 1.84 | 1.82 |      |      |
| cfa-miR-25    | Canis familiaris   | 0.2                    | 4.07                   | 1.84 | 3.24 | 5.88 | 1.67 | 1.84 | 1.82 |      |      |
| dof-miR-270   | chi-miR-1306-5p    | Capra hircus           | CCACCTCCCCTGCAAACGTCC  | 0    | 0    | 0    | 0    | 0    | 0    | 0.17 | 0    |
|               | mml-miR-1306-5p    | Macaca mulatta         |                        | 0    | 0    | 0    | 0    | 0    | 0    | 0.17 | 0    |
|               | ola-miR-1306       | Oryzias latipes        |                        | 0    | 0    | 0    | 0    | 0    | 0    | 0.17 | 0    |
|               | cgr-miR-1306-5p    | Cricetulus griseus     |                        | 0    | 0    | 0    | 0    | 0    | 0    | 0.17 | 0    |
|               | cfa-miR-1306       | Canis familiaris       |                        | 0    | 0    | 0    | 0    | 0    | 0    | 0.17 | 0    |
|               | bta-miR-1306       | Bos taurus             |                        | 0    | 0    | 0    | 0    | 0    | 0    | 0.17 | 0    |
| dof-miR-271   | hsa-miR-1306-5p    | Homo sapiens           | CCACCTCCCCTGCAAACGTCCA | 0    | 0    | 0.37 | 0    | 0    | 0    | 0    | 0    |
|               | tch-miR-1306-5p    | Tupaia chinensis       |                        | 0    | 0    | 0.37 | 0    | 0    | 0    | 0    | 0    |
|               | dre-miR-1306       | Danio rerio            |                        | 0    | 0    | 0.37 | 0    | 0    | 0    | 0    | 0    |
|               | rno-miR-1306-5p    | Rattus norvegicus      |                        | 0    | 0    | 0.37 | 0    | 0    | 0    | 0    | 0    |

|                |                           |                          |                         |       |      |       |      |      |      |      |      |
|----------------|---------------------------|--------------------------|-------------------------|-------|------|-------|------|------|------|------|------|
|                | ssc-miR-1306-5p           | Sus scrofa               |                         | 0     | 0    | 0.37  | 0    | 0    | 0    | 0    | 0    |
| dof-miR-272    | rno-miR-194-3p            | Rattus norvegicus        | CCAGTGGGGCTGCTGTATCT    | 0     | 0    | 0     | 0    | 0.09 | 0    | 0    | 0    |
| dof-miR-273    | mdo-miR-199b-2-5p         | Monodelphis domestica    | CCAGTGTTTCAGACTACCTGTTC | 0     | 0    | 0.37  | 0    | 0    | 0    | 0.17 | 0    |
| dof-miR-274    | ssc-miR-7139-5p           | Sus scrofa               | CCATTCTTCGTCTGTGCACTAG  | 0     | 0    | 0     | 0    | 0    | 0    | 0.17 | 0    |
| dof-miR-275    | mml-miR-323b-3p           | Macaca mulatta           | CCCAATACACGGTCGACCTCT   | 0     | 0    | 0     | 0    | 0.09 | 0    | 0    | 0    |
| dof-miR-276    | oar-miR-323b              | Ovis aries               | CCCAATACACGGTCGATCTCT   | 0     | 0    | 0.18  | 0    | 0    | 0    | 0    | 0    |
| dof-miR-277    | aca-miR-199a-5p           | Anolis carolinensis      | CCCAGTGTTTCAGACTACCTGT  | 0.2   | 0    | 0.73  | 0.54 | 0    | 0    | 0    | 0.14 |
| dof-miR-278    | bta-miR-199a-5p           | Bos taurus               | CCCAGTGTTTCAGACTACCTGTT | 0.59  | 1.27 | 4.59  | 5.95 | 0.37 | 0    | 1.5  | 0.42 |
|                | oan-miR-199-5p            | Ornithorhynchus anatinus |                         | 0.59  | 1.27 | 4.59  | 5.95 | 0.37 | 0    | 1.5  | 0.42 |
|                | pol-miR-199a-5p           | Paralichthys olivaceus   |                         | 0.59  | 1.27 | 4.59  | 5.95 | 0.37 | 0    | 1.5  | 0.42 |
|                | ola-miR-199a-5p           | Oryzias latipes          |                         | 0.59  | 1.27 | 4.59  | 5.95 | 0.37 | 0    | 1.5  | 0.42 |
|                | tgu-miR-199-5p            | Taeniopygia guttata      |                         | 0.59  | 1.27 | 4.59  | 5.95 | 0.37 | 0    | 1.5  | 0.42 |
| dof-miR-279    | mmu-miR-199a-5p           | Mus musculus             | CCCAGTGTTTCAGACTACCTGTT | 2.77  | 2.55 | 13.41 | 20.9 | 5.78 | 0.52 | 5.34 | 1.26 |
|                | hsa-miR-199a-5p           | Homo sapiens             |                         | 2.77  | 2.55 | 13.41 | 20.9 | 5.78 | 0.52 | 5.34 | 1.26 |
|                | rno-miR-199a-5p           | Rattus norvegicus        |                         | 2.77  | 2.55 | 13.41 | 20.9 | 5.78 | 0.52 | 5.34 | 1.26 |
|                | gga-miR-199-5p            | Gallus gallus            |                         | 2.77  | 2.55 | 13.41 | 20.9 | 5.78 | 0.52 | 5.34 | 1.26 |
|                | dre-miR-199-5p            | Danio rerio              |                         | 2.77  | 2.55 | 13.41 | 20.9 | 5.78 | 0.52 | 5.34 | 1.26 |
|                | ggo-miR-199a              | Gorilla gorilla          |                         | 2.77  | 2.55 | 13.41 | 20.9 | 5.78 | 0.52 | 5.34 | 1.26 |
|                | ppa-miR-199a              | Pan paniscus             |                         | 2.77  | 2.55 | 13.41 | 20.9 | 5.78 | 0.52 | 5.34 | 1.26 |
|                | ppy-miR-199a              | Pongo pygmaeus           |                         | 2.77  | 2.55 | 13.41 | 20.9 | 5.78 | 0.52 | 5.34 | 1.26 |
|                | ptr-miR-199a-5p           | Pan troglodytes          |                         | 2.77  | 2.55 | 13.41 | 20.9 | 5.78 | 0.52 | 5.34 | 1.26 |
|                | mml-miR-199a              | Macaca mulatta           |                         | 2.77  | 2.55 | 13.41 | 20.9 | 5.78 | 0.52 | 5.34 | 1.26 |
|                | sla-miR-199a              | Saguinus labiatus        |                         | 2.77  | 2.55 | 13.41 | 20.9 | 5.78 | 0.52 | 5.34 | 1.26 |
|                | lla-miR-199a              | Lagothrix lagotricha     |                         | 2.77  | 2.55 | 13.41 | 20.9 | 5.78 | 0.52 | 5.34 | 1.26 |
|                | mne-miR-199a              | Macaca nemestrina        |                         | 2.77  | 2.55 | 13.41 | 20.9 | 5.78 | 0.52 | 5.34 | 1.26 |
|                | fru-miR-199               | Fugu rubripes            |                         | 2.77  | 2.55 | 13.41 | 20.9 | 5.78 | 0.52 | 5.34 | 1.26 |
|                | tni-miR-199               | Tetraodon nigroviridis   |                         | 2.77  | 2.55 | 13.41 | 20.9 | 5.78 | 0.52 | 5.34 | 1.26 |
|                | xtr-miR-199a-5p           | Xenopus tropicalis       |                         | 2.77  | 2.55 | 13.41 | 20.9 | 5.78 | 0.52 | 5.34 | 1.26 |
|                | chi-miR-199a-5p           | Capra hircus             |                         | 2.77  | 2.55 | 13.41 | 20.9 | 5.78 | 0.52 | 5.34 | 1.26 |
|                | oha-miR-199c-5p           | Ophiophagus hannah       |                         | 2.77  | 2.55 | 13.41 | 20.9 | 5.78 | 0.52 | 5.34 | 1.26 |
|                | ssa-miR-199a-5p           | Salmo salar              |                         | 2.77  | 2.55 | 13.41 | 20.9 | 5.78 | 0.52 | 5.34 | 1.26 |
|                | ipu-miR-199a-5p           | Ictalurus punctatus      |                         | 2.77  | 2.55 | 13.41 | 20.9 | 5.78 | 0.52 | 5.34 | 1.26 |
| hhi-miR-199a   | Hippoglossus hippoglossus | 2.77                     | 2.55                    | 13.41 | 20.9 | 5.78  | 0.52 | 5.34 | 1.26 |      |      |
| ccr-miR-199-5p | Cyprinus carpio           | 2.77                     | 2.55                    | 13.41 | 20.9 | 5.78  | 0.52 | 5.34 | 1.26 |      |      |

|             |                   |                         |                         |      |      |       |        |      |      |      |      |
|-------------|-------------------|-------------------------|-------------------------|------|------|-------|--------|------|------|------|------|
|             | pma-miR-199a-5p   | Petromyzon marinus      |                         | 2.77 | 2.55 | 13.41 | 20.9   | 5.78 | 0.52 | 5.34 | 1.26 |
|             | ppy-miR-199a-5p   | Pongo pygmaeus          |                         | 2.77 | 2.55 | 13.41 | 20.9   | 5.78 | 0.52 | 5.34 | 1.26 |
|             | eca-miR-199a-5p   | Equus caballus          |                         | 2.77 | 2.55 | 13.41 | 20.9   | 5.78 | 0.52 | 5.34 | 1.26 |
|             | ssc-miR-199a-5p   | Sus scrofa              |                         | 2.77 | 2.55 | 13.41 | 20.9   | 5.78 | 0.52 | 5.34 | 1.26 |
|             | mml-miR-199a-5p   | Macaca mulatta          |                         | 2.77 | 2.55 | 13.41 | 20.9   | 5.78 | 0.52 | 5.34 | 1.26 |
| dof-miR-280 | mmu-miR-199b-5p   | Mus musculus            | CCCAGTGTTTAGACTACCTGTTC | 0    | 0    | 0     | 0      | 0    | 0.1  | 0    | 0    |
|             | cgr-miR-199b      | Cricetulus griseus      |                         | 0    | 0    | 0     | 0      | 0    | 0.1  | 0    | 0    |
| dof-miR-281 | ssc-miR-199b-5p   | Sus scrofa              | CCCAGTGTTTAGACTATCTGTT  | 0    | 0.25 | 1.65  | 2.88   | 0.28 | 0    | 0    | 0    |
| dof-miR-282 | hsa-miR-199b-5p   | Homo sapiens            | CCCAGTGTTTAGACTATCTGTTC | 0.2  | 0    | 1.65  | 2.16   | 0.28 | 0.1  | 0.33 | 0    |
|             | bta-miR-199b      | Bos taurus              |                         | 0.2  | 0    | 1.65  | 2.16   | 0.28 | 0.1  | 0.33 | 0    |
|             | mdo-miR-199b-1-5p | Monodelphis domestica   |                         | 0.2  | 0    | 1.65  | 2.16   | 0.28 | 0.1  | 0.33 | 0    |
|             | chi-miR-199b-5p   | Capra hircus            |                         | 0.2  | 0    | 1.65  | 2.16   | 0.28 | 0.1  | 0.33 | 0    |
|             | chi-miR-199c-5p   | Capra hircus            |                         | 0.2  | 0    | 1.65  | 2.16   | 0.28 | 0.1  | 0.33 | 0    |
|             | eca-miR-199b-5p   | Equus caballus          |                         | 0.2  | 0    | 1.65  | 2.16   | 0.28 | 0.1  | 0.33 | 0    |
| dof-miR-283 | tgu-miR-142-5p    | Taeniopygia guttata     | CCCATAAAGTAGAAAGCACT    | 0    | 1.27 | 0     | 0      | 1.96 | 0.94 | 0.17 | 0.7  |
| dof-miR-284 | sha-miR-142       | Sarcophilus harrisii    | CCCATAAAGTAGAAAGCACTA   | 0.2  | 0    | 0     | 0      | 1.49 | 0.31 | 0.17 | 0    |
|             | ggo-miR-142       | Gorilla gorilla         |                         | 0.2  | 0    | 0     | 0      | 1.49 | 0.31 | 0.17 | 0    |
|             | cfa-miR-142       | Canis familiaris        |                         | 0.2  | 0    | 0     | 0      | 1.49 | 0.31 | 0.17 | 0    |
| dof-miR-285 | gga-miR-142-5p    | Gallus gallus           | CCCATAAAGTAGAAAGCACTAC  | 0    | 0    | 0     | 0      | 1.12 | 0.42 | 0.5  | 0    |
|             | cgr-miR-142-5p    | Cricetulus griseus      |                         | 0    | 0    | 0     | 0      | 1.12 | 0.42 | 0.5  | 0    |
| dof-miR-286 | ssc-miR-361-3p    | Sus scrofa              | CCCCAGGTGTGATTCTGATTGTC | 0    | 0    | 0     | 0.18   | 0.09 | 0    | 0    | 0    |
| dof-miR-287 | ata-miR168-3p     | Aegilops tauschii       | CCCGCCTTGACCAAGTGAAT    | 0    | 0    | 0     | 0      | 0.19 | 0    | 0    | 0    |
|             | bdi-miR168-3p     | Brachypodium distachyon |                         | 0    | 0    | 0     | 0      | 0.19 | 0    | 0    | 0    |
| dof-miR-288 | ath-miR168a-3p    | Arabidopsis thaliana    | CCCGCCTTGCATCAACTGAAT   | 0.2  | 0    | 4.96  | 161.99 | 0.09 | 0    | 0.83 | 0.14 |
|             | ptc-miR168a-3p    | Populus trichocarpa     |                         | 0.2  | 0    | 4.96  | 161.99 | 0.09 | 0    | 0.83 | 0.14 |
|             | ptc-miR168b-3p    | Populus trichocarpa     |                         | 0.2  | 0    | 4.96  | 161.99 | 0.09 | 0    | 0.83 | 0.14 |
|             | bra-miR168b-3p    | Brassica rapa           |                         | 0.2  | 0    | 4.96  | 161.99 | 0.09 | 0    | 0.83 | 0.14 |
|             | bra-miR168c-3p    | Brassica rapa           |                         | 0.2  | 0    | 4.96  | 161.99 | 0.09 | 0    | 0.83 | 0.14 |
|             | sly-miR168b-3p    | Solanum lycopersicum    |                         | 0.2  | 0    | 4.96  | 161.99 | 0.09 | 0    | 0.83 | 0.14 |
|             | mtr-miR168c-3p    | Medicago truncatula     |                         | 0.2  | 0    | 4.96  | 161.99 | 0.09 | 0    | 0.83 | 0.14 |
|             | aly-miR168a-3p    | Arabidopsis lyrata      |                         | 0.2  | 0    | 4.96  | 161.99 | 0.09 | 0    | 0.83 | 0.14 |
| dof-miR-289 | hsa-miR-6852-5p   | Homo sapiens            | CCCTGGGGTTCTGAGGACATG   | 0    | 0    | 0     | 0      | 0.09 | 0    | 0    | 0    |
| dof-miR-290 | ptc-miR6478       | Populus trichocarpa     | CCGACCTTAGCTCAGTTGGTG   | 0    | 0    | 0     | 0      | 0.09 | 0    | 0    | 0    |
| dof-miR-291 | chi-miR-106b-3p   | Capra hircus            | CCGCACTGTGGGTACTTGCT    | 0    | 0.25 | 0.18  | 0      | 0.65 | 0.1  | 0    | 0.28 |

|             |                 |                            |                         |       |        |        |        |        |        |        |        |   |
|-------------|-----------------|----------------------------|-------------------------|-------|--------|--------|--------|--------|--------|--------|--------|---|
| dof-miR-292 | pde-miR1314     | Pinus densata              | CCGGCCTCGAATGTTAGGAGAA  | 0     | 0      | 0.73   | 2.7    | 0      | 0      | 0      | 0      |   |
| dof-miR-293 | eca-miR-676     | Equus caballus             | CCGTCTAAGGTTGTTGAGTT    | 0     | 0      | 0      | 0      | 0      | 0      | 0.17   | 0      |   |
|             | mml-miR-676-3p  | Macaca mulatta             |                         | 0     | 0      | 0      | 0      | 0      | 0      | 0      | 0.17   | 0 |
|             | ssc-miR-676-3p  | Sus scrofa                 |                         | 0     | 0      | 0      | 0      | 0      | 0      | 0      | 0.17   | 0 |
| dof-miR-294 | chi-miR-3431-5p | Capra hircus               | CCTCAGTCAGCCTTGTGGATGT  | 0     | 0      | 0.55   | 0.54   | 0      | 0      | 0      | 0      |   |
|             | bta-miR-3431    | Bos taurus                 |                         | 0     | 0      | 0.55   | 0.54   | 0      | 0      | 0      | 0      |   |
| dof-miR-295 | mmu-miR-326-3p  | Mus musculus               | CCTCTGGGCCCTTCCTCAGT    | 0     | 0      | 0      | 0.18   | 0.19   | 0      | 0      | 0      |   |
|             | rno-miR-326-3p  | Rattus norvegicus          |                         | 0     | 0      | 0      | 0.18   | 0.19   | 0      | 0      | 0      |   |
|             | cgr-miR-326     | Cricetulus griseus         |                         | 0     | 0      | 0      | 0.18   | 0.19   | 0      | 0      | 0      |   |
| dof-miR-296 | sly-miR168a-3p  | Solanum lycopersicum       | CCTGCCTTGCATCAACTGAAT   | 294.7 | 357.68 | 673.92 | 259.46 | 176.37 | 408.27 | 259.61 | 359.14 |   |
| dof-miR-297 | oar-miR-409-3p  | Ovis aries                 | CGAATGTTGCTCGGTGAACCCCT | 0     | 0      | 0.18   | 0.36   | 0.09   | 0      | 0      | 0      |   |
| dof-miR-298 | ath-miR156g     | Arabidopsis thaliana       | CGACAGAAGAGAGTGAGCAC    | 0     | 0      | 0.18   | 0      | 0      | 0      | 0      | 0      |   |
|             | smo-miR156a     | Selaginella moellendorffii |                         | 0     | 0      | 0.18   | 0      | 0      | 0      | 0      | 0      |   |
|             | aly-miR156g-5p  | Arabidopsis lyrata         |                         | 0     | 0      | 0.18   | 0      | 0      | 0      | 0      | 0      |   |
| dof-miR-299 | ppe-miR171d-3p  | Prunus persica             | CGAGCCGAATCAATATCACTC   | 0     | 0      | 0.37   | 0.18   | 0      | 0      | 0      | 0      |   |
|             | mtr-miR171g     | Medicago truncatula        |                         | 0     | 0      | 0.37   | 0.18   | 0      | 0      | 0      | 0      |   |
|             | mtr-miR171h     | Medicago truncatula        |                         | 0     | 0      | 0.37   | 0.18   | 0      | 0      | 0      | 0      |   |
|             | csi-miR171b     | Citrus sinensis            |                         | 0     | 0      | 0.37   | 0.18   | 0      | 0      | 0      | 0      |   |
|             | gma-miR171b-3p  | Glycine max                |                         | 0     | 0      | 0.37   | 0.18   | 0      | 0      | 0      | 0      |   |
| dof-miR-300 | ptc-miR399e     | Populus trichocarpa        | CGCCAAAGGAGAGTTGCCCTC   | 0     | 0      | 0      | 0.36   | 0      | 0      | 0      | 0      |   |
| dof-miR-301 | tcc-miR399a     | Theobroma cacao            | CGCCAAAGGAGAGTTGCCCTG   | 0     | 0      | 0      | 23.06  | 0      | 0      | 0      | 0      |   |
|             | vvi-miR399i     | Vitis vinifera             |                         | 0     | 0      | 0      | 23.06  | 0      | 0      | 0      | 0      |   |
| dof-miR-302 | ptc-miR390d-3p  | Populus trichocarpa        | CGCTATCCATCCTGAGTTTTA   | 0     | 0      | 0      | 0.54   | 0      | 0      | 0      | 0      |   |
|             | sly-miR390a-3p  | Solanum lycopersicum       |                         | 0     | 0      | 0      | 0.54   | 0      | 0      | 0      | 0      |   |
| dof-miR-303 | gma-miR166m     | Glycine max                | CGGACCAGGCTTCATTCCCC    | 28.12 | 13.49  | 49.79  | 291.54 | 3.73   | 1.36   | 8.35   | 12.89  |   |
| dof-miR-304 | mmu-miR-486b-3p | Mus musculus               | CGGGGCAGCTCAGTACAGGA    | 0     | 0      | 0      | 0      | 0.28   | 0.1    | 0      | 0      |   |
| dof-miR-305 | hsa-miR-486-3p  | Homo sapiens               | CGGGGCAGCTCAGTACAGGAT   | 0     | 0      | 0      | 0      | 0.19   | 0      | 0      | 0      |   |
|             | mmu-miR-486a-3p | Mus musculus               |                         | 0     | 0      | 0      | 0      | 0.19   | 0      | 0      | 0      |   |
|             | tch-miR-486-3p  | Tupaia chinensis           |                         | 0     | 0      | 0      | 0      | 0.19   | 0      | 0      | 0      |   |
|             | eca-miR-486-3p  | Equus caballus             |                         | 0     | 0      | 0      | 0      | 0.19   | 0      | 0      | 0      |   |
|             | mml-miR-486-3p  | Macaca mulatta             |                         | 0     | 0      | 0      | 0      | 0.19   | 0      | 0      | 0      |   |
| dof-miR-306 | bta-miR-126-3p  | Bos taurus                 | CGTACCGTGAGTAATAATGCG   | 0     | 0      | 0      | 0      | 0.09   | 0      | 0.17   | 0      |   |
| dof-miR-307 | hsa-miR-505-3p  | Homo sapiens               | CGTCAACACTTGCTGGTTTCCT  | 0.2   | 0      | 0      | 0      | 0      | 0      | 0      | 0      |   |
|             | tch-miR-505-3p  | Tupaia chinensis           |                         | 0.2   | 0      | 0      | 0      | 0      | 0      | 0      | 0      |   |



|             |                 |                        |                         |      |      |       |      |      |      |      |      |      |
|-------------|-----------------|------------------------|-------------------------|------|------|-------|------|------|------|------|------|------|
|             | ppy-miR-505     | Pongo pygmaeus         |                         | 0.2  | 0    | 0     | 0    | 0    | 0    | 0    | 0    | 0    |
|             | eca-miR-505     | Equus caballus         |                         | 0.2  | 0    | 0     | 0    | 0    | 0    | 0    | 0    | 0    |
|             | mml-miR-505-3p  | Macaca mulatta         |                         | 0.2  | 0    | 0     | 0    | 0    | 0    | 0    | 0    | 0    |
|             | ptr-miR-505     | Pan troglodytes        |                         | 0.2  | 0    | 0     | 0    | 0    | 0    | 0    | 0    | 0    |
|             | bta-miR-505     | Bos taurus             |                         | 0.2  | 0    | 0     | 0    | 0    | 0    | 0    | 0    | 0    |
| dof-miR-308 | ssa-miR-22b-5p  | Salmo salar            | CGTTCTTCACTGGCTAGCTTT   | 0    | 0    | 0     | 0    | 0    | 0    | 0    | 0.17 | 0    |
| dof-miR-309 | ppt-miR894      | Physcomitrella patens  | CGTTTCACGTCGGGTTACCC    | 0.2  | 0    | 50.53 | 7.21 | 2.98 | 2.19 | 2.5  | 1.26 |      |
| dof-miR-310 | ssa-miR-144-3p  | Salmo salar            | CTACAGTATAGATGATGTAC    | 1.78 | 1.27 | 0     | 0    | 0.09 | 0    | 1    | 0.7  |      |
| dof-miR-311 | ipu-miR-144     | Ictalurus punctatus    | CTACAGTATAGATGATGTACT   | 0.4  | 1.53 | 0     | 0    | 0    | 0    | 2    | 0.14 |      |
|             | ccr-miR-144     | Cyprinus carpio        |                         | 0.4  | 1.53 | 0     | 0    | 0    | 0    | 2    | 0.14 |      |
| dof-miR-312 | hsa-miR-151a-3p | Homo sapiens           | CTAGACTGAAGCTCCTTGAGG   | 0    | 0    | 0.18  | 0    | 1.03 | 0.21 | 0    | 0    |      |
|             | bta-miR-151-3p  | Bos taurus             |                         | 0    | 0    | 0.18  | 0    | 1.03 | 0.21 | 0    | 0    |      |
|             | chi-miR-151-3p  | Capra hircus           |                         | 0    | 0    | 0.18  | 0    | 1.03 | 0.21 | 0    | 0    |      |
|             | ppy-miR-151a-3p | Pongo pygmaeus         |                         | 0    | 0    | 0.18  | 0    | 1.03 | 0.21 | 0    | 0    |      |
|             | mml-miR-151-3p  | Macaca mulatta         |                         | 0    | 0    | 0.18  | 0    | 1.03 | 0.21 | 0    | 0    |      |
|             | ptr-miR-151     | Pan troglodytes        |                         | 0    | 0    | 0.18  | 0    | 1.03 | 0.21 | 0    | 0    |      |
| dof-miR-313 | ssc-miR-151-3p  | Sus scrofa             | CTAGACTGAAGCTCCTTGAGGA  | 0    | 0    | 0     | 0    | 1.03 | 0    | 0    | 0    |      |
| dof-miR-314 | mmu-miR-151-3p  | Mus musculus           | CTAGACTGAGGCTCCTTGAGG   | 0    | 0    | 0     | 0    | 0    | 0    | 0    | 0    | 0.14 |
|             | rno-miR-151-3p  | Rattus norvegicus      |                         | 0    | 0    | 0     | 0    | 0    | 0    | 0    | 0    | 0.14 |
|             | cgr-miR-151-3p  | Cricetulus griseus     |                         | 0    | 0    | 0     | 0    | 0    | 0    | 0    | 0    | 0.14 |
| dof-miR-315 | ggo-miR-29a     | Gorilla gorilla        | CTAGCACCATCTGAAATCGGTT  | 0    | 0    | 0.18  | 0    | 0    | 0    | 0.17 | 0    |      |
|             | age-miR-29a     | Ateles geoffroyi       |                         | 0    | 0    | 0.18  | 0    | 0    | 0    | 0.17 | 0    |      |
|             | ppa-miR-29a     | Pan paniscus           |                         | 0    | 0    | 0.18  | 0    | 0    | 0    | 0.17 | 0    |      |
|             | ppy-miR-29a     | Pongo pygmaeus         |                         | 0    | 0    | 0.18  | 0    | 0    | 0    | 0.17 | 0    |      |
|             | ptr-miR-29a     | Pan troglodytes        |                         | 0    | 0    | 0.18  | 0    | 0    | 0    | 0.17 | 0    |      |
|             | mml-miR-29a-3p  | Macaca mulatta         |                         | 0    | 0    | 0.18  | 0    | 0    | 0    | 0.17 | 0    |      |
|             | sla-miR-29a     | Saguinus labiatus      |                         | 0    | 0    | 0.18  | 0    | 0    | 0    | 0.17 | 0    |      |
|             | lla-miR-29a     | Lagothrix lagotricha   |                         | 0    | 0    | 0.18  | 0    | 0    | 0    | 0.17 | 0    |      |
|             | mne-miR-29a     | Macaca nemestrina      |                         | 0    | 0    | 0.18  | 0    | 0    | 0    | 0.17 | 0    |      |
| dof-miR-316 | chi-let-7b-3p   | Capra hircus let-7b-3p | CTATAACAACCTACTGCCTTCCT | 0    | 0    | 0     | 0.18 | 0    | 0    | 0    | 0    |      |
| dof-miR-317 | ssa-let-7h-3p   | Salmo salar let-7h-3p  | CTATAACAACCTACTGCCTTCCT | 0    | 0    | 0     | 0.18 | 0    | 0    | 0    | 0    |      |
| dof-miR-318 | chi-let-7d-3p   | Capra hircus let-7d-3p | CTATACGACCTGCTGCCTTTC   | 0    | 0    | 0     | 0    | 0.09 | 0    | 0    | 0    |      |
| dof-miR-319 | hsa-let-7d-3p   | Homo sapiens let-7d-3p | CTATACGACCTGCTGCCTTTC   | 0    | 0    | 0.18  | 0    | 0.09 | 0.21 | 0    | 0    |      |
|             | mmu-let-7d-3p   | Mus musculus let-7d-3p |                         | 0    | 0    | 0.18  | 0    | 0.09 | 0.21 | 0    | 0    |      |

|             |                 |                              |                        |        |       |        |        |        |        |        |        |
|-------------|-----------------|------------------------------|------------------------|--------|-------|--------|--------|--------|--------|--------|--------|
|             | rno-let-7d-3p   | Rattus norvegicus let-7d-3p  |                        | 0      | 0     | 0.18   | 0      | 0.09   | 0.21   | 0      | 0      |
|             | ssc-let-7d-3p   | Sus scrofa let-7d-3p         |                        | 0      | 0     | 0.18   | 0      | 0.09   | 0.21   | 0      | 0      |
|             | cgr-let-7d-3p   | Cricetulus griseus let-7d-3p |                        | 0      | 0     | 0.18   | 0      | 0.09   | 0.21   | 0      | 0      |
| dof-miR-320 | hsa-let-7e-3p   | Homo sapiens let-7e-3p       | CTATACGGCCTCCTAGCTTTCC | 0      | 0     | 0      | 0.36   | 0      | 0      | 0      | 0      |
|             | mmu-let-7e-3p   | Mus musculus let-7e-3p       |                        | 0      | 0     | 0      | 0.36   | 0      | 0      | 0      | 0      |
|             | rno-let-7e-3p   | Rattus norvegicus let-7e-3p  |                        | 0      | 0     | 0      | 0.36   | 0      | 0      | 0      | 0      |
|             | chi-let-7e-3p   | Capra hircus let-7e-3p       |                        | 0      | 0     | 0      | 0.36   | 0      | 0      | 0      | 0      |
|             | mml-let-7e-3p   | Macaca mulatta let-7e-3p     |                        | 0      | 0     | 0      | 0.36   | 0      | 0      | 0      | 0      |
| dof-miR-321 | ptc-miR396g-3p  | Populus trichocarpa          | CTCAAGAAAGCCGTGGGAAAA  | 0      | 0     | 0      | 0      | 0      | 0      | 0.17   | 0      |
| dof-miR-322 | ptc-miR396e-3p  | Populus trichocarpa          | CTCAAGAAAGCTGTGGGAGA   | 0      | 0     | 0.55   | 16.94  | 0      | 0      | 0.33   | 0      |
| dof-miR-323 | chi-miR-1468-5p | Capra hircus                 | CTCCGTTTGCCTGTTTTGTGTA | 0      | 0     | 0.18   | 0.18   | 0      | 0      | 0      | 0      |
|             | ssc-miR-1468    | Sus scrofa                   |                        | 0      | 0     | 0.18   | 0.18   | 0      | 0      | 0      | 0      |
|             | bta-miR-1468    | Bos taurus                   |                        | 0      | 0     | 0.18   | 0.18   | 0      | 0      | 0      | 0      |
| dof-miR-324 | bdi-miR166e-3p  | Brachypodium distachyon      | CTCGGACCAGGCTTCATTCCC  | 287.18 | 90.12 | 275.59 | 108.11 | 153.14 | 106.63 | 173.29 | 245.08 |
| dof-miR-325 | ccr-miR-126-3p  | Cyprinus carpio              | CTCGTACCCTGAGTAATAATGC | 0.4    | 0     | 0      | 1.8    | 0.09   | 0      | 1      | 0      |
| dof-miR-326 | mes-miR477a     | Manihot esculenta            | CTCTCCCTCAAGGGCTTCTG   | 0      | 0     | 0      | 0.54   | 0      | 0      | 0      | 0      |
|             | mes-miR477b     | Manihot esculenta            |                        | 0      | 0     | 0      | 0.54   | 0      | 0      | 0      | 0      |
|             | mes-miR477c     | Manihot esculenta            |                        | 0      | 0     | 0      | 0.54   | 0      | 0      | 0      | 0      |
|             | mes-miR477e     | Manihot esculenta            |                        | 0      | 0     | 0      | 0.54   | 0      | 0      | 0      | 0      |
| dof-miR-327 | ath-miR395a     | Arabidopsis thaliana         | CTGAAGTGTTGGGGGAAGCTC  | 0      | 1.78  | 0.55   | 0.54   | 0.84   | 0.31   | 0.33   | 0      |
|             | ath-miR395d     | Arabidopsis thaliana         |                        | 0      | 1.78  | 0.55   | 0.54   | 0.84   | 0.31   | 0.33   | 0      |
|             | ath-miR395e     | Arabidopsis thaliana         |                        | 0      | 1.78  | 0.55   | 0.54   | 0.84   | 0.31   | 0.33   | 0      |
|             | ptc-miR395b     | Populus trichocarpa          |                        | 0      | 1.78  | 0.55   | 0.54   | 0.84   | 0.31   | 0.33   | 0      |
|             | ptc-miR395c     | Populus trichocarpa          |                        | 0      | 1.78  | 0.55   | 0.54   | 0.84   | 0.31   | 0.33   | 0      |
|             | ptc-miR395d     | Populus trichocarpa          |                        | 0      | 1.78  | 0.55   | 0.54   | 0.84   | 0.31   | 0.33   | 0      |
|             | ptc-miR395e     | Populus trichocarpa          |                        | 0      | 1.78  | 0.55   | 0.54   | 0.84   | 0.31   | 0.33   | 0      |
|             | ptc-miR395f     | Populus trichocarpa          |                        | 0      | 1.78  | 0.55   | 0.54   | 0.84   | 0.31   | 0.33   | 0      |
|             | ptc-miR395g     | Populus trichocarpa          |                        | 0      | 1.78  | 0.55   | 0.54   | 0.84   | 0.31   | 0.33   | 0      |
|             | ptc-miR395h     | Populus trichocarpa          |                        | 0      | 1.78  | 0.55   | 0.54   | 0.84   | 0.31   | 0.33   | 0      |
|             | ptc-miR395i     | Populus trichocarpa          |                        | 0      | 1.78  | 0.55   | 0.54   | 0.84   | 0.31   | 0.33   | 0      |
|             | ptc-miR395j     | Populus trichocarpa          |                        | 0      | 1.78  | 0.55   | 0.54   | 0.84   | 0.31   | 0.33   | 0      |
|             | vvi-miR395a     | Vitis vinifera               |                        | 0      | 1.78  | 0.55   | 0.54   | 0.84   | 0.31   | 0.33   | 0      |
|             | vvi-miR395b     | Vitis vinifera               |                        | 0      | 1.78  | 0.55   | 0.54   | 0.84   | 0.31   | 0.33   | 0      |
| vvi-miR395c | Vitis vinifera  | 0                            | 1.78                   | 0.55   | 0.54  | 0.84   | 0.31   | 0.33   | 0      |        |        |





|             |                |                            |                         |      |      |       |       |       |       |       |       |
|-------------|----------------|----------------------------|-------------------------|------|------|-------|-------|-------|-------|-------|-------|
|             | gma-miR395a    | Glycine max                |                         | 0    | 1.78 | 0.55  | 0.54  | 0.84  | 0.31  | 0.33  | 0     |
|             | gma-miR395b    | Glycine max                |                         | 0    | 1.78 | 0.55  | 0.54  | 0.84  | 0.31  | 0.33  | 0     |
|             | gma-miR395c    | Glycine max                |                         | 0    | 1.78 | 0.55  | 0.54  | 0.84  | 0.31  | 0.33  | 0     |
|             | aly-miR395g-3p | Arabidopsis lyrata         |                         | 0    | 1.78 | 0.55  | 0.54  | 0.84  | 0.31  | 0.33  | 0     |
|             | csi-miR395     | Citrus sinensis            |                         | 0    | 1.78 | 0.55  | 0.54  | 0.84  | 0.31  | 0.33  | 0     |
|             | rco-miR395a    | Ricinus communis           |                         | 0    | 1.78 | 0.55  | 0.54  | 0.84  | 0.31  | 0.33  | 0     |
|             | rco-miR395b    | Ricinus communis           |                         | 0    | 1.78 | 0.55  | 0.54  | 0.84  | 0.31  | 0.33  | 0     |
|             | rco-miR395c    | Ricinus communis           |                         | 0    | 1.78 | 0.55  | 0.54  | 0.84  | 0.31  | 0.33  | 0     |
|             | rco-miR395d    | Ricinus communis           |                         | 0    | 1.78 | 0.55  | 0.54  | 0.84  | 0.31  | 0.33  | 0     |
|             | rco-miR395e    | Ricinus communis           |                         | 0    | 1.78 | 0.55  | 0.54  | 0.84  | 0.31  | 0.33  | 0     |
|             | aly-miR395d-3p | Arabidopsis lyrata         |                         | 0    | 1.78 | 0.55  | 0.54  | 0.84  | 0.31  | 0.33  | 0     |
|             | aly-miR395e-3p | Arabidopsis lyrata         |                         | 0    | 1.78 | 0.55  | 0.54  | 0.84  | 0.31  | 0.33  | 0     |
| dof-miR-328 | stu-miR156f-5p | Solanum tuberosum          | CTGACAGAAGAGAGTGAGCA    | 0    | 0    | 0.18  | 0     | 0     | 0     | 0     | 0     |
| dof-miR-329 | ama-miR156     | Avicennia marina           | CTGACAGAAGAGAGTGAGCAC   | 0    | 0    | 0.18  | 0.18  | 0     | 0.1   | 0.17  | 0.14  |
| dof-miR-330 | smo-miR156b    | Selaginella moellendorffii | CTGACAGAAGATAGAGAGCAC   | 7.92 | 9.16 | 33.81 | 13.51 | 10.63 | 24.73 | 34.73 | 25.92 |
|             | mdm-miR156p    | Malus domestica            |                         | 7.92 | 9.16 | 33.81 | 13.51 | 10.63 | 24.73 | 34.73 | 25.92 |
|             | mdm-miR156q    | Malus domestica            |                         | 7.92 | 9.16 | 33.81 | 13.51 | 10.63 | 24.73 | 34.73 | 25.92 |
|             | mdm-miR156r    | Malus domestica            |                         | 7.92 | 9.16 | 33.81 | 13.51 | 10.63 | 24.73 | 34.73 | 25.92 |
|             | mdm-miR156s    | Malus domestica            |                         | 7.92 | 9.16 | 33.81 | 13.51 | 10.63 | 24.73 | 34.73 | 25.92 |
| dof-miR-331 | hsa-miR-192-5p | Homo sapiens               | CTGACCTATGAATTGACAGCC   | 2.18 | 2.04 | 0.18  | 0.18  | 4.01  | 2.19  | 15.69 | 3.22  |
|             | mmu-miR-192-5p | Mus musculus               |                         | 2.18 | 2.04 | 0.18  | 0.18  | 4.01  | 2.19  | 15.69 | 3.22  |
|             | rno-miR-192-5p | Rattus norvegicus          |                         | 2.18 | 2.04 | 0.18  | 0.18  | 4.01  | 2.19  | 15.69 | 3.22  |
|             | oan-miR-192-5p | Ornithorhynchus anatinus   |                         | 2.18 | 2.04 | 0.18  | 0.18  | 4.01  | 2.19  | 15.69 | 3.22  |
|             | chi-miR-192-5p | Capra hircus               |                         | 2.18 | 2.04 | 0.18  | 0.18  | 4.01  | 2.19  | 15.69 | 3.22  |
|             | tch-miR-192-5p | Tupaia chinensis           |                         | 2.18 | 2.04 | 0.18  | 0.18  | 4.01  | 2.19  | 15.69 | 3.22  |
|             | ggo-miR-192    | Gorilla gorilla            |                         | 2.18 | 2.04 | 0.18  | 0.18  | 4.01  | 2.19  | 15.69 | 3.22  |
|             | ppy-miR-192    | Pongo pygmaeus             |                         | 2.18 | 2.04 | 0.18  | 0.18  | 4.01  | 2.19  | 15.69 | 3.22  |
|             | eca-miR-192    | Equus caballus             |                         | 2.18 | 2.04 | 0.18  | 0.18  | 4.01  | 2.19  | 15.69 | 3.22  |
|             | ssc-miR-192    | Sus scrofa                 |                         | 2.18 | 2.04 | 0.18  | 0.18  | 4.01  | 2.19  | 15.69 | 3.22  |
|             | mml-miR-192-5p | Macaca mulatta             |                         | 2.18 | 2.04 | 0.18  | 0.18  | 4.01  | 2.19  | 15.69 | 3.22  |
|             | cfa-miR-192    | Canis familiaris           |                         | 2.18 | 2.04 | 0.18  | 0.18  | 4.01  | 2.19  | 15.69 | 3.22  |
|             | ptr-miR-192    | Pan troglodytes            |                         | 2.18 | 2.04 | 0.18  | 0.18  | 4.01  | 2.19  | 15.69 | 3.22  |
| dof-miR-332 | cgr-miR-192    | Cricetulus griseus         | CTGACCTATGAATTGACAGCCA  | 0.4  | 0.76 | 0     | 0     | 0.75  | 0.21  | 0.83  | 0.84  |
| dof-miR-333 | bta-miR-192    | Bos taurus                 | CTGACCTATGAATTGACAGCCAG | 0    | 0    | 0     | 0     | 0     | 0.1   | 0     | 0     |

|             |                  |                               |                         |        |      |        |       |        |        |       |        |
|-------------|------------------|-------------------------------|-------------------------|--------|------|--------|-------|--------|--------|-------|--------|
| dof-miR-334 | mmu-let-7i-3p    | Mus musculus let-7i-3p        | CTGGCGCAAGCTACTGCCTTGCT | 0      | 0    | 0      | 0     | 0.09   | 0      | 0     | 0      |
|             | hsa-let-7i-3p    | Homo sapiens let-7i-3p        |                         | 0      | 0    | 0      | 0     | 0.09   | 0      | 0     | 0      |
|             | rno-let-7i-3p    | Rattus norvegicus let-7i-3p   |                         | 0      | 0    | 0      | 0     | 0.09   | 0      | 0     | 0      |
|             | chi-let-7i-3p    | Capra hircus let-7i-3p        |                         | 0      | 0    | 0      | 0     | 0.09   | 0      | 0     | 0      |
|             | aja-let-7i       | Artibeus jamaicensis let-7i   |                         | 0      | 0    | 0      | 0     | 0.09   | 0      | 0     | 0      |
|             | tgu-let-7i-3p    | Taeniopygia guttata let-7i-3p |                         | 0      | 0    | 0      | 0     | 0.09   | 0      | 0     | 0      |
| dof-miR-335 | hsa-miR-30c-2-3p | Homo sapiens                  | CTGGGAGAAGGCTGTTTACTCT  | 0      | 0    | 0      | 0.18  | 0      | 0      | 0     | 0      |
|             | mmu-miR-30c-2-3p | Mus musculus                  |                         | 0      | 0    | 0      | 0.18  | 0      | 0      | 0     | 0      |
|             | rno-miR-30c-2-3p | Rattus norvegicus             |                         | 0      | 0    | 0      | 0.18  | 0      | 0      | 0     | 0      |
|             | ssc-miR-30c-3p   | Sus scrofa                    |                         | 0      | 0    | 0      | 0.18  | 0      | 0      | 0     | 0      |
|             | oan-miR-30c-2-3p | Ornithorhynchus anatinus      |                         | 0      | 0    | 0      | 0.18  | 0      | 0      | 0     | 0      |
|             | oha-miR-30c-1-3p | Ophiophagus hannah            |                         | 0      | 0    | 0      | 0.18  | 0      | 0      | 0     | 0      |
|             | aca-miR-30c-3p   | Anolis carolinensis           |                         | 0      | 0    | 0      | 0.18  | 0      | 0      | 0     | 0      |
|             | tgu-miR-30c-3p   | Taeniopygia guttata           |                         | 0      | 0    | 0      | 0.18  | 0      | 0      | 0     | 0      |
| dof-miR-336 | ssa-miR-210-3p   | Salmo salar                   | CTGTGCGTGTGACAGCGGCT    | 0      | 0    | 0.18   | 0     | 0      | 0      | 0     | 0      |
|             | ipu-miR-210      | Ictalurus punctatus           |                         | 0      | 0    | 0.18   | 0     | 0      | 0      | 0     | 0      |
|             | ccr-miR-210      | Cyprinus carpio               |                         | 0      | 0    | 0.18   | 0     | 0      | 0      | 0     | 0      |
| dof-miR-337 | dre-miR-210-3p   | Danio rerio                   | CTGTGCGTGTGACAGCGCTAA   | 0.2    | 0    | 0      | 0     | 0      | 0      | 0     | 0      |
|             | fru-miR-210      | Fugu rubripes                 |                         | 0.2    | 0    | 0      | 0     | 0      | 0      | 0     | 0      |
|             | tmi-miR-210      | Tetraodon nigroviridis        |                         | 0.2    | 0    | 0      | 0     | 0      | 0      | 0     | 0      |
|             | xtr-miR-210      | Xenopus tropicalis            |                         | 0.2    | 0    | 0      | 0     | 0      | 0      | 0     | 0      |
|             | oha-miR-210-3p   | Ophiophagus hannah            |                         | 0.2    | 0    | 0      | 0     | 0      | 0      | 0     | 0      |
| dof-miR-338 | mmu-miR-744-3p   | Mus musculus                  | CTGTTGCCACTAACCTCAACCT  | 0      | 0    | 0      | 0     | 0.09   | 0      | 0     | 0      |
|             | hsa-miR-744-3p   | Homo sapiens                  |                         | 0      | 0    | 0      | 0     | 0.09   | 0      | 0     | 0      |
| dof-miR-339 | hsa-miR-374a-3p  | Homo sapiens                  | CTTATCAGATTGTATTGTAATT  | 0      | 0    | 0      | 0     | 0.28   | 0      | 0     | 0      |
|             | mml-miR-374a-3p  | Macaca mulatta                |                         | 0      | 0    | 0      | 0     | 0.28   | 0      | 0     | 0      |
| dof-miR-340 | ppt-miR319a      | Physcomitrella patens         | CTTGACTGAAGGGAGCTCC     | 0.79   | 0    | 2.02   | 1.44  | 5.97   | 5.32   | 1.17  | 0.28   |
|             | ppt-miR319b      | Physcomitrella patens         |                         | 0.79   | 0    | 2.02   | 1.44  | 5.97   | 5.32   | 1.17  | 0.28   |
|             | sly-miR319a      | Solanum lycopersicum          |                         | 0.79   | 0    | 2.02   | 1.44  | 5.97   | 5.32   | 1.17  | 0.28   |
| dof-miR-341 | ppt-miR319c      | Physcomitrella patens         | CTTGACTGAAGGGAGCTCCC    | 177.85 | 9.67 | 197.88 | 61.44 | 510.72 | 529.51 | 92.16 | 105.51 |
|             | ppt-miR319d-3p   | Physcomitrella patens         |                         | 177.85 | 9.67 | 197.88 | 61.44 | 510.72 | 529.51 | 92.16 | 105.51 |
|             | ppt-miR319e      | Physcomitrella patens         |                         | 177.85 | 9.67 | 197.88 | 61.44 | 510.72 | 529.51 | 92.16 | 105.51 |
| dof-miR-342 | mes-miR319h      | Manihot esculenta             | CTTGACTGAAGGGAGCTCCT    | 0      | 0    | 0.37   | 1.08  | 1.31   | 2.4    | 0     | 0      |
|             | vun-miR319b      | Vigna unguiculata             |                         | 0      | 0    | 0.37   | 1.08  | 1.31   | 2.4    | 0     | 0      |

|             |                |                            |                        |        |      |      |      |      |      |      |       |
|-------------|----------------|----------------------------|------------------------|--------|------|------|------|------|------|------|-------|
| dof-miR-343 | cpa-miR159b    | Carica papaya              | CTTGGATTGAAGGGAGCTCC   | 200.83 | 1.53 | 7.17 | 2.52 | 1.4  | 0.94 | 2.34 | 17.94 |
|             | mdm-miR159a    | Malus domestica            |                        | 200.83 | 1.53 | 7.17 | 2.52 | 1.4  | 0.94 | 2.34 | 17.94 |
|             | mdm-miR159b    | Malus domestica            |                        | 200.83 | 1.53 | 7.17 | 2.52 | 1.4  | 0.94 | 2.34 | 17.94 |
| dof-miR-344 | pta-miR159c    | Pinus taeda                | CTTGGATTGAAGGGAGCTCCC  | 0.2    | 0    | 0.18 | 0.18 | 0.28 | 0    | 0    | 0.14  |
|             | smo-miR159     | Selaginella moellendorffii |                        | 0.2    | 0    | 0.18 | 0.18 | 0.28 | 0    | 0    | 0.14  |
| dof-miR-345 | sof-miR159c    | Saccharum officinarum      | CTTGGATTGAAGGGAGCTCCT  | 6.73   | 0    | 0.37 | 0.9  | 0    | 0    | 0    | 0.84  |
|             | zma-miR159c-3p | Zea mays                   |                        | 6.73   | 0    | 0.37 | 0.9  | 0    | 0    | 0    | 0.84  |
|             | zma-miR159d-3p | Zea mays                   |                        | 6.73   | 0    | 0.37 | 0.9  | 0    | 0    | 0    | 0.84  |
|             | sbi-miR159b    | Sorghum bicolor            |                        | 6.73   | 0    | 0.37 | 0.9  | 0    | 0    | 0    | 0.84  |
|             | ptc-miR159d    | Populus trichocarpa        |                        | 6.73   | 0    | 0.37 | 0.9  | 0    | 0    | 0    | 0.84  |
| dof-miR-346 | bdi-miR159a-3p | Brachypodium distachyon    | CTTGGATTGAAGGGAGCTCT   | 0.2    | 0    | 0.18 | 0.36 | 0.56 | 0.1  | 0    | 0     |
| dof-miR-347 | cfa-miR-1271   | Canis familiaris           | CTTGGCACCTAGTAAGCACT   | 0      | 0.51 | 0    | 0    | 0    | 0    | 0    | 0.42  |
| dof-miR-348 | mmu-miR-30e-3p | Mus musculus               | CTTTCAGTCGGATGTTTACAGC | 0      | 0    | 0.18 | 0    | 0.75 | 0    | 0    | 0.14  |
|             | hsa-miR-30e-3p | Homo sapiens               |                        | 0      | 0    | 0.18 | 0    | 0.75 | 0    | 0    | 0.14  |
|             | rno-miR-30e-3p | Rattus norvegicus          |                        | 0      | 0    | 0.18 | 0    | 0.75 | 0    | 0    | 0.14  |
|             | oan-miR-30e-3p | Ornithorhynchus anatinus   |                        | 0      | 0    | 0.18 | 0    | 0.75 | 0    | 0    | 0.14  |
|             | oha-miR-30e-3p | Ophiophagus hannah         |                        | 0      | 0    | 0.18 | 0    | 0.75 | 0    | 0    | 0.14  |
|             | cgr-miR-30e-3p | Cricetulus griseus         |                        | 0      | 0    | 0.18 | 0    | 0.75 | 0    | 0    | 0.14  |
|             | aca-miR-30e-3p | Anolis carolinensis        |                        | 0      | 0    | 0.18 | 0    | 0.75 | 0    | 0    | 0.14  |
|             | ssc-miR-30e-3p | Sus scrofa                 |                        | 0      | 0    | 0.18 | 0    | 0.75 | 0    | 0    | 0.14  |
|             | tgu-miR-30a-3p | Taeniopygia guttata        |                        | 0      | 0    | 0.18 | 0    | 0.75 | 0    | 0    | 0.14  |
|             | cfa-miR-30e    | Canis familiaris           |                        | 0      | 0    | 0.18 | 0    | 0.75 | 0    | 0    | 0.14  |
| dof-miR-349 | hsa-miR-30a-3p | Homo sapiens               | CTTTCAGTCGGATGTTTGCAGC | 0.2    | 0.25 | 0    | 0.54 | 0    | 0    | 0    | 0.14  |
|             | mmu-miR-30a-3p | Mus musculus               |                        | 0.2    | 0.25 | 0    | 0.54 | 0    | 0    | 0    | 0.14  |
|             | rno-miR-30a-3p | Rattus norvegicus          |                        | 0.2    | 0.25 | 0    | 0.54 | 0    | 0    | 0    | 0.14  |
|             | gga-miR-30a-3p | Gallus gallus              |                        | 0.2    | 0.25 | 0    | 0.54 | 0    | 0    | 0    | 0.14  |
|             | dre-miR-30e-3p | Danio rerio                |                        | 0.2    | 0.25 | 0    | 0.54 | 0    | 0    | 0    | 0.14  |
|             | mml-miR-30a-3p | Macaca mulatta             |                        | 0.2    | 0.25 | 0    | 0.54 | 0    | 0    | 0    | 0.14  |
|             | ptr-miR-30a-3p | Pan troglodytes            |                        | 0.2    | 0.25 | 0    | 0.54 | 0    | 0    | 0    | 0.14  |
|             | ggo-miR-30a-3p | Gorilla gorilla            |                        | 0.2    | 0.25 | 0    | 0.54 | 0    | 0    | 0    | 0.14  |
|             | ppy-miR-30a-3p | Pongo pygmaeus             |                        | 0.2    | 0.25 | 0    | 0.54 | 0    | 0    | 0    | 0.14  |
|             | ppa-miR-30a-3p | Pan paniscus               |                        | 0.2    | 0.25 | 0    | 0.54 | 0    | 0    | 0    | 0.14  |
|             | oan-miR-30a-3p | Ornithorhynchus anatinus   |                        | 0.2    | 0.25 | 0    | 0.54 | 0    | 0    | 0    | 0.14  |
|             | oha-miR-30a-3p | Ophiophagus hannah         |                        | 0.2    | 0.25 | 0    | 0.54 | 0    | 0    | 0    | 0.14  |

|             |                  |                          |                          |     |      |   |      |      |   |      |      |      |   |
|-------------|------------------|--------------------------|--------------------------|-----|------|---|------|------|---|------|------|------|---|
|             | ssa-miR-30c-3p   | Salmo salar              |                          | 0.2 | 0.25 | 0 | 0.54 | 0    | 0 | 0    | 0.14 |      |   |
|             | ssa-miR-30d-3p   | Salmo salar              |                          | 0.2 | 0.25 | 0 | 0.54 | 0    | 0 | 0    | 0.14 |      |   |
|             | ipu-miR-30e      | Ictalurus punctatus      |                          | 0.2 | 0.25 | 0 | 0.54 | 0    | 0 | 0    | 0.14 |      |   |
|             | cgr-miR-30a-3p   | Cricetulus griseus       |                          | 0.2 | 0.25 | 0 | 0.54 | 0    | 0 | 0    | 0.14 |      |   |
|             | aca-miR-30a-3p   | Anolis carolinensis      |                          | 0.2 | 0.25 | 0 | 0.54 | 0    | 0 | 0    | 0.14 |      |   |
|             | ssc-miR-30a-3p   | Sus scrofa               |                          | 0.2 | 0.25 | 0 | 0.54 | 0    | 0 | 0    | 0.14 |      |   |
| dof-miR-350 | mmu-miR-129-5p   | Mus musculus             | CTTTTTCGGTCTGGGCTTGC     | 0   | 0    | 0 | 0    | 0    | 0 | 0    | 0.17 | 0    |   |
|             | hsa-miR-129-5p   | Homo sapiens             |                          | 0   | 0    | 0 | 0    | 0    | 0 | 0    | 0    | 0.17 | 0 |
|             | rno-miR-129-5p   | Rattus norvegicus        |                          | 0   | 0    | 0 | 0    | 0    | 0 | 0    | 0    | 0.17 | 0 |
|             | xtr-miR-129      | Xenopus tropicalis       |                          | 0   | 0    | 0 | 0    | 0    | 0 | 0    | 0    | 0.17 | 0 |
|             | oan-miR-129-5p   | Ornithorhynchus anatinus |                          | 0   | 0    | 0 | 0    | 0    | 0 | 0    | 0    | 0.17 | 0 |
|             | chi-miR-129-5p   | Capra hircus             |                          | 0   | 0    | 0 | 0    | 0    | 0 | 0    | 0    | 0.17 | 0 |
|             | tch-miR-129-5p   | Tupaia chinensis         |                          | 0   | 0    | 0 | 0    | 0    | 0 | 0    | 0    | 0.17 | 0 |
|             | ssa-miR-129-5p   | Salmo salar              |                          | 0   | 0    | 0 | 0    | 0    | 0 | 0    | 0    | 0.17 | 0 |
|             | ipu-miR-129      | Ictalurus punctatus      |                          | 0   | 0    | 0 | 0    | 0    | 0 | 0    | 0    | 0.17 | 0 |
|             | ccr-miR-129      | Cyprinus carpio          |                          | 0   | 0    | 0 | 0    | 0    | 0 | 0    | 0    | 0.17 | 0 |
|             | sha-miR-129      | Sarcophilus harrisii     |                          | 0   | 0    | 0 | 0    | 0    | 0 | 0    | 0    | 0.17 | 0 |
|             | cgr-miR-129      | Cricetulus griseus       |                          | 0   | 0    | 0 | 0    | 0    | 0 | 0    | 0    | 0.17 | 0 |
|             | ssc-miR-129b     | Sus scrofa               |                          | 0   | 0    | 0 | 0    | 0    | 0 | 0    | 0    | 0.17 | 0 |
|             | aca-miR-129a-5p  | Anolis carolinensis      |                          | 0   | 0    | 0 | 0    | 0    | 0 | 0    | 0    | 0.17 | 0 |
|             | ppy-miR-129-5p   | Pongo pygmaeus           |                          | 0   | 0    | 0 | 0    | 0    | 0 | 0    | 0    | 0.17 | 0 |
|             | eca-miR-129a-5p  | Equus caballus           |                          | 0   | 0    | 0 | 0    | 0    | 0 | 0    | 0    | 0.17 | 0 |
|             | eca-miR-129b-5p  | Equus caballus           |                          | 0   | 0    | 0 | 0    | 0    | 0 | 0    | 0    | 0.17 | 0 |
|             | ssc-miR-129a-5p  | Sus scrofa               |                          | 0   | 0    | 0 | 0    | 0    | 0 | 0    | 0    | 0.17 | 0 |
|             | tgu-miR-129-5p   | Taeniopygia guttata      |                          | 0   | 0    | 0 | 0    | 0    | 0 | 0    | 0    | 0.17 | 0 |
|             | mml-miR-129-5p   | Macaca mulatta           |                          | 0   | 0    | 0 | 0    | 0    | 0 | 0    | 0    | 0.17 | 0 |
| cfa-miR-129 | Canis familiaris | 0                        | 0                        | 0   | 0    | 0 | 0    | 0    | 0 | 0.17 | 0    |      |   |
| ptr-miR-129 | Pan troglodytes  | 0                        | 0                        | 0   | 0    | 0 | 0    | 0    | 0 | 0.17 | 0    |      |   |
| dof-miR-351 | chi-miR-499-3p   | Capra hircus             | GAACATCACAGCAAGTCTGTGC   | 0   | 0.25 | 0 | 0    | 0    | 0 | 0    | 0    | 0    |   |
|             | cgr-miR-499-3p   | Cricetulus griseus       |                          | 0   | 0.25 | 0 | 0    | 0    | 0 | 0    | 0    | 0    |   |
| dof-miR-352 | mmu-miR-148b-5p  | Mus musculus             | GAAGTTCTGTTATACACTCAGGCT | 0   | 0    | 0 | 0    | 0.09 | 0 | 0    | 0    | 0    |   |
|             | mml-miR-148b-5p  | Macaca mulatta           |                          | 0   | 0    | 0 | 0    | 0.09 | 0 | 0    | 0    | 0    |   |
| dof-miR-353 | hsa-miR-382-5p   | Homo sapiens             | GAAGTTGTTTCGTGGTGGATTCC  | 0   | 0    | 0 | 0.36 | 0.09 | 0 | 0    | 0    | 0    |   |
|             | mmu-miR-382-5p   | Mus musculus             |                          | 0   | 0    | 0 | 0.36 | 0.09 | 0 | 0    | 0    | 0    |   |



|             |                  |                        |                         |      |      |      |      |      |      |      |      |
|-------------|------------------|------------------------|-------------------------|------|------|------|------|------|------|------|------|
|             | rno-miR-382-5p   | Rattus norvegicus      |                         | 0    | 0    | 0    | 0.36 | 0.09 | 0    | 0    | 0    |
|             | chi-miR-382-5p   | Capra hircus           |                         | 0    | 0    | 0    | 0.36 | 0.09 | 0    | 0    | 0    |
|             | cgr-miR-382      | Cricetulus griseus     |                         | 0    | 0    | 0    | 0.36 | 0.09 | 0    | 0    | 0    |
|             | oar-miR-382-5p   | Ovis aries             |                         | 0    | 0    | 0    | 0.36 | 0.09 | 0    | 0    | 0    |
|             | eca-miR-382      | Equus caballus         |                         | 0    | 0    | 0    | 0.36 | 0.09 | 0    | 0    | 0    |
|             | mml-miR-382-5p   | Macaca mulatta         |                         | 0    | 0    | 0    | 0.36 | 0.09 | 0    | 0    | 0    |
|             | ptr-miR-382      | Pan troglodytes        |                         | 0    | 0    | 0    | 0.36 | 0.09 | 0    | 0    | 0    |
|             | bta-miR-382      | Bos taurus             |                         | 0    | 0    | 0    | 0.36 | 0.09 | 0    | 0    | 0    |
| dof-miR-354 | aly-miR172e-3p   | Arabidopsis lyrata     | GAATCTTGATGATGCTGCAT    | 0    | 0    | 0    | 0.18 | 0.09 | 0.1  | 0    | 0.14 |
| dof-miR-355 | mmu-miR-409-3p   | Mus musculus           | GAATGTTGCTCGGTGAACCCCT  | 0    | 0.25 | 1.29 | 1.62 | 0.19 | 0.1  | 0    | 0    |
|             | hsa-miR-409-3p   | Homo sapiens           |                         | 0    | 0.25 | 1.29 | 1.62 | 0.19 | 0.1  | 0    | 0    |
|             | tch-miR-409-3p   | Tupaia chinensis       |                         | 0    | 0.25 | 1.29 | 1.62 | 0.19 | 0.1  | 0    | 0    |
|             | cgr-miR-409-3p   | Cricetulus griseus     |                         | 0    | 0.25 | 1.29 | 1.62 | 0.19 | 0.1  | 0    | 0    |
|             | ppy-miR-409-3p   | Pongo pygmaeus         |                         | 0    | 0.25 | 1.29 | 1.62 | 0.19 | 0.1  | 0    | 0    |
|             | eca-miR-409-3p   | Equus caballus         |                         | 0    | 0.25 | 1.29 | 1.62 | 0.19 | 0.1  | 0    | 0    |
|             | mml-miR-409-3p   | Macaca mulatta         |                         | 0    | 0.25 | 1.29 | 1.62 | 0.19 | 0.1  | 0    | 0    |
|             | ptr-miR-409      | Pan troglodytes        |                         | 0    | 0.25 | 1.29 | 1.62 | 0.19 | 0.1  | 0    | 0    |
| dof-miR-356 | api-miR-100      | Acyrtosiphon pisum     | GACCCGTAGATCCGAACCTTGTG | 0    | 0.25 | 0    | 0    | 0    | 0    | 0    | 0    |
|             | nve-miR-100-5p   | Nematostella vectensis |                         | 0    | 0.25 | 0    | 0    | 0    | 0    | 0    | 0    |
| dof-miR-357 | ssa-miR-7132b-5p | Salmo salar            | GACTTGGTCAAAGTCCTCAGC   | 0    | 0    | 0    | 0    | 0    | 0    | 0.17 | 0    |
| dof-miR-358 | ppt-miR390c-5p   | Physcomitrella patens  | GAGCTCAGGAGGGATAGCGCC   | 0.2  | 0    | 0    | 0    | 0    | 0    | 0.17 | 0    |
| dof-miR-359 | gma-miR159e-5p   | Glycine max            | GAGTCCTTGAAGTCCAATT     | 0    | 0    | 0    | 0.18 | 0    | 0    | 0    | 0    |
| dof-miR-360 | hsa-miR-590-5p   | Homo sapiens           | GAGCTTATTCATAAAAGTGCAG  | 0    | 0    | 0    | 0    | 0.09 | 0    | 0    | 0    |
|             | mmu-miR-590-5p   | Mus musculus           |                         | 0    | 0    | 0    | 0    | 0.09 | 0    | 0    | 0    |
|             | ggo-miR-590      | Gorilla gorilla        |                         | 0    | 0    | 0    | 0    | 0.09 | 0    | 0    | 0    |
|             | ppy-miR-590-5p   | Pongo pygmaeus         |                         | 0    | 0    | 0    | 0    | 0.09 | 0    | 0    | 0    |
|             | mml-miR-590-5p   | Macaca mulatta         |                         | 0    | 0    | 0    | 0    | 0.09 | 0    | 0    | 0    |
| dof-miR-361 | ath-miR167a-3p   | Arabidopsis thaliana   | GATCATGTTCCGACGTTTCACC  | 0    | 0    | 0    | 0    | 0    | 0    | 0    | 0.28 |
|             | aly-miR167a-3p   | Arabidopsis lyrata     |                         | 0    | 0    | 0    | 0    | 0    | 0    | 0    | 0.28 |
| dof-miR-362 | ath-miR8175      | Arabidopsis thaliana   | GATCCCCGGCAACGGCGCCA    | 4.95 | 1.53 | 0.37 | 5.41 | 3.54 | 1.67 | 3.17 | 9.39 |
| dof-miR-363 | hsa-miR-330-3p   | Homo sapiens           | GCAAAGCACACGGCTGCAGAGA  | 0    | 0    | 0    | 0    | 0.19 | 0    | 0    | 0    |
|             | tch-miR-330-3p   | Tupaia chinensis       |                         | 0    | 0    | 0    | 0    | 0.19 | 0    | 0    | 0    |
|             | ggo-miR-330      | Gorilla gorilla        |                         | 0    | 0    | 0    | 0    | 0.19 | 0    | 0    | 0    |
|             | ppy-miR-330-3p   | Pongo pygmaeus         |                         | 0    | 0    | 0    | 0    | 0.19 | 0    | 0    | 0    |

|             |                |                      |                        |   |   |      |      |      |   |      |   |
|-------------|----------------|----------------------|------------------------|---|---|------|------|------|---|------|---|
|             | mml-miR-330-3p | Macaca mulatta       |                        | 0 | 0 | 0    | 0    | 0.19 | 0 | 0    | 0 |
|             | ptr-miR-330    | Pan troglodytes      |                        | 0 | 0 | 0    | 0    | 0.19 | 0 | 0    | 0 |
|             | bta-miR-330    | Bos taurus           |                        | 0 | 0 | 0    | 0    | 0.19 | 0 | 0    | 0 |
| dof-miR-364 | ssc-miR-323    | Sus scrofa           | GCACATTACACGGTCGACCTCT | 0 | 0 | 0.18 | 0.72 | 0    | 0 | 0.17 | 0 |
|             | bta-miR-323    | Bos taurus           |                        | 0 | 0 | 0.18 | 0.72 | 0    | 0 | 0.17 | 0 |
| dof-miR-365 | bta-miR-455-3p | Bos taurus           | GCAGTCCATGGGCATATACACT | 0 | 0 | 0.18 | 0.18 | 0    | 0 | 0    | 0 |
|             | chi-miR-455-3p | Capra hircus         |                        | 0 | 0 | 0.18 | 0.18 | 0    | 0 | 0    | 0 |
|             | tch-miR-455-3p | Tupaia chinensis     |                        | 0 | 0 | 0.18 | 0.18 | 0    | 0 | 0    | 0 |
|             | ssa-miR-455-3p | Salmo salar          |                        | 0 | 0 | 0.18 | 0.18 | 0    | 0 | 0    | 0 |
| dof-miR-366 | ptc-miR160e-3p | Populus trichocarpa  | GCATGAGGGGAGTCGAGCAGG  | 0 | 0 | 0    | 0.18 | 0    | 0 | 0    | 0 |
| dof-miR-367 | cgr-miR-331-3p | Cricetulus griseus   | GCCCCTGGGCCTATCCTAGA   | 0 | 0 | 0    | 0.36 | 0    | 0 | 0    | 0 |
| dof-miR-368 | rno-miR-331-3p | Rattus norvegicus    | GCCCCTGGGCCTATCCTAGAA  | 0 | 0 | 0    | 0.36 | 0    | 0 | 0    | 0 |
|             | mmu-miR-331-3p | Mus musculus         |                        | 0 | 0 | 0    | 0.36 | 0    | 0 | 0    | 0 |
|             | hsa-miR-331-3p | Homo sapiens         |                        | 0 | 0 | 0    | 0.36 | 0    | 0 | 0    | 0 |
|             | bta-miR-331-3p | Bos taurus           |                        | 0 | 0 | 0    | 0.36 | 0    | 0 | 0    | 0 |
|             | aja-miR-331    | Artibeus jamaicensis |                        | 0 | 0 | 0    | 0.36 | 0    | 0 | 0    | 0 |
|             | eca-miR-331    | Equus caballus       |                        | 0 | 0 | 0    | 0.36 | 0    | 0 | 0    | 0 |
|             | ssc-miR-331-3p | Sus scrofa           |                        | 0 | 0 | 0    | 0.36 | 0    | 0 | 0    | 0 |
|             | mml-miR-331-3p | Macaca mulatta       |                        | 0 | 0 | 0    | 0.36 | 0    | 0 | 0    | 0 |
|             | ptr-miR-331    | Pan troglodytes      |                        | 0 | 0 | 0    | 0.36 | 0    | 0 | 0    | 0 |
|             | cfa-miR-331    | Canis familiaris     |                        | 0 | 0 | 0    | 0.36 | 0    | 0 | 0    | 0 |
| dof-miR-369 | hsa-miR-370-3p | Homo sapiens         | GCCTGCTGGGGTGAACCTGGT  | 0 | 0 | 0.55 | 0.9  | 0    | 0 | 0    | 0 |
|             | mmu-miR-370-3p | Mus musculus         |                        | 0 | 0 | 0.55 | 0.9  | 0    | 0 | 0    | 0 |
|             | rno-miR-370-3p | Rattus norvegicus    |                        | 0 | 0 | 0.55 | 0.9  | 0    | 0 | 0    | 0 |
|             | efu-miR-370    | Eptesicus fuscus     |                        | 0 | 0 | 0.55 | 0.9  | 0    | 0 | 0    | 0 |
|             | ssc-miR-370    | Sus scrofa           |                        | 0 | 0 | 0.55 | 0.9  | 0    | 0 | 0    | 0 |
|             | ppy-miR-370    | Pongo pygmaeus       |                        | 0 | 0 | 0.55 | 0.9  | 0    | 0 | 0    | 0 |
|             | eca-miR-370    | Equus caballus       |                        | 0 | 0 | 0.55 | 0.9  | 0    | 0 | 0    | 0 |
|             | mml-miR-370-3p | Macaca mulatta       |                        | 0 | 0 | 0.55 | 0.9  | 0    | 0 | 0    | 0 |
|             | ptr-miR-370    | Pan troglodytes      |                        | 0 | 0 | 0.55 | 0.9  | 0    | 0 | 0    | 0 |
|             | bta-miR-370    | Bos taurus           |                        | 0 | 0 | 0.55 | 0.9  | 0    | 0 | 0    | 0 |
|             | cfa-miR-370    | Canis familiaris     |                        | 0 | 0 | 0.55 | 0.9  | 0    | 0 | 0    | 0 |
| dof-miR-370 | ath-miR160a-3p | Arabidopsis thaliana | GCGTATGAGGAGCCATGCATA  | 0 | 0 | 0.18 | 5.59 | 0    | 0 | 0    | 0 |
|             | ptc-miR160b-3p | Populus trichocarpa  |                        | 0 | 0 | 0.18 | 5.59 | 0    | 0 | 0    | 0 |

|             |                |                      |                       |   |   |      |       |   |      |      |      |
|-------------|----------------|----------------------|-----------------------|---|---|------|-------|---|------|------|------|
|             | ptc-miR160c-3p | Populus trichocarpa  |                       | 0 | 0 | 0.18 | 5.59  | 0 | 0    | 0    | 0    |
|             | cpa-miR160c-3p | Carica papaya        |                       | 0 | 0 | 0.18 | 5.59  | 0 | 0    | 0    | 0    |
|             | cpa-miR160f-3p | Carica papaya        |                       | 0 | 0 | 0.18 | 5.59  | 0 | 0    | 0    | 0    |
|             | aly-miR160a-3p | Arabidopsis lyrata   |                       | 0 | 0 | 0.18 | 5.59  | 0 | 0    | 0    | 0    |
|             | bra-miR160a-3p | Brassica rapa        |                       | 0 | 0 | 0.18 | 5.59  | 0 | 0    | 0    | 0    |
| dof-miR-371 | ath-miR396b-3p | Arabidopsis thaliana | GCTCAAGAAAGCTGTGGGAAA | 0 | 0 | 0    | 0.18  | 0 | 0    | 0    | 0    |
|             | bra-miR396-3p  | Brassica rapa        |                       | 0 | 0 | 0    | 0.18  | 0 | 0    | 0    | 0    |
|             | aly-miR396b-3p | Arabidopsis lyrata   |                       | 0 | 0 | 0    | 0.18  | 0 | 0    | 0    | 0    |
| dof-miR-372 | gma-miR396b-3p | Glycine max          | GCTCAAGAAAGCTGTGGGAGA | 0 | 0 | 0    | 36.76 | 0 | 0    | 0    | 0    |
|             | mtr-miR396a-3p | Medicago truncatula  |                       | 0 | 0 | 0    | 36.76 | 0 | 0    | 0    | 0    |
|             | gma-miR396k-3p | Glycine max          |                       | 0 | 0 | 0    | 36.76 | 0 | 0    | 0    | 0    |
| dof-miR-373 | ath-miR156f-3p | Arabidopsis thaliana | GCTCACTCTCTATCCGTCACC | 0 | 0 | 0    | 0     | 0 | 0    | 0    | 0.14 |
| dof-miR-374 | bra-miR156b-3p | Brassica rapa        | GCTCACTCTCTATCTGTCACC | 0 | 0 | 0.18 | 1.62  | 0 | 0.21 | 0.33 | 5.6  |
|             | bra-miR156d-3p | Brassica rapa        |                       | 0 | 0 | 0.18 | 1.62  | 0 | 0.21 | 0.33 | 5.6  |
|             | aly-miR156f-3p | Arabidopsis lyrata   |                       | 0 | 0 | 0.18 | 1.62  | 0 | 0.21 | 0.33 | 5.6  |
| dof-miR-375 | osa-miR156f-3p | Oryza sativa         | GCTCACTTCTTTTCTGTCAGC | 0 | 0 | 0    | 3.6   | 0 | 0    | 0    | 0    |
|             | osa-miR156h-3p | Oryza sativa         |                       | 0 | 0 | 0    | 3.6   | 0 | 0    | 0    | 0    |
|             | osa-miR156l-3p | Oryza sativa         |                       | 0 | 0 | 0    | 3.6   | 0 | 0    | 0    | 0    |
|             | zma-miR156d-3p | Zea mays             |                       | 0 | 0 | 0    | 3.6   | 0 | 0    | 0    | 0    |
|             | zma-miR156f-3p | Zea mays             |                       | 0 | 0 | 0    | 3.6   | 0 | 0    | 0    | 0    |
|             | zma-miR156g-3p | Zea mays             |                       | 0 | 0 | 0    | 3.6   | 0 | 0    | 0    | 0    |
| dof-miR-376 | aly-miR157d-3p | Arabidopsis lyrata   | GCTCTCTATGCTTCTGTCATC | 0 | 0 | 0    | 40.72 | 0 | 0    | 0    | 0    |
| dof-miR-377 | ptc-miR172g-3p | Populus trichocarpa  | GGAATCTTGATGATGCTGCAG | 0 | 0 | 0    | 0.18  | 0 | 0    | 0    | 0    |
|             | ptc-miR172h-3p | Populus trichocarpa  |                       | 0 | 0 | 0    | 0.18  | 0 | 0    | 0    | 0    |
|             | vvi-miR172c    | Vitis vinifera       |                       | 0 | 0 | 0    | 0.18  | 0 | 0    | 0    | 0    |
|             | ppe-miR172d    | Prunus persica       |                       | 0 | 0 | 0    | 0.18  | 0 | 0    | 0    | 0    |
|             | mes-miR172e    | Manihot esculenta    |                       | 0 | 0 | 0    | 0.18  | 0 | 0    | 0    | 0    |
|             | mes-miR172f    | Manihot esculenta    |                       | 0 | 0 | 0    | 0.18  | 0 | 0    | 0    | 0    |
|             | stu-miR172d-3p | Solanum tuberosum    |                       | 0 | 0 | 0    | 0.18  | 0 | 0    | 0    | 0    |
|             | mdm-miR172l    | Malus domestica      |                       | 0 | 0 | 0    | 0.18  | 0 | 0    | 0    | 0    |
|             | cme-miR172a    | Cucumis melo         |                       | 0 | 0 | 0    | 0.18  | 0 | 0    | 0    | 0    |
|             | lus-miR172e    | Linum usitatissimum  |                       | 0 | 0 | 0    | 0.18  | 0 | 0    | 0    | 0    |
|             | lus-miR172i    | Linum usitatissimum  |                       | 0 | 0 | 0    | 0.18  | 0 | 0    | 0    | 0    |
|             | rco-miR172     | Ricinus communis     |                       | 0 | 0 | 0    | 0.18  | 0 | 0    | 0    | 0    |

|             |                    |                         |                       |       |       |       |      |       |       |        |        |
|-------------|--------------------|-------------------------|-----------------------|-------|-------|-------|------|-------|-------|--------|--------|
|             | gma-miR172c        | Glycine max             |                       | 0     | 0     | 0     | 0.18 | 0     | 0     | 0      | 0      |
| dof-miR-378 | ath-miR172e-3p     | Arabidopsis thaliana    | GGAATCTTGATGATGCTGCAT | 0.2   | 0     | 0     | 0.36 | 0     | 0     | 0      | 0      |
|             | osa-miR172b        | Oryza sativa            |                       | 0.2   | 0     | 0     | 0.36 | 0     | 0     | 0      | 0      |
|             | zma-miR172e        | Zea mays                |                       | 0.2   | 0     | 0     | 0.36 | 0     | 0     | 0      | 0      |
|             | ptc-miR172d        | Populus trichocarpa     |                       | 0.2   | 0     | 0     | 0.36 | 0     | 0     | 0      | 0      |
|             | ptc-miR172e        | Populus trichocarpa     |                       | 0.2   | 0     | 0     | 0.36 | 0     | 0     | 0      | 0      |
|             | bra-miR172d-3p     | Brassica rapa           |                       | 0.2   | 0     | 0     | 0.36 | 0     | 0     | 0      | 0      |
|             | ata-miR172c-3p     | Aegilops tauschii       |                       | 0.2   | 0     | 0     | 0.36 | 0     | 0     | 0      | 0      |
|             | ppe-miR172c        | Prunus persica          |                       | 0.2   | 0     | 0     | 0.36 | 0     | 0     | 0      | 0      |
|             | mdm-miR172i        | Malus domestica         |                       | 0.2   | 0     | 0     | 0.36 | 0     | 0     | 0      | 0      |
|             | mdm-miR172j        | Malus domestica         |                       | 0.2   | 0     | 0     | 0.36 | 0     | 0     | 0      | 0      |
|             | mdm-miR172k        | Malus domestica         |                       | 0.2   | 0     | 0     | 0.36 | 0     | 0     | 0      | 0      |
|             | cme-miR172d        | Cucumis melo            |                       | 0.2   | 0     | 0     | 0.36 | 0     | 0     | 0      | 0      |
|             | gma-miR172l        | Glycine max             |                       | 0.2   | 0     | 0     | 0.36 | 0     | 0     | 0      | 0      |
|             | bnm-miR172b        | Brassica napus          |                       | 0.2   | 0     | 0     | 0.36 | 0     | 0     | 0      | 0      |
|             | bnm-miR172c        | Brassica napus          |                       | 0.2   | 0     | 0     | 0.36 | 0     | 0     | 0      | 0      |
|             | lus-miR172g        | Linum usitatissimum     |                       | 0.2   | 0     | 0     | 0.36 | 0     | 0     | 0      | 0      |
|             | nta-miR172j        | Nicotiana tabacum       |                       | 0.2   | 0     | 0     | 0.36 | 0     | 0     | 0      | 0      |
|             | tcc-miR172c        | Theobroma cacao         |                       | 0.2   | 0     | 0     | 0.36 | 0     | 0     | 0      | 0      |
|             | bdi-miR172b        | Brachypodium distachyon |                       | 0.2   | 0     | 0     | 0.36 | 0     | 0     | 0      | 0      |
|             | gma-miR172i-3p     | Glycine max             |                       | 0.2   | 0     | 0     | 0.36 | 0     | 0     | 0      | 0      |
| aqc-miR172b | Aquilegia caerulea | 0.2                     | 0                     | 0     | 0.36  | 0     | 0    | 0     | 0     |        |        |
| dof-miR-379 | osa-miR166h-5p     | Oryza sativa            | GGAATGTTGGCTGGCTCGAGG | 0.2   | 0     | 0     | 0    | 0.09  | 0.1   | 0      | 0      |
|             | zma-miR166m-5p     | Zea mays                |                       | 0.2   | 0     | 0     | 0    | 0.09  | 0.1   | 0      | 0      |
|             | mtr-miR166e-5p     | Medicago truncatula     |                       | 0.2   | 0     | 0     | 0    | 0.09  | 0.1   | 0      | 0      |
| dof-miR-380 | ath-miR165a-5p     | Arabidopsis thaliana    | GGAATGTTGTCTGGATCGAGG | 0     | 0     | 0     | 0    | 0     | 0     | 0      | 0.14   |
| dof-miR-381 | osa-miR166d-5p     | Oryza sativa            | GGAATGTTGTCTGGCTCGAGG | 264.8 | 18.07 | 83.41 | 251  | 19.21 | 29.11 | 105.85 | 111.68 |
|             | zma-miR166c-5p     | Zea mays                |                       | 264.8 | 18.07 | 83.41 | 251  | 19.21 | 29.11 | 105.85 | 111.68 |
|             | gma-miR166a-5p     | Glycine max             |                       | 264.8 | 18.07 | 83.41 | 251  | 19.21 | 29.11 | 105.85 | 111.68 |
|             | mtr-miR166g-5p     | Medicago truncatula     |                       | 264.8 | 18.07 | 83.41 | 251  | 19.21 | 29.11 | 105.85 | 111.68 |
|             | stu-miR166a-5p     | Solanum tuberosum       |                       | 264.8 | 18.07 | 83.41 | 251  | 19.21 | 29.11 | 105.85 | 111.68 |
|             | gma-miR166l        | Glycine max             |                       | 264.8 | 18.07 | 83.41 | 251  | 19.21 | 29.11 | 105.85 | 111.68 |
|             | gma-miR166c-5p     | Glycine max             |                       | 264.8 | 18.07 | 83.41 | 251  | 19.21 | 29.11 | 105.85 | 111.68 |
|             | bdi-miR166e-5p     | Brachypodium distachyon |                       | 264.8 | 18.07 | 83.41 | 251  | 19.21 | 29.11 | 105.85 | 111.68 |



|             |                 |                      |                         |     |      |      |      |      |      |      |      |
|-------------|-----------------|----------------------|-------------------------|-----|------|------|------|------|------|------|------|
| dof-miR-392 | hsa-miR-145-3p  | Homo sapiens         | GGATTCCTGGAAATACTGTTCT  | 0.4 | 0.25 | 0.55 | 0    | 0    | 0    | 1.17 | 0    |
|             | dre-miR-145-3p  | Danio rerio          |                         | 0.4 | 0.25 | 0.55 | 0    | 0    | 0    | 1.17 | 0    |
|             | ssc-miR-145-3p  | Sus scrofa           |                         | 0.4 | 0.25 | 0.55 | 0    | 0    | 0    | 1.17 | 0    |
|             | oha-miR-145-3p  | Ophiophagus hannah   |                         | 0.4 | 0.25 | 0.55 | 0    | 0    | 0    | 1.17 | 0    |
|             | aja-miR-145     | Artibeus jamaicensis |                         | 0.4 | 0.25 | 0.55 | 0    | 0    | 0    | 1.17 | 0    |
| dof-miR-393 | aly-miR167b-3p  | Arabidopsis lyrata   | GGTCATGCTCTGACAGCCTCACT | 0   | 0    | 0.18 | 6.49 | 0    | 0    | 0    | 0    |
| dof-miR-394 | mmu-miR-143-5p  | Mus musculus         | GGTGCAGTGCTGCATCTCTGG   | 0   | 0    | 0.18 | 0.18 | 0    | 0    | 0    | 0    |
|             | rno-miR-143-5p  | Rattus norvegicus    |                         | 0   | 0    | 0.18 | 0.18 | 0    | 0    | 0    | 0    |
|             | chi-miR-143-5p  | Capra hircus         |                         | 0   | 0    | 0.18 | 0.18 | 0    | 0    | 0    | 0    |
|             | aca-miR-143-5p  | Anolis carolinensis  |                         | 0   | 0    | 0.18 | 0.18 | 0    | 0    | 0    | 0    |
|             | ssc-miR-143-5p  | Sus scrofa           |                         | 0   | 0    | 0.18 | 0.18 | 0    | 0    | 0    | 0    |
| dof-miR-395 | hsa-miR-143-5p  | Homo sapiens         | GGTGCAGTGCTGCATCTCTGGT  | 0   | 0    | 0.18 | 0.18 | 0    | 0    | 0    | 0    |
|             | ssa-miR-143-5p  | Salmo salar          |                         | 0   | 0    | 0.18 | 0.18 | 0    | 0    | 0    | 0    |
| dof-miR-396 | chi-miR-3959-5p | Capra hircus         | GGTTGATCAGAGAACATACATT  | 0   | 0    | 0    | 0.18 | 0    | 0    | 0    | 0.14 |
|             | bta-miR-411c-5p | Bos taurus           |                         | 0   | 0    | 0    | 0.18 | 0    | 0    | 0    | 0.14 |
|             | oar-miR-3959-5p | Ovis aries           |                         | 0   | 0    | 0    | 0.18 | 0    | 0    | 0    | 0.14 |
| dof-miR-397 | tch-miR-101     | Tupaia chinensis     | GTACAGTACTGTGATAACTGA   | 0   | 0    | 0.37 | 0.72 | 0.28 | 0.21 | 0.17 | 0    |
|             | ola-miR-101a-3p | Oryzias latipes      |                         | 0   | 0    | 0.37 | 0.72 | 0.28 | 0.21 | 0.17 | 0    |
|             | sha-miR-101     | Sarcophilus harrisii |                         | 0   | 0    | 0.37 | 0.72 | 0.28 | 0.21 | 0.17 | 0    |
| dof-miR-398 | gga-miR-101-3p  | Gallus gallus        | GTACAGTACTGTGATAACTGAA  | 0   | 0    | 0.55 | 0.54 | 0.09 | 0.1  | 0.17 | 0    |
|             | oha-miR-101a-3p | Ophiophagus hannah   |                         | 0   | 0    | 0.55 | 0.54 | 0.09 | 0.1  | 0.17 | 0    |
|             | tgu-miR-101-3p  | Taeniopygia guttata  |                         | 0   | 0    | 0.55 | 0.54 | 0.09 | 0.1  | 0.17 | 0    |
| dof-miR-399 | gma-miR172b-5p  | Glycine max          | GTAGCATCATCAAGATTCAC    | 0   | 0    | 0    | 2.16 | 0    | 0    | 0    | 0    |
| dof-miR-400 | mtr-miR172c-5p  | Medicago truncatula  | GTAGCATCATCAAGATTCACA   | 0   | 0    | 0    | 0.9  | 0    | 0    | 0.17 | 0    |
| dof-miR-401 | ccr-miR-142-3p  | Cyprinus carpio      | GTAGTGTTCCTACTTTATGG    | 0   | 0    | 0    | 0    | 0.28 | 0    | 0    | 0    |
|             | cgr-miR-142-3p  | Cricetulus griseus   |                         | 0   | 0    | 0    | 0    | 0.28 | 0    | 0    | 0    |
| dof-miR-402 | tch-miR-142     | Tupaia chinensis     | GTAGTGTTCCTACTTTATGGA   | 0.2 | 0    | 0    | 0.18 | 0.28 | 0    | 0    | 0.14 |
|             | ipu-miR-142     | Ictalurus punctatus  |                         | 0.2 | 0    | 0    | 0.18 | 0.28 | 0    | 0    | 0.14 |
|             | tgu-miR-142-3p  | Taeniopygia guttata  |                         | 0.2 | 0    | 0    | 0.18 | 0.28 | 0    | 0    | 0.14 |
| dof-miR-403 | hsa-miR-485-3p  | Homo sapiens         | GTCATACACGGCTCTCCTCTCT  | 0   | 0    | 0    | 0.36 | 0.09 | 0    | 0    | 0    |
|             | efu-miR-485     | Eptesicus fuscus     |                         | 0   | 0    | 0    | 0.36 | 0.09 | 0    | 0    | 0    |
|             | oar-miR-485-3p  | Ovis aries           |                         | 0   | 0    | 0    | 0.36 | 0.09 | 0    | 0    | 0    |
|             | ppy-miR-485-3p  | Pongo pygmaeus       |                         | 0   | 0    | 0    | 0.36 | 0.09 | 0    | 0    | 0    |
|             | eca-miR-485-3p  | Equus caballus       |                         | 0   | 0    | 0    | 0.36 | 0.09 | 0    | 0    | 0    |

|             |                  |                          |                          |      |      |       |      |      |      |      |      |
|-------------|------------------|--------------------------|--------------------------|------|------|-------|------|------|------|------|------|
|             | mml-miR-485-3p   | Macaca mulatta           |                          | 0    | 0    | 0     | 0.36 | 0.09 | 0    | 0    | 0    |
|             | ptr-miR-485      | Pan troglodytes          |                          | 0    | 0    | 0     | 0.36 | 0.09 | 0    | 0    | 0    |
| dof-miR-404 | oan-miR-153-1-5p | Ornithorhynchus anatinus | GTCCATTTTGTGATCTGCAGCT   | 0    | 0    | 0     | 0    | 0    | 0.1  | 0    | 0    |
| dof-miR-405 | oan-miR-145-5p   | Ornithorhynchus anatinus | GTCCAGTTTCCCAGGAAT       | 0    | 0    | 0     | 0.36 | 0    | 0.1  | 0    | 0    |
| dof-miR-406 | dre-miR-145-5p   | Danio rerio              | GTCCAGTTTCCCAGGAATCCC    | 0    | 0.25 | 0.73  | 1.26 | 0    | 0    | 0.33 | 0    |
|             | aca-miR-145-5p   | Anolis carolinensis      |                          | 0    | 0.25 | 0.73  | 1.26 | 0    | 0    | 0.33 | 0    |
| dof-miR-407 | mmu-miR-145a-5p  | Mus musculus             | GTCCAGTTTCCCAGGAATCCCT   | 0.2  | 0.25 | 1.29  | 0.54 | 0    | 0    | 0.17 | 0.14 |
|             | hsa-miR-145-5p   | Homo sapiens             |                          | 0.2  | 0.25 | 1.29  | 0.54 | 0    | 0    | 0.17 | 0.14 |
|             | rno-miR-145-5p   | Rattus norvegicus        |                          | 0.2  | 0.25 | 1.29  | 0.54 | 0    | 0    | 0.17 | 0.14 |
|             | bta-miR-145      | Bos taurus               |                          | 0.2  | 0.25 | 1.29  | 0.54 | 0    | 0    | 0.17 | 0.14 |
|             | mdo-miR-145-5p   | Monodelphis domestica    |                          | 0.2  | 0.25 | 1.29  | 0.54 | 0    | 0    | 0.17 | 0.14 |
|             | chi-miR-145-5p   | Capra hircus             |                          | 0.2  | 0.25 | 1.29  | 0.54 | 0    | 0    | 0.17 | 0.14 |
|             | ssa-miR-145-5p   | Salmo salar              |                          | 0.2  | 0.25 | 1.29  | 0.54 | 0    | 0    | 0.17 | 0.14 |
|             | ipu-miR-145      | Ictalurus punctatus      |                          | 0.2  | 0.25 | 1.29  | 0.54 | 0    | 0    | 0.17 | 0.14 |
|             | pma-miR-145-5p   | Petromyzon marinus       |                          | 0.2  | 0.25 | 1.29  | 0.54 | 0    | 0    | 0.17 | 0.14 |
|             | eca-miR-145      | Equus caballus           |                          | 0.2  | 0.25 | 1.29  | 0.54 | 0    | 0    | 0.17 | 0.14 |
| cfa-miR-145 | Canis familiaris | 0.2                      | 0.25                     | 1.29 | 0.54 | 0     | 0    | 0.17 | 0.14 |      |      |
| dof-miR-408 | gma-miR6300      | Glycine max              | GTCCGTGTAGTATAGTGG       | 2.18 | 0.51 | 9.74  | 2.34 | 1.59 | 1.67 | 0.83 | 27.6 |
| dof-miR-409 | mmu-miR-203-3p   | Mus musculus             | GTGAAATGTTTAGGACCACTAG   | 0    | 0    | 0     | 0    | 0    | 0    | 0    | 0.14 |
|             | hsa-miR-203a-3p  | Homo sapiens             |                          | 0    | 0    | 0     | 0    | 0    | 0    | 0    | 0.14 |
|             | rno-miR-203a-3p  | Rattus norvegicus        |                          | 0    | 0    | 0     | 0    | 0    | 0    | 0    | 0.14 |
|             | ppy-miR-203      | Pongo pygmaeus           |                          | 0    | 0    | 0     | 0    | 0    | 0    | 0    | 0.14 |
|             | mml-miR-203      | Macaca mulatta           |                          | 0    | 0    | 0     | 0    | 0    | 0    | 0    | 0.14 |
|             | ptr-miR-203      | Pan troglodytes          |                          | 0    | 0    | 0     | 0    | 0    | 0    | 0    | 0.14 |
|             | cfa-miR-203      | Canis familiaris         |                          | 0    | 0    | 0     | 0    | 0    | 0    | 0    | 0.14 |
| dof-miR-410 | ssc-miR-24-1-5p  | Sus scrofa               | GTGCCTACTGAGCTGAAACACAGT | 0    | 0    | 0     | 0    | 0.09 | 0    | 0    | 0    |
|             | mdo-miR-24-5p    | Monodelphis domestica    |                          | 0    | 0    | 0     | 0    | 0.09 | 0    | 0    | 0    |
| dof-miR-411 | cgr-miR-24-5p    | Cricetulus griseus       | GTGCCTACTGAGCTGAAACAG    | 0    | 0    | 0     | 0    | 0.09 | 0    | 0    | 0    |
| dof-miR-412 | aly-miR172a-5p   | Arabidopsis lyrata       | GTGGCATCATCAAGATTCACA    | 0.4  | 0    | 0     | 0    | 0.37 | 0.31 | 0.83 | 0.14 |
| dof-miR-413 | ptc-miR6427-3p   | Populus trichocarpa      | GTGGGAATGAACATTATGAGA    | 0    | 0    | 0.55  | 0.18 | 0    | 0    | 0.33 | 0    |
| dof-miR-414 | osa-miR396a-3p   | Oryza sativa             | GTTCAATAAAGCTGTGGGAA     | 0    | 0.25 | 4.04  | 2.34 | 0    | 0.21 | 0.17 | 0.14 |
|             | osa-miR396b-3p   | Oryza sativa             |                          | 0    | 0.25 | 4.04  | 2.34 | 0    | 0.21 | 0.17 | 0.14 |
| dof-miR-415 | zma-miR396b-3p   | Zea mays                 | GTTCAATAAAGCTGTGGGAA     | 10.1 | 4.84 | 37.85 | 8.29 | 4.1  | 7.83 | 2.34 | 4.62 |
|             | zma-miR396a-3p   | Zea mays                 |                          | 10.1 | 4.84 | 37.85 | 8.29 | 4.1  | 7.83 | 2.34 | 4.62 |

|              |                 |                          |                         |      |      |       |       |      |      |      |      |
|--------------|-----------------|--------------------------|-------------------------|------|------|-------|-------|------|------|------|------|
|              | ata-miR396e-3p  | Aegilops tauschii        |                         | 10.1 | 4.84 | 37.85 | 8.29  | 4.1  | 7.83 | 2.34 | 4.62 |
|              | bdi-miR396d-3p  | Brachypodium distachyon  |                         | 10.1 | 4.84 | 37.85 | 8.29  | 4.1  | 7.83 | 2.34 | 4.62 |
|              | bdi-miR396c-3p  | Brachypodium distachyon  |                         | 10.1 | 4.84 | 37.85 | 8.29  | 4.1  | 7.83 | 2.34 | 4.62 |
| dof-miR-416  | ath-miR396a-3p  | Arabidopsis thaliana     | GTTCAATAAAGCTGTGGGAAG   | 0    | 0    | 0.92  | 77.84 | 0    | 0    | 0.17 | 0    |
|              | mtr-miR396b-3p  | Medicago truncatula      |                         | 0    | 0    | 0.92  | 77.84 | 0    | 0    | 0.17 | 0    |
|              | sly-miR396a-3p  | Solanum lycopersicum     |                         | 0    | 0    | 0.92  | 77.84 | 0    | 0    | 0.17 | 0    |
|              | gma-miR396i-3p  | Glycine max              |                         | 0    | 0    | 0.92  | 77.84 | 0    | 0    | 0.17 | 0    |
|              | aly-miR396a-3p  | Arabidopsis lyrata       |                         | 0    | 0    | 0.92  | 77.84 | 0    | 0    | 0.17 | 0    |
| dof-miR-417  | ipu-miR-737     | Ictalurus punctatus      | GTTTTTTTAGGTTTTGATTTTT  | 0.2  | 0    | 0     | 0.36  | 0    | 0    | 0    | 0    |
| dof-miR-418  | gga-miR-9-3p    | Gallus gallus            | TAAAGCTAGAGAACCGAATGT   | 0    | 0    | 0.18  | 0.18  | 0    | 0    | 0    | 0    |
|              | oan-miR-9-3p    | Ornithorhynchus anatinus |                         | 0    | 0    | 0.18  | 0.18  | 0    | 0    | 0    | 0    |
| dof-miR-419  | dre-miR-9-4-3p  | Danio rerio              | TAAAGCTAGAGAACCGAATGTA  | 0    | 0    | 0.37  | 1.44  | 0    | 0    | 0    | 0    |
|              | ssa-miR-9b-3p   | Salmo salar              |                         | 0    | 0    | 0.37  | 1.44  | 0    | 0    | 0    | 0    |
| dof-miR-420  | ssa-miR-9a-1-3p | Salmo salar              | TAAAGCTAGAGAACCGAATGTAT | 0    | 0    | 0     | 0.36  | 0    | 0    | 0    | 0    |
| dof-miR-421  | sly-miR167b-5p  | Solanum lycopersicum     | TAAAGCTGCCAGCATGATCTGG  | 0    | 0    | 0     | 2.16  | 0    | 0    | 0    | 0    |
| dof-miR-422  | mmu-miR-106b-5p | Mus musculus             | TAAAGTGCTGACAGTGCAGAT   | 0    | 0    | 0     | 0.9   | 0.47 | 0.1  | 0.17 | 0    |
|              | hsa-miR-106b-5p | Homo sapiens             |                         | 0    | 0    | 0     | 0.9   | 0.47 | 0.1  | 0.17 | 0    |
|              | rno-miR-106b-5p | Rattus norvegicus        |                         | 0    | 0    | 0     | 0.9   | 0.47 | 0.1  | 0.17 | 0    |
|              | ggo-miR-106b    | Gorilla gorilla          |                         | 0    | 0    | 0     | 0.9   | 0.47 | 0.1  | 0.17 | 0    |
|              | age-miR-106b    | Ateles geoffroyi         |                         | 0    | 0    | 0     | 0.9   | 0.47 | 0.1  | 0.17 | 0    |
|              | ppa-miR-106b    | Pan paniscus             |                         | 0    | 0    | 0     | 0.9   | 0.47 | 0.1  | 0.17 | 0    |
|              | ppy-miR-106b    | Pongo pygmaeus           |                         | 0    | 0    | 0     | 0.9   | 0.47 | 0.1  | 0.17 | 0    |
|              | ptr-miR-106b    | Pan troglodytes          |                         | 0    | 0    | 0     | 0.9   | 0.47 | 0.1  | 0.17 | 0    |
|              | mml-miR-106b-5p | Macaca mulatta           |                         | 0    | 0    | 0     | 0.9   | 0.47 | 0.1  | 0.17 | 0    |
|              | sla-miR-106b    | Saguinus labiatus        |                         | 0    | 0    | 0     | 0.9   | 0.47 | 0.1  | 0.17 | 0    |
|              | lla-miR-106b    | Lagothrix lagotricha     |                         | 0    | 0    | 0     | 0.9   | 0.47 | 0.1  | 0.17 | 0    |
|              | mne-miR-106b    | Macaca nemestrina        |                         | 0    | 0    | 0     | 0.9   | 0.47 | 0.1  | 0.17 | 0    |
|              | chi-miR-106b-5p | Capra hircus             |                         | 0    | 0    | 0     | 0.9   | 0.47 | 0.1  | 0.17 | 0    |
|              | oar-miR-106b    | Ovis aries               |                         | 0    | 0    | 0     | 0.9   | 0.47 | 0.1  | 0.17 | 0    |
|              | eca-miR-106b    | Equus caballus           |                         | 0    | 0    | 0     | 0.9   | 0.47 | 0.1  | 0.17 | 0    |
|              | cfa-miR-106b    | Canis familiaris         |                         | 0    | 0    | 0     | 0.9   | 0.47 | 0.1  | 0.17 | 0    |
| bta-miR-106b | Bos taurus      | 0                        | 0                       | 0    | 0.9  | 0.47  | 0.1   | 0.17 | 0    |      |      |
| dof-miR-423  | cgr-miR-106b-5p | Cricetulus griseus       | TAAAGTGCTGACAGTGCAGATA  | 0    | 0    | 0     | 0     | 0.28 | 0    | 0    | 0    |
| dof-miR-424  | ola-miR-106a    | Oryzias latipes          | TAAAGTGCTTACAGTGCAGGT   | 0    | 0    | 0     | 0.54  | 0    | 0    | 0    | 0    |





|             |                |                       |                         |     |      |      |      |      |   |      |      |
|-------------|----------------|-----------------------|-------------------------|-----|------|------|------|------|---|------|------|
|             | ame-miR-277    | Apis mellifera        |                         | 0   | 0    | 0    | 0    | 0    | 0 | 0.17 | 0    |
|             | aga-miR-277    | Anopheles gambiae     |                         | 0   | 0    | 0    | 0    | 0    | 0 | 0.17 | 0    |
|             | bmo-miR-277-3p | Bombyx mori           |                         | 0   | 0    | 0    | 0    | 0    | 0 | 0.17 | 0    |
|             | pxy-miR-277    | Plutella xylostella   |                         | 0   | 0    | 0    | 0    | 0    | 0 | 0.17 | 0    |
|             | mse-miR-277    | Manduca sexta         |                         | 0   | 0    | 0    | 0    | 0    | 0 | 0.17 | 0    |
|             | nvi-miR-277    | Nasonia vitripennis   |                         | 0   | 0    | 0    | 0    | 0    | 0 | 0.17 | 0    |
|             | ngi-miR-277    | Nasonia giraulti      |                         | 0   | 0    | 0    | 0    | 0    | 0 | 0.17 | 0    |
|             | nlo-miR-277    | Nasonia longicornis   |                         | 0   | 0    | 0    | 0    | 0    | 0 | 0.17 | 0    |
|             | api-miR-277    | Acyrtosiphon pisum    |                         | 0   | 0    | 0    | 0    | 0    | 0 | 0.17 | 0    |
|             | tca-miR-277-3p | Tribolium castaneum   |                         | 0   | 0    | 0    | 0    | 0    | 0 | 0.17 | 0    |
|             | dan-miR-277    | Drosophila ananassae  |                         | 0   | 0    | 0    | 0    | 0    | 0 | 0.17 | 0    |
|             | der-miR-277    | Drosophila erecta     |                         | 0   | 0    | 0    | 0    | 0    | 0 | 0.17 | 0    |
|             | dgr-miR-277    | Drosophila grimshawi  |                         | 0   | 0    | 0    | 0    | 0    | 0 | 0.17 | 0    |
|             | dmo-miR-277    | Drosophila mojavensis |                         | 0   | 0    | 0    | 0    | 0    | 0 | 0.17 | 0    |
|             | dpe-miR-277    | Drosophila persimilis |                         | 0   | 0    | 0    | 0    | 0    | 0 | 0.17 | 0    |
|             | dse-miR-277    | Drosophila sechellia  |                         | 0   | 0    | 0    | 0    | 0    | 0 | 0.17 | 0    |
|             | dvi-miR-277-3p | Drosophila virilis    |                         | 0   | 0    | 0    | 0    | 0    | 0 | 0.17 | 0    |
|             | dwi-miR-277    | Drosophila willistoni |                         | 0   | 0    | 0    | 0    | 0    | 0 | 0.17 | 0    |
|             | dya-miR-277    | Drosophila yakuba     |                         | 0   | 0    | 0    | 0    | 0    | 0 | 0.17 | 0    |
| dof-miR-429 | sha-miR-141    | Sarcophilus harrisii  | TAACACTGTCTGGTAAAGATG   | 0   | 0    | 0    | 0    | 0.09 | 0 | 4.67 | 0.28 |
| dof-miR-430 | mmu-miR-141-3p | Mus musculus          | TAACACTGTCTGGTAAAGATGG  | 0   | 0    | 0    | 0.18 | 0    | 0 | 0.17 | 0    |
|             | hsa-miR-141-3p | Homo sapiens          |                         | 0   | 0    | 0    | 0.18 | 0    | 0 | 0.17 | 0    |
|             | rno-miR-141-3p | Rattus norvegicus     |                         | 0   | 0    | 0    | 0.18 | 0    | 0 | 0.17 | 0    |
|             | chi-miR-141    | Capra hircus          |                         | 0   | 0    | 0    | 0.18 | 0    | 0 | 0.17 | 0    |
|             | eca-miR-141    | Equus caballus        |                         | 0   | 0    | 0    | 0.18 | 0    | 0 | 0.17 | 0    |
|             | ptr-miR-141    | Pan troglodytes       |                         | 0   | 0    | 0    | 0.18 | 0    | 0 | 0.17 | 0    |
|             | bta-miR-141    | Bos taurus            |                         | 0   | 0    | 0    | 0.18 | 0    | 0 | 0.17 | 0    |
| dof-miR-431 | efu-miR-141    | Eptesicus fuscus      | TAACACTGTCTGGTAAAGATGGC | 0   | 0    | 0    | 0    | 0    | 0 | 0.17 | 0    |
|             | tch-miR-141-3p | Tupaia chinensis      |                         | 0   | 0    | 0    | 0    | 0    | 0 | 0.17 | 0    |
|             | cgr-miR-141    | Cricetulus griseus    |                         | 0   | 0    | 0    | 0    | 0    | 0 | 0.17 | 0    |
| dof-miR-432 | chi-miR-200a   | Capra hircus          | TAACACTGTCTGGTAAACGATG  | 0.4 | 0.25 | 0.18 | 1.44 | 0.09 | 0 | 2.84 | 0.7  |
|             | ipu-miR-141    | Ictalurus punctatus   |                         | 0.4 | 0.25 | 0.18 | 1.44 | 0.09 | 0 | 2.84 | 0.7  |
|             | ipu-miR-200a   | Ictalurus punctatus   |                         | 0.4 | 0.25 | 0.18 | 1.44 | 0.09 | 0 | 2.84 | 0.7  |
|             | ccr-miR-200a   | Cyprinus carpio       |                         | 0.4 | 0.25 | 0.18 | 1.44 | 0.09 | 0 | 2.84 | 0.7  |



|             |                |                        |                         |   |      |   |      |   |   |      |      |      |
|-------------|----------------|------------------------|-------------------------|---|------|---|------|---|---|------|------|------|
|             | rno-miR-124-3p | Rattus norvegicus      |                         | 0 | 0    | 0 | 0    | 0 | 0 | 0    | 0    | 0.14 |
|             | chi-miR-124a   | Capra hircus           |                         | 0 | 0    | 0 | 0    | 0 | 0 | 0    | 0    | 0.14 |
|             | ipu-miR-124a   | Ictalurus punctatus    |                         | 0 | 0    | 0 | 0    | 0 | 0 | 0    | 0    | 0.14 |
|             | ppy-miR-124    | Pongo pygmaeus         |                         | 0 | 0    | 0 | 0    | 0 | 0 | 0    | 0    | 0.14 |
|             | eca-miR-124    | Equus caballus         |                         | 0 | 0    | 0 | 0    | 0 | 0 | 0    | 0    | 0.14 |
|             | crm-miR-124a   | Caenorhabditis remanei |                         | 0 | 0    | 0 | 0    | 0 | 0 | 0    | 0    | 0.14 |
|             | ppc-miR-124    | Pristionchus pacificus |                         | 0 | 0    | 0 | 0    | 0 | 0 | 0    | 0    | 0.14 |
| dof-miR-441 | prd-miR-124-3p | Panagrellus redivivus  | TAAGGCACGCGGTGAATGCCAAT | 0 | 0    | 0 | 0    | 0 | 0 | 0    | 0    | 0.14 |
| dof-miR-442 | ipu-miR-18a    | Ictalurus punctatus    | TAAGGTGCATCTAGTGCAGA    | 0 | 0.25 | 0 | 0    | 0 | 0 | 0    | 0    | 0    |
| dof-miR-443 | gga-miR-18a-5p | Gallus gallus          | TAAGGTGCATCTAGTGCAGATA  | 0 | 0    | 0 | 0.18 | 0 | 0 | 0.17 | 0.14 |      |
|             | dre-miR-18a    | Danio rerio            |                         | 0 | 0    | 0 | 0.18 | 0 | 0 | 0.17 | 0.14 |      |
|             | ssc-miR-18a    | Sus scrofa             |                         | 0 | 0    | 0 | 0.18 | 0 | 0 | 0.17 | 0.14 |      |
|             | ggo-miR-18a    | Gorilla gorilla        |                         | 0 | 0    | 0 | 0.18 | 0 | 0 | 0.17 | 0.14 |      |
|             | lca-miR-18     | Lemur catta            |                         | 0 | 0    | 0 | 0.18 | 0 | 0 | 0.17 | 0.14 |      |
|             | age-miR-18     | Ateles geoffroyi       |                         | 0 | 0    | 0 | 0.18 | 0 | 0 | 0.17 | 0.14 |      |
|             | ppa-miR-18     | Pan paniscus           |                         | 0 | 0    | 0 | 0.18 | 0 | 0 | 0.17 | 0.14 |      |
|             | ppy-miR-18a    | Pongo pygmaeus         |                         | 0 | 0    | 0 | 0.18 | 0 | 0 | 0.17 | 0.14 |      |
|             | ptr-miR-18a    | Pan troglodytes        |                         | 0 | 0    | 0 | 0.18 | 0 | 0 | 0.17 | 0.14 |      |
|             | mml-miR-18a-5p | Macaca mulatta         |                         | 0 | 0    | 0 | 0.18 | 0 | 0 | 0.17 | 0.14 |      |
|             | sla-miR-18     | Saguinus labiatus      |                         | 0 | 0    | 0 | 0.18 | 0 | 0 | 0.17 | 0.14 |      |
|             | lla-miR-18     | Lagothrix lagotricha   |                         | 0 | 0    | 0 | 0.18 | 0 | 0 | 0.17 | 0.14 |      |
|             | mne-miR-18     | Macaca nemestrina      |                         | 0 | 0    | 0 | 0.18 | 0 | 0 | 0.17 | 0.14 |      |
|             | fru-miR-18     | Fugu rubripes          |                         | 0 | 0    | 0 | 0.18 | 0 | 0 | 0.17 | 0.14 |      |
|             | tni-miR-18     | Tetraodon nigroviridis |                         | 0 | 0    | 0 | 0.18 | 0 | 0 | 0.17 | 0.14 |      |
|             | bta-miR-18a    | Bos taurus             |                         | 0 | 0    | 0 | 0.18 | 0 | 0 | 0.17 | 0.14 |      |
|             | mdo-miR-18a-5p | Monodelphis domestica  |                         | 0 | 0    | 0 | 0.18 | 0 | 0 | 0.17 | 0.14 |      |
|             | ssa-miR-18b-5p | Salmo salar            |                         | 0 | 0    | 0 | 0.18 | 0 | 0 | 0.17 | 0.14 |      |
|             | tgu-miR-18a    | Taeniopygia guttata    |                         | 0 | 0    | 0 | 0.18 | 0 | 0 | 0.17 | 0.14 |      |
|             | cfa-miR-18a    | Canis familiaris       |                         | 0 | 0    | 0 | 0.18 | 0 | 0 | 0.17 | 0.14 |      |
| dof-miR-444 | hsa-miR-18a-5p | Homo sapiens           | TAAGGTGCATCTAGTGCAGATAG | 0 | 0    | 0 | 0.54 | 0 | 0 | 0    | 0    |      |
|             | mmu-miR-18a-5p | Mus musculus           |                         | 0 | 0    | 0 | 0.54 | 0 | 0 | 0    | 0    |      |
|             | rno-miR-18a-5p | Rattus norvegicus      |                         | 0 | 0    | 0 | 0.54 | 0 | 0 | 0    | 0    |      |
|             | xtr-miR-18a-5p | Xenopus tropicalis     |                         | 0 | 0    | 0 | 0.54 | 0 | 0 | 0    | 0    |      |
|             | chi-miR-18a-5p | Capra hircus           |                         | 0 | 0    | 0 | 0.54 | 0 | 0 | 0    | 0    |      |

|             |                 |                           |                         |   |      |      |      |   |     |      |      |
|-------------|-----------------|---------------------------|-------------------------|---|------|------|------|---|-----|------|------|
|             | oha-miR-18a-5p  | Ophiophagus hannah        |                         | 0 | 0    | 0    | 0.54 | 0 | 0   | 0    | 0    |
|             | ccr-miR-18a     | Cyprinus carpio           |                         | 0 | 0    | 0    | 0.54 | 0 | 0   | 0    | 0    |
|             | ola-miR-18      | Oryzias latipes           |                         | 0 | 0    | 0    | 0.54 | 0 | 0   | 0    | 0    |
|             | cgr-miR-18a-5p  | Cricetulus griseus        |                         | 0 | 0    | 0    | 0.54 | 0 | 0   | 0    | 0    |
|             | pma-miR-18a-5p  | Petromyzon marinus        |                         | 0 | 0    | 0    | 0.54 | 0 | 0   | 0    | 0    |
|             | aca-miR-18a-5p  | Anolis carolinensis       |                         | 0 | 0    | 0    | 0.54 | 0 | 0   | 0    | 0    |
|             | eca-miR-18a     | Equus caballus            |                         | 0 | 0    | 0    | 0.54 | 0 | 0   | 0    | 0    |
| dof-miR-445 | mmu-miR-467a-5p | Mus musculus              | TAAGTGCCTGCATGTATATGCG  | 0 | 0    | 0    | 0    | 0 | 0   | 0.17 | 0    |
| dof-miR-446 | mmu-miR-467c-5p | Mus musculus              | TAAGTGCCTGCATGTATATGTG  | 0 | 0    | 0    | 0    | 0 | 0   | 0.17 | 0    |
| dof-miR-447 | dre-miR-430a-3p | Danio rerio               | TAAGTGCTATTTGTTGGGGTAG  | 0 | 0    | 0.55 | 0.18 | 0 | 0   | 0    | 0    |
|             | hhi-miR-430a    | Hippoglossus hippoglossus |                         | 0 | 0    | 0.55 | 0.18 | 0 | 0   | 0    | 0    |
|             | ccr-miR-430     | Cyprinus carpio           |                         | 0 | 0    | 0.55 | 0.18 | 0 | 0   | 0    | 0    |
| dof-miR-448 | rno-miR-200c-3p | Rattus norvegicus         | TAATACTGCCGGGTAATGATG   | 0 | 0.25 | 0    | 0    | 0 | 0   | 0    | 0.14 |
| dof-miR-449 | mdo-miR-200c-3p | Monodelphis domestica     | TAATACTGCCGGGTAATGATGG  | 0 | 0    | 0    | 0    | 0 | 0   | 0    | 0.14 |
|             | oar-miR-200c    | Ovis aries                |                         | 0 | 0    | 0    | 0    | 0 | 0   | 0    | 0    |
| dof-miR-450 | hsa-miR-200c-3p | Homo sapiens              | TAATACTGCCGGGTAATGATGGA | 0 | 0    | 0.37 | 1.08 | 0 | 0.1 | 0.67 | 0.28 |
|             | mmu-miR-200c-3p | Mus musculus              |                         | 0 | 0    | 0.37 | 1.08 | 0 | 0.1 | 0.67 | 0.28 |
|             | bta-miR-200c    | Bos taurus                |                         | 0 | 0    | 0.37 | 1.08 | 0 | 0.1 | 0.67 | 0.28 |
|             | efu-miR-200c    | Eptesicus fuscus          |                         | 0 | 0    | 0.37 | 1.08 | 0 | 0.1 | 0.67 | 0.28 |
|             | chi-miR-200c    | Capra hircus              |                         | 0 | 0    | 0.37 | 1.08 | 0 | 0.1 | 0.67 | 0.28 |
|             | tch-miR-200c-3p | Tupaia chinensis          |                         | 0 | 0    | 0.37 | 1.08 | 0 | 0.1 | 0.67 | 0.28 |
|             | cgr-miR-200c    | Cricetulus griseus        |                         | 0 | 0    | 0.37 | 1.08 | 0 | 0.1 | 0.67 | 0.28 |
|             | ptr-miR-200c    | Pan troglodytes           |                         | 0 | 0    | 0.37 | 1.08 | 0 | 0.1 | 0.67 | 0.28 |
|             | eca-miR-200c    | Equus caballus            |                         | 0 | 0    | 0.37 | 1.08 | 0 | 0.1 | 0.67 | 0.28 |
|             | cfa-miR-200c    | Canis familiaris          |                         | 0 | 0    | 0.37 | 1.08 | 0 | 0.1 | 0.67 | 0.28 |
| dof-miR-451 | sha-miR-200b    | Sarcophilus harrisii      | TAATACTGCCTGGTAATGA     | 0 | 0    | 0    | 0.18 | 0 | 0   | 0.17 | 0    |
| dof-miR-452 | bta-miR-200b    | Bos taurus                | TAATACTGCCTGGTAATGATG   | 0 | 0    | 0.37 | 0.72 | 0 | 0   | 0    | 0    |
|             | oar-miR-200b    | Ovis aries                |                         | 0 | 0    | 0.37 | 0.72 | 0 | 0   | 0    | 0    |
|             | ola-miR-200b    | Oryzias latipes           |                         | 0 | 0    | 0.37 | 0.72 | 0 | 0   | 0    | 0    |
| dof-miR-453 | mmu-miR-200b-3p | Mus musculus              | TAATACTGCCTGGTAATGATGA  | 0 | 0    | 1.1  | 2.7  | 0 | 0   | 0.67 | 0.28 |
|             | hsa-miR-200b-3p | Homo sapiens              |                         | 0 | 0    | 1.1  | 2.7  | 0 | 0   | 0.67 | 0.28 |
|             | dre-miR-200b-3p | Danio rerio               |                         | 0 | 0    | 1.1  | 2.7  | 0 | 0   | 0.67 | 0.28 |
|             | fru-miR-200b    | Fugu rubripes             |                         | 0 | 0    | 1.1  | 2.7  | 0 | 0   | 0.67 | 0.28 |
|             | tmi-miR-200b    | Tetraodon nigroviridis    |                         | 0 | 0    | 1.1  | 2.7  | 0 | 0   | 0.67 | 0.28 |



|             |                 |                          |                         |   |   |      |      |   |      |      |      |
|-------------|-----------------|--------------------------|-------------------------|---|---|------|------|---|------|------|------|
|             | der-miR-8       | Drosophila erecta        |                         | 0 | 0 | 0    | 0    | 0 | 0.73 | 0    | 0    |
|             | dgr-miR-8       | Drosophila grimshawi     |                         | 0 | 0 | 0    | 0    | 0 | 0.73 | 0    | 0    |
|             | dmo-miR-8       | Drosophila mojavensis    |                         | 0 | 0 | 0    | 0    | 0 | 0.73 | 0    | 0    |
|             | dpe-miR-8       | Drosophila persimilis    |                         | 0 | 0 | 0    | 0    | 0 | 0.73 | 0    | 0    |
|             | dse-miR-8       | Drosophila sechellia     |                         | 0 | 0 | 0    | 0    | 0 | 0.73 | 0    | 0    |
|             | dsi-miR-8       | Drosophila simulans      |                         | 0 | 0 | 0    | 0    | 0 | 0.73 | 0    | 0    |
|             | dvi-miR-8-3p    | Drosophila virilis       |                         | 0 | 0 | 0    | 0    | 0 | 0.73 | 0    | 0    |
|             | dwi-miR-8       | Drosophila willistoni    |                         | 0 | 0 | 0    | 0    | 0 | 0.73 | 0    | 0    |
|             | dya-miR-8       | Drosophila yakuba        |                         | 0 | 0 | 0    | 0    | 0 | 0.73 | 0    | 0    |
|             | cte-miR-8       | Capitella teleta         |                         | 0 | 0 | 0    | 0    | 0 | 0.73 | 0    | 0    |
|             | lgi-miR-8       | Lottia gigantea          |                         | 0 | 0 | 0    | 0    | 0 | 0.73 | 0    | 0    |
| dof-miR-460 | xla-miR-429     | Xenopus laevis           | TAATACTGTCTGGTAATGCCG   | 0 | 0 | 0    | 0.18 | 0 | 0    | 0.17 | 0.14 |
|             | chi-miR-429     | Capra hircus             |                         | 0 | 0 | 0    | 0.18 | 0 | 0    | 0.17 | 0.14 |
|             | ssa-miR-429-3p  | Salmo salar              |                         | 0 | 0 | 0    | 0.18 | 0 | 0    | 0.17 | 0.14 |
|             | ipu-miR-429a    | Ictalurus punctatus      |                         | 0 | 0 | 0    | 0.18 | 0 | 0    | 0.17 | 0.14 |
|             | eca-miR-429     | Equus caballus           |                         | 0 | 0 | 0    | 0.18 | 0 | 0    | 0.17 | 0.14 |
| dof-miR-461 | mmu-miR-429-3p  | Mus musculus             | TAATACTGTCTGGTAATGCCGT  | 0 | 0 | 0.18 | 0    | 0 | 0    | 0    | 0    |
|             | rno-miR-429     | Rattus norvegicus        |                         | 0 | 0 | 0.18 | 0    | 0 | 0    | 0    | 0    |
|             | cfa-miR-429     | Canis familiaris         |                         | 0 | 0 | 0.18 | 0    | 0 | 0    | 0    | 0    |
|             | dre-miR-429a    | Danio rerio              |                         | 0 | 0 | 0.18 | 0    | 0 | 0    | 0    | 0    |
|             | fru-miR-429     | Fugu rubripes            |                         | 0 | 0 | 0.18 | 0    | 0 | 0    | 0    | 0    |
|             | tmi-miR-429     | Tetraodon nigroviridis   |                         | 0 | 0 | 0.18 | 0    | 0 | 0    | 0    | 0    |
|             | gga-miR-429-3p  | Gallus gallus            |                         | 0 | 0 | 0.18 | 0    | 0 | 0    | 0    | 0    |
|             | xtr-miR-429     | Xenopus tropicalis       |                         | 0 | 0 | 0.18 | 0    | 0 | 0    | 0    | 0    |
|             | oan-miR-429-3p  | Ornithorhynchus anatinus |                         | 0 | 0 | 0.18 | 0    | 0 | 0    | 0    | 0    |
|             | ccr-miR-429     | Cyprinus carpio          |                         | 0 | 0 | 0.18 | 0    | 0 | 0    | 0    | 0    |
|             | cgr-miR-429     | Cricetulus griseus       |                         | 0 | 0 | 0.18 | 0    | 0 | 0    | 0    | 0    |
|             | ssc-miR-429     | Sus scrofa               |                         | 0 | 0 | 0.18 | 0    | 0 | 0    | 0    | 0    |
|             | aca-miR-429-3p  | Anolis carolinensis      |                         | 0 | 0 | 0.18 | 0    | 0 | 0    | 0    | 0    |
|             | bta-miR-429     | Bos taurus               |                         | 0 | 0 | 0.18 | 0    | 0 | 0    | 0    | 0    |
| dof-miR-462 | hsa-miR-500a-5p | Homo sapiens             | TAATCCTTGCTACCTGGGTGAGA | 0 | 0 | 0    | 0.54 | 0 | 0    | 0    | 0    |
|             | chi-miR-500-5p  | Capra hircus             |                         | 0 | 0 | 0    | 0.54 | 0 | 0    | 0    | 0    |
|             | mml-miR-500b-5p | Macaca mulatta           |                         | 0 | 0 | 0    | 0.54 | 0 | 0    | 0    | 0    |
|             | ppy-miR-500     | Pongo pygmaeus           |                         | 0 | 0 | 0    | 0.54 | 0 | 0    | 0    | 0    |

|             |                 |                        |                        |     |      |      |      |      |      |      |      |
|-------------|-----------------|------------------------|------------------------|-----|------|------|------|------|------|------|------|
|             | eca-miR-500     | Equus caballus         |                        | 0   | 0    | 0    | 0.54 | 0    | 0    | 0    | 0    |
|             | mml-miR-500a-5p | Macaca mulatta         |                        | 0   | 0    | 0    | 0.54 | 0    | 0    | 0    | 0    |
|             | ptr-miR-500     | Pan troglodytes        |                        | 0   | 0    | 0    | 0.54 | 0    | 0    | 0    | 0    |
|             | bta-miR-500     | Bos taurus             |                        | 0   | 0    | 0    | 0.54 | 0    | 0    | 0    | 0    |
| dof-miR-463 | dre-miR-216b    | Danio rerio            | TAATCTCTGCAGGCAACTGTGA | 0   | 0.25 | 0    | 0    | 0    | 0    | 0    | 0    |
|             | fru-miR-216b    | Fugu rubripes          |                        | 0   | 0.25 | 0    | 0    | 0    | 0    | 0    | 0    |
|             | tmi-miR-216b    | Tetraodon nigroviridis |                        | 0   | 0.25 | 0    | 0    | 0    | 0    | 0    | 0    |
|             | ssa-miR-216a-5p | Salmo salar            |                        | 0   | 0.25 | 0    | 0    | 0    | 0    | 0    | 0    |
|             | ipu-miR-216b    | Ictalurus punctatus    |                        | 0   | 0.25 | 0    | 0    | 0    | 0    | 0    | 0    |
|             | csa-miR-216b    | Ciona savignyi         |                        | 0   | 0.25 | 0    | 0    | 0    | 0    | 0    | 0    |
| dof-miR-464 | ptc-miR2111a    | Populus trichocarpa    | TAATCTGCATCCTGAGGTTTG  | 0   | 0    | 0    | 1.26 | 0    | 0    | 0    | 0    |
|             | ptc-miR2111b    | Populus trichocarpa    |                        | 0   | 0    | 0    | 1.26 | 0    | 0    | 0    | 0    |
| dof-miR-465 | hsa-miR-590-3p  | Homo sapiens           | TAATTTTATGTATAAGTAGT   | 0   | 0    | 0    | 0    | 0.09 | 0    | 0    | 0    |
|             | mmu-miR-590-3p  | Mus musculus           |                        | 0   | 0    | 0    | 0    | 0.09 | 0    | 0    | 0    |
|             | ppy-miR-590-3p  | Pongo pygmaeus         |                        | 0   | 0    | 0    | 0    | 0.09 | 0    | 0    | 0    |
|             | eca-miR-590-3p  | Equus caballus         |                        | 0   | 0    | 0    | 0    | 0.09 | 0    | 0    | 0    |
|             | cfa-miR-590     | Canis familiaris       |                        | 0   | 0    | 0    | 0    | 0.09 | 0    | 0    | 0    |
|             | ptr-miR-590     | Pan troglodytes        |                        | 0   | 0    | 0    | 0    | 0.09 | 0    | 0    | 0    |
| dof-miR-466 | chi-miR-214-3p  | Capra hircus           | TACAGCAGGCACAGACAGGC   | 0   | 0    | 0.18 | 0    | 0    | 0    | 0    | 0    |
| dof-miR-467 | dre-miR-101b    | Danio rerio            | TACAGTACTATGATAACTGAAG | 0   | 0    | 0    | 0    | 0    | 0    | 0    | 0.14 |
|             | fru-miR-101b    | Fugu rubripes          |                        | 0   | 0    | 0    | 0    | 0    | 0    | 0    | 0.14 |
|             | tmi-miR-101b    | Tetraodon nigroviridis |                        | 0   | 0    | 0    | 0    | 0    | 0    | 0    | 0.14 |
| dof-miR-468 | chi-miR-101-3p  | Capra hircus           | TACAGTACTGTGATAACTGA   | 0.2 | 0    | 0.73 | 0.18 | 0.28 | 0.21 | 0    | 0    |
|             | aca-miR-101-3p  | Anolis carolinensis    |                        | 0.2 | 0    | 0.73 | 0.18 | 0.28 | 0.21 | 0    | 0    |
|             | cfa-miR-101     | Canis familiaris       |                        | 0.2 | 0    | 0.73 | 0.18 | 0.28 | 0.21 | 0    | 0    |
| dof-miR-469 | hsa-miR-101-3p  | Homo sapiens           | TACAGTACTGTGATAACTGAA  | 0   | 0    | 0    | 0    | 0.37 | 0    | 0.17 | 0    |
|             | mmu-miR-101a-3p | Mus musculus           |                        | 0   | 0    | 0    | 0    | 0.37 | 0    | 0.17 | 0    |
|             | rno-miR-101a-3p | Rattus norvegicus      |                        | 0   | 0    | 0    | 0    | 0.37 | 0    | 0.17 | 0    |
|             | ppy-miR-101     | Pongo pygmaeus         |                        | 0   | 0    | 0    | 0    | 0.37 | 0    | 0.17 | 0    |
|             | bta-miR-101     | Bos taurus             |                        | 0   | 0    | 0    | 0    | 0.37 | 0    | 0.17 | 0    |
|             | eca-miR-101     | Equus caballus         |                        | 0   | 0    | 0    | 0    | 0.37 | 0    | 0.17 | 0    |
|             | ssc-miR-101     | Sus scrofa             |                        | 0   | 0    | 0    | 0    | 0.37 | 0    | 0.17 | 0    |
| dof-miR-470 | dre-miR-101a    | Danio rerio            | TACAGTACTGTGATAACTGAAG | 0   | 0    | 0.18 | 0.54 | 1.12 | 0.52 | 0.5  | 0    |
|             | ggo-miR-101     | Gorilla gorilla        |                        | 0   | 0    | 0.18 | 0.54 | 1.12 | 0.52 | 0.5  | 0    |



|             |                 |                          |                        |      |      |      |      |      |      |      |      |
|-------------|-----------------|--------------------------|------------------------|------|------|------|------|------|------|------|------|
|             | sla-miR-101     | Saguinus labiatus        |                        | 0    | 0    | 0.18 | 0.54 | 1.12 | 0.52 | 0.5  | 0    |
|             | age-miR-101     | Ateles geoffroyi         |                        | 0    | 0    | 0.18 | 0.54 | 1.12 | 0.52 | 0.5  | 0    |
|             | ppa-miR-101     | Pan paniscus             |                        | 0    | 0    | 0.18 | 0.54 | 1.12 | 0.52 | 0.5  | 0    |
|             | ptr-miR-101     | Pan troglodytes          |                        | 0    | 0    | 0.18 | 0.54 | 1.12 | 0.52 | 0.5  | 0    |
|             | mml-miR-101-3p  | Macaca mulatta           |                        | 0    | 0    | 0.18 | 0.54 | 1.12 | 0.52 | 0.5  | 0    |
|             | lla-miR-101     | Lagothrix lagotricha     |                        | 0    | 0    | 0.18 | 0.54 | 1.12 | 0.52 | 0.5  | 0    |
|             | mne-miR-101     | Macaca nemestrina        |                        | 0    | 0    | 0.18 | 0.54 | 1.12 | 0.52 | 0.5  | 0    |
|             | fru-miR-101a    | Fugu rubripes            |                        | 0    | 0    | 0.18 | 0.54 | 1.12 | 0.52 | 0.5  | 0    |
|             | tni-miR-101a    | Tetraodon nigroviridis   |                        | 0    | 0    | 0.18 | 0.54 | 1.12 | 0.52 | 0.5  | 0    |
|             | xtr-miR-101a    | Xenopus tropicalis       |                        | 0    | 0    | 0.18 | 0.54 | 1.12 | 0.52 | 0.5  | 0    |
|             | mdo-miR-101-3p  | Monodelphis domestica    |                        | 0    | 0    | 0.18 | 0.54 | 1.12 | 0.52 | 0.5  | 0    |
|             | oan-miR-101     | Ornithorhynchus anatinus |                        | 0    | 0    | 0.18 | 0.54 | 1.12 | 0.52 | 0.5  | 0    |
|             | oha-miR-101b-3p | Ophiophagus hannah       |                        | 0    | 0    | 0.18 | 0.54 | 1.12 | 0.52 | 0.5  | 0    |
|             | ssa-miR-101a-3p | Salmo salar              |                        | 0    | 0    | 0.18 | 0.54 | 1.12 | 0.52 | 0.5  | 0    |
|             | ipu-miR-101a    | Ictalurus punctatus      |                        | 0    | 0    | 0.18 | 0.54 | 1.12 | 0.52 | 0.5  | 0    |
|             | ccr-miR-101a    | Cyprinus carpio          |                        | 0    | 0    | 0.18 | 0.54 | 1.12 | 0.52 | 0.5  | 0    |
|             | cgr-miR-101b-3p | Cricetulus griseus       |                        | 0    | 0    | 0.18 | 0.54 | 1.12 | 0.52 | 0.5  | 0    |
| dof-miR-471 | dre-miR-199-3p  | Danio rerio              | TACAGTAGTCTGCACATTGGTT | 0    | 0    | 3.67 | 3.24 | 0.19 | 0    | 0.17 | 0.14 |
|             | xtr-miR-199a-3p | Xenopus tropicalis       |                        | 0    | 0    | 3.67 | 3.24 | 0.19 | 0    | 0.17 | 0.14 |
|             | oha-miR-199c-3p | Ophiophagus hannah       |                        | 0    | 0    | 3.67 | 3.24 | 0.19 | 0    | 0.17 | 0.14 |
|             | ssc-miR-199b-3p | Sus scrofa               |                        | 0    | 0    | 3.67 | 3.24 | 0.19 | 0    | 0.17 | 0.14 |
| dof-miR-472 | chi-miR-144-3p  | Capra hircus             | TACAGTATAGATGATGTAC    | 3.37 | 6.36 | 0.55 | 0    | 0.75 | 0.21 | 1.84 | 5.04 |
|             | ssc-miR-144     | Sus scrofa               |                        | 3.37 | 6.36 | 0.55 | 0    | 0.75 | 0.21 | 1.84 | 5.04 |
| dof-miR-473 | mmu-miR-144-3p  | Mus musculus             | TACAGTATAGATGATGTACT   | 0.79 | 3.82 | 0.18 | 0.18 | 0.19 | 0.52 | 0.83 | 1.4  |
|             | hsa-miR-144-3p  | Homo sapiens             |                        | 0.79 | 3.82 | 0.18 | 0.18 | 0.19 | 0.52 | 0.83 | 1.4  |
|             | rno-miR-144-3p  | Rattus norvegicus        |                        | 0.79 | 3.82 | 0.18 | 0.18 | 0.19 | 0.52 | 0.83 | 1.4  |
|             | dre-miR-144-3p  | Danio rerio              |                        | 0.79 | 3.82 | 0.18 | 0.18 | 0.19 | 0.52 | 0.83 | 1.4  |
|             | fru-miR-144     | Fugu rubripes            |                        | 0.79 | 3.82 | 0.18 | 0.18 | 0.19 | 0.52 | 0.83 | 1.4  |
|             | tni-miR-144     | Tetraodon nigroviridis   |                        | 0.79 | 3.82 | 0.18 | 0.18 | 0.19 | 0.52 | 0.83 | 1.4  |
|             | oan-miR-144-3p  | Ornithorhynchus anatinus |                        | 0.79 | 3.82 | 0.18 | 0.18 | 0.19 | 0.52 | 0.83 | 1.4  |
|             | aja-miR-144     | Artibeus jamaicensis     |                        | 0.79 | 3.82 | 0.18 | 0.18 | 0.19 | 0.52 | 0.83 | 1.4  |
|             | aca-miR-144-3p  | Anolis carolinensis      |                        | 0.79 | 3.82 | 0.18 | 0.18 | 0.19 | 0.52 | 0.83 | 1.4  |
|             | eca-miR-144     | Equus caballus           |                        | 0.79 | 3.82 | 0.18 | 0.18 | 0.19 | 0.52 | 0.83 | 1.4  |
|             | tgu-miR-144-3p  | Taeniopygia guttata      |                        | 0.79 | 3.82 | 0.18 | 0.18 | 0.19 | 0.52 | 0.83 | 1.4  |

|             |                |                          |                         |      |      |      |      |      |      |      |      |
|-------------|----------------|--------------------------|-------------------------|------|------|------|------|------|------|------|------|
|             | mml-miR-144    | Macaca mulatta           |                         | 0.79 | 3.82 | 0.18 | 0.18 | 0.19 | 0.52 | 0.83 | 1.4  |
| dof-miR-474 | mmu-miR-140-3p | Mus musculus             | TACCACAGGGTAGAACACGG    | 0    | 0.25 | 0.18 | 0    | 0.19 | 0.1  | 0.17 | 0    |
|             | hsa-miR-140-3p | Homo sapiens             |                         | 0    | 0.25 | 0.18 | 0    | 0.19 | 0.1  | 0.17 | 0    |
|             | rno-miR-140-3p | Rattus norvegicus        |                         | 0    | 0.25 | 0.18 | 0    | 0.19 | 0.1  | 0.17 | 0    |
|             | aca-miR-140-3p | Anolis carolinensis      |                         | 0    | 0.25 | 0.18 | 0    | 0.19 | 0.1  | 0.17 | 0    |
|             | ppy-miR-140-3p | Pongo pygmaeus           |                         | 0    | 0.25 | 0.18 | 0    | 0.19 | 0.1  | 0.17 | 0    |
|             | eca-miR-140-3p | Equus caballus           |                         | 0    | 0.25 | 0.18 | 0    | 0.19 | 0.1  | 0.17 | 0    |
|             | mml-miR-140-3p | Macaca mulatta           |                         | 0    | 0.25 | 0.18 | 0    | 0.19 | 0.1  | 0.17 | 0    |
| dof-miR-475 | bta-miR-140    | Bos taurus               | TACCACAGGGTAGAACACGGA   | 0.2  | 0    | 0.18 | 0.9  | 0.93 | 0.1  | 0.17 | 0.14 |
|             | oan-miR-140-3p | Ornithorhynchus anatinus |                         | 0.2  | 0    | 0.18 | 0.9  | 0.93 | 0.1  | 0.17 | 0.14 |
|             | ssa-miR-140-3p | Salmo salar              |                         | 0.2  | 0    | 0.18 | 0.9  | 0.93 | 0.1  | 0.17 | 0.14 |
|             | ccr-miR-140-3p | Cyprinus carpio          |                         | 0.2  | 0    | 0.18 | 0.9  | 0.93 | 0.1  | 0.17 | 0.14 |
|             | mdo-miR-140-3p | Monodelphis domestica    |                         | 0.2  | 0    | 0.18 | 0.9  | 0.93 | 0.1  | 0.17 | 0.14 |
| dof-miR-476 | dre-miR-140-3p | Danio rerio              | TACCACAGGGTAGAACACGGAC  | 0.2  | 0.25 | 0.73 | 1.62 | 0.84 | 0    | 0.33 | 0.28 |
|             | ssc-miR-140-3p | Sus scrofa               |                         | 0.2  | 0.25 | 0.73 | 1.62 | 0.84 | 0    | 0.33 | 0.28 |
|             | oha-miR-140-3p | Ophiophagus hannah       |                         | 0.2  | 0.25 | 0.73 | 1.62 | 0.84 | 0    | 0.33 | 0.28 |
|             | tgu-miR-140-3p | Taeniopygia guttata      |                         | 0.2  | 0.25 | 0.73 | 1.62 | 0.84 | 0    | 0.33 | 0.28 |
| dof-miR-477 | bta-miR-660    | Bos taurus               | TACCCATTGCATATCGGAGCTG  | 0    | 0    | 0.18 | 0    | 0    | 0    | 0    |      |
| dof-miR-478 | chi-miR-660    | Capra hircus             | TACCCATTGCATATCGGAGCTGT | 0    | 0    | 0    | 0.18 | 0    | 0    | 0    |      |
| dof-miR-479 | hsa-miR-660-5p | Homo sapiens             | TACCCATTGCATATCGGAGTTG  | 0    | 0    | 0    | 0    | 0.19 | 0    | 0    | 0    |
|             | ggo-miR-660    | Gorilla gorilla          |                         | 0    | 0    | 0    | 0    | 0.19 | 0    | 0    | 0    |
|             | ppy-miR-660    | Pongo pygmaeus           |                         | 0    | 0    | 0    | 0    | 0.19 | 0    | 0    | 0    |
|             | eca-miR-660    | Equus caballus           |                         | 0    | 0    | 0    | 0    | 0.19 | 0    | 0    | 0    |
|             | mml-miR-660-5p | Macaca mulatta           |                         | 0    | 0    | 0    | 0    | 0.19 | 0    | 0    | 0    |
|             | cfa-miR-660    | Canis familiaris         |                         | 0    | 0    | 0    | 0    | 0.19 | 0    | 0    | 0    |
|             | ptr-miR-660    | Pan troglodytes          |                         | 0    | 0    | 0    | 0    | 0.19 | 0    | 0    | 0    |
| dof-miR-480 | efu-miR-660    | Eptesicus fuscus         | TACCCATTGCATATCGGAGTTGT | 0    | 0    | 0    | 0    | 0.19 | 0.21 | 0    |      |
| dof-miR-481 | gga-miR-10b-5p | Gallus gallus            | TACCCGTAGAACCGAATTTGT   | 3.56 | 5.86 | 3.31 | 5.59 | 0.56 | 0.1  | 8.01 | 2.8  |
|             | ggo-miR-10b    | Gorilla gorilla          |                         | 3.56 | 5.86 | 3.31 | 5.59 | 0.56 | 0.1  | 8.01 | 2.8  |
|             | mne-miR-10b    | Macaca nemestrina        |                         | 3.56 | 5.86 | 3.31 | 5.59 | 0.56 | 0.1  | 8.01 | 2.8  |
|             | ppa-miR-10b    | Pan paniscus             |                         | 3.56 | 5.86 | 3.31 | 5.59 | 0.56 | 0.1  | 8.01 | 2.8  |
|             | xtr-miR-10b    | Xenopus tropicalis       |                         | 3.56 | 5.86 | 3.31 | 5.59 | 0.56 | 0.1  | 8.01 | 2.8  |
|             | oan-miR-10b-5p | Ornithorhynchus anatinus |                         | 3.56 | 5.86 | 3.31 | 5.59 | 0.56 | 0.1  | 8.01 | 2.8  |
|             | chi-miR-10b-5p | Capra hircus             |                         | 3.56 | 5.86 | 3.31 | 5.59 | 0.56 | 0.1  | 8.01 | 2.8  |

|             |                |                          |                         |      |      |      |      |      |      |      |      |
|-------------|----------------|--------------------------|-------------------------|------|------|------|------|------|------|------|------|
|             | ssa-miR-10b-5p | Salmo salar              |                         | 3.56 | 5.86 | 3.31 | 5.59 | 0.56 | 0.1  | 8.01 | 2.8  |
|             | ipu-miR-10b    | Ictalurus punctatus      |                         | 3.56 | 5.86 | 3.31 | 5.59 | 0.56 | 0.1  | 8.01 | 2.8  |
|             | ccr-miR-10b    | Cyprinus carpio          |                         | 3.56 | 5.86 | 3.31 | 5.59 | 0.56 | 0.1  | 8.01 | 2.8  |
|             | ola-miR-10b    | Oryzias latipes          |                         | 3.56 | 5.86 | 3.31 | 5.59 | 0.56 | 0.1  | 8.01 | 2.8  |
|             | cgr-miR-10b-5p | Cricetulus griseus       |                         | 3.56 | 5.86 | 3.31 | 5.59 | 0.56 | 0.1  | 8.01 | 2.8  |
|             | aca-miR-10b-5p | Anolis carolinensis      |                         | 3.56 | 5.86 | 3.31 | 5.59 | 0.56 | 0.1  | 8.01 | 2.8  |
|             | tgu-miR-10a-5p | Taeniopygia guttata      |                         | 3.56 | 5.86 | 3.31 | 5.59 | 0.56 | 0.1  | 8.01 | 2.8  |
|             | ssc-miR-10b    | Sus scrofa               |                         | 3.56 | 5.86 | 3.31 | 5.59 | 0.56 | 0.1  | 8.01 | 2.8  |
| dof-miR-482 | mmu-miR-10b-5p | Mus musculus             | TACCCTGTAGAACCGAATTTGTG | 0    | 0.25 | 0.18 | 0.36 | 0    | 0    | 0    | 0    |
|             | hsa-miR-10b-5p | Homo sapiens             |                         | 0    | 0.25 | 0.18 | 0.36 | 0    | 0    | 0    | 0    |
|             | dre-miR-10b-5p | Danio rerio              |                         | 0    | 0.25 | 0.18 | 0.36 | 0    | 0    | 0    | 0    |
|             | fru-miR-10b    | Fugu rubripes            |                         | 0    | 0.25 | 0.18 | 0.36 | 0    | 0    | 0    | 0    |
|             | tmi-miR-10b    | Tetraodon nigroviridis   |                         | 0    | 0.25 | 0.18 | 0.36 | 0    | 0    | 0    | 0    |
|             | bta-miR-10b    | Bos taurus               |                         | 0    | 0.25 | 0.18 | 0.36 | 0    | 0    | 0    | 0    |
|             | tch-miR-10b-5p | Tupaia chinensis         |                         | 0    | 0.25 | 0.18 | 0.36 | 0    | 0    | 0    | 0    |
|             | ppy-miR-10b    | Pongo pygmaeus           |                         | 0    | 0.25 | 0.18 | 0.36 | 0    | 0    | 0    | 0    |
|             | eca-miR-10b    | Equus caballus           |                         | 0    | 0.25 | 0.18 | 0.36 | 0    | 0    | 0    | 0    |
|             | mml-miR-10b-5p | Macaca mulatta           |                         | 0    | 0.25 | 0.18 | 0.36 | 0    | 0    | 0    | 0    |
|             | ptr-miR-10b    | Pan troglodytes          |                         | 0    | 0.25 | 0.18 | 0.36 | 0    | 0    | 0    | 0    |
| dof-miR-483 | oar-miR-10a    | Ovis aries               | TACCCTGTAGATCCGAATTTG   | 0    | 0    | 0    | 0    | 0.28 | 0    | 0    | 0    |
| dof-miR-484 | dre-miR-10a-5p | Danio rerio              | TACCCTGTAGATCCGAATTTGT  | 0.2  | 0.76 | 4.23 | 5.05 | 2.15 | 0.31 | 2.17 | 0.84 |
|             | oan-miR-10a-5p | Ornithorhynchus anatinus |                         | 0.2  | 0.76 | 4.23 | 5.05 | 2.15 | 0.31 | 2.17 | 0.84 |
|             | chi-miR-10a-5p | Capra hircus             |                         | 0.2  | 0.76 | 4.23 | 5.05 | 2.15 | 0.31 | 2.17 | 0.84 |
|             | bbe-miR-10a-5p | Branchiostoma belcheri   |                         | 0.2  | 0.76 | 4.23 | 5.05 | 2.15 | 0.31 | 2.17 | 0.84 |
|             | pxy-miR-10-5p  | Plutella xylostella      |                         | 0.2  | 0.76 | 4.23 | 5.05 | 2.15 | 0.31 | 2.17 | 0.84 |
|             | ipu-miR-10a    | Ictalurus punctatus      |                         | 0.2  | 0.76 | 4.23 | 5.05 | 2.15 | 0.31 | 2.17 | 0.84 |
|             | cgr-miR-10a-5p | Cricetulus griseus       |                         | 0.2  | 0.76 | 4.23 | 5.05 | 2.15 | 0.31 | 2.17 | 0.84 |
|             | isc-miR-10     | Ixodes scapularis        |                         | 0.2  | 0.76 | 4.23 | 5.05 | 2.15 | 0.31 | 2.17 | 0.84 |
|             | ssc-miR-10a-5p | Sus scrofa               |                         | 0.2  | 0.76 | 4.23 | 5.05 | 2.15 | 0.31 | 2.17 | 0.84 |
|             | gga-miR-10a-5p | Gallus gallus            |                         | 0.2  | 0.76 | 4.23 | 5.05 | 2.15 | 0.31 | 2.17 | 0.84 |
|             | cfa-miR-10a    | Canis familiaris         |                         | 0.2  | 0.76 | 4.23 | 5.05 | 2.15 | 0.31 | 2.17 | 0.84 |
|             | tca-miR-10-5p  | Tribolium castaneum      |                         | 0.2  | 0.76 | 4.23 | 5.05 | 2.15 | 0.31 | 2.17 | 0.84 |
|             | lgi-miR-10     | Lottia gigantea          |                         | 0.2  | 0.76 | 4.23 | 5.05 | 2.15 | 0.31 | 2.17 | 0.84 |
|             | lmi-miR-10-5p  | Locusta migratoria       |                         | 0.2  | 0.76 | 4.23 | 5.05 | 2.15 | 0.31 | 2.17 | 0.84 |

|             |                          |                        |                         |      |      |      |      |      |      |      |      |
|-------------|--------------------------|------------------------|-------------------------|------|------|------|------|------|------|------|------|
|             | dpu-miR-10               | Daphnia pulex          |                         | 0.2  | 0.76 | 4.23 | 5.05 | 2.15 | 0.31 | 2.17 | 0.84 |
| dof-miR-485 | hsa-miR-10a-5p           | Homo sapiens           | TACCCTGTAGATCCGAATTTGTG | 0    | 0    | 0.73 | 0.9  | 0    | 0.1  | 0.17 | 0    |
|             | mmu-miR-10a-5p           | Mus musculus           |                         | 0    | 0    | 0.73 | 0.9  | 0    | 0.1  | 0.17 | 0    |
|             | rno-miR-10a-5p           | Rattus norvegicus      |                         | 0    | 0    | 0.73 | 0.9  | 0    | 0.1  | 0.17 | 0    |
|             | ggo-miR-10a              | Gorilla gorilla        |                         | 0    | 0    | 0.73 | 0.9  | 0    | 0.1  | 0.17 | 0    |
|             | ppy-miR-10a              | Pongo pygmaeus         |                         | 0    | 0    | 0.73 | 0.9  | 0    | 0.1  | 0.17 | 0    |
|             | sla-miR-10a              | Saguinus labiatus      |                         | 0    | 0    | 0.73 | 0.9  | 0    | 0.1  | 0.17 | 0    |
|             | age-miR-10a              | Ateles geoffroyi       |                         | 0    | 0    | 0.73 | 0.9  | 0    | 0.1  | 0.17 | 0    |
|             | ppa-miR-10a              | Pan paniscus           |                         | 0    | 0    | 0.73 | 0.9  | 0    | 0.1  | 0.17 | 0    |
|             | xtr-miR-10a              | Xenopus tropicalis     |                         | 0    | 0    | 0.73 | 0.9  | 0    | 0.1  | 0.17 | 0    |
|             | bta-miR-10a              | Bos taurus             |                         | 0    | 0    | 0.73 | 0.9  | 0    | 0.1  | 0.17 | 0    |
|             | mdo-miR-10a-5p           | Monodelphis domestica  |                         | 0    | 0    | 0.73 | 0.9  | 0    | 0.1  | 0.17 | 0    |
|             | oha-miR-10a-5p           | Ophiophagus hannah     |                         | 0    | 0    | 0.73 | 0.9  | 0    | 0.1  | 0.17 | 0    |
|             | aca-miR-10a-5p           | Anolis carolinensis    |                         | 0    | 0    | 0.73 | 0.9  | 0    | 0.1  | 0.17 | 0    |
|             | eca-miR-10a              | Equus caballus         |                         | 0    | 0    | 0.73 | 0.9  | 0    | 0.1  | 0.17 | 0    |
|             | mml-miR-10a-5p           | Macaca mulatta         |                         | 0    | 0    | 0.73 | 0.9  | 0    | 0.1  | 0.17 | 0    |
|             | ptr-miR-10a              | Pan troglodytes        |                         | 0    | 0    | 0.73 | 0.9  | 0    | 0.1  | 0.17 | 0    |
|             | bfl-miR-10a-5p           | Branchiostoma floridae |                         | 0    | 0    | 0.73 | 0.9  | 0    | 0.1  | 0.17 | 0    |
| sko-miR-10  | Saccoglossus kowalevskii | 0                      | 0                       | 0.73 | 0.9  | 0    | 0.1  | 0.17 | 0    |      |      |
| dof-miR-486 | dre-miR-10c-5p           | Danio rerio            | TACCCTGTAGATCCGGATTTGT  | 0.59 | 1.78 | 0.73 | 0.72 | 0    | 0    | 4.34 | 0.42 |
|             | fru-miR-10c              | Fugu rubripes          |                         | 0.59 | 1.78 | 0.73 | 0.72 | 0    | 0    | 4.34 | 0.42 |
|             | tmi-miR-10c              | Tetraodon nigroviridis |                         | 0.59 | 1.78 | 0.73 | 0.72 | 0    | 0    | 4.34 | 0.42 |
|             | ssa-miR-10a-5p           | Salmo salar            |                         | 0.59 | 1.78 | 0.73 | 0.72 | 0    | 0    | 4.34 | 0.42 |
|             | ipu-miR-10c              | Ictalurus punctatus    |                         | 0.59 | 1.78 | 0.73 | 0.72 | 0    | 0    | 4.34 | 0.42 |
| dof-miR-487 | ccr-miR-10c              | Cyprinus carpio        | TACCCTGTAGATCCGGATTTGTG | 0    | 0.51 | 0    | 0    | 0    | 0    | 0.33 | 0.14 |
| dof-miR-488 | ptc-miR6421-3p           | Populus trichocarpa    | TAGAGCAGATTGTAAGGGAAG   | 0    | 0    | 0.18 | 0    | 0    | 0    | 0    | 0    |
| dof-miR-489 | chi-miR-29a-3p           | Capra hircus           | TAGACCATCTGAAATCGGTT    | 0    | 0    | 0.18 | 0    | 4.2  | 0.83 | 0    | 0    |
|             | tch-miR-29a-3p           | Tupaia chinensis       |                         | 0    | 0    | 0.18 | 0    | 4.2  | 0.83 | 0    | 0    |
|             | cgr-miR-29a-3p           | Cricetulus griseus     |                         | 0    | 0    | 0.18 | 0    | 4.2  | 0.83 | 0    | 0    |
|             | oar-miR-29a              | Ovis aries             |                         | 0    | 0    | 0.18 | 0    | 4.2  | 0.83 | 0    | 0    |
| dof-miR-490 | hsa-miR-29a-3p           | Homo sapiens           | TAGACCATCTGAAATCGGTTA   | 0    | 0    | 0.37 | 0.54 | 0.56 | 0.1  | 0    | 0    |
|             | mmu-miR-29a-3p           | Mus musculus           |                         | 0    | 0    | 0.37 | 0.54 | 0.56 | 0.1  | 0    | 0    |
|             | rno-miR-29a-3p           | Rattus norvegicus      |                         | 0    | 0    | 0.37 | 0.54 | 0.56 | 0.1  | 0    | 0    |
|             | eca-miR-29a              | Equus caballus         |                         | 0    | 0    | 0.37 | 0.54 | 0.56 | 0.1  | 0    | 0    |

|                |                          |                          |                       |   |      |      |      |      |     |      |   |
|----------------|--------------------------|--------------------------|-----------------------|---|------|------|------|------|-----|------|---|
|                | cfa-miR-29a              | Canis familiaris         |                       | 0 | 0    | 0.37 | 0.54 | 0.56 | 0.1 | 0    | 0 |
| dof-miR-491    | ppy-miR-29b              | Pongo pygmaeus           | TAGCACCATTGAAATCAGT   | 0 | 0    | 0    | 0    | 0    | 0.1 | 0    | 0 |
|                | ptr-miR-29b              | Pan troglodytes          |                       | 0 | 0    | 0    | 0    | 0    | 0.1 | 0    | 0 |
|                | ggo-miR-29b              | Gorilla gorilla          |                       | 0 | 0    | 0    | 0    | 0    | 0.1 | 0    | 0 |
|                | lla-miR-29b              | Lagothrix lagotricha     |                       | 0 | 0    | 0    | 0    | 0    | 0.1 | 0    | 0 |
|                | age-miR-29b              | Ateles geoffroyi         |                       | 0 | 0    | 0    | 0    | 0    | 0.1 | 0    | 0 |
|                | ppa-miR-29b              | Pan paniscus             |                       | 0 | 0    | 0    | 0    | 0    | 0.1 | 0    | 0 |
|                | sla-miR-29b              | Saguinus labiatus        |                       | 0 | 0    | 0    | 0    | 0    | 0.1 | 0    | 0 |
|                | mne-miR-29b              | Macaca nemestrina        |                       | 0 | 0    | 0    | 0    | 0    | 0.1 | 0    | 0 |
|                | ame-miR-29b              | Apis mellifera           |                       | 0 | 0    | 0    | 0    | 0    | 0.1 | 0    | 0 |
|                | chi-miR-29b-3p           | Capra hircus             |                       | 0 | 0    | 0    | 0    | 0    | 0.1 | 0    | 0 |
|                | ssa-miR-29a-3p           | Salmo salar              |                       | 0 | 0    | 0    | 0    | 0    | 0.1 | 0    | 0 |
|                | nvi-miR-29b              | Nasonia vitripennis      |                       | 0 | 0    | 0    | 0    | 0    | 0.1 | 0    | 0 |
| ngi-miR-29b    | Nasonia giraulti         | 0                        | 0                     | 0 | 0    | 0    | 0.1  | 0    | 0   |      |   |
| dof-miR-492    | aca-miR-29b              | Anolis carolinensis      | TAGCACCATTGAAATCAGTG  | 0 | 0    | 0    | 0    | 0.09 | 0   | 0    | 0 |
|                | tgu-miR-29b-3p           | Taeniopygia guttata      |                       | 0 | 0    | 0    | 0    | 0.09 | 0   | 0    | 0 |
|                | cte-miR-29b              | Capitella teleta         |                       | 0 | 0    | 0    | 0    | 0.09 | 0   | 0    | 0 |
| dof-miR-493    | dre-miR-29b              | Danio rerio              | TAGCACCATTGAAATCAGTGT | 0 | 0    | 0    | 0.18 | 0.09 | 0   | 0    | 0 |
|                | fru-miR-29b              | Fugu rubripes            |                       | 0 | 0    | 0    | 0.18 | 0.09 | 0   | 0    | 0 |
|                | tmi-miR-29b              | Tetraodon nigroviridis   |                       | 0 | 0    | 0    | 0.18 | 0.09 | 0   | 0    | 0 |
|                | mdo-miR-29b-3p           | Monodelphis domestica    |                       | 0 | 0    | 0    | 0.18 | 0.09 | 0   | 0    | 0 |
|                | oan-miR-29b-3p           | Ornithorhynchus anatinus |                       | 0 | 0    | 0    | 0.18 | 0.09 | 0   | 0    | 0 |
|                | oar-miR-29b              | Ovis aries               |                       | 0 | 0    | 0    | 0.18 | 0.09 | 0   | 0    | 0 |
|                | ola-miR-29b              | Oryzias latipes          |                       | 0 | 0    | 0    | 0.18 | 0.09 | 0   | 0    | 0 |
|                | pma-miR-29c              | Petromyzon marinus       |                       | 0 | 0    | 0    | 0.18 | 0.09 | 0   | 0    | 0 |
| sko-miR-29b-3p | Saccoglossus kowalevskii | 0                        | 0                     | 0 | 0.18 | 0.09 | 0    | 0    | 0   |      |   |
| dof-miR-494    | hsa-miR-29b-3p           | Homo sapiens             | TAGCACCATTGAAATCAGTGT | 0 | 0    | 0    | 0    | 0.09 | 0   | 0.33 | 0 |
|                | mmu-miR-29b-3p           | Mus musculus             |                       | 0 | 0    | 0    | 0    | 0.09 | 0   | 0.33 | 0 |
|                | rno-miR-29b-3p           | Rattus norvegicus        |                       | 0 | 0    | 0    | 0    | 0.09 | 0   | 0.33 | 0 |
|                | gga-miR-29b-3p           | Gallus gallus            |                       | 0 | 0    | 0    | 0    | 0.09 | 0   | 0.33 | 0 |
|                | ssc-miR-29b              | Sus scrofa               |                       | 0 | 0    | 0    | 0    | 0.09 | 0   | 0.33 | 0 |
|                | xtr-miR-29b              | Xenopus tropicalis       |                       | 0 | 0    | 0    | 0    | 0.09 | 0   | 0.33 | 0 |
|                | bta-miR-29b              | Bos taurus               |                       | 0 | 0    | 0    | 0    | 0.09 | 0   | 0.33 | 0 |
|                | tch-miR-29b-3p           | Tupaia chinensis         |                       | 0 | 0    | 0    | 0    | 0.09 | 0   | 0.33 | 0 |

|             |                |                          |                       |   |   |   |      |      |     |      |   |
|-------------|----------------|--------------------------|-----------------------|---|---|---|------|------|-----|------|---|
|             | oha-miR-29b-3p | Ophiophagus hannah       |                       | 0 | 0 | 0 | 0    | 0.09 | 0   | 0.33 | 0 |
|             | aja-miR-29b    | Artibeus jamaicensis     |                       | 0 | 0 | 0 | 0    | 0.09 | 0   | 0.33 | 0 |
|             | ccr-miR-29b    | Cyprinus carpio          |                       | 0 | 0 | 0 | 0    | 0.09 | 0   | 0.33 | 0 |
|             | cgr-miR-29b-3p | Cricetulus griseus       |                       | 0 | 0 | 0 | 0    | 0.09 | 0   | 0.33 | 0 |
|             | eca-miR-29b    | Equus caballus           |                       | 0 | 0 | 0 | 0    | 0.09 | 0   | 0.33 | 0 |
|             | mml-miR-29b-3p | Macaca mulatta           |                       | 0 | 0 | 0 | 0    | 0.09 | 0   | 0.33 | 0 |
|             | cfa-miR-29b    | Canis familiaris         |                       | 0 | 0 | 0 | 0    | 0.09 | 0   | 0.33 | 0 |
| dof-miR-495 | gga-miR-29c-3p | Gallus gallus            | TAGCACCATTGAAATCGGT   | 0 | 0 | 0 | 0    | 0.28 | 0.1 | 0    | 0 |
|             | xtr-miR-29c-3p | Xenopus tropicalis       |                       | 0 | 0 | 0 | 0    | 0.28 | 0.1 | 0    | 0 |
| dof-miR-496 | gga-miR-29a-3p | Gallus gallus            | TAGCACCATTGAAATCGGT   | 0 | 0 | 0 | 0    | 0.65 | 0.1 | 0.17 | 0 |
|             | xtr-miR-29a    | Xenopus tropicalis       |                       | 0 | 0 | 0 | 0    | 0.65 | 0.1 | 0.17 | 0 |
|             | mdo-miR-29a-3p | Monodelphis domestica    |                       | 0 | 0 | 0 | 0    | 0.65 | 0.1 | 0.17 | 0 |
|             | oan-miR-29a-3p | Ornithorhynchus anatinus |                       | 0 | 0 | 0 | 0    | 0.65 | 0.1 | 0.17 | 0 |
|             | tch-miR-29c-3p | Tupaia chinensis         |                       | 0 | 0 | 0 | 0    | 0.65 | 0.1 | 0.17 | 0 |
|             | cgr-miR-29c-3p | Cricetulus griseus       |                       | 0 | 0 | 0 | 0    | 0.65 | 0.1 | 0.17 | 0 |
|             | aca-miR-29a-3p | Anolis carolinensis      |                       | 0 | 0 | 0 | 0    | 0.65 | 0.1 | 0.17 | 0 |
|             | tgu-miR-29a-3p | Taeniopygia guttata      |                       | 0 | 0 | 0 | 0    | 0.65 | 0.1 | 0.17 | 0 |
| dof-miR-497 | mmu-miR-29c-3p | Mus musculus             | TAGCACCATTGAAATCGGTTA | 0 | 0 | 0 | 0.18 | 0.09 | 0   | 0.17 | 0 |
|             | hsa-miR-29c-3p | Homo sapiens             |                       | 0 | 0 | 0 | 0.18 | 0.09 | 0   | 0.17 | 0 |
|             | rno-miR-29c-3p | Rattus norvegicus        |                       | 0 | 0 | 0 | 0.18 | 0.09 | 0   | 0.17 | 0 |
|             | dre-miR-29a    | Danio rerio              |                       | 0 | 0 | 0 | 0.18 | 0.09 | 0   | 0.17 | 0 |
|             | ssc-miR-29c    | Sus scrofa               |                       | 0 | 0 | 0 | 0.18 | 0.09 | 0   | 0.17 | 0 |
|             | fru-miR-29a    | Fugu rubripes            |                       | 0 | 0 | 0 | 0.18 | 0.09 | 0   | 0.17 | 0 |
|             | tni-miR-29a    | Tetraodon nigroviridis   |                       | 0 | 0 | 0 | 0.18 | 0.09 | 0   | 0.17 | 0 |
|             | bta-miR-29c    | Bos taurus               |                       | 0 | 0 | 0 | 0.18 | 0.09 | 0   | 0.17 | 0 |
|             | oha-miR-29a-3p | Ophiophagus hannah       |                       | 0 | 0 | 0 | 0.18 | 0.09 | 0   | 0.17 | 0 |
|             | ssa-miR-29b-3p | Salmo salar              |                       | 0 | 0 | 0 | 0.18 | 0.09 | 0   | 0.17 | 0 |
|             | aja-miR-29c    | Artibeus jamaicensis     |                       | 0 | 0 | 0 | 0.18 | 0.09 | 0   | 0.17 | 0 |
|             | ccr-miR-29a    | Cyprinus carpio          |                       | 0 | 0 | 0 | 0.18 | 0.09 | 0   | 0.17 | 0 |
|             | ggo-miR-29c    | Gorilla gorilla          |                       | 0 | 0 | 0 | 0.18 | 0.09 | 0   | 0.17 | 0 |
|             | ppy-miR-29c    | Pongo pygmaeus           |                       | 0 | 0 | 0 | 0.18 | 0.09 | 0   | 0.17 | 0 |
|             | eca-miR-29c    | Equus caballus           |                       | 0 | 0 | 0 | 0.18 | 0.09 | 0   | 0.17 | 0 |
|             | mml-miR-29c-3p | Macaca mulatta           |                       | 0 | 0 | 0 | 0.18 | 0.09 | 0   | 0.17 | 0 |
|             | cfa-miR-29c    | Canis familiaris         |                       | 0 | 0 | 0 | 0.18 | 0.09 | 0   | 0.17 | 0 |

|             |                 |                          |                        |   |      |      |      |      |      |      |   |
|-------------|-----------------|--------------------------|------------------------|---|------|------|------|------|------|------|---|
|             | ptr-miR-29c     | Pan troglodytes          |                        | 0 | 0    | 0    | 0.18 | 0.09 | 0    | 0.17 | 0 |
| dof-miR-498 | mmu-miR-195a-5p | Mus musculus             | TAGCAGCACAGAAATATTGGC  | 0 | 0    | 0.37 | 0.36 | 0.09 | 0    | 0    | 0 |
|             | hsa-miR-195-5p  | Homo sapiens             |                        | 0 | 0    | 0.37 | 0.36 | 0.09 | 0    | 0    | 0 |
|             | rno-miR-195-5p  | Rattus norvegicus        |                        | 0 | 0    | 0.37 | 0.36 | 0.09 | 0    | 0    | 0 |
|             | ggo-miR-195     | Gorilla gorilla          |                        | 0 | 0    | 0.37 | 0.36 | 0.09 | 0    | 0    | 0 |
|             | ppa-miR-195     | Pan paniscus             |                        | 0 | 0    | 0.37 | 0.36 | 0.09 | 0    | 0    | 0 |
|             | ppy-miR-195     | Pongo pygmaeus           |                        | 0 | 0    | 0.37 | 0.36 | 0.09 | 0    | 0    | 0 |
|             | eca-miR-195     | Equus caballus           |                        | 0 | 0    | 0.37 | 0.36 | 0.09 | 0    | 0    | 0 |
|             | ssc-miR-195     | Sus scrofa               |                        | 0 | 0    | 0.37 | 0.36 | 0.09 | 0    | 0    | 0 |
|             | mml-miR-195-5p  | Macaca mulatta           |                        | 0 | 0    | 0.37 | 0.36 | 0.09 | 0    | 0    | 0 |
|             | ptr-miR-195     | Pan troglodytes          |                        | 0 | 0    | 0.37 | 0.36 | 0.09 | 0    | 0    | 0 |
| dof-miR-499 | bta-miR-195     | Bos taurus               | TAGCAGCACAGAAATATTGGCA | 0 | 0    | 0.18 | 0.18 | 0    | 0    | 0    | 0 |
|             | tch-miR-195-5p  | Tupaia chinensis         |                        | 0 | 0    | 0.18 | 0.18 | 0    | 0    | 0    | 0 |
|             | cgr-miR-195     | Cricetulus griseus       |                        | 0 | 0    | 0.18 | 0.18 | 0    | 0    | 0    | 0 |
|             | cfa-miR-195     | Canis familiaris         |                        | 0 | 0    | 0.18 | 0.18 | 0    | 0    | 0    | 0 |
| dof-miR-500 | dre-miR-15a-5p  | Danio rerio              | TAGCAGCACAGAATGGTTTGTG | 0 | 0    | 0    | 0.18 | 0    | 0    | 0    | 0 |
| dof-miR-501 | gga-miR-15a     | Gallus gallus            | TAGCAGCACATAATGGTTTGT  | 0 | 0    | 0    | 0    | 0.75 | 0.21 | 0    | 0 |
|             | bta-miR-15a     | Bos taurus               |                        | 0 | 0    | 0    | 0    | 0.75 | 0.21 | 0    | 0 |
|             | oan-miR-15a-5p  | Ornithorhynchus anatinus |                        | 0 | 0    | 0    | 0    | 0.75 | 0.21 | 0    | 0 |
|             | tgu-miR-15a-5p  | Taeniopygia guttata      |                        | 0 | 0    | 0    | 0    | 0.75 | 0.21 | 0    | 0 |
|             | cfa-miR-15a     | Canis familiaris         |                        | 0 | 0    | 0    | 0    | 0.75 | 0.21 | 0    | 0 |
|             | ssc-miR-15a     | Sus scrofa               |                        | 0 | 0    | 0    | 0    | 0.75 | 0.21 | 0    | 0 |
| dof-miR-502 | hsa-miR-15a-5p  | Homo sapiens             | TAGCAGCACATAATGGTTTGTG | 0 | 0.25 | 0    | 0    | 0.09 | 0.1  | 0.17 | 0 |
|             | mmu-miR-15a-5p  | Mus musculus             |                        | 0 | 0.25 | 0    | 0    | 0.09 | 0.1  | 0.17 | 0 |
|             | age-miR-15a     | Ateles geoffroyi         |                        | 0 | 0.25 | 0    | 0    | 0.09 | 0.1  | 0.17 | 0 |
|             | ggo-miR-15a     | Gorilla gorilla          |                        | 0 | 0.25 | 0    | 0    | 0.09 | 0.1  | 0.17 | 0 |
|             | mne-miR-15a     | Macaca nemestrina        |                        | 0 | 0.25 | 0    | 0    | 0.09 | 0.1  | 0.17 | 0 |
|             | sla-miR-15a     | Saguinus labiatus        |                        | 0 | 0.25 | 0    | 0    | 0.09 | 0.1  | 0.17 | 0 |
|             | ppa-miR-15a     | Pan paniscus             |                        | 0 | 0.25 | 0    | 0    | 0.09 | 0.1  | 0.17 | 0 |
|             | lca-miR-15a     | Lemur catta              |                        | 0 | 0.25 | 0    | 0    | 0.09 | 0.1  | 0.17 | 0 |
|             | mml-miR-15a-5p  | Macaca mulatta           |                        | 0 | 0.25 | 0    | 0    | 0.09 | 0.1  | 0.17 | 0 |
|             | ppy-miR-15a     | Pongo pygmaeus           |                        | 0 | 0.25 | 0    | 0    | 0.09 | 0.1  | 0.17 | 0 |
|             | ptr-miR-15a     | Pan troglodytes          |                        | 0 | 0.25 | 0    | 0    | 0.09 | 0.1  | 0.17 | 0 |
|             | lla-miR-15a     | Lagothrix lagotricha     |                        | 0 | 0.25 | 0    | 0    | 0.09 | 0.1  | 0.17 | 0 |

|             |                |                           |                         |   |      |      |      |      |      |      |      |
|-------------|----------------|---------------------------|-------------------------|---|------|------|------|------|------|------|------|
|             | xtr-miR-15a    | Xenopus tropicalis        |                         | 0 | 0.25 | 0    | 0    | 0.09 | 0.1  | 0.17 | 0    |
|             | eca-miR-15a    | Equus caballus            |                         | 0 | 0.25 | 0    | 0    | 0.09 | 0.1  | 0.17 | 0    |
| dof-miR-503 | chi-miR-15a-5p | Capra hircus              | TAGCAGCACATAATGGTTGTGG  | 0 | 0.25 | 0    | 0    | 0    | 0    | 0    | 0    |
|             | tch-miR-15a-5p | Tupaia chinensis          |                         | 0 | 0.25 | 0    | 0    | 0    | 0    | 0    | 0    |
| dof-miR-504 | cgr-miR-15a-5p | Cricetulus griseus        | TAGCAGCACATAATGGTTGTGGA | 0 | 0    | 0    | 0    | 0    | 0.1  | 0    | 0    |
| dof-miR-505 | cfa-miR-15b    | Canis familiaris          | TAGCAGCACATCATGGTTTA    | 0 | 0    | 0    | 0.18 | 0    | 0    | 0    | 0    |
| dof-miR-506 | mmu-miR-15b-5p | Mus musculus              | TAGCAGCACATCATGGTTTACA  | 0 | 0.76 | 0    | 0.36 | 1.4  | 0.42 | 0    | 0.28 |
|             | hsa-miR-15b-5p | Homo sapiens              |                         | 0 | 0.76 | 0    | 0.36 | 1.4  | 0.42 | 0    | 0.28 |
|             | rno-miR-15b-5p | Rattus norvegicus         |                         | 0 | 0.76 | 0    | 0.36 | 1.4  | 0.42 | 0    | 0.28 |
|             | ssc-miR-15b    | Sus scrofa                |                         | 0 | 0.76 | 0    | 0.36 | 1.4  | 0.42 | 0    | 0.28 |
|             | ggo-miR-15b    | Gorilla gorilla           |                         | 0 | 0.76 | 0    | 0.36 | 1.4  | 0.42 | 0    | 0.28 |
|             | age-miR-15b    | Ateles geoffroyi          |                         | 0 | 0.76 | 0    | 0.36 | 1.4  | 0.42 | 0    | 0.28 |
|             | ppa-miR-15b    | Pan paniscus              |                         | 0 | 0.76 | 0    | 0.36 | 1.4  | 0.42 | 0    | 0.28 |
|             | ppy-miR-15b    | Pongo pygmaeus            |                         | 0 | 0.76 | 0    | 0.36 | 1.4  | 0.42 | 0    | 0.28 |
|             | ptr-miR-15b    | Pan troglodytes           |                         | 0 | 0.76 | 0    | 0.36 | 1.4  | 0.42 | 0    | 0.28 |
|             | mml-miR-15b-5p | Macaca mulatta            |                         | 0 | 0.76 | 0    | 0.36 | 1.4  | 0.42 | 0    | 0.28 |
|             | lla-miR-15b    | Lagothrix lagotricha      |                         | 0 | 0.76 | 0    | 0.36 | 1.4  | 0.42 | 0    | 0.28 |
|             | mne-miR-15b    | Macaca nemestrina         |                         | 0 | 0.76 | 0    | 0.36 | 1.4  | 0.42 | 0    | 0.28 |
|             | bta-miR-15b    | Bos taurus                |                         | 0 | 0.76 | 0    | 0.36 | 1.4  | 0.42 | 0    | 0.28 |
|             | efu-miR-15     | Eptesicus fuscus          |                         | 0 | 0.76 | 0    | 0.36 | 1.4  | 0.42 | 0    | 0.28 |
|             | chi-miR-15b-5p | Capra hircus              |                         | 0 | 0.76 | 0    | 0.36 | 1.4  | 0.42 | 0    | 0.28 |
|             | tch-miR-15b-5p | Tupaia chinensis          |                         | 0 | 0.76 | 0    | 0.36 | 1.4  | 0.42 | 0    | 0.28 |
|             | cgr-miR-15b-5p | Cricetulus griseus        |                         | 0 | 0.76 | 0    | 0.36 | 1.4  | 0.42 | 0    | 0.28 |
|             | eca-miR-15b    | Equus caballus            |                         | 0 | 0.76 | 0    | 0.36 | 1.4  | 0.42 | 0    | 0.28 |
| dof-miR-507 | gga-miR-15b-5p | Gallus gallus             | TAGCAGCACATCATGGTTTGCA  | 0 | 0    | 0    | 0    | 0    | 0    | 0    | 0.14 |
| dof-miR-508 | dre-miR-15b-5p | Danio rerio               | TAGCAGCACATCATGGTTTGTA  | 0 | 0    | 0.37 | 0    | 0    | 0    | 0    | 0    |
|             | xtr-miR-15c    | Xenopus tropicalis        |                         | 0 | 0    | 0.37 | 0    | 0    | 0    | 0    | 0    |
|             | ipu-miR-15b    | Ictalurus punctatus       |                         | 0 | 0    | 0.37 | 0    | 0    | 0    | 0    | 0    |
|             | gga-miR-15c-5p | Gallus gallus             |                         | 0 | 0    | 0.37 | 0    | 0    | 0    | 0    | 0    |
|             | xla-miR-15c    | Xenopus laevis            |                         | 0 | 0    | 0.37 | 0    | 0    | 0    | 0    | 0    |
| dof-miR-509 | fru-miR-15a    | Fugu rubripes             | TAGCAGCACGGAATGGTTGTG   | 0 | 0    | 0    | 0    | 0    | 0    | 0.17 | 0    |
|             | tmi-miR-15a    | Tetraodon nigroviridis    |                         | 0 | 0    | 0    | 0    | 0    | 0    | 0.17 | 0    |
|             | hhi-miR-15a    | Hippoglossus hippoglossus |                         | 0 | 0    | 0    | 0    | 0    | 0    | 0.17 | 0    |
| dof-miR-510 | ppy-miR-16     | Pongo pygmaeus            | TAGCAGCACGTAATATTTGG    | 0 | 0    | 0.18 | 0    | 0.65 | 0.42 | 0    | 0    |



|             |                |                          |                         |      |       |       |      |       |      |      |      |
|-------------|----------------|--------------------------|-------------------------|------|-------|-------|------|-------|------|------|------|
|             | oar-miR-16b    | Ovis aries               |                         | 0    | 0     | 0.18  | 0    | 0.65  | 0.42 | 0    | 0    |
|             | aca-miR-16a-5p | Anolis carolinensis      |                         | 0    | 0     | 0.18  | 0    | 0.65  | 0.42 | 0    | 0    |
| dof-miR-511 | dre-miR-16b    | Danio rerio              | TAGCAGCACGTAAATATTGGAG  | 0.4  | 0     | 0     | 0.18 | 0     | 0    | 1.17 | 0.28 |
|             | fru-miR-16     | Fugu rubripes            |                         | 0.4  | 0     | 0     | 0.18 | 0     | 0    | 1.17 | 0.28 |
|             | tni-miR-16     | Tetraodon nigroviridis   |                         | 0.4  | 0     | 0     | 0.18 | 0     | 0    | 1.17 | 0.28 |
|             | chi-miR-16a-5p | Capra hircus             |                         | 0.4  | 0     | 0     | 0.18 | 0     | 0    | 1.17 | 0.28 |
|             | ssa-miR-16a-5p | Salmo salar              |                         | 0.4  | 0     | 0     | 0.18 | 0     | 0    | 1.17 | 0.28 |
|             | ipu-miR-16b    | Ictalurus punctatus      |                         | 0.4  | 0     | 0     | 0.18 | 0     | 0    | 1.17 | 0.28 |
|             | ccr-miR-16b    | Cyprinus carpio          |                         | 0.4  | 0     | 0     | 0.18 | 0     | 0    | 1.17 | 0.28 |
|             | tgu-miR-16b-5p | Taeniopygia guttata      |                         | 0.4  | 0     | 0     | 0.18 | 0     | 0    | 1.17 | 0.28 |
| dof-miR-512 | pma-miR-16-5p  | Petromyzon marinus       | TAGCAGCACGTAAATATTGGAGT | 0    | 0     | 0     | 0    | 0     | 0    | 0.33 | 0.14 |
| dof-miR-513 | bta-miR-16b    | Bos taurus               | TAGCAGCACGTAAATATTGGC   | 2.38 | 2.55  | 0     | 0.18 | 2.05  | 0.1  | 6.18 | 1.68 |
|             | ola-miR-16     | Oryzias latipes          |                         | 2.38 | 2.55  | 0     | 0.18 | 2.05  | 0.1  | 6.18 | 1.68 |
| dof-miR-514 | hsa-miR-16-5p  | Homo sapiens             | TAGCAGCACGTAAATATTGGCG  | 2.18 | 15.53 | 2.02  | 1.98 | 24.34 | 9.39 | 4.84 | 4.48 |
|             | mmu-miR-16-5p  | Mus musculus             |                         | 2.18 | 15.53 | 2.02  | 1.98 | 24.34 | 9.39 | 4.84 | 4.48 |
|             | rno-miR-16-5p  | Rattus norvegicus        |                         | 2.18 | 15.53 | 2.02  | 1.98 | 24.34 | 9.39 | 4.84 | 4.48 |
|             | age-miR-16     | Ateles geoffroyi         |                         | 2.18 | 15.53 | 2.02  | 1.98 | 24.34 | 9.39 | 4.84 | 4.48 |
|             | ggo-miR-16     | Gorilla gorilla          |                         | 2.18 | 15.53 | 2.02  | 1.98 | 24.34 | 9.39 | 4.84 | 4.48 |
|             | mne-miR-16     | Macaca nemestrina        |                         | 2.18 | 15.53 | 2.02  | 1.98 | 24.34 | 9.39 | 4.84 | 4.48 |
|             | sla-miR-16     | Saguinus labiatus        |                         | 2.18 | 15.53 | 2.02  | 1.98 | 24.34 | 9.39 | 4.84 | 4.48 |
|             | ppa-miR-16     | Pan paniscus             |                         | 2.18 | 15.53 | 2.02  | 1.98 | 24.34 | 9.39 | 4.84 | 4.48 |
|             | mml-miR-16-5p  | Macaca mulatta           |                         | 2.18 | 15.53 | 2.02  | 1.98 | 24.34 | 9.39 | 4.84 | 4.48 |
|             | ptr-miR-16     | Pan troglodytes          |                         | 2.18 | 15.53 | 2.02  | 1.98 | 24.34 | 9.39 | 4.84 | 4.48 |
|             | lla-miR-16     | Lagothrix lagotricha     |                         | 2.18 | 15.53 | 2.02  | 1.98 | 24.34 | 9.39 | 4.84 | 4.48 |
|             | mdo-miR-16-5p  | Monodelphis domestica    |                         | 2.18 | 15.53 | 2.02  | 1.98 | 24.34 | 9.39 | 4.84 | 4.48 |
|             | oan-miR-16a-5p | Ornithorhynchus anatinus |                         | 2.18 | 15.53 | 2.02  | 1.98 | 24.34 | 9.39 | 4.84 | 4.48 |
|             | ssa-miR-16c-5p | Salmo salar              |                         | 2.18 | 15.53 | 2.02  | 1.98 | 24.34 | 9.39 | 4.84 | 4.48 |
|             | cgr-miR-16-5p  | Cricetulus griseus       |                         | 2.18 | 15.53 | 2.02  | 1.98 | 24.34 | 9.39 | 4.84 | 4.48 |
|             | eca-miR-16     | Equus caballus           |                         | 2.18 | 15.53 | 2.02  | 1.98 | 24.34 | 9.39 | 4.84 | 4.48 |
|             | cfa-miR-16     | Canis familiaris         |                         | 2.18 | 15.53 | 2.02  | 1.98 | 24.34 | 9.39 | 4.84 | 4.48 |
| ssc-miR-16  | Sus scrofa     | 2.18                     | 15.53                   | 2.02 | 1.98  | 24.34 | 9.39 | 4.84  | 4.48 |      |      |
| dof-miR-515 | efu-miR-16     | Eptesicus fuscus         | TAGCAGCACGTAAATATTGGCGT | 0.4  | 0.25  | 0.37  | 0    | 0.47  | 0    | 0.17 | 0.42 |
| dof-miR-516 | chi-miR-16b-5p | Capra hircus             | TAGCAGCACGTAAATATTGGGG  | 0    | 0     | 0     | 0    | 0.09  | 0    | 0    | 0    |
| dof-miR-517 | gga-miR-16-5p  | Gallus gallus            | TAGCAGCACGTAAATATTGGTG  | 0    | 0     | 0     | 0.54 | 0     | 0.1  | 0    | 0    |

|             |                      |                          |                        |       |       |       |      |       |      |      |     |
|-------------|----------------------|--------------------------|------------------------|-------|-------|-------|------|-------|------|------|-----|
|             | dre-miR-16a          | Danio rerio              |                        | 0     | 0     | 0     | 0.54 | 0     | 0.1  | 0    | 0   |
|             | lca-miR-16           | Lemur catta              |                        | 0     | 0     | 0     | 0.54 | 0     | 0.1  | 0    | 0   |
|             | xtr-miR-16a          | Xenopus tropicalis       |                        | 0     | 0     | 0     | 0.54 | 0     | 0.1  | 0    | 0   |
|             | oan-miR-16b-5p       | Ornithorhynchus anatinus |                        | 0     | 0     | 0     | 0.54 | 0     | 0.1  | 0    | 0   |
|             | oha-miR-16b-5p       | Ophiophagus hannah       |                        | 0     | 0     | 0     | 0.54 | 0     | 0.1  | 0    | 0   |
|             | ssa-miR-16b-5p       | Salmo salar              |                        | 0     | 0     | 0     | 0.54 | 0     | 0.1  | 0    | 0   |
|             | ccr-miR-16a          | Cyprinus carpio          |                        | 0     | 0     | 0     | 0.54 | 0     | 0.1  | 0    | 0   |
|             | tgu-miR-16a-5p       | Taeniopygia guttata      |                        | 0     | 0     | 0     | 0.54 | 0     | 0.1  | 0    | 0   |
|             | bta-miR-16a          | Bos taurus               |                        | 0     | 0     | 0     | 0.54 | 0     | 0.1  | 0    | 0   |
| dof-miR-518 | ccr-miR-16c          | Cyprinus carpio          | TAGCAGCATGTAAATATTGGA  | 0     | 0     | 0     | 0.36 | 0     | 0    | 0    | 0   |
| dof-miR-519 | dre-miR-16c-5p       | Danio rerio              | TAGCAGCATGTAAATATTGGAG | 0     | 0     | 0.18  | 0.18 | 0     | 0    | 0    | 0   |
| dof-miR-520 | ssa-miR-15c-5p       | Salmo salar              | TAGCAGCGCATCATGGTTGA   | 0     | 1.02  | 0     | 0    | 0     | 0    | 1.34 | 0   |
| dof-miR-521 | bta-miR-503-5p       | Bos taurus               | TAGCAGCGGGAACAGTACTG   | 0     | 0     | 0     | 0.36 | 0     | 0    | 0    | 0   |
|             | cfa-miR-503          | Canis familiaris         |                        | 0     | 0     | 0     | 0.36 | 0     | 0    | 0    | 0   |
| dof-miR-522 | sbi-miR169d-5p       | Sorghum bicolor          | TAGCCAAGGATGACTTGCCCT  | 0.2   | 12.98 | 13.96 | 5.05 | 0.56  | 1.25 | 1.17 | 0   |
|             | stu-miR169a-5p       | Solanum tuberosum        |                        | 0.2   | 12.98 | 13.96 | 5.05 | 0.56  | 1.25 | 1.17 | 0   |
|             | stu-miR169b-5p       | Solanum tuberosum        |                        | 0.2   | 12.98 | 13.96 | 5.05 | 0.56  | 1.25 | 1.17 | 0   |
|             | stu-miR169c-5p       | Solanum tuberosum        |                        | 0.2   | 12.98 | 13.96 | 5.05 | 0.56  | 1.25 | 1.17 | 0   |
|             | stu-miR169d-5p       | Solanum tuberosum        |                        | 0.2   | 12.98 | 13.96 | 5.05 | 0.56  | 1.25 | 1.17 | 0   |
|             | stu-miR169e-5p       | Solanum tuberosum        |                        | 0.2   | 12.98 | 13.96 | 5.05 | 0.56  | 1.25 | 1.17 | 0   |
|             | stu-miR169f-5p       | Solanum tuberosum        |                        | 0.2   | 12.98 | 13.96 | 5.05 | 0.56  | 1.25 | 1.17 | 0   |
|             | stu-miR169g          | Solanum tuberosum        |                        | 0.2   | 12.98 | 13.96 | 5.05 | 0.56  | 1.25 | 1.17 | 0   |
|             | stu-miR169h          | Solanum tuberosum        |                        | 0.2   | 12.98 | 13.96 | 5.05 | 0.56  | 1.25 | 1.17 | 0   |
|             | atr-miR169a          | Amborella trichopoda     |                        | 0.2   | 12.98 | 13.96 | 5.05 | 0.56  | 1.25 | 1.17 | 0   |
| atr-miR169c | Amborella trichopoda | 0.2                      | 12.98                  | 13.96 | 5.05  | 0.56  | 1.25 | 1.17  | 0    |      |     |
| dof-miR-523 | cca-miR169a          | Cynara cardunculus       | TAGCCAAGGATGACTTGCCCT  | 0     | 0     | 1.1   | 0    | 0     | 0.21 | 0.17 | 0   |
|             | nta-miR169t          | Nicotiana tabacum        |                        | 0     | 0     | 1.1   | 0    | 0     | 0.21 | 0.17 | 0   |
| dof-miR-524 | hsa-miR-21-5p        | Homo sapiens             | TAGCTTATCAGACTGATGTTGA | 1.19  | 2.04  | 3.67  | 6.49 | 18.93 | 5.01 | 4.01 | 2.1 |
|             | mmu-miR-21a-5p       | Mus musculus             |                        | 1.19  | 2.04  | 3.67  | 6.49 | 18.93 | 5.01 | 4.01 | 2.1 |
|             | rno-miR-21-5p        | Rattus norvegicus        |                        | 1.19  | 2.04  | 3.67  | 6.49 | 18.93 | 5.01 | 4.01 | 2.1 |
|             | ssc-miR-21           | Sus scrofa               |                        | 1.19  | 2.04  | 3.67  | 6.49 | 18.93 | 5.01 | 4.01 | 2.1 |
|             | mml-miR-21-5p        | Macaca mulatta           |                        | 1.19  | 2.04  | 3.67  | 6.49 | 18.93 | 5.01 | 4.01 | 2.1 |
|             | ptr-miR-21           | Pan troglodytes          |                        | 1.19  | 2.04  | 3.67  | 6.49 | 18.93 | 5.01 | 4.01 | 2.1 |
|             | ggo-miR-21           | Gorilla gorilla          |                        | 1.19  | 2.04  | 3.67  | 6.49 | 18.93 | 5.01 | 4.01 | 2.1 |

|             |                 |                           |                          |      |      |      |      |       |      |       |      |
|-------------|-----------------|---------------------------|--------------------------|------|------|------|------|-------|------|-------|------|
|             | ppy-miR-21      | Pongo pygmaeus            |                          | 1.19 | 2.04 | 3.67 | 6.49 | 18.93 | 5.01 | 4.01  | 2.1  |
|             | mne-miR-21      | Macaca nemestrina         |                          | 1.19 | 2.04 | 3.67 | 6.49 | 18.93 | 5.01 | 4.01  | 2.1  |
|             | age-miR-21      | Ateles geoffroyi          |                          | 1.19 | 2.04 | 3.67 | 6.49 | 18.93 | 5.01 | 4.01  | 2.1  |
|             | ppa-miR-21      | Pan paniscus              |                          | 1.19 | 2.04 | 3.67 | 6.49 | 18.93 | 5.01 | 4.01  | 2.1  |
|             | gga-miR-21-5p   | Gallus gallus             |                          | 1.19 | 2.04 | 3.67 | 6.49 | 18.93 | 5.01 | 4.01  | 2.1  |
|             | mdo-miR-21-5p   | Monodelphis domestica     |                          | 1.19 | 2.04 | 3.67 | 6.49 | 18.93 | 5.01 | 4.01  | 2.1  |
|             | cgr-miR-21-5p   | Cricetulus griseus        |                          | 1.19 | 2.04 | 3.67 | 6.49 | 18.93 | 5.01 | 4.01  | 2.1  |
|             | oan-miR-21-5p   | Ornithorhynchus anatinus  |                          | 1.19 | 2.04 | 3.67 | 6.49 | 18.93 | 5.01 | 4.01  | 2.1  |
|             | tch-miR-21-5p   | Tupaia chinensis          |                          | 1.19 | 2.04 | 3.67 | 6.49 | 18.93 | 5.01 | 4.01  | 2.1  |
|             | oha-miR-21-5p   | Ophiophagus hannah        |                          | 1.19 | 2.04 | 3.67 | 6.49 | 18.93 | 5.01 | 4.01  | 2.1  |
|             | aca-miR-21-5p   | Anolis carolinensis       |                          | 1.19 | 2.04 | 3.67 | 6.49 | 18.93 | 5.01 | 4.01  | 2.1  |
|             | eca-miR-21      | Equus caballus            |                          | 1.19 | 2.04 | 3.67 | 6.49 | 18.93 | 5.01 | 4.01  | 2.1  |
|             | tgu-miR-21-5p   | Taeniopygia guttata       |                          | 1.19 | 2.04 | 3.67 | 6.49 | 18.93 | 5.01 | 4.01  | 2.1  |
|             | cfa-miR-21      | Canis familiaris          |                          | 1.19 | 2.04 | 3.67 | 6.49 | 18.93 | 5.01 | 4.01  | 2.1  |
| dof-miR-525 | chi-miR-21-5p   | Capra hircus              | TAGCTTATCAGACTGATGTTGAC  | 0.4  | 1.78 | 6.98 | 6.85 | 39.17 | 4.07 | 3.67  | 0.7  |
|             | oar-miR-21      | Ovis aries                |                          | 0.4  | 1.78 | 6.98 | 6.85 | 39.17 | 4.07 | 3.67  | 0.7  |
| dof-miR-526 | bta-miR-21-5p   | Bos taurus                | TAGCTTATCAGACTGATGTTGACT | 0    | 1.27 | 1.1  | 2.7  | 13.99 | 0.83 | 0.67  | 0.14 |
| dof-miR-527 | ola-miR-21      | Oryzias latipes           | TAGCTTATCAGACTGGTGTTG    | 0.4  | 0.76 | 0.18 | 0.9  | 0     | 0    | 1.5   | 0    |
| dof-miR-528 | pol-miR-21-5p   | Paralichthys olivaceus    | TAGCTTATCAGACTGGTGTTGG   | 2.38 | 1.78 | 1.65 | 0.9  | 0     | 0    | 6.01  | 0.98 |
| dof-miR-529 | dre-miR-21      | Danio rerio               | TAGCTTATCAGACTGGTGTTGGC  | 4.36 | 6.11 | 2.2  | 7.21 | 0     | 0    | 16.86 | 1.4  |
|             | fru-miR-21      | Fugu rubripes             |                          | 4.36 | 6.11 | 2.2  | 7.21 | 0     | 0    | 16.86 | 1.4  |
|             | tmi-miR-21      | Tetraodon nigroviridis    |                          | 4.36 | 6.11 | 2.2  | 7.21 | 0     | 0    | 16.86 | 1.4  |
|             | ssa-miR-21b-5p  | Salmo salar               |                          | 4.36 | 6.11 | 2.2  | 7.21 | 0     | 0    | 16.86 | 1.4  |
|             | ipu-miR-21      | Ictalurus punctatus       |                          | 4.36 | 6.11 | 2.2  | 7.21 | 0     | 0    | 16.86 | 1.4  |
|             | hhi-miR-21      | Hippoglossus hippoglossus |                          | 4.36 | 6.11 | 2.2  | 7.21 | 0     | 0    | 16.86 | 1.4  |
|             | ccr-miR-21      | Cyprinus carpio           |                          | 4.36 | 6.11 | 2.2  | 7.21 | 0     | 0    | 16.86 | 1.4  |
| dof-miR-530 | dme-miR-276a-3p | Drosophila melanogaster   | TAGGAACTTCATACCGTGCTCT   | 0.2  | 0    | 0    | 2.34 | 0     | 0    | 0     | 0    |
|             | dps-miR-276a    | Drosophila pseudoobscura  |                          | 0.2  | 0    | 0    | 2.34 | 0     | 0    | 0     | 0    |
|             | ame-miR-276     | Apis mellifera            |                          | 0.2  | 0    | 0    | 2.34 | 0     | 0    | 0     | 0    |
|             | aga-miR-276-3p  | Anopheles gambiae         |                          | 0.2  | 0    | 0    | 2.34 | 0     | 0    | 0     | 0    |
|             | bmo-miR-276-3p  | Bombyx mori               |                          | 0.2  | 0    | 0    | 2.34 | 0     | 0    | 0     | 0    |
|             | mse-miR-276     | Manduca sexta             |                          | 0.2  | 0    | 0    | 2.34 | 0     | 0    | 0     | 0    |
|             | nvi-miR-276     | Nasonia vitripennis       |                          | 0.2  | 0    | 0    | 2.34 | 0     | 0    | 0     | 0    |
|             | ngi-miR-276     | Nasonia giraulti          |                          | 0.2  | 0    | 0    | 2.34 | 0     | 0    | 0     | 0    |

|             |                 |                        |                       |     |   |   |      |      |     |   |      |
|-------------|-----------------|------------------------|-----------------------|-----|---|---|------|------|-----|---|------|
|             | nlo-miR-276     | Nasonia longicornis    |                       | 0.2 | 0 | 0 | 2.34 | 0    | 0   | 0 | 0    |
|             | dpu-miR-276     | Daphnia pulex          |                       | 0.2 | 0 | 0 | 2.34 | 0    | 0   | 0 | 0    |
|             | api-miR-276     | Acyrtosiphon pisum     |                       | 0.2 | 0 | 0 | 2.34 | 0    | 0   | 0 | 0    |
|             | cqu-miR-276-3p  | Culex quinquefasciatus |                       | 0.2 | 0 | 0 | 2.34 | 0    | 0   | 0 | 0    |
|             | tca-miR-276-3p  | Tribolium castaneum    |                       | 0.2 | 0 | 0 | 2.34 | 0    | 0   | 0 | 0    |
|             | dan-miR-276a    | Drosophila ananassae   |                       | 0.2 | 0 | 0 | 2.34 | 0    | 0   | 0 | 0    |
|             | der-miR-276a    | Drosophila erecta      |                       | 0.2 | 0 | 0 | 2.34 | 0    | 0   | 0 | 0    |
|             | dgr-miR-276a-3p | Drosophila grimshawi   |                       | 0.2 | 0 | 0 | 2.34 | 0    | 0   | 0 | 0    |
|             | dmo-miR-276a    | Drosophila mojavensis  |                       | 0.2 | 0 | 0 | 2.34 | 0    | 0   | 0 | 0    |
|             | dpe-miR-276a    | Drosophila persimilis  |                       | 0.2 | 0 | 0 | 2.34 | 0    | 0   | 0 | 0    |
|             | dse-miR-276a    | Drosophila sechellia   |                       | 0.2 | 0 | 0 | 2.34 | 0    | 0   | 0 | 0    |
|             | dsi-miR-276a    | Drosophila simulans    |                       | 0.2 | 0 | 0 | 2.34 | 0    | 0   | 0 | 0    |
|             | dvi-miR-276a-3p | Drosophila virilis     |                       | 0.2 | 0 | 0 | 2.34 | 0    | 0   | 0 | 0    |
|             | dwi-miR-276a-3p | Drosophila willistoni  |                       | 0.2 | 0 | 0 | 2.34 | 0    | 0   | 0 | 0    |
|             | dya-miR-276a    | Drosophila yakuba      |                       | 0.2 | 0 | 0 | 2.34 | 0    | 0   | 0 | 0    |
|             | lmi-miR-276-3p  | Locusta migratoria     |                       | 0.2 | 0 | 0 | 2.34 | 0    | 0   | 0 | 0    |
| dof-miR-531 | mmu-miR-1197-3p | Mus musculus           | TAGGACACATGGTCTACTTCT | 0   | 0 | 0 | 0.36 | 0    | 0   | 0 | 0    |
|             | hsa-miR-1197    | Homo sapiens           |                       | 0   | 0 | 0 | 0.36 | 0    | 0   | 0 | 0    |
|             | chi-miR-1197-3p | Capra hircus           |                       | 0   | 0 | 0 | 0.36 | 0    | 0   | 0 | 0    |
|             | oar-miR-1197-3p | Ovis aries             |                       | 0   | 0 | 0 | 0.36 | 0    | 0   | 0 | 0    |
|             | ppy-miR-1197    | Pongo pygmaeus         |                       | 0   | 0 | 0 | 0.36 | 0    | 0   | 0 | 0    |
|             | eca-miR-1197    | Equus caballus         |                       | 0   | 0 | 0 | 0.36 | 0    | 0   | 0 | 0    |
|             | ptr-miR-1197    | Pan troglodytes        |                       | 0   | 0 | 0 | 0.36 | 0    | 0   | 0 | 0    |
|             | bta-miR-1197    | Bos taurus             |                       | 0   | 0 | 0 | 0.36 | 0    | 0   | 0 | 0    |
| dof-miR-532 | nta-miR6153     | Nicotiana tabacum      | TAGGACCATATTCACTATTG  | 0   | 0 | 0 | 0    | 0    | 0   | 0 | 0.14 |
| dof-miR-533 | osa-miR1425-5p  | Oryza sativa           | TAGGATTCAATCCTTGTCTGT | 0   | 0 | 0 | 0    | 0.09 | 0.1 | 0 | 0    |
| dof-miR-534 | gga-miR-196-5p  | Gallus gallus          | TAGGTAGTTTCATGTTGTTGG | 0   | 0 | 0 | 0.18 | 0    | 0   | 0 | 0    |
|             | mml-miR-196a-5p | Macaca mulatta         |                       | 0   | 0 | 0 | 0.18 | 0    | 0   | 0 | 0    |
|             | ggo-miR-196     | Gorilla gorilla        |                       | 0   | 0 | 0 | 0.18 | 0    | 0   | 0 | 0    |
|             | ppy-miR-196     | Pongo pygmaeus         |                       | 0   | 0 | 0 | 0.18 | 0    | 0   | 0 | 0    |
|             | xtr-miR-196a    | Xenopus tropicalis     |                       | 0   | 0 | 0 | 0.18 | 0    | 0   | 0 | 0    |
|             | chi-miR-196a    | Capra hircus           |                       | 0   | 0 | 0 | 0.18 | 0    | 0   | 0 | 0    |
|             | ola-miR-196a    | Oryzias latipes        |                       | 0   | 0 | 0 | 0.18 | 0    | 0   | 0 | 0    |
|             | aca-miR-196a    | Anolis carolinensis    |                       | 0   | 0 | 0 | 0.18 | 0    | 0   | 0 | 0    |

|              |                 |                          |                         |   |      |      |      |   |   |   |   |
|--------------|-----------------|--------------------------|-------------------------|---|------|------|------|---|---|---|---|
| dof-miR-535  | hsa-miR-196a-5p | Homo sapiens             | TAGGTAGTTTCATGTTGTTGGG  | 0 | 0    | 0    | 0.36 | 0 | 0 | 0 | 0 |
|              | mmu-miR-196a-5p | Mus musculus             |                         | 0 | 0    | 0    | 0.36 | 0 | 0 | 0 | 0 |
|              | rno-miR-196a-5p | Rattus norvegicus        |                         | 0 | 0    | 0    | 0.36 | 0 | 0 | 0 | 0 |
|              | dre-miR-196a-5p | Danio rerio              |                         | 0 | 0    | 0    | 0.36 | 0 | 0 | 0 | 0 |
|              | ssc-miR-196a    | Sus scrofa               |                         | 0 | 0    | 0    | 0.36 | 0 | 0 | 0 | 0 |
|              | ptr-miR-196a    | Pan troglodytes          |                         | 0 | 0    | 0    | 0.36 | 0 | 0 | 0 | 0 |
|              | ppy-miR-196-2   | Pongo pygmaeus           |                         | 0 | 0    | 0    | 0.36 | 0 | 0 | 0 | 0 |
|              | lla-miR-196     | Lagothrix lagotricha     |                         | 0 | 0    | 0    | 0.36 | 0 | 0 | 0 | 0 |
|              | age-miR-196     | Ateles geoffroyi         |                         | 0 | 0    | 0    | 0.36 | 0 | 0 | 0 | 0 |
|              | ppa-miR-196     | Pan paniscus             |                         | 0 | 0    | 0    | 0.36 | 0 | 0 | 0 | 0 |
|              | fru-miR-196a    | Fugu rubripes            |                         | 0 | 0    | 0    | 0.36 | 0 | 0 | 0 | 0 |
|              | tui-miR-196a    | Tetraodon nigroviridis   |                         | 0 | 0    | 0    | 0.36 | 0 | 0 | 0 | 0 |
|              | oan-miR-196a-5p | Ornithorhynchus anatinus |                         | 0 | 0    | 0    | 0.36 | 0 | 0 | 0 | 0 |
|              | oha-miR-196b-5p | Ophiophagus hannah       |                         | 0 | 0    | 0    | 0.36 | 0 | 0 | 0 | 0 |
|              | ssa-miR-196a-5p | Salmo salar              |                         | 0 | 0    | 0    | 0.36 | 0 | 0 | 0 | 0 |
|              | ccr-miR-196a    | Cyprinus carpio          |                         | 0 | 0    | 0    | 0.36 | 0 | 0 | 0 | 0 |
|              | cgr-miR-196a-5p | Cricetulus griseus       |                         | 0 | 0    | 0    | 0.36 | 0 | 0 | 0 | 0 |
|              | pma-miR-196a-5p | Petromyzon marinus       |                         | 0 | 0    | 0    | 0.36 | 0 | 0 | 0 | 0 |
|              | eca-miR-196a    | Equus caballus           |                         | 0 | 0    | 0    | 0.36 | 0 | 0 | 0 | 0 |
|              | cfa-miR-196a    | Canis familiaris         |                         | 0 | 0    | 0    | 0.36 | 0 | 0 | 0 | 0 |
| bta-miR-196a | Bos taurus      | 0                        | 0                       | 0 | 0.36 | 0    | 0    | 0 | 0 |   |   |
| dof-miR-536  | efu-miR-196     | Eptesicus fuscus         | TAGGTAGTTTCATGTTGTTGGGA | 0 | 0    | 0.18 | 0.54 | 0 | 0 | 0 | 0 |
|              | tch-miR-196a-5p | Tupaia chinensis         |                         | 0 | 0    | 0.18 | 0.54 | 0 | 0 | 0 | 0 |
|              | ipu-miR-196a    | Ictalurus punctatus      |                         | 0 | 0    | 0.18 | 0.54 | 0 | 0 | 0 | 0 |
| dof-miR-537  | mdo-miR-196b    | Monodelphis domestica    | TAGGTAGTTTCCTGTTGTTGG   | 0 | 0    | 0.18 | 0    | 0 | 0 | 0 | 0 |
|              | oan-miR-196b-5p | Ornithorhynchus anatinus |                         | 0 | 0    | 0.18 | 0    | 0 | 0 | 0 | 0 |
|              | chi-miR-196b    | Capra hircus             |                         | 0 | 0    | 0.18 | 0    | 0 | 0 | 0 | 0 |
| dof-miR-538  | hsa-miR-196b-5p | Homo sapiens             | TAGGTAGTTTCCTGTTGTTGGG  | 0 | 0    | 0    | 0.18 | 0 | 0 | 0 | 0 |
|              | mmu-miR-196b-5p | Mus musculus             |                         | 0 | 0    | 0    | 0.18 | 0 | 0 | 0 | 0 |
|              | rno-miR-196b-5p | Rattus norvegicus        |                         | 0 | 0    | 0    | 0.18 | 0 | 0 | 0 | 0 |
|              | mdo-miR-196a-5p | Monodelphis domestica    |                         | 0 | 0    | 0    | 0.18 | 0 | 0 | 0 | 0 |
|              | cgr-miR-196b    | Cricetulus griseus       |                         | 0 | 0    | 0    | 0.18 | 0 | 0 | 0 | 0 |
|              | ppy-miR-196b    | Pongo pygmaeus           |                         | 0 | 0    | 0    | 0.18 | 0 | 0 | 0 | 0 |
|              | eca-miR-196b    | Equus caballus           |                         | 0 | 0    | 0    | 0.18 | 0 | 0 | 0 | 0 |

|             |                 |                          |                         |                       |      |      |      |      |   |   |   |
|-------------|-----------------|--------------------------|-------------------------|-----------------------|------|------|------|------|---|---|---|
|             | ssc-miR-196b-5p | Sus scrofa               |                         | 0                     | 0    | 0    | 0.18 | 0    | 0 | 0 | 0 |
|             | mml-miR-196b-5p | Macaca mulatta           |                         | 0                     | 0    | 0    | 0.18 | 0    | 0 | 0 | 0 |
|             | ptr-miR-196b    | Pan troglodytes          |                         | 0                     | 0    | 0    | 0.18 | 0    | 0 | 0 | 0 |
| dof-miR-539 | cfa-miR-196b    | Canis familiaris         | TAGGTAGTTTCCTGTTGTTGGGA | 0                     | 0    | 0.18 | 0    | 0    | 0 | 0 | 0 |
|             | bta-miR-196b    | Bos taurus               |                         | 0                     | 0    | 0.18 | 0    | 0    | 0 | 0 | 0 |
| dof-miR-540 | ptc-miR476a     | Populus trichocarpa      | TAGTAATCCTTCTTTGCAAAG   | 0                     | 0    | 0    | 0.18 | 0    | 0 | 0 | 0 |
| dof-miR-541 | mmu-miR-411-5p  | Mus musculus             | TAGTAGACCGTATAGCGTACG   | 0                     | 0    | 0    | 0.72 | 0    | 0 | 0 | 0 |
|             | hsa-miR-411-5p  | Homo sapiens             |                         | 0                     | 0    | 0    | 0.72 | 0    | 0 | 0 | 0 |
|             | rno-miR-411-5p  | Rattus norvegicus        |                         | 0                     | 0    | 0    | 0.72 | 0    | 0 | 0 | 0 |
|             | tch-miR-411-5p  | Tupaia chinensis         |                         | 0                     | 0    | 0    | 0.72 | 0    | 0 | 0 | 0 |
|             | ppy-miR-411     | Pongo pygmaeus           |                         | 0                     | 0    | 0    | 0.72 | 0    | 0 | 0 | 0 |
|             | eca-miR-411     | Equus caballus           |                         | 0                     | 0    | 0    | 0.72 | 0    | 0 | 0 | 0 |
|             | mml-miR-411-5p  | Macaca mulatta           |                         | 0                     | 0    | 0    | 0.72 | 0    | 0 | 0 | 0 |
|             | ptr-miR-411     | Pan troglodytes          |                         | 0                     | 0    | 0    | 0.72 | 0    | 0 | 0 | 0 |
| dof-miR-542 | dre-miR-454b    | Danio rerio              | TAGTGCAATATTGCTTATAGGG  | 0                     | 0    | 0    | 0.18 | 0    | 0 | 0 | 0 |
|             | ppy-miR-454     | Pongo pygmaeus           |                         | 0                     | 0    | 0    | 0.18 | 0    | 0 | 0 | 0 |
|             | cfa-miR-454     | Canis familiaris         |                         | 0                     | 0    | 0    | 0.18 | 0    | 0 | 0 | 0 |
| dof-miR-543 | hsa-miR-454-3p  | Homo sapiens             | TAGTGCAATATTGCTTATAGGGT | 0                     | 0.25 | 0    | 0    | 0.09 | 0 | 0 | 0 |
|             | oan-miR-454-3p  | Ornithorhynchus anatinus |                         | 0                     | 0.25 | 0    | 0    | 0.09 | 0 | 0 | 0 |
|             | gga-miR-454-3p  | Gallus gallus            |                         | 0                     | 0.25 | 0    | 0    | 0.09 | 0 | 0 | 0 |
|             | chi-miR-454-3p  | Capra hircus             |                         | 0                     | 0.25 | 0    | 0    | 0.09 | 0 | 0 | 0 |
|             | ipu-miR-454b    | Ictalurus punctatus      |                         | 0                     | 0.25 | 0    | 0    | 0.09 | 0 | 0 | 0 |
|             | sha-miR-454     | Sarcophilus harrisii     |                         | 0                     | 0.25 | 0    | 0    | 0.09 | 0 | 0 | 0 |
|             | aca-miR-454-3p  | Anolis carolinensis      |                         | 0                     | 0.25 | 0    | 0    | 0.09 | 0 | 0 | 0 |
|             | eca-miR-454     | Equus caballus           |                         | 0                     | 0.25 | 0    | 0    | 0.09 | 0 | 0 | 0 |
|             | tgu-miR-454-3p  | Taeniopygia guttata      |                         | 0                     | 0.25 | 0    | 0    | 0.09 | 0 | 0 | 0 |
|             | mml-miR-454-3p  | Macaca mulatta           |                         | 0                     | 0.25 | 0    | 0    | 0.09 | 0 | 0 | 0 |
|             | ptr-miR-454     | Pan troglodytes          |                         | 0                     | 0.25 | 0    | 0    | 0.09 | 0 | 0 | 0 |
|             | bta-miR-454     | Bos taurus               |                         | 0                     | 0.25 | 0    | 0    | 0.09 | 0 | 0 | 0 |
| dof-miR-544 | hsa-miR-381-3p  | Homo sapiens             |                         | TATACAAGGCAAGCTCTCTGT | 0    | 0    | 0.37 | 0    | 0 | 0 | 0 |
|             | mmu-miR-381-3p  | Mus musculus             | 0                       |                       | 0    | 0.37 | 0    | 0    | 0 | 0 | 0 |
|             | chi-miR-381     | Capra hircus             | 0                       |                       | 0    | 0.37 | 0    | 0    | 0 | 0 | 0 |
|             | tch-miR-381-3p  | Tupaia chinensis         | 0                       |                       | 0    | 0.37 | 0    | 0    | 0 | 0 | 0 |
|             | cgr-miR-381     | Cricetulus griseus       | 0                       |                       | 0    | 0.37 | 0    | 0    | 0 | 0 | 0 |

|             |                 |                          |                          |     |   |      |      |      |   |      |      |
|-------------|-----------------|--------------------------|--------------------------|-----|---|------|------|------|---|------|------|
|             | ppy-miR-381     | Pongo pygmaeus           |                          | 0   | 0 | 0.37 | 0    | 0    | 0 | 0    | 0    |
|             | eca-miR-381     | Equus caballus           |                          | 0   | 0 | 0.37 | 0    | 0    | 0 | 0    | 0    |
|             | mml-miR-381-3p  | Macaca mulatta           |                          | 0   | 0 | 0.37 | 0    | 0    | 0 | 0    | 0    |
|             | ptr-miR-381     | Pan troglodytes          |                          | 0   | 0 | 0.37 | 0    | 0    | 0 | 0    | 0    |
|             | bta-miR-381     | Bos taurus               |                          | 0   | 0 | 0.37 | 0    | 0    | 0 | 0    | 0    |
|             | cfa-miR-381     | Canis familiaris         |                          | 0   | 0 | 0.37 | 0    | 0    | 0 | 0    | 0    |
| dof-miR-545 | api-miR-2a      | Acyrtosiphon pisum       | TATCACAGCCAGCTTTGATGAGCG | 0   | 0 | 0    | 0    | 0    | 0 | 0.17 | 0    |
| dof-miR-546 | fru-miR-135b    | Fugu rubripes            | TATGGCTTTTTATTCTATCTG    | 0   | 0 | 0.18 | 0.36 | 0    | 0 | 0    | 0    |
|             | tmi-miR-135b    | Tetraodon nigroviridis   |                          | 0   | 0 | 0.18 | 0.36 | 0    | 0 | 0    | 0    |
|             | dre-miR-135b-5p | Danio rerio              |                          | 0   | 0 | 0.18 | 0.36 | 0    | 0 | 0    | 0    |
|             | ipu-miR-135b    | Ictalurus punctatus      |                          | 0   | 0 | 0.18 | 0.36 | 0    | 0 | 0    | 0    |
| dof-miR-547 | ssa-miR-135a-5p | Salmo salar              | TATGGCTTTTTATTCTATCTGA   | 0   | 0 | 0.73 | 0.18 | 0    | 0 | 0    | 0    |
| dof-miR-548 | chi-miR-411a-3p | Capra hircus             | TATGTAACACGGTCCACTAAC    | 0   | 0 | 0.18 | 1.08 | 0.09 | 0 | 0.17 | 0    |
|             | oar-miR-411a-3p | Ovis aries               |                          | 0   | 0 | 0.18 | 1.08 | 0.09 | 0 | 0.17 | 0    |
|             | mml-miR-411-3p  | Macaca mulatta           |                          | 0   | 0 | 0.18 | 1.08 | 0.09 | 0 | 0.17 | 0    |
| dof-miR-549 | mmu-miR-411-3p  | Mus musculus             | TATGTAACACGGTCCACTAAC    | 0   | 0 | 0    | 0.18 | 0    | 0 | 0    | 0    |
|             | hsa-miR-411-3p  | Homo sapiens             |                          | 0   | 0 | 0    | 0.18 | 0    | 0 | 0    | 0    |
| dof-miR-550 | cfa-miR-380     | Canis familiaris         | TATGTAATATGGTCCACGTCT    | 0.2 | 0 | 0.18 | 1.26 | 0    | 0 | 0.17 | 0.56 |
| dof-miR-551 | bta-miR-380-3p  | Bos taurus               | TATGTAATGTGGTCCACGTCT    | 0   | 0 | 0.37 | 0    | 0    | 0 | 0    | 0    |
|             | chi-miR-380-3p  | Capra hircus             |                          | 0   | 0 | 0.37 | 0    | 0    | 0 | 0    | 0    |
|             | oar-miR-380-3p  | Ovis aries               |                          | 0   | 0 | 0.37 | 0    | 0    | 0 | 0    | 0    |
| dof-miR-552 | rno-miR-299a-3p | Rattus norvegicus        | TATGTGGGACGGTAAACCGCT    | 0   | 0 | 0    | 0.18 | 0    | 0 | 0    | 0    |
| dof-miR-553 | mmu-miR-299a-3p | Mus musculus             | TATGTGGGACGGTAAACCGCTT   | 0   | 0 | 0.37 | 0    | 0    | 0 | 0    | 0    |
|             | ppy-miR-299-3p  | Pongo pygmaeus           |                          | 0   | 0 | 0.37 | 0    | 0    | 0 | 0    | 0    |
|             | mml-miR-299-3p  | Macaca mulatta           |                          | 0   | 0 | 0.37 | 0    | 0    | 0 | 0    | 0    |
| dof-miR-554 | oan-miR-32-5p   | Ornithorhynchus anatinus | TATTGCACATTACTAAGTTG     | 0   | 0 | 0    | 0    | 0.19 | 0 | 0    | 0    |
| dof-miR-555 | gga-miR-32-5p   | Gallus gallus            | TATTGCACATTACTAAGTTGC    | 0.2 | 0 | 0    | 0    | 0.09 | 0 | 0    | 0    |
|             | sse-miR-32      | Sus scrofa               |                          | 0.2 | 0 | 0    | 0    | 0.09 | 0 | 0    | 0    |
|             | mml-miR-32-5p   | Macaca mulatta           |                          | 0.2 | 0 | 0    | 0    | 0.09 | 0 | 0    | 0    |
|             | ptr-miR-32      | Pan troglodytes          |                          | 0.2 | 0 | 0    | 0    | 0.09 | 0 | 0    | 0    |
|             | ggo-miR-32      | Gorilla gorilla          |                          | 0.2 | 0 | 0    | 0    | 0.09 | 0 | 0    | 0    |
|             | ppy-miR-32      | Pongo pygmaeus           |                          | 0.2 | 0 | 0    | 0    | 0.09 | 0 | 0    | 0    |
|             | sla-miR-32      | Saguinus labiatus        |                          | 0.2 | 0 | 0    | 0    | 0.09 | 0 | 0    | 0    |
|             | mne-miR-32      | Macaca nemestrina        |                          | 0.2 | 0 | 0    | 0    | 0.09 | 0 | 0    | 0    |

|             |                  |                               |                        |     |      |      |      |      |      |      |      |
|-------------|------------------|-------------------------------|------------------------|-----|------|------|------|------|------|------|------|
|             | ppa-miR-32       | Pan paniscus                  |                        | 0.2 | 0    | 0    | 0    | 0.09 | 0    | 0    | 0    |
|             | mdo-miR-32-5p    | Monodelphis domestica         |                        | 0.2 | 0    | 0    | 0    | 0.09 | 0    | 0    | 0    |
|             | cgr-miR-32-5p    | Cricetulus griseus            |                        | 0.2 | 0    | 0    | 0    | 0.09 | 0    | 0    | 0    |
|             | tgu-miR-32       | Taeniopygia guttata           |                        | 0.2 | 0    | 0    | 0    | 0.09 | 0    | 0    | 0    |
| dof-miR-556 | bma-miR-92       | Brugia malayi                 | TATTGCACTCGTCCCGGCCT   | 0   | 0    | 0    | 0    | 0.09 | 0    | 0    | 0    |
| dof-miR-557 | xtr-miR-92b      | Xenopus tropicalis            | TATTGCACTCGTCCCGGCCTC  | 0   | 0    | 0    | 0    | 0    | 0    | 0.17 | 0    |
| dof-miR-558 | dre-miR-92b-3p   | Danio rerio                   | TATTGCACTCGTCCCGGCCTCC | 0   | 0    | 0    | 0.18 | 0    | 0    | 0    | 0    |
|             | hsa-miR-92b-3p   | Homo sapiens                  |                        | 0   | 0    | 0    | 0.18 | 0    | 0    | 0    | 0    |
|             | mmu-miR-92b-3p   | Mus musculus                  |                        | 0   | 0    | 0    | 0.18 | 0    | 0    | 0    | 0    |
|             | rno-miR-92b-3p   | Rattus norvegicus             |                        | 0   | 0    | 0    | 0.18 | 0    | 0    | 0    | 0    |
|             | efu-miR-92b      | Eptesicus fuscus              |                        | 0   | 0    | 0    | 0.18 | 0    | 0    | 0    | 0    |
|             | ssa-miR-92b-3p   | Salmo salar                   |                        | 0   | 0    | 0    | 0.18 | 0    | 0    | 0    | 0    |
|             | ipu-miR-92b      | Ictalurus punctatus           |                        | 0   | 0    | 0    | 0.18 | 0    | 0    | 0    | 0    |
|             | ccr-miR-92b      | Cyprinus carpio               |                        | 0   | 0    | 0    | 0.18 | 0    | 0    | 0    | 0    |
|             | mdo-miR-92b-3p   | Monodelphis domestica         |                        | 0   | 0    | 0    | 0.18 | 0    | 0    | 0    | 0    |
|             | cgr-miR-92b-3p   | Cricetulus griseus            |                        | 0   | 0    | 0    | 0.18 | 0    | 0    | 0    | 0    |
|             | ptr-miR-92b      | Pan troglodytes               |                        | 0   | 0    | 0    | 0.18 | 0    | 0    | 0    | 0    |
|             | ppy-miR-92b      | Pongo pygmaeus                |                        | 0   | 0    | 0    | 0.18 | 0    | 0    | 0    | 0    |
|             | eca-miR-92b      | Equus caballus                |                        | 0   | 0    | 0    | 0.18 | 0    | 0    | 0    | 0    |
|             | ssc-miR-92b-3p   | Sus scrofa                    |                        | 0   | 0    | 0    | 0.18 | 0    | 0    | 0    | 0    |
|             | mml-miR-92b-3p   | Macaca mulatta                |                        | 0   | 0    | 0    | 0.18 | 0    | 0    | 0    | 0    |
| cfa-miR-92b | Canis familiaris | 0                             | 0                      | 0   | 0.18 | 0    | 0    | 0    | 0    |      |      |
| bta-miR-92b | Bos taurus       | 0                             | 0                      | 0   | 0.18 | 0    | 0    | 0    | 0    |      |      |
| dof-miR-559 | pmi-miR-92b-3p   | Patiria miniata               | TATTGCACTCGTCCCGGCCTGC | 0   | 0    | 0    | 0    | 0    | 0    | 0.17 | 0    |
|             | lva-miR-92b-3p   | Lytechinus variegatus         |                        | 0   | 0    | 0    | 0    | 0    | 0    | 0.17 | 0    |
|             | spu-miR-92c      | Strongylocentrotus purpuratus |                        | 0   | 0    | 0    | 0    | 0    | 0    | 0.17 | 0    |
| dof-miR-560 | oan-miR-92b      | Ornithorhynchus anatinus      | TATTGCACTTGTCACAGCCTGT | 0   | 0    | 0    | 0    | 0.09 | 0    | 0    | 0    |
| dof-miR-561 | pmi-miR-92c-3p   | Patiria miniata               | TATTGCACTTGTCACAGCCTGC | 0   | 0    | 0    | 0    | 0.09 | 0    | 0    | 0    |
| dof-miR-562 | ska-miR-92a      | Saccoglossus kowalevskii      | TATTGCACTTGTCACAGCCTAA | 0   | 0    | 0    | 0    | 0.19 | 0    | 0    | 0    |
| dof-miR-563 | mmu-miR-92a-3p   | Mus musculus                  | TATTGCACTTGTCACAGCCTG  | 0   | 0.25 | 0.37 | 0    | 1.68 | 1.04 | 0.33 | 0.14 |
|             | rno-miR-92a-3p   | Rattus norvegicus             |                        | 0   | 0.25 | 0.37 | 0    | 1.68 | 1.04 | 0.33 | 0.14 |
|             | gga-miR-92-3p    | Gallus gallus                 |                        | 0   | 0.25 | 0.37 | 0    | 1.68 | 1.04 | 0.33 | 0.14 |
|             | xtr-miR-92a      | Xenopus tropicalis            |                        | 0   | 0.25 | 0.37 | 0    | 1.68 | 1.04 | 0.33 | 0.14 |
|             | ola-miR-92a      | Oryzias latipes               |                        | 0   | 0.25 | 0.37 | 0    | 1.68 | 1.04 | 0.33 | 0.14 |



|             |                |                               |                        |      |       |      |      |       |       |      |      |
|-------------|----------------|-------------------------------|------------------------|------|-------|------|------|-------|-------|------|------|
|             | xla-miR-92a    | Xenopus laevis                |                        | 0    | 0.25  | 0.37 | 0    | 1.68  | 1.04  | 0.33 | 0.14 |
| dof-miR-564 | sko-miR-92b    | Saccoglossus kowalevskii      | TATTGCACTTGTCGCCGCCTGC | 0    | 0     | 0.18 | 0.18 | 0     | 0     | 0    | 0    |
|             | spu-miR-92b-3p | Strongylocentrotus purpuratus |                        | 0    | 0     | 0.18 | 0.18 | 0     | 0     | 0    | 0    |
|             | hsa-miR-92a-3p | Homo sapiens                  |                        | 3.17 | 12.73 | 5.51 | 3.96 | 29.01 | 11.27 | 5.18 | 6.31 |
| dof-miR-565 | dre-miR-92a-3p | Danio rerio                   | TATTGCACTTGTCGCCGCCTGT | 3.17 | 12.73 | 5.51 | 3.96 | 29.01 | 11.27 | 5.18 | 6.31 |
|             | ggo-miR-92     | Gorilla gorilla               |                        | 3.17 | 12.73 | 5.51 | 3.96 | 29.01 | 11.27 | 5.18 | 6.31 |
|             | lca-miR-92     | Lemur catta                   |                        | 3.17 | 12.73 | 5.51 | 3.96 | 29.01 | 11.27 | 5.18 | 6.31 |
|             | age-miR-92     | Ateles geoffroyi              |                        | 3.17 | 12.73 | 5.51 | 3.96 | 29.01 | 11.27 | 5.18 | 6.31 |
|             | ppa-miR-92     | Pan paniscus                  |                        | 3.17 | 12.73 | 5.51 | 3.96 | 29.01 | 11.27 | 5.18 | 6.31 |
|             | ppy-miR-92     | Pongo pygmaeus                |                        | 3.17 | 12.73 | 5.51 | 3.96 | 29.01 | 11.27 | 5.18 | 6.31 |
|             | ptr-miR-92     | Pan troglodytes               |                        | 3.17 | 12.73 | 5.51 | 3.96 | 29.01 | 11.27 | 5.18 | 6.31 |
|             | mml-miR-92a-3p | Macaca mulatta                |                        | 3.17 | 12.73 | 5.51 | 3.96 | 29.01 | 11.27 | 5.18 | 6.31 |
|             | sla-miR-92     | Saguinus labiatus             |                        | 3.17 | 12.73 | 5.51 | 3.96 | 29.01 | 11.27 | 5.18 | 6.31 |
|             | lla-miR-92     | Lagothrix lagotricha          |                        | 3.17 | 12.73 | 5.51 | 3.96 | 29.01 | 11.27 | 5.18 | 6.31 |
|             | mne-miR-92     | Macaca nemestrina             |                        | 3.17 | 12.73 | 5.51 | 3.96 | 29.01 | 11.27 | 5.18 | 6.31 |
|             | fru-miR-92     | Fugu rubripes                 |                        | 3.17 | 12.73 | 5.51 | 3.96 | 29.01 | 11.27 | 5.18 | 6.31 |
|             | tmi-miR-92     | Tetraodon nigroviridis        |                        | 3.17 | 12.73 | 5.51 | 3.96 | 29.01 | 11.27 | 5.18 | 6.31 |
|             | bta-miR-92a    | Bos taurus                    |                        | 3.17 | 12.73 | 5.51 | 3.96 | 29.01 | 11.27 | 5.18 | 6.31 |
|             | mdo-miR-92a-3p | Monodelphis domestica         |                        | 3.17 | 12.73 | 5.51 | 3.96 | 29.01 | 11.27 | 5.18 | 6.31 |
|             | oan-miR-92a-3p | Ornithorhynchus anatinus      |                        | 3.17 | 12.73 | 5.51 | 3.96 | 29.01 | 11.27 | 5.18 | 6.31 |
|             | chi-miR-92a-3p | Capra hircus                  |                        | 3.17 | 12.73 | 5.51 | 3.96 | 29.01 | 11.27 | 5.18 | 6.31 |
|             | chi-miR-92b    | Capra hircus                  |                        | 3.17 | 12.73 | 5.51 | 3.96 | 29.01 | 11.27 | 5.18 | 6.31 |
|             | tch-miR-92a-3p | Tupaia chinensis              |                        | 3.17 | 12.73 | 5.51 | 3.96 | 29.01 | 11.27 | 5.18 | 6.31 |
|             | oha-miR-92a-3p | Ophiophagus hannah            |                        | 3.17 | 12.73 | 5.51 | 3.96 | 29.01 | 11.27 | 5.18 | 6.31 |
|             | oha-miR-92a    | Ophiophagus hannah            |                        | 3.17 | 12.73 | 5.51 | 3.96 | 29.01 | 11.27 | 5.18 | 6.31 |
|             | ssa-miR-92a-3p | Salmo salar                   |                        | 3.17 | 12.73 | 5.51 | 3.96 | 29.01 | 11.27 | 5.18 | 6.31 |
|             | ipu-miR-92a    | Ictalurus punctatus           |                        | 3.17 | 12.73 | 5.51 | 3.96 | 29.01 | 11.27 | 5.18 | 6.31 |
|             | ccr-miR-92a    | Cyprinus carpio               |                        | 3.17 | 12.73 | 5.51 | 3.96 | 29.01 | 11.27 | 5.18 | 6.31 |
|             | cgr-miR-92a-3p | Cricetulus griseus            |                        | 3.17 | 12.73 | 5.51 | 3.96 | 29.01 | 11.27 | 5.18 | 6.31 |
|             | aca-miR-92a    | Anolis carolinensis           |                        | 3.17 | 12.73 | 5.51 | 3.96 | 29.01 | 11.27 | 5.18 | 6.31 |
|             | eca-miR-92a    | Equus caballus                |                        | 3.17 | 12.73 | 5.51 | 3.96 | 29.01 | 11.27 | 5.18 | 6.31 |
|             | ssc-miR-92a    | Sus scrofa                    |                        | 3.17 | 12.73 | 5.51 | 3.96 | 29.01 | 11.27 | 5.18 | 6.31 |
|             | tgu-miR-92-3p  | Taeniopygia guttata           |                        | 3.17 | 12.73 | 5.51 | 3.96 | 29.01 | 11.27 | 5.18 | 6.31 |
|             | cfa-miR-92a    | Canis familiaris              |                        | 3.17 | 12.73 | 5.51 | 3.96 | 29.01 | 11.27 | 5.18 | 6.31 |

|             |                 |                      |                         |     |      |      |      |      |     |      |      |
|-------------|-----------------|----------------------|-------------------------|-----|------|------|------|------|-----|------|------|
| dof-miR-566 | efu-miR-92a     | Eptesicus fuscus     | TATTGCACTGTCCCGCCTGTG   | 0   | 0    | 0    | 0    | 0.19 | 0   | 0    | 0    |
| dof-miR-567 | cin-miR-92b-3p  | Ciona intestinalis   | TATTGCACTGTCCCGCCTT     | 0   | 0    | 0    | 0    | 0.09 | 0   | 0    | 0    |
| dof-miR-568 | ath-miR170-5p   | Arabidopsis thaliana | TATTGGCCTGGTCACTCAGA    | 0   | 0    | 0.18 | 22.7 | 0    | 0   | 0    | 0    |
|             | ath-miR171a-5p  | Arabidopsis thaliana |                         | 0   | 0    | 0.18 | 22.7 | 0    | 0   | 0    | 0    |
|             | stu-miR171a-5p  | Solanum tuberosum    |                         | 0   | 0    | 0.18 | 22.7 | 0    | 0   | 0    | 0    |
|             | stu-miR171c-5p  | Solanum tuberosum    |                         | 0   | 0    | 0.18 | 22.7 | 0    | 0   | 0    | 0    |
|             | gma-miR171j-5p  | Glycine max          |                         | 0   | 0    | 0.18 | 22.7 | 0    | 0   | 0    | 0    |
|             | aly-miR170-5p   | Arabidopsis lyrata   |                         | 0   | 0    | 0.18 | 22.7 | 0    | 0   | 0    | 0    |
|             | aly-miR171a-5p  | Arabidopsis lyrata   |                         | 0   | 0    | 0.18 | 22.7 | 0    | 0   | 0    | 0    |
| dof-miR-569 | chi-miR-335-5p  | Capra hircus         | TCAAGAGCAATAACGAAAAAT   | 0   | 0.25 | 0.18 | 0.54 | 0.47 | 0   | 0.17 | 0    |
| dof-miR-570 | tch-miR-335-5p  | Tupaia chinensis     | TCAAGAGCAATAACGAAAAATG  | 0   | 0    | 0    | 0.18 | 0.09 | 0   | 0    | 0    |
|             | ggo-miR-335     | Gorilla gorilla      |                         | 0   | 0    | 0    | 0.18 | 0.09 | 0   | 0    | 0    |
|             | ssc-miR-335     | Sus scrofa           |                         | 0   | 0    | 0    | 0.18 | 0.09 | 0   | 0    | 0    |
| dof-miR-571 | rno-miR-335     | Rattus norvegicus    | TCAAGAGCAATAACGAAAAATGT | 0   | 0    | 0    | 0.54 | 0.47 | 0   | 0    | 0.28 |
|             | hsa-miR-335-5p  | Homo sapiens         |                         | 0   | 0    | 0    | 0.54 | 0.47 | 0   | 0    | 0.28 |
|             | mmu-miR-335-5p  | Mus musculus         |                         | 0   | 0    | 0    | 0.54 | 0.47 | 0   | 0    | 0.28 |
|             | efu-miR-335     | Eptesicus fuscus     |                         | 0   | 0    | 0    | 0.54 | 0.47 | 0   | 0    | 0.28 |
|             | ppy-miR-335     | Pongo pygmaeus       |                         | 0   | 0    | 0    | 0.54 | 0.47 | 0   | 0    | 0.28 |
|             | eca-miR-335     | Equus caballus       |                         | 0   | 0    | 0    | 0.54 | 0.47 | 0   | 0    | 0.28 |
|             | mml-miR-335-5p  | Macaca mulatta       |                         | 0   | 0    | 0    | 0.54 | 0.47 | 0   | 0    | 0.28 |
|             | cfa-miR-335     | Canis familiaris     |                         | 0   | 0    | 0    | 0.54 | 0.47 | 0   | 0    | 0.28 |
|             | ptr-miR-335     | Pan troglodytes      |                         | 0   | 0    | 0    | 0.54 | 0.47 | 0   | 0    | 0.28 |
|             | bta-miR-335     | Bos taurus           |                         | 0   | 0    | 0    | 0.54 | 0.47 | 0   | 0    | 0.28 |
| dof-miR-572 | ath-miR161.2    | Arabidopsis thaliana | TCAATGCATTGAAAAGTGACTA  | 0   | 0    | 0    | 0    | 0    | 0   | 0    | 0.14 |
|             | aly-miR161-5p.2 | Arabidopsis lyrata   |                         | 0   | 0    | 0    | 0    | 0    | 0   | 0    | 0.14 |
| dof-miR-573 | mse-miR-2a      | Manduca sexta        | TCACAGCCAGCTTTGATGAGCA  | 0   | 0    | 0    | 0    | 0    | 0.1 | 0.17 | 0    |
| dof-miR-574 | ola-miR-128     | Oryzias latipes      | TCACAGTGAACCGGTCTCTT    | 0.2 | 0    | 0    | 0.18 | 0    | 0.1 | 0    | 0    |
|             | ggo-miR-128     | Gorilla gorilla      |                         | 0.2 | 0    | 0    | 0.18 | 0    | 0.1 | 0    | 0    |
| dof-miR-575 | mmu-miR-128-3p  | Mus musculus         | TCACAGTGAACCGGTCTCTTT   | 0.2 | 1.02 | 0.37 | 0.72 | 0.75 | 0   | 0    | 0    |
|             | hsa-miR-128-3p  | Homo sapiens         |                         | 0.2 | 1.02 | 0.37 | 0.72 | 0.75 | 0   | 0    | 0    |
|             | rno-miR-128-3p  | Rattus norvegicus    |                         | 0.2 | 1.02 | 0.37 | 0.72 | 0.75 | 0   | 0    | 0    |
|             | gga-miR-128-3p  | Gallus gallus        |                         | 0.2 | 1.02 | 0.37 | 0.72 | 0.75 | 0   | 0    | 0    |
|             | ssc-miR-128     | Sus scrofa           |                         | 0.2 | 1.02 | 0.37 | 0.72 | 0.75 | 0   | 0    | 0    |
|             | ptr-miR-128     | Pan troglodytes      |                         | 0.2 | 1.02 | 0.37 | 0.72 | 0.75 | 0   | 0    | 0    |

|             |                 |                          |                        |      |      |      |       |      |      |      |      |
|-------------|-----------------|--------------------------|------------------------|------|------|------|-------|------|------|------|------|
|             | ppy-miR-128     | Pongo pygmaeus           |                        | 0.2  | 1.02 | 0.37 | 0.72  | 0.75 | 0    | 0    | 0    |
|             | bta-miR-128     | Bos taurus               |                        | 0.2  | 1.02 | 0.37 | 0.72  | 0.75 | 0    | 0    | 0    |
|             | mdo-miR-128a-3p | Monodelphis domestica    |                        | 0.2  | 1.02 | 0.37 | 0.72  | 0.75 | 0    | 0    | 0    |
|             | oan-miR-128-3p  | Ornithorhynchus anatinus |                        | 0.2  | 1.02 | 0.37 | 0.72  | 0.75 | 0    | 0    | 0    |
|             | chi-miR-128-3p  | Capra hircus             |                        | 0.2  | 1.02 | 0.37 | 0.72  | 0.75 | 0    | 0    | 0    |
|             | tch-miR-128     | Tupaia chinensis         |                        | 0.2  | 1.02 | 0.37 | 0.72  | 0.75 | 0    | 0    | 0    |
|             | ssa-miR-128-3p  | Salmo salar              |                        | 0.2  | 1.02 | 0.37 | 0.72  | 0.75 | 0    | 0    | 0    |
|             | mdo-miR-128b-3p | Monodelphis domestica    |                        | 0.2  | 1.02 | 0.37 | 0.72  | 0.75 | 0    | 0    | 0    |
|             | ipu-miR-128     | Ictalurus punctatus      |                        | 0.2  | 1.02 | 0.37 | 0.72  | 0.75 | 0    | 0    | 0    |
|             | ccr-miR-128     | Cyprinus carpio          |                        | 0.2  | 1.02 | 0.37 | 0.72  | 0.75 | 0    | 0    | 0    |
|             | sha-miR-128     | Sarcophilus harrisii     |                        | 0.2  | 1.02 | 0.37 | 0.72  | 0.75 | 0    | 0    | 0    |
|             | cgr-miR-128-3p  | Cricetulus griseus       |                        | 0.2  | 1.02 | 0.37 | 0.72  | 0.75 | 0    | 0    | 0    |
|             | aca-miR-128-3p  | Anolis carolinensis      |                        | 0.2  | 1.02 | 0.37 | 0.72  | 0.75 | 0    | 0    | 0    |
|             | eca-miR-128     | Equus caballus           |                        | 0.2  | 1.02 | 0.37 | 0.72  | 0.75 | 0    | 0    | 0    |
|             | tgu-miR-128-3p  | Taeniopygia guttata      |                        | 0.2  | 1.02 | 0.37 | 0.72  | 0.75 | 0    | 0    | 0    |
|             | mml-miR-128b-3p | Macaca mulatta           |                        | 0.2  | 1.02 | 0.37 | 0.72  | 0.75 | 0    | 0    | 0    |
|             | cfa-miR-128     | Canis familiaris         |                        | 0.2  | 1.02 | 0.37 | 0.72  | 0.75 | 0    | 0    | 0    |
| dof-miR-576 | efu-miR-128a    | Eptesicus fuscus         | TCACAGTGAACCGGTCTCTTTC | 0.4  | 0    | 0    | 0.18  | 0    | 0    | 0.17 | 0    |
|             | pma-miR-128     | Petromyzon marinus       |                        | 0.4  | 0    | 0    | 0.18  | 0    | 0    | 0.17 | 0    |
| dof-miR-577 | dre-miR-128-3p  | Danio rerio              |                        | 0.2  | 0.25 | 0.18 | 0.54  | 0    | 0.1  | 0    | 0    |
|             | mml-miR-128a-3p | Macaca mulatta           |                        | 0.2  | 0.25 | 0.18 | 0.54  | 0    | 0.1  | 0    | 0    |
|             | sla-miR-128     | Saguinus labiatus        |                        | 0.2  | 0.25 | 0.18 | 0.54  | 0    | 0.1  | 0    | 0    |
|             | age-miR-128     | Ateles geoffroyi         |                        | 0.2  | 0.25 | 0.18 | 0.54  | 0    | 0.1  | 0    | 0    |
|             | ppa-miR-128     | Pan paniscus             | TCACAGTGAACCGGTCTCTTTT | 0.2  | 0.25 | 0.18 | 0.54  | 0    | 0.1  | 0    | 0    |
|             | fru-miR-128     | Fugu rubripes            |                        | 0.2  | 0.25 | 0.18 | 0.54  | 0    | 0.1  | 0    | 0    |
|             | tni-miR-128     | Tetraodon nigroviridis   |                        | 0.2  | 0.25 | 0.18 | 0.54  | 0    | 0.1  | 0    | 0    |
|             | xtr-miR-128     | Xenopus tropicalis       |                        | 0.2  | 0.25 | 0.18 | 0.54  | 0    | 0.1  | 0    | 0    |
|             | oha-miR-128-3p  | Ophiophagus hannah       |                        | 0.2  | 0.25 | 0.18 | 0.54  | 0    | 0.1  | 0    | 0    |
| dof-miR-578 | efu-miR-128b    | Eptesicus fuscus         | TCACAGTGAACCGGTCTTTTT  | 0    | 0    | 0    | 0.54  | 0    | 0    | 0    | 0    |
| dof-miR-579 | pab-miR950-5p   | Picea abies              | TCACATCTGGGCCACGATGGTT | 0    | 0    | 8.45 | 13.33 | 0    | 0    | 0.33 | 0    |
| dof-miR-580 | pde-miR1311     | Pinus densata            |                        | 0    | 0    | 0.37 | 1.26  | 0    | 0    | 0.17 | 0    |
|             | pab-miR1311     | Picea abies              | TCAGAGTTTTGCCAGTCCGCC  | 0    | 0    | 0.37 | 1.26  | 0    | 0    | 0.17 | 0    |
|             | pta-miR1311     | Pinus taeda              |                        | 0    | 0    | 0.37 | 1.26  | 0    | 0    | 0.17 | 0    |
| dof-miR-581 | gra-miR167a     | Gossypium raimondii      | TCAGATCATCTTGCAGCTTCA  | 0.79 | 4.33 | 0    | 0     | 0.47 | 0.94 | 0.67 | 0.98 |

|             |                |                          |                         |      |      |      |      |      |      |      |      |
|-------------|----------------|--------------------------|-------------------------|------|------|------|------|------|------|------|------|
|             | gra-miR167b    | Gossypium raimondii      |                         | 0.79 | 4.33 | 0    | 0    | 0.47 | 0.94 | 0.67 | 0.98 |
| dof-miR-582 | ggo-miR-484    | Gorilla gorilla          | TCAGGCTCAGTCCCCTCCCGA   | 0    | 0    | 0    | 0    | 0.19 | 0    | 0    | 0    |
| dof-miR-583 | hsa-miR-484    | Homo sapiens             | TCAGGCTCAGTCCCCTCCCGAT  | 0    | 0    | 0.37 | 0.18 | 0    | 0    | 0    | 0    |
|             | mmu-miR-484    | Mus musculus             |                         | 0    | 0    | 0.37 | 0.18 | 0    | 0    | 0    | 0    |
|             | bta-miR-484    | Bos taurus               |                         | 0    | 0    | 0.37 | 0.18 | 0    | 0    | 0    | 0    |
|             | rno-miR-484    | Rattus norvegicus        |                         | 0    | 0    | 0.37 | 0.18 | 0    | 0    | 0    | 0    |
|             | cgr-miR-484    | Cricetulus griseus       |                         | 0    | 0    | 0.37 | 0.18 | 0    | 0    | 0    | 0    |
|             | ppy-miR-484    | Pongo pygmaeus           |                         | 0    | 0    | 0.37 | 0.18 | 0    | 0    | 0    | 0    |
|             | mml-miR-484    | Macaca mulatta           |                         | 0    | 0    | 0.37 | 0.18 | 0    | 0    | 0    | 0    |
|             | ptr-miR-484    | Pan troglodytes          |                         | 0    | 0    | 0.37 | 0.18 | 0    | 0    | 0    | 0    |
| dof-miR-584 | dme-miR-275-3p | Drosophila melanogaster  | TCAGGTACCTGAAGTAGCGCGCG | 0    | 0    | 0    | 0    | 0    | 0    | 0.17 | 0    |
|             | dps-miR-275    | Drosophila pseudoobscura |                         | 0    | 0    | 0    | 0    | 0    | 0    | 0.17 | 0    |
|             | aga-miR-275    | Anopheles gambiae        |                         | 0    | 0    | 0    | 0    | 0    | 0    | 0.17 | 0    |
|             | bmo-miR-275-3p | Bombyx mori              |                         | 0    | 0    | 0    | 0    | 0    | 0    | 0.17 | 0    |
|             | ame-miR-275    | Apis mellifera           |                         | 0    | 0    | 0    | 0    | 0    | 0    | 0.17 | 0    |
|             | mse-miR-275    | Manduca sexta            |                         | 0    | 0    | 0    | 0    | 0    | 0    | 0.17 | 0    |
|             | nvi-miR-275    | Nasonia vitripennis      |                         | 0    | 0    | 0    | 0    | 0    | 0    | 0.17 | 0    |
|             | ngi-miR-275    | Nasonia giraulti         |                         | 0    | 0    | 0    | 0    | 0    | 0    | 0.17 | 0    |
|             | nlo-miR-275    | Nasonia longicornis      |                         | 0    | 0    | 0    | 0    | 0    | 0    | 0.17 | 0    |
|             | dpu-miR-275    | Daphnia pulex            |                         | 0    | 0    | 0    | 0    | 0    | 0    | 0.17 | 0    |
|             | isc-miR-275    | Ixodes scapularis        |                         | 0    | 0    | 0    | 0    | 0    | 0    | 0.17 | 0    |
|             | tca-miR-275-3p | Tribolium castaneum      |                         | 0    | 0    | 0    | 0    | 0    | 0    | 0.17 | 0    |
|             | dan-miR-275    | Drosophila ananassae     |                         | 0    | 0    | 0    | 0    | 0    | 0    | 0.17 | 0    |
|             | der-miR-275    | Drosophila erecta        |                         | 0    | 0    | 0    | 0    | 0    | 0    | 0.17 | 0    |
|             | dgr-miR-275    | Drosophila grimshawi     |                         | 0    | 0    | 0    | 0    | 0    | 0    | 0.17 | 0    |
|             | dmo-miR-275    | Drosophila mojavensis    |                         | 0    | 0    | 0    | 0    | 0    | 0    | 0.17 | 0    |
|             | dpe-miR-275    | Drosophila persimilis    |                         | 0    | 0    | 0    | 0    | 0    | 0    | 0.17 | 0    |
|             | dse-miR-275    | Drosophila sechellia     |                         | 0    | 0    | 0    | 0    | 0    | 0    | 0.17 | 0    |
|             | dsi-miR-275    | Drosophila simulans      |                         | 0    | 0    | 0    | 0    | 0    | 0    | 0.17 | 0    |
|             | dvi-miR-275-3p | Drosophila virilis       |                         | 0    | 0    | 0    | 0    | 0    | 0    | 0.17 | 0    |
|             | dwi-miR-275    | Drosophila willistoni    |                         | 0    | 0    | 0    | 0    | 0    | 0    | 0.17 | 0    |
|             | dya-miR-275    | Drosophila yakuba        |                         | 0    | 0    | 0    | 0    | 0    | 0    | 0.17 | 0    |
| dof-miR-585 | dre-miR-459-5p | Danio rerio              | TCAGTAACAAGGATTCATCCTG  | 0    | 0    | 0    | 0.18 | 0    | 0    | 0    | 0    |
|             | ipu-miR-459    | Ictalurus punctatus      |                         | 0    | 0    | 0    | 0.18 | 0    | 0    | 0    | 0    |

|              |                 |                          |                         |      |      |       |      |       |      |      |      |     |   |
|--------------|-----------------|--------------------------|-------------------------|------|------|-------|------|-------|------|------|------|-----|---|
|              | ola-miR-459-5p  | Oryzias latipes          |                         | 0    | 0    | 0     | 0.18 | 0     | 0    | 0    | 0    |     |   |
| dof-miR-586  | ssa-miR-459-5p  | Salmo salar              | TCAGTAACAAGGATTCATCCTGT | 0    | 0    | 0     | 0.36 | 0     | 0    | 0    | 0    |     |   |
| dof-miR-587  | efu-miR-452     | Eptesiscus fuscus        | TCAGTCTCATCTGCAAAGAAGT  | 0    | 0    | 0.18  | 0    | 0     | 0    | 0    | 0    |     |   |
| dof-miR-588  | dme-miR-14-3p   | Drosophila melanogaster  | TCAGTCTTTTTCTCTCTCTAT   | 0    | 0    | 0     | 0    | 0     | 0    | 0    | 0.5  | 0   |   |
|              | hme-miR-14      | Heliconius melpomene     |                         | 0    | 0    | 0     | 0    | 0     | 0    | 0    | 0    | 0.5 | 0 |
|              | mse-miR-14      | Manduca sexta            |                         | 0    | 0    | 0     | 0    | 0     | 0    | 0    | 0    | 0.5 | 0 |
|              | aae-miR-14      | Aedes aegypti            |                         | 0    | 0    | 0     | 0    | 0     | 0    | 0    | 0    | 0.5 | 0 |
|              | cqu-miR-14      | Culex quinquefasciatus   |                         | 0    | 0    | 0     | 0    | 0     | 0    | 0    | 0    | 0.5 | 0 |
|              | api-miR-14      | Acyrtosiphon pisum       |                         | 0    | 0    | 0     | 0    | 0     | 0    | 0    | 0    | 0.5 | 0 |
|              | tca-miR-14-3p   | Tribolium castaneum      |                         | 0    | 0    | 0     | 0    | 0     | 0    | 0    | 0    | 0.5 | 0 |
| dof-miR-589  | rno-miR-148a-3p | Rattus norvegicus        | TCAGTGCACTACAGAACTTTG   | 0    | 0    | 0     | 0    | 0.19  | 0.31 | 0.17 | 0    |     |   |
|              | ggo-miR-148a    | Gorilla gorilla          |                         | 0    | 0    | 0     | 0    | 0.19  | 0.31 | 0.17 | 0    |     |   |
| dof-miR-590  | hsa-miR-148a-3p | Homo sapiens             | TCAGTGCACTACAGAACTTTGT  | 1.58 | 3.82 | 6.61  | 7.75 | 11.19 | 3.55 | 1.5  | 1.26 |     |   |
|              | mmu-miR-148a-3p | Mus musculus             |                         | 1.58 | 3.82 | 6.61  | 7.75 | 11.19 | 3.55 | 1.5  | 1.26 |     |   |
|              | gga-miR-148a-3p | Gallus gallus            |                         | 1.58 | 3.82 | 6.61  | 7.75 | 11.19 | 3.55 | 1.5  | 1.26 |     |   |
|              | ssc-miR-148a-3p | Sus scrofa               |                         | 1.58 | 3.82 | 6.61  | 7.75 | 11.19 | 3.55 | 1.5  | 1.26 |     |   |
|              | bta-miR-148a    | Bos taurus               |                         | 1.58 | 3.82 | 6.61  | 7.75 | 11.19 | 3.55 | 1.5  | 1.26 |     |   |
|              | xtr-miR-148a    | Xenopus tropicalis       |                         | 1.58 | 3.82 | 6.61  | 7.75 | 11.19 | 3.55 | 1.5  | 1.26 |     |   |
|              | oan-miR-148-3p  | Ornithorhynchus anatinus |                         | 1.58 | 3.82 | 6.61  | 7.75 | 11.19 | 3.55 | 1.5  | 1.26 |     |   |
|              | chi-miR-148a-3p | Capra hircus             |                         | 1.58 | 3.82 | 6.61  | 7.75 | 11.19 | 3.55 | 1.5  | 1.26 |     |   |
|              | tch-miR-148a-3p | Tupaia chinensis         |                         | 1.58 | 3.82 | 6.61  | 7.75 | 11.19 | 3.55 | 1.5  | 1.26 |     |   |
|              | oar-miR-148a    | Ovis aries               |                         | 1.58 | 3.82 | 6.61  | 7.75 | 11.19 | 3.55 | 1.5  | 1.26 |     |   |
|              | aca-miR-148a-3p | Anolis carolinensis      |                         | 1.58 | 3.82 | 6.61  | 7.75 | 11.19 | 3.55 | 1.5  | 1.26 |     |   |
|              | ppy-miR-148a    | Pongo pygmaeus           |                         | 1.58 | 3.82 | 6.61  | 7.75 | 11.19 | 3.55 | 1.5  | 1.26 |     |   |
|              | mdo-miR-148-3p  | Monodelphis domestica    |                         | 1.58 | 3.82 | 6.61  | 7.75 | 11.19 | 3.55 | 1.5  | 1.26 |     |   |
|              | eca-miR-148a    | Equus caballus           |                         | 1.58 | 3.82 | 6.61  | 7.75 | 11.19 | 3.55 | 1.5  | 1.26 |     |   |
|              | tgu-miR-148-3p  | Taeniopygia guttata      |                         | 1.58 | 3.82 | 6.61  | 7.75 | 11.19 | 3.55 | 1.5  | 1.26 |     |   |
|              | mml-miR-148a-3p | Macaca mulatta           |                         | 1.58 | 3.82 | 6.61  | 7.75 | 11.19 | 3.55 | 1.5  | 1.26 |     |   |
|              | cfa-miR-148a    | Canis familiaris         |                         | 1.58 | 3.82 | 6.61  | 7.75 | 11.19 | 3.55 | 1.5  | 1.26 |     |   |
| ptr-miR-148a | Pan troglodytes | 1.58                     | 3.82                    | 6.61 | 7.75 | 11.19 | 3.55 | 1.5   | 1.26 |      |      |     |   |
| dof-miR-591  | ssa-miR-152-3p  | Salmo salar              | TCAGTGATAACAGAACTTTG    | 0    | 0    | 0.18  | 0.36 | 0     | 0    | 0    | 0    |     |   |
| dof-miR-592  | fru-miR-152     | Fugu rubripes            | TCAGTGATAACAGAACTTTGT   | 0    | 0.76 | 0.18  | 1.8  | 0     | 0    | 0.33 | 0    |     |   |
|              | tmi-miR-152     | Tetraodon nigroviridis   |                         | 0    | 0.76 | 0.18  | 1.8  | 0     | 0    | 0.33 | 0    |     |   |
| dof-miR-593  | ggo-miR-148b    | Gorilla gorilla          | TCAGTGATCACAGAACTTTG    | 0    | 0.25 | 0     | 0    | 0.28  | 0.1  | 0    | 0.14 |     |   |

|              |                 |                        |                         |      |      |      |      |      |      |      |      |
|--------------|-----------------|------------------------|-------------------------|------|------|------|------|------|------|------|------|
| dof-miR-594  | rno-miR-148b-3p | Rattus norvegicus      | TCAGTGCATCACAGAACTTTGT  | 0    | 0.76 | 0.18 | 0.36 | 0.84 | 0.42 | 0    | 0.56 |
|              | mmu-miR-148b-3p | Mus musculus           |                         | 0    | 0.76 | 0.18 | 0.36 | 0.84 | 0.42 | 0    | 0.56 |
|              | hsa-miR-148b-3p | Homo sapiens           |                         | 0    | 0.76 | 0.18 | 0.36 | 0.84 | 0.42 | 0    | 0.56 |
|              | xtr-miR-148b    | Xenopus tropicalis     |                         | 0    | 0.76 | 0.18 | 0.36 | 0.84 | 0.42 | 0    | 0.56 |
|              | bta-miR-148b    | Bos taurus             |                         | 0    | 0.76 | 0.18 | 0.36 | 0.84 | 0.42 | 0    | 0.56 |
|              | chi-miR-148b-3p | Capra hircus           |                         | 0    | 0.76 | 0.18 | 0.36 | 0.84 | 0.42 | 0    | 0.56 |
|              | tch-miR-148b-3p | Tupaia chinensis       |                         | 0    | 0.76 | 0.18 | 0.36 | 0.84 | 0.42 | 0    | 0.56 |
|              | oha-miR-148b    | Ophiophagus hannah     |                         | 0    | 0.76 | 0.18 | 0.36 | 0.84 | 0.42 | 0    | 0.56 |
|              | cgr-miR-148b-3p | Cricetulus griseus     |                         | 0    | 0.76 | 0.18 | 0.36 | 0.84 | 0.42 | 0    | 0.56 |
|              | aca-miR-148b-3p | Anolis carolinensis    |                         | 0    | 0.76 | 0.18 | 0.36 | 0.84 | 0.42 | 0    | 0.56 |
|              | ppy-miR-148b    | Pongo pygmaeus         |                         | 0    | 0.76 | 0.18 | 0.36 | 0.84 | 0.42 | 0    | 0.56 |
|              | eca-miR-148b-3p | Equus caballus         |                         | 0    | 0.76 | 0.18 | 0.36 | 0.84 | 0.42 | 0    | 0.56 |
|              | ssc-miR-148b-3p | Sus scrofa             |                         | 0    | 0.76 | 0.18 | 0.36 | 0.84 | 0.42 | 0    | 0.56 |
|              | mml-miR-148b-3p | Macaca mulatta         |                         | 0    | 0.76 | 0.18 | 0.36 | 0.84 | 0.42 | 0    | 0.56 |
|              | cfa-miR-148b    | Canis familiaris       |                         | 0    | 0.76 | 0.18 | 0.36 | 0.84 | 0.42 | 0    | 0.56 |
| ptr-miR-148b | Pan troglodytes | 0                      | 0.76                    | 0.18 | 0.36 | 0.84 | 0.42 | 0    | 0.56 |      |      |
| dof-miR-595  | efu-miR-148     | Eptesicus fuscus       | TCAGTGCATCACAGAACTTTGTC | 0    | 0    | 0    | 0    | 0.09 | 0    | 0    | 0    |
| dof-miR-596  | mmu-miR-152-3p  | Mus musculus           | TCAGTGCATGACAGAACITGG   | 0.2  | 0    | 1.29 | 0.18 | 0.28 | 0.21 | 0    | 0.14 |
|              | hsa-miR-152-3p  | Homo sapiens           |                         | 0.2  | 0    | 1.29 | 0.18 | 0.28 | 0.21 | 0    | 0.14 |
|              | rno-miR-152-3p  | Rattus norvegicus      |                         | 0.2  | 0    | 1.29 | 0.18 | 0.28 | 0.21 | 0    | 0.14 |
|              | tch-miR-152     | Tupaia chinensis       |                         | 0.2  | 0    | 1.29 | 0.18 | 0.28 | 0.21 | 0    | 0.14 |
|              | oar-miR-152     | Ovis aries             |                         | 0.2  | 0    | 1.29 | 0.18 | 0.28 | 0.21 | 0    | 0.14 |
|              | cgr-miR-152-3p  | Cricetulus griseus     |                         | 0.2  | 0    | 1.29 | 0.18 | 0.28 | 0.21 | 0    | 0.14 |
|              | ggo-miR-152     | Gorilla gorilla        |                         | 0.2  | 0    | 1.29 | 0.18 | 0.28 | 0.21 | 0    | 0.14 |
|              | ppy-miR-152     | Pongo pygmaeus         |                         | 0.2  | 0    | 1.29 | 0.18 | 0.28 | 0.21 | 0    | 0.14 |
|              | ssc-miR-152     | Sus scrofa             |                         | 0.2  | 0    | 1.29 | 0.18 | 0.28 | 0.21 | 0    | 0.14 |
|              | mml-miR-152-3p  | Macaca mulatta         |                         | 0.2  | 0    | 1.29 | 0.18 | 0.28 | 0.21 | 0    | 0.14 |
|              | cfa-miR-152     | Canis familiaris       |                         | 0.2  | 0    | 1.29 | 0.18 | 0.28 | 0.21 | 0    | 0.14 |
|              | ptr-miR-152     | Pan troglodytes        |                         | 0.2  | 0    | 1.29 | 0.18 | 0.28 | 0.21 | 0    | 0.14 |
| dof-miR-597  | ola-miR-148     | Oryzias latipes        | TCAGTGCATTACAGAACTTT    | 0    | 0    | 0    | 0.18 | 0    | 0    | 0    | 0    |
| dof-miR-598  | dre-miR-148     | Danio rerio            | TCAGTGCATTACAGAACTTTGT  | 0    | 0.25 | 0.18 | 0.9  | 0    | 0    | 0.17 | 0.14 |
|              | fru-miR-148     | Fugu rubripes          |                         | 0    | 0.25 | 0.18 | 0.9  | 0    | 0    | 0.17 | 0.14 |
|              | tmi-miR-148     | Tetraodon nigroviridis |                         | 0    | 0.25 | 0.18 | 0.9  | 0    | 0    | 0.17 | 0.14 |
|              | ssa-miR-148a-3p | Salmo salar            |                         | 0    | 0.25 | 0.18 | 0.9  | 0    | 0    | 0.17 | 0.14 |

|             |                         |                      |                        |      |       |      |       |      |      |      |      |
|-------------|-------------------------|----------------------|------------------------|------|-------|------|-------|------|------|------|------|
|             | ipu-miR-148             | Ictalurus punctatus  |                        | 0    | 0.25  | 0.18 | 0.9   | 0    | 0    | 0.17 | 0.14 |
|             | ccr-miR-148             | Cyprinus carpio      |                        | 0    | 0.25  | 0.18 | 0.9   | 0    | 0    | 0.17 | 0.14 |
| dof-miR-599 | hme-miR-970             | Heliconius melpomene | TCATAAGACACACGCGGCTCT  | 0    | 0     | 0    | 0.18  | 0    | 0    | 0    | 0    |
|             | mse-miR-970             | Manduca sexta        |                        | 0    | 0     | 0    | 0.18  | 0    | 0    | 0    | 0    |
|             | bmo-miR-970-3p          | Bombyx mori          |                        | 0    | 0     | 0    | 0.18  | 0    | 0    | 0    | 0    |
| dof-miR-600 | ath-miR397a             | Arabidopsis thaliana | TCATTGAGTGCAGCGTTGATG  | 0    | 0     | 0.18 | 30.63 | 0    | 0    | 0    | 0    |
|             | osa-miR397a             | Oryza sativa         |                        | 0    | 0     | 0.18 | 30.63 | 0    | 0    | 0    | 0    |
|             | ptc-miR397a             | Populus trichocarpa  |                        | 0    | 0     | 0.18 | 30.63 | 0    | 0    | 0    | 0    |
|             | ppe-miR397              | Prunus persica       |                        | 0    | 0     | 0.18 | 30.63 | 0    | 0    | 0    | 0    |
|             | mtr-miR397-5p           | Medicago truncatula  |                        | 0    | 0     | 0.18 | 30.63 | 0    | 0    | 0    | 0    |
|             | cme-miR397              | Cucumis melo         |                        | 0    | 0     | 0.18 | 30.63 | 0    | 0    | 0    | 0    |
|             | ssl-miR397              | Salvia sclarea       |                        | 0    | 0     | 0.18 | 30.63 | 0    | 0    | 0    | 0    |
|             | lus-miR397b             | Linum usitatissimum  |                        | 0    | 0     | 0.18 | 30.63 | 0    | 0    | 0    | 0    |
|             | tcc-miR397              | Theobroma cacao      |                        | 0    | 0     | 0.18 | 30.63 | 0    | 0    | 0    | 0    |
|             | gma-miR397a             | Glycine max          |                        | 0    | 0     | 0.18 | 30.63 | 0    | 0    | 0    | 0    |
|             | gma-miR397b-5p          | Glycine max          |                        | 0    | 0     | 0.18 | 30.63 | 0    | 0    | 0    | 0    |
|             | csi-miR397              | Citrus sinensis      |                        | 0    | 0     | 0.18 | 30.63 | 0    | 0    | 0    | 0    |
|             | rco-miR397              | Ricinus communis     |                        | 0    | 0     | 0.18 | 30.63 | 0    | 0    | 0    | 0    |
|             | aly-miR397a-5p          | Arabidopsis lyrata   |                        | 0    | 0     | 0.18 | 30.63 | 0    | 0    | 0    | 0    |
|             | aly-miR397b-5p          | Arabidopsis lyrata   |                        | 0    | 0     | 0.18 | 30.63 | 0    | 0    | 0    | 0    |
|             | vvi-miR397a             | Vitis vinifera       |                        | 0    | 0     | 0.18 | 30.63 | 0    | 0    | 0    | 0    |
|             | sbi-miR397-5p           | Sorghum bicolor      |                        | 0    | 0     | 0.18 | 30.63 | 0    | 0    | 0    | 0    |
| bdi-miR397a | Brachypodium distachyon | 0                    | 0                      | 0.18 | 30.63 | 0    | 0     | 0    | 0    |      |      |
| dof-miR-601 | bna-miR397a             | Brassica napus       | TCATTGAGTGCAGCGTTGATGT | 0    | 0     | 0    | 1.8   | 0    | 0    | 0    | 0    |
|             | bna-miR397b             | Brassica napus       |                        | 0    | 0     | 0    | 1.8   | 0    | 0    | 0    | 0    |
| dof-miR-602 | osa-miR393a             | Oryza sativa         | TCCAAAGGGATCGCATTGATC  | 0    | 1.78  | 1.65 | 1.8   | 0.93 | 1.77 | 0.5  | 1.12 |
|             | sbi-miR393a             | Sorghum bicolor      |                        | 0    | 1.78  | 1.65 | 1.8   | 0.93 | 1.77 | 0.5  | 1.12 |
|             | mtr-miR393a             | Medicago truncatula  |                        | 0    | 1.78  | 1.65 | 1.8   | 0.93 | 1.77 | 0.5  | 1.12 |
|             | ptc-miR393a-5p          | Populus trichocarpa  |                        | 0    | 1.78  | 1.65 | 1.8   | 0.93 | 1.77 | 0.5  | 1.12 |
|             | ptc-miR393b-5p          | Populus trichocarpa  |                        | 0    | 1.78  | 1.65 | 1.8   | 0.93 | 1.77 | 0.5  | 1.12 |
|             | ptc-miR393c             | Populus trichocarpa  |                        | 0    | 1.78  | 1.65 | 1.8   | 0.93 | 1.77 | 0.5  | 1.12 |
|             | mtr-miR393b-5p          | Medicago truncatula  |                        | 0    | 1.78  | 1.65 | 1.8   | 0.93 | 1.77 | 0.5  | 1.12 |
|             | bna-miR393              | Brassica napus       |                        | 0    | 1.78  | 1.65 | 1.8   | 0.93 | 1.77 | 0.5  | 1.12 |
|             | vvi-miR393b             | Vitis vinifera       |                        | 0    | 1.78  | 1.65 | 1.8   | 0.93 | 1.77 | 0.5  | 1.12 |

|                |                    |                         |                        |      |      |      |      |      |      |     |      |
|----------------|--------------------|-------------------------|------------------------|------|------|------|------|------|------|-----|------|
|                | ppe-miR393b        | Prunus persica          |                        | 0    | 1.78 | 1.65 | 1.8  | 0.93 | 1.77 | 0.5 | 1.12 |
|                | cme-miR393a        | Cucumis melo            |                        | 0    | 1.78 | 1.65 | 1.8  | 0.93 | 1.77 | 0.5 | 1.12 |
|                | cme-miR393b        | Cucumis melo            |                        | 0    | 1.78 | 1.65 | 1.8  | 0.93 | 1.77 | 0.5 | 1.12 |
|                | cme-miR393c        | Cucumis melo            |                        | 0    | 1.78 | 1.65 | 1.8  | 0.93 | 1.77 | 0.5 | 1.12 |
|                | lus-miR393a        | Linum usitatissimum     |                        | 0    | 1.78 | 1.65 | 1.8  | 0.93 | 1.77 | 0.5 | 1.12 |
|                | lus-miR393b        | Linum usitatissimum     |                        | 0    | 1.78 | 1.65 | 1.8  | 0.93 | 1.77 | 0.5 | 1.12 |
|                | lus-miR393c        | Linum usitatissimum     |                        | 0    | 1.78 | 1.65 | 1.8  | 0.93 | 1.77 | 0.5 | 1.12 |
|                | lus-miR393d        | Linum usitatissimum     |                        | 0    | 1.78 | 1.65 | 1.8  | 0.93 | 1.77 | 0.5 | 1.12 |
|                | tcc-miR393b        | Theobroma cacao         |                        | 0    | 1.78 | 1.65 | 1.8  | 0.93 | 1.77 | 0.5 | 1.12 |
|                | bdi-miR393a        | Brachypodium distachyon |                        | 0    | 1.78 | 1.65 | 1.8  | 0.93 | 1.77 | 0.5 | 1.12 |
|                | bdi-miR393b-5p     | Brachypodium distachyon |                        | 0    | 1.78 | 1.65 | 1.8  | 0.93 | 1.77 | 0.5 | 1.12 |
|                | rco-miR393         | Ricinus communis        |                        | 0    | 1.78 | 1.65 | 1.8  | 0.93 | 1.77 | 0.5 | 1.12 |
|                | gma-miR393a        | Glycine max             |                        | 0    | 1.78 | 1.65 | 1.8  | 0.93 | 1.77 | 0.5 | 1.12 |
|                | vvi-miR393a        | Vitis vinifera          |                        | 0    | 1.78 | 1.65 | 1.8  | 0.93 | 1.77 | 0.5 | 1.12 |
|                | sbi-miR393b        | Sorghum bicolor         |                        | 0    | 1.78 | 1.65 | 1.8  | 0.93 | 1.77 | 0.5 | 1.12 |
| dof-miR-603    | ath-miR393a-5p     | Arabidopsis thaliana    | TCCAAAGGGATCGCATTGATCC | 0    | 0    | 0.18 | 0.36 | 0    | 0    | 0   | 0.14 |
|                | ath-miR393b-5p     | Arabidopsis thaliana    |                        | 0    | 0    | 0.18 | 0.36 | 0    | 0    | 0   | 0.14 |
|                | cpa-miR393         | Carica papaya           |                        | 0    | 0    | 0.18 | 0.36 | 0    | 0    | 0   | 0.14 |
|                | atr-miR393         | Amborella trichopoda    |                        | 0    | 0    | 0.18 | 0.36 | 0    | 0    | 0   | 0.14 |
|                | mes-miR393a        | Manihot esculenta       |                        | 0    | 0    | 0.18 | 0.36 | 0    | 0    | 0   | 0.14 |
|                | mes-miR393b        | Manihot esculenta       |                        | 0    | 0    | 0.18 | 0.36 | 0    | 0    | 0   | 0.14 |
|                | stu-miR393-5p      | Solanum tuberosum       |                        | 0    | 0    | 0.18 | 0.36 | 0    | 0    | 0   | 0.14 |
|                | gma-miR393e        | Glycine max             |                        | 0    | 0    | 0.18 | 0.36 | 0    | 0    | 0   | 0.14 |
|                | gma-miR393f        | Glycine max             |                        | 0    | 0    | 0.18 | 0.36 | 0    | 0    | 0   | 0.14 |
|                | gma-miR393g        | Glycine max             |                        | 0    | 0    | 0.18 | 0.36 | 0    | 0    | 0   | 0.14 |
|                | htu-miR393a        | Helianthus tuberosus    |                        | 0    | 0    | 0.18 | 0.36 | 0    | 0    | 0   | 0.14 |
|                | htu-miR393b        | Helianthus tuberosus    |                        | 0    | 0    | 0.18 | 0.36 | 0    | 0    | 0   | 0.14 |
|                | htu-miR393c        | Helianthus tuberosus    |                        | 0    | 0    | 0.18 | 0.36 | 0    | 0    | 0   | 0.14 |
|                | gma-miR393c-5p     | Glycine max             |                        | 0    | 0    | 0.18 | 0.36 | 0    | 0    | 0   | 0.14 |
|                | gma-miR393d        | Glycine max             |                        | 0    | 0    | 0.18 | 0.36 | 0    | 0    | 0   | 0.14 |
|                | tcc-miR393a        | Theobroma cacao         |                        | 0    | 0    | 0.18 | 0.36 | 0    | 0    | 0   | 0.14 |
|                | zma-miR393b-5p     | Zea mays                |                        | 0    | 0    | 0.18 | 0.36 | 0    | 0    | 0   | 0.14 |
|                | aly-miR393a-5p     | Arabidopsis lyrata      |                        | 0    | 0    | 0.18 | 0.36 | 0    | 0    | 0   | 0.14 |
| aly-miR393b-5p | Arabidopsis lyrata | 0                       | 0                      | 0.18 | 0.36 | 0    | 0    | 0    | 0.14 |     |      |



|             |                |                         |                        |       |      |       |       |       |       |       |       |
|-------------|----------------|-------------------------|------------------------|-------|------|-------|-------|-------|-------|-------|-------|
| dof-miR-604 | osa-miR393b-5p | Oryza sativa            | TCCAAAGGGATCGCATTGATCT | 18.82 | 47.1 | 33.81 | 24.87 | 14.08 | 37.77 | 24.21 | 25.64 |
|             | zma-miR393a-5p | Zea mays                |                        | 18.82 | 47.1 | 33.81 | 24.87 | 14.08 | 37.77 | 24.21 | 25.64 |
|             | mes-miR393c    | Manihot esculenta       |                        | 18.82 | 47.1 | 33.81 | 24.87 | 14.08 | 37.77 | 24.21 | 25.64 |
|             | mes-miR393d    | Manihot esculenta       |                        | 18.82 | 47.1 | 33.81 | 24.87 | 14.08 | 37.77 | 24.21 | 25.64 |
|             | mdm-miR393a    | Malus domestica         |                        | 18.82 | 47.1 | 33.81 | 24.87 | 14.08 | 37.77 | 24.21 | 25.64 |
|             | mdm-miR393b    | Malus domestica         |                        | 18.82 | 47.1 | 33.81 | 24.87 | 14.08 | 37.77 | 24.21 | 25.64 |
|             | mdm-miR393c    | Malus domestica         |                        | 18.82 | 47.1 | 33.81 | 24.87 | 14.08 | 37.77 | 24.21 | 25.64 |
|             | zma-miR393c-5p | Zea mays                |                        | 18.82 | 47.1 | 33.81 | 24.87 | 14.08 | 37.77 | 24.21 | 25.64 |
|             | ghr-miR393     | Gossypium hirsutum      |                        | 18.82 | 47.1 | 33.81 | 24.87 | 14.08 | 37.77 | 24.21 | 25.64 |
| dof-miR-605 | gma-miR396h    | Glycine max             | TCCACAGCTTTCTTGAAGCTG  | 6.34  | 4.84 | 1.29  | 59.82 | 0.37  | 0.73  | 3.01  | 5.32  |
| dof-miR-606 | osa-miR396e-5p | Oryza sativa            | TCCACAGGCTTTCTTGAAGCTG | 0     | 0.25 | 0     | 0     | 0.09  | 0     | 0     | 0.14  |
|             | ata-miR396a-5p | Aegilops tauschii       |                        | 0     | 0.25 | 0     | 0     | 0.09  | 0     | 0     | 0.14  |
|             | ata-miR396d-5p | Aegilops tauschii       |                        | 0     | 0.25 | 0     | 0     | 0.09  | 0     | 0     | 0.14  |
|             | ata-miR396b-5p | Aegilops tauschii       |                        | 0     | 0.25 | 0     | 0     | 0.09  | 0     | 0     | 0.14  |
|             | bdi-miR396a-5p | Brachypodium distachyon |                        | 0     | 0.25 | 0     | 0     | 0.09  | 0     | 0     | 0.14  |
|             | bdi-miR396b-5p | Brachypodium distachyon |                        | 0     | 0.25 | 0     | 0     | 0.09  | 0     | 0     | 0.14  |
|             | far-miR396     | Festuca arundinacea     |                        | 0     | 0.25 | 0     | 0     | 0.09  | 0     | 0     | 0.14  |
| dof-miR-607 | chi-miR-338-3p | Capra hircus            | TCCAGCATCAGTGATTTTGT   | 0     | 0    | 0     | 0.18  | 0     | 0     | 0     | 0.14  |
|             | ola-miR-338-3p | Oryzias latipes         |                        | 0     | 0    | 0     | 0.18  | 0     | 0     | 0     | 0.14  |
|             | aca-miR-338-3p | Anolis carolinensis     |                        | 0     | 0    | 0     | 0.18  | 0     | 0     | 0     | 0.14  |
| dof-miR-608 | ola-miR-142    | Oryzias latipes         | TCCATAAAGTAGAAAGCACTAC | 0     | 0    | 0     | 0.18  | 0     | 0     | 0     | 0     |
| dof-miR-609 | hsa-miR-885-5p | Homo sapiens            | TCCATTACACTACCCTGCCTCT | 0     | 0    | 0     | 0     | 0.09  | 0     | 0     | 0     |
|             | ppy-miR-885-5p | Pongo pygmaeus          |                        | 0     | 0    | 0     | 0     | 0.09  | 0     | 0     | 0     |
|             | eca-miR-885-5p | Equus caballus          |                        | 0     | 0    | 0     | 0     | 0.09  | 0     | 0     | 0     |
|             | ssc-miR-885-5p | Sus scrofa              |                        | 0     | 0    | 0     | 0     | 0.09  | 0     | 0     | 0     |
|             | mml-miR-885-5p | Macaca mulatta          |                        | 0     | 0    | 0     | 0     | 0.09  | 0     | 0     | 0     |
|             | bta-miR-885    | Bos taurus              |                        | 0     | 0    | 0     | 0     | 0.09  | 0     | 0     | 0     |
|             | cfa-miR-885    | Canis familiaris        |                        | 0     | 0    | 0     | 0     | 0.09  | 0     | 0     | 0     |
| dof-miR-610 | ath-miR158a-3p | Arabidopsis thaliana    | TCCCAAATGTAGACAAAGCA   | 0     | 0    | 0     | 0     | 0     | 0     | 0     | 0.7   |
|             | aly-miR158a-3p | Arabidopsis lyrata      |                        | 0     | 0    | 0     | 0     | 0     | 0     | 0     | 0.7   |
| dof-miR-611 | chi-miR-361-3p | Capra hircus            | TCCCCCAGGTGTGATTCTGATT | 0     | 0    | 0     | 0     | 0.19  | 0     | 0.17  | 0     |
| dof-miR-612 | hsa-miR-361-3p | Homo sapiens            | TCCCCCAGGTGTGATTCTGATT | 0     | 0    | 0     | 0     | 0.09  | 0     | 0     | 0     |
|             | ppy-miR-361-3p | Pongo pygmaeus          |                        | 0     | 0    | 0     | 0     | 0.09  | 0     | 0     | 0     |
|             | mml-miR-361-3p | Macaca mulatta          |                        | 0     | 0    | 0     | 0     | 0.09  | 0     | 0     | 0     |

|             |                 |                          |                        |      |      |      |      |      |     |      |      |
|-------------|-----------------|--------------------------|------------------------|------|------|------|------|------|-----|------|------|
|             | ptr-miR-361     | Pan troglodytes          |                        | 0    | 0    | 0    | 0    | 0.09 | 0   | 0    | 0    |
| dof-miR-613 | dre-miR-125c-5p | Danio rerio              | TCCCTGAGACCCTAACTCGTGA | 0    | 0    | 0    | 0.18 | 0    | 0   | 0    | 0    |
|             | ipu-miR-125c    | Ictalurus punctatus      |                        | 0    | 0    | 0    | 0.18 | 0    | 0   | 0    | 0    |
|             | ccr-miR-125c    | Cyprinus carpio          |                        | 0    | 0    | 0    | 0.18 | 0    | 0   | 0    | 0    |
| dof-miR-614 | chi-miR-125b-5p | Capra hircus             | TCCCTGAGACCCTAACTTGT   | 0    | 0.25 | 0.92 | 1.26 | 0.19 | 0   | 0.17 | 0.42 |
| dof-miR-615 | oar-miR-125b    | Ovis aries               | TCCCTGAGACCCTAACTTGTG  | 0.59 | 1.02 | 2.76 | 2.7  | 0    | 0   | 1.17 | 0.42 |
|             | dvi-miR-125-5p  | Drosophila virilis       |                        | 0.59 | 1.02 | 2.76 | 2.7  | 0    | 0   | 1.17 | 0.42 |
| dof-miR-616 | mmu-miR-125b-5p | Mus musculus             | TCCCTGAGACCCTAACTTGTGA | 0    | 1.02 | 6.98 | 9.01 | 0.19 | 0.1 | 1.5  | 0.14 |
|             | dme-miR-125-5p  | Drosophila melanogaster  |                        | 0    | 1.02 | 6.98 | 9.01 | 0.19 | 0.1 | 1.5  | 0.14 |
|             | hsa-miR-125b-5p | Homo sapiens             |                        | 0    | 1.02 | 6.98 | 9.01 | 0.19 | 0.1 | 1.5  | 0.14 |
|             | rno-miR-125b-5p | Rattus norvegicus        |                        | 0    | 1.02 | 6.98 | 9.01 | 0.19 | 0.1 | 1.5  | 0.14 |
|             | gga-miR-125b-5p | Gallus gallus            |                        | 0    | 1.02 | 6.98 | 9.01 | 0.19 | 0.1 | 1.5  | 0.14 |
|             | dps-miR-125     | Drosophila pseudoobscura |                        | 0    | 1.02 | 6.98 | 9.01 | 0.19 | 0.1 | 1.5  | 0.14 |
|             | aga-miR-125     | Anopheles gambiae        |                        | 0    | 1.02 | 6.98 | 9.01 | 0.19 | 0.1 | 1.5  | 0.14 |
|             | dre-miR-125b-5p | Danio rerio              |                        | 0    | 1.02 | 6.98 | 9.01 | 0.19 | 0.1 | 1.5  | 0.14 |
|             | ssc-miR-125b    | Sus scrofa               |                        | 0    | 1.02 | 6.98 | 9.01 | 0.19 | 0.1 | 1.5  | 0.14 |
|             | ggo-miR-125b    | Gorilla gorilla          |                        | 0    | 1.02 | 6.98 | 9.01 | 0.19 | 0.1 | 1.5  | 0.14 |
|             | age-miR-125b    | Ateles geoffroyi         |                        | 0    | 1.02 | 6.98 | 9.01 | 0.19 | 0.1 | 1.5  | 0.14 |
|             | ppa-miR-125b    | Pan paniscus             |                        | 0    | 1.02 | 6.98 | 9.01 | 0.19 | 0.1 | 1.5  | 0.14 |
|             | ppy-miR-125b    | Pongo pygmaeus           |                        | 0    | 1.02 | 6.98 | 9.01 | 0.19 | 0.1 | 1.5  | 0.14 |
|             | ptr-miR-125b    | Pan troglodytes          |                        | 0    | 1.02 | 6.98 | 9.01 | 0.19 | 0.1 | 1.5  | 0.14 |
|             | mml-miR-125b-5p | Macaca mulatta           |                        | 0    | 1.02 | 6.98 | 9.01 | 0.19 | 0.1 | 1.5  | 0.14 |
|             | sla-miR-125b    | Saguinus labiatus        |                        | 0    | 1.02 | 6.98 | 9.01 | 0.19 | 0.1 | 1.5  | 0.14 |
|             | lla-miR-125b    | Lagothrix lagotricha     |                        | 0    | 1.02 | 6.98 | 9.01 | 0.19 | 0.1 | 1.5  | 0.14 |
|             | mne-miR-125b    | Macaca nemestrina        |                        | 0    | 1.02 | 6.98 | 9.01 | 0.19 | 0.1 | 1.5  | 0.14 |
|             | lca-miR-125b    | Lemur catta              |                        | 0    | 1.02 | 6.98 | 9.01 | 0.19 | 0.1 | 1.5  | 0.14 |
|             | fru-miR-125b    | Fugu rubripes            |                        | 0    | 1.02 | 6.98 | 9.01 | 0.19 | 0.1 | 1.5  | 0.14 |
|             | tmi-miR-125b    | Tetraodon nigroviridis   |                        | 0    | 1.02 | 6.98 | 9.01 | 0.19 | 0.1 | 1.5  | 0.14 |
|             | bta-miR-125b    | Bos taurus               |                        | 0    | 1.02 | 6.98 | 9.01 | 0.19 | 0.1 | 1.5  | 0.14 |
|             | xtr-miR-125b    | Xenopus tropicalis       |                        | 0    | 1.02 | 6.98 | 9.01 | 0.19 | 0.1 | 1.5  | 0.14 |
|             | mdo-miR-125b-5p | Monodelphis domestica    |                        | 0    | 1.02 | 6.98 | 9.01 | 0.19 | 0.1 | 1.5  | 0.14 |
|             | oan-miR-125-5p  | Ornithorhynchus anatinus |                        | 0    | 1.02 | 6.98 | 9.01 | 0.19 | 0.1 | 1.5  | 0.14 |
|             | tch-miR-125b-5p | Tupaia chinensis         |                        | 0    | 1.02 | 6.98 | 9.01 | 0.19 | 0.1 | 1.5  | 0.14 |
|             | bbe-miR-125a-5p | Branchiostoma belcheri   |                        | 0    | 1.02 | 6.98 | 9.01 | 0.19 | 0.1 | 1.5  | 0.14 |

|             |                 |                               |                        |   |      |      |      |      |     |      |      |
|-------------|-----------------|-------------------------------|------------------------|---|------|------|------|------|-----|------|------|
|             | ssa-miR-125a-5p | Salmo salar                   |                        | 0 | 1.02 | 6.98 | 9.01 | 0.19 | 0.1 | 1.5  | 0.14 |
|             | ipu-miR-125b    | Ictalurus punctatus           |                        | 0 | 1.02 | 6.98 | 9.01 | 0.19 | 0.1 | 1.5  | 0.14 |
|             | pmi-miR-125-5p  | Patiria miniata               |                        | 0 | 1.02 | 6.98 | 9.01 | 0.19 | 0.1 | 1.5  | 0.14 |
|             | lva-miR-125-5p  | Lytechinus variegatus         |                        | 0 | 1.02 | 6.98 | 9.01 | 0.19 | 0.1 | 1.5  | 0.14 |
|             | ccr-miR-125b    | Cyprinus carpio               |                        | 0 | 1.02 | 6.98 | 9.01 | 0.19 | 0.1 | 1.5  | 0.14 |
|             | ola-miR-125b    | Oryzias latipes               |                        | 0 | 1.02 | 6.98 | 9.01 | 0.19 | 0.1 | 1.5  | 0.14 |
|             | sha-miR-125a    | Sarcophilus harrisi           |                        | 0 | 1.02 | 6.98 | 9.01 | 0.19 | 0.1 | 1.5  | 0.14 |
|             | cgr-miR-125b-5p | Cricetulus griseus            |                        | 0 | 1.02 | 6.98 | 9.01 | 0.19 | 0.1 | 1.5  | 0.14 |
|             | pma-miR-125-5p  | Petromyzon marinus            |                        | 0 | 1.02 | 6.98 | 9.01 | 0.19 | 0.1 | 1.5  | 0.14 |
|             | aca-miR-125b    | Anolis carolinensis           |                        | 0 | 1.02 | 6.98 | 9.01 | 0.19 | 0.1 | 1.5  | 0.14 |
|             | nvi-miR-125     | Nasonia vitripennis           |                        | 0 | 1.02 | 6.98 | 9.01 | 0.19 | 0.1 | 1.5  | 0.14 |
|             | nlo-miR-125     | Nasonia longicornis           |                        | 0 | 1.02 | 6.98 | 9.01 | 0.19 | 0.1 | 1.5  | 0.14 |
|             | eca-miR-125b-5p | Equus caballus                |                        | 0 | 1.02 | 6.98 | 9.01 | 0.19 | 0.1 | 1.5  | 0.14 |
|             | aae-miR-125-5p  | Aedes aegypti                 |                        | 0 | 1.02 | 6.98 | 9.01 | 0.19 | 0.1 | 1.5  | 0.14 |
|             | cqu-miR-125-5p  | Culex quinquefasciatus        |                        | 0 | 1.02 | 6.98 | 9.01 | 0.19 | 0.1 | 1.5  | 0.14 |
|             | tgu-miR-125-5p  | Taeniopygia guttata           |                        | 0 | 1.02 | 6.98 | 9.01 | 0.19 | 0.1 | 1.5  | 0.14 |
|             | cfa-miR-125b    | Canis familiaris              |                        | 0 | 1.02 | 6.98 | 9.01 | 0.19 | 0.1 | 1.5  | 0.14 |
|             | tca-miR-125-5p  | Tribolium castaneum           |                        | 0 | 1.02 | 6.98 | 9.01 | 0.19 | 0.1 | 1.5  | 0.14 |
|             | dan-miR-125     | Drosophila ananassae          |                        | 0 | 1.02 | 6.98 | 9.01 | 0.19 | 0.1 | 1.5  | 0.14 |
|             | der-miR-125     | Drosophila erecta             |                        | 0 | 1.02 | 6.98 | 9.01 | 0.19 | 0.1 | 1.5  | 0.14 |
|             | dgr-miR-125     | Drosophila grimshawi          |                        | 0 | 1.02 | 6.98 | 9.01 | 0.19 | 0.1 | 1.5  | 0.14 |
|             | dmo-miR-125     | Drosophila mojavensis         |                        | 0 | 1.02 | 6.98 | 9.01 | 0.19 | 0.1 | 1.5  | 0.14 |
|             | dpe-miR-125     | Drosophila persimilis         |                        | 0 | 1.02 | 6.98 | 9.01 | 0.19 | 0.1 | 1.5  | 0.14 |
|             | dse-miR-125     | Drosophila sechellia          |                        | 0 | 1.02 | 6.98 | 9.01 | 0.19 | 0.1 | 1.5  | 0.14 |
|             | dsi-miR-125     | Drosophila simulans           |                        | 0 | 1.02 | 6.98 | 9.01 | 0.19 | 0.1 | 1.5  | 0.14 |
|             | dwi-miR-125     | Drosophila willistoni         |                        | 0 | 1.02 | 6.98 | 9.01 | 0.19 | 0.1 | 1.5  | 0.14 |
|             | dya-miR-125     | Drosophila yakuba             |                        | 0 | 1.02 | 6.98 | 9.01 | 0.19 | 0.1 | 1.5  | 0.14 |
|             | bfl-miR-125a-5p | Branchiostoma floridae        |                        | 0 | 1.02 | 6.98 | 9.01 | 0.19 | 0.1 | 1.5  | 0.14 |
|             | cte-miR-125     | Capitella teleta              |                        | 0 | 1.02 | 6.98 | 9.01 | 0.19 | 0.1 | 1.5  | 0.14 |
|             | sko-miR-125a    | Saccoglossus kowalevskii      |                        | 0 | 1.02 | 6.98 | 9.01 | 0.19 | 0.1 | 1.5  | 0.14 |
|             | spu-miR-125-5p  | Strongylocentrotus purpuratus |                        | 0 | 1.02 | 6.98 | 9.01 | 0.19 | 0.1 | 1.5  | 0.14 |
| dof-miR-617 | dre-miR-125a    | Danio rerio                   | TCCCTGAGACCCTTAACCTGTG | 0 | 0.76 | 0    | 0.36 | 0    | 0   | 0.67 | 0.14 |
|             | fru-miR-125a    | Fugu rubripes                 |                        | 0 | 0.76 | 0    | 0.36 | 0    | 0   | 0.67 | 0.14 |
|             | tmi-miR-125a    | Tetraodon nigroviridis        |                        | 0 | 0.76 | 0    | 0.36 | 0    | 0   | 0.67 | 0.14 |

|             |                 |                       |                          |      |      |      |      |       |      |      |      |
|-------------|-----------------|-----------------------|--------------------------|------|------|------|------|-------|------|------|------|
|             | xtr-miR-125a    | Xenopus tropicalis    |                          | 0    | 0.76 | 0    | 0.36 | 0     | 0    | 0.67 | 0.14 |
|             | oha-miR-125a-5p | Ophiophagus hannah    |                          | 0    | 0.76 | 0    | 0.36 | 0     | 0    | 0.67 | 0.14 |
|             | ipu-miR-125a    | Ictalurus punctatus   |                          | 0    | 0.76 | 0    | 0.36 | 0     | 0    | 0.67 | 0.14 |
|             | ola-miR-125a-5p | Oryzias latipes       |                          | 0    | 0.76 | 0    | 0.36 | 0     | 0    | 0.67 | 0.14 |
|             | aca-miR-125a-5p | Anolis carolinensis   |                          | 0    | 0.76 | 0    | 0.36 | 0     | 0    | 0.67 | 0.14 |
| dof-miR-618 | ggo-miR-125a    | Gorilla gorilla       | TCCCTGAGACCCCTTAACTG     | 0    | 0    | 0.18 | 0    | 0.09  | 0    | 0    | 0    |
| dof-miR-619 | chi-miR-125a-5p | Capra hircus          | TCCCTGAGACCCCTTAACTGT    | 0.2  | 1.27 | 4.78 | 4.5  | 0.37  | 0.1  | 0.33 | 0.14 |
|             | cfa-miR-125a    | Canis familiaris      |                          | 0.2  | 1.27 | 4.78 | 4.5  | 0.37  | 0.1  | 0.33 | 0.14 |
| dof-miR-620 | bta-miR-125a    | Bos taurus            | TCCCTGAGACCCCTTAACTGTG   | 0    | 0    | 2.02 | 1.44 | 0.19  | 0    | 0    | 0.14 |
|             | tch-miR-125a-5p | Tupaia chinensis      |                          | 0    | 0    | 2.02 | 1.44 | 0.19  | 0    | 0    | 0.14 |
|             | ssc-miR-125a    | Sus scrofa            |                          | 0    | 0    | 2.02 | 1.44 | 0.19  | 0    | 0    | 0.14 |
| dof-miR-621 | mmu-miR-125a-5p | Mus musculus          | TCCCTGAGACCCCTTAACTGTGA  | 0    | 0    | 0    | 0.54 | 0.09  | 0    | 0.17 | 0    |
|             | hsa-miR-125a-5p | Homo sapiens          |                          | 0    | 0    | 0    | 0.54 | 0.09  | 0    | 0.17 | 0    |
|             | rno-miR-125a-5p | Rattus norvegicus     |                          | 0    | 0    | 0    | 0.54 | 0.09  | 0    | 0.17 | 0    |
|             | cgr-miR-125a-5p | Cricetulus griseus    |                          | 0    | 0    | 0    | 0.54 | 0.09  | 0    | 0.17 | 0    |
|             | ppy-miR-125a-5p | Pongo pygmaeus        |                          | 0    | 0    | 0    | 0.54 | 0.09  | 0    | 0.17 | 0    |
|             | eca-miR-125a-5p | Equus caballus        |                          | 0    | 0    | 0    | 0.54 | 0.09  | 0    | 0.17 | 0    |
|             | mml-miR-125a-5p | Macaca mulatta        |                          | 0    | 0    | 0    | 0.54 | 0.09  | 0    | 0.17 | 0    |
| dof-miR-622 | mmu-miR-351-5p  | Mus musculus          | TCCCTGAGGAGCCCTTTGAGCCTG | 0    | 0    | 0    | 0.18 | 0     | 0    | 0    | 0    |
| dof-miR-623 | cfa-miR-339     | Canis familiaris      | TCCCTGTCCTCCAGGAGCT      | 0.2  | 0    | 0    | 0    | 0     | 0    | 0    | 0    |
| dof-miR-624 | ssc-miR-4334-3p | Sus scrofa            | TCCCTGTCCTCCAGGAGCTC     | 0.2  | 0.76 | 0.18 | 0.18 | 0.09  | 0    | 0    | 0.28 |
|             | bta-miR-339b    | Bos taurus            |                          | 0.2  | 0.76 | 0.18 | 0.18 | 0.09  | 0    | 0    | 0.28 |
| dof-miR-625 | ssc-miR-339     | Sus scrofa            | TCCCTGTCCTCCAGGAGCTCA    | 0    | 0    | 0.92 | 0    | 0     | 0.1  | 0    | 0.28 |
| dof-miR-626 | ssc-miR-339-5p  | Sus scrofa            | TCCCTGTCCTCCAGGAGCTCAC   | 0    | 0.51 | 0.55 | 0.18 | 0     | 0    | 0    | 0    |
|             | bta-miR-339a    | Bos taurus            |                          | 0    | 0.51 | 0.55 | 0.18 | 0     | 0    | 0    | 0    |
| dof-miR-627 | ppt-miR166j     | Physcomitrella patens | TCCGGACCAGGCTTCATTCCC    | 0.2  | 0.25 | 0    | 0    | 0     | 0.1  | 0    | 0    |
|             | ppt-miR166k     | Physcomitrella patens |                          | 0.2  | 0.25 | 0    | 0    | 0     | 0.1  | 0    | 0    |
|             | ppt-miR166l     | Physcomitrella patens |                          | 0.2  | 0.25 | 0    | 0    | 0     | 0.1  | 0    | 0    |
| dof-miR-628 | cfa-miR-486     | Canis familiaris      | TCCTGTACTGAGCTGCCCGA     | 0.4  | 1.02 | 0.18 | 0.18 | 11.56 | 4.8  | 0.5  | 0    |
| dof-miR-629 | hsa-miR-486-5p  | Homo sapiens          | TCCTGTACTGAGCTGCCCGAG    | 0.79 | 7.13 | 0    | 0.36 | 21.82 | 9.39 | 1.67 | 1.26 |
|             | mmu-miR-486a-5p | Mus musculus          |                          | 0.79 | 7.13 | 0    | 0.36 | 21.82 | 9.39 | 1.67 | 1.26 |
|             | rno-miR-486     | Rattus norvegicus     |                          | 0.79 | 7.13 | 0    | 0.36 | 21.82 | 9.39 | 1.67 | 1.26 |
|             | cgr-miR-486-5p  | Cricetulus griseus    |                          | 0.79 | 7.13 | 0    | 0.36 | 21.82 | 9.39 | 1.67 | 1.26 |
|             | ggo-miR-486     | Gorilla gorilla       |                          | 0.79 | 7.13 | 0    | 0.36 | 21.82 | 9.39 | 1.67 | 1.26 |

|             |                  |                          |                        |      |      |   |      |       |      |      |      |
|-------------|------------------|--------------------------|------------------------|------|------|---|------|-------|------|------|------|
|             | ppy-miR-486-5p   | Pongo pygmaeus           |                        | 0.79 | 7.13 | 0 | 0.36 | 21.82 | 9.39 | 1.67 | 1.26 |
|             | eca-miR-486-5p   | Equus caballus           |                        | 0.79 | 7.13 | 0 | 0.36 | 21.82 | 9.39 | 1.67 | 1.26 |
|             | ssc-miR-486      | Sus scrofa               |                        | 0.79 | 7.13 | 0 | 0.36 | 21.82 | 9.39 | 1.67 | 1.26 |
|             | mmu-miR-486b-5p  | Mus musculus             |                        | 0.79 | 7.13 | 0 | 0.36 | 21.82 | 9.39 | 1.67 | 1.26 |
|             | mml-miR-486-5p   | Macaca mulatta           |                        | 0.79 | 7.13 | 0 | 0.36 | 21.82 | 9.39 | 1.67 | 1.26 |
|             | ptr-miR-486      | Pan troglodytes          |                        | 0.79 | 7.13 | 0 | 0.36 | 21.82 | 9.39 | 1.67 | 1.26 |
|             | bta-miR-486      | Bos taurus               |                        | 0.79 | 7.13 | 0 | 0.36 | 21.82 | 9.39 | 1.67 | 1.26 |
| dof-miR-630 | cgr-miR-205      | Cricetulus griseus       | TCCTTCATTCCACCGGAGT    | 0    | 0    | 0 | 0    | 0     | 0    | 0    | 0.28 |
| dof-miR-631 | oan-miR-205-5p   | Ornithorhynchus anatinus | TCCTTCATTCCACCGGAGTCT  | 0    | 0    | 0 | 0.18 | 0     | 0    | 0    | 0.14 |
|             | sha-miR-205      | Sarcophilus harrisii     |                        | 0    | 0    | 0 | 0.18 | 0     | 0    | 0    | 0.14 |
| dof-miR-632 | mmu-miR-205-5p   | Mus musculus             | TCCTTCATTCCACCGGAGTCTG | 0    | 0    | 0 | 0.18 | 0     | 0    | 0.17 | 0    |
|             | hsa-miR-205-5p   | Homo sapiens             |                        | 0    | 0    | 0 | 0.18 | 0     | 0    | 0.17 | 0    |
|             | gga-miR-205a     | Gallus gallus            |                        | 0    | 0    | 0 | 0.18 | 0     | 0    | 0.17 | 0    |
|             | dre-miR-205-5p   | Danio rerio              |                        | 0    | 0    | 0 | 0.18 | 0     | 0    | 0.17 | 0    |
|             | ssc-miR-205      | Sus scrofa               |                        | 0    | 0    | 0 | 0.18 | 0     | 0    | 0.17 | 0    |
|             | ggo-miR-205      | Gorilla gorilla          |                        | 0    | 0    | 0 | 0.18 | 0     | 0    | 0.17 | 0    |
|             | age-miR-205      | Ateles geoffroyi         |                        | 0    | 0    | 0 | 0.18 | 0     | 0    | 0.17 | 0    |
|             | ppa-miR-205      | Pan paniscus             |                        | 0    | 0    | 0 | 0.18 | 0     | 0    | 0.17 | 0    |
|             | ptr-miR-205      | Pan troglodytes          |                        | 0    | 0    | 0 | 0.18 | 0     | 0    | 0.17 | 0    |
|             | lla-miR-205      | Lagothrix lagotricha     |                        | 0    | 0    | 0 | 0.18 | 0     | 0    | 0.17 | 0    |
|             | mne-miR-205      | Macaca nemestrina        |                        | 0    | 0    | 0 | 0.18 | 0     | 0    | 0.17 | 0    |
|             | fru-miR-205      | Fugu rubripes            |                        | 0    | 0    | 0 | 0.18 | 0     | 0    | 0.17 | 0    |
|             | tni-miR-205      | Tetraodon nigroviridis   |                        | 0    | 0    | 0 | 0.18 | 0     | 0    | 0.17 | 0    |
|             | bta-miR-205      | Bos taurus               |                        | 0    | 0    | 0 | 0.18 | 0     | 0    | 0.17 | 0    |
|             | xtr-miR-205a     | Xenopus tropicalis       |                        | 0    | 0    | 0 | 0.18 | 0     | 0    | 0.17 | 0    |
|             | ssa-miR-205b-5p  | Salmo salar              |                        | 0    | 0    | 0 | 0.18 | 0     | 0    | 0.17 | 0    |
|             | ccr-miR-205      | Cyprinus carpio          |                        | 0    | 0    | 0 | 0.18 | 0     | 0    | 0.17 | 0    |
|             | aca-miR-205a     | Anolis carolinensis      |                        | 0    | 0    | 0 | 0.18 | 0     | 0    | 0.17 | 0    |
|             | ppy-miR-205      | Pongo pygmaeus           |                        | 0    | 0    | 0 | 0.18 | 0     | 0    | 0.17 | 0    |
|             | mdo-miR-205a     | Monodelphis domestica    |                        | 0    | 0    | 0 | 0.18 | 0     | 0    | 0.17 | 0    |
| eca-miR-205 | Equus caballus   | 0                        | 0                      | 0    | 0.18 | 0 | 0    | 0.17  | 0    |      |      |
| mml-miR-205 | Macaca mulatta   | 0                        | 0                      | 0    | 0.18 | 0 | 0    | 0.17  | 0    |      |      |
| xla-miR-205 | Xenopus laevis   | 0                        | 0                      | 0    | 0.18 | 0 | 0    | 0.17  | 0    |      |      |
| cfa-miR-205 | Canis familiaris | 0                        | 0                      | 0    | 0.18 | 0 | 0    | 0.17  | 0    |      |      |

|                |                   |                      |                       |      |        |      |        |      |      |      |      |
|----------------|-------------------|----------------------|-----------------------|------|--------|------|--------|------|------|------|------|
| dof-miR-633    | rno-miR-205       | Rattus norvegicus    | TCCTTCATCCACGGAGTCTGT | 0    | 0      | 0    | 1.08   | 0    | 0    | 0    | 0.14 |
|                | efu-miR-205       | Eptesicus fuscus     |                       | 0    | 0      | 0    | 1.08   | 0    | 0    | 0    | 0.14 |
|                | oha-miR-205a-5p   | Ophiophagus hannah   |                       | 0    | 0      | 0    | 1.08   | 0    | 0    | 0    | 0.14 |
|                | ipu-miR-205       | Ictalurus punctatus  |                       | 0    | 0      | 0    | 1.08   | 0    | 0    | 0    | 0.14 |
|                | pma-miR-205a-5p   | Petromyzon marinus   |                       | 0    | 0      | 0    | 1.08   | 0    | 0    | 0    | 0.14 |
| dof-miR-634    | osa-miR166e-3p    | Oryza sativa         | TCGAACCAGGCTTCATCCCC  | 6.73 | 3.05   | 1.65 | 14.78  | 0.75 | 0.21 | 0.67 | 6.45 |
| dof-miR-635    | hsa-miR-1307-5p   | Homo sapiens         | TCGACCGGACCTCGACCGGCT | 0    | 0      | 0    | 0.36   | 0.09 | 0    | 0    | 0    |
| dof-miR-636    | ggo-miR-151a      | Gorilla gorilla      | TCGAGGAGCTCACAGTCTAG  | 0    | 0      | 0    | 0      | 0.65 | 0    | 0    | 0    |
| dof-miR-637    | mmu-miR-151-5p    | Mus musculus         | TCGAGGAGCTCACAGTCTAGT | 0.99 | 0.76   | 1.84 | 2.16   | 6.99 | 1.46 | 0    | 0.28 |
|                | rno-miR-151-5p    | Rattus norvegicus    |                       | 0.99 | 0.76   | 1.84 | 2.16   | 6.99 | 1.46 | 0    | 0.28 |
|                | hsa-miR-151a-5p   | Homo sapiens         |                       | 0.99 | 0.76   | 1.84 | 2.16   | 6.99 | 1.46 | 0    | 0.28 |
|                | bta-miR-151-5p    | Bos taurus           |                       | 0.99 | 0.76   | 1.84 | 2.16   | 6.99 | 1.46 | 0    | 0.28 |
|                | chi-miR-151-5p    | Capra hircus         |                       | 0.99 | 0.76   | 1.84 | 2.16   | 6.99 | 1.46 | 0    | 0.28 |
|                | cgr-miR-151-5p    | Cricetulus griseus   |                       | 0.99 | 0.76   | 1.84 | 2.16   | 6.99 | 1.46 | 0    | 0.28 |
|                | ppy-miR-151a-5p   | Pongo pygmaeus       |                       | 0.99 | 0.76   | 1.84 | 2.16   | 6.99 | 1.46 | 0    | 0.28 |
|                | eca-miR-151-5p    | Equus caballus       |                       | 0.99 | 0.76   | 1.84 | 2.16   | 6.99 | 1.46 | 0    | 0.28 |
|                | ssc-miR-151-5p    | Sus scrofa           |                       | 0.99 | 0.76   | 1.84 | 2.16   | 6.99 | 1.46 | 0    | 0.28 |
|                | mml-miR-151-5p    | Macaca mulatta       |                       | 0.99 | 0.76   | 1.84 | 2.16   | 6.99 | 1.46 | 0    | 0.28 |
|                | cfa-miR-151       | Canis familiaris     |                       | 0.99 | 0.76   | 1.84 | 2.16   | 6.99 | 1.46 | 0    | 0.28 |
| dof-miR-638    | zma-miR162-3p     | Zea mays             | TCGATAAACCTCTGCATCCA  | 0    | 0      | 0.73 | 4.32   | 0.19 | 0.1  | 0    | 0    |
|                | gma-miR162a       | Glycine max          |                       | 0    | 0      | 0.73 | 4.32   | 0.19 | 0.1  | 0    | 0    |
| dof-miR-639    | ath-miR162a-3p    | Arabidopsis thaliana | TCGATAAACCTCTGCATCCAG | 0.79 | 0      | 2.02 | 447.22 | 0.19 | 0.42 | 0.67 | 0    |
|                | ath-miR162b-3p    | Arabidopsis thaliana |                       | 0.79 | 0      | 2.02 | 447.22 | 0.19 | 0.42 | 0.67 | 0    |
|                | osa-miR162a       | Oryza sativa         |                       | 0.79 | 0      | 2.02 | 447.22 | 0.19 | 0.42 | 0.67 | 0    |
|                | mtr-miR162        | Medicago truncatula  |                       | 0.79 | 0      | 2.02 | 447.22 | 0.19 | 0.42 | 0.67 | 0    |
|                | ptc-miR162a       | Populus trichocarpa  |                       | 0.79 | 0      | 2.02 | 447.22 | 0.19 | 0.42 | 0.67 | 0    |
|                | ptc-miR162b       | Populus trichocarpa  |                       | 0.79 | 0      | 2.02 | 447.22 | 0.19 | 0.42 | 0.67 | 0    |
|                | ghr-miR162a       | Gossypium hirsutum   |                       | 0.79 | 0      | 2.02 | 447.22 | 0.19 | 0.42 | 0.67 | 0    |
|                | cpa-miR162a       | Carica papaya        |                       | 0.79 | 0      | 2.02 | 447.22 | 0.19 | 0.42 | 0.67 | 0    |
|                | vvi-miR162        | Vitis vinifera       |                       | 0.79 | 0      | 2.02 | 447.22 | 0.19 | 0.42 | 0.67 | 0    |
|                | bra-miR162-3p     | Brassica rapa        |                       | 0.79 | 0      | 2.02 | 447.22 | 0.19 | 0.42 | 0.67 | 0    |
|                | ppe-miR162        | Prunus persica       |                       | 0.79 | 0      | 2.02 | 447.22 | 0.19 | 0.42 | 0.67 | 0    |
|                | mes-miR162        | Manihot esculenta    |                       | 0.79 | 0      | 2.02 | 447.22 | 0.19 | 0.42 | 0.67 | 0    |
| stu-miR162a-3p | Solanum tuberosum | 0.79                 | 0                     | 2.02 | 447.22 | 0.19 | 0.42   | 0.67 | 0    |      |      |

|             |                |                         |                       |        |        |        |        |        |         |        |        |
|-------------|----------------|-------------------------|-----------------------|--------|--------|--------|--------|--------|---------|--------|--------|
|             | stu-miR162b-3p | Solanum tuberosum       |                       | 0.79   | 0      | 2.02   | 447.22 | 0.19   | 0.42    | 0.67   | 0      |
|             | pde-miR162     | Pinus densata           |                       | 0.79   | 0      | 2.02   | 447.22 | 0.19   | 0.42    | 0.67   | 0      |
|             | htu-miR162a    | Helianthus tuberosus    |                       | 0.79   | 0      | 2.02   | 447.22 | 0.19   | 0.42    | 0.67   | 0      |
|             | hpe-miR162a    | Helianthus petiolaris   |                       | 0.79   | 0      | 2.02   | 447.22 | 0.19   | 0.42    | 0.67   | 0      |
|             | mdm-miR162a    | Malus domestica         |                       | 0.79   | 0      | 2.02   | 447.22 | 0.19   | 0.42    | 0.67   | 0      |
|             | mdm-miR162b    | Malus domestica         |                       | 0.79   | 0      | 2.02   | 447.22 | 0.19   | 0.42    | 0.67   | 0      |
|             | cme-miR162     | Cucumis melo            |                       | 0.79   | 0      | 2.02   | 447.22 | 0.19   | 0.42    | 0.67   | 0      |
|             | vun-miR162     | Vigna unguiculata       |                       | 0.79   | 0      | 2.02   | 447.22 | 0.19   | 0.42    | 0.67   | 0      |
|             | lus-miR162a    | Linum usitatissimum     |                       | 0.79   | 0      | 2.02   | 447.22 | 0.19   | 0.42    | 0.67   | 0      |
|             | lus-miR162b    | Linum usitatissimum     |                       | 0.79   | 0      | 2.02   | 447.22 | 0.19   | 0.42    | 0.67   | 0      |
|             | nta-miR162a    | Nicotiana tabacum       |                       | 0.79   | 0      | 2.02   | 447.22 | 0.19   | 0.42    | 0.67   | 0      |
|             | nta-miR162b    | Nicotiana tabacum       |                       | 0.79   | 0      | 2.02   | 447.22 | 0.19   | 0.42    | 0.67   | 0      |
|             | tcc-miR162     | Theobroma cacao         |                       | 0.79   | 0      | 2.02   | 447.22 | 0.19   | 0.42    | 0.67   | 0      |
|             | gma-miR162b    | Glycine max             |                       | 0.79   | 0      | 2.02   | 447.22 | 0.19   | 0.42    | 0.67   | 0      |
|             | gma-miR162c    | Glycine max             |                       | 0.79   | 0      | 2.02   | 447.22 | 0.19   | 0.42    | 0.67   | 0      |
|             | aau-miR162     | Acacia auriculiformis   |                       | 0.79   | 0      | 2.02   | 447.22 | 0.19   | 0.42    | 0.67   | 0      |
|             | sbi-miR162     | Sorghum bicolor         |                       | 0.79   | 0      | 2.02   | 447.22 | 0.19   | 0.42    | 0.67   | 0      |
|             | csi-miR162-3p  | Citrus sinensis         |                       | 0.79   | 0      | 2.02   | 447.22 | 0.19   | 0.42    | 0.67   | 0      |
|             | rco-miR162     | Ricinus communis        |                       | 0.79   | 0      | 2.02   | 447.22 | 0.19   | 0.42    | 0.67   | 0      |
|             | aly-miR162a-3p | Arabidopsis lyrata      |                       | 0.79   | 0      | 2.02   | 447.22 | 0.19   | 0.42    | 0.67   | 0      |
|             | aly-miR162b-3p | Arabidopsis lyrata      |                       | 0.79   | 0      | 2.02   | 447.22 | 0.19   | 0.42    | 0.67   | 0      |
|             | sly-miR162     | Solanum lycopersicum    |                       | 0.79   | 0      | 2.02   | 447.22 | 0.19   | 0.42    | 0.67   | 0      |
| dof-miR-640 | bdi-miR162     | Brachypodium distachyon | TCGATAAACCTCTGCATCCGG | 487.81 | 359.97 | 599.69 | 532.98 | 451.97 | 1309.44 | 211.86 | 670.07 |
| dof-miR-641 | mdm-miR3627a   | Malus domestica         | TCGCAGGAGAGATGGCACTA  | 0      | 0      | 0      | 0.72   | 0      | 0       | 0      | 0      |
|             | mdm-miR3627b   | Malus domestica         |                       | 0      | 0      | 0      | 0.72   | 0      | 0       | 0      | 0      |
|             | mdm-miR3627c   | Malus domestica         |                       | 0      | 0      | 0      | 0.72   | 0      | 0       | 0      | 0      |
| dof-miR-642 | osa-miR168a-5p | Oryza sativa            | TCGCTTGGTGCAGATCGGGAC | 0.2    | 0      | 0      | 0      | 0.09   | 0       | 0      | 0      |
|             | sbi-miR168     | Sorghum bicolor         |                       | 0.2    | 0      | 0      | 0      | 0.09   | 0       | 0      | 0      |
|             | sof-miR168a    | Saccharum officinarum   |                       | 0.2    | 0      | 0      | 0      | 0.09   | 0       | 0      | 0      |
|             | zma-miR168a-5p | Zea mays                |                       | 0.2    | 0      | 0      | 0      | 0.09   | 0       | 0      | 0      |
|             | zma-miR168b-5p | Zea mays                |                       | 0.2    | 0      | 0      | 0      | 0.09   | 0       | 0      | 0      |
|             | ata-miR168-5p  | Aegilops tauschii       |                       | 0.2    | 0      | 0      | 0      | 0.09   | 0       | 0      | 0      |
|             | bdi-miR168-5p  | Brachypodium distachyon |                       | 0.2    | 0      | 0      | 0      | 0.09   | 0       | 0      | 0      |
|             | ssp-miR168a    | Saccharum sp.           |                       | 0.2    | 0      | 0      | 0      | 0.09   | 0       | 0      | 0      |

|                |                    |                      |                       |         |         |         |         |        |        |        |        |
|----------------|--------------------|----------------------|-----------------------|---------|---------|---------|---------|--------|--------|--------|--------|
|                | hvu-miR168-5p      | Hordeum vulgare      |                       | 0.2     | 0       | 0       | 0       | 0.09   | 0      | 0      | 0      |
| dof-miR-643    | bna-miR168b        | Brassica napus       | TCGCTTGGTGCAGGTCGAGAA | 0.2     | 0       | 0.18    | 0.9     | 0      | 0.1    | 0      | 0.14   |
| dof-miR-644    | gma-miR168b        | Glycine max          | TCGCTTGGTGCAGGTCGGG   | 0       | 0       | 2.39    | 0       | 0.19   | 0      | 0      | 0.7    |
| dof-miR-645    | cme-miR168         | Cucumis melo         | TCGCTTGGTGCAGGTCGGGA  | 91.3    | 42.51   | 191.63  | 82.88   | 19.87  | 26.81  | 44.41  | 95.84  |
| dof-miR-646    | ath-miR168a-5p     | Arabidopsis thaliana | TCGCTTGGTGCAGGTCGGGAA | 130.52  | 217.41  | 1243.11 | 3662.24 | 105.11 | 116.96 | 88.98  | 275.48 |
|                | ath-miR168b-5p     | Arabidopsis thaliana |                       | 130.52  | 217.41  | 1243.11 | 3662.24 | 105.11 | 116.96 | 88.98  | 275.48 |
|                | gma-miR168a        | Glycine max          |                       | 130.52  | 217.41  | 1243.11 | 3662.24 | 105.11 | 116.96 | 88.98  | 275.48 |
|                | ptc-miR168a-5p     | Populus trichocarpa  |                       | 130.52  | 217.41  | 1243.11 | 3662.24 | 105.11 | 116.96 | 88.98  | 275.48 |
|                | ptc-miR168b-5p     | Populus trichocarpa  |                       | 130.52  | 217.41  | 1243.11 | 3662.24 | 105.11 | 116.96 | 88.98  | 275.48 |
|                | bna-miR168a        | Brassica napus       |                       | 130.52  | 217.41  | 1243.11 | 3662.24 | 105.11 | 116.96 | 88.98  | 275.48 |
|                | vvi-miR168         | Vitis vinifera       |                       | 130.52  | 217.41  | 1243.11 | 3662.24 | 105.11 | 116.96 | 88.98  | 275.48 |
|                | bra-miR168a-5p     | Brassica rapa        |                       | 130.52  | 217.41  | 1243.11 | 3662.24 | 105.11 | 116.96 | 88.98  | 275.48 |
|                | ppe-miR168         | Prunus persica       |                       | 130.52  | 217.41  | 1243.11 | 3662.24 | 105.11 | 116.96 | 88.98  | 275.48 |
|                | atr-miR168         | Amborella trichopoda |                       | 130.52  | 217.41  | 1243.11 | 3662.24 | 105.11 | 116.96 | 88.98  | 275.48 |
|                | mdm-miR168a        | Malus domestica      |                       | 130.52  | 217.41  | 1243.11 | 3662.24 | 105.11 | 116.96 | 88.98  | 275.48 |
|                | mdm-miR168b        | Malus domestica      |                       | 130.52  | 217.41  | 1243.11 | 3662.24 | 105.11 | 116.96 | 88.98  | 275.48 |
|                | mtr-miR168c-5p     | Medicago truncatula  |                       | 130.52  | 217.41  | 1243.11 | 3662.24 | 105.11 | 116.96 | 88.98  | 275.48 |
|                | vun-miR168         | Vigna unguiculata    |                       | 130.52  | 217.41  | 1243.11 | 3662.24 | 105.11 | 116.96 | 88.98  | 275.48 |
|                | mes-miR168a        | Manihot esculenta    |                       | 130.52  | 217.41  | 1243.11 | 3662.24 | 105.11 | 116.96 | 88.98  | 275.48 |
|                | cca-miR168a        | Cynara cardunculus   |                       | 130.52  | 217.41  | 1243.11 | 3662.24 | 105.11 | 116.96 | 88.98  | 275.48 |
|                | lus-miR168a        | Linum usitatissimum  |                       | 130.52  | 217.41  | 1243.11 | 3662.24 | 105.11 | 116.96 | 88.98  | 275.48 |
|                | lus-miR168b        | Linum usitatissimum  |                       | 130.52  | 217.41  | 1243.11 | 3662.24 | 105.11 | 116.96 | 88.98  | 275.48 |
|                | nta-miR168d        | Nicotiana tabacum    |                       | 130.52  | 217.41  | 1243.11 | 3662.24 | 105.11 | 116.96 | 88.98  | 275.48 |
|                | nta-miR168e        | Nicotiana tabacum    |                       | 130.52  | 217.41  | 1243.11 | 3662.24 | 105.11 | 116.96 | 88.98  | 275.48 |
|                | tcc-miR168         | Theobroma cacao      |                       | 130.52  | 217.41  | 1243.11 | 3662.24 | 105.11 | 116.96 | 88.98  | 275.48 |
|                | mtr-miR168b        | Medicago truncatula  |                       | 130.52  | 217.41  | 1243.11 | 3662.24 | 105.11 | 116.96 | 88.98  | 275.48 |
| cc1-miR168     | Citrus clementina  | 130.52               | 217.41                | 1243.11 | 3662.24 | 105.11  | 116.96  | 88.98  | 275.48 |        |        |
| crt-miR168     | Citrus reticulata  | 130.52               | 217.41                | 1243.11 | 3662.24 | 105.11  | 116.96  | 88.98  | 275.48 |        |        |
| rco-miR168     | Ricinus communis   | 130.52               | 217.41                | 1243.11 | 3662.24 | 105.11  | 116.96  | 88.98  | 275.48 |        |        |
| aly-miR168a-5p | Arabidopsis lyrata | 130.52               | 217.41                | 1243.11 | 3662.24 | 105.11  | 116.96  | 88.98  | 275.48 |        |        |
| aly-miR168b-5p | Arabidopsis lyrata | 130.52               | 217.41                | 1243.11 | 3662.24 | 105.11  | 116.96  | 88.98  | 275.48 |        |        |
| dof-miR-647    | bra-miR168b-5p     | Brassica rapa        | TCGCTTGGTGCAGGTCGGGAC | 83.58   | 107.18  | 395.75  | 109.19  | 67.8   | 56.13  | 110.35 | 151.05 |
|                | bra-miR168c-5p     | Brassica rapa        |                       | 83.58   | 107.18  | 395.75  | 109.19  | 67.8   | 56.13  | 110.35 | 151.05 |
|                | sly-miR168a-5p     | Solanum lycopersicum |                       | 83.58   | 107.18  | 395.75  | 109.19  | 67.8   | 56.13  | 110.35 | 151.05 |



|             |                |                         |                       |       |        |        |        |       |       |        |        |
|-------------|----------------|-------------------------|-----------------------|-------|--------|--------|--------|-------|-------|--------|--------|
|             | sly-miR168b-5p | Solanum lycopersicum    |                       | 83.58 | 107.18 | 395.75 | 109.19 | 67.8  | 56.13 | 110.35 | 151.05 |
|             | nta-miR168a    | Nicotiana tabacum       |                       | 83.58 | 107.18 | 395.75 | 109.19 | 67.8  | 56.13 | 110.35 | 151.05 |
|             | nta-miR168b    | Nicotiana tabacum       |                       | 83.58 | 107.18 | 395.75 | 109.19 | 67.8  | 56.13 | 110.35 | 151.05 |
|             | nta-miR168c    | Nicotiana tabacum       |                       | 83.58 | 107.18 | 395.75 | 109.19 | 67.8  | 56.13 | 110.35 | 151.05 |
| dof-miR-648 | osa-miR166k-3p | Oryza sativa            | TCGGACCAGGCTTCAATCCCT | 0     | 0      | 0      | 0      | 0.47  | 0     | 0      | 0      |
|             | osa-miR166l-3p | Oryza sativa            |                       | 0     | 0      | 0      | 0      | 0.47  | 0     | 0      | 0      |
|             | sbi-miR166e    | Sorghum bicolor         |                       | 0     | 0      | 0      | 0      | 0.47  | 0     | 0      | 0      |
|             | zma-miR166k-3p | Zea mays                |                       | 0     | 0      | 0      | 0      | 0.47  | 0     | 0      | 0      |
|             | zma-miR166j-3p | Zea mays                |                       | 0     | 0      | 0      | 0      | 0.47  | 0     | 0      | 0      |
|             | sbi-miR166g    | Sorghum bicolor         |                       | 0     | 0      | 0      | 0      | 0.47  | 0     | 0      | 0      |
|             | ata-miR5168-3p | Aegilops tauschii       |                       | 0     | 0      | 0      | 0      | 0.47  | 0     | 0      | 0      |
|             | bdi-miR166h-3p | Brachypodium distachyon |                       | 0     | 0      | 0      | 0      | 0.47  | 0     | 0      | 0      |
|             | zma-miR166n-3p | Zea mays                |                       | 0     | 0      | 0      | 0      | 0.47  | 0     | 0      | 0      |
| dof-miR-649 | aly-miR165a-3p | Arabidopsis lyrata      | TCGGACCAGGCTTCATCCCC  | 0.59  | 0      | 0.37   | 4.86   | 0.37  | 0.21  | 0      | 0.42   |
|             | aly-miR165b-3p | Arabidopsis lyrata      |                       | 0.59  | 0      | 0.37   | 4.86   | 0.37  | 0.21  | 0      | 0.42   |
| dof-miR-650 | ath-miR165a-3p | Arabidopsis thaliana    | TCGGACCAGGCTTCATCCCC  | 47.73 | 20.11  | 82.68  | 298.02 | 12.78 | 10.33 | 21.54  | 35.73  |
|             | ath-miR165b    | Arabidopsis thaliana    |                       | 47.73 | 20.11  | 82.68  | 298.02 | 12.78 | 10.33 | 21.54  | 35.73  |
|             | bna-miR166f    | Brassica napus          |                       | 47.73 | 20.11  | 82.68  | 298.02 | 12.78 | 10.33 | 21.54  | 35.73  |
|             | lus-miR166b    | Linum usitatissimum     |                       | 47.73 | 20.11  | 82.68  | 298.02 | 12.78 | 10.33 | 21.54  | 35.73  |
| dof-miR-651 | vvi-miR166a    | Vitis vinifera          | TCGGACCAGGCTTCATCC    | 17.43 | 7.89   | 9.19   | 61.44  | 15.58 | 11.48 | 7.35   | 15.13  |
|             | vvi-miR166b    | Vitis vinifera          |                       | 17.43 | 7.89   | 9.19   | 61.44  | 15.58 | 11.48 | 7.35   | 15.13  |
|             | hbr-miR166a    | Hevea brasiliensis      |                       | 17.43 | 7.89   | 9.19   | 61.44  | 15.58 | 11.48 | 7.35   | 15.13  |
|             | pde-miR166a    | Pinus densata           |                       | 17.43 | 7.89   | 9.19   | 61.44  | 15.58 | 11.48 | 7.35   | 15.13  |
|             | pde-miR166b    | Pinus densata           |                       | 17.43 | 7.89   | 9.19   | 61.44  | 15.58 | 11.48 | 7.35   | 15.13  |
| dof-miR-652 | zma-miR166h-3p | Zea mays                | TCGGACCAGGCTTCATCCCC  | 17.43 | 6.36   | 24.07  | 117.48 | 13.99 | 10.33 | 8.18   | 15.55  |
|             | zma-miR166e    | Zea mays                |                       | 17.43 | 6.36   | 24.07  | 117.48 | 13.99 | 10.33 | 8.18   | 15.55  |
|             | zma-miR166i-3p | Zea mays                |                       | 17.43 | 6.36   | 24.07  | 117.48 | 13.99 | 10.33 | 8.18   | 15.55  |
|             | zma-miR166f    | Zea mays                |                       | 17.43 | 6.36   | 24.07  | 117.48 | 13.99 | 10.33 | 8.18   | 15.55  |
|             | zma-miR166g-3p | Zea mays                |                       | 17.43 | 6.36   | 24.07  | 117.48 | 13.99 | 10.33 | 8.18   | 15.55  |
|             | zma-miR166b-3p | Zea mays                |                       | 17.43 | 6.36   | 24.07  | 117.48 | 13.99 | 10.33 | 8.18   | 15.55  |
|             | zma-miR166c-3p | Zea mays                |                       | 17.43 | 6.36   | 24.07  | 117.48 | 13.99 | 10.33 | 8.18   | 15.55  |
|             | zma-miR166d-3p | Zea mays                |                       | 17.43 | 6.36   | 24.07  | 117.48 | 13.99 | 10.33 | 8.18   | 15.55  |
|             | sbi-miR166d    | Sorghum bicolor         |                       | 17.43 | 6.36   | 24.07  | 117.48 | 13.99 | 10.33 | 8.18   | 15.55  |
|             | sbi-miR166c    | Sorghum bicolor         |                       | 17.43 | 6.36   | 24.07  | 117.48 | 13.99 | 10.33 | 8.18   | 15.55  |

|             |                     |                      |                       |          |          |          |          |         |         |         |         |
|-------------|---------------------|----------------------|-----------------------|----------|----------|----------|----------|---------|---------|---------|---------|
|             | sbi-miR166b         | Sorghum bicolor      |                       | 17.43    | 6.36     | 24.07    | 117.48   | 13.99   | 10.33   | 8.18    | 15.55   |
|             | sbi-miR166a         | Sorghum bicolor      |                       | 17.43    | 6.36     | 24.07    | 117.48   | 13.99   | 10.33   | 8.18    | 15.55   |
|             | cme-miR166g         | Cucumis melo         |                       | 17.43    | 6.36     | 24.07    | 117.48   | 13.99   | 10.33   | 8.18    | 15.55   |
|             | gma-miR166p         | Glycine max          |                       | 17.43    | 6.36     | 24.07    | 117.48   | 13.99   | 10.33   | 8.18    | 15.55   |
|             | gma-miR166q         | Glycine max          |                       | 17.43    | 6.36     | 24.07    | 117.48   | 13.99   | 10.33   | 8.18    | 15.55   |
|             | gma-miR166r         | Glycine max          |                       | 17.43    | 6.36     | 24.07    | 117.48   | 13.99   | 10.33   | 8.18    | 15.55   |
|             | gma-miR166s         | Glycine max          |                       | 17.43    | 6.36     | 24.07    | 117.48   | 13.99   | 10.33   | 8.18    | 15.55   |
|             | gma-miR166t         | Glycine max          |                       | 17.43    | 6.36     | 24.07    | 117.48   | 13.99   | 10.33   | 8.18    | 15.55   |
|             | tcc-miR166b         | Theobroma cacao      |                       | 17.43    | 6.36     | 24.07    | 117.48   | 13.99   | 10.33   | 8.18    | 15.55   |
|             | csi-miR166c         | Citrus sinensis      |                       | 17.43    | 6.36     | 24.07    | 117.48   | 13.99   | 10.33   | 8.18    | 15.55   |
|             | sbi-miR166h         | Sorghum bicolor      |                       | 17.43    | 6.36     | 24.07    | 117.48   | 13.99   | 10.33   | 8.18    | 15.55   |
|             | sbi-miR166i         | Sorghum bicolor      |                       | 17.43    | 6.36     | 24.07    | 117.48   | 13.99   | 10.33   | 8.18    | 15.55   |
|             | sbi-miR166j         | Sorghum bicolor      |                       | 17.43    | 6.36     | 24.07    | 117.48   | 13.99   | 10.33   | 8.18    | 15.55   |
| dof-miR-653 | ath-miR166a-3p      | Arabidopsis thaliana | TCGGACCAGGCTTCATTCCCC | 9666.41  | 4616.5   | 17796.83 | 76532.76 | 7029.53 | 4550.58 | 5029.88 | 8342.53 |
|             | ath-miR166b-3p      | Arabidopsis thaliana |                       | 9666.41  | 4616.5   | 17796.83 | 76532.76 | 7029.53 | 4550.58 | 5029.88 | 8342.53 |
|             | ath-miR166c         | Arabidopsis thaliana |                       | 9666.41  | 4616.5   | 17796.83 | 76532.76 | 7029.53 | 4550.58 | 5029.88 | 8342.53 |
|             | ath-miR166d         | Arabidopsis thaliana |                       | 9666.41  | 4616.5   | 17796.83 | 76532.76 | 7029.53 | 4550.58 | 5029.88 | 8342.53 |
|             | ath-miR166e-3p      | Arabidopsis thaliana |                       | 9666.41  | 4616.5   | 17796.83 | 76532.76 | 7029.53 | 4550.58 | 5029.88 | 8342.53 |
|             | ath-miR166f         | Arabidopsis thaliana |                       | 9666.41  | 4616.5   | 17796.83 | 76532.76 | 7029.53 | 4550.58 | 5029.88 | 8342.53 |
|             | ath-miR166g         | Arabidopsis thaliana |                       | 9666.41  | 4616.5   | 17796.83 | 76532.76 | 7029.53 | 4550.58 | 5029.88 | 8342.53 |
|             | osa-miR166a-3p      | Oryza sativa         |                       | 9666.41  | 4616.5   | 17796.83 | 76532.76 | 7029.53 | 4550.58 | 5029.88 | 8342.53 |
|             | osa-miR166b-3p      | Oryza sativa         |                       | 9666.41  | 4616.5   | 17796.83 | 76532.76 | 7029.53 | 4550.58 | 5029.88 | 8342.53 |
|             | osa-miR166c-3p      | Oryza sativa         |                       | 9666.41  | 4616.5   | 17796.83 | 76532.76 | 7029.53 | 4550.58 | 5029.88 | 8342.53 |
|             | osa-miR166d-3p      | Oryza sativa         |                       | 9666.41  | 4616.5   | 17796.83 | 76532.76 | 7029.53 | 4550.58 | 5029.88 | 8342.53 |
|             | osa-miR166f         | Oryza sativa         |                       | 9666.41  | 4616.5   | 17796.83 | 76532.76 | 7029.53 | 4550.58 | 5029.88 | 8342.53 |
|             | osa-miR166j-3p      | Oryza sativa         |                       | 9666.41  | 4616.5   | 17796.83 | 76532.76 | 7029.53 | 4550.58 | 5029.88 | 8342.53 |
|             | zma-miR166a-3p      | Zea mays             |                       | 9666.41  | 4616.5   | 17796.83 | 76532.76 | 7029.53 | 4550.58 | 5029.88 | 8342.53 |
|             | mtr-miR166a         | Medicago truncatula  |                       | 9666.41  | 4616.5   | 17796.83 | 76532.76 | 7029.53 | 4550.58 | 5029.88 | 8342.53 |
|             | gma-miR166a-3p      | Glycine max          |                       | 9666.41  | 4616.5   | 17796.83 | 76532.76 | 7029.53 | 4550.58 | 5029.88 | 8342.53 |
|             | gma-miR166b         | Glycine max          |                       | 9666.41  | 4616.5   | 17796.83 | 76532.76 | 7029.53 | 4550.58 | 5029.88 | 8342.53 |
|             | ptc-miR166a         | Populus trichocarpa  |                       | 9666.41  | 4616.5   | 17796.83 | 76532.76 | 7029.53 | 4550.58 | 5029.88 | 8342.53 |
| ptc-miR166b | Populus trichocarpa | 9666.41              | 4616.5                | 17796.83 | 76532.76 | 7029.53  | 4550.58  | 5029.88 | 8342.53 |         |         |
| ptc-miR166c | Populus trichocarpa | 9666.41              | 4616.5                | 17796.83 | 76532.76 | 7029.53  | 4550.58  | 5029.88 | 8342.53 |         |         |
| ptc-miR166d | Populus trichocarpa | 9666.41              | 4616.5                | 17796.83 | 76532.76 | 7029.53  | 4550.58  | 5029.88 | 8342.53 |         |         |







|             |                |                         |                        |         |        |          |          |         |         |         |         |
|-------------|----------------|-------------------------|------------------------|---------|--------|----------|----------|---------|---------|---------|---------|
|             | gma-miR166c-3p | Glycine max             |                        | 9666.41 | 4616.5 | 17796.83 | 76532.76 | 7029.53 | 4550.58 | 5029.88 | 8342.53 |
|             | gma-miR166d    | Glycine max             |                        | 9666.41 | 4616.5 | 17796.83 | 76532.76 | 7029.53 | 4550.58 | 5029.88 | 8342.53 |
|             | gma-miR166e    | Glycine max             |                        | 9666.41 | 4616.5 | 17796.83 | 76532.76 | 7029.53 | 4550.58 | 5029.88 | 8342.53 |
|             | gma-miR166f    | Glycine max             |                        | 9666.41 | 4616.5 | 17796.83 | 76532.76 | 7029.53 | 4550.58 | 5029.88 | 8342.53 |
|             | gma-miR166g    | Glycine max             |                        | 9666.41 | 4616.5 | 17796.83 | 76532.76 | 7029.53 | 4550.58 | 5029.88 | 8342.53 |
|             | bdi-miR166d-3p | Brachypodium distachyon |                        | 9666.41 | 4616.5 | 17796.83 | 76532.76 | 7029.53 | 4550.58 | 5029.88 | 8342.53 |
|             | bdi-miR166b-3p | Brachypodium distachyon |                        | 9666.41 | 4616.5 | 17796.83 | 76532.76 | 7029.53 | 4550.58 | 5029.88 | 8342.53 |
|             | bdi-miR166c-3p | Brachypodium distachyon |                        | 9666.41 | 4616.5 | 17796.83 | 76532.76 | 7029.53 | 4550.58 | 5029.88 | 8342.53 |
|             | hvu-miR166c    | Hordeum vulgare         |                        | 9666.41 | 4616.5 | 17796.83 | 76532.76 | 7029.53 | 4550.58 | 5029.88 | 8342.53 |
|             | gma-miR166i-3p | Glycine max             |                        | 9666.41 | 4616.5 | 17796.83 | 76532.76 | 7029.53 | 4550.58 | 5029.88 | 8342.53 |
|             | hvu-miR166a    | Hordeum vulgare         |                        | 9666.41 | 4616.5 | 17796.83 | 76532.76 | 7029.53 | 4550.58 | 5029.88 | 8342.53 |
|             | hvu-miR166b    | Hordeum vulgare         |                        | 9666.41 | 4616.5 | 17796.83 | 76532.76 | 7029.53 | 4550.58 | 5029.88 | 8342.53 |
|             | csi-miR166e-3p | Citrus sinensis         |                        | 9666.41 | 4616.5 | 17796.83 | 76532.76 | 7029.53 | 4550.58 | 5029.88 | 8342.53 |
|             | rco-miR166a    | Ricinus communis        |                        | 9666.41 | 4616.5 | 17796.83 | 76532.76 | 7029.53 | 4550.58 | 5029.88 | 8342.53 |
|             | rco-miR166b    | Ricinus communis        |                        | 9666.41 | 4616.5 | 17796.83 | 76532.76 | 7029.53 | 4550.58 | 5029.88 | 8342.53 |
|             | rco-miR166c    | Ricinus communis        |                        | 9666.41 | 4616.5 | 17796.83 | 76532.76 | 7029.53 | 4550.58 | 5029.88 | 8342.53 |
|             | rco-miR166d    | Ricinus communis        |                        | 9666.41 | 4616.5 | 17796.83 | 76532.76 | 7029.53 | 4550.58 | 5029.88 | 8342.53 |
|             | rco-miR166e    | Ricinus communis        |                        | 9666.41 | 4616.5 | 17796.83 | 76532.76 | 7029.53 | 4550.58 | 5029.88 | 8342.53 |
|             | aly-miR166a-3p | Arabidopsis lyrata      |                        | 9666.41 | 4616.5 | 17796.83 | 76532.76 | 7029.53 | 4550.58 | 5029.88 | 8342.53 |
|             | aly-miR166b-3p | Arabidopsis lyrata      |                        | 9666.41 | 4616.5 | 17796.83 | 76532.76 | 7029.53 | 4550.58 | 5029.88 | 8342.53 |
|             | aly-miR166c-3p | Arabidopsis lyrata      |                        | 9666.41 | 4616.5 | 17796.83 | 76532.76 | 7029.53 | 4550.58 | 5029.88 | 8342.53 |
|             | aly-miR166d-3p | Arabidopsis lyrata      |                        | 9666.41 | 4616.5 | 17796.83 | 76532.76 | 7029.53 | 4550.58 | 5029.88 | 8342.53 |
|             | aly-miR166e-3p | Arabidopsis lyrata      |                        | 9666.41 | 4616.5 | 17796.83 | 76532.76 | 7029.53 | 4550.58 | 5029.88 | 8342.53 |
|             | aly-miR166f-3p | Arabidopsis lyrata      |                        | 9666.41 | 4616.5 | 17796.83 | 76532.76 | 7029.53 | 4550.58 | 5029.88 | 8342.53 |
|             | aly-miR166g-3p | Arabidopsis lyrata      |                        | 9666.41 | 4616.5 | 17796.83 | 76532.76 | 7029.53 | 4550.58 | 5029.88 | 8342.53 |
|             | sly-miR166a    | Solanum lycopersicum    |                        | 9666.41 | 4616.5 | 17796.83 | 76532.76 | 7029.53 | 4550.58 | 5029.88 | 8342.53 |
|             | sly-miR166b    | Solanum lycopersicum    |                        | 9666.41 | 4616.5 | 17796.83 | 76532.76 | 7029.53 | 4550.58 | 5029.88 | 8342.53 |
|             | pvu-miR166a    | Phaseolus vulgaris      |                        | 9666.41 | 4616.5 | 17796.83 | 76532.76 | 7029.53 | 4550.58 | 5029.88 | 8342.53 |
|             | bdi-miR166a-3p | Brachypodium distachyon |                        | 9666.41 | 4616.5 | 17796.83 | 76532.76 | 7029.53 | 4550.58 | 5029.88 | 8342.53 |
|             | aqc-miR166e    | Aquilegia caerulea      |                        | 9666.41 | 4616.5 | 17796.83 | 76532.76 | 7029.53 | 4550.58 | 5029.88 | 8342.53 |
|             | aqc-miR166b    | Aquilegia caerulea      |                        | 9666.41 | 4616.5 | 17796.83 | 76532.76 | 7029.53 | 4550.58 | 5029.88 | 8342.53 |
| dof-miR-654 | lus-miR166k    | Linum usitatissimum     | TCGGACCAGGCTTCATTCCCCC | 0.4     | 1.02   | 7.17     | 20.9     | 2.8     | 1.88    | 1.17    | 0.42    |
|             | hbr-miR166b    | Hevea brasiliensis      |                        | 0.4     | 1.02   | 7.17     | 20.9     | 2.8     | 1.88    | 1.17    | 0.42    |
|             | lus-miR166i    | Linum usitatissimum     |                        | 0.4     | 1.02   | 7.17     | 20.9     | 2.8     | 1.88    | 1.17    | 0.42    |

|             |                    |                      |                        |       |       |       |        |       |       |      |      |
|-------------|--------------------|----------------------|------------------------|-------|-------|-------|--------|-------|-------|------|------|
|             | ctr-miR166         | Citrus trifoliata    |                        | 0.4   | 1.02  | 7.17  | 20.9   | 2.8   | 1.88  | 1.17 | 0.42 |
|             | csi-miR166a        | Citrus sinensis      |                        | 0.4   | 1.02  | 7.17  | 20.9   | 2.8   | 1.88  | 1.17 | 0.42 |
| dof-miR-655 | cpa-miR166d        | Carica papaya        | TCGGACCAGGCTTCATTCCCG  | 0.2   | 0     | 1.84  | 163.97 | 17.63 | 14.09 | 0.17 | 0.98 |
|             | gma-miR166j-3p     | Glycine max          |                        | 0.2   | 0     | 1.84  | 163.97 | 17.63 | 14.09 | 0.17 | 0.98 |
| dof-miR-656 | mes-miR166h        | Manihot esculenta    | TCGGACCAGGCTTCATTCCCGT | 0     | 0     | 0     | 0.36   | 0     | 0.1   | 0    | 0    |
|             | crt-miR166a        | Citrus reticulata    |                        | 0     | 0     | 0     | 0.36   | 0     | 0.1   | 0    | 0    |
|             | csi-miR166b        | Citrus sinensis      |                        | 0     | 0     | 0     | 0.36   | 0     | 0.1   | 0    | 0    |
| dof-miR-657 | osa-miR166m        | Oryza sativa         | TCGGACCAGGCTTCATTCCCT  | 2.97  | 1.53  | 22.6  | 100.18 | 9.33  | 4.59  | 3.17 | 3.08 |
|             | csi-miR166d        | Citrus sinensis      |                        | 2.97  | 1.53  | 22.6  | 100.18 | 9.33  | 4.59  | 3.17 | 3.08 |
| dof-miR-658 | crt-miR166b        | Citrus reticulata    | TCGGACCAGGCTTCATTCCCTT | 0     | 0.25  | 0     | 0.72   | 0     | 0.1   | 0    | 0    |
| dof-miR-659 | sbi-miR166k        | Sorghum bicolor      | TCGGACCAGGCTTCATTCCCT  | 0.4   | 0     | 0.73  | 9.37   | 0.47  | 0.42  | 0.33 | 0.28 |
|             | aqc-miR166c        | Aquilegia caerulea   |                        | 0.4   | 0     | 0.73  | 9.37   | 0.47  | 0.42  | 0.33 | 0.28 |
| dof-miR-660 | mtr-miR166b        | Medicago truncatula  | TCGGACCAGGCTTCATTCCCTA | 0     | 0     | 0     | 0.18   | 0     | 0     | 0    | 0    |
| dof-miR-661 | osa-miR166g-3p     | Oryza sativa         | TCGGACCAGGCTTCATTCCCTC | 7.13  | 3.31  | 17.82 | 70.99  | 1.87  | 1.57  | 5.34 | 5.75 |
|             | osa-miR166h-3p     | Oryza sativa         |                        | 7.13  | 3.31  | 17.82 | 70.99  | 1.87  | 1.57  | 5.34 | 5.75 |
|             | sbi-miR166f        | Sorghum bicolor      |                        | 7.13  | 3.31  | 17.82 | 70.99  | 1.87  | 1.57  | 5.34 | 5.75 |
|             | zma-miR166l-3p     | Zea mays             |                        | 7.13  | 3.31  | 17.82 | 70.99  | 1.87  | 1.57  | 5.34 | 5.75 |
|             | zma-miR166m-3p     | Zea mays             |                        | 7.13  | 3.31  | 17.82 | 70.99  | 1.87  | 1.57  | 5.34 | 5.75 |
|             | mtr-miR166c        | Medicago truncatula  |                        | 7.13  | 3.31  | 17.82 | 70.99  | 1.87  | 1.57  | 5.34 | 5.75 |
|             | mtr-miR166f        | Medicago truncatula  |                        | 7.13  | 3.31  | 17.82 | 70.99  | 1.87  | 1.57  | 5.34 | 5.75 |
|             | sly-miR166c-3p     | Solanum lycopersicum |                        | 7.13  | 3.31  | 17.82 | 70.99  | 1.87  | 1.57  | 5.34 | 5.75 |
|             | mes-miR166j        | Manihot esculenta    |                        | 7.13  | 3.31  | 17.82 | 70.99  | 1.87  | 1.57  | 5.34 | 5.75 |
|             | stu-miR166b        | Solanum tuberosum    |                        | 7.13  | 3.31  | 17.82 | 70.99  | 1.87  | 1.57  | 5.34 | 5.75 |
|             | cme-miR166e        | Cucumis melo         |                        | 7.13  | 3.31  | 17.82 | 70.99  | 1.87  | 1.57  | 5.34 | 5.75 |
|             | ssl-miR166a        | Salvia sclarea       |                        | 7.13  | 3.31  | 17.82 | 70.99  | 1.87  | 1.57  | 5.34 | 5.75 |
|             | dpr-miR166a        | Digitalis purpurea   |                        | 7.13  | 3.31  | 17.82 | 70.99  | 1.87  | 1.57  | 5.34 | 5.75 |
|             | lus-miR166e        | Linum usitatissimum  |                        | 7.13  | 3.31  | 17.82 | 70.99  | 1.87  | 1.57  | 5.34 | 5.75 |
|             | tcc-miR166c        | Theobroma cacao      |                        | 7.13  | 3.31  | 17.82 | 70.99  | 1.87  | 1.57  | 5.34 | 5.75 |
|             | pab-miR166a        | Picea abies          |                        | 7.13  | 3.31  | 17.82 | 70.99  | 1.87  | 1.57  | 5.34 | 5.75 |
|             | aqc-miR166a        | Aquilegia caerulea   |                        | 7.13  | 3.31  | 17.82 | 70.99  | 1.87  | 1.57  | 5.34 | 5.75 |
| aqc-miR166d | Aquilegia caerulea | 7.13                 | 3.31                   | 17.82 | 70.99 | 1.87  | 1.57   | 5.34  | 5.75  |      |      |
| dof-miR-662 | ptc-miR166n        | Populus trichocarpa  | TCGGACCAGGCTTCATTCCCTT | 0     | 0     | 6.61  | 205.59 | 0.28  | 0.1   | 0.67 | 0.14 |
|             | ptc-miR166o        | Populus trichocarpa  |                        | 0     | 0     | 6.61  | 205.59 | 0.28  | 0.1   | 0.67 | 0.14 |
|             | ptc-miR166q        | Populus trichocarpa  |                        | 0     | 0     | 6.61  | 205.59 | 0.28  | 0.1   | 0.67 | 0.14 |

|             |                  |                         |                        |      |      |      |        |      |      |      |      |
|-------------|------------------|-------------------------|------------------------|------|------|------|--------|------|------|------|------|
|             | bdi-miR166j      | Brachypodium distachyon |                        | 0    | 0    | 6.61 | 205.59 | 0.28 | 0.1  | 0.67 | 0.14 |
|             | ata-miR166c-3p   | Aegilops tauschii       |                        | 0    | 0    | 6.61 | 205.59 | 0.28 | 0.1  | 0.67 | 0.14 |
|             | lus-miR166f      | Linum usitatissimum     |                        | 0    | 0    | 6.61 | 205.59 | 0.28 | 0.1  | 0.67 | 0.14 |
|             | pab-miR166b      | Picea abies             |                        | 0    | 0    | 6.61 | 205.59 | 0.28 | 0.1  | 0.67 | 0.14 |
| dof-miR-663 | cme-miR166i      | Cucumis melo            | TCGGACCAGGCTTCATTCTC   | 0.4  | 0    | 0    | 0.72   | 0.19 | 0    | 0.17 | 0    |
| dof-miR-664 | osa-miR166i-3p   | Oryza sativa            | TCGGATCAGGCTTCATTCCTC  | 0    | 0    | 0    | 0.18   | 0    | 0    | 0    | 0    |
| dof-miR-665 | chi-miR-127-3p   | Capra hircus            | TCGGATCCGTCTGAGCTTGG   | 0    | 0.25 | 1.1  | 2.16   | 0    | 0    | 0    | 0    |
| dof-miR-666 | ggo-miR-127      | Gorilla gorilla         | TCGGATCCGTCTGAGCTTGGC  | 0    | 0    | 1.29 | 1.8    | 0    | 0    | 0.33 | 0.14 |
| dof-miR-667 | mmu-miR-127-3p   | Mus musculus            | TCGGATCCGTCTGAGCTTGGCT | 0.2  | 0.76 | 5.7  | 6.13   | 0.19 | 0    | 1    | 0.14 |
|             | hsa-miR-127-3p   | Homo sapiens            |                        | 0.2  | 0.76 | 5.7  | 6.13   | 0.19 | 0    | 1    | 0.14 |
|             | rno-miR-127-3p   | Rattus norvegicus       |                        | 0.2  | 0.76 | 5.7  | 6.13   | 0.19 | 0    | 1    | 0.14 |
|             | mml-miR-127-3p   | Macaca mulatta          |                        | 0.2  | 0.76 | 5.7  | 6.13   | 0.19 | 0    | 1    | 0.14 |
|             | ptr-miR-127      | Pan troglodytes         |                        | 0.2  | 0.76 | 5.7  | 6.13   | 0.19 | 0    | 1    | 0.14 |
|             | ppy-miR-127      | Pongo pygmaeus          |                        | 0.2  | 0.76 | 5.7  | 6.13   | 0.19 | 0    | 1    | 0.14 |
|             | sla-miR-127      | Saguinus labiatus       |                        | 0.2  | 0.76 | 5.7  | 6.13   | 0.19 | 0    | 1    | 0.14 |
|             | lla-miR-127      | Lagothrix lagotricha    |                        | 0.2  | 0.76 | 5.7  | 6.13   | 0.19 | 0    | 1    | 0.14 |
|             | mne-miR-127      | Macaca nemestrina       |                        | 0.2  | 0.76 | 5.7  | 6.13   | 0.19 | 0    | 1    | 0.14 |
|             | age-miR-127      | Ateles geoffroyi        |                        | 0.2  | 0.76 | 5.7  | 6.13   | 0.19 | 0    | 1    | 0.14 |
|             | bta-miR-127      | Bos taurus              |                        | 0.2  | 0.76 | 5.7  | 6.13   | 0.19 | 0    | 1    | 0.14 |
|             | tch-miR-127-3p   | Tupaia chinensis        |                        | 0.2  | 0.76 | 5.7  | 6.13   | 0.19 | 0    | 1    | 0.14 |
|             | eca-miR-127      | Equus caballus          |                        | 0.2  | 0.76 | 5.7  | 6.13   | 0.19 | 0    | 1    | 0.14 |
|             | ssc-miR-127      | Sus scrofa              |                        | 0.2  | 0.76 | 5.7  | 6.13   | 0.19 | 0    | 1    | 0.14 |
| cfa-miR-127 | Canis familiaris | 0.2                     | 0.76                   | 5.7  | 6.13 | 0.19 | 0      | 1    | 0.14 |      |      |
| dof-miR-668 | pta-miR1314      | Pinus taeda             | TCGGCCTTGAATGTTAGGAGAA | 0    | 0    | 1.29 | 1.62   | 0    | 0    | 0    | 0    |
| dof-miR-669 | mtr-miR166d      | Medicago truncatula     | TCGGGCCAGGCTTCATCCCC   | 0    | 0    | 0    | 0.36   | 0    | 0    | 0    | 0    |
| dof-miR-670 | sha-miR-126      | Sarcophilus harrisii    | TCGTACCGTGAGTAATAAT    | 0    | 0    | 0.18 | 0.72   | 0.19 | 0    | 0    | 0.14 |
| dof-miR-671 | ola-miR-126-3p   | Oryzias latipes         | TCGTACCGTGAGTAATAATG   | 0.2  | 0    | 1.29 | 0.18   | 0.28 | 0.1  | 0.33 | 0.28 |
| dof-miR-672 | dre-miR-126a-3p  | Danio rerio             | TCGTACCGTGAGTAATAATGC  | 1.39 | 3.31 | 9    | 8.11   | 3.26 | 1.04 | 5.01 | 1.12 |
|             | fru-miR-126      | Fugu rubripes           |                        | 1.39 | 3.31 | 9    | 8.11   | 3.26 | 1.04 | 5.01 | 1.12 |
|             | tmi-miR-126      | Tetraodon nigroviridis  |                        | 1.39 | 3.31 | 9    | 8.11   | 3.26 | 1.04 | 5.01 | 1.12 |
|             | xtr-miR-126-3p   | Xenopus tropicalis      |                        | 1.39 | 3.31 | 9    | 8.11   | 3.26 | 1.04 | 5.01 | 1.12 |
|             | chi-miR-126-3p   | Capra hircus            |                        | 1.39 | 3.31 | 9    | 8.11   | 3.26 | 1.04 | 5.01 | 1.12 |
| dof-miR-673 | ssa-miR-126-3p   | Salmo salar             | TCGTACCGTGAGTAATAATGCA | 3.96 | 5.09 | 5.88 | 8.29   | 0    | 0    | 8.18 | 1.26 |
|             | ipu-miR-126a     | Ictalurus punctatus     |                        | 3.96 | 5.09 | 5.88 | 8.29   | 0    | 0    | 8.18 | 1.26 |



|             |                 |                          |                         |      |      |      |      |      |      |      |      |   |
|-------------|-----------------|--------------------------|-------------------------|------|------|------|------|------|------|------|------|---|
| dof-miR-674 | mmu-miR-126a-3p | Mus musculus             | TCGTACCGTGAGTAATAATGCG  | 0.2  | 0.51 | 2.39 | 2.34 | 1.4  | 0.52 | 0.33 | 0    |   |
|             | hsa-miR-126-3p  | Homo sapiens             |                         | 0.2  | 0.51 | 2.39 | 2.34 | 1.4  | 0.52 | 0.33 | 0    |   |
|             | rno-miR-126a-3p | Rattus norvegicus        |                         | 0.2  | 0.51 | 2.39 | 2.34 | 1.4  | 0.52 | 0.33 | 0    |   |
|             | oan-miR-126-3p  | Ornithorhynchus anatinus |                         | 0.2  | 0.51 | 2.39 | 2.34 | 1.4  | 0.52 | 0.33 | 0    |   |
|             | cgr-miR-126     | Cricetulus griseus       |                         | 0.2  | 0.51 | 2.39 | 2.34 | 1.4  | 0.52 | 0.33 | 0    |   |
|             | aca-miR-126-3p  | Anolis carolinensis      |                         | 0.2  | 0.51 | 2.39 | 2.34 | 1.4  | 0.52 | 0.33 | 0    |   |
|             | ppy-miR-126     | Pongo pygmaeus           |                         | 0.2  | 0.51 | 2.39 | 2.34 | 1.4  | 0.52 | 0.33 | 0    |   |
|             | ssc-miR-126-3p  | Sus scrofa               |                         | 0.2  | 0.51 | 2.39 | 2.34 | 1.4  | 0.52 | 0.33 | 0    |   |
|             | mdo-miR-126-3p  | Monodelphis domestica    |                         | 0.2  | 0.51 | 2.39 | 2.34 | 1.4  | 0.52 | 0.33 | 0    |   |
|             | eca-miR-126-3p  | Equus caballus           |                         | 0.2  | 0.51 | 2.39 | 2.34 | 1.4  | 0.52 | 0.33 | 0    |   |
|             | tgu-miR-126-3p  | Taeniopygia guttata      |                         | 0.2  | 0.51 | 2.39 | 2.34 | 1.4  | 0.52 | 0.33 | 0    |   |
|             | mml-miR-126     | Macaca mulatta           |                         | 0.2  | 0.51 | 2.39 | 2.34 | 1.4  | 0.52 | 0.33 | 0    |   |
| ptr-miR-126 | Pan troglodytes | 0.2                      | 0.51                    | 2.39 | 2.34 | 1.4  | 0.52 | 0.33 | 0    |      |      |   |
| dof-miR-675 | lla-miR-139     | Lagothrix lagotricha     | TCTACAGTGCACGTGTCT      | 0    | 0    | 0.18 | 0    | 0    | 0    | 0    | 0    |   |
|             | ppa-miR-139     | Pan paniscus             |                         | 0    | 0    | 0.18 | 0    | 0    | 0    | 0    | 0    |   |
| dof-miR-676 | hsa-miR-139-5p  | Homo sapiens             | TCTACAGTGCACGTGTCTCCAGT | 0    | 0    | 0    | 0.36 | 0    | 0    | 0    | 0    |   |
|             | bta-miR-139     | Bos taurus               |                         | 0    | 0    | 0    | 0.36 | 0    | 0    | 0    | 0    |   |
|             | tch-miR-139-5p  | Tupaia chinensis         |                         | 0    | 0    | 0    | 0.36 | 0    | 0    | 0    | 0    |   |
| dof-miR-677 | oan-miR-139-5p  | Ornithorhynchus anatinus | TCTACAGTGCATGTGTCTCCAG  | 0    | 0    | 0    | 0    | 0    | 0    | 0    | 0.42 |   |
| dof-miR-678 | ssa-miR-139-5p  | Salmo salar              | TCTACAGTGCATGTGTCTCCAGT | 0    | 0    | 0    | 0    | 0    | 0    | 0    | 0.17 | 0 |
|             | ipu-miR-139     | Ictalurus punctatus      |                         | 0    | 0    | 0    | 0    | 0    | 0    | 0    | 0.17 | 0 |
|             | ccr-miR-139     | Cyprinus carpio          |                         | 0    | 0    | 0    | 0    | 0    | 0    | 0    | 0.17 | 0 |
|             | sha-miR-139     | Sarcophilus harrisii     |                         | 0    | 0    | 0    | 0    | 0    | 0    | 0    | 0.17 | 0 |
|             | tgu-miR-139-5p  | Taeniopygia guttata      |                         | 0    | 0    | 0    | 0    | 0    | 0    | 0    | 0.17 | 0 |
| dof-miR-679 | ggo-miR-342     | Gorilla gorilla          | TCTCACACAGAAATCGCACCCG  | 0    | 0.25 | 0    | 0    | 0.84 | 0    | 0    | 0    |   |
| dof-miR-680 | rno-miR-342-3p  | Rattus norvegicus        | TCTCACACAGAAATCGCACCCGT | 0    | 0.76 | 0    | 0    | 1.4  | 0.21 | 0    | 0.14 |   |
|             | mmu-miR-342-3p  | Mus musculus             |                         | 0    | 0.76 | 0    | 0    | 1.4  | 0.21 | 0    | 0.14 |   |
|             | hsa-miR-342-3p  | Homo sapiens             |                         | 0    | 0.76 | 0    | 0    | 1.4  | 0.21 | 0    | 0.14 |   |
|             | tch-miR-342-3p  | Tupaia chinensis         |                         | 0    | 0.76 | 0    | 0    | 1.4  | 0.21 | 0    | 0.14 |   |
|             | ppy-miR-342-3p  | Pongo pygmaeus           |                         | 0    | 0.76 | 0    | 0    | 1.4  | 0.21 | 0    | 0.14 |   |
|             | eca-miR-342-3p  | Equus caballus           |                         | 0    | 0.76 | 0    | 0    | 1.4  | 0.21 | 0    | 0.14 |   |
|             | mml-miR-342-3p  | Macaca mulatta           |                         | 0    | 0.76 | 0    | 0    | 1.4  | 0.21 | 0    | 0.14 |   |
|             | cfa-miR-342     | Canis familiaris         |                         | 0    | 0.76 | 0    | 0    | 1.4  | 0.21 | 0    | 0.14 |   |
|             | ptr-miR-342     | Pan troglodytes          |                         | 0    | 0.76 | 0    | 0    | 1.4  | 0.21 | 0    | 0.14 |   |

|             |                 |                         |                          |         |        |        |         |        |       |        |         |
|-------------|-----------------|-------------------------|--------------------------|---------|--------|--------|---------|--------|-------|--------|---------|
| dof-miR-681 | cgr-miR-342-3p  | Cricetulus griseus      | TCTCACACAGAAATCGCACCCGTC | 0       | 0      | 0      | 0       | 0.75   | 0     | 0.17   | 0       |
| dof-miR-682 | mmu-miR-150-5p  | Mus musculus            | TCTCCCAACCCTTGTACCAGTG   | 0       | 0.25   | 0      | 0.18    | 2.52   | 0.31  | 0      | 0       |
|             | hsa-miR-150-5p  | Homo sapiens            |                          | 0       | 0.25   | 0      | 0.18    | 2.52   | 0.31  | 0      | 0       |
|             | rno-miR-150-5p  | Rattus norvegicus       |                          | 0       | 0.25   | 0      | 0.18    | 2.52   | 0.31  | 0      | 0       |
|             | chi-miR-150     | Capra hircus            |                          | 0       | 0.25   | 0      | 0.18    | 2.52   | 0.31  | 0      | 0       |
|             | oar-miR-150     | Ovis aries              |                          | 0       | 0.25   | 0      | 0.18    | 2.52   | 0.31  | 0      | 0       |
|             | ssc-miR-150     | Sus scrofa              |                          | 0       | 0.25   | 0      | 0.18    | 2.52   | 0.31  | 0      | 0       |
|             | ggo-miR-150     | Gorilla gorilla         |                          | 0       | 0.25   | 0      | 0.18    | 2.52   | 0.31  | 0      | 0       |
|             | aca-miR-150-5p  | Anolis carolinensis     |                          | 0       | 0.25   | 0      | 0.18    | 2.52   | 0.31  | 0      | 0       |
|             | ppy-miR-150     | Pongo pygmaeus          |                          | 0       | 0.25   | 0      | 0.18    | 2.52   | 0.31  | 0      | 0       |
|             | eca-miR-150     | Equus caballus          |                          | 0       | 0.25   | 0      | 0.18    | 2.52   | 0.31  | 0      | 0       |
|             | mml-miR-150-5p  | Macaca mulatta          |                          | 0       | 0.25   | 0      | 0.18    | 2.52   | 0.31  | 0      | 0       |
|             | cfa-miR-150     | Canis familiaris        |                          | 0       | 0.25   | 0      | 0.18    | 2.52   | 0.31  | 0      | 0       |
| ptr-miR-150 | Pan troglodytes | 0                       | 0.25                     | 0       | 0.18   | 2.52   | 0.31    | 0      | 0     |        |         |
| dof-miR-683 | bta-miR-150     | Bos taurus              | TCTCCCAACCCTTGTACCAGTGT  | 0       | 0      | 0      | 0.18    | 1.03   | 0.21  | 0      | 0       |
|             | oha-miR-150     | Ophiophagus hannah      |                          | 0       | 0      | 0      | 0.18    | 1.03   | 0.21  | 0      | 0       |
| dof-miR-684 | dre-miR-150     | Danio rerio             | TCTCCCAATCCTTGTACCAGTG   | 0       | 0      | 0      | 0       | 0      | 0     | 0.17   | 0       |
|             | ipu-miR-150     | Ictalurus punctatus     |                          | 0       | 0      | 0      | 0       | 0      | 0     | 0      | 0.17    |
| dof-miR-685 | gma-miR166u     | Glycine max             | TCTCGGACCAGGCTTCATTC     | 2.97    | 0      | 0.92   | 8.47    | 0.47   | 0.52  | 0.5    | 5.04    |
| dof-miR-686 | atr-miR166b     | Amborella trichopoda    | TCTCGGACCAGGCTTCATTC     | 1336.47 | 497.95 | 368.38 | 6709.15 | 136.82 | 77.31 | 339.24 | 5855.62 |
|             | gma-miR166k     | Glycine max             |                          | 1336.47 | 497.95 | 368.38 | 6709.15 | 136.82 | 77.31 | 339.24 | 5855.62 |
|             | gma-miR166h-3p  | Glycine max             |                          | 1336.47 | 497.95 | 368.38 | 6709.15 | 136.82 | 77.31 | 339.24 | 5855.62 |
|             | bdi-miR166f     | Brachypodium distachyon |                          | 1336.47 | 497.95 | 368.38 | 6709.15 | 136.82 | 77.31 | 339.24 | 5855.62 |
| dof-miR-687 | mml-miR-4677-3p | Macaca mulatta          | TCTGTGAGACCAAAGAACTACT   | 0       | 0      | 0      | 0       | 0.09   | 0     | 0      | 0       |
|             | hsa-miR-4677-3p | Homo sapiens            |                          | 0       | 0      | 0      | 0       | 0.09   | 0     | 0      | 0       |
| dof-miR-688 | gma-miR482d-3p  | Glycine max             | TCTTCCCTACACCTCCCATACC   | 0       | 0      | 0.18   | 0.54    | 0      | 0     | 0      | 0       |
|             | gma-miR482b-3p  | Glycine max             |                          | 0       | 0      | 0.18   | 0.54    | 0      | 0     | 0      | 0       |
| dof-miR-689 | mes-miR482      | Manihot esculenta       | TCTTCCCTACTCCACCCATTC    | 0       | 0      | 0      | 2.34    | 0      | 0     | 0      | 0       |
| dof-miR-690 | pta-miR482a     | Pinus taeda             | TCTTCCCTACTCCTCCCATTC    | 0       | 0      | 1.65   | 1.08    | 0      | 0     | 0      | 0       |
|             | pta-miR482b     | Pinus taeda             |                          | 0       | 0      | 1.65   | 1.08    | 0      | 0     | 0      | 0       |
|             | pab-miR482a     | Picea abies             |                          | 0       | 0      | 1.65   | 1.08    | 0      | 0     | 0      | 0       |
| dof-miR-691 | ghr-miR482b     | Gossypium hirsutum      | TCTTGCTACTCCACCCATGCC    | 0       | 0      | 0      | 0.9     | 0      | 0     | 0      | 0       |
| dof-miR-692 | mes-miR828a     | Manihot esculenta       | TCTTGCTCAAATGAGTATTCCA   | 0       | 0      | 0      | 0.18    | 0      | 0     | 0      | 0       |
|             | mes-miR828b     | Manihot esculenta       |                          | 0       | 0      | 0      | 0.18    | 0      | 0     | 0      | 0       |

|             |                |                          |                        |   |      |      |      |      |   |      |      |
|-------------|----------------|--------------------------|------------------------|---|------|------|------|------|---|------|------|
|             | ptc-miR828a    | Populus trichocarpa      |                        | 0 | 0    | 0    | 0.18 | 0    | 0 | 0    | 0    |
|             | ptc-miR828b-5p | Populus trichocarpa      |                        | 0 | 0    | 0    | 0.18 | 0    | 0 | 0    | 0    |
|             | mdm-miR828a    | Malus domestica          |                        | 0 | 0    | 0    | 0.18 | 0    | 0 | 0    | 0    |
|             | mdm-miR828b    | Malus domestica          |                        | 0 | 0    | 0    | 0.18 | 0    | 0 | 0    | 0    |
|             | cme-miR828     | Cucumis melo             |                        | 0 | 0    | 0    | 0.18 | 0    | 0 | 0    | 0    |
|             | ssl-miR828     | Salvia sclarea           |                        | 0 | 0    | 0    | 0.18 | 0    | 0 | 0    | 0    |
|             | gma-miR828a    | Glycine max              |                        | 0 | 0    | 0    | 0.18 | 0    | 0 | 0    | 0    |
|             | gma-miR828b    | Glycine max              |                        | 0 | 0    | 0    | 0.18 | 0    | 0 | 0    | 0    |
|             | ppe-miR828-5p  | Prunus persica           |                        | 0 | 0    | 0    | 0.18 | 0    | 0 | 0    | 0    |
|             | vvi-miR828a    | Vitis vinifera           |                        | 0 | 0    | 0    | 0.18 | 0    | 0 | 0    | 0    |
| dof-miR-693 | tch-miR-432-5p | Tupaia chinensis         | TCTTGAGTAGGTCATTGGGTG  | 0 | 0.25 | 0    | 0    | 0.09 | 0 | 0    | 0    |
|             | ggo-miR-432    | Gorilla gorilla          |                        | 0 | 0.25 | 0    | 0    | 0.09 | 0 | 0    | 0    |
| dof-miR-694 | oar-miR-432    | Ovis aries               | TCTTGAGTAGGTCATTGGGTGG | 0 | 0    | 0    | 0    | 0.19 | 0 | 0    | 0    |
|             | hsa-miR-432-5p | Homo sapiens             |                        | 0 | 0    | 0    | 0    | 0.19 | 0 | 0    | 0    |
|             | chi-miR-432-5p | Capra hircus             |                        | 0 | 0    | 0    | 0    | 0.19 | 0 | 0    | 0    |
|             | ppy-miR-432    | Pongo pygmaeus           |                        | 0 | 0    | 0    | 0    | 0.19 | 0 | 0    | 0    |
|             | eca-miR-432    | Equus caballus           |                        | 0 | 0    | 0    | 0    | 0.19 | 0 | 0    | 0    |
|             | mml-miR-432-5p | Macaca mulatta           |                        | 0 | 0    | 0    | 0    | 0.19 | 0 | 0    | 0    |
|             | ptr-miR-432    | Pan troglodytes          |                        | 0 | 0    | 0    | 0    | 0.19 | 0 | 0    | 0    |
|             | bta-miR-432    | Bos taurus               |                        | 0 | 0    | 0    | 0    | 0.19 | 0 | 0    | 0    |
|             | cfa-miR-432    | Canis familiaris         |                        | 0 | 0    | 0    | 0    | 0.19 | 0 | 0    | 0    |
| dof-miR-695 | ptc-miR482c-3p | Populus trichocarpa      | TCTTCCGAGTCCTCCCATAACC | 0 | 0    | 0    | 0.36 | 0    | 0 | 0.17 | 0    |
| dof-miR-696 | pde-miR482a    | Pinus densata            | TCTTTCCTACTCCTCCCATTCC | 0 | 0    | 0.55 | 1.26 | 0    | 0 | 0    | 0    |
|             | pab-miR482c    | Picea abies              |                        | 0 | 0    | 0.55 | 1.26 | 0    | 0 | 0    | 0    |
|             | vvi-miR482     | Vitis vinifera           |                        | 0 | 0    | 0.55 | 1.26 | 0    | 0 | 0    | 0    |
| dof-miR-697 | sha-miR-9      | Sarcophilus harrisii     | TCTTTGGTTATCTAGCTGTAT  | 0 | 0    | 0.18 | 0    | 0    | 0 | 0    | 0.14 |
|             | sko-miR-9-5p   | Saccoglossus kowalevskii |                        | 0 | 0    | 0.18 | 0    | 0    | 0 | 0    | 0.14 |
|             | tca-miR-9a-5p  | Tribolium castaneum      |                        | 0 | 0    | 0.18 | 0    | 0    | 0 | 0    | 0.14 |
| dof-miR-698 | xtr-miR-9-5p   | Xenopus tropicalis       | TCTTTGGTTATCTAGCTGTATG | 0 | 0    | 0.18 | 0.36 | 0    | 0 | 0    | 0    |
|             | oan-miR-9-5p   | Ornithorhynchus anatinus |                        | 0 | 0    | 0.18 | 0.36 | 0    | 0 | 0    | 0    |
|             | lva-miR-9-5p   | Lytechinus variegatus    |                        | 0 | 0    | 0.18 | 0.36 | 0    | 0 | 0    | 0    |
|             | ssc-miR-9      | Sus scrofa               |                        | 0 | 0    | 0.18 | 0.36 | 0    | 0 | 0    | 0    |
|             | ccr-miR-9-3p   | Cyprinus carpio          |                        | 0 | 0    | 0.18 | 0.36 | 0    | 0 | 0    | 0    |
|             | cgr-miR-9      | Cricetulus griseus       |                        | 0 | 0    | 0.18 | 0.36 | 0    | 0 | 0    | 0    |

|               |                 |                               |                         |   |      |      |      |     |      |     |      |
|---------------|-----------------|-------------------------------|-------------------------|---|------|------|------|-----|------|-----|------|
|               | pma-miR-9a-5p   | Petromyzon marinus            |                         | 0 | 0    | 0.18 | 0.36 | 0   | 0    | 0   | 0    |
|               | bta-miR-9-5p    | Bos taurus                    |                         | 0 | 0    | 0.18 | 0.36 | 0   | 0    | 0   | 0    |
|               | spu-miR-9-5p    | Strongylocentrotus purpuratus |                         | 0 | 0    | 0.18 | 0.36 | 0   | 0    | 0   | 0    |
|               | bfl-miR-9-5p    | Branchiostoma floridae        |                         | 0 | 0    | 0.18 | 0.36 | 0   | 0    | 0   | 0    |
|               | ppc-miR-9       | Pristionchus pacificus        |                         | 0 | 0    | 0.18 | 0.36 | 0   | 0    | 0   | 0    |
| dof-miR-699   | dme-miR-9a-5p   | Drosophila melanogaster       | TCTTTGGTTATCTAGCTGTATGA | 0 | 0    | 0    | 0.18 | 0   | 0    | 0.5 | 0.14 |
|               | mmu-miR-9-5p    | Mus musculus                  |                         | 0 | 0    | 0    | 0.18 | 0   | 0    | 0.5 | 0.14 |
|               | hsa-miR-9-5p    | Homo sapiens                  |                         | 0 | 0    | 0    | 0.18 | 0   | 0    | 0.5 | 0.14 |
|               | rno-miR-9a-5p   | Rattus norvegicus             |                         | 0 | 0    | 0    | 0.18 | 0   | 0    | 0.5 | 0.14 |
|               | gga-miR-9-5p    | Gallus gallus                 |                         | 0 | 0    | 0    | 0.18 | 0   | 0    | 0.5 | 0.14 |
|               | dps-miR-9a      | Drosophila pseudoobscura      |                         | 0 | 0    | 0    | 0.18 | 0   | 0    | 0.5 | 0.14 |
|               | ame-miR-9a      | Apis mellifera                |                         | 0 | 0    | 0    | 0.18 | 0   | 0    | 0.5 | 0.14 |
|               | aga-miR-9a      | Anopheles gambiae             |                         | 0 | 0    | 0    | 0.18 | 0   | 0    | 0.5 | 0.14 |
|               | dre-miR-9-5p    | Danio rerio                   |                         | 0 | 0    | 0    | 0.18 | 0   | 0    | 0.5 | 0.14 |
|               | ssc-miR-9-1     | Sus scrofa                    |                         | 0 | 0    | 0    | 0.18 | 0   | 0    | 0.5 | 0.14 |
|               | ssc-miR-9-2     | Sus scrofa                    |                         | 0 | 0    | 0    | 0.18 | 0   | 0    | 0.5 | 0.14 |
|               | ptr-miR-9       | Pan troglodytes               |                         | 0 | 0    | 0    | 0.18 | 0   | 0    | 0.5 | 0.14 |
|               | ggo-miR-9       | Gorilla gorilla               |                         | 0 | 0    | 0    | 0.18 | 0   | 0    | 0.5 | 0.14 |
|               | lla-miR-9       | Lagothrix lagotricha          |                         | 0 | 0    | 0    | 0.18 | 0   | 0    | 0.5 | 0.14 |
|               | mne-miR-9       | Macaca nemestrina             |                         | 0 | 0    | 0    | 0.18 | 0   | 0    | 0.5 | 0.14 |
|               | age-miR-9       | Ateles geoffroyi              |                         | 0 | 0    | 0    | 0.18 | 0   | 0    | 0.5 | 0.14 |
|               | fru-miR-9       | Fugu rubripes                 |                         | 0 | 0    | 0    | 0.18 | 0   | 0    | 0.5 | 0.14 |
|               | tni-miR-9       | Tetraodon nigroviridis        |                         | 0 | 0    | 0    | 0.18 | 0   | 0    | 0.5 | 0.14 |
|               | xtr-miR-9a-5p   | Xenopus tropicalis            |                         | 0 | 0    | 0    | 0.18 | 0   | 0    | 0.5 | 0.14 |
|               | bmo-miR-9a-5p   | Bombyx mori                   |                         | 0 | 0    | 0    | 0.18 | 0   | 0    | 0.5 | 0.14 |
|               | mdo-miR-9a-5p   | Monodelphis domestica         |                         | 0 | 0    | 0    | 0.18 | 0   | 0    | 0.5 | 0.14 |
|               | chi-miR-9-5p    | Capra hircus                  |                         | 0 | 0    | 0    | 0.18 | 0   | 0    | 0.5 | 0.14 |
|               | tch-miR-9-5p    | Tupaia chinensis              |                         | 0 | 0    | 0    | 0.18 | 0   | 0    | 0.5 | 0.14 |
|               | bbe-miR-9-5p    | Branchiostoma belcheri        |                         | 0 | 0    | 0    | 0.18 | 0   | 0    | 0.5 | 0.14 |
|               | ssa-miR-9a-5p   | Salmo salar                   |                         | 0 | 0    | 0    | 0.18 | 0   | 0    | 0.5 | 0.14 |
|               | ipu-miR-9       | Ictalurus punctatus           |                         | 0 | 0    | 0    | 0.18 | 0   | 0    | 0.5 | 0.14 |
|               | pmi-miR-9-5p    | Patiria miniata               |                         | 0 | 0    | 0    | 0.18 | 0   | 0    | 0.5 | 0.14 |
|               | pol-miR-9b-5p   | Paralichthys olivaceus        |                         | 0 | 0    | 0    | 0.18 | 0   | 0    | 0.5 | 0.14 |
| ola-miR-9b-5p | Oryzias latipes | 0                             | 0                       | 0 | 0.18 | 0    | 0    | 0.5 | 0.14 |     |      |

|             |                |                        |                         |   |   |      |      |      |      |     |      |
|-------------|----------------|------------------------|-------------------------|---|---|------|------|------|------|-----|------|
|             | ola-miR-9a-5p  | Oryzias latipes        |                         | 0 | 0 | 0    | 0.18 | 0    | 0    | 0.5 | 0.14 |
|             | hco-miR-9      | Haemonchus contortus   |                         | 0 | 0 | 0    | 0.18 | 0    | 0    | 0.5 | 0.14 |
|             | asu-miR-9-5p   | Ascaris suum           |                         | 0 | 0 | 0    | 0.18 | 0    | 0    | 0.5 | 0.14 |
|             | nvi-miR-9a     | Nasonia vitripennis    |                         | 0 | 0 | 0    | 0.18 | 0    | 0    | 0.5 | 0.14 |
|             | ppy-miR-9      | Pongo pygmaeus         |                         | 0 | 0 | 0    | 0.18 | 0    | 0    | 0.5 | 0.14 |
|             | ngi-miR-9a     | Nasonia giraulti       |                         | 0 | 0 | 0    | 0.18 | 0    | 0    | 0.5 | 0.14 |
|             | nlo-miR-9a     | Nasonia longicornis    |                         | 0 | 0 | 0    | 0.18 | 0    | 0    | 0.5 | 0.14 |
|             | dpu-miR-9-5p   | Daphnia pulex          |                         | 0 | 0 | 0    | 0.18 | 0    | 0    | 0.5 | 0.14 |
|             | eca-miR-9a     | Equus caballus         |                         | 0 | 0 | 0    | 0.18 | 0    | 0    | 0.5 | 0.14 |
|             | aae-miR-9a     | Aedes aegypti          |                         | 0 | 0 | 0    | 0.18 | 0    | 0    | 0.5 | 0.14 |
|             | tgu-miR-9-5p   | Taeniopygia guttata    |                         | 0 | 0 | 0    | 0.18 | 0    | 0    | 0.5 | 0.14 |
|             | api-miR-9a     | Acyrtosiphon pisum     |                         | 0 | 0 | 0    | 0.18 | 0    | 0    | 0.5 | 0.14 |
|             | mml-miR-9-5p   | Macaca mulatta         |                         | 0 | 0 | 0    | 0.18 | 0    | 0    | 0.5 | 0.14 |
|             | cfa-miR-9      | Canis familiaris       |                         | 0 | 0 | 0    | 0.18 | 0    | 0    | 0.5 | 0.14 |
|             | dan-miR-9a     | Drosophila ananassae   |                         | 0 | 0 | 0    | 0.18 | 0    | 0    | 0.5 | 0.14 |
|             | der-miR-9a     | Drosophila erecta      |                         | 0 | 0 | 0    | 0.18 | 0    | 0    | 0.5 | 0.14 |
|             | dgr-miR-9a     | Drosophila grimshawi   |                         | 0 | 0 | 0    | 0.18 | 0    | 0    | 0.5 | 0.14 |
|             | dmo-miR-9a     | Drosophila mojavensis  |                         | 0 | 0 | 0    | 0.18 | 0    | 0    | 0.5 | 0.14 |
|             | dpe-miR-9a     | Drosophila persimilis  |                         | 0 | 0 | 0    | 0.18 | 0    | 0    | 0.5 | 0.14 |
|             | dse-miR-9a     | Drosophila sechellia   |                         | 0 | 0 | 0    | 0.18 | 0    | 0    | 0.5 | 0.14 |
|             | dsi-miR-9a     | Drosophila simulans    |                         | 0 | 0 | 0    | 0.18 | 0    | 0    | 0.5 | 0.14 |
|             | dvi-miR-9a-5p  | Drosophila virilis     |                         | 0 | 0 | 0    | 0.18 | 0    | 0    | 0.5 | 0.14 |
|             | dwi-miR-9a     | Drosophila willistoni  |                         | 0 | 0 | 0    | 0.18 | 0    | 0    | 0.5 | 0.14 |
|             | dya-miR-9a     | Drosophila yakuba      |                         | 0 | 0 | 0    | 0.18 | 0    | 0    | 0.5 | 0.14 |
|             | cte-miR-9-5p   | Capitella teleta       |                         | 0 | 0 | 0    | 0.18 | 0    | 0    | 0.5 | 0.14 |
|             | lgi-miR-9-5p   | Lottia gigantea        |                         | 0 | 0 | 0    | 0.18 | 0    | 0    | 0.5 | 0.14 |
|             | lmi-miR-9a-5p  | Locusta migratoria     |                         | 0 | 0 | 0    | 0.18 | 0    | 0    | 0.5 | 0.14 |
| dof-miR-700 | bta-miR-2284x  | Bos taurus             | TGAAAAGTTCGTTCCGGGTTTT  | 0 | 0 | 0    | 0.18 | 0    | 0    | 0   | 0    |
| dof-miR-701 | rno-miR-494-3p | Rattus norvegicus      | TGAAACATACACGGGAAACCTCT | 0 | 0 | 0.73 | 1.44 | 0.19 | 0.1  | 0   | 0    |
|             | efu-miR-494    | Eptesicus fuscus       |                         | 0 | 0 | 0.73 | 1.44 | 0.19 | 0.1  | 0   | 0    |
|             | chi-miR-494    | Capra hircus           |                         | 0 | 0 | 0.73 | 1.44 | 0.19 | 0.1  | 0   | 0    |
|             | oar-miR-494-3p | Ovis aries             |                         | 0 | 0 | 0.73 | 1.44 | 0.19 | 0.1  | 0   | 0    |
| dof-miR-702 | sme-miR-71c-5p | Schmidtea mediterranea | TGAAAGACATGGGTAGTGAGAT  | 0 | 0 | 0    | 0    | 0    | 0.52 | 0   | 0    |
|             | bbe-miR-71-5p  | Branchiostoma belcheri |                         | 0 | 0 | 0    | 0    | 0    | 0.52 | 0   | 0    |

|             |                |                        |                           |      |      |      |       |      |      |      |      |
|-------------|----------------|------------------------|---------------------------|------|------|------|-------|------|------|------|------|
|             | pmi-miR-71-5p  | Patiria miniata        |                           | 0    | 0    | 0    | 0     | 0    | 0.52 | 0    | 0    |
|             | tca-miR-71-5p  | Tribolium castaneum    |                           | 0    | 0    | 0    | 0     | 0    | 0.52 | 0    | 0    |
|             | bfl-miR-71-5p  | Branchiostoma floridae |                           | 0    | 0    | 0    | 0     | 0    | 0.52 | 0    | 0    |
| dof-miR-703 | tur-miR-71-5p  | Tetranychus urticae    | TGAAAGACATGGGTAGTGAGATG   | 0    | 0    | 0    | 0     | 0    | 0.1  | 0.17 | 0    |
|             | mse-miR-71     | Manduca sexta          |                           | 0    | 0    | 0    | 0     | 0    | 0.1  | 0.17 | 0    |
|             | dpu-miR-71     | Daphnia pulex          |                           | 0    | 0    | 0    | 0     | 0    | 0.1  | 0.17 | 0    |
|             | isc-miR-71     | Ixodes scapularis      |                           | 0    | 0    | 0    | 0     | 0    | 0.1  | 0.17 | 0    |
|             | api-miR-71     | Acyrtosiphon pisum     |                           | 0    | 0    | 0    | 0     | 0    | 0.1  | 0.17 | 0    |
|             | cte-miR-71     | Capitella teleta       |                           | 0    | 0    | 0    | 0     | 0    | 0.1  | 0.17 | 0    |
| dof-miR-704 | pde-miR3701    | Pinus densata          | TGAACAATGCCACCCCTTCATC    | 0    | 0    | 0.55 | 1.62  | 0    | 0    | 0    | 0    |
| dof-miR-705 | ame-miR-317    | Apis mellifera         | TGAACACAGCTGGTGGTATCTCAGT | 0    | 0    | 0    | 0     | 0    | 0.1  | 0    | 0    |
|             | nvi-miR-317    | Nasonia vitripennis    |                           | 0    | 0    | 0    | 0     | 0    | 0.1  | 0    | 0    |
|             | ngi-miR-317    | Nasonia giraulti       |                           | 0    | 0    | 0    | 0     | 0    | 0.1  | 0    | 0    |
|             | dpu-miR-317    | Daphnia pulex          |                           | 0    | 0    | 0    | 0     | 0    | 0.1  | 0    | 0    |
|             | tca-miR-317-3p | Tribolium castaneum    |                           | 0    | 0    | 0    | 0     | 0    | 0.1  | 0    | 0    |
| dof-miR-706 | lja-miR167a    | Lotus japonicus        | TGAAGCTGCCAGCATGATCT      | 8.52 | 4.33 | 2.94 | 24.87 | 1.77 | 3.65 | 0.5  | 4.9  |
|             | lja-miR167b    | Lotus japonicus        |                           | 8.52 | 4.33 | 2.94 | 24.87 | 1.77 | 3.65 | 0.5  | 4.9  |
|             | lja-miR167c    | Lotus japonicus        |                           | 8.52 | 4.33 | 2.94 | 24.87 | 1.77 | 3.65 | 0.5  | 4.9  |
|             | bna-miR167d    | Brassica napus         |                           | 8.52 | 4.33 | 2.94 | 24.87 | 1.77 | 3.65 | 0.5  | 4.9  |
| dof-miR-707 | ath-miR167a-5p | Arabidopsis thaliana   | TGAAGCTGCCAGCATGATCTA     | 8.91 | 0    | 1.1  | 1.44  | 0.75 | 2.4  | 3.34 | 7.01 |
|             | ath-miR167b    | Arabidopsis thaliana   |                           | 8.91 | 0    | 1.1  | 1.44  | 0.75 | 2.4  | 3.34 | 7.01 |
|             | osa-miR167a-5p | Oryza sativa           |                           | 8.91 | 0    | 1.1  | 1.44  | 0.75 | 2.4  | 3.34 | 7.01 |
|             | osa-miR167b    | Oryza sativa           |                           | 8.91 | 0    | 1.1  | 1.44  | 0.75 | 2.4  | 3.34 | 7.01 |
|             | osa-miR167c-5p | Oryza sativa           |                           | 8.91 | 0    | 1.1  | 1.44  | 0.75 | 2.4  | 3.34 | 7.01 |
|             | zma-miR167a-5p | Zea mays               |                           | 8.91 | 0    | 1.1  | 1.44  | 0.75 | 2.4  | 3.34 | 7.01 |
|             | zma-miR167b-5p | Zea mays               |                           | 8.91 | 0    | 1.1  | 1.44  | 0.75 | 2.4  | 3.34 | 7.01 |
|             | zma-miR167d-5p | Zea mays               |                           | 8.91 | 0    | 1.1  | 1.44  | 0.75 | 2.4  | 3.34 | 7.01 |
|             | zma-miR167c-5p | Zea mays               |                           | 8.91 | 0    | 1.1  | 1.44  | 0.75 | 2.4  | 3.34 | 7.01 |
|             | sbi-miR167a    | Sorghum bicolor        |                           | 8.91 | 0    | 1.1  | 1.44  | 0.75 | 2.4  | 3.34 | 7.01 |
|             | sbi-miR167b    | Sorghum bicolor        |                           | 8.91 | 0    | 1.1  | 1.44  | 0.75 | 2.4  | 3.34 | 7.01 |
|             | gma-miR167a    | Glycine max            |                           | 8.91 | 0    | 1.1  | 1.44  | 0.75 | 2.4  | 3.34 | 7.01 |
|             | gma-miR167b    | Glycine max            |                           | 8.91 | 0    | 1.1  | 1.44  | 0.75 | 2.4  | 3.34 | 7.01 |
|             | ptc-miR167a    | Populus trichocarpa    |                           | 8.91 | 0    | 1.1  | 1.44  | 0.75 | 2.4  | 3.34 | 7.01 |
|             | ptc-miR167b    | Populus trichocarpa    |                           | 8.91 | 0    | 1.1  | 1.44  | 0.75 | 2.4  | 3.34 | 7.01 |



|             |                |                         |                        |      |      |      |       |      |      |      |      |
|-------------|----------------|-------------------------|------------------------|------|------|------|-------|------|------|------|------|
|             | lus-miR167d    | Linum usitatissimum     |                        | 8.91 | 0    | 1.1  | 1.44  | 0.75 | 2.4  | 3.34 | 7.01 |
|             | lus-miR167e    | Linum usitatissimum     |                        | 8.91 | 0    | 1.1  | 1.44  | 0.75 | 2.4  | 3.34 | 7.01 |
|             | lus-miR167h    | Linum usitatissimum     |                        | 8.91 | 0    | 1.1  | 1.44  | 0.75 | 2.4  | 3.34 | 7.01 |
|             | nta-miR167d    | Nicotiana tabacum       |                        | 8.91 | 0    | 1.1  | 1.44  | 0.75 | 2.4  | 3.34 | 7.01 |
|             | nta-miR167e    | Nicotiana tabacum       |                        | 8.91 | 0    | 1.1  | 1.44  | 0.75 | 2.4  | 3.34 | 7.01 |
|             | tcc-miR167a    | Theobroma cacao         |                        | 8.91 | 0    | 1.1  | 1.44  | 0.75 | 2.4  | 3.34 | 7.01 |
|             | tcc-miR167b    | Theobroma cacao         |                        | 8.91 | 0    | 1.1  | 1.44  | 0.75 | 2.4  | 3.34 | 7.01 |
|             | bdi-miR167b    | Brachypodium distachyon |                        | 8.91 | 0    | 1.1  | 1.44  | 0.75 | 2.4  | 3.34 | 7.01 |
|             | rco-miR167a    | Ricinus communis        |                        | 8.91 | 0    | 1.1  | 1.44  | 0.75 | 2.4  | 3.34 | 7.01 |
|             | rco-miR167b    | Ricinus communis        |                        | 8.91 | 0    | 1.1  | 1.44  | 0.75 | 2.4  | 3.34 | 7.01 |
|             | ghr-miR167a    | Gossypium hirsutum      |                        | 8.91 | 0    | 1.1  | 1.44  | 0.75 | 2.4  | 3.34 | 7.01 |
|             | aly-miR167a-5p | Arabidopsis lyrata      |                        | 8.91 | 0    | 1.1  | 1.44  | 0.75 | 2.4  | 3.34 | 7.01 |
|             | aly-miR167b-5p | Arabidopsis lyrata      |                        | 8.91 | 0    | 1.1  | 1.44  | 0.75 | 2.4  | 3.34 | 7.01 |
|             | sly-miR167a    | Solanum lycopersicum    |                        | 8.91 | 0    | 1.1  | 1.44  | 0.75 | 2.4  | 3.34 | 7.01 |
|             | gma-miR167d    | Glycine max             |                        | 8.91 | 0    | 1.1  | 1.44  | 0.75 | 2.4  | 3.34 | 7.01 |
|             | bra-miR167a    | Brassica rapa           |                        | 8.91 | 0    | 1.1  | 1.44  | 0.75 | 2.4  | 3.34 | 7.01 |
|             | bra-miR167b    | Brassica rapa           |                        | 8.91 | 0    | 1.1  | 1.44  | 0.75 | 2.4  | 3.34 | 7.01 |
|             | bra-miR167c    | Brassica rapa           |                        | 8.91 | 0    | 1.1  | 1.44  | 0.75 | 2.4  | 3.34 | 7.01 |
|             | bra-miR167d    | Brassica rapa           |                        | 8.91 | 0    | 1.1  | 1.44  | 0.75 | 2.4  | 3.34 | 7.01 |
|             | sbi-miR167i    | Sorghum bicolor         |                        | 8.91 | 0    | 1.1  | 1.44  | 0.75 | 2.4  | 3.34 | 7.01 |
|             | bdi-miR167a    | Brachypodium distachyon |                        | 8.91 | 0    | 1.1  | 1.44  | 0.75 | 2.4  | 3.34 | 7.01 |
| dof-miR-708 | bna-miR167a    | Brassica napus          | TGAAGCTGCCAGCATGATCTAA | 0.2  | 0.51 | 0.18 | 0     | 0.09 | 0.31 | 0    | 0.84 |
|             | bna-miR167b    | Brassica napus          |                        | 0.2  | 0.51 | 0.18 | 0     | 0.09 | 0.31 | 0    | 0.84 |
| dof-miR-709 | vvi-miR167c    | Vitis vinifera          | TGAAGCTGCCAGCATGATCTC  | 0    | 0    | 0    | 0.18  | 0.09 | 0.1  | 0    | 0    |
|             | lus-miR167a    | Linum usitatissimum     |                        | 0    | 0    | 0    | 0.18  | 0.09 | 0.1  | 0    | 0    |
| dof-miR-710 | osa-miR167d-5p | Oryza sativa            | TGAAGCTGCCAGCATGATCTG  | 0.79 | 1.53 | 4.04 | 20.54 | 3.45 | 6.57 | 0.83 | 1.4  |
|             | osa-miR167e-5p | Oryza sativa            |                        | 0.79 | 1.53 | 4.04 | 20.54 | 3.45 | 6.57 | 0.83 | 1.4  |
|             | osa-miR167f    | Oryza sativa            |                        | 0.79 | 1.53 | 4.04 | 20.54 | 3.45 | 6.57 | 0.83 | 1.4  |
|             | osa-miR167g    | Oryza sativa            |                        | 0.79 | 1.53 | 4.04 | 20.54 | 3.45 | 6.57 | 0.83 | 1.4  |
|             | osa-miR167h-5p | Oryza sativa            |                        | 0.79 | 1.53 | 4.04 | 20.54 | 3.45 | 6.57 | 0.83 | 1.4  |
|             | osa-miR167i-5p | Oryza sativa            |                        | 0.79 | 1.53 | 4.04 | 20.54 | 3.45 | 6.57 | 0.83 | 1.4  |
|             | osa-miR167j    | Oryza sativa            |                        | 0.79 | 1.53 | 4.04 | 20.54 | 3.45 | 6.57 | 0.83 | 1.4  |
|             | sbi-miR167d    | Sorghum bicolor         |                        | 0.79 | 1.53 | 4.04 | 20.54 | 3.45 | 6.57 | 0.83 | 1.4  |
|             | sbi-miR167f    | Sorghum bicolor         |                        | 0.79 | 1.53 | 4.04 | 20.54 | 3.45 | 6.57 | 0.83 | 1.4  |



|             |                |                         |                        |        |        |       |        |       |       |        |        |
|-------------|----------------|-------------------------|------------------------|--------|--------|-------|--------|-------|-------|--------|--------|
|             | sbi-miR167g    | Sorghum bicolor         |                        | 0.79   | 1.53   | 4.04  | 20.54  | 3.45  | 6.57  | 0.83   | 1.4    |
|             | sbi-miR167e    | Sorghum bicolor         |                        | 0.79   | 1.53   | 4.04  | 20.54  | 3.45  | 6.57  | 0.83   | 1.4    |
|             | sbi-miR167c    | Sorghum bicolor         |                        | 0.79   | 1.53   | 4.04  | 20.54  | 3.45  | 6.57  | 0.83   | 1.4    |
|             | sof-miR167a    | Saccharum officinarum   |                        | 0.79   | 1.53   | 4.04  | 20.54  | 3.45  | 6.57  | 0.83   | 1.4    |
|             | sof-miR167b    | Saccharum officinarum   |                        | 0.79   | 1.53   | 4.04  | 20.54  | 3.45  | 6.57  | 0.83   | 1.4    |
|             | zma-miR167e-5p | Zea mays                |                        | 0.79   | 1.53   | 4.04  | 20.54  | 3.45  | 6.57  | 0.83   | 1.4    |
|             | zma-miR167f-5p | Zea mays                |                        | 0.79   | 1.53   | 4.04  | 20.54  | 3.45  | 6.57  | 0.83   | 1.4    |
|             | zma-miR167g-5p | Zea mays                |                        | 0.79   | 1.53   | 4.04  | 20.54  | 3.45  | 6.57  | 0.83   | 1.4    |
|             | zma-miR167h-5p | Zea mays                |                        | 0.79   | 1.53   | 4.04  | 20.54  | 3.45  | 6.57  | 0.83   | 1.4    |
|             | zma-miR167i-5p | Zea mays                |                        | 0.79   | 1.53   | 4.04  | 20.54  | 3.45  | 6.57  | 0.83   | 1.4    |
|             | ptc-miR167e    | Populus trichocarpa     |                        | 0.79   | 1.53   | 4.04  | 20.54  | 3.45  | 6.57  | 0.83   | 1.4    |
|             | vvi-miR167a    | Vitis vinifera          |                        | 0.79   | 1.53   | 4.04  | 20.54  | 3.45  | 6.57  | 0.83   | 1.4    |
|             | atr-miR167     | Amborella trichopoda    |                        | 0.79   | 1.53   | 4.04  | 20.54  | 3.45  | 6.57  | 0.83   | 1.4    |
|             | cme-miR167d    | Cucumis melo            |                        | 0.79   | 1.53   | 4.04  | 20.54  | 3.45  | 6.57  | 0.83   | 1.4    |
|             | cme-miR167f    | Cucumis melo            |                        | 0.79   | 1.53   | 4.04  | 20.54  | 3.45  | 6.57  | 0.83   | 1.4    |
|             | mtr-miR167b-5p | Medicago truncatula     |                        | 0.79   | 1.53   | 4.04  | 20.54  | 3.45  | 6.57  | 0.83   | 1.4    |
|             | dpr-miR167c    | Digitalis purpurea      |                        | 0.79   | 1.53   | 4.04  | 20.54  | 3.45  | 6.57  | 0.83   | 1.4    |
|             | mes-miR167a    | Manihot esculenta       |                        | 0.79   | 1.53   | 4.04  | 20.54  | 3.45  | 6.57  | 0.83   | 1.4    |
|             | lus-miR167f    | Linum usitatissimum     |                        | 0.79   | 1.53   | 4.04  | 20.54  | 3.45  | 6.57  | 0.83   | 1.4    |
|             | lus-miR167g    | Linum usitatissimum     |                        | 0.79   | 1.53   | 4.04  | 20.54  | 3.45  | 6.57  | 0.83   | 1.4    |
|             | lus-miR167i    | Linum usitatissimum     |                        | 0.79   | 1.53   | 4.04  | 20.54  | 3.45  | 6.57  | 0.83   | 1.4    |
|             | ssp-miR167b    | Saccharum sp.           |                        | 0.79   | 1.53   | 4.04  | 20.54  | 3.45  | 6.57  | 0.83   | 1.4    |
|             | gma-miR167j    | Glycine max             |                        | 0.79   | 1.53   | 4.04  | 20.54  | 3.45  | 6.57  | 0.83   | 1.4    |
|             | gso-miR167a    | Glycine soja            |                        | 0.79   | 1.53   | 4.04  | 20.54  | 3.45  | 6.57  | 0.83   | 1.4    |
|             | csi-miR167c    | Citrus sinensis         |                        | 0.79   | 1.53   | 4.04  | 20.54  | 3.45  | 6.57  | 0.83   | 1.4    |
|             | csi-miR167a    | Citrus sinensis         |                        | 0.79   | 1.53   | 4.04  | 20.54  | 3.45  | 6.57  | 0.83   | 1.4    |
|             | zma-miR167j-5p | Zea mays                |                        | 0.79   | 1.53   | 4.04  | 20.54  | 3.45  | 6.57  | 0.83   | 1.4    |
|             | gma-miR167c    | Glycine max             |                        | 0.79   | 1.53   | 4.04  | 20.54  | 3.45  | 6.57  | 0.83   | 1.4    |
|             | lja-miR167     | Lotus japonicus         |                        | 0.79   | 1.53   | 4.04  | 20.54  | 3.45  | 6.57  | 0.83   | 1.4    |
|             | sbi-miR167h    | Sorghum bicolor         |                        | 0.79   | 1.53   | 4.04  | 20.54  | 3.45  | 6.57  | 0.83   | 1.4    |
| dof-miR-711 | bdi-miR167g    | Brachypodium distachyon | TGAAGCTGCCAGCATGATCTGA | 343.82 | 449.58 | 50.89 | 148.29 | 85.43 | 317.6 | 138.57 | 370.77 |
|             | ata-miR167b-5p | Aegilops tauschii       |                        | 343.82 | 449.58 | 50.89 | 148.29 | 85.43 | 317.6 | 138.57 | 370.77 |
|             | ata-miR167d-5p | Aegilops tauschii       |                        | 343.82 | 449.58 | 50.89 | 148.29 | 85.43 | 317.6 | 138.57 | 370.77 |
|             | ppe-miR167c    | Prunus persica          |                        | 343.82 | 449.58 | 50.89 | 148.29 | 85.43 | 317.6 | 138.57 | 370.77 |

|             |                |                         |                        |        |        |       |        |       |       |        |        |
|-------------|----------------|-------------------------|------------------------|--------|--------|-------|--------|-------|-------|--------|--------|
|             | cpa-miR167d    | Carica papaya           |                        | 343.82 | 449.58 | 50.89 | 148.29 | 85.43 | 317.6 | 138.57 | 370.77 |
|             | mes-miR167d    | Manihot esculenta       |                        | 343.82 | 449.58 | 50.89 | 148.29 | 85.43 | 317.6 | 138.57 | 370.77 |
|             | mes-miR167e    | Manihot esculenta       |                        | 343.82 | 449.58 | 50.89 | 148.29 | 85.43 | 317.6 | 138.57 | 370.77 |
|             | mes-miR167f    | Manihot esculenta       |                        | 343.82 | 449.58 | 50.89 | 148.29 | 85.43 | 317.6 | 138.57 | 370.77 |
|             | bdi-miR167e-5p | Brachypodium distachyon |                        | 343.82 | 449.58 | 50.89 | 148.29 | 85.43 | 317.6 | 138.57 | 370.77 |
|             | bdi-miR167c-5p | Brachypodium distachyon |                        | 343.82 | 449.58 | 50.89 | 148.29 | 85.43 | 317.6 | 138.57 | 370.77 |
|             | bdi-miR167d-5p | Brachypodium distachyon |                        | 343.82 | 449.58 | 50.89 | 148.29 | 85.43 | 317.6 | 138.57 | 370.77 |
|             | gma-miR167g    | Glycine max             |                        | 343.82 | 449.58 | 50.89 | 148.29 | 85.43 | 317.6 | 138.57 | 370.77 |
|             | ccl-miR167a    | Citrus clementina       |                        | 343.82 | 449.58 | 50.89 | 148.29 | 85.43 | 317.6 | 138.57 | 370.77 |
|             | ctr-miR167     | Citrus trifoliata       |                        | 343.82 | 449.58 | 50.89 | 148.29 | 85.43 | 317.6 | 138.57 | 370.77 |
|             | ccl-miR167b    | Citrus clementina       |                        | 343.82 | 449.58 | 50.89 | 148.29 | 85.43 | 317.6 | 138.57 | 370.77 |
| dof-miR-712 | tae-miR167c-5p | Triticum aestivum       | TGAAGCTGCCAGCATGATCTGC | 0.4    | 0.25   | 0     | 0.72   | 0.19  | 0.52  | 0      | 0.28   |
|             | ata-miR167f-5p | Aegilops tauschii       |                        | 0.4    | 0.25   | 0     | 0.72   | 0.19  | 0.52  | 0      | 0.28   |
| dof-miR-713 | ath-miR167d    | Arabidopsis thaliana    | TGAAGCTGCCAGCATGATCTGG | 6.34   | 2.8    | 5.88  | 836.23 | 7.65  | 41    | 8.51   | 1.26   |
|             | cca-miR167     | Cynara cardunculus      |                        | 6.34   | 2.8    | 5.88  | 836.23 | 7.65  | 41    | 8.51   | 1.26   |
|             | nta-miR167a    | Nicotiana tabacum       |                        | 6.34   | 2.8    | 5.88  | 836.23 | 7.65  | 41    | 8.51   | 1.26   |
|             | nta-miR167b    | Nicotiana tabacum       |                        | 6.34   | 2.8    | 5.88  | 836.23 | 7.65  | 41    | 8.51   | 1.26   |
|             | nta-miR167c    | Nicotiana tabacum       |                        | 6.34   | 2.8    | 5.88  | 836.23 | 7.65  | 41    | 8.51   | 1.26   |
|             | rco-miR167c    | Ricinus communis        |                        | 6.34   | 2.8    | 5.88  | 836.23 | 7.65  | 41    | 8.51   | 1.26   |
|             | aly-miR167d-5p | Arabidopsis lyrata      |                        | 6.34   | 2.8    | 5.88  | 836.23 | 7.65  | 41    | 8.51   | 1.26   |
| dof-miR-714 | ptc-miR167f-5p | Populus trichocarpa     | TGAAGCTGCCAGCATGATCTT  | 0.2    | 0      | 0     | 21.44  | 0     | 0.1   | 0.5    | 0      |
|             | ptc-miR167g-5p | Populus trichocarpa     |                        | 0.2    | 0      | 0     | 21.44  | 0     | 0.1   | 0.5    | 0      |
|             | cpa-miR167c    | Carica papaya           |                        | 0.2    | 0      | 0     | 21.44  | 0     | 0.1   | 0.5    | 0      |
|             | mes-miR167g    | Manihot esculenta       |                        | 0.2    | 0      | 0     | 21.44  | 0     | 0.1   | 0.5    | 0      |
|             | mes-miR167h    | Manihot esculenta       |                        | 0.2    | 0      | 0     | 21.44  | 0     | 0.1   | 0.5    | 0      |
|             | cme-miR167c    | Cucumis melo            |                        | 0.2    | 0      | 0     | 21.44  | 0     | 0.1   | 0.5    | 0      |
|             | lus-miR167b    | Linum usitatissimum     |                        | 0.2    | 0      | 0     | 21.44  | 0     | 0.1   | 0.5    | 0      |
|             | tcc-miR167c    | Theobroma cacao         |                        | 0.2    | 0      | 0     | 21.44  | 0     | 0.1   | 0.5    | 0      |
|             | ahy-miR167-5p  | Arachis hypogaea        |                        | 0.2    | 0      | 0     | 21.44  | 0     | 0.1   | 0.5    | 0      |
|             | csi-miR167b    | Citrus sinensis         |                        | 0.2    | 0      | 0     | 21.44  | 0     | 0.1   | 0.5    | 0      |
|             | gma-miR167e    | Glycine max             |                        | 0.2    | 0      | 0     | 21.44  | 0     | 0.1   | 0.5    | 0      |
|             | gma-miR167f    | Glycine max             |                        | 0.2    | 0      | 0     | 21.44  | 0     | 0.1   | 0.5    | 0      |
| dof-miR-715 | ppe-miR167d    | Prunus persica          | TGAAGCTGCCAGCATGATCTTA | 0      | 0.25   | 0.37  | 18.74  | 0     | 0.21  | 0      | 0      |
|             | mdm-miR167h    | Malus domestica         |                        | 0      | 0.25   | 0.37  | 18.74  | 0     | 0.21  | 0      | 0      |

|             |                |                         |                        |   |      |      |       |   |      |   |   |
|-------------|----------------|-------------------------|------------------------|---|------|------|-------|---|------|---|---|
|             | mdm-miR167i    | Malus domestica         |                        | 0 | 0.25 | 0.37 | 18.74 | 0 | 0.21 | 0 | 0 |
|             | mdm-miR167j    | Malus domestica         |                        | 0 | 0.25 | 0.37 | 18.74 | 0 | 0.21 | 0 | 0 |
| dof-miR-716 | hsa-miR-493-3p | Homo sapiens            | TGAAGGTCTACTGTGTGCCAGG | 0 | 0    | 0    | 0.18  | 0 | 0    | 0 | 0 |
|             | chi-miR-493-3p | Capra hircus            |                        | 0 | 0    | 0    | 0.18  | 0 | 0    | 0 | 0 |
|             | ssc-miR-493-3p | Sus scrofa              |                        | 0 | 0    | 0    | 0.18  | 0 | 0    | 0 | 0 |
|             | oar-miR-493-3p | Ovis aries              |                        | 0 | 0    | 0    | 0.18  | 0 | 0    | 0 | 0 |
|             | ppy-miR-493    | Pongo pygmaeus          |                        | 0 | 0    | 0    | 0.18  | 0 | 0    | 0 | 0 |
|             | mml-miR-493-3p | Macaca mulatta          |                        | 0 | 0    | 0    | 0.18  | 0 | 0    | 0 | 0 |
|             | bta-miR-493    | Bos taurus              |                        | 0 | 0    | 0    | 0.18  | 0 | 0    | 0 | 0 |
| dof-miR-717 | bdi-miR395q    | Brachypodium distachyon | TGAAGTGTGGGGGAAGTC     | 0 | 0    | 0    | 0     | 0 | 0.1  | 0 | 0 |
|             | ata-miR395e-3p | Aegilops tauschii       |                        | 0 | 0    | 0    | 0     | 0 | 0.1  | 0 | 0 |
|             | ata-miR395a-3p | Aegilops tauschii       |                        | 0 | 0    | 0    | 0     | 0 | 0.1  | 0 | 0 |
|             | ata-miR395d-3p | Aegilops tauschii       |                        | 0 | 0    | 0    | 0     | 0 | 0.1  | 0 | 0 |
|             | ata-miR395f-3p | Aegilops tauschii       |                        | 0 | 0    | 0    | 0     | 0 | 0.1  | 0 | 0 |
|             | ata-miR395c-3p | Aegilops tauschii       |                        | 0 | 0    | 0    | 0     | 0 | 0.1  | 0 | 0 |
|             | cpa-miR395a    | Carica papaya           |                        | 0 | 0    | 0    | 0     | 0 | 0.1  | 0 | 0 |
|             | cpa-miR395b    | Carica papaya           |                        | 0 | 0    | 0    | 0     | 0 | 0.1  | 0 | 0 |
|             | cpa-miR395c    | Carica papaya           |                        | 0 | 0    | 0    | 0     | 0 | 0.1  | 0 | 0 |
|             | cpa-miR395d    | Carica papaya           |                        | 0 | 0    | 0    | 0     | 0 | 0.1  | 0 | 0 |
|             | cpa-miR395e    | Carica papaya           |                        | 0 | 0    | 0    | 0     | 0 | 0.1  | 0 | 0 |
|             | bdi-miR395o-3p | Brachypodium distachyon |                        | 0 | 0    | 0    | 0     | 0 | 0.1  | 0 | 0 |
|             | bdi-miR395a    | Brachypodium distachyon |                        | 0 | 0    | 0    | 0     | 0 | 0.1  | 0 | 0 |
|             | bdi-miR395b    | Brachypodium distachyon |                        | 0 | 0    | 0    | 0     | 0 | 0.1  | 0 | 0 |
|             | bdi-miR395c-3p | Brachypodium distachyon |                        | 0 | 0    | 0    | 0     | 0 | 0.1  | 0 | 0 |
|             | bdi-miR395m    | Brachypodium distachyon |                        | 0 | 0    | 0    | 0     | 0 | 0.1  | 0 | 0 |
|             | bdi-miR395e-3p | Brachypodium distachyon |                        | 0 | 0    | 0    | 0     | 0 | 0.1  | 0 | 0 |
|             | bdi-miR395f-3p | Brachypodium distachyon |                        | 0 | 0    | 0    | 0     | 0 | 0.1  | 0 | 0 |
|             | bdi-miR395g-3p | Brachypodium distachyon |                        | 0 | 0    | 0    | 0     | 0 | 0.1  | 0 | 0 |
|             | bdi-miR395h-3p | Brachypodium distachyon |                        | 0 | 0    | 0    | 0     | 0 | 0.1  | 0 | 0 |
|             | bdi-miR395j-3p | Brachypodium distachyon |                        | 0 | 0    | 0    | 0     | 0 | 0.1  | 0 | 0 |
|             | bdi-miR395k-3p | Brachypodium distachyon |                        | 0 | 0    | 0    | 0     | 0 | 0.1  | 0 | 0 |
|             | bdi-miR395l-3p | Brachypodium distachyon |                        | 0 | 0    | 0    | 0     | 0 | 0.1  | 0 | 0 |
|             | bdi-miR395n-3p | Brachypodium distachyon |                        | 0 | 0    | 0    | 0     | 0 | 0.1  | 0 | 0 |
|             | tae-miR395b    | Triticum aestivum       |                        | 0 | 0    | 0    | 0     | 0 | 0.1  | 0 | 0 |

| dof-miR-718 | gma-miR172k    | Glycine max             | TGAATCTTGATGATGCTGCAT | 0       | 0      | 6.06    | 1.98   | 0.09   | 0       | 0.17   | 0       |
|-------------|----------------|-------------------------|-----------------------|---------|--------|---------|--------|--------|---------|--------|---------|
| dof-miR-719 | ppt-miR535a    | Physcomitrella patens   | TGACAACGAGAGAGCAGC    | 1409.75 | 1031.8 | 1317.33 | 1316.6 | 905.33 | 1585.41 | 958.29 | 1647.29 |
|             | ppt-miR535b    | Physcomitrella patens   |                       | 1409.75 | 1031.8 | 1317.33 | 1316.6 | 905.33 | 1585.41 | 958.29 | 1647.29 |
|             | ppt-miR535c    | Physcomitrella patens   |                       | 1409.75 | 1031.8 | 1317.33 | 1316.6 | 905.33 | 1585.41 | 958.29 | 1647.29 |
|             | osa-miR535-5p  | Oryza sativa            |                       | 1409.75 | 1031.8 | 1317.33 | 1316.6 | 905.33 | 1585.41 | 958.29 | 1647.29 |
|             | ppt-miR535d    | Physcomitrella patens   |                       | 1409.75 | 1031.8 | 1317.33 | 1316.6 | 905.33 | 1585.41 | 958.29 | 1647.29 |
|             | vvi-miR535a    | Vitis vinifera          |                       | 1409.75 | 1031.8 | 1317.33 | 1316.6 | 905.33 | 1585.41 | 958.29 | 1647.29 |
|             | vvi-miR535b    | Vitis vinifera          |                       | 1409.75 | 1031.8 | 1317.33 | 1316.6 | 905.33 | 1585.41 | 958.29 | 1647.29 |
|             | vvi-miR535c    | Vitis vinifera          |                       | 1409.75 | 1031.8 | 1317.33 | 1316.6 | 905.33 | 1585.41 | 958.29 | 1647.29 |
|             | ppe-miR535a    | Prunus persica          |                       | 1409.75 | 1031.8 | 1317.33 | 1316.6 | 905.33 | 1585.41 | 958.29 | 1647.29 |
|             | cpa-miR535     | Carica papaya           |                       | 1409.75 | 1031.8 | 1317.33 | 1316.6 | 905.33 | 1585.41 | 958.29 | 1647.29 |
|             | atr-miR535     | Amborella trichopoda    |                       | 1409.75 | 1031.8 | 1317.33 | 1316.6 | 905.33 | 1585.41 | 958.29 | 1647.29 |
|             | mdm-miR535a    | Malus domestica         |                       | 1409.75 | 1031.8 | 1317.33 | 1316.6 | 905.33 | 1585.41 | 958.29 | 1647.29 |
|             | pab-miR535     | Picea abies             |                       | 1409.75 | 1031.8 | 1317.33 | 1316.6 | 905.33 | 1585.41 | 958.29 | 1647.29 |
|             | rco-miR535     | Ricinus communis        |                       | 1409.75 | 1031.8 | 1317.33 | 1316.6 | 905.33 | 1585.41 | 958.29 | 1647.29 |
| dof-miR-720 | aqc-miR535     | Aquilegia caerulea      | TGACAACGAGAGAGCAGC    | 0       | 0      | 0       | 0      | 0      | 0.21    | 0      | 0       |
| dof-miR-721 | mes-miR535b    | Manihot esculenta       | TGACAACGAGAGAGCAGC    | 0       | 0      | 0.18    | 0      | 2.33   | 4.9     | 0.33   | 0       |
| dof-miR-722 | mes-miR535a    | Manihot esculenta       | TGACAACGAGAGAGCAGC    | 0.4     | 0.25   | 0.92    | 1.44   | 1.21   | 2.3     | 0.5    | 0.28    |
| dof-miR-723 | tcc-miR535     | Theobroma cacao         | TGACAACGATAGAGAGCAGC  | 0.79    | 0.51   | 0.55    | 0.18   | 0.09   | 0.31    | 0.33   | 1.12    |
| dof-miR-724 | mdm-miR535b    | Malus domestica         | TGACAAGGAGAGAGCAGC    | 0.2     | 0      | 0.37    | 0.36   | 0      | 0.1     | 0      | 0       |
|             | mdm-miR535c    | Malus domestica         |                       | 0.2     | 0      | 0.37    | 0.36   | 0      | 0.1     | 0      | 0       |
| dof-miR-725 | mdm-miR156ad   | Malus domestica         | TGACAGAAGAAAGTGAGCAC  | 0       | 0      | 0       | 0      | 0      | 0       | 0      | 0.28    |
|             | mdm-miR156ae   | Malus domestica         |                       | 0       | 0      | 0       | 0      | 0      | 0       | 0      | 0.28    |
| dof-miR-726 | bdi-miR156j    | Brachypodium distachyon | TGACAGAAGAGAGAGCAGC   | 0       | 0      | 0       | 0      | 0      | 0       | 0      | 0.14    |
|             | hpa-miR156a    | Helianthus paradoxus    |                       | 0       | 0      | 0       | 0      | 0      | 0       | 0      | 0.14    |
|             | ath-miR156j    | Arabidopsis thaliana    |                       | 0       | 0      | 0       | 0      | 0      | 0       | 0      | 0.14    |
|             | ahy-miR156a    | Arachis hypogaea        |                       | 0       | 0      | 0       | 0      | 0      | 0       | 0      | 0.14    |
| dof-miR-727 | zma-miR156k-5p | Zea mays                | TGACAGAAGAGAGCGAGCAC  | 0       | 0      | 0.37    | 0.54   | 0      | 0       | 0      | 0.14    |
|             | sbi-miR156e    | Sorghum bicolor         |                       | 0       | 0      | 0.37    | 0.54   | 0      | 0       | 0      | 0.14    |
| dof-miR-728 | har-miR156c    | Helianthus argophyllus  | TGACAGAAGAGAGGGAGCA   | 0       | 0      | 0       | 0      | 0.09   | 0       | 0      | 0       |
| dof-miR-729 | ptc-miR156k    | Populus trichocarpa     | TGACAGAAGAGAGGGAGCAC  | 0.4     | 0      | 1.65    | 0.72   | 0.19   | 0.52    | 0.5    | 0.84    |
|             | vvi-miR156a    | Vitis vinifera          |                       | 0.4     | 0      | 1.65    | 0.72   | 0.19   | 0.52    | 0.5    | 0.84    |
|             | hci-miR156b    | Helianthus ciliaris     |                       | 0.4     | 0      | 1.65    | 0.72   | 0.19   | 0.52    | 0.5    | 0.84    |
|             | cme-miR156h    | Cucumis melo            |                       | 0.4     | 0      | 1.65    | 0.72   | 0.19   | 0.52    | 0.5    | 0.84    |

|             |                     |                       |                      |        |       |        |       |       |        |       |        |
|-------------|---------------------|-----------------------|----------------------|--------|-------|--------|-------|-------|--------|-------|--------|
|             | cme-miR156g         | Cucumis melo          |                      | 0.4    | 0     | 1.65   | 0.72  | 0.19  | 0.52   | 0.5   | 0.84   |
|             | dpr-miR156a         | Digitalis purpurea    |                      | 0.4    | 0     | 1.65   | 0.72  | 0.19  | 0.52   | 0.5   | 0.84   |
| dof-miR-730 | ath-miR156a-5p      | Arabidopsis thaliana  | TGACAGAAGAGAGTGAGCAC | 69.52  | 49.9  | 181.16 | 63.42 | 13.34 | 37.67  | 76.96 | 239.61 |
|             | ath-miR156b-5p      | Arabidopsis thaliana  |                      | 69.52  | 49.9  | 181.16 | 63.42 | 13.34 | 37.67  | 76.96 | 239.61 |
|             | ath-miR156c-5p      | Arabidopsis thaliana  |                      | 69.52  | 49.9  | 181.16 | 63.42 | 13.34 | 37.67  | 76.96 | 239.61 |
|             | ath-miR156d-5p      | Arabidopsis thaliana  |                      | 69.52  | 49.9  | 181.16 | 63.42 | 13.34 | 37.67  | 76.96 | 239.61 |
|             | ath-miR156e         | Arabidopsis thaliana  |                      | 69.52  | 49.9  | 181.16 | 63.42 | 13.34 | 37.67  | 76.96 | 239.61 |
|             | ath-miR156f-5p      | Arabidopsis thaliana  |                      | 69.52  | 49.9  | 181.16 | 63.42 | 13.34 | 37.67  | 76.96 | 239.61 |
|             | osa-miR156a         | Oryza sativa          |                      | 69.52  | 49.9  | 181.16 | 63.42 | 13.34 | 37.67  | 76.96 | 239.61 |
|             | osa-miR156b-5p      | Oryza sativa          |                      | 69.52  | 49.9  | 181.16 | 63.42 | 13.34 | 37.67  | 76.96 | 239.61 |
|             | osa-miR156c-5p      | Oryza sativa          |                      | 69.52  | 49.9  | 181.16 | 63.42 | 13.34 | 37.67  | 76.96 | 239.61 |
|             | osa-miR156d         | Oryza sativa          |                      | 69.52  | 49.9  | 181.16 | 63.42 | 13.34 | 37.67  | 76.96 | 239.61 |
|             | osa-miR156e         | Oryza sativa          |                      | 69.52  | 49.9  | 181.16 | 63.42 | 13.34 | 37.67  | 76.96 | 239.61 |
|             | osa-miR156f-5p      | Oryza sativa          |                      | 69.52  | 49.9  | 181.16 | 63.42 | 13.34 | 37.67  | 76.96 | 239.61 |
|             | osa-miR156g-5p      | Oryza sativa          |                      | 69.52  | 49.9  | 181.16 | 63.42 | 13.34 | 37.67  | 76.96 | 239.61 |
|             | osa-miR156h-5p      | Oryza sativa          |                      | 69.52  | 49.9  | 181.16 | 63.42 | 13.34 | 37.67  | 76.96 | 239.61 |
|             | osa-miR156i         | Oryza sativa          |                      | 69.52  | 49.9  | 181.16 | 63.42 | 13.34 | 37.67  | 76.96 | 239.61 |
|             | osa-miR156j-5p      | Oryza sativa          |                      | 69.52  | 49.9  | 181.16 | 63.42 | 13.34 | 37.67  | 76.96 | 239.61 |
|             | zma-miR156d-5p      | Zea mays              |                      | 69.52  | 49.9  | 181.16 | 63.42 | 13.34 | 37.67  | 76.96 | 239.61 |
|             | zma-miR156f-5p      | Zea mays              |                      | 69.52  | 49.9  | 181.16 | 63.42 | 13.34 | 37.67  | 76.96 | 239.61 |
|             | zma-miR156g-5p      | Zea mays              |                      | 69.52  | 49.9  | 181.16 | 63.42 | 13.34 | 37.67  | 76.96 | 239.61 |
|             | zma-miR156b-5p      | Zea mays              |                      | 69.52  | 49.9  | 181.16 | 63.42 | 13.34 | 37.67  | 76.96 | 239.61 |
|             | zma-miR156c         | Zea mays              |                      | 69.52  | 49.9  | 181.16 | 63.42 | 13.34 | 37.67  | 76.96 | 239.61 |
|             | zma-miR156e-5p      | Zea mays              |                      | 69.52  | 49.9  | 181.16 | 63.42 | 13.34 | 37.67  | 76.96 | 239.61 |
|             | zma-miR156a-5p      | Zea mays              |                      | 69.52  | 49.9  | 181.16 | 63.42 | 13.34 | 37.67  | 76.96 | 239.61 |
|             | zma-miR156h-5p      | Zea mays              |                      | 69.52  | 49.9  | 181.16 | 63.42 | 13.34 | 37.67  | 76.96 | 239.61 |
|             | zma-miR156i-5p      | Zea mays              |                      | 69.52  | 49.9  | 181.16 | 63.42 | 13.34 | 37.67  | 76.96 | 239.61 |
|             | sbi-miR156a         | Sorghum bicolor       |                      | 69.52  | 49.9  | 181.16 | 63.42 | 13.34 | 37.67  | 76.96 | 239.61 |
|             | sbi-miR156c         | Sorghum bicolor       |                      | 69.52  | 49.9  | 181.16 | 63.42 | 13.34 | 37.67  | 76.96 | 239.61 |
|             | sbi-miR156b         | Sorghum bicolor       |                      | 69.52  | 49.9  | 181.16 | 63.42 | 13.34 | 37.67  | 76.96 | 239.61 |
|             | sof-miR156          | Saccharum officinarum |                      | 69.52  | 49.9  | 181.16 | 63.42 | 13.34 | 37.67  | 76.96 | 239.61 |
|             | gma-miR156a         | Glycine max           |                      | 69.52  | 49.9  | 181.16 | 63.42 | 13.34 | 37.67  | 76.96 | 239.61 |
| ptc-miR156a | Populus trichocarpa | 69.52                 | 49.9                 | 181.16 | 63.42 | 13.34  | 37.67 | 76.96 | 239.61 |       |        |
| ptc-miR156b | Populus trichocarpa | 69.52                 | 49.9                 | 181.16 | 63.42 | 13.34  | 37.67 | 76.96 | 239.61 |       |        |









|             |                |                         |                       |       |      |        |       |       |       |       |        |
|-------------|----------------|-------------------------|-----------------------|-------|------|--------|-------|-------|-------|-------|--------|
|             | gma-miR156h    | Glycine max             |                       | 69.52 | 49.9 | 181.16 | 63.42 | 13.34 | 37.67 | 76.96 | 239.61 |
|             | bdi-miR156b-5p | Brachypodium distachyon |                       | 69.52 | 49.9 | 181.16 | 63.42 | 13.34 | 37.67 | 76.96 | 239.61 |
|             | bdi-miR156c    | Brachypodium distachyon |                       | 69.52 | 49.9 | 181.16 | 63.42 | 13.34 | 37.67 | 76.96 | 239.61 |
|             | bdi-miR156d-5p | Brachypodium distachyon |                       | 69.52 | 49.9 | 181.16 | 63.42 | 13.34 | 37.67 | 76.96 | 239.61 |
|             | csi-miR156     | Citrus sinensis         |                       | 69.52 | 49.9 | 181.16 | 63.42 | 13.34 | 37.67 | 76.96 | 239.61 |
|             | zma-miR156l-5p | Zea mays                |                       | 69.52 | 49.9 | 181.16 | 63.42 | 13.34 | 37.67 | 76.96 | 239.61 |
|             | ctr-miR156     | Citrus trifoliata       |                       | 69.52 | 49.9 | 181.16 | 63.42 | 13.34 | 37.67 | 76.96 | 239.61 |
|             | aly-miR156a-5p | Arabidopsis lyrata      |                       | 69.52 | 49.9 | 181.16 | 63.42 | 13.34 | 37.67 | 76.96 | 239.61 |
|             | aly-miR156b-5p | Arabidopsis lyrata      |                       | 69.52 | 49.9 | 181.16 | 63.42 | 13.34 | 37.67 | 76.96 | 239.61 |
|             | aly-miR156c-5p | Arabidopsis lyrata      |                       | 69.52 | 49.9 | 181.16 | 63.42 | 13.34 | 37.67 | 76.96 | 239.61 |
|             | aly-miR156d-5p | Arabidopsis lyrata      |                       | 69.52 | 49.9 | 181.16 | 63.42 | 13.34 | 37.67 | 76.96 | 239.61 |
|             | aly-miR156e-5p | Arabidopsis lyrata      |                       | 69.52 | 49.9 | 181.16 | 63.42 | 13.34 | 37.67 | 76.96 | 239.61 |
|             | aly-miR156f-5p | Arabidopsis lyrata      |                       | 69.52 | 49.9 | 181.16 | 63.42 | 13.34 | 37.67 | 76.96 | 239.61 |
|             | sbi-miR156f    | Sorghum bicolor         |                       | 69.52 | 49.9 | 181.16 | 63.42 | 13.34 | 37.67 | 76.96 | 239.61 |
|             | sbi-miR156g    | Sorghum bicolor         |                       | 69.52 | 49.9 | 181.16 | 63.42 | 13.34 | 37.67 | 76.96 | 239.61 |
|             | sbi-miR156h    | Sorghum bicolor         |                       | 69.52 | 49.9 | 181.16 | 63.42 | 13.34 | 37.67 | 76.96 | 239.61 |
|             | sbi-miR156i    | Sorghum bicolor         |                       | 69.52 | 49.9 | 181.16 | 63.42 | 13.34 | 37.67 | 76.96 | 239.61 |
| dof-miR-731 | bna-miR156a    | Brassica napus          | TGACAGAAGAGAGTGAGCAC  | 0     | 0.25 | 1.1    | 0.54  | 0.19  | 0.31  | 0.33  | 1.26   |
|             | hvu-miR156b    | Hordeum vulgare         |                       | 0     | 0.25 | 1.1    | 0.54  | 0.19  | 0.31  | 0.33  | 1.26   |
|             | ssl-miR156     | Salvia sclarea          |                       | 0     | 0.25 | 1.1    | 0.54  | 0.19  | 0.31  | 0.33  | 1.26   |
|             | ssp-miR156     | Saccharum sp.           |                       | 0     | 0.25 | 1.1    | 0.54  | 0.19  | 0.31  | 0.33  | 1.26   |
|             | hvu-miR156a    | Hordeum vulgare         |                       | 0     | 0.25 | 1.1    | 0.54  | 0.19  | 0.31  | 0.33  | 1.26   |
|             | tae-miR156     | Triticum aestivum       |                       | 0     | 0.25 | 1.1    | 0.54  | 0.19  | 0.31  | 0.33  | 1.26   |
|             | rco-miR156a    | Ricinus communis        |                       | 0     | 0.25 | 1.1    | 0.54  | 0.19  | 0.31  | 0.33  | 1.26   |
|             | rco-miR156b    | Ricinus communis        |                       | 0     | 0.25 | 1.1    | 0.54  | 0.19  | 0.31  | 0.33  | 1.26   |
|             | rco-miR156c    | Ricinus communis        |                       | 0     | 0.25 | 1.1    | 0.54  | 0.19  | 0.31  | 0.33  | 1.26   |
|             | rco-miR156d    | Ricinus communis        |                       | 0     | 0.25 | 1.1    | 0.54  | 0.19  | 0.31  | 0.33  | 1.26   |
| dof-miR-732 | gma-miR156q    | Glycine max             | TGACAGAAGAGAGTGAGCACT | 0.4   | 0.51 | 1.29   | 0.72  | 0.28  | 0.63  | 0.67  | 2.24   |
|             | gma-miR156s    | Glycine max             |                       | 0.4   | 0.51 | 1.29   | 0.72  | 0.28  | 0.63  | 0.67  | 2.24   |
| dof-miR-733 | hci-miR156a    | Helianthus ciliaris     | TGACAGAAGAGAGTGAGTAC  | 0     | 0    | 0.37   | 0     | 0     | 0     | 0     | 0      |
| dof-miR-734 | mtr-miR156j    | Medicago truncatula     | TGACAGAAGAGGGTGAGCAC  | 0     | 0    | 0      | 0     | 0     | 0     | 0     | 0.14   |
| dof-miR-735 | ath-miR157d    | Arabidopsis thaliana    | TGACAGAAGATAGAGAGCAC  | 0     | 0    | 1.29   | 1.26  | 0.28  | 1.04  | 0.5   | 2.38   |
|             | ppe-miR156f    | Prunus persica          |                       | 0     | 0    | 1.29   | 1.26  | 0.28  | 1.04  | 0.5   | 2.38   |
|             | mdm-miR156x    | Malus domestica         |                       | 0     | 0    | 1.29   | 1.26  | 0.28  | 1.04  | 0.5   | 2.38   |

|             |                 |                      |                        |       |       |      |      |      |      |       |      |
|-------------|-----------------|----------------------|------------------------|-------|-------|------|------|------|------|-------|------|
|             | mdm-miR156y     | Malus domestica      |                        | 0     | 0     | 1.29 | 1.26 | 0.28 | 1.04 | 0.5   | 2.38 |
|             | mdm-miR156z     | Malus domestica      |                        | 0     | 0     | 1.29 | 1.26 | 0.28 | 1.04 | 0.5   | 2.38 |
|             | mdm-miR156aa    | Malus domestica      |                        | 0     | 0     | 1.29 | 1.26 | 0.28 | 1.04 | 0.5   | 2.38 |
|             | cme-miR156f     | Cucumis melo         |                        | 0     | 0     | 1.29 | 1.26 | 0.28 | 1.04 | 0.5   | 2.38 |
|             | nta-miR156g     | Nicotiana tabacum    |                        | 0     | 0     | 1.29 | 1.26 | 0.28 | 1.04 | 0.5   | 2.38 |
|             | nta-miR156h     | Nicotiana tabacum    |                        | 0     | 0     | 1.29 | 1.26 | 0.28 | 1.04 | 0.5   | 2.38 |
|             | nta-miR156i     | Nicotiana tabacum    |                        | 0     | 0     | 1.29 | 1.26 | 0.28 | 1.04 | 0.5   | 2.38 |
|             | nta-miR156j     | Nicotiana tabacum    |                        | 0     | 0     | 1.29 | 1.26 | 0.28 | 1.04 | 0.5   | 2.38 |
|             | aly-miR157d-5p  | Arabidopsis lyrata   |                        | 0     | 0     | 1.29 | 1.26 | 0.28 | 1.04 | 0.5   | 2.38 |
|             | aqc-miR156b     | Aquilegia caerulea   |                        | 0     | 0     | 1.29 | 1.26 | 0.28 | 1.04 | 0.5   | 2.38 |
|             | aqc-miR156a     | Aquilegia caerulea   |                        | 0     | 0     | 1.29 | 1.26 | 0.28 | 1.04 | 0.5   | 2.38 |
| dof-miR-736 | vvi-miR156e     | Vitis vinifera       | TGACAGAGGAGAGTGAGCAC   | 0     | 0.25  | 0    | 0    | 0    | 0    | 0     | 0.14 |
| dof-miR-737 | ola-miR-192-5p  | Oryzias latipes      | TGACCTATGAATTGACAGCCA  | 0.4   | 0.51  | 0.37 | 0    | 0.19 | 0    | 0.5   | 0.7  |
| dof-miR-738 | ppe-miR535b     | Prunus persica       | TGACGACGAGAGAGCACGC    | 0     | 0.51  | 0    | 0.18 | 0.56 | 0.21 | 0     | 0.28 |
|             | mdm-miR535d     | Malus domestica      |                        | 0     | 0.51  | 0    | 0.18 | 0.56 | 0.21 | 0     | 0.28 |
| dof-miR-739 | api-miR-279a    | Acyrtosiphon pisum   | TGACTAGATCCACACTCATCC  | 0     | 0     | 0    | 0    | 0    | 0    | 0.33  | 0    |
|             | cte-miR-279     | Capitella teleta     |                        | 0     | 0     | 0    | 0    | 0    | 0    | 0.33  | 0    |
| dof-miR-740 | ame-miR-279d    | Apis mellifera       | TGACTAGATCCACACTCATCCA | 0     | 0     | 0    | 0    | 0    | 0    | 0.17  | 0    |
|             | hme-miR-279a    | Heliconius melpomene |                        | 0     | 0     | 0    | 0    | 0    | 0    | 0.17  | 0    |
|             | mse-miR-279a    | Manduca sexta        |                        | 0     | 0     | 0    | 0    | 0    | 0    | 0.17  | 0    |
|             | dpu-miR-279a    | Daphnia pulex        |                        | 0     | 0     | 0    | 0    | 0    | 0    | 0.17  | 0    |
|             | isc-miR-279     | Ixodes scapularis    |                        | 0     | 0     | 0    | 0    | 0    | 0    | 0.17  | 0    |
|             | lgi-miR-279     | Lottia gigantea      |                        | 0     | 0     | 0    | 0    | 0    | 0    | 0.17  | 0    |
|             | tca-miR-279b-3p | Tribolium castaneum  |                        | 0     | 0     | 0    | 0    | 0    | 0    | 0.17  | 0    |
| dof-miR-741 | dre-miR-146b    | Danio rerio          | TGAGAACTGAATTCCAAGGGTG | 0     | 0     | 0    | 0.18 | 0    | 0    | 0     | 0    |
|             | ipu-miR-146b    | Ictalurus punctatus  |                        | 0     | 0     | 0    | 0.18 | 0    | 0    | 0     | 0    |
| dof-miR-742 | dre-miR-146a    | Danio rerio          | TGAGAACTGAATTCATAGATGG | 16.64 | 15.02 | 2.2  | 7.21 | 0    | 0    | 25.88 | 3.36 |
|             | ssa-miR-146a-5p | Salmo salar          |                        | 16.64 | 15.02 | 2.2  | 7.21 | 0    | 0    | 25.88 | 3.36 |
|             | ipu-miR-146a    | Ictalurus punctatus  |                        | 16.64 | 15.02 | 2.2  | 7.21 | 0    | 0    | 25.88 | 3.36 |
|             | ccr-miR-146a    | Cyprinus carpio      |                        | 16.64 | 15.02 | 2.2  | 7.21 | 0    | 0    | 25.88 | 3.36 |
| dof-miR-743 | aca-miR-146a-5p | Anolis carolinensis  | TGAGAACTGAATTCATAGGC   | 0     | 0     | 0    | 0    | 1.59 | 0.21 | 0     | 0    |
|             | ssc-miR-146b    | Sus scrofa           |                        | 0     | 0     | 0    | 0    | 1.59 | 0.21 | 0     | 0    |
| dof-miR-744 | gga-miR-146b-5p | Gallus gallus        | TGAGAACTGAATTCATAGGCG  | 0     | 0     | 0    | 0    | 0.09 | 0    | 0     | 0    |
|             | tgu-miR-146b-5p | Taeniopygia guttata  |                        | 0     | 0     | 0    | 0    | 0.09 | 0    | 0     | 0    |

|             |                 |                          |                         |     |      |      |      |      |      |      |      |
|-------------|-----------------|--------------------------|-------------------------|-----|------|------|------|------|------|------|------|
| dof-miR-745 | hsa-miR-146b-5p | Homo sapiens             | TGAGAACTGAATTCATAGGCT   | 0   | 0    | 0.18 | 0    | 6.62 | 0.31 | 0    | 0    |
|             | mmu-miR-146b-5p | Mus musculus             |                         | 0   | 0    | 0.18 | 0    | 6.62 | 0.31 | 0    | 0    |
|             | oan-miR-146b-5p | Ornithorhynchus anatinus |                         | 0   | 0    | 0.18 | 0    | 6.62 | 0.31 | 0    | 0    |
|             | pma-miR-146-5p  | Petromyzon marinus       |                         | 0   | 0    | 0.18 | 0    | 6.62 | 0.31 | 0    | 0    |
|             | ppy-miR-146b-5p | Pongo pygmaeus           |                         | 0   | 0    | 0.18 | 0    | 6.62 | 0.31 | 0    | 0    |
|             | mdo-miR-146b-5p | Monodelphis domestica    |                         | 0   | 0    | 0.18 | 0    | 6.62 | 0.31 | 0    | 0    |
|             | eca-miR-146b-5p | Equus caballus           |                         | 0   | 0    | 0.18 | 0    | 6.62 | 0.31 | 0    | 0    |
|             | mml-miR-146b-5p | Macaca mulatta           |                         | 0   | 0    | 0.18 | 0    | 6.62 | 0.31 | 0    | 0    |
|             | cfa-miR-146b    | Canis familiaris         |                         | 0   | 0    | 0.18 | 0    | 6.62 | 0.31 | 0    | 0    |
|             | ptr-miR-146b    | Pan troglodytes          |                         | 0   | 0    | 0.18 | 0    | 6.62 | 0.31 | 0    | 0    |
| dof-miR-746 | cgr-miR-146b-5p | Cricetulus griseus       | TGAGAACTGAATTCATAGGCTG  | 0   | 0    | 0    | 0    | 0.93 | 0    | 0    | 0    |
| dof-miR-747 | rno-miR-146b-5p | Rattus norvegicus        | TGAGAACTGAATTCATAGGCTGT | 0   | 0.25 | 0.18 | 0    | 4.38 | 0.63 | 0.33 | 0.14 |
|             | chi-miR-146b-5p | Capra hircus             |                         | 0   | 0.25 | 0.18 | 0    | 4.38 | 0.63 | 0.33 | 0.14 |
|             | ggo-miR-146b    | Gorilla gorilla          |                         | 0   | 0.25 | 0.18 | 0    | 4.38 | 0.63 | 0.33 | 0.14 |
|             | bta-miR-146b    | Bos taurus               |                         | 0   | 0.25 | 0.18 | 0    | 4.38 | 0.63 | 0.33 | 0.14 |
| dof-miR-748 | xtr-miR-146a    | Xenopus tropicalis       | TGAGAACTGAATTCATAGGTT   | 0   | 0    | 0.73 | 0.36 | 0    | 0    | 0    | 0    |
|             | chi-miR-146a    | Capra hircus             |                         | 0   | 0    | 0.73 | 0.36 | 0    | 0    | 0    | 0    |
| dof-miR-749 | gga-miR-146c-5p | Gallus gallus            | TGAGAACTGAATTCATGGACTG  | 0   | 0    | 0.18 | 0    | 0    | 0    | 0    | 0    |
| dof-miR-750 | ggo-miR-146a    | Gorilla gorilla          | TGAGAACTGAATTCATGGGT    | 0   | 0    | 0.18 | 0.18 | 0.56 | 0.42 | 0.33 | 0    |
| dof-miR-751 | mmu-miR-146a-5p | Mus musculus             | TGAGAACTGAATTCATGGGTT   | 0.2 | 1.02 | 1.65 | 1.08 | 8.49 | 1.25 | 1.17 | 0.14 |
|             | hsa-miR-146a-5p | Homo sapiens             |                         | 0.2 | 1.02 | 1.65 | 1.08 | 8.49 | 1.25 | 1.17 | 0.14 |
|             | rno-miR-146a-5p | Rattus norvegicus        |                         | 0.2 | 1.02 | 1.65 | 1.08 | 8.49 | 1.25 | 1.17 | 0.14 |
|             | gga-miR-146a-5p | Gallus gallus            |                         | 0.2 | 1.02 | 1.65 | 1.08 | 8.49 | 1.25 | 1.17 | 0.14 |
|             | tch-miR-146a-5p | Tupaia chinensis         |                         | 0.2 | 1.02 | 1.65 | 1.08 | 8.49 | 1.25 | 1.17 | 0.14 |
|             | cgr-miR-146a    | Cricetulus griseus       |                         | 0.2 | 1.02 | 1.65 | 1.08 | 8.49 | 1.25 | 1.17 | 0.14 |
|             | ppy-miR-146a    | Pongo pygmaeus           |                         | 0.2 | 1.02 | 1.65 | 1.08 | 8.49 | 1.25 | 1.17 | 0.14 |
|             | ssc-miR-146a-5p | Sus scrofa               |                         | 0.2 | 1.02 | 1.65 | 1.08 | 8.49 | 1.25 | 1.17 | 0.14 |
|             | mdo-miR-146a-5p | Monodelphis domestica    |                         | 0.2 | 1.02 | 1.65 | 1.08 | 8.49 | 1.25 | 1.17 | 0.14 |
|             | eca-miR-146a    | Equus caballus           |                         | 0.2 | 1.02 | 1.65 | 1.08 | 8.49 | 1.25 | 1.17 | 0.14 |
|             | tgu-miR-146c    | Taeniopygia guttata      |                         | 0.2 | 1.02 | 1.65 | 1.08 | 8.49 | 1.25 | 1.17 | 0.14 |
|             | mml-miR-146a-5p | Macaca mulatta           |                         | 0.2 | 1.02 | 1.65 | 1.08 | 8.49 | 1.25 | 1.17 | 0.14 |
|             | cfa-miR-146a    | Canis familiaris         |                         | 0.2 | 1.02 | 1.65 | 1.08 | 8.49 | 1.25 | 1.17 | 0.14 |
|             | ptr-miR-146a    | Pan troglodytes          |                         | 0.2 | 1.02 | 1.65 | 1.08 | 8.49 | 1.25 | 1.17 | 0.14 |
| dof-miR-752 | vvi-miR172d     | Vitis vinifera           | TGAGAATCTTGATGATGCTGCAT | 0   | 0.25 | 0    | 0    | 0    | 0    | 0    | 0    |

|             |                |                               |                         |      |      |       |       |      |      |      |      |
|-------------|----------------|-------------------------------|-------------------------|------|------|-------|-------|------|------|------|------|
|             | aau-miR172     | Acacia auriculiformis         |                         | 0    | 0.25 | 0     | 0     | 0    | 0    | 0    | 0    |
| dof-miR-753 | gso-miR3522a   | Glycine soja                  | TGAGACCAAATGAGCAGCTGA   | 0    | 0    | 0.37  | 0     | 0    | 0    | 0    | 0    |
| dof-miR-754 | bta-miR-769    | Bos taurus                    | TGAGACCTCCGGGTTCTGAGCT  | 0    | 0    | 0     | 0.36  | 0    | 0    | 0    | 0    |
| dof-miR-755 | hsa-miR-769-5p | Homo sapiens                  | TGAGACCTCTGGGTTCTGAGCT  | 0    | 0    | 0     | 0     | 0.19 | 0.1  | 0    | 0    |
| dof-miR-756 | mse-bantam     | Manduca sexta bantam          | TGAGATCATTGTGAAAGCTAAT  | 0.2  | 0    | 0     | 0     | 0    | 0    | 0    | 0    |
| dof-miR-757 | ame-bantam     | Apis mellifera bantam         | TGAGATCATTGTGAAAGCTGATT | 0    | 0    | 0     | 0     | 0.37 | 0.94 | 0    | 0    |
|             | nvi-bantam     | Nasonia vitripennis bantam    |                         | 0    | 0    | 0     | 0     | 0.37 | 0.94 | 0    | 0    |
|             | isc-bantam     | Ixodes scapularis bantam      |                         | 0    | 0    | 0     | 0     | 0.37 | 0.94 | 0    | 0    |
|             | tca-bantam-3p  | Tribolium castaneum bantam-3p |                         | 0    | 0    | 0     | 0     | 0.37 | 0.94 | 0    | 0    |
|             | dpu-bantam     | Daphnia pulex bantam          |                         | 0    | 0    | 0     | 0     | 0.37 | 0.94 | 0    | 0    |
| dof-miR-758 | ccr-miR-143    | Cyprinus carpio               | TGAGATGAAGCACTGTAGCT    | 5.35 | 6.36 | 12.68 | 12.61 | 1.21 | 0.83 | 6.18 | 0.7  |
|             | ola-miR-143    | Oryzias latipes               |                         | 5.35 | 6.36 | 12.68 | 12.61 | 1.21 | 0.83 | 6.18 | 0.7  |
| dof-miR-759 | mmu-miR-143-3p | Mus musculus                  | TGAGATGAAGCACTGTAGCTC   | 1.98 | 2.29 | 11.39 | 9.19  | 1.87 | 0.42 | 5.51 | 0.98 |
|             | hsa-miR-143-3p | Homo sapiens                  |                         | 1.98 | 2.29 | 11.39 | 9.19  | 1.87 | 0.42 | 5.51 | 0.98 |
|             | dre-miR-143    | Danio rerio                   |                         | 1.98 | 2.29 | 11.39 | 9.19  | 1.87 | 0.42 | 5.51 | 0.98 |
|             | oan-miR-143-3p | Ornithorhynchus anatinus      |                         | 1.98 | 2.29 | 11.39 | 9.19  | 1.87 | 0.42 | 5.51 | 0.98 |
|             | ssa-miR-143-3p | Salmo salar                   |                         | 1.98 | 2.29 | 11.39 | 9.19  | 1.87 | 0.42 | 5.51 | 0.98 |
|             | ipu-miR-143    | Ictalurus punctatus           |                         | 1.98 | 2.29 | 11.39 | 9.19  | 1.87 | 0.42 | 5.51 | 0.98 |
|             | oar-miR-143    | Ovis aries                    |                         | 1.98 | 2.29 | 11.39 | 9.19  | 1.87 | 0.42 | 5.51 | 0.98 |
|             | cgr-miR-143    | Cricetulus griseus            |                         | 1.98 | 2.29 | 11.39 | 9.19  | 1.87 | 0.42 | 5.51 | 0.98 |
|             | aca-miR-143-3p | Anolis carolinensis           |                         | 1.98 | 2.29 | 11.39 | 9.19  | 1.87 | 0.42 | 5.51 | 0.98 |
|             | eca-miR-143    | Equus caballus                |                         | 1.98 | 2.29 | 11.39 | 9.19  | 1.87 | 0.42 | 5.51 | 0.98 |
|             | ssc-miR-143-3p | Sus scrofa                    |                         | 1.98 | 2.29 | 11.39 | 9.19  | 1.87 | 0.42 | 5.51 | 0.98 |
|             | mml-miR-143-3p | Macaca mulatta                |                         | 1.98 | 2.29 | 11.39 | 9.19  | 1.87 | 0.42 | 5.51 | 0.98 |
|             | cfa-miR-143    | Canis familiaris              |                         | 1.98 | 2.29 | 11.39 | 9.19  | 1.87 | 0.42 | 5.51 | 0.98 |
| dof-miR-760 | rno-miR-143-3p | Rattus norvegicus             | TGAGATGAAGCACTGTAGCTCA  | 0    | 0    | 0.92  | 0.72  | 0.47 | 0.1  | 0.17 | 0    |
|             | ptr-miR-143    | Pan troglodytes               |                         | 0    | 0    | 0.92  | 0.72  | 0.47 | 0.1  | 0.17 | 0    |
|             | ggo-miR-143    | Gorilla gorilla               |                         | 0    | 0    | 0.92  | 0.72  | 0.47 | 0.1  | 0.17 | 0    |
|             | ppy-miR-143    | Pongo pygmaeus                |                         | 0    | 0    | 0.92  | 0.72  | 0.47 | 0.1  | 0.17 | 0    |
|             | lla-miR-143    | Lagothrix lagotricha          |                         | 0    | 0    | 0.92  | 0.72  | 0.47 | 0.1  | 0.17 | 0    |
|             | ppa-miR-143    | Pan paniscus                  |                         | 0    | 0    | 0.92  | 0.72  | 0.47 | 0.1  | 0.17 | 0    |
|             | oha-miR-143-3p | Ophiophagus hannah            |                         | 0    | 0    | 0.92  | 0.72  | 0.47 | 0.1  | 0.17 | 0    |
| dof-miR-761 | xtr-miR-143    | Xenopus tropicalis            | TGAGATGAAGCACTGTAGCTCG  | 0    | 0    | 0.73  | 0.36  | 0    | 0.1  | 0.17 | 0    |
|             | mdo-miR-143-3p | Monodelphis domestica         |                         | 0    | 0    | 0.73  | 0.36  | 0    | 0.1  | 0.17 | 0    |

|             |                        |                             |                          |      |      |      |      |      |      |      |      |
|-------------|------------------------|-----------------------------|--------------------------|------|------|------|------|------|------|------|------|
|             | chi-miR-143-3p         | Capra hircus                |                          | 0    | 0    | 0.73 | 0.36 | 0    | 0.1  | 0.17 | 0    |
|             | tch-miR-143-3p         | Tupaia chinensis            |                          | 0    | 0    | 0.73 | 0.36 | 0    | 0.1  | 0.17 | 0    |
|             | aja-miR-143            | Artibeus jamaicensis        |                          | 0    | 0    | 0.73 | 0.36 | 0    | 0.1  | 0.17 | 0    |
|             | bta-miR-143            | Bos taurus                  |                          | 0    | 0    | 0.73 | 0.36 | 0    | 0.1  | 0.17 | 0    |
| dof-miR-762 | ata-miR171a-3p         | Aegilops tauschii           | TGAGCCGAACCAATATCACTC    | 0    | 0    | 0    | 0    | 0    | 0    | 0    | 0.14 |
|             | stu-miR479             | Solanum tuberosum           |                          | 0    | 0    | 0    | 0    | 0    | 0    | 0    | 0.14 |
|             | mdm-miR171i            | Malus domestica             |                          | 0    | 0    | 0    | 0    | 0    | 0    | 0    | 0.14 |
| dof-miR-763 | pte-miR473a-3p         | Populus trichocarpa         | TGAGGCCTTTGGGGGAGAGTGG   | 0    | 0    | 0.18 | 0    | 0    | 0    | 0    | 0    |
| dof-miR-764 | ggo-miR-423            | Gorilla gorilla             | TGAGGGGCAGAGAGCGAGACTT   | 0    | 0    | 0    | 0    | 1.21 | 0.21 | 0    | 0    |
| dof-miR-765 | hsa-miR-423-5p         | Homo sapiens                | TGAGGGGCAGAGAGCGAGACTTT  | 0.4  | 1.27 | 0    | 0.18 | 1.21 | 0.42 | 0.17 | 0.14 |
|             | mmu-miR-423-5p         | Mus musculus                |                          | 0.4  | 1.27 | 0    | 0.18 | 1.21 | 0.42 | 0.17 | 0.14 |
|             | bta-miR-423-5p         | Bos taurus                  |                          | 0.4  | 1.27 | 0    | 0.18 | 1.21 | 0.42 | 0.17 | 0.14 |
|             | chi-miR-423-5p         | Capra hircus                |                          | 0.4  | 1.27 | 0    | 0.18 | 1.21 | 0.42 | 0.17 | 0.14 |
|             | cgr-miR-423-5p         | Cricetulus griseus          |                          | 0.4  | 1.27 | 0    | 0.18 | 1.21 | 0.42 | 0.17 | 0.14 |
|             | ppy-miR-423-5p         | Pongo pygmaeus              |                          | 0.4  | 1.27 | 0    | 0.18 | 1.21 | 0.42 | 0.17 | 0.14 |
|             | eca-miR-423-5p         | Equus caballus              |                          | 0.4  | 1.27 | 0    | 0.18 | 1.21 | 0.42 | 0.17 | 0.14 |
|             | ssc-miR-423-5p         | Sus scrofa                  |                          | 0.4  | 1.27 | 0    | 0.18 | 1.21 | 0.42 | 0.17 | 0.14 |
|             | mml-miR-423-5p         | Macaca mulatta              |                          | 0.4  | 1.27 | 0    | 0.18 | 1.21 | 0.42 | 0.17 | 0.14 |
|             | cfa-miR-423a           | Canis familiaris            |                          | 0.4  | 1.27 | 0    | 0.18 | 1.21 | 0.42 | 0.17 | 0.14 |
| dof-miR-766 | rno-miR-423-5p         | Rattus norvegicus           | TGAGGGGCAGAGAGCGAGACTTTT | 0    | 0    | 0    | 0    | 0.09 | 0.63 | 0    | 0    |
|             | efu-miR-423            | Eptesicus fuscus            |                          | 0    | 0    | 0    | 0    | 0.09 | 0.63 | 0    | 0    |
| dof-miR-767 | bta-let-7e             | Bos taurus let-7e           | TGAGGTAGGAGGTTGTATAGT    | 0    | 0    | 0.18 | 0.54 | 0.09 | 0.1  | 0    | 0    |
|             | ggo-let-7e             | Gorilla gorilla let-7e      |                          | 0    | 0    | 0.18 | 0.54 | 0.09 | 0.1  | 0    | 0    |
| dof-miR-768 | hsa-let-7e-5p          | Homo sapiens let-7e-5p      | TGAGGTAGGAGGTTGTATAGTT   | 0.4  | 0.25 | 1.65 | 1.26 | 0.37 | 0    | 0    | 0    |
|             | mmu-let-7e-5p          | Mus musculus let-7e-5p      |                          | 0.4  | 0.25 | 1.65 | 1.26 | 0.37 | 0    | 0    | 0    |
|             | rno-let-7e-5p          | Rattus norvegicus let-7e-5p |                          | 0.4  | 0.25 | 1.65 | 1.26 | 0.37 | 0    | 0    | 0    |
|             | chi-let-7e-5p          | Capra hircus let-7e-5p      |                          | 0.4  | 0.25 | 1.65 | 1.26 | 0.37 | 0    | 0    | 0    |
|             | tch-let-7e-5p          | Tupaia chinensis let-7e-5p  |                          | 0.4  | 0.25 | 1.65 | 1.26 | 0.37 | 0    | 0    | 0    |
|             | ppy-let-7e             | Pongo pygmaeus let-7e       |                          | 0.4  | 0.25 | 1.65 | 1.26 | 0.37 | 0    | 0    | 0    |
|             | eca-let-7e             | Equus caballus let-7e       |                          | 0.4  | 0.25 | 1.65 | 1.26 | 0.37 | 0    | 0    | 0    |
|             | ssc-let-7e             | Sus scrofa let-7e           |                          | 0.4  | 0.25 | 1.65 | 1.26 | 0.37 | 0    | 0    | 0    |
|             | mml-let-7e-5p          | Macaca mulatta let-7e-5p    |                          | 0.4  | 0.25 | 1.65 | 1.26 | 0.37 | 0    | 0    | 0    |
|             | cfa-let-7e             | Canis familiaris let-7e     |                          | 0.4  | 0.25 | 1.65 | 1.26 | 0.37 | 0    | 0    | 0    |
| ptr-let-7e  | Pan troglodytes let-7e | 0.4                         | 0.25                     | 1.65 | 1.26 | 0.37 | 0    | 0    | 0    |      |      |

|               |                               |                                    |                        |      |      |      |      |      |      |      |      |
|---------------|-------------------------------|------------------------------------|------------------------|------|------|------|------|------|------|------|------|
| dof-miR-769   | aca-miR-98-5p                 | Anolis carolinensis                | TGAGGTAGTAAGTTGTATTGT  | 0    | 0    | 0.18 | 0    | 0.28 | 0    | 0    | 0    |
| dof-miR-770   | hsa-miR-98-5p                 | Homo sapiens                       | TGAGGTAGTAAGTTGTATTGT  | 0.2  | 0.25 | 0.92 | 1.08 | 0.75 | 0    | 0.17 | 0.14 |
|               | mmu-miR-98-5p                 | Mus musculus                       |                        | 0.2  | 0.25 | 0.92 | 1.08 | 0.75 | 0    | 0.17 | 0.14 |
|               | rno-miR-98-5p                 | Rattus norvegicus                  |                        | 0.2  | 0.25 | 0.92 | 1.08 | 0.75 | 0    | 0.17 | 0.14 |
|               | mml-miR-98                    | Macaca mulatta                     |                        | 0.2  | 0.25 | 0.92 | 1.08 | 0.75 | 0    | 0.17 | 0.14 |
|               | ptr-miR-98                    | Pan troglodytes                    |                        | 0.2  | 0.25 | 0.92 | 1.08 | 0.75 | 0    | 0.17 | 0.14 |
|               | ggo-miR-98                    | Gorilla gorilla                    |                        | 0.2  | 0.25 | 0.92 | 1.08 | 0.75 | 0    | 0.17 | 0.14 |
|               | ppy-miR-98                    | Pongo pygmaeus                     |                        | 0.2  | 0.25 | 0.92 | 1.08 | 0.75 | 0    | 0.17 | 0.14 |
|               | age-miR-98                    | Ateles geoffroyi                   |                        | 0.2  | 0.25 | 0.92 | 1.08 | 0.75 | 0    | 0.17 | 0.14 |
|               | ppa-miR-98                    | Pan paniscus                       |                        | 0.2  | 0.25 | 0.92 | 1.08 | 0.75 | 0    | 0.17 | 0.14 |
|               | xtr-miR-98                    | Xenopus tropicalis                 |                        | 0.2  | 0.25 | 0.92 | 1.08 | 0.75 | 0    | 0.17 | 0.14 |
|               | bta-miR-98                    | Bos taurus                         |                        | 0.2  | 0.25 | 0.92 | 1.08 | 0.75 | 0    | 0.17 | 0.14 |
|               | oan-miR-98                    | Ornithorhynchus anatinus           |                        | 0.2  | 0.25 | 0.92 | 1.08 | 0.75 | 0    | 0.17 | 0.14 |
|               | chi-miR-98-5p                 | Capra hircus                       |                        | 0.2  | 0.25 | 0.92 | 1.08 | 0.75 | 0    | 0.17 | 0.14 |
|               | tch-miR-98-5p                 | Tupaia chinensis                   |                        | 0.2  | 0.25 | 0.92 | 1.08 | 0.75 | 0    | 0.17 | 0.14 |
|               | oha-miR-98-5p                 | Ophiophagus hannah                 |                        | 0.2  | 0.25 | 0.92 | 1.08 | 0.75 | 0    | 0.17 | 0.14 |
|               | cgr-miR-98                    | Cricetulus griseus                 |                        | 0.2  | 0.25 | 0.92 | 1.08 | 0.75 | 0    | 0.17 | 0.14 |
|               | eca-miR-98                    | Equus caballus                     |                        | 0.2  | 0.25 | 0.92 | 1.08 | 0.75 | 0    | 0.17 | 0.14 |
|               | ssc-miR-98                    | Sus scrofa                         |                        | 0.2  | 0.25 | 0.92 | 1.08 | 0.75 | 0    | 0.17 | 0.14 |
| cfa-miR-98    | Canis familiaris              | 0.2                                | 0.25                   | 0.92 | 1.08 | 0.75 | 0    | 0.17 | 0.14 |      |      |
| dof-miR-771   | dre-let-7h                    | Danio rerio let-7h                 | TGAGGTAGTAAGTTGTGTTGTT | 0    | 0.25 | 0.55 | 1.26 | 0    | 0    | 0.33 | 0    |
|               | fru-let-7h                    | Fugu rubripes let-7h               |                        | 0    | 0.25 | 0.55 | 1.26 | 0    | 0    | 0.33 | 0    |
|               | tmi-let-7h                    | Tetraodon nigroviridis let-7h      |                        | 0    | 0.25 | 0.55 | 1.26 | 0    | 0    | 0.33 | 0    |
|               | ssa-let-7h-5p                 | Salmo salar let-7h-5p              |                        | 0    | 0.25 | 0.55 | 1.26 | 0    | 0    | 0.33 | 0    |
|               | ipu-let-7h                    | Ictalurus punctatus let-7h         |                        | 0    | 0.25 | 0.55 | 1.26 | 0    | 0    | 0.33 | 0    |
| dof-miR-772   | gga-let-7k-5p                 | Gallus gallus let-7k-5p            | TGAGGTAGTAGATTGAATAGTT | 1.78 | 2.8  | 1.1  | 1.08 | 0.09 | 0    | 4.17 | 0.42 |
|               | dre-let-7e                    | Danio rerio let-7e                 |                        | 1.78 | 2.8  | 1.1  | 1.08 | 0.09 | 0    | 4.17 | 0.42 |
|               | fru-let-7e                    | Fugu rubripes let-7e               |                        | 1.78 | 2.8  | 1.1  | 1.08 | 0.09 | 0    | 4.17 | 0.42 |
|               | tmi-let-7e                    | Tetraodon nigroviridis let-7e      |                        | 1.78 | 2.8  | 1.1  | 1.08 | 0.09 | 0    | 4.17 | 0.42 |
|               | oan-let-7e-5p                 | Ornithorhynchus anatinus let-7e-5p |                        | 1.78 | 2.8  | 1.1  | 1.08 | 0.09 | 0    | 4.17 | 0.42 |
|               | oha-let-7e-5p                 | Ophiophagus hannah let-7e-5p       |                        | 1.78 | 2.8  | 1.1  | 1.08 | 0.09 | 0    | 4.17 | 0.42 |
|               | ssa-let-7e-5p                 | Salmo salar let-7e-5p              |                        | 1.78 | 2.8  | 1.1  | 1.08 | 0.09 | 0    | 4.17 | 0.42 |
|               | ipu-let-7e                    | Ictalurus punctatus let-7e         |                        | 1.78 | 2.8  | 1.1  | 1.08 | 0.09 | 0    | 4.17 | 0.42 |
| aca-let-7e-5p | Anolis carolinensis let-7e-5p | 1.78                               | 2.8                    | 1.1  | 1.08 | 0.09 | 0    | 4.17 | 0.42 |      |      |

|               |                               |                                    |                         |      |       |       |       |       |      |      |      |
|---------------|-------------------------------|------------------------------------|-------------------------|------|-------|-------|-------|-------|------|------|------|
|               | tgu-let-7e-5p                 | Taeniopygia guttata let-7e-5p      |                         | 1.78 | 2.8   | 1.1   | 1.08  | 0.09  | 0    | 4.17 | 0.42 |
| dof-miR-773   | oar-let-7f                    | Ovis aries let-7f                  | TGAGGTTAGTAGATTGTATAGT  | 1.39 | 0.76  | 1.65  | 2.34  | 5.04  | 0.83 | 1    | 1.12 |
|               | ggo-let-7f                    | Gorilla gorilla let-7f             |                         | 1.39 | 0.76  | 1.65  | 2.34  | 5.04  | 0.83 | 1    | 1.12 |
| dof-miR-774   | hsa-let-7f-5p                 | Homo sapiens let-7f-5p             | TGAGGTTAGTAGATTGTATAGTT | 1.98 | 2.8   | 8.64  | 10.63 | 26.67 | 2.92 | 2.17 | 2.1  |
|               | mmu-let-7f-5p                 | Mus musculus let-7f-5p             |                         | 1.98 | 2.8   | 8.64  | 10.63 | 26.67 | 2.92 | 2.17 | 2.1  |
|               | rno-let-7f-5p                 | Rattus norvegicus let-7f-5p        |                         | 1.98 | 2.8   | 8.64  | 10.63 | 26.67 | 2.92 | 2.17 | 2.1  |
|               | gga-let-7f-5p                 | Gallus gallus let-7f-5p            |                         | 1.98 | 2.8   | 8.64  | 10.63 | 26.67 | 2.92 | 2.17 | 2.1  |
|               | dre-let-7f                    | Danio rerio let-7f                 |                         | 1.98 | 2.8   | 8.64  | 10.63 | 26.67 | 2.92 | 2.17 | 2.1  |
|               | ssc-let-7f                    | Sus scrofa let-7f                  |                         | 1.98 | 2.8   | 8.64  | 10.63 | 26.67 | 2.92 | 2.17 | 2.1  |
|               | bta-let-7f                    | Bos taurus let-7f                  |                         | 1.98 | 2.8   | 8.64  | 10.63 | 26.67 | 2.92 | 2.17 | 2.1  |
|               | xtr-let-7f                    | Xenopus tropicalis let-7f          |                         | 1.98 | 2.8   | 8.64  | 10.63 | 26.67 | 2.92 | 2.17 | 2.1  |
|               | mdo-let-7f-5p                 | Monodelphis domestica let-7f-5p    |                         | 1.98 | 2.8   | 8.64  | 10.63 | 26.67 | 2.92 | 2.17 | 2.1  |
|               | oan-let-7f-5p                 | Ornithorhynchus anatinus let-7f-5p |                         | 1.98 | 2.8   | 8.64  | 10.63 | 26.67 | 2.92 | 2.17 | 2.1  |
|               | chi-let-7f-5p                 | Capra hircus let-7f-5p             |                         | 1.98 | 2.8   | 8.64  | 10.63 | 26.67 | 2.92 | 2.17 | 2.1  |
|               | tch-let-7f-5p                 | Tupaia chinensis let-7f-5p         |                         | 1.98 | 2.8   | 8.64  | 10.63 | 26.67 | 2.92 | 2.17 | 2.1  |
|               | oha-let-7f-5p                 | Ophiophagus hannah let-7f-5p       |                         | 1.98 | 2.8   | 8.64  | 10.63 | 26.67 | 2.92 | 2.17 | 2.1  |
|               | ipu-let-7f                    | Ictalurus punctatus let-7f         |                         | 1.98 | 2.8   | 8.64  | 10.63 | 26.67 | 2.92 | 2.17 | 2.1  |
|               | cgr-let-7f                    | Cricetulus griseus let-7f          |                         | 1.98 | 2.8   | 8.64  | 10.63 | 26.67 | 2.92 | 2.17 | 2.1  |
|               | aca-let-7f-5p                 | Anolis carolinensis let-7f-5p      |                         | 1.98 | 2.8   | 8.64  | 10.63 | 26.67 | 2.92 | 2.17 | 2.1  |
|               | ppy-let-7f                    | Pongo pygmaeus let-7f              |                         | 1.98 | 2.8   | 8.64  | 10.63 | 26.67 | 2.92 | 2.17 | 2.1  |
|               | eca-let-7f                    | Equus caballus let-7f              |                         | 1.98 | 2.8   | 8.64  | 10.63 | 26.67 | 2.92 | 2.17 | 2.1  |
| tgu-let-7f-5p | Taeniopygia guttata let-7f-5p | 1.98                               | 2.8                     | 8.64 | 10.63 | 26.67 | 2.92  | 2.17  | 2.1  |      |      |
| mml-let-7f-5p | Macaca mulatta let-7f-5p      | 1.98                               | 2.8                     | 8.64 | 10.63 | 26.67 | 2.92  | 2.17  | 2.1  |      |      |
| cfa-let-7f    | Canis familiaris let-7f       | 1.98                               | 2.8                     | 8.64 | 10.63 | 26.67 | 2.92  | 2.17  | 2.1  |      |      |
| ptr-let-7f    | Pan troglodytes let-7f        | 1.98                               | 2.8                     | 8.64 | 10.63 | 26.67 | 2.92  | 2.17  | 2.1  |      |      |
| dof-miR-775   | pma-let-7c                    | Petromyzon marinus let-7c          | TGAGGTTAGTAGATTGTATGGTT | 0    | 0     | 0     | 0     | 0.19  | 0.1  | 0    | 0    |
| dof-miR-776   | ssa-let-7f-5p                 | Salmo salar let-7f-5p              | TGAGGTTAGTAGATTGTATTGTT | 0    | 0     | 0     | 0     | 0.09  | 0    | 0    | 0    |
| dof-miR-777   | mse-let-7a                    | Manduca sexta let-7a               | TGAGGTTAGTAGGTTGTATAG   | 0    | 0     | 0.18  | 0.54  | 1.59  | 0.42 | 0.17 | 0    |
|               | tca-let-7-5p                  | Tribolium castaneum let-7-5p       |                         | 0    | 0     | 0.18  | 0.54  | 1.59  | 0.42 | 0.17 | 0    |
| dof-miR-778   | dme-let-7-5p                  | Drosophila melanogaster let-7-5p   | TGAGGTTAGTAGGTTGTATAGT  | 0.79 | 3.56  | 4.96  | 5.23  | 4.29  | 0.83 | 1.67 | 1.26 |
|               | dps-let-7                     | Drosophila pseudoobscura let-7     |                         | 0.79 | 3.56  | 4.96  | 5.23  | 4.29  | 0.83 | 1.67 | 1.26 |
|               | bmo-let-7-5p                  | Bombyx mori let-7-5p               |                         | 0.79 | 3.56  | 4.96  | 5.23  | 4.29  | 0.83 | 1.67 | 1.26 |
|               | ame-let-7                     | Apis mellifera let-7               |                         | 0.79 | 3.56  | 4.96  | 5.23  | 4.29  | 0.83 | 1.67 | 1.26 |
|               | ola-let-7a-5p                 | Oryzias latipes let-7a-5p          |                         | 0.79 | 3.56  | 4.96  | 5.23  | 4.29  | 0.83 | 1.67 | 1.26 |

|               |                                  |                                 |                        |       |       |       |      |       |      |      |      |
|---------------|----------------------------------|---------------------------------|------------------------|-------|-------|-------|------|-------|------|------|------|
|               | sha-let-7a                       | Sarcophilus harrisii let-7a     |                        | 0.79  | 3.56  | 4.96  | 5.23 | 4.29  | 0.83 | 1.67 | 1.26 |
|               | ggo-let-7a                       | Gorilla gorilla let-7a          |                        | 0.79  | 3.56  | 4.96  | 5.23 | 4.29  | 0.83 | 1.67 | 1.26 |
|               | nvi-let-7                        | Nasonia vitripennis let-7       |                        | 0.79  | 3.56  | 4.96  | 5.23 | 4.29  | 0.83 | 1.67 | 1.26 |
|               | ngi-let-7                        | Nasonia giraulti let-7          |                        | 0.79  | 3.56  | 4.96  | 5.23 | 4.29  | 0.83 | 1.67 | 1.26 |
|               | isc-let-7                        | Ixodes scapularis let-7         |                        | 0.79  | 3.56  | 4.96  | 5.23 | 4.29  | 0.83 | 1.67 | 1.26 |
|               | dan-let-7                        | Drosophila ananassae let-7      |                        | 0.79  | 3.56  | 4.96  | 5.23 | 4.29  | 0.83 | 1.67 | 1.26 |
|               | der-let-7                        | Drosophila erecta let-7         |                        | 0.79  | 3.56  | 4.96  | 5.23 | 4.29  | 0.83 | 1.67 | 1.26 |
|               | dgr-let-7                        | Drosophila grimshawi let-7      |                        | 0.79  | 3.56  | 4.96  | 5.23 | 4.29  | 0.83 | 1.67 | 1.26 |
|               | dmo-let-7                        | Drosophila mojavensis let-7     |                        | 0.79  | 3.56  | 4.96  | 5.23 | 4.29  | 0.83 | 1.67 | 1.26 |
|               | dpe-let-7                        | Drosophila persimilis let-7     |                        | 0.79  | 3.56  | 4.96  | 5.23 | 4.29  | 0.83 | 1.67 | 1.26 |
|               | dse-let-7                        | Drosophila sechellia let-7      |                        | 0.79  | 3.56  | 4.96  | 5.23 | 4.29  | 0.83 | 1.67 | 1.26 |
|               | dsi-let-7                        | Drosophila simulans let-7       |                        | 0.79  | 3.56  | 4.96  | 5.23 | 4.29  | 0.83 | 1.67 | 1.26 |
|               | dvi-let-7                        | Drosophila virilis let-7        |                        | 0.79  | 3.56  | 4.96  | 5.23 | 4.29  | 0.83 | 1.67 | 1.26 |
|               | dwi-let-7                        | Drosophila willistoni let-7     |                        | 0.79  | 3.56  | 4.96  | 5.23 | 4.29  | 0.83 | 1.67 | 1.26 |
|               | dya-let-7                        | Drosophila yakuba let-7         |                        | 0.79  | 3.56  | 4.96  | 5.23 | 4.29  | 0.83 | 1.67 | 1.26 |
|               | cte-let-7                        | Capitella teleta let-7          |                        | 0.79  | 3.56  | 4.96  | 5.23 | 4.29  | 0.83 | 1.67 | 1.26 |
| dof-miR-779   | hme-let-7                        | Heliconius melpomene let-7      | TGAGGTAGTAGGTTGTATAGTA | 0     | 0     | 0.18  | 0.18 | 0.09  | 0.1  | 0    | 0    |
| dof-miR-780   | cel-let-7-5p                     | Caenorhabditis elegans let-7-5p | TGAGGTAGTAGGTTGTATAGTT | 3.56  | 10.95 | 15.43 | 23.6 | 18.09 | 4.07 | 6.68 | 2.66 |
|               | hsa-let-7a-5p                    | Homo sapiens let-7a-5p          |                        | 3.56  | 10.95 | 15.43 | 23.6 | 18.09 | 4.07 | 6.68 | 2.66 |
|               | cbr-let-7                        | Caenorhabditis briggsae let-7   |                        | 3.56  | 10.95 | 15.43 | 23.6 | 18.09 | 4.07 | 6.68 | 2.66 |
|               | mmu-let-7a-5p                    | Mus musculus let-7a-5p          |                        | 3.56  | 10.95 | 15.43 | 23.6 | 18.09 | 4.07 | 6.68 | 2.66 |
|               | rno-let-7a-5p                    | Rattus norvegicus let-7a-5p     |                        | 3.56  | 10.95 | 15.43 | 23.6 | 18.09 | 4.07 | 6.68 | 2.66 |
|               | gga-let-7a-5p                    | Gallus gallus let-7a-5p         |                        | 3.56  | 10.95 | 15.43 | 23.6 | 18.09 | 4.07 | 6.68 | 2.66 |
|               | gga-let-7j-5p                    | Gallus gallus let-7j-5p         |                        | 3.56  | 10.95 | 15.43 | 23.6 | 18.09 | 4.07 | 6.68 | 2.66 |
|               | dre-let-7a                       | Danio rerio let-7a              |                        | 3.56  | 10.95 | 15.43 | 23.6 | 18.09 | 4.07 | 6.68 | 2.66 |
|               | fru-let-7a                       | Fugu rubripes let-7a            |                        | 3.56  | 10.95 | 15.43 | 23.6 | 18.09 | 4.07 | 6.68 | 2.66 |
|               | tni-let-7a                       | Tetraodon nigroviridis let-7a   |                        | 3.56  | 10.95 | 15.43 | 23.6 | 18.09 | 4.07 | 6.68 | 2.66 |
|               | xtr-let-7a                       | Xenopus tropicalis let-7a       |                        | 3.56  | 10.95 | 15.43 | 23.6 | 18.09 | 4.07 | 6.68 | 2.66 |
|               | bta-let-7a-5p                    | Bos taurus let-7a-5p            |                        | 3.56  | 10.95 | 15.43 | 23.6 | 18.09 | 4.07 | 6.68 | 2.66 |
|               | mdo-let-7a-5p                    | Monodelphis domestica let-7a-5p |                        | 3.56  | 10.95 | 15.43 | 23.6 | 18.09 | 4.07 | 6.68 | 2.66 |
|               | chi-let-7a-5p                    | Capra hircus let-7a-5p          |                        | 3.56  | 10.95 | 15.43 | 23.6 | 18.09 | 4.07 | 6.68 | 2.66 |
|               | oha-let-7a                       | Ophiophagus hannah let-7a       |                        | 3.56  | 10.95 | 15.43 | 23.6 | 18.09 | 4.07 | 6.68 | 2.66 |
|               | oha-let-7a-5p                    | Ophiophagus hannah let-7a-5p    |                        | 3.56  | 10.95 | 15.43 | 23.6 | 18.09 | 4.07 | 6.68 | 2.66 |
| bbe-let-7a-5p | Branchiostoma belcheri let-7a-5p | 3.56                            | 10.95                  | 15.43 | 23.6  | 18.09 | 4.07 | 6.68  | 2.66 |      |      |



|             |                   |                                  |                         |      |       |       |      |       |      |      |      |
|-------------|-------------------|----------------------------------|-------------------------|------|-------|-------|------|-------|------|------|------|
|             | ssa-let-7a-5p     | Salmo salar let-7a-5p            |                         | 3.56 | 10.95 | 15.43 | 23.6 | 18.09 | 4.07 | 6.68 | 2.66 |
|             | ipu-let-7a        | Ictalurus punctatus let-7a       |                         | 3.56 | 10.95 | 15.43 | 23.6 | 18.09 | 4.07 | 6.68 | 2.66 |
|             | cbn-let-7         | Caenorhabditis breneri let-7     |                         | 3.56 | 10.95 | 15.43 | 23.6 | 18.09 | 4.07 | 6.68 | 2.66 |
|             | oar-let-7a        | Ovis aries let-7a                |                         | 3.56 | 10.95 | 15.43 | 23.6 | 18.09 | 4.07 | 6.68 | 2.66 |
|             | ccr-let-7a        | Cyprinus carpio let-7a           |                         | 3.56 | 10.95 | 15.43 | 23.6 | 18.09 | 4.07 | 6.68 | 2.66 |
|             | ola-let-7a        | Oryzias latipes let-7a           |                         | 3.56 | 10.95 | 15.43 | 23.6 | 18.09 | 4.07 | 6.68 | 2.66 |
|             | cgr-let-7a        | Cricetulus griseus let-7a        |                         | 3.56 | 10.95 | 15.43 | 23.6 | 18.09 | 4.07 | 6.68 | 2.66 |
|             | pma-let-7a        | Petromyzon marinus let-7a        |                         | 3.56 | 10.95 | 15.43 | 23.6 | 18.09 | 4.07 | 6.68 | 2.66 |
|             | asu-let-7-5p      | Ascaris suum let-7-5p            |                         | 3.56 | 10.95 | 15.43 | 23.6 | 18.09 | 4.07 | 6.68 | 2.66 |
|             | aca-let-7a-5p     | Anolis carolinensis let-7a-5p    |                         | 3.56 | 10.95 | 15.43 | 23.6 | 18.09 | 4.07 | 6.68 | 2.66 |
|             | ppy-let-7a        | Pongo pygmaeus let-7a            |                         | 3.56 | 10.95 | 15.43 | 23.6 | 18.09 | 4.07 | 6.68 | 2.66 |
|             | eca-let-7a        | Equus caballus let-7a            |                         | 3.56 | 10.95 | 15.43 | 23.6 | 18.09 | 4.07 | 6.68 | 2.66 |
|             | ssc-let-7a        | Sus scrofa let-7a                |                         | 3.56 | 10.95 | 15.43 | 23.6 | 18.09 | 4.07 | 6.68 | 2.66 |
|             | bma-let-7         | Brugia malayi let-7              |                         | 3.56 | 10.95 | 15.43 | 23.6 | 18.09 | 4.07 | 6.68 | 2.66 |
|             | tgu-let-7a-5p     | Taeniopygia guttata let-7a-5p    |                         | 3.56 | 10.95 | 15.43 | 23.6 | 18.09 | 4.07 | 6.68 | 2.66 |
|             | mml-let-7a-5p     | Macaca mulatta let-7a-5p         |                         | 3.56 | 10.95 | 15.43 | 23.6 | 18.09 | 4.07 | 6.68 | 2.66 |
|             | cfa-let-7a        | Canis familiaris let-7a          |                         | 3.56 | 10.95 | 15.43 | 23.6 | 18.09 | 4.07 | 6.68 | 2.66 |
|             | ptr-let-7a        | Pan troglodytes let-7a           |                         | 3.56 | 10.95 | 15.43 | 23.6 | 18.09 | 4.07 | 6.68 | 2.66 |
|             | bfl-let-7a-5p     | Branchiostoma floridae let-7a-5p |                         | 3.56 | 10.95 | 15.43 | 23.6 | 18.09 | 4.07 | 6.68 | 2.66 |
|             | lgi-let-7         | Lottia gigantea let-7            |                         | 3.56 | 10.95 | 15.43 | 23.6 | 18.09 | 4.07 | 6.68 | 2.66 |
|             | sko-let-7         | Saccoglossus kowalevskii let-7   |                         | 3.56 | 10.95 | 15.43 | 23.6 | 18.09 | 4.07 | 6.68 | 2.66 |
|             | crm-let-7         | Caenorhabditis remanei let-7     |                         | 3.56 | 10.95 | 15.43 | 23.6 | 18.09 | 4.07 | 6.68 | 2.66 |
|             | ppc-let-7         | Pristionchus pacificus let-7     |                         | 3.56 | 10.95 | 15.43 | 23.6 | 18.09 | 4.07 | 6.68 | 2.66 |
| dof-miR-781 | prd-let-7-5p      | Panagrellus redivivus let-7-5p   | TGAGGTAGTAGGTTGTATAGTTT | 0.59 | 1.27  | 0.73  | 1.26 | 1.21  | 0    | 0.5  | 0.28 |
| dof-miR-782 | ola-let-7c        | Oryzias latipes let-7c           | TGAGGTAGTAGGTTGTATGGT   | 0    | 0     | 0.37  | 0.36 | 0     | 0    | 0.17 | 0    |
|             | ggo-let-7c        | Gorilla gorilla let-7c           |                         | 0    | 0     | 0.37  | 0.36 | 0     | 0    | 0.17 | 0    |
| dof-miR-783 | hsa-let-7c-5p     | Homo sapiens let-7c-5p           | TGAGGTAGTAGGTTGTATGGTT  | 0.4  | 0     | 4.41  | 7.93 | 0.65  | 0.1  | 0.5  | 0.14 |
|             | mmu-let-7c-5p     | Mus musculus let-7c-5p           |                         | 0.4  | 0     | 4.41  | 7.93 | 0.65  | 0.1  | 0.5  | 0.14 |
|             | rno-let-7c-5p     | Rattus norvegicus let-7c-5p      |                         | 0.4  | 0     | 4.41  | 7.93 | 0.65  | 0.1  | 0.5  | 0.14 |
|             | gga-let-7c-5p     | Gallus gallus let-7c-5p          |                         | 0.4  | 0     | 4.41  | 7.93 | 0.65  | 0.1  | 0.5  | 0.14 |
|             | dre-let-7c-5p     | Danio rerio let-7c-5p            |                         | 0.4  | 0     | 4.41  | 7.93 | 0.65  | 0.1  | 0.5  | 0.14 |
|             | ssc-let-7c        | Sus scrofa let-7c                |                         | 0.4  | 0     | 4.41  | 7.93 | 0.65  | 0.1  | 0.5  | 0.14 |
|             | xtr-let-7c        | Xenopus tropicalis let-7c        |                         | 0.4  | 0     | 4.41  | 7.93 | 0.65  | 0.1  | 0.5  | 0.14 |
| bta-let-7c  | Bos taurus let-7c | 0.4                              | 0                       | 4.41 | 7.93  | 0.65  | 0.1  | 0.5   | 0.14 |      |      |

|             |               |                                    |                        |     |      |      |      |      |      |      |      |
|-------------|---------------|------------------------------------|------------------------|-----|------|------|------|------|------|------|------|
|             | chi-let-7c-5p | Capra hircus let-7c-5p             |                        | 0.4 | 0    | 4.41 | 7.93 | 0.65 | 0.1  | 0.5  | 0.14 |
|             | oha-let-7c-5p | Ophiophagus hannah let-7c-5p       |                        | 0.4 | 0    | 4.41 | 7.93 | 0.65 | 0.1  | 0.5  | 0.14 |
|             | ssa-let-7c-5p | Salmo salar let-7c-5p              |                        | 0.4 | 0    | 4.41 | 7.93 | 0.65 | 0.1  | 0.5  | 0.14 |
|             | oan-let-7c-5p | Ornithorhynchus anatinus let-7c-5p |                        | 0.4 | 0    | 4.41 | 7.93 | 0.65 | 0.1  | 0.5  | 0.14 |
|             | ipu-let-7c    | Ictalurus punctatus let-7c         |                        | 0.4 | 0    | 4.41 | 7.93 | 0.65 | 0.1  | 0.5  | 0.14 |
|             | hhi-let-7c    | Hippoglossus hippoglossus let-7c   |                        | 0.4 | 0    | 4.41 | 7.93 | 0.65 | 0.1  | 0.5  | 0.14 |
|             | pol-let-7a-5p | Paralichthys olivaceus let-7a-5p   |                        | 0.4 | 0    | 4.41 | 7.93 | 0.65 | 0.1  | 0.5  | 0.14 |
|             | aca-let-7c-5p | Anolis carolinensis let-7c-5p      |                        | 0.4 | 0    | 4.41 | 7.93 | 0.65 | 0.1  | 0.5  | 0.14 |
|             | ppy-let-7c    | Pongo pygmaeus let-7c              |                        | 0.4 | 0    | 4.41 | 7.93 | 0.65 | 0.1  | 0.5  | 0.14 |
|             | eca-let-7c    | Equus caballus let-7c              |                        | 0.4 | 0    | 4.41 | 7.93 | 0.65 | 0.1  | 0.5  | 0.14 |
|             | tgu-let-7c-5p | Taeniopygia guttata let-7c-5p      |                        | 0.4 | 0    | 4.41 | 7.93 | 0.65 | 0.1  | 0.5  | 0.14 |
|             | oar-let-7c    | Ovis aries let-7c                  |                        | 0.4 | 0    | 4.41 | 7.93 | 0.65 | 0.1  | 0.5  | 0.14 |
|             | mml-let-7c-5p | Macaca mulatta let-7c-5p           |                        | 0.4 | 0    | 4.41 | 7.93 | 0.65 | 0.1  | 0.5  | 0.14 |
|             | cfa-let-7c    | Canis familiaris let-7c            |                        | 0.4 | 0    | 4.41 | 7.93 | 0.65 | 0.1  | 0.5  | 0.14 |
|             | ptr-let-7c    | Pan troglodytes let-7c             |                        | 0.4 | 0    | 4.41 | 7.93 | 0.65 | 0.1  | 0.5  | 0.14 |
| dof-miR-784 | ipu-let-7b    | Ictalurus punctatus let-7b         | TGAGGTAGTAGGTTGTGTGGT  | 0.2 | 0.51 | 2.39 | 1.08 | 1.96 | 0.73 | 0    | 0    |
|             | ola-let-7b    | Oryzias latipes let-7b             |                        | 0.2 | 0.51 | 2.39 | 1.08 | 1.96 | 0.73 | 0    | 0    |
|             | ggo-let-7b    | Gorilla gorilla let-7b             |                        | 0.2 | 0.51 | 2.39 | 1.08 | 1.96 | 0.73 | 0    | 0    |
|             | aca-let-7b-5p | Anolis carolinensis let-7b-5p      |                        | 0.2 | 0.51 | 2.39 | 1.08 | 1.96 | 0.73 | 0    | 0    |
|             | oar-let-7b    | Ovis aries let-7b                  |                        | 0.2 | 0.51 | 2.39 | 1.08 | 1.96 | 0.73 | 0    | 0    |
| dof-miR-785 | hsa-let-7b-5p | Homo sapiens let-7b-5p             | TGAGGTAGTAGGTTGTGTGGTT | 0.4 | 0.25 | 6.43 | 5.05 | 2.05 | 0.73 | 0.67 | 0.7  |
|             | mmu-let-7b-5p | Mus musculus let-7b-5p             |                        | 0.4 | 0.25 | 6.43 | 5.05 | 2.05 | 0.73 | 0.67 | 0.7  |
|             | rno-let-7b-5p | Rattus norvegicus let-7b-5p        |                        | 0.4 | 0.25 | 6.43 | 5.05 | 2.05 | 0.73 | 0.67 | 0.7  |
|             | gga-let-7b    | Gallus gallus let-7b               |                        | 0.4 | 0.25 | 6.43 | 5.05 | 2.05 | 0.73 | 0.67 | 0.7  |
|             | dre-let-7b    | Danio rerio let-7b                 |                        | 0.4 | 0.25 | 6.43 | 5.05 | 2.05 | 0.73 | 0.67 | 0.7  |
|             | fru-let-7b    | Fugu rubripes let-7b               |                        | 0.4 | 0.25 | 6.43 | 5.05 | 2.05 | 0.73 | 0.67 | 0.7  |
|             | tni-let-7b    | Tetraodon nigroviridis let-7b      |                        | 0.4 | 0.25 | 6.43 | 5.05 | 2.05 | 0.73 | 0.67 | 0.7  |
|             | mdo-let-7b    | Monodelphis domestica let-7b       |                        | 0.4 | 0.25 | 6.43 | 5.05 | 2.05 | 0.73 | 0.67 | 0.7  |
|             | bta-let-7b    | Bos taurus let-7b                  |                        | 0.4 | 0.25 | 6.43 | 5.05 | 2.05 | 0.73 | 0.67 | 0.7  |
|             | oan-let-7b-5p | Ornithorhynchus anatinus let-7b-5p |                        | 0.4 | 0.25 | 6.43 | 5.05 | 2.05 | 0.73 | 0.67 | 0.7  |
|             | chi-let-7b-5p | Capra hircus let-7b-5p             |                        | 0.4 | 0.25 | 6.43 | 5.05 | 2.05 | 0.73 | 0.67 | 0.7  |
|             | oha-let-7b-5p | Ophiophagus hannah let-7b-5p       |                        | 0.4 | 0.25 | 6.43 | 5.05 | 2.05 | 0.73 | 0.67 | 0.7  |
|             | ssa-let-7b-5p | Salmo salar let-7b-5p              |                        | 0.4 | 0.25 | 6.43 | 5.05 | 2.05 | 0.73 | 0.67 | 0.7  |
|             | pol-let-7b-5p | Paralichthys olivaceus let-7b-5p   |                        | 0.4 | 0.25 | 6.43 | 5.05 | 2.05 | 0.73 | 0.67 | 0.7  |

|             |               |                                    |                        |      |      |      |      |       |      |      |      |
|-------------|---------------|------------------------------------|------------------------|------|------|------|------|-------|------|------|------|
|             | ccr-let-7b    | Cyprinus carpio let-7b             |                        | 0.4  | 0.25 | 6.43 | 5.05 | 2.05  | 0.73 | 0.67 | 0.7  |
|             | cgr-let-7b    | Cricetulus griseus let-7b          |                        | 0.4  | 0.25 | 6.43 | 5.05 | 2.05  | 0.73 | 0.67 | 0.7  |
|             | ppy-let-7b    | Pongo pygmaeus let-7b              |                        | 0.4  | 0.25 | 6.43 | 5.05 | 2.05  | 0.73 | 0.67 | 0.7  |
|             | tgu-let-7b-5p | Taeniopygia guttata let-7b-5p      |                        | 0.4  | 0.25 | 6.43 | 5.05 | 2.05  | 0.73 | 0.67 | 0.7  |
|             | mml-let-7b-5p | Macaca mulatta let-7b-5p           |                        | 0.4  | 0.25 | 6.43 | 5.05 | 2.05  | 0.73 | 0.67 | 0.7  |
|             | ptr-let-7b    | Pan troglodytes let-7b             |                        | 0.4  | 0.25 | 6.43 | 5.05 | 2.05  | 0.73 | 0.67 | 0.7  |
|             | cfa-let-7b    | Canis familiaris let-7b            |                        | 0.4  | 0.25 | 6.43 | 5.05 | 2.05  | 0.73 | 0.67 | 0.7  |
| dof-miR-786 | gga-let-7g-5p | Gallus gallus let-7g-5p            | TGAGGTAGTAGTTTGTACAGT  | 0.2  | 1.53 | 0.73 | 0.36 | 4.57  | 0.52 | 0    | 0.42 |
|             | mdo-let-7g-5p | Monodelphis domestica let-7g-5p    |                        | 0.2  | 1.53 | 0.73 | 0.36 | 4.57  | 0.52 | 0    | 0.42 |
|             | oar-let-7g    | Ovis aries let-7g                  |                        | 0.2  | 1.53 | 0.73 | 0.36 | 4.57  | 0.52 | 0    | 0.42 |
|             | sha-let-7g    | Sarcophilus harrisii let-7g        |                        | 0.2  | 1.53 | 0.73 | 0.36 | 4.57  | 0.52 | 0    | 0.42 |
|             | ggo-let-7g    | Gorilla gorilla let-7g             |                        | 0.2  | 1.53 | 0.73 | 0.36 | 4.57  | 0.52 | 0    | 0.42 |
| dof-miR-787 | mmu-let-7g-5p | Mus musculus let-7g-5p             | TGAGGTAGTAGTTTGTACAGTT | 0.99 | 3.31 | 4.23 | 3.06 | 23.04 | 1.67 | 1.67 | 1.4  |
|             | hsa-let-7g-5p | Homo sapiens let-7g-5p             |                        | 0.99 | 3.31 | 4.23 | 3.06 | 23.04 | 1.67 | 1.67 | 1.4  |
|             | bta-let-7g    | Bos taurus let-7g                  |                        | 0.99 | 3.31 | 4.23 | 3.06 | 23.04 | 1.67 | 1.67 | 1.4  |
|             | oan-let-7g-5p | Ornithorhynchus anatinus let-7g-5p |                        | 0.99 | 3.31 | 4.23 | 3.06 | 23.04 | 1.67 | 1.67 | 1.4  |
|             | rno-let-7g-5p | Rattus norvegicus let-7g-5p        |                        | 0.99 | 3.31 | 4.23 | 3.06 | 23.04 | 1.67 | 1.67 | 1.4  |
|             | chi-let-7g-5p | Capra hircus let-7g-5p             |                        | 0.99 | 3.31 | 4.23 | 3.06 | 23.04 | 1.67 | 1.67 | 1.4  |
|             | tch-let-7g-5p | Tupaia chinensis let-7g-5p         |                        | 0.99 | 3.31 | 4.23 | 3.06 | 23.04 | 1.67 | 1.67 | 1.4  |
|             | oha-let-7g-5p | Ophiophagus hannah let-7g-5p       |                        | 0.99 | 3.31 | 4.23 | 3.06 | 23.04 | 1.67 | 1.67 | 1.4  |
|             | cgr-let-7g-5p | Cricetulus griseus let-7g-5p       |                        | 0.99 | 3.31 | 4.23 | 3.06 | 23.04 | 1.67 | 1.67 | 1.4  |
|             | aca-let-7g    | Anolis carolinensis let-7g         |                        | 0.99 | 3.31 | 4.23 | 3.06 | 23.04 | 1.67 | 1.67 | 1.4  |
|             | ppy-let-7g    | Pongo pygmaeus let-7g              |                        | 0.99 | 3.31 | 4.23 | 3.06 | 23.04 | 1.67 | 1.67 | 1.4  |
|             | eca-let-7g    | Equus caballus let-7g              |                        | 0.99 | 3.31 | 4.23 | 3.06 | 23.04 | 1.67 | 1.67 | 1.4  |
|             | ssc-let-7g    | Sus scrofa let-7g                  |                        | 0.99 | 3.31 | 4.23 | 3.06 | 23.04 | 1.67 | 1.67 | 1.4  |
|             | tgu-let-7g-5p | Taeniopygia guttata let-7g-5p      |                        | 0.99 | 3.31 | 4.23 | 3.06 | 23.04 | 1.67 | 1.67 | 1.4  |
|             | mml-let-7g-5p | Macaca mulatta let-7g-5p           |                        | 0.99 | 3.31 | 4.23 | 3.06 | 23.04 | 1.67 | 1.67 | 1.4  |
|             | cfa-let-7g    | Canis familiaris let-7g            |                        | 0.99 | 3.31 | 4.23 | 3.06 | 23.04 | 1.67 | 1.67 | 1.4  |
|             | ptr-let-7g    | Pan troglodytes let-7g             |                        | 0.99 | 3.31 | 4.23 | 3.06 | 23.04 | 1.67 | 1.67 | 1.4  |
| dof-miR-788 | dre-let-7g    | Danio rerio let-7g                 | TGAGGTAGTAGTTTGTATAGTT | 0.59 | 1.27 | 4.41 | 5.59 | 0     | 0    | 2.5  | 0.14 |
|             | fru-let-7g    | Fugu rubripes let-7g               |                        | 0.59 | 1.27 | 4.41 | 5.59 | 0     | 0    | 2.5  | 0.14 |
|             | tmi-let-7g    | Tetraodon nigroviridis let-7g      |                        | 0.59 | 1.27 | 4.41 | 5.59 | 0     | 0    | 2.5  | 0.14 |
|             | ssa-let-7g-5p | Salmo salar let-7g-5p              |                        | 0.59 | 1.27 | 4.41 | 5.59 | 0     | 0    | 2.5  | 0.14 |
|             | ipu-let-7g    | Ictalurus punctatus let-7g         |                        | 0.59 | 1.27 | 4.41 | 5.59 | 0     | 0    | 2.5  | 0.14 |

|               |                          |                                  |                        |      |      |      |      |      |      |      |      |
|---------------|--------------------------|----------------------------------|------------------------|------|------|------|------|------|------|------|------|
|               | ccr-let-7g               | Cyprinus carpio let-7g           |                        | 0.59 | 1.27 | 4.41 | 5.59 | 0    | 0    | 2.5  | 0.14 |
| dof-miR-789   | ssc-let-7i               | Sus scrofa let-7i                | TGAGGTAGTAGTTGTGCT     | 0    | 0    | 0    | 0    | 0.28 | 0.1  | 0    | 0    |
| dof-miR-790   | gga-let-7i               | Gallus gallus let-7i             | TGAGGTAGTAGTTGTGCTGT   | 0    | 0.25 | 0.92 | 1.08 | 1.77 | 1.04 | 0    | 0    |
|               | xtr-let-7i               | Xenopus tropicalis let-7i        |                        | 0    | 0.25 | 0.92 | 1.08 | 1.77 | 1.04 | 0    | 0    |
|               | mdo-let-7i-5p            | Monodelphis domestica let-7i-5p  |                        | 0    | 0.25 | 0.92 | 1.08 | 1.77 | 1.04 | 0    | 0    |
|               | ccr-let-7i               | Cyprinus carpio let-7i           |                        | 0    | 0.25 | 0.92 | 1.08 | 1.77 | 1.04 | 0    | 0    |
|               | sha-let-7i               | Sarcophilus harrisii let-7i      |                        | 0    | 0.25 | 0.92 | 1.08 | 1.77 | 1.04 | 0    | 0    |
|               | ggo-let-7i               | Gorilla gorilla let-7i           |                        | 0    | 0.25 | 0.92 | 1.08 | 1.77 | 1.04 | 0    | 0    |
| dof-miR-791   | mmu-let-7i-5p            | Mus musculus let-7i-5p           | TGAGGTAGTAGTTGTGCTGTT  | 0.59 | 2.55 | 3.49 | 5.95 | 7.09 | 1.88 | 1.84 | 1.12 |
|               | hsa-let-7i-5p            | Homo sapiens let-7i-5p           |                        | 0.59 | 2.55 | 3.49 | 5.95 | 7.09 | 1.88 | 1.84 | 1.12 |
|               | rno-let-7i-5p            | Rattus norvegicus let-7i-5p      |                        | 0.59 | 2.55 | 3.49 | 5.95 | 7.09 | 1.88 | 1.84 | 1.12 |
|               | dre-let-7i               | Danio rerio let-7i               |                        | 0.59 | 2.55 | 3.49 | 5.95 | 7.09 | 1.88 | 1.84 | 1.12 |
|               | fru-let-7i               | Fugu rubripes let-7i             |                        | 0.59 | 2.55 | 3.49 | 5.95 | 7.09 | 1.88 | 1.84 | 1.12 |
|               | tmi-let-7i               | Tetraodon nigroviridis let-7i    |                        | 0.59 | 2.55 | 3.49 | 5.95 | 7.09 | 1.88 | 1.84 | 1.12 |
|               | bta-let-7i               | Bos taurus let-7i                |                        | 0.59 | 2.55 | 3.49 | 5.95 | 7.09 | 1.88 | 1.84 | 1.12 |
|               | chi-let-7i-5p            | Capra hircus let-7i-5p           |                        | 0.59 | 2.55 | 3.49 | 5.95 | 7.09 | 1.88 | 1.84 | 1.12 |
|               | tch-let-7i-5p            | Tupaia chinensis let-7i-5p       |                        | 0.59 | 2.55 | 3.49 | 5.95 | 7.09 | 1.88 | 1.84 | 1.12 |
|               | oha-let-7i-5p            | Ophiophagus hannah let-7i-5p     |                        | 0.59 | 2.55 | 3.49 | 5.95 | 7.09 | 1.88 | 1.84 | 1.12 |
|               | ssa-let-7i-5p            | Salmo salar let-7i-5p            |                        | 0.59 | 2.55 | 3.49 | 5.95 | 7.09 | 1.88 | 1.84 | 1.12 |
|               | ipu-let-7i               | Ictalurus punctatus let-7i       |                        | 0.59 | 2.55 | 3.49 | 5.95 | 7.09 | 1.88 | 1.84 | 1.12 |
|               | oar-let-7i               | Ovis aries let-7i                |                        | 0.59 | 2.55 | 3.49 | 5.95 | 7.09 | 1.88 | 1.84 | 1.12 |
|               | aca-let-7i-5p            | Anolis carolinensis let-7i-5p    |                        | 0.59 | 2.55 | 3.49 | 5.95 | 7.09 | 1.88 | 1.84 | 1.12 |
|               | ppy-let-7i               | Pongo pygmaeus let-7i            |                        | 0.59 | 2.55 | 3.49 | 5.95 | 7.09 | 1.88 | 1.84 | 1.12 |
|               | tgu-let-7i-5p            | Taeniopygia guttata let-7i-5p    |                        | 0.59 | 2.55 | 3.49 | 5.95 | 7.09 | 1.88 | 1.84 | 1.12 |
| mml-let-7i-5p | Macaca mulatta let-7i-5p | 0.59                             | 2.55                   | 3.49 | 5.95 | 7.09 | 1.88 | 1.84 | 1.12 |      |      |
| ptr-let-7i    | Pan troglodytes let-7i   | 0.59                             | 2.55                   | 3.49 | 5.95 | 7.09 | 1.88 | 1.84 | 1.12 |      |      |
| dof-miR-792   | dre-let-7d-5p            | Danio rerio let-7d-5p            | TGAGGTAGTTGGTTGTATGGTT | 0.2  | 0    | 0.18 | 0    | 0    | 0    | 1.34 | 0.28 |
|               | fru-let-7d               | Fugu rubripes let-7d             |                        | 0.2  | 0    | 0.18 | 0    | 0    | 0    | 1.34 | 0.28 |
|               | tmi-let-7d               | Tetraodon nigroviridis let-7d    |                        | 0.2  | 0    | 0.18 | 0    | 0    | 0    | 1.34 | 0.28 |
|               | ssa-let-7d-5p            | Salmo salar let-7d-5p            |                        | 0.2  | 0    | 0.18 | 0    | 0    | 0    | 1.34 | 0.28 |
|               | ipu-let-7d               | Ictalurus punctatus let-7d       |                        | 0.2  | 0    | 0.18 | 0    | 0    | 0    | 1.34 | 0.28 |
|               | pol-let-7d-5p            | Paralichthys olivaceus let-7d-5p |                        | 0.2  | 0    | 0.18 | 0    | 0    | 0    | 1.34 | 0.28 |
| dof-miR-793   | dre-let-7j               | Danio rerio let-7j               | TGAGGTAGTTGTTTGTACAGTT | 0.4  | 0    | 0.92 | 1.98 | 0    | 0    | 0.5  | 0    |
|               | ipu-let-7j               | Ictalurus punctatus let-7j       |                        | 0.4  | 0    | 0.92 | 1.98 | 0    | 0    | 0.5  | 0    |

|             |                        |                                  |                         |      |      |      |      |      |     |      |      |
|-------------|------------------------|----------------------------------|-------------------------|------|------|------|------|------|-----|------|------|
|             | hhi-let-7j             | Hippoglossus hippoglossus let-7j |                         | 0.4  | 0    | 0.92 | 1.98 | 0    | 0   | 0.5  | 0    |
|             | ccr-let-7j             | Cyprinus carpio let-7j           |                         | 0.4  | 0    | 0.92 | 1.98 | 0    | 0   | 0.5  | 0    |
| dof-miR-794 | hsa-miR-7854-3p        | Homo sapiens                     | TGAGGTGACCGCAGATGGGAA   | 0    | 0    | 0    | 0    | 0.09 | 0   | 0    | 0    |
| dof-miR-795 | dme-miR-12-5p          | Drosophila melanogaster          | TGAGTATTACATCAGGTACTGGT | 0    | 0    | 0    | 0    | 0.28 | 0   | 0    | 0    |
|             | dps-miR-12             | Drosophila pseudoobscura         |                         | 0    | 0    | 0    | 0    | 0.28 | 0   | 0    | 0    |
|             | ame-miR-12             | Apis mellifera                   |                         | 0    | 0    | 0    | 0    | 0.28 | 0   | 0    | 0    |
|             | aga-miR-12             | Anopheles gambiae                |                         | 0    | 0    | 0    | 0    | 0.28 | 0   | 0    | 0    |
|             | nvi-miR-12             | Nasonia vitripennis              |                         | 0    | 0    | 0    | 0    | 0.28 | 0   | 0    | 0    |
|             | nlo-miR-12             | Nasonia longicornis              |                         | 0    | 0    | 0    | 0    | 0.28 | 0   | 0    | 0    |
|             | isc-miR-12             | Ixodes scapularis                |                         | 0    | 0    | 0    | 0    | 0.28 | 0   | 0    | 0    |
|             | aae-miR-12-5p          | Aedes aegypti                    |                         | 0    | 0    | 0    | 0    | 0.28 | 0   | 0    | 0    |
|             | cqu-miR-12-3p          | Culex quinquefasciatus           |                         | 0    | 0    | 0    | 0    | 0.28 | 0   | 0    | 0    |
|             | dan-miR-12             | Drosophila ananassae             |                         | 0    | 0    | 0    | 0    | 0.28 | 0   | 0    | 0    |
|             | der-miR-12             | Drosophila erecta                |                         | 0    | 0    | 0    | 0    | 0.28 | 0   | 0    | 0    |
|             | dgr-miR-12             | Drosophila grimshawi             |                         | 0    | 0    | 0    | 0    | 0.28 | 0   | 0    | 0    |
|             | dmo-miR-12             | Drosophila mojavensis            |                         | 0    | 0    | 0    | 0    | 0.28 | 0   | 0    | 0    |
|             | dpe-miR-12             | Drosophila persimilis            |                         | 0    | 0    | 0    | 0    | 0.28 | 0   | 0    | 0    |
|             | dse-miR-12             | Drosophila sechellia             |                         | 0    | 0    | 0    | 0    | 0.28 | 0   | 0    | 0    |
|             | dsi-miR-12             | Drosophila simulans              |                         | 0    | 0    | 0    | 0    | 0.28 | 0   | 0    | 0    |
|             | dvi-miR-12-5p          | Drosophila virilis               |                         | 0    | 0    | 0    | 0    | 0.28 | 0   | 0    | 0    |
|             | dwi-miR-12             | Drosophila willistoni            |                         | 0    | 0    | 0    | 0    | 0.28 | 0   | 0    | 0    |
| dpu-miR-12  | Daphnia pulex          | 0                                | 0                       | 0    | 0    | 0.28 | 0    | 0    | 0   |      |      |
| dof-miR-796 | sly-miR156e-5p         | Solanum lycopersicum             | TGATAGAAGAGAGTGAGCAC    | 0.59 | 0    | 0.18 | 0    | 0    | 0.1 | 0.17 | 0.28 |
| dof-miR-797 | mmu-miR-190a-5p        | Mus musculus                     | TGATATGTTTGATATATTAGGT  | 0    | 0.25 | 0    | 0    | 0    | 0   | 0.33 | 0    |
|             | hsa-miR-190a-5p        | Homo sapiens                     |                         | 0    | 0.25 | 0    | 0    | 0    | 0   | 0.33 | 0    |
|             | rno-miR-190a-5p        | Rattus norvegicus                |                         | 0    | 0.25 | 0    | 0    | 0    | 0   | 0.33 | 0    |
|             | gga-miR-190a-5p        | Gallus gallus                    |                         | 0    | 0.25 | 0    | 0    | 0    | 0   | 0.33 | 0    |
|             | dre-miR-190a           | Danio rerio                      |                         | 0    | 0.25 | 0    | 0    | 0    | 0   | 0.33 | 0    |
|             | mml-miR-190a-5p        | Macaca mulatta                   |                         | 0    | 0.25 | 0    | 0    | 0    | 0   | 0.33 | 0    |
|             | ptr-miR-190a           | Pan troglodytes                  |                         | 0    | 0.25 | 0    | 0    | 0    | 0   | 0.33 | 0    |
|             | ggo-miR-190a           | Gorilla gorilla                  |                         | 0    | 0.25 | 0    | 0    | 0    | 0   | 0.33 | 0    |
|             | ppa-miR-190            | Pan paniscus                     |                         | 0    | 0.25 | 0    | 0    | 0    | 0   | 0.33 | 0    |
|             | fru-miR-190            | Fugu rubripes                    |                         | 0    | 0.25 | 0    | 0    | 0    | 0   | 0.33 | 0    |
| tmi-miR-190 | Tetraodon nigroviridis | 0                                | 0.25                    | 0    | 0    | 0    | 0    | 0.33 | 0   |      |      |

|             |                         |                          |                        |      |       |       |       |       |       |      |      |
|-------------|-------------------------|--------------------------|------------------------|------|-------|-------|-------|-------|-------|------|------|
|             | oan-miR-190a-5p         | Ornithorhynchus anatinus |                        | 0    | 0.25  | 0     | 0     | 0     | 0     | 0.33 | 0    |
|             | sha-miR-190             | Sarcophilus harrisii     |                        | 0    | 0.25  | 0     | 0     | 0     | 0     | 0.33 | 0    |
|             | ppy-miR-190a            | Pongo pygmaeus           |                        | 0    | 0.25  | 0     | 0     | 0     | 0     | 0.33 | 0    |
|             | mdo-miR-190a-5p         | Monodelphis domestica    |                        | 0    | 0.25  | 0     | 0     | 0     | 0     | 0.33 | 0    |
|             | eca-miR-190a            | Equus caballus           |                        | 0    | 0.25  | 0     | 0     | 0     | 0     | 0.33 | 0    |
|             | tgu-miR-190-5p          | Taeniopygia guttata      |                        | 0    | 0.25  | 0     | 0     | 0     | 0     | 0.33 | 0    |
|             | bta-miR-190a            | Bos taurus               |                        | 0    | 0.25  | 0     | 0     | 0     | 0     | 0.33 | 0    |
|             | cfa-miR-190a            | Canis familiaris         |                        | 0    | 0.25  | 0     | 0     | 0     | 0     | 0.33 | 0    |
| dof-miR-798 | hsa-miR-4772-5p         | Homo sapiens             | TGATCAGGCAAAATTGCAGACT | 0    | 0     | 0     | 0     | 0.19  | 0     | 0    | 0    |
| dof-miR-799 | htu-miR171a             | Helianthus tuberosus     | TGATTGAGCCGTGCCAATAT   | 0    | 0     | 0.18  | 0     | 0     | 0     | 0    | 0    |
| dof-miR-800 | osa-miR171b             | Oryza sativa             | TGATTGAGCCGTGCCAATATC  | 0    | 21.64 | 37.3  | 17.3  | 17.44 | 30.26 | 36.9 | 0.56 |
|             | osa-miR171c-3p          | Oryza sativa             |                        | 0    | 21.64 | 37.3  | 17.3  | 17.44 | 30.26 | 36.9 | 0.56 |
|             | osa-miR171d-3p          | Oryza sativa             |                        | 0    | 21.64 | 37.3  | 17.3  | 17.44 | 30.26 | 36.9 | 0.56 |
|             | osa-miR171e-3p          | Oryza sativa             |                        | 0    | 21.64 | 37.3  | 17.3  | 17.44 | 30.26 | 36.9 | 0.56 |
|             | osa-miR171f-3p          | Oryza sativa             |                        | 0    | 21.64 | 37.3  | 17.3  | 17.44 | 30.26 | 36.9 | 0.56 |
|             | sbi-miR171b             | Sorghum bicolor          |                        | 0    | 21.64 | 37.3  | 17.3  | 17.44 | 30.26 | 36.9 | 0.56 |
|             | sbi-miR171d             | Sorghum bicolor          |                        | 0    | 21.64 | 37.3  | 17.3  | 17.44 | 30.26 | 36.9 | 0.56 |
|             | sbi-miR171a             | Sorghum bicolor          |                        | 0    | 21.64 | 37.3  | 17.3  | 17.44 | 30.26 | 36.9 | 0.56 |
|             | zma-miR171d-3p          | Zea mays                 |                        | 0    | 21.64 | 37.3  | 17.3  | 17.44 | 30.26 | 36.9 | 0.56 |
|             | zma-miR171j-3p          | Zea mays                 |                        | 0    | 21.64 | 37.3  | 17.3  | 17.44 | 30.26 | 36.9 | 0.56 |
|             | zma-miR171e-3p          | Zea mays                 |                        | 0    | 21.64 | 37.3  | 17.3  | 17.44 | 30.26 | 36.9 | 0.56 |
|             | zma-miR171i-3p          | Zea mays                 |                        | 0    | 21.64 | 37.3  | 17.3  | 17.44 | 30.26 | 36.9 | 0.56 |
|             | ptc-miR171e             | Populus trichocarpa      |                        | 0    | 21.64 | 37.3  | 17.3  | 17.44 | 30.26 | 36.9 | 0.56 |
|             | ptc-miR171f             | Populus trichocarpa      |                        | 0    | 21.64 | 37.3  | 17.3  | 17.44 | 30.26 | 36.9 | 0.56 |
|             | ptc-miR171g-3p          | Populus trichocarpa      |                        | 0    | 21.64 | 37.3  | 17.3  | 17.44 | 30.26 | 36.9 | 0.56 |
|             | ptc-miR171h-3p          | Populus trichocarpa      |                        | 0    | 21.64 | 37.3  | 17.3  | 17.44 | 30.26 | 36.9 | 0.56 |
|             | ptc-miR171i             | Populus trichocarpa      |                        | 0    | 21.64 | 37.3  | 17.3  | 17.44 | 30.26 | 36.9 | 0.56 |
|             | mtr-miR171d             | Medicago truncatula      |                        | 0    | 21.64 | 37.3  | 17.3  | 17.44 | 30.26 | 36.9 | 0.56 |
|             | tae-miR171a             | Triticum aestivum        |                        | 0    | 21.64 | 37.3  | 17.3  | 17.44 | 30.26 | 36.9 | 0.56 |
|             | vvi-miR171a             | Vitis vinifera           |                        | 0    | 21.64 | 37.3  | 17.3  | 17.44 | 30.26 | 36.9 | 0.56 |
| vvi-miR171c | Vitis vinifera          | 0                        | 21.64                  | 37.3 | 17.3  | 17.44 | 30.26 | 36.9  | 0.56  |      |      |
| vvi-miR171d | Vitis vinifera          | 0                        | 21.64                  | 37.3 | 17.3  | 17.44 | 30.26 | 36.9  | 0.56  |      |      |
| vvi-miR171i | Vitis vinifera          | 0                        | 21.64                  | 37.3 | 17.3  | 17.44 | 30.26 | 36.9  | 0.56  |      |      |
| bdi-miR171e | Brachypodium distachyon | 0                        | 21.64                  | 37.3 | 17.3  | 17.44 | 30.26 | 36.9  | 0.56  |      |      |



|             |                |                            |                        |        |         |       |       |       |        |       |         |
|-------------|----------------|----------------------------|------------------------|--------|---------|-------|-------|-------|--------|-------|---------|
|             | tcc-miR171f    | Theobroma cacao            |                        | 0      | 21.64   | 37.3  | 17.3  | 17.44 | 30.26  | 36.9  | 0.56    |
|             | tcc-miR171g    | Theobroma cacao            |                        | 0      | 21.64   | 37.3  | 17.3  | 17.44 | 30.26  | 36.9  | 0.56    |
|             | tcc-miR171h    | Theobroma cacao            |                        | 0      | 21.64   | 37.3  | 17.3  | 17.44 | 30.26  | 36.9  | 0.56    |
|             | gma-miR171e    | Glycine max                |                        | 0      | 21.64   | 37.3  | 17.3  | 17.44 | 30.26  | 36.9  | 0.56    |
|             | gma-miR171f    | Glycine max                |                        | 0      | 21.64   | 37.3  | 17.3  | 17.44 | 30.26  | 36.9  | 0.56    |
|             | gma-miR171g    | Glycine max                |                        | 0      | 21.64   | 37.3  | 17.3  | 17.44 | 30.26  | 36.9  | 0.56    |
|             | bdi-miR171b    | Brachypodium distachyon    |                        | 0      | 21.64   | 37.3  | 17.3  | 17.44 | 30.26  | 36.9  | 0.56    |
|             | bdi-miR171d-3p | Brachypodium distachyon    |                        | 0      | 21.64   | 37.3  | 17.3  | 17.44 | 30.26  | 36.9  | 0.56    |
|             | gma-miR171j-3p | Glycine max                |                        | 0      | 21.64   | 37.3  | 17.3  | 17.44 | 30.26  | 36.9  | 0.56    |
|             | hvu-miR171-3p  | Hordeum vulgare            |                        | 0      | 21.64   | 37.3  | 17.3  | 17.44 | 30.26  | 36.9  | 0.56    |
|             | far-miR171     | Festuca arundinacea        |                        | 0      | 21.64   | 37.3  | 17.3  | 17.44 | 30.26  | 36.9  | 0.56    |
|             | crt-miR171     | Citrus reticulata          |                        | 0      | 21.64   | 37.3  | 17.3  | 17.44 | 30.26  | 36.9  | 0.56    |
|             | rco-miR171c    | Ricinus communis           |                        | 0      | 21.64   | 37.3  | 17.3  | 17.44 | 30.26  | 36.9  | 0.56    |
|             | rco-miR171d    | Ricinus communis           |                        | 0      | 21.64   | 37.3  | 17.3  | 17.44 | 30.26  | 36.9  | 0.56    |
|             | rco-miR171e    | Ricinus communis           |                        | 0      | 21.64   | 37.3  | 17.3  | 17.44 | 30.26  | 36.9  | 0.56    |
|             | rco-miR171f    | Ricinus communis           |                        | 0      | 21.64   | 37.3  | 17.3  | 17.44 | 30.26  | 36.9  | 0.56    |
|             | sly-miR171a    | Solanum lycopersicum       |                        | 0      | 21.64   | 37.3  | 17.3  | 17.44 | 30.26  | 36.9  | 0.56    |
|             | sbi-miR171i    | Sorghum bicolor            |                        | 0      | 21.64   | 37.3  | 17.3  | 17.44 | 30.26  | 36.9  | 0.56    |
|             | sbi-miR171k    | Sorghum bicolor            |                        | 0      | 21.64   | 37.3  | 17.3  | 17.44 | 30.26  | 36.9  | 0.56    |
|             | bdi-miR171c-3p | Brachypodium distachyon    |                        | 0      | 21.64   | 37.3  | 17.3  | 17.44 | 30.26  | 36.9  | 0.56    |
|             | aqc-miR171a    | Aquilegia caerulea         |                        | 0      | 21.64   | 37.3  | 17.3  | 17.44 | 30.26  | 36.9  | 0.56    |
|             | aqc-miR171b    | Aquilegia caerulea         |                        | 0      | 21.64   | 37.3  | 17.3  | 17.44 | 30.26  | 36.9  | 0.56    |
|             | aqc-miR171d    | Aquilegia caerulea         |                        | 0      | 21.64   | 37.3  | 17.3  | 17.44 | 30.26  | 36.9  | 0.56    |
| dof-miR-801 | ath-miR170-3p  | Arabidopsis thaliana       | TGATTGAGCCGTGCAATATC   | 0      | 0       | 0     | 0     | 0     | 0.1    | 0     | 0       |
|             | stu-miR171c-3p | Solanum tuberosum          |                        | 0      | 0       | 0     | 0     | 0     | 0.1    | 0     | 0       |
|             | aly-miR170-3p  | Arabidopsis lyrata         |                        | 0      | 0       | 0     | 0     | 0     | 0.1    | 0     | 0       |
| dof-miR-802 | gma-miR408d    | Glycine max                | TGCACTGCCTCTCCCTGGC    | 15.25  | 30.04   | 0.73  | 10.81 | 1.21  | 3.03   | 6.18  | 43.72   |
| dof-miR-803 | ppt-miR408b    | Physcomitrella patens      |                        | 322.23 | 2916.69 | 14.15 | 91.17 | 34.23 | 147.53 | 331.9 | 1192.73 |
|             | stu-miR408b-3p | Solanum tuberosum          | TGCACTGCCTCTCCCTGGCT   | 322.23 | 2916.69 | 14.15 | 91.17 | 34.23 | 147.53 | 331.9 | 1192.73 |
|             | cca-miR408     | Cynara cardunculus         |                        | 322.23 | 2916.69 | 14.15 | 91.17 | 34.23 | 147.53 | 331.9 | 1192.73 |
|             | nta-miR408     | Nicotiana tabacum          |                        | 322.23 | 2916.69 | 14.15 | 91.17 | 34.23 | 147.53 | 331.9 | 1192.73 |
| dof-miR-804 | smo-miR408     | Selaginella moellendorffii | TGCACTGCCTCTCCCTGGCTG  | 0.2    | 1.02    | 0     | 0     | 0     | 0.1    | 0.17  | 0       |
| dof-miR-805 | gga-miR-455-3p | Gallus gallus              | TGCAGTCCATGGGCATATACAC | 0      | 0       | 0     | 0     | 0     | 0      | 0.17  | 0       |
| dof-miR-806 | osa-miR444b.2  | Oryza sativa               | TGCAGTTGTTGTCTCAAGCTT  | 0      | 0       | 0     | 0     | 0     | 0.1    | 0     | 0       |



|             |                 |                         |                       |      |       |      |       |      |      |      |      |
|-------------|-----------------|-------------------------|-----------------------|------|-------|------|-------|------|------|------|------|
|             | osa-miR444c.2   | Oryza sativa            |                       | 0    | 0     | 0    | 0     | 0    | 0.1  | 0    | 0    |
|             | bdi-miR444c     | Brachypodium distachyon |                       | 0    | 0     | 0    | 0     | 0    | 0.1  | 0    | 0    |
|             | bdi-miR444d     | Brachypodium distachyon |                       | 0    | 0     | 0    | 0     | 0    | 0.1  | 0    | 0    |
|             | zma-miR444a     | Zea mays                |                       | 0    | 0     | 0    | 0     | 0    | 0.1  | 0    | 0    |
|             | zma-miR444b     | Zea mays                |                       | 0    | 0     | 0    | 0     | 0    | 0.1  | 0    | 0    |
|             | ssp-miR444c-3p  | Saccharum sp.           |                       | 0    | 0     | 0    | 0     | 0    | 0.1  | 0    | 0    |
| dof-miR-807 | tcc-miR530a     | Theobroma cacao         | TGCATTGCACCTGCACCTC   | 0    | 0     | 0    | 2.88  | 0    | 0    | 0    | 0    |
| dof-miR-808 | ptc-miR530a     | Populus trichocarpa     | TGCAATTGCACCTGCACCTT  | 0    | 0     | 0.18 | 0     | 0    | 0    | 0    | 0    |
|             | mes-miR530a     | Manihot esculenta       |                       | 0    | 0     | 0.18 | 0     | 0    | 0    | 0    | 0    |
|             | mes-miR530b     | Manihot esculenta       |                       | 0    | 0     | 0.18 | 0     | 0    | 0    | 0    | 0    |
|             | htu-miR530      | Helianthus tuberosus    |                       | 0    | 0     | 0.18 | 0     | 0    | 0    | 0    | 0    |
|             | cme-miR530a     | Cucumis melo            |                       | 0    | 0     | 0.18 | 0     | 0    | 0    | 0    | 0    |
|             | lus-miR530a     | Linum usitatissimum     |                       | 0    | 0     | 0.18 | 0     | 0    | 0    | 0    | 0    |
|             | lus-miR530b     | Linum usitatissimum     |                       | 0    | 0     | 0.18 | 0     | 0    | 0    | 0    | 0    |
|             | tcc-miR530b     | Theobroma cacao         |                       | 0    | 0     | 0.18 | 0     | 0    | 0    | 0    | 0    |
| dof-miR-809 | tae-miR399      | Triticum aestivum       | TGCCAAAGGAGAATTGCC    | 0.2  | 0     | 0.18 | 0.36  | 0    | 0    | 0.17 | 0    |
| dof-miR-810 | ssl-miR399      | Salvia sclarea          | TGCCAAAGGAGAATTGCCCGG | 0    | 0     | 0    | 0.18  | 0    | 0    | 0    | 0    |
| dof-miR-811 | osa-miR399a     | Oryza sativa            | TGCCAAAGGAGAATTGCCCTG | 0.2  | 22.15 | 3.31 | 42.16 | 2.33 | 3.13 | 1    | 3.64 |
|             | osa-miR399b     | Oryza sativa            |                       | 0.2  | 22.15 | 3.31 | 42.16 | 2.33 | 3.13 | 1    | 3.64 |
|             | osa-miR399c     | Oryza sativa            |                       | 0.2  | 22.15 | 3.31 | 42.16 | 2.33 | 3.13 | 1    | 3.64 |
|             | sbi-miR399a     | Sorghum bicolor         |                       | 0.2  | 22.15 | 3.31 | 42.16 | 2.33 | 3.13 | 1    | 3.64 |
|             | sbi-miR399c     | Sorghum bicolor         |                       | 0.2  | 22.15 | 3.31 | 42.16 | 2.33 | 3.13 | 1    | 3.64 |
|             | zma-miR399a-3p  | Zea mays                |                       | 0.2  | 22.15 | 3.31 | 42.16 | 2.33 | 3.13 | 1    | 3.64 |
|             | zma-miR399c-3p  | Zea mays                |                       | 0.2  | 22.15 | 3.31 | 42.16 | 2.33 | 3.13 | 1    | 3.64 |
|             | sbi-miR399h     | Sorghum bicolor         |                       | 0.2  | 22.15 | 3.31 | 42.16 | 2.33 | 3.13 | 1    | 3.64 |
|             | ptc-miR399f     | Populus trichocarpa     |                       | 0.2  | 22.15 | 3.31 | 42.16 | 2.33 | 3.13 | 1    | 3.64 |
|             | ptc-miR399g     | Populus trichocarpa     |                       | 0.2  | 22.15 | 3.31 | 42.16 | 2.33 | 3.13 | 1    | 3.64 |
|             | vvi-miR399a     | Vitis vinifera          |                       | 0.2  | 22.15 | 3.31 | 42.16 | 2.33 | 3.13 | 1    | 3.64 |
|             | vvi-miR399h     | Vitis vinifera          |                       | 0.2  | 22.15 | 3.31 | 42.16 | 2.33 | 3.13 | 1    | 3.64 |
|             | bdi-miR399c     | Brachypodium distachyon |                       | 0.2  | 22.15 | 3.31 | 42.16 | 2.33 | 3.13 | 1    | 3.64 |
|             | gma-miR399i     | Glycine max             |                       | 0.2  | 22.15 | 3.31 | 42.16 | 2.33 | 3.13 | 1    | 3.64 |
|             | ata-miR399b-3p  | Aegilops tauschii       |                       | 0.2  | 22.15 | 3.31 | 42.16 | 2.33 | 3.13 | 1    | 3.64 |
|             | ata-miR399a-3p  | Aegilops tauschii       |                       | 0.2  | 22.15 | 3.31 | 42.16 | 2.33 | 3.13 | 1    | 3.64 |
| mdm-miR399a | Malus domestica | 0.2                     | 22.15                 | 3.31 | 42.16 | 2.33 | 3.13  | 1    | 3.64 |      |      |

|                |                  |                         |                       |      |       |      |       |      |      |      |      |
|----------------|------------------|-------------------------|-----------------------|------|-------|------|-------|------|------|------|------|
|                | mdm-miR399b      | Malus domestica         |                       | 0.2  | 22.15 | 3.31 | 42.16 | 2.33 | 3.13 | 1    | 3.64 |
|                | mdm-miR399c      | Malus domestica         |                       | 0.2  | 22.15 | 3.31 | 42.16 | 2.33 | 3.13 | 1    | 3.64 |
|                | vun-miR399b      | Vigna unguiculata       |                       | 0.2  | 22.15 | 3.31 | 42.16 | 2.33 | 3.13 | 1    | 3.64 |
|                | mes-miR399a      | Manihot esculenta       |                       | 0.2  | 22.15 | 3.31 | 42.16 | 2.33 | 3.13 | 1    | 3.64 |
|                | lus-miR399b      | Linum usitatissimum     |                       | 0.2  | 22.15 | 3.31 | 42.16 | 2.33 | 3.13 | 1    | 3.64 |
|                | lus-miR399d      | Linum usitatissimum     |                       | 0.2  | 22.15 | 3.31 | 42.16 | 2.33 | 3.13 | 1    | 3.64 |
|                | tcc-miR399g      | Theobroma cacao         |                       | 0.2  | 22.15 | 3.31 | 42.16 | 2.33 | 3.13 | 1    | 3.64 |
|                | bdi-miR399b      | Brachypodium distachyon |                       | 0.2  | 22.15 | 3.31 | 42.16 | 2.33 | 3.13 | 1    | 3.64 |
|                | csi-miR399e      | Citrus sinensis         |                       | 0.2  | 22.15 | 3.31 | 42.16 | 2.33 | 3.13 | 1    | 3.64 |
|                | csi-miR399c      | Citrus sinensis         |                       | 0.2  | 22.15 | 3.31 | 42.16 | 2.33 | 3.13 | 1    | 3.64 |
|                | zma-miR399h-3p   | Zea mays                |                       | 0.2  | 22.15 | 3.31 | 42.16 | 2.33 | 3.13 | 1    | 3.64 |
|                | sbi-miR399j      | Sorghum bicolor         |                       | 0.2  | 22.15 | 3.31 | 42.16 | 2.33 | 3.13 | 1    | 3.64 |
| dof-miR-812    | ath-miR399b      | Arabidopsis thaliana    | TGCCAAAGGAGAGTTGCCCTG | 0    | 1.27  | 0.18 | 0.18  | 0.19 | 0.21 | 0.17 | 0.14 |
|                | ath-miR399c-3p   | Arabidopsis thaliana    |                       | 0    | 1.27  | 0.18 | 0.18  | 0.19 | 0.21 | 0.17 | 0.14 |
|                | osa-miR399d      | Oryza sativa            |                       | 0    | 1.27  | 0.18 | 0.18  | 0.19 | 0.21 | 0.17 | 0.14 |
|                | sbi-miR399d      | Sorghum bicolor         |                       | 0    | 1.27  | 0.18 | 0.18  | 0.19 | 0.21 | 0.17 | 0.14 |
|                | zma-miR399e-3p   | Zea mays                |                       | 0    | 1.27  | 0.18 | 0.18  | 0.19 | 0.21 | 0.17 | 0.14 |
|                | sbi-miR399i      | Sorghum bicolor         |                       | 0    | 1.27  | 0.18 | 0.18  | 0.19 | 0.21 | 0.17 | 0.14 |
|                | mtr-miR399l      | Medicago truncatula     |                       | 0    | 1.27  | 0.18 | 0.18  | 0.19 | 0.21 | 0.17 | 0.14 |
|                | mtr-miR399p      | Medicago truncatula     |                       | 0    | 1.27  | 0.18 | 0.18  | 0.19 | 0.21 | 0.17 | 0.14 |
|                | vvi-miR399b      | Vitis vinifera          |                       | 0    | 1.27  | 0.18 | 0.18  | 0.19 | 0.21 | 0.17 | 0.14 |
|                | mes-miR399f      | Manihot esculenta       |                       | 0    | 1.27  | 0.18 | 0.18  | 0.19 | 0.21 | 0.17 | 0.14 |
|                | mdm-miR399i      | Malus domestica         |                       | 0    | 1.27  | 0.18 | 0.18  | 0.19 | 0.21 | 0.17 | 0.14 |
|                | mdm-miR399j      | Malus domestica         |                       | 0    | 1.27  | 0.18 | 0.18  | 0.19 | 0.21 | 0.17 | 0.14 |
|                | vun-miR399a      | Vigna unguiculata       |                       | 0    | 1.27  | 0.18 | 0.18  | 0.19 | 0.21 | 0.17 | 0.14 |
|                | gma-miR399a      | Glycine max             |                       | 0    | 1.27  | 0.18 | 0.18  | 0.19 | 0.21 | 0.17 | 0.14 |
|                | gma-miR399b      | Glycine max             |                       | 0    | 1.27  | 0.18 | 0.18  | 0.19 | 0.21 | 0.17 | 0.14 |
|                | gma-miR399c      | Glycine max             |                       | 0    | 1.27  | 0.18 | 0.18  | 0.19 | 0.21 | 0.17 | 0.14 |
|                | gma-miR399h      | Glycine max             |                       | 0    | 1.27  | 0.18 | 0.18  | 0.19 | 0.21 | 0.17 | 0.14 |
|                | tcc-miR399i      | Theobroma cacao         |                       | 0    | 1.27  | 0.18 | 0.18  | 0.19 | 0.21 | 0.17 | 0.14 |
|                | csi-miR399d      | Citrus sinensis         |                       | 0    | 1.27  | 0.18 | 0.18  | 0.19 | 0.21 | 0.17 | 0.14 |
|                | zma-miR399i-3p   | Zea mays                |                       | 0    | 1.27  | 0.18 | 0.18  | 0.19 | 0.21 | 0.17 | 0.14 |
| zma-miR399j-3p | Zea mays         | 0                       | 1.27                  | 0.18 | 0.18  | 0.19 | 0.21  | 0.17 | 0.14 |      |      |
| rco-miR399a    | Ricinus communis | 0                       | 1.27                  | 0.18 | 0.18  | 0.19 | 0.21  | 0.17 | 0.14 |      |      |

|             |                  |                         |                        |     |      |      |      |      |      |      |      |      |
|-------------|------------------|-------------------------|------------------------|-----|------|------|------|------|------|------|------|------|
|             | aly-miR399b-3p   | Arabidopsis lyrata      |                        | 0   | 1.27 | 0.18 | 0.18 | 0.19 | 0.21 | 0.17 | 0.14 |      |
|             | aly-miR399c-3p   | Arabidopsis lyrata      |                        | 0   | 1.27 | 0.18 | 0.18 | 0.19 | 0.21 | 0.17 | 0.14 |      |
|             | vvi-miR399c      | Vitis vinifera          |                        | 0   | 1.27 | 0.18 | 0.18 | 0.19 | 0.21 | 0.17 | 0.14 |      |
|             | pvu-miR399a      | Phaseolus vulgaris      |                        | 0   | 1.27 | 0.18 | 0.18 | 0.19 | 0.21 | 0.17 | 0.14 |      |
| dof-miR-813 | osa-miR399e      | Oryza sativa            | TGCCAAAGGAGATTTGCCAG   | 0.2 | 0    | 0    | 0    | 0    | 0    | 0    | 1.82 |      |
|             | osa-miR399f      | Oryza sativa            |                        | 0.2 | 0    | 0    | 0    | 0    | 0    | 0    | 0    | 1.82 |
|             | osa-miR399g      | Oryza sativa            |                        | 0.2 | 0    | 0    | 0    | 0    | 0    | 0    | 0    | 1.82 |
|             | sbi-miR399e      | Sorghum bicolor         |                        | 0.2 | 0    | 0    | 0    | 0    | 0    | 0    | 0    | 1.82 |
|             | sbi-miR399f      | Sorghum bicolor         |                        | 0.2 | 0    | 0    | 0    | 0    | 0    | 0    | 0    | 1.82 |
|             | mtr-miR399a      | Medicago truncatula     |                        | 0.2 | 0    | 0    | 0    | 0    | 0    | 0    | 0    | 1.82 |
|             | mtr-miR399e      | Medicago truncatula     |                        | 0.2 | 0    | 0    | 0    | 0    | 0    | 0    | 0    | 1.82 |
|             | mtr-miR399f      | Medicago truncatula     |                        | 0.2 | 0    | 0    | 0    | 0    | 0    | 0    | 0    | 1.82 |
|             | mtr-miR399g      | Medicago truncatula     |                        | 0.2 | 0    | 0    | 0    | 0    | 0    | 0    | 0    | 1.82 |
|             | mtr-miR399s-3p   | Medicago truncatula     |                        | 0.2 | 0    | 0    | 0    | 0    | 0    | 0    | 0    | 1.82 |
|             | mtr-miR399t-3p   | Medicago truncatula     |                        | 0.2 | 0    | 0    | 0    | 0    | 0    | 0    | 0    | 1.82 |
|             | gma-miR399d      | Glycine max             |                        | 0.2 | 0    | 0    | 0    | 0    | 0    | 0    | 0    | 1.82 |
|             | gma-miR399e      | Glycine max             |                        | 0.2 | 0    | 0    | 0    | 0    | 0    | 0    | 0    | 1.82 |
|             | gma-miR399f      | Glycine max             |                        | 0.2 | 0    | 0    | 0    | 0    | 0    | 0    | 0    | 1.82 |
|             | gma-miR399g      | Glycine max             |                        | 0.2 | 0    | 0    | 0    | 0    | 0    | 0    | 0    | 1.82 |
|             | lus-miR399f      | Linum usitatissimum     |                        | 0.2 | 0    | 0    | 0    | 0    | 0    | 0    | 0    | 1.82 |
|             | lus-miR399g      | Linum usitatissimum     |                        | 0.2 | 0    | 0    | 0    | 0    | 0    | 0    | 0    | 1.82 |
| rco-miR399e | Ricinus communis | 0.2                     | 0                      | 0   | 0    | 0    | 0    | 0    | 0    | 1.82 |      |      |
| dof-miR-814 | ssa-miR-24a-5p   | Salmo salar             | TGCCTACTGAACTGGTATCAGT | 0   | 0    | 0    | 0    | 0    | 0    | 0.17 | 0    |      |
| dof-miR-815 | osa-miR160f-5p   | Oryza sativa            | TGCCCTGGCTCCCTGAATGCCA | 0   | 0    | 0.18 | 0.18 | 0    | 0    | 0    | 0    |      |
|             | ptc-miR160e-5p   | Populus trichocarpa     |                        | 0   | 0    | 0.18 | 0.18 | 0    | 0    | 0    | 0    |      |
|             | ptc-miR160f      | Populus trichocarpa     |                        | 0   | 0    | 0.18 | 0.18 | 0    | 0    | 0    | 0    |      |
|             | mtr-miR160c      | Medicago truncatula     |                        | 0   | 0    | 0.18 | 0.18 | 0    | 0    | 0    | 0    |      |
|             | cpa-miR160d      | Carica papaya           |                        | 0   | 0    | 0.18 | 0.18 | 0    | 0    | 0    | 0    |      |
|             | cme-miR160d      | Cucumis melo            |                        | 0   | 0    | 0.18 | 0.18 | 0    | 0    | 0    | 0    |      |
|             | tcc-miR160a      | Theobroma cacao         |                        | 0   | 0    | 0.18 | 0.18 | 0    | 0    | 0    | 0    |      |
|             | bdi-miR160e-5p   | Brachypodium distachyon |                        | 0   | 0    | 0.18 | 0.18 | 0    | 0    | 0    | 0    |      |
|             | ahy-miR160-5p    | Arachis hypogaea        |                        | 0   | 0    | 0.18 | 0.18 | 0    | 0    | 0    | 0    |      |
|             | rco-miR160c      | Ricinus communis        |                        | 0   | 0    | 0.18 | 0.18 | 0    | 0    | 0    | 0    |      |
|             | sbi-miR160f      | Sorghum bicolor         |                        | 0   | 0    | 0.18 | 0.18 | 0    | 0    | 0    | 0    |      |

|             |                       |                         |                       |       |      |       |      |      |      |      |      |
|-------------|-----------------------|-------------------------|-----------------------|-------|------|-------|------|------|------|------|------|
| dof-miR-816 | bdi-miR160f           | Brachypodium distachyon | TGCCTGGCTCCCTGTATGCC  | 2.18  | 1.27 | 2.76  | 2.16 | 1.68 | 3.03 | 3.17 | 1.4  |
|             | htu-miR160a           | Helianthus tuberosus    |                       | 2.18  | 1.27 | 2.76  | 2.16 | 1.68 | 3.03 | 3.17 | 1.4  |
|             | gma-miR160b           | Glycine max             |                       | 2.18  | 1.27 | 2.76  | 2.16 | 1.68 | 3.03 | 3.17 | 1.4  |
|             | gma-miR160c           | Glycine max             |                       | 2.18  | 1.27 | 2.76  | 2.16 | 1.68 | 3.03 | 3.17 | 1.4  |
|             | gma-miR160d           | Glycine max             |                       | 2.18  | 1.27 | 2.76  | 2.16 | 1.68 | 3.03 | 3.17 | 1.4  |
|             | gma-miR160e           | Glycine max             |                       | 2.18  | 1.27 | 2.76  | 2.16 | 1.68 | 3.03 | 3.17 | 1.4  |
| dof-miR-817 | ath-miR160a-5p        | Arabidopsis thaliana    | TGCCTGGCTCCCTGTATGCCA | 1.98  | 3.82 | 12.49 | 7.39 | 5.32 | 7.41 | 4.17 | 4.76 |
|             | ath-miR160b           | Arabidopsis thaliana    |                       | 1.98  | 3.82 | 12.49 | 7.39 | 5.32 | 7.41 | 4.17 | 4.76 |
|             | ath-miR160c-5p        | Arabidopsis thaliana    |                       | 1.98  | 3.82 | 12.49 | 7.39 | 5.32 | 7.41 | 4.17 | 4.76 |
|             | osa-miR160a-5p        | Oryza sativa            |                       | 1.98  | 3.82 | 12.49 | 7.39 | 5.32 | 7.41 | 4.17 | 4.76 |
|             | osa-miR160b-5p        | Oryza sativa            |                       | 1.98  | 3.82 | 12.49 | 7.39 | 5.32 | 7.41 | 4.17 | 4.76 |
|             | osa-miR160c-5p        | Oryza sativa            |                       | 1.98  | 3.82 | 12.49 | 7.39 | 5.32 | 7.41 | 4.17 | 4.76 |
|             | osa-miR160d-5p        | Oryza sativa            |                       | 1.98  | 3.82 | 12.49 | 7.39 | 5.32 | 7.41 | 4.17 | 4.76 |
|             | zma-miR160a-5p        | Zea mays                |                       | 1.98  | 3.82 | 12.49 | 7.39 | 5.32 | 7.41 | 4.17 | 4.76 |
|             | zma-miR160c-5p        | Zea mays                |                       | 1.98  | 3.82 | 12.49 | 7.39 | 5.32 | 7.41 | 4.17 | 4.76 |
|             | zma-miR160d-5p        | Zea mays                |                       | 1.98  | 3.82 | 12.49 | 7.39 | 5.32 | 7.41 | 4.17 | 4.76 |
|             | zma-miR160b-5p        | Zea mays                |                       | 1.98  | 3.82 | 12.49 | 7.39 | 5.32 | 7.41 | 4.17 | 4.76 |
|             | zma-miR160e           | Zea mays                |                       | 1.98  | 3.82 | 12.49 | 7.39 | 5.32 | 7.41 | 4.17 | 4.76 |
|             | sbi-miR160d           | Sorghum bicolor         |                       | 1.98  | 3.82 | 12.49 | 7.39 | 5.32 | 7.41 | 4.17 | 4.76 |
|             | sbi-miR160a           | Sorghum bicolor         |                       | 1.98  | 3.82 | 12.49 | 7.39 | 5.32 | 7.41 | 4.17 | 4.76 |
|             | sbi-miR160c           | Sorghum bicolor         |                       | 1.98  | 3.82 | 12.49 | 7.39 | 5.32 | 7.41 | 4.17 | 4.76 |
|             | sbi-miR160b           | Sorghum bicolor         |                       | 1.98  | 3.82 | 12.49 | 7.39 | 5.32 | 7.41 | 4.17 | 4.76 |
|             | sbi-miR160e           | Sorghum bicolor         |                       | 1.98  | 3.82 | 12.49 | 7.39 | 5.32 | 7.41 | 4.17 | 4.76 |
|             | mtr-miR160a           | Medicago truncatula     |                       | 1.98  | 3.82 | 12.49 | 7.39 | 5.32 | 7.41 | 4.17 | 4.76 |
|             | gma-miR160a-5p        | Glycine max             |                       | 1.98  | 3.82 | 12.49 | 7.39 | 5.32 | 7.41 | 4.17 | 4.76 |
|             | ptc-miR160a           | Populus trichocarpa     |                       | 1.98  | 3.82 | 12.49 | 7.39 | 5.32 | 7.41 | 4.17 | 4.76 |
|             | ptc-miR160b-5p        | Populus trichocarpa     |                       | 1.98  | 3.82 | 12.49 | 7.39 | 5.32 | 7.41 | 4.17 | 4.76 |
|             | ptc-miR160c-5p        | Populus trichocarpa     |                       | 1.98  | 3.82 | 12.49 | 7.39 | 5.32 | 7.41 | 4.17 | 4.76 |
|             | ptc-miR160d           | Populus trichocarpa     |                       | 1.98  | 3.82 | 12.49 | 7.39 | 5.32 | 7.41 | 4.17 | 4.76 |
|             | mtr-miR160b           | Medicago truncatula     |                       | 1.98  | 3.82 | 12.49 | 7.39 | 5.32 | 7.41 | 4.17 | 4.76 |
|             | mtr-miR160d           | Medicago truncatula     |                       | 1.98  | 3.82 | 12.49 | 7.39 | 5.32 | 7.41 | 4.17 | 4.76 |
|             | mtr-miR160e           | Medicago truncatula     |                       | 1.98  | 3.82 | 12.49 | 7.39 | 5.32 | 7.41 | 4.17 | 4.76 |
|             | ppt-miR160a           | Physcomitrella patens   |                       | 1.98  | 3.82 | 12.49 | 7.39 | 5.32 | 7.41 | 4.17 | 4.76 |
| ppt-miR160e | Physcomitrella patens | 1.98                    | 3.82                  | 12.49 | 7.39 | 5.32  | 7.41 | 4.17 | 4.76 |      |      |



|             |                |                         |                       |      |      |       |      |      |      |      |      |
|-------------|----------------|-------------------------|-----------------------|------|------|-------|------|------|------|------|------|
|             | bnamiR160c     | Brassica napus          |                       | 1.98 | 3.82 | 12.49 | 7.39 | 5.32 | 7.41 | 4.17 | 4.76 |
|             | bnamiR160d     | Brassica napus          |                       | 1.98 | 3.82 | 12.49 | 7.39 | 5.32 | 7.41 | 4.17 | 4.76 |
|             | cca-miR160b    | Cynara cardunculus      |                       | 1.98 | 3.82 | 12.49 | 7.39 | 5.32 | 7.41 | 4.17 | 4.76 |
|             | lus-miR160a    | Linum usitatissimum     |                       | 1.98 | 3.82 | 12.49 | 7.39 | 5.32 | 7.41 | 4.17 | 4.76 |
|             | lus-miR160b    | Linum usitatissimum     |                       | 1.98 | 3.82 | 12.49 | 7.39 | 5.32 | 7.41 | 4.17 | 4.76 |
|             | lus-miR160d    | Linum usitatissimum     |                       | 1.98 | 3.82 | 12.49 | 7.39 | 5.32 | 7.41 | 4.17 | 4.76 |
|             | lus-miR160e    | Linum usitatissimum     |                       | 1.98 | 3.82 | 12.49 | 7.39 | 5.32 | 7.41 | 4.17 | 4.76 |
|             | lus-miR160f    | Linum usitatissimum     |                       | 1.98 | 3.82 | 12.49 | 7.39 | 5.32 | 7.41 | 4.17 | 4.76 |
|             | lus-miR160h    | Linum usitatissimum     |                       | 1.98 | 3.82 | 12.49 | 7.39 | 5.32 | 7.41 | 4.17 | 4.76 |
|             | lus-miR160i    | Linum usitatissimum     |                       | 1.98 | 3.82 | 12.49 | 7.39 | 5.32 | 7.41 | 4.17 | 4.76 |
|             | lus-miR160j    | Linum usitatissimum     |                       | 1.98 | 3.82 | 12.49 | 7.39 | 5.32 | 7.41 | 4.17 | 4.76 |
|             | nta-miR160a    | Nicotiana tabacum       |                       | 1.98 | 3.82 | 12.49 | 7.39 | 5.32 | 7.41 | 4.17 | 4.76 |
|             | nta-miR160b    | Nicotiana tabacum       |                       | 1.98 | 3.82 | 12.49 | 7.39 | 5.32 | 7.41 | 4.17 | 4.76 |
|             | nta-miR160c    | Nicotiana tabacum       |                       | 1.98 | 3.82 | 12.49 | 7.39 | 5.32 | 7.41 | 4.17 | 4.76 |
|             | gma-miR160f    | Glycine max             |                       | 1.98 | 3.82 | 12.49 | 7.39 | 5.32 | 7.41 | 4.17 | 4.76 |
|             | tcc-miR160b    | Theobroma cacao         |                       | 1.98 | 3.82 | 12.49 | 7.39 | 5.32 | 7.41 | 4.17 | 4.76 |
|             | bdi-miR160a-5p | Brachypodium distachyon |                       | 1.98 | 3.82 | 12.49 | 7.39 | 5.32 | 7.41 | 4.17 | 4.76 |
|             | bdi-miR160b-5p | Brachypodium distachyon |                       | 1.98 | 3.82 | 12.49 | 7.39 | 5.32 | 7.41 | 4.17 | 4.76 |
|             | bdi-miR160c-5p | Brachypodium distachyon |                       | 1.98 | 3.82 | 12.49 | 7.39 | 5.32 | 7.41 | 4.17 | 4.76 |
|             | bdi-miR160d-5p | Brachypodium distachyon |                       | 1.98 | 3.82 | 12.49 | 7.39 | 5.32 | 7.41 | 4.17 | 4.76 |
|             | pab-miR160a    | Picea abies             |                       | 1.98 | 3.82 | 12.49 | 7.39 | 5.32 | 7.41 | 4.17 | 4.76 |
|             | pab-miR160b    | Picea abies             |                       | 1.98 | 3.82 | 12.49 | 7.39 | 5.32 | 7.41 | 4.17 | 4.76 |
|             | ttu-miR160     | Triticum turgidum       |                       | 1.98 | 3.82 | 12.49 | 7.39 | 5.32 | 7.41 | 4.17 | 4.76 |
|             | far-miR160     | Festuca arundinacea     |                       | 1.98 | 3.82 | 12.49 | 7.39 | 5.32 | 7.41 | 4.17 | 4.76 |
|             | zma-miR160g-5p | Zea mays                |                       | 1.98 | 3.82 | 12.49 | 7.39 | 5.32 | 7.41 | 4.17 | 4.76 |
|             | rco-miR160a    | Ricinus communis        |                       | 1.98 | 3.82 | 12.49 | 7.39 | 5.32 | 7.41 | 4.17 | 4.76 |
|             | rco-miR160b    | Ricinus communis        |                       | 1.98 | 3.82 | 12.49 | 7.39 | 5.32 | 7.41 | 4.17 | 4.76 |
|             | aly-miR160a-5p | Arabidopsis lyrata      |                       | 1.98 | 3.82 | 12.49 | 7.39 | 5.32 | 7.41 | 4.17 | 4.76 |
|             | aly-miR160b-5p | Arabidopsis lyrata      |                       | 1.98 | 3.82 | 12.49 | 7.39 | 5.32 | 7.41 | 4.17 | 4.76 |
|             | aly-miR160c-5p | Arabidopsis lyrata      |                       | 1.98 | 3.82 | 12.49 | 7.39 | 5.32 | 7.41 | 4.17 | 4.76 |
|             | sly-miR160a    | Solanum lycopersicum    |                       | 1.98 | 3.82 | 12.49 | 7.39 | 5.32 | 7.41 | 4.17 | 4.76 |
|             | bra-miR160a-5p | Brassica rapa           |                       | 1.98 | 3.82 | 12.49 | 7.39 | 5.32 | 7.41 | 4.17 | 4.76 |
|             | aqc-miR160b    | Aquilegia caerulea      |                       | 1.98 | 3.82 | 12.49 | 7.39 | 5.32 | 7.41 | 4.17 | 4.76 |
| dof-miR-818 | cgr-miR-744-5p | Cricetulus griseus      | TGCGGGGCTAGGGCTAACAGC | 0    | 0    | 0     | 0.18 | 0.47 | 0    | 0.17 | 0    |

|             |                 |                          |                          |   |      |      |      |      |      |      |      |
|-------------|-----------------|--------------------------|--------------------------|---|------|------|------|------|------|------|------|
| dof-miR-819 | mtr-miR156b-3p  | Medicago truncatula      | TGCTCACTCTCTATCTGTCACC   | 0 | 0.25 | 0    | 0    | 0    | 0    | 0.33 | 6.03 |
| dof-miR-820 | ssa-miR-222a-5p | Salmo salar              | TGCTCAGTAGGCAGTGTAGATCCT | 0 | 0    | 0    | 0    | 0    | 0    | 0.17 | 0    |
| dof-miR-821 | ssa-miR-222b-5p | Salmo salar              | TGCTCAGTAGTCAGTGTAGATC   | 0 | 0    | 0    | 0    | 0    | 0    | 0.17 | 0    |
|             | ipu-miR-222a    | Ictalurus punctatus      |                          | 0 | 0    | 0    | 0    | 0    | 0    | 0    | 0.17 |
| dof-miR-822 | dre-miR-222a-5p | Danio rerio              | TGCTCAGTAGTCAGTGTAGATCC  | 0 | 0    | 0    | 0.18 | 0    | 0    | 0    | 0    |
| dof-miR-823 | mtr-miR156c-3p  | Medicago truncatula      | TGCTTACTCTCTATCTGTCACC   | 0 | 0    | 0    | 0    | 0    | 0    | 0    | 0.14 |
| dof-miR-824 | ggo-miR-7       | Gorilla gorilla          | TGGAAGACTAGTGATTTTGT     | 0 | 0    | 0.18 | 0.18 | 0    | 0.21 | 0    | 0.14 |
|             | ppy-miR-7       | Pongo pygmaeus           |                          | 0 | 0    | 0.18 | 0.18 | 0    | 0.21 | 0    | 0.14 |
|             | sla-miR-7       | Saguinus labiatus        |                          | 0 | 0    | 0.18 | 0.18 | 0    | 0.21 | 0    | 0.14 |
|             | lla-miR-7       | Lagothrix lagotricha     |                          | 0 | 0    | 0.18 | 0.18 | 0    | 0.21 | 0    | 0.14 |
|             | mne-miR-7       | Macaca nemestrina        |                          | 0 | 0    | 0.18 | 0.18 | 0    | 0.21 | 0    | 0.14 |
|             | ppa-miR-7       | Pan paniscus             |                          | 0 | 0    | 0.18 | 0.18 | 0    | 0.21 | 0    | 0.14 |
|             | fru-miR-7       | Fugu rubripes            |                          | 0 | 0    | 0.18 | 0.18 | 0    | 0.21 | 0    | 0.14 |
| dof-miR-825 | gga-miR-7       | Gallus gallus            | TGGAAGACTAGTGATTTTGTG    | 0 | 0    | 0    | 0.72 | 0    | 0    | 0    | 0.28 |
|             | xtr-miR-7       | Xenopus tropicalis       |                          | 0 | 0    | 0    | 0.72 | 0    | 0    | 0    | 0.28 |
|             | mdo-miR-7       | Monodelphis domestica    |                          | 0 | 0    | 0    | 0.72 | 0    | 0    | 0    | 0.28 |
|             | odi-miR-7       | Oikopleura dioica        |                          | 0 | 0    | 0    | 0.72 | 0    | 0    | 0    | 0.28 |
|             | cin-miR-7-5p    | Ciona intestinalis       |                          | 0 | 0    | 0    | 0.72 | 0    | 0    | 0    | 0.28 |
|             | hme-miR-7       | Heliconius melpomene     |                          | 0 | 0    | 0    | 0.72 | 0    | 0    | 0    | 0.28 |
| dof-miR-826 | dme-miR-7-5p    | Drosophila melanogaster  | TGGAAGACTAGTGATTTTGTG    | 0 | 0    | 0.37 | 0.18 | 0.09 | 0.1  | 0.17 | 0.28 |
|             | hsa-miR-7-5p    | Homo sapiens             |                          | 0 | 0    | 0.37 | 0.18 | 0.09 | 0.1  | 0.17 | 0.28 |
|             | rno-miR-7a-5p   | Rattus norvegicus        |                          | 0 | 0    | 0.37 | 0.18 | 0.09 | 0.1  | 0.17 | 0.28 |
|             | mmu-miR-7a-5p   | Mus musculus             |                          | 0 | 0    | 0.37 | 0.18 | 0.09 | 0.1  | 0.17 | 0.28 |
|             | dps-miR-7       | Drosophila pseudoobscura |                          | 0 | 0    | 0.37 | 0.18 | 0.09 | 0.1  | 0.17 | 0.28 |
|             | dre-miR-7a      | Danio rerio              |                          | 0 | 0    | 0.37 | 0.18 | 0.09 | 0.1  | 0.17 | 0.28 |
|             | ame-miR-7       | Apis mellifera           |                          | 0 | 0    | 0.37 | 0.18 | 0.09 | 0.1  | 0.17 | 0.28 |
|             | aga-miR-7       | Anopheles gambiae        |                          | 0 | 0    | 0.37 | 0.18 | 0.09 | 0.1  | 0.17 | 0.28 |
|             | ptr-miR-7       | Pan troglodytes          |                          | 0 | 0    | 0.37 | 0.18 | 0.09 | 0.1  | 0.17 | 0.28 |
|             | tmi-miR-7       | Tetraodon nigroviridis   |                          | 0 | 0    | 0.37 | 0.18 | 0.09 | 0.1  | 0.17 | 0.28 |
|             | bmo-miR-7-5p    | Bombyx mori              |                          | 0 | 0    | 0.37 | 0.18 | 0.09 | 0.1  | 0.17 | 0.28 |
|             | oan-miR-7-5p    | Ornithorhynchus anatinus |                          | 0 | 0    | 0.37 | 0.18 | 0.09 | 0.1  | 0.17 | 0.28 |
|             | bbe-miR-7-5p    | Branchiostoma belcheri   |                          | 0 | 0    | 0.37 | 0.18 | 0.09 | 0.1  | 0.17 | 0.28 |
|             | ssa-miR-7a-5p   | Salmo salar              |                          | 0 | 0    | 0.37 | 0.18 | 0.09 | 0.1  | 0.17 | 0.28 |
|             | ipu-miR-7a      | Ictalurus punctatus      |                          | 0 | 0    | 0.37 | 0.18 | 0.09 | 0.1  | 0.17 | 0.28 |

|             |               |                               |                         |     |      |      |      |      |      |      |      |
|-------------|---------------|-------------------------------|-------------------------|-----|------|------|------|------|------|------|------|
|             | pmi-miR-7-5p  | Patiria miniata               |                         | 0   | 0    | 0.37 | 0.18 | 0.09 | 0.1  | 0.17 | 0.28 |
|             | lva-miR-7-5p  | Lytechinus variegatus         |                         | 0   | 0    | 0.37 | 0.18 | 0.09 | 0.1  | 0.17 | 0.28 |
|             | cgr-miR-7a    | Cricetulus griseus            |                         | 0   | 0    | 0.37 | 0.18 | 0.09 | 0.1  | 0.17 | 0.28 |
|             | pma-miR-7a-5p | Petromyzon marinus            |                         | 0   | 0    | 0.37 | 0.18 | 0.09 | 0.1  | 0.17 | 0.28 |
|             | aca-miR-7-5p  | Anolis carolinensis           |                         | 0   | 0    | 0.37 | 0.18 | 0.09 | 0.1  | 0.17 | 0.28 |
|             | nvi-miR-7     | Nasonia vitripennis           |                         | 0   | 0    | 0.37 | 0.18 | 0.09 | 0.1  | 0.17 | 0.28 |
|             | nlo-miR-7     | Nasonia longicornis           |                         | 0   | 0    | 0.37 | 0.18 | 0.09 | 0.1  | 0.17 | 0.28 |
|             | dpu-miR-7     | Daphnia pulex                 |                         | 0   | 0    | 0.37 | 0.18 | 0.09 | 0.1  | 0.17 | 0.28 |
|             | isc-miR-7     | Ixodes scapularis             |                         | 0   | 0    | 0.37 | 0.18 | 0.09 | 0.1  | 0.17 | 0.28 |
|             | eca-miR-7     | Equus caballus                |                         | 0   | 0    | 0.37 | 0.18 | 0.09 | 0.1  | 0.17 | 0.28 |
|             | aae-miR-7     | Aedes aegypti                 |                         | 0   | 0    | 0.37 | 0.18 | 0.09 | 0.1  | 0.17 | 0.28 |
|             | cqu-miR-7     | Culex quinquefasciatus        |                         | 0   | 0    | 0.37 | 0.18 | 0.09 | 0.1  | 0.17 | 0.28 |
|             | tgu-miR-7-5p  | Taeniopygia guttata           |                         | 0   | 0    | 0.37 | 0.18 | 0.09 | 0.1  | 0.17 | 0.28 |
|             | csa-miR-7     | Ciona savignyi                |                         | 0   | 0    | 0.37 | 0.18 | 0.09 | 0.1  | 0.17 | 0.28 |
|             | mml-miR-7     | Macaca mulatta                |                         | 0   | 0    | 0.37 | 0.18 | 0.09 | 0.1  | 0.17 | 0.28 |
|             | cfa-miR-7     | Canis familiaris              |                         | 0   | 0    | 0.37 | 0.18 | 0.09 | 0.1  | 0.17 | 0.28 |
|             | dan-miR-7     | Drosophila ananassae          |                         | 0   | 0    | 0.37 | 0.18 | 0.09 | 0.1  | 0.17 | 0.28 |
|             | der-miR-7     | Drosophila erecta             |                         | 0   | 0    | 0.37 | 0.18 | 0.09 | 0.1  | 0.17 | 0.28 |
|             | dgr-miR-7     | Drosophila grimshawi          |                         | 0   | 0    | 0.37 | 0.18 | 0.09 | 0.1  | 0.17 | 0.28 |
|             | dmo-miR-7     | Drosophila mojaveensis        |                         | 0   | 0    | 0.37 | 0.18 | 0.09 | 0.1  | 0.17 | 0.28 |
|             | dpe-miR-7     | Drosophila persimilis         |                         | 0   | 0    | 0.37 | 0.18 | 0.09 | 0.1  | 0.17 | 0.28 |
|             | dse-miR-7     | Drosophila sechellia          |                         | 0   | 0    | 0.37 | 0.18 | 0.09 | 0.1  | 0.17 | 0.28 |
|             | dsi-miR-7     | Drosophila simulans           |                         | 0   | 0    | 0.37 | 0.18 | 0.09 | 0.1  | 0.17 | 0.28 |
|             | dwi-miR-7     | Drosophila willistoni         |                         | 0   | 0    | 0.37 | 0.18 | 0.09 | 0.1  | 0.17 | 0.28 |
|             | dya-miR-7     | Drosophila yakuba             |                         | 0   | 0    | 0.37 | 0.18 | 0.09 | 0.1  | 0.17 | 0.28 |
|             | bfl-miR-7     | Branchiostoma floridae        |                         | 0   | 0    | 0.37 | 0.18 | 0.09 | 0.1  | 0.17 | 0.28 |
|             | sko-miR-7-5p  | Saccoglossus kowalevskii      |                         | 0   | 0    | 0.37 | 0.18 | 0.09 | 0.1  | 0.17 | 0.28 |
|             | spu-miR-7     | Strongylocentrotus purpuratus |                         | 0   | 0    | 0.37 | 0.18 | 0.09 | 0.1  | 0.17 | 0.28 |
| dof-miR-827 | ssc-miR-7     | Sus scrofa                    | TGGAAGACTAGTGATTTTGTGTT | 0.4 | 1.02 | 0.37 | 0    | 1.03 | 0.52 | 0.83 | 0.56 |
|             | bta-miR-7     | Bos taurus                    |                         | 0.4 | 1.02 | 0.37 | 0    | 1.03 | 0.52 | 0.83 | 0.56 |
|             | chi-miR-7-5p  | Capra hircus                  |                         | 0.4 | 1.02 | 0.37 | 0    | 1.03 | 0.52 | 0.83 | 0.56 |
|             | tch-miR-7-5p  | Tupaia chinensis              |                         | 0.4 | 1.02 | 0.37 | 0    | 1.03 | 0.52 | 0.83 | 0.56 |
|             | oha-miR-7-5p  | Ophiophagus hannah            |                         | 0.4 | 1.02 | 0.37 | 0    | 1.03 | 0.52 | 0.83 | 0.56 |
|             | ccr-miR-7a    | Cyprinus carpio               |                         | 0.4 | 1.02 | 0.37 | 0    | 1.03 | 0.52 | 0.83 | 0.56 |



|             |                |                          |                         |         |         |        |      |        |         |        |        |
|-------------|----------------|--------------------------|-------------------------|---------|---------|--------|------|--------|---------|--------|--------|
|             | tur-miR-7-5p   | Tetranychus urticae      |                         | 0.4     | 1.02    | 0.37   | 0    | 1.03   | 0.52    | 0.83   | 0.56   |
|             | mse-miR-7      | Manduca sexta            |                         | 0.4     | 1.02    | 0.37   | 0    | 1.03   | 0.52    | 0.83   | 0.56   |
|             | api-miR-7      | Acyrtosiphon pisum       |                         | 0.4     | 1.02    | 0.37   | 0    | 1.03   | 0.52    | 0.83   | 0.56   |
|             | dvi-miR-7-5p   | Drosophila virilis       |                         | 0.4     | 1.02    | 0.37   | 0    | 1.03   | 0.52    | 0.83   | 0.56   |
|             | lgi-miR-7      | Lottia gigantea          |                         | 0.4     | 1.02    | 0.37   | 0    | 1.03   | 0.52    | 0.83   | 0.56   |
| dof-miR-828 | efu-miR-7b     | Eptesicus fuscus         | TGGAAGACTAGTGATTTGTGTGT | 0       | 0       | 0      | 0    | 0.19   | 0.31    | 0      | 0      |
| dof-miR-829 | mmu-miR-7b-5p  | Mus musculus             | TGGAAGACTTGTGATTTGTGTGT | 0       | 0       | 0.37   | 0.9  | 0      | 0       | 0      | 0.14   |
|             | rno-miR-7b     | Rattus norvegicus        |                         | 0       | 0       | 0.37   | 0.9  | 0      | 0       | 0      | 0.14   |
|             | ipu-miR-7b     | Ictalurus punctatus      |                         | 0       | 0       | 0.37   | 0.9  | 0      | 0       | 0      | 0.14   |
|             | ccr-miR-7b     | Cyprinus carpio          |                         | 0       | 0       | 0.37   | 0.9  | 0      | 0       | 0      | 0.14   |
|             | bma-miR-7      | Brugia malayi            |                         | 0       | 0       | 0.37   | 0.9  | 0      | 0       | 0      | 0.14   |
| dof-miR-830 | cgr-miR-7b     | Cricetulus griseus       | TGGAAGACTTGTGATTTGTGTGT | 0       | 0       | 0.37   | 0.36 | 0      | 0       | 0      | 0      |
| dof-miR-831 | osa-miR528-5p  | Oryza sativa             | TGGAAGGGGCATGCAGAGGAG   | 1469.16 | 4641.45 | 646.54 | 5.41 | 352.82 | 1246.83 | 991.35 | 4676.9 |
|             | ata-miR528-5p  | Aegilops tauschii        |                         | 1469.16 | 4641.45 | 646.54 | 5.41 | 352.82 | 1246.83 | 991.35 | 4676.9 |
|             | bdi-miR528-5p  | Brachypodium distachyon  |                         | 1469.16 | 4641.45 | 646.54 | 5.41 | 352.82 | 1246.83 | 991.35 | 4676.9 |
|             | ssp-miR528     | Saccharum sp.            |                         | 1469.16 | 4641.45 | 646.54 | 5.41 | 352.82 | 1246.83 | 991.35 | 4676.9 |
|             | zma-miR528a-5p | Zea mays                 |                         | 1469.16 | 4641.45 | 646.54 | 5.41 | 352.82 | 1246.83 | 991.35 | 4676.9 |
|             | zma-miR528b-5p | Zea mays                 |                         | 1469.16 | 4641.45 | 646.54 | 5.41 | 352.82 | 1246.83 | 991.35 | 4676.9 |
|             | sbi-miR528     | Sorghum bicolor          |                         | 1469.16 | 4641.45 | 646.54 | 5.41 | 352.82 | 1246.83 | 991.35 | 4676.9 |
| dof-miR-832 | aga-miR-184    | Anopheles gambiae        | TGGACGGAGAACTGATAAGGG   | 0       | 0       | 0      | 0    | 2.42   | 6.57    | 0.5    | 0      |
|             | fru-miR-184    | Fugu rubripes            |                         | 0       | 0       | 0      | 0    | 2.42   | 6.57    | 0.5    | 0      |
|             | tmi-miR-184    | Tetraodon nigroviridis   |                         | 0       | 0       | 0      | 0    | 2.42   | 6.57    | 0.5    | 0      |
|             | ola-miR-184-3p | Oryzias latipes          |                         | 0       | 0       | 0      | 0    | 2.42   | 6.57    | 0.5    | 0      |
|             | bfl-miR-184-3p | Branchiostoma floridae   |                         | 0       | 0       | 0      | 0    | 2.42   | 6.57    | 0.5    | 0      |
| dof-miR-833 | dme-miR-184-3p | Drosophila melanogaster  | TGGACGGAGAACTGATAAGGGC  | 0       | 0       | 0      | 0    | 3.26   | 12      | 0.5    | 0      |
|             | dps-miR-184    | Drosophila pseudoobscura |                         | 0       | 0       | 0      | 0    | 3.26   | 12      | 0.5    | 0      |
|             | ame-miR-184    | Apis mellifera           |                         | 0       | 0       | 0      | 0    | 3.26   | 12      | 0.5    | 0      |
|             | dre-miR-184    | Danio rerio              |                         | 0       | 0       | 0      | 0    | 3.26   | 12      | 0.5    | 0      |
|             | cin-miR-184    | Ciona intestinalis       |                         | 0       | 0       | 0      | 0    | 3.26   | 12      | 0.5    | 0      |
|             | bbe-miR-184-3p | Branchiostoma belcheri   |                         | 0       | 0       | 0      | 0    | 3.26   | 12      | 0.5    | 0      |
|             | ipu-miR-184    | Ictalurus punctatus      |                         | 0       | 0       | 0      | 0    | 3.26   | 12      | 0.5    | 0      |
|             | pmi-miR-184-3p | Patiria miniata          |                         | 0       | 0       | 0      | 0    | 3.26   | 12      | 0.5    | 0      |
|             | lva-miR-184-3p | Lytechinus variegatus    |                         | 0       | 0       | 0      | 0    | 3.26   | 12      | 0.5    | 0      |
|             | hme-miR-184    | Heliconius melpomene     |                         | 0       | 0       | 0      | 0    | 3.26   | 12      | 0.5    | 0      |

|             |                |                               |                        |   |   |   |   |      |      |     |   |
|-------------|----------------|-------------------------------|------------------------|---|---|---|---|------|------|-----|---|
|             | ccr-miR-184    | Cyprinus carpio               |                        | 0 | 0 | 0 | 0 | 3.26 | 12   | 0.5 | 0 |
|             | tur-miR-184-3p | Tetranychus urticae           |                        | 0 | 0 | 0 | 0 | 3.26 | 12   | 0.5 | 0 |
|             | mse-miR-184    | Manduca sexta                 |                        | 0 | 0 | 0 | 0 | 3.26 | 12   | 0.5 | 0 |
|             | nvi-miR-184    | Nasonia vitripennis           |                        | 0 | 0 | 0 | 0 | 3.26 | 12   | 0.5 | 0 |
|             | ngi-miR-184    | Nasonia giraulti              |                        | 0 | 0 | 0 | 0 | 3.26 | 12   | 0.5 | 0 |
|             | nlo-miR-184    | Nasonia longicornis           |                        | 0 | 0 | 0 | 0 | 3.26 | 12   | 0.5 | 0 |
|             | isc-miR-184    | Ixodes scapularis             |                        | 0 | 0 | 0 | 0 | 3.26 | 12   | 0.5 | 0 |
|             | api-miR-184a   | Acyrtosiphon pisum            |                        | 0 | 0 | 0 | 0 | 3.26 | 12   | 0.5 | 0 |
|             | aae-miR-184    | Aedes aegypti                 |                        | 0 | 0 | 0 | 0 | 3.26 | 12   | 0.5 | 0 |
|             | cqu-miR-184    | Culex quinquefasciatus        |                        | 0 | 0 | 0 | 0 | 3.26 | 12   | 0.5 | 0 |
|             | tca-miR-184-3p | Tribolium castaneum           |                        | 0 | 0 | 0 | 0 | 3.26 | 12   | 0.5 | 0 |
|             | dan-miR-184-3p | Drosophila ananassae          |                        | 0 | 0 | 0 | 0 | 3.26 | 12   | 0.5 | 0 |
|             | der-miR-184-3p | Drosophila erecta             |                        | 0 | 0 | 0 | 0 | 3.26 | 12   | 0.5 | 0 |
|             | dgr-miR-184-3p | Drosophila grimshawi          |                        | 0 | 0 | 0 | 0 | 3.26 | 12   | 0.5 | 0 |
|             | dmo-miR-184-3p | Drosophila mojavensis         |                        | 0 | 0 | 0 | 0 | 3.26 | 12   | 0.5 | 0 |
|             | dpe-miR-184-3p | Drosophila persimilis         |                        | 0 | 0 | 0 | 0 | 3.26 | 12   | 0.5 | 0 |
|             | dse-miR-184-3p | Drosophila sechellia          |                        | 0 | 0 | 0 | 0 | 3.26 | 12   | 0.5 | 0 |
|             | dsi-miR-184-3p | Drosophila simulans           |                        | 0 | 0 | 0 | 0 | 3.26 | 12   | 0.5 | 0 |
|             | dvi-miR-184-3p | Drosophila virilis            |                        | 0 | 0 | 0 | 0 | 3.26 | 12   | 0.5 | 0 |
|             | dwi-miR-184-3p | Drosophila willistoni         |                        | 0 | 0 | 0 | 0 | 3.26 | 12   | 0.5 | 0 |
|             | dya-miR-184-3p | Drosophila yakuba             |                        | 0 | 0 | 0 | 0 | 3.26 | 12   | 0.5 | 0 |
|             | cte-miR-184a   | Capitella teleta              |                        | 0 | 0 | 0 | 0 | 3.26 | 12   | 0.5 | 0 |
|             | lgi-miR-184    | Lottia gigantea               |                        | 0 | 0 | 0 | 0 | 3.26 | 12   | 0.5 | 0 |
|             | ske-miR-184-3p | Saccoglossus kowalevskii      |                        | 0 | 0 | 0 | 0 | 3.26 | 12   | 0.5 | 0 |
|             | spu-miR-184    | Strongylocentrotus purpuratus |                        | 0 | 0 | 0 | 0 | 3.26 | 12   | 0.5 | 0 |
| dof-miR-834 | mmu-miR-184-3p | Mus musculus                  | TGGACGGAGAACTGATAAGGGT | 0 | 0 | 0 | 0 | 0.19 | 0.21 | 0   | 0 |
|             | hsa-miR-184    | Homo sapiens                  |                        | 0 | 0 | 0 | 0 | 0.19 | 0.21 | 0   | 0 |
|             | rno-miR-184    | Rattus norvegicus             |                        | 0 | 0 | 0 | 0 | 0.19 | 0.21 | 0   | 0 |
|             | gga-miR-184-3p | Gallus gallus                 |                        | 0 | 0 | 0 | 0 | 0.19 | 0.21 | 0   | 0 |
|             | ssc-miR-184    | Sus scrofa                    |                        | 0 | 0 | 0 | 0 | 0.19 | 0.21 | 0   | 0 |
|             | ptr-miR-184    | Pan troglodytes               |                        | 0 | 0 | 0 | 0 | 0.19 | 0.21 | 0   | 0 |
|             | ppy-miR-184    | Pongo pygmaeus                |                        | 0 | 0 | 0 | 0 | 0.19 | 0.21 | 0   | 0 |
|             | mne-miR-184    | Macaca nemestrina             |                        | 0 | 0 | 0 | 0 | 0.19 | 0.21 | 0   | 0 |
|             | mdo-miR-184-3p | Monodelphis domestica         |                        | 0 | 0 | 0 | 0 | 0.19 | 0.21 | 0   | 0 |

|             |                |                      |                       |       |       |       |         |       |        |       |       |
|-------------|----------------|----------------------|-----------------------|-------|-------|-------|---------|-------|--------|-------|-------|
|             | chi-miR-184    | Capra hircus         |                       | 0     | 0     | 0     | 0       | 0.19  | 0.21   | 0     | 0     |
|             | tch-miR-184    | Tupaia chinensis     |                       | 0     | 0     | 0     | 0       | 0.19  | 0.21   | 0     | 0     |
|             | cgr-miR-184    | Cricetulus griseus   |                       | 0     | 0     | 0     | 0       | 0.19  | 0.21   | 0     | 0     |
|             | aca-miR-184-3p | Anolis carolinensis  |                       | 0     | 0     | 0     | 0       | 0.19  | 0.21   | 0     | 0     |
|             | eca-miR-184    | Equus caballus       |                       | 0     | 0     | 0     | 0       | 0.19  | 0.21   | 0     | 0     |
|             | tgu-miR-184    | Taeniopygia guttata  |                       | 0     | 0     | 0     | 0       | 0.19  | 0.21   | 0     | 0     |
|             | mml-miR-184    | Macaca mulatta       |                       | 0     | 0     | 0     | 0       | 0.19  | 0.21   | 0     | 0     |
|             | bta-miR-184    | Bos taurus           |                       | 0     | 0     | 0     | 0       | 0.19  | 0.21   | 0     | 0     |
|             | cfa-miR-184    | Canis familiaris     |                       | 0     | 0     | 0     | 0       | 0.19  | 0.21   | 0     | 0     |
| dof-miR-835 | gma-miR164b    | Glycine max          | TGGAGAAGCAGGGCACGTGC  | 2.97  | 0.51  | 0.37  | 27.03   | 0.75  | 2.4    | 0.17  | 0.56  |
|             | gma-miR164c    | Glycine max          |                       | 2.97  | 0.51  | 0.37  | 27.03   | 0.75  | 2.4    | 0.17  | 0.56  |
|             | gma-miR164d    | Glycine max          |                       | 2.97  | 0.51  | 0.37  | 27.03   | 0.75  | 2.4    | 0.17  | 0.56  |
| dof-miR-836 | ath-miR164a    | Arabidopsis thaliana | TGGAGAAGCAGGGCACGTGCA | 19.21 | 75.86 | 26.46 | 1457.69 | 65.57 | 129.27 | 52.59 | 18.08 |
|             | ath-miR164b-5p | Arabidopsis thaliana |                       | 19.21 | 75.86 | 26.46 | 1457.69 | 65.57 | 129.27 | 52.59 | 18.08 |
|             | osa-miR164a    | Oryza sativa         |                       | 19.21 | 75.86 | 26.46 | 1457.69 | 65.57 | 129.27 | 52.59 | 18.08 |
|             | osa-miR164b    | Oryza sativa         |                       | 19.21 | 75.86 | 26.46 | 1457.69 | 65.57 | 129.27 | 52.59 | 18.08 |
|             | osa-miR164f    | Oryza sativa         |                       | 19.21 | 75.86 | 26.46 | 1457.69 | 65.57 | 129.27 | 52.59 | 18.08 |
|             | zma-miR164a-5p | Zea mays             |                       | 19.21 | 75.86 | 26.46 | 1457.69 | 65.57 | 129.27 | 52.59 | 18.08 |
|             | zma-miR164d-5p | Zea mays             |                       | 19.21 | 75.86 | 26.46 | 1457.69 | 65.57 | 129.27 | 52.59 | 18.08 |
|             | zma-miR164b-5p | Zea mays             |                       | 19.21 | 75.86 | 26.46 | 1457.69 | 65.57 | 129.27 | 52.59 | 18.08 |
|             | zma-miR164c-5p | Zea mays             |                       | 19.21 | 75.86 | 26.46 | 1457.69 | 65.57 | 129.27 | 52.59 | 18.08 |
|             | sbi-miR164a    | Sorghum bicolor      |                       | 19.21 | 75.86 | 26.46 | 1457.69 | 65.57 | 129.27 | 52.59 | 18.08 |
|             | ptc-miR164a    | Populus trichocarpa  |                       | 19.21 | 75.86 | 26.46 | 1457.69 | 65.57 | 129.27 | 52.59 | 18.08 |
|             | ptc-miR164b    | Populus trichocarpa  |                       | 19.21 | 75.86 | 26.46 | 1457.69 | 65.57 | 129.27 | 52.59 | 18.08 |
|             | ptc-miR164c    | Populus trichocarpa  |                       | 19.21 | 75.86 | 26.46 | 1457.69 | 65.57 | 129.27 | 52.59 | 18.08 |
|             | ptc-miR164d    | Populus trichocarpa  |                       | 19.21 | 75.86 | 26.46 | 1457.69 | 65.57 | 129.27 | 52.59 | 18.08 |
|             | ptc-miR164e    | Populus trichocarpa  |                       | 19.21 | 75.86 | 26.46 | 1457.69 | 65.57 | 129.27 | 52.59 | 18.08 |
|             | mtr-miR164a    | Medicago truncatula  |                       | 19.21 | 75.86 | 26.46 | 1457.69 | 65.57 | 129.27 | 52.59 | 18.08 |
|             | mtr-miR164b    | Medicago truncatula  |                       | 19.21 | 75.86 | 26.46 | 1457.69 | 65.57 | 129.27 | 52.59 | 18.08 |
|             | mtr-miR164c    | Medicago truncatula  |                       | 19.21 | 75.86 | 26.46 | 1457.69 | 65.57 | 129.27 | 52.59 | 18.08 |
|             | tae-miR164     | Triticum aestivum    |                       | 19.21 | 75.86 | 26.46 | 1457.69 | 65.57 | 129.27 | 52.59 | 18.08 |
|             | bnm-miR164a    | Brassica napus       |                       | 19.21 | 75.86 | 26.46 | 1457.69 | 65.57 | 129.27 | 52.59 | 18.08 |
|             | vvi-miR164a    | Vitis vinifera       |                       | 19.21 | 75.86 | 26.46 | 1457.69 | 65.57 | 129.27 | 52.59 | 18.08 |
|             | vvi-miR164c    | Vitis vinifera       |                       | 19.21 | 75.86 | 26.46 | 1457.69 | 65.57 | 129.27 | 52.59 | 18.08 |



|             |                |                         |                        |       |       |       |         |       |        |       |       |
|-------------|----------------|-------------------------|------------------------|-------|-------|-------|---------|-------|--------|-------|-------|
|             | gma-miR164g    | Glycine max             |                        | 19.21 | 75.86 | 26.46 | 1457.69 | 65.57 | 129.27 | 52.59 | 18.08 |
|             | gma-miR164h    | Glycine max             |                        | 19.21 | 75.86 | 26.46 | 1457.69 | 65.57 | 129.27 | 52.59 | 18.08 |
|             | gma-miR164i    | Glycine max             |                        | 19.21 | 75.86 | 26.46 | 1457.69 | 65.57 | 129.27 | 52.59 | 18.08 |
|             | gma-miR164j    | Glycine max             |                        | 19.21 | 75.86 | 26.46 | 1457.69 | 65.57 | 129.27 | 52.59 | 18.08 |
|             | gma-miR164k    | Glycine max             |                        | 19.21 | 75.86 | 26.46 | 1457.69 | 65.57 | 129.27 | 52.59 | 18.08 |
|             | tcc-miR164a    | Theobroma cacao         |                        | 19.21 | 75.86 | 26.46 | 1457.69 | 65.57 | 129.27 | 52.59 | 18.08 |
|             | tcc-miR164b    | Theobroma cacao         |                        | 19.21 | 75.86 | 26.46 | 1457.69 | 65.57 | 129.27 | 52.59 | 18.08 |
|             | bdi-miR164b    | Brachypodium distachyon |                        | 19.21 | 75.86 | 26.46 | 1457.69 | 65.57 | 129.27 | 52.59 | 18.08 |
|             | bdi-miR164a-5p | Brachypodium distachyon |                        | 19.21 | 75.86 | 26.46 | 1457.69 | 65.57 | 129.27 | 52.59 | 18.08 |
|             | bdi-miR164e    | Brachypodium distachyon |                        | 19.21 | 75.86 | 26.46 | 1457.69 | 65.57 | 129.27 | 52.59 | 18.08 |
|             | zma-miR164g-5p | Zea mays                |                        | 19.21 | 75.86 | 26.46 | 1457.69 | 65.57 | 129.27 | 52.59 | 18.08 |
|             | csi-miR164     | Citrus sinensis         |                        | 19.21 | 75.86 | 26.46 | 1457.69 | 65.57 | 129.27 | 52.59 | 18.08 |
|             | ctr-miR164     | Citrus trifoliata       |                        | 19.21 | 75.86 | 26.46 | 1457.69 | 65.57 | 129.27 | 52.59 | 18.08 |
|             | rco-miR164a    | Ricinus communis        |                        | 19.21 | 75.86 | 26.46 | 1457.69 | 65.57 | 129.27 | 52.59 | 18.08 |
|             | rco-miR164b    | Ricinus communis        |                        | 19.21 | 75.86 | 26.46 | 1457.69 | 65.57 | 129.27 | 52.59 | 18.08 |
|             | rco-miR164c    | Ricinus communis        |                        | 19.21 | 75.86 | 26.46 | 1457.69 | 65.57 | 129.27 | 52.59 | 18.08 |
|             | ghr-miR164     | Gossypium hirsutum      |                        | 19.21 | 75.86 | 26.46 | 1457.69 | 65.57 | 129.27 | 52.59 | 18.08 |
|             | aly-miR164a-5p | Arabidopsis lyrata      |                        | 19.21 | 75.86 | 26.46 | 1457.69 | 65.57 | 129.27 | 52.59 | 18.08 |
|             | aly-miR164b-5p | Arabidopsis lyrata      |                        | 19.21 | 75.86 | 26.46 | 1457.69 | 65.57 | 129.27 | 52.59 | 18.08 |
|             | gma-miR164a    | Glycine max             |                        | 19.21 | 75.86 | 26.46 | 1457.69 | 65.57 | 129.27 | 52.59 | 18.08 |
|             | bra-miR164a    | Brassica rapa           |                        | 19.21 | 75.86 | 26.46 | 1457.69 | 65.57 | 129.27 | 52.59 | 18.08 |
|             | sbi-miR164d    | Sorghum bicolor         |                        | 19.21 | 75.86 | 26.46 | 1457.69 | 65.57 | 129.27 | 52.59 | 18.08 |
|             | sbi-miR164e    | Sorghum bicolor         |                        | 19.21 | 75.86 | 26.46 | 1457.69 | 65.57 | 129.27 | 52.59 | 18.08 |
| dof-miR-837 | bra-miR164e-5p | Brassica rapa           | TGGAGAAGCAGGGCACGTGCAA | 0     | 0     | 0     | 0.72    | 0     | 0.1    | 0     | 0     |
| dof-miR-838 | ath-miR164c-5p | Arabidopsis thaliana    | TGGAGAAGCAGGGCACGTGCG  | 0     | 0     | 0.18  | 2.34    | 0.19  | 0.21   | 0     | 0     |
|             | bra-miR164b-5p | Brassica rapa           |                        | 0     | 0     | 0.18  | 2.34    | 0.19  | 0.21   | 0     | 0     |
|             | bra-miR164d-5p | Brassica rapa           |                        | 0     | 0     | 0.18  | 2.34    | 0.19  | 0.21   | 0     | 0     |
|             | bra-miR164c-5p | Brassica rapa           |                        | 0     | 0     | 0.18  | 2.34    | 0.19  | 0.21   | 0     | 0     |
|             | cln-miR164     | Cunninghamia lanceolata |                        | 0     | 0     | 0.18  | 2.34    | 0.19  | 0.21   | 0     | 0     |
|             | bna-miR164b    | Brassica napus          |                        | 0     | 0     | 0.18  | 2.34    | 0.19  | 0.21   | 0     | 0     |
|             | bna-miR164c    | Brassica napus          |                        | 0     | 0     | 0.18  | 2.34    | 0.19  | 0.21   | 0     | 0     |
|             | bna-miR164d    | Brassica napus          |                        | 0     | 0     | 0.18  | 2.34    | 0.19  | 0.21   | 0     | 0     |
|             | aly-miR164c-5p | Arabidopsis lyrata      |                        | 0     | 0     | 0.18  | 2.34    | 0.19  | 0.21   | 0     | 0     |
| dof-miR-839 | osa-miR164d    | Oryza sativa            | TGGAGAAGCAGGGCACGTGCT  | 0     | 0     | 0     | 8.65    | 0.28  | 0.42   | 0.17  | 0     |

|             |                |                          |                         |      |      |      |      |       |      |      |      |
|-------------|----------------|--------------------------|-------------------------|------|------|------|------|-------|------|------|------|
|             | sbi-miR164b    | Sorghum bicolor          |                         | 0    | 0    | 0    | 8.65 | 0.28  | 0.42 | 0.17 | 0    |
|             | ata-miR164a-5p | Aegilops tauschii        |                         | 0    | 0    | 0    | 8.65 | 0.28  | 0.42 | 0.17 | 0    |
|             | bdi-miR164c-5p | Brachypodium distachyon  |                         | 0    | 0    | 0    | 8.65 | 0.28  | 0.42 | 0.17 | 0    |
|             | cme-miR164a    | Cucumis melo             |                         | 0    | 0    | 0    | 8.65 | 0.28  | 0.42 | 0.17 | 0    |
|             | zma-miR164f-5p | Zea mays                 |                         | 0    | 0    | 0    | 8.65 | 0.28  | 0.42 | 0.17 | 0    |
| dof-miR-840 | osa-miR164c    | Oryza sativa             | TGGAGAAGCAGGGTACGTGCA   | 0    | 0    | 0    | 0.36 | 0     | 0    | 0    | 0    |
|             | cca-miR164     | Cynara cardunculus       |                         | 0    | 0    | 0    | 0.36 | 0     | 0    | 0    | 0    |
| dof-miR-841 | mmu-miR-185-5p | Mus musculus             | TGGAGAGAAAGGCAGTTCCTGA  | 0    | 0.25 | 0.18 | 0    | 3.73  | 1.67 | 0.17 | 0    |
|             | hsa-miR-185-5p | Homo sapiens             |                         | 0    | 0.25 | 0.18 | 0    | 3.73  | 1.67 | 0.17 | 0    |
|             | rno-miR-185-5p | Rattus norvegicus        |                         | 0    | 0.25 | 0.18 | 0    | 3.73  | 1.67 | 0.17 | 0    |
|             | tch-miR-185-5p | Tupaia chinensis         |                         | 0    | 0.25 | 0.18 | 0    | 3.73  | 1.67 | 0.17 | 0    |
|             | cgr-miR-185-5p | Cricetulus griseus       |                         | 0    | 0.25 | 0.18 | 0    | 3.73  | 1.67 | 0.17 | 0    |
|             | ggo-miR-185    | Gorilla gorilla          |                         | 0    | 0.25 | 0.18 | 0    | 3.73  | 1.67 | 0.17 | 0    |
|             | ppy-miR-185    | Pongo pygmaeus           |                         | 0    | 0.25 | 0.18 | 0    | 3.73  | 1.67 | 0.17 | 0    |
|             | mml-miR-185-5p | Macaca mulatta           |                         | 0    | 0.25 | 0.18 | 0    | 3.73  | 1.67 | 0.17 | 0    |
|             | cfa-miR-185    | Canis familiaris         |                         | 0    | 0.25 | 0.18 | 0    | 3.73  | 1.67 | 0.17 | 0    |
|             | ssc-miR-185    | Sus scrofa               |                         | 0    | 0.25 | 0.18 | 0    | 3.73  | 1.67 | 0.17 | 0    |
|             | ptr-miR-185    | Pan troglodytes          |                         | 0    | 0.25 | 0.18 | 0    | 3.73  | 1.67 | 0.17 | 0    |
|             | bta-miR-185    | Bos taurus               |                         | 0    | 0.25 | 0.18 | 0    | 3.73  | 1.67 | 0.17 | 0    |
| dof-miR-842 | efu-miR-185    | Eptesicus fuscus         | TGGAGAGAAAGGCAGTTCCTGAT | 0    | 0    | 0.18 | 0    | 0.28  | 0.1  | 0    | 0    |
| dof-miR-843 | tch-miR-122-5p | Tupaia chinensis         | TGGAGTGTGACAATGGTGTTT   | 1.98 | 2.04 | 0.37 | 0    | 13.06 | 6.89 | 0.5  | 2.24 |
|             | ipu-miR-122    | Ictalurus punctatus      |                         | 1.98 | 2.04 | 0.37 | 0    | 13.06 | 6.89 | 0.5  | 2.24 |
|             | ccr-miR-122    | Cyprinus carpio          |                         | 1.98 | 2.04 | 0.37 | 0    | 13.06 | 6.89 | 0.5  | 2.24 |
|             | cgr-miR-122    | Cricetulus griseus       |                         | 1.98 | 2.04 | 0.37 | 0    | 13.06 | 6.89 | 0.5  | 2.24 |
| dof-miR-844 | mmu-miR-122-5p | Mus musculus             | TGGAGTGTGACAATGGTGTTTG  | 0.79 | 2.04 | 0    | 0.36 | 3.08  | 2.71 | 1.17 | 0.98 |
|             | hsa-miR-122-5p | Homo sapiens             |                         | 0.79 | 2.04 | 0    | 0.36 | 3.08  | 2.71 | 1.17 | 0.98 |
|             | rno-miR-122-5p | Rattus norvegicus        |                         | 0.79 | 2.04 | 0    | 0.36 | 3.08  | 2.71 | 1.17 | 0.98 |
|             | dre-miR-122    | Danio rerio              |                         | 0.79 | 2.04 | 0    | 0.36 | 3.08  | 2.71 | 1.17 | 0.98 |
|             | fru-miR-122    | Fugu rubripes            |                         | 0.79 | 2.04 | 0    | 0.36 | 3.08  | 2.71 | 1.17 | 0.98 |
|             | tmi-miR-122    | Tetraodon nigroviridis   |                         | 0.79 | 2.04 | 0    | 0.36 | 3.08  | 2.71 | 1.17 | 0.98 |
|             | bta-miR-122    | Bos taurus               |                         | 0.79 | 2.04 | 0    | 0.36 | 3.08  | 2.71 | 1.17 | 0.98 |
|             | oan-miR-122-5p | Ornithorhynchus anatinus |                         | 0.79 | 2.04 | 0    | 0.36 | 3.08  | 2.71 | 1.17 | 0.98 |
|             | chi-miR-122    | Capra hircus             |                         | 0.79 | 2.04 | 0    | 0.36 | 3.08  | 2.71 | 1.17 | 0.98 |
|             | ssa-miR-122-5p | Salmo salar              |                         | 0.79 | 2.04 | 0    | 0.36 | 3.08  | 2.71 | 1.17 | 0.98 |

|              |                 |                        |                           |      |      |      |      |       |      |      |      |
|--------------|-----------------|------------------------|---------------------------|------|------|------|------|-------|------|------|------|
|              | pol-miR-122-5p  | Paralichthys olivaceus |                           | 0.79 | 2.04 | 0    | 0.36 | 3.08  | 2.71 | 1.17 | 0.98 |
|              | ggo-miR-122     | Gorilla gorilla        |                           | 0.79 | 2.04 | 0    | 0.36 | 3.08  | 2.71 | 1.17 | 0.98 |
|              | aca-miR-122-5p  | Anolis carolinensis    |                           | 0.79 | 2.04 | 0    | 0.36 | 3.08  | 2.71 | 1.17 | 0.98 |
|              | ppy-miR-122     | Pongo pygmaeus         |                           | 0.79 | 2.04 | 0    | 0.36 | 3.08  | 2.71 | 1.17 | 0.98 |
|              | eca-miR-122     | Equus caballus         |                           | 0.79 | 2.04 | 0    | 0.36 | 3.08  | 2.71 | 1.17 | 0.98 |
|              | tgu-miR-122-5p  | Taeniopygia guttata    |                           | 0.79 | 2.04 | 0    | 0.36 | 3.08  | 2.71 | 1.17 | 0.98 |
|              | mml-miR-122a-5p | Macaca mulatta         |                           | 0.79 | 2.04 | 0    | 0.36 | 3.08  | 2.71 | 1.17 | 0.98 |
|              | cfa-miR-122     | Canis familiaris       |                           | 0.79 | 2.04 | 0    | 0.36 | 3.08  | 2.71 | 1.17 | 0.98 |
|              | ptr-miR-122     | Pan troglodytes        |                           | 0.79 | 2.04 | 0    | 0.36 | 3.08  | 2.71 | 1.17 | 0.98 |
| dof-miR-845  | gga-miR-122-5p  | Gallus gallus          | TGGAGTGTGACAATGGTGTTTGT   | 1.98 | 4.33 | 0.18 | 0    | 10.45 | 5.63 | 1.5  | 1.82 |
|              | ssc-miR-122     | Sus scrofa             |                           | 1.98 | 4.33 | 0.18 | 0    | 10.45 | 5.63 | 1.5  | 1.82 |
|              | xtr-miR-122     | Xenopus tropicalis     |                           | 1.98 | 4.33 | 0.18 | 0    | 10.45 | 5.63 | 1.5  | 1.82 |
| dof-miR-846  | oha-miR-122-5p  | Ophiophagus hannah     | TGGAGTGTGACAATGGTGTTTGTAT | 0    | 0    | 0    | 0    | 0     | 0.21 | 0    | 0    |
| dof-miR-847  | bta-miR-2320-5p | Bos taurus             | TGGCACAGGGTCCAGCTGTCGGC   | 0    | 0    | 0.18 | 0    | 0     | 0    | 0    | 0    |
| dof-miR-848  | hsa-miR-449a    | Homo sapiens           | TGGCAGTGTATTGTTAGCTGGT    | 0    | 0    | 0.18 | 0.18 | 0     | 0    | 0    | 0    |
|              | mmu-miR-449a-5p | Mus musculus           |                           | 0    | 0    | 0.18 | 0.18 | 0     | 0    | 0    | 0    |
|              | rno-miR-449a-5p | Rattus norvegicus      |                           | 0    | 0    | 0.18 | 0.18 | 0     | 0    | 0    | 0    |
|              | cfa-miR-449a    | Canis familiaris       |                           | 0    | 0    | 0.18 | 0.18 | 0     | 0    | 0    | 0    |
|              | mdo-miR-449a-5p | Monodelphis domestica  |                           | 0    | 0    | 0.18 | 0.18 | 0     | 0    | 0    | 0    |
|              | ppy-miR-449a    | Pongo pygmaeus         |                           | 0    | 0    | 0.18 | 0.18 | 0     | 0    | 0    | 0    |
|              | eca-miR-449a    | Equus caballus         |                           | 0    | 0    | 0.18 | 0.18 | 0     | 0    | 0    | 0    |
|              | mml-miR-449a-5p | Macaca mulatta         |                           | 0    | 0    | 0.18 | 0.18 | 0     | 0    | 0    | 0    |
| bta-miR-449a | Bos taurus      | 0                      | 0                         | 0.18 | 0.18 | 0    | 0    | 0     | 0    | 0    |      |
| dof-miR-849  | hsa-miR-34a-5p  | Homo sapiens           | TGGCAGTGTCTTAGCTGGTTGT    | 0    | 0    | 0.55 | 0.18 | 0     | 0.1  | 0    | 0    |
|              | mmu-miR-34a-5p  | Mus musculus           |                           | 0    | 0    | 0.55 | 0.18 | 0     | 0.1  | 0    | 0    |
|              | rno-miR-34a-5p  | Rattus norvegicus      |                           | 0    | 0    | 0.55 | 0.18 | 0     | 0.1  | 0    | 0    |
|              | dre-miR-34a     | Danio rerio            |                           | 0    | 0    | 0.55 | 0.18 | 0     | 0.1  | 0    | 0    |
|              | ggo-miR-34a     | Gorilla gorilla        |                           | 0    | 0    | 0.55 | 0.18 | 0     | 0.1  | 0    | 0    |
|              | age-miR-34a     | Ateles geoffroyi       |                           | 0    | 0    | 0.55 | 0.18 | 0     | 0.1  | 0    | 0    |
|              | ppa-miR-34a     | Pan paniscus           |                           | 0    | 0    | 0.55 | 0.18 | 0     | 0.1  | 0    | 0    |
|              | ppy-miR-34a     | Pongo pygmaeus         |                           | 0    | 0    | 0.55 | 0.18 | 0     | 0.1  | 0    | 0    |
|              | ptr-miR-34a     | Pan troglodytes        |                           | 0    | 0    | 0.55 | 0.18 | 0     | 0.1  | 0    | 0    |
|              | mml-miR-34a-5p  | Macaca mulatta         |                           | 0    | 0    | 0.55 | 0.18 | 0     | 0.1  | 0    | 0    |
|              | sla-miR-34a     | Saguinus labiatus      |                           | 0    | 0    | 0.55 | 0.18 | 0     | 0.1  | 0    | 0    |

|             |                |                        |                         |      |      |      |      |      |      |     |      |
|-------------|----------------|------------------------|-------------------------|------|------|------|------|------|------|-----|------|
|             | lla-miR-34a    | Lagothrix lagotricha   |                         | 0    | 0    | 0.55 | 0.18 | 0    | 0.1  | 0   | 0    |
|             | mne-miR-34a    | Macaca nemestrina      |                         | 0    | 0    | 0.55 | 0.18 | 0    | 0.1  | 0   | 0    |
|             | bta-miR-34a    | Bos taurus             |                         | 0    | 0    | 0.55 | 0.18 | 0    | 0.1  | 0   | 0    |
|             | chi-miR-34a    | Capra hircus           |                         | 0    | 0    | 0.55 | 0.18 | 0    | 0.1  | 0   | 0    |
|             | ipu-miR-34a    | Ictalurus punctatus    |                         | 0    | 0    | 0.55 | 0.18 | 0    | 0.1  | 0   | 0    |
|             | ccr-miR-34     | Cyprinus carpio        |                         | 0    | 0    | 0.55 | 0.18 | 0    | 0.1  | 0   | 0    |
|             | cgr-miR-34a    | Cricetulus griseus     |                         | 0    | 0    | 0.55 | 0.18 | 0    | 0.1  | 0   | 0    |
|             | eca-miR-34a    | Equus caballus         |                         | 0    | 0    | 0.55 | 0.18 | 0    | 0.1  | 0   | 0    |
|             | tgu-miR-34a    | Taeniopygia guttata    |                         | 0    | 0    | 0.55 | 0.18 | 0    | 0.1  | 0   | 0    |
|             | cfa-miR-34a    | Canis familiaris       |                         | 0    | 0    | 0.55 | 0.18 | 0    | 0.1  | 0   | 0    |
|             | ssc-miR-34a    | Sus scrofa             |                         | 0    | 0    | 0.55 | 0.18 | 0    | 0.1  | 0   | 0    |
| dof-miR-850 | gga-miR-34a-5p | Gallus gallus          | TGGCAGTGTCTTAGCTGGTTGTT | 0    | 0    | 0    | 0.18 | 0    | 0    | 0   | 0    |
|             | xtr-miR-34a    | Xenopus tropicalis     |                         | 0    | 0    | 0    | 0.18 | 0    | 0    | 0   | 0    |
|             | mdo-miR-34a-5p | Monodelphis domestica  |                         | 0    | 0    | 0    | 0.18 | 0    | 0    | 0   | 0    |
|             | tch-miR-34a-5p | Tupaia chinensis       |                         | 0    | 0    | 0    | 0.18 | 0    | 0    | 0   | 0    |
|             | oha-miR-34a-5p | Ophiophagus hannah     |                         | 0    | 0    | 0    | 0.18 | 0    | 0    | 0   | 0    |
| dof-miR-851 | sha-miR-24     | Sarcophilus harrisi    | TGGCTCAGTTCAGCAGGAA     | 0    | 0    | 0    | 0    | 0.09 | 0    | 0   | 0    |
| dof-miR-852 | chi-miR-24-3p  | Capra hircus           | TGGCTCAGTTCAGCAGGAAC    | 0.79 | 0.76 | 2.94 | 4.32 | 2.98 | 0.42 | 0.5 | 0.28 |
|             | ssa-miR-24a-3p | Salmo salar            |                         | 0.79 | 0.76 | 2.94 | 4.32 | 2.98 | 0.42 | 0.5 | 0.28 |
|             | ipu-miR-24b    | Ictalurus punctatus    |                         | 0.79 | 0.76 | 2.94 | 4.32 | 2.98 | 0.42 | 0.5 | 0.28 |
| dof-miR-853 | hsa-miR-24-3p  | Homo sapiens           | TGGCTCAGTTCAGCAGGAACAG  | 0    | 0    | 0.55 | 0.18 | 0.47 | 0.31 | 0   | 0    |
|             | mmu-miR-24-3p  | Mus musculus           |                         | 0    | 0    | 0.55 | 0.18 | 0.47 | 0.31 | 0   | 0    |
|             | rno-miR-24-3p  | Rattus norvegicus      |                         | 0    | 0    | 0.55 | 0.18 | 0.47 | 0.31 | 0   | 0    |
|             | gga-miR-24-3p  | Gallus gallus          |                         | 0    | 0    | 0.55 | 0.18 | 0.47 | 0.31 | 0   | 0    |
|             | dre-miR-24     | Danio rerio            |                         | 0    | 0    | 0.55 | 0.18 | 0.47 | 0.31 | 0   | 0    |
|             | ssc-miR-24-3p  | Sus scrofa             |                         | 0    | 0    | 0.55 | 0.18 | 0.47 | 0.31 | 0   | 0    |
|             | mml-miR-24-3p  | Macaca mulatta         |                         | 0    | 0    | 0.55 | 0.18 | 0.47 | 0.31 | 0   | 0    |
|             | ppy-miR-24-3p  | Pongo pygmaeus         |                         | 0    | 0    | 0.55 | 0.18 | 0.47 | 0.31 | 0   | 0    |
|             | mne-miR-24-3p  | Macaca nemestrina      |                         | 0    | 0    | 0.55 | 0.18 | 0.47 | 0.31 | 0   | 0    |
|             | ppa-miR-24-3p  | Pan paniscus           |                         | 0    | 0    | 0.55 | 0.18 | 0.47 | 0.31 | 0   | 0    |
|             | ggo-miR-24     | Gorilla gorilla        |                         | 0    | 0    | 0.55 | 0.18 | 0.47 | 0.31 | 0   | 0    |
|             | ptr-miR-24     | Pan troglodytes        |                         | 0    | 0    | 0.55 | 0.18 | 0.47 | 0.31 | 0   | 0    |
|             | fru-miR-24-3p  | Fugu rubripes          |                         | 0    | 0    | 0.55 | 0.18 | 0.47 | 0.31 | 0   | 0    |
|             | tmi-miR-24     | Tetraodon nigroviridis |                         | 0    | 0    | 0.55 | 0.18 | 0.47 | 0.31 | 0   | 0    |



|              |                  |                          |                        |   |   |      |      |      |      |      |   |
|--------------|------------------|--------------------------|------------------------|---|---|------|------|------|------|------|---|
|              | xtr-miR-24a-3p   | Xenopus tropicalis       |                        | 0 | 0 | 0.55 | 0.18 | 0.47 | 0.31 | 0    | 0 |
|              | bta-miR-24-3p    | Bos taurus               |                        | 0 | 0 | 0.55 | 0.18 | 0.47 | 0.31 | 0    | 0 |
|              | oan-miR-24-3p    | Ornithorhynchus anatinus |                        | 0 | 0 | 0.55 | 0.18 | 0.47 | 0.31 | 0    | 0 |
|              | ccr-miR-24       | Cyprinus carpio          |                        | 0 | 0 | 0.55 | 0.18 | 0.47 | 0.31 | 0    | 0 |
|              | ola-miR-24a      | Oryzias latipes          |                        | 0 | 0 | 0.55 | 0.18 | 0.47 | 0.31 | 0    | 0 |
|              | pma-miR-24       | Petromyzon marinus       |                        | 0 | 0 | 0.55 | 0.18 | 0.47 | 0.31 | 0    | 0 |
|              | aca-miR-24-3p    | Anolis carolinensis      |                        | 0 | 0 | 0.55 | 0.18 | 0.47 | 0.31 | 0    | 0 |
|              | eca-miR-24       | Equus caballus           |                        | 0 | 0 | 0.55 | 0.18 | 0.47 | 0.31 | 0    | 0 |
|              | tgu-miR-24-3p    | Taeniopygia guttata      |                        | 0 | 0 | 0.55 | 0.18 | 0.47 | 0.31 | 0    | 0 |
| dof-miR-854  | chi-miR-144-5p   | Capra hircus             | TGGGATATCATCATATACTGT  | 0 | 0 | 0    | 0    | 0    | 0    | 0.17 | 0 |
| dof-miR-855  | aca-miR-193-5p   | Anolis carolinensis      | TGGGTCTTTGCGGGCGAGATG  | 0 | 0 | 0    | 0    | 0.09 | 0    | 0    | 0 |
| dof-miR-856  | hsa-miR-193a-5p  | Homo sapiens             | TGGGTCTTTGCGGGCGAGATGA | 0 | 0 | 0    | 0    | 0.09 | 0    | 0    | 0 |
|              | bta-miR-193a-5p  | Bos taurus               |                        | 0 | 0 | 0    | 0    | 0.09 | 0    | 0    | 0 |
|              | oha-miR-193-5p   | Ophiophagus hannah       |                        | 0 | 0 | 0    | 0    | 0.09 | 0    | 0    | 0 |
|              | ppy-miR-193a-5p  | Pongo pygmaeus           |                        | 0 | 0 | 0    | 0    | 0.09 | 0    | 0    | 0 |
|              | eca-miR-193a-5p  | Equus caballus           |                        | 0 | 0 | 0    | 0    | 0.09 | 0    | 0    | 0 |
|              | ssc-miR-193a-5p  | Sus scrofa               |                        | 0 | 0 | 0    | 0    | 0.09 | 0    | 0    | 0 |
|              | tgu-miR-193b-5p  | Taeniopygia guttata      |                        | 0 | 0 | 0    | 0    | 0.09 | 0    | 0    | 0 |
|              | gga-miR-193a-5p  | Gallus gallus            |                        | 0 | 0 | 0    | 0    | 0.09 | 0    | 0    | 0 |
|              | mml-miR-193a-5p  | Macaca mulatta           |                        | 0 | 0 | 0    | 0    | 0.09 | 0    | 0    | 0 |
| cfa-miR-193a | Canis familiaris | 0                        | 0                      | 0 | 0 | 0.09 | 0    | 0    | 0    |      |   |
| dof-miR-857  | hsa-miR-629-5p   | Homo sapiens             | TGGGTTTACGTTGGGAGAACT  | 0 | 0 | 0    | 0    | 0.09 | 0.1  | 0    | 0 |
| dof-miR-858  | hme-miR-2765     | Heliconius melpomene     | TGGTAACTCCACCACCGTTGGC | 0 | 0 | 0    | 0    | 0    | 0    | 0.67 | 0 |
|              | ame-miR-2765-5p  | Apis mellifera           |                        | 0 | 0 | 0    | 0    | 0    | 0    | 0.67 | 0 |
|              | mse-miR-2765     | Manduca sexta            |                        | 0 | 0 | 0    | 0    | 0    | 0    | 0.67 | 0 |
|              | tca-miR-2765-5p  | Tribolium castaneum      |                        | 0 | 0 | 0    | 0    | 0    | 0    | 0.67 | 0 |
|              | bmo-miR-2765     | Bombyx mori              |                        | 0 | 0 | 0    | 0    | 0    | 0    | 0.67 | 0 |
|              | aae-miR-2765     | Aedes aegypti            |                        | 0 | 0 | 0    | 0    | 0    | 0    | 0.67 | 0 |
| dof-miR-859  | hsa-miR-379-5p   | Homo sapiens             | TGGTAGACTATGGAACGTAGG  | 0 | 0 | 0    | 0.18 | 0.09 | 0    | 0    | 0 |
|              | mmu-miR-379-5p   | Mus musculus             |                        | 0 | 0 | 0    | 0.18 | 0.09 | 0    | 0    | 0 |
|              | rno-miR-379-5p   | Rattus norvegicus        |                        | 0 | 0 | 0    | 0.18 | 0.09 | 0    | 0    | 0 |
|              | chi-miR-379-5p   | Capra hircus             |                        | 0 | 0 | 0    | 0.18 | 0.09 | 0    | 0    | 0 |
|              | cgr-miR-379      | Cricetulus griseus       |                        | 0 | 0 | 0    | 0.18 | 0.09 | 0    | 0    | 0 |
|              | ggo-miR-379      | Gorilla gorilla          |                        | 0 | 0 | 0    | 0.18 | 0.09 | 0    | 0    | 0 |

|             |                |                          |                          |     |      |      |      |       |      |     |      |
|-------------|----------------|--------------------------|--------------------------|-----|------|------|------|-------|------|-----|------|
|             | ppy-miR-379    | Pongo pygmaeus           |                          | 0   | 0    | 0    | 0.18 | 0.09  | 0    | 0   | 0    |
|             | eca-miR-379    | Equus caballus           |                          | 0   | 0    | 0    | 0.18 | 0.09  | 0    | 0   | 0    |
|             | mml-miR-379-5p | Macaca mulatta           |                          | 0   | 0    | 0    | 0.18 | 0.09  | 0    | 0   | 0    |
|             | cfa-miR-379    | Canis familiaris         |                          | 0   | 0    | 0    | 0.18 | 0.09  | 0    | 0   | 0    |
|             | ptr-miR-379    | Pan troglodytes          |                          | 0   | 0    | 0    | 0.18 | 0.09  | 0    | 0   | 0    |
|             | bta-miR-379    | Bos taurus               |                          | 0   | 0    | 0    | 0.18 | 0.09  | 0    | 0   | 0    |
| dof-miR-860 | hsa-miR-412-5p | Homo sapiens             | TGGTCGACCAGTTGGAAAGTAAT  | 0   | 0    | 0    | 0.72 | 0     | 0    | 0   | 0    |
|             | efu-miR-412    | Eptesicus fuscus         |                          | 0   | 0    | 0    | 0.72 | 0     | 0    | 0   | 0    |
|             | chi-miR-412-5p | Capra hircus             |                          | 0   | 0    | 0    | 0.72 | 0     | 0    | 0   | 0    |
|             | oar-miR-412-3p | Ovis aries               |                          | 0   | 0    | 0    | 0.72 | 0     | 0    | 0   | 0    |
| dof-miR-861 | chi-miR-30f-5p | Capra hircus             | TGTAACACCCCTACACTCTCAGC  | 0   | 0    | 0.55 | 0.18 | 0     | 0    | 0   | 0    |
|             | pma-miR-30f    | Petromyzon marinus       |                          | 0   | 0    | 0.55 | 0.18 | 0     | 0    | 0   | 0    |
| dof-miR-862 | bta-miR-30f    | Bos taurus               | TGTAACACCCCTACACTCTCAGCT | 0   | 0    | 0    | 0.9  | 0     | 0    | 0   | 0    |
| dof-miR-863 | oar-miR-30d    | Ovis aries               | TGTAACATCCCCGACTGG       | 0   | 0    | 0    | 0.18 | 0.19  | 0    | 0   | 0    |
| dof-miR-864 | hsa-miR-30d-5p | Homo sapiens             |                          | 0   | 0.25 | 0.55 | 0.36 | 0.75  | 0.1  | 0   | 0    |
|             | mmu-miR-30d-5p | Mus musculus             |                          | 0   | 0.25 | 0.55 | 0.36 | 0.75  | 0.1  | 0   | 0    |
|             | rno-miR-30d-5p | Rattus norvegicus        |                          | 0   | 0.25 | 0.55 | 0.36 | 0.75  | 0.1  | 0   | 0    |
|             | gga-miR-30d    | Gallus gallus            |                          | 0   | 0.25 | 0.55 | 0.36 | 0.75  | 0.1  | 0   | 0    |
|             | dre-miR-30d    | Danio rerio              |                          | 0   | 0.25 | 0.55 | 0.36 | 0.75  | 0.1  | 0   | 0    |
|             | ptr-miR-30d    | Pan troglodytes          |                          | 0   | 0.25 | 0.55 | 0.36 | 0.75  | 0.1  | 0   | 0    |
|             | ggo-miR-30d    | Gorilla gorilla          |                          | 0   | 0.25 | 0.55 | 0.36 | 0.75  | 0.1  | 0   | 0    |
|             | mne-miR-30d    | Macaca nemestrina        | TGTAACATCCCCGACTGGAAG    | 0   | 0.25 | 0.55 | 0.36 | 0.75  | 0.1  | 0   | 0    |
|             | ppa-miR-30d    | Pan paniscus             |                          | 0   | 0.25 | 0.55 | 0.36 | 0.75  | 0.1  | 0   | 0    |
|             | fru-miR-30d    | Fugu rubripes            |                          | 0   | 0.25 | 0.55 | 0.36 | 0.75  | 0.1  | 0   | 0    |
|             | tmi-miR-30d    | Tetraodon nigroviridis   |                          | 0   | 0.25 | 0.55 | 0.36 | 0.75  | 0.1  | 0   | 0    |
|             | xtr-miR-30d    | Xenopus tropicalis       |                          | 0   | 0.25 | 0.55 | 0.36 | 0.75  | 0.1  | 0   | 0    |
|             | aca-miR-30d-5p | Anolis carolinensis      |                          | 0   | 0.25 | 0.55 | 0.36 | 0.75  | 0.1  | 0   | 0    |
|             | ppy-miR-30d    | Pongo pygmaeus           |                          | 0   | 0.25 | 0.55 | 0.36 | 0.75  | 0.1  | 0   | 0    |
|             | eca-miR-30d    | Equus caballus           |                          | 0   | 0.25 | 0.55 | 0.36 | 0.75  | 0.1  | 0   | 0    |
|             | mml-miR-30d-5p | Macaca mulatta           |                          | 0   | 0.25 | 0.55 | 0.36 | 0.75  | 0.1  | 0   | 0    |
| dof-miR-865 | oan-miR-30d-5p | Ornithorhynchus anatinus |                          | 0   | 0.51 | 1.29 | 1.8  | 1.96  | 0.63 | 0.5 | 0.42 |
|             | ccr-miR-30d    | Cyprinus carpio          | TGTAACATCCCCGACTGGAAGC   | 0   | 0.51 | 1.29 | 1.8  | 1.96  | 0.63 | 0.5 | 0.42 |
|             | ola-miR-30d-5p | Oryzias latipes          |                          | 0   | 0.51 | 1.29 | 1.8  | 1.96  | 0.63 | 0.5 | 0.42 |
| dof-miR-866 | bta-miR-30d    | Bos taurus               | TGTAACATCCCCGACTGGAAGCT  | 0.4 | 0.51 | 1.65 | 3.42 | 10.45 | 1.25 | 1.5 | 0.28 |

|             |                |                          |                         |      |      |      |      |       |      |      |      |
|-------------|----------------|--------------------------|-------------------------|------|------|------|------|-------|------|------|------|
|             | oha-miR-30d-5p | Ophiophagus hannah       |                         | 0.4  | 0.51 | 1.65 | 3.42 | 10.45 | 1.25 | 1.5  | 0.28 |
|             | ssa-miR-30b-5p | Salmo salar              |                         | 0.4  | 0.51 | 1.65 | 3.42 | 10.45 | 1.25 | 1.5  | 0.28 |
|             | ssc-miR-30d    | Sus scrofa               |                         | 0.4  | 0.51 | 1.65 | 3.42 | 10.45 | 1.25 | 1.5  | 0.28 |
|             | tgu-miR-30d-5p | Taeniopygia guttata      |                         | 0.4  | 0.51 | 1.65 | 3.42 | 10.45 | 1.25 | 1.5  | 0.28 |
|             | cfa-miR-30d    | Canis familiaris         |                         | 0.4  | 0.51 | 1.65 | 3.42 | 10.45 | 1.25 | 1.5  | 0.28 |
| dof-miR-867 | pma-miR-30b    | Petromyzon marinus       | TGTAACATCCCTGACTGGAAGCT | 0    | 0    | 0    | 0    | 0.09  | 0    | 0    | 0    |
| dof-miR-868 | mml-miR-30b-5p | Macaca mulatta           | TGTAACATCCTACTCAGC      | 0.2  | 0    | 0    | 0.9  | 0     | 0    | 0    | 0.14 |
|             | ptr-miR-30b    | Pan troglodytes          |                         | 0.2  | 0    | 0    | 0.9  | 0     | 0    | 0    | 0.14 |
|             | ggo-miR-30b    | Gorilla gorilla          |                         | 0.2  | 0    | 0    | 0.9  | 0     | 0    | 0    | 0.14 |
|             | lla-miR-30b    | Lagothrix lagotricha     |                         | 0.2  | 0    | 0    | 0.9  | 0     | 0    | 0    | 0.14 |
|             | mne-miR-30b    | Macaca nemestrina        |                         | 0.2  | 0    | 0    | 0.9  | 0     | 0    | 0    | 0.14 |
|             | age-miR-30b    | Ateles geoffroyi         |                         | 0.2  | 0    | 0    | 0.9  | 0     | 0    | 0    | 0.14 |
|             | ppa-miR-30b    | Pan paniscus             |                         | 0.2  | 0    | 0    | 0.9  | 0     | 0    | 0    | 0.14 |
|             | oar-miR-30b    | Ovis aries               |                         | 0.2  | 0    | 0    | 0.9  | 0     | 0    | 0    | 0.14 |
| dof-miR-869 | mmu-miR-30b-5p | Mus musculus             | TGTAACATCCTACTCAGCT     | 0.99 | 0.51 | 2.02 | 3.24 | 2.7   | 0.31 | 0.67 | 0.14 |
|             | hsa-miR-30b-5p | Homo sapiens             |                         | 0.99 | 0.51 | 2.02 | 3.24 | 2.7   | 0.31 | 0.67 | 0.14 |
|             | rno-miR-30b-5p | Rattus norvegicus        |                         | 0.99 | 0.51 | 2.02 | 3.24 | 2.7   | 0.31 | 0.67 | 0.14 |
|             | gga-miR-30b-5p | Gallus gallus            |                         | 0.99 | 0.51 | 2.02 | 3.24 | 2.7   | 0.31 | 0.67 | 0.14 |
|             | dre-miR-30b    | Danio rerio              |                         | 0.99 | 0.51 | 2.02 | 3.24 | 2.7   | 0.31 | 0.67 | 0.14 |
|             | fru-miR-30b    | Fugu rubripes            |                         | 0.99 | 0.51 | 2.02 | 3.24 | 2.7   | 0.31 | 0.67 | 0.14 |
|             | tni-miR-30b    | Tetraodon nigroviridis   |                         | 0.99 | 0.51 | 2.02 | 3.24 | 2.7   | 0.31 | 0.67 | 0.14 |
|             | bta-miR-30b-5p | Bos taurus               |                         | 0.99 | 0.51 | 2.02 | 3.24 | 2.7   | 0.31 | 0.67 | 0.14 |
|             | xtr-miR-30b    | Xenopus tropicalis       |                         | 0.99 | 0.51 | 2.02 | 3.24 | 2.7   | 0.31 | 0.67 | 0.14 |
|             | oan-miR-30b-5p | Ornithorhynchus anatinus |                         | 0.99 | 0.51 | 2.02 | 3.24 | 2.7   | 0.31 | 0.67 | 0.14 |
|             | chi-miR-30b-5p | Capra hircus             |                         | 0.99 | 0.51 | 2.02 | 3.24 | 2.7   | 0.31 | 0.67 | 0.14 |
|             | tch-miR-30b-5p | Tupaia chinensis         |                         | 0.99 | 0.51 | 2.02 | 3.24 | 2.7   | 0.31 | 0.67 | 0.14 |
|             | oha-miR-30b-5p | Ophiophagus hannah       |                         | 0.99 | 0.51 | 2.02 | 3.24 | 2.7   | 0.31 | 0.67 | 0.14 |
|             | ssa-miR-30e-5p | Salmo salar              |                         | 0.99 | 0.51 | 2.02 | 3.24 | 2.7   | 0.31 | 0.67 | 0.14 |
|             | ipu-miR-30b    | Ictalurus punctatus      |                         | 0.99 | 0.51 | 2.02 | 3.24 | 2.7   | 0.31 | 0.67 | 0.14 |
|             | tgu-miR-30e    | Taeniopygia guttata      |                         | 0.99 | 0.51 | 2.02 | 3.24 | 2.7   | 0.31 | 0.67 | 0.14 |
|             | ccr-miR-30b    | Cyprinus carpio          |                         | 0.99 | 0.51 | 2.02 | 3.24 | 2.7   | 0.31 | 0.67 | 0.14 |
|             | mdo-miR-30b-5p | Monodelphis domestica    |                         | 0.99 | 0.51 | 2.02 | 3.24 | 2.7   | 0.31 | 0.67 | 0.14 |
|             | cgr-miR-30b-5p | Cricetulus griseus       |                         | 0.99 | 0.51 | 2.02 | 3.24 | 2.7   | 0.31 | 0.67 | 0.14 |
|             | aca-miR-30b-5p | Anolis carolinensis      |                         | 0.99 | 0.51 | 2.02 | 3.24 | 2.7   | 0.31 | 0.67 | 0.14 |

|             |                |                          |                           |      |      |      |      |      |      |      |      |
|-------------|----------------|--------------------------|---------------------------|------|------|------|------|------|------|------|------|
|             | ppy-miR-30b    | Pongo pygmaeus           |                           | 0.99 | 0.51 | 2.02 | 3.24 | 2.7  | 0.31 | 0.67 | 0.14 |
|             | eca-miR-30b    | Equus caballus           |                           | 0.99 | 0.51 | 2.02 | 3.24 | 2.7  | 0.31 | 0.67 | 0.14 |
|             | cfa-miR-30b    | Canis familiaris         |                           | 0.99 | 0.51 | 2.02 | 3.24 | 2.7  | 0.31 | 0.67 | 0.14 |
|             | ssc-miR-30b-5p | Sus scrofa               |                           | 0.99 | 0.51 | 2.02 | 3.24 | 2.7  | 0.31 | 0.67 | 0.14 |
| dof-miR-870 | oar-miR-30c    | Ovis aries               | TGTA AACATCCTACACTCTCA    | 0    | 0.25 | 0    | 0    | 0    | 0    | 0.83 | 0.14 |
|             | aca-miR-30c-5p | Anolis carolinensis      |                           | 0    | 0.25 | 0    | 0    | 0    | 0    | 0.83 | 0.14 |
| dof-miR-871 | dre-miR-30c-5p | Danio rerio              | TGTA AACATCCTACACTCTCAG   | 0    | 0    | 0.18 | 0    | 0    | 0    | 0    | 0    |
| dof-miR-872 | hsa-miR-30c-5p | Homo sapiens             | TGTA AACATCCTACACTCTCAGC  | 1.19 | 1.02 | 2.76 | 2.7  | 1.31 | 0.31 | 0.83 | 0.14 |
|             | mmu-miR-30c-5p | Mus musculus             |                           | 1.19 | 1.02 | 2.76 | 2.7  | 1.31 | 0.31 | 0.83 | 0.14 |
|             | rno-miR-30c-5p | Rattus norvegicus        |                           | 1.19 | 1.02 | 2.76 | 2.7  | 1.31 | 0.31 | 0.83 | 0.14 |
|             | ssc-miR-30c-5p | Sus scrofa               |                           | 1.19 | 1.02 | 2.76 | 2.7  | 1.31 | 0.31 | 0.83 | 0.14 |
|             | ptr-miR-30c    | Pan troglodytes          |                           | 1.19 | 1.02 | 2.76 | 2.7  | 1.31 | 0.31 | 0.83 | 0.14 |
|             | lla-miR-30c    | Lagothrix lagotricha     |                           | 1.19 | 1.02 | 2.76 | 2.7  | 1.31 | 0.31 | 0.83 | 0.14 |
|             | mne-miR-30c    | Macaca nemestrina        |                           | 1.19 | 1.02 | 2.76 | 2.7  | 1.31 | 0.31 | 0.83 | 0.14 |
|             | xtr-miR-30c    | Xenopus tropicalis       |                           | 1.19 | 1.02 | 2.76 | 2.7  | 1.31 | 0.31 | 0.83 | 0.14 |
|             | bta-miR-30c    | Bos taurus               |                           | 1.19 | 1.02 | 2.76 | 2.7  | 1.31 | 0.31 | 0.83 | 0.14 |
|             | oan-miR-30c-5p | Ornithorhynchus anatinus |                           | 1.19 | 1.02 | 2.76 | 2.7  | 1.31 | 0.31 | 0.83 | 0.14 |
|             | chi-miR-30c-5p | Capra hircus             |                           | 1.19 | 1.02 | 2.76 | 2.7  | 1.31 | 0.31 | 0.83 | 0.14 |
|             | tch-miR-30c-5p | Tupaia chinensis         |                           | 1.19 | 1.02 | 2.76 | 2.7  | 1.31 | 0.31 | 0.83 | 0.14 |
|             | ssa-miR-30a-5p | Salmo salar              |                           | 1.19 | 1.02 | 2.76 | 2.7  | 1.31 | 0.31 | 0.83 | 0.14 |
|             | mdo-miR-30c-5p | Monodelphis domestica    |                           | 1.19 | 1.02 | 2.76 | 2.7  | 1.31 | 0.31 | 0.83 | 0.14 |
|             | ola-miR-30c    | Oryzias latipes          |                           | 1.19 | 1.02 | 2.76 | 2.7  | 1.31 | 0.31 | 0.83 | 0.14 |
|             | cgr-miR-30c    | Cricetulus griseus       |                           | 1.19 | 1.02 | 2.76 | 2.7  | 1.31 | 0.31 | 0.83 | 0.14 |
|             | ggo-miR-30c    | Gorilla gorilla          |                           | 1.19 | 1.02 | 2.76 | 2.7  | 1.31 | 0.31 | 0.83 | 0.14 |
|             | ppy-miR-30c    | Pongo pygmaeus           |                           | 1.19 | 1.02 | 2.76 | 2.7  | 1.31 | 0.31 | 0.83 | 0.14 |
|             | eca-miR-30c    | Equus caballus           |                           | 1.19 | 1.02 | 2.76 | 2.7  | 1.31 | 0.31 | 0.83 | 0.14 |
|             | mml-miR-30c-5p | Macaca mulatta           |                           | 1.19 | 1.02 | 2.76 | 2.7  | 1.31 | 0.31 | 0.83 | 0.14 |
| dof-miR-873 | gga-miR-30c-5p | Gallus gallus            | TGTA AACATCCTACACTCTCAGCT | 0.99 | 1.27 | 2.76 | 5.05 | 3.73 | 0.52 | 1.5  | 0.28 |
|             | oha-miR-30c-5p | Ophiophagus hannah       |                           | 0.99 | 1.27 | 2.76 | 5.05 | 3.73 | 0.52 | 1.5  | 0.28 |
|             | ipu-miR-30c    | Ictalurus punctatus      |                           | 0.99 | 1.27 | 2.76 | 5.05 | 3.73 | 0.52 | 1.5  | 0.28 |
|             | sha-miR-30c    | Sarcophilus harrisii     |                           | 0.99 | 1.27 | 2.76 | 5.05 | 3.73 | 0.52 | 1.5  | 0.28 |
|             | tgu-miR-30c-5p | Taeniopygia guttata      |                           | 0.99 | 1.27 | 2.76 | 5.05 | 3.73 | 0.52 | 1.5  | 0.28 |
|             | cfa-miR-30c    | Canis familiaris         |                           | 0.99 | 1.27 | 2.76 | 5.05 | 3.73 | 0.52 | 1.5  | 0.28 |
| dof-miR-874 | fru-miR-30c    | Fugu rubripes            | TGTA AACATCCTACACTCTCGG   | 0    | 0.25 | 0    | 0    | 0    | 0    | 0.67 | 0    |

|                |                |                          |                           |      |      |      |      |      |      |      |      |
|----------------|----------------|--------------------------|---------------------------|------|------|------|------|------|------|------|------|
|                | tmi-miR-30c    | Tetraodon nigroviridis   |                           | 0    | 0.25 | 0    | 0    | 0    | 0    | 0.67 | 0    |
| dof-miR-875    | tch-miR-30a-5p | Tupaia chinensis         | TGTA AACATCCTCGACTGGA     | 0.4  | 0.51 | 2.2  | 2.52 | 0.37 | 0.31 | 0.17 | 0.28 |
| dof-miR-876    | hsa-miR-30a-5p | Homo sapiens             | TGTA AACATCCTCGACTGGAAG   | 0    | 0.25 | 0.55 | 0.72 | 0    | 0.1  | 0.17 | 0    |
|                | mmu-miR-30a-5p | Mus musculus             |                           | 0    | 0.25 | 0.55 | 0.72 | 0    | 0.1  | 0.17 | 0    |
|                | rno-miR-30a-5p | Rattus norvegicus        |                           | 0    | 0.25 | 0.55 | 0.72 | 0    | 0.1  | 0.17 | 0    |
|                | gga-miR-30a-5p | Gallus gallus            |                           | 0    | 0.25 | 0.55 | 0.72 | 0    | 0.1  | 0.17 | 0    |
|                | mml-miR-30a-5p | Macaca mulatta           |                           | 0    | 0.25 | 0.55 | 0.72 | 0    | 0.1  | 0.17 | 0    |
|                | ptr-miR-30a-5p | Pan troglodytes          |                           | 0    | 0.25 | 0.55 | 0.72 | 0    | 0.1  | 0.17 | 0    |
|                | ggo-miR-30a-5p | Gorilla gorilla          |                           | 0    | 0.25 | 0.55 | 0.72 | 0    | 0.1  | 0.17 | 0    |
|                | ppy-miR-30a-5p | Pongo pygmaeus           |                           | 0    | 0.25 | 0.55 | 0.72 | 0    | 0.1  | 0.17 | 0    |
|                | ppa-miR-30a-5p | Pan paniscus             |                           | 0    | 0.25 | 0.55 | 0.72 | 0    | 0.1  | 0.17 | 0    |
|                | xtr-miR-30a-5p | Xenopus tropicalis       |                           | 0    | 0.25 | 0.55 | 0.72 | 0    | 0.1  | 0.17 | 0    |
|                | mdo-miR-30a-5p | Monodelphis domestica    |                           | 0    | 0.25 | 0.55 | 0.72 | 0    | 0.1  | 0.17 | 0    |
|                | aca-miR-30a-5p | Anolis carolinensis      |                           | 0    | 0.25 | 0.55 | 0.72 | 0    | 0.1  | 0.17 | 0    |
| ssc-miR-30a-5p | Sus scrofa     | 0                        | 0.25                      | 0.55 | 0.72 | 0    | 0.1  | 0.17 | 0    |      |      |
| dof-miR-877    | oan-miR-30a-5p | Ornithorhynchus anatinus | TGTA AACATCCTCGACTGGAAGC  | 0    | 0    | 1.84 | 2.7  | 0.65 | 0.52 | 0    | 0    |
|                | oar-miR-30a-5p | Ovis aries               |                           | 0    | 0    | 1.84 | 2.7  | 0.65 | 0.52 | 0    | 0    |
|                | cgr-miR-30a-5p | Cricetulus griseus       |                           | 0    | 0    | 1.84 | 2.7  | 0.65 | 0.52 | 0    | 0    |
|                | pma-miR-30a-5p | Petromyzon marinus       |                           | 0    | 0    | 1.84 | 2.7  | 0.65 | 0.52 | 0    | 0    |
|                | tgu-miR-30b-5p | Taeniopygia guttata      |                           | 0    | 0    | 1.84 | 2.7  | 0.65 | 0.52 | 0    | 0    |
|                | cfa-miR-30a    | Canis familiaris         |                           | 0    | 0    | 1.84 | 2.7  | 0.65 | 0.52 | 0    | 0    |
| dof-miR-878    | bta-miR-30a-5p | Bos taurus               | TGTA AACATCCTCGACTGGAAGCT | 0.79 | 0.76 | 3.49 | 7.57 | 2.61 | 0.94 | 1    | 0.28 |
|                | chi-miR-30a-5p | Capra hircus             |                           | 0.79 | 0.76 | 3.49 | 7.57 | 2.61 | 0.94 | 1    | 0.28 |
|                | oha-miR-30a-5p | Ophiophagus hannah       |                           | 0.79 | 0.76 | 3.49 | 7.57 | 2.61 | 0.94 | 1    | 0.28 |
| dof-miR-879    | ssa-miR-30d-5p | Salmo salar              | TGTA AACATCCTTGACTGAAAGCT | 0    | 0    | 0    | 0    | 0.09 | 0    | 0    | 0    |
| dof-miR-880    | gga-miR-30e-5p | Gallus gallus            | TGTA AACATCCTTGACTGG      | 0    | 0    | 0    | 0    | 0.28 | 0    | 0.17 | 0.14 |
|                | ola-miR-30a-5p | Oryzias latipes          |                           | 0    | 0    | 0    | 0    | 0.28 | 0    | 0.17 | 0.14 |
| dof-miR-881    | mmu-miR-30e-5p | Mus musculus             | TGTA AACATCCTTGACTGGAAG   | 0.2  | 0    | 0    | 0.54 | 0.09 | 0    | 0    | 0    |
|                | hsa-miR-30e-5p | Homo sapiens             |                           | 0.2  | 0    | 0    | 0.54 | 0.09 | 0    | 0    | 0    |
|                | rno-miR-30e-5p | Rattus norvegicus        |                           | 0.2  | 0    | 0    | 0.54 | 0.09 | 0    | 0    | 0    |
|                | dre-miR-30e-5p | Danio rerio              |                           | 0.2  | 0    | 0    | 0.54 | 0.09 | 0    | 0    | 0    |
|                | xtr-miR-30e    | Xenopus tropicalis       |                           | 0.2  | 0    | 0    | 0.54 | 0.09 | 0    | 0    | 0    |
|                | ppy-miR-30e    | Pongo pygmaeus           |                           | 0.2  | 0    | 0    | 0.54 | 0.09 | 0    | 0    | 0    |
|                | eca-miR-30e    | Equus caballus           |                           | 0.2  | 0    | 0    | 0.54 | 0.09 | 0    | 0    | 0    |

|             |                 |                          |                         |      |      |      |       |       |      |      |      |
|-------------|-----------------|--------------------------|-------------------------|------|------|------|-------|-------|------|------|------|
|             | mml-miR-30e-5p  | Macaca mulatta           |                         | 0.2  | 0    | 0    | 0.54  | 0.09  | 0    | 0    | 0    |
|             | ptr-miR-30e     | Pan troglodytes          |                         | 0.2  | 0    | 0    | 0.54  | 0.09  | 0    | 0    | 0    |
| dof-miR-882 | oan-miR-30e-5p  | Ornithorhynchus anatinus | TGTAACATCCTTGACTGGAAGC  | 0    | 0    | 0.92 | 1.8   | 0.37  | 0    | 0.33 | 0    |
|             | mdo-miR-30d-5p  | Monodelphis domestica    |                         | 0    | 0    | 0.92 | 1.8   | 0.37  | 0    | 0.33 | 0    |
|             | cgr-miR-30e-5p  | Cricetulus griseus       |                         | 0    | 0    | 0.92 | 1.8   | 0.37  | 0    | 0.33 | 0    |
|             | ggo-miR-30e     | Gorilla gorilla          |                         | 0    | 0    | 0.92 | 1.8   | 0.37  | 0    | 0.33 | 0    |
|             | aca-miR-30e-5p  | Anolis carolinensis      |                         | 0    | 0    | 0.92 | 1.8   | 0.37  | 0    | 0.33 | 0    |
| dof-miR-883 | bta-miR-30e-5p  | Bos taurus               | TGTAACATCCTTGACTGGAAGCT | 0.99 | 3.31 | 3.67 | 10.63 | 24.06 | 2.71 | 4.01 | 3.64 |
|             | chi-miR-30e-5p  | Capra hircus             |                         | 0.99 | 3.31 | 3.67 | 10.63 | 24.06 | 2.71 | 4.01 | 3.64 |
|             | ssa-miR-30c-5p  | Salmo salar              |                         | 0.99 | 3.31 | 3.67 | 10.63 | 24.06 | 2.71 | 4.01 | 3.64 |
|             | ssc-miR-30e-5p  | Sus scrofa               |                         | 0.99 | 3.31 | 3.67 | 10.63 | 24.06 | 2.71 | 4.01 | 3.64 |
|             | tgu-miR-30a-5p  | Taeniopygia guttata      |                         | 0.99 | 3.31 | 3.67 | 10.63 | 24.06 | 2.71 | 4.01 | 3.64 |
| dof-miR-884 | dre-miR-194a    | Danio rerio              | TGTAACAGCAACTCCATGTGG   | 0    | 0    | 0.18 | 0     | 0     | 0    | 0    | 0    |
|             | fru-miR-194     | Fugu rubripes            |                         | 0    | 0    | 0.18 | 0     | 0     | 0    | 0    | 0    |
|             | tmi-miR-194     | Tetraodon nigroviridis   |                         | 0    | 0    | 0.18 | 0     | 0     | 0    | 0    | 0    |
|             | ssc-miR-194a    | Sus scrofa               |                         | 0    | 0    | 0.18 | 0     | 0     | 0    | 0    | 0    |
| dof-miR-885 | mmu-miR-194-5p  | Mus musculus             | TGTAACAGCAACTCCATGTGGA  | 0    | 0.25 | 0    | 0     | 0.37  | 0.1  | 0.5  | 0.14 |
|             | hsa-miR-194-5p  | Homo sapiens             |                         | 0    | 0.25 | 0    | 0     | 0.37  | 0.1  | 0.5  | 0.14 |
|             | rno-miR-194-5p  | Rattus norvegicus        |                         | 0    | 0.25 | 0    | 0     | 0.37  | 0.1  | 0.5  | 0.14 |
|             | gga-miR-194     | Gallus gallus            |                         | 0    | 0.25 | 0    | 0     | 0.37  | 0.1  | 0.5  | 0.14 |
|             | mml-miR-194-5p  | Macaca mulatta           |                         | 0    | 0.25 | 0    | 0     | 0.37  | 0.1  | 0.5  | 0.14 |
|             | ptr-miR-194     | Pan troglodytes          |                         | 0    | 0.25 | 0    | 0     | 0.37  | 0.1  | 0.5  | 0.14 |
|             | ppy-miR-194     | Pongo pygmaeus           |                         | 0    | 0.25 | 0    | 0     | 0.37  | 0.1  | 0.5  | 0.14 |
|             | ggo-miR-194     | Gorilla gorilla          |                         | 0    | 0.25 | 0    | 0     | 0.37  | 0.1  | 0.5  | 0.14 |
|             | mne-miR-194     | Macaca nemestrina        |                         | 0    | 0.25 | 0    | 0     | 0.37  | 0.1  | 0.5  | 0.14 |
|             | age-miR-194     | Ateles geoffroyi         |                         | 0    | 0.25 | 0    | 0     | 0.37  | 0.1  | 0.5  | 0.14 |
|             | xtr-miR-194     | Xenopus tropicalis       |                         | 0    | 0.25 | 0    | 0     | 0.37  | 0.1  | 0.5  | 0.14 |
|             | oan-miR-194-5p  | Ornithorhynchus anatinus |                         | 0    | 0.25 | 0    | 0     | 0.37  | 0.1  | 0.5  | 0.14 |
|             | efu-miR-194     | Eptesicus fuscus         |                         | 0    | 0.25 | 0    | 0     | 0.37  | 0.1  | 0.5  | 0.14 |
|             | chi-miR-194     | Capra hircus             |                         | 0    | 0.25 | 0    | 0     | 0.37  | 0.1  | 0.5  | 0.14 |
|             | oha-miR-194-5p  | Ophiophagus hannah       |                         | 0    | 0.25 | 0    | 0     | 0.37  | 0.1  | 0.5  | 0.14 |
|             | ssa-miR-194a-5p | Salmo salar              |                         | 0    | 0.25 | 0    | 0     | 0.37  | 0.1  | 0.5  | 0.14 |
|             | ipu-miR-194a    | Ictalurus punctatus      |                         | 0    | 0.25 | 0    | 0     | 0.37  | 0.1  | 0.5  | 0.14 |
|             | oar-miR-194     | Ovis aries               |                         | 0    | 0.25 | 0    | 0     | 0.37  | 0.1  | 0.5  | 0.14 |

|             |                 |                          |                         |     |      |      |      |      |     |      |      |
|-------------|-----------------|--------------------------|-------------------------|-----|------|------|------|------|-----|------|------|
|             | ccr-miR-194     | Cyprinus carpio          |                         | 0   | 0.25 | 0    | 0    | 0.37 | 0.1 | 0.5  | 0.14 |
|             | cgr-miR-194     | Cricetulus griseus       |                         | 0   | 0.25 | 0    | 0    | 0.37 | 0.1 | 0.5  | 0.14 |
|             | aca-miR-194-5p  | Anolis carolinensis      |                         | 0   | 0.25 | 0    | 0    | 0.37 | 0.1 | 0.5  | 0.14 |
|             | eca-miR-194     | Equus caballus           |                         | 0   | 0.25 | 0    | 0    | 0.37 | 0.1 | 0.5  | 0.14 |
|             | tgu-miR-194-5p  | Taeniopygia guttata      |                         | 0   | 0.25 | 0    | 0    | 0.37 | 0.1 | 0.5  | 0.14 |
|             | cfa-miR-194     | Canis familiaris         |                         | 0   | 0.25 | 0    | 0    | 0.37 | 0.1 | 0.5  | 0.14 |
|             | xla-miR-194     | Xenopus laevis           |                         | 0   | 0.25 | 0    | 0    | 0.37 | 0.1 | 0.5  | 0.14 |
|             | bta-miR-194     | Bos taurus               |                         | 0   | 0.25 | 0    | 0    | 0.37 | 0.1 | 0.5  | 0.14 |
| dof-miR-886 | pma-miR-194-5p  | Petromyzon marinus       | TGTAACAGCAACTCCATGTGGAT | 0   | 0    | 0    | 0    | 0    | 0.1 | 0    | 0    |
| dof-miR-887 | ssc-miR-194b-5p | Sus scrofa               | TGTAACAGCGACTCCATGTGGGA | 0   | 0    | 0    | 0    | 0.09 | 0   | 0.33 | 0.28 |
| dof-miR-888 | gga-miR-142-3p  | Gallus gallus            | TGTAGTGTTTCCTACTTTATGG  | 0   | 0    | 0    | 0.72 | 0.56 | 0.1 | 0.17 | 0.28 |
|             | oan-miR-142-3p  | Ornithorhynchus anatinus |                         | 0   | 0    | 0    | 0.72 | 0.56 | 0.1 | 0.17 | 0.28 |
|             | ssc-miR-142-3p  | Sus scrofa               |                         | 0   | 0    | 0    | 0.72 | 0.56 | 0.1 | 0.17 | 0.28 |
| dof-miR-889 | mmu-miR-142a-3p | Mus musculus             | TGTAGTGTTTCCTACTTTATGGA | 0   | 0    | 0.37 | 0    | 0    | 0   | 0.17 | 0.14 |
|             | hsa-miR-142-3p  | Homo sapiens             |                         | 0   | 0    | 0.37 | 0    | 0    | 0   | 0.17 | 0.14 |
|             | rno-miR-142-3p  | Rattus norvegicus        |                         | 0   | 0    | 0.37 | 0    | 0    | 0   | 0.17 | 0.14 |
|             | dre-miR-142a-3p | Danio rerio              |                         | 0   | 0    | 0.37 | 0    | 0    | 0   | 0.17 | 0.14 |
|             | xtr-miR-142-3p  | Xenopus tropicalis       |                         | 0   | 0    | 0.37 | 0    | 0    | 0   | 0.17 | 0.14 |
|             | mdo-miR-142     | Monodelphis domestica    |                         | 0   | 0    | 0.37 | 0    | 0    | 0   | 0.17 | 0.14 |
|             | efu-miR-142     | Eptesicus fuscus         |                         | 0   | 0    | 0.37 | 0    | 0    | 0   | 0.17 | 0.14 |
|             | oha-miR-142-3p  | Ophiophagus hannah       |                         | 0   | 0    | 0.37 | 0    | 0    | 0   | 0.17 | 0.14 |
|             | aja-miR-142     | Artibeus jamaicensis     |                         | 0   | 0    | 0.37 | 0    | 0    | 0   | 0.17 | 0.14 |
|             | ppy-miR-142-3p  | Pongo pygmaeus           |                         | 0   | 0    | 0.37 | 0    | 0    | 0   | 0.17 | 0.14 |
|             | eca-miR-142-3p  | Equus caballus           |                         | 0   | 0    | 0.37 | 0    | 0    | 0   | 0.17 | 0.14 |
|             | mml-miR-142-3p  | Macaca mulatta           |                         | 0   | 0    | 0.37 | 0    | 0    | 0   | 0.17 | 0.14 |
|             | ptr-miR-142     | Pan troglodytes          |                         | 0   | 0    | 0.37 | 0    | 0    | 0   | 0.17 | 0.14 |
| dof-miR-890 | chi-miR-3959-3p | Capra hircus             | TGTATGTCAACTGATCCACAGT  | 0   | 0    | 0.18 | 0    | 0    | 0   | 0    | 0    |
|             | bta-miR-411c-3p | Bos taurus               |                         | 0   | 0    | 0.18 | 0    | 0    | 0   | 0    | 0    |
|             | oar-miR-3959-3p | Ovis aries               |                         | 0   | 0    | 0.18 | 0    | 0    | 0   | 0    | 0    |
| dof-miR-891 | ola-miR-223     | Oryzias latipes          | TGTCAGTTTGTCAAATACCC    | 0   | 0    | 0.18 | 0    | 0.56 | 0   | 0.17 | 0    |
| dof-miR-892 | rno-miR-223-3p  | Rattus norvegicus        | TGTCAGTTTGTCAAATACCCC   | 0.2 | 0    | 0.18 | 0    | 0.47 | 0   | 0    | 0    |
|             | gga-miR-223     | Gallus gallus            |                         | 0.2 | 0    | 0.18 | 0    | 0.47 | 0   | 0    | 0    |
|             | dre-miR-223     | Danio rerio              |                         | 0.2 | 0    | 0.18 | 0    | 0.47 | 0   | 0    | 0    |
|             | mml-miR-223     | Macaca mulatta           |                         | 0.2 | 0    | 0.18 | 0    | 0.47 | 0   | 0    | 0    |

|             |                |                          |                        |     |      |      |      |      |   |   |      |
|-------------|----------------|--------------------------|------------------------|-----|------|------|------|------|---|---|------|
|             | ptr-miR-223    | Pan troglodytes          |                        | 0.2 | 0    | 0.18 | 0    | 0.47 | 0 | 0 | 0    |
|             | ggo-miR-223    | Gorilla gorilla          |                        | 0.2 | 0    | 0.18 | 0    | 0.47 | 0 | 0 | 0    |
|             | ppy-miR-223    | Pongo pygmaeus           |                        | 0.2 | 0    | 0.18 | 0    | 0.47 | 0 | 0 | 0    |
|             | sla-miR-223    | Saguinus labiatus        |                        | 0.2 | 0    | 0.18 | 0    | 0.47 | 0 | 0 | 0    |
|             | ppa-miR-223    | Pan paniscus             |                        | 0.2 | 0    | 0.18 | 0    | 0.47 | 0 | 0 | 0    |
|             | fru-miR-223    | Fugu rubripes            |                        | 0.2 | 0    | 0.18 | 0    | 0.47 | 0 | 0 | 0    |
|             | tni-miR-223    | Tetraodon nigroviridis   |                        | 0.2 | 0    | 0.18 | 0    | 0.47 | 0 | 0 | 0    |
|             | xtr-miR-223    | Xenopus tropicalis       |                        | 0.2 | 0    | 0.18 | 0    | 0.47 | 0 | 0 | 0    |
|             | mdo-miR-223-3p | Monodelphis domestica    |                        | 0.2 | 0    | 0.18 | 0    | 0.47 | 0 | 0 | 0    |
|             | tgu-miR-223    | Taeniopygia guttata      |                        | 0.2 | 0    | 0.18 | 0    | 0.47 | 0 | 0 | 0    |
|             | xla-miR-223    | Xenopus laevis           |                        | 0.2 | 0    | 0.18 | 0    | 0.47 | 0 | 0 | 0    |
|             | cfa-miR-223    | Canis familiaris         |                        | 0.2 | 0    | 0.18 | 0    | 0.47 | 0 | 0 | 0    |
| dof-miR-893 | hsa-miR-223-3p | Homo sapiens             | TGTCAGTTTGCAAATACCCCA  | 0.4 | 0.76 | 0    | 0    | 2.61 | 0 | 0 | 0    |
|             | mmu-miR-223-3p | Mus musculus             |                        | 0.4 | 0.76 | 0    | 0    | 2.61 | 0 | 0 | 0    |
|             | chi-miR-223-3p | Capra hircus             |                        | 0.4 | 0.76 | 0    | 0    | 2.61 | 0 | 0 | 0    |
|             | eca-miR-223    | Equus caballus           |                        | 0.4 | 0.76 | 0    | 0    | 2.61 | 0 | 0 | 0    |
|             | bta-miR-223    | Bos taurus               |                        | 0.4 | 0.76 | 0    | 0    | 2.61 | 0 | 0 | 0    |
| dof-miR-894 | efu-miR-223    | Eptesicus fuscus         | TGTCAGTTTGCAAATACCCCAA | 0   | 0.25 | 0.18 | 0    | 1.68 | 0 | 0 | 0    |
| dof-miR-895 | oan-miR-223-3p | Ornithorhynchus anatinus | TGTCAGTTTGCAAATACCCTA  | 0   | 0    | 0    | 0    | 0    | 0 | 0 | 0.14 |
| dof-miR-896 | chi-miR-542-3p | Capra hircus             | TGTGACAGATTGATAACTGA   | 0   | 0    | 0.18 | 0    | 0    | 0 | 0 | 0    |
| dof-miR-897 | mmu-miR-542-3p | Mus musculus             | TGTGACAGATTGATAACTGAAA | 0   | 0    | 0    | 0.18 | 0    | 0 | 0 | 0    |
|             | rno-miR-542-3p | Rattus norvegicus        |                        | 0   | 0    | 0    | 0.18 | 0    | 0 | 0 | 0    |
|             | hsa-miR-542-3p | Homo sapiens             |                        | 0   | 0    | 0    | 0.18 | 0    | 0 | 0 | 0    |
|             | tch-miR-542-3p | Tupaia chinensis         |                        | 0   | 0    | 0    | 0.18 | 0    | 0 | 0 | 0    |
|             | ggo-miR-542    | Gorilla gorilla          |                        | 0   | 0    | 0    | 0.18 | 0    | 0 | 0 | 0    |
|             | ppy-miR-542-3p | Pongo pygmaeus           |                        | 0   | 0    | 0    | 0.18 | 0    | 0 | 0 | 0    |
|             | eca-miR-542-3p | Equus caballus           |                        | 0   | 0    | 0    | 0.18 | 0    | 0 | 0 | 0    |
|             | ssc-miR-542-3p | Sus scrofa               |                        | 0   | 0    | 0    | 0.18 | 0    | 0 | 0 | 0    |
|             | mml-miR-542-3p | Macaca mulatta           |                        | 0   | 0    | 0    | 0.18 | 0    | 0 | 0 | 0    |
|             | cfa-miR-542    | Canis familiaris         |                        | 0   | 0    | 0    | 0.18 | 0    | 0 | 0 | 0    |
| dof-miR-898 | mmu-miR-134-5p | Mus musculus             | TGTGACTGGTTGACCAGAGGGG | 0   | 0    | 0    | 0    | 0.09 | 0 | 0 | 0    |
|             | hsa-miR-134-5p | Homo sapiens             |                        | 0   | 0    | 0    | 0    | 0.09 | 0 | 0 | 0    |
|             | rno-miR-134-5p | Rattus norvegicus        |                        | 0   | 0    | 0    | 0    | 0.09 | 0 | 0 | 0    |
|             | chi-miR-134    | Capra hircus             |                        | 0   | 0    | 0    | 0    | 0.09 | 0 | 0 | 0    |



|                |                          |                        |                         |     |      |      |      |      |      |      |      |
|----------------|--------------------------|------------------------|-------------------------|-----|------|------|------|------|------|------|------|
|                | cgr-miR-134              | Cricetulus griseus     |                         | 0   | 0    | 0    | 0    | 0.09 | 0    | 0    | 0    |
|                | eca-miR-134              | Equus caballus         |                         | 0   | 0    | 0    | 0    | 0.09 | 0    | 0    | 0    |
|                | mml-miR-134-5p           | Macaca mulatta         |                         | 0   | 0    | 0    | 0    | 0.09 | 0    | 0    | 0    |
|                | ptr-miR-134              | Pan troglodytes        |                         | 0   | 0    | 0    | 0    | 0.09 | 0    | 0    | 0    |
|                | cfa-miR-134              | Canis familiaris       |                         | 0   | 0    | 0    | 0    | 0.09 | 0    | 0    | 0    |
| dof-miR-899    | ptc-miR1711-5p           | Populus trichocarpa    | TGTGATATTGGTCCGGCTCATC  | 0   | 0    | 0.18 | 0.36 | 0    | 0    | 0    | 0    |
| dof-miR-900    | ola-miR-19d              | Oryzias latipes        | TGTGCAAACCCATGCAAAACTG  | 0   | 0    | 0    | 0.18 | 0    | 0    | 0.17 | 0    |
| dof-miR-901    | dre-miR-19d-3p           | Danio rerio            | TGTGCAAACCCATGCAAAACTGA | 0   | 0.25 | 0.18 | 0.36 | 0    | 0    | 0.33 | 0    |
|                | ccr-miR-19d              | Cyprinus carpio        |                         | 0   | 0.25 | 0.18 | 0.36 | 0    | 0    | 0.33 | 0    |
| dof-miR-902    | aca-miR-19b              | Anolis carolinensis    | TGTGCAAATCCATGCAAAACT   | 0.2 | 0.51 | 0    | 0    | 0.19 | 0.21 | 1    | 0.84 |
| dof-miR-903    | ssa-miR-19c-3p           | Salmo salar            | TGTGCAAATCCATGCAAAACTG  | 0   | 0    | 0.92 | 0.9  | 0.37 | 0.1  | 0.17 | 0.14 |
|                | cfa-miR-19b              | Canis familiaris       |                         | 0   | 0    | 0.92 | 0.9  | 0.37 | 0.1  | 0.17 | 0.14 |
| dof-miR-904    | hsa-miR-19b-3p           | Homo sapiens           | TGTGCAAATCCATGCAAAACTGA | 0   | 0.76 | 1.1  | 0.9  | 0.93 | 0.1  | 0.17 | 0    |
|                | mmu-miR-19b-3p           | Mus musculus           |                         | 0   | 0.76 | 1.1  | 0.9  | 0.93 | 0.1  | 0.17 | 0    |
|                | rno-miR-19b-3p           | Rattus norvegicus      |                         | 0   | 0.76 | 1.1  | 0.9  | 0.93 | 0.1  | 0.17 | 0    |
|                | gga-miR-19b-3p           | Gallus gallus          |                         | 0   | 0.76 | 1.1  | 0.9  | 0.93 | 0.1  | 0.17 | 0    |
|                | xla-miR-19b              | Xenopus laevis         |                         | 0   | 0.76 | 1.1  | 0.9  | 0.93 | 0.1  | 0.17 | 0    |
|                | dre-miR-19b-3p           | Danio rerio            |                         | 0   | 0.76 | 1.1  | 0.9  | 0.93 | 0.1  | 0.17 | 0    |
|                | ggo-miR-19b              | Gorilla gorilla        |                         | 0   | 0.76 | 1.1  | 0.9  | 0.93 | 0.1  | 0.17 | 0    |
|                | lca-miR-19b              | Lemur catta            |                         | 0   | 0.76 | 1.1  | 0.9  | 0.93 | 0.1  | 0.17 | 0    |
|                | age-miR-19b              | Ateles geoffroyi       |                         | 0   | 0.76 | 1.1  | 0.9  | 0.93 | 0.1  | 0.17 | 0    |
|                | ppa-miR-19b              | Pan paniscus           |                         | 0   | 0.76 | 1.1  | 0.9  | 0.93 | 0.1  | 0.17 | 0    |
|                | ppy-miR-19b              | Pongo pygmaeus         |                         | 0   | 0.76 | 1.1  | 0.9  | 0.93 | 0.1  | 0.17 | 0    |
|                | ptr-miR-19b              | Pan troglodytes        |                         | 0   | 0.76 | 1.1  | 0.9  | 0.93 | 0.1  | 0.17 | 0    |
|                | mml-miR-19b              | Macaca mulatta         |                         | 0   | 0.76 | 1.1  | 0.9  | 0.93 | 0.1  | 0.17 | 0    |
|                | sla-miR-19b              | Saguinus labiatus      |                         | 0   | 0.76 | 1.1  | 0.9  | 0.93 | 0.1  | 0.17 | 0    |
|                | lla-miR-19b              | Lagothrix lagotricha   |                         | 0   | 0.76 | 1.1  | 0.9  | 0.93 | 0.1  | 0.17 | 0    |
|                | mne-miR-19b              | Macaca nemestrina      |                         | 0   | 0.76 | 1.1  | 0.9  | 0.93 | 0.1  | 0.17 | 0    |
|                | fru-miR-19b              | Fugu rubripes          |                         | 0   | 0.76 | 1.1  | 0.9  | 0.93 | 0.1  | 0.17 | 0    |
|                | tni-miR-19b              | Tetraodon nigroviridis |                         | 0   | 0.76 | 1.1  | 0.9  | 0.93 | 0.1  | 0.17 | 0    |
|                | xtr-miR-19b              | Xenopus tropicalis     |                         | 0   | 0.76 | 1.1  | 0.9  | 0.93 | 0.1  | 0.17 | 0    |
|                | mdo-miR-19b-3p           | Monodelphis domestica  |                         | 0   | 0.76 | 1.1  | 0.9  | 0.93 | 0.1  | 0.17 | 0    |
| bta-miR-19b    | Bos taurus               | 0                      | 0.76                    | 1.1 | 0.9  | 0.93 | 0.1  | 0.17 | 0    |      |      |
| oan-miR-19b-3p | Ornithorhynchus anatinus | 0                      | 0.76                    | 1.1 | 0.9  | 0.93 | 0.1  | 0.17 | 0    |      |      |

|             |                |                          |                         |   |      |      |      |      |     |      |   |
|-------------|----------------|--------------------------|-------------------------|---|------|------|------|------|-----|------|---|
|             | chi-miR-19b-3p | Capra hircus             |                         | 0 | 0.76 | 1.1  | 0.9  | 0.93 | 0.1 | 0.17 | 0 |
|             | tch-miR-19b-3p | Tupaia chinensis         |                         | 0 | 0.76 | 1.1  | 0.9  | 0.93 | 0.1 | 0.17 | 0 |
|             | oha-miR-19b-3p | Ophiophagus hannah       |                         | 0 | 0.76 | 1.1  | 0.9  | 0.93 | 0.1 | 0.17 | 0 |
|             | oar-miR-19b    | Ovis aries               |                         | 0 | 0.76 | 1.1  | 0.9  | 0.93 | 0.1 | 0.17 | 0 |
|             | cgr-miR-19b-3p | Cricetulus griseus       |                         | 0 | 0.76 | 1.1  | 0.9  | 0.93 | 0.1 | 0.17 | 0 |
|             | pma-miR-19b-3p | Petromyzon marinus       |                         | 0 | 0.76 | 1.1  | 0.9  | 0.93 | 0.1 | 0.17 | 0 |
|             | eca-miR-19b    | Equus caballus           |                         | 0 | 0.76 | 1.1  | 0.9  | 0.93 | 0.1 | 0.17 | 0 |
|             | ssc-miR-19b    | Sus scrofa               |                         | 0 | 0.76 | 1.1  | 0.9  | 0.93 | 0.1 | 0.17 | 0 |
|             | tgu-miR-19b-3p | Taeniopygia guttata      |                         | 0 | 0.76 | 1.1  | 0.9  | 0.93 | 0.1 | 0.17 | 0 |
| dof-miR-905 | ssa-miR-19a-3p | Salmo salar              | TGTGCAAATCTATGCAAAACTG  | 0 | 0    | 0.18 | 0.36 | 0.09 | 0   | 0.17 | 0 |
|             | aca-miR-19a-3p | Anolis carolinensis      |                         | 0 | 0    | 0.18 | 0.36 | 0.09 | 0   | 0.17 | 0 |
| dof-miR-906 | hsa-miR-19a-3p | Homo sapiens             | TGTGCAAATCTATGCAAAACTGA | 0 | 0    | 0.18 | 0.36 | 0.37 | 0   | 0    | 0 |
|             | mmu-miR-19a-3p | Mus musculus             |                         | 0 | 0    | 0.18 | 0.36 | 0.37 | 0   | 0    | 0 |
|             | rno-miR-19a-3p | Rattus norvegicus        |                         | 0 | 0    | 0.18 | 0.36 | 0.37 | 0   | 0    | 0 |
|             | gga-miR-19a-3p | Gallus gallus            |                         | 0 | 0    | 0.18 | 0.36 | 0.37 | 0   | 0    | 0 |
|             | dre-miR-19a-3p | Danio rerio              |                         | 0 | 0    | 0.18 | 0.36 | 0.37 | 0   | 0    | 0 |
|             | ssc-miR-19a    | Sus scrofa               |                         | 0 | 0    | 0.18 | 0.36 | 0.37 | 0   | 0    | 0 |
|             | ggo-miR-19a    | Gorilla gorilla          |                         | 0 | 0    | 0.18 | 0.36 | 0.37 | 0   | 0    | 0 |
|             | lca-miR-19a    | Lemur catta              |                         | 0 | 0    | 0.18 | 0.36 | 0.37 | 0   | 0    | 0 |
|             | age-miR-19a    | Ateles geoffroyi         |                         | 0 | 0    | 0.18 | 0.36 | 0.37 | 0   | 0    | 0 |
|             | ppa-miR-19a    | Pan paniscus             |                         | 0 | 0    | 0.18 | 0.36 | 0.37 | 0   | 0    | 0 |
|             | ppy-miR-19a    | Pongo pygmaeus           |                         | 0 | 0    | 0.18 | 0.36 | 0.37 | 0   | 0    | 0 |
|             | ptr-miR-19a    | Pan troglodytes          |                         | 0 | 0    | 0.18 | 0.36 | 0.37 | 0   | 0    | 0 |
|             | mml-miR-19a-3p | Macaca mulatta           |                         | 0 | 0    | 0.18 | 0.36 | 0.37 | 0   | 0    | 0 |
|             | sla-miR-19a    | Saguinus labiatus        |                         | 0 | 0    | 0.18 | 0.36 | 0.37 | 0   | 0    | 0 |
|             | lla-miR-19a    | Lagothrix lagotricha     |                         | 0 | 0    | 0.18 | 0.36 | 0.37 | 0   | 0    | 0 |
|             | mne-miR-19a    | Macaca nemestrina        |                         | 0 | 0    | 0.18 | 0.36 | 0.37 | 0   | 0    | 0 |
|             | fru-miR-19a    | Fugu rubripes            |                         | 0 | 0    | 0.18 | 0.36 | 0.37 | 0   | 0    | 0 |
|             | tmi-miR-19a    | Tetraodon nigroviridis   |                         | 0 | 0    | 0.18 | 0.36 | 0.37 | 0   | 0    | 0 |
|             | xtr-miR-19a    | Xenopus tropicalis       |                         | 0 | 0    | 0.18 | 0.36 | 0.37 | 0   | 0    | 0 |
|             | mdo-miR-19a-3p | Monodelphis domestica    |                         | 0 | 0    | 0.18 | 0.36 | 0.37 | 0   | 0    | 0 |
|             | bta-miR-19a    | Bos taurus               |                         | 0 | 0    | 0.18 | 0.36 | 0.37 | 0   | 0    | 0 |
|             | oan-miR-19a-3p | Ornithorhynchus anatinus |                         | 0 | 0    | 0.18 | 0.36 | 0.37 | 0   | 0    | 0 |
|             | chi-miR-19a    | Capra hircus             |                         | 0 | 0    | 0.18 | 0.36 | 0.37 | 0   | 0    | 0 |

|             |                    |                      |                       |   |      |      |        |      |   |      |   |
|-------------|--------------------|----------------------|-----------------------|---|------|------|--------|------|---|------|---|
|             | tch-miR-19a-3p     | Tupaia chinensis     |                       | 0 | 0    | 0.18 | 0.36   | 0.37 | 0 | 0    | 0 |
|             | oha-miR-19a-3p     | Ophiophagus hannah   |                       | 0 | 0    | 0.18 | 0.36   | 0.37 | 0 | 0    | 0 |
|             | cgr-miR-19a        | Cricetulus griseus   |                       | 0 | 0    | 0.18 | 0.36   | 0.37 | 0 | 0    | 0 |
|             | eca-miR-19a        | Equus caballus       |                       | 0 | 0    | 0.18 | 0.36   | 0.37 | 0 | 0    | 0 |
|             | cfa-miR-19a        | Canis familiaris     |                       | 0 | 0    | 0.18 | 0.36   | 0.37 | 0 | 0    | 0 |
| dof-miR-907 | pta-miR946a-5p     | Pinus taeda          | TGTGGATAGAGAAGGGTTAGT | 0 | 0    | 0.37 | 0.36   | 0    | 0 | 0    | 0 |
| dof-miR-908 | ath-miR398b-3p     | Arabidopsis thaliana | TGTGTTCTCAGGTCACCCCTG | 0 | 0    | 0    | 0.18   | 0    | 0 | 0    | 0 |
|             | ath-miR398c-3p     | Arabidopsis thaliana |                       | 0 | 0    | 0    | 0.18   | 0    | 0 | 0    | 0 |
|             | bra-miR398-3p      | Brassica rapa        |                       | 0 | 0    | 0    | 0.18   | 0    | 0 | 0    | 0 |
|             | aly-miR398b-3p     | Arabidopsis lyrata   |                       | 0 | 0    | 0    | 0.18   | 0    | 0 | 0    | 0 |
| dof-miR-909 | ath-miR398a-3p     | Arabidopsis thaliana | TGTGTTCTCAGGTCACCCCTT | 0 | 0    | 0    | 0.54   | 0    | 0 | 0    | 0 |
|             | osa-miR398a        | Oryza sativa         |                       | 0 | 0    | 0    | 0.54   | 0    | 0 | 0    | 0 |
|             | gma-miR398a        | Glycine max          |                       | 0 | 0    | 0    | 0.54   | 0    | 0 | 0    | 0 |
|             | gma-miR398b        | Glycine max          |                       | 0 | 0    | 0    | 0.54   | 0    | 0 | 0    | 0 |
|             | ptc-miR398a        | Populus trichocarpa  |                       | 0 | 0    | 0    | 0.54   | 0    | 0 | 0    | 0 |
|             | mtr-miR398a-3p     | Medicago truncatula  |                       | 0 | 0    | 0    | 0.54   | 0    | 0 | 0    | 0 |
|             | vvi-miR398a        | Vitis vinifera       |                       | 0 | 0    | 0    | 0.54   | 0    | 0 | 0    | 0 |
|             | mdm-miR398a        | Malus domestica      |                       | 0 | 0    | 0    | 0.54   | 0    | 0 | 0    | 0 |
|             | cme-miR398b        | Cucumis melo         |                       | 0 | 0    | 0    | 0.54   | 0    | 0 | 0    | 0 |
|             | tcc-miR398b        | Theobroma cacao      |                       | 0 | 0    | 0    | 0.54   | 0    | 0 | 0    | 0 |
|             | csi-miR398         | Citrus sinensis      |                       | 0 | 0    | 0    | 0.54   | 0    | 0 | 0    | 0 |
|             | rco-miR398a        | Ricinus communis     |                       | 0 | 0    | 0    | 0.54   | 0    | 0 | 0    | 0 |
|             | gra-miR398         | Gossypium raimondii  |                       | 0 | 0    | 0    | 0.54   | 0    | 0 | 0    | 0 |
|             | ghr-miR398         | Gossypium hirsutum   |                       | 0 | 0    | 0    | 0.54   | 0    | 0 | 0    | 0 |
|             | aly-miR398a-3p     | Arabidopsis lyrata   |                       | 0 | 0    | 0    | 0.54   | 0    | 0 | 0    | 0 |
|             | bol-miR398a-3p     | Brassica oleracea    |                       | 0 | 0    | 0    | 0.54   | 0    | 0 | 0    | 0 |
| aqc-miR398a | Aquilegia caerulea | 0                    | 0                     | 0 | 0.54 | 0    | 0      | 0    | 0 |      |   |
| dof-miR-910 | osa-miR398b        | Oryza sativa         | TGTGTTCTCAGGTCGCCCTG  | 0 | 0    | 0.37 | 192.44 | 0    | 0 | 0.17 | 0 |
|             | ptc-miR398b        | Populus trichocarpa  |                       | 0 | 0    | 0.37 | 192.44 | 0    | 0 | 0.17 | 0 |
|             | ptc-miR398c-3p     | Populus trichocarpa  |                       | 0 | 0    | 0.37 | 192.44 | 0    | 0 | 0.17 | 0 |
|             | mtr-miR398b        | Medicago truncatula  |                       | 0 | 0    | 0.37 | 192.44 | 0    | 0 | 0.17 | 0 |
|             | mtr-miR398c        | Medicago truncatula  |                       | 0 | 0    | 0.37 | 192.44 | 0    | 0 | 0.17 | 0 |
|             | gma-miR398d        | Glycine max          |                       | 0 | 0    | 0.37 | 192.44 | 0    | 0 | 0.17 | 0 |
|             | mdm-miR398b        | Malus domestica      |                       | 0 | 0    | 0.37 | 192.44 | 0    | 0 | 0.17 | 0 |



|             |                  |                          |                         |   |      |      |   |      |     |      |   |
|-------------|------------------|--------------------------|-------------------------|---|------|------|---|------|-----|------|---|
|             | ssc-miR-499-5p   | Sus scrofa               |                         | 0 | 0.25 | 0    | 0 | 0    | 0   | 0.17 | 0 |
|             | mml-miR-499-5p   | Macaca mulatta           |                         | 0 | 0.25 | 0    | 0 | 0    | 0   | 0.17 | 0 |
|             | cfa-miR-499      | Canis familiaris         |                         | 0 | 0.25 | 0    | 0 | 0    | 0   | 0.17 | 0 |
| dof-miR-917 | dre-miR-499-5p   | Danio rerio              | TTAAGACTTGCAGTGATGTTTA  | 0 | 0    | 0    | 0 | 0    | 0   | 0.17 | 0 |
|             | ssa-miR-499b-5p  | Salmo salar              |                         | 0 | 0    | 0    | 0 | 0    | 0   | 0.17 | 0 |
|             | ccr-miR-499      | Cyprinus carpio          |                         | 0 | 0    | 0    | 0 | 0    | 0   | 0.17 | 0 |
|             | cgr-miR-499-5p   | Cricetulus griseus       |                         | 0 | 0    | 0    | 0 | 0    | 0   | 0.17 | 0 |
|             | aca-miR-499-5p   | Anolis carolinensis      |                         | 0 | 0    | 0    | 0 | 0    | 0   | 0.17 | 0 |
| dof-miR-918 | hsa-miR-889-3p   | Homo sapiens             | TTAATATCGGACAACCATTGT   | 0 | 0    | 0    | 0 | 0.09 | 0   | 0    | 0 |
|             | ppy-miR-889      | Pongo pygmaeus           |                         | 0 | 0    | 0    | 0 | 0.09 | 0   | 0    | 0 |
|             | eca-miR-889      | Equus caballus           |                         | 0 | 0    | 0    | 0 | 0.09 | 0   | 0    | 0 |
|             | mml-miR-889-3p   | Macaca mulatta           |                         | 0 | 0    | 0    | 0 | 0.09 | 0   | 0    | 0 |
|             | ptr-miR-889      | Pan troglodytes          |                         | 0 | 0    | 0    | 0 | 0.09 | 0   | 0    | 0 |
| dof-miR-919 | tgu-miR-155-5p   | Taeniopygia guttata      | TTAATGCTAATCGTGATAGGG   | 0 | 0    | 0    | 0 | 0.19 | 0   | 0.17 | 0 |
| dof-miR-920 | hsa-miR-155-5p   | Homo sapiens             | TTAATGCTAATCGTGATAGGGTT | 0 | 0    | 0.18 | 0 | 0.37 | 0.1 | 0.17 | 0 |
|             | oan-miR-155-5p   | Ornithorhynchus anatinus |                         | 0 | 0    | 0.18 | 0 | 0.37 | 0.1 | 0.17 | 0 |
|             | chi-miR-155-5p   | Capra hircus             |                         | 0 | 0    | 0.18 | 0 | 0.37 | 0.1 | 0.17 | 0 |
|             | tch-miR-155-5p   | Tupaia chinensis         |                         | 0 | 0    | 0.18 | 0 | 0.37 | 0.1 | 0.17 | 0 |
|             | ssa-miR-155-5p   | Salmo salar              |                         | 0 | 0    | 0.18 | 0 | 0.37 | 0.1 | 0.17 | 0 |
|             | ppy-miR-155      | Pongo pygmaeus           |                         | 0 | 0    | 0.18 | 0 | 0.37 | 0.1 | 0.17 | 0 |
|             | eca-miR-155      | Equus caballus           |                         | 0 | 0    | 0.18 | 0 | 0.37 | 0.1 | 0.17 | 0 |
|             | mml-miR-155      | Macaca mulatta           |                         | 0 | 0    | 0.18 | 0 | 0.37 | 0.1 | 0.17 | 0 |
|             | cfa-miR-155      | Canis familiaris         |                         | 0 | 0    | 0.18 | 0 | 0.37 | 0.1 | 0.17 | 0 |
|             | ptr-miR-155      | Pan troglodytes          |                         | 0 | 0    | 0.18 | 0 | 0.37 | 0.1 | 0.17 | 0 |
|             | bta-miR-155      | Bos taurus               |                         | 0 | 0    | 0.18 | 0 | 0.37 | 0.1 | 0.17 | 0 |
| dof-miR-921 | ipu-miR-155      | Ictalurus punctatus      | TTAATGCTAATCGTGATAGGGTT | 0 | 0    | 0    | 0 | 0.65 | 0   | 0    | 0 |
| dof-miR-922 | ssa-miR-7552a-5p | Salmo salar              | TTACAATTAAGGATATTTCTT   | 0 | 0.25 | 0    | 0 | 0    | 0   | 0    | 0 |
| dof-miR-923 | ptc-miR475a-3p   | Populus trichocarpa      | TTACAGTGCCCATGATTAAG    | 0 | 0    | 0.37 | 0 | 0    | 0   | 0    | 0 |
|             | ptc-miR475b-3p   | Populus trichocarpa      |                         | 0 | 0    | 0.37 | 0 | 0    | 0   | 0    | 0 |
| dof-miR-924 | hsa-miR-582-5p   | Homo sapiens             | TTACAGTTGTTCAACCAGTTACT | 0 | 0    | 0    | 0 | 0.09 | 0   | 0    | 0 |
|             | ppy-miR-582-5p   | Pongo pygmaeus           |                         | 0 | 0    | 0    | 0 | 0.09 | 0   | 0    | 0 |
|             | eca-miR-582-5p   | Equus caballus           |                         | 0 | 0    | 0    | 0 | 0.09 | 0   | 0    | 0 |
|             | mml-miR-582-5p   | Macaca mulatta           |                         | 0 | 0    | 0    | 0 | 0.09 | 0   | 0    | 0 |
|             | bta-miR-582      | Bos taurus               |                         | 0 | 0    | 0    | 0 | 0.09 | 0   | 0    | 0 |

|             |                |                         |                        |       |        |       |       |       |       |       |       |
|-------------|----------------|-------------------------|------------------------|-------|--------|-------|-------|-------|-------|-------|-------|
| dof-miR-925 | ptc-miR482b-3p | Populus trichocarpa     | TTACCAATACCTCTCATGCCAA | 0     | 0      | 0     | 0.18  | 0     | 0     | 0     | 0     |
| dof-miR-926 | ptc-miR827     | Populus trichocarpa     | TTAGATGACCATCAACGAAAA  | 0     | 0      | 0     | 0     | 0     | 0     | 0.33  | 0     |
| dof-miR-927 | mdm-miR827     | Malus domestica         | TTAGATGACCATCAACGAACA  | 0     | 0      | 0     | 19.1  | 0     | 0     | 0     | 0     |
| dof-miR-928 | bdi-miR827-3p  | Brachypodium distachyon | TTAGATGACCATCAGCAAAACA | 16.83 | 105.14 | 72.76 | 26.31 | 38.89 | 19.62 | 24.71 | 40.78 |
|             | ssp-miR827     | Saccharum sp.           |                        | 16.83 | 105.14 | 72.76 | 26.31 | 38.89 | 19.62 | 24.71 | 40.78 |
|             | zma-miR827-3p  | Zea mays                |                        | 16.83 | 105.14 | 72.76 | 26.31 | 38.89 | 19.62 | 24.71 | 40.78 |
|             | osa-miR827     | Oryza sativa            |                        | 16.83 | 105.14 | 72.76 | 26.31 | 38.89 | 19.62 | 24.71 | 40.78 |
| dof-miR-929 | ath-miR403-3p  | Arabidopsis thaliana    | TTAGATTCACGCACAAACTCG  | 0     | 0      | 4.04  | 702.9 | 0.28  | 0     | 0.17  | 0.14  |
|             | ptc-miR403a    | Populus trichocarpa     |                        | 0     | 0      | 4.04  | 702.9 | 0.28  | 0     | 0.17  | 0.14  |
|             | ptc-miR403b    | Populus trichocarpa     |                        | 0     | 0      | 4.04  | 702.9 | 0.28  | 0     | 0.17  | 0.14  |
|             | ptc-miR403c-3p | Populus trichocarpa     |                        | 0     | 0      | 4.04  | 702.9 | 0.28  | 0     | 0.17  | 0.14  |
|             | bra-miR403-3p  | Brassica rapa           |                        | 0     | 0      | 4.04  | 702.9 | 0.28  | 0     | 0.17  | 0.14  |
|             | aly-miR403b-3p | Arabidopsis lyrata      |                        | 0     | 0      | 4.04  | 702.9 | 0.28  | 0     | 0.17  | 0.14  |
|             | ppe-miR403     | Prunus persica          |                        | 0     | 0      | 4.04  | 702.9 | 0.28  | 0     | 0.17  | 0.14  |
|             | mes-miR403a    | Manihot esculenta       |                        | 0     | 0      | 4.04  | 702.9 | 0.28  | 0     | 0.17  | 0.14  |
|             | mes-miR403b    | Manihot esculenta       |                        | 0     | 0      | 4.04  | 702.9 | 0.28  | 0     | 0.17  | 0.14  |
|             | ptc-miR403d    | Populus trichocarpa     |                        | 0     | 0      | 4.04  | 702.9 | 0.28  | 0     | 0.17  | 0.14  |
|             | htu-miR403a    | Helianthus tuberosus    |                        | 0     | 0      | 4.04  | 702.9 | 0.28  | 0     | 0.17  | 0.14  |
|             | htu-miR403b    | Helianthus tuberosus    |                        | 0     | 0      | 4.04  | 702.9 | 0.28  | 0     | 0.17  | 0.14  |
|             | htu-miR403c    | Helianthus tuberosus    |                        | 0     | 0      | 4.04  | 702.9 | 0.28  | 0     | 0.17  | 0.14  |
|             | htu-miR403d    | Helianthus tuberosus    |                        | 0     | 0      | 4.04  | 702.9 | 0.28  | 0     | 0.17  | 0.14  |
|             | htu-miR403e    | Helianthus tuberosus    |                        | 0     | 0      | 4.04  | 702.9 | 0.28  | 0     | 0.17  | 0.14  |
|             | har-miR403a    | Helianthus argophyllus  |                        | 0     | 0      | 4.04  | 702.9 | 0.28  | 0     | 0.17  | 0.14  |
|             | hpe-miR403a    | Helianthus petiolaris   |                        | 0     | 0      | 4.04  | 702.9 | 0.28  | 0     | 0.17  | 0.14  |
|             | mdm-miR403a    | Malus domestica         |                        | 0     | 0      | 4.04  | 702.9 | 0.28  | 0     | 0.17  | 0.14  |
|             | mdm-miR403b    | Malus domestica         |                        | 0     | 0      | 4.04  | 702.9 | 0.28  | 0     | 0.17  | 0.14  |
|             | bnm-miR403     | Brassica napus          |                        | 0     | 0      | 4.04  | 702.9 | 0.28  | 0     | 0.17  | 0.14  |
|             | tcc-miR403a    | Theobroma cacao         |                        | 0     | 0      | 4.04  | 702.9 | 0.28  | 0     | 0.17  | 0.14  |
|             | tcc-miR403b    | Theobroma cacao         |                        | 0     | 0      | 4.04  | 702.9 | 0.28  | 0     | 0.17  | 0.14  |
|             | csi-miR403     | Citrus sinensis         |                        | 0     | 0      | 4.04  | 702.9 | 0.28  | 0     | 0.17  | 0.14  |
|             | rco-miR403a    | Ricinus communis        |                        | 0     | 0      | 4.04  | 702.9 | 0.28  | 0     | 0.17  | 0.14  |
|             | rco-miR403b    | Ricinus communis        |                        | 0     | 0      | 4.04  | 702.9 | 0.28  | 0     | 0.17  | 0.14  |
|             | aly-miR403a-3p | Arabidopsis lyrata      |                        | 0     | 0      | 4.04  | 702.9 | 0.28  | 0     | 0.17  | 0.14  |
|             | vvi-miR403a    | Vitis vinifera          |                        | 0     | 0      | 4.04  | 702.9 | 0.28  | 0     | 0.17  | 0.14  |

|              |                  |                    |                        |      |      |      |       |      |      |      |      |
|--------------|------------------|--------------------|------------------------|------|------|------|-------|------|------|------|------|
|              | vvi-miR403b      | Vitis vinifera     |                        | 0    | 0    | 4.04 | 702.9 | 0.28 | 0    | 0.17 | 0.14 |
|              | vvi-miR403c      | Vitis vinifera     |                        | 0    | 0    | 4.04 | 702.9 | 0.28 | 0    | 0.17 | 0.14 |
|              | vvi-miR403d      | Vitis vinifera     |                        | 0    | 0    | 4.04 | 702.9 | 0.28 | 0    | 0.17 | 0.14 |
|              | vvi-miR403e      | Vitis vinifera     |                        | 0    | 0    | 4.04 | 702.9 | 0.28 | 0    | 0.17 | 0.14 |
|              | vvi-miR403f      | Vitis vinifera     |                        | 0    | 0    | 4.04 | 702.9 | 0.28 | 0    | 0.17 | 0.14 |
| dof-miR-930  | gma-miR403a      | Glycine max        | TTAGATTCACGCACAAACTTG  | 0    | 0    | 0    | 1.62  | 0    | 0    | 0    | 0    |
|              | gma-miR403b      | Glycine max        |                        | 0    | 0    | 0    | 1.62  | 0    | 0    | 0    | 0    |
| dof-miR-931  | hsa-miR-4662a-5p | Homo sapiens       | TTAGCCAATTGTCCATCTTTAG | 0    | 0    | 0    | 0     | 0.09 | 0    | 0    | 0    |
| dof-miR-932  | ggo-miR-340      | Gorilla gorilla    | TTATAAAGCAATGAGACTGAT  | 0    | 0    | 0.18 | 0.18  | 0.37 | 0    | 0    | 0    |
| dof-miR-933  | rno-miR-340-5p   | Rattus norvegicus  | TTATAAAGCAATGAGACTGATT | 0    | 0.25 | 0.18 | 0.18  | 1.87 | 0.21 | 0.17 | 0    |
|              | mmu-miR-340-5p   | Mus musculus       |                        | 0    | 0.25 | 0.18 | 0.18  | 1.87 | 0.21 | 0.17 | 0    |
|              | hsa-miR-340-5p   | Homo sapiens       |                        | 0    | 0.25 | 0.18 | 0.18  | 1.87 | 0.21 | 0.17 | 0    |
|              | chi-miR-340-5p   | Capra hircus       |                        | 0    | 0.25 | 0.18 | 0.18  | 1.87 | 0.21 | 0.17 | 0    |
|              | cgr-miR-340-5p   | Cricetulus griseus |                        | 0    | 0.25 | 0.18 | 0.18  | 1.87 | 0.21 | 0.17 | 0    |
|              | ppy-miR-340      | Pongo pygmaeus     |                        | 0    | 0.25 | 0.18 | 0.18  | 1.87 | 0.21 | 0.17 | 0    |
|              | eca-miR-340-5p   | Equus caballus     |                        | 0    | 0.25 | 0.18 | 0.18  | 1.87 | 0.21 | 0.17 | 0    |
|              | ssc-miR-340      | Sus scrofa         |                        | 0    | 0.25 | 0.18 | 0.18  | 1.87 | 0.21 | 0.17 | 0    |
|              | mml-miR-340-5p   | Macaca mulatta     |                        | 0    | 0.25 | 0.18 | 0.18  | 1.87 | 0.21 | 0.17 | 0    |
|              | ptr-miR-340      | Pan troglodytes    |                        | 0    | 0.25 | 0.18 | 0.18  | 1.87 | 0.21 | 0.17 | 0    |
|              | cfa-miR-340      | Canis familiaris   |                        | 0    | 0.25 | 0.18 | 0.18  | 1.87 | 0.21 | 0.17 | 0    |
| dof-miR-934  | chi-miR-374a-5p  | Capra hircus       | TTATAATACAACCTGATAAGT  | 0.4  | 1.53 | 0.55 | 0.18  | 0.84 | 0.1  | 0.17 | 0.14 |
|              | cfa-miR-374a     | Canis familiaris   |                        | 0.4  | 1.53 | 0.55 | 0.18  | 0.84 | 0.1  | 0.17 | 0.14 |
| dof-miR-935  | hsa-miR-374a-5p  | Homo sapiens       | TTATAATACAACCTGATAAGTG | 0    | 0    | 0.18 | 0.54  | 0.56 | 0.21 | 0    | 0    |
|              | bta-miR-374a     | Bos taurus         |                        | 0    | 0    | 0.18 | 0.54  | 0.56 | 0.21 | 0    | 0    |
|              | tch-miR-374a-5p  | Tupaia chinensis   |                        | 0    | 0    | 0.18 | 0.54  | 0.56 | 0.21 | 0    | 0    |
|              | oar-miR-374a     | Ovis aries         |                        | 0    | 0    | 0.18 | 0.54  | 0.56 | 0.21 | 0    | 0    |
|              | ppy-miR-374a     | Pongo pygmaeus     |                        | 0    | 0    | 0.18 | 0.54  | 0.56 | 0.21 | 0    | 0    |
|              | eca-miR-374a     | Equus caballus     |                        | 0    | 0    | 0.18 | 0.54  | 0.56 | 0.21 | 0    | 0    |
|              | ssc-miR-374a-5p  | Sus scrofa         |                        | 0    | 0    | 0.18 | 0.54  | 0.56 | 0.21 | 0    | 0    |
|              | mml-miR-374a-5p  | Macaca mulatta     |                        | 0    | 0    | 0.18 | 0.54  | 0.56 | 0.21 | 0    | 0    |
| ptr-miR-374a | Pan troglodytes  | 0                  | 0                      | 0.18 | 0.54 | 0.56 | 0.21  | 0    | 0    |      |      |
| dof-miR-936  | tch-miR-361-5p   | Tupaia chinensis   | TTATCAGAATCTCCAGGGGTA  | 0    | 0    | 0    | 0     | 0    | 0    | 0    | 0.14 |
| dof-miR-937  | hsa-miR-361-5p   | Homo sapiens       | TTATCAGAATCTCCAGGGGTAC | 0.4  | 0    | 0.37 | 0.72  | 0.56 | 0.21 | 0.5  | 0    |
|              | mmu-miR-361-5p   | Mus musculus       |                        | 0.4  | 0    | 0.37 | 0.72  | 0.56 | 0.21 | 0.5  | 0    |

|             |                  |                           |                        |       |       |       |       |       |      |       |      |
|-------------|------------------|---------------------------|------------------------|-------|-------|-------|-------|-------|------|-------|------|
|             | rno-miR-361-5p   | Rattus norvegicus         |                        | 0.4   | 0     | 0.37  | 0.72  | 0.56  | 0.21 | 0.5   | 0    |
|             | bta-miR-361      | Bos taurus                |                        | 0.4   | 0     | 0.37  | 0.72  | 0.56  | 0.21 | 0.5   | 0    |
|             | efu-miR-361      | Eptesicus fuscus          |                        | 0.4   | 0     | 0.37  | 0.72  | 0.56  | 0.21 | 0.5   | 0    |
|             | chi-miR-361-5p   | Capra hircus              |                        | 0.4   | 0     | 0.37  | 0.72  | 0.56  | 0.21 | 0.5   | 0    |
|             | cgr-miR-361      | Cricetulus griseus        |                        | 0.4   | 0     | 0.37  | 0.72  | 0.56  | 0.21 | 0.5   | 0    |
|             | ggo-miR-361      | Gorilla gorilla           |                        | 0.4   | 0     | 0.37  | 0.72  | 0.56  | 0.21 | 0.5   | 0    |
|             | ppy-miR-361-5p   | Pongo pygmaeus            |                        | 0.4   | 0     | 0.37  | 0.72  | 0.56  | 0.21 | 0.5   | 0    |
|             | eca-miR-361-5p   | Equus caballus            |                        | 0.4   | 0     | 0.37  | 0.72  | 0.56  | 0.21 | 0.5   | 0    |
|             | ssc-miR-361-5p   | Sus scrofa                |                        | 0.4   | 0     | 0.37  | 0.72  | 0.56  | 0.21 | 0.5   | 0    |
|             | mml-miR-361-5p   | Macaca mulatta            |                        | 0.4   | 0     | 0.37  | 0.72  | 0.56  | 0.21 | 0.5   | 0    |
|             | cfa-miR-361      | Canis familiaris          |                        | 0.4   | 0     | 0.37  | 0.72  | 0.56  | 0.21 | 0.5   | 0    |
| dof-miR-938 | ggo-miR-584      | Gorilla gorilla           | TTATGGTTTGCCTGGGACTGA  | 0     | 0     | 0     | 0     | 0.75  | 0    | 0     | 0    |
| dof-miR-939 | hsa-miR-95-3p    | Homo sapiens              | TTCAACGGGTATTTATTGAGCA | 0     | 0     | 0     | 0     | 0.09  | 0    | 0     | 0    |
|             | ssc-miR-95       | Sus scrofa                |                        | 0     | 0     | 0     | 0     | 0.09  | 0    | 0     | 0    |
|             | ptr-miR-95       | Pan troglodytes           |                        | 0     | 0     | 0     | 0     | 0.09  | 0    | 0     | 0    |
|             | ggo-miR-95       | Gorilla gorilla           |                        | 0     | 0     | 0     | 0     | 0.09  | 0    | 0     | 0    |
|             | ppy-miR-95       | Pongo pygmaeus            |                        | 0     | 0     | 0     | 0     | 0.09  | 0    | 0     | 0    |
|             | sla-miR-95       | Saguinus labiatus         |                        | 0     | 0     | 0     | 0     | 0.09  | 0    | 0     | 0    |
|             | lla-miR-95       | Lagothrix lagotricha      |                        | 0     | 0     | 0     | 0     | 0.09  | 0    | 0     | 0    |
|             | ppa-miR-95       | Pan paniscus              |                        | 0     | 0     | 0     | 0     | 0.09  | 0    | 0     | 0    |
|             | tch-miR-95       | Tupaia chinensis          |                        | 0     | 0     | 0     | 0     | 0.09  | 0    | 0     | 0    |
|             | mml-miR-95-3p    | Macaca mulatta            |                        | 0     | 0     | 0     | 0     | 0.09  | 0    | 0     | 0    |
|             | bta-miR-95       | Bos taurus                |                        | 0     | 0     | 0     | 0     | 0.09  | 0    | 0     | 0    |
| cfa-miR-95  | Canis familiaris | 0                         | 0                      | 0     | 0     | 0.09  | 0     | 0     | 0    |       |      |
| dof-miR-940 | tch-miR-26a-2-5p | Tupaia chinensis          | TTCAAGTAACCCAGGATAGGCT | 0.2   | 0     | 0     | 0     | 0.09  | 0    | 0     | 0    |
| dof-miR-941 | cgr-miR-26a      | Cricetulus griseus        | TTCAAGTAATCCAGGATAGG   | 0.4   | 0.51  | 1.1   | 1.26  | 3.17  | 0.63 | 1.17  | 0.56 |
|             | aca-miR-26-5p    | Anolis carolinensis       |                        | 0.4   | 0.51  | 1.1   | 1.26  | 3.17  | 0.63 | 1.17  | 0.56 |
| dof-miR-942 | gga-miR-26a-5p   | Gallus gallus             | TTCAAGTAATCCAGGATAGGC  | 2.18  | 0.25  | 5.33  | 5.59  | 4.57  | 0.21 | 2.17  | 2.1  |
|             | xtr-miR-26       | Xenopus tropicalis        |                        | 2.18  | 0.25  | 5.33  | 5.59  | 4.57  | 0.21 | 2.17  | 2.1  |
|             | hhi-miR-26       | Hippoglossus hippoglossus |                        | 2.18  | 0.25  | 5.33  | 5.59  | 4.57  | 0.21 | 2.17  | 2.1  |
|             | ola-miR-26       | Oryzias latipes           |                        | 2.18  | 0.25  | 5.33  | 5.59  | 4.57  | 0.21 | 2.17  | 2.1  |
|             | mdo-miR-26-5p    | Monodelphis domestica     |                        | 2.18  | 0.25  | 5.33  | 5.59  | 4.57  | 0.21 | 2.17  | 2.1  |
| dof-miR-943 | hsa-miR-26a-5p   | Homo sapiens              | TTCAAGTAATCCAGGATAGGCT | 15.05 | 24.18 | 30.87 | 57.66 | 65.85 | 8.03 | 32.05 | 9.81 |
|             | mmu-miR-26a-5p   | Mus musculus              |                        | 15.05 | 24.18 | 30.87 | 57.66 | 65.85 | 8.03 | 32.05 | 9.81 |



|             |                |                          |                        |       |       |       |       |       |      |       |      |
|-------------|----------------|--------------------------|------------------------|-------|-------|-------|-------|-------|------|-------|------|
|             | rno-miR-26a-5p | Rattus norvegicus        |                        | 15.05 | 24.18 | 30.87 | 57.66 | 65.85 | 8.03 | 32.05 | 9.81 |
|             | dre-miR-26a-5p | Danio rerio              |                        | 15.05 | 24.18 | 30.87 | 57.66 | 65.85 | 8.03 | 32.05 | 9.81 |
|             | ssc-miR-26a    | Sus scrofa               |                        | 15.05 | 24.18 | 30.87 | 57.66 | 65.85 | 8.03 | 32.05 | 9.81 |
|             | ptr-miR-26a    | Pan troglodytes          |                        | 15.05 | 24.18 | 30.87 | 57.66 | 65.85 | 8.03 | 32.05 | 9.81 |
|             | ggo-miR-26a    | Gorilla gorilla          |                        | 15.05 | 24.18 | 30.87 | 57.66 | 65.85 | 8.03 | 32.05 | 9.81 |
|             | ppy-miR-26a    | Pongo pygmaeus           |                        | 15.05 | 24.18 | 30.87 | 57.66 | 65.85 | 8.03 | 32.05 | 9.81 |
|             | lla-miR-26a    | Lagothrix lagotricha     |                        | 15.05 | 24.18 | 30.87 | 57.66 | 65.85 | 8.03 | 32.05 | 9.81 |
|             | mne-miR-26a    | Macaca nemestrina        |                        | 15.05 | 24.18 | 30.87 | 57.66 | 65.85 | 8.03 | 32.05 | 9.81 |
|             | mml-miR-26a-5p | Macaca mulatta           |                        | 15.05 | 24.18 | 30.87 | 57.66 | 65.85 | 8.03 | 32.05 | 9.81 |
|             | ppa-miR-26a    | Pan paniscus             |                        | 15.05 | 24.18 | 30.87 | 57.66 | 65.85 | 8.03 | 32.05 | 9.81 |
|             | fru-miR-26     | Fugu rubripes            |                        | 15.05 | 24.18 | 30.87 | 57.66 | 65.85 | 8.03 | 32.05 | 9.81 |
|             | tui-miR-26     | Tetraodon nigroviridis   |                        | 15.05 | 24.18 | 30.87 | 57.66 | 65.85 | 8.03 | 32.05 | 9.81 |
|             | bta-miR-26a    | Bos taurus               |                        | 15.05 | 24.18 | 30.87 | 57.66 | 65.85 | 8.03 | 32.05 | 9.81 |
|             | oan-miR-26-5p  | Ornithorhynchus anatinus |                        | 15.05 | 24.18 | 30.87 | 57.66 | 65.85 | 8.03 | 32.05 | 9.81 |
|             | chi-miR-26a-5p | Capra hircus             |                        | 15.05 | 24.18 | 30.87 | 57.66 | 65.85 | 8.03 | 32.05 | 9.81 |
|             | tch-miR-26a-5p | Tupaia chinensis         |                        | 15.05 | 24.18 | 30.87 | 57.66 | 65.85 | 8.03 | 32.05 | 9.81 |
|             | oha-miR-26-5p  | Ophiophagus hannah       |                        | 15.05 | 24.18 | 30.87 | 57.66 | 65.85 | 8.03 | 32.05 | 9.81 |
|             | ssa-miR-26a-5p | Salmo salar              |                        | 15.05 | 24.18 | 30.87 | 57.66 | 65.85 | 8.03 | 32.05 | 9.81 |
|             | ipu-miR-26a    | Ictalurus punctatus      |                        | 15.05 | 24.18 | 30.87 | 57.66 | 65.85 | 8.03 | 32.05 | 9.81 |
|             | oar-miR-26a    | Ovis aries               |                        | 15.05 | 24.18 | 30.87 | 57.66 | 65.85 | 8.03 | 32.05 | 9.81 |
|             | ccr-miR-26a    | Cyprinus carpio          |                        | 15.05 | 24.18 | 30.87 | 57.66 | 65.85 | 8.03 | 32.05 | 9.81 |
|             | pma-miR-26a-5p | Petromyzon marinus       |                        | 15.05 | 24.18 | 30.87 | 57.66 | 65.85 | 8.03 | 32.05 | 9.81 |
|             | eca-miR-26a    | Equus caballus           |                        | 15.05 | 24.18 | 30.87 | 57.66 | 65.85 | 8.03 | 32.05 | 9.81 |
|             | tgu-miR-26-5p  | Taeniopygia guttata      |                        | 15.05 | 24.18 | 30.87 | 57.66 | 65.85 | 8.03 | 32.05 | 9.81 |
|             | cfa-miR-26a    | Canis familiaris         |                        | 15.05 | 24.18 | 30.87 | 57.66 | 65.85 | 8.03 | 32.05 | 9.81 |
| dof-miR-944 | dre-miR-26b    | Danio rerio              | TTCAAGTAATCCAGGATAGGTT | 0.2   | 0.25  | 0.92  | 1.44  | 0     | 0    | 0.33  | 0.42 |
|             | ssa-miR-26b-5p | Salmo salar              |                        | 0.2   | 0.25  | 0.92  | 1.44  | 0     | 0    | 0.33  | 0.42 |
|             | ipu-miR-26b    | Ictalurus punctatus      |                        | 0.2   | 0.25  | 0.92  | 1.44  | 0     | 0    | 0.33  | 0.42 |
|             | pma-miR-26b-5p | Petromyzon marinus       |                        | 0.2   | 0.25  | 0.92  | 1.44  | 0     | 0    | 0.33  | 0.42 |
| dof-miR-945 | ssa-miR-26d-5p | Salmo salar              | TTCAAGTAATCTAGGATAGGCT | 0.2   | 0     | 0     | 0     | 0     | 0    | 0     |      |
| dof-miR-946 | hsa-miR-26b-5p | Homo sapiens             | TTCAAGTAATTCAGGATAGGT  | 0.2   | 0.25  | 0.55  | 1.26  | 5.69  | 0.52 | 0.33  | 0.28 |
|             | mmu-miR-26b-5p | Mus musculus             |                        | 0.2   | 0.25  | 0.55  | 1.26  | 5.69  | 0.52 | 0.33  | 0.28 |
|             | rno-miR-26b-5p | Rattus norvegicus        |                        | 0.2   | 0.25  | 0.55  | 1.26  | 5.69  | 0.52 | 0.33  | 0.28 |
|             | oar-miR-26b    | Ovis aries               |                        | 0.2   | 0.25  | 0.55  | 1.26  | 5.69  | 0.52 | 0.33  | 0.28 |

|             |                |                          |                         |      |      |      |       |       |      |      |      |
|-------------|----------------|--------------------------|-------------------------|------|------|------|-------|-------|------|------|------|
|             | ggo-miR-26b    | Gorilla gorilla          |                         | 0.2  | 0.25 | 0.55 | 1.26  | 5.69  | 0.52 | 0.33 | 0.28 |
|             | ppy-miR-26b    | Pongo pygmaeus           |                         | 0.2  | 0.25 | 0.55 | 1.26  | 5.69  | 0.52 | 0.33 | 0.28 |
|             | mml-miR-26b-5p | Macaca mulatta           |                         | 0.2  | 0.25 | 0.55 | 1.26  | 5.69  | 0.52 | 0.33 | 0.28 |
|             | ptr-miR-26b    | Pan troglodytes          |                         | 0.2  | 0.25 | 0.55 | 1.26  | 5.69  | 0.52 | 0.33 | 0.28 |
| dof-miR-947 | bta-miR-26b    | Bos taurus               | TTCACAGTAATTCAGGATAGGTT | 0.79 | 1.27 | 2.02 | 4.5   | 16.41 | 1.98 | 0.33 | 0.56 |
|             | chi-miR-26b-5p | Capra hircus             |                         | 0.79 | 1.27 | 2.02 | 4.5   | 16.41 | 1.98 | 0.33 | 0.56 |
|             | tch-miR-26b-5p | Tupaia chinensis         |                         | 0.79 | 1.27 | 2.02 | 4.5   | 16.41 | 1.98 | 0.33 | 0.56 |
|             | cgr-miR-26b-5p | Cricetulus griseus       |                         | 0.79 | 1.27 | 2.02 | 4.5   | 16.41 | 1.98 | 0.33 | 0.56 |
|             | cfa-miR-26b    | Canis familiaris         |                         | 0.79 | 1.27 | 2.02 | 4.5   | 16.41 | 1.98 | 0.33 | 0.56 |
| dof-miR-948 | gma-miR396a-3p | Glycine max              | TTCATAAAAGCTGTGGGAAG    | 0    | 0    | 0    | 14.96 | 0     | 0.1  | 0.17 | 0    |
| dof-miR-949 | ptc-miR1450    | Populus trichocarpa      | TTCATGGCTCGGTCAGGTTAC   | 0    | 0    | 0.18 | 0     | 0     | 0    | 0    | 0    |
| dof-miR-950 | ola-miR-27d-3p | Oryzias latipes          | TTCACAGTGCTAAGTTC       | 0    | 0    | 0    | 0     | 0.19  | 0    | 0    | 0    |
| dof-miR-951 | ssa-miR-27c-3p | Salmo salar              | TTCACAGTGGCTAAGTTCAGT   | 0    | 0    | 0    | 0     | 0     | 0    | 0.17 | 0.14 |
|             | ipu-miR-27e    | Ictalurus punctatus      |                         | 0    | 0    | 0    | 0     | 0     | 0    | 0.17 | 0.14 |
| dof-miR-952 | bta-miR-27a-3p | Bos taurus               | TTCACAGTGGCTAAGTTCGG    | 0    | 0    | 0.18 | 0.18  | 0.84  | 0.21 | 0    | 0    |
|             | chi-miR-27a-3p | Capra hircus             |                         | 0    | 0    | 0.18 | 0.18  | 0.84  | 0.21 | 0    | 0    |
|             | ola-miR-27a    | Oryzias latipes          |                         | 0    | 0    | 0.18 | 0.18  | 0.84  | 0.21 | 0    | 0    |
|             | cfa-miR-27a    | Canis familiaris         |                         | 0    | 0    | 0.18 | 0.18  | 0.84  | 0.21 | 0    | 0    |
| dof-miR-953 | hsa-miR-27a-3p | Homo sapiens             | TTCACAGTGGCTAAGTTCGGC   | 0.2  | 0    | 1.1  | 1.44  | 1.59  | 0.21 | 0.83 | 0.14 |
|             | mmu-miR-27a-3p | Mus musculus             |                         | 0.2  | 0    | 1.1  | 1.44  | 1.59  | 0.21 | 0.83 | 0.14 |
|             | rno-miR-27a-3p | Rattus norvegicus        |                         | 0.2  | 0    | 1.1  | 1.44  | 1.59  | 0.21 | 0.83 | 0.14 |
|             | ssc-miR-27a    | Sus scrofa               |                         | 0.2  | 0    | 1.1  | 1.44  | 1.59  | 0.21 | 0.83 | 0.14 |
|             | xtr-miR-27a    | Xenopus tropicalis       |                         | 0.2  | 0    | 1.1  | 1.44  | 1.59  | 0.21 | 0.83 | 0.14 |
|             | mdo-miR-27a-3p | Monodelphis domestica    |                         | 0.2  | 0    | 1.1  | 1.44  | 1.59  | 0.21 | 0.83 | 0.14 |
|             | oan-miR-27a-3p | Ornithorhynchus anatinus |                         | 0.2  | 0    | 1.1  | 1.44  | 1.59  | 0.21 | 0.83 | 0.14 |
|             | oar-miR-27a    | Ovis aries               |                         | 0.2  | 0    | 1.1  | 1.44  | 1.59  | 0.21 | 0.83 | 0.14 |
|             | ccr-miR-27a    | Cyprinus carpio          |                         | 0.2  | 0    | 1.1  | 1.44  | 1.59  | 0.21 | 0.83 | 0.14 |
|             | cgr-miR-27a-3p | Cricetulus griseus       |                         | 0.2  | 0    | 1.1  | 1.44  | 1.59  | 0.21 | 0.83 | 0.14 |
|             | aca-miR-27a-3p | Anolis carolinensis      |                         | 0.2  | 0    | 1.1  | 1.44  | 1.59  | 0.21 | 0.83 | 0.14 |
|             | eca-miR-27a    | Equus caballus           |                         | 0.2  | 0    | 1.1  | 1.44  | 1.59  | 0.21 | 0.83 | 0.14 |
| dof-miR-954 | dre-miR-27a-3p | Danio rerio              | TTCACAGTGGCTAAGTTCGGCT  | 0    | 0    | 0.18 | 0.54  | 0.19  | 0    | 0    | 0    |
|             | ssa-miR-27a-3p | Salmo salar              |                         | 0    | 0    | 0.18 | 0.54  | 0.19  | 0    | 0    | 0    |
|             | ipu-miR-27a    | Ictalurus punctatus      |                         | 0    | 0    | 0.18 | 0.54  | 0.19  | 0    | 0    | 0    |
| dof-miR-955 | tch-miR-27a-3p | Tupaia chinensis         | TTCACAGTGGCTAAGTTCGGT   | 0    | 0    | 0.18 | 0.36  | 0.28  | 0    | 0    | 0    |

|                |                  |                          |                        |      |       |      |       |      |      |      |      |
|----------------|------------------|--------------------------|------------------------|------|-------|------|-------|------|------|------|------|
| dof-miR-956    | mmu-miR-27b-3p   | Mus musculus             | TTCACAGTGGCTAAGTTCTGC  | 1.58 | 4.33  | 9.92 | 13.15 | 7.37 | 1.15 | 4.51 | 1.96 |
|                | hsa-miR-27b-3p   | Homo sapiens             |                        | 1.58 | 4.33  | 9.92 | 13.15 | 7.37 | 1.15 | 4.51 | 1.96 |
|                | rno-miR-27b-3p   | Rattus norvegicus        |                        | 1.58 | 4.33  | 9.92 | 13.15 | 7.37 | 1.15 | 4.51 | 1.96 |
|                | gga-miR-27b-3p   | Gallus gallus            |                        | 1.58 | 4.33  | 9.92 | 13.15 | 7.37 | 1.15 | 4.51 | 1.96 |
|                | bta-miR-27b      | Bos taurus               |                        | 1.58 | 4.33  | 9.92 | 13.15 | 7.37 | 1.15 | 4.51 | 1.96 |
|                | xtr-miR-27b      | Xenopus tropicalis       |                        | 1.58 | 4.33  | 9.92 | 13.15 | 7.37 | 1.15 | 4.51 | 1.96 |
|                | mdo-miR-27b-3p   | Monodelphis domestica    |                        | 1.58 | 4.33  | 9.92 | 13.15 | 7.37 | 1.15 | 4.51 | 1.96 |
|                | oan-miR-27b-3p   | Ornithorhynchus anatinus |                        | 1.58 | 4.33  | 9.92 | 13.15 | 7.37 | 1.15 | 4.51 | 1.96 |
|                | chi-miR-27b-3p   | Capra hircus             |                        | 1.58 | 4.33  | 9.92 | 13.15 | 7.37 | 1.15 | 4.51 | 1.96 |
|                | tch-miR-27b-3p   | Tupaia chinensis         |                        | 1.58 | 4.33  | 9.92 | 13.15 | 7.37 | 1.15 | 4.51 | 1.96 |
|                | ssa-miR-27b-3p   | Salmo salar              |                        | 1.58 | 4.33  | 9.92 | 13.15 | 7.37 | 1.15 | 4.51 | 1.96 |
|                | ipu-miR-27b      | Ictalurus punctatus      |                        | 1.58 | 4.33  | 9.92 | 13.15 | 7.37 | 1.15 | 4.51 | 1.96 |
|                | sha-miR-27b      | Sarcophilus harrisii     |                        | 1.58 | 4.33  | 9.92 | 13.15 | 7.37 | 1.15 | 4.51 | 1.96 |
|                | cgr-miR-27b-3p   | Cricetulus griseus       |                        | 1.58 | 4.33  | 9.92 | 13.15 | 7.37 | 1.15 | 4.51 | 1.96 |
|                | ggo-miR-27b      | Gorilla gorilla          |                        | 1.58 | 4.33  | 9.92 | 13.15 | 7.37 | 1.15 | 4.51 | 1.96 |
|                | pma-miR-27b-3p   | Petromyzon marinus       |                        | 1.58 | 4.33  | 9.92 | 13.15 | 7.37 | 1.15 | 4.51 | 1.96 |
|                | ppy-miR-27b      | Pongo pygmaeus           |                        | 1.58 | 4.33  | 9.92 | 13.15 | 7.37 | 1.15 | 4.51 | 1.96 |
|                | eca-miR-27b      | Equus caballus           |                        | 1.58 | 4.33  | 9.92 | 13.15 | 7.37 | 1.15 | 4.51 | 1.96 |
|                | ssc-miR-27b-3p   | Sus scrofa               |                        | 1.58 | 4.33  | 9.92 | 13.15 | 7.37 | 1.15 | 4.51 | 1.96 |
|                | tgu-miR-27-3p    | Taeniopygia guttata      |                        | 1.58 | 4.33  | 9.92 | 13.15 | 7.37 | 1.15 | 4.51 | 1.96 |
| mml-miR-27b-3p | Macaca mulatta   | 1.58                     | 4.33                   | 9.92 | 13.15 | 7.37 | 1.15  | 4.51 | 1.96 |      |      |
| cfa-miR-27b    | Canis familiaris | 1.58                     | 4.33                   | 9.92 | 13.15 | 7.37 | 1.15  | 4.51 | 1.96 |      |      |
| ptr-miR-27b    | Pan troglodytes  | 1.58                     | 4.33                   | 9.92 | 13.15 | 7.37 | 1.15  | 4.51 | 1.96 |      |      |
| dof-miR-957    | dre-miR-27b-3p   | Danio rerio              | TTCACAGTGGCTAAGTTCTGCA | 0    | 0     | 0.18 | 0.54  | 0.19 | 0    | 0    | 0    |
|                | fru-miR-27b      | Fugu rubripes            |                        | 0    | 0     | 0.18 | 0.54  | 0.19 | 0    | 0    | 0    |
|                | tmi-miR-27b      | Tetraodon nigroviridis   |                        | 0    | 0     | 0.18 | 0.54  | 0.19 | 0    | 0    | 0    |
|                | oha-miR-27b-3p   | Ophiophagus hannah       |                        | 0    | 0     | 0.18 | 0.54  | 0.19 | 0    | 0    | 0    |
|                | aca-miR-27b-3p   | Anolis carolinensis      |                        | 0    | 0     | 0.18 | 0.54  | 0.19 | 0    | 0    | 0    |
| dof-miR-958    | ssa-miR-27d-3p   | Salmo salar              | TTCACAGTGGTTAAGTTCTG   | 0    | 0.25  | 0    | 0.18  | 0    | 0    | 0.17 | 0    |
|                | ipu-miR-27c      | Ictalurus punctatus      |                        | 0    | 0.25  | 0    | 0.18  | 0    | 0    | 0.17 | 0    |
|                | ola-miR-27c-3p   | Oryzias latipes          |                        | 0    | 0.25  | 0    | 0.18  | 0    | 0    | 0.17 | 0    |
| dof-miR-959    | dre-miR-27c-3p   | Danio rerio              | TTCACAGTGGTTAAGTTCTGC  | 0.59 | 0.51  | 0.18 | 0.36  | 0    | 0    | 0    | 0.14 |
|                | fru-miR-27c      | Fugu rubripes            |                        | 0.59 | 0.51  | 0.18 | 0.36  | 0    | 0    | 0    | 0.14 |
|                | tmi-miR-27c      | Tetraodon nigroviridis   |                        | 0.59 | 0.51  | 0.18 | 0.36  | 0    | 0    | 0    | 0.14 |

|             |                |                       |                        |        |         |        |          |         |         |        |         |
|-------------|----------------|-----------------------|------------------------|--------|---------|--------|----------|---------|---------|--------|---------|
| dof-miR-960 | ccr-miR-27c-3p | Cyprinus carpio       | TTCACAGTGGTTAAGTTCTGCC | 0      | 0       | 0      | 0.18     | 0       | 0       | 0.17   | 0       |
| dof-miR-961 | hsa-miR-197-3p | Homo sapiens          | TTCACCACCTTCCACCCAGC   | 0      | 0       | 0.37   | 0        | 0.19    | 0       | 0      | 0       |
|             | ptr-miR-197    | Pan troglodytes       |                        | 0      | 0       | 0.37   | 0        | 0.19    | 0       | 0      | 0       |
|             | ppy-miR-197    | Pongo pygmaeus        |                        | 0      | 0       | 0.37   | 0        | 0.19    | 0       | 0      | 0       |
|             | age-miR-197    | Ateles geoffroyi      |                        | 0      | 0       | 0.37   | 0        | 0.19    | 0       | 0      | 0       |
|             | ppa-miR-197    | Pan paniscus          |                        | 0      | 0       | 0.37   | 0        | 0.19    | 0       | 0      | 0       |
|             | chi-miR-197-3p | Capra hircus          |                        | 0      | 0       | 0.37   | 0        | 0.19    | 0       | 0      | 0       |
|             | ggo-miR-197    | Gorilla gorilla       |                        | 0      | 0       | 0.37   | 0        | 0.19    | 0       | 0      | 0       |
|             | eca-miR-197    | Equus caballus        |                        | 0      | 0       | 0.37   | 0        | 0.19    | 0       | 0      | 0       |
|             | mml-miR-197-3p | Macaca mulatta        |                        | 0      | 0       | 0.37   | 0        | 0.19    | 0       | 0      | 0       |
|             | cfa-miR-197    | Canis familiaris      |                        | 0      | 0       | 0.37   | 0        | 0.19    | 0       | 0      | 0       |
| bta-miR-197 | Bos taurus     | 0                     | 0                      | 0.37   | 0       | 0.19   | 0        | 0       | 0       | 0      |         |
| dof-miR-962 | ata-miR393-5p  | Aegilops tauschii     | TTCCAAAGGGATCGATTGAT   | 0.2    | 1.02    | 6.25   | 7.75     | 1.59    | 1.04    | 0.83   | 0.42    |
| dof-miR-963 | gma-miR393h    | Glycine max           | TTCCAAAGGGATCGATTGATC  | 18.02  | 74.85   | 32.7   | 56.76    | 27.33   | 61.98   | 44.58  | 37.83   |
|             | gma-miR393i    | Glycine max           |                        | 18.02  | 74.85   | 32.7   | 56.76    | 27.33   | 61.98   | 44.58  | 37.83   |
|             | gma-miR393j    | Glycine max           |                        | 18.02  | 74.85   | 32.7   | 56.76    | 27.33   | 61.98   | 44.58  | 37.83   |
|             | gma-miR393k    | Glycine max           |                        | 18.02  | 74.85   | 32.7   | 56.76    | 27.33   | 61.98   | 44.58  | 37.83   |
| dof-miR-964 | mdm-miR396a    | Malus domestica       | TTCCACAGCTTTCTTGAACAG  | 2.38   | 0.51    | 0      | 0.72     | 0.09    | 0.52    | 0.17   | 0.42    |
| dof-miR-965 | ppe-miR396a    | Prunus persica        | TTCCACAGCTTTCTTGAACGT  | 0.2    | 0       | 0      | 1.26     | 0       | 0       | 0      | 0       |
| dof-miR-966 | vvi-miR396b    | Vitis vinifera        | TTCCACAGCTTTCTTGAACT   | 91.1   | 20.37   | 107.48 | 821.1    | 84.31   | 99.43   | 15.36  | 63.9    |
| dof-miR-967 | vvi-miR396a    | Vitis vinifera        | TTCCACAGCTTTCTTGAACTA  | 3.96   | 2.29    | 2.39   | 29.91    | 3.45    | 9.91    | 1.5    | 2.66    |
|             | pab-miR396a    | Picea abies           |                        | 3.96   | 2.29    | 2.39   | 29.91    | 3.45    | 9.91    | 1.5    | 2.66    |
| dof-miR-968 | ath-miR396a-5p | Arabidopsis thaliana  | TTCCACAGCTTTCTTGAACTG  | 6360.1 | 3143.77 | 831.37 | 12378.63 | 2218.04 | 4734.21 | 2528.8 | 2836.94 |
|             | osa-miR396a-5p | Oryza sativa          |                        | 6360.1 | 3143.77 | 831.37 | 12378.63 | 2218.04 | 4734.21 | 2528.8 | 2836.94 |
|             | osa-miR396b-5p | Oryza sativa          |                        | 6360.1 | 3143.77 | 831.37 | 12378.63 | 2218.04 | 4734.21 | 2528.8 | 2836.94 |
|             | sbi-miR396b    | Sorghum bicolor       |                        | 6360.1 | 3143.77 | 831.37 | 12378.63 | 2218.04 | 4734.21 | 2528.8 | 2836.94 |
|             | sbi-miR396a    | Sorghum bicolor       |                        | 6360.1 | 3143.77 | 831.37 | 12378.63 | 2218.04 | 4734.21 | 2528.8 | 2836.94 |
|             | sof-miR396     | Saccharum officinarum |                        | 6360.1 | 3143.77 | 831.37 | 12378.63 | 2218.04 | 4734.21 | 2528.8 | 2836.94 |
|             | gma-miR396a-5p | Glycine max           |                        | 6360.1 | 3143.77 | 831.37 | 12378.63 | 2218.04 | 4734.21 | 2528.8 | 2836.94 |
|             | zma-miR396b-5p | Zea mays              |                        | 6360.1 | 3143.77 | 831.37 | 12378.63 | 2218.04 | 4734.21 | 2528.8 | 2836.94 |
|             | zma-miR396a-5p | Zea mays              |                        | 6360.1 | 3143.77 | 831.37 | 12378.63 | 2218.04 | 4734.21 | 2528.8 | 2836.94 |
|             | ptc-miR396a    | Populus trichocarpa   |                        | 6360.1 | 3143.77 | 831.37 | 12378.63 | 2218.04 | 4734.21 | 2528.8 | 2836.94 |
|             | ptc-miR396b    | Populus trichocarpa   |                        | 6360.1 | 3143.77 | 831.37 | 12378.63 | 2218.04 | 4734.21 | 2528.8 | 2836.94 |
|             | mtr-miR396b-5p | Medicago truncatula   |                        | 6360.1 | 3143.77 | 831.37 | 12378.63 | 2218.04 | 4734.21 | 2528.8 | 2836.94 |

|             |                |                         |                       |        |         |        |          |         |         |        |         |
|-------------|----------------|-------------------------|-----------------------|--------|---------|--------|----------|---------|---------|--------|---------|
|             | ghr-miR396a    | Gossypium hirsutum      |                       | 6360.1 | 3143.77 | 831.37 | 12378.63 | 2218.04 | 4734.21 | 2528.8 | 2836.94 |
|             | ghr-miR396b    | Gossypium hirsutum      |                       | 6360.1 | 3143.77 | 831.37 | 12378.63 | 2218.04 | 4734.21 | 2528.8 | 2836.94 |
|             | vvi-miR396d    | Vitis vinifera          |                       | 6360.1 | 3143.77 | 831.37 | 12378.63 | 2218.04 | 4734.21 | 2528.8 | 2836.94 |
|             | sly-miR396a-5p | Solanum lycopersicum    |                       | 6360.1 | 3143.77 | 831.37 | 12378.63 | 2218.04 | 4734.21 | 2528.8 | 2836.94 |
|             | ata-miR396e-5p | Aegilops tauschii       |                       | 6360.1 | 3143.77 | 831.37 | 12378.63 | 2218.04 | 4734.21 | 2528.8 | 2836.94 |
|             | cpa-miR396     | Carica papaya           |                       | 6360.1 | 3143.77 | 831.37 | 12378.63 | 2218.04 | 4734.21 | 2528.8 | 2836.94 |
|             | mes-miR396a    | Manihot esculenta       |                       | 6360.1 | 3143.77 | 831.37 | 12378.63 | 2218.04 | 4734.21 | 2528.8 | 2836.94 |
|             | mes-miR396b    | Manihot esculenta       |                       | 6360.1 | 3143.77 | 831.37 | 12378.63 | 2218.04 | 4734.21 | 2528.8 | 2836.94 |
|             | hbr-miR396b    | Hevea brasiliensis      |                       | 6360.1 | 3143.77 | 831.37 | 12378.63 | 2218.04 | 4734.21 | 2528.8 | 2836.94 |
|             | mdm-miR396b    | Malus domestica         |                       | 6360.1 | 3143.77 | 831.37 | 12378.63 | 2218.04 | 4734.21 | 2528.8 | 2836.94 |
|             | cme-miR396b    | Cucumis melo            |                       | 6360.1 | 3143.77 | 831.37 | 12378.63 | 2218.04 | 4734.21 | 2528.8 | 2836.94 |
|             | ssl-miR396     | Salvia sclarea          |                       | 6360.1 | 3143.77 | 831.37 | 12378.63 | 2218.04 | 4734.21 | 2528.8 | 2836.94 |
|             | dpr-miR396     | Digitalis purpurea      |                       | 6360.1 | 3143.77 | 831.37 | 12378.63 | 2218.04 | 4734.21 | 2528.8 | 2836.94 |
|             | lus-miR396a    | Linum usitatissimum     |                       | 6360.1 | 3143.77 | 831.37 | 12378.63 | 2218.04 | 4734.21 | 2528.8 | 2836.94 |
|             | lus-miR396c    | Linum usitatissimum     |                       | 6360.1 | 3143.77 | 831.37 | 12378.63 | 2218.04 | 4734.21 | 2528.8 | 2836.94 |
|             | nta-miR396a    | Nicotiana tabacum       |                       | 6360.1 | 3143.77 | 831.37 | 12378.63 | 2218.04 | 4734.21 | 2528.8 | 2836.94 |
|             | bgym-miR396a   | Bruguiera gymnorhiza    |                       | 6360.1 | 3143.77 | 831.37 | 12378.63 | 2218.04 | 4734.21 | 2528.8 | 2836.94 |
|             | bcy-miR396a    | Bruguiera cylindrica    |                       | 6360.1 | 3143.77 | 831.37 | 12378.63 | 2218.04 | 4734.21 | 2528.8 | 2836.94 |
|             | tcc-miR396a    | Theobroma cacao         |                       | 6360.1 | 3143.77 | 831.37 | 12378.63 | 2218.04 | 4734.21 | 2528.8 | 2836.94 |
|             | tcc-miR396b    | Theobroma cacao         |                       | 6360.1 | 3143.77 | 831.37 | 12378.63 | 2218.04 | 4734.21 | 2528.8 | 2836.94 |
|             | bdi-miR396d-5p | Brachypodium distachyon |                       | 6360.1 | 3143.77 | 831.37 | 12378.63 | 2218.04 | 4734.21 | 2528.8 | 2836.94 |
|             | bdi-miR396c-5p | Brachypodium distachyon |                       | 6360.1 | 3143.77 | 831.37 | 12378.63 | 2218.04 | 4734.21 | 2528.8 | 2836.94 |
|             | ssp-miR396     | Saccharum sp.           |                       | 6360.1 | 3143.77 | 831.37 | 12378.63 | 2218.04 | 4734.21 | 2528.8 | 2836.94 |
|             | gma-miR396i-5p | Glycine max             |                       | 6360.1 | 3143.77 | 831.37 | 12378.63 | 2218.04 | 4734.21 | 2528.8 | 2836.94 |
|             | aau-miR396     | Acacia auriculiformis   |                       | 6360.1 | 3143.77 | 831.37 | 12378.63 | 2218.04 | 4734.21 | 2528.8 | 2836.94 |
|             | amg-miR396     | Acacia mangium          |                       | 6360.1 | 3143.77 | 831.37 | 12378.63 | 2218.04 | 4734.21 | 2528.8 | 2836.94 |
|             | csi-miR396a    | Citrus sinensis         |                       | 6360.1 | 3143.77 | 831.37 | 12378.63 | 2218.04 | 4734.21 | 2528.8 | 2836.94 |
|             | csi-miR396b    | Citrus sinensis         |                       | 6360.1 | 3143.77 | 831.37 | 12378.63 | 2218.04 | 4734.21 | 2528.8 | 2836.94 |
|             | aly-miR396a-5p | Arabidopsis lyrata      |                       | 6360.1 | 3143.77 | 831.37 | 12378.63 | 2218.04 | 4734.21 | 2528.8 | 2836.94 |
|             | vvi-miR396c    | Vitis vinifera          |                       | 6360.1 | 3143.77 | 831.37 | 12378.63 | 2218.04 | 4734.21 | 2528.8 | 2836.94 |
|             | lja-miR396     | Lotus japonicus         |                       | 6360.1 | 3143.77 | 831.37 | 12378.63 | 2218.04 | 4734.21 | 2528.8 | 2836.94 |
|             | aqc-miR396a    | Aquilegia caerulea      |                       | 6360.1 | 3143.77 | 831.37 | 12378.63 | 2218.04 | 4734.21 | 2528.8 | 2836.94 |
| dof-miR-969 | gma-miR396e    | Glycine max             | TTCCACAGCTTCTTGAAGTGT | 1.19   | 1.53    | 0      | 1.8      | 0.56    | 2.61    | 1.17   | 0.42    |
| dof-miR-970 | ath-miR396b-5p | Arabidopsis thaliana    | TTCCACAGCTTCTTGAAGT   | 31.49  | 7.38    | 26.27  | 4297.21  | 17.07   | 34.85   | 7.68   | 31.39   |



|             |                 |                         |                        |       |      |       |         |       |       |      |       |
|-------------|-----------------|-------------------------|------------------------|-------|------|-------|---------|-------|-------|------|-------|
|             | bgm-miR396b     | Bruguiera gymnorhiza    |                        | 31.49 | 7.38 | 26.27 | 4297.21 | 17.07 | 34.85 | 7.68 | 31.39 |
|             | bey-miR396b     | Bruguiera cylindrica    |                        | 31.49 | 7.38 | 26.27 | 4297.21 | 17.07 | 34.85 | 7.68 | 31.39 |
|             | tcc-miR396c     | Theobroma cacao         |                        | 31.49 | 7.38 | 26.27 | 4297.21 | 17.07 | 34.85 | 7.68 | 31.39 |
|             | tcc-miR396e     | Theobroma cacao         |                        | 31.49 | 7.38 | 26.27 | 4297.21 | 17.07 | 34.85 | 7.68 | 31.39 |
|             | bdi-miR396e-5p  | Brachypodium distachyon |                        | 31.49 | 7.38 | 26.27 | 4297.21 | 17.07 | 34.85 | 7.68 | 31.39 |
|             | zma-miR396e-5p  | Zea mays                |                        | 31.49 | 7.38 | 26.27 | 4297.21 | 17.07 | 34.85 | 7.68 | 31.39 |
|             | zma-miR396f-5p  | Zea mays                |                        | 31.49 | 7.38 | 26.27 | 4297.21 | 17.07 | 34.85 | 7.68 | 31.39 |
|             | ccl-miR396      | Citrus clementina       |                        | 31.49 | 7.38 | 26.27 | 4297.21 | 17.07 | 34.85 | 7.68 | 31.39 |
|             | rco-miR396      | Ricinus communis        |                        | 31.49 | 7.38 | 26.27 | 4297.21 | 17.07 | 34.85 | 7.68 | 31.39 |
|             | aly-miR396b-5p  | Arabidopsis lyrata      |                        | 31.49 | 7.38 | 26.27 | 4297.21 | 17.07 | 34.85 | 7.68 | 31.39 |
|             | gma-miR396c     | Glycine max             |                        | 31.49 | 7.38 | 26.27 | 4297.21 | 17.07 | 34.85 | 7.68 | 31.39 |
|             | aqc-miR396b     | Aquilegia caerulea      |                        | 31.49 | 7.38 | 26.27 | 4297.21 | 17.07 | 34.85 | 7.68 | 31.39 |
| dof-miR-971 | ptc-miR396f     | Populus trichocarpa     | TTCCACGGCTTTCTTGAAC TG | 2.38  | 0.25 | 0.37  | 4.14    | 0.47  | 1.67  | 0.33 | 0     |
|             | mdm-miR396f     | Malus domestica         |                        | 2.38  | 0.25 | 0.37  | 4.14    | 0.47  | 1.67  | 0.33 | 0     |
|             | mdm-miR396g     | Malus domestica         |                        | 2.38  | 0.25 | 0.37  | 4.14    | 0.47  | 1.67  | 0.33 | 0     |
|             | cme-miR396e     | Cucumis melo            |                        | 2.38  | 0.25 | 0.37  | 4.14    | 0.47  | 1.67  | 0.33 | 0     |
| dof-miR-972 | ptc-miR396g-5p  | Populus trichocarpa     | TTCCACGGCTTTCTTGAAC TT | 0     | 0    | 0.18  | 2.34    | 0     | 0     | 0.17 | 0     |
|             | tcc-miR396d     | Theobroma cacao         |                        | 0     | 0    | 0.18  | 2.34    | 0     | 0     | 0.17 | 0     |
|             | pab-miR396b     | Picea abies             |                        | 0     | 0    | 0.18  | 2.34    | 0     | 0     | 0.17 | 0     |
|             | pab-miR396c     | Picea abies             |                        | 0     | 0    | 0.18  | 2.34    | 0     | 0     | 0.17 | 0     |
| dof-miR-973 | hsa-miR-7977    | Homo sapiens            | TTCCCAGCCAACGCACCA     | 0     | 0    | 0     | 0       | 0     | 0     | 0    | 0.14  |
| dof-miR-974 | ata-miR2118b-5p | Aegilops tauschii       | TTCCCGATGCCTCCCATTCCTA | 0     | 0    | 0     | 0       | 0.09  | 0     | 0    | 0     |
|             | osa-miR2118b    | Oryza sativa            |                        | 0     | 0    | 0     | 0       | 0.09  | 0     | 0    | 0     |
|             | osa-miR2118n    | Oryza sativa            |                        | 0     | 0    | 0     | 0       | 0.09  | 0     | 0    | 0     |
|             | zma-miR2118b    | Zea mays                |                        | 0     | 0    | 0     | 0       | 0.09  | 0     | 0    | 0     |
| dof-miR-975 | mmu-miR-204-5p  | Mus musculus            | TTCCCTTTGTCATCCTATGCCT | 0     | 0    | 0     | 0.18    | 0     | 0     | 0    | 0.14  |
|             | hsa-miR-204-5p  | Homo sapiens            |                        | 0     | 0    | 0     | 0.18    | 0     | 0     | 0    | 0.14  |
|             | rno-miR-204-5p  | Rattus norvegicus       |                        | 0     | 0    | 0     | 0.18    | 0     | 0     | 0    | 0.14  |
|             | gga-miR-204     | Gallus gallus           |                        | 0     | 0    | 0     | 0.18    | 0     | 0     | 0    | 0.14  |
|             | dre-miR-204-5p  | Danio rerio             |                        | 0     | 0    | 0     | 0.18    | 0     | 0     | 0    | 0.14  |
|             | ssc-miR-204     | Sus scrofa              |                        | 0     | 0    | 0     | 0.18    | 0     | 0     | 0    | 0.14  |
|             | ptr-miR-204     | Pan troglodytes         |                        | 0     | 0    | 0     | 0.18    | 0     | 0     | 0    | 0.14  |
|             | ggo-miR-204     | Gorilla gorilla         |                        | 0     | 0    | 0     | 0.18    | 0     | 0     | 0    | 0.14  |
|             | ppy-miR-204     | Pongo pygmaeus          |                        | 0     | 0    | 0     | 0.18    | 0     | 0     | 0    | 0.14  |





|             |                      |                      |                       |      |       |      |       |      |      |      |      |
|-------------|----------------------|----------------------|-----------------------|------|-------|------|-------|------|------|------|------|
|             | far-miR156b          | Festuca arundinacea  |                       | 0.2  | 0     | 0    | 0     | 0    | 0    | 0    | 0    |
| dof-miR-982 | gma-miR156k          | Glycine max          | TTGACAGAAGAGAGTGAGCAC | 1.78 | 8.91  | 7.72 | 7.03  | 2.61 | 3.23 | 7.51 | 1.82 |
|             | gma-miR156n          | Glycine max          |                       | 1.78 | 8.91  | 7.72 | 7.03  | 2.61 | 3.23 | 7.51 | 1.82 |
|             | gma-miR156o          | Glycine max          |                       | 1.78 | 8.91  | 7.72 | 7.03  | 2.61 | 3.23 | 7.51 | 1.82 |
| dof-miR-983 | hbr-miR156           | Hevea brasiliensis   | TTGACAGAAGATAGAGAGC   | 0    | 0     | 0    | 0.18  | 0    | 0    | 0    | 0    |
| dof-miR-984 | ath-miR157a-5p       | Arabidopsis thaliana | TTGACAGAAGATAGAGAGC   | 0    | 0     | 1.29 | 21.62 | 0    | 0    | 0.17 | 0.14 |
|             | ath-miR157b-5p       | Arabidopsis thaliana |                       | 0    | 0     | 1.29 | 21.62 | 0    | 0    | 0.17 | 0.14 |
|             | ath-miR157c-5p       | Arabidopsis thaliana |                       | 0    | 0     | 1.29 | 21.62 | 0    | 0    | 0.17 | 0.14 |
|             | gma-miR156d          | Glycine max          |                       | 0    | 0     | 1.29 | 21.62 | 0    | 0    | 0.17 | 0.14 |
|             | gma-miR156e          | Glycine max          |                       | 0    | 0     | 1.29 | 21.62 | 0    | 0    | 0.17 | 0.14 |
|             | gma-miR156c          | Glycine max          |                       | 0    | 0     | 1.29 | 21.62 | 0    | 0    | 0.17 | 0.14 |
|             | ptc-miR156g          | Populus trichocarpa  |                       | 0    | 0     | 1.29 | 21.62 | 0    | 0    | 0.17 | 0.14 |
|             | ptc-miR156h          | Populus trichocarpa  |                       | 0    | 0     | 1.29 | 21.62 | 0    | 0    | 0.17 | 0.14 |
|             | ptc-miR156i          | Populus trichocarpa  |                       | 0    | 0     | 1.29 | 21.62 | 0    | 0    | 0.17 | 0.14 |
|             | ptc-miR156j          | Populus trichocarpa  |                       | 0    | 0     | 1.29 | 21.62 | 0    | 0    | 0.17 | 0.14 |
|             | mtr-miR156e          | Medicago truncatula  |                       | 0    | 0     | 1.29 | 21.62 | 0    | 0    | 0.17 | 0.14 |
|             | mtr-miR156f          | Medicago truncatula  |                       | 0    | 0     | 1.29 | 21.62 | 0    | 0    | 0.17 | 0.14 |
|             | mtr-miR156h-5p       | Medicago truncatula  |                       | 0    | 0     | 1.29 | 21.62 | 0    | 0    | 0.17 | 0.14 |
|             | gra-miR157a          | Gossypium raimondii  |                       | 0    | 0     | 1.29 | 21.62 | 0    | 0    | 0.17 | 0.14 |
|             | gra-miR157b          | Gossypium raimondii  |                       | 0    | 0     | 1.29 | 21.62 | 0    | 0    | 0.17 | 0.14 |
|             | bn-miR156b           | Brassica napus       |                       | 0    | 0     | 1.29 | 21.62 | 0    | 0    | 0.17 | 0.14 |
|             | bn-miR156c           | Brassica napus       |                       | 0    | 0     | 1.29 | 21.62 | 0    | 0    | 0.17 | 0.14 |
|             | vvi-miR156f          | Vitis vinifera       |                       | 0    | 0     | 1.29 | 21.62 | 0    | 0    | 0.17 | 0.14 |
|             | vvi-miR156g          | Vitis vinifera       |                       | 0    | 0     | 1.29 | 21.62 | 0    | 0    | 0.17 | 0.14 |
|             | vvi-miR156i          | Vitis vinifera       |                       | 0    | 0     | 1.29 | 21.62 | 0    | 0    | 0.17 | 0.14 |
|             | ppe-miR156g          | Prunus persica       |                       | 0    | 0     | 1.29 | 21.62 | 0    | 0    | 0.17 | 0.14 |
|             | ppe-miR156h          | Prunus persica       |                       | 0    | 0     | 1.29 | 21.62 | 0    | 0    | 0.17 | 0.14 |
|             | ppe-miR156i          | Prunus persica       |                       | 0    | 0     | 1.29 | 21.62 | 0    | 0    | 0.17 | 0.14 |
|             | cpa-miR156e          | Carica papaya        |                       | 0    | 0     | 1.29 | 21.62 | 0    | 0    | 0.17 | 0.14 |
|             | cpa-miR156f          | Carica papaya        |                       | 0    | 0     | 1.29 | 21.62 | 0    | 0    | 0.17 | 0.14 |
|             | lus-miR156h          | Linum usitatissimum  |                       | 0    | 0     | 1.29 | 21.62 | 0    | 0    | 0.17 | 0.14 |
|             | atr-miR156a          | Amborella trichopoda |                       | 0    | 0     | 1.29 | 21.62 | 0    | 0    | 0.17 | 0.14 |
| atr-miR156c | Amborella trichopoda | 0                    | 0                     | 1.29 | 21.62 | 0    | 0     | 0.17 | 0.14 |      |      |
| mes-miR156h | Manihot esculenta    | 0                    | 0                     | 1.29 | 21.62 | 0    | 0     | 0.17 | 0.14 |      |      |



|             |                |                      |                       |       |       |      |       |      |      |       |        |
|-------------|----------------|----------------------|-----------------------|-------|-------|------|-------|------|------|-------|--------|
|             | bra-miR157a    | Brassica rapa        |                       | 0     | 0     | 1.29 | 21.62 | 0    | 0    | 0.17  | 0.14   |
|             | bol-miR157a    | Brassica oleracea    |                       | 0     | 0     | 1.29 | 21.62 | 0    | 0    | 0.17  | 0.14   |
| dof-miR-985 | csi-miR171a    | Citrus sinensis      | TTGAGCCGCGCCAATATCAC  | 0     | 0     | 0    | 0     | 0    | 0    | 0     | 0.14   |
|             | sly-miR171d    | Solanum lycopersicum |                       | 0     | 0     | 0    | 0     | 0    | 0    | 0     | 0.14   |
| dof-miR-986 | vvi-miR171f    | Vitis vinifera       | TTGAGCCGCGCCAATATCAC  | 1.19  | 0.25  | 0    | 0.18  | 2.24 | 1.15 | 0.17  | 0.98   |
|             | lja-miR171d-5p | Lotus japonicus      |                       | 1.19  | 0.25  | 0    | 0.18  | 2.24 | 1.15 | 0.17  | 0.98   |
|             | mdm-miR171j    | Malus domestica      |                       | 1.19  | 0.25  | 0    | 0.18  | 2.24 | 1.15 | 0.17  | 0.98   |
|             | mdm-miR171k    | Malus domestica      |                       | 1.19  | 0.25  | 0    | 0.18  | 2.24 | 1.15 | 0.17  | 0.98   |
|             | mdm-miR171l    | Malus domestica      |                       | 1.19  | 0.25  | 0    | 0.18  | 2.24 | 1.15 | 0.17  | 0.98   |
|             | ssl-miR171b    | Salvia sclarea       |                       | 1.19  | 0.25  | 0    | 0.18  | 2.24 | 1.15 | 0.17  | 0.98   |
|             | nta-miR171b    | Nicotiana tabacum    |                       | 1.19  | 0.25  | 0    | 0.18  | 2.24 | 1.15 | 0.17  | 0.98   |
|             | ppe-miR171b    | Prunus persica       |                       | 1.19  | 0.25  | 0    | 0.18  | 2.24 | 1.15 | 0.17  | 0.98   |
|             | gma-miR171k-3p | Glycine max          |                       | 1.19  | 0.25  | 0    | 0.18  | 2.24 | 1.15 | 0.17  | 0.98   |
| dof-miR-987 | gma-miR171m    | Glycine max          | TTGAGCCGCGTCAATATCTCA | 0     | 0     | 0    | 0.9   | 0    | 0    | 0     | 0      |
|             | gma-miR171t    | Glycine max          |                       | 0     | 0     | 0    | 0.9   | 0    | 0    | 0     | 0      |
| dof-miR-988 | mdm-miR171a    | Malus domestica      | TTGAGCCGCGTCAATATCTCC | 93.68 | 10.95 | 5.14 | 7.57  | 6.62 | 9.81 | 77.63 | 199.26 |
|             | mdm-miR171b    | Malus domestica      |                       | 93.68 | 10.95 | 5.14 | 7.57  | 6.62 | 9.81 | 77.63 | 199.26 |
|             | ppe-miR171h    | Prunus persica       |                       | 93.68 | 10.95 | 5.14 | 7.57  | 6.62 | 9.81 | 77.63 | 199.26 |
|             | ctr-miR171     | Citrus trifoliata    |                       | 93.68 | 10.95 | 5.14 | 7.57  | 6.62 | 9.81 | 77.63 | 199.26 |
| dof-miR-989 | sly-miR171e    | Solanum lycopersicum | TTGAGCCGCGTCAATATCTCT | 1.19  | 0     | 0.55 | 0.18  | 0    | 0.52 | 1.17  | 2.66   |
|             | stu-miR171b-3p | Solanum tuberosum    |                       | 1.19  | 0     | 0.55 | 0.18  | 0    | 0.52 | 1.17  | 2.66   |
| dof-miR-990 | zma-miR171b-3p | Zea mays             | TTGAGCCGTGCCAATATCAC  | 0     | 0     | 0    | 0.18  | 0    | 0    | 0     | 0      |
| dof-miR-991 | ath-miR171b-3p | Arabidopsis thaliana | TTGAGCCGTGCCAATATCAC  | 0     | 0     | 0    | 1.08  | 0    | 0    | 0     | 0      |
|             | ath-miR171c-3p | Arabidopsis thaliana |                       | 0     | 0     | 0    | 1.08  | 0    | 0    | 0     | 0      |
|             | ptc-miR171a-3p | Populus trichocarpa  |                       | 0     | 0     | 0    | 1.08  | 0    | 0    | 0     | 0      |
|             | ptc-miR171b    | Populus trichocarpa  |                       | 0     | 0     | 0    | 1.08  | 0    | 0    | 0     | 0      |
|             | mtr-miR171f    | Medicago truncatula  |                       | 0     | 0     | 0    | 1.08  | 0    | 0    | 0     | 0      |
|             | bnm-miR171a    | Brassica napus       |                       | 0     | 0     | 0    | 1.08  | 0    | 0    | 0     | 0      |
|             | bnm-miR171b    | Brassica napus       |                       | 0     | 0     | 0    | 1.08  | 0    | 0    | 0     | 0      |
|             | bnm-miR171c    | Brassica napus       |                       | 0     | 0     | 0    | 1.08  | 0    | 0    | 0     | 0      |
|             | bnm-miR171d    | Brassica napus       |                       | 0     | 0     | 0    | 1.08  | 0    | 0    | 0     | 0      |
|             | bnm-miR171e    | Brassica napus       |                       | 0     | 0     | 0    | 1.08  | 0    | 0    | 0     | 0      |
|             | ata-miR171c-3p | Aegilops tauschii    |                       | 0     | 0     | 0    | 1.08  | 0    | 0    | 0     | 0      |
|             | mes-miR171b    | Manihot esculenta    |                       | 0     | 0     | 0    | 1.08  | 0    | 0    | 0     | 0      |



|              |                   |                      |                       |        |       |         |        |         |         |        |        |
|--------------|-------------------|----------------------|-----------------------|--------|-------|---------|--------|---------|---------|--------|--------|
| dof-miR-999  | mes-miR166i       | Manihot esculenta    | TTGGACCAGGCTTCATTCCCC | 10.1   | 5.09  | 19.84   | 74.96  | 1.49    | 1.04    | 8.01   | 16.95  |
| dof-miR-1000 | gma-miR319c       | Glycine max          | TTGGACTGAAAGGAGCTCCT  | 0      | 0     | 0       | 0      | 0.09    | 0       | 0      | 0      |
| dof-miR-1001 | pta-miR319        | Pinus taeda          | TTGGACTGAAGGGAGCTCC   | 0      | 0     | 3.31    | 0.9    | 4.66    | 4.8     | 0.5    | 0.28   |
| dof-miR-1002 | mtr-miR319a-3p    | Medicago truncatula  | TTGGACTGAAGGGAGCTCCC  | 114.08 | 12.98 | 299.66  | 93.7   | 634.39  | 802.88  | 66.45  | 64.74  |
|              | gma-miR319a       | Glycine max          |                       | 114.08 | 12.98 | 299.66  | 93.7   | 634.39  | 802.88  | 66.45  | 64.74  |
|              | gma-miR319b       | Glycine max          |                       | 114.08 | 12.98 | 299.66  | 93.7   | 634.39  | 802.88  | 66.45  | 64.74  |
|              | ptc-miR319a       | Populus trichocarpa  |                       | 114.08 | 12.98 | 299.66  | 93.7   | 634.39  | 802.88  | 66.45  | 64.74  |
|              | ptc-miR319b       | Populus trichocarpa  |                       | 114.08 | 12.98 | 299.66  | 93.7   | 634.39  | 802.88  | 66.45  | 64.74  |
|              | ptc-miR319c       | Populus trichocarpa  |                       | 114.08 | 12.98 | 299.66  | 93.7   | 634.39  | 802.88  | 66.45  | 64.74  |
|              | ptc-miR319d       | Populus trichocarpa  |                       | 114.08 | 12.98 | 299.66  | 93.7   | 634.39  | 802.88  | 66.45  | 64.74  |
|              | mtr-miR319b-3p    | Medicago truncatula  |                       | 114.08 | 12.98 | 299.66  | 93.7   | 634.39  | 802.88  | 66.45  | 64.74  |
|              | atr-miR319a       | Amborella trichopoda |                       | 114.08 | 12.98 | 299.66  | 93.7   | 634.39  | 802.88  | 66.45  | 64.74  |
|              | atr-miR319c       | Amborella trichopoda |                       | 114.08 | 12.98 | 299.66  | 93.7   | 634.39  | 802.88  | 66.45  | 64.74  |
|              | cme-miR319b       | Cucumis melo         |                       | 114.08 | 12.98 | 299.66  | 93.7   | 634.39  | 802.88  | 66.45  | 64.74  |
|              | cme-miR319a       | Cucumis melo         |                       | 114.08 | 12.98 | 299.66  | 93.7   | 634.39  | 802.88  | 66.45  | 64.74  |
|              | lus-miR319b       | Linum usitatissimum  |                       | 114.08 | 12.98 | 299.66  | 93.7   | 634.39  | 802.88  | 66.45  | 64.74  |
|              | ppe-miR319a       | Prunus persica       |                       | 114.08 | 12.98 | 299.66  | 93.7   | 634.39  | 802.88  | 66.45  | 64.74  |
|              | gma-miR319e       | Glycine max          |                       | 114.08 | 12.98 | 299.66  | 93.7   | 634.39  | 802.88  | 66.45  | 64.74  |
| ctr-miR319   | Citrus trifoliata | 114.08               | 12.98                 | 299.66 | 93.7  | 634.39  | 802.88 | 66.45   | 64.74   |        |        |
| dof-miR-1003 | vvi-miR319g       | Vitis vinifera       | TTGGACTGAAGGGAGCTCCCA | 0.2    | 0.25  | 4.59    | 0.36   | 9.89    | 20.97   | 2.5    | 0.56   |
|              | mtr-miR319c-3p    | Medicago truncatula  |                       | 0.2    | 0.25  | 4.59    | 0.36   | 9.89    | 20.97   | 2.5    | 0.56   |
| dof-miR-1004 | ath-miR319a       | Arabidopsis thaliana | TTGGACTGAAGGGAGCTCCCT | 546.63 | 34.88 | 2277.68 | 762.18 | 4933.47 | 8395.52 | 1765.5 | 308.83 |
|              | ath-miR319b       | Arabidopsis thaliana |                       | 546.63 | 34.88 | 2277.68 | 762.18 | 4933.47 | 8395.52 | 1765.5 | 308.83 |
|              | vvi-miR319b       | Vitis vinifera       |                       | 546.63 | 34.88 | 2277.68 | 762.18 | 4933.47 | 8395.52 | 1765.5 | 308.83 |
|              | vvi-miR319c       | Vitis vinifera       |                       | 546.63 | 34.88 | 2277.68 | 762.18 | 4933.47 | 8395.52 | 1765.5 | 308.83 |
|              | vvi-miR319f       | Vitis vinifera       |                       | 546.63 | 34.88 | 2277.68 | 762.18 | 4933.47 | 8395.52 | 1765.5 | 308.83 |
|              | sly-miR319b       | Solanum lycopersicum |                       | 546.63 | 34.88 | 2277.68 | 762.18 | 4933.47 | 8395.52 | 1765.5 | 308.83 |
|              | bra-miR319-3p     | Brassica rapa        |                       | 546.63 | 34.88 | 2277.68 | 762.18 | 4933.47 | 8395.52 | 1765.5 | 308.83 |
|              | mes-miR319a       | Manihot esculenta    |                       | 546.63 | 34.88 | 2277.68 | 762.18 | 4933.47 | 8395.52 | 1765.5 | 308.83 |
|              | mes-miR319b       | Manihot esculenta    |                       | 546.63 | 34.88 | 2277.68 | 762.18 | 4933.47 | 8395.52 | 1765.5 | 308.83 |
|              | mes-miR319c       | Manihot esculenta    |                       | 546.63 | 34.88 | 2277.68 | 762.18 | 4933.47 | 8395.52 | 1765.5 | 308.83 |
|              | mes-miR319d       | Manihot esculenta    |                       | 546.63 | 34.88 | 2277.68 | 762.18 | 4933.47 | 8395.52 | 1765.5 | 308.83 |
|              | mes-miR319e       | Manihot esculenta    |                       | 546.63 | 34.88 | 2277.68 | 762.18 | 4933.47 | 8395.52 | 1765.5 | 308.83 |
|              | mtr-miR319d-3p    | Medicago truncatula  |                       | 546.63 | 34.88 | 2277.68 | 762.18 | 4933.47 | 8395.52 | 1765.5 | 308.83 |

|              |                |                       |                       |        |       |         |        |         |         |        |        |
|--------------|----------------|-----------------------|-----------------------|--------|-------|---------|--------|---------|---------|--------|--------|
|              | stu-miR319a-3p | Solanum tuberosum     |                       | 546.63 | 34.88 | 2277.68 | 762.18 | 4933.47 | 8395.52 | 1765.5 | 308.83 |
|              | hbr-miR319     | Hevea brasiliensis    |                       | 546.63 | 34.88 | 2277.68 | 762.18 | 4933.47 | 8395.52 | 1765.5 | 308.83 |
|              | mdm-miR319a    | Malus domestica       |                       | 546.63 | 34.88 | 2277.68 | 762.18 | 4933.47 | 8395.52 | 1765.5 | 308.83 |
|              | mdm-miR319b    | Malus domestica       |                       | 546.63 | 34.88 | 2277.68 | 762.18 | 4933.47 | 8395.52 | 1765.5 | 308.83 |
|              | vun-miR319a    | Vigna unguiculata     |                       | 546.63 | 34.88 | 2277.68 | 762.18 | 4933.47 | 8395.52 | 1765.5 | 308.83 |
|              | cca-miR319     | Cynara cardunculus    |                       | 546.63 | 34.88 | 2277.68 | 762.18 | 4933.47 | 8395.52 | 1765.5 | 308.83 |
|              | lus-miR319a    | Linum usitatissimum   |                       | 546.63 | 34.88 | 2277.68 | 762.18 | 4933.47 | 8395.52 | 1765.5 | 308.83 |
|              | nta-miR319a    | Nicotiana tabacum     |                       | 546.63 | 34.88 | 2277.68 | 762.18 | 4933.47 | 8395.52 | 1765.5 | 308.83 |
|              | nta-miR319b    | Nicotiana tabacum     |                       | 546.63 | 34.88 | 2277.68 | 762.18 | 4933.47 | 8395.52 | 1765.5 | 308.83 |
|              | gma-miR319h    | Glycine max           |                       | 546.63 | 34.88 | 2277.68 | 762.18 | 4933.47 | 8395.52 | 1765.5 | 308.83 |
|              | gma-miR319j    | Glycine max           |                       | 546.63 | 34.88 | 2277.68 | 762.18 | 4933.47 | 8395.52 | 1765.5 | 308.83 |
|              | gma-miR319k    | Glycine max           |                       | 546.63 | 34.88 | 2277.68 | 762.18 | 4933.47 | 8395.52 | 1765.5 | 308.83 |
|              | gma-miR319m    | Glycine max           |                       | 546.63 | 34.88 | 2277.68 | 762.18 | 4933.47 | 8395.52 | 1765.5 | 308.83 |
|              | aau-miR319     | Acacia auriculiformis |                       | 546.63 | 34.88 | 2277.68 | 762.18 | 4933.47 | 8395.52 | 1765.5 | 308.83 |
|              | amg-miR319     | Acacia mangium        |                       | 546.63 | 34.88 | 2277.68 | 762.18 | 4933.47 | 8395.52 | 1765.5 | 308.83 |
|              | tae-miR319     | Triticum aestivum     |                       | 546.63 | 34.88 | 2277.68 | 762.18 | 4933.47 | 8395.52 | 1765.5 | 308.83 |
|              | rco-miR319a    | Ricinus communis      |                       | 546.63 | 34.88 | 2277.68 | 762.18 | 4933.47 | 8395.52 | 1765.5 | 308.83 |
|              | rco-miR319b    | Ricinus communis      |                       | 546.63 | 34.88 | 2277.68 | 762.18 | 4933.47 | 8395.52 | 1765.5 | 308.83 |
|              | rco-miR319c    | Ricinus communis      |                       | 546.63 | 34.88 | 2277.68 | 762.18 | 4933.47 | 8395.52 | 1765.5 | 308.83 |
|              | aly-miR319a-3p | Arabidopsis lyrata    |                       | 546.63 | 34.88 | 2277.68 | 762.18 | 4933.47 | 8395.52 | 1765.5 | 308.83 |
|              | aly-miR319b-3p | Arabidopsis lyrata    |                       | 546.63 | 34.88 | 2277.68 | 762.18 | 4933.47 | 8395.52 | 1765.5 | 308.83 |
|              | aqc-miR319     | Aquilegia caerulea    |                       | 546.63 | 34.88 | 2277.68 | 762.18 | 4933.47 | 8395.52 | 1765.5 | 308.83 |
| dof-miR-1005 | ptc-miR319e    | Populus trichocarpa   | TTGGACTGAAGGGAGCTCCT  | 0.99   | 0.25  | 1.65    | 8.47   | 4.01    | 5.74    | 0.67   | 0.56   |
|              | ptc-miR319f    | Populus trichocarpa   |                       | 0.99   | 0.25  | 1.65    | 8.47   | 4.01    | 5.74    | 0.67   | 0.56   |
|              | ptc-miR319g    | Populus trichocarpa   |                       | 0.99   | 0.25  | 1.65    | 8.47   | 4.01    | 5.74    | 0.67   | 0.56   |
|              | ptc-miR319h    | Populus trichocarpa   |                       | 0.99   | 0.25  | 1.65    | 8.47   | 4.01    | 5.74    | 0.67   | 0.56   |
|              | stu-miR319b    | Solanum tuberosum     |                       | 0.99   | 0.25  | 1.65    | 8.47   | 4.01    | 5.74    | 0.67   | 0.56   |
|              | cme-miR319c    | Cucumis melo          |                       | 0.99   | 0.25  | 1.65    | 8.47   | 4.01    | 5.74    | 0.67   | 0.56   |
|              | cme-miR319d    | Cucumis melo          |                       | 0.99   | 0.25  | 1.65    | 8.47   | 4.01    | 5.74    | 0.67   | 0.56   |
| dof-miR-1006 | ath-miR319c    | Arabidopsis thaliana  | TTGGACTGAAGGGAGCTCCTT | 0.2    | 0.25  | 0.55    | 1.08   | 0.56    | 2.19    | 0.83   | 0.14   |
|              | sly-miR319c-3p | Solanum lycopersicum  |                       | 0.2    | 0.25  | 0.55    | 1.08   | 0.56    | 2.19    | 0.83   | 0.14   |
|              | mes-miR319f    | Manihot esculenta     |                       | 0.2    | 0.25  | 0.55    | 1.08   | 0.56    | 2.19    | 0.83   | 0.14   |
|              | mes-miR319g    | Manihot esculenta     |                       | 0.2    | 0.25  | 0.55    | 1.08   | 0.56    | 2.19    | 0.83   | 0.14   |
|              | aly-miR319d-3p | Arabidopsis lyrata    |                       | 0.2    | 0.25  | 0.55    | 1.08   | 0.56    | 2.19    | 0.83   | 0.14   |

|              |                     |                         |                       |       |       |       |       |       |       |       |       |
|--------------|---------------------|-------------------------|-----------------------|-------|-------|-------|-------|-------|-------|-------|-------|
|              | rco-miR319d         | Ricinus communis        |                       | 0.2   | 0.25  | 0.55  | 1.08  | 0.56  | 2.19  | 0.83  | 0.14  |
|              | aly-miR319c-3p      | Arabidopsis lyrata      |                       | 0.2   | 0.25  | 0.55  | 1.08  | 0.56  | 2.19  | 0.83  | 0.14  |
|              | pvu-miR319c         | Phaseolus vulgaris      |                       | 0.2   | 0.25  | 0.55  | 1.08  | 0.56  | 2.19  | 0.83  | 0.14  |
| dof-miR-1007 | osa-miR319a-3p.2-3p | Oryza sativa            | TTGGACTGAAGGGTGCTCCC  | 0     | 0     | 0     | 0     | 0.19  | 0.31  | 0.17  | 0     |
|              | osa-miR319b         | Oryza sativa            |                       | 0     | 0     | 0     | 0     | 0.19  | 0.31  | 0.17  | 0     |
|              | sbi-miR319a         | Sorghum bicolor         |                       | 0     | 0     | 0     | 0     | 0.19  | 0.31  | 0.17  | 0     |
|              | zma-miR319a-3p      | Zea mays                |                       | 0     | 0     | 0     | 0     | 0.19  | 0.31  | 0.17  | 0     |
|              | zma-miR319c-3p      | Zea mays                |                       | 0     | 0     | 0     | 0     | 0.19  | 0.31  | 0.17  | 0     |
|              | zma-miR319b-3p      | Zea mays                |                       | 0     | 0     | 0     | 0     | 0.19  | 0.31  | 0.17  | 0     |
|              | zma-miR319d-3p      | Zea mays                |                       | 0     | 0     | 0     | 0     | 0.19  | 0.31  | 0.17  | 0     |
|              | sbi-miR319b         | Sorghum bicolor         |                       | 0     | 0     | 0     | 0     | 0.19  | 0.31  | 0.17  | 0     |
| dof-miR-1008 | bdi-miR319b-3p      | Brachypodium distachyon | TTGGACTGAAGGGTGCTCCCT | 0     | 0     | 0.55  | 0.18  | 1.21  | 3.55  | 0.17  | 0.14  |
| dof-miR-1009 | ath-miR394a         | Arabidopsis thaliana    | TTGGCATTCTGTCCACCTCC  | 25.75 | 56.52 | 55.85 | 610.1 | 45.05 | 69.49 | 21.04 | 31.81 |
|              | ath-miR394b-5p      | Arabidopsis thaliana    |                       | 25.75 | 56.52 | 55.85 | 610.1 | 45.05 | 69.49 | 21.04 | 31.81 |
|              | osa-miR394          | Oryza sativa            |                       | 25.75 | 56.52 | 55.85 | 610.1 | 45.05 | 69.49 | 21.04 | 31.81 |
|              | sbi-miR394a         | Sorghum bicolor         |                       | 25.75 | 56.52 | 55.85 | 610.1 | 45.05 | 69.49 | 21.04 | 31.81 |
|              | zma-miR394a-5p      | Zea mays                |                       | 25.75 | 56.52 | 55.85 | 610.1 | 45.05 | 69.49 | 21.04 | 31.81 |
|              | zma-miR394b-5p      | Zea mays                |                       | 25.75 | 56.52 | 55.85 | 610.1 | 45.05 | 69.49 | 21.04 | 31.81 |
|              | ptc-miR394a-5p      | Populus trichocarpa     |                       | 25.75 | 56.52 | 55.85 | 610.1 | 45.05 | 69.49 | 21.04 | 31.81 |
|              | ptc-miR394b-5p      | Populus trichocarpa     |                       | 25.75 | 56.52 | 55.85 | 610.1 | 45.05 | 69.49 | 21.04 | 31.81 |
|              | vvi-miR394b         | Vitis vinifera          |                       | 25.75 | 56.52 | 55.85 | 610.1 | 45.05 | 69.49 | 21.04 | 31.81 |
|              | sly-miR394-5p       | Solanum lycopersicum    |                       | 25.75 | 56.52 | 55.85 | 610.1 | 45.05 | 69.49 | 21.04 | 31.81 |
|              | ata-miR394-5p       | Aegilops tauschii       |                       | 25.75 | 56.52 | 55.85 | 610.1 | 45.05 | 69.49 | 21.04 | 31.81 |
|              | stu-miR384-5p       | Solanum tuberosum       |                       | 25.75 | 56.52 | 55.85 | 610.1 | 45.05 | 69.49 | 21.04 | 31.81 |
|              | ppe-miR394b         | Prunus persica          |                       | 25.75 | 56.52 | 55.85 | 610.1 | 45.05 | 69.49 | 21.04 | 31.81 |
|              | cpa-miR394a         | Carica papaya           |                       | 25.75 | 56.52 | 55.85 | 610.1 | 45.05 | 69.49 | 21.04 | 31.81 |
|              | cpa-miR394b         | Carica papaya           |                       | 25.75 | 56.52 | 55.85 | 610.1 | 45.05 | 69.49 | 21.04 | 31.81 |
|              | atr-miR394          | Amborella trichopoda    |                       | 25.75 | 56.52 | 55.85 | 610.1 | 45.05 | 69.49 | 21.04 | 31.81 |
|              | mes-miR394b         | Manihot esculenta       |                       | 25.75 | 56.52 | 55.85 | 610.1 | 45.05 | 69.49 | 21.04 | 31.81 |
|              | gma-miR394g         | Glycine max             |                       | 25.75 | 56.52 | 55.85 | 610.1 | 45.05 | 69.49 | 21.04 | 31.81 |
|              | mdm-miR394a         | Malus domestica         |                       | 25.75 | 56.52 | 55.85 | 610.1 | 45.05 | 69.49 | 21.04 | 31.81 |
|              | mdm-miR394b         | Malus domestica         |                       | 25.75 | 56.52 | 55.85 | 610.1 | 45.05 | 69.49 | 21.04 | 31.81 |
| cme-miR394b  | Cucumis melo        | 25.75                   | 56.52                 | 55.85 | 610.1 | 45.05 | 69.49 | 21.04 | 31.81 |       |       |
| cme-miR394a  | Cucumis melo        | 25.75                   | 56.52                 | 55.85 | 610.1 | 45.05 | 69.49 | 21.04 | 31.81 |       |       |

|              |                 |                          |                        |       |       |       |       |       |       |       |       |
|--------------|-----------------|--------------------------|------------------------|-------|-------|-------|-------|-------|-------|-------|-------|
|              | ssl-miR394      | Salvia sclarea           |                        | 25.75 | 56.52 | 55.85 | 610.1 | 45.05 | 69.49 | 21.04 | 31.81 |
|              | gma-miR394d     | Glycine max              |                        | 25.75 | 56.52 | 55.85 | 610.1 | 45.05 | 69.49 | 21.04 | 31.81 |
|              | gma-miR394e     | Glycine max              |                        | 25.75 | 56.52 | 55.85 | 610.1 | 45.05 | 69.49 | 21.04 | 31.81 |
|              | gma-miR394f     | Glycine max              |                        | 25.75 | 56.52 | 55.85 | 610.1 | 45.05 | 69.49 | 21.04 | 31.81 |
|              | bnm-miR394a     | Brassica napus           |                        | 25.75 | 56.52 | 55.85 | 610.1 | 45.05 | 69.49 | 21.04 | 31.81 |
|              | bnm-miR394b     | Brassica napus           |                        | 25.75 | 56.52 | 55.85 | 610.1 | 45.05 | 69.49 | 21.04 | 31.81 |
|              | mes-miR394a     | Manihot esculenta        |                        | 25.75 | 56.52 | 55.85 | 610.1 | 45.05 | 69.49 | 21.04 | 31.81 |
|              | cca-miR394      | Cynara cardunculus       |                        | 25.75 | 56.52 | 55.85 | 610.1 | 45.05 | 69.49 | 21.04 | 31.81 |
|              | lus-miR394a     | Linum usitatissimum      |                        | 25.75 | 56.52 | 55.85 | 610.1 | 45.05 | 69.49 | 21.04 | 31.81 |
|              | lus-miR394b     | Linum usitatissimum      |                        | 25.75 | 56.52 | 55.85 | 610.1 | 45.05 | 69.49 | 21.04 | 31.81 |
|              | nta-miR394      | Nicotiana tabacum        |                        | 25.75 | 56.52 | 55.85 | 610.1 | 45.05 | 69.49 | 21.04 | 31.81 |
|              | ppe-miR394a     | Prunus persica           |                        | 25.75 | 56.52 | 55.85 | 610.1 | 45.05 | 69.49 | 21.04 | 31.81 |
|              | tcc-miR394a     | Theobroma cacao          |                        | 25.75 | 56.52 | 55.85 | 610.1 | 45.05 | 69.49 | 21.04 | 31.81 |
|              | tcc-miR394b     | Theobroma cacao          |                        | 25.75 | 56.52 | 55.85 | 610.1 | 45.05 | 69.49 | 21.04 | 31.81 |
|              | gma-miR394c-5p  | Glycine max              |                        | 25.75 | 56.52 | 55.85 | 610.1 | 45.05 | 69.49 | 21.04 | 31.81 |
|              | bdi-miR394      | Brachypodium distachyon  |                        | 25.75 | 56.52 | 55.85 | 610.1 | 45.05 | 69.49 | 21.04 | 31.81 |
|              | ahy-miR394      | Arachis hypogaea         |                        | 25.75 | 56.52 | 55.85 | 610.1 | 45.05 | 69.49 | 21.04 | 31.81 |
|              | gma-miR394b-5p  | Glycine max              |                        | 25.75 | 56.52 | 55.85 | 610.1 | 45.05 | 69.49 | 21.04 | 31.81 |
|              | gma-miR394a-5p  | Glycine max              |                        | 25.75 | 56.52 | 55.85 | 610.1 | 45.05 | 69.49 | 21.04 | 31.81 |
|              | csi-miR394      | Citrus sinensis          |                        | 25.75 | 56.52 | 55.85 | 610.1 | 45.05 | 69.49 | 21.04 | 31.81 |
|              | ghr-miR394b     | Gossypium hirsutum       |                        | 25.75 | 56.52 | 55.85 | 610.1 | 45.05 | 69.49 | 21.04 | 31.81 |
|              | ghr-miR394a     | Gossypium hirsutum       |                        | 25.75 | 56.52 | 55.85 | 610.1 | 45.05 | 69.49 | 21.04 | 31.81 |
|              | aly-miR394a-5p  | Arabidopsis lyrata       |                        | 25.75 | 56.52 | 55.85 | 610.1 | 45.05 | 69.49 | 21.04 | 31.81 |
|              | aly-miR394b-5p  | Arabidopsis lyrata       |                        | 25.75 | 56.52 | 55.85 | 610.1 | 45.05 | 69.49 | 21.04 | 31.81 |
|              | sbi-miR394b     | Sorghum bicolor          |                        | 25.75 | 56.52 | 55.85 | 610.1 | 45.05 | 69.49 | 21.04 | 31.81 |
| dof-miR-1010 | ptc-miR319i     | Populus trichocarpa      | TTGGGCTGAAGGGAGCTCC    | 0     | 0     | 0     | 0     | 0.09  | 0.31  | 0     | 0     |
| dof-miR-1011 | dme-miR-133-3p  | Drosophila melanogaster  | TTGGTCCCCTTCAACCAGCTGT | 2.18  | 2.55  | 0.92  | 1.44  | 0     | 0     | 1.5   | 0.84  |
|              | gga-miR-133a-3p | Gallus gallus            |                        | 2.18  | 2.55  | 0.92  | 1.44  | 0     | 0     | 1.5   | 0.84  |
|              | dps-miR-133     | Drosophila pseudoobscura |                        | 2.18  | 2.55  | 0.92  | 1.44  | 0     | 0     | 1.5   | 0.84  |
|              | xla-miR-133a    | Xenopus laevis           |                        | 2.18  | 2.55  | 0.92  | 1.44  | 0     | 0     | 1.5   | 0.84  |
|              | ame-miR-133     | Apis mellifera           |                        | 2.18  | 2.55  | 0.92  | 1.44  | 0     | 0     | 1.5   | 0.84  |
|              | aga-miR-133     | Anopheles gambiae        |                        | 2.18  | 2.55  | 0.92  | 1.44  | 0     | 0     | 1.5   | 0.84  |
|              | ggo-miR-133a    | Gorilla gorilla          |                        | 2.18  | 2.55  | 0.92  | 1.44  | 0     | 0     | 1.5   | 0.84  |
|              | age-miR-133a    | Ateles geoffroyi         |                        | 2.18  | 2.55  | 0.92  | 1.44  | 0     | 0     | 1.5   | 0.84  |





|              |                 |                          |                        |      |      |      |      |   |   |     |      |
|--------------|-----------------|--------------------------|------------------------|------|------|------|------|---|---|-----|------|
|              | lgi-miR-133-3p  | Lottia gigantea          |                        | 2.18 | 2.55 | 0.92 | 1.44 | 0 | 0 | 1.5 | 0.84 |
|              | ske-miR-133     | Saccoglossus kowalevskii |                        | 2.18 | 2.55 | 0.92 | 1.44 | 0 | 0 | 1.5 | 0.84 |
|              | cfa-miR-133a    | Canis familiaris         |                        | 2.18 | 2.55 | 0.92 | 1.44 | 0 | 0 | 1.5 | 0.84 |
|              | dpu-miR-133     | Daphnia pulex            |                        | 2.18 | 2.55 | 0.92 | 1.44 | 0 | 0 | 1.5 | 0.84 |
| dof-miR-1012 | hsa-miR-493-5p  | Homo sapiens             | TTGTACATGGTAGGCTTTCATT | 0    | 0    | 0    | 0.36 | 0 | 0 | 0   | 0    |
|              | rno-miR-493-5p  | Rattus norvegicus        |                        | 0    | 0    | 0    | 0.36 | 0 | 0 | 0   | 0    |
|              | chi-miR-493-5p  | Capra hircus             |                        | 0    | 0    | 0    | 0.36 | 0 | 0 | 0   | 0    |
|              | ssc-miR-493-5p  | Sus scrofa               |                        | 0    | 0    | 0    | 0.36 | 0 | 0 | 0   | 0    |
|              | oar-miR-493-5p  | Ovis aries               |                        | 0    | 0    | 0    | 0.36 | 0 | 0 | 0   | 0    |
|              | mml-miR-493-5p  | Macaca mulatta           |                        | 0    | 0    | 0    | 0.36 | 0 | 0 | 0   | 0    |
| dof-miR-1013 | hsa-miR-218-5p  | Homo sapiens             | TTGTGCTTGATCTAACCATGT  | 0    | 0    | 0.55 | 0.36 | 0 | 0 | 0   | 0    |
|              | mmu-miR-218-5p  | Mus musculus             |                        | 0    | 0    | 0.55 | 0.36 | 0 | 0 | 0   | 0    |
|              | rno-miR-218a-5p | Rattus norvegicus        |                        | 0    | 0    | 0.55 | 0.36 | 0 | 0 | 0   | 0    |
|              | gga-miR-218-5p  | Gallus gallus            |                        | 0    | 0    | 0.55 | 0.36 | 0 | 0 | 0   | 0    |
|              | ggo-miR-218     | Gorilla gorilla          |                        | 0    | 0    | 0.55 | 0.36 | 0 | 0 | 0   | 0    |
|              | age-miR-218     | Ateles geoffroyi         |                        | 0    | 0    | 0.55 | 0.36 | 0 | 0 | 0   | 0    |
|              | ppa-miR-218     | Pan paniscus             |                        | 0    | 0    | 0.55 | 0.36 | 0 | 0 | 0   | 0    |
|              | lca-miR-218     | Lemur catta              |                        | 0    | 0    | 0.55 | 0.36 | 0 | 0 | 0   | 0    |
|              | ppy-miR-218     | Pongo pygmaeus           |                        | 0    | 0    | 0.55 | 0.36 | 0 | 0 | 0   | 0    |
|              | ptr-miR-218     | Pan troglodytes          |                        | 0    | 0    | 0.55 | 0.36 | 0 | 0 | 0   | 0    |
|              | sla-miR-218     | Saguinus labiatus        |                        | 0    | 0    | 0.55 | 0.36 | 0 | 0 | 0   | 0    |
|              | lla-miR-218     | Lagothrix lagotricha     |                        | 0    | 0    | 0.55 | 0.36 | 0 | 0 | 0   | 0    |
|              | mne-miR-218     | Macaca nemestrina        |                        | 0    | 0    | 0.55 | 0.36 | 0 | 0 | 0   | 0    |
|              | mml-miR-218-5p  | Macaca mulatta           |                        | 0    | 0    | 0.55 | 0.36 | 0 | 0 | 0   | 0    |
|              | xtr-miR-218     | Xenopus tropicalis       |                        | 0    | 0    | 0.55 | 0.36 | 0 | 0 | 0   | 0    |
|              | mdo-miR-218-5p  | Monodelphis domestica    |                        | 0    | 0    | 0.55 | 0.36 | 0 | 0 | 0   | 0    |
|              | oan-miR-218-5p  | Ornithorhynchus anatinus |                        | 0    | 0    | 0.55 | 0.36 | 0 | 0 | 0   | 0    |
|              | chi-miR-218     | Capra hircus             |                        | 0    | 0    | 0.55 | 0.36 | 0 | 0 | 0   | 0    |
|              | tch-miR-218-5p  | Tupaia chinensis         |                        | 0    | 0    | 0.55 | 0.36 | 0 | 0 | 0   | 0    |
|              | oar-miR-218a    | Ovis aries               |                        | 0    | 0    | 0.55 | 0.36 | 0 | 0 | 0   | 0    |
|              | ssc-miR-218     | Sus scrofa               |                        | 0    | 0    | 0.55 | 0.36 | 0 | 0 | 0   | 0    |
|              | ola-miR-218a    | Oryzias latipes          |                        | 0    | 0    | 0.55 | 0.36 | 0 | 0 | 0   | 0    |
|              | ssc-miR-218-5p  | Sus scrofa               |                        | 0    | 0    | 0.55 | 0.36 | 0 | 0 | 0   | 0    |
|              | eca-miR-218     | Equus caballus           |                        | 0    | 0    | 0.55 | 0.36 | 0 | 0 | 0   | 0    |

|                |                     |                        |                        |      |      |      |        |      |      |      |     |
|----------------|---------------------|------------------------|------------------------|------|------|------|--------|------|------|------|-----|
|                | tgu-miR-218-5p      | Taeniopygia guttata    |                        | 0    | 0    | 0.55 | 0.36   | 0    | 0    | 0    | 0   |
|                | cfa-miR-218         | Canis familiaris       |                        | 0    | 0    | 0.55 | 0.36   | 0    | 0    | 0    | 0   |
| dof-miR-1014   | dre-miR-218a        | Danio rerio            | TTGTGCTTGATCTAACCATGTG | 0    | 0    | 0.18 | 0      | 0    | 0    | 0    | 0   |
|                | fru-miR-218a        | Fugu rubripes          |                        | 0    | 0    | 0.18 | 0      | 0    | 0    | 0    | 0   |
|                | tni-miR-218a        | Tetraodon nigroviridis |                        | 0    | 0    | 0.18 | 0      | 0    | 0    | 0    | 0   |
|                | bta-miR-218         | Bos taurus             |                        | 0    | 0    | 0.18 | 0      | 0    | 0    | 0    | 0   |
|                | oha-miR-218-5p      | Ophiophagus hannah     |                        | 0    | 0    | 0.18 | 0      | 0    | 0    | 0    | 0   |
|                | ssa-miR-218-5p      | Salmo salar            |                        | 0    | 0    | 0.18 | 0      | 0    | 0    | 0    | 0   |
|                | ccr-miR-218a        | Cyprinus carpio        |                        | 0    | 0    | 0.18 | 0      | 0    | 0    | 0    | 0   |
|                | cgr-miR-218a        | Cricetulus griseus     |                        | 0    | 0    | 0.18 | 0      | 0    | 0    | 0    | 0   |
|                | pma-miR-218a-5p     | Petromyzon marinus     |                        | 0    | 0    | 0.18 | 0      | 0    | 0    | 0    | 0   |
|                | ssc-miR-218b        | Sus scrofa             |                        | 0    | 0    | 0.18 | 0      | 0    | 0    | 0    | 0   |
| aca-miR-218-5p | Anolis carolinensis | 0                      | 0                      | 0.18 | 0    | 0    | 0      | 0    | 0    | 0    |     |
| dof-miR-1015   | stu-miR398b-3p      | Solanum tuberosum      | TTGTGTTCTCAGGTCACCCCT  | 0    | 0    | 0    | 3.42   | 0    | 0    | 0    | 0   |
| dof-miR-1016   | xtr-miR-202-5p      | Xenopus tropicalis     | TTTCCTATGCATATACTCTTT  | 0    | 0    | 2.02 | 2.7    | 0    | 0    | 0    | 0   |
| dof-miR-1017   | atr-miR319b         | Amborella trichopoda   | TTTGGACTGAAGGGAGCTCCT  | 0    | 0.76 | 2.39 | 1.62   | 0    | 0.1  | 0.33 | 0   |
|                | atr-miR319d         | Amborella trichopoda   |                        | 0    | 0.76 | 2.39 | 1.62   | 0    | 0.1  | 0.33 | 0   |
|                | atr-miR319e         | Amborella trichopoda   |                        | 0    | 0.76 | 2.39 | 1.62   | 0    | 0.1  | 0.33 | 0   |
|                | tcc-miR319          | Theobroma cacao        |                        | 0    | 0.76 | 2.39 | 1.62   | 0    | 0.1  | 0.33 | 0   |
|                | csi-miR319          | Citrus sinensis        |                        | 0    | 0.76 | 2.39 | 1.62   | 0    | 0.1  | 0.33 | 0   |
|                | vvi-miR319e         | Vitis vinifera         |                        | 0    | 0.76 | 2.39 | 1.62   | 0    | 0.1  | 0.33 | 0   |
| dof-miR-1018   | pde-miR1312         | Pinus densata          | TTTGGAGAGAAAATGGCGACAT | 0    | 0    | 0.37 | 1.26   | 0    | 0    | 0.17 | 0   |
|                | pta-miR1312         | Pinus taeda            |                        | 0    | 0    | 0.37 | 1.26   | 0    | 0    | 0.17 | 0   |
| dof-miR-1019   | zma-miR159h-3p      | Zea mays               | TTTGGAGTGAAGGGAGCTCTG  | 0    | 0    | 0.37 | 0.36   | 0.19 | 0.52 | 0    | 0   |
|                | zma-miR159i-3p      | Zea mays               |                        | 0    | 0    | 0.37 | 0.36   | 0.19 | 0.52 | 0    | 0   |
| dof-miR-1020   | ath-miR159c         | Arabidopsis thaliana   | TTTGGATTGAAGGGAGCTCCT  | 0    | 0    | 0    | 1.08   | 0    | 0.1  | 0    | 0   |
|                | aly-miR159c-3p      | Arabidopsis lyrata     |                        | 0    | 0    | 0    | 1.08   | 0    | 0.1  | 0    | 0   |
| dof-miR-1021   | ath-miR159a         | Arabidopsis thaliana   | TTTGGATTGAAGGGAGCTCTA  | 0.59 | 0.25 | 6.61 | 718.21 | 2.05 | 4.8  | 2.84 | 0.7 |
|                | gma-miR159a-3p      | Glycine max            |                        | 0.59 | 0.25 | 6.61 | 718.21 | 2.05 | 4.8  | 2.84 | 0.7 |
|                | ptc-miR159a         | Populus trichocarpa    |                        | 0.59 | 0.25 | 6.61 | 718.21 | 2.05 | 4.8  | 2.84 | 0.7 |
|                | ptc-miR159b         | Populus trichocarpa    |                        | 0.59 | 0.25 | 6.61 | 718.21 | 2.05 | 4.8  | 2.84 | 0.7 |
|                | bna-miR159          | Brassica napus         |                        | 0.59 | 0.25 | 6.61 | 718.21 | 2.05 | 4.8  | 2.84 | 0.7 |
|                | vvi-miR159c         | Vitis vinifera         |                        | 0.59 | 0.25 | 6.61 | 718.21 | 2.05 | 4.8  | 2.84 | 0.7 |
|                | ppe-miR159          | Prunus persica         |                        | 0.59 | 0.25 | 6.61 | 718.21 | 2.05 | 4.8  | 2.84 | 0.7 |

|                |                  |                         |                       |         |         |         |         |         |        |       |        |
|----------------|------------------|-------------------------|-----------------------|---------|---------|---------|---------|---------|--------|-------|--------|
|                | cpa-miR159a      | Carica papaya           |                       | 0.59    | 0.25    | 6.61    | 718.21  | 2.05    | 4.8    | 2.84  | 0.7    |
|                | atr-miR159       | Amborella trichopoda    |                       | 0.59    | 0.25    | 6.61    | 718.21  | 2.05    | 4.8    | 2.84  | 0.7    |
|                | mes-miR159b      | Manihot esculenta       |                       | 0.59    | 0.25    | 6.61    | 718.21  | 2.05    | 4.8    | 2.84  | 0.7    |
|                | hbr-miR159a      | Hevea brasiliensis      |                       | 0.59    | 0.25    | 6.61    | 718.21  | 2.05    | 4.8    | 2.84  | 0.7    |
|                | htu-miR159a      | Helianthus tuberosus    |                       | 0.59    | 0.25    | 6.61    | 718.21  | 2.05    | 4.8    | 2.84  | 0.7    |
|                | cme-miR159a      | Cucumis melo            |                       | 0.59    | 0.25    | 6.61    | 718.21  | 2.05    | 4.8    | 2.84  | 0.7    |
|                | mes-miR159a      | Manihot esculenta       |                       | 0.59    | 0.25    | 6.61    | 718.21  | 2.05    | 4.8    | 2.84  | 0.7    |
|                | nta-miR159       | Nicotiana tabacum       |                       | 0.59    | 0.25    | 6.61    | 718.21  | 2.05    | 4.8    | 2.84  | 0.7    |
|                | gma-miR159e-3p   | Glycine max             |                       | 0.59    | 0.25    | 6.61    | 718.21  | 2.05    | 4.8    | 2.84  | 0.7    |
|                | ahy-miR159       | Arachis hypogaea        |                       | 0.59    | 0.25    | 6.61    | 718.21  | 2.05    | 4.8    | 2.84  | 0.7    |
|                | csi-miR159       | Citrus sinensis         |                       | 0.59    | 0.25    | 6.61    | 718.21  | 2.05    | 4.8    | 2.84  | 0.7    |
|                | rco-miR159       | Ricinus communis        |                       | 0.59    | 0.25    | 6.61    | 718.21  | 2.05    | 4.8    | 2.84  | 0.7    |
|                | aly-miR159a-3p   | Arabidopsis lyrata      |                       | 0.59    | 0.25    | 6.61    | 718.21  | 2.05    | 4.8    | 2.84  | 0.7    |
|                | sly-miR159       | Solanum lycopersicum    |                       | 0.59    | 0.25    | 6.61    | 718.21  | 2.05    | 4.8    | 2.84  | 0.7    |
|                | bra-miR159a      | Brassica rapa           |                       | 0.59    | 0.25    | 6.61    | 718.21  | 2.05    | 4.8    | 2.84  | 0.7    |
|                | mtr-miR159a      | Medicago truncatula     |                       | 0.59    | 0.25    | 6.61    | 718.21  | 2.05    | 4.8    | 2.84  | 0.7    |
|                | pvu-miR159a.1    | Phaseolus vulgaris      |                       | 0.59    | 0.25    | 6.61    | 718.21  | 2.05    | 4.8    | 2.84  | 0.7    |
| dof-miR-1022   | lus-miR159b      | Linum usitatissimum     | TTTGGATTGAAGGGAGCTCTC | 0       | 0       | 0.55    | 0.9     | 0.93    | 1.98   | 0     | 0      |
| dof-miR-1023   | osa-miR159a.1    | Oryza sativa            | TTTGGATTGAAGGGAGCTCTG | 289.75  | 678.7   | 1547.54 | 1150.65 | 1814.86 | 2489.7 | 315.2 | 282.07 |
|                | osa-miR159b      | Oryza sativa            |                       | 289.75  | 678.7   | 1547.54 | 1150.65 | 1814.86 | 2489.7 | 315.2 | 282.07 |
|                | sbi-miR159a      | Sorghum bicolor         |                       | 289.75  | 678.7   | 1547.54 | 1150.65 | 1814.86 | 2489.7 | 315.2 | 282.07 |
|                | sof-miR159a      | Saccharum officinarum   |                       | 289.75  | 678.7   | 1547.54 | 1150.65 | 1814.86 | 2489.7 | 315.2 | 282.07 |
|                | sof-miR159b      | Saccharum officinarum   |                       | 289.75  | 678.7   | 1547.54 | 1150.65 | 1814.86 | 2489.7 | 315.2 | 282.07 |
|                | sof-miR159d      | Saccharum officinarum   |                       | 289.75  | 678.7   | 1547.54 | 1150.65 | 1814.86 | 2489.7 | 315.2 | 282.07 |
|                | zma-miR159a-3p   | Zea mays                |                       | 289.75  | 678.7   | 1547.54 | 1150.65 | 1814.86 | 2489.7 | 315.2 | 282.07 |
|                | zma-miR159b-3p   | Zea mays                |                       | 289.75  | 678.7   | 1547.54 | 1150.65 | 1814.86 | 2489.7 | 315.2 | 282.07 |
|                | tae-miR159a      | Triticum aestivum       |                       | 289.75  | 678.7   | 1547.54 | 1150.65 | 1814.86 | 2489.7 | 315.2 | 282.07 |
|                | tae-miR159b      | Triticum aestivum       |                       | 289.75  | 678.7   | 1547.54 | 1150.65 | 1814.86 | 2489.7 | 315.2 | 282.07 |
|                | bdi-miR159b-3p.1 | Brachypodium distachyon |                       | 289.75  | 678.7   | 1547.54 | 1150.65 | 1814.86 | 2489.7 | 315.2 | 282.07 |
|                | ssp-miR159a      | Saccharum sp.           |                       | 289.75  | 678.7   | 1547.54 | 1150.65 | 1814.86 | 2489.7 | 315.2 | 282.07 |
|                | hvu-miR159b      | Hordeum vulgare         |                       | 289.75  | 678.7   | 1547.54 | 1150.65 | 1814.86 | 2489.7 | 315.2 | 282.07 |
|                | hvu-miR159a      | Hordeum vulgare         |                       | 289.75  | 678.7   | 1547.54 | 1150.65 | 1814.86 | 2489.7 | 315.2 | 282.07 |
|                | far-miR159       | Festuca arundinacea     |                       | 289.75  | 678.7   | 1547.54 | 1150.65 | 1814.86 | 2489.7 | 315.2 | 282.07 |
| zma-miR159f-3p | Zea mays         | 289.75                  | 678.7                 | 1547.54 | 1150.65 | 1814.86 | 2489.7  | 315.2   | 282.07 |       |        |





|              |                  |                     |                         |     |      |      |      |      |     |      |   |
|--------------|------------------|---------------------|-------------------------|-----|------|------|------|------|-----|------|---|
|              | rno-miR-758-3p   | Rattus norvegicus   |                         | 0   | 0    | 0    | 0    | 0    | 0.1 | 0    | 0 |
|              | chi-miR-758      | Capra hircus        |                         | 0   | 0    | 0    | 0    | 0    | 0.1 | 0    | 0 |
|              | ppy-miR-758      | Pongo pygmaeus      |                         | 0   | 0    | 0    | 0    | 0    | 0.1 | 0    | 0 |
|              | eca-miR-758      | Equus caballus      |                         | 0   | 0    | 0    | 0    | 0    | 0.1 | 0    | 0 |
|              | ptr-miR-758      | Pan troglodytes     |                         | 0   | 0    | 0    | 0    | 0    | 0.1 | 0    | 0 |
|              | bta-miR-758      | Bos taurus          |                         | 0   | 0    | 0    | 0    | 0    | 0.1 | 0    | 0 |
|              | cfa-miR-758      | Canis familiaris    |                         | 0   | 0    | 0    | 0    | 0    | 0.1 | 0    | 0 |
| dof-miR-1037 | ptc-miR403c-5p   | Populus trichocarpa | TTTGTGCGTGGATCTGAGGCC   | 0   | 0    | 0    | 0    | 0    | 0   | 0.17 | 0 |
| dof-miR-1038 | hsa-miR-375      | Homo sapiens        | TTTGTTCGTTTCGGCTCGCGTGA | 0   | 0    | 0    | 0.18 | 0.09 | 0   | 0.17 | 0 |
|              | mmu-miR-375-3p   | Mus musculus        |                         | 0   | 0    | 0    | 0.18 | 0.09 | 0   | 0.17 | 0 |
|              | rno-miR-375-3p   | Rattus norvegicus   |                         | 0   | 0    | 0    | 0.18 | 0.09 | 0   | 0.17 | 0 |
|              | ggo-miR-375      | Gorilla gorilla     |                         | 0   | 0    | 0    | 0.18 | 0.09 | 0   | 0.17 | 0 |
|              | ppy-miR-375      | Pongo pygmaeus      |                         | 0   | 0    | 0    | 0.18 | 0.09 | 0   | 0.17 | 0 |
|              | mml-miR-375      | Macaca mulatta      |                         | 0   | 0    | 0    | 0.18 | 0.09 | 0   | 0.17 | 0 |
|              | ptr-miR-375      | Pan troglodytes     |                         | 0   | 0    | 0    | 0.18 | 0.09 | 0   | 0.17 | 0 |
| cfa-miR-375  | Canis familiaris | 0                   | 0                       | 0   | 0.18 | 0.09 | 0    | 0.17 | 0   |      |   |
| dof-miR-1039 | ptc-miR472b      | Populus trichocarpa | TTTTCCCAACTCCACCCATCCC  | 0   | 0    | 2.57 | 2.7  | 0    | 0   | 1    | 0 |
| dof-miR-1040 | ptc-miR472a      | Populus trichocarpa | TTTTCCCTACTCCACCCATCCC  | 0   | 0    | 2.94 | 3.96 | 0    | 0   | 1.5  | 0 |
| dof-miR-1041 | cfa-miR-450b     | Canis familiaris    | TTTTGCAATATGTTCTGAAT    | 0   | 0    | 0.18 | 0.72 | 0    | 0   | 0    | 0 |
| dof-miR-1042 | hsa-miR-450b-5p  | Homo sapiens        | TTTTGCAATATGTTCTGAATA   | 0.2 | 0    | 0    | 0    | 0    | 0   | 0    | 0 |
|              | ggo-miR-450b     | Gorilla gorilla     |                         | 0.2 | 0    | 0    | 0    | 0    | 0   | 0    | 0 |
|              | bta-miR-450b     | Bos taurus          |                         | 0.2 | 0    | 0    | 0    | 0    | 0   | 0    | 0 |
|              | ppy-miR-450b-5p  | Pongo pygmaeus      |                         | 0.2 | 0    | 0    | 0    | 0    | 0   | 0    | 0 |
|              | eca-miR-450b-5p  | Equus caballus      |                         | 0.2 | 0    | 0    | 0    | 0    | 0   | 0    | 0 |
|              | ssc-miR-450b-5p  | Sus scrofa          |                         | 0.2 | 0    | 0    | 0    | 0    | 0   | 0    | 0 |
|              | mml-miR-450b-5p  | Macaca mulatta      |                         | 0.2 | 0    | 0    | 0    | 0    | 0   | 0    | 0 |
| dof-miR-1043 | chi-miR-450-5p   | Capra hircus        | TTTTGCGATGTGTTCTAAT     | 0.2 | 0    | 0.55 | 0.18 | 0    | 0   | 0    | 0 |
| dof-miR-1044 | rno-miR-450b-5p  | Rattus norvegicus   | TTTTGCGATGTGTTCTAATA    | 0   | 0    | 0    | 0.36 | 0    | 0   | 0    | 0 |
|              | ggo-miR-450a     | Gorilla gorilla     |                         | 0   | 0    | 0    | 0.36 | 0    | 0   | 0    | 0 |
|              | ppy-miR-450a     | Pongo pygmaeus      |                         | 0   | 0    | 0    | 0.36 | 0    | 0   | 0    | 0 |
| dof-miR-1045 | ssc-miR-450c-5p  | Sus scrofa          | TTTTGCGATGTGTTCTAATAC   | 0   | 0    | 0.37 | 0.18 | 0    | 0   | 0    | 0 |
|              | eca-miR-450c     | Equus caballus      |                         | 0   | 0    | 0.37 | 0.18 | 0    | 0   | 0    | 0 |
| dof-miR-1046 | hsa-miR-450a-5p  | Homo sapiens        | TTTTGCGATGTGTTCTAATAT   | 0   | 0    | 1.84 | 0.54 | 0.09 | 0   | 0    | 0 |
|              | mmu-miR-450a-5p  | Mus musculus        |                         | 0   | 0    | 1.84 | 0.54 | 0.09 | 0   | 0    | 0 |

|              |                 |                         |                     |      |      |       |      |       |       |       |       |
|--------------|-----------------|-------------------------|---------------------|------|------|-------|------|-------|-------|-------|-------|
|              | bta-miR-450a    | Bos taurus              |                     | 0    | 0    | 1.84  | 0.54 | 0.09  | 0     | 0     | 0     |
|              | efu-miR-450     | Eptesicus fuscus        |                     | 0    | 0    | 1.84  | 0.54 | 0.09  | 0     | 0     | 0     |
|              | tch-miR-450a-5p | Tupaia chinensis        |                     | 0    | 0    | 1.84  | 0.54 | 0.09  | 0     | 0     | 0     |
|              | cgr-miR-450a    | Cricetulus griseus      |                     | 0    | 0    | 1.84  | 0.54 | 0.09  | 0     | 0     | 0     |
|              | eca-miR-450a    | Equus caballus          |                     | 0    | 0    | 1.84  | 0.54 | 0.09  | 0     | 0     | 0     |
|              | mml-miR-450a-5p | Macaca mulatta          |                     | 0    | 0    | 1.84  | 0.54 | 0.09  | 0     | 0     | 0     |
|              | ptr-miR-450a    | Pan troglodytes         |                     | 0    | 0    | 1.84  | 0.54 | 0.09  | 0     | 0     | 0     |
|              | ssc-miR-450a    | Sus scrofa              |                     | 0    | 0    | 1.84  | 0.54 | 0.09  | 0     | 0     | 0     |
| dof-miR-1047 | osa-miR5179     | Oryza sativa            | TTTTGCTCAAGACCGCAAC | 7.13 | 5.86 | 18.19 | 6.67 | 12.59 | 16.28 | 30.22 | 12.47 |
|              | bdi-miR5179     | Brachypodium distachyon |                     | 7.13 | 5.86 | 18.19 | 6.67 | 12.59 | 16.28 | 30.22 | 12.47 |



**Table S6** A partial list of miRNA--target pairs identified from *Dendrobium officinale*. The miRNA IDs, target transcript IDs, target length and target annotations are included in this table. Based on the functional annotations of the target transcripts, the miRNA--target pairs were classified into four functional groups (hormone signaling-, plant development-, secondary metabolism- and Argonaute 1-related groups) for network construction.

**Hormone signaling:**

| Regulatory miRNA IDs | Target transcript IDs | Target transcript length | Target transcript annotations                                  | GO (Gene Ontology) term annotations of target transcripts                                                                                                                                                                                                     |
|----------------------|-----------------------|--------------------------|----------------------------------------------------------------|---------------------------------------------------------------------------------------------------------------------------------------------------------------------------------------------------------------------------------------------------------------|
| dof-miR-835          | comp151738_c1_seq1    | 1151                     | NAC domain-containing protein                                  | GO:0005634(nucleus);GO:0003677(DNA binding);GO:0003700(sequence-specific DNA binding transcription factor activity);GO:0009734(auxin mediated signaling pathway);GO:0048527(lateral root development);GO:0010072(primary shoot apical meristem specification) |
| dof-miR-836          |                       |                          |                                                                |                                                                                                                                                                                                                                                               |
| dof-miR-837          |                       |                          |                                                                |                                                                                                                                                                                                                                                               |
| dof-miR-838          |                       |                          |                                                                |                                                                                                                                                                                                                                                               |
| dof-miR-839          |                       |                          |                                                                |                                                                                                                                                                                                                                                               |
| dof-miR-840          |                       |                          |                                                                |                                                                                                                                                                                                                                                               |
| dof-miR-835          | comp151738_c1_seq2    | 1220                     | NAC domain-containing protein                                  | GO:0005634(nucleus);GO:0003677(DNA binding);GO:0003700(sequence-specific DNA binding transcription factor activity);GO:0009734(auxin mediated signaling pathway);GO:0048527(lateral root development);GO:0010072(primary shoot apical meristem specification) |
| dof-miR-836          |                       |                          |                                                                |                                                                                                                                                                                                                                                               |
| dof-miR-837          |                       |                          |                                                                |                                                                                                                                                                                                                                                               |
| dof-miR-838          |                       |                          |                                                                |                                                                                                                                                                                                                                                               |
| dof-miR-839          |                       |                          |                                                                |                                                                                                                                                                                                                                                               |
| dof-miR-840          |                       |                          |                                                                |                                                                                                                                                                                                                                                               |
| dof-miR-835          | comp151738_c1_seq3    | 1178                     | NAC domain-containing protein 21/22<br>OS=Arabidopsis thaliana | GO:0005634(nucleus);GO:0003677(DNA binding);GO:0003700(sequence-specific DNA binding transcription factor activity);GO:0009734(auxin mediated signaling pathway);GO:0048527(lateral root development);GO:0010072(primary shoot apical meristem specification) |
| dof-miR-836          |                       |                          |                                                                |                                                                                                                                                                                                                                                               |
| dof-miR-837          |                       |                          |                                                                |                                                                                                                                                                                                                                                               |
| dof-miR-838          |                       |                          |                                                                |                                                                                                                                                                                                                                                               |
| dof-miR-839          |                       |                          |                                                                |                                                                                                                                                                                                                                                               |
| dof-miR-840          |                       |                          |                                                                |                                                                                                                                                                                                                                                               |
| dof-miR-835          | comp160962_c0_seq2    | 1758                     | NAC domain-containing protein 100<br>OS=Arabidopsis thaliana   | GO:0005634(nucleus);GO:0003677(DNA binding);GO:0006355(regulation of transcription, DNA-dependent);GO:0006351(transcription, DNA-dependent)                                                                                                                   |
| dof-miR-836          |                       |                          |                                                                |                                                                                                                                                                                                                                                               |
| dof-miR-837          |                       |                          |                                                                |                                                                                                                                                                                                                                                               |

|             |                     |      |                                                              |                                                                                                                                                                                                                                    |
|-------------|---------------------|------|--------------------------------------------------------------|------------------------------------------------------------------------------------------------------------------------------------------------------------------------------------------------------------------------------------|
| dof-miR-838 |                     |      |                                                              |                                                                                                                                                                                                                                    |
| dof-miR-839 |                     |      |                                                              |                                                                                                                                                                                                                                    |
| dof-miR-835 | comp160962_c0_seq11 | 1369 | NAC domain-containing protein 100<br>OS=Arabidopsis thaliana | GO:0005634(nucleus);GO:0003677(DNA binding);GO:0006355(regulation of transcription, DNA-dependent);GO:0006351(transcription, DNA-dependent)                                                                                        |
| dof-miR-836 |                     |      |                                                              |                                                                                                                                                                                                                                    |
| dof-miR-837 |                     |      |                                                              |                                                                                                                                                                                                                                    |
| dof-miR-838 |                     |      |                                                              |                                                                                                                                                                                                                                    |
| dof-miR-839 |                     |      |                                                              |                                                                                                                                                                                                                                    |
| dof-miR-840 |                     |      |                                                              |                                                                                                                                                                                                                                    |
| dof-miR-835 | comp160962_c0_seq13 | 1484 | NAC domain-containing protein 100<br>OS=Arabidopsis thaliana | GO:0005634(nucleus);GO:0003677(DNA binding);GO:0006355(regulation of transcription, DNA-dependent);GO:0006351(transcription, DNA-dependent)                                                                                        |
| dof-miR-836 |                     |      |                                                              |                                                                                                                                                                                                                                    |
| dof-miR-837 |                     |      |                                                              |                                                                                                                                                                                                                                    |
| dof-miR-838 |                     |      |                                                              |                                                                                                                                                                                                                                    |
| dof-miR-839 |                     |      |                                                              |                                                                                                                                                                                                                                    |
| dof-miR-840 |                     |      |                                                              |                                                                                                                                                                                                                                    |
| dof-miR-815 | comp165418_c0_seq1  | 2900 | Auxin response factor 18 OS=Oryza sativa subsp. Japonica     | GO:0005634(nucleus);GO:0003677(DNA binding);GO:0046983(protein dimerization activity);GO:0009734(auxin mediated signaling pathway);GO:0006355(regulation of transcription, DNA-dependent);GO:0006351(transcription, DNA-dependent) |
| dof-miR-816 |                     |      |                                                              |                                                                                                                                                                                                                                    |
| dof-miR-817 |                     |      |                                                              |                                                                                                                                                                                                                                    |
| dof-miR-815 | comp165418_c0_seq8  | 3366 | Auxin response factor 18 OS=Oryza sativa subsp. Japonica     | GO:0005634(nucleus);GO:0003677(DNA binding);GO:0046983(protein dimerization activity);GO:0009734(auxin mediated signaling pathway);GO:0006355(regulation of transcription, DNA-dependent);GO:0006351(transcription, DNA-dependent) |
| dof-miR-816 |                     |      |                                                              |                                                                                                                                                                                                                                    |
| dof-miR-817 |                     |      |                                                              |                                                                                                                                                                                                                                    |
| dof-miR-815 | comp165418_c0_seq16 | 2926 | Auxin response factor 18 OS=Oryza sativa subsp. Japonica     | GO:0005634(nucleus);GO:0003677(DNA binding);GO:0046983(protein dimerization activity);GO:0009734(auxin mediated signaling pathway);GO:0006355(regulation of transcription, DNA-dependent);GO:0006351(transcription, DNA-dependent) |
| dof-miR-816 |                     |      |                                                              |                                                                                                                                                                                                                                    |
| dof-miR-817 |                     |      |                                                              |                                                                                                                                                                                                                                    |
| dof-miR-815 | comp165418_c0_seq18 | 2790 | Auxin response factor 18 OS=Oryza sativa subsp. Japonica     | GO:0005634(nucleus);GO:0003677(DNA binding);GO:0046983(protein dimerization activity);GO:0009734(auxin mediated signaling pathway);GO:0006355(regulation of transcription, DNA-dependent);GO:0006351(transcription, DNA-dependent) |
| dof-miR-816 |                     |      |                                                              |                                                                                                                                                                                                                                    |
| dof-miR-817 |                     |      |                                                              |                                                                                                                                                                                                                                    |
| dof-miR-815 | comp165418_c0_seq20 | 3432 | Auxin response factor 18 OS=Oryza sativa subsp. Japonica     | GO:0005634(nucleus);GO:0003677(DNA binding);GO:0046983(protein dimerization activity);GO:0009734(auxin mediated signaling pathway);GO:0006355(regulation of transcription, DNA-dependent);GO:0006351(transcription, DNA-dependent) |
| dof-miR-816 |                     |      |                                                              |                                                                                                                                                                                                                                    |
| dof-miR-817 |                     |      |                                                              |                                                                                                                                                                                                                                    |
| dof-miR-421 | comp171031_c0_seq1  | 4351 | Auxin response factor 12 OS=Oryza sativa subsp. Indica       | GO:0005634(nucleus);GO:0003677(DNA binding);GO:0046983(protein dimerization activity);GO:0009734(auxin mediated signaling pathway);GO:0006355(regulation of transcription, DNA-dependent);GO:0006351(transcription, DNA-dependent) |
| dof-miR-707 |                     |      |                                                              |                                                                                                                                                                                                                                    |

|             |                     |      |                                                        |                                                                                                                                                                                                                                    |
|-------------|---------------------|------|--------------------------------------------------------|------------------------------------------------------------------------------------------------------------------------------------------------------------------------------------------------------------------------------------|
| dof-miR-708 |                     |      |                                                        |                                                                                                                                                                                                                                    |
| dof-miR-710 |                     |      |                                                        |                                                                                                                                                                                                                                    |
| dof-miR-711 |                     |      |                                                        |                                                                                                                                                                                                                                    |
| dof-miR-712 |                     |      |                                                        |                                                                                                                                                                                                                                    |
| dof-miR-713 |                     |      |                                                        |                                                                                                                                                                                                                                    |
| dof-miR-715 |                     |      |                                                        |                                                                                                                                                                                                                                    |
| dof-miR-421 | comp171031_c0_seq10 | 4326 | Auxin response factor 12 OS=Oryza sativa subsp. Indica | GO:0005634(nucleus);GO:0003677(DNA binding);GO:0046983(protein dimerization activity);GO:0009734(auxin mediated signaling pathway);GO:0006355(regulation of transcription, DNA-dependent);GO:0006351(transcription, DNA-dependent) |
| dof-miR-707 |                     |      |                                                        |                                                                                                                                                                                                                                    |
| dof-miR-708 |                     |      |                                                        |                                                                                                                                                                                                                                    |
| dof-miR-710 |                     |      |                                                        |                                                                                                                                                                                                                                    |
| dof-miR-711 |                     |      |                                                        |                                                                                                                                                                                                                                    |
| dof-miR-712 |                     |      |                                                        |                                                                                                                                                                                                                                    |
| dof-miR-713 |                     |      |                                                        |                                                                                                                                                                                                                                    |
| dof-miR-715 |                     |      |                                                        |                                                                                                                                                                                                                                    |
| dof-miR-421 | comp171031_c0_seq12 | 4952 | Auxin response factor 12 OS=Oryza sativa subsp. Indica | GO:0005634(nucleus);GO:0003677(DNA binding);GO:0046983(protein dimerization activity);GO:0009734(auxin mediated signaling pathway);GO:0006355(regulation of transcription, DNA-dependent);GO:0006351(transcription, DNA-dependent) |
| dof-miR-707 |                     |      |                                                        |                                                                                                                                                                                                                                    |
| dof-miR-708 |                     |      |                                                        |                                                                                                                                                                                                                                    |
| dof-miR-710 |                     |      |                                                        |                                                                                                                                                                                                                                    |
| dof-miR-711 |                     |      |                                                        |                                                                                                                                                                                                                                    |
| dof-miR-712 |                     |      |                                                        |                                                                                                                                                                                                                                    |
| dof-miR-713 |                     |      |                                                        |                                                                                                                                                                                                                                    |
| dof-miR-715 |                     |      |                                                        |                                                                                                                                                                                                                                    |
| dof-miR-421 | comp171031_c0_seq23 | 4977 | Auxin response factor 12 OS=Oryza sativa subsp. Indica | GO:0005634(nucleus);GO:0003677(DNA binding);GO:0046983(protein dimerization activity);GO:0009734(auxin mediated signaling pathway);GO:0006355(regulation of transcription, DNA-dependent);GO:0006351(transcription, DNA-dependent) |
| dof-miR-707 |                     |      |                                                        |                                                                                                                                                                                                                                    |
| dof-miR-708 |                     |      |                                                        |                                                                                                                                                                                                                                    |
| dof-miR-710 |                     |      |                                                        |                                                                                                                                                                                                                                    |
| dof-miR-711 |                     |      |                                                        |                                                                                                                                                                                                                                    |
| dof-miR-712 |                     |      |                                                        |                                                                                                                                                                                                                                    |
| dof-miR-713 |                     |      |                                                        |                                                                                                                                                                                                                                    |
| dof-miR-715 |                     |      |                                                        |                                                                                                                                                                                                                                    |
| dof-miR-421 | comp171031_c0_seq29 | 4254 | Auxin response factor 12 OS=Oryza sativa subsp.        | GO:0005634(nucleus);GO:0003677(DNA binding);GO:0046983(protein dimerization activity);GO:0009734(auxin                                                                                                                             |

|             |                     |      |                                                                         |                                                                                                                                                                                                                                                                                                                                                                                                                                                                                                               |
|-------------|---------------------|------|-------------------------------------------------------------------------|---------------------------------------------------------------------------------------------------------------------------------------------------------------------------------------------------------------------------------------------------------------------------------------------------------------------------------------------------------------------------------------------------------------------------------------------------------------------------------------------------------------|
| dof-miR-707 |                     |      | Indica                                                                  | mediated signaling pathway);GO:0006355(regulation of transcription, DNA-dependent);GO:0006351(transcription, DNA-dependent)                                                                                                                                                                                                                                                                                                                                                                                   |
| dof-miR-708 |                     |      |                                                                         |                                                                                                                                                                                                                                                                                                                                                                                                                                                                                                               |
| dof-miR-710 |                     |      |                                                                         |                                                                                                                                                                                                                                                                                                                                                                                                                                                                                                               |
| dof-miR-711 |                     |      |                                                                         |                                                                                                                                                                                                                                                                                                                                                                                                                                                                                                               |
| dof-miR-712 |                     |      |                                                                         |                                                                                                                                                                                                                                                                                                                                                                                                                                                                                                               |
| dof-miR-713 |                     |      |                                                                         |                                                                                                                                                                                                                                                                                                                                                                                                                                                                                                               |
| dof-miR-715 |                     |      |                                                                         |                                                                                                                                                                                                                                                                                                                                                                                                                                                                                                               |
| dof-miR-421 | comp171031_c0_seq32 | 1782 | Auxin response factor 12 OS=Oryza sativa subsp. Indica                  | GO:0005634(nucleus);GO:0003677(DNA binding);GO:0046983(protein dimerization activity);GO:0009734(auxin mediated signaling pathway);GO:0006355(regulation of transcription, DNA-dependent);GO:0006351(transcription, DNA-dependent)                                                                                                                                                                                                                                                                            |
| dof-miR-707 |                     |      |                                                                         |                                                                                                                                                                                                                                                                                                                                                                                                                                                                                                               |
| dof-miR-708 |                     |      |                                                                         |                                                                                                                                                                                                                                                                                                                                                                                                                                                                                                               |
| dof-miR-710 |                     |      |                                                                         |                                                                                                                                                                                                                                                                                                                                                                                                                                                                                                               |
| dof-miR-711 |                     |      |                                                                         |                                                                                                                                                                                                                                                                                                                                                                                                                                                                                                               |
| dof-miR-712 |                     |      |                                                                         |                                                                                                                                                                                                                                                                                                                                                                                                                                                                                                               |
| dof-miR-713 |                     |      |                                                                         |                                                                                                                                                                                                                                                                                                                                                                                                                                                                                                               |
| dof-miR-715 |                     |      |                                                                         |                                                                                                                                                                                                                                                                                                                                                                                                                                                                                                               |
| dof-miR-421 | comp171031_c0_seq34 | 4279 | Auxin response factor 12 OS=Oryza sativa subsp. Indica                  | GO:0005634(nucleus);GO:0003677(DNA binding);GO:0046983(protein dimerization activity);GO:0009734(auxin mediated signaling pathway);GO:0006355(regulation of transcription, DNA-dependent);GO:0006351(transcription, DNA-dependent)                                                                                                                                                                                                                                                                            |
| dof-miR-707 |                     |      |                                                                         |                                                                                                                                                                                                                                                                                                                                                                                                                                                                                                               |
| dof-miR-708 |                     |      |                                                                         |                                                                                                                                                                                                                                                                                                                                                                                                                                                                                                               |
| dof-miR-710 |                     |      |                                                                         |                                                                                                                                                                                                                                                                                                                                                                                                                                                                                                               |
| dof-miR-711 |                     |      |                                                                         |                                                                                                                                                                                                                                                                                                                                                                                                                                                                                                               |
| dof-miR-712 |                     |      |                                                                         |                                                                                                                                                                                                                                                                                                                                                                                                                                                                                                               |
| dof-miR-713 |                     |      |                                                                         |                                                                                                                                                                                                                                                                                                                                                                                                                                                                                                               |
| dof-miR-715 |                     |      |                                                                         |                                                                                                                                                                                                                                                                                                                                                                                                                                                                                                               |
| dof-miR-522 | comp169140_c0_seq5  | 1037 | Auxin response factor 9 OS=Arabidopsis thaliana                         | GO:0005634(nucleus);GO:0003677(DNA binding);GO:0046983(protein dimerization activity);GO:0009734(auxin mediated signaling pathway);GO:0006355(regulation of transcription, DNA-dependent);GO:0006351(transcription, DNA-dependent)                                                                                                                                                                                                                                                                            |
| dof-miR-523 |                     |      |                                                                         |                                                                                                                                                                                                                                                                                                                                                                                                                                                                                                               |
| dof-miR-962 | comp167643_c0_seq3  | 2202 | TRANSPORT INHIBITOR RESPONSE (TIR) 1 OS=Arabidopsis thaliana            | GO:0005634(nucleus);GO:0019005(SCF ubiquitin ligase complex);GO:0010011(auxin binding);GO:0000822(inositol hexakisphosphate binding);GO:0005515(protein binding);GO:0004842(ubiquitin-protein ligase activity);GO:0009734(auxin mediated signaling pathway);GO:0007049(cell cycle);GO:0016036(cellular response to phosphate starvation);GO:0006952(defense response);GO:0009873(ethylene mediated signaling pathway);GO:0010311(lateral root formation);GO:0002237(response to molecule of bacterial origin) |
| dof-miR-963 |                     |      |                                                                         |                                                                                                                                                                                                                                                                                                                                                                                                                                                                                                               |
| dof-miR-718 | comp163584_c0_seq4  | 2715 | Ethylene-responsive transcription factor RAP2-7 OS=Arabidopsis thaliana | GO:0005634(nucleus);GO:0003677(DNA binding);GO:0003700(sequence-specific DNA binding transcription factor activity);GO:0009873(ethylene mediated signaling pathway);GO:0010228(vegetative to reproductive phase transition of meristem)                                                                                                                                                                                                                                                                       |
| dof-miR-752 |                     |      |                                                                         |                                                                                                                                                                                                                                                                                                                                                                                                                                                                                                               |

## Development:

| Regulatory miRNA IDs | Target transcript IDs | Target transcript length | Target transcript annotations                                    | GO (Gene Ontology) term annotations of target transcripts                                                                                                                                                                                                             |
|----------------------|-----------------------|--------------------------|------------------------------------------------------------------|-----------------------------------------------------------------------------------------------------------------------------------------------------------------------------------------------------------------------------------------------------------------------|
| dof-miR-718          | comp163584_c0_seq3    | 1402                     | Floral homeotic protein APETALA 2 OS=Arabidopsis thaliana        | GO:0005634(nucleus);GO:0003677(DNA binding);GO:0003700(sequence-specific DNA binding transcription factor activity);GO:0030154(cell differentiation);GO:0010073(meristem maintenance);GO:0048316(seed development);GO:0010093(specification of floral organ identity) |
| dof-miR-752          |                       |                          |                                                                  |                                                                                                                                                                                                                                                                       |
| dof-miR-718          | comp163807_c0_seq1    | 2436                     | Floral homeotic protein APETALA 2 OS=Arabidopsis thaliana        | GO:0005634(nucleus);GO:0003677(DNA binding);GO:0003700(sequence-specific DNA binding transcription factor activity);GO:0030154(cell differentiation);GO:0010073(meristem maintenance);GO:0048316(seed development);GO:0010093(specification of floral organ identity) |
| dof-miR-718          | comp163807_c0_seq2    | 2310                     | Floral homeotic protein APETALA 2 OS=Arabidopsis thaliana        | GO:0005634(nucleus);GO:0003677(DNA binding);GO:0003700(sequence-specific DNA binding transcription factor activity);GO:0030154(cell differentiation);GO:0010073(meristem maintenance);GO:0048316(seed development);GO:0010093(specification of floral organ identity) |
| dof-miR-1047         | comp167920_c2_seq11   | 1185                     | MADS-box transcription factor 16 OS=Oryza sativa subsp. Japonica | GO:0005634(nucleus);GO:0043565(sequence-specific DNA binding);GO:0003700(sequence-specific DNA binding transcription factor activity);GO:0030154(cell differentiation);GO:0009908(flower development)                                                                 |
| dof-miR-1047         | comp167920_c2_seq2    | 1116                     | MADS-box transcription factor 16 OS=Oryza sativa subsp. Japonica | GO:0005634(nucleus);GO:0043565(sequence-specific DNA binding);GO:0003700(sequence-specific DNA binding transcription factor activity);GO:0030154(cell differentiation);GO:0009908(flower development)                                                                 |
| dof-miR-1001         | comp166058_c0_seq4    | 2025                     | Transcription factor TCP2 OS=Arabidopsis thaliana                | GO:0005634(nucleus);GO:0003677(DNA binding);GO:0048366(leaf development);GO:0006355(regulation of transcription, DNA-dependent);GO:0006351(transcription, DNA-dependent)                                                                                              |
| dof-miR-1005         |                       |                          |                                                                  |                                                                                                                                                                                                                                                                       |
| dof-miR-1006         |                       |                          |                                                                  |                                                                                                                                                                                                                                                                       |
| dof-miR-1007         |                       |                          |                                                                  |                                                                                                                                                                                                                                                                       |
| dof-miR-1008         |                       |                          |                                                                  |                                                                                                                                                                                                                                                                       |
| dof-miR-1001         | comp166058_c0_seq9    | 1802                     | Transcription factor TCP2 OS=Arabidopsis thaliana                | GO:0005634(nucleus);GO:0003677(DNA binding);GO:0048366(leaf development);GO:0006355(regulation of transcription, DNA-dependent);GO:0006351(transcription, DNA-dependent)                                                                                              |
| dof-miR-1005         |                       |                          |                                                                  |                                                                                                                                                                                                                                                                       |
| dof-miR-1006         |                       |                          |                                                                  |                                                                                                                                                                                                                                                                       |
| dof-miR-1007         |                       |                          |                                                                  |                                                                                                                                                                                                                                                                       |
| dof-miR-1008         |                       |                          |                                                                  |                                                                                                                                                                                                                                                                       |

|             |                    |      |                                                            |                                                                                                                                                                                                                                              |
|-------------|--------------------|------|------------------------------------------------------------|----------------------------------------------------------------------------------------------------------------------------------------------------------------------------------------------------------------------------------------------|
| dof-miR-606 | comp154657_c0_seq2 | 3067 | Growth-regulating factor 6 OS=Oryza sativa subsp. Japonica | -                                                                                                                                                                                                                                            |
| dof-miR-606 | comp154657_c0_seq3 | 2463 | Growth-regulating factor 6 OS=Oryza sativa subsp. Japonica | -                                                                                                                                                                                                                                            |
| dof-miR-606 | comp154657_c0_seq5 | 2996 | Growth-regulating factor 6 OS=Oryza sativa subsp. Japonica | -                                                                                                                                                                                                                                            |
| dof-miR-606 | comp154657_c0_seq6 | 3600 | Growth-regulating factor 6 OS=Oryza sativa subsp. Japonica | -                                                                                                                                                                                                                                            |
| dof-miR-606 | comp165566_c0_seq1 | 1689 | Growth-regulating factor 4 OS=Oryza sativa subsp. Japonica | -                                                                                                                                                                                                                                            |
| dof-miR-606 | comp170683_c0_seq9 | 1362 | Growth-regulating factor 5 OS=Oryza sativa subsp. Japonica | -                                                                                                                                                                                                                                            |
| dof-miR-606 | comp68197_c0_seq2  | 575  | Growth-regulating factor 7 OS=Oryza sativa subsp. Japonica | -                                                                                                                                                                                                                                            |
| dof-miR-985 | comp156499_c0_seq2 | 2726 | Scarecrow-like protein 6 OS=Arabidopsis thaliana           | GO:0005634(nucleus);GO:0005515(protein binding);GO:0051301(cell division);GO:0007623(circadian rhythm);GO:0006355(regulation of transcription, DNA-dependent);GO:0048768(root hair cell tip growth);GO:0006351(transcription, DNA-dependent) |
| dof-miR-986 |                    |      |                                                            |                                                                                                                                                                                                                                              |
| dof-miR-987 |                    |      |                                                            |                                                                                                                                                                                                                                              |
| dof-miR-988 |                    |      |                                                            |                                                                                                                                                                                                                                              |
| dof-miR-989 |                    |      |                                                            |                                                                                                                                                                                                                                              |
| dof-miR-990 |                    |      |                                                            |                                                                                                                                                                                                                                              |
| dof-miR-991 |                    |      |                                                            |                                                                                                                                                                                                                                              |
| dof-miR-831 | comp150481_c0_seq2 | 876  | Expansin-like B1 OS=Oryza sativa subsp. Japonica           | GO:0005576(extracellular region)                                                                                                                                                                                                             |
| dof-miR-831 | comp150481_c0_seq3 | 998  | Expansin-like B1 OS=Oryza sativa subsp. Japonica           | GO:0005576(extracellular region)                                                                                                                                                                                                             |

## Secondary metabolism:

| Regulatory miRNA IDs | Target transcript IDs | Target transcript length | Target transcript annotations              | KOG (eukaryotic orthologous group) annotations of target transcripts | GO (Gene Ontology) term annotations of target transcripts                                                                                                                     |
|----------------------|-----------------------|--------------------------|--------------------------------------------|----------------------------------------------------------------------|-------------------------------------------------------------------------------------------------------------------------------------------------------------------------------|
| dof-miR-992          | comp153832_c0_seq1    | 2021                     | Laccase-3 OS=Oryza sativa subsp. Japonica  | [Q] Secondary metabolites biosynthesis, transport and catabolism     | GO:0048046(apoplast);GO:0005507(copper ion binding);GO:0052716(hydroquinone:oxygen oxidoreductase activity);GO:0008471(laccase activity);GO:0046274(lignin catabolic process) |
| dof-miR-992          | comp163430_c1_seq2    | 2185                     | Laccase-7 OS=Arabidopsis thaliana          | [Q] Secondary metabolites biosynthesis, transport and catabolism     | GO:0048046(apoplast);GO:0005507(copper ion binding);GO:0052716(hydroquinone:oxygen oxidoreductase activity);GO:0008471(laccase activity);GO:0046274(lignin catabolic process) |
| dof-miR-992          | comp167551_c0_seq1    | 1998                     | Laccase-3 OS=Oryza sativa subsp. Japonica  | [Q] Secondary metabolites biosynthesis, transport and catabolism     | GO:0048046(apoplast);GO:0005507(copper ion binding);GO:0052716(hydroquinone:oxygen oxidoreductase activity);GO:0008471(laccase activity);GO:0046274(lignin catabolic process) |
| dof-miR-803          | comp167551_c0_seq6    | 2127                     | Laccase-3 OS=Oryza sativa subsp. Japonica  | [Q] Secondary metabolites biosynthesis, transport and catabolism     | GO:0048046(apoplast);GO:0005507(copper ion binding);GO:0052716(hydroquinone:oxygen oxidoreductase activity);GO:0008471(laccase activity);GO:0046274(lignin catabolic process) |
| dof-miR-804          |                       |                          |                                            |                                                                      |                                                                                                                                                                               |
| dof-miR-992          | comp172995_c3_seq3    | 2382                     | Laccase-22 OS=Oryza sativa subsp. Japonica | [Q] Secondary metabolites biosynthesis, transport and catabolism     | GO:0048046(apoplast);GO:0005507(copper ion binding);GO:0052716(hydroquinone:oxygen oxidoreductase activity);GO:0008471(laccase activity);GO:0046274(lignin catabolic process) |
| dof-miR-992          | comp172995_c3_seq8    | 2303                     | Laccase-22 OS=Oryza sativa subsp. Japonica | [Q] Secondary metabolites biosynthesis, transport and catabolism     | GO:0048046(apoplast);GO:0005507(copper ion binding);GO:0052716(hydroquinone:oxygen oxidoreductase activity);GO:0008471(laccase activity);GO:0046274(lignin catabolic process) |
| dof-miR-992          | comp172995_c3_seq15   | 2227                     | Laccase-22 OS=Oryza sativa subsp. Japonica | [Q] Secondary metabolites biosynthesis, transport and catabolism     | GO:0048046(apoplast);GO:0005507(copper ion binding);GO:0052716(hydroquinone:oxygen oxidoreductase activity);GO:0008471(laccase activity);GO:0046274(lignin catabolic process) |
| dof-miR-992          | comp172995_c3_seq16   | 2306                     | Laccase-22 OS=Oryza sativa subsp. Japonica | [Q] Secondary metabolites biosynthesis, transport and catabolism     | GO:0048046(apoplast);GO:0005507(copper ion binding);GO:0052716(hydroquinone:oxygen oxidoreductase activity);GO:0008471(laccase activity);GO:0046274(lignin catabolic process) |

## AGO1-related:

| Regulatory miRNA IDs | Target transcript IDs | Target transcript length | Target transcript annotations                        |
|----------------------|-----------------------|--------------------------|------------------------------------------------------|
| dof-miR-642          | comp174401_c2_seq5    | 4114                     | Protein argonaute 1B OS=Oryza sativa subsp. Japonica |
| dof-miR-644          |                       |                          |                                                      |
| dof-miR-645          |                       |                          |                                                      |
| dof-miR-646          |                       |                          |                                                      |
| dof-miR-647          |                       |                          |                                                      |
| dof-miR-642          | comp174401_c2_seq6    | 4269                     | Protein argonaute 1B OS=Oryza sativa subsp. Japonica |
| dof-miR-644          |                       |                          |                                                      |
| dof-miR-645          |                       |                          |                                                      |
| dof-miR-646          |                       |                          |                                                      |
| dof-miR-647          |                       |                          |                                                      |
